# Supplementary material
Source: PubMed Central journal article supplement (PMC8600767)
Supplement: mmc8.pdf [file mmc8.pdf]

We gratefully acknowledge the following Authors from the Originating laboratories responsible for obtaining the specimens, as well as the Submitting laboratories where the genome data were generated and shared via GISAID, on which this research is based.

All Submitters of data may be contacted directly via [www.gisaid.org](http://www.gisaid.org)

Authors are sorted alphabetically.

| Accession ID                                                                                                                                                                                                                                                                                                                                                                                                                                                                                                                                                                                                                                                                                                                                                                                                                                                                                                                                                                                                                                                                                                                                                                                                                                                                                                                                                                                                                                                                                                                                                                                                                                                                                                                                                                                                                                                                                                                                                                                                                                                                                                                                                                                                                                                                                                                                                                                                                                                                                                                                                                                                                                                                                                                                                                                                                                                                                                                                                                                                                                                                                                                                                                                                                                                                                                                                                                                                                                                                                                                                                                                                                                                                                                                                                                                                                                                                                                                                                                                                                                                                                                                                                                                                                                                                                                                                                                                                                                                                                                                                                                                                                                                                                                                                                                                                                                                                                                                                                                                                                                                                                                                                                                                                                                                                                                                                                                                                                                                                                                                                                                                                                                                                                                                                                                                                                                                                                                                                                                                                                                                                                                                                                                                                                                                                                                                                                                                                                                                                                                                                                                                                                                                                                                                                                                                                                                                                                                                                                                                                                                                                                                                                                                                                                                                                                                                                                                                                                                                                                                                                                                                                                                                                                                                                                                                                                                                                                                                                                                                                                                                                                                                                                                                                                                                                                                                                                                                                                                                                                                                                                                                                                                                                                                                                                                                                                                                                                                                                                                                                                                                                                                                                                                                                                                                                                                                                                                                                                                                                                                                                                                                                                                                                                                                                                                                                                                                                                                                                                                                                                                                                                                                                                                                                                                                                                                                                                                                                                                                                                                                                                                                                                                                                                                                                                                                                                                                                                                                                                                                                                                                                                                                                                                                                                                                                                                                                                                                                                                                                                                                                                                                                                                                                                                                                                                                                                                                                                                                                                                                                                                                                                                                                                                                                                                                                                                                                                                                                                                                                                                                                                                                                                                                                                                                                                                                                                                                                                                                                                                                                                                                                                                                                                                                                                                                                                                                                                                                                                                                                                                                                                                                                                                                                                                                                                                                                                                                                                                                                                                                                                                                                                                                                                                                                                                                                                                                                                                                                                                                                                                                                                                                                                                                                                                                                                                                                                                                                                                                                                                                                                                                                                                                                                                                                                                                                                                                                                                                                                                                                   | Originating Laboratory                                                                                                                                        | Submitting Laboratory                                                                                                                                         | Authors                                                                                                                                                                                                                                                                                                                                                                                                                                                                                   |
|--------------------------------------------------------------------------------------------------------------------------------------------------------------------------------------------------------------------------------------------------------------------------------------------------------------------------------------------------------------------------------------------------------------------------------------------------------------------------------------------------------------------------------------------------------------------------------------------------------------------------------------------------------------------------------------------------------------------------------------------------------------------------------------------------------------------------------------------------------------------------------------------------------------------------------------------------------------------------------------------------------------------------------------------------------------------------------------------------------------------------------------------------------------------------------------------------------------------------------------------------------------------------------------------------------------------------------------------------------------------------------------------------------------------------------------------------------------------------------------------------------------------------------------------------------------------------------------------------------------------------------------------------------------------------------------------------------------------------------------------------------------------------------------------------------------------------------------------------------------------------------------------------------------------------------------------------------------------------------------------------------------------------------------------------------------------------------------------------------------------------------------------------------------------------------------------------------------------------------------------------------------------------------------------------------------------------------------------------------------------------------------------------------------------------------------------------------------------------------------------------------------------------------------------------------------------------------------------------------------------------------------------------------------------------------------------------------------------------------------------------------------------------------------------------------------------------------------------------------------------------------------------------------------------------------------------------------------------------------------------------------------------------------------------------------------------------------------------------------------------------------------------------------------------------------------------------------------------------------------------------------------------------------------------------------------------------------------------------------------------------------------------------------------------------------------------------------------------------------------------------------------------------------------------------------------------------------------------------------------------------------------------------------------------------------------------------------------------------------------------------------------------------------------------------------------------------------------------------------------------------------------------------------------------------------------------------------------------------------------------------------------------------------------------------------------------------------------------------------------------------------------------------------------------------------------------------------------------------------------------------------------------------------------------------------------------------------------------------------------------------------------------------------------------------------------------------------------------------------------------------------------------------------------------------------------------------------------------------------------------------------------------------------------------------------------------------------------------------------------------------------------------------------------------------------------------------------------------------------------------------------------------------------------------------------------------------------------------------------------------------------------------------------------------------------------------------------------------------------------------------------------------------------------------------------------------------------------------------------------------------------------------------------------------------------------------------------------------------------------------------------------------------------------------------------------------------------------------------------------------------------------------------------------------------------------------------------------------------------------------------------------------------------------------------------------------------------------------------------------------------------------------------------------------------------------------------------------------------------------------------------------------------------------------------------------------------------------------------------------------------------------------------------------------------------------------------------------------------------------------------------------------------------------------------------------------------------------------------------------------------------------------------------------------------------------------------------------------------------------------------------------------------------------------------------------------------------------------------------------------------------------------------------------------------------------------------------------------------------------------------------------------------------------------------------------------------------------------------------------------------------------------------------------------------------------------------------------------------------------------------------------------------------------------------------------------------------------------------------------------------------------------------------------------------------------------------------------------------------------------------------------------------------------------------------------------------------------------------------------------------------------------------------------------------------------------------------------------------------------------------------------------------------------------------------------------------------------------------------------------------------------------------------------------------------------------------------------------------------------------------------------------------------------------------------------------------------------------------------------------------------------------------------------------------------------------------------------------------------------------------------------------------------------------------------------------------------------------------------------------------------------------------------------------------------------------------------------------------------------------------------------------------------------------------------------------------------------------------------------------------------------------------------------------------------------------------------------------------------------------------------------------------------------------------------------------------------------------------------------------------------------------------------------------------------------------------------------------------------------------------------------------------------------------------------------------------------------------------------------------------------------------------------------------------------------------------------------------------------------------------------------------------------------------------------------------------------------------------------------------------------------------------------------------------------------------------------------------------------------------------------------------------------------------------------------------------------------------------------------------------------------------------------------------------------------------------------------------------------------------------------------------------------------------------------------------------------------------------------------------------------------------------------------------------------------------------------------------------------------------------------------------------------------------------------------------------------------------------------------------------------------------------------------------------------------------------------------------------------------------------------------------------------------------------------------------------------------------------------------------------------------------------------------------------------------------------------------------------------------------------------------------------------------------------------------------------------------------------------------------------------------------------------------------------------------------------------------------------------------------------------------------------------------------------------------------------------------------------------------------------------------------------------------------------------------------------------------------------------------------------------------------------------------------------------------------------------------------------------------------------------------------------------------------------------------------------------------------------------------------------------------------------------------------------------------------------------------------------------------------------------------------------------------------------------------------------------------------------------------------------------------------------------------------------------------------------------------------------------------------------------------------------------------------------------------------------------------------------------------------------------------------------------------------------------------------------------------------------------------------------------------------------------------------------------------------------------------------------------------------------------------------------------------------------------------------------------------------------------------------------------------------------------------------------------------------------------------------------------------------------------------------------------------------------------------------------------------------------------------------------------------------------------------------------------------------------------------------------------------------------------------------------------------------------------------------------------------------------------------------------------------------------------------------------------------------------------------------------------------------------------------------------------------------------------------------------------------------------------------------------------------------------------------------------------------------------------------------------------------------------------------------------------------------------------------------------------------------------------------------------------------------------------------------------------------------------------------------------------------------------------------------------------------------------------------------------------------------------------------------------------------------------------------------------------------------------------------------------------------------------------------------------------------------------------------------------------------------------------------------------------------------------------------------------------------------------------------------------------------------------------------------------------------------------------------------------------------------------------------------------------------------------------------------------------------------------------------------------------------------------------------------------------------------------------------------------------------------------------------------------------------------------------------------------------------------------------------------------------------------------------------------------------------------------------------------------------------------------------------------------------------------------------------------------------------------------------------------------------------------------------------------------------------------------------------------------------------------------------------------------------------------------------------------------------------------------------------------------------------------------------------------------------------------------------------------------------------------------------------------------------------------------------------------------------------------------------------------------------------------------------------------------------------------------------------------------------------------------------------------------------------------------------------------------------------------------------------------------------------------------------------------------------------------------------------------------------------------------------------------------------------------------------------------------------------------------------------------------------------------------------------------------------------------------------------------------------------------------------------------------------------------------------------------------------------------------------------------------------------------------------------------------------------------------------------------------------------------------------|---------------------------------------------------------------------------------------------------------------------------------------------------------------|---------------------------------------------------------------------------------------------------------------------------------------------------------------|-------------------------------------------------------------------------------------------------------------------------------------------------------------------------------------------------------------------------------------------------------------------------------------------------------------------------------------------------------------------------------------------------------------------------------------------------------------------------------------------|
| EPI_ISL_413014                                                                                                                                                                                                                                                                                                                                                                                                                                                                                                                                                                                                                                                                                                                                                                                                                                                                                                                                                                                                                                                                                                                                                                                                                                                                                                                                                                                                                                                                                                                                                                                                                                                                                                                                                                                                                                                                                                                                                                                                                                                                                                                                                                                                                                                                                                                                                                                                                                                                                                                                                                                                                                                                                                                                                                                                                                                                                                                                                                                                                                                                                                                                                                                                                                                                                                                                                                                                                                                                                                                                                                                                                                                                                                                                                                                                                                                                                                                                                                                                                                                                                                                                                                                                                                                                                                                                                                                                                                                                                                                                                                                                                                                                                                                                                                                                                                                                                                                                                                                                                                                                                                                                                                                                                                                                                                                                                                                                                                                                                                                                                                                                                                                                                                                                                                                                                                                                                                                                                                                                                                                                                                                                                                                                                                                                                                                                                                                                                                                                                                                                                                                                                                                                                                                                                                                                                                                                                                                                                                                                                                                                                                                                                                                                                                                                                                                                                                                                                                                                                                                                                                                                                                                                                                                                                                                                                                                                                                                                                                                                                                                                                                                                                                                                                                                                                                                                                                                                                                                                                                                                                                                                                                                                                                                                                                                                                                                                                                                                                                                                                                                                                                                                                                                                                                                                                                                                                                                                                                                                                                                                                                                                                                                                                                                                                                                                                                                                                                                                                                                                                                                                                                                                                                                                                                                                                                                                                                                                                                                                                                                                                                                                                                                                                                                                                                                                                                                                                                                                                                                                                                                                                                                                                                                                                                                                                                                                                                                                                                                                                                                                                                                                                                                                                                                                                                                                                                                                                                                                                                                                                                                                                                                                                                                                                                                                                                                                                                                                                                                                                                                                                                                                                                                                                                                                                                                                                                                                                                                                                                                                                                                                                                                                                                                                                                                                                                                                                                                                                                                                                                                                                                                                                                                                                                                                                                                                                                                                                                                                                                                                                                                                                                                                                                                                                                                                                                                                                                                                                                                                                                                                                                                                                                                                                                                                                                                                                                                                                                                                                                                                                                                                                                                                                                                                                                                                                                                                                                                                                                                                 | Public Health Ontario Laboratory                                                                                                                              | Ontario Agency for Health Protection and Promotion (OAHPP)                                                                                                    | Alireza Eshaghi, Samir N Patel, Jonathan B Gubbay, Vanessa G Allen, Christine Frantz, Aimin Li, Sandeep Nagra                                                                                                                                                                                                                                                                                                                                                                             |
| EPI_ISL_414477                                                                                                                                                                                                                                                                                                                                                                                                                                                                                                                                                                                                                                                                                                                                                                                                                                                                                                                                                                                                                                                                                                                                                                                                                                                                                                                                                                                                                                                                                                                                                                                                                                                                                                                                                                                                                                                                                                                                                                                                                                                                                                                                                                                                                                                                                                                                                                                                                                                                                                                                                                                                                                                                                                                                                                                                                                                                                                                                                                                                                                                                                                                                                                                                                                                                                                                                                                                                                                                                                                                                                                                                                                                                                                                                                                                                                                                                                                                                                                                                                                                                                                                                                                                                                                                                                                                                                                                                                                                                                                                                                                                                                                                                                                                                                                                                                                                                                                                                                                                                                                                                                                                                                                                                                                                                                                                                                                                                                                                                                                                                                                                                                                                                                                                                                                                                                                                                                                                                                                                                                                                                                                                                                                                                                                                                                                                                                                                                                                                                                                                                                                                                                                                                                                                                                                                                                                                                                                                                                                                                                                                                                                                                                                                                                                                                                                                                                                                                                                                                                                                                                                                                                                                                                                                                                                                                                                                                                                                                                                                                                                                                                                                                                                                                                                                                                                                                                                                                                                                                                                                                                                                                                                                                                                                                                                                                                                                                                                                                                                                                                                                                                                                                                                                                                                                                                                                                                                                                                                                                                                                                                                                                                                                                                                                                                                                                                                                                                                                                                                                                                                                                                                                                                                                                                                                                                                                                                                                                                                                                                                                                                                                                                                                                                                                                                                                                                                                                                                                                                                                                                                                                                                                                                                                                                                                                                                                                                                                                                                                                                                                                                                                                                                                                                                                                                                                                                                                                                                                                                                                                                                                                                                                                                                                                                                                                                                                                                                                                                                                                                                                                                                                                                                                                                                                                                                                                                                                                                                                                                                                                                                                                                                                                                                                                                                                                                                                                                                                                                                                                                                                                                                                                                                                                                                                                                                                                                                                                                                                                                                                                                                                                                                                                                                                                                                                                                                                                                                                                                                                                                                                                                                                                                                                                                                                                                                                                                                                                                                                                                                                                                                                                                                                                                                                                                                                                                                                                                                                                                                                                 | The National Institute of Public Health Center for Epidemiology and Microbiology                                                                              | State Veterinary Institute Prague                                                                                                                             | Alexander Nagy, Oldrich Bartos, Helena Jirincova, Klara Labska, Ludmila Novakova, Olga Storkanova, Dusan Trmka, Jaromira Vecerova                                                                                                                                                                                                                                                                                                                                                         |
| EPI_ISL_416482                                                                                                                                                                                                                                                                                                                                                                                                                                                                                                                                                                                                                                                                                                                                                                                                                                                                                                                                                                                                                                                                                                                                                                                                                                                                                                                                                                                                                                                                                                                                                                                                                                                                                                                                                                                                                                                                                                                                                                                                                                                                                                                                                                                                                                                                                                                                                                                                                                                                                                                                                                                                                                                                                                                                                                                                                                                                                                                                                                                                                                                                                                                                                                                                                                                                                                                                                                                                                                                                                                                                                                                                                                                                                                                                                                                                                                                                                                                                                                                                                                                                                                                                                                                                                                                                                                                                                                                                                                                                                                                                                                                                                                                                                                                                                                                                                                                                                                                                                                                                                                                                                                                                                                                                                                                                                                                                                                                                                                                                                                                                                                                                                                                                                                                                                                                                                                                                                                                                                                                                                                                                                                                                                                                                                                                                                                                                                                                                                                                                                                                                                                                                                                                                                                                                                                                                                                                                                                                                                                                                                                                                                                                                                                                                                                                                                                                                                                                                                                                                                                                                                                                                                                                                                                                                                                                                                                                                                                                                                                                                                                                                                                                                                                                                                                                                                                                                                                                                                                                                                                                                                                                                                                                                                                                                                                                                                                                                                                                                                                                                                                                                                                                                                                                                                                                                                                                                                                                                                                                                                                                                                                                                                                                                                                                                                                                                                                                                                                                                                                                                                                                                                                                                                                                                                                                                                                                                                                                                                                                                                                                                                                                                                                                                                                                                                                                                                                                                                                                                                                                                                                                                                                                                                                                                                                                                                                                                                                                                                                                                                                                                                                                                                                                                                                                                                                                                                                                                                                                                                                                                                                                                                                                                                                                                                                                                                                                                                                                                                                                                                                                                                                                                                                                                                                                                                                                                                                                                                                                                                                                                                                                                                                                                                                                                                                                                                                                                                                                                                                                                                                                                                                                                                                                                                                                                                                                                                                                                                                                                                                                                                                                                                                                                                                                                                                                                                                                                                                                                                                                                                                                                                                                                                                                                                                                                                                                                                                                                                                                                                                                                                                                                                                                                                                                                                                                                                                                                                                                                                                                                 | R. G. Lugar Center for Public Health Research, National Center for Disease Control and Public Health (NCDC) of Georgia.                                       | R. G. Lugar Center for Public Health Research, National Center for Disease Control and Public Health (NCDC) of Georgia.                                       | Adam Kotorashvili, Marine Murtskhaladze, Nato Kotaria, Ann Machabishvili, Lela Sabadze, Mari Gavashelidze, Ana Papkiauri, Meri Pantsulaia, Gvantsa Brachveli, Tata Imnadze, Tamar Jashiasvili, Tea Tevdoradze, Ketevan Sidamonidze, Ekaterine Khmaladze, Zakalashvili, Lela Urushadze, Magda Dgebuadze, Giorgi Tomashvili, Davit Tsaguria, Ekaterine Zangaladze, Nino Berishvili, Gvantsa Chanturia, Maia Alkhashvili, Irma Burjanadze, Anna Kasradze, Khatuna Zakhshvili, Paata Imnadze, |
| EPI_ISL_416488                                                                                                                                                                                                                                                                                                                                                                                                                                                                                                                                                                                                                                                                                                                                                                                                                                                                                                                                                                                                                                                                                                                                                                                                                                                                                                                                                                                                                                                                                                                                                                                                                                                                                                                                                                                                                                                                                                                                                                                                                                                                                                                                                                                                                                                                                                                                                                                                                                                                                                                                                                                                                                                                                                                                                                                                                                                                                                                                                                                                                                                                                                                                                                                                                                                                                                                                                                                                                                                                                                                                                                                                                                                                                                                                                                                                                                                                                                                                                                                                                                                                                                                                                                                                                                                                                                                                                                                                                                                                                                                                                                                                                                                                                                                                                                                                                                                                                                                                                                                                                                                                                                                                                                                                                                                                                                                                                                                                                                                                                                                                                                                                                                                                                                                                                                                                                                                                                                                                                                                                                                                                                                                                                                                                                                                                                                                                                                                                                                                                                                                                                                                                                                                                                                                                                                                                                                                                                                                                                                                                                                                                                                                                                                                                                                                                                                                                                                                                                                                                                                                                                                                                                                                                                                                                                                                                                                                                                                                                                                                                                                                                                                                                                                                                                                                                                                                                                                                                                                                                                                                                                                                                                                                                                                                                                                                                                                                                                                                                                                                                                                                                                                                                                                                                                                                                                                                                                                                                                                                                                                                                                                                                                                                                                                                                                                                                                                                                                                                                                                                                                                                                                                                                                                                                                                                                                                                                                                                                                                                                                                                                                                                                                                                                                                                                                                                                                                                                                                                                                                                                                                                                                                                                                                                                                                                                                                                                                                                                                                                                                                                                                                                                                                                                                                                                                                                                                                                                                                                                                                                                                                                                                                                                                                                                                                                                                                                                                                                                                                                                                                                                                                                                                                                                                                                                                                                                                                                                                                                                                                                                                                                                                                                                                                                                                                                                                                                                                                                                                                                                                                                                                                                                                                                                                                                                                                                                                                                                                                                                                                                                                                                                                                                                                                                                                                                                                                                                                                                                                                                                                                                                                                                                                                                                                                                                                                                                                                                                                                                                                                                                                                                                                                                                                                                                                                                                                                                                                                                                                                                                 | ViroGenetics - BSL3 Laboratory of Virology; Human Genome Variation Research Group & Genomics Centre MCB; Bioinformatics Research Group Department of Virology | ViroGenetics - BSL3 Laboratory of Virology; Human Genome Variation Research Group & Genomics Centre MCB; Bioinformatics Research Group Department of Virology | Aleksandra Milewska, Ewelina Popiech, Agata Jarosz, Adrianna Klajmon, Kamila Marszaek, Katarzyna Pancer, Magdalena Rzeczkowska, Tomasz Wokowicz, Katarzyna Zacharczuk, Agnieszka Koakowska-Kulesza, Natalia Wolaniuk, Ewelina Hallman-Szeliska,                                                                                                                                                                                                                                           |
| EPI_ISL_416521                                                                                                                                                                                                                                                                                                                                                                                                                                                                                                                                                                                                                                                                                                                                                                                                                                                                                                                                                                                                                                                                                                                                                                                                                                                                                                                                                                                                                                                                                                                                                                                                                                                                                                                                                                                                                                                                                                                                                                                                                                                                                                                                                                                                                                                                                                                                                                                                                                                                                                                                                                                                                                                                                                                                                                                                                                                                                                                                                                                                                                                                                                                                                                                                                                                                                                                                                                                                                                                                                                                                                                                                                                                                                                                                                                                                                                                                                                                                                                                                                                                                                                                                                                                                                                                                                                                                                                                                                                                                                                                                                                                                                                                                                                                                                                                                                                                                                                                                                                                                                                                                                                                                                                                                                                                                                                                                                                                                                                                                                                                                                                                                                                                                                                                                                                                                                                                                                                                                                                                                                                                                                                                                                                                                                                                                                                                                                                                                                                                                                                                                                                                                                                                                                                                                                                                                                                                                                                                                                                                                                                                                                                                                                                                                                                                                                                                                                                                                                                                                                                                                                                                                                                                                                                                                                                                                                                                                                                                                                                                                                                                                                                                                                                                                                                                                                                                                                                                                                                                                                                                                                                                                                                                                                                                                                                                                                                                                                                                                                                                                                                                                                                                                                                                                                                                                                                                                                                                                                                                                                                                                                                                                                                                                                                                                                                                                                                                                                                                                                                                                                                                                                                                                                                                                                                                                                                                                                                                                                                                                                                                                                                                                                                                                                                                                                                                                                                                                                                                                                                                                                                                                                                                                                                                                                                                                                                                                                                                                                                                                                                                                                                                                                                                                                                                                                                                                                                                                                                                                                                                                                                                                                                                                                                                                                                                                                                                                                                                                                                                                                                                                                                                                                                                                                                                                                                                                                                                                                                                                                                                                                                                                                                                                                                                                                                                                                                                                                                                                                                                                                                                                                                                                                                                                                                                                                                                                                                                                                                                                                                                                                                                                                                                                                                                                                                                                                                                                                                                                                                                                                                                                                                                                                                                                                                                                                                                                                                                                                                                                                                                                                                                                                                                                                                                                                                                                                                                                                                                                                                                                 | Public Health Laboratory                                                                                                                                      | Public Health Laboratory, Saudi CDC                                                                                                                           | Albarrag, A                                                                                                                                                                                                                                                                                                                                                                                                                                                                               |
| EPI_ISL_416522                                                                                                                                                                                                                                                                                                                                                                                                                                                                                                                                                                                                                                                                                                                                                                                                                                                                                                                                                                                                                                                                                                                                                                                                                                                                                                                                                                                                                                                                                                                                                                                                                                                                                                                                                                                                                                                                                                                                                                                                                                                                                                                                                                                                                                                                                                                                                                                                                                                                                                                                                                                                                                                                                                                                                                                                                                                                                                                                                                                                                                                                                                                                                                                                                                                                                                                                                                                                                                                                                                                                                                                                                                                                                                                                                                                                                                                                                                                                                                                                                                                                                                                                                                                                                                                                                                                                                                                                                                                                                                                                                                                                                                                                                                                                                                                                                                                                                                                                                                                                                                                                                                                                                                                                                                                                                                                                                                                                                                                                                                                                                                                                                                                                                                                                                                                                                                                                                                                                                                                                                                                                                                                                                                                                                                                                                                                                                                                                                                                                                                                                                                                                                                                                                                                                                                                                                                                                                                                                                                                                                                                                                                                                                                                                                                                                                                                                                                                                                                                                                                                                                                                                                                                                                                                                                                                                                                                                                                                                                                                                                                                                                                                                                                                                                                                                                                                                                                                                                                                                                                                                                                                                                                                                                                                                                                                                                                                                                                                                                                                                                                                                                                                                                                                                                                                                                                                                                                                                                                                                                                                                                                                                                                                                                                                                                                                                                                                                                                                                                                                                                                                                                                                                                                                                                                                                                                                                                                                                                                                                                                                                                                                                                                                                                                                                                                                                                                                                                                                                                                                                                                                                                                                                                                                                                                                                                                                                                                                                                                                                                                                                                                                                                                                                                                                                                                                                                                                                                                                                                                                                                                                                                                                                                                                                                                                                                                                                                                                                                                                                                                                                                                                                                                                                                                                                                                                                                                                                                                                                                                                                                                                                                                                                                                                                                                                                                                                                                                                                                                                                                                                                                                                                                                                                                                                                                                                                                                                                                                                                                                                                                                                                                                                                                                                                                                                                                                                                                                                                                                                                                                                                                                                                                                                                                                                                                                                                                                                                                                                                                                                                                                                                                                                                                                                                                                                                                                                                                                                                                                                                 | Public Health Laboratory, Saudi CDC                                                                                                                           | Public Health Laboratory, Saudi CDC                                                                                                                           | Albarrag,A                                                                                                                                                                                                                                                                                                                                                                                                                                                                                |
| EPI_ISL_417064                                                                                                                                                                                                                                                                                                                                                                                                                                                                                                                                                                                                                                                                                                                                                                                                                                                                                                                                                                                                                                                                                                                                                                                                                                                                                                                                                                                                                                                                                                                                                                                                                                                                                                                                                                                                                                                                                                                                                                                                                                                                                                                                                                                                                                                                                                                                                                                                                                                                                                                                                                                                                                                                                                                                                                                                                                                                                                                                                                                                                                                                                                                                                                                                                                                                                                                                                                                                                                                                                                                                                                                                                                                                                                                                                                                                                                                                                                                                                                                                                                                                                                                                                                                                                                                                                                                                                                                                                                                                                                                                                                                                                                                                                                                                                                                                                                                                                                                                                                                                                                                                                                                                                                                                                                                                                                                                                                                                                                                                                                                                                                                                                                                                                                                                                                                                                                                                                                                                                                                                                                                                                                                                                                                                                                                                                                                                                                                                                                                                                                                                                                                                                                                                                                                                                                                                                                                                                                                                                                                                                                                                                                                                                                                                                                                                                                                                                                                                                                                                                                                                                                                                                                                                                                                                                                                                                                                                                                                                                                                                                                                                                                                                                                                                                                                                                                                                                                                                                                                                                                                                                                                                                                                                                                                                                                                                                                                                                                                                                                                                                                                                                                                                                                                                                                                                                                                                                                                                                                                                                                                                                                                                                                                                                                                                                                                                                                                                                                                                                                                                                                                                                                                                                                                                                                                                                                                                                                                                                                                                                                                                                                                                                                                                                                                                                                                                                                                                                                                                                                                                                                                                                                                                                                                                                                                                                                                                                                                                                                                                                                                                                                                                                                                                                                                                                                                                                                                                                                                                                                                                                                                                                                                                                                                                                                                                                                                                                                                                                                                                                                                                                                                                                                                                                                                                                                                                                                                                                                                                                                                                                                                                                                                                                                                                                                                                                                                                                                                                                                                                                                                                                                                                                                                                                                                                                                                                                                                                                                                                                                                                                                                                                                                                                                                                                                                                                                                                                                                                                                                                                                                                                                                                                                                                                                                                                                                                                                                                                                                                                                                                                                                                                                                                                                                                                                                                                                                                                                                                                                                                 | Prince of Wales Hospital                                                                                                                                      | Hong Kong Department of Health                                                                                                                                | Alan K.L. Tsang, Peter C.W. Yip, Edman T.K. Lam, Rickjason C.W. Chan, Dominic N.C. Tsang                                                                                                                                                                                                                                                                                                                                                                                                  |
| EPI_ISL_417186                                                                                                                                                                                                                                                                                                                                                                                                                                                                                                                                                                                                                                                                                                                                                                                                                                                                                                                                                                                                                                                                                                                                                                                                                                                                                                                                                                                                                                                                                                                                                                                                                                                                                                                                                                                                                                                                                                                                                                                                                                                                                                                                                                                                                                                                                                                                                                                                                                                                                                                                                                                                                                                                                                                                                                                                                                                                                                                                                                                                                                                                                                                                                                                                                                                                                                                                                                                                                                                                                                                                                                                                                                                                                                                                                                                                                                                                                                                                                                                                                                                                                                                                                                                                                                                                                                                                                                                                                                                                                                                                                                                                                                                                                                                                                                                                                                                                                                                                                                                                                                                                                                                                                                                                                                                                                                                                                                                                                                                                                                                                                                                                                                                                                                                                                                                                                                                                                                                                                                                                                                                                                                                                                                                                                                                                                                                                                                                                                                                                                                                                                                                                                                                                                                                                                                                                                                                                                                                                                                                                                                                                                                                                                                                                                                                                                                                                                                                                                                                                                                                                                                                                                                                                                                                                                                                                                                                                                                                                                                                                                                                                                                                                                                                                                                                                                                                                                                                                                                                                                                                                                                                                                                                                                                                                                                                                                                                                                                                                                                                                                                                                                                                                                                                                                                                                                                                                                                                                                                                                                                                                                                                                                                                                                                                                                                                                                                                                                                                                                                                                                                                                                                                                                                                                                                                                                                                                                                                                                                                                                                                                                                                                                                                                                                                                                                                                                                                                                                                                                                                                                                                                                                                                                                                                                                                                                                                                                                                                                                                                                                                                                                                                                                                                                                                                                                                                                                                                                                                                                                                                                                                                                                                                                                                                                                                                                                                                                                                                                                                                                                                                                                                                                                                                                                                                                                                                                                                                                                                                                                                                                                                                                                                                                                                                                                                                                                                                                                                                                                                                                                                                                                                                                                                                                                                                                                                                                                                                                                                                                                                                                                                                                                                                                                                                                                                                                                                                                                                                                                                                                                                                                                                                                                                                                                                                                                                                                                                                                                                                                                                                                                                                                                                                                                                                                                                                                                                                                                                                                                                                 | National Institute for Communicable Diseases of the National Health Laboratory Service                                                                        | National Institute for Communicable Diseases of the National Health Laboratory Service                                                                        | Allam M, Kwenda S, van Heusden P, Khumalo Z, Mohale T, Subramoney K, von Gottberg, A, Ismail A, Bhiman JN                                                                                                                                                                                                                                                                                                                                                                                 |
| EPI_ISL_418322, EPI_ISL_418323, EPI_ISL_418324, EPI_ISL_418325, EPI_ISL_418326, EPI_ISL_418327, EPI_ISL_418328, EPI_ISL_418329, EPI_ISL_418330, EPI_ISL_418331, EPI_ISL_418332, EPI_ISL_418333, EPI_ISL_418334, EPI_ISL_418335, EPI_ISL_418336, EPI_ISL_418337, EPI_ISL_418338, EPI_ISL_418339, EPI_ISL_418340, EPI_ISL_418341, EPI_ISL_418342, EPI_ISL_418343, EPI_ISL_418344, EPI_ISL_418345, EPI_ISL_418346, EPI_ISL_418347, EPI_ISL_418348, EPI_ISL_418349, EPI_ISL_418350, EPI_ISL_418351, EPI_ISL_418352, EPI_ISL_418353, EPI_ISL_418354, EPI_ISL_418355, EPI_ISL_418356, EPI_ISL_418357, EPI_ISL_418358, EPI_ISL_418359, EPI_ISL_418360, EPI_ISL_418361, EPI_ISL_418362, EPI_ISL_418363, EPI_ISL_418364, EPI_ISL_418365, EPI_ISL_418366, EPI_ISL_418367, EPI_ISL_418368, EPI_ISL_418369, EPI_ISL_418370, EPI_ISL_418371, EPI_ISL_418372, EPI_ISL_418373, EPI_ISL_418374, EPI_ISL_418375, EPI_ISL_418376, EPI_ISL_418377, EPI_ISL_418378, EPI_ISL_418379, EPI_ISL_418380, EPI_ISL_418381, EPI_ISL_418382, EPI_ISL_418383, EPI_ISL_418384, EPI_ISL_418385, EPI_ISL_418386, EPI_ISL_418387, EPI_ISL_418388, EPI_ISL_418389, EPI_ISL_418390, EPI_ISL_418391, EPI_ISL_418392, EPI_ISL_418393, EPI_ISL_418394, EPI_ISL_418395, EPI_ISL_418396, EPI_ISL_418397, EPI_ISL_418398, EPI_ISL_418399, EPI_ISL_419654, EPI_ISL_419655, EPI_ISL_419656, EPI_ISL_419657, EPI_ISL_419658, EPI_ISL_419659, EPI_ISL_419660, EPI_ISL_419661, EPI_ISL_419662, EPI_ISL_419663, EPI_ISL_419664, EPI_ISL_419665, EPI_ISL_419666, EPI_ISL_419667, EPI_ISL_419668, EPI_ISL_419669, EPI_ISL_419670, EPI_ISL_419671, EPI_ISL_419672, EPI_ISL_419673, EPI_ISL_419674, EPI_ISL_419675, EPI_ISL_419676, EPI_ISL_419677, EPI_ISL_419678, EPI_ISL_419679, EPI_ISL_419680, EPI_ISL_419681, EPI_ISL_419682, EPI_ISL_419683, EPI_ISL_419684, EPI_ISL_419685, EPI_ISL_419686, EPI_ISL_419687, EPI_ISL_419688, EPI_ISL_419689, EPI_ISL_419690, EPI_ISL_419691, EPI_ISL_419692, EPI_ISL_419693, EPI_ISL_419694, EPI_ISL_419695, EPI_ISL_419696, EPI_ISL_419697, EPI_ISL_419698, EPI_ISL_419699, EPI_ISL_419700, EPI_ISL_419701, EPI_ISL_419702, EPI_ISL_419703, EPI_ISL_419704, EPI_ISL_419705, EPI_ISL_419706, EPI_ISL_419707, EPI_ISL_419708, EPI_ISL_419709, EPI_ISL_419710, EPI_ISL_419711, EPI_ISL_419712, EPI_ISL_419713, EPI_ISL_419714, EPI_ISL_419715, EPI_ISL_419716, EPI_ISL_419717, EPI_ISL_419718, EPI_ISL_419719, EPI_ISL_419720, EPI_ISL_419721, EPI_ISL_419722, EPI_ISL_419723, EPI_ISL_419724, EPI_ISL_419725, EPI_ISL_419726, EPI_ISL_419727, EPI_ISL_419728, EPI_ISL_419729, EPI_ISL_419730, EPI_ISL_419731, EPI_ISL_419732, EPI_ISL_419733, EPI_ISL_419734, EPI_ISL_419735, EPI_ISL_419736, EPI_ISL_419737, EPI_ISL_419738, EPI_ISL_419739, EPI_ISL_419740, EPI_ISL_419741, EPI_ISL_419742, EPI_ISL_419743, EPI_ISL_419744, EPI_ISL_419745, EPI_ISL_419746, EPI_ISL_419747, EPI_ISL_419748, EPI_ISL_419749, EPI_ISL_419750, EPI_ISL_419751, EPI_ISL_419752, EPI_ISL_419753, EPI_ISL_419754, EPI_ISL_419755, EPI_ISL_419756, EPI_ISL_419757, EPI_ISL_419758, EPI_ISL_419759, EPI_ISL_419760, EPI_ISL_419761, EPI_ISL_419762, EPI_ISL_419763, EPI_ISL_419764, EPI_ISL_419765, EPI_ISL_419766, EPI_ISL_419767, EPI_ISL_419768, EPI_ISL_419769, EPI_ISL_419770, EPI_ISL_419771, EPI_ISL_419772, EPI_ISL_419773, EPI_ISL_419774, EPI_ISL_419775, EPI_ISL_419776, EPI_ISL_419777, EPI_ISL_419778, EPI_ISL_419779, EPI_ISL_419780, EPI_ISL_419781, EPI_ISL_419782, EPI_ISL_419783, EPI_ISL_419784, EPI_ISL_419785, EPI_ISL_419786, EPI_ISL_419787, EPI_ISL_419788, EPI_ISL_419789, EPI_ISL_419790, EPI_ISL_419791, EPI_ISL_419792, EPI_ISL_419793, EPI_ISL_419794, EPI_ISL_419795, EPI_ISL_419796, EPI_ISL_419797, EPI_ISL_419798, EPI_ISL_419799, EPI_ISL_419800, EPI_ISL_419801, EPI_ISL_419802, EPI_ISL_419803, EPI_ISL_419804, EPI_ISL_419805, EPI_ISL_419806, EPI_ISL_419807, EPI_ISL_419808, EPI_ISL_419809, EPI_ISL_419810, EPI_ISL_419811, EPI_ISL_419812, EPI_ISL_419813, EPI_ISL_419814, EPI_ISL_419815, EPI_ISL_419816, EPI_ISL_419817, EPI_ISL_419818, EPI_ISL_419819, EPI_ISL_419820, EPI_ISL_419821, EPI_ISL_419822, EPI_ISL_419823, EPI_ISL_419824, EPI_ISL_419825, EPI_ISL_419826, EPI_ISL_419827, EPI_ISL_419828, EPI_ISL_419829, EPI_ISL_419830, EPI_ISL_419831, EPI_ISL_419832, EPI_ISL_419833, EPI_ISL_419834, EPI_ISL_419835, EPI_ISL_419836, EPI_ISL_419837, EPI_ISL_419838, EPI_ISL_419839, EPI_ISL_419840, EPI_ISL_419841, EPI_ISL_419842, EPI_ISL_419843, EPI_ISL_419844, EPI_ISL_419845, EPI_ISL_419846, EPI_ISL_419847, EPI_ISL_419848, EPI_ISL_419849, EPI_ISL_419850, EPI_ISL_419851, EPI_ISL_419852, EPI_ISL_419853, EPI_ISL_419854, EPI_ISL_419855, EPI_ISL_419856, EPI_ISL_419857, EPI_ISL_419858, EPI_ISL_419859, EPI_ISL_419860, EPI_ISL_419861, EPI_ISL_419862, EPI_ISL_419863, EPI_ISL_419864, EPI_ISL_419865, EPI_ISL_419866, EPI_ISL_419867, EPI_ISL_419868, EPI_ISL_419869, EPI_ISL_419870, EPI_ISL_419871, EPI_ISL_419872, EPI_ISL_419873, EPI_ISL_419874, EPI_ISL_419875, EPI_ISL_419876, EPI_ISL_419877, EPI_ISL_419878, EPI_ISL_419879, EPI_ISL_419880, EPI_ISL_419881, EPI_ISL_419882, EPI_ISL_419883, EPI_ISL_419884, EPI_ISL_419885, EPI_ISL_419886, EPI_ISL_419887, EPI_ISL_419888, EPI_ISL_419889, EPI_ISL_419890, EPI_ISL_419891, EPI_ISL_419892, EPI_ISL_419893, EPI_ISL_419894, EPI_ISL_419895, EPI_ISL_419896, EPI_ISL_419897, EPI_ISL_419898, EPI_ISL_419899, EPI_ISL_419900, EPI_ISL_419901, EPI_ISL_419902, EPI_ISL_419903, EPI_ISL_419904, EPI_ISL_419905, EPI_ISL_419906, EPI_ISL_419907, EPI_ISL_419908, EPI_ISL_419909, EPI_ISL_419910, EPI_ISL_419911, EPI_ISL_419912, EPI_ISL_419913, EPI_ISL_419914, EPI_ISL_419915, EPI_ISL_419916, EPI_ISL_419917, EPI_ISL_419918, EPI_ISL_419919, EPI_ISL_419920, EPI_ISL_419921, EPI_ISL_419922, EPI_ISL_419923, EPI_ISL_419924, EPI_ISL_419925, EPI_ISL_419926, EPI_ISL_419927, EPI_ISL_419928, EPI_ISL_419929, EPI_ISL_419930, EPI_ISL_419931, EPI_ISL_419932, EPI_ISL_419933, EPI_ISL_419934, EPI_ISL_419935, EPI_ISL_419936, EPI_ISL_419937, EPI_ISL_419938, EPI_ISL_419939, EPI_ISL_419940, EPI_ISL_419941, EPI_ISL_419942, EPI_ISL_419943, EPI_ISL_419944, EPI_ISL_419945, EPI_ISL_419946, EPI_ISL_419947, EPI_ISL_419948, EPI_ISL_419949, EPI_ISL_419950, EPI_ISL_419951, EPI_ISL_419952, EPI_ISL_419953, EPI_ISL_419954, EPI_ISL_419955, EPI_ISL_419956, EPI_ISL_419957, EPI_ISL_419958, EPI_ISL_419959, EPI_ISL_419960, EPI_ISL_419961, EPI_ISL_419962, EPI_ISL_419963, EPI_ISL_419964, EPI_ISL_419965, EPI_ISL_419966, EPI_ISL_419967, EPI_ISL_419968, EPI_ISL_419969, EPI_ISL_419970, EPI_ISL_419971, EPI_ISL_419972, EPI_ISL_419973, EPI_ISL_419974, EPI_ISL_419975, EPI_ISL_419976, EPI_ISL_419977, EPI_ISL_419978, EPI_ISL_419979, EPI_ISL_419980, EPI_ISL_419981, EPI_ISL_419982, EPI_ISL_419983, EPI_ISL_419984, EPI_ISL_419985, EPI_ISL_419986, EPI_ISL_419987, EPI_ISL_419988, EPI_ISL_419989, EPI_ISL_419990, EPI_ISL_419991, EPI_ISL_419992, EPI_ISL_419993, EPI_ISL_419994, EPI_ISL_419995, EPI_ISL_419996, EPI_ISL_419997, EPI_ISL_419998, EPI_ISL_419999, EPI_ISL_420000, EPI_ISL_420001, EPI_ISL_420002, EPI_ISL_420003, EPI_ISL_420004, EPI_ISL_420005, EPI_ISL_420006, EPI_ISL_420007, EPI_ISL_420008, EPI_ISL_420009, EPI_ISL_420010, EPI_ISL_420011, EPI_ISL_420012, EPI_ISL_420013, EPI_ISL_420014, EPI_ISL_420015, EPI_ISL_420016, EPI_ISL_420017, EPI_ISL_420018, EPI_ISL_420019, EPI_ISL_420020, EPI_ISL_420021, EPI_ISL_420022, EPI_ISL_420023, EPI_ISL_420024, EPI_ISL_420025, EPI_ISL_420026, EPI_ISL_420027, EPI_ISL_420028, EPI_ISL_420029, EPI_ISL_420030, EPI_ISL_420031, EPI_ISL_420032, EPI_ISL_420033, EPI_ISL_420034, EPI_ISL_420035, EPI_ISL_420036, EPI_ISL_420037, EPI_ISL_420038, EPI_ISL_420039, EPI_ISL_420040, EPI_ISL_420041, EPI_ISL_420042, EPI_ISL_420043, EPI_ISL_420044, EPI_ISL_420045, EPI_ISL_420046, EPI_ISL_420047, EPI_ISL_420048, EPI_ISL_420049, EPI_ISL_420050, EPI_ISL_420051, EPI_ISL_420052, EPI_ISL_420053, EPI_ISL_420054, EPI_ISL_420055, EPI_ISL_420056, EPI_ISL_420057, EPI_ISL_420058, EPI_ISL_420059, EPI_ISL_420060, EPI_ISL_420061, EPI_ISL_420062, EPI_ISL_420063, EPI_ISL_420064, EPI_ISL_420065, EPI_ISL_420066, EPI_ISL_420067, EPI_ISL_420068, EPI_ISL_420069, EPI_ISL_420070, EPI_ISL_420071, EPI_ISL_420072, EPI_ISL_420073, EPI_ISL_420074, EPI_ISL_420075, EPI_ISL_420076, EPI_ISL_420077, EPI_ISL_420078, EPI_ISL_420079, EPI_ISL_420080, EPI_ISL_420081, EPI_ISL_420082, EPI_ISL_420083, EPI_ISL_420084, EPI_ISL_420085, EPI_ISL_420086, EPI_ISL_420087, EPI_ISL_420088, EPI_ISL_420089, EPI_ISL_420090, EPI_ISL_420091, EPI_ISL_420092, EPI_ISL_420093, EPI_ISL_420094, EPI_ISL_420095, EPI_ISL_420096, EPI_ISL_420097, EPI_ISL_420098, EPI_ISL_420099, EPI_ISL_420100, EPI_ISL_420101, EPI_ISL_420102, EPI_ISL_420103, EPI_ISL_420104, EPI_ISL_420105, EPI_ISL_420106, EPI_ISL_420107, EPI_ISL_420108, EPI_ISL_420109, EPI_ISL_420110, EPI_ISL_420111, EPI_ISL_420112, EPI_ISL_420113, EPI_ISL_420114, EPI_ISL_420115, EPI_ISL_420116, EPI_ISL_420117, EPI_ISL_420118, EPI_ISL_420119, EPI_ISL_420120, EPI_ISL_420121, EPI_ISL_420122, EPI_ISL_420123, EPI_ISL_420124, EPI_ISL_420125, EPI_ISL_420126, EPI_ISL_420127, EPI_ISL_420128, EPI_ISL_420129, EPI_ISL_420130, EPI_ISL_420131, EPI_ISL_420132, EPI_ISL_420133, EPI_ISL_420134, EPI_ISL_420135, EPI_ISL_420136, EPI_ISL_420137, EPI_ISL_420138, EPI_ISL_420139, EPI_ISL_420140, EPI_ISL_420141, EPI_ISL_420142, EPI_ISL_420143, EPI_ISL_420144, EPI_ISL_420145, EPI_ISL_420146, EPI_ISL_420147, EPI_ISL_420148, EPI_ISL_420149, EPI_ISL_420150, EPI_ISL_420151, EPI_ISL_420152, EPI_ISL_420153, EPI_ISL_420154, EPI_ISL_420155, EPI_ISL_420156, EPI_ISL_420157, EPI_ISL_420158, EPI_ISL_420159, EPI_ISL_420160, EPI_ISL_420161, EPI_ISL_420162, EPI_ISL_420163, EPI_ISL_420164, EPI_ISL_420165, EPI_ISL_420166, EPI_ISL_420167, EPI_ISL_420168, EPI_ISL_420169, EPI_ISL_420170, EPI_ISL_420171, EPI_ISL_420172, EPI_ISL_420173, EPI_ISL_420174, EPI_ISL_420175, EPI_ISL_420176, EPI_ISL_420177, EPI_ISL_420178, EPI_ISL_420179, EPI_ISL_420180, EPI_ISL_420181, EPI_ISL_420182, EPI_ISL_420183, EPI_ISL_420184, EPI_ISL_420185, EPI_ISL_420186, EPI_ISL_420187, EPI_ISL_420188, EPI_ISL_420189, EPI_ISL_420190, EPI_ISL_420191, EPI_ISL_420192, EPI_ISL_420193, EPI_ISL_420194, EPI_ISL_420195, EPI_ISL_420196, EPI_ISL_420197, EPI_ISL_420198, EPI_ISL_420199, EPI_ISL_420200, EPI_ISL_420201, EPI_ISL_420202, EPI_ISL_420203, EPI_ISL_420204, EPI_ISL_420205, EPI_ISL_420206, EPI_ISL_420207, EPI_ISL_420208, EPI_ISL_420209, EPI_ISL_420210, EPI_ISL_420211, EPI_ISL_420212, EPI_ISL_420213, EPI_ISL_420214, EPI_ISL_420215, EPI_ISL_420216, EPI_ISL_420217, EPI_ISL_420218, EPI_ISL_420219, EPI_ISL_420220, EPI_ISL_420221, EPI_ISL_420222, EPI_ISL_420223, EPI_ISL_420224, EPI_ISL_420225, EPI_ISL_420226, EPI_ISL_420227, EPI_ISL_420228, EPI_ISL_420229, EPI_ISL_420230, EPI_ISL_420231, EPI_ISL_420232, EPI_ISL_420233, EPI_ISL_420234, EPI_ISL_420235, EPI_ISL_420236, EPI_ISL_420237, EPI_ISL_420238, EPI_ISL_420239, EPI_ISL_420240, EPI_ISL_420241, EPI_ISL_420242, EPI_ISL_420243, EPI_ISL_420244, EPI_ISL_420245, EPI_ISL_420246, EPI_ISL_420247, EPI_ISL_420248, EPI_ISL_420249, EPI_ISL_420250, EPI_ISL_420251, EPI_ISL_420252, EPI_ISL_420253, EPI_ISL_420254, EPI_ISL_420255, EPI_ISL_420256, EPI_ISL_420257, EPI_ISL_420258, EPI_ISL_420259, EPI_ISL_420260, EPI_ISL_420261, EPI_ISL_420262, EPI_ISL_420263, EPI_ISL_420264, EPI_ISL_420265, EPI_ISL_420266, EPI_ISL_420267, EPI_ISL_420268, EPI_ISL_420269, EPI_ISL_420270, EPI_ISL_420271, EPI_ISL_420272, EPI_ISL_420273, EPI_ISL_420274, EPI_ISL_420275, EPI_ISL_420276, EPI_ISL_420277, EPI_ISL_420278, EPI_ISL_420279, EPI_ISL_420280, EPI_ISL_420281, EPI_ISL_420282, EPI_ISL_420283, EPI_ISL_420284, EPI_ISL_420285, EPI_ISL_420286, EPI_ISL_420287, EPI_ISL_420288, EPI_ISL_420289, EPI_ISL_420290, EPI_ISL_420291, EPI_ISL_420292, EPI_ISL_420293, EPI_ISL_420294, EPI_ISL_420295, EPI_ISL_420296, EPI_ISL_420297, EPI_ISL_420298, EPI_ISL_420299, EPI_ISL_420300, EPI_ISL_420301, EPI_ISL_420302, EPI_ISL_420303, EPI_ISL_420304, EPI_ISL_420305, EPI_ISL_420306, EPI_ISL_420307, EPI_ISL_420308, EPI_ISL_420309, EPI_ISL_420310, EPI_ISL_420311, EPI_ISL_420312, EPI_ISL_420313, EPI_ISL_420314, EPI_ISL_420315, EPI_ISL_420316, EPI_ISL_420317, EPI_ISL_420318, EPI_ISL_420319, EPI_ISL_420320, EPI_ISL_420321, EPI_ISL_420322, EPI_ISL_420323, EPI_ISL_420324, EPI_ISL_420325, EPI_ISL_420326, EPI_ISL_420327, EPI_ISL_420328, EPI_ISL_420329, EPI_ISL_420330, EPI_ISL_420331, EPI_ISL_420332, EPI_ISL_420333, EPI_ISL_420334, EPI_ISL_420335, EPI_ISL_420336, EPI_ISL_420337, EPI_ISL_420338, EPI_ISL_420339, EPI_ISL_420340, EPI_ISL_420341, EPI_ISL_420342, EPI_ISL_420343, EPI_ISL_420344, EPI_ISL_420345, EPI_ISL_420346, EPI_ISL_420347, EPI_ISL_420348, EPI_ISL_420349, EPI_ISL_420350, EPI_ISL_420351, EPI_ISL_420352, EPI_ISL_420353, EPI_ISL_420354, EPI_ISL_420355, EPI_ISL_420356, EPI_ISL_420357, EPI_ISL_420358, EPI_ISL_420359, EPI_ISL_420360, EPI_ISL_420361, EPI_ISL_420362, EPI_ISL_420363, EPI_ISL_420364, EPI_ISL_420365, EPI_ISL_420366, EPI_ISL_420367, EPI_ISL_420368, EPI_ISL_420369, EPI_ISL_420370, EPI_ISL_420371, EPI_ISL_420372, EPI_ISL_420373, EPI_ISL_420374, EPI_ISL_420375, EPI_ISL_420376, EPI_ISL_420377, EPI_ISL_420378, EPI_ISL_420379, EPI_ISL_420380, EPI_ISL_420381, EPI_ISL_420382, EPI_ISL_420383, EPI_ISL_420384, EPI_ISL_420385, EPI_ISL_420386, EPI_ISL_420387, EPI_ISL_420388, EPI_ISL_420389, EPI_ISL_420390, EPI_ISL_420391, EPI_ISL_420392, EPI_ISL_420393, EPI_ISL_420394, EPI_ISL_420395, EPI_ISL_420396, EPI_ISL_420397, EPI_ISL_420398, EPI_ISL_420399, EPI_ISL_420400, EPI_ISL_420401, EPI_ISL_420402, EPI_ISL_420403, EPI_ISL_420404, EPI_ISL_420405, EPI_ISL_420406, EPI_ISL_420407, EPI_ISL_420408, EPI_ISL_420409, EPI_ISL_420410, EPI_ISL_420411, EPI_ISL_420412, EPI_ISL_420413, EPI_ISL_420414, EPI_ISL_420415, EPI_ISL_420416, EPI_ISL_420417, EPI_ISL_420418, EPI_ISL_420419, EPI_ISL_420420, EPI_ISL_420421, EPI_ISL_420422, EPI_ISL_420423, EPI_ISL_420424, EPI_ISL_420425, EPI_ISL_420426, EPI_ISL_420427, EPI_ISL_420428, EPI_ISL_420429, EPI_ISL_420430, EPI_ISL_420431, EPI_ISL_420432, EPI_ISL_420433, EPI_ISL_420434, EPI_ISL_420435, EPI_ISL_420436, EPI_ISL_420437, EPI_ISL_420438, EPI_ISL_420439, EPI_ISL_420440, EPI_ISL_420441, EPI_ISL_420442, EPI_ISL_420443, EPI_ISL_420444, EPI_ISL_420445, EPI_ISL_420446, EPI_ISL_420447, EPI_ISL_420448, EPI_ISL_420449, EPI_ISL_420450, EPI_ISL_420451, EPI_ISL_420452, EPI_ISL_420453, EPI_ISL_420454, EPI_ISL_420455, EPI_ISL_420456, EPI_ISL_420457, EPI_ISL_420458, EPI_ISL_420459, EPI_ISL_420460, EPI_ISL_420461, EPI_ISL_420462, EPI_ISL_420463, EPI_ISL_420464, EPI_ISL_420465, EPI_ISL_420466, EPI_ISL_420467, EPI_ISL_420468, EPI_ISL_420469, EPI_ISL_420470, EPI_ISL_420471, EPI_ISL_420472, EPI_ISL_420473, EPI_ISL_420474, EPI_ISL_420475, EPI_ISL_420476, EPI_ISL_420477, EPI_ISL_420478, EPI_ISL_420479, EPI_ISL_420480, EPI_ISL_420481, EPI_ISL_420482, EPI_ISL_420483, EPI_ISL_420484, EPI_ISL_420485, EPI_ISL_420486, EPI_ISL_420487, EPI_ISL_420488, EPI_ISL_420489, EPI_ISL_420490, EPI_ISL_420491, EPI_ISL_420492, EPI_ISL_420493, EPI_ISL_420494, EPI_ISL_420495, EPI_ISL_420496, EPI_ISL_420497, EPI_ISL_420498, EPI_ISL_420499, EPI_ISL_420500, EPI_ISL_420501, EPI_ISL_420502, EPI_ISL_420503, EPI_ISL_420504 |                                                                                                                                                               |                                                                                                                                                               |                                                                                                                                                                                                                                                                                                                                                                                                                                                                                           |

|                                                                                                                                                                                                                                                                                                                                                                                                                |                                                                                                                                                                                           |                                                                                                                       |                                                                                                                                                                                                                                                                                                                                                                                                                                                           |                                                                                                                                                                                                                                                  |
|----------------------------------------------------------------------------------------------------------------------------------------------------------------------------------------------------------------------------------------------------------------------------------------------------------------------------------------------------------------------------------------------------------------|-------------------------------------------------------------------------------------------------------------------------------------------------------------------------------------------|-----------------------------------------------------------------------------------------------------------------------|-----------------------------------------------------------------------------------------------------------------------------------------------------------------------------------------------------------------------------------------------------------------------------------------------------------------------------------------------------------------------------------------------------------------------------------------------------------|--------------------------------------------------------------------------------------------------------------------------------------------------------------------------------------------------------------------------------------------------|
| EPI_ISL_429076, EPI_ISL_429078, EPI_ISL_429079, EPI_ISL_429080, EPI_ISL_429081, EPI_ISL_429084, EPI_ISL_429086, EPI_ISL_429094, EPI_ISL_429095, EPI_ISL_429099, EPI_ISL_429100, EPI_ISL_429101, EPI_ISL_429102, EPI_ISL_429103, EPI_ISL_429104, EPI_ISL_429105                                                                                                                                                 | see above                                                                                                                                                                                 | The First Affiliated Hospital of Guangzhou Medical University                                                         | BGI-shenzhen & The First Affiliated Hospital of Guangzhou Medical University                                                                                                                                                                                                                                                                                                                                                                              |                                                                                                                                                                                                                                                  |
| EPI_ISL_430297                                                                                                                                                                                                                                                                                                                                                                                                 | National Institute for Communicable Diseases of the National Health Laboratory Service                                                                                                    | National Institute for Communicable Diseases of the National Health Laboratory Service                                | Allam M, Kwenda S, van Heusden P, Khumalo Z, Mohale T, Subramoney K, von Gottberg, A, Ismail A, Bhiman JN                                                                                                                                                                                                                                                                                                                                                 |                                                                                                                                                                                                                                                  |
| EPI_ISL_434517, EPI_ISL_434518, EPI_ISL_434519, EPI_ISL_434520, EPI_ISL_434521, EPI_ISL_434522, EPI_ISL_434523, EPI_ISL_434524, EPI_ISL_434525, EPI_ISL_434526, EPI_ISL_434527, EPI_ISL_434528, EPI_ISL_434529, EPI_ISL_434530, EPI_ISL_434531, EPI_ISL_434532                                                                                                                                                 | see above                                                                                                                                                                                 | Robert Garry lab                                                                                                      | Andersen lab at Scripps Research                                                                                                                                                                                                                                                                                                                                                                                                                          | Allison Smither, Gilberto Sabino-Santos, Patricia Snarski, Lilia Melnik, Antoinette Bell, Kaylynn Genemaras, Arnaud Drouin, Dahlene Fusco, Robert Garry with SEARCH Alliance San Diego                                                           |
| EPI_ISL_434572                                                                                                                                                                                                                                                                                                                                                                                                 | The National Institute of Public Health Center for Epidemiology and Microbiology                                                                                                          | The National Institute of Public Health Center for Epidemiology and Microbiology                                      | Alexander Nagy, Helena Jirincova, Ludmila Novakova, Dusan Trnka, Jaromira Vecerova                                                                                                                                                                                                                                                                                                                                                                        |                                                                                                                                                                                                                                                  |
| EPI_ISL_435045, EPI_ISL_435046, EPI_ISL_435047, EPI_ISL_435048                                                                                                                                                                                                                                                                                                                                                 | Laboratory of Applied Genetics                                                                                                                                                            | RSE "National Center for Biotechnology"                                                                               | Alexandr Shevtsov, Ilyas Akhmetollayev, Viktoriya Lutsay, Asylulan Amirgazin, Ruslan Kalendar, Yerlan Ramanculov                                                                                                                                                                                                                                                                                                                                          |                                                                                                                                                                                                                                                  |
| EPI_ISL_435058, EPI_ISL_435059                                                                                                                                                                                                                                                                                                                                                                                 | National Institute for Communicable Diseases of the National Health Laboratory Service                                                                                                    | National Institute for Communicable Diseases of the National Health Laboratory Service                                | Allam M, Kwenda S, van Heusden P, Khumalo Z, Mohale T, Subramoney K, von Gottberg, A, Ismail A, Bhiman JN                                                                                                                                                                                                                                                                                                                                                 |                                                                                                                                                                                                                                                  |
| EPI_ISL_435119                                                                                                                                                                                                                                                                                                                                                                                                 | Mohammed Bin Rashid University of Medicine and Health Sciences                                                                                                                            | Al Jaliia Children's Hospital                                                                                         | Ahmad Abou Tayoun, Tom Loney, Hamda Khansaheb, Sathishkumar Ramaswamy, Divinlal Harilal, Zulfa Omar Deesi, Rupa Murthy Varghese, Hanan Al Suwaidi, Abdulmajeed Alkhaja, Mohammed Uddin, Rifat Hamoudi, Rabih Halwani, Abiola Catherine Senok, Qu                                                                                                                                                                                                          |                                                                                                                                                                                                                                                  |
| EPI_ISL_435120, EPI_ISL_435121, EPI_ISL_435122, EPI_ISL_435123, EPI_ISL_435124, EPI_ISL_435125, EPI_ISL_435126, EPI_ISL_435127, EPI_ISL_435128, EPI_ISL_435129, EPI_ISL_435130, EPI_ISL_435131, EPI_ISL_435132, EPI_ISL_435133, EPI_ISL_435134, EPI_ISL_435135, EPI_ISL_435136, EPI_ISL_435137, EPI_ISL_435141, EPI_ISL_435142, EPI_ISL_435143                                                                 | see above                                                                                                                                                                                 | Mohammed Bin Rashid University of Medicine and Health Sciences                                                        | Al Jaliia Genomics Center                                                                                                                                                                                                                                                                                                                                                                                                                                 | Ahmad Abou Tayoun, Tom Loney, Hamda Khansaheb, Sathishkumar Ramaswamy, Divinlal Harilal, Zulfa Omar Deesi, Rupa Murthy Varghese, Hanan Al Suwaidi, Abdulmajeed Alkhaja, Mohammed Uddin, Rifat Hamoudi, Rabih Halwani, Abiola Catherine Senok, Qu |
| EPI_ISL_435445, EPI_ISL_435446, EPI_ISL_435447, EPI_ISL_435448, EPI_ISL_435449, EPI_ISL_435450, EPI_ISL_435451, EPI_ISL_435452, EPI_ISL_435453, EPI_ISL_435454, EPI_ISL_435455, EPI_ISL_435456, EPI_ISL_435457, EPI_ISL_435458, EPI_ISL_435459, EPI_ISL_435460, EPI_ISL_435461, EPI_ISL_435462, EPI_ISL_435466, EPI_ISL_435467, EPI_ISL_435468, EPI_ISL_435469, EPI_ISL_435470, EPI_ISL_435471, EPI_ISL_435472 | see above                                                                                                                                                                                 | Robert Garry lab                                                                                                      | Andersen lab at Scripps Research                                                                                                                                                                                                                                                                                                                                                                                                                          | Allison Smither, Gilberto Sabino-Santos, Patricia Snarski, Lilia Melnik, Antoinette Bell, Kaylynn Genemaras, Arnaud Drouin, Dahlene Fusco, Robert Garry with SEARCH Alliance San Diego                                                           |
| EPI_ISL_435723                                                                                                                                                                                                                                                                                                                                                                                                 | Laboratory of Genomics & Bioinformatics, Institute of Immunology and Experimental Therapy, Polish Academy of Sciences Oddzia Mikrobiologii Wojewódzkiej Stacji Sanitarno Epidemiologiczna | Laboratory of Genomics & Bioinformatics, Institute of Immunology and Experimental Therapy, Polish Academy of Sciences | Aleksandra Herud, Dorota Kujawa, Dariusz Martynowski, Krzysztof Jakub Pawlik, Joanna Sikorska, Paulina ebrowska, Grayna Zalewska, Oskar Karpiski and ukasz aczmaski                                                                                                                                                                                                                                                                                       |                                                                                                                                                                                                                                                  |
| EPI_ISL_436715, EPI_ISL_436716, EPI_ISL_436717                                                                                                                                                                                                                                                                                                                                                                 | Genomics and Computational Biology Lab, Scientific Research Institute of Physical-Chemical Medicine, FMBA of Russia                                                                       | Genomics and Computational Biology Lab, Scientific Research Institute of Physical-Chemical Medicine, FMBA of Russia   | A. Pavlenko, O. Guskova, K. Klimina, V. Veselovsky, A. Manolov, D. Fedorov, V. Govorun and E. Ilina                                                                                                                                                                                                                                                                                                                                                       |                                                                                                                                                                                                                                                  |
| EPI_ISL_437439                                                                                                                                                                                                                                                                                                                                                                                                 | Department of Microbiology, Government Medical College, Surat                                                                                                                             | Gujarat Biotechnology Research Centre                                                                                 | Akanksha Verma, Nitin Savaliya, Raghawendra Kumar, Dinesh Kumar, Zuber Saiyed, Dipa Kinariwala, Disha Patel, Binita Aring, Neeta Khandelwal, Geeta Vaghela, Sonia Barve, Bhavesh Modi, Kairavi Joshi, Gaurishankar Shrimali, Nidhi Sood, Pranay Shah, R D Dixit Pandit, Tejas Shah, Ankit Hinsu, Pritesh Sabara, Apurvashin Puvar, Janvi Raval, Monika Gandhi, Pinal Trivedi, Maharshi Pandya, Amit Kanani, Armi Chaudhari, Chaitanya Joshi, Madhvi Joshi |                                                                                                                                                                                                                                                  |
| EPI_ISL_437519                                                                                                                                                                                                                                                                                                                                                                                                 | The National Institute of Public Health Center for Epidemiology and Microbiology                                                                                                          | The National Institute of Public Health Center for Epidemiology and Microbiology                                      | Alexander Nagy, Helena Jirincova, Ludmila Novakova, Dusan Trnka, Jaromira Vecerova                                                                                                                                                                                                                                                                                                                                                                        |                                                                                                                                                                                                                                                  |
| EPI_ISL_437540, EPI_ISL_437541, EPI_ISL_437542, EPI_ISL_437544, EPI_ISL_437545,                                                                                                                                                                                                                                                                                                                                | Robert Garry lab                                                                                                                                                                          | Andersen lab at Scripps Research                                                                                      | Allison Smither, Gilberto Sabino-Santos, Patricia Snarski, Lilia Melnik, Antoinette Bell, Kaylynn Genemaras, Arnaud Drouin, Dahlene Fusco, Robert Garry with SEARCH Alliance San Diego                                                                                                                                                                                                                                                                    |                                                                                                                                                                                                                                                  |

|                                                                                                                                                                                                                                                                                                                                                                                                                                                                                                                                                                                                                                                                                                                                                                                                                                                                                                                                                                                                                                                                                                                                                                                                                                                                                                                                                                                                                                                                                                                                                                                                                                                                                                                                                                                                                                                                                                                                                                                                                                                                                                                                                                                                                                                                                                                                                                                                                                                                                                                                                                                                                                                                                                                                                                                                                                                                                                                                                                                                                                                                                                                                                                                                                                                                                                                                                                                                                                                                                                                                                                                                |                                                                                        |                                                                                                                                                                                                                                                                                                      |                                                                                                                                                                                                                                                                                                                                                                                                                                                               |                                                                                                                                                                                        |
|------------------------------------------------------------------------------------------------------------------------------------------------------------------------------------------------------------------------------------------------------------------------------------------------------------------------------------------------------------------------------------------------------------------------------------------------------------------------------------------------------------------------------------------------------------------------------------------------------------------------------------------------------------------------------------------------------------------------------------------------------------------------------------------------------------------------------------------------------------------------------------------------------------------------------------------------------------------------------------------------------------------------------------------------------------------------------------------------------------------------------------------------------------------------------------------------------------------------------------------------------------------------------------------------------------------------------------------------------------------------------------------------------------------------------------------------------------------------------------------------------------------------------------------------------------------------------------------------------------------------------------------------------------------------------------------------------------------------------------------------------------------------------------------------------------------------------------------------------------------------------------------------------------------------------------------------------------------------------------------------------------------------------------------------------------------------------------------------------------------------------------------------------------------------------------------------------------------------------------------------------------------------------------------------------------------------------------------------------------------------------------------------------------------------------------------------------------------------------------------------------------------------------------------------------------------------------------------------------------------------------------------------------------------------------------------------------------------------------------------------------------------------------------------------------------------------------------------------------------------------------------------------------------------------------------------------------------------------------------------------------------------------------------------------------------------------------------------------------------------------------------------------------------------------------------------------------------------------------------------------------------------------------------------------------------------------------------------------------------------------------------------------------------------------------------------------------------------------------------------------------------------------------------------------------------------------------------------------|----------------------------------------------------------------------------------------|------------------------------------------------------------------------------------------------------------------------------------------------------------------------------------------------------------------------------------------------------------------------------------------------------|---------------------------------------------------------------------------------------------------------------------------------------------------------------------------------------------------------------------------------------------------------------------------------------------------------------------------------------------------------------------------------------------------------------------------------------------------------------|----------------------------------------------------------------------------------------------------------------------------------------------------------------------------------------|
| EPI_ISL_437546,<br>EPI_ISL_437547,<br>EPI_ISL_437548                                                                                                                                                                                                                                                                                                                                                                                                                                                                                                                                                                                                                                                                                                                                                                                                                                                                                                                                                                                                                                                                                                                                                                                                                                                                                                                                                                                                                                                                                                                                                                                                                                                                                                                                                                                                                                                                                                                                                                                                                                                                                                                                                                                                                                                                                                                                                                                                                                                                                                                                                                                                                                                                                                                                                                                                                                                                                                                                                                                                                                                                                                                                                                                                                                                                                                                                                                                                                                                                                                                                           |                                                                                        |                                                                                                                                                                                                                                                                                                      |                                                                                                                                                                                                                                                                                                                                                                                                                                                               |                                                                                                                                                                                        |
| EPI_ISL_437913, EPI_ISL_437914, EPI_ISL_437915, EPI_ISL_437916, EPI_ISL_437917, EPI_ISL_437918, EPI_ISL_437919, EPI_ISL_437920, EPI_ISL_437921, EPI_ISL_437922, EPI_ISL_437923, EPI_ISL_437924, EPI_ISL_437925, EPI_ISL_437926, EPI_ISL_437927, EPI_ISL_437928, EPI_ISL_437929, EPI_ISL_437930, EPI_ISL_437931, EPI_ISL_437932, EPI_ISL_437933, EPI_ISL_437934, EPI_ISL_437935, EPI_ISL_437936, EPI_ISL_437937, EPI_ISL_437938, EPI_ISL_437939, EPI_ISL_437940, EPI_ISL_437941, EPI_ISL_437942, EPI_ISL_437943, EPI_ISL_437944, EPI_ISL_437945, EPI_ISL_437946, EPI_ISL_437947, EPI_ISL_437948, EPI_ISL_437949, EPI_ISL_437950, EPI_ISL_437951, EPI_ISL_437952, EPI_ISL_437953, EPI_ISL_437954, EPI_ISL_437955, EPI_ISL_437956, EPI_ISL_437957, EPI_ISL_437958, EPI_ISL_437959, EPI_ISL_437960, EPI_ISL_437961, EPI_ISL_437962, EPI_ISL_437963, EPI_ISL_437964, EPI_ISL_437965, EPI_ISL_437966, EPI_ISL_437967, EPI_ISL_437968, EPI_ISL_437969, EPI_ISL_437970, EPI_ISL_437971, EPI_ISL_437972, EPI_ISL_437973, EPI_ISL_437974, EPI_ISL_437975, EPI_ISL_437976, EPI_ISL_437977, EPI_ISL_437978, EPI_ISL_437979, EPI_ISL_437980, EPI_ISL_437981, EPI_ISL_437982, EPI_ISL_437983, EPI_ISL_437984, EPI_ISL_437985, EPI_ISL_437986, EPI_ISL_437987, EPI_ISL_437988, EPI_ISL_437989, EPI_ISL_437990, EPI_ISL_437991, EPI_ISL_437992, EPI_ISL_437993, EPI_ISL_437994, EPI_ISL_437995, EPI_ISL_437996, EPI_ISL_437997, EPI_ISL_437998, EPI_ISL_437999, EPI_ISL_438000, EPI_ISL_438001, EPI_ISL_438002, EPI_ISL_438003, EPI_ISL_438004, EPI_ISL_438005, EPI_ISL_438006, EPI_ISL_438007, EPI_ISL_438008, EPI_ISL_438009, EPI_ISL_438010, EPI_ISL_438011, EPI_ISL_438012, EPI_ISL_438013, EPI_ISL_438014, EPI_ISL_438015, EPI_ISL_438016, EPI_ISL_438017, EPI_ISL_438018, EPI_ISL_438019, EPI_ISL_438020, EPI_ISL_438021, EPI_ISL_438022, EPI_ISL_438023, EPI_ISL_438024, EPI_ISL_438025, EPI_ISL_438026, EPI_ISL_438027, EPI_ISL_438028, EPI_ISL_438029, EPI_ISL_438030, EPI_ISL_438031, EPI_ISL_438032, EPI_ISL_438033, EPI_ISL_438034, EPI_ISL_438035, EPI_ISL_438036, EPI_ISL_438037, EPI_ISL_438038, EPI_ISL_438039, EPI_ISL_438040, EPI_ISL_438041, EPI_ISL_438042, EPI_ISL_438043, EPI_ISL_438044, EPI_ISL_438045, EPI_ISL_438046, EPI_ISL_438047, EPI_ISL_438048, EPI_ISL_438049, EPI_ISL_438050, EPI_ISL_438051, EPI_ISL_438052, EPI_ISL_438053, EPI_ISL_438054, EPI_ISL_438055, EPI_ISL_438056, EPI_ISL_438057, EPI_ISL_438058, EPI_ISL_438059, EPI_ISL_438060, EPI_ISL_438061, EPI_ISL_438062, EPI_ISL_438063, EPI_ISL_438064, EPI_ISL_438065, EPI_ISL_438066, EPI_ISL_438067, EPI_ISL_438068, EPI_ISL_438069, EPI_ISL_438070, EPI_ISL_438071, EPI_ISL_438072, EPI_ISL_438073, EPI_ISL_438074, EPI_ISL_438075, EPI_ISL_438076, EPI_ISL_438077, EPI_ISL_438078, EPI_ISL_438079, EPI_ISL_438080, EPI_ISL_438081, EPI_ISL_438082, EPI_ISL_438083, EPI_ISL_438084, EPI_ISL_438085, EPI_ISL_438086, EPI_ISL_438087, EPI_ISL_438088, EPI_ISL_438089, EPI_ISL_438090, EPI_ISL_438091, EPI_ISL_438092, EPI_ISL_438093, EPI_ISL_438094, EPI_ISL_438095, EPI_ISL_438096, EPI_ISL_438097, EPI_ISL_438098, EPI_ISL_438099, EPI_ISL_438100, EPI_ISL_438101, EPI_ISL_438102, EPI_ISL_438103, EPI_ISL_438104, EPI_ISL_438105, EPI_ISL_438106, EPI_ISL_438107, EPI_ISL_438108, EPI_ISL_438109, EPI_ISL_438110, EPI_ISL_438111, EPI_ISL_438112, EPI_ISL_438113, EPI_ISL_438114, EPI_ISL_438115, EPI_ISL_438116, EPI_ISL_438117, EPI_ISL_438118, EPI_ISL_438119, EPI_ISL_438120, EPI_ISL_438121, EPI_ISL_438122, EPI_ISL_438123, EPI_ISL_438124, EPI_ISL_438125, EPI_ISL_438126, EPI_ISL_438127, EPI_ISL_438128 |                                                                                        | Alexandra Popa, Benedikt Agerer, Henrique Colaco, Lukas Endler, Jakob-Wendelin Genger, Alexander Lercher, Mark Smyth, Thomas Penz, Michael Schuster, Jan Laine, Martin Senekowitsch, Judith Aberle, Stephan Aberle, Elisabeth Puchhammer-Stoeckl, Manfred N Laer, Christoph Bock, Andreas Bergthaler |                                                                                                                                                                                                                                                                                                                                                                                                                                                               |                                                                                                                                                                                        |
| EPI_ISL_437933, EPI_ISL_437934, EPI_ISL_437935, EPI_ISL_437936, EPI_ISL_437937, EPI_ISL_437938, EPI_ISL_437939, EPI_ISL_437940, EPI_ISL_437941, EPI_ISL_437942, EPI_ISL_437943, EPI_ISL_437944, EPI_ISL_437945, EPI_ISL_437946, EPI_ISL_437947, EPI_ISL_437948, EPI_ISL_437949, EPI_ISL_437950, EPI_ISL_437951, EPI_ISL_437952, EPI_ISL_437953, EPI_ISL_437954, EPI_ISL_437955, EPI_ISL_437956, EPI_ISL_437957, EPI_ISL_437958, EPI_ISL_437959, EPI_ISL_437960, EPI_ISL_437961, EPI_ISL_437962, EPI_ISL_437963, EPI_ISL_437964, EPI_ISL_437965, EPI_ISL_437966, EPI_ISL_437967, EPI_ISL_437968, EPI_ISL_437969, EPI_ISL_437970, EPI_ISL_437971, EPI_ISL_437972, EPI_ISL_437973, EPI_ISL_437974, EPI_ISL_437975, EPI_ISL_437976, EPI_ISL_437977, EPI_ISL_437978, EPI_ISL_437979, EPI_ISL_437980, EPI_ISL_437981, EPI_ISL_437982, EPI_ISL_437983, EPI_ISL_437984, EPI_ISL_437985, EPI_ISL_437986, EPI_ISL_437987, EPI_ISL_437988, EPI_ISL_437989, EPI_ISL_437990, EPI_ISL_437991, EPI_ISL_437992, EPI_ISL_437993, EPI_ISL_437994, EPI_ISL_437995, EPI_ISL_437996, EPI_ISL_437997, EPI_ISL_437998, EPI_ISL_437999, EPI_ISL_438000, EPI_ISL_438001, EPI_ISL_438002, EPI_ISL_438003, EPI_ISL_438004, EPI_ISL_438005, EPI_ISL_438006, EPI_ISL_438007, EPI_ISL_438008, EPI_ISL_438009, EPI_ISL_438010, EPI_ISL_438011, EPI_ISL_438012, EPI_ISL_438013, EPI_ISL_438014, EPI_ISL_438015, EPI_ISL_438016, EPI_ISL_438017, EPI_ISL_438018, EPI_ISL_438019, EPI_ISL_438020, EPI_ISL_438021, EPI_ISL_438022, EPI_ISL_438023, EPI_ISL_438024, EPI_ISL_438025, EPI_ISL_438026, EPI_ISL_438027, EPI_ISL_438028, EPI_ISL_438029, EPI_ISL_438030, EPI_ISL_438031, EPI_ISL_438032, EPI_ISL_438033, EPI_ISL_438034, EPI_ISL_438035, EPI_ISL_438036, EPI_ISL_438037, EPI_ISL_438038, EPI_ISL_438039, EPI_ISL_438040, EPI_ISL_438041, EPI_ISL_438042, EPI_ISL_438043, EPI_ISL_438044, EPI_ISL_438045, EPI_ISL_438046, EPI_ISL_438047, EPI_ISL_438048, EPI_ISL_438049, EPI_ISL_438050, EPI_ISL_438051, EPI_ISL_438052, EPI_ISL_438053, EPI_ISL_438054, EPI_ISL_438055, EPI_ISL_438056, EPI_ISL_438057, EPI_ISL_438058, EPI_ISL_438059, EPI_ISL_438060, EPI_ISL_438061, EPI_ISL_438062, EPI_ISL_438063, EPI_ISL_438064, EPI_ISL_438065, EPI_ISL_438066, EPI_ISL_438067, EPI_ISL_438068, EPI_ISL_438069, EPI_ISL_438070, EPI_ISL_438071, EPI_ISL_438072, EPI_ISL_438073, EPI_ISL_438074, EPI_ISL_438075, EPI_ISL_438076, EPI_ISL_438077, EPI_ISL_438078, EPI_ISL_438079, EPI_ISL_438080, EPI_ISL_438081, EPI_ISL_438082, EPI_ISL_438083, EPI_ISL_438084, EPI_ISL_438085, EPI_ISL_438086, EPI_ISL_438087, EPI_ISL_438088, EPI_ISL_438089, EPI_ISL_438090, EPI_ISL_438091, EPI_ISL_438092, EPI_ISL_438093, EPI_ISL_438094, EPI_ISL_438095, EPI_ISL_438096, EPI_ISL_438097, EPI_ISL_438098, EPI_ISL_438099, EPI_ISL_438100, EPI_ISL_438101, EPI_ISL_438102, EPI_ISL_438103, EPI_ISL_438104, EPI_ISL_438105, EPI_ISL_438106, EPI_ISL_438107, EPI_ISL_438108, EPI_ISL_438109, EPI_ISL_438110, EPI_ISL_438111, EPI_ISL_438112, EPI_ISL_438113, EPI_ISL_438114, EPI_ISL_438115, EPI_ISL_438116, EPI_ISL_438117, EPI_ISL_438118, EPI_ISL_438119, EPI_ISL_438120, EPI_ISL_438121, EPI_ISL_438122, EPI_ISL_438123, EPI_ISL_438124, EPI_ISL_438125, EPI_ISL_438126, EPI_ISL_438127, EPI_ISL_438128                                                                                                                                                                                                                                                                                                                                 |                                                                                        | Alexandra Popa, Benedikt Agerer, Henrique Colaco, Lukas Endler, Jakob-Wendelin Genger, Alexander Lercher, Mark Smyth, Thomas Penz, Michael Schuster, Jan Laine, Martin Senekowitsch, Judith Aberle, Stephan Aberle, Elisabeth Puchhammer-Stoeckl, Manfred N Laer, Christoph Bock, Andreas Bergthaler |                                                                                                                                                                                                                                                                                                                                                                                                                                                               |                                                                                                                                                                                        |
| EPI_ISL_444469                                                                                                                                                                                                                                                                                                                                                                                                                                                                                                                                                                                                                                                                                                                                                                                                                                                                                                                                                                                                                                                                                                                                                                                                                                                                                                                                                                                                                                                                                                                                                                                                                                                                                                                                                                                                                                                                                                                                                                                                                                                                                                                                                                                                                                                                                                                                                                                                                                                                                                                                                                                                                                                                                                                                                                                                                                                                                                                                                                                                                                                                                                                                                                                                                                                                                                                                                                                                                                                                                                                                                                                 | B.J. Medical College and Civil hospital                                                | Gujarat Biotechnology Research Centre                                                                                                                                                                                                                                                                | Akanksha Verma, Nitin Savaliya, Raghawendra Kumar, Dinesh Kumar, Zuber Saiyed, Dipa Kinariwala, Disha Patel, Binita Aring, Neeta Khandelwal, Geeta Vaghela, Sonia Barve, Bhavesh Modi, Kairavi Joshi, Gaurishankar Shrimali, Nidhi Sood, Pranay Shah, R D Dixit Pandit, Tejas Shah, Ankit Hinsu, Pritesh Sabara, Apurvasinh Puvar, Janvi Raval, Monika Gandhi, Pinal Trivedi, Maharshi Pandya, Amit Kanani, Priti Pandita, Chaitanya Joshi, Madhvi Joshi      |                                                                                                                                                                                        |
| EPI_ISL_445088                                                                                                                                                                                                                                                                                                                                                                                                                                                                                                                                                                                                                                                                                                                                                                                                                                                                                                                                                                                                                                                                                                                                                                                                                                                                                                                                                                                                                                                                                                                                                                                                                                                                                                                                                                                                                                                                                                                                                                                                                                                                                                                                                                                                                                                                                                                                                                                                                                                                                                                                                                                                                                                                                                                                                                                                                                                                                                                                                                                                                                                                                                                                                                                                                                                                                                                                                                                                                                                                                                                                                                                 | Human Genetic Research Center, Kawsar Biotech Company                                  | Human Genetic Research Center, Kawsar Biotech Company                                                                                                                                                                                                                                                | Abbasalipour Bashash,M., Khosravi,M.A., Zeinali,S., Keshvar,Y., Sabeghi,S., Jadaliha,M. and Yazdani,R.                                                                                                                                                                                                                                                                                                                                                        |                                                                                                                                                                                        |
| EPI_ISL_445119, EPI_ISL_445120, EPI_ISL_445121, EPI_ISL_445122, EPI_ISL_445123, EPI_ISL_445124, EPI_ISL_445125, EPI_ISL_445126, EPI_ISL_445127, EPI_ISL_445128, EPI_ISL_445129, EPI_ISL_445130, EPI_ISL_445131, EPI_ISL_445132, EPI_ISL_445133, EPI_ISL_445134, EPI_ISL_445135, EPI_ISL_445136, EPI_ISL_445137, EPI_ISL_445138, EPI_ISL_445139, EPI_ISL_445140, EPI_ISL_445141, EPI_ISL_445142, EPI_ISL_445143, EPI_ISL_445144, EPI_ISL_445145, EPI_ISL_445146, EPI_ISL_445147, EPI_ISL_445148, EPI_ISL_445149, EPI_ISL_445150, EPI_ISL_445151, EPI_ISL_445152, EPI_ISL_445153, EPI_ISL_445154, EPI_ISL_445155, EPI_ISL_445156, EPI_ISL_445157, EPI_ISL_445158, EPI_ISL_445159, EPI_ISL_445160, EPI_ISL_445161, EPI_ISL_445162, EPI_ISL_445163                                                                                                                                                                                                                                                                                                                                                                                                                                                                                                                                                                                                                                                                                                                                                                                                                                                                                                                                                                                                                                                                                                                                                                                                                                                                                                                                                                                                                                                                                                                                                                                                                                                                                                                                                                                                                                                                                                                                                                                                                                                                                                                                                                                                                                                                                                                                                                                                                                                                                                                                                                                                                                                                                                                                                                                                                                                 | see above                                                                              | Robert Garry lab                                                                                                                                                                                                                                                                                     | Andersen lab at Scripps Research                                                                                                                                                                                                                                                                                                                                                                                                                              | Allison Smither, Gilberto Sabino-Santos, Patricia Snarski, Lilia Melnik, Antoinette Bell, Kaylynn Genemaras, Arnaud Drouin, Dahlene Fusco, Robert Garry with SEARCH Alliance San Diego |
| EPI_ISL_445233                                                                                                                                                                                                                                                                                                                                                                                                                                                                                                                                                                                                                                                                                                                                                                                                                                                                                                                                                                                                                                                                                                                                                                                                                                                                                                                                                                                                                                                                                                                                                                                                                                                                                                                                                                                                                                                                                                                                                                                                                                                                                                                                                                                                                                                                                                                                                                                                                                                                                                                                                                                                                                                                                                                                                                                                                                                                                                                                                                                                                                                                                                                                                                                                                                                                                                                                                                                                                                                                                                                                                                                 | Vardcentralen Brinken                                                                  | The Public Health Agency of Sweden                                                                                                                                                                                                                                                                   | Agnes Wigh, Oskar Karlsson Lindsjo, Maria Lind Karlberg, Anna-Malin Linde, Olov Svartstrom, Anna Risberg, Theresa Enkirch, Mia Brytting, Karin Tegmark-Wisell                                                                                                                                                                                                                                                                                                 |                                                                                                                                                                                        |
| EPI_ISL_447041                                                                                                                                                                                                                                                                                                                                                                                                                                                                                                                                                                                                                                                                                                                                                                                                                                                                                                                                                                                                                                                                                                                                                                                                                                                                                                                                                                                                                                                                                                                                                                                                                                                                                                                                                                                                                                                                                                                                                                                                                                                                                                                                                                                                                                                                                                                                                                                                                                                                                                                                                                                                                                                                                                                                                                                                                                                                                                                                                                                                                                                                                                                                                                                                                                                                                                                                                                                                                                                                                                                                                                                 | B.J. Medical College and Civil hospital                                                | Gujarat Biotechnology Research Centre                                                                                                                                                                                                                                                                | Akanksha Verma, Nitin Savaliya, Raghawendra Kumar, Dinesh Kumar, Zuber Saiyed, Dipa Kinariwala, Disha Patel, Binita Aring, Neeta Khandelwal, Geeta Vaghela, Sonia Barve, Bhavesh Modi, Kairavi Joshi, Gaurishankar Shrimali, Nidhi Sood, Pranay Shah, R D Dixit Pandit, Tejas Shah, Ankit Hinsu, Pritesh Sabara, Apurvasinh Puvar, Janvi Raval, Monika Gandhi, Pinal Trivedi, Maharshi Pandya, Amit Kanani, Sharmista Majumdar, Chaitanya Joshi, Madhvi Joshi |                                                                                                                                                                                        |
| EPI_ISL_447550                                                                                                                                                                                                                                                                                                                                                                                                                                                                                                                                                                                                                                                                                                                                                                                                                                                                                                                                                                                                                                                                                                                                                                                                                                                                                                                                                                                                                                                                                                                                                                                                                                                                                                                                                                                                                                                                                                                                                                                                                                                                                                                                                                                                                                                                                                                                                                                                                                                                                                                                                                                                                                                                                                                                                                                                                                                                                                                                                                                                                                                                                                                                                                                                                                                                                                                                                                                                                                                                                                                                                                                 | GMERS Medical College and Hospital, Gandhinagar                                        | Gujarat Biotechnology Research Centre                                                                                                                                                                                                                                                                | Akanksha Verma, Nitin Savaliya, Raghawendra Kumar, Dinesh Kumar, Zuber Saiyed, Dipa Kinariwala, Disha Patel, Binita Aring, Neeta Khandelwal, Geeta Vaghela, Sonia Barve, Bhavesh Modi, Kairavi Joshi, Gaurishankar Shrimali, Nidhi Sood, Pranay Shah, R D Dixit Pandit, Tejas Shah, Ankit Hinsu, Pritesh Sabara, Apurvasinh Puvar, Janvi Raval, Monika Gandhi, Pinal Trivedi, Maharshi Pandya, Amit Kanani, Armi Chaudhari, Chaitanya Joshi, Madhvi Joshi     |                                                                                                                                                                                        |
| EPI_ISL_450173, EPI_ISL_450174, EPI_ISL_450175, EPI_ISL_450176, EPI_ISL_450177, EPI_ISL_450178, EPI_ISL_450179, EPI_ISL_450180, EPI_ISL_450181, EPI_ISL_450182, EPI_ISL_450183, EPI_ISL_450184, EPI_ISL_450185, EPI_ISL_450231                                                                                                                                                                                                                                                                                                                                                                                                                                                                                                                                                                                                                                                                                                                                                                                                                                                                                                                                                                                                                                                                                                                                                                                                                                                                                                                                                                                                                                                                                                                                                                                                                                                                                                                                                                                                                                                                                                                                                                                                                                                                                                                                                                                                                                                                                                                                                                                                                                                                                                                                                                                                                                                                                                                                                                                                                                                                                                                                                                                                                                                                                                                                                                                                                                                                                                                                                                 | see above                                                                              | Robert Garry lab                                                                                                                                                                                                                                                                                     | Andersen lab at Scripps Research                                                                                                                                                                                                                                                                                                                                                                                                                              | Allison Smither, Gilberto Sabino-Santos, Patricia Snarski, Lilia Melnik, Antoinette Bell, Kaylynn Genemaras, Arnaud Drouin, Dahlene Fusco, Robert Garry with SEARCH Alliance San Diego |
| EPI_ISL_450296, EPI_ISL_450297, EPI_ISL_450298, EPI_ISL_450299, EPI_ISL_450300, EPI_ISL_450301                                                                                                                                                                                                                                                                                                                                                                                                                                                                                                                                                                                                                                                                                                                                                                                                                                                                                                                                                                                                                                                                                                                                                                                                                                                                                                                                                                                                                                                                                                                                                                                                                                                                                                                                                                                                                                                                                                                                                                                                                                                                                                                                                                                                                                                                                                                                                                                                                                                                                                                                                                                                                                                                                                                                                                                                                                                                                                                                                                                                                                                                                                                                                                                                                                                                                                                                                                                                                                                                                                 | National Institute for Communicable Diseases of the National Health Laboratory Service | National Institute for Communicable Diseases of the National Health Laboratory Service                                                                                                                                                                                                               | Allam M, Ismail A, Khumalo Z, Kwenda S, van Heusden P, Mtshali P, Mnyameni F, Mohale T, Subramoney K, Bhiman JN                                                                                                                                                                                                                                                                                                                                               |                                                                                                                                                                                        |
| EPI_ISL_450346, EPI_ISL_450347, EPI_ISL_450348, EPI_ISL_450349, EPI_ISL_450350, EPI_ISL_450351, EPI_ISL_450352                                                                                                                                                                                                                                                                                                                                                                                                                                                                                                                                                                                                                                                                                                                                                                                                                                                                                                                                                                                                                                                                                                                                                                                                                                                                                                                                                                                                                                                                                                                                                                                                                                                                                                                                                                                                                                                                                                                                                                                                                                                                                                                                                                                                                                                                                                                                                                                                                                                                                                                                                                                                                                                                                                                                                                                                                                                                                                                                                                                                                                                                                                                                                                                                                                                                                                                                                                                                                                                                                 | St.Olavs hospital/NTNU                                                                 | Institute of Genomics Core Facility, University of Tartu                                                                                                                                                                                                                                             | Aleksandr Ianevski, Tuuli Reisberg, Janne-Fossum Malmring, Svein Arne Nordbø, Denis Kainov                                                                                                                                                                                                                                                                                                                                                                    |                                                                                                                                                                                        |
| EPI_ISL_450495                                                                                                                                                                                                                                                                                                                                                                                                                                                                                                                                                                                                                                                                                                                                                                                                                                                                                                                                                                                                                                                                                                                                                                                                                                                                                                                                                                                                                                                                                                                                                                                                                                                                                                                                                                                                                                                                                                                                                                                                                                                                                                                                                                                                                                                                                                                                                                                                                                                                                                                                                                                                                                                                                                                                                                                                                                                                                                                                                                                                                                                                                                                                                                                                                                                                                                                                                                                                                                                                                                                                                                                 | National Institute for Communicable Diseases of the National Health Laboratory Service | National Institute for Communicable Diseases of the National Health Laboratory Service                                                                                                                                                                                                               | Allam M, Ismail A, Khumalo Z, Kwenda S, van Heusden P, Mtshali P, Mnyameni F, Mohale T, Subramoney K, Bhiman JN                                                                                                                                                                                                                                                                                                                                               |                                                                                                                                                                                        |
| EPI_ISL_452181, EPI_ISL_452182, EPI_ISL_452183,                                                                                                                                                                                                                                                                                                                                                                                                                                                                                                                                                                                                                                                                                                                                                                                                                                                                                                                                                                                                                                                                                                                                                                                                                                                                                                                                                                                                                                                                                                                                                                                                                                                                                                                                                                                                                                                                                                                                                                                                                                                                                                                                                                                                                                                                                                                                                                                                                                                                                                                                                                                                                                                                                                                                                                                                                                                                                                                                                                                                                                                                                                                                                                                                                                                                                                                                                                                                                                                                                                                                                | ULSS9 Distretto di Bussolengo                                                          | Istituto Zooprofilattico Sperimentale delle Venezie                                                                                                                                                                                                                                                  | Adelaide Milani, Alessia Schivo, Annalisa Salviato, Erika Giorgia Quaranta, Ambra Pastori, Bianca Zecchin, Alice Fusaro, Isabella Monne, Calogero Terregino, Antonia Ricci                                                                                                                                                                                                                                                                                    |                                                                                                                                                                                        |

|                                                                                                                                                                                                                                                                                                                                                |                                                            |                                                                                                                                                        |                                                                                                                                                                              |
|------------------------------------------------------------------------------------------------------------------------------------------------------------------------------------------------------------------------------------------------------------------------------------------------------------------------------------------------|------------------------------------------------------------|--------------------------------------------------------------------------------------------------------------------------------------------------------|------------------------------------------------------------------------------------------------------------------------------------------------------------------------------|
| EPI_ISL_452184,<br>EPI_ISL_452185,<br>EPI_ISL_452186,<br>EPI_ISL_452187,<br>EPI_ISL_452188,<br>EPI_ISL_452189                                                                                                                                                                                                                                  |                                                            |                                                                                                                                                        |                                                                                                                                                                              |
| EPI_ISL_452190,<br>EPI_ISL_452191                                                                                                                                                                                                                                                                                                              | ULSS9 Distretto di<br>San Bonifacio                        | Istituto Zooprofilattico<br>Sperimentale delle<br>Venezie                                                                                              | Adelaide Milani, Alessia Schivo, Annalisa Salviato, Erika Giorgia Quaranta, Ambra Pastori, Bianca Zecchin, Alice Fusaro, Isabella Monne, Calogero Terregino, Antonia Ricci   |
| EPI_ISL_454497, EPI_ISL_454498, EPI_ISL_454499, EPI_ISL_454500, EPI_ISL_454501, EPI_ISL_454502, EPI_ISL_454503, EPI_ISL_454504, EPI_ISL_454505, EPI_ISL_454506, EPI_ISL_454507, EPI_ISL_454508, EPI_ISL_454509, EPI_ISL_454510, EPI_ISL_454511, EPI_ISL_454512, EPI_ISL_454513, EPI_ISL_454514, EPI_ISL_454518, EPI_ISL_454519, EPI_ISL_454520 |                                                            |                                                                                                                                                        |                                                                                                                                                                              |
| see above                                                                                                                                                                                                                                                                                                                                      | RSE "National<br>Center for<br>Biotechnology"              | RSE "National Center<br>for Biotechnology"                                                                                                             | Alexandr Shevtsov, Ilyas Akhmetollayev, Viktoriya Lutsay, Asylulan Amirgazin, Askar Abdaliyev, Akbota Rakhmetova, Zabira Aushakhmetova, Ruslan Kalendar, Yerlan Ramankulov   |
| EPI_ISL_454571                                                                                                                                                                                                                                                                                                                                 | National Center of<br>Expertise                            | National Center for<br>Expertise, National<br>Center for<br>Biotechnology,<br>Kazakhstan                                                               | Abdaliyev Askar, Shevtsov Alexandr, Akhmetollayev Ilyas, Kalendar Ruslan, Rakhmetova Akbota, , Lutsay Viktoriya, Amirgazin Asylulan, Aushakhmetova Zabira, Ramankulov Yerlan |
| EPI_ISL_454572                                                                                                                                                                                                                                                                                                                                 | National Center of<br>Expertise                            | National Center for<br>Expertise, Kazakhstan<br>National Center for<br>Biotechnology,<br>Kazakhstan                                                    | Abdaliyev Askar, Shevtsov Alexandr, Akhmetollayev Ilyas, Kalendar Ruslan, Rakhmetova Akbota, , Lutsay Viktoriya, Amirgazin Asylulan, Aushakhmetova Zabira, Ramankulov Yerlan |
| EPI_ISL_454575                                                                                                                                                                                                                                                                                                                                 | Laboratory of<br>virology, National<br>Center of Expertise | Laboratory of<br>molecular-genetic<br>research, National<br>Center for Expertise,<br>Kazakhstan National<br>Center for<br>Biotechnology,<br>Kazakhstan | Abdaliyev Askar, Shevtsov Alexandr, Akhmetollayev Ilyas, Kalendar Ruslan, Rakhmetova Akbota, , Lutsay Viktoriya, Amirgazin Asylulan, Aushakhmetova Zabira, Ramankulov Yerlan |
| EPI_ISL_454576,<br>EPI_ISL_454577,<br>EPI_ISL_454579,<br>EPI_ISL_454580,<br>EPI_ISL_454582                                                                                                                                                                                                                                                     | Laboratory of<br>virology, National<br>Center of Expertise | Laboratory of<br>molecular-genetic<br>research, National<br>Center of Expertise,<br>Kazakhstan National<br>Center for<br>Biotechnology,<br>Kazakhstan  | Abdaliyev Askar, Shevtsov Alexandr, Akhmetollayev Ilyas, Kalendar Ruslan, Rakhmetova Akbota, , Lutsay Viktoriya, Amirgazin Asylulan, Aushakhmetova Zabira, Ramankulov Yerlan |
| EPI_ISL_454584,<br>EPI_ISL_454585,<br>EPI_ISL_454586                                                                                                                                                                                                                                                                                           | Laboratory of<br>virology, National<br>Center of Expertise | Laboratory of<br>molecular-genetic<br>research, National<br>Center for Expertise,<br>Kazakhstan National<br>Center for<br>Biotechnology,<br>Kazakhstan | Abdaliyev Askar, Shevtsov Alexandr, Akhmetollayev Ilyas, Kalendar Ruslan, Rakhmetova Akbota, , Lutsay Viktoriya, Amirgazin Asylulan, Aushakhmetova Zabira, Ramankulov Yerlan |
| EPI_ISL_454587                                                                                                                                                                                                                                                                                                                                 | Laboratory of<br>virology, National<br>Center of Expertise | Laboratory of<br>molecular-genetic<br>research, National<br>Center of Expertise,<br>Kazakhstan National<br>Center for<br>Biotechnology,<br>Kazakhstan  | Abdaliyev Askar, Shevtsov Alexandr, Akhmetollayev Ilyas, Kalendar Ruslan, Rakhmetova Akbota, , Lutsay Viktoriya, Amirgazin Asylulan, Aushakhmetova Zabira, Ramankulov Yerlan |
| EPI_ISL_454589                                                                                                                                                                                                                                                                                                                                 | Laboratory of<br>virology, National<br>Center of Expertise | Laboratory of<br>molecular-genetic<br>research, National<br>Center for Expertise,<br>Kazakhstan National<br>Center for<br>Biotechnology,<br>Kazakhstan | Abdaliyev Askar, Shevtsov Alexandr, Akhmetollayev Ilyas, Kalendar Ruslan, Rakhmetova Akbota, , Lutsay Viktoriya, Amirgazin Asylulan, Aushakhmetova Zabira, Ramankulov Yerlan |
| EPI_ISL_454590,<br>EPI_ISL_454591,<br>EPI_ISL_454593,<br>EPI_ISL_454594                                                                                                                                                                                                                                                                        | Laboratory of<br>virology, National<br>Center of Expertise | Laboratory of<br>molecular-genetic<br>research, National<br>Center of Expertise,<br>Kazakhstan National<br>Center for<br>Biotechnology,<br>Kazakhstan  | Abdaliyev Askar, Shevtsov Alexandr, Akhmetollayev Ilyas, Kalendar Ruslan, Rakhmetova Akbota, , Lutsay Viktoriya, Amirgazin Asylulan, Aushakhmetova Zabira, Ramankulov Yerlan |
| EPI_ISL_454596,<br>EPI_ISL_454597                                                                                                                                                                                                                                                                                                              | Laboratory of<br>virology, National<br>Center of Expertise | Laboratory of<br>molecular-genetic<br>research, National<br>Center for Expertise,<br>Kazakhstan National<br>Center for<br>Biotechnology,<br>Kazakhstan | Abdaliyev Askar, Shevtsov Alexandr, Akhmetollayev Ilyas, Kalendar Ruslan, Rakhmetova Akbota, , Lutsay Viktoriya, Amirgazin Asylulan, Aushakhmetova Zabira, Ramankulov Yerlan |
| EPI_ISL_454598                                                                                                                                                                                                                                                                                                                                 | Laboratory of                                              | Laboratory of                                                                                                                                          | Abdaliyev Askar, Shevtsov Alexandr, Akhmetollayev Ilyas, Kalendar Ruslan, Rakhmetova Akbota, , Lutsay Viktoriya, Amirgazin Asylulan, Aushakhmetova Zabira, Ramankulov Yerlan |





|                                                                                                                                                                                                                                                                                                                                                                                                                                                                                                                                                                                                                                                                                                                                                                                                                                                |                                                                                                |                                                                                                                                                                                                                                                                                                                 |                                                                                                                                                                                                                                                                                                                                                     |                                                                                                                                                                                                                                                                                                                                   |
|------------------------------------------------------------------------------------------------------------------------------------------------------------------------------------------------------------------------------------------------------------------------------------------------------------------------------------------------------------------------------------------------------------------------------------------------------------------------------------------------------------------------------------------------------------------------------------------------------------------------------------------------------------------------------------------------------------------------------------------------------------------------------------------------------------------------------------------------|------------------------------------------------------------------------------------------------|-----------------------------------------------------------------------------------------------------------------------------------------------------------------------------------------------------------------------------------------------------------------------------------------------------------------|-----------------------------------------------------------------------------------------------------------------------------------------------------------------------------------------------------------------------------------------------------------------------------------------------------------------------------------------------------|-----------------------------------------------------------------------------------------------------------------------------------------------------------------------------------------------------------------------------------------------------------------------------------------------------------------------------------|
| EPI_ISL_475770, EPI_ISL_475771, EPI_ISL_475772, EPI_ISL_475773, EPI_ISL_475774, EPI_ISL_475775, EPI_ISL_475776, EPI_ISL_475777, EPI_ISL_475778, EPI_ISL_475779, EPI_ISL_475780, EPI_ISL_475781, EPI_ISL_475782, EPI_ISL_475783, EPI_ISL_475784, EPI_ISL_475785, EPI_ISL_475786, EPI_ISL_475787, EPI_ISL_475791, EPI_ISL_475792, EPI_ISL_475793, EPI_ISL_475794, EPI_ISL_475795, EPI_ISL_475796, EPI_ISL_475797, EPI_ISL_475798, EPI_ISL_475799, EPI_ISL_475800, EPI_ISL_475801, EPI_ISL_475802, EPI_ISL_475803, EPI_ISL_475804, EPI_ISL_475805, EPI_ISL_475806, EPI_ISL_475807, EPI_ISL_475808, EPI_ISL_475812                                                                                                                                                                                                                                 | Hygiene, Mikrobiologie und Public Health                                                       | Center for Molecular Medicine of the Austrian Academy of Sciences                                                                                                                                                                                                                                               |                                                                                                                                                                                                                                                                                                                                                     |                                                                                                                                                                                                                                                                                                                                   |
| see above                                                                                                                                                                                                                                                                                                                                                                                                                                                                                                                                                                                                                                                                                                                                                                                                                                      | Center for Virology, Medical University of Vienna                                              | Bergthaler laboratory, CeMM Research Center for Molecular Medicine of the Austrian Academy of Sciences                                                                                                                                                                                                          | Alexandra Popa, Benedikt Agerer, Henrique Colaco, Lukas Endler, Jakob-Wendelin                                                                                                                                                                                                                                                                      | Genger, Alexander Lercher, Mark Smyth, Thomas Penz, Michael Schuster, Jan Laine, Martin Senekowitsch, Judith Aberle, Stephan Aberle, Peter Hufnagl, Daniela Schmid, Franz Allerh Guenter Weiss, Gregor Hörmann, Kinga Rigler-Hohenwarter, Rainer Gattringer, Wegene Borena, Dorothee von Laer, Christoph Bock, Andreas Bergthaler |
| EPI_ISL_475813, EPI_ISL_475814, EPI_ISL_475815, EPI_ISL_475816, EPI_ISL_475817, EPI_ISL_475818, EPI_ISL_475819, EPI_ISL_475820, EPI_ISL_475821, EPI_ISL_475822, EPI_ISL_475823, EPI_ISL_475824, EPI_ISL_475825, EPI_ISL_475826, EPI_ISL_475827, EPI_ISL_475828, EPI_ISL_475829                                                                                                                                                                                                                                                                                                                                                                                                                                                                                                                                                                 |                                                                                                |                                                                                                                                                                                                                                                                                                                 |                                                                                                                                                                                                                                                                                                                                                     |                                                                                                                                                                                                                                                                                                                                   |
| see above                                                                                                                                                                                                                                                                                                                                                                                                                                                                                                                                                                                                                                                                                                                                                                                                                                      | Institut für Virologie am Department für Hygiene, Mikrobiologie und Public Health              | Bergthaler laboratory, CeMM Research Center for Molecular Medicine of the Austrian Academy of Sciences                                                                                                                                                                                                          | Alexandra Popa, Benedikt Agerer, Henrique Colaco, Lukas Endler, Jakob-Wendelin                                                                                                                                                                                                                                                                      | Genger, Alexander Lercher, Mark Smyth, Thomas Penz, Michael Schuster, Jan Laine, Martin Senekowitsch, Judith Aberle, Stephan Aberle, Peter Hufnagl, Daniela Schmid, Franz Allerh Guenter Weiss, Gregor Hörmann, Kinga Rigler-Hohenwarter, Rainer Gattringer, Wegene Borena, Dorothee von Laer, Christoph Bock, Andreas Bergthaler |
| EPI_ISL_475830, EPI_ISL_475831, EPI_ISL_475832, EPI_ISL_475833, EPI_ISL_475834, EPI_ISL_475835, EPI_ISL_475836, EPI_ISL_475837, EPI_ISL_475838, EPI_ISL_475839, EPI_ISL_475840, EPI_ISL_475841, EPI_ISL_475842, EPI_ISL_475843, EPI_ISL_475844, EPI_ISL_475845, EPI_ISL_475846, EPI_ISL_475847, EPI_ISL_475851, EPI_ISL_475852, EPI_ISL_475853, EPI_ISL_475854, EPI_ISL_475855, EPI_ISL_475856, EPI_ISL_475857, EPI_ISL_475858, EPI_ISL_475859, EPI_ISL_475860, EPI_ISL_475861, EPI_ISL_475862, EPI_ISL_475863, EPI_ISL_475864, EPI_ISL_475865, EPI_ISL_475866, EPI_ISL_475867, EPI_ISL_475868, EPI_ISL_475872, EPI_ISL_475873, EPI_ISL_475874, EPI_ISL_475875, EPI_ISL_475876, EPI_ISL_475877, EPI_ISL_475878, EPI_ISL_475879, EPI_ISL_475880, EPI_ISL_475881, EPI_ISL_475882, EPI_ISL_475883, EPI_ISL_475884, EPI_ISL_475885, EPI_ISL_475886 |                                                                                                |                                                                                                                                                                                                                                                                                                                 |                                                                                                                                                                                                                                                                                                                                                     |                                                                                                                                                                                                                                                                                                                                   |
| see above                                                                                                                                                                                                                                                                                                                                                                                                                                                                                                                                                                                                                                                                                                                                                                                                                                      | Austrian Agency for Health and Food Safety (AGES)                                              | Bergthaler laboratory, CeMM Research Center for Molecular Medicine of the Austrian Academy of Sciences                                                                                                                                                                                                          | Alexandra Popa, Benedikt Agerer, Henrique Colaco, Lukas Endler, Jakob-Wendelin                                                                                                                                                                                                                                                                      | Genger, Alexander Lercher, Mark Smyth, Thomas Penz, Michael Schuster, Jan Laine, Martin Senekowitsch, Judith Aberle, Stephan Aberle, Peter Hufnagl, Daniela Schmid, Franz Allerh Guenter Weiss, Gregor Hörmann, Kinga Rigler-Hohenwarter, Rainer Gattringer, Wegene Borena, Dorothee von Laer, Christoph Bock, Andreas Bergthaler |
| EPI_ISL_475887, EPI_ISL_475888, EPI_ISL_475889, EPI_ISL_475890, EPI_ISL_475891, EPI_ISL_475892, EPI_ISL_475893, EPI_ISL_475894, EPI_ISL_475895, EPI_ISL_475896, EPI_ISL_475897, EPI_ISL_475898, EPI_ISL_475899, EPI_ISL_475900, EPI_ISL_475901, EPI_ISL_475902, EPI_ISL_475903, EPI_ISL_475904, EPI_ISL_475908, EPI_ISL_475909                                                                                                                                                                                                                                                                                                                                                                                                                                                                                                                 |                                                                                                |                                                                                                                                                                                                                                                                                                                 |                                                                                                                                                                                                                                                                                                                                                     |                                                                                                                                                                                                                                                                                                                                   |
| see above                                                                                                                                                                                                                                                                                                                                                                                                                                                                                                                                                                                                                                                                                                                                                                                                                                      | Zentralinstitut für medizinische und chemische Labordiagnostik, Universitätskliniken Innsbruck | Bergthaler laboratory, CeMM Research Center for Molecular Medicine of the Austrian Academy of Sciences                                                                                                                                                                                                          | Alexandra Popa, Benedikt Agerer, Henrique Colaco, Lukas Endler, Jakob-Wendelin                                                                                                                                                                                                                                                                      | Genger, Alexander Lercher, Mark Smyth, Thomas Penz, Michael Schuster, Jan Laine, Martin Senekowitsch, Judith Aberle, Stephan Aberle, Peter Hufnagl, Daniela Schmid, Franz Allerh Guenter Weiss, Gregor Hörmann, Kinga Rigler-Hohenwarter, Rainer Gattringer, Wegene Borena, Dorothee von Laer, Christoph Bock, Andreas Bergthaler |
| EPI_ISL_475910, EPI_ISL_475911, EPI_ISL_475912, EPI_ISL_475913, EPI_ISL_475914, EPI_ISL_475915                                                                                                                                                                                                                                                                                                                                                                                                                                                                                                                                                                                                                                                                                                                                                 | Klinikum Wels-Grieskirchen                                                                     | Bergthaler laboratory, CeMM Research Center for Molecular Medicine of the Austrian Academy of Sciences                                                                                                                                                                                                          | Alexandra Popa, Benedikt Agerer, Henrique Colaco, Lukas Endler, Jakob-Wendelin                                                                                                                                                                                                                                                                      | Genger, Alexander Lercher, Mark Smyth, Thomas Penz, Michael Schuster, Jan Laine, Martin Senekowitsch, Judith Aberle, Stephan Aberle, Peter Hufnagl, Daniela Schmid, Franz Allerh Guenter Weiss, Gregor Hörmann, Kinga Rigler-Hohenwarter, Rainer Gattringer, Wegene Borena, Dorothee von Laer, Christoph Bock, Andreas Bergthaler |
| EPI_ISL_475916, EPI_ISL_475917, EPI_ISL_475918, EPI_ISL_475919, EPI_ISL_475920, EPI_ISL_475921, EPI_ISL_475922, EPI_ISL_475923, EPI_ISL_475924, EPI_ISL_475925, EPI_ISL_475926, EPI_ISL_475927, EPI_ISL_475928                                                                                                                                                                                                                                                                                                                                                                                                                                                                                                                                                                                                                                 |                                                                                                |                                                                                                                                                                                                                                                                                                                 |                                                                                                                                                                                                                                                                                                                                                     |                                                                                                                                                                                                                                                                                                                                   |
| see above                                                                                                                                                                                                                                                                                                                                                                                                                                                                                                                                                                                                                                                                                                                                                                                                                                      | Institut für Virologie am Department für Hygiene, Mikrobiologie und Public Health              | Bergthaler laboratory, CeMM Research Center for Molecular Medicine of the Austrian Academy of Sciences                                                                                                                                                                                                          | Alexandra Popa, Benedikt Agerer, Henrique Colaco, Lukas Endler, Jakob-Wendelin                                                                                                                                                                                                                                                                      | Genger, Alexander Lercher, Mark Smyth, Thomas Penz, Michael Schuster, Jan Laine, Martin Senekowitsch, Judith Aberle, Stephan Aberle, Peter Hufnagl, Daniela Schmid, Franz Allerh Guenter Weiss, Gregor Hörmann, Kinga Rigler-Hohenwarter, Rainer Gattringer, Wegene Borena, Dorothee von Laer, Christoph Bock, Andreas Bergthaler |
| EPI_ISL_475929, EPI_ISL_475930, EPI_ISL_475931, EPI_ISL_475932, EPI_ISL_475933, EPI_ISL_475934, EPI_ISL_475935, EPI_ISL_475936                                                                                                                                                                                                                                                                                                                                                                                                                                                                                                                                                                                                                                                                                                                 | Universitätsklinik für Innere Medizin II Innsbruck                                             | Bergthaler laboratory, CeMM Research Center for Molecular Medicine of the Austrian Academy of Sciences                                                                                                                                                                                                          | Alexandra Popa, Benedikt Agerer, Henrique Colaco, Lukas Endler, Jakob-Wendelin                                                                                                                                                                                                                                                                      | Genger, Alexander Lercher, Mark Smyth, Thomas Penz, Michael Schuster, Jan Laine, Martin Senekowitsch, Judith Aberle, Stephan Aberle, Peter Hufnagl, Daniela Schmid, Franz Allerh Guenter Weiss, Gregor Hörmann, Kinga Rigler-Hohenwarter, Rainer Gattringer, Wegene Borena, Dorothee von Laer, Christoph Bock, Andreas Bergthaler |
| EPI_ISL_476702, EPI_ISL_476703, EPI_ISL_476704                                                                                                                                                                                                                                                                                                                                                                                                                                                                                                                                                                                                                                                                                                                                                                                                 | Incubadora Venezolana de Ciencia, Venezuela                                                    | Incubadora Venezolana de Ciencia, Venezuela / Instituto Nacional de Salud, Bogotá, Colombia / Grupo de Investigaciones Microbiológicas-UR (GIMUR), Departamento de Biología, Facultad de Ciencias Naturales, Universidad del Rosario, Bogotá, Colombia / Icahn School of Medicine at Mount Sinai, New York, USA | Alberto Paniz-Mondolfi, Marina Muñoz, Luis Perez-Garcia, Lourdes Delgado, Carolina Florez, Sergio Gomez, Angelica Rico, Lisseth Pardo, Esther C. Barros, Carolina Hernández, Jesús E. Jaimes, Anibal A. Teherán, Ana S. Gonzalez-Reiche, Matthew M. Hernandez, Juan David Ramírez                                                                   |                                                                                                                                                                                                                                                                                                                                   |
| EPI_ISL_476868                                                                                                                                                                                                                                                                                                                                                                                                                                                                                                                                                                                                                                                                                                                                                                                                                                 | Banas Medical College and Research Institute                                                   | Gujarat Biotechnology Research Centre                                                                                                                                                                                                                                                                           | Afzal Ansari, Nikha Trivedi, Radhika Khara, Sunil R Joshi, Viren s Doshi, Apurvashin Puvar, Janvi Raval, Zarna Patel, Monika Gandhi, Pinal Trivedi, Maharshi Pandya, Nidhi Patel, Nitin Savaliya, Raghawendra Kumar, Dinesh Kumar, Zuber Saiyed, Komal Patel, Labdhi F Joshi, Madhvi Joshi                                                          |                                                                                                                                                                                                                                                                                                                                   |
| EPI_ISL_480446, EPI_ISL_480447, EPI_ISL_480448, EPI_ISL_480449, EPI_ISL_480450                                                                                                                                                                                                                                                                                                                                                                                                                                                                                                                                                                                                                                                                                                                                                                 | National Institute of Laboratory Medicine and Referral Center                                  | Genomic Research Lab, BCSIR                                                                                                                                                                                                                                                                                     | Abu Sayeed Mohammad Mahmud, Mohammad Samir Uzzaman, Eshrar Osman, Md. Ahasan Habib, Shahina Akter, Tanjina Akhter Banu, Md. Murshed Hasan Sarkar, Barna Goswami, Iffat Jahan, Md. Saddam Hossain, Tasnim Nafisa, Md. Maruf Ahmed Molla, Mahmud A. K. M. Shamsuzzaman, Sheikh Md. Selim Al Din, Utpal Chandra Ray, Salek Ahmed Sajib, Md. Salim Khan |                                                                                                                                                                                                                                                                                                                                   |
| EPI_ISL_480961, EPI_ISL_480975, EPI_ISL_480981, EPI_ISL_480989, EPI_ISL_480995, EPI_ISL_481003, EPI_ISL_481017, EPI_ISL_481025, EPI_ISL_481029, EPI_ISL_481034, EPI_ISL_481035                                                                                                                                                                                                                                                                                                                                                                                                                                                                                                                                                                                                                                                                 |                                                                                                |                                                                                                                                                                                                                                                                                                                 |                                                                                                                                                                                                                                                                                                                                                     |                                                                                                                                                                                                                                                                                                                                   |





|                                                                                                                                                                                                                                                                                                                                                                                                                                                                                                                                                                                                                                                                                                                                                                                                                                                                                                |                                                                                             |                                                                                                                                                                                                                                            |                                                                                                                                                                                                                                                                                                                                                   |                                                                                                                                                                                                                                                                                                                                                                       |
|------------------------------------------------------------------------------------------------------------------------------------------------------------------------------------------------------------------------------------------------------------------------------------------------------------------------------------------------------------------------------------------------------------------------------------------------------------------------------------------------------------------------------------------------------------------------------------------------------------------------------------------------------------------------------------------------------------------------------------------------------------------------------------------------------------------------------------------------------------------------------------------------|---------------------------------------------------------------------------------------------|--------------------------------------------------------------------------------------------------------------------------------------------------------------------------------------------------------------------------------------------|---------------------------------------------------------------------------------------------------------------------------------------------------------------------------------------------------------------------------------------------------------------------------------------------------------------------------------------------------|-----------------------------------------------------------------------------------------------------------------------------------------------------------------------------------------------------------------------------------------------------------------------------------------------------------------------------------------------------------------------|
| EPI_ISL_488837, EPI_ISL_488838, EPI_ISL_488839, EPI_ISL_488841, EPI_ISL_488842, EPI_ISL_488843, EPI_ISL_488844, EPI_ISL_488846, EPI_ISL_488848, EPI_ISL_488849, EPI_ISL_488850, EPI_ISL_488851, EPI_ISL_488852, EPI_ISL_488857, EPI_ISL_488858, EPI_ISL_488859, EPI_ISL_488860, EPI_ISL_488862, EPI_ISL_488868, EPI_ISL_488869, EPI_ISL_488870, EPI_ISL_488871, EPI_ISL_488873                                                                                                                                                                                                                                                                                                                                                                                                                                                                                                                 | see above                                                                                   | Microbiology Department, Hereford County Hospital                                                                                                                                                                                          | Wellcome Sanger Institute for the COVID-19 Genomics UK (COG-UK) consortium                                                                                                                                                                                                                                                                        | Alison Johnson, Venkat Sivaprakasam, Fenella Halstead, Jane Thomas, Wendy Hogsdon, Samantha Lamb and Alex Alderton, Roberto Amato, Sonia Goncalves, Ewan Harrison, David K. Jackson, Ian Johnston, Dominic Kwiatkowski, Cordelia Langford, John Sillitoe or Surveillance Team ( <a href="http://www.sanger.ac.uk/covid-team">http://www.sanger.ac.uk/covid-team</a> ) |
| EPI_ISL_489996, EPI_ISL_489997, EPI_ISL_489998, EPI_ISL_489999, EPI_ISL_490000, EPI_ISL_490001, EPI_ISL_490002, EPI_ISL_490003, EPI_ISL_490004, EPI_ISL_490005, EPI_ISL_490006, EPI_ISL_490007, EPI_ISL_490008, EPI_ISL_490009, EPI_ISL_490010, EPI_ISL_490011, EPI_ISL_490012                                                                                                                                                                                                                                                                                                                                                                                                                                                                                                                                                                                                                 | see above                                                                                   | King Fahad Medical City                                                                                                                                                                                                                    | King Fahad Medical City                                                                                                                                                                                                                                                                                                                           | Alosaimi,B., Naeem,A., Alghorabi,M., Enani,M.                                                                                                                                                                                                                                                                                                                         |
| EPI_ISL_490167, EPI_ISL_490168                                                                                                                                                                                                                                                                                                                                                                                                                                                                                                                                                                                                                                                                                                                                                                                                                                                                 | National Institute of Laboratory Medicine and Referral Center                               | Genomic Research Lab, BCSIR                                                                                                                                                                                                                | Abu Sayeed Mohammad Mahmud, Mohammad Samir Uzzaman, Eshrar Osman, Md. Ahasan Habib, Shahina Akter, Tanjina Akhter Banu, Md. Murshed Hasan Sarkar, Barna Goswami, Iffat Jahan, Md. Saddam Hossain, Tasnim Nafisa, Md. Maruf Ahmed Molla, M. Shamsuzzaman, Sheikh Md. Selim Al Din, Utpal Chandra Ray, Salek Ahmed Sajib, Md. Salim Khan            |                                                                                                                                                                                                                                                                                                                                                                       |
| EPI_ISL_490201                                                                                                                                                                                                                                                                                                                                                                                                                                                                                                                                                                                                                                                                                                                                                                                                                                                                                 | National Influenza Centre of INSPI-Ecuador                                                  | INSPI - Charité                                                                                                                                                                                                                            | Alfredo Bruno Caicedo, Domenica de Mora Coloma, Andres Moreira-Soto, Anna-Lena Sander, Nina Krause, Maritza Olmedo,Denisses Portugal, Manuel Gonzalez, Silvia Salgado, Alberto Orlando, Alexandra Usiña, Juan Carlos Zebalac                                                                                                                      |                                                                                                                                                                                                                                                                                                                                                                       |
| EPI_ISL_490255, EPI_ISL_490256, EPI_ISL_490257, EPI_ISL_490258, EPI_ISL_490259, EPI_ISL_490260, EPI_ISL_490261, EPI_ISL_490262, EPI_ISL_490263, EPI_ISL_490264, EPI_ISL_490265, EPI_ISL_490266, EPI_ISL_490267, EPI_ISL_490268, EPI_ISL_490269, EPI_ISL_490270, EPI_ISL_490271, EPI_ISL_490272, EPI_ISL_490276, EPI_ISL_490277, EPI_ISL_490278, EPI_ISL_490279, EPI_ISL_490280, EPI_ISL_490281, EPI_ISL_490282, EPI_ISL_490283, EPI_ISL_490284, EPI_ISL_490285, EPI_ISL_490286, EPI_ISL_490287, EPI_ISL_490288, EPI_ISL_490289, EPI_ISL_490290, EPI_ISL_490291, EPI_ISL_490292, EPI_ISL_490293, EPI_ISL_490297, EPI_ISL_490298, EPI_ISL_490299, EPI_ISL_490300, EPI_ISL_490301, EPI_ISL_490302, EPI_ISL_490303, EPI_ISL_490304, EPI_ISL_490305, EPI_ISL_490306, EPI_ISL_490307, EPI_ISL_490308, EPI_ISL_490309, EPI_ISL_490310, EPI_ISL_490311, EPI_ISL_490312, EPI_ISL_490313, EPI_ISL_490314 | see above                                                                                   | National Institute for Communicable Diseases of the National Health Laboratory Service                                                                                                                                                     | National Institute for Communicable Diseases of the National Health Laboratory Service                                                                                                                                                                                                                                                            | Allam M, Ismail A, Khumalo Z, Kwenda S, Mtshali P, Mnyameni F, Mohale T, Subramoney K, Bhiman JN                                                                                                                                                                                                                                                                      |
| EPI_ISL_491146, EPI_ISL_491147, EPI_ISL_491148, EPI_ISL_491149, EPI_ISL_491150, EPI_ISL_491151, EPI_ISL_491152, EPI_ISL_491153, EPI_ISL_491154, EPI_ISL_491155, EPI_ISL_491156, EPI_ISL_491157, EPI_ISL_491158                                                                                                                                                                                                                                                                                                                                                                                                                                                                                                                                                                                                                                                                                 | see above                                                                                   | Oman-National Influenza Center                                                                                                                                                                                                             | Biotechnology & OMICs Laboratory                                                                                                                                                                                                                                                                                                                  | Abdul Latif Khan, Samira Al-Mahruqi, Ahmed Al-Harrasi, Samiha Al-Kharusi, Adil Khan, Ahmed Al-Rawahi, Sajjad Asaf, Amina Al-Jardani, Hanan Al-Kindi, Intisar Al-Shukri, Ahlam Al-Amri, Aisha Al-Amri, Aisha Al-Busaidi, Adil Al-Wat                                                                                                                                   |
| EPI_ISL_491944, EPI_ISL_491945, EPI_ISL_491946, EPI_ISL_491947, EPI_ISL_491948, EPI_ISL_491949, EPI_ISL_491950, EPI_ISL_491951, EPI_ISL_491952, EPI_ISL_491953, EPI_ISL_491954                                                                                                                                                                                                                                                                                                                                                                                                                                                                                                                                                                                                                                                                                                                 | see above                                                                                   | Instituto Nacional de Investigación en Salud Pública - INSPI                                                                                                                                                                               | INSPI - Charité                                                                                                                                                                                                                                                                                                                                   | Alfredo Bruno Caicedo, Domenica de Mora Coloma, Andres Moreira-Soto, Anna-Lena Sander, Nina Krause, Maritza Olmedo,Denisses Portugal, Manuel Gonzalez, Silvia Salgado, Alberto Orlando, Alexandra Usiña, Juan Carlos Zebalac                                                                                                                                          |
| EPI_ISL_495028, EPI_ISL_495046                                                                                                                                                                                                                                                                                                                                                                                                                                                                                                                                                                                                                                                                                                                                                                                                                                                                 | GMERS Medical College & Hospital, Gotri, Vadodara                                           | Gujarat Biotechnology Research Centre                                                                                                                                                                                                      | Afzal Ansari, Nikha Trivedi, Meenakshi Shah, Neena Doshi, Varsha Godbole, Apurvasinh Puvar, Janvi Raval, Zarna Patel, Monika Gandhi, Pinal Trivedi, Maharshi Pandya, Nidhi Patel, Nitin Savaliya, Raghawendra Kumar, Dinesh Kumar, Zuber Saiyed, Komal Patel, I Chaitanya Joshi, Madhvi Joshi                                                     |                                                                                                                                                                                                                                                                                                                                                                       |
| EPI_ISL_495064                                                                                                                                                                                                                                                                                                                                                                                                                                                                                                                                                                                                                                                                                                                                                                                                                                                                                 | GMERS Medical College & Hospital, Himmatnagar                                               | Gujarat Biotechnology Research Centre                                                                                                                                                                                                      | Afzal Ansari, Nikha Trivedi, Himanshu Khatri, Mayur Gandhi, Apurvasinh Puvar, Janvi Raval, Zarna Patel, Monika Gandhi, Pinal Trivedi, Maharshi Pandya, Nidhi Patel, Nitin Savaliya, Raghawendra Kumar, Dinesh Kumar, Zuber Saiyed, Komal Patel, Labdhi Pandya, R Madhvi Joshi,                                                                    |                                                                                                                                                                                                                                                                                                                                                                       |
| EPI_ISL_495079                                                                                                                                                                                                                                                                                                                                                                                                                                                                                                                                                                                                                                                                                                                                                                                                                                                                                 | Department of Microbiology, Government Medical College, Surat                               | Gujarat Biotechnology Research Centre                                                                                                                                                                                                      | Afzal Ansari, Nikha Trivedi, Naresh Chauhan, Summaiya Mullan, Amit gamit, Apurvasinh Puvar, Janvi Raval, Zarna Patel, Monika Gandhi, Pinal Trivedi, Maharshi Pandya, Nidhi Patel, Nitin Savaliya, Raghawendra Kumar, Dinesh Kumar, Zuber Saiyed, Komal Patel, I Chaitanya Joshi, Madhvi Joshi                                                     |                                                                                                                                                                                                                                                                                                                                                                       |
| EPI_ISL_496482                                                                                                                                                                                                                                                                                                                                                                                                                                                                                                                                                                                                                                                                                                                                                                                                                                                                                 | Dept. Infectious, Tropical Diseases & Microbiology, IRCCS Sacro Cuore Don Calabria Hospital | 1) Dept. Infectious, Tropical Diseases & Microbiology, IRCCS Sacro Cuore Don Calabria Hospital; 2) Centro Piattaforme Tecnologiche, University of Verona; 3) Dept. Neurosciences, Biomedicine and Movement Sciences, University of Verona. | 1) Antonio Mori, Michela Deiana, Elena Pomari, Chiara Piubelli; 2) Monica Castellucci and Francesca Griggio; 3) Giovanni Malerba                                                                                                                                                                                                                  |                                                                                                                                                                                                                                                                                                                                                                       |
| EPI_ISL_498551, EPI_ISL_498552, EPI_ISL_498554, EPI_ISL_498556                                                                                                                                                                                                                                                                                                                                                                                                                                                                                                                                                                                                                                                                                                                                                                                                                                 | Lebanese American University                                                                | Lebanese American University                                                                                                                                                                                                               | Abi Habib,W., Abdallah,J., El Shesheny,R., Mokhbat,J., Webby,R.J., Goldstein,J. and Kayali,G.                                                                                                                                                                                                                                                     |                                                                                                                                                                                                                                                                                                                                                                       |
| EPI_ISL_498808, EPI_ISL_498809, EPI_ISL_498811, EPI_ISL_498814, EPI_ISL_498815, EPI_ISL_498816, EPI_ISL_498817, EPI_ISL_498818, EPI_ISL_498830, EPI_ISL_498892, EPI_ISL_498932, EPI_ISL_498933                                                                                                                                                                                                                                                                                                                                                                                                                                                                                                                                                                                                                                                                                                 | see above                                                                                   | National Institute of Laboratory Medicine and Referral Center                                                                                                                                                                              | Genomic Research Lab, BCSIR                                                                                                                                                                                                                                                                                                                       | Abu Sayeed Mohammad Mahmud, Mohammad Samir Uzzaman, Eshrar Osman, Md. Ahasan Habib, Shahina Akter, Tanjina Akhter Banu, Md. Murshed Hasan Sarkar, Barna Goswami, Iffat Jahan, Md. Saddam Hossain, Tasnim Nafisa, Md. Maruf Ahmed Molla, M. Shamsuzzaman, Sheikh Md. Selim Al Din, Utpal Chandra Ray, Salek Ahmed Sajib, Md. Salim Khan                                |
| EPI_ISL_504137, EPI_ISL_504176, EPI_ISL_504177, EPI_ISL_504178, EPI_ISL_504179, EPI_ISL_504180, EPI_ISL_504181, EPI_ISL_504182, EPI_ISL_504183, EPI_ISL_504184                                                                                                                                                                                                                                                                                                                                                                                                                                                                                                                                                                                                                                                                                                                                 | National Institute of Laboratory Medicine and Referral Center                               | Genomic Research Lab, BCSIR                                                                                                                                                                                                                | Abu Sayeed Mohammad Mahmud, Mohammad Samir Uzzaman, Eshrar Osman, Md. Ahasan Habib, Shahina Akter, Tanjina Akhter Banu, Md. Murshed Hasan Sarkar, Barna Goswami, Iffat Jahan, Md. Saddam Hossain, Tarannum Taznin, Tasnim Nafisa, Md. Maruf Ahm K. M. Shamsuzzaman, Sheikh Md. Selim Al Din, Utpal Chandra Ray, Salek Ahmed Sajib, Md. Salim Khan |                                                                                                                                                                                                                                                                                                                                                                       |
| EPI_ISL_504186, EPI_ISL_504187, EPI_ISL_504188, EPI_ISL_504189, EPI_ISL_504190, EPI_ISL_504191, EPI_ISL_504192, EPI_ISL_504193, EPI_ISL_504194, EPI_ISL_504195, EPI_ISL_504196, EPI_ISL_504197, EPI_ISL_504198, EPI_ISL_504199, EPI_ISL_504200, EPI_ISL_504201, EPI_ISL_504202, EPI_ISL_504203, EPI_ISL_504207, EPI_ISL_504208, EPI_ISL_504209, EPI_ISL_504210, EPI_ISL_504211, EPI_ISL_504212, EPI_ISL_504213, EPI_ISL_504214, EPI_ISL_504215, EPI_ISL_504216, EPI_ISL_504217, EPI_ISL_504218, EPI_ISL_504219, EPI_ISL_504220, EPI_ISL_504221, EPI_ISL_504222, EPI_ISL_504223, EPI_ISL_504224, EPI_ISL_504228, EPI_ISL_504229, EPI_ISL_504230, EPI_ISL_504231, EPI_ISL_504232, EPI_ISL_504233, EPI_ISL_504234, EPI_ISL_504235, EPI_ISL_504236, EPI_ISL_504237, EPI_ISL_504238, EPI_ISL_504239, EPI_ISL_504240, EPI_ISL_504241, EPI_ISL_504242, EPI_ISL_504243, EPI_ISL_504244                 | see above                                                                                   | National Institute for                                                                                                                                                                                                                     | National Institute for                                                                                                                                                                                                                                                                                                                            | Allam M, Ismail A, Khumalo Z, Kwenda S, Mtshali P, Mnyameni F, Mohale T, Bhiman JN                                                                                                                                                                                                                                                                                    |

|                                                                                                                                                                                                                                                                                                                                                                                                                                                                                                                                                                                                                                                                                                                                                                                                                                                                                                                                                                                                                                                                                                                                                                                                                                                                                                                                                                                                                                                                                                                                                                                                                                                                                                                                                                                                                                                                                                                                                                                                                                                                                                                                                                                                                                                                                                                                                                                                                                                                                                                                                                                                                                                                                                                                                                                                                                                                                                                                                                                                                                                                                                                                                                                                                                                                                                                                                                                                                                                                                                                                                                                                                                                                                                                                                                                                                                                                                                                                                                                                                                                                                                                                                                                                                                                                                                                                                                                                                                                                                                                                                                                                                                                                                                                                                                                                                                                                                                                                                                                                                                                                                                                                                                                                                                                                                                                                                                                                                                                                                                                                |                                                                   |                                                                                                   |                                                                                                                                                                                                                                                                                                                                        |                           |
|--------------------------------------------------------------------------------------------------------------------------------------------------------------------------------------------------------------------------------------------------------------------------------------------------------------------------------------------------------------------------------------------------------------------------------------------------------------------------------------------------------------------------------------------------------------------------------------------------------------------------------------------------------------------------------------------------------------------------------------------------------------------------------------------------------------------------------------------------------------------------------------------------------------------------------------------------------------------------------------------------------------------------------------------------------------------------------------------------------------------------------------------------------------------------------------------------------------------------------------------------------------------------------------------------------------------------------------------------------------------------------------------------------------------------------------------------------------------------------------------------------------------------------------------------------------------------------------------------------------------------------------------------------------------------------------------------------------------------------------------------------------------------------------------------------------------------------------------------------------------------------------------------------------------------------------------------------------------------------------------------------------------------------------------------------------------------------------------------------------------------------------------------------------------------------------------------------------------------------------------------------------------------------------------------------------------------------------------------------------------------------------------------------------------------------------------------------------------------------------------------------------------------------------------------------------------------------------------------------------------------------------------------------------------------------------------------------------------------------------------------------------------------------------------------------------------------------------------------------------------------------------------------------------------------------------------------------------------------------------------------------------------------------------------------------------------------------------------------------------------------------------------------------------------------------------------------------------------------------------------------------------------------------------------------------------------------------------------------------------------------------------------------------------------------------------------------------------------------------------------------------------------------------------------------------------------------------------------------------------------------------------------------------------------------------------------------------------------------------------------------------------------------------------------------------------------------------------------------------------------------------------------------------------------------------------------------------------------------------------------------------------------------------------------------------------------------------------------------------------------------------------------------------------------------------------------------------------------------------------------------------------------------------------------------------------------------------------------------------------------------------------------------------------------------------------------------------------------------------------------------------------------------------------------------------------------------------------------------------------------------------------------------------------------------------------------------------------------------------------------------------------------------------------------------------------------------------------------------------------------------------------------------------------------------------------------------------------------------------------------------------------------------------------------------------------------------------------------------------------------------------------------------------------------------------------------------------------------------------------------------------------------------------------------------------------------------------------------------------------------------------------------------------------------------------------------------------------------------------------------------------------------------------|-------------------------------------------------------------------|---------------------------------------------------------------------------------------------------|----------------------------------------------------------------------------------------------------------------------------------------------------------------------------------------------------------------------------------------------------------------------------------------------------------------------------------------|---------------------------|
| EPI_ISL_507010, EPI_ISL_507011, EPI_ISL_507012, EPI_ISL_507013, EPI_ISL_507014, EPI_ISL_507015, EPI_ISL_507016, EPI_ISL_507017, EPI_ISL_507018, EPI_ISL_507019, EPI_ISL_507020, EPI_ISL_507021, EPI_ISL_507022, EPI_ISL_507023, EPI_ISL_507024, EPI_ISL_507025, EPI_ISL_507026, EPI_ISL_507027, EPI_ISL_507031, EPI_ISL_507032, EPI_ISL_507033, EPI_ISL_507034, EPI_ISL_507035, EPI_ISL_507036, EPI_ISL_507037, EPI_ISL_507038                                                                                                                                                                                                                                                                                                                                                                                                                                                                                                                                                                                                                                                                                                                                                                                                                                                                                                                                                                                                                                                                                                                                                                                                                                                                                                                                                                                                                                                                                                                                                                                                                                                                                                                                                                                                                                                                                                                                                                                                                                                                                                                                                                                                                                                                                                                                                                                                                                                                                                                                                                                                                                                                                                                                                                                                                                                                                                                                                                                                                                                                                                                                                                                                                                                                                                                                                                                                                                                                                                                                                                                                                                                                                                                                                                                                                                                                                                                                                                                                                                                                                                                                                                                                                                                                                                                                                                                                                                                                                                                                                                                                                                                                                                                                                                                                                                                                                                                                                                                                                                                                                                 | Communicable Diseases of the National Health Laboratory Service   | Communicable Diseases of the National Health Laboratory Service                                   |                                                                                                                                                                                                                                                                                                                                        |                           |
| see above                                                                                                                                                                                                                                                                                                                                                                                                                                                                                                                                                                                                                                                                                                                                                                                                                                                                                                                                                                                                                                                                                                                                                                                                                                                                                                                                                                                                                                                                                                                                                                                                                                                                                                                                                                                                                                                                                                                                                                                                                                                                                                                                                                                                                                                                                                                                                                                                                                                                                                                                                                                                                                                                                                                                                                                                                                                                                                                                                                                                                                                                                                                                                                                                                                                                                                                                                                                                                                                                                                                                                                                                                                                                                                                                                                                                                                                                                                                                                                                                                                                                                                                                                                                                                                                                                                                                                                                                                                                                                                                                                                                                                                                                                                                                                                                                                                                                                                                                                                                                                                                                                                                                                                                                                                                                                                                                                                                                                                                                                                                      | unknown                                                           | Infectious Diseases Research, King Abdullah International Medical Research Center (KAIMRC)        |                                                                                                                                                                                                                                                                                                                                        | Algoribi,M.F.             |
| EPI_ISL_510528                                                                                                                                                                                                                                                                                                                                                                                                                                                                                                                                                                                                                                                                                                                                                                                                                                                                                                                                                                                                                                                                                                                                                                                                                                                                                                                                                                                                                                                                                                                                                                                                                                                                                                                                                                                                                                                                                                                                                                                                                                                                                                                                                                                                                                                                                                                                                                                                                                                                                                                                                                                                                                                                                                                                                                                                                                                                                                                                                                                                                                                                                                                                                                                                                                                                                                                                                                                                                                                                                                                                                                                                                                                                                                                                                                                                                                                                                                                                                                                                                                                                                                                                                                                                                                                                                                                                                                                                                                                                                                                                                                                                                                                                                                                                                                                                                                                                                                                                                                                                                                                                                                                                                                                                                                                                                                                                                                                                                                                                                                                 | Communicable Disease Laboratory, Public Health Directorate        | Communicable Disease Laboratory, Public Health Directorate                                        |                                                                                                                                                                                                                                                                                                                                        | Al Wasti,H. and AlTaif,Z. |
| EPI_ISL_512068                                                                                                                                                                                                                                                                                                                                                                                                                                                                                                                                                                                                                                                                                                                                                                                                                                                                                                                                                                                                                                                                                                                                                                                                                                                                                                                                                                                                                                                                                                                                                                                                                                                                                                                                                                                                                                                                                                                                                                                                                                                                                                                                                                                                                                                                                                                                                                                                                                                                                                                                                                                                                                                                                                                                                                                                                                                                                                                                                                                                                                                                                                                                                                                                                                                                                                                                                                                                                                                                                                                                                                                                                                                                                                                                                                                                                                                                                                                                                                                                                                                                                                                                                                                                                                                                                                                                                                                                                                                                                                                                                                                                                                                                                                                                                                                                                                                                                                                                                                                                                                                                                                                                                                                                                                                                                                                                                                                                                                                                                                                 | Sardar Vallabhbhai Patel Institute of Medical Sciences & Research | Gujarat Biotechnology Research Centre                                                             | Afzal Ansari, Nikha Trivedi, Pranay Shah, Kamlesh J Upadhyay, Sanjay Kapadia, Apurvashin Puvur, Janvi Raval, Zarna Patel, Monika Gandhi, Pinal Trivedi, Maharshi Pandya, Nidhi Patel, Nitin Savaliya, Raghawendra Kumar, Dinesh Kumar, Zuber Saiyed, Komal Patel Chaitanya Joshi, Madhvi Joshi                                         |                           |
| EPI_ISL_512774                                                                                                                                                                                                                                                                                                                                                                                                                                                                                                                                                                                                                                                                                                                                                                                                                                                                                                                                                                                                                                                                                                                                                                                                                                                                                                                                                                                                                                                                                                                                                                                                                                                                                                                                                                                                                                                                                                                                                                                                                                                                                                                                                                                                                                                                                                                                                                                                                                                                                                                                                                                                                                                                                                                                                                                                                                                                                                                                                                                                                                                                                                                                                                                                                                                                                                                                                                                                                                                                                                                                                                                                                                                                                                                                                                                                                                                                                                                                                                                                                                                                                                                                                                                                                                                                                                                                                                                                                                                                                                                                                                                                                                                                                                                                                                                                                                                                                                                                                                                                                                                                                                                                                                                                                                                                                                                                                                                                                                                                                                                 | Genomic Research Lab, BCSIR                                       | Bangladesh Council of Scientific and Industrial Research                                          | Abu Sayeed Mohammad Mahmud, Mohammad Samir Uzzaman, Eshrar Osman, Md. Ahasan Habib, Shahina Akter, Tanjina Akhter Banu, Md. Murshed Hasan Sarkar, Barna Goswami, Iffat Jahan, Md. Saddam Hossain, Tasnim Nafisa, Md. Maruf Ahmed Molla, M. Shamsuzzaman, Sheikh Md. Selim Al Din, Utpal Chandra Ray, Salek Ahmed Sajib, Md. Salim Khan |                           |
| EPI_ISL_513002, EPI_ISL_513003, EPI_ISL_513004, EPI_ISL_513005, EPI_ISL_513006, EPI_ISL_513007, EPI_ISL_513008, EPI_ISL_513009, EPI_ISL_513010, EPI_ISL_513011, EPI_ISL_513012, EPI_ISL_513013, EPI_ISL_513014, EPI_ISL_513015, EPI_ISL_513016, EPI_ISL_513017, EPI_ISL_513018, EPI_ISL_513019, EPI_ISL_513023, EPI_ISL_513024, EPI_ISL_513025, EPI_ISL_513026, EPI_ISL_513190, EPI_ISL_513191, EPI_ISL_513192, EPI_ISL_513193, EPI_ISL_513194, EPI_ISL_513195, EPI_ISL_513196, EPI_ISL_513197, EPI_ISL_513249, EPI_ISL_513250, EPI_ISL_513251, EPI_ISL_513252, EPI_ISL_513253, EPI_ISL_513254, EPI_ISL_513259, EPI_ISL_513260, EPI_ISL_513261, EPI_ISL_513262, EPI_ISL_513263, EPI_ISL_513264                                                                                                                                                                                                                                                                                                                                                                                                                                                                                                                                                                                                                                                                                                                                                                                                                                                                                                                                                                                                                                                                                                                                                                                                                                                                                                                                                                                                                                                                                                                                                                                                                                                                                                                                                                                                                                                                                                                                                                                                                                                                                                                                                                                                                                                                                                                                                                                                                                                                                                                                                                                                                                                                                                                                                                                                                                                                                                                                                                                                                                                                                                                                                                                                                                                                                                                                                                                                                                                                                                                                                                                                                                                                                                                                                                                                                                                                                                                                                                                                                                                                                                                                                                                                                                                                                                                                                                                                                                                                                                                                                                                                                                                                                                                                                                                                                                 | see above                                                         | Pathogen Genomics Lab King Abdullah University of Science and Technology(KAUST)                   | Afrah Alsomali, Fathia Ben Rached, Raaee Naeem, Sharif Hala,Rahul P Salunke, Amanda Ooi, Luke Esau, Sara Mfarrej, Amit Kumar Subudhi, Fadwa Alofi, Asim Khogeer, Kahled Alqithami, Anwar Hashem, Naif Almontashiri,                                                                                                                    |                           |
| EPI_ISL_514248, EPI_ISL_514249, EPI_ISL_514250, EPI_ISL_514251, EPI_ISL_514252                                                                                                                                                                                                                                                                                                                                                                                                                                                                                                                                                                                                                                                                                                                                                                                                                                                                                                                                                                                                                                                                                                                                                                                                                                                                                                                                                                                                                                                                                                                                                                                                                                                                                                                                                                                                                                                                                                                                                                                                                                                                                                                                                                                                                                                                                                                                                                                                                                                                                                                                                                                                                                                                                                                                                                                                                                                                                                                                                                                                                                                                                                                                                                                                                                                                                                                                                                                                                                                                                                                                                                                                                                                                                                                                                                                                                                                                                                                                                                                                                                                                                                                                                                                                                                                                                                                                                                                                                                                                                                                                                                                                                                                                                                                                                                                                                                                                                                                                                                                                                                                                                                                                                                                                                                                                                                                                                                                                                                                 | National Institute of Laboratory Medicine and Referral Center     | Genomic Research Lab, BCSIR                                                                       | Abu Sayeed Mohammad Mahmud, Mohammad Samir Uzzaman, Eshrar Osman, Md. Ahasan Habib, Shahina Akter, Tanjina Akhter Banu, Md. Murshed Hasan Sarkar, Barna Goswami, Iffat Jahan, Md. Saddam Hossain, Tasnim Nafisa, Md. Maruf Ahmed Molla, M. Shamsuzzaman, Sheikh Md. Selim Al Din, Utpal Chandra Ray, Salek Ahmed Sajib, Md. Salim Khan |                           |
| EPI_ISL_514253                                                                                                                                                                                                                                                                                                                                                                                                                                                                                                                                                                                                                                                                                                                                                                                                                                                                                                                                                                                                                                                                                                                                                                                                                                                                                                                                                                                                                                                                                                                                                                                                                                                                                                                                                                                                                                                                                                                                                                                                                                                                                                                                                                                                                                                                                                                                                                                                                                                                                                                                                                                                                                                                                                                                                                                                                                                                                                                                                                                                                                                                                                                                                                                                                                                                                                                                                                                                                                                                                                                                                                                                                                                                                                                                                                                                                                                                                                                                                                                                                                                                                                                                                                                                                                                                                                                                                                                                                                                                                                                                                                                                                                                                                                                                                                                                                                                                                                                                                                                                                                                                                                                                                                                                                                                                                                                                                                                                                                                                                                                 | Advanced Biotechnology Laboratory                                 | Genomic Research Lab, BCSIR                                                                       | Abu Sayeed Mohammad Mahmud, Mohammad Samir Uzzaman, Eshrar Osman, Hossain Uddin Shekhar, M. Aftab Uddin, Md. Bayejid Hosen, Eunus Ali, Md. Ahasan Habib, Shahina Akter, Tanjina Akhter Banu, Md. Murshed Hasan Sarkar, Barna Goswami, Iffat Jaha Ahmed Sajib, Md. Salim Khan                                                           |                           |
| EPI_ISL_514355, EPI_ISL_514356, EPI_ISL_514357, EPI_ISL_514358, EPI_ISL_514359, EPI_ISL_514360, EPI_ISL_514361, EPI_ISL_514362, EPI_ISL_514363, EPI_ISL_514364, EPI_ISL_514365, EPI_ISL_514366, EPI_ISL_514367, EPI_ISL_514368, EPI_ISL_514369, EPI_ISL_514370, EPI_ISL_514371, EPI_ISL_514372, EPI_ISL_514376, EPI_ISL_514377, EPI_ISL_514378, EPI_ISL_514379, EPI_ISL_514380, EPI_ISL_514381, EPI_ISL_514382, EPI_ISL_514383, EPI_ISL_514384, EPI_ISL_514385, EPI_ISL_514386, EPI_ISL_514387, EPI_ISL_514388, EPI_ISL_514389, EPI_ISL_514390, EPI_ISL_514391, EPI_ISL_514392, EPI_ISL_514393, EPI_ISL_514397, EPI_ISL_514398, EPI_ISL_514399, EPI_ISL_514400, EPI_ISL_514401, EPI_ISL_514402, EPI_ISL_514403, EPI_ISL_514404, EPI_ISL_514405, EPI_ISL_514406, EPI_ISL_514407, EPI_ISL_514408, EPI_ISL_514409, EPI_ISL_514410, EPI_ISL_514411, EPI_ISL_514412, EPI_ISL_514413, EPI_ISL_514414, EPI_ISL_514418, EPI_ISL_514419, EPI_ISL_514420, EPI_ISL_514421, EPI_ISL_514422, EPI_ISL_514423, EPI_ISL_514424                                                                                                                                                                                                                                                                                                                                                                                                                                                                                                                                                                                                                                                                                                                                                                                                                                                                                                                                                                                                                                                                                                                                                                                                                                                                                                                                                                                                                                                                                                                                                                                                                                                                                                                                                                                                                                                                                                                                                                                                                                                                                                                                                                                                                                                                                                                                                                                                                                                                                                                                                                                                                                                                                                                                                                                                                                                                                                                                                                                                                                                                                                                                                                                                                                                                                                                                                                                                                                                                                                                                                                                                                                                                                                                                                                                                                                                                                                                                                                                                                                                                                                                                                                                                                                                                                                                                                                                                                                                                                                                 | see above                                                         | National Institute for Communicable Diseases of the National Health Laboratory Service            | Allam M, Ismail A, Khumalo Z, Kwenda S, Mtshali P, Mnyameni F, Mohale T, Bhiman JN                                                                                                                                                                                                                                                     |                           |
| EPI_ISL_514587, EPI_ISL_514605                                                                                                                                                                                                                                                                                                                                                                                                                                                                                                                                                                                                                                                                                                                                                                                                                                                                                                                                                                                                                                                                                                                                                                                                                                                                                                                                                                                                                                                                                                                                                                                                                                                                                                                                                                                                                                                                                                                                                                                                                                                                                                                                                                                                                                                                                                                                                                                                                                                                                                                                                                                                                                                                                                                                                                                                                                                                                                                                                                                                                                                                                                                                                                                                                                                                                                                                                                                                                                                                                                                                                                                                                                                                                                                                                                                                                                                                                                                                                                                                                                                                                                                                                                                                                                                                                                                                                                                                                                                                                                                                                                                                                                                                                                                                                                                                                                                                                                                                                                                                                                                                                                                                                                                                                                                                                                                                                                                                                                                                                                 | B.J. Medical College and Civil hospital, Ahmedabad                | Gujarat Biotechnology Research Centre                                                             | Afzal Ansari, Nikha Trivedi, Pranay Shah, Kamlesh J Upadhyay, Sanjay Kapadia, Apurvashin Puvur, Janvi Raval, Zarna Patel, Monika Gandhi, Pinal Trivedi, Maharshi Pandya, Nidhi Patel, Nitin Savaliya, Raghawendra Kumar, Dinesh Kumar, Zuber Saiyed, Komal Patel Chaitanya Joshi, Madhvi Joshi                                         |                           |
| EPI_ISL_515133, EPI_ISL_515134, EPI_ISL_515135, EPI_ISL_515136, EPI_ISL_515137, EPI_ISL_515138, EPI_ISL_515139, EPI_ISL_515140, EPI_ISL_515141, EPI_ISL_515142, EPI_ISL_515143, EPI_ISL_515144, EPI_ISL_515145, EPI_ISL_515146, EPI_ISL_515147, EPI_ISL_515148, EPI_ISL_515149, EPI_ISL_515150, EPI_ISL_515154, EPI_ISL_515155, EPI_ISL_515156, EPI_ISL_515157, EPI_ISL_515158, EPI_ISL_515159, EPI_ISL_515160, EPI_ISL_515161, EPI_ISL_515162, EPI_ISL_515163, EPI_ISL_515164, EPI_ISL_515165, EPI_ISL_515166, EPI_ISL_515167, EPI_ISL_515168, EPI_ISL_515169, EPI_ISL_515170, EPI_ISL_515171, EPI_ISL_515176, EPI_ISL_515177, EPI_ISL_515178, EPI_ISL_515179, EPI_ISL_515180                                                                                                                                                                                                                                                                                                                                                                                                                                                                                                                                                                                                                                                                                                                                                                                                                                                                                                                                                                                                                                                                                                                                                                                                                                                                                                                                                                                                                                                                                                                                                                                                                                                                                                                                                                                                                                                                                                                                                                                                                                                                                                                                                                                                                                                                                                                                                                                                                                                                                                                                                                                                                                                                                                                                                                                                                                                                                                                                                                                                                                                                                                                                                                                                                                                                                                                                                                                                                                                                                                                                                                                                                                                                                                                                                                                                                                                                                                                                                                                                                                                                                                                                                                                                                                                                                                                                                                                                                                                                                                                                                                                                                                                                                                                                                                                                                                                 | see above                                                         | National Institute for Communicable Diseases of the National Health Laboratory Service            | Allam M, Ismail A, Khumalo Z, Kwenda S, Mtshali P, Mnyameni F, Mohale T, Bhiman JN                                                                                                                                                                                                                                                     |                           |
| EPI_ISL_518824, EPI_ISL_518846, EPI_ISL_518847, EPI_ISL_518848, EPI_ISL_518849, EPI_ISL_518850, EPI_ISL_518851, EPI_ISL_518852, EPI_ISL_518853, EPI_ISL_518854                                                                                                                                                                                                                                                                                                                                                                                                                                                                                                                                                                                                                                                                                                                                                                                                                                                                                                                                                                                                                                                                                                                                                                                                                                                                                                                                                                                                                                                                                                                                                                                                                                                                                                                                                                                                                                                                                                                                                                                                                                                                                                                                                                                                                                                                                                                                                                                                                                                                                                                                                                                                                                                                                                                                                                                                                                                                                                                                                                                                                                                                                                                                                                                                                                                                                                                                                                                                                                                                                                                                                                                                                                                                                                                                                                                                                                                                                                                                                                                                                                                                                                                                                                                                                                                                                                                                                                                                                                                                                                                                                                                                                                                                                                                                                                                                                                                                                                                                                                                                                                                                                                                                                                                                                                                                                                                                                                 | Oman-National Influenza Center                                    | Biotechnology & OMICS Laboratory, Natural & Medical Sciences Research Center, University of Nizwa | Abdul Latif Khan, Samira Al-Mahruqi, Ahmed Al-Harrasi, Samiha Al-Kharusi, Adil Khan, Ahmed Al-Rawahi, Sajjad Asaf, Amina Al-Jardani, Hanan Al-Kindi, Intisar Al-Shukri, Ahlam Al-Amri, Aisha Al-Amri, Aisha Al-Busaidi, Adil Al-Waf                                                                                                    |                           |
| EPI_ISL_520663, EPI_ISL_520664, EPI_ISL_520665, EPI_ISL_520666, EPI_ISL_520667, EPI_ISL_520668, EPI_ISL_520669, EPI_ISL_520670, EPI_ISL_520671, EPI_ISL_520672, EPI_ISL_520673, EPI_ISL_520674, EPI_ISL_520675, EPI_ISL_520676, EPI_ISL_520677, EPI_ISL_520678, EPI_ISL_520679, EPI_ISL_520680, EPI_ISL_520681, EPI_ISL_520682, EPI_ISL_520683, EPI_ISL_520684, EPI_ISL_520685, EPI_ISL_520686, EPI_ISL_520687, EPI_ISL_520688, EPI_ISL_520689, EPI_ISL_520690, EPI_ISL_520691, EPI_ISL_520692, EPI_ISL_520693, EPI_ISL_520694, EPI_ISL_520695, EPI_ISL_520696, EPI_ISL_520697, EPI_ISL_520698, EPI_ISL_520699, EPI_ISL_520700, EPI_ISL_520701, EPI_ISL_520705, EPI_ISL_520706, EPI_ISL_520707, EPI_ISL_520708, EPI_ISL_520709, EPI_ISL_520710, EPI_ISL_520711, EPI_ISL_520712, EPI_ISL_520713, EPI_ISL_520714, EPI_ISL_520715, EPI_ISL_520716, EPI_ISL_520717, EPI_ISL_520718, EPI_ISL_520719, EPI_ISL_520720, EPI_ISL_520721, EPI_ISL_520722, EPI_ISL_520726, EPI_ISL_520727, EPI_ISL_520728, EPI_ISL_520729, EPI_ISL_520730, EPI_ISL_520731, EPI_ISL_520732, EPI_ISL_520733, EPI_ISL_520734, EPI_ISL_520735, EPI_ISL_520736, EPI_ISL_520737, EPI_ISL_520738, EPI_ISL_520739, EPI_ISL_520740, EPI_ISL_520741, EPI_ISL_520742, EPI_ISL_520743, EPI_ISL_520744, EPI_ISL_520745, EPI_ISL_520746, EPI_ISL_520747, EPI_ISL_520748, EPI_ISL_520749, EPI_ISL_520750, EPI_ISL_520751, EPI_ISL_520752, EPI_ISL_520753, EPI_ISL_520754, EPI_ISL_520755, EPI_ISL_520756, EPI_ISL_520757, EPI_ISL_520758, EPI_ISL_520759, EPI_ISL_520760, EPI_ISL_520761, EPI_ISL_520762, EPI_ISL_520763, EPI_ISL_520764, EPI_ISL_520765, EPI_ISL_520766, EPI_ISL_520767, EPI_ISL_520768, EPI_ISL_520769, EPI_ISL_520770, EPI_ISL_520771, EPI_ISL_520772, EPI_ISL_520773, EPI_ISL_520774, EPI_ISL_520775, EPI_ISL_520776, EPI_ISL_520777, EPI_ISL_520778, EPI_ISL_520779, EPI_ISL_520780, EPI_ISL_520781, EPI_ISL_520782, EPI_ISL_520783, EPI_ISL_520784, EPI_ISL_520785, EPI_ISL_520786, EPI_ISL_520787, EPI_ISL_520788, EPI_ISL_520789, EPI_ISL_520790, EPI_ISL_520791, EPI_ISL_520792, EPI_ISL_520793, EPI_ISL_520794, EPI_ISL_520795, EPI_ISL_520796, EPI_ISL_520797, EPI_ISL_520798, EPI_ISL_520799, EPI_ISL_520800, EPI_ISL_520801, EPI_ISL_520802, EPI_ISL_520803, EPI_ISL_520804, EPI_ISL_520805, EPI_ISL_520806, EPI_ISL_520807, EPI_ISL_520808, EPI_ISL_520809, EPI_ISL_520810, EPI_ISL_520811, EPI_ISL_520812, EPI_ISL_520813, EPI_ISL_520814, EPI_ISL_520815, EPI_ISL_520816, EPI_ISL_520817, EPI_ISL_520818, EPI_ISL_520819, EPI_ISL_520820, EPI_ISL_520821, EPI_ISL_520822, EPI_ISL_520823, EPI_ISL_520824, EPI_ISL_520825, EPI_ISL_520826, EPI_ISL_520827, EPI_ISL_520828, EPI_ISL_520829, EPI_ISL_520830, EPI_ISL_520831, EPI_ISL_520832, EPI_ISL_520833, EPI_ISL_520834, EPI_ISL_520835, EPI_ISL_520836, EPI_ISL_520837, EPI_ISL_520838, EPI_ISL_520839, EPI_ISL_520840, EPI_ISL_520841, EPI_ISL_520842, EPI_ISL_520843, EPI_ISL_520844, EPI_ISL_520845, EPI_ISL_520846, EPI_ISL_520847, EPI_ISL_520848, EPI_ISL_520849, EPI_ISL_520850, EPI_ISL_520851, EPI_ISL_520852, EPI_ISL_520853, EPI_ISL_520854, EPI_ISL_520855, EPI_ISL_520856, EPI_ISL_520857, EPI_ISL_520858, EPI_ISL_520859, EPI_ISL_520860, EPI_ISL_520861, EPI_ISL_520862, EPI_ISL_520863, EPI_ISL_520864, EPI_ISL_520865, EPI_ISL_520866, EPI_ISL_520867, EPI_ISL_520868, EPI_ISL_520869, EPI_ISL_520870, EPI_ISL_520871, EPI_ISL_520872, EPI_ISL_520873, EPI_ISL_520874, EPI_ISL_520875, EPI_ISL_520876, EPI_ISL_520877, EPI_ISL_520878, EPI_ISL_520879, EPI_ISL_520880, EPI_ISL_520881, EPI_ISL_520882, EPI_ISL_520883, EPI_ISL_520884, EPI_ISL_520885, EPI_ISL_520886, EPI_ISL_520887, EPI_ISL_520888, EPI_ISL_520889, EPI_ISL_520890, EPI_ISL_520891, EPI_ISL_520892, EPI_ISL_520893, EPI_ISL_520894, EPI_ISL_520895, EPI_ISL_520896, EPI_ISL_520897, EPI_ISL_520898, EPI_ISL_520899, EPI_ISL_520900, EPI_ISL_520901, EPI_ISL_520902, EPI_ISL_520903, EPI_ISL_520904, EPI_ISL_520905, EPI_ISL_520906, EPI_ISL_520907, EPI_ISL_520908, EPI_ISL_520909, EPI_ISL_520910, EPI_ISL_520911, EPI_ISL_520912, EPI_ISL_520913, EPI_ISL_520914, EPI_ISL_520915, EPI_ISL_520916, EPI_ISL_520917, EPI_ISL_520918, EPI_ISL_520919, EPI_ISL_520920, EPI_ISL_520921, EPI_ISL_520922, EPI_ISL_520923, EPI_ISL_520924, EPI_ISL_520925, EPI_ISL_520926, EPI_ISL_520927, EPI_ISL_520928, EPI_ISL_520929, EPI_ISL_520930, EPI_ISL_520931, EPI_ISL_520932, EPI_ISL_520933, EPI_ISL_520934, EPI_ISL_520935, EPI_ISL_520936, EPI_ISL_520937, EPI_ISL_520938, EPI_ISL_520939, EPI_ISL_520940, EPI_ISL_520941, EPI_ISL_520942, EPI_ISL_520943, EPI_ISL_520944, EPI_ISL_520945, EPI_ISL_520946, EPI_ISL_520947, EPI_ISL_520948, EPI_ISL_520949, EPI_ISL_520950, EPI_ISL_520951, EPI_ISL_520952, EPI_ISL_520953, EPI_ISL_520954, EPI_ISL_520955, EPI_ISL_520956, EPI_ISL_520957, EPI_ISL_520958, EPI_ISL_520959, EPI_ISL_520960, EPI_ISL_520961, EPI_ISL_520962, EPI_ISL_520963, EPI_ISL_520964, EPI_ISL_520965, EPI_ISL_520966, EPI_ISL_520967, EPI_ISL_520968, EPI_ISL_520969, EPI_ISL_520970, EPI_ISL_520971, EPI_ISL_520972, EPI_ISL_520973, EPI_ISL_520974, EPI_ISL_520975, EPI_ISL_520976, EPI_ISL_520977, EPI_ISL_520978, EPI_ISL_520979, EPI_ISL_520980, EPI_ISL_520981, EPI_ISL_520982, EPI_ISL_520983, EPI_ISL_520984, EPI_ISL_520985, EPI_ISL_520986, EPI_ISL_520987, EPI_ISL_520988, EPI_ISL_520989, EPI_ISL_520990, EPI_ISL_520991, EPI_ISL_520992, EPI_ISL_520993, EPI_ISL_520994, EPI_ISL_520995, EPI_ISL_520996, EPI_ISL_520997, EPI_ISL_520998, EPI_ISL_520999, EPI_ISL_521000 | see above                                                         | Mohammed Bin Rashid University of Medicine and Health Sciences                                    | Ahmad Abou Tayoun, Tom Loney, Hamda Khansaheb, Sathishkumar Ramaswamy, Divinlal Harilal, Zulfia Omar Deesi, Rupa Murthy Varghese, Hanan Al Suwaidi, Abdulmajeed Alkhaja, Mohammed Uddin, Rifat Hamoudi, Rabih Halwani, Abiola Catherine Senok, Qu                                                                                      |                           |
| EPI_ISL_522855                                                                                                                                                                                                                                                                                                                                                                                                                                                                                                                                                                                                                                                                                                                                                                                                                                                                                                                                                                                                                                                                                                                                                                                                                                                                                                                                                                                                                                                                                                                                                                                                                                                                                                                                                                                                                                                                                                                                                                                                                                                                                                                                                                                                                                                                                                                                                                                                                                                                                                                                                                                                                                                                                                                                                                                                                                                                                                                                                                                                                                                                                                                                                                                                                                                                                                                                                                                                                                                                                                                                                                                                                                                                                                                                                                                                                                                                                                                                                                                                                                                                                                                                                                                                                                                                                                                                                                                                                                                                                                                                                                                                                                                                                                                                                                                                                                                                                                                                                                                                                                                                                                                                                                                                                                                                                                                                                                                                                                                                                                                 | ULSS9 Distretto di Bussolengo                                     | Istituto Zooprofilattico Sperimentale delle                                                       | Adelaide Milani, Alessia Schivo, Annalisa Salviato, Erika Giorgia Quaranta, Ambra Pastori, Bianca Zecchin, Alice Fusaro, Isabella Monne, Calogero Terregino, Antonia Ricci                                                                                                                                                             |                           |

|                                                                                                                                                                        |                                                                |                                                      |                                                                                                                                                                                                                                                                                                |  |
|------------------------------------------------------------------------------------------------------------------------------------------------------------------------|----------------------------------------------------------------|------------------------------------------------------|------------------------------------------------------------------------------------------------------------------------------------------------------------------------------------------------------------------------------------------------------------------------------------------------|--|
|                                                                                                                                                                        |                                                                | Venezie                                              |                                                                                                                                                                                                                                                                                                |  |
| EPI_ISL_522856                                                                                                                                                         | ULSS9 Distretto di San Bonifacio                               | Istituto Zooprofilattico Sperimentale delle          | Adelaide Milani, Alessia Schivo, Annalisa Salviato, Erika Giorgia Quaranta, Ambra Pastori, Bianca Zecchin, Alice Fusaro, Isabella Monne, Calogero Terregino, Antonia Ricci                                                                                                                     |  |
| EPI_ISL_522857                                                                                                                                                         | ULSS9 Scaligera                                                | Istituto Zooprofilattico Sperimentale delle          | Adelaide Milani, Alessia Schivo, Annalisa Salviato, Erika Giorgia Quaranta, Ambra Pastori, Bianca Zecchin, Alice Fusaro, Isabella Monne, Calogero Terregino, Antonia Ricci                                                                                                                     |  |
| EPI_ISL_522858                                                                                                                                                         | ULSS9 Distretto di San Bonifacio                               | Istituto Zooprofilattico Sperimentale delle          | Adelaide Milani, Alessia Schivo, Annalisa Salviato, Erika Giorgia Quaranta, Ambra Pastori, Bianca Zecchin, Alice Fusaro, Isabella Monne, Calogero Terregino, Antonia Ricci                                                                                                                     |  |
| EPI_ISL_522859                                                                                                                                                         | ULSS9 Scaligera                                                | Istituto Zooprofilattico Sperimentale delle          | Adelaide Milani, Alessia Schivo, Annalisa Salviato, Erika Giorgia Quaranta, Ambra Pastori, Bianca Zecchin, Alice Fusaro, Isabella Monne, Calogero Terregino, Antonia Ricci                                                                                                                     |  |
| EPI_ISL_522860,<br>EPI_ISL_522861,<br>EPI_ISL_522862,<br>EPI_ISL_522863,<br>EPI_ISL_522864,<br>EPI_ISL_522865,<br>EPI_ISL_522866,<br>EPI_ISL_522867,<br>EPI_ISL_522868 | ULSS9 Distretto di Bussolengo                                  | Istituto Zooprofilattico Sperimentale delle          | Adelaide Milani, Alessia Schivo, Annalisa Salviato, Erika Giorgia Quaranta, Ambra Pastori, Bianca Zecchin, Alice Fusaro, Isabella Monne, Calogero Terregino, Antonia Ricci                                                                                                                     |  |
| EPI_ISL_523952,<br>EPI_ISL_523953                                                                                                                                      | Mohammed Bin Rashid University of Medicine and Health Sciences | Al Jalila Genomics Center                            | Ahmad About Tayoun, Tom Loney, Hamda Khansaheb, Sathishkumar Ramaswamy, Divinlal Harilal, Zuifa Omar Deesi, Rupa Murthy Varghese, Hanan Al Suwaidi, Abdulmajeed Alkhaja, Mohammed Uddin, Rifat Hamoudi, Rabih Halwani, Abiola Catherine Senok, Qur                                             |  |
| EPI_ISL_524726                                                                                                                                                         | B.J. Medical College and Civil hospital, Ahmedabad             | Gujarat Biotechnology Research Centre                | Afzal Ansari, Nikha Trivedi, Pranay Shah, Kamlesh J Upadhyay, Sanjay Kapadia, Apurvasinh Puvar, Janvi Raval, Zarna Patel, Monika Gandhi, Pinal Trivedi, Maharshi Pandya, Nidhi Patel, Nitin Savaliya, Raghawendra Kumar, Dinesh Kumar, Zuber Saiyed, Komal Patel Chaitanya Joshi, Madhvi Joshi |  |
| EPI_ISL_524733                                                                                                                                                         | GMERS Medical College and Hospital, Dharpur, Patan             | Gujarat Biotechnology Research Centre                | A N Parmar, Apurvasinh Puvar, Janvi Raval, Zarna Patel, Monika Gandhi, Pinal Trivedi, Maharshi Pandya, Nidhi Patel, Nitin Savaliya, Raghawendra Kumar, Dinesh Kumar, Zuber Saiyed, Komal Patel, Labdhi Pandya, Afzal Ansari, Nikha Trivedi, R D Dixit, A M Kac                                 |  |
| EPI_ISL_524747                                                                                                                                                         | Sir M P Shah Government Medical College, Jamnagar              | Gujarat Biotechnology Research Centre                | Afzal Ansari, Nikha Trivedi, Binita Aring, Apurvasinh Puvar, Janvi Raval, Zarna Patel, Monika Gandhi, Pinal Trivedi, Maharshi Pandya, Nidhi Patel, Nitin Savaliya, Raghawendra Kumar, Dinesh Kumar, Zuber Saiyed, Komal Patel, Labdhi Pandya, R D Dixit, A M Kac                               |  |
| EPI_ISL_524762                                                                                                                                                         | GMERS Medical College and Hospital, Dharpur, Patan             | Gujarat Biotechnology Research Centre                | Afzal Ansari, Nikha Trivedi, A N Parmar, Apurvasinh Puvar, Janvi Raval, Zarna Patel, Monika Gandhi, Pinal Trivedi, Maharshi Pandya, Nidhi Patel, Nitin Savaliya, Raghawendra Kumar, Dinesh Kumar, Zuber Saiyed, Komal Patel, Labdhi Pandya, R D Dixit, A M Kac                                 |  |
| EPI_ISL_524764                                                                                                                                                         | GMERS Medical College and Hospital, Dharpur, Patan             | Gujarat Biotechnology Research Centre                | A N Parmar, Apurvasinh Puvar, Janvi Raval, Zarna Patel, Monika Gandhi, Pinal Trivedi, Maharshi Pandya, Nidhi Patel, Nitin Savaliya, Raghawendra Kumar, Dinesh Kumar, Zuber Saiyed, Komal Patel, Labdhi Pandya, Afzal Ansari, Nikha Trivedi, R D Dixit, A M Kac                                 |  |
| EPI_ISL_529162,<br>EPI_ISL_529163,<br>EPI_ISL_529164,<br>EPI_ISL_529165,<br>EPI_ISL_529166                                                                             | Department of Immunology, The Scripps Research Institute       | Andersen lab at Scripps Research                     | Allison Smither, Gilberto Sabino-Santos, Patricia Snarski, Lilia Melnik, Antoinette Bell, Kaylynn Genemaras, Arnaud Drouin, Dahlene Fusco, Robert Garry with SEARCH Alliance San Diego                                                                                                         |  |
| EPI_ISL_529964                                                                                                                                                         | RSUD Bangil Pasuruan                                           | Institute of Tropical Disease, Universitas Airlangga | Aldise M Nastri, Jezzy R Dewantari, Rima R Prasetya, Krisnoadi Rahardjo, Arma Roosalina, Gatot Soegiarto, Laksmi Wulandari, Retno A Setyoningrum, Resti Yudhawati, Yohko K Shimizu, Mitsuhiro Nishimura, Yasuko Mori, Soetjipto, Kazufu                                                        |  |
| EPI_ISL_529967                                                                                                                                                         | RSUD Sidoarjo                                                  | Institute of Tropical Disease, Universitas Airlangga | Aldise M Nastri, Jezzy R Dewantari, Rima R Prasetya, Krisnoadi Rahardjo, Atok Irawan, Gatot Soegiarto, Laksmi Wulandari, Retno A Setyoningrum, Resti Yudhawati, Yohko K Shimizu, Mitsuhiro Nishimura, Yasuko Mori, Soetjipto, Kazufum                                                          |  |
| EPI_ISL_539803                                                                                                                                                         | Queen Mary Hospital                                            | Hong Kong Department of Health                       | Alan K.L. Tsang, Peter C.W. Yip, Edman T.K. Lam, Rickjason C.W. Chan, Dominic N.C. Tsang                                                                                                                                                                                                       |  |
| EPI_ISL_539804                                                                                                                                                         | Yan Chai Hospital                                              | Hong Kong Department of Health                       | Alan K.L. Tsang, Peter C.W. Yip, Edman T.K. Lam, Rickjason C.W. Chan, Dominic N.C. Tsang                                                                                                                                                                                                       |  |
| EPI_ISL_539805                                                                                                                                                         | Kwong Wah Hospital                                             | Hong Kong Department of Health                       | Alan K.L. Tsang, Peter C.W. Yip, Edman T.K. Lam, Rickjason C.W. Chan, Dominic N.C. Tsang                                                                                                                                                                                                       |  |
| EPI_ISL_539806,<br>EPI_ISL_539807,<br>EPI_ISL_539808                                                                                                                   | Princess Margaret Hospital                                     | Hong Kong Department of Health                       | Alan K.L. Tsang, Peter C.W. Yip, Edman T.K. Lam, Rickjason C.W. Chan, Dominic N.C. Tsang                                                                                                                                                                                                       |  |
| EPI_ISL_539809,<br>EPI_ISL_539810,<br>EPI_ISL_539811,<br>EPI_ISL_539812                                                                                                | Asiaworld Expo Command Post                                    | Hong Kong Department of Health                       | Alan K.L. Tsang, Peter C.W. Yip, Edman T.K. Lam, Rickjason C.W. Chan, Dominic N.C. Tsang                                                                                                                                                                                                       |  |
| EPI_ISL_539813                                                                                                                                                         | Prince of Wales Hospital                                       | Hong Kong Department of Health                       | Alan K.L. Tsang, Peter C.W. Yip, Edman T.K. Lam, Rickjason C.W. Chan, Dominic N.C. Tsang                                                                                                                                                                                                       |  |
| EPI_ISL_539814                                                                                                                                                         | Tuen Mun Hospital                                              | Hong Kong Department of Health                       | Alan K.L. Tsang, Peter C.W. Yip, Edman T.K. Lam, Rickjason C.W. Chan, Dominic N.C. Tsang                                                                                                                                                                                                       |  |
| EPI_ISL_539815                                                                                                                                                         | Queen Elizabeth Hospital                                       | Hong Kong Department of Health                       | Alan K.L. Tsang, Peter C.W. Yip, Edman T.K. Lam, Rickjason C.W. Chan, Dominic N.C. Tsang                                                                                                                                                                                                       |  |
| EPI_ISL_539816,                                                                                                                                                        | Queen Mary                                                     | Hong Kong Department                                 | Alan K.L. Tsang, Peter C.W. Yip, Edman T.K. Lam, Rickjason C.W. Chan, Dominic N.C. Tsang                                                                                                                                                                                                       |  |





Medicine of the Austrian  
Academy of Sciences

EPI\_ISL\_583727, EPI\_ISL\_583728, EPI\_ISL\_583729, EPI\_ISL\_583730, EPI\_ISL\_583731, EPI\_ISL\_583732, EPI\_ISL\_583733, EPI\_ISL\_583734, EPI\_ISL\_583735, EPI\_ISL\_583736, EPI\_ISL\_583737, EPI\_ISL\_583738, EPI\_ISL\_583739, EPI\_ISL\_583740, EPI\_ISL\_583741, EPI\_ISL\_583742, EPI\_ISL\_583743, EPI\_ISL\_583744, EPI\_ISL\_583748, EPI\_ISL\_583749, EPI\_ISL\_583750, EPI\_ISL\_583751, EPI\_ISL\_583752, EPI\_ISL\_583753, EPI\_ISL\_583754, EPI\_ISL\_583755, EPI\_ISL\_583756, EPI\_ISL\_583757, EPI\_ISL\_583758, EPI\_ISL\_583759, EPI\_ISL\_583760, EPI\_ISL\_583761, EPI\_ISL\_583762, EPI\_ISL\_583763, EPI\_ISL\_583764, EPI\_ISL\_583765, EPI\_ISL\_583769, EPI\_ISL\_583770, EPI\_ISL\_583771, EPI\_ISL\_583772, EPI\_ISL\_583773, EPI\_ISL\_583774, EPI\_ISL\_583775, EPI\_ISL\_583776, EPI\_ISL\_583777, EPI\_ISL\_583778, EPI\_ISL\_583779, EPI\_ISL\_583780, EPI\_ISL\_583781, EPI\_ISL\_583782, EPI\_ISL\_583783, EPI\_ISL\_583784, EPI\_ISL\_583785, EPI\_ISL\_583786, EPI\_ISL\_583790, EPI\_ISL\_583791, EPI\_ISL\_583792, EPI\_ISL\_583793, EPI\_ISL\_583794, EPI\_ISL\_583795, EPI\_ISL\_583796, EPI\_ISL\_583797, EPI\_ISL\_583798, EPI\_ISL\_583799, EPI\_ISL\_583800, EPI\_ISL\_583801, EPI\_ISL\_583802, EPI\_ISL\_583803, EPI\_ISL\_583804, EPI\_ISL\_583805, EPI\_ISL\_583806, EPI\_ISL\_583807, EPI\_ISL\_583811, EPI\_ISL\_583812, EPI\_ISL\_583813, EPI\_ISL\_583814, EPI\_ISL\_583815, EPI\_ISL\_583816, EPI\_ISL\_583817, EPI\_ISL\_583818, EPI\_ISL\_583819, EPI\_ISL\_583820, EPI\_ISL\_583821, EPI\_ISL\_583822, EPI\_ISL\_583823, EPI\_ISL\_583824, EPI\_ISL\_583825, EPI\_ISL\_583826, EPI\_ISL\_583827, EPI\_ISL\_583828, EPI\_ISL\_583832, EPI\_ISL\_583833, EPI\_ISL\_583834, EPI\_ISL\_583835, EPI\_ISL\_583836, EPI\_ISL\_583837, EPI\_ISL\_583838, EPI\_ISL\_583839, EPI\_ISL\_583840, EPI\_ISL\_583841, EPI\_ISL\_583842, EPI\_ISL\_583843, EPI\_ISL\_583844, EPI\_ISL\_583845, EPI\_ISL\_583846, EPI\_ISL\_583847, EPI\_ISL\_583848, EPI\_ISL\_583849, EPI\_ISL\_583852, EPI\_ISL\_583853, EPI\_ISL\_583854, EPI\_ISL\_583855, EPI\_ISL\_583856, EPI\_ISL\_583857, EPI\_ISL\_583858, EPI\_ISL\_583859, EPI\_ISL\_583860, EPI\_ISL\_583861, EPI\_ISL\_583862, EPI\_ISL\_583863, EPI\_ISL\_583864, EPI\_ISL\_583865, EPI\_ISL\_583866, EPI\_ISL\_583867, EPI\_ISL\_583868

see above Dr. Gernot Walder Bergthaler laboratory, Alexandra Popa, Benedikt Agerer, Henrique Colaco, Lukas Endler, Jakob-Wendelin Genger, Alexander Lercher, Mark Smyth, Thomas Penz, Michael Schuster, Jan Laine, Martin Senekowitsch, Judith Aberle, Stephan Aberle, Peter Hufnagl, Daniela Schmid, Franz Allerlb  
GmbH CeMM Research Center for Molecular Medicine of the Austrian Academy of Sciences Guenter Weiss, Gregor Hörmann, Kinga Rigler-Hohenwarter, Rainer Gattringer, Wegene Borena, Dorothee von Laer, Gernot Walder, Peter Obrist, Christian Paar, Sabine Sussitz-Rack, Gunther Vogl, Adi Steinrigl, Christoph Bock, Ar

EPI\_ISL\_583853, EPI\_ISL\_583854, EPI\_ISL\_583855, EPI\_ISL\_583856, EPI\_ISL\_583857, EPI\_ISL\_583858, EPI\_ISL\_583859, EPI\_ISL\_583860, EPI\_ISL\_583861, EPI\_ISL\_583862, EPI\_ISL\_583863, EPI\_ISL\_583864, EPI\_ISL\_583865, EPI\_ISL\_583866, EPI\_ISL\_583867, EPI\_ISL\_583868

see above Institute for Bergthaler laboratory, Alexandra Popa, Benedikt Agerer, Henrique Colaco, Lukas Endler, Jakob-Wendelin Genger, Alexander Lercher, Mark Smyth, Thomas Penz, Michael Schuster, Jan Laine, Martin Senekowitsch, Judith Aberle, Stephan Aberle, Peter Hufnagl, Daniela Schmid, Franz Allerlb  
Laboratory CeMM Research Center for Molecular Medicine of the Austrian Academy of Sciences Diagnostics and Microbiology, Gunter Weiss, Gregor Hörmann, Kinga Rigler-Hohenwarter, Rainer Gattringer, Wegene Borena, Dorothee von Laer, Gernot Walder, Peter Obrist, Christian Paar, Sabine Sussitz-Rack, Gunther Vogl, Adi Steinrigl, Christoph Bock, Ar  
Klinikum Klagenfurt am Werthorsee

EPI\_ISL\_583869, EPI\_ISL\_583870, EPI\_ISL\_583871, EPI\_ISL\_583872, EPI\_ISL\_583873, EPI\_ISL\_583874, EPI\_ISL\_583875, EPI\_ISL\_583876, EPI\_ISL\_583877, EPI\_ISL\_583878, EPI\_ISL\_583879, EPI\_ISL\_583880, EPI\_ISL\_583881, EPI\_ISL\_583882

see above Center for Virology, Bergthaler laboratory, Alexandra Popa, Benedikt Agerer, Henrique Colaco, Lukas Endler, Jakob-Wendelin Genger, Alexander Lercher, Mark Smyth, Thomas Penz, Michael Schuster, Jan Laine, Martin Senekowitsch, Judith Aberle, Stephan Aberle, Peter Hufnagl, Daniela Schmid, Franz Allerlb  
Medical University of Vienna CeMM Research Center for Molecular Medicine of the Austrian Academy of Sciences Guenter Weiss, Gregor Hörmann, Kinga Rigler-Hohenwarter, Rainer Gattringer, Wegene Borena, Dorothee von Laer, Gernot Walder, Peter Obrist, Christian Paar, Sabine Sussitz-Rack, Gunther Vogl, Adi Steinrigl, Christoph Bock, Ar

EPI\_ISL\_583883, Austrian Agency for Bergthaler laboratory, Alexandra Popa, Benedikt Agerer, Henrique Colaco, Lukas Endler, Jakob-Wendelin Genger, Alexander Lercher, Mark Smyth, Thomas Penz, Michael Schuster, Jan Laine, Martin Senekowitsch, Judith Aberle, Stephan Aberle, Peter Hufnagl, Daniela Schmid, Franz Allerlb  
Health and Food CeMM Research Center for Molecular Medicine of the Austrian Academy of Sciences Safety (AGES) Guenter Weiss, Gregor Hörmann, Kinga Rigler-Hohenwarter, Rainer Gattringer, Wegene Borena, Dorothee von Laer, Gernot Walder, Peter Obrist, Christian Paar, Sabine Sussitz-Rack, Gunther Vogl, Adi Steinrigl, Christoph Bock, Ar  
EPI\_ISL\_583886, EPI\_ISL\_583887, EPI\_ISL\_583888, EPI\_ISL\_583889, EPI\_ISL\_583890, EPI\_ISL\_583891, EPI\_ISL\_583892

EPI\_ISL\_586267, EPI\_ISL\_586268, EPI\_ISL\_586269, EPI\_ISL\_586270, EPI\_ISL\_586271, EPI\_ISL\_586272, EPI\_ISL\_586273, EPI\_ISL\_586274, EPI\_ISL\_586275, EPI\_ISL\_586276, EPI\_ISL\_586277, EPI\_ISL\_586278, EPI\_ISL\_586279, EPI\_ISL\_586280, EPI\_ISL\_586281, EPI\_ISL\_586282, EPI\_ISL\_586283, EPI\_ISL\_586284, EPI\_ISL\_586288, EPI\_ISL\_586289, EPI\_ISL\_586290, EPI\_ISL\_586291, EPI\_ISL\_586292, EPI\_ISL\_586293, EPI\_ISL\_586294, EPI\_ISL\_586295, EPI\_ISL\_586296, EPI\_ISL\_586297, EPI\_ISL\_586298, EPI\_ISL\_586299, EPI\_ISL\_586300, EPI\_ISL\_586301, EPI\_ISL\_586302, EPI\_ISL\_586303, EPI\_ISL\_586304, EPI\_ISL\_586305, EPI\_ISL\_586309, EPI\_ISL\_586310, EPI\_ISL\_586311, EPI\_ISL\_586312, EPI\_ISL\_586313, EPI\_ISL\_586314, EPI\_ISL\_586315, EPI\_ISL\_586316, EPI\_ISL\_586317, EPI\_ISL\_586318, EPI\_ISL\_586319, EPI\_ISL\_586320, EPI\_ISL\_586321, EPI\_ISL\_586322, EPI\_ISL\_586323, EPI\_ISL\_586324, EPI\_ISL\_586325, EPI\_ISL\_586326, EPI\_ISL\_586330, EPI\_ISL\_586331, EPI\_ISL\_586332, EPI\_ISL\_586333, EPI\_ISL\_586334, EPI\_ISL\_586335, EPI\_ISL\_586336, EPI\_ISL\_586337, EPI\_ISL\_586338, EPI\_ISL\_586339, EPI\_ISL\_586340, EPI\_ISL\_586341, EPI\_ISL\_586342, EPI\_ISL\_586343, EPI\_ISL\_586344, EPI\_ISL\_586345, EPI\_ISL\_586346, EPI\_ISL\_586347, EPI\_ISL\_586351, EPI\_ISL\_586352, EPI\_ISL\_586353, EPI\_ISL\_586354, EPI\_ISL\_586355, EPI\_ISL\_586356, EPI\_ISL\_586357, EPI\_ISL\_586358, EPI\_ISL\_586359, EPI\_ISL\_586360, EPI\_ISL\_586361, EPI\_ISL\_586362, EPI\_ISL\_586363, EPI\_ISL\_586364, EPI\_ISL\_586365, EPI\_ISL\_586366, EPI\_ISL\_586367, EPI\_ISL\_586368, EPI\_ISL\_586372, EPI\_ISL\_586373, EPI\_ISL\_586374, EPI\_ISL\_586375, EPI\_ISL\_586376, EPI\_ISL\_586377, EPI\_ISL\_586378, EPI\_ISL\_586379, EPI\_ISL\_586380, EPI\_ISL\_586381, EPI\_ISL\_586382, EPI\_ISL\_586383, EPI\_ISL\_586384, EPI\_ISL\_586385, EPI\_ISL\_586386, EPI\_ISL\_586387, EPI\_ISL\_586388, EPI\_ISL\_586389, EPI\_ISL\_586393, EPI\_ISL\_586394, EPI\_ISL\_586395, EPI\_ISL\_586396, EPI\_ISL\_586397, EPI\_ISL\_586398, EPI\_ISL\_586399, EPI\_ISL\_586400, EPI\_ISL\_586401, EPI\_ISL\_586402, EPI\_ISL\_586403, EPI\_ISL\_586404, EPI\_ISL\_586405, EPI\_ISL\_586406, EPI\_ISL\_586407, EPI\_ISL\_586408, EPI\_ISL\_586409, EPI\_ISL\_586410, EPI\_ISL\_586414, EPI\_ISL\_586415, EPI\_ISL\_586416, EPI\_ISL\_586417, EPI\_ISL\_586418, EPI\_ISL\_586419, EPI\_ISL\_586420, EPI\_ISL\_586421, EPI\_ISL\_586422, EPI\_ISL\_586423, EPI\_ISL\_586424, EPI\_ISL\_586425, EPI\_ISL\_586426, EPI\_ISL\_586427, EPI\_ISL\_586428, EPI\_ISL\_586429, EPI\_ISL\_586430, EPI\_ISL\_586431, EPI\_ISL\_586435, EPI\_ISL\_586436, EPI\_ISL\_586437, EPI\_ISL\_586438, EPI\_ISL\_586439, EPI\_ISL\_586440, EPI\_ISL\_586441, EPI\_ISL\_586442, EPI\_ISL\_586443, EPI\_ISL\_586444, EPI\_ISL\_586445, EPI\_ISL\_586446, EPI\_ISL\_586447, EPI\_ISL\_586448, EPI\_ISL\_586449, EPI\_ISL\_586450, EPI\_ISL\_586451, EPI\_ISL\_586452, EPI\_ISL\_586456, EPI\_ISL\_586457, EPI\_ISL\_586458, EPI\_ISL\_586459, EPI\_ISL\_586460, EPI\_ISL\_586461, EPI\_ISL\_586462, EPI\_ISL\_586463, EPI\_ISL\_586464, EPI\_ISL\_586465, EPI\_ISL\_586466, EPI\_ISL\_586467, EPI\_ISL\_586468, EPI\_ISL\_586469, EPI\_ISL\_586470, EPI\_ISL\_586471, EPI\_ISL\_586472, EPI\_ISL\_586473, EPI\_ISL\_586477, EPI\_ISL\_586478, EPI\_ISL\_586479, EPI\_ISL\_586480, EPI\_ISL\_586481, EPI\_ISL\_586482, EPI\_ISL\_586483, EPI\_ISL\_586484, EPI\_ISL\_586485, EPI\_ISL\_586486, EPI\_ISL\_586488, EPI\_ISL\_586489, EPI\_ISL\_586490, EPI\_ISL\_586491, EPI\_ISL\_586492, EPI\_ISL\_586493, EPI\_ISL\_586494, EPI\_ISL\_586498, EPI\_ISL\_586499, EPI\_ISL\_586500, EPI\_ISL\_586501, EPI\_ISL\_586502, EPI\_ISL\_586503, EPI\_ISL\_586504, EPI\_ISL\_586505, EPI\_ISL\_586506, EPI\_ISL\_586507, EPI\_ISL\_586508

see above Toronto Invasive Bacterial Diseases Network McMaster University Allison McGeer, Patryk Aftanas, Hooman Derakhshani, Angel Li, Kuganya Nirmalarajah, Emily Panousis, Ahmed Draia, Jalees Nasir, Michael Surette, Samira Mubareka, Andrew G. McArthur

EPI\_ISL\_586522 B.J. Medical College and Civil hospital, Ahmedabad Gujarat Biotechnology Research Centre Afzal Ansari, Nikha Trivedi, Pranay Shah, Kamlesh J Upadhyay, Sanjay Kapadia, Apurvashin Puvar, Janvi Raval, Zarna Patel, Monika Gandhi, Pinal Trivedi, Maharshi Pandya, Nidhi Patel, Nitin Savaliya, Raghawendra Kumar, Dinesh Kumar, Zuber Saiyed, Komal Patel Chaitanya Joshi, Madhvi Joshi

EPI\_ISL\_586544 Government General Hospital, Jam Khabhaliya, Devbhoomi Dwaraka Gujarat Biotechnology Research Centre Afzal Ansari, Nikha Trivedi, Harish Matani, Apurvashin Puvar, Janvi Raval, Zarna Patel, Monika Gandhi, Pinal Trivedi, Maharshi Pandya, Nidhi Patel, Nitin Savaliya, Raghawendra Kumar, Dinesh Kumar, Zuber Saiyed, Komal Patel, Labdhi Pandya, R D Dixit, A M Ke

EPI\_ISL\_586561 CCC,Veraval Gujarat Biotechnology Research Centre Afzal Ansari, Nikha Trivedi, Jignesh Parmar, Jitendra Bamrotia, Apurvashin Puvar, Janvi Raval, Zarna Patel, Monika Gandhi, Pinal Trivedi, Maharshi Pandya, Nidhi Patel, Nitin Savaliya, Raghawendra Kumar, Dinesh Kumar, Zuber Saiyed, Komal Patel, Labdhi Pandya, Madhvi Joshi

EPI\_ISL\_591100, EPI\_ISL\_591101, EPI\_ISL\_591102, EPI\_ISL\_591103, EPI\_ISL\_591104, EPI\_ISL\_591105, EPI\_ISL\_591106, EPI\_ISL\_591107, EPI\_ISL\_591108, EPI\_ISL\_591109, EPI\_ISL\_591110, EPI\_ISL\_591111, EPI\_ISL\_591112, EPI\_ISL\_591113, EPI\_ISL\_591114, EPI\_ISL\_591115, EPI\_ISL\_591116, EPI\_ISL\_591117, EPI\_ISL\_591121, EPI\_ISL\_591122, EPI\_ISL\_591123, EPI\_ISL\_591124, EPI\_ISL\_591125, EPI\_ISL\_591126, EPI\_ISL\_591127, EPI\_ISL\_591128, EPI\_ISL\_591129, EPI\_ISL\_591130, EPI\_ISL\_591131, EPI\_ISL\_591132, EPI\_ISL\_591133, EPI\_ISL\_591134, EPI\_ISL\_591135, EPI\_ISL\_591136, EPI\_ISL\_591137, EPI\_ISL\_591138, EPI\_ISL\_591142, EPI\_ISL\_591143, EPI\_ISL\_591144, EPI\_ISL\_591145, EPI\_ISL\_591146, EPI\_ISL\_591147, EPI\_ISL\_591148, EPI\_ISL\_591149, EPI\_ISL\_591150, EPI\_ISL\_591151, EPI\_ISL\_591152, EPI\_ISL\_591153, EPI\_ISL\_591154, EPI\_ISL\_591155, EPI\_ISL\_591156, EPI\_ISL\_591157, EPI\_ISL\_591158, EPI\_ISL\_591159, EPI\_ISL\_591163, EPI\_ISL\_591164, EPI\_ISL\_591165, EPI\_ISL\_591166, EPI\_ISL\_591167, EPI\_ISL\_591168, EPI\_ISL\_591169, EPI\_ISL\_591170, EPI\_ISL\_591171, EPI\_ISL\_591172, EPI\_ISL\_591173, EPI\_ISL\_591174, EPI\_ISL\_591175, EPI\_ISL\_591176, EPI\_ISL\_591177, EPI\_ISL\_591178, EPI\_ISL\_591179, EPI\_ISL\_591180, EPI\_ISL\_591184, EPI\_ISL\_591185, EPI\_ISL\_591186, EPI\_ISL\_591187, EPI\_ISL\_591188, EPI\_ISL\_591189, EPI\_ISL\_591190, EPI\_ISL\_591191, EPI\_ISL\_591192, EPI\_ISL\_591193, EPI\_ISL\_591194, EPI\_ISL\_591195, EPI\_ISL\_591196, EPI\_ISL\_591197, EPI\_ISL\_591198, EPI\_ISL\_591199, EPI\_ISL\_591200, EPI\_ISL\_591201, EPI\_ISL\_591205, EPI\_ISL\_591206, EPI\_ISL\_591207, EPI\_ISL\_591208, EPI\_ISL\_591209, EPI\_ISL\_591210, EPI\_ISL\_591211, EPI\_ISL\_591212, EPI\_ISL\_591213, EPI\_ISL\_591214, EPI\_ISL\_591215, EPI\_ISL\_591216, EPI\_ISL\_591217, EPI\_ISL\_591218, EPI\_ISL\_591219, EPI\_ISL\_591220, EPI\_ISL\_591221, EPI\_ISL\_591222, EPI\_ISL\_591226, EPI\_ISL\_591227, EPI\_ISL\_591228, EPI\_ISL\_591229, EPI\_ISL\_591230, EPI\_ISL\_591231, EPI\_ISL\_591232, EPI\_ISL\_591233, EPI\_ISL\_591234, EPI\_ISL\_591235, EPI\_ISL\_591236, EPI\_ISL\_591237, EPI\_ISL\_591238, EPI\_ISL\_591239, EPI\_ISL\_591240, EPI\_ISL\_591241, EPI\_ISL\_591242, EPI\_ISL\_591243, EPI\_ISL\_591247, EPI\_ISL\_591248, EPI\_ISL\_591249, EPI\_ISL\_591250, EPI\_ISL\_591251, EPI\_ISL\_591252, EPI\_ISL\_591253, EPI\_ISL\_591254, EPI\_ISL\_591255, EPI\_ISL\_591256, EPI\_ISL\_591257, EPI\_ISL\_591258, EPI\_ISL\_591259, EPI\_ISL\_591260, EPI\_ISL\_591261, EPI\_ISL\_591262, EPI\_ISL\_591263, EPI\_ISL\_591264, EPI\_ISL\_591265, EPI\_ISL\_591266, EPI\_ISL\_591267, EPI\_ISL\_591268, EPI\_ISL\_591269

see above Toronto Invasive Bacterial Diseases Network McMaster University Allison McGeer, Patryk Aftanas, Hooman Derakhshani, Angel Li, Kuganya Nirmalarajah, Emily Panousis, Ahmed Draia, Jalees Nasir, Michael Surette, Samira Mubareka, Andrew G. McArthur

EPI\_ISL\_603221, National Institute of Laboratory Medicine and Referral Center Genomic Research Lab, BCSIR Abu Sayeed Mohammad Mahmud, Mohammad Samir Uzzaman, Eshrar Osman, Md. Ahashan Habib, Shahina Akter, Tanjina Akhter Banu, Md. Murshed Hasan Sarkar, Barna Goswami, Iffat Jahan, Md. Saddam Hossain, Tasnim Nafisa, Md. Maruf Ahmed Molla, M EPI\_ISL\_603222 Shamsuzzaman, Monira Parveen, Md. Masum Hossain Arif, Md. Salim Khan

EPI\_ISL\_613457 QUARANTINE CAMP Hong Kong Department of Health Alan K.L. Tsang, Peter C.W. Yip, Edman T.K. Lam, Rickjason C.W. Chan, Dominic N.C. Tsang

EPI\_ISL\_622894, EPI\_ISL\_622895, EPI\_ISL\_622896, EPI\_ISL\_622897, EPI\_ISL\_622898, EPI\_ISL\_622899, EPI\_ISL\_622900, EPI\_ISL\_622901, EPI\_ISL\_622902, EPI\_ISL\_622903, EPI\_ISL\_622904, EPI\_ISL\_622905, EPI\_ISL\_622906, EPI\_ISL\_622907, EPI\_ISL\_622908, EPI\_ISL\_622909, EPI\_ISL\_622910, EPI\_ISL\_622911, EPI\_ISL\_622915, EPI\_ISL\_622916, EPI\_ISL\_622917, EPI\_ISL\_622918, EPI\_ISL\_622919, EPI\_ISL\_622920, EPI\_ISL\_622921, EPI\_ISL\_622922, EPI\_ISL\_622923, EPI\_ISL\_622924, EPI\_ISL\_622925, EPI\_ISL\_622926, EPI\_ISL\_622927, EPI\_ISL\_622928, EPI\_ISL\_622929, EPI\_ISL\_622930, EPI\_ISL\_622931, EPI\_ISL\_622932, EPI\_ISL\_622933, EPI\_ISL\_622934, EPI\_ISL\_622935, EPI\_ISL\_622936, EPI\_ISL\_622937, EPI\_ISL\_622938, EPI\_ISL\_622939, EPI\_ISL\_622940, EPI\_ISL\_622941, EPI\_ISL\_622942, EPI\_ISL\_622943, EPI\_ISL\_622944, EPI\_ISL\_622945, EPI\_ISL\_622946, EPI\_ISL\_622947, EPI\_ISL\_622948, EPI\_ISL\_622949, EPI\_ISL\_622950, EPI\_ISL\_622951, EPI\_ISL\_622952, EPI\_ISL\_622953, EPI\_ISL\_622954, EPI\_ISL\_622955, EPI\_ISL\_622956, EPI\_ISL\_622957, EPI\_ISL\_622958, EPI\_ISL\_622959, EPI\_ISL\_622960, EPI\_ISL\_622961, EPI\_ISL\_622962, EPI\_ISL\_622963, EPI\_ISL\_622964, EPI\_ISL\_622965, EPI\_ISL\_622966, EPI\_ISL\_622967, EPI\_ISL\_622968, EPI\_ISL\_622969, EPI\_ISL\_622970, EPI\_ISL\_622971, EPI\_ISL\_622972, EPI\_ISL\_622973, EPI\_ISL\_622974, EPI\_ISL\_622975, EPI\_ISL\_622976, EPI\_ISL\_622977, EPI\_ISL\_622978, EPI\_ISL\_622979, EPI\_ISL\_622980, EPI\_ISL\_622981, EPI\_ISL\_622982, EPI\_ISL\_622983, EPI\_ISL\_622984, EPI\_ISL\_622985, EPI\_ISL\_622986, EPI\_ISL\_622987, EPI\_ISL\_622988, EPI\_ISL\_622989, EPI\_ISL\_622990, EPI\_ISL\_622991, EPI\_ISL\_622992, EPI\_ISL\_622993, EPI\_ISL\_622994, EPI\_ISL\_622995, EPI\_ISL\_622996, EPI\_ISL\_622997, EPI\_ISL\_622998, EPI\_ISL\_622999, EPI\_ISL\_623000, EPI\_ISL\_623001, EPI\_ISL\_623002, EPI\_ISL\_623003, EPI\_ISL\_623004, EPI\_ISL\_623005, EPI\_ISL\_623006, EPI\_ISL\_623007, EPI\_ISL\_623008, EPI\_ISL\_623009, EPI\_ISL\_623010, EPI\_ISL\_623011, EPI\_ISL\_623012, EPI\_ISL\_623013, EPI\_ISL\_623014, EPI\_ISL\_623015, EPI\_ISL\_623016, EPI\_ISL\_623017, EPI\_ISL\_623018, EPI\_ISL\_623019, EPI\_ISL\_623020, EPI\_ISL\_623021, EPI\_ISL\_623022, EPI\_ISL\_623023, EPI\_ISL\_623024, EPI\_ISL\_623025, EPI\_ISL\_623026, EPI\_ISL\_623027, EPI\_ISL\_623028, EPI\_ISL\_623029, EPI\_ISL\_623030, EPI\_ISL\_623031, EPI\_ISL\_623032, EPI\_ISL\_623033, EPI\_ISL\_623034, EPI\_ISL\_623035, EPI\_ISL\_623036, EPI\_ISL\_623037, EPI\_ISL\_623038, EPI\_ISL\_623039, EPI\_ISL\_623040, EPI\_ISL\_623041, EPI\_ISL\_623042, EPI\_ISL\_623043, EPI\_ISL\_623044, EPI\_ISL\_623045, EPI\_ISL\_623046, EPI\_ISL\_623047, EPI\_ISL\_623048, EPI\_ISL\_623049, EPI\_ISL\_623050, EPI\_ISL\_623051, EPI\_ISL\_623052, EPI\_ISL\_623053, EPI\_ISL\_623054, EPI\_ISL\_623055, EPI\_ISL\_623056, EPI\_ISL\_623057, EPI\_ISL\_623058, EPI\_ISL\_623059, EPI\_ISL\_623060, EPI\_ISL\_623061, EPI\_ISL\_623062, EPI\_ISL\_623063, EPI\_ISL\_623064, EPI\_ISL\_623065, EPI\_ISL\_623066, EPI\_ISL\_623067, EPI\_ISL\_623068, EPI\_ISL\_623069, EPI\_ISL\_623070, EPI\_ISL\_623071, EPI\_ISL\_623072, EPI\_ISL\_623073, EPI\_ISL\_623074, EPI\_ISL\_623075, EPI\_ISL\_623076, EPI\_ISL\_623077, EPI\_ISL\_623078, EPI\_ISL\_623079, EPI\_ISL\_623080, EPI\_ISL\_623081, EPI\_ISL\_623082, EPI\_ISL\_623083, EPI\_ISL\_623084, EPI\_ISL\_623085, EPI\_ISL\_623086, EPI\_ISL\_623087, EPI\_ISL\_623088, EPI\_ISL\_623089, EPI\_ISL\_623090, EPI\_ISL\_623091, EPI\_ISL\_623092, EPI\_ISL\_623093, EPI\_ISL\_623094, EPI\_ISL\_623095, EPI\_ISL\_623096, EPI\_ISL\_623097, EPI\_ISL\_623098, EPI\_ISL\_623099, EPI\_ISL\_623100, EPI\_ISL\_623101, EPI\_ISL\_623102, EPI\_ISL\_623103, EPI\_ISL\_623104, EPI\_ISL\_623105, EPI\_ISL\_623106, EPI\_ISL\_623107, EPI\_ISL\_623108, EPI\_ISL\_623109, EPI\_ISL\_623110, EPI\_ISL\_623111, EPI\_ISL\_623112, EPI\_ISL\_623113, EPI\_ISL\_623114, EPI\_ISL\_623115, EPI\_ISL\_623116, EPI\_ISL\_623117, EPI\_ISL\_623118, EPI\_ISL\_623119, EPI\_ISL\_623120, EPI\_ISL\_623121, EPI\_ISL\_623122, EPI\_ISL\_623123, EPI\_ISL\_623124, EPI\_ISL\_623125, EPI\_ISL\_623126, EPI\_ISL\_623127, EPI\_ISL\_623128, EPI\_ISL\_623129, EPI\_ISL\_623130, EPI\_ISL\_623131, EPI\_ISL\_623132, EPI\_ISL\_623133, EPI\_ISL\_623134, EPI\_ISL\_623135, EPI\_ISL\_623136, EPI\_ISL\_623137, EPI\_ISL\_623138, EPI\_ISL\_623139, EPI\_ISL\_623140, EPI\_ISL\_623141, EPI\_ISL\_623142, EPI\_ISL\_623143, EPI\_ISL\_623144, EPI\_ISL\_623145, EPI\_ISL\_623146, EPI\_ISL\_623147, EPI\_ISL\_623148, EPI\_ISL\_623149, EPI\_ISL\_623150, EPI\_ISL\_623151, EPI\_ISL\_623152, EPI\_ISL\_623153, EPI\_ISL\_623154, EPI\_ISL\_623155, EPI\_ISL\_623156, EPI\_ISL\_623157, EPI\_ISL\_623158, EPI\_ISL\_623159, EPI\_ISL\_623160, EPI\_ISL\_623161, EPI\_ISL\_623162, EPI\_ISL\_623163, EPI\_ISL\_623164, EPI\_ISL\_623165, EPI\_ISL\_623166, EPI\_ISL\_623167, EPI\_ISL\_623168, EPI\_ISL\_623169, EPI\_ISL\_623170, EPI\_ISL\_623171, EPI\_ISL\_623172, EPI\_ISL\_623173, EPI\_ISL\_623174, EPI\_ISL\_623175, EPI\_ISL\_623176, EPI\_ISL\_623177, EPI\_ISL\_623178, EPI\_ISL\_623179, EPI\_ISL\_623180, EPI\_ISL\_623181, EPI\_ISL\_623182, EPI\_ISL\_623183, EPI\_ISL\_623184, EPI\_ISL\_623185, EPI\_ISL\_623186, EPI\_ISL\_623187, EPI\_ISL\_623188, EPI\_ISL\_623189, EPI\_ISL\_623190, EPI\_ISL\_623191, EPI\_ISL\_623192, EPI\_ISL\_623193, EPI\_ISL\_623194, EPI\_ISL\_623195, EPI\_ISL\_623196, EPI\_ISL\_623197, EPI\_ISL\_623198, EPI\_ISL\_623199, EPI\_ISL\_623200, EPI\_ISL\_623201, EPI\_ISL\_623202, EPI\_ISL\_623203, EPI\_ISL\_623204, EPI\_ISL\_623205, EPI\_ISL\_623206, EPI\_ISL\_623207, EPI\_ISL\_623208, EPI\_ISL\_623209, EPI\_ISL\_623210, EPI\_ISL\_623211, EPI\_ISL\_623212, EPI\_ISL\_623213, EPI\_ISL\_623214, EPI\_ISL\_623215, EPI\_ISL\_623216, EPI\_ISL\_623217, EPI\_ISL\_623218, EPI\_ISL\_623219, EPI\_ISL\_623220, EPI\_ISL\_623221, EPI\_ISL\_623222, EPI\_ISL\_623223, EPI\_ISL\_623224, EPI\_ISL\_623225, EPI\_ISL\_623226, EPI\_ISL\_623227, EPI\_ISL\_623228, EPI\_ISL\_623229, EPI\_ISL\_623230, EPI\_ISL\_623231, EPI\_ISL\_623232, EPI\_ISL\_623233, EPI\_ISL\_623234, EPI\_ISL\_623235, EPI\_ISL\_623236, EPI\_ISL\_623237, EPI\_ISL\_623238, EPI\_ISL\_623239, EPI\_ISL\_623240, EPI\_ISL\_623241, EPI\_ISL\_623242, EPI\_ISL\_623243, EPI\_ISL\_623244, EPI\_ISL\_623245, EPI\_ISL\_623246, EPI\_ISL\_623247, EPI\_ISL



|                                                                                                                                                                                                                                                                                                                                                                                                                                                                                                                                                                                                                                                                                                                                                                                                                                                                                |                                                            |                                                                                                  |                                                                                                  |
|--------------------------------------------------------------------------------------------------------------------------------------------------------------------------------------------------------------------------------------------------------------------------------------------------------------------------------------------------------------------------------------------------------------------------------------------------------------------------------------------------------------------------------------------------------------------------------------------------------------------------------------------------------------------------------------------------------------------------------------------------------------------------------------------------------------------------------------------------------------------------------|------------------------------------------------------------|--------------------------------------------------------------------------------------------------|--------------------------------------------------------------------------------------------------|
| EPI_ISL_622986                                                                                                                                                                                                                                                                                                                                                                                                                                                                                                                                                                                                                                                                                                                                                                                                                                                                 |                                                            | Communicable Diseases of the National Health Laboratory Service                                  |                                                                                                  |
| EPI_ISL_622987                                                                                                                                                                                                                                                                                                                                                                                                                                                                                                                                                                                                                                                                                                                                                                                                                                                                 | National Health Laboratory Service                         | National Institute for Communicable Diseases of the National Health Laboratory Service           | Allam M, Ismail A, Khumalo Z, Kwenda S, Mtshali P, Mnyameni F, Mohale T, Subramoney K, Bhiman JN |
| EPI_ISL_622988                                                                                                                                                                                                                                                                                                                                                                                                                                                                                                                                                                                                                                                                                                                                                                                                                                                                 | Lancet Laboratories                                        | National Institute for Communicable Diseases of the National Health Laboratory Service           | Allam M, Ismail A, Khumalo Z, Kwenda S, Mtshali P, Mnyameni F, Mohale T, Subramoney K, Bhiman JN |
| EPI_ISL_622989                                                                                                                                                                                                                                                                                                                                                                                                                                                                                                                                                                                                                                                                                                                                                                                                                                                                 | National Health Laboratory Service                         | National Institute for Communicable Diseases of the National Health Laboratory Service           | Allam M, Ismail A, Khumalo Z, Kwenda S, Mtshali P, Mnyameni F, Mohale T, Subramoney K, Bhiman JN |
| EPI_ISL_622990                                                                                                                                                                                                                                                                                                                                                                                                                                                                                                                                                                                                                                                                                                                                                                                                                                                                 | Lancet Laboratories                                        | National Institute for Communicable Diseases of the National Health Laboratory Service           | Allam M, Ismail A, Khumalo Z, Kwenda S, Mtshali P, Mnyameni F, Mohale T, Subramoney K, Bhiman JN |
| EPI_ISL_622991,<br>EPI_ISL_622992,<br>EPI_ISL_622993                                                                                                                                                                                                                                                                                                                                                                                                                                                                                                                                                                                                                                                                                                                                                                                                                           | National Health Laboratory Service                         | National Institute for Communicable Diseases of the National Health Laboratory Service           | Allam M, Ismail A, Khumalo Z, Kwenda S, Mtshali P, Mnyameni F, Mohale T, Subramoney K, Bhiman JN |
| EPI_ISL_622994                                                                                                                                                                                                                                                                                                                                                                                                                                                                                                                                                                                                                                                                                                                                                                                                                                                                 | Lancet Laboratories                                        | National Institute for Communicable Diseases of the National Health Laboratory Service           | Allam M, Ismail A, Khumalo Z, Kwenda S, Mtshali P, Mnyameni F, Mohale T, Subramoney K, Bhiman JN |
| EPI_ISL_622995, EPI_ISL_622996, EPI_ISL_622997, EPI_ISL_622998, EPI_ISL_622999, EPI_ISL_623001, EPI_ISL_623002, EPI_ISL_623003, EPI_ISL_623004, EPI_ISL_623005, EPI_ISL_623007, EPI_ISL_623008, EPI_ISL_623009, EPI_ISL_623010, EPI_ISL_623011, EPI_ISL_623012, EPI_ISL_623013, EPI_ISL_623014, EPI_ISL_623018, EPI_ISL_623019, EPI_ISL_623020, EPI_ISL_623021, EPI_ISL_623022, EPI_ISL_623023, EPI_ISL_623026, EPI_ISL_623027, EPI_ISL_623028, EPI_ISL_623029, EPI_ISL_623030, EPI_ISL_623031, EPI_ISL_623032, EPI_ISL_623033, EPI_ISL_623034, EPI_ISL_623035, EPI_ISL_623036, EPI_ISL_623037, EPI_ISL_623041, EPI_ISL_623043, EPI_ISL_623044, EPI_ISL_623045, EPI_ISL_623046, EPI_ISL_623047, EPI_ISL_623048, EPI_ISL_623049, EPI_ISL_623050, EPI_ISL_623051, EPI_ISL_623053, EPI_ISL_623054, EPI_ISL_623055, EPI_ISL_623056, EPI_ISL_623057, EPI_ISL_623060, EPI_ISL_623062 |                                                            | Allam M, Ismail A, Khumalo Z, Kwenda S, Mtshali P, Mnyameni F, Mohale T, Subramoney K, Bhiman JN |                                                                                                  |
| see above                                                                                                                                                                                                                                                                                                                                                                                                                                                                                                                                                                                                                                                                                                                                                                                                                                                                      | National Health Laboratory Service                         | National Institute for Communicable Diseases of the National Health Laboratory Service           | Allam M, Ismail A, Khumalo Z, Kwenda S, Mtshali P, Mnyameni F, Mohale T, Subramoney K, Bhiman JN |
| EPI_ISL_623064                                                                                                                                                                                                                                                                                                                                                                                                                                                                                                                                                                                                                                                                                                                                                                                                                                                                 | Lancet Laboratories                                        | National Institute for Communicable Diseases of the National Health Laboratory Service           | Allam M, Ismail A, Khumalo Z, Kwenda S, Mtshali P, Mnyameni F, Mohale T, Subramoney K, Bhiman JN |
| EPI_ISL_623065,<br>EPI_ISL_623066                                                                                                                                                                                                                                                                                                                                                                                                                                                                                                                                                                                                                                                                                                                                                                                                                                              | National Health Laboratory Service                         | National Institute for Communicable Diseases of the National Health Laboratory Service           | Allam M, Ismail A, Khumalo Z, Kwenda S, Mtshali P, Mnyameni F, Mohale T, Subramoney K, Bhiman JN |
| EPI_ISL_623068                                                                                                                                                                                                                                                                                                                                                                                                                                                                                                                                                                                                                                                                                                                                                                                                                                                                 | Lancet Laboratories                                        | National Institute for Communicable Diseases of the National Health Laboratory Service           | Allam M, Ismail A, Khumalo Z, Kwenda S, Mtshali P, Mnyameni F, Mohale T, Subramoney K, Bhiman JN |
| EPI_ISL_623069,<br>EPI_ISL_623070,<br>EPI_ISL_623071,<br>EPI_ISL_623072                                                                                                                                                                                                                                                                                                                                                                                                                                                                                                                                                                                                                                                                                                                                                                                                        | National Health Laboratory Service                         | National Institute for Communicable Diseases of the National Health Laboratory Service           | Allam M, Ismail A, Khumalo Z, Kwenda S, Mtshali P, Mnyameni F, Mohale T, Subramoney K, Bhiman JN |
| EPI_ISL_623073                                                                                                                                                                                                                                                                                                                                                                                                                                                                                                                                                                                                                                                                                                                                                                                                                                                                 | Lancet Laboratories                                        | National Institute for Communicable Diseases of the National Health Laboratory Service           | Allam M, Ismail A, Khumalo Z, Kwenda S, Mtshali P, Mnyameni F, Mohale T, Subramoney K, Bhiman JN |
| EPI_ISL_632250,<br>EPI_ISL_632251,<br>EPI_ISL_632252,<br>EPI_ISL_632253,<br>EPI_ISL_632254,<br>EPI_ISL_632255                                                                                                                                                                                                                                                                                                                                                                                                                                                                                                                                                                                                                                                                                                                                                                  | Communicable Disease Laboratory, Public Health Directorate | Communicable Disease Laboratory, Public Health Directorate                                       | AlWasti,H., Altaif,Z., AlHujairi,Z., AlAbbas,Z.                                                  |
| EPI_ISL_632256,<br>EPI_ISL_632257,<br>EPI_ISL_632258                                                                                                                                                                                                                                                                                                                                                                                                                                                                                                                                                                                                                                                                                                                                                                                                                           | Communicable Disease Laboratory, Public Health Directorate | Communicable Disease Laboratory, Public Health Directorate                                       | AlHujairi,Z., Altaif,Z., AlWasti,H., AlAbbas,Z.                                                  |
| EPI_ISL_632259,<br>EPI_ISL_632260                                                                                                                                                                                                                                                                                                                                                                                                                                                                                                                                                                                                                                                                                                                                                                                                                                              | Communicable Disease Laboratory,                           | Communicable Disease Laboratory, Public                                                          | AlTaif,Z., AlWasti,H., AlHujairi,Z., AlAbbas,Z.                                                  |



|                                                                                                                                                                                                                                                                                                                                                                                                                                                                                                                                                                                                                                                                                                                                                                                                                                                                                                                                                                                                                                                                                                                                                                                                                                                                                                                                                                                                                                                                                                                                                                                                                                |                                                                                       |                                                                                                      |                                                                                                                                                                                                                      |
|--------------------------------------------------------------------------------------------------------------------------------------------------------------------------------------------------------------------------------------------------------------------------------------------------------------------------------------------------------------------------------------------------------------------------------------------------------------------------------------------------------------------------------------------------------------------------------------------------------------------------------------------------------------------------------------------------------------------------------------------------------------------------------------------------------------------------------------------------------------------------------------------------------------------------------------------------------------------------------------------------------------------------------------------------------------------------------------------------------------------------------------------------------------------------------------------------------------------------------------------------------------------------------------------------------------------------------------------------------------------------------------------------------------------------------------------------------------------------------------------------------------------------------------------------------------------------------------------------------------------------------|---------------------------------------------------------------------------------------|------------------------------------------------------------------------------------------------------|----------------------------------------------------------------------------------------------------------------------------------------------------------------------------------------------------------------------|
|                                                                                                                                                                                                                                                                                                                                                                                                                                                                                                                                                                                                                                                                                                                                                                                                                                                                                                                                                                                                                                                                                                                                                                                                                                                                                                                                                                                                                                                                                                                                                                                                                                | Public Health Directorate                                                             | Health Directorate                                                                                   |                                                                                                                                                                                                                      |
| EPI_ISL_632261, EPI_ISL_632262, EPI_ISL_632263, EPI_ISL_632264, EPI_ISL_632265, EPI_ISL_632266, EPI_ISL_632267, EPI_ISL_632268, EPI_ISL_632269, EPI_ISL_632270, EPI_ISL_632271, EPI_ISL_632272, EPI_ISL_632273, EPI_ISL_632274, EPI_ISL_632275, EPI_ISL_632276, EPI_ISL_632277, EPI_ISL_632278, EPI_ISL_632282, EPI_ISL_632283, EPI_ISL_632284, EPI_ISL_632285                                                                                                                                                                                                                                                                                                                                                                                                                                                                                                                                                                                                                                                                                                                                                                                                                                                                                                                                                                                                                                                                                                                                                                                                                                                                 |                                                                                       |                                                                                                      |                                                                                                                                                                                                                      |
| see above                                                                                                                                                                                                                                                                                                                                                                                                                                                                                                                                                                                                                                                                                                                                                                                                                                                                                                                                                                                                                                                                                                                                                                                                                                                                                                                                                                                                                                                                                                                                                                                                                      | Communicable Disease Laboratory, Public Health Directorate                            | Communicable Disease Laboratory, Public Health Directorate                                           | AlWasti,H., AlTauf,Z., AlHujairi,Z., AlAbbas,Z.                                                                                                                                                                      |
| EPI_ISL_632287                                                                                                                                                                                                                                                                                                                                                                                                                                                                                                                                                                                                                                                                                                                                                                                                                                                                                                                                                                                                                                                                                                                                                                                                                                                                                                                                                                                                                                                                                                                                                                                                                 | Environmental and Global Health, University of Florida                                | Environmental and Global Health, University of Florida                                               | Alam,M.M., Lauzardo,M., Elbadry,M.A., Stephenson,C.J., Gibson,J.C., Morris,J.G. and Lednický,J.A.                                                                                                                    |
| EPI_ISL_632899, EPI_ISL_632900, EPI_ISL_632901, EPI_ISL_632902, EPI_ISL_632903                                                                                                                                                                                                                                                                                                                                                                                                                                                                                                                                                                                                                                                                                                                                                                                                                                                                                                                                                                                                                                                                                                                                                                                                                                                                                                                                                                                                                                                                                                                                                 | Communicable Disease Laboratory, Public Health Directorate                            | Communicable Disease Laboratory, Public Health Directorate                                           | AlAbbas,Z., Altaif,Z., AlWasti,H., Alhujairi,Z.                                                                                                                                                                      |
| EPI_ISL_632904                                                                                                                                                                                                                                                                                                                                                                                                                                                                                                                                                                                                                                                                                                                                                                                                                                                                                                                                                                                                                                                                                                                                                                                                                                                                                                                                                                                                                                                                                                                                                                                                                 | Communicable Disease Laboratory, Public Health Directorate                            | Communicable Disease Laboratory, Public Health Directorate                                           | AlTauf,Z., AlHujairi,Z., AlWasti,H., AlAbbas,Z.                                                                                                                                                                      |
| EPI_ISL_632905                                                                                                                                                                                                                                                                                                                                                                                                                                                                                                                                                                                                                                                                                                                                                                                                                                                                                                                                                                                                                                                                                                                                                                                                                                                                                                                                                                                                                                                                                                                                                                                                                 | Communicable Disease Laboratory, Public Health Directorate                            | Communicable Disease Laboratory, Public Health Directorate                                           | AlHujairi,Z., Altaif,Z., AlWasti,H., AlAbbas,Z.                                                                                                                                                                      |
| EPI_ISL_632906, EPI_ISL_632907                                                                                                                                                                                                                                                                                                                                                                                                                                                                                                                                                                                                                                                                                                                                                                                                                                                                                                                                                                                                                                                                                                                                                                                                                                                                                                                                                                                                                                                                                                                                                                                                 | Communicable Disease Laboratory, Public Health Directorate                            | Communicable Disease Laboratory, Public Health Directorate                                           | AlAbbas,Z., Altaif,Z., AlWasti,H., Alhujairi,Z.                                                                                                                                                                      |
| EPI_ISL_632908                                                                                                                                                                                                                                                                                                                                                                                                                                                                                                                                                                                                                                                                                                                                                                                                                                                                                                                                                                                                                                                                                                                                                                                                                                                                                                                                                                                                                                                                                                                                                                                                                 | Genomic Sciences, Rehman Medical Institute                                            | Genomic Sciences, Rehman Medical Institute                                                           | Ali,J., Afridi,U.K., Haider,S.A., Sabiha,B., Jan,H. and Jehanzeb,V.                                                                                                                                                  |
| EPI_ISL_636462, EPI_ISL_636463                                                                                                                                                                                                                                                                                                                                                                                                                                                                                                                                                                                                                                                                                                                                                                                                                                                                                                                                                                                                                                                                                                                                                                                                                                                                                                                                                                                                                                                                                                                                                                                                 | ULSS6 Euganea                                                                         | Istituto Zooprofilattico Sperimentale delle Venezie                                                  | Adelaide Milani, Alessia Schivo, Annalisa Salviato, Erika Giorgia Quaranta, Ambra Pastori, Bianca Zecchin, Alice Fusaro, Isabella Monne, Calogero Terregino, Antonia Ricci                                           |
| EPI_ISL_636464                                                                                                                                                                                                                                                                                                                                                                                                                                                                                                                                                                                                                                                                                                                                                                                                                                                                                                                                                                                                                                                                                                                                                                                                                                                                                                                                                                                                                                                                                                                                                                                                                 | ULSS6 Piove di Sacco                                                                  | Istituto Zooprofilattico Sperimentale delle Venezie                                                  | Adelaide Milani, Alessia Schivo, Annalisa Salviato, Erika Giorgia Quaranta, Ambra Pastori, Bianca Zecchin, Alice Fusaro, Isabella Monne, Calogero Terregino, Antonia Ricci                                           |
| EPI_ISL_636465, EPI_ISL_636466                                                                                                                                                                                                                                                                                                                                                                                                                                                                                                                                                                                                                                                                                                                                                                                                                                                                                                                                                                                                                                                                                                                                                                                                                                                                                                                                                                                                                                                                                                                                                                                                 | ULSS6 Euganea                                                                         | Istituto Zooprofilattico Sperimentale delle Venezie                                                  | Adelaide Milani, Alessia Schivo, Annalisa Salviato, Erika Giorgia Quaranta, Ambra Pastori, Bianca Zecchin, Alice Fusaro, Isabella Monne, Calogero Terregino, Antonia Ricci                                           |
| EPI_ISL_636467, EPI_ISL_636468, EPI_ISL_636469, EPI_ISL_636470                                                                                                                                                                                                                                                                                                                                                                                                                                                                                                                                                                                                                                                                                                                                                                                                                                                                                                                                                                                                                                                                                                                                                                                                                                                                                                                                                                                                                                                                                                                                                                 | ULSS6 Distretto Padova Terme Colli                                                    | Istituto Zooprofilattico Sperimentale delle Venezie                                                  | Adelaide Milani, Alessia Schivo, Annalisa Salviato, Erika Giorgia Quaranta, Ambra Pastori, Bianca Zecchin, Alice Fusaro, Isabella Monne, Calogero Terregino, Antonia Ricci                                           |
| EPI_ISL_636471, EPI_ISL_636472, EPI_ISL_636473                                                                                                                                                                                                                                                                                                                                                                                                                                                                                                                                                                                                                                                                                                                                                                                                                                                                                                                                                                                                                                                                                                                                                                                                                                                                                                                                                                                                                                                                                                                                                                                 | ULSS6 Piove di Sacco                                                                  | Istituto Zooprofilattico Sperimentale delle Venezie                                                  | Adelaide Milani, Alessia Schivo, Annalisa Salviato, Erika Giorgia Quaranta, Ambra Pastori, Bianca Zecchin, Alice Fusaro, Isabella Monne, Calogero Terregino, Antonia Ricci                                           |
| EPI_ISL_636474, EPI_ISL_636475                                                                                                                                                                                                                                                                                                                                                                                                                                                                                                                                                                                                                                                                                                                                                                                                                                                                                                                                                                                                                                                                                                                                                                                                                                                                                                                                                                                                                                                                                                                                                                                                 | ULSS6 Distretto Padova Terme Colli                                                    | Istituto Zooprofilattico Sperimentale delle Venezie                                                  | Adelaide Milani, Alessia Schivo, Annalisa Salviato, Erika Giorgia Quaranta, Ambra Pastori, Bianca Zecchin, Alice Fusaro, Isabella Monne, Calogero Terregino, Antonia Ricci                                           |
| EPI_ISL_636488                                                                                                                                                                                                                                                                                                                                                                                                                                                                                                                                                                                                                                                                                                                                                                                                                                                                                                                                                                                                                                                                                                                                                                                                                                                                                                                                                                                                                                                                                                                                                                                                                 | ULSS9 Scaligera                                                                       | Istituto Zooprofilattico Sperimentale delle Venezie                                                  | Adelaide Milani, Alessia Schivo, Annalisa Salviato, Erika Giorgia Quaranta, Ambra Pastori, Bianca Zecchin, Alice Fusaro, Isabella Monne, Calogero Terregino, Antonia Ricci                                           |
| EPI_ISL_636491, EPI_ISL_636492, EPI_ISL_636493, EPI_ISL_636494, EPI_ISL_636495, EPI_ISL_636496, EPI_ISL_636497, EPI_ISL_636498, EPI_ISL_636499, EPI_ISL_636500, EPI_ISL_636501, EPI_ISL_636502, EPI_ISL_636503, EPI_ISL_636504, EPI_ISL_636505, EPI_ISL_636506, EPI_ISL_636507, EPI_ISL_636508, EPI_ISL_636512, EPI_ISL_636513, EPI_ISL_636514, EPI_ISL_636515, EPI_ISL_636516, EPI_ISL_636517, EPI_ISL_636518, EPI_ISL_636519, EPI_ISL_636520, EPI_ISL_636521, EPI_ISL_636522, EPI_ISL_636523, EPI_ISL_636524, EPI_ISL_636525, EPI_ISL_636526, EPI_ISL_636527, EPI_ISL_636528, EPI_ISL_636529, EPI_ISL_636533, EPI_ISL_636534, EPI_ISL_636535, EPI_ISL_636536, EPI_ISL_636537, EPI_ISL_636538, EPI_ISL_636539, EPI_ISL_636540, EPI_ISL_636541, EPI_ISL_636542, EPI_ISL_636543, EPI_ISL_636544, EPI_ISL_636545, EPI_ISL_636546, EPI_ISL_636547, EPI_ISL_636548, EPI_ISL_636549, EPI_ISL_636550, EPI_ISL_636554, EPI_ISL_636555, EPI_ISL_636556, EPI_ISL_636557, EPI_ISL_636558, EPI_ISL_636559, EPI_ISL_636560, EPI_ISL_636561, EPI_ISL_636562, EPI_ISL_636563, EPI_ISL_636564, EPI_ISL_636565, EPI_ISL_636566, EPI_ISL_636567, EPI_ISL_636568, EPI_ISL_636569, EPI_ISL_636570, EPI_ISL_636571, EPI_ISL_636575, EPI_ISL_636576, EPI_ISL_636577, EPI_ISL_636578, EPI_ISL_636579, EPI_ISL_636580, EPI_ISL_636581, EPI_ISL_636582, EPI_ISL_636583, EPI_ISL_636584, EPI_ISL_636585, EPI_ISL_636586, EPI_ISL_636587, EPI_ISL_636588, EPI_ISL_636589, EPI_ISL_636590, EPI_ISL_636591, EPI_ISL_636592, EPI_ISL_636596, EPI_ISL_636597, EPI_ISL_636598, EPI_ISL_636599, EPI_ISL_636600, EPI_ISL_636601, EPI_ISL_636602, EPI_ISL_636603 |                                                                                       |                                                                                                      |                                                                                                                                                                                                                      |
| see above                                                                                                                                                                                                                                                                                                                                                                                                                                                                                                                                                                                                                                                                                                                                                                                                                                                                                                                                                                                                                                                                                                                                                                                                                                                                                                                                                                                                                                                                                                                                                                                                                      | Dutch COVID-19 response team                                                          | National Institute for Public Health and the Environment (RIVM)                                      | Adam Meijer, Harry Vennema, Jeroen Cremer, Sharon van den Brink, Bas van der Veer, AnneMarie van den Brandt, Florian Zwagemaker, Dennis Schmitz, Chantal Reusken, on behalf of the national COVID-19 response        |
| EPI_ISL_636972                                                                                                                                                                                                                                                                                                                                                                                                                                                                                                                                                                                                                                                                                                                                                                                                                                                                                                                                                                                                                                                                                                                                                                                                                                                                                                                                                                                                                                                                                                                                                                                                                 | Pathogen Genomics Lab King Abdullah University of Science and Technology (KAUST)      | Pathogen Genomics Lab King Abdullah University of Science and Technology (KAUST)                     | Afrah Alsomali, Fathia Ben Rached, Raece Naeem, Sharif Hala,Rahul P Salunke, Amanda Ooi, Luke Esau, Sara Mfarrej, Amit Kumar Subudhi, Fadwa Alofi, Asim Khogeer, Kahled Alghithami, Anwar Hashem, Naif Almontashiri, |
| EPI_ISL_636973                                                                                                                                                                                                                                                                                                                                                                                                                                                                                                                                                                                                                                                                                                                                                                                                                                                                                                                                                                                                                                                                                                                                                                                                                                                                                                                                                                                                                                                                                                                                                                                                                 | Public Health Lab                                                                     | Public Health Lab                                                                                    | Alwasti, H                                                                                                                                                                                                           |
| EPI_ISL_654818                                                                                                                                                                                                                                                                                                                                                                                                                                                                                                                                                                                                                                                                                                                                                                                                                                                                                                                                                                                                                                                                                                                                                                                                                                                                                                                                                                                                                                                                                                                                                                                                                 | Department of Respiratory and other Viral Infections of L.V.Gromashevsky Institute of | Department of Respiratory and other Viral Infections of L.V.Gromashevsky Institute of Epidemiology & | Alla Mironenko, Andriy Goy, Ihor Kravchuk, Ludmyla Bolotova, Larysa Radchenko, Nataliia Teteriuk                                                                                                                     |







EPI\_ISL\_755677, EPI\_ISL\_755678, EPI\_ISL\_755679, EPI\_ISL\_755680, EPI\_ISL\_755681, EPI\_ISL\_755682, EPI\_ISL\_755683, EPI\_ISL\_755684, EPI\_ISL\_755685, EPI\_ISL\_755686, EPI\_ISL\_755687, EPI\_ISL\_755688, EPI\_ISL\_755689, EPI\_ISL\_755690, EPI\_ISL\_755691, EPI\_ISL\_755692, EPI\_ISL\_755693, EPI\_ISL\_755694, EPI\_ISL\_755695, EPI\_ISL\_755696, EPI\_ISL\_755697, EPI\_ISL\_755698, EPI\_ISL\_755699, EPI\_ISL\_755700, EPI\_ISL\_755701, EPI\_ISL\_755702, EPI\_ISL\_755703, EPI\_ISL\_755704, EPI\_ISL\_755705, EPI\_ISL\_755706, EPI\_ISL\_755707, EPI\_ISL\_755708, EPI\_ISL\_755709, EPI\_ISL\_755710, EPI\_ISL\_755711, EPI\_ISL\_755712, EPI\_ISL\_755713, EPI\_ISL\_755714, EPI\_ISL\_755715, EPI\_ISL\_755716, EPI\_ISL\_755717, EPI\_ISL\_755718, EPI\_ISL\_755719, EPI\_ISL\_755720, EPI\_ISL\_755721, EPI\_ISL\_755722, EPI\_ISL\_755723, EPI\_ISL\_755724, EPI\_ISL\_755725, EPI\_ISL\_755726, EPI\_ISL\_755727, EPI\_ISL\_755728, EPI\_ISL\_755729, EPI\_ISL\_755730, EPI\_ISL\_755731, EPI\_ISL\_755732, EPI\_ISL\_755733, EPI\_ISL\_755734, EPI\_ISL\_755735, EPI\_ISL\_755736, EPI\_ISL\_755737, EPI\_ISL\_755738, EPI\_ISL\_755739, EPI\_ISL\_755740, EPI\_ISL\_755741, EPI\_ISL\_755742, EPI\_ISL\_755743, EPI\_ISL\_755744, EPI\_ISL\_755745, EPI\_ISL\_755746, EPI\_ISL\_755747, EPI\_ISL\_755748, EPI\_ISL\_755749, EPI\_ISL\_755750, EPI\_ISL\_755751, EPI\_ISL\_755752, EPI\_ISL\_755753, EPI\_ISL\_755754, EPI\_ISL\_755755, EPI\_ISL\_755756, EPI\_ISL\_755757, EPI\_ISL\_755758, EPI\_ISL\_755759, EPI\_ISL\_755760, EPI\_ISL\_755761, EPI\_ISL\_755762, EPI\_ISL\_755763, EPI\_ISL\_755764, EPI\_ISL\_755765, EPI\_ISL\_755766, EPI\_ISL\_755767, EPI\_ISL\_755768, EPI\_ISL\_755769, EPI\_ISL\_755770, EPI\_ISL\_755771, EPI\_ISL\_755772, EPI\_ISL\_755773, EPI\_ISL\_755774, EPI\_ISL\_755775, EPI\_ISL\_755776, EPI\_ISL\_755777, EPI\_ISL\_755778, EPI\_ISL\_755779, EPI\_ISL\_755780, EPI\_ISL\_755781, EPI\_ISL\_755782, EPI\_ISL\_755783, EPI\_ISL\_755784, EPI\_ISL\_755785, EPI\_ISL\_755786, EPI\_ISL\_755787, EPI\_ISL\_755788, EPI\_ISL\_755789, EPI\_ISL\_755790, EPI\_ISL\_755791, EPI\_ISL\_755792, EPI\_ISL\_755793, EPI\_ISL\_755794, EPI\_ISL\_755795, EPI\_ISL\_755796, EPI\_ISL\_755797, EPI\_ISL\_755798, EPI\_ISL\_755799, EPI\_ISL\_755800, EPI\_ISL\_755801, EPI\_ISL\_755802, EPI\_ISL\_755803, EPI\_ISL\_755804, EPI\_ISL\_755805, EPI\_ISL\_755806, EPI\_ISL\_755807, EPI\_ISL\_755808, EPI\_ISL\_755809, EPI\_ISL\_755810, EPI\_ISL\_755811, EPI\_ISL\_755812, EPI\_ISL\_755813, EPI\_ISL\_755814, EPI\_ISL\_755815, EPI\_ISL\_755816, EPI\_ISL\_755817, EPI\_ISL\_755818, EPI\_ISL\_755819, EPI\_ISL\_755820, EPI\_ISL\_755821, EPI\_ISL\_755822, EPI\_ISL\_755823, EPI\_ISL\_755824, EPI\_ISL\_755825, EPI\_ISL\_755826, EPI\_ISL\_755827, EPI\_ISL\_755828, EPI\_ISL\_755829, EPI\_ISL\_755830, EPI\_ISL\_755831, EPI\_ISL\_755832, EPI\_ISL\_755833, EPI\_ISL\_755834, EPI\_ISL\_755835, EPI\_ISL\_755836, EPI\_ISL\_755837, EPI\_ISL\_755838, EPI\_ISL\_755839, EPI\_ISL\_755840, EPI\_ISL\_755841, EPI\_ISL\_755842, EPI\_ISL\_755843, EPI\_ISL\_755844, EPI\_ISL\_755845, EPI\_ISL\_755846, EPI\_ISL\_755847, EPI\_ISL\_755848, EPI\_ISL\_755849, EPI\_ISL\_755850, EPI\_ISL\_755851, EPI\_ISL\_755852, EPI\_ISL\_755853, EPI\_ISL\_755854, EPI\_ISL\_755855, EPI\_ISL\_755856, EPI\_ISL\_755857, EPI\_ISL\_755858, EPI\_ISL\_755859, EPI\_ISL\_755860, EPI\_ISL\_755861, EPI\_ISL\_755862, EPI\_ISL\_755863, EPI\_ISL\_755864, EPI\_ISL\_755865, EPI\_ISL\_755866, EPI\_ISL\_755867, EPI\_ISL\_755868, EPI\_ISL\_755869, EPI\_ISL\_755870, EPI\_ISL\_755871, EPI\_ISL\_755872, EPI\_ISL\_755873, EPI\_ISL\_755874, EPI\_ISL\_755875, EPI\_ISL\_755876, EPI\_ISL\_755877, EPI\_ISL\_755878, EPI\_ISL\_755879, EPI\_ISL\_755880, EPI\_ISL\_755881, EPI\_ISL\_755882, EPI\_ISL\_755883, EPI\_ISL\_755884, EPI\_ISL\_755885, EPI\_ISL\_755886, EPI\_ISL\_755887, EPI\_ISL\_755888, EPI\_ISL\_755889, EPI\_ISL\_755890, EPI\_ISL\_755891, EPI\_ISL\_755892, EPI\_ISL\_755893, EPI\_ISL\_755894, EPI\_ISL\_755895, EPI\_ISL\_755896, EPI\_ISL\_755897, EPI\_ISL\_755898, EPI\_ISL\_755899, EPI\_ISL\_755900, EPI\_ISL\_755901, EPI\_ISL\_755902, EPI\_ISL\_755903, EPI\_ISL\_755904, EPI\_ISL\_755905, EPI\_ISL\_755906, EPI\_ISL\_755907, EPI\_ISL\_755908, EPI\_ISL\_755909, EPI\_ISL\_755910, EPI\_ISL\_755911, EPI\_ISL\_755912, EPI\_ISL\_755913, EPI\_ISL\_755914, EPI\_ISL\_755915, EPI\_ISL\_755916, EPI\_ISL\_755917, EPI\_ISL\_755918, EPI\_ISL\_755919, EPI\_ISL\_755920, EPI\_ISL\_755921, EPI\_ISL\_755922, EPI\_ISL\_755923, EPI\_ISL\_755924, EPI\_ISL\_755925, EPI\_ISL\_755926, EPI\_ISL\_755927, EPI\_ISL\_755928, EPI\_ISL\_755929, EPI\_ISL\_755930, EPI\_ISL\_755931, EPI\_ISL\_755932, EPI\_ISL\_755933, EPI\_ISL\_755934, EPI\_ISL\_755935, EPI\_ISL\_755936, EPI\_ISL\_755937, EPI\_ISL\_755938, EPI\_ISL\_755939

|                                                                                                                                                                                                                                                                                                                                                                                                                                                                                                                                                                                                                                                                                                                                                                                                                                                                                                                                                                                                                                                                                                                                                                                                                                                                                                                                                                                                                                                                                                                                                                                                                                                                                                                                                                                                                                                                                                                                                                                                                                                                                                                                                                                                                                                                                                                                                                                                                                                                                                                                                                                                                                                                                                                                                                                                                                                                                                                                                                                                                                                                                                                                                                                                                                                                                                                                                                                                                                                                                                                                                                                                                                                                                                                                                                                                                                                                                                                                                                                                                                                                                                                                                                                                                                                |                                                                                                                                        |                                                                                                                 |                                                                                                                                                                                                                                                                                                     |
|------------------------------------------------------------------------------------------------------------------------------------------------------------------------------------------------------------------------------------------------------------------------------------------------------------------------------------------------------------------------------------------------------------------------------------------------------------------------------------------------------------------------------------------------------------------------------------------------------------------------------------------------------------------------------------------------------------------------------------------------------------------------------------------------------------------------------------------------------------------------------------------------------------------------------------------------------------------------------------------------------------------------------------------------------------------------------------------------------------------------------------------------------------------------------------------------------------------------------------------------------------------------------------------------------------------------------------------------------------------------------------------------------------------------------------------------------------------------------------------------------------------------------------------------------------------------------------------------------------------------------------------------------------------------------------------------------------------------------------------------------------------------------------------------------------------------------------------------------------------------------------------------------------------------------------------------------------------------------------------------------------------------------------------------------------------------------------------------------------------------------------------------------------------------------------------------------------------------------------------------------------------------------------------------------------------------------------------------------------------------------------------------------------------------------------------------------------------------------------------------------------------------------------------------------------------------------------------------------------------------------------------------------------------------------------------------------------------------------------------------------------------------------------------------------------------------------------------------------------------------------------------------------------------------------------------------------------------------------------------------------------------------------------------------------------------------------------------------------------------------------------------------------------------------------------------------------------------------------------------------------------------------------------------------------------------------------------------------------------------------------------------------------------------------------------------------------------------------------------------------------------------------------------------------------------------------------------------------------------------------------------------------------------------------------------------------------------------------------------------------------------------------------------------------------------------------------------------------------------------------------------------------------------------------------------------------------------------------------------------------------------------------------------------------------------------------------------------------------------------------------------------------------------------------------------------------------------------------------------------------|----------------------------------------------------------------------------------------------------------------------------------------|-----------------------------------------------------------------------------------------------------------------|-----------------------------------------------------------------------------------------------------------------------------------------------------------------------------------------------------------------------------------------------------------------------------------------------------|
| see above                                                                                                                                                                                                                                                                                                                                                                                                                                                                                                                                                                                                                                                                                                                                                                                                                                                                                                                                                                                                                                                                                                                                                                                                                                                                                                                                                                                                                                                                                                                                                                                                                                                                                                                                                                                                                                                                                                                                                                                                                                                                                                                                                                                                                                                                                                                                                                                                                                                                                                                                                                                                                                                                                                                                                                                                                                                                                                                                                                                                                                                                                                                                                                                                                                                                                                                                                                                                                                                                                                                                                                                                                                                                                                                                                                                                                                                                                                                                                                                                                                                                                                                                                                                                                                      | Toronto Invasive Bacterial Diseases Network                                                                                            | McMaster University                                                                                             | Allison McGeer, Patryk Aftanas, Hooman Derakhshani, Angel Li, Kuganya Nirmalarajah, Emily Panousis, Ahmed Draia, Jalees Nasir, Michael Surette, Samira Mubareka, Andrew G. McArthur                                                                                                                 |
| EPI_ISL_756401                                                                                                                                                                                                                                                                                                                                                                                                                                                                                                                                                                                                                                                                                                                                                                                                                                                                                                                                                                                                                                                                                                                                                                                                                                                                                                                                                                                                                                                                                                                                                                                                                                                                                                                                                                                                                                                                                                                                                                                                                                                                                                                                                                                                                                                                                                                                                                                                                                                                                                                                                                                                                                                                                                                                                                                                                                                                                                                                                                                                                                                                                                                                                                                                                                                                                                                                                                                                                                                                                                                                                                                                                                                                                                                                                                                                                                                                                                                                                                                                                                                                                                                                                                                                                                 | National Institute of Health Research and Development                                                                                  | National Institute of Health Research and Development                                                           | Adam,K; Wibowo,HA; Ramadhany,R; Rukminiati,Y; Agustiningsih; Pawestri,HA; Subangkit; Puspa,KD; Nugraha,AA; Ikawati,HD; Pangesti,KNA; Soekarso,T; Susilarini,NK; Hariastuti,NI; Nikmah,UA; Mursinah; Febriyani,A; Herman,R; Susanti,N; Herna; Febriyanti,T; Nu Rizki,A; Puspandari,N; Setiawaty,Vivi |
| EPI_ISL_759892, EPI_ISL_759893, EPI_ISL_759894                                                                                                                                                                                                                                                                                                                                                                                                                                                                                                                                                                                                                                                                                                                                                                                                                                                                                                                                                                                                                                                                                                                                                                                                                                                                                                                                                                                                                                                                                                                                                                                                                                                                                                                                                                                                                                                                                                                                                                                                                                                                                                                                                                                                                                                                                                                                                                                                                                                                                                                                                                                                                                                                                                                                                                                                                                                                                                                                                                                                                                                                                                                                                                                                                                                                                                                                                                                                                                                                                                                                                                                                                                                                                                                                                                                                                                                                                                                                                                                                                                                                                                                                                                                                 | Temporary Specimen Collection Centre                                                                                                   | Hong Kong Department of Health                                                                                  | Alan K.L. Tsang, Peter C.W. Yip, Edman T.K. Lam, Rickjason C.W. Chan, Dominic N.C. Tsang                                                                                                                                                                                                            |
| EPI_ISL_759895                                                                                                                                                                                                                                                                                                                                                                                                                                                                                                                                                                                                                                                                                                                                                                                                                                                                                                                                                                                                                                                                                                                                                                                                                                                                                                                                                                                                                                                                                                                                                                                                                                                                                                                                                                                                                                                                                                                                                                                                                                                                                                                                                                                                                                                                                                                                                                                                                                                                                                                                                                                                                                                                                                                                                                                                                                                                                                                                                                                                                                                                                                                                                                                                                                                                                                                                                                                                                                                                                                                                                                                                                                                                                                                                                                                                                                                                                                                                                                                                                                                                                                                                                                                                                                 | United Christian Hospital                                                                                                              | Hong Kong Department of Health                                                                                  | Alan K.L. Tsang, Peter C.W. Yip, Edman T.K. Lam, Rickjason C.W. Chan, Dominic N.C. Tsang                                                                                                                                                                                                            |
| EPI_ISL_759896                                                                                                                                                                                                                                                                                                                                                                                                                                                                                                                                                                                                                                                                                                                                                                                                                                                                                                                                                                                                                                                                                                                                                                                                                                                                                                                                                                                                                                                                                                                                                                                                                                                                                                                                                                                                                                                                                                                                                                                                                                                                                                                                                                                                                                                                                                                                                                                                                                                                                                                                                                                                                                                                                                                                                                                                                                                                                                                                                                                                                                                                                                                                                                                                                                                                                                                                                                                                                                                                                                                                                                                                                                                                                                                                                                                                                                                                                                                                                                                                                                                                                                                                                                                                                                 | Queen Elizabeth Hospital                                                                                                               | Hong Kong Department of Health                                                                                  | Alan K.L. Tsang, Peter C.W. Yip, Edman T.K. Lam, Rickjason C.W. Chan, Dominic N.C. Tsang                                                                                                                                                                                                            |
| EPI_ISL_759897, EPI_ISL_759898                                                                                                                                                                                                                                                                                                                                                                                                                                                                                                                                                                                                                                                                                                                                                                                                                                                                                                                                                                                                                                                                                                                                                                                                                                                                                                                                                                                                                                                                                                                                                                                                                                                                                                                                                                                                                                                                                                                                                                                                                                                                                                                                                                                                                                                                                                                                                                                                                                                                                                                                                                                                                                                                                                                                                                                                                                                                                                                                                                                                                                                                                                                                                                                                                                                                                                                                                                                                                                                                                                                                                                                                                                                                                                                                                                                                                                                                                                                                                                                                                                                                                                                                                                                                                 | United Christian Hospital                                                                                                              | Hong Kong Department of Health                                                                                  | Alan K.L. Tsang, Peter C.W. Yip, Edman T.K. Lam, Rickjason C.W. Chan, Dominic N.C. Tsang                                                                                                                                                                                                            |
| EPI_ISL_759955                                                                                                                                                                                                                                                                                                                                                                                                                                                                                                                                                                                                                                                                                                                                                                                                                                                                                                                                                                                                                                                                                                                                                                                                                                                                                                                                                                                                                                                                                                                                                                                                                                                                                                                                                                                                                                                                                                                                                                                                                                                                                                                                                                                                                                                                                                                                                                                                                                                                                                                                                                                                                                                                                                                                                                                                                                                                                                                                                                                                                                                                                                                                                                                                                                                                                                                                                                                                                                                                                                                                                                                                                                                                                                                                                                                                                                                                                                                                                                                                                                                                                                                                                                                                                                 | Primasatya Husada Citra Hospital                                                                                                       | Institute of Tropical Disease, Universitas Airlangga                                                            | Aldise M Nastri, Jezzy R Dewantari, Rima R Prasetya, Krisnoadi Rahardjo, Pudji Djanuartono, Gatot Soegiarto, Laksmi Wulandari, Resti Yudhawati, Soetjipto, Yasuko Mori, Maria I Lusida, Kazufumi Shimizu                                                                                            |
| EPI_ISL_759960                                                                                                                                                                                                                                                                                                                                                                                                                                                                                                                                                                                                                                                                                                                                                                                                                                                                                                                                                                                                                                                                                                                                                                                                                                                                                                                                                                                                                                                                                                                                                                                                                                                                                                                                                                                                                                                                                                                                                                                                                                                                                                                                                                                                                                                                                                                                                                                                                                                                                                                                                                                                                                                                                                                                                                                                                                                                                                                                                                                                                                                                                                                                                                                                                                                                                                                                                                                                                                                                                                                                                                                                                                                                                                                                                                                                                                                                                                                                                                                                                                                                                                                                                                                                                                 | Surabaya Public Health Office                                                                                                          | Institute of Tropical Disease, Universitas Airlangga                                                            | Aldise M Nastri, Jezzy R Dewantari, Rima R Prasetya, Krisnoadi Rahardjo, Febria Rachmanita, Gatot Soegiarto, Laksmi Wulandari, Resti Yudhawati, Soetjipto, Yasuko Mori, Maria I Lusida, Kazufumi Shimizu                                                                                            |
| EPI_ISL_759963                                                                                                                                                                                                                                                                                                                                                                                                                                                                                                                                                                                                                                                                                                                                                                                                                                                                                                                                                                                                                                                                                                                                                                                                                                                                                                                                                                                                                                                                                                                                                                                                                                                                                                                                                                                                                                                                                                                                                                                                                                                                                                                                                                                                                                                                                                                                                                                                                                                                                                                                                                                                                                                                                                                                                                                                                                                                                                                                                                                                                                                                                                                                                                                                                                                                                                                                                                                                                                                                                                                                                                                                                                                                                                                                                                                                                                                                                                                                                                                                                                                                                                                                                                                                                                 | RSUD Sidoarjo                                                                                                                          | Institute of Tropical Disease, Universitas Airlangga                                                            | Aldise M Nastri, Jezzy R Dewantari, Rima R Prasetya, Krisnoadi Rahardjo, Atok Irawan, Gatot Soegiarto, Laksmi Wulandari, Resti Yudhawati, Yasuko Mori, Soetjipto, Kazufumi Shimizu ,Maria I Lusida                                                                                                  |
| EPI_ISL_759991, EPI_ISL_759992, EPI_ISL_759993, EPI_ISL_759994, EPI_ISL_759995, EPI_ISL_759996, EPI_ISL_759997, EPI_ISL_759998, EPI_ISL_759999, EPI_ISL_760000, EPI_ISL_760001, EPI_ISL_760002, EPI_ISL_760003, EPI_ISL_760004, EPI_ISL_760005, EPI_ISL_760006, EPI_ISL_760007, EPI_ISL_760008, EPI_ISL_760009, EPI_ISL_760010, EPI_ISL_760011, EPI_ISL_760012, EPI_ISL_760013, EPI_ISL_760014, EPI_ISL_760015, EPI_ISL_760016, EPI_ISL_760017, EPI_ISL_760018, EPI_ISL_760019, EPI_ISL_760020, EPI_ISL_760021, EPI_ISL_760022, EPI_ISL_760023, EPI_ISL_760024, EPI_ISL_760025, EPI_ISL_760026, EPI_ISL_760027, EPI_ISL_760028, EPI_ISL_760029, EPI_ISL_760030, EPI_ISL_760031, EPI_ISL_760032, EPI_ISL_760033, EPI_ISL_760034, EPI_ISL_760035, EPI_ISL_760036, EPI_ISL_760037, EPI_ISL_760038, EPI_ISL_760039, EPI_ISL_760040, EPI_ISL_760041, EPI_ISL_760042, EPI_ISL_760043, EPI_ISL_760044, EPI_ISL_760045, EPI_ISL_760046, EPI_ISL_760047, EPI_ISL_760048, EPI_ISL_760049, EPI_ISL_760050, EPI_ISL_760051, EPI_ISL_760052, EPI_ISL_760053, EPI_ISL_760054, EPI_ISL_760055, EPI_ISL_760056, EPI_ISL_760057, EPI_ISL_760058, EPI_ISL_760059, EPI_ISL_760060, EPI_ISL_760061, EPI_ISL_760062, EPI_ISL_760063, EPI_ISL_760064, EPI_ISL_760065, EPI_ISL_760066, EPI_ISL_760067, EPI_ISL_760068, EPI_ISL_760069, EPI_ISL_760070, EPI_ISL_760071, EPI_ISL_760072, EPI_ISL_760073, EPI_ISL_760074, EPI_ISL_760075, EPI_ISL_760076, EPI_ISL_760077, EPI_ISL_760078, EPI_ISL_760079, EPI_ISL_760080, EPI_ISL_760081, EPI_ISL_760082, EPI_ISL_760083, EPI_ISL_760084, EPI_ISL_760085, EPI_ISL_760086, EPI_ISL_760087, EPI_ISL_760088, EPI_ISL_760089, EPI_ISL_760090, EPI_ISL_760091, EPI_ISL_760092, EPI_ISL_760093, EPI_ISL_760094, EPI_ISL_760095, EPI_ISL_760096, EPI_ISL_760097, EPI_ISL_760098, EPI_ISL_760099, EPI_ISL_760100, EPI_ISL_760101, EPI_ISL_760102, EPI_ISL_760103, EPI_ISL_760104, EPI_ISL_760105, EPI_ISL_760106, EPI_ISL_760107, EPI_ISL_760108, EPI_ISL_760109, EPI_ISL_760110, EPI_ISL_760111, EPI_ISL_760112, EPI_ISL_760113, EPI_ISL_760114, EPI_ISL_760115, EPI_ISL_760116, EPI_ISL_760117, EPI_ISL_760118, EPI_ISL_760119, EPI_ISL_760120, EPI_ISL_760121, EPI_ISL_760122, EPI_ISL_760123, EPI_ISL_760124, EPI_ISL_760125, EPI_ISL_760126, EPI_ISL_760127, EPI_ISL_760128, EPI_ISL_760129, EPI_ISL_760130, EPI_ISL_760131, EPI_ISL_760132, EPI_ISL_760133, EPI_ISL_760134, EPI_ISL_760135, EPI_ISL_760136, EPI_ISL_760137, EPI_ISL_760138, EPI_ISL_760139, EPI_ISL_760140, EPI_ISL_760141, EPI_ISL_760142, EPI_ISL_760143, EPI_ISL_760144, EPI_ISL_760145, EPI_ISL_760146, EPI_ISL_760147, EPI_ISL_760148, EPI_ISL_760149, EPI_ISL_760150, EPI_ISL_760151, EPI_ISL_760152, EPI_ISL_760153, EPI_ISL_760154, EPI_ISL_760155, EPI_ISL_760156, EPI_ISL_760157, EPI_ISL_760158, EPI_ISL_760159, EPI_ISL_760160, EPI_ISL_760161, EPI_ISL_760162, EPI_ISL_760163, EPI_ISL_760164, EPI_ISL_760165, EPI_ISL_760166, EPI_ISL_760167, EPI_ISL_760168, EPI_ISL_760169, EPI_ISL_760170, EPI_ISL_760171, EPI_ISL_760172, EPI_ISL_760173, EPI_ISL_760174, EPI_ISL_760175, EPI_ISL_760176, EPI_ISL_760177, EPI_ISL_760178, EPI_ISL_760179, EPI_ISL_760180, EPI_ISL_760181, EPI_ISL_760182, EPI_ISL_760183, EPI_ISL_760184, EPI_ISL_760185, EPI_ISL_760186, EPI_ISL_760187, EPI_ISL_760188, EPI_ISL_760189, EPI_ISL_760190, EPI_ISL_760191, EPI_ISL_760192, EPI_ISL_760193, EPI_ISL_760194, EPI_ISL_760195, EPI_ISL_760196, EPI_ISL_760197, EPI_ISL_760198, EPI_ISL_760199, EPI_ISL_760200, EPI_ISL_760201, EPI_ISL_760202, EPI_ISL_760203, EPI_ISL_760204, EPI_ISL_760205, EPI_ISL_760206, EPI_ISL_760207, EPI_ISL_760208, EPI_ISL_760209, EPI_ISL_760210, EPI_ISL_760211, EPI_ISL_760212, EPI_ISL_760213, EPI_ISL_760214, EPI_ISL_760215, EPI_ISL_760216, EPI_ISL_760217, EPI_ISL_760218, EPI_ISL_760219, EPI_ISL_760220, EPI_ISL_760221, EPI_ISL_760222, EPI_ISL_760223, EPI_ISL_760224, EPI_ISL_760225, EPI_ISL_760226, EPI_ISL_760227, EPI_ISL_760228, EPI_ISL_760229, EPI_ISL_760230, EPI_ISL_760231, EPI_ISL_760232, EPI_ISL_760233, EPI_ISL_760234, EPI_ISL_760235, EPI_ISL_760236, EPI_ISL_760237, EPI_ISL_760238, EPI_ISL_760239, EPI_ISL_760240, EPI_ISL_760241, EPI_ISL_760242, EPI_ISL_760243, EPI_ISL_760244, EPI_ISL_760245 |                                                                                                                                        |                                                                                                                 |                                                                                                                                                                                                                                                                                                     |
| see above                                                                                                                                                                                                                                                                                                                                                                                                                                                                                                                                                                                                                                                                                                                                                                                                                                                                                                                                                                                                                                                                                                                                                                                                                                                                                                                                                                                                                                                                                                                                                                                                                                                                                                                                                                                                                                                                                                                                                                                                                                                                                                                                                                                                                                                                                                                                                                                                                                                                                                                                                                                                                                                                                                                                                                                                                                                                                                                                                                                                                                                                                                                                                                                                                                                                                                                                                                                                                                                                                                                                                                                                                                                                                                                                                                                                                                                                                                                                                                                                                                                                                                                                                                                                                                      | Division of Emerging Infectious Diseases, Bureau of Infectious Diseases Diagnosis Control, Korea Disease Control and Prevention Agency | Division of Emerging Infectious Diseases, Bureau of Infectious Diseases Diagnosis Control and Prevention Agency | Ae Kyung Park, Il-Hwan Kim, Heui Man Kim, Jeong-Min Kim, Namjoo Lee, Chaeyoung Lee, Sang Hee Woo, Eun-Jin Kim                                                                                                                                                                                       |
| EPI_ISL_762992                                                                                                                                                                                                                                                                                                                                                                                                                                                                                                                                                                                                                                                                                                                                                                                                                                                                                                                                                                                                                                                                                                                                                                                                                                                                                                                                                                                                                                                                                                                                                                                                                                                                                                                                                                                                                                                                                                                                                                                                                                                                                                                                                                                                                                                                                                                                                                                                                                                                                                                                                                                                                                                                                                                                                                                                                                                                                                                                                                                                                                                                                                                                                                                                                                                                                                                                                                                                                                                                                                                                                                                                                                                                                                                                                                                                                                                                                                                                                                                                                                                                                                                                                                                                                                 | Division of Emerging Infectious Diseases, Bureau of Infectious Diseases Diagnosis Control, Korea Disease Control and Prevention Agency | Division of Emerging Infectious Diseases, Bureau of Infectious Diseases Diagnosis Control and Prevention Agency | Ae Kyung Park, Il-Hwan Kim, Heui Man Kim, Jeong-Min Kim, Namjoo Lee, Chaeyoung Lee, Sang Hee Woo, Eun-Jin Kim                                                                                                                                                                                       |
| EPI_ISL_763078, EPI_ISL_763079, EPI_ISL_763080, EPI_ISL_763081, EPI_ISL_763082, EPI_ISL_763083, EPI_ISL_763084, EPI_ISL_763085                                                                                                                                                                                                                                                                                                                                                                                                                                                                                                                                                                                                                                                                                                                                                                                                                                                                                                                                                                                                                                                                                                                                                                                                                                                                                                                                                                                                                                                                                                                                                                                                                                                                                                                                                                                                                                                                                                                                                                                                                                                                                                                                                                                                                                                                                                                                                                                                                                                                                                                                                                                                                                                                                                                                                                                                                                                                                                                                                                                                                                                                                                                                                                                                                                                                                                                                                                                                                                                                                                                                                                                                                                                                                                                                                                                                                                                                                                                                                                                                                                                                                                                 | Microbiologia e Virologia                                                                                                              | Istituto Zooprofilattico Sperimentale delle Venezie                                                             | Adelaide Milani, Alessia Schivo, Annalisa Salviato, Erika Giorgia Quaranta, Ambra Pastori, Bianca Zecchin, Alice Fusaro, Isabella Monne, Calogero Terregino, Antonia Ricci                                                                                                                          |
| EPI_ISL_766571, EPI_ISL_766572, EPI_ISL_766573                                                                                                                                                                                                                                                                                                                                                                                                                                                                                                                                                                                                                                                                                                                                                                                                                                                                                                                                                                                                                                                                                                                                                                                                                                                                                                                                                                                                                                                                                                                                                                                                                                                                                                                                                                                                                                                                                                                                                                                                                                                                                                                                                                                                                                                                                                                                                                                                                                                                                                                                                                                                                                                                                                                                                                                                                                                                                                                                                                                                                                                                                                                                                                                                                                                                                                                                                                                                                                                                                                                                                                                                                                                                                                                                                                                                                                                                                                                                                                                                                                                                                                                                                                                                 | ULSS 7 Pedemontana - Distretto 1                                                                                                       | Istituto Zooprofilattico Sperimentale delle Venezie                                                             | Adelaide Milani, Alessia Schivo, Annalisa Salviato, Erika Giorgia Quaranta, Ambra Pastori, Bianca Zecchin, Alice Fusaro, Isabella Monne, Calogero Terregino, Antonia Ricci                                                                                                                          |
| EPI_ISL_766574, EPI_ISL_766575, EPI_ISL_766576, EPI_ISL_766577, EPI_ISL_766578, EPI_ISL_766579                                                                                                                                                                                                                                                                                                                                                                                                                                                                                                                                                                                                                                                                                                                                                                                                                                                                                                                                                                                                                                                                                                                                                                                                                                                                                                                                                                                                                                                                                                                                                                                                                                                                                                                                                                                                                                                                                                                                                                                                                                                                                                                                                                                                                                                                                                                                                                                                                                                                                                                                                                                                                                                                                                                                                                                                                                                                                                                                                                                                                                                                                                                                                                                                                                                                                                                                                                                                                                                                                                                                                                                                                                                                                                                                                                                                                                                                                                                                                                                                                                                                                                                                                 | ULSS 8 Berica                                                                                                                          | Istituto Zooprofilattico Sperimentale delle Venezie                                                             | Adelaide Milani, Alessia Schivo, Annalisa Salviato, Erika Giorgia Quaranta, Ambra Pastori, Bianca Zecchin, Alice Fusaro, Isabella Monne, Calogero Terregino, Antonia Ricci                                                                                                                          |
| EPI_ISL_766580                                                                                                                                                                                                                                                                                                                                                                                                                                                                                                                                                                                                                                                                                                                                                                                                                                                                                                                                                                                                                                                                                                                                                                                                                                                                                                                                                                                                                                                                                                                                                                                                                                                                                                                                                                                                                                                                                                                                                                                                                                                                                                                                                                                                                                                                                                                                                                                                                                                                                                                                                                                                                                                                                                                                                                                                                                                                                                                                                                                                                                                                                                                                                                                                                                                                                                                                                                                                                                                                                                                                                                                                                                                                                                                                                                                                                                                                                                                                                                                                                                                                                                                                                                                                                                 | ULSS 2 Treviso                                                                                                                         | Istituto Zooprofilattico                                                                                        | Adelaide Milani, Alessia Schivo, Annalisa Salviato, Erika Giorgia Quaranta, Ambra Pastori, Bianca Zecchin, Alice Fusaro, Isabella Monne, Calogero Terregino, Antonia Ricci                                                                                                                          |





EPI\_ISL\_790822, EPI\_ISL\_790823, EPI\_ISL\_790824, EPI\_ISL\_790825, EPI\_ISL\_790826, EPI\_ISL\_790827, EPI\_ISL\_790828, EPI\_ISL\_790829, EPI\_ISL\_790830, EPI\_ISL\_790831, EPI\_ISL\_790832, EPI\_ISL\_790833, EPI\_ISL\_790834, EPI\_ISL\_790835, EPI\_ISL\_790836, EPI\_ISL\_790837, EPI\_ISL\_790838, EPI\_ISL\_790839, EPI\_ISL\_790843, EPI\_ISL\_790844, EPI\_ISL\_790845, EPI\_ISL\_790846, EPI\_ISL\_790847, EPI\_ISL\_790848, EPI\_ISL\_790849, EPI\_ISL\_790850, EPI\_ISL\_790851, EPI\_ISL\_790852, EPI\_ISL\_790853, EPI\_ISL\_790854, EPI\_ISL\_790855, EPI\_ISL\_790856, EPI\_ISL\_790857, EPI\_ISL\_790858, EPI\_ISL\_790859, EPI\_ISL\_790860, EPI\_ISL\_790864, EPI\_ISL\_790865, EPI\_ISL\_790866, EPI\_ISL\_790867, EPI\_ISL\_790868, EPI\_ISL\_790869, EPI\_ISL\_790870, EPI\_ISL\_790871, EPI\_ISL\_790872, EPI\_ISL\_790873, EPI\_ISL\_790874, EPI\_ISL\_790875, EPI\_ISL\_790876, EPI\_ISL\_790877, EPI\_ISL\_790878, EPI\_ISL\_790879, EPI\_ISL\_790880, EPI\_ISL\_790881, EPI\_ISL\_790885, EPI\_ISL\_790886, EPI\_ISL\_790887, EPI\_ISL\_790888, EPI\_ISL\_790889, EPI\_ISL\_790890, EPI\_ISL\_790891, EPI\_ISL\_790892, EPI\_ISL\_790893, EPI\_ISL\_790894, EPI\_ISL\_790895, EPI\_ISL\_790896, EPI\_ISL\_790897, EPI\_ISL\_790898, EPI\_ISL\_790899, EPI\_ISL\_790900, EPI\_ISL\_790901, EPI\_ISL\_790902, EPI\_ISL\_790906, EPI\_ISL\_790907, EPI\_ISL\_790908, EPI\_ISL\_790909, EPI\_ISL\_790910, EPI\_ISL\_790911, EPI\_ISL\_790912, EPI\_ISL\_790913, EPI\_ISL\_790914, EPI\_ISL\_790915, EPI\_ISL\_790916, EPI\_ISL\_790917, EPI\_ISL\_790918, EPI\_ISL\_790919, EPI\_ISL\_790920, EPI\_ISL\_790921, EPI\_ISL\_790922, EPI\_ISL\_790923, EPI\_ISL\_790927, EPI\_ISL\_790928, EPI\_ISL\_790929, EPI\_ISL\_790930, EPI\_ISL\_790931, EPI\_ISL\_790932, EPI\_ISL\_790933, EPI\_ISL\_790934, EPI\_ISL\_790935, EPI\_ISL\_790936, EPI\_ISL\_790937, EPI\_ISL\_790938, EPI\_ISL\_790939, EPI\_ISL\_790940, EPI\_ISL\_790941, EPI\_ISL\_790942, EPI\_ISL\_790943, EPI\_ISL\_790944, EPI\_ISL\_790948, EPI\_ISL\_790949, EPI\_ISL\_790950, EPI\_ISL\_790951, EPI\_ISL\_790952, EPI\_ISL\_790953, EPI\_ISL\_790954, EPI\_ISL\_790955, EPI\_ISL\_790956, EPI\_ISL\_790957, EPI\_ISL\_790958, EPI\_ISL\_790959, EPI\_ISL\_790960, EPI\_ISL\_790961, EPI\_ISL\_790962, EPI\_ISL\_790963, EPI\_ISL\_790964, EPI\_ISL\_790965, EPI\_ISL\_790969, EPI\_ISL\_790970, EPI\_ISL\_790971, EPI\_ISL\_790972, EPI\_ISL\_790973, EPI\_ISL\_790974, EPI\_ISL\_790975, EPI\_ISL\_790976, EPI\_ISL\_790977, EPI\_ISL\_790978, EPI\_ISL\_790979, EPI\_ISL\_790980, EPI\_ISL\_790981, EPI\_ISL\_790982, EPI\_ISL\_790983, EPI\_ISL\_790984, EPI\_ISL\_790985, EPI\_ISL\_790986, EPI\_ISL\_790990, EPI\_ISL\_790991, EPI\_ISL\_790992, EPI\_ISL\_790993, EPI\_ISL\_790994, EPI\_ISL\_790995, EPI\_ISL\_790996, EPI\_ISL\_790997, EPI\_ISL\_790998, EPI\_ISL\_790999, EPI\_ISL\_791000, EPI\_ISL\_791001, EPI\_ISL\_791002, EPI\_ISL\_791003, EPI\_ISL\_791004, EPI\_ISL\_791005, EPI\_ISL\_791006, EPI\_ISL\_791007, EPI\_ISL\_791011, EPI\_ISL\_791012, EPI\_ISL\_791013, EPI\_ISL\_791014, EPI\_ISL\_791015, EPI\_ISL\_791016, EPI\_ISL\_791017, EPI\_ISL\_791018, EPI\_ISL\_791019, EPI\_ISL\_791020, EPI\_ISL\_791021, EPI\_ISL\_791022, EPI\_ISL\_791023, EPI\_ISL\_791024, EPI\_ISL\_791025, EPI\_ISL\_791026, EPI\_ISL\_791027, EPI\_ISL\_791028, EPI\_ISL\_791032, EPI\_ISL\_791033, EPI\_ISL\_791034, EPI\_ISL\_791035, EPI\_ISL\_791036, EPI\_ISL\_791037, EPI\_ISL\_791038, EPI\_ISL\_791039, EPI\_ISL\_791040, EPI\_ISL\_791041, EPI\_ISL\_791042, EPI\_ISL\_791043, EPI\_ISL\_791044, EPI\_ISL\_791045, EPI\_ISL\_791046, EPI\_ISL\_791047, EPI\_ISL\_791048, EPI\_ISL\_791049, EPI\_ISL\_791053, EPI\_ISL\_791054, EPI\_ISL\_791055, EPI\_ISL\_791056, EPI\_ISL\_791057, EPI\_ISL\_791058, EPI\_ISL\_791059, EPI\_ISL\_791060, EPI\_ISL\_791061, EPI\_ISL\_791062, EPI\_ISL\_791063, EPI\_ISL\_791064, EPI\_ISL\_791065, EPI\_ISL\_791066, EPI\_ISL\_791067, EPI\_ISL\_791068, EPI\_ISL\_791069, EPI\_ISL\_791070, EPI\_ISL\_791074, EPI\_ISL\_791075, EPI\_ISL\_791076, EPI\_ISL\_791077, EPI\_ISL\_791078, EPI\_ISL\_791079, EPI\_ISL\_791080, EPI\_ISL\_791081, EPI\_ISL\_791082, EPI\_ISL\_791083

see above Dutch COVID-19 response team National Institute for Public Health and the Environment (RIVM) Adam Meijer, Harry Vennema, Jeroen Cremer, Sharon van den Brink, Bas van der Veer, AnneMarie van den Brandt, Florian Zwagemaker, Dennis Schmitz, Chantal Reusken, on behalf of the national COVID-19 response

EPI\_ISL\_791280, EPI\_ISL\_791281, EPI\_ISL\_791282, EPI\_ISL\_791283, EPI\_ISL\_791284, EPI\_ISL\_791285, EPI\_ISL\_791286, EPI\_ISL\_791287, EPI\_ISL\_791288, EPI\_ISL\_791289, EPI\_ISL\_791290, EPI\_ISL\_791291, EPI\_ISL\_791292, EPI\_ISL\_791293, EPI\_ISL\_791294, EPI\_ISL\_791295, EPI\_ISL\_791296, EPI\_ISL\_791297, EPI\_ISL\_791301, EPI\_ISL\_791302, EPI\_ISL\_791303, EPI\_ISL\_791304, EPI\_ISL\_791305, EPI\_ISL\_791306, EPI\_ISL\_791307, EPI\_ISL\_791308, EPI\_ISL\_791309, EPI\_ISL\_791310, EPI\_ISL\_791311, EPI\_ISL\_791312, EPI\_ISL\_791313, EPI\_ISL\_791314, EPI\_ISL\_791315, EPI\_ISL\_791316, EPI\_ISL\_791317, EPI\_ISL\_791318, EPI\_ISL\_791322, EPI\_ISL\_791323, EPI\_ISL\_791324, EPI\_ISL\_791325, EPI\_ISL\_791326

see above National Virus Reference Laboratory Irish Coronavirus Sequencing Consortium - Teagasc Moorepark Alejandro Abner Garcia Leon, Paul Cotter, Fiona Crispie, John Kenny, Paddy Mallon, Calum Walsh

EPI\_ISL\_791488, EPI\_ISL\_791489, EPI\_ISL\_791490, EPI\_ISL\_791491, EPI\_ISL\_791492, EPI\_ISL\_791493, EPI\_ISL\_791494, EPI\_ISL\_791495, EPI\_ISL\_791496, EPI\_ISL\_791497, EPI\_ISL\_791498, EPI\_ISL\_791499, EPI\_ISL\_791500, EPI\_ISL\_791501, EPI\_ISL\_791502, EPI\_ISL\_791503, EPI\_ISL\_791504, EPI\_ISL\_791505, EPI\_ISL\_791509, EPI\_ISL\_791510, EPI\_ISL\_791511, EPI\_ISL\_791512, EPI\_ISL\_791513

see above The Hospital for Sick Children The Hospital for Sick Children Aaron Campigotto, Christian Marshall, Lynette Lau

EPI\_ISL\_792084, EPI\_ISL\_792085, EPI\_ISL\_792086, EPI\_ISL\_792087, EPI\_ISL\_792088, EPI\_ISL\_792089, EPI\_ISL\_792090, EPI\_ISL\_792091 Toronto Invasive Bacterial Diseases Network McMaster University Allison McGeer, Patryk Aftanas, Hooman Derakhshani, Angel Li, Kuganya Nirmalarajah, Emily Panousis, Ahmed Draia, Jalees Nasir, Michael Surette, Samira Mubareka, Andrew G. McArthur

EPI\_ISL\_794592 Laboratorio Estatal de Salud Pública de Tamaulipas Instituto de diagnóstico y Referencia Epidemiológicos (INDRE) Abril Rodriguez-Maldonado, Claudia Wong-Arambula, Fabiola Garces-Ayala, Gisela Barrera-Badillo, Ana María Cortez-Calderon, Bernardita Reyes-Berrones, Hilda del Carmen-Selvera, Gloria Molina-Gamboa, Lucia Hernandez-Rivas, Irma Lopez-Martinez, Celia Alpu Gatell-Ramirez, Ernesto Ramirez-Gonzalez.

EPI\_ISL\_794826, EPI\_ISL\_794827, EPI\_ISL\_794828 ULSS 7 Pedemontana - Distretto 2 Istituto Zooprofilattico Sperimentale delle Venezie Adelaide Milani, Alessia Schivo, Annalisa Salviato, Erika Giorgia Quaranta, Ambra Pastori, Bianca Zecchin, Alice Fusaro, Isabella Monne, Calogero Terregino, Antonia Ricci

EPI\_ISL\_802567, EPI\_ISL\_802568, EPI\_ISL\_802569, EPI\_ISL\_802570, EPI\_ISL\_802571 Essentia Health-St. Mary's Medical Center Minnesota Department of Health, Public Health Laboratory Alexandra Lorentz, Jacob Garfin, Matt Plumb, and Xiong Wang

EPI\_ISL\_802572 UMN Advanced Research and Diagnostics Minnesota Department of Health, Public Health Laboratory Alexandra Lorentz, Jacob Garfin, Matt Plumb, and Xiong Wang

EPI\_ISL\_802573 M Health Fairview Minnesota Department of Health, Public Health Laboratory Alexandra Lorentz, Jacob Garfin, Matt Plumb, and Xiong Wang

EPI\_ISL\_802574, EPI\_ISL\_802575, EPI\_ISL\_802576, EPI\_ISL\_802577, EPI\_ISL\_802578, EPI\_ISL\_802579, EPI\_ISL\_802580, EPI\_ISL\_802581, EPI\_ISL\_802582, EPI\_ISL\_802583, EPI\_ISL\_802584, EPI\_ISL\_802585, EPI\_ISL\_802586, EPI\_ISL\_802587, EPI\_ISL\_802588, EPI\_ISL\_802589, EPI\_ISL\_802590, EPI\_ISL\_802591, EPI\_ISL\_802595, EPI\_ISL\_802596, EPI\_ISL\_802597, EPI\_ISL\_802598

see above Vault Health Minnesota Department of Health, Public Health Laboratory Alexandra Lorentz, Jacob Garfin, Matt Plumb, and Xiong Wang

EPI\_ISL\_803867 National Institute of Laboratory Medicine and Referral Center Genomic Research Lab, BC SIR Abu Sayeed Mohammad Mahmud, Mohammad Samir Uzzaman, Eshrar Osman, Md. Ahashan Habib, Shahina Akter, Tanjina Akhter Banu, Md. Murshed Hasan Sarkar, Barna Goswami, Iffat Jahan, Md. Saddam Hossain, Tasnim Nafisa, Md. Maruf Ahmed Molla, Md. Shamsuzzaman, Monira Parveen, Md. Masum Hossain Arif, Md. Salim Khan

EPI\_ISL\_804379, EPI\_ISL\_804380, EPI\_ISL\_804381, EPI\_ISL\_804382, EPI\_ISL\_804383, EPI\_ISL\_804384, EPI\_ISL\_804385, EPI\_ISL\_804386, EPI\_ISL\_804387, EPI\_ISL\_804388, EPI\_ISL\_804389, EPI\_ISL\_804390, EPI\_ISL\_804391, EPI\_ISL\_804392, EPI\_ISL\_804393, EPI\_ISL\_804394, EPI\_ISL\_804395, EPI\_ISL\_804396, EPI\_ISL\_804400, EPI\_ISL\_804401, EPI\_ISL\_804402, EPI\_ISL\_804403, EPI\_ISL\_804404, EPI\_ISL\_804405, EPI\_ISL\_804406, EPI\_ISL\_804407, EPI\_ISL\_804408, EPI\_ISL\_804409, EPI\_ISL\_804410, EPI\_ISL\_804411, EPI\_ISL\_804412, EPI\_ISL\_804413, EPI\_ISL\_804414, EPI\_ISL\_804415, EPI\_ISL\_804416, EPI\_ISL\_804417, EPI\_ISL\_804421, EPI\_ISL\_804422, EPI\_ISL\_804423, EPI\_ISL\_804424, EPI\_ISL\_804425, EPI\_ISL\_804426, EPI\_ISL\_804427, EPI\_ISL\_804428, EPI\_ISL\_804429, EPI\_ISL\_804430, EPI\_ISL\_804431, EPI\_ISL\_804432, EPI\_ISL\_804433, EPI\_ISL\_804434, EPI\_ISL\_804435, EPI\_ISL\_804436, EPI\_ISL\_804437, EPI\_ISL\_804438, EPI\_ISL\_804442, EPI\_ISL\_804443, EPI\_ISL\_804444, EPI\_ISL\_804445, EPI\_ISL\_804446, EPI\_ISL\_804447, EPI\_ISL\_804448, EPI\_ISL\_804449, EPI\_ISL\_804450, EPI\_ISL\_804451, EPI\_ISL\_804452, EPI\_ISL\_804453, EPI\_ISL\_804454, EPI\_ISL\_804455, EPI\_ISL\_804456, EPI\_ISL\_804457, EPI\_ISL\_804458, EPI\_ISL\_804459, EPI\_ISL\_804460, EPI\_ISL\_804461, EPI\_ISL\_804462, EPI\_ISL\_804463, EPI\_ISL\_804464, EPI\_ISL\_804465, EPI\_ISL\_804466, EPI\_ISL\_804467, EPI\_ISL\_804468, EPI\_ISL\_804469, EPI\_ISL\_804470, EPI\_ISL\_804471, EPI\_ISL\_804472, EPI\_ISL\_804473, EPI\_ISL\_804474, EPI\_ISL\_804475, EPI\_ISL\_804476, EPI\_ISL\_804477, EPI\_ISL\_804478, EPI\_ISL\_804479, EPI\_ISL\_804480, EPI\_ISL\_804481, EPI\_ISL\_804482, EPI\_ISL\_804483, EPI\_ISL\_804484, EPI\_ISL\_804485, EPI\_ISL\_804486, EPI\_ISL\_804487, EPI\_ISL\_804488, EPI\_ISL\_804489, EPI\_ISL\_804490, EPI\_ISL\_804491, EPI\_ISL\_804492, EPI\_ISL\_804493, EPI\_ISL\_804494, EPI\_ISL\_804495, EPI\_ISL\_804496, EPI\_ISL\_804497, EPI\_ISL\_804498, EPI\_ISL\_804499, EPI\_ISL\_804500, EPI\_ISL\_804501, EPI\_ISL\_804502, EPI\_ISL\_804503, EPI\_ISL\_804504, EPI\_ISL\_804505, EPI\_ISL\_804506, EPI\_ISL\_804507, EPI\_ISL\_804508, EPI\_ISL\_804509, EPI\_ISL\_804510, EPI\_ISL\_804511, EPI\_ISL\_804512, EPI\_ISL\_804513, EPI\_ISL\_804514, EPI\_ISL\_804515, EPI\_ISL\_804516, EPI\_ISL\_804517, EPI\_ISL\_804518, EPI\_ISL\_804519, EPI\_ISL\_804520, EPI\_ISL\_804521, EPI\_ISL\_804522, EPI\_ISL\_804523, EPI\_ISL\_804524, EPI\_ISL\_804525, EPI\_ISL\_804526, EPI\_ISL\_804527, EPI\_ISL\_804528, EPI\_ISL\_804529, EPI\_ISL\_804530, EPI\_ISL\_804531, EPI\_ISL\_804532, EPI\_ISL\_804533, EPI\_ISL\_804534, EPI\_ISL\_804535, EPI\_ISL\_804536, EPI\_ISL\_804537, EPI\_ISL\_804538, EPI\_ISL\_804539, EPI\_ISL\_804540, EPI\_ISL\_804541, EPI\_ISL\_804542, EPI\_ISL\_804543, EPI\_ISL\_804544, EPI\_ISL\_804545, EPI\_ISL\_804546, EPI\_ISL\_804547, EPI\_ISL\_804548, EPI\_ISL\_804549, EPI\_ISL\_804550, EPI\_ISL\_804551, EPI\_ISL\_804552, EPI\_ISL\_804553, EPI\_ISL\_804554, EPI\_ISL\_804555, EPI\_ISL\_804556, EPI\_ISL\_804557, EPI\_ISL\_804558, EPI\_ISL\_804559, EPI\_ISL\_804560, EPI\_ISL\_804561, EPI\_ISL\_804562, EPI\_ISL\_804563, EPI\_ISL\_804564, EPI\_ISL\_804565, EPI\_ISL\_804566, EPI\_ISL\_804567, EPI\_ISL\_804568, EPI\_ISL\_804569, EPI\_ISL\_804570, EPI\_ISL\_804571, EPI\_ISL\_804572, EPI\_ISL\_804573, EPI\_ISL\_804574, EPI\_ISL\_804575, EPI\_ISL\_804576, EPI\_ISL\_804577, EPI\_ISL\_804578, EPI\_ISL\_804579, EPI\_ISL\_804580, EPI\_ISL\_804581, EPI\_ISL\_804582, EPI\_ISL\_804583, EPI\_ISL\_804584, EPI\_ISL\_804585, EPI\_ISL\_804586, EPI\_ISL\_804587, EPI\_ISL\_804588, EPI\_ISL\_804589, EPI\_ISL\_804590, EPI\_ISL\_804591, EPI\_ISL\_804592, EPI\_ISL\_804593, EPI\_ISL\_804594, EPI\_ISL\_804595, EPI\_ISL\_804596, EPI\_ISL\_804597, EPI\_ISL\_804598, EPI\_ISL\_804599, EPI\_ISL\_804600, EPI\_ISL\_804601, EPI\_ISL\_804602, EPI\_ISL\_804603, EPI\_ISL\_804604, EPI\_ISL\_804605, EPI\_ISL\_804606, EPI\_ISL\_804607, EPI\_ISL\_804608, EPI\_ISL\_804609, EPI\_ISL\_804610, EPI\_ISL\_804611, EPI\_ISL\_804612, EPI\_ISL\_804613, EPI\_ISL\_804614, EPI\_ISL\_804615, EPI\_ISL\_804616, EPI\_ISL\_804617, EPI\_ISL\_804618, EPI\_ISL\_804619, EPI\_ISL\_804620, EPI\_ISL\_804621, EPI\_ISL\_804622, EPI\_ISL\_804623, EPI\_ISL\_804624, EPI\_ISL\_804625, EPI\_ISL\_804626, EPI\_ISL\_804627, EPI\_ISL\_804628, EPI\_ISL\_804629, EPI\_ISL\_804630, EPI\_ISL\_804631, EPI\_ISL\_804632, EPI\_ISL\_804633, EPI\_ISL\_804634, EPI\_ISL\_804635, EPI\_ISL\_804636, EPI\_ISL\_804637, EPI\_ISL\_804638, EPI\_ISL\_804639, EPI\_ISL\_804640, EPI\_ISL\_804641, EPI\_ISL\_804642, EPI\_ISL\_804643, EPI\_ISL\_804644, EPI\_ISL\_804645, EPI\_ISL\_804646, EPI\_ISL\_804647, EPI\_ISL\_804648, EPI\_ISL\_804649, EPI\_ISL\_804650, EPI\_ISL\_804651, EPI\_ISL\_804652, EPI\_ISL\_804653, EPI\_ISL\_804654, EPI\_ISL\_804655, EPI\_ISL\_804656, EPI\_ISL\_804657, EPI\_ISL\_804658, EPI\_ISL\_804659, EPI\_ISL\_804660, EPI\_ISL\_804661, EPI\_ISL\_804662, EPI\_ISL\_804663, EPI\_ISL\_804664, EPI\_ISL\_804665, EPI\_ISL\_804666, EPI\_ISL\_804667, EPI\_ISL\_804668, EPI\_ISL\_804669, EPI\_ISL\_804670, EPI\_ISL\_804671, EPI\_ISL\_804672, EPI\_ISL\_804673, EPI\_ISL\_804674, EPI\_ISL\_804675, EPI\_ISL\_804676, EPI\_ISL\_804677, EPI\_ISL\_804678, EPI\_ISL\_804679, EPI\_ISL\_804680, EPI\_ISL\_804681, EPI\_ISL\_804682, EPI\_ISL\_804683, EPI\_ISL\_804684, EPI\_ISL\_804685, EPI\_ISL\_804686, EPI\_ISL\_804687, EPI\_ISL\_804688, EPI\_ISL\_804689, EPI\_ISL\_804690, EPI\_ISL\_804691, EPI\_ISL\_804692, EPI\_ISL\_804693, EPI\_ISL\_804694, EPI\_ISL\_804695, EPI\_ISL\_804696, EPI\_ISL\_804697, EPI\_ISL\_804698, EPI\_ISL\_804699, EPI\_ISL\_804700, EPI\_ISL\_804701, EPI\_ISL\_804702, EPI\_ISL\_804703, EPI\_ISL\_804704, EPI\_ISL\_804705, EPI\_ISL\_804706, EPI\_ISL\_804707, EPI\_ISL\_804708, EPI\_ISL\_804709, EPI\_ISL\_804710, EPI\_ISL\_804711, EPI\_ISL\_804712, EPI\_ISL\_804713, EPI\_ISL\_804714, EPI\_ISL\_804715, EPI\_ISL\_804716, EPI\_ISL\_804717, EPI\_ISL\_804718, EPI\_ISL\_804719, EPI\_ISL\_804720, EPI\_ISL\_804721, EPI\_ISL\_804722, EPI\_ISL\_804723, EPI\_ISL\_804724, EPI\_ISL\_804725, EPI\_ISL\_804726, EPI\_ISL\_804727, EPI\_ISL\_804728, EPI\_ISL\_804729, EPI\_ISL\_804730, EPI\_ISL\_804731, EPI\_ISL\_804732, EPI\_ISL\_804733, EPI\_ISL\_804734, EPI\_ISL\_804735, EPI\_ISL\_804736, EPI\_ISL\_804737, EPI\_ISL\_804738, EPI\_ISL\_804739, EPI\_ISL\_804740, EPI\_ISL\_804741, EPI\_ISL\_804742, EPI\_ISL\_804743, EPI\_ISL\_804744, EPI\_ISL\_804745, EPI\_ISL\_804746, EPI\_ISL\_804747, EPI\_ISL\_804748, EPI\_ISL\_804749, EPI\_ISL\_804750, EPI\_ISL\_804751, EPI\_ISL\_804752, EPI\_ISL\_804753, EPI\_ISL\_804754, EPI\_ISL\_804755, EPI\_ISL\_804756, EPI\_ISL\_804757, EPI\_ISL\_804758, EPI\_ISL\_804759, EPI\_ISL\_804760, EPI\_ISL\_804761, EPI\_ISL\_804762, EPI\_ISL\_804763, EPI\_ISL\_804764, EPI\_ISL\_804765, EPI\_ISL\_804766, EPI\_ISL\_804767, EPI\_ISL\_804768, EPI\_ISL\_804769, EPI\_ISL\_804770, EPI\_ISL\_804771, EPI\_ISL\_804772, EPI\_ISL\_804773, EPI\_ISL\_804774, EPI\_ISL\_804775, EPI\_ISL\_804776, EPI\_ISL\_804777, EPI\_ISL\_804778, EPI\_ISL\_804779, EPI\_ISL\_804780, EPI\_ISL\_804781, EPI\_ISL\_804782, EPI\_ISL\_804783, EPI\_ISL\_804784, EPI\_ISL\_804785, EPI\_ISL\_804786, EPI\_ISL\_804787, EPI\_ISL\_804788, EPI\_ISL\_804789, EPI\_ISL\_804790, EPI\_ISL\_804791, EPI\_ISL\_804792, EPI\_ISL\_804793, EPI\_ISL\_804794, EPI\_ISL\_804795, EPI\_ISL\_804796, EPI\_ISL\_804797, EPI\_ISL\_804798, EPI\_ISL\_804799, EPI\_ISL\_804800, EPI\_ISL\_804801, EPI\_ISL\_804802, EPI\_ISL\_804803, EPI\_ISL\_804804, EPI\_ISL\_804805, EPI\_ISL\_804806, EPI\_ISL\_804807, EPI\_ISL\_804808, EPI\_ISL\_804809, EPI\_ISL\_804810, EPI\_ISL\_804811, EPI\_ISL\_804812, EPI\_ISL\_804813, EPI\_ISL\_804814, EPI\_ISL\_804815, EPI\_ISL\_804816, EPI\_ISL\_804817, EPI\_ISL\_804818, EPI\_ISL\_804819, EPI\_ISL\_804820, EPI\_ISL\_804821, EPI\_ISL\_804822, EPI\_ISL\_804823, EPI\_ISL\_804824, EPI\_ISL\_804825, EPI\_ISL\_804826, EPI\_ISL\_804827, EPI\_ISL\_804828, EPI\_ISL\_804829, EPI\_ISL\_804830, EPI\_ISL\_804831, EPI\_ISL\_804832, EPI\_ISL\_804833, EPI\_ISL\_804834, EPI\_ISL\_804835, EPI\_ISL\_804836, EPI\_ISL\_804837, EPI\_ISL\_804838, EPI\_ISL\_804839, EPI\_ISL\_804840, EPI\_ISL\_804841, EPI\_ISL\_804842, EPI\_ISL\_804843, EPI\_ISL\_804844, EPI\_ISL\_804845, EPI\_ISL\_804846, EPI\_ISL\_804847, EPI\_ISL\_804848, EPI\_ISL\_804849, EPI\_ISL\_804850, EPI\_ISL\_804851, EPI\_ISL\_804852, EPI\_ISL\_804853, EPI\_ISL\_804854, EPI\_ISL\_804855, EPI\_ISL\_804856, EPI\_ISL\_804857, EPI\_ISL\_804858, EPI\_ISL\_804859, EPI\_ISL\_804860, EPI\_ISL\_804861, EPI\_ISL\_804862, EPI\_ISL\_804863, EPI\_ISL\_804864, EPI\_ISL\_804865, EPI\_ISL\_804866, EPI\_ISL\_804867, EPI\_ISL\_804868, EPI\_ISL\_804869, EPI\_ISL\_804870, EPI\_ISL\_804871, EPI\_ISL\_804872, EPI\_ISL\_804873, EPI\_ISL\_804874, EPI\_ISL\_804875, EPI\_ISL\_804876, EPI\_ISL\_804877, EPI\_ISL\_804878, EPI\_ISL\_804879, EPI\_ISL\_804880, EPI\_ISL\_804881, EPI\_ISL\_804882, EPI\_ISL\_804883, EPI\_ISL\_804884, EPI\_ISL\_804885, EPI\_ISL\_804886, EPI\_ISL\_804887, EPI\_ISL\_804888, EPI\_ISL\_804889, EPI\_ISL\_804890, EPI\_ISL\_804891, EPI\_ISL\_804892, EPI\_ISL\_804893, EPI\_ISL\_804894, EPI\_ISL\_804895, EPI\_ISL\_804896, EPI\_ISL\_804897, EPI\_ISL\_804898, EPI\_ISL\_804899, EPI\_ISL\_804900, EPI\_ISL\_804901, EPI\_ISL\_804902, EPI\_ISL\_804903, EPI\_ISL\_804904, EPI\_ISL\_804905, EPI\_ISL\_804906, EPI\_ISL\_804907, EPI\_ISL\_804908, EPI\_ISL\_804909, EPI\_ISL\_804910, EPI\_ISL\_804911, EPI\_ISL\_804912, EPI\_ISL\_804913, EPI\_ISL\_804914, EPI\_ISL\_804915, EPI\_ISL\_804916, EPI\_ISL\_804917, EPI\_ISL\_804918, EPI\_ISL\_804919, EPI\_ISL\_804920, EPI\_ISL\_804921, EPI\_ISL\_804922, EPI\_ISL\_804923, EPI\_ISL\_804924, EPI\_ISL\_804925, EPI\_ISL\_804926, EPI\_ISL\_804927, EPI\_ISL\_804928, EPI\_ISL\_804929, EPI\_ISL\_804930, EPI\_ISL\_804931, EPI\_ISL\_804932, EPI\_ISL\_804933, EPI\_ISL\_804934, EPI\_ISL\_804935, EPI\_ISL\_804936, EPI\_ISL\_804937, EPI\_ISL\_804938, EPI\_ISL\_804939, EPI\_ISL\_804940, EPI\_ISL\_804941, EPI\_ISL\_804942, EPI\_ISL\_804943, EPI\_ISL\_804944, EPI\_ISL\_804945, EPI\_ISL\_804946, EPI\_ISL\_804947, EPI\_ISL\_804948, EPI\_ISL\_804949, EPI\_ISL\_804950, EPI\_ISL\_804951, EPI\_ISL\_804952, EPI\_ISL\_804953, EPI\_ISL\_804954, EPI\_ISL\_804955, EPI\_ISL\_804956, EPI\_ISL\_804957, EPI\_ISL\_804958, EPI\_ISL\_804959, EPI\_ISL\_804960, EPI\_ISL\_804961, EPI\_ISL\_804962, EPI\_ISL\_804963, EPI\_ISL\_804964, EPI\_ISL\_804965, EPI\_ISL\_804966, EPI\_ISL\_804967, EPI\_ISL\_804968, EPI\_ISL\_804969, EPI\_ISL\_804970, EPI\_ISL\_804971, EPI\_ISL\_804972, EPI\_ISL\_804973, EPI\_ISL\_804974, EPI\_ISL\_804975, EPI\_ISL\_804976, EPI\_ISL\_804977, EPI\_ISL\_804978, EPI\_ISL\_804979, EPI\_ISL\_804980, EPI\_ISL\_804981, EPI\_ISL\_804982, EPI\_ISL\_804983, EPI\_ISL\_804984, EPI\_ISL\_804985, EPI\_ISL\_804986, EPI\_ISL\_804987, EPI



EPI\_ISL\_816706, EPI\_ISL\_816707, EPI\_ISL\_816708, EPI\_ISL\_816709, EPI\_ISL\_816710, EPI\_ISL\_816711, EPI\_ISL\_816712, EPI\_ISL\_816713, EPI\_ISL\_816714, EPI\_ISL\_816715, EPI\_ISL\_816716, EPI\_ISL\_816717, EPI\_ISL\_816718, EPI\_ISL\_816719, EPI\_ISL\_816720, EPI\_ISL\_816721, EPI\_ISL\_816722, EPI\_ISL\_816723, EPI\_ISL\_816724, EPI\_ISL\_816725, EPI\_ISL\_816726, EPI\_ISL\_816727, EPI\_ISL\_816728, EPI\_ISL\_816729, EPI\_ISL\_816730, EPI\_ISL\_816731, EPI\_ISL\_816732, EPI\_ISL\_816733, EPI\_ISL\_816734, EPI\_ISL\_816735, EPI\_ISL\_816736, EPI\_ISL\_816737, EPI\_ISL\_816738, EPI\_ISL\_816739, EPI\_ISL\_816740, EPI\_ISL\_816741, EPI\_ISL\_816742, EPI\_ISL\_816743, EPI\_ISL\_816744, EPI\_ISL\_816745, EPI\_ISL\_816746, EPI\_ISL\_816747, EPI\_ISL\_816748, EPI\_ISL\_816749, EPI\_ISL\_816750, EPI\_ISL\_816751, EPI\_ISL\_816752, EPI\_ISL\_816753, EPI\_ISL\_816754, EPI\_ISL\_816755, EPI\_ISL\_816756, EPI\_ISL\_816757, EPI\_ISL\_816758, EPI\_ISL\_816759, EPI\_ISL\_816760, EPI\_ISL\_816761, EPI\_ISL\_816762, EPI\_ISL\_816763, EPI\_ISL\_816764, EPI\_ISL\_816765, EPI\_ISL\_816766, EPI\_ISL\_816767, EPI\_ISL\_816768, EPI\_ISL\_816769, EPI\_ISL\_816770, EPI\_ISL\_816771, EPI\_ISL\_816772, EPI\_ISL\_816773, EPI\_ISL\_816774, EPI\_ISL\_816775, EPI\_ISL\_816776, EPI\_ISL\_816777, EPI\_ISL\_816778, EPI\_ISL\_816779, EPI\_ISL\_816780, EPI\_ISL\_816781, EPI\_ISL\_816782, EPI\_ISL\_816783, EPI\_ISL\_816784, EPI\_ISL\_816785, EPI\_ISL\_816786, EPI\_ISL\_816787, EPI\_ISL\_816788, EPI\_ISL\_816789, EPI\_ISL\_816790, EPI\_ISL\_816791, EPI\_ISL\_816792, EPI\_ISL\_816793, EPI\_ISL\_816794, EPI\_ISL\_816795, EPI\_ISL\_816796, EPI\_ISL\_816797, EPI\_ISL\_816798, EPI\_ISL\_816799, EPI\_ISL\_816800, EPI\_ISL\_816801, EPI\_ISL\_816802, EPI\_ISL\_816803, EPI\_ISL\_816804, EPI\_ISL\_816805, EPI\_ISL\_816806, EPI\_ISL\_816807, EPI\_ISL\_816808, EPI\_ISL\_816809, EPI\_ISL\_816810, EPI\_ISL\_816811, EPI\_ISL\_816812, EPI\_ISL\_816813, EPI\_ISL\_816814, EPI\_ISL\_816815, EPI\_ISL\_816816, EPI\_ISL\_816817, EPI\_ISL\_816818, EPI\_ISL\_816819, EPI\_ISL\_816820, EPI\_ISL\_816821, EPI\_ISL\_816822, EPI\_ISL\_816823, EPI\_ISL\_816824, EPI\_ISL\_816825, EPI\_ISL\_816826, EPI\_ISL\_816827, EPI\_ISL\_816828, EPI\_ISL\_816829, EPI\_ISL\_816830, EPI\_ISL\_816831, EPI\_ISL\_816832, EPI\_ISL\_816833, EPI\_ISL\_816834, EPI\_ISL\_816835, EPI\_ISL\_816836, EPI\_ISL\_816837, EPI\_ISL\_816838, EPI\_ISL\_816839, EPI\_ISL\_816840, EPI\_ISL\_816841, EPI\_ISL\_816842, EPI\_ISL\_816843, EPI\_ISL\_816844, EPI\_ISL\_816845, EPI\_ISL\_816846, EPI\_ISL\_816847, EPI\_ISL\_816848, EPI\_ISL\_816849, EPI\_ISL\_816850, EPI\_ISL\_816851, EPI\_ISL\_816852, EPI\_ISL\_816853, EPI\_ISL\_816854, EPI\_ISL\_816855, EPI\_ISL\_816856, EPI\_ISL\_816857, EPI\_ISL\_816858, EPI\_ISL\_816859, EPI\_ISL\_816860, EPI\_ISL\_816861, EPI\_ISL\_816862, EPI\_ISL\_816863, EPI\_ISL\_816864, EPI\_ISL\_816865, EPI\_ISL\_816866, EPI\_ISL\_816867, EPI\_ISL\_816868, EPI\_ISL\_816869, EPI\_ISL\_816870, EPI\_ISL\_816871, EPI\_ISL\_816872, EPI\_ISL\_816873, EPI\_ISL\_816874, EPI\_ISL\_816875, EPI\_ISL\_816876, EPI\_ISL\_816877, EPI\_ISL\_816878, EPI\_ISL\_816879, EPI\_ISL\_816880, EPI\_ISL\_816881, EPI\_ISL\_816882, EPI\_ISL\_816883, EPI\_ISL\_816884, EPI\_ISL\_816885, EPI\_ISL\_816886, EPI\_ISL\_816887, EPI\_ISL\_816888, EPI\_ISL\_816889, EPI\_ISL\_816890, EPI\_ISL\_816891, EPI\_ISL\_816892, EPI\_ISL\_816893, EPI\_ISL\_816894, EPI\_ISL\_816895, EPI\_ISL\_816896, EPI\_ISL\_816897, EPI\_ISL\_816898, EPI\_ISL\_816899, EPI\_ISL\_816900, EPI\_ISL\_816901, EPI\_ISL\_816902, EPI\_ISL\_816903, EPI\_ISL\_816904, EPI\_ISL\_816905, EPI\_ISL\_816906, EPI\_ISL\_816907, EPI\_ISL\_816908, EPI\_ISL\_816909, EPI\_ISL\_816910, EPI\_ISL\_816911, EPI\_ISL\_816912, EPI\_ISL\_816913, EPI\_ISL\_816914, EPI\_ISL\_816915, EPI\_ISL\_816916, EPI\_ISL\_816917, EPI\_ISL\_816918, EPI\_ISL\_816919, EPI\_ISL\_816920, EPI\_ISL\_816921, EPI\_ISL\_816922, EPI\_ISL\_816923, EPI\_ISL\_816924, EPI\_ISL\_816925, EPI\_ISL\_816926, EPI\_ISL\_816927, EPI\_ISL\_816928, EPI\_ISL\_816929, EPI\_ISL\_816930, EPI\_ISL\_816931, EPI\_ISL\_816932, EPI\_ISL\_816933, EPI\_ISL\_816934, EPI\_ISL\_816935, EPI\_ISL\_816936, EPI\_ISL\_816937, EPI\_ISL\_816938, EPI\_ISL\_816939, EPI\_ISL\_816940, EPI\_ISL\_816941, EPI\_ISL\_816942, EPI\_ISL\_816943, EPI\_ISL\_816944, EPI\_ISL\_816945, EPI\_ISL\_816946, EPI\_ISL\_816947, EPI\_ISL\_816948, EPI\_ISL\_816949, EPI\_ISL\_816950, EPI\_ISL\_816951, EPI\_ISL\_816952, EPI\_ISL\_816953, EPI\_ISL\_816954, EPI\_ISL\_816955, EPI\_ISL\_816956, EPI\_ISL\_816957, EPI\_ISL\_816958, EPI\_ISL\_816959, EPI\_ISL\_816960, EPI\_ISL\_816961, EPI\_ISL\_816962, EPI\_ISL\_816963, EPI\_ISL\_816964, EPI\_ISL\_816965, EPI\_ISL\_816966, EPI\_ISL\_816967, EPI\_ISL\_816968, EPI\_ISL\_816969, EPI\_ISL\_816970, EPI\_ISL\_816971, EPI\_ISL\_816972, EPI\_ISL\_816973, EPI\_ISL\_816974, EPI\_ISL\_816975, EPI\_ISL\_816976, EPI\_ISL\_816977, EPI\_ISL\_816978, EPI\_ISL\_816979, EPI\_ISL\_816980, EPI\_ISL\_816981, EPI\_ISL\_816982, EPI\_ISL\_816983, EPI\_ISL\_816984, EPI\_ISL\_816985, EPI\_ISL\_816986, EPI\_ISL\_816987, EPI\_ISL\_816988, EPI\_ISL\_816989, EPI\_ISL\_816990, EPI\_ISL\_816991, EPI\_ISL\_816992, EPI\_ISL\_816993, EPI\_ISL\_816994, EPI\_ISL\_816995, EPI\_ISL\_816996, EPI\_ISL\_816997, EPI\_ISL\_816998, EPI\_ISL\_816999, EPI\_ISL\_817000, EPI\_ISL\_817001, EPI\_ISL\_817002, EPI\_ISL\_817003, EPI\_ISL\_817004, EPI\_ISL\_817005, EPI\_ISL\_817006, EPI\_ISL\_817007, EPI\_ISL\_817008, EPI\_ISL\_817009, EPI\_ISL\_817010, EPI\_ISL\_817011, EPI\_ISL\_817012, EPI\_ISL\_817013, EPI\_ISL\_817014, EPI\_ISL\_817015, EPI\_ISL\_817016, EPI\_ISL\_817017, EPI\_ISL\_817018, EPI\_ISL\_817019, EPI\_ISL\_817020, EPI\_ISL\_817021, EPI\_ISL\_817022, EPI\_ISL\_817023, EPI\_ISL\_817024, EPI\_ISL\_817025, EPI\_ISL\_817026, EPI\_ISL\_817027, EPI\_ISL\_817028, EPI\_ISL\_817029, EPI\_ISL\_817030, EPI\_ISL\_817031, EPI\_ISL\_817032, EPI\_ISL\_817033, EPI\_ISL\_817034, EPI\_ISL\_817035, EPI\_ISL\_817036, EPI\_ISL\_817037, EPI\_ISL\_817038, EPI\_ISL\_817039, EPI\_ISL\_817040, EPI\_ISL\_817041, EPI\_ISL\_817042, EPI\_ISL\_817043, EPI\_ISL\_817044, EPI\_ISL\_817045, EPI\_ISL\_817046, EPI\_ISL\_817047, EPI\_ISL\_817048, EPI\_ISL\_817049, EPI\_ISL\_817050, EPI\_ISL\_817051, EPI\_ISL\_817052, EPI\_ISL\_817053, EPI\_ISL\_817054, EPI\_ISL\_817055, EPI\_ISL\_817056, EPI\_ISL\_817057, EPI\_ISL\_817058, EPI\_ISL\_817059, EPI\_ISL\_817060, EPI\_ISL\_817061, EPI\_ISL\_817062, EPI\_ISL\_817063, EPI\_ISL\_817064, EPI\_ISL\_817065, EPI\_ISL\_817066, EPI\_ISL\_817067, EPI\_ISL\_817068, EPI\_ISL\_817069, EPI\_ISL\_817070, EPI\_ISL\_817071, EPI\_ISL\_817072, EPI\_ISL\_817073, EPI\_ISL\_817074, EPI\_ISL\_817075, EPI\_ISL\_817076, EPI\_ISL\_817077, EPI\_ISL\_817078, EPI\_ISL\_817079, EPI\_ISL\_817080, EPI\_ISL\_817081, EPI\_ISL\_817082, EPI\_ISL\_817083, EPI\_ISL\_817084, EPI\_ISL\_817085, EPI\_ISL\_817086, EPI\_ISL\_817087, EPI\_ISL\_817088, EPI\_ISL\_817089, EPI\_ISL\_817090, EPI\_ISL\_817091, EPI\_ISL\_817092, EPI\_ISL\_817093, EPI\_ISL\_817094, EPI\_ISL\_817095, EPI\_ISL\_817096, EPI\_ISL\_817097, EPI\_ISL\_817098, EPI\_ISL\_817099, EPI\_ISL\_817100, EPI\_ISL\_817101, EPI\_ISL\_817102, EPI\_ISL\_817103, EPI\_ISL\_817104, EPI\_ISL\_817105, EPI\_ISL\_817106, EPI\_ISL\_817107, EPI\_ISL\_817108, EPI\_ISL\_817109, EPI\_ISL\_817110, EPI\_ISL\_817111, EPI\_ISL\_817112, EPI\_ISL\_817113, EPI\_ISL\_817114, EPI\_ISL\_817115, EPI\_ISL\_817116, EPI\_ISL\_817117, EPI\_ISL\_817118, EPI\_ISL\_817119, EPI\_ISL\_817120, EPI\_ISL\_817121, EPI\_ISL\_817122

see above      Bioinformatics and      COVID-19 Genomics      Aengus Stewart, Jerome Nicod, Chelsea Sawyer, Laura Cubitt, Harshil Patel, Margaret Crawford  
 Biostatistics Lab,      UK (COG-UK)  
 Advanced      Consortium  
 Sequencing Facility

EPI\_ISL\_823976, EPI\_ISL\_823977, EPI\_ISL\_823978, EPI\_ISL\_823979, EPI\_ISL\_823980, EPI\_ISL\_823981, EPI\_ISL\_823982, EPI\_ISL\_823983, EPI\_ISL\_823984, EPI\_ISL\_823985, EPI\_ISL\_823986, EPI\_ISL\_823987, EPI\_ISL\_823988, EPI\_ISL\_823989, EPI\_ISL\_823990, EPI\_ISL\_823991, EPI\_ISL\_823992, EPI\_ISL\_823993, EPI\_ISL\_823994, EPI\_ISL\_823995, EPI\_ISL\_823996, EPI\_ISL\_824000, EPI\_ISL\_824001, EPI\_ISL\_824002, EPI\_ISL\_824003, EPI\_ISL\_824004, EPI\_ISL\_824005, EPI\_ISL\_824006, EPI\_ISL\_824007, EPI\_ISL\_824008, EPI\_ISL\_824009, EPI\_ISL\_824010, EPI\_ISL\_824011, EPI\_ISL\_824012, EPI\_ISL\_824013, EPI\_ISL\_824014, EPI\_ISL\_824015, EPI\_ISL\_824016, EPI\_ISL\_824017, EPI\_ISL\_824018, EPI\_ISL\_824019, EPI\_ISL\_824020, EPI\_ISL\_824021, EPI\_ISL\_824022, EPI\_ISL\_824023, EPI\_ISL\_824024, EPI\_ISL\_824025, EPI\_ISL\_824026, EPI\_ISL\_824027, EPI\_ISL\_824028, EPI\_ISL\_824029, EPI\_ISL\_824030, EPI\_ISL\_824031, EPI\_ISL\_824032, EPI\_ISL\_824033, EPI\_ISL\_824034, EPI\_ISL\_824035, EPI\_ISL\_824036, EPI\_ISL\_824037, EPI\_ISL\_824038, EPI\_ISL\_824039, EPI\_ISL\_824040, EPI\_ISL\_824041, EPI\_ISL\_824042, EPI\_ISL\_824043, EPI\_ISL\_824044, EPI\_ISL\_824045, EPI\_ISL\_824046, EPI\_ISL\_824047, EPI\_ISL\_824048, EPI\_ISL\_824049, EPI\_ISL\_824050, EPI\_ISL\_824051, EPI\_ISL\_824052, EPI\_ISL\_824053, EPI\_ISL\_824054, EPI\_ISL\_824055, EPI\_ISL\_824056, EPI\_ISL\_824057, EPI\_ISL\_824058, EPI\_ISL\_824059, EPI\_ISL\_824060, EPI\_ISL\_824061, EPI\_ISL\_824062, EPI\_ISL\_824063, EPI\_ISL\_824064, EPI\_ISL\_824065, EPI\_ISL\_824066, EPI\_ISL\_824067, EPI\_ISL\_824068, EPI\_ISL\_824069, EPI\_ISL\_824070, EPI\_ISL\_824071, EPI\_ISL\_824072, EPI\_ISL\_824073, EPI\_ISL\_824074, EPI\_ISL\_824075, EPI\_ISL\_824076, EPI\_ISL\_824077, EPI\_ISL\_824078, EPI\_ISL\_824079, EPI\_ISL\_824080, EPI\_ISL\_824081, EPI\_ISL\_824082, EPI\_ISL\_824083, EPI\_ISL\_824084, EPI\_ISL\_824085, EPI\_ISL\_824086, EPI\_ISL\_824087, EPI\_ISL\_824088, EPI\_ISL\_824089, EPI\_ISL\_824090, EPI\_ISL\_824091, EPI\_ISL\_824092, EPI\_ISL\_824093, EPI\_ISL\_824094, EPI\_ISL\_824095, EPI\_ISL\_824096, EPI\_ISL\_824097, EPI\_ISL\_824098, EPI\_ISL\_824099, EPI\_ISL\_824100, EPI\_ISL\_824101, EPI\_ISL\_824102, EPI\_ISL\_824103, EPI\_ISL\_824104, EPI\_ISL\_824105, EPI\_ISL\_824106, EPI\_ISL\_824107, EPI\_ISL\_824108, EPI\_ISL\_824109, EPI\_ISL\_824110, EPI\_ISL\_824111, EPI\_ISL\_824112, EPI\_ISL\_824113, EPI\_ISL\_824114, EPI\_ISL\_824115, EPI\_ISL\_824116, EPI\_ISL\_824117, EPI\_ISL\_824118, EPI\_ISL\_824119, EPI\_ISL\_824120, EPI\_ISL\_824121, EPI\_ISL\_824122, EPI\_ISL\_824123, EPI\_ISL\_824124, EPI\_ISL\_824125, EPI\_ISL\_824126, EPI\_ISL\_824127, EPI\_ISL\_824128, EPI\_ISL\_824129, EPI\_ISL\_824130, EPI\_ISL\_824131, EPI\_ISL\_824132, EPI\_ISL\_824133, EPI\_ISL\_824134, EPI\_ISL\_824135, EPI\_ISL\_824136, EPI\_ISL\_824137, EPI\_ISL\_824138, EPI\_ISL\_824139, EPI\_ISL\_824140, EPI\_ISL\_824141, EPI\_ISL\_824142, EPI\_ISL\_824143, EPI\_ISL\_824144, EPI\_ISL\_824145, EPI\_ISL\_824146, EPI\_ISL\_824147, EPI\_ISL\_824148, EPI\_ISL\_824149, EPI\_ISL\_824150, EPI\_ISL\_824151, EPI\_ISL\_824152, EPI\_ISL\_824153, EPI\_ISL\_824154, EPI\_ISL\_824155, EPI\_ISL\_824156, EPI\_ISL\_824157, EPI\_ISL\_824158, EPI\_ISL\_824159, EPI\_ISL\_824160, EPI\_ISL\_824161, EPI\_ISL\_824162, EPI\_ISL\_824163, EPI\_ISL\_824164, EPI\_ISL\_824165, EPI\_ISL\_824166, EPI\_ISL\_824167, EPI\_ISL\_824168, EPI\_ISL\_824169, EPI\_ISL\_824170, EPI\_ISL\_824171, EPI\_ISL\_824172, EPI\_ISL\_824173, EPI\_ISL\_824174, EPI\_ISL\_824175, EPI\_ISL\_824176, EPI\_ISL\_824177, EPI\_ISL\_824178, EPI\_ISL\_824179, EPI\_ISL\_824180, EPI\_ISL\_824181, EPI\_ISL\_824182, EPI\_ISL\_824183, EPI\_ISL\_824184, EPI\_ISL\_824185, EPI\_ISL\_824186, EPI\_ISL\_824187, EPI\_ISL\_824188, EPI\_ISL\_824189, EPI\_ISL\_824190, EPI\_ISL\_824191, EPI\_ISL\_824192, EPI\_ISL\_824193, EPI\_ISL\_824194, EPI\_ISL\_824195, EPI\_ISL\_824196, EPI\_ISL\_824197, EPI\_ISL\_824198, EPI\_ISL\_824199, EPI\_ISL\_824200, EPI\_ISL\_824201, EPI\_ISL\_824202, EPI\_ISL\_824203, EPI\_ISL\_824204, EPI\_ISL\_824205, EPI\_ISL\_824206, EPI\_ISL\_824207, EPI\_ISL\_824208, EPI\_ISL\_824209, EPI\_ISL\_824210, EPI\_ISL\_824211, EPI\_ISL\_824212, EPI\_ISL\_824213, EPI\_ISL\_824214, EPI\_ISL\_824215, EPI\_ISL\_824216, EPI\_ISL\_824217, EPI\_ISL\_824218, EPI\_ISL\_824219, EPI\_ISL\_824220, EPI\_ISL\_824221, EPI\_ISL\_824222, EPI\_ISL\_824223, EPI\_ISL\_824224, EPI\_ISL\_824225, EPI\_ISL\_824226, EPI\_ISL\_824227, EPI\_ISL\_824228, EPI\_ISL\_824229, EPI\_ISL\_824230, EPI\_ISL\_824231, EPI\_ISL\_824232, EPI\_ISL\_824233, EPI\_ISL\_824234, EPI\_ISL\_824235, EPI\_ISL\_824236, EPI\_ISL\_824237, EPI\_ISL\_824238, EPI\_ISL\_824239, EPI\_ISL\_824240, EPI\_ISL\_824241, EPI\_ISL\_824242, EPI\_ISL\_824243, EPI\_ISL\_824244, EPI\_ISL\_824245, EPI\_ISL\_824246, EPI\_ISL\_824247, EPI\_ISL\_824248, EPI\_ISL\_824249, EPI\_ISL\_824250, EPI\_ISL\_824251, EPI\_ISL\_824252, EPI\_ISL\_824253, EPI\_ISL\_824254, EPI\_ISL\_824255, EPI\_ISL\_824256, EPI\_ISL\_824257, EPI\_ISL\_824258, EPI\_ISL\_824259, EPI\_ISL\_824260, EPI\_ISL\_824261, EPI\_ISL\_824262, EPI\_ISL\_824263, EPI\_ISL\_824264, EPI\_ISL\_824265, EPI\_ISL\_824266, EPI\_ISL\_824267, EPI\_ISL\_824268, EPI\_ISL\_824269, EPI\_ISL\_824270, EPI\_ISL\_824271, EPI\_ISL\_824272, EPI\_ISL\_824273, EPI\_ISL\_824274, EPI\_ISL\_824275, EPI\_ISL\_824276, EPI\_ISL\_824277, EPI\_ISL\_824278, EPI\_ISL\_824279, EPI\_ISL\_824280, EPI\_ISL\_824281, EPI\_ISL\_824282, EPI\_ISL\_824283

see above      Dutch COVID-19      National Institute for      Adam Meijer, Harry Vennema, Jeroen Cremer, Sharon van den Brink, Bas van der Veer, AnneMarie van den Brandt, Florian Zwagemaker, Dennis Schmitz, Chantal Reusken, on behalf of the national COVID-19 response  
 response team      Public Health and the  
 Environment (RIVM)

EPI\_ISL\_825040      B.J. Medical College      Gujarat Biotechnology      Afzal Ansari, Nikha Trivedi, Apurvasinh Puvar, Ramesh Pandit, Janvi Raval, Zarna Patel, Nitin Savaliya, Dinesh Kumar, Zuber Saiyed, Labdhi Pandya, Pranay Shah, Kamlesh J Upadhyay, Sanjay Kapadia, Dipa Kinariwala, Chaitanya J  
 and Civil hospital,      Research Centre

EPI\_ISL\_825059      NHL Municipal      Gujarat Biotechnology      Afzal Ansari, Nikha Trivedi, Apurvasinh Puvar, Ramesh Pandit, Janvi Raval, Zarna Patel, Nitin Savaliya, Dinesh Kumar, Zuber Saiyed, Jaysrih Pethani, Monila Patel, Ait Shah, NM Shaikh, Bimal Chauhan, Tanmay Mehta, Bhavin Prajapati, Ch  
 Medical College,      Research Centre

EPI\_ISL\_825085      University Medical      Heinrich Pette Institute,      Alexis Robitaille, Thomas Günther, Johannes Knobloch, Martin Aepfelbacher, Nicole Fischer, Adam Grundhoff  
 Center Hamburg      Leibniz Institute for  
 Eppendorf      Experimental Virology

EPI\_ISL\_826523, EPI\_ISL\_826524, EPI\_ISL\_826525, EPI\_ISL\_826526, EPI\_ISL\_826527, EPI\_ISL\_826528, EPI\_ISL\_826529, EPI\_ISL\_826530, EPI\_ISL\_826531, EPI\_ISL\_826532, EPI\_ISL\_826533, EPI\_ISL\_826534, EPI\_ISL\_826535, EPI\_ISL\_826536

see above      Dutch COVID-19      National Institute for      Adam Meijer, Harry Vennema, Jeroen Cremer, Sharon van den Brink, Bas van der Veer, AnneMarie van den Brandt, Florian Zwagemaker, Dennis Schmitz, Chantal Reusken, on behalf of the national COVID-19 response  
 response team      Public Health and the  
 Environment (RIVM)

EPI\_ISL\_833130      National Institute of      National Institute of      Agustinisih;Adam,K;Wibowo,HA;Ramadhany,R;Rukminiati,Y;Pawestri,HA;Subangkit;Puspa,KD;Nugraha,AA;Ikawati,HD;Pangesti,KNA;Soekarso,T;Susilarini,NK;Hariastuti,NI;Nikmah,UA;Mursinah;Febriyani,A;Herman,R;Susanti,N;Herna;Febriyanti,T;Kurniawati,J;Kipuw  
 Health Research      Health Research and  
 and Development      Development

EPI\_ISL\_833181      National Institute of      Genomic Research      Abu Sayeed Mohammad Mahmud, Mohammad Samir Uzzaman, Eshrar Osman, Md. Ahashan Habib, Shahina Akter, Tanjina Akhtar Banu,Md. Murshed Hasan Sarkar, Barna Goswami, Iffat Jahan, Md. Saddam Hossain, Tasnim Nafisa, Md. Maruf Ahmed Molla, M  
 Laboratory Medicine      Lab, BCSIR      Shamsuzzaman, Monira Parveen, Md. Masum Hossain Arif, Md. Salim Khan

EPI\_ISL\_833249      Division of Emerging      Division of Emerging      Ae Kyung Park, Il-Hwan Kim, Heui Man Kim, Jeong-Min Kim, Namjoon Lee, Chaeyoung Lee, Sang Hee Woo, Eun-Jin Kim  
 Infectious Diseases,      Infectious Diseases,  
 Bureau of Infectious      Bureau of Infectious  
 Diseases Diagnosis      Diseases Diagnosis  
 Control, Korea      Control, Korea Disease  
 Disease Control and      Control and Prevention  
 Prevention Agency      Agency

EPI\_ISL\_833494      RS PMI Bogor,      Biosafety Level-3      Ade Andriani, Anik Budhi Dharmayanthi, Syam Budi Iryanto, Andri Wardiana, Anggia Prasetyoputri, Isa Nuryana, Ahmad Fathoni, Maritsa Nurfatwa, Anky Zannati, Ratih Asmana Ningrum  
 Indonesia      Laboratory, Indonesian  
 Institute of Sciences  
 (LIPI)

EPI\_ISL\_833495      Klinik Apotek Dein,      Biosafety Level-3      Ade Andriani, Anik Budhi Dharmayanthi, Syam Budi Iryanto, Andri Wardiana, Anggia Prasetyoputri, Isa Nuryana, Ahmad Fathoni, Hariyatun, Akhirta Atikana, Ratih Asmana Ningrum  
 Jakarta, Indonesia      Laboratory, Indonesian  
 Institute of Sciences  
 (LIPI)

EPI\_ISL\_833505      RS MMC, Jakarta,      Biosafety Level-3      Ade Andriani, Anik Budhi Dharmayanthi, Syam Budi Iryanto, Andri Wardiana, Anggia Prasetyoputri, Isa Nuryana, Ahmad Fathoni, Muhammad Ridwan, Ratih Asmana Ningrum  
 Indonesia      Laboratory, Indonesian  
 Institute of Sciences  
 (LIPI)





|                                                                                                                                                                                                                                                                                                                                                                                                                                                                                                                                                                                                                                                                                                                                                                                                                                                                                                                                                                                | Diagnostico y Referencia Epidemiologicos (INDRE)                                                                                                                                                                                                                                                                                                                                                        | y Referencia Epidemiologicos (INDRE)                                                                                                                                     |                                                                                                                                                                                                                                                                                                                                                                                                                                                                                                                                                                                                                                                                                                                                                   |
|--------------------------------------------------------------------------------------------------------------------------------------------------------------------------------------------------------------------------------------------------------------------------------------------------------------------------------------------------------------------------------------------------------------------------------------------------------------------------------------------------------------------------------------------------------------------------------------------------------------------------------------------------------------------------------------------------------------------------------------------------------------------------------------------------------------------------------------------------------------------------------------------------------------------------------------------------------------------------------|---------------------------------------------------------------------------------------------------------------------------------------------------------------------------------------------------------------------------------------------------------------------------------------------------------------------------------------------------------------------------------------------------------|--------------------------------------------------------------------------------------------------------------------------------------------------------------------------|---------------------------------------------------------------------------------------------------------------------------------------------------------------------------------------------------------------------------------------------------------------------------------------------------------------------------------------------------------------------------------------------------------------------------------------------------------------------------------------------------------------------------------------------------------------------------------------------------------------------------------------------------------------------------------------------------------------------------------------------------|
| EPI_ISL_872097                                                                                                                                                                                                                                                                                                                                                                                                                                                                                                                                                                                                                                                                                                                                                                                                                                                                                                                                                                 | Instituto de Diagnostico y Referencia Epidemiologicos (INDRE)                                                                                                                                                                                                                                                                                                                                           | Instituto de Diagnostico y Referencia Epidemiologicos (INDRE)                                                                                                            | Abril Rodriguez-Maldonado, Gisela Barrera-Badillo ,Claudia Wong-Arambula , Natividad Cruz-Ortiz, Tatiana Nunez-Garcia, Dayanira Arellano-Suarez, Fabiola Garces-Ayala, Adnan-Araiza Rodriguez, Edgar Mendieta-Condado, Lucia Hernandez-Rivas, Irma L                                                                                                                                                                                                                                                                                                                                                                                                                                                                                              |
| EPI_ISL_872628, EPI_ISL_872629, EPI_ISL_872630, EPI_ISL_872631, EPI_ISL_872632, EPI_ISL_872633, EPI_ISL_872634, EPI_ISL_872635, EPI_ISL_872636, EPI_ISL_872637, EPI_ISL_872638, EPI_ISL_872639, EPI_ISL_872640                                                                                                                                                                                                                                                                                                                                                                                                                                                                                                                                                                                                                                                                                                                                                                 | see above                                                                                                                                                                                                                                                                                                                                                                                               | Pathogenic Microorganisms Variability Laboratory                                                                                                                         | Alexey Shchetinin, Olesya Venchakova, Maria Nikiforova, Andrei Siniavin, Nadezhda Kuznetsova, Elena Shidlovskaya, Elizaveta Divisenko, Kirill Krasnoslobotsev, Evgeniya Mukasheva, Anna Ignatieva, Svetlana Trushakova, Andrey Pochtovyy, Valeria Bacalin, Evger Svetlana Smetanina, Elena Burtseva, Denis Logunov, Vladimir Gushchin, Alexander Gintsburg                                                                                                                                                                                                                                                                                                                                                                                        |
| EPI_ISL_872641, EPI_ISL_872642                                                                                                                                                                                                                                                                                                                                                                                                                                                                                                                                                                                                                                                                                                                                                                                                                                                                                                                                                 | Influenza etiology and epidemiology laboratory                                                                                                                                                                                                                                                                                                                                                          | Pathogenic Microorganisms Variability Laboratory                                                                                                                         | Alexey Shchetinin, Olesya Venchakova, Maria Nikiforova, Andrei Siniavin, Nadezhda Kuznetsova, Elena Shidlovskaya, Elizaveta Divisenko, Kirill Krasnoslobotsev, Evgeniya Mukasheva, Anna Ignatieva, Svetlana Trushakova, Andrey Pochtovyy, Valeria Bacalin, Evger Svetlana Smetanina, Elena Burtseva, Denis Logunov, Vladimir Gushchin, Alexander Gintsburg                                                                                                                                                                                                                                                                                                                                                                                        |
| EPI_ISL_872643                                                                                                                                                                                                                                                                                                                                                                                                                                                                                                                                                                                                                                                                                                                                                                                                                                                                                                                                                                 | Pathogenic Microorganisms Variability Laboratory                                                                                                                                                                                                                                                                                                                                                        | Pathogenic Microorganisms Variability Laboratory                                                                                                                         | Alexey Shchetinin, Olesya Venchakova, Maria Nikiforova, Andrei Siniavin, Nadezhda Kuznetsova, Elena Shidlovskaya, Elizaveta Divisenko, Kirill Krasnoslobotsev, Evgeniya Mukasheva, Anna Ignatieva, Svetlana Trushakova, Andrey Pochtovyy, Valeria Bacalin, Evger Svetlana Smetanina, Elena Burtseva, Denis Logunov, Vladimir Gushchin, Alexander Gintsburg                                                                                                                                                                                                                                                                                                                                                                                        |
| EPI_ISL_873211, EPI_ISL_873212, EPI_ISL_873213, EPI_ISL_873214, EPI_ISL_873215, EPI_ISL_873216, EPI_ISL_873217, EPI_ISL_873218, EPI_ISL_873219, EPI_ISL_873220, EPI_ISL_873221, EPI_ISL_873222, EPI_ISL_873223, EPI_ISL_873224, EPI_ISL_873225, EPI_ISL_873226, EPI_ISL_873227, EPI_ISL_873228, EPI_ISL_873229, EPI_ISL_873230, EPI_ISL_873231, EPI_ISL_873232, EPI_ISL_873233, EPI_ISL_873234, EPI_ISL_873235, EPI_ISL_873236, EPI_ISL_873237, EPI_ISL_873238, EPI_ISL_873239, EPI_ISL_873240, EPI_ISL_873241, EPI_ISL_873242, EPI_ISL_873243, EPI_ISL_873244, EPI_ISL_873245, EPI_ISL_873246, EPI_ISL_873247, EPI_ISL_873248, EPI_ISL_873249, EPI_ISL_873250, EPI_ISL_873251, EPI_ISL_873252, EPI_ISL_873253, EPI_ISL_873254, EPI_ISL_873255, EPI_ISL_873256, EPI_ISL_873257, EPI_ISL_873258, EPI_ISL_873259, EPI_ISL_873260, EPI_ISL_873261, EPI_ISL_873262, EPI_ISL_873263, EPI_ISL_873264, EPI_ISL_873265, EPI_ISL_873266, EPI_ISL_873267, EPI_ISL_873268, EPI_ISL_873269 | see above                                                                                                                                                                                                                                                                                                                                                                                               | M Health Fairview<br>Minnesota Department of Health, Public Health Laboratory<br>Alexandra Lorentz, Jacob Garfin, Matt Plumb, and Xiong Wang                             |                                                                                                                                                                                                                                                                                                                                                                                                                                                                                                                                                                                                                                                                                                                                                   |
| EPI_ISL_873270, EPI_ISL_873271                                                                                                                                                                                                                                                                                                                                                                                                                                                                                                                                                                                                                                                                                                                                                                                                                                                                                                                                                 | Minnesota Department of Health, Public Health Laboratory                                                                                                                                                                                                                                                                                                                                                | Minnesota Department of Health, Public Health Laboratory                                                                                                                 | Alexandra Lorentz, Jacob Garfin, Matt Plumb, and Xiong Wang                                                                                                                                                                                                                                                                                                                                                                                                                                                                                                                                                                                                                                                                                       |
| EPI_ISL_873272, EPI_ISL_873273, EPI_ISL_873274, EPI_ISL_873275                                                                                                                                                                                                                                                                                                                                                                                                                                                                                                                                                                                                                                                                                                                                                                                                                                                                                                                 | Vault Health                                                                                                                                                                                                                                                                                                                                                                                            | Minnesota Department of Health, Public Health Laboratory                                                                                                                 | Alexandra Lorentz, Jacob Garfin, Matt Plumb, and Xiong Wang                                                                                                                                                                                                                                                                                                                                                                                                                                                                                                                                                                                                                                                                                       |
| EPI_ISL_873276                                                                                                                                                                                                                                                                                                                                                                                                                                                                                                                                                                                                                                                                                                                                                                                                                                                                                                                                                                 | Hennepin County Medical Center                                                                                                                                                                                                                                                                                                                                                                          | Minnesota Department of Health, Public Health Laboratory                                                                                                                 | Alexandra Lorentz, Jacob Garfin, Matt Plumb, and Xiong Wang                                                                                                                                                                                                                                                                                                                                                                                                                                                                                                                                                                                                                                                                                       |
| EPI_ISL_873278                                                                                                                                                                                                                                                                                                                                                                                                                                                                                                                                                                                                                                                                                                                                                                                                                                                                                                                                                                 | School of Pharmacy, Shenandoah University                                                                                                                                                                                                                                                                                                                                                               | School of Pharmacy, Shenandoah University                                                                                                                                | Adams,S.M., Harralson,A.F., Kidd,R.S. and Sawyer,G.W.                                                                                                                                                                                                                                                                                                                                                                                                                                                                                                                                                                                                                                                                                             |
| EPI_ISL_875515                                                                                                                                                                                                                                                                                                                                                                                                                                                                                                                                                                                                                                                                                                                                                                                                                                                                                                                                                                 | Influenza etiology and epidemiology laboratory                                                                                                                                                                                                                                                                                                                                                          | Pathogenic Microorganisms Variability Laboratory                                                                                                                         | Alexey Shchetinin, Olesya Venchakova, Maria Nikiforova, Andrei Siniavin, Nadezhda Kuznetsova, Elena Shidlovskaya, Elizaveta Divisenko, Kirill Krasnoslobotsev, Evgeniya Mukasheva, Anna Ignatieva, Svetlana Trushakova, Andrey Pochtovyy, Valeria Bacalin, Evger Svetlana Smetanina, Elena Burtseva, Denis Logunov, Vladimir Gushchin, Alexander Gintsburg                                                                                                                                                                                                                                                                                                                                                                                        |
| EPI_ISL_875551                                                                                                                                                                                                                                                                                                                                                                                                                                                                                                                                                                                                                                                                                                                                                                                                                                                                                                                                                                 | ULSS 1 Dolomiti                                                                                                                                                                                                                                                                                                                                                                                         | Istituto Zooprofilattico Sperimentale delle Venezie                                                                                                                      | Adelaide Milani, Alessia Schivo, Annalisa Salviato, Erika Giorgia Quaranta, Ambra Pastori, Bianca Zecchin, Alice Fusaro, Isabella Monne, Calogero Terregino, Antonia Ricci                                                                                                                                                                                                                                                                                                                                                                                                                                                                                                                                                                        |
| EPI_ISL_875552, EPI_ISL_875553, EPI_ISL_875554, EPI_ISL_875555, EPI_ISL_875556, EPI_ISL_875557                                                                                                                                                                                                                                                                                                                                                                                                                                                                                                                                                                                                                                                                                                                                                                                                                                                                                 | ULSS 2 Treviso                                                                                                                                                                                                                                                                                                                                                                                          | Istituto Zooprofilattico Sperimentale delle Venezie                                                                                                                      | Adelaide Milani, Alessia Schivo, Annalisa Salviato, Erika Giorgia Quaranta, Ambra Pastori, Bianca Zecchin, Alice Fusaro, Isabella Monne, Calogero Terregino, Antonia Ricci                                                                                                                                                                                                                                                                                                                                                                                                                                                                                                                                                                        |
| EPI_ISL_875558                                                                                                                                                                                                                                                                                                                                                                                                                                                                                                                                                                                                                                                                                                                                                                                                                                                                                                                                                                 | Microbiologia e Virologia                                                                                                                                                                                                                                                                                                                                                                               | Istituto Zooprofilattico Sperimentale delle Venezie                                                                                                                      | Adelaide Milani, Alessia Schivo, Annalisa Salviato, Erika Giorgia Quaranta, Ambra Pastori, Bianca Zecchin, Alice Fusaro, Isabella Monne, Calogero Terregino, Antonia Ricci                                                                                                                                                                                                                                                                                                                                                                                                                                                                                                                                                                        |
| EPI_ISL_875674                                                                                                                                                                                                                                                                                                                                                                                                                                                                                                                                                                                                                                                                                                                                                                                                                                                                                                                                                                 | "1.AO Universitaria 'S. Giovanni di Dio e Ruggi D'Aragona, Scuola Medica Salernitana' Hospital / 2.UOC di Virologia e Microbiologia, Università della Campania 'L. Vanvitelli' / 3.AO Universitaria 'Federico II' Napoli Hospital / 4.AORN 'San Giuseppe Moscati' Avellino Hospital / 5.AO 'San Pio - presidio G. Rummo' Benevento Hospital / 6.AO 'Sant'Anna e San Sebastiano' Caserta Hospital / 7.PO | "1. Genome Research Center for Health (CRGS) / 2. Laboratory of Molecular Medicine and Genomics(LMMGe) / 3. Center for Research in Pure and Applied Mathematics (CRMPA)" | "Giorgio Giurato (Corresponding Author), Francesca Rizzo (Corresponding Author), Alessandro Weisz (Corresponding Author), Gianluigi Franci, Giovanni Nassa, Pasquale Pagliano, Roberta Tarallo, Elena Alexandrova, Ylenia D'Agostino, Carlo Ferravante, Jessica Lan Cappa, Domenico Palumbo, Giovanni Pecoraro, Assunta Sellitto, Oriana Strianese, Ilaria Terenzi, Giuseppe Fenza, Aniello Gentile, Antonello Saccomanno, Sonia Amabile, Teresa Rocco, Annamaria Salvati, Emilia Vaccaro, Massimiliano Galdiero, Michele Cennamo, Gi Maria Landi, Maurizio Fumi, Vincenzo Rocco, Rita Greco, Vittoria Letizia, Arnolfo Petruzzello, Maddalena Schioppa, Gregorio Goffredi, Francesca Marciano, Michele Caraglia, Alessia Cossu, Marianna Scrima" |

|                                                                                                                                                                                                                                                                                                                                                                                                                |                                                                                         |                                                                       |                                                                                                                                                                                                         |
|----------------------------------------------------------------------------------------------------------------------------------------------------------------------------------------------------------------------------------------------------------------------------------------------------------------------------------------------------------------------------------------------------------------|-----------------------------------------------------------------------------------------|-----------------------------------------------------------------------|---------------------------------------------------------------------------------------------------------------------------------------------------------------------------------------------------------|
|                                                                                                                                                                                                                                                                                                                                                                                                                | 'Maria Santissima Addolorata' Eboli Hospital / 8.Biogem Istituto di Ricerche Genetiche" |                                                                       |                                                                                                                                                                                                         |
| EPI_ISL_876044                                                                                                                                                                                                                                                                                                                                                                                                 | M Health Fairview                                                                       | Minnesota Department of Health, Public Health Laboratory              | Alexandra Lorentz, Jacob Garfin, Matt Plumb, and Xiong Wang                                                                                                                                             |
| EPI_ISL_876597, EPI_ISL_876598, EPI_ISL_876599, EPI_ISL_876600, EPI_ISL_876601, EPI_ISL_876602, EPI_ISL_876603, EPI_ISL_876604, EPI_ISL_876605, EPI_ISL_876606, EPI_ISL_876607, EPI_ISL_876608, EPI_ISL_876609, EPI_ISL_876610, EPI_ISL_876611, EPI_ISL_876612, EPI_ISL_876613, EPI_ISL_876614, EPI_ISL_876618, EPI_ISL_876619, EPI_ISL_876620, EPI_ISL_876621, EPI_ISL_876622, EPI_ISL_876623, EPI_ISL_876624 | see above                                                                               | Toronto Invasive Bacterial Diseases Network<br>McMaster University    | Allison McGeer, Patryk Aftanas, Hooman Derakhshani, Angel Li, Kuganya Nirmalarajah, Emily Panousis, Ahmed Draia, Jalees Nasir, Michael Surette, Samira Mubareka, Andrew G. McArthur                     |
| EPI_ISL_877420                                                                                                                                                                                                                                                                                                                                                                                                 | Darus Syifa' Islamic Hospital                                                           | Institute of Tropical Disease, Universitas Airlangga                  | Aldise M Nastri, Jezzy R Dewantari, Rima R Prasetya, Krisnoadi Rahardjo, HM Faiz, Gatot Soegiarto, Laksmi Wulandari, Resti Yudhawati, Soetjipto, Yasuko Mori, Maria I Lusida, Kazufumi Shimizu          |
| EPI_ISL_877457                                                                                                                                                                                                                                                                                                                                                                                                 | Primasatya Husada Citra Hospital                                                        | Institute of Tropical Disease, Universitas Airlangga                  | Aldise M Nastri, Jezzy R Dewantari, Rima R Prasetya, Krisnoadi Rahardjo, Pudji Djuarntono, Gatot Soegiarto, Laksmi Wulandari, Resti Yudhawati, Soetjipto, Yasuko Mori, Maria I Lusida, Kazufumi Shimizu |
| EPI_ISL_878529, EPI_ISL_878531, EPI_ISL_878534, EPI_ISL_878537, EPI_ISL_878539, EPI_ISL_878541, EPI_ISL_878544, EPI_ISL_878547, EPI_ISL_878549, EPI_ISL_878552, EPI_ISL_878554, EPI_ISL_878557, EPI_ISL_878560, EPI_ISL_878563, EPI_ISL_878565, EPI_ISL_878568                                                                                                                                                 | see above                                                                               | Robert Garry lab<br>Andersen lab at Scripps Research                  | Allison Smither, Gilberto Sabino-Santos, Patricia Snarski, Lilia Melnik, Antoinette Bell, Kaylynn Genemaras, Arnaud Drouin, Dahlene Fusco, Robert Garry with SEARCH Alliance San Diego                  |
| EPI_ISL_882637, EPI_ISL_882638, EPI_ISL_882639                                                                                                                                                                                                                                                                                                                                                                 | Azerbaijan National Hematology Center<br>Division of Medical Genetics                   | Azerbaijan National Hematology Center<br>Division of Medical Genetics | Aghayev Agha Rza, Bayrami Ramin                                                                                                                                                                         |
| EPI_ISL_882640                                                                                                                                                                                                                                                                                                                                                                                                 | Azerbaijan National Hematology Center<br>Division of Medical Genetics                   | Azerbaijan National Hematology Center<br>Division of Medical Genetics | Aghayev Agha Rza                                                                                                                                                                                        |
| EPI_ISL_882641                                                                                                                                                                                                                                                                                                                                                                                                 | Azerbaijan National Hematology Center<br>Division of Medical Genetics                   | Azerbaijan National Hematology Center<br>Division of Medical Genetics | Aghayev Agha Rza, Bayrami Ramin                                                                                                                                                                         |
| EPI_ISL_882642, EPI_ISL_882643, EPI_ISL_882644                                                                                                                                                                                                                                                                                                                                                                 | Azerbaijan National Hematology Center<br>Division of Medical Genetics                   | Azerbaijan National Hematology Center<br>Division of Medical Genetics | Aghayev Agha Rza                                                                                                                                                                                        |
| EPI_ISL_882770                                                                                                                                                                                                                                                                                                                                                                                                 | Darus Syifa' Islamic Hospital                                                           | Institute of Tropical Disease, Universitas Airlangga                  | Aldise M Nastri, Jezzy R Dewantari, Rima R Prasetya, Krisnoadi Rahardjo, HM Faiz, Gatot Soegiarto, Laksmi Wulandari, Resti Yudhawati, Soetjipto, Yasuko Mori, Kazufumi Shimizu, Maria I Lusida          |
| EPI_ISL_890232, EPI_ISL_890233, EPI_ISL_890234                                                                                                                                                                                                                                                                                                                                                                 | School of Pharmacy, Shenandoah University                                               | School of Pharmacy, Shenandoah University                             | Adams,S.M., Harralson,A.F., Kidd,R.S., Sawyer,G.W.                                                                                                                                                      |

We gratefully acknowledge the following Authors from the Originating laboratories responsible for obtaining the specimens, as well as the Submitting laboratories where the genome data were generated and shared via GISAID, on which this research is based.

All Submitters of data may be contacted directly via [www.gisaid.org](http://www.gisaid.org)

Authors are sorted alphabetically.

| Accession ID                                                                                                                                                                                                                                                                                                                                                                                                                                                                                                                                                                                                                                                                                                                                                                                                                                                                                                                                                                                                                                                                                                                                                                                                                                                                                                                                                                                                                                                                                                                                                                                                                                                                                                                                                                                                                                                                                                                                                                                                                                                                                                                                                                                                                                                                                                                                                                                                                                                                                                                                                                                                                                                                                                                                                                                                                                                                                                                                                                                                                                                                                                                                                                                                                                                                                                                                                                                                                                                                                                                                                                                                                                                                                                                                                                                                                                                                                                                                                                                                                                                                                                                                                                                                                                                                                                                                                                                                                                                                                                                                                                                                                                                                                                                                                                                                                                                                                                                                                                                                                                                                                                                                                                                                                                                                                                                                                                                                                                                                                                                                                                                                                                                                                                                                                                                                                                                                                                                                                                                                                                                                                                                                                                                                                                                                                                                                                                                                                                                                                                                                                                                                                   | Originating Laboratory                                        | Submitting Laboratory                                                                                                                                 | Authors                                                                                                                                                                                                                                                                                                                                                                                                                                                                                                    |
|--------------------------------------------------------------------------------------------------------------------------------------------------------------------------------------------------------------------------------------------------------------------------------------------------------------------------------------------------------------------------------------------------------------------------------------------------------------------------------------------------------------------------------------------------------------------------------------------------------------------------------------------------------------------------------------------------------------------------------------------------------------------------------------------------------------------------------------------------------------------------------------------------------------------------------------------------------------------------------------------------------------------------------------------------------------------------------------------------------------------------------------------------------------------------------------------------------------------------------------------------------------------------------------------------------------------------------------------------------------------------------------------------------------------------------------------------------------------------------------------------------------------------------------------------------------------------------------------------------------------------------------------------------------------------------------------------------------------------------------------------------------------------------------------------------------------------------------------------------------------------------------------------------------------------------------------------------------------------------------------------------------------------------------------------------------------------------------------------------------------------------------------------------------------------------------------------------------------------------------------------------------------------------------------------------------------------------------------------------------------------------------------------------------------------------------------------------------------------------------------------------------------------------------------------------------------------------------------------------------------------------------------------------------------------------------------------------------------------------------------------------------------------------------------------------------------------------------------------------------------------------------------------------------------------------------------------------------------------------------------------------------------------------------------------------------------------------------------------------------------------------------------------------------------------------------------------------------------------------------------------------------------------------------------------------------------------------------------------------------------------------------------------------------------------------------------------------------------------------------------------------------------------------------------------------------------------------------------------------------------------------------------------------------------------------------------------------------------------------------------------------------------------------------------------------------------------------------------------------------------------------------------------------------------------------------------------------------------------------------------------------------------------------------------------------------------------------------------------------------------------------------------------------------------------------------------------------------------------------------------------------------------------------------------------------------------------------------------------------------------------------------------------------------------------------------------------------------------------------------------------------------------------------------------------------------------------------------------------------------------------------------------------------------------------------------------------------------------------------------------------------------------------------------------------------------------------------------------------------------------------------------------------------------------------------------------------------------------------------------------------------------------------------------------------------------------------------------------------------------------------------------------------------------------------------------------------------------------------------------------------------------------------------------------------------------------------------------------------------------------------------------------------------------------------------------------------------------------------------------------------------------------------------------------------------------------------------------------------------------------------------------------------------------------------------------------------------------------------------------------------------------------------------------------------------------------------------------------------------------------------------------------------------------------------------------------------------------------------------------------------------------------------------------------------------------------------------------------------------------------------------------------------------------------------------------------------------------------------------------------------------------------------------------------------------------------------------------------------------------------------------------------------------------------------------------------------------------------------------------------------------------------------------------------------------------------------------------------------------------------------------|---------------------------------------------------------------|-------------------------------------------------------------------------------------------------------------------------------------------------------|------------------------------------------------------------------------------------------------------------------------------------------------------------------------------------------------------------------------------------------------------------------------------------------------------------------------------------------------------------------------------------------------------------------------------------------------------------------------------------------------------------|
| EPI_ISL_421348, EPI_ISL_421349, EPI_ISL_421350, EPI_ISL_421351, EPI_ISL_421352, EPI_ISL_421353, EPI_ISL_421354, EPI_ISL_421355, EPI_ISL_421356, EPI_ISL_421357, EPI_ISL_421358, EPI_ISL_421359, EPI_ISL_421360, EPI_ISL_421361, EPI_ISL_421362, EPI_ISL_421363, EPI_ISL_421364, EPI_ISL_421365, EPI_ISL_421366, EPI_ISL_421367, EPI_ISL_421368, EPI_ISL_421369, EPI_ISL_421370, EPI_ISL_421371, EPI_ISL_421372, EPI_ISL_421373, EPI_ISL_421374, EPI_ISL_421375, EPI_ISL_421376, EPI_ISL_421377, EPI_ISL_421378, EPI_ISL_421379, EPI_ISL_421380, EPI_ISL_421381, EPI_ISL_421382, EPI_ISL_421383, EPI_ISL_421384, EPI_ISL_421385, EPI_ISL_421386, EPI_ISL_421387, EPI_ISL_421388, EPI_ISL_421389, EPI_ISL_421390, EPI_ISL_421391, EPI_ISL_421392, EPI_ISL_421393, EPI_ISL_421394, EPI_ISL_421395, EPI_ISL_421396, EPI_ISL_421397, EPI_ISL_421398, EPI_ISL_421399, EPI_ISL_421400, EPI_ISL_421401, EPI_ISL_421402, EPI_ISL_421403, EPI_ISL_421404, EPI_ISL_421405, EPI_ISL_421406, EPI_ISL_421407, EPI_ISL_421408, EPI_ISL_421409, EPI_ISL_421410, EPI_ISL_421411, EPI_ISL_421412, EPI_ISL_421413, EPI_ISL_421414, EPI_ISL_421415, EPI_ISL_421416, EPI_ISL_421417, EPI_ISL_421418, EPI_ISL_421419, EPI_ISL_421420, EPI_ISL_421421, EPI_ISL_421422, EPI_ISL_421423, EPI_ISL_421424, EPI_ISL_421425, EPI_ISL_421426, EPI_ISL_421427, EPI_ISL_421428, EPI_ISL_421429, EPI_ISL_421430, EPI_ISL_421431, EPI_ISL_421432, EPI_ISL_421433, EPI_ISL_421434, EPI_ISL_421435, EPI_ISL_421593, EPI_ISL_421594, EPI_ISL_421595, EPI_ISL_421596, EPI_ISL_421597, EPI_ISL_421598, EPI_ISL_421599, EPI_ISL_421600, EPI_ISL_421601, EPI_ISL_421602, EPI_ISL_421603, EPI_ISL_421604, EPI_ISL_421605, EPI_ISL_421606, EPI_ISL_421607, EPI_ISL_421608, EPI_ISL_421609, EPI_ISL_421610, EPI_ISL_421611, EPI_ISL_421612, EPI_ISL_421613, EPI_ISL_421614, EPI_ISL_421615, EPI_ISL_421616, EPI_ISL_421617, EPI_ISL_421618, EPI_ISL_421619, EPI_ISL_421620, EPI_ISL_421621, EPI_ISL_421622, EPI_ISL_421623, EPI_ISL_421624, EPI_ISL_421625, EPI_ISL_421626, EPI_ISL_421627, EPI_ISL_421628, EPI_ISL_421629, EPI_ISL_421630, EPI_ISL_421631, EPI_ISL_421632, EPI_ISL_421633, EPI_ISL_421634, EPI_ISL_421635, EPI_ISL_422486, EPI_ISL_422488, EPI_ISL_422489, EPI_ISL_422490, EPI_ISL_422491, EPI_ISL_422492, EPI_ISL_422493, EPI_ISL_422494, EPI_ISL_422495, EPI_ISL_422496, EPI_ISL_422497, EPI_ISL_422498, EPI_ISL_422499, EPI_ISL_422500, EPI_ISL_422501, EPI_ISL_422502, EPI_ISL_422503, EPI_ISL_422504, EPI_ISL_422505, EPI_ISL_422506, EPI_ISL_422507, EPI_ISL_422508, EPI_ISL_422509, EPI_ISL_422510, EPI_ISL_422511, EPI_ISL_422512, EPI_ISL_422513, EPI_ISL_422514, EPI_ISL_422515, EPI_ISL_422516, EPI_ISL_422517, EPI_ISL_422518, EPI_ISL_422519, EPI_ISL_422520, EPI_ISL_422521, EPI_ISL_422522, EPI_ISL_422523, EPI_ISL_422524, EPI_ISL_422525, EPI_ISL_422526, EPI_ISL_422527, EPI_ISL_422528, EPI_ISL_422529, EPI_ISL_422530, EPI_ISL_422531, EPI_ISL_422532, EPI_ISL_422533, EPI_ISL_422534, EPI_ISL_422535, EPI_ISL_422536, EPI_ISL_422537, EPI_ISL_422538, EPI_ISL_422539, EPI_ISL_422540, EPI_ISL_422541, EPI_ISL_422542, EPI_ISL_422543, EPI_ISL_422544, EPI_ISL_422545, EPI_ISL_422546, EPI_ISL_422547, EPI_ISL_422548, EPI_ISL_422549, EPI_ISL_422550, EPI_ISL_422551, EPI_ISL_422552, EPI_ISL_422553, EPI_ISL_422554, EPI_ISL_422555, EPI_ISL_422556, EPI_ISL_422557, EPI_ISL_422558, EPI_ISL_422559, EPI_ISL_422560, EPI_ISL_422561, EPI_ISL_422562                                                                                                                                                                                                                                                                                                                                                                                                                                                                                                                                                                                                                                                                                                                                                                                                                                                                                                                                                                                                                                                                                                                                                                                                                                                                                                                                                                                                                                                                                                                                                                                                                                                                                                                                                                                                                                                                                                                                                                                                                                                                                                                                                                                                                                                                                                                                                                                                                                                                                                                                                                                                                                                                                                                                                                                                                                                                                                                                                                                                                                                                                                                                                                                 | see above                                                     | MSSH Clinical Microbiology Laboratories<br>MSSH Pathogen Surveillance Program                                                                         | Ana S. Gonzalez-Reiche, Mitchell Sullivan, Ajay Obla, Gopi Patel, Emilia Sordillo, Melissa Gitman, Alberto Paniz-mondolfi, Matthew Hernandez, Selcic Fabre, Jose Polanco, Zenab Khan, Bremy Albuquerque, Jayeeta Dutta, Juan Soto, Shwetha Sridhar Hara, Ying-Chih Wang, Melissa Smith, Robert Sebra, Lisa Miorin, Wen-chun Liu, Randy Albrecht, Judith Aberg, Florian Krammer, Adolfo Garcia-Sarstre, Viviana Simon, Harn van Bakel                                                                       |
| EPI_ISL_425177                                                                                                                                                                                                                                                                                                                                                                                                                                                                                                                                                                                                                                                                                                                                                                                                                                                                                                                                                                                                                                                                                                                                                                                                                                                                                                                                                                                                                                                                                                                                                                                                                                                                                                                                                                                                                                                                                                                                                                                                                                                                                                                                                                                                                                                                                                                                                                                                                                                                                                                                                                                                                                                                                                                                                                                                                                                                                                                                                                                                                                                                                                                                                                                                                                                                                                                                                                                                                                                                                                                                                                                                                                                                                                                                                                                                                                                                                                                                                                                                                                                                                                                                                                                                                                                                                                                                                                                                                                                                                                                                                                                                                                                                                                                                                                                                                                                                                                                                                                                                                                                                                                                                                                                                                                                                                                                                                                                                                                                                                                                                                                                                                                                                                                                                                                                                                                                                                                                                                                                                                                                                                                                                                                                                                                                                                                                                                                                                                                                                                                                                                                                                                 | Public Health Ontario                                         | Public Health Agency of Canada - National Microbiology Laboratory                                                                                     | Amrit S. Boese, Nikesh Tailor, Anders Leung, Joshua Quick, Shari Tyson, Morag Graham, Jonathan Audet, Natalie Knox, Darwyn Kobasa                                                                                                                                                                                                                                                                                                                                                                          |
| EPI_ISL_425647, EPI_ISL_425648, EPI_ISL_425649, EPI_ISL_425650, EPI_ISL_425652, EPI_ISL_425653, EPI_ISL_425654, EPI_ISL_425655, EPI_ISL_425656, EPI_ISL_425657, EPI_ISL_425658, EPI_ISL_425660, EPI_ISL_425661, EPI_ISL_425662, EPI_ISL_425663, EPI_ISL_425664, EPI_ISL_425665, EPI_ISL_425666, EPI_ISL_425667, EPI_ISL_425668, EPI_ISL_425669, EPI_ISL_425670, EPI_ISL_425671, EPI_ISL_425672, EPI_ISL_425673, EPI_ISL_425674, EPI_ISL_425675, EPI_ISL_425676, EPI_ISL_425677, EPI_ISL_425678, EPI_ISL_425679, EPI_ISL_425680, EPI_ISL_425682, EPI_ISL_425683, EPI_ISL_425684, EPI_ISL_425685, EPI_ISL_425686, EPI_ISL_425687, EPI_ISL_425688, EPI_ISL_425689, EPI_ISL_425690, EPI_ISL_425691, EPI_ISL_425692, EPI_ISL_425693, EPI_ISL_425694, EPI_ISL_425695, EPI_ISL_425696, EPI_ISL_425697, EPI_ISL_425698, EPI_ISL_425701, EPI_ISL_425702, EPI_ISL_425703, EPI_ISL_425704, EPI_ISL_425705, EPI_ISL_425706, EPI_ISL_425707, EPI_ISL_425708, EPI_ISL_425709, EPI_ISL_425710, EPI_ISL_425711, EPI_ISL_425712, EPI_ISL_425713, EPI_ISL_425714, EPI_ISL_425715, EPI_ISL_425716, EPI_ISL_425717, EPI_ISL_425718, EPI_ISL_425719, EPI_ISL_425720, EPI_ISL_425721, EPI_ISL_425722, EPI_ISL_425723, EPI_ISL_425724, EPI_ISL_425725, EPI_ISL_425726, EPI_ISL_425727, EPI_ISL_425728, EPI_ISL_425729, EPI_ISL_425730, EPI_ISL_425731, EPI_ISL_425732, EPI_ISL_425733, EPI_ISL_425734, EPI_ISL_425735, EPI_ISL_425736, EPI_ISL_425737, EPI_ISL_425738, EPI_ISL_425739, EPI_ISL_425740, EPI_ISL_425741, EPI_ISL_425742, EPI_ISL_425743, EPI_ISL_425744, EPI_ISL_425745, EPI_ISL_425746, EPI_ISL_425747, EPI_ISL_425748, EPI_ISL_425749, EPI_ISL_425750, EPI_ISL_425751, EPI_ISL_425752, EPI_ISL_425753, EPI_ISL_425754, EPI_ISL_425755, EPI_ISL_425756, EPI_ISL_425757, EPI_ISL_425758, EPI_ISL_425759, EPI_ISL_425760, EPI_ISL_425761, EPI_ISL_425762, EPI_ISL_425763, EPI_ISL_425764, EPI_ISL_425765, EPI_ISL_425766, EPI_ISL_425767, EPI_ISL_425768, EPI_ISL_425769, EPI_ISL_425770, EPI_ISL_425771, EPI_ISL_425772, EPI_ISL_425773, EPI_ISL_425774, EPI_ISL_425775, EPI_ISL_425776, EPI_ISL_425777, EPI_ISL_425778, EPI_ISL_425779, EPI_ISL_425780, EPI_ISL_425781, EPI_ISL_425782, EPI_ISL_425783, EPI_ISL_425784, EPI_ISL_425785, EPI_ISL_425786, EPI_ISL_425787, EPI_ISL_425788, EPI_ISL_425789, EPI_ISL_425790, EPI_ISL_425791, EPI_ISL_425792, EPI_ISL_425793, EPI_ISL_425794, EPI_ISL_425795, EPI_ISL_425796, EPI_ISL_425797, EPI_ISL_425798, EPI_ISL_425799, EPI_ISL_425800, EPI_ISL_425801, EPI_ISL_425802, EPI_ISL_425803, EPI_ISL_425805, EPI_ISL_425806, EPI_ISL_425807, EPI_ISL_425808, EPI_ISL_425809, EPI_ISL_425810, EPI_ISL_425811, EPI_ISL_425812, EPI_ISL_425813, EPI_ISL_425814, EPI_ISL_425815, EPI_ISL_425816, EPI_ISL_425817, EPI_ISL_425818                                                                                                                                                                                                                                                                                                                                                                                                                                                                                                                                                                                                                                                                                                                                                                                                                                                                                                                                                                                                                                                                                                                                                                                                                                                                                                                                                                                                                                                                                                                                                                                                                                                                                                                                                                                                                                                                                                                                                                                                                                                                                                                                                                                                                                                                                                                                                                                                                                                                                                                                                                                                                                                                                                                                                                                                                                                                                                                                                                                                                                                                                                                                                                                                                                                                                                                                                                                                                                                                                                                                                                                                                                                                                                                                                                                                                                                                 | see above                                                     | West of Scotland Specialist Virology Centre, NHSGGC / MRC-University of Glasgow Centre for Virus Research<br>COVID-19 Genomics UK (COG-UK) Consortium | Ana da Silva Filipe, Kathy Smollett, Stephen Carmichael, Natasha Johnson, Daniel Mair, Lily Tong, Jenna Nichols; Sarah McDonald; Richard Orton, Joseph Hughes, Sreenu Vattipally, David L Robertson; Kathy Li, Natasha Jesudason, Rajiv Shah, James Shepherd, Antonia Ho, Emma Thomson; Alasdair MacLean, Rory Gunson.                                                                                                                                                                                     |
| EPI_ISL_426627, EPI_ISL_426628                                                                                                                                                                                                                                                                                                                                                                                                                                                                                                                                                                                                                                                                                                                                                                                                                                                                                                                                                                                                                                                                                                                                                                                                                                                                                                                                                                                                                                                                                                                                                                                                                                                                                                                                                                                                                                                                                                                                                                                                                                                                                                                                                                                                                                                                                                                                                                                                                                                                                                                                                                                                                                                                                                                                                                                                                                                                                                                                                                                                                                                                                                                                                                                                                                                                                                                                                                                                                                                                                                                                                                                                                                                                                                                                                                                                                                                                                                                                                                                                                                                                                                                                                                                                                                                                                                                                                                                                                                                                                                                                                                                                                                                                                                                                                                                                                                                                                                                                                                                                                                                                                                                                                                                                                                                                                                                                                                                                                                                                                                                                                                                                                                                                                                                                                                                                                                                                                                                                                                                                                                                                                                                                                                                                                                                                                                                                                                                                                                                                                                                                                                                                 | Ochsner Health                                                | BioInfoExperts, LLC                                                                                                                                   | Amy Feehan, David Nolan, Rebecca Rose, Susanna Lamers, Sissy Cross, Julia-Garcia-Diaz, Tong Yang, Luke Caruso, David Moraga Amador, Wayra Navia, Lydia Von Borstel, Xiao Hui Zhou                                                                                                                                                                                                                                                                                                                          |
| EPI_ISL_433268, EPI_ISL_433269, EPI_ISL_433270, EPI_ISL_433271, EPI_ISL_433272, EPI_ISL_433273, EPI_ISL_433274, EPI_ISL_433275, EPI_ISL_433276, EPI_ISL_433277, EPI_ISL_433278, EPI_ISL_433279, EPI_ISL_433280, EPI_ISL_433281, EPI_ISL_433282, EPI_ISL_433283, EPI_ISL_433284, EPI_ISL_433285, EPI_ISL_433286, EPI_ISL_433287, EPI_ISL_433288, EPI_ISL_433289, EPI_ISL_433290, EPI_ISL_433291, EPI_ISL_433292, EPI_ISL_433293, EPI_ISL_433294, EPI_ISL_433295, EPI_ISL_433296, EPI_ISL_433297, EPI_ISL_433298, EPI_ISL_433299, EPI_ISL_433300, EPI_ISL_433301, EPI_ISL_433302, EPI_ISL_433303, EPI_ISL_433304, EPI_ISL_433305, EPI_ISL_433306, EPI_ISL_433307, EPI_ISL_433308, EPI_ISL_433309, EPI_ISL_433310, EPI_ISL_433311, EPI_ISL_433312, EPI_ISL_433313, EPI_ISL_433314, EPI_ISL_433315, EPI_ISL_433316, EPI_ISL_433317, EPI_ISL_433318, EPI_ISL_433319, EPI_ISL_433320, EPI_ISL_433321, EPI_ISL_433322, EPI_ISL_433323, EPI_ISL_433324, EPI_ISL_433325, EPI_ISL_433326, EPI_ISL_433327, EPI_ISL_433328, EPI_ISL_433329, EPI_ISL_433330, EPI_ISL_433331, EPI_ISL_433332, EPI_ISL_433333, EPI_ISL_433334, EPI_ISL_433335, EPI_ISL_433336, EPI_ISL_433337, EPI_ISL_433338, EPI_ISL_433339, EPI_ISL_433340, EPI_ISL_433341, EPI_ISL_433342, EPI_ISL_433343, EPI_ISL_433344, EPI_ISL_433345, EPI_ISL_433346, EPI_ISL_433347, EPI_ISL_433348, EPI_ISL_433349, EPI_ISL_433350, EPI_ISL_433351, EPI_ISL_433352, EPI_ISL_433353, EPI_ISL_433354, EPI_ISL_433355, EPI_ISL_433356, EPI_ISL_433357, EPI_ISL_433358, EPI_ISL_433359, EPI_ISL_433360, EPI_ISL_433361, EPI_ISL_433362, EPI_ISL_433363, EPI_ISL_433364, EPI_ISL_433365, EPI_ISL_433366, EPI_ISL_433367, EPI_ISL_433368, EPI_ISL_433369, EPI_ISL_433370, EPI_ISL_433371, EPI_ISL_433372, EPI_ISL_433373, EPI_ISL_433374, EPI_ISL_433375, EPI_ISL_433376, EPI_ISL_433377, EPI_ISL_433378, EPI_ISL_433379, EPI_ISL_433380, EPI_ISL_433381, EPI_ISL_433382, EPI_ISL_433383, EPI_ISL_433384, EPI_ISL_433385, EPI_ISL_433386, EPI_ISL_433387, EPI_ISL_433388, EPI_ISL_433389, EPI_ISL_433390, EPI_ISL_433391, EPI_ISL_433392, EPI_ISL_433393, EPI_ISL_433394, EPI_ISL_433395, EPI_ISL_433396, EPI_ISL_433397, EPI_ISL_433398, EPI_ISL_433399, EPI_ISL_433400, EPI_ISL_433401, EPI_ISL_433402, EPI_ISL_433403, EPI_ISL_433404, EPI_ISL_433405, EPI_ISL_433406, EPI_ISL_433407, EPI_ISL_433408, EPI_ISL_433409, EPI_ISL_433410, EPI_ISL_433411, EPI_ISL_433412, EPI_ISL_433413, EPI_ISL_433414, EPI_ISL_433415, EPI_ISL_433416, EPI_ISL_433417, EPI_ISL_433418, EPI_ISL_433419, EPI_ISL_433420, EPI_ISL_433421, EPI_ISL_433422, EPI_ISL_433423, EPI_ISL_433424, EPI_ISL_433425, EPI_ISL_433426, EPI_ISL_433427, EPI_ISL_433428, EPI_ISL_433429, EPI_ISL_433430, EPI_ISL_433431, EPI_ISL_433432, EPI_ISL_433433, EPI_ISL_433434, EPI_ISL_433435, EPI_ISL_433436, EPI_ISL_433437, EPI_ISL_433438, EPI_ISL_433439, EPI_ISL_433440, EPI_ISL_433441, EPI_ISL_433442, EPI_ISL_433443, EPI_ISL_433444, EPI_ISL_433445, EPI_ISL_433446, EPI_ISL_433447, EPI_ISL_433448, EPI_ISL_433449, EPI_ISL_433450, EPI_ISL_433451, EPI_ISL_433452, EPI_ISL_433453, EPI_ISL_433454, EPI_ISL_433455, EPI_ISL_433456, EPI_ISL_433457, EPI_ISL_433458, EPI_ISL_433459, EPI_ISL_433460, EPI_ISL_433461, EPI_ISL_433462, EPI_ISL_433463, EPI_ISL_433464, EPI_ISL_433465, EPI_ISL_433466, EPI_ISL_433467, EPI_ISL_433468, EPI_ISL_433469, EPI_ISL_433470, EPI_ISL_433471, EPI_ISL_433472, EPI_ISL_433473, EPI_ISL_433474, EPI_ISL_433475, EPI_ISL_433476, EPI_ISL_433477, EPI_ISL_433478, EPI_ISL_433479, EPI_ISL_433480, EPI_ISL_433481, EPI_ISL_433482, EPI_ISL_433483, EPI_ISL_433484, EPI_ISL_433485, EPI_ISL_433486, EPI_ISL_433487, EPI_ISL_433488, EPI_ISL_433489, EPI_ISL_433490, EPI_ISL_433491, EPI_ISL_433492, EPI_ISL_433493, EPI_ISL_433494, EPI_ISL_433495, EPI_ISL_433496, EPI_ISL_433497, EPI_ISL_433498, EPI_ISL_433499, EPI_ISL_433500, EPI_ISL_433501, EPI_ISL_433502, EPI_ISL_433503, EPI_ISL_433504, EPI_ISL_433505, EPI_ISL_433506, EPI_ISL_433507, EPI_ISL_433508, EPI_ISL_433509, EPI_ISL_433510, EPI_ISL_433511, EPI_ISL_433512, EPI_ISL_433513, EPI_ISL_433514, EPI_ISL_433515, EPI_ISL_433516, EPI_ISL_433517, EPI_ISL_433518, EPI_ISL_433519, EPI_ISL_433520, EPI_ISL_433521, EPI_ISL_433522, EPI_ISL_433523, EPI_ISL_433524, EPI_ISL_433525, EPI_ISL_433526, EPI_ISL_433527, EPI_ISL_433528, EPI_ISL_433529, EPI_ISL_433530, EPI_ISL_433531, EPI_ISL_433532, EPI_ISL_433533, EPI_ISL_433534, EPI_ISL_433535, EPI_ISL_433536, EPI_ISL_433537, EPI_ISL_433538, EPI_ISL_433539, EPI_ISL_433540, EPI_ISL_433541, EPI_ISL_433542, EPI_ISL_433543, EPI_ISL_433544, EPI_ISL_433545, EPI_ISL_433546, EPI_ISL_433547, EPI_ISL_433548, EPI_ISL_433549, EPI_ISL_433550, EPI_ISL_433551, EPI_ISL_433552, EPI_ISL_433553, EPI_ISL_433554, EPI_ISL_433555, EPI_ISL_433556, EPI_ISL_433557, EPI_ISL_433558, EPI_ISL_433559, EPI_ISL_433560, EPI_ISL_433561, EPI_ISL_433562, EPI_ISL_433563, EPI_ISL_433564, EPI_ISL_433565, EPI_ISL_433566, EPI_ISL_433567, EPI_ISL_433568, EPI_ISL_433569, EPI_ISL_433570, EPI_ISL_433571, EPI_ISL_433572, EPI_ISL_433573, EPI_ISL_433574, EPI_ISL_433575, EPI_ISL_433576, EPI_ISL_433577, EPI_ISL_433578, EPI_ISL_433579, EPI_ISL_433580, EPI_ISL_433581, EPI_ISL_433582, EPI_ISL_433583, EPI_ISL_433584, EPI_ISL_433585, EPI_ISL_433586, EPI_ISL_433587, EPI_ISL_433588, EPI_ISL_433589, EPI_ISL_433590, EPI_ISL_433591, EPI_ISL_433592, EPI_ISL_433593, EPI_ISL_433594, EPI_ISL_433595, EPI_ISL_433596, EPI_ISL_433597, EPI_ISL_433598, EPI_ISL_433599, EPI_ISL_433600, EPI_ISL_433601, EPI_ISL_433602, EPI_ISL_433603, EPI_ISL_433604, EPI_ISL_433605, EPI_ISL_433606, EPI_ISL_433607, EPI_ISL_433608, EPI_ISL_433609, EPI_ISL_433610, EPI_ISL_433611, EPI_ISL_433612, EPI_ISL_433613, EPI_ISL_433614, EPI_ISL_433615, EPI_ISL_433616, EPI_ISL_433617, EPI_ISL_433618, EPI_ISL_433619, EPI_ISL_433620, EPI_ISL_433621, EPI_ISL_433622, EPI_ISL_433623, EPI_ISL_433624, EPI_ISL_433625, EPI_ISL_433626, EPI_ISL_433627, EPI_ISL_433628, EPI_ISL_433629, EPI_ISL_433630, EPI_ISL_433631, EPI_ISL_433632, EPI_ISL_433633, EPI_ISL_433634, EPI_ISL_433635, EPI_ISL_433636, EPI_ISL_433637, EPI_ISL_433638, EPI_ISL_433639, EPI_ISL_433640, EPI_ISL_433641, EPI_ISL_433642, EPI_ISL_433643, EPI_ISL_433644, EPI_ISL_433645, EPI_ISL_433646, EPI_ISL_433647, EPI_ISL_433648, EPI_ISL_433649, EPI_ISL_433650, EPI_ISL_433651, EPI_ISL_433652, EPI_ISL_433653, EPI_ISL_433654, EPI_ISL_433655, EPI_ISL_433656, EPI_ISL_433657, EPI_ISL_433658, EPI_ISL_433659, EPI_ISL_433660, EPI_ISL_433661, EPI_ISL_433662, EPI_ISL_433663, EPI_ISL_433664, EPI_ISL_433665 | see above                                                     | West of Scotland Specialist Virology Centre, NHSGGC / MRC-University of Glasgow Centre for Virus Research<br>COVID-19 Genomics UK (COG-UK) Consortium | Ana da Silva Filipe, Natasha Johnson, Kathy Smollett, Daniel Mair, Stephen Carmichael, Lily Tong, Jenna Nichols, Elihu Aranday-Cortes, Kirstyn Brunker, Yasmin Parr, Kyriaki Nomikou; Sarah McDonald, Marc Niebel, Pataweé Asamaphan; Richard Orton, Joseph Hughes, Sreenu Vattipally, David L Robertson; Alasdair MacLean, Rory Gunson; Kathy Li, Natasha Jesudason, Rajiv Shah, James Shepherd, Antonia Ho, Emma Thomson                                                                                 |
| EPI_ISL_434653, EPI_ISL_434656                                                                                                                                                                                                                                                                                                                                                                                                                                                                                                                                                                                                                                                                                                                                                                                                                                                                                                                                                                                                                                                                                                                                                                                                                                                                                                                                                                                                                                                                                                                                                                                                                                                                                                                                                                                                                                                                                                                                                                                                                                                                                                                                                                                                                                                                                                                                                                                                                                                                                                                                                                                                                                                                                                                                                                                                                                                                                                                                                                                                                                                                                                                                                                                                                                                                                                                                                                                                                                                                                                                                                                                                                                                                                                                                                                                                                                                                                                                                                                                                                                                                                                                                                                                                                                                                                                                                                                                                                                                                                                                                                                                                                                                                                                                                                                                                                                                                                                                                                                                                                                                                                                                                                                                                                                                                                                                                                                                                                                                                                                                                                                                                                                                                                                                                                                                                                                                                                                                                                                                                                                                                                                                                                                                                                                                                                                                                                                                                                                                                                                                                                                                                 | Trollbackens VC                                               | The Public Health Agency of Sweden                                                                                                                    | Amelie Holmqvist, Oskar Karlsson Lindsjo, Maria Lind Karlberg, Anna-Malin Linde, Olov Svartstrom, Anna Risberg, Theresa Enkirch, Mia Brytting, Karin Tegmark-Wisell                                                                                                                                                                                                                                                                                                                                        |
| EPI_ISL_436097                                                                                                                                                                                                                                                                                                                                                                                                                                                                                                                                                                                                                                                                                                                                                                                                                                                                                                                                                                                                                                                                                                                                                                                                                                                                                                                                                                                                                                                                                                                                                                                                                                                                                                                                                                                                                                                                                                                                                                                                                                                                                                                                                                                                                                                                                                                                                                                                                                                                                                                                                                                                                                                                                                                                                                                                                                                                                                                                                                                                                                                                                                                                                                                                                                                                                                                                                                                                                                                                                                                                                                                                                                                                                                                                                                                                                                                                                                                                                                                                                                                                                                                                                                                                                                                                                                                                                                                                                                                                                                                                                                                                                                                                                                                                                                                                                                                                                                                                                                                                                                                                                                                                                                                                                                                                                                                                                                                                                                                                                                                                                                                                                                                                                                                                                                                                                                                                                                                                                                                                                                                                                                                                                                                                                                                                                                                                                                                                                                                                                                                                                                                                                 | Prince Charles Hospital                                       | Public Health Virology Laboratory, Forensics and Scientific Services, Queensland Health                                                               | Alyssa Pyke, Neelima Nair, Natalie Simpson, Lisa Leckie, Jamie McMahon, Jean Barcelon, Amanda De Jong, Sean Moody, Doris Genge, Glen Hewitson, Peter Burtonclay, Judy Northill, Ian Maxwell Mackay, Carmel Taylor, Bixing Huang, David Warrilow, Mitchell Finger, Peter Moore, Sarah Wheatley, Sonja Hall-Mendelin, Andrew Van Den Hurk, Elisabeth Gamez, Inga Sultana and Frederick Moore                                                                                                                 |
| EPI_ISL_436098                                                                                                                                                                                                                                                                                                                                                                                                                                                                                                                                                                                                                                                                                                                                                                                                                                                                                                                                                                                                                                                                                                                                                                                                                                                                                                                                                                                                                                                                                                                                                                                                                                                                                                                                                                                                                                                                                                                                                                                                                                                                                                                                                                                                                                                                                                                                                                                                                                                                                                                                                                                                                                                                                                                                                                                                                                                                                                                                                                                                                                                                                                                                                                                                                                                                                                                                                                                                                                                                                                                                                                                                                                                                                                                                                                                                                                                                                                                                                                                                                                                                                                                                                                                                                                                                                                                                                                                                                                                                                                                                                                                                                                                                                                                                                                                                                                                                                                                                                                                                                                                                                                                                                                                                                                                                                                                                                                                                                                                                                                                                                                                                                                                                                                                                                                                                                                                                                                                                                                                                                                                                                                                                                                                                                                                                                                                                                                                                                                                                                                                                                                                                                 | Royal Brisbane and Women's Hospital                           | Public Health Virology Laboratory, Forensic and Scientific Services, Queensland Health                                                                | Alyssa Pyke, Neelima Nair, Natalie Simpson, Lisa Leckie, Jamie McMahon, Jean Barcelon, Amanda De Jong, Sean Moody, Doris Genge, Glen Hewitson, Peter Burtonclay, Judy Northill, Ian Maxwell Mackay, Carmel Taylor, Bixing Huang, David Warrilow, Mitchell Finger, Peter Moore, Sarah Wheatley, Sonja Hall-Mendelin, Andrew Van Den Hurk, Elisabeth Gamez, Inga Sultana and Frederick Moore                                                                                                                 |
| EPI_ISL_436939, EPI_ISL_436940, EPI_ISL_436941, EPI_ISL_436942, EPI_ISL_436943, EPI_ISL_436944, EPI_ISL_436945, EPI_ISL_436946, EPI_ISL_436947, EPI_ISL_436948, EPI_ISL_436949, EPI_ISL_436950, EPI_ISL_436951, EPI_ISL_436952, EPI_ISL_436953, EPI_ISL_436954, EPI_ISL_436955, EPI_ISL_436956, EPI_ISL_436957, EPI_ISL_436958, EPI_ISL_436959, EPI_ISL_436960, EPI_ISL_436961                                                                                                                                                                                                                                                                                                                                                                                                                                                                                                                                                                                                                                                                                                                                                                                                                                                                                                                                                                                                                                                                                                                                                                                                                                                                                                                                                                                                                                                                                                                                                                                                                                                                                                                                                                                                                                                                                                                                                                                                                                                                                                                                                                                                                                                                                                                                                                                                                                                                                                                                                                                                                                                                                                                                                                                                                                                                                                                                                                                                                                                                                                                                                                                                                                                                                                                                                                                                                                                                                                                                                                                                                                                                                                                                                                                                                                                                                                                                                                                                                                                                                                                                                                                                                                                                                                                                                                                                                                                                                                                                                                                                                                                                                                                                                                                                                                                                                                                                                                                                                                                                                                                                                                                                                                                                                                                                                                                                                                                                                                                                                                                                                                                                                                                                                                                                                                                                                                                                                                                                                                                                                                                                                                                                                                                 | see above                                                     | Ochsner Health<br>Bioinfoexperts, LLC                                                                                                                 | Amy Feehan, David J. Nolan, Rebecca Rose, Sissy Cross, David Moraga Amador, Tong Yang, Luke Caruso, Wayra Navia, Lydia Von Borstel, Xiao Hui Zhou, Julia-Garcia-Diaz, Susanna L Lamers                                                                                                                                                                                                                                                                                                                     |
| EPI_ISL_437438                                                                                                                                                                                                                                                                                                                                                                                                                                                                                                                                                                                                                                                                                                                                                                                                                                                                                                                                                                                                                                                                                                                                                                                                                                                                                                                                                                                                                                                                                                                                                                                                                                                                                                                                                                                                                                                                                                                                                                                                                                                                                                                                                                                                                                                                                                                                                                                                                                                                                                                                                                                                                                                                                                                                                                                                                                                                                                                                                                                                                                                                                                                                                                                                                                                                                                                                                                                                                                                                                                                                                                                                                                                                                                                                                                                                                                                                                                                                                                                                                                                                                                                                                                                                                                                                                                                                                                                                                                                                                                                                                                                                                                                                                                                                                                                                                                                                                                                                                                                                                                                                                                                                                                                                                                                                                                                                                                                                                                                                                                                                                                                                                                                                                                                                                                                                                                                                                                                                                                                                                                                                                                                                                                                                                                                                                                                                                                                                                                                                                                                                                                                                                 | Department of MicroBiology, Government Medical College, Surat | Gujarat Biotechnology Research Centre                                                                                                                 | Amit Kanani, Akanksha Verma, Nitin Savaliya, Raghawendra Kumar, Dinesh Kumar, Zuber Saiyed, Dipa Kinarivara, Disha Patel, Binita Arora, Neeta Khandelwal, Geeta Vaghela, Sonali Barve, Bhavesh Modi, Kairavi Joshi, Gaurishankar Shrimali, Naidh, Sanoo, Pranay Shah, R D Dixit, Snehal Bagatharia, Kamesh J Upadhyay, Ramesh Pandit, Tejas Shah, Ankil Hinsu, Pritesh Sabara, Apurvashin Puvar, Janvi Raval, Monika Gandhi, Pinal Trivedi, Maharshi Pandya, Neelam Nathani, Chaitanya Joshi, Madhvi Joshi |
| EPI_ISL_438749, EPI_ISL_438750, EPI_ISL_438751, EPI_ISL_438752, EPI_ISL_438753, EPI_ISL_438754, EPI_ISL_438755, EPI_ISL_438756, EPI_ISL_438757, EPI_ISL_438758, EPI_ISL_438759, EPI_ISL_438760, EPI_ISL_438761, EPI_ISL_438762, EPI_ISL_438763, EPI_ISL_438765, EPI_ISL_438766, EPI_ISL_438767, EPI_ISL_438769, EPI_ISL_438770, EPI_ISL_438771, EPI_ISL_438772, EPI_ISL_438773, EPI_ISL_438774, EPI_ISL_438775, EPI_ISL_438776, EPI_ISL_438777, EPI_ISL_438778, EPI_ISL_438779, EPI_ISL_438780, EPI_ISL_438781, EPI_ISL_438782, EPI_ISL_438783, EPI_ISL_438784, EPI_ISL_438785, EPI_ISL_438786,                                                                                                                                                                                                                                                                                                                                                                                                                                                                                                                                                                                                                                                                                                                                                                                                                                                                                                                                                                                                                                                                                                                                                                                                                                                                                                                                                                                                                                                                                                                                                                                                                                                                                                                                                                                                                                                                                                                                                                                                                                                                                                                                                                                                                                                                                                                                                                                                                                                                                                                                                                                                                                                                                                                                                                                                                                                                                                                                                                                                                                                                                                                                                                                                                                                                                                                                                                                                                                                                                                                                                                                                                                                                                                                                                                                                                                                                                                                                                                                                                                                                                                                                                                                                                                                                                                                                                                                                                                                                                                                                                                                                                                                                                                                                                                                                                                                                                                                                                                                                                                                                                                                                                                                                                                                                                                                                                                                                                                                                                                                                                                                                                                                                                                                                                                                                                                                                                                                                                                                                                                |                                                               |                                                                                                                                                       |                                                                                                                                                                                                                                                                                                                                                                                                                                                                                                            |

EPI\_ISL\_438787, EPI\_ISL\_438788, EPI\_ISL\_438789, EPI\_ISL\_438790, EPI\_ISL\_438791, EPI\_ISL\_438792, EPI\_ISL\_438793, EPI\_ISL\_438794, EPI\_ISL\_438796, EPI\_ISL\_438797, EPI\_ISL\_438798, EPI\_ISL\_438799, EPI\_ISL\_438800, EPI\_ISL\_438801, EPI\_ISL\_438802, EPI\_ISL\_438803, EPI\_ISL\_438804, EPI\_ISL\_438805, EPI\_ISL\_438806, EPI\_ISL\_438807, EPI\_ISL\_438808, EPI\_ISL\_438809, EPI\_ISL\_438810, EPI\_ISL\_438811, EPI\_ISL\_438812, EPI\_ISL\_438813, EPI\_ISL\_438814, EPI\_ISL\_438815, EPI\_ISL\_438816, EPI\_ISL\_438817, EPI\_ISL\_438818, EPI\_ISL\_438819, EPI\_ISL\_438820, EPI\_ISL\_438821, EPI\_ISL\_438822, EPI\_ISL\_438823, EPI\_ISL\_438824, EPI\_ISL\_438825, EPI\_ISL\_438826, EPI\_ISL\_438827, EPI\_ISL\_438828, EPI\_ISL\_438829, EPI\_ISL\_438830, EPI\_ISL\_438831, EPI\_ISL\_438832, EPI\_ISL\_438833, EPI\_ISL\_438834, EPI\_ISL\_438835, EPI\_ISL\_438836, EPI\_ISL\_438837, EPI\_ISL\_438838, EPI\_ISL\_438839, EPI\_ISL\_438840, EPI\_ISL\_438841, EPI\_ISL\_438842, EPI\_ISL\_438843, EPI\_ISL\_438844, EPI\_ISL\_438845, EPI\_ISL\_438846, EPI\_ISL\_438847, EPI\_ISL\_438848, EPI\_ISL\_438849, EPI\_ISL\_438850, EPI\_ISL\_438851, EPI\_ISL\_438852, EPI\_ISL\_438853, EPI\_ISL\_438854, EPI\_ISL\_438855, EPI\_ISL\_438856, EPI\_ISL\_438857, EPI\_ISL\_438858, EPI\_ISL\_438859, EPI\_ISL\_438860, EPI\_ISL\_438861, EPI\_ISL\_438862, EPI\_ISL\_438863, EPI\_ISL\_438864, EPI\_ISL\_438865, EPI\_ISL\_438866, EPI\_ISL\_438867, EPI\_ISL\_438868, EPI\_ISL\_438869, EPI\_ISL\_438870, EPI\_ISL\_438871, EPI\_ISL\_438872, EPI\_ISL\_438873, EPI\_ISL\_438874, EPI\_ISL\_438875, EPI\_ISL\_438876, EPI\_ISL\_438877, EPI\_ISL\_438878, EPI\_ISL\_438879, EPI\_ISL\_438880, EPI\_ISL\_438881, EPI\_ISL\_438882, EPI\_ISL\_438883, EPI\_ISL\_438884, EPI\_ISL\_438885, EPI\_ISL\_438886, EPI\_ISL\_438887, EPI\_ISL\_438888, EPI\_ISL\_438889, EPI\_ISL\_438890, EPI\_ISL\_438891, EPI\_ISL\_438892, EPI\_ISL\_438893, EPI\_ISL\_438894, EPI\_ISL\_438895, EPI\_ISL\_438896, EPI\_ISL\_438897, EPI\_ISL\_438898, EPI\_ISL\_438899, EPI\_ISL\_439000, EPI\_ISL\_439001, EPI\_ISL\_439002, EPI\_ISL\_439003, EPI\_ISL\_439004, EPI\_ISL\_439005, EPI\_ISL\_439006, EPI\_ISL\_439007, EPI\_ISL\_439008, EPI\_ISL\_439009, EPI\_ISL\_439010, EPI\_ISL\_439011, EPI\_ISL\_439012, EPI\_ISL\_439013, EPI\_ISL\_439014, EPI\_ISL\_439015, EPI\_ISL\_439016, EPI\_ISL\_439017, EPI\_ISL\_439018, EPI\_ISL\_439019, EPI\_ISL\_439020, EPI\_ISL\_439021, EPI\_ISL\_439022, EPI\_ISL\_439023, EPI\_ISL\_439024, EPI\_ISL\_439025, EPI\_ISL\_439026, EPI\_ISL\_439027, EPI\_ISL\_439028, EPI\_ISL\_439029, EPI\_ISL\_439030, EPI\_ISL\_439031, EPI\_ISL\_439032, EPI\_ISL\_439033, EPI\_ISL\_439034, EPI\_ISL\_439035, EPI\_ISL\_439036, EPI\_ISL\_439037, EPI\_ISL\_439038, EPI\_ISL\_439039, EPI\_ISL\_439040, EPI\_ISL\_439041, EPI\_ISL\_439042, EPI\_ISL\_439043, EPI\_ISL\_439044, EPI\_ISL\_439045, EPI\_ISL\_439046, EPI\_ISL\_439047, EPI\_ISL\_439048, EPI\_ISL\_439049, EPI\_ISL\_439050, EPI\_ISL\_439051, EPI\_ISL\_439052, EPI\_ISL\_439053, EPI\_ISL\_439054, EPI\_ISL\_439055, EPI\_ISL\_439056, EPI\_ISL\_439057, EPI\_ISL\_439058, EPI\_ISL\_439059, EPI\_ISL\_439060, EPI\_ISL\_439061, EPI\_ISL\_439062, EPI\_ISL\_439063, EPI\_ISL\_439064, EPI\_ISL\_439065, EPI\_ISL\_439066, EPI\_ISL\_439067, EPI\_ISL\_439068, EPI\_ISL\_439069, EPI\_ISL\_439070, EPI\_ISL\_439071, EPI\_ISL\_439072, EPI\_ISL\_439073, EPI\_ISL\_439074, EPI\_ISL\_439075, EPI\_ISL\_439076, EPI\_ISL\_439077, EPI\_ISL\_439078, EPI\_ISL\_439079, EPI\_ISL\_439080, EPI\_ISL\_439081, EPI\_ISL\_439082, EPI\_ISL\_439083, EPI\_ISL\_439084, EPI\_ISL\_439085, EPI\_ISL\_439086, EPI\_ISL\_439087, EPI\_ISL\_439088, EPI\_ISL\_439089, EPI\_ISL\_439090, EPI\_ISL\_439091, EPI\_ISL\_439092, EPI\_ISL\_439093, EPI\_ISL\_439094, EPI\_ISL\_439095, EPI\_ISL\_439096, EPI\_ISL\_439097, EPI\_ISL\_439098, EPI\_ISL\_439099, EPI\_ISL\_439100, EPI\_ISL\_439101, EPI\_ISL\_439102, EPI\_ISL\_439103, EPI\_ISL\_439104, EPI\_ISL\_439105, EPI\_ISL\_439106, EPI\_ISL\_439107, EPI\_ISL\_439108, EPI\_ISL\_439109, EPI\_ISL\_439110, EPI\_ISL\_439111, EPI\_ISL\_439112, EPI\_ISL\_439113, EPI\_ISL\_439114, EPI\_ISL\_439115, EPI\_ISL\_439116, EPI\_ISL\_439117, EPI\_ISL\_439118, EPI\_ISL\_439119, EPI\_ISL\_439120, EPI\_ISL\_439121, EPI\_ISL\_439122, EPI\_ISL\_439123, EPI\_ISL\_439124, EPI\_ISL\_439125, EPI\_ISL\_439126, EPI\_ISL\_439127, EPI\_ISL\_439128, EPI\_ISL\_439129, EPI\_ISL\_439130, EPI\_ISL\_439131, EPI\_ISL\_439132, EPI\_ISL\_439133, EPI\_ISL\_439134, EPI\_ISL\_439135, EPI\_ISL\_439136, EPI\_ISL\_439137, EPI\_ISL\_439138, EPI\_ISL\_439139, EPI\_ISL\_439140, EPI\_ISL\_439141, EPI\_ISL\_439142, EPI\_ISL\_439143

see above West of Scotland Specialist Virology Centre, NHSGGC / MRC-University of Glasgow Centre for Virus Research COVID-19 Genomics UK (COG-UK) Consortium Ana da Silva Filipe, Natasha Johnson, Kathy Smollett, Daniel Mair, Stephen Carmichael, Lily Tong, Jenna Nichols, Elihu Aranday-Cortes, Kirstyn Brunker, Yasmin Parr, Kyriaki Nomikou, Sarah McDonald, Marc Niebel, Patawee Asamaphan; Richard Orton, Joseph Hughes, Sreenu Vattipally, David L Robertson; Alasdair MacLean, Rory Gunson; Kathy Li, Natasha Jesudason, Rajiv Shah, James Shepherd, Antonia Ho, Emma Thomson

EPI\_ISL\_444468 B.J. Medical College and Civil hospital Gujarat Biotechnology Research Centre Amit Kanani, Akanksha Verma, Nitin Savaliya, Raghawendra Kumar, Dinesh Kumar, Zuber Saiyed, Dipa Kinariwala, Disha Patel, Binita Aring, Neeta Khandelwal, Geeta Vaghela, Sonia Barve, Bhavesh Modi, Kairavi Joshi, Gaurishankar Shrimali, Nidhi Sood, Pranay Shah, R D Dixit, Snehal Bagatharia, Kamlesh J Upadhyay, Ramesh Pandit, Tejas Shah, Ankit Hinsu, Pritesh Sabara, Apurvasinh Puvar, Janvi Raval, Monika Gandhi, Pinal Trivedi, Maharshi Pandya, Nidhi Patel, Chaitanya Joshi, Madhvi Joshi

EPI\_ISL\_447040 B.J. Medical College and Civil hospital Gujarat Biotechnology Research Centre Amit Kanani, Akanksha Verma, Nitin Savaliya, Raghawendra Kumar, Dinesh Kumar, Zuber Saiyed, Dipa Kinariwala, Disha Patel, Binita Aring, Neeta Khandelwal, Geeta Vaghela, Sonia Barve, Bhavesh Modi, Kairavi Joshi, Gaurishankar Shrimali, Nidhi Sood, Pranay Shah, R D Dixit, Snehal Bagatharia, Kamlesh J Upadhyay, Ramesh Pandit, Tejas Shah, Ankit Hinsu, Pritesh Sabara, Apurvasinh Puvar, Janvi Raval, Monika Gandhi, Pinal Trivedi, Maharshi Pandya, Anjali Rajwar, Chaitanya Joshi, Madhvi Joshi

EPI\_ISL\_447549 GMERS Medical College and Hospital, Gandhinagar Gujarat Biotechnology Research Centre Amit Kanani, Akanksha Verma, Nitin Savaliya, Raghawendra Kumar, Dinesh Kumar, Zuber Saiyed, Dipa Kinariwala, Disha Patel, Binita Aring, Neeta Khandelwal, Geeta Vaghela, Sonia Barve, Bhavesh Modi, Kairavi Joshi, Gaurishankar Shrimali, Nidhi Sood, Pranay Shah, R D Dixit, Snehal Bagatharia, Kamlesh J Upadhyay, Ramesh Pandit, Tejas Shah, Ankit Hinsu, Pritesh Sabara, Apurvasinh Puvar, Janvi Raval, Monika Gandhi, Pinal Trivedi, Maharshi Pandya, Neelam Nathani, Chaitanya Joshi, Madhvi Joshi

EPI\_ISL\_448116, EPI\_ISL\_448117, EPI\_ISL\_448118, EPI\_ISL\_448119, EPI\_ISL\_448120, EPI\_ISL\_448121, EPI\_ISL\_448122, EPI\_ISL\_448123, EPI\_ISL\_448124, EPI\_ISL\_448125, EPI\_ISL\_448126, EPI\_ISL\_448127, EPI\_ISL\_448128, EPI\_ISL\_448129, EPI\_ISL\_448130, EPI\_ISL\_448131, EPI\_ISL\_448132, EPI\_ISL\_448133, EPI\_ISL\_448134, EPI\_ISL\_448135, EPI\_ISL\_448136, EPI\_ISL\_448137, EPI\_ISL\_448138, EPI\_ISL\_448139, EPI\_ISL\_448140, EPI\_ISL\_448141, EPI\_ISL\_448142, EPI\_ISL\_448143, EPI\_ISL\_448144, EPI\_ISL\_448145, EPI\_ISL\_448146, EPI\_ISL\_448147, EPI\_ISL\_448148, EPI\_ISL\_448149, EPI\_ISL\_448150, EPI\_ISL\_448151, EPI\_ISL\_448152, EPI\_ISL\_448153, EPI\_ISL\_448154, EPI\_ISL\_448155, EPI\_ISL\_448156, EPI\_ISL\_448157, EPI\_ISL\_448158, EPI\_ISL\_448159, EPI\_ISL\_448160, EPI\_ISL\_448161, EPI\_ISL\_448162, EPI\_ISL\_448163, EPI\_ISL\_448164, EPI\_ISL\_448165, EPI\_ISL\_448166, EPI\_ISL\_448167, EPI\_ISL\_448168, EPI\_ISL\_448169, EPI\_ISL\_448170, EPI\_ISL\_448171, EPI\_ISL\_448172, EPI\_ISL\_448173, EPI\_ISL\_448174, EPI\_ISL\_448175, EPI\_ISL\_448176, EPI\_ISL\_448177, EPI\_ISL\_448178, EPI\_ISL\_448179, EPI\_ISL\_448180, EPI\_ISL\_448181, EPI\_ISL\_448182, EPI\_ISL\_448183, EPI\_ISL\_448184, EPI\_ISL\_448185, EPI\_ISL\_448186, EPI\_ISL\_448187, EPI\_ISL\_448188, EPI\_ISL\_448189, EPI\_ISL\_448190, EPI\_ISL\_448191, EPI\_ISL\_448192, EPI\_ISL\_448193, EPI\_ISL\_448194, EPI\_ISL\_448195, EPI\_ISL\_448196, EPI\_ISL\_448197, EPI\_ISL\_448198, EPI\_ISL\_448199, EPI\_ISL\_448200, EPI\_ISL\_448201, EPI\_ISL\_448202, EPI\_ISL\_448203, EPI\_ISL\_448204, EPI\_ISL\_448205, EPI\_ISL\_448206, EPI\_ISL\_448207, EPI\_ISL\_448208, EPI\_ISL\_448209, EPI\_ISL\_448210, EPI\_ISL\_448211, EPI\_ISL\_448212, EPI\_ISL\_448213, EPI\_ISL\_448214, EPI\_ISL\_448215, EPI\_ISL\_448216, EPI\_ISL\_448217, EPI\_ISL\_448218, EPI\_ISL\_448219, EPI\_ISL\_448220, EPI\_ISL\_448221, EPI\_ISL\_448222, EPI\_ISL\_448223, EPI\_ISL\_448224, EPI\_ISL\_448225, EPI\_ISL\_448226, EPI\_ISL\_448227, EPI\_ISL\_448228, EPI\_ISL\_448229, EPI\_ISL\_448230, EPI\_ISL\_448231, EPI\_ISL\_448232, EPI\_ISL\_448233, EPI\_ISL\_448234, EPI\_ISL\_448235, EPI\_ISL\_448236, EPI\_ISL\_448237, EPI\_ISL\_448238, EPI\_ISL\_448239, EPI\_ISL\_448240, EPI\_ISL\_448241, EPI\_ISL\_448242, EPI\_ISL\_448243, EPI\_ISL\_448244, EPI\_ISL\_448245, EPI\_ISL\_448246, EPI\_ISL\_448247, EPI\_ISL\_448248, EPI\_ISL\_448249, EPI\_ISL\_448250, EPI\_ISL\_448251, EPI\_ISL\_448252, EPI\_ISL\_448253, EPI\_ISL\_448254, EPI\_ISL\_448255, EPI\_ISL\_448256, EPI\_ISL\_448257, EPI\_ISL\_448258

see above West of Scotland Specialist Virology Centre, NHSGGC / MRC-University of Glasgow Centre for Virus Research COVID-19 Genomics UK (COG-UK) Consortium Ana da Silva Filipe, Natasha Johnson, Kathy Smollett, Daniel Mair, Stephen Carmichael, Lily Tong, Jenna Nichols, Elihu Aranday-Cortes, Kirstyn Brunker, Yasmin Parr, Kyriaki Nomikou, Sarah McDonald, Marc Niebel, Patawee Asamaphan; Richard Orton, Joseph Hughes, Sreenu Vattipally, David L Robertson; Alasdair MacLean, Rory Gunson; Kathy Li, Natasha Jesudason, Rajiv Shah, James Shepherd, Antonia Ho, Emma Thomson

EPI\_ISL\_450004, EPI\_ISL\_450005, EPI\_ISL\_450006, EPI\_ISL\_450007, EPI\_ISL\_450008, EPI\_ISL\_450009, EPI\_ISL\_450010, EPI\_ISL\_450011, EPI\_ISL\_450012, EPI\_ISL\_450013, EPI\_ISL\_450014, EPI\_ISL\_450015, EPI\_ISL\_450016, EPI\_ISL\_450017, EPI\_ISL\_450018, EPI\_ISL\_450019, EPI\_ISL\_450020, EPI\_ISL\_450021, EPI\_ISL\_450022, EPI\_ISL\_450023, EPI\_ISL\_450024, EPI\_ISL\_450025, EPI\_ISL\_450026, EPI\_ISL\_450027, EPI\_ISL\_450028, EPI\_ISL\_450029, EPI\_ISL\_450030, EPI\_ISL\_450031, EPI\_ISL\_450032, EPI\_ISL\_450033, EPI\_ISL\_450034, EPI\_ISL\_450035, EPI\_ISL\_450036, EPI\_ISL\_450037, EPI\_ISL\_450038, EPI\_ISL\_450039, EPI\_ISL\_450040, EPI\_ISL\_450041, EPI\_ISL\_450042, EPI\_ISL\_450043, EPI\_ISL\_450044, EPI\_ISL\_450045, EPI\_ISL\_450046, EPI\_ISL\_450047, EPI\_ISL\_450048, EPI\_ISL\_450049, EPI\_ISL\_450050, EPI\_ISL\_450051, EPI\_ISL\_450052, EPI\_ISL\_450053, EPI\_ISL\_450054, EPI\_ISL\_450055, EPI\_ISL\_450056, EPI\_ISL\_450057, EPI\_ISL\_450058, EPI\_ISL\_450059, EPI\_ISL\_450060, EPI\_ISL\_450061, EPI\_ISL\_450062, EPI\_ISL\_450063, EPI\_ISL\_450064, EPI\_ISL\_450065, EPI\_ISL\_450066, EPI\_ISL\_450067, EPI\_ISL\_450068, EPI\_ISL\_450069, EPI\_ISL\_450070, EPI\_ISL\_450071, EPI\_ISL\_450072, EPI\_ISL\_450073, EPI\_ISL\_450074, EPI\_ISL\_450075, EPI\_ISL\_450076, EPI\_ISL\_450077, EPI\_ISL\_450078, EPI\_ISL\_450079, EPI\_ISL\_450080, EPI\_ISL\_450081, EPI\_ISL\_450082, EPI\_ISL\_450083, EPI\_ISL\_450084, EPI\_ISL\_450085, EPI\_ISL\_450086, EPI\_ISL\_450087, EPI\_ISL\_450088, EPI\_ISL\_450089, EPI\_ISL\_450090, EPI\_ISL\_450091, EPI\_ISL\_450092, EPI\_ISL\_450093, EPI\_ISL\_450094, EPI\_ISL\_450095, EPI\_ISL\_450096, EPI\_ISL\_450097, EPI\_ISL\_450098, EPI\_ISL\_450099, EPI\_ISL\_450100, EPI\_ISL\_450101, EPI\_ISL\_450102, EPI\_ISL\_450103, EPI\_ISL\_450104, EPI\_ISL\_450105, EPI\_ISL\_450106, EPI\_ISL\_450107, EPI\_ISL\_450108, EPI\_ISL\_450109, EPI\_ISL\_450110, EPI\_ISL\_450111, EPI\_ISL\_450112, EPI\_ISL\_450113, EPI\_ISL\_450114, EPI\_ISL\_450115, EPI\_ISL\_450116, EPI\_ISL\_450117, EPI\_ISL\_450118, EPI\_ISL\_450119, EPI\_ISL\_450120, EPI\_ISL\_450121, EPI\_ISL\_450122, EPI\_ISL\_450123, EPI\_ISL\_450124, EPI\_ISL\_450125, EPI\_ISL\_450126, EPI\_ISL\_450127, EPI\_ISL\_450128, EPI\_ISL\_450129, EPI\_ISL\_450130, EPI\_ISL\_450131, EPI\_ISL\_450132, EPI\_ISL\_450133, EPI\_ISL\_450134, EPI\_ISL\_450135, EPI\_ISL\_450136, EPI\_ISL\_450137, EPI\_ISL\_450138, EPI\_ISL\_450139, EPI\_ISL\_450140, EPI\_ISL\_450141, EPI\_ISL\_450142, EPI\_ISL\_450143, EPI\_ISL\_450144, EPI\_ISL\_450145, EPI\_ISL\_450146, EPI\_ISL\_450147, EPI\_ISL\_450148, EPI\_ISL\_450149, EPI\_ISL\_450150, EPI\_ISL\_450151, EPI\_ISL\_450152, EPI\_ISL\_450153, EPI\_ISL\_450154, EPI\_ISL\_450155, EPI\_ISL\_450156, EPI\_ISL\_450157, EPI\_ISL\_450158, EPI\_ISL\_450159, EPI\_ISL\_450160, EPI\_ISL\_450161, EPI\_ISL\_450162, EPI\_ISL\_450163, EPI\_ISL\_450164, EPI\_ISL\_450165, EPI\_ISL\_450166, EPI\_ISL\_450167, EPI\_ISL\_450168, EPI\_ISL\_450169, EPI\_ISL\_450170

see above MSHS Clinical Microbiology Laboratories MSHS Pathogen Surveillance Program Ana S. Gonzalez-Reiche, Mitchell Sullivan, Ajay Obla, Gopi Patel, Emilia Sordillo, Melissa Gitman, Alberto Paniz-mondolfi, Matthew Hernandez, Shclie Fabre, Jose Polanco, Zenab Khan, Bremy Albuquerque, Jayeeta Dutta, Juaan Soto, Shwetha Giridhar Hara, Ying-Chih Wang, Melissa Smith, Robert Sebra, Lisa Miorin, Wen-chun Liu, Randy Albrecht, Judith Abreg, Florian Krammer, Adolfo Garcia-Sastre, Viviana Simon, Herm van Bakel

EPI\_ISL\_451156 Government Medical College, Vadodara Gujarat Biotechnology Research Centre Amit Kanani, Nidhi Patel, Nitin Savaliya, Raghawendra Kumar, Dinesh Kumar, Zuber Saiyed, Komal Patel, Labdhi Pandya, Snehal Bagatharia, Ramesh Pandit, Tejas Shah, Ankit Hinsu, Pritesh Sabara, Apurvasinh Puvar, Janvi Raval, Zarna Patel, Monika Gandhi, Pinal Trivedi, Maharshi Pandya, Manish Pattani, Tanuja Javadekar, Bhavesh Modi, Gaurishankar Shrimali, R D Dixit, A M Kadri, Bhavya Jindal, Chaitanya Joshi, Madhvi Joshi

EPI\_ISL\_453006, EPI\_ISL\_453007, EPI\_ISL\_453008, EPI\_ISL\_453009, EPI\_ISL\_453010, EPI\_ISL\_453011, EPI\_ISL\_453012, EPI\_ISL\_453013, EPI\_ISL\_453014, EPI\_ISL\_453015, EPI\_ISL\_453016, EPI\_ISL\_453017, EPI\_ISL\_453018, EPI\_ISL\_453019, EPI\_ISL\_453020, EPI\_ISL\_453021, EPI\_ISL\_453022, EPI\_ISL\_453023, EPI\_ISL\_453024, EPI\_ISL\_453025, EPI\_ISL\_453026, EPI\_ISL\_453027, EPI\_ISL\_453028, EPI\_ISL\_453029, EPI\_ISL\_453030, EPI\_ISL\_453031, EPI\_ISL\_453032, EPI\_ISL\_453033, EPI\_ISL\_453034, EPI\_ISL\_453035, EPI\_ISL\_453036, EPI\_ISL\_453037, EPI\_ISL\_453038, EPI\_ISL\_453039, EPI\_ISL\_453040, EPI\_ISL\_453041, EPI\_ISL\_453042, EPI\_ISL\_453043, EPI\_ISL\_453044, EPI\_ISL\_453045, EPI\_ISL\_453046, EPI\_ISL\_453047, EPI\_ISL\_453048, EPI\_ISL\_453049, EPI\_ISL\_453050, EPI\_ISL\_453051, EPI\_ISL\_453052, EPI\_ISL\_453053, EPI\_ISL\_453054, EPI\_ISL\_453055, EPI\_ISL\_453056, EPI\_ISL\_453057, EPI\_ISL\_453058, EPI\_ISL\_453059, EPI\_ISL\_453060, EPI\_ISL\_453061, EPI\_ISL\_453062, EPI\_ISL\_453063, EPI\_ISL\_453064, EPI\_ISL\_453065, EPI\_ISL\_453066, EPI\_ISL\_453067, EPI\_ISL\_453068, EPI\_ISL\_453069, EPI\_ISL\_453070, EPI\_ISL\_453071, EPI\_ISL\_453072, EPI\_ISL\_453073, EPI\_ISL\_453074, EPI\_ISL\_453075, EPI\_ISL\_453076, EPI\_ISL\_453077, EPI\_ISL\_453078, EPI\_ISL\_453079, EPI\_ISL\_453080, EPI\_ISL\_453081, EPI\_ISL\_453082, EPI\_ISL\_453083, EPI\_ISL\_453084, EPI\_ISL\_453085, EPI\_ISL\_453086, EPI\_ISL\_453087, EPI\_ISL\_453088, EPI\_ISL\_453089, EPI\_ISL\_453090, EPI\_ISL\_453091, EPI\_ISL\_453092, EPI\_ISL\_453093, EPI\_ISL\_453094, EPI\_ISL\_453095, EPI\_ISL\_453096, EPI\_ISL\_453097, EPI\_ISL\_453098, EPI\_ISL\_453099, EPI\_ISL\_453100, EPI\_ISL\_453101, EPI\_ISL\_453102, EPI\_ISL\_453103, EPI\_ISL\_453104, EPI\_ISL\_453105, EPI\_ISL\_453106, EPI\_ISL\_453107, EPI\_ISL\_453108, EPI\_ISL\_453109, EPI\_ISL\_453110, EPI\_ISL\_453111, EPI\_ISL\_453112, EPI\_ISL\_453113, EPI\_ISL\_453114, EPI\_ISL\_453115, EPI\_ISL\_453116, EPI\_ISL\_453117, EPI\_ISL\_453118, EPI\_ISL\_453119, EPI\_ISL\_453120, EPI\_ISL\_453121, EPI\_ISL\_453122, EPI\_ISL\_453123, EPI\_ISL\_453124, EPI\_ISL\_453125, EPI\_ISL\_453126, EPI\_ISL\_453127, EPI\_ISL\_453128, EPI\_ISL\_453129, EPI\_ISL\_453130, EPI\_ISL\_453131, EPI\_ISL\_453132, EPI\_ISL\_453133, EPI\_ISL\_453134, EPI\_ISL\_453135, EPI\_ISL\_453136, EPI\_ISL\_453137, EPI\_ISL\_453138, EPI\_ISL\_453139, EPI\_ISL\_453140, EPI\_ISL\_453141, EPI\_ISL\_453142, EPI\_ISL\_453143, EPI\_ISL\_453144, EPI\_ISL\_453145, EPI\_ISL\_453146, EPI\_ISL\_453147, EPI\_ISL\_453148, EPI\_ISL\_453149, EPI\_ISL\_453150, EPI\_ISL\_453151, EPI\_ISL\_453152, EPI\_ISL\_453153, EPI\_ISL\_453154, EPI\_ISL\_453155, EPI\_ISL\_453156, EPI\_ISL\_453157, EPI\_ISL\_453158, EPI\_ISL\_453159, EPI\_ISL\_453160, EPI\_ISL\_453161, EPI\_ISL\_453162, EPI\_ISL\_453163, EPI\_ISL\_453164, EPI\_ISL\_453165, EPI\_ISL\_453166, EPI\_ISL\_453167, EPI\_ISL\_453168, EPI\_ISL\_453169, EPI\_ISL\_453170

see above West of Scotland Specialist Virology Centre, NHSGGC / MRC-University of Glasgow Centre for Virus Research COVID-19 Genomics UK (COG-UK) Consortium Ana da Silva Filipe, Natasha Johnson, Kathy Smollett, Daniel Mair, Stephen Carmichael, Lily Tong, Jenna Nichols, Elihu Aranday-Cortes, Kirstyn Brunker, Yasmin Parr, Kyriaki Nomikou; Sarah McDonald, Marc Niebel, Patawee Asamaphan; Richard Orton, Joseph Hughes, Sreenu Vattipally, David L Robertson; Alasdair MacLean, Rory Gunson; Kathy Li, Natasha Jesudason, Rajiv Shah, James Shepherd, Antonia Ho, Emma Thomson

EPI\_ISL\_458092 B.J. Medical College and Civil hospital Gujarat Biotechnology Research Centre Amit Kanani, Nidhi Patel, Nitin Savaliya, Raghawendra Kumar, Dinesh Kumar, Zuber Saiyed, Komal Patel, Labdhi Pandya, Snehal Bagatharia, Dhaval Vaghela, Ramesh Patel, Pranay Shah, Kamlesh J Upadhyay, Ramesh Pandit, Tejas Shah, Ankit Hinsu, Pritesh Sabara, Apurvasinh Puvar, Janvi Raval, Zarna Patel, Monika Gandhi, Pinal Trivedi, Maharshi Pandya, Camellia Chakraborty, Bhavesh Modi, Gaurishankar Shrimali, R D Dixit, A M Kadri, Umang Mishra, Chaitanya Joshi, Madhvi Joshi





|                                                                                                                                                                                                                                                                                                                                                                                                                                                                                                                                                                                                                                                                                                                                                                                                                                                                                                                                                                                                                                                                                                                                                                                                                                                                                                                                                                                                                                                                                                                                                                                                                                                                                                                                                                                                                                                                                                                                                                                                                                                                                                                                                                                                                                                                                                                                                                                                                                                                                                                                                                                                                                                                                                                                                                                                                                                                                                                                                                                                                                                                                                                                                                                                                                                                                                                                                                                                                                                                                                                                                                                                                                                                                                                                                                                                                                                                                                                                                                                                                                                                                                                                                                                                                                                                                                                                                                                                                                                                                                                                                                                                                                                                                                                                                                                                                                                                                                                                                                                                                                                                                                                                                                                                                                                                                                                                                                                                                                                                                                                                                                                                                                                                                                                                                                                                                                                                                                                                                                                                                                                                                                                                                                                                                                                                                                                                                                                                                                                                                                                                                                                                                                                                                                                                                                                                                                                                                                                                                                                                                                                                                                                                                                                                                                                                                                                                                                                                                                                                                                                                                                                                                                                                                                                                                          |           |                                                                                                                                                                                         |                                                                                                                                                                                         |                                                                                                                                                                                                                                                                                                                                                                                                                                                                                                                                                                    |
|----------------------------------------------------------------------------------------------------------------------------------------------------------------------------------------------------------------------------------------------------------------------------------------------------------------------------------------------------------------------------------------------------------------------------------------------------------------------------------------------------------------------------------------------------------------------------------------------------------------------------------------------------------------------------------------------------------------------------------------------------------------------------------------------------------------------------------------------------------------------------------------------------------------------------------------------------------------------------------------------------------------------------------------------------------------------------------------------------------------------------------------------------------------------------------------------------------------------------------------------------------------------------------------------------------------------------------------------------------------------------------------------------------------------------------------------------------------------------------------------------------------------------------------------------------------------------------------------------------------------------------------------------------------------------------------------------------------------------------------------------------------------------------------------------------------------------------------------------------------------------------------------------------------------------------------------------------------------------------------------------------------------------------------------------------------------------------------------------------------------------------------------------------------------------------------------------------------------------------------------------------------------------------------------------------------------------------------------------------------------------------------------------------------------------------------------------------------------------------------------------------------------------------------------------------------------------------------------------------------------------------------------------------------------------------------------------------------------------------------------------------------------------------------------------------------------------------------------------------------------------------------------------------------------------------------------------------------------------------------------------------------------------------------------------------------------------------------------------------------------------------------------------------------------------------------------------------------------------------------------------------------------------------------------------------------------------------------------------------------------------------------------------------------------------------------------------------------------------------------------------------------------------------------------------------------------------------------------------------------------------------------------------------------------------------------------------------------------------------------------------------------------------------------------------------------------------------------------------------------------------------------------------------------------------------------------------------------------------------------------------------------------------------------------------------------------------------------------------------------------------------------------------------------------------------------------------------------------------------------------------------------------------------------------------------------------------------------------------------------------------------------------------------------------------------------------------------------------------------------------------------------------------------------------------------------------------------------------------------------------------------------------------------------------------------------------------------------------------------------------------------------------------------------------------------------------------------------------------------------------------------------------------------------------------------------------------------------------------------------------------------------------------------------------------------------------------------------------------------------------------------------------------------------------------------------------------------------------------------------------------------------------------------------------------------------------------------------------------------------------------------------------------------------------------------------------------------------------------------------------------------------------------------------------------------------------------------------------------------------------------------------------------------------------------------------------------------------------------------------------------------------------------------------------------------------------------------------------------------------------------------------------------------------------------------------------------------------------------------------------------------------------------------------------------------------------------------------------------------------------------------------------------------------------------------------------------------------------------------------------------------------------------------------------------------------------------------------------------------------------------------------------------------------------------------------------------------------------------------------------------------------------------------------------------------------------------------------------------------------------------------------------------------------------------------------------------------------------------------------------------------------------------------------------------------------------------------------------------------------------------------------------------------------------------------------------------------------------------------------------------------------------------------------------------------------------------------------------------------------------------------------------------------------------------------------------------------------------------------------------------------------------------------------------------------------------------------------------------------------------------------------------------------------------------------------------------------------------------------------------------------------------------------------------------------------------------------------------------------------------------------------------------------------------------------------------------------------------------------------------------------|-----------|-----------------------------------------------------------------------------------------------------------------------------------------------------------------------------------------|-----------------------------------------------------------------------------------------------------------------------------------------------------------------------------------------|--------------------------------------------------------------------------------------------------------------------------------------------------------------------------------------------------------------------------------------------------------------------------------------------------------------------------------------------------------------------------------------------------------------------------------------------------------------------------------------------------------------------------------------------------------------------|
| EPI_ISL_477856, EPI_ISL_477857, EPI_ISL_477858, EPI_ISL_477859, EPI_ISL_477860, EPI_ISL_477861, EPI_ISL_477862, EPI_ISL_477863, EPI_ISL_477864, EPI_ISL_477865, EPI_ISL_477866, EPI_ISL_477867, EPI_ISL_477868, EPI_ISL_477869, EPI_ISL_477870, EPI_ISL_477871, EPI_ISL_477872, EPI_ISL_477873, EPI_ISL_477874, EPI_ISL_477875, EPI_ISL_477876, EPI_ISL_477877, EPI_ISL_477878, EPI_ISL_477879, EPI_ISL_477880, EPI_ISL_477881, EPI_ISL_477882, EPI_ISL_477883, EPI_ISL_477884, EPI_ISL_477885, EPI_ISL_477887, EPI_ISL_477888, EPI_ISL_477889, EPI_ISL_477890, EPI_ISL_477891, EPI_ISL_477892, EPI_ISL_477893, EPI_ISL_477894, EPI_ISL_477895, EPI_ISL_477896, EPI_ISL_477897, EPI_ISL_477898, EPI_ISL_477899, EPI_ISL_477900, EPI_ISL_477912, EPI_ISL_477913, EPI_ISL_477914, EPI_ISL_477915, EPI_ISL_477916, EPI_ISL_477917, EPI_ISL_477918, EPI_ISL_477919, EPI_ISL_477920, EPI_ISL_477921, EPI_ISL_477922, EPI_ISL_477923, EPI_ISL_477924, EPI_ISL_477925, EPI_ISL_477926, EPI_ISL_477927, EPI_ISL_477928, EPI_ISL_477929, EPI_ISL_477930, EPI_ISL_477931, EPI_ISL_477932, EPI_ISL_477933, EPI_ISL_477934, EPI_ISL_477935, EPI_ISL_477936, EPI_ISL_477937, EPI_ISL_477938, EPI_ISL_477939, EPI_ISL_477940, EPI_ISL_477941, EPI_ISL_477942, EPI_ISL_477943, EPI_ISL_477944, EPI_ISL_477945, EPI_ISL_477946, EPI_ISL_477947, EPI_ISL_477948, EPI_ISL_477949, EPI_ISL_477950, EPI_ISL_477951, EPI_ISL_477952, EPI_ISL_477953, EPI_ISL_477954, EPI_ISL_477955, EPI_ISL_477956, EPI_ISL_477957, EPI_ISL_477958, EPI_ISL_477959, EPI_ISL_477960, EPI_ISL_477961, EPI_ISL_477962, EPI_ISL_477963, EPI_ISL_477964, EPI_ISL_477965, EPI_ISL_477966, EPI_ISL_477967, EPI_ISL_477968, EPI_ISL_477969, EPI_ISL_477970, EPI_ISL_477971, EPI_ISL_477972, EPI_ISL_477973, EPI_ISL_477974, EPI_ISL_477975, EPI_ISL_477976, EPI_ISL_477977, EPI_ISL_477978, EPI_ISL_477979, EPI_ISL_477980, EPI_ISL_477982, EPI_ISL_477983, EPI_ISL_477984, EPI_ISL_477985, EPI_ISL_477986, EPI_ISL_477987, EPI_ISL_477988, EPI_ISL_477989, EPI_ISL_477990, EPI_ISL_477991, EPI_ISL_477992, EPI_ISL_477993, EPI_ISL_477994, EPI_ISL_477995, EPI_ISL_477996, EPI_ISL_477997, EPI_ISL_477998, EPI_ISL_477999, EPI_ISL_48000, EPI_ISL_48001, EPI_ISL_48002, EPI_ISL_48004, EPI_ISL_48005, EPI_ISL_48006, EPI_ISL_48007, EPI_ISL_48008, EPI_ISL_48009, EPI_ISL_48010, EPI_ISL_48011, EPI_ISL_48012, EPI_ISL_48013, EPI_ISL_48014, EPI_ISL_48015, EPI_ISL_48016, EPI_ISL_48017, EPI_ISL_48018, EPI_ISL_48019, EPI_ISL_48020, EPI_ISL_48021, EPI_ISL_48022, EPI_ISL_48023, EPI_ISL_48024, EPI_ISL_48025, EPI_ISL_48026, EPI_ISL_48027, EPI_ISL_48028, EPI_ISL_48029, EPI_ISL_48030, EPI_ISL_48031, EPI_ISL_48032, EPI_ISL_48033, EPI_ISL_48034, EPI_ISL_48035, EPI_ISL_48036, EPI_ISL_48037, EPI_ISL_48038, EPI_ISL_48039, EPI_ISL_48040, EPI_ISL_48041, EPI_ISL_48042, EPI_ISL_48043, EPI_ISL_48044, EPI_ISL_48045, EPI_ISL_48046, EPI_ISL_48047, EPI_ISL_48048, EPI_ISL_48049, EPI_ISL_48050, EPI_ISL_48051, EPI_ISL_48052, EPI_ISL_48053, EPI_ISL_48054, EPI_ISL_48055, EPI_ISL_48056, EPI_ISL_48057, EPI_ISL_48058, EPI_ISL_48059, EPI_ISL_48060, EPI_ISL_48061, EPI_ISL_48062, EPI_ISL_48063, EPI_ISL_48064, EPI_ISL_48065, EPI_ISL_48066, EPI_ISL_48067, EPI_ISL_48068, EPI_ISL_48069, EPI_ISL_48070, EPI_ISL_48071, EPI_ISL_48072, EPI_ISL_48073, EPI_ISL_48074, EPI_ISL_48075, EPI_ISL_48076, EPI_ISL_48077, EPI_ISL_48078, EPI_ISL_48079, EPI_ISL_48080, EPI_ISL_48081, EPI_ISL_48082, EPI_ISL_48083, EPI_ISL_48084, EPI_ISL_48085, EPI_ISL_48086, EPI_ISL_48087, EPI_ISL_48088, EPI_ISL_48089, EPI_ISL_48090, EPI_ISL_48091, EPI_ISL_48092, EPI_ISL_48093, EPI_ISL_48094, EPI_ISL_48095, EPI_ISL_48096, EPI_ISL_48097, EPI_ISL_48098, EPI_ISL_48099, EPI_ISL_48100, EPI_ISL_48101, EPI_ISL_48102, EPI_ISL_48103, EPI_ISL_48104, EPI_ISL_48105, EPI_ISL_48106, EPI_ISL_48107, EPI_ISL_48108, EPI_ISL_48109, EPI_ISL_48110, EPI_ISL_48111, EPI_ISL_48112, EPI_ISL_48113, EPI_ISL_48114, EPI_ISL_48115, EPI_ISL_48116, EPI_ISL_48117, EPI_ISL_48118, EPI_ISL_48119, EPI_ISL_48120, EPI_ISL_48121, EPI_ISL_48122, EPI_ISL_48123, EPI_ISL_48124, EPI_ISL_48125, EPI_ISL_48126, EPI_ISL_48127, EPI_ISL_48128, EPI_ISL_48129, EPI_ISL_48130, EPI_ISL_48131, EPI_ISL_48132, EPI_ISL_48133, EPI_ISL_48134, EPI_ISL_48135, EPI_ISL_48136, EPI_ISL_48137, EPI_ISL_48138, EPI_ISL_48139, EPI_ISL_48140, EPI_ISL_48141, EPI_ISL_48142, EPI_ISL_48143, EPI_ISL_48144, EPI_ISL_48145, EPI_ISL_48146, EPI_ISL_48147, EPI_ISL_48148, EPI_ISL_48149, EPI_ISL_48150, EPI_ISL_48151, EPI_ISL_48152, EPI_ISL_48153, EPI_ISL_48154, EPI_ISL_48155, EPI_ISL_48156, EPI_ISL_48157, EPI_ISL_48158, EPI_ISL_48159, EPI_ISL_48160, EPI_ISL_48161, EPI_ISL_48162                                                                                                                                                                                                                                                                                                                                                                                                                                                                                                                                                                                                                                                                                                                                                                                                                                                                                                                                                                                                                                                                                                                                                                                                                                                                                                                                                                                                                                                                                                                                                                                                                                                                                                                                                                                                                                                                                                                                                                                                                                                                                                                                                                                                                                                                                                                                                                                                                                                                                                                                                                                                                                                                                                                                                                                                                                                                                                                                                                                                                                             | see above | West of Scotland Specialist Virology Centre, NHSGGC / MRC-University of Glasgow Centre for Virus Research                                                                               | COVID-19 Genomics UK (COG-UK) Consortium                                                                                                                                                | Ana da Silva Filipe, Natasha Johnson, Kathy Smollett, Daniel Mair, Stephen Carmichael, Lily Tong, Jenna Nichols, Elihu Aranday-Cortes, Kirstyn Brunker, Yasmin Parr, Alice Broos, Kyriaki Nomikou; Sarah McDonald, Marc Niebel, Patawee Asamaphan; Richard Orton, Joseph Hughes, Sreenu Vattipally, David L Robertson; Alasdair MacLean, Rory Gunson; Kathy Li, Natasha Jesudason, Rajiv Shah, James Shepherd, Antonia Ho, Emma Thomson                                                                                                                            |
| EPI_ISL_481380                                                                                                                                                                                                                                                                                                                                                                                                                                                                                                                                                                                                                                                                                                                                                                                                                                                                                                                                                                                                                                                                                                                                                                                                                                                                                                                                                                                                                                                                                                                                                                                                                                                                                                                                                                                                                                                                                                                                                                                                                                                                                                                                                                                                                                                                                                                                                                                                                                                                                                                                                                                                                                                                                                                                                                                                                                                                                                                                                                                                                                                                                                                                                                                                                                                                                                                                                                                                                                                                                                                                                                                                                                                                                                                                                                                                                                                                                                                                                                                                                                                                                                                                                                                                                                                                                                                                                                                                                                                                                                                                                                                                                                                                                                                                                                                                                                                                                                                                                                                                                                                                                                                                                                                                                                                                                                                                                                                                                                                                                                                                                                                                                                                                                                                                                                                                                                                                                                                                                                                                                                                                                                                                                                                                                                                                                                                                                                                                                                                                                                                                                                                                                                                                                                                                                                                                                                                                                                                                                                                                                                                                                                                                                                                                                                                                                                                                                                                                                                                                                                                                                                                                                                                                                                                                           |           | Department for Virology, Molecular Biology and Genome Research, R. G. Lugar Centre for Public Health Research, National Center for Disease Control and Public Health (NCDC) of Georgia. | Department for Virology, Molecular Biology and Genome Research, R. G. Lugar Center for Public Health Research, National Center for Disease Control and Public Health (NCDC) of Georgia. | Ana Pakkaiuri, Tata Imnadze, Giorgi Tomashvili, Meri Pantsulaia, Gvantsa Brachveli, Gvantsa Chanturia, Ekaterine Machabishvili, Nato Kotaria, Marine Murtskhvaladze, Lela Sabadze, Mari Gavashelidze, Tamar Jashishvili, Tva Tevdoradze, Ketevan Sidamondize, Ekaterine Khmaladze, Ekaterine Zhgenthi, Roena Sukhishvili, Mariam Zakalashvili, Lela Urushadze, Magda Guebadze, Davit Tsaguria, Ekaterine Zangaladze, Nino Berishvili, Adam Kotorashvili, Maia Alkhashvili, Irma Burjanadze, Anna Kasradze, Khatuna Zakhashvili, Paata Imnadze, Amiran Gamkrelidze. |
| EPI_ISL_482057, EPI_ISL_482058, EPI_ISL_482059, EPI_ISL_482060, EPI_ISL_482061, EPI_ISL_482062, EPI_ISL_482063, EPI_ISL_482064, EPI_ISL_482065, EPI_ISL_482066, EPI_ISL_482067, EPI_ISL_482068, EPI_ISL_482120, EPI_ISL_482121, EPI_ISL_482122, EPI_ISL_482123, EPI_ISL_482124, EPI_ISL_482125, EPI_ISL_482126, EPI_ISL_482127, EPI_ISL_482128, EPI_ISL_482129, EPI_ISL_482130                                                                                                                                                                                                                                                                                                                                                                                                                                                                                                                                                                                                                                                                                                                                                                                                                                                                                                                                                                                                                                                                                                                                                                                                                                                                                                                                                                                                                                                                                                                                                                                                                                                                                                                                                                                                                                                                                                                                                                                                                                                                                                                                                                                                                                                                                                                                                                                                                                                                                                                                                                                                                                                                                                                                                                                                                                                                                                                                                                                                                                                                                                                                                                                                                                                                                                                                                                                                                                                                                                                                                                                                                                                                                                                                                                                                                                                                                                                                                                                                                                                                                                                                                                                                                                                                                                                                                                                                                                                                                                                                                                                                                                                                                                                                                                                                                                                                                                                                                                                                                                                                                                                                                                                                                                                                                                                                                                                                                                                                                                                                                                                                                                                                                                                                                                                                                                                                                                                                                                                                                                                                                                                                                                                                                                                                                                                                                                                                                                                                                                                                                                                                                                                                                                                                                                                                                                                                                                                                                                                                                                                                                                                                                                                                                                                                                                                                                                           | see above | The Department of Microbiology, Torbay and South Devon NHS Foundation Trust                                                                                                             | Wellcome Sanger Institute for the COVID-19 Genomics UK (COG-UK) consortium                                                                                                              | Amy Hurd, Sophie Lloyd, Anthony Mogridge, Jack Howe, Helen Brown, Gary Booth, Mel Brown, Cheryl Bailiss, Michelle Harrison and Alex Alderton, Roberto Amato, Sonia Goncalves, Ewan Harrison, David K. Jackson, Ian Johnston, Dominic Kwiatkowski, Cordelia Langford, John Sillitoe on behalf of the Wellcome Sanger Institute COVID-19 Surveillance Team ( <a href="http://www.sanger.ac.uk/covid-team">http://www.sanger.ac.uk/covid-team</a> )                                                                                                                   |
| EPI_ISL_483860, EPI_ISL_483878                                                                                                                                                                                                                                                                                                                                                                                                                                                                                                                                                                                                                                                                                                                                                                                                                                                                                                                                                                                                                                                                                                                                                                                                                                                                                                                                                                                                                                                                                                                                                                                                                                                                                                                                                                                                                                                                                                                                                                                                                                                                                                                                                                                                                                                                                                                                                                                                                                                                                                                                                                                                                                                                                                                                                                                                                                                                                                                                                                                                                                                                                                                                                                                                                                                                                                                                                                                                                                                                                                                                                                                                                                                                                                                                                                                                                                                                                                                                                                                                                                                                                                                                                                                                                                                                                                                                                                                                                                                                                                                                                                                                                                                                                                                                                                                                                                                                                                                                                                                                                                                                                                                                                                                                                                                                                                                                                                                                                                                                                                                                                                                                                                                                                                                                                                                                                                                                                                                                                                                                                                                                                                                                                                                                                                                                                                                                                                                                                                                                                                                                                                                                                                                                                                                                                                                                                                                                                                                                                                                                                                                                                                                                                                                                                                                                                                                                                                                                                                                                                                                                                                                                                                                                                                                           |           | Department of Microbiology, Government Medical College, Surat                                                                                                                           | Gujarat Biotechnology Research Centre                                                                                                                                                   | Amit gamit, Apurvasinh Puvar, Janvi Ravai, Zarna Patel, Monika Gandhi, Pinal Trivedi, Maharshi Pandya, Nidhi Patel, Nitin Savaliya, Raghawendra Kumar, Dinesh Kumar, Zuber Saiyed, Komal Patel, Labdhi Pandya, Afzal Ansari, Nikha Trivedi, Naresh Chauhan, Sumaiya Mullan, R D Dixit, A M Kadri, Harsh Bakshi, Chaitanya Joshi, Madhvi Joshi                                                                                                                                                                                                                      |
| EPI_ISL_484519, EPI_ISL_484520, EPI_ISL_484521, EPI_ISL_484522, EPI_ISL_484523, EPI_ISL_484524, EPI_ISL_484525, EPI_ISL_484526, EPI_ISL_484527, EPI_ISL_484528, EPI_ISL_484529, EPI_ISL_484530, EPI_ISL_484531, EPI_ISL_484532, EPI_ISL_484533, EPI_ISL_484534, EPI_ISL_484535, EPI_ISL_484536, EPI_ISL_484537, EPI_ISL_484538, EPI_ISL_484539, EPI_ISL_484540, EPI_ISL_484541, EPI_ISL_484542, EPI_ISL_484543, EPI_ISL_484544, EPI_ISL_484545, EPI_ISL_484546, EPI_ISL_484547, EPI_ISL_484548, EPI_ISL_484549, EPI_ISL_484550, EPI_ISL_484551, EPI_ISL_484552, EPI_ISL_484553, EPI_ISL_484554, EPI_ISL_484555, EPI_ISL_484556, EPI_ISL_484557, EPI_ISL_484558, EPI_ISL_484559, EPI_ISL_484560, EPI_ISL_484561, EPI_ISL_484562, EPI_ISL_484563, EPI_ISL_484564, EPI_ISL_484565, EPI_ISL_484566, EPI_ISL_484567, EPI_ISL_484568, EPI_ISL_484569, EPI_ISL_484570, EPI_ISL_484571, EPI_ISL_484572, EPI_ISL_484573, EPI_ISL_484574, EPI_ISL_484575, EPI_ISL_484576, EPI_ISL_484577, EPI_ISL_484578, EPI_ISL_484579, EPI_ISL_484580, EPI_ISL_484581, EPI_ISL_484582, EPI_ISL_484583, EPI_ISL_484584, EPI_ISL_484585, EPI_ISL_484586, EPI_ISL_484587, EPI_ISL_484588, EPI_ISL_484589, EPI_ISL_484590, EPI_ISL_484591, EPI_ISL_484592, EPI_ISL_484593, EPI_ISL_484594, EPI_ISL_484595, EPI_ISL_484596, EPI_ISL_484597, EPI_ISL_484598, EPI_ISL_484599, EPI_ISL_484600, EPI_ISL_484601, EPI_ISL_484602, EPI_ISL_484603, EPI_ISL_484604, EPI_ISL_484605, EPI_ISL_484606, EPI_ISL_484607, EPI_ISL_484608, EPI_ISL_484609, EPI_ISL_484610, EPI_ISL_484611, EPI_ISL_484612, EPI_ISL_484613, EPI_ISL_484614, EPI_ISL_484615, EPI_ISL_484616, EPI_ISL_484617, EPI_ISL_484618, EPI_ISL_484619, EPI_ISL_484620, EPI_ISL_484621, EPI_ISL_484622, EPI_ISL_484623, EPI_ISL_484624, EPI_ISL_484625, EPI_ISL_484626, EPI_ISL_484627, EPI_ISL_484628, EPI_ISL_484629, EPI_ISL_484630, EPI_ISL_484631, EPI_ISL_484632, EPI_ISL_484633, EPI_ISL_484634, EPI_ISL_484635, EPI_ISL_484636, EPI_ISL_484637, EPI_ISL_484638, EPI_ISL_484639, EPI_ISL_484640, EPI_ISL_484641, EPI_ISL_484642, EPI_ISL_484643, EPI_ISL_484644, EPI_ISL_484645, EPI_ISL_484646, EPI_ISL_484647, EPI_ISL_484648, EPI_ISL_484649, EPI_ISL_484650, EPI_ISL_484651, EPI_ISL_484652, EPI_ISL_484653, EPI_ISL_484654, EPI_ISL_484655, EPI_ISL_484656, EPI_ISL_484657, EPI_ISL_484658, EPI_ISL_484659, EPI_ISL_484660, EPI_ISL_484661, EPI_ISL_484662, EPI_ISL_484663, EPI_ISL_484664, EPI_ISL_484665, EPI_ISL_484666, EPI_ISL_484667, EPI_ISL_484668, EPI_ISL_484669, EPI_ISL_484670, EPI_ISL_484671, EPI_ISL_484672, EPI_ISL_484673, EPI_ISL_484674, EPI_ISL_484675, EPI_ISL_484676, EPI_ISL_484677, EPI_ISL_484678, EPI_ISL_484679                                                                                                                                                                                                                                                                                                                                                                                                                                                                                                                                                                                                                                                                                                                                                                                                                                                                                                                                                                                                                                                                                                                                                                                                                                                                                                                                                                                                                                                                                                                                                                                                                                                                                                                                                                                                                                                                                                                                                                                                                                                                                                                                                                                                                                                                                                                                                                                                                                                                                                                                                                                                                                                                                                                                                                                                                                                                                                                                                                                                                                                                                                                                                                                                                                                                                                                                                                                                                                                                                                                                                                                                                                                                                                                                                                                                                                                                                                                                                                                                                                                                                                                                                                                                                                                                                                                                                                                                                                                                                                                                                                                                                                                                                                                                                                                                                                                                                                                                                                                                                                                                           | see above | West of Scotland Specialist Virology Centre, NHSGGC / MRC-University of Glasgow Centre for Virus Research                                                                               | COVID-19 Genomics UK (COG-UK) Consortium                                                                                                                                                | Ana da Silva Filipe, Natasha Johnson, Kathy Smollett, Daniel Mair, Stephen Carmichael, Lily Tong, Jenna Nichols, Elihu Aranday-Cortes, Kirstyn Brunker, Yasmin Parr, Alice Broos, Kyriaki Nomikou; Sarah McDonald, Marc Niebel, Patawee Asamaphan; Richard Orton, Joseph Hughes, Sreenu Vattipally, David L Robertson; Alasdair MacLean, Rory Gunson; Kathy Li, Natasha Jesudason, Rajiv Shah, James Shepherd, Antonia Ho, Emma Thomson                                                                                                                            |
| EPI_ISL_486427                                                                                                                                                                                                                                                                                                                                                                                                                                                                                                                                                                                                                                                                                                                                                                                                                                                                                                                                                                                                                                                                                                                                                                                                                                                                                                                                                                                                                                                                                                                                                                                                                                                                                                                                                                                                                                                                                                                                                                                                                                                                                                                                                                                                                                                                                                                                                                                                                                                                                                                                                                                                                                                                                                                                                                                                                                                                                                                                                                                                                                                                                                                                                                                                                                                                                                                                                                                                                                                                                                                                                                                                                                                                                                                                                                                                                                                                                                                                                                                                                                                                                                                                                                                                                                                                                                                                                                                                                                                                                                                                                                                                                                                                                                                                                                                                                                                                                                                                                                                                                                                                                                                                                                                                                                                                                                                                                                                                                                                                                                                                                                                                                                                                                                                                                                                                                                                                                                                                                                                                                                                                                                                                                                                                                                                                                                                                                                                                                                                                                                                                                                                                                                                                                                                                                                                                                                                                                                                                                                                                                                                                                                                                                                                                                                                                                                                                                                                                                                                                                                                                                                                                                                                                                                                                           | unknown   |                                                                                                                                                                                         | Clinical Laboratory, Hospital Israelita Albert Einstein                                                                                                                                 | Amgartebe,D., Malta,F., Guedes,R.L., Santana,R.A., de Menezes,F.G., Manguiera,C.L. and Pinho,J.R.                                                                                                                                                                                                                                                                                                                                                                                                                                                                  |
| EPI_ISL_489380, EPI_ISL_489381, EPI_ISL_489382, EPI_ISL_489383, EPI_ISL_489384, EPI_ISL_489385, EPI_ISL_489386, EPI_ISL_489387, EPI_ISL_489388, EPI_ISL_489389, EPI_ISL_489390, EPI_ISL_489391, EPI_ISL_489392, EPI_ISL_489393, EPI_ISL_489394, EPI_ISL_489395, EPI_ISL_489396, EPI_ISL_489397, EPI_ISL_489398, EPI_ISL_489399, EPI_ISL_489400, EPI_ISL_489401, EPI_ISL_489402, EPI_ISL_489403, EPI_ISL_489404, EPI_ISL_489405, EPI_ISL_489406, EPI_ISL_489407, EPI_ISL_489408, EPI_ISL_489409, EPI_ISL_489410, EPI_ISL_489411, EPI_ISL_489412, EPI_ISL_489413, EPI_ISL_489414, EPI_ISL_489415, EPI_ISL_489416, EPI_ISL_489417, EPI_ISL_489418, EPI_ISL_489419, EPI_ISL_489420, EPI_ISL_489421, EPI_ISL_489422, EPI_ISL_489423, EPI_ISL_489424, EPI_ISL_489425, EPI_ISL_489426, EPI_ISL_489427, EPI_ISL_489428, EPI_ISL_489429, EPI_ISL_489430, EPI_ISL_489431, EPI_ISL_489432, EPI_ISL_489433, EPI_ISL_489434, EPI_ISL_489435, EPI_ISL_489436, EPI_ISL_489437, EPI_ISL_489438, EPI_ISL_489439, EPI_ISL_489440, EPI_ISL_489441, EPI_ISL_489442, EPI_ISL_489443, EPI_ISL_489444, EPI_ISL_489445, EPI_ISL_489446, EPI_ISL_489447, EPI_ISL_489448, EPI_ISL_489449, EPI_ISL_489450, EPI_ISL_489451, EPI_ISL_489452, EPI_ISL_489453, EPI_ISL_489454, EPI_ISL_489455, EPI_ISL_489456, EPI_ISL_489457, EPI_ISL_489458, EPI_ISL_489459, EPI_ISL_489460, EPI_ISL_489461, EPI_ISL_489462, EPI_ISL_489463, EPI_ISL_489464, EPI_ISL_489465, EPI_ISL_489466, EPI_ISL_489467, EPI_ISL_489468, EPI_ISL_489469, EPI_ISL_489470, EPI_ISL_489471, EPI_ISL_489472, EPI_ISL_489473, EPI_ISL_489474, EPI_ISL_489475, EPI_ISL_489476, EPI_ISL_489477, EPI_ISL_489478, EPI_ISL_489479, EPI_ISL_489480, EPI_ISL_489481, EPI_ISL_489482, EPI_ISL_489483, EPI_ISL_489484, EPI_ISL_489485, EPI_ISL_489486, EPI_ISL_489487, EPI_ISL_489488, EPI_ISL_489489, EPI_ISL_489490, EPI_ISL_489491, EPI_ISL_489492, EPI_ISL_489493, EPI_ISL_489494, EPI_ISL_489495, EPI_ISL_489496, EPI_ISL_489497, EPI_ISL_489498, EPI_ISL_489499, EPI_ISL_489500, EPI_ISL_489501, EPI_ISL_489502, EPI_ISL_489503, EPI_ISL_489504, EPI_ISL_489505, EPI_ISL_489506, EPI_ISL_489507, EPI_ISL_489508, EPI_ISL_489509, EPI_ISL_489510, EPI_ISL_489511, EPI_ISL_489512, EPI_ISL_489513, EPI_ISL_489514, EPI_ISL_489515, EPI_ISL_489516, EPI_ISL_489517, EPI_ISL_489518, EPI_ISL_489519, EPI_ISL_489520, EPI_ISL_489521, EPI_ISL_489522, EPI_ISL_489523, EPI_ISL_489524, EPI_ISL_489525, EPI_ISL_489526, EPI_ISL_489527, EPI_ISL_489528, EPI_ISL_489529, EPI_ISL_489530, EPI_ISL_489531, EPI_ISL_489532, EPI_ISL_489533, EPI_ISL_489534, EPI_ISL_489535, EPI_ISL_489536, EPI_ISL_489537, EPI_ISL_489538, EPI_ISL_489539, EPI_ISL_489540, EPI_ISL_489541, EPI_ISL_489542, EPI_ISL_489543, EPI_ISL_489544, EPI_ISL_489545, EPI_ISL_489546, EPI_ISL_489547, EPI_ISL_489548, EPI_ISL_489549, EPI_ISL_489550, EPI_ISL_489551, EPI_ISL_489552, EPI_ISL_489553, EPI_ISL_489554, EPI_ISL_489555, EPI_ISL_489556, EPI_ISL_489557, EPI_ISL_489558, EPI_ISL_489559, EPI_ISL_489560, EPI_ISL_489561, EPI_ISL_489562, EPI_ISL_489563, EPI_ISL_489564, EPI_ISL_489565, EPI_ISL_489566, EPI_ISL_489567, EPI_ISL_489568, EPI_ISL_489569, EPI_ISL_489570, EPI_ISL_489571, EPI_ISL_489572, EPI_ISL_489573, EPI_ISL_489574, EPI_ISL_489575, EPI_ISL_489576, EPI_ISL_489577, EPI_ISL_489578, EPI_ISL_489579, EPI_ISL_489580, EPI_ISL_489581, EPI_ISL_489582, EPI_ISL_489583, EPI_ISL_489584, EPI_ISL_489585, EPI_ISL_489586, EPI_ISL_489587, EPI_ISL_489588, EPI_ISL_489589, EPI_ISL_489590, EPI_ISL_489591, EPI_ISL_489592, EPI_ISL_489593, EPI_ISL_489594, EPI_ISL_489595, EPI_ISL_489596, EPI_ISL_489597, EPI_ISL_489598, EPI_ISL_489599, EPI_ISL_489600, EPI_ISL_489601, EPI_ISL_489602, EPI_ISL_489603, EPI_ISL_489604, EPI_ISL_489605, EPI_ISL_489606, EPI_ISL_489607, EPI_ISL_489608, EPI_ISL_489609, EPI_ISL_489610, EPI_ISL_489611, EPI_ISL_489612, EPI_ISL_489613, EPI_ISL_489614, EPI_ISL_489615, EPI_ISL_489616, EPI_ISL_489617, EPI_ISL_489618, EPI_ISL_489619, EPI_ISL_489620, EPI_ISL_489621, EPI_ISL_489622, EPI_ISL_489623, EPI_ISL_489624, EPI_ISL_489625, EPI_ISL_489626, EPI_ISL_489627, EPI_ISL_489628, EPI_ISL_489629, EPI_ISL_489630, EPI_ISL_489631, EPI_ISL_489632, EPI_ISL_489633, EPI_ISL_489634, EPI_ISL_489635, EPI_ISL_489636, EPI_ISL_489637, EPI_ISL_489638, EPI_ISL_489639, EPI_ISL_489640, EPI_ISL_489641, EPI_ISL_489642, EPI_ISL_489643, EPI_ISL_489644, EPI_ISL_489645, EPI_ISL_489646, EPI_ISL_489647, EPI_ISL_489648, EPI_ISL_489649, EPI_ISL_489650, EPI_ISL_489651, EPI_ISL_489652, EPI_ISL_489653, EPI_ISL_489654, EPI_ISL_489655, EPI_ISL_489656, EPI_ISL_489657, EPI_ISL_489658, EPI_ISL_489659, EPI_ISL_489660, EPI_ISL_489661, EPI_ISL_489662, EPI_ISL_489663, EPI_ISL_489664, EPI_ISL_489665, EPI_ISL_489666, EPI_ISL_489667, EPI_ISL_489668, EPI_ISL_489669, EPI_ISL_489670, EPI_ISL_489671, EPI_ISL_489672, EPI_ISL_489673, EPI_ISL_489674, EPI_ISL_489675, EPI_ISL_489676, EPI_ISL_489677, EPI_ISL_489678, EPI_ISL_489679, EPI_ISL_489680, EPI_ISL_489681, EPI_ISL_489682, EPI_ISL_489683, EPI_ISL_489684, EPI_ISL_489685, EPI_ISL_489686, EPI_ISL_489687, EPI_ISL_489688, EPI_ISL_489689, EPI_ISL_489690, EPI_ISL_489691, EPI_ISL_489692, EPI_ISL_489693, EPI_ISL_489694, EPI_ISL_489695, EPI_ISL_489696, EPI_ISL_489697, EPI_ISL_489698, EPI_ISL_489699, EPI_ISL_489700, EPI_ISL_489701, EPI_ISL_489702, EPI_ISL_489703, EPI_ISL_489704, EPI_ISL_489705, EPI_ISL_489706, EPI_ISL_489707, EPI_ISL_489708, EPI_ISL_489709, EPI_ISL_489710, EPI_ISL_489711, EPI_ISL_489712, EPI_ISL_489713, EPI_ISL_489714, EPI_ISL_489715, EPI_ISL_489716, EPI_ISL_489717, EPI_ISL_489718, EPI_ISL_489719, EPI_ISL_489720, EPI_ISL_489721, EPI_ISL_489722, EPI_ISL_489723, EPI_ISL_489724, EPI_ISL_489725, EPI_ISL_489726, EPI_ISL_489727, EPI_ISL_489728, EPI_ISL_489729, EPI_ISL_489730, EPI_ISL_489731, EPI_ISL_489732, EPI_ISL_489733, EPI_ISL_489734, EPI_ISL_489735, EPI_ISL_489736, EPI_ISL_489737, EPI_ISL_489738, EPI_ISL_489739, EPI_ISL_489740, EPI_ISL_489741, EPI_ISL_489742, EPI_ISL_489743, EPI_ISL_489744, EPI_ISL_489745, EPI_ISL_489746, EPI_ISL_489747, EPI_ISL_489748, EPI_ISL_489749, EPI_ISL_489750, EPI_ISL_489751, EPI_ISL_489752, EPI_ISL_489753, EPI_ISL_489754, EPI_ISL_489755, EPI_ISL_489756, EPI_ISL_489757, EPI_ISL_489758, EPI_ISL_489759, EPI_ISL_489760, EPI_ISL_489761, EPI_ISL_489762, EPI_ISL_489763, EPI_ISL_489764, EPI_ISL_489765, EPI_ISL_489766, EPI_ISL_489767, EPI_ISL_489768, EPI_ISL_489769, EPI_ISL_489770, EPI_ISL_489771, EPI_ISL_489772, EPI_ISL_489773, EPI_ISL_489774, EPI_ISL_489775, EPI_ISL_489776, EPI_ISL_489777, EPI_ISL_489778, EPI_ISL_489779, EPI_ISL_489780, EPI_ISL_489781, EPI_ISL_489782, EPI_ISL_489783, EPI_ISL_489784, EPI_ISL_489785, EPI_ISL_489786, EPI_ISL_489787, EPI_ISL_489788, EPI_ISL_489789, EPI_ISL_489790, EPI_ISL_489791, EPI_ISL_489792, EPI_ISL_489793, EPI_ISL_489794, EPI_ISL_489795, EPI_ISL_489796, EPI_ISL_489797, EPI_ISL_489798, EPI_ISL_489799, EPI_ISL_489800, EPI_ISL_489801, EPI_ISL_489802, EPI_ISL_489803, EPI_ISL_489804, EPI_ISL_489805, EPI_ISL_489806, EPI_ISL_489807, EPI_ISL_489808, EPI_ISL_489809, EPI_ISL_489810, EPI_ISL_489811, EPI_ISL_489812, EPI_ISL_489813, EPI_ISL_489814, EPI_ISL_489815, EPI_ISL_489816, EPI_ISL_489817, EPI_ISL_489818, EPI_ISL_489819, EPI_ISL_489820, EPI_ISL_489821, EPI_ISL_489822, EPI_ISL_489823, EPI_ISL_489824, EPI_ISL_489825, EPI_ISL_489826, EPI_ISL_489827, EPI_ISL_489828, EPI_ISL_489829, EPI_ISL_489830, EPI_ISL_489831, EPI_ISL_489832, EPI_ISL_489833, EPI_ISL_489834, EPI_ISL_489835, EPI_ISL_489836, EPI_ISL_489837, EPI_ISL_489838, EPI_ISL_489839, EPI_ISL_489840, EPI_ISL_489841, EPI_ISL_489842, EPI_ISL_489843, EPI_ISL_489844, EPI_ISL_ |           |                                                                                                                                                                                         |                                                                                                                                                                                         |                                                                                                                                                                                                                                                                                                                                                                                                                                                                                                                                                                    |























|                                                                                                                                                                                                                                                                                                                                                                                                                                                                                                                                                                                                                                                                                                                                                                                                                                                                                                                                                                                                                                                                                                                                                                                                                                                                                                                                                                                                                                                                                                                                                                                                                                                                                                                                                                                                                                                                                                                                                                                                                                                                                                                                                                                                                                                                                                                                                                                                                                                                                                                                                                                                                                                                                                                                                                                                                                                                                                                                                                                                                                                                                                                                                                                                                                                                                                                                                                                                                                                                                                                                                                                                                                                                                                                                                                                                                                                                                                                                                                                                                                                                                                                                                                                                                                                                                                                                                                                                                                                                                                                                                                                                                                                                                                                                                                                                                                                                                                                                                                                                                                                                                                                                                                                                                                                                                                                                                                                                                                                                                                                                                                                                                                                                                                                                                                                                                                                                                                                                                                                                                                                                                                                                                                                                                                                                                                                                                                                                                                                                                                                                                                                                                                                                                                                                                                                                                                                                                                                                                                                                                                                                                                                                                                                                                                                                                                                                                                                                                                                                                                                                                                                                                                                                                                                                                                                                                                                                                                                                                                                                                                                                                                                                                                                                                                                                                                                                                                                                                                                                                                                                                                                                                                                                                                                                                                                                                                                                                                                                                                                                                                                                                                                                                                                                                                                                                                                                                                                                                                                |                                                                                 |                                                                                                                                                                                                     |                                                                                                                                                                                                                                                                                                                                                                                                                                                                                                                                                                                                                                                                                                                                                                                                |
|------------------------------------------------------------------------------------------------------------------------------------------------------------------------------------------------------------------------------------------------------------------------------------------------------------------------------------------------------------------------------------------------------------------------------------------------------------------------------------------------------------------------------------------------------------------------------------------------------------------------------------------------------------------------------------------------------------------------------------------------------------------------------------------------------------------------------------------------------------------------------------------------------------------------------------------------------------------------------------------------------------------------------------------------------------------------------------------------------------------------------------------------------------------------------------------------------------------------------------------------------------------------------------------------------------------------------------------------------------------------------------------------------------------------------------------------------------------------------------------------------------------------------------------------------------------------------------------------------------------------------------------------------------------------------------------------------------------------------------------------------------------------------------------------------------------------------------------------------------------------------------------------------------------------------------------------------------------------------------------------------------------------------------------------------------------------------------------------------------------------------------------------------------------------------------------------------------------------------------------------------------------------------------------------------------------------------------------------------------------------------------------------------------------------------------------------------------------------------------------------------------------------------------------------------------------------------------------------------------------------------------------------------------------------------------------------------------------------------------------------------------------------------------------------------------------------------------------------------------------------------------------------------------------------------------------------------------------------------------------------------------------------------------------------------------------------------------------------------------------------------------------------------------------------------------------------------------------------------------------------------------------------------------------------------------------------------------------------------------------------------------------------------------------------------------------------------------------------------------------------------------------------------------------------------------------------------------------------------------------------------------------------------------------------------------------------------------------------------------------------------------------------------------------------------------------------------------------------------------------------------------------------------------------------------------------------------------------------------------------------------------------------------------------------------------------------------------------------------------------------------------------------------------------------------------------------------------------------------------------------------------------------------------------------------------------------------------------------------------------------------------------------------------------------------------------------------------------------------------------------------------------------------------------------------------------------------------------------------------------------------------------------------------------------------------------------------------------------------------------------------------------------------------------------------------------------------------------------------------------------------------------------------------------------------------------------------------------------------------------------------------------------------------------------------------------------------------------------------------------------------------------------------------------------------------------------------------------------------------------------------------------------------------------------------------------------------------------------------------------------------------------------------------------------------------------------------------------------------------------------------------------------------------------------------------------------------------------------------------------------------------------------------------------------------------------------------------------------------------------------------------------------------------------------------------------------------------------------------------------------------------------------------------------------------------------------------------------------------------------------------------------------------------------------------------------------------------------------------------------------------------------------------------------------------------------------------------------------------------------------------------------------------------------------------------------------------------------------------------------------------------------------------------------------------------------------------------------------------------------------------------------------------------------------------------------------------------------------------------------------------------------------------------------------------------------------------------------------------------------------------------------------------------------------------------------------------------------------------------------------------------------------------------------------------------------------------------------------------------------------------------------------------------------------------------------------------------------------------------------------------------------------------------------------------------------------------------------------------------------------------------------------------------------------------------------------------------------------------------------------------------------------------------------------------------------------------------------------------------------------------------------------------------------------------------------------------------------------------------------------------------------------------------------------------------------------------------------------------------------------------------------------------------------------------------------------------------------------------------------------------------------------------------------------------------------------------------------------------------------------------------------------------------------------------------------------------------------------------------------------------------------------------------------------------------------------------------------------------------------------------------------------------------------------------------------------------------------------------------------------------------------------------------------------------------------------------------------------------------------------------------------------------------------------------------------------------------------------------------------------------------------------------------------------------------------------------------------------------------------------------------------------------------------------------------------------------------------------------------------------------------------------------------------------------------------------------------------------------------------------------------------------------------------------------------------------------------------------------------------------------------------------------------------------------------------------------------------------------------------------------------------------------------------------------------------------------------------------------------------------------------------------------------------------------------------------|---------------------------------------------------------------------------------|-----------------------------------------------------------------------------------------------------------------------------------------------------------------------------------------------------|------------------------------------------------------------------------------------------------------------------------------------------------------------------------------------------------------------------------------------------------------------------------------------------------------------------------------------------------------------------------------------------------------------------------------------------------------------------------------------------------------------------------------------------------------------------------------------------------------------------------------------------------------------------------------------------------------------------------------------------------------------------------------------------------|
| EPI_ISL_751502                                                                                                                                                                                                                                                                                                                                                                                                                                                                                                                                                                                                                                                                                                                                                                                                                                                                                                                                                                                                                                                                                                                                                                                                                                                                                                                                                                                                                                                                                                                                                                                                                                                                                                                                                                                                                                                                                                                                                                                                                                                                                                                                                                                                                                                                                                                                                                                                                                                                                                                                                                                                                                                                                                                                                                                                                                                                                                                                                                                                                                                                                                                                                                                                                                                                                                                                                                                                                                                                                                                                                                                                                                                                                                                                                                                                                                                                                                                                                                                                                                                                                                                                                                                                                                                                                                                                                                                                                                                                                                                                                                                                                                                                                                                                                                                                                                                                                                                                                                                                                                                                                                                                                                                                                                                                                                                                                                                                                                                                                                                                                                                                                                                                                                                                                                                                                                                                                                                                                                                                                                                                                                                                                                                                                                                                                                                                                                                                                                                                                                                                                                                                                                                                                                                                                                                                                                                                                                                                                                                                                                                                                                                                                                                                                                                                                                                                                                                                                                                                                                                                                                                                                                                                                                                                                                                                                                                                                                                                                                                                                                                                                                                                                                                                                                                                                                                                                                                                                                                                                                                                                                                                                                                                                                                                                                                                                                                                                                                                                                                                                                                                                                                                                                                                                                                                                                                                                                                                                                 | Pathogen Genomics Lab King Abdullah University of Science and Technology(KAUST) | Pathogen Genomics Lab King Abdullah University of Science and Technology(KAUST)                                                                                                                     | Amit Kumar Subudhi, Sharif Hala, Sara Mfarrej, Rahul P Salunke, Raushan Nugmanova, Olga Douvropoulou, Raeece Naeem, Afrah Alsomali, Fadwa Alofi, Asim Khogeer, Jumana Taha, Abdulaziz Alahmadi, Kahled Alghithami, Anwar Hashem, Naif Almontashiri, Arnab Pain                                                                                                                                                                                                                                                                                                                                                                                                                                                                                                                                 |
| EPI_ISL_763366, EPI_ISL_763370, EPI_ISL_763375, EPI_ISL_763379, EPI_ISL_763380, EPI_ISL_763426, EPI_ISL_763438, EPI_ISL_763448, EPI_ISL_763464, EPI_ISL_763469, EPI_ISL_763508, EPI_ISL_763518, EPI_ISL_763526, EPI_ISL_763542, EPI_ISL_763559, EPI_ISL_763593, EPI_ISL_763637, EPI_ISL_763638, EPI_ISL_763641, EPI_ISL_763648, EPI_ISL_763666, EPI_ISL_763688, EPI_ISL_763702, EPI_ISL_763790, EPI_ISL_763792, EPI_ISL_763793, EPI_ISL_763794, EPI_ISL_763795, EPI_ISL_763796, EPI_ISL_763801, EPI_ISL_763802, EPI_ISL_763815, EPI_ISL_763816, EPI_ISL_763839, EPI_ISL_763843, EPI_ISL_763847, EPI_ISL_763848, EPI_ISL_763849, EPI_ISL_763850, EPI_ISL_763872, EPI_ISL_763873, EPI_ISL_763874, EPI_ISL_763877, EPI_ISL_763878, EPI_ISL_763879, EPI_ISL_763880, EPI_ISL_763881, EPI_ISL_763882, EPI_ISL_763883, EPI_ISL_763884, EPI_ISL_763885, EPI_ISL_763886, EPI_ISL_763887, EPI_ISL_763888, EPI_ISL_763889, EPI_ISL_763890, EPI_ISL_763891, EPI_ISL_764141, EPI_ISL_764142, EPI_ISL_764143, EPI_ISL_764144, EPI_ISL_764145, EPI_ISL_764146, EPI_ISL_764147, EPI_ISL_764148, EPI_ISL_764149, EPI_ISL_764150, EPI_ISL_764151, EPI_ISL_764152, EPI_ISL_764153, EPI_ISL_764154, EPI_ISL_764155, EPI_ISL_764156, EPI_ISL_764157, EPI_ISL_764158, EPI_ISL_764159, EPI_ISL_764160, EPI_ISL_764161, EPI_ISL_764162, EPI_ISL_764163, EPI_ISL_764164, EPI_ISL_764165, EPI_ISL_764166, EPI_ISL_764167, EPI_ISL_764168, EPI_ISL_764169, EPI_ISL_764170, EPI_ISL_764171, EPI_ISL_764172, EPI_ISL_764173, EPI_ISL_764174, EPI_ISL_764175, EPI_ISL_764176, EPI_ISL_764177, EPI_ISL_764178, EPI_ISL_764179, EPI_ISL_764180, EPI_ISL_764181, EPI_ISL_764182, EPI_ISL_764183, EPI_ISL_764184, EPI_ISL_764185, EPI_ISL_764186, EPI_ISL_764187, EPI_ISL_764188, EPI_ISL_764189, EPI_ISL_764190, EPI_ISL_764191, EPI_ISL_764192, EPI_ISL_764193, EPI_ISL_764194, EPI_ISL_764195, EPI_ISL_764196, EPI_ISL_764197, EPI_ISL_764198, EPI_ISL_764199, EPI_ISL_764200, EPI_ISL_764201, EPI_ISL_764202, EPI_ISL_764203, EPI_ISL_764204, EPI_ISL_764205, EPI_ISL_764206, EPI_ISL_764207, EPI_ISL_764208, EPI_ISL_764209, EPI_ISL_764210, EPI_ISL_764211, EPI_ISL_764212, EPI_ISL_764213, EPI_ISL_764214, EPI_ISL_764215, EPI_ISL_764216, EPI_ISL_764217, EPI_ISL_764218, EPI_ISL_764219, EPI_ISL_764220, EPI_ISL_764221, EPI_ISL_764222, EPI_ISL_764223, EPI_ISL_764224, EPI_ISL_764225, EPI_ISL_764226, EPI_ISL_764227, EPI_ISL_764228, EPI_ISL_764229, EPI_ISL_764230, EPI_ISL_764231, EPI_ISL_764232, EPI_ISL_764233, EPI_ISL_764234, EPI_ISL_764235, EPI_ISL_764236, EPI_ISL_764237, EPI_ISL_764238, EPI_ISL_764239, EPI_ISL_764240, EPI_ISL_764241, EPI_ISL_764242, EPI_ISL_764243, EPI_ISL_764244, EPI_ISL_764245, EPI_ISL_764246, EPI_ISL_764247, EPI_ISL_764248, EPI_ISL_764249, EPI_ISL_764250, EPI_ISL_764251, EPI_ISL_764252, EPI_ISL_764253, EPI_ISL_764254, EPI_ISL_764255, EPI_ISL_764256, EPI_ISL_764257, EPI_ISL_764258, EPI_ISL_764259, EPI_ISL_764260, EPI_ISL_764261, EPI_ISL_764262, EPI_ISL_764263, EPI_ISL_764264, EPI_ISL_764265, EPI_ISL_764266, EPI_ISL_764267, EPI_ISL_764268, EPI_ISL_764269, EPI_ISL_764270, EPI_ISL_764271, EPI_ISL_764272, EPI_ISL_764273, EPI_ISL_764274, EPI_ISL_764275, EPI_ISL_764276, EPI_ISL_764277, EPI_ISL_764278, EPI_ISL_764279, EPI_ISL_764280, EPI_ISL_764281, EPI_ISL_764282, EPI_ISL_764283, EPI_ISL_764284, EPI_ISL_764285, EPI_ISL_764286, EPI_ISL_764287, EPI_ISL_764288, EPI_ISL_764289, EPI_ISL_764290, EPI_ISL_764291, EPI_ISL_764292, EPI_ISL_764293, EPI_ISL_764294, EPI_ISL_764295, EPI_ISL_764296, EPI_ISL_764297, EPI_ISL_764298, EPI_ISL_764299, EPI_ISL_764300, EPI_ISL_764301, EPI_ISL_764302, EPI_ISL_764303, EPI_ISL_764304, EPI_ISL_764305, EPI_ISL_764306, EPI_ISL_764307, EPI_ISL_764308, EPI_ISL_764309, EPI_ISL_764310, EPI_ISL_764311, EPI_ISL_764312, EPI_ISL_764313, EPI_ISL_764314, EPI_ISL_764315, EPI_ISL_764316, EPI_ISL_764317, EPI_ISL_764318, EPI_ISL_764319, EPI_ISL_764320, EPI_ISL_764321, EPI_ISL_764322, EPI_ISL_764323, EPI_ISL_764324, EPI_ISL_764325, EPI_ISL_764326, EPI_ISL_764327, EPI_ISL_764328, EPI_ISL_764329, EPI_ISL_764330, EPI_ISL_764331, EPI_ISL_764332, EPI_ISL_764333, EPI_ISL_764334, EPI_ISL_764335, EPI_ISL_764336, EPI_ISL_764337, EPI_ISL_764338, EPI_ISL_764339, EPI_ISL_764340, EPI_ISL_764341, EPI_ISL_764342, EPI_ISL_764343, EPI_ISL_764344, EPI_ISL_764345, EPI_ISL_764346, EPI_ISL_764347, EPI_ISL_764348, EPI_ISL_764349, EPI_ISL_764350, EPI_ISL_764351, EPI_ISL_764352, EPI_ISL_764353, EPI_ISL_764354, EPI_ISL_764355                                                                                                                                                                                                                                                                                                                                                                                                                                                                                                                                                                                                                                                                                                                                                                                                                                                                                                                                                                                                                                                                                                                                                                                                                                                                                                                                                                                                                                                                                                                                                                                                                                                                                                                                                                                                                                                                                                                                                                                                                                                                                                                                                                                                                                                                                                                                                                                                                                                                                                                                                                                                                                                                                                                                                                                                                                                                                                                                                                                                                                                                                                                                                                                                                                                                                                                                                                                                                                                                                                                                                                                                                                                                                                                                                                                                                                                                                                                                                                                                                                                                                                                                                                                                                                                                                                                                                                                                                                                                                                                                                                                                                                                                                                                                                                                                                                                                                                                 |                                                                                 |                                                                                                                                                                                                     |                                                                                                                                                                                                                                                                                                                                                                                                                                                                                                                                                                                                                                                                                                                                                                                                |
| see above                                                                                                                                                                                                                                                                                                                                                                                                                                                                                                                                                                                                                                                                                                                                                                                                                                                                                                                                                                                                                                                                                                                                                                                                                                                                                                                                                                                                                                                                                                                                                                                                                                                                                                                                                                                                                                                                                                                                                                                                                                                                                                                                                                                                                                                                                                                                                                                                                                                                                                                                                                                                                                                                                                                                                                                                                                                                                                                                                                                                                                                                                                                                                                                                                                                                                                                                                                                                                                                                                                                                                                                                                                                                                                                                                                                                                                                                                                                                                                                                                                                                                                                                                                                                                                                                                                                                                                                                                                                                                                                                                                                                                                                                                                                                                                                                                                                                                                                                                                                                                                                                                                                                                                                                                                                                                                                                                                                                                                                                                                                                                                                                                                                                                                                                                                                                                                                                                                                                                                                                                                                                                                                                                                                                                                                                                                                                                                                                                                                                                                                                                                                                                                                                                                                                                                                                                                                                                                                                                                                                                                                                                                                                                                                                                                                                                                                                                                                                                                                                                                                                                                                                                                                                                                                                                                                                                                                                                                                                                                                                                                                                                                                                                                                                                                                                                                                                                                                                                                                                                                                                                                                                                                                                                                                                                                                                                                                                                                                                                                                                                                                                                                                                                                                                                                                                                                                                                                                                                                      | Department of Pathology, University of Cambridge                                | COVID-19 Genomics UK (COG-UK) Consortium                                                                                                                                                            | Aminu S. Jahun, Yasmin Chaudhry, Grant Hall, Iliana Georgana, Myra Hosmillo, Martin D. Curran, Malte Pinckert, Surendra Parmar, Ian Goodfellow                                                                                                                                                                                                                                                                                                                                                                                                                                                                                                                                                                                                                                                 |
| EPI_ISL_792522, EPI_ISL_792523, EPI_ISL_792524                                                                                                                                                                                                                                                                                                                                                                                                                                                                                                                                                                                                                                                                                                                                                                                                                                                                                                                                                                                                                                                                                                                                                                                                                                                                                                                                                                                                                                                                                                                                                                                                                                                                                                                                                                                                                                                                                                                                                                                                                                                                                                                                                                                                                                                                                                                                                                                                                                                                                                                                                                                                                                                                                                                                                                                                                                                                                                                                                                                                                                                                                                                                                                                                                                                                                                                                                                                                                                                                                                                                                                                                                                                                                                                                                                                                                                                                                                                                                                                                                                                                                                                                                                                                                                                                                                                                                                                                                                                                                                                                                                                                                                                                                                                                                                                                                                                                                                                                                                                                                                                                                                                                                                                                                                                                                                                                                                                                                                                                                                                                                                                                                                                                                                                                                                                                                                                                                                                                                                                                                                                                                                                                                                                                                                                                                                                                                                                                                                                                                                                                                                                                                                                                                                                                                                                                                                                                                                                                                                                                                                                                                                                                                                                                                                                                                                                                                                                                                                                                                                                                                                                                                                                                                                                                                                                                                                                                                                                                                                                                                                                                                                                                                                                                                                                                                                                                                                                                                                                                                                                                                                                                                                                                                                                                                                                                                                                                                                                                                                                                                                                                                                                                                                                                                                                                                                                                                                                                 | Laboratorio de Virología del Hospital de Niños Dr. Ricardo Gutiérrez            | Grupo de Genómica y Bioinformática del Instituto de Investigación de la Cadena Láctea CONICET-INTA on behalf of 'Proyecto Argentino Interinstitucional de genómica de SARS-CoV-2' (PAIS Consortium) | Amadio, AF, Eberhardt, MF; Irazoqui, M; Torres, C; Aulicino, P; König, G; Acevedo, ME; Alvarez Lopez, C; Alexy, S; Jacques, O; Mischchenko, AS, Goya, S; Nabaes Jodar, MS; Viegas, M.                                                                                                                                                                                                                                                                                                                                                                                                                                                                                                                                                                                                          |
| EPI_ISL_792525                                                                                                                                                                                                                                                                                                                                                                                                                                                                                                                                                                                                                                                                                                                                                                                                                                                                                                                                                                                                                                                                                                                                                                                                                                                                                                                                                                                                                                                                                                                                                                                                                                                                                                                                                                                                                                                                                                                                                                                                                                                                                                                                                                                                                                                                                                                                                                                                                                                                                                                                                                                                                                                                                                                                                                                                                                                                                                                                                                                                                                                                                                                                                                                                                                                                                                                                                                                                                                                                                                                                                                                                                                                                                                                                                                                                                                                                                                                                                                                                                                                                                                                                                                                                                                                                                                                                                                                                                                                                                                                                                                                                                                                                                                                                                                                                                                                                                                                                                                                                                                                                                                                                                                                                                                                                                                                                                                                                                                                                                                                                                                                                                                                                                                                                                                                                                                                                                                                                                                                                                                                                                                                                                                                                                                                                                                                                                                                                                                                                                                                                                                                                                                                                                                                                                                                                                                                                                                                                                                                                                                                                                                                                                                                                                                                                                                                                                                                                                                                                                                                                                                                                                                                                                                                                                                                                                                                                                                                                                                                                                                                                                                                                                                                                                                                                                                                                                                                                                                                                                                                                                                                                                                                                                                                                                                                                                                                                                                                                                                                                                                                                                                                                                                                                                                                                                                                                                                                                                                 | Laboratorio del Hospital Interzonal General de Agudos Evita                     | Grupo de Genómica y Bioinformática del Instituto de Investigación de la Cadena Láctea CONICET-INTA on behalf of 'Proyecto Argentino Interinstitucional de genómica de SARS-CoV-2' (PAIS Consortium) | Amadio, AF, Eberhardt, MF; Irazoqui, M; Torres, C; Aulicino, P; König, G; Desimone, I; Luczac, E; Serrano, L; Grossi, O; Musto; Alexy, S; Goya, S; Nabaes Jodar, MS; Viegas, M.                                                                                                                                                                                                                                                                                                                                                                                                                                                                                                                                                                                                                |
| EPI_ISL_801861, EPI_ISL_801862, EPI_ISL_801863, EPI_ISL_801864, EPI_ISL_801865, EPI_ISL_801866, EPI_ISL_801867, EPI_ISL_801868, EPI_ISL_801869, EPI_ISL_801870, EPI_ISL_801871, EPI_ISL_801872, EPI_ISL_801873, EPI_ISL_801874, EPI_ISL_801875, EPI_ISL_801876, EPI_ISL_801877, EPI_ISL_801878, EPI_ISL_801879, EPI_ISL_801880, EPI_ISL_801881, EPI_ISL_801882, EPI_ISL_801883, EPI_ISL_801884, EPI_ISL_801885, EPI_ISL_801886, EPI_ISL_801887, EPI_ISL_801888, EPI_ISL_801889, EPI_ISL_801890, EPI_ISL_801891, EPI_ISL_801892, EPI_ISL_801893, EPI_ISL_801894, EPI_ISL_801895, EPI_ISL_801896, EPI_ISL_801897, EPI_ISL_801898, EPI_ISL_801899, EPI_ISL_801900, EPI_ISL_801901, EPI_ISL_801902, EPI_ISL_801903, EPI_ISL_801904, EPI_ISL_801905, EPI_ISL_801906, EPI_ISL_801907, EPI_ISL_801908, EPI_ISL_801909, EPI_ISL_801910, EPI_ISL_801911, EPI_ISL_801912, EPI_ISL_801913, EPI_ISL_801914, EPI_ISL_801915, EPI_ISL_801916, EPI_ISL_801917, EPI_ISL_801918, EPI_ISL_801919, EPI_ISL_801920, EPI_ISL_801921, EPI_ISL_801922, EPI_ISL_801923, EPI_ISL_801924, EPI_ISL_801925, EPI_ISL_801926, EPI_ISL_801927, EPI_ISL_801928, EPI_ISL_801929, EPI_ISL_801930, EPI_ISL_801931, EPI_ISL_801932, EPI_ISL_801933, EPI_ISL_801934, EPI_ISL_801935, EPI_ISL_801936, EPI_ISL_801937, EPI_ISL_801938, EPI_ISL_801939, EPI_ISL_801940, EPI_ISL_801941, EPI_ISL_801942, EPI_ISL_801943, EPI_ISL_801944, EPI_ISL_801945, EPI_ISL_801946, EPI_ISL_801947, EPI_ISL_801948, EPI_ISL_801949, EPI_ISL_801950, EPI_ISL_801951, EPI_ISL_801952, EPI_ISL_801953, EPI_ISL_801954, EPI_ISL_801955, EPI_ISL_801956, EPI_ISL_801957, EPI_ISL_801958, EPI_ISL_801959, EPI_ISL_801960, EPI_ISL_801961, EPI_ISL_801962, EPI_ISL_801963, EPI_ISL_801964, EPI_ISL_801965, EPI_ISL_801966, EPI_ISL_801967, EPI_ISL_801968, EPI_ISL_801969, EPI_ISL_801970, EPI_ISL_801971, EPI_ISL_801972, EPI_ISL_801973, EPI_ISL_801974, EPI_ISL_801975, EPI_ISL_801976, EPI_ISL_801977, EPI_ISL_801978, EPI_ISL_801979, EPI_ISL_801980, EPI_ISL_801981, EPI_ISL_801982, EPI_ISL_801983, EPI_ISL_801984, EPI_ISL_801985, EPI_ISL_801986, EPI_ISL_801987, EPI_ISL_801988, EPI_ISL_801989, EPI_ISL_801990, EPI_ISL_801991, EPI_ISL_801992, EPI_ISL_801993, EPI_ISL_801994, EPI_ISL_801995, EPI_ISL_801996, EPI_ISL_801997, EPI_ISL_801998, EPI_ISL_801999, EPI_ISL_802000, EPI_ISL_802001, EPI_ISL_802002, EPI_ISL_802003, EPI_ISL_802004, EPI_ISL_802005, EPI_ISL_802006, EPI_ISL_802007, EPI_ISL_802008, EPI_ISL_802009, EPI_ISL_802010, EPI_ISL_802011, EPI_ISL_802012, EPI_ISL_802013, EPI_ISL_802014, EPI_ISL_802015, EPI_ISL_802016, EPI_ISL_802017, EPI_ISL_802018, EPI_ISL_802019, EPI_ISL_802020, EPI_ISL_802021, EPI_ISL_802022, EPI_ISL_802023, EPI_ISL_802024, EPI_ISL_802025, EPI_ISL_802026, EPI_ISL_802027, EPI_ISL_802028, EPI_ISL_802029, EPI_ISL_802030, EPI_ISL_802031, EPI_ISL_802032, EPI_ISL_802033, EPI_ISL_802034, EPI_ISL_802035, EPI_ISL_802036, EPI_ISL_802037, EPI_ISL_802038, EPI_ISL_802039, EPI_ISL_802040, EPI_ISL_802041, EPI_ISL_802042, EPI_ISL_802043, EPI_ISL_802044, EPI_ISL_802045, EPI_ISL_802046, EPI_ISL_802047, EPI_ISL_802048, EPI_ISL_802049, EPI_ISL_802050, EPI_ISL_802051, EPI_ISL_802052, EPI_ISL_802053, EPI_ISL_802054, EPI_ISL_802055, EPI_ISL_802056, EPI_ISL_802057, EPI_ISL_802058, EPI_ISL_802059, EPI_ISL_802060, EPI_ISL_802061, EPI_ISL_802062, EPI_ISL_802063, EPI_ISL_802064, EPI_ISL_802065, EPI_ISL_802066, EPI_ISL_802067, EPI_ISL_802068, EPI_ISL_802069, EPI_ISL_802070, EPI_ISL_802071, EPI_ISL_802072, EPI_ISL_802073, EPI_ISL_802074, EPI_ISL_802075, EPI_ISL_802076, EPI_ISL_802077, EPI_ISL_802078, EPI_ISL_802079, EPI_ISL_802080, EPI_ISL_802081, EPI_ISL_802082, EPI_ISL_802083, EPI_ISL_802084, EPI_ISL_802085, EPI_ISL_802086, EPI_ISL_802087, EPI_ISL_802088, EPI_ISL_802089, EPI_ISL_802090, EPI_ISL_802091, EPI_ISL_802092, EPI_ISL_802093, EPI_ISL_802094, EPI_ISL_802095, EPI_ISL_802096, EPI_ISL_802097, EPI_ISL_802098, EPI_ISL_802099, EPI_ISL_802100, EPI_ISL_802101, EPI_ISL_802102, EPI_ISL_802103, EPI_ISL_802104, EPI_ISL_802105, EPI_ISL_802106, EPI_ISL_802107, EPI_ISL_802108, EPI_ISL_802109, EPI_ISL_802110, EPI_ISL_802111, EPI_ISL_802112, EPI_ISL_802113, EPI_ISL_802114, EPI_ISL_802115, EPI_ISL_802116, EPI_ISL_802117, EPI_ISL_802118, EPI_ISL_802119, EPI_ISL_802120, EPI_ISL_802121, EPI_ISL_802122, EPI_ISL_802123, EPI_ISL_802124, EPI_ISL_802125, EPI_ISL_802126, EPI_ISL_802127, EPI_ISL_802128, EPI_ISL_802129, EPI_ISL_802130, EPI_ISL_802131, EPI_ISL_802132, EPI_ISL_802133, EPI_ISL_802134, EPI_ISL_802135, EPI_ISL_802136, EPI_ISL_802137, EPI_ISL_802138, EPI_ISL_802139, EPI_ISL_802140, EPI_ISL_802141, EPI_ISL_802142, EPI_ISL_802143, EPI_ISL_802144, EPI_ISL_802145, EPI_ISL_802146, EPI_ISL_802147, EPI_ISL_802148, EPI_ISL_802149, EPI_ISL_802150, EPI_ISL_802151, EPI_ISL_802152, EPI_ISL_802153, EPI_ISL_802154, EPI_ISL_802155, EPI_ISL_802156, EPI_ISL_802157, EPI_ISL_802158, EPI_ISL_802159, EPI_ISL_802160, EPI_ISL_802161, EPI_ISL_802162, EPI_ISL_802163, EPI_ISL_802164, EPI_ISL_802165, EPI_ISL_802166, EPI_ISL_802167, EPI_ISL_802168, EPI_ISL_802169, EPI_ISL_802170, EPI_ISL_802171, EPI_ISL_802172, EPI_ISL_802173, EPI_ISL_802174, EPI_ISL_802175, EPI_ISL_802176, EPI_ISL_802177, EPI_ISL_802178, EPI_ISL_802179, EPI_ISL_802180, EPI_ISL_802181, EPI_ISL_802182, EPI_ISL_802183, EPI_ISL_802184, EPI_ISL_802185, EPI_ISL_802186, EPI_ISL_802187, EPI_ISL_802188, EPI_ISL_802189, EPI_ISL_802190, EPI_ISL_802191, EPI_ISL_802192, EPI_ISL_802193, EPI_ISL_802194, EPI_ISL_802195, EPI_ISL_802196, EPI_ISL_802197, EPI_ISL_802198, EPI_ISL_802199, EPI_ISL_802200, EPI_ISL_802201, EPI_ISL_802202, EPI_ISL_802203, EPI_ISL_802204, EPI_ISL_802205, EPI_ISL_802206, EPI_ISL_802207, EPI_ISL_802208, EPI_ISL_802209, EPI_ISL_802210, EPI_ISL_802211, EPI_ISL_802212, EPI_ISL_802213, EPI_ISL_802214, EPI_ISL_802215, EPI_ISL_802216, EPI_ISL_802217, EPI_ISL_802218, EPI_ISL_802219, EPI_ISL_802220, EPI_ISL_802221, EPI_ISL_802222, EPI_ISL_802223, EPI_ISL_802224, EPI_ISL_802225, EPI_ISL_802226, EPI_ISL_802227, EPI_ISL_802228, EPI_ISL_802229, EPI_ISL_802230, EPI_ISL_802231, EPI_ISL_802232, EPI_ISL_802233, EPI_ISL_802234, EPI_ISL_802235, EPI_ISL_802236, EPI_ISL_802237, EPI_ISL_802238, EPI_ISL_802239, EPI_ISL_802240, EPI_ISL_802241, EPI_ISL_802242, EPI_ISL_802243, EPI_ISL_802244, EPI_ISL_802245, EPI_ISL_802246, EPI_ISL_802247, EPI_ISL_802248, EPI_ISL_802249, EPI_ISL_802250, EPI_ISL_802251, EPI_ISL_802252, EPI_ISL_802253, EPI_ISL_802254, EPI_ISL_802255, EPI_ISL_802256, EPI_ISL_802257, EPI_ISL_802258, EPI_ISL_802259, EPI_ISL_802260, EPI_ISL_802261, EPI_ISL_802262, EPI_ISL_802263, EPI_ISL_802264, EPI_ISL_802265, EPI_ISL_802266, EPI_ISL_802267, EPI_ISL_802268, EPI_ISL_802269, EPI_ISL_802270, EPI_ISL_802271, EPI_ISL_802272, EPI_ISL_802273, EPI_ISL_802274, EPI_ISL_802275, EPI_ISL_802276, EPI_ISL_802277, EPI_ISL_802278, EPI_ISL_802279, EPI_ISL_802280, EPI_ISL_802281, EPI_ISL_802282, EPI_ISL_802283, EPI_ISL_802284, EPI_ISL_802285, EPI_ISL_802286, EPI_ISL_802287, EPI_ISL_802288, EPI_ISL_802289, EPI_ISL_802290, EPI_ISL_802291, EPI_ISL_802292, EPI_ISL_802293, EPI_ISL_802294, EPI_ISL_802295, EPI_ISL_802296, EPI_ISL_802297, EPI_ISL_802298, EPI_ISL_802299, EPI_ISL_802300, EPI_ISL_802301, EPI_ISL_802302, EPI_ISL_802303, EPI_ISL_802304, EPI_ISL_802305, EPI_ISL_802306, EPI_ISL_802307, EPI_ISL_802308, EPI_ISL_802309, EPI_ISL_802310, EPI_ISL_802311, EPI_ISL_802312, EPI_ISL_802313, EPI_ISL_802314, EPI_ISL_802315, EPI_ISL_802316, EPI_ISL_802317, EPI_ISL_802318, EPI_ISL_802319, EPI_ISL_802320, EPI_ISL_802321, EPI_ISL_802322, EPI_ISL_802323, EPI_ISL_802324, EPI_ISL_802325, EPI_ISL_802326, EPI_ISL_802327, EPI_ISL_802328, EPI_ISL_802329, EPI_ISL_802330, EPI_ISL_802331, EPI_ISL_802332, EPI_ISL_802333, EPI_ISL_802334, EPI_ISL_802335, EPI_ISL_802336, EPI_ISL_802337, EPI_ISL_802338, EPI_ISL_802339, EPI_ISL_802340, EPI_ISL_802341, EPI_ISL_802342, EPI_ISL_802343, EPI_ISL_802344, EPI_ISL_802345, EPI_ISL_802346, EPI_ISL_802347, EPI_ISL_802348, EPI_ISL_802349, EPI_ISL_802350, EPI_ISL_802351, EPI_ISL_802352, EPI_ISL_802353, EPI_ISL_802354, EPI_ISL_802355, EPI_ISL_802356, EPI_ISL_802357, EPI_ISL_802358, EPI_ISL_802359, EPI_ISL_802360, EPI_ISL_802361, EPI_ISL_802362, EPI_ISL_802363, EPI_ISL_802364, EPI_ISL_802365, EPI_ISL_802366, EPI_ISL_802367, EPI_ISL_802368, EPI_ISL_802369, EPI_ISL_802370, EPI_ISL_802371, EPI_ISL_802372, EPI_ISL_802373, EPI_ISL_802374, EPI_ISL_802375, EPI_ISL_802376, EPI_ISL_802377, EPI_ISL_802378, EPI_ISL_802379, EPI_ISL_802380, EPI_ISL_802381, EPI_ISL_802382, EPI_ISL_802383, EPI_ISL_802384, EPI_ISL_802385, EPI_ISL_802386, EPI_ISL_802387, EPI_ISL_802388, EPI_ISL_802389, EPI_ISL_802390, EPI_ISL_802391, EPI_ISL_802392, EPI_ISL_802393, EPI_ISL_802394, EPI_ISL_802395, EPI_ISL_802396, EPI_ISL_802397, EPI_ISL_802398, EPI_ISL_802399, EPI_ISL_802400, EPI_ISL_802401, EPI_ISL_802402, EPI_ISL_802403, EPI_ISL_802404, EPI_ISL_802405, EPI_ISL_802406, EPI_ISL_802407, EPI_ISL_802408, EPI_ISL_802409, EPI_ISL_802410, EPI_ISL_802411, EPI_ISL_802412, EPI_ISL_802413, EPI_ISL_802414, EPI_ISL_802415, EPI_ISL_802416, EPI_ISL_802417, EPI_ISL_802418, EPI_ISL_802419, EPI_ISL_802420, EPI_ISL_802421, EPI_ISL_802422, EPI_ISL_802423, EPI_ISL_802424, EPI_ISL_802425, EPI_ISL_802426, EPI_ISL_802427 |                                                                                 |                                                                                                                                                                                                     |                                                                                                                                                                                                                                                                                                                                                                                                                                                                                                                                                                                                                                                                                                                                                                                                |
| see above                                                                                                                                                                                                                                                                                                                                                                                                                                                                                                                                                                                                                                                                                                                                                                                                                                                                                                                                                                                                                                                                                                                                                                                                                                                                                                                                                                                                                                                                                                                                                                                                                                                                                                                                                                                                                                                                                                                                                                                                                                                                                                                                                                                                                                                                                                                                                                                                                                                                                                                                                                                                                                                                                                                                                                                                                                                                                                                                                                                                                                                                                                                                                                                                                                                                                                                                                                                                                                                                                                                                                                                                                                                                                                                                                                                                                                                                                                                                                                                                                                                                                                                                                                                                                                                                                                                                                                                                                                                                                                                                                                                                                                                                                                                                                                                                                                                                                                                                                                                                                                                                                                                                                                                                                                                                                                                                                                                                                                                                                                                                                                                                                                                                                                                                                                                                                                                                                                                                                                                                                                                                                                                                                                                                                                                                                                                                                                                                                                                                                                                                                                                                                                                                                                                                                                                                                                                                                                                                                                                                                                                                                                                                                                                                                                                                                                                                                                                                                                                                                                                                                                                                                                                                                                                                                                                                                                                                                                                                                                                                                                                                                                                                                                                                                                                                                                                                                                                                                                                                                                                                                                                                                                                                                                                                                                                                                                                                                                                                                                                                                                                                                                                                                                                                                                                                                                                                                                                                                                      | MSHS Clinical Microbiology Laboratories                                         | MSHS Pathogen Surveillance Program                                                                                                                                                                  | Ana S. Gonzalez-Reiche, Hala Alshammry, Mitchell J. Sullivan, Brienne Ciferri, Ajay Obla, Angela Amoako, Mahmoud Awada, Elena Hirsch, Ashley S. Salimungan, Levy Sominsky, Katherine Beach, Kayla Russo, Charles Gleason, Shelcie Fabre, Giulio Kleiner, Zenab Khan, Bremy Albuquerque, Adriana van de Guchte, Komal Srivastava, Matthew M. Hernandez, Jayeeta Dutta, Denise Jurczykaszak, Emily Ferreri, Rachel Chernet, Nancy Franquerou, Betsaida Salom Melo, Irina Oussenko, Gintaras Dekus, Juan Soto, Swetha Hara Sridhar, Yung-Chih Wang, Kathryn Twyman, Andrew Kasarskis, Deena R. Altman, Robert Sebra, Adolfo Garcia-Sastre, Marta Luksza, Gopi Patel, Sarah Schaefer, Melissa Gitman, Michael D. Nowak, Alberto Paniz-Mondolfi, Emilia Mia Sordillo, Viviana Simon, Harm van Bakel |
| EPI_ISL_813154, EPI_ISL_813155, EPI_ISL_813156, EPI_ISL_813157, EPI_ISL_813158, EPI_ISL_813159, EPI_ISL_813160, EPI_ISL_813161, EPI_ISL_813162, EPI_ISL_813163, EPI_ISL_813164, EPI_ISL_813165, EPI_ISL_813166, EPI_ISL_813167, EPI_ISL_813168, EPI_ISL_813169, EPI_ISL_813170, EPI_ISL_813171, EPI_ISL_813172, EPI_ISL_813173, EPI_ISL_813174, EPI_ISL_813175, EPI_ISL_813176, EPI_ISL_813177, EPI_ISL_813178, EPI_ISL_813179, EPI_ISL_813180, EPI_ISL_813181, EPI_ISL_813182, EPI_ISL_813183, EPI_ISL_813184, EPI_ISL_813185, EPI_ISL_813186, EPI_ISL_813187, EPI_ISL_813188, EPI_ISL_813189, EPI_ISL_813190, EPI_ISL_813191, EPI_ISL_813192, EPI_ISL_813193, EPI_ISL_813194, EPI_ISL_813195, EPI_ISL_813196, EPI_ISL_813197, EPI_ISL_813198, EPI_ISL_813199, EPI_ISL_813200, EPI_ISL_813201, EPI_ISL_813202, EPI_ISL_813203, EPI_ISL_813204, EPI_ISL_813205, EPI_ISL_813206, EPI_ISL_813207, EPI_ISL_813208, EPI_ISL_813209, EPI_ISL_813210, EPI_ISL_813211, EPI_ISL_813212, EPI_ISL_813213, EPI_ISL_813214, EPI_ISL_813215, EPI_ISL_813216, EPI_ISL_813217, EPI_ISL_813218, EPI_ISL_813219, EPI_ISL_813220, EPI_ISL_813221, EPI_ISL_813222, EPI_ISL_813223, EPI_ISL_813224, EPI_ISL_813225, EPI_ISL_813226, EPI_ISL_813227, EPI_ISL_813228, EPI_ISL_813229, EPI_ISL_813230, EPI_ISL_813231, EPI_ISL_813232, EPI_ISL_813233, EPI_ISL_813234, EPI_ISL_813235, EPI_ISL_813236, EPI_ISL_813237, EPI_ISL_813238, EPI_ISL_813239, EPI_ISL_813240, EPI_ISL_813241, EPI_ISL_813242, EPI_ISL_813243, EPI_ISL_813244, EPI_ISL_813245, EPI_ISL_813246, EPI_ISL_813247, EPI_ISL_813248, EPI_ISL_813249, EPI_ISL_813250, EPI_ISL_813251, EPI_ISL_813252, EPI_ISL_813253, EPI_ISL_813254, EPI_ISL_813255, EPI_ISL_813256, EPI_ISL_813257, EPI_ISL_813258, EPI_ISL_813259, EPI_ISL_813260, EPI_ISL_813261, EPI_ISL_813262, E                                                                                                                                                                                                                                                                                                                                                                                                                                                                                                                                                                                                                                                                                                                                                                                                                                                                                                                                                                                                                                                                                                                                                                                                                                                                                                                                                                                                                                                                                                                                                                                                                                                                                                                                                                                                                                                                                                                                                                                                                                                                                                                                                                                                                                                                                                                                                                                                                                                                                                                                                                                                                                                                                                                                                                                                                                                                                                                                                                                                                                                                                                                                                                                                                                                                                                                                                                                                                                                                                                                                                                                                                                                                                                                                                                                                                                                                                                                                                                                                                                                                                                                                                                                                                                                                                                                                                                                                                                                                                                                                                                                                                                                                                                                                                                                                                                                                                                                                                                                                                                                                                                                                                                                                                                                                                                                                                                                                                                                                                                                                                                                                                                                                                                                                                                                                                                                                                                                                                                                                                                                                                                                                                                                                                                                                                                                                                                                                                                                                                                                                                                                                                                                                                                                                                                                                                                                                                                                                                                                                                                                                                                                                                                                                                                                                                                                                                                                                                                                                                                                                                                                                                              |                                                                                 |                                                                                                                                                                                                     |                                                                                                                                                                                                                                                                                                                                                                                                                                                                                                                                                                                                                                                                                                                                                                                                |

EPI\_ISL\_837873, EPI\_ISL\_837874, EPI\_ISL\_837875, EPI\_ISL\_837876, EPI\_ISL\_837877, EPI\_ISL\_837878, EPI\_ISL\_837879, EPI\_ISL\_837880, EPI\_ISL\_837881, EPI\_ISL\_837882, EPI\_ISL\_837883, EPI\_ISL\_837884, EPI\_ISL\_837885, EPI\_ISL\_837886, EPI\_ISL\_837887, EPI\_ISL\_837888, EPI\_ISL\_837889, EPI\_ISL\_837890, EPI\_ISL\_837891, EPI\_ISL\_837892, EPI\_ISL\_837893, EPI\_ISL\_837894, EPI\_ISL\_837895, EPI\_ISL\_837896, EPI\_ISL\_837897, EPI\_ISL\_837898, EPI\_ISL\_837899, EPI\_ISL\_837900, EPI\_ISL\_837901, EPI\_ISL\_837902, EPI\_ISL\_837903, EPI\_ISL\_837904, EPI\_ISL\_837905, EPI\_ISL\_837906, EPI\_ISL\_837907, EPI\_ISL\_837908, EPI\_ISL\_837909, EPI\_ISL\_837910, EPI\_ISL\_837911, EPI\_ISL\_837912, EPI\_ISL\_837913, EPI\_ISL\_837914, EPI\_ISL\_837915, EPI\_ISL\_837916, EPI\_ISL\_837917, EPI\_ISL\_837918, EPI\_ISL\_837919, EPI\_ISL\_837920, EPI\_ISL\_837921, EPI\_ISL\_837922, EPI\_ISL\_837923, EPI\_ISL\_837924, EPI\_ISL\_837925, EPI\_ISL\_837926, EPI\_ISL\_837927, EPI\_ISL\_837928, EPI\_ISL\_837929, EPI\_ISL\_837930, EPI\_ISL\_837931, EPI\_ISL\_837932, EPI\_ISL\_837933, EPI\_ISL\_837934, EPI\_ISL\_837935, EPI\_ISL\_837936, EPI\_ISL\_837937, EPI\_ISL\_837938, EPI\_ISL\_837939, EPI\_ISL\_837940, EPI\_ISL\_837941, EPI\_ISL\_837942, EPI\_ISL\_837943, EPI\_ISL\_837944, EPI\_ISL\_837945, EPI\_ISL\_837946, EPI\_ISL\_837947, EPI\_ISL\_837948, EPI\_ISL\_837949, EPI\_ISL\_837950, EPI\_ISL\_837951, EPI\_ISL\_837952, EPI\_ISL\_837953, EPI\_ISL\_837954, EPI\_ISL\_837955, EPI\_ISL\_837956, EPI\_ISL\_837957, EPI\_ISL\_837958, EPI\_ISL\_837959, EPI\_ISL\_837960, EPI\_ISL\_837961, EPI\_ISL\_837962, EPI\_ISL\_837963, EPI\_ISL\_837964, EPI\_ISL\_837965, EPI\_ISL\_837966, EPI\_ISL\_837967, EPI\_ISL\_837968, EPI\_ISL\_837969, EPI\_ISL\_837970, EPI\_ISL\_837971, EPI\_ISL\_837972, EPI\_ISL\_837973, EPI\_ISL\_837974, EPI\_ISL\_837975, EPI\_ISL\_837976, EPI\_ISL\_837977, EPI\_ISL\_837978, EPI\_ISL\_837979, EPI\_ISL\_837980, EPI\_ISL\_837981, EPI\_ISL\_837982, EPI\_ISL\_837983, EPI\_ISL\_837984, EPI\_ISL\_837985, EPI\_ISL\_837986, EPI\_ISL\_837987, EPI\_ISL\_837988, EPI\_ISL\_837989, EPI\_ISL\_837990, EPI\_ISL\_837991, EPI\_ISL\_837992, EPI\_ISL\_837993, EPI\_ISL\_837994, EPI\_ISL\_837995, EPI\_ISL\_837996, EPI\_ISL\_837997, EPI\_ISL\_837998, EPI\_ISL\_837999, EPI\_ISL\_838000, EPI\_ISL\_838001, EPI\_ISL\_838002, EPI\_ISL\_838003, EPI\_ISL\_838004, EPI\_ISL\_838005, EPI\_ISL\_838006, EPI\_ISL\_838007, EPI\_ISL\_838008, EPI\_ISL\_838009, EPI\_ISL\_838010, EPI\_ISL\_838011, EPI\_ISL\_838012, EPI\_ISL\_838013, EPI\_ISL\_838014, EPI\_ISL\_838015, EPI\_ISL\_838016, EPI\_ISL\_838017, EPI\_ISL\_838018, EPI\_ISL\_838019, EPI\_ISL\_838020, EPI\_ISL\_838021, EPI\_ISL\_838022, EPI\_ISL\_838023, EPI\_ISL\_838024, EPI\_ISL\_838025, EPI\_ISL\_838026, EPI\_ISL\_838027, EPI\_ISL\_838028, EPI\_ISL\_838029, EPI\_ISL\_838030, EPI\_ISL\_838031, EPI\_ISL\_838032, EPI\_ISL\_838033, EPI\_ISL\_838034, EPI\_ISL\_838035, EPI\_ISL\_838036, EPI\_ISL\_838037, EPI\_ISL\_838038, EPI\_ISL\_838039, EPI\_ISL\_838040, EPI\_ISL\_838041, EPI\_ISL\_838042, EPI\_ISL\_838043, EPI\_ISL\_838044, EPI\_ISL\_838045, EPI\_ISL\_838046, EPI\_ISL\_838047, EPI\_ISL\_838048, EPI\_ISL\_838049, EPI\_ISL\_838050, EPI\_ISL\_838051, EPI\_ISL\_838052, EPI\_ISL\_838053, EPI\_ISL\_838054

see above Department of Pathology, University of Cambridge COVID-19 Genomics UK (COG-UK) Consortium Aminu S. Jahun, Yasmin Chaudhry, Grant Hall, Iliana Georgana, Myra Hosmillo, Martin D. Curran, Malte Pinckert, Surendra Parmar, Ian Goodfellow  
EPI\_ISL\_838055, EPI\_ISL\_838056, EPI\_ISL\_838057, EPI\_ISL\_838058, EPI\_ISL\_838059, EPI\_ISL\_838060, EPI\_ISL\_838061, EPI\_ISL\_838062, EPI\_ISL\_838063, EPI\_ISL\_838064, EPI\_ISL\_838065, EPI\_ISL\_838066, EPI\_ISL\_838067, EPI\_ISL\_838068, EPI\_ISL\_838069, EPI\_ISL\_838070, EPI\_ISL\_838071, EPI\_ISL\_838072, EPI\_ISL\_838073, EPI\_ISL\_838074, EPI\_ISL\_838075, EPI\_ISL\_838076, EPI\_ISL\_838077, EPI\_ISL\_838078, EPI\_ISL\_838079, EPI\_ISL\_838080, EPI\_ISL\_838081, EPI\_ISL\_838082, EPI\_ISL\_838083, EPI\_ISL\_838084, EPI\_ISL\_838085, EPI\_ISL\_838086, EPI\_ISL\_838087, EPI\_ISL\_838088, EPI\_ISL\_838089, EPI\_ISL\_838090, EPI\_ISL\_838091, EPI\_ISL\_838092, EPI\_ISL\_838093, EPI\_ISL\_838094, EPI\_ISL\_838095, EPI\_ISL\_838096, EPI\_ISL\_838097, EPI\_ISL\_838098, EPI\_ISL\_838099, EPI\_ISL\_838100, EPI\_ISL\_838101, EPI\_ISL\_838102, EPI\_ISL\_838103, EPI\_ISL\_838104, EPI\_ISL\_838105, EPI\_ISL\_838106, EPI\_ISL\_838107, EPI\_ISL\_838108, EPI\_ISL\_838109, EPI\_ISL\_838110, EPI\_ISL\_838111, EPI\_ISL\_838112, EPI\_ISL\_838113, EPI\_ISL\_838114, EPI\_ISL\_838115, EPI\_ISL\_838116, EPI\_ISL\_838117, EPI\_ISL\_838118, EPI\_ISL\_838119, EPI\_ISL\_838120, EPI\_ISL\_838121, EPI\_ISL\_838122, EPI\_ISL\_838123, EPI\_ISL\_838124, EPI\_ISL\_838125, EPI\_ISL\_838126, EPI\_ISL\_838127, EPI\_ISL\_838128, EPI\_ISL\_838129, EPI\_ISL\_838130, EPI\_ISL\_838131, EPI\_ISL\_838132, EPI\_ISL\_838133, EPI\_ISL\_838134, EPI\_ISL\_838135, EPI\_ISL\_838136, EPI\_ISL\_838137, EPI\_ISL\_838138, EPI\_ISL\_838139, EPI\_ISL\_838140, EPI\_ISL\_838141, EPI\_ISL\_838142, EPI\_ISL\_838143, EPI\_ISL\_838144, EPI\_ISL\_838145, EPI\_ISL\_838146, EPI\_ISL\_838147, EPI\_ISL\_838148, EPI\_ISL\_838149, EPI\_ISL\_838150, EPI\_ISL\_838151, EPI\_ISL\_838152, EPI\_ISL\_838153, EPI\_ISL\_838154, EPI\_ISL\_838155, EPI\_ISL\_838156, EPI\_ISL\_838157, EPI\_ISL\_838158, EPI\_ISL\_838159, EPI\_ISL\_838160, EPI\_ISL\_838161, EPI\_ISL\_838162, EPI\_ISL\_838163, EPI\_ISL\_838164, EPI\_ISL\_838165, EPI\_ISL\_838166, EPI\_ISL\_838167, EPI\_ISL\_838168, EPI\_ISL\_838169, EPI\_ISL\_838170, EPI\_ISL\_838171, EPI\_ISL\_838172, EPI\_ISL\_838173, EPI\_ISL\_838174, EPI\_ISL\_838175, EPI\_ISL\_838176, EPI\_ISL\_838177, EPI\_ISL\_838178, EPI\_ISL\_838179, EPI\_ISL\_838180, EPI\_ISL\_838181, EPI\_ISL\_838182, EPI\_ISL\_838183, EPI\_ISL\_838184, EPI\_ISL\_838185, EPI\_ISL\_838186, EPI\_ISL\_838187, EPI\_ISL\_838188, EPI\_ISL\_838189, EPI\_ISL\_838190, EPI\_ISL\_838191, EPI\_ISL\_838192, EPI\_ISL\_838193, EPI\_ISL\_838194, EPI\_ISL\_838195, EPI\_ISL\_838196, EPI\_ISL\_838197, EPI\_ISL\_838198, EPI\_ISL\_838199, EPI\_ISL\_838200, EPI\_ISL\_838201, EPI\_ISL\_838202, EPI\_ISL\_838203, EPI\_ISL\_838204, EPI\_ISL\_838205, EPI\_ISL\_838206, EPI\_ISL\_838207, EPI\_ISL\_838208, EPI\_ISL\_838209, EPI\_ISL\_838210, EPI\_ISL\_838211, EPI\_ISL\_838212, EPI\_ISL\_838213

see above West of Scotland Specialist Virology Centre, NHSGGC / MRC-University of Glasgow Centre for Virus Research COVID-19 Genomics UK (COG-UK) Consortium Ana da Silva Filipe, Natasha Johnson, Kathy Smollett, Daniel Mair, Stephen Carmichael, Alice Broos, Lily Tong, Jenna Nichols, Kyriaki Nomikou; Sarah McDonald; Richard Orton, Joseph Hughes, Sreenu Vattipally, David L Robertson; Alasdair MacLean, Rory Gunson; Sharif Shaaban, Matthew Holden; Rachel Blacow, Guy Mollett, Kathy Li, James Shepherd, Antonia Ho, Emma Thomson

EPI\_ISL\_842110 Department of Pathology, University of Cambridge COVID-19 Genomics UK (COG-UK) Consortium Aminu S. Jahun, Yasmin Chaudhry, Grant Hall, Iliana Georgana, Myra Hosmillo, Martin D. Curran, Malte Pinckert, Surendra Parmar, Ian Goodfellow  
EPI\_ISL\_842652 Laboratorio de Biología Molecular Hospital Pedro de Elizalde Grupo de Genómica y Bioinformática del Instituto de Investigación de la Cadena Láctea CONICET-INTA on behalf of 'Proyecto Argentino Interinstitucional de genómica de SARS-CoV-2' (PAIS Consortium) Amadio, AF, Eberhardt, MF; Irazoqui, M; Indart, J; Rocovich, J; Montoto Piazza, L; Wenk, G; Martin, ME; Sanchez, F; Marchetti, P; Morandi, F; Sueiro, ML; Claps, A; Bressan, L; Torres, FJ; Chamorro, J; Gondolesi, J; Gómez, ML; Diaz, B; Rosales, D; Alegre, F; Zamora, N; Osaba, E; Paez, E; Lorenzo, F; Torres, C; Aulicino, P; König, G; Alexay, S; Natale, M; Valinotto, L; Lusso, S; Goya, S; Nabaeas Jodar, MS; Viegas, M.

EPI\_ISL\_854763, EPI\_ISL\_854764, EPI\_ISL\_854765, EPI\_ISL\_854766, EPI\_ISL\_854767, EPI\_ISL\_854768, EPI\_ISL\_854769, EPI\_ISL\_854770, EPI\_ISL\_854771, EPI\_ISL\_854772, EPI\_ISL\_854773, EPI\_ISL\_854774, EPI\_ISL\_854775, EPI\_ISL\_854776, EPI\_ISL\_854777, EPI\_ISL\_854778, EPI\_ISL\_854779, EPI\_ISL\_854780, EPI\_ISL\_854781, EPI\_ISL\_854782, EPI\_ISL\_854783, EPI\_ISL\_854784, EPI\_ISL\_854785, EPI\_ISL\_854786, EPI\_ISL\_854787, EPI\_ISL\_854788, EPI\_ISL\_854789, EPI\_ISL\_854790, EPI\_ISL\_854791, EPI\_ISL\_854792, EPI\_ISL\_854793, EPI\_ISL\_854794, EPI\_ISL\_854795, EPI\_ISL\_854796, EPI\_ISL\_854797, EPI\_ISL\_854798, EPI\_ISL\_854799, EPI\_ISL\_854800, EPI\_ISL\_854801, EPI\_ISL\_854802, EPI\_ISL\_854803, EPI\_ISL\_854804, EPI\_ISL\_854805, EPI\_ISL\_854806, EPI\_ISL\_854807, EPI\_ISL\_854808, EPI\_ISL\_854809

see above Ontario's COVID-19 Genomics Rapid Response Coalition McMaster University Ana Cabrera, Allison McGeer, Patryk Aftanas, Hooman Derakhshani, Angel Li, Kuganya Nirmlarajah, Emily Panousis, Ahmed Draia, Jalees Nasir, Michael Surette, Samira Mubareka, Andrew G. McArthur

EPI\_ISL\_857489, EPI\_ISL\_857490, EPI\_ISL\_857491, EPI\_ISL\_857492, EPI\_ISL\_857493, EPI\_ISL\_857494, EPI\_ISL\_857495, EPI\_ISL\_857496, EPI\_ISL\_857497, EPI\_ISL\_857498, EPI\_ISL\_857499, EPI\_ISL\_857500, EPI\_ISL\_857501, EPI\_ISL\_857502, EPI\_ISL\_857503, EPI\_ISL\_857504, EPI\_ISL\_857505, EPI\_ISL\_857506, EPI\_ISL\_857507, EPI\_ISL\_857508, EPI\_ISL\_857509, EPI\_ISL\_857510, EPI\_ISL\_857511, EPI\_ISL\_857512, EPI\_ISL\_857513, EPI\_ISL\_857514, EPI\_ISL\_857515

see above Swiss National Reference Centre for Influenza Swiss National Reference Centre for Influenza Ana Rita Gonçalves, Samuel Cordey, Laurent Kaiser, Lorenzo Cerutti, Henri Pegeot, Melyssa Elies, Keith Harshman, Ioannis Xenarios, Emmanouil Dermatzakis

EPI\_ISL\_860730, EPI\_ISL\_860731, EPI\_ISL\_860732, EPI\_ISL\_860733, EPI\_ISL\_860734, EPI\_ISL\_860735, EPI\_ISL\_860736, EPI\_ISL\_860737, EPI\_ISL\_860738, EPI\_ISL\_860739, EPI\_ISL\_860740, EPI\_ISL\_860741, EPI\_ISL\_860742, EPI\_ISL\_860743, EPI\_ISL\_860744, EPI\_ISL\_860745, EPI\_ISL\_860746, EPI\_ISL\_860747, EPI\_ISL\_860748, EPI\_ISL\_860749, EPI\_ISL\_860750, EPI\_ISL\_860751, EPI\_ISL\_860752, EPI\_ISL\_860753, EPI\_ISL\_860754, EPI\_ISL\_860755, EPI\_ISL\_860756, EPI\_ISL\_860757, EPI\_ISL\_860758, EPI\_ISL\_860759, EPI\_ISL\_860760, EPI\_ISL\_860761, EPI\_ISL\_860762, EPI\_ISL\_860763, EPI\_ISL\_860764, EPI\_ISL\_860765, EPI\_ISL\_860766, EPI\_ISL\_860767, EPI\_ISL\_860768, EPI\_ISL\_860769, EPI\_ISL\_860770, EPI\_ISL\_860771, EPI\_ISL\_860772, EPI\_ISL\_860773, EPI\_ISL\_860774, EPI\_ISL\_860775, EPI\_ISL\_860776, EPI\_ISL\_860777, EPI\_ISL\_860778, EPI\_ISL\_860779, EPI\_ISL\_860780, EPI\_ISL\_860781

see above Swiss National Reference Centre for Influenza Swiss National Reference Centre for Influenza Ana Rita Gonçalves Cabecinhas, Samuel Cordey, Florian Laubscher, Christoph Grünig, Laurent Kaiser

EPI\_ISL\_864738, EPI\_ISL\_864739, EPI\_ISL\_864740, EPI\_ISL\_864741, EPI\_ISL\_864742, EPI\_ISL\_864743, EPI\_ISL\_864744, EPI\_ISL\_864745, EPI\_ISL\_864746, EPI\_ISL\_864747, EPI\_ISL\_864748, EPI\_ISL\_864749, EPI\_ISL\_864750, EPI\_ISL\_864751, EPI\_ISL\_864752, EPI\_ISL\_864753, EPI\_ISL\_864754, EPI\_ISL\_864755, EPI\_ISL\_864756, EPI\_ISL\_864757, EPI\_ISL\_864758, EPI\_ISL\_864759, EPI\_ISL\_864760, EPI\_ISL\_864761, EPI\_ISL\_864762, EPI\_ISL\_864763, EPI\_ISL\_864764, EPI\_ISL\_864765, EPI\_ISL\_864766, EPI\_ISL\_864767, EPI\_ISL\_864768, EPI\_ISL\_864769, EPI\_ISL\_864770, EPI\_ISL\_864771, EPI\_ISL\_864772, EPI\_ISL\_864773, EPI\_ISL\_864774, EPI\_ISL\_864775, EPI\_ISL\_864776, EPI\_ISL\_864777, EPI\_ISL\_864778, EPI\_ISL\_864779, EPI\_ISL\_864780, EPI\_ISL\_864781, EPI\_ISL\_864782, EPI\_ISL\_864783, EPI\_ISL\_864784, EPI\_ISL\_864785, EPI\_ISL\_864786, EPI\_ISL\_864787, EPI\_ISL\_864788, EPI\_ISL\_864789, EPI\_ISL\_864790, EPI\_ISL\_864791, EPI\_ISL\_864792, EPI\_ISL\_864793, EPI\_ISL\_864794, EPI\_ISL\_864795, EPI\_ISL\_864796, EPI\_ISL\_864797, EPI\_ISL\_864798, EPI\_ISL\_864799, EPI\_ISL\_864800, EPI\_ISL\_864801, EPI\_ISL\_864802, EPI\_ISL\_864803, EPI\_ISL\_864804, EPI\_ISL\_864805, EPI\_ISL\_864806, EPI\_ISL\_864807, EPI\_ISL\_864808, EPI\_ISL\_864809, EPI\_ISL\_864810, EPI\_ISL\_864811, EPI\_ISL\_864812, EPI\_ISL\_864813, EPI\_ISL\_864814, EPI\_ISL\_864815, EPI\_ISL\_864816, EPI\_ISL\_864817, EPI\_ISL\_864818, EPI\_ISL\_864819, EPI\_ISL\_864820, EPI\_ISL\_864821, EPI\_ISL\_864822, EPI\_ISL\_864823, EPI\_ISL\_864824, EPI\_ISL\_864825, EPI\_ISL\_864826, EPI\_ISL\_864827, EPI\_ISL\_864828, EPI\_ISL\_864829, EPI\_ISL\_864830, EPI\_ISL\_864831, EPI\_ISL\_864832, EPI\_ISL\_864833, EPI\_ISL\_864834, EPI\_ISL\_864835, EPI\_ISL\_864836, EPI\_ISL\_864837, EPI\_ISL\_864838, EPI\_ISL\_864839, EPI\_ISL\_864840, EPI\_ISL\_864841, EPI\_ISL\_864842, EPI\_ISL\_864843, EPI\_ISL\_864844, EPI\_ISL\_864845, EPI\_ISL\_864846, EPI\_ISL\_864847, EPI\_ISL\_864848, EPI\_ISL\_864849, EPI\_ISL\_864850, EPI\_ISL\_864851, EPI\_ISL\_864852, EPI\_ISL\_864853, EPI\_ISL\_864854, EPI\_ISL\_864855, EPI\_ISL\_864856, EPI\_ISL\_864857, EPI\_ISL\_864858, EPI\_ISL\_864859, EPI\_ISL\_864860, EPI\_ISL\_864861, EPI\_ISL\_864862, EPI\_ISL\_864863, EPI\_ISL\_864864, EPI\_ISL\_864865, EPI\_ISL\_864866, EPI\_ISL\_864867, EPI\_ISL\_864868, EPI\_ISL\_864869, EPI\_ISL\_864870, EPI\_ISL\_864871, EPI\_ISL\_864872, EPI\_ISL\_864873, EPI\_ISL\_864874, EPI\_ISL\_864875, EPI\_ISL\_864876, EPI\_ISL\_864877, EPI\_ISL\_864878, EPI\_ISL\_864879, EPI\_ISL\_864880, EPI\_ISL\_864881, EPI\_ISL\_864882, EPI\_ISL\_864883, EPI\_ISL\_864884, EPI\_ISL\_864885, EPI\_ISL\_864886, EPI\_ISL\_864887, EPI\_ISL\_864888, EPI\_ISL\_864889, EPI\_ISL\_864890, EPI\_ISL\_864891, EPI\_ISL\_864892, EPI\_ISL\_864893, EPI\_ISL\_864894, EPI\_ISL\_864895, EPI\_ISL\_864896, EPI\_ISL\_864897, EPI\_ISL\_864898, EPI\_ISL\_864899, EPI\_ISL\_864900, EPI\_ISL\_864901, EPI\_ISL\_864902, EPI\_ISL\_864903, EPI\_ISL\_864904, EPI\_ISL\_864905, EPI\_ISL\_864906, EPI\_ISL\_864907, EPI\_ISL\_864908, EPI\_ISL\_864909, EPI\_ISL\_864910, EPI\_ISL\_864911, EPI\_ISL\_864912, EPI\_ISL\_864913, EPI\_ISL\_864914, EPI\_ISL\_864915, EPI\_ISL\_864916, EPI\_ISL\_864917, EPI\_ISL\_864918, EPI\_ISL\_864919, EPI\_ISL\_864920, EPI\_ISL\_864921, EPI\_ISL\_864922, EPI\_ISL\_864923, EPI\_ISL\_864924, EPI\_ISL\_864925, EPI\_ISL\_864926, EPI\_ISL\_864927, EPI\_ISL\_864928, EPI\_ISL\_864929, EPI\_ISL\_864930, EPI\_ISL\_864931, EPI\_ISL\_864932, EPI\_ISL\_864933, EPI\_ISL\_864934, EPI\_ISL\_864935, EPI\_ISL\_864936, EPI\_ISL\_864937, EPI\_ISL\_864938, EPI\_ISL\_864939, EPI\_ISL\_864940, EPI\_ISL\_864941, EPI\_ISL\_864942, EPI\_ISL\_864943, EPI\_ISL\_864944, EPI\_ISL\_864945, EPI\_ISL\_864946, EPI\_ISL\_864947, EPI\_ISL\_864948, EPI\_ISL\_864949, EPI\_ISL\_864950, EPI\_ISL\_864951, EPI\_ISL\_864952, EPI\_ISL\_864953, EPI\_ISL\_864954, EPI\_ISL\_864955, EPI\_ISL\_864956, EPI\_ISL\_864957, EPI\_ISL\_864958, EPI\_ISL\_864959

see above Department of Pathology, University of Cambridge COVID-19 Genomics UK (COG-UK) Consortium Aminu S. Jahun, Yasmin Chaudhry, Grant Hall, Iliana Georgana, Myra Hosmillo, Martin D. Curran, Malte Pinckert, Surendra Parmar, Ian Goodfellow  
EPI\_ISL\_864960, EPI\_ISL\_864961, EPI\_ISL\_864962, EPI\_ISL\_864963, EPI\_ISL\_864964, EPI\_ISL\_864965, EPI\_ISL\_864966, EPI\_ISL\_864967, EPI\_ISL\_864968, EPI\_ISL\_864969, EPI\_ISL\_864970, EPI\_ISL\_864971, EPI\_ISL\_864972, EPI\_ISL\_864973, EPI\_ISL\_864975, EPI\_ISL\_864976, EPI\_ISL\_864977, EPI\_ISL\_864978, EPI\_ISL\_864979, EPI\_ISL\_864980, EPI\_ISL\_864981, EPI\_ISL\_864982, EPI\_ISL\_864983, EPI\_ISL\_864984, EPI\_ISL\_864985, EPI\_ISL\_864986, EPI\_ISL\_864987, EPI\_ISL\_864988, EPI\_ISL\_864989, EPI\_ISL\_864990, EPI\_ISL\_864991, EPI\_ISL\_864992, EPI\_ISL\_864993, EPI\_ISL\_864994, EPI\_ISL\_864995, EPI\_ISL\_864996, EPI\_ISL\_864997, EPI\_ISL\_864998, EPI\_ISL\_864999

see above West of Scotland Specialist Virology Centre, NHSGGC / MRC-University of Glasgow Centre for Virus Research COVID-19 Genomics UK (COG-UK) Consortium Ana da Silva Filipe, Natasha Johnson, Kathy Smollett, Daniel Mair, Stephen Carmichael, Alice Broos, Lily Tong, Jenna Nichols, Kyriaki Nomikou; Sarah McDonald; Richard Orton, Joseph Hughes, Sreenu Vattipally, David L Robertson; Alasdair MacLean, Rory Gunson; Sharif Shaaban, Matthew Holden; Rachel Blacow, Guy Mollett, Kathy Li, James Shepherd, Antonia Ho, Emma Thomson

EPI\_ISL\_865000, EPI\_ISL\_865001, EPI\_ISL\_865002, EPI\_ISL\_865003, EPI\_ISL\_865004, EPI\_ISL\_865005, EPI\_ISL\_865006, EPI\_ISL\_865007, EPI\_ISL\_865008, EPI\_ISL\_865009, EPI\_ISL\_865010, EPI\_ISL\_865011, EPI\_ISL\_865012

see above Lighthouse Lab in Glasgow / MRC-University of Glasgow Centre for Virus Research COVID-19 Genomics UK (COG-UK) Consortium Ana da Silva Filipe, Natasha Johnson, Kathy Smollett, Daniel Mair, Stephen Carmichael, Alice Broos, Lily Tong, Jenna Nichols, Kyriaki Nomikou; Sarah McDonald; Harper VanSteenhouse, Yumi Kasai, David Gray, Carol Clugston, Anna Dominiczak; Alasdair MacLean, Rory Gunson; Richard Orton, Joseph Hughes, Sreenu Vattipally, David L Robertson; Sharif Shaaban, Matthew Holden; Kathy Li, James Shepherd, Antonia Ho, Emma Thomson

EPI\_ISL\_865013, EPI\_ISL\_865014, EPI\_ISL\_865016, EPI\_ISL\_865017, EPI\_ISL\_865018, EPI\_ISL\_865019, EPI\_ISL\_865020, EPI\_ISL\_865021, EPI\_ISL\_865023, EPI\_ISL\_865024, EPI\_ISL\_865025, EPI\_ISL\_865026, EPI\_ISL\_865027, EPI\_ISL\_865028, EPI\_ISL\_865029, EPI\_ISL\_865030, EPI\_ISL\_865031, EPI\_ISL\_865032, EPI\_ISL\_865033, EPI\_ISL\_865034, EPI\_ISL\_865035, EPI\_ISL\_865036, EPI\_ISL\_865037, EPI\_ISL\_865038, EPI\_ISL\_865039, EPI\_ISL\_865040, EPI\_ISL\_865041, EPI\_ISL\_865042, EPI\_ISL\_865043, EPI\_ISL\_865044, EPI\_ISL\_865045, EPI\_ISL\_865046, EPI\_ISL\_865047, EPI\_ISL\_865048, EPI\_ISL\_865049, EPI\_ISL\_865050, EPI\_ISL\_865051, EPI\_ISL\_865052, EPI\_ISL\_865053, EPI\_ISL\_865054, EPI\_ISL\_865055, EPI\_ISL\_865056, EPI\_ISL\_865057, EPI\_ISL\_865058, EPI\_ISL\_865059, EPI\_ISL\_865060, EPI\_ISL\_865061, EPI\_ISL\_865062, EPI\_ISL\_865063, EPI\_ISL\_865064, EPI\_ISL\_865065, EPI\_ISL\_865066, EPI\_ISL\_865067

see above West of Scotland Specialist Virology Centre, NHSGGC / MRC-University of Glasgow Centre for Virus Research COVID-19 Genomics UK (COG-UK) Consortium Ana da Silva Filipe, Natasha Johnson, Kathy Smollett, Daniel Mair, Stephen Carmichael, Alice Broos, Lily Tong, Jenna Nichols, Kyriaki Nomikou; Sarah McDonald; Richard Orton, Joseph Hughes, Sreenu Vattipally, David L Robertson; Alasdair MacLean, Rory Gunson; Sharif Shaaban, Matthew Holden; Rachel Blacow, Guy Mollett, Kathy Li, James Shepherd, Antonia Ho, Emma Thomson

EPI\_ISL\_865068 Lighthouse Lab in Glasgow / MRC-University of Glasgow Centre for Virus Research COVID-19 Genomics UK (COG-UK) Consortium Ana da Silva Filipe, Natasha Johnson, Kathy Smollett, Daniel Mair, Stephen Carmichael, Alice Broos, Lily Tong, Jenna Nichols, Kyriaki Nomikou; Sarah McDonald; Harper VanSteenhouse, Yumi Kasai, David Gray, Carol Clugston, Anna Dominiczak; Alasdair MacLean, Rory Gunson; Richard Orton, Joseph Hughes, Sreenu Vattipally, David L Robertson; Sharif Shaaban, Matthew Holden; Kathy Li, James Shepherd, Antonia Ho, Emma Thomson

EPI\_ISL\_882805 MSHS Clinical Microbiology Laboratories MSHS Pathogen Surveillance Program Ana S. Gonzalez-Reiche, Alsha Halamangy, Mitchell J. Sullivan, Brianne Ciferri, Ajay Obia, Angela Amoako, Mahmood Awadwa, Elena Hirsch, Ashley S. Salimbangon, Levy Sominisky, Katherine Beach, Kayla Russo, Charles Gleason, Shelcie Fabela, Giulio Kleiner, Zenab Khan, Bremy Alburquerque, Adriana van de Guchte, Komal Srivastava, Matthew M. Hernandez, Jayeeta Dutta, Denise Jurczynszak, Emily Ferreri, Rachel Chernet, Nancy Francoeur, Betsaida

Salom Melo, Irina Oussenko, Gintaras Deikus, Juan Soto, Shwetha Hara Sridhar, Ying-Chih Wang, Kathryn Twyman, Andrew Kasarskis, Deena R. Altman, Robert Sebra, Adolfo Garcia-Sastre, Marta Luksza, Gopi Patel, Sarah Schaefer, Melissa Gitman, Michael D. Nowak, Alberto Paniz-Mondolfi, Emilia Mia Sordillo, Viviana Simon, Harm van Bakel

We gratefully acknowledge the following Authors from the Originating laboratories responsible for obtaining the specimens, as well as the Submitting laboratories where the genome data were generated and shared via GISAID, on which this research is based.

All Submitters of data may be contacted directly via [www.gisaid.org](http://www.gisaid.org)

Authors are sorted alphabetically.

| Accession ID                                                                                                                                                                                                                                                                                                                                                                                                                                                                                                                                                                                                                                                                                                                                                                                                                                                                                                                                                                                                                                                                                                                                                                                                                                                                                                                                                                                                                                                                                                                                                                                                                                                                                                                                                                                                                                                                                                                                                   | Originating Laboratory                                                                                                  | Submitting Laboratory                                                                                                   | Authors                                                                                                                                                                                                                                                                                                                                                                                                                                                                                                                                                       |
|----------------------------------------------------------------------------------------------------------------------------------------------------------------------------------------------------------------------------------------------------------------------------------------------------------------------------------------------------------------------------------------------------------------------------------------------------------------------------------------------------------------------------------------------------------------------------------------------------------------------------------------------------------------------------------------------------------------------------------------------------------------------------------------------------------------------------------------------------------------------------------------------------------------------------------------------------------------------------------------------------------------------------------------------------------------------------------------------------------------------------------------------------------------------------------------------------------------------------------------------------------------------------------------------------------------------------------------------------------------------------------------------------------------------------------------------------------------------------------------------------------------------------------------------------------------------------------------------------------------------------------------------------------------------------------------------------------------------------------------------------------------------------------------------------------------------------------------------------------------------------------------------------------------------------------------------------------------|-------------------------------------------------------------------------------------------------------------------------|-------------------------------------------------------------------------------------------------------------------------|---------------------------------------------------------------------------------------------------------------------------------------------------------------------------------------------------------------------------------------------------------------------------------------------------------------------------------------------------------------------------------------------------------------------------------------------------------------------------------------------------------------------------------------------------------------|
| EPI_ISL_406034, EPI_ISL_406036                                                                                                                                                                                                                                                                                                                                                                                                                                                                                                                                                                                                                                                                                                                                                                                                                                                                                                                                                                                                                                                                                                                                                                                                                                                                                                                                                                                                                                                                                                                                                                                                                                                                                                                                                                                                                                                                                                                                 | California Department of Public Health                                                                                  | Pathogen Discovery, Respiratory Viruses Branch, Division of Viral Diseases, Centers for Diseases Control and Prevention | Anna Uehara, Krista Queen, Ying Tao, Yan Li, Clinton R. Paden, Jing Zhang, Xiaoyan Lu, Brian Lynch, Senthil Kumar K. Sakthivel, Brett L. Whitaker, Shifaq Kamili, Lijuan Wang, Janna' R. Murray, Susan I. Gerber, Stephen Lindstrom, Suxiang Tong                                                                                                                                                                                                                                                                                                             |
| EPI_ISL_413606, EPI_ISL_413607, EPI_ISL_413608, EPI_ISL_413609, EPI_ISL_413610, EPI_ISL_413611                                                                                                                                                                                                                                                                                                                                                                                                                                                                                                                                                                                                                                                                                                                                                                                                                                                                                                                                                                                                                                                                                                                                                                                                                                                                                                                                                                                                                                                                                                                                                                                                                                                                                                                                                                                                                                                                 | unknown                                                                                                                 | Pathogen Discovery, Respiratory Viruses Branch, Division of Viral Diseases, Centers for Diseases Control and Prevention | Anna Uehara, Ying Tao, Clinton R. Paden, Krista Queen, Jing Zhang, Yan Li, Mary S. Keckler, Alison S Laufer Halpin, Haibin Wang, Jasmine Padilla, Justin Lee, Christopher A. Elkins, Susan I. Gerber, Suxiang Tong                                                                                                                                                                                                                                                                                                                                            |
| EPI_ISL_414577, EPI_ISL_414578                                                                                                                                                                                                                                                                                                                                                                                                                                                                                                                                                                                                                                                                                                                                                                                                                                                                                                                                                                                                                                                                                                                                                                                                                                                                                                                                                                                                                                                                                                                                                                                                                                                                                                                                                                                                                                                                                                                                 | Hospital de Talca, Chile                                                                                                | Instituto de Salud Publica de Chile                                                                                     | Andrés E. Castillo, Bárbara Parra, Paz Tapia, Alejandra Acevedo, Jaime Lagos, Winston Andrade, Loredana Arata, Gabriel Leal, Gisselle Barra, Carolina Tambley, Javier Tognarelli, Patricia Bustos, Soledad Ulloa, Rodrigo Fasce, Jorge Fernández.                                                                                                                                                                                                                                                                                                             |
| EPI_ISL_414579                                                                                                                                                                                                                                                                                                                                                                                                                                                                                                                                                                                                                                                                                                                                                                                                                                                                                                                                                                                                                                                                                                                                                                                                                                                                                                                                                                                                                                                                                                                                                                                                                                                                                                                                                                                                                                                                                                                                                 | Clinica Alemana de Santiago, Chile                                                                                      | Instituto de Salud Publica de Chile                                                                                     | Andrés E. Castillo, Bárbara Parra, Paz Tapia, Alejandra Acevedo, Jaime Lagos, Winston Andrade, Loredana Arata, Gabriel Leal, Gisselle Barra, Carolina Tambley, Javier Tognarelli, Patricia Bustos, Soledad Ulloa, Rodrigo Fasce, Jorge Fernández.                                                                                                                                                                                                                                                                                                             |
| EPI_ISL_414580                                                                                                                                                                                                                                                                                                                                                                                                                                                                                                                                                                                                                                                                                                                                                                                                                                                                                                                                                                                                                                                                                                                                                                                                                                                                                                                                                                                                                                                                                                                                                                                                                                                                                                                                                                                                                                                                                                                                                 | Clinica Santa Maria, Santiago, Chile                                                                                    | Instituto de Salud Publica de Chile                                                                                     | Andrés E. Castillo, Bárbara Parra, Paz Tapia, Alejandra Acevedo, Jaime Lagos, Winston Andrade, Loredana Arata, Gabriel Leal, Gisselle Barra, Carolina Tambley, Javier Tognarelli, Patricia Bustos, Soledad Ulloa, Rodrigo Fasce, Jorge Fernández.                                                                                                                                                                                                                                                                                                             |
| EPI_ISL_415710                                                                                                                                                                                                                                                                                                                                                                                                                                                                                                                                                                                                                                                                                                                                                                                                                                                                                                                                                                                                                                                                                                                                                                                                                                                                                                                                                                                                                                                                                                                                                                                                                                                                                                                                                                                                                                                                                                                                                 | WHO National Influenza Centre Russian Federation                                                                        | WHO National Influenza Centre Russian Federation                                                                        | Andrey Komissarov, Artem Fadeev, Anna Ivanova, Daria Danilenko                                                                                                                                                                                                                                                                                                                                                                                                                                                                                                |
| EPI_ISL_416480                                                                                                                                                                                                                                                                                                                                                                                                                                                                                                                                                                                                                                                                                                                                                                                                                                                                                                                                                                                                                                                                                                                                                                                                                                                                                                                                                                                                                                                                                                                                                                                                                                                                                                                                                                                                                                                                                                                                                 | R. G. Lugar Center for Public Health Research, National Center for Disease Control and Public Health (NCDC) of Georgia. | R. G. Lugar Center for Public Health Research, National Center for Disease Control and Public Health (NCDC) of Georgia. | Ann Machabishvili, Nato Kotaria, Marine Murtskhvaladze, Lela Sabadze, Mari Gavashelidze, Ana Papkiauri, Meri Pantsulaia, Gvantsa Brachveli, Tata Imnadze, Tamar Jashivshvili, Tea Tevdoradze, Ketevan Sidamonidze, Ekaterine Khmaladze, Ekaterine Zhghenti, Roena Sukhishvili, Mariam Zakalashvili, Lela Urushadze, Magda Dgebuadze, Giorgi Tomashvili, Davit Tsaradze, Ekaterine Zangaladze, Nino Berishvili, Gvantsa Chanturia, Adam Kotorashvili, Maia Alkhashvili, Irma Burjanadze, Anna Kasradze, Khatuna Zakhshvili, Paata Imnadze, Amiran Gamkrelidze. |
| EPI_ISL_417526, EPI_ISL_417527, EPI_ISL_417528, EPI_ISL_417529, EPI_ISL_417530, EPI_ISL_417531, EPI_ISL_417532, EPI_ISL_417533, EPI_ISL_417534                                                                                                                                                                                                                                                                                                                                                                                                                                                                                                                                                                                                                                                                                                                                                                                                                                                                                                                                                                                                                                                                                                                                                                                                                                                                                                                                                                                                                                                                                                                                                                                                                                                                                                                                                                                                                 | Laboratoire Nationale de Santé, Microbiology, Virology                                                                  | Laboratoire Nationale de Santé, Microbiology, Epidemiology and Microbial Genomics                                       | Anke Wienecke-Baldacchino, Ardashes Latsuzbaia, Jessica Tapp, Catherine Ragimbeau, Guillaume Fournier, Tamir Abdelrahman, Trung Nguyen Nguyen, Joel Mossong                                                                                                                                                                                                                                                                                                                                                                                                   |
| EPI_ISL_418811                                                                                                                                                                                                                                                                                                                                                                                                                                                                                                                                                                                                                                                                                                                                                                                                                                                                                                                                                                                                                                                                                                                                                                                                                                                                                                                                                                                                                                                                                                                                                                                                                                                                                                                                                                                                                                                                                                                                                 | Dr. Georges-L.-Dumont University Hospital Centre                                                                        | National Microbiology Laboratory                                                                                        | Anna Majer, Shari Tyson, Grace Seo, Philip Mabon, Natalie Knox, Morag Graham, Richard Garceau, Guillaume Desnoyers, Nathalie Bastien, Yan Li, Matthew Gilmour, Timothy Booth                                                                                                                                                                                                                                                                                                                                                                                  |
| EPI_ISL_418812, EPI_ISL_418813                                                                                                                                                                                                                                                                                                                                                                                                                                                                                                                                                                                                                                                                                                                                                                                                                                                                                                                                                                                                                                                                                                                                                                                                                                                                                                                                                                                                                                                                                                                                                                                                                                                                                                                                                                                                                                                                                                                                 | Cadham Provincial Laboratory                                                                                            | National Microbiology Laboratory                                                                                        | Anna Majer, Shari Tyson, Grace Seo, Philip Mabon, Natalie Knox, Morag Graham, Paul Van Caesele, Jared Bullard, David Alexander, Kerry Dust, Nathalie Bastien, Yan Li, Matthew Gilmour, Timothy Booth                                                                                                                                                                                                                                                                                                                                                          |
| EPI_ISL_418814                                                                                                                                                                                                                                                                                                                                                                                                                                                                                                                                                                                                                                                                                                                                                                                                                                                                                                                                                                                                                                                                                                                                                                                                                                                                                                                                                                                                                                                                                                                                                                                                                                                                                                                                                                                                                                                                                                                                                 | Queen Elizabeth II Health Science Centre                                                                                | National Microbiology Laboratory                                                                                        | Anna Majer, Shari Tyson, Grace Seo, Philip Mabon, Natalie Knox, Morag Graham, Todd Hachette, Jason LeBlanc, Nathalie Bastien, Yan Li, Matthew Gilmour, Timothy Booth                                                                                                                                                                                                                                                                                                                                                                                          |
| EPI_ISL_419559, EPI_ISL_419560                                                                                                                                                                                                                                                                                                                                                                                                                                                                                                                                                                                                                                                                                                                                                                                                                                                                                                                                                                                                                                                                                                                                                                                                                                                                                                                                                                                                                                                                                                                                                                                                                                                                                                                                                                                                                                                                                                                                 | FL Bureau of Public Health Laboratories-Tampa                                                                           | Pathogen Discovery, Respiratory Viruses Branch, Division of Viral Diseases, Centers for Disease Control and Prevention  | Anna Uehara, Ying Tao, Jing Zhang, Krista Queen, Clinton R. Paden, Yan Li, Haibin Wang, Jasmine Padilla, Justin Lee, Suxiang Tong                                                                                                                                                                                                                                                                                                                                                                                                                             |
| EPI_ISL_419562, EPI_ISL_419563, EPI_ISL_419564, EPI_ISL_419565, EPI_ISL_419566, EPI_ISL_419567, EPI_ISL_419568, EPI_ISL_419569, EPI_ISL_419570, EPI_ISL_419571, EPI_ISL_419572, EPI_ISL_419573, EPI_ISL_419574, EPI_ISL_419575, EPI_ISL_419576, EPI_ISL_419577, EPI_ISL_419578, EPI_ISL_419579, EPI_ISL_419580, EPI_ISL_419581, EPI_ISL_419582, EPI_ISL_419583, EPI_ISL_419584, EPI_ISL_419585, EPI_ISL_419586, EPI_ISL_419587, EPI_ISL_419588, EPI_ISL_419589, EPI_ISL_419590, EPI_ISL_419591, EPI_ISL_419592, EPI_ISL_419593, EPI_ISL_419594, EPI_ISL_419595, EPI_ISL_419596, EPI_ISL_419597, EPI_ISL_419598, EPI_ISL_419599, EPI_ISL_419600, EPI_ISL_419601, EPI_ISL_419602, EPI_ISL_419603, EPI_ISL_419604, EPI_ISL_419605, EPI_ISL_419606, EPI_ISL_419607                                                                                                                                                                                                                                                                                                                                                                                                                                                                                                                                                                                                                                                                                                                                                                                                                                                                                                                                                                                                                                                                                                                                                                                                 | Laboratoire Nationale de Santé, Microbiology, Virology                                                                  | Laboratoire Nationale de Santé, Microbiology, Epidemiology and Microbial Genomics                                       | Anke Wienecke-Baldacchino, Ardashes Latsuzbaia, Jessica Tapp, Catherine Ragimbeau, Guillaume Fournier, Tamir Abdelrahman, Trung Nguyen Nguyen, Joel Mossong                                                                                                                                                                                                                                                                                                                                                                                                   |
| EPI_ISL_420080                                                                                                                                                                                                                                                                                                                                                                                                                                                                                                                                                                                                                                                                                                                                                                                                                                                                                                                                                                                                                                                                                                                                                                                                                                                                                                                                                                                                                                                                                                                                                                                                                                                                                                                                                                                                                                                                                                                                                 | WHO National Influenza Centre Russian Federation                                                                        | WHO National Influenza Centre Russian Federation                                                                        | Andrey Komissarov, Artem Fadeev, Anna Ivanova, Daria Danilenko                                                                                                                                                                                                                                                                                                                                                                                                                                                                                                |
| EPI_ISL_420081                                                                                                                                                                                                                                                                                                                                                                                                                                                                                                                                                                                                                                                                                                                                                                                                                                                                                                                                                                                                                                                                                                                                                                                                                                                                                                                                                                                                                                                                                                                                                                                                                                                                                                                                                                                                                                                                                                                                                 | WHO National Influenza Centre Russian Federation                                                                        | WHO National Influenza Centre Russian Federation                                                                        | Andrey Komissarov, Artem Fadeev, Maria Sergeeva, Anna Ivanova, Daria Danilenko                                                                                                                                                                                                                                                                                                                                                                                                                                                                                |
| EPI_ISL_421734, EPI_ISL_421735, EPI_ISL_421736, EPI_ISL_421737, EPI_ISL_421738, EPI_ISL_421739, EPI_ISL_421740, EPI_ISL_421741, EPI_ISL_421742, EPI_ISL_421743, EPI_ISL_421744, EPI_ISL_421745, EPI_ISL_421746, EPI_ISL_421747, EPI_ISL_421748, EPI_ISL_421749, EPI_ISL_421750, EPI_ISL_421751, EPI_ISL_421752, EPI_ISL_421753, EPI_ISL_421754, EPI_ISL_421755, EPI_ISL_421756, EPI_ISL_421757, EPI_ISL_421758, EPI_ISL_421759, EPI_ISL_421760, EPI_ISL_421761, EPI_ISL_421762, EPI_ISL_421763                                                                                                                                                                                                                                                                                                                                                                                                                                                                                                                                                                                                                                                                                                                                                                                                                                                                                                                                                                                                                                                                                                                                                                                                                                                                                                                                                                                                                                                                 | Laboratoire National de Sante, Microbiology, Virology                                                                   | Laboratoire National de Sante, Microbiology, Epidemiology and Microbial Genomics                                        | Anke Wienecke-Baldacchino, Ardashes Latsuzbaia, Jessica Tapp, Catherine Ragimbeau, Guillaume Fournier, Tamir Abdelrahman, Trung Nguyen Nguyen, Joel Mossong                                                                                                                                                                                                                                                                                                                                                                                                   |
| EPI_ISL_425651, EPI_ISL_425658, EPI_ISL_425667, EPI_ISL_425681, EPI_ISL_425699, EPI_ISL_425700, EPI_ISL_425738, EPI_ISL_425765, EPI_ISL_425804                                                                                                                                                                                                                                                                                                                                                                                                                                                                                                                                                                                                                                                                                                                                                                                                                                                                                                                                                                                                                                                                                                                                                                                                                                                                                                                                                                                                                                                                                                                                                                                                                                                                                                                                                                                                                 | West of Scotland Specialist Virology Centre, NHSGGC / MRC-University of Glasgow Centre for Virus Research               | COVID-19 Genomics UK (COG-UK) Consortium                                                                                | Ana da Silva Filipe, Kathy Smollett, Stephen Carmichael, Natasha Johnson, Daniel Majr, Lily Tong, Jenna Nichols; Sarah McDonald; Richard Orton, Joseph Hughes, Sreenu Vattipally, David L Robertson; Kathy Li, Natasha Jesudason, Rajiv Shah, James Shepherd, Antonia Ho, Emma Thomson; Alasdair MacLean, Rory Gunson.                                                                                                                                                                                                                                        |
| EPI_ISL_426416                                                                                                                                                                                                                                                                                                                                                                                                                                                                                                                                                                                                                                                                                                                                                                                                                                                                                                                                                                                                                                                                                                                                                                                                                                                                                                                                                                                                                                                                                                                                                                                                                                                                                                                                                                                                                                                                                                                                                 | CT-Dr. Katherine A. Kelley State Public Health Lab                                                                      | Pathogen Discovery, Respiratory Viruses Branch, Division of Viral Diseases, Centers for Disease Control and Prevention  | Anna Uehara, Yan Li, Krista Queen, Clinton R. Paden, Rachel Marine, Ying Tao, Jing Zhang, Haibin Wang, Mary S. Keckler, Alison S. Laufer Halpin, Christopher A. Elkins, Suxiang Tong                                                                                                                                                                                                                                                                                                                                                                          |
| EPI_ISL_426417, EPI_ISL_426418, EPI_ISL_426419                                                                                                                                                                                                                                                                                                                                                                                                                                                                                                                                                                                                                                                                                                                                                                                                                                                                                                                                                                                                                                                                                                                                                                                                                                                                                                                                                                                                                                                                                                                                                                                                                                                                                                                                                                                                                                                                                                                 | GA Department of Public Health Laboratory                                                                               | Pathogen Discovery, Respiratory Viruses Branch, Division of Viral Diseases, Centers for Disease Control and Prevention  | Anna Uehara, Yan Li, Krista Queen, Clinton R. Paden, Rachel Marine, Ying Tao, Jing Zhang, Haibin Wang, Mary S. Keckler, Alison S. Laufer Halpin, Christopher A. Elkins, Suxiang Tong                                                                                                                                                                                                                                                                                                                                                                          |
| EPI_ISL_426420, EPI_ISL_426421                                                                                                                                                                                                                                                                                                                                                                                                                                                                                                                                                                                                                                                                                                                                                                                                                                                                                                                                                                                                                                                                                                                                                                                                                                                                                                                                                                                                                                                                                                                                                                                                                                                                                                                                                                                                                                                                                                                                 | HI Dept. of Health, State Laboratories Division                                                                         | Pathogen Discovery, Respiratory Viruses Branch, Division of Viral Diseases, Centers for Disease Control and Prevention  | Anna Uehara, Yan Li, Krista Queen, Clinton R. Paden, Rachel Marine, Ying Tao, Jing Zhang, Haibin Wang, Mary S. Keckler, Alison S. Laufer Halpin, Christopher A. Elkins, Suxiang Tong                                                                                                                                                                                                                                                                                                                                                                          |
| EPI_ISL_427307, EPI_ISL_427308, EPI_ISL_427309, EPI_ISL_427310, EPI_ISL_427311, EPI_ISL_427312, EPI_ISL_427313, EPI_ISL_427314, EPI_ISL_427315, EPI_ISL_427316, EPI_ISL_427317, EPI_ISL_427318, EPI_ISL_427319, EPI_ISL_427320, EPI_ISL_427321, EPI_ISL_427322, EPI_ISL_427323, EPI_ISL_427324, EPI_ISL_427325, EPI_ISL_427326, EPI_ISL_427327, EPI_ISL_427328, EPI_ISL_427329, EPI_ISL_427330, EPI_ISL_427331, EPI_ISL_427332, EPI_ISL_427333, EPI_ISL_427334, EPI_ISL_427335, EPI_ISL_427336, EPI_ISL_427337, EPI_ISL_427338, EPI_ISL_427339                                                                                                                                                                                                                                                                                                                                                                                                                                                                                                                                                                                                                                                                                                                                                                                                                                                                                                                                                                                                                                                                                                                                                                                                                                                                                                                                                                                                                 | WHO National Influenza Centre Russian Federation                                                                        | WHO National Influenza Centre Russian Federation                                                                        | Andrey Komissarov, Artem Fadeev, Maria Sergeeva, Anna Ivanova, Daria Danilenko                                                                                                                                                                                                                                                                                                                                                                                                                                                                                |
| EPI_ISL_427815                                                                                                                                                                                                                                                                                                                                                                                                                                                                                                                                                                                                                                                                                                                                                                                                                                                                                                                                                                                                                                                                                                                                                                                                                                                                                                                                                                                                                                                                                                                                                                                                                                                                                                                                                                                                                                                                                                                                                 | WHO National Influenza Centre Russian Federation                                                                        | WHO National Influenza Centre Russian Federation                                                                        | Andrey Komissarov, Artem Fadeev, Anna Ivanova, Daria Danilenko                                                                                                                                                                                                                                                                                                                                                                                                                                                                                                |
| EPI_ISL_428939, EPI_ISL_428940, EPI_ISL_428941, EPI_ISL_428942, EPI_ISL_428943, EPI_ISL_428944, EPI_ISL_428945, EPI_ISL_428946, EPI_ISL_428947, EPI_ISL_428948, EPI_ISL_428949, EPI_ISL_428950, EPI_ISL_428951, EPI_ISL_428952, EPI_ISL_428953, EPI_ISL_428954, EPI_ISL_428955, EPI_ISL_428956, EPI_ISL_428957, EPI_ISL_428958, EPI_ISL_428959, EPI_ISL_428960, EPI_ISL_428961, EPI_ISL_428962, EPI_ISL_429706, EPI_ISL_429707, EPI_ISL_429708, EPI_ISL_429709, EPI_ISL_429710, EPI_ISL_429711, EPI_ISL_429712, EPI_ISL_429713, EPI_ISL_429714, EPI_ISL_429715, EPI_ISL_429716, EPI_ISL_429717, EPI_ISL_429718, EPI_ISL_429719, EPI_ISL_429720, EPI_ISL_429721, EPI_ISL_429722, EPI_ISL_429723, EPI_ISL_429724, EPI_ISL_429725, EPI_ISL_429726, EPI_ISL_429727, EPI_ISL_429728, EPI_ISL_429729, EPI_ISL_429730, EPI_ISL_429731, EPI_ISL_429732, EPI_ISL_429733, EPI_ISL_429734, EPI_ISL_429735, EPI_ISL_429736, EPI_ISL_429737, EPI_ISL_429738, EPI_ISL_429739, EPI_ISL_429740, EPI_ISL_429741, EPI_ISL_429742, EPI_ISL_429743, EPI_ISL_429744, EPI_ISL_429745, EPI_ISL_429746, EPI_ISL_429747, EPI_ISL_429748, EPI_ISL_429749, EPI_ISL_429750, EPI_ISL_429751, EPI_ISL_429752, EPI_ISL_429753, EPI_ISL_429754, EPI_ISL_429755, EPI_ISL_429756, EPI_ISL_429757, EPI_ISL_429758, EPI_ISL_429759, EPI_ISL_429760, EPI_ISL_429761, EPI_ISL_429762, EPI_ISL_429763, EPI_ISL_429764, EPI_ISL_429765, EPI_ISL_429766, EPI_ISL_429767, EPI_ISL_429768, EPI_ISL_429769, EPI_ISL_429770, EPI_ISL_429771, EPI_ISL_429772, EPI_ISL_429773, EPI_ISL_429774, EPI_ISL_429775, EPI_ISL_429776, EPI_ISL_429777, EPI_ISL_429778, EPI_ISL_429779, EPI_ISL_429780, EPI_ISL_429781, EPI_ISL_429782, EPI_ISL_429783, EPI_ISL_429784, EPI_ISL_429785, EPI_ISL_429786, EPI_ISL_429787, EPI_ISL_429788, EPI_ISL_429789, EPI_ISL_429790, EPI_ISL_429791, EPI_ISL_429793, EPI_ISL_429794, EPI_ISL_429795, EPI_ISL_429796, EPI_ISL_429797, EPI_ISL_429798, EPI_ISL_429799, EPI_ISL_429800 |                                                                                                                         |                                                                                                                         |                                                                                                                                                                                                                                                                                                                                                                                                                                                                                                                                                               |

|                                                                                                                                                                                                                                                                                                                                                                                                                                                                                                                                                                                                                                                                                                                                                                |                                                                                                                                                           |                                                                                  |                                                                                                                                                                                                                                                                                                                                                                                                                                                                                                          |
|----------------------------------------------------------------------------------------------------------------------------------------------------------------------------------------------------------------------------------------------------------------------------------------------------------------------------------------------------------------------------------------------------------------------------------------------------------------------------------------------------------------------------------------------------------------------------------------------------------------------------------------------------------------------------------------------------------------------------------------------------------------|-----------------------------------------------------------------------------------------------------------------------------------------------------------|----------------------------------------------------------------------------------|----------------------------------------------------------------------------------------------------------------------------------------------------------------------------------------------------------------------------------------------------------------------------------------------------------------------------------------------------------------------------------------------------------------------------------------------------------------------------------------------------------|
| see above                                                                                                                                                                                                                                                                                                                                                                                                                                                                                                                                                                                                                                                                                                                                                      | Laboratoire National de Sante, Microbiology, Virology                                                                                                     | Laboratoire National de Sante, Microbiology, Epidemiology and Microbial Genomics | Anke Wienecke-Baldacchino, Ardashesh Latsuzbaia, Jessica Tapp, Catherine Ragimbeau, Guillaume Fournier, Tamir Abdelrahman, Trung Nguyen Nguyen, Joel Mossong                                                                                                                                                                                                                                                                                                                                             |
| EPI_ISL_429806                                                                                                                                                                                                                                                                                                                                                                                                                                                                                                                                                                                                                                                                                                                                                 | Dr. Georges-L.-Dumont University Hospital Centre                                                                                                          | National Microbiology Laboratory                                                 | Anna Majer, Shari Tyson, Grace Seo, Kristyn Burak, Philip Mabon, Elsie Grudeski, Rhiannon Huzarewich, Russell Mandes, Jennifer Tanner, Natalie Knox, Morag Graham, Gary Van Domselaar, Richard Garceau, Guillaume Desnoyers, Nathalie Bastien, Yan Li, Timothy Booth, Matthew Gilmour                                                                                                                                                                                                                    |
| EPI_ISL_429807                                                                                                                                                                                                                                                                                                                                                                                                                                                                                                                                                                                                                                                                                                                                                 | Cadham Provincial Laboratory                                                                                                                              | National Microbiology Laboratory                                                 | Anna Majer, Shari Tyson, Grace Seo, Kristyn Burak, Philip Mabon, Elsie Grudeski, Rhiannon Huzarewich, Russell Mandes, Jennifer Tanner, Natalie Knox, Morag Graham, Gary Van Domselaar, Paul Van Caesele, Jared Bullard, David Alexander, Kerry Dust, Nathalie Bastien, Yan Li, Timothy Booth, Matthew Gilmour                                                                                                                                                                                            |
| EPI_ISL_429811                                                                                                                                                                                                                                                                                                                                                                                                                                                                                                                                                                                                                                                                                                                                                 | Dr. Georges-L.-Dumont University Hospital Centre                                                                                                          | National Microbiology Laboratory                                                 | Anna Majer, Shari Tyson, Grace Seo, Kristyn Burak, Philip Mabon, Elsie Grudeski, Rhiannon Huzarewich, Russell Mandes, Jennifer Tanner, Natalie Knox, Morag Graham, Gary Van Domselaar, Richard Garceau, Guillaume Desnoyers, Nathalie Bastien, Yan Li, Timothy Booth, Matthew Gilmour                                                                                                                                                                                                                    |
| EPI_ISL_429812, EPI_ISL_429813, EPI_ISL_429814                                                                                                                                                                                                                                                                                                                                                                                                                                                                                                                                                                                                                                                                                                                 | Queen Elizabeth II Health Science Centre                                                                                                                  | National Microbiology Laboratory                                                 | Anna Majer, Shari Tyson, Grace Seo, Kristyn Burak, Philip Mabon, Elsie Grudeski, Rhiannon Huzarewich, Russell Mandes, Jennifer Tanner, Natalie Knox, Morag Graham, Gary Van Domselaar, Todd Hatchette, Jason LeBlanc, Nathalie Bastien, Yan Li, Timothy Booth, Matthew Gilmour                                                                                                                                                                                                                           |
| EPI_ISL_429815                                                                                                                                                                                                                                                                                                                                                                                                                                                                                                                                                                                                                                                                                                                                                 | Public Health Laboratory                                                                                                                                  | National Microbiology Laboratory                                                 | Anna Majer, Shari Tyson, Grace Seo, Kristyn Burak, Philip Mabon, Elsie Grudeski, Rhiannon Huzarewich, Russell Mandes, Jennifer Tanner, Natalie Knox, Morag Graham, Gary Van Domselaar, Robert Needle, Yang Yu, Adel Malek, Laura Gilbert, George Zahariadis, Nathalie Bastien, Yan Li, Timothy Booth, Matthew Gilmour                                                                                                                                                                                    |
| EPI_ISL_429816                                                                                                                                                                                                                                                                                                                                                                                                                                                                                                                                                                                                                                                                                                                                                 | Dr. Georges-L.-Dumont University Hospital Centre                                                                                                          | National Microbiology Laboratory                                                 | Anna Majer, Shari Tyson, Grace Seo, Kristyn Burak, Philip Mabon, Elsie Grudeski, Rhiannon Huzarewich, Russell Mandes, Jennifer Tanner, Natalie Knox, Morag Graham, Gary Van Domselaar, Richard Garceau, Guillaume Desnoyers, Nathalie Bastien, Yan Li, Timothy Booth, Matthew Gilmour                                                                                                                                                                                                                    |
| EPI_ISL_429817, EPI_ISL_429818, EPI_ISL_429819                                                                                                                                                                                                                                                                                                                                                                                                                                                                                                                                                                                                                                                                                                                 | Cadham Provincial Laboratory                                                                                                                              | National Microbiology Laboratory                                                 | Anna Majer, Shari Tyson, Grace Seo, Kristyn Burak, Philip Mabon, Elsie Grudeski, Rhiannon Huzarewich, Russell Mandes, Jennifer Tanner, Natalie Knox, Morag Graham, Gary Van Domselaar, Paul Van Caesele, Jared Bullard, David Alexander, Kerry Dust, Nathalie Bastien, Yan Li, Timothy Booth, Matthew Gilmour                                                                                                                                                                                            |
| EPI_ISL_429820                                                                                                                                                                                                                                                                                                                                                                                                                                                                                                                                                                                                                                                                                                                                                 | Cadham Provincial Laboratory                                                                                                                              | National Microbiology Laboratory                                                 | Anna Majer, Shari Tyson, Grace Seo, Kristyn Burak, Philip Mabon, Elsie Grudeski, Rhiannon Huzarewich, Russell Mandes, Jennifer Tanner, Natalie Knox, Morag Graham, Gary Van Domselaar, Paul Van Caesele, Jared Bullard, David Alexander, Kerry Dust, Nathalie Bastien, Yan Li, Timothy Booth, Matthew Gilmour                                                                                                                                                                                            |
| EPI_ISL_430067, EPI_ISL_430068, EPI_ISL_430069, EPI_ISL_430070, EPI_ISL_430071, EPI_ISL_430072, EPI_ISL_430073, EPI_ISL_430074, EPI_ISL_430075, EPI_ISL_430076, EPI_ISL_430077, EPI_ISL_430078, EPI_ISL_430079, EPI_ISL_430080, EPI_ISL_430081, EPI_ISL_430082, EPI_ISL_430083, EPI_ISL_430084, EPI_ISL_430085, EPI_ISL_430086, EPI_ISL_430087, EPI_ISL_430088, EPI_ISL_430089, EPI_ISL_430090, EPI_ISL_430091, EPI_ISL_430092, EPI_ISL_430093, EPI_ISL_430094, EPI_ISL_430095, EPI_ISL_430096, EPI_ISL_430097, EPI_ISL_430098, EPI_ISL_430099, EPI_ISL_430100, EPI_ISL_430101, EPI_ISL_430102, EPI_ISL_430103, EPI_ISL_430104, EPI_ISL_430105, EPI_ISL_430106, EPI_ISL_430107, EPI_ISL_430108, EPI_ISL_430109, EPI_ISL_430110, EPI_ISL_430111, EPI_ISL_430112 | WHO National Influenza Centre Russian Federation                                                                                                          | WHO National Influenza Centre Russian Federation                                 | Andrey Komissarov, Artem Fadeev, Mariia Sergeeva, Anna Ivanova, Daria Danilenko                                                                                                                                                                                                                                                                                                                                                                                                                          |
| see above                                                                                                                                                                                                                                                                                                                                                                                                                                                                                                                                                                                                                                                                                                                                                      | WHO National Influenza Centre Russian Federation                                                                                                          | WHO National Influenza Centre Russian Federation                                 | Andrey Komissarov, Artem Fadeev, Mariia Sergeeva, Anna Ivanova, Daria Danilenko                                                                                                                                                                                                                                                                                                                                                                                                                          |
| EPI_ISL_430846                                                                                                                                                                                                                                                                                                                                                                                                                                                                                                                                                                                                                                                                                                                                                 | General Intensive Care Unit, Raymond Poincaré Hospital (AP-HP), Lab Inflammation & Infection, U1173 University Paris Saclay-UVSQ/INSERM, Garches, France. | Institut Pasteur, Laboratory for Urgent Response to biological Threats           | Annane Djillali, Vanhomwegen Jessica, Caro Valérie, Manuguerra Jean-Claude                                                                                                                                                                                                                                                                                                                                                                                                                               |
| EPI_ISL_433273, EPI_ISL_433302, EPI_ISL_433329, EPI_ISL_433336, EPI_ISL_433339, EPI_ISL_433519, EPI_ISL_433577, EPI_ISL_433609, EPI_ISL_433662                                                                                                                                                                                                                                                                                                                                                                                                                                                                                                                                                                                                                 | West of Scotland Specialist Virology Centre, NHSGGC / MRC-University of Glasgow Centre for Virus Research                                                 | COVID-19 Genomics UK (COG-UK) Consortium                                         | Ana da Silva Filipe, Natasha Johnson, Kathy Smollett, Daniel Mair, Stephen Carmichael, Lily Tong, Jenna Nichols, Elihu Aranday-Cortes, Kirstyn Brunker, Yasmin Parr, Kyriaki Nomikou; Sarah McDonald, Marc Niebel, Patawee Asamaphan; Richard Orton, Joseph Hughes, Sreenu Vattipally, David L Robertson; Alasdair MacLean, Rory Gunson; Kathy Li, Natasha Jesudason, Rajiv Shah, James Shepherd, Antonia Ho, Emma Thomson                                                                               |
| EPI_ISL_434487, EPI_ISL_434488, EPI_ISL_434489, EPI_ISL_434490, EPI_ISL_434491, EPI_ISL_434492, EPI_ISL_434493, EPI_ISL_434494, EPI_ISL_434495, EPI_ISL_434496, EPI_ISL_434497, EPI_ISL_434498, EPI_ISL_434499, EPI_ISL_434500, EPI_ISL_434501, EPI_ISL_434502, EPI_ISL_434503, EPI_ISL_434504, EPI_ISL_434505, EPI_ISL_434506, EPI_ISL_434507, EPI_ISL_434508, EPI_ISL_434509, EPI_ISL_434510, EPI_ISL_434511, EPI_ISL_434512, EPI_ISL_434513, EPI_ISL_434514, EPI_ISL_434515                                                                                                                                                                                                                                                                                 | Laboratoire National de Sante, Microbiology, Virology                                                                                                     | Laboratoire National de Sante, Microbiology, Epidemiology and Microbial Genomics | Anke Wienecke-Baldacchino, Ardashesh Latsuzbaia, Jessica Tapp, Catherine Ragimbeau, Guillaume Fournier, Tamir Abdelrahman, Trung Nguyen Nguyen, Joel Mossong                                                                                                                                                                                                                                                                                                                                             |
| see above                                                                                                                                                                                                                                                                                                                                                                                                                                                                                                                                                                                                                                                                                                                                                      | Laboratoire National de Sante, Microbiology, Virology                                                                                                     | Laboratoire National de Sante, Microbiology, Epidemiology and Microbial Genomics | Anke Wienecke-Baldacchino, Ardashesh Latsuzbaia, Jessica Tapp, Catherine Ragimbeau, Guillaume Fournier, Tamir Abdelrahman, Trung Nguyen Nguyen, Joel Mossong                                                                                                                                                                                                                                                                                                                                             |
| EPI_ISL_434643, EPI_ISL_434655, EPI_ISL_434665                                                                                                                                                                                                                                                                                                                                                                                                                                                                                                                                                                                                                                                                                                                 | Uppsala Narakut Aleris                                                                                                                                    | The Public Health Agency of Sweden                                               | Annika Nilsson, Oskar Karlsson Lindsjo, Maria Lind Karlberg, Anna-Malin Linde, Olov Svartstrom, Anna Risberg, Theresa Enkirch, Mia Brytting, Karin Tegmark-Wisell                                                                                                                                                                                                                                                                                                                                        |
| EPI_ISL_435050                                                                                                                                                                                                                                                                                                                                                                                                                                                                                                                                                                                                                                                                                                                                                 | B.J. Medical College and Civil hospital                                                                                                                   | Gujarat Biotechnology Research Centre                                            | Ankit Hinsu, Pritesh Sabara, Apurvasinh Puvar, Janvi Raval, Monika Gandhi, Pinal Trivedi, Maharshi Pandya, Amit Kanani, Akanksha Verma, Nitin Savaliya, Raghawendra Kumar, Dinesh Kumar, Zuber Saiyed, Dipa Kinariwala, Disha Patel, Binita Aring, Geeta Vaghela, Sonia Barve, Bhavesh Modi, Kairavi Joshi, Gaurishankar Shrimali, Nidhi Sood, Pranay Shah, R D Dixit, Snehal Bagatharia, Kamlesh J Upadhyay, Ramesh Pandit, Tejas Shah, Dipeshwari Shewale, Chaitanya Joshi, Madhvi Joshi               |
| EPI_ISL_438764, EPI_ISL_438768, EPI_ISL_438795, EPI_ISL_438852, EPI_ISL_438866, EPI_ISL_438881, EPI_ISL_438893, EPI_ISL_438912, EPI_ISL_438920, EPI_ISL_438923, EPI_ISL_438981, EPI_ISL_438982, EPI_ISL_439004, EPI_ISL_439009, EPI_ISL_439063, EPI_ISL_439076, EPI_ISL_439122                                                                                                                                                                                                                                                                                                                                                                                                                                                                                 | West of Scotland Specialist Virology Centre, NHSGGC / MRC-University of Glasgow Centre for Virus Research                                                 | COVID-19 Genomics UK (COG-UK) Consortium                                         | Ana da Silva Filipe, Natasha Johnson, Kathy Smollett, Daniel Mair, Stephen Carmichael, Lily Tong, Jenna Nichols, Elihu Aranday-Cortes, Kirstyn Brunker, Yasmin Parr, Kyriaki Nomikou; Sarah McDonald, Marc Niebel, Patawee Asamaphan; Richard Orton, Joseph Hughes, Sreenu Vattipally, David L Robertson; Alasdair MacLean, Rory Gunson; Kathy Li, Natasha Jesudason, Rajiv Shah, James Shepherd, Antonia Ho, Emma Thomson                                                                               |
| EPI_ISL_444455                                                                                                                                                                                                                                                                                                                                                                                                                                                                                                                                                                                                                                                                                                                                                 | Molecular Infectious Disease                                                                                                                              | Molecular Infectious Disease                                                     | Anderson,B.P., Rosenthal,S.H., Gerasimova,A., Kagan,R.M. and Owen,R.                                                                                                                                                                                                                                                                                                                                                                                                                                     |
| EPI_ISL_444461                                                                                                                                                                                                                                                                                                                                                                                                                                                                                                                                                                                                                                                                                                                                                 | B.J. Medical College and Civil hospital                                                                                                                   | Gujarat Biotechnology Research Centre                                            | Ankit Hinsu, Pritesh Sabara, Apurvasinh Puvar, Janvi Raval, Monika Gandhi, Pinal Trivedi, Maharshi Pandya, Amit Kanani, Akanksha Verma, Nitin Savaliya, Raghawendra Kumar, Dinesh Kumar, Zuber Saiyed, Dipa Kinariwala, Disha Patel, Binita Aring, Neeta Khandelwal, Geeta Vaghela, Sonia Barve, Bhavesh Modi, Kairavi Joshi, Gaurishankar Shrimali, Nidhi Sood, Pranay Shah, R D Dixit, Snehal Bagatharia, Kamlesh J Upadhyay, Ramesh Pandit, Neelam Nathani, Chaitanya Joshi, Madhvi Joshi, Tejas Shah |
| EPI_ISL_444518                                                                                                                                                                                                                                                                                                                                                                                                                                                                                                                                                                                                                                                                                                                                                 | unknown                                                                                                                                                   | Molecular Infectious Disease                                                     | Anderson,B.P., Rosenthal,S.H., Gerasimova,A., Kagan,R.M. and Owen,R.                                                                                                                                                                                                                                                                                                                                                                                                                                     |
| EPI_ISL_444519                                                                                                                                                                                                                                                                                                                                                                                                                                                                                                                                                                                                                                                                                                                                                 | Molecular Infectious Disease                                                                                                                              | Molecular Infectious Disease                                                     | Anderson,B.P., Rosenthal,S.H., Gerasimova,A., Kagan,R.M. and Owen,R.                                                                                                                                                                                                                                                                                                                                                                                                                                     |
| EPI_ISL_445053, EPI_ISL_445054, EPI_ISL_445055, EPI_ISL_445056, EPI_ISL_445057, EPI_ISL_445058, EPI_ISL_445059, EPI_ISL_445060, EPI_ISL_445061, EPI_ISL_445062, EPI_ISL_445063, EPI_ISL_445064, EPI_ISL_445065, EPI_ISL_445066, EPI_ISL_445067, EPI_ISL_445068, EPI_ISL_445069, EPI_ISL_445070, EPI_ISL_445071, EPI_ISL_445072, EPI_ISL_445073, EPI_ISL_445074, EPI_ISL_445075, EPI_ISL_445076                                                                                                                                                                                                                                                                                                                                                                 | Laboratoire National de Sante, Microbiology, Virology                                                                                                     | Laboratoire National de Sante, Microbiology, Epidemiology and Microbial Genomics | Anke Wienecke-Baldacchino, Ardashesh Latsuzbaia, Jessica Tapp, Catherine Ragimbeau, Guillaume Fournier, Tamir Abdelrahman, Trung Nguyen Nguyen, Joel Mossong                                                                                                                                                                                                                                                                                                                                             |
| see above                                                                                                                                                                                                                                                                                                                                                                                                                                                                                                                                                                                                                                                                                                                                                      | Laboratoire National de Sante, Microbiology, Virology                                                                                                     | Laboratoire National de Sante, Microbiology, Epidemiology and Microbial Genomics | Anke Wienecke-Baldacchino, Ardashesh Latsuzbaia, Jessica Tapp, Catherine Ragimbeau, Guillaume Fournier, Tamir Abdelrahman, Trung Nguyen Nguyen, Joel Mossong                                                                                                                                                                                                                                                                                                                                             |
| EPI_ISL_445227, EPI_ISL_445230, EPI_ISL_445231, EPI_ISL_445239                                                                                                                                                                                                                                                                                                                                                                                                                                                                                                                                                                                                                                                                                                 | Uppsala Narakut Aleris                                                                                                                                    | The Public Health Agency of Sweden                                               | Annika Nilsson, Oskar Karlsson Lindsjo, Maria Lind Karlberg, Anna-Malin Linde, Olov Svartstrom, Anna Risberg, Theresa Enkirch, Mia Brytting, Karin Tegmark-Wisell                                                                                                                                                                                                                                                                                                                                        |
| EPI_ISL_445245                                                                                                                                                                                                                                                                                                                                                                                                                                                                                                                                                                                                                                                                                                                                                 | CLINICA ALEMANA DE SANTIAGO S.A.                                                                                                                          | Instituto de Salud Publica de Chile                                              | Andrés E Castillo, Bárbara Parra,Paz Tapia, Jaime Lagos, Loredana Arata, Alejandra Acevedo, Winston Andrade, Gabriel Leal, Carolina Tambley, Patricia Bustos, Rodrigo Fasce, Jorge Fernandez                                                                                                                                                                                                                                                                                                             |
| EPI_ISL_445246                                                                                                                                                                                                                                                                                                                                                                                                                                                                                                                                                                                                                                                                                                                                                 | HOSPITAL PUERTO MONTT                                                                                                                                     | Instituto de Salud Publica de Chile                                              | Andrés E Castillo, Bárbara Parra,Paz Tapia, Jaime Lagos, Loredana Arata, Alejandra Acevedo, Winston Andrade, Gabriel Leal, Carolina Tambley, Patricia Bustos, Rodrigo Fasce, Jorge Fernandez                                                                                                                                                                                                                                                                                                             |
| EPI_ISL_445247                                                                                                                                                                                                                                                                                                                                                                                                                                                                                                                                                                                                                                                                                                                                                 | UNIVERSIDAD DE LOS ANDES                                                                                                                                  | Instituto de Salud Publica de Chile                                              | Andrés E Castillo, Bárbara Parra,Paz Tapia, Jaime Lagos, Loredana Arata, Alejandra Acevedo, Winston Andrade, Gabriel Leal, Carolina Tambley, Patricia Bustos, Rodrigo Fasce, Jorge Fernandez                                                                                                                                                                                                                                                                                                             |
| EPI_ISL_445248                                                                                                                                                                                                                                                                                                                                                                                                                                                                                                                                                                                                                                                                                                                                                 | CLINICA ALEMANA DE SANTIAGO S.A.                                                                                                                          | Instituto de Salud Publica de Chile                                              | Andrés E Castillo, Bárbara Parra,Paz Tapia, Jaime Lagos, Loredana Arata, Alejandra Acevedo, Winston Andrade, Gabriel Leal, Carolina Tambley, Patricia Bustos, Rodrigo Fasce, Jorge Fernandez                                                                                                                                                                                                                                                                                                             |
| EPI_ISL_445249                                                                                                                                                                                                                                                                                                                                                                                                                                                                                                                                                                                                                                                                                                                                                 | CLINICA SANTA MARIA S.A.                                                                                                                                  | Instituto de Salud Publica de Chile                                              | Andrés E Castillo, Bárbara Parra,Paz Tapia, Jaime Lagos, Loredana Arata, Alejandra Acevedo, Winston Andrade, Gabriel Leal, Carolina Tambley, Patricia Bustos, Rodrigo Fasce, Jorge Fernandez                                                                                                                                                                                                                                                                                                             |
| EPI_ISL_445250                                                                                                                                                                                                                                                                                                                                                                                                                                                                                                                                                                                                                                                                                                                                                 | CLINICA ALEMANA DE SANTIAGO S.A.                                                                                                                          | Instituto de Salud Publica de Chile                                              | Andrés E Castillo, Bárbara Parra,Paz Tapia, Jaime Lagos, Loredana Arata, Alejandra Acevedo, Winston Andrade, Gabriel Leal, Carolina Tambley, Patricia                                                                                                                                                                                                                                                                                                                                                    |







|                                                                                                                                                                                                                                                                |                                                                                                           |                                          |                                                                                                                                                                                                                                                                                                                                                                                                                                                                                                              |
|----------------------------------------------------------------------------------------------------------------------------------------------------------------------------------------------------------------------------------------------------------------|-----------------------------------------------------------------------------------------------------------|------------------------------------------|--------------------------------------------------------------------------------------------------------------------------------------------------------------------------------------------------------------------------------------------------------------------------------------------------------------------------------------------------------------------------------------------------------------------------------------------------------------------------------------------------------------|
|                                                                                                                                                                                                                                                                | CONCEPCION                                                                                                |                                          | Bustos, Rodrigo Fasce, Jorge Fernandez                                                                                                                                                                                                                                                                                                                                                                                                                                                                       |
| EPI_ISL_445334                                                                                                                                                                                                                                                 | CLINICA UNIVERSITARIA DE PUERTO MONTT S.A.                                                                | Instituto de Salud Publica de Chile      | Andrés E Castillo, Bárbara Parra,Paz Tapia, Jaime Lagos, Loredana Arata, Alejandra Acevedo, Winston Andrade, Gabriel Leal, Carolina Tambley, Patricia Bustos, Rodrigo Fasce, Jorge Fernandez                                                                                                                                                                                                                                                                                                                 |
| EPI_ISL_445335                                                                                                                                                                                                                                                 | HOSPITAL DE CALBUCO                                                                                       | Instituto de Salud Publica de Chile      | Andrés E Castillo, Bárbara Parra,Paz Tapia, Jaime Lagos, Loredana Arata, Alejandra Acevedo, Winston Andrade, Gabriel Leal, Carolina Tambley, Patricia Bustos, Rodrigo Fasce, Jorge Fernandez                                                                                                                                                                                                                                                                                                                 |
| EPI_ISL_445336                                                                                                                                                                                                                                                 | HOSPITAL LAS HIGUERAS DE TALCAHUANO                                                                       | Instituto de Salud Publica de Chile      | Andrés E Castillo, Bárbara Parra,Paz Tapia, Jaime Lagos, Loredana Arata, Alejandra Acevedo, Winston Andrade, Gabriel Leal, Carolina Tambley, Patricia Bustos, Rodrigo Fasce, Jorge Fernandez                                                                                                                                                                                                                                                                                                                 |
| EPI_ISL_445337                                                                                                                                                                                                                                                 | HOSPITAL HANGA ROA                                                                                        | Instituto de Salud Publica de Chile      | Andrés E Castillo, Bárbara Parra,Paz Tapia, Jaime Lagos, Loredana Arata, Alejandra Acevedo, Winston Andrade, Gabriel Leal, Carolina Tambley, Patricia Bustos, Rodrigo Fasce, Jorge Fernandez                                                                                                                                                                                                                                                                                                                 |
| EPI_ISL_445338, EPI_ISL_445339, EPI_ISL_445340, EPI_ISL_445341, EPI_ISL_445342, EPI_ISL_445343, EPI_ISL_445344, EPI_ISL_445345, EPI_ISL_445346, EPI_ISL_445347, EPI_ISL_445348                                                                                 |                                                                                                           |                                          |                                                                                                                                                                                                                                                                                                                                                                                                                                                                                                              |
| see above                                                                                                                                                                                                                                                      | HOSPITAL DR.HERNAN HENRIQUEZ ARAVENA                                                                      | Instituto de Salud Publica de Chile      | Andrés E Castillo, Bárbara Parra,Paz Tapia, Jaime Lagos, Loredana Arata, Alejandra Acevedo, Winston Andrade, Gabriel Leal, Carolina Tambley, Patricia Bustos, Rodrigo Fasce, Jorge Fernandez                                                                                                                                                                                                                                                                                                                 |
| EPI_ISL_445349, EPI_ISL_445350, EPI_ISL_445351                                                                                                                                                                                                                 | HOSPITAL SAN JUAN DE DIOS                                                                                 | Instituto de Salud Publica de Chile      | Andrés E Castillo, Bárbara Parra,Paz Tapia, Jaime Lagos, Loredana Arata, Alejandra Acevedo, Winston Andrade, Gabriel Leal, Carolina Tambley, Patricia Bustos, Rodrigo Fasce, Jorge Fernandez                                                                                                                                                                                                                                                                                                                 |
| EPI_ISL_445352                                                                                                                                                                                                                                                 | HOSPITAL DEL PROFESOR                                                                                     | Instituto de Salud Publica de Chile      | Andrés E Castillo, Bárbara Parra,Paz Tapia, Jaime Lagos, Loredana Arata, Alejandra Acevedo, Winston Andrade, Gabriel Leal, Carolina Tambley, Patricia Bustos, Rodrigo Fasce, Jorge Fernandez                                                                                                                                                                                                                                                                                                                 |
| EPI_ISL_445353                                                                                                                                                                                                                                                 | HOSPITAL PADRE HURTADO                                                                                    | Instituto de Salud Publica de Chile      | Andrés E Castillo, Bárbara Parra,Paz Tapia, Jaime Lagos, Loredana Arata, Alejandra Acevedo, Winston Andrade, Gabriel Leal, Carolina Tambley, Patricia Bustos, Rodrigo Fasce, Jorge Fernandez                                                                                                                                                                                                                                                                                                                 |
| EPI_ISL_445354                                                                                                                                                                                                                                                 | HOSPITAL DE CARABINEROS                                                                                   | Instituto de Salud Publica de Chile      | Andrés E Castillo, Bárbara Parra,Paz Tapia, Jaime Lagos, Loredana Arata, Alejandra Acevedo, Winston Andrade, Gabriel Leal, Carolina Tambley, Patricia Bustos, Rodrigo Fasce, Jorge Fernandez                                                                                                                                                                                                                                                                                                                 |
| EPI_ISL_445355                                                                                                                                                                                                                                                 | MUTUAL DE SEGURIDAD C.CH.C.                                                                               | Instituto de Salud Publica de Chile      | Andrés E Castillo, Bárbara Parra,Paz Tapia, Jaime Lagos, Loredana Arata, Alejandra Acevedo, Winston Andrade, Gabriel Leal, Carolina Tambley, Patricia Bustos, Rodrigo Fasce, Jorge Fernandez                                                                                                                                                                                                                                                                                                                 |
| EPI_ISL_445356                                                                                                                                                                                                                                                 | PONTIFICIA U. CATOLICA SERV. LABORATORIO                                                                  | Instituto de Salud Publica de Chile      | Andrés E Castillo, Bárbara Parra,Paz Tapia, Jaime Lagos, Loredana Arata, Alejandra Acevedo, Winston Andrade, Gabriel Leal, Carolina Tambley, Patricia Bustos, Rodrigo Fasce, Jorge Fernandez                                                                                                                                                                                                                                                                                                                 |
| EPI_ISL_445357                                                                                                                                                                                                                                                 | INTEGRAMEDICA CENTROS MEDICOS S.A.                                                                        | Instituto de Salud Publica de Chile      | Andrés E Castillo, Bárbara Parra,Paz Tapia, Jaime Lagos, Loredana Arata, Alejandra Acevedo, Winston Andrade, Gabriel Leal, Carolina Tambley, Patricia Bustos, Rodrigo Fasce, Jorge Fernandez                                                                                                                                                                                                                                                                                                                 |
| EPI_ISL_445358                                                                                                                                                                                                                                                 | MEGASALUD SPA.                                                                                            | Instituto de Salud Publica de Chile      | Andrés E Castillo, Bárbara Parra,Paz Tapia, Jaime Lagos, Loredana Arata, Alejandra Acevedo, Winston Andrade, Gabriel Leal, Carolina Tambley, Patricia Bustos, Rodrigo Fasce, Jorge Fernandez                                                                                                                                                                                                                                                                                                                 |
| EPI_ISL_445359                                                                                                                                                                                                                                                 | HOSP. SANTIAGO ORIENTE DR. LUIS TISNE B.                                                                  | Instituto de Salud Publica de Chile      | Andrés E Castillo, Bárbara Parra,Paz Tapia, Jaime Lagos, Loredana Arata, Alejandra Acevedo, Winston Andrade, Gabriel Leal, Carolina Tambley, Patricia Bustos, Rodrigo Fasce, Jorge Fernandez                                                                                                                                                                                                                                                                                                                 |
| EPI_ISL_445360                                                                                                                                                                                                                                                 | HOSPITAL DEL PROFESOR                                                                                     | Instituto de Salud Publica de Chile      | Andrés E Castillo, Bárbara Parra,Paz Tapia, Jaime Lagos, Loredana Arata, Alejandra Acevedo, Winston Andrade, Gabriel Leal, Carolina Tambley, Patricia Bustos, Rodrigo Fasce, Jorge Fernandez                                                                                                                                                                                                                                                                                                                 |
| EPI_ISL_445361                                                                                                                                                                                                                                                 | CLINICA UC SAN CARLOS DE APOQUINDO                                                                        | Instituto de Salud Publica de Chile      | Andrés E Castillo, Bárbara Parra,Paz Tapia, Jaime Lagos, Loredana Arata, Alejandra Acevedo, Winston Andrade, Gabriel Leal, Carolina Tambley, Patricia Bustos, Rodrigo Fasce, Jorge Fernandez                                                                                                                                                                                                                                                                                                                 |
| EPI_ISL_445363                                                                                                                                                                                                                                                 | ASISTENCIA PUBLICA DR.ALEJANDRO DEL RIO                                                                   | Instituto de Salud Publica de Chile      | Andrés E Castillo, Bárbara Parra,Paz Tapia, Jaime Lagos, Loredana Arata, Alejandra Acevedo, Winston Andrade, Gabriel Leal, Carolina Tambley, Patricia Bustos, Rodrigo Fasce, Jorge Fernandez                                                                                                                                                                                                                                                                                                                 |
| EPI_ISL_445364                                                                                                                                                                                                                                                 | HOSPITAL EL CARMEN DR.LUIS VALENTIN F.                                                                    | Instituto de Salud Publica de Chile      | Andrés E Castillo, Bárbara Parra,Paz Tapia, Jaime Lagos, Loredana Arata, Alejandra Acevedo, Winston Andrade, Gabriel Leal, Carolina Tambley, Patricia Bustos, Rodrigo Fasce, Jorge Fernandez                                                                                                                                                                                                                                                                                                                 |
| EPI_ISL_445365, EPI_ISL_445366                                                                                                                                                                                                                                 | HOSPITAL DR.SOTERO DEL RIO                                                                                | Instituto de Salud Publica de Chile      | Andrés E Castillo, Bárbara Parra,Paz Tapia, Jaime Lagos, Loredana Arata, Alejandra Acevedo, Winston Andrade, Gabriel Leal, Carolina Tambley, Patricia Bustos, Rodrigo Fasce, Jorge Fernandez                                                                                                                                                                                                                                                                                                                 |
| EPI_ISL_445367                                                                                                                                                                                                                                                 | ASISTENCIA PUBLICA DR.ALEJANDRO DEL RIO                                                                   | Instituto de Salud Publica de Chile      | Andrés E Castillo, Bárbara Parra,Paz Tapia, Jaime Lagos, Loredana Arata, Alejandra Acevedo, Winston Andrade, Gabriel Leal, Carolina Tambley, Patricia Bustos, Rodrigo Fasce, Jorge Fernandez                                                                                                                                                                                                                                                                                                                 |
| EPI_ISL_445368                                                                                                                                                                                                                                                 | HOSPITAL DEL PROFESOR                                                                                     | Instituto de Salud Publica de Chile      | Andrés E Castillo, Bárbara Parra,Paz Tapia, Jaime Lagos, Loredana Arata, Alejandra Acevedo, Winston Andrade, Gabriel Leal, Carolina Tambley, Patricia Bustos, Rodrigo Fasce, Jorge Fernandez                                                                                                                                                                                                                                                                                                                 |
| EPI_ISL_445369, EPI_ISL_445370                                                                                                                                                                                                                                 | HOSPITAL DE CARABINEROS                                                                                   | Instituto de Salud Publica de Chile      | Andrés E Castillo, Bárbara Parra,Paz Tapia, Jaime Lagos, Loredana Arata, Alejandra Acevedo, Winston Andrade, Gabriel Leal, Carolina Tambley, Patricia Bustos, Rodrigo Fasce, Jorge Fernandez                                                                                                                                                                                                                                                                                                                 |
| EPI_ISL_445371                                                                                                                                                                                                                                                 | HOSPITAL DR.SOTERO DEL RIO                                                                                | Instituto de Salud Publica de Chile      | Andrés E Castillo, Bárbara Parra,Paz Tapia, Jaime Lagos, Loredana Arata, Alejandra Acevedo, Winston Andrade, Gabriel Leal, Carolina Tambley, Patricia Bustos, Rodrigo Fasce, Jorge Fernandez                                                                                                                                                                                                                                                                                                                 |
| EPI_ISL_445372                                                                                                                                                                                                                                                 | HOSPITAL FF.AA. "CIRUJANO C. GUZMAN                                                                       | Instituto de Salud Publica de Chile      | Andrés E Castillo, Bárbara Parra,Paz Tapia, Jaime Lagos, Loredana Arata, Alejandra Acevedo, Winston Andrade, Gabriel Leal, Carolina Tambley, Patricia Bustos, Rodrigo Fasce, Jorge Fernandez                                                                                                                                                                                                                                                                                                                 |
| EPI_ISL_445373, EPI_ISL_445374, EPI_ISL_445375, EPI_ISL_445376, EPI_ISL_445377                                                                                                                                                                                 | HOSPITAL SAN JUAN DE DIOS                                                                                 | Instituto de Salud Publica de Chile      | Andrés E Castillo, Bárbara Parra,Paz Tapia, Jaime Lagos, Loredana Arata, Alejandra Acevedo, Winston Andrade, Gabriel Leal, Carolina Tambley, Patricia Bustos, Rodrigo Fasce, Jorge Fernandez                                                                                                                                                                                                                                                                                                                 |
| EPI_ISL_445378                                                                                                                                                                                                                                                 | HOSPITAL DE BULNES                                                                                        | Instituto de Salud Publica de Chile      | Andrés E Castillo, Bárbara Parra,Paz Tapia, Jaime Lagos, Loredana Arata, Alejandra Acevedo, Winston Andrade, Gabriel Leal, Carolina Tambley, Patricia Bustos, Rodrigo Fasce, Jorge Fernandez                                                                                                                                                                                                                                                                                                                 |
| EPI_ISL_445379                                                                                                                                                                                                                                                 | IMALAB- HOSPITAL FACH                                                                                     | Instituto de Salud Publica de Chile      | Andrés E Castillo, Bárbara Parra,Paz Tapia, Jaime Lagos, Loredana Arata, Alejandra Acevedo, Winston Andrade, Gabriel Leal, Carolina Tambley, Patricia Bustos, Rodrigo Fasce, Jorge Fernandez                                                                                                                                                                                                                                                                                                                 |
| EPI_ISL_447033                                                                                                                                                                                                                                                 | B.J. Medical College and Civil hospital                                                                   | Gujarat Biotechnology Research Centre    | Ankit Hinsu, Pritesh Sabara, Apurvashin Puvar, Janvi Raval, Monika Gandhi, Pinal Trivedi, Maharshi Pandya, Amit Kanani, Akanksha Verma, Nitin Savaliya, Raghawendra Kumar, Dinesh Kumar, Zuber Saiyed, Dipa Kinariwala, Disha Patel, Binita Aring, Neeta Khandelwal, Geeta Vaghela, Sonia Barve, Bhavesh Modi, Kairavi Joshi, Gaurishankar Shrimali, Nidhi Sood, Pranay Shah, R D Dixit, Snehal Bagatharia, Kamlesh J Upadhyay, Ramesh Pandit, Tejas Shah, Nidhi Patel, Chaitanya Joshi, Madhvi Joshi        |
| EPI_ISL_447119                                                                                                                                                                                                                                                 | HOSPITAL DR.HERNAN HENRIQUEZ ARAVENA                                                                      | Instituto de Salud Publica de Chile      | Andrés E Castillo, Bárbara Parra,Paz Tapia, Jaime Lagos, Loredana Arata, Alejandra Acevedo, Winston Andrade, Gabriel Leal, Carolina Tambley, Patricia Bustos, Rodrigo Fasce, Jorge Fernandez                                                                                                                                                                                                                                                                                                                 |
| EPI_ISL_447542                                                                                                                                                                                                                                                 | Gujarat Biotechnology Research Centre                                                                     | Gujarat Biotechnology Research Centre    | Ankit Hinsu, Pritesh Sabara, Apurvashin Puvar, Janvi Raval, Monika Gandhi, Pinal Trivedi, Maharshi Pandya, Amit Kanani, Akanksha Verma, Nitin Savaliya, Raghawendra Kumar, Dinesh Kumar, Zuber Saiyed, Dipa Kinariwala, Disha Patel, Binita Aring, Neeta Khandelwal, Geeta Vaghela, Sonia Barve, Bhavesh Modi, Kairavi Joshi, Gaurishankar Shrimali, Nidhi Sood, Pranay Shah, R D Dixit, Snehal Bagatharia, Kamlesh J Upadhyay, Ramesh Pandit, Tejas Shah, Dipeshwari Shewale, Chaitanya Joshi, Madhvi Joshi |
| EPI_ISL_448120, EPI_ISL_448121, EPI_ISL_448136, EPI_ISL_448160, EPI_ISL_448180, EPI_ISL_448182, EPI_ISL_448220, EPI_ISL_449185, EPI_ISL_449187, EPI_ISL_449189, EPI_ISL_449194, EPI_ISL_449198, EPI_ISL_449208, EPI_ISL_449213, EPI_ISL_449224, EPI_ISL_449248 |                                                                                                           |                                          |                                                                                                                                                                                                                                                                                                                                                                                                                                                                                                              |
| see above                                                                                                                                                                                                                                                      | West of Scotland Specialist Virology Centre, NHSGGC / MRC-University of Glasgow Centre for Virus Research | COVID-19 Genomics UK (COG-UK) Consortium | Ana da Silva Filipe, Natasha Johnson, Kathy Smollett, Daniel Mair, Stephen Carmichael, Lily Tong, Jenna Nichols, Elihu Aranday-Cortes, Kirstyn Brunker, Yasmin Parr, Kyriaki Nomikou, Sarah McDonald, Marc Niebel, Patavee Asamaphan, Richard Orton, Joseph Hughes, Sreenu Vattipally, David L Robertson, Alasdair MacLean, Rory Gunson, Kathy Li, Natasha Jesudason, Rajiv Shah, James Shepherd, Antonia Ho, Emma Thomson                                                                                   |

|                                                                                                                                                                                                                                                                                                                                                                                                                                                                                                                                                                                                                                                                                                                                                                                                                                                                                                                                |                                                                                                                            |                                                                                                                        |                                                                                                                                                                                                                                                                                                                                                                                                                                                                                                                                                                              |
|--------------------------------------------------------------------------------------------------------------------------------------------------------------------------------------------------------------------------------------------------------------------------------------------------------------------------------------------------------------------------------------------------------------------------------------------------------------------------------------------------------------------------------------------------------------------------------------------------------------------------------------------------------------------------------------------------------------------------------------------------------------------------------------------------------------------------------------------------------------------------------------------------------------------------------|----------------------------------------------------------------------------------------------------------------------------|------------------------------------------------------------------------------------------------------------------------|------------------------------------------------------------------------------------------------------------------------------------------------------------------------------------------------------------------------------------------------------------------------------------------------------------------------------------------------------------------------------------------------------------------------------------------------------------------------------------------------------------------------------------------------------------------------------|
| EPI_ISL_449800                                                                                                                                                                                                                                                                                                                                                                                                                                                                                                                                                                                                                                                                                                                                                                                                                                                                                                                 | HOSPITAL SAN JUAN DE DIOS                                                                                                  | Instituto de Salud Publica de Chile                                                                                    | Andrés E Castillo, Bárbara Parra,Paz Tapia, Jaime Lagos, Loredana Arata, Alejandra Acevedo, Winston Andrade, Gabriel Leal, Carolina Tambley, Patricia Bustos, Rodrigo Fasce, Jorge Fernandez                                                                                                                                                                                                                                                                                                                                                                                 |
| EPI_ISL_450241, EPI_ISL_450242, EPI_ISL_450243, EPI_ISL_450244, EPI_ISL_450245, EPI_ISL_450246, EPI_ISL_450247, EPI_ISL_450248, EPI_ISL_450249, EPI_ISL_450250, EPI_ISL_450251, EPI_ISL_450252, EPI_ISL_450253, EPI_ISL_450254, EPI_ISL_450255, EPI_ISL_450256, EPI_ISL_450257, EPI_ISL_450258, EPI_ISL_450259, EPI_ISL_450260, EPI_ISL_450261, EPI_ISL_450262, EPI_ISL_450263, EPI_ISL_450264, EPI_ISL_450265, EPI_ISL_450266, EPI_ISL_450267, EPI_ISL_450268, EPI_ISL_450269, EPI_ISL_450270, EPI_ISL_450271, EPI_ISL_450272, EPI_ISL_450273, EPI_ISL_450274, EPI_ISL_450275, EPI_ISL_450276, EPI_ISL_450277, EPI_ISL_450278, EPI_ISL_450279, EPI_ISL_450280, EPI_ISL_450281, EPI_ISL_450282, EPI_ISL_450283, EPI_ISL_450284, EPI_ISL_450285, EPI_ISL_450286, EPI_ISL_450287, EPI_ISL_450288, EPI_ISL_450289, EPI_ISL_450290, EPI_ISL_450291, EPI_ISL_450292, EPI_ISL_450293                                                 | WHO National Influenza Centre Russian Federation                                                                           | WHO National Influenza Centre Russian Federation                                                                       | Andrey Komissarov, Artem Fadeev, Maria Sergeeva, Anna Ivanova, Tamila Musaeva, Ksenia Komissarova, Mariia Timofeeva, Veronica Eder, Mariia Pisareva, Daria Danilenko                                                                                                                                                                                                                                                                                                                                                                                                         |
| see above                                                                                                                                                                                                                                                                                                                                                                                                                                                                                                                                                                                                                                                                                                                                                                                                                                                                                                                      | WHO National Influenza Centre Russian Federation                                                                           | WHO National Influenza Centre Russian Federation                                                                       | Andrey Komissarov, Artem Fadeev, Maria Sergeeva, Anna Ivanova, Tamila Musaeva, Ksenia Komissarova, Mariia Timofeeva, Veronica Eder, Mariia Pisareva, Daria Danilenko                                                                                                                                                                                                                                                                                                                                                                                                         |
| EPI_ISL_450789                                                                                                                                                                                                                                                                                                                                                                                                                                                                                                                                                                                                                                                                                                                                                                                                                                                                                                                 | Pandit Deendayal Upadhyay Government Medical College, Rajkot                                                               | Gujarat Biotechnology Research Centre                                                                                  | Ankit Hinsu, Pritesh Sabara, Apurvasinh Puvar, Janvi Raval, Zarna Patel, Monika Gandhi, Pinal Trivedi, Maharshi Pandya, Amit Kanani, Nidhi Patel, Nitin Savaliya, Raghawendra Kumar, Dinesh Kumar, Zuber Saiyed, Komal Patel, Labdhi Pandya, Snehal Bagatharia, Prakash Modi, Sejal Antala, Manish Pattani, Ramesh Pandit, Tejas Shah, Bhavesh Modi, Gaurishankar Shrimali, R D Dixit, A M Kadri, Siddhant Kumar, Chaitanya Joshi, Madhvi Joshi                                                                                                                              |
| EPI_ISL_450812                                                                                                                                                                                                                                                                                                                                                                                                                                                                                                                                                                                                                                                                                                                                                                                                                                                                                                                 | Uppsala Narakut Aleris                                                                                                     | The Public Health Agency of Sweden                                                                                     | Annika Nilsson, Anna-Malin Linde, Maria Lind Karlberg, Oskar Karlsson Lindsjo, Olov Svartstrom, Anna Risberg, Theresa Enkirch, Mia Brytting, Karin Tegmark-Wisell                                                                                                                                                                                                                                                                                                                                                                                                            |
| EPI_ISL_450819                                                                                                                                                                                                                                                                                                                                                                                                                                                                                                                                                                                                                                                                                                                                                                                                                                                                                                                 | Hovas Askim Familjelakare och BVC                                                                                          | The Public Health Agency of Sweden                                                                                     | Anna Wendel, Anna-Malin Linde, Maria Lind Karlberg, Oskar Karlsson Lindsjo, Olov Svartstrom, Anna Risberg, Theresa Enkirch, Mia Brytting, Karin Tegmark-Wisell                                                                                                                                                                                                                                                                                                                                                                                                               |
| EPI_ISL_450826, EPI_ISL_450827, EPI_ISL_450828                                                                                                                                                                                                                                                                                                                                                                                                                                                                                                                                                                                                                                                                                                                                                                                                                                                                                 | Uppsala Narakut Aleris                                                                                                     | The Public Health Agency of Sweden                                                                                     | Annika Nilsson, Anna-Malin Linde, Maria Lind Karlberg, Oskar Karlsson Lindsjo, Olov Svartstrom, Anna Risberg, Theresa Enkirch, Mia Brytting, Karin Tegmark-Wisell                                                                                                                                                                                                                                                                                                                                                                                                            |
| EPI_ISL_450831, EPI_ISL_450833                                                                                                                                                                                                                                                                                                                                                                                                                                                                                                                                                                                                                                                                                                                                                                                                                                                                                                 | Wetterhalsan                                                                                                               | The Public Health Agency of Sweden                                                                                     | Anders Tengblad, Anna-Malin Linde, Maria Lind Karlberg, Oskar Karlsson Lindsjo, Olov Svartstrom, Anna Risberg, Theresa Enkirch, Mia Brytting, Karin Tegmark-Wisell                                                                                                                                                                                                                                                                                                                                                                                                           |
| EPI_ISL_450836, EPI_ISL_450837                                                                                                                                                                                                                                                                                                                                                                                                                                                                                                                                                                                                                                                                                                                                                                                                                                                                                                 | Laboratoriemedicin                                                                                                         | The Public Health Agency of Sweden                                                                                     | Anna-Malin Linde, Maria Lind Karlberg, Oskar Karlsson Lindsjo, Olov Svartstrom, Anna Risberg, Theresa Enkirch, Mia Brytting, Karin Tegmark-Wisell                                                                                                                                                                                                                                                                                                                                                                                                                            |
| EPI_ISL_452137, EPI_ISL_452138                                                                                                                                                                                                                                                                                                                                                                                                                                                                                                                                                                                                                                                                                                                                                                                                                                                                                                 | VI-US Virgin Islands Department of Health                                                                                  | Pathogen Discovery, Respiratory Viruses Branch, Division of Viral Diseases, Centers for Disease Control and Prevention | Anna Uehara, Yan Li, Anna Montmayeur, Ying Tao, Krista Queen, Jing Zhang, Clinton R. Paden, Rachel Marine, Habib Wang, Bettina Bankamp, Zachary Weiner, Suxiang Tong                                                                                                                                                                                                                                                                                                                                                                                                         |
| EPI_ISL_452237, EPI_ISL_452240                                                                                                                                                                                                                                                                                                                                                                                                                                                                                                                                                                                                                                                                                                                                                                                                                                                                                                 | Huddinge VC                                                                                                                | The Public Health Agency of Sweden                                                                                     | Anders Johansson, Anna-Malin Linde, Maria Lind Karlberg, Oskar Karlsson Lindsjo, Olov Svartstrom, Anna Risberg, Theresa Enkirch, Mia Brytting, Karin Tegmark-Wisell                                                                                                                                                                                                                                                                                                                                                                                                          |
| EPI_ISL_452787, EPI_ISL_452788, EPI_ISL_452789, EPI_ISL_452790, EPI_ISL_452791, EPI_ISL_452792, EPI_ISL_452793, EPI_ISL_452794, EPI_ISL_452795                                                                                                                                                                                                                                                                                                                                                                                                                                                                                                                                                                                                                                                                                                                                                                                 | ICAR-National Institute of High Security Animal Diseases                                                                   | ICAR-National Institute of High Security Animal Diseases                                                               | Anamika Mishra, Ashutosh Aasdev, Sandeep Bhatia, Harshad Murugkar, Chakradhar Tosh, Niranjan Mishra, Shanmugasundaram Nagarajan, Katherukamem Rajukumar, Richa Sood, G Venkatesh, Atul Kumar Pateriya, Manoj Kumar, Shashi Bhushan Sudhakar, Fateh Singh, Sethil Kumar D, Senmannan Kalaiyarasu, Pradeep Gandhale, Naveen Kumar, Chandan Kumar Dubey, Sushil Tripathi, Sandeep Kumar Jhade, Meghna Tripathi, Suman Kumari Shah, Pushpendra Singh, Pushpendra Namdeo, Suman Mishra, Rupal Singh, Vishnupriya Patil, Dipesh Kumar Nayak, Vijendra Pal Singh, Ashwin Ashok Raut |
| EPI_ISL_453012, EPI_ISL_453041, EPI_ISL_453079                                                                                                                                                                                                                                                                                                                                                                                                                                                                                                                                                                                                                                                                                                                                                                                                                                                                                 | West of Scotland Specialist Virology Centre, NHSGGC / MRC-University of Glasgow Centre for Virus Research                  | COVID-19 Genomics UK (COG-UK) Consortium                                                                               | Ana da Silva Filipe, Natasha Johnson, Kathy Smollett, Daniel Mair, Stephen Carmichael, Lily Tong, Jenna Nichols, Elihu Aranday-Cortes, Kirstyn Brunker, Yasmin Parr, Kyriaki Nomikou; Sarah McDonald, Marc Niebel, Patawee Asamaphan; Richard Orton, Joseph Hughes, Sreenu Vattipally, David L Robertson; Alasdair MacLean, Rory Gunson; Kathy Li, Natasha Jesudason, Rajiv Shah, James Shepherd, Antonia Ho, Emma Thomson                                                                                                                                                   |
| EPI_ISL_453665                                                                                                                                                                                                                                                                                                                                                                                                                                                                                                                                                                                                                                                                                                                                                                                                                                                                                                                 | Centre for Enzyme Innovation, University of Portsmouth / Translational Research Laboratory, Portsmouth Hospitals NHS Trust | University of Portsmouth                                                                                               | Angela Beckett,,Yann Bourgeois,,Garry Scarlett,,Sharon Glaysher,,Scott Elliott,,Kelly Bicknell,,Robert Impey,,Allyson Lloyd,,Sarah Wyllie,,Ethan Butcher,,Anoop Chauhan,,Samuel Robson                                                                                                                                                                                                                                                                                                                                                                                       |
| EPI_ISL_453666, EPI_ISL_453667, EPI_ISL_453668, EPI_ISL_453669, EPI_ISL_453670, EPI_ISL_453671, EPI_ISL_453672, EPI_ISL_453673, EPI_ISL_453674, EPI_ISL_453675, EPI_ISL_453676, EPI_ISL_453677, EPI_ISL_453678, EPI_ISL_453679, EPI_ISL_453680, EPI_ISL_453681, EPI_ISL_453682, EPI_ISL_453683, EPI_ISL_453684, EPI_ISL_453685, EPI_ISL_453686, EPI_ISL_453687, EPI_ISL_453688, EPI_ISL_453689, EPI_ISL_453690, EPI_ISL_453691, EPI_ISL_453692, EPI_ISL_453693, EPI_ISL_453694, EPI_ISL_453695                                                                                                                                                                                                                                                                                                                                                                                                                                 | Centre for Enzyme Innovation, University of Portsmouth / Translational Research Laboratory, Portsmouth Hospitals NHS Trust | COVID-19 Genomics UK (COG-UK) Consortium                                                                               | Angela Beckett,,Yann Bourgeois,,Garry Scarlett,,Sharon Glaysher,,Scott Elliott,,Kelly Bicknell,,Robert Impey,,Allyson Lloyd,,Sarah Wyllie,,Ethan Butcher,,Anoop Chauhan,,Samuel Robson                                                                                                                                                                                                                                                                                                                                                                                       |
| see above                                                                                                                                                                                                                                                                                                                                                                                                                                                                                                                                                                                                                                                                                                                                                                                                                                                                                                                      | Centre for Enzyme Innovation, University of Portsmouth / Translational Research Laboratory, Portsmouth Hospitals NHS Trust | COVID-19 Genomics UK (COG-UK) Consortium                                                                               | Angela Beckett,,Yann Bourgeois,,Garry Scarlett,,Sharon Glaysher,,Scott Elliott,,Kelly Bicknell,,Robert Impey,,Allyson Lloyd,,Sarah Wyllie,,Ethan Butcher,,Anoop Chauhan,,Samuel Robson                                                                                                                                                                                                                                                                                                                                                                                       |
| EPI_ISL_454436, EPI_ISL_454437, EPI_ISL_454438, EPI_ISL_454439, EPI_ISL_454440, EPI_ISL_454441, EPI_ISL_454442, EPI_ISL_454443, EPI_ISL_454444, EPI_ISL_454445, EPI_ISL_454446                                                                                                                                                                                                                                                                                                                                                                                                                                                                                                                                                                                                                                                                                                                                                 | Halmstad klinisk mikrobiologi                                                                                              | The Public Health Agency of Sweden                                                                                     | Anna-Malin Linde, Maria Lind Karlberg, Mattias Haukland, Reza Advani, Olov Svartstrom, Oskar Karlsson Lindsjo, Petra Edquist, Shamam Muradrasoli, Anna Risberg, Karin Tegmark-Wisell                                                                                                                                                                                                                                                                                                                                                                                         |
| see above                                                                                                                                                                                                                                                                                                                                                                                                                                                                                                                                                                                                                                                                                                                                                                                                                                                                                                                      | Halmstad klinisk mikrobiologi                                                                                              | The Public Health Agency of Sweden                                                                                     | Anna-Malin Linde, Maria Lind Karlberg, Mattias Haukland, Reza Advani, Olov Svartstrom, Oskar Karlsson Lindsjo, Petra Edquist, Shamam Muradrasoli, Anna Risberg, Karin Tegmark-Wisell                                                                                                                                                                                                                                                                                                                                                                                         |
| EPI_ISL_454447, EPI_ISL_454448, EPI_ISL_454449, EPI_ISL_454450, EPI_ISL_454451, EPI_ISL_454452, EPI_ISL_454453, EPI_ISL_454454, EPI_ISL_454455, EPI_ISL_454456, EPI_ISL_454457, EPI_ISL_454458, EPI_ISL_454459, EPI_ISL_454460, EPI_ISL_454461, EPI_ISL_454462, EPI_ISL_454463, EPI_ISL_454464, EPI_ISL_454465, EPI_ISL_454466, EPI_ISL_454467, EPI_ISL_454468, EPI_ISL_454469, EPI_ISL_454470, EPI_ISL_454471, EPI_ISL_454472, EPI_ISL_454473, EPI_ISL_454474, EPI_ISL_454475, EPI_ISL_454476, EPI_ISL_454477, EPI_ISL_454478, EPI_ISL_454479, EPI_ISL_454480, EPI_ISL_454481, EPI_ISL_454482, EPI_ISL_454483, EPI_ISL_454484, EPI_ISL_454485, EPI_ISL_454486, EPI_ISL_454487, EPI_ISL_454488, EPI_ISL_454489, EPI_ISL_454490, EPI_ISL_454491, EPI_ISL_454492, EPI_ISL_454493                                                                                                                                                 | Karolinska Universitetslaboratoriet                                                                                        | The Public Health Agency of Sweden                                                                                     | Anna-Malin Linde, Maria Lind Karlberg, Mattias Haukland, Reza Advani, Olov Svartstrom, Oskar Karlsson Lindsjo, Petra Edquist, Shamam Muradrasoli, Anna Risberg, Karin Tegmark-Wisell                                                                                                                                                                                                                                                                                                                                                                                         |
| see above                                                                                                                                                                                                                                                                                                                                                                                                                                                                                                                                                                                                                                                                                                                                                                                                                                                                                                                      | Karolinska Universitetslaboratoriet                                                                                        | The Public Health Agency of Sweden                                                                                     | Anna-Malin Linde, Maria Lind Karlberg, Mattias Haukland, Reza Advani, Olov Svartstrom, Oskar Karlsson Lindsjo, Petra Edquist, Shamam Muradrasoli, Anna Risberg, Karin Tegmark-Wisell                                                                                                                                                                                                                                                                                                                                                                                         |
| EPI_ISL_454494, EPI_ISL_454495, EPI_ISL_454496                                                                                                                                                                                                                                                                                                                                                                                                                                                                                                                                                                                                                                                                                                                                                                                                                                                                                 | Skovde/Unilabs                                                                                                             | The Public Health Agency of Sweden                                                                                     | Anna-Malin Linde, Maria Lind Karlberg, Mattias Haukland, Reza Advani, Olov Svartstrom, Oskar Karlsson Lindsjo, Petra Edquist, Shamam Muradrasoli, Anna Risberg, Karin Tegmark-Wisell                                                                                                                                                                                                                                                                                                                                                                                         |
| EPI_ISL_454692                                                                                                                                                                                                                                                                                                                                                                                                                                                                                                                                                                                                                                                                                                                                                                                                                                                                                                                 | Quest Diagnostics                                                                                                          | Quest Diagnostics                                                                                                      | Anderson,B.P., Rosenthal,S.H., Gerasimova,A., Kagan,R.M. and Owen, R.                                                                                                                                                                                                                                                                                                                                                                                                                                                                                                        |
| EPI_ISL_454868, EPI_ISL_454869, EPI_ISL_454870, EPI_ISL_454871, EPI_ISL_454872, EPI_ISL_454873, EPI_ISL_454874, EPI_ISL_454875, EPI_ISL_454876, EPI_ISL_454877, EPI_ISL_454878, EPI_ISL_454879, EPI_ISL_454880, EPI_ISL_454881, EPI_ISL_454882, EPI_ISL_454883, EPI_ISL_454884, EPI_ISL_454885, EPI_ISL_454886, EPI_ISL_454887, EPI_ISL_454888, EPI_ISL_454889, EPI_ISL_454890, EPI_ISL_454891, EPI_ISL_454892, EPI_ISL_454893, EPI_ISL_454894, EPI_ISL_454895, EPI_ISL_454896, EPI_ISL_454897, EPI_ISL_454898, EPI_ISL_454899, EPI_ISL_454900, EPI_ISL_454901, EPI_ISL_454902                                                                                                                                                                                                                                                                                                                                                 | Karolinska Universitetslaboratoriet                                                                                        | The Public Health Agency of Sweden                                                                                     | Anna-Malin Linde, Maria Lind Karlberg, Mattias Haukland, Reza Advani, Olov Svartstrom, Oskar Karlsson Lindsjo, Petra Edquist, Shamam Muradrasoli, Anna Risberg, Karin Tegmark-Wisell                                                                                                                                                                                                                                                                                                                                                                                         |
| see above                                                                                                                                                                                                                                                                                                                                                                                                                                                                                                                                                                                                                                                                                                                                                                                                                                                                                                                      | Karolinska Universitetslaboratoriet                                                                                        | The Public Health Agency of Sweden                                                                                     | Anna-Malin Linde, Maria Lind Karlberg, Mattias Haukland, Reza Advani, Olov Svartstrom, Oskar Karlsson Lindsjo, Petra Edquist, Shamam Muradrasoli, Anna Risberg, Karin Tegmark-Wisell                                                                                                                                                                                                                                                                                                                                                                                         |
| EPI_ISL_454903                                                                                                                                                                                                                                                                                                                                                                                                                                                                                                                                                                                                                                                                                                                                                                                                                                                                                                                 | Klinisk mikrobiologi, UAS                                                                                                  | The Public Health Agency of Sweden                                                                                     | Anna-Malin Linde, Maria Lind Karlberg, Mattias Haukland, Reza Advani, Olov Svartstrom, Oskar Karlsson Lindsjo, Petra Edquist, Shamam Muradrasoli, Anna Risberg, Karin Tegmark-Wisell                                                                                                                                                                                                                                                                                                                                                                                         |
| EPI_ISL_455021                                                                                                                                                                                                                                                                                                                                                                                                                                                                                                                                                                                                                                                                                                                                                                                                                                                                                                                 | Government Medical College, Vadodara                                                                                       | Gujarat Biotechnology Research Centre                                                                                  | Ankit Hinsu, Pritesh Sabara, Apurvasinh Puvar, Janvi Raval, Zarna Patel, Monika Gandhi, Pinal Trivedi, Maharshi Pandya, Amit Kanani, Nidhi Patel, Nitin Savaliya, Raghawendra Kumar, Dinesh Kumar, Zuber Saiyed, Komal Patel, Labdhi Pandya, Snehal Bagatharia, Tanuja Javadekar , R N Daveswar, Ramesh Pandit, Tejas Shah, Camellia Chakraborty, Bhavesh Modi, Gaurishankar Shrimali, R D Dixit, A M Kadri, Umang Mishra, Chaitanya Joshi, Madhvi Joshi,                                                                                                                    |
| EPI_ISL_455100                                                                                                                                                                                                                                                                                                                                                                                                                                                                                                                                                                                                                                                                                                                                                                                                                                                                                                                 | Orsa VC                                                                                                                    | The Public Health Agency of Sweden                                                                                     | Anna-Karin Lundqvist, Anna-Malin Linde, Maria Lind Karlberg, Oskar Karlsson Lindsjo, Olov Svartstrom, Anna Risberg, Theresa Enkirch, Mia Brytting, Karin Tegmark-Wisell                                                                                                                                                                                                                                                                                                                                                                                                      |
| EPI_ISL_455105                                                                                                                                                                                                                                                                                                                                                                                                                                                                                                                                                                                                                                                                                                                                                                                                                                                                                                                 | Wetterhalsan                                                                                                               | The Public Health Agency of Sweden                                                                                     | Anders Tengblad, Anna-Malin Linde, Maria Lind Karlberg, Oskar Karlsson Lindsjo, Olov Svartstrom, Anna Risberg, Theresa Enkirch, Mia Brytting, Karin Tegmark-Wisell                                                                                                                                                                                                                                                                                                                                                                                                           |
| EPI_ISL_455840, EPI_ISL_455841                                                                                                                                                                                                                                                                                                                                                                                                                                                                                                                                                                                                                                                                                                                                                                                                                                                                                                 | Orebro klinisk mikrobiologi                                                                                                | The Public Health Agency of Sweden                                                                                     | Anna-Malin Linde, Maria Lind Karlberg, Mattias Haukland, Reza Advani, Olov Svartstrom, Oskar Karlsson Lindsjo, Petra Edquist, Shamam Muradrasoli, Anna Risberg, Karin Tegmark-Wisell                                                                                                                                                                                                                                                                                                                                                                                         |
| EPI_ISL_455842, EPI_ISL_455843, EPI_ISL_455844, EPI_ISL_455845                                                                                                                                                                                                                                                                                                                                                                                                                                                                                                                                                                                                                                                                                                                                                                                                                                                                 | Skovde/Unilabs                                                                                                             | The Public Health Agency of Sweden                                                                                     | Anna-Malin Linde, Maria Lind Karlberg, Mattias Haukland, Reza Advani, Olov Svartstrom, Oskar Karlsson Lindsjo, Petra Edquist, Shamam Muradrasoli, Anna Risberg, Karin Tegmark-Wisell                                                                                                                                                                                                                                                                                                                                                                                         |
| EPI_ISL_455846, EPI_ISL_455847, EPI_ISL_455848, EPI_ISL_455849, EPI_ISL_455850, EPI_ISL_455851, EPI_ISL_455852, EPI_ISL_455853, EPI_ISL_455854, EPI_ISL_455855, EPI_ISL_455856, EPI_ISL_455857, EPI_ISL_455858, EPI_ISL_455859, EPI_ISL_455860, EPI_ISL_455861, EPI_ISL_455862, EPI_ISL_455863, EPI_ISL_455864, EPI_ISL_455865, EPI_ISL_455866, EPI_ISL_455867, EPI_ISL_455868, EPI_ISL_455869, EPI_ISL_455870, EPI_ISL_455871, EPI_ISL_455872, EPI_ISL_455873, EPI_ISL_455874, EPI_ISL_455875, EPI_ISL_455876, EPI_ISL_455877, EPI_ISL_455878, EPI_ISL_455879, EPI_ISL_455880, EPI_ISL_455881, EPI_ISL_455882, EPI_ISL_455883, EPI_ISL_455884, EPI_ISL_455885, EPI_ISL_455886, EPI_ISL_455887, EPI_ISL_455888, EPI_ISL_455889, EPI_ISL_455890, EPI_ISL_455891, EPI_ISL_455892, EPI_ISL_455893, EPI_ISL_455894, EPI_ISL_455895, EPI_ISL_455896, EPI_ISL_455897, EPI_ISL_455898, EPI_ISL_455899, EPI_ISL_455900, EPI_ISL_455901 | Skovde/Unilabs                                                                                                             | The Public Health Agency of Sweden                                                                                     | Anna-Malin Linde, Maria Lind Karlberg, Mattias Haukland, Reza Advani, Olov Svartstrom, Oskar Karlsson Lindsjo, Petra Edquist, Shamam Muradrasoli, Anna Risberg, Karin Tegmark-Wisell                                                                                                                                                                                                                                                                                                                                                                                         |

|                                                                                                                                                                                                                                                                                                                                                                                                                                                                                                                                                                                                                                                                                                                                                                                                                                                                                                                                                                                                                                                                                                                                                                                                                                                                                                                                                                                                                                                                                                                                                                                                                                                                                                                                                                                                                                                                                                                                                                                                                                                                                                                                                                                                                                                                                                                                                                                                                                |                                                                                                                            |                                                                                  |                                                                                                                                                                                                                                                                                                                                                                                                                                                                                                                                                                                                                                                                                                                                                               |
|--------------------------------------------------------------------------------------------------------------------------------------------------------------------------------------------------------------------------------------------------------------------------------------------------------------------------------------------------------------------------------------------------------------------------------------------------------------------------------------------------------------------------------------------------------------------------------------------------------------------------------------------------------------------------------------------------------------------------------------------------------------------------------------------------------------------------------------------------------------------------------------------------------------------------------------------------------------------------------------------------------------------------------------------------------------------------------------------------------------------------------------------------------------------------------------------------------------------------------------------------------------------------------------------------------------------------------------------------------------------------------------------------------------------------------------------------------------------------------------------------------------------------------------------------------------------------------------------------------------------------------------------------------------------------------------------------------------------------------------------------------------------------------------------------------------------------------------------------------------------------------------------------------------------------------------------------------------------------------------------------------------------------------------------------------------------------------------------------------------------------------------------------------------------------------------------------------------------------------------------------------------------------------------------------------------------------------------------------------------------------------------------------------------------------------|----------------------------------------------------------------------------------------------------------------------------|----------------------------------------------------------------------------------|---------------------------------------------------------------------------------------------------------------------------------------------------------------------------------------------------------------------------------------------------------------------------------------------------------------------------------------------------------------------------------------------------------------------------------------------------------------------------------------------------------------------------------------------------------------------------------------------------------------------------------------------------------------------------------------------------------------------------------------------------------------|
| see above                                                                                                                                                                                                                                                                                                                                                                                                                                                                                                                                                                                                                                                                                                                                                                                                                                                                                                                                                                                                                                                                                                                                                                                                                                                                                                                                                                                                                                                                                                                                                                                                                                                                                                                                                                                                                                                                                                                                                                                                                                                                                                                                                                                                                                                                                                                                                                                                                      | Karolinska Universitetslaboratoriet                                                                                        | The Public Health Agency of Sweden                                               | Anna-Malin Linde, Maria Lind Karlberg, Mattias Haukland, Reza Advani, Olov Svartstrom, Oskar Karlsson Lindsjo, Petra Edquist, Shamam Muradrasoli, Anna Risberg, Karin Tegmark-Wisell                                                                                                                                                                                                                                                                                                                                                                                                                                                                                                                                                                          |
| EPI_ISL_455902                                                                                                                                                                                                                                                                                                                                                                                                                                                                                                                                                                                                                                                                                                                                                                                                                                                                                                                                                                                                                                                                                                                                                                                                                                                                                                                                                                                                                                                                                                                                                                                                                                                                                                                                                                                                                                                                                                                                                                                                                                                                                                                                                                                                                                                                                                                                                                                                                 | Halmstad klinisk mikrobiologi                                                                                              | The Public Health Agency of Sweden                                               | Anna-Malin Linde, Maria Lind Karlberg, Mattias Haukland, Reza Advani, Olov Svartstrom, Oskar Karlsson Lindsjo, Petra Edquist, Shamam Muradrasoli, Anna Risberg, Karin Tegmark-Wisell                                                                                                                                                                                                                                                                                                                                                                                                                                                                                                                                                                          |
| EPI_ISL_455903                                                                                                                                                                                                                                                                                                                                                                                                                                                                                                                                                                                                                                                                                                                                                                                                                                                                                                                                                                                                                                                                                                                                                                                                                                                                                                                                                                                                                                                                                                                                                                                                                                                                                                                                                                                                                                                                                                                                                                                                                                                                                                                                                                                                                                                                                                                                                                                                                 | Folkhalsomyndigheten                                                                                                       | The Public Health Agency of Sweden                                               | Anna-Malin Linde, Maria Lind Karlberg, Mattias Haukland, Reza Advani, Olov Svartstrom, Oskar Karlsson Lindsjo, Petra Edquist, Shamam Muradrasoli, Anna Risberg, Karin Tegmark-Wisell                                                                                                                                                                                                                                                                                                                                                                                                                                                                                                                                                                          |
| EPI_ISL_455904, EPI_ISL_455905, EPI_ISL_455906, EPI_ISL_455907                                                                                                                                                                                                                                                                                                                                                                                                                                                                                                                                                                                                                                                                                                                                                                                                                                                                                                                                                                                                                                                                                                                                                                                                                                                                                                                                                                                                                                                                                                                                                                                                                                                                                                                                                                                                                                                                                                                                                                                                                                                                                                                                                                                                                                                                                                                                                                 | Klinisk mikrobiologi, UAS                                                                                                  | The Public Health Agency of Sweden                                               | Anna-Malin Linde, Maria Lind Karlberg, Mattias Haukland, Reza Advani, Olov Svartstrom, Oskar Karlsson Lindsjo, Petra Edquist, Shamam Muradrasoli, Anna Risberg, Karin Tegmark-Wisell                                                                                                                                                                                                                                                                                                                                                                                                                                                                                                                                                                          |
| EPI_ISL_456804, EPI_ISL_456813, EPI_ISL_456823, EPI_ISL_456841, EPI_ISL_456843, EPI_ISL_456850, EPI_ISL_456868, EPI_ISL_456875, EPI_ISL_456881                                                                                                                                                                                                                                                                                                                                                                                                                                                                                                                                                                                                                                                                                                                                                                                                                                                                                                                                                                                                                                                                                                                                                                                                                                                                                                                                                                                                                                                                                                                                                                                                                                                                                                                                                                                                                                                                                                                                                                                                                                                                                                                                                                                                                                                                                 | West of Scotland Specialist Virology Centre, NHSGGC / MRC-University of Glasgow Centre for Virus Research                  | COVID-19 Genomics UK (COG-UK) Consortium                                         | Ana da Silva Filipe, Natasha Johnson, Kathy Smollett, Daniel Mair, Stephen Carmichael, Lily Tong, Jenna Nichols, Elihu Aranday-Cortes, Kirstyn Brunker, Yasmin Parr, Kyriaki Nomikou; Sarah McDonald, Marc Niebel, Patawee Asamaphan; Richard Orton, Joseph Hughes, Sreenu Vattipally, David L Robertson; Alasdair MacLean, Rory Gunson; Kathy Li, Natasha Jesudason, Rajiv Shah, James Shepherd, Antonia Ho, Emma Thomson                                                                                                                                                                                                                                                                                                                                    |
| EPI_ISL_458105                                                                                                                                                                                                                                                                                                                                                                                                                                                                                                                                                                                                                                                                                                                                                                                                                                                                                                                                                                                                                                                                                                                                                                                                                                                                                                                                                                                                                                                                                                                                                                                                                                                                                                                                                                                                                                                                                                                                                                                                                                                                                                                                                                                                                                                                                                                                                                                                                 | Gujarat Biotechnology Research Centre                                                                                      | Gujarat Biotechnology Research Centre                                            | Ankit Hinsu, Pritesh Sabara, Apurvasinh Puvar, Janvi Raval, Zarna Patel, Monika Gandhi, Pinal Trivedi, Maharshi Pandya, Amit Kanani, Nidhi Patel, Nitin Savaliya, Raghawendra Kumar, Dinesh Kumar, Zuber Saiyed, Komal Patel, Labdhi Pandya, Snehal Bagatharia, Ramesh Pandit, Tejas Shah, Camellia Chakraborty, Bhavesh Modi, Gaurishankar Shrimali, R D Dixit, A M Kadri, Umang Mishra, Chaitanya Joshi, Madhvi Joshi, , , ,                                                                                                                                                                                                                                                                                                                                |
| EPI_ISL_458236                                                                                                                                                                                                                                                                                                                                                                                                                                                                                                                                                                                                                                                                                                                                                                                                                                                                                                                                                                                                                                                                                                                                                                                                                                                                                                                                                                                                                                                                                                                                                                                                                                                                                                                                                                                                                                                                                                                                                                                                                                                                                                                                                                                                                                                                                                                                                                                                                 | Hospital Mexico                                                                                                            | Charité Virology-University of Costa Rica                                        | Andres Moreira-Soto, Eugenia Corrales-Aguilar, Teresita Somogyi, Jan Felix Drexler                                                                                                                                                                                                                                                                                                                                                                                                                                                                                                                                                                                                                                                                            |
| EPI_ISL_459107, EPI_ISL_459128, EPI_ISL_459140, EPI_ISL_459155, EPI_ISL_459518, EPI_ISL_459563, EPI_ISL_459584, EPI_ISL_459593, EPI_ISL_459644, EPI_ISL_459660, EPI_ISL_459665, EPI_ISL_459674, EPI_ISL_459687, EPI_ISL_459689, EPI_ISL_459690, EPI_ISL_459722                                                                                                                                                                                                                                                                                                                                                                                                                                                                                                                                                                                                                                                                                                                                                                                                                                                                                                                                                                                                                                                                                                                                                                                                                                                                                                                                                                                                                                                                                                                                                                                                                                                                                                                                                                                                                                                                                                                                                                                                                                                                                                                                                                 | NHSGGC West of Scotland Specialist Virology Centre / MRC-University of Glasgow Centre for Virus Research                   | Wellcome Sanger Institute for the COVID-19 Genomics UK (COG-UK) consortium       | Ana da Silva Filipe, Natasha Johnson, Kathy Smollett, Daniel Mair, Stephen Carmichael, Lily Tong, Jenna Nichols, Elihu Aranday-Cortes, Kirstyn Brunker, Yasmin Parr, Kyriaki Nomikou; Sarah McDonald, Marc Niebel, Patawee Asamaphan; Richard Orton, Joseph Hughes, Sreenu Vattipally, David L Robertson; Alasdair MacLean, Rory Gunson; Kathy Li, Natasha Jesudason, Rajiv Shah, James Shepherd, Antonia Ho, Alice Broos, Emma Thomson and Alex Alderton, Roberto Amato, Sonia Goncalves, Ewan Harrison, David K. Jackson, Ian Johnston, Dominic Kwiatkowski, Cordelia Langford, John Sillitoe on behalf of the Wellcome Sanger Institute COVID-19 Surveillance Team ( <a href="http://www.sanger.ac.uk/covid-team">http://www.sanger.ac.uk/covid-team</a> ) |
| EPI_ISL_459893, EPI_ISL_459894, EPI_ISL_459895, EPI_ISL_459896, EPI_ISL_459897, EPI_ISL_459898, EPI_ISL_459899, EPI_ISL_459900, EPI_ISL_459901, EPI_ISL_459902, EPI_ISL_459903, EPI_ISL_459904, EPI_ISL_459905, EPI_ISL_459906                                                                                                                                                                                                                                                                                                                                                                                                                                                                                                                                                                                                                                                                                                                                                                                                                                                                                                                                                                                                                                                                                                                                                                                                                                                                                                                                                                                                                                                                                                                                                                                                                                                                                                                                                                                                                                                                                                                                                                                                                                                                                                                                                                                                 | Laboratoire National de Sante, Microbiology, Virology                                                                      | Laboratoire National de Sante, Microbiology, Epidemiology and Microbial Genomics | Anke Wienecke-Baldacchino, Jessica Tapp, Guillaume Fournier, Tamir Abdelrahman, Trung Nguyen Nguyen, Catherine Ragimbeau                                                                                                                                                                                                                                                                                                                                                                                                                                                                                                                                                                                                                                      |
| EPI_ISL_461482                                                                                                                                                                                                                                                                                                                                                                                                                                                                                                                                                                                                                                                                                                                                                                                                                                                                                                                                                                                                                                                                                                                                                                                                                                                                                                                                                                                                                                                                                                                                                                                                                                                                                                                                                                                                                                                                                                                                                                                                                                                                                                                                                                                                                                                                                                                                                                                                                 | Pandit Deendayal Upadhyay Government Medical College, Rajkot                                                               | Gujarat Biotechnology Research Centre                                            | Anjali Rajwar, Zuber Saiyed, Komal Patel, Labdhi Pandya, Snehal Bagatharia, Prakash Modi, Sejul Antala, Manish Pattani, Tejas Shah, Ankit Hinsu, Pritesh Sabara, Apurvasinh Puvar, Janvi Raval, Zarna Patel, Monika Gandhi, Pinal Trivedi, Maharshi Pandya, Nidhi Patel, Nitin Savaliya, Raghawendra Kumar, Dinesh Kumar, R D Dixit, A M Kadri, Harsh Bakshi, Chaitanya Joshi, Madhvi Joshi                                                                                                                                                                                                                                                                                                                                                                   |
| EPI_ISL_461495                                                                                                                                                                                                                                                                                                                                                                                                                                                                                                                                                                                                                                                                                                                                                                                                                                                                                                                                                                                                                                                                                                                                                                                                                                                                                                                                                                                                                                                                                                                                                                                                                                                                                                                                                                                                                                                                                                                                                                                                                                                                                                                                                                                                                                                                                                                                                                                                                 | B.J. Medical College and Civil hospital                                                                                    | Gujarat Biotechnology Research Centre                                            | Anjali Rajwar, Pinal Trivedi, Maharshi Pandya, Nidhi Patel, Nitin Savaliya, Raghawendra Kumar, Dinesh Kumar, Zuber Saiyed, Komal Patel, Labdhi Pandya, Snehal Bagatharia, Pranay Shah, Kamlesh J Upadhyay, Tejas Shah, Ankit Hinsu, Pritesh Sabara, Apurvasinh Puvar, Janvi Raval, Zarna Patel, Monika Gandhi, R D Dixit, A M Kadri, Harsh Bakshi, Chaitanya Joshi, Madhvi Joshi,                                                                                                                                                                                                                                                                                                                                                                             |
| EPI_ISL_461630, EPI_ISL_461643, EPI_ISL_461656, EPI_ISL_461671, EPI_ISL_461687, EPI_ISL_461693                                                                                                                                                                                                                                                                                                                                                                                                                                                                                                                                                                                                                                                                                                                                                                                                                                                                                                                                                                                                                                                                                                                                                                                                                                                                                                                                                                                                                                                                                                                                                                                                                                                                                                                                                                                                                                                                                                                                                                                                                                                                                                                                                                                                                                                                                                                                 | West of Scotland Specialist Virology Centre, NHSGGC / MRC-University of Glasgow Centre for Virus Research                  | COVID-19 Genomics UK (COG-UK) Consortium                                         | Ana da Silva Filipe, Natasha Johnson, Kathy Smollett, Daniel Mair, Stephen Carmichael, Lily Tong, Jenna Nichols, Elihu Aranday-Cortes, Kirstyn Brunker, Yasmin Parr, Kyriaki Nomikou; Sarah McDonald, Marc Niebel, Patawee Asamaphan; Richard Orton, Joseph Hughes, Sreenu Vattipally, David L Robertson; Alasdair MacLean, Rory Gunson; Kathy Li, Natasha Jesudason, Rajiv Shah, James Shepherd, Antonia Ho, Emma Thomson                                                                                                                                                                                                                                                                                                                                    |
| EPI_ISL_461970, EPI_ISL_461971, EPI_ISL_461972, EPI_ISL_461973, EPI_ISL_461974, EPI_ISL_461975, EPI_ISL_461976, EPI_ISL_461977, EPI_ISL_461978, EPI_ISL_461979, EPI_ISL_461980, EPI_ISL_461981, EPI_ISL_461982, EPI_ISL_461983, EPI_ISL_461984, EPI_ISL_461985, EPI_ISL_461986, EPI_ISL_461987, EPI_ISL_461988, EPI_ISL_461989, EPI_ISL_461990, EPI_ISL_461991, EPI_ISL_461992, EPI_ISL_461993, EPI_ISL_461994, EPI_ISL_461995, EPI_ISL_461996, EPI_ISL_461997, EPI_ISL_461998                                                                                                                                                                                                                                                                                                                                                                                                                                                                                                                                                                                                                                                                                                                                                                                                                                                                                                                                                                                                                                                                                                                                                                                                                                                                                                                                                                                                                                                                                                                                                                                                                                                                                                                                                                                                                                                                                                                                                 | Centre for Enzyme Innovation, University of Portsmouth / Translational Research Laboratory, Portsmouth Hospitals NHS Trust | COVID-19 Genomics UK (COG-UK) Consortium                                         | Angela Beckett, Yann Bourgeois, Garry Scarlett, Sharon Glayscher, Scott Elliott, Kelly Bicknell, Robert Impey, Allyson Lloyd, Sarah Wyllie, Ethan Butcher, Anoop Chauhan, Samuel Robson                                                                                                                                                                                                                                                                                                                                                                                                                                                                                                                                                                       |
| EPI_ISL_463008                                                                                                                                                                                                                                                                                                                                                                                                                                                                                                                                                                                                                                                                                                                                                                                                                                                                                                                                                                                                                                                                                                                                                                                                                                                                                                                                                                                                                                                                                                                                                                                                                                                                                                                                                                                                                                                                                                                                                                                                                                                                                                                                                                                                                                                                                                                                                                                                                 | Institute of Molecular Virology, University Múnster                                                                        | Institute of Molecular Virology, University Múnster                              | Angeles Mecate Zambrano, Linda Brunotte, Stephan Ludwig, Joachim Kühn, Alexander Mellmann                                                                                                                                                                                                                                                                                                                                                                                                                                                                                                                                                                                                                                                                     |
| EPI_ISL_467034                                                                                                                                                                                                                                                                                                                                                                                                                                                                                                                                                                                                                                                                                                                                                                                                                                                                                                                                                                                                                                                                                                                                                                                                                                                                                                                                                                                                                                                                                                                                                                                                                                                                                                                                                                                                                                                                                                                                                                                                                                                                                                                                                                                                                                                                                                                                                                                                                 | GMERS Medical College and Hospital, Gandhinagar                                                                            | Gujarat Biotechnology Research Centre                                            | Ankit Hinsu, Pritesh Sabara, Apurvasinh Puvar, Janvi Raval, Zarna Patel, Monika Gandhi, Pinal Trivedi, Maharshi Pandya, Nidhi Patel, Nitin Savaliya, Raghawendra Kumar, Dinesh Kumar, Zuber Saiyed, Komal Patel, Labdhi Pandya, Snehal Bagatharia, Seema Bhatt, Gaurishankar Shrimali, Bhavesh Modi, Bharti Rajani, Tejas Shah, Pragya Sharma, R D Dixit, A M Kadri, Harsh Bakshi, Chaitanya Joshi, Madhvi Joshi                                                                                                                                                                                                                                                                                                                                              |
| EPI_ISL_467811, EPI_ISL_467812, EPI_ISL_467813, EPI_ISL_467814, EPI_ISL_467815, EPI_ISL_467816, EPI_ISL_467817, EPI_ISL_467818, EPI_ISL_467819, EPI_ISL_467820, EPI_ISL_467821, EPI_ISL_467822, EPI_ISL_467823, EPI_ISL_467824, EPI_ISL_467825, EPI_ISL_467826, EPI_ISL_467827, EPI_ISL_467828, EPI_ISL_467829, EPI_ISL_467830, EPI_ISL_467831, EPI_ISL_467832, EPI_ISL_467833, EPI_ISL_467834, EPI_ISL_467835, EPI_ISL_467836, EPI_ISL_467837, EPI_ISL_467838, EPI_ISL_467839, EPI_ISL_467840, EPI_ISL_467841, EPI_ISL_467842, EPI_ISL_467843, EPI_ISL_467844, EPI_ISL_467845, EPI_ISL_467846, EPI_ISL_467847, EPI_ISL_467848, EPI_ISL_467849, EPI_ISL_467850, EPI_ISL_467851, EPI_ISL_467852, EPI_ISL_467853, EPI_ISL_467854, EPI_ISL_467855, EPI_ISL_467856, EPI_ISL_467857, EPI_ISL_467858, EPI_ISL_467859, EPI_ISL_467860, EPI_ISL_467861, EPI_ISL_467862, EPI_ISL_467863, EPI_ISL_467864, EPI_ISL_467865, EPI_ISL_467866, EPI_ISL_467867, EPI_ISL_467868, EPI_ISL_467869, EPI_ISL_467870, EPI_ISL_467871, EPI_ISL_467872, EPI_ISL_467873, EPI_ISL_467874, EPI_ISL_467875, EPI_ISL_467876, EPI_ISL_467877, EPI_ISL_467878, EPI_ISL_467879, EPI_ISL_467880, EPI_ISL_467881, EPI_ISL_467882, EPI_ISL_467883, EPI_ISL_467884, EPI_ISL_467885, EPI_ISL_467886, EPI_ISL_467887, EPI_ISL_467888, EPI_ISL_467889, EPI_ISL_467890, EPI_ISL_467891, EPI_ISL_467892, EPI_ISL_467893, EPI_ISL_467894, EPI_ISL_467895, EPI_ISL_467896, EPI_ISL_467897, EPI_ISL_467900, EPI_ISL_467901, EPI_ISL_467902, EPI_ISL_467903, EPI_ISL_467904, EPI_ISL_467905, EPI_ISL_467906, EPI_ISL_467907, EPI_ISL_467908, EPI_ISL_467909, EPI_ISL_467910, EPI_ISL_467911, EPI_ISL_467912, EPI_ISL_467913, EPI_ISL_467914, EPI_ISL_467915, EPI_ISL_467916, EPI_ISL_467917, EPI_ISL_467918, EPI_ISL_467919, EPI_ISL_467920, EPI_ISL_467921, EPI_ISL_467922, EPI_ISL_467923, EPI_ISL_467924, EPI_ISL_467925, EPI_ISL_467926, EPI_ISL_467927, EPI_ISL_468560, EPI_ISL_468561, EPI_ISL_468562, EPI_ISL_468563, EPI_ISL_468564, EPI_ISL_468565, EPI_ISL_468566, EPI_ISL_468567, EPI_ISL_468568, EPI_ISL_468569, EPI_ISL_468570, EPI_ISL_468571, EPI_ISL_468572, EPI_ISL_468573, EPI_ISL_468574, EPI_ISL_468575, EPI_ISL_468576, EPI_ISL_468577, EPI_ISL_468578, EPI_ISL_468579, EPI_ISL_468580, EPI_ISL_468581, EPI_ISL_468582, EPI_ISL_468583, EPI_ISL_468584, EPI_ISL_468585, EPI_ISL_468586, EPI_ISL_468587, EPI_ISL_468588, EPI_ISL_468589, EPI_ISL_468590 | Quest Diagnostics                                                                                                          | Quest Diagnostics                                                                | Anderson, B.P., Rosenthal, S.H., Gerasimova, A., Kagan, R.M. and Owen, R.                                                                                                                                                                                                                                                                                                                                                                                                                                                                                                                                                                                                                                                                                     |
| EPI_ISL_469025                                                                                                                                                                                                                                                                                                                                                                                                                                                                                                                                                                                                                                                                                                                                                                                                                                                                                                                                                                                                                                                                                                                                                                                                                                                                                                                                                                                                                                                                                                                                                                                                                                                                                                                                                                                                                                                                                                                                                                                                                                                                                                                                                                                                                                                                                                                                                                                                                 | B.J. Medical College and Civil hospital                                                                                    | Gujarat Biotechnology Research Centre                                            | Ankit Hinsu, Pritesh Sabara, Apurvasinh Puvar, Janvi Raval, Zarna Patel, Monika Gandhi, Pinal Trivedi, Maharshi Pandya, Nidhi Patel, Nitin Savaliya, Raghawendra Kumar, Dinesh Kumar, Zuber Saiyed, Komal Patel, Labdhi Pandya, Snehal Bagatharia, Pranay Shah, Kamlesh J Upadhyay, Nirav Mungalpara, Tejas Shah, Pragya Sharma, R D Dixit, A M Kadri, Harsh Bakshi, Chaitanya Joshi, Madhvi Joshi                                                                                                                                                                                                                                                                                                                                                            |
| EPI_ISL_469047                                                                                                                                                                                                                                                                                                                                                                                                                                                                                                                                                                                                                                                                                                                                                                                                                                                                                                                                                                                                                                                                                                                                                                                                                                                                                                                                                                                                                                                                                                                                                                                                                                                                                                                                                                                                                                                                                                                                                                                                                                                                                                                                                                                                                                                                                                                                                                                                                 | Dr. N. D. Desai Medical College & Hospital                                                                                 | Gujarat Biotechnology Research Centre                                            | Ankit Hinsu, Pritesh Sabara, Apurvasinh Puvar, Janvi Raval, Zarna Patel, Monika Gandhi, Pinal Trivedi, Maharshi Pandya, Nidhi Patel, Nitin Savaliya, Raghawendra Kumar, Dinesh Kumar, Zuber Saiyed, Komal Patel, Labdhi Pandya, Snehal Bagatharia, J G Burch, Jigar Gusani, Supreet Prabhu, Tejas Shah, Akanksha Verma, R D Dixit, A M Kadri, Harsh Bakshi, Chaitanya Joshi, Madhvi Joshi                                                                                                                                                                                                                                                                                                                                                                     |
| EPI_ISL_469224, EPI_ISL_469225, EPI_ISL_469226, EPI_ISL_469227, EPI_ISL_469228, EPI_ISL_469229, EPI_ISL_469230, EPI_ISL_469231, EPI_ISL_469232, EPI_ISL_469233, EPI_ISL_469234, EPI_ISL_469235, EPI_ISL_469236, EPI_ISL_469237, EPI_ISL_469238, EPI_ISL_469239, EPI_ISL_469240                                                                                                                                                                                                                                                                                                                                                                                                                                                                                                                                                                                                                                                                                                                                                                                                                                                                                                                                                                                                                                                                                                                                                                                                                                                                                                                                                                                                                                                                                                                                                                                                                                                                                                                                                                                                                                                                                                                                                                                                                                                                                                                                                 | Public Health Laboratory                                                                                                   | National Microbiology Laboratory                                                 | Anna Majer, Shari Tyson, Grace Seo, Kristyn Burak, Philip Mabon, Elsie Grudeski, Rhiannon Huzarewicz, Russell Mandes, Jennifer Tanner, Natalie Knox, Morag Graham, Gary Van Domselaar, Robert Needle, Yang Yu, Adel Malek, Laura Gilbert, Laura Gibbert, George Zahariadis, Nathalie Bastien, Yan Li, Timothy Booth, Matthew Gilmour                                                                                                                                                                                                                                                                                                                                                                                                                          |
| EPI_ISL_469956, EPI_ISL_469971, EPI_ISL_469984, EPI_ISL_470012                                                                                                                                                                                                                                                                                                                                                                                                                                                                                                                                                                                                                                                                                                                                                                                                                                                                                                                                                                                                                                                                                                                                                                                                                                                                                                                                                                                                                                                                                                                                                                                                                                                                                                                                                                                                                                                                                                                                                                                                                                                                                                                                                                                                                                                                                                                                                                 | NHSGGC West of Scotland Specialist Virology Centre / MRC-University of Glasgow Centre for Virus Research                   | Wellcome Sanger Institute for the COVID-19 Genomics UK (COG-UK) consortium       | Ana da Silva Filipe, Natasha Johnson, Kathy Smollett, Daniel Mair, Stephen Carmichael, Lily Tong, Jenna Nichols, Elihu Aranday-Cortes, Kirstyn Brunker, Yasmin Parr, Kyriaki Nomikou; Sarah McDonald, Marc Niebel, Patawee Asamaphan; Richard Orton, Joseph Hughes, Sreenu Vattipally, David L Robertson; Alasdair MacLean, Rory Gunson; Kathy Li, Natasha Jesudason, Rajiv Shah, James Shepherd, Antonia Ho, Alice Broos, Emma Thomson and Alex Alderton, Roberto Amato, Sonia Goncalves, Ewan Harrison, David K. Jackson, Ian Johnston, Dominic Kwiatkowski, Cordelia Langford, John Sillitoe on behalf of the Wellcome Sanger Institute COVID-19 Surveillance Team ( <a href="http://www.sanger.ac.uk/covid-team">http://www.sanger.ac.uk/covid-team</a> ) |
| EPI_ISL_473536, EPI_ISL_473543, EPI_ISL_473549, EPI_ISL_473561, EPI_ISL_473575, EPI_ISL_473607, EPI_ISL_473616, EPI_ISL_473644, EPI_ISL_473649, EPI_ISL_473652, EPI_ISL_473655, EPI_ISL_473724, EPI_ISL_473727, EPI_ISL_473781                                                                                                                                                                                                                                                                                                                                                                                                                                                                                                                                                                                                                                                                                                                                                                                                                                                                                                                                                                                                                                                                                                                                                                                                                                                                                                                                                                                                                                                                                                                                                                                                                                                                                                                                                                                                                                                                                                                                                                                                                                                                                                                                                                                                 | West of Scotland Specialist Virology Centre, NHSGGC / MRC-University of Glasgow Centre for Virus Research                  | COVID-19 Genomics UK (COG-UK) Consortium                                         | Ana da Silva Filipe, Natasha Johnson, Kathy Smollett, Daniel Mair, Stephen Carmichael, Lily Tong, Jenna Nichols, Elihu Aranday-Cortes, Kirstyn Brunker, Yasmin Parr, Alice Broos, Kyriaki Nomikou; Sarah McDonald, Marc Niebel, Patawee Asamaphan; Richard Orton, Joseph Hughes, Sreenu Vattipally, David L Robertson; Alasdair MacLean, Rory Gunson; Kathy Li, Natasha Jesudason, Rajiv Shah, James Shepherd, Antonia Ho, Emma Thomson                                                                                                                                                                                                                                                                                                                       |
| EPI_ISL_475239, EPI_ISL_475240, EPI_ISL_475241, EPI_ISL_475242, EPI_ISL_475243, EPI_ISL_475244, EPI_ISL_475245, EPI_ISL_475246, EPI_ISL_475247, EPI_ISL_475248, EPI_ISL_475249, EPI_ISL_475250, EPI_ISL_475251, EPI_ISL_475252, EPI_ISL_475253, EPI_ISL_475254, EPI_ISL_475255, EPI_ISL_475256                                                                                                                                                                                                                                                                                                                                                                                                                                                                                                                                                                                                                                                                                                                                                                                                                                                                                                                                                                                                                                                                                                                                                                                                                                                                                                                                                                                                                                                                                                                                                                                                                                                                                                                                                                                                                                                                                                                                                                                                                                                                                                                                 | West of Scotland Specialist Virology Centre, NHSGGC / MRC-University of Glasgow Centre for Virus Research                  | COVID-19 Genomics UK (COG-UK) Consortium                                         | Ana da Silva Filipe, Natasha Johnson, Kathy Smollett, Daniel Mair, Stephen Carmichael, Lily Tong, Jenna Nichols, Elihu Aranday-Cortes, Kirstyn Brunker, Yasmin Parr, Alice Broos, Kyriaki Nomikou; Sarah McDonald, Marc Niebel, Patawee Asamaphan; Richard Orton, Joseph Hughes, Sreenu Vattipally, David L Robertson; Alasdair MacLean, Rory Gunson; Kathy Li, Natasha Jesudason, Rajiv Shah, James Shepherd, Antonia Ho, Emma Thomson                                                                                                                                                                                                                                                                                                                       |

|                                                                                                                                                                                                                                                                                                                                                                                                                                                                                                                                                                                                                                                                                                                                                                                                                                                                                                                                                                                                                                                                                                                                                                                                                                                                                                                                                                                                                |                                                                                                                            |                                                                                                                    |                                                                                                                                                                                                                                                                                                                                                                                                                                                                                                                                                                                                                                                                                                                                                                            |
|----------------------------------------------------------------------------------------------------------------------------------------------------------------------------------------------------------------------------------------------------------------------------------------------------------------------------------------------------------------------------------------------------------------------------------------------------------------------------------------------------------------------------------------------------------------------------------------------------------------------------------------------------------------------------------------------------------------------------------------------------------------------------------------------------------------------------------------------------------------------------------------------------------------------------------------------------------------------------------------------------------------------------------------------------------------------------------------------------------------------------------------------------------------------------------------------------------------------------------------------------------------------------------------------------------------------------------------------------------------------------------------------------------------|----------------------------------------------------------------------------------------------------------------------------|--------------------------------------------------------------------------------------------------------------------|----------------------------------------------------------------------------------------------------------------------------------------------------------------------------------------------------------------------------------------------------------------------------------------------------------------------------------------------------------------------------------------------------------------------------------------------------------------------------------------------------------------------------------------------------------------------------------------------------------------------------------------------------------------------------------------------------------------------------------------------------------------------------|
| EPI_ISL_475257, EPI_ISL_475258, EPI_ISL_475259, EPI_ISL_475260, EPI_ISL_475261, EPI_ISL_475262, EPI_ISL_475263, EPI_ISL_475264, EPI_ISL_475265, EPI_ISL_475266, EPI_ISL_475267, EPI_ISL_475268, EPI_ISL_475269, EPI_ISL_475270, EPI_ISL_475271, EPI_ISL_475272, EPI_ISL_475273, EPI_ISL_475274, EPI_ISL_475275, EPI_ISL_475276, EPI_ISL_475277, EPI_ISL_475278, EPI_ISL_475279, EPI_ISL_475280, EPI_ISL_475281, EPI_ISL_475282, EPI_ISL_475283, EPI_ISL_475284, EPI_ISL_475285, EPI_ISL_475286, EPI_ISL_475287, EPI_ISL_475288, EPI_ISL_475289, EPI_ISL_475290, EPI_ISL_475291, EPI_ISL_475292, EPI_ISL_475293, EPI_ISL_475294, EPI_ISL_475295, EPI_ISL_475296, EPI_ISL_475297, EPI_ISL_475298, EPI_ISL_475299, EPI_ISL_475300, EPI_ISL_475301, EPI_ISL_475302, EPI_ISL_475303, EPI_ISL_475304, EPI_ISL_475305, EPI_ISL_475306, EPI_ISL_475307, EPI_ISL_475308, EPI_ISL_475309, EPI_ISL_475310, EPI_ISL_475311, EPI_ISL_475312, EPI_ISL_475313, EPI_ISL_475314, EPI_ISL_475315, EPI_ISL_475316, EPI_ISL_475317, EPI_ISL_475318, EPI_ISL_475319, EPI_ISL_475320, EPI_ISL_475321, EPI_ISL_475322, EPI_ISL_475323, EPI_ISL_475324, EPI_ISL_475325, EPI_ISL_475326, EPI_ISL_475327, EPI_ISL_475328, EPI_ISL_475329, EPI_ISL_475330, EPI_ISL_475331, EPI_ISL_475332, EPI_ISL_475333, EPI_ISL_475334, EPI_ISL_475335, EPI_ISL_475336, EPI_ISL_475337, EPI_ISL_475338, EPI_ISL_475339, EPI_ISL_475340, EPI_ISL_475341 | Centre for Enzyme Innovation, University of Portsmouth / Translational Research Laboratory, Portsmouth Hospitals NHS Trust | COVID-19 Genomics UK (COG-UK) Consortium                                                                           | Angela Beckett, Yann Bourgeois, Garry Scarlett, Sharon Glaysher, Scott Elliott, Kelly Bicknell, Robert Impey, Allyson Lloyd, Sarah Wyllie, Ethan Butcher, Anoop Chauhan, Samuel Robson                                                                                                                                                                                                                                                                                                                                                                                                                                                                                                                                                                                     |
| EPI_ISL_476565                                                                                                                                                                                                                                                                                                                                                                                                                                                                                                                                                                                                                                                                                                                                                                                                                                                                                                                                                                                                                                                                                                                                                                                                                                                                                                                                                                                                 | Hospital de Pediatría "Prof. Dr. Juan P Garrahan"                                                                          | Héritas                                                                                                            | Andrea Mangano, Maria Florencia Fernandez, Dalmacio Pereyra, Roberta Crespo, Mauricio Grisolia, Cristian Rohr, Fabian Fay, Martin Vazquez                                                                                                                                                                                                                                                                                                                                                                                                                                                                                                                                                                                                                                  |
| EPI_ISL_477886, EPI_ISL_477894, EPI_ISL_477948, EPI_ISL_477956, EPI_ISL_477957, EPI_ISL_477981, EPI_ISL_477992, EPI_ISL_478003, EPI_ISL_478019, EPI_ISL_478064, EPI_ISL_478107, EPI_ISL_478112, EPI_ISL_478136, EPI_ISL_478139, EPI_ISL_478141, EPI_ISL_478151, EPI_ISL_478154                                                                                                                                                                                                                                                                                                                                                                                                                                                                                                                                                                                                                                                                                                                                                                                                                                                                                                                                                                                                                                                                                                                                 | West of Scotland Specialist Virology Centre, NHSGGC / MRC-University of Glasgow Centre for Virus Research                  | COVID-19 Genomics UK (COG-UK) Consortium                                                                           | Ana da Silva Filipe, Natasha Johnson, Kathy Smollett, Daniel Mair, Stephen Carmichael, Lily Tong, Jenna Nichols, Elihu Aranday-Cortes, Kirstyn Brunker, Yasmin Parr, Alice Broos, Kyriaki Nomikou; Sarah McDonald, Marc Niebel, Patawee Asamaphan; Richard Orton, Joseph Hughes, Sreenu Vattipally, David L Robertson; Alasdair MacLean, Rory Gunson; Kathy Li, Natasha Jesudason, Rajiv Shah, James Shepherd, Antonia Ho, Emma Thomson                                                                                                                                                                                                                                                                                                                                    |
| EPI_ISL_479175, EPI_ISL_479176, EPI_ISL_479177, EPI_ISL_479178, EPI_ISL_479179, EPI_ISL_479180, EPI_ISL_479181, EPI_ISL_479182, EPI_ISL_479183, EPI_ISL_479184, EPI_ISL_479185, EPI_ISL_479186, EPI_ISL_479187, EPI_ISL_479188, EPI_ISL_479189, EPI_ISL_479190, EPI_ISL_479191, EPI_ISL_479192, EPI_ISL_479193, EPI_ISL_479194                                                                                                                                                                                                                                                                                                                                                                                                                                                                                                                                                                                                                                                                                                                                                                                                                                                                                                                                                                                                                                                                                 | Centre for Enzyme Innovation, University of Portsmouth / Translational Research Laboratory, Portsmouth Hospitals NHS Trust | COVID-19 Genomics UK (COG-UK) Consortium                                                                           | Angela Beckett, Yann Bourgeois, Garry Scarlett, Sharon Glaysher, Scott Elliott, Kelly Bicknell, Robert Impey, Allyson Lloyd, Sarah Wyllie, Ethan Butcher, Anoop Chauhan, Samuel Robson                                                                                                                                                                                                                                                                                                                                                                                                                                                                                                                                                                                     |
| EPI_ISL_479625, EPI_ISL_479626, EPI_ISL_479627, EPI_ISL_479628, EPI_ISL_479629, EPI_ISL_479630, EPI_ISL_479631, EPI_ISL_479632, EPI_ISL_479633, EPI_ISL_479634, EPI_ISL_479635, EPI_ISL_479636, EPI_ISL_479637, EPI_ISL_479638, EPI_ISL_479639, EPI_ISL_479640, EPI_ISL_479641, EPI_ISL_479642, EPI_ISL_479643, EPI_ISL_479644, EPI_ISL_479645, EPI_ISL_479646, EPI_ISL_479647, EPI_ISL_479648, EPI_ISL_479649, EPI_ISL_479650, EPI_ISL_479651                                                                                                                                                                                                                                                                                                                                                                                                                                                                                                                                                                                                                                                                                                                                                                                                                                                                                                                                                                 | Dr. Georges-L.-Dumont University Hospital Centre                                                                           | National Microbiology Laboratory                                                                                   | Anna Majer, Shari Tyson, Grace Seo, Kristyn Burak, Philip Mabon, Elsie Grudeski, Rhiannon Huzarewich, Russell Mandes, Jennifer Tanner, Natalie Knox, Morag Graham, Gary Van Domselaar, Richard Garceau, Guillaume Desnoyers, Nathalie Bastien, Yan Li, Timothy Booth                                                                                                                                                                                                                                                                                                                                                                                                                                                                                                       |
| EPI_ISL_480312, EPI_ISL_480313, EPI_ISL_480314                                                                                                                                                                                                                                                                                                                                                                                                                                                                                                                                                                                                                                                                                                                                                                                                                                                                                                                                                                                                                                                                                                                                                                                                                                                                                                                                                                 | Hospital Mexico                                                                                                            | Charité Virology-University of Costa Rica                                                                          | Andres Moreira-Soto, Eugenia Corrales-Aguilar, Ignacio Postigo-Hidalgo, Teresita Somogyi, Jan Felix Drexler                                                                                                                                                                                                                                                                                                                                                                                                                                                                                                                                                                                                                                                                |
| EPI_ISL_480315, EPI_ISL_480316, EPI_ISL_480317, EPI_ISL_480318, EPI_ISL_480319, EPI_ISL_480320                                                                                                                                                                                                                                                                                                                                                                                                                                                                                                                                                                                                                                                                                                                                                                                                                                                                                                                                                                                                                                                                                                                                                                                                                                                                                                                 | Hospital Clínica Biblica                                                                                                   | Charité Virology-University of Costa Rica                                                                          | Andres Moreira-Soto, Eugenia Corrales-Aguilar, Ignacio Postigo-Hidalgo, Karla Sofia Gutiérrez, Jan Felix Drexler                                                                                                                                                                                                                                                                                                                                                                                                                                                                                                                                                                                                                                                           |
| EPI_ISL_480321                                                                                                                                                                                                                                                                                                                                                                                                                                                                                                                                                                                                                                                                                                                                                                                                                                                                                                                                                                                                                                                                                                                                                                                                                                                                                                                                                                                                 | Laboratorio Clínico San José                                                                                               | Charité Virology-University of Costa Rica                                                                          | Andres Moreira-Soto, Eugenia Corrales-Aguilar, Ignacio Postigo-Hidalgo, Hugo Núñez Navas, Jan Felix Drexler                                                                                                                                                                                                                                                                                                                                                                                                                                                                                                                                                                                                                                                                |
| EPI_ISL_480322, EPI_ISL_480323, EPI_ISL_480324, EPI_ISL_480325, EPI_ISL_480326, EPI_ISL_480327                                                                                                                                                                                                                                                                                                                                                                                                                                                                                                                                                                                                                                                                                                                                                                                                                                                                                                                                                                                                                                                                                                                                                                                                                                                                                                                 | Hospital Nacional de Niños                                                                                                 | Charité Virology-University of Costa Rica                                                                          | Andres Moreira-Soto, Eugenia Corrales-Aguilar, Ignacio Postigo-Hidalgo, Cristian Pérez Corrales, Andrei Montero Bonilla, Jan Felix Drexler                                                                                                                                                                                                                                                                                                                                                                                                                                                                                                                                                                                                                                 |
| EPI_ISL_480328                                                                                                                                                                                                                                                                                                                                                                                                                                                                                                                                                                                                                                                                                                                                                                                                                                                                                                                                                                                                                                                                                                                                                                                                                                                                                                                                                                                                 | Laboratorio LABIN                                                                                                          | Charité Virology-University of Costa Rica                                                                          | Andres Moreira-Soto, Eugenia Corrales-Aguilar, Ignacio Postigo-Hidalgo, Ignacio Soto Pacheco, Jan Felix Drexler                                                                                                                                                                                                                                                                                                                                                                                                                                                                                                                                                                                                                                                            |
| EPI_ISL_481742, EPI_ISL_481743, EPI_ISL_481744, EPI_ISL_481745, EPI_ISL_481746, EPI_ISL_481747, EPI_ISL_481748, EPI_ISL_481749, EPI_ISL_481750, EPI_ISL_481751, EPI_ISL_481752, EPI_ISL_481753, EPI_ISL_481754, EPI_ISL_481755, EPI_ISL_481756, EPI_ISL_481757, EPI_ISL_481758                                                                                                                                                                                                                                                                                                                                                                                                                                                                                                                                                                                                                                                                                                                                                                                                                                                                                                                                                                                                                                                                                                                                 | Dr. Georges-L.-Dumont University Hospital Centre                                                                           | National Microbiology Laboratory                                                                                   | Anna Majer, Shari Tyson, Grace Seo, Kristyn Burak, Philip Mabon, Elsie Grudeski, Rhiannon Huzarewich, Russell Mandes, Jennifer Tanner, Natalie Knox, Morag Graham, Gary Van Domselaar, Richard Garceau, Guillaume Desnoyers, Nathalie Bastien, Yan Li, Timothy Booth                                                                                                                                                                                                                                                                                                                                                                                                                                                                                                       |
| EPI_ISL_482469, EPI_ISL_482470                                                                                                                                                                                                                                                                                                                                                                                                                                                                                                                                                                                                                                                                                                                                                                                                                                                                                                                                                                                                                                                                                                                                                                                                                                                                                                                                                                                 | Queen Elizabeth II Health Science Centre                                                                                   | National Microbiology Laboratory                                                                                   | Anna Majer, Shari Tyson, Grace Seo, Kristyn Burak, Philip Mabon, Elsie Grudeski, Rhiannon Huzarewich, Russell Mandes, Jennifer Tanner, Natalie Knox, Morag Graham, Gary Van Domselaar, Todd Hatchette, Jason LeBlanc, Nathalie Bastien, Yan Li, Timothy Booth                                                                                                                                                                                                                                                                                                                                                                                                                                                                                                              |
| EPI_ISL_482471, EPI_ISL_482472, EPI_ISL_482473                                                                                                                                                                                                                                                                                                                                                                                                                                                                                                                                                                                                                                                                                                                                                                                                                                                                                                                                                                                                                                                                                                                                                                                                                                                                                                                                                                 | Dr. Georges-L.-Dumont University Hospital Centre                                                                           | National Microbiology Laboratory                                                                                   | Anna Majer, Shari Tyson, Grace Seo, Kristyn Burak, Philip Mabon, Elsie Grudeski, Rhiannon Huzarewich, Russell Mandes, Jennifer Tanner, Natalie Knox, Morag Graham, Gary Van Domselaar, Richard Garceau, Guillaume Desnoyers, Nathalie Bastien, Yan Li, Timothy Booth                                                                                                                                                                                                                                                                                                                                                                                                                                                                                                       |
| EPI_ISL_482474, EPI_ISL_482475                                                                                                                                                                                                                                                                                                                                                                                                                                                                                                                                                                                                                                                                                                                                                                                                                                                                                                                                                                                                                                                                                                                                                                                                                                                                                                                                                                                 | Cadham Provincial Laboratory                                                                                               | National Microbiology Laboratory                                                                                   | Anna Majer, Shari Tyson, Grace Seo, Kristyn Burak, Philip Mabon, Elsie Grudeski, Rhiannon Huzarewich, Russell Mandes, Jennifer Tanner, Natalie Knox, Morag Graham, Gary Van Domselaar, Paul Van Caesele, Jared Bullard, David Alexander, Kerry Dust, Nathalie Bastien, Yan Li, Timothy Booth                                                                                                                                                                                                                                                                                                                                                                                                                                                                               |
| EPI_ISL_482476, EPI_ISL_482477                                                                                                                                                                                                                                                                                                                                                                                                                                                                                                                                                                                                                                                                                                                                                                                                                                                                                                                                                                                                                                                                                                                                                                                                                                                                                                                                                                                 | Queen Elizabeth II Health Science Centre                                                                                   | National Microbiology Laboratory                                                                                   | Anna Majer, Shari Tyson, Grace Seo, Kristyn Burak, Philip Mabon, Elsie Grudeski, Rhiannon Huzarewich, Russell Mandes, Jennifer Tanner, Natalie Knox, Morag Graham, Gary Van Domselaar, Todd Hatchette, Jason LeBlanc, Nathalie Bastien, Yan Li, Timothy Booth                                                                                                                                                                                                                                                                                                                                                                                                                                                                                                              |
| EPI_ISL_482478                                                                                                                                                                                                                                                                                                                                                                                                                                                                                                                                                                                                                                                                                                                                                                                                                                                                                                                                                                                                                                                                                                                                                                                                                                                                                                                                                                                                 | Cadham Provincial Laboratory                                                                                               | National Microbiology Laboratory                                                                                   | Anna Majer, Shari Tyson, Grace Seo, Kristyn Burak, Philip Mabon, Elsie Grudeski, Rhiannon Huzarewich, Russell Mandes, Jennifer Tanner, Natalie Knox, Morag Graham, Gary Van Domselaar, Paul Van Caesele, Jared Bullard, David Alexander, Kerry Dust, Nathalie Bastien, Yan Li, Timothy Booth                                                                                                                                                                                                                                                                                                                                                                                                                                                                               |
| EPI_ISL_482479                                                                                                                                                                                                                                                                                                                                                                                                                                                                                                                                                                                                                                                                                                                                                                                                                                                                                                                                                                                                                                                                                                                                                                                                                                                                                                                                                                                                 | Public Health Laboratory                                                                                                   | National Microbiology Laboratory                                                                                   | Anna Majer, Shari Tyson, Grace Seo, Kristyn Burak, Philip Mabon, Elsie Grudeski, Rhiannon Huzarewich, Russell Mandes, Jennifer Tanner, Natalie Knox, Morag Graham, Gary Van Domselaar, Robert Needle, Yang Yu, Adel Malek, Laura Gilbert, George Zahariadis, Nathalie Bastien, Yan Li, Timothy Booth                                                                                                                                                                                                                                                                                                                                                                                                                                                                       |
| EPI_ISL_482480, EPI_ISL_482481, EPI_ISL_482482, EPI_ISL_482483, EPI_ISL_482484                                                                                                                                                                                                                                                                                                                                                                                                                                                                                                                                                                                                                                                                                                                                                                                                                                                                                                                                                                                                                                                                                                                                                                                                                                                                                                                                 | Cadham Provincial Laboratory                                                                                               | National Microbiology Laboratory                                                                                   | Anna Majer, Shari Tyson, Grace Seo, Kristyn Burak, Philip Mabon, Elsie Grudeski, Rhiannon Huzarewich, Russell Mandes, Jennifer Tanner, Natalie Knox, Morag Graham, Gary Van Domselaar, Paul Van Caesele, Jared Bullard, David Alexander, Kerry Dust, Nathalie Bastien, Yan Li, Timothy Booth                                                                                                                                                                                                                                                                                                                                                                                                                                                                               |
| EPI_ISL_484407, EPI_ISL_484408, EPI_ISL_484409, EPI_ISL_484410, EPI_ISL_484411, EPI_ISL_484412, EPI_ISL_484413, EPI_ISL_484414, EPI_ISL_484415, EPI_ISL_484416, EPI_ISL_484417, EPI_ISL_484418, EPI_ISL_484419, EPI_ISL_484420, EPI_ISL_484421, EPI_ISL_484422, EPI_ISL_484423, EPI_ISL_484424, EPI_ISL_484425, EPI_ISL_484426, EPI_ISL_484427, EPI_ISL_484428, EPI_ISL_484429, EPI_ISL_484430, EPI_ISL_484431, EPI_ISL_484432                                                                                                                                                                                                                                                                                                                                                                                                                                                                                                                                                                                                                                                                                                                                                                                                                                                                                                                                                                                 | Centre for Enzyme Innovation, University of Portsmouth / Translational Research Laboratory, Portsmouth Hospitals NHS Trust | COVID-19 Genomics UK (COG-UK) Consortium                                                                           | Angela Beckett, Yann Bourgeois, Garry Scarlett, Sharon Glaysher, Scott Elliott, Kelly Bicknell, Robert Impey, Allyson Lloyd, Sarah Wyllie, Ethan Butcher, Anoop Chauhan, Samuel Robson                                                                                                                                                                                                                                                                                                                                                                                                                                                                                                                                                                                     |
| EPI_ISL_484575, EPI_ISL_484577, EPI_ISL_484624, EPI_ISL_484626, EPI_ISL_484627, EPI_ISL_484636, EPI_ISL_484673                                                                                                                                                                                                                                                                                                                                                                                                                                                                                                                                                                                                                                                                                                                                                                                                                                                                                                                                                                                                                                                                                                                                                                                                                                                                                                 | West of Scotland Specialist Virology Centre, NHSGGC / MRC-University of Glasgow Centre for Virus Research                  | COVID-19 Genomics UK (COG-UK) Consortium                                                                           | Ana da Silva Filipe, Natasha Johnson, Kathy Smollett, Daniel Mair, Stephen Carmichael, Lily Tong, Jenna Nichols, Elihu Aranday-Cortes, Kirstyn Brunker, Yasmin Parr, Alice Broos, Kyriaki Nomikou; Sarah McDonald, Marc Niebel, Patawee Asamaphan; Richard Orton, Joseph Hughes, Sreenu Vattipally, David L Robertson; Alasdair MacLean, Rory Gunson; Kathy Li, Natasha Jesudason, Rajiv Shah, James Shepherd, Antonia Ho, Alice Broos, Emma Thomson and Alex Alderton, Roberto Amato, Sonia Goncalves, Ewan Harrison, David K. Jackson, Ian Johnston, Dominic Kwiatkowski, Cordelia Langford, John Sillitoe on behalf of the Wellcome Sanger Institute COVID-19 Surveillance Team ( <a href="http://www.sanger.ac.uk/covid-team">http://www.sanger.ac.uk/covid-team</a> ) |
| EPI_ISL_485809                                                                                                                                                                                                                                                                                                                                                                                                                                                                                                                                                                                                                                                                                                                                                                                                                                                                                                                                                                                                                                                                                                                                                                                                                                                                                                                                                                                                 | Institut für Virologie und Epidemiologie der Viruskrankheiten, Universitätsklinikum Tübingen                               | NGS Competence Center Tübingen, Institut für Medizinische Mikrobiologie und Hygiene, Universitätsklinikum Tübingen | Angelov at al.                                                                                                                                                                                                                                                                                                                                                                                                                                                                                                                                                                                                                                                                                                                                                             |
| EPI_ISL_485810, EPI_ISL_485811, EPI_ISL_485812, EPI_ISL_485813                                                                                                                                                                                                                                                                                                                                                                                                                                                                                                                                                                                                                                                                                                                                                                                                                                                                                                                                                                                                                                                                                                                                                                                                                                                                                                                                                 | Institut für Virologie und Epidemiologie der Viruskrankheiten, Universitätsklinikum Tübingen                               | NGS Competence Center Tübingen, Institut für Medizinische Mikrobiologie und Hygiene, Universitätsklinikum Tübingen | Angelov at al.                                                                                                                                                                                                                                                                                                                                                                                                                                                                                                                                                                                                                                                                                                                                                             |
| EPI_ISL_489578                                                                                                                                                                                                                                                                                                                                                                                                                                                                                                                                                                                                                                                                                                                                                                                                                                                                                                                                                                                                                                                                                                                                                                                                                                                                                                                                                                                                 | NHSGGC West of Scotland Specialist Virology Centre / MRC-University of Glasgow Centre for Virus Research                   | Wellcome Sanger Institute for the COVID-19 Genomics UK (COG-UK) consortium                                         | Ana da Silva Filipe, Natasha Johnson, Kathy Smollett, Daniel Mair, Stephen Carmichael, Lily Tong, Jenna Nichols, Elihu Aranday-Cortes, Kirstyn Brunker, Yasmin Parr, Kyriaki Nomikou; Sarah McDonald, Marc Niebel, Patawee Asamaphan; Richard Orton, Joseph Hughes, Sreenu Vattipally, David L Robertson; Alasdair MacLean, Rory Gunson; Kathy Li, Natasha Jesudason, Rajiv Shah, James Shepherd, Antonia Ho, Alice Broos, Emma Thomson and Alex Alderton, Roberto Amato, Sonia Goncalves, Ewan Harrison, David K. Jackson, Ian Johnston, Dominic Kwiatkowski, Cordelia Langford, John Sillitoe on behalf of the Wellcome Sanger Institute COVID-19 Surveillance Team ( <a href="http://www.sanger.ac.uk/covid-team">http://www.sanger.ac.uk/covid-team</a> )              |
| EPI_ISL_489581                                                                                                                                                                                                                                                                                                                                                                                                                                                                                                                                                                                                                                                                                                                                                                                                                                                                                                                                                                                                                                                                                                                                                                                                                                                                                                                                                                                                 | NHSGGC West of Scotland Specialist Virology Centre / MRC-University of Glasgow Centre for Virus Research                   | Wellcome Sanger Institute for the COVID-19 Genomics UK (COG-UK) Consortium                                         | Ana da Silva Filipe, Natasha Johnson, Kathy Smollett, Daniel Mair, Stephen Carmichael, Lily Tong, Jenna Nichols, Elihu Aranday-Cortes, Kirstyn Brunker, Yasmin Parr, Kyriaki Nomikou; Sarah McDonald, Marc Niebel, Patawee Asamaphan; Richard Orton, Joseph Hughes, Sreenu Vattipally, David L Robertson; Alasdair MacLean, Rory Gunson; Kathy Li, Natasha Jesudason, Rajiv Shah, James Shepherd, Antonia Ho, Alice Broos, Emma Thomson and Alex Alderton, Roberto Amato, Sonia Goncalves, Ewan Harrison, David K. Jackson, Ian Johnston, Dominic Kwiatkowski, Cordelia Langford, John Sillitoe on behalf of the Wellcome Sanger Institute COVID-19 Surveillance Team                                                                                                      |

|                                                                                                                                                                                                                                                                                                                                                                                                                                                                                                                                                                                                                                                                                                                                                                                                                                                                                                                                                                                                                                                                                                                                                                                                                                                                                                                                                                                                                                                                                                                                                                                                                                                                                                                                                                                                                                                                                                                                                                                                                                                                                                                                                                                                                                                                                                                                                                                                                                                                                                                                                                                                                                                                                                                                                                                                                                                                                                                                                                                                                                                                                                                                                                                                                                                                                                                                                                                                                                                                                                                                                                                                                                                                                                                                                                                                                                                                                                                                                                                                                                                                                                                                                                                                                                                                                                                                                                                                                                                                                                                                                                                                                                                                                                                                                                                                                                                                                                                                                                                                                                                                                                                                                                                                                                                                                                                                                                                                                                                                                                                                                                                                                                                                                                                                                                                                                                                                                                                                                                                                                                                                                                                                                                                                                                                                                                                                                                                                                                                                                                                                                                                                                                                                                                                                                                                                                                                                                                                                                                                                                                                                                                                                                                                                                                                                                                                                                                                                                                                                                                                                                                                                                                                                                                                                                                                                                                                                                                                                                                                                                                                                                                   |                                                                                                                            |                                                                                                                    |                                                                                                                                                                                                                                                                                                                                                                                                                                                                                                                                                                                                                                                                                                                                                               |
|---------------------------------------------------------------------------------------------------------------------------------------------------------------------------------------------------------------------------------------------------------------------------------------------------------------------------------------------------------------------------------------------------------------------------------------------------------------------------------------------------------------------------------------------------------------------------------------------------------------------------------------------------------------------------------------------------------------------------------------------------------------------------------------------------------------------------------------------------------------------------------------------------------------------------------------------------------------------------------------------------------------------------------------------------------------------------------------------------------------------------------------------------------------------------------------------------------------------------------------------------------------------------------------------------------------------------------------------------------------------------------------------------------------------------------------------------------------------------------------------------------------------------------------------------------------------------------------------------------------------------------------------------------------------------------------------------------------------------------------------------------------------------------------------------------------------------------------------------------------------------------------------------------------------------------------------------------------------------------------------------------------------------------------------------------------------------------------------------------------------------------------------------------------------------------------------------------------------------------------------------------------------------------------------------------------------------------------------------------------------------------------------------------------------------------------------------------------------------------------------------------------------------------------------------------------------------------------------------------------------------------------------------------------------------------------------------------------------------------------------------------------------------------------------------------------------------------------------------------------------------------------------------------------------------------------------------------------------------------------------------------------------------------------------------------------------------------------------------------------------------------------------------------------------------------------------------------------------------------------------------------------------------------------------------------------------------------------------------------------------------------------------------------------------------------------------------------------------------------------------------------------------------------------------------------------------------------------------------------------------------------------------------------------------------------------------------------------------------------------------------------------------------------------------------------------------------------------------------------------------------------------------------------------------------------------------------------------------------------------------------------------------------------------------------------------------------------------------------------------------------------------------------------------------------------------------------------------------------------------------------------------------------------------------------------------------------------------------------------------------------------------------------------------------------------------------------------------------------------------------------------------------------------------------------------------------------------------------------------------------------------------------------------------------------------------------------------------------------------------------------------------------------------------------------------------------------------------------------------------------------------------------------------------------------------------------------------------------------------------------------------------------------------------------------------------------------------------------------------------------------------------------------------------------------------------------------------------------------------------------------------------------------------------------------------------------------------------------------------------------------------------------------------------------------------------------------------------------------------------------------------------------------------------------------------------------------------------------------------------------------------------------------------------------------------------------------------------------------------------------------------------------------------------------------------------------------------------------------------------------------------------------------------------------------------------------------------------------------------------------------------------------------------------------------------------------------------------------------------------------------------------------------------------------------------------------------------------------------------------------------------------------------------------------------------------------------------------------------------------------------------------------------------------------------------------------------------------------------------------------------------------------------------------------------------------------------------------------------------------------------------------------------------------------------------------------------------------------------------------------------------------------------------------------------------------------------------------------------------------------------------------------------------------------------------------------------------------------------------------------------------------------------------------------------------------------------------------------------------------------------------------------------------------------------------------------------------------------------------------------------------------------------------------------------------------------------------------------------------------------------------------------------------------------------------------------------------------------------------------------------------------------------------------------------------------------------------------------------------------------------------------------------------------------------------------------------------------------------------------------------------------------------------------------------------------------------------------------------------------------------------------------------------------------------------------------------------------------------------------------------------------------------------------------------------------------------------------------------|----------------------------------------------------------------------------------------------------------------------------|--------------------------------------------------------------------------------------------------------------------|---------------------------------------------------------------------------------------------------------------------------------------------------------------------------------------------------------------------------------------------------------------------------------------------------------------------------------------------------------------------------------------------------------------------------------------------------------------------------------------------------------------------------------------------------------------------------------------------------------------------------------------------------------------------------------------------------------------------------------------------------------------|
| EPI_ISL_489598, EPI_ISL_489601, EPI_ISL_489604, EPI_ISL_489642, EPI_ISL_489651, EPI_ISL_489660, EPI_ISL_489672, EPI_ISL_489673, EPI_ISL_489704                                                                                                                                                                                                                                                                                                                                                                                                                                                                                                                                                                                                                                                                                                                                                                                                                                                                                                                                                                                                                                                                                                                                                                                                                                                                                                                                                                                                                                                                                                                                                                                                                                                                                                                                                                                                                                                                                                                                                                                                                                                                                                                                                                                                                                                                                                                                                                                                                                                                                                                                                                                                                                                                                                                                                                                                                                                                                                                                                                                                                                                                                                                                                                                                                                                                                                                                                                                                                                                                                                                                                                                                                                                                                                                                                                                                                                                                                                                                                                                                                                                                                                                                                                                                                                                                                                                                                                                                                                                                                                                                                                                                                                                                                                                                                                                                                                                                                                                                                                                                                                                                                                                                                                                                                                                                                                                                                                                                                                                                                                                                                                                                                                                                                                                                                                                                                                                                                                                                                                                                                                                                                                                                                                                                                                                                                                                                                                                                                                                                                                                                                                                                                                                                                                                                                                                                                                                                                                                                                                                                                                                                                                                                                                                                                                                                                                                                                                                                                                                                                                                                                                                                                                                                                                                                                                                                                                                                                                                                                    | NHSGGC West of Scotland Specialist Virology Centre / MRC-University of Glasgow Centre for Virus Research                   | Wellcome Sanger Institute for the COVID-19 Genomics UK (COG-UK) consortium                                         | Ana da Silva Filipe, Natasha Johnson, Kathy Smollett, Daniel Mair, Stephen Carmichael, Lily Tong, Jenna Nichols, Elihu Aranday-Cortes, Kirstyn Brunker, Yasmin Parr, Kyriaki Nomikou; Sarah McDonald, Marc Niebel, Patawee Asamaphan; Richard Orton, Joseph Hughes, Sreenu Vattipally, David L Robertson; Alasdair MacLean, Rory Gunson; Kathy Li, Natasha Jesudason, Rajiv Shah, James Shepherd, Antonia Ho, Alice Broos, Emma Thomson and Alex Alderton, Roberto Amato, Sonia Goncalves, Ewan Harrison, David K. Jackson, Ian Johnston, Dominic Kwiatkowski, Cordelia Langford, John Sillitoe on behalf of the Wellcome Sanger Institute COVID-19 Surveillance Team ( <a href="http://www.sanger.ac.uk/covid-team">http://www.sanger.ac.uk/covid-team</a> ) |
| EPI_ISL_490658, EPI_ISL_490684                                                                                                                                                                                                                                                                                                                                                                                                                                                                                                                                                                                                                                                                                                                                                                                                                                                                                                                                                                                                                                                                                                                                                                                                                                                                                                                                                                                                                                                                                                                                                                                                                                                                                                                                                                                                                                                                                                                                                                                                                                                                                                                                                                                                                                                                                                                                                                                                                                                                                                                                                                                                                                                                                                                                                                                                                                                                                                                                                                                                                                                                                                                                                                                                                                                                                                                                                                                                                                                                                                                                                                                                                                                                                                                                                                                                                                                                                                                                                                                                                                                                                                                                                                                                                                                                                                                                                                                                                                                                                                                                                                                                                                                                                                                                                                                                                                                                                                                                                                                                                                                                                                                                                                                                                                                                                                                                                                                                                                                                                                                                                                                                                                                                                                                                                                                                                                                                                                                                                                                                                                                                                                                                                                                                                                                                                                                                                                                                                                                                                                                                                                                                                                                                                                                                                                                                                                                                                                                                                                                                                                                                                                                                                                                                                                                                                                                                                                                                                                                                                                                                                                                                                                                                                                                                                                                                                                                                                                                                                                                                                                                                    | West of Scotland Specialist Virology Centre, NHSGGC / MRC-University of Glasgow Centre for Virus Research                  | COVID-19 Genomics UK (COG-UK) Consortium                                                                           | Ana da Silva Filipe, Natasha Johnson, Kathy Smollett, Daniel Mair, Stephen Carmichael, Lily Tong, Jenna Nichols, Elihu Aranday-Cortes, Kirstyn Brunker, Yasmin Parr, Alice Broos, Kyriaki Nomikou; Sarah McDonald, Marc Niebel, Patawee Asamaphan; Richard Orton, Joseph Hughes, Sreenu Vattipally, David L Robertson; Alasdair MacLean, Rory Gunson; Kathy Li, Natasha Jesudason, Rajiv Shah, James Shepherd, Antonia Ho, Emma Thomson                                                                                                                                                                                                                                                                                                                       |
| EPI_ISL_493614, EPI_ISL_493615, EPI_ISL_493616, EPI_ISL_493617, EPI_ISL_493618, EPI_ISL_493619, EPI_ISL_493620, EPI_ISL_493621, EPI_ISL_493622, EPI_ISL_493623, EPI_ISL_493624, EPI_ISL_493625, EPI_ISL_493626, EPI_ISL_493627, EPI_ISL_493628, EPI_ISL_493629, EPI_ISL_493630, EPI_ISL_493631, EPI_ISL_493632, EPI_ISL_493633, EPI_ISL_493634, EPI_ISL_493635, EPI_ISL_493636, EPI_ISL_493637, EPI_ISL_493638, EPI_ISL_493639, EPI_ISL_493640, EPI_ISL_493641, EPI_ISL_493642, EPI_ISL_493643, EPI_ISL_493644, EPI_ISL_493645, EPI_ISL_493646, EPI_ISL_493647, EPI_ISL_493648, EPI_ISL_493649, EPI_ISL_493650, EPI_ISL_493651, EPI_ISL_493652, EPI_ISL_493653, EPI_ISL_493654, EPI_ISL_493655, EPI_ISL_493656, EPI_ISL_493657, EPI_ISL_493658, EPI_ISL_493659, EPI_ISL_493660, EPI_ISL_493661, EPI_ISL_493662, EPI_ISL_493663, EPI_ISL_493664, EPI_ISL_493665                                                                                                                                                                                                                                                                                                                                                                                                                                                                                                                                                                                                                                                                                                                                                                                                                                                                                                                                                                                                                                                                                                                                                                                                                                                                                                                                                                                                                                                                                                                                                                                                                                                                                                                                                                                                                                                                                                                                                                                                                                                                                                                                                                                                                                                                                                                                                                                                                                                                                                                                                                                                                                                                                                                                                                                                                                                                                                                                                                                                                                                                                                                                                                                                                                                                                                                                                                                                                                                                                                                                                                                                                                                                                                                                                                                                                                                                                                                                                                                                                                                                                                                                                                                                                                                                                                                                                                                                                                                                                                                                                                                                                                                                                                                                                                                                                                                                                                                                                                                                                                                                                                                                                                                                                                                                                                                                                                                                                                                                                                                                                                                                                                                                                                                                                                                                                                                                                                                                                                                                                                                                                                                                                                                                                                                                                                                                                                                                                                                                                                                                                                                                                                                                                                                                                                                                                                                                                                                                                                                                                                                                                                                                                                                                                                    | Centre for Enzyme Innovation, University of Portsmouth / Translational Research Laboratory, Portsmouth Hospitals NHS Trust | COVID-19 Genomics UK (COG-UK) Consortium                                                                           | Angela Beckett, Yann Bourgeois, Garry Scarlett, Sharon Glaysher, Scott Elliott, Kelly Bicknell, Robert Impey, Allyson Lloyd, Sarah Wyllie, Ethan Butcher, Anoop Chauhan, Samuel Robson                                                                                                                                                                                                                                                                                                                                                                                                                                                                                                                                                                        |
| EPI_ISL_493741, EPI_ISL_493754, EPI_ISL_493788, EPI_ISL_493800, EPI_ISL_493819, EPI_ISL_493822, EPI_ISL_493847, EPI_ISL_493851, EPI_ISL_493887                                                                                                                                                                                                                                                                                                                                                                                                                                                                                                                                                                                                                                                                                                                                                                                                                                                                                                                                                                                                                                                                                                                                                                                                                                                                                                                                                                                                                                                                                                                                                                                                                                                                                                                                                                                                                                                                                                                                                                                                                                                                                                                                                                                                                                                                                                                                                                                                                                                                                                                                                                                                                                                                                                                                                                                                                                                                                                                                                                                                                                                                                                                                                                                                                                                                                                                                                                                                                                                                                                                                                                                                                                                                                                                                                                                                                                                                                                                                                                                                                                                                                                                                                                                                                                                                                                                                                                                                                                                                                                                                                                                                                                                                                                                                                                                                                                                                                                                                                                                                                                                                                                                                                                                                                                                                                                                                                                                                                                                                                                                                                                                                                                                                                                                                                                                                                                                                                                                                                                                                                                                                                                                                                                                                                                                                                                                                                                                                                                                                                                                                                                                                                                                                                                                                                                                                                                                                                                                                                                                                                                                                                                                                                                                                                                                                                                                                                                                                                                                                                                                                                                                                                                                                                                                                                                                                                                                                                                                                                    | West of Scotland Specialist Virology Centre, NHSGGC / MRC-University of Glasgow Centre for Virus Research                  | COVID-19 Genomics UK (COG-UK) Consortium                                                                           | Ana da Silva Filipe, Natasha Johnson, Kathy Smollett, Daniel Mair, Stephen Carmichael, Lily Tong, Jenna Nichols, Elihu Aranday-Cortes, Kirstyn Brunker, Yasmin Parr, Alice Broos, Kyriaki Nomikou; Sarah McDonald, Marc Niebel, Patawee Asamaphan; Richard Orton, Joseph Hughes, Sreenu Vattipally, David L Robertson; Alasdair MacLean, Rory Gunson; Kathy Li, Natasha Jesudason, Rajiv Shah, James Shepherd, Antonia Ho, Emma Thomson                                                                                                                                                                                                                                                                                                                       |
| EPI_ISL_494504, EPI_ISL_494505, EPI_ISL_494506, EPI_ISL_494507, EPI_ISL_494508, EPI_ISL_494509, EPI_ISL_494510, EPI_ISL_494511, EPI_ISL_494512, EPI_ISL_494513, EPI_ISL_494514, EPI_ISL_494515, EPI_ISL_494516, EPI_ISL_494517, EPI_ISL_494518, EPI_ISL_494519, EPI_ISL_494520, EPI_ISL_494521, EPI_ISL_494522, EPI_ISL_494523, EPI_ISL_494524, EPI_ISL_494525, EPI_ISL_494526, EPI_ISL_494527, EPI_ISL_494528, EPI_ISL_494529, EPI_ISL_494530, EPI_ISL_494531, EPI_ISL_494532, EPI_ISL_494533, EPI_ISL_494534, EPI_ISL_494535, EPI_ISL_494536, EPI_ISL_494537, EPI_ISL_494538, EPI_ISL_494539, EPI_ISL_494540, EPI_ISL_494541, EPI_ISL_494542, EPI_ISL_494543, EPI_ISL_494544, EPI_ISL_494545, EPI_ISL_494546, EPI_ISL_494547, EPI_ISL_494548, EPI_ISL_494549, EPI_ISL_494550, EPI_ISL_494551, EPI_ISL_494552                                                                                                                                                                                                                                                                                                                                                                                                                                                                                                                                                                                                                                                                                                                                                                                                                                                                                                                                                                                                                                                                                                                                                                                                                                                                                                                                                                                                                                                                                                                                                                                                                                                                                                                                                                                                                                                                                                                                                                                                                                                                                                                                                                                                                                                                                                                                                                                                                                                                                                                                                                                                                                                                                                                                                                                                                                                                                                                                                                                                                                                                                                                                                                                                                                                                                                                                                                                                                                                                                                                                                                                                                                                                                                                                                                                                                                                                                                                                                                                                                                                                                                                                                                                                                                                                                                                                                                                                                                                                                                                                                                                                                                                                                                                                                                                                                                                                                                                                                                                                                                                                                                                                                                                                                                                                                                                                                                                                                                                                                                                                                                                                                                                                                                                                                                                                                                                                                                                                                                                                                                                                                                                                                                                                                                                                                                                                                                                                                                                                                                                                                                                                                                                                                                                                                                                                                                                                                                                                                                                                                                                                                                                                                                                                                                                                                    | Quest Diagnostics                                                                                                          | Quest Diagnostics                                                                                                  | Anderson, B.P., Rosenthal, S.H., Gerasimova, A., Kagan, R.M. and Owen, R.                                                                                                                                                                                                                                                                                                                                                                                                                                                                                                                                                                                                                                                                                     |
| EPI_ISL_499270, EPI_ISL_499271, EPI_ISL_499272, EPI_ISL_499273, EPI_ISL_499274, EPI_ISL_499275, EPI_ISL_499276, EPI_ISL_499277, EPI_ISL_499278, EPI_ISL_499279, EPI_ISL_499280, EPI_ISL_499281, EPI_ISL_499282, EPI_ISL_499283, EPI_ISL_499284, EPI_ISL_499285, EPI_ISL_499286, EPI_ISL_499287, EPI_ISL_499288, EPI_ISL_499289, EPI_ISL_499290, EPI_ISL_499291, EPI_ISL_499292, EPI_ISL_499293, EPI_ISL_499294, EPI_ISL_499295, EPI_ISL_499296, EPI_ISL_499297, EPI_ISL_499298, EPI_ISL_499299, EPI_ISL_499300, EPI_ISL_499301, EPI_ISL_499302, EPI_ISL_499303, EPI_ISL_499304, EPI_ISL_499305, EPI_ISL_499306, EPI_ISL_499307, EPI_ISL_499308, EPI_ISL_499309, EPI_ISL_499310, EPI_ISL_499311, EPI_ISL_499312, EPI_ISL_499313, EPI_ISL_499314, EPI_ISL_499315, EPI_ISL_499316, EPI_ISL_499317, EPI_ISL_499318, EPI_ISL_499319, EPI_ISL_499320, EPI_ISL_499321, EPI_ISL_499322, EPI_ISL_499323, EPI_ISL_499324, EPI_ISL_499325, EPI_ISL_499326, EPI_ISL_499327, EPI_ISL_499328, EPI_ISL_499329                                                                                                                                                                                                                                                                                                                                                                                                                                                                                                                                                                                                                                                                                                                                                                                                                                                                                                                                                                                                                                                                                                                                                                                                                                                                                                                                                                                                                                                                                                                                                                                                                                                                                                                                                                                                                                                                                                                                                                                                                                                                                                                                                                                                                                                                                                                                                                                                                                                                                                                                                                                                                                                                                                                                                                                                                                                                                                                                                                                                                                                                                                                                                                                                                                                                                                                                                                                                                                                                                                                                                                                                                                                                                                                                                                                                                                                                                                                                                                                                                                                                                                                                                                                                                                                                                                                                                                                                                                                                                                                                                                                                                                                                                                                                                                                                                                                                                                                                                                                                                                                                                                                                                                                                                                                                                                                                                                                                                                                                                                                                                                                                                                                                                                                                                                                                                                                                                                                                                                                                                                                                                                                                                                                                                                                                                                                                                                                                                                                                                                                                                                                                                                                                                                                                                                                                                                                                                                                                                                                                                                                                                                    | Centre for Enzyme Innovation, University of Portsmouth / Translational Research Laboratory, Portsmouth Hospitals NHS Trust | COVID-19 Genomics UK (COG-UK) Consortium                                                                           | Angela Beckett, Yann Bourgeois, Garry Scarlett, Sharon Glaysher, Scott Elliott, Kelly Bicknell, Robert Impey, Allyson Lloyd, Sarah Wyllie, Ethan Butcher, Anoop Chauhan, Samuel Robson                                                                                                                                                                                                                                                                                                                                                                                                                                                                                                                                                                        |
| EPI_ISL_500864                                                                                                                                                                                                                                                                                                                                                                                                                                                                                                                                                                                                                                                                                                                                                                                                                                                                                                                                                                                                                                                                                                                                                                                                                                                                                                                                                                                                                                                                                                                                                                                                                                                                                                                                                                                                                                                                                                                                                                                                                                                                                                                                                                                                                                                                                                                                                                                                                                                                                                                                                                                                                                                                                                                                                                                                                                                                                                                                                                                                                                                                                                                                                                                                                                                                                                                                                                                                                                                                                                                                                                                                                                                                                                                                                                                                                                                                                                                                                                                                                                                                                                                                                                                                                                                                                                                                                                                                                                                                                                                                                                                                                                                                                                                                                                                                                                                                                                                                                                                                                                                                                                                                                                                                                                                                                                                                                                                                                                                                                                                                                                                                                                                                                                                                                                                                                                                                                                                                                                                                                                                                                                                                                                                                                                                                                                                                                                                                                                                                                                                                                                                                                                                                                                                                                                                                                                                                                                                                                                                                                                                                                                                                                                                                                                                                                                                                                                                                                                                                                                                                                                                                                                                                                                                                                                                                                                                                                                                                                                                                                                                                                    | Instituto de Pesquisas Biomédicas, Hospital Naval Marcilio Dias                                                            | Bioinformatics Laboratory / LNCC                                                                                   | Andressa Rangel de Oliveira Lima, Luiz Gonzaga Paula de Almeida, Alexandra Lehmkuhl Gerber, Marlon Daniel Lima Tonin, Mônica Gomes Monteiro da R. Santos, Claudio Alberto Mule Monteiro, Átla Duque Rossi, Isabel de Medeiros Magalhães de As, Luana Ferreira Martins de Toledo, Amílcar Tanuri, Alaina Luciana da Silva Freitas, Fernanda Conceição Silva de Amorim, Shana Priscila Coutinho Barroso, Cynthia Chester Cardoso, Carolina Moreira Voloch, Ana Tereza Vasconcelos                                                                                                                                                                                                                                                                               |
| EPI_ISL_507131, EPI_ISL_507132, EPI_ISL_507133, EPI_ISL_507134, EPI_ISL_507135, EPI_ISL_507136, EPI_ISL_507137, EPI_ISL_507138, EPI_ISL_507139, EPI_ISL_507140, EPI_ISL_507141, EPI_ISL_507142, EPI_ISL_507143, EPI_ISL_507144, EPI_ISL_507145, EPI_ISL_507146, EPI_ISL_507147, EPI_ISL_507148, EPI_ISL_507149, EPI_ISL_507150, EPI_ISL_507151, EPI_ISL_507152, EPI_ISL_507153, EPI_ISL_507154, EPI_ISL_507155, EPI_ISL_507156, EPI_ISL_507157, EPI_ISL_507158, EPI_ISL_507159                                                                                                                                                                                                                                                                                                                                                                                                                                                                                                                                                                                                                                                                                                                                                                                                                                                                                                                                                                                                                                                                                                                                                                                                                                                                                                                                                                                                                                                                                                                                                                                                                                                                                                                                                                                                                                                                                                                                                                                                                                                                                                                                                                                                                                                                                                                                                                                                                                                                                                                                                                                                                                                                                                                                                                                                                                                                                                                                                                                                                                                                                                                                                                                                                                                                                                                                                                                                                                                                                                                                                                                                                                                                                                                                                                                                                                                                                                                                                                                                                                                                                                                                                                                                                                                                                                                                                                                                                                                                                                                                                                                                                                                                                                                                                                                                                                                                                                                                                                                                                                                                                                                                                                                                                                                                                                                                                                                                                                                                                                                                                                                                                                                                                                                                                                                                                                                                                                                                                                                                                                                                                                                                                                                                                                                                                                                                                                                                                                                                                                                                                                                                                                                                                                                                                                                                                                                                                                                                                                                                                                                                                                                                                                                                                                                                                                                                                                                                                                                                                                                                                                                                                    | Centre for Enzyme Innovation, University of Portsmouth / Translational Research Laboratory, Portsmouth Hospitals NHS Trust | COVID-19 Genomics UK (COG-UK) Consortium                                                                           | Angela Beckett, Yann Bourgeois, Garry Scarlett, Sharon Glaysher, Scott Elliott, Kelly Bicknell, Robert Impey, Allyson Lloyd, Sarah Wyllie, Ethan Butcher, Anoop Chauhan, Samuel Robson                                                                                                                                                                                                                                                                                                                                                                                                                                                                                                                                                                        |
| EPI_ISL_507205                                                                                                                                                                                                                                                                                                                                                                                                                                                                                                                                                                                                                                                                                                                                                                                                                                                                                                                                                                                                                                                                                                                                                                                                                                                                                                                                                                                                                                                                                                                                                                                                                                                                                                                                                                                                                                                                                                                                                                                                                                                                                                                                                                                                                                                                                                                                                                                                                                                                                                                                                                                                                                                                                                                                                                                                                                                                                                                                                                                                                                                                                                                                                                                                                                                                                                                                                                                                                                                                                                                                                                                                                                                                                                                                                                                                                                                                                                                                                                                                                                                                                                                                                                                                                                                                                                                                                                                                                                                                                                                                                                                                                                                                                                                                                                                                                                                                                                                                                                                                                                                                                                                                                                                                                                                                                                                                                                                                                                                                                                                                                                                                                                                                                                                                                                                                                                                                                                                                                                                                                                                                                                                                                                                                                                                                                                                                                                                                                                                                                                                                                                                                                                                                                                                                                                                                                                                                                                                                                                                                                                                                                                                                                                                                                                                                                                                                                                                                                                                                                                                                                                                                                                                                                                                                                                                                                                                                                                                                                                                                                                                                                    | WHO National Influenza Centre Russian Federation                                                                           | WHO National Influenza Centre Russian Federation                                                                   | Andrey Komissarov, Artem Fadeev, Mariia Sergeeva, Anna Ivanova, Daria Danilenko                                                                                                                                                                                                                                                                                                                                                                                                                                                                                                                                                                                                                                                                               |
| EPI_ISL_507206, EPI_ISL_507207, EPI_ISL_507208, EPI_ISL_507209, EPI_ISL_507210, EPI_ISL_507211, EPI_ISL_507212, EPI_ISL_507213, EPI_ISL_507214, EPI_ISL_507215                                                                                                                                                                                                                                                                                                                                                                                                                                                                                                                                                                                                                                                                                                                                                                                                                                                                                                                                                                                                                                                                                                                                                                                                                                                                                                                                                                                                                                                                                                                                                                                                                                                                                                                                                                                                                                                                                                                                                                                                                                                                                                                                                                                                                                                                                                                                                                                                                                                                                                                                                                                                                                                                                                                                                                                                                                                                                                                                                                                                                                                                                                                                                                                                                                                                                                                                                                                                                                                                                                                                                                                                                                                                                                                                                                                                                                                                                                                                                                                                                                                                                                                                                                                                                                                                                                                                                                                                                                                                                                                                                                                                                                                                                                                                                                                                                                                                                                                                                                                                                                                                                                                                                                                                                                                                                                                                                                                                                                                                                                                                                                                                                                                                                                                                                                                                                                                                                                                                                                                                                                                                                                                                                                                                                                                                                                                                                                                                                                                                                                                                                                                                                                                                                                                                                                                                                                                                                                                                                                                                                                                                                                                                                                                                                                                                                                                                                                                                                                                                                                                                                                                                                                                                                                                                                                                                                                                                                                                                    | Department of Experimental Modeling and Pathogenesis of Infectious Diseases                                                | WHO National Influenza Centre Russian Federation                                                                   | Andrey Komissarov, Artem Fadeev, Mariia Sergeeva, Anna Ivanova, Daria Danilenko                                                                                                                                                                                                                                                                                                                                                                                                                                                                                                                                                                                                                                                                               |
| EPI_ISL_507216, EPI_ISL_507217, EPI_ISL_507218, EPI_ISL_507219, EPI_ISL_507220, EPI_ISL_507221, EPI_ISL_507222, EPI_ISL_507223, EPI_ISL_507224, EPI_ISL_507225, EPI_ISL_507226, EPI_ISL_507227, EPI_ISL_507228, EPI_ISL_507229, EPI_ISL_507230, EPI_ISL_507231, EPI_ISL_507232, EPI_ISL_507233, EPI_ISL_507234, EPI_ISL_507235, EPI_ISL_507236, EPI_ISL_507237, EPI_ISL_507238, EPI_ISL_507239, EPI_ISL_507240, EPI_ISL_507241, EPI_ISL_507242, EPI_ISL_507243, EPI_ISL_507244, EPI_ISL_507245, EPI_ISL_507246, EPI_ISL_507247, EPI_ISL_507248, EPI_ISL_507249, EPI_ISL_507250, EPI_ISL_507251, EPI_ISL_507252, EPI_ISL_507253, EPI_ISL_507254, EPI_ISL_507255, EPI_ISL_507256, EPI_ISL_507257, EPI_ISL_507258, EPI_ISL_507259, EPI_ISL_507260, EPI_ISL_507261, EPI_ISL_507262, EPI_ISL_507263, EPI_ISL_507264, EPI_ISL_507265, EPI_ISL_507266, EPI_ISL_507267, EPI_ISL_507268, EPI_ISL_507269, EPI_ISL_507270, EPI_ISL_507271, EPI_ISL_507272, EPI_ISL_507273, EPI_ISL_507274, EPI_ISL_507275, EPI_ISL_507276, EPI_ISL_507277, EPI_ISL_507278, EPI_ISL_507279, EPI_ISL_507280, EPI_ISL_507281, EPI_ISL_507282, EPI_ISL_507283, EPI_ISL_507284, EPI_ISL_507285, EPI_ISL_507286, EPI_ISL_507287, EPI_ISL_507288, EPI_ISL_507289, EPI_ISL_507290, EPI_ISL_507291, EPI_ISL_507292, EPI_ISL_507293, EPI_ISL_507294, EPI_ISL_507295, EPI_ISL_507296                                                                                                                                                                                                                                                                                                                                                                                                                                                                                                                                                                                                                                                                                                                                                                                                                                                                                                                                                                                                                                                                                                                                                                                                                                                                                                                                                                                                                                                                                                                                                                                                                                                                                                                                                                                                                                                                                                                                                                                                                                                                                                                                                                                                                                                                                                                                                                                                                                                                                                                                                                                                                                                                                                                                                                                                                                                                                                                                                                                                                                                                                                                                                                                                                                                                                                                                                                                                                                                                                                                                                                                                                                                                                                                                                                                                                                                                                                                                                                                                                                                                                                                                                                                                                                                                                                                                                                                                                                                                                                                                                                                                                                                                                                                                                                                                                                                                                                                                                                                                                                                                                                                                                                                                                                                                                                                                                                                                                                                                                                                                                                                                                                                                                                                                                                                                                                                                                                                                                                                                                                                                                                                                                                                                                                                                                                                                                                                                                                                                                                                                                                                                                                                                                                                                                    | WHO National Influenza Centre Russian Federation                                                                           | Andrey Komissarov, Artem Fadeev, Mariia Sergeeva, Anna Ivanova, Daria Danilenko                                    |                                                                                                                                                                                                                                                                                                                                                                                                                                                                                                                                                                                                                                                                                                                                                               |
| EPI_ISL_507297, EPI_ISL_507298, EPI_ISL_507299                                                                                                                                                                                                                                                                                                                                                                                                                                                                                                                                                                                                                                                                                                                                                                                                                                                                                                                                                                                                                                                                                                                                                                                                                                                                                                                                                                                                                                                                                                                                                                                                                                                                                                                                                                                                                                                                                                                                                                                                                                                                                                                                                                                                                                                                                                                                                                                                                                                                                                                                                                                                                                                                                                                                                                                                                                                                                                                                                                                                                                                                                                                                                                                                                                                                                                                                                                                                                                                                                                                                                                                                                                                                                                                                                                                                                                                                                                                                                                                                                                                                                                                                                                                                                                                                                                                                                                                                                                                                                                                                                                                                                                                                                                                                                                                                                                                                                                                                                                                                                                                                                                                                                                                                                                                                                                                                                                                                                                                                                                                                                                                                                                                                                                                                                                                                                                                                                                                                                                                                                                                                                                                                                                                                                                                                                                                                                                                                                                                                                                                                                                                                                                                                                                                                                                                                                                                                                                                                                                                                                                                                                                                                                                                                                                                                                                                                                                                                                                                                                                                                                                                                                                                                                                                                                                                                                                                                                                                                                                                                                                                    | Republican Medical Genetics Center                                                                                         | WHO National Influenza Centre Russian Federation                                                                   | Andrey Komissarov, Artem Fadeev, Mariia Sergeeva, Anna Ivanova, Ildar Minnikhmetov, Rita Khusainova, Daria Danilenko                                                                                                                                                                                                                                                                                                                                                                                                                                                                                                                                                                                                                                          |
| EPI_ISL_507300                                                                                                                                                                                                                                                                                                                                                                                                                                                                                                                                                                                                                                                                                                                                                                                                                                                                                                                                                                                                                                                                                                                                                                                                                                                                                                                                                                                                                                                                                                                                                                                                                                                                                                                                                                                                                                                                                                                                                                                                                                                                                                                                                                                                                                                                                                                                                                                                                                                                                                                                                                                                                                                                                                                                                                                                                                                                                                                                                                                                                                                                                                                                                                                                                                                                                                                                                                                                                                                                                                                                                                                                                                                                                                                                                                                                                                                                                                                                                                                                                                                                                                                                                                                                                                                                                                                                                                                                                                                                                                                                                                                                                                                                                                                                                                                                                                                                                                                                                                                                                                                                                                                                                                                                                                                                                                                                                                                                                                                                                                                                                                                                                                                                                                                                                                                                                                                                                                                                                                                                                                                                                                                                                                                                                                                                                                                                                                                                                                                                                                                                                                                                                                                                                                                                                                                                                                                                                                                                                                                                                                                                                                                                                                                                                                                                                                                                                                                                                                                                                                                                                                                                                                                                                                                                                                                                                                                                                                                                                                                                                                                                                    | WHO National Influenza Centre Russian Federation                                                                           | WHO National Influenza Centre Russian Federation                                                                   | Andrey Komissarov, Artem Fadeev, Mariia Sergeeva, Anna Ivanova, Daria Danilenko                                                                                                                                                                                                                                                                                                                                                                                                                                                                                                                                                                                                                                                                               |
| EPI_ISL_508615, EPI_ISL_508616, EPI_ISL_508617, EPI_ISL_508618, EPI_ISL_508619, EPI_ISL_508620, EPI_ISL_508621, EPI_ISL_508622, EPI_ISL_508623, EPI_ISL_508624, EPI_ISL_508625, EPI_ISL_508626, EPI_ISL_508627, EPI_ISL_508628, EPI_ISL_508629, EPI_ISL_508630, EPI_ISL_508631, EPI_ISL_508632, EPI_ISL_508633, EPI_ISL_508634, EPI_ISL_508635, EPI_ISL_508636, EPI_ISL_508637, EPI_ISL_508638, EPI_ISL_508639, EPI_ISL_508640, EPI_ISL_508641, EPI_ISL_508642, EPI_ISL_508643, EPI_ISL_508644, EPI_ISL_508645, EPI_ISL_508646, EPI_ISL_508647, EPI_ISL_508648, EPI_ISL_508649, EPI_ISL_508650, EPI_ISL_508651, EPI_ISL_508652, EPI_ISL_508653, EPI_ISL_508654, EPI_ISL_508655, EPI_ISL_508656, EPI_ISL_508657, EPI_ISL_508658, EPI_ISL_508659, EPI_ISL_508660, EPI_ISL_508661, EPI_ISL_508662, EPI_ISL_508663, EPI_ISL_508664, EPI_ISL_508665, EPI_ISL_508666, EPI_ISL_508667, EPI_ISL_508668, EPI_ISL_508669, EPI_ISL_508670, EPI_ISL_508671, EPI_ISL_508672, EPI_ISL_508673, EPI_ISL_508674, EPI_ISL_508675, EPI_ISL_508676, EPI_ISL_508677, EPI_ISL_508678, EPI_ISL_508679, EPI_ISL_508680, EPI_ISL_508682, EPI_ISL_508683, EPI_ISL_508684, EPI_ISL_508685, EPI_ISL_508686, EPI_ISL_508687                                                                                                                                                                                                                                                                                                                                                                                                                                                                                                                                                                                                                                                                                                                                                                                                                                                                                                                                                                                                                                                                                                                                                                                                                                                                                                                                                                                                                                                                                                                                                                                                                                                                                                                                                                                                                                                                                                                                                                                                                                                                                                                                                                                                                                                                                                                                                                                                                                                                                                                                                                                                                                                                                                                                                                                                                                                                                                                                                                                                                                                                                                                                                                                                                                                                                                                                                                                                                                                                                                                                                                                                                                                                                                                                                                                                                                                                                                                                                                                                                                                                                                                                                                                                                                                                                                                                                                                                                                                                                                                                                                                                                                                                                                                                                                                                                                                                                                                                                                                                                                                                                                                                                                                                                                                                                                                                                                                                                                                                                                                                                                                                                                                                                                                                                                                                                                                                                                                                                                                                                                                                                                                                                                                                                                                                                                                                                                                                                                                                                                                                                                                                                                                                                                                                                                                                                                                                                                    | Departamento de Microbiología, CDB, Hospital Clínic, Barcelona                                                             | SeqCOVID-SPAIN consortium/IBV(CSIC)                                                                                | Andrea Vergara, Mikel Martínez, Elisa Rubio, Jéssica Navero, Aida Peiró and SeqCOVID-SPAIN consortium                                                                                                                                                                                                                                                                                                                                                                                                                                                                                                                                                                                                                                                         |
| EPI_ISL_508687, EPI_ISL_508688, EPI_ISL_508689, EPI_ISL_508690, EPI_ISL_508691, EPI_ISL_508692, EPI_ISL_508693, EPI_ISL_508694, EPI_ISL_508695, EPI_ISL_508696, EPI_ISL_508697, EPI_ISL_508698, EPI_ISL_508699, EPI_ISL_508700, EPI_ISL_508701, EPI_ISL_508702, EPI_ISL_508703, EPI_ISL_508704                                                                                                                                                                                                                                                                                                                                                                                                                                                                                                                                                                                                                                                                                                                                                                                                                                                                                                                                                                                                                                                                                                                                                                                                                                                                                                                                                                                                                                                                                                                                                                                                                                                                                                                                                                                                                                                                                                                                                                                                                                                                                                                                                                                                                                                                                                                                                                                                                                                                                                                                                                                                                                                                                                                                                                                                                                                                                                                                                                                                                                                                                                                                                                                                                                                                                                                                                                                                                                                                                                                                                                                                                                                                                                                                                                                                                                                                                                                                                                                                                                                                                                                                                                                                                                                                                                                                                                                                                                                                                                                                                                                                                                                                                                                                                                                                                                                                                                                                                                                                                                                                                                                                                                                                                                                                                                                                                                                                                                                                                                                                                                                                                                                                                                                                                                                                                                                                                                                                                                                                                                                                                                                                                                                                                                                                                                                                                                                                                                                                                                                                                                                                                                                                                                                                                                                                                                                                                                                                                                                                                                                                                                                                                                                                                                                                                                                                                                                                                                                                                                                                                                                                                                                                                                                                                                                                    | Institut für Virologie und Epidemiologie der Viruskrankheiten, Universitätsklinikum Tübingen                               | NGS Competence Center Tübingen, Institut für Medizinische Mikrobiologie und Hygiene, Universitätsklinikum Tübingen | Angel Angelov                                                                                                                                                                                                                                                                                                                                                                                                                                                                                                                                                                                                                                                                                                                                                 |
| EPI_ISL_510064, EPI_ISL_510065, EPI_ISL_510066, EPI_ISL_510067, EPI_ISL_510068, EPI_ISL_510069, EPI_ISL_510070, EPI_ISL_510071, EPI_ISL_510072, EPI_ISL_510073, EPI_ISL_510074, EPI_ISL_510075, EPI_ISL_510076, EPI_ISL_510077, EPI_ISL_510078, EPI_ISL_510079, EPI_ISL_510080, EPI_ISL_510081, EPI_ISL_510082, EPI_ISL_510083, EPI_ISL_510084, EPI_ISL_510085, EPI_ISL_510086, EPI_ISL_510087, EPI_ISL_510088, EPI_ISL_510089, EPI_ISL_510090, EPI_ISL_510091, EPI_ISL_510092, EPI_ISL_510093, EPI_ISL_510094, EPI_ISL_510095, EPI_ISL_510096, EPI_ISL_510097, EPI_ISL_510098, EPI_ISL_510099, EPI_ISL_510100, EPI_ISL_510101, EPI_ISL_510102, EPI_ISL_510103, EPI_ISL_510104, EPI_ISL_510105, EPI_ISL_510106, EPI_ISL_510107, EPI_ISL_510108, EPI_ISL_510109, EPI_ISL_510110, EPI_ISL_510111, EPI_ISL_510112, EPI_ISL_510113, EPI_ISL_510114, EPI_ISL_510115, EPI_ISL_510116, EPI_ISL_510117, EPI_ISL_510118, EPI_ISL_510119, EPI_ISL_510120, EPI_ISL_510121, EPI_ISL_510122, EPI_ISL_510123, EPI_ISL_510124, EPI_ISL_510125, EPI_ISL_510126, EPI_ISL_510127, EPI_ISL_510128, EPI_ISL_510129, EPI_ISL_510130, EPI_ISL_510131, EPI_ISL_510132, EPI_ISL_510133, EPI_ISL_510134, EPI_ISL_510135, EPI_ISL_510136, EPI_ISL_510137, EPI_ISL_510138, EPI_ISL_510139, EPI_ISL_510140, EPI_ISL_510141, EPI_ISL_510142, EPI_ISL_510143, EPI_ISL_510144, EPI_ISL_510145, EPI_ISL_510146, EPI_ISL_510147, EPI_ISL_510148, EPI_ISL_510149, EPI_ISL_510150, EPI_ISL_510151, EPI_ISL_510152, EPI_ISL_510153, EPI_ISL_510154, EPI_ISL_510155, EPI_ISL_510156, EPI_ISL_510157, EPI_ISL_510158, EPI_ISL_510159, EPI_ISL_510160, EPI_ISL_510161, EPI_ISL_510162, EPI_ISL_510163, EPI_ISL_510164, EPI_ISL_510165, EPI_ISL_510166, EPI_ISL_510167, EPI_ISL_510168, EPI_ISL_510169, EPI_ISL_510170, EPI_ISL_510171, EPI_ISL_510172, EPI_ISL_510173, EPI_ISL_510174, EPI_ISL_510175, EPI_ISL_510176, EPI_ISL_510177, EPI_ISL_510178, EPI_ISL_510179, EPI_ISL_510180, EPI_ISL_510181, EPI_ISL_510182, EPI_ISL_510183, EPI_ISL_510184, EPI_ISL_510185, EPI_ISL_510186, EPI_ISL_510187, EPI_ISL_510188, EPI_ISL_510189, EPI_ISL_510190, EPI_ISL_510191, EPI_ISL_510192, EPI_ISL_510193, EPI_ISL_510194, EPI_ISL_510195, EPI_ISL_510196, EPI_ISL_510197, EPI_ISL_510198, EPI_ISL_510199, EPI_ISL_510200, EPI_ISL_510201, EPI_ISL_510202, EPI_ISL_510203, EPI_ISL_510204, EPI_ISL_510205, EPI_ISL_510206, EPI_ISL_510207, EPI_ISL_510208, EPI_ISL_510209, EPI_ISL_510210, EPI_ISL_510211, EPI_ISL_510212, EPI_ISL_510213, EPI_ISL_510214, EPI_ISL_510215, EPI_ISL_510216, EPI_ISL_510217, EPI_ISL_510218, EPI_ISL_510219, EPI_ISL_510220, EPI_ISL_510221, EPI_ISL_510222, EPI_ISL_510223, EPI_ISL_510224, EPI_ISL_510225, EPI_ISL_510226, EPI_ISL_510227, EPI_ISL_510228, EPI_ISL_510229, EPI_ISL_510230, EPI_ISL_510231, EPI_ISL_510232, EPI_ISL_510233, EPI_ISL_510234, EPI_ISL_510235, EPI_ISL_510236, EPI_ISL_510237, EPI_ISL_510238, EPI_ISL_510239, EPI_ISL_510240, EPI_ISL_510241, EPI_ISL_510242, EPI_ISL_510243, EPI_ISL_510244, EPI_ISL_510245, EPI_ISL_510246, EPI_ISL_510247, EPI_ISL_510248, EPI_ISL_510249, EPI_ISL_510250, EPI_ISL_510251, EPI_ISL_510252, EPI_ISL_510253, EPI_ISL_510254, EPI_ISL_510255, EPI_ISL_510256, EPI_ISL_510257, EPI_ISL_510258, EPI_ISL_510259, EPI_ISL_510260, EPI_ISL_510261, EPI_ISL_510262, EPI_ISL_510263, EPI_ISL_510264, EPI_ISL_510265, EPI_ISL_510266, EPI_ISL_510267, EPI_ISL_510268, EPI_ISL_510269, EPI_ISL_510270, EPI_ISL_510271, EPI_ISL_510272, EPI_ISL_510273, EPI_ISL_510274, EPI_ISL_510275, EPI_ISL_510276, EPI_ISL_510277, EPI_ISL_510278, EPI_ISL_510279, EPI_ISL_510280, EPI_ISL_510281, EPI_ISL_510282, EPI_ISL_510283, EPI_ISL_510284, EPI_ISL_510285, EPI_ISL_510286, EPI_ISL_510287, EPI_ISL_510288, EPI_ISL_510289, EPI_ISL_510290, EPI_ISL_510291, EPI_ISL_510292, EPI_ISL_510293, EPI_ISL_510294, EPI_ISL_510295, EPI_ISL_510296, EPI_ISL_510297, EPI_ISL_510298, EPI_ISL_510299, EPI_ISL_510300, EPI_ISL_510301, EPI_ISL_510302, EPI_ISL_510303, EPI_ISL_510304, EPI_ISL_510305, EPI_ISL_510306, EPI_ISL_510307, EPI_ISL_510308, EPI_ISL_510309, EPI_ISL_510310, EPI_ISL_510311, EPI_ISL_510312, EPI_ISL_510313, EPI_ISL_510314, EPI_ISL_510315, EPI_ISL_510316, EPI_ISL_510317, EPI_ISL_510318, EPI_ISL_510319, EPI_ISL_510320, EPI_ISL_510321, EPI_ISL_510322, EPI_ISL_510323, EPI_ISL_510324, EPI_ISL_510325, EPI_ISL_510326, EPI_ISL_510327, EPI_ISL_510328, EPI_ISL_510329, EPI_ISL_510330, EPI_ISL_510331, EPI_ISL_510332, EPI_ISL_510333, EPI_ISL_510334, EPI_ISL_510335, EPI_ISL_510336, EPI_ISL_510337, EPI_ISL_510338, EPI_ISL_510339, EPI_ISL_510340, EPI_ISL_510341, EPI_ISL_510342, EPI_ISL_510343, EPI_ISL_510344, EPI_ISL_510345, EPI_ISL_510346, EPI_ISL_510347, EPI_ISL_510348, EPI_ISL_510349, EPI_ISL_510350, EPI_ISL_510351, EPI_ISL_510352, EPI_ISL_510353, EPI_ISL_510354, EPI_ISL_510355, EPI_ISL_510356, EPI_ISL_510357, EPI_ISL_510358, EPI_ISL_510359, EPI_ISL_510360, EPI_ISL_510361, EPI_ISL_510362, EPI_ISL_510363, EPI_ISL_510364, EPI_ISL_510365, EPI_ISL_510366, EPI_ISL_510367, EPI_ISL_510368, EPI_ISL_510369, EPI_ISL_510370, EPI_ISL_510371, EPI_ISL_510372, EPI_ISL_510373, EPI_ISL_510374, EPI_ISL_510375, EPI_ISL_510376, EPI_ISL_510377, EPI_ISL_510378, EPI_ISL_510379, EPI_ISL_510380, EPI_ISL_510381, EPI_ISL_510382, EPI_ISL_510383, EPI_ISL_510384, EPI_ISL_510385, EPI_ISL_510386, EPI_ISL_510387, EPI_ISL_510388, EPI_ISL_510389, EPI_ISL_510390, EPI_ISL_510391, EPI_ISL_510392, EPI_ISL_510393, EPI_ISL_510394, EPI_ISL_510395, EPI_ISL_510396, EPI_ISL_510397, EPI_ISL_510398, EPI_ISL_510399, EPI_ISL_510400, EPI_ISL_510401, EPI_ISL_510402, EPI_ISL_510403, EPI_ISL_510404, EPI_ISL_510405, EPI_ISL_510406, EPI_ISL_510407, EPI_ISL_510408, EPI_ISL_510409, EPI_ISL_510410, EPI_ISL_510411, EPI_ISL_510412, EPI_ISL_510413, EPI_ISL_510414, EPI_ISL_510415, EPI_ISL_510416, EPI_ISL_510417, EPI_ISL_510418, EPI_ISL_510419, EPI_ISL_510420, EPI_ISL_510421, EPI_ISL_510422, EPI_ISL_510423, EPI_ISL_510424, EPI_ISL_510425, EPI_ISL_510426, EPI_ISL_510427, EPI_ISL_510428, EPI_ISL_510429, EPI_ISL_510430, EPI_ISL_510431, EPI_ISL_510432, EPI_ISL_510433, EPI_ISL_510434, EPI_ISL_510435, EPI_ISL_510436, EPI_ISL_510437, EPI_ISL_510438, EPI_ISL_510439, EPI_ISL_510440, EPI_ISL_510441, EPI_ISL_510442, EPI_ISL_510443, EPI_ISL_510444, EPI_ISL_510445, EPI_ISL_510446, EPI_ISL_510447, EPI_ISL_510448, EPI_ISL_510449, EPI_ISL_510450, EPI_ISL_510451, EPI_ISL_510452, EPI_ISL_510453, EPI_ISL_510454, EPI_ISL_510455, EPI_ISL_510456, EPI_ISL_510457, EPI_ISL_510458, EPI_ISL_510459, EPI_ISL_510460, EPI_ISL_510461, EPI_ISL_510462, EPI_ISL_510463, EPI_ISL_510464, EPI_ISL_510465, EPI_ISL_510466, EPI_ISL_510467, EPI_ISL_510468, EPI_ISL_510469, EPI_ISL_510470, EPI_ISL_510471, EPI_ISL_510472, EPI_ISL_510473, EPI_ISL_510474, EPI_ISL_510475, EPI_ISL_510476, EPI_ISL_510477, EPI_ISL_510478, EPI_ISL_510479, EPI_ISL_510480, EPI_ISL_510481, EPI_ISL_510482, EPI_ISL_510483, EPI_ISL_510484, EPI_ISL_510485, EPI_ISL_510486, EPI_ISL_510487, EPI_ISL_510488, EPI_ISL_510489, EPI_ISL_510490, EPI_ISL_510491, EPI_ISL_510492, EPI_ISL_510493, EPI_ISL_510494, EPI_ISL_510495, EPI_ISL_510496, EPI_ISL_510497, EPI_ISL_510498, EPI_ISL_510499, EPI_ISL_510500, EPI_ISL_510501, EPI_ISL_510502, EPI_ISL_510503, EPI_ISL_510504, EPI_ISL_510505, EPI_ISL_510506, EPI_ISL_510507, EPI_ISL_510508, EPI_ISL_510509, EPI_ISL_510510, EPI_ISL_510511, EPI_ISL_510512, EPI_ISL_510513, EPI_ISL_510514, EPI_ISL_510515, EPI_ISL_510516, EPI_ISL_510517, EPI_ISL_510518, EPI_ISL_510519, EPI_ISL_510520, EPI_ISL_510521, EPI_ISL_510522, EPI_ISL_510523, EPI_ISL_510524, EPI_ISL_510525, EPI_ISL_510526, EPI_ISL_510527, EPI_ISL_510528, EPI_ISL_510529, EPI_ISL_510530, EPI_ISL_510531, EPI_ISL_510532, EPI_ISL_510533, EPI_ISL_510534, EPI_ISL_510535, EPI_ISL_510536, EPI_ISL_510537, EPI_ISL_510538, EPI_ISL_510539, EPI_ISL_510540, EPI_ISL_510541, EPI_ISL_510542, EPI_ISL_510543, EPI_ISL_510544, EPI_ISL_510545, EPI_ISL_510546, EPI_ISL_510547, EPI_ISL_510548, EPI_ISL_510549, E |                                                                                                                            |                                                                                                                    |                                                                                                                                                                                                                                                                                                                                                                                                                                                                                                                                                                                                                                                                                                                                                               |

|                                                                                                                                                                                                                                                                                                                                                                                                                                                                                                                                                                                                                                                                                                                                                                                                                                                                                                                                                                |                                                                                                                                  |                                                                                                  |                                                                                                                                                                                                                                                                                                                                                                                                                                                                                                                                                                                                                                                                                                                                                               |
|----------------------------------------------------------------------------------------------------------------------------------------------------------------------------------------------------------------------------------------------------------------------------------------------------------------------------------------------------------------------------------------------------------------------------------------------------------------------------------------------------------------------------------------------------------------------------------------------------------------------------------------------------------------------------------------------------------------------------------------------------------------------------------------------------------------------------------------------------------------------------------------------------------------------------------------------------------------|----------------------------------------------------------------------------------------------------------------------------------|--------------------------------------------------------------------------------------------------|---------------------------------------------------------------------------------------------------------------------------------------------------------------------------------------------------------------------------------------------------------------------------------------------------------------------------------------------------------------------------------------------------------------------------------------------------------------------------------------------------------------------------------------------------------------------------------------------------------------------------------------------------------------------------------------------------------------------------------------------------------------|
| see above                                                                                                                                                                                                                                                                                                                                                                                                                                                                                                                                                                                                                                                                                                                                                                                                                                                                                                                                                      | Centre for Enzyme Innovation, University of Portsmouth /<br>Translational Research Laboratory, Portsmouth Hospitals<br>NHS Trust | COVID-19 Genomics UK (COG-UK) Consortium                                                         | Angela Beckett,Yann Bourgeois,Garry Scarlett,Sharon Glaysher,Scott Elliott,Kelly Bicknell,Robert Impey,Allyson Lloyd,Sarah Wyllie,Ethan Butcher,Anoop Chauhan,Samuel Robson                                                                                                                                                                                                                                                                                                                                                                                                                                                                                                                                                                                   |
| EPI_ISL_516748, EPI_ISL_516749, EPI_ISL_516750, EPI_ISL_516751, EPI_ISL_516752, EPI_ISL_516753, EPI_ISL_516754, EPI_ISL_516755, EPI_ISL_516756, EPI_ISL_516757, EPI_ISL_516758, EPI_ISL_516759, EPI_ISL_516760, EPI_ISL_516761, EPI_ISL_516762, EPI_ISL_516763, EPI_ISL_516764, EPI_ISL_516765, EPI_ISL_516766, EPI_ISL_516767, EPI_ISL_516768, EPI_ISL_516769, EPI_ISL_516770, EPI_ISL_516771, EPI_ISL_516772, EPI_ISL_516773, EPI_ISL_516774, EPI_ISL_516775, EPI_ISL_516776, EPI_ISL_516777, EPI_ISL_516778, EPI_ISL_516779, EPI_ISL_516780, EPI_ISL_516781, EPI_ISL_516782                                                                                                                                                                                                                                                                                                                                                                                 |                                                                                                                                  |                                                                                                  |                                                                                                                                                                                                                                                                                                                                                                                                                                                                                                                                                                                                                                                                                                                                                               |
| see above                                                                                                                                                                                                                                                                                                                                                                                                                                                                                                                                                                                                                                                                                                                                                                                                                                                                                                                                                      | van Bakel Laboratory, Genetics and Genomics Sciences,<br>Icahn School of Medicine at Mount Sinai                                 | van Bakel Laboratory, Genetics and Genomics Sciences,<br>Icahn School of Medicine at Mount Sinai | Andrew G. Letizia, Irene Ramos, Ajay Obla, Carl Goforth, Dawn Weir, Yongchao Ge, Marcas M. Bamman, Jayeeta Dutta, Ethan Ellis, Luis Estrella, Mary-Catherine George, Ana S. Gonzalez-Reiche, Darnell Graham, Adriana van de Guchte, Ramiro Gutierrez, Franca Jones, Aspasia Kalomoiri, Rhonda Lizewski, Stephen Lizewski, Jan Marayag, Nada Marjanovic, Eugene V. Millar, Venugopalain Nair, German Nudelman, Edgar Nunez, Brian Pike, James Regeimbal, Stas Rirak, Ernesto Santa Ana, Rachel S. Gelernter Sealfon, Robert Sebra, Mark Simons, Alessandra Soares-Schanoski, Michael Termini, Sindhu Vangeti, Carlos Williams, Harm van Bakel, Stuart C. Sealfon                                                                                               |
| EPI_ISL_517510, EPI_ISL_517511, EPI_ISL_517512, EPI_ISL_517513, EPI_ISL_517514, EPI_ISL_517515, EPI_ISL_517516, EPI_ISL_517517, EPI_ISL_517518, EPI_ISL_517519, EPI_ISL_517520, EPI_ISL_517521, EPI_ISL_517522, EPI_ISL_517523, EPI_ISL_517524, EPI_ISL_517525, EPI_ISL_517526, EPI_ISL_517527, EPI_ISL_517528, EPI_ISL_517529, EPI_ISL_517530, EPI_ISL_517532, EPI_ISL_517533, EPI_ISL_517534, EPI_ISL_517535, EPI_ISL_517536, EPI_ISL_517537, EPI_ISL_517538, EPI_ISL_517539, EPI_ISL_517540, EPI_ISL_517541, EPI_ISL_517542                                                                                                                                                                                                                                                                                                                                                                                                                                 |                                                                                                                                  |                                                                                                  |                                                                                                                                                                                                                                                                                                                                                                                                                                                                                                                                                                                                                                                                                                                                                               |
| see above                                                                                                                                                                                                                                                                                                                                                                                                                                                                                                                                                                                                                                                                                                                                                                                                                                                                                                                                                      | Centre for Enzyme Innovation, University of Portsmouth /<br>Translational Research Laboratory, Portsmouth Hospitals<br>NHS Trust | COVID-19 Genomics UK (COG-UK) Consortium                                                         | Angela Beckett,Yann Bourgeois,Garry Scarlett,Sharon Glaysher,Scott Elliott,Kelly Bicknell,Robert Impey,Allyson Lloyd,Sarah Wyllie,Ethan Butcher,Anoop Chauhan,Samuel Robson                                                                                                                                                                                                                                                                                                                                                                                                                                                                                                                                                                                   |
| EPI_ISL_518819                                                                                                                                                                                                                                                                                                                                                                                                                                                                                                                                                                                                                                                                                                                                                                                                                                                                                                                                                 | Qadr Hospital, Tangerang, Banten                                                                                                 | Biosafety Level-3 Laboratory, Indonesian Institute of Sciences (LIPI)                            | Anik Budhi Dharmayanthi, Syam Budi Iryanto, Andri Wardiana, Anggia Prasetyoputri, Isa Nuryana, Ade Andriani, Ario Betha Juanssilfero, Asep M Ridwanuloh, Ahmad Fathoni, Rifki Sadikin, Ratih Asmana Ningrum, Wien Kusharyoto, Puspita Lisdiyanti                                                                                                                                                                                                                                                                                                                                                                                                                                                                                                              |
| EPI_ISL_518820                                                                                                                                                                                                                                                                                                                                                                                                                                                                                                                                                                                                                                                                                                                                                                                                                                                                                                                                                 | Klinik Apotek Dein, Jakarta, Indonesia                                                                                           | Biosafety Level-3 Laboratory, Indonesian Institute of Sciences (LIPI)                            | Anik Budhi Dharmayanthi, Syam Budi Iryanto, Andri Wardiana, Anggia Prasetyoputri, Isa Nuryana, Ade Andriani, Ario Betha Juanssilfero, Asep M Ridwanuloh, Ahmad Fathoni, Rifki Sadikin, Ratih Asmana Ningrum, Wien Kusharyoto, Puspita Lisdiyanti                                                                                                                                                                                                                                                                                                                                                                                                                                                                                                              |
| EPI_ISL_523995, EPI_ISL_523996, EPI_ISL_523997, EPI_ISL_523998, EPI_ISL_523999, EPI_ISL_524000, EPI_ISL_524001, EPI_ISL_524002, EPI_ISL_524003, EPI_ISL_524004, EPI_ISL_524005, EPI_ISL_524006, EPI_ISL_524007, EPI_ISL_524008, EPI_ISL_524009, EPI_ISL_524010, EPI_ISL_524011, EPI_ISL_524012, EPI_ISL_524013, EPI_ISL_524014, EPI_ISL_524015, EPI_ISL_524016, EPI_ISL_524017, EPI_ISL_524018, EPI_ISL_524019, EPI_ISL_524020, EPI_ISL_524021, EPI_ISL_524022, EPI_ISL_524023, EPI_ISL_524024, EPI_ISL_524025, EPI_ISL_524026, EPI_ISL_524027, EPI_ISL_524028, EPI_ISL_524029, EPI_ISL_524030, EPI_ISL_524031, EPI_ISL_524032, EPI_ISL_524033, EPI_ISL_524034, EPI_ISL_524035, EPI_ISL_524036, EPI_ISL_524037, EPI_ISL_524038, EPI_ISL_524039, EPI_ISL_524040, EPI_ISL_524041, EPI_ISL_524042, EPI_ISL_524043, EPI_ISL_524044, EPI_ISL_524045, EPI_ISL_524046, EPI_ISL_524047, EPI_ISL_524048, EPI_ISL_524049, EPI_ISL_524050, EPI_ISL_524051, EPI_ISL_524052 |                                                                                                                                  |                                                                                                  |                                                                                                                                                                                                                                                                                                                                                                                                                                                                                                                                                                                                                                                                                                                                                               |
| see above                                                                                                                                                                                                                                                                                                                                                                                                                                                                                                                                                                                                                                                                                                                                                                                                                                                                                                                                                      | WHO National Influenza Centre Russian Federation                                                                                 | WHO National Influenza Centre Russian Federation                                                 | Andrey Komissarov, Artem Fadeev, Mariia Sergeeva, Anna Ivanova, Daria Danilenko                                                                                                                                                                                                                                                                                                                                                                                                                                                                                                                                                                                                                                                                               |
| EPI_ISL_524534, EPI_ISL_524550                                                                                                                                                                                                                                                                                                                                                                                                                                                                                                                                                                                                                                                                                                                                                                                                                                                                                                                                 | NHSGGC West of Scotland Specialist Virology Centre /<br>MRC-University of Glasgow Centre for Virus Research                      | Wellcome Sanger Institute for the COVID-19 Genomics UK (COG-UK) consortium                       | Ana da Silva Filipe, Natasha Johnson, Kathy Smollett, Daniel Mair, Stephen Carmichael, Lily Tong, Jenna Nichols, Elihu Aranday-Cortes, Kirstyn Brunker, Yasmin Parr, Kyriaki Nomikou; Sarah McDonald, Marc Niebel, Patawee Asamaphan; Richard Orton, Joseph Hughes, Sreenu Vattipally, David L Robertson; Ailsdair MacLean, Rory Gunson; Kathy Li, Natasha Jesudason, Rajiv Shah, James Shepherd, Antonia Ho, Alice Broos, Emma Thomson and Alex Alderton, Roberto Amato, Sonia Goncalves, Ewan Harrison, David K. Jackson, Ian Johnston, Dominic Kwiatkowski, Cordelia Langford, John Sillitoe on behalf of the Wellcome Sanger Institute COVID-19 Surveillance Team ( <a href="http://www.sanger.ac.uk/covid-team">http://www.sanger.ac.uk/covid-team</a> ) |
| EPI_ISL_526433, EPI_ISL_526434, EPI_ISL_526435, EPI_ISL_526436                                                                                                                                                                                                                                                                                                                                                                                                                                                                                                                                                                                                                                                                                                                                                                                                                                                                                                 | Centre for Enzyme Innovation, University of Portsmouth /<br>Translational Research Laboratory, Portsmouth Hospitals<br>NHS Trust | COVID-19 Genomics UK (COG-UK) Consortium                                                         | Angela Beckett,Yann Bourgeois,Garry Scarlett,Sharon Glaysher,Scott Elliott,Kelly Bicknell,Robert Impey,Allyson Lloyd,Sarah Wyllie,Ethan Butcher,Anoop Chauhan,Samuel Robson                                                                                                                                                                                                                                                                                                                                                                                                                                                                                                                                                                                   |
| EPI_ISL_528538                                                                                                                                                                                                                                                                                                                                                                                                                                                                                                                                                                                                                                                                                                                                                                                                                                                                                                                                                 | Alsafar                                                                                                                          | Alsafar                                                                                          | Andreas Henschel, Gihan Elsir Ahmed Daw Elbait, Samuel Feng, Rifat, Ernesto Damiani, Guan Tay, Habiba Alsafar                                                                                                                                                                                                                                                                                                                                                                                                                                                                                                                                                                                                                                                 |
| EPI_ISL_528686, EPI_ISL_528687, EPI_ISL_528688, EPI_ISL_528689, EPI_ISL_528690, EPI_ISL_528691, EPI_ISL_528692, EPI_ISL_528693, EPI_ISL_528694, EPI_ISL_528695, EPI_ISL_528696, EPI_ISL_528697, EPI_ISL_528698, EPI_ISL_528699, EPI_ISL_528700, EPI_ISL_528701, EPI_ISL_528702, EPI_ISL_528703, EPI_ISL_528704, EPI_ISL_528705, EPI_ISL_528706, EPI_ISL_528707, EPI_ISL_528708, EPI_ISL_528709, EPI_ISL_528710, EPI_ISL_528711, EPI_ISL_528712, EPI_ISL_528713, EPI_ISL_528714, EPI_ISL_528715, EPI_ISL_528716, EPI_ISL_528717, EPI_ISL_528718, EPI_ISL_528719, EPI_ISL_528720, EPI_ISL_528721                                                                                                                                                                                                                                                                                                                                                                 |                                                                                                                                  |                                                                                                  |                                                                                                                                                                                                                                                                                                                                                                                                                                                                                                                                                                                                                                                                                                                                                               |
| see above                                                                                                                                                                                                                                                                                                                                                                                                                                                                                                                                                                                                                                                                                                                                                                                                                                                                                                                                                      | Alsafar - Khalifa University Abu Dhabi                                                                                           | Alsafar - Khalifa University Abu Dhabi                                                           | Andreas Henschel, Gihan Daw Elbait, Samuel Feng, Rifat Hamoudi, Ernesto Damiani, Guan Tay, Habiba Alsafar                                                                                                                                                                                                                                                                                                                                                                                                                                                                                                                                                                                                                                                     |
| EPI_ISL_529272, EPI_ISL_529303, EPI_ISL_529341, EPI_ISL_529342, EPI_ISL_529343, EPI_ISL_529344, EPI_ISL_529345, EPI_ISL_529346, EPI_ISL_529347, EPI_ISL_529348, EPI_ISL_529349, EPI_ISL_529350, EPI_ISL_529351, EPI_ISL_529352, EPI_ISL_529373, EPI_ISL_529374, EPI_ISL_529375, EPI_ISL_529376, EPI_ISL_529377, EPI_ISL_529431, EPI_ISL_529432, EPI_ISL_529465, EPI_ISL_529481, EPI_ISL_529491, EPI_ISL_529511, EPI_ISL_529525, EPI_ISL_529668, EPI_ISL_529669, EPI_ISL_529670, EPI_ISL_529671, EPI_ISL_529672, EPI_ISL_529673, EPI_ISL_529674                                                                                                                                                                                                                                                                                                                                                                                                                 |                                                                                                                                  |                                                                                                  |                                                                                                                                                                                                                                                                                                                                                                                                                                                                                                                                                                                                                                                                                                                                                               |
| see above                                                                                                                                                                                                                                                                                                                                                                                                                                                                                                                                                                                                                                                                                                                                                                                                                                                                                                                                                      | Centre for Enzyme Innovation, University of Portsmouth /<br>Translational Research Laboratory, Portsmouth Hospitals<br>NHS Trust | COVID-19 Genomics UK (COG-UK) Consortium                                                         | Angela Beckett,Yann Bourgeois,Garry Scarlett,Sharon Glaysher,Scott Elliott,Kelly Bicknell,Robert Impey,Allyson Lloyd,Sarah Wyllie,Ethan Butcher,Anoop Chauhan,Samuel Robson                                                                                                                                                                                                                                                                                                                                                                                                                                                                                                                                                                                   |
| EPI_ISL_530553, EPI_ISL_530985, EPI_ISL_531033, EPI_ISL_531079, EPI_ISL_531096, EPI_ISL_531155, EPI_ISL_531480, EPI_ISL_531590, EPI_ISL_531842, EPI_ISL_531858, EPI_ISL_532005, EPI_ISL_532202, EPI_ISL_532271, EPI_ISL_532335, EPI_ISL_532356, EPI_ISL_532444, EPI_ISL_532464, EPI_ISL_532469, EPI_ISL_532473, EPI_ISL_532514, EPI_ISL_532670, EPI_ISL_533262, EPI_ISL_533270                                                                                                                                                                                                                                                                                                                                                                                                                                                                                                                                                                                 |                                                                                                                                  |                                                                                                  |                                                                                                                                                                                                                                                                                                                                                                                                                                                                                                                                                                                                                                                                                                                                                               |
| see above                                                                                                                                                                                                                                                                                                                                                                                                                                                                                                                                                                                                                                                                                                                                                                                                                                                                                                                                                      | NHSGGC West of Scotland Specialist Virology Centre /<br>MRC-University of Glasgow Centre for Virus Research                      | Wellcome Sanger Institute for the COVID-19 Genomics UK (COG-UK) consortium                       | Ana da Silva Filipe, Natasha Johnson, Kathy Smollett, Daniel Mair, Stephen Carmichael, Lily Tong, Jenna Nichols, Elihu Aranday-Cortes, Kirstyn Brunker, Yasmin Parr, Kyriaki Nomikou; Sarah McDonald, Marc Niebel, Patawee Asamaphan; Richard Orton, Joseph Hughes, Sreenu Vattipally, David L Robertson; Ailsdair MacLean, Rory Gunson; Kathy Li, Natasha Jesudason, Rajiv Shah, James Shepherd, Antonia Ho, Alice Broos, Emma Thomson and Alex Alderton, Roberto Amato, Sonia Goncalves, Ewan Harrison, David K. Jackson, Ian Johnston, Dominic Kwiatkowski, Cordelia Langford, John Sillitoe                                                                                                                                                               |
| EPI_ISL_534224                                                                                                                                                                                                                                                                                                                                                                                                                                                                                                                                                                                                                                                                                                                                                                                                                                                                                                                                                 | Universitetssjukhuset i Linköping                                                                                                | The Public Health Agency of Sweden                                                               | Anna-Malin Linde, Maria Lind Karlberg, Mattias Haukland, Reza Advani, Olov Svartstrom, Oskar Karlsson Lindsjo, Sandra Broddesson, Petra Edquist, Mia Brytting, Anna Risberg, Karin Tegmark-Wisell                                                                                                                                                                                                                                                                                                                                                                                                                                                                                                                                                             |
| EPI_ISL_534225, EPI_ISL_534226, EPI_ISL_534227, EPI_ISL_534228, EPI_ISL_534229                                                                                                                                                                                                                                                                                                                                                                                                                                                                                                                                                                                                                                                                                                                                                                                                                                                                                 | Skanes universitetssjukhus Lund                                                                                                  | The Public Health Agency of Sweden                                                               | Anna-Malin Linde, Maria Lind Karlberg, Mattias Haukland, Reza Advani, Olov Svartstrom, Oskar Karlsson Lindsjo, Sandra Broddesson, Petra Edquist, Mia Brytting, Anna Risberg, Karin Tegmark-Wisell                                                                                                                                                                                                                                                                                                                                                                                                                                                                                                                                                             |
| EPI_ISL_534230, EPI_ISL_534231, EPI_ISL_534232, EPI_ISL_534233                                                                                                                                                                                                                                                                                                                                                                                                                                                                                                                                                                                                                                                                                                                                                                                                                                                                                                 | Capio S:t Gorans sjukhus                                                                                                         | The Public Health Agency of Sweden                                                               | Anna-Malin Linde, Maria Lind Karlberg, Mattias Haukland, Reza Advani, Olov Svartstrom, Oskar Karlsson Lindsjo, Sandra Broddesson, Petra Edquist, Mia Brytting, Anna Risberg, Karin Tegmark-Wisell                                                                                                                                                                                                                                                                                                                                                                                                                                                                                                                                                             |
| EPI_ISL_534234, EPI_ISL_534235, EPI_ISL_534236                                                                                                                                                                                                                                                                                                                                                                                                                                                                                                                                                                                                                                                                                                                                                                                                                                                                                                                 | Karolinska universitetssjukhuset SOLNA                                                                                           | The Public Health Agency of Sweden                                                               | Anna-Malin Linde, Maria Lind Karlberg, Mattias Haukland, Reza Advani, Olov Svartstrom, Oskar Karlsson Lindsjo, Sandra Broddesson, Petra Edquist, Mia Brytting, Anna Risberg, Karin Tegmark-Wisell                                                                                                                                                                                                                                                                                                                                                                                                                                                                                                                                                             |
| EPI_ISL_534237, EPI_ISL_534238                                                                                                                                                                                                                                                                                                                                                                                                                                                                                                                                                                                                                                                                                                                                                                                                                                                                                                                                 | Lanssjukhuset Kalmar                                                                                                             | The Public Health Agency of Sweden                                                               | Anna-Malin Linde, Maria Lind Karlberg, Mattias Haukland, Reza Advani, Olov Svartstrom, Oskar Karlsson Lindsjo, Sandra Broddesson, Petra Edquist, Mia Brytting, Anna Risberg, Karin Tegmark-Wisell                                                                                                                                                                                                                                                                                                                                                                                                                                                                                                                                                             |
| EPI_ISL_534239, EPI_ISL_534240, EPI_ISL_534241, EPI_ISL_534242, EPI_ISL_534243                                                                                                                                                                                                                                                                                                                                                                                                                                                                                                                                                                                                                                                                                                                                                                                                                                                                                 | Norra Alvsborgs lanssjukhus                                                                                                      | The Public Health Agency of Sweden                                                               | Anna-Malin Linde, Maria Lind Karlberg, Mattias Haukland, Reza Advani, Olov Svartstrom, Oskar Karlsson Lindsjo, Sandra Broddesson, Petra Edquist, Mia Brytting, Anna Risberg, Karin Tegmark-Wisell                                                                                                                                                                                                                                                                                                                                                                                                                                                                                                                                                             |
| EPI_ISL_534244                                                                                                                                                                                                                                                                                                                                                                                                                                                                                                                                                                                                                                                                                                                                                                                                                                                                                                                                                 | Sundsvalls sjukhus                                                                                                               | The Public Health Agency of Sweden                                                               | Anna-Malin Linde, Maria Lind Karlberg, Mattias Haukland, Reza Advani, Olov Svartstrom, Oskar Karlsson Lindsjo, Sandra Broddesson, Petra Edquist, Mia Brytting, Anna Risberg, Karin Tegmark-Wisell                                                                                                                                                                                                                                                                                                                                                                                                                                                                                                                                                             |
| EPI_ISL_534245                                                                                                                                                                                                                                                                                                                                                                                                                                                                                                                                                                                                                                                                                                                                                                                                                                                                                                                                                 | Kliniskt mikrobiologiska laboratoriet                                                                                            | The Public Health Agency of Sweden                                                               | Anna-Malin Linde, Maria Lind Karlberg, Mattias Haukland, Reza Advani, Olov Svartstrom, Oskar Karlsson Lindsjo, Sandra Broddesson, Petra Edquist, Mia Brytting, Anna Risberg, Karin Tegmark-Wisell                                                                                                                                                                                                                                                                                                                                                                                                                                                                                                                                                             |
| EPI_ISL_534246, EPI_ISL_534247                                                                                                                                                                                                                                                                                                                                                                                                                                                                                                                                                                                                                                                                                                                                                                                                                                                                                                                                 | Universitetssjukhuset i Linköping                                                                                                | The Public Health Agency of Sweden                                                               | Anna-Malin Linde, Maria Lind Karlberg, Mattias Haukland, Reza Advani, Olov Svartstrom, Oskar Karlsson Lindsjo, Sandra Broddesson, Petra Edquist, Mia Brytting, Anna Risberg, Karin Tegmark-Wisell                                                                                                                                                                                                                                                                                                                                                                                                                                                                                                                                                             |
| EPI_ISL_534248                                                                                                                                                                                                                                                                                                                                                                                                                                                                                                                                                                                                                                                                                                                                                                                                                                                                                                                                                 | Laboratoriemedicin Vasternorrland                                                                                                | The Public Health Agency of Sweden                                                               | Anna-Malin Linde, Maria Lind Karlberg, Mattias Haukland, Reza Advani, Olov Svartstrom, Oskar Karlsson Lindsjo, Sandra Broddesson, Petra Edquist, Mia Brytting, Anna Risberg, Karin Tegmark-Wisell                                                                                                                                                                                                                                                                                                                                                                                                                                                                                                                                                             |
| EPI_ISL_534249, EPI_ISL_534250, EPI_ISL_534251                                                                                                                                                                                                                                                                                                                                                                                                                                                                                                                                                                                                                                                                                                                                                                                                                                                                                                                 | Gavle Sjukhus                                                                                                                    | The Public Health Agency of Sweden                                                               | Anna-Malin Linde, Maria Lind Karlberg, Mattias Haukland, Reza Advani, Olov Svartstrom, Oskar Karlsson Lindsjo, Sandra Broddesson, Petra Edquist, Mia Brytting, Anna Risberg, Karin Tegmark-Wisell                                                                                                                                                                                                                                                                                                                                                                                                                                                                                                                                                             |
| EPI_ISL_534252, EPI_ISL_534253, EPI_ISL_534254, EPI_ISL_534255                                                                                                                                                                                                                                                                                                                                                                                                                                                                                                                                                                                                                                                                                                                                                                                                                                                                                                 | Laboratoriemedicin Vasternorrland                                                                                                | The Public Health Agency of Sweden                                                               | Anna-Malin Linde, Maria Lind Karlberg, Mattias Haukland, Reza Advani, Olov Svartstrom, Oskar Karlsson Lindsjo, Sandra Broddesson, Petra Edquist, Mia Brytting, Anna Risberg, Karin Tegmark-Wisell                                                                                                                                                                                                                                                                                                                                                                                                                                                                                                                                                             |



|                                                                                                                                                                                                                                                                                                                |                                                                                                           |                                                                                                                            |                                                                                                                                                                                                                                                                                                                                                                                                                                                                                                                                                                                                                                                                                                                                                               |                                                                                                                                                                                        |
|----------------------------------------------------------------------------------------------------------------------------------------------------------------------------------------------------------------------------------------------------------------------------------------------------------------|-----------------------------------------------------------------------------------------------------------|----------------------------------------------------------------------------------------------------------------------------|---------------------------------------------------------------------------------------------------------------------------------------------------------------------------------------------------------------------------------------------------------------------------------------------------------------------------------------------------------------------------------------------------------------------------------------------------------------------------------------------------------------------------------------------------------------------------------------------------------------------------------------------------------------------------------------------------------------------------------------------------------------|----------------------------------------------------------------------------------------------------------------------------------------------------------------------------------------|
| EPI_ISL_534256                                                                                                                                                                                                                                                                                                 | Klinisk mikrobiologi, Laboratoriemedicin Gavleborg                                                        | The Public Health Agency of Sweden                                                                                         | Anna-Malin Linde, Maria Lind Karlberg, Mattias Haukland, Reza Advani, Olov Svartstrom, Oskar Karlsson Lindsjo, Sandra Broddesson, Petra Edquist, Mia Brytting, Anna Risberg, Karin Tegmark-Wisell                                                                                                                                                                                                                                                                                                                                                                                                                                                                                                                                                             |                                                                                                                                                                                        |
| EPI_ISL_534257, EPI_ISL_534258                                                                                                                                                                                                                                                                                 | Laboratoriemedicin Vasternorrland                                                                         | The Public Health Agency of Sweden                                                                                         | Anna-Malin Linde, Maria Lind Karlberg, Mattias Haukland, Reza Advani, Olov Svartstrom, Oskar Karlsson Lindsjo, Sandra Broddesson, Petra Edquist, Mia Brytting, Anna Risberg, Karin Tegmark-Wisell                                                                                                                                                                                                                                                                                                                                                                                                                                                                                                                                                             |                                                                                                                                                                                        |
| EPI_ISL_534259                                                                                                                                                                                                                                                                                                 | Karolinska universitetslaboratoriet                                                                       | The Public Health Agency of Sweden                                                                                         | Anna-Malin Linde, Maria Lind Karlberg, Mattias Haukland, Reza Advani, Olov Svartstrom, Oskar Karlsson Lindsjo, Sandra Broddesson, Petra Edquist, Mia Brytting, Anna Risberg, Karin Tegmark-Wisell                                                                                                                                                                                                                                                                                                                                                                                                                                                                                                                                                             |                                                                                                                                                                                        |
| EPI_ISL_534365, EPI_ISL_534373                                                                                                                                                                                                                                                                                 | NHSGGC West of Scotland Specialist Virology Centre / MRC-University of Glasgow Centre for Virus Research  | Wellcome Sanger Institute for the COVID-19 Genomics UK (COG-UK) consortium                                                 | Ana da Silva Filipe, Natasha Johnson, Kathy Smollett, Daniel Mair, Stephen Carmichael, Lily Tong, Jenna Nichols, Elihu Aranday-Cortes, Kirstyn Brunker, Yasmin Parr, Kyriaki Nomikou; Sarah McDonald, Marc Niebel, Patawee Asamaphan; Richard Orton, Joseph Hughes, Sreenu Vattipally, David L Robertson; Alasdair MacLean, Rory Gunson; Kathy Li, Natasha Jesudason, Rajiv Shah, James Shepherd, Antonia Ho, Alice Broos, Emma Thomson and Alex Alderton, Roberto Amato, Sonia Goncalves, Ewan Harrison, David K. Jackson, Ian Johnston, Dominic Kwiatkowski, Cordelia Langford, John Sillitoe on behalf of the Wellcome Sanger Institute COVID-19 Surveillance Team ( <a href="http://www.sanger.ac.uk/covid-team">http://www.sanger.ac.uk/covid-team</a> ) |                                                                                                                                                                                        |
| EPI_ISL_534395                                                                                                                                                                                                                                                                                                 | NHSGGC West of Scotland Specialist Virology Centre / MRC-University of Glasgow Centre for Virus Research  | Wellcome Sanger Institute for the COVID-19 Genomics UK (COG-UK) Consortium                                                 | Ana da Silva Filipe, Natasha Johnson, Kathy Smollett, Daniel Mair, Stephen Carmichael, Lily Tong, Jenna Nichols, Elihu Aranday-Cortes, Kirstyn Brunker, Yasmin Parr, Kyriaki Nomikou; Sarah McDonald, Marc Niebel, Patawee Asamaphan; Richard Orton, Joseph Hughes, Sreenu Vattipally, David L Robertson; Alasdair MacLean, Rory Gunson; Kathy Li, Natasha Jesudason, Rajiv Shah, James Shepherd, Antonia Ho, Alice Broos, Emma Thomson and Alex Alderton, Roberto Amato, Sonia Goncalves, Ewan Harrison, David K. Jackson, Ian Johnston, Dominic Kwiatkowski, Cordelia Langford, John Sillitoe on behalf of the Wellcome Sanger Institute COVID-19 Surveillance Team                                                                                         |                                                                                                                                                                                        |
| EPI_ISL_534460, EPI_ISL_534483, EPI_ISL_534509, EPI_ISL_534571, EPI_ISL_534579, EPI_ISL_534597, EPI_ISL_534606, EPI_ISL_534608, EPI_ISL_534611, EPI_ISL_534632                                                                                                                                                 | NHSGGC West of Scotland Specialist Virology Centre / MRC-University of Glasgow Centre for Virus Research  | Wellcome Sanger Institute for the COVID-19 Genomics UK (COG-UK) consortium                                                 | Ana da Silva Filipe, Natasha Johnson, Kathy Smollett, Daniel Mair, Stephen Carmichael, Lily Tong, Jenna Nichols, Elihu Aranday-Cortes, Kirstyn Brunker, Yasmin Parr, Kyriaki Nomikou; Sarah McDonald, Marc Niebel, Patawee Asamaphan; Richard Orton, Joseph Hughes, Sreenu Vattipally, David L Robertson; Alasdair MacLean, Rory Gunson; Kathy Li, Natasha Jesudason, Rajiv Shah, James Shepherd, Antonia Ho, Alice Broos, Emma Thomson and Alex Alderton, Roberto Amato, Sonia Goncalves, Ewan Harrison, David K. Jackson, Ian Johnston, Dominic Kwiatkowski, Cordelia Langford, John Sillitoe on behalf of the Wellcome Sanger Institute COVID-19 Surveillance Team ( <a href="http://www.sanger.ac.uk/covid-team">http://www.sanger.ac.uk/covid-team</a> ) |                                                                                                                                                                                        |
| EPI_ISL_534634                                                                                                                                                                                                                                                                                                 | NHSGGC West of Scotland Specialist Virology Centre / MRC-University of Glasgow Centre for Virus Research  | Wellcome Sanger Institute for the COVID-19 Genomics UK (COG-UK) Consortium                                                 | Ana da Silva Filipe, Natasha Johnson, Kathy Smollett, Daniel Mair, Stephen Carmichael, Lily Tong, Jenna Nichols, Elihu Aranday-Cortes, Kirstyn Brunker, Yasmin Parr, Kyriaki Nomikou; Sarah McDonald, Marc Niebel, Patawee Asamaphan; Richard Orton, Joseph Hughes, Sreenu Vattipally, David L Robertson; Alasdair MacLean, Rory Gunson; Kathy Li, Natasha Jesudason, Rajiv Shah, James Shepherd, Antonia Ho, Alice Broos, Emma Thomson and Alex Alderton, Roberto Amato, Sonia Goncalves, Ewan Harrison, David K. Jackson, Ian Johnston, Dominic Kwiatkowski, Cordelia Langford, John Sillitoe on behalf of the Wellcome Sanger Institute COVID-19 Surveillance Team                                                                                         |                                                                                                                                                                                        |
| EPI_ISL_535024, EPI_ISL_535025, EPI_ISL_535026, EPI_ISL_535027, EPI_ISL_535028, EPI_ISL_535029, EPI_ISL_535030, EPI_ISL_535031, EPI_ISL_535032, EPI_ISL_535033, EPI_ISL_535034, EPI_ISL_535035, EPI_ISL_535036, EPI_ISL_535037, EPI_ISL_535038, EPI_ISL_535039, EPI_ISL_535040, EPI_ISL_535041, EPI_ISL_535042 | see above                                                                                                 | Centre for Enzyme Innovation, University of Portsmouth / Translational Research Laboratory, Portsmouth Hospitals NHS Trust | COVID-19 Genomics UK (COG-UK) Consortium                                                                                                                                                                                                                                                                                                                                                                                                                                                                                                                                                                                                                                                                                                                      | Angela Beckett, Yann Bourgeois, Garry Scarlett, Sharon Glaysher, Scott Elliott, Kelly Bicknell, Robert Impey, Allyson Lloyd, Sarah Wyllie, Ethan Butcher, Anoop Chauhan, Samuel Robson |
| EPI_ISL_535115, EPI_ISL_535120, EPI_ISL_535129, EPI_ISL_535157, EPI_ISL_535167                                                                                                                                                                                                                                 | West of Scotland Specialist Virology Centre, NHSGGC / MRC-University of Glasgow Centre for Virus Research | COVID-19 Genomics UK (COG-UK) Consortium                                                                                   | Ana da Silva Filipe, Natasha Johnson, Kathy Smollett, Daniel Mair, Stephen Carmichael, Lily Tong, Jenna Nichols, Elihu Aranday-Cortes, Yasmin Parr, Alice Broos, Kyriaki Nomikou; Sarah McDonald, Marc Niebel, Patawee Asamaphan; Richard Orton, Joseph Hughes, Sreenu Vattipally, David L Robertson; Alasdair MacLean, Rory Gunson; Kathy Li, Natasha Jesudason, Rajiv Shah, James Shepherd, Antonia Ho, Emma Thomson                                                                                                                                                                                                                                                                                                                                        |                                                                                                                                                                                        |
| EPI_ISL_539785, EPI_ISL_539786, EPI_ISL_539787, EPI_ISL_539788                                                                                                                                                                                                                                                 | Institute of Microbiology, Universidad San Francisco de Quito                                             | Institute of Microbiology, Universidad San Francisco de Quito                                                              | Andrea Macias, Belén Prado-Vivar, Sully Márquez, Juan José Guadalupe, Monica Becerra-Wong, Bernardo Gutiérrez, Verónica Barragán, Patricio Rojas-Silva, Gabriel Trueba, Michelle Grunauer, Paúl Cárdenas                                                                                                                                                                                                                                                                                                                                                                                                                                                                                                                                                      |                                                                                                                                                                                        |
| EPI_ISL_539881                                                                                                                                                                                                                                                                                                 | Kungsbacka Narakut                                                                                        | The Public Health Agency of Sweden                                                                                         | Anna-Malin Linde, Maria Lind Karlberg, Oskar Karlsson Lindsjo, Olov Svartstrom, Mattias Haukland, Reza Advani, Sandra Broddesson, Anna Risberg, Theresa Enkirch, Mia Brytting, Karin Tegmark-Wisell                                                                                                                                                                                                                                                                                                                                                                                                                                                                                                                                                           |                                                                                                                                                                                        |
| EPI_ISL_539882                                                                                                                                                                                                                                                                                                 | Narhalsan Olskroken VC                                                                                    | The Public Health Agency of Sweden                                                                                         | Anna-Malin Linde, Maria Lind Karlberg, Oskar Karlsson Lindsjo, Olov Svartstrom, Mattias Haukland, Reza Advani, Sandra Broddesson, Anna Risberg, Theresa Enkirch, Mia Brytting, Karin Tegmark-Wisell                                                                                                                                                                                                                                                                                                                                                                                                                                                                                                                                                           |                                                                                                                                                                                        |
| EPI_ISL_539883, EPI_ISL_539884                                                                                                                                                                                                                                                                                 | Omtanken Grimmered                                                                                        | The Public Health Agency of Sweden                                                                                         | Anna-Malin Linde, Maria Lind Karlberg, Oskar Karlsson Lindsjo, Olov Svartstrom, Mattias Haukland, Reza Advani, Sandra Broddesson, Anna Risberg, Theresa Enkirch, Mia Brytting, Karin Tegmark-Wisell                                                                                                                                                                                                                                                                                                                                                                                                                                                                                                                                                           |                                                                                                                                                                                        |
| EPI_ISL_539885                                                                                                                                                                                                                                                                                                 | Narhalsan Fjallbacka VC                                                                                   | The Public Health Agency of Sweden                                                                                         | Anna-Malin Linde, Maria Lind Karlberg, Oskar Karlsson Lindsjo, Olov Svartstrom, Mattias Haukland, Reza Advani, Sandra Broddesson, Anna Risberg, Theresa Enkirch, Mia Brytting, Karin Tegmark-Wisell                                                                                                                                                                                                                                                                                                                                                                                                                                                                                                                                                           |                                                                                                                                                                                        |
| EPI_ISL_539886                                                                                                                                                                                                                                                                                                 | Barnakuten                                                                                                | The Public Health Agency of Sweden                                                                                         | Anna-Malin Linde, Maria Lind Karlberg, Oskar Karlsson Lindsjo, Olov Svartstrom, Mattias Haukland, Reza Advani, Sandra Broddesson, Anna Risberg, Theresa Enkirch, Mia Brytting, Karin Tegmark-Wisell                                                                                                                                                                                                                                                                                                                                                                                                                                                                                                                                                           |                                                                                                                                                                                        |
| EPI_ISL_540775, EPI_ISL_540780                                                                                                                                                                                                                                                                                 | West of Scotland Specialist Virology Centre, NHSGGC / MRC-University of Glasgow Centre for Virus Research | COVID-19 Genomics UK (COG-UK) Consortium                                                                                   | Ana da Silva Filipe, Natasha Johnson, Kathy Smollett, Daniel Mair, Stephen Carmichael, Lily Tong, Jenna Nichols, Elihu Aranday-Cortes, Kyriaki Nomikou; Sarah McDonald, Marc Niebel, Patawee Asamaphan; Richard Orton, Joseph Hughes, Sreenu Vattipally, David L Robertson; Alasdair MacLean, Rory Gunson; Kathy Li, Igor Starinskij, Natasha Jesudason, Rajiv Shah, James Shepherd, Antonia Ho, Emma Thomson                                                                                                                                                                                                                                                                                                                                                 |                                                                                                                                                                                        |
| EPI_ISL_540826, EPI_ISL_540841, EPI_ISL_540842, EPI_ISL_540846                                                                                                                                                                                                                                                 | Lighthouse Lab in Glasgow / MRC-University of Glasgow Centre for Virus Research                           | COVID-19 Genomics UK (COG-UK) Consortium                                                                                   | Ana da Silva Filipe, Natasha Johnson, Kathy Smollett, Daniel Mair, Stephen Carmichael, Lily Tong, Jenna Nichols, Elihu Aranday-Cortes, Kyriaki Nomikou; Sarah McDonald, Marc Niebel, Patawee Asamaphan; Harper VanSteenhouse, Yumi Kasai, David Gray, Carol Clugston, Anna Dominiczak; Alasdair MacLean, Rory Gunson; Richard Orton, Joseph Hughes, Sreenu Vattipally, David L Robertson; Sharif Shaaban, Matthew Holden; Kathy Li, Natasha Jesudason, Rajiv Shah, James Shepherd, Antonia Ho, Emma Thomson                                                                                                                                                                                                                                                   |                                                                                                                                                                                        |
| EPI_ISL_548245, EPI_ISL_548246                                                                                                                                                                                                                                                                                 | Skovde/Unilabs                                                                                            | The Public Health Agency of Sweden                                                                                         | Anna-Malin Linde, Maria Lind Karlberg, Mattias Haukland, Reza Advani, Olov Svartstrom, Oskar Karlsson Lindsjo, Sandra Broddesson, Petra Edquist, Mia Brytting, Anna Risberg, Karin Tegmark-Wisell                                                                                                                                                                                                                                                                                                                                                                                                                                                                                                                                                             |                                                                                                                                                                                        |
| EPI_ISL_548247                                                                                                                                                                                                                                                                                                 | Halmstad klinisk mikrobiologi                                                                             | The Public Health Agency of Sweden                                                                                         | Anna-Malin Linde, Maria Lind Karlberg, Mattias Haukland, Reza Advani, Olov Svartstrom, Oskar Karlsson Lindsjo, Sandra Broddesson, Petra Edquist, Mia Brytting, Anna Risberg, Karin Tegmark-Wisell                                                                                                                                                                                                                                                                                                                                                                                                                                                                                                                                                             |                                                                                                                                                                                        |
| EPI_ISL_548248                                                                                                                                                                                                                                                                                                 | Ostersund klinisk mikrobiologi                                                                            | The Public Health Agency of Sweden                                                                                         | Anna-Malin Linde, Maria Lind Karlberg, Mattias Haukland, Reza Advani, Olov Svartstrom, Oskar Karlsson Lindsjo, Sandra Broddesson, Petra Edquist, Mia Brytting, Anna Risberg, Karin Tegmark-Wisell                                                                                                                                                                                                                                                                                                                                                                                                                                                                                                                                                             |                                                                                                                                                                                        |
| EPI_ISL_548249                                                                                                                                                                                                                                                                                                 | Halmstad klinisk mikrobiologi                                                                             | The Public Health Agency of Sweden                                                                                         | Anna-Malin Linde, Maria Lind Karlberg, Mattias Haukland, Reza Advani, Olov Svartstrom, Oskar Karlsson Lindsjo, Sandra Broddesson, Petra Edquist, Mia Brytting, Anna Risberg, Karin Tegmark-Wisell                                                                                                                                                                                                                                                                                                                                                                                                                                                                                                                                                             |                                                                                                                                                                                        |
| EPI_ISL_548250, EPI_ISL_548251                                                                                                                                                                                                                                                                                 | Klinisk mikrobiologi NAL Trollhattan                                                                      | The Public Health Agency of Sweden                                                                                         | Anna-Malin Linde, Maria Lind Karlberg, Mattias Haukland, Reza Advani, Olov Svartstrom, Oskar Karlsson Lindsjo, Sandra Broddesson, Petra Edquist, Mia Brytting, Anna Risberg, Karin Tegmark-Wisell                                                                                                                                                                                                                                                                                                                                                                                                                                                                                                                                                             |                                                                                                                                                                                        |
| EPI_ISL_548252                                                                                                                                                                                                                                                                                                 | Klinisk mikrobiologi centralsjukhuset Karlstad                                                            | The Public Health Agency of Sweden                                                                                         | Anna-Malin Linde, Maria Lind Karlberg, Mattias Haukland, Reza Advani, Olov Svartstrom, Oskar Karlsson Lindsjo, Sandra Broddesson, Petra Edquist, Mia Brytting, Anna Risberg, Karin Tegmark-Wisell                                                                                                                                                                                                                                                                                                                                                                                                                                                                                                                                                             |                                                                                                                                                                                        |
| EPI_ISL_548253, EPI_ISL_548254                                                                                                                                                                                                                                                                                 | Klinisk mikrobiologi NAL Trollhattan                                                                      | The Public Health Agency of Sweden                                                                                         | Anna-Malin Linde, Maria Lind Karlberg, Mattias Haukland, Reza Advani, Olov Svartstrom, Oskar Karlsson Lindsjo, Sandra Broddesson, Petra Edquist, Mia Brytting, Anna Risberg, Karin Tegmark-Wisell                                                                                                                                                                                                                                                                                                                                                                                                                                                                                                                                                             |                                                                                                                                                                                        |
| EPI_ISL_548255                                                                                                                                                                                                                                                                                                 | Lanssjukhuset Kalmar                                                                                      | The Public Health Agency of Sweden                                                                                         | Anna-Malin Linde, Maria Lind Karlberg, Mattias Haukland, Reza Advani, Olov Svartstrom, Oskar Karlsson Lindsjo, Sandra Broddesson, Petra Edquist, Mia Brytting, Anna Risberg, Karin Tegmark-Wisell                                                                                                                                                                                                                                                                                                                                                                                                                                                                                                                                                             |                                                                                                                                                                                        |
| EPI_ISL_548256                                                                                                                                                                                                                                                                                                 | Centralsjukhuset                                                                                          | The Public Health Agency of Sweden                                                                                         | Anna-Malin Linde, Maria Lind Karlberg, Mattias Haukland, Reza Advani, Olov Svartstrom, Oskar Karlsson Lindsjo, Sandra Broddesson, Petra Edquist, Mia Brytting, Anna Risberg, Karin Tegmark-Wisell                                                                                                                                                                                                                                                                                                                                                                                                                                                                                                                                                             |                                                                                                                                                                                        |
| EPI_ISL_548257, EPI_ISL_548258                                                                                                                                                                                                                                                                                 | Karolinska universitetslaboratoriet                                                                       | The Public Health Agency of Sweden                                                                                         | Anna-Malin Linde, Maria Lind Karlberg, Mattias Haukland, Reza Advani, Olov Svartstrom, Oskar Karlsson Lindsjo, Sandra Broddesson, Petra Edquist, Mia Brytting, Anna Risberg, Karin Tegmark-Wisell                                                                                                                                                                                                                                                                                                                                                                                                                                                                                                                                                             |                                                                                                                                                                                        |

|                                                                                                                                                                                                                                                                                                                                                                                                                                                                                                                                                                                                                                                                                                                                                                                                                                                                                                                                                                                                                                                                                                                                                                                                                                                                                                                                                                                                                                                                                                                                                                                                                                                                                                                                                                                                                                                                                                                                                                                                                                                                                                                                                                                                                                                                                                                                                                                                                                                                                                                                                                                                                                                                                                                                                                                                                                                                                                                                                                                                                                                                                                                                                                                                                                                                                                                                                                                                                                                                                                                                |           |                                                                                                                            |                                                  |                                                                                                                                                                                                                                                                                                                                                                                                                                                                                                             |
|--------------------------------------------------------------------------------------------------------------------------------------------------------------------------------------------------------------------------------------------------------------------------------------------------------------------------------------------------------------------------------------------------------------------------------------------------------------------------------------------------------------------------------------------------------------------------------------------------------------------------------------------------------------------------------------------------------------------------------------------------------------------------------------------------------------------------------------------------------------------------------------------------------------------------------------------------------------------------------------------------------------------------------------------------------------------------------------------------------------------------------------------------------------------------------------------------------------------------------------------------------------------------------------------------------------------------------------------------------------------------------------------------------------------------------------------------------------------------------------------------------------------------------------------------------------------------------------------------------------------------------------------------------------------------------------------------------------------------------------------------------------------------------------------------------------------------------------------------------------------------------------------------------------------------------------------------------------------------------------------------------------------------------------------------------------------------------------------------------------------------------------------------------------------------------------------------------------------------------------------------------------------------------------------------------------------------------------------------------------------------------------------------------------------------------------------------------------------------------------------------------------------------------------------------------------------------------------------------------------------------------------------------------------------------------------------------------------------------------------------------------------------------------------------------------------------------------------------------------------------------------------------------------------------------------------------------------------------------------------------------------------------------------------------------------------------------------------------------------------------------------------------------------------------------------------------------------------------------------------------------------------------------------------------------------------------------------------------------------------------------------------------------------------------------------------------------------------------------------------------------------------------------------|-----------|----------------------------------------------------------------------------------------------------------------------------|--------------------------------------------------|-------------------------------------------------------------------------------------------------------------------------------------------------------------------------------------------------------------------------------------------------------------------------------------------------------------------------------------------------------------------------------------------------------------------------------------------------------------------------------------------------------------|
| EPI_ISL_549341, EPI_ISL_549343, EPI_ISL_549360, EPI_ISL_549363, EPI_ISL_549364, EPI_ISL_549366, EPI_ISL_549460, EPI_ISL_549461, EPI_ISL_549462, EPI_ISL_549463, EPI_ISL_549464, EPI_ISL_549465, EPI_ISL_549466, EPI_ISL_549467, EPI_ISL_549468, EPI_ISL_549469, EPI_ISL_549470, EPI_ISL_549471, EPI_ISL_549472, EPI_ISL_549473, EPI_ISL_549474, EPI_ISL_549475, EPI_ISL_549476                                                                                                                                                                                                                                                                                                                                                                                                                                                                                                                                                                                                                                                                                                                                                                                                                                                                                                                                                                                                                                                                                                                                                                                                                                                                                                                                                                                                                                                                                                                                                                                                                                                                                                                                                                                                                                                                                                                                                                                                                                                                                                                                                                                                                                                                                                                                                                                                                                                                                                                                                                                                                                                                                                                                                                                                                                                                                                                                                                                                                                                                                                                                                 | see above | Centre for Enzyme Innovation, University of Portsmouth / Translational Research Laboratory, Portsmouth Hospitals NHS Trust | COVID-19 Genomics UK (COG-UK) Consortium         | Angela Beckett, Yann Bourgeois, Garry Scarlett, Sharon Glaysher, Scott Elliott, Kelly Bicknell, Robert Impey, Allyson Lloyd, Sarah Wyllie, Ethan Butcher, Anoop Chauhan, Samuel Robson                                                                                                                                                                                                                                                                                                                      |
| EPI_ISL_559969                                                                                                                                                                                                                                                                                                                                                                                                                                                                                                                                                                                                                                                                                                                                                                                                                                                                                                                                                                                                                                                                                                                                                                                                                                                                                                                                                                                                                                                                                                                                                                                                                                                                                                                                                                                                                                                                                                                                                                                                                                                                                                                                                                                                                                                                                                                                                                                                                                                                                                                                                                                                                                                                                                                                                                                                                                                                                                                                                                                                                                                                                                                                                                                                                                                                                                                                                                                                                                                                                                                 |           | Lighthouse Lab in Glasgow / MRC-University of Glasgow Centre for Virus Research                                            | COVID-19 Genomics UK (COG-UK) Consortium         | Ana da Silva Filipe, Natasha Johnson, Kathy Smollett, Daniel Mair, Stephen Carmichael, Lily Tong, Jenna Nichols, Elihu Aranday-Cortes, Kyriaki Nomikou, Sarah McDonald, Marc Niebel, Patawee Asamaphan; Harper VanSteenhouse, Yumi Kasal, David Gray, Carol Ciugston, Anna Dominiczak; Alasdair MacLean, Rory Gunson; Richard Orton, Joseph Hughes, Sreenu Vattipally, David L Robertson; Sharif Shaaban, Matthew Holden; Kathy Li, Natasha Jesudason, Rajiv Shah, James Shepherd, Antonia Ho, Emma Thomson |
| EPI_ISL_559983                                                                                                                                                                                                                                                                                                                                                                                                                                                                                                                                                                                                                                                                                                                                                                                                                                                                                                                                                                                                                                                                                                                                                                                                                                                                                                                                                                                                                                                                                                                                                                                                                                                                                                                                                                                                                                                                                                                                                                                                                                                                                                                                                                                                                                                                                                                                                                                                                                                                                                                                                                                                                                                                                                                                                                                                                                                                                                                                                                                                                                                                                                                                                                                                                                                                                                                                                                                                                                                                                                                 |           | Centre for Enzyme Innovation, University of Portsmouth / Translational Research Laboratory, Portsmouth Hospitals NHS Trust | COVID-19 Genomics UK (COG-UK) Consortium         | Angela Beckett, Yann Bourgeois, Garry Scarlett, Sharon Glaysher, Scott Elliott, Kelly Bicknell, Robert Impey, Allyson Lloyd, Sarah Wyllie, Ethan Butcher, Anoop Chauhan, Samuel Robson                                                                                                                                                                                                                                                                                                                      |
| EPI_ISL_560308, EPI_ISL_560309, EPI_ISL_560310, EPI_ISL_560311, EPI_ISL_560312, EPI_ISL_560313, EPI_ISL_560314, EPI_ISL_560315, EPI_ISL_560316, EPI_ISL_560317                                                                                                                                                                                                                                                                                                                                                                                                                                                                                                                                                                                                                                                                                                                                                                                                                                                                                                                                                                                                                                                                                                                                                                                                                                                                                                                                                                                                                                                                                                                                                                                                                                                                                                                                                                                                                                                                                                                                                                                                                                                                                                                                                                                                                                                                                                                                                                                                                                                                                                                                                                                                                                                                                                                                                                                                                                                                                                                                                                                                                                                                                                                                                                                                                                                                                                                                                                 |           | UMMC-Health                                                                                                                | WHO National Influenza Centre Russian Federation | Andrey Komissarov, Artem Fadeev, Anna Ivanova, Tatiana Platonova, Daria Danilenko                                                                                                                                                                                                                                                                                                                                                                                                                           |
| EPI_ISL_560972                                                                                                                                                                                                                                                                                                                                                                                                                                                                                                                                                                                                                                                                                                                                                                                                                                                                                                                                                                                                                                                                                                                                                                                                                                                                                                                                                                                                                                                                                                                                                                                                                                                                                                                                                                                                                                                                                                                                                                                                                                                                                                                                                                                                                                                                                                                                                                                                                                                                                                                                                                                                                                                                                                                                                                                                                                                                                                                                                                                                                                                                                                                                                                                                                                                                                                                                                                                                                                                                                                                 |           | Orebro klinisk mikrobiologi                                                                                                | The Public Health Agency of Sweden               | Anna-Malin Linde, Maria Lind Karlberg, Mattias Haukland, Reza Advani, Olov Svartstrom, Oskar Karlsson Lindsjo, Sandra Broddesson, Petra Edquist, Mia Brytting, Anna Risberg, Karin Tegmark-Wisell                                                                                                                                                                                                                                                                                                           |
| EPI_ISL_560973                                                                                                                                                                                                                                                                                                                                                                                                                                                                                                                                                                                                                                                                                                                                                                                                                                                                                                                                                                                                                                                                                                                                                                                                                                                                                                                                                                                                                                                                                                                                                                                                                                                                                                                                                                                                                                                                                                                                                                                                                                                                                                                                                                                                                                                                                                                                                                                                                                                                                                                                                                                                                                                                                                                                                                                                                                                                                                                                                                                                                                                                                                                                                                                                                                                                                                                                                                                                                                                                                                                 |           | Klinisk mikrobiologi NAL Trollhattan                                                                                       | The Public Health Agency of Sweden               | Anna-Malin Linde, Maria Lind Karlberg, Mattias Haukland, Reza Advani, Olov Svartstrom, Oskar Karlsson Lindsjo, Sandra Broddesson, Petra Edquist, Mia Brytting, Anna Risberg, Karin Tegmark-Wisell                                                                                                                                                                                                                                                                                                           |
| EPI_ISL_560974                                                                                                                                                                                                                                                                                                                                                                                                                                                                                                                                                                                                                                                                                                                                                                                                                                                                                                                                                                                                                                                                                                                                                                                                                                                                                                                                                                                                                                                                                                                                                                                                                                                                                                                                                                                                                                                                                                                                                                                                                                                                                                                                                                                                                                                                                                                                                                                                                                                                                                                                                                                                                                                                                                                                                                                                                                                                                                                                                                                                                                                                                                                                                                                                                                                                                                                                                                                                                                                                                                                 |           | Karolinska Universitetslaboratoriet                                                                                        | The Public Health Agency of Sweden               | Anna-Malin Linde, Maria Lind Karlberg, Mattias Haukland, Reza Advani, Olov Svartstrom, Oskar Karlsson Lindsjo, Sandra Broddesson, Petra Edquist, Mia Brytting, Anna Risberg, Karin Tegmark-Wisell                                                                                                                                                                                                                                                                                                           |
| EPI_ISL_560975                                                                                                                                                                                                                                                                                                                                                                                                                                                                                                                                                                                                                                                                                                                                                                                                                                                                                                                                                                                                                                                                                                                                                                                                                                                                                                                                                                                                                                                                                                                                                                                                                                                                                                                                                                                                                                                                                                                                                                                                                                                                                                                                                                                                                                                                                                                                                                                                                                                                                                                                                                                                                                                                                                                                                                                                                                                                                                                                                                                                                                                                                                                                                                                                                                                                                                                                                                                                                                                                                                                 |           | Klinisk mikrobiologi centralsjukhuset Karlstad                                                                             | The Public Health Agency of Sweden               | Anna-Malin Linde, Maria Lind Karlberg, Mattias Haukland, Reza Advani, Olov Svartstrom, Oskar Karlsson Lindsjo, Sandra Broddesson, Petra Edquist, Mia Brytting, Anna Risberg, Karin Tegmark-Wisell                                                                                                                                                                                                                                                                                                           |
| EPI_ISL_560976                                                                                                                                                                                                                                                                                                                                                                                                                                                                                                                                                                                                                                                                                                                                                                                                                                                                                                                                                                                                                                                                                                                                                                                                                                                                                                                                                                                                                                                                                                                                                                                                                                                                                                                                                                                                                                                                                                                                                                                                                                                                                                                                                                                                                                                                                                                                                                                                                                                                                                                                                                                                                                                                                                                                                                                                                                                                                                                                                                                                                                                                                                                                                                                                                                                                                                                                                                                                                                                                                                                 |           | Klinsisk mikrobiologi Linkoping                                                                                            | The Public Health Agency of Sweden               | Anna-Malin Linde, Maria Lind Karlberg, Mattias Haukland, Reza Advani, Olov Svartstrom, Oskar Karlsson Lindsjo, Sandra Broddesson, Petra Edquist, Mia Brytting, Anna Risberg, Karin Tegmark-Wisell                                                                                                                                                                                                                                                                                                           |
| EPI_ISL_560977, EPI_ISL_560978, EPI_ISL_560979                                                                                                                                                                                                                                                                                                                                                                                                                                                                                                                                                                                                                                                                                                                                                                                                                                                                                                                                                                                                                                                                                                                                                                                                                                                                                                                                                                                                                                                                                                                                                                                                                                                                                                                                                                                                                                                                                                                                                                                                                                                                                                                                                                                                                                                                                                                                                                                                                                                                                                                                                                                                                                                                                                                                                                                                                                                                                                                                                                                                                                                                                                                                                                                                                                                                                                                                                                                                                                                                                 |           | Universitetssjukhuset i Linkoping                                                                                          | The Public Health Agency of Sweden               | Anna-Malin Linde, Maria Lind Karlberg, Mattias Haukland, Reza Advani, Olov Svartstrom, Oskar Karlsson Lindsjo, Sandra Broddesson, Petra Edquist, Mia Brytting, Anna Risberg, Karin Tegmark-Wisell                                                                                                                                                                                                                                                                                                           |
| EPI_ISL_560980                                                                                                                                                                                                                                                                                                                                                                                                                                                                                                                                                                                                                                                                                                                                                                                                                                                                                                                                                                                                                                                                                                                                                                                                                                                                                                                                                                                                                                                                                                                                                                                                                                                                                                                                                                                                                                                                                                                                                                                                                                                                                                                                                                                                                                                                                                                                                                                                                                                                                                                                                                                                                                                                                                                                                                                                                                                                                                                                                                                                                                                                                                                                                                                                                                                                                                                                                                                                                                                                                                                 |           | Skanes universitetssjukhus Lund                                                                                            | The Public Health Agency of Sweden               | Anna-Malin Linde, Maria Lind Karlberg, Mattias Haukland, Reza Advani, Olov Svartstrom, Oskar Karlsson Lindsjo, Sandra Broddesson, Petra Edquist, Mia Brytting, Anna Risberg, Karin Tegmark-Wisell                                                                                                                                                                                                                                                                                                           |
| EPI_ISL_560981                                                                                                                                                                                                                                                                                                                                                                                                                                                                                                                                                                                                                                                                                                                                                                                                                                                                                                                                                                                                                                                                                                                                                                                                                                                                                                                                                                                                                                                                                                                                                                                                                                                                                                                                                                                                                                                                                                                                                                                                                                                                                                                                                                                                                                                                                                                                                                                                                                                                                                                                                                                                                                                                                                                                                                                                                                                                                                                                                                                                                                                                                                                                                                                                                                                                                                                                                                                                                                                                                                                 |           | Capio S:t Gorans sjukhus                                                                                                   | The Public Health Agency of Sweden               | Anna-Malin Linde, Maria Lind Karlberg, Mattias Haukland, Reza Advani, Olov Svartstrom, Oskar Karlsson Lindsjo, Sandra Broddesson, Petra Edquist, Mia Brytting, Anna Risberg, Karin Tegmark-Wisell                                                                                                                                                                                                                                                                                                           |
| EPI_ISL_560982, EPI_ISL_560983, EPI_ISL_560984, EPI_ISL_560985                                                                                                                                                                                                                                                                                                                                                                                                                                                                                                                                                                                                                                                                                                                                                                                                                                                                                                                                                                                                                                                                                                                                                                                                                                                                                                                                                                                                                                                                                                                                                                                                                                                                                                                                                                                                                                                                                                                                                                                                                                                                                                                                                                                                                                                                                                                                                                                                                                                                                                                                                                                                                                                                                                                                                                                                                                                                                                                                                                                                                                                                                                                                                                                                                                                                                                                                                                                                                                                                 |           | Karolinska universitetslaboratoriet SOLNA                                                                                  | The Public Health Agency of Sweden               | Anna-Malin Linde, Maria Lind Karlberg, Mattias Haukland, Reza Advani, Olov Svartstrom, Oskar Karlsson Lindsjo, Sandra Broddesson, Petra Edquist, Mia Brytting, Anna Risberg, Karin Tegmark-Wisell                                                                                                                                                                                                                                                                                                           |
| EPI_ISL_560986                                                                                                                                                                                                                                                                                                                                                                                                                                                                                                                                                                                                                                                                                                                                                                                                                                                                                                                                                                                                                                                                                                                                                                                                                                                                                                                                                                                                                                                                                                                                                                                                                                                                                                                                                                                                                                                                                                                                                                                                                                                                                                                                                                                                                                                                                                                                                                                                                                                                                                                                                                                                                                                                                                                                                                                                                                                                                                                                                                                                                                                                                                                                                                                                                                                                                                                                                                                                                                                                                                                 |           | Sundsvalls sjukhus                                                                                                         | The Public Health Agency of Sweden               | Anna-Malin Linde, Maria Lind Karlberg, Mattias Haukland, Reza Advani, Olov Svartstrom, Oskar Karlsson Lindsjo, Sandra Broddesson, Petra Edquist, Mia Brytting, Anna Risberg, Karin Tegmark-Wisell                                                                                                                                                                                                                                                                                                           |
| EPI_ISL_560987                                                                                                                                                                                                                                                                                                                                                                                                                                                                                                                                                                                                                                                                                                                                                                                                                                                                                                                                                                                                                                                                                                                                                                                                                                                                                                                                                                                                                                                                                                                                                                                                                                                                                                                                                                                                                                                                                                                                                                                                                                                                                                                                                                                                                                                                                                                                                                                                                                                                                                                                                                                                                                                                                                                                                                                                                                                                                                                                                                                                                                                                                                                                                                                                                                                                                                                                                                                                                                                                                                                 |           | Kliniskt mikrobiologiska laboratoriet                                                                                      | The Public Health Agency of Sweden               | Anna-Malin Linde, Maria Lind Karlberg, Mattias Haukland, Reza Advani, Olov Svartstrom, Oskar Karlsson Lindsjo, Sandra Broddesson, Petra Edquist, Mia Brytting, Anna Risberg, Karin Tegmark-Wisell                                                                                                                                                                                                                                                                                                           |
| EPI_ISL_560988                                                                                                                                                                                                                                                                                                                                                                                                                                                                                                                                                                                                                                                                                                                                                                                                                                                                                                                                                                                                                                                                                                                                                                                                                                                                                                                                                                                                                                                                                                                                                                                                                                                                                                                                                                                                                                                                                                                                                                                                                                                                                                                                                                                                                                                                                                                                                                                                                                                                                                                                                                                                                                                                                                                                                                                                                                                                                                                                                                                                                                                                                                                                                                                                                                                                                                                                                                                                                                                                                                                 |           | Klinisk mikrobiologi, Laboratoriemedicin Gavleborg                                                                         | The Public Health Agency of Sweden               | Anna-Malin Linde, Maria Lind Karlberg, Mattias Haukland, Reza Advani, Olov Svartstrom, Oskar Karlsson Lindsjo, Sandra Broddesson, Petra Edquist, Mia Brytting, Anna Risberg, Karin Tegmark-Wisell                                                                                                                                                                                                                                                                                                           |
| EPI_ISL_560989, EPI_ISL_560990                                                                                                                                                                                                                                                                                                                                                                                                                                                                                                                                                                                                                                                                                                                                                                                                                                                                                                                                                                                                                                                                                                                                                                                                                                                                                                                                                                                                                                                                                                                                                                                                                                                                                                                                                                                                                                                                                                                                                                                                                                                                                                                                                                                                                                                                                                                                                                                                                                                                                                                                                                                                                                                                                                                                                                                                                                                                                                                                                                                                                                                                                                                                                                                                                                                                                                                                                                                                                                                                                                 |           | Karolinska universitetslaboratoriet                                                                                        | The Public Health Agency of Sweden               | Anna-Malin Linde, Maria Lind Karlberg, Mattias Haukland, Reza Advani, Olov Svartstrom, Oskar Karlsson Lindsjo, Sandra Broddesson, Petra Edquist, Mia Brytting, Anna Risberg, Karin Tegmark-Wisell                                                                                                                                                                                                                                                                                                           |
| EPI_ISL_566077, EPI_ISL_566078, EPI_ISL_566079, EPI_ISL_566080, EPI_ISL_566081, EPI_ISL_566082, EPI_ISL_566083                                                                                                                                                                                                                                                                                                                                                                                                                                                                                                                                                                                                                                                                                                                                                                                                                                                                                                                                                                                                                                                                                                                                                                                                                                                                                                                                                                                                                                                                                                                                                                                                                                                                                                                                                                                                                                                                                                                                                                                                                                                                                                                                                                                                                                                                                                                                                                                                                                                                                                                                                                                                                                                                                                                                                                                                                                                                                                                                                                                                                                                                                                                                                                                                                                                                                                                                                                                                                 |           | Pathogenic Microorganisms Variability Laboratory                                                                           | WHO National Influenza Centre Russian Federation | Andrey Komissarov, Artem Fadeev, Anna Ivanova, Kseniya Komissarova, Daria Danilenko, Dmitry Lioznov, Nadezhda Kuznetsova, Elena Shidlovskaya, Elizaveta Divisenko, Ekaterina Milashenko, Kirill Krasnoslobotsev, Evgeniya Mukasheva, Anna Ignatieva, Svetlana Trushakova, Alexey Shchetinin, Maria Nikiforova, Andrey Pochtovy, Vyalya Bacalin, Evgeny Usachev, Olga Bargasova, Ludmila Kolobukhina, Svetlana Smetanina, Elena Burtseva, Artem Tkachuk, Vladimir Gushchin, Alexander Gintsburg              |
| EPI_ISL_568878, EPI_ISL_568885, EPI_ISL_568889, EPI_ISL_568891, EPI_ISL_568892, EPI_ISL_568893, EPI_ISL_568899, EPI_ISL_568901, EPI_ISL_568904, EPI_ISL_568905, EPI_ISL_568912, EPI_ISL_568928, EPI_ISL_568929, EPI_ISL_568931, EPI_ISL_568932, EPI_ISL_568934, EPI_ISL_568937, EPI_ISL_568938, EPI_ISL_568948, EPI_ISL_568951, EPI_ISL_568952, EPI_ISL_568954, EPI_ISL_568955, EPI_ISL_568956, EPI_ISL_568966, EPI_ISL_568970, EPI_ISL_568976, EPI_ISL_568980, EPI_ISL_568981, EPI_ISL_568983, EPI_ISL_568989, EPI_ISL_568991, EPI_ISL_568996, EPI_ISL_569001, EPI_ISL_569004, EPI_ISL_569005, EPI_ISL_569020, EPI_ISL_569021, EPI_ISL_569023, EPI_ISL_569036, EPI_ISL_569037, EPI_ISL_569039, EPI_ISL_569048, EPI_ISL_569049, EPI_ISL_569053, EPI_ISL_569058, EPI_ISL_569074, EPI_ISL_569075, EPI_ISL_569076, EPI_ISL_569080, EPI_ISL_569082, EPI_ISL_569087, EPI_ISL_569089, EPI_ISL_569092, EPI_ISL_569105, EPI_ISL_569111, EPI_ISL_569113, EPI_ISL_569117, EPI_ISL_569123, EPI_ISL_569126, EPI_ISL_569128, EPI_ISL_569133, EPI_ISL_569135, EPI_ISL_569143, EPI_ISL_569145, EPI_ISL_569154, EPI_ISL_569161, EPI_ISL_569162, EPI_ISL_569163, EPI_ISL_569164, EPI_ISL_569168, EPI_ISL_569169, EPI_ISL_569173, EPI_ISL_569177, EPI_ISL_569181, EPI_ISL_569184, EPI_ISL_569194, EPI_ISL_569214, EPI_ISL_569221, EPI_ISL_569222, EPI_ISL_569223, EPI_ISL_569224, EPI_ISL_569226, EPI_ISL_569228, EPI_ISL_569234, EPI_ISL_569236, EPI_ISL_569237, EPI_ISL_569241, EPI_ISL_569245, EPI_ISL_569253, EPI_ISL_569260, EPI_ISL_569261, EPI_ISL_569262, EPI_ISL_569264, EPI_ISL_569268, EPI_ISL_569274, EPI_ISL_569278, EPI_ISL_569284, EPI_ISL_569285, EPI_ISL_569287, EPI_ISL_569289, EPI_ISL_569291, EPI_ISL_569292, EPI_ISL_569296, EPI_ISL_569301, EPI_ISL_569308, EPI_ISL_569310, EPI_ISL_569314, EPI_ISL_569319, EPI_ISL_569321, EPI_ISL_569325, EPI_ISL_569329, EPI_ISL_569334, EPI_ISL_569337, EPI_ISL_569339, EPI_ISL_569341, EPI_ISL_569344, EPI_ISL_569354, EPI_ISL_569357, EPI_ISL_569358, EPI_ISL_569368, EPI_ISL_569378, EPI_ISL_569379, EPI_ISL_569381, EPI_ISL_569385, EPI_ISL_569386, EPI_ISL_569388, EPI_ISL_569398, EPI_ISL_569400, EPI_ISL_569408, EPI_ISL_569412, EPI_ISL_569430, EPI_ISL_569431, EPI_ISL_569438, EPI_ISL_569440, EPI_ISL_569446, EPI_ISL_569457, EPI_ISL_569460, EPI_ISL_569472, EPI_ISL_569479, EPI_ISL_569480, EPI_ISL_569482, EPI_ISL_569483, EPI_ISL_569484, EPI_ISL_569485, EPI_ISL_569486, EPI_ISL_569494, EPI_ISL_569497, EPI_ISL_569503, EPI_ISL_569507, EPI_ISL_569509, EPI_ISL_569513, EPI_ISL_569516, EPI_ISL_569517, EPI_ISL_569521, EPI_ISL_569522, EPI_ISL_569523, EPI_ISL_569526, EPI_ISL_569527, EPI_ISL_569528, EPI_ISL_569538, EPI_ISL_569547, EPI_ISL_569550, EPI_ISL_569554, EPI_ISL_569568, EPI_ISL_569570, EPI_ISL_569571, EPI_ISL_569575, EPI_ISL_569576, EPI_ISL_569594, EPI_ISL_569598, EPI_ISL_569604, EPI_ISL_569605, EPI_ISL_569607                                                                                                                                                                                                                                                                                                                                                                                                                                                                                                                                                                                                                                 | see above | MEPHI, Aix Marseille University                                                                                            | MEPHI, Aix Marseille University                  | Anthony LEVASSEUR                                                                                                                                                                                                                                                                                                                                                                                                                                                                                           |
| EPI_ISL_572715, EPI_ISL_572716, EPI_ISL_572721, EPI_ISL_573253, EPI_ISL_573254, EPI_ISL_573255, EPI_ISL_573256, EPI_ISL_573257, EPI_ISL_573258, EPI_ISL_573259, EPI_ISL_573260, EPI_ISL_573261, EPI_ISL_573262, EPI_ISL_573263, EPI_ISL_573264, EPI_ISL_573265                                                                                                                                                                                                                                                                                                                                                                                                                                                                                                                                                                                                                                                                                                                                                                                                                                                                                                                                                                                                                                                                                                                                                                                                                                                                                                                                                                                                                                                                                                                                                                                                                                                                                                                                                                                                                                                                                                                                                                                                                                                                                                                                                                                                                                                                                                                                                                                                                                                                                                                                                                                                                                                                                                                                                                                                                                                                                                                                                                                                                                                                                                                                                                                                                                                                 | see above | Centre for Enzyme Innovation, University of Portsmouth / Translational Research Laboratory, Portsmouth Hospitals NHS Trust | COVID-19 Genomics UK (COG-UK) Consortium         | Angela Beckett, Yann Bourgeois, Garry Scarlett, Sharon Glaysher, Scott Elliott, Kelly Bicknell, Robert Impey, Allyson Lloyd, Sarah Wyllie, Ethan Butcher, Anoop Chauhan, Samuel Robson                                                                                                                                                                                                                                                                                                                      |
| EPI_ISL_573770                                                                                                                                                                                                                                                                                                                                                                                                                                                                                                                                                                                                                                                                                                                                                                                                                                                                                                                                                                                                                                                                                                                                                                                                                                                                                                                                                                                                                                                                                                                                                                                                                                                                                                                                                                                                                                                                                                                                                                                                                                                                                                                                                                                                                                                                                                                                                                                                                                                                                                                                                                                                                                                                                                                                                                                                                                                                                                                                                                                                                                                                                                                                                                                                                                                                                                                                                                                                                                                                                                                 |           | West of Scotland Specialist Virology Centre, NHSGCC / MRC-University of Glasgow Centre for Virus Research                  | COVID-19 Genomics UK (COG-UK) Consortium         | Ana da Silva Filipe, Natasha Johnson, Kathy Smollett, Daniel Mair, Stephen Carmichael, Lily Tong, Jenna Nichols, Elihu Aranday-Cortes, Kyriaki Nomikou; Sarah McDonald, Marc Niebel, Patawee Asamaphan; Richard Orton, Joseph Hughes, Sreenu Vattipally, David L Robertson; Alasdair MacLean, Rory Gunson; Kathy Li, Igor Starinskij, Natasha Jesudason, Rajiv Shah, James Shepherd, Antonia Ho, Emma Thomson                                                                                               |
| EPI_ISL_573870, EPI_ISL_577040, EPI_ISL_577041, EPI_ISL_577042, EPI_ISL_577043, EPI_ISL_577044, EPI_ISL_577045, EPI_ISL_577046, EPI_ISL_577047, EPI_ISL_577048, EPI_ISL_577049, EPI_ISL_577051, EPI_ISL_577052, EPI_ISL_577053, EPI_ISL_577054, EPI_ISL_577055, EPI_ISL_577056, EPI_ISL_577057, EPI_ISL_577058, EPI_ISL_577059, EPI_ISL_577060, EPI_ISL_577061, EPI_ISL_577062, EPI_ISL_577063, EPI_ISL_577064, EPI_ISL_577065, EPI_ISL_577066, EPI_ISL_577067, EPI_ISL_577193, EPI_ISL_577194, EPI_ISL_577195, EPI_ISL_577196, EPI_ISL_577197, EPI_ISL_577198, EPI_ISL_577199, EPI_ISL_577200, EPI_ISL_577201, EPI_ISL_577203, EPI_ISL_577204, EPI_ISL_577205, EPI_ISL_577206, EPI_ISL_577207, EPI_ISL_577208, EPI_ISL_577209, EPI_ISL_577210, EPI_ISL_577211, EPI_ISL_577212, EPI_ISL_577213, EPI_ISL_577214, EPI_ISL_577215, EPI_ISL_577216, EPI_ISL_577217, EPI_ISL_577218, EPI_ISL_577219, EPI_ISL_577299, EPI_ISL_577300, EPI_ISL_577301, EPI_ISL_577302, EPI_ISL_577303, EPI_ISL_577304, EPI_ISL_577305, EPI_ISL_577306, EPI_ISL_577307, EPI_ISL_577308, EPI_ISL_577309, EPI_ISL_577310, EPI_ISL_577311, EPI_ISL_577312, EPI_ISL_577313, EPI_ISL_577314, EPI_ISL_577315, EPI_ISL_577316, EPI_ISL_577317, EPI_ISL_577318, EPI_ISL_577319, EPI_ISL_577320, EPI_ISL_577321, EPI_ISL_577322, EPI_ISL_577323, EPI_ISL_577324, EPI_ISL_577325, EPI_ISL_577326, EPI_ISL_577327, EPI_ISL_577328, EPI_ISL_577329, EPI_ISL_577330, EPI_ISL_577331, EPI_ISL_577332, EPI_ISL_577333, EPI_ISL_577334, EPI_ISL_577335, EPI_ISL_577336, EPI_ISL_577337, EPI_ISL_577338, EPI_ISL_577339, EPI_ISL_577340, EPI_ISL_577341, EPI_ISL_577342, EPI_ISL_577343, EPI_ISL_577344, EPI_ISL_577345, EPI_ISL_577346, EPI_ISL_577347, EPI_ISL_577348, EPI_ISL_577349, EPI_ISL_577350, EPI_ISL_577351, EPI_ISL_577352, EPI_ISL_577353, EPI_ISL_577354, EPI_ISL_577355, EPI_ISL_577356, EPI_ISL_577357, EPI_ISL_577358, EPI_ISL_577359, EPI_ISL_577360, EPI_ISL_577361, EPI_ISL_577362, EPI_ISL_577363, EPI_ISL_577364, EPI_ISL_577365, EPI_ISL_577366, EPI_ISL_577367, EPI_ISL_577368, EPI_ISL_577369, EPI_ISL_577370, EPI_ISL_577371, EPI_ISL_577372, EPI_ISL_577373, EPI_ISL_577374, EPI_ISL_577375, EPI_ISL_577376, EPI_ISL_577377, EPI_ISL_577378, EPI_ISL_577379, EPI_ISL_577380, EPI_ISL_577381, EPI_ISL_577382, EPI_ISL_577383, EPI_ISL_577384, EPI_ISL_577385, EPI_ISL_577386, EPI_ISL_577387, EPI_ISL_577388, EPI_ISL_577389, EPI_ISL_577390, EPI_ISL_577391, EPI_ISL_577392, EPI_ISL_577393, EPI_ISL_577394, EPI_ISL_577395, EPI_ISL_577396, EPI_ISL_577397, EPI_ISL_577398, EPI_ISL_577399, EPI_ISL_577400, EPI_ISL_577401, EPI_ISL_577402, EPI_ISL_577403, EPI_ISL_577404, EPI_ISL_577405, EPI_ISL_577406, EPI_ISL_577407, EPI_ISL_577408, EPI_ISL_577409, EPI_ISL_577410, EPI_ISL_577411, EPI_ISL_577412, EPI_ISL_577413, EPI_ISL_577414, EPI_ISL_577415, EPI_ISL_577416, EPI_ISL_577417, EPI_ISL_577418, EPI_ISL_577419, EPI_ISL_577420, EPI_ISL_577421, EPI_ISL_577422, EPI_ISL_577423, EPI_ISL_577424, EPI_ISL_577425, EPI_ISL_577426, EPI_ISL_577427, EPI_ISL_577428, EPI_ISL_577429, EPI_ISL_577430, EPI_ISL_577431, EPI_ISL_577432, EPI_ISL_577433, EPI_ISL_577434, EPI_ISL_577435, EPI_ISL_577436, EPI_ISL_577437, EPI_ISL_577438, EPI_ISL_577439, EPI_ISL_577440, EPI_ISL_577441, EPI_ISL_577442, EPI_ISL_577443, EPI_ISL_577444, EPI_ISL_577445, EPI_ISL_577446, EPI_ISL_577447, EPI_ISL_577448, EPI_ISL_577449, EPI_ISL_577450, EPI_ISL_577451, EPI_ISL_577452, EPI_ISL_577453, EPI_ISL_577454, EPI_ISL_577455, EPI_ISL_577456 | see above | Centre for Enzyme Innovation, University of Portsmouth / Translational Research Laboratory, Portsmouth Hospitals           | COVID-19 Genomics UK (COG-UK) Consortium         | Angela Beckett, Yann Bourgeois, Garry Scarlett, Sharon Glaysher, Scott Elliott, Kelly Bicknell, Robert Impey, Allyson Lloyd, Sarah Wyllie, Ethan Butcher, Anoop Chauhan, Samuel Robson                                                                                                                                                                                                                                                                                                                      |



|                                                                                                                                                                                                                                                                                                                                                                                                                                                                                                                                                                                                                                                                                                                                                                                                                                |                                                                                                                            |                                                  |                                                                                                                                                                                                                                                                                                                                                                                                                                                                                                                   |
|--------------------------------------------------------------------------------------------------------------------------------------------------------------------------------------------------------------------------------------------------------------------------------------------------------------------------------------------------------------------------------------------------------------------------------------------------------------------------------------------------------------------------------------------------------------------------------------------------------------------------------------------------------------------------------------------------------------------------------------------------------------------------------------------------------------------------------|----------------------------------------------------------------------------------------------------------------------------|--------------------------------------------------|-------------------------------------------------------------------------------------------------------------------------------------------------------------------------------------------------------------------------------------------------------------------------------------------------------------------------------------------------------------------------------------------------------------------------------------------------------------------------------------------------------------------|
| EPI_ISL_582800                                                                                                                                                                                                                                                                                                                                                                                                                                                                                                                                                                                                                                                                                                                                                                                                                 | Klinisk mikrobiologi Vasternorrland                                                                                        | The Public Health Agency of Sweden               | Anna-Malin Linde, Maria Lind Karlberg, Mattias Haukland, Reza Advani, Olov Svartstrom, Oskar Karlsson Lindsjo, Sandra Broddesson, Petra Edquist, Mia Brytting, Anna Risberg, Karin Tegmark-Wisell                                                                                                                                                                                                                                                                                                                 |
| EPI_ISL_582801                                                                                                                                                                                                                                                                                                                                                                                                                                                                                                                                                                                                                                                                                                                                                                                                                 | Gavle klinisk mikrobiologi                                                                                                 | The Public Health Agency of Sweden               | Anna-Malin Linde, Maria Lind Karlberg, Mattias Haukland, Reza Advani, Olov Svartstrom, Oskar Karlsson Lindsjo, Sandra Broddesson, Petra Edquist, Mia Brytting, Anna Risberg, Karin Tegmark-Wisell                                                                                                                                                                                                                                                                                                                 |
| EPI_ISL_582803, EPI_ISL_582804, EPI_ISL_582805                                                                                                                                                                                                                                                                                                                                                                                                                                                                                                                                                                                                                                                                                                                                                                                 | Halmstad klinisk mikrobiologi                                                                                              | The Public Health Agency of Sweden               | Anna-Malin Linde, Maria Lind Karlberg, Mattias Haukland, Reza Advani, Olov Svartstrom, Oskar Karlsson Lindsjo, Sandra Broddesson, Petra Edquist, Mia Brytting, Anna Risberg, Karin Tegmark-Wisell                                                                                                                                                                                                                                                                                                                 |
| EPI_ISL_582806, EPI_ISL_582807                                                                                                                                                                                                                                                                                                                                                                                                                                                                                                                                                                                                                                                                                                                                                                                                 | Klinisk mikrobiologi SAS Boras                                                                                             | The Public Health Agency of Sweden               | Anna-Malin Linde, Maria Lind Karlberg, Mattias Haukland, Reza Advani, Olov Svartstrom, Oskar Karlsson Lindsjo, Sandra Broddesson, Petra Edquist, Mia Brytting, Anna Risberg, Karin Tegmark-Wisell                                                                                                                                                                                                                                                                                                                 |
| EPI_ISL_582808                                                                                                                                                                                                                                                                                                                                                                                                                                                                                                                                                                                                                                                                                                                                                                                                                 | Klinisk Mikrobiologi                                                                                                       | The Public Health Agency of Sweden               | Anna-Malin Linde, Maria Lind Karlberg, Mattias Haukland, Reza Advani, Olov Svartstrom, Oskar Karlsson Lindsjo, Sandra Broddesson, Petra Edquist, Mia Brytting, Anna Risberg, Karin Tegmark-Wisell                                                                                                                                                                                                                                                                                                                 |
| EPI_ISL_582809, EPI_ISL_582834                                                                                                                                                                                                                                                                                                                                                                                                                                                                                                                                                                                                                                                                                                                                                                                                 | Gavle klinisk mikrobiologi                                                                                                 | The Public Health Agency of Sweden               | Anna-Malin Linde, Maria Lind Karlberg, Mattias Haukland, Reza Advani, Olov Svartstrom, Oskar Karlsson Lindsjo, Sandra Broddesson, Petra Edquist, Mia Brytting, Anna Risberg, Karin Tegmark-Wisell                                                                                                                                                                                                                                                                                                                 |
| EPI_ISL_582835, EPI_ISL_582836, EPI_ISL_582837, EPI_ISL_582838                                                                                                                                                                                                                                                                                                                                                                                                                                                                                                                                                                                                                                                                                                                                                                 | Klinisk mikrobiologi Vasternorrland                                                                                        | The Public Health Agency of Sweden               | Anna-Malin Linde, Maria Lind Karlberg, Mattias Haukland, Reza Advani, Olov Svartstrom, Oskar Karlsson Lindsjo, Sandra Broddesson, Petra Edquist, Mia Brytting, Anna Risberg, Karin Tegmark-Wisell                                                                                                                                                                                                                                                                                                                 |
| EPI_ISL_582839                                                                                                                                                                                                                                                                                                                                                                                                                                                                                                                                                                                                                                                                                                                                                                                                                 | Stockholm_KUL Solna                                                                                                        | The Public Health Agency of Sweden               | Anna-Malin Linde, Maria Lind Karlberg, Mattias Haukland, Reza Advani, Olov Svartstrom, Oskar Karlsson Lindsjo, Sandra Broddesson, Petra Edquist, Mia Brytting, Anna Risberg, Karin Tegmark-Wisell                                                                                                                                                                                                                                                                                                                 |
| EPI_ISL_582840                                                                                                                                                                                                                                                                                                                                                                                                                                                                                                                                                                                                                                                                                                                                                                                                                 | Narhalsan Fjallbacka VC                                                                                                    | The Public Health Agency of Sweden               | Anna-Malin Linde, Maria Lind Karlberg, Mattias Haukland, Reza Advani, Olov Svartstrom, Oskar Karlsson Lindsjo, Sandra Broddesson, Petra Edquist, Mia Brytting, Anna Risberg, Karin Tegmark-Wisell                                                                                                                                                                                                                                                                                                                 |
| EPI_ISL_582841                                                                                                                                                                                                                                                                                                                                                                                                                                                                                                                                                                                                                                                                                                                                                                                                                 | Orebro klinisk mikrobiologi                                                                                                | The Public Health Agency of Sweden               | Anna-Malin Linde, Maria Lind Karlberg, Mattias Haukland, Reza Advani, Olov Svartstrom, Oskar Karlsson Lindsjo, Sandra Broddesson, Petra Edquist, Mia Brytting, Anna Risberg, Karin Tegmark-Wisell                                                                                                                                                                                                                                                                                                                 |
| EPI_ISL_584168, EPI_ISL_584169, EPI_ISL_584170, EPI_ISL_584171, EPI_ISL_584172, EPI_ISL_584173, EPI_ISL_584174, EPI_ISL_584175, EPI_ISL_584176, EPI_ISL_584177, EPI_ISL_584178, EPI_ISL_584179, EPI_ISL_584180, EPI_ISL_584181, EPI_ISL_584182, EPI_ISL_584183, EPI_ISL_584184, EPI_ISL_584185, EPI_ISL_584186, EPI_ISL_584187, EPI_ISL_584193, EPI_ISL_584194, EPI_ISL_584195, EPI_ISL_584200, EPI_ISL_584201, EPI_ISL_584202, EPI_ISL_584203, EPI_ISL_584204, EPI_ISL_584205, EPI_ISL_584206, EPI_ISL_584212, EPI_ISL_584213, EPI_ISL_584214, EPI_ISL_584215, EPI_ISL_584216, EPI_ISL_584809, EPI_ISL_584810                                                                                                                                                                                                                 | Centre for Enzyme Innovation, University of Portsmouth / Translational Research Laboratory, Portsmouth Hospitals NHS Trust | COVID-19 Genomics UK (COG-UK) Consortium         | Angela Beckett, Yann Bourgeois, Garry Scarlett, Sharon Glaysher, Scott Elliott, Kelly Bicknell, Robert Impey, Allyson Lloyd, Sarah Wyllie, Ethan Butcher, Anoop Chauhan, Samuel Robson                                                                                                                                                                                                                                                                                                                            |
| EPI_ISL_585298, EPI_ISL_585314, EPI_ISL_585356, EPI_ISL_585371, EPI_ISL_585394, EPI_ISL_585397, EPI_ISL_585417, EPI_ISL_585419                                                                                                                                                                                                                                                                                                                                                                                                                                                                                                                                                                                                                                                                                                 | Lighthouse Lab in Glasgow / MRC-University of Glasgow Centre for Virus Research                                            | COVID-19 Genomics UK (COG-UK) Consortium         | Ana da Silva Filipe, Natasha Johnson, Kathy Smollett, Daniel Mair, Stephen Carmichael, Lily Tong, Jenna Nichols, Elihu Aranday-Cortes, Kyriaki Nomikou; Sarah McDonald, Marc Niebel, Patawee Asamaphan; Harper VanSteenhouse, Yumi Kasai, David Gray, Carol Clugston, Anna Dominiczak; Alasdair MacLean, Rory Gunson; Richard Orton, Joseph Hughes, Sreenu Vattipally, David L Robertson; Sharif Shaaban, Matthew Holden; Kathy Li, Natasha Jesudason, Rajiv Shah, James Shepherd, Antonia Ho, Emma Thomson       |
| EPI_ISL_594148                                                                                                                                                                                                                                                                                                                                                                                                                                                                                                                                                                                                                                                                                                                                                                                                                 | Halmstad klinisk mikrobiologi                                                                                              | The Public Health Agency of Sweden               | Anna-Malin Linde, Maria Lind Karlberg, Mattias Haukland, Reza Advani, Olov Svartstrom, Oskar Karlsson Lindsjo, Sandra Broddesson, Petra Edquist, Mia Brytting, Anna Risberg, Karin Tegmark-Wisell                                                                                                                                                                                                                                                                                                                 |
| EPI_ISL_594149, EPI_ISL_594150, EPI_ISL_594151, EPI_ISL_594152, EPI_ISL_594153                                                                                                                                                                                                                                                                                                                                                                                                                                                                                                                                                                                                                                                                                                                                                 | Klinsisk mikrobiologi Linköping                                                                                            | The Public Health Agency of Sweden               | Anna-Malin Linde, Maria Lind Karlberg, Mattias Haukland, Reza Advani, Olov Svartstrom, Oskar Karlsson Lindsjo, Sandra Broddesson, Petra Edquist, Mia Brytting, Anna Risberg, Karin Tegmark-Wisell                                                                                                                                                                                                                                                                                                                 |
| EPI_ISL_594154                                                                                                                                                                                                                                                                                                                                                                                                                                                                                                                                                                                                                                                                                                                                                                                                                 | Unilabs Eskilstuna                                                                                                         | The Public Health Agency of Sweden               | Anna-Malin Linde, Maria Lind Karlberg, Mattias Haukland, Reza Advani, Olov Svartstrom, Oskar Karlsson Lindsjo, Sandra Broddesson, Petra Edquist, Mia Brytting, Anna Risberg, Karin Tegmark-Wisell                                                                                                                                                                                                                                                                                                                 |
| EPI_ISL_594656, EPI_ISL_594666, EPI_ISL_594697, EPI_ISL_594730, EPI_ISL_594736, EPI_ISL_594744, EPI_ISL_594746                                                                                                                                                                                                                                                                                                                                                                                                                                                                                                                                                                                                                                                                                                                 | West of Scotland Specialist Virology Centre, NHSGGC / MRC-University of Glasgow Centre for Virus Research                  | COVID-19 Genomics UK (COG-UK) Consortium         | Ana da Silva Filipe, Natasha Johnson, Kathy Smollett, Daniel Mair, Stephen Carmichael, Lily Tong, Jenna Nichols, Elihu Aranday-Cortes, Kyriaki Nomikou; Sarah McDonald, Marc Niebel, Patawee Asamaphan; Richard Orton, Joseph Hughes, Sreenu Vattipally, David L Robertson; Alasdair MacLean, Rory Gunson; Kathy Li, Igor Starinskij, Natasha Jesudason, Rajiv Shah, James Shepherd, Antonia Ho, Emma Thomson                                                                                                     |
| EPI_ISL_595100, EPI_ISL_595101, EPI_ISL_595102, EPI_ISL_595103, EPI_ISL_595104, EPI_ISL_595105, EPI_ISL_595106, EPI_ISL_595107, EPI_ISL_595108, EPI_ISL_595109, EPI_ISL_595110, EPI_ISL_595111, EPI_ISL_595112, EPI_ISL_595113, EPI_ISL_595114                                                                                                                                                                                                                                                                                                                                                                                                                                                                                                                                                                                 | Centre for Enzyme Innovation, University of Portsmouth / Translational Research Laboratory, Portsmouth Hospitals NHS Trust | COVID-19 Genomics UK (COG-UK) Consortium         | Angela Beckett, Yann Bourgeois, Garry Scarlett, Sharon Glaysher, Scott Elliott, Kelly Bicknell, Robert Impey, Allyson Lloyd, Sarah Wyllie, Ethan Butcher, Anoop Chauhan, Samuel Robson                                                                                                                                                                                                                                                                                                                            |
| EPI_ISL_596228                                                                                                                                                                                                                                                                                                                                                                                                                                                                                                                                                                                                                                                                                                                                                                                                                 | WHO National Influenza Centre Russian Federation                                                                           | WHO National Influenza Centre Russian Federation | Andrey Komissarov, Artem Fadeev, Anna Ivanova, Kseniya Komissarova, Dmitry Bazhenov, Daria Danilenko, Ksenia Safina, Elena Nabieva, Georgii Bazzykin, Dmitry Lioznov                                                                                                                                                                                                                                                                                                                                              |
| EPI_ISL_596229, EPI_ISL_596230, EPI_ISL_596231                                                                                                                                                                                                                                                                                                                                                                                                                                                                                                                                                                                                                                                                                                                                                                                 | WHO National Influenza Centre Russian Federation                                                                           | WHO National Influenza Centre Russian Federation | Andrey Komissarov, Artem Fadeev, Anna Ivanova, Kseniya Komissarova, Dmitry Bazhenov, Daria Danilenko                                                                                                                                                                                                                                                                                                                                                                                                              |
| EPI_ISL_596232                                                                                                                                                                                                                                                                                                                                                                                                                                                                                                                                                                                                                                                                                                                                                                                                                 | WHO National Influenza Centre Russian Federation                                                                           | WHO National Influenza Centre Russian Federation | Andrey Komissarov, Artem Fadeev, Anna Ivanova, Mariia Sergeeva, Kseniya Komissarova, Dmitry Bazhenov, Daria Danilenko                                                                                                                                                                                                                                                                                                                                                                                             |
| EPI_ISL_596233, EPI_ISL_596234, EPI_ISL_596235, EPI_ISL_596236, EPI_ISL_596237, EPI_ISL_596238, EPI_ISL_596239, EPI_ISL_596240, EPI_ISL_596241, EPI_ISL_596242, EPI_ISL_596243, EPI_ISL_596244, EPI_ISL_596245, EPI_ISL_596246, EPI_ISL_596247, EPI_ISL_596248, EPI_ISL_596249                                                                                                                                                                                                                                                                                                                                                                                                                                                                                                                                                 | WHO National Influenza Centre Russian Federation                                                                           | WHO National Influenza Centre Russian Federation | Andrey Komissarov, Artem Fadeev, Anna Ivanova, Kseniya Komissarova, Dmitry Bazhenov, Daria Danilenko                                                                                                                                                                                                                                                                                                                                                                                                              |
| EPI_ISL_596250, EPI_ISL_596251, EPI_ISL_596252, EPI_ISL_596253, EPI_ISL_596254, EPI_ISL_596255, EPI_ISL_596256, EPI_ISL_596257, EPI_ISL_596258, EPI_ISL_596259, EPI_ISL_596260, EPI_ISL_596261, EPI_ISL_596262, EPI_ISL_596263                                                                                                                                                                                                                                                                                                                                                                                                                                                                                                                                                                                                 | WHO National Influenza Centre Russian Federation                                                                           | WHO National Influenza Centre Russian Federation | Andrey Komissarov, Artem Fadeev, Anna Ivanova, Kseniya Komissarova, Dmitry Bazhenov, Daria Danilenko                                                                                                                                                                                                                                                                                                                                                                                                              |
| EPI_ISL_596264, EPI_ISL_596265                                                                                                                                                                                                                                                                                                                                                                                                                                                                                                                                                                                                                                                                                                                                                                                                 | WHO National Influenza Centre Russian Federation                                                                           | WHO National Influenza Centre Russian Federation | Andrey Komissarov, Artem Fadeev, Anna Ivanova, Mariia Sergeeva, Kseniya Komissarova, Dmitry Bazhenov, Daria Danilenko                                                                                                                                                                                                                                                                                                                                                                                             |
| EPI_ISL_596266, EPI_ISL_596267                                                                                                                                                                                                                                                                                                                                                                                                                                                                                                                                                                                                                                                                                                                                                                                                 | WHO National Influenza Centre Russian Federation                                                                           | WHO National Influenza Centre Russian Federation | Andrey Komissarov, Artem Fadeev, Anna Ivanova, Kseniya Komissarova, Dmitry Bazhenov, Daria Danilenko                                                                                                                                                                                                                                                                                                                                                                                                              |
| EPI_ISL_596268, EPI_ISL_596269, EPI_ISL_596270, EPI_ISL_596271, EPI_ISL_596272, EPI_ISL_596273, EPI_ISL_596274, EPI_ISL_596275, EPI_ISL_596276, EPI_ISL_596277, EPI_ISL_596278, EPI_ISL_596279, EPI_ISL_596280, EPI_ISL_596281, EPI_ISL_596282, EPI_ISL_596283, EPI_ISL_596284, EPI_ISL_596285, EPI_ISL_596286, EPI_ISL_596287, EPI_ISL_596288, EPI_ISL_596289, EPI_ISL_596290, EPI_ISL_596291, EPI_ISL_596292, EPI_ISL_596293, EPI_ISL_596294, EPI_ISL_596295, EPI_ISL_596296, EPI_ISL_596297, EPI_ISL_596298, EPI_ISL_596299, EPI_ISL_596300, EPI_ISL_596301, EPI_ISL_596302, EPI_ISL_596303, EPI_ISL_596304, EPI_ISL_596305, EPI_ISL_596306, EPI_ISL_596307, EPI_ISL_596308, EPI_ISL_596309, EPI_ISL_596310, EPI_ISL_596311, EPI_ISL_596312, EPI_ISL_596313, EPI_ISL_596314, EPI_ISL_596315, EPI_ISL_596316, EPI_ISL_596317 | WHO National Influenza Centre Russian Federation                                                                           | WHO National Influenza Centre Russian Federation | Andrey Komissarov, Artem Fadeev, Anna Ivanova, Kseniya Komissarova, Dmitry Bazhenov, Daria Danilenko                                                                                                                                                                                                                                                                                                                                                                                                              |
| EPI_ISL_596318, EPI_ISL_596319, EPI_ISL_596320, EPI_ISL_596321, EPI_ISL_596322, EPI_ISL_596323, EPI_ISL_596324, EPI_ISL_596325, EPI_ISL_596326, EPI_ISL_596327, EPI_ISL_596328, EPI_ISL_596329, EPI_ISL_596330, EPI_ISL_596331, EPI_ISL_596332, EPI_ISL_596333, EPI_ISL_596334, EPI_ISL_596335, EPI_ISL_596336, EPI_ISL_596337, EPI_ISL_596338, EPI_ISL_596339, EPI_ISL_596340, EPI_ISL_596341, EPI_ISL_596342, EPI_ISL_596343, EPI_ISL_596344, EPI_ISL_596345, EPI_ISL_596346, EPI_ISL_596347, EPI_ISL_596348, EPI_ISL_596349, EPI_ISL_596350, EPI_ISL_596351, EPI_ISL_596352                                                                                                                                                                                                                                                 | WHO National Influenza Centre Russian Federation                                                                           | WHO National Influenza Centre Russian Federation | Andrey Komissarov, Artem Fadeev, Anna Ivanova, Kseniya Komissarova, Dmitry Bazhenov, Daria Danilenko, Dmitry Lioznov, Nadezhda Kuznetsova, Elena Shidlovskaya, Elizaveta Divisenko, Ekaterina Milashenko, Kirill Krasnoslobotsev, Evgeniya Mukasheva, Anna Ignatieva, Svetlana Trushakova, Alexey Shchetinin, Maria Nikiforova, Andrey Pochtoviy, Valeria Bacalin, Evgeny Usachev, Olga Burgasova, Ludmila Kolobukhina, Svetlana Smetanina, Elena Burtseva, Artem Tkachuk, Vladimir Gushchin, Alexander Gintsburg |
| EPI_ISL_596353, EPI_ISL_596354, EPI_ISL_596355, EPI_ISL_596356                                                                                                                                                                                                                                                                                                                                                                                                                                                                                                                                                                                                                                                                                                                                                                 | WHO National Influenza Centre Russian Federation                                                                           | WHO National Influenza Centre Russian Federation | Andrey Komissarov, Artem Fadeev, Anna Ivanova, Kseniya Komissarova, Dmitry Bazhenov, Daria Danilenko                                                                                                                                                                                                                                                                                                                                                                                                              |
| EPI_ISL_596357, EPI_ISL_596358, EPI_ISL_596359, EPI_ISL_596360, EPI_ISL_596361, EPI_ISL_596362, EPI_ISL_596363, EPI_ISL_596364, EPI_ISL_596365, EPI_ISL_596366, EPI_ISL_596367, EPI_ISL_596368, EPI_ISL_596369, EPI_ISL_596370, EPI_ISL_596371, EPI_ISL_596372, EPI_ISL_596373, EPI_ISL_596374, EPI_ISL_596375, EPI_ISL_596376, EPI_ISL_596377                                                                                                                                                                                                                                                                                                                                                                                                                                                                                 | WHO National Influenza Centre Russian Federation                                                                           | WHO National Influenza Centre Russian Federation | Andrey Komissarov, Artem Fadeev, Anna Ivanova, Kseniya Komissarova, Dmitry Bazhenov, Daria Danilenko                                                                                                                                                                                                                                                                                                                                                                                                              |
| see above                                                                                                                                                                                                                                                                                                                                                                                                                                                                                                                                                                                                                                                                                                                                                                                                                      | HELIX LCC                                                                                                                  | WHO National Influenza Centre Russian Federation | Andrey Komissarov, Artem Fadeev, Anna Ivanova, Kseniya Komissarova, Dmitry Bazhenov, Daria Danilenko                                                                                                                                                                                                                                                                                                                                                                                                              |

|                                                                                                                                                                                                                                                                                                                                                                                                                                                                                                                                                                                                                                                                                                                                                                                                                                                                                                                                                                                                                                                                                                                                                                                                                                                                                                                                                                                |                                                                                                                            |                                                                                                                            |                                                                                                                                                                                                                                                                                                                                                                                                               |                                                                                                                                                                                        |
|--------------------------------------------------------------------------------------------------------------------------------------------------------------------------------------------------------------------------------------------------------------------------------------------------------------------------------------------------------------------------------------------------------------------------------------------------------------------------------------------------------------------------------------------------------------------------------------------------------------------------------------------------------------------------------------------------------------------------------------------------------------------------------------------------------------------------------------------------------------------------------------------------------------------------------------------------------------------------------------------------------------------------------------------------------------------------------------------------------------------------------------------------------------------------------------------------------------------------------------------------------------------------------------------------------------------------------------------------------------------------------|----------------------------------------------------------------------------------------------------------------------------|----------------------------------------------------------------------------------------------------------------------------|---------------------------------------------------------------------------------------------------------------------------------------------------------------------------------------------------------------------------------------------------------------------------------------------------------------------------------------------------------------------------------------------------------------|----------------------------------------------------------------------------------------------------------------------------------------------------------------------------------------|
| EPI_ISL_602329, EPI_ISL_602330, EPI_ISL_602331, EPI_ISL_602332, EPI_ISL_602333, EPI_ISL_602334, EPI_ISL_602335, EPI_ISL_602336, EPI_ISL_602337, EPI_ISL_602338, EPI_ISL_602339, EPI_ISL_602340, EPI_ISL_602341, EPI_ISL_602342, EPI_ISL_602343, EPI_ISL_602344, EPI_ISL_602345, EPI_ISL_602346, EPI_ISL_602347, EPI_ISL_602348, EPI_ISL_602349, EPI_ISL_602350, EPI_ISL_602351, EPI_ISL_602352, EPI_ISL_602353, EPI_ISL_602354, EPI_ISL_602355, EPI_ISL_602356, EPI_ISL_602357, EPI_ISL_602358, EPI_ISL_602359, EPI_ISL_602360, EPI_ISL_602361, EPI_ISL_602362, EPI_ISL_602363, EPI_ISL_602364, EPI_ISL_602365, EPI_ISL_602366, EPI_ISL_602367, EPI_ISL_602368, EPI_ISL_602369, EPI_ISL_602370, EPI_ISL_602371, EPI_ISL_602372, EPI_ISL_602373, EPI_ISL_602374, EPI_ISL_602375, EPI_ISL_602376, EPI_ISL_602377, EPI_ISL_602378, EPI_ISL_602379, EPI_ISL_602380, EPI_ISL_602381, EPI_ISL_602382, EPI_ISL_602383, EPI_ISL_602384, EPI_ISL_602385, EPI_ISL_602386, EPI_ISL_602387, EPI_ISL_602388, EPI_ISL_602389, EPI_ISL_602390, EPI_ISL_602391, EPI_ISL_602392, EPI_ISL_602393, EPI_ISL_602394, EPI_ISL_602395, EPI_ISL_602396, EPI_ISL_602397, EPI_ISL_602398, EPI_ISL_602399, EPI_ISL_602400, EPI_ISL_602401, EPI_ISL_602402, EPI_ISL_602403, EPI_ISL_602404, EPI_ISL_602405, EPI_ISL_602406, EPI_ISL_602407, EPI_ISL_602408, EPI_ISL_602409, EPI_ISL_602410, EPI_ISL_602411 | see above                                                                                                                  | HELIx LLC                                                                                                                  | WHO National Influenza Centre Russian Federation                                                                                                                                                                                                                                                                                                                                                              | Andrey Komissarov, Artem Fadeev, Kseniya Komissarova, Anna Ivanova, Dmitry Bazhenov, Daria Danilenko                                                                                   |
| EPI_ISL_602412, EPI_ISL_602413, EPI_ISL_602414, EPI_ISL_602415, EPI_ISL_602416                                                                                                                                                                                                                                                                                                                                                                                                                                                                                                                                                                                                                                                                                                                                                                                                                                                                                                                                                                                                                                                                                                                                                                                                                                                                                                 |                                                                                                                            | WHO National Influenza Centre Russian Federation                                                                           | WHO National Influenza Centre Russian Federation                                                                                                                                                                                                                                                                                                                                                              | Andrey Komissarov, Artem Fadeev, Kseniya Komissarova, Anna Ivanova, Dmitry Bazhenov, Daria Danilenko                                                                                   |
| EPI_ISL_602417, EPI_ISL_602418, EPI_ISL_602419, EPI_ISL_602420, EPI_ISL_602421, EPI_ISL_602422, EPI_ISL_602423, EPI_ISL_602424, EPI_ISL_602425, EPI_ISL_602426, EPI_ISL_602427, EPI_ISL_602428, EPI_ISL_602429, EPI_ISL_602430, EPI_ISL_602431, EPI_ISL_602432, EPI_ISL_602433, EPI_ISL_602434, EPI_ISL_602435, EPI_ISL_602436, EPI_ISL_602437, EPI_ISL_602438, EPI_ISL_602439, EPI_ISL_602440, EPI_ISL_602441, EPI_ISL_602442, EPI_ISL_602443, EPI_ISL_602444, EPI_ISL_602445, EPI_ISL_602446, EPI_ISL_602447, EPI_ISL_602448, EPI_ISL_602449, EPI_ISL_602450, EPI_ISL_602451, EPI_ISL_602452, EPI_ISL_602453, EPI_ISL_602454, EPI_ISL_602455, EPI_ISL_602456, EPI_ISL_602457, EPI_ISL_602458, EPI_ISL_602459, EPI_ISL_602460, EPI_ISL_602461                                                                                                                                                                                                                                                                                                                                                                                                                                                                                                                                                                                                                                 | see above                                                                                                                  | HELIx LLC                                                                                                                  | WHO National Influenza Centre Russian Federation                                                                                                                                                                                                                                                                                                                                                              | Andrey Komissarov, Artem Fadeev, Kseniya Komissarova, Anna Ivanova, Dmitry Bazhenov, Daria Danilenko                                                                                   |
| EPI_ISL_605792                                                                                                                                                                                                                                                                                                                                                                                                                                                                                                                                                                                                                                                                                                                                                                                                                                                                                                                                                                                                                                                                                                                                                                                                                                                                                                                                                                 | Department of Experimental Modeling and Pathogenesis of Infectious Diseases                                                | WHO National Influenza Centre Russian Federation                                                                           | Andrey Komissarov, Artem Fadeev, Anna Ivanova, Kseniya Komissarova, Sobolev I.A., Alekseev A.Yu., Shestopalov A.M.                                                                                                                                                                                                                                                                                            |                                                                                                                                                                                        |
| EPI_ISL_605793                                                                                                                                                                                                                                                                                                                                                                                                                                                                                                                                                                                                                                                                                                                                                                                                                                                                                                                                                                                                                                                                                                                                                                                                                                                                                                                                                                 | Department of Experimental Modeling and Pathogenesis of Infectious Diseases                                                | WHO National Influenza Centre Russian Federation                                                                           | Andrey Komissarov, Artem Fadeev, Anna Ivanova, Kseniya Komissarova, Sobolev I.A., Alekseev A.Yu., Chepurinov A.A., Kononova Yu.V., Shestopalov A.M.                                                                                                                                                                                                                                                           |                                                                                                                                                                                        |
| EPI_ISL_605794                                                                                                                                                                                                                                                                                                                                                                                                                                                                                                                                                                                                                                                                                                                                                                                                                                                                                                                                                                                                                                                                                                                                                                                                                                                                                                                                                                 | Department of Experimental Modeling and Pathogenesis of Infectious Diseases                                                | WHO National Influenza Centre Russian Federation                                                                           | Andrey Komissarov, Artem Fadeev, Anna Ivanova, Kseniya Komissarova, Sobolev I.A., Alekseev A.Yu., Kononova Yu.V., Shestopalov A.M.                                                                                                                                                                                                                                                                            |                                                                                                                                                                                        |
| EPI_ISL_605795, EPI_ISL_605796                                                                                                                                                                                                                                                                                                                                                                                                                                                                                                                                                                                                                                                                                                                                                                                                                                                                                                                                                                                                                                                                                                                                                                                                                                                                                                                                                 | Department of Experimental Modeling and Pathogenesis of Infectious Diseases                                                | WHO National Influenza Centre Russian Federation                                                                           | Andrey Komissarov, Artem Fadeev, Anna Ivanova, Kseniya Komissarova, Sobolev I.A., Alekseev A.Yu., Chepurinov A.A., Kononova Yu.V., Shestopalov A.M.                                                                                                                                                                                                                                                           |                                                                                                                                                                                        |
| EPI_ISL_611526, EPI_ISL_611532, EPI_ISL_611535, EPI_ISL_611537, EPI_ISL_611538, EPI_ISL_611555, EPI_ISL_611557, EPI_ISL_611585, EPI_ISL_611589, EPI_ISL_611590, EPI_ISL_611592, EPI_ISL_611638, EPI_ISL_611639, EPI_ISL_611689                                                                                                                                                                                                                                                                                                                                                                                                                                                                                                                                                                                                                                                                                                                                                                                                                                                                                                                                                                                                                                                                                                                                                 | see above                                                                                                                  | Centre for Enzyme Innovation, University of Portsmouth / Translational Research Laboratory, Portsmouth Hospitals NHS Trust | COVID-19 Genomics UK (COG-UK) Consortium                                                                                                                                                                                                                                                                                                                                                                      | Angela Beckett, Yann Bourgeois, Garry Scarlett, Sharon Glaysher, Scott Elliott, Kelly Bicknell, Robert Impey, Allyson Lloyd, Sarah Wyllie, Ethan Butcher, Anoop Chauhan, Samuel Robson |
| EPI_ISL_611716                                                                                                                                                                                                                                                                                                                                                                                                                                                                                                                                                                                                                                                                                                                                                                                                                                                                                                                                                                                                                                                                                                                                                                                                                                                                                                                                                                 | West of Scotland Specialist Virology Centre, NHSGGC / MRC-University of Glasgow Centre for Virus Research                  | COVID-19 Genomics UK (COG-UK) Consortium                                                                                   | Ana da Silva Filipe, Natasha Johnson, Kathy Smollett, Daniel Mair, Stephen Carmichael, Lily Tong, Jenna Nichols, Elihu Aranday-Cortes, Kyriaki Nomikou, Sarah McDonald, Marc Niebel, Patawee Asamaphan, Richard Orton, Joseph Hughes, Sreenu Vattipally, David L Robertson, Alasdair MacLean, Rory Gunson, Kathy Li, Igor Starinskij, Natasha Jesudason, Rajiv Shah, James Shepherd, Antonia Ho, Emma Thomson |                                                                                                                                                                                        |
| EPI_ISL_611754, EPI_ISL_611755, EPI_ISL_611761, EPI_ISL_611762, EPI_ISL_611763, EPI_ISL_611771, EPI_ISL_611772, EPI_ISL_611773, EPI_ISL_611841                                                                                                                                                                                                                                                                                                                                                                                                                                                                                                                                                                                                                                                                                                                                                                                                                                                                                                                                                                                                                                                                                                                                                                                                                                 | Centre for Enzyme Innovation, University of Portsmouth / Translational Research Laboratory, Portsmouth Hospitals NHS Trust | COVID-19 Genomics UK (COG-UK) Consortium                                                                                   | Angela Beckett, Yann Bourgeois, Garry Scarlett, Sharon Glaysher, Scott Elliott, Kelly Bicknell, Robert Impey, Allyson Lloyd, Sarah Wyllie, Ethan Butcher, Anoop Chauhan, Samuel Robson                                                                                                                                                                                                                        |                                                                                                                                                                                        |
| EPI_ISL_611852, EPI_ISL_611882                                                                                                                                                                                                                                                                                                                                                                                                                                                                                                                                                                                                                                                                                                                                                                                                                                                                                                                                                                                                                                                                                                                                                                                                                                                                                                                                                 | West of Scotland Specialist Virology Centre, NHSGGC / MRC-University of Glasgow Centre for Virus Research                  | COVID-19 Genomics UK (COG-UK) Consortium                                                                                   | Ana da Silva Filipe, Natasha Johnson, Kathy Smollett, Daniel Mair, Stephen Carmichael, Lily Tong, Jenna Nichols, Elihu Aranday-Cortes, Kyriaki Nomikou, Sarah McDonald, Marc Niebel, Patawee Asamaphan, Richard Orton, Joseph Hughes, Sreenu Vattipally, David L Robertson, Alasdair MacLean, Rory Gunson, Kathy Li, Igor Starinskij, Natasha Jesudason, Rajiv Shah, James Shepherd, Antonia Ho, Emma Thomson |                                                                                                                                                                                        |
| EPI_ISL_611916, EPI_ISL_611925, EPI_ISL_611927, EPI_ISL_611928, EPI_ISL_611933, EPI_ISL_611934, EPI_ISL_611935, EPI_ISL_611957, EPI_ISL_611958, EPI_ISL_611959, EPI_ISL_611960, EPI_ISL_611961, EPI_ISL_611962, EPI_ISL_611971, EPI_ISL_611983, EPI_ISL_611998, EPI_ISL_612004, EPI_ISL_612028, EPI_ISL_612068, EPI_ISL_612069, EPI_ISL_612082, EPI_ISL_612086, EPI_ISL_612089, EPI_ISL_612092, EPI_ISL_612094                                                                                                                                                                                                                                                                                                                                                                                                                                                                                                                                                                                                                                                                                                                                                                                                                                                                                                                                                                 | see above                                                                                                                  | Centre for Enzyme Innovation, University of Portsmouth / Translational Research Laboratory, Portsmouth Hospitals NHS Trust | COVID-19 Genomics UK (COG-UK) Consortium                                                                                                                                                                                                                                                                                                                                                                      | Angela Beckett, Yann Bourgeois, Garry Scarlett, Sharon Glaysher, Scott Elliott, Kelly Bicknell, Robert Impey, Allyson Lloyd, Sarah Wyllie, Ethan Butcher, Anoop Chauhan, Samuel Robson |
| EPI_ISL_612113, EPI_ISL_612311                                                                                                                                                                                                                                                                                                                                                                                                                                                                                                                                                                                                                                                                                                                                                                                                                                                                                                                                                                                                                                                                                                                                                                                                                                                                                                                                                 | West of Scotland Specialist Virology Centre, NHSGGC / MRC-University of Glasgow Centre for Virus Research                  | COVID-19 Genomics UK (COG-UK) Consortium                                                                                   | Ana da Silva Filipe, Natasha Johnson, Kathy Smollett, Daniel Mair, Stephen Carmichael, Lily Tong, Jenna Nichols, Elihu Aranday-Cortes, Kyriaki Nomikou, Sarah McDonald, Marc Niebel, Patawee Asamaphan, Richard Orton, Joseph Hughes, Sreenu Vattipally, David L Robertson, Alasdair MacLean, Rory Gunson, Kathy Li, Igor Starinskij, Natasha Jesudason, Rajiv Shah, James Shepherd, Antonia Ho, Emma Thomson |                                                                                                                                                                                        |
| EPI_ISL_613282, EPI_ISL_613283, EPI_ISL_613284, EPI_ISL_613285, EPI_ISL_613286, EPI_ISL_613287, EPI_ISL_613288, EPI_ISL_613289, EPI_ISL_613290, EPI_ISL_613291, EPI_ISL_613292, EPI_ISL_613293, EPI_ISL_613294, EPI_ISL_613295, EPI_ISL_613296, EPI_ISL_613297, EPI_ISL_613298, EPI_ISL_613299                                                                                                                                                                                                                                                                                                                                                                                                                                                                                                                                                                                                                                                                                                                                                                                                                                                                                                                                                                                                                                                                                 | see above                                                                                                                  | Centre for Enzyme Innovation, University of Portsmouth / Translational Research Laboratory, Portsmouth Hospitals NHS Trust | COVID-19 Genomics UK (COG-UK) Consortium                                                                                                                                                                                                                                                                                                                                                                      | Angela Beckett, Yann Bourgeois, Garry Scarlett, Sharon Glaysher, Scott Elliott, Kelly Bicknell, Robert Impey, Allyson Lloyd, Sarah Wyllie, Ethan Butcher, Anoop Chauhan, Samuel Robson |
| EPI_ISL_615076, EPI_ISL_615077, EPI_ISL_615078                                                                                                                                                                                                                                                                                                                                                                                                                                                                                                                                                                                                                                                                                                                                                                                                                                                                                                                                                                                                                                                                                                                                                                                                                                                                                                                                 | Uppsala klinisk mikrobiologi                                                                                               | The Public Health Agency of Sweden                                                                                         | Anna-Malin Linde, Maria Lind Karlberg, Mattias Haukland, Reza Advani, Olov Svartstrom, Oskar Karlsson Lindsjo, Sandra Broddesson, Petra Edquist, Mia Brytting, Anna Risberg, Karin Tegmark-Wisell                                                                                                                                                                                                             |                                                                                                                                                                                        |
| EPI_ISL_615079                                                                                                                                                                                                                                                                                                                                                                                                                                                                                                                                                                                                                                                                                                                                                                                                                                                                                                                                                                                                                                                                                                                                                                                                                                                                                                                                                                 | Orebro klinisk mikrobiologi                                                                                                | The Public Health Agency of Sweden                                                                                         | Anna-Malin Linde, Maria Lind Karlberg, Mattias Haukland, Reza Advani, Olov Svartstrom, Oskar Karlsson Lindsjo, Sandra Broddesson, Petra Edquist, Mia Brytting, Anna Risberg, Karin Tegmark-Wisell                                                                                                                                                                                                             |                                                                                                                                                                                        |
| EPI_ISL_615080, EPI_ISL_615081, EPI_ISL_615082, EPI_ISL_615083, EPI_ISL_615084, EPI_ISL_615085                                                                                                                                                                                                                                                                                                                                                                                                                                                                                                                                                                                                                                                                                                                                                                                                                                                                                                                                                                                                                                                                                                                                                                                                                                                                                 | Klinisk mikrobiologi, Skanes universitetssjukhus, Lund                                                                     | The Public Health Agency of Sweden                                                                                         | Anna-Malin Linde, Maria Lind Karlberg, Mattias Haukland, Reza Advani, Olov Svartstrom, Oskar Karlsson Lindsjo, Sandra Broddesson, Petra Edquist, Mia Brytting, Anna Risberg, Karin Tegmark-Wisell                                                                                                                                                                                                             |                                                                                                                                                                                        |
| EPI_ISL_615086, EPI_ISL_615087, EPI_ISL_615088, EPI_ISL_615089                                                                                                                                                                                                                                                                                                                                                                                                                                                                                                                                                                                                                                                                                                                                                                                                                                                                                                                                                                                                                                                                                                                                                                                                                                                                                                                 | Karolinska Universitetslaboratoriet                                                                                        | The Public Health Agency of Sweden                                                                                         | Anna-Malin Linde, Maria Lind Karlberg, Mattias Haukland, Reza Advani, Olov Svartstrom, Oskar Karlsson Lindsjo, Sandra Broddesson, Petra Edquist, Mia Brytting, Anna Risberg, Karin Tegmark-Wisell                                                                                                                                                                                                             |                                                                                                                                                                                        |
| EPI_ISL_615090, EPI_ISL_615091                                                                                                                                                                                                                                                                                                                                                                                                                                                                                                                                                                                                                                                                                                                                                                                                                                                                                                                                                                                                                                                                                                                                                                                                                                                                                                                                                 | Klinisk mikrobiologi NAL Trollhattan                                                                                       | The Public Health Agency of Sweden                                                                                         | Anna-Malin Linde, Maria Lind Karlberg, Mattias Haukland, Reza Advani, Olov Svartstrom, Oskar Karlsson Lindsjo, Sandra Broddesson, Petra Edquist, Mia Brytting, Anna Risberg, Karin Tegmark-Wisell                                                                                                                                                                                                             |                                                                                                                                                                                        |
| EPI_ISL_615092, EPI_ISL_615093, EPI_ISL_615094, EPI_ISL_615095, EPI_ISL_615096                                                                                                                                                                                                                                                                                                                                                                                                                                                                                                                                                                                                                                                                                                                                                                                                                                                                                                                                                                                                                                                                                                                                                                                                                                                                                                 | Umea klinisk mikrobiologi                                                                                                  | The Public Health Agency of Sweden                                                                                         | Anna-Malin Linde, Maria Lind Karlberg, Mattias Haukland, Reza Advani, Olov Svartstrom, Oskar Karlsson Lindsjo, Sandra Broddesson, Petra Edquist, Mia Brytting, Anna Risberg, Karin Tegmark-Wisell                                                                                                                                                                                                             |                                                                                                                                                                                        |
| EPI_ISL_615097, EPI_ISL_615098, EPI_ISL_615099, EPI_ISL_615100                                                                                                                                                                                                                                                                                                                                                                                                                                                                                                                                                                                                                                                                                                                                                                                                                                                                                                                                                                                                                                                                                                                                                                                                                                                                                                                 | Klinisk mikrobiologi Lanssjukhuset Ryhov, Jonkoping                                                                        | The Public Health Agency of Sweden                                                                                         | Anna-Malin Linde, Maria Lind Karlberg, Mattias Haukland, Reza Advani, Olov Svartstrom, Oskar Karlsson Lindsjo, Sandra Broddesson, Petra Edquist, Mia Brytting, Anna Risberg, Karin Tegmark-Wisell                                                                                                                                                                                                             |                                                                                                                                                                                        |
| EPI_ISL_615101, EPI_ISL_615102, EPI_ISL_615103                                                                                                                                                                                                                                                                                                                                                                                                                                                                                                                                                                                                                                                                                                                                                                                                                                                                                                                                                                                                                                                                                                                                                                                                                                                                                                                                 | Gavle klinisk mikrobiologi                                                                                                 | The Public Health Agency of Sweden                                                                                         | Anna-Malin Linde, Maria Lind Karlberg, Mattias Haukland, Reza Advani, Olov Svartstrom, Oskar Karlsson Lindsjo, Sandra Broddesson, Petra Edquist, Mia Brytting, Anna Risberg, Karin Tegmark-Wisell                                                                                                                                                                                                             |                                                                                                                                                                                        |
| EPI_ISL_615104, EPI_ISL_615105, EPI_ISL_615106, EPI_ISL_615107                                                                                                                                                                                                                                                                                                                                                                                                                                                                                                                                                                                                                                                                                                                                                                                                                                                                                                                                                                                                                                                                                                                                                                                                                                                                                                                 | Halmstad klinisk mikrobiologi                                                                                              | The Public Health Agency of Sweden                                                                                         | Anna-Malin Linde, Maria Lind Karlberg, Mattias Haukland, Reza Advani, Olov Svartstrom, Oskar Karlsson Lindsjo, Sandra Broddesson, Petra Edquist, Mia Brytting, Anna Risberg, Karin Tegmark-Wisell                                                                                                                                                                                                             |                                                                                                                                                                                        |
| EPI_ISL_615108                                                                                                                                                                                                                                                                                                                                                                                                                                                                                                                                                                                                                                                                                                                                                                                                                                                                                                                                                                                                                                                                                                                                                                                                                                                                                                                                                                 | Klinisk Mikrobiologi                                                                                                       | The Public Health Agency of Sweden                                                                                         | Anna-Malin Linde, Maria Lind Karlberg, Mattias Haukland, Reza Advani, Olov Svartstrom, Oskar Karlsson Lindsjo, Sandra Broddesson, Petra Edquist, Mia Brytting, Anna Risberg, Karin Tegmark-Wisell                                                                                                                                                                                                             |                                                                                                                                                                                        |
| EPI_ISL_615109                                                                                                                                                                                                                                                                                                                                                                                                                                                                                                                                                                                                                                                                                                                                                                                                                                                                                                                                                                                                                                                                                                                                                                                                                                                                                                                                                                 | Klinisk mikrobiologi NAL Trollhattan                                                                                       | The Public Health Agency of Sweden                                                                                         | Anna-Malin Linde, Maria Lind Karlberg, Mattias Haukland, Reza Advani, Olov Svartstrom, Oskar Karlsson Lindsjo, Sandra Broddesson, Petra Edquist, Mia Brytting, Anna Risberg, Karin Tegmark-Wisell                                                                                                                                                                                                             |                                                                                                                                                                                        |

|                                                                                                                                                                                                                                                                                                                                                                                                                                                                                                                                                                                                                                                                                                                                                                                                                                                                                                                                                                                                                                                                                                                                                                                                 |                                                                                                                            |                                                                                                                            |                                                                                                                                                                                                                                                                                                                                                                                                                                                                                                                                                                                                                                           |                                                                                                                                                                                                                                                                                                                                                                                                                 |
|-------------------------------------------------------------------------------------------------------------------------------------------------------------------------------------------------------------------------------------------------------------------------------------------------------------------------------------------------------------------------------------------------------------------------------------------------------------------------------------------------------------------------------------------------------------------------------------------------------------------------------------------------------------------------------------------------------------------------------------------------------------------------------------------------------------------------------------------------------------------------------------------------------------------------------------------------------------------------------------------------------------------------------------------------------------------------------------------------------------------------------------------------------------------------------------------------|----------------------------------------------------------------------------------------------------------------------------|----------------------------------------------------------------------------------------------------------------------------|-------------------------------------------------------------------------------------------------------------------------------------------------------------------------------------------------------------------------------------------------------------------------------------------------------------------------------------------------------------------------------------------------------------------------------------------------------------------------------------------------------------------------------------------------------------------------------------------------------------------------------------------|-----------------------------------------------------------------------------------------------------------------------------------------------------------------------------------------------------------------------------------------------------------------------------------------------------------------------------------------------------------------------------------------------------------------|
| EPI_ISL_615110                                                                                                                                                                                                                                                                                                                                                                                                                                                                                                                                                                                                                                                                                                                                                                                                                                                                                                                                                                                                                                                                                                                                                                                  | Klinsisk mikrobiologi Linköping                                                                                            | The Public Health Agency of Sweden                                                                                         | Anna-Malin Linde, Maria Lind Karlberg, Mattias Haukland, Reza Advani, Olov Svartstrom, Oskar Karlsson Lindsjo, Sandra Broddesson, Petra Edquist, Mia Brytting, Anna Risberg, Karin Tegmark-Wisell                                                                                                                                                                                                                                                                                                                                                                                                                                         |                                                                                                                                                                                                                                                                                                                                                                                                                 |
| EPI_ISL_615111, EPI_ISL_615112, EPI_ISL_615113, EPI_ISL_615114                                                                                                                                                                                                                                                                                                                                                                                                                                                                                                                                                                                                                                                                                                                                                                                                                                                                                                                                                                                                                                                                                                                                  | Orebro klinisk mikrobiologi                                                                                                | The Public Health Agency of Sweden                                                                                         | Anna-Malin Linde, Maria Lind Karlberg, Mattias Haukland, Reza Advani, Olov Svartstrom, Oskar Karlsson Lindsjo, Sandra Broddesson, Petra Edquist, Mia Brytting, Anna Risberg, Karin Tegmark-Wisell                                                                                                                                                                                                                                                                                                                                                                                                                                         |                                                                                                                                                                                                                                                                                                                                                                                                                 |
| EPI_ISL_615115, EPI_ISL_615116                                                                                                                                                                                                                                                                                                                                                                                                                                                                                                                                                                                                                                                                                                                                                                                                                                                                                                                                                                                                                                                                                                                                                                  | Skovde/Unilabs                                                                                                             | The Public Health Agency of Sweden                                                                                         | Anna-Malin Linde, Maria Lind Karlberg, Mattias Haukland, Reza Advani, Olov Svartstrom, Oskar Karlsson Lindsjo, Sandra Broddesson, Petra Edquist, Mia Brytting, Anna Risberg, Karin Tegmark-Wisell                                                                                                                                                                                                                                                                                                                                                                                                                                         |                                                                                                                                                                                                                                                                                                                                                                                                                 |
| EPI_ISL_615117, EPI_ISL_615118, EPI_ISL_615119                                                                                                                                                                                                                                                                                                                                                                                                                                                                                                                                                                                                                                                                                                                                                                                                                                                                                                                                                                                                                                                                                                                                                  | Klinsisk mikrobiologi Linköping                                                                                            | The Public Health Agency of Sweden                                                                                         | Anna-Malin Linde, Maria Lind Karlberg, Mattias Haukland, Reza Advani, Olov Svartstrom, Oskar Karlsson Lindsjo, Sandra Broddesson, Petra Edquist, Mia Brytting, Anna Risberg, Karin Tegmark-Wisell                                                                                                                                                                                                                                                                                                                                                                                                                                         |                                                                                                                                                                                                                                                                                                                                                                                                                 |
| EPI_ISL_615120                                                                                                                                                                                                                                                                                                                                                                                                                                                                                                                                                                                                                                                                                                                                                                                                                                                                                                                                                                                                                                                                                                                                                                                  | Orebro klinisk mikrobiologi                                                                                                | The Public Health Agency of Sweden                                                                                         | Anna-Malin Linde, Maria Lind Karlberg, Mattias Haukland, Reza Advani, Olov Svartstrom, Oskar Karlsson Lindsjo, Sandra Broddesson, Petra Edquist, Mia Brytting, Anna Risberg, Karin Tegmark-Wisell                                                                                                                                                                                                                                                                                                                                                                                                                                         |                                                                                                                                                                                                                                                                                                                                                                                                                 |
| EPI_ISL_623076, EPI_ISL_623077, EPI_ISL_623078, EPI_ISL_623079                                                                                                                                                                                                                                                                                                                                                                                                                                                                                                                                                                                                                                                                                                                                                                                                                                                                                                                                                                                                                                                                                                                                  | Uppsala klinisk mikrobiologi                                                                                               | The Public Health Agency of Sweden                                                                                         | Anna-Malin Linde, Maria Lind Karlberg, Mattias Haukland, Reza Advani, Olov Svartstrom, Oskar Karlsson Lindsjo, Sandra Broddesson, Petra Edquist, Mia Brytting, Anna Risberg, Karin Tegmark-Wisell                                                                                                                                                                                                                                                                                                                                                                                                                                         |                                                                                                                                                                                                                                                                                                                                                                                                                 |
| EPI_ISL_623080, EPI_ISL_623081, EPI_ISL_623082, EPI_ISL_623083, EPI_ISL_623084, EPI_ISL_623085                                                                                                                                                                                                                                                                                                                                                                                                                                                                                                                                                                                                                                                                                                                                                                                                                                                                                                                                                                                                                                                                                                  | Klinisk mikrobiologi, Skanes universitetssjukhus, Lund                                                                     | The Public Health Agency of Sweden                                                                                         | Anna-Malin Linde, Maria Lind Karlberg, Mattias Haukland, Reza Advani, Olov Svartstrom, Oskar Karlsson Lindsjo, Sandra Broddesson, Petra Edquist, Mia Brytting, Anna Risberg, Karin Tegmark-Wisell                                                                                                                                                                                                                                                                                                                                                                                                                                         |                                                                                                                                                                                                                                                                                                                                                                                                                 |
| EPI_ISL_623086                                                                                                                                                                                                                                                                                                                                                                                                                                                                                                                                                                                                                                                                                                                                                                                                                                                                                                                                                                                                                                                                                                                                                                                  | Halmstad klinisk mikrobiologi                                                                                              | The Public Health Agency of Sweden                                                                                         | Anna-Malin Linde, Maria Lind Karlberg, Mattias Haukland, Reza Advani, Olov Svartstrom, Oskar Karlsson Lindsjo, Sandra Broddesson, Petra Edquist, Mia Brytting, Anna Risberg, Karin Tegmark-Wisell                                                                                                                                                                                                                                                                                                                                                                                                                                         |                                                                                                                                                                                                                                                                                                                                                                                                                 |
| EPI_ISL_623087, EPI_ISL_623088                                                                                                                                                                                                                                                                                                                                                                                                                                                                                                                                                                                                                                                                                                                                                                                                                                                                                                                                                                                                                                                                                                                                                                  | Klinisk mikrobiologi NAL Trollhattan                                                                                       | The Public Health Agency of Sweden                                                                                         | Anna-Malin Linde, Maria Lind Karlberg, Mattias Haukland, Reza Advani, Olov Svartstrom, Oskar Karlsson Lindsjo, Sandra Broddesson, Petra Edquist, Mia Brytting, Anna Risberg, Karin Tegmark-Wisell                                                                                                                                                                                                                                                                                                                                                                                                                                         |                                                                                                                                                                                                                                                                                                                                                                                                                 |
| EPI_ISL_623089                                                                                                                                                                                                                                                                                                                                                                                                                                                                                                                                                                                                                                                                                                                                                                                                                                                                                                                                                                                                                                                                                                                                                                                  | Klinisk mikrobiologi Linköping                                                                                             | The Public Health Agency of Sweden                                                                                         | Anna-Malin Linde, Maria Lind Karlberg, Mattias Haukland, Reza Advani, Olov Svartstrom, Oskar Karlsson Lindsjo, Sandra Broddesson, Petra Edquist, Mia Brytting, Anna Risberg, Karin Tegmark-Wisell                                                                                                                                                                                                                                                                                                                                                                                                                                         |                                                                                                                                                                                                                                                                                                                                                                                                                 |
| EPI_ISL_623090                                                                                                                                                                                                                                                                                                                                                                                                                                                                                                                                                                                                                                                                                                                                                                                                                                                                                                                                                                                                                                                                                                                                                                                  | Klinisk mikrobiologi Vasternorrland                                                                                        | The Public Health Agency of Sweden                                                                                         | Anna-Malin Linde, Maria Lind Karlberg, Mattias Haukland, Reza Advani, Olov Svartstrom, Oskar Karlsson Lindsjo, Sandra Broddesson, Petra Edquist, Mia Brytting, Anna Risberg, Karin Tegmark-Wisell                                                                                                                                                                                                                                                                                                                                                                                                                                         |                                                                                                                                                                                                                                                                                                                                                                                                                 |
| EPI_ISL_623091                                                                                                                                                                                                                                                                                                                                                                                                                                                                                                                                                                                                                                                                                                                                                                                                                                                                                                                                                                                                                                                                                                                                                                                  | Kalmar klinisk mikrobiologi                                                                                                | The Public Health Agency of Sweden                                                                                         | Anna-Malin Linde, Maria Lind Karlberg, Mattias Haukland, Reza Advani, Olov Svartstrom, Oskar Karlsson Lindsjo, Sandra Broddesson, Petra Edquist, Mia Brytting, Anna Risberg, Karin Tegmark-Wisell                                                                                                                                                                                                                                                                                                                                                                                                                                         |                                                                                                                                                                                                                                                                                                                                                                                                                 |
| EPI_ISL_623092, EPI_ISL_623093, EPI_ISL_623094                                                                                                                                                                                                                                                                                                                                                                                                                                                                                                                                                                                                                                                                                                                                                                                                                                                                                                                                                                                                                                                                                                                                                  | Klinisk mikrobiologi Lanssjukhuset Ryhov, Jonköping                                                                        | The Public Health Agency of Sweden                                                                                         | Anna-Malin Linde, Maria Lind Karlberg, Mattias Haukland, Reza Advani, Olov Svartstrom, Oskar Karlsson Lindsjo, Sandra Broddesson, Petra Edquist, Mia Brytting, Anna Risberg, Karin Tegmark-Wisell                                                                                                                                                                                                                                                                                                                                                                                                                                         |                                                                                                                                                                                                                                                                                                                                                                                                                 |
| EPI_ISL_623095                                                                                                                                                                                                                                                                                                                                                                                                                                                                                                                                                                                                                                                                                                                                                                                                                                                                                                                                                                                                                                                                                                                                                                                  | Gavle klinisk mikrobiologi                                                                                                 | The Public Health Agency of Sweden                                                                                         | Anna-Malin Linde, Maria Lind Karlberg, Mattias Haukland, Reza Advani, Olov Svartstrom, Oskar Karlsson Lindsjo, Sandra Broddesson, Petra Edquist, Mia Brytting, Anna Risberg, Karin Tegmark-Wisell                                                                                                                                                                                                                                                                                                                                                                                                                                         |                                                                                                                                                                                                                                                                                                                                                                                                                 |
| EPI_ISL_626677, EPI_ISL_626678, EPI_ISL_626684, EPI_ISL_626689, EPI_ISL_626690, EPI_ISL_626738, EPI_ISL_626778, EPI_ISL_626792                                                                                                                                                                                                                                                                                                                                                                                                                                                                                                                                                                                                                                                                                                                                                                                                                                                                                                                                                                                                                                                                  | Centre for Enzyme Innovation, University of Portsmouth / Translational Research Laboratory, Portsmouth Hospitals NHS Trust | COVID-19 Genomics UK (COG-UK) Consortium                                                                                   | Angela Beckett, Yann Bourgeois, Garry Scarlett, Sharon Glaysher, Scott Elliott, Kelly Bicknell, Robert Impey, Allyson Lloyd, Sarah Wyllie, Ethan Butcher, Anoop Chauhan, Samuel Robson                                                                                                                                                                                                                                                                                                                                                                                                                                                    |                                                                                                                                                                                                                                                                                                                                                                                                                 |
| EPI_ISL_626812                                                                                                                                                                                                                                                                                                                                                                                                                                                                                                                                                                                                                                                                                                                                                                                                                                                                                                                                                                                                                                                                                                                                                                                  | West of Scotland Specialist Virology Centre, NHSGGC / MRC-University of Glasgow Centre for Virus Research                  | COVID-19 Genomics UK (COG-UK) Consortium                                                                                   | Ana da Silva Filipe, Natasha Johnson, Kathy Smollett, Daniel Mair, Stephen Carmichael, Lily Tong, Jenna Nichols, Elihu Aranday-Cortes, Kyriaki Nomikou; Sarah McDonald, Marc Niebel, Patawee Asamaphan; Richard Orton, Joseph Hughes, Sreenu Vattipally, David L Robertson; Alasdair MacLean, Rory Gunson; Kathy Li, Igor Starinskij, Natasha Jesudason, Rajiv Shah, James Shepherd, Antonia Ho, Emma Thomson                                                                                                                                                                                                                             |                                                                                                                                                                                                                                                                                                                                                                                                                 |
| EPI_ISL_626878, EPI_ISL_626879, EPI_ISL_626880, EPI_ISL_626895, EPI_ISL_626936                                                                                                                                                                                                                                                                                                                                                                                                                                                                                                                                                                                                                                                                                                                                                                                                                                                                                                                                                                                                                                                                                                                  | Centre for Enzyme Innovation, University of Portsmouth / Translational Research Laboratory, Portsmouth Hospitals NHS Trust | COVID-19 Genomics UK (COG-UK) Consortium                                                                                   | Angela Beckett, Yann Bourgeois, Garry Scarlett, Sharon Glaysher, Scott Elliott, Kelly Bicknell, Robert Impey, Allyson Lloyd, Sarah Wyllie, Ethan Butcher, Anoop Chauhan, Samuel Robson                                                                                                                                                                                                                                                                                                                                                                                                                                                    |                                                                                                                                                                                                                                                                                                                                                                                                                 |
| EPI_ISL_626971, EPI_ISL_626980, EPI_ISL_626982                                                                                                                                                                                                                                                                                                                                                                                                                                                                                                                                                                                                                                                                                                                                                                                                                                                                                                                                                                                                                                                                                                                                                  | West of Scotland Specialist Virology Centre, NHSGGC / MRC-University of Glasgow Centre for Virus Research                  | COVID-19 Genomics UK (COG-UK) Consortium                                                                                   | Ana da Silva Filipe, Natasha Johnson, Kathy Smollett, Daniel Mair, Stephen Carmichael, Lily Tong, Jenna Nichols, Elihu Aranday-Cortes, Kyriaki Nomikou; Sarah McDonald, Marc Niebel, Patawee Asamaphan; Richard Orton, Joseph Hughes, Sreenu Vattipally, David L Robertson; Alasdair MacLean, Rory Gunson; Kathy Li, Igor Starinskij, Natasha Jesudason, Rajiv Shah, James Shepherd, Antonia Ho, Emma Thomson                                                                                                                                                                                                                             |                                                                                                                                                                                                                                                                                                                                                                                                                 |
| EPI_ISL_627056, EPI_ISL_627057, EPI_ISL_627116                                                                                                                                                                                                                                                                                                                                                                                                                                                                                                                                                                                                                                                                                                                                                                                                                                                                                                                                                                                                                                                                                                                                                  | Centre for Enzyme Innovation, University of Portsmouth / Translational Research Laboratory, Portsmouth Hospitals NHS Trust | COVID-19 Genomics UK (COG-UK) Consortium                                                                                   | Angela Beckett, Yann Bourgeois, Garry Scarlett, Sharon Glaysher, Scott Elliott, Kelly Bicknell, Robert Impey, Allyson Lloyd, Sarah Wyllie, Ethan Butcher, Anoop Chauhan, Samuel Robson                                                                                                                                                                                                                                                                                                                                                                                                                                                    |                                                                                                                                                                                                                                                                                                                                                                                                                 |
| EPI_ISL_627117                                                                                                                                                                                                                                                                                                                                                                                                                                                                                                                                                                                                                                                                                                                                                                                                                                                                                                                                                                                                                                                                                                                                                                                  | West of Scotland Specialist Virology Centre, NHSGGC / MRC-University of Glasgow Centre for Virus Research                  | COVID-19 Genomics UK (COG-UK) Consortium                                                                                   | Ana da Silva Filipe, Natasha Johnson, Kathy Smollett, Daniel Mair, Stephen Carmichael, Lily Tong, Jenna Nichols, Elihu Aranday-Cortes, Kyriaki Nomikou; Sarah McDonald, Marc Niebel, Patawee Asamaphan; Richard Orton, Joseph Hughes, Sreenu Vattipally, David L Robertson; Alasdair MacLean, Rory Gunson; Kathy Li, Igor Starinskij, Natasha Jesudason, Rajiv Shah, James Shepherd, Antonia Ho, Emma Thomson                                                                                                                                                                                                                             |                                                                                                                                                                                                                                                                                                                                                                                                                 |
| EPI_ISL_627128, EPI_ISL_627144, EPI_ISL_627150                                                                                                                                                                                                                                                                                                                                                                                                                                                                                                                                                                                                                                                                                                                                                                                                                                                                                                                                                                                                                                                                                                                                                  | Centre for Enzyme Innovation, University of Portsmouth / Translational Research Laboratory, Portsmouth Hospitals NHS Trust | COVID-19 Genomics UK (COG-UK) Consortium                                                                                   | Angela Beckett, Yann Bourgeois, Garry Scarlett, Sharon Glaysher, Scott Elliott, Kelly Bicknell, Robert Impey, Allyson Lloyd, Sarah Wyllie, Ethan Butcher, Anoop Chauhan, Samuel Robson                                                                                                                                                                                                                                                                                                                                                                                                                                                    |                                                                                                                                                                                                                                                                                                                                                                                                                 |
| EPI_ISL_627334, EPI_ISL_627352, EPI_ISL_627353, EPI_ISL_627358, EPI_ISL_627377, EPI_ISL_627383, EPI_ISL_627396, EPI_ISL_627401, EPI_ISL_627417                                                                                                                                                                                                                                                                                                                                                                                                                                                                                                                                                                                                                                                                                                                                                                                                                                                                                                                                                                                                                                                  | West of Scotland Specialist Virology Centre, NHSGGC / MRC-University of Glasgow Centre for Virus Research                  | COVID-19 Genomics UK (COG-UK) Consortium                                                                                   | Ana da Silva Filipe, Natasha Johnson, Kathy Smollett, Daniel Mair, Stephen Carmichael, Lily Tong, Jenna Nichols, Elihu Aranday-Cortes, Kyriaki Nomikou; Sarah McDonald, Marc Niebel, Patawee Asamaphan; Richard Orton, Joseph Hughes, Sreenu Vattipally, David L Robertson; Alasdair MacLean, Rory Gunson; Kathy Li, Igor Starinskij, Natasha Jesudason, Rajiv Shah, James Shepherd, Antonia Ho, Emma Thomson                                                                                                                                                                                                                             |                                                                                                                                                                                                                                                                                                                                                                                                                 |
| EPI_ISL_628312, EPI_ISL_628313, EPI_ISL_628314, EPI_ISL_628315, EPI_ISL_628316, EPI_ISL_628317, EPI_ISL_628318, EPI_ISL_628319, EPI_ISL_628320, EPI_ISL_628321, EPI_ISL_628322, EPI_ISL_628323, EPI_ISL_628324, EPI_ISL_628325, EPI_ISL_628326, EPI_ISL_628327, EPI_ISL_628328, EPI_ISL_628329, EPI_ISL_628330, EPI_ISL_628331, EPI_ISL_628332, EPI_ISL_628333                                                                                                                                                                                                                                                                                                                                                                                                                                                                                                                                                                                                                                                                                                                                                                                                                                  | see above                                                                                                                  | Centre for Enzyme Innovation, University of Portsmouth / Translational Research Laboratory, Portsmouth Hospitals NHS Trust | COVID-19 Genomics UK (COG-UK) Consortium                                                                                                                                                                                                                                                                                                                                                                                                                                                                                                                                                                                                  | Angela Beckett, Yann Bourgeois, Garry Scarlett, Sharon Glaysher, Scott Elliott, Kelly Bicknell, Robert Impey, Allyson Lloyd, Sarah Wyllie, Ethan Butcher, Anoop Chauhan, Samuel Robson                                                                                                                                                                                                                          |
| EPI_ISL_632248                                                                                                                                                                                                                                                                                                                                                                                                                                                                                                                                                                                                                                                                                                                                                                                                                                                                                                                                                                                                                                                                                                                                                                                  | NHSGGC West of Scotland Specialist Virology Centre                                                                         | MRC-University of Glasgow Centre for Virus Research                                                                        | Ana da Silva Filipe, Natasha Johnson, Kathy Smollett, Daniel Mair, Stephen Carmichael, Lily Tong, Jenna Nichols, Kyriaki Nomikou; Richard Orton, Joseph Hughes, Sreenu Vattipally, David L Robertson; Alasdair MacLean, Rory Gunson; Kathy Li, Natasha Jesudason, Rajiv Shah, James Shepherd, Antonia Ho, Emma Thomson; Alex Alderton, Roberto Amato, Sonia Goncalves, Ewan Harrison, David K. Jackson, Ian Johnston, Dominic Kwiatkowski, Cordelia Langford, John Sillitoe on behalf of the Wellcome Sanger Institute COVID-19 Surveillance Team ( <a href="http://www.sanger.ac.uk/covid-team">http://www.sanger.ac.uk/covid-team</a> ) |                                                                                                                                                                                                                                                                                                                                                                                                                 |
| EPI_ISL_632909, EPI_ISL_632910, EPI_ISL_632911, EPI_ISL_632912, EPI_ISL_632913, EPI_ISL_632914, EPI_ISL_632915, EPI_ISL_632916, EPI_ISL_632917, EPI_ISL_632918, EPI_ISL_632919, EPI_ISL_632920, EPI_ISL_632921, EPI_ISL_632922, EPI_ISL_632923, EPI_ISL_632924, EPI_ISL_632925, EPI_ISL_632926, EPI_ISL_632927, EPI_ISL_632928, EPI_ISL_632929, EPI_ISL_632930, EPI_ISL_632931, EPI_ISL_632932, EPI_ISL_632933                                                                                                                                                                                                                                                                                                                                                                                                                                                                                                                                                                                                                                                                                                                                                                                  | see above                                                                                                                  | Cadham Provincial laboratory                                                                                               | Cadham Provincial laboratory                                                                                                                                                                                                                                                                                                                                                                                                                                                                                                                                                                                                              | Anna Majer, Shari Tyson, Grace Seo, Philip Mabon, Elsie Grudeski, Rhianonn Huzarewich, Russell Mandes, Anneliese Landgraf, Jennifer Tanner, Natalie Knox, Morag Graham, Gary Van Domselaar, Paul Van Caesele, Jared Bullard, David Alexander, Kerry Dust, Nathalie Bastien, Yan Li, Timothy Booth, Darian Hole, Madison Chapel, CanCOGeN's metadata curation team, Public Health Agency of Canada CanCOGeN team |
| EPI_ISL_637278, EPI_ISL_637279, EPI_ISL_637305, EPI_ISL_637369, EPI_ISL_637370, EPI_ISL_637371, EPI_ISL_637372, EPI_ISL_637387, EPI_ISL_637402, EPI_ISL_637411, EPI_ISL_637432, EPI_ISL_637453, EPI_ISL_637459, EPI_ISL_637466, EPI_ISL_637467, EPI_ISL_637491, EPI_ISL_637492, EPI_ISL_637493, EPI_ISL_637494, EPI_ISL_637495, EPI_ISL_637496, EPI_ISL_637497, EPI_ISL_637498, EPI_ISL_637499, EPI_ISL_637502, EPI_ISL_637528, EPI_ISL_637610, EPI_ISL_637659, EPI_ISL_637674, EPI_ISL_637714, EPI_ISL_637715, EPI_ISL_637717, EPI_ISL_637718, EPI_ISL_637719, EPI_ISL_637720, EPI_ISL_637780, EPI_ISL_637781, EPI_ISL_637782, EPI_ISL_637783, EPI_ISL_637853, EPI_ISL_637889, EPI_ISL_637892, EPI_ISL_637920, EPI_ISL_637921, EPI_ISL_637931, EPI_ISL_637932, EPI_ISL_637949, EPI_ISL_637951, EPI_ISL_637986, EPI_ISL_638002, EPI_ISL_638006, EPI_ISL_638026, EPI_ISL_638050, EPI_ISL_638065, EPI_ISL_638134, EPI_ISL_638135, EPI_ISL_638136, EPI_ISL_638137, EPI_ISL_638249, EPI_ISL_638250, EPI_ISL_638251, EPI_ISL_638252, EPI_ISL_638253, EPI_ISL_638254, EPI_ISL_638255, EPI_ISL_638256, EPI_ISL_638257, EPI_ISL_638265, EPI_ISL_638266, EPI_ISL_638267, EPI_ISL_638268, EPI_ISL_638269, |                                                                                                                            |                                                                                                                            |                                                                                                                                                                                                                                                                                                                                                                                                                                                                                                                                                                                                                                           |                                                                                                                                                                                                                                                                                                                                                                                                                 |

|                                                                                                                                                                                                                                                                                                                                                                                                                                                                                                                                                                                                                                                                                                                                                                                                                                                                |           |                                                                                                                                  |                                                  |                                                                                                                                                                                                   |
|----------------------------------------------------------------------------------------------------------------------------------------------------------------------------------------------------------------------------------------------------------------------------------------------------------------------------------------------------------------------------------------------------------------------------------------------------------------------------------------------------------------------------------------------------------------------------------------------------------------------------------------------------------------------------------------------------------------------------------------------------------------------------------------------------------------------------------------------------------------|-----------|----------------------------------------------------------------------------------------------------------------------------------|--------------------------------------------------|---------------------------------------------------------------------------------------------------------------------------------------------------------------------------------------------------|
| EPI_ISL_638270, EPI_ISL_638271, EPI_ISL_638272, EPI_ISL_638273, EPI_ISL_638274, EPI_ISL_638275, EPI_ISL_638276, EPI_ISL_638277, EPI_ISL_638278, EPI_ISL_638279, EPI_ISL_638280, EPI_ISL_638281, EPI_ISL_638282, EPI_ISL_638283, EPI_ISL_638284, EPI_ISL_638285, EPI_ISL_638286, EPI_ISL_638287, EPI_ISL_638288, EPI_ISL_638289, EPI_ISL_638290, EPI_ISL_638291, EPI_ISL_638292, EPI_ISL_638454, EPI_ISL_638455, EPI_ISL_638456, EPI_ISL_638457, EPI_ISL_638458, EPI_ISL_638911, EPI_ISL_638912, EPI_ISL_638913, EPI_ISL_639006, EPI_ISL_639007                                                                                                                                                                                                                                                                                                                 | see above | Centre for Enzyme Innovation, University of Portsmouth /<br>Translational Research Laboratory, Portsmouth Hospitals<br>NHS Trust | COVID-19 Genomics UK (COG-UK) Consortium         | Angela Beckett, Yann Bourgeois, Garry Scarlett, Sharon Glaysheer, Scott Elliott, Kelly Bicknell, Robert Impey, Allyson Lloyd, Sarah Wyllie, Ethan Butcher, Anoop Chauhan, Samuel Robson           |
| EPI_ISL_639948, EPI_ISL_639949, EPI_ISL_639950, EPI_ISL_639951, EPI_ISL_639952, EPI_ISL_639953, EPI_ISL_639954, EPI_ISL_639955, EPI_ISL_639956, EPI_ISL_639957, EPI_ISL_639958, EPI_ISL_639959, EPI_ISL_639960, EPI_ISL_639961, EPI_ISL_639962, EPI_ISL_639963, EPI_ISL_639964, EPI_ISL_639965, EPI_ISL_639966, EPI_ISL_639967, EPI_ISL_639968, EPI_ISL_639969, EPI_ISL_639970, EPI_ISL_639971, EPI_ISL_639972, EPI_ISL_639973                                                                                                                                                                                                                                                                                                                                                                                                                                 | see above | HELIX LLC                                                                                                                        | WHO National Influenza Centre Russian Federation | Andrey Komissarov, Artem Fadeev, Kseniya Komissarova, Anna Ivanova, Dmitry Bazhenov, Daria Danilenko                                                                                              |
| EPI_ISL_644378, EPI_ISL_644388, EPI_ISL_644390, EPI_ISL_644397, EPI_ISL_644398, EPI_ISL_644401, EPI_ISL_644402, EPI_ISL_644403, EPI_ISL_644404, EPI_ISL_644405, EPI_ISL_644418, EPI_ISL_644425, EPI_ISL_644429, EPI_ISL_644430, EPI_ISL_644431, EPI_ISL_644432, EPI_ISL_644433, EPI_ISL_644438, EPI_ISL_644442, EPI_ISL_644444, EPI_ISL_644445, EPI_ISL_644449, EPI_ISL_644452, EPI_ISL_644455, EPI_ISL_644457, EPI_ISL_644458, EPI_ISL_644462, EPI_ISL_644470, EPI_ISL_644476, EPI_ISL_644478, EPI_ISL_644479, EPI_ISL_644490, EPI_ISL_644498, EPI_ISL_644502, EPI_ISL_644506, EPI_ISL_644507, EPI_ISL_644508, EPI_ISL_644510, EPI_ISL_644511, EPI_ISL_644516, EPI_ISL_644518, EPI_ISL_644523, EPI_ISL_644532, EPI_ISL_644533, EPI_ISL_644537, EPI_ISL_644538, EPI_ISL_644539, EPI_ISL_644545, EPI_ISL_644551, EPI_ISL_644556, EPI_ISL_644562, EPI_ISL_644564 | see above | MEPHI, Aix Marseille University                                                                                                  | MEPHI, Aix Marseille University                  | Anthony LEVASSEUR                                                                                                                                                                                 |
| EPI_ISL_648129                                                                                                                                                                                                                                                                                                                                                                                                                                                                                                                                                                                                                                                                                                                                                                                                                                                 |           | The Public Health Agency of Sweden                                                                                               | The Public Health Agency of Sweden               | Anna-Malin Linde, Maria Lind Karlberg, Mattias Haukland, Reza Advani, Olov Svartstrom, Oskar Karlsson Lindsjo, Sandra Broddesson, Petra Edquist, Mia Brytting, Anna Risberg, Karin Tegmark-Wisell |
| EPI_ISL_648130, EPI_ISL_648131                                                                                                                                                                                                                                                                                                                                                                                                                                                                                                                                                                                                                                                                                                                                                                                                                                 |           | Uppsala klinisk mikrobiologi                                                                                                     | The Public Health Agency of Sweden               | Anna-Malin Linde, Maria Lind Karlberg, Mattias Haukland, Reza Advani, Olov Svartstrom, Oskar Karlsson Lindsjo, Sandra Broddesson, Petra Edquist, Mia Brytting, Anna Risberg, Karin Tegmark-Wisell |
| EPI_ISL_648132                                                                                                                                                                                                                                                                                                                                                                                                                                                                                                                                                                                                                                                                                                                                                                                                                                                 |           | The Public Health Agency of Sweden                                                                                               | The Public Health Agency of Sweden               | Anna-Malin Linde, Maria Lind Karlberg, Mattias Haukland, Reza Advani, Olov Svartstrom, Oskar Karlsson Lindsjo, Sandra Broddesson, Petra Edquist, Mia Brytting, Anna Risberg, Karin Tegmark-Wisell |
| EPI_ISL_648133                                                                                                                                                                                                                                                                                                                                                                                                                                                                                                                                                                                                                                                                                                                                                                                                                                                 |           | Klinisk mikrobiologi centralsjukhuset Karlstad                                                                                   | The Public Health Agency of Sweden               | Anna-Malin Linde, Maria Lind Karlberg, Mattias Haukland, Reza Advani, Olov Svartstrom, Oskar Karlsson Lindsjo, Sandra Broddesson, Petra Edquist, Mia Brytting, Anna Risberg, Karin Tegmark-Wisell |
| EPI_ISL_648134, EPI_ISL_648135, EPI_ISL_648136, EPI_ISL_648137, EPI_ISL_648138, EPI_ISL_648139                                                                                                                                                                                                                                                                                                                                                                                                                                                                                                                                                                                                                                                                                                                                                                 |           | The Public Health Agency of Sweden                                                                                               | The Public Health Agency of Sweden               | Anna-Malin Linde, Maria Lind Karlberg, Mattias Haukland, Reza Advani, Olov Svartstrom, Oskar Karlsson Lindsjo, Sandra Broddesson, Petra Edquist, Mia Brytting, Anna Risberg, Karin Tegmark-Wisell |
| EPI_ISL_648140, EPI_ISL_648141, EPI_ISL_648142                                                                                                                                                                                                                                                                                                                                                                                                                                                                                                                                                                                                                                                                                                                                                                                                                 |           | Gavle klinisk mikrobiologi                                                                                                       | The Public Health Agency of Sweden               | Anna-Malin Linde, Maria Lind Karlberg, Mattias Haukland, Reza Advani, Olov Svartstrom, Oskar Karlsson Lindsjo, Sandra Broddesson, Petra Edquist, Mia Brytting, Anna Risberg, Karin Tegmark-Wisell |
| EPI_ISL_648143                                                                                                                                                                                                                                                                                                                                                                                                                                                                                                                                                                                                                                                                                                                                                                                                                                                 |           | The Public Health Agency of Sweden                                                                                               | The Public Health Agency of Sweden               | Anna-Malin Linde, Maria Lind Karlberg, Mattias Haukland, Reza Advani, Olov Svartstrom, Oskar Karlsson Lindsjo, Sandra Broddesson, Petra Edquist, Mia Brytting, Anna Risberg, Karin Tegmark-Wisell |
| EPI_ISL_648144                                                                                                                                                                                                                                                                                                                                                                                                                                                                                                                                                                                                                                                                                                                                                                                                                                                 |           | Gavle klinisk mikrobiologi                                                                                                       | The Public Health Agency of Sweden               | Anna-Malin Linde, Maria Lind Karlberg, Mattias Haukland, Reza Advani, Olov Svartstrom, Oskar Karlsson Lindsjo, Sandra Broddesson, Petra Edquist, Mia Brytting, Anna Risberg, Karin Tegmark-Wisell |
| EPI_ISL_648145, EPI_ISL_648146, EPI_ISL_648147                                                                                                                                                                                                                                                                                                                                                                                                                                                                                                                                                                                                                                                                                                                                                                                                                 |           | The Public Health Agency of Sweden                                                                                               | The Public Health Agency of Sweden               | Anna-Malin Linde, Maria Lind Karlberg, Mattias Haukland, Reza Advani, Olov Svartstrom, Oskar Karlsson Lindsjo, Sandra Broddesson, Petra Edquist, Mia Brytting, Anna Risberg, Karin Tegmark-Wisell |
| EPI_ISL_648148                                                                                                                                                                                                                                                                                                                                                                                                                                                                                                                                                                                                                                                                                                                                                                                                                                                 |           | Halmstad klinisk mikrobiologi                                                                                                    | The Public Health Agency of Sweden               | Anna-Malin Linde, Maria Lind Karlberg, Mattias Haukland, Reza Advani, Olov Svartstrom, Oskar Karlsson Lindsjo, Sandra Broddesson, Petra Edquist, Mia Brytting, Anna Risberg, Karin Tegmark-Wisell |
| EPI_ISL_648149, EPI_ISL_648150                                                                                                                                                                                                                                                                                                                                                                                                                                                                                                                                                                                                                                                                                                                                                                                                                                 |           | The Public Health Agency of Sweden                                                                                               | The Public Health Agency of Sweden               | Anna-Malin Linde, Maria Lind Karlberg, Mattias Haukland, Reza Advani, Olov Svartstrom, Oskar Karlsson Lindsjo, Sandra Broddesson, Petra Edquist, Mia Brytting, Anna Risberg, Karin Tegmark-Wisell |
| EPI_ISL_648151                                                                                                                                                                                                                                                                                                                                                                                                                                                                                                                                                                                                                                                                                                                                                                                                                                                 |           | Halmstad                                                                                                                         | The Public Health Agency of Sweden               | Anna-Malin Linde, Maria Lind Karlberg, Mattias Haukland, Reza Advani, Olov Svartstrom, Oskar Karlsson Lindsjo, Sandra Broddesson, Petra Edquist, Mia Brytting, Anna Risberg, Karin Tegmark-Wisell |
| EPI_ISL_648152, EPI_ISL_648153, EPI_ISL_648154, EPI_ISL_648155                                                                                                                                                                                                                                                                                                                                                                                                                                                                                                                                                                                                                                                                                                                                                                                                 |           | Stockholm                                                                                                                        | The Public Health Agency of Sweden               | Anna-Malin Linde, Maria Lind Karlberg, Mattias Haukland, Reza Advani, Olov Svartstrom, Oskar Karlsson Lindsjo, Sandra Broddesson, Petra Edquist, Mia Brytting, Anna Risberg, Karin Tegmark-Wisell |
| EPI_ISL_648156                                                                                                                                                                                                                                                                                                                                                                                                                                                                                                                                                                                                                                                                                                                                                                                                                                                 |           | The Public Health Agency of Sweden                                                                                               | The Public Health Agency of Sweden               | Anna-Malin Linde, Maria Lind Karlberg, Mattias Haukland, Reza Advani, Olov Svartstrom, Oskar Karlsson Lindsjo, Sandra Broddesson, Petra Edquist, Mia Brytting, Anna Risberg, Karin Tegmark-Wisell |
| EPI_ISL_648157, EPI_ISL_648158, EPI_ISL_648159, EPI_ISL_648160, EPI_ISL_648161                                                                                                                                                                                                                                                                                                                                                                                                                                                                                                                                                                                                                                                                                                                                                                                 |           | Sundsvall                                                                                                                        | The Public Health Agency of Sweden               | Anna-Malin Linde, Maria Lind Karlberg, Mattias Haukland, Reza Advani, Olov Svartstrom, Oskar Karlsson Lindsjo, Sandra Broddesson, Petra Edquist, Mia Brytting, Anna Risberg, Karin Tegmark-Wisell |
| EPI_ISL_648162                                                                                                                                                                                                                                                                                                                                                                                                                                                                                                                                                                                                                                                                                                                                                                                                                                                 |           | Klinisk mikrobiologi Vasternorrland                                                                                              | The Public Health Agency of Sweden               | Anna-Malin Linde, Maria Lind Karlberg, Mattias Haukland, Reza Advani, Olov Svartstrom, Oskar Karlsson Lindsjo, Sandra Broddesson, Petra Edquist, Mia Brytting, Anna Risberg, Karin Tegmark-Wisell |
| EPI_ISL_648163                                                                                                                                                                                                                                                                                                                                                                                                                                                                                                                                                                                                                                                                                                                                                                                                                                                 |           | Gavle klinisk mikrobiologi                                                                                                       | The Public Health Agency of Sweden               | Anna-Malin Linde, Maria Lind Karlberg, Mattias Haukland, Reza Advani, Olov Svartstrom, Oskar Karlsson Lindsjo, Sandra Broddesson, Petra Edquist, Mia Brytting, Anna Risberg, Karin Tegmark-Wisell |
| EPI_ISL_648164                                                                                                                                                                                                                                                                                                                                                                                                                                                                                                                                                                                                                                                                                                                                                                                                                                                 |           | Kalmar klinisk mikrobiologi                                                                                                      | The Public Health Agency of Sweden               | Anna-Malin Linde, Maria Lind Karlberg, Mattias Haukland, Reza Advani, Olov Svartstrom, Oskar Karlsson Lindsjo, Sandra Broddesson, Petra Edquist, Mia Brytting, Anna Risberg, Karin Tegmark-Wisell |
| EPI_ISL_648165                                                                                                                                                                                                                                                                                                                                                                                                                                                                                                                                                                                                                                                                                                                                                                                                                                                 |           | The Public Health Agency of Sweden                                                                                               | The Public Health Agency of Sweden               | Anna-Malin Linde, Maria Lind Karlberg, Mattias Haukland, Reza Advani, Olov Svartstrom, Oskar Karlsson Lindsjo, Sandra Broddesson, Petra Edquist, Mia Brytting, Anna Risberg, Karin Tegmark-Wisell |
| EPI_ISL_648166, EPI_ISL_648167, EPI_ISL_648168                                                                                                                                                                                                                                                                                                                                                                                                                                                                                                                                                                                                                                                                                                                                                                                                                 |           | Eskestuna                                                                                                                        | The Public Health Agency of Sweden               | Anna-Malin Linde, Maria Lind Karlberg, Mattias Haukland, Reza Advani, Olov Svartstrom, Oskar Karlsson Lindsjo, Sandra Broddesson, Petra Edquist, Mia Brytting, Anna Risberg, Karin Tegmark-Wisell |
| EPI_ISL_648169                                                                                                                                                                                                                                                                                                                                                                                                                                                                                                                                                                                                                                                                                                                                                                                                                                                 |           | Klinisk mikrobiologi NAL Trollhattan                                                                                             | The Public Health Agency of Sweden               | Anna-Malin Linde, Maria Lind Karlberg, Mattias Haukland, Reza Advani, Olov Svartstrom, Oskar Karlsson Lindsjo, Sandra Broddesson, Petra Edquist, Mia Brytting, Anna Risberg, Karin Tegmark-Wisell |
| EPI_ISL_648170, EPI_ISL_648171, EPI_ISL_648172                                                                                                                                                                                                                                                                                                                                                                                                                                                                                                                                                                                                                                                                                                                                                                                                                 |           | The Public Health Agency of Sweden                                                                                               | The Public Health Agency of Sweden               | Anna-Malin Linde, Maria Lind Karlberg, Mattias Haukland, Reza Advani, Olov Svartstrom, Oskar Karlsson Lindsjo, Sandra Broddesson, Petra Edquist, Mia Brytting, Anna Risberg, Karin Tegmark-Wisell |
| EPI_ISL_648173                                                                                                                                                                                                                                                                                                                                                                                                                                                                                                                                                                                                                                                                                                                                                                                                                                                 |           | Klinisk mikrobiologi NAL Trollhattan                                                                                             | The Public Health Agency of Sweden               | Anna-Malin Linde, Maria Lind Karlberg, Mattias Haukland, Reza Advani, Olov Svartstrom, Oskar Karlsson Lindsjo, Sandra Broddesson, Petra Edquist, Mia Brytting, Anna Risberg, Karin Tegmark-Wisell |
| EPI_ISL_648174, EPI_ISL_648175, EPI_ISL_648176, EPI_ISL_648177, EPI_ISL_648178, EPI_ISL_648179, EPI_ISL_648180, EPI_ISL_648181, EPI_ISL_648182, EPI_ISL_648183, EPI_ISL_648184, EPI_ISL_648185, EPI_ISL_648186, EPI_ISL_648187, EPI_ISL_648188, EPI_ISL_648189, EPI_ISL_648190, EPI_ISL_648191                                                                                                                                                                                                                                                                                                                                                                                                                                                                                                                                                                 | see above | The Public Health Agency of Sweden                                                                                               | The Public Health Agency of Sweden               | Anna-Malin Linde, Maria Lind Karlberg, Mattias Haukland, Reza Advani, Olov Svartstrom, Oskar Karlsson Lindsjo, Sandra Broddesson, Petra Edquist, Mia Brytting, Anna Risberg, Karin Tegmark-Wisell |
| EPI_ISL_648192                                                                                                                                                                                                                                                                                                                                                                                                                                                                                                                                                                                                                                                                                                                                                                                                                                                 |           | Sundsvall                                                                                                                        | The Public Health Agency of Sweden               | Anna-Malin Linde, Maria Lind Karlberg, Mattias Haukland, Reza Advani, Olov Svartstrom, Oskar Karlsson Lindsjo, Sandra Broddesson, Petra Edquist, Mia Brytting, Anna Risberg, Karin Tegmark-Wisell |
| EPI_ISL_648193                                                                                                                                                                                                                                                                                                                                                                                                                                                                                                                                                                                                                                                                                                                                                                                                                                                 |           | Klinisk mikrobiologi SAS Boras                                                                                                   | The Public Health Agency of Sweden               | Anna-Malin Linde, Maria Lind Karlberg, Mattias Haukland, Reza Advani, Olov Svartstrom, Oskar Karlsson Lindsjo, Sandra Broddesson, Petra Edquist, Mia Brytting, Anna Risberg, Karin Tegmark-Wisell |
| EPI_ISL_648194, EPI_ISL_648195, EPI_ISL_648196, EPI_ISL_648197                                                                                                                                                                                                                                                                                                                                                                                                                                                                                                                                                                                                                                                                                                                                                                                                 |           | The Public Health Agency of Sweden                                                                                               | The Public Health Agency of Sweden               | Anna-Malin Linde, Maria Lind Karlberg, Mattias Haukland, Reza Advani, Olov Svartstrom, Oskar Karlsson Lindsjo, Sandra Broddesson, Petra Edquist, Mia Brytting, Anna Risberg, Karin Tegmark-Wisell |
| EPI_ISL_648198, EPI_ISL_648199                                                                                                                                                                                                                                                                                                                                                                                                                                                                                                                                                                                                                                                                                                                                                                                                                                 |           | Skovde/Unilabs                                                                                                                   | The Public Health Agency of Sweden               | Anna-Malin Linde, Maria Lind Karlberg, Mattias Haukland, Reza Advani, Olov Svartstrom, Oskar Karlsson Lindsjo, Sandra Broddesson, Petra Edquist, Mia Brytting, Anna Risberg, Karin Tegmark-Wisell |

|                                                                                                                                                                                                                                                                                                                                                                                                                                                                                                                |                                                                                                                            |                                          |                                                                                                                                                                                                                                                                                                                                                                                                                                     |
|----------------------------------------------------------------------------------------------------------------------------------------------------------------------------------------------------------------------------------------------------------------------------------------------------------------------------------------------------------------------------------------------------------------------------------------------------------------------------------------------------------------|----------------------------------------------------------------------------------------------------------------------------|------------------------------------------|-------------------------------------------------------------------------------------------------------------------------------------------------------------------------------------------------------------------------------------------------------------------------------------------------------------------------------------------------------------------------------------------------------------------------------------|
| EPI_ISL_648200, EPI_ISL_648201, EPI_ISL_648202, EPI_ISL_648203                                                                                                                                                                                                                                                                                                                                                                                                                                                 | Linkoping                                                                                                                  | The Public Health Agency of Sweden       | Anna-Malin Linde, Maria Lind Karlberg, Mattias Haukland, Reza Advani, Olov Svartstrom, Oskar Karlsson Lindsjo, Sandra Broddesson, Petra Edquist, Mia Brytting, Anna Risberg, Karin Tegmark-Wisell                                                                                                                                                                                                                                   |
| EPI_ISL_648204, EPI_ISL_648205, EPI_ISL_648206                                                                                                                                                                                                                                                                                                                                                                                                                                                                 | Orebro klinisk mikrobiologi                                                                                                | The Public Health Agency of Sweden       | Anna-Malin Linde, Maria Lind Karlberg, Mattias Haukland, Reza Advani, Olov Svartstrom, Oskar Karlsson Lindsjo, Sandra Broddesson, Petra Edquist, Mia Brytting, Anna Risberg, Karin Tegmark-Wisell                                                                                                                                                                                                                                   |
| EPI_ISL_648207, EPI_ISL_648208                                                                                                                                                                                                                                                                                                                                                                                                                                                                                 | Orebro                                                                                                                     | The Public Health Agency of Sweden       | Anna-Malin Linde, Maria Lind Karlberg, Mattias Haukland, Reza Advani, Olov Svartstrom, Oskar Karlsson Lindsjo, Sandra Broddesson, Petra Edquist, Mia Brytting, Anna Risberg, Karin Tegmark-Wisell                                                                                                                                                                                                                                   |
| EPI_ISL_650168, EPI_ISL_650169, EPI_ISL_650221, EPI_ISL_650248, EPI_ISL_650249, EPI_ISL_650379, EPI_ISL_650388, EPI_ISL_650401                                                                                                                                                                                                                                                                                                                                                                                 | Centre for Enzyme Innovation, University of Portsmouth / Translational Research Laboratory, Portsmouth Hospitals NHS Trust | COVID-19 Genomics UK (COG-UK) Consortium | Angela Beckett, Yann Bourgeois, Garry Scarlett, Sharon Glaysher, Scott Elliott, Kelly Bicknell, Robert Impey, Allyson Lloyd, Sarah Wyllie, Ethan Butcher, Anoop Chauhan, Samuel Robson                                                                                                                                                                                                                                              |
| EPI_ISL_650514                                                                                                                                                                                                                                                                                                                                                                                                                                                                                                 | West of Scotland Specialist Virology Centre, NHSGGC / MRC-University of Glasgow Centre for Virus Research                  | COVID-19 Genomics UK (COG-UK) Consortium | Ana da Silva Filipe, Natasha Johnson, Kathy Smollett, Daniel Mair, Stephen Carmichael, Alice Broos, Lily Tong, Jenna Nichols, Kyriaki Nomikou; Sarah McDonald; Richard Orton, Joseph Hughes, Sreenu Vattipally, David L Robertson; Alasdair MacLean, Rory Gunson; Sharif Shaaban, Matthew Holden; Rachel Blacow, Guy Mollett, Kathy Li, James Shepherd, Antonia Ho, Emma Thomson                                                    |
| EPI_ISL_650566, EPI_ISL_650567, EPI_ISL_650568, EPI_ISL_650569, EPI_ISL_650570, EPI_ISL_650571, EPI_ISL_650575, EPI_ISL_650576, EPI_ISL_650577, EPI_ISL_650578, EPI_ISL_650579, EPI_ISL_650581, EPI_ISL_650584, EPI_ISL_650585, EPI_ISL_650600, EPI_ISL_650601, EPI_ISL_650602, EPI_ISL_650603, EPI_ISL_650604, EPI_ISL_650605, EPI_ISL_650608, EPI_ISL_650711                                                                                                                                                 | see above                                                                                                                  | COVID-19 Genomics UK (COG-UK) Consortium | Angela Beckett, Yann Bourgeois, Garry Scarlett, Sharon Glaysher, Scott Elliott, Kelly Bicknell, Robert Impey, Allyson Lloyd, Sarah Wyllie, Ethan Butcher, Anoop Chauhan, Samuel Robson                                                                                                                                                                                                                                              |
| EPI_ISL_650861                                                                                                                                                                                                                                                                                                                                                                                                                                                                                                 | West of Scotland Specialist Virology Centre, NHSGGC / MRC-University of Glasgow Centre for Virus Research                  | COVID-19 Genomics UK (COG-UK) Consortium | Ana da Silva Filipe, Natasha Johnson, Kathy Smollett, Daniel Mair, Stephen Carmichael, Alice Broos, Lily Tong, Jenna Nichols, Kyriaki Nomikou; Sarah McDonald; Richard Orton, Joseph Hughes, Sreenu Vattipally, David L Robertson; Alasdair MacLean, Rory Gunson; Sharif Shaaban, Matthew Holden; Rachel Blacow, Guy Mollett, Kathy Li, James Shepherd, Antonia Ho, Emma Thomson                                                    |
| EPI_ISL_650941, EPI_ISL_650947, EPI_ISL_650949, EPI_ISL_650956, EPI_ISL_650957, EPI_ISL_650964, EPI_ISL_650965, EPI_ISL_650966, EPI_ISL_650980, EPI_ISL_650981, EPI_ISL_650982, EPI_ISL_651066, EPI_ISL_651067, EPI_ISL_651068, EPI_ISL_651069, EPI_ISL_651070, EPI_ISL_651099, EPI_ISL_651187, EPI_ISL_651277                                                                                                                                                                                                 | see above                                                                                                                  | COVID-19 Genomics UK (COG-UK) Consortium | Angela Beckett, Yann Bourgeois, Garry Scarlett, Sharon Glaysher, Scott Elliott, Kelly Bicknell, Robert Impey, Allyson Lloyd, Sarah Wyllie, Ethan Butcher, Anoop Chauhan, Samuel Robson                                                                                                                                                                                                                                              |
| EPI_ISL_651540, EPI_ISL_651736, EPI_ISL_651775, EPI_ISL_651781, EPI_ISL_651782, EPI_ISL_651784                                                                                                                                                                                                                                                                                                                                                                                                                 | West of Scotland Specialist Virology Centre, NHSGGC / MRC-University of Glasgow Centre for Virus Research                  | COVID-19 Genomics UK (COG-UK) Consortium | Ana da Silva Filipe, Natasha Johnson, Kathy Smollett, Daniel Mair, Stephen Carmichael, Alice Broos, Lily Tong, Jenna Nichols, Kyriaki Nomikou; Sarah McDonald; Richard Orton, Joseph Hughes, Sreenu Vattipally, David L Robertson; Alasdair MacLean, Rory Gunson; Sharif Shaaban, Matthew Holden; Rachel Blacow, Guy Mollett, Kathy Li, James Shepherd, Antonia Ho, Emma Thomson                                                    |
| EPI_ISL_651800                                                                                                                                                                                                                                                                                                                                                                                                                                                                                                 | Lighthouse Lab in Glasgow / MRC-University of Glasgow Centre for Virus Research                                            | COVID-19 Genomics UK (COG-UK) Consortium | Ana da Silva Filipe, Natasha Johnson, Kathy Smollett, Daniel Mair, Stephen Carmichael, Alice Broos, Lily Tong, Jenna Nichols, Kyriaki Nomikou; Sarah McDonald; Harper VanSteenhouse, Yumi Kasai, David Gray, Carol Clugston, Anna Dominiczak; Alasdair MacLean, Rory Gunson; Richard Orton, Joseph Hughes, Sreenu Vattipally, David L Robertson; Sharif Shaaban, Matthew Holden; Kathy Li, James Shepherd, Antonia Ho, Emma Thomson |
| EPI_ISL_651843, EPI_ISL_651865, EPI_ISL_651904, EPI_ISL_651920                                                                                                                                                                                                                                                                                                                                                                                                                                                 | West of Scotland Specialist Virology Centre, NHSGGC / MRC-University of Glasgow Centre for Virus Research                  | COVID-19 Genomics UK (COG-UK) Consortium | Ana da Silva Filipe, Natasha Johnson, Kathy Smollett, Daniel Mair, Stephen Carmichael, Alice Broos, Lily Tong, Jenna Nichols, Kyriaki Nomikou; Sarah McDonald; Richard Orton, Joseph Hughes, Sreenu Vattipally, David L Robertson; Alasdair MacLean, Rory Gunson; Sharif Shaaban, Matthew Holden; Rachel Blacow, Guy Mollett, Kathy Li, James Shepherd, Antonia Ho, Emma Thomson                                                    |
| EPI_ISL_652103, EPI_ISL_652104, EPI_ISL_652105, EPI_ISL_652106, EPI_ISL_652107, EPI_ISL_652108, EPI_ISL_652109, EPI_ISL_652110, EPI_ISL_652620, EPI_ISL_652621, EPI_ISL_652622, EPI_ISL_652623, EPI_ISL_652624, EPI_ISL_652625, EPI_ISL_652626                                                                                                                                                                                                                                                                 | see above                                                                                                                  | COVID-19 Genomics UK (COG-UK) Consortium | Angela Beckett, Yann Bourgeois, Garry Scarlett, Sharon Glaysher, Scott Elliott, Kelly Bicknell, Robert Impey, Allyson Lloyd, Sarah Wyllie, Ethan Butcher, Anoop Chauhan, Samuel Robson                                                                                                                                                                                                                                              |
| EPI_ISL_654498, EPI_ISL_654499, EPI_ISL_654500, EPI_ISL_654501, EPI_ISL_654502, EPI_ISL_654503                                                                                                                                                                                                                                                                                                                                                                                                                 | The Public Health Agency of Sweden                                                                                         | The Public Health Agency of Sweden       | Anna-Malin Linde, Maria Lind Karlberg, Mattias Haukland, Reza Advani, Olov Svartstrom, Oskar Karlsson Lindsjo, Sandra Broddesson, Petra Edquist, Mia Brytting, Anna Risberg, Karin Tegmark-Wisell                                                                                                                                                                                                                                   |
| EPI_ISL_654504, EPI_ISL_654505                                                                                                                                                                                                                                                                                                                                                                                                                                                                                 | Klinisk mikrobiologi Vasternorrland                                                                                        | The Public Health Agency of Sweden       | Anna-Malin Linde, Maria Lind Karlberg, Mattias Haukland, Reza Advani, Olov Svartstrom, Oskar Karlsson Lindsjo, Sandra Broddesson, Petra Edquist, Mia Brytting, Anna Risberg, Karin Tegmark-Wisell                                                                                                                                                                                                                                   |
| EPI_ISL_654506, EPI_ISL_654507, EPI_ISL_654508                                                                                                                                                                                                                                                                                                                                                                                                                                                                 | The Public Health Agency of Sweden                                                                                         | The Public Health Agency of Sweden       | Anna-Malin Linde, Maria Lind Karlberg, Mattias Haukland, Reza Advani, Olov Svartstrom, Oskar Karlsson Lindsjo, Sandra Broddesson, Petra Edquist, Mia Brytting, Anna Risberg, Karin Tegmark-Wisell                                                                                                                                                                                                                                   |
| EPI_ISL_654892, EPI_ISL_654893, EPI_ISL_654894, EPI_ISL_654895, EPI_ISL_654896, EPI_ISL_654897, EPI_ISL_654898, EPI_ISL_654899, EPI_ISL_654942                                                                                                                                                                                                                                                                                                                                                                 | Klinisk mikrobiologi                                                                                                       | The Public Health Agency of Sweden       | Anna-Malin Linde, Maria Lind Karlberg, Mattias Haukland, Reza Advani, Olov Svartstrom, Oskar Karlsson Lindsjo, Sandra Broddesson, Petra Edquist, Mia Brytting, Anna Risberg, Karin Tegmark-Wisell                                                                                                                                                                                                                                   |
| EPI_ISL_654943                                                                                                                                                                                                                                                                                                                                                                                                                                                                                                 | Orebro klinisk mikrobiologi                                                                                                | The Public Health Agency of Sweden       | Anna-Malin Linde, Maria Lind Karlberg, Mattias Haukland, Reza Advani, Olov Svartstrom, Oskar Karlsson Lindsjo, Sandra Broddesson, Petra Edquist, Mia Brytting, Anna Risberg, Karin Tegmark-Wisell                                                                                                                                                                                                                                   |
| EPI_ISL_654944, EPI_ISL_654945, EPI_ISL_654946, EPI_ISL_654947, EPI_ISL_654948, EPI_ISL_654949, EPI_ISL_654950, EPI_ISL_654951                                                                                                                                                                                                                                                                                                                                                                                 | Klinisk mikrobiologi                                                                                                       | The Public Health Agency of Sweden       | Anna-Malin Linde, Maria Lind Karlberg, Mattias Haukland, Reza Advani, Olov Svartstrom, Oskar Karlsson Lindsjo, Sandra Broddesson, Petra Edquist, Mia Brytting, Anna Risberg, Karin Tegmark-Wisell                                                                                                                                                                                                                                   |
| EPI_ISL_654952                                                                                                                                                                                                                                                                                                                                                                                                                                                                                                 | Klinsisk mikrobiologi Linkoping                                                                                            | The Public Health Agency of Sweden       | Anna-Malin Linde, Maria Lind Karlberg, Mattias Haukland, Reza Advani, Olov Svartstrom, Oskar Karlsson Lindsjo, Sandra Broddesson, Petra Edquist, Mia Brytting, Anna Risberg, Karin Tegmark-Wisell                                                                                                                                                                                                                                   |
| EPI_ISL_654953                                                                                                                                                                                                                                                                                                                                                                                                                                                                                                 | Uppsala klinisk mikrobiologi                                                                                               | The Public Health Agency of Sweden       | Anna-Malin Linde, Maria Lind Karlberg, Mattias Haukland, Reza Advani, Olov Svartstrom, Oskar Karlsson Lindsjo, Sandra Broddesson, Petra Edquist, Mia Brytting, Anna Risberg, Karin Tegmark-Wisell                                                                                                                                                                                                                                   |
| EPI_ISL_654954                                                                                                                                                                                                                                                                                                                                                                                                                                                                                                 | Klinisk Mikrobiologi                                                                                                       | The Public Health Agency of Sweden       | Anna-Malin Linde, Maria Lind Karlberg, Mattias Haukland, Reza Advani, Olov Svartstrom, Oskar Karlsson Lindsjo, Sandra Broddesson, Petra Edquist, Mia Brytting, Anna Risberg, Karin Tegmark-Wisell                                                                                                                                                                                                                                   |
| EPI_ISL_654955, EPI_ISL_654956                                                                                                                                                                                                                                                                                                                                                                                                                                                                                 | Skovde/Unilabs                                                                                                             | The Public Health Agency of Sweden       | Anna-Malin Linde, Maria Lind Karlberg, Mattias Haukland, Reza Advani, Olov Svartstrom, Oskar Karlsson Lindsjo, Sandra Broddesson, Petra Edquist, Mia Brytting, Anna Risberg, Karin Tegmark-Wisell                                                                                                                                                                                                                                   |
| EPI_ISL_654957                                                                                                                                                                                                                                                                                                                                                                                                                                                                                                 | Klinisk mikrobiologi Vasternorrland                                                                                        | The Public Health Agency of Sweden       | Anna-Malin Linde, Maria Lind Karlberg, Mattias Haukland, Reza Advani, Olov Svartstrom, Oskar Karlsson Lindsjo, Sandra Broddesson, Petra Edquist, Mia Brytting, Anna Risberg, Karin Tegmark-Wisell                                                                                                                                                                                                                                   |
| EPI_ISL_660378, EPI_ISL_660379, EPI_ISL_660380, EPI_ISL_660381, EPI_ISL_660382, EPI_ISL_660383                                                                                                                                                                                                                                                                                                                                                                                                                 | Orebro klinisk mikrobiologi                                                                                                | The Public Health Agency of Sweden       | Anna-Malin Linde, Maria Lind Karlberg, Mattias Haukland, Reza Advani, Olov Svartstrom, Oskar Karlsson Lindsjo, Sandra Broddesson, Petra Edquist, Mia Brytting, Anna Risberg, Karin Tegmark-Wisell                                                                                                                                                                                                                                   |
| EPI_ISL_660384, EPI_ISL_660385, EPI_ISL_660386, EPI_ISL_660387, EPI_ISL_660388, EPI_ISL_660389, EPI_ISL_660390, EPI_ISL_660391, EPI_ISL_660392, EPI_ISL_660393, EPI_ISL_660394, EPI_ISL_660395, EPI_ISL_660396, EPI_ISL_660397, EPI_ISL_660398, EPI_ISL_660399, EPI_ISL_660400, EPI_ISL_660401, EPI_ISL_660402, EPI_ISL_660403, EPI_ISL_660404, EPI_ISL_660405, EPI_ISL_660406, EPI_ISL_660407, EPI_ISL_660408, EPI_ISL_660409, EPI_ISL_660410, EPI_ISL_660411, EPI_ISL_660412, EPI_ISL_660413, EPI_ISL_660414 | see above                                                                                                                  | Klinsisk mikrobiologi Linkoping          | The Public Health Agency of Sweden                                                                                                                                                                                                                                                                                                                                                                                                  |
|                                                                                                                                                                                                                                                                                                                                                                                                                                                                                                                |                                                                                                                            |                                          | Anna-Malin Linde, Maria Lind Karlberg, Mattias Haukland, Reza Advani, Olov Svartstrom, Oskar Karlsson Lindsjo, Sandra Broddesson, Petra Edquist, Mia Brytting, Anna Risberg, Karin Tegmark-Wisell                                                                                                                                                                                                                                   |



|                                                                                                                                                                                                                                                                                                                                                                                                                                                                                                                                                                                                                                                                                                                                                                                                                                                                                                                                                                                                                                                                                                                                                                                                                                                                                                                                                                                                                                                                                                                                                                                                                                                                                                                                                                                                                                                                                                                                                                                                                                                                                                                                                                                                                                                                                                                                                                                                                                                                                                                                                                                                                                                                                                                                                                                                                                                                                                                                                                                                                                                                                                                                                                                                                                                                                                                                                                                                                                                                                                                                                                                                                                                                                                                                                                                                                                                                                                                                                                                                                                                                                                                                                                                                                                                                                                                                                                                                                                                                                                                                                                                                                                                                                                                                                                                                                                                                                                                                                                                                                                                                                                                                                                                                                                                                                                                                                                                                                                                                                                                                                                                                                                                                                                                                                                                                                                                                                                                                                                                                                                                                                                                                                                                                                                                                                                                                                                                                                                                                                                                                                                                                                                                                                                                                                                                                                                                                                                                                                                                                                                                |                                                                                                                            |                                                               |                                                                                                                                                                                                                                                                                                                                                                                  |                                              |
|------------------------------------------------------------------------------------------------------------------------------------------------------------------------------------------------------------------------------------------------------------------------------------------------------------------------------------------------------------------------------------------------------------------------------------------------------------------------------------------------------------------------------------------------------------------------------------------------------------------------------------------------------------------------------------------------------------------------------------------------------------------------------------------------------------------------------------------------------------------------------------------------------------------------------------------------------------------------------------------------------------------------------------------------------------------------------------------------------------------------------------------------------------------------------------------------------------------------------------------------------------------------------------------------------------------------------------------------------------------------------------------------------------------------------------------------------------------------------------------------------------------------------------------------------------------------------------------------------------------------------------------------------------------------------------------------------------------------------------------------------------------------------------------------------------------------------------------------------------------------------------------------------------------------------------------------------------------------------------------------------------------------------------------------------------------------------------------------------------------------------------------------------------------------------------------------------------------------------------------------------------------------------------------------------------------------------------------------------------------------------------------------------------------------------------------------------------------------------------------------------------------------------------------------------------------------------------------------------------------------------------------------------------------------------------------------------------------------------------------------------------------------------------------------------------------------------------------------------------------------------------------------------------------------------------------------------------------------------------------------------------------------------------------------------------------------------------------------------------------------------------------------------------------------------------------------------------------------------------------------------------------------------------------------------------------------------------------------------------------------------------------------------------------------------------------------------------------------------------------------------------------------------------------------------------------------------------------------------------------------------------------------------------------------------------------------------------------------------------------------------------------------------------------------------------------------------------------------------------------------------------------------------------------------------------------------------------------------------------------------------------------------------------------------------------------------------------------------------------------------------------------------------------------------------------------------------------------------------------------------------------------------------------------------------------------------------------------------------------------------------------------------------------------------------------------------------------------------------------------------------------------------------------------------------------------------------------------------------------------------------------------------------------------------------------------------------------------------------------------------------------------------------------------------------------------------------------------------------------------------------------------------------------------------------------------------------------------------------------------------------------------------------------------------------------------------------------------------------------------------------------------------------------------------------------------------------------------------------------------------------------------------------------------------------------------------------------------------------------------------------------------------------------------------------------------------------------------------------------------------------------------------------------------------------------------------------------------------------------------------------------------------------------------------------------------------------------------------------------------------------------------------------------------------------------------------------------------------------------------------------------------------------------------------------------------------------------------------------------------------------------------------------------------------------------------------------------------------------------------------------------------------------------------------------------------------------------------------------------------------------------------------------------------------------------------------------------------------------------------------------------------------------------------------------------------------------------------------------------------------------------------------------------------------------------------------------------------------------------------------------------------------------------------------------------------------------------------------------------------------------------------------------------------------------------------------------------------------------------------------------------------------------------------------------------------------------------------------------------------------------------------------------------------------|----------------------------------------------------------------------------------------------------------------------------|---------------------------------------------------------------|----------------------------------------------------------------------------------------------------------------------------------------------------------------------------------------------------------------------------------------------------------------------------------------------------------------------------------------------------------------------------------|----------------------------------------------|
|                                                                                                                                                                                                                                                                                                                                                                                                                                                                                                                                                                                                                                                                                                                                                                                                                                                                                                                                                                                                                                                                                                                                                                                                                                                                                                                                                                                                                                                                                                                                                                                                                                                                                                                                                                                                                                                                                                                                                                                                                                                                                                                                                                                                                                                                                                                                                                                                                                                                                                                                                                                                                                                                                                                                                                                                                                                                                                                                                                                                                                                                                                                                                                                                                                                                                                                                                                                                                                                                                                                                                                                                                                                                                                                                                                                                                                                                                                                                                                                                                                                                                                                                                                                                                                                                                                                                                                                                                                                                                                                                                                                                                                                                                                                                                                                                                                                                                                                                                                                                                                                                                                                                                                                                                                                                                                                                                                                                                                                                                                                                                                                                                                                                                                                                                                                                                                                                                                                                                                                                                                                                                                                                                                                                                                                                                                                                                                                                                                                                                                                                                                                                                                                                                                                                                                                                                                                                                                                                                                                                                                                |                                                                                                                            |                                                               |                                                                                                                                                                                                                                                                                                                                                                                  | Brytting, Anna Risberg, Karin Tegmark-Wisell |
| EPI_ISL_660415                                                                                                                                                                                                                                                                                                                                                                                                                                                                                                                                                                                                                                                                                                                                                                                                                                                                                                                                                                                                                                                                                                                                                                                                                                                                                                                                                                                                                                                                                                                                                                                                                                                                                                                                                                                                                                                                                                                                                                                                                                                                                                                                                                                                                                                                                                                                                                                                                                                                                                                                                                                                                                                                                                                                                                                                                                                                                                                                                                                                                                                                                                                                                                                                                                                                                                                                                                                                                                                                                                                                                                                                                                                                                                                                                                                                                                                                                                                                                                                                                                                                                                                                                                                                                                                                                                                                                                                                                                                                                                                                                                                                                                                                                                                                                                                                                                                                                                                                                                                                                                                                                                                                                                                                                                                                                                                                                                                                                                                                                                                                                                                                                                                                                                                                                                                                                                                                                                                                                                                                                                                                                                                                                                                                                                                                                                                                                                                                                                                                                                                                                                                                                                                                                                                                                                                                                                                                                                                                                                                                                                 | unknown                                                                                                                    | The Public Health Agency of Sweden                            | Anna-Malin Linde, Maria Lind Karlberg, Mattias Haukland, Reza Advani, Olov Svartstrom, Oskar Karlsson Lindsjo, Sandra Broddesson, Petra Edquist, Mia Brytting, Anna Risberg, Karin Tegmark-Wisell                                                                                                                                                                                |                                              |
| EPI_ISL_660416, EPI_ISL_660417, EPI_ISL_660418, EPI_ISL_660419, EPI_ISL_660420, EPI_ISL_660421                                                                                                                                                                                                                                                                                                                                                                                                                                                                                                                                                                                                                                                                                                                                                                                                                                                                                                                                                                                                                                                                                                                                                                                                                                                                                                                                                                                                                                                                                                                                                                                                                                                                                                                                                                                                                                                                                                                                                                                                                                                                                                                                                                                                                                                                                                                                                                                                                                                                                                                                                                                                                                                                                                                                                                                                                                                                                                                                                                                                                                                                                                                                                                                                                                                                                                                                                                                                                                                                                                                                                                                                                                                                                                                                                                                                                                                                                                                                                                                                                                                                                                                                                                                                                                                                                                                                                                                                                                                                                                                                                                                                                                                                                                                                                                                                                                                                                                                                                                                                                                                                                                                                                                                                                                                                                                                                                                                                                                                                                                                                                                                                                                                                                                                                                                                                                                                                                                                                                                                                                                                                                                                                                                                                                                                                                                                                                                                                                                                                                                                                                                                                                                                                                                                                                                                                                                                                                                                                                 | Klinisk mikrobiologi                                                                                                       | The Public Health Agency of Sweden                            | Anna-Malin Linde, Maria Lind Karlberg, Mattias Haukland, Reza Advani, Olov Svartstrom, Oskar Karlsson Lindsjo, Sandra Broddesson, Petra Edquist, Mia Brytting, Anna Risberg, Karin Tegmark-Wisell                                                                                                                                                                                |                                              |
| EPI_ISL_660422, EPI_ISL_660423, EPI_ISL_660424, EPI_ISL_660425, EPI_ISL_660426                                                                                                                                                                                                                                                                                                                                                                                                                                                                                                                                                                                                                                                                                                                                                                                                                                                                                                                                                                                                                                                                                                                                                                                                                                                                                                                                                                                                                                                                                                                                                                                                                                                                                                                                                                                                                                                                                                                                                                                                                                                                                                                                                                                                                                                                                                                                                                                                                                                                                                                                                                                                                                                                                                                                                                                                                                                                                                                                                                                                                                                                                                                                                                                                                                                                                                                                                                                                                                                                                                                                                                                                                                                                                                                                                                                                                                                                                                                                                                                                                                                                                                                                                                                                                                                                                                                                                                                                                                                                                                                                                                                                                                                                                                                                                                                                                                                                                                                                                                                                                                                                                                                                                                                                                                                                                                                                                                                                                                                                                                                                                                                                                                                                                                                                                                                                                                                                                                                                                                                                                                                                                                                                                                                                                                                                                                                                                                                                                                                                                                                                                                                                                                                                                                                                                                                                                                                                                                                                                                 | Orebro klinisk mikrobiologi                                                                                                | The Public Health Agency of Sweden                            | Anna-Malin Linde, Maria Lind Karlberg, Mattias Haukland, Reza Advani, Olov Svartstrom, Oskar Karlsson Lindsjo, Sandra Broddesson, Petra Edquist, Mia Brytting, Anna Risberg, Karin Tegmark-Wisell                                                                                                                                                                                |                                              |
| EPI_ISL_660427, EPI_ISL_660428, EPI_ISL_660429, EPI_ISL_660430, EPI_ISL_660431                                                                                                                                                                                                                                                                                                                                                                                                                                                                                                                                                                                                                                                                                                                                                                                                                                                                                                                                                                                                                                                                                                                                                                                                                                                                                                                                                                                                                                                                                                                                                                                                                                                                                                                                                                                                                                                                                                                                                                                                                                                                                                                                                                                                                                                                                                                                                                                                                                                                                                                                                                                                                                                                                                                                                                                                                                                                                                                                                                                                                                                                                                                                                                                                                                                                                                                                                                                                                                                                                                                                                                                                                                                                                                                                                                                                                                                                                                                                                                                                                                                                                                                                                                                                                                                                                                                                                                                                                                                                                                                                                                                                                                                                                                                                                                                                                                                                                                                                                                                                                                                                                                                                                                                                                                                                                                                                                                                                                                                                                                                                                                                                                                                                                                                                                                                                                                                                                                                                                                                                                                                                                                                                                                                                                                                                                                                                                                                                                                                                                                                                                                                                                                                                                                                                                                                                                                                                                                                                                                 | Klinisk Mikrobiologi                                                                                                       | The Public Health Agency of Sweden                            | Anna-Malin Linde, Maria Lind Karlberg, Mattias Haukland, Reza Advani, Olov Svartstrom, Oskar Karlsson Lindsjo, Sandra Broddesson, Petra Edquist, Mia Brytting, Anna Risberg, Karin Tegmark-Wisell                                                                                                                                                                                |                                              |
| EPI_ISL_664137, EPI_ISL_664191, EPI_ISL_664302, EPI_ISL_664374, EPI_ISL_664375, EPI_ISL_664376, EPI_ISL_664377, EPI_ISL_664492, EPI_ISL_664526, EPI_ISL_664556, EPI_ISL_664557, EPI_ISL_664558, EPI_ISL_664559, EPI_ISL_664679, EPI_ISL_664690, EPI_ISL_664746, EPI_ISL_664763, EPI_ISL_664767, EPI_ISL_664840, EPI_ISL_664841, EPI_ISL_664842, EPI_ISL_664843, EPI_ISL_664844, EPI_ISL_664845, EPI_ISL_664846, EPI_ISL_664847, EPI_ISL_664848, EPI_ISL_664849, EPI_ISL_664850, EPI_ISL_664851, EPI_ISL_664852, EPI_ISL_664853, EPI_ISL_664854, EPI_ISL_664855, EPI_ISL_665267, EPI_ISL_665274, EPI_ISL_665301, EPI_ISL_665304, EPI_ISL_665330, EPI_ISL_665338, EPI_ISL_665341, EPI_ISL_665347, EPI_ISL_665348, EPI_ISL_665383, EPI_ISL_665391                                                                                                                                                                                                                                                                                                                                                                                                                                                                                                                                                                                                                                                                                                                                                                                                                                                                                                                                                                                                                                                                                                                                                                                                                                                                                                                                                                                                                                                                                                                                                                                                                                                                                                                                                                                                                                                                                                                                                                                                                                                                                                                                                                                                                                                                                                                                                                                                                                                                                                                                                                                                                                                                                                                                                                                                                                                                                                                                                                                                                                                                                                                                                                                                                                                                                                                                                                                                                                                                                                                                                                                                                                                                                                                                                                                                                                                                                                                                                                                                                                                                                                                                                                                                                                                                                                                                                                                                                                                                                                                                                                                                                                                                                                                                                                                                                                                                                                                                                                                                                                                                                                                                                                                                                                                                                                                                                                                                                                                                                                                                                                                                                                                                                                                                                                                                                                                                                                                                                                                                                                                                                                                                                                                                                                                                                                 |                                                                                                                            |                                                               |                                                                                                                                                                                                                                                                                                                                                                                  |                                              |
| see above                                                                                                                                                                                                                                                                                                                                                                                                                                                                                                                                                                                                                                                                                                                                                                                                                                                                                                                                                                                                                                                                                                                                                                                                                                                                                                                                                                                                                                                                                                                                                                                                                                                                                                                                                                                                                                                                                                                                                                                                                                                                                                                                                                                                                                                                                                                                                                                                                                                                                                                                                                                                                                                                                                                                                                                                                                                                                                                                                                                                                                                                                                                                                                                                                                                                                                                                                                                                                                                                                                                                                                                                                                                                                                                                                                                                                                                                                                                                                                                                                                                                                                                                                                                                                                                                                                                                                                                                                                                                                                                                                                                                                                                                                                                                                                                                                                                                                                                                                                                                                                                                                                                                                                                                                                                                                                                                                                                                                                                                                                                                                                                                                                                                                                                                                                                                                                                                                                                                                                                                                                                                                                                                                                                                                                                                                                                                                                                                                                                                                                                                                                                                                                                                                                                                                                                                                                                                                                                                                                                                                                      | Centre for Enzyme Innovation, University of Portsmouth / Translational Research Laboratory, Portsmouth Hospitals NHS Trust | COVID-19 Genomics UK (COG-UK) Consortium                      | Angela Beckett, Yann Bourgeois, Garry Scarlett, Sharon Glaysher, Scott Elliott, Kelly Bicknell, Robert Impey, Allyson Lloyd, Sarah Wyllie, Ethan Butcher, Anoop Chauhan, Samuel Robson                                                                                                                                                                                           |                                              |
| EPI_ISL_665416                                                                                                                                                                                                                                                                                                                                                                                                                                                                                                                                                                                                                                                                                                                                                                                                                                                                                                                                                                                                                                                                                                                                                                                                                                                                                                                                                                                                                                                                                                                                                                                                                                                                                                                                                                                                                                                                                                                                                                                                                                                                                                                                                                                                                                                                                                                                                                                                                                                                                                                                                                                                                                                                                                                                                                                                                                                                                                                                                                                                                                                                                                                                                                                                                                                                                                                                                                                                                                                                                                                                                                                                                                                                                                                                                                                                                                                                                                                                                                                                                                                                                                                                                                                                                                                                                                                                                                                                                                                                                                                                                                                                                                                                                                                                                                                                                                                                                                                                                                                                                                                                                                                                                                                                                                                                                                                                                                                                                                                                                                                                                                                                                                                                                                                                                                                                                                                                                                                                                                                                                                                                                                                                                                                                                                                                                                                                                                                                                                                                                                                                                                                                                                                                                                                                                                                                                                                                                                                                                                                                                                 | West of Scotland Specialist Virology Centre, NHSGGC / MRC-University of Glasgow Centre for Virus Research                  | COVID-19 Genomics UK (COG-UK) Consortium                      | Ana da Silva Filipe, Natasha Johnson, Kathy Smollett, Daniel Mair, Stephen Carmichael, Alice Broos, Lily Tong, Jenna Nichols, Kyriaki Nomikou; Sarah McDonald; Richard Orton, Joseph Hughes, Sreenu Vattipally, David L Robertson; Alasdair MacLean, Rory Gunson; Sharif Shaaban, Matthew Holden; Rachel Blacow, Guy Mollett, Kathy Li, James Shepherd, Antonia Ho, Emma Thomson |                                              |
| EPI_ISL_665418, EPI_ISL_665434, EPI_ISL_665471, EPI_ISL_665472, EPI_ISL_665476, EPI_ISL_665477, EPI_ISL_665478, EPI_ISL_665479, EPI_ISL_665480, EPI_ISL_665482, EPI_ISL_665483, EPI_ISL_665484, EPI_ISL_665485, EPI_ISL_665486, EPI_ISL_665487, EPI_ISL_665488                                                                                                                                                                                                                                                                                                                                                                                                                                                                                                                                                                                                                                                                                                                                                                                                                                                                                                                                                                                                                                                                                                                                                                                                                                                                                                                                                                                                                                                                                                                                                                                                                                                                                                                                                                                                                                                                                                                                                                                                                                                                                                                                                                                                                                                                                                                                                                                                                                                                                                                                                                                                                                                                                                                                                                                                                                                                                                                                                                                                                                                                                                                                                                                                                                                                                                                                                                                                                                                                                                                                                                                                                                                                                                                                                                                                                                                                                                                                                                                                                                                                                                                                                                                                                                                                                                                                                                                                                                                                                                                                                                                                                                                                                                                                                                                                                                                                                                                                                                                                                                                                                                                                                                                                                                                                                                                                                                                                                                                                                                                                                                                                                                                                                                                                                                                                                                                                                                                                                                                                                                                                                                                                                                                                                                                                                                                                                                                                                                                                                                                                                                                                                                                                                                                                                                                 |                                                                                                                            |                                                               |                                                                                                                                                                                                                                                                                                                                                                                  |                                              |
| see above                                                                                                                                                                                                                                                                                                                                                                                                                                                                                                                                                                                                                                                                                                                                                                                                                                                                                                                                                                                                                                                                                                                                                                                                                                                                                                                                                                                                                                                                                                                                                                                                                                                                                                                                                                                                                                                                                                                                                                                                                                                                                                                                                                                                                                                                                                                                                                                                                                                                                                                                                                                                                                                                                                                                                                                                                                                                                                                                                                                                                                                                                                                                                                                                                                                                                                                                                                                                                                                                                                                                                                                                                                                                                                                                                                                                                                                                                                                                                                                                                                                                                                                                                                                                                                                                                                                                                                                                                                                                                                                                                                                                                                                                                                                                                                                                                                                                                                                                                                                                                                                                                                                                                                                                                                                                                                                                                                                                                                                                                                                                                                                                                                                                                                                                                                                                                                                                                                                                                                                                                                                                                                                                                                                                                                                                                                                                                                                                                                                                                                                                                                                                                                                                                                                                                                                                                                                                                                                                                                                                                                      | Centre for Enzyme Innovation, University of Portsmouth / Translational Research Laboratory, Portsmouth Hospitals NHS Trust | COVID-19 Genomics UK (COG-UK) Consortium                      | Angela Beckett, Yann Bourgeois, Garry Scarlett, Sharon Glaysher, Scott Elliott, Kelly Bicknell, Robert Impey, Allyson Lloyd, Sarah Wyllie, Ethan Butcher, Anoop Chauhan, Samuel Robson                                                                                                                                                                                           |                                              |
| EPI_ISL_665531                                                                                                                                                                                                                                                                                                                                                                                                                                                                                                                                                                                                                                                                                                                                                                                                                                                                                                                                                                                                                                                                                                                                                                                                                                                                                                                                                                                                                                                                                                                                                                                                                                                                                                                                                                                                                                                                                                                                                                                                                                                                                                                                                                                                                                                                                                                                                                                                                                                                                                                                                                                                                                                                                                                                                                                                                                                                                                                                                                                                                                                                                                                                                                                                                                                                                                                                                                                                                                                                                                                                                                                                                                                                                                                                                                                                                                                                                                                                                                                                                                                                                                                                                                                                                                                                                                                                                                                                                                                                                                                                                                                                                                                                                                                                                                                                                                                                                                                                                                                                                                                                                                                                                                                                                                                                                                                                                                                                                                                                                                                                                                                                                                                                                                                                                                                                                                                                                                                                                                                                                                                                                                                                                                                                                                                                                                                                                                                                                                                                                                                                                                                                                                                                                                                                                                                                                                                                                                                                                                                                                                 | West of Scotland Specialist Virology Centre, NHSGGC / MRC-University of Glasgow Centre for Virus Research                  | COVID-19 Genomics UK (COG-UK) Consortium                      | Ana da Silva Filipe, Natasha Johnson, Kathy Smollett, Daniel Mair, Stephen Carmichael, Alice Broos, Lily Tong, Jenna Nichols, Kyriaki Nomikou; Sarah McDonald; Richard Orton, Joseph Hughes, Sreenu Vattipally, David L Robertson; Alasdair MacLean, Rory Gunson; Sharif Shaaban, Matthew Holden; Rachel Blacow, Guy Mollett, Kathy Li, James Shepherd, Antonia Ho, Emma Thomson |                                              |
| EPI_ISL_665614, EPI_ISL_665615, EPI_ISL_665616, EPI_ISL_665624, EPI_ISL_665625, EPI_ISL_665652, EPI_ISL_665698, EPI_ISL_665723, EPI_ISL_665726, EPI_ISL_665745, EPI_ISL_665849, EPI_ISL_665946, EPI_ISL_665947, EPI_ISL_665948, EPI_ISL_665949, EPI_ISL_665950, EPI_ISL_665951, EPI_ISL_665952, EPI_ISL_665953, EPI_ISL_665954, EPI_ISL_665955                                                                                                                                                                                                                                                                                                                                                                                                                                                                                                                                                                                                                                                                                                                                                                                                                                                                                                                                                                                                                                                                                                                                                                                                                                                                                                                                                                                                                                                                                                                                                                                                                                                                                                                                                                                                                                                                                                                                                                                                                                                                                                                                                                                                                                                                                                                                                                                                                                                                                                                                                                                                                                                                                                                                                                                                                                                                                                                                                                                                                                                                                                                                                                                                                                                                                                                                                                                                                                                                                                                                                                                                                                                                                                                                                                                                                                                                                                                                                                                                                                                                                                                                                                                                                                                                                                                                                                                                                                                                                                                                                                                                                                                                                                                                                                                                                                                                                                                                                                                                                                                                                                                                                                                                                                                                                                                                                                                                                                                                                                                                                                                                                                                                                                                                                                                                                                                                                                                                                                                                                                                                                                                                                                                                                                                                                                                                                                                                                                                                                                                                                                                                                                                                                                 |                                                                                                                            |                                                               |                                                                                                                                                                                                                                                                                                                                                                                  |                                              |
| see above                                                                                                                                                                                                                                                                                                                                                                                                                                                                                                                                                                                                                                                                                                                                                                                                                                                                                                                                                                                                                                                                                                                                                                                                                                                                                                                                                                                                                                                                                                                                                                                                                                                                                                                                                                                                                                                                                                                                                                                                                                                                                                                                                                                                                                                                                                                                                                                                                                                                                                                                                                                                                                                                                                                                                                                                                                                                                                                                                                                                                                                                                                                                                                                                                                                                                                                                                                                                                                                                                                                                                                                                                                                                                                                                                                                                                                                                                                                                                                                                                                                                                                                                                                                                                                                                                                                                                                                                                                                                                                                                                                                                                                                                                                                                                                                                                                                                                                                                                                                                                                                                                                                                                                                                                                                                                                                                                                                                                                                                                                                                                                                                                                                                                                                                                                                                                                                                                                                                                                                                                                                                                                                                                                                                                                                                                                                                                                                                                                                                                                                                                                                                                                                                                                                                                                                                                                                                                                                                                                                                                                      | Centre for Enzyme Innovation, University of Portsmouth / Translational Research Laboratory, Portsmouth Hospitals NHS Trust | COVID-19 Genomics UK (COG-UK) Consortium                      | Angela Beckett, Yann Bourgeois, Garry Scarlett, Sharon Glaysher, Scott Elliott, Kelly Bicknell, Robert Impey, Allyson Lloyd, Sarah Wyllie, Ethan Butcher, Anoop Chauhan, Samuel Robson                                                                                                                                                                                           |                                              |
| EPI_ISL_666035, EPI_ISL_666037                                                                                                                                                                                                                                                                                                                                                                                                                                                                                                                                                                                                                                                                                                                                                                                                                                                                                                                                                                                                                                                                                                                                                                                                                                                                                                                                                                                                                                                                                                                                                                                                                                                                                                                                                                                                                                                                                                                                                                                                                                                                                                                                                                                                                                                                                                                                                                                                                                                                                                                                                                                                                                                                                                                                                                                                                                                                                                                                                                                                                                                                                                                                                                                                                                                                                                                                                                                                                                                                                                                                                                                                                                                                                                                                                                                                                                                                                                                                                                                                                                                                                                                                                                                                                                                                                                                                                                                                                                                                                                                                                                                                                                                                                                                                                                                                                                                                                                                                                                                                                                                                                                                                                                                                                                                                                                                                                                                                                                                                                                                                                                                                                                                                                                                                                                                                                                                                                                                                                                                                                                                                                                                                                                                                                                                                                                                                                                                                                                                                                                                                                                                                                                                                                                                                                                                                                                                                                                                                                                                                                 | West of Scotland Specialist Virology Centre, NHSGGC / MRC-University of Glasgow Centre for Virus Research                  | COVID-19 Genomics UK (COG-UK) Consortium                      | Ana da Silva Filipe, Natasha Johnson, Kathy Smollett, Daniel Mair, Stephen Carmichael, Alice Broos, Lily Tong, Jenna Nichols, Kyriaki Nomikou; Sarah McDonald; Richard Orton, Joseph Hughes, Sreenu Vattipally, David L Robertson; Alasdair MacLean, Rory Gunson; Sharif Shaaban, Matthew Holden; Rachel Blacow, Guy Mollett, Kathy Li, James Shepherd, Antonia Ho, Emma Thomson |                                              |
| EPI_ISL_666107, EPI_ISL_666108, EPI_ISL_666109, EPI_ISL_678831, EPI_ISL_679969, EPI_ISL_679970, EPI_ISL_679971, EPI_ISL_679972, EPI_ISL_679973, EPI_ISL_679974, EPI_ISL_679975, EPI_ISL_679976, EPI_ISL_679977, EPI_ISL_679978, EPI_ISL_679979, EPI_ISL_679980, EPI_ISL_679981, EPI_ISL_679982, EPI_ISL_679983, EPI_ISL_679984, EPI_ISL_679985, EPI_ISL_680016, EPI_ISL_680017, EPI_ISL_680018, EPI_ISL_680019, EPI_ISL_680020, EPI_ISL_680021, EPI_ISL_680022, EPI_ISL_680023, EPI_ISL_680024, EPI_ISL_680025, EPI_ISL_680026, EPI_ISL_680027, EPI_ISL_680028, EPI_ISL_680029, EPI_ISL_680030, EPI_ISL_680031, EPI_ISL_680032, EPI_ISL_680033, EPI_ISL_680034, EPI_ISL_680035, EPI_ISL_680036                                                                                                                                                                                                                                                                                                                                                                                                                                                                                                                                                                                                                                                                                                                                                                                                                                                                                                                                                                                                                                                                                                                                                                                                                                                                                                                                                                                                                                                                                                                                                                                                                                                                                                                                                                                                                                                                                                                                                                                                                                                                                                                                                                                                                                                                                                                                                                                                                                                                                                                                                                                                                                                                                                                                                                                                                                                                                                                                                                                                                                                                                                                                                                                                                                                                                                                                                                                                                                                                                                                                                                                                                                                                                                                                                                                                                                                                                                                                                                                                                                                                                                                                                                                                                                                                                                                                                                                                                                                                                                                                                                                                                                                                                                                                                                                                                                                                                                                                                                                                                                                                                                                                                                                                                                                                                                                                                                                                                                                                                                                                                                                                                                                                                                                                                                                                                                                                                                                                                                                                                                                                                                                                                                                                                                                                                                                                                 |                                                                                                                            |                                                               |                                                                                                                                                                                                                                                                                                                                                                                  |                                              |
| see above                                                                                                                                                                                                                                                                                                                                                                                                                                                                                                                                                                                                                                                                                                                                                                                                                                                                                                                                                                                                                                                                                                                                                                                                                                                                                                                                                                                                                                                                                                                                                                                                                                                                                                                                                                                                                                                                                                                                                                                                                                                                                                                                                                                                                                                                                                                                                                                                                                                                                                                                                                                                                                                                                                                                                                                                                                                                                                                                                                                                                                                                                                                                                                                                                                                                                                                                                                                                                                                                                                                                                                                                                                                                                                                                                                                                                                                                                                                                                                                                                                                                                                                                                                                                                                                                                                                                                                                                                                                                                                                                                                                                                                                                                                                                                                                                                                                                                                                                                                                                                                                                                                                                                                                                                                                                                                                                                                                                                                                                                                                                                                                                                                                                                                                                                                                                                                                                                                                                                                                                                                                                                                                                                                                                                                                                                                                                                                                                                                                                                                                                                                                                                                                                                                                                                                                                                                                                                                                                                                                                                                      | Centre for Enzyme Innovation, University of Portsmouth / Translational Research Laboratory, Portsmouth Hospitals NHS Trust | COVID-19 Genomics UK (COG-UK) Consortium                      | Angela Beckett, Yann Bourgeois, Garry Scarlett, Sharon Glaysher, Scott Elliott, Kelly Bicknell, Robert Impey, Allyson Lloyd, Sarah Wyllie, Ethan Butcher, Anoop Chauhan, Samuel Robson                                                                                                                                                                                           |                                              |
| EPI_ISL_680445                                                                                                                                                                                                                                                                                                                                                                                                                                                                                                                                                                                                                                                                                                                                                                                                                                                                                                                                                                                                                                                                                                                                                                                                                                                                                                                                                                                                                                                                                                                                                                                                                                                                                                                                                                                                                                                                                                                                                                                                                                                                                                                                                                                                                                                                                                                                                                                                                                                                                                                                                                                                                                                                                                                                                                                                                                                                                                                                                                                                                                                                                                                                                                                                                                                                                                                                                                                                                                                                                                                                                                                                                                                                                                                                                                                                                                                                                                                                                                                                                                                                                                                                                                                                                                                                                                                                                                                                                                                                                                                                                                                                                                                                                                                                                                                                                                                                                                                                                                                                                                                                                                                                                                                                                                                                                                                                                                                                                                                                                                                                                                                                                                                                                                                                                                                                                                                                                                                                                                                                                                                                                                                                                                                                                                                                                                                                                                                                                                                                                                                                                                                                                                                                                                                                                                                                                                                                                                                                                                                                                                 | West of Scotland Specialist Virology Centre, NHSGGC / MRC-University of Glasgow Centre for Virus Research                  | COVID-19 Genomics UK (COG-UK) Consortium                      | Ana da Silva Filipe, Natasha Johnson, Kathy Smollett, Daniel Mair, Stephen Carmichael, Alice Broos, Lily Tong, Jenna Nichols, Kyriaki Nomikou; Sarah McDonald; Richard Orton, Joseph Hughes, Sreenu Vattipally, David L Robertson; Alasdair MacLean, Rory Gunson; Sharif Shaaban, Matthew Holden; Rachel Blacow, Guy Mollett, Kathy Li, James Shepherd, Antonia Ho, Emma Thomson |                                              |
| EPI_ISL_680562, EPI_ISL_680563, EPI_ISL_680564, EPI_ISL_680565, EPI_ISL_680566, EPI_ISL_680567, EPI_ISL_680568, EPI_ISL_680569, EPI_ISL_680570, EPI_ISL_680578                                                                                                                                                                                                                                                                                                                                                                                                                                                                                                                                                                                                                                                                                                                                                                                                                                                                                                                                                                                                                                                                                                                                                                                                                                                                                                                                                                                                                                                                                                                                                                                                                                                                                                                                                                                                                                                                                                                                                                                                                                                                                                                                                                                                                                                                                                                                                                                                                                                                                                                                                                                                                                                                                                                                                                                                                                                                                                                                                                                                                                                                                                                                                                                                                                                                                                                                                                                                                                                                                                                                                                                                                                                                                                                                                                                                                                                                                                                                                                                                                                                                                                                                                                                                                                                                                                                                                                                                                                                                                                                                                                                                                                                                                                                                                                                                                                                                                                                                                                                                                                                                                                                                                                                                                                                                                                                                                                                                                                                                                                                                                                                                                                                                                                                                                                                                                                                                                                                                                                                                                                                                                                                                                                                                                                                                                                                                                                                                                                                                                                                                                                                                                                                                                                                                                                                                                                                                                 | Centre for Enzyme Innovation, University of Portsmouth / Translational Research Laboratory, Portsmouth Hospitals NHS Trust | COVID-19 Genomics UK (COG-UK) Consortium                      | Angela Beckett, Yann Bourgeois, Garry Scarlett, Sharon Glaysher, Scott Elliott, Kelly Bicknell, Robert Impey, Allyson Lloyd, Sarah Wyllie, Ethan Butcher, Anoop Chauhan, Samuel Robson                                                                                                                                                                                           |                                              |
| EPI_ISL_692769, EPI_ISL_692770, EPI_ISL_692771, EPI_ISL_692772, EPI_ISL_692773, EPI_ISL_692774, EPI_ISL_692775, EPI_ISL_692776, EPI_ISL_692777, EPI_ISL_692778, EPI_ISL_692779, EPI_ISL_692780, EPI_ISL_692781, EPI_ISL_692782, EPI_ISL_692783, EPI_ISL_692784, EPI_ISL_692785, EPI_ISL_692786, EPI_ISL_692787, EPI_ISL_692788, EPI_ISL_692789, EPI_ISL_692790, EPI_ISL_692791, EPI_ISL_692792, EPI_ISL_692793, EPI_ISL_692794, EPI_ISL_692795, EPI_ISL_692796, EPI_ISL_692797, EPI_ISL_692798, EPI_ISL_692799, EPI_ISL_692800, EPI_ISL_692801, EPI_ISL_692802, EPI_ISL_692803, EPI_ISL_692804, EPI_ISL_692805, EPI_ISL_692806, EPI_ISL_692807, EPI_ISL_692808, EPI_ISL_692809, EPI_ISL_692810, EPI_ISL_692811, EPI_ISL_692812, EPI_ISL_692813, EPI_ISL_692814, EPI_ISL_692815, EPI_ISL_692816, EPI_ISL_692817, EPI_ISL_692818, EPI_ISL_692819, EPI_ISL_692820, EPI_ISL_692821, EPI_ISL_692822, EPI_ISL_692823, EPI_ISL_692824, EPI_ISL_692825, EPI_ISL_692826, EPI_ISL_692827, EPI_ISL_692828, EPI_ISL_692829, EPI_ISL_692830, EPI_ISL_692831, EPI_ISL_692832, EPI_ISL_692833, EPI_ISL_692834, EPI_ISL_692835, EPI_ISL_692836, EPI_ISL_692837, EPI_ISL_692838, EPI_ISL_692839, EPI_ISL_692840, EPI_ISL_692841, EPI_ISL_692842, EPI_ISL_692843, EPI_ISL_692844, EPI_ISL_692845, EPI_ISL_692846, EPI_ISL_692847, EPI_ISL_692848, EPI_ISL_692849, EPI_ISL_692850, EPI_ISL_692851, EPI_ISL_692852, EPI_ISL_692853, EPI_ISL_692854, EPI_ISL_692855, EPI_ISL_692856, EPI_ISL_692857, EPI_ISL_692858, EPI_ISL_692859, EPI_ISL_692860, EPI_ISL_692861, EPI_ISL_692862, EPI_ISL_692863, EPI_ISL_692864, EPI_ISL_692865, EPI_ISL_692866, EPI_ISL_692867, EPI_ISL_692868, EPI_ISL_692869, EPI_ISL_692870, EPI_ISL_692871, EPI_ISL_692872, EPI_ISL_692873, EPI_ISL_692874, EPI_ISL_692875, EPI_ISL_692876, EPI_ISL_692877, EPI_ISL_692878, EPI_ISL_692879, EPI_ISL_692880, EPI_ISL_692881, EPI_ISL_692882, EPI_ISL_692883, EPI_ISL_692884, EPI_ISL_692885, EPI_ISL_692886, EPI_ISL_692887, EPI_ISL_692888, EPI_ISL_692889, EPI_ISL_692890, EPI_ISL_692891, EPI_ISL_692892, EPI_ISL_692893, EPI_ISL_692894, EPI_ISL_692895, EPI_ISL_692896, EPI_ISL_692897, EPI_ISL_692898, EPI_ISL_692899, EPI_ISL_692900, EPI_ISL_692901, EPI_ISL_692902, EPI_ISL_692903, EPI_ISL_692904, EPI_ISL_692905, EPI_ISL_692906, EPI_ISL_692907, EPI_ISL_692908, EPI_ISL_692909, EPI_ISL_692910, EPI_ISL_692911, EPI_ISL_692912, EPI_ISL_692913, EPI_ISL_692914, EPI_ISL_692915, EPI_ISL_692916, EPI_ISL_692917, EPI_ISL_692918, EPI_ISL_692919, EPI_ISL_692920, EPI_ISL_692921, EPI_ISL_692922, EPI_ISL_692923, EPI_ISL_692924, EPI_ISL_692925, EPI_ISL_692926, EPI_ISL_692927, EPI_ISL_692928, EPI_ISL_692929, EPI_ISL_692930, EPI_ISL_692931, EPI_ISL_692932, EPI_ISL_692933, EPI_ISL_692934, EPI_ISL_692935, EPI_ISL_692936, EPI_ISL_692937, EPI_ISL_692938, EPI_ISL_692939, EPI_ISL_692940, EPI_ISL_692941, EPI_ISL_692942, EPI_ISL_692943, EPI_ISL_692944, EPI_ISL_692945, EPI_ISL_692946, EPI_ISL_692947, EPI_ISL_692948, EPI_ISL_692949, EPI_ISL_692950, EPI_ISL_692951, EPI_ISL_692952, EPI_ISL_692953, EPI_ISL_692954, EPI_ISL_692955, EPI_ISL_692956, EPI_ISL_692957, EPI_ISL_692958, EPI_ISL_692959, EPI_ISL_692960, EPI_ISL_692961, EPI_ISL_692962, EPI_ISL_692963, EPI_ISL_692964, EPI_ISL_692965, EPI_ISL_692966, EPI_ISL_692967, EPI_ISL_692968, EPI_ISL_692969, EPI_ISL_692970, EPI_ISL_692971, EPI_ISL_692972, EPI_ISL_692973, EPI_ISL_692974, EPI_ISL_692975, EPI_ISL_692976, EPI_ISL_692977, EPI_ISL_692978, EPI_ISL_692979, EPI_ISL_692980, EPI_ISL_692981, EPI_ISL_692982, EPI_ISL_692983, EPI_ISL_692984, EPI_ISL_692985, EPI_ISL_692986, EPI_ISL_692987, EPI_ISL_692988, EPI_ISL_692989, EPI_ISL_692990, EPI_ISL_692991, EPI_ISL_692992, EPI_ISL_692993, EPI_ISL_692994, EPI_ISL_692995, EPI_ISL_692996, EPI_ISL_692997, EPI_ISL_692998, EPI_ISL_692999, EPI_ISL_693000, EPI_ISL_693001, EPI_ISL_693002, EPI_ISL_693003, EPI_ISL_693004, EPI_ISL_693005, EPI_ISL_693006, EPI_ISL_693007, EPI_ISL_693008, EPI_ISL_693009, EPI_ISL_693010, EPI_ISL_693011, EPI_ISL_693012, EPI_ISL_693013, EPI_ISL_693014, EPI_ISL_693015, EPI_ISL_693016, EPI_ISL_693017, EPI_ISL_693018, EPI_ISL_693019, EPI_ISL_693020, EPI_ISL_693021, EPI_ISL_693022, EPI_ISL_693023, EPI_ISL_693024, EPI_ISL_693025, EPI_ISL_693026, EPI_ISL_693027, EPI_ISL_693028, EPI_ISL_693029, EPI_ISL_693030, EPI_ISL_693031, EPI_ISL_693032, EPI_ISL_693033, EPI_ISL_693034, EPI_ISL_693035, EPI_ISL_693036, EPI_ISL_693037, EPI_ISL_693038, EPI_ISL_693039, EPI_ISL_693040, EPI_ISL_693041, EPI_ISL_693042, EPI_ISL_693043, EPI_ISL_693044, EPI_ISL_693045, EPI_ISL_693046, EPI_ISL_693047, EPI_ISL_693048, EPI_ISL_693049, EPI_ISL_693050, EPI_ISL_693051, EPI_ISL_693052, EPI_ISL_693053, EPI_ISL_693054, EPI_ISL_693055, EPI_ISL_693056, EPI_ISL_693057, EPI_ISL_693058, EPI_ISL_693059, EPI_ISL_693060, EPI_ISL_693061, EPI_ISL_693062, EPI_ISL_693063, EPI_ISL_693064, EPI_ISL_693065, EPI_ISL_693066, EPI_ISL_693067, EPI_ISL_693068, EPI_ISL_693069, EPI_ISL_693070, EPI_ISL_693071, EPI_ISL_693072, EPI_ISL_693073, EPI_ISL_693074, EPI_ISL_693075, EPI_ISL_693076, EPI_ISL_693077, EPI_ISL_693078, EPI_ISL_693079, EPI_ISL_693080, EPI_ISL_693081, EPI_ISL_693082, EPI_ISL_693083, EPI_ISL_693084, EPI_ISL_693085, EPI_ISL_693086, EPI_ISL_693087, EPI_ISL_693088, EPI_ISL_693089, EPI_ISL_693090, EPI_ISL_693091, EPI_ISL_693092, EPI_ISL_693093, EPI_ISL_693094, EPI_ISL_693095, EPI_ISL_693096, EPI_ISL_693097, EPI_ISL_693098, EPI_ISL_693099, EPI_ISL_693100, EPI_ISL_693101, EPI_ISL_693102, EPI_ISL_693103, EPI_ISL_693104, EPI_ISL_693105, EPI_ISL_693106, EPI_ISL_693107, EPI_ISL_693108, EPI_ISL_693109, EPI_ISL_693110, EPI_ISL_693111, EPI_ISL_693112, EPI_ISL_693113, EPI_ISL_693114, EPI_ISL_693115, EPI_ISL_693116, EPI_ISL_693117, EPI_ISL_693118, EPI_ISL_693119, EPI_ISL_693120, EPI_ISL_693121, EPI_ISL_693122, EPI_ISL_693123, EPI_ISL_693124, EPI_ISL_693125, EPI_ISL_693126, EPI_ISL_693127, EPI_ISL_693128, EPI_ISL_693129, EPI_ISL_693130, EPI_ISL_693131, EPI_ISL_693132, EPI_ISL_693133, EPI_ISL_693134, EPI_ISL_693135, EPI_ISL_693136, EPI_ISL_693137, EPI_ISL_693138, EPI_ISL_693139, EPI_ISL_693140, EPI_ISL_693141, EPI_ISL_693142, EPI_ISL_693143, EPI_ISL_693144, EPI_ISL_693145, EPI_ISL_693146, EPI_ISL_693147, EPI_ISL_693148, EPI_ISL_693149, EPI_ISL_693150, EPI_ISL_693151, EPI_ISL_693152, EPI_ISL_693153, EPI_ISL_693154, EPI_ISL_693155, EPI_ISL_693156, EPI_ISL_693157, EPI_ISL_693158, EPI_ISL_693159, EPI_ISL_693160, EPI_ISL_693161, EPI_ISL_693162, EPI_ISL_693163, EPI_ISL_693164, EPI_ISL_693165, EPI_ISL_693166, EPI_ISL_693167, EPI_ISL_693168, EPI_ISL_693169, EPI_ISL_693170, EPI_ISL_693171, EPI_ISL_693172, EPI_ISL_693173, EPI_ISL_693174, EPI_ISL_693175, EPI_ISL_693176, EPI_ISL_693177, EPI_ISL_693178, EPI_ISL_693179, EPI_ISL_693180, EPI_ISL_693181, EPI_ISL_693182, EPI_ISL_693183, EPI_ISL_693184, EPI_ISL_693185, EPI_ISL_693186, EPI_ISL_693187, EPI_ISL_693188, EPI_ISL_693189, EPI_ISL_693190, EPI_ISL_693191 |                                                                                                                            |                                                               |                                                                                                                                                                                                                                                                                                                                                                                  |                                              |
| see above                                                                                                                                                                                                                                                                                                                                                                                                                                                                                                                                                                                                                                                                                                                                                                                                                                                                                                                                                                                                                                                                                                                                                                                                                                                                                                                                                                                                                                                                                                                                                                                                                                                                                                                                                                                                                                                                                                                                                                                                                                                                                                                                                                                                                                                                                                                                                                                                                                                                                                                                                                                                                                                                                                                                                                                                                                                                                                                                                                                                                                                                                                                                                                                                                                                                                                                                                                                                                                                                                                                                                                                                                                                                                                                                                                                                                                                                                                                                                                                                                                                                                                                                                                                                                                                                                                                                                                                                                                                                                                                                                                                                                                                                                                                                                                                                                                                                                                                                                                                                                                                                                                                                                                                                                                                                                                                                                                                                                                                                                                                                                                                                                                                                                                                                                                                                                                                                                                                                                                                                                                                                                                                                                                                                                                                                                                                                                                                                                                                                                                                                                                                                                                                                                                                                                                                                                                                                                                                                                                                                                                      | Massachusetts State Public Health Laboratory                                                                               | Massachusetts State Public Health Laboratory                  | Andrew Lang, Timelia Fink, Glen Gallagher, Sandra Smole                                                                                                                                                                                                                                                                                                                          |                                              |
| EPI_ISL_697787, EPI_ISL_697794, EPI_ISL_697795                                                                                                                                                                                                                                                                                                                                                                                                                                                                                                                                                                                                                                                                                                                                                                                                                                                                                                                                                                                                                                                                                                                                                                                                                                                                                                                                                                                                                                                                                                                                                                                                                                                                                                                                                                                                                                                                                                                                                                                                                                                                                                                                                                                                                                                                                                                                                                                                                                                                                                                                                                                                                                                                                                                                                                                                                                                                                                                                                                                                                                                                                                                                                                                                                                                                                                                                                                                                                                                                                                                                                                                                                                                                                                                                                                                                                                                                                                                                                                                                                                                                                                                                                                                                                                                                                                                                                                                                                                                                                                                                                                                                                                                                                                                                                                                                                                                                                                                                                                                                                                                                                                                                                                                                                                                                                                                                                                                                                                                                                                                                                                                                                                                                                                                                                                                                                                                                                                                                                                                                                                                                                                                                                                                                                                                                                                                                                                                                                                                                                                                                                                                                                                                                                                                                                                                                                                                                                                                                                                                                 | Institute of Microbiology, Universidad San Francisco de Quito                                                              | Institute of Microbiology, Universidad San Francisco de Quito | Andrea Macias, Belén Prado-Vivar, Sully Márquez, Juan José Guadalupe, Monica Becerra-Wong, Bernardo Gutiérrez, Verónica Barragán, Patricio Rojas-Silva, Gabriel Trueba, Michelle Grunauer, Paul Cárdenas                                                                                                                                                                         |                                              |
| EPI_ISL_702560, EPI_ISL_702585, EPI_ISL_702736, EPI_ISL_702744, EPI_ISL_702795, EPI_ISL_702837, EPI_ISL_702851, EPI_ISL_702858, EPI_ISL_702870, EPI_ISL_702915, EPI_ISL_702985, EPI_ISL_702987, EPI_ISL_703015, EPI_ISL_703053, EPI_ISL_703071, EPI_ISL_703082, EPI_ISL_703152, EPI_ISL_703267,                                                                                                                                                                                                                                                                                                                                                                                                                                                                                                                                                                                                                                                                                                                                                                                                                                                                                                                                                                                                                                                                                                                                                                                                                                                                                                                                                                                                                                                                                                                                                                                                                                                                                                                                                                                                                                                                                                                                                                                                                                                                                                                                                                                                                                                                                                                                                                                                                                                                                                                                                                                                                                                                                                                                                                                                                                                                                                                                                                                                                                                                                                                                                                                                                                                                                                                                                                                                                                                                                                                                                                                                                                                                                                                                                                                                                                                                                                                                                                                                                                                                                                                                                                                                                                                                                                                                                                                                                                                                                                                                                                                                                                                                                                                                                                                                                                                                                                                                                                                                                                                                                                                                                                                                                                                                                                                                                                                                                                                                                                                                                                                                                                                                                                                                                                                                                                                                                                                                                                                                                                                                                                                                                                                                                                                                                                                                                                                                                                                                                                                                                                                                                                                                                                                                                |                                                                                                                            |                                                               |                                                                                                                                                                                                                                                                                                                                                                                  |                                              |

|                                                                                                                                                                                                                                                                                                                                                                                                                                                                                                                                                                                                                                                                                                                                                                                                                                                                                                                                                                                                                                                                                                                                                                                                                                                                                                                                                                                                                                                                                                                                                                                                                                                                                                                                                                                                                                                                                                                                                                                                                                                                                                                                                                                                                                                                                                                                                                                                                                                                                                                                                                                                                                                                                                                                                                                                                                                                                                                                                                                                                                                                                                                                                                                                                                                                                                                                                                                                                                                                                                                                                                                                                                                                                                                                                                                                                                                                                                                                                                                                                                                                                                                                                                                                                                                                                                                                                                                                                                                                                                                                                                                                                                                                                                                                                                |                                                                                                                            |                                                  |                                                                                                                                                                                                                                                                                                                                                                                                                                    |
|----------------------------------------------------------------------------------------------------------------------------------------------------------------------------------------------------------------------------------------------------------------------------------------------------------------------------------------------------------------------------------------------------------------------------------------------------------------------------------------------------------------------------------------------------------------------------------------------------------------------------------------------------------------------------------------------------------------------------------------------------------------------------------------------------------------------------------------------------------------------------------------------------------------------------------------------------------------------------------------------------------------------------------------------------------------------------------------------------------------------------------------------------------------------------------------------------------------------------------------------------------------------------------------------------------------------------------------------------------------------------------------------------------------------------------------------------------------------------------------------------------------------------------------------------------------------------------------------------------------------------------------------------------------------------------------------------------------------------------------------------------------------------------------------------------------------------------------------------------------------------------------------------------------------------------------------------------------------------------------------------------------------------------------------------------------------------------------------------------------------------------------------------------------------------------------------------------------------------------------------------------------------------------------------------------------------------------------------------------------------------------------------------------------------------------------------------------------------------------------------------------------------------------------------------------------------------------------------------------------------------------------------------------------------------------------------------------------------------------------------------------------------------------------------------------------------------------------------------------------------------------------------------------------------------------------------------------------------------------------------------------------------------------------------------------------------------------------------------------------------------------------------------------------------------------------------------------------------------------------------------------------------------------------------------------------------------------------------------------------------------------------------------------------------------------------------------------------------------------------------------------------------------------------------------------------------------------------------------------------------------------------------------------------------------------------------------------------------------------------------------------------------------------------------------------------------------------------------------------------------------------------------------------------------------------------------------------------------------------------------------------------------------------------------------------------------------------------------------------------------------------------------------------------------------------------------------------------------------------------------------------------------------------------------------------------------------------------------------------------------------------------------------------------------------------------------------------------------------------------------------------------------------------------------------------------------------------------------------------------------------------------------------------------------------------------------------------------------------------------------------------------|----------------------------------------------------------------------------------------------------------------------------|--------------------------------------------------|------------------------------------------------------------------------------------------------------------------------------------------------------------------------------------------------------------------------------------------------------------------------------------------------------------------------------------------------------------------------------------------------------------------------------------|
| EPI_ISL_703327, EPI_ISL_703338, EPI_ISL_703419, EPI_ISL_703446, EPI_ISL_703454, EPI_ISL_703489, EPI_ISL_703492, EPI_ISL_703495, EPI_ISL_703497, EPI_ISL_703500, EPI_ISL_703502, EPI_ISL_703548, EPI_ISL_703551, EPI_ISL_703554, EPI_ISL_703556, EPI_ISL_703559, EPI_ISL_703562, EPI_ISL_703564, EPI_ISL_703567, EPI_ISL_703666, EPI_ISL_703668, EPI_ISL_703682, EPI_ISL_703687, EPI_ISL_703772, EPI_ISL_703797, EPI_ISL_704243, EPI_ISL_704266, EPI_ISL_704322, EPI_ISL_704585, EPI_ISL_704586, EPI_ISL_704587, EPI_ISL_704588, EPI_ISL_704589, EPI_ISL_704590, EPI_ISL_704591, EPI_ISL_704592, EPI_ISL_704593, EPI_ISL_704783, EPI_ISL_705187, EPI_ISL_705234, EPI_ISL_705249, EPI_ISL_705294, EPI_ISL_705325, EPI_ISL_705369, EPI_ISL_705370, EPI_ISL_705379                                                                                                                                                                                                                                                                                                                                                                                                                                                                                                                                                                                                                                                                                                                                                                                                                                                                                                                                                                                                                                                                                                                                                                                                                                                                                                                                                                                                                                                                                                                                                                                                                                                                                                                                                                                                                                                                                                                                                                                                                                                                                                                                                                                                                                                                                                                                                                                                                                                                                                                                                                                                                                                                                                                                                                                                                                                                                                                                                                                                                                                                                                                                                                                                                                                                                                                                                                                                                                                                                                                                                                                                                                                                                                                                                                                                                                                                                                                                                                                                 | Centre for Enzyme Innovation, University of Portsmouth / Translational Research Laboratory, Portsmouth Hospitals NHS Trust | COVID-19 Genomics UK (COG-UK) Consortium         | Angela Beckett, Yann Bourgeois, Garry Scarlett, Sharon Glaysher, Scott Elliott, Kelly Bicknell, Robert Impey, Allyson Lloyd, Sarah Wyllie, Ethan Butcher, Anoop Chauhan, Samuel Robson                                                                                                                                                                                                                                             |
| EPI_ISL_705657, EPI_ISL_705662, EPI_ISL_705692, EPI_ISL_705702                                                                                                                                                                                                                                                                                                                                                                                                                                                                                                                                                                                                                                                                                                                                                                                                                                                                                                                                                                                                                                                                                                                                                                                                                                                                                                                                                                                                                                                                                                                                                                                                                                                                                                                                                                                                                                                                                                                                                                                                                                                                                                                                                                                                                                                                                                                                                                                                                                                                                                                                                                                                                                                                                                                                                                                                                                                                                                                                                                                                                                                                                                                                                                                                                                                                                                                                                                                                                                                                                                                                                                                                                                                                                                                                                                                                                                                                                                                                                                                                                                                                                                                                                                                                                                                                                                                                                                                                                                                                                                                                                                                                                                                                                                 | West of Scotland Specialist Virology Centre, NHSGGC / MRC-University of Glasgow Centre for Virus Research                  | COVID-19 Genomics UK (COG-UK) Consortium         | Ana da Silva Filipe, Natasha Johnson, Kathy Smollett, Daniel Mair, Stephen Carmichael, Alice Broos, Lily Tong, Jenna Nichols, Kyriaki Nomikou; Sarah McDonald; Richard Orton, Joseph Hughes, Sreenu Vattipally, David L Robertson; Alasdair MacLean, Rory Gunson; Sharif Shaaban, Matthew Holden; Rachel Blacow, Guy Mollett, Kathy Li, James Shepherd, Antonia Ho, Emma Thomson                                                   |
| EPI_ISL_706864, EPI_ISL_706865, EPI_ISL_706866, EPI_ISL_706867, EPI_ISL_706868, EPI_ISL_706869, EPI_ISL_706870, EPI_ISL_706871, EPI_ISL_706872, EPI_ISL_706873, EPI_ISL_706874, EPI_ISL_706875, EPI_ISL_706876, EPI_ISL_706877, EPI_ISL_706878, EPI_ISL_706879, EPI_ISL_706880, EPI_ISL_706881, EPI_ISL_706882, EPI_ISL_706883, EPI_ISL_706884, EPI_ISL_706885, EPI_ISL_706886, EPI_ISL_706887, EPI_ISL_706888, EPI_ISL_706889, EPI_ISL_706890                                                                                                                                                                                                                                                                                                                                                                                                                                                                                                                                                                                                                                                                                                                                                                                                                                                                                                                                                                                                                                                                                                                                                                                                                                                                                                                                                                                                                                                                                                                                                                                                                                                                                                                                                                                                                                                                                                                                                                                                                                                                                                                                                                                                                                                                                                                                                                                                                                                                                                                                                                                                                                                                                                                                                                                                                                                                                                                                                                                                                                                                                                                                                                                                                                                                                                                                                                                                                                                                                                                                                                                                                                                                                                                                                                                                                                                                                                                                                                                                                                                                                                                                                                                                                                                                                                                 | Centre for Enzyme Innovation, University of Portsmouth / Translational Research Laboratory, Portsmouth Hospitals NHS Trust | COVID-19 Genomics UK (COG-UK) Consortium         | Angela Beckett, Yann Bourgeois, Garry Scarlett, Sharon Glaysher, Scott Elliott, Kelly Bicknell, Robert Impey, Allyson Lloyd, Sarah Wyllie, Ethan Butcher, Anoop Chauhan, Samuel Robson                                                                                                                                                                                                                                             |
| EPI_ISL_710043, EPI_ISL_710044, EPI_ISL_710045, EPI_ISL_710046, EPI_ISL_710047, EPI_ISL_710048, EPI_ISL_710049, EPI_ISL_710050, EPI_ISL_710051, EPI_ISL_710052, EPI_ISL_710053, EPI_ISL_710054, EPI_ISL_710055, EPI_ISL_710056, EPI_ISL_710057, EPI_ISL_710058, EPI_ISL_710059, EPI_ISL_710060, EPI_ISL_710061, EPI_ISL_710062, EPI_ISL_710063, EPI_ISL_710064, EPI_ISL_710065, EPI_ISL_710066, EPI_ISL_710067, EPI_ISL_710068, EPI_ISL_710069, EPI_ISL_710070, EPI_ISL_710071, EPI_ISL_710072, EPI_ISL_710073, EPI_ISL_710074, EPI_ISL_710075, EPI_ISL_710076, EPI_ISL_710077, EPI_ISL_710078, EPI_ISL_710079, EPI_ISL_710080, EPI_ISL_710081, EPI_ISL_710082, EPI_ISL_710083, EPI_ISL_710084, EPI_ISL_710085, EPI_ISL_710086, EPI_ISL_710087, EPI_ISL_710088, EPI_ISL_710089                                                                                                                                                                                                                                                                                                                                                                                                                                                                                                                                                                                                                                                                                                                                                                                                                                                                                                                                                                                                                                                                                                                                                                                                                                                                                                                                                                                                                                                                                                                                                                                                                                                                                                                                                                                                                                                                                                                                                                                                                                                                                                                                                                                                                                                                                                                                                                                                                                                                                                                                                                                                                                                                                                                                                                                                                                                                                                                                                                                                                                                                                                                                                                                                                                                                                                                                                                                                                                                                                                                                                                                                                                                                                                                                                                                                                                                                                                                                                                                 | Texas Department of State Health Services                                                                                  | Texas Department of State Health Services        | Anita Pokharel, Bonnie Oh, James Daniel Bonser, Rashmi Tuladhar, Mayela Pedrueza, Jenny Zhang, Maliha Rahman, Myong Koag, Chung Wang, Rachel Lee, Grace Kubin                                                                                                                                                                                                                                                                      |
| EPI_ISL_723521, EPI_ISL_723522, EPI_ISL_723523, EPI_ISL_723524, EPI_ISL_723525, EPI_ISL_723526, EPI_ISL_723527, EPI_ISL_723528, EPI_ISL_723529, EPI_ISL_723530, EPI_ISL_723531, EPI_ISL_723532, EPI_ISL_723533, EPI_ISL_723534, EPI_ISL_723535, EPI_ISL_723536, EPI_ISL_723537, EPI_ISL_723538, EPI_ISL_723539, EPI_ISL_723540, EPI_ISL_723541, EPI_ISL_723542, EPI_ISL_723543, EPI_ISL_723544, EPI_ISL_723545, EPI_ISL_723546, EPI_ISL_723547, EPI_ISL_723548, EPI_ISL_723549, EPI_ISL_723550, EPI_ISL_723551, EPI_ISL_723552, EPI_ISL_723553, EPI_ISL_723554, EPI_ISL_723555, EPI_ISL_723556, EPI_ISL_723557, EPI_ISL_723558, EPI_ISL_723559, EPI_ISL_723560, EPI_ISL_723561, EPI_ISL_723562, EPI_ISL_723563, EPI_ISL_723564, EPI_ISL_723565, EPI_ISL_723566, EPI_ISL_723567, EPI_ISL_723568, EPI_ISL_723569, EPI_ISL_723570, EPI_ISL_723571, EPI_ISL_723572, EPI_ISL_723573, EPI_ISL_723574, EPI_ISL_723575, EPI_ISL_723576, EPI_ISL_723577, EPI_ISL_723578, EPI_ISL_723579, EPI_ISL_723580, EPI_ISL_723581, EPI_ISL_723582, EPI_ISL_723583, EPI_ISL_723584, EPI_ISL_723585, EPI_ISL_723586, EPI_ISL_723587, EPI_ISL_723588, EPI_ISL_723589, EPI_ISL_723590, EPI_ISL_723591, EPI_ISL_723592, EPI_ISL_723593, EPI_ISL_723594, EPI_ISL_723595, EPI_ISL_723596, EPI_ISL_723597, EPI_ISL_723598, EPI_ISL_723599, EPI_ISL_723600, EPI_ISL_723601, EPI_ISL_723602, EPI_ISL_723603, EPI_ISL_723604, EPI_ISL_723605, EPI_ISL_723606, EPI_ISL_723607, EPI_ISL_723608, EPI_ISL_723609, EPI_ISL_723610, EPI_ISL_723611, EPI_ISL_723612, EPI_ISL_723613, EPI_ISL_723614, EPI_ISL_723615, EPI_ISL_723616, EPI_ISL_723617, EPI_ISL_723618, EPI_ISL_723619, EPI_ISL_723620, EPI_ISL_723621, EPI_ISL_723622, EPI_ISL_723623, EPI_ISL_723624, EPI_ISL_723625, EPI_ISL_723626, EPI_ISL_723627, EPI_ISL_723628, EPI_ISL_723629, EPI_ISL_723630, EPI_ISL_723631, EPI_ISL_723632, EPI_ISL_723633, EPI_ISL_723634, EPI_ISL_723635, EPI_ISL_723636, EPI_ISL_723637, EPI_ISL_723638, EPI_ISL_723639, EPI_ISL_723640, EPI_ISL_723641, EPI_ISL_723642, EPI_ISL_723643, EPI_ISL_723644, EPI_ISL_723645, EPI_ISL_723646, EPI_ISL_723647, EPI_ISL_723648, EPI_ISL_723649, EPI_ISL_723650, EPI_ISL_723651, EPI_ISL_723652, EPI_ISL_723653, EPI_ISL_723654, EPI_ISL_723655, EPI_ISL_723656, EPI_ISL_723657, EPI_ISL_723658, EPI_ISL_723659, EPI_ISL_723660, EPI_ISL_723661, EPI_ISL_723662, EPI_ISL_723663, EPI_ISL_723664, EPI_ISL_723665, EPI_ISL_723666, EPI_ISL_723667, EPI_ISL_723668, EPI_ISL_723669, EPI_ISL_723670, EPI_ISL_723671, EPI_ISL_723672, EPI_ISL_723673, EPI_ISL_723674, EPI_ISL_723675, EPI_ISL_723676, EPI_ISL_723677, EPI_ISL_723678, EPI_ISL_723679, EPI_ISL_723680, EPI_ISL_723681, EPI_ISL_723682, EPI_ISL_723683, EPI_ISL_723684, EPI_ISL_723685, EPI_ISL_723686, EPI_ISL_723687, EPI_ISL_723688, EPI_ISL_723689, EPI_ISL_723690, EPI_ISL_723691, EPI_ISL_723692, EPI_ISL_723693, EPI_ISL_723694, EPI_ISL_723695, EPI_ISL_723696, EPI_ISL_723697, EPI_ISL_723698, EPI_ISL_723699, EPI_ISL_723700, EPI_ISL_723701, EPI_ISL_723702, EPI_ISL_723703, EPI_ISL_723704, EPI_ISL_723705, EPI_ISL_723706, EPI_ISL_723707, EPI_ISL_723708, EPI_ISL_723709, EPI_ISL_723710, EPI_ISL_723711, EPI_ISL_723712, EPI_ISL_723713, EPI_ISL_723714, EPI_ISL_723715, EPI_ISL_723716, EPI_ISL_723717, EPI_ISL_723718, EPI_ISL_723719, EPI_ISL_723720, EPI_ISL_723721, EPI_ISL_723722, EPI_ISL_723723, EPI_ISL_723724, EPI_ISL_723725, EPI_ISL_723726, EPI_ISL_723727, EPI_ISL_723728, EPI_ISL_723729, EPI_ISL_723730, EPI_ISL_723731, EPI_ISL_723732, EPI_ISL_723733, EPI_ISL_723734, EPI_ISL_723735, EPI_ISL_723736, EPI_ISL_723737, EPI_ISL_723738, EPI_ISL_723739, EPI_ISL_723740, EPI_ISL_723741, EPI_ISL_723742, EPI_ISL_723743, EPI_ISL_723744, EPI_ISL_723745, EPI_ISL_723746, EPI_ISL_723747, EPI_ISL_723748, EPI_ISL_723749, EPI_ISL_723750, EPI_ISL_723751, EPI_ISL_723752, EPI_ISL_723753, EPI_ISL_723754, EPI_ISL_723755, EPI_ISL_723756, EPI_ISL_723757, EPI_ISL_723758, EPI_ISL_723759, EPI_ISL_723760, EPI_ISL_723761, EPI_ISL_723762, EPI_ISL_723763, EPI_ISL_723764, EPI_ISL_723765, EPI_ISL_723766, EPI_ISL_723767, EPI_ISL_723768, EPI_ISL_723769, EPI_ISL_723770, EPI_ISL_723771, EPI_ISL_723772, EPI_ISL_723773, EPI_ISL_723774, EPI_ISL_723775, EPI_ISL_723776, EPI_ISL_723777, EPI_ISL_723778, EPI_ISL_723779, EPI_ISL_723780, EPI_ISL_723781, EPI_ISL_723782, EPI_ISL_723783, EPI_ISL_723784, EPI_ISL_723785, EPI_ISL_723786, EPI_ISL_723787, EPI_ISL_723788, EPI_ISL_723789, EPI_ISL_723790, EPI_ISL_723791, EPI_ISL_723792, EPI_ISL_723793, EPI_ISL_723794, EPI_ISL_723795, EPI_ISL_723796, EPI_ISL_723797, EPI_ISL_723798, EPI_ISL_723799, EPI_ISL_723800, EPI_ISL_723801, EPI_ISL_723802, EPI_ISL_723803, EPI_ISL_723804, EPI_ISL_723805, EPI_ISL_723806 | Centre for Enzyme Innovation, University of Portsmouth / Translational Research Laboratory, Portsmouth Hospitals NHS Trust | COVID-19 Genomics UK (COG-UK) Consortium         | Angela Beckett, Yann Bourgeois, Garry Scarlett, Sharon Glaysher, Scott Elliott, Kelly Bicknell, Robert Impey, Allyson Lloyd, Sarah Wyllie, Ethan Butcher, Anoop Chauhan, Samuel Robson                                                                                                                                                                                                                                             |
| EPI_ISL_732971, EPI_ISL_732972, EPI_ISL_732973, EPI_ISL_732974, EPI_ISL_732975, EPI_ISL_732976, EPI_ISL_732977, EPI_ISL_732978, EPI_ISL_732979, EPI_ISL_732980, EPI_ISL_732981, EPI_ISL_732982, EPI_ISL_732983, EPI_ISL_732984, EPI_ISL_732985, EPI_ISL_732986, EPI_ISL_732987, EPI_ISL_732988, EPI_ISL_732989                                                                                                                                                                                                                                                                                                                                                                                                                                                                                                                                                                                                                                                                                                                                                                                                                                                                                                                                                                                                                                                                                                                                                                                                                                                                                                                                                                                                                                                                                                                                                                                                                                                                                                                                                                                                                                                                                                                                                                                                                                                                                                                                                                                                                                                                                                                                                                                                                                                                                                                                                                                                                                                                                                                                                                                                                                                                                                                                                                                                                                                                                                                                                                                                                                                                                                                                                                                                                                                                                                                                                                                                                                                                                                                                                                                                                                                                                                                                                                                                                                                                                                                                                                                                                                                                                                                                                                                                                                                 | WHO National Influenza Centre Russian Federation                                                                           | WHO National Influenza Centre Russian Federation | Andrey Komissarov, Artem Fadeev, Anna Ivanova, Kseniya Komissarova, Dmitry Bazhenov, Daria Danilenko, Ksenia Safina, Elena Nabieva, Georgii Bazykin, Dmitry Lioznov                                                                                                                                                                                                                                                                |
| EPI_ISL_732990, EPI_ISL_732991, EPI_ISL_732992, EPI_ISL_732993, EPI_ISL_732994, EPI_ISL_732995, EPI_ISL_732996, EPI_ISL_732997, EPI_ISL_732998, EPI_ISL_732999, EPI_ISL_733000, EPI_ISL_733001, EPI_ISL_733002, EPI_ISL_733003, EPI_ISL_733004                                                                                                                                                                                                                                                                                                                                                                                                                                                                                                                                                                                                                                                                                                                                                                                                                                                                                                                                                                                                                                                                                                                                                                                                                                                                                                                                                                                                                                                                                                                                                                                                                                                                                                                                                                                                                                                                                                                                                                                                                                                                                                                                                                                                                                                                                                                                                                                                                                                                                                                                                                                                                                                                                                                                                                                                                                                                                                                                                                                                                                                                                                                                                                                                                                                                                                                                                                                                                                                                                                                                                                                                                                                                                                                                                                                                                                                                                                                                                                                                                                                                                                                                                                                                                                                                                                                                                                                                                                                                                                                 | UMMC-Health                                                                                                                | WHO National Influenza Centre Russian Federation | Andrey Komissarov, Artem Fadeev, Anna Ivanova, Kseniya Komissarova, Dmitry Bazhenov, Tatiana Platonova, Daria Danilenko, Ksenia Safina, Elena Nabieva, Georgii Bazykin, Dmitry Lioznov                                                                                                                                                                                                                                             |
| EPI_ISL_733005, EPI_ISL_733006, EPI_ISL_733007, EPI_ISL_733008, EPI_ISL_733009, EPI_ISL_733010, EPI_ISL_733011, EPI_ISL_733012, EPI_ISL_733013, EPI_ISL_733014, EPI_ISL_733015, EPI_ISL_733016, EPI_ISL_733017, EPI_ISL_733018, EPI_ISL_733019, EPI_ISL_733020, EPI_ISL_733021, EPI_ISL_733022                                                                                                                                                                                                                                                                                                                                                                                                                                                                                                                                                                                                                                                                                                                                                                                                                                                                                                                                                                                                                                                                                                                                                                                                                                                                                                                                                                                                                                                                                                                                                                                                                                                                                                                                                                                                                                                                                                                                                                                                                                                                                                                                                                                                                                                                                                                                                                                                                                                                                                                                                                                                                                                                                                                                                                                                                                                                                                                                                                                                                                                                                                                                                                                                                                                                                                                                                                                                                                                                                                                                                                                                                                                                                                                                                                                                                                                                                                                                                                                                                                                                                                                                                                                                                                                                                                                                                                                                                                                                 | WHO National Influenza Centre Russian Federation                                                                           | WHO National Influenza Centre Russian Federation | Andrey Komissarov, Artem Fadeev, Anna Ivanova, Kseniya Komissarova, Dmitry Bazhenov, Daria Danilenko, Ksenia Safina, Elena Nabieva, Georgii Bazykin, Dmitry Lioznov                                                                                                                                                                                                                                                                |
| EPI_ISL_733023, EPI_ISL_733024, EPI_ISL_733025, EPI_ISL_733026, EPI_ISL_733027, EPI_ISL_733028, EPI_ISL_733029, EPI_ISL_733030, EPI_ISL_733031, EPI_ISL_733032, EPI_ISL_733033, EPI_ISL_733034, EPI_ISL_733035, EPI_ISL_733036, EPI_ISL_733037, EPI_ISL_733038, EPI_ISL_733039, EPI_ISL_733040, EPI_ISL_733041, EPI_ISL_733042, EPI_ISL_733043, EPI_ISL_733044, EPI_ISL_733045, EPI_ISL_733046, EPI_ISL_733047, EPI_ISL_733048, EPI_ISL_733049, EPI_ISL_733050, EPI_ISL_733051, EPI_ISL_733052, EPI_ISL_733053, EPI_ISL_733054, EPI_ISL_733055, EPI_ISL_733056, EPI_ISL_733057, EPI_ISL_733058, EPI_ISL_733059, EPI_ISL_733060, EPI_ISL_733061, EPI_ISL_733062, EPI_ISL_733063, EPI_ISL_733064, EPI_ISL_733065, EPI_ISL_733066, EPI_ISL_733067, EPI_ISL_733068, EPI_ISL_733069, EPI_ISL_733070, EPI_ISL_733071, EPI_ISL_733072, EPI_ISL_733073, EPI_ISL_733074, EPI_ISL_733075, EPI_ISL_733076, EPI_ISL_733077, EPI_ISL_733078, EPI_ISL_733079, EPI_ISL_733080, EPI_ISL_733081, EPI_ISL_733082, EPI_ISL_733083, EPI_ISL_733084, EPI_ISL_733085, EPI_ISL_733086, EPI_ISL_733087, EPI_ISL_733088, EPI_ISL_733089, EPI_ISL_733090, EPI_ISL_733091, EPI_ISL_733092, EPI_ISL_733093, EPI_ISL_733094, EPI_ISL_733095, EPI_ISL_733096, EPI_ISL_733097, EPI_ISL_733098, EPI_ISL_733099, EPI_ISL_733100, EPI_ISL_733101, EPI_ISL_733102, EPI_ISL_733103, EPI_ISL_733104, EPI_ISL_733105, EPI_ISL_733106, EPI_ISL_733107, EPI_ISL_733108, EPI_ISL_733109, EPI_ISL_733110, EPI_ISL_733111, EPI_ISL_733112, EPI_ISL_733113, EPI_ISL_733114, EPI_ISL_733115, EPI_ISL_733116, EPI_ISL_733117, EPI_ISL_733118, EPI_ISL_733119, EPI_ISL_733120, EPI_ISL_733121, EPI_ISL_733122, EPI_ISL_733123, EPI_ISL_733124, EPI_ISL_733125, EPI_ISL_733126, EPI_ISL_733127, EPI_ISL_733128, EPI_ISL_733129, EPI_ISL_733130, EPI_ISL_733131, EPI_ISL_733132, EPI_ISL_733133, EPI_ISL_733134, EPI_ISL_733135, EPI_ISL_733136, EPI_ISL_733137, EPI_ISL_733138, EPI_ISL_733139, EPI_ISL_733140, EPI_ISL_733141, EPI_ISL_733142, EPI_ISL_733143, EPI_ISL_733144, EPI_ISL_733145, EPI_ISL_733146, EPI_ISL_733147, EPI_ISL_733148, EPI_ISL_733149, EPI_ISL_733150, EPI_ISL_733151, EPI_ISL_733152, EPI_ISL_733153                                                                                                                                                                                                                                                                                                                                                                                                                                                                                                                                                                                                                                                                                                                                                                                                                                                                                                                                                                                                                                                                                                                                                                                                                                                                                                                                                                                                                                                                                                                                                                                                                                                                                                                                                                                                                                                                                                                                                                                                                                                                                                                                                                                                                                                                                                                                                                                                                                                                                                                                                                                 | HELIX LLC                                                                                                                  | WHO National Influenza Centre Russian Federation | Andrey Komissarov, Artem Fadeev, Anna Ivanova, Kseniya Komissarova, Dmitry Bazhenov, Daria Danilenko, Ksenia Safina, Elena Nabieva, Georgii Bazykin, Dmitry Lioznov                                                                                                                                                                                                                                                                |
| EPI_ISL_733154, EPI_ISL_733155                                                                                                                                                                                                                                                                                                                                                                                                                                                                                                                                                                                                                                                                                                                                                                                                                                                                                                                                                                                                                                                                                                                                                                                                                                                                                                                                                                                                                                                                                                                                                                                                                                                                                                                                                                                                                                                                                                                                                                                                                                                                                                                                                                                                                                                                                                                                                                                                                                                                                                                                                                                                                                                                                                                                                                                                                                                                                                                                                                                                                                                                                                                                                                                                                                                                                                                                                                                                                                                                                                                                                                                                                                                                                                                                                                                                                                                                                                                                                                                                                                                                                                                                                                                                                                                                                                                                                                                                                                                                                                                                                                                                                                                                                                                                 | WHO National Influenza Centre Russian Federation                                                                           | WHO National Influenza Centre Russian Federation | Andrey Komissarov, Artem Fadeev, Anna Ivanova, Kseniya Komissarova, Dmitry Bazhenov, Daria Danilenko, Ksenia Safina, Elena Nabieva, Georgii Bazykin, Dmitry Lioznov                                                                                                                                                                                                                                                                |
| EPI_ISL_733156, EPI_ISL_733157, EPI_ISL_733158, EPI_ISL_733159, EPI_ISL_733160, EPI_ISL_733161, EPI_ISL_733162, EPI_ISL_733163, EPI_ISL_733164, EPI_ISL_733165, EPI_ISL_733166, EPI_ISL_733167, EPI_ISL_733168, EPI_ISL_733169, EPI_ISL_733170, EPI_ISL_733171, EPI_ISL_733172, EPI_ISL_733173, EPI_ISL_733174, EPI_ISL_733175, EPI_ISL_733176, EPI_ISL_733177, EPI_ISL_733178, EPI_ISL_733179, EPI_ISL_733180, EPI_ISL_733181, EPI_ISL_733182                                                                                                                                                                                                                                                                                                                                                                                                                                                                                                                                                                                                                                                                                                                                                                                                                                                                                                                                                                                                                                                                                                                                                                                                                                                                                                                                                                                                                                                                                                                                                                                                                                                                                                                                                                                                                                                                                                                                                                                                                                                                                                                                                                                                                                                                                                                                                                                                                                                                                                                                                                                                                                                                                                                                                                                                                                                                                                                                                                                                                                                                                                                                                                                                                                                                                                                                                                                                                                                                                                                                                                                                                                                                                                                                                                                                                                                                                                                                                                                                                                                                                                                                                                                                                                                                                                                 | Pathogenic Microorganisms Variability Laboratory                                                                           | WHO National Influenza Centre Russian Federation | Andrey Komissarov, Artem Fadeev, Anna Ivanova, Kseniya Komissarova, Dmitry Bazhenov, Daria Danilenko, Ksenia Safina, Elena Nabieva, Georgii Bazykin, Nadezhda Kuznetsova, Elena Shidlovskaya, Sergey Alkhovskaya, Elizaveta Divisenko, Alexey Shchetinin, Maria Nikiforova, Andrey Pochtovyy, Evgeny Usachev, Elena Vokalova, Maxim Rubalsky, Oleg Rubalsky, Artem Tkachuk, Vladimir Gushchin, Alexander Gintsburg, Dmitry Lioznov |
| EPI_ISL_733183, EPI_ISL_733184                                                                                                                                                                                                                                                                                                                                                                                                                                                                                                                                                                                                                                                                                                                                                                                                                                                                                                                                                                                                                                                                                                                                                                                                                                                                                                                                                                                                                                                                                                                                                                                                                                                                                                                                                                                                                                                                                                                                                                                                                                                                                                                                                                                                                                                                                                                                                                                                                                                                                                                                                                                                                                                                                                                                                                                                                                                                                                                                                                                                                                                                                                                                                                                                                                                                                                                                                                                                                                                                                                                                                                                                                                                                                                                                                                                                                                                                                                                                                                                                                                                                                                                                                                                                                                                                                                                                                                                                                                                                                                                                                                                                                                                                                                                                 | WHO National Influenza Centre Russian Federation                                                                           | WHO National Influenza Centre Russian Federation | Andrey Komissarov, Artem Fadeev, Anna Ivanova, Kseniya Komissarova, Dmitry Bazhenov, Daria Danilenko, Ksenia Safina, Elena Nabieva, Georgii Bazykin, Dmitry Lioznov                                                                                                                                                                                                                                                                |
| EPI_ISL_733185, EPI_ISL_733186, EPI_ISL_733187, EPI_ISL_733188, EPI_ISL_733189, EPI_ISL_733190, EPI_ISL_733191, EPI_ISL_733192, EPI_ISL_733193, EPI_ISL_733194, EPI_ISL_733195, EPI_ISL_733196, EPI_ISL_733197, EPI_ISL_733198, EPI_ISL_733199, EPI_ISL_733200, EPI_ISL_733201, EPI_ISL_733202, EPI_ISL_733203, EPI_ISL_733204, EPI_ISL_733205, EPI_ISL_733206, EPI_ISL_733207, EPI_ISL_733208, EPI_ISL_733209, EPI_ISL_733210, EPI_ISL_733211, EPI_ISL_733212, EPI_ISL_733213, EPI_ISL_733214, EPI_ISL_733215, EPI_ISL_733216, EPI_ISL_733217, EPI_ISL_733218, EPI_ISL_733219, EPI_ISL_733220, EPI_ISL_733221, EPI_ISL_733222                                                                                                                                                                                                                                                                                                                                                                                                                                                                                                                                                                                                                                                                                                                                                                                                                                                                                                                                                                                                                                                                                                                                                                                                                                                                                                                                                                                                                                                                                                                                                                                                                                                                                                                                                                                                                                                                                                                                                                                                                                                                                                                                                                                                                                                                                                                                                                                                                                                                                                                                                                                                                                                                                                                                                                                                                                                                                                                                                                                                                                                                                                                                                                                                                                                                                                                                                                                                                                                                                                                                                                                                                                                                                                                                                                                                                                                                                                                                                                                                                                                                                                                                 | Pathogenic Microorganisms Variability Laboratory                                                                           | WHO National Influenza Centre Russian Federation | Andrey Komissarov, Artem Fadeev, Anna Ivanova, Kseniya Komissarova, Dmitry Bazhenov, Daria Danilenko, Ksenia Safina, Elena Nabieva, Georgii Bazykin, Nadezhda Kuznetsova, Elena Shidlovskaya, Sergey Alkhovskaya, Elizaveta Divisenko, Alexey Shchetinin, Maria Nikiforova, Andrey Pochtovyy, Evgeny Usachev, Elena Vokalova, Maxim Rubalsky, Oleg Rubalsky, Artem Tkachuk, Vladimir Gushchin, Alexander Gintsburg, Dmitry Lioznov |
| EPI_ISL_733223, EPI_ISL_733224, EPI_ISL_733225, EPI_ISL_733226, EPI_ISL_733227, EPI_ISL_733228, EPI_ISL_733229, EPI_ISL_733230, EPI_ISL_733231, EPI_ISL_733232, EPI_ISL_733233, EPI_ISL_733234, EPI_ISL_733235, EPI_ISL_733236, EPI_ISL_733237, EPI_ISL_733238, EPI_ISL_733239, EPI_ISL_733240                                                                                                                                                                                                                                                                                                                                                                                                                                                                                                                                                                                                                                                                                                                                                                                                                                                                                                                                                                                                                                                                                                                                                                                                                                                                                                                                                                                                                                                                                                                                                                                                                                                                                                                                                                                                                                                                                                                                                                                                                                                                                                                                                                                                                                                                                                                                                                                                                                                                                                                                                                                                                                                                                                                                                                                                                                                                                                                                                                                                                                                                                                                                                                                                                                                                                                                                                                                                                                                                                                                                                                                                                                                                                                                                                                                                                                                                                                                                                                                                                                                                                                                                                                                                                                                                                                                                                                                                                                                                 | UMMC-Health                                                                                                                | WHO National Influenza Centre Russian Federation | Andrey Komissarov, Artem Fadeev, Anna Ivanova, Kseniya Komissarova, Dmitry Bazhenov, Tatiana Platonova, Daria Danilenko, Ksenia Safina, Elena Nabieva, Georgii Bazykin, Dmitry Lioznov                                                                                                                                                                                                                                             |
| EPI_ISL_733241, EPI_ISL_733242, EPI_ISL_733243, EPI_ISL_733244, EPI_ISL_733245, EPI_ISL_733246, EPI_ISL_733247, EPI_ISL_733248, EPI_ISL_733249, EPI_ISL_733250, EPI_ISL_733251, EPI_ISL_733252, EPI_ISL_733253, EPI_ISL_733254, EPI_ISL_733255, EPI_ISL_733256, EPI_ISL_733257, EPI_ISL_733258, EPI_ISL_733259, EPI_ISL_733260, EPI_ISL_733261, EPI_ISL_733262, EPI_ISL_733263, EPI_ISL_733264, EPI_ISL_733265, EPI_ISL_733266, EPI_ISL_733267, EPI_ISL_733268, EPI_ISL_733269, EPI_ISL_733270, EPI_ISL_733271, EPI_ISL_733272, EPI_ISL_733273, EPI_ISL_733274, EPI_ISL_733275, EPI_ISL_733276, EPI_ISL_733277, EPI_ISL_733278, EPI_ISL_733279, EPI_ISL_733280, EPI_ISL_733281, EPI_ISL_733282, EPI_ISL_733283, EPI_ISL_733284, EPI_ISL_733285, EPI_ISL_733286, EPI_ISL_733287, EPI_ISL_733288, EPI_ISL_733289, EPI_ISL_733290, EPI_ISL_733291, EPI_ISL_733292, EPI_ISL_733293, EPI_ISL_733294, EPI_ISL_733295, EPI_ISL_733296, EPI_ISL_733297, EPI_ISL_733298, EPI_ISL_733299, EPI_ISL_733300                                                                                                                                                                                                                                                                                                                                                                                                                                                                                                                                                                                                                                                                                                                                                                                                                                                                                                                                                                                                                                                                                                                                                                                                                                                                                                                                                                                                                                                                                                                                                                                                                                                                                                                                                                                                                                                                                                                                                                                                                                                                                                                                                                                                                                                                                                                                                                                                                                                                                                                                                                                                                                                                                                                                                                                                                                                                                                                                                                                                                                                                                                                                                                                                                                                                                                                                                                                                                                                                                                                                                                                                                                                                                                                                                                 |                                                                                                                            |                                                  |                                                                                                                                                                                                                                                                                                                                                                                                                                    |

|                                                                                                                                                                                                                                                                                                                                                                                                                                                                                                                                                                                                                                                                                                                                                                                                                                                                                                                                                                                                                                                                                                                                                                                                                                                                                                                                                                                                                                                                                                                |                                                       |                                                                                  |                                                                                                                                                                                                                                                  |
|----------------------------------------------------------------------------------------------------------------------------------------------------------------------------------------------------------------------------------------------------------------------------------------------------------------------------------------------------------------------------------------------------------------------------------------------------------------------------------------------------------------------------------------------------------------------------------------------------------------------------------------------------------------------------------------------------------------------------------------------------------------------------------------------------------------------------------------------------------------------------------------------------------------------------------------------------------------------------------------------------------------------------------------------------------------------------------------------------------------------------------------------------------------------------------------------------------------------------------------------------------------------------------------------------------------------------------------------------------------------------------------------------------------------------------------------------------------------------------------------------------------|-------------------------------------------------------|----------------------------------------------------------------------------------|--------------------------------------------------------------------------------------------------------------------------------------------------------------------------------------------------------------------------------------------------|
| see above                                                                                                                                                                                                                                                                                                                                                                                                                                                                                                                                                                                                                                                                                                                                                                                                                                                                                                                                                                                                                                                                                                                                                                                                                                                                                                                                                                                                                                                                                                      | WHO National Influenza Centre Russian Federation      | WHO National Influenza Centre Russian Federation                                 | Andrey Komissarov, Artem Fadeev, Anna Ivanova, Kseniya Komissarova, Dmitry Bazhenov, Daria Danilenko, Ksenia Safina, Elena Nabieva, Georgii Bazykin, Dmitry Lioznov                                                                              |
| EPI_ISL_733301, EPI_ISL_733302, EPI_ISL_733303, EPI_ISL_733304, EPI_ISL_733305, EPI_ISL_733306, EPI_ISL_733307, EPI_ISL_733308, EPI_ISL_733309, EPI_ISL_733310, EPI_ISL_733311, EPI_ISL_733312, EPI_ISL_733313, EPI_ISL_733314, EPI_ISL_733315, EPI_ISL_733316, EPI_ISL_733317, EPI_ISL_733318, EPI_ISL_733319, EPI_ISL_733320, EPI_ISL_733321, EPI_ISL_733322, EPI_ISL_733323, EPI_ISL_733324, EPI_ISL_733325, EPI_ISL_733326, EPI_ISL_733327, EPI_ISL_733328, EPI_ISL_733329, EPI_ISL_733330, EPI_ISL_733331, EPI_ISL_733332, EPI_ISL_733333, EPI_ISL_733334, EPI_ISL_733335, EPI_ISL_733336, EPI_ISL_733337, EPI_ISL_733338, EPI_ISL_733339, EPI_ISL_733340, EPI_ISL_733341, EPI_ISL_733342, EPI_ISL_733343, EPI_ISL_733344, EPI_ISL_733345, EPI_ISL_733346, EPI_ISL_733347, EPI_ISL_733348, EPI_ISL_733349, EPI_ISL_733350, EPI_ISL_733351, EPI_ISL_733352, EPI_ISL_733353, EPI_ISL_733354, EPI_ISL_733355, EPI_ISL_733356, EPI_ISL_733357, EPI_ISL_733358, EPI_ISL_733359, EPI_ISL_733360, EPI_ISL_733361, EPI_ISL_733362, EPI_ISL_733363, EPI_ISL_733364, EPI_ISL_733365, EPI_ISL_733366, EPI_ISL_733367, EPI_ISL_733368, EPI_ISL_733369, EPI_ISL_733370, EPI_ISL_733371, EPI_ISL_733372, EPI_ISL_733373, EPI_ISL_733374, EPI_ISL_733375, EPI_ISL_733376, EPI_ISL_733377, EPI_ISL_733378, EPI_ISL_733379, EPI_ISL_733380, EPI_ISL_733381, EPI_ISL_733382, EPI_ISL_733383, EPI_ISL_733384, EPI_ISL_733385, EPI_ISL_733386, EPI_ISL_733387, EPI_ISL_733388, EPI_ISL_733389, EPI_ISL_733390, EPI_ISL_733391 | HELIX LLC                                             | WHO National Influenza Centre Russian Federation                                 | Andrey Komissarov, Artem Fadeev, Anna Ivanova, Kseniya Komissarova, Dmitry Bazhenov, Daria Danilenko, Ksenia Safina, Elena Nabieva, Georgii Bazykin, Dmitry Lioznov                                                                              |
| EPI_ISL_733392                                                                                                                                                                                                                                                                                                                                                                                                                                                                                                                                                                                                                                                                                                                                                                                                                                                                                                                                                                                                                                                                                                                                                                                                                                                                                                                                                                                                                                                                                                 | WHO National Influenza Centre Russian Federation      | WHO National Influenza Centre Russian Federation                                 | Andrey Komissarov, Artem Fadeev, Anna Ivanova, Kseniya Komissarova, Dmitry Bazhenov, Daria Danilenko, Ksenia Safina, Elena Nabieva, Georgii Bazykin, Dmitry Lioznov                                                                              |
| EPI_ISL_733393                                                                                                                                                                                                                                                                                                                                                                                                                                                                                                                                                                                                                                                                                                                                                                                                                                                                                                                                                                                                                                                                                                                                                                                                                                                                                                                                                                                                                                                                                                 | HELIX LLC                                             | WHO National Influenza Centre Russian Federation                                 | Andrey Komissarov, Artem Fadeev, Anna Ivanova, Kseniya Komissarova, Dmitry Bazhenov, Daria Danilenko, Ksenia Safina, Elena Nabieva, Georgii Bazykin, Dmitry Lioznov                                                                              |
| EPI_ISL_733394, EPI_ISL_733395                                                                                                                                                                                                                                                                                                                                                                                                                                                                                                                                                                                                                                                                                                                                                                                                                                                                                                                                                                                                                                                                                                                                                                                                                                                                                                                                                                                                                                                                                 | WHO National Influenza Centre Russian Federation      | WHO National Influenza Centre Russian Federation                                 | Andrey Komissarov, Artem Fadeev, Anna Ivanova, Kseniya Komissarova, Dmitry Bazhenov, Daria Danilenko, Ksenia Safina, Elena Nabieva, Georgii Bazykin, Dmitry Lioznov                                                                              |
| EPI_ISL_733396, EPI_ISL_733397, EPI_ISL_733398, EPI_ISL_733399, EPI_ISL_733400, EPI_ISL_733401                                                                                                                                                                                                                                                                                                                                                                                                                                                                                                                                                                                                                                                                                                                                                                                                                                                                                                                                                                                                                                                                                                                                                                                                                                                                                                                                                                                                                 | HELIX LLC                                             | WHO National Influenza Centre Russian Federation                                 | Andrey Komissarov, Artem Fadeev, Anna Ivanova, Kseniya Komissarova, Dmitry Bazhenov, Daria Danilenko, Ksenia Safina, Elena Nabieva, Georgii Bazykin, Dmitry Lioznov                                                                              |
| EPI_ISL_733402, EPI_ISL_733403, EPI_ISL_733404                                                                                                                                                                                                                                                                                                                                                                                                                                                                                                                                                                                                                                                                                                                                                                                                                                                                                                                                                                                                                                                                                                                                                                                                                                                                                                                                                                                                                                                                 | WHO National Influenza Centre Russian Federation      | WHO National Influenza Centre Russian Federation                                 | Andrey Komissarov, Artem Fadeev, Anna Ivanova, Kseniya Komissarova, Dmitry Bazhenov, Daria Danilenko, Ksenia Safina, Elena Nabieva, Georgii Bazykin, Dmitry Lioznov                                                                              |
| EPI_ISL_733405, EPI_ISL_733406, EPI_ISL_733407, EPI_ISL_733408, EPI_ISL_733409, EPI_ISL_733410, EPI_ISL_733411, EPI_ISL_733412, EPI_ISL_733413, EPI_ISL_733414, EPI_ISL_733415, EPI_ISL_733416                                                                                                                                                                                                                                                                                                                                                                                                                                                                                                                                                                                                                                                                                                                                                                                                                                                                                                                                                                                                                                                                                                                                                                                                                                                                                                                 | UMMC-Health                                           | WHO National Influenza Centre Russian Federation                                 | Andrey Komissarov, Artem Fadeev, Anna Ivanova, Kseniya Komissarova, Dmitry Bazhenov, Tatiana Platonova, Daria Danilenko, Ksenia Safina, Elena Nabieva, Georgii Bazykin, Dmitry Lioznov                                                           |
| EPI_ISL_733417, EPI_ISL_733418, EPI_ISL_733419, EPI_ISL_733420, EPI_ISL_733421, EPI_ISL_733422, EPI_ISL_733423, EPI_ISL_733424, EPI_ISL_733425, EPI_ISL_733426, EPI_ISL_733427, EPI_ISL_733428, EPI_ISL_733429, EPI_ISL_733430, EPI_ISL_733431, EPI_ISL_733432, EPI_ISL_733433, EPI_ISL_733434, EPI_ISL_733435, EPI_ISL_733436, EPI_ISL_733437, EPI_ISL_733438, EPI_ISL_733439, EPI_ISL_733440, EPI_ISL_733441, EPI_ISL_733442, EPI_ISL_733443, EPI_ISL_733444, EPI_ISL_733445, EPI_ISL_733446, EPI_ISL_733447, EPI_ISL_733448, EPI_ISL_733449, EPI_ISL_733450, EPI_ISL_733451, EPI_ISL_733452, EPI_ISL_733453, EPI_ISL_733454, EPI_ISL_733455, EPI_ISL_733456, EPI_ISL_733457, EPI_ISL_733458                                                                                                                                                                                                                                                                                                                                                                                                                                                                                                                                                                                                                                                                                                                                                                                                                 | HELIX LLC                                             | WHO National Influenza Centre Russian Federation                                 | Andrey Komissarov, Artem Fadeev, Anna Ivanova, Kseniya Komissarova, Dmitry Bazhenov, Daria Danilenko, Ksenia Safina, Elena Nabieva, Georgii Bazykin, Dmitry Lioznov                                                                              |
| EPI_ISL_733459, EPI_ISL_733460, EPI_ISL_733461, EPI_ISL_733462, EPI_ISL_733463, EPI_ISL_733464, EPI_ISL_733465, EPI_ISL_733466, EPI_ISL_733467, EPI_ISL_733468, EPI_ISL_733469, EPI_ISL_733470, EPI_ISL_733471, EPI_ISL_733472, EPI_ISL_733473, EPI_ISL_733474, EPI_ISL_733475, EPI_ISL_733476, EPI_ISL_733477                                                                                                                                                                                                                                                                                                                                                                                                                                                                                                                                                                                                                                                                                                                                                                                                                                                                                                                                                                                                                                                                                                                                                                                                 | WHO National Influenza Centre Russian Federation      | WHO National Influenza Centre Russian Federation                                 | Andrey Komissarov, Artem Fadeev, Anna Ivanova, Kseniya Komissarova, Dmitry Bazhenov, Daria Danilenko, Ksenia Safina, Elena Nabieva, Georgii Bazykin, Dmitry Lioznov                                                                              |
| EPI_ISL_733478, EPI_ISL_733479, EPI_ISL_733480, EPI_ISL_733481                                                                                                                                                                                                                                                                                                                                                                                                                                                                                                                                                                                                                                                                                                                                                                                                                                                                                                                                                                                                                                                                                                                                                                                                                                                                                                                                                                                                                                                 | SOGAZ PROFMEDICINA LLC                                | WHO National Influenza Centre Russian Federation                                 | Andrey Komissarov, Artem Fadeev, Anna Ivanova, Kseniya Komissarova, Dmitry Bazhenov, Daria Danilenko, Ksenia Safina, Elena Nabieva, Georgii Bazykin, Dmitry Lioznov                                                                              |
| EPI_ISL_733482, EPI_ISL_733483, EPI_ISL_733484, EPI_ISL_733485, EPI_ISL_733486, EPI_ISL_733487, EPI_ISL_733488, EPI_ISL_733489, EPI_ISL_733490, EPI_ISL_733491, EPI_ISL_733492, EPI_ISL_733493                                                                                                                                                                                                                                                                                                                                                                                                                                                                                                                                                                                                                                                                                                                                                                                                                                                                                                                                                                                                                                                                                                                                                                                                                                                                                                                 | Omsk Research Institute of Natural Focal Infections   | WHO National Influenza Centre Russian Federation                                 | Andrey Komissarov, Artem Fadeev, Anna Ivanova, Kseniya Komissarova, Dmitry Bazhenov, Daria Danilenko, Ekaterina Gradoboeva, Elena Poleshchuk, Aleksei Vasilenko, Valery Yakimenko, Ksenia Safina, Elena Nabieva, Georgii Bazykin, Dmitry Lioznov |
| EPI_ISL_733494, EPI_ISL_733495                                                                                                                                                                                                                                                                                                                                                                                                                                                                                                                                                                                                                                                                                                                                                                                                                                                                                                                                                                                                                                                                                                                                                                                                                                                                                                                                                                                                                                                                                 | WHO National Influenza Centre Russian Federation      | WHO National Influenza Centre Russian Federation                                 | Andrey Komissarov, Artem Fadeev, Anna Ivanova, Kseniya Komissarova, Dmitry Bazhenov, Daria Danilenko, Ksenia Safina, Elena Nabieva, Georgii Bazykin, Dmitry Lioznov                                                                              |
| EPI_ISL_738148, EPI_ISL_738149, EPI_ISL_738150, EPI_ISL_738151, EPI_ISL_738152, EPI_ISL_738153, EPI_ISL_738154, EPI_ISL_738155, EPI_ISL_738156, EPI_ISL_738157, EPI_ISL_738158, EPI_ISL_738159, EPI_ISL_738160, EPI_ISL_738161, EPI_ISL_738162, EPI_ISL_738163, EPI_ISL_738164, EPI_ISL_738165, EPI_ISL_738166, EPI_ISL_738167, EPI_ISL_738168, EPI_ISL_738169, EPI_ISL_738170, EPI_ISL_738171, EPI_ISL_738172, EPI_ISL_738173, EPI_ISL_738174, EPI_ISL_738175, EPI_ISL_738176, EPI_ISL_738177, EPI_ISL_738178, EPI_ISL_738179, EPI_ISL_738180, EPI_ISL_738181, EPI_ISL_738182, EPI_ISL_738183, EPI_ISL_738184, EPI_ISL_738185, EPI_ISL_738186, EPI_ISL_738187, EPI_ISL_738188, EPI_ISL_738189, EPI_ISL_738190, EPI_ISL_738191, EPI_ISL_738192, EPI_ISL_738193                                                                                                                                                                                                                                                                                                                                                                                                                                                                                                                                                                                                                                                                                                                                                 | Texas Department of State Health Services             | Texas Department of State Health Services                                        | Anita Pokharel, Bonnie Oh, James Daniel Bonser, Rashmi Tuladhar, Mayela Pedrueza, Jenny Zhang, Maliha Rahman, Myong Koag, Chung Wang, Rachel Lee, Grace Kubin                                                                                    |
| EPI_ISL_738317, EPI_ISL_738318, EPI_ISL_738319, EPI_ISL_738320, EPI_ISL_738321, EPI_ISL_738322, EPI_ISL_738323, EPI_ISL_738324, EPI_ISL_738325, EPI_ISL_738326, EPI_ISL_738327, EPI_ISL_738328, EPI_ISL_738329, EPI_ISL_738330, EPI_ISL_738331, EPI_ISL_738332, EPI_ISL_738333, EPI_ISL_738334, EPI_ISL_738335, EPI_ISL_738336, EPI_ISL_738337, EPI_ISL_738338, EPI_ISL_738339, EPI_ISL_738340, EPI_ISL_738341, EPI_ISL_738342, EPI_ISL_738343, EPI_ISL_738344, EPI_ISL_738345, EPI_ISL_738346, EPI_ISL_738347, EPI_ISL_738348, EPI_ISL_738349                                                                                                                                                                                                                                                                                                                                                                                                                                                                                                                                                                                                                                                                                                                                                                                                                                                                                                                                                                 | Landstuhl Regional Medical Center                     | United States Air Force School of Aerospace Medicine                             | Anthony Fries, Jennifer Meyer, Amanda Javorina, Sarah Purves, William Gruner, Clarise Starr, Elizabeth Macias, Fritz Castillo, Cole Anderson                                                                                                     |
| EPI_ISL_739693, EPI_ISL_739694, EPI_ISL_739695, EPI_ISL_739696, EPI_ISL_739697, EPI_ISL_739698, EPI_ISL_739699                                                                                                                                                                                                                                                                                                                                                                                                                                                                                                                                                                                                                                                                                                                                                                                                                                                                                                                                                                                                                                                                                                                                                                                                                                                                                                                                                                                                 | Laboratoire national de santé, Microbiology, Virology | Laboratoire national de santé, Microbiology, Microbial Genomics Platform         | Anke Wienecke-Baldacchino, Catherine Ragimbeau, Jessica Tapp, Fatu Djabi, Lise Pignon, Raoul Salmon, Tamir Abdelrahman                                                                                                                           |
| EPI_ISL_739700                                                                                                                                                                                                                                                                                                                                                                                                                                                                                                                                                                                                                                                                                                                                                                                                                                                                                                                                                                                                                                                                                                                                                                                                                                                                                                                                                                                                                                                                                                 | Laboratoire national de santé, Microbiology, Virology | Laboratoire national de santé, Microbiology, Epidemiology and Microbial Genomics | Anke Wienecke-Baldacchino, Catherine Ragimbeau, Tamir Abdelrahman, Jessica Tapp, Fatu Djabi, Trung Nguyen Nguyen                                                                                                                                 |
| EPI_ISL_739701, EPI_ISL_739702, EPI_ISL_739703, EPI_ISL_739704, EPI_ISL_739705, EPI_ISL_739706, EPI_ISL_739707, EPI_ISL_739708, EPI_ISL_739709, EPI_ISL_739710, EPI_ISL_739711, EPI_ISL_739712, EPI_ISL_739713, EPI_ISL_739714, EPI_ISL_739715, EPI_ISL_739716, EPI_ISL_739717, EPI_ISL_739718, EPI_ISL_739719, EPI_ISL_739720, EPI_ISL_739721, EPI_ISL_739722, EPI_ISL_739723, EPI_ISL_739724, EPI_ISL_739725, EPI_ISL_739726, EPI_ISL_739727, EPI_ISL_739728, EPI_ISL_739729, EPI_ISL_739730, EPI_ISL_739731, EPI_ISL_739732, EPI_ISL_739733, EPI_ISL_739734, EPI_ISL_739735, EPI_ISL_739736, EPI_ISL_739737, EPI_ISL_739738, EPI_ISL_739739, EPI_ISL_739740, EPI_ISL_739741, EPI_ISL_739742, EPI_ISL_739743, EPI_ISL_739744, EPI_ISL_739745, EPI_ISL_739746, EPI_ISL_739747, EPI_ISL_739748, EPI_ISL_739749, EPI_ISL_739750, EPI_ISL_739751, EPI_ISL_739752                                                                                                                                                                                                                                                                                                                                                                                                                                                                                                                                                                                                                                                 | Laboratoire national de santé, Microbiology, Virology | Laboratoire national de santé, Microbiology, Microbial Genomics Platform         | Anke Wienecke-Baldacchino, Catherine Ragimbeau, Jessica Tapp, Fatu Djabi, Lise Pignon, Raoul Salmon, Tamir Abdelrahman                                                                                                                           |
| EPI_ISL_739753                                                                                                                                                                                                                                                                                                                                                                                                                                                                                                                                                                                                                                                                                                                                                                                                                                                                                                                                                                                                                                                                                                                                                                                                                                                                                                                                                                                                                                                                                                 | Laboratoire national de santé, Microbiology, Virology | Laboratoire national de santé, Microbiology, Microbial Genomics Platform         | Anke Wienecke-Baldacchino, Catherine Ragimbeau, Tamir Abdelrahman, Jessica Tapp, Fatu Djabi                                                                                                                                                      |
| EPI_ISL_739754, EPI_ISL_739755, EPI_ISL_739756, EPI_ISL_739757, EPI_ISL_739758, EPI_ISL_739759, EPI_ISL_739760, EPI_ISL_739761, EPI_ISL_739762, EPI_ISL_739763, EPI_ISL_739764, EPI_ISL_739765, EPI_ISL_739766, EPI_ISL_739767, EPI_ISL_739768, EPI_ISL_739769, EPI_ISL_739770, EPI_ISL_739771, EPI_ISL_739772                                                                                                                                                                                                                                                                                                                                                                                                                                                                                                                                                                                                                                                                                                                                                                                                                                                                                                                                                                                                                                                                                                                                                                                                 | Laboratoire national de santé, Microbiology, Virology | Laboratoire national de santé, Microbiology, Microbial Genomics Platform         | Anke Wienecke-Baldacchino, Catherine Ragimbeau, Jessica Tapp, Fatu Djabi, Lise Pignon, Raoul Salmon, Tamir Abdelrahman                                                                                                                           |
| EPI_ISL_739773                                                                                                                                                                                                                                                                                                                                                                                                                                                                                                                                                                                                                                                                                                                                                                                                                                                                                                                                                                                                                                                                                                                                                                                                                                                                                                                                                                                                                                                                                                 | Laboratoire national de santé, Microbiology, Virology | Laboratoire national de santé, Microbiology, Microbial Genomics Platform         | Anke Wienecke-Baldacchino, Catherine Ragimbeau, Tamir Abdelrahman, Jessica Tapp, Fatu Djabi                                                                                                                                                      |
| EPI_ISL_739774, EPI_ISL_739775, EPI_ISL_739776, EPI_ISL_739777, EPI_ISL_739778, EPI_ISL_739779, EPI_ISL_739780, EPI_ISL_739781, EPI_ISL_739782, EPI_ISL_739783, EPI_ISL_739784, EPI_ISL_739785, EPI_ISL_739786, EPI_ISL_739787, EPI_ISL_739788, EPI_ISL_739789, EPI_ISL_739790, EPI_ISL_739791                                                                                                                                                                                                                                                                                                                                                                                                                                                                                                                                                                                                                                                                                                                                                                                                                                                                                                                                                                                                                                                                                                                                                                                                                 | Laboratoire national de santé, Microbiology, Virology | Laboratoire national de santé, Microbiology, Microbial Genomics Platform         | Anke Wienecke-Baldacchino, Catherine Ragimbeau, Jessica Tapp, Fatu Djabi, Lise Pignon, Raoul Salmon, Tamir Abdelrahman                                                                                                                           |
| EPI_ISL_739792                                                                                                                                                                                                                                                                                                                                                                                                                                                                                                                                                                                                                                                                                                                                                                                                                                                                                                                                                                                                                                                                                                                                                                                                                                                                                                                                                                                                                                                                                                 | Laboratoire national de santé, Microbiology, Virology | Laboratoire national de santé, Microbiology, Microbial                           | Anke Wienecke-Baldacchino, Catherine Ragimbeau, Tamir Abdelrahman, Jessica Tapp, Fatu Djabi                                                                                                                                                      |

















|                                                                                                                                                                                                                                                                                                                                                                                                                                                                                                                                                                                                                                                                                                                                                                                                                                                                                                                                                                                                                                                                                                                                                                                                                                                                                                                                                                                                                                                                                                                                                                                                                                                                                                                                                                                                                                                                                                                                                                                                                                                                                                                                                                                                                                                                                                                                                                                                                                                                                                                                                                                                                                                                                                                                                                                                                                                                                                                                                                                                                                                                                                                                                                                                                                                                                                                                                                                                                                                                                                                                                                                                                                                                                                                                                                                                                                                                                                                                                                                                                                                                                                                                                                                                                                                                                                                                                                                                                                                                                                                                                                                                                                                                                                                                                                                                                                                                                                                                                                                                                                                                                                |           |                                                                                                                            |                                                                          |                                                                                                                                                                                                                                                                                                                                                                                                                                                       |
|------------------------------------------------------------------------------------------------------------------------------------------------------------------------------------------------------------------------------------------------------------------------------------------------------------------------------------------------------------------------------------------------------------------------------------------------------------------------------------------------------------------------------------------------------------------------------------------------------------------------------------------------------------------------------------------------------------------------------------------------------------------------------------------------------------------------------------------------------------------------------------------------------------------------------------------------------------------------------------------------------------------------------------------------------------------------------------------------------------------------------------------------------------------------------------------------------------------------------------------------------------------------------------------------------------------------------------------------------------------------------------------------------------------------------------------------------------------------------------------------------------------------------------------------------------------------------------------------------------------------------------------------------------------------------------------------------------------------------------------------------------------------------------------------------------------------------------------------------------------------------------------------------------------------------------------------------------------------------------------------------------------------------------------------------------------------------------------------------------------------------------------------------------------------------------------------------------------------------------------------------------------------------------------------------------------------------------------------------------------------------------------------------------------------------------------------------------------------------------------------------------------------------------------------------------------------------------------------------------------------------------------------------------------------------------------------------------------------------------------------------------------------------------------------------------------------------------------------------------------------------------------------------------------------------------------------------------------------------------------------------------------------------------------------------------------------------------------------------------------------------------------------------------------------------------------------------------------------------------------------------------------------------------------------------------------------------------------------------------------------------------------------------------------------------------------------------------------------------------------------------------------------------------------------------------------------------------------------------------------------------------------------------------------------------------------------------------------------------------------------------------------------------------------------------------------------------------------------------------------------------------------------------------------------------------------------------------------------------------------------------------------------------------------------------------------------------------------------------------------------------------------------------------------------------------------------------------------------------------------------------------------------------------------------------------------------------------------------------------------------------------------------------------------------------------------------------------------------------------------------------------------------------------------------------------------------------------------------------------------------------------------------------------------------------------------------------------------------------------------------------------------------------------------------------------------------------------------------------------------------------------------------------------------------------------------------------------------------------------------------------------------------------------------------------------------------------------------------|-----------|----------------------------------------------------------------------------------------------------------------------------|--------------------------------------------------------------------------|-------------------------------------------------------------------------------------------------------------------------------------------------------------------------------------------------------------------------------------------------------------------------------------------------------------------------------------------------------------------------------------------------------------------------------------------------------|
| EPI_ISL_763805, EPI_ISL_763806, EPI_ISL_763807, EPI_ISL_763808, EPI_ISL_763812, EPI_ISL_763823, EPI_ISL_763824, EPI_ISL_763825, EPI_ISL_763827, EPI_ISL_763828, EPI_ISL_763829, EPI_ISL_763830, EPI_ISL_763831, EPI_ISL_763832, EPI_ISL_763833, EPI_ISL_763834, EPI_ISL_763835, EPI_ISL_763836, EPI_ISL_763837, EPI_ISL_763865, EPI_ISL_764006, EPI_ISL_764007, EPI_ISL_764008, EPI_ISL_764009, EPI_ISL_764010, EPI_ISL_764011, EPI_ISL_764012, EPI_ISL_764013, EPI_ISL_764014, EPI_ISL_764015, EPI_ISL_764016, EPI_ISL_764017, EPI_ISL_764018, EPI_ISL_764019, EPI_ISL_764020, EPI_ISL_764022, EPI_ISL_764023, EPI_ISL_764024, EPI_ISL_764025, EPI_ISL_764026, EPI_ISL_764027, EPI_ISL_764028, EPI_ISL_764029, EPI_ISL_764030, EPI_ISL_764031, EPI_ISL_764036, EPI_ISL_764081, EPI_ISL_764082, EPI_ISL_764094, EPI_ISL_764095, EPI_ISL_764096, EPI_ISL_764097, EPI_ISL_764098, EPI_ISL_764101, EPI_ISL_764102, EPI_ISL_764118, EPI_ISL_764119, EPI_ISL_764120, EPI_ISL_764121, EPI_ISL_764122, EPI_ISL_764123, EPI_ISL_764124, EPI_ISL_764125, EPI_ISL_764136, EPI_ISL_764140, EPI_ISL_764152, EPI_ISL_764169, EPI_ISL_764172, EPI_ISL_764193, EPI_ISL_765112, EPI_ISL_765113, EPI_ISL_765114, EPI_ISL_765115, EPI_ISL_765116, EPI_ISL_765117, EPI_ISL_765118, EPI_ISL_765119, EPI_ISL_765120, EPI_ISL_765121, EPI_ISL_765122, EPI_ISL_765123, EPI_ISL_765124, EPI_ISL_765125, EPI_ISL_765126, EPI_ISL_765127, EPI_ISL_765128, EPI_ISL_765129, EPI_ISL_765130, EPI_ISL_765131, EPI_ISL_765132, EPI_ISL_765133, EPI_ISL_765134, EPI_ISL_765135, EPI_ISL_765136, EPI_ISL_765137, EPI_ISL_765138, EPI_ISL_765139, EPI_ISL_765140, EPI_ISL_765141, EPI_ISL_765142, EPI_ISL_765143, EPI_ISL_765144, EPI_ISL_765145, EPI_ISL_765146, EPI_ISL_765147, EPI_ISL_765148                                                                                                                                                                                                                                                                                                                                                                                                                                                                                                                                                                                                                                                                                                                                                                                                                                                                                                                                                                                                                                                                                                                                                                                                                                                                                                                                                                                                                                                                                                                                                                                                                                                                                                                                                                                                                                                                                                                                                                                                                                                                                                                                                                                                                                                                                                                                                                                                                                                                                                                                                                                                                                                                                                                                                                                                                                                                                                                                                                                                                                                                                                                                                                                                                                                                                                                                 | see above | Centre for Enzyme Innovation, University of Portsmouth / Translational Research Laboratory, Portsmouth Hospitals NHS Trust | COVID-19 Genomics UK (COG-UK) Consortium                                 | Angela Beckett, Yann Bourgeois, Garry Scarlett, Sharon Glayscher, Scott Elliott, Kelly Bicknell, Robert Impey, Allyson Lloyd, Sarah Wylie, Ethan Butcher, Anoop Chauhan, Samuel Robson                                                                                                                                                                                                                                                                |
| EPI_ISL_766938                                                                                                                                                                                                                                                                                                                                                                                                                                                                                                                                                                                                                                                                                                                                                                                                                                                                                                                                                                                                                                                                                                                                                                                                                                                                                                                                                                                                                                                                                                                                                                                                                                                                                                                                                                                                                                                                                                                                                                                                                                                                                                                                                                                                                                                                                                                                                                                                                                                                                                                                                                                                                                                                                                                                                                                                                                                                                                                                                                                                                                                                                                                                                                                                                                                                                                                                                                                                                                                                                                                                                                                                                                                                                                                                                                                                                                                                                                                                                                                                                                                                                                                                                                                                                                                                                                                                                                                                                                                                                                                                                                                                                                                                                                                                                                                                                                                                                                                                                                                                                                                                                 |           | Nevada State Health Lab                                                                                                    | Nevada State Health Lab                                                  | Andrew Gorzalski                                                                                                                                                                                                                                                                                                                                                                                                                                      |
| EPI_ISL_770633, EPI_ISL_770634, EPI_ISL_770635, EPI_ISL_770636, EPI_ISL_770637                                                                                                                                                                                                                                                                                                                                                                                                                                                                                                                                                                                                                                                                                                                                                                                                                                                                                                                                                                                                                                                                                                                                                                                                                                                                                                                                                                                                                                                                                                                                                                                                                                                                                                                                                                                                                                                                                                                                                                                                                                                                                                                                                                                                                                                                                                                                                                                                                                                                                                                                                                                                                                                                                                                                                                                                                                                                                                                                                                                                                                                                                                                                                                                                                                                                                                                                                                                                                                                                                                                                                                                                                                                                                                                                                                                                                                                                                                                                                                                                                                                                                                                                                                                                                                                                                                                                                                                                                                                                                                                                                                                                                                                                                                                                                                                                                                                                                                                                                                                                                 |           | WHO National Influenza Centre Russian Federation                                                                           | WHO National Influenza Centre Russian Federation                         | Andrey Komissarov, Artem Fadeev, Anna Ivanova, Kseniya Komissarova, Dmitry Bazhenov, Daria Danilenko, Ksenia Safina, Elena Nabieva, Georgii Bazykin, Dmitry Lioznov                                                                                                                                                                                                                                                                                   |
| EPI_ISL_770638                                                                                                                                                                                                                                                                                                                                                                                                                                                                                                                                                                                                                                                                                                                                                                                                                                                                                                                                                                                                                                                                                                                                                                                                                                                                                                                                                                                                                                                                                                                                                                                                                                                                                                                                                                                                                                                                                                                                                                                                                                                                                                                                                                                                                                                                                                                                                                                                                                                                                                                                                                                                                                                                                                                                                                                                                                                                                                                                                                                                                                                                                                                                                                                                                                                                                                                                                                                                                                                                                                                                                                                                                                                                                                                                                                                                                                                                                                                                                                                                                                                                                                                                                                                                                                                                                                                                                                                                                                                                                                                                                                                                                                                                                                                                                                                                                                                                                                                                                                                                                                                                                 |           | UMMC-Health                                                                                                                | WHO National Influenza Centre Russian Federation                         | Andrey Komissarov, Artem Fadeev, Anna Ivanova, Kseniya Komissarova, Dmitry Bazhenov, Tatiana Platonova, Daria Danilenko, Ksenia Safina, Elena Nabieva, Georgii Bazykin, Dmitry Lioznov                                                                                                                                                                                                                                                                |
| EPI_ISL_770639, EPI_ISL_770640, EPI_ISL_770641                                                                                                                                                                                                                                                                                                                                                                                                                                                                                                                                                                                                                                                                                                                                                                                                                                                                                                                                                                                                                                                                                                                                                                                                                                                                                                                                                                                                                                                                                                                                                                                                                                                                                                                                                                                                                                                                                                                                                                                                                                                                                                                                                                                                                                                                                                                                                                                                                                                                                                                                                                                                                                                                                                                                                                                                                                                                                                                                                                                                                                                                                                                                                                                                                                                                                                                                                                                                                                                                                                                                                                                                                                                                                                                                                                                                                                                                                                                                                                                                                                                                                                                                                                                                                                                                                                                                                                                                                                                                                                                                                                                                                                                                                                                                                                                                                                                                                                                                                                                                                                                 |           | WHO National Influenza Centre Russian Federation                                                                           | WHO National Influenza Centre Russian Federation                         | Andrey Komissarov, Artem Fadeev, Anna Ivanova, Kseniya Komissarova, Dmitry Bazhenov, Daria Danilenko, Ksenia Safina, Elena Nabieva, Georgii Bazykin, Dmitry Lioznov                                                                                                                                                                                                                                                                                   |
| EPI_ISL_770642                                                                                                                                                                                                                                                                                                                                                                                                                                                                                                                                                                                                                                                                                                                                                                                                                                                                                                                                                                                                                                                                                                                                                                                                                                                                                                                                                                                                                                                                                                                                                                                                                                                                                                                                                                                                                                                                                                                                                                                                                                                                                                                                                                                                                                                                                                                                                                                                                                                                                                                                                                                                                                                                                                                                                                                                                                                                                                                                                                                                                                                                                                                                                                                                                                                                                                                                                                                                                                                                                                                                                                                                                                                                                                                                                                                                                                                                                                                                                                                                                                                                                                                                                                                                                                                                                                                                                                                                                                                                                                                                                                                                                                                                                                                                                                                                                                                                                                                                                                                                                                                                                 |           | UMMC-Health                                                                                                                | WHO National Influenza Centre Russian Federation                         | Andrey Komissarov, Artem Fadeev, Anna Ivanova, Kseniya Komissarova, Dmitry Bazhenov, Tatiana Platonova, Daria Danilenko, Ksenia Safina, Elena Nabieva, Georgii Bazykin, Dmitry Lioznov                                                                                                                                                                                                                                                                |
| EPI_ISL_770643, EPI_ISL_770644, EPI_ISL_770645, EPI_ISL_770646                                                                                                                                                                                                                                                                                                                                                                                                                                                                                                                                                                                                                                                                                                                                                                                                                                                                                                                                                                                                                                                                                                                                                                                                                                                                                                                                                                                                                                                                                                                                                                                                                                                                                                                                                                                                                                                                                                                                                                                                                                                                                                                                                                                                                                                                                                                                                                                                                                                                                                                                                                                                                                                                                                                                                                                                                                                                                                                                                                                                                                                                                                                                                                                                                                                                                                                                                                                                                                                                                                                                                                                                                                                                                                                                                                                                                                                                                                                                                                                                                                                                                                                                                                                                                                                                                                                                                                                                                                                                                                                                                                                                                                                                                                                                                                                                                                                                                                                                                                                                                                 |           | WHO National Influenza Centre Russian Federation                                                                           | WHO National Influenza Centre Russian Federation                         | Andrey Komissarov, Artem Fadeev, Anna Ivanova, Kseniya Komissarova, Dmitry Bazhenov, Daria Danilenko, Ksenia Safina, Elena Nabieva, Georgii Bazykin, Dmitry Lioznov                                                                                                                                                                                                                                                                                   |
| EPI_ISL_770647, EPI_ISL_770648, EPI_ISL_770649, EPI_ISL_770650, EPI_ISL_770651, EPI_ISL_770652                                                                                                                                                                                                                                                                                                                                                                                                                                                                                                                                                                                                                                                                                                                                                                                                                                                                                                                                                                                                                                                                                                                                                                                                                                                                                                                                                                                                                                                                                                                                                                                                                                                                                                                                                                                                                                                                                                                                                                                                                                                                                                                                                                                                                                                                                                                                                                                                                                                                                                                                                                                                                                                                                                                                                                                                                                                                                                                                                                                                                                                                                                                                                                                                                                                                                                                                                                                                                                                                                                                                                                                                                                                                                                                                                                                                                                                                                                                                                                                                                                                                                                                                                                                                                                                                                                                                                                                                                                                                                                                                                                                                                                                                                                                                                                                                                                                                                                                                                                                                 |           | UMMC-Health                                                                                                                | WHO National Influenza Centre Russian Federation                         | Andrey Komissarov, Artem Fadeev, Anna Ivanova, Kseniya Komissarova, Dmitry Bazhenov, Tatiana Platonova, Daria Danilenko, Ksenia Safina, Elena Nabieva, Georgii Bazykin, Dmitry Lioznov                                                                                                                                                                                                                                                                |
| EPI_ISL_770653                                                                                                                                                                                                                                                                                                                                                                                                                                                                                                                                                                                                                                                                                                                                                                                                                                                                                                                                                                                                                                                                                                                                                                                                                                                                                                                                                                                                                                                                                                                                                                                                                                                                                                                                                                                                                                                                                                                                                                                                                                                                                                                                                                                                                                                                                                                                                                                                                                                                                                                                                                                                                                                                                                                                                                                                                                                                                                                                                                                                                                                                                                                                                                                                                                                                                                                                                                                                                                                                                                                                                                                                                                                                                                                                                                                                                                                                                                                                                                                                                                                                                                                                                                                                                                                                                                                                                                                                                                                                                                                                                                                                                                                                                                                                                                                                                                                                                                                                                                                                                                                                                 |           | WHO National Influenza Centre Russian Federation                                                                           | WHO National Influenza Centre Russian Federation                         | Andrey Komissarov, Artem Fadeev, Anna Ivanova, Kseniya Komissarova, Dmitry Bazhenov, Daria Danilenko, Ksenia Safina, Elena Nabieva, Georgii Bazykin, Dmitry Lioznov                                                                                                                                                                                                                                                                                   |
| EPI_ISL_770654, EPI_ISL_770655, EPI_ISL_770656, EPI_ISL_770657                                                                                                                                                                                                                                                                                                                                                                                                                                                                                                                                                                                                                                                                                                                                                                                                                                                                                                                                                                                                                                                                                                                                                                                                                                                                                                                                                                                                                                                                                                                                                                                                                                                                                                                                                                                                                                                                                                                                                                                                                                                                                                                                                                                                                                                                                                                                                                                                                                                                                                                                                                                                                                                                                                                                                                                                                                                                                                                                                                                                                                                                                                                                                                                                                                                                                                                                                                                                                                                                                                                                                                                                                                                                                                                                                                                                                                                                                                                                                                                                                                                                                                                                                                                                                                                                                                                                                                                                                                                                                                                                                                                                                                                                                                                                                                                                                                                                                                                                                                                                                                 |           | UMMC-Health                                                                                                                | WHO National Influenza Centre Russian Federation                         | Andrey Komissarov, Artem Fadeev, Anna Ivanova, Kseniya Komissarova, Dmitry Bazhenov, Tatiana Platonova, Daria Danilenko, Ksenia Safina, Elena Nabieva, Georgii Bazykin, Dmitry Lioznov                                                                                                                                                                                                                                                                |
| EPI_ISL_770658                                                                                                                                                                                                                                                                                                                                                                                                                                                                                                                                                                                                                                                                                                                                                                                                                                                                                                                                                                                                                                                                                                                                                                                                                                                                                                                                                                                                                                                                                                                                                                                                                                                                                                                                                                                                                                                                                                                                                                                                                                                                                                                                                                                                                                                                                                                                                                                                                                                                                                                                                                                                                                                                                                                                                                                                                                                                                                                                                                                                                                                                                                                                                                                                                                                                                                                                                                                                                                                                                                                                                                                                                                                                                                                                                                                                                                                                                                                                                                                                                                                                                                                                                                                                                                                                                                                                                                                                                                                                                                                                                                                                                                                                                                                                                                                                                                                                                                                                                                                                                                                                                 |           | WHO National Influenza Centre Russian Federation                                                                           | WHO National Influenza Centre Russian Federation                         | Andrey Komissarov, Artem Fadeev, Anna Ivanova, Kseniya Komissarova, Dmitry Bazhenov, Daria Danilenko, Ksenia Safina, Elena Nabieva, Georgii Bazykin, Dmitry Lioznov                                                                                                                                                                                                                                                                                   |
| EPI_ISL_770659                                                                                                                                                                                                                                                                                                                                                                                                                                                                                                                                                                                                                                                                                                                                                                                                                                                                                                                                                                                                                                                                                                                                                                                                                                                                                                                                                                                                                                                                                                                                                                                                                                                                                                                                                                                                                                                                                                                                                                                                                                                                                                                                                                                                                                                                                                                                                                                                                                                                                                                                                                                                                                                                                                                                                                                                                                                                                                                                                                                                                                                                                                                                                                                                                                                                                                                                                                                                                                                                                                                                                                                                                                                                                                                                                                                                                                                                                                                                                                                                                                                                                                                                                                                                                                                                                                                                                                                                                                                                                                                                                                                                                                                                                                                                                                                                                                                                                                                                                                                                                                                                                 |           | UMMC-Health                                                                                                                | WHO National Influenza Centre Russian Federation                         | Andrey Komissarov, Artem Fadeev, Anna Ivanova, Kseniya Komissarova, Dmitry Bazhenov, Tatiana Platonova, Daria Danilenko, Ksenia Safina, Elena Nabieva, Georgii Bazykin, Dmitry Lioznov                                                                                                                                                                                                                                                                |
| EPI_ISL_770660, EPI_ISL_770661                                                                                                                                                                                                                                                                                                                                                                                                                                                                                                                                                                                                                                                                                                                                                                                                                                                                                                                                                                                                                                                                                                                                                                                                                                                                                                                                                                                                                                                                                                                                                                                                                                                                                                                                                                                                                                                                                                                                                                                                                                                                                                                                                                                                                                                                                                                                                                                                                                                                                                                                                                                                                                                                                                                                                                                                                                                                                                                                                                                                                                                                                                                                                                                                                                                                                                                                                                                                                                                                                                                                                                                                                                                                                                                                                                                                                                                                                                                                                                                                                                                                                                                                                                                                                                                                                                                                                                                                                                                                                                                                                                                                                                                                                                                                                                                                                                                                                                                                                                                                                                                                 |           | WHO National Influenza Centre Russian Federation                                                                           | WHO National Influenza Centre Russian Federation                         | Andrey Komissarov, Artem Fadeev, Anna Ivanova, Kseniya Komissarova, Dmitry Bazhenov, Daria Danilenko, Ksenia Safina, Elena Nabieva, Georgii Bazykin, Dmitry Lioznov                                                                                                                                                                                                                                                                                   |
| EPI_ISL_770662, EPI_ISL_770663, EPI_ISL_770664, EPI_ISL_770665                                                                                                                                                                                                                                                                                                                                                                                                                                                                                                                                                                                                                                                                                                                                                                                                                                                                                                                                                                                                                                                                                                                                                                                                                                                                                                                                                                                                                                                                                                                                                                                                                                                                                                                                                                                                                                                                                                                                                                                                                                                                                                                                                                                                                                                                                                                                                                                                                                                                                                                                                                                                                                                                                                                                                                                                                                                                                                                                                                                                                                                                                                                                                                                                                                                                                                                                                                                                                                                                                                                                                                                                                                                                                                                                                                                                                                                                                                                                                                                                                                                                                                                                                                                                                                                                                                                                                                                                                                                                                                                                                                                                                                                                                                                                                                                                                                                                                                                                                                                                                                 |           | UMMC-Health                                                                                                                | WHO National Influenza Centre Russian Federation                         | Andrey Komissarov, Artem Fadeev, Anna Ivanova, Kseniya Komissarova, Dmitry Bazhenov, Tatiana Platonova, Daria Danilenko, Ksenia Safina, Elena Nabieva, Georgii Bazykin, Dmitry Lioznov                                                                                                                                                                                                                                                                |
| EPI_ISL_770666                                                                                                                                                                                                                                                                                                                                                                                                                                                                                                                                                                                                                                                                                                                                                                                                                                                                                                                                                                                                                                                                                                                                                                                                                                                                                                                                                                                                                                                                                                                                                                                                                                                                                                                                                                                                                                                                                                                                                                                                                                                                                                                                                                                                                                                                                                                                                                                                                                                                                                                                                                                                                                                                                                                                                                                                                                                                                                                                                                                                                                                                                                                                                                                                                                                                                                                                                                                                                                                                                                                                                                                                                                                                                                                                                                                                                                                                                                                                                                                                                                                                                                                                                                                                                                                                                                                                                                                                                                                                                                                                                                                                                                                                                                                                                                                                                                                                                                                                                                                                                                                                                 |           | WHO National Influenza Centre Russian Federation                                                                           | WHO National Influenza Centre Russian Federation                         | Andrey Komissarov, Artem Fadeev, Anna Ivanova, Kseniya Komissarova, Dmitry Bazhenov, Daria Danilenko, Ksenia Safina, Elena Nabieva, Georgii Bazykin, Dmitry Lioznov                                                                                                                                                                                                                                                                                   |
| EPI_ISL_770667, EPI_ISL_770668                                                                                                                                                                                                                                                                                                                                                                                                                                                                                                                                                                                                                                                                                                                                                                                                                                                                                                                                                                                                                                                                                                                                                                                                                                                                                                                                                                                                                                                                                                                                                                                                                                                                                                                                                                                                                                                                                                                                                                                                                                                                                                                                                                                                                                                                                                                                                                                                                                                                                                                                                                                                                                                                                                                                                                                                                                                                                                                                                                                                                                                                                                                                                                                                                                                                                                                                                                                                                                                                                                                                                                                                                                                                                                                                                                                                                                                                                                                                                                                                                                                                                                                                                                                                                                                                                                                                                                                                                                                                                                                                                                                                                                                                                                                                                                                                                                                                                                                                                                                                                                                                 |           | UMMC-Health                                                                                                                | WHO National Influenza Centre Russian Federation                         | Andrey Komissarov, Artem Fadeev, Anna Ivanova, Kseniya Komissarova, Dmitry Bazhenov, Tatiana Platonova, Daria Danilenko, Ksenia Safina, Elena Nabieva, Georgii Bazykin, Dmitry Lioznov                                                                                                                                                                                                                                                                |
| EPI_ISL_770669                                                                                                                                                                                                                                                                                                                                                                                                                                                                                                                                                                                                                                                                                                                                                                                                                                                                                                                                                                                                                                                                                                                                                                                                                                                                                                                                                                                                                                                                                                                                                                                                                                                                                                                                                                                                                                                                                                                                                                                                                                                                                                                                                                                                                                                                                                                                                                                                                                                                                                                                                                                                                                                                                                                                                                                                                                                                                                                                                                                                                                                                                                                                                                                                                                                                                                                                                                                                                                                                                                                                                                                                                                                                                                                                                                                                                                                                                                                                                                                                                                                                                                                                                                                                                                                                                                                                                                                                                                                                                                                                                                                                                                                                                                                                                                                                                                                                                                                                                                                                                                                                                 |           | WHO National Influenza Centre Russian Federation                                                                           | WHO National Influenza Centre Russian Federation                         | Andrey Komissarov, Artem Fadeev, Anna Ivanova, Kseniya Komissarova, Dmitry Bazhenov, Daria Danilenko, Ksenia Safina, Elena Nabieva, Georgii Bazykin, Dmitry Lioznov                                                                                                                                                                                                                                                                                   |
| EPI_ISL_770670                                                                                                                                                                                                                                                                                                                                                                                                                                                                                                                                                                                                                                                                                                                                                                                                                                                                                                                                                                                                                                                                                                                                                                                                                                                                                                                                                                                                                                                                                                                                                                                                                                                                                                                                                                                                                                                                                                                                                                                                                                                                                                                                                                                                                                                                                                                                                                                                                                                                                                                                                                                                                                                                                                                                                                                                                                                                                                                                                                                                                                                                                                                                                                                                                                                                                                                                                                                                                                                                                                                                                                                                                                                                                                                                                                                                                                                                                                                                                                                                                                                                                                                                                                                                                                                                                                                                                                                                                                                                                                                                                                                                                                                                                                                                                                                                                                                                                                                                                                                                                                                                                 |           | Pathogenic Microorganisms Variability Laboratory                                                                           | WHO National Influenza Centre Russian Federation                         | Andrey Komissarov, Artem Fadeev, Anna Ivanova, Kseniya Komissarova, Dmitry Bazhenov, Daria Danilenko, Ksenia Safina, Elena Nabieva, Georgii Bazykin, Nadezhda Kuznetsova, Elena Shidlovskaya, Sergey Alkhovsky, Tatyana Vishnevskaya, Elizaveta Divisenko, Alexey Shchetinin, Maria Nikiforova, Andrey Pochovyy, Evgeny Usachev, Elena Vokalova, Maxim Rubalsky, Oleg Rubalsky, Artem Tkachuk, Vladimir Gushchin, Alexander Gintsburg, Dmitry Lioznov |
| EPI_ISL_770671, EPI_ISL_770672                                                                                                                                                                                                                                                                                                                                                                                                                                                                                                                                                                                                                                                                                                                                                                                                                                                                                                                                                                                                                                                                                                                                                                                                                                                                                                                                                                                                                                                                                                                                                                                                                                                                                                                                                                                                                                                                                                                                                                                                                                                                                                                                                                                                                                                                                                                                                                                                                                                                                                                                                                                                                                                                                                                                                                                                                                                                                                                                                                                                                                                                                                                                                                                                                                                                                                                                                                                                                                                                                                                                                                                                                                                                                                                                                                                                                                                                                                                                                                                                                                                                                                                                                                                                                                                                                                                                                                                                                                                                                                                                                                                                                                                                                                                                                                                                                                                                                                                                                                                                                                                                 |           | UMMC-Health                                                                                                                | WHO National Influenza Centre Russian Federation                         | Andrey Komissarov, Artem Fadeev, Anna Ivanova, Kseniya Komissarova, Dmitry Bazhenov, Tatiana Platonova, Daria Danilenko, Ksenia Safina, Elena Nabieva, Georgii Bazykin, Dmitry Lioznov                                                                                                                                                                                                                                                                |
| EPI_ISL_770673, EPI_ISL_770674, EPI_ISL_770675, EPI_ISL_770676, EPI_ISL_770677, EPI_ISL_770678, EPI_ISL_770679, EPI_ISL_770680, EPI_ISL_770681, EPI_ISL_770682, EPI_ISL_770683, EPI_ISL_770684, EPI_ISL_770685, EPI_ISL_770686, EPI_ISL_770687                                                                                                                                                                                                                                                                                                                                                                                                                                                                                                                                                                                                                                                                                                                                                                                                                                                                                                                                                                                                                                                                                                                                                                                                                                                                                                                                                                                                                                                                                                                                                                                                                                                                                                                                                                                                                                                                                                                                                                                                                                                                                                                                                                                                                                                                                                                                                                                                                                                                                                                                                                                                                                                                                                                                                                                                                                                                                                                                                                                                                                                                                                                                                                                                                                                                                                                                                                                                                                                                                                                                                                                                                                                                                                                                                                                                                                                                                                                                                                                                                                                                                                                                                                                                                                                                                                                                                                                                                                                                                                                                                                                                                                                                                                                                                                                                                                                 |           | WHO National Influenza Centre Russian Federation                                                                           | WHO National Influenza Centre Russian Federation                         | Andrey Komissarov, Artem Fadeev, Anna Ivanova, Kseniya Komissarova, Dmitry Bazhenov, Daria Danilenko, Ksenia Safina, Elena Nabieva, Georgii Bazykin, Dmitry Lioznov                                                                                                                                                                                                                                                                                   |
| EPI_ISL_770845, EPI_ISL_770846, EPI_ISL_770847, EPI_ISL_770848, EPI_ISL_770849, EPI_ISL_770850, EPI_ISL_770851, EPI_ISL_770852, EPI_ISL_770853, EPI_ISL_770854, EPI_ISL_770855, EPI_ISL_770856, EPI_ISL_770857, EPI_ISL_770858, EPI_ISL_770859, EPI_ISL_770860, EPI_ISL_770861, EPI_ISL_770862, EPI_ISL_770863, EPI_ISL_770864, EPI_ISL_770865, EPI_ISL_770866, EPI_ISL_770867, EPI_ISL_770868, EPI_ISL_770869, EPI_ISL_770870, EPI_ISL_770871, EPI_ISL_770872, EPI_ISL_770873, EPI_ISL_770874, EPI_ISL_770875, EPI_ISL_770876, EPI_ISL_770877, EPI_ISL_770878, EPI_ISL_770879, EPI_ISL_770880, EPI_ISL_770881, EPI_ISL_770882, EPI_ISL_770883, EPI_ISL_770884, EPI_ISL_770885, EPI_ISL_770886, EPI_ISL_770887, EPI_ISL_770888, EPI_ISL_770889, EPI_ISL_770890, EPI_ISL_770891, EPI_ISL_770892, EPI_ISL_770893, EPI_ISL_770894, EPI_ISL_770895, EPI_ISL_770896, EPI_ISL_770897, EPI_ISL_770898, EPI_ISL_770899, EPI_ISL_770900, EPI_ISL_770901, EPI_ISL_770902, EPI_ISL_770903, EPI_ISL_770904, EPI_ISL_770905, EPI_ISL_770906, EPI_ISL_770907, EPI_ISL_770908, EPI_ISL_770909, EPI_ISL_770910, EPI_ISL_770911, EPI_ISL_770912, EPI_ISL_770913, EPI_ISL_770914, EPI_ISL_770915, EPI_ISL_770916, EPI_ISL_770917, EPI_ISL_770918, EPI_ISL_770919, EPI_ISL_770920, EPI_ISL_770921, EPI_ISL_770922, EPI_ISL_770923, EPI_ISL_770924, EPI_ISL_770925, EPI_ISL_770926, EPI_ISL_770927, EPI_ISL_770928, EPI_ISL_770929, EPI_ISL_770930, EPI_ISL_770931, EPI_ISL_770932, EPI_ISL_770933, EPI_ISL_770934, EPI_ISL_770935, EPI_ISL_770936, EPI_ISL_770937, EPI_ISL_770938, EPI_ISL_770939, EPI_ISL_770940, EPI_ISL_770941, EPI_ISL_770942, EPI_ISL_770943, EPI_ISL_770944, EPI_ISL_770945, EPI_ISL_770946, EPI_ISL_770947, EPI_ISL_770948, EPI_ISL_770949, EPI_ISL_770950, EPI_ISL_770951, EPI_ISL_770952, EPI_ISL_770953, EPI_ISL_770954, EPI_ISL_770955, EPI_ISL_770956, EPI_ISL_770957, EPI_ISL_770958, EPI_ISL_770959, EPI_ISL_770960, EPI_ISL_770961, EPI_ISL_770962, EPI_ISL_770963, EPI_ISL_770964, EPI_ISL_770965, EPI_ISL_770966, EPI_ISL_770967, EPI_ISL_770968, EPI_ISL_770969, EPI_ISL_770970, EPI_ISL_770971, EPI_ISL_770972, EPI_ISL_770973, EPI_ISL_770974, EPI_ISL_770975, EPI_ISL_770976, EPI_ISL_770977, EPI_ISL_770978, EPI_ISL_770979, EPI_ISL_770980, EPI_ISL_770981, EPI_ISL_770982, EPI_ISL_770983, EPI_ISL_770984, EPI_ISL_770985, EPI_ISL_770986, EPI_ISL_770987, EPI_ISL_770988, EPI_ISL_770989, EPI_ISL_770990, EPI_ISL_770991, EPI_ISL_770992, EPI_ISL_770993, EPI_ISL_770994, EPI_ISL_770995, EPI_ISL_770996, EPI_ISL_770997, EPI_ISL_770998, EPI_ISL_770999, EPI_ISL_771000, EPI_ISL_771001, EPI_ISL_771002, EPI_ISL_771003, EPI_ISL_771004, EPI_ISL_771005, EPI_ISL_771006, EPI_ISL_771007, EPI_ISL_771008, EPI_ISL_771009, EPI_ISL_771010, EPI_ISL_771011, EPI_ISL_771012, EPI_ISL_771013, EPI_ISL_771014, EPI_ISL_771015, EPI_ISL_771016, EPI_ISL_771017, EPI_ISL_771018, EPI_ISL_771019, EPI_ISL_771020, EPI_ISL_771021, EPI_ISL_771022, EPI_ISL_771023, EPI_ISL_771024, EPI_ISL_771025, EPI_ISL_771026, EPI_ISL_771027, EPI_ISL_771028, EPI_ISL_771029, EPI_ISL_771030, EPI_ISL_771031, EPI_ISL_771032, EPI_ISL_771033, EPI_ISL_771034, EPI_ISL_771035, EPI_ISL_771036, EPI_ISL_771037, EPI_ISL_771038, EPI_ISL_771039, EPI_ISL_771040, EPI_ISL_771041, EPI_ISL_771042, EPI_ISL_771043, EPI_ISL_771044, EPI_ISL_771045, EPI_ISL_771046, EPI_ISL_771047, EPI_ISL_771048, EPI_ISL_771049, EPI_ISL_771050, EPI_ISL_771051, EPI_ISL_771052, EPI_ISL_771053, EPI_ISL_771054, EPI_ISL_771055, EPI_ISL_771056, EPI_ISL_771057, EPI_ISL_771058, EPI_ISL_771059, EPI_ISL_771060, EPI_ISL_771061, EPI_ISL_771062, EPI_ISL_771063, EPI_ISL_771064, EPI_ISL_771065, EPI_ISL_771066, EPI_ISL_771067, EPI_ISL_771068, EPI_ISL_771069, EPI_ISL_771070, EPI_ISL_771071, EPI_ISL_771072, EPI_ISL_771073, EPI_ISL_771074, EPI_ISL_771075, EPI_ISL_771076, EPI_ISL_771077, EPI_ISL_771078, EPI_ISL_771079, EPI_ISL_771080, EPI_ISL_771081, EPI_ISL_771082, EPI_ISL_771083, EPI_ISL_771084, EPI_ISL_771085, EPI_ISL_771086, EPI_ISL_771087, EPI_ISL_771088, EPI_ISL_771089, EPI_ISL_771090, EPI_ISL_771091, EPI_ISL_771092, EPI_ISL_771093, EPI_ISL_771094, EPI_ISL_771095, EPI_ISL_771096, EPI_ISL_771097, EPI_ISL_771098, EPI_ISL_771099, EPI_ISL_771100, EPI_ISL_771101, EPI_ISL_771102, EPI_ISL_771103, EPI_ISL_771104, EPI_ISL_771105, EPI_ISL_771106, EPI_ISL_771107, EPI_ISL_771108, EPI_ISL_771109, EPI_ISL_771110, EPI_ISL_771111, EPI_ISL_771112, EPI_ISL_771113, EPI_ISL_771114, EPI_ISL_771115, EPI_ISL_771116, EPI_ISL_771117, EPI_ISL_771118, EPI_ISL_771119, EPI_ISL_771120, EPI_ISL_771121, EPI_ISL_771122, EPI_ISL_771123, EPI_ISL_771124, EPI_ISL_771125, EPI_ISL_771126, EPI_ISL_771127, EPI_ISL_771128, EPI_ISL_771129, EPI_ISL_771130, EPI_ISL_771131, EPI_ISL_771132, EPI_ISL_771133, EPI_ISL_771134, EPI_ISL_771135, EPI_ISL_771136, EPI_ISL_771137, EPI_ISL_771138, EPI_ISL_771139, EPI_ISL_771140, EPI_ISL_771141, EPI_ISL_771142, EPI_ISL_771143, EPI_ISL_771144, EPI_ISL_771145, EPI_ISL_771146, EPI_ISL_771147, EPI_ISL_771148, EPI_ISL_771149, EPI_ISL_771150 | see above | Laboratoire national de santé, Microbiology, Virology                                                                      | Laboratoire national de santé, Microbiology, Microbial Genomics Platform | Anke Wienecke-Baldacchino, Catherine Raqimbeau, Jessica Tapp, Fatu Djabi, Lise Pignon, Raoul Salmon, Tamir Abdelrahman                                                                                                                                                                                                                                                                                                                                |
| EPI_ISL_803890                                                                                                                                                                                                                                                                                                                                                                                                                                                                                                                                                                                                                                                                                                                                                                                                                                                                                                                                                                                                                                                                                                                                                                                                                                                                                                                                                                                                                                                                                                                                                                                                                                                                                                                                                                                                                                                                                                                                                                                                                                                                                                                                                                                                                                                                                                                                                                                                                                                                                                                                                                                                                                                                                                                                                                                                                                                                                                                                                                                                                                                                                                                                                                                                                                                                                                                                                                                                                                                                                                                                                                                                                                                                                                                                                                                                                                                                                                                                                                                                                                                                                                                                                                                                                                                                                                                                                                                                                                                                                                                                                                                                                                                                                                                                                                                                                                                                                                                                                                                                                                                                                 |           | Robert Koch Institute                                                                                                      | Robert Koch Institute                                                    | Annika Brinkmann, Janine Michel, Livia Schrick, Steven Uddin, Dominique Seifert, Merle Corty, Lars Schaade, Andreas Nitsche                                                                                                                                                                                                                                                                                                                           |
| EPI_ISL_803894                                                                                                                                                                                                                                                                                                                                                                                                                                                                                                                                                                                                                                                                                                                                                                                                                                                                                                                                                                                                                                                                                                                                                                                                                                                                                                                                                                                                                                                                                                                                                                                                                                                                                                                                                                                                                                                                                                                                                                                                                                                                                                                                                                                                                                                                                                                                                                                                                                                                                                                                                                                                                                                                                                                                                                                                                                                                                                                                                                                                                                                                                                                                                                                                                                                                                                                                                                                                                                                                                                                                                                                                                                                                                                                                                                                                                                                                                                                                                                                                                                                                                                                                                                                                                                                                                                                                                                                                                                                                                                                                                                                                                                                                                                                                                                                                                                                                                                                                                                                                                                                                                 |           | Robert Koch Institut                                                                                                       | Robert Koch Institut                                                     | Annika Brinkmann, Janine Michel, Livia Schrick, Steven Uddin, Dominique Seifert, Alexander Dalpke, Leo Büttner, Kristina Hochauf-Stange, Dirk Lindemann, Lars Schaade, Andreas Nitsche                                                                                                                                                                                                                                                                |
| EPI_ISL_804471, EPI_ISL_804475, EPI_ISL_804477, EPI_ISL_804478, EPI_ISL_804482, EPI_ISL_804487, EPI_ISL_804502, EPI_ISL_804509, EPI_ISL_804510, EPI_ISL_804516, EPI_ISL_804527, EPI_ISL_804530, EPI_ISL_804535, EPI_ISL_804538, EPI_ISL_804539, EPI_ISL_804545, EPI_ISL_804551, EPI_ISL_804554,                                                                                                                                                                                                                                                                                                                                                                                                                                                                                                                                                                                                                                                                                                                                                                                                                                                                                                                                                                                                                                                                                                                                                                                                                                                                                                                                                                                                                                                                                                                                                                                                                                                                                                                                                                                                                                                                                                                                                                                                                                                                                                                                                                                                                                                                                                                                                                                                                                                                                                                                                                                                                                                                                                                                                                                                                                                                                                                                                                                                                                                                                                                                                                                                                                                                                                                                                                                                                                                                                                                                                                                                                                                                                                                                                                                                                                                                                                                                                                                                                                                                                                                                                                                                                                                                                                                                                                                                                                                                                                                                                                                                                                                                                                                                                                                                |           |                                                                                                                            |                                                                          |                                                                                                                                                                                                                                                                                                                                                                                                                                                       |

|                                                                                                                                                                                                                                                                                                                                                                                                                                                                                                                                                                                                                                                                                                                                                                                                                                                                                                                                                                                                                                                                                                                                                                                                                                                                                                                                                                                                                                                                                                                                                                                                                                                                                                                                                                                                                                                                                                                                                                                                                                                                                                                                                                                                                                                                                                                                                                                                                                                                                                                                                                                                                                                                                                                                                                                                                                                                                                                                                                                                                                                                                                                                                                                                                                                                                                                                                                                                                                                                                                                                                                                                                                                                                                                                                                                                                                                                                                                                                                                                                                                                                                                                                                                                                                                                                                                                                                                                                                                                                                                                                                                                                                                                                                                                                                                                                                                                                                                                                                                                                                                                                                                                                                                                                                                                                                                                                                                                                                                                                                                                                                                                                                                                                                                |                                                                                                           |                                                                       |                                                                       |                                                                                                                                                                                                                                                                                                                                                                                  |
|----------------------------------------------------------------------------------------------------------------------------------------------------------------------------------------------------------------------------------------------------------------------------------------------------------------------------------------------------------------------------------------------------------------------------------------------------------------------------------------------------------------------------------------------------------------------------------------------------------------------------------------------------------------------------------------------------------------------------------------------------------------------------------------------------------------------------------------------------------------------------------------------------------------------------------------------------------------------------------------------------------------------------------------------------------------------------------------------------------------------------------------------------------------------------------------------------------------------------------------------------------------------------------------------------------------------------------------------------------------------------------------------------------------------------------------------------------------------------------------------------------------------------------------------------------------------------------------------------------------------------------------------------------------------------------------------------------------------------------------------------------------------------------------------------------------------------------------------------------------------------------------------------------------------------------------------------------------------------------------------------------------------------------------------------------------------------------------------------------------------------------------------------------------------------------------------------------------------------------------------------------------------------------------------------------------------------------------------------------------------------------------------------------------------------------------------------------------------------------------------------------------------------------------------------------------------------------------------------------------------------------------------------------------------------------------------------------------------------------------------------------------------------------------------------------------------------------------------------------------------------------------------------------------------------------------------------------------------------------------------------------------------------------------------------------------------------------------------------------------------------------------------------------------------------------------------------------------------------------------------------------------------------------------------------------------------------------------------------------------------------------------------------------------------------------------------------------------------------------------------------------------------------------------------------------------------------------------------------------------------------------------------------------------------------------------------------------------------------------------------------------------------------------------------------------------------------------------------------------------------------------------------------------------------------------------------------------------------------------------------------------------------------------------------------------------------------------------------------------------------------------------------------------------------------------------------------------------------------------------------------------------------------------------------------------------------------------------------------------------------------------------------------------------------------------------------------------------------------------------------------------------------------------------------------------------------------------------------------------------------------------------------------------------------------------------------------------------------------------------------------------------------------------------------------------------------------------------------------------------------------------------------------------------------------------------------------------------------------------------------------------------------------------------------------------------------------------------------------------------------------------------------------------------------------------------------------------------------------------------------------------------------------------------------------------------------------------------------------------------------------------------------------------------------------------------------------------------------------------------------------------------------------------------------------------------------------------------------------------------------------------------------------------------------------------------------------------------|-----------------------------------------------------------------------------------------------------------|-----------------------------------------------------------------------|-----------------------------------------------------------------------|----------------------------------------------------------------------------------------------------------------------------------------------------------------------------------------------------------------------------------------------------------------------------------------------------------------------------------------------------------------------------------|
| EPI_ISL_804563, EPI_ISL_804576, EPI_ISL_804584, EPI_ISL_804585, EPI_ISL_804588, EPI_ISL_804589, EPI_ISL_804590                                                                                                                                                                                                                                                                                                                                                                                                                                                                                                                                                                                                                                                                                                                                                                                                                                                                                                                                                                                                                                                                                                                                                                                                                                                                                                                                                                                                                                                                                                                                                                                                                                                                                                                                                                                                                                                                                                                                                                                                                                                                                                                                                                                                                                                                                                                                                                                                                                                                                                                                                                                                                                                                                                                                                                                                                                                                                                                                                                                                                                                                                                                                                                                                                                                                                                                                                                                                                                                                                                                                                                                                                                                                                                                                                                                                                                                                                                                                                                                                                                                                                                                                                                                                                                                                                                                                                                                                                                                                                                                                                                                                                                                                                                                                                                                                                                                                                                                                                                                                                                                                                                                                                                                                                                                                                                                                                                                                                                                                                                                                                                                                 | see above                                                                                                 | MEPHI, Aix Marseille University                                       | MEPHI, Aix Marseille University                                       | Anthony LEVASSEUR                                                                                                                                                                                                                                                                                                                                                                |
| EPI_ISL_811147                                                                                                                                                                                                                                                                                                                                                                                                                                                                                                                                                                                                                                                                                                                                                                                                                                                                                                                                                                                                                                                                                                                                                                                                                                                                                                                                                                                                                                                                                                                                                                                                                                                                                                                                                                                                                                                                                                                                                                                                                                                                                                                                                                                                                                                                                                                                                                                                                                                                                                                                                                                                                                                                                                                                                                                                                                                                                                                                                                                                                                                                                                                                                                                                                                                                                                                                                                                                                                                                                                                                                                                                                                                                                                                                                                                                                                                                                                                                                                                                                                                                                                                                                                                                                                                                                                                                                                                                                                                                                                                                                                                                                                                                                                                                                                                                                                                                                                                                                                                                                                                                                                                                                                                                                                                                                                                                                                                                                                                                                                                                                                                                                                                                                                 | WHO National Influenza Centre Russian Federation                                                          | WHO National Influenza Centre Russian Federation                      | WHO National Influenza Centre Russian Federation                      | Andrey Komissarov, Artem Fadeev, Maxim Burlakov, Anna Ivanova, Kseniya Komissarova, Dmitry Bazhenov, Daria Danilenko, Ksenia Safina, Elena Nabieva, Gergely Bazykin, Dmitry Lioznov                                                                                                                                                                                              |
| EPI_ISL_812258, EPI_ISL_812259, EPI_ISL_812260, EPI_ISL_812261, EPI_ISL_812262, EPI_ISL_812263, EPI_ISL_812264, EPI_ISL_812265, EPI_ISL_812266, EPI_ISL_812267, EPI_ISL_812268, EPI_ISL_812269, EPI_ISL_812270, EPI_ISL_812271, EPI_ISL_812272, EPI_ISL_812273, EPI_ISL_812274, EPI_ISL_812275, EPI_ISL_812276, EPI_ISL_812279, EPI_ISL_812278, EPI_ISL_812280, EPI_ISL_812281, EPI_ISL_812282, EPI_ISL_812283, EPI_ISL_812284, EPI_ISL_812285                                                                                                                                                                                                                                                                                                                                                                                                                                                                                                                                                                                                                                                                                                                                                                                                                                                                                                                                                                                                                                                                                                                                                                                                                                                                                                                                                                                                                                                                                                                                                                                                                                                                                                                                                                                                                                                                                                                                                                                                                                                                                                                                                                                                                                                                                                                                                                                                                                                                                                                                                                                                                                                                                                                                                                                                                                                                                                                                                                                                                                                                                                                                                                                                                                                                                                                                                                                                                                                                                                                                                                                                                                                                                                                                                                                                                                                                                                                                                                                                                                                                                                                                                                                                                                                                                                                                                                                                                                                                                                                                                                                                                                                                                                                                                                                                                                                                                                                                                                                                                                                                                                                                                                                                                                                                 | see above                                                                                                 | Landstuhli Regional Medical Center                                    | United States Air Force School of Aerospace Medicine                  | Anthony Fries, Jennifer Meyer, Amanda Javorina, Sarah Purves, William Gruner, Clarise Starr, Elizabeth Macias, Fritz Castillo, Cole Anderson                                                                                                                                                                                                                                     |
| EPI_ISL_812308, EPI_ISL_812309, EPI_ISL_812310, EPI_ISL_812311, EPI_ISL_812312, EPI_ISL_812313, EPI_ISL_812314, EPI_ISL_812315, EPI_ISL_812316, EPI_ISL_812317, EPI_ISL_812318, EPI_ISL_812319, EPI_ISL_812320, EPI_ISL_812321, EPI_ISL_812322, EPI_ISL_812323, EPI_ISL_812324, EPI_ISL_812325, EPI_ISL_812326, EPI_ISL_812327, EPI_ISL_812328, EPI_ISL_812329, EPI_ISL_812330, EPI_ISL_812331, EPI_ISL_812332, EPI_ISL_812333, EPI_ISL_812334, EPI_ISL_812335, EPI_ISL_812336, EPI_ISL_812337, EPI_ISL_812338, EPI_ISL_812339, EPI_ISL_812340, EPI_ISL_812341, EPI_ISL_812342, EPI_ISL_812343, EPI_ISL_812344, EPI_ISL_812345, EPI_ISL_812526, EPI_ISL_812527, EPI_ISL_812528, EPI_ISL_812529, EPI_ISL_812530, EPI_ISL_812531, EPI_ISL_812532, EPI_ISL_812533, EPI_ISL_812534, EPI_ISL_812535, EPI_ISL_812536, EPI_ISL_812537, EPI_ISL_812538, EPI_ISL_812539, EPI_ISL_812540, EPI_ISL_812541, EPI_ISL_812542, EPI_ISL_812543, EPI_ISL_812544, EPI_ISL_812545, EPI_ISL_812546, EPI_ISL_812547, EPI_ISL_812548, EPI_ISL_812549, EPI_ISL_812550, EPI_ISL_812551, EPI_ISL_812552, EPI_ISL_812553, EPI_ISL_812554, EPI_ISL_812555, EPI_ISL_812556, EPI_ISL_812557, EPI_ISL_812558, EPI_ISL_812559, EPI_ISL_812560, EPI_ISL_812561, EPI_ISL_812562, EPI_ISL_812563, EPI_ISL_812564, EPI_ISL_812565, EPI_ISL_812566, EPI_ISL_812567, EPI_ISL_812568, EPI_ISL_812569, EPI_ISL_812570, EPI_ISL_812571, EPI_ISL_812572, EPI_ISL_812573, EPI_ISL_812574, EPI_ISL_812575, EPI_ISL_812576, EPI_ISL_812577, EPI_ISL_812578, EPI_ISL_812579, EPI_ISL_812580, EPI_ISL_812581, EPI_ISL_812582, EPI_ISL_812583, EPI_ISL_812584, EPI_ISL_812585, EPI_ISL_812586, EPI_ISL_812587, EPI_ISL_812588, EPI_ISL_812589, EPI_ISL_812590, EPI_ISL_812591, EPI_ISL_812592, EPI_ISL_812593, EPI_ISL_812594, EPI_ISL_812595, EPI_ISL_812596, EPI_ISL_812597, EPI_ISL_812598, EPI_ISL_812599, EPI_ISL_812600, EPI_ISL_812601, EPI_ISL_812602, EPI_ISL_812603, EPI_ISL_812604, EPI_ISL_812605, EPI_ISL_812606, EPI_ISL_812607, EPI_ISL_812608, EPI_ISL_812609, EPI_ISL_812610, EPI_ISL_812611, EPI_ISL_812612, EPI_ISL_812613, EPI_ISL_812614, EPI_ISL_812615, EPI_ISL_812616, EPI_ISL_812617, EPI_ISL_812618, EPI_ISL_812619, EPI_ISL_812620, EPI_ISL_812621, EPI_ISL_812622, EPI_ISL_812623, EPI_ISL_812624, EPI_ISL_812625, EPI_ISL_812626, EPI_ISL_812627, EPI_ISL_812628, EPI_ISL_812629, EPI_ISL_812630, EPI_ISL_812631, EPI_ISL_812632, EPI_ISL_812633, EPI_ISL_812634, EPI_ISL_812635, EPI_ISL_812636, EPI_ISL_812637, EPI_ISL_812638, EPI_ISL_812639, EPI_ISL_812640, EPI_ISL_812641, EPI_ISL_812642, EPI_ISL_812643, EPI_ISL_812644, EPI_ISL_812645, EPI_ISL_812646, EPI_ISL_812647, EPI_ISL_812648, EPI_ISL_812649, EPI_ISL_812650, EPI_ISL_812651, EPI_ISL_812652, EPI_ISL_812653, EPI_ISL_812654, EPI_ISL_812655, EPI_ISL_812656, EPI_ISL_812657, EPI_ISL_812658, EPI_ISL_812659, EPI_ISL_812660, EPI_ISL_812661, EPI_ISL_812662, EPI_ISL_812663, EPI_ISL_812664, EPI_ISL_812665, EPI_ISL_812666, EPI_ISL_812667, EPI_ISL_812668, EPI_ISL_812669, EPI_ISL_812670, EPI_ISL_812671, EPI_ISL_812672, EPI_ISL_812673, EPI_ISL_812674, EPI_ISL_812675, EPI_ISL_812676, EPI_ISL_812677, EPI_ISL_812678, EPI_ISL_812679, EPI_ISL_812680, EPI_ISL_812681, EPI_ISL_812682, EPI_ISL_812683, EPI_ISL_812684, EPI_ISL_812685, EPI_ISL_812686, EPI_ISL_812687, EPI_ISL_812688, EPI_ISL_812689, EPI_ISL_812690, EPI_ISL_812691, EPI_ISL_812692, EPI_ISL_812693, EPI_ISL_812694, EPI_ISL_812695, EPI_ISL_812696, EPI_ISL_812697, EPI_ISL_812698, EPI_ISL_812699, EPI_ISL_812700, EPI_ISL_812701, EPI_ISL_812702, EPI_ISL_812703, EPI_ISL_812704, EPI_ISL_812705, EPI_ISL_812706, EPI_ISL_812707, EPI_ISL_812708, EPI_ISL_812709, EPI_ISL_812710, EPI_ISL_812711                                                                                                                                                                                                                                                                                                                                                                                                                                                                                                                                                                                                                                                                                                                                                                                                                                                                                                                                                                                                                                                                                                                                                                                                                                                                                                                                                                                                                                                                                                                                                                                                                                                                                                                                                                                                                                                                                                                                                                                 | see above                                                                                                 | United States Air Force School of Aerospace Medicine                  | United States Air Force School of Aerospace Medicine                  | Anthony Fries, Jennifer Meyer, Amanda Javorina, Sarah Purves, William Gruner, Clarise Starr, Elizabeth Macias                                                                                                                                                                                                                                                                    |
| EPI_ISL_814441                                                                                                                                                                                                                                                                                                                                                                                                                                                                                                                                                                                                                                                                                                                                                                                                                                                                                                                                                                                                                                                                                                                                                                                                                                                                                                                                                                                                                                                                                                                                                                                                                                                                                                                                                                                                                                                                                                                                                                                                                                                                                                                                                                                                                                                                                                                                                                                                                                                                                                                                                                                                                                                                                                                                                                                                                                                                                                                                                                                                                                                                                                                                                                                                                                                                                                                                                                                                                                                                                                                                                                                                                                                                                                                                                                                                                                                                                                                                                                                                                                                                                                                                                                                                                                                                                                                                                                                                                                                                                                                                                                                                                                                                                                                                                                                                                                                                                                                                                                                                                                                                                                                                                                                                                                                                                                                                                                                                                                                                                                                                                                                                                                                                                                 | West of Scotland Specialist Virology Centre, NHSGGC / MRC-University of Glasgow Centre for Virus Research | COVID-19 Genomics UK (COG-UK) Consortium                              | COVID-19 Genomics UK (COG-UK) Consortium                              | Ana da Silva Filipe, Natasha Johnson, Kathy Smollett, Daniel Mair, Stephen Carmichael, Alice Broos, Lily Tong, Jenna Nichols, Kyriaki Normikou, Sarah McDonald, Richard Orton, Joseph Hughes, Sreenu Vattipally, David L Robertson, Alasdair MacLean, Rory Gunson, Sharif Shaaban, Matthew Holden, Rachel Blacow, Guy Mollet, Kathy Li, James Shepherd, Antonia Ho, Emma Thomson |
| EPI_ISL_816137, EPI_ISL_816138, EPI_ISL_816139, EPI_ISL_816140, EPI_ISL_816141, EPI_ISL_816142, EPI_ISL_816143, EPI_ISL_816144, EPI_ISL_816145, EPI_ISL_816146, EPI_ISL_816147, EPI_ISL_816148, EPI_ISL_816149, EPI_ISL_816150, EPI_ISL_816151, EPI_ISL_816152, EPI_ISL_816153, EPI_ISL_816154, EPI_ISL_816155, EPI_ISL_816156, EPI_ISL_816157, EPI_ISL_816158, EPI_ISL_816159, EPI_ISL_816160, EPI_ISL_816161, EPI_ISL_816162, EPI_ISL_816163, EPI_ISL_816164, EPI_ISL_816165, EPI_ISL_816166, EPI_ISL_816167, EPI_ISL_816168, EPI_ISL_816169, EPI_ISL_816170, EPI_ISL_816171, EPI_ISL_816172, EPI_ISL_816173, EPI_ISL_816174, EPI_ISL_816175, EPI_ISL_816176, EPI_ISL_816177, EPI_ISL_816178, EPI_ISL_816179, EPI_ISL_816180, EPI_ISL_816181, EPI_ISL_816182, EPI_ISL_816183, EPI_ISL_816184, EPI_ISL_816185, EPI_ISL_816186, EPI_ISL_816187, EPI_ISL_816188, EPI_ISL_816189, EPI_ISL_816190, EPI_ISL_816191, EPI_ISL_816192, EPI_ISL_816193, EPI_ISL_816194, EPI_ISL_816195, EPI_ISL_816196, EPI_ISL_816197, EPI_ISL_816198, EPI_ISL_816199, EPI_ISL_816200, EPI_ISL_816201, EPI_ISL_816202, EPI_ISL_816203, EPI_ISL_816204, EPI_ISL_816205, EPI_ISL_816206, EPI_ISL_816207, EPI_ISL_816208, EPI_ISL_816209, EPI_ISL_816210, EPI_ISL_816211, EPI_ISL_816212, EPI_ISL_816213, EPI_ISL_816214, EPI_ISL_816215, EPI_ISL_816216, EPI_ISL_816217, EPI_ISL_816218, EPI_ISL_816219, EPI_ISL_816220, EPI_ISL_816221, EPI_ISL_816222, EPI_ISL_816223, EPI_ISL_816224, EPI_ISL_816225, EPI_ISL_816226, EPI_ISL_816227, EPI_ISL_816228, EPI_ISL_816229, EPI_ISL_816230, EPI_ISL_816231, EPI_ISL_816232, EPI_ISL_816233, EPI_ISL_816234, EPI_ISL_816235, EPI_ISL_816236, EPI_ISL_816237, EPI_ISL_816238, EPI_ISL_816239, EPI_ISL_816240, EPI_ISL_816241, EPI_ISL_816242, EPI_ISL_816243, EPI_ISL_816244, EPI_ISL_816245, EPI_ISL_816246, EPI_ISL_816247, EPI_ISL_816248, EPI_ISL_816249, EPI_ISL_816250, EPI_ISL_816251, EPI_ISL_816252, EPI_ISL_816253, EPI_ISL_816254, EPI_ISL_816255, EPI_ISL_816256, EPI_ISL_816257, EPI_ISL_816258, EPI_ISL_816259, EPI_ISL_816260, EPI_ISL_816261, EPI_ISL_816262, EPI_ISL_816263, EPI_ISL_816264, EPI_ISL_816265, EPI_ISL_816266, EPI_ISL_816267, EPI_ISL_816268, EPI_ISL_816269, EPI_ISL_816270, EPI_ISL_816271, EPI_ISL_816272, EPI_ISL_816273, EPI_ISL_816274, EPI_ISL_816275, EPI_ISL_816276, EPI_ISL_816277, EPI_ISL_816278, EPI_ISL_816279, EPI_ISL_816280, EPI_ISL_816281, EPI_ISL_816282, EPI_ISL_816283, EPI_ISL_816284, EPI_ISL_816285, EPI_ISL_816286, EPI_ISL_816287, EPI_ISL_816288, EPI_ISL_816289, EPI_ISL_816290, EPI_ISL_816291, EPI_ISL_816292, EPI_ISL_816293, EPI_ISL_816294, EPI_ISL_816295, EPI_ISL_816296, EPI_ISL_816297, EPI_ISL_816298, EPI_ISL_816299, EPI_ISL_81700, EPI_ISL_81701, EPI_ISL_81702, EPI_ISL_81703, EPI_ISL_81704, EPI_ISL_81705, EPI_ISL_81706, EPI_ISL_81707, EPI_ISL_81708, EPI_ISL_81709, EPI_ISL_81710, EPI_ISL_81711, EPI_ISL_81712, EPI_ISL_81713, EPI_ISL_81714, EPI_ISL_81715, EPI_ISL_81716, EPI_ISL_81717, EPI_ISL_81718, EPI_ISL_81719, EPI_ISL_81720, EPI_ISL_81721, EPI_ISL_81722, EPI_ISL_81723, EPI_ISL_81724, EPI_ISL_81725, EPI_ISL_81726, EPI_ISL_81727, EPI_ISL_81728, EPI_ISL_81729, EPI_ISL_81730, EPI_ISL_81731, EPI_ISL_81732, EPI_ISL_81733, EPI_ISL_81734, EPI_ISL_81735, EPI_ISL_81736, EPI_ISL_81737, EPI_ISL_81738, EPI_ISL_81739, EPI_ISL_81740, EPI_ISL_81741, EPI_ISL_81742, EPI_ISL_81743, EPI_ISL_81744, EPI_ISL_81745, EPI_ISL_81746, EPI_ISL_81747, EPI_ISL_81748, EPI_ISL_81749, EPI_ISL_81750, EPI_ISL_81751, EPI_ISL_81752, EPI_ISL_81753, EPI_ISL_81754, EPI_ISL_81755, EPI_ISL_81756, EPI_ISL_81757, EPI_ISL_81758, EPI_ISL_81759, EPI_ISL_81760, EPI_ISL_81761, EPI_ISL_81762, EPI_ISL_81763, EPI_ISL_81764, EPI_ISL_81765, EPI_ISL_81766, EPI_ISL_81767, EPI_ISL_81768, EPI_ISL_81769, EPI_ISL_81770, EPI_ISL_81771, EPI_ISL_81772, EPI_ISL_81773, EPI_ISL_81774, EPI_ISL_81775, EPI_ISL_81776, EPI_ISL_81777, EPI_ISL_81778, EPI_ISL_81779, EPI_ISL_81780, EPI_ISL_81781, EPI_ISL_81782, EPI_ISL_81783, EPI_ISL_81784, EPI_ISL_81785, EPI_ISL_81786, EPI_ISL_81787, EPI_ISL_81788, EPI_ISL_81789, EPI_ISL_81790, EPI_ISL_81791, EPI_ISL_81792, EPI_ISL_81793, EPI_ISL_81794, EPI_ISL_81795, EPI_ISL_81796, EPI_ISL_81797, EPI_ISL_81798, EPI_ISL_81799, EPI_ISL_81800, EPI_ISL_81801, EPI_ISL_81802, EPI_ISL_81803, EPI_ISL_81804, EPI_ISL_81805, EPI_ISL_81806, EPI_ISL_81807, EPI_ISL_81808, EPI_ISL_81809, EPI_ISL_81810, EPI_ISL_81811, EPI_ISL_81812, EPI_ISL_81813, EPI_ISL_81814, EPI_ISL_81815, EPI_ISL_81816, EPI_ISL_81817, EPI_ISL_81818, EPI_ISL_81819, EPI_ISL_81820, EPI_ISL_81821, EPI_ISL_81822, EPI_ISL_81823, EPI_ISL_81824, EPI_ISL_81825, EPI_ISL_81826, EPI_ISL_81827, EPI_ISL_81828, EPI_ISL_81829, EPI_ISL_81830, EPI_ISL_81831, EPI_ISL_81832, EPI_ISL_81833, EPI_ISL_81834, EPI_ISL_81835, EPI_ISL_81836, EPI_ISL_81837, EPI_ISL_81838, EPI_ISL_81839, EPI_ISL_81840, EPI_ISL_81841, EPI_ISL_81842, EPI_ISL_81843, EPI_ISL_81844, EPI_ISL_81845, EPI_ISL_81846, EPI_ISL_81847, EPI_ISL_81848, EPI_ISL_81849, EPI_ISL_81850, EPI_ISL_81851, EPI_ISL_81852, EPI_ISL_81853, EPI_ISL_81854, EPI_ISL_81855, EPI_ISL_81856, EPI_ISL_81857, EPI_ISL_81858, EPI_ISL_81859, EPI_ISL_81860, EPI_ISL_81861, EPI_ISL_81862, EPI_ISL_81863, EPI_ISL_81864, EPI_ISL_81865, EPI_ISL_81866, EPI_ISL_81867, EPI_ISL_81868, EPI_ISL_81869, EPI_ISL_81870, EPI_ISL_81871, EPI_ISL_81872, EPI_ISL_81873, EPI_ISL_81874, EPI_ISL_81875, EPI_ISL_81876, EPI_ISL_81877, EPI_ISL_81878, EPI_ISL_81879, EPI_ISL_81880, EPI_ISL_81881, EPI_ISL_81882, EPI_ISL_81883, EPI_ISL_81884, EPI_ISL_81885, EPI_ISL_81886, EPI_ISL_81887, EPI_ISL_81888, EPI_ISL_81889, EPI_ISL_81890, EPI_ISL_81891 | see above                                                                                                 | United States Air Force School of Aerospace Medicine                  | United States Air Force School of Aerospace Medicine                  | Anthony Fries, Jennifer Meyer, William Gruner, Amanda Javorina, Sarah Purves, Clarise Starr, Elizabeth Macias                                                                                                                                                                                                                                                                    |
| EPI_ISL_833390                                                                                                                                                                                                                                                                                                                                                                                                                                                                                                                                                                                                                                                                                                                                                                                                                                                                                                                                                                                                                                                                                                                                                                                                                                                                                                                                                                                                                                                                                                                                                                                                                                                                                                                                                                                                                                                                                                                                                                                                                                                                                                                                                                                                                                                                                                                                                                                                                                                                                                                                                                                                                                                                                                                                                                                                                                                                                                                                                                                                                                                                                                                                                                                                                                                                                                                                                                                                                                                                                                                                                                                                                                                                                                                                                                                                                                                                                                                                                                                                                                                                                                                                                                                                                                                                                                                                                                                                                                                                                                                                                                                                                                                                                                                                                                                                                                                                                                                                                                                                                                                                                                                                                                                                                                                                                                                                                                                                                                                                                                                                                                                                                                                                                                 | Klinik Apotek Dein, Jakarta, Indonesia                                                                    | Biosafety Level-3 Laboratory, Indonesian Institute of Sciences (LIPI) | Biosafety Level-3 Laboratory, Indonesian Institute of Sciences (LIPI) | Andri Wardiana, Anggia Prasetyoputri, Isa Nuryana, Ade Andriani, Anik Budhi Dharmayanthi, Syam Budi Iryanto, Ahmad Fathoni, Fahrurrozy, Ali Faukri, Fathurahman, Ratih Asmana Ningrum                                                                                                                                                                                            |
| EPI_ISL_833391                                                                                                                                                                                                                                                                                                                                                                                                                                                                                                                                                                                                                                                                                                                                                                                                                                                                                                                                                                                                                                                                                                                                                                                                                                                                                                                                                                                                                                                                                                                                                                                                                                                                                                                                                                                                                                                                                                                                                                                                                                                                                                                                                                                                                                                                                                                                                                                                                                                                                                                                                                                                                                                                                                                                                                                                                                                                                                                                                                                                                                                                                                                                                                                                                                                                                                                                                                                                                                                                                                                                                                                                                                                                                                                                                                                                                                                                                                                                                                                                                                                                                                                                                                                                                                                                                                                                                                                                                                                                                                                                                                                                                                                                                                                                                                                                                                                                                                                                                                                                                                                                                                                                                                                                                                                                                                                                                                                                                                                                                                                                                                                                                                                                                                 | Klinik Apotek Dein, Jakarta, Indonesia                                                                    | Biosafety Level-3 Laboratory, Indonesian Institute of Sciences (LIPI) | Biosafety Level-3 Laboratory, Indonesian Institute of Sciences (LIPI) | Andri Wardiana, Anggia Prasetyoputri, Isa Nuryana, Ade Andriani, Anik Budhi Dharmayanthi, Syam Budi Iryanto, Ahmad Fathoni, Herman Irawan, Dadang Supriatna, Ratih Asmana Ningrum                                                                                                                                                                                                |
| EPI_ISL_833392                                                                                                                                                                                                                                                                                                                                                                                                                                                                                                                                                                                                                                                                                                                                                                                                                                                                                                                                                                                                                                                                                                                                                                                                                                                                                                                                                                                                                                                                                                                                                                                                                                                                                                                                                                                                                                                                                                                                                                                                                                                                                                                                                                                                                                                                                                                                                                                                                                                                                                                                                                                                                                                                                                                                                                                                                                                                                                                                                                                                                                                                                                                                                                                                                                                                                                                                                                                                                                                                                                                                                                                                                                                                                                                                                                                                                                                                                                                                                                                                                                                                                                                                                                                                                                                                                                                                                                                                                                                                                                                                                                                                                                                                                                                                                                                                                                                                                                                                                                                                                                                                                                                                                                                                                                                                                                                                                                                                                                                                                                                                                                                                                                                                                                 | RSU Sayang Bunda, Makasar, Indonesia                                                                      | Biosafety Level-3 Laboratory, Indonesian Institute of Sciences (LIPI) | Biosafety Level-3 Laboratory, Indonesian Institute of Sciences (LIPI) | Anggia Prasetyoputri, Isa Nuryana, Ade Andriani, Anik Budhi Dharmayanthi, Syam Budi Iryanto, Andri Wardiana, Ahmad Fathoni, Dini Nurdiani, Wahyuni, Ratih Asmana Ningrum                                                                                                                                                                                                         |
| EPI_ISL_833393                                                                                                                                                                                                                                                                                                                                                                                                                                                                                                                                                                                                                                                                                                                                                                                                                                                                                                                                                                                                                                                                                                                                                                                                                                                                                                                                                                                                                                                                                                                                                                                                                                                                                                                                                                                                                                                                                                                                                                                                                                                                                                                                                                                                                                                                                                                                                                                                                                                                                                                                                                                                                                                                                                                                                                                                                                                                                                                                                                                                                                                                                                                                                                                                                                                                                                                                                                                                                                                                                                                                                                                                                                                                                                                                                                                                                                                                                                                                                                                                                                                                                                                                                                                                                                                                                                                                                                                                                                                                                                                                                                                                                                                                                                                                                                                                                                                                                                                                                                                                                                                                                                                                                                                                                                                                                                                                                                                                                                                                                                                                                                                                                                                                                                 | RS MMC Jakarta, Indonesia                                                                                 | Biosafety Level-3 Laboratory, Indonesian Institute of Sciences (LIPI) | Biosafety Level-3 Laboratory, Indonesian Institute of Sciences (LIPI) | Anggia Prasetyoputri, Isa Nuryana, Ade Andriani, Anik Budhi Dharmayanthi, Syam Budi Iryanto, Andri Wardiana, Ahmad Fathoni, Eva Erdayani, Linda Sukmarini, Ratih Asmana Ningrum                                                                                                                                                                                                  |
| EPI_ISL_833496                                                                                                                                                                                                                                                                                                                                                                                                                                                                                                                                                                                                                                                                                                                                                                                                                                                                                                                                                                                                                                                                                                                                                                                                                                                                                                                                                                                                                                                                                                                                                                                                                                                                                                                                                                                                                                                                                                                                                                                                                                                                                                                                                                                                                                                                                                                                                                                                                                                                                                                                                                                                                                                                                                                                                                                                                                                                                                                                                                                                                                                                                                                                                                                                                                                                                                                                                                                                                                                                                                                                                                                                                                                                                                                                                                                                                                                                                                                                                                                                                                                                                                                                                                                                                                                                                                                                                                                                                                                                                                                                                                                                                                                                                                                                                                                                                                                                                                                                                                                                                                                                                                                                                                                                                                                                                                                                                                                                                                                                                                                                                                                                                                                                                                 | RS PMI Bogor, Indonesia                                                                                   | Biosafety Level-3 Laboratory, Indonesian Institute of Sciences (LIPI) | Biosafety Level-3 Laboratory, Indonesian Institute of Sciences (LIPI) | Anik Budhi Dharmayanthi, Syam Budi Iryanto, Andri Wardiana, Anggia Prasetyoputri, Isa Nuryana, Ade Andriani, Ahmad Fathoni, Arie Wulandari, Yana Rubiyana, Ratih Asmana Ningrum                                                                                                                                                                                                  |
| EPI_ISL_833498                                                                                                                                                                                                                                                                                                                                                                                                                                                                                                                                                                                                                                                                                                                                                                                                                                                                                                                                                                                                                                                                                                                                                                                                                                                                                                                                                                                                                                                                                                                                                                                                                                                                                                                                                                                                                                                                                                                                                                                                                                                                                                                                                                                                                                                                                                                                                                                                                                                                                                                                                                                                                                                                                                                                                                                                                                                                                                                                                                                                                                                                                                                                                                                                                                                                                                                                                                                                                                                                                                                                                                                                                                                                                                                                                                                                                                                                                                                                                                                                                                                                                                                                                                                                                                                                                                                                                                                                                                                                                                                                                                                                                                                                                                                                                                                                                                                                                                                                                                                                                                                                                                                                                                                                                                                                                                                                                                                                                                                                                                                                                                                                                                                                                                 | Kartika Pulomas Hospital, Jakarta, Indonesia                                                              | Biosafety Level-3 Laboratory, Indonesian Institute of Sciences (LIPI) | Biosafety Level-3 Laboratory, Indonesian Institute of Sciences (LIPI) | Anggia Prasetyoputri, Isa Nuryana, Ade Andriani, Anik Budhi Dharmayanthi, Syam Budi Iryanto, Andri Wardiana, Ahmad Fathoni, Wirinda Tasia, Pinka Alisa Diana Shafa, Ratih Asmana Ningrum                                                                                                                                                                                         |
| EPI_ISL_833500                                                                                                                                                                                                                                                                                                                                                                                                                                                                                                                                                                                                                                                                                                                                                                                                                                                                                                                                                                                                                                                                                                                                                                                                                                                                                                                                                                                                                                                                                                                                                                                                                                                                                                                                                                                                                                                                                                                                                                                                                                                                                                                                                                                                                                                                                                                                                                                                                                                                                                                                                                                                                                                                                                                                                                                                                                                                                                                                                                                                                                                                                                                                                                                                                                                                                                                                                                                                                                                                                                                                                                                                                                                                                                                                                                                                                                                                                                                                                                                                                                                                                                                                                                                                                                                                                                                                                                                                                                                                                                                                                                                                                                                                                                                                                                                                                                                                                                                                                                                                                                                                                                                                                                                                                                                                                                                                                                                                                                                                                                                                                                                                                                                                                                 | Klinik Apotek Dein, Jakarta, Indonesia                                                                    | Biosafety Level-3 Laboratory, Indonesian Institute of Sciences (LIPI) | Biosafety Level-3 Laboratory, Indonesian Institute of Sciences (LIPI) | Anik Budhi Dharmayanthi, Syam Budi Iryanto, Andri Wardiana, Anggia Prasetyoputri, Isa Nuryana, Ade Andriani, Ahmad Fathoni, Ratih Asmana Ningrum                                                                                                                                                                                                                                 |
| EPI_ISL_833502                                                                                                                                                                                                                                                                                                                                                                                                                                                                                                                                                                                                                                                                                                                                                                                                                                                                                                                                                                                                                                                                                                                                                                                                                                                                                                                                                                                                                                                                                                                                                                                                                                                                                                                                                                                                                                                                                                                                                                                                                                                                                                                                                                                                                                                                                                                                                                                                                                                                                                                                                                                                                                                                                                                                                                                                                                                                                                                                                                                                                                                                                                                                                                                                                                                                                                                                                                                                                                                                                                                                                                                                                                                                                                                                                                                                                                                                                                                                                                                                                                                                                                                                                                                                                                                                                                                                                                                                                                                                                                                                                                                                                                                                                                                                                                                                                                                                                                                                                                                                                                                                                                                                                                                                                                                                                                                                                                                                                                                                                                                                                                                                                                                                                                 | RS Sayang Bunda, Makasar, Indonesia                                                                       | Biosafety Level-3 Laboratory, Indonesian Institute of Sciences (LIPI) | Biosafety Level-3 Laboratory, Indonesian Institute of Sciences (LIPI) | Andri Wardiana, Anggia Prasetyoputri, Anik Budhi Dharmayanthi, Syam Budi Iryanto, Isa Nuryana, Ade Andriani, Ahmad Fathoni, Onny Nurrahman Marwayana, Fajarrudin Ahmad, Ratih Asmana Ningrum                                                                                                                                                                                     |
| EPI_ISL_833503                                                                                                                                                                                                                                                                                                                                                                                                                                                                                                                                                                                                                                                                                                                                                                                                                                                                                                                                                                                                                                                                                                                                                                                                                                                                                                                                                                                                                                                                                                                                                                                                                                                                                                                                                                                                                                                                                                                                                                                                                                                                                                                                                                                                                                                                                                                                                                                                                                                                                                                                                                                                                                                                                                                                                                                                                                                                                                                                                                                                                                                                                                                                                                                                                                                                                                                                                                                                                                                                                                                                                                                                                                                                                                                                                                                                                                                                                                                                                                                                                                                                                                                                                                                                                                                                                                                                                                                                                                                                                                                                                                                                                                                                                                                                                                                                                                                                                                                                                                                                                                                                                                                                                                                                                                                                                                                                                                                                                                                                                                                                                                                                                                                                                                 | RS MMC, Jakarta, Indonesia                                                                                | Biosafety Level-3 Laboratory, Indonesian Institute of Sciences (LIPI) | Biosafety Level-3 Laboratory, Indonesian Institute of Sciences (LIPI) | Anggia Prasetyoputri, Isa Nuryana, Anik Budhi Dharmayanthi, Syam Budi Iryanto, Andri Wardiana, Ade Andriani, Ahmad Fathoni, Idris, Ruby Setiawan, Ratih Asmana Ningrum                                                                                                                                                                                                           |
| EPI_ISL_833507                                                                                                                                                                                                                                                                                                                                                                                                                                                                                                                                                                                                                                                                                                                                                                                                                                                                                                                                                                                                                                                                                                                                                                                                                                                                                                                                                                                                                                                                                                                                                                                                                                                                                                                                                                                                                                                                                                                                                                                                                                                                                                                                                                                                                                                                                                                                                                                                                                                                                                                                                                                                                                                                                                                                                                                                                                                                                                                                                                                                                                                                                                                                                                                                                                                                                                                                                                                                                                                                                                                                                                                                                                                                                                                                                                                                                                                                                                                                                                                                                                                                                                                                                                                                                                                                                                                                                                                                                                                                                                                                                                                                                                                                                                                                                                                                                                                                                                                                                                                                                                                                                                                                                                                                                                                                                                                                                                                                                                                                                                                                                                                                                                                                                                 | RS MMC, Jakarta, Indonesia                                                                                | Biosafety Level-3 Laboratory, Indonesian Institute of Sciences (LIPI) | Biosafety Level-3 Laboratory, Indonesian Institute of Sciences (LIPI) | Anggia Prasetyoputri, Anik Budhi Dharmayanthi, Syam Budi Iryanto, Andri Wardiana, Isa Nuryana, Ade Andriani, Ahmad Fathoni, Syaiful Rizal, Pangda Sopha, Ratih Asmana Ningrum                                                                                                                                                                                                    |

|                                                                                                                                                                                                                                                                                                                                                                                                                                                                                                                                                                                                                                                                                                                                                                                                                                                                                                                                                                                                                                                                                                                                                                                                                                                                                                                                                                                                                                                                                                                                                                                                                                                                                                                                                                                                                                                                                                                                                                                                                                                                                                                                                                                                                                                                                                                                                                                                                                                                                                                                                                                                                                                                                                                                                                                                                                                                                                                                                                                                                                                                                                                                                                                                                                                                                                                                                                                                                                                                                                                                                                                                                                                                                                                                                                                                                                                                                                                                                                                                                                                                                                                                                                                                                                                                                                                                                                                                                                                                                                                                                                                                                                                                                                                                                                                                                                                                                                                                                                                                                                                                                                                                                                                                                                                                                                                                                                                                                                                                                                                                                                                                                                                                                                                                                                                                                                                                                                                                                                                                                                                                                                                                                                                                                                                                                                                                                                                                                                                                                                                                                                                                                                                                                                                                                                                                                                                                                                                                                                                                                                                                                |                                                                                                                            |                                                                                                                 |                                                                                                                                                                                                                                                                                                                                                                                  |
|--------------------------------------------------------------------------------------------------------------------------------------------------------------------------------------------------------------------------------------------------------------------------------------------------------------------------------------------------------------------------------------------------------------------------------------------------------------------------------------------------------------------------------------------------------------------------------------------------------------------------------------------------------------------------------------------------------------------------------------------------------------------------------------------------------------------------------------------------------------------------------------------------------------------------------------------------------------------------------------------------------------------------------------------------------------------------------------------------------------------------------------------------------------------------------------------------------------------------------------------------------------------------------------------------------------------------------------------------------------------------------------------------------------------------------------------------------------------------------------------------------------------------------------------------------------------------------------------------------------------------------------------------------------------------------------------------------------------------------------------------------------------------------------------------------------------------------------------------------------------------------------------------------------------------------------------------------------------------------------------------------------------------------------------------------------------------------------------------------------------------------------------------------------------------------------------------------------------------------------------------------------------------------------------------------------------------------------------------------------------------------------------------------------------------------------------------------------------------------------------------------------------------------------------------------------------------------------------------------------------------------------------------------------------------------------------------------------------------------------------------------------------------------------------------------------------------------------------------------------------------------------------------------------------------------------------------------------------------------------------------------------------------------------------------------------------------------------------------------------------------------------------------------------------------------------------------------------------------------------------------------------------------------------------------------------------------------------------------------------------------------------------------------------------------------------------------------------------------------------------------------------------------------------------------------------------------------------------------------------------------------------------------------------------------------------------------------------------------------------------------------------------------------------------------------------------------------------------------------------------------------------------------------------------------------------------------------------------------------------------------------------------------------------------------------------------------------------------------------------------------------------------------------------------------------------------------------------------------------------------------------------------------------------------------------------------------------------------------------------------------------------------------------------------------------------------------------------------------------------------------------------------------------------------------------------------------------------------------------------------------------------------------------------------------------------------------------------------------------------------------------------------------------------------------------------------------------------------------------------------------------------------------------------------------------------------------------------------------------------------------------------------------------------------------------------------------------------------------------------------------------------------------------------------------------------------------------------------------------------------------------------------------------------------------------------------------------------------------------------------------------------------------------------------------------------------------------------------------------------------------------------------------------------------------------------------------------------------------------------------------------------------------------------------------------------------------------------------------------------------------------------------------------------------------------------------------------------------------------------------------------------------------------------------------------------------------------------------------------------------------------------------------------------------------------------------------------------------------------------------------------------------------------------------------------------------------------------------------------------------------------------------------------------------------------------------------------------------------------------------------------------------------------------------------------------------------------------------------------------------------------------------------------------------------------------------------------------------------------------------------------------------------------------------------------------------------------------------------------------------------------------------------------------------------------------------------------------------------------------------------------------------------------------------------------------------------------------------------------------------------------------------------------------------------------------------------------|----------------------------------------------------------------------------------------------------------------------------|-----------------------------------------------------------------------------------------------------------------|----------------------------------------------------------------------------------------------------------------------------------------------------------------------------------------------------------------------------------------------------------------------------------------------------------------------------------------------------------------------------------|
| EPI_ISL_833508                                                                                                                                                                                                                                                                                                                                                                                                                                                                                                                                                                                                                                                                                                                                                                                                                                                                                                                                                                                                                                                                                                                                                                                                                                                                                                                                                                                                                                                                                                                                                                                                                                                                                                                                                                                                                                                                                                                                                                                                                                                                                                                                                                                                                                                                                                                                                                                                                                                                                                                                                                                                                                                                                                                                                                                                                                                                                                                                                                                                                                                                                                                                                                                                                                                                                                                                                                                                                                                                                                                                                                                                                                                                                                                                                                                                                                                                                                                                                                                                                                                                                                                                                                                                                                                                                                                                                                                                                                                                                                                                                                                                                                                                                                                                                                                                                                                                                                                                                                                                                                                                                                                                                                                                                                                                                                                                                                                                                                                                                                                                                                                                                                                                                                                                                                                                                                                                                                                                                                                                                                                                                                                                                                                                                                                                                                                                                                                                                                                                                                                                                                                                                                                                                                                                                                                                                                                                                                                                                                                                                                                                 | Klinik Apotek Dein, Jakarta, Indonesia                                                                                     | Biosafety Level-3 Laboratory, Indonesian Institute of Sciences (LIPI)                                           | Andri Wardiana, Anggia Prasetyoputri, Anik Budhi Dharmayanthi, Syam Budi Iryanto, Isa Nuryana, Ade Andriani, Ahmad Fathoni, Rath Asmana Ningrum                                                                                                                                                                                                                                  |
| EPI_ISL_833510                                                                                                                                                                                                                                                                                                                                                                                                                                                                                                                                                                                                                                                                                                                                                                                                                                                                                                                                                                                                                                                                                                                                                                                                                                                                                                                                                                                                                                                                                                                                                                                                                                                                                                                                                                                                                                                                                                                                                                                                                                                                                                                                                                                                                                                                                                                                                                                                                                                                                                                                                                                                                                                                                                                                                                                                                                                                                                                                                                                                                                                                                                                                                                                                                                                                                                                                                                                                                                                                                                                                                                                                                                                                                                                                                                                                                                                                                                                                                                                                                                                                                                                                                                                                                                                                                                                                                                                                                                                                                                                                                                                                                                                                                                                                                                                                                                                                                                                                                                                                                                                                                                                                                                                                                                                                                                                                                                                                                                                                                                                                                                                                                                                                                                                                                                                                                                                                                                                                                                                                                                                                                                                                                                                                                                                                                                                                                                                                                                                                                                                                                                                                                                                                                                                                                                                                                                                                                                                                                                                                                                                                 | RS Melania, Bogor, Indonesia                                                                                               | Biosafety Level-3 Laboratory, Indonesian Institute of Sciences (LIPI)                                           | Anik Budhi Dharmayanthi, Syam Budi Iryanto, Andri Wardiana, Anggia Prasetyoputri, Isa Nuryana, Ade Andriani, Ahmad Fathoni, Rath Asmana Ningrum                                                                                                                                                                                                                                  |
| EPI_ISL_838091, EPI_ISL_838115, EPI_ISL_838116, EPI_ISL_838139, EPI_ISL_838140, EPI_ISL_838143, EPI_ISL_838157, EPI_ISL_838164, EPI_ISL_838166, EPI_ISL_838186                                                                                                                                                                                                                                                                                                                                                                                                                                                                                                                                                                                                                                                                                                                                                                                                                                                                                                                                                                                                                                                                                                                                                                                                                                                                                                                                                                                                                                                                                                                                                                                                                                                                                                                                                                                                                                                                                                                                                                                                                                                                                                                                                                                                                                                                                                                                                                                                                                                                                                                                                                                                                                                                                                                                                                                                                                                                                                                                                                                                                                                                                                                                                                                                                                                                                                                                                                                                                                                                                                                                                                                                                                                                                                                                                                                                                                                                                                                                                                                                                                                                                                                                                                                                                                                                                                                                                                                                                                                                                                                                                                                                                                                                                                                                                                                                                                                                                                                                                                                                                                                                                                                                                                                                                                                                                                                                                                                                                                                                                                                                                                                                                                                                                                                                                                                                                                                                                                                                                                                                                                                                                                                                                                                                                                                                                                                                                                                                                                                                                                                                                                                                                                                                                                                                                                                                                                                                                                                 | West of Scotland Specialist Virology Centre, NHSGCC / MRC-University of Glasgow Centre for Virus Research                  | COVID-19 Genomics UK (COG-UK) Consortium                                                                        | Ana da Silva Filipe, Natasha Johnson, Kathy Smollett, Daniel Mair, Stephen Carmichael, Alice Broos, Lily Tong, Jenna Nichols, Kyriaki Nomikou; Sarah McDonald; Richard Orton, Joseph Hughes, Sreenu Vattipally, David L Robertson; Alasdair MacLean, Rory Gunson; Sharif Shaaban, Matthew Holden; Rachel Blacow, Guy Mollett, Kathy Li, James Shepherd, Antonia Ho, Emma Thomson |
| EPI_ISL_841755, EPI_ISL_841756, EPI_ISL_841757, EPI_ISL_841758, EPI_ISL_841759, EPI_ISL_841760, EPI_ISL_841761, EPI_ISL_841762, EPI_ISL_841763, EPI_ISL_841764, EPI_ISL_841765, EPI_ISL_841766, EPI_ISL_841767, EPI_ISL_841768, EPI_ISL_841769, EPI_ISL_841770, EPI_ISL_841771, EPI_ISL_841772, EPI_ISL_841773, EPI_ISL_841774, EPI_ISL_841775, EPI_ISL_841776, EPI_ISL_841777, EPI_ISL_841778, EPI_ISL_841779, EPI_ISL_841780, EPI_ISL_841781, EPI_ISL_841782, EPI_ISL_841783, EPI_ISL_841784, EPI_ISL_841785, EPI_ISL_841786, EPI_ISL_841787, EPI_ISL_841788, EPI_ISL_841789, EPI_ISL_841790, EPI_ISL_841791, EPI_ISL_841792, EPI_ISL_841793, EPI_ISL_841794, EPI_ISL_841795, EPI_ISL_841796, EPI_ISL_841797, EPI_ISL_841798, EPI_ISL_841799, EPI_ISL_841800, EPI_ISL_841801, EPI_ISL_841802, EPI_ISL_841803, EPI_ISL_841804, EPI_ISL_841805, EPI_ISL_841806, EPI_ISL_841807, EPI_ISL_841808, EPI_ISL_841809, EPI_ISL_841810, EPI_ISL_841811, EPI_ISL_841812, EPI_ISL_841813, EPI_ISL_841814, EPI_ISL_841815, EPI_ISL_841816, EPI_ISL_841817, EPI_ISL_841818, EPI_ISL_841819, EPI_ISL_841820, EPI_ISL_841821, EPI_ISL_841822, EPI_ISL_841823, EPI_ISL_841824, EPI_ISL_841825, EPI_ISL_841826, EPI_ISL_841827, EPI_ISL_841828, EPI_ISL_841829, EPI_ISL_841830, EPI_ISL_841831, EPI_ISL_841832, EPI_ISL_841833, EPI_ISL_841834, EPI_ISL_841835, EPI_ISL_841836, EPI_ISL_841837, EPI_ISL_841838, EPI_ISL_841839, EPI_ISL_841840, EPI_ISL_841841, EPI_ISL_841842, EPI_ISL_841843, EPI_ISL_841844, EPI_ISL_841845, EPI_ISL_841846, EPI_ISL_841847, EPI_ISL_841848, EPI_ISL_841849, EPI_ISL_841850, EPI_ISL_841852, EPI_ISL_841853, EPI_ISL_841854, EPI_ISL_841855, EPI_ISL_841856, EPI_ISL_841857, EPI_ISL_841858, EPI_ISL_841859, EPI_ISL_841860, EPI_ISL_841861, EPI_ISL_841862, EPI_ISL_841863, EPI_ISL_841864, EPI_ISL_841865, EPI_ISL_841866, EPI_ISL_841867, EPI_ISL_841868, EPI_ISL_841869, EPI_ISL_841870, EPI_ISL_841871, EPI_ISL_841872, EPI_ISL_841873, EPI_ISL_841874, EPI_ISL_841875, EPI_ISL_841876, EPI_ISL_841877, EPI_ISL_841878, EPI_ISL_841879, EPI_ISL_841880, EPI_ISL_841881, EPI_ISL_841882, EPI_ISL_841883, EPI_ISL_841884, EPI_ISL_841885, EPI_ISL_841886, EPI_ISL_841887, EPI_ISL_841888, EPI_ISL_841889, EPI_ISL_841890, EPI_ISL_841891, EPI_ISL_841892, EPI_ISL_841893, EPI_ISL_841894, EPI_ISL_841895, EPI_ISL_841896, EPI_ISL_841897, EPI_ISL_841898, EPI_ISL_841899, EPI_ISL_841900, EPI_ISL_841901, EPI_ISL_841902, EPI_ISL_841903, EPI_ISL_841904, EPI_ISL_841905, EPI_ISL_841906, EPI_ISL_841907, EPI_ISL_841908, EPI_ISL_841909, EPI_ISL_841910, EPI_ISL_841911, EPI_ISL_841912, EPI_ISL_841913, EPI_ISL_841914, EPI_ISL_841915, EPI_ISL_841916, EPI_ISL_841917, EPI_ISL_841918, EPI_ISL_841919, EPI_ISL_841920, EPI_ISL_841921, EPI_ISL_841922, EPI_ISL_841923, EPI_ISL_841924, EPI_ISL_841925, EPI_ISL_841926, EPI_ISL_841927, EPI_ISL_841928, EPI_ISL_841929, EPI_ISL_841930, EPI_ISL_841931, EPI_ISL_841932, EPI_ISL_841933, EPI_ISL_841934, EPI_ISL_841935, EPI_ISL_841936, EPI_ISL_841937, EPI_ISL_841938, EPI_ISL_841939, EPI_ISL_841940, EPI_ISL_841941, EPI_ISL_841942, EPI_ISL_841943, EPI_ISL_841944, EPI_ISL_841945, EPI_ISL_841946, EPI_ISL_841947, EPI_ISL_841948, EPI_ISL_841949, EPI_ISL_841950, EPI_ISL_841951, EPI_ISL_841952, EPI_ISL_841953, EPI_ISL_841954, EPI_ISL_841955, EPI_ISL_841956, EPI_ISL_841957, EPI_ISL_841958, EPI_ISL_841959, EPI_ISL_841960, EPI_ISL_841961, EPI_ISL_841962, EPI_ISL_841963, EPI_ISL_841964, EPI_ISL_841965, EPI_ISL_841966, EPI_ISL_841967, EPI_ISL_841968, EPI_ISL_841969, EPI_ISL_841970, EPI_ISL_841972, EPI_ISL_841973, EPI_ISL_841974, EPI_ISL_841975, EPI_ISL_841976, EPI_ISL_841977, EPI_ISL_841978, EPI_ISL_841979, EPI_ISL_841980, EPI_ISL_841981, EPI_ISL_841982, EPI_ISL_841983, EPI_ISL_841984, EPI_ISL_841985, EPI_ISL_841986, EPI_ISL_841987, EPI_ISL_841988, EPI_ISL_841989, EPI_ISL_841990, EPI_ISL_841991, EPI_ISL_841992, EPI_ISL_841993, EPI_ISL_841994, EPI_ISL_841995, EPI_ISL_841996, EPI_ISL_841997, EPI_ISL_841998, EPI_ISL_841999, EPI_ISL_842000, EPI_ISL_842001, EPI_ISL_842002, EPI_ISL_842003, EPI_ISL_842004, EPI_ISL_842005, EPI_ISL_842006, EPI_ISL_842007, EPI_ISL_842008, EPI_ISL_842009, EPI_ISL_842010, EPI_ISL_842011, EPI_ISL_842012, EPI_ISL_842013, EPI_ISL_842014, EPI_ISL_842015, EPI_ISL_842016, EPI_ISL_842017, EPI_ISL_842018, EPI_ISL_842019, EPI_ISL_842020, EPI_ISL_842021, EPI_ISL_842022, EPI_ISL_842023, EPI_ISL_842024, EPI_ISL_842025, EPI_ISL_842026, EPI_ISL_842027, EPI_ISL_842028, EPI_ISL_842029, EPI_ISL_842030, EPI_ISL_842031, EPI_ISL_842032, EPI_ISL_842033, EPI_ISL_842034, EPI_ISL_842035, EPI_ISL_842036, EPI_ISL_842037, EPI_ISL_842038, EPI_ISL_842039, EPI_ISL_842040, EPI_ISL_842041, EPI_ISL_842042, EPI_ISL_842043, EPI_ISL_842044, EPI_ISL_842045, EPI_ISL_842046, EPI_ISL_842047, EPI_ISL_842048, EPI_ISL_842049, EPI_ISL_842050, EPI_ISL_842051, EPI_ISL_842052, EPI_ISL_842053, EPI_ISL_842054, EPI_ISL_842055, EPI_ISL_842056, EPI_ISL_842057, EPI_ISL_842058, EPI_ISL_842059, EPI_ISL_842060, EPI_ISL_842061, EPI_ISL_842062, EPI_ISL_842063, EPI_ISL_842064, EPI_ISL_842065, EPI_ISL_842066, EPI_ISL_842067, EPI_ISL_842068, EPI_ISL_842069, EPI_ISL_842070, EPI_ISL_842071, EPI_ISL_842072, EPI_ISL_842073, EPI_ISL_842074, EPI_ISL_842075, EPI_ISL_842076, EPI_ISL_842077, EPI_ISL_842078, EPI_ISL_842079, EPI_ISL_842080, EPI_ISL_842081, EPI_ISL_842082, EPI_ISL_842083, EPI_ISL_842084, EPI_ISL_842085, EPI_ISL_842086, EPI_ISL_842087, EPI_ISL_842088, EPI_ISL_842089, EPI_ISL_842090, EPI_ISL_842091, EPI_ISL_842092, EPI_ISL_842093, EPI_ISL_842094, EPI_ISL_842095, EPI_ISL_842096, EPI_ISL_842097, EPI_ISL_842098, EPI_ISL_842099                                                                                                                                                                                                                                                                                                                                                                                                                                                                                                                                                                                                                                                                                                                                                                                                                                                                                                                                                                                                                                                                                                                                                                                                                                                                                                                                                                 | Centre for Enzyme Innovation, University of Portsmouth / Translational Research Laboratory, Portsmouth Hospitals NHS Trust | COVID-19 Genomics UK (COG-UK) Consortium                                                                        | Angela Beckett, Yann Bourgeois, Garry Scarlett, Sharon Glaysher, Scott Elliott, Kelly Bicknell, Robert Impey, Allyson Lloyd, Sarah Wylie, Ethan Butcher, Anoop Chauhan, Samuel Robson                                                                                                                                                                                            |
| EPI_ISL_856712, EPI_ISL_856713, EPI_ISL_856714, EPI_ISL_856715, EPI_ISL_856716, EPI_ISL_856717, EPI_ISL_856718, EPI_ISL_856719, EPI_ISL_856720, EPI_ISL_856721                                                                                                                                                                                                                                                                                                                                                                                                                                                                                                                                                                                                                                                                                                                                                                                                                                                                                                                                                                                                                                                                                                                                                                                                                                                                                                                                                                                                                                                                                                                                                                                                                                                                                                                                                                                                                                                                                                                                                                                                                                                                                                                                                                                                                                                                                                                                                                                                                                                                                                                                                                                                                                                                                                                                                                                                                                                                                                                                                                                                                                                                                                                                                                                                                                                                                                                                                                                                                                                                                                                                                                                                                                                                                                                                                                                                                                                                                                                                                                                                                                                                                                                                                                                                                                                                                                                                                                                                                                                                                                                                                                                                                                                                                                                                                                                                                                                                                                                                                                                                                                                                                                                                                                                                                                                                                                                                                                                                                                                                                                                                                                                                                                                                                                                                                                                                                                                                                                                                                                                                                                                                                                                                                                                                                                                                                                                                                                                                                                                                                                                                                                                                                                                                                                                                                                                                                                                                                                                 | Infectious Diseases Unit, Department of Internal Medicine, Azienda Ospedaliera-Universitaria di Padova                     | Laboratory of Infectious Diseases, Department of Biomedical and Clinical Sciences L. Sacco, University of Milan | Anna Maria Cattelan, Lolita Sasset, Davide Leoni, Alessia Lai, Annalisa Bergna, Carla Della Ventura, Claudia Balotta, Massimo Galli, Gianguglielmo Zehender on behalf of SARS-CoV-2 ITALIAN RESEARCH ENTERPRISE-(SCIRE) Collaborative Group                                                                                                                                      |
| EPI_ISL_857349, EPI_ISL_857350, EPI_ISL_857351, EPI_ISL_857352, EPI_ISL_857353, EPI_ISL_857354, EPI_ISL_857355, EPI_ISL_857356, EPI_ISL_857357, EPI_ISL_857358, EPI_ISL_857359, EPI_ISL_857360, EPI_ISL_857361, EPI_ISL_857362, EPI_ISL_857363, EPI_ISL_857364, EPI_ISL_857365, EPI_ISL_857366, EPI_ISL_857367, EPI_ISL_857368, EPI_ISL_857369, EPI_ISL_857370, EPI_ISL_857371, EPI_ISL_857372, EPI_ISL_857373, EPI_ISL_857374, EPI_ISL_857375, EPI_ISL_857376, EPI_ISL_857377, EPI_ISL_857378, EPI_ISL_857379, EPI_ISL_857380, EPI_ISL_857381, EPI_ISL_857382, EPI_ISL_857383, EPI_ISL_857384, EPI_ISL_857385, EPI_ISL_857386, EPI_ISL_857387, EPI_ISL_857388, EPI_ISL_857389, EPI_ISL_857390, EPI_ISL_857391, EPI_ISL_857392, EPI_ISL_857393, EPI_ISL_857394                                                                                                                                                                                                                                                                                                                                                                                                                                                                                                                                                                                                                                                                                                                                                                                                                                                                                                                                                                                                                                                                                                                                                                                                                                                                                                                                                                                                                                                                                                                                                                                                                                                                                                                                                                                                                                                                                                                                                                                                                                                                                                                                                                                                                                                                                                                                                                                                                                                                                                                                                                                                                                                                                                                                                                                                                                                                                                                                                                                                                                                                                                                                                                                                                                                                                                                                                                                                                                                                                                                                                                                                                                                                                                                                                                                                                                                                                                                                                                                                                                                                                                                                                                                                                                                                                                                                                                                                                                                                                                                                                                                                                                                                                                                                                                                                                                                                                                                                                                                                                                                                                                                                                                                                                                                                                                                                                                                                                                                                                                                                                                                                                                                                                                                                                                                                                                                                                                                                                                                                                                                                                                                                                                                                                                                                                                                 | Texas Department of State Health Services (TXDSHS)                                                                         | Texas Department of State Health Services (TXDSHS)                                                              | Anita Pokharel, Bonnie Oh, James Daniel Bonser, Rashmi Tuladhar, Mayela Pedrueza, Jenny Zhang, Maliha Rahman, Myong Koag, Chung Wang, Rachel Lee, Grace Kubin                                                                                                                                                                                                                    |
| EPI_ISL_860298, EPI_ISL_860299, EPI_ISL_860300, EPI_ISL_860301, EPI_ISL_860302, EPI_ISL_860303, EPI_ISL_860304, EPI_ISL_860305, EPI_ISL_860306, EPI_ISL_860307, EPI_ISL_860309, EPI_ISL_860310, EPI_ISL_860311, EPI_ISL_860312, EPI_ISL_860313, EPI_ISL_860314, EPI_ISL_860315, EPI_ISL_860316                                                                                                                                                                                                                                                                                                                                                                                                                                                                                                                                                                                                                                                                                                                                                                                                                                                                                                                                                                                                                                                                                                                                                                                                                                                                                                                                                                                                                                                                                                                                                                                                                                                                                                                                                                                                                                                                                                                                                                                                                                                                                                                                                                                                                                                                                                                                                                                                                                                                                                                                                                                                                                                                                                                                                                                                                                                                                                                                                                                                                                                                                                                                                                                                                                                                                                                                                                                                                                                                                                                                                                                                                                                                                                                                                                                                                                                                                                                                                                                                                                                                                                                                                                                                                                                                                                                                                                                                                                                                                                                                                                                                                                                                                                                                                                                                                                                                                                                                                                                                                                                                                                                                                                                                                                                                                                                                                                                                                                                                                                                                                                                                                                                                                                                                                                                                                                                                                                                                                                                                                                                                                                                                                                                                                                                                                                                                                                                                                                                                                                                                                                                                                                                                                                                                                                                 | Unit 17: Influenza & Other Respiratory Viruses, German National Influenza Center                                           | Project group Epidemiology of Highly Pathogenic Microorganisms, Robert Koch-Institute                           | Andreas Sachse, Grit Schubert, Essia Belarbi, Sébastien Calvignac-Spencer, Thorsten Wolff, Ralf Dürwald, Djin-Ye Oh, Marianne Wedde                                                                                                                                                                                                                                              |
| EPI_ISL_864974, EPI_ISL_865015, EPI_ISL_865022                                                                                                                                                                                                                                                                                                                                                                                                                                                                                                                                                                                                                                                                                                                                                                                                                                                                                                                                                                                                                                                                                                                                                                                                                                                                                                                                                                                                                                                                                                                                                                                                                                                                                                                                                                                                                                                                                                                                                                                                                                                                                                                                                                                                                                                                                                                                                                                                                                                                                                                                                                                                                                                                                                                                                                                                                                                                                                                                                                                                                                                                                                                                                                                                                                                                                                                                                                                                                                                                                                                                                                                                                                                                                                                                                                                                                                                                                                                                                                                                                                                                                                                                                                                                                                                                                                                                                                                                                                                                                                                                                                                                                                                                                                                                                                                                                                                                                                                                                                                                                                                                                                                                                                                                                                                                                                                                                                                                                                                                                                                                                                                                                                                                                                                                                                                                                                                                                                                                                                                                                                                                                                                                                                                                                                                                                                                                                                                                                                                                                                                                                                                                                                                                                                                                                                                                                                                                                                                                                                                                                                 | West of Scotland Specialist Virology Centre, NHSGCC / MRC-University of Glasgow Centre for Virus Research                  | COVID-19 Genomics UK (COG-UK) Consortium                                                                        | Ana da Silva Filipe, Natasha Johnson, Kathy Smollett, Daniel Mair, Stephen Carmichael, Alice Broos, Lily Tong, Jenna Nichols, Kyriaki Nomikou; Sarah McDonald; Richard Orton, Joseph Hughes, Sreenu Vattipally, David L Robertson; Alasdair MacLean, Rory Gunson; Sharif Shaaban, Matthew Holden; Rachel Blacow, Guy Mollett, Kathy Li, James Shepherd, Antonia Ho, Emma Thomson |
| EPI_ISL_867930, EPI_ISL_867931, EPI_ISL_867932, EPI_ISL_867933, EPI_ISL_867934, EPI_ISL_867935, EPI_ISL_867936, EPI_ISL_867937, EPI_ISL_867938, EPI_ISL_867939, EPI_ISL_867940, EPI_ISL_867941, EPI_ISL_867942, EPI_ISL_867943, EPI_ISL_867944, EPI_ISL_867945, EPI_ISL_867946, EPI_ISL_867947, EPI_ISL_867948, EPI_ISL_867949, EPI_ISL_867950, EPI_ISL_867951, EPI_ISL_867952, EPI_ISL_867953, EPI_ISL_867954, EPI_ISL_867955, EPI_ISL_867956, EPI_ISL_867957, EPI_ISL_867958, EPI_ISL_867959, EPI_ISL_867960, EPI_ISL_867961, EPI_ISL_867962, EPI_ISL_867963, EPI_ISL_867964, EPI_ISL_867965, EPI_ISL_867966, EPI_ISL_867967, EPI_ISL_867968, EPI_ISL_867969, EPI_ISL_867970, EPI_ISL_867971, EPI_ISL_867972, EPI_ISL_867973, EPI_ISL_867974, EPI_ISL_867975, EPI_ISL_867976, EPI_ISL_867977, EPI_ISL_867978, EPI_ISL_867979, EPI_ISL_867980, EPI_ISL_867981, EPI_ISL_867982, EPI_ISL_867983, EPI_ISL_867985, EPI_ISL_867986, EPI_ISL_867987, EPI_ISL_867988, EPI_ISL_867989, EPI_ISL_867990, EPI_ISL_867991, EPI_ISL_867992, EPI_ISL_867993, EPI_ISL_867994, EPI_ISL_867995, EPI_ISL_867996, EPI_ISL_867997, EPI_ISL_867998, EPI_ISL_867999, EPI_ISL_868000, EPI_ISL_868001, EPI_ISL_868002, EPI_ISL_868003, EPI_ISL_868004, EPI_ISL_868005, EPI_ISL_868006, EPI_ISL_868007, EPI_ISL_868008, EPI_ISL_868009, EPI_ISL_868010, EPI_ISL_868011, EPI_ISL_868012, EPI_ISL_868013, EPI_ISL_868014, EPI_ISL_868015, EPI_ISL_868016, EPI_ISL_868017, EPI_ISL_868018, EPI_ISL_868019, EPI_ISL_868020, EPI_ISL_868021, EPI_ISL_868022, EPI_ISL_868023, EPI_ISL_868024, EPI_ISL_868025, EPI_ISL_868026, EPI_ISL_868027, EPI_ISL_868028, EPI_ISL_868029, EPI_ISL_868030, EPI_ISL_868031, EPI_ISL_868032, EPI_ISL_868033, EPI_ISL_868034, EPI_ISL_868035, EPI_ISL_868036, EPI_ISL_868037, EPI_ISL_868038, EPI_ISL_868039, EPI_ISL_868040, EPI_ISL_868041, EPI_ISL_868042, EPI_ISL_868043, EPI_ISL_868044, EPI_ISL_868045, EPI_ISL_868046, EPI_ISL_868047, EPI_ISL_868048, EPI_ISL_868049, EPI_ISL_868050, EPI_ISL_868051, EPI_ISL_868052, EPI_ISL_868053, EPI_ISL_868054, EPI_ISL_868055, EPI_ISL_868056, EPI_ISL_868057, EPI_ISL_868058, EPI_ISL_868059, EPI_ISL_868060, EPI_ISL_868061, EPI_ISL_868062, EPI_ISL_868063, EPI_ISL_868064, EPI_ISL_868065, EPI_ISL_868066, EPI_ISL_868067, EPI_ISL_868068, EPI_ISL_868069, EPI_ISL_868070, EPI_ISL_868071, EPI_ISL_868072, EPI_ISL_868073, EPI_ISL_868074, EPI_ISL_868075, EPI_ISL_868076, EPI_ISL_868077, EPI_ISL_868078, EPI_ISL_868079, EPI_ISL_868080, EPI_ISL_868081, EPI_ISL_868082, EPI_ISL_868083, EPI_ISL_868084, EPI_ISL_868085, EPI_ISL_868086, EPI_ISL_868087, EPI_ISL_868088, EPI_ISL_868089, EPI_ISL_868090, EPI_ISL_868091, EPI_ISL_868092, EPI_ISL_868093, EPI_ISL_868094, EPI_ISL_868095, EPI_ISL_868096, EPI_ISL_868097, EPI_ISL_868098, EPI_ISL_868099, EPI_ISL_868100, EPI_ISL_868101, EPI_ISL_868102, EPI_ISL_868103, EPI_ISL_868104, EPI_ISL_868105, EPI_ISL_868106, EPI_ISL_868107, EPI_ISL_868108, EPI_ISL_868109, EPI_ISL_868110, EPI_ISL_868111, EPI_ISL_868112, EPI_ISL_868113, EPI_ISL_868114, EPI_ISL_868115, EPI_ISL_868116, EPI_ISL_868117, EPI_ISL_868118, EPI_ISL_868119, EPI_ISL_868120, EPI_ISL_868121, EPI_ISL_868122, EPI_ISL_868123, EPI_ISL_868124, EPI_ISL_868125, EPI_ISL_868126, EPI_ISL_868127, EPI_ISL_868128, EPI_ISL_868129, EPI_ISL_868130, EPI_ISL_868131, EPI_ISL_868132, EPI_ISL_868133, EPI_ISL_868134, EPI_ISL_868135, EPI_ISL_868136, EPI_ISL_868137, EPI_ISL_868138, EPI_ISL_868139, EPI_ISL_868140, EPI_ISL_868141, EPI_ISL_868142, EPI_ISL_868143, EPI_ISL_868144, EPI_ISL_868145, EPI_ISL_868146, EPI_ISL_868147, EPI_ISL_868148, EPI_ISL_868149, EPI_ISL_868150, EPI_ISL_868151, EPI_ISL_868152, EPI_ISL_868153, EPI_ISL_868154, EPI_ISL_868155, EPI_ISL_868156, EPI_ISL_868157, EPI_ISL_868158, EPI_ISL_868159, EPI_ISL_868160, EPI_ISL_868161, EPI_ISL_868162, EPI_ISL_868163, EPI_ISL_868164, EPI_ISL_868165, EPI_ISL_868166, EPI_ISL_868167, EPI_ISL_868168, EPI_ISL_868169, EPI_ISL_868170, EPI_ISL_868171, EPI_ISL_868172, EPI_ISL_868173, EPI_ISL_868174, EPI_ISL_868175, EPI_ISL_868176, EPI_ISL_868177, EPI_ISL_868178, EPI_ISL_868179, EPI_ISL_868180, EPI_ISL_868181, EPI_ISL_868182, EPI_ISL_868183, EPI_ISL_868184, EPI_ISL_868185, EPI_ISL_868186, EPI_ISL_868187, EPI_ISL_868188, EPI_ISL_868189, EPI_ISL_868190, EPI_ISL_868191, EPI_ISL_868192, EPI_ISL_868193, EPI_ISL_868194, EPI_ISL_868195, EPI_ISL_868196, EPI_ISL_868197, EPI_ISL_868198, EPI_ISL_868199, EPI_ISL_868200, EPI_ISL_868201, EPI_ISL_868202, EPI_ISL_868203, EPI_ISL_868204, EPI_ISL_868205, EPI_ISL_868206, EPI_ISL_868207, EPI_ISL_868208, EPI_ISL_868209, EPI_ISL_868210, EPI_ISL_868211, EPI_ISL_868212, EPI_ISL_868213, EPI_ISL_868214, EPI_ISL_868215, EPI_ISL_868216, EPI_ISL_868217, EPI_ISL_868218, EPI_ISL_868219, EPI_ISL_868220, EPI_ISL_868221, EPI_ISL_868222, EPI_ISL_868223, EPI_ISL_868224, EPI_ISL_868225, EPI_ISL_868226, EPI_ISL_868227, EPI_ISL_868228, EPI_ISL_868229, EPI_ISL_868230, EPI_ISL_868231, EPI_ISL_868232, EPI_ISL_868233, EPI_ISL_868234, EPI_ISL_868235, EPI_ISL_868236, EPI_ISL_868237, EPI_ISL_868238, EPI_ISL_868239, EPI_ISL_868240, EPI_ISL_868241, EPI_ISL_868242, EPI_ISL_868243, EPI_ISL_868244, EPI_ISL_868245, EPI_ISL_868246, EPI_ISL_868247, EPI_ISL_868248, EPI_ISL_868249, EPI_ISL_868250, EPI_ISL_868251, EPI_ISL_868252, EPI_ISL_868253, EPI_ISL_868254, EPI_ISL_868255, EPI_ISL_868256, EPI_ISL_868257, EPI_ISL_868258, EPI_ISL_868259, EPI_ISL_868260, EPI_ISL_868261, EPI_ISL_868262, EPI_ISL_868263, EPI_ISL_868264, EPI_ISL_868265, EPI_ISL_868266, EPI_ISL_868267, EPI_ISL_868268, EPI_ISL_868269, EPI_ISL_868270, EPI_ISL_868271, EPI_ISL_868272, EPI_ISL_868273, EPI_ISL_868274, EPI_ISL_868275, EPI_ISL_868276, EPI_ISL_868277, EPI_ISL_868278, EPI_ISL_868279, EPI_ISL_868280, EPI_ISL_868281, EPI_ISL_868282, EPI_ISL_868283, EPI_ISL_868284, EPI_ISL_868285, EPI_ISL_868286, EPI_ISL_868287, EPI_ISL_868288, EPI_ISL_868289, EPI_ISL_868290, EPI_ISL_868291, EPI_ISL_868292, EPI_ISL_868293, EPI_ISL_868294, EPI_ISL_868295, EPI_ISL_868296, EPI_ISL_868297, EPI_ISL_868298, EPI_ISL_868299, EPI_ISL_868300, EPI_ISL_868301, EPI_ISL_868302, EPI_ISL_868303, EPI_ISL_868304, EPI_ISL_868305, EPI_ISL_868306, EPI_ISL_868307, EPI_ISL_868308, EPI_ISL_868309, EPI_ISL_868310, EPI_ISL_868311, EPI_ISL_868312, EPI_ISL_868313, EPI_ISL_868314, EPI_ISL_868315, EPI_ISL_868316, EPI_ISL_868317, EPI_ISL_868318, EPI_ISL_868319, EPI_ISL_868320, EPI_ISL_868321, EPI_ISL_868322, EPI_ISL_868323, EPI_ISL_868324, EPI_ISL_868325, EPI_ISL_868326, EPI_ISL_868327, EPI_ISL_868328, EPI_ISL_868329, EPI_ISL_868330, EPI_ISL_868331, EPI_ISL_868332, EPI_ISL_868333, EPI_ISL_868334, EPI_ISL_868335, EPI_ISL_868336, EPI_ISL_868337, EPI_ISL_868338, EPI_ISL_868339, EPI_ISL_868340, EPI_ISL_868341, EPI_ISL_868342, EPI_ISL_868343, EPI_ISL_868344, EPI_ISL_868345, EPI_ISL_868346, EPI_ISL_868347, EPI_ISL_868348, EPI_ISL_868349, EPI_ISL_868350, EPI_ISL_868351, EPI_ISL_868352, EPI_ISL_868353, EPI_ISL_868354, EPI_ISL_868355 | Centre for Enzyme Innovation, University of Portsmouth / Translational Research Laboratory, Portsmouth Hospitals NHS Trust | COVID-19 Genomics UK (COG-UK) Consortium                                                                        | Angela Beckett, Yann Bourgeois, Garry Scarlett, Sharon Glaysher, Scott Elliott, Kelly Bicknell, Robert Impey, Allyson Lloyd, Sarah Wylie, Ethan Butcher, Anoop Chauhan, Samuel Robson                                                                                                                                                                                            |
| EPI_ISL_869242, EPI_ISL_869243, EPI_ISL_869244, EPI_ISL_869245, EPI_ISL_869246                                                                                                                                                                                                                                                                                                                                                                                                                                                                                                                                                                                                                                                                                                                                                                                                                                                                                                                                                                                                                                                                                                                                                                                                                                                                                                                                                                                                                                                                                                                                                                                                                                                                                                                                                                                                                                                                                                                                                                                                                                                                                                                                                                                                                                                                                                                                                                                                                                                                                                                                                                                                                                                                                                                                                                                                                                                                                                                                                                                                                                                                                                                                                                                                                                                                                                                                                                                                                                                                                                                                                                                                                                                                                                                                                                                                                                                                                                                                                                                                                                                                                                                                                                                                                                                                                                                                                                                                                                                                                                                                                                                                                                                                                                                                                                                                                                                                                                                                                                                                                                                                                                                                                                                                                                                                                                                                                                                                                                                                                                                                                                                                                                                                                                                                                                                                                                                                                                                                                                                                                                                                                                                                                                                                                                                                                                                                                                                                                                                                                                                                                                                                                                                                                                                                                                                                                                                                                                                                                                                                 | UMMC-Health                                                                                                                | WHO National Influenza Centre Russian Federation                                                                | Andrey Komissarov, Artem Fadeev, Anna Ivanova, Kseniya Komissarova, Dmitry Bazhenov, Mikhail Bakaev, Tatiana Platonova, Daria Danilenko, Ksenia Safina, Elena Nabieva, Georgii Bazykin, Dmitry Lioznov                                                                                                                                                                           |
| EPI_ISL_869247                                                                                                                                                                                                                                                                                                                                                                                                                                                                                                                                                                                                                                                                                                                                                                                                                                                                                                                                                                                                                                                                                                                                                                                                                                                                                                                                                                                                                                                                                                                                                                                                                                                                                                                                                                                                                                                                                                                                                                                                                                                                                                                                                                                                                                                                                                                                                                                                                                                                                                                                                                                                                                                                                                                                                                                                                                                                                                                                                                                                                                                                                                                                                                                                                                                                                                                                                                                                                                                                                                                                                                                                                                                                                                                                                                                                                                                                                                                                                                                                                                                                                                                                                                                                                                                                                                                                                                                                                                                                                                                                                                                                                                                                                                                                                                                                                                                                                                                                                                                                                                                                                                                                                                                                                                                                                                                                                                                                                                                                                                                                                                                                                                                                                                                                                                                                                                                                                                                                                                                                                                                                                                                                                                                                                                                                                                                                                                                                                                                                                                                                                                                                                                                                                                                                                                                                                                                                                                                                                                                                                                                                 | Krasnoyarsk Regional Clinical Hospital                                                                                     | WHO National Influenza Centre Russian Federation                                                                | Andrey Komissarov, Artem Fadeev, Anna Ivanova, Kseniya Komissarova, Dmitry Bazhenov, Mikhail Bakaev, Daria Danilenko, Ksenia Safina, Elena Nabieva, Georgii Bazykin, Dmitry Lioznov                                                                                                                                                                                              |
| EPI_ISL_869248, EPI_ISL_869249                                                                                                                                                                                                                                                                                                                                                                                                                                                                                                                                                                                                                                                                                                                                                                                                                                                                                                                                                                                                                                                                                                                                                                                                                                                                                                                                                                                                                                                                                                                                                                                                                                                                                                                                                                                                                                                                                                                                                                                                                                                                                                                                                                                                                                                                                                                                                                                                                                                                                                                                                                                                                                                                                                                                                                                                                                                                                                                                                                                                                                                                                                                                                                                                                                                                                                                                                                                                                                                                                                                                                                                                                                                                                                                                                                                                                                                                                                                                                                                                                                                                                                                                                                                                                                                                                                                                                                                                                                                                                                                                                                                                                                                                                                                                                                                                                                                                                                                                                                                                                                                                                                                                                                                                                                                                                                                                                                                                                                                                                                                                                                                                                                                                                                                                                                                                                                                                                                                                                                                                                                                                                                                                                                                                                                                                                                                                                                                                                                                                                                                                                                                                                                                                                                                                                                                                                                                                                                                                                                                                                                                 | UMMC-Health                                                                                                                | WHO National Influenza Centre Russian Federation                                                                | Andrey Komissarov, Artem Fadeev, Anna Ivanova, Kseniya Komissarova, Dmitry Bazhenov, Mikhail Bakaev, Tatiana Platonova, Daria Danilenko, Ksenia Safina, Elena Nabieva, Georgii Bazykin, Dmitry Lioznov                                                                                                                                                                           |



We gratefully acknowledge the following Authors from the Originating laboratories responsible for obtaining the specimens, as well as the Submitting laboratories where the genome data were generated and shared via GISAID, on which this research is based.

All Submitters of data may be contacted directly via [www.gisaid.org](http://www.gisaid.org)

Authors are sorted alphabetically.

| Accession ID                                                                                   | Originating Laboratory                                                                                        | Submitting Laboratory                                                                                                              | Authors                                                                                                                                                                                                                                                                                                                                                                                      |
|------------------------------------------------------------------------------------------------|---------------------------------------------------------------------------------------------------------------|------------------------------------------------------------------------------------------------------------------------------------|----------------------------------------------------------------------------------------------------------------------------------------------------------------------------------------------------------------------------------------------------------------------------------------------------------------------------------------------------------------------------------------------|
| EPI_ISL_407894, EPI_ISL_407896                                                                 | Pathology Queensland                                                                                          | Public Health Virology Laboratory                                                                                                  | Ben Huang, Alyssa Pyke, Amanda De Jong, Andrew Van Den Hurk, Carmel Taylor, David Warrilow, Doris Genge, Elisabeth Gamez, Glen Hewitson, Ian Maxwell Mackay, Inga Sultana, Jamie McMahon, Jean Barcelon, Judy Northill, Mitchell Finger, Natalie Simpson, Neelima Nair, Peter Burtonclay, Peter Moore, Sarah Wheatley, Sean Moody, Sonja Hall-Mendelin, Timothy Gardam, and Frederick Moore. |
| EPI_ISL_410486                                                                                 | CNR Virus des Infections Respiratoires - France SUD                                                           | CNR Virus des Infections Respiratoires - France SUD                                                                                | Bal, Antonin; Destras, Gregory; Gaymard, Alexandre; Bouscambert-Duchamp, Maude; Cheynet, Valérie; Brengel-Pesce, Karen; Morfin-Sherpa, Florence; Valette, Martine; Josset, Laurence; Lina, Bruno.                                                                                                                                                                                            |
| EPI_ISL_410717, EPI_ISL_410718                                                                 | Pathology Queensland                                                                                          | Public Health Virology Laboratory                                                                                                  | Ben Huang, Alyssa Pyke, Amanda De Jong, Andrew Van Den Hurk, Carmel Taylor, David Warrilow, Doris Genge, Elisabeth Gamez, Glen Hewitson, Ian Maxwell Mackay, Inga Sultana, Jamie McMahon, Jean Barcelon, Judy Northill, Mitchell Finger, Natalie Simpson, Neelima Nair, Peter Burtonclay, Peter Moore, Sarah Wheatley, Sean Moody, Sonja Hall-Mendelin, Timothy Gardam, and Frederick Moore. |
| EPI_ISL_416745, EPI_ISL_416746                                                                 | CNR Virus des Infections Respiratoires - France SUD                                                           | CNR Virus des Infections Respiratoires - France SUD                                                                                | Bal, Antonin; Destras, Gregory; Gaymard, Alexandre; Bouscambert-Duchamp, Maude; Cheynet, Valérie; Brengel-Pesce, Karen; Morfin-Sherpa, Florence; Valette, Martine; Josset, Laurence; Lina, Bruno.                                                                                                                                                                                            |
| EPI_ISL_416747, EPI_ISL_416748                                                                 | Institut des Agents Infectieux (IAI) Hospices Civils de Lyon                                                  | CNR Virus des Infections Respiratoires - France SUD                                                                                | Bal, Antonin; Destras, Gregory; Gaymard, Alexandre; Bouscambert-Duchamp, Maude; Cheynet, Valérie; Brengel-Pesce, Karen; Morfin-Sherpa, Florence; Valette, Martine; Josset, Laurence; Lina, Bruno.                                                                                                                                                                                            |
| EPI_ISL_416749                                                                                 | Centre Hospitalier de Valence                                                                                 | CNR Virus des Infections Respiratoires - France SUD                                                                                | Bal, Antonin; Destras, Gregory; Gaymard, Alexandre; Bouscambert-Duchamp, Maude; Cheynet, Valérie; Brengel-Pesce, Karen; Morfin-Sherpa, Florence; Valette, Martine; Josset, Laurence; Lina, Bruno.                                                                                                                                                                                            |
| EPI_ISL_416750                                                                                 | Institut des Agents Infectieux (IAI) Hospices Civils de Lyon                                                  | CNR Virus des Infections Respiratoires - France SUD                                                                                | Bal, Antonin; Destras, Gregory; Gaymard, Alexandre; Bouscambert-Duchamp, Maude; Cheynet, Valérie; Brengel-Pesce, Karen; Morfin-Sherpa, Florence; Valette, Martine; Josset, Laurence; Lina, Bruno.                                                                                                                                                                                            |
| EPI_ISL_416751, EPI_ISL_416752                                                                 | CHU Gabriel Montpied                                                                                          | CNR Virus des Infections Respiratoires - France SUD                                                                                | Bal, Antonin; Destras, Gregory; Gaymard, Alexandre; Bouscambert-Duchamp, Maude; Cheynet, Valérie; Brengel-Pesce, Karen; Morfin-Sherpa, Florence; Valette, Martine; Josset, Laurence; Lina, Bruno.                                                                                                                                                                                            |
| EPI_ISL_416753, EPI_ISL_416754, EPI_ISL_416756                                                 | Institut des Agents Infectieux (IAI) Hospices Civils de Lyon                                                  | CNR Virus des Infections Respiratoires - France SUD                                                                                | Bal, Antonin; Destras, Gregory; Gaymard, Alexandre; Bouscambert-Duchamp, Maude; Cheynet, Valérie; Brengel-Pesce, Karen; Morfin-Sherpa, Florence; Valette, Martine; Josset, Laurence; Lina, Bruno.                                                                                                                                                                                            |
| EPI_ISL_416757                                                                                 | Centre Hospitalier de Bourg en Bresse                                                                         | CNR Virus des Infections Respiratoires - France SUD                                                                                | Bal, Antonin; Destras, Gregory; Gaymard, Alexandre; Bouscambert-Duchamp, Maude; Cheynet, Valérie; Brengel-Pesce, Karen; Morfin-Sherpa, Florence; Valette, Martine; Josset, Laurence; Lina, Bruno.                                                                                                                                                                                            |
| EPI_ISL_416758                                                                                 | Institut des Agents Infectieux (IAI) Hospices Civils de Lyon                                                  | CNR Virus des Infections Respiratoires - France SUD                                                                                | Bal, Antonin; Destras, Gregory; Gaymard, Alexandre; Bouscambert-Duchamp, Maude; Cheynet, Valérie; Brengel-Pesce, Karen; Morfin-Sherpa, Florence; Valette, Martine; Josset, Laurence; Lina, Bruno.                                                                                                                                                                                            |
| EPI_ISL_417333, EPI_ISL_417334, EPI_ISL_417335, EPI_ISL_417336, EPI_ISL_417337                 | Institut des Agents Infectieux (IAI), Hospices Civils de Lyon                                                 | CNR Virus des Infections Respiratoires - France SUD                                                                                | Antonin Bal, Gregory Destras, Gwendolyne Burfin, Solenne Brun, Carine Moustaud, Raphaëlle Lamy, Alexandre Gaymard, Maude Bouscambert-Duchamp, Florence Morfin-Sherpa, Martine Valette, Laurence Josset, Bruno Lina                                                                                                                                                                           |
| EPI_ISL_417338                                                                                 | Centre Hospitalier de Macon                                                                                   | CNR Virus des Infections Respiratoires - France SUD                                                                                | Antonin Bal, Gregory Destras, Gwendolyne Burfin, Solenne Brun, Carine Moustaud, Raphaëlle Lamy, Alexandre Gaymard, Maude Bouscambert-Duchamp, Florence Morfin-Sherpa, Martine Valette, Laurence Josset, Bruno Lina                                                                                                                                                                           |
| EPI_ISL_417339                                                                                 | Institut des Agents Infectieux (IAI), Hospices Civils de Lyon                                                 | CNR Virus des Infections Respiratoires - France SUD                                                                                | Antonin Bal, Gregory Destras, Gwendolyne Burfin, Solenne Brun, Carine Moustaud, Raphaëlle Lamy, Alexandre Gaymard, Maude Bouscambert-Duchamp, Florence Morfin-Sherpa, Martine Valette, Laurence Josset, Bruno Lina                                                                                                                                                                           |
| EPI_ISL_417340                                                                                 | Centre Hospitalier de Bourg en Bresse                                                                         | CNR Virus des Infections Respiratoires - France SUD                                                                                | Antonin Bal, Gregory Destras, Gwendolyne Burfin, Solenne Brun, Carine Moustaud, Raphaëlle Lamy, Alexandre Gaymard, Maude Bouscambert-Duchamp, Florence Morfin-Sherpa, Martine Valette, Laurence Josset, Bruno Lina                                                                                                                                                                           |
| EPI_ISL_417389, EPI_ISL_417406                                                                 | Centre for Infectious Diseases and Microbiology Public Health                                                 | NSW Health Pathology - Institute of Clinical Pathology and Medical Research; Westmead Hospital; University of Sydney               | Arnott A, Sadsad R, Carter I, Rahman H, Holmes EC, O'Sullivan MV, Sintchenko V, Chen SC, Maddocks S, Kok J, Dwyer DE, Rockett R, Eden J-S, Lam C, Gray K, Timms V and Gall M for the 2019-nCoV Study Group                                                                                                                                                                                   |
| EPI_ISL_417491                                                                                 | Virology Laboratory, Department of Biomedical Sciences and Public Health, University Politecnica delle Marche | Virology and Legal Medicine Laboratories, Department of Biomedical Sciences and Public Health, University Politecnica delle Marche | Bagnarelli,P., Caucci,S., Di Sante,L., Menzo,S., Alessandrini,F., Onofri,V., Turchi,C., Tagliabracchi,A.                                                                                                                                                                                                                                                                                     |
| EPI_ISL_418412                                                                                 | Centre Hospitalier des Vals d'Ardeche                                                                         | CNR Virus des Infections Respiratoires - France SUD                                                                                | Antonin Bal, Gregory Destras, Gwendolyne Burfin, Solenne Brun, Carine Moustaud, Raphaëlle Lamy, Alexandre Gaymard, Maude Bouscambert-Duchamp, Florence Morfin-Sherpa, Martine Valette, Bruno Lina, Laurence Josset                                                                                                                                                                           |
| EPI_ISL_418413                                                                                 | Centre Hospitalier de Macon                                                                                   | CNR Virus des Infections Respiratoires - France SUD                                                                                | Antonin Bal, Gregory Destras, Gwendolyne Burfin, Solenne Brun, Carine Moustaud, Raphaëlle Lamy, Alexandre Gaymard, Maude Bouscambert-Duchamp, Florence Morfin-Sherpa, Martine Valette, Bruno Lina, Laurence Josset                                                                                                                                                                           |
| EPI_ISL_418414, EPI_ISL_418415                                                                 | Centre Hospitalier de Valence                                                                                 | CNR Virus des Infections Respiratoires - France SUD                                                                                | Antonin Bal, Gregory Destras, Gwendolyne Burfin, Solenne Brun, Carine Moustaud, Raphaëlle Lamy, Alexandre Gaymard, Maude Bouscambert-Duchamp, Florence Morfin-Sherpa, Martine Valette, Bruno Lina, Laurence Josset                                                                                                                                                                           |
| EPI_ISL_418416                                                                                 | GH Les Portes du Sud                                                                                          | CNR Virus des Infections Respiratoires - France SUD                                                                                | Antonin Bal, Gregory Destras, Gwendolyne Burfin, Solenne Brun, Carine Moustaud, Raphaëlle Lamy, Alexandre Gaymard, Maude Bouscambert-Duchamp, Florence Morfin-Sherpa, Martine Valette, Bruno Lina, Laurence Josset                                                                                                                                                                           |
| EPI_ISL_418417                                                                                 | Centre Hospitalier de Valence                                                                                 | CNR Virus des Infections Respiratoires - France SUD                                                                                | Antonin Bal, Gregory Destras, Gwendolyne Burfin, Solenne Brun, Carine Moustaud, Raphaëlle Lamy, Alexandre Gaymard, Maude Bouscambert-Duchamp, Florence Morfin-Sherpa, Martine Valette, Bruno Lina, Laurence Josset                                                                                                                                                                           |
| EPI_ISL_418418, EPI_ISL_418419                                                                 | Centre Hospitalier Saint Joseph Saint Luc                                                                     | CNR Virus des Infections Respiratoires - France SUD                                                                                | Antonin Bal, Gregory Destras, Gwendolyne Burfin, Solenne Brun, Carine Moustaud, Raphaëlle Lamy, Alexandre Gaymard, Maude Bouscambert-Duchamp, Florence Morfin-Sherpa, Martine Valette, Bruno Lina, Laurence Josset                                                                                                                                                                           |
| EPI_ISL_418420, EPI_ISL_418421, EPI_ISL_418422, EPI_ISL_418423, EPI_ISL_418424, EPI_ISL_418425 | Institut des Agents Infectieux (IAI), Hospices Civils de Lyon                                                 | CNR Virus des Infections Respiratoires - France SUD                                                                                | Antonin Bal, Gregory Destras, Gwendolyne Burfin, Solenne Brun, Carine Moustaud, Raphaëlle Lamy, Alexandre Gaymard, Maude Bouscambert-Duchamp, Florence Morfin-Sherpa, Martine Valette, Bruno Lina, Laurence Josset                                                                                                                                                                           |
| EPI_ISL_418426                                                                                 | Centre Hospitalier de Bourg en Bresse                                                                         | CNR Virus des Infections Respiratoires - France SUD                                                                                | Antonin Bal, Gregory Destras, Gwendolyne Burfin, Solenne Brun, Carine Moustaud, Raphaëlle Lamy, Alexandre Gaymard, Maude Bouscambert-Duchamp, Florence Morfin-Sherpa, Martine Valette, Bruno Lina, Laurence Josset                                                                                                                                                                           |
| EPI_ISL_418427                                                                                 | Hopital Privé de l'Est Lyonnais                                                                               | CNR Virus des Infections Respiratoires - France SUD                                                                                | Antonin Bal, Gregory Destras, Gwendolyne Burfin, Solenne Brun, Carine Moustaud, Raphaëlle Lamy, Alexandre Gaymard, Maude Bouscambert-Duchamp, Florence Morfin-Sherpa, Martine Valette, Bruno Lina, Laurence Josset                                                                                                                                                                           |
| EPI_ISL_418428                                                                                 | Centre Hospitalier Lucien Hussel                                                                              | CNR Virus des Infections Respiratoires - France SUD                                                                                | Antonin Bal, Gregory Destras, Gwendolyne Burfin, Solenne Brun, Carine Moustaud, Raphaëlle Lamy, Alexandre Gaymard, Maude Bouscambert-Duchamp, Florence Morfin-Sherpa, Martine Valette, Bruno Lina, Laurence Josset                                                                                                                                                                           |
| EPI_ISL_418429, EPI_ISL_418430, EPI_ISL_418431, EPI_ISL_418432                                 | Institut des Agents Infectieux (IAI), Hospices Civils de Lyon                                                 | CNR Virus des Infections Respiratoires - France SUD                                                                                | Antonin Bal, Gregory Destras, Gwendolyne Burfin, Solenne Brun, Carine Moustaud, Raphaëlle Lamy, Alexandre Gaymard, Maude Bouscambert-Duchamp, Florence Morfin-Sherpa, Martine Valette, Bruno Lina, Laurence Josset                                                                                                                                                                           |

|                                                                                                                                                                                                                                                                                                                                                                                                                                                                                                                                                                                                                                                                                                                                                                                                                                                                                                                                                                                                                                                                                                                                                                                                                                                                                                                                                                                                                                                                                                                                                                                                                                                                                                                                                                                                                                                                                                                                                                                                                                                                                                                                                                                                                                                                                                                                                                                                                                                                                                                                                                                                                                                                                                                                                                                                                                                                                                                                                                                                                                                                                                                                                                                                                                                                                                                                                                                                                                                                                                                                                                                                                                                                                                                                                                                                                                                                                                                                                                                                                                                                                                                                                                                                                                                                                                                                                                                                                                                                                                                                                                                                                                                                                                                                                                                                                                                                                                                                                                                                                                                                                                                                                                                                                                                                                                                                                                                                                                                                                                                                                                                                                                                                                                                                                                                                                                                                                                                                                                                                                                                                                                                                                                                                                                                                                                                                                                                                                                                                                                                                                                                                |                                                                                 |                                                                                                        |                                                                                                                                                                                                                                                                                                                                                                                                                                                                         |
|------------------------------------------------------------------------------------------------------------------------------------------------------------------------------------------------------------------------------------------------------------------------------------------------------------------------------------------------------------------------------------------------------------------------------------------------------------------------------------------------------------------------------------------------------------------------------------------------------------------------------------------------------------------------------------------------------------------------------------------------------------------------------------------------------------------------------------------------------------------------------------------------------------------------------------------------------------------------------------------------------------------------------------------------------------------------------------------------------------------------------------------------------------------------------------------------------------------------------------------------------------------------------------------------------------------------------------------------------------------------------------------------------------------------------------------------------------------------------------------------------------------------------------------------------------------------------------------------------------------------------------------------------------------------------------------------------------------------------------------------------------------------------------------------------------------------------------------------------------------------------------------------------------------------------------------------------------------------------------------------------------------------------------------------------------------------------------------------------------------------------------------------------------------------------------------------------------------------------------------------------------------------------------------------------------------------------------------------------------------------------------------------------------------------------------------------------------------------------------------------------------------------------------------------------------------------------------------------------------------------------------------------------------------------------------------------------------------------------------------------------------------------------------------------------------------------------------------------------------------------------------------------------------------------------------------------------------------------------------------------------------------------------------------------------------------------------------------------------------------------------------------------------------------------------------------------------------------------------------------------------------------------------------------------------------------------------------------------------------------------------------------------------------------------------------------------------------------------------------------------------------------------------------------------------------------------------------------------------------------------------------------------------------------------------------------------------------------------------------------------------------------------------------------------------------------------------------------------------------------------------------------------------------------------------------------------------------------------------------------------------------------------------------------------------------------------------------------------------------------------------------------------------------------------------------------------------------------------------------------------------------------------------------------------------------------------------------------------------------------------------------------------------------------------------------------------------------------------------------------------------------------------------------------------------------------------------------------------------------------------------------------------------------------------------------------------------------------------------------------------------------------------------------------------------------------------------------------------------------------------------------------------------------------------------------------------------------------------------------------------------------------------------------------------------------------------------------------------------------------------------------------------------------------------------------------------------------------------------------------------------------------------------------------------------------------------------------------------------------------------------------------------------------------------------------------------------------------------------------------------------------------------------------------------------------------------------------------------------------------------------------------------------------------------------------------------------------------------------------------------------------------------------------------------------------------------------------------------------------------------------------------------------------------------------------------------------------------------------------------------------------------------------------------------------------------------------------------------------------------------------------------------------------------------------------------------------------------------------------------------------------------------------------------------------------------------------------------------------------------------------------------------------------------------------------------------------------------------------------------------------------------------------------------------------------------------------------------------|---------------------------------------------------------------------------------|--------------------------------------------------------------------------------------------------------|-------------------------------------------------------------------------------------------------------------------------------------------------------------------------------------------------------------------------------------------------------------------------------------------------------------------------------------------------------------------------------------------------------------------------------------------------------------------------|
| EPI_ISL_419168                                                                                                                                                                                                                                                                                                                                                                                                                                                                                                                                                                                                                                                                                                                                                                                                                                                                                                                                                                                                                                                                                                                                                                                                                                                                                                                                                                                                                                                                                                                                                                                                                                                                                                                                                                                                                                                                                                                                                                                                                                                                                                                                                                                                                                                                                                                                                                                                                                                                                                                                                                                                                                                                                                                                                                                                                                                                                                                                                                                                                                                                                                                                                                                                                                                                                                                                                                                                                                                                                                                                                                                                                                                                                                                                                                                                                                                                                                                                                                                                                                                                                                                                                                                                                                                                                                                                                                                                                                                                                                                                                                                                                                                                                                                                                                                                                                                                                                                                                                                                                                                                                                                                                                                                                                                                                                                                                                                                                                                                                                                                                                                                                                                                                                                                                                                                                                                                                                                                                                                                                                                                                                                                                                                                                                                                                                                                                                                                                                                                                                                                                                                 | Centre Hospitalier de Valence                                                   | CNR Virus des Infections Respiratoires - France SUD                                                    | Antonin Bal, Gregory Destras, Gwendolyne Burfin, Solenne Brun, Carine Moustaud, Raphaëlle Lamy, Alexandre Gaymard, Maude Bouscambert-Duchamp, Florence Morfin-Sherpa, Martine Valette, Bruno Lina, Laurence Josset                                                                                                                                                                                                                                                      |
| EPI_ISL_419169, EPI_ISL_419170, EPI_ISL_419171, EPI_ISL_419172, EPI_ISL_419173                                                                                                                                                                                                                                                                                                                                                                                                                                                                                                                                                                                                                                                                                                                                                                                                                                                                                                                                                                                                                                                                                                                                                                                                                                                                                                                                                                                                                                                                                                                                                                                                                                                                                                                                                                                                                                                                                                                                                                                                                                                                                                                                                                                                                                                                                                                                                                                                                                                                                                                                                                                                                                                                                                                                                                                                                                                                                                                                                                                                                                                                                                                                                                                                                                                                                                                                                                                                                                                                                                                                                                                                                                                                                                                                                                                                                                                                                                                                                                                                                                                                                                                                                                                                                                                                                                                                                                                                                                                                                                                                                                                                                                                                                                                                                                                                                                                                                                                                                                                                                                                                                                                                                                                                                                                                                                                                                                                                                                                                                                                                                                                                                                                                                                                                                                                                                                                                                                                                                                                                                                                                                                                                                                                                                                                                                                                                                                                                                                                                                                                 | Institut des Agents Infectieux (IAI), Hospices Civils de Lyon                   | CNR Virus des Infections Respiratoires - France SUD                                                    | Antonin Bal, Gregory Destras, Gwendolyne Burfin, Solenne Brun, Carine Moustaud, Raphaëlle Lamy, Alexandre Gaymard, Maude Bouscambert-Duchamp, Florence Morfin-Sherpa, Martine Valette, Bruno Lina, Laurence Josset                                                                                                                                                                                                                                                      |
| EPI_ISL_419174, EPI_ISL_419175, EPI_ISL_419176                                                                                                                                                                                                                                                                                                                                                                                                                                                                                                                                                                                                                                                                                                                                                                                                                                                                                                                                                                                                                                                                                                                                                                                                                                                                                                                                                                                                                                                                                                                                                                                                                                                                                                                                                                                                                                                                                                                                                                                                                                                                                                                                                                                                                                                                                                                                                                                                                                                                                                                                                                                                                                                                                                                                                                                                                                                                                                                                                                                                                                                                                                                                                                                                                                                                                                                                                                                                                                                                                                                                                                                                                                                                                                                                                                                                                                                                                                                                                                                                                                                                                                                                                                                                                                                                                                                                                                                                                                                                                                                                                                                                                                                                                                                                                                                                                                                                                                                                                                                                                                                                                                                                                                                                                                                                                                                                                                                                                                                                                                                                                                                                                                                                                                                                                                                                                                                                                                                                                                                                                                                                                                                                                                                                                                                                                                                                                                                                                                                                                                                                                 | Centre Hospitalier de Macon                                                     | CNR Virus des Infections Respiratoires - France SUD                                                    | Antonin Bal, Gregory Destras, Gwendolyne Burfin, Solenne Brun, Carine Moustaud, Raphaëlle Lamy, Alexandre Gaymard, Maude Bouscambert-Duchamp, Florence Morfin-Sherpa, Martine Valette, Bruno Lina, Laurence Josset                                                                                                                                                                                                                                                      |
| EPI_ISL_419177, EPI_ISL_419178, EPI_ISL_419179, EPI_ISL_419180, EPI_ISL_419181, EPI_ISL_419182                                                                                                                                                                                                                                                                                                                                                                                                                                                                                                                                                                                                                                                                                                                                                                                                                                                                                                                                                                                                                                                                                                                                                                                                                                                                                                                                                                                                                                                                                                                                                                                                                                                                                                                                                                                                                                                                                                                                                                                                                                                                                                                                                                                                                                                                                                                                                                                                                                                                                                                                                                                                                                                                                                                                                                                                                                                                                                                                                                                                                                                                                                                                                                                                                                                                                                                                                                                                                                                                                                                                                                                                                                                                                                                                                                                                                                                                                                                                                                                                                                                                                                                                                                                                                                                                                                                                                                                                                                                                                                                                                                                                                                                                                                                                                                                                                                                                                                                                                                                                                                                                                                                                                                                                                                                                                                                                                                                                                                                                                                                                                                                                                                                                                                                                                                                                                                                                                                                                                                                                                                                                                                                                                                                                                                                                                                                                                                                                                                                                                                 | Institut des Agents Infectieux (IAI), Hospices Civils de Lyon                   | CNR Virus des Infections Respiratoires - France SUD                                                    | Antonin Bal, Gregory Destras, Gwendolyne Burfin, Solenne Brun, Carine Moustaud, Raphaëlle Lamy, Alexandre Gaymard, Maude Bouscambert-Duchamp, Florence Morfin-Sherpa, Martine Valette, Bruno Lina, Laurence Josset                                                                                                                                                                                                                                                      |
| EPI_ISL_419183                                                                                                                                                                                                                                                                                                                                                                                                                                                                                                                                                                                                                                                                                                                                                                                                                                                                                                                                                                                                                                                                                                                                                                                                                                                                                                                                                                                                                                                                                                                                                                                                                                                                                                                                                                                                                                                                                                                                                                                                                                                                                                                                                                                                                                                                                                                                                                                                                                                                                                                                                                                                                                                                                                                                                                                                                                                                                                                                                                                                                                                                                                                                                                                                                                                                                                                                                                                                                                                                                                                                                                                                                                                                                                                                                                                                                                                                                                                                                                                                                                                                                                                                                                                                                                                                                                                                                                                                                                                                                                                                                                                                                                                                                                                                                                                                                                                                                                                                                                                                                                                                                                                                                                                                                                                                                                                                                                                                                                                                                                                                                                                                                                                                                                                                                                                                                                                                                                                                                                                                                                                                                                                                                                                                                                                                                                                                                                                                                                                                                                                                                                                 | Centre Hospitalier de Bourg en Bresse                                           | CNR Virus des Infections Respiratoires - France SUD                                                    | Antonin Bal, Gregory Destras, Gwendolyne Burfin, Solenne Brun, Carine Moustaud, Raphaëlle Lamy, Alexandre Gaymard, Maude Bouscambert-Duchamp, Florence Morfin-Sherpa, Martine Valette, Bruno Lina, Laurence Josset                                                                                                                                                                                                                                                      |
| EPI_ISL_419184                                                                                                                                                                                                                                                                                                                                                                                                                                                                                                                                                                                                                                                                                                                                                                                                                                                                                                                                                                                                                                                                                                                                                                                                                                                                                                                                                                                                                                                                                                                                                                                                                                                                                                                                                                                                                                                                                                                                                                                                                                                                                                                                                                                                                                                                                                                                                                                                                                                                                                                                                                                                                                                                                                                                                                                                                                                                                                                                                                                                                                                                                                                                                                                                                                                                                                                                                                                                                                                                                                                                                                                                                                                                                                                                                                                                                                                                                                                                                                                                                                                                                                                                                                                                                                                                                                                                                                                                                                                                                                                                                                                                                                                                                                                                                                                                                                                                                                                                                                                                                                                                                                                                                                                                                                                                                                                                                                                                                                                                                                                                                                                                                                                                                                                                                                                                                                                                                                                                                                                                                                                                                                                                                                                                                                                                                                                                                                                                                                                                                                                                                                                 | Institut des Agents Infectieux (IAI), Hospices Civils de Lyon                   | CNR Virus des Infections Respiratoires - France SUD                                                    | Antonin Bal, Gregory Destras, Gwendolyne Burfin, Solenne Brun, Carine Moustaud, Raphaëlle Lamy, Alexandre Gaymard, Maude Bouscambert-Duchamp, Florence Morfin-Sherpa, Martine Valette, Bruno Lina, Laurence Josset                                                                                                                                                                                                                                                      |
| EPI_ISL_419185, EPI_ISL_419186                                                                                                                                                                                                                                                                                                                                                                                                                                                                                                                                                                                                                                                                                                                                                                                                                                                                                                                                                                                                                                                                                                                                                                                                                                                                                                                                                                                                                                                                                                                                                                                                                                                                                                                                                                                                                                                                                                                                                                                                                                                                                                                                                                                                                                                                                                                                                                                                                                                                                                                                                                                                                                                                                                                                                                                                                                                                                                                                                                                                                                                                                                                                                                                                                                                                                                                                                                                                                                                                                                                                                                                                                                                                                                                                                                                                                                                                                                                                                                                                                                                                                                                                                                                                                                                                                                                                                                                                                                                                                                                                                                                                                                                                                                                                                                                                                                                                                                                                                                                                                                                                                                                                                                                                                                                                                                                                                                                                                                                                                                                                                                                                                                                                                                                                                                                                                                                                                                                                                                                                                                                                                                                                                                                                                                                                                                                                                                                                                                                                                                                                                                 | Centre Hospitalier de Bourg en Bresse                                           | CNR Virus des Infections Respiratoires - France SUD                                                    | Antonin Bal, Gregory Destras, Gwendolyne Burfin, Solenne Brun, Carine Moustaud, Raphaëlle Lamy, Alexandre Gaymard, Maude Bouscambert-Duchamp, Florence Morfin-Sherpa, Martine Valette, Bruno Lina, Laurence Josset                                                                                                                                                                                                                                                      |
| EPI_ISL_419187, EPI_ISL_419188                                                                                                                                                                                                                                                                                                                                                                                                                                                                                                                                                                                                                                                                                                                                                                                                                                                                                                                                                                                                                                                                                                                                                                                                                                                                                                                                                                                                                                                                                                                                                                                                                                                                                                                                                                                                                                                                                                                                                                                                                                                                                                                                                                                                                                                                                                                                                                                                                                                                                                                                                                                                                                                                                                                                                                                                                                                                                                                                                                                                                                                                                                                                                                                                                                                                                                                                                                                                                                                                                                                                                                                                                                                                                                                                                                                                                                                                                                                                                                                                                                                                                                                                                                                                                                                                                                                                                                                                                                                                                                                                                                                                                                                                                                                                                                                                                                                                                                                                                                                                                                                                                                                                                                                                                                                                                                                                                                                                                                                                                                                                                                                                                                                                                                                                                                                                                                                                                                                                                                                                                                                                                                                                                                                                                                                                                                                                                                                                                                                                                                                                                                 | Centre Hospitalier de Macon                                                     | CNR Virus des Infections Respiratoires - France SUD                                                    | Antonin Bal, Gregory Destras, Gwendolyne Burfin, Solenne Brun, Carine Moustaud, Raphaëlle Lamy, Alexandre Gaymard, Maude Bouscambert-Duchamp, Florence Morfin-Sherpa, Martine Valette, Bruno Lina, Laurence Josset                                                                                                                                                                                                                                                      |
| EPI_ISL_419254                                                                                                                                                                                                                                                                                                                                                                                                                                                                                                                                                                                                                                                                                                                                                                                                                                                                                                                                                                                                                                                                                                                                                                                                                                                                                                                                                                                                                                                                                                                                                                                                                                                                                                                                                                                                                                                                                                                                                                                                                                                                                                                                                                                                                                                                                                                                                                                                                                                                                                                                                                                                                                                                                                                                                                                                                                                                                                                                                                                                                                                                                                                                                                                                                                                                                                                                                                                                                                                                                                                                                                                                                                                                                                                                                                                                                                                                                                                                                                                                                                                                                                                                                                                                                                                                                                                                                                                                                                                                                                                                                                                                                                                                                                                                                                                                                                                                                                                                                                                                                                                                                                                                                                                                                                                                                                                                                                                                                                                                                                                                                                                                                                                                                                                                                                                                                                                                                                                                                                                                                                                                                                                                                                                                                                                                                                                                                                                                                                                                                                                                                                                 | INMI Lazzaro Spallanzani IRCCS                                                  | Laboratory of Virology, INMI Lazzaro Spallanzani IRCCS                                                 | Barbara Bartolini, Martina Rueca, Francesco Messina, Cesare E. M. Gruber, Emanuela Giombini, Maria R. Capobianchi, Fabrizio Carletti, Francesca Colavita, Concetta Castilletti, Eleonora Lalle, Daniele Lapa, Giuseppe Ippolito.                                                                                                                                                                                                                                        |
| EPI_ISL_419255                                                                                                                                                                                                                                                                                                                                                                                                                                                                                                                                                                                                                                                                                                                                                                                                                                                                                                                                                                                                                                                                                                                                                                                                                                                                                                                                                                                                                                                                                                                                                                                                                                                                                                                                                                                                                                                                                                                                                                                                                                                                                                                                                                                                                                                                                                                                                                                                                                                                                                                                                                                                                                                                                                                                                                                                                                                                                                                                                                                                                                                                                                                                                                                                                                                                                                                                                                                                                                                                                                                                                                                                                                                                                                                                                                                                                                                                                                                                                                                                                                                                                                                                                                                                                                                                                                                                                                                                                                                                                                                                                                                                                                                                                                                                                                                                                                                                                                                                                                                                                                                                                                                                                                                                                                                                                                                                                                                                                                                                                                                                                                                                                                                                                                                                                                                                                                                                                                                                                                                                                                                                                                                                                                                                                                                                                                                                                                                                                                                                                                                                                                                 | INMI Lazzaro Spallanzani IRCCS                                                  | INMI Lazzaro Spallanzani IRCCS                                                                         | Antonino Di Caro, Cesare E. M. Gruber, Martina Rueca, Barbara Bartolini, Francesco Messina, Emanuela Giombini, Maria R. Capobianchi, Fabrizio Carletti, Francesca Colavita, Concetta Castilletti, Eleonora Lalle, Daniele Lapa, Giuseppe Ippolito.                                                                                                                                                                                                                      |
| EPI_ISL_420113                                                                                                                                                                                                                                                                                                                                                                                                                                                                                                                                                                                                                                                                                                                                                                                                                                                                                                                                                                                                                                                                                                                                                                                                                                                                                                                                                                                                                                                                                                                                                                                                                                                                                                                                                                                                                                                                                                                                                                                                                                                                                                                                                                                                                                                                                                                                                                                                                                                                                                                                                                                                                                                                                                                                                                                                                                                                                                                                                                                                                                                                                                                                                                                                                                                                                                                                                                                                                                                                                                                                                                                                                                                                                                                                                                                                                                                                                                                                                                                                                                                                                                                                                                                                                                                                                                                                                                                                                                                                                                                                                                                                                                                                                                                                                                                                                                                                                                                                                                                                                                                                                                                                                                                                                                                                                                                                                                                                                                                                                                                                                                                                                                                                                                                                                                                                                                                                                                                                                                                                                                                                                                                                                                                                                                                                                                                                                                                                                                                                                                                                                                                 | Servicio de Microbiología. Consorcio Hospital General Universitario de Valencia | Sequencing and Bioinformatics Service and Molecular Epidemiology Research Group. FISABIO-Public Health | Beatriz Beamud, Lidia Ruiz Roldan, Marta Pla Diaz, Neris Garcia-Gonzalez, Loreto Ferrús Abad, Inma Galán Vendrell, Paula Ruiz-Hueso, Mariana Reyes-Prieto, Vicente Soriano Chirona, Maria Alma Bracho, Maria Dolores Ocete, Lúcia Martínez-PriegoGriselda De Marco, , Concepcion Gimeno, Giuseppe D'Auria, Fernando Gonzalez-Candelas                                                                                                                                   |
| EPI_ISL_420598, EPI_ISL_420599, EPI_ISL_420600                                                                                                                                                                                                                                                                                                                                                                                                                                                                                                                                                                                                                                                                                                                                                                                                                                                                                                                                                                                                                                                                                                                                                                                                                                                                                                                                                                                                                                                                                                                                                                                                                                                                                                                                                                                                                                                                                                                                                                                                                                                                                                                                                                                                                                                                                                                                                                                                                                                                                                                                                                                                                                                                                                                                                                                                                                                                                                                                                                                                                                                                                                                                                                                                                                                                                                                                                                                                                                                                                                                                                                                                                                                                                                                                                                                                                                                                                                                                                                                                                                                                                                                                                                                                                                                                                                                                                                                                                                                                                                                                                                                                                                                                                                                                                                                                                                                                                                                                                                                                                                                                                                                                                                                                                                                                                                                                                                                                                                                                                                                                                                                                                                                                                                                                                                                                                                                                                                                                                                                                                                                                                                                                                                                                                                                                                                                                                                                                                                                                                                                                                 | Servicio Virosis Respiratorias-Departamento Virologia-INEI                      | Instituto Nacional Enfermedades Infecciosas C.G.Malbran                                                | Baumeister E., Avaro M., Benedetti E., Russo M., Dattero ME, Pontoriero A., Cisterna D., Molina V., Perandones C., Tuduri E., Lorenzo F., Poklepovich T., Campos J.                                                                                                                                                                                                                                                                                                     |
| EPI_ISL_420604, EPI_ISL_420605, EPI_ISL_420606, EPI_ISL_420607, EPI_ISL_420608, EPI_ISL_420609, EPI_ISL_420610, EPI_ISL_420611                                                                                                                                                                                                                                                                                                                                                                                                                                                                                                                                                                                                                                                                                                                                                                                                                                                                                                                                                                                                                                                                                                                                                                                                                                                                                                                                                                                                                                                                                                                                                                                                                                                                                                                                                                                                                                                                                                                                                                                                                                                                                                                                                                                                                                                                                                                                                                                                                                                                                                                                                                                                                                                                                                                                                                                                                                                                                                                                                                                                                                                                                                                                                                                                                                                                                                                                                                                                                                                                                                                                                                                                                                                                                                                                                                                                                                                                                                                                                                                                                                                                                                                                                                                                                                                                                                                                                                                                                                                                                                                                                                                                                                                                                                                                                                                                                                                                                                                                                                                                                                                                                                                                                                                                                                                                                                                                                                                                                                                                                                                                                                                                                                                                                                                                                                                                                                                                                                                                                                                                                                                                                                                                                                                                                                                                                                                                                                                                                                                                 | Institut des Agents Infectieux (IAI), Hospices Civils de Lyon                   | CNR Virus des Infections Respiratoires - France SUD                                                    | Antonin Bal, Gregory Destras, Gwendolyne Burfin, Solenne Brun, Carine Moustaud, Raphaëlle Lamy, Alexandre Gaymard, Maude Bouscambert-Duchamp, Florence Morfin-Sherpa, Martine Valette, Bruno Lina, Laurence Josset                                                                                                                                                                                                                                                      |
| EPI_ISL_420612, EPI_ISL_420613, EPI_ISL_420614                                                                                                                                                                                                                                                                                                                                                                                                                                                                                                                                                                                                                                                                                                                                                                                                                                                                                                                                                                                                                                                                                                                                                                                                                                                                                                                                                                                                                                                                                                                                                                                                                                                                                                                                                                                                                                                                                                                                                                                                                                                                                                                                                                                                                                                                                                                                                                                                                                                                                                                                                                                                                                                                                                                                                                                                                                                                                                                                                                                                                                                                                                                                                                                                                                                                                                                                                                                                                                                                                                                                                                                                                                                                                                                                                                                                                                                                                                                                                                                                                                                                                                                                                                                                                                                                                                                                                                                                                                                                                                                                                                                                                                                                                                                                                                                                                                                                                                                                                                                                                                                                                                                                                                                                                                                                                                                                                                                                                                                                                                                                                                                                                                                                                                                                                                                                                                                                                                                                                                                                                                                                                                                                                                                                                                                                                                                                                                                                                                                                                                                                                 | Centre Hospitalier de Macon                                                     | CNR Virus des Infections Respiratoires - France SUD                                                    | Antonin Bal, Gregory Destras, Gwendolyne Burfin, Solenne Brun, Carine Moustaud, Raphaëlle Lamy, Alexandre Gaymard, Maude Bouscambert-Duchamp, Florence Morfin-Sherpa, Martine Valette, Bruno Lina, Laurence Josset                                                                                                                                                                                                                                                      |
| EPI_ISL_420615, EPI_ISL_420616                                                                                                                                                                                                                                                                                                                                                                                                                                                                                                                                                                                                                                                                                                                                                                                                                                                                                                                                                                                                                                                                                                                                                                                                                                                                                                                                                                                                                                                                                                                                                                                                                                                                                                                                                                                                                                                                                                                                                                                                                                                                                                                                                                                                                                                                                                                                                                                                                                                                                                                                                                                                                                                                                                                                                                                                                                                                                                                                                                                                                                                                                                                                                                                                                                                                                                                                                                                                                                                                                                                                                                                                                                                                                                                                                                                                                                                                                                                                                                                                                                                                                                                                                                                                                                                                                                                                                                                                                                                                                                                                                                                                                                                                                                                                                                                                                                                                                                                                                                                                                                                                                                                                                                                                                                                                                                                                                                                                                                                                                                                                                                                                                                                                                                                                                                                                                                                                                                                                                                                                                                                                                                                                                                                                                                                                                                                                                                                                                                                                                                                                                                 | Institut des Agents Infectieux (IAI), Hospices Civils de Lyon                   | CNR Virus des Infections Respiratoires - France SUD                                                    | Antonin Bal, Gregory Destras, Gwendolyne Burfin, Solenne Brun, Carine Moustaud, Raphaëlle Lamy, Alexandre Gaymard, Maude Bouscambert-Duchamp, Florence Morfin-Sherpa, Martine Valette, Bruno Lina, Laurence Josset                                                                                                                                                                                                                                                      |
| EPI_ISL_420617                                                                                                                                                                                                                                                                                                                                                                                                                                                                                                                                                                                                                                                                                                                                                                                                                                                                                                                                                                                                                                                                                                                                                                                                                                                                                                                                                                                                                                                                                                                                                                                                                                                                                                                                                                                                                                                                                                                                                                                                                                                                                                                                                                                                                                                                                                                                                                                                                                                                                                                                                                                                                                                                                                                                                                                                                                                                                                                                                                                                                                                                                                                                                                                                                                                                                                                                                                                                                                                                                                                                                                                                                                                                                                                                                                                                                                                                                                                                                                                                                                                                                                                                                                                                                                                                                                                                                                                                                                                                                                                                                                                                                                                                                                                                                                                                                                                                                                                                                                                                                                                                                                                                                                                                                                                                                                                                                                                                                                                                                                                                                                                                                                                                                                                                                                                                                                                                                                                                                                                                                                                                                                                                                                                                                                                                                                                                                                                                                                                                                                                                                                                 | Centre Hospitalier Saint Joseph Saint Luc                                       | CNR Virus des Infections Respiratoires - France SUD                                                    | Antonin Bal, Gregory Destras, Gwendolyne Burfin, Solenne Brun, Carine Moustaud, Raphaëlle Lamy, Alexandre Gaymard, Maude Bouscambert-Duchamp, Florence Morfin-Sherpa, Martine Valette, Bruno Lina, Laurence Josset                                                                                                                                                                                                                                                      |
| EPI_ISL_420618, EPI_ISL_420619                                                                                                                                                                                                                                                                                                                                                                                                                                                                                                                                                                                                                                                                                                                                                                                                                                                                                                                                                                                                                                                                                                                                                                                                                                                                                                                                                                                                                                                                                                                                                                                                                                                                                                                                                                                                                                                                                                                                                                                                                                                                                                                                                                                                                                                                                                                                                                                                                                                                                                                                                                                                                                                                                                                                                                                                                                                                                                                                                                                                                                                                                                                                                                                                                                                                                                                                                                                                                                                                                                                                                                                                                                                                                                                                                                                                                                                                                                                                                                                                                                                                                                                                                                                                                                                                                                                                                                                                                                                                                                                                                                                                                                                                                                                                                                                                                                                                                                                                                                                                                                                                                                                                                                                                                                                                                                                                                                                                                                                                                                                                                                                                                                                                                                                                                                                                                                                                                                                                                                                                                                                                                                                                                                                                                                                                                                                                                                                                                                                                                                                                                                 | Institut des Agents Infectieux (IAI), Hospices Civils de Lyon                   | CNR Virus des Infections Respiratoires - France SUD                                                    | Antonin Bal, Gregory Destras, Gwendolyne Burfin, Solenne Brun, Carine Moustaud, Raphaëlle Lamy, Alexandre Gaymard, Maude Bouscambert-Duchamp, Florence Morfin-Sherpa, Martine Valette, Bruno Lina, Laurence Josset                                                                                                                                                                                                                                                      |
| EPI_ISL_420620                                                                                                                                                                                                                                                                                                                                                                                                                                                                                                                                                                                                                                                                                                                                                                                                                                                                                                                                                                                                                                                                                                                                                                                                                                                                                                                                                                                                                                                                                                                                                                                                                                                                                                                                                                                                                                                                                                                                                                                                                                                                                                                                                                                                                                                                                                                                                                                                                                                                                                                                                                                                                                                                                                                                                                                                                                                                                                                                                                                                                                                                                                                                                                                                                                                                                                                                                                                                                                                                                                                                                                                                                                                                                                                                                                                                                                                                                                                                                                                                                                                                                                                                                                                                                                                                                                                                                                                                                                                                                                                                                                                                                                                                                                                                                                                                                                                                                                                                                                                                                                                                                                                                                                                                                                                                                                                                                                                                                                                                                                                                                                                                                                                                                                                                                                                                                                                                                                                                                                                                                                                                                                                                                                                                                                                                                                                                                                                                                                                                                                                                                                                 | Centre Hospitalier de Bourg en Bresse                                           | CNR Virus des Infections Respiratoires - France SUD                                                    | Antonin Bal, Gregory Destras, Gwendolyne Burfin, Solenne Brun, Carine Moustaud, Raphaëlle Lamy, Alexandre Gaymard, Maude Bouscambert-Duchamp, Florence Morfin-Sherpa, Martine Valette, Bruno Lina, Laurence Josset                                                                                                                                                                                                                                                      |
| EPI_ISL_420621, EPI_ISL_420622, EPI_ISL_420623, EPI_ISL_420624, EPI_ISL_420625                                                                                                                                                                                                                                                                                                                                                                                                                                                                                                                                                                                                                                                                                                                                                                                                                                                                                                                                                                                                                                                                                                                                                                                                                                                                                                                                                                                                                                                                                                                                                                                                                                                                                                                                                                                                                                                                                                                                                                                                                                                                                                                                                                                                                                                                                                                                                                                                                                                                                                                                                                                                                                                                                                                                                                                                                                                                                                                                                                                                                                                                                                                                                                                                                                                                                                                                                                                                                                                                                                                                                                                                                                                                                                                                                                                                                                                                                                                                                                                                                                                                                                                                                                                                                                                                                                                                                                                                                                                                                                                                                                                                                                                                                                                                                                                                                                                                                                                                                                                                                                                                                                                                                                                                                                                                                                                                                                                                                                                                                                                                                                                                                                                                                                                                                                                                                                                                                                                                                                                                                                                                                                                                                                                                                                                                                                                                                                                                                                                                                                                 | Institut des Agents Infectieux (IAI), Hospices Civils de Lyon                   | CNR Virus des Infections Respiratoires - France SUD                                                    | Antonin Bal, Gregory Destras, Gwendolyne Burfin, Solenne Brun, Carine Moustaud, Raphaëlle Lamy, Alexandre Gaymard, Maude Bouscambert-Duchamp, Florence Morfin-Sherpa, Martine Valette, Bruno Lina, Laurence Josset                                                                                                                                                                                                                                                      |
| EPI_ISL_422563                                                                                                                                                                                                                                                                                                                                                                                                                                                                                                                                                                                                                                                                                                                                                                                                                                                                                                                                                                                                                                                                                                                                                                                                                                                                                                                                                                                                                                                                                                                                                                                                                                                                                                                                                                                                                                                                                                                                                                                                                                                                                                                                                                                                                                                                                                                                                                                                                                                                                                                                                                                                                                                                                                                                                                                                                                                                                                                                                                                                                                                                                                                                                                                                                                                                                                                                                                                                                                                                                                                                                                                                                                                                                                                                                                                                                                                                                                                                                                                                                                                                                                                                                                                                                                                                                                                                                                                                                                                                                                                                                                                                                                                                                                                                                                                                                                                                                                                                                                                                                                                                                                                                                                                                                                                                                                                                                                                                                                                                                                                                                                                                                                                                                                                                                                                                                                                                                                                                                                                                                                                                                                                                                                                                                                                                                                                                                                                                                                                                                                                                                                                 | Institute of Microbiology Universidad San Francisco de Quito                    | Institute of Microbiology Universidad San Francisco de Quito                                           | Belen Prado-Vivar, Sully Marquez, Juan Jose Guadalupe, Bernardo Gutierrez, Francisco Mora, Juan Gaviria, Alejandra Ramones, Franklin Espinoza, Edison Ligna, Jorge Reyes, Patricio Rojas-Silva, Veronica Barragan, Gabriel Trueba, Michelle Grunauer, Paul Cardenas                                                                                                                                                                                                     |
| EPI_ISL_422566, EPI_ISL_422567, EPI_ISL_422568, EPI_ISL_422569, EPI_ISL_422570, EPI_ISL_422571, EPI_ISL_422572, EPI_ISL_422573, EPI_ISL_422574, EPI_ISL_422575, EPI_ISL_422576, EPI_ISL_422577, EPI_ISL_422578, EPI_ISL_422579, EPI_ISL_422580, EPI_ISL_422581, EPI_ISL_422582, EPI_ISL_422583, EPI_ISL_422584, EPI_ISL_422585, EPI_ISL_422586, EPI_ISL_422587, EPI_ISL_422588, EPI_ISL_422589, EPI_ISL_422590, EPI_ISL_422591, EPI_ISL_422592, EPI_ISL_422593, EPI_ISL_422594, EPI_ISL_422595, EPI_ISL_422596, EPI_ISL_422597, EPI_ISL_422598, EPI_ISL_422599, EPI_ISL_422600, EPI_ISL_422601, EPI_ISL_422602, EPI_ISL_422603, EPI_ISL_422604, EPI_ISL_422605, EPI_ISL_422606, EPI_ISL_422607, EPI_ISL_422608, EPI_ISL_422609, EPI_ISL_422610, EPI_ISL_422611, EPI_ISL_422612, EPI_ISL_422613, EPI_ISL_422614, EPI_ISL_422615, EPI_ISL_422616, EPI_ISL_422617, EPI_ISL_422618, EPI_ISL_422619, EPI_ISL_422620, EPI_ISL_422621, EPI_ISL_422622, EPI_ISL_422623, EPI_ISL_422624, EPI_ISL_422625, EPI_ISL_422626, EPI_ISL_422627, EPI_ISL_422628, EPI_ISL_422629, EPI_ISL_422630, EPI_ISL_422631, EPI_ISL_422632, EPI_ISL_422633, EPI_ISL_422634, EPI_ISL_422635, EPI_ISL_422636, EPI_ISL_422637, EPI_ISL_422638, EPI_ISL_422639, EPI_ISL_422640, EPI_ISL_422641, EPI_ISL_422642, EPI_ISL_422643, EPI_ISL_422644, EPI_ISL_422645, EPI_ISL_422646, EPI_ISL_422647, EPI_ISL_422648, EPI_ISL_422649, EPI_ISL_422650, EPI_ISL_422651, EPI_ISL_422652, EPI_ISL_422653, EPI_ISL_422654, EPI_ISL_422655, EPI_ISL_422656, EPI_ISL_422657, EPI_ISL_422658, EPI_ISL_422659, EPI_ISL_422660, EPI_ISL_422661, EPI_ISL_422662, EPI_ISL_422663, EPI_ISL_422664, EPI_ISL_422665, EPI_ISL_422666, EPI_ISL_422667, EPI_ISL_422668, EPI_ISL_422669, EPI_ISL_422670, EPI_ISL_422671, EPI_ISL_422672, EPI_ISL_422673, EPI_ISL_422674, EPI_ISL_422675, EPI_ISL_422676, EPI_ISL_422677, EPI_ISL_422678, EPI_ISL_422679, EPI_ISL_422680, EPI_ISL_422681, EPI_ISL_422682, EPI_ISL_422683, EPI_ISL_422684, EPI_ISL_422685, EPI_ISL_422686, EPI_ISL_422687, EPI_ISL_422688, EPI_ISL_422689, EPI_ISL_422690, EPI_ISL_422691, EPI_ISL_422692, EPI_ISL_422693, EPI_ISL_422694, EPI_ISL_422695, EPI_ISL_422696, EPI_ISL_422697, EPI_ISL_422698, EPI_ISL_422699, EPI_ISL_422700, EPI_ISL_422701, EPI_ISL_422702, EPI_ISL_422703, EPI_ISL_422704, EPI_ISL_422705, EPI_ISL_422706, EPI_ISL_422707, EPI_ISL_422708, EPI_ISL_422709, EPI_ISL_422710, EPI_ISL_422711, EPI_ISL_422712, EPI_ISL_422713, EPI_ISL_422714, EPI_ISL_422715, EPI_ISL_422716, EPI_ISL_422717, EPI_ISL_422718, EPI_ISL_422719, EPI_ISL_422720, EPI_ISL_422721, EPI_ISL_422722, EPI_ISL_422723, EPI_ISL_422724, EPI_ISL_422725, EPI_ISL_422726, EPI_ISL_422727, EPI_ISL_422728, EPI_ISL_422729, EPI_ISL_422730, EPI_ISL_422731, EPI_ISL_422732, EPI_ISL_422733, EPI_ISL_422734, EPI_ISL_422735, EPI_ISL_422736, EPI_ISL_422737, EPI_ISL_422738, EPI_ISL_422739, EPI_ISL_422740, EPI_ISL_422741, EPI_ISL_422742, EPI_ISL_422743, EPI_ISL_422744, EPI_ISL_422745, EPI_ISL_422746, EPI_ISL_422747, EPI_ISL_422748, EPI_ISL_422749, EPI_ISL_422750, EPI_ISL_422751, EPI_ISL_422752, EPI_ISL_422753, EPI_ISL_422754, EPI_ISL_422755, EPI_ISL_422756, EPI_ISL_422757, EPI_ISL_422758, EPI_ISL_422759, EPI_ISL_422760, EPI_ISL_422761, EPI_ISL_422762, EPI_ISL_422763, EPI_ISL_422764, EPI_ISL_422765, EPI_ISL_422766, EPI_ISL_422767, EPI_ISL_422768, EPI_ISL_422769, EPI_ISL_422770, EPI_ISL_422771, EPI_ISL_422772, EPI_ISL_422773, EPI_ISL_422774, EPI_ISL_422775, EPI_ISL_422776, EPI_ISL_422777, EPI_ISL_422778, EPI_ISL_422779, EPI_ISL_422780, EPI_ISL_422781, EPI_ISL_422782, EPI_ISL_422783, EPI_ISL_422784, EPI_ISL_422785, EPI_ISL_422786, EPI_ISL_422787, EPI_ISL_422788, EPI_ISL_422789, EPI_ISL_422790, EPI_ISL_422791, EPI_ISL_422792, EPI_ISL_422793, EPI_ISL_422794, EPI_ISL_422795, EPI_ISL_422796, EPI_ISL_422797, EPI_ISL_422798, EPI_ISL_422799, EPI_ISL_422800, EPI_ISL_422801, EPI_ISL_422802, EPI_ISL_422803, EPI_ISL_422804, EPI_ISL_422805, EPI_ISL_422806, EPI_ISL_422807, EPI_ISL_422808, EPI_ISL_422809, EPI_ISL_422810, EPI_ISL_422811, EPI_ISL_422812, EPI_ISL_422813, EPI_ISL_422814, EPI_ISL_422815, EPI_ISL_422816, EPI_ISL_422817, EPI_ISL_422818, EPI_ISL_422819, EPI_ISL_422820, EPI_ISL_422821, EPI_ISL_422822, EPI_ISL_422823, EPI_ISL_422824, EPI_ISL_422825, EPI_ISL_422826, EPI_ISL_422827, EPI_ISL_422828, EPI_ISL_422829, EPI_ISL_422830, EPI_ISL_422831, EPI_ISL_422832, EPI_ISL_422833, EPI_ISL_422834, EPI_ISL_422835, EPI_ISL_422836, EPI_ISL_422837, EPI_ISL_422838, EPI_ISL_422839, EPI_ISL_422840, EPI_ISL_422841, EPI_ISL_422842, EPI_ISL_422843, EPI_ISL_422844, EPI_ISL_422845, EPI_ISL_422846, EPI_ISL_422847, EPI_ISL_422848, EPI_ISL_422849, EPI_ISL_422850, EPI_ISL_422851, EPI_ISL_422852, EPI_ISL_422853, EPI_ISL_422854, EPI_ISL_422855, EPI_ISL_422856, EPI_ISL_422857, EPI_ISL_422858, EPI_ISL_422859, EPI_ISL_422860, EPI_ISL_422861, EPI_ISL_422862, EPI_ISL_422863, EPI_ISL_422864, EPI_ISL_422865, EPI_ISL_422866, EPI_ISL_422867, EPI_ISL_422868, EPI_ISL_422869, EPI_ISL_422870, EPI_ISL_422871, EPI_ISL_422872, EPI_ISL_422873, EPI_ISL_422874, EPI_ISL_422875, EPI_ISL_422876, EPI_ISL_422877, EPI_ISL_422878, EPI_ISL_422879, EPI_ISL_422880, EPI_ISL_422881, EPI_ISL_422882, EPI_ISL_422883, EPI_ISL_422884, EPI_ISL_422885, EPI_ISL_422886, EPI_ISL_422887, EPI_ISL_422888, EPI_ISL_422889, EPI_ISL_422890, EPI_ISL_422891, EPI_ISL_422892, EPI_ISL_422893, EPI_ISL_422894, EPI_ISL_422895, EPI_ISL_422896, EPI_ISL_422897, EPI_ISL_422898, EPI_ISL_422899, EPI_ISL_422900, EPI_ISL_422901, EPI_ISL_422902, EPI_ISL_422903, EPI_ISL_422904, EPI_ISL_422905, EPI_ISL_422906, EPI_ISL_422907, EPI_ISL_422908, EPI_ISL_422909, EPI_ISL_422910, EPI_ISL_422911, EPI_ISL_422912, EPI_ISL_422913, EPI_ISL_422914, EPI_ISL_422915, EPI_ISL_422916, EPI_ISL_422917, EPI_ISL_422918, EPI_ISL_422919, EPI_ISL_422920, EPI_ISL_422921, EPI_ISL_422922, EPI_ISL_422923, EPI_ISL_422924, EPI_ISL_422925, EPI_ISL_422926, EPI_ISL_422927, EPI_ISL_422928, EPI_ISL_422929, EPI_ISL_422930, EPI_ISL_422931, EPI_ISL_422932, EPI_ISL_422933, EPI_ISL_422934, EPI_ISL_422935, EPI_ISL_422936, EPI_ISL_422937, EPI_ISL_422938, EPI_ISL_422939, EPI_ISL_422940, EPI_ISL_422941, EPI_ISL_422942, EPI_ISL_422943, EPI_ISL_422944, EPI_ISL_422945, EPI_ISL_422946, EPI_ISL_422947, EPI_ISL_422948, EPI_ISL_422949, EPI_ISL_422950, EPI_ISL_422951, EPI_ISL_422952, EPI_ISL_422953, EPI_ISL_422954, EPI_ISL_422955, EPI_ISL_422956, EPI_ISL_422957, EPI_ISL_422958, EPI_ISL_422959, EPI_ISL_422960, EPI_ISL_423034 |                                                                                 |                                                                                                        |                                                                                                                                                                                                                                                                                                                                                                                                                                                                         |
| see above                                                                                                                                                                                                                                                                                                                                                                                                                                                                                                                                                                                                                                                                                                                                                                                                                                                                                                                                                                                                                                                                                                                                                                                                                                                                                                                                                                                                                                                                                                                                                                                                                                                                                                                                                                                                                                                                                                                                                                                                                                                                                                                                                                                                                                                                                                                                                                                                                                                                                                                                                                                                                                                                                                                                                                                                                                                                                                                                                                                                                                                                                                                                                                                                                                                                                                                                                                                                                                                                                                                                                                                                                                                                                                                                                                                                                                                                                                                                                                                                                                                                                                                                                                                                                                                                                                                                                                                                                                                                                                                                                                                                                                                                                                                                                                                                                                                                                                                                                                                                                                                                                                                                                                                                                                                                                                                                                                                                                                                                                                                                                                                                                                                                                                                                                                                                                                                                                                                                                                                                                                                                                                                                                                                                                                                                                                                                                                                                                                                                                                                                                                                      | Dutch COVID-19 response team                                                    | Erasmus Medical Center                                                                                 | Bas Oude Munnink, David Nieuwenhuijse, Reina Sikkema, Claudia Schapendonk, Irina Chestakova, Anne van der Linden, Theo Bestebroer, Stefan van Nieuwkoop, Mark Pronk, Pascal Lexmond, Corien Swaan, Manon Haverkate, Madelief Mollers, Mart Stein, Sandra Kengne Kamga Mbou, Jeroen van Kampen, Jolanda Voermans, Aura Timen, Corine GeurtsvanKessel, Annemiek van der Eijk, Richard Molenkamp, Marion Koopmans, on behalf of the Dutch national COVID-19 response team. |
| EPI_ISL_424353                                                                                                                                                                                                                                                                                                                                                                                                                                                                                                                                                                                                                                                                                                                                                                                                                                                                                                                                                                                                                                                                                                                                                                                                                                                                                                                                                                                                                                                                                                                                                                                                                                                                                                                                                                                                                                                                                                                                                                                                                                                                                                                                                                                                                                                                                                                                                                                                                                                                                                                                                                                                                                                                                                                                                                                                                                                                                                                                                                                                                                                                                                                                                                                                                                                                                                                                                                                                                                                                                                                                                                                                                                                                                                                                                                                                                                                                                                                                                                                                                                                                                                                                                                                                                                                                                                                                                                                                                                                                                                                                                                                                                                                                                                                                                                                                                                                                                                                                                                                                                                                                                                                                                                                                                                                                                                                                                                                                                                                                                                                                                                                                                                                                                                                                                                                                                                                                                                                                                                                                                                                                                                                                                                                                                                                                                                                                                                                                                                                                                                                                                                                 | Dirk Dittmer                                                                    | Dirk Dittmer                                                                                           | Bailey,A.G., Caro-Vegas,C., Thompson,C., Dittmer,D., Eason,A.B., Juarez,A., Landis,J.T., McNamara,R.P., Miller,M.B., Moorad,R., Pluta,L.J., Seltzer,T.A., Villamor,F. and Vahrson,W.                                                                                                                                                                                                                                                                                    |
| EPI_ISL_424354                                                                                                                                                                                                                                                                                                                                                                                                                                                                                                                                                                                                                                                                                                                                                                                                                                                                                                                                                                                                                                                                                                                                                                                                                                                                                                                                                                                                                                                                                                                                                                                                                                                                                                                                                                                                                                                                                                                                                                                                                                                                                                                                                                                                                                                                                                                                                                                                                                                                                                                                                                                                                                                                                                                                                                                                                                                                                                                                                                                                                                                                                                                                                                                                                                                                                                                                                                                                                                                                                                                                                                                                                                                                                                                                                                                                                                                                                                                                                                                                                                                                                                                                                                                                                                                                                                                                                                                                                                                                                                                                                                                                                                                                                                                                                                                                                                                                                                                                                                                                                                                                                                                                                                                                                                                                                                                                                                                                                                                                                                                                                                                                                                                                                                                                                                                                                                                                                                                                                                                                                                                                                                                                                                                                                                                                                                                                                                                                                                                                                                                                                                                 | Dirk Dittmer                                                                    | Dirk Dittmer                                                                                           | Bailey,A.G., Caro-Vegas,C.P., Dittmer,D., Eason,A.B., Juarez,A., Landis,J.T., McNamara,R.P., Miller,M.B., Moorad,R., Pluta,L.J., Seltzer,T.A., Thompson,C., Vahrson,W. and Villamor,F.                                                                                                                                                                                                                                                                                  |



|                                                                                                                                                                                |                                                                                            |                                                                                                                      |                                                                                                                                                                                                                                                                                                                                                                                                                                                                                       |
|--------------------------------------------------------------------------------------------------------------------------------------------------------------------------------|--------------------------------------------------------------------------------------------|----------------------------------------------------------------------------------------------------------------------|---------------------------------------------------------------------------------------------------------------------------------------------------------------------------------------------------------------------------------------------------------------------------------------------------------------------------------------------------------------------------------------------------------------------------------------------------------------------------------------|
| EPI_ISL_424983                                                                                                                                                                 | Dirk Dittmer                                                                               | Dirk Dittmer                                                                                                         | Bailey,A.G., Caro-Vegas,C., Dittmer,D., Eason,A.B., Juarez,A., Landis,J.T., McNamara,R.P., Miller,M.B., Moorad,R., Pluta,L.J., Seltzer,T.A., Thompson,C., Vahrson,W. and Villamor,F.                                                                                                                                                                                                                                                                                                  |
| EPI_ISL_424987                                                                                                                                                                 | Dirk Dittmer                                                                               | Dirk Dittmer                                                                                                         | Bailey,A.G., Caro-Vegas,C.P., Dittmer,D., Eason,A.B., Juarez,A., Landis,J.T., McNamara,R.P., Miller,M.B., Moorad,R., Pluta,L.J., Seltzer,T.A., Thompson,C., Vahrson,W. and Villamor,F.                                                                                                                                                                                                                                                                                                |
| EPI_ISL_425181, EPI_ISL_425195                                                                                                                                                 | Servicio de Microbiología. Consorcio Hospital General Universitario de Valencia            | Sequencing and Bioinformatics Service and Molecular Epidemiology Research Group. FISABIO-Public Health               | Beatriz Beamud, Lidia Ruiz Roldan, Marta Pla Diaz, Neris Garcia-Gonzalez, Inma Galán Vendrell, Sandra Carbo, Loreto Ferrús Abad, Paula Ruiz-Hueso, Mariana Reyes-Prieto, Vicente Soriano Chirona, Ivan Ansari, David Navarro, Maria Alma Bracho, Griselda De Marco, Lúcia Martínez-Priego, Giuseppe D'Auria, Fernando Gonzalez-Candelas                                                                                                                                               |
| EPI_ISL_425206                                                                                                                                                                 | Servicio de Microbiología. Hospital Clínico Universitario de Valencia                      | Sequencing and Bioinformatics Service and Molecular Epidemiology Research Group. FISABIO-Public Health               | Beatriz Beamud, Lidia Ruiz Roldan, Marta Pla Diaz, Neris Garcia-Gonzalez, Loreto Ferrús Abad, María Dolores Ocete, Inma Galán Vendrell, Paula Ruiz-Hueso, Mariana Reyes-Prieto, Vicente Soriano Chirona, Maria Alma Bracho, Griselda De Marco, Lúcia Martínez-Priego, Concepcion Gimeno, Giuseppe D'Auria, Fernando Gonzalez-Candelas                                                                                                                                                 |
| EPI_ISL_425215                                                                                                                                                                 | Servicio de Microbiología. Consorcio Hospital General Universitario de Valencia            | Sequencing and Bioinformatics Service and Molecular Epidemiology Research Group. FISABIO-Public Health               | Beatriz Beamud, Lidia Ruiz Roldan, Marta Pla Diaz, Neris Garcia-Gonzalez, Inma Galán Vendrell, Sandra Carbo, Loreto Ferrús Abad, Paula Ruiz-Hueso, Mariana Reyes-Prieto, Vicente Soriano Chirona, Ivan Ansari, David Navarro, Maria Alma Bracho, Griselda De Marco, Lúcia Martínez-Priego, Giuseppe D'Auria, Fernando Gonzalez-Candelas                                                                                                                                               |
| EPI_ISL_427043                                                                                                                                                                 | Laboratory of Microbiology, Medical School, National and Kapodistrian University of Athens | Laboratory of Biology, Department of Medicine, Democritus University of Thrace                                       | Bampali,M., Dvornik,N., Gatzidou,E., Froukala,E., Stavropoulou,A., Veletza,S., Tsakris,A., Spanakis,N. and Karakasiliotis,I.                                                                                                                                                                                                                                                                                                                                                          |
| EPI_ISL_427648                                                                                                                                                                 | Centre for Infectious Diseases and Microbiology Public Health                              | NSW Health Pathology - Institute of Clinical Pathology and Medical Research; Westmead Hospital; University of Sydney | Bachmann N, Rockett R, Lam C, Gray K, Timms V, Gall M, Arnott A, Sadsad R, Draper J, Sim E, Carter I, Holmes EC, O'Sullivan MV, Byun R, Sintchenko V, Chen SC, Eden JS, Maddocks S, Kok J, Propenko M, Sorrell T, Chang S, Basile K, Dwyer DE for the 2019-nCoV Study Group                                                                                                                                                                                                           |
| EPI_ISL_427651                                                                                                                                                                 | Centre for Infectious Diseases and Microbiology Public Health                              | NSW Health Pathology - Institute of Clinical Pathology and Medical Research; Westmead Hospital; University of Sydney | Arnott A, Sadsad R, Draper J, Sim E, Bachmann N, Rockett R, Lam C, Gray K, Timms V, Gall M, Carter I, Holmes EC, O'Sullivan MV, Byun R, Sintchenko V, Chen SC, Eden JS, Maddocks S, Kok J, Propenko M, Sorrell T, Chang S, Basile K, Dwyer DE for the 2019-nCoV Study Group                                                                                                                                                                                                           |
| EPI_ISL_427656, EPI_ISL_427659, EPI_ISL_427666                                                                                                                                 | Centre for Infectious Diseases and Microbiology Public Health                              | NSW Health Pathology - Institute of Clinical Pathology and Medical Research; Westmead Hospital; University of Sydney | Bachmann N, Rockett R, Lam C, Gray K, Timms V, Gall M, Arnott A, Sadsad R, Draper J, Sim E, Carter I, Holmes EC, O'Sullivan MV, Byun R, Sintchenko V, Chen SC, Eden JS, Maddocks S, Kok J, Propenko M, Sorrell T, Chang S, Basile K, Dwyer DE for the 2019-nCoV Study Group                                                                                                                                                                                                           |
| EPI_ISL_427670                                                                                                                                                                 | Centre for Infectious Diseases and Microbiology Public Health                              | NSW Health Pathology - Institute of Clinical Pathology and Medical Research; Westmead Hospital; University of Sydney | Arnott A, Sadsad R, Draper J, Sim E, Bachmann N, Rockett R, Lam C, Gray K, Timms V, Gall M, Carter I, Holmes EC, O'Sullivan MV, Byun R, Sintchenko V, Chen SC, Eden JS, Maddocks S, Kok J, Propenko M, Sorrell T, Chang S, Basile K, Dwyer DE for the 2019-nCoV Study Group                                                                                                                                                                                                           |
| EPI_ISL_427671, EPI_ISL_427675                                                                                                                                                 | Centre for Infectious Diseases and Microbiology Public Health                              | NSW Health Pathology - Institute of Clinical Pathology and Medical Research; Westmead Hospital; University of Sydney | Bachmann N, Rockett R, Lam C, Gray K, Timms V, Gall M, Arnott A, Sadsad R, Draper J, Sim E, Carter I, Holmes EC, O'Sullivan MV, Byun R, Sintchenko V, Chen SC, Eden JS, Maddocks S, Kok J, Propenko M, Sorrell T, Chang S, Basile K, Dwyer DE for the 2019-nCoV Study Group                                                                                                                                                                                                           |
| EPI_ISL_427683, EPI_ISL_427689, EPI_ISL_427693, EPI_ISL_427694, EPI_ISL_427702, EPI_ISL_427707                                                                                 | Centre for Infectious Diseases and Microbiology Public Health                              | NSW Health Pathology - Institute of Clinical Pathology and Medical Research; Westmead Hospital; University of Sydney | Arnott A, Sadsad R, Draper J, Sim E, Bachmann N, Rockett R, Lam C, Gray K, Timms V, Gall M, Carter I, Holmes EC, O'Sullivan MV, Byun R, Sintchenko V, Chen SC, Eden JS, Maddocks S, Kok J, Propenko M, Sorrell T, Chang S, Basile K, Dwyer DE for the 2019-nCoV Study Group                                                                                                                                                                                                           |
| EPI_ISL_427713                                                                                                                                                                 | Centre for Infectious Diseases and Microbiology Public Health                              | NSW Health Pathology - Institute of Clinical Pathology and Medical Research; Westmead Hospital; University of Sydney | Bachmann N, Rockett R, Lam C, Gray K, Timms V, Gall M, Arnott A, Sadsad R, Draper J, Sim E, Carter I, Holmes EC, O'Sullivan MV, Byun R, Sintchenko V, Chen SC, Eden JS, Maddocks S, Kok J, Propenko M, Sorrell T, Chang S, Basile K, Dwyer DE for the 2019-nCoV Study Group                                                                                                                                                                                                           |
| EPI_ISL_427735, EPI_ISL_427739                                                                                                                                                 | Centre for Infectious Diseases and Microbiology Public Health                              | NSW Health Pathology - Institute of Clinical Pathology and Medical Research; Westmead Hospital; University of Sydney | Arnott A, Sadsad R, Draper J, Sim E, Bachmann N, Rockett R, Lam C, Gray K, Timms V, Gall M, Carter I, Holmes EC, O'Sullivan MV, Byun R, Sintchenko V, Chen SC, Eden JS, Maddocks S, Kok J, Propenko M, Sorrell T, Chang S, Basile K, Dwyer DE for the 2019-nCoV Study Group                                                                                                                                                                                                           |
| EPI_ISL_427744, EPI_ISL_427749                                                                                                                                                 | Centre for Infectious Diseases and Microbiology Public Health                              | NSW Health Pathology - Institute of Clinical Pathology and Medical Research; Westmead Hospital; University of Sydney | Bachmann N, Rockett R, Lam C, Gray K, Timms V, Gall M, Arnott A, Sadsad R, Draper J, Sim E, Carter I, Holmes EC, O'Sullivan MV, Byun R, Sintchenko V, Chen SC, Eden JS, Maddocks S, Kok J, Propenko M, Sorrell T, Chang S, Basile K, Dwyer DE for the 2019-nCoV Study Group                                                                                                                                                                                                           |
| EPI_ISL_427751, EPI_ISL_427753                                                                                                                                                 | Centre for Infectious Diseases and Microbiology Public Health                              | NSW Health Pathology - Institute of Clinical Pathology and Medical Research; Westmead Hospital; University of Sydney | Arnott A, Sadsad R, Draper J, Sim E, Bachmann N, Rockett R, Lam C, Gray K, Timms V, Gall M, Carter I, Holmes EC, O'Sullivan MV, Byun R, Sintchenko V, Chen SC, Eden JS, Maddocks S, Kok J, Propenko M, Sorrell T, Chang S, Basile K, Dwyer DE for the 2019-nCoV Study Group                                                                                                                                                                                                           |
| EPI_ISL_427758                                                                                                                                                                 | Centre for Infectious Diseases and Microbiology Public Health                              | NSW Health Pathology - Institute of Clinical Pathology and Medical Research; Westmead Hospital; University of Sydney | Bachmann N, Rockett R, Lam C, Gray K, Timms V, Gall M, Arnott A, Sadsad R, Draper J, Sim E, Carter I, Holmes EC, O'Sullivan MV, Byun R, Sintchenko V, Chen SC, Eden JS, Maddocks S, Kok J, Propenko M, Sorrell T, Chang S, Basile K, Dwyer DE for the 2019-nCoV Study Group                                                                                                                                                                                                           |
| EPI_ISL_427761                                                                                                                                                                 | Centre for Infectious Diseases and Microbiology Public Health                              | NSW Health Pathology - Institute of Clinical Pathology and Medical Research; Westmead Hospital; University of Sydney | Arnott A, Sadsad R, Draper J, Sim E, Bachmann N, Rockett R, Lam C, Gray K, Timms V, Gall M, Carter I, Holmes EC, O'Sullivan MV, Byun R, Sintchenko V, Chen SC, Eden JS, Maddocks S, Kok J, Propenko M, Sorrell T, Chang S, Basile K, Dwyer DE for the 2019-nCoV Study Group                                                                                                                                                                                                           |
| EPI_ISL_427762                                                                                                                                                                 | Centre for Infectious Diseases and Microbiology Public Health                              | NSW Health Pathology - Institute of Clinical Pathology and Medical Research; Westmead Hospital; University of Sydney | Bachmann N, Rockett R, Lam C, Gray K, Timms V, Gall M, Arnott A, Sadsad R, Draper J, Sim E, Carter I, Holmes EC, O'Sullivan MV, Byun R, Sintchenko V, Chen SC, Eden JS, Maddocks S, Kok J, Propenko M, Sorrell T, Chang S, Basile K, Dwyer DE for the 2019-nCoV Study Group                                                                                                                                                                                                           |
| EPI_ISL_427770, EPI_ISL_427774                                                                                                                                                 | Centre for Infectious Diseases and Microbiology Public Health                              | NSW Health Pathology - Institute of Clinical Pathology and Medical Research; Westmead Hospital; University of Sydney | Arnott A, Sadsad R, Draper J, Sim E, Bachmann N, Rockett R, Lam C, Gray K, Timms V, Gall M, Carter I, Holmes EC, O'Sullivan MV, Byun R, Sintchenko V, Chen SC, Eden JS, Maddocks S, Kok J, Propenko M, Sorrell T, Chang S, Basile K, Dwyer DE for the 2019-nCoV Study Group                                                                                                                                                                                                           |
| EPI_ISL_427778, EPI_ISL_427787, EPI_ISL_427797                                                                                                                                 | Centre for Infectious Diseases and Microbiology Public Health                              | NSW Health Pathology - Institute of Clinical Pathology and Medical Research; Westmead Hospital; University of Sydney | Bachmann N, Rockett R, Lam C, Gray K, Timms V, Gall M, Arnott A, Sadsad R, Draper J, Sim E, Carter I, Holmes EC, O'Sullivan MV, Byun R, Sintchenko V, Chen SC, Eden JS, Maddocks S, Kok J, Propenko M, Sorrell T, Chang S, Basile K, Dwyer DE for the 2019-nCoV Study Group                                                                                                                                                                                                           |
| EPI_ISL_427804                                                                                                                                                                 | Centre for Infectious Diseases and Microbiology Public Health                              | NSW Health Pathology - Institute of Clinical Pathology and Medical Research; Westmead Hospital; University of Sydney | Arnott A, Sadsad R, Draper J, Sim E, Bachmann N, Rockett R, Lam C, Gray K, Timms V, Gall M, Carter I, Holmes EC, O'Sullivan MV, Byun R, Sintchenko V, Chen SC, Eden JS, Maddocks S, Kok J, Propenko M, Sorrell T, Chang S, Basile K, Dwyer DE for the 2019-nCoV Study Group                                                                                                                                                                                                           |
| EPI_ISL_427805                                                                                                                                                                 | Centre for Infectious Diseases and Microbiology Public Health                              | NSW Health Pathology - Institute of Clinical Pathology and Medical Research; Westmead Hospital; University of Sydney | Bachmann N, Rockett R, Lam C, Gray K, Timms V, Gall M, Arnott A, Sadsad R, Draper J, Sim E, Carter I, Holmes EC, O'Sullivan MV, Byun R, Sintchenko V, Chen SC, Eden JS, Maddocks S, Kok J, Propenko M, Sorrell T, Chang S, Basile K, Dwyer DE for the 2019-nCoV Study Group                                                                                                                                                                                                           |
| EPI_ISL_429115, EPI_ISL_429116, EPI_ISL_429117, EPI_ISL_429118, EPI_ISL_429119, EPI_ISL_429120, EPI_ISL_429121, EPI_ISL_429122, EPI_ISL_429123, EPI_ISL_429124, EPI_ISL_429125 | see above                                                                                  | The Public Health Agency of Sweden                                                                                   | Arne Kotz, Olov Svartstrom, Maria Lind Karlberg, Anna-Malin Linde, Oskar Karlsson Lindsjo, Anna Risberg, Shaman Muradrasoli, Karin Tegmark-Wisell                                                                                                                                                                                                                                                                                                                                     |
| EPI_ISL_430464, EPI_ISL_430465, EPI_ISL_430466, EPI_ISL_430467, EPI_ISL_430468                                                                                                 | Klinisk mikrobiologi och vardhygien Halmstad                                               | The Public Health Agency of Sweden                                                                                   | Arne Kotz, Oskar Karlsson Lindsjo, Maria Lind Karlberg, Anna-Malin Linde, Olov Svartstrom, Anna Risberg, Shaman Muradrasoli, Karin Tegmark-Wisell                                                                                                                                                                                                                                                                                                                                     |
| EPI_ISL_430848, EPI_ISL_430849, EPI_ISL_430850, EPI_ISL_430851, EPI_ISL_430852, EPI_ISL_430853, EPI_ISL_430854, EPI_ISL_430855                                                 | ICMR-National Institute of Cholera and Enteric Diseases                                    | National Institute of Biomedical Genomics                                                                            | Arindam Maitra, Mamta Chawla Sarkar, Sreedhar Chinnaswamy, Hasina Banu, Ananya Chatterjee, Shanta Dutta, Saumitra Das                                                                                                                                                                                                                                                                                                                                                                 |
| EPI_ISL_435052                                                                                                                                                                 | Klinisk mikrobiologi och vardhygien Halmstad                                               | The Public Health Agency of Sweden                                                                                   | Arne Kotz, Oskar Karlsson Lindsjo, Maria Lind Karlberg, Anna-Malin Linde, Olov Svartstrom, Anna Risberg, Shaman Muradrasoli, Karin Tegmark-Wisell                                                                                                                                                                                                                                                                                                                                     |
| EPI_ISL_436197, EPI_ISL_436205, EPI_ISL_436213, EPI_ISL_436221, EPI_ISL_436228, EPI_ISL_436272                                                                                 | B.J. Medical College and Civil hospital                                                    | Gujarat Biotechnology Research Centre                                                                                | Apurvashin Puvar, Janvi Raval, Monika Gandhi, Pinal Trivedi, Maharshi Pandya, Amit Kanani, Akanksha Verma, Nitin Savaliya, Raghawendra Kumar, Dinesh Kumar, Zuber Saiyed, Dipa Kinariwala, Disha Patel, Binita Aring, Geeta Vaghela, Sonia Barve, Bhavesh Modi, Kairavi Joshi, Gaurishankar Shrimali, Nidhi Sood, Pranay Shah, R D Dixit, Snehal Bagatharia, Kamlesh J Upadhyay, Ramesh Pandit, Tejas Shah, Ankit Hinsu, Pritesh Sabara, Pooja P Doshi, Chaitanya Joshi, Madhvi Joshi |
| EPI_ISL_436280                                                                                                                                                                 | Servicio de Microbiología. Consorcio Hospital General Universitario de Valencia            | Sequencing and Bioinformatics Service and Molecular Epidemiology Research Group. FISABIO-Public Health               | Beatriz Beamud, Lidia Ruiz Roldan, Marta Pla Diaz, Neris Garcia-Gonzalez, Loreto Ferrús Abad, María Dolores Ocete, Inma Galán Vendrell, Paula Ruiz-Hueso, Mariana Reyes-Prieto, Vicente Soriano Chirona, Maria Alma Bracho, Griselda De Marco, Lúcia Martínez-Priego, Concepcion Gimeno, Giuseppe D'Auria, Fernando Gonzalez-Candelas                                                                                                                                                 |
| EPI_ISL_436294                                                                                                                                                                 | Servicio de Microbiología. Hospital Clínico Universitario de Valencia                      | Sequencing and Bioinformatics Service and Molecular Epidemiology Research Group. FISABIO-Public Health               | Beatriz Beamud, Lidia Ruiz Roldan, Marta Pla Diaz, Neris Garcia-Gonzalez, Loreto Ferrús Abad, María Dolores Ocete, Inma Galán Vendrell, Paula Ruiz-Hueso, Mariana Reyes-Prieto, Vicente Soriano Chirona, Ivan Ansari, David Navarro, Maria Alma Bracho, Griselda De Marco, Lúcia Martínez-Priego, Giuseppe D'Auria, Fernando Gonzalez-Candelas                                                                                                                                        |

|                                                                                                                                                                                                                                                                                                                                                                                                                                                                                                                                                                                                                                                                                                                                                                                                                                                                                                                                                                                                                                                                                                                                                                                                                                                                                                                                                                                                                                                                                                                                                                                                                                                                                                                                                                                                                                                |                                                                                 |                                                                                                                     |                                                                                                                                                                                                                                                                                                                                                                                                                                                                                                         |                                                                                                                                                                                     |
|------------------------------------------------------------------------------------------------------------------------------------------------------------------------------------------------------------------------------------------------------------------------------------------------------------------------------------------------------------------------------------------------------------------------------------------------------------------------------------------------------------------------------------------------------------------------------------------------------------------------------------------------------------------------------------------------------------------------------------------------------------------------------------------------------------------------------------------------------------------------------------------------------------------------------------------------------------------------------------------------------------------------------------------------------------------------------------------------------------------------------------------------------------------------------------------------------------------------------------------------------------------------------------------------------------------------------------------------------------------------------------------------------------------------------------------------------------------------------------------------------------------------------------------------------------------------------------------------------------------------------------------------------------------------------------------------------------------------------------------------------------------------------------------------------------------------------------------------|---------------------------------------------------------------------------------|---------------------------------------------------------------------------------------------------------------------|---------------------------------------------------------------------------------------------------------------------------------------------------------------------------------------------------------------------------------------------------------------------------------------------------------------------------------------------------------------------------------------------------------------------------------------------------------------------------------------------------------|-------------------------------------------------------------------------------------------------------------------------------------------------------------------------------------|
| EPI_ISL_436300                                                                                                                                                                                                                                                                                                                                                                                                                                                                                                                                                                                                                                                                                                                                                                                                                                                                                                                                                                                                                                                                                                                                                                                                                                                                                                                                                                                                                                                                                                                                                                                                                                                                                                                                                                                                                                 | Servicio de Microbiología. Hospital Clínico Universitario de Valencia           | Sequencing and Bioinformatics Service and Molecular Epidemiology Research Group. FISABIO-Public Health              | Beatriz Beamud, Lidia Ruiz Roldan, Marta Pla Diaz, Neris Garcia-Gonzalez, Inma Galán Vendrell, Sandra Carbo, Loreto Ferrús Abad, Paula Ruiz-Hueso, Mariana Reyes-Prieto, Vicente Soriano Chirona, Ivan Ansari, David Navarro, Maria Alma Bracho, Griselda De Marco, Lúcia Martínez-Priego, Giuseppe D'Auria, Fernando Gonzalez-Candelas                                                                                                                                                                 |                                                                                                                                                                                     |
| EPI_ISL_436314                                                                                                                                                                                                                                                                                                                                                                                                                                                                                                                                                                                                                                                                                                                                                                                                                                                                                                                                                                                                                                                                                                                                                                                                                                                                                                                                                                                                                                                                                                                                                                                                                                                                                                                                                                                                                                 | Servicio de Microbiología. Hospital Clínico Universitario de Valencia           | Sequencing and Bioinformatics Service and Molecular Epidemiology Research Group. FISABIO-Public Health              | Beatriz Beamud, Lidia Ruiz Roldan, Marta Pla Diaz, Neris Garcia-Gonzalez, Inma Galán Vendrell, Sandra Carbo, Loreto Ferrús Abad, Paula Ruiz-Hueso, Mariana Reyes-Prieto, Vicente Soriano Chirona, Ivan Ansari, David Navarro, Maria Alma Bracho, Griselda De Marco, Lúcia Martínez-Priego, Giuseppe D'Auria, Fernando Gonzalez-Candelas                                                                                                                                                                 |                                                                                                                                                                                     |
| EPI_ISL_436320                                                                                                                                                                                                                                                                                                                                                                                                                                                                                                                                                                                                                                                                                                                                                                                                                                                                                                                                                                                                                                                                                                                                                                                                                                                                                                                                                                                                                                                                                                                                                                                                                                                                                                                                                                                                                                 | Servicio de Microbiología. Hospital Clínico Universitario de Valencia           | Sequencing and Bioinformatics Service and Molecular Epidemiology Research Group. FISABIO-Public Health              | Beatriz Beamud, Lidia Ruiz Roldan, Marta Pla Diaz, Neris Garcia-Gonzalez, Inma Galán Vendrell, Sandra Carbo, Loreto Ferrús Abad, Paula Ruiz-Hueso, Mariana Reyes-Prieto, Vicente Soriano Chirona, Ivan Ansari, David Navarro, Maria Alma Bracho, Griselda De Marco, Lúcia Martínez-Priego, Giuseppe D'Auria, Fernando Gonzalez-Candelas                                                                                                                                                                 |                                                                                                                                                                                     |
| EPI_ISL_436334                                                                                                                                                                                                                                                                                                                                                                                                                                                                                                                                                                                                                                                                                                                                                                                                                                                                                                                                                                                                                                                                                                                                                                                                                                                                                                                                                                                                                                                                                                                                                                                                                                                                                                                                                                                                                                 | Servicio de Microbiología. Hospital Clínico Universitario de Valencia           | Sequencing and Bioinformatics Service and Molecular Epidemiology Research Group. FISABIO-Public Health              | Beatriz Beamud, Lidia Ruiz Roldan, Marta Pla Diaz, Neris Garcia-Gonzalez, Inma Galán Vendrell, Sandra Carbo, Loreto Ferrús Abad, Paula Ruiz-Hueso, Mariana Reyes-Prieto, Vicente Soriano Chirona, Ivan Ansari, David Navarro, Maria Alma Bracho, Griselda De Marco, Lúcia Martínez-Priego, Giuseppe D'Auria, Fernando Gonzalez-Candelas                                                                                                                                                                 |                                                                                                                                                                                     |
| EPI_ISL_436340                                                                                                                                                                                                                                                                                                                                                                                                                                                                                                                                                                                                                                                                                                                                                                                                                                                                                                                                                                                                                                                                                                                                                                                                                                                                                                                                                                                                                                                                                                                                                                                                                                                                                                                                                                                                                                 | Servicio de Microbiología. Hospital Clínico Universitario de Valencia           | Sequencing and Bioinformatics Service and Molecular Epidemiology Research Group. FISABIO-Public Health              | Beatriz Beamud, Lidia Ruiz Roldan, Marta Pla Diaz, Neris Garcia-Gonzalez, Inma Galán Vendrell, Sandra Carbo, Loreto Ferrús Abad, Paula Ruiz-Hueso, Mariana Reyes-Prieto, Vicente Soriano Chirona, Ivan Ansari, David Navarro, Maria Alma Bracho, Griselda De Marco, Lúcia Martínez-Priego, Giuseppe D'Auria, Fernando Gonzalez-Candelas                                                                                                                                                                 |                                                                                                                                                                                     |
| EPI_ISL_436354                                                                                                                                                                                                                                                                                                                                                                                                                                                                                                                                                                                                                                                                                                                                                                                                                                                                                                                                                                                                                                                                                                                                                                                                                                                                                                                                                                                                                                                                                                                                                                                                                                                                                                                                                                                                                                 | Servicio de Microbiología. Hospital Clínico Universitario de Valencia           | Sequencing and Bioinformatics Service and Molecular Epidemiology Research Group. FISABIO-Public Health              | Beatriz Beamud, Lidia Ruiz Roldan, Marta Pla Diaz, Neris Garcia-Gonzalez, Inma Galán Vendrell, Sandra Carbo, Loreto Ferrús Abad, Paula Ruiz-Hueso, Mariana Reyes-Prieto, Vicente Soriano Chirona, Ivan Ansari, David Navarro, Maria Alma Bracho, Griselda De Marco, Lúcia Martínez-Priego, Giuseppe D'Auria, Fernando Gonzalez-Candelas                                                                                                                                                                 |                                                                                                                                                                                     |
| EPI_ISL_436364                                                                                                                                                                                                                                                                                                                                                                                                                                                                                                                                                                                                                                                                                                                                                                                                                                                                                                                                                                                                                                                                                                                                                                                                                                                                                                                                                                                                                                                                                                                                                                                                                                                                                                                                                                                                                                 | Servicio de Microbiología. Hospital Clínico Universitario de Valencia           | Sequencing and Bioinformatics Service and Molecular Epidemiology Research Group. FISABIO-Public Health              | Beatriz Beamud, Lidia Ruiz Roldan, Marta Pla Diaz, Neris Garcia-Gonzalez, Inma Galán Vendrell, Sandra Carbo, Loreto Ferrús Abad, Paula Ruiz-Hueso, Mariana Reyes-Prieto, Vicente Soriano Chirona, Ivan Ansari, David Navarro, Maria Alma Bracho, Griselda De Marco, Lúcia Martínez-Priego, Giuseppe D'Auria, Fernando Gonzalez-Candelas                                                                                                                                                                 |                                                                                                                                                                                     |
| EPI_ISL_436385, EPI_ISL_436392                                                                                                                                                                                                                                                                                                                                                                                                                                                                                                                                                                                                                                                                                                                                                                                                                                                                                                                                                                                                                                                                                                                                                                                                                                                                                                                                                                                                                                                                                                                                                                                                                                                                                                                                                                                                                 | Servicio de Microbiología. Consorcio Hospital General Universitario de Valencia | Sequencing and Bioinformatics Service and Molecular Epidemiology Research Group. FISABIO-Public Health              | Beatriz Beamud, Lidia Ruiz Roldan, Marta Pla Diaz, Neris Garcia-Gonzalez, Loreto Ferrús Abad, María Dolores Ocete, Inma Galán Vendrell, Paula Ruiz-Hueso, Mariana Reyes-Prieto, Vicente Soriano Chirona, Maria Alma Bracho, Griselda De Marco, Lúcia Martínez-Priego, Concepcion Gimeno, Giuseppe D'Auria, Fernando Gonzalez-Candelas                                                                                                                                                                   |                                                                                                                                                                                     |
| EPI_ISL_436405                                                                                                                                                                                                                                                                                                                                                                                                                                                                                                                                                                                                                                                                                                                                                                                                                                                                                                                                                                                                                                                                                                                                                                                                                                                                                                                                                                                                                                                                                                                                                                                                                                                                                                                                                                                                                                 | Servicio de Microbiología. Hospital Clínico Universitario de Valencia           | Sequencing and Bioinformatics Service and Molecular Epidemiology Research Group. FISABIO-Public Health              | Beatriz Beamud, Lidia Ruiz Roldan, Marta Pla Diaz, Neris Garcia-Gonzalez, Inma Galán Vendrell, Sandra Carbo, Loreto Ferrús Abad, Paula Ruiz-Hueso, Mariana Reyes-Prieto, Vicente Soriano Chirona, Ivan Ansari, David Navarro, Maria Alma Bracho, Griselda De Marco, Lúcia Martínez-Priego, Giuseppe D'Auria, Fernando Gonzalez-Candelas                                                                                                                                                                 |                                                                                                                                                                                     |
| EPI_ISL_437433                                                                                                                                                                                                                                                                                                                                                                                                                                                                                                                                                                                                                                                                                                                                                                                                                                                                                                                                                                                                                                                                                                                                                                                                                                                                                                                                                                                                                                                                                                                                                                                                                                                                                                                                                                                                                                 | Bozeman Health Deaconess Hospital                                               | Wiedenhft lab, Montana State University                                                                             | Artem Nemudryi, Anna Nemudraia, Kevin Surya, Tanner Wiegand, Murat Buyukyork, Royce Wilkinson, Blake Wiedenhft                                                                                                                                                                                                                                                                                                                                                                                          |                                                                                                                                                                                     |
| EPI_ISL_437434                                                                                                                                                                                                                                                                                                                                                                                                                                                                                                                                                                                                                                                                                                                                                                                                                                                                                                                                                                                                                                                                                                                                                                                                                                                                                                                                                                                                                                                                                                                                                                                                                                                                                                                                                                                                                                 | Bozeman Water Reclamation Facility                                              | Wiedenhft lab, Montana State University                                                                             | Artem Nemudryi, Anna Nemudraia, Kevin Surya, Tanner Wiegand, Murat Buyukyork, Royce Wilkinson, Blake Wiedenhft                                                                                                                                                                                                                                                                                                                                                                                          |                                                                                                                                                                                     |
| EPI_ISL_437536, EPI_ISL_437537, EPI_ISL_437538, EPI_ISL_437539                                                                                                                                                                                                                                                                                                                                                                                                                                                                                                                                                                                                                                                                                                                                                                                                                                                                                                                                                                                                                                                                                                                                                                                                                                                                                                                                                                                                                                                                                                                                                                                                                                                                                                                                                                                 | ICMR-National Institute of Cholera and Enteric Diseases                         | National Institute of Biomedical Genomics                                                                           | Arindam Maitra, Mamta Chawla Sarkar, Sreedhar Chinnaswamy, Hasina Banu, Ananya Chatterjee, Shanta Dutta, Saumitra Das                                                                                                                                                                                                                                                                                                                                                                                   |                                                                                                                                                                                     |
| EPI_ISL_444463                                                                                                                                                                                                                                                                                                                                                                                                                                                                                                                                                                                                                                                                                                                                                                                                                                                                                                                                                                                                                                                                                                                                                                                                                                                                                                                                                                                                                                                                                                                                                                                                                                                                                                                                                                                                                                 | B.J. Medical College and Civil hospital                                         | Gujarat Biotechnology Research Centre                                                                               | Apurvashin Puvar, Janvi Raval, Monika Gandhi, Pinal Trivedi, Maharshi Pandya, Amit Kanani, Akanksha Verma, Nitin Savaliya, Raghawendra Kumar, Dinesh Kumar, Zuber Saiyed, Dipa Kinariwala, Disha Patel, Binita Aring, Neeta Khandelwal, Geeta Vaghela, Sonia Barve, Bhavesh Modi, Kairavi Joshi, Gaurishankar Shrimali, Nidhi Sood, Pranay Shah, R D Dixit, Snehal Bagatharia, Kamlesh J Upadhyay, Ramesh Pandit, Tejas Shah, Ankit Hinsu, Pritesh Sabara, Bhavya Jindal, Chaitanya Joshi, Madhvi Joshi |                                                                                                                                                                                     |
| EPI_ISL_445219                                                                                                                                                                                                                                                                                                                                                                                                                                                                                                                                                                                                                                                                                                                                                                                                                                                                                                                                                                                                                                                                                                                                                                                                                                                                                                                                                                                                                                                                                                                                                                                                                                                                                                                                                                                                                                 | Universidad del Valle, Laboratorio de Microbiología, VIREM                      | Universidad del Valle, Universidad Nacional de Colombia-Sede Palmira, International Center for Tropical Agriculture | Beatriz Parra, Diana López-Alvarez, Wilmer J. Cuellar                                                                                                                                                                                                                                                                                                                                                                                                                                                   |                                                                                                                                                                                     |
| EPI_ISL_447035                                                                                                                                                                                                                                                                                                                                                                                                                                                                                                                                                                                                                                                                                                                                                                                                                                                                                                                                                                                                                                                                                                                                                                                                                                                                                                                                                                                                                                                                                                                                                                                                                                                                                                                                                                                                                                 | B.J. Medical College and Civil hospital                                         | Gujarat Biotechnology Research Centre                                                                               | Apurvashin Puvar, Janvi Raval, Monika Gandhi, Pinal Trivedi, Maharshi Pandya, Amit Kanani, Akanksha Verma, Nitin Savaliya, Raghawendra Kumar, Dinesh Kumar, Zuber Saiyed, Dipa Kinariwala, Disha Patel, Binita Aring, Neeta Khandelwal, Geeta Vaghela, Sonia Barve, Bhavesh Modi, Kairavi Joshi, Gaurishankar Shrimali, Nidhi Sood, Pranay Shah, R D Dixit, Snehal Bagatharia, Kamlesh J Upadhyay, Ramesh Pandit, Tejas Shah, Ankit Hinsu, Pritesh Sabara, Neha Rajpara, Chaitanya Joshi, Madhvi Joshi  |                                                                                                                                                                                     |
| EPI_ISL_447544                                                                                                                                                                                                                                                                                                                                                                                                                                                                                                                                                                                                                                                                                                                                                                                                                                                                                                                                                                                                                                                                                                                                                                                                                                                                                                                                                                                                                                                                                                                                                                                                                                                                                                                                                                                                                                 | Gujarat Biotechnology Research Centre                                           | Gujarat Biotechnology Research Centre                                                                               | Apurvashin Puvar, Janvi Raval, Monika Gandhi, Pinal Trivedi, Maharshi Pandya, Amit Kanani, Akanksha Verma, Nitin Savaliya, Raghawendra Kumar, Dinesh Kumar, Zuber Saiyed, Dipa Kinariwala, Disha Patel, Binita Aring, Neeta Khandelwal, Geeta Vaghela, Sonia Barve, Bhavesh Modi, Kairavi Joshi, Gaurishankar Shrimali, Nidhi Sood, Pranay Shah, R D Dixit, Snehal Bagatharia, Kamlesh J Upadhyay, Ramesh Pandit, Tejas Shah, Ankit Hinsu, Pritesh Sabara, Pooja P Doshi, Chaitanya Joshi, Madhvi Joshi |                                                                                                                                                                                     |
| EPI_ISL_450834                                                                                                                                                                                                                                                                                                                                                                                                                                                                                                                                                                                                                                                                                                                                                                                                                                                                                                                                                                                                                                                                                                                                                                                                                                                                                                                                                                                                                                                                                                                                                                                                                                                                                                                                                                                                                                 | Klinisk mikrobiologi och vardhygien Halmstad                                    | The Public Health Agency of Sweden                                                                                  | Arne Kotz, Anna-Malin Linde, Maria Lind Karlberg, Oskar Karlsson Lindsjo, Olov Svartstrom, Anna Risberg, Theresa Enkirch, Mia Brytting, Karin Tegmark-Wisell                                                                                                                                                                                                                                                                                                                                            |                                                                                                                                                                                     |
| EPI_ISL_451076                                                                                                                                                                                                                                                                                                                                                                                                                                                                                                                                                                                                                                                                                                                                                                                                                                                                                                                                                                                                                                                                                                                                                                                                                                                                                                                                                                                                                                                                                                                                                                                                                                                                                                                                                                                                                                 | West China Hospital of Sichuan University                                       | State Key Laboratory of Biotherapy of Sichuan University                                                            | Baowen Du, Minjin Wang, Chao Tanga, Chuan Chena, Yongzhao Zhou, Mingxia Yu, Han-Cheng Wei, Weimin Li, Jing-wen Lin, Jia Geng, Binwu Ying, Lu Chen                                                                                                                                                                                                                                                                                                                                                       |                                                                                                                                                                                     |
| EPI_ISL_451306                                                                                                                                                                                                                                                                                                                                                                                                                                                                                                                                                                                                                                                                                                                                                                                                                                                                                                                                                                                                                                                                                                                                                                                                                                                                                                                                                                                                                                                                                                                                                                                                                                                                                                                                                                                                                                 | Molecular Virology Unit, Fondazione IRCCS Policlinico San Matteo , Pavia        | Laboratory of Virology, INMI Lazzaro Spallanzani IRCCS                                                              | Antonio Piralla, Fausto Baldanti, Martina Rueca, Antonino Di Caro, Maria R. Capobianchi, Cesare E.M. Gruber, Barbara Bartolini                                                                                                                                                                                                                                                                                                                                                                          |                                                                                                                                                                                     |
| EPI_ISL_451308                                                                                                                                                                                                                                                                                                                                                                                                                                                                                                                                                                                                                                                                                                                                                                                                                                                                                                                                                                                                                                                                                                                                                                                                                                                                                                                                                                                                                                                                                                                                                                                                                                                                                                                                                                                                                                 | Molecular Virology Unit, Fondazione IRCCS Policlinico San Matteo , Pavia        | Laboratory of Virology, INMI Lazzaro Spallanzani IRCCS                                                              | Antonio Piralla, Fausto Baldanti, Maria R. Capobianchi, Cesare E.M. Gruber, Martina Rueca, Barbara Bartolini, Antonino Di Caro                                                                                                                                                                                                                                                                                                                                                                          |                                                                                                                                                                                     |
| EPI_ISL_451312, EPI_ISL_451313, EPI_ISL_451314, EPI_ISL_451315, EPI_ISL_451316, EPI_ISL_451317, EPI_ISL_451318, EPI_ISL_451319, EPI_ISL_451320, EPI_ISL_451321, EPI_ISL_451322, EPI_ISL_451323, EPI_ISL_451324, EPI_ISL_451325, EPI_ISL_451326, EPI_ISL_451327, EPI_ISL_451328, EPI_ISL_451329, EPI_ISL_451330, EPI_ISL_451331, EPI_ISL_451332, EPI_ISL_451333, EPI_ISL_451334, EPI_ISL_451335, EPI_ISL_451336, EPI_ISL_451337, EPI_ISL_451338, EPI_ISL_451339, EPI_ISL_451340, EPI_ISL_451341, EPI_ISL_451342, EPI_ISL_451343, EPI_ISL_451344, EPI_ISL_451345, EPI_ISL_451346, EPI_ISL_451347, EPI_ISL_451348, EPI_ISL_451349, EPI_ISL_451350, EPI_ISL_451351, EPI_ISL_451352, EPI_ISL_451353, EPI_ISL_451354, EPI_ISL_451355, EPI_ISL_451356, EPI_ISL_451357, EPI_ISL_451358, EPI_ISL_451359, EPI_ISL_451360, EPI_ISL_451361, EPI_ISL_451362, EPI_ISL_451363, EPI_ISL_451364, EPI_ISL_451365, EPI_ISL_451366, EPI_ISL_451367, EPI_ISL_451368, EPI_ISL_451369, EPI_ISL_451370, EPI_ISL_451371, EPI_ISL_451372, EPI_ISL_451373, EPI_ISL_451374, EPI_ISL_451375, EPI_ISL_451376, EPI_ISL_451377, EPI_ISL_451378, EPI_ISL_451379, EPI_ISL_451380, EPI_ISL_451381, EPI_ISL_451382, EPI_ISL_451383, EPI_ISL_451384, EPI_ISL_451385, EPI_ISL_451386, EPI_ISL_451387, EPI_ISL_451388, EPI_ISL_451389, EPI_ISL_451390, EPI_ISL_451391, EPI_ISL_451392, EPI_ISL_451393, EPI_ISL_451394, EPI_ISL_451395, EPI_ISL_451396, EPI_ISL_451397, EPI_ISL_451398, EPI_ISL_451399                                                                                                                                                                                                                                                                                                                                                                                 | see above                                                                       | West China Hospital of Sichuan University                                                                           | State Key Laboratory of Biotherapy of Sichuan University                                                                                                                                                                                                                                                                                                                                                                                                                                                | Baowen Du, Minjin Wang, Chao Tang, Chuan Chen, Yongzhao Zhou, Mingxia Yu, Hancheng Wei, Weimin Li, Jing-wen Lin, Jia Geng, Binwu Ying, Lu Chen                                      |
| EPI_ISL_454412, EPI_ISL_454413, EPI_ISL_454414, EPI_ISL_454415, EPI_ISL_454796, EPI_ISL_454797, EPI_ISL_454798, EPI_ISL_454799, EPI_ISL_454800, EPI_ISL_454801, EPI_ISL_454802, EPI_ISL_454803, EPI_ISL_454804, EPI_ISL_454805, EPI_ISL_454806, EPI_ISL_454807, EPI_ISL_454808, EPI_ISL_454809, EPI_ISL_454810, EPI_ISL_454811, EPI_ISL_454812, EPI_ISL_454813, EPI_ISL_454814, EPI_ISL_454815, EPI_ISL_454816, EPI_ISL_454817, EPI_ISL_454818, EPI_ISL_454819, EPI_ISL_454820, EPI_ISL_454821, EPI_ISL_454822, EPI_ISL_454823, EPI_ISL_454824, EPI_ISL_454825, EPI_ISL_454826, EPI_ISL_454827, EPI_ISL_454828, EPI_ISL_454829                                                                                                                                                                                                                                                                                                                                                                                                                                                                                                                                                                                                                                                                                                                                                                                                                                                                                                                                                                                                                                                                                                                                                                                                                 | see above                                                                       | Dirk Dittmer                                                                                                        | Dirk Dittmer                                                                                                                                                                                                                                                                                                                                                                                                                                                                                            | Bailey,A.G., Caro-Vegas,C.P., Dittmer,D., Eason,A.B., Juarez,A., Landis,J.T., McNamara,R.P., Miller,M.B., Moorad,R., Pluta,L.J., Seltzer,T.A., Thompson,C., Vahrson,W., Villamor,F. |
| EPI_ISL_454904, EPI_ISL_454905, EPI_ISL_454906, EPI_ISL_454907, EPI_ISL_454908, EPI_ISL_454909, EPI_ISL_454910, EPI_ISL_454911, EPI_ISL_454912, EPI_ISL_454913, EPI_ISL_454914, EPI_ISL_454915, EPI_ISL_454916, EPI_ISL_454917, EPI_ISL_454918, EPI_ISL_454919, EPI_ISL_454920, EPI_ISL_454921, EPI_ISL_454922, EPI_ISL_454923, EPI_ISL_454924, EPI_ISL_454925, EPI_ISL_454926, EPI_ISL_454927, EPI_ISL_454928, EPI_ISL_454929, EPI_ISL_454930, EPI_ISL_454931, EPI_ISL_454932, EPI_ISL_454933, EPI_ISL_454934, EPI_ISL_454935, EPI_ISL_454936, EPI_ISL_454937, EPI_ISL_454938, EPI_ISL_454939, EPI_ISL_454940, EPI_ISL_454941, EPI_ISL_454942, EPI_ISL_454943, EPI_ISL_454944, EPI_ISL_454945, EPI_ISL_454946, EPI_ISL_454947, EPI_ISL_454948, EPI_ISL_454949, EPI_ISL_454950, EPI_ISL_454951, EPI_ISL_454952, EPI_ISL_454953, EPI_ISL_454954, EPI_ISL_454955, EPI_ISL_454956, EPI_ISL_454957, EPI_ISL_454958, EPI_ISL_454959, EPI_ISL_454960, EPI_ISL_454961, EPI_ISL_454962, EPI_ISL_454963, EPI_ISL_454964, EPI_ISL_454965, EPI_ISL_454966, EPI_ISL_454967, EPI_ISL_454968, EPI_ISL_454969, EPI_ISL_454970, EPI_ISL_454971, EPI_ISL_454972, EPI_ISL_454973, EPI_ISL_454974, EPI_ISL_454975, EPI_ISL_454976, EPI_ISL_454977, EPI_ISL_454978, EPI_ISL_454979, EPI_ISL_454980, EPI_ISL_454981, EPI_ISL_454982, EPI_ISL_454983, EPI_ISL_454984, EPI_ISL_454985, EPI_ISL_454986, EPI_ISL_454987, EPI_ISL_454988, EPI_ISL_454989, EPI_ISL_454990, EPI_ISL_454991, EPI_ISL_454992, EPI_ISL_454993, EPI_ISL_454994, EPI_ISL_454995, EPI_ISL_454996, EPI_ISL_454997, EPI_ISL_454998, EPI_ISL_454999, EPI_ISL_455000, EPI_ISL_455001, EPI_ISL_455002, EPI_ISL_455003, EPI_ISL_455004, EPI_ISL_455005, EPI_ISL_455006, EPI_ISL_455007, EPI_ISL_455008, EPI_ISL_455009, EPI_ISL_455010, EPI_ISL_455011, EPI_ISL_455012, EPI_ISL_455013, EPI_ISL_455014 | see above                                                                       | Wuhan Chain Medical Labs (CMLabs)                                                                                   | State Key Laboratory of Biotherapy of Sichuan University                                                                                                                                                                                                                                                                                                                                                                                                                                                | Baowen Du, Minjin Wang, Chao Tang, Chuan Chen, Yongzhao Zhou, Mingxia Yu, Hancheng Wei, Weimin Li, Jing-wen Lin, Jia Geng, Binwu Ying, Lu Chen                                      |

|                                                                                                                                                                                                                                                                                                                                                                                                                                                                                                                                                                                                                                                                                                                                                                                                                                                                                                                                                                                                                                                                                                                                                                                                                                                                                                                                                                                                                                                                                                                                                                                                                                                                                                                                                                                                                                                                                                                                                                                                                                                                                                                                                                                                                                                                                                                                                                                                                                                                                                                                                                                                                                                                                                                                                                                                                                                                                                                                                                                                                                                                                                                                                                                                                                                                |                                                                          |                                                               |                                                                                                                                                                                                                                                                                                                                                                                                                                                                         |
|----------------------------------------------------------------------------------------------------------------------------------------------------------------------------------------------------------------------------------------------------------------------------------------------------------------------------------------------------------------------------------------------------------------------------------------------------------------------------------------------------------------------------------------------------------------------------------------------------------------------------------------------------------------------------------------------------------------------------------------------------------------------------------------------------------------------------------------------------------------------------------------------------------------------------------------------------------------------------------------------------------------------------------------------------------------------------------------------------------------------------------------------------------------------------------------------------------------------------------------------------------------------------------------------------------------------------------------------------------------------------------------------------------------------------------------------------------------------------------------------------------------------------------------------------------------------------------------------------------------------------------------------------------------------------------------------------------------------------------------------------------------------------------------------------------------------------------------------------------------------------------------------------------------------------------------------------------------------------------------------------------------------------------------------------------------------------------------------------------------------------------------------------------------------------------------------------------------------------------------------------------------------------------------------------------------------------------------------------------------------------------------------------------------------------------------------------------------------------------------------------------------------------------------------------------------------------------------------------------------------------------------------------------------------------------------------------------------------------------------------------------------------------------------------------------------------------------------------------------------------------------------------------------------------------------------------------------------------------------------------------------------------------------------------------------------------------------------------------------------------------------------------------------------------------------------------------------------------------------------------------------------|--------------------------------------------------------------------------|---------------------------------------------------------------|-------------------------------------------------------------------------------------------------------------------------------------------------------------------------------------------------------------------------------------------------------------------------------------------------------------------------------------------------------------------------------------------------------------------------------------------------------------------------|
| EPI_ISL_455023                                                                                                                                                                                                                                                                                                                                                                                                                                                                                                                                                                                                                                                                                                                                                                                                                                                                                                                                                                                                                                                                                                                                                                                                                                                                                                                                                                                                                                                                                                                                                                                                                                                                                                                                                                                                                                                                                                                                                                                                                                                                                                                                                                                                                                                                                                                                                                                                                                                                                                                                                                                                                                                                                                                                                                                                                                                                                                                                                                                                                                                                                                                                                                                                                                                 | Government Medical College, Vadodara                                     | Gujarat Biotechnology Research Centre                         | Apurvashin Puvar, Janvi Raval, Zarna Patel, Monika Gandhi, Pinal Trivedi, Maharshi Pandya, Amit Kanani, Nidhi Patel, Nitin Savaliya, Raghawendra Kumar, Dinesh Kumar, Zuber Saiyed, Komal Patel, Labdhi Pandya, Snehal Bagatharia, Tanuja Javadekar , R N Daveshtar, Ramesh Pandit, Tejas Shah, Ankit Hinsu, Pritesh Sabara, Priyanka P Vatsa, Bhavesh Modi, Gaurishankar Shrimali, R D Dixit, A M Kadri, Umang Mishra, Chaitanya Joshi, Madhvi Joshi,                  |
| EPI_ISL_455112, EPI_ISL_455113, EPI_ISL_455114, EPI_ISL_455115, EPI_ISL_455116, EPI_ISL_455117, EPI_ISL_455118, EPI_ISL_455119, EPI_ISL_455120, EPI_ISL_455121, EPI_ISL_455122, EPI_ISL_455123, EPI_ISL_455124, EPI_ISL_455125, EPI_ISL_455126, EPI_ISL_455127, EPI_ISL_455128, EPI_ISL_455129, EPI_ISL_455130, EPI_ISL_455131, EPI_ISL_455132, EPI_ISL_455133, EPI_ISL_455134, EPI_ISL_455135, EPI_ISL_455136, EPI_ISL_455137, EPI_ISL_455138, EPI_ISL_455139, EPI_ISL_455140, EPI_ISL_455141, EPI_ISL_455142, EPI_ISL_455143, EPI_ISL_455144, EPI_ISL_455145, EPI_ISL_455146, EPI_ISL_455147, EPI_ISL_455148, EPI_ISL_455149, EPI_ISL_455150, EPI_ISL_455151, EPI_ISL_455152, EPI_ISL_455153, EPI_ISL_455154, EPI_ISL_455155, EPI_ISL_455156, EPI_ISL_455157, EPI_ISL_455158, EPI_ISL_455159, EPI_ISL_455160, EPI_ISL_455161, EPI_ISL_455162, EPI_ISL_455163, EPI_ISL_455164, EPI_ISL_455165, EPI_ISL_455166, EPI_ISL_455167, EPI_ISL_455168, EPI_ISL_455169, EPI_ISL_455170, EPI_ISL_455171, EPI_ISL_455172, EPI_ISL_455173, EPI_ISL_455174, EPI_ISL_455175, EPI_ISL_455176, EPI_ISL_455177, EPI_ISL_455178, EPI_ISL_455179, EPI_ISL_455180, EPI_ISL_455181, EPI_ISL_455182, EPI_ISL_455183, EPI_ISL_455184, EPI_ISL_455185, EPI_ISL_455186, EPI_ISL_455187, EPI_ISL_455188, EPI_ISL_455189, EPI_ISL_455190, EPI_ISL_455191, EPI_ISL_455192, EPI_ISL_455193, EPI_ISL_455194, EPI_ISL_455195, EPI_ISL_455196, EPI_ISL_455197, EPI_ISL_455198, EPI_ISL_455199, EPI_ISL_455200, EPI_ISL_455201, EPI_ISL_455202, EPI_ISL_455203, EPI_ISL_455204, EPI_ISL_455205, EPI_ISL_455206, EPI_ISL_455207, EPI_ISL_455208, EPI_ISL_455209, EPI_ISL_455210, EPI_ISL_455211, EPI_ISL_455212, EPI_ISL_455213, EPI_ISL_455214, EPI_ISL_455215, EPI_ISL_455216, EPI_ISL_455217, EPI_ISL_455218, EPI_ISL_455219, EPI_ISL_455220, EPI_ISL_455221, EPI_ISL_455222, EPI_ISL_455223, EPI_ISL_455224, EPI_ISL_455225, EPI_ISL_455226, EPI_ISL_455227, EPI_ISL_455228, EPI_ISL_455229, EPI_ISL_455230, EPI_ISL_455231, EPI_ISL_455232, EPI_ISL_455233, EPI_ISL_455234, EPI_ISL_455235, EPI_ISL_455236, EPI_ISL_455237, EPI_ISL_455238, EPI_ISL_455239, EPI_ISL_455240, EPI_ISL_455241, EPI_ISL_455242, EPI_ISL_455243, EPI_ISL_455244, EPI_ISL_455245, EPI_ISL_455246, EPI_ISL_455247, EPI_ISL_455248, EPI_ISL_455249, EPI_ISL_455250, EPI_ISL_455251, EPI_ISL_455252, EPI_ISL_455253, EPI_ISL_455254, EPI_ISL_455255, EPI_ISL_455256, EPI_ISL_455257, EPI_ISL_455258, EPI_ISL_455259, EPI_ISL_455260, EPI_ISL_455261, EPI_ISL_455262, EPI_ISL_455263, EPI_ISL_455264, EPI_ISL_455265, EPI_ISL_455266, EPI_ISL_455267, EPI_ISL_455268, EPI_ISL_455269, EPI_ISL_455270, EPI_ISL_455271, EPI_ISL_455272, EPI_ISL_455273, EPI_ISL_455274, EPI_ISL_455275, EPI_ISL_455276, EPI_ISL_455277, EPI_ISL_455278, EPI_ISL_455279, EPI_ISL_455280, EPI_ISL_455281, EPI_ISL_455282, EPI_ISL_455283, EPI_ISL_455284, EPI_ISL_455285, EPI_ISL_455286, EPI_ISL_455287, EPI_ISL_455288, EPI_ISL_455289, EPI_ISL_455290, EPI_ISL_455291, EPI_ISL_455292, EPI_ISL_455293, EPI_ISL_455294, EPI_ISL_455295, EPI_ISL_455296, EPI_ISL_455297, EPI_ISL_455298, EPI_ISL_455299, EPI_ISL_455300, EPI_ISL_455301, EPI_ISL_455302, EPI_ISL_455303, EPI_ISL_455304, EPI_ISL_455305, EPI_ISL_455306, EPI_ISL_455307 | Dutch COVID-19 response team                                             | Erasmus Medical Center                                        | Bas Oude Munnink, David Nieuwenhuijse, Reina Sikkema, Claudia Schapendonk, Irina Chestakova, Anne van der Linden, Theo Bestebroer, Stefan van Nieukoop, Mark Pronk, Pascal Lexmond, Corien Swaan, Manon Haverkate, Madelief Molters, Mart Stein, Sandra Kengne Kamga Mboou, Jeroen van Kampen, Jolanda Voermans, Aura Timen, Corine GeurtsvanKessel, Annemiek van der Eijk, Richard Molenkamp, Marion Koopmans, on behalf of the Dutch national COVID-19 response team. |
| EPI_ISL_455363, EPI_ISL_455364, EPI_ISL_455365, EPI_ISL_455366, EPI_ISL_455367, EPI_ISL_455368, EPI_ISL_455369, EPI_ISL_455370, EPI_ISL_455371, EPI_ISL_455372, EPI_ISL_455373, EPI_ISL_455374, EPI_ISL_455375, EPI_ISL_455376, EPI_ISL_455377, EPI_ISL_455378, EPI_ISL_455379, EPI_ISL_455380, EPI_ISL_455381, EPI_ISL_455382, EPI_ISL_455383, EPI_ISL_455384, EPI_ISL_455385, EPI_ISL_455386, EPI_ISL_455387, EPI_ISL_455388, EPI_ISL_455389, EPI_ISL_455390, EPI_ISL_455391, EPI_ISL_455392, EPI_ISL_455393, EPI_ISL_455394, EPI_ISL_455395, EPI_ISL_455396, EPI_ISL_455397, EPI_ISL_455398, EPI_ISL_455399, EPI_ISL_455400, EPI_ISL_455401, EPI_ISL_455402, EPI_ISL_455403, EPI_ISL_455404, EPI_ISL_455405, EPI_ISL_455406, EPI_ISL_455407, EPI_ISL_455408, EPI_ISL_455409, EPI_ISL_455410, EPI_ISL_455411                                                                                                                                                                                                                                                                                                                                                                                                                                                                                                                                                                                                                                                                                                                                                                                                                                                                                                                                                                                                                                                                                                                                                                                                                                                                                                                                                                                                                                                                                                                                                                                                                                                                                                                                                                                                                                                                                                                                                                                                                                                                                                                                                                                                                                                                                                                                                                                                                                                 | Wuhan Chain Medical Labs (CMLabs)                                        | State Key Laboratory of Biotherapy of Sichuan University      | Baowen Du, Minjin Wang, Chao Tang, Chuan Chen, Yongzhao Zhou, Mingxia Yu, Hancheng Wei, Weimin Li, Jing-wen Lin, Jia Geng, Binwu Ying, Lu Chen                                                                                                                                                                                                                                                                                                                          |
| EPI_ISL_455437, EPI_ISL_455438                                                                                                                                                                                                                                                                                                                                                                                                                                                                                                                                                                                                                                                                                                                                                                                                                                                                                                                                                                                                                                                                                                                                                                                                                                                                                                                                                                                                                                                                                                                                                                                                                                                                                                                                                                                                                                                                                                                                                                                                                                                                                                                                                                                                                                                                                                                                                                                                                                                                                                                                                                                                                                                                                                                                                                                                                                                                                                                                                                                                                                                                                                                                                                                                                                 | Instituto de Diagnostico y Referencia Epidemiologicos (INDRE)            | Instituto de Diagnostico y Referencia Epidemiologicos (INDRE) | Araiza-Rodriguez Adnan, Garces-Ayala Fabiola, Ramirez-Gonzalez Ernesto, Mendieta-Condado Edgar, Rodriguez-Maldonado Abril, Wong-Arambula Claudia, Barrera-Badillo Gisela, Hernandez-Rivas Lucia, Lopez-Martinez Irma, Taboada Ramirez Blanca.                                                                                                                                                                                                                           |
| EPI_ISL_455595, EPI_ISL_455596, EPI_ISL_455597, EPI_ISL_455598, EPI_ISL_455599, EPI_ISL_455600, EPI_ISL_455601, EPI_ISL_455602, EPI_ISL_455603                                                                                                                                                                                                                                                                                                                                                                                                                                                                                                                                                                                                                                                                                                                                                                                                                                                                                                                                                                                                                                                                                                                                                                                                                                                                                                                                                                                                                                                                                                                                                                                                                                                                                                                                                                                                                                                                                                                                                                                                                                                                                                                                                                                                                                                                                                                                                                                                                                                                                                                                                                                                                                                                                                                                                                                                                                                                                                                                                                                                                                                                                                                 | SA Pathology                                                             | VPRL                                                          | Beard, MR., Van Der Hoek, K., Lim, C.K., Leong, L.E.X., Colbeck-Shackley, R., Shue, B., Kirby, E., Merrett, J., Llamas, B.                                                                                                                                                                                                                                                                                                                                              |
| EPI_ISL_455640, EPI_ISL_455641, EPI_ISL_455642, EPI_ISL_455643, EPI_ISL_455644, EPI_ISL_455645, EPI_ISL_455646, EPI_ISL_455647, EPI_ISL_455648, EPI_ISL_455649, EPI_ISL_455650, EPI_ISL_455651, EPI_ISL_455652, EPI_ISL_455653, EPI_ISL_455654, EPI_ISL_455655, EPI_ISL_455656, EPI_ISL_455657, EPI_ISL_455658, EPI_ISL_455659, EPI_ISL_455660, EPI_ISL_455661, EPI_ISL_455662, EPI_ISL_455663, EPI_ISL_455664, EPI_ISL_455665, EPI_ISL_455666, EPI_ISL_455667, EPI_ISL_455668, EPI_ISL_455669, EPI_ISL_455670, EPI_ISL_455671, EPI_ISL_455672, EPI_ISL_455673, EPI_ISL_455674, EPI_ISL_455675, EPI_ISL_455676, EPI_ISL_455677, EPI_ISL_455678, EPI_ISL_455679                                                                                                                                                                                                                                                                                                                                                                                                                                                                                                                                                                                                                                                                                                                                                                                                                                                                                                                                                                                                                                                                                                                                                                                                                                                                                                                                                                                                                                                                                                                                                                                                                                                                                                                                                                                                                                                                                                                                                                                                                                                                                                                                                                                                                                                                                                                                                                                                                                                                                                                                                                                                 | ICMR-National Institute of Cholera and Enteric Diseases                  | National Institute of Biomedical Genomics                     | Arindam Maitra, Mamta Chawla Sarkar, Sreedhar Chinnaswamy, Hasina Banu, Ananya Chatterjee, Shanta Dutta, Saumitra Das                                                                                                                                                                                                                                                                                                                                                   |
| EPI_ISL_457024, EPI_ISL_457025, EPI_ISL_457026, EPI_ISL_457027, EPI_ISL_457028, EPI_ISL_457029, EPI_ISL_457031, EPI_ISL_457036, EPI_ISL_457038, EPI_ISL_457039, EPI_ISL_457040, EPI_ISL_457041, EPI_ISL_457042, EPI_ISL_457043, EPI_ISL_457044, EPI_ISL_457045, EPI_ISL_457046, EPI_ISL_457047, EPI_ISL_457048, EPI_ISL_457049, EPI_ISL_457050, EPI_ISL_457053, EPI_ISL_457054, EPI_ISL_457055, EPI_ISL_457056, EPI_ISL_457058, EPI_ISL_457059, EPI_ISL_457060, EPI_ISL_457061, EPI_ISL_457062, EPI_ISL_457063, EPI_ISL_457064, EPI_ISL_457065, EPI_ISL_457066, EPI_ISL_457067, EPI_ISL_457068, EPI_ISL_457070, EPI_ISL_457071, EPI_ISL_457072, EPI_ISL_457073, EPI_ISL_457074, EPI_ISL_457075, EPI_ISL_457077, EPI_ISL_457078, EPI_ISL_457079, EPI_ISL_457080, EPI_ISL_457081, EPI_ISL_457082, EPI_ISL_457083, EPI_ISL_457084, EPI_ISL_457085, EPI_ISL_457086, EPI_ISL_457087, EPI_ISL_457088, EPI_ISL_457089, EPI_ISL_457092, EPI_ISL_457093, EPI_ISL_457095, EPI_ISL_457096, EPI_ISL_457097, EPI_ISL_457098, EPI_ISL_457099, EPI_ISL_457100, EPI_ISL_457101, EPI_ISL_457103, EPI_ISL_457104, EPI_ISL_457105, EPI_ISL_457106, EPI_ISL_457107, EPI_ISL_457108, EPI_ISL_457109, EPI_ISL_457110, EPI_ISL_457111, EPI_ISL_457112, EPI_ISL_457113, EPI_ISL_457114, EPI_ISL_457115, EPI_ISL_457116, EPI_ISL_457117, EPI_ISL_457118, EPI_ISL_457119, EPI_ISL_457120, EPI_ISL_457122, EPI_ISL_457123, EPI_ISL_457124, EPI_ISL_457125, EPI_ISL_457126, EPI_ISL_457127, EPI_ISL_457128, EPI_ISL_457130, EPI_ISL_457132, EPI_ISL_457133, EPI_ISL_457134, EPI_ISL_457135, EPI_ISL_457137, EPI_ISL_457138, EPI_ISL_457139, EPI_ISL_457140, EPI_ISL_457141, EPI_ISL_457142, EPI_ISL_457143, EPI_ISL_457144, EPI_ISL_457145, EPI_ISL_457146, EPI_ISL_457147, EPI_ISL_457148, EPI_ISL_457149, EPI_ISL_457150, EPI_ISL_457151, EPI_ISL_457152, EPI_ISL_457153, EPI_ISL_457154, EPI_ISL_457155, EPI_ISL_457156, EPI_ISL_457160, EPI_ISL_457161, EPI_ISL_457162, EPI_ISL_457163, EPI_ISL_457164, EPI_ISL_457165, EPI_ISL_457166, EPI_ISL_457168, EPI_ISL_457169, EPI_ISL_457170, EPI_ISL_457171, EPI_ISL_457172, EPI_ISL_457173, EPI_ISL_457175, EPI_ISL_457176, EPI_ISL_457177, EPI_ISL_457178, EPI_ISL_457179, EPI_ISL_457180, EPI_ISL_457182, EPI_ISL_457183, EPI_ISL_457184, EPI_ISL_457185, EPI_ISL_457186, EPI_ISL_457187, EPI_ISL_457188, EPI_ISL_457189, EPI_ISL_457190, EPI_ISL_457191, EPI_ISL_457192, EPI_ISL_457193, EPI_ISL_457196, EPI_ISL_457197, EPI_ISL_457198, EPI_ISL_457199, EPI_ISL_457200, EPI_ISL_457202, EPI_ISL_457204, EPI_ISL_457206, EPI_ISL_457207, EPI_ISL_457208, EPI_ISL_457209, EPI_ISL_457210, EPI_ISL_457211, EPI_ISL_457212, EPI_ISL_457213, EPI_ISL_457215, EPI_ISL_457218, EPI_ISL_457219, EPI_ISL_457220, EPI_ISL_457221, EPI_ISL_457222, EPI_ISL_457223, EPI_ISL_457225, EPI_ISL_457226, EPI_ISL_457227, EPI_ISL_457228, EPI_ISL_457229, EPI_ISL_457230, EPI_ISL_457231, EPI_ISL_457232, EPI_ISL_457233, EPI_ISL_457234, EPI_ISL_457235, EPI_ISL_457236, EPI_ISL_457237, EPI_ISL_457238, EPI_ISL_457242, EPI_ISL_457243, EPI_ISL_457244, EPI_ISL_457245, EPI_ISL_457246, EPI_ISL_457249, EPI_ISL_457250, EPI_ISL_457251, EPI_ISL_457252, EPI_ISL_457253, EPI_ISL_457254, EPI_ISL_457255, EPI_ISL_457256, EPI_ISL_457257, EPI_ISL_457258 | University of Exeter                                                     | COVID-19 Genomics UK (COG-UK) Consortium                      | Ben Temperton, Aaron Jeffries, Michelle Michelsen, Joanna Warwick-Dugdale, Audrey Farbos, Robyn Manley, Stephen Michell, Jane Masoli                                                                                                                                                                                                                                                                                                                                    |
| EPI_ISL_458001, EPI_ISL_458002, EPI_ISL_458003, EPI_ISL_458004, EPI_ISL_458005, EPI_ISL_458006                                                                                                                                                                                                                                                                                                                                                                                                                                                                                                                                                                                                                                                                                                                                                                                                                                                                                                                                                                                                                                                                                                                                                                                                                                                                                                                                                                                                                                                                                                                                                                                                                                                                                                                                                                                                                                                                                                                                                                                                                                                                                                                                                                                                                                                                                                                                                                                                                                                                                                                                                                                                                                                                                                                                                                                                                                                                                                                                                                                                                                                                                                                                                                 | Dirk Dittmer                                                             | Dirk Dittmer                                                  | Bailey, A.G., Caro-Vegas, C.P., Dittmer, D., Eason, A.B., Juarez, A., Landis, J.T., McNamara, R.P., Miller, M.B., Moorad, R., Pluta, L.J., Seltzer, T.A., Thompson, C., Vahrson, W., Villamor, F.                                                                                                                                                                                                                                                                       |
| EPI_ISL_458007                                                                                                                                                                                                                                                                                                                                                                                                                                                                                                                                                                                                                                                                                                                                                                                                                                                                                                                                                                                                                                                                                                                                                                                                                                                                                                                                                                                                                                                                                                                                                                                                                                                                                                                                                                                                                                                                                                                                                                                                                                                                                                                                                                                                                                                                                                                                                                                                                                                                                                                                                                                                                                                                                                                                                                                                                                                                                                                                                                                                                                                                                                                                                                                                                                                 | Dirk Dittmer                                                             | Dirk Dittmer                                                  | Aubrey, B.G., Caro-Vegas, C.P., Dittmer, D., Eason, A.B., Juarez, A., Landis, J.T., McNamara, R.P., Miller, M.B., Moorad, R., Pluta, L.J., Seltzer, T.A., Thompson, C., Vahrson, W., Villamor, F.                                                                                                                                                                                                                                                                       |
| EPI_ISL_458107                                                                                                                                                                                                                                                                                                                                                                                                                                                                                                                                                                                                                                                                                                                                                                                                                                                                                                                                                                                                                                                                                                                                                                                                                                                                                                                                                                                                                                                                                                                                                                                                                                                                                                                                                                                                                                                                                                                                                                                                                                                                                                                                                                                                                                                                                                                                                                                                                                                                                                                                                                                                                                                                                                                                                                                                                                                                                                                                                                                                                                                                                                                                                                                                                                                 | Gujarat Biotechnology Research Centre                                    | Gujarat Biotechnology Research Centre                         | Apurvashin Puvar, Janvi Raval, Zarna Patel, Monika Gandhi, Pinal Trivedi, Maharshi Pandya, Amit Kanani, Nidhi Patel, Nitin Savaliya, Raghawendra Kumar, Dinesh Kumar, Zuber Saiyed, Komal Patel, Labdhi Pandya, Snehal Bagatharia, Ramesh Pandit, Tejas Shah, Ankit Hinsu, Pritesh Sabara, Priyanka P Vatsa, Bhavesh Modi, Gaurishankar Shrimali, R D Dixit, A M Kadri, Umang Mishra, Chaitanya Joshi, Madhvi Joshi, , , , ,                                            |
| EPI_ISL_458291                                                                                                                                                                                                                                                                                                                                                                                                                                                                                                                                                                                                                                                                                                                                                                                                                                                                                                                                                                                                                                                                                                                                                                                                                                                                                                                                                                                                                                                                                                                                                                                                                                                                                                                                                                                                                                                                                                                                                                                                                                                                                                                                                                                                                                                                                                                                                                                                                                                                                                                                                                                                                                                                                                                                                                                                                                                                                                                                                                                                                                                                                                                                                                                                                                                 | Dirk Dittmer                                                             | Dirk Dittmer                                                  | Bailey, A.G., Caro-Vegas, C.P., Dittmer, D., Eason, A.B., Juarez, A., Landis, J.T., McNamara, R.P., Miller, M.B., Moorad, R., Pluta, L.J., Seltzer, T.A., Thompson, C., Vahrson, W., Villamor, F.                                                                                                                                                                                                                                                                       |
| EPI_ISL_458292, EPI_ISL_458293                                                                                                                                                                                                                                                                                                                                                                                                                                                                                                                                                                                                                                                                                                                                                                                                                                                                                                                                                                                                                                                                                                                                                                                                                                                                                                                                                                                                                                                                                                                                                                                                                                                                                                                                                                                                                                                                                                                                                                                                                                                                                                                                                                                                                                                                                                                                                                                                                                                                                                                                                                                                                                                                                                                                                                                                                                                                                                                                                                                                                                                                                                                                                                                                                                 | Dirk Dittmer                                                             | Dirk Dittmer                                                  | Aubrey, B.G., Caro-Vegas, C.P., Dittmer, D., Eason, A.B., Juarez, A., Landis, J.T., McNamara, R.P., Miller, M.B., Moorad, R., Pluta, L.J., Seltzer, T.A., Thompson, C., Vahrson, W., Villamor, F.                                                                                                                                                                                                                                                                       |
| EPI_ISL_458294, EPI_ISL_458295, EPI_ISL_458296, EPI_ISL_458297                                                                                                                                                                                                                                                                                                                                                                                                                                                                                                                                                                                                                                                                                                                                                                                                                                                                                                                                                                                                                                                                                                                                                                                                                                                                                                                                                                                                                                                                                                                                                                                                                                                                                                                                                                                                                                                                                                                                                                                                                                                                                                                                                                                                                                                                                                                                                                                                                                                                                                                                                                                                                                                                                                                                                                                                                                                                                                                                                                                                                                                                                                                                                                                                 | Dirk Dittmer                                                             | Dirk Dittmer                                                  | Bailey, A.G., Caro-Vegas, C.P., Dittmer, D., Eason, A.B., Juarez, A., Landis, J.T., McNamara, R.P., Miller, M.B., Moorad, R., Pluta, L.J., Seltzer, T.A., Thompson, C., Vahrson, W., Villamor, F.                                                                                                                                                                                                                                                                       |
| EPI_ISL_460079                                                                                                                                                                                                                                                                                                                                                                                                                                                                                                                                                                                                                                                                                                                                                                                                                                                                                                                                                                                                                                                                                                                                                                                                                                                                                                                                                                                                                                                                                                                                                                                                                                                                                                                                                                                                                                                                                                                                                                                                                                                                                                                                                                                                                                                                                                                                                                                                                                                                                                                                                                                                                                                                                                                                                                                                                                                                                                                                                                                                                                                                                                                                                                                                                                                 | Molecular Virology Unit, Fondazione IRCCS Policlinico San Matteo , Pavia | Laboratory of Virology, INMI Lazzaro Spallanzani IRCCS        | Barbara Bartolini, Cesare E.M. Gruber, Maria R. Capobianchi, Martina Rueca, Antonio Piralla, Fausto Baldanti, Antonino Di Caro                                                                                                                                                                                                                                                                                                                                          |
| EPI_ISL_460080                                                                                                                                                                                                                                                                                                                                                                                                                                                                                                                                                                                                                                                                                                                                                                                                                                                                                                                                                                                                                                                                                                                                                                                                                                                                                                                                                                                                                                                                                                                                                                                                                                                                                                                                                                                                                                                                                                                                                                                                                                                                                                                                                                                                                                                                                                                                                                                                                                                                                                                                                                                                                                                                                                                                                                                                                                                                                                                                                                                                                                                                                                                                                                                                                                                 | Molecular Virology Unit, Fondazione IRCCS Policlinico San Matteo , Pavia | Laboratory of Virology, INMI Lazzaro Spallanzani IRCCS        | Antonio Piralla, Barbara Bartolini, Fausto Baldanti, Martina Rueca, Antonino Di Caro, Cesare E.M. Gruber, Maria R. Capobianchi                                                                                                                                                                                                                                                                                                                                          |
| EPI_ISL_460089                                                                                                                                                                                                                                                                                                                                                                                                                                                                                                                                                                                                                                                                                                                                                                                                                                                                                                                                                                                                                                                                                                                                                                                                                                                                                                                                                                                                                                                                                                                                                                                                                                                                                                                                                                                                                                                                                                                                                                                                                                                                                                                                                                                                                                                                                                                                                                                                                                                                                                                                                                                                                                                                                                                                                                                                                                                                                                                                                                                                                                                                                                                                                                                                                                                 | Molecular Virology Unit, Fondazione IRCCS Policlinico San Matteo , Pavia | Laboratory of Virology, INMI Lazzaro Spallanzani IRCCS        | Antonino Di Caro, Barbara Bartolini, Martina Rueca, Cesare E.M. Gruber, Antonio Piralla, Fausto Baldanti, Maria R. Capobianchi                                                                                                                                                                                                                                                                                                                                          |
| EPI_ISL_460090                                                                                                                                                                                                                                                                                                                                                                                                                                                                                                                                                                                                                                                                                                                                                                                                                                                                                                                                                                                                                                                                                                                                                                                                                                                                                                                                                                                                                                                                                                                                                                                                                                                                                                                                                                                                                                                                                                                                                                                                                                                                                                                                                                                                                                                                                                                                                                                                                                                                                                                                                                                                                                                                                                                                                                                                                                                                                                                                                                                                                                                                                                                                                                                                                                                 | Molecular Virology Unit, Fondazione IRCCS Policlinico San Matteo , Pavia | Laboratory of Virology, INMI Lazzaro Spallanzani IRCCS        | Antonio Piralla, Cesare E.M. Gruber, Antonino Di Caro, Maria R. Capobianchi, Martina Rueca, Barbara Bartolini, Fausto Baldanti                                                                                                                                                                                                                                                                                                                                          |
| EPI_ISL_460091                                                                                                                                                                                                                                                                                                                                                                                                                                                                                                                                                                                                                                                                                                                                                                                                                                                                                                                                                                                                                                                                                                                                                                                                                                                                                                                                                                                                                                                                                                                                                                                                                                                                                                                                                                                                                                                                                                                                                                                                                                                                                                                                                                                                                                                                                                                                                                                                                                                                                                                                                                                                                                                                                                                                                                                                                                                                                                                                                                                                                                                                                                                                                                                                                                                 | Molecular Virology Unit, Fondazione IRCCS Policlinico San Matteo , Pavia | Laboratory of Virology, INMI Lazzaro Spallanzani IRCCS        | Antonino Di Caro, Antonio Piralla, Martina Rueca, Fausto Baldanti, Barbara Bartolini, Maria R. Capobianchi, Cesare E.M. Gruber                                                                                                                                                                                                                                                                                                                                          |
| EPI_ISL_460094                                                                                                                                                                                                                                                                                                                                                                                                                                                                                                                                                                                                                                                                                                                                                                                                                                                                                                                                                                                                                                                                                                                                                                                                                                                                                                                                                                                                                                                                                                                                                                                                                                                                                                                                                                                                                                                                                                                                                                                                                                                                                                                                                                                                                                                                                                                                                                                                                                                                                                                                                                                                                                                                                                                                                                                                                                                                                                                                                                                                                                                                                                                                                                                                                                                 | Molecular Virology Unit, Fondazione IRCCS Policlinico San Matteo , Pavia | Laboratory of Virology, INMI Lazzaro Spallanzani IRCCS        | Barbara Bartolini, Maria R. Capobianchi, Antonino Di Caro, Antonio Piralla, Cesare E.M. Gruber, Martina Rueca, Fausto Baldanti                                                                                                                                                                                                                                                                                                                                          |
| EPI_ISL_460095                                                                                                                                                                                                                                                                                                                                                                                                                                                                                                                                                                                                                                                                                                                                                                                                                                                                                                                                                                                                                                                                                                                                                                                                                                                                                                                                                                                                                                                                                                                                                                                                                                                                                                                                                                                                                                                                                                                                                                                                                                                                                                                                                                                                                                                                                                                                                                                                                                                                                                                                                                                                                                                                                                                                                                                                                                                                                                                                                                                                                                                                                                                                                                                                                                                 | Molecular Virology Unit, Fondazione IRCCS Policlinico San Matteo , Pavia | Laboratory of Virology, INMI Lazzaro Spallanzani IRCCS        | Barbara Bartolini, Antonino Di Caro, Fausto Baldanti, Cesare E.M. Gruber, Maria R. Capobianchi, Martina Rueca, Antonio Piralla                                                                                                                                                                                                                                                                                                                                          |
| EPI_ISL_460636, EPI_ISL_460637, EPI_ISL_460638, EPI_ISL_460639, EPI_ISL_460640, EPI_ISL_460641, EPI_ISL_460642, EPI_ISL_460643, EPI_ISL_460644, EPI_ISL_460645, EPI_ISL_460646, EPI_ISL_460647, EPI_ISL_460648, EPI_ISL_460649, EPI_ISL_460650, EPI_ISL_460651, EPI_ISL_460652, EPI_ISL_460653,                                                                                                                                                                                                                                                                                                                                                                                                                                                                                                                                                                                                                                                                                                                                                                                                                                                                                                                                                                                                                                                                                                                                                                                                                                                                                                                                                                                                                                                                                                                                                                                                                                                                                                                                                                                                                                                                                                                                                                                                                                                                                                                                                                                                                                                                                                                                                                                                                                                                                                                                                                                                                                                                                                                                                                                                                                                                                                                                                                |                                                                          |                                                               |                                                                                                                                                                                                                                                                                                                                                                                                                                                                         |

EPI\_ISL\_460654, EPI\_ISL\_460655, EPI\_ISL\_460656, EPI\_ISL\_460657, EPI\_ISL\_460658, EPI\_ISL\_460659, EPI\_ISL\_460660, EPI\_ISL\_460661, EPI\_ISL\_460662, EPI\_ISL\_460663, EPI\_ISL\_460664, EPI\_ISL\_460665, EPI\_ISL\_460666, EPI\_ISL\_460667, EPI\_ISL\_460668, EPI\_ISL\_460669, EPI\_ISL\_460670, EPI\_ISL\_460671, EPI\_ISL\_460672, EPI\_ISL\_460673, EPI\_ISL\_460674, EPI\_ISL\_460675, EPI\_ISL\_460676, EPI\_ISL\_460677, EPI\_ISL\_460678, EPI\_ISL\_460679, EPI\_ISL\_460680, EPI\_ISL\_460681, EPI\_ISL\_460682, EPI\_ISL\_460683, EPI\_ISL\_460684, EPI\_ISL\_460685, EPI\_ISL\_460686, EPI\_ISL\_460687, EPI\_ISL\_460688, EPI\_ISL\_460689, EPI\_ISL\_460690, EPI\_ISL\_460691, EPI\_ISL\_460692, EPI\_ISL\_460693, EPI\_ISL\_460694, EPI\_ISL\_460695, EPI\_ISL\_460696, EPI\_ISL\_460700, EPI\_ISL\_460701, EPI\_ISL\_460702, EPI\_ISL\_460703, EPI\_ISL\_460704, EPI\_ISL\_460705, EPI\_ISL\_460706, EPI\_ISL\_460707, EPI\_ISL\_460708, EPI\_ISL\_460709, EPI\_ISL\_460710, EPI\_ISL\_460711, EPI\_ISL\_460712, EPI\_ISL\_460713, EPI\_ISL\_460714, EPI\_ISL\_460715, EPI\_ISL\_460716, EPI\_ISL\_460717, EPI\_ISL\_460718, EPI\_ISL\_460719, EPI\_ISL\_460720, EPI\_ISL\_460721, EPI\_ISL\_460722, EPI\_ISL\_460723, EPI\_ISL\_460724, EPI\_ISL\_460725, EPI\_ISL\_460726, EPI\_ISL\_460727, EPI\_ISL\_460728, EPI\_ISL\_460729, EPI\_ISL\_460730, EPI\_ISL\_460731, EPI\_ISL\_460732, EPI\_ISL\_460733, EPI\_ISL\_460734, EPI\_ISL\_460735, EPI\_ISL\_460736, EPI\_ISL\_460737, EPI\_ISL\_460738, EPI\_ISL\_460739, EPI\_ISL\_460740, EPI\_ISL\_460741, EPI\_ISL\_460742, EPI\_ISL\_460743, EPI\_ISL\_460744, EPI\_ISL\_460745, EPI\_ISL\_460746, EPI\_ISL\_460747, EPI\_ISL\_460748, EPI\_ISL\_460749, EPI\_ISL\_460750, EPI\_ISL\_460751, EPI\_ISL\_460752, EPI\_ISL\_460753, EPI\_ISL\_460754, EPI\_ISL\_460755, EPI\_ISL\_460756, EPI\_ISL\_460757, EPI\_ISL\_460758, EPI\_ISL\_460759, EPI\_ISL\_460760, EPI\_ISL\_460761, EPI\_ISL\_460762, EPI\_ISL\_460763, EPI\_ISL\_460764, EPI\_ISL\_460765, EPI\_ISL\_460766, EPI\_ISL\_460767, EPI\_ISL\_460768, EPI\_ISL\_460769, EPI\_ISL\_460770, EPI\_ISL\_460771, EPI\_ISL\_460772, EPI\_ISL\_460773, EPI\_ISL\_460774, EPI\_ISL\_460775, EPI\_ISL\_460776, EPI\_ISL\_460777, EPI\_ISL\_460778, EPI\_ISL\_460779, EPI\_ISL\_460780, EPI\_ISL\_460781, EPI\_ISL\_460782, EPI\_ISL\_460783, EPI\_ISL\_460784, EPI\_ISL\_460785, EPI\_ISL\_460786, EPI\_ISL\_460787, EPI\_ISL\_460788, EPI\_ISL\_460789, EPI\_ISL\_460790, EPI\_ISL\_460791, EPI\_ISL\_460792, EPI\_ISL\_460793, EPI\_ISL\_460794, EPI\_ISL\_460795, EPI\_ISL\_460796, EPI\_ISL\_460797, EPI\_ISL\_460798, EPI\_ISL\_460799, EPI\_ISL\_460800, EPI\_ISL\_460801, EPI\_ISL\_460802, EPI\_ISL\_460803, EPI\_ISL\_460804, EPI\_ISL\_460805, EPI\_ISL\_460806, EPI\_ISL\_460807, EPI\_ISL\_460808, EPI\_ISL\_460809, EPI\_ISL\_460810, EPI\_ISL\_460811, EPI\_ISL\_460812, EPI\_ISL\_460813, EPI\_ISL\_460814, EPI\_ISL\_460815, EPI\_ISL\_460816, EPI\_ISL\_460817, EPI\_ISL\_460818, EPI\_ISL\_460819, EPI\_ISL\_460820, EPI\_ISL\_460821, EPI\_ISL\_460822, EPI\_ISL\_460823, EPI\_ISL\_460824, EPI\_ISL\_460825, EPI\_ISL\_460826, EPI\_ISL\_460827, EPI\_ISL\_460828, EPI\_ISL\_460829, EPI\_ISL\_460830, EPI\_ISL\_460831, EPI\_ISL\_460832, EPI\_ISL\_460833, EPI\_ISL\_460834, EPI\_ISL\_460835, EPI\_ISL\_460836, EPI\_ISL\_460837, EPI\_ISL\_460838, EPI\_ISL\_460839, EPI\_ISL\_460840, EPI\_ISL\_460841, EPI\_ISL\_460842, EPI\_ISL\_460843, EPI\_ISL\_460844, EPI\_ISL\_460845, EPI\_ISL\_460846, EPI\_ISL\_460847, EPI\_ISL\_460848, EPI\_ISL\_460849, EPI\_ISL\_460850, EPI\_ISL\_460851, EPI\_ISL\_460852, EPI\_ISL\_460853, EPI\_ISL\_460854, EPI\_ISL\_460855, EPI\_ISL\_460856, EPI\_ISL\_460857, EPI\_ISL\_460858, EPI\_ISL\_460859, EPI\_ISL\_460860, EPI\_ISL\_460861, EPI\_ISL\_460862, EPI\_ISL\_460863, EPI\_ISL\_460864, EPI\_ISL\_460865, EPI\_ISL\_460866, EPI\_ISL\_460867, EPI\_ISL\_460868, EPI\_ISL\_460869, EPI\_ISL\_460870, EPI\_ISL\_460871, EPI\_ISL\_460872, EPI\_ISL\_460873, EPI\_ISL\_460874, EPI\_ISL\_460875, EPI\_ISL\_460876, EPI\_ISL\_460877, EPI\_ISL\_460878, EPI\_ISL\_460879, EPI\_ISL\_460880, EPI\_ISL\_460881, EPI\_ISL\_460882, EPI\_ISL\_460883, EPI\_ISL\_460884, EPI\_ISL\_460885, EPI\_ISL\_460886, EPI\_ISL\_460887, EPI\_ISL\_460888, EPI\_ISL\_460889, EPI\_ISL\_460890, EPI\_ISL\_460891, EPI\_ISL\_460892, EPI\_ISL\_460893, EPI\_ISL\_460894, EPI\_ISL\_460895, EPI\_ISL\_460896, EPI\_ISL\_460897, EPI\_ISL\_460898, EPI\_ISL\_460899, EPI\_ISL\_460900, EPI\_ISL\_460901, EPI\_ISL\_460902, EPI\_ISL\_460903, EPI\_ISL\_460904, EPI\_ISL\_460905, EPI\_ISL\_460906, EPI\_ISL\_460907, EPI\_ISL\_460908, EPI\_ISL\_460909, EPI\_ISL\_460910, EPI\_ISL\_460911, EPI\_ISL\_460912, EPI\_ISL\_460913, EPI\_ISL\_460914, EPI\_ISL\_460915, EPI\_ISL\_460916, EPI\_ISL\_460917, EPI\_ISL\_460918, EPI\_ISL\_460919, EPI\_ISL\_460920, EPI\_ISL\_460921, EPI\_ISL\_460922, EPI\_ISL\_460923, EPI\_ISL\_460924, EPI\_ISL\_460925, EPI\_ISL\_460926, EPI\_ISL\_460927, EPI\_ISL\_460928, EPI\_ISL\_460929, EPI\_ISL\_460930, EPI\_ISL\_460931, EPI\_ISL\_460932, EPI\_ISL\_460933, EPI\_ISL\_460934, EPI\_ISL\_460935, EPI\_ISL\_460936, EPI\_ISL\_460937, EPI\_ISL\_460938, EPI\_ISL\_460939, EPI\_ISL\_460940, EPI\_ISL\_460941, EPI\_ISL\_460942, EPI\_ISL\_460943, EPI\_ISL\_460944, EPI\_ISL\_460945, EPI\_ISL\_460946, EPI\_ISL\_460947, EPI\_ISL\_460948, EPI\_ISL\_460949, EPI\_ISL\_460950, EPI\_ISL\_460951, EPI\_ISL\_460952, EPI\_ISL\_460953, EPI\_ISL\_460954, EPI\_ISL\_460955, EPI\_ISL\_460956, EPI\_ISL\_460957, EPI\_ISL\_460958, EPI\_ISL\_460959, EPI\_ISL\_460960, EPI\_ISL\_460961, EPI\_ISL\_460962, EPI\_ISL\_460963, EPI\_ISL\_460964, EPI\_ISL\_460965, EPI\_ISL\_460966, EPI\_ISL\_460967, EPI\_ISL\_460968, EPI\_ISL\_460969, EPI\_ISL\_460970, EPI\_ISL\_460971, EPI\_ISL\_460972, EPI\_ISL\_460973, EPI\_ISL\_460974, EPI\_ISL\_460975, EPI\_ISL\_460976, EPI\_ISL\_460977, EPI\_ISL\_460978, EPI\_ISL\_460979, EPI\_ISL\_460980, EPI\_ISL\_460981, EPI\_ISL\_460982, EPI\_ISL\_460983, EPI\_ISL\_460984, EPI\_ISL\_460985, EPI\_ISL\_460986, EPI\_ISL\_460987, EPI\_ISL\_460988, EPI\_ISL\_460989, EPI\_ISL\_460990, EPI\_ISL\_460991, EPI\_ISL\_460992, EPI\_ISL\_460993, EPI\_ISL\_460994, EPI\_ISL\_460995, EPI\_ISL\_460996, EPI\_ISL\_460997, EPI\_ISL\_460998, EPI\_ISL\_460999, EPI\_ISL\_461000, EPI\_ISL\_461001, EPI\_ISL\_461002, EPI\_ISL\_461003, EPI\_ISL\_461004, EPI\_ISL\_461005, EPI\_ISL\_461006, EPI\_ISL\_461007, EPI\_ISL\_461008, EPI\_ISL\_461009, EPI\_ISL\_461010, EPI\_ISL\_461011, EPI\_ISL\_461012, EPI\_ISL\_461013, EPI\_ISL\_461014, EPI\_ISL\_461015, EPI\_ISL\_461016, EPI\_ISL\_461017, EPI\_ISL\_461018, EPI\_ISL\_461019, EPI\_ISL\_461020, EPI\_ISL\_461021, EPI\_ISL\_461022, EPI\_ISL\_461023, EPI\_ISL\_461024, EPI\_ISL\_461025, EPI\_ISL\_461026, EPI\_ISL\_461027, EPI\_ISL\_461028, EPI\_ISL\_461029, EPI\_ISL\_461030, EPI\_ISL\_461031, EPI\_ISL\_461032, EPI\_ISL\_461033, EPI\_ISL\_461034, EPI\_ISL\_461035, EPI\_ISL\_461036, EPI\_ISL\_461037, EPI\_ISL\_461038, EPI\_ISL\_461039, EPI\_ISL\_461040, EPI\_ISL\_461041, EPI\_ISL\_461042, EPI\_ISL\_461043, EPI\_ISL\_461044, EPI\_ISL\_461045, EPI\_ISL\_461046, EPI\_ISL\_461047, EPI\_ISL\_461048, EPI\_ISL\_461049, EPI\_ISL\_461050, EPI\_ISL\_461051, EPI\_ISL\_461052, EPI\_ISL\_461053, EPI\_ISL\_461054, EPI\_ISL\_461055, EPI\_ISL\_461056, EPI\_ISL\_461057, EPI\_ISL\_461058, EPI\_ISL\_461059, EPI\_ISL\_461060, EPI\_ISL\_461061, EPI\_ISL\_461062, EPI\_ISL\_461063, EPI\_ISL\_461064, EPI\_ISL\_461065, EPI\_ISL\_461066, EPI\_ISL\_461067, EPI\_ISL\_461068, EPI\_ISL\_461069, EPI\_ISL\_461070, EPI\_ISL\_461071, EPI\_ISL\_461072, EPI\_ISL\_461073, EPI\_ISL\_461074, EPI\_ISL\_461075, EPI\_ISL\_461076, EPI\_ISL\_461077, EPI\_ISL\_461078, EPI\_ISL\_461079, EPI\_ISL\_461080, EPI\_ISL\_461081, EPI\_ISL\_461082, EPI\_ISL\_461083, EPI\_ISL\_461084, EPI\_ISL\_461085, EPI\_ISL\_461086, EPI\_ISL\_461087, EPI\_ISL\_461088, EPI\_ISL\_461089, EPI\_ISL\_461090, EPI\_ISL\_461091, EPI\_ISL\_461092, EPI\_ISL\_461093, EPI\_ISL\_461094, EPI\_ISL\_461095, EPI\_ISL\_461096, EPI\_ISL\_461097, EPI\_ISL\_461098, EPI\_ISL\_461099, EPI\_ISL\_461100, EPI\_ISL\_461101, EPI\_ISL\_461102, EPI\_ISL\_461103, EPI\_ISL\_461104, EPI\_ISL\_461105, EPI\_ISL\_461106, EPI\_ISL\_461107, EPI\_ISL\_461108, EPI\_ISL\_461109, EPI\_ISL\_461110, EPI\_ISL\_461111, EPI\_ISL\_461112, EPI\_ISL\_461113, EPI\_ISL\_461114, EPI\_ISL\_461115, EPI\_ISL\_461116, EPI\_ISL\_461117, EPI\_ISL\_461118, EPI\_ISL\_461119, EPI\_ISL\_461120, EPI\_ISL\_461121, EPI\_ISL\_461122, EPI\_ISL\_461123, EPI\_ISL\_461124, EPI\_ISL\_461125, EPI\_ISL\_461126, EPI\_ISL\_461127, EPI\_ISL\_461128, EPI\_ISL\_461129, EPI\_ISL\_461130, EPI\_ISL\_461131, EPI\_ISL\_461132, EPI\_ISL\_461133, EPI\_ISL\_461134, EPI\_ISL\_461135, EPI\_ISL\_461136, EPI\_ISL\_461137, EPI\_ISL\_461138, EPI\_ISL\_461139, EPI\_ISL\_461140, EPI\_ISL\_461141, EPI\_ISL\_461142, EPI\_ISL\_461143, EPI\_ISL\_461144, EPI\_ISL\_461145, EPI\_ISL\_461146, EPI\_ISL\_461147, EPI\_ISL\_461148, EPI\_ISL\_461149, EPI\_ISL\_461150, EPI\_ISL\_461151, EPI\_ISL\_461152, EPI\_ISL\_461153, EPI\_ISL\_461154, EPI\_ISL\_461155, EPI\_ISL\_461156, EPI\_ISL\_461157, EPI\_ISL\_461158, EPI\_ISL\_461159, EPI\_ISL\_461160, EPI\_ISL\_461161, EPI\_ISL\_461162, EPI\_ISL\_461163, EPI\_ISL\_461164, EPI\_ISL\_461165, EPI\_ISL\_461166, EPI\_ISL\_461167, EPI\_ISL\_461168, EPI\_ISL\_461169, EPI\_ISL\_461170, EPI\_ISL\_461171, EPI\_ISL\_461172, EPI\_ISL\_461173, EPI\_ISL\_461174, EPI\_ISL\_461175, EPI\_ISL\_461176, EPI\_ISL\_461177, EPI\_ISL\_461178, EPI\_ISL\_461179, EPI\_ISL\_461180, EPI\_ISL\_461181, EPI\_ISL\_461182, EPI\_ISL\_461183, EPI\_ISL\_461184, EPI\_ISL\_461185, EPI\_ISL\_461186, EPI\_ISL\_461187, EPI\_ISL\_461188, EPI\_ISL\_461189, EPI\_ISL\_461190, EPI\_ISL\_461191, EPI\_ISL\_461192, EPI\_ISL\_461193, EPI\_ISL\_461194, EPI\_ISL\_461195, EPI\_ISL\_461196, EPI\_ISL\_461197, EPI\_ISL\_461198, EPI\_ISL\_461199, EPI\_ISL\_461200, EPI\_ISL\_461201, EPI\_ISL\_461202, EPI\_ISL\_461203, EPI\_ISL\_461204, EPI\_ISL\_461205, EPI\_ISL\_461206, EPI\_ISL\_461207, EPI\_ISL\_461208, EPI\_ISL\_461209, EPI\_ISL\_461210, EPI\_ISL\_461211, EPI\_ISL\_461212, EPI\_ISL\_461213, EPI\_ISL\_461214, EPI\_ISL\_461215, EPI\_ISL\_461216, EPI\_ISL\_461217, EPI\_ISL\_461218, EPI\_ISL\_461219, EPI\_ISL\_461220, EPI\_ISL\_461221, EPI\_ISL\_461222, EPI\_ISL\_461223, EPI\_ISL\_461224, EPI\_ISL\_461225, EPI\_ISL\_461226, EPI\_ISL\_461227, EPI\_ISL\_461228, EPI\_ISL\_461229, EPI\_ISL\_461230, EPI\_ISL\_461231, EPI\_ISL\_461232, EPI\_ISL\_461233, EPI\_ISL\_461234, EPI\_ISL\_461235, EPI\_ISL\_461236, EPI\_ISL\_461237, EPI\_ISL\_461238, EPI\_ISL\_461239, EPI\_ISL\_461240, EPI\_ISL\_461241, EPI\_ISL\_461242, EPI\_ISL\_461243, EPI\_ISL\_461244, EPI\_ISL\_461245, EPI\_ISL\_461246, EPI\_ISL\_461247, EPI\_ISL\_461248, EPI\_ISL\_461249, EPI\_ISL\_461250, EPI\_ISL\_461251, EPI\_ISL\_461252, EPI\_ISL\_461253, EPI\_ISL\_461254, EPI\_ISL\_461255, EPI\_ISL\_461256, EPI\_ISL\_461257, EPI\_ISL\_461258, EPI\_ISL\_461259, EPI\_ISL\_461260, EPI\_ISL\_461261, EPI\_ISL\_461262, EPI\_ISL\_461263, EPI\_ISL\_461264, EPI\_ISL\_461265, EPI\_ISL\_461266, EPI\_ISL\_461267, EPI\_ISL\_461268, EPI\_ISL\_461269, EPI\_ISL\_461270, EPI\_ISL\_461271, EPI\_ISL\_461272, EPI\_ISL\_461273, EPI\_ISL\_461274, EPI\_ISL\_461275, EPI\_ISL\_461276, EPI\_ISL\_461277, EPI\_ISL\_461278, EPI\_ISL\_461279, EPI\_ISL\_461280, EPI\_ISL\_461281, EPI\_ISL\_461282, EPI\_ISL\_461283, EPI\_ISL\_461284, EPI\_ISL\_461285, EPI\_ISL\_461286, EPI\_ISL\_461287, EPI\_ISL\_461288, EPI\_ISL\_461289, EPI\_ISL\_461290, EPI\_ISL\_461291, EPI\_ISL\_461292, EPI\_ISL\_461293, EPI\_ISL\_461294, EPI\_ISL\_461295, EPI\_ISL\_461296, EPI\_ISL\_461297, EPI\_ISL\_461298, EPI\_ISL\_461299, EPI\_ISL\_461300, EPI\_ISL\_461301, EPI\_ISL\_461302, EPI\_ISL\_461303, EPI\_ISL\_461304, EPI\_ISL\_461305, EPI\_ISL\_461306, EPI\_ISL\_461307, EPI\_ISL\_461308, EPI\_ISL\_461309, EPI\_ISL\_461310, EPI\_ISL\_461311, EPI\_ISL\_461312, EPI\_ISL\_461313, EPI\_ISL\_461314, EPI\_ISL\_461315, EPI\_ISL\_461316, EPI\_ISL\_461317, EPI\_ISL\_461318, EPI\_ISL\_461319, EPI\_ISL\_461320, EPI\_ISL\_461321, EPI\_ISL\_461322, EPI\_ISL\_461323, EPI\_ISL\_461324, EPI\_ISL\_461325, EPI\_ISL\_461326, EPI\_ISL\_461327, EPI\_ISL\_461328, EPI\_ISL\_461329, EPI\_ISL\_461330, EPI\_ISL\_461331, EPI\_ISL\_461332, EPI\_ISL\_461333, EPI\_ISL\_461334, EPI\_ISL\_461335, EPI\_ISL\_461336, EPI\_ISL\_461337, EPI\_ISL\_461338, EPI\_ISL\_461339, EPI\_ISL\_461340, EPI\_ISL\_461341, EPI\_ISL\_461342, EPI\_ISL\_461343, EPI\_ISL\_461344, EPI\_ISL\_461345, EPI\_ISL\_461346, EPI\_ISL\_461347, EPI\_ISL\_461348, EPI\_ISL\_461349, EPI\_ISL\_461350, EPI\_ISL\_461351, EPI\_ISL\_461352, EPI\_ISL\_461353, EPI\_ISL\_461354, EPI\_ISL\_461355, EPI\_ISL\_461356, EPI\_ISL\_461357, EPI\_ISL\_461358, EPI\_ISL\_461359, EPI\_ISL\_461360, EPI\_ISL\_461361, EPI\_ISL\_461362, EPI\_ISL\_461363, EPI\_ISL\_461364, EPI\_ISL\_461365, EPI\_ISL\_461366, EPI\_ISL\_461367, EPI\_ISL\_461368, EPI\_ISL\_461369, EPI\_ISL\_461370, EPI\_ISL\_461371, EPI\_ISL\_461372, EPI\_ISL\_461373, EPI\_ISL\_461374, EPI\_ISL\_461375, EPI\_ISL\_461376, EPI\_ISL\_461377, EPI\_ISL\_461378, EPI\_ISL\_461379, EPI\_ISL\_461380, EPI\_ISL\_461381, EPI\_ISL\_461382, EPI\_ISL\_461383, EPI\_ISL\_461384, EPI\_ISL\_461385, EPI\_ISL\_461386, EPI\_ISL\_461387, EPI\_ISL\_461388, EPI\_ISL\_461389, EPI\_ISL\_461390, EPI\_ISL\_461391, EPI\_ISL\_461392, EPI\_ISL\_461393, EPI\_ISL\_461394, EPI\_ISL\_461395, EPI\_ISL\_461396, EPI\_ISL\_461397, EPI\_ISL\_461398

|                                                                                                                |                                                                      |                                                                                                                          |                                                                                                                                                                                                                                                                                                                                                                                                                                                                         |
|----------------------------------------------------------------------------------------------------------------|----------------------------------------------------------------------|--------------------------------------------------------------------------------------------------------------------------|-------------------------------------------------------------------------------------------------------------------------------------------------------------------------------------------------------------------------------------------------------------------------------------------------------------------------------------------------------------------------------------------------------------------------------------------------------------------------|
| see above                                                                                                      | Dutch COVID-19 response team                                         | Erasmus Medical Center                                                                                                   | Bas Oude Munnink, David Nieuwenhuijse, Reina Sikkema, Claudia Schapendonk, Irina Chestakova, Anne van der Linden, Theo Bestebroer, Stefan van Nieuwkoop, Mark Pronk, Pascal Lexmond, Reina Swaan, Manon Haverkate, Madelief Mollers, Mart Stein, Sandra Kengne Kangma Mbou, Jeroen van Kampen, Jolanda Voermans, Aura Timen, Corine GeurtsvanKessel, Anneliek van der Eijk, Richard Molenkamp, Marion Koopmans, on behalf of the Dutch national COVID-19 response team. |
| EPI_ISL_461480                                                                                                 | Government Medical College, Vadodara                                 | Gujarat Biotechnology Research Center                                                                                    | Armi Chaudhari, Raghawendra Kumar, Dinesh Kumar, Zuber Saiyed, Komal Patel, Labdhi Pandya, Snehal Bagatharia, Tanuja Javadekar , R N Daveswkar, Tejas Shah, Ankit Hinsu, Pritesh Sabara, Apurvasinh Puvar, Janvi Raval, Zarna Patel, Monika Gandhi, Pinal Trivedi, Maharshi Pandya, Nidhi Patel, Nitin Savaliya, R D Dixit, A M Kadri, Harsh Bakshi, Chaitanya Joshi, Madhvi Joshi,                                                                                     |
| EPI_ISL_461493                                                                                                 | B.J. Medical College and Civil hospital                              | Gujarat Biotechnology Research Center                                                                                    | Armi Chaudhari, Zarna Patel, Monika Gandhi, Pinal Trivedi, Maharshi Pandya, Nidhi Patel, Nitin Savaliya, Raghawendra Kumar, Dinesh Kumar, Zuber Saiyed, Komal Patel, Labdhi Pandya, Snehal Bagatharia, Pranay Shah, Kamlesh J Upadhayay, Tejas Shah, Ankit Hinsu, Pritesh Sabara, Apurvasinh Puvar, Janvi Raval, R D Dixit, A M Kadri, Harsh Bakshi, Chaitanya Joshi, Madhvi Joshi,                                                                                     |
| EPI_ISL_462090                                                                                                 | National Institute of Laboratory Medicine and Referral Center        | Genomic Research Lab, BCSIR                                                                                              | Barna Goswami, Abu Sayeed Mohammad Mahmud, Mohammad Samir Uzzaman, Eshrar Osman, Md. Ahasan Habib, Shahina Akter, Tanjina Akhter Banu, Iffat Jahan, Md. Saddam Hossain, Tasnim Hafsa, Md. Maruf Ahmed Molla, Mahmuda Yeasmin, Asish Kumar Ghos, Bayzid Bin Monir, Arifa Akram, Sheikh Md. Selim Al Din, Salek Ahmed Sajib, Utpal Chandra Ray, Md. Salim Khan                                                                                                            |
| EPI_ISL_462439, EPI_ISL_462440, EPI_ISL_462441, EPI_ISL_462442, EPI_ISL_462443, EPI_ISL_462444, EPI_ISL_462445 | unknown                                                              | Ryota Kumagai Tokyo Metropolitan Institute of Public Health                                                              | Asakura,H., Kumagai,R., Yoshida,I., Nagashima,M., Chiba,T., Sadamasu,K.                                                                                                                                                                                                                                                                                                                                                                                                 |
| EPI_ISL_464165, EPI_ISL_464166                                                                                 | National Institute of Laboratory Medicine and Referral Center        | Genomic Research Lab, BCSIR                                                                                              | Barna Goswami, Abu Sayeed Mohammad Mahmud, Mohammad Samir Uzzaman, Eshrar Osman, Md. Ahasan Habib, Shahina Akter, Tanjina Akhter Banu, Md. Murshed Hasan Sarker, Iffat Jahan, Md. Saddam Hossain, Tasnim Hafsa, Md. Maruf Ahmed Molla, Mahmuda Yeasmin, Asish Kumar Ghosh, Arifa Akram, A. K. M. Shamsuzzaman, Sheikh Md. Selim Al Din, Utpal Chandra Ray, Salek Ahmed Sajib, Md. Salim Khan                                                                            |
| EPI_ISL_466839                                                                                                 | National Genomics Core-Center for DNA Fingerprinting and Diagnostics | National Genomics Core- Center for DNA Fingerprinting and Diagnostics (NGC-CDFD)- DBT's PAN-INDIA-1000 Genome consortium | Bala Pratyusha, Vinay Donipadi, G Shashikanth, Amrita Bhattacharjee, Rajeshree Sanyal, Raju Kumar, Ajay Kumar Chaudhary, Akash Chinchole, Brahmaji Sontyana, C. Arun Kumar, R HARINARAYANAN, RASHNA BHANDARI, MURALI DHARAN BASHYAM, DEBASHIS MITRA, DIVYA VASHISHT, ASHWIN DALAL                                                                                                                                                                                       |
| EPI_ISL_466840, EPI_ISL_466841, EPI_ISL_466842, EPI_ISL_466843, EPI_ISL_466844                                 | National Genomics Core-Center for DNA Fingerprinting and Diagnostics | National Genomics Core- Center for DNA Fingerprinting and Diagnostics (NGC-CDFD)- DBT's PAN-INDIA-1000 Genome consortium | Bala Pratyusha, Vinay Donipadi, G Shashikanth, Amrita Bhattacharjee, Nalini Raghunathan, Rajeshree Sanyal, Raju Kumar, Ajay Kumar Chaudhary, Akash Chinchole, Brahmaji Sontyana, C. Arun Kumar, R Harinarayanan, Rashna Bhandari, Murali Dharan Bashyam, Debashis Mitra, Divya Vashisht, Ashwin Dalal                                                                                                                                                                   |
| EPI_ISL_466845, EPI_ISL_466846, EPI_ISL_466847                                                                 | National Genomics Core-Center for DNA Fingerprinting and Diagnostics | National Genomics Core- Center for DNA Fingerprinting and Diagnostics (NGC-CDFD)- DBT's PAN-INDIA-1000 Genome consortium | Bala Pratyusha, Vinay Donipadi, G Shashikanth, Amrita Bhattacharjee, Chandra Shekhar V. Chilikala Gangi Reddy, Chinthakindi KrishnaPrasad, Eedurugatha Dinesh, Guru Raja, Hial Ahmad Reshi, R HARINARAYANAN, RASHNA BHANDARI, MURALI DHARAN BASHYAM, DEBASHIS MITRA, DIVYA VASHISHT, ASHWIN DALAL                                                                                                                                                                       |
| EPI_ISL_466848, EPI_ISL_466849, EPI_ISL_466850, EPI_ISL_466851, EPI_ISL_466852                                 | National Genomics Core-Center for DNA Fingerprinting and Diagnostics | National Genomics Core- Center for DNA Fingerprinting and Diagnostics (NGC-CDFD)- DBT's PAN-INDIA-1000 Genome consortium | Bala Pratyusha, Vinay Donipadi, G Shashikanth, Amrita Bhattacharjee, J. Mallikarjun, K. Viswakalyan, Kaisar Ahmad Lone, Kausika Kumar Malik, N. Sudheer, Neeraj Kumar, R HARINARAYANAN, RASHNA BHANDARI, MURALI DHARAN BASHYAM, DEBASHIS MITRA, DIVYA VASHISHT, ASHWIN DALAL                                                                                                                                                                                            |
| EPI_ISL_466853, EPI_ISL_466854, EPI_ISL_466855, EPI_ISL_466856, EPI_ISL_466857                                 | National Genomics Core-Center for DNA Fingerprinting and Diagnostics | National Genomics Core- Center for DNA Fingerprinting and Diagnostics (NGC-CDFD)- DBT's PAN-INDIA-1000 Genome consortium | Bala Pratyusha, Vinay Donipadi, G Shashikanth, Amrita Bhattacharjee, Niteen Pathak, Pradipta Hore, Rahul Baroi, Sayantan Goswami, Shaffiqu T S, Shalini Arichotta, R HARINARAYANAN, RASHNA BHANDARI, MURALI DHARAN BASHYAM, DEBASHIS MITRA, DIVYA VASHISHT, ASHWIN DALAL                                                                                                                                                                                                |
| EPI_ISL_466858, EPI_ISL_466859, EPI_ISL_466860, EPI_ISL_466861, EPI_ISL_466862                                 | National Genomics Core-Center for DNA Fingerprinting and Diagnostics | National Genomics Core- Center for DNA Fingerprinting and Diagnostics (NGC-CDFD)- DBT's PAN-INDIA-1000 Genome consortium | Bala Pratyusha, Vinay Donipadi, G Shashikanth, Amrita Bhattacharjee, Sobhan Babu, SPR Prasad, Yogesh Patidar, Arijta Jaiswal, Arpita Singh, Devanshi Gupta, R HARINARAYANAN, RASHNA BHANDARI, MURALI DHARAN BASHYAM, DEBASHIS MITRA, DIVYA VASHISHT, ASHWIN DALAL                                                                                                                                                                                                       |
| EPI_ISL_466863, EPI_ISL_466864,                                                                                | National Genomics Core-Center for DNA Fingerprinting and             | National Genomics Core- Center for DNA Fingerprinting and                                                                | Bala Pratyusha, Vinay Donipadi, G Shashikanth, Amrita Bhattacharjee, Romila Moirangthem, Sanjana Sarkar, Shivani Yadav, Shubhra Ganguli, Suchitra                                                                                                                                                                                                                                                                                                                       |

|                                                                                                                                                                                                                                                                                                                                                                                                                                                                                                                                                                                                                                                                                                                                                                                                                                                                                                                                                                                                                                                                                                                                                                                                                                                                                                                                                                                                                                                                                                                                                                                |                                                                      |                                                                                                                          |                                                                                                                                                                                                                                                                                                                                                                                                                 |
|--------------------------------------------------------------------------------------------------------------------------------------------------------------------------------------------------------------------------------------------------------------------------------------------------------------------------------------------------------------------------------------------------------------------------------------------------------------------------------------------------------------------------------------------------------------------------------------------------------------------------------------------------------------------------------------------------------------------------------------------------------------------------------------------------------------------------------------------------------------------------------------------------------------------------------------------------------------------------------------------------------------------------------------------------------------------------------------------------------------------------------------------------------------------------------------------------------------------------------------------------------------------------------------------------------------------------------------------------------------------------------------------------------------------------------------------------------------------------------------------------------------------------------------------------------------------------------|----------------------------------------------------------------------|--------------------------------------------------------------------------------------------------------------------------|-----------------------------------------------------------------------------------------------------------------------------------------------------------------------------------------------------------------------------------------------------------------------------------------------------------------------------------------------------------------------------------------------------------------|
| EPI_ISL_466865, EPI_ISL_466866, EPI_ISL_466867                                                                                                                                                                                                                                                                                                                                                                                                                                                                                                                                                                                                                                                                                                                                                                                                                                                                                                                                                                                                                                                                                                                                                                                                                                                                                                                                                                                                                                                                                                                                 | Diagnostics                                                          | Diagnostics (NGC-CDFD)- DBT's PAN-INDIA-1000 Genome consortium                                                           | Upreti, Swathi Chodisetty , R HARINARAYANAN, RASHNA BHANDARI, MURALI DHARAN BASHYAM, DEBASHIS MITRA, DIVYA VASHISHT, ASHWIN DALAL                                                                                                                                                                                                                                                                               |
| EPI_ISL_466868, EPI_ISL_466869, EPI_ISL_466870, EPI_ISL_466871, EPI_ISL_466872                                                                                                                                                                                                                                                                                                                                                                                                                                                                                                                                                                                                                                                                                                                                                                                                                                                                                                                                                                                                                                                                                                                                                                                                                                                                                                                                                                                                                                                                                                 | National Genomics Core-Center for DNA Fingerprinting and Diagnostics | National Genomics Core- Center for DNA Fingerprinting and Diagnostics (NGC-CDFD)- DBT's PAN-INDIA-1000 Genome consortium | Bala Pratyusha, Vinay Donipadi, G Shashikanth, Amrita Bhattacharjee, Vani Singh, Shubhra Ganguli, Suchitra Upreti, Swathi Chodisetty , Vani Singh , R HARINARAYANAN, RASHNA BHANDARI, MURALI DHARAN BASHYAM, DEBASHIS MITRA, DIVYA VASHISHT, ASHWIN DALAL                                                                                                                                                       |
| EPI_ISL_467036                                                                                                                                                                                                                                                                                                                                                                                                                                                                                                                                                                                                                                                                                                                                                                                                                                                                                                                                                                                                                                                                                                                                                                                                                                                                                                                                                                                                                                                                                                                                                                 | GMERS Medical College and Hospital, Gandhinagar                      | Gujarat Biotechnology Research Centre                                                                                    | Apurvashin Puvar, Janvi Raval, Zarna Patel, Monika Gandhi, Pinal Trivedi, Maharshi Pandya, Nidhi Patel, Nitin Savaliya, Raghawendra Kumar, Dinesh Kumar, Zuber Saiyed, Komal Patel, Labdhi Pandya, Snehal Bagatharia, Seema Bhatt, Gaurishankar Shrirami, Bhavesh Modi, Bharti Rajani, Tejas Shah, Ankit Hinsu, Pritesh Sabara, Afzal Ansari, R D Dixit, A M Kadri, Harsh Bakshi, Chaitanya Joshi, Madhvi Joshi |
| EPI_ISL_468765, EPI_ISL_468766, EPI_ISL_468767, EPI_ISL_468768, EPI_ISL_468769, EPI_ISL_468770, EPI_ISL_468771, EPI_ISL_468772, EPI_ISL_468773, EPI_ISL_468774, EPI_ISL_468775, EPI_ISL_468776, EPI_ISL_468777, EPI_ISL_468778, EPI_ISL_468779, EPI_ISL_468780, EPI_ISL_468781, EPI_ISL_468782, EPI_ISL_468783, EPI_ISL_468784, EPI_ISL_468785, EPI_ISL_468786, EPI_ISL_468787, EPI_ISL_468788, EPI_ISL_468789, EPI_ISL_468790, EPI_ISL_468791, EPI_ISL_468792, EPI_ISL_468793, EPI_ISL_468794, EPI_ISL_468795, EPI_ISL_468796, EPI_ISL_468797, EPI_ISL_468798, EPI_ISL_468799, EPI_ISL_468800, EPI_ISL_468801, EPI_ISL_468802, EPI_ISL_468803, EPI_ISL_468804, EPI_ISL_468805, EPI_ISL_468806, EPI_ISL_468807, EPI_ISL_468808, EPI_ISL_468809, EPI_ISL_468810, EPI_ISL_468811, EPI_ISL_468812, EPI_ISL_468813, EPI_ISL_468814, EPI_ISL_468815, EPI_ISL_468816, EPI_ISL_468817, EPI_ISL_468818, EPI_ISL_468819, EPI_ISL_468820, EPI_ISL_468821, EPI_ISL_468822, EPI_ISL_468823, EPI_ISL_468824, EPI_ISL_468825, EPI_ISL_468826, EPI_ISL_468827, EPI_ISL_468828, EPI_ISL_468829, EPI_ISL_468830, EPI_ISL_468831, EPI_ISL_468832, EPI_ISL_468833, EPI_ISL_468834, EPI_ISL_468835, EPI_ISL_468836, EPI_ISL_468837, EPI_ISL_468838, EPI_ISL_468839, EPI_ISL_468840, EPI_ISL_468841, EPI_ISL_468842, EPI_ISL_468843, EPI_ISL_468844, EPI_ISL_468845, EPI_ISL_468846, EPI_ISL_468847, EPI_ISL_468848, EPI_ISL_468849, EPI_ISL_468850, EPI_ISL_468851, EPI_ISL_468852, EPI_ISL_468853, EPI_ISL_468854, EPI_ISL_468855, EPI_ISL_468856, EPI_ISL_468857, EPI_ISL_468858, EPI_ISL_468859 | Sevicio de Microbiología, Hospital Miguel Servet, Zaragoza           | SeqCOVID-SPAIN consortium/IBV(CSIC)                                                                                      | Antonio Rezusta López, Alexander Tristancho Baró, Ana Milagro, Yolanda Gracia Grataloup, Nieves Martínez Cameo and SeqCOVID-SPAIN consortium                                                                                                                                                                                                                                                                    |
| see above                                                                                                                                                                                                                                                                                                                                                                                                                                                                                                                                                                                                                                                                                                                                                                                                                                                                                                                                                                                                                                                                                                                                                                                                                                                                                                                                                                                                                                                                                                                                                                      |                                                                      |                                                                                                                          |                                                                                                                                                                                                                                                                                                                                                                                                                 |
| EPI_ISL_469027                                                                                                                                                                                                                                                                                                                                                                                                                                                                                                                                                                                                                                                                                                                                                                                                                                                                                                                                                                                                                                                                                                                                                                                                                                                                                                                                                                                                                                                                                                                                                                 | B.J. Medical College and Civil hospital                              | Gujarat Biotechnology Research Centre                                                                                    | Apurvashin Puvar, Janvi Raval, Zarna Patel, Monika Gandhi, Pinal Trivedi, Maharshi Pandya, Nidhi Patel, Nitin Savaliya, Raghawendra Kumar, Dinesh Kumar, Zuber Saiyed, Komal Patel, Labdhi Pandya, Snehal Bagatharia, Pranay Shah, Kamlesh J Upadhyay, Nirav Mungalpara, Tejas Shah, Ankit Hinsu, Pritesh Sabara, Afzal Ansari, R D Dixit, A M Kadri, Harsh Bakshi, Chaitanya Joshi, Madhvi Joshi               |
| EPI_ISL_469241, EPI_ISL_469242, EPI_ISL_469243, EPI_ISL_469244, EPI_ISL_469245, EPI_ISL_469246, EPI_ISL_469247, EPI_ISL_469248, EPI_ISL_469249, EPI_ISL_469250, EPI_ISL_469251, EPI_ISL_469252                                                                                                                                                                                                                                                                                                                                                                                                                                                                                                                                                                                                                                                                                                                                                                                                                                                                                                                                                                                                                                                                                                                                                                                                                                                                                                                                                                                 |                                                                      |                                                                                                                          |                                                                                                                                                                                                                                                                                                                                                                                                                 |
| see above                                                                                                                                                                                                                                                                                                                                                                                                                                                                                                                                                                                                                                                                                                                                                                                                                                                                                                                                                                                                                                                                                                                                                                                                                                                                                                                                                                                                                                                                                                                                                                      |                                                                      | Special Infectious Agents Unit                                                                                           | Azhar,E.I., Hassan,A.M., Tolah,A.M., Uthman,N.A., Al-Sobahy,T.L., Farraj,S.A., El-Kafrawy,S.A.                                                                                                                                                                                                                                                                                                                  |
| EPI_ISL_469297                                                                                                                                                                                                                                                                                                                                                                                                                                                                                                                                                                                                                                                                                                                                                                                                                                                                                                                                                                                                                                                                                                                                                                                                                                                                                                                                                                                                                                                                                                                                                                 | National Institute of Laboratory Medicine and Referral Center        | Genomic Research Lab, BCSIR                                                                                              | Barna Goswami, Abu Sayeed Mohammad Mahmud, Mohammad Samir Uzzaman, Eshrar Osman, Md. Ahasan Habib, Shahina Akter, Tanjina Akhter Banu, Md. Murshed Hasan Sarkar, Iffat Jahan, Md. Saddam Hossain, Tasnim Nafisa, Md. Maruf Ahmed Molla, Mahmuda Yeasmin, Asish Kumar Ghosh, Bayzid Bin Monir, A. K. M. Shamsuzzaman, Sheikh Md. Selim Al Din, Utpal Chandra Ray, Salek Ahmed Sajib, Md. Salim Khan              |
| EPI_ISL_471268                                                                                                                                                                                                                                                                                                                                                                                                                                                                                                                                                                                                                                                                                                                                                                                                                                                                                                                                                                                                                                                                                                                                                                                                                                                                                                                                                                                                                                                                                                                                                                 | Hospital IESS Babahoyo                                               | Institute of Microbiology, Universidad San Francisco de Quito                                                            | Belén Prado-Vivar, Sully Márquez, Juan José Guadalupe, Bernardo Gutiérrez, Francisco Cordova, Ninfa Henriquez, Killen Briones-Zamora, Killen Briones-Claudette, Verónica Barragán, Patricio Rojas-Silva, Gabriel Trueba, Michelle Grunauer, Paul Cárdenas                                                                                                                                                       |
| EPI_ISL_471911, EPI_ISL_471912, EPI_ISL_471913, EPI_ISL_471914, EPI_ISL_471917, EPI_ISL_471918, EPI_ISL_471919, EPI_ISL_471920, EPI_ISL_471921, EPI_ISL_471922, EPI_ISL_471924, EPI_ISL_471925, EPI_ISL_471926, EPI_ISL_471927, EPI_ISL_471928, EPI_ISL_471929, EPI_ISL_471930, EPI_ISL_471931, EPI_ISL_471932, EPI_ISL_471933, EPI_ISL_471934, EPI_ISL_471935, EPI_ISL_471937, EPI_ISL_471938, EPI_ISL_471939, EPI_ISL_471940, EPI_ISL_471942, EPI_ISL_471943, EPI_ISL_471944, EPI_ISL_471945, EPI_ISL_471946, EPI_ISL_471947, EPI_ISL_471948, EPI_ISL_471949, EPI_ISL_471950, EPI_ISL_471951, EPI_ISL_471952, EPI_ISL_471953, EPI_ISL_471954, EPI_ISL_471955, EPI_ISL_471956, EPI_ISL_471957, EPI_ISL_471958, EPI_ISL_471963, EPI_ISL_471964, EPI_ISL_471965, EPI_ISL_471966, EPI_ISL_471967, EPI_ISL_471969, EPI_ISL_471970, EPI_ISL_471971, EPI_ISL_471972, EPI_ISL_471973, EPI_ISL_471974, EPI_ISL_471975, EPI_ISL_471977, EPI_ISL_471978, EPI_ISL_471979, EPI_ISL_471981, EPI_ISL_471985, EPI_ISL_471988, EPI_ISL_471990, EPI_ISL_471991, EPI_ISL_471992                                                                                                                                                                                                                                                                                                                                                                                                                                                                                                                 | University of Exeter                                                 | COVID-19 Genomics UK (COG-UK) Consortium                                                                                 | Ben Temperton,Aaron Jeffries,Michelle Michelsen,Joanna Warwick-Dugdale,Audrey Farbos,Robyn Manley,Stephen Michell,Jane Masoli                                                                                                                                                                                                                                                                                   |
| see above                                                                                                                                                                                                                                                                                                                                                                                                                                                                                                                                                                                                                                                                                                                                                                                                                                                                                                                                                                                                                                                                                                                                                                                                                                                                                                                                                                                                                                                                                                                                                                      |                                                                      |                                                                                                                          |                                                                                                                                                                                                                                                                                                                                                                                                                 |
| EPI_ISL_475029                                                                                                                                                                                                                                                                                                                                                                                                                                                                                                                                                                                                                                                                                                                                                                                                                                                                                                                                                                                                                                                                                                                                                                                                                                                                                                                                                                                                                                                                                                                                                                 | Banas Medical College and Research Institute                         | Gujarat Biotechnology Research Centre                                                                                    | Apurvashin Puvar, Janvi Raval, Zarna Patel, Monika Gandhi, Pinal Trivedi, Maharshi Pandya, Nidhi Patel, Nitin Savaliya, Raghawendra Kumar, Dinesh Kumar, Zuber Saiyed, Komal Patel, Labdhi Pandya, Snehal Bagatharia, Radhika Khara, Sunil R Joshi, Viren S Doshi, Pritesh Sabara, Neelam Nathani, R D Dixit, A M Kadri, Harsh Bakshi, Chaitanya Joshi, Madhvi Joshi                                            |
| EPI_ISL_475047                                                                                                                                                                                                                                                                                                                                                                                                                                                                                                                                                                                                                                                                                                                                                                                                                                                                                                                                                                                                                                                                                                                                                                                                                                                                                                                                                                                                                                                                                                                                                                 | GMERS Medical College & Hospital                                     | Gujarat Biotechnology Research Centre                                                                                    | Apurvashin Puvar, Janvi Raval, Zarna Patel, Monika Gandhi, Pinal Trivedi, Maharshi Pandya, Nidhi Patel, Nitin Savaliya, Raghawendra Kumar, Dinesh Kumar, Zuber Saiyed, Komal Patel, Labdhi Pandya, Snehal Bagatharia, Meenakshi Shah, Neena Doshi, Varsha Godbole, Pritesh Sabara, Pragya Sharma, R D Dixit, A M Kadri, Harsh Bakshi, Chaitanya Joshi, Madhvi Joshi                                             |
| EPI_ISL_475058                                                                                                                                                                                                                                                                                                                                                                                                                                                                                                                                                                                                                                                                                                                                                                                                                                                                                                                                                                                                                                                                                                                                                                                                                                                                                                                                                                                                                                                                                                                                                                 | GAIMS & G K General Hospital                                         | Gujarat Biotechnology Research Centre                                                                                    | Babulal Babhoria, Hitesh Assudani, Komal Patel, Labdhi Pandya, Snehal Bagatharia, Pritesh Sabara, Apurvashin Puvar, Janvi Raval, Zarna Patel, Monika Gandhi, Pinal Trivedi, Maharshi Pandya, Nidhi Patel, Nitin Savaliya, Raghawendra Kumar, Dinesh Kumar, Zuber Saiyed, Prayag Sharma, R D Dixit, A M Kadri, Harsh Bakshi, Chaitanya Joshi, Madhvi Joshi                                                       |
| EPI_ISL_475167                                                                                                                                                                                                                                                                                                                                                                                                                                                                                                                                                                                                                                                                                                                                                                                                                                                                                                                                                                                                                                                                                                                                                                                                                                                                                                                                                                                                                                                                                                                                                                 | National Institute of Laboratory Medicine and Referral Center        | Genomic Research Lab, BCSIR                                                                                              | Barna Goswami, Abu Sayeed Mohammad Mahmud, Mohammad Samir Uzzaman, Eshrar Osman, Md. Ahasan Habib, Shahina Akter, Tanjina Akhter Banu, Md. Murshed Hasan Sarkar, Iffat Jahan, Md. Saddam Hossain, Tasnim Nafisa, Md. Maruf Ahmed Molla, Mahmuda Yeasmin, Asish Kumar Ghosh, Bayzid Bin Monir, A. K. M. Shamsuzzaman, Sheikh Md. Selim Al Din, Utpal Chandra Ray, Salek Ahmed Sajib, Md. Salim Khan              |
| EPI_ISL_475757                                                                                                                                                                                                                                                                                                                                                                                                                                                                                                                                                                                                                                                                                                                                                                                                                                                                                                                                                                                                                                                                                                                                                                                                                                                                                                                                                                                                                                                                                                                                                                 | National Institute of Laboratory Medicine and Referral Center        | Genomic Research Lab, BCSIR                                                                                              | Barna Goswami, Abu Sayeed Mohammad Mahmud, Mohammad Samir Uzzaman, Eshrar Osman, Md. Ahasan Habib, Shahina Akter, Tanjina Akhter Banu, Md. Murshed Hasan Sarkar, Iffat Jahan, Md. Saddam Hossain, Tasnim Nafisa, Md. Maruf Ahmed Molla, Mahmuda Yeasmin, Asish Kumar Ghosh, Arifa Akram, A. K. M. Shamsuzzaman, Sheikh Md. Selim Al Din, Utpal Chandra Ray, Salek Ahmed Sajib, Md. Salim Khan                   |
| EPI_ISL_476855                                                                                                                                                                                                                                                                                                                                                                                                                                                                                                                                                                                                                                                                                                                                                                                                                                                                                                                                                                                                                                                                                                                                                                                                                                                                                                                                                                                                                                                                                                                                                                 | GMERS Medical College & Hospital, Gotri, Vadodara                    | Gujarat Biotechnology Research Centre                                                                                    | Apurvashin Puvar, Janvi Raval, Zarna Patel, Monika Gandhi, Pinal Trivedi, Maharshi Pandya, Nidhi Patel, Nitin Savaliya, Raghawendra Kumar, Dinesh Kumar, Zuber Saiyed, Komal Patel, Labdhi Pandya, Afzal Ansari, Nikha Trivedi, Meenakshi Shah, Neena Doshi, Varsha Godbole, R D Dixit, A M Kadri, Harsh Bakshi, Chaitanya Joshi, Madhvi Joshi                                                                  |
| EPI_ISL_476873                                                                                                                                                                                                                                                                                                                                                                                                                                                                                                                                                                                                                                                                                                                                                                                                                                                                                                                                                                                                                                                                                                                                                                                                                                                                                                                                                                                                                                                                                                                                                                 | Department of MicroBiology, Government Medical College, Surat        | Gujarat Biotechnology Research Centre                                                                                    | Apurvashin Puvar, Janvi Raval, Zarna Patel, Monika Gandhi, Pinal Trivedi, Maharshi Pandya, Nidhi Patel, Nitin Savaliya, Raghawendra Kumar, Dinesh Kumar, Zuber Saiyed, Komal Patel, Labdhi Pandya, Afzal Ansari, Nikha Trivedi, Naresh Chauhan, Summaja Mullan, Amit gamit, R D Dixit, A M Kadri, Harsh Bakshi, Chaitanya Joshi, Madhvi Joshi                                                                   |
| EPI_ISL_477014                                                                                                                                                                                                                                                                                                                                                                                                                                                                                                                                                                                                                                                                                                                                                                                                                                                                                                                                                                                                                                                                                                                                                                                                                                                                                                                                                                                                                                                                                                                                                                 | Institute of Microbiology, Universidad San Francisco de Quito        | Institute of Microbiology, Universidad San Francisco de Quito                                                            | Belen Prado-Vivar, Sully Marquez, Juan Jose Guadalupe, Monica Becerra-Wong, Carla Torres, Bernardo Gutierrez, Francisco Mora, Juan Gaviña, Alejandra Ramones, Franklin Espinoza, Edison Liña, Jorge Reyes, Patricio Rojas-Silva, Veronica Barragan, Gabriel Trueba, Michelle Grunauer, Paul Cardenas                                                                                                            |
| EPI_ISL_478274, EPI_ISL_478275, EPI_ISL_478277, EPI_ISL_478278, EPI_ISL_478279, EPI_ISL_478280, EPI_ISL_478281, EPI_ISL_478282, EPI_ISL_478283, EPI_ISL_478284, EPI_ISL_478286, EPI_ISL_478287, EPI_ISL_478288                                                                                                                                                                                                                                                                                                                                                                                                                                                                                                                                                                                                                                                                                                                                                                                                                                                                                                                                                                                                                                                                                                                                                                                                                                                                                                                                                                 |                                                                      |                                                                                                                          |                                                                                                                                                                                                                                                                                                                                                                                                                 |
| see above                                                                                                                                                                                                                                                                                                                                                                                                                                                                                                                                                                                                                                                                                                                                                                                                                                                                                                                                                                                                                                                                                                                                                                                                                                                                                                                                                                                                                                                                                                                                                                      |                                                                      | COVID-19 Genomics UK (COG-UK) Consortium                                                                                 | Ben Temperton,Aaron Jeffries,Michelle Michelsen,Joanna Warwick-Dugdale,Audrey Farbos,Robyn Manley,Stephen Michell,Jane Masoli                                                                                                                                                                                                                                                                                   |
| EPI_ISL_479676, EPI_ISL_479677, EPI_ISL_479678, EPI_ISL_479679, EPI_ISL_479680, EPI_ISL_479681, EPI_ISL_479682, EPI_ISL_479683, EPI_ISL_479684, EPI_ISL_479685                                                                                                                                                                                                                                                                                                                                                                                                                                                                                                                                                                                                                                                                                                                                                                                                                                                                                                                                                                                                                                                                                                                                                                                                                                                                                                                                                                                                                 | unknown                                                              | Contact:Hiroyuki Asakura Tokyo Metropolitan Institute of Public Health, Department of Microbiology                       | Asakura,H., Yoshida,I., Kumagai,R., Nagashima,M., Chiba,T., Sadamasu,K.                                                                                                                                                                                                                                                                                                                                         |
| EPI_ISL_480441, EPI_ISL_480442                                                                                                                                                                                                                                                                                                                                                                                                                                                                                                                                                                                                                                                                                                                                                                                                                                                                                                                                                                                                                                                                                                                                                                                                                                                                                                                                                                                                                                                                                                                                                 | National Institute of Laboratory Medicine and Referral Center        | Bangladesh Council of Scientific and Industrial Research                                                                 | Barna Goswami, Abu Sayeed Mohammad Mahmud, Mohammad Samir Uzzaman, Eshrar Osman, Md. Ahasan Habib, Shahina Akter, Tanjina Akhter Banu, Md. Murshed Hasan Sarkar, Iffat Jahan, Md. Saddam Hossain, Tasnim Nafisa, Md. Maruf Ahmed Molla, Mahmuda Yeasmin, Asish Kumar Ghosh, Shahjahan Siddique, A. K. M. Shamsuzzaman, Sheikh Md. Selim Al Din, Utpal Chandra Ray, Salek Ahmed Sajib, Md. Salim Khan            |
| EPI_ISL_481244, EPI_ISL_481245, EPI_ISL_481246, EPI_ISL_481247, EPI_ISL_481248                                                                                                                                                                                                                                                                                                                                                                                                                                                                                                                                                                                                                                                                                                                                                                                                                                                                                                                                                                                                                                                                                                                                                                                                                                                                                                                                                                                                                                                                                                 | Hospital IESS Babahoyo                                               | Institute of Microbiology, Universidad San Francisco de Quito                                                            | Belén Prado-Vivar, Sully Márquez, Juan José Guadalupe, Monica Becerra-Wong, Carla Torres, Bernardo Gutiérrez, Francisco Cordova, Ninfa Henriquez, Killen Briones-Zamora, Killen Briones-Claudette, Verónica Barragán, Patricio Rojas-Silva, Gabriel Trueba, Michelle Grunauer, Paul Cárdenas                                                                                                                    |
| EPI_ISL_483542, EPI_ISL_483543, EPI_ISL_483544, EPI_ISL_483545, EPI_ISL_483546, EPI_ISL_483547, EPI_ISL_483548, EPI_ISL_483549, EPI_ISL_483550, EPI_ISL_483551, EPI_ISL_483552, EPI_ISL_483553, EPI_ISL_483554, EPI_ISL_483555, EPI_ISL_483556, EPI_ISL_483557, EPI_ISL_483558, EPI_ISL_483559, EPI_ISL_483560, EPI_ISL_483561, EPI_ISL_483562, EPI_ISL_483563, EPI_ISL_483564, EPI_ISL_483565                                                                                                                                                                                                                                                                                                                                                                                                                                                                                                                                                                                                                                                                                                                                                                                                                                                                                                                                                                                                                                                                                                                                                                                 |                                                                      |                                                                                                                          |                                                                                                                                                                                                                                                                                                                                                                                                                 |
| see above                                                                                                                                                                                                                                                                                                                                                                                                                                                                                                                                                                                                                                                                                                                                                                                                                                                                                                                                                                                                                                                                                                                                                                                                                                                                                                                                                                                                                                                                                                                                                                      | Kingdom of Bahrain Ministry of Health                                | Erasmus Medical Center                                                                                                   | Bas Oude Munnink, David Nieuwenhuijse, Reina Sikkema, Fatema, Ebrahim Shehad, Amjad Ghanem Mohamed, Hashmeya Al Wasti, Claudia Schapendonk, Irina Chestakova, Anne van der Linden, Theo Bestebroer, Stefan van Nieuwkoop, Mark Pronk, Pascal Lexmond, Richard Molenkamp, Marion Koopmans, on behalf of the Dutch national COVID-19 response team.                                                               |
| EPI_ISL_483629, EPI_ISL_483630                                                                                                                                                                                                                                                                                                                                                                                                                                                                                                                                                                                                                                                                                                                                                                                                                                                                                                                                                                                                                                                                                                                                                                                                                                                                                                                                                                                                                                                                                                                                                 | National Institute of Laboratory Medicine and Referral Center        | Genomic Research Lab, BCSIR                                                                                              | Asish Kumar Ghosh, Abu Sayeed Mohammad Mahmud, Mohammad Samir Uzzaman, Eshrar Osman, Md. Ahasan Habib, Shahina Akter, Tanjina Akhter Banu, Md. Murshed Hasan Sarkar, Barna Goswami, Iffat Jahan, Md. Saddam Hossain, Tasnim Nafisa, Md. Maruf Ahmed Molla, Mahmuda Yeasmin, A. K.                                                                                                                               |

|                                                                                                                                                                                                                                                                                                                                                                                                                                                                                                                                                                                                                                                                                                                                                                                                                                                                                                                                                                                                                                                                                                                                                                                                 |                                                                                                     |                                                               |                                                                                                                                                                                                                                                                                                                                                                                  |
|-------------------------------------------------------------------------------------------------------------------------------------------------------------------------------------------------------------------------------------------------------------------------------------------------------------------------------------------------------------------------------------------------------------------------------------------------------------------------------------------------------------------------------------------------------------------------------------------------------------------------------------------------------------------------------------------------------------------------------------------------------------------------------------------------------------------------------------------------------------------------------------------------------------------------------------------------------------------------------------------------------------------------------------------------------------------------------------------------------------------------------------------------------------------------------------------------|-----------------------------------------------------------------------------------------------------|---------------------------------------------------------------|----------------------------------------------------------------------------------------------------------------------------------------------------------------------------------------------------------------------------------------------------------------------------------------------------------------------------------------------------------------------------------|
|                                                                                                                                                                                                                                                                                                                                                                                                                                                                                                                                                                                                                                                                                                                                                                                                                                                                                                                                                                                                                                                                                                                                                                                                 |                                                                                                     |                                                               | M. Shamsuzzaman, Sheikh Md. Selim Al Din, Utpal Chandra Ray, Salek Ahmed Sajib, Md. Salim Khan                                                                                                                                                                                                                                                                                   |
| EPI_ISL_483638, EPI_ISL_483639, EPI_ISL_483640                                                                                                                                                                                                                                                                                                                                                                                                                                                                                                                                                                                                                                                                                                                                                                                                                                                                                                                                                                                                                                                                                                                                                  | Kingdom of Bahrain Ministry of Health                                                               | Erasmus Medical Center                                        | Bas Oude Munnink, David Nieuwenhuijse, Reina Sikkema, Fatema, Ebrahim Shehad, Amjad Ghanem Mohamed, Hashmeya Al Wasti, Claudia Schapendonk, Irina Chestakova, Anne van der Linden, Theo Bestebroer, Stefan van Nieuwkoop, Mark Pronk, Pascal Lehmann, Richard Molenkamp, Marion Koopmans, on behalf of the Dutch national COVID-19 response team.                                |
| EPI_ISL_483641, EPI_ISL_483642                                                                                                                                                                                                                                                                                                                                                                                                                                                                                                                                                                                                                                                                                                                                                                                                                                                                                                                                                                                                                                                                                                                                                                  | National Institute of Laboratory Medicine and Referral Center                                       | Genomic Research Lab, BCSIR                                   | Barna Goswami, Abu Sayeed Mohammad Mahmud, Mohammad Samir Uzzaman, Eshrar Osman, Md. Ahasan Habib, Shahina Akter, Tanjina Akhter Banu, Md. Murshed Hasan Sarkar, Iffat Jahan, Md. Saddam Hossain, Tasnim Nafisa, Md. Maruf Ahmed Molla, Mahmuda Yeasmin, Asish Kumar Ghosh, A. K. M. Shamsuzzaman, Sheikh Md. Selim Al Din, Utpal Chandra Ray, Salek Ahmed Sajib, Md. Salim Khan |
| EPI_ISL_483826                                                                                                                                                                                                                                                                                                                                                                                                                                                                                                                                                                                                                                                                                                                                                                                                                                                                                                                                                                                                                                                                                                                                                                                  | GMERS Medical College Himmatnagar                                                                   | Gujarat Biotechnology Research Centre                         | Apurvashin Puvar, Janvi Raval, Zarna Patel, Monika Gandhi, Pinal Trivedi, Maharshi Pandya, Nidhi Patel, Nitin Savaliya, Raghawendra Kumar, Dinesh Kumar, Zuber Saiyed, Komal Patel, Labdhi Pandya, Afzal Ansari, Nikha Trivedi, Himanshu Khatri, Mayur Gandhi, R D Dixit, A M Kadri, Harsh Bakshi, Chaitanya Joshi, Madhvi Joshi                                                 |
| EPI_ISL_483842                                                                                                                                                                                                                                                                                                                                                                                                                                                                                                                                                                                                                                                                                                                                                                                                                                                                                                                                                                                                                                                                                                                                                                                  | Pandit Deendayal Upadhyay Government Medical College, Rajkot                                        | Gujarat Biotechnology Research Centre                         | Arti Trivedi, Apurvashin Puvar, Janvi Raval, Zarna Patel, Monika Gandhi, Pinal Trivedi, Maharshi Pandya, Nidhi Patel, Nitin Savaliya, Raghawendra Kumar, Dinesh Kumar, Zuber Saiyed, Komal Patel, Labdhi Pandya, Afzal Ansari, Nikha Trivedi, Gauravi Dhruv, R D Dixit, A M Kadri, Harsh Bakshi, Chaitanya Joshi, Madhvi Joshi                                                   |
| EPI_ISL_483843                                                                                                                                                                                                                                                                                                                                                                                                                                                                                                                                                                                                                                                                                                                                                                                                                                                                                                                                                                                                                                                                                                                                                                                  | Pandit Deendayal Upadhyay Government Medical College, Rajkot                                        | Gujarat Biotechnology Research Centre                         | Apurvashin Puvar, Janvi Raval, Zarna Patel, Monika Gandhi, Pinal Trivedi, Maharshi Pandya, Nidhi Patel, Nitin Savaliya, Raghawendra Kumar, Dinesh Kumar, Zuber Saiyed, Komal Patel, Labdhi Pandya, Afzal Ansari, Nikha Trivedi, Gauravi Dhruv, Arti Trivedi, R D Dixit, A M Kadri, Harsh Bakshi, Chaitanya Joshi, Madhvi Joshi                                                   |
| EPI_ISL_483861, EPI_ISL_483879                                                                                                                                                                                                                                                                                                                                                                                                                                                                                                                                                                                                                                                                                                                                                                                                                                                                                                                                                                                                                                                                                                                                                                  | Department of Microbiology, Government Medical College, Surat                                       | Gujarat Biotechnology Research Centre                         | Apurvashin Puvar, Janvi Raval, Zarna Patel, Monika Gandhi, Pinal Trivedi, Maharshi Pandya, Nidhi Patel, Nitin Savaliya, Raghawendra Kumar, Dinesh Kumar, Zuber Saiyed, Komal Patel, Labdhi Pandya, Afzal Ansari, Nikha Trivedi, Naresh Chauhan, Summaiya Mullan, Amit gamit, R D Dixit, A M Kadri, Harsh Bakshi, Chaitanya Joshi, Madhvi Joshi                                   |
| EPI_ISL_486842, EPI_ISL_486843, EPI_ISL_486844                                                                                                                                                                                                                                                                                                                                                                                                                                                                                                                                                                                                                                                                                                                                                                                                                                                                                                                                                                                                                                                                                                                                                  | Institute of Microbiology, Universidad San Francisco de Quito                                       | Institute of Microbiology, Universidad San Francisco de Quito | Belén Prado-Vivar, Sully Márquez, Juan José Guadalupe, Monica Becerra-Wong, Carla Torres, Bernardo Gutiérrez, Fausto Maldonado, Geovanny Carzola, Verónica Barragán, Patricio Rojas-Silva, Gabriel Trueba, Michelle Grunauer, Paúl Cárdenas                                                                                                                                      |
| EPI_ISL_486845, EPI_ISL_486846, EPI_ISL_486847, EPI_ISL_486848, EPI_ISL_486849, EPI_ISL_486850, EPI_ISL_486851                                                                                                                                                                                                                                                                                                                                                                                                                                                                                                                                                                                                                                                                                                                                                                                                                                                                                                                                                                                                                                                                                  | Institute of Microbiology, Universidad San Francisco de Quito                                       | Institute of Microbiology, Universidad San Francisco de Quito | Belén Prado-Vivar, Sully Márquez, Juan José Guadalupe, Monica Becerra-Wong, Carla Torres, Bernardo Gutiérrez, Jonathan Araujo, Verónica Barragán, Patricio Rojas-Silva, Gabriel Trueba, Michelle Grunauer, Paúl Cárdenas                                                                                                                                                         |
| EPI_ISL_486890, EPI_ISL_486891, EPI_ISL_486892, EPI_ISL_486893, EPI_ISL_486894, EPI_ISL_486895, EPI_ISL_486896                                                                                                                                                                                                                                                                                                                                                                                                                                                                                                                                                                                                                                                                                                                                                                                                                                                                                                                                                                                                                                                                                  | Tokyo Metropolitan Institute of Public Health                                                       | Tokyo Metropolitan Institute of Public Health                 | Asakura,H., Yoshida,I., Kumagai,R., Nagashima,M., Chiba,T., Sadamasu,K.                                                                                                                                                                                                                                                                                                          |
| EPI_ISL_486897, EPI_ISL_486898, EPI_ISL_486899, EPI_ISL_486900, EPI_ISL_486901, EPI_ISL_486902, EPI_ISL_486903, EPI_ISL_486904, EPI_ISL_486905, EPI_ISL_486906, EPI_ISL_486907, EPI_ISL_486908, EPI_ISL_486909, EPI_ISL_486910, EPI_ISL_486911                                                                                                                                                                                                                                                                                                                                                                                                                                                                                                                                                                                                                                                                                                                                                                                                                                                                                                                                                  | see above                                                                                           | Tokyo Metropolitan Institute of Public Health                 | Asakura,H., Yoshida,I., Kumagai,R., Chiba,T., Sadamasu,K., Nagashima,M.                                                                                                                                                                                                                                                                                                          |
| EPI_ISL_487368, EPI_ISL_487371, EPI_ISL_490144                                                                                                                                                                                                                                                                                                                                                                                                                                                                                                                                                                                                                                                                                                                                                                                                                                                                                                                                                                                                                                                                                                                                                  | National Institute of Laboratory Medicine and Referral Center                                       | Genomic Research Lab, BCSIR                                   | Barna Goswami, Abu Sayeed Mohammad Mahmud, Mohammad Samir Uzzaman, Eshrar Osman, Md. Ahasan Habib, Shahina Akter, Tanjina Akhter Banu, Md. Murshed Hasan Sarkar, Iffat Jahan, Md. Saddam Hossain, Tasnim Nafisa, Md. Maruf Ahmed Molla, Mahmuda Yeasmin, Asish Kumar Ghosh, A. K. M. Shamsuzzaman, Sheikh Md. Selim Al Din, Utpal Chandra Ray, Salek Ahmed Sajib, Md. Salim Khan |
| EPI_ISL_491932                                                                                                                                                                                                                                                                                                                                                                                                                                                                                                                                                                                                                                                                                                                                                                                                                                                                                                                                                                                                                                                                                                                                                                                  | Institute of Microbiology, Universidad San Francisco de Quito                                       | Institute of Microbiology, Universidad San Francisco de Quito | Belén Prado-Vivar, Sully Márquez, Juan José Guadalupe, Monica Becerra-Wong, Bernardo Gutiérrez, Carlos Mena, Nabih Dahik, Verónica Barragán, Patricio Rojas-Silva, Gabriel Trueba, Michelle Grunauer, Paúl Cárdenas                                                                                                                                                              |
| EPI_ISL_491936                                                                                                                                                                                                                                                                                                                                                                                                                                                                                                                                                                                                                                                                                                                                                                                                                                                                                                                                                                                                                                                                                                                                                                                  | Institute of Microbiology, Universidad San Francisco de Quito                                       | Institute of Microbiology, Universidad San Francisco de Quito | Belén Prado-Vivar, Sully Márquez, Juan José Guadalupe, Monica Becerra-Wong, Bernardo Gutiérrez, Carlos Guerrero, Verónica Barragán, Patricio Rojas-Silva, Gabriel Trueba, Michelle Grunauer, Paúl Cárdenas                                                                                                                                                                       |
| EPI_ISL_491937, EPI_ISL_491938                                                                                                                                                                                                                                                                                                                                                                                                                                                                                                                                                                                                                                                                                                                                                                                                                                                                                                                                                                                                                                                                                                                                                                  | Institute of Microbiology, Universidad San Francisco de Quito                                       | Institute of Microbiology, Universidad San Francisco de Quito | Belén Prado-Vivar, Sully Márquez, Juan José Guadalupe, Monica Becerra-Wong, Bernardo Gutiérrez, Rosario Erazo, Verónica Barragán, Patricio Rojas-Silva, Gabriel Trueba, Michelle Grunauer, Paúl Cárdenas                                                                                                                                                                         |
| EPI_ISL_491939, EPI_ISL_491940                                                                                                                                                                                                                                                                                                                                                                                                                                                                                                                                                                                                                                                                                                                                                                                                                                                                                                                                                                                                                                                                                                                                                                  | Institute of Microbiology, Universidad San Francisco de Quito                                       | Institute of Microbiology, Universidad San Francisco de Quito | Belén Prado-Vivar, Sully Márquez, Juan José Guadalupe, Monica Becerra-Wong, Bernardo Gutiérrez, Carlos Mena, Nabih Dahik, Verónica Barragán, Patricio Rojas-Silva, Gabriel Trueba, Michelle Grunauer, Paúl Cárdenas                                                                                                                                                              |
| EPI_ISL_492980, EPI_ISL_492981, EPI_ISL_492982, EPI_ISL_492983, EPI_ISL_492984, EPI_ISL_492985, EPI_ISL_492986, EPI_ISL_492987                                                                                                                                                                                                                                                                                                                                                                                                                                                                                                                                                                                                                                                                                                                                                                                                                                                                                                                                                                                                                                                                  | IRCCS Sacro Cuore Don Calabria Hospital, Department of Infectious, Tropical Diseases & Microbiology | University of Verona, Department of Biotechnology             | Antonio Mori, Michela Deiana, Elena Pomari, Chiara Piubelli, Giulia Lopatriello, Luca Marcolungo, Cristina Beltrami, Chiara Degli Esposti, Emanuela Cosentino, Massimo Delledonne                                                                                                                                                                                                |
| EPI_ISL_493329                                                                                                                                                                                                                                                                                                                                                                                                                                                                                                                                                                                                                                                                                                                                                                                                                                                                                                                                                                                                                                                                                                                                                                                  | INMI Lazzaro Spallanzani IRCCS                                                                      | INMI Lazzaro Spallanzani IRCCS                                | Barbara Bartolini, Martina Rueca, Cesare E.M. Gruber, Francesco Messina, Antonino Di Caro, Maria R. Capobianchi                                                                                                                                                                                                                                                                  |
| EPI_ISL_493333                                                                                                                                                                                                                                                                                                                                                                                                                                                                                                                                                                                                                                                                                                                                                                                                                                                                                                                                                                                                                                                                                                                                                                                  | Istituto Zooprofilattico Sperimentale del Mezzogiorno                                               | INMI Lazzaro Spallanzani IRCCS                                | Barbara Bartolini, Martina Rueca, Cesare E.M. Gruber, Francesco Messina, Antonino Di Caro, Giovanna Fusco, Maurizio Viscardi, Giorgia Borriello, Maria R. Capobianchi                                                                                                                                                                                                            |
| EPI_ISL_495033, EPI_ISL_495051                                                                                                                                                                                                                                                                                                                                                                                                                                                                                                                                                                                                                                                                                                                                                                                                                                                                                                                                                                                                                                                                                                                                                                  | GMERS Medical College & Hospital, Gotri, Vadodara                                                   | Gujarat Biotechnology Research Centre                         | Apurvashin Puvar, Janvi Raval, Zarna Patel, Monika Gandhi, Pinal Trivedi, Maharshi Pandya, Nidhi Patel, Nitin Savaliya, Raghawendra Kumar, Dinesh Kumar, Zuber Saiyed, Komal Patel, Labdhi Pandya, Afzal Ansari, Nikha Trivedi, Meenakshi Shah, Neena Doshi, Varsha Godbole, R D Dixit, A M Kadri, Harsh Bakshi, Chaitanya Joshi, Madhvi Joshi                                   |
| EPI_ISL_495066                                                                                                                                                                                                                                                                                                                                                                                                                                                                                                                                                                                                                                                                                                                                                                                                                                                                                                                                                                                                                                                                                                                                                                                  | GAIMS & G K General Hospital                                                                        | Gujarat Biotechnology Research Centre                         | Babul Baborhia, Hitesh Assudani, Apurvashin Puvar, Janvi Raval, Zarna Patel, Monika Gandhi, Pinal Trivedi, Maharshi Pandya, Nidhi Patel, Nitin Savaliya, Raghawendra Kumar, Dinesh Kumar, Zuber Saiyed, Komal Patel, Labdhi Pandya, Afzal Ansari, Nikha Trivedi, Naresh Chauhan, Summaiya Mullan, Amit gamit, R D Dixit, A M Kadri, Harsh Bakshi, Chaitanya Joshi, Madhvi Joshi  |
| EPI_ISL_495070                                                                                                                                                                                                                                                                                                                                                                                                                                                                                                                                                                                                                                                                                                                                                                                                                                                                                                                                                                                                                                                                                                                                                                                  | Department of MicroBiology, Government Medical College, Surat                                       | Gujarat Biotechnology Research Centre                         | Apurvashin Puvar, Janvi Raval, Zarna Patel, Monika Gandhi, Pinal Trivedi, Maharshi Pandya, Nidhi Patel, Nitin Savaliya, Raghawendra Kumar, Dinesh Kumar, Zuber Saiyed, Komal Patel, Labdhi Pandya, Afzal Ansari, Nikha Trivedi, Naresh Chauhan, Summaiya Mullan, Amit gamit, R D Dixit, A M Kadri, Harsh Bakshi, Chaitanya Joshi, Madhvi Joshi                                   |
| EPI_ISL_498267, EPI_ISL_498268                                                                                                                                                                                                                                                                                                                                                                                                                                                                                                                                                                                                                                                                                                                                                                                                                                                                                                                                                                                                                                                                                                                                                                  | National Institute of Laboratory Medicine and Referral Center                                       | Genomic Research Lab, BCSIR                                   | Barna Goswami, Abu Sayeed Mohammad Mahmud, Mohammad Samir Uzzaman, Eshrar Osman, Md. Ahasan Habib, Shahina Akter, Tanjina Akhter Banu, Md. Murshed Hasan Sarkar, Iffat Jahan, Md. Saddam Hossain, Tasnim Nafisa, Md. Maruf Ahmed Molla, Mahmuda Yeasmin, Asish Kumar Ghosh, A. K. M. Shamsuzzaman, Sheikh Md. Selim Al Din, Utpal Chandra Ray, Salek Ahmed Sajib, Md. Salim Khan |
| EPI_ISL_498468, EPI_ISL_498469, EPI_ISL_498470, EPI_ISL_498471, EPI_ISL_498472, EPI_ISL_498473, EPI_ISL_498474, EPI_ISL_498475, EPI_ISL_498476, EPI_ISL_498477, EPI_ISL_498478, EPI_ISL_498479, EPI_ISL_498480, EPI_ISL_498481, EPI_ISL_498482, EPI_ISL_498483, EPI_ISL_498484, EPI_ISL_498485, EPI_ISL_498486, EPI_ISL_498487, EPI_ISL_498488, EPI_ISL_498489, EPI_ISL_498490, EPI_ISL_498491, EPI_ISL_498492, EPI_ISL_498493, EPI_ISL_498494, EPI_ISL_498495, EPI_ISL_498496, EPI_ISL_498497, EPI_ISL_498498, EPI_ISL_498499, EPI_ISL_498500, EPI_ISL_498501, EPI_ISL_498502, EPI_ISL_498503, EPI_ISL_498504, EPI_ISL_498505, EPI_ISL_498506, EPI_ISL_498507, EPI_ISL_498508, EPI_ISL_498509, EPI_ISL_498510, EPI_ISL_498511, EPI_ISL_498512, EPI_ISL_498513, EPI_ISL_498514, EPI_ISL_498515, EPI_ISL_498516, EPI_ISL_498517, EPI_ISL_498518, EPI_ISL_498519, EPI_ISL_498520, EPI_ISL_498521, EPI_ISL_498522, EPI_ISL_498523, EPI_ISL_498524, EPI_ISL_498525, EPI_ISL_498526, EPI_ISL_498527, EPI_ISL_498528, EPI_ISL_498529, EPI_ISL_498530, EPI_ISL_498531, EPI_ISL_498532, EPI_ISL_498533, EPI_ISL_498534, EPI_ISL_498535, EPI_ISL_498536, EPI_ISL_498537, EPI_ISL_498538, EPI_ISL_498539, |                                                                                                     |                                                               |                                                                                                                                                                                                                                                                                                                                                                                  |
| see above                                                                                                                                                                                                                                                                                                                                                                                                                                                                                                                                                                                                                                                                                                                                                                                                                                                                                                                                                                                                                                                                                                                                                                                       | ACT Pathology                                                                                       | Schwessinger Lab                                              | Ashley Jones, Benjamin Schwessinger, Robert Lanfear, Robyn N Hall, Megan McDonald, Ming-Dao Chia, Kevin Murray, Craig Kennedy, Karina Kennedy                                                                                                                                                                                                                                    |
| EPI_ISL_498549, EPI_ISL_498550                                                                                                                                                                                                                                                                                                                                                                                                                                                                                                                                                                                                                                                                                                                                                                                                                                                                                                                                                                                                                                                                                                                                                                  | National Institute of Laboratory Medicine and Referral Center                                       | Genomic Research Lab, BCSIR                                   | Asish Kumar Ghosh, Abu Sayeed Mohammad Mahmud, Mohammad Samir Uzzaman, Eshrar Osman, Md. Ahasan Habib, Shahina Akter, Tanjina Akhter Banu, Md. Murshed Hasan Sarkar, Barna Goswami, Iffat Jahan, Md. Saddam Hossain, Tasnim Nafisa, Md. Maruf Ahmed Molla, Mahmuda Yeasmin, A. K. M. Shamsuzzaman, Sheikh Md. Selim Al Din, Utpal Chandra Ray, Salek Ahmed Sajib, Md. Salim Khan |
| EPI_ISL_500287, EPI_ISL_500288, EPI_ISL_500290, EPI_ISL_500291, EPI_ISL_500336, EPI_ISL_500337, EPI_ISL_500338, EPI_ISL_500339, EPI_ISL_500340, EPI_ISL_500341, EPI_ISL_500343, EPI_ISL_500344, EPI_ISL_500345, EPI_ISL_500346, EPI_ISL_500347, EPI_ISL_500349, EPI_ISL_500350, EPI_ISL_500351, EPI_ISL_500352, EPI_ISL_500353, EPI_ISL_500354, EPI_ISL_500355, EPI_ISL_500356, EPI_ISL_500357, EPI_ISL_500359, EPI_ISL_500360, EPI_ISL_500361, EPI_ISL_500362, EPI_ISL_500363, EPI_ISL_500364, EPI_ISL_500365, EPI_ISL_500366, EPI_ISL_500367, EPI_ISL_500368                                                                                                                                                                                                                                                                                                                                                                                                                                                                                                                                                                                                                                  | see above                                                                                           | Servicio de Microbiología, Hospital Miguel Servet, Zaragoza   |                                                                                                                                                                                                                                                                                                                                                                                  |
|                                                                                                                                                                                                                                                                                                                                                                                                                                                                                                                                                                                                                                                                                                                                                                                                                                                                                                                                                                                                                                                                                                                                                                                                 |                                                                                                     | SeqCOVID-SPAIN consortium/IBV(CSIC)                           | Antonio Rezusta López, Alexander Tristanchó Baró, Ana Milagro, Yolanda Gracia Grataloup, Nieves Martínez Cameo and SeqCOVID-SPAIN consortium                                                                                                                                                                                                                                     |

|                                                                                                                                                                                                                                                                                                                                                                                                                                                                                                                                                                                                                                                                                                                                                                                                                                                                                                                                                                                                                                                                                                                                                                                                                                                                                                                                |           |                                                                                         |                                                                                        |                                                                                                                                                                                                                    |
|--------------------------------------------------------------------------------------------------------------------------------------------------------------------------------------------------------------------------------------------------------------------------------------------------------------------------------------------------------------------------------------------------------------------------------------------------------------------------------------------------------------------------------------------------------------------------------------------------------------------------------------------------------------------------------------------------------------------------------------------------------------------------------------------------------------------------------------------------------------------------------------------------------------------------------------------------------------------------------------------------------------------------------------------------------------------------------------------------------------------------------------------------------------------------------------------------------------------------------------------------------------------------------------------------------------------------------|-----------|-----------------------------------------------------------------------------------------|----------------------------------------------------------------------------------------|--------------------------------------------------------------------------------------------------------------------------------------------------------------------------------------------------------------------|
| EPI_ISL_508156, EPI_ISL_508157, EPI_ISL_508158, EPI_ISL_508159, EPI_ISL_508160, EPI_ISL_508161, EPI_ISL_508162, EPI_ISL_508163, EPI_ISL_508164, EPI_ISL_508165, EPI_ISL_508166, EPI_ISL_508167, EPI_ISL_508168, EPI_ISL_508169, EPI_ISL_508170, EPI_ISL_508171, EPI_ISL_508172, EPI_ISL_508173, EPI_ISL_508174, EPI_ISL_508175, EPI_ISL_508176, EPI_ISL_508177, EPI_ISL_508178, EPI_ISL_508179, EPI_ISL_508180, EPI_ISL_508181, EPI_ISL_508182, EPI_ISL_508183, EPI_ISL_508184, EPI_ISL_508185, EPI_ISL_508186, EPI_ISL_508187, EPI_ISL_508188, EPI_ISL_508189, EPI_ISL_508190, EPI_ISL_508191, EPI_ISL_508192, EPI_ISL_508193, EPI_ISL_508194, EPI_ISL_508195, EPI_ISL_508196, EPI_ISL_508197, EPI_ISL_508198, EPI_ISL_508199, EPI_ISL_508200, EPI_ISL_508201, EPI_ISL_508202, EPI_ISL_508203, EPI_ISL_508204, EPI_ISL_508205, EPI_ISL_508206                                                                                                                                                                                                                                                                                                                                                                                                                                                                                 | see above | All india institute of Medical Sciences Rishikesh                                       | National Institute of Biomedical Genomics                                              | Arindam Maitra, Deepjyoti Kalita, Amit Mangla, Ravi Kant, Saumitra Das                                                                                                                                             |
| EPI_ISL_508207, EPI_ISL_508208, EPI_ISL_508209, EPI_ISL_508210, EPI_ISL_508211, EPI_ISL_508212, EPI_ISL_508213, EPI_ISL_508214, EPI_ISL_508215, EPI_ISL_508216, EPI_ISL_508217, EPI_ISL_508218, EPI_ISL_508219, EPI_ISL_508220, EPI_ISL_508221, EPI_ISL_508222, EPI_ISL_508223, EPI_ISL_508224, EPI_ISL_508225, EPI_ISL_508226, EPI_ISL_508227, EPI_ISL_508228, EPI_ISL_508229, EPI_ISL_508230, EPI_ISL_508231, EPI_ISL_508232, EPI_ISL_508233, EPI_ISL_508234, EPI_ISL_508235, EPI_ISL_508236, EPI_ISL_508237, EPI_ISL_508238, EPI_ISL_508239, EPI_ISL_508240, EPI_ISL_508241, EPI_ISL_508242, EPI_ISL_508243, EPI_ISL_508244, EPI_ISL_508245, EPI_ISL_508246, EPI_ISL_508247, EPI_ISL_508248, EPI_ISL_508249, EPI_ISL_508250, EPI_ISL_508251, EPI_ISL_508252, EPI_ISL_508253, EPI_ISL_508254, EPI_ISL_508255, EPI_ISL_508256, EPI_ISL_508257, EPI_ISL_508258, EPI_ISL_508259, EPI_ISL_508260, EPI_ISL_508261, EPI_ISL_508262, EPI_ISL_508263, EPI_ISL_508264, EPI_ISL_508265, EPI_ISL_508266, EPI_ISL_508267, EPI_ISL_508268, EPI_ISL_508269, EPI_ISL_508270, EPI_ISL_508271, EPI_ISL_508272, EPI_ISL_508273, EPI_ISL_508274, EPI_ISL_508275, EPI_ISL_508276, EPI_ISL_508277, EPI_ISL_508278, EPI_ISL_508279, EPI_ISL_508280, EPI_ISL_508281, EPI_ISL_508282, EPI_ISL_508283, EPI_ISL_508284, EPI_ISL_508285, EPI_ISL_508286 | see above | Government Medical College                                                              | National Institute of Biomedical Genomics                                              | Arindam Maitra, Jyoti Iravane, Dhaval Khatri, Maitrik Dave, Saumitra Das                                                                                                                                           |
| EPI_ISL_508287, EPI_ISL_508288, EPI_ISL_508289, EPI_ISL_508290, EPI_ISL_508291, EPI_ISL_508292, EPI_ISL_508293, EPI_ISL_508294, EPI_ISL_508295, EPI_ISL_508296, EPI_ISL_508297, EPI_ISL_508298, EPI_ISL_508299, EPI_ISL_508300, EPI_ISL_508301, EPI_ISL_508302, EPI_ISL_508303, EPI_ISL_508304, EPI_ISL_508305, EPI_ISL_508306, EPI_ISL_508307, EPI_ISL_508308, EPI_ISL_508309, EPI_ISL_508310, EPI_ISL_508311, EPI_ISL_508312, EPI_ISL_508313, EPI_ISL_508314, EPI_ISL_508315, EPI_ISL_508316, EPI_ISL_508317, EPI_ISL_508318, EPI_ISL_508319, EPI_ISL_508320, EPI_ISL_508321, EPI_ISL_508322, EPI_ISL_508323, EPI_ISL_508324, EPI_ISL_508325, EPI_ISL_508326, EPI_ISL_508327, EPI_ISL_508328, EPI_ISL_508329, EPI_ISL_508330, EPI_ISL_508331, EPI_ISL_508332, EPI_ISL_508333, EPI_ISL_508334, EPI_ISL_508335, EPI_ISL_508336, EPI_ISL_508337                                                                                                                                                                                                                                                                                                                                                                                                                                                                                 | see above | Indian Institute of Science                                                             | National Institute of Biomedical Genomics                                              | Arindam Maitra, Bharath K Sundararaj, Harsha Raheja, N. Srinivasan, Deepak K Saini, Amit Singh, Saumitra Das                                                                                                       |
| EPI_ISL_508338, EPI_ISL_508339, EPI_ISL_508340, EPI_ISL_508341, EPI_ISL_508342, EPI_ISL_508343, EPI_ISL_508344, EPI_ISL_508345, EPI_ISL_508346, EPI_ISL_508347, EPI_ISL_508348, EPI_ISL_508349, EPI_ISL_508350, EPI_ISL_508351, EPI_ISL_508352, EPI_ISL_508353, EPI_ISL_508354, EPI_ISL_508355, EPI_ISL_508356, EPI_ISL_508357, EPI_ISL_508358, EPI_ISL_508359, EPI_ISL_508360, EPI_ISL_508361, EPI_ISL_508362, EPI_ISL_508363, EPI_ISL_508364, EPI_ISL_508365, EPI_ISL_508366, EPI_ISL_508367, EPI_ISL_508368, EPI_ISL_508369, EPI_ISL_508370, EPI_ISL_508371, EPI_ISL_508372, EPI_ISL_508373, EPI_ISL_508374, EPI_ISL_508375, EPI_ISL_508376, EPI_ISL_508377, EPI_ISL_508378, EPI_ISL_508379, EPI_ISL_508380, EPI_ISL_508381, EPI_ISL_508382, EPI_ISL_508383, EPI_ISL_508384, EPI_ISL_508385, EPI_ISL_508386, EPI_ISL_508387, EPI_ISL_508388, EPI_ISL_508389, EPI_ISL_508390, EPI_ISL_508391, EPI_ISL_508392, EPI_ISL_508393, EPI_ISL_508394, EPI_ISL_508395, EPI_ISL_508396, EPI_ISL_508397, EPI_ISL_508398, EPI_ISL_508399, EPI_ISL_508400, EPI_ISL_508401, EPI_ISL_508402, EPI_ISL_508403, EPI_ISL_508404, EPI_ISL_508405, EPI_ISL_508406, EPI_ISL_508407, EPI_ISL_508408, EPI_ISL_508409, EPI_ISL_508410, EPI_ISL_508411, EPI_ISL_508412, EPI_ISL_508413, EPI_ISL_508414                                                 | see above | Institute of Post Graduate Medical Education & Research<br>Maulana Azad Medical College | National Institute of Biomedical Genomics<br>National Institute of Biomedical Genomics | Arindam Maitra, Aritra Biswas, Jayeeta Haldar, Raja Ray, Monimoy Banerjee, Saumitra Das<br>Arindam Maitra, Sonal Saxena, Vikas Manchanda, Oves Siddiqui, Saumitra Das                                              |
| EPI_ISL_508423, EPI_ISL_508424, EPI_ISL_508425, EPI_ISL_508426, EPI_ISL_508427, EPI_ISL_508428, EPI_ISL_508429, EPI_ISL_508430, EPI_ISL_508431, EPI_ISL_508432, EPI_ISL_508433, EPI_ISL_508434, EPI_ISL_508435, EPI_ISL_508436, EPI_ISL_508437, EPI_ISL_508438, EPI_ISL_508439, EPI_ISL_508440                                                                                                                                                                                                                                                                                                                                                                                                                                                                                                                                                                                                                                                                                                                                                                                                                                                                                                                                                                                                                                 | see above | Mahatma Gandhi Institute of Medical Sciences                                            | National Institute of Biomedical Genomics                                              | Arindam Maitra, Vijayshri Deotale, Rahul Narang, Deepashri Maraskolhe, Saumitra Das                                                                                                                                |
| EPI_ISL_508441, EPI_ISL_508442, EPI_ISL_508443, EPI_ISL_508444, EPI_ISL_508445, EPI_ISL_508446, EPI_ISL_508447, EPI_ISL_508448, EPI_ISL_508449, EPI_ISL_508450, EPI_ISL_508451, EPI_ISL_508452, EPI_ISL_508453, EPI_ISL_508454, EPI_ISL_508455, EPI_ISL_508456, EPI_ISL_508457, EPI_ISL_508458, EPI_ISL_508459, EPI_ISL_508460, EPI_ISL_508461, EPI_ISL_508462, EPI_ISL_508463, EPI_ISL_508464, EPI_ISL_508465, EPI_ISL_508466, EPI_ISL_508467, EPI_ISL_508468, EPI_ISL_508469, EPI_ISL_508470, EPI_ISL_508471, EPI_ISL_508472, EPI_ISL_508473, EPI_ISL_508474, EPI_ISL_508475, EPI_ISL_508476, EPI_ISL_508477, EPI_ISL_508478, EPI_ISL_508479, EPI_ISL_508480, EPI_ISL_508481, EPI_ISL_508482, EPI_ISL_508483, EPI_ISL_508484, EPI_ISL_508485, EPI_ISL_508486, EPI_ISL_508487, EPI_ISL_508488                                                                                                                                                                                                                                                                                                                                                                                                                                                                                                                                 | see above | ICMR-National Institute of Cholera and Enteric Diseases                                 | National Institute of Biomedical Genomics                                              | Arindam Maitra, Mamta Chawla Sarkar, Sreedhar Chinnaswamy, Hasina Banu, Ananya Chatterjee, Shanta Dutta, Saumitra Das                                                                                              |
| EPI_ISL_508489, EPI_ISL_508490, EPI_ISL_508491, EPI_ISL_508492, EPI_ISL_508493, EPI_ISL_508494, EPI_ISL_508495, EPI_ISL_508496, EPI_ISL_508497, EPI_ISL_508498, EPI_ISL_508499, EPI_ISL_508500, EPI_ISL_508501, EPI_ISL_508502, EPI_ISL_508503, EPI_ISL_508504, EPI_ISL_508505, EPI_ISL_508506, EPI_ISL_508507, EPI_ISL_508508, EPI_ISL_508509                                                                                                                                                                                                                                                                                                                                                                                                                                                                                                                                                                                                                                                                                                                                                                                                                                                                                                                                                                                 | see above | Translational Health Science and Technology Institute                                   | National Institute of Biomedical Genomics                                              | Arindam Maitra, Guruprasad Medigeschi, Sharanabasava Patil, Anbalagan Ananthraj, Madhu Pareek, Imran Khan, Gagandeep Kang, Saumitra Das                                                                            |
| EPI_ISL_508871, EPI_ISL_508872, EPI_ISL_508873, EPI_ISL_508874                                                                                                                                                                                                                                                                                                                                                                                                                                                                                                                                                                                                                                                                                                                                                                                                                                                                                                                                                                                                                                                                                                                                                                                                                                                                 |           | Institut des Agents Infectieux (IAI), Hospices Civils de Lyon                           | CNR Virus des Infections Respiratoires - France SUD                                    | Antonin Bal, Gregory Destras, Gwendolyne Burfin, Solenne Brun, Carine Moustaud, Raphaëlle Lamy, Alexandre Gaymard, Maude Bouscambert-Duchamp, Florence Morfin-Sherpa, Martine Valette, Bruno Lina, Laurence Josset |
| EPI_ISL_508875, EPI_ISL_508876                                                                                                                                                                                                                                                                                                                                                                                                                                                                                                                                                                                                                                                                                                                                                                                                                                                                                                                                                                                                                                                                                                                                                                                                                                                                                                 |           | Centre Hospitalier de Macon                                                             | CNR Virus des Infections Respiratoires - France SUD                                    | Antonin Bal, Gregory Destras, Gwendolyne Burfin, Solenne Brun, Carine Moustaud, Raphaëlle Lamy, Alexandre Gaymard, Maude Bouscambert-Duchamp, Florence Morfin-Sherpa, Martine Valette, Bruno Lina, Laurence Josset |
| EPI_ISL_508877                                                                                                                                                                                                                                                                                                                                                                                                                                                                                                                                                                                                                                                                                                                                                                                                                                                                                                                                                                                                                                                                                                                                                                                                                                                                                                                 |           | Institut des Agents Infectieux (IAI), Hospices Civils de Lyon                           | CNR Virus des Infections Respiratoires - France SUD                                    | Antonin Bal, Gregory Destras, Gwendolyne Burfin, Solenne Brun, Carine Moustaud, Raphaëlle Lamy, Alexandre Gaymard, Maude Bouscambert-Duchamp, Florence Morfin-Sherpa, Martine Valette, Bruno Lina, Laurence Josset |
| EPI_ISL_508878                                                                                                                                                                                                                                                                                                                                                                                                                                                                                                                                                                                                                                                                                                                                                                                                                                                                                                                                                                                                                                                                                                                                                                                                                                                                                                                 |           | GH Les Portes du Sud                                                                    | CNR Virus des Infections Respiratoires - France SUD                                    | Antonin Bal, Gregory Destras, Gwendolyne Burfin, Solenne Brun, Carine Moustaud, Raphaëlle Lamy, Alexandre Gaymard, Maude Bouscambert-Duchamp, Florence Morfin-Sherpa, Martine Valette, Bruno Lina, Laurence Josset |
| EPI_ISL_508879, EPI_ISL_508880                                                                                                                                                                                                                                                                                                                                                                                                                                                                                                                                                                                                                                                                                                                                                                                                                                                                                                                                                                                                                                                                                                                                                                                                                                                                                                 |           | Centre Hospitalier Saint Joseph Saint Luc                                               | CNR Virus des Infections Respiratoires - France SUD                                    | Antonin Bal, Gregory Destras, Gwendolyne Burfin, Solenne Brun, Carine Moustaud, Raphaëlle Lamy, Alexandre Gaymard, Maude Bouscambert-Duchamp, Florence Morfin-Sherpa, Martine Valette, Bruno Lina, Laurence Josset |
| EPI_ISL_508881                                                                                                                                                                                                                                                                                                                                                                                                                                                                                                                                                                                                                                                                                                                                                                                                                                                                                                                                                                                                                                                                                                                                                                                                                                                                                                                 |           | Centre Hospitalier de Valence                                                           | CNR Virus des Infections Respiratoires - France SUD                                    | Antonin Bal, Gregory Destras, Gwendolyne Burfin, Solenne Brun, Carine Moustaud, Raphaëlle Lamy, Alexandre Gaymard, Maude Bouscambert-Duchamp, Florence Morfin-Sherpa, Martine Valette, Bruno Lina, Laurence Josset |
| EPI_ISL_508882, EPI_ISL_508883, EPI_ISL_508884, EPI_ISL_508885, EPI_ISL_508886, EPI_ISL_508887, EPI_ISL_508888, EPI_ISL_508889, EPI_ISL_508890, EPI_ISL_508891, EPI_ISL_508892, EPI_ISL_508893, EPI_ISL_508894, EPI_ISL_508895, EPI_ISL_508896, EPI_ISL_508897, EPI_ISL_508898, EPI_ISL_508899, EPI_ISL_508900, EPI_ISL_508901, EPI_ISL_508902, EPI_ISL_508903, EPI_ISL_508904, EPI_ISL_508905, EPI_ISL_508906, EPI_ISL_508907, EPI_ISL_508908, EPI_ISL_508909, EPI_ISL_508910, EPI_ISL_508911                                                                                                                                                                                                                                                                                                                                                                                                                                                                                                                                                                                                                                                                                                                                                                                                                                 | see above | Institut des Agents Infectieux (IAI), Hospices Civils de Lyon                           | CNR Virus des Infections Respiratoires - France SUD                                    | Antonin Bal, Gregory Destras, Gwendolyne Burfin, Solenne Brun, Carine Moustaud, Raphaëlle Lamy, Alexandre Gaymard, Maude Bouscambert-Duchamp, Florence Morfin-Sherpa, Martine Valette, Bruno Lina, Laurence Josset |
| EPI_ISL_508912, EPI_ISL_508913, EPI_ISL_508914, EPI_ISL_508915, EPI_ISL_508916, EPI_ISL_508917, EPI_ISL_508918, EPI_ISL_508919, EPI_ISL_508920, EPI_ISL_508921, EPI_ISL_508922, EPI_ISL_508923, EPI_ISL_508924, EPI_ISL_508925, EPI_ISL_508926, EPI_ISL_508927, EPI_ISL_508928, EPI_ISL_508929, EPI_ISL_508930                                                                                                                                                                                                                                                                                                                                                                                                                                                                                                                                                                                                                                                                                                                                                                                                                                                                                                                                                                                                                 | see above | CNR Virus des Infections Respiratoires - France SUD                                     | CNR Virus des Infections Respiratoires - France SUD                                    | Antonin Bal, Gregory Destras, Gwendolyne Burfin, Solenne Brun, Carine Moustaud, Raphaëlle Lamy, Alexandre Gaymard, Maude Bouscambert-Duchamp, Florence Morfin-Sherpa, Martine Valette, Bruno Lina, Laurence Josset |
| EPI_ISL_508931                                                                                                                                                                                                                                                                                                                                                                                                                                                                                                                                                                                                                                                                                                                                                                                                                                                                                                                                                                                                                                                                                                                                                                                                                                                                                                                 |           | L'Hôpital Nord-Ouest Tarare-Grandris                                                    | CNR Virus des Infections Respiratoires - France SUD                                    | Antonin Bal, Gregory Destras, Gwendolyne Burfin, Solenne Brun, Carine Moustaud, Raphaëlle Lamy, Alexandre Gaymard, Maude Bouscambert-Duchamp, Florence Morfin-Sherpa, Martine Valette, Bruno Lina, Laurence Josset |
| EPI_ISL_508932                                                                                                                                                                                                                                                                                                                                                                                                                                                                                                                                                                                                                                                                                                                                                                                                                                                                                                                                                                                                                                                                                                                                                                                                                                                                                                                 |           | Centre Hospitalier de Villefranche                                                      | CNR Virus des Infections Respiratoires - France SUD                                    | Antonin Bal, Gregory Destras, Gwendolyne Burfin, Solenne Brun, Carine Moustaud, Raphaëlle Lamy, Alexandre Gaymard, Maude Bouscambert-Duchamp, Florence Morfin-Sherpa, Martine Valette, Bruno Lina, Laurence Josset |
| EPI_ISL_508933                                                                                                                                                                                                                                                                                                                                                                                                                                                                                                                                                                                                                                                                                                                                                                                                                                                                                                                                                                                                                                                                                                                                                                                                                                                                                                                 |           | CNR Virus des Infections Respiratoires - France SUD                                     | CNR Virus des Infections Respiratoires - France SUD                                    | Antonin Bal, Gregory Destras, Gwendolyne Burfin, Solenne Brun, Carine Moustaud, Raphaëlle Lamy, Alexandre Gaymard, Maude Bouscambert-Duchamp, Florence Morfin-Sherpa, Martine Valette, Bruno Lina, Laurence Josset |
| EPI_ISL_508934, EPI_ISL_508935, EPI_ISL_508936                                                                                                                                                                                                                                                                                                                                                                                                                                                                                                                                                                                                                                                                                                                                                                                                                                                                                                                                                                                                                                                                                                                                                                                                                                                                                 |           | Centre hospitalier Métropole Savoie                                                     | CNR Virus des Infections Respiratoires - France SUD                                    | Antonin Bal, Gregory Destras, Gwendolyne Burfin, Solenne Brun, Carine Moustaud, Raphaëlle Lamy, Alexandre Gaymard, Maude Bouscambert-Duchamp, Florence Morfin-Sherpa, Martine Valette, Bruno Lina, Laurence Josset |
| EPI_ISL_508937                                                                                                                                                                                                                                                                                                                                                                                                                                                                                                                                                                                                                                                                                                                                                                                                                                                                                                                                                                                                                                                                                                                                                                                                                                                                                                                 |           | CNR Virus des Infections Respiratoires - France SUD                                     | CNR Virus des Infections Respiratoires - France SUD                                    | Antonin Bal, Gregory Destras, Gwendolyne Burfin, Solenne Brun, Carine Moustaud, Raphaëlle Lamy, Alexandre Gaymard, Maude Bouscambert-Duchamp, Florence Morfin-Sherpa, Martine Valette, Bruno Lina, Laurence Josset |
| EPI_ISL_508938                                                                                                                                                                                                                                                                                                                                                                                                                                                                                                                                                                                                                                                                                                                                                                                                                                                                                                                                                                                                                                                                                                                                                                                                                                                                                                                 |           | Centre Hospitalier de Bourg en Bresse                                                   | CNR Virus des Infections Respiratoires - France SUD                                    | Antonin Bal, Gregory Destras, Gwendolyne Burfin, Solenne Brun, Carine Moustaud, Raphaëlle Lamy, Alexandre Gaymard, Maude Bouscambert-Duchamp, Florence Morfin-Sherpa, Martine Valette, Bruno Lina, Laurence Josset |
| EPI_ISL_508939, EPI_ISL_508940                                                                                                                                                                                                                                                                                                                                                                                                                                                                                                                                                                                                                                                                                                                                                                                                                                                                                                                                                                                                                                                                                                                                                                                                                                                                                                 |           | CNR Virus des Infections Respiratoires - France SUD                                     | CNR Virus des Infections Respiratoires - France SUD                                    | Antonin Bal, Gregory Destras, Gwendolyne Burfin, Solenne Brun, Carine Moustaud, Raphaëlle Lamy, Alexandre Gaymard, Maude Bouscambert-Duchamp, Florence Morfin-Sherpa, Martine Valette, Bruno Lina, Laurence Josset |
| EPI_ISL_508941                                                                                                                                                                                                                                                                                                                                                                                                                                                                                                                                                                                                                                                                                                                                                                                                                                                                                                                                                                                                                                                                                                                                                                                                                                                                                                                 |           | Centre Hospitalier de Macon                                                             | CNR Virus des Infections Respiratoires - France SUD                                    | Antonin Bal, Gregory Destras, Gwendolyne Burfin, Solenne Brun, Carine Moustaud, Raphaëlle Lamy, Alexandre Gaymard, Maude Bouscambert-Duchamp, Florence Morfin-Sherpa, Martine Valette, Bruno Lina, Laurence Josset |
| EPI_ISL_508942                                                                                                                                                                                                                                                                                                                                                                                                                                                                                                                                                                                                                                                                                                                                                                                                                                                                                                                                                                                                                                                                                                                                                                                                                                                                                                                 |           | CNR Virus des Infections Respiratoires - France SUD                                     | CNR Virus des Infections Respiratoires - France SUD                                    | Antonin Bal, Gregory Destras, Gwendolyne Burfin, Solenne Brun, Carine Moustaud, Raphaëlle Lamy, Alexandre Gaymard, Maude Bouscambert-Duchamp, Florence Morfin-Sherpa, Martine Valette, Bruno Lina, Laurence Josset |





|                                                                                                                                                                                                                                                                                                                                                                                                                                                                                                                                                                                                                                                                                                                                                                                                                                                                                                                                                                                                                                                                                                                                                                                                                                                                                                                                                                                                                                                                                                                                                                                                                                                                                                                                                                                                                                                                                                                                                                                                                                                                                                |                                                                         |                                                                                                              |                                                                                                                                                                                                                                                                                                                                                                                  |
|------------------------------------------------------------------------------------------------------------------------------------------------------------------------------------------------------------------------------------------------------------------------------------------------------------------------------------------------------------------------------------------------------------------------------------------------------------------------------------------------------------------------------------------------------------------------------------------------------------------------------------------------------------------------------------------------------------------------------------------------------------------------------------------------------------------------------------------------------------------------------------------------------------------------------------------------------------------------------------------------------------------------------------------------------------------------------------------------------------------------------------------------------------------------------------------------------------------------------------------------------------------------------------------------------------------------------------------------------------------------------------------------------------------------------------------------------------------------------------------------------------------------------------------------------------------------------------------------------------------------------------------------------------------------------------------------------------------------------------------------------------------------------------------------------------------------------------------------------------------------------------------------------------------------------------------------------------------------------------------------------------------------------------------------------------------------------------------------|-------------------------------------------------------------------------|--------------------------------------------------------------------------------------------------------------|----------------------------------------------------------------------------------------------------------------------------------------------------------------------------------------------------------------------------------------------------------------------------------------------------------------------------------------------------------------------------------|
| EPI_ISL_509016                                                                                                                                                                                                                                                                                                                                                                                                                                                                                                                                                                                                                                                                                                                                                                                                                                                                                                                                                                                                                                                                                                                                                                                                                                                                                                                                                                                                                                                                                                                                                                                                                                                                                                                                                                                                                                                                                                                                                                                                                                                                                 | Centre Hospitalier du Haut-Bugey                                        | CNR Virus des Infections Respiratoires - France SUD                                                          | Antonin Bal, Gregory Destras, Gwendolyne Burfin, Solenne Brun, Carine Moustaud, Raphaëlle Lamy, Alexandre Gaymard, Maude Bouscambert-Duchamp, Florence Morfin-Sherpa, Martine Valette, Bruno Lina, Laurence Josset                                                                                                                                                               |
| EPI_ISL_510333, EPI_ISL_510334, EPI_ISL_510335, EPI_ISL_510336, EPI_ISL_510337, EPI_ISL_510338, EPI_ISL_510339, EPI_ISL_510340, EPI_ISL_510341, EPI_ISL_510342, EPI_ISL_510343, EPI_ISL_510344, EPI_ISL_510345, EPI_ISL_510346, EPI_ISL_510347, EPI_ISL_510348, EPI_ISL_510349, EPI_ISL_510350, EPI_ISL_510351, EPI_ISL_510352, EPI_ISL_510353, EPI_ISL_510354, EPI_ISL_510355, EPI_ISL_510356, EPI_ISL_510357, EPI_ISL_510358, EPI_ISL_510359, EPI_ISL_510360, EPI_ISL_510361, EPI_ISL_510362, EPI_ISL_510363, EPI_ISL_510364, EPI_ISL_510365, EPI_ISL_510366, EPI_ISL_510367, EPI_ISL_510368, EPI_ISL_510369, EPI_ISL_510370, EPI_ISL_510371, EPI_ISL_510372, EPI_ISL_510373, EPI_ISL_510374, EPI_ISL_510375, EPI_ISL_510376, EPI_ISL_510377, EPI_ISL_510378, EPI_ISL_510379, EPI_ISL_510380, EPI_ISL_510381, EPI_ISL_510382, EPI_ISL_510383, EPI_ISL_510384, EPI_ISL_510385, EPI_ISL_510386, EPI_ISL_510387, EPI_ISL_510388, EPI_ISL_510389, EPI_ISL_510390                                                                                                                                                                                                                                                                                                                                                                                                                                                                                                                                                                                                                                                                                                                                                                                                                                                                                                                                                                                                                                                                                                                                 |                                                                         |                                                                                                              |                                                                                                                                                                                                                                                                                                                                                                                  |
| see above                                                                                                                                                                                                                                                                                                                                                                                                                                                                                                                                                                                                                                                                                                                                                                                                                                                                                                                                                                                                                                                                                                                                                                                                                                                                                                                                                                                                                                                                                                                                                                                                                                                                                                                                                                                                                                                                                                                                                                                                                                                                                      | Servicio de Microbiología, Hospital Miguel Servet, Zaragoza             | SeqCOVID-SPAIN consortium/IBV(CSIC)                                                                          | Antonio Rezusta López, Alexander Tristancho Baró, Ana Milagro, Yolanda Gracia Grataloup, Nieves Martínez Cameo and SeqCOVID-SPAIN consortium                                                                                                                                                                                                                                     |
| EPI_ISL_510527                                                                                                                                                                                                                                                                                                                                                                                                                                                                                                                                                                                                                                                                                                                                                                                                                                                                                                                                                                                                                                                                                                                                                                                                                                                                                                                                                                                                                                                                                                                                                                                                                                                                                                                                                                                                                                                                                                                                                                                                                                                                                 | Unite des virus émergents, UMR190                                       | Unite des virus émergents, UMR190                                                                            | Baronti, C., Piorowski, G., Coutard, B., Charrel, R. and de Lamballerie, X.                                                                                                                                                                                                                                                                                                      |
| EPI_ISL_511899                                                                                                                                                                                                                                                                                                                                                                                                                                                                                                                                                                                                                                                                                                                                                                                                                                                                                                                                                                                                                                                                                                                                                                                                                                                                                                                                                                                                                                                                                                                                                                                                                                                                                                                                                                                                                                                                                                                                                                                                                                                                                 | ICMR-National Institute of Cholera and Enteric Diseases                 | National Institute of Biomedical Genomics - DBT's PAN-INDIA 1000 SARS-CoV-2 RNA Genome Sequencing Consortium | Arindam Maitra, Mamta Chawla Sarkar, Sreedhar Chinnaswamy, Hasina Banu, Ananya Chatterjee, Shanta Dutta, Saumitra Das                                                                                                                                                                                                                                                            |
| EPI_ISL_511900, EPI_ISL_511901, EPI_ISL_511902, EPI_ISL_511903, EPI_ISL_511904, EPI_ISL_511905, EPI_ISL_511906, EPI_ISL_511907                                                                                                                                                                                                                                                                                                                                                                                                                                                                                                                                                                                                                                                                                                                                                                                                                                                                                                                                                                                                                                                                                                                                                                                                                                                                                                                                                                                                                                                                                                                                                                                                                                                                                                                                                                                                                                                                                                                                                                 | Institute of Post Graduate Medical Education & Research                 | National Institute of Biomedical Genomics - DBT's PAN-INDIA 1000 SARS-CoV-2 RNA Genome Sequencing Consortium | Arindam Maitra, Aritra Biswas, Jayeeta Haldar, Raja Ray, Monimoy Banerjee, Saumitra Das                                                                                                                                                                                                                                                                                          |
| EPI_ISL_511908, EPI_ISL_511909, EPI_ISL_511910, EPI_ISL_511911, EPI_ISL_511912, EPI_ISL_511913, EPI_ISL_511914, EPI_ISL_511915, EPI_ISL_511916, EPI_ISL_511917, EPI_ISL_511918, EPI_ISL_511919, EPI_ISL_511920, EPI_ISL_511921, EPI_ISL_511922                                                                                                                                                                                                                                                                                                                                                                                                                                                                                                                                                                                                                                                                                                                                                                                                                                                                                                                                                                                                                                                                                                                                                                                                                                                                                                                                                                                                                                                                                                                                                                                                                                                                                                                                                                                                                                                 |                                                                         |                                                                                                              |                                                                                                                                                                                                                                                                                                                                                                                  |
| see above                                                                                                                                                                                                                                                                                                                                                                                                                                                                                                                                                                                                                                                                                                                                                                                                                                                                                                                                                                                                                                                                                                                                                                                                                                                                                                                                                                                                                                                                                                                                                                                                                                                                                                                                                                                                                                                                                                                                                                                                                                                                                      | All india institute of Medical Sciences Rishikesh                       | National Institute of Biomedical Genomics - DBT's PAN-INDIA 1000 SARS-CoV-2 RNA Genome Sequencing Consortium | Arindam Maitra, Deepjyoti Kalita, Amit Mangla, Ravi Kant, Saumitra Das                                                                                                                                                                                                                                                                                                           |
| EPI_ISL_511923, EPI_ISL_511924, EPI_ISL_511925, EPI_ISL_511926, EPI_ISL_511927, EPI_ISL_511928, EPI_ISL_511929                                                                                                                                                                                                                                                                                                                                                                                                                                                                                                                                                                                                                                                                                                                                                                                                                                                                                                                                                                                                                                                                                                                                                                                                                                                                                                                                                                                                                                                                                                                                                                                                                                                                                                                                                                                                                                                                                                                                                                                 | Mahatma Gandhi Institute of Medical Sciences                            | National Institute of Biomedical Genomics - DBT's PAN-INDIA 1000 SARS-CoV-2 RNA Genome Sequencing Consortium | Arindam Maitra, Vijayshri Deotale, Rahul Narang, Deepashri Maraskolhe, Saumitra Das                                                                                                                                                                                                                                                                                              |
| EPI_ISL_511930, EPI_ISL_511931, EPI_ISL_511932, EPI_ISL_511933, EPI_ISL_511934, EPI_ISL_511935, EPI_ISL_511936, EPI_ISL_511937, EPI_ISL_511938, EPI_ISL_511939, EPI_ISL_511940, EPI_ISL_511941                                                                                                                                                                                                                                                                                                                                                                                                                                                                                                                                                                                                                                                                                                                                                                                                                                                                                                                                                                                                                                                                                                                                                                                                                                                                                                                                                                                                                                                                                                                                                                                                                                                                                                                                                                                                                                                                                                 |                                                                         |                                                                                                              |                                                                                                                                                                                                                                                                                                                                                                                  |
| see above                                                                                                                                                                                                                                                                                                                                                                                                                                                                                                                                                                                                                                                                                                                                                                                                                                                                                                                                                                                                                                                                                                                                                                                                                                                                                                                                                                                                                                                                                                                                                                                                                                                                                                                                                                                                                                                                                                                                                                                                                                                                                      | Government Medical College                                              | National Institute of Biomedical Genomics - DBT's PAN-INDIA 1000 SARS-CoV-2 RNA Genome Sequencing Consortium | Arindam Maitra, Jyoti Iravane, Dhaval Khatri, Maitrik Dave, Saumitra Das                                                                                                                                                                                                                                                                                                         |
| EPI_ISL_511942, EPI_ISL_511943, EPI_ISL_511944                                                                                                                                                                                                                                                                                                                                                                                                                                                                                                                                                                                                                                                                                                                                                                                                                                                                                                                                                                                                                                                                                                                                                                                                                                                                                                                                                                                                                                                                                                                                                                                                                                                                                                                                                                                                                                                                                                                                                                                                                                                 | Translational Health Science and Technology Institute                   | National Institute of Biomedical Genomics - DBT's PAN-INDIA 1000 SARS-CoV-2 RNA Genome Sequencing Consortium | Arindam Maitra, Guruprasad Medigeshi, Sharanabasava Patil, Anbalagan Ananthraj, Madhu Pareek, Imran Khan, Gagandeep Kang, Saumitra Das                                                                                                                                                                                                                                           |
| EPI_ISL_511945, EPI_ISL_511946, EPI_ISL_511947, EPI_ISL_511948, EPI_ISL_511949, EPI_ISL_511950, EPI_ISL_511951, EPI_ISL_511952, EPI_ISL_511953, EPI_ISL_511954                                                                                                                                                                                                                                                                                                                                                                                                                                                                                                                                                                                                                                                                                                                                                                                                                                                                                                                                                                                                                                                                                                                                                                                                                                                                                                                                                                                                                                                                                                                                                                                                                                                                                                                                                                                                                                                                                                                                 | Indian Institute of Science                                             | National Institute of Biomedical Genomics - DBT's PAN-INDIA 1000 SARS-CoV-2 RNA Genome Sequencing Consortium | Arindam Maitra, Bharath K Sundararaj, Harsha Raheja, N. Srinivasan, Deepak K Saini, Amit Singh, Saumitra Das                                                                                                                                                                                                                                                                     |
| EPI_ISL_512073                                                                                                                                                                                                                                                                                                                                                                                                                                                                                                                                                                                                                                                                                                                                                                                                                                                                                                                                                                                                                                                                                                                                                                                                                                                                                                                                                                                                                                                                                                                                                                                                                                                                                                                                                                                                                                                                                                                                                                                                                                                                                 | Saikrishna Hospital, Mehsana                                            | Gujarat Biotechnology Research Centre                                                                        | Apurvashin Puvar, Janvi Raval, Zarna Patel, Monika Gandhi, Pinal Trivedi, Maharshi Pandya, Nidhi Patel, Nitin Savaliya, Raghawendra Kumar, Dinesh Kumar, Zuber Saiyed, Komal Patel, Labdhi Pandya, Afzal Ansari, Nikha Trivedi, Harshadhbhai Parmar, R D Dixit, A M Kadri, Harsh Bakshi, Chaitanya Joshi, Madhvi Joshi                                                           |
| EPI_ISL_512336, EPI_ISL_512337, EPI_ISL_512338, EPI_ISL_512339, EPI_ISL_512340, EPI_ISL_512341                                                                                                                                                                                                                                                                                                                                                                                                                                                                                                                                                                                                                                                                                                                                                                                                                                                                                                                                                                                                                                                                                                                                                                                                                                                                                                                                                                                                                                                                                                                                                                                                                                                                                                                                                                                                                                                                                                                                                                                                 | University of Exeter                                                    | COVID-19 Genomics UK (COG-UK) Consortium                                                                     | Ben Temperton, Aaron Jeffries, Michelle Michelsen, Joanna Warwick-Dugdale, Audrey Farbos, Robyn Manley, Stephen Michell, Jane Masoli                                                                                                                                                                                                                                             |
| EPI_ISL_514228, EPI_ISL_514229, EPI_ISL_514230                                                                                                                                                                                                                                                                                                                                                                                                                                                                                                                                                                                                                                                                                                                                                                                                                                                                                                                                                                                                                                                                                                                                                                                                                                                                                                                                                                                                                                                                                                                                                                                                                                                                                                                                                                                                                                                                                                                                                                                                                                                 | National Institute of Laboratory Medicine and Referral Center           | Genomic Research Lab, BCSIR                                                                                  | Barna Goswami, Abu Sayeed Mohammad Mahmud, Mohammad Samir Uzzaman, Eshrar Osman, Md. Ahasan Habib, Shahina Akter, Tanjina Akhter Banu, Md. Murshed Hasan Sarkar, Iffat Jahan, Md. Saddam Hossain, Tasnim Nafisa, Md. Maruf Ahmed Molla, Mahmuda Yeasmin, Asish Kumar Ghosh, A. K. M. Shamsuzzaman, Sheikh Md. Selim Al Din, Utpal Chandra Ray, Salek Ahmed Sajib, Md. Salim Khan |
| EPI_ISL_514592                                                                                                                                                                                                                                                                                                                                                                                                                                                                                                                                                                                                                                                                                                                                                                                                                                                                                                                                                                                                                                                                                                                                                                                                                                                                                                                                                                                                                                                                                                                                                                                                                                                                                                                                                                                                                                                                                                                                                                                                                                                                                 | B.J. Medical College and Civil hospital, Ahmedabad                      | Gujarat Biotechnology Research Centre                                                                        | Apurvashin Puvar, Janvi Raval, Zarna Patel, Monika Gandhi, Pinal Trivedi, Maharshi Pandya, Nidhi Patel, Nitin Savaliya, Raghawendra Kumar, Dinesh Kumar, Zuber Saiyed, Komal Patel, Labdhi Pandya, Afzal Ansari, Nikha Trivedi, Pranay Shah, Kamlesh J Upadhyay, Sanjay Kapadia, R D Dixit, A M Kadri, Harsh Bakshi, Chaitanya Joshi, Madhvi Joshi                               |
| EPI_ISL_515181, EPI_ISL_515182, EPI_ISL_515183, EPI_ISL_515184, EPI_ISL_515247, EPI_ISL_515248, EPI_ISL_515249                                                                                                                                                                                                                                                                                                                                                                                                                                                                                                                                                                                                                                                                                                                                                                                                                                                                                                                                                                                                                                                                                                                                                                                                                                                                                                                                                                                                                                                                                                                                                                                                                                                                                                                                                                                                                                                                                                                                                                                 | Kumasi Centre for Collaborative Research in Tropical Medicine, Kumasi.  | Institute of Virology, Charité - Universitätsmedizin Berlin                                                  | Augustina Sylverken, Philip El-Duah, Michael Owusu, Julia Schneider, Richmond Yeboah, Richmond Gorman, Eric Adu, Sherihane Areyetey, Jesse Addo Asamoah, Jörn Beheim-Schwarzbach, Victor Max Corman, Christian Drosten, Richard Phillips.                                                                                                                                        |
| EPI_ISL_516079, EPI_ISL_516080, EPI_ISL_516081, EPI_ISL_516082, EPI_ISL_516083, EPI_ISL_516084, EPI_ISL_516085, EPI_ISL_516086, EPI_ISL_516087, EPI_ISL_516088                                                                                                                                                                                                                                                                                                                                                                                                                                                                                                                                                                                                                                                                                                                                                                                                                                                                                                                                                                                                                                                                                                                                                                                                                                                                                                                                                                                                                                                                                                                                                                                                                                                                                                                                                                                                                                                                                                                                 | Biomedical Sciences and Public Health, Polytechnic University of Marche | Biomedical Sciences and Public Health, Polytechnic University of Marche                                      | Bagnarelli, P., Caucci, S., Di Sante, L., Menzo, S., Alessandrini, F., Onofri, V., Turchi, C., Melchionda, F., Tagliabracchi, A.                                                                                                                                                                                                                                                 |
| EPI_ISL_517611                                                                                                                                                                                                                                                                                                                                                                                                                                                                                                                                                                                                                                                                                                                                                                                                                                                                                                                                                                                                                                                                                                                                                                                                                                                                                                                                                                                                                                                                                                                                                                                                                                                                                                                                                                                                                                                                                                                                                                                                                                                                                 | Institute of Medical Microbiology, University Medical Center Goettingen | Institute of Human Genetics, University Medical Center Goettingen                                            | Arne Zibat, Gabriela Salinas-Riester, Andreas E Zautner, Maren Sitte, Antje Dickmanns, Maren Stegmann, Uwe Groß, Matthias Döbelstein, Bernd Wolnik                                                                                                                                                                                                                               |
| EPI_ISL_517612, EPI_ISL_517613, EPI_ISL_517614, EPI_ISL_517615, EPI_ISL_517616, EPI_ISL_517617, EPI_ISL_517618, EPI_ISL_517619, EPI_ISL_517620, EPI_ISL_517621, EPI_ISL_517622, EPI_ISL_517623, EPI_ISL_517624, EPI_ISL_517625, EPI_ISL_517626, EPI_ISL_517627, EPI_ISL_517628, EPI_ISL_517629, EPI_ISL_517630, EPI_ISL_517631, EPI_ISL_517632, EPI_ISL_517633, EPI_ISL_517634, EPI_ISL_517635, EPI_ISL_517636, EPI_ISL_517637, EPI_ISL_517638, EPI_ISL_517639, EPI_ISL_517640, EPI_ISL_517641, EPI_ISL_517642, EPI_ISL_517643, EPI_ISL_517644, EPI_ISL_517645, EPI_ISL_517646, EPI_ISL_517647, EPI_ISL_517648, EPI_ISL_517649, EPI_ISL_517650, EPI_ISL_517651, EPI_ISL_517652, EPI_ISL_517653, EPI_ISL_517654, EPI_ISL_517655, EPI_ISL_517656, EPI_ISL_517657, EPI_ISL_517658, EPI_ISL_517659, EPI_ISL_517660, EPI_ISL_517661, EPI_ISL_517662                                                                                                                                                                                                                                                                                                                                                                                                                                                                                                                                                                                                                                                                                                                                                                                                                                                                                                                                                                                                                                                                                                                                                                                                                                                 |                                                                         |                                                                                                              |                                                                                                                                                                                                                                                                                                                                                                                  |
| see above                                                                                                                                                                                                                                                                                                                                                                                                                                                                                                                                                                                                                                                                                                                                                                                                                                                                                                                                                                                                                                                                                                                                                                                                                                                                                                                                                                                                                                                                                                                                                                                                                                                                                                                                                                                                                                                                                                                                                                                                                                                                                      | Academic Hospital Paramaribo                                            | Erasmus Medical Center                                                                                       | Bas Oude Munnink, Dion Gajadin, Ed Ijzerman, Emmanuelle Munger, Gary Gummels, Ingrid Krishnadhath, Lycke Woittiez, Marion Koopmans, Mireille Van de Veer, Princes Wongsowidjojo, Radjesh Ori, Rohma Banwari, Stephen Vredend                                                                                                                                                     |
| EPI_ISL_518031, EPI_ISL_518032                                                                                                                                                                                                                                                                                                                                                                                                                                                                                                                                                                                                                                                                                                                                                                                                                                                                                                                                                                                                                                                                                                                                                                                                                                                                                                                                                                                                                                                                                                                                                                                                                                                                                                                                                                                                                                                                                                                                                                                                                                                                 | Indian Institute of Science                                             | National Institute of Biomedical Genomics - DBT's PAN-INDIA 1000 SARS-CoV-2 RNA Genome Sequencing Consortium | Arindam Maitra, Bharath K Sundararaj, Harsha Raheja, N. Srinivasan, Deepak K Saini, Amit Singh, Saumitra Das                                                                                                                                                                                                                                                                     |
| EPI_ISL_518799, EPI_ISL_518800, EPI_ISL_518801, EPI_ISL_518802, EPI_ISL_518803, EPI_ISL_518804, EPI_ISL_518805, EPI_ISL_518806, EPI_ISL_518807, EPI_ISL_518808, EPI_ISL_518809, EPI_ISL_518810, EPI_ISL_518811, EPI_ISL_518812, EPI_ISL_518813, EPI_ISL_518814, EPI_ISL_518815, EPI_ISL_518816, EPI_ISL_518817, EPI_ISL_518818                                                                                                                                                                                                                                                                                                                                                                                                                                                                                                                                                                                                                                                                                                                                                                                                                                                                                                                                                                                                                                                                                                                                                                                                                                                                                                                                                                                                                                                                                                                                                                                                                                                                                                                                                                 |                                                                         |                                                                                                              |                                                                                                                                                                                                                                                                                                                                                                                  |
| see above                                                                                                                                                                                                                                                                                                                                                                                                                                                                                                                                                                                                                                                                                                                                                                                                                                                                                                                                                                                                                                                                                                                                                                                                                                                                                                                                                                                                                                                                                                                                                                                                                                                                                                                                                                                                                                                                                                                                                                                                                                                                                      | Academic Hospital Paramaribo                                            | Erasmus Medical Center                                                                                       | Bas Oude Munnink, Dion Gajadin, Ed Ijzerman, Emmanuelle Munger, Gary Gummels, Ingrid Krishnadhath, Lycke Woittiez, Marion Koopmans, Mireille Van de Veer, Princes Wongsowidjojo, Radjesh Ori, Rohma Banwari, Stephen Vredend                                                                                                                                                     |
| EPI_ISL_522437                                                                                                                                                                                                                                                                                                                                                                                                                                                                                                                                                                                                                                                                                                                                                                                                                                                                                                                                                                                                                                                                                                                                                                                                                                                                                                                                                                                                                                                                                                                                                                                                                                                                                                                                                                                                                                                                                                                                                                                                                                                                                 | Mahatma Gandhi Institute of Medical Sciences                            | National Institute of Biomedical Genomics - DBT's PAN-INDIA 1000 SARS-CoV-2 RNA Genome Sequencing Consortium | Arindam Maitra, Vijayshri Deotale, Rahul Narang, Deepashri Maraskolhe, Saumitra Das                                                                                                                                                                                                                                                                                              |
| EPI_ISL_523121, EPI_ISL_523122, EPI_ISL_523123, EPI_ISL_523124, EPI_ISL_523125, EPI_ISL_523126, EPI_ISL_523127, EPI_ISL_523128, EPI_ISL_523129, EPI_ISL_523130, EPI_ISL_523131, EPI_ISL_523132, EPI_ISL_523133, EPI_ISL_523134, EPI_ISL_523135, EPI_ISL_523136, EPI_ISL_523137, EPI_ISL_523138, EPI_ISL_523139, EPI_ISL_523140, EPI_ISL_523141, EPI_ISL_523142, EPI_ISL_523143, EPI_ISL_523144, EPI_ISL_523145, EPI_ISL_523146, EPI_ISL_523147, EPI_ISL_523148, EPI_ISL_523149, EPI_ISL_523150, EPI_ISL_523151, EPI_ISL_523152, EPI_ISL_523153, EPI_ISL_523154, EPI_ISL_523155, EPI_ISL_523156, EPI_ISL_523157, EPI_ISL_523158, EPI_ISL_523159, EPI_ISL_523160, EPI_ISL_523161, EPI_ISL_523162, EPI_ISL_523163, EPI_ISL_523164, EPI_ISL_523165, EPI_ISL_523166, EPI_ISL_523167, EPI_ISL_523168, EPI_ISL_523169, EPI_ISL_523170, EPI_ISL_523171, EPI_ISL_523172, EPI_ISL_523173, EPI_ISL_523174, EPI_ISL_523175, EPI_ISL_523176, EPI_ISL_523177, EPI_ISL_523178, EPI_ISL_523179, EPI_ISL_523180, EPI_ISL_523181, EPI_ISL_523182, EPI_ISL_523183, EPI_ISL_523184, EPI_ISL_523185, EPI_ISL_523186, EPI_ISL_523187, EPI_ISL_523188, EPI_ISL_523189, EPI_ISL_523190, EPI_ISL_523191, EPI_ISL_523192, EPI_ISL_523193, EPI_ISL_523194, EPI_ISL_523195, EPI_ISL_523196, EPI_ISL_523197, EPI_ISL_523198, EPI_ISL_523199, EPI_ISL_523200, EPI_ISL_523201, EPI_ISL_523202, EPI_ISL_523203, EPI_ISL_523204, EPI_ISL_523205, EPI_ISL_523206, EPI_ISL_523207, EPI_ISL_523208, EPI_ISL_523209, EPI_ISL_523210, EPI_ISL_523211, EPI_ISL_523212, EPI_ISL_523213, EPI_ISL_523214, EPI_ISL_523215, EPI_ISL_523216, EPI_ISL_523217, EPI_ISL_523218, EPI_ISL_523219, EPI_ISL_523220, EPI_ISL_523221, EPI_ISL_523222, EPI_ISL_523223, EPI_ISL_523224, EPI_ISL_523225, EPI_ISL_523226, EPI_ISL_523227, EPI_ISL_523228, EPI_ISL_523229, EPI_ISL_523230, EPI_ISL_523231, EPI_ISL_523232, EPI_ISL_523233, EPI_ISL_523234, EPI_ISL_523235, EPI_ISL_523236, EPI_ISL_523237, EPI_ISL_523238, EPI_ISL_523239, EPI_ISL_523240, EPI_ISL_523241, EPI_ISL_523242, EPI_ISL_523243, EPI_ISL_523244, EPI_ISL_523245, EPI_ISL_523246 |                                                                         |                                                                                                              |                                                                                                                                                                                                                                                                                                                                                                                  |

EPI\_ISL\_523247, EPI\_ISL\_523248, EPI\_ISL\_523249, EPI\_ISL\_523250, EPI\_ISL\_523251, EPI\_ISL\_523252, EPI\_ISL\_523253, EPI\_ISL\_523254, EPI\_ISL\_523255, EPI\_ISL\_523256, EPI\_ISL\_523257, EPI\_ISL\_523258, EPI\_ISL\_523259, EPI\_ISL\_523260, EPI\_ISL\_523261, EPI\_ISL\_523262, EPI\_ISL\_523263, EPI\_ISL\_523264, EPI\_ISL\_523265, EPI\_ISL\_523266, EPI\_ISL\_523267, EPI\_ISL\_523268, EPI\_ISL\_523269, EPI\_ISL\_523270, EPI\_ISL\_523271, EPI\_ISL\_523272, EPI\_ISL\_523273, EPI\_ISL\_523274, EPI\_ISL\_523275, EPI\_ISL\_523276, EPI\_ISL\_523277, EPI\_ISL\_523278, EPI\_ISL\_523279, EPI\_ISL\_523280, EPI\_ISL\_523281, EPI\_ISL\_523282, EPI\_ISL\_523283, EPI\_ISL\_523284, EPI\_ISL\_523285, EPI\_ISL\_523286, EPI\_ISL\_523287, EPI\_ISL\_523288, EPI\_ISL\_523289, EPI\_ISL\_523290, EPI\_ISL\_523291, EPI\_ISL\_523292, EPI\_ISL\_523293, EPI\_ISL\_523294, EPI\_ISL\_523295, EPI\_ISL\_523296, EPI\_ISL\_523297, EPI\_ISL\_523298, EPI\_ISL\_523299, EPI\_ISL\_523300, EPI\_ISL\_523301, EPI\_ISL\_523302, EPI\_ISL\_523303, EPI\_ISL\_523304, EPI\_ISL\_523305, EPI\_ISL\_523306, EPI\_ISL\_523307, EPI\_ISL\_523308, EPI\_ISL\_523309, EPI\_ISL\_523310, EPI\_ISL\_523311, EPI\_ISL\_523312, EPI\_ISL\_523313, EPI\_ISL\_523314, EPI\_ISL\_523315, EPI\_ISL\_523316, EPI\_ISL\_523317, EPI\_ISL\_523318, EPI\_ISL\_523319, EPI\_ISL\_523320, EPI\_ISL\_523321, EPI\_ISL\_523322, EPI\_ISL\_523323, EPI\_ISL\_523324, EPI\_ISL\_523325, EPI\_ISL\_523326, EPI\_ISL\_523327, EPI\_ISL\_523328, EPI\_ISL\_523329, EPI\_ISL\_523330, EPI\_ISL\_523331, EPI\_ISL\_523332, EPI\_ISL\_523333, EPI\_ISL\_523334, EPI\_ISL\_523335, EPI\_ISL\_523336, EPI\_ISL\_523337, EPI\_ISL\_523338, EPI\_ISL\_523339, EPI\_ISL\_523340, EPI\_ISL\_523341, EPI\_ISL\_523342, EPI\_ISL\_523343, EPI\_ISL\_523344, EPI\_ISL\_523345, EPI\_ISL\_523346, EPI\_ISL\_523347, EPI\_ISL\_523348, EPI\_ISL\_523349, EPI\_ISL\_523350, EPI\_ISL\_523351, EPI\_ISL\_523352, EPI\_ISL\_523353, EPI\_ISL\_523354, EPI\_ISL\_523355, EPI\_ISL\_523356, EPI\_ISL\_523357, EPI\_ISL\_523358, EPI\_ISL\_523359, EPI\_ISL\_523360, EPI\_ISL\_523361, EPI\_ISL\_523362, EPI\_ISL\_523363, EPI\_ISL\_523364, EPI\_ISL\_523365, EPI\_ISL\_523366, EPI\_ISL\_523367, EPI\_ISL\_523368, EPI\_ISL\_523369, EPI\_ISL\_523370, EPI\_ISL\_523371, EPI\_ISL\_523372, EPI\_ISL\_523373, EPI\_ISL\_523374, EPI\_ISL\_523375, EPI\_ISL\_523376, EPI\_ISL\_523377, EPI\_ISL\_523378, EPI\_ISL\_523379, EPI\_ISL\_523380, EPI\_ISL\_523381, EPI\_ISL\_523382, EPI\_ISL\_523383, EPI\_ISL\_523384, EPI\_ISL\_523385, EPI\_ISL\_523386, EPI\_ISL\_523387, EPI\_ISL\_523388, EPI\_ISL\_523389, EPI\_ISL\_523390, EPI\_ISL\_523391, EPI\_ISL\_523392, EPI\_ISL\_523393, EPI\_ISL\_523394, EPI\_ISL\_523395, EPI\_ISL\_523396, EPI\_ISL\_523397, EPI\_ISL\_523398, EPI\_ISL\_523399, EPI\_ISL\_523400, EPI\_ISL\_523401, EPI\_ISL\_523402, EPI\_ISL\_523403, EPI\_ISL\_523404, EPI\_ISL\_523405, EPI\_ISL\_523406, EPI\_ISL\_523407, EPI\_ISL\_523408, EPI\_ISL\_523409, EPI\_ISL\_523410, EPI\_ISL\_523411, EPI\_ISL\_523412, EPI\_ISL\_523413, EPI\_ISL\_523414, EPI\_ISL\_523415, EPI\_ISL\_523416, EPI\_ISL\_523417, EPI\_ISL\_523418, EPI\_ISL\_523419, EPI\_ISL\_523420, EPI\_ISL\_523421, EPI\_ISL\_523422, EPI\_ISL\_523423, EPI\_ISL\_523424, EPI\_ISL\_523425, EPI\_ISL\_523426, EPI\_ISL\_523427, EPI\_ISL\_523428, EPI\_ISL\_523429, EPI\_ISL\_523430, EPI\_ISL\_523431, EPI\_ISL\_523432, EPI\_ISL\_523433, EPI\_ISL\_523434, EPI\_ISL\_523435, EPI\_ISL\_523436, EPI\_ISL\_523437, EPI\_ISL\_523438, EPI\_ISL\_523439, EPI\_ISL\_523440, EPI\_ISL\_523441, EPI\_ISL\_523442, EPI\_ISL\_523443, EPI\_ISL\_523444, EPI\_ISL\_523445, EPI\_ISL\_523446, EPI\_ISL\_523447, EPI\_ISL\_523448, EPI\_ISL\_523449, EPI\_ISL\_523450, EPI\_ISL\_523451, EPI\_ISL\_523452, EPI\_ISL\_523453, EPI\_ISL\_523454, EPI\_ISL\_523455, EPI\_ISL\_523456, EPI\_ISL\_523457, EPI\_ISL\_523458, EPI\_ISL\_523459, EPI\_ISL\_523460, EPI\_ISL\_523461, EPI\_ISL\_523462, EPI\_ISL\_523463, EPI\_ISL\_523464, EPI\_ISL\_523465, EPI\_ISL\_523466, EPI\_ISL\_523467, EPI\_ISL\_523468, EPI\_ISL\_523469, EPI\_ISL\_523470, EPI\_ISL\_523471, EPI\_ISL\_523472, EPI\_ISL\_523473, EPI\_ISL\_523474, EPI\_ISL\_523475, EPI\_ISL\_523476, EPI\_ISL\_523477, EPI\_ISL\_523478, EPI\_ISL\_523479, EPI\_ISL\_523480, EPI\_ISL\_523481, EPI\_ISL\_523482, EPI\_ISL\_523483, EPI\_ISL\_523484, EPI\_ISL\_523485, EPI\_ISL\_523486, EPI\_ISL\_523487, EPI\_ISL\_523488, EPI\_ISL\_523489, EPI\_ISL\_523490, EPI\_ISL\_523491, EPI\_ISL\_523492, EPI\_ISL\_523493, EPI\_ISL\_523494, EPI\_ISL\_523495, EPI\_ISL\_523496, EPI\_ISL\_523497, EPI\_ISL\_523498, EPI\_ISL\_523499, EPI\_ISL\_523500, EPI\_ISL\_523501, EPI\_ISL\_523502, EPI\_ISL\_523503, EPI\_ISL\_523504, EPI\_ISL\_523505, EPI\_ISL\_523506, EPI\_ISL\_523507, EPI\_ISL\_523508, EPI\_ISL\_523509, EPI\_ISL\_523510, EPI\_ISL\_523511, EPI\_ISL\_523512, EPI\_ISL\_523513, EPI\_ISL\_523514, EPI\_ISL\_523515, EPI\_ISL\_523516, EPI\_ISL\_523517, EPI\_ISL\_523518, EPI\_ISL\_523519, EPI\_ISL\_523520, EPI\_ISL\_523521, EPI\_ISL\_523522, EPI\_ISL\_523523, EPI\_ISL\_523524, EPI\_ISL\_523525, EPI\_ISL\_523526, EPI\_ISL\_523527, EPI\_ISL\_523528, EPI\_ISL\_523529, EPI\_ISL\_523530, EPI\_ISL\_523531, EPI\_ISL\_523532, EPI\_ISL\_523533, EPI\_ISL\_523534, EPI\_ISL\_523535, EPI\_ISL\_523536, EPI\_ISL\_523537, EPI\_ISL\_523538, EPI\_ISL\_523539, EPI\_ISL\_523540, EPI\_ISL\_523541, EPI\_ISL\_523542, EPI\_ISL\_523543, EPI\_ISL\_523544, EPI\_ISL\_523545, EPI\_ISL\_523546, EPI\_ISL\_523547, EPI\_ISL\_523548, EPI\_ISL\_523549, EPI\_ISL\_523550, EPI\_ISL\_523551, EPI\_ISL\_523552, EPI\_ISL\_523553, EPI\_ISL\_523554, EPI\_ISL\_523555, EPI\_ISL\_523556, EPI\_ISL\_523557, EPI\_ISL\_523558, EPI\_ISL\_523559, EPI\_ISL\_523560, EPI\_ISL\_523561, EPI\_ISL\_523562, EPI\_ISL\_523563, EPI\_ISL\_523564, EPI\_ISL\_523565, EPI\_ISL\_523566, EPI\_ISL\_523567, EPI\_ISL\_523568, EPI\_ISL\_523569, EPI\_ISL\_523570, EPI\_ISL\_523571, EPI\_ISL\_523572, EPI\_ISL\_523573, EPI\_ISL\_523574, EPI\_ISL\_523575, EPI\_ISL\_523576, EPI\_ISL\_523577, EPI\_ISL\_523578, EPI\_ISL\_523579, EPI\_ISL\_523580, EPI\_ISL\_523581, EPI\_ISL\_523582, EPI\_ISL\_523583, EPI\_ISL\_523584, EPI\_ISL\_523585, EPI\_ISL\_523586, EPI\_ISL\_523587, EPI\_ISL\_523588, EPI\_ISL\_523589, EPI\_ISL\_523590, EPI\_ISL\_523591, EPI\_ISL\_523592, EPI\_ISL\_523593, EPI\_ISL\_523594, EPI\_ISL\_523595, EPI\_ISL\_523596, EPI\_ISL\_523597, EPI\_ISL\_523598, EPI\_ISL\_523599, EPI\_ISL\_523600, EPI\_ISL\_523601, EPI\_ISL\_523602, EPI\_ISL\_523603, EPI\_ISL\_523604, EPI\_ISL\_523605, EPI\_ISL\_523606, EPI\_ISL\_523607, EPI\_ISL\_523608, EPI\_ISL\_523609, EPI\_ISL\_523610, EPI\_ISL\_523611, EPI\_ISL\_523612, EPI\_ISL\_523613, EPI\_ISL\_523614, EPI\_ISL\_523615, EPI\_ISL\_523616, EPI\_ISL\_523617, EPI\_ISL\_523618, EPI\_ISL\_523619, EPI\_ISL\_523620, EPI\_ISL\_523621, EPI\_ISL\_523622, EPI\_ISL\_523623, EPI\_ISL\_523624, EPI\_ISL\_523625, EPI\_ISL\_523626, EPI\_ISL\_523627, EPI\_ISL\_523628, EPI\_ISL\_523629, EPI\_ISL\_523630, EPI\_ISL\_523631, EPI\_ISL\_523632, EPI\_ISL\_523633, EPI\_ISL\_523634, EPI\_ISL\_523635, EPI\_ISL\_523636, EPI\_ISL\_523637, EPI\_ISL\_523638, EPI\_ISL\_523639, EPI\_ISL\_523640, EPI\_ISL\_523641, EPI\_ISL\_523642, EPI\_ISL\_523643, EPI\_ISL\_523644, EPI\_ISL\_523645, EPI\_ISL\_523646, EPI\_ISL\_523647, EPI\_ISL\_523648, EPI\_ISL\_523649, EPI\_ISL\_523650, EPI\_ISL\_523651, EPI\_ISL\_523652, EPI\_ISL\_523653, EPI\_ISL\_523654, EPI\_ISL\_523655, EPI\_ISL\_523656, EPI\_ISL\_523657, EPI\_ISL\_523658, EPI\_ISL\_523659, EPI\_ISL\_523660, EPI\_ISL\_523661, EPI\_ISL\_523662, EPI\_ISL\_523663, EPI\_ISL\_523664, EPI\_ISL\_523665, EPI\_ISL\_523666, EPI\_ISL\_523667, EPI\_ISL\_523668, EPI\_ISL\_523669, EPI\_ISL\_523670, EPI\_ISL\_523671, EPI\_ISL\_523672, EPI\_ISL\_523673, EPI\_ISL\_523674, EPI\_ISL\_523675, EPI\_ISL\_523676, EPI\_ISL\_523677, EPI\_ISL\_523678, EPI\_ISL\_523679, EPI\_ISL\_523680, EPI\_ISL\_523681, EPI\_ISL\_523682, EPI\_ISL\_523683, EPI\_ISL\_523684, EPI\_ISL\_523685, EPI\_ISL\_523686, EPI\_ISL\_523687, EPI\_ISL\_523688, EPI\_ISL\_523689, EPI\_ISL\_523690, EPI\_ISL\_523691, EPI\_ISL\_523692, EPI\_ISL\_523693, EPI\_ISL\_523694, EPI\_ISL\_523695, EPI\_ISL\_523696, EPI\_ISL\_523697, EPI\_ISL\_523698, EPI\_ISL\_523699, EPI\_ISL\_523700, EPI\_ISL\_523701, EPI\_ISL\_523702, EPI\_ISL\_523703, EPI\_ISL\_523704, EPI\_ISL\_523705, EPI\_ISL\_523706, EPI\_ISL\_523707, EPI\_ISL\_523708, EPI\_ISL\_523709, EPI\_ISL\_523710, EPI\_ISL\_523711, EPI\_ISL\_523712, EPI\_ISL\_523713, EPI\_ISL\_523714, EPI\_ISL\_523715, EPI\_ISL\_523716, EPI\_ISL\_523717, EPI\_ISL\_523718, EPI\_ISL\_523719, EPI\_ISL\_523720, EPI\_ISL\_523721, EPI\_ISL\_523722, EPI\_ISL\_523723, EPI\_ISL\_523724, EPI\_ISL\_523725, EPI\_ISL\_523726, EPI\_ISL\_523727, EPI\_ISL\_523728, EPI\_ISL\_523729, EPI\_ISL\_523730, EPI\_ISL\_523731, EPI\_ISL\_523732, EPI\_ISL\_523733, EPI\_ISL\_523734, EPI\_ISL\_523735, EPI\_ISL\_523736, EPI\_ISL\_523737, EPI\_ISL\_523738, EPI\_ISL\_523739, EPI\_ISL\_523740, EPI\_ISL\_523741, EPI\_ISL\_523742, EPI\_ISL\_523743, EPI\_ISL\_523744, EPI\_ISL\_523745, EPI\_ISL\_523746, EPI\_ISL\_523747, EPI\_ISL\_523748, EPI\_ISL\_523749, EPI\_ISL\_523750, EPI\_ISL\_523751, EPI\_ISL\_523752, EPI\_ISL\_523753, EPI\_ISL\_523754, EPI\_ISL\_523755, EPI\_ISL\_523756, EPI\_ISL\_523757, EPI\_ISL\_523758, EPI\_ISL\_523759, EPI\_ISL\_523760, EPI\_ISL\_523761, EPI\_ISL\_523762, EPI\_ISL\_523763, EPI\_ISL\_523764, EPI\_ISL\_523765, EPI\_ISL\_523766, EPI\_ISL\_523767, EPI\_ISL\_523768, EPI\_ISL\_523769, EPI\_ISL\_523770, EPI\_ISL\_523771, EPI\_ISL\_523772, EPI\_ISL\_523773, EPI\_ISL\_523774, EPI\_ISL\_523775, EPI\_ISL\_523776, EPI\_ISL\_523777, EPI\_ISL\_523778, EPI\_ISL\_523779, EPI\_ISL\_523780, EPI\_ISL\_523781, EPI\_ISL\_523782, EPI\_ISL\_523783, EPI\_ISL\_523784, EPI\_ISL\_523785, EPI\_ISL\_523786, EPI\_ISL\_523787, EPI\_ISL\_523788, EPI\_ISL\_523789, EPI\_ISL\_523790, EPI\_ISL\_523791, EPI\_ISL\_523792, EPI\_ISL\_523793, EPI\_ISL\_523794, EPI\_ISL\_523795, EPI\_ISL\_523796, EPI\_ISL\_523797, EPI\_ISL\_523798, EPI\_ISL\_523799, EPI\_ISL\_523800, EPI\_ISL\_523801, EPI\_ISL\_523802, EPI\_ISL\_523803, EPI\_ISL\_523804, EPI\_ISL\_523805, EPI\_ISL\_523806, EPI\_ISL\_523807, EPI\_ISL\_523808, EPI\_ISL\_523809

|                                                                                                                |                                                                      |                                                                                                                          |                                                                                                                                                                                                                                                                                                                                                                                                                                                                          |
|----------------------------------------------------------------------------------------------------------------|----------------------------------------------------------------------|--------------------------------------------------------------------------------------------------------------------------|--------------------------------------------------------------------------------------------------------------------------------------------------------------------------------------------------------------------------------------------------------------------------------------------------------------------------------------------------------------------------------------------------------------------------------------------------------------------------|
| see above                                                                                                      | Dutch COVID-19 response team                                         | Erasmus Medical Center                                                                                                   | Bas Oude Munnink, David Nieuwenhuijse, Reina Sikkema, Claudia Schapendonk, Irina Chestakova, Anne van der Linden, Theo Bestebroer, Stefan van Nieuwkoop, Mark Pronk, Pascal Lexmond, Corien Swaan, Manon Haverkate, Madelief Mollers, Mart Stein, Sandra Kengne Kamga Mobou, Jeroen van Kampen, Jolanda Voermans, Aura Timen, Corine GeurtsvanKessel, Annemiek van der Eijk, Richard Molenkamp, Marion Koopmans, on behalf of the Dutch national COVID-19 response team. |
| EPI_ISL_524428, EPI_ISL_524429, EPI_ISL_524430, EPI_ISL_524431, EPI_ISL_524432                                 | Dirk Dittmer                                                         | Dirk Dittmer                                                                                                             | Bailey,A.G., Caro-Vegas,C.P., Dittmer,D., Eason,A.B., Juarez,A., Landis,J.T., McNamara,R.P., Miller,M.B., Moorad,R., Pluta,L.J., Seltzer,T.A., Thompson,C., Vahrson,W. and Villamor,F.                                                                                                                                                                                                                                                                                   |
| EPI_ISL_524450, EPI_ISL_524451, EPI_ISL_524452, EPI_ISL_524453, EPI_ISL_524454                                 | Microbiology & Immunology, University of North Carolina              | Microbiology & Immunology, University of North Carolina                                                                  | Bailey,A.G., Caro-Vegas,C.P., Dittmer,D., Eason,A.B., Juarez,A., Landis,J.T., McNamara,R.P., Miller,M.B., Moorad,R., Pluta,L.J., Seltzer,T.A., Thompson,C., Vahrson,W., Villamor,F.                                                                                                                                                                                                                                                                                      |
| EPI_ISL_524713                                                                                                 | B.J. Medical College and Civil hospital, Ahmedabad                   | Gujarat Biotechnology Research Centre                                                                                    | Apurvashin Puvar, Janvi Raval, Zarna Patel, Monika Gandhi, Pinal Trivedi, Maharshi Pandya, Nidhi Patel, Nitin Savaliya, Raghawendra Kumar, Dinesh Kumar, Zuber Saiyed, Komal Patel, Labdhi Pandya, Afzal Ansari, Nikha Trivedi, Pranay Shah, Kamlesh J Upadhyay, Sanjay Kapadia, R D Dixit, A M Kadri, Harsh Bakshi, Chaitanya Joshi, Madhvi Joshi                                                                                                                       |
| EPI_ISL_524734                                                                                                 | GMERS Medical College and Hospital, Dharpur, Patan                   | Gujarat Biotechnology Research Centre                                                                                    | Apurvashin Puvar, Janvi Raval, Zarna Patel, Monika Gandhi, Pinal Trivedi, Maharshi Pandya, Nidhi Patel, Nitin Savaliya, Raghawendra Kumar, Dinesh Kumar, Zuber Saiyed, Komal Patel, Labdhi Pandya, Afzal Ansari, Nikha Trivedi, A N Parmar, R D Dixit, A M Kadri, Harsh Bakshi, Chaitanya Joshi, Madhvi Joshi                                                                                                                                                            |
| EPI_ISL_524749                                                                                                 | Sir M P Shah Government Medical College, Jamnagar                    | Gujarat Biotechnology Research Centre                                                                                    | Apurvashin Puvar, Janvi Raval, Zarna Patel, Monika Gandhi, Pinal Trivedi, Maharshi Pandya, Nidhi Patel, Nitin Savaliya, Raghawendra Kumar, Dinesh Kumar, Zuber Saiyed, Komal Patel, Labdhi Pandya, Afzal Ansari, Nikha Trivedi, Binita Aring, R D Dixit, A M Kadri, Harsh Bakshi, Chaitanya Joshi, Madhvi Joshi                                                                                                                                                          |
| EPI_ISL_524765                                                                                                 | GMERS Medical College and Hospital, Dharpur, Patan                   | Gujarat Biotechnology Research Centre                                                                                    | Apurvashin Puvar, Janvi Raval, Zarna Patel, Monika Gandhi, Pinal Trivedi, Maharshi Pandya, Nidhi Patel, Nitin Savaliya, Raghawendra Kumar, Dinesh Kumar, Zuber Saiyed, Komal Patel, Labdhi Pandya, Afzal Ansari, Nikha Trivedi, A N Parmar, R D Dixit, A M Kadri, Harsh Bakshi, Chaitanya Joshi, Madhvi Joshi                                                                                                                                                            |
| EPI_ISL_525536, EPI_ISL_525537, EPI_ISL_525538                                                                 | CNR Virus des Infections Respiratoires - France SUD                  | CNR Virus des Infections Respiratoires - France SUD                                                                      | Antonin Bal, Gregory Destras, Gwendolyne Burfin, Solenne Brun, Alexandre Gaymard, Maude Bouscambert-Duchamp, Florence Morfin-Sherpa, Martine Valette, Bruno Lina, Laurence Josset                                                                                                                                                                                                                                                                                        |
| EPI_ISL_525539                                                                                                 | Centre Hospitalier de Bourg en Bresse                                | CNR Virus des Infections Respiratoires - France SUD                                                                      | Antonin Bal, Gregory Destras, Gwendolyne Burfin, Solenne Brun, Alexandre Gaymard, Maude Bouscambert-Duchamp, Florence Morfin-Sherpa, Martine Valette, Bruno Lina, Laurence Josset                                                                                                                                                                                                                                                                                        |
| EPI_ISL_525540, EPI_ISL_525541, EPI_ISL_525542, EPI_ISL_525543                                                 | CNR Virus des Infections Respiratoires - France SUD                  | CNR Virus des Infections Respiratoires - France SUD                                                                      | Antonin Bal, Gregory Destras, Gwendolyne Burfin, Solenne Brun, Alexandre Gaymard, Maude Bouscambert-Duchamp, Florence Morfin-Sherpa, Martine Valette, Bruno Lina, Laurence Josset                                                                                                                                                                                                                                                                                        |
| EPI_ISL_527809, EPI_ISL_527810, EPI_ISL_527811                                                                 | Institute of Microbiology, Universidad San Francisco de Quito        | Institute of Microbiology, Universidad San Francisco de Quito                                                            | Belén Prado-Vivar, Sully Márquez, Juan José Guadalupe, Monica Becerra-Wong, Bernardo Gutiérrez, Stephanie Arregui, Rene Bracho, Karina Barragan, Anita Garcia, Carlos Tobar, Verónica Barragan, Patricio Rojas-Silva, Gabriel Trueba, Michelle Grunauer, Paul Cárdenas                                                                                                                                                                                                   |
| EPI_ISL_527812, EPI_ISL_527813, EPI_ISL_527814, EPI_ISL_527815, EPI_ISL_527816, EPI_ISL_527817                 | Institute of Microbiology, Universidad San Francisco de Quito        | Institute of Microbiology, Universidad San Francisco de Quito                                                            | Belén Prado-Vivar, Sully Márquez, Juan José Guadalupe, Monica Becerra-Wong, Bernardo Gutiérrez, Khurram Mahbbob, Verónica Barragan, Patricio Rojas-Silva, Gabriel Trueba, Michelle Grunauer, Paul Cárdenas                                                                                                                                                                                                                                                               |
| EPI_ISL_527861                                                                                                 | Hospital e Maternidade Celso Pterro                                  | Instituto Adolfo Lutz, Interdisciplinary Procedures Center, Strategic Laboratory                                         | Av. Dr. Arnaldo, 355 - Brazil, Cerqueira Cesar, São Paulo - SP, 01246-1301                                                                                                                                                                                                                                                                                                                                                                                               |
| EPI_ISL_527866                                                                                                 | PS Municipal Dr Lauro Ribas Braga                                    | Instituto Adolfo Lutz, Interdisciplinary Procedures Center, Strategic Laboratory                                         | Av. Dr. Arnaldo, 355 - Brazil, Cerqueira Cesar, São Paulo - SP, 01246-1301                                                                                                                                                                                                                                                                                                                                                                                               |
| EPI_ISL_528427                                                                                                 | National Genomics Core-Center for DNA Fingerprinting and Diagnostics | National Genomics Core- Center for DNA Fingerprinting and Diagnostics (NGC-CDFD)- DBT's PAN-INDIA-1000 Genome consortium | Bala Pratyusha, Heena Shah, G Shashikanth, Vinay Donipadi, Edrugatla Dinesh, Guru Raja, Hiral Ahmad Reshi, J. Mallikarjun, K. Viswakalyan, Kaisar Ahmad Lone,Kausika Kumar Malik, N. Sudheer, R Harinarayanan, Rashna Bhandari, Murali Dharan Bhashyam, Debashish Mitra, Divya Vashisht, Ashwin Dalal                                                                                                                                                                    |
| EPI_ISL_528428, EPI_ISL_528429                                                                                 | National Genomics Core-Center for DNA Fingerprinting and Diagnostics | National Genomics Core- Center for DNA Fingerprinting and Diagnostics (NGC-CDFD)- DBT's PAN-INDIA-1000 Genome consortium | Ashwin Dalal, Bala Pratyusha, Heena Shah, G Shashikanth, Vinay Donipadi, Neeraj Kumar, Niteen Pathak, Pradipta Hore, Rahul Baroi, Sayantan Goswami, Shaffiqu T S, Shalini Arichota, Sobhan Babu, R Harinarayanan, Rashna Bhandari, Murali Dharan Bhashyam, Debashish Mitra, Divya Vashisht                                                                                                                                                                               |
| EPI_ISL_528596, EPI_ISL_528597, EPI_ISL_528598, EPI_ISL_528599, EPI_ISL_528600, EPI_ISL_528601, EPI_ISL_528602 | National Genomics Core-Center for DNA Fingerprinting and Diagnostics | National Genomics Core- Center for DNA Fingerprinting and Diagnostics (NGC-CDFD)- DBT's PAN-INDIA-1000 Genome consortium | Bala Pratyusha, Heena Shah, G Shashikanth, Vinay Donipadi, Edrugatla Dinesh, Guru Raja, Hiral Ahmad Reshi, J. Mallikarjun, K. Viswakalyan, Kaisar Ahmad Lone,Kausika Kumar Malik, N. Sudheer, R Harinarayanan, Rashna Bhandari, Murali Dharan Bhashyam, Debashish Mitra, Divya Vashisht, Ashwin Dalal                                                                                                                                                                    |

|                                                                                                                                                                                                                                                                                                                                                                                                                                                                                                                                                                                                                                                                                                                                                                                                                                                                                                                                                                                                                                                                                                                                                                                                                                                                                                                                                                                                                                                                                                                                                                                                                                                                                                                                                                                                                                                                                                                                                                                                                                                                                                                                                                                                                                                                                                                                                                                                                                                                                                                                                                                                                                                                                                                                                                                                                                                                                                                                                                                                                                                                                                                                                                                                                                                                                                                                                                                                                                                                                                                                                                                                                                                                                                                                                                                                                                                                                                                                                                                                                                                                                                                                                                                                                                                                                                                                                                                                                                                                                                                                                                                                                                                                                                                                                                                                                                                                                                                                                                                                                                                                                                                                                                                                                                                                                                                                                                                                                                                                                                                                                                                                                                                                                                                                                                                                                                                                                                                                                                                                                                                                                                                                                                                                                                                                                                                                                                                                                                                                                                                                                                                                                                                                                                                                                                                                                                                                                                                                                                                                                                                                                                                                                                                                                                                                                                                                                                                                                                                                                                                                                                                                                                                                                                                                                                                                                                                                                                                                                                                                                                                                                                                                                                                                                                                                                                                                                                                                                                                                                                                                                                                                                                                                                                                                                                                                                                                                                                                                                                                                                                                                                                                                                                                                                                                                                                                                                                                                                                                                                                                                                                                                                                                                                                                                                                                                                                                                                                                                                                                                                                                                                                                                                                                                                                                                                                                                                                                                                                                                                                                                                                                                                                                                                                                                                                                                                                                                                                                                                                                                                                                                                                                                                                                                                                                                                                                                                                                                                                                                                                                                                                                                                                                                                                                                                                                                                                                                                                                                                                                                                                                                                                                                                                                                                                                                                                                                                                                                                                                                                                                                                                                                                                                                                                                                                                                                                                                                                                                                                                                                                                                                                                                                                                                                                                                                                                                                                                                                                                                                                                                           |                                                                      |                                                                                                                                                                                                               |                                                                                                                                                                                                                                                                                                                                                                                  |                                                                                                                                              |
|---------------------------------------------------------------------------------------------------------------------------------------------------------------------------------------------------------------------------------------------------------------------------------------------------------------------------------------------------------------------------------------------------------------------------------------------------------------------------------------------------------------------------------------------------------------------------------------------------------------------------------------------------------------------------------------------------------------------------------------------------------------------------------------------------------------------------------------------------------------------------------------------------------------------------------------------------------------------------------------------------------------------------------------------------------------------------------------------------------------------------------------------------------------------------------------------------------------------------------------------------------------------------------------------------------------------------------------------------------------------------------------------------------------------------------------------------------------------------------------------------------------------------------------------------------------------------------------------------------------------------------------------------------------------------------------------------------------------------------------------------------------------------------------------------------------------------------------------------------------------------------------------------------------------------------------------------------------------------------------------------------------------------------------------------------------------------------------------------------------------------------------------------------------------------------------------------------------------------------------------------------------------------------------------------------------------------------------------------------------------------------------------------------------------------------------------------------------------------------------------------------------------------------------------------------------------------------------------------------------------------------------------------------------------------------------------------------------------------------------------------------------------------------------------------------------------------------------------------------------------------------------------------------------------------------------------------------------------------------------------------------------------------------------------------------------------------------------------------------------------------------------------------------------------------------------------------------------------------------------------------------------------------------------------------------------------------------------------------------------------------------------------------------------------------------------------------------------------------------------------------------------------------------------------------------------------------------------------------------------------------------------------------------------------------------------------------------------------------------------------------------------------------------------------------------------------------------------------------------------------------------------------------------------------------------------------------------------------------------------------------------------------------------------------------------------------------------------------------------------------------------------------------------------------------------------------------------------------------------------------------------------------------------------------------------------------------------------------------------------------------------------------------------------------------------------------------------------------------------------------------------------------------------------------------------------------------------------------------------------------------------------------------------------------------------------------------------------------------------------------------------------------------------------------------------------------------------------------------------------------------------------------------------------------------------------------------------------------------------------------------------------------------------------------------------------------------------------------------------------------------------------------------------------------------------------------------------------------------------------------------------------------------------------------------------------------------------------------------------------------------------------------------------------------------------------------------------------------------------------------------------------------------------------------------------------------------------------------------------------------------------------------------------------------------------------------------------------------------------------------------------------------------------------------------------------------------------------------------------------------------------------------------------------------------------------------------------------------------------------------------------------------------------------------------------------------------------------------------------------------------------------------------------------------------------------------------------------------------------------------------------------------------------------------------------------------------------------------------------------------------------------------------------------------------------------------------------------------------------------------------------------------------------------------------------------------------------------------------------------------------------------------------------------------------------------------------------------------------------------------------------------------------------------------------------------------------------------------------------------------------------------------------------------------------------------------------------------------------------------------------------------------------------------------------------------------------------------------------------------------------------------------------------------------------------------------------------------------------------------------------------------------------------------------------------------------------------------------------------------------------------------------------------------------------------------------------------------------------------------------------------------------------------------------------------------------------------------------------------------------------------------------------------------------------------------------------------------------------------------------------------------------------------------------------------------------------------------------------------------------------------------------------------------------------------------------------------------------------------------------------------------------------------------------------------------------------------------------------------------------------------------------------------------------------------------------------------------------------------------------------------------------------------------------------------------------------------------------------------------------------------------------------------------------------------------------------------------------------------------------------------------------------------------------------------------------------------------------------------------------------------------------------------------------------------------------------------------------------------------------------------------------------------------------------------------------------------------------------------------------------------------------------------------------------------------------------------------------------------------------------------------------------------------------------------------------------------------------------------------------------------------------------------------------------------------------------------------------------------------------------------------------------------------------------------------------------------------------------------------------------------------------------------------------------------------------------------------------------------------------------------------------------------------------------------------------------------------------------------------------------------------------------------------------------------------------------------------------------------------------------------------------------------------------------------------------------------------------------------------------------------------------------------------------------------------------------------------------------------------------------------------------------------------------------------------------------------------------------------------------------------------------------------------------------------------------------------------------------------------------------------------------------------------------------------------------------------------------------------------------------------------------------------------------------------------------------------------------------------------------------------------------------------------------------------------------------------------------------------------------------------------------------------------------------------------------------------------------------------------------------------------------------------------------------------------------------------------------------------------------------------------------------------------------------------------------------------------------------------------------------------------------------------------------------------------------------------------------------------------------------------------------------------------------------------------------------------------------------------------------------------------------------------------------------------------------------------------------------------------------------------------------------------------------------------------------------------------------------------------------------------------------------------------------------------------------------------------------------------------------------------------------------------------------------------------------------------------------------------------------------------------------------------------------------------------------------------------------------------------------------------------------------------------------------------------------------------------------------------------------------------------------------------------------------------------------------------------------------------------------------------------------------------------------------------------------------------------------------------------------------------------------------------------------------------------------------------------------------------------------------------------------------------------------------------------------------------------------------------------------------------------------------------------------------------------------------------------------------------------------------------------------------------------------------------------------------------------------------------------------------------------------------------------------------------------------------------------------------------------------------------------------------------------------------------------------------------------------------------------------------------------------------------------------------------------------------------------------------------------------------------------------------------------------------------------------------------------------------------------------------------------------------------------------------------------------------------------------------------------------------------------------------------------------------------------------------------------------------------------------------------------------------|----------------------------------------------------------------------|---------------------------------------------------------------------------------------------------------------------------------------------------------------------------------------------------------------|----------------------------------------------------------------------------------------------------------------------------------------------------------------------------------------------------------------------------------------------------------------------------------------------------------------------------------------------------------------------------------|----------------------------------------------------------------------------------------------------------------------------------------------|
| EPI_ISL_528603, EPI_ISL_528604                                                                                                                                                                                                                                                                                                                                                                                                                                                                                                                                                                                                                                                                                                                                                                                                                                                                                                                                                                                                                                                                                                                                                                                                                                                                                                                                                                                                                                                                                                                                                                                                                                                                                                                                                                                                                                                                                                                                                                                                                                                                                                                                                                                                                                                                                                                                                                                                                                                                                                                                                                                                                                                                                                                                                                                                                                                                                                                                                                                                                                                                                                                                                                                                                                                                                                                                                                                                                                                                                                                                                                                                                                                                                                                                                                                                                                                                                                                                                                                                                                                                                                                                                                                                                                                                                                                                                                                                                                                                                                                                                                                                                                                                                                                                                                                                                                                                                                                                                                                                                                                                                                                                                                                                                                                                                                                                                                                                                                                                                                                                                                                                                                                                                                                                                                                                                                                                                                                                                                                                                                                                                                                                                                                                                                                                                                                                                                                                                                                                                                                                                                                                                                                                                                                                                                                                                                                                                                                                                                                                                                                                                                                                                                                                                                                                                                                                                                                                                                                                                                                                                                                                                                                                                                                                                                                                                                                                                                                                                                                                                                                                                                                                                                                                                                                                                                                                                                                                                                                                                                                                                                                                                                                                                                                                                                                                                                                                                                                                                                                                                                                                                                                                                                                                                                                                                                                                                                                                                                                                                                                                                                                                                                                                                                                                                                                                                                                                                                                                                                                                                                                                                                                                                                                                                                                                                                                                                                                                                                                                                                                                                                                                                                                                                                                                                                                                                                                                                                                                                                                                                                                                                                                                                                                                                                                                                                                                                                                                                                                                                                                                                                                                                                                                                                                                                                                                                                                                                                                                                                                                                                                                                                                                                                                                                                                                                                                                                                                                                                                                                                                                                                                                                                                                                                                                                                                                                                                                                                                                                                                                                                                                                                                                                                                                                                                                                                                                                                                                                                                                                            | National Genomics Core-Center for DNA Fingerprinting and Diagnostics | National Genomics Core- Center for DNA Fingerprinting and Diagnostics (NGC-CDFD)- DBT's PAN-INDIA-1000 Genome consortium                                                                                      | Ashwin Dalal, Bala Pratyusha, Heena Shah, G Shashikanth, Vinay Donipadi, Neeraj Kumar, Niteen Pathak, Pradipta Hore, Rahul Baroi, Sayantan Goswami, Shaffiq T S, Shalini Arichota, Sobhan Babu, R Harinarayanan, Rashna Bhandari, Murali Dharan Bashyam, Debashish Mitra, Divya Vashisht                                                                                         |                                                                                                                                              |
| EPI_ISL_528605, EPI_ISL_528606, EPI_ISL_528607, EPI_ISL_528608                                                                                                                                                                                                                                                                                                                                                                                                                                                                                                                                                                                                                                                                                                                                                                                                                                                                                                                                                                                                                                                                                                                                                                                                                                                                                                                                                                                                                                                                                                                                                                                                                                                                                                                                                                                                                                                                                                                                                                                                                                                                                                                                                                                                                                                                                                                                                                                                                                                                                                                                                                                                                                                                                                                                                                                                                                                                                                                                                                                                                                                                                                                                                                                                                                                                                                                                                                                                                                                                                                                                                                                                                                                                                                                                                                                                                                                                                                                                                                                                                                                                                                                                                                                                                                                                                                                                                                                                                                                                                                                                                                                                                                                                                                                                                                                                                                                                                                                                                                                                                                                                                                                                                                                                                                                                                                                                                                                                                                                                                                                                                                                                                                                                                                                                                                                                                                                                                                                                                                                                                                                                                                                                                                                                                                                                                                                                                                                                                                                                                                                                                                                                                                                                                                                                                                                                                                                                                                                                                                                                                                                                                                                                                                                                                                                                                                                                                                                                                                                                                                                                                                                                                                                                                                                                                                                                                                                                                                                                                                                                                                                                                                                                                                                                                                                                                                                                                                                                                                                                                                                                                                                                                                                                                                                                                                                                                                                                                                                                                                                                                                                                                                                                                                                                                                                                                                                                                                                                                                                                                                                                                                                                                                                                                                                                                                                                                                                                                                                                                                                                                                                                                                                                                                                                                                                                                                                                                                                                                                                                                                                                                                                                                                                                                                                                                                                                                                                                                                                                                                                                                                                                                                                                                                                                                                                                                                                                                                                                                                                                                                                                                                                                                                                                                                                                                                                                                                                                                                                                                                                                                                                                                                                                                                                                                                                                                                                                                                                                                                                                                                                                                                                                                                                                                                                                                                                                                                                                                                                                                                                                                                                                                                                                                                                                                                                                                                                                                                                                                                                            | National Genomics Core-Center for DNA Fingerprinting and Diagnostics | National Genomics Core- Center for DNA Fingerprinting and Diagnostics (NGC-CDFD)- DBT's PAN-INDIA-1000 Genome consortium                                                                                      | Ashwin Dalal, Bala Pratyusha, Heena Shah, G Shashikanth, Vinay Donipadi, K Manohar, Madhumohan Rao Neeraj Kumar, Niteen Pathak, Pradipta Hore, Rahul Baroi, Sayantan Goswami, Shaffiq T S, Shalini Arichota, Sobhan Babu, R Harinarayanan, Rashna Bhandari, Murali Dharan Bashyam, Debashish Mitra, Divya Vashisht                                                               |                                                                                                                                              |
| EPI_ISL_528748                                                                                                                                                                                                                                                                                                                                                                                                                                                                                                                                                                                                                                                                                                                                                                                                                                                                                                                                                                                                                                                                                                                                                                                                                                                                                                                                                                                                                                                                                                                                                                                                                                                                                                                                                                                                                                                                                                                                                                                                                                                                                                                                                                                                                                                                                                                                                                                                                                                                                                                                                                                                                                                                                                                                                                                                                                                                                                                                                                                                                                                                                                                                                                                                                                                                                                                                                                                                                                                                                                                                                                                                                                                                                                                                                                                                                                                                                                                                                                                                                                                                                                                                                                                                                                                                                                                                                                                                                                                                                                                                                                                                                                                                                                                                                                                                                                                                                                                                                                                                                                                                                                                                                                                                                                                                                                                                                                                                                                                                                                                                                                                                                                                                                                                                                                                                                                                                                                                                                                                                                                                                                                                                                                                                                                                                                                                                                                                                                                                                                                                                                                                                                                                                                                                                                                                                                                                                                                                                                                                                                                                                                                                                                                                                                                                                                                                                                                                                                                                                                                                                                                                                                                                                                                                                                                                                                                                                                                                                                                                                                                                                                                                                                                                                                                                                                                                                                                                                                                                                                                                                                                                                                                                                                                                                                                                                                                                                                                                                                                                                                                                                                                                                                                                                                                                                                                                                                                                                                                                                                                                                                                                                                                                                                                                                                                                                                                                                                                                                                                                                                                                                                                                                                                                                                                                                                                                                                                                                                                                                                                                                                                                                                                                                                                                                                                                                                                                                                                                                                                                                                                                                                                                                                                                                                                                                                                                                                                                                                                                                                                                                                                                                                                                                                                                                                                                                                                                                                                                                                                                                                                                                                                                                                                                                                                                                                                                                                                                                                                                                                                                                                                                                                                                                                                                                                                                                                                                                                                                                                                                                                                                                                                                                                                                                                                                                                                                                                                                                                                                                                                            | Dinkes Provinsi Jawa Barat                                           | School of Life Sciences and Technology & School of Pharmacy-Institut Teknologi Bandung; Molecular Genetics Laboratory-Faculty of Medicine-Universitas Padjadjaran; Laboratorium Kesehatan Provinsi Jawa Barat | Azzania Fibriani, Catur Riani, Marselina Irasonia Tan, Yunia Sribudiani, Husna Nugrahapraja, Tarwadi, Emma Rahmawati, Savira Ekawardhani, Hesti Lina Wiraswati, Ryan Bayusantika Ristandi, Rifky Waluyajati Rachman, Cut Nur Cinthia Alamanda, Lia Faridah, Gusti Ayu Prani Pradani, Adelina Kristiani Rahayu, Hammam Riza, Sony Solistia Wirawan, Agung Eru Wibowo, Ivan Faizal |                                                                                                                                              |
| EPI_ISL_528753                                                                                                                                                                                                                                                                                                                                                                                                                                                                                                                                                                                                                                                                                                                                                                                                                                                                                                                                                                                                                                                                                                                                                                                                                                                                                                                                                                                                                                                                                                                                                                                                                                                                                                                                                                                                                                                                                                                                                                                                                                                                                                                                                                                                                                                                                                                                                                                                                                                                                                                                                                                                                                                                                                                                                                                                                                                                                                                                                                                                                                                                                                                                                                                                                                                                                                                                                                                                                                                                                                                                                                                                                                                                                                                                                                                                                                                                                                                                                                                                                                                                                                                                                                                                                                                                                                                                                                                                                                                                                                                                                                                                                                                                                                                                                                                                                                                                                                                                                                                                                                                                                                                                                                                                                                                                                                                                                                                                                                                                                                                                                                                                                                                                                                                                                                                                                                                                                                                                                                                                                                                                                                                                                                                                                                                                                                                                                                                                                                                                                                                                                                                                                                                                                                                                                                                                                                                                                                                                                                                                                                                                                                                                                                                                                                                                                                                                                                                                                                                                                                                                                                                                                                                                                                                                                                                                                                                                                                                                                                                                                                                                                                                                                                                                                                                                                                                                                                                                                                                                                                                                                                                                                                                                                                                                                                                                                                                                                                                                                                                                                                                                                                                                                                                                                                                                                                                                                                                                                                                                                                                                                                                                                                                                                                                                                                                                                                                                                                                                                                                                                                                                                                                                                                                                                                                                                                                                                                                                                                                                                                                                                                                                                                                                                                                                                                                                                                                                                                                                                                                                                                                                                                                                                                                                                                                                                                                                                                                                                                                                                                                                                                                                                                                                                                                                                                                                                                                                                                                                                                                                                                                                                                                                                                                                                                                                                                                                                                                                                                                                                                                                                                                                                                                                                                                                                                                                                                                                                                                                                                                                                                                                                                                                                                                                                                                                                                                                                                                                                                                                                                            | Dinkes Kota Bogor                                                    | School of Life Sciences and Technology & School of Pharmacy-Institut Teknologi Bandung; Molecular Genetics Laboratory-Faculty of Medicine-Universitas Padjadjaran; Laboratorium Kesehatan Provinsi Jawa Barat | Azzania Fibriani, Catur Riani, Marselina Irasonia Tan, Yunia Sribudiani, Husna Nugrahapraja, Tarwadi, Emma Rahmawati, Savira Ekawardhani, Hesti Lina Wiraswati, Ryan Bayusantika Ristandi, Rifky Waluyajati Rachman, Cut Nur Cinthia Alamanda, Lia Faridah, Davin H. E. Setiawati, Rizki Mardian, Hammam Riza, Sony Solistia Wirawan, Agung Eru Wibowo, Ivan Faizal              |                                                                                                                                              |
| EPI_ISL_529154                                                                                                                                                                                                                                                                                                                                                                                                                                                                                                                                                                                                                                                                                                                                                                                                                                                                                                                                                                                                                                                                                                                                                                                                                                                                                                                                                                                                                                                                                                                                                                                                                                                                                                                                                                                                                                                                                                                                                                                                                                                                                                                                                                                                                                                                                                                                                                                                                                                                                                                                                                                                                                                                                                                                                                                                                                                                                                                                                                                                                                                                                                                                                                                                                                                                                                                                                                                                                                                                                                                                                                                                                                                                                                                                                                                                                                                                                                                                                                                                                                                                                                                                                                                                                                                                                                                                                                                                                                                                                                                                                                                                                                                                                                                                                                                                                                                                                                                                                                                                                                                                                                                                                                                                                                                                                                                                                                                                                                                                                                                                                                                                                                                                                                                                                                                                                                                                                                                                                                                                                                                                                                                                                                                                                                                                                                                                                                                                                                                                                                                                                                                                                                                                                                                                                                                                                                                                                                                                                                                                                                                                                                                                                                                                                                                                                                                                                                                                                                                                                                                                                                                                                                                                                                                                                                                                                                                                                                                                                                                                                                                                                                                                                                                                                                                                                                                                                                                                                                                                                                                                                                                                                                                                                                                                                                                                                                                                                                                                                                                                                                                                                                                                                                                                                                                                                                                                                                                                                                                                                                                                                                                                                                                                                                                                                                                                                                                                                                                                                                                                                                                                                                                                                                                                                                                                                                                                                                                                                                                                                                                                                                                                                                                                                                                                                                                                                                                                                                                                                                                                                                                                                                                                                                                                                                                                                                                                                                                                                                                                                                                                                                                                                                                                                                                                                                                                                                                                                                                                                                                                                                                                                                                                                                                                                                                                                                                                                                                                                                                                                                                                                                                                                                                                                                                                                                                                                                                                                                                                                                                                                                                                                                                                                                                                                                                                                                                                                                                                                                                                                                            | Department of Immunology, The Scripps Research Institute             | Andersen lab at Scripps Research                                                                                                                                                                              | Basler, T., Shephard, J., Austin, B. with SEARCH Alliance San Diego                                                                                                                                                                                                                                                                                                              |                                                                                                                                              |
| EPI_ISL_537729, EPI_ISL_537730, EPI_ISL_537731, EPI_ISL_537732, EPI_ISL_537733, EPI_ISL_537734, EPI_ISL_537735, EPI_ISL_537736, EPI_ISL_537737, EPI_ISL_537738, EPI_ISL_537739, EPI_ISL_537740, EPI_ISL_537741, EPI_ISL_537742, EPI_ISL_537743, EPI_ISL_537744, EPI_ISL_537745, EPI_ISL_537746, EPI_ISL_537747, EPI_ISL_537748, EPI_ISL_537749, EPI_ISL_537750, EPI_ISL_537751, EPI_ISL_537752, EPI_ISL_537753, EPI_ISL_537754, EPI_ISL_537755, EPI_ISL_537756, EPI_ISL_537757, EPI_ISL_537758, EPI_ISL_537759, EPI_ISL_537760, EPI_ISL_537761, EPI_ISL_537762, EPI_ISL_537763, EPI_ISL_537764, EPI_ISL_537765, EPI_ISL_537766, EPI_ISL_537767, EPI_ISL_537768, EPI_ISL_537769, EPI_ISL_537770, EPI_ISL_537771, EPI_ISL_537772, EPI_ISL_537773, EPI_ISL_537774, EPI_ISL_537775, EPI_ISL_537776, EPI_ISL_537777, EPI_ISL_537778, EPI_ISL_537779, EPI_ISL_537780, EPI_ISL_537781, EPI_ISL_537782, EPI_ISL_537783, EPI_ISL_537784, EPI_ISL_537785, EPI_ISL_537786, EPI_ISL_537787                                                                                                                                                                                                                                                                                                                                                                                                                                                                                                                                                                                                                                                                                                                                                                                                                                                                                                                                                                                                                                                                                                                                                                                                                                                                                                                                                                                                                                                                                                                                                                                                                                                                                                                                                                                                                                                                                                                                                                                                                                                                                                                                                                                                                                                                                                                                                                                                                                                                                                                                                                                                                                                                                                                                                                                                                                                                                                                                                                                                                                                                                                                                                                                                                                                                                                                                                                                                                                                                                                                                                                                                                                                                                                                                                                                                                                                                                                                                                                                                                                                                                                                                                                                                                                                                                                                                                                                                                                                                                                                                                                                                                                                                                                                                                                                                                                                                                                                                                                                                                                                                                                                                                                                                                                                                                                                                                                                                                                                                                                                                                                                                                                                                                                                                                                                                                                                                                                                                                                                                                                                                                                                                                                                                                                                                                                                                                                                                                                                                                                                                                                                                                                                                                                                                                                                                                                                                                                                                                                                                                                                                                                                                                                                                                                                                                                                                                                                                                                                                                                                                                                                                                                                                                                                                                                                                                                                                                                                                                                                                                                                                                                                                                                                                                                                                                                                                                                                                                                                                                                                                                                                                                                                                                                                                                                                                                                                                                                                                                                                                                                                                                                                                                                                                                                                                                                                                                                                                                                                                                                                                                                                                                                                                                                                                                                                                                                                                                                                                                                                                                                                                                                                                                                                                                                                                                                                                                                                                                                                                                                                                                                                                                                                                                                                                                                                                                                                                                                                                                                                                                                                                                                                                                                                                                                                                                                                                                                                                                                                                                                                                                                                                                                                                                                                                                                                                                                                                                                                                                                                                                                                                                                                                                                                                                                                                                                                                                                                                                                                                                                                                            | see above                                                            | Servicio de Microbiología, Hospital Miguel Servet, Zaragoza                                                                                                                                                   | SeqCOVID-SPAIN consortium/IBV(CSIC)                                                                                                                                                                                                                                                                                                                                              | Antonio Rezusta López, Alexander Tristáncho Baró, Ana Milagro, Yolanda Gracia Grataloup, Nieves Martínez Cameo and SeqCOVID-SPAIN consortium |
| EPI_ISL_539789, EPI_ISL_539790, EPI_ISL_539791, EPI_ISL_539792, EPI_ISL_539793                                                                                                                                                                                                                                                                                                                                                                                                                                                                                                                                                                                                                                                                                                                                                                                                                                                                                                                                                                                                                                                                                                                                                                                                                                                                                                                                                                                                                                                                                                                                                                                                                                                                                                                                                                                                                                                                                                                                                                                                                                                                                                                                                                                                                                                                                                                                                                                                                                                                                                                                                                                                                                                                                                                                                                                                                                                                                                                                                                                                                                                                                                                                                                                                                                                                                                                                                                                                                                                                                                                                                                                                                                                                                                                                                                                                                                                                                                                                                                                                                                                                                                                                                                                                                                                                                                                                                                                                                                                                                                                                                                                                                                                                                                                                                                                                                                                                                                                                                                                                                                                                                                                                                                                                                                                                                                                                                                                                                                                                                                                                                                                                                                                                                                                                                                                                                                                                                                                                                                                                                                                                                                                                                                                                                                                                                                                                                                                                                                                                                                                                                                                                                                                                                                                                                                                                                                                                                                                                                                                                                                                                                                                                                                                                                                                                                                                                                                                                                                                                                                                                                                                                                                                                                                                                                                                                                                                                                                                                                                                                                                                                                                                                                                                                                                                                                                                                                                                                                                                                                                                                                                                                                                                                                                                                                                                                                                                                                                                                                                                                                                                                                                                                                                                                                                                                                                                                                                                                                                                                                                                                                                                                                                                                                                                                                                                                                                                                                                                                                                                                                                                                                                                                                                                                                                                                                                                                                                                                                                                                                                                                                                                                                                                                                                                                                                                                                                                                                                                                                                                                                                                                                                                                                                                                                                                                                                                                                                                                                                                                                                                                                                                                                                                                                                                                                                                                                                                                                                                                                                                                                                                                                                                                                                                                                                                                                                                                                                                                                                                                                                                                                                                                                                                                                                                                                                                                                                                                                                                                                                                                                                                                                                                                                                                                                                                                                                                                                                                                                                            | Institute of Microbiology, Universidad San Francisco de Quito        | Institute of Microbiology, Universidad San Francisco de Quito                                                                                                                                                 | Belén Prado-Vivar, Sully Márquez, Juan José Guadalupe, Monica Becerra-Wong, Bernardo Gutiérrez, Ligia Briceño, Nabih Dahik, Verónica Barragán, Patricio Rojas-Silva, Gabriel Trueba, Michelle Grunauer, Paúl Cárdenas                                                                                                                                                            |                                                                                                                                              |
| EPI_ISL_540579, EPI_ISL_540580, EPI_ISL_540582, EPI_ISL_540583                                                                                                                                                                                                                                                                                                                                                                                                                                                                                                                                                                                                                                                                                                                                                                                                                                                                                                                                                                                                                                                                                                                                                                                                                                                                                                                                                                                                                                                                                                                                                                                                                                                                                                                                                                                                                                                                                                                                                                                                                                                                                                                                                                                                                                                                                                                                                                                                                                                                                                                                                                                                                                                                                                                                                                                                                                                                                                                                                                                                                                                                                                                                                                                                                                                                                                                                                                                                                                                                                                                                                                                                                                                                                                                                                                                                                                                                                                                                                                                                                                                                                                                                                                                                                                                                                                                                                                                                                                                                                                                                                                                                                                                                                                                                                                                                                                                                                                                                                                                                                                                                                                                                                                                                                                                                                                                                                                                                                                                                                                                                                                                                                                                                                                                                                                                                                                                                                                                                                                                                                                                                                                                                                                                                                                                                                                                                                                                                                                                                                                                                                                                                                                                                                                                                                                                                                                                                                                                                                                                                                                                                                                                                                                                                                                                                                                                                                                                                                                                                                                                                                                                                                                                                                                                                                                                                                                                                                                                                                                                                                                                                                                                                                                                                                                                                                                                                                                                                                                                                                                                                                                                                                                                                                                                                                                                                                                                                                                                                                                                                                                                                                                                                                                                                                                                                                                                                                                                                                                                                                                                                                                                                                                                                                                                                                                                                                                                                                                                                                                                                                                                                                                                                                                                                                                                                                                                                                                                                                                                                                                                                                                                                                                                                                                                                                                                                                                                                                                                                                                                                                                                                                                                                                                                                                                                                                                                                                                                                                                                                                                                                                                                                                                                                                                                                                                                                                                                                                                                                                                                                                                                                                                                                                                                                                                                                                                                                                                                                                                                                                                                                                                                                                                                                                                                                                                                                                                                                                                                                                                                                                                                                                                                                                                                                                                                                                                                                                                                                                                                            | University of Exeter                                                 | COVID-19 Genomics UK (COG-UK) Consortium                                                                                                                                                                      | Ben Temperton, Aaron Jeffries, Michelle Michelsen, Joanna Warwick-Dugdale, Audrey Farbos, Robyn Manley, Stephen Michell, Jane Masoli                                                                                                                                                                                                                                             |                                                                                                                                              |
| EPI_ISL_541008, EPI_ISL_541009, EPI_ISL_541010, EPI_ISL_541011, EPI_ISL_541012, EPI_ISL_541013, EPI_ISL_541014, EPI_ISL_541015, EPI_ISL_541016, EPI_ISL_541017, EPI_ISL_541018, EPI_ISL_541019, EPI_ISL_541020, EPI_ISL_541021, EPI_ISL_541022, EPI_ISL_541023, EPI_ISL_541024, EPI_ISL_541025, EPI_ISL_541026, EPI_ISL_541027, EPI_ISL_541028, EPI_ISL_541029, EPI_ISL_541030, EPI_ISL_541031, EPI_ISL_541032, EPI_ISL_541033, EPI_ISL_541034, EPI_ISL_541035, EPI_ISL_541036                                                                                                                                                                                                                                                                                                                                                                                                                                                                                                                                                                                                                                                                                                                                                                                                                                                                                                                                                                                                                                                                                                                                                                                                                                                                                                                                                                                                                                                                                                                                                                                                                                                                                                                                                                                                                                                                                                                                                                                                                                                                                                                                                                                                                                                                                                                                                                                                                                                                                                                                                                                                                                                                                                                                                                                                                                                                                                                                                                                                                                                                                                                                                                                                                                                                                                                                                                                                                                                                                                                                                                                                                                                                                                                                                                                                                                                                                                                                                                                                                                                                                                                                                                                                                                                                                                                                                                                                                                                                                                                                                                                                                                                                                                                                                                                                                                                                                                                                                                                                                                                                                                                                                                                                                                                                                                                                                                                                                                                                                                                                                                                                                                                                                                                                                                                                                                                                                                                                                                                                                                                                                                                                                                                                                                                                                                                                                                                                                                                                                                                                                                                                                                                                                                                                                                                                                                                                                                                                                                                                                                                                                                                                                                                                                                                                                                                                                                                                                                                                                                                                                                                                                                                                                                                                                                                                                                                                                                                                                                                                                                                                                                                                                                                                                                                                                                                                                                                                                                                                                                                                                                                                                                                                                                                                                                                                                                                                                                                                                                                                                                                                                                                                                                                                                                                                                                                                                                                                                                                                                                                                                                                                                                                                                                                                                                                                                                                                                                                                                                                                                                                                                                                                                                                                                                                                                                                                                                                                                                                                                                                                                                                                                                                                                                                                                                                                                                                                                                                                                                                                                                                                                                                                                                                                                                                                                                                                                                                                                                                                                                                                                                                                                                                                                                                                                                                                                                                                                                                                                                                                                                                                                                                                                                                                                                                                                                                                                                                                                                                                                                                                                                                                                                                                                                                                                                                                                                                                                                                                                                                                                                            | see above                                                            | Servicio de Microbiología, Hospital Miguel Servet, Zaragoza                                                                                                                                                   | Antonio Rezusta López, Alexander Tristáncho Baró, Ana Milagro, Yolanda Gracia Grataloup, Nieves Martínez Cameo and SeqCOVID-SPAIN consortium                                                                                                                                                                                                                                     |                                                                                                                                              |
| EPI_ISL_560407                                                                                                                                                                                                                                                                                                                                                                                                                                                                                                                                                                                                                                                                                                                                                                                                                                                                                                                                                                                                                                                                                                                                                                                                                                                                                                                                                                                                                                                                                                                                                                                                                                                                                                                                                                                                                                                                                                                                                                                                                                                                                                                                                                                                                                                                                                                                                                                                                                                                                                                                                                                                                                                                                                                                                                                                                                                                                                                                                                                                                                                                                                                                                                                                                                                                                                                                                                                                                                                                                                                                                                                                                                                                                                                                                                                                                                                                                                                                                                                                                                                                                                                                                                                                                                                                                                                                                                                                                                                                                                                                                                                                                                                                                                                                                                                                                                                                                                                                                                                                                                                                                                                                                                                                                                                                                                                                                                                                                                                                                                                                                                                                                                                                                                                                                                                                                                                                                                                                                                                                                                                                                                                                                                                                                                                                                                                                                                                                                                                                                                                                                                                                                                                                                                                                                                                                                                                                                                                                                                                                                                                                                                                                                                                                                                                                                                                                                                                                                                                                                                                                                                                                                                                                                                                                                                                                                                                                                                                                                                                                                                                                                                                                                                                                                                                                                                                                                                                                                                                                                                                                                                                                                                                                                                                                                                                                                                                                                                                                                                                                                                                                                                                                                                                                                                                                                                                                                                                                                                                                                                                                                                                                                                                                                                                                                                                                                                                                                                                                                                                                                                                                                                                                                                                                                                                                                                                                                                                                                                                                                                                                                                                                                                                                                                                                                                                                                                                                                                                                                                                                                                                                                                                                                                                                                                                                                                                                                                                                                                                                                                                                                                                                                                                                                                                                                                                                                                                                                                                                                                                                                                                                                                                                                                                                                                                                                                                                                                                                                                                                                                                                                                                                                                                                                                                                                                                                                                                                                                                                                                                                                                                                                                                                                                                                                                                                                                                                                                                                                                                                                                            | Istituto Zooprofilattico Sperimentale del Mezzogiorno                | INMI Lazzaro Spallanzani IRCCS                                                                                                                                                                                | Barbara Bartolini, Cesare E.M. Gruber, Martina Rueca, Francesco Messina, Antonino Di Caro, Giovanna Fusco, Maurizio Viscardi, Giorgia Borriello, Sergio Brandi, Maria R. Capobianchi                                                                                                                                                                                             |                                                                                                                                              |
| EPI_ISL_568877, EPI_ISL_568879, EPI_ISL_568880, EPI_ISL_568881, EPI_ISL_568882, EPI_ISL_568883, EPI_ISL_568884, EPI_ISL_568885, EPI_ISL_568886, EPI_ISL_568887, EPI_ISL_568888, EPI_ISL_568889, EPI_ISL_568890, EPI_ISL_568891, EPI_ISL_568892, EPI_ISL_568893, EPI_ISL_568894, EPI_ISL_568895, EPI_ISL_568896, EPI_ISL_568897, EPI_ISL_568898, EPI_ISL_568899, EPI_ISL_568900, EPI_ISL_568901, EPI_ISL_568902, EPI_ISL_568903, EPI_ISL_568904, EPI_ISL_568905, EPI_ISL_568906, EPI_ISL_568907, EPI_ISL_568908, EPI_ISL_568909, EPI_ISL_568910, EPI_ISL_568911, EPI_ISL_568912, EPI_ISL_568913, EPI_ISL_568914, EPI_ISL_568915, EPI_ISL_568916, EPI_ISL_568917, EPI_ISL_568918, EPI_ISL_568919, EPI_ISL_568920, EPI_ISL_568921, EPI_ISL_568922, EPI_ISL_568923, EPI_ISL_568924, EPI_ISL_568925, EPI_ISL_568926, EPI_ISL_568927, EPI_ISL_568928, EPI_ISL_568929, EPI_ISL_568930, EPI_ISL_568931, EPI_ISL_568932, EPI_ISL_568933, EPI_ISL_568934, EPI_ISL_568935, EPI_ISL_568936, EPI_ISL_568937, EPI_ISL_568938, EPI_ISL_568939, EPI_ISL_568940, EPI_ISL_568941, EPI_ISL_568942, EPI_ISL_568943, EPI_ISL_568944, EPI_ISL_568945, EPI_ISL_568946, EPI_ISL_568947, EPI_ISL_568948, EPI_ISL_568949, EPI_ISL_568950, EPI_ISL_568951, EPI_ISL_568952, EPI_ISL_568953, EPI_ISL_568954, EPI_ISL_568955, EPI_ISL_568956, EPI_ISL_568957, EPI_ISL_568958, EPI_ISL_568959, EPI_ISL_568960, EPI_ISL_568961, EPI_ISL_568962, EPI_ISL_568963, EPI_ISL_568964, EPI_ISL_568965, EPI_ISL_568966, EPI_ISL_568967, EPI_ISL_568968, EPI_ISL_568969, EPI_ISL_568970, EPI_ISL_568971, EPI_ISL_568972, EPI_ISL_568973, EPI_ISL_568974, EPI_ISL_568975, EPI_ISL_568976, EPI_ISL_568977, EPI_ISL_568978, EPI_ISL_568979, EPI_ISL_568980, EPI_ISL_568981, EPI_ISL_568982, EPI_ISL_568983, EPI_ISL_568984, EPI_ISL_568985, EPI_ISL_568986, EPI_ISL_568987, EPI_ISL_568988, EPI_ISL_568989, EPI_ISL_568990, EPI_ISL_568991, EPI_ISL_568992, EPI_ISL_568993, EPI_ISL_568994, EPI_ISL_568995, EPI_ISL_568996, EPI_ISL_568997, EPI_ISL_568998, EPI_ISL_568999, EPI_ISL_569000, EPI_ISL_569001, EPI_ISL_569002, EPI_ISL_569003, EPI_ISL_569004, EPI_ISL_569005, EPI_ISL_569006, EPI_ISL_569007, EPI_ISL_569008, EPI_ISL_569009, EPI_ISL_569010, EPI_ISL_569011, EPI_ISL_569012, EPI_ISL_569013, EPI_ISL_569014, EPI_ISL_569015, EPI_ISL_569016, EPI_ISL_569017, EPI_ISL_569018, EPI_ISL_569019, EPI_ISL_569020, EPI_ISL_569021, EPI_ISL_569022, EPI_ISL_569023, EPI_ISL_569024, EPI_ISL_569025, EPI_ISL_569026, EPI_ISL_569027, EPI_ISL_569028, EPI_ISL_569029, EPI_ISL_569030, EPI_ISL_569031, EPI_ISL_569032, EPI_ISL_569033, EPI_ISL_569034, EPI_ISL_569035, EPI_ISL_569036, EPI_ISL_569037, EPI_ISL_569038, EPI_ISL_569039, EPI_ISL_569040, EPI_ISL_569041, EPI_ISL_569042, EPI_ISL_569043, EPI_ISL_569044, EPI_ISL_569045, EPI_ISL_569046, EPI_ISL_569047, EPI_ISL_569048, EPI_ISL_569049, EPI_ISL_569050, EPI_ISL_569051, EPI_ISL_569052, EPI_ISL_569053, EPI_ISL_569054, EPI_ISL_569055, EPI_ISL_569056, EPI_ISL_569057, EPI_ISL_569058, EPI_ISL_569059, EPI_ISL_569060, EPI_ISL_569061, EPI_ISL_569062, EPI_ISL_569063, EPI_ISL_569064, EPI_ISL_569065, EPI_ISL_569066, EPI_ISL_569067, EPI_ISL_569068, EPI_ISL_569069, EPI_ISL_569070, EPI_ISL_569071, EPI_ISL_569072, EPI_ISL_569073, EPI_ISL_569074, EPI_ISL_569075, EPI_ISL_569076, EPI_ISL_569077, EPI_ISL_569078, EPI_ISL_569079, EPI_ISL_569080, EPI_ISL_569081, EPI_ISL_569082, EPI_ISL_569083, EPI_ISL_569084, EPI_ISL_569085, EPI_ISL_569086, EPI_ISL_569087, EPI_ISL_569088, EPI_ISL_569089, EPI_ISL_569090, EPI_ISL_569091, EPI_ISL_569092, EPI_ISL_569093, EPI_ISL_569094, EPI_ISL_569095, EPI_ISL_569096, EPI_ISL_569097, EPI_ISL_569098, EPI_ISL_569099, EPI_ISL_569100, EPI_ISL_569101, EPI_ISL_569102, EPI_ISL_569103, EPI_ISL_569104, EPI_ISL_569105, EPI_ISL_569106, EPI_ISL_569107, EPI_ISL_569108, EPI_ISL_569109, EPI_ISL_569110, EPI_ISL_569111, EPI_ISL_569112, EPI_ISL_569113, EPI_ISL_569114, EPI_ISL_569115, EPI_ISL_569116, EPI_ISL_569117, EPI_ISL_569118, EPI_ISL_569119, EPI_ISL_569120, EPI_ISL_569121, EPI_ISL_569122, EPI_ISL_569123, EPI_ISL_569124, EPI_ISL_569125, EPI_ISL_569126, EPI_ISL_569127, EPI_ISL_569128, EPI_ISL_569129, EPI_ISL_569130, EPI_ISL_569131, EPI_ISL_569132, EPI_ISL_569133, EPI_ISL_569134, EPI_ISL_569135, EPI_ISL_569136, EPI_ISL_569137, EPI_ISL_569138, EPI_ISL_569139, EPI_ISL_569140, EPI_ISL_569141, EPI_ISL_569142, EPI_ISL_569143, EPI_ISL_569144, EPI_ISL_569145, EPI_ISL_569146, EPI_ISL_569147, EPI_ISL_569148, EPI_ISL_569149, EPI_ISL_569150, EPI_ISL_569151, EPI_ISL_569152, EPI_ISL_569153, EPI_ISL_569154, EPI_ISL_569155, EPI_ISL_569156, EPI_ISL_569157, EPI_ISL_569158, EPI_ISL_569159, EPI_ISL_569160, EPI_ISL_569161, EPI_ISL_569162, EPI_ISL_569163, EPI_ISL_569164, EPI_ISL_569165, EPI_ISL_569166, EPI_ISL_569167, EPI_ISL_569168, EPI_ISL_569169, EPI_ISL_569170, EPI_ISL_569171, EPI_ISL_569172, EPI_ISL_569173, EPI_ISL_569174, EPI_ISL_569175, EPI_ISL_569176, EPI_ISL_569177, EPI_ISL_569178, EPI_ISL_569179, EPI_ISL_569180, EPI_ISL_569181, EPI_ISL_569182, EPI_ISL_569183, EPI_ISL_569184, EPI_ISL_569185, EPI_ISL_569186, EPI_ISL_569187, EPI_ISL_569188, EPI_ISL_569189, EPI_ISL_569190, EPI_ISL_569191, EPI_ISL_569192, EPI_ISL_569193, EPI_ISL_569194, EPI_ISL_569195, EPI_ISL_569196, EPI_ISL_569197, EPI_ISL_569198, EPI_ISL_569199, EPI_ISL_569200, EPI_ISL_569201, EPI_ISL_569202, EPI_ISL_569203, EPI_ISL_569204, EPI_ISL_569205, EPI_ISL_569206, EPI_ISL_569207, EPI_ISL_569208, EPI_ISL_569209, EPI_ISL_569210, EPI_ISL_569211, EPI_ISL_569212, EPI_ISL_569213, EPI_ISL_569214, EPI_ISL_569215, EPI_ISL_569216, EPI_ISL_569217, EPI_ISL_569218, EPI_ISL_569219, EPI_ISL_569220, EPI_ISL_569221, EPI_ISL_569222, EPI_ISL_569223, EPI_ISL_569224, EPI_ISL_569225, EPI_ISL_569226, EPI_ISL_569227, EPI_ISL_569228, EPI_ISL_569229, EPI_ISL_569230, EPI_ISL_569231, EPI_ISL_569232, EPI_ISL_569233, EPI_ISL_569234, EPI_ISL_569235, EPI_ISL_569236, EPI_ISL_569237, EPI_ISL_569238, EPI_ISL_569239, EPI_ISL_569240, EPI_ISL_569241, EPI_ISL_569242, EPI_ISL_569243, EPI_ISL_569244, EPI_ISL_569245, EPI_ISL_569246, EPI_ISL_569247, EPI_ISL_569248, EPI_ISL_569249, EPI_ISL_569250, EPI_ISL_569251, EPI_ISL_569252, EPI_ISL_569253, EPI_ISL_569254, EPI_ISL_569255, EPI_ISL_569256, EPI_ISL_569257, EPI_ISL_569258, EPI_ISL_569259, EPI_ISL_569260, EPI_ISL_569261, EPI_ISL_569262, EPI_ISL_569263, EPI_ISL_569264, EPI_ISL_569265, EPI_ISL_569266, EPI_ISL_569267, EPI_ISL_569268, EPI_ISL_569269, EPI_ISL_569270, EPI_ISL_569271, EPI_ISL_569272, EPI_ISL_569273, EPI_ISL_569274, EPI_ISL_569275, EPI_ISL_569276, EPI_ISL_569277, EPI_ISL_569278, EPI_ISL_569279, EPI_ISL_569280, EPI_ISL_569281, EPI_ISL_569282, EPI_ISL_569283, EPI_ISL_569284, EPI_ISL_569285, EPI_ISL_569286, EPI_ISL_569287, EPI_ISL_569288, EPI_ISL_569289, EPI_ISL_569290, EPI_ISL_569291, EPI_ISL_569292, EPI_ISL_569293, EPI_ISL_569294, EPI_ISL_569295, EPI_ISL_569296, EPI_ISL_569297, EPI_ISL_569298, EPI_ISL_569299, EPI_ISL_569300, EPI_ISL_569301, EPI_ISL_569302, EPI_ISL_569303, EPI_ISL_569304, EPI_ISL_569305, EPI_ISL_569306, EPI_ISL_569307, EPI_ISL_569308, EPI_ISL_569309, EPI_ISL_569310, EPI_ISL_569311, EPI_ISL_569312, EPI_ISL_569313, EPI_ISL_569314, EPI_ISL_569315, EPI_ISL_569316, EPI_ISL_569317, EPI_ISL_569318, EPI_ISL_569319, EPI_ISL_569320, EPI_ISL_569321, EPI_ISL_569322, EPI_ISL_569323, EPI_ISL_569324, EPI_ISL_569325, EPI_ISL_569326, EPI_ISL_569327, EPI_ISL_569328, EPI_ISL_569329, EPI_ISL_569330, EPI_ISL_569331, EPI_ISL_569332, EPI_ISL_569333, EPI_ISL_569334, EPI_ISL_569335, EPI_ISL_569336, EPI_ISL_569337, EPI_ISL_569338, EPI_ISL_569339, EPI_ISL_569340, EPI_ISL_569341, EPI_ISL_569342, EPI_ISL_569343, EPI_ISL_569344, EPI_ISL_569345, EPI_ISL_569346, EPI_ISL_569347, EPI_ISL_569348, EPI_ISL_569349, EPI_ISL_569350, EPI_ISL_569351, EPI_ISL_569352, EPI_ISL_569353, EPI_ISL_569354, EPI_ISL_569355, EPI_ISL_569356, EPI_ISL_569357, EPI_ISL_569358, EPI_ISL_569359, EPI_ISL_569360, EPI_ISL_569361, EPI_ISL_569362, EPI_ISL_569363, EPI_ISL_569364, EPI_ISL_569365, EPI_ISL_569366, EPI_ISL_569367, EPI_ISL_569368, EPI_ISL_569369, EPI_ISL_569370, EPI_ISL_569371, EPI_ISL_569372, EPI_ISL_569373, EPI_ISL_569374, EPI_ISL_569375, EPI_ISL_569376, EPI_ISL_569377, EPI_ISL_569378, EPI_ISL_569379, EPI_ISL_569380, EPI_ISL_569381, EPI_ISL_569382, EPI_ISL_569383, EPI_ISL_569384, EPI_ISL_569385, EPI_ISL_569386, EPI_ISL_569387, EPI_ISL_569388, EPI_ISL_569389, EPI_ISL_569390, EPI_ISL_569391, EPI_ISL_569392, EPI_ISL_569393, EPI_ISL_569394, EPI_ISL_569395, EPI_ISL_569396, EPI_ISL_569397, EPI_ISL_569398, EPI_ISL_569399, EPI_ISL_569400, EPI_ISL_569401, EPI_ISL_569402, EPI_ISL_569403, EPI_ISL_569404, EPI_ISL_569405, EPI_ISL_569406, EPI_ISL_569407, EPI_ISL_569408, EPI_ISL_569409, EPI_ISL_569410, EPI_ISL_569411, EPI_ISL_569412, EPI_ISL_569413, EPI_ISL_569414, EPI_ISL_569415, EPI_ISL_569416, EPI_ISL_569417, EPI_ISL_569418, EPI_ISL_569419, EPI_ISL_569420, EPI_ISL_569421, EPI_ISL_569422, EPI_ISL_569423, EPI_ISL_569424, EPI_ISL_569425, EPI_ISL_569426, EPI_ISL_569427, EPI_ISL_569428, EPI_ISL_569429, EPI_ISL_569430, EPI_ISL_569431, EPI_ISL_569432, EPI_ISL_569433, EPI_ISL_569434, EPI_ISL_569435, EPI_ISL_569436, EPI_ISL_569437, EPI_ISL_569438, EPI_ISL_569439, EPI_ISL_569440, EPI_ISL_569441, EPI_ISL_569442, EPI_ISL_569443, EPI_ISL_569444, EPI_ISL_569445, EPI_ISL_569446, EPI_ISL_569447, EPI_ISL_569448, EPI_ISL_569449, EPI_ISL_569450, EPI_ISL_569451, EPI_ISL_569452, EPI_ISL_569453, EPI_ISL_569454, EPI_ISL_569455, EPI_ISL_569456, EPI_ISL_569457, EPI_ISL_569458, EPI_ISL_569459, EPI_ISL_569460, EPI_ISL_569461, EPI_ISL_569462, EPI_ISL_569463, EPI_ISL_569464, EPI_ISL_569465, EPI_ISL_569466, EPI_ISL_569467, EPI_ISL_569468, EPI_ISL_569469, EPI_ISL_569470, EPI_ISL_569471, EPI_ISL_569472, EPI_ISL_569473, EPI_ISL_569474, EPI_ISL_569475, EPI_ISL_569476, EPI_ISL_569477, EPI_ISL_569478, EPI_ISL_569479, EPI_ISL_569480, EPI_ISL_569481, EPI_ISL_569482, EPI_ISL_569483, EPI_ISL_569484, EPI_ISL_569485, EPI_ISL_569486, EPI_ISL_569487, EPI_ISL_569488, EPI_ISL_569489, EPI_ISL_569490, EPI_ISL_569491, EPI_ISL_569492, EPI_ISL_569493, EPI_ISL_569494, EPI_ISL_569495, EPI_ISL_569496, EPI_ISL_569497, EPI_ISL_569498, EPI_ISL_569499, EPI_ISL_569500, EPI_ISL_569501, EPI_ISL_569502, EPI_ISL_569503, EPI_ISL_569504, EPI_ISL_569505, EPI_ISL_569506, EPI_ISL_569507, EPI_ISL_569508, EPI_ISL_569509, EPI_ISL_569510, EPI_ISL_569511, EPI_ISL_569512, EPI_ISL_569513, EPI_ISL_569514, EPI_ISL_569515, EPI_ISL_569516, EPI_ISL_569517, EPI_ISL_569518, EPI_ISL_569519, EPI_ISL_569520, EPI_ISL_569521, EPI_ISL_569522, EPI_ISL_569523, EPI_ISL_569524, EPI_ISL_569525, EPI_ISL_569526, EPI_ISL_569527, EPI_ISL_569528, EPI_ISL_569529, EPI_ISL_569530, EPI_ISL_569531, EPI_ISL_569532, EPI_ISL_569533, EPI_ISL_569534, EPI_ISL_569535, EPI_ISL_569536, EPI_ISL_569537, EPI_ISL_569538, EPI_ISL_569539, EPI_ISL_569540, EPI_ISL_569541, EPI_ISL_569542, EPI_ISL_569543, EPI_ISL_569544, EPI_ISL_569545, EPI_ISL_569546, EPI_ISL_569547, EPI_ISL_569548, EPI_ISL_569549, EPI_ISL_569550, EPI_ISL_569551, EPI_ISL_569552, EPI_ISL_569553, EPI_ISL_569554, EPI_ISL_569555, EPI_ISL_569556, EPI_ISL_569557, EPI_ISL_569558, EPI_ISL_569559, EPI_ISL_569560, EPI_ISL_569561, EPI_ISL_569562, EPI_ISL_569563, EPI_ISL_569564, EPI_ISL_569565, EPI_ISL_569566, EPI_ISL_569567, EPI_ISL_569568, EPI_ISL_569569, EPI_ISL_569570, EPI_ISL_569571, EPI_ISL_569572, EPI_ISL_569573, EPI_ISL_569574, EPI_ISL_569575, EPI_ISL_569576, EPI_ISL_569577, EPI_ISL_569578, EPI_ISL_569579, EPI_ISL_569580, EPI_ISL_569581, EPI_ISL_569582, EPI_ISL_569583, EPI_ISL_569584, EPI_ISL_569585, EPI_ISL_569586, EPI_ISL_569587, EPI_ISL_569588, EPI_ISL_569589, EPI_ISL_569590, EPI_ISL_569591, EPI_ISL_569592, EPI_ISL_569593, EPI_ISL_569594, EPI_ISL_569595, EPI_ISL_569596, EPI_ISL_569597, EPI_ISL_569598, EPI_ISL_569599, EPI_ISL_569600, EPI_ISL_569601, EPI_ISL_569602, EPI_ISL_569603, EPI_ISL_569604, EPI_ISL_569605, EPI_ISL_569606, EPI_ISL_569607, EPI_ISL_569608, EPI_ISL_569609, EPI_ISL_569610, EPI_ISL_569611, EPI_ISL_569612, EPI_ISL_569613, EPI_ISL_569614, EPI_ISL_569615, EPI_ISL_569616, EPI_ISL_569617, EPI_ISL_569618, EPI_ISL_569619, EPI_ISL_569620, EPI_ISL_569621, EPI_ISL_569622, EPI_ISL_569623, EPI_ISL_569624, EPI_ISL_569625, EPI_ISL_569626, EPI_ISL_569627, EPI_ISL_569628, EPI_ISL_569629, EPI_ISL_569630, EPI_ISL_569631, EPI_ISL_569632, EPI_ISL_569633, EPI_ISL_569634, EPI_ISL_569635, EPI_ISL_569636, EPI_ISL_569637, EPI_ISL_569638, EPI_ISL_569639, EPI_ISL_569640, EPI_ISL_569641, EPI_ISL_569642, EPI_ISL_569643, EPI_ISL_569644, EPI_ISL_569645, EPI_ISL_569646, EPI_ISL_569647, EPI_ISL_569648, EPI_ISL_569649, EPI_ISL_569650, EPI_ISL_569651, EPI_ISL_569652, EPI_ISL_569653, EPI_ISL_569654, EPI_ISL_569655, EPI_ISL_569656, EPI_ISL_569657, EPI_ISL_569658, EPI_ISL_569659, EPI_ISL_569660, EPI_ISL_569661, EPI_ISL_569662, EPI_ISL_569663, EPI_ISL_569664, EPI_ISL_569665, EPI_ISL_569666, EPI_ISL_569667, EPI_ISL_569668, EPI_ISL_569669, EPI_ISL_569670, EPI_ISL_569671, EPI_ISL_569672, EPI_ISL_569673, EPI_ISL_569674, EPI_ISL_569675, EPI_ISL_569676, EPI_ISL_569677, EPI_ISL_569678, EPI_ISL_569679, EPI_ISL_569680, EPI_ISL_569681, EPI_ISL_569682, EPI_ISL_569683, EPI_ISL_569684, EPI_ISL_569685, EPI_ISL_569686, EPI_ISL_569687, EPI_ISL_569688, EPI_ISL_5 |                                                                      |                                                                                                                                                                                                               |                                                                                                                                                                                                                                                                                                                                                                                  |                                                                                                                                              |

|                                                                                                                                                                                                                                                                                                                                                                                                                                                                                                                                                                                                                                                                                                                                                                                                                                                                                                                                                                                                                                                                                                                                                                                                                                                                                                                                                                                                                                                                                                                                                                                                                                                                                                                                                                                                                                                                                                                                                                                                                                                                                                                                                                                                                                                                                                                                                                                                                                                                                                                                                                                                                                                                                                                                                                                                                                                                                                                                                                                                                                                                                                                                                                                                                                                                                                                                                                                                                                                                                                                                                                                                                                                                                                                                                                                                                                                                                                                                                                                                                                                                                                                     |           |                                                                           |                                                                           |                                                                                                                                                                                                                                                                                                                                                     |
|---------------------------------------------------------------------------------------------------------------------------------------------------------------------------------------------------------------------------------------------------------------------------------------------------------------------------------------------------------------------------------------------------------------------------------------------------------------------------------------------------------------------------------------------------------------------------------------------------------------------------------------------------------------------------------------------------------------------------------------------------------------------------------------------------------------------------------------------------------------------------------------------------------------------------------------------------------------------------------------------------------------------------------------------------------------------------------------------------------------------------------------------------------------------------------------------------------------------------------------------------------------------------------------------------------------------------------------------------------------------------------------------------------------------------------------------------------------------------------------------------------------------------------------------------------------------------------------------------------------------------------------------------------------------------------------------------------------------------------------------------------------------------------------------------------------------------------------------------------------------------------------------------------------------------------------------------------------------------------------------------------------------------------------------------------------------------------------------------------------------------------------------------------------------------------------------------------------------------------------------------------------------------------------------------------------------------------------------------------------------------------------------------------------------------------------------------------------------------------------------------------------------------------------------------------------------------------------------------------------------------------------------------------------------------------------------------------------------------------------------------------------------------------------------------------------------------------------------------------------------------------------------------------------------------------------------------------------------------------------------------------------------------------------------------------------------------------------------------------------------------------------------------------------------------------------------------------------------------------------------------------------------------------------------------------------------------------------------------------------------------------------------------------------------------------------------------------------------------------------------------------------------------------------------------------------------------------------------------------------------------------------------------------------------------------------------------------------------------------------------------------------------------------------------------------------------------------------------------------------------------------------------------------------------------------------------------------------------------------------------------------------------------------------------------------------------------------------------------------------------|-----------|---------------------------------------------------------------------------|---------------------------------------------------------------------------|-----------------------------------------------------------------------------------------------------------------------------------------------------------------------------------------------------------------------------------------------------------------------------------------------------------------------------------------------------|
| EPI_ISL_577243, EPI_ISL_577244, EPI_ISL_577245, EPI_ISL_577246, EPI_ISL_577247, EPI_ISL_577248, EPI_ISL_577249, EPI_ISL_577250, EPI_ISL_577251, EPI_ISL_577252, EPI_ISL_577253, EPI_ISL_577254, EPI_ISL_577255, EPI_ISL_577256, EPI_ISL_577257, EPI_ISL_577258, EPI_ISL_577261, EPI_ISL_577263, EPI_ISL_577264, EPI_ISL_577265, EPI_ISL_577266, EPI_ISL_577267, EPI_ISL_577268, EPI_ISL_577269, EPI_ISL_577270, EPI_ISL_577272, EPI_ISL_577273, EPI_ISL_577274, EPI_ISL_577275, EPI_ISL_577276, EPI_ISL_577278, EPI_ISL_577279, EPI_ISL_577280, EPI_ISL_577281, EPI_ISL_577283, EPI_ISL_577285, EPI_ISL_577286, EPI_ISL_577287, EPI_ISL_577288, EPI_ISL_577291, EPI_ISL_577292, EPI_ISL_577294, EPI_ISL_577295, EPI_ISL_577296, EPI_ISL_577297, EPI_ISL_577346, EPI_ISL_577361, EPI_ISL_577362, EPI_ISL_577364, EPI_ISL_577365, EPI_ISL_577366, EPI_ISL_577367, EPI_ISL_577368, EPI_ISL_577369, EPI_ISL_577370, EPI_ISL_577371, EPI_ISL_577372, EPI_ISL_577373, EPI_ISL_577374, EPI_ISL_577375, EPI_ISL_577376, EPI_ISL_577377, EPI_ISL_577379, EPI_ISL_577380, EPI_ISL_577544                                                                                                                                                                                                                                                                                                                                                                                                                                                                                                                                                                                                                                                                                                                                                                                                                                                                                                                                                                                                                                                                                                                                                                                                                                                                                                                                                                                                                                                                                                                                                                                                                                                                                                                                                                                                                                                                                                                                                                                                                                                                                                                                                                                                                                                                                                                                                                                                                                                                                                                                                                                                                                                                                                                                                                                                                                                                                                                                                                                                                                      | see above | University of Exeter                                                      | COVID-19 Genomics UK (COG-UK) Consortium                                  | Ben Temperton, Aaron Jeffries, Michelle Michelsen, Joanna Warwick-Dugdale, Audrey Farbos, Robyn Manley, Stephen Michell, Jane Masoli                                                                                                                                                                                                                |
| EPI_ISL_577743, EPI_ISL_577744, EPI_ISL_577745, EPI_ISL_577746, EPI_ISL_577747, EPI_ISL_577748, EPI_ISL_577829, EPI_ISL_577830, EPI_ISL_577831, EPI_ISL_577832, EPI_ISL_577833, EPI_ISL_577834, EPI_ISL_577835, EPI_ISL_577836, EPI_ISL_577837, EPI_ISL_577838, EPI_ISL_577839, EPI_ISL_577840, EPI_ISL_577841, EPI_ISL_577842, EPI_ISL_577843, EPI_ISL_577844, EPI_ISL_577845, EPI_ISL_577846, EPI_ISL_577847, EPI_ISL_577848, EPI_ISL_577849, EPI_ISL_577850, EPI_ISL_577851, EPI_ISL_577852, EPI_ISL_577853, EPI_ISL_577854, EPI_ISL_577855, EPI_ISL_577856, EPI_ISL_577857, EPI_ISL_577858, EPI_ISL_577859, EPI_ISL_577860, EPI_ISL_577861, EPI_ISL_577862, EPI_ISL_577863, EPI_ISL_577864, EPI_ISL_577865, EPI_ISL_577866, EPI_ISL_577867, EPI_ISL_577868, EPI_ISL_577869, EPI_ISL_577870, EPI_ISL_577871, EPI_ISL_577872, EPI_ISL_577873, EPI_ISL_577874, EPI_ISL_577875, EPI_ISL_577876, EPI_ISL_577877, EPI_ISL_577878, EPI_ISL_577879, EPI_ISL_577880, EPI_ISL_577881, EPI_ISL_577882, EPI_ISL_577883, EPI_ISL_577884, EPI_ISL_577885, EPI_ISL_577886, EPI_ISL_577887, EPI_ISL_577888, EPI_ISL_577889, EPI_ISL_577890, EPI_ISL_577891, EPI_ISL_577892, EPI_ISL_577893, EPI_ISL_577894, EPI_ISL_577895, EPI_ISL_577896, EPI_ISL_577897, EPI_ISL_577898, EPI_ISL_577899, EPI_ISL_577900, EPI_ISL_577901, EPI_ISL_577902, EPI_ISL_577903, EPI_ISL_577904, EPI_ISL_577905, EPI_ISL_577906, EPI_ISL_577907, EPI_ISL_577908, EPI_ISL_577909, EPI_ISL_577910, EPI_ISL_577911, EPI_ISL_577912, EPI_ISL_577913, EPI_ISL_577914, EPI_ISL_577915, EPI_ISL_577916, EPI_ISL_577917, EPI_ISL_577918, EPI_ISL_577919, EPI_ISL_577920, EPI_ISL_577921, EPI_ISL_577922, EPI_ISL_577923, EPI_ISL_577924, EPI_ISL_577925, EPI_ISL_577926, EPI_ISL_577927, EPI_ISL_577928, EPI_ISL_577929, EPI_ISL_577930, EPI_ISL_577931, EPI_ISL_577932, EPI_ISL_577933, EPI_ISL_577934, EPI_ISL_577935, EPI_ISL_577936, EPI_ISL_577937, EPI_ISL_577938, EPI_ISL_577939, EPI_ISL_577940, EPI_ISL_577941, EPI_ISL_577942, EPI_ISL_577943, EPI_ISL_577944, EPI_ISL_577945, EPI_ISL_577946, EPI_ISL_577947, EPI_ISL_577948, EPI_ISL_577949, EPI_ISL_577950, EPI_ISL_577951, EPI_ISL_577952, EPI_ISL_577953, EPI_ISL_577954, EPI_ISL_577955, EPI_ISL_577956, EPI_ISL_577957, EPI_ISL_577958, EPI_ISL_577959, EPI_ISL_577960, EPI_ISL_577961, EPI_ISL_577962, EPI_ISL_577963, EPI_ISL_577964, EPI_ISL_577965, EPI_ISL_577966, EPI_ISL_577967, EPI_ISL_577968, EPI_ISL_577969, EPI_ISL_577970, EPI_ISL_577971, EPI_ISL_577972, EPI_ISL_577973, EPI_ISL_577974, EPI_ISL_577975, EPI_ISL_577976, EPI_ISL_577977, EPI_ISL_577978, EPI_ISL_577979, EPI_ISL_577980, EPI_ISL_577981, EPI_ISL_577982, EPI_ISL_577983, EPI_ISL_577984, EPI_ISL_577985, EPI_ISL_577986, EPI_ISL_577987, EPI_ISL_577988, EPI_ISL_577989, EPI_ISL_577990, EPI_ISL_577991, EPI_ISL_577992, EPI_ISL_577993, EPI_ISL_577994, EPI_ISL_577995, EPI_ISL_577996, EPI_ISL_577997, EPI_ISL_577998, EPI_ISL_577999, EPI_ISL_58000, EPI_ISL_58001, EPI_ISL_58002, EPI_ISL_58003, EPI_ISL_58004, EPI_ISL_58005, EPI_ISL_58006, EPI_ISL_58007, EPI_ISL_58008, EPI_ISL_58009, EPI_ISL_58010, EPI_ISL_58011, EPI_ISL_58012, EPI_ISL_58013, EPI_ISL_58014, EPI_ISL_58015, EPI_ISL_58016, EPI_ISL_58017, EPI_ISL_58018, EPI_ISL_58019, EPI_ISL_58020, EPI_ISL_58021, EPI_ISL_58022, EPI_ISL_58023, EPI_ISL_58024, EPI_ISL_58025, EPI_ISL_58026, EPI_ISL_58027, EPI_ISL_58028, EPI_ISL_58029, EPI_ISL_58030, EPI_ISL_58031, EPI_ISL_58032, EPI_ISL_58033, EPI_ISL_58034, EPI_ISL_58035, EPI_ISL_58036, EPI_ISL_58037, EPI_ISL_58038, EPI_ISL_58039, EPI_ISL_58040, EPI_ISL_58041, EPI_ISL_58042, EPI_ISL_58043, EPI_ISL_58044, EPI_ISL_58045, EPI_ISL_58046, EPI_ISL_58047, EPI_ISL_58048, EPI_ISL_58049, EPI_ISL_58050, EPI_ISL_58051, EPI_ISL_58052, EPI_ISL_58053, EPI_ISL_58054, EPI_ISL_58055, EPI_ISL_58056, EPI_ISL_58057, EPI_ISL_58058, EPI_ISL_58059, EPI_ISL_58060, EPI_ISL_58061, EPI_ISL_58062, EPI_ISL_58063, EPI_ISL_58064, EPI_ISL_58065, EPI_ISL_58066, EPI_ISL_58067, EPI_ISL_58068, EPI_ISL_58069, EPI_ISL_58070, EPI_ISL_58071, EPI_ISL_58072, EPI_ISL_58073, EPI_ISL_58074 | see above | Dutch COVID-19 response team                                              | Erasmus Medical Center                                                    | Bas Oude Munnink, Reina Sikkema, David Nieuwenhuijse, Irina Chestakova, Anne van der Linden, Marjan Boter, Emmanuelle Munger, Corine GeurtsvanKessel, Annemie van der Eijk, Richard Molenkamp, Marion Koopmans, on behalf of the Dutch national COVID-19 response team.                                                                             |
| EPI_ISL_578176, EPI_ISL_578177                                                                                                                                                                                                                                                                                                                                                                                                                                                                                                                                                                                                                                                                                                                                                                                                                                                                                                                                                                                                                                                                                                                                                                                                                                                                                                                                                                                                                                                                                                                                                                                                                                                                                                                                                                                                                                                                                                                                                                                                                                                                                                                                                                                                                                                                                                                                                                                                                                                                                                                                                                                                                                                                                                                                                                                                                                                                                                                                                                                                                                                                                                                                                                                                                                                                                                                                                                                                                                                                                                                                                                                                                                                                                                                                                                                                                                                                                                                                                                                                                                                                                      |           | CNR Virus des Infections Respiratoires - France SUD                       | CNR Virus des Infections Respiratoires - France SUD                       | Antonin Bal, Gregory Queromes, Emilie Frobet, Gregory Destras, Gwendolyne Burfin, Solenne Brun, Alexandre Gaymard, Maude Bouscambert-Duchamp, Florence Morfin-Sherpa, Martine Valette, Bruno Lina, Laurence Josset                                                                                                                                  |
| EPI_ISL_582110, EPI_ISL_582111, EPI_ISL_582112, EPI_ISL_582113, EPI_ISL_582114, EPI_ISL_582115, EPI_ISL_582116, EPI_ISL_582117, EPI_ISL_582118, EPI_ISL_582119, EPI_ISL_582120                                                                                                                                                                                                                                                                                                                                                                                                                                                                                                                                                                                                                                                                                                                                                                                                                                                                                                                                                                                                                                                                                                                                                                                                                                                                                                                                                                                                                                                                                                                                                                                                                                                                                                                                                                                                                                                                                                                                                                                                                                                                                                                                                                                                                                                                                                                                                                                                                                                                                                                                                                                                                                                                                                                                                                                                                                                                                                                                                                                                                                                                                                                                                                                                                                                                                                                                                                                                                                                                                                                                                                                                                                                                                                                                                                                                                                                                                                                                      | see above | CNR Virus des Infections Respiratoires - France SUD                       | CNR Virus des Infections Respiratoires - France SUD                       | Antonin Bal, Gregory Destras, Gwendolyne Burfin, Hadrien Règue, Alexandre Gaymard, Maude Bouscambert-Duchamp, Florence Morfin-Sherpa, Martine Valette, Bruno Lina, Laurence Josset                                                                                                                                                                  |
| EPI_ISL_582121                                                                                                                                                                                                                                                                                                                                                                                                                                                                                                                                                                                                                                                                                                                                                                                                                                                                                                                                                                                                                                                                                                                                                                                                                                                                                                                                                                                                                                                                                                                                                                                                                                                                                                                                                                                                                                                                                                                                                                                                                                                                                                                                                                                                                                                                                                                                                                                                                                                                                                                                                                                                                                                                                                                                                                                                                                                                                                                                                                                                                                                                                                                                                                                                                                                                                                                                                                                                                                                                                                                                                                                                                                                                                                                                                                                                                                                                                                                                                                                                                                                                                                      |           | Centre Hospitalier de Bourg en Bresse                                     | CNR Virus des Infections Respiratoires - France SUD                       | Antonin Bal, Gregory Destras, Gwendolyne Burfin, Hadrien Règue, Alexandre Gaymard, Maude Bouscambert-Duchamp, Florence Morfin-Sherpa, Martine Valette, Bruno Lina, Laurence Josset                                                                                                                                                                  |
| EPI_ISL_582122                                                                                                                                                                                                                                                                                                                                                                                                                                                                                                                                                                                                                                                                                                                                                                                                                                                                                                                                                                                                                                                                                                                                                                                                                                                                                                                                                                                                                                                                                                                                                                                                                                                                                                                                                                                                                                                                                                                                                                                                                                                                                                                                                                                                                                                                                                                                                                                                                                                                                                                                                                                                                                                                                                                                                                                                                                                                                                                                                                                                                                                                                                                                                                                                                                                                                                                                                                                                                                                                                                                                                                                                                                                                                                                                                                                                                                                                                                                                                                                                                                                                                                      |           | CNR Virus des Infections Respiratoires - France SUD                       | CNR Virus des Infections Respiratoires - France SUD                       | Antonin Bal, Gregory Destras, Gwendolyne Burfin, Hadrien Règue, Alexandre Gaymard, Maude Bouscambert-Duchamp, Florence Morfin-Sherpa, Martine Valette, Bruno Lina, Laurence Josset                                                                                                                                                                  |
| EPI_ISL_582135, EPI_ISL_582136, EPI_ISL_582137, EPI_ISL_582138, EPI_ISL_582139, EPI_ISL_582140, EPI_ISL_582141, EPI_ISL_582142, EPI_ISL_582143, EPI_ISL_582144, EPI_ISL_582145, EPI_ISL_582146, EPI_ISL_582147                                                                                                                                                                                                                                                                                                                                                                                                                                                                                                                                                                                                                                                                                                                                                                                                                                                                                                                                                                                                                                                                                                                                                                                                                                                                                                                                                                                                                                                                                                                                                                                                                                                                                                                                                                                                                                                                                                                                                                                                                                                                                                                                                                                                                                                                                                                                                                                                                                                                                                                                                                                                                                                                                                                                                                                                                                                                                                                                                                                                                                                                                                                                                                                                                                                                                                                                                                                                                                                                                                                                                                                                                                                                                                                                                                                                                                                                                                      | see above | Tokyo Metropolitan Institute of Public Health, Department of Microbiology | Tokyo Metropolitan Institute of Public Health, Department of Microbiology | Asakura, H., Yoshida, I., Kumagai, R., Nagashima, M., Chiba, T. and Sadamasu, K.                                                                                                                                                                                                                                                                    |
| EPI_ISL_582508                                                                                                                                                                                                                                                                                                                                                                                                                                                                                                                                                                                                                                                                                                                                                                                                                                                                                                                                                                                                                                                                                                                                                                                                                                                                                                                                                                                                                                                                                                                                                                                                                                                                                                                                                                                                                                                                                                                                                                                                                                                                                                                                                                                                                                                                                                                                                                                                                                                                                                                                                                                                                                                                                                                                                                                                                                                                                                                                                                                                                                                                                                                                                                                                                                                                                                                                                                                                                                                                                                                                                                                                                                                                                                                                                                                                                                                                                                                                                                                                                                                                                                      |           | CNR Virus des Infections Respiratoires - France SUD                       | CNR Virus des Infections Respiratoires - France SUD                       | Antonin Bal, Gregory Destras, Gwendolyne Burfin, Hadrien Règue, Alexandre Gaymard, Maude Bouscambert-Duchamp, Florence Morfin-Sherpa, Martine Valette, Bruno Lina, Laurence Josset                                                                                                                                                                  |
| EPI_ISL_584884, EPI_ISL_584885, EPI_ISL_584886, EPI_ISL_584887, EPI_ISL_584888, EPI_ISL_584889, EPI_ISL_584891, EPI_ISL_584892, EPI_ISL_584893, EPI_ISL_584894, EPI_ISL_584895, EPI_ISL_584896, EPI_ISL_584898, EPI_ISL_584899, EPI_ISL_584901, EPI_ISL_584902, EPI_ISL_584904, EPI_ISL_584905, EPI_ISL_585533, EPI_ISL_585534, EPI_ISL_585535, EPI_ISL_585536, EPI_ISL_585537, EPI_ISL_585538, EPI_ISL_585540, EPI_ISL_585541, EPI_ISL_585542, EPI_ISL_585543, EPI_ISL_585544, EPI_ISL_585546, EPI_ISL_585547, EPI_ISL_585548, EPI_ISL_585549, EPI_ISL_585550, EPI_ISL_585552, EPI_ISL_585553, EPI_ISL_585554, EPI_ISL_585555, EPI_ISL_585557, EPI_ISL_585559, EPI_ISL_585560, EPI_ISL_585561, EPI_ISL_585562, EPI_ISL_585563, EPI_ISL_585566, EPI_ISL_585567, EPI_ISL_585569, EPI_ISL_585571, EPI_ISL_585573, EPI_ISL_585574, EPI_ISL_585575, EPI_ISL_585576, EPI_ISL_585577, EPI_ISL_585578, EPI_ISL_585579, EPI_ISL_585580, EPI_ISL_585582                                                                                                                                                                                                                                                                                                                                                                                                                                                                                                                                                                                                                                                                                                                                                                                                                                                                                                                                                                                                                                                                                                                                                                                                                                                                                                                                                                                                                                                                                                                                                                                                                                                                                                                                                                                                                                                                                                                                                                                                                                                                                                                                                                                                                                                                                                                                                                                                                                                                                                                                                                                                                                                                                                                                                                                                                                                                                                                                                                                                                                                                                                                                                                      | see above | University of Exeter                                                      | COVID-19 Genomics UK (COG-UK) Consortium                                  | Ben Temperton, Aaron Jeffries, Michelle Michelsen, Joanna Warwick-Dugdale, Audrey Farbos, Robyn Manley, Stephen Michell, Jane Masoli                                                                                                                                                                                                                |
| EPI_ISL_586527                                                                                                                                                                                                                                                                                                                                                                                                                                                                                                                                                                                                                                                                                                                                                                                                                                                                                                                                                                                                                                                                                                                                                                                                                                                                                                                                                                                                                                                                                                                                                                                                                                                                                                                                                                                                                                                                                                                                                                                                                                                                                                                                                                                                                                                                                                                                                                                                                                                                                                                                                                                                                                                                                                                                                                                                                                                                                                                                                                                                                                                                                                                                                                                                                                                                                                                                                                                                                                                                                                                                                                                                                                                                                                                                                                                                                                                                                                                                                                                                                                                                                                      |           | B.J. Medical College and Civil hospital, Ahmedabad                        | Gujarat Biotechnology Research Centre                                     | Apurvashin Puvar, Janvi Raval, Zarna Patel, Monika Gandhi, Pinal Trivedi, Maharshi Pandya, Nikha Trivedi, Nitin Savaliya, Raghwendra Kumar, Dinesh Kumar, Zuber Saiyed, Komal Patel, Labdhi Pandya, Afzal Ansari, Nikha Trivedi, Pranay Shah, Kamlesh J Upadhyay, Sanjay Kapadia, R D Dixit, A M Kadri, Harsh Bakshi, Chaitanya Joshi, Madhvi Joshi |
| EPI_ISL_586532                                                                                                                                                                                                                                                                                                                                                                                                                                                                                                                                                                                                                                                                                                                                                                                                                                                                                                                                                                                                                                                                                                                                                                                                                                                                                                                                                                                                                                                                                                                                                                                                                                                                                                                                                                                                                                                                                                                                                                                                                                                                                                                                                                                                                                                                                                                                                                                                                                                                                                                                                                                                                                                                                                                                                                                                                                                                                                                                                                                                                                                                                                                                                                                                                                                                                                                                                                                                                                                                                                                                                                                                                                                                                                                                                                                                                                                                                                                                                                                                                                                                                                      |           | General Hospital, Chhotaudepur                                            | Gujarat Biotechnology Research Centre                                     | Ari Thakur, Dharak Pandya, Maharshi Pandya, Nidhi Patel, Nitin Savaliya, Raghwendra Kumar, Dinesh Kumar, Zuber Saiyed, Komal Patel, Labdhi Pandya, Afzal Ansari, Nikha Trivedi, Apurvashin Puvar, Janvi Raval, Zama Patel, Monika Gandhi, Pinal Trivedi, Yogesh Parmar, R D Dixit, A M Kadri, Harsh Bakshi, Chaitanya Joshi, Madhvi Joshi           |
| EPI_ISL_586565                                                                                                                                                                                                                                                                                                                                                                                                                                                                                                                                                                                                                                                                                                                                                                                                                                                                                                                                                                                                                                                                                                                                                                                                                                                                                                                                                                                                                                                                                                                                                                                                                                                                                                                                                                                                                                                                                                                                                                                                                                                                                                                                                                                                                                                                                                                                                                                                                                                                                                                                                                                                                                                                                                                                                                                                                                                                                                                                                                                                                                                                                                                                                                                                                                                                                                                                                                                                                                                                                                                                                                                                                                                                                                                                                                                                                                                                                                                                                                                                                                                                                                      |           | GMERS GMERS Medical College and Hospital, Junagadh                        | Gujarat Biotechnology Research Centre                                     | Apurvashin Puvar, Janvi Raval, Zarna Patel, Monika Gandhi, Pinal Trivedi, Maharshi Pandya, Nidhi Patel, Nitin Savaliya, Raghwendra Kumar, Dinesh Kumar, Zuber Saiyed, Komal Patel, Labdhi Pandya, Afzal Ansari, Nikha Trivedi, Jignesh Parmar, Jitendra Bamrotia, R D Dixit, A M Kadri, Harsh Bakshi, Chaitanya Joshi, Madhvi Joshi                 |
| EPI_ISL_590690                                                                                                                                                                                                                                                                                                                                                                                                                                                                                                                                                                                                                                                                                                                                                                                                                                                                                                                                                                                                                                                                                                                                                                                                                                                                                                                                                                                                                                                                                                                                                                                                                                                                                                                                                                                                                                                                                                                                                                                                                                                                                                                                                                                                                                                                                                                                                                                                                                                                                                                                                                                                                                                                                                                                                                                                                                                                                                                                                                                                                                                                                                                                                                                                                                                                                                                                                                                                                                                                                                                                                                                                                                                                                                                                                                                                                                                                                                                                                                                                                                                                                                      |           | CCC, Veraval                                                              | Gujarat Biotechnology Research Centre                                     | Apurvashin Puvar, Janvi Raval, Zarna Patel, Monika Gandhi, Pinal Trivedi, Maharshi Pandya, Nidhi Patel, Nitin Savaliya, Raghwendra Kumar, Dinesh Kumar, Zuber Saiyed, Komal Patel, Labdhi Pandya, Afzal Ansari, Nikha Trivedi, Jignesh Parmar, Jitendra Bamrotia, R D Dixit, A M Kadri, Harsh Bakshi, Chaitanya Joshi, Madhvi Joshi                 |
| EPI_ISL_590694                                                                                                                                                                                                                                                                                                                                                                                                                                                                                                                                                                                                                                                                                                                                                                                                                                                                                                                                                                                                                                                                                                                                                                                                                                                                                                                                                                                                                                                                                                                                                                                                                                                                                                                                                                                                                                                                                                                                                                                                                                                                                                                                                                                                                                                                                                                                                                                                                                                                                                                                                                                                                                                                                                                                                                                                                                                                                                                                                                                                                                                                                                                                                                                                                                                                                                                                                                                                                                                                                                                                                                                                                                                                                                                                                                                                                                                                                                                                                                                                                                                                                                      |           | INMI Lazzaro Spallanzani IRCCS                                            | INMI Lazzaro Spallanzani IRCCS                                            | Barbara Bartolini, Martina Rueda, Francesco Messina, Cesare E.M. Gruber, Emanuela Giombini, Beatrice Valli, Eleonora Lalle, Simone Lanini, Francesco Vairo, Maria R. Capobianchi, Antonino Di Caro                                                                                                                                                  |
| EPI_ISL_590698                                                                                                                                                                                                                                                                                                                                                                                                                                                                                                                                                                                                                                                                                                                                                                                                                                                                                                                                                                                                                                                                                                                                                                                                                                                                                                                                                                                                                                                                                                                                                                                                                                                                                                                                                                                                                                                                                                                                                                                                                                                                                                                                                                                                                                                                                                                                                                                                                                                                                                                                                                                                                                                                                                                                                                                                                                                                                                                                                                                                                                                                                                                                                                                                                                                                                                                                                                                                                                                                                                                                                                                                                                                                                                                                                                                                                                                                                                                                                                                                                                                                                                      |           | INMI Lazzaro Spallanzani IRCCS                                            | INMI Lazzaro Spallanzani IRCCS                                            | Barbara Bartolini, Francesco Messina, Cesare E.M. Gruber, Martina Rueda, Emanuela Giombini, Beatrice Valli, Eleonora Lalle, Simone Lanini, Francesco Vairo, Maria R. Capobianchi, Antonino Di Caro                                                                                                                                                  |
| EPI_ISL_603142                                                                                                                                                                                                                                                                                                                                                                                                                                                                                                                                                                                                                                                                                                                                                                                                                                                                                                                                                                                                                                                                                                                                                                                                                                                                                                                                                                                                                                                                                                                                                                                                                                                                                                                                                                                                                                                                                                                                                                                                                                                                                                                                                                                                                                                                                                                                                                                                                                                                                                                                                                                                                                                                                                                                                                                                                                                                                                                                                                                                                                                                                                                                                                                                                                                                                                                                                                                                                                                                                                                                                                                                                                                                                                                                                                                                                                                                                                                                                                                                                                                                                                      |           | INMI Lazzaro Spallanzani IRCCS                                            | INMI Lazzaro Spallanzani IRCCS                                            | Barbara Bartolini, Cesare E.M. Gruber, Francesco Messina, Martina Rueda, Simone Lanini, Emanuela Giombini, Maria R. Capobianchi, Antonino Di Caro                                                                                                                                                                                                   |
| EPI_ISL_603150                                                                                                                                                                                                                                                                                                                                                                                                                                                                                                                                                                                                                                                                                                                                                                                                                                                                                                                                                                                                                                                                                                                                                                                                                                                                                                                                                                                                                                                                                                                                                                                                                                                                                                                                                                                                                                                                                                                                                                                                                                                                                                                                                                                                                                                                                                                                                                                                                                                                                                                                                                                                                                                                                                                                                                                                                                                                                                                                                                                                                                                                                                                                                                                                                                                                                                                                                                                                                                                                                                                                                                                                                                                                                                                                                                                                                                                                                                                                                                                                                                                                                                      |           | INMI Lazzaro Spallanzani IRCCS                                            | INMI Lazzaro Spallanzani IRCCS                                            | Barbara Bartolini, Francesco Messina, Martina Rueda, Cesare E.M. Gruber, Simone Lanini, Emanuela Giombini, Patrizia Massarelli, Maria R. Capobianchi, Antonino Di Caro                                                                                                                                                                              |
| EPI_ISL_603152                                                                                                                                                                                                                                                                                                                                                                                                                                                                                                                                                                                                                                                                                                                                                                                                                                                                                                                                                                                                                                                                                                                                                                                                                                                                                                                                                                                                                                                                                                                                                                                                                                                                                                                                                                                                                                                                                                                                                                                                                                                                                                                                                                                                                                                                                                                                                                                                                                                                                                                                                                                                                                                                                                                                                                                                                                                                                                                                                                                                                                                                                                                                                                                                                                                                                                                                                                                                                                                                                                                                                                                                                                                                                                                                                                                                                                                                                                                                                                                                                                                                                                      |           | INMI Lazzaro Spallanzani IRCCS                                            | INMI Lazzaro Spallanzani IRCCS                                            | Barbara Bartolini, Cesare E.M. Gruber, Francesco Messina, Martina Rueda, Emanuela Giombini, Simone Lanini, Patrizia Massarelli, Antonino Di Caro, Maria R. Capobianchi                                                                                                                                                                              |
| EPI_ISL_603156                                                                                                                                                                                                                                                                                                                                                                                                                                                                                                                                                                                                                                                                                                                                                                                                                                                                                                                                                                                                                                                                                                                                                                                                                                                                                                                                                                                                                                                                                                                                                                                                                                                                                                                                                                                                                                                                                                                                                                                                                                                                                                                                                                                                                                                                                                                                                                                                                                                                                                                                                                                                                                                                                                                                                                                                                                                                                                                                                                                                                                                                                                                                                                                                                                                                                                                                                                                                                                                                                                                                                                                                                                                                                                                                                                                                                                                                                                                                                                                                                                                                                                      |           | INMI Lazzaro Spallanzani IRCCS                                            | INMI Lazzaro Spallanzani IRCCS                                            | Barbara Bartolini, Francesco Messina, Cesare E.M. Gruber, Martina Rueda, Emanuela Giombini, Simone Lanini, Maria R. Capobianchi, Antonino Di Caro                                                                                                                                                                                                   |
| EPI_ISL_603158                                                                                                                                                                                                                                                                                                                                                                                                                                                                                                                                                                                                                                                                                                                                                                                                                                                                                                                                                                                                                                                                                                                                                                                                                                                                                                                                                                                                                                                                                                                                                                                                                                                                                                                                                                                                                                                                                                                                                                                                                                                                                                                                                                                                                                                                                                                                                                                                                                                                                                                                                                                                                                                                                                                                                                                                                                                                                                                                                                                                                                                                                                                                                                                                                                                                                                                                                                                                                                                                                                                                                                                                                                                                                                                                                                                                                                                                                                                                                                                                                                                                                                      |           | INMI Lazzaro Spallanzani IRCCS                                            | INMI Lazzaro Spallanzani IRCCS                                            | Barbara Bartolini, Cesare E.M. Gruber, Francesco Messina, Martina Rueda, Emanuela Giombini, Simone Lanini, Fulvia Pimpinelli, Maria R. Capobianchi, Antonino Di Caro                                                                                                                                                                                |
| EPI_ISL_603159                                                                                                                                                                                                                                                                                                                                                                                                                                                                                                                                                                                                                                                                                                                                                                                                                                                                                                                                                                                                                                                                                                                                                                                                                                                                                                                                                                                                                                                                                                                                                                                                                                                                                                                                                                                                                                                                                                                                                                                                                                                                                                                                                                                                                                                                                                                                                                                                                                                                                                                                                                                                                                                                                                                                                                                                                                                                                                                                                                                                                                                                                                                                                                                                                                                                                                                                                                                                                                                                                                                                                                                                                                                                                                                                                                                                                                                                                                                                                                                                                                                                                                      |           | INMI Lazzaro Spallanzani IRCCS                                            | INMI Lazzaro Spallanzani IRCCS                                            | Barbara Bartolini, Francesco Messina, Cesare E.M. Gruber, Martina Rueda, Simone Lanini, Emanuela Giombini, Fulvia Pimpinelli, Maria R. Capobianchi, Antonino Di Caro                                                                                                                                                                                |
| EPI_ISL_603160                                                                                                                                                                                                                                                                                                                                                                                                                                                                                                                                                                                                                                                                                                                                                                                                                                                                                                                                                                                                                                                                                                                                                                                                                                                                                                                                                                                                                                                                                                                                                                                                                                                                                                                                                                                                                                                                                                                                                                                                                                                                                                                                                                                                                                                                                                                                                                                                                                                                                                                                                                                                                                                                                                                                                                                                                                                                                                                                                                                                                                                                                                                                                                                                                                                                                                                                                                                                                                                                                                                                                                                                                                                                                                                                                                                                                                                                                                                                                                                                                                                                                                      |           | INMI Lazzaro Spallanzani IRCCS                                            | INMI Lazzaro Spallanzani IRCCS                                            | Barbara Bartolini, Simone Lanini, Emanuela Giombini, Francesco Messina, Cesare E.M. Gruber, Martina Rueda, Fulvia Pimpinelli, Maria R. Capobianchi, Antonino Di Caro                                                                                                                                                                                |
| EPI_ISL_603171                                                                                                                                                                                                                                                                                                                                                                                                                                                                                                                                                                                                                                                                                                                                                                                                                                                                                                                                                                                                                                                                                                                                                                                                                                                                                                                                                                                                                                                                                                                                                                                                                                                                                                                                                                                                                                                                                                                                                                                                                                                                                                                                                                                                                                                                                                                                                                                                                                                                                                                                                                                                                                                                                                                                                                                                                                                                                                                                                                                                                                                                                                                                                                                                                                                                                                                                                                                                                                                                                                                                                                                                                                                                                                                                                                                                                                                                                                                                                                                                                                                                                                      |           | INMI Lazzaro Spallanzani IRCCS                                            | INMI Lazzaro Spallanzani IRCCS                                            | Barbara Bartolini, Cesare E.M. Gruber, Francesco Messina, Martina Rueda, Emanuela Giombini, Simone Lanini, Mariarosa Gaudio, Antonino Di Caro, Maria R. Capobianchi                                                                                                                                                                                 |
| EPI_ISL_603173                                                                                                                                                                                                                                                                                                                                                                                                                                                                                                                                                                                                                                                                                                                                                                                                                                                                                                                                                                                                                                                                                                                                                                                                                                                                                                                                                                                                                                                                                                                                                                                                                                                                                                                                                                                                                                                                                                                                                                                                                                                                                                                                                                                                                                                                                                                                                                                                                                                                                                                                                                                                                                                                                                                                                                                                                                                                                                                                                                                                                                                                                                                                                                                                                                                                                                                                                                                                                                                                                                                                                                                                                                                                                                                                                                                                                                                                                                                                                                                                                                                                                                      |           | INMI Lazzaro Spallanzani IRCCS                                            | INMI Lazzaro Spallanzani IRCCS                                            | Barbara Bartolini, Cesare E.M. Gruber, Martina Rueda, Francesco Messina, Simone Lanini, Emanuela Giombini, Giuseppina Cappiello, Maria R. Capobianchi, Antonino Di Caro                                                                                                                                                                             |











|                                                                                                                                |                                                                                                                                      |                                                                                                                                      |                                                                                                                                                                                                                                               |                                                                                                                                                                                                                                          |
|--------------------------------------------------------------------------------------------------------------------------------|--------------------------------------------------------------------------------------------------------------------------------------|--------------------------------------------------------------------------------------------------------------------------------------|-----------------------------------------------------------------------------------------------------------------------------------------------------------------------------------------------------------------------------------------------|------------------------------------------------------------------------------------------------------------------------------------------------------------------------------------------------------------------------------------------|
| EPI_ISL_640102                                                                                                                 | Vanguard CHC wc VGC                                                                                                                  | NHLS/UCT                                                                                                                             | Williamson                                                                                                                                                                                                                                    | Arash Iranzadeh, Deelan Doolabh, Lynn Tyers, Bruna Galvao, Innocent Mudau, Marvin Hsiao, Kruger Marais, Diana Hardie, Stephen Korsman, Carolyn Williamson                                                                                |
| EPI_ISL_640103                                                                                                                 | Heideveld CDC wc HVP                                                                                                                 | NHLS/UCT                                                                                                                             | Williamson                                                                                                                                                                                                                                    | Arash Iranzadeh, Deelan Doolabh, Lynn Tyers, Bruna Galvao, Innocent Mudau, Marvin Hsiao, Kruger Marais, Diana Hardie, Stephen Korsman, Carolyn Williamson                                                                                |
| EPI_ISL_640104                                                                                                                 | Guguletu CHC wc GDH                                                                                                                  | NHLS/UCT                                                                                                                             | Williamson                                                                                                                                                                                                                                    | Arash Iranzadeh, Deelan Doolabh, Lynn Tyers, Bruna Galvao, Innocent Mudau, Marvin Hsiao, Kruger Marais, Diana Hardie, Stephen Korsman, Carolyn Williamson                                                                                |
| EPI_ISL_640105                                                                                                                 | Nyanga CDC wc NGC                                                                                                                    | NHLS/UCT                                                                                                                             | Williamson                                                                                                                                                                                                                                    | Arash Iranzadeh, Deelan Doolabh, Lynn Tyers, Bruna Galvao, Innocent Mudau, Marvin Hsiao, Kruger Marais, Diana Hardie, Stephen Korsman, Carolyn Williamson                                                                                |
| EPI_ISL_640106                                                                                                                 | Heideveld CDC wc HVP                                                                                                                 | NHLS/UCT                                                                                                                             | Williamson                                                                                                                                                                                                                                    | Arash Iranzadeh, Deelan Doolabh, Lynn Tyers, Bruna Galvao, Innocent Mudau, Marvin Hsiao, Kruger Marais, Diana Hardie, Stephen Korsman, Carolyn Williamson                                                                                |
| EPI_ISL_640107                                                                                                                 | 2 Military Hospital wc MAA                                                                                                           | NHLS/UCT                                                                                                                             | Williamson                                                                                                                                                                                                                                    | Arash Iranzadeh, Deelan Doolabh, Lynn Tyers, Bruna Galvao, Innocent Mudau, Marvin Hsiao, Kruger Marais, Diana Hardie, Stephen Korsman, Carolyn Williamson                                                                                |
| EPI_ISL_640108, EPI_ISL_640109, EPI_ISL_640110                                                                                 | Victoria Hospital wc VHW                                                                                                             | NHLS/UCT                                                                                                                             | Williamson                                                                                                                                                                                                                                    | Arash Iranzadeh, Deelan Doolabh, Lynn Tyers, Bruna Galvao, Innocent Mudau, Marvin Hsiao, Kruger Marais, Diana Hardie, Stephen Korsman, Carolyn Williamson                                                                                |
| EPI_ISL_640111, EPI_ISL_640112                                                                                                 | Groote Schuur Hospital wc GSH                                                                                                        | NHLS/UCT                                                                                                                             | Williamson                                                                                                                                                                                                                                    | Arash Iranzadeh, Deelan Doolabh, Lynn Tyers, Bruna Galvao, Innocent Mudau, Marvin Hsiao, Kruger Marais, Diana Hardie, Stephen Korsman, Carolyn Williamson                                                                                |
| EPI_ISL_640113                                                                                                                 | Victoria Hospital wc VHW                                                                                                             | NHLS/UCT                                                                                                                             | Williamson                                                                                                                                                                                                                                    | Arash Iranzadeh, Deelan Doolabh, Lynn Tyers, Bruna Galvao, Innocent Mudau, Marvin Hsiao, Kruger Marais, Diana Hardie, Stephen Korsman, Carolyn Williamson                                                                                |
| EPI_ISL_640114                                                                                                                 | Valkenberg Hospital wc VBH                                                                                                           | NHLS/UCT                                                                                                                             | Williamson                                                                                                                                                                                                                                    | Arash Iranzadeh, Deelan Doolabh, Lynn Tyers, Bruna Galvao, Innocent Mudau, Marvin Hsiao, Kruger Marais, Diana Hardie, Stephen Korsman, Carolyn Williamson                                                                                |
| EPI_ISL_640115                                                                                                                 | 2 Military Hospital wc MAA                                                                                                           | NHLS/UCT                                                                                                                             | Williamson                                                                                                                                                                                                                                    | Arash Iranzadeh, Deelan Doolabh, Lynn Tyers, Bruna Galvao, Innocent Mudau, Marvin Hsiao, Kruger Marais, Diana Hardie, Stephen Korsman, Carolyn Williamson                                                                                |
| EPI_ISL_640116                                                                                                                 | False Bay Hospital wc FBH                                                                                                            | NHLS/UCT                                                                                                                             | Williamson                                                                                                                                                                                                                                    | Arash Iranzadeh, Deelan Doolabh, Lynn Tyers, Bruna Galvao, Innocent Mudau, Marvin Hsiao, Kruger Marais, Diana Hardie, Stephen Korsman, Carolyn Williamson                                                                                |
| EPI_ISL_640117                                                                                                                 | 2 Military Hospital wc MAA                                                                                                           | NHLS/UCT                                                                                                                             | Williamson                                                                                                                                                                                                                                    | Arash Iranzadeh, Deelan Doolabh, Lynn Tyers, Bruna Galvao, Innocent Mudau, Marvin Hsiao, Kruger Marais, Diana Hardie, Stephen Korsman, Carolyn Williamson                                                                                |
| EPI_ISL_640118                                                                                                                 | Conville CDC wc CVC                                                                                                                  | NHLS/UCT                                                                                                                             | Williamson                                                                                                                                                                                                                                    | Arash Iranzadeh, Deelan Doolabh, Lynn Tyers, Bruna Galvao, Innocent Mudau, Marvin Hsiao, Kruger Marais, Diana Hardie, Stephen Korsman, Carolyn Williamson                                                                                |
| EPI_ISL_640119, EPI_ISL_640120                                                                                                 | Groote Schuur Hospital wc GSH                                                                                                        | NHLS/UCT                                                                                                                             | Williamson                                                                                                                                                                                                                                    | Arash Iranzadeh, Deelan Doolabh, Lynn Tyers, Bruna Galvao, Innocent Mudau, Marvin Hsiao, Kruger Marais, Diana Hardie, Stephen Korsman, Carolyn Williamson                                                                                |
| EPI_ISL_640121                                                                                                                 | False Bay Hospital wc FBH                                                                                                            | NHLS/UCT                                                                                                                             | Williamson                                                                                                                                                                                                                                    | Arash Iranzadeh, Deelan Doolabh, Lynn Tyers, Bruna Galvao, Innocent Mudau, Marvin Hsiao, Kruger Marais, Diana Hardie, Stephen Korsman, Carolyn Williamson                                                                                |
| EPI_ISL_640122                                                                                                                 | Groote Schuur Hospital wc GSH                                                                                                        | NHLS/UCT                                                                                                                             | Williamson                                                                                                                                                                                                                                    | Arash Iranzadeh, Deelan Doolabh, Lynn Tyers, Bruna Galvao, Innocent Mudau, Marvin Hsiao, Kruger Marais, Diana Hardie, Stephen Korsman, Carolyn Williamson                                                                                |
| EPI_ISL_640123, EPI_ISL_640124, EPI_ISL_640125                                                                                 | False Bay Hospital wc FBH                                                                                                            | NHLS/UCT                                                                                                                             | Williamson                                                                                                                                                                                                                                    | Arash Iranzadeh, Deelan Doolabh, Lynn Tyers, Bruna Galvao, Innocent Mudau, Marvin Hsiao, Kruger Marais, Diana Hardie, Stephen Korsman, Carolyn Williamson                                                                                |
| EPI_ISL_640126                                                                                                                 | Victoria Hospital wc VHW                                                                                                             | NHLS/UCT                                                                                                                             | Williamson                                                                                                                                                                                                                                    | Arash Iranzadeh, Deelan Doolabh, Lynn Tyers, Bruna Galvao, Innocent Mudau, Marvin Hsiao, Kruger Marais, Diana Hardie, Stephen Korsman, Carolyn Williamson                                                                                |
| EPI_ISL_640127                                                                                                                 | 2 Military Hospital wc MAA                                                                                                           | NHLS/UCT                                                                                                                             | Williamson                                                                                                                                                                                                                                    | Arash Iranzadeh, Deelan Doolabh, Lynn Tyers, Bruna Galvao, Innocent Mudau, Marvin Hsiao, Kruger Marais, Diana Hardie, Stephen Korsman, Carolyn Williamson                                                                                |
| EPI_ISL_640128, EPI_ISL_640129, EPI_ISL_640130, EPI_ISL_640131, EPI_ISL_640132, EPI_ISL_640133, EPI_ISL_640134, EPI_ISL_640135 | Groote Schuur Hospital wc GSH                                                                                                        | NHLS/UCT                                                                                                                             | Williamson                                                                                                                                                                                                                                    | Arash Iranzadeh, Deelan Doolabh, Lynn Tyers, Bruna Galvao, Innocent Mudau, Marvin Hsiao, Kruger Marais, Diana Hardie, Stephen Korsman, Carolyn Williamson                                                                                |
| EPI_ISL_640136                                                                                                                 | Red Cross Children's Hospital wc RXH                                                                                                 | NHLS/UCT                                                                                                                             | Williamson                                                                                                                                                                                                                                    | Arash Iranzadeh, Deelan Doolabh, Lynn Tyers, Bruna Galvao, Innocent Mudau, Marvin Hsiao, Kruger Marais, Diana Hardie, Stephen Korsman, Carolyn Williamson                                                                                |
| EPI_ISL_640137, EPI_ISL_640138, EPI_ISL_640139, EPI_ISL_640140                                                                 | Groote Schuur Hospital wc GSH                                                                                                        | NHLS/UCT                                                                                                                             | Williamson                                                                                                                                                                                                                                    | Arash Iranzadeh, Deelan Doolabh, Lynn Tyers, Bruna Galvao, Innocent Mudau, Marvin Hsiao, Kruger Marais, Diana Hardie, Stephen Korsman, Carolyn Williamson                                                                                |
| EPI_ISL_640141                                                                                                                 | Victoria Hospital wc VHW                                                                                                             | NHLS/UCT                                                                                                                             | Williamson                                                                                                                                                                                                                                    | Arash Iranzadeh, Deelan Doolabh, Lynn Tyers, Bruna Galvao, Innocent Mudau, Marvin Hsiao, Kruger Marais, Diana Hardie, Stephen Korsman, Carolyn Williamson                                                                                |
| EPI_ISL_641312, EPI_ISL_641313, EPI_ISL_641314, EPI_ISL_641315, EPI_ISL_641316, EPI_ISL_641317                                 | Rocky Mountain Laboratories, RTS Genomics Unit, National Institute of Allergy and Infectious Diseases, National Institutes of Health | Rocky Mountain Laboratories, RTS Genomics Unit, National Institute of Allergy and Infectious Diseases, National Institutes of Health | Avanzato,V.A., Matson,M.J., Seifert,S.N., Pryce,R., Williamson,B.N., Anzick,S.L., Barbian,K., Judson,S.D., Fischer,E.R., Martens,C., Bowden,T.A., de Wit,E., Riedo,F.X., Munster,V.J., Siefert,S.N., Williamson,B.N., Anzick,S., Martens,C.A. |                                                                                                                                                                                                                                          |
| EPI_ISL_641519                                                                                                                 | CHU de Saint-Étienne Hôpital Nord                                                                                                    | CNR Virus des Infections Respiratoires - France SUD                                                                                  |                                                                                                                                                                                                                                               | Antonin Bal, Gregory Destras, Gwendolyne Burfin, Hadrien Règue, Quentin Semanas, Martine Valette, Bruno Lina, Issam Bechri, Manon Vogrig, Marine Delorme, Bruno Pozzetto, Thomas Bourlet, Sylvie Gonzalo, Sylvie Pillet, Laurence Josset |
| EPI_ISL_641520                                                                                                                 | CHU de Nice - Hôpital Archet 2                                                                                                       | CNR Virus des Infections Respiratoires - France SUD                                                                                  |                                                                                                                                                                                                                                               | Antonin Bal, Géraldine Gonfrier, Gregory Destras, Gwendolyne Burfin, Hadrien Règue, Quentin Semanas, Martine Valette, Bruno Lina, Valérie Giordanengo, Laurence Josset                                                                   |
| EPI_ISL_641521                                                                                                                 | CHU de Nice - Hôpital Archet 8                                                                                                       | CNR Virus des Infections Respiratoires - France SUD                                                                                  |                                                                                                                                                                                                                                               | Antonin Bal, Géraldine Gonfrier, Gregory Destras, Gwendolyne Burfin, Hadrien Règue, Quentin Semanas, Martine Valette, Bruno Lina, Valérie Giordanengo, Laurence Josset                                                                   |
| EPI_ISL_641522                                                                                                                 | CHU de Nice - Hôpital Archet 3                                                                                                       | CNR Virus des Infections Respiratoires - France SUD                                                                                  |                                                                                                                                                                                                                                               | Antonin Bal, Géraldine Gonfrier, Gregory Destras, Gwendolyne Burfin, Hadrien Règue, Quentin Semanas, Martine Valette, Bruno Lina, Valérie Giordanengo, Laurence Josset                                                                   |
| EPI_ISL_641523                                                                                                                 | CHU de Nice - Hôpital Archet 4                                                                                                       | CNR Virus des Infections Respiratoires - France SUD                                                                                  |                                                                                                                                                                                                                                               | Antonin Bal, Géraldine Gonfrier, Gregory Destras, Gwendolyne Burfin, Hadrien Règue, Quentin Semanas, Martine Valette, Bruno Lina, Valérie Giordanengo, Laurence Josset                                                                   |
| EPI_ISL_641524                                                                                                                 | CHU de Nice - Hôpital Archet 5                                                                                                       | CNR Virus des Infections Respiratoires - France SUD                                                                                  |                                                                                                                                                                                                                                               | Antonin Bal, Géraldine Gonfrier, Gregory Destras, Gwendolyne Burfin, Hadrien Règue, Quentin Semanas, Martine Valette, Bruno Lina, Valérie Giordanengo, Laurence Josset                                                                   |
| EPI_ISL_641525                                                                                                                 | CHU de Nice - Hôpital Archet 6                                                                                                       | CNR Virus des Infections Respiratoires - France SUD                                                                                  |                                                                                                                                                                                                                                               | Antonin Bal, Géraldine Gonfrier, Gregory Destras, Gwendolyne Burfin, Hadrien Règue, Quentin Semanas, Martine Valette, Bruno Lina, Valérie Giordanengo, Laurence Josset                                                                   |
| EPI_ISL_641526                                                                                                                 | CHU de Nice - Hôpital Archet 7                                                                                                       | CNR Virus des Infections Respiratoires - France SUD                                                                                  |                                                                                                                                                                                                                                               | Antonin Bal, Géraldine Gonfrier, Gregory Destras, Gwendolyne Burfin, Hadrien Règue, Quentin Semanas, Martine Valette, Bruno Lina, Valérie Giordanengo, Laurence Josset                                                                   |
| EPI_ISL_641527                                                                                                                 | CHU de Nice - Hôpital Archet 9                                                                                                       | CNR Virus des Infections Respiratoires - France SUD                                                                                  |                                                                                                                                                                                                                                               | Antonin Bal, Géraldine Gonfrier, Gregory Destras, Gwendolyne Burfin, Hadrien Règue, Quentin Semanas, Martine Valette, Bruno Lina, Valérie Giordanengo, Laurence Josset                                                                   |

|                                                                                                                                                                                                                                                                                                                                                                                                                                                                                                                                                                                                                                                                                                                                                                                                                                                                                                                                                                                                                                                                                                                                                                                                                                                                                                                                                                                                                                                                                                                                                                                                                                                                                                                                                                                                                                                                                                                                                                                                                                                                                                                                                                                                                                                                                                                |                                   |                                                     |                                                                                                                                                                                                                                                                                             |                              |
|----------------------------------------------------------------------------------------------------------------------------------------------------------------------------------------------------------------------------------------------------------------------------------------------------------------------------------------------------------------------------------------------------------------------------------------------------------------------------------------------------------------------------------------------------------------------------------------------------------------------------------------------------------------------------------------------------------------------------------------------------------------------------------------------------------------------------------------------------------------------------------------------------------------------------------------------------------------------------------------------------------------------------------------------------------------------------------------------------------------------------------------------------------------------------------------------------------------------------------------------------------------------------------------------------------------------------------------------------------------------------------------------------------------------------------------------------------------------------------------------------------------------------------------------------------------------------------------------------------------------------------------------------------------------------------------------------------------------------------------------------------------------------------------------------------------------------------------------------------------------------------------------------------------------------------------------------------------------------------------------------------------------------------------------------------------------------------------------------------------------------------------------------------------------------------------------------------------------------------------------------------------------------------------------------------------|-----------------------------------|-----------------------------------------------------|---------------------------------------------------------------------------------------------------------------------------------------------------------------------------------------------------------------------------------------------------------------------------------------------|------------------------------|
|                                                                                                                                                                                                                                                                                                                                                                                                                                                                                                                                                                                                                                                                                                                                                                                                                                                                                                                                                                                                                                                                                                                                                                                                                                                                                                                                                                                                                                                                                                                                                                                                                                                                                                                                                                                                                                                                                                                                                                                                                                                                                                                                                                                                                                                                                                                |                                   |                                                     |                                                                                                                                                                                                                                                                                             | Giordanengo, Laurence Josset |
| EPI_ISL_641528                                                                                                                                                                                                                                                                                                                                                                                                                                                                                                                                                                                                                                                                                                                                                                                                                                                                                                                                                                                                                                                                                                                                                                                                                                                                                                                                                                                                                                                                                                                                                                                                                                                                                                                                                                                                                                                                                                                                                                                                                                                                                                                                                                                                                                                                                                 | CHU de Nice - Hôpital Archet 10   | CNR Virus des Infections Respiratoires - France SUD | Antonin Bal, Géraldine Gonfrier, Gregory Destras, Gwendolyne Burfin, Hadrien Règue, Quentin Semanas, Martine Valette, Bruno Lina, Valérie Giordanengo, Laurence Josset                                                                                                                      |                              |
| EPI_ISL_641529                                                                                                                                                                                                                                                                                                                                                                                                                                                                                                                                                                                                                                                                                                                                                                                                                                                                                                                                                                                                                                                                                                                                                                                                                                                                                                                                                                                                                                                                                                                                                                                                                                                                                                                                                                                                                                                                                                                                                                                                                                                                                                                                                                                                                                                                                                 | CHU de Nice - Hôpital Archet 11   | CNR Virus des Infections Respiratoires - France SUD | Antonin Bal, Géraldine Gonfrier, Gregory Destras, Gwendolyne Burfin, Hadrien Règue, Quentin Semanas, Martine Valette, Bruno Lina, Valérie Giordanengo, Laurence Josset                                                                                                                      |                              |
| EPI_ISL_641530                                                                                                                                                                                                                                                                                                                                                                                                                                                                                                                                                                                                                                                                                                                                                                                                                                                                                                                                                                                                                                                                                                                                                                                                                                                                                                                                                                                                                                                                                                                                                                                                                                                                                                                                                                                                                                                                                                                                                                                                                                                                                                                                                                                                                                                                                                 | CHU de Nice - Hôpital Archet 12   | CNR Virus des Infections Respiratoires - France SUD | Antonin Bal, Géraldine Gonfrier, Gregory Destras, Gwendolyne Burfin, Hadrien Règue, Quentin Semanas, Martine Valette, Bruno Lina, Valérie Giordanengo, Laurence Josset                                                                                                                      |                              |
| EPI_ISL_641531                                                                                                                                                                                                                                                                                                                                                                                                                                                                                                                                                                                                                                                                                                                                                                                                                                                                                                                                                                                                                                                                                                                                                                                                                                                                                                                                                                                                                                                                                                                                                                                                                                                                                                                                                                                                                                                                                                                                                                                                                                                                                                                                                                                                                                                                                                 | CHU de Nice - Hôpital Archet 13   | CNR Virus des Infections Respiratoires - France SUD | Antonin Bal, Géraldine Gonfrier, Gregory Destras, Gwendolyne Burfin, Hadrien Règue, Quentin Semanas, Martine Valette, Bruno Lina, Valérie Giordanengo, Laurence Josset                                                                                                                      |                              |
| EPI_ISL_641532                                                                                                                                                                                                                                                                                                                                                                                                                                                                                                                                                                                                                                                                                                                                                                                                                                                                                                                                                                                                                                                                                                                                                                                                                                                                                                                                                                                                                                                                                                                                                                                                                                                                                                                                                                                                                                                                                                                                                                                                                                                                                                                                                                                                                                                                                                 | CHU de Nice - Hôpital Archet 14   | CNR Virus des Infections Respiratoires - France SUD | Antonin Bal, Géraldine Gonfrier, Gregory Destras, Gwendolyne Burfin, Hadrien Règue, Quentin Semanas, Martine Valette, Bruno Lina, Valérie Giordanengo, Laurence Josset                                                                                                                      |                              |
| EPI_ISL_641533                                                                                                                                                                                                                                                                                                                                                                                                                                                                                                                                                                                                                                                                                                                                                                                                                                                                                                                                                                                                                                                                                                                                                                                                                                                                                                                                                                                                                                                                                                                                                                                                                                                                                                                                                                                                                                                                                                                                                                                                                                                                                                                                                                                                                                                                                                 | CHU de Nice - Hôpital Archet 15   | CNR Virus des Infections Respiratoires - France SUD | Antonin Bal, Géraldine Gonfrier, Gregory Destras, Gwendolyne Burfin, Hadrien Règue, Quentin Semanas, Martine Valette, Bruno Lina, Valérie Giordanengo, Laurence Josset                                                                                                                      |                              |
| EPI_ISL_641534                                                                                                                                                                                                                                                                                                                                                                                                                                                                                                                                                                                                                                                                                                                                                                                                                                                                                                                                                                                                                                                                                                                                                                                                                                                                                                                                                                                                                                                                                                                                                                                                                                                                                                                                                                                                                                                                                                                                                                                                                                                                                                                                                                                                                                                                                                 | CHU de Nice - Hôpital Archet 16   | CNR Virus des Infections Respiratoires - France SUD | Antonin Bal, Géraldine Gonfrier, Gregory Destras, Gwendolyne Burfin, Hadrien Règue, Quentin Semanas, Martine Valette, Bruno Lina, Valérie Giordanengo, Laurence Josset                                                                                                                      |                              |
| EPI_ISL_641535, EPI_ISL_641536, EPI_ISL_641537, EPI_ISL_641538, EPI_ISL_641539, EPI_ISL_641540, EPI_ISL_641541, EPI_ISL_641542, EPI_ISL_641543, EPI_ISL_641544, EPI_ISL_641545                                                                                                                                                                                                                                                                                                                                                                                                                                                                                                                                                                                                                                                                                                                                                                                                                                                                                                                                                                                                                                                                                                                                                                                                                                                                                                                                                                                                                                                                                                                                                                                                                                                                                                                                                                                                                                                                                                                                                                                                                                                                                                                                 |                                   |                                                     |                                                                                                                                                                                                                                                                                             |                              |
| see above                                                                                                                                                                                                                                                                                                                                                                                                                                                                                                                                                                                                                                                                                                                                                                                                                                                                                                                                                                                                                                                                                                                                                                                                                                                                                                                                                                                                                                                                                                                                                                                                                                                                                                                                                                                                                                                                                                                                                                                                                                                                                                                                                                                                                                                                                                      | CHU de Saint-Étienne Hôpital Nord | CNR Virus des Infections Respiratoires - France SUD | Antonin Bal, Gregory Destras, Gwendolyne Burfin, Hadrien Règue, Quentin Semanas, Martine Valette, Bruno Lina, Issam Bechri, Manon Vogrig, Marine Delorme, Bruno Pozzetto, Thomas Bourlet, Sylvie Gonzalo, Sylvie Pillet, Laurence Josset                                                    |                              |
| EPI_ISL_641546, EPI_ISL_641547, EPI_ISL_641548, EPI_ISL_641549, EPI_ISL_641550                                                                                                                                                                                                                                                                                                                                                                                                                                                                                                                                                                                                                                                                                                                                                                                                                                                                                                                                                                                                                                                                                                                                                                                                                                                                                                                                                                                                                                                                                                                                                                                                                                                                                                                                                                                                                                                                                                                                                                                                                                                                                                                                                                                                                                 | CHU Clermont-Ferrand              | CNR Virus des Infections Respiratoires - France SUD | Antonin Bal, Gregory Destras, Gwendolyne Burfin, Hadrien Règue, Quentin Semanas, Martine Valette, Bruno Lina, Christine Archimbaud, Amélie Brebion, Hélène Chabrolles, Martine Chambon, Audrey Mirand, Christel Regagnon, Maxime Bisseux, Patricia Combes, Cécile Henquell, Laurence Josset |                              |
| EPI_ISL_641551, EPI_ISL_641552, EPI_ISL_641553, EPI_ISL_641554, EPI_ISL_641555                                                                                                                                                                                                                                                                                                                                                                                                                                                                                                                                                                                                                                                                                                                                                                                                                                                                                                                                                                                                                                                                                                                                                                                                                                                                                                                                                                                                                                                                                                                                                                                                                                                                                                                                                                                                                                                                                                                                                                                                                                                                                                                                                                                                                                 | CHU Toulouse                      | CNR Virus des Infections Respiratoires - France SUD | Antonin Bal, Gregory Destras, Gwendolyne Burfin, Hadrien Règue, Quentin Semanas, Martine Valette, Bruno Lina, Jean Michel Mansuy, Laurence Josset                                                                                                                                           |                              |
| EPI_ISL_641556                                                                                                                                                                                                                                                                                                                                                                                                                                                                                                                                                                                                                                                                                                                                                                                                                                                                                                                                                                                                                                                                                                                                                                                                                                                                                                                                                                                                                                                                                                                                                                                                                                                                                                                                                                                                                                                                                                                                                                                                                                                                                                                                                                                                                                                                                                 | CHU Montpellier                   | CNR Virus des Infections Respiratoires - France SUD | Antonin Bal, Gregory Destras, Gwendolyne Burfin, Hadrien Règue, Quentin Semanas, Martine Valette, Bruno Lina, Michel Segondy, Vincent Foulongne, Laurence Josset                                                                                                                            |                              |
| EPI_ISL_644375, EPI_ISL_644376, EPI_ISL_644377, EPI_ISL_644379, EPI_ISL_644380, EPI_ISL_644381, EPI_ISL_644382, EPI_ISL_644383, EPI_ISL_644384, EPI_ISL_644385, EPI_ISL_644386, EPI_ISL_644387, EPI_ISL_644389, EPI_ISL_644391, EPI_ISL_644392, EPI_ISL_644393, EPI_ISL_644394, EPI_ISL_644395, EPI_ISL_644396, EPI_ISL_644399, EPI_ISL_644400, EPI_ISL_644406, EPI_ISL_644407, EPI_ISL_644408, EPI_ISL_644409, EPI_ISL_644410, EPI_ISL_644411, EPI_ISL_644412, EPI_ISL_644413, EPI_ISL_644414, EPI_ISL_644415, EPI_ISL_644416, EPI_ISL_644417, EPI_ISL_644419, EPI_ISL_644420, EPI_ISL_644421, EPI_ISL_644422, EPI_ISL_644423, EPI_ISL_644424, EPI_ISL_644426, EPI_ISL_644427, EPI_ISL_644428, EPI_ISL_644434, EPI_ISL_644435, EPI_ISL_644436, EPI_ISL_644437, EPI_ISL_644439, EPI_ISL_644440, EPI_ISL_644441, EPI_ISL_644443, EPI_ISL_644446, EPI_ISL_644447, EPI_ISL_644448, EPI_ISL_644450, EPI_ISL_644451, EPI_ISL_644453, EPI_ISL_644454, EPI_ISL_644456, EPI_ISL_644459, EPI_ISL_644460, EPI_ISL_644461, EPI_ISL_644463, EPI_ISL_644464, EPI_ISL_644465, EPI_ISL_644466, EPI_ISL_644467, EPI_ISL_644468, EPI_ISL_644469, EPI_ISL_644471, EPI_ISL_644472, EPI_ISL_644473, EPI_ISL_644474, EPI_ISL_644475, EPI_ISL_644477, EPI_ISL_644480, EPI_ISL_644481, EPI_ISL_644482, EPI_ISL_644483, EPI_ISL_644484, EPI_ISL_644485, EPI_ISL_644486, EPI_ISL_644487, EPI_ISL_644488, EPI_ISL_644489, EPI_ISL_644491, EPI_ISL_644492, EPI_ISL_644493, EPI_ISL_644494, EPI_ISL_644495, EPI_ISL_644496, EPI_ISL_644497, EPI_ISL_644499, EPI_ISL_644500, EPI_ISL_644501, EPI_ISL_644503, EPI_ISL_644504, EPI_ISL_644505, EPI_ISL_644509, EPI_ISL_644512, EPI_ISL_644513, EPI_ISL_644514, EPI_ISL_644515, EPI_ISL_644517, EPI_ISL_644519, EPI_ISL_644520, EPI_ISL_644521, EPI_ISL_644522, EPI_ISL_644524, EPI_ISL_644525, EPI_ISL_644526, EPI_ISL_644527, EPI_ISL_644528, EPI_ISL_644529, EPI_ISL_644530, EPI_ISL_644531, EPI_ISL_644534, EPI_ISL_644535, EPI_ISL_644536, EPI_ISL_644540, EPI_ISL_644541, EPI_ISL_644542, EPI_ISL_644543, EPI_ISL_644544, EPI_ISL_644545, EPI_ISL_644546, EPI_ISL_644547, EPI_ISL_644548, EPI_ISL_644549, EPI_ISL_644550, EPI_ISL_644552, EPI_ISL_644553, EPI_ISL_644554, EPI_ISL_644555, EPI_ISL_644557, EPI_ISL_644558, EPI_ISL_644559, EPI_ISL_644560, EPI_ISL_644561, EPI_ISL_644563 |                                   |                                                     |                                                                                                                                                                                                                                                                                             |                              |
| see above                                                                                                                                                                                                                                                                                                                                                                                                                                                                                                                                                                                                                                                                                                                                                                                                                                                                                                                                                                                                                                                                                                                                                                                                                                                                                                                                                                                                                                                                                                                                                                                                                                                                                                                                                                                                                                                                                                                                                                                                                                                                                                                                                                                                                                                                                                      | MEPHI, Aix Marseille University   | MEPHI, Aix Marseille University                     | Anthony LEVASSEUR                                                                                                                                                                                                                                                                           |                              |
| EPI_ISL_644673, EPI_ISL_644674, EPI_ISL_644675, EPI_ISL_644676, EPI_ISL_644677, EPI_ISL_644678, EPI_ISL_644679, EPI_ISL_644680                                                                                                                                                                                                                                                                                                                                                                                                                                                                                                                                                                                                                                                                                                                                                                                                                                                                                                                                                                                                                                                                                                                                                                                                                                                                                                                                                                                                                                                                                                                                                                                                                                                                                                                                                                                                                                                                                                                                                                                                                                                                                                                                                                                 | CHU de Limoges                    | CNR Virus des Infections Respiratoires - France SUD | Antonin Bal, Gregory Destras, Gwendolyne Burfin, Hadrien Règue, Quentin Semanas, Martine Valette, Bruno Lina, Sylvie Rogez, Laurence Josset                                                                                                                                                 |                              |
| EPI_ISL_644681, EPI_ISL_644682, EPI_ISL_644683, EPI_ISL_644684, EPI_ISL_644685, EPI_ISL_644686, EPI_ISL_644687, EPI_ISL_644688, EPI_ISL_644689, EPI_ISL_644690, EPI_ISL_644691, EPI_ISL_644692, EPI_ISL_644693, EPI_ISL_644694, EPI_ISL_644695, EPI_ISL_644696                                                                                                                                                                                                                                                                                                                                                                                                                                                                                                                                                                                                                                                                                                                                                                                                                                                                                                                                                                                                                                                                                                                                                                                                                                                                                                                                                                                                                                                                                                                                                                                                                                                                                                                                                                                                                                                                                                                                                                                                                                                 |                                   |                                                     |                                                                                                                                                                                                                                                                                             |                              |
| see above                                                                                                                                                                                                                                                                                                                                                                                                                                                                                                                                                                                                                                                                                                                                                                                                                                                                                                                                                                                                                                                                                                                                                                                                                                                                                                                                                                                                                                                                                                                                                                                                                                                                                                                                                                                                                                                                                                                                                                                                                                                                                                                                                                                                                                                                                                      | CHU Montpellier                   | CNR Virus des Infections Respiratoires - France SUD | Antonin Bal, Gregory Destras, Gwendolyne Burfin, Hadrien Règue, Quentin Semanas, Martine Valette, Bruno Lina, Michel Segondy, Vincent Foulongne, Laurence Josset                                                                                                                            |                              |
| EPI_ISL_644697, EPI_ISL_644698, EPI_ISL_644699, EPI_ISL_644700, EPI_ISL_644701, EPI_ISL_644702                                                                                                                                                                                                                                                                                                                                                                                                                                                                                                                                                                                                                                                                                                                                                                                                                                                                                                                                                                                                                                                                                                                                                                                                                                                                                                                                                                                                                                                                                                                                                                                                                                                                                                                                                                                                                                                                                                                                                                                                                                                                                                                                                                                                                 | CHU Nîmes                         | CNR Virus des Infections Respiratoires - France SUD | Antonin Bal, Gregory Destras, Gwendolyne Burfin, Hadrien Règue, Quentin Semanas, Martine Valette, Bruno Lina, Jean-Philippe Lavigne, Stephan Robin, Maxence Lotellier, Marie-Josée Carles, Laurence Josset                                                                                  |                              |
| EPI_ISL_644703, EPI_ISL_644704, EPI_ISL_644705, EPI_ISL_644706, EPI_ISL_644707, EPI_ISL_644708, EPI_ISL_644709, EPI_ISL_644710, EPI_ISL_644711, EPI_ISL_644712, EPI_ISL_644713, EPI_ISL_644714                                                                                                                                                                                                                                                                                                                                                                                                                                                                                                                                                                                                                                                                                                                                                                                                                                                                                                                                                                                                                                                                                                                                                                                                                                                                                                                                                                                                                                                                                                                                                                                                                                                                                                                                                                                                                                                                                                                                                                                                                                                                                                                 |                                   |                                                     |                                                                                                                                                                                                                                                                                             |                              |
| see above                                                                                                                                                                                                                                                                                                                                                                                                                                                                                                                                                                                                                                                                                                                                                                                                                                                                                                                                                                                                                                                                                                                                                                                                                                                                                                                                                                                                                                                                                                                                                                                                                                                                                                                                                                                                                                                                                                                                                                                                                                                                                                                                                                                                                                                                                                      | Unité des Virus Émergents         | CNR Virus des Infections Respiratoires - France SUD | Antonin Bal, Gregory Destras, Gwendolyne Burfin, Hadrien Règue, Quentin Semanas, Martine Valette, Bruno Lina, Laetitia Ninove, Léa Luciani, Antoine Nougairède, Laurence Josset                                                                                                             |                              |
| EPI_ISL_645169, EPI_ISL_645170, EPI_ISL_645171, EPI_ISL_645172                                                                                                                                                                                                                                                                                                                                                                                                                                                                                                                                                                                                                                                                                                                                                                                                                                                                                                                                                                                                                                                                                                                                                                                                                                                                                                                                                                                                                                                                                                                                                                                                                                                                                                                                                                                                                                                                                                                                                                                                                                                                                                                                                                                                                                                 | CHU Bordeaux                      | CNR Virus des Infections Respiratoires - France SUD | Antonin Bal, Gregory Destras, Gwendolyne Burfin, Hadrien Règue, Quentin Semanas, Martine Valette, Bruno Lina, Pantxika Bellecave, Camille Ciccone, Isabelle Garrigue, Marie-Edith Lafon, Pascale Trimoulet, Laurence Josset                                                                 |                              |
| EPI_ISL_645173                                                                                                                                                                                                                                                                                                                                                                                                                                                                                                                                                                                                                                                                                                                                                                                                                                                                                                                                                                                                                                                                                                                                                                                                                                                                                                                                                                                                                                                                                                                                                                                                                                                                                                                                                                                                                                                                                                                                                                                                                                                                                                                                                                                                                                                                                                 | CHU de Nice                       | CNR Virus des Infections Respiratoires - France SUD | Antonin Bal, Géraldine Gonfrier, Gregory Destras, Gwendolyne Burfin, Hadrien Règue, Quentin Semanas, Martine Valette, Bruno Lina, Valérie Giordanengo, Laurence Josset                                                                                                                      |                              |
| EPI_ISL_645174, EPI_ISL_645175, EPI_ISL_645176, EPI_ISL_645177, EPI_ISL_645178, EPI_ISL_645179, EPI_ISL_645180, EPI_ISL_645181, EPI_ISL_645182, EPI_ISL_645183                                                                                                                                                                                                                                                                                                                                                                                                                                                                                                                                                                                                                                                                                                                                                                                                                                                                                                                                                                                                                                                                                                                                                                                                                                                                                                                                                                                                                                                                                                                                                                                                                                                                                                                                                                                                                                                                                                                                                                                                                                                                                                                                                 | CHU de Limoges                    | CNR Virus des Infections Respiratoires - France SUD | Antonin Bal, Gregory Destras, Gwendolyne Burfin, Hadrien Règue, Quentin Semanas, Martine Valette, Bruno Lina, Sylvie Rogez, Laurence Josset                                                                                                                                                 |                              |
| EPI_ISL_645184, EPI_ISL_645185, EPI_ISL_645186, EPI_ISL_645187                                                                                                                                                                                                                                                                                                                                                                                                                                                                                                                                                                                                                                                                                                                                                                                                                                                                                                                                                                                                                                                                                                                                                                                                                                                                                                                                                                                                                                                                                                                                                                                                                                                                                                                                                                                                                                                                                                                                                                                                                                                                                                                                                                                                                                                 | CHU de Saint-Étienne Hôpital Nord | CNR Virus des Infections Respiratoires - France SUD | Antonin Bal, Gregory Destras, Gwendolyne Burfin, Hadrien Règue, Quentin Semanas, Martine Valette, Bruno Lina, Issam Bechri, Manon Vogrig, Marine Delorme, Bruno Pozzetto, Thomas Bourlet, Sylvie Gonzalo, Sylvie Pillet, Laurence Josset                                                    |                              |
| EPI_ISL_645188, EPI_ISL_645189, EPI_ISL_645190, EPI_ISL_645191, EPI_ISL_645192, EPI_ISL_645193, EPI_ISL_645194, EPI_ISL_645195, EPI_ISL_645196                                                                                                                                                                                                                                                                                                                                                                                                                                                                                                                                                                                                                                                                                                                                                                                                                                                                                                                                                                                                                                                                                                                                                                                                                                                                                                                                                                                                                                                                                                                                                                                                                                                                                                                                                                                                                                                                                                                                                                                                                                                                                                                                                                 | CHU Clermont-Ferrand              | CNR Virus des Infections Respiratoires - France SUD | Antonin Bal, Gregory Destras, Gwendolyne Burfin, Hadrien Règue, Quentin Semanas, Martine Valette, Bruno Lina, Christine Archimbaud, Amélie Brebion, Hélène Chabrolles, Martine Chambon, Audrey Mirand, Christel Regagnon, Maxime Bisseux, Patricia Combes, Cécile Henquell, Laurence Josset |                              |
| EPI_ISL_645197, EPI_ISL_645198, EPI_ISL_645199, EPI_ISL_645200, EPI_ISL_645201, EPI_ISL_645202, EPI_ISL_645203, EPI_ISL_645204, EPI_ISL_645205, EPI_ISL_645206, EPI_ISL_645207, EPI_ISL_645208, EPI_ISL_645209                                                                                                                                                                                                                                                                                                                                                                                                                                                                                                                                                                                                                                                                                                                                                                                                                                                                                                                                                                                                                                                                                                                                                                                                                                                                                                                                                                                                                                                                                                                                                                                                                                                                                                                                                                                                                                                                                                                                                                                                                                                                                                 |                                   |                                                     |                                                                                                                                                                                                                                                                                             |                              |
| see above                                                                                                                                                                                                                                                                                                                                                                                                                                                                                                                                                                                                                                                                                                                                                                                                                                                                                                                                                                                                                                                                                                                                                                                                                                                                                                                                                                                                                                                                                                                                                                                                                                                                                                                                                                                                                                                                                                                                                                                                                                                                                                                                                                                                                                                                                                      | CHU Nîmes                         | CNR Virus des Infections Respiratoires - France SUD | Antonin Bal, Gregory Destras, Gwendolyne Burfin, Hadrien Règue, Quentin Semanas, Martine Valette, Bruno Lina, Jean-Philippe Lavigne, Stephan Robin, Maxence Lotellier, Marie-Josée Carles, Laurence Josset                                                                                  |                              |
| EPI_ISL_645212, EPI_ISL_645213, EPI_ISL_645214                                                                                                                                                                                                                                                                                                                                                                                                                                                                                                                                                                                                                                                                                                                                                                                                                                                                                                                                                                                                                                                                                                                                                                                                                                                                                                                                                                                                                                                                                                                                                                                                                                                                                                                                                                                                                                                                                                                                                                                                                                                                                                                                                                                                                                                                 | Unité des Virus Émergents         | CNR Virus des Infections Respiratoires - France SUD | Antonin Bal, Gregory Destras, Gwendolyne Burfin, Hadrien Règue, Quentin Semanas, Martine Valette, Bruno Lina, Laetitia Ninove, Léa Luciani, Antoine Nougairède, Laurence Josset                                                                                                             |                              |
| EPI_ISL_645215                                                                                                                                                                                                                                                                                                                                                                                                                                                                                                                                                                                                                                                                                                                                                                                                                                                                                                                                                                                                                                                                                                                                                                                                                                                                                                                                                                                                                                                                                                                                                                                                                                                                                                                                                                                                                                                                                                                                                                                                                                                                                                                                                                                                                                                                                                 | CHU Nîmes                         | CNR Virus des Infections Respiratoires - France SUD | Antonin Bal, Gregory Destras, Gwendolyne Burfin, Hadrien Règue, Quentin Semanas, Martine Valette, Bruno Lina, Jean-Philippe Lavigne, Stephan Robin, Maxence Lotellier, Marie-Josée Carles, Laurence Josset                                                                                  |                              |
| EPI_ISL_645216                                                                                                                                                                                                                                                                                                                                                                                                                                                                                                                                                                                                                                                                                                                                                                                                                                                                                                                                                                                                                                                                                                                                                                                                                                                                                                                                                                                                                                                                                                                                                                                                                                                                                                                                                                                                                                                                                                                                                                                                                                                                                                                                                                                                                                                                                                 | CHU Poitiers                      | CNR Virus des Infections Respiratoires - France SUD | Antonin Bal, Gregory Destras, Gwendolyne Burfin, Hadrien Règue, Quentin Semanas, Martine Valette, Bruno Lina, Agnès Beby-Defaux, Magali Garcia, Clément Jousselin, Nicolas Lévêque, Laurence Josset                                                                                         |                              |

|                                                                                                                                                                                                                                                                                                                                                                                                                                                                                                                                                                                                                                                                                                                                                                                                                                                                                                                                                                                                                                                                                                                                                                                                                                                                                                                                                                                                                                                                                                                                                                                                                                                                                |                                                       |                                                                           |                                                                                                                                                                                                                                          |                                                                                                                                                                                                                                                                                             |
|--------------------------------------------------------------------------------------------------------------------------------------------------------------------------------------------------------------------------------------------------------------------------------------------------------------------------------------------------------------------------------------------------------------------------------------------------------------------------------------------------------------------------------------------------------------------------------------------------------------------------------------------------------------------------------------------------------------------------------------------------------------------------------------------------------------------------------------------------------------------------------------------------------------------------------------------------------------------------------------------------------------------------------------------------------------------------------------------------------------------------------------------------------------------------------------------------------------------------------------------------------------------------------------------------------------------------------------------------------------------------------------------------------------------------------------------------------------------------------------------------------------------------------------------------------------------------------------------------------------------------------------------------------------------------------|-------------------------------------------------------|---------------------------------------------------------------------------|------------------------------------------------------------------------------------------------------------------------------------------------------------------------------------------------------------------------------------------|---------------------------------------------------------------------------------------------------------------------------------------------------------------------------------------------------------------------------------------------------------------------------------------------|
| EPI_ISL_645217, EPI_ISL_645218                                                                                                                                                                                                                                                                                                                                                                                                                                                                                                                                                                                                                                                                                                                                                                                                                                                                                                                                                                                                                                                                                                                                                                                                                                                                                                                                                                                                                                                                                                                                                                                                                                                 | CHU Nantes                                            | CNR Virus des Infections Respiratoires - France SUD                       | Antonin Bal, Louise Castain, Gregory Destras, Gwendolyne Burfin, Hadrien Règue, Quentin Semanas, Martine Valette, Bruno Lina, Celine Bressollette, Laurence Josset                                                                       |                                                                                                                                                                                                                                                                                             |
| EPI_ISL_649126, EPI_ISL_649127, EPI_ISL_649128, EPI_ISL_649129, EPI_ISL_649130, EPI_ISL_649131, EPI_ISL_649132, EPI_ISL_649133, EPI_ISL_649134, EPI_ISL_649135, EPI_ISL_649136, EPI_ISL_649137, EPI_ISL_649138, EPI_ISL_649139, EPI_ISL_649140, EPI_ISL_649141, EPI_ISL_649142, EPI_ISL_649143, EPI_ISL_649144                                                                                                                                                                                                                                                                                                                                                                                                                                                                                                                                                                                                                                                                                                                                                                                                                                                                                                                                                                                                                                                                                                                                                                                                                                                                                                                                                                 | see above                                             | Tokyo Metropolitan Institute of Public Health, Department of Microbiology | Tokyo Metropolitan Institute of Public Health, Department of Microbiology                                                                                                                                                                | Asakura,H., Kurnagai,R., Yoshida,I., Nagashima,M., Chiba,T. and Sadamasu,K.                                                                                                                                                                                                                 |
| EPI_ISL_649173, EPI_ISL_649174, EPI_ISL_649175, EPI_ISL_649176, EPI_ISL_649177, EPI_ISL_649178, EPI_ISL_649179, EPI_ISL_649180, EPI_ISL_649181, EPI_ISL_649182, EPI_ISL_649183, EPI_ISL_649184, EPI_ISL_649185, EPI_ISL_649186, EPI_ISL_649187                                                                                                                                                                                                                                                                                                                                                                                                                                                                                                                                                                                                                                                                                                                                                                                                                                                                                                                                                                                                                                                                                                                                                                                                                                                                                                                                                                                                                                 | see above                                             | CHU Nantes                                                                | CNR Virus des Infections Respiratoires - France SUD                                                                                                                                                                                      | Antonin Bal, Louise Castain, Gregory Destras, Gwendolyne Burfin, Hadrien Règue, Quentin Semanas, Martine Valette, Bruno Lina, Celine Bressollette, Laurence Josset                                                                                                                          |
| EPI_ISL_649188                                                                                                                                                                                                                                                                                                                                                                                                                                                                                                                                                                                                                                                                                                                                                                                                                                                                                                                                                                                                                                                                                                                                                                                                                                                                                                                                                                                                                                                                                                                                                                                                                                                                 | Unité des Virus Émergents                             | CNR Virus des Infections Respiratoires - France SUD                       | Antonin Bal, Gregory Destras, Gwendolyne Burfin, Hadrien Règue, Quentin Semanas, Martine Valette, Bruno Lina, Laetitia Ninove, Léa Luciani, Antoine Nougairède, Laurence Josset                                                          |                                                                                                                                                                                                                                                                                             |
| EPI_ISL_649942, EPI_ISL_649943, EPI_ISL_649944, EPI_ISL_649945, EPI_ISL_649946, EPI_ISL_649947, EPI_ISL_649948, EPI_ISL_649949, EPI_ISL_649950, EPI_ISL_649951, EPI_ISL_649952, EPI_ISL_649953                                                                                                                                                                                                                                                                                                                                                                                                                                                                                                                                                                                                                                                                                                                                                                                                                                                                                                                                                                                                                                                                                                                                                                                                                                                                                                                                                                                                                                                                                 | see above                                             | CHU de Saint-Étienne Hôpital Nord                                         | CNR Virus des Infections Respiratoires - France SUD                                                                                                                                                                                      | Antonin Bal, Gregory Destras, Gwendolyne Burfin, Hadrien Règue, Quentin Semanas, Martine Valette, Bruno Lina, Issam Bechri, Manon Vogrig, Marine Delorme, Bruno Pozzetto, Thomas Bourlet, Sylvie Gonzalo, Sylvie Pillet, Laurence Josset                                                    |
| EPI_ISL_649954, EPI_ISL_649955, EPI_ISL_649956, EPI_ISL_649957, EPI_ISL_649958, EPI_ISL_649959, EPI_ISL_649960, EPI_ISL_649961, EPI_ISL_649962, EPI_ISL_649963, EPI_ISL_649964, EPI_ISL_649965, EPI_ISL_649966, EPI_ISL_649967, EPI_ISL_649968, EPI_ISL_649969, EPI_ISL_649970, EPI_ISL_649971                                                                                                                                                                                                                                                                                                                                                                                                                                                                                                                                                                                                                                                                                                                                                                                                                                                                                                                                                                                                                                                                                                                                                                                                                                                                                                                                                                                 | see above                                             | CHU Bordeaux                                                              | CNR Virus des Infections Respiratoires - France SUD                                                                                                                                                                                      | Antonin Bal, Gregory Destras, Gwendolyne Burfin, Hadrien Règue, Quentin Semanas, Martine Valette, Bruno Lina, Pantxika Bellecave, Camille Ciccone, Isabelle Garrigue, Marie-Edith Lafon, Pascale Trimoulet, Laurence Josset                                                                 |
| EPI_ISL_650141, EPI_ISL_650151, EPI_ISL_650215, EPI_ISL_650219, EPI_ISL_650222, EPI_ISL_650225, EPI_ISL_650226, EPI_ISL_650258, EPI_ISL_650260, EPI_ISL_650261, EPI_ISL_650296, EPI_ISL_650352, EPI_ISL_650357, EPI_ISL_650358, EPI_ISL_650360, EPI_ISL_650361, EPI_ISL_650377, EPI_ISL_650399, EPI_ISL_650445, EPI_ISL_650565, EPI_ISL_650597, EPI_ISL_650606, EPI_ISL_650607, EPI_ISL_650610, EPI_ISL_650636, EPI_ISL_650637, EPI_ISL_650638, EPI_ISL_650639, EPI_ISL_650643, EPI_ISL_650644, EPI_ISL_650667, EPI_ISL_650702, EPI_ISL_650788, EPI_ISL_651053, EPI_ISL_651054, EPI_ISL_651055, EPI_ISL_651057, EPI_ISL_651058, EPI_ISL_651074, EPI_ISL_651075, EPI_ISL_651083, EPI_ISL_651084, EPI_ISL_651085, EPI_ISL_651130, EPI_ISL_651143, EPI_ISL_651177, EPI_ISL_651231, EPI_ISL_651238, EPI_ISL_651241, EPI_ISL_651289, EPI_ISL_651290, EPI_ISL_651300, EPI_ISL_651372, EPI_ISL_651373, EPI_ISL_651384, EPI_ISL_651439, EPI_ISL_651467, EPI_ISL_651468, EPI_ISL_651527, EPI_ISL_651547, EPI_ISL_652290, EPI_ISL_652291, EPI_ISL_652292, EPI_ISL_652293, EPI_ISL_652294, EPI_ISL_652295, EPI_ISL_652296, EPI_ISL_652298, EPI_ISL_652299, EPI_ISL_652300, EPI_ISL_652301, EPI_ISL_652302, EPI_ISL_652303, EPI_ISL_652675, EPI_ISL_652676, EPI_ISL_652677, EPI_ISL_652678, EPI_ISL_652679, EPI_ISL_652680, EPI_ISL_652682, EPI_ISL_652684, EPI_ISL_652686, EPI_ISL_652688, EPI_ISL_652689, EPI_ISL_652692, EPI_ISL_652693, EPI_ISL_652694, EPI_ISL_652695, EPI_ISL_652697, EPI_ISL_652698, EPI_ISL_652699, EPI_ISL_652700, EPI_ISL_652701, EPI_ISL_652702, EPI_ISL_652703, EPI_ISL_652704, EPI_ISL_652706, EPI_ISL_652707, EPI_ISL_652708, EPI_ISL_652709, EPI_ISL_652710 | see above                                             | University of Exeter                                                      | COVID-19 Genomics UK (COG-UK) Consortium                                                                                                                                                                                                 | Ben Temperton,Aaron Jeffries,Michelle Michelsen,Joanna Warwick-Dugdale,Audrey Farbos,Robyn Manley,Stephen Michell,Jane Masoli                                                                                                                                                               |
| EPI_ISL_653917                                                                                                                                                                                                                                                                                                                                                                                                                                                                                                                                                                                                                                                                                                                                                                                                                                                                                                                                                                                                                                                                                                                                                                                                                                                                                                                                                                                                                                                                                                                                                                                                                                                                 | Translational Health Science and Technology Institute | National Institute of Biomedical Genomics                                 | Arindam Maitra, Guruprasad Medigeshi, Sharanabasava Patil, Anbalagan Ananthraj, Madhu Pareek, Imran Khan, Gagandeep Kang, Saumitra Das                                                                                                   |                                                                                                                                                                                                                                                                                             |
| EPI_ISL_654401, EPI_ISL_654402, EPI_ISL_654403, EPI_ISL_654404, EPI_ISL_654405, EPI_ISL_654406, EPI_ISL_654407, EPI_ISL_654408, EPI_ISL_654409, EPI_ISL_654410, EPI_ISL_654411, EPI_ISL_654412, EPI_ISL_654413, EPI_ISL_654414, EPI_ISL_654415, EPI_ISL_654416, EPI_ISL_654417, EPI_ISL_654418, EPI_ISL_654419, EPI_ISL_654420, EPI_ISL_654421, EPI_ISL_654422, EPI_ISL_654423, EPI_ISL_654424, EPI_ISL_654425, EPI_ISL_654426, EPI_ISL_654427, EPI_ISL_654428, EPI_ISL_654429, EPI_ISL_654430, EPI_ISL_654431, EPI_ISL_654432, EPI_ISL_654433, EPI_ISL_654434, EPI_ISL_654435, EPI_ISL_654436, EPI_ISL_654437, EPI_ISL_654438, EPI_ISL_654439, EPI_ISL_654440, EPI_ISL_654441, EPI_ISL_654442, EPI_ISL_654443, EPI_ISL_654444, EPI_ISL_654445, EPI_ISL_654446, EPI_ISL_654447, EPI_ISL_654448, EPI_ISL_654449, EPI_ISL_654450, EPI_ISL_654451, EPI_ISL_654452, EPI_ISL_654453, EPI_ISL_654454, EPI_ISL_654455, EPI_ISL_654456, EPI_ISL_654457, EPI_ISL_654458, EPI_ISL_654459, EPI_ISL_654460, EPI_ISL_654461, EPI_ISL_654462, EPI_ISL_654463, EPI_ISL_654464, EPI_ISL_654465, EPI_ISL_654466, EPI_ISL_654467                                                                                                                                                                                                                                                                                                                                                                                                                                                                                                                                                                 | see above                                             | Servicio de Microbiología, Hospital Miguel Servet, Zaragoza               | SeqCOVID-SPAIN consortium/IBV(CSIC)                                                                                                                                                                                                      | Antonio Rezusta López, Alexander Tristáncho Baró, Ana Milagro, Yolanda Gracia Gratalou, Nieves Martínez Cameo and SecCOVID-SPAIN consortium                                                                                                                                                 |
| EPI_ISL_660326, EPI_ISL_660327, EPI_ISL_660328, EPI_ISL_660329, EPI_ISL_660330, EPI_ISL_660331, EPI_ISL_660332, EPI_ISL_660333, EPI_ISL_660334, EPI_ISL_660335, EPI_ISL_660336, EPI_ISL_660337, EPI_ISL_660338, EPI_ISL_660339, EPI_ISL_660340, EPI_ISL_660341, EPI_ISL_660342, EPI_ISL_660343, EPI_ISL_660344, EPI_ISL_660345, EPI_ISL_660346, EPI_ISL_660347, EPI_ISL_660348, EPI_ISL_660349, EPI_ISL_660350, EPI_ISL_660351, EPI_ISL_660352                                                                                                                                                                                                                                                                                                                                                                                                                                                                                                                                                                                                                                                                                                                                                                                                                                                                                                                                                                                                                                                                                                                                                                                                                                 | see above                                             | CHU de Saint-Étienne Hôpital Nord                                         | CNR Virus des Infections Respiratoires - France SUD                                                                                                                                                                                      | Antonin Bal, Gregory Destras, Gwendolyne Burfin, Hadrien Règue, Quentin Semanas, Martine Valette, Bruno Lina, Issam Bechri, Manon Vogrig, Marine Delorme, Bruno Pozzetto, Thomas Bourlet, Sylvie Gonzalo, Sylvie Pillet, Laurence Josset                                                    |
| EPI_ISL_660353, EPI_ISL_660354, EPI_ISL_660355, EPI_ISL_660356, EPI_ISL_660357, EPI_ISL_660358, EPI_ISL_660359, EPI_ISL_660360, EPI_ISL_660361, EPI_ISL_660362, EPI_ISL_660363, EPI_ISL_660364, EPI_ISL_660365, EPI_ISL_660366, EPI_ISL_660367, EPI_ISL_660368, EPI_ISL_660369, EPI_ISL_660370, EPI_ISL_660371                                                                                                                                                                                                                                                                                                                                                                                                                                                                                                                                                                                                                                                                                                                                                                                                                                                                                                                                                                                                                                                                                                                                                                                                                                                                                                                                                                 | see above                                             | CHU Clermont-Ferrand                                                      | CNR Virus des Infections Respiratoires - France SUD                                                                                                                                                                                      | Antonin Bal, Gregory Destras, Gwendolyne Burfin, Hadrien Règue, Quentin Semanas, Martine Valette, Bruno Lina, Christine Archimbaud, Amélie Brebion, Hélène Chabrolles, Martine Chambon, Audrey Mirand, Christel Regagnon, Maxime Bisseux, Patricia Combes, Cécile Henquell, Laurence Josset |
| EPI_ISL_660372                                                                                                                                                                                                                                                                                                                                                                                                                                                                                                                                                                                                                                                                                                                                                                                                                                                                                                                                                                                                                                                                                                                                                                                                                                                                                                                                                                                                                                                                                                                                                                                                                                                                 | CHU Bordeaux                                          | CNR Virus des Infections Respiratoires - France SUD                       | Antonin Bal, Gregory Destras, Gwendolyne Burfin, Hadrien Règue, Quentin Semanas, Martine Valette, Bruno Lina, Pantxika Bellecave, Camille Ciccone, Isabelle Garrigue, Marie-Edith Lafon, Pascale Trimoulet, Laurence Josset              |                                                                                                                                                                                                                                                                                             |
| EPI_ISL_660373, EPI_ISL_660374, EPI_ISL_660375, EPI_ISL_660376, EPI_ISL_660377                                                                                                                                                                                                                                                                                                                                                                                                                                                                                                                                                                                                                                                                                                                                                                                                                                                                                                                                                                                                                                                                                                                                                                                                                                                                                                                                                                                                                                                                                                                                                                                                 | CHU Toulouse                                          | CNR Virus des Infections Respiratoires - France SUD                       | Antonin Bal, Gregory Destras, Gwendolyne Burfin, Hadrien Règue, Quentin Semanas, Martine Valette, Bruno Lina, Jean Michel Mansuy, Laurence Josset                                                                                        |                                                                                                                                                                                                                                                                                             |
| EPI_ISL_660432                                                                                                                                                                                                                                                                                                                                                                                                                                                                                                                                                                                                                                                                                                                                                                                                                                                                                                                                                                                                                                                                                                                                                                                                                                                                                                                                                                                                                                                                                                                                                                                                                                                                 | CHU de Saint-Étienne Hôpital Nord                     | CNR Virus des Infections Respiratoires - France SUD                       | Antonin Bal, Gregory Destras, Gwendolyne Burfin, Hadrien Règue, Quentin Semanas, Martine Valette, Bruno Lina, Issam Bechri, Manon Vogrig, Marine Delorme, Bruno Pozzetto, Thomas Bourlet, Sylvie Gonzalo, Sylvie Pillet, Laurence Josset |                                                                                                                                                                                                                                                                                             |
| EPI_ISL_660665, EPI_ISL_660666, EPI_ISL_660667, EPI_ISL_660668, EPI_ISL_660669, EPI_ISL_660670, EPI_ISL_660671                                                                                                                                                                                                                                                                                                                                                                                                                                                                                                                                                                                                                                                                                                                                                                                                                                                                                                                                                                                                                                                                                                                                                                                                                                                                                                                                                                                                                                                                                                                                                                 | CHU Toulouse                                          | CNR Virus des Infections Respiratoires - France SUD                       | Antonin Bal, Gregory Destras, Gwendolyne Burfin, Hadrien Règue, Quentin Semanas, Martine Valette, Bruno Lina, Jean Michel Mansuy, Laurence Josset                                                                                        |                                                                                                                                                                                                                                                                                             |
| EPI_ISL_660672, EPI_ISL_660673, EPI_ISL_660674, EPI_ISL_660675, EPI_ISL_660676, EPI_ISL_660677, EPI_ISL_660678, EPI_ISL_660679, EPI_ISL_660680, EPI_ISL_660681, EPI_ISL_660682, EPI_ISL_660683, EPI_ISL_660684, EPI_ISL_660685, EPI_ISL_660686, EPI_ISL_660687, EPI_ISL_660688, EPI_ISL_660689, EPI_ISL_660690, EPI_ISL_660691, EPI_ISL_660692, EPI_ISL_660693, EPI_ISL_660694, EPI_ISL_660695, EPI_ISL_660696, EPI_ISL_660697, EPI_ISL_660698, EPI_ISL_660699, EPI_ISL_660700, EPI_ISL_660701, EPI_ISL_660702, EPI_ISL_660703, EPI_ISL_660704, EPI_ISL_660705, EPI_ISL_660706, EPI_ISL_660707, EPI_ISL_660708, EPI_ISL_660709                                                                                                                                                                                                                                                                                                                                                                                                                                                                                                                                                                                                                                                                                                                                                                                                                                                                                                                                                                                                                                                 | see above                                             | CHU Montpellier                                                           | CNR Virus des Infections Respiratoires - France SUD                                                                                                                                                                                      | Antonin Bal, Gregory Destras, Gwendolyne Burfin, Hadrien Règue, Quentin Semanas, Martine Valette, Bruno Lina, Michel Segondy, Vincent Foulongne, Laurence Josset                                                                                                                            |
| EPI_ISL_660710, EPI_ISL_660711, EPI_ISL_660712, EPI_ISL_660713, EPI_ISL_660714, EPI_ISL_660715, EPI_ISL_660716, EPI_ISL_660717, EPI_ISL_660718, EPI_ISL_660719, EPI_ISL_660720, EPI_ISL_660721, EPI_ISL_660722, EPI_ISL_660723, EPI_ISL_660724, EPI_ISL_660725, EPI_ISL_660726, EPI_ISL_660727, EPI_ISL_660728, EPI_ISL_660729, EPI_ISL_660730, EPI_ISL_660731                                                                                                                                                                                                                                                                                                                                                                                                                                                                                                                                                                                                                                                                                                                                                                                                                                                                                                                                                                                                                                                                                                                                                                                                                                                                                                                 | see above                                             | CHU Nîmes                                                                 | CNR Virus des Infections Respiratoires - France SUD                                                                                                                                                                                      | Antonin Bal, Gregory Destras, Gwendolyne Burfin, Hadrien Règue, Quentin Semanas, Martine Valette, Bruno Lina, Jean-Philippe Lavigne, Stephan Robin, Maxence Lotellier, Marie-Josée Carles, Laurence Josset                                                                                  |
| EPI_ISL_660732, EPI_ISL_660733, EPI_ISL_660734, EPI_ISL_660735, EPI_ISL_660736, EPI_ISL_660737, EPI_ISL_660738, EPI_ISL_660739, EPI_ISL_660740, EPI_ISL_660741                                                                                                                                                                                                                                                                                                                                                                                                                                                                                                                                                                                                                                                                                                                                                                                                                                                                                                                                                                                                                                                                                                                                                                                                                                                                                                                                                                                                                                                                                                                 | Unité des Virus Émergents                             | CNR Virus des Infections Respiratoires - France SUD                       | Antonin Bal, Gregory Destras, Gwendolyne Burfin, Hadrien Règue, Quentin Semanas, Martine Valette, Bruno Lina, Laetitia Ninove, Léa Luciani, Antoine Nougairède, Laurence Josset                                                          |                                                                                                                                                                                                                                                                                             |
| EPI_ISL_663206, EPI_ISL_663207, EPI_ISL_663208, EPI_ISL_663209, EPI_ISL_663210, EPI_ISL_663211, EPI_ISL_663212, EPI_ISL_663213, EPI_ISL_663214, EPI_ISL_663215, EPI_ISL_663216, EPI_ISL_663217, EPI_ISL_663218, EPI_ISL_663219, EPI_ISL_663220, EPI_ISL_663221, EPI_ISL_663222, EPI_ISL_663223, EPI_ISL_663224, EPI_ISL_663225, EPI_ISL_663226                                                                                                                                                                                                                                                                                                                                                                                                                                                                                                                                                                                                                                                                                                                                                                                                                                                                                                                                                                                                                                                                                                                                                                                                                                                                                                                                 | see above                                             | CHU de Limoges                                                            | CNR Virus des Infections Respiratoires - France SUD                                                                                                                                                                                      | Antonin Bal, Gregory Destras, Gwendolyne Burfin, Hadrien Règue, Quentin Semanas, Martine Valette, Bruno Lina, Sylvie Rogez, Laurence Josset                                                                                                                                                 |
| EPI_ISL_663227, EPI_ISL_663228, EPI_ISL_663229, EPI_ISL_663230, EPI_ISL_663231, EPI_ISL_663232, EPI_ISL_663233, EPI_ISL_663234, EPI_ISL_663235, EPI_ISL_663236, EPI_ISL_663237, EPI_ISL_663238, EPI_ISL_663239, EPI_ISL_663240, EPI_ISL_663241, EPI_ISL_663242                                                                                                                                                                                                                                                                                                                                                                                                                                                                                                                                                                                                                                                                                                                                                                                                                                                                                                                                                                                                                                                                                                                                                                                                                                                                                                                                                                                                                 | see above                                             | CHU Poitiers                                                              | CNR Virus des Infections Respiratoires - France SUD                                                                                                                                                                                      | Antonin Bal, Gregory Destras, Gwendolyne Burfin, Hadrien Règue, Quentin Semanas, Martine Valette, Bruno Lina, Agnès Beby-Defaux, Magali Garcia, Clément Jousse, Nicolas Lévêque, Laurence Josset                                                                                            |
| EPI_ISL_663243, EPI_ISL_663244, EPI_ISL_663245, EPI_ISL_663246                                                                                                                                                                                                                                                                                                                                                                                                                                                                                                                                                                                                                                                                                                                                                                                                                                                                                                                                                                                                                                                                                                                                                                                                                                                                                                                                                                                                                                                                                                                                                                                                                 | CHU Nîmes                                             | CNR Virus des Infections Respiratoires - France SUD                       | Antonin Bal, Gregory Destras, Gwendolyne Burfin, Hadrien Règue, Quentin Semanas, Martine Valette, Bruno Lina, Jean-Philippe Lavigne, Stephan Robin, Maxence Lotellier, Marie-Josée Carles, Laurence Josset                               |                                                                                                                                                                                                                                                                                             |





|                                                                                                                                                                |                                                                                |                                                               |                                                                                                                                                                                                                                                          |
|----------------------------------------------------------------------------------------------------------------------------------------------------------------|--------------------------------------------------------------------------------|---------------------------------------------------------------|----------------------------------------------------------------------------------------------------------------------------------------------------------------------------------------------------------------------------------------------------------|
| EPI_ISL_696492                                                                                                                                                 | Conville CDC wc CVC & NHL/UCT                                                  | KRISP, KZN Research Innovation and Sequencing Platform        | Arash Iranzadeh, Deelan Doolabh, Lynn Tyers, Bruna Galvao, Innocent Mudau, Marvin Hsiao, Kruger Marais, Jennifer Giandhari, Sureshnee Pillay, Houriiyah Tegally, Emanuel James San, Tulio de Oliveira, Diana Hardie, Stephen Korsman, Carolyn Williamson |
| EPI_ISL_696493, EPI_ISL_696494                                                                                                                                 | Thembaletu CDC wc THC & NHL/UCT                                                | KRISP, KZN Research Innovation and Sequencing Platform        | Arash Iranzadeh, Deelan Doolabh, Lynn Tyers, Bruna Galvao, Innocent Mudau, Marvin Hsiao, Kruger Marais, Jennifer Giandhari, Sureshnee Pillay, Houriiyah Tegally, Emanuel James San, Tulio de Oliveira, Diana Hardie, Stephen Korsman, Carolyn Williamson |
| EPI_ISL_696495                                                                                                                                                 | Knysna CDC wc WLC & NHL/UCT                                                    | KRISP, KZN Research Innovation and Sequencing Platform        | Arash Iranzadeh, Deelan Doolabh, Lynn Tyers, Bruna Galvao, Innocent Mudau, Marvin Hsiao, Kruger Marais, Jennifer Giandhari, Sureshnee Pillay, Houriiyah Tegally, Emanuel James San, Tulio de Oliveira, Diana Hardie, Stephen Korsman, Carolyn Williamson |
| EPI_ISL_696496                                                                                                                                                 | Thembaletu CDC wc THC & NHL/UCT                                                | KRISP, KZN Research Innovation and Sequencing Platform        | Arash Iranzadeh, Deelan Doolabh, Lynn Tyers, Bruna Galvao, Innocent Mudau, Marvin Hsiao, Kruger Marais, Jennifer Giandhari, Sureshnee Pillay, Houriiyah Tegally, Emanuel James San, Tulio de Oliveira, Diana Hardie, Stephen Korsman, Carolyn Williamson |
| EPI_ISL_696497                                                                                                                                                 | Great Brak River Clinic wc GBC & NHL/UCT                                       | KRISP, KZN Research Innovation and Sequencing Platform        | Arash Iranzadeh, Deelan Doolabh, Lynn Tyers, Bruna Galvao, Innocent Mudau, Marvin Hsiao, Kruger Marais, Jennifer Giandhari, Sureshnee Pillay, Houriiyah Tegally, Emanuel James San, Tulio de Oliveira, Diana Hardie, Stephen Korsman, Carolyn Williamson |
| EPI_ISL_696498                                                                                                                                                 | Kranshoek Clinic wc KSH & NHL/UCT                                              | KRISP, KZN Research Innovation and Sequencing Platform        | Arash Iranzadeh, Deelan Doolabh, Lynn Tyers, Bruna Galvao, Innocent Mudau, Marvin Hsiao, Kruger Marais, Jennifer Giandhari, Sureshnee Pillay, Houriiyah Tegally, Emanuel James San, Tulio de Oliveira, Diana Hardie, Stephen Korsman, Carolyn Williamson |
| EPI_ISL_696499, EPI_ISL_696500                                                                                                                                 | Thembaletu CDC wc THC & NHL/UCT                                                | KRISP, KZN Research Innovation and Sequencing Platform        | Arash Iranzadeh, Deelan Doolabh, Lynn Tyers, Bruna Galvao, Innocent Mudau, Marvin Hsiao, Kruger Marais, Jennifer Giandhari, Sureshnee Pillay, Houriiyah Tegally, Emanuel James San, Tulio de Oliveira, Diana Hardie, Stephen Korsman, Carolyn Williamson |
| EPI_ISL_696501                                                                                                                                                 | Great Brak River Clinic wc GBC & NHL/UCT                                       | KRISP, KZN Research Innovation and Sequencing Platform        | Arash Iranzadeh, Deelan Doolabh, Lynn Tyers, Bruna Galvao, Innocent Mudau, Marvin Hsiao, Kruger Marais, Jennifer Giandhari, Sureshnee Pillay, Houriiyah Tegally, Emanuel James San, Tulio de Oliveira, Diana Hardie, Stephen Korsman, Carolyn Williamson |
| EPI_ISL_696502                                                                                                                                                 | Hornlee Clinic wc HLC & NHL/UCT                                                | KRISP, KZN Research Innovation and Sequencing Platform        | Arash Iranzadeh, Deelan Doolabh, Lynn Tyers, Bruna Galvao, Innocent Mudau, Marvin Hsiao, Kruger Marais, Jennifer Giandhari, Sureshnee Pillay, Houriiyah Tegally, Emanuel James San, Tulio de Oliveira, Diana Hardie, Stephen Korsman, Carolyn Williamson |
| EPI_ISL_696503                                                                                                                                                 | George Hospital wc GRH & NHL/UCT                                               | KRISP, KZN Research Innovation and Sequencing Platform        | Arash Iranzadeh, Deelan Doolabh, Lynn Tyers, Bruna Galvao, Innocent Mudau, Marvin Hsiao, Kruger Marais, Jennifer Giandhari, Sureshnee Pillay, Houriiyah Tegally, Emanuel James San, Tulio de Oliveira, Diana Hardie, Stephen Korsman, Carolyn Williamson |
| EPI_ISL_696504                                                                                                                                                 | Pacaltsdorp Clinic wc PAC & NHL/UCT                                            | KRISP, KZN Research Innovation and Sequencing Platform        | Arash Iranzadeh, Deelan Doolabh, Lynn Tyers, Bruna Galvao, Innocent Mudau, Marvin Hsiao, Kruger Marais, Jennifer Giandhari, Sureshnee Pillay, Houriiyah Tegally, Emanuel James San, Tulio de Oliveira, Diana Hardie, Stephen Korsman, Carolyn Williamson |
| EPI_ISL_696505                                                                                                                                                 | Khayeletu Clinic wc KLC & NHL/UCT                                              | KRISP, KZN Research Innovation and Sequencing Platform        | Arash Iranzadeh, Deelan Doolabh, Lynn Tyers, Bruna Galvao, Innocent Mudau, Marvin Hsiao, Kruger Marais, Jennifer Giandhari, Sureshnee Pillay, Houriiyah Tegally, Emanuel James San, Tulio de Oliveira, Diana Hardie, Stephen Korsman, Carolyn Williamson |
| EPI_ISL_696506                                                                                                                                                 | Knysna CDC wc WLC & NHL/UCT                                                    | KRISP, KZN Research Innovation and Sequencing Platform        | Arash Iranzadeh, Deelan Doolabh, Lynn Tyers, Bruna Galvao, Innocent Mudau, Marvin Hsiao, Kruger Marais, Jennifer Giandhari, Sureshnee Pillay, Houriiyah Tegally, Emanuel James San, Tulio de Oliveira, Diana Hardie, Stephen Korsman, Carolyn Williamson |
| EPI_ISL_696507                                                                                                                                                 | Great Brak River Clinic wc GBC & NHL/UCT                                       | KRISP, KZN Research Innovation and Sequencing Platform        | Arash Iranzadeh, Deelan Doolabh, Lynn Tyers, Bruna Galvao, Innocent Mudau, Marvin Hsiao, Kruger Marais, Jennifer Giandhari, Sureshnee Pillay, Houriiyah Tegally, Emanuel James San, Tulio de Oliveira, Diana Hardie, Stephen Korsman, Carolyn Williamson |
| EPI_ISL_696508, EPI_ISL_696509                                                                                                                                 | Conville CDC wc CVC & NHL/UCT                                                  | KRISP, KZN Research Innovation and Sequencing Platform        | Arash Iranzadeh, Deelan Doolabh, Lynn Tyers, Bruna Galvao, Innocent Mudau, Marvin Hsiao, Kruger Marais, Jennifer Giandhari, Sureshnee Pillay, Houriiyah Tegally, Emanuel James San, Tulio de Oliveira, Diana Hardie, Stephen Korsman, Carolyn Williamson |
| EPI_ISL_696510                                                                                                                                                 | Sedgefield Clinic wc SGE & NHL/UCT                                             | KRISP, KZN Research Innovation and Sequencing Platform        | Arash Iranzadeh, Deelan Doolabh, Lynn Tyers, Bruna Galvao, Innocent Mudau, Marvin Hsiao, Kruger Marais, Jennifer Giandhari, Sureshnee Pillay, Houriiyah Tegally, Emanuel James San, Tulio de Oliveira, Diana Hardie, Stephen Korsman, Carolyn Williamson |
| EPI_ISL_696511                                                                                                                                                 | Keurhoek Clinic wc KTT & NHL/UCT                                               | KRISP, KZN Research Innovation and Sequencing Platform        | Arash Iranzadeh, Deelan Doolabh, Lynn Tyers, Bruna Galvao, Innocent Mudau, Marvin Hsiao, Kruger Marais, Jennifer Giandhari, Sureshnee Pillay, Houriiyah Tegally, Emanuel James San, Tulio de Oliveira, Diana Hardie, Stephen Korsman, Carolyn Williamson |
| EPI_ISL_696512                                                                                                                                                 | Conville CDC wc CVC & NHL/UCT                                                  | KRISP, KZN Research Innovation and Sequencing Platform        | Arash Iranzadeh, Deelan Doolabh, Lynn Tyers, Bruna Galvao, Innocent Mudau, Marvin Hsiao, Kruger Marais, Jennifer Giandhari, Sureshnee Pillay, Houriiyah Tegally, Emanuel James San, Tulio de Oliveira, Diana Hardie, Stephen Korsman, Carolyn Williamson |
| EPI_ISL_696513                                                                                                                                                 | Pacaltsdorp Clinic wc PAC & NHL/UCT                                            | KRISP, KZN Research Innovation and Sequencing Platform        | Arash Iranzadeh, Deelan Doolabh, Lynn Tyers, Bruna Galvao, Innocent Mudau, Marvin Hsiao, Kruger Marais, Jennifer Giandhari, Sureshnee Pillay, Houriiyah Tegally, Emanuel James San, Tulio de Oliveira, Diana Hardie, Stephen Korsman, Carolyn Williamson |
| EPI_ISL_696514, EPI_ISL_696515, EPI_ISL_696516, EPI_ISL_696517, EPI_ISL_696518                                                                                 | Sedgefield Clinic wc SGE & NHL/UCT                                             | KRISP, KZN Research Innovation and Sequencing Platform        | Arash Iranzadeh, Deelan Doolabh, Lynn Tyers, Bruna Galvao, Innocent Mudau, Marvin Hsiao, Kruger Marais, Jennifer Giandhari, Sureshnee Pillay, Houriiyah Tegally, Emanuel James San, Tulio de Oliveira, Diana Hardie, Stephen Korsman, Carolyn Williamson |
| EPI_ISL_696519, EPI_ISL_696520                                                                                                                                 | Thembaletu CDC wc THC & NHL/UCT                                                | KRISP, KZN Research Innovation and Sequencing Platform        | Arash Iranzadeh, Deelan Doolabh, Lynn Tyers, Bruna Galvao, Innocent Mudau, Marvin Hsiao, Kruger Marais, Jennifer Giandhari, Sureshnee Pillay, Houriiyah Tegally, Emanuel James San, Tulio de Oliveira, Diana Hardie, Stephen Korsman, Carolyn Williamson |
| EPI_ISL_696521                                                                                                                                                 | Thembaletu CDC wc THC & NHL/UC                                                 | KRISP, KZN Research Innovation and Sequencing Platform        | Arash Iranzadeh, Deelan Doolabh, Lynn Tyers, Bruna Galvao, Innocent Mudau, Marvin Hsiao, Kruger Marais, Jennifer Giandhari, Sureshnee Pillay, Houriiyah Tegally, Emanuel James San, Tulio de Oliveira, Diana Hardie, Stephen Korsman, Carolyn Williamson |
| EPI_ISL_697783, EPI_ISL_697784, EPI_ISL_697785, EPI_ISL_697786, EPI_ISL_697788, EPI_ISL_697789, EPI_ISL_697790, EPI_ISL_697791, EPI_ISL_697792, EPI_ISL_697793 | Institute of Microbiology, Universidad San Francisco de Quito                  | Institute of Microbiology, Universidad San Francisco de Quito | Belén Prado-Vivar, Sully Márquez, Juan José Guadalupe, Monica Becerra-Wong, Bernardo Gutiérrez, Jonathan Araujo, Verónica Barragán, Patricia Rojas-Silva, Gabriel Trueba, Michelle Grunauer, Paúl Cárdenas                                               |
| EPI_ISL_697798, EPI_ISL_697799                                                                                                                                 | Institute of Microbiology, Universidad San Francisco de Quito                  | Institute of Microbiology, Universidad San Francisco de Quito | Belén Prado-Vivar, Sully Márquez, Juan José Guadalupe, Monica Becerra-Wong, Diana Zambrano, Fredy Loor, Juan Zuñiga, Edison Chavez, Bernardo Gutiérrez, Verónica Barragán, Patricia Rojas-Silva, Gabriel Trueba, Michelle Grunauer, Paúl Cárdenas        |
| EPI_ISL_697800                                                                                                                                                 | Institute of Microbiology, Universidad San Francisco de Quito                  | Institute of Microbiology, Universidad San Francisco de Quito | Belén Prado-Vivar, Sully Márquez, Juan José Guadalupe, Monica Becerra-Wong, Maureen Mosquera, Bernardo Gutiérrez, Verónica Barragán, Patricia Rojas-Silva, Gabriel Trueba, Michelle Grunauer, Paúl Cárdenas                                              |
| EPI_ISL_700326                                                                                                                                                 | CHU Bordeaux                                                                   | CNR Virus des Infections Respiratoires - France SUD           | Antonin Bal, Gregory Destras, Gwendolyne Burfin, Hadrien Règue, Quentin Semanas, Martine Valette, Bruno Lina, Pantxika Bellecave, Camille Ciccone, Isabelle Garrigue, Marie-Edith Lafon, Pascale Trimoulet, Laurence Josset                              |
| EPI_ISL_700327                                                                                                                                                 | CNR Virus des Infections Respiratoires - France SUD                            | CNR Virus des Infections Respiratoires - France SUD           | Antonin Bal, Gregory Destras, Gwendolyne Burfin, Solenne Brun, Martine Valette, Bruno Lina, Laurence Josset                                                                                                                                              |
| EPI_ISL_700348                                                                                                                                                 | Laboratoire de virologie, CHU de Grenoble - CS 10217 - 38043 Grenoble cedex 9  | CNR Virus des Infections Respiratoires - France SUD           | Antonin Bal, Gregory Destras, Gwendolyne Burfin, Hadrien Règue, Quentin Semanas, Martine Valette, Bruno Lina, Sylvie Larrat, Laurence Josset                                                                                                             |
| EPI_ISL_700349                                                                                                                                                 | Laboratoire de virologie, CHU de Grenoble - CS 10217 - 38043 Grenoble cedex 10 | CNR Virus des Infections Respiratoires - France SUD           | Antonin Bal, Gregory Destras, Gwendolyne Burfin, Hadrien Règue, Quentin Semanas, Martine Valette, Bruno Lina, Sylvie Larrat, Laurence Josset                                                                                                             |
| EPI_ISL_700350                                                                                                                                                 | Laboratoire de virologie, CHU de Grenoble - CS 10217 - 38043 Grenoble cedex 11 | CNR Virus des Infections Respiratoires - France SUD           | Antonin Bal, Gregory Destras, Gwendolyne Burfin, Hadrien Règue, Quentin Semanas, Martine Valette, Bruno Lina, Sylvie Larrat, Laurence Josset                                                                                                             |
| EPI_ISL_700351                                                                                                                                                 | Laboratoire de virologie, CHU de Grenoble - CS 10217 - 38043 Grenoble cedex 12 | CNR Virus des Infections Respiratoires - France SUD           | Antonin Bal, Gregory Destras, Gwendolyne Burfin, Hadrien Règue, Quentin Semanas, Martine Valette, Bruno Lina, Sylvie Larrat, Laurence Josset                                                                                                             |
| EPI_ISL_700352                                                                                                                                                 | Laboratoire de virologie, CHU de Grenoble - CS 10217 - 38043 Grenoble cedex 13 | CNR Virus des Infections Respiratoires - France SUD           | Antonin Bal, Gregory Destras, Gwendolyne Burfin, Hadrien Règue, Quentin Semanas, Martine Valette, Bruno Lina, Sylvie Larrat, Laurence Josset                                                                                                             |
| EPI_ISL_700353                                                                                                                                                 | Laboratoire de virologie, CHU de Grenoble - CS 10217 - 38043 Grenoble cedex 14 | CNR Virus des Infections Respiratoires - France SUD           | Antonin Bal, Gregory Destras, Gwendolyne Burfin, Hadrien Règue, Quentin Semanas, Martine Valette, Bruno Lina, Sylvie Larrat, Laurence Josset                                                                                                             |
| EPI_ISL_700354                                                                                                                                                 | Laboratoire de virologie, CHU de Grenoble - CS 10217 - 38043 Grenoble cedex 15 | CNR Virus des Infections Respiratoires - France SUD           | Antonin Bal, Gregory Destras, Gwendolyne Burfin, Hadrien Règue, Quentin Semanas, Martine Valette, Bruno Lina, Sylvie Larrat, Laurence Josset                                                                                                             |









|                                                                                                                                                                                                                                                                                                                                                                                                                                                                                                                                                                                                                                                                                                                                                                                                                                                                                                                                |                                                                          |                                                                          |                                                                                                                                                                                                     |
|--------------------------------------------------------------------------------------------------------------------------------------------------------------------------------------------------------------------------------------------------------------------------------------------------------------------------------------------------------------------------------------------------------------------------------------------------------------------------------------------------------------------------------------------------------------------------------------------------------------------------------------------------------------------------------------------------------------------------------------------------------------------------------------------------------------------------------------------------------------------------------------------------------------------------------|--------------------------------------------------------------------------|--------------------------------------------------------------------------|-----------------------------------------------------------------------------------------------------------------------------------------------------------------------------------------------------|
| EPI_ISL_700567, EPI_ISL_700568                                                                                                                                                                                                                                                                                                                                                                                                                                                                                                                                                                                                                                                                                                                                                                                                                                                                                                 | Dr Abdurahman CDC wc DAC                                                 | NHLS/UCT                                                                 | Arash Iranzadeh, Deelan Doolabh, Lynn Tyers, Bruna Galvao, Innocent Mudau, Marvin Hsiao, Kruger Marais, Diana Hardie, Stephen Korsman, Carolyn Williamson                                           |
| EPI_ISL_700569                                                                                                                                                                                                                                                                                                                                                                                                                                                                                                                                                                                                                                                                                                                                                                                                                                                                                                                 | D'Almeida Clinic wc DAL                                                  | NHLS/UCT                                                                 | Arash Iranzadeh, Deelan Doolabh, Lynn Tyers, Bruna Galvao, Innocent Mudau, Marvin Hsiao, Kruger Marais, Diana Hardie, Stephen Korsman, Carolyn Williamson                                           |
| EPI_ISL_700570                                                                                                                                                                                                                                                                                                                                                                                                                                                                                                                                                                                                                                                                                                                                                                                                                                                                                                                 | Dr Abdurahman CDC wc DAC                                                 | NHLS/UCT                                                                 | Arash Iranzadeh, Deelan Doolabh, Lynn Tyers, Bruna Galvao, Innocent Mudau, Marvin Hsiao, Kruger Marais, Diana Hardie, Stephen Korsman, Carolyn Williamson                                           |
| EPI_ISL_700571                                                                                                                                                                                                                                                                                                                                                                                                                                                                                                                                                                                                                                                                                                                                                                                                                                                                                                                 | Herbertsdale Sat Clinic wc HBD                                           | NHLS/UCT                                                                 | Arash Iranzadeh, Deelan Doolabh, Lynn Tyers, Bruna Galvao, Innocent Mudau, Marvin Hsiao, Kruger Marais, Diana Hardie, Stephen Korsman, Carolyn Williamson                                           |
| EPI_ISL_700572                                                                                                                                                                                                                                                                                                                                                                                                                                                                                                                                                                                                                                                                                                                                                                                                                                                                                                                 | Mitchells Plain Hospital wc MPH                                          | NHLS/UCT                                                                 | Arash Iranzadeh, Deelan Doolabh, Lynn Tyers, Bruna Galvao, Innocent Mudau, Marvin Hsiao, Kruger Marais, Diana Hardie, Stephen Korsman, Carolyn Williamson                                           |
| EPI_ISL_700573                                                                                                                                                                                                                                                                                                                                                                                                                                                                                                                                                                                                                                                                                                                                                                                                                                                                                                                 | Hanover Park CHC wc HPH                                                  | NHLS/UCT                                                                 | Arash Iranzadeh, Deelan Doolabh, Lynn Tyers, Bruna Galvao, Innocent Mudau, Marvin Hsiao, Kruger Marais, Diana Hardie, Stephen Korsman, Carolyn Williamson                                           |
| EPI_ISL_700574                                                                                                                                                                                                                                                                                                                                                                                                                                                                                                                                                                                                                                                                                                                                                                                                                                                                                                                 | Heideveld Emergency Centre                                               | NHLS/UCT                                                                 | Arash Iranzadeh, Deelan Doolabh, Lynn Tyers, Bruna Galvao, Innocent Mudau, Marvin Hsiao, Kruger Marais, Diana Hardie, Stephen Korsman, Carolyn Williamson                                           |
| EPI_ISL_700575                                                                                                                                                                                                                                                                                                                                                                                                                                                                                                                                                                                                                                                                                                                                                                                                                                                                                                                 | Oudtshoorn Hospital wc OUD                                               | NHLS/UCT                                                                 | Arash Iranzadeh, Deelan Doolabh, Lynn Tyers, Bruna Galvao, Innocent Mudau, Marvin Hsiao, Kruger Marais, Diana Hardie, Stephen Korsman, Carolyn Williamson                                           |
| EPI_ISL_700576                                                                                                                                                                                                                                                                                                                                                                                                                                                                                                                                                                                                                                                                                                                                                                                                                                                                                                                 | Guguletu CHC wc GDH                                                      | NHLS/UCT                                                                 | Arash Iranzadeh, Deelan Doolabh, Lynn Tyers, Bruna Galvao, Innocent Mudau, Marvin Hsiao, Kruger Marais, Diana Hardie, Stephen Korsman, Carolyn Williamson                                           |
| EPI_ISL_700577                                                                                                                                                                                                                                                                                                                                                                                                                                                                                                                                                                                                                                                                                                                                                                                                                                                                                                                 | Groote Schuur Hospital wc GSH                                            | NHLS/UCT                                                                 | Arash Iranzadeh, Deelan Doolabh, Lynn Tyers, Bruna Galvao, Innocent Mudau, Marvin Hsiao, Kruger Marais, Diana Hardie, Stephen Korsman, Carolyn Williamson                                           |
| EPI_ISL_700578                                                                                                                                                                                                                                                                                                                                                                                                                                                                                                                                                                                                                                                                                                                                                                                                                                                                                                                 | Guguletu CHC wc GDH                                                      | NHLS/UCT                                                                 | Arash Iranzadeh, Deelan Doolabh, Lynn Tyers, Bruna Galvao, Innocent Mudau, Marvin Hsiao, Kruger Marais, Diana Hardie, Stephen Korsman, Carolyn Williamson                                           |
| EPI_ISL_700580                                                                                                                                                                                                                                                                                                                                                                                                                                                                                                                                                                                                                                                                                                                                                                                                                                                                                                                 | Nyanga CDC wc NGC                                                        | NHLS/UCT                                                                 | Arash Iranzadeh, Deelan Doolabh, Lynn Tyers, Bruna Galvao, Innocent Mudau, Marvin Hsiao, Kruger Marais, Diana Hardie, Stephen Korsman, Carolyn Williamson                                           |
| EPI_ISL_700582                                                                                                                                                                                                                                                                                                                                                                                                                                                                                                                                                                                                                                                                                                                                                                                                                                                                                                                 | Dr Abdurahman CDC wc DAC                                                 | NHLS/UCT                                                                 | Arash Iranzadeh, Deelan Doolabh, Lynn Tyers, Bruna Galvao, Innocent Mudau, Marvin Hsiao, Kruger Marais, Diana Hardie, Stephen Korsman, Carolyn Williamson                                           |
| EPI_ISL_700583                                                                                                                                                                                                                                                                                                                                                                                                                                                                                                                                                                                                                                                                                                                                                                                                                                                                                                                 | Knysna Hospital wc KNY                                                   | NHLS/UCT                                                                 | Arash Iranzadeh, Deelan Doolabh, Lynn Tyers, Bruna Galvao, Innocent Mudau, Marvin Hsiao, Kruger Marais, Diana Hardie, Stephen Korsman, Carolyn Williamson                                           |
| EPI_ISL_700584                                                                                                                                                                                                                                                                                                                                                                                                                                                                                                                                                                                                                                                                                                                                                                                                                                                                                                                 | Heideveld Emergency Centre                                               | NHLS/UCT                                                                 | Arash Iranzadeh, Deelan Doolabh, Lynn Tyers, Bruna Galvao, Innocent Mudau, Marvin Hsiao, Kruger Marais, Diana Hardie, Stephen Korsman, Carolyn Williamson                                           |
| EPI_ISL_700585                                                                                                                                                                                                                                                                                                                                                                                                                                                                                                                                                                                                                                                                                                                                                                                                                                                                                                                 | Hanover Park CHC wc HPH                                                  | NHLS/UCT                                                                 | Arash Iranzadeh, Deelan Doolabh, Lynn Tyers, Bruna Galvao, Innocent Mudau, Marvin Hsiao, Kruger Marais, Diana Hardie, Stephen Korsman, Carolyn Williamson                                           |
| EPI_ISL_700586                                                                                                                                                                                                                                                                                                                                                                                                                                                                                                                                                                                                                                                                                                                                                                                                                                                                                                                 | Pacaltsdorp Clinic wc PAC                                                | NHLS/UCT                                                                 | Arash Iranzadeh, Deelan Doolabh, Lynn Tyers, Bruna Galvao, Innocent Mudau, Marvin Hsiao, Kruger Marais, Diana Hardie, Stephen Korsman, Carolyn Williamson                                           |
| EPI_ISL_700588                                                                                                                                                                                                                                                                                                                                                                                                                                                                                                                                                                                                                                                                                                                                                                                                                                                                                                                 | Sedgefield Clinic wc SGE                                                 | NHLS/UCT                                                                 | Arash Iranzadeh, Deelan Doolabh, Lynn Tyers, Bruna Galvao, Innocent Mudau, Marvin Hsiao, Kruger Marais, Diana Hardie, Stephen Korsman, Carolyn Williamson                                           |
| EPI_ISL_700591, EPI_ISL_700592                                                                                                                                                                                                                                                                                                                                                                                                                                                                                                                                                                                                                                                                                                                                                                                                                                                                                                 | Dr Abdurahman CDC wc DAC                                                 | NHLS/UCT                                                                 | Arash Iranzadeh, Deelan Doolabh, Lynn Tyers, Bruna Galvao, Innocent Mudau, Marvin Hsiao, Kruger Marais, Diana Hardie, Stephen Korsman, Carolyn Williamson                                           |
| EPI_ISL_700593                                                                                                                                                                                                                                                                                                                                                                                                                                                                                                                                                                                                                                                                                                                                                                                                                                                                                                                 | Hanover Park CHC wc HPH                                                  | NHLS/UCT                                                                 | Arash Iranzadeh, Deelan Doolabh, Lynn Tyers, Bruna Galvao, Innocent Mudau, Marvin Hsiao, Kruger Marais, Diana Hardie, Stephen Korsman, Carolyn Williamson                                           |
| EPI_ISL_700594                                                                                                                                                                                                                                                                                                                                                                                                                                                                                                                                                                                                                                                                                                                                                                                                                                                                                                                 | Oudtshoorn Hospital wc OUD                                               | NHLS/UCT                                                                 | Arash Iranzadeh, Deelan Doolabh, Lynn Tyers, Bruna Galvao, Innocent Mudau, Marvin Hsiao, Kruger Marais, Diana Hardie, Stephen Korsman, Carolyn Williamson                                           |
| EPI_ISL_700595                                                                                                                                                                                                                                                                                                                                                                                                                                                                                                                                                                                                                                                                                                                                                                                                                                                                                                                 | Heideveld Emergency Centre                                               | NHLS/UCT                                                                 | Arash Iranzadeh, Deelan Doolabh, Lynn Tyers, Bruna Galvao, Innocent Mudau, Marvin Hsiao, Kruger Marais, Diana Hardie, Stephen Korsman, Carolyn Williamson                                           |
| EPI_ISL_700596                                                                                                                                                                                                                                                                                                                                                                                                                                                                                                                                                                                                                                                                                                                                                                                                                                                                                                                 | Victoria Hospital wc VHW                                                 | NHLS/UCT                                                                 | Arash Iranzadeh, Deelan Doolabh, Lynn Tyers, Bruna Galvao, Innocent Mudau, Marvin Hsiao, Kruger Marais, Diana Hardie, Stephen Korsman, Carolyn Williamson                                           |
| EPI_ISL_700597                                                                                                                                                                                                                                                                                                                                                                                                                                                                                                                                                                                                                                                                                                                                                                                                                                                                                                                 | Mitchells Plain Hospital wc MPH                                          | NHLS/UCT                                                                 | Arash Iranzadeh, Deelan Doolabh, Lynn Tyers, Bruna Galvao, Innocent Mudau, Marvin Hsiao, Kruger Marais, Diana Hardie, Stephen Korsman, Carolyn Williamson                                           |
| EPI_ISL_700598                                                                                                                                                                                                                                                                                                                                                                                                                                                                                                                                                                                                                                                                                                                                                                                                                                                                                                                 | Heideveld Emergency Centre                                               | NHLS/UCT                                                                 | Arash Iranzadeh, Deelan Doolabh, Lynn Tyers, Bruna Galvao, Innocent Mudau, Marvin Hsiao, Kruger Marais, Diana Hardie, Stephen Korsman, Carolyn Williamson                                           |
| EPI_ISL_700599                                                                                                                                                                                                                                                                                                                                                                                                                                                                                                                                                                                                                                                                                                                                                                                                                                                                                                                 | Conville CDC wc CVC                                                      | NHLS/UCT                                                                 | Arash Iranzadeh, Deelan Doolabh, Lynn Tyers, Bruna Galvao, Innocent Mudau, Marvin Hsiao, Kruger Marais, Diana Hardie, Stephen Korsman, Carolyn Williamson                                           |
| EPI_ISL_702790, EPI_ISL_702844, EPI_ISL_705099, EPI_ISL_705134, EPI_ISL_705237, EPI_ISL_705251, EPI_ISL_705373, EPI_ISL_705383                                                                                                                                                                                                                                                                                                                                                                                                                                                                                                                                                                                                                                                                                                                                                                                                 | University of Exeter                                                     | COVID-19 Genomics UK (COG-UK) Consortium                                 | Ben Temperton, Aaron Jeffries, Michelle Michelsen, Joanna Warwick-Dugdale, Audrey Farbos, Robyn Manley, Stephen Michell, Jane Masoli                                                                |
| EPI_ISL_707781, EPI_ISL_707782                                                                                                                                                                                                                                                                                                                                                                                                                                                                                                                                                                                                                                                                                                                                                                                                                                                                                                 | CHU Poitiers                                                             | CNR Virus des Infections Respiratoires - France SUD                      | Antonin Bal, Gregory Destras, Gwendolyne Burfin, Hadrien Règue, Quentin Semanas, Martine Valette, Bruno Lina, Agnès Beby-Defaux, Magali Garcia, Clément Joussetin, Nicolas Lévêque, Laurence Josset |
| EPI_ISL_710543                                                                                                                                                                                                                                                                                                                                                                                                                                                                                                                                                                                                                                                                                                                                                                                                                                                                                                                 | National Institute for Infectious Diseases, INMI, "L. Spallanzani" IRCCS | National Institute for Infectious Diseases, INMI, "L. Spallanzani" IRCCS | B Bartolini, C.E.M Gruber, M Rueca, F Messina, E Giombini, MR Capobianchi, A Di Caro                                                                                                                |
| EPI_ISL_718265                                                                                                                                                                                                                                                                                                                                                                                                                                                                                                                                                                                                                                                                                                                                                                                                                                                                                                                 | National Institute for Infectious Diseases, INMI, "L. Spallanzani" IRCCS | National Institute for Infectious Diseases, INMI, "L. Spallanzani" IRCCS | B Bartolini, M Rueca, C.E.M Gruber, F Messina, E Giombini, A Di Caro, MR Capobianchi                                                                                                                |
| EPI_ISL_721625                                                                                                                                                                                                                                                                                                                                                                                                                                                                                                                                                                                                                                                                                                                                                                                                                                                                                                                 | National Institute for Infectious Diseases, INMI, "L. Spallanzani" IRCCS | National Institute for Infectious Diseases, INMI, "L. Spallanzani" IRCCS | B Bartolini, C.E.M Gruber, M Rueca, F Messina, E Giombini, MR Capobianchi, A Di Caro                                                                                                                |
| EPI_ISL_722210, EPI_ISL_722212, EPI_ISL_722213, EPI_ISL_722214, EPI_ISL_722215, EPI_ISL_722217, EPI_ISL_722218, EPI_ISL_722219, EPI_ISL_722220, EPI_ISL_722221, EPI_ISL_722222, EPI_ISL_722223, EPI_ISL_722224, EPI_ISL_722225, EPI_ISL_722226, EPI_ISL_722227, EPI_ISL_722228, EPI_ISL_722229, EPI_ISL_722230, EPI_ISL_722231, EPI_ISL_722232, EPI_ISL_722233, EPI_ISL_722234, EPI_ISL_722237, EPI_ISL_722240, EPI_ISL_722242, EPI_ISL_722243, EPI_ISL_722244, EPI_ISL_722245, EPI_ISL_722246, EPI_ISL_722247, EPI_ISL_722248, EPI_ISL_722249, EPI_ISL_722250, EPI_ISL_722251, EPI_ISL_722252, EPI_ISL_722253, EPI_ISL_722254, EPI_ISL_722255, EPI_ISL_722256, EPI_ISL_722257, EPI_ISL_722258, EPI_ISL_722259, EPI_ISL_722260, EPI_ISL_722261, EPI_ISL_722262, EPI_ISL_722263, EPI_ISL_722264, EPI_ISL_722265, EPI_ISL_722266, EPI_ISL_722267, EPI_ISL_722268, EPI_ISL_722269, EPI_ISL_722270, EPI_ISL_722271, EPI_ISL_722272 |                                                                          |                                                                          |                                                                                                                                                                                                     |
| see above                                                                                                                                                                                                                                                                                                                                                                                                                                                                                                                                                                                                                                                                                                                                                                                                                                                                                                                      | Servicio de Microbiología, Hospital Miguel Servet, Zaragoza              | SeqCOVID-SPAIN consortium/IBV(CSIC)                                      | Antonio Rezusta López, Alexander Tristanchó Baró, Ana Milagro, Yolanda Gracia Grataloup, Nieves Martínez Cameo and SeqCOVID-SPAIN consortium                                                        |
| EPI_ISL_722273, EPI_ISL_722274, EPI_ISL_722275, EPI_ISL_722276, EPI_ISL_722277, EPI_ISL_722278, EPI_ISL_722279, EPI_ISL_722280, EPI_ISL_722281, EPI_ISL_722282, EPI_ISL_722283, EPI_ISL_722284, EPI_ISL_722285, EPI_ISL_722286, EPI_ISL_722287, EPI_ISL_722288, EPI_ISL_722289, EPI_ISL_722290, EPI_ISL_722291, EPI_ISL_722292, EPI_ISL_722293, EPI_ISL_722294, EPI_ISL_722295, EPI_ISL_722296, EPI_ISL_722297, EPI_ISL_722298, EPI_ISL_722299, EPI_ISL_722300, EPI_ISL_722301, EPI_ISL_722302, EPI_ISL_722303, EPI_ISL_722304, EPI_ISL_722305, EPI_ISL_722306, EPI_ISL_722307, EPI_ISL_722308,                                                                                                                                                                                                                                                                                                                                |                                                                          |                                                                          |                                                                                                                                                                                                     |

EPI\_ISL\_722309, EPI\_ISL\_722310, EPI\_ISL\_722311, EPI\_ISL\_722312, EPI\_ISL\_722313, EPI\_ISL\_722314, EPI\_ISL\_722315, EPI\_ISL\_722316, EPI\_ISL\_722317, EPI\_ISL\_722318, EPI\_ISL\_722319, EPI\_ISL\_722321, EPI\_ISL\_722322, EPI\_ISL\_722323, EPI\_ISL\_722324, EPI\_ISL\_722325, EPI\_ISL\_722326, EPI\_ISL\_722327, EPI\_ISL\_722328, EPI\_ISL\_722329, EPI\_ISL\_722330, EPI\_ISL\_722331, EPI\_ISL\_722332, EPI\_ISL\_722333, EPI\_ISL\_722334, EPI\_ISL\_722335, EPI\_ISL\_722336, EPI\_ISL\_722337, EPI\_ISL\_722338, EPI\_ISL\_722339, EPI\_ISL\_722340, EPI\_ISL\_722341, EPI\_ISL\_722342, EPI\_ISL\_722343, EPI\_ISL\_722344, EPI\_ISL\_722345, EPI\_ISL\_722346, EPI\_ISL\_722347, EPI\_ISL\_722348, EPI\_ISL\_722349, EPI\_ISL\_722350, EPI\_ISL\_722351, EPI\_ISL\_722352, EPI\_ISL\_722353, EPI\_ISL\_722354, EPI\_ISL\_722355, EPI\_ISL\_722356, EPI\_ISL\_722357, EPI\_ISL\_722358, EPI\_ISL\_722359, EPI\_ISL\_722360, EPI\_ISL\_722361, EPI\_ISL\_722362, EPI\_ISL\_722363, EPI\_ISL\_722364, EPI\_ISL\_722365, EPI\_ISL\_722366, EPI\_ISL\_722367, EPI\_ISL\_722368, EPI\_ISL\_722369, EPI\_ISL\_722370, EPI\_ISL\_722371, EPI\_ISL\_722372, EPI\_ISL\_722373, EPI\_ISL\_722374, EPI\_ISL\_722375, EPI\_ISL\_722376, EPI\_ISL\_722377, EPI\_ISL\_722378, EPI\_ISL\_722379, EPI\_ISL\_722380, EPI\_ISL\_722381, EPI\_ISL\_722382, EPI\_ISL\_722383, EPI\_ISL\_722384, EPI\_ISL\_722385, EPI\_ISL\_722386, EPI\_ISL\_722387, EPI\_ISL\_722388, EPI\_ISL\_722389, EPI\_ISL\_722390, EPI\_ISL\_722391, EPI\_ISL\_722392, EPI\_ISL\_722393, EPI\_ISL\_722394, EPI\_ISL\_722395, EPI\_ISL\_722396, EPI\_ISL\_722397, EPI\_ISL\_722398, EPI\_ISL\_722399, EPI\_ISL\_722400, EPI\_ISL\_722401, EPI\_ISL\_722402, EPI\_ISL\_722403, EPI\_ISL\_722404, EPI\_ISL\_722405, EPI\_ISL\_722406, EPI\_ISL\_722407, EPI\_ISL\_722408, EPI\_ISL\_722409, EPI\_ISL\_722410, EPI\_ISL\_722411, EPI\_ISL\_722412, EPI\_ISL\_722413, EPI\_ISL\_722414, EPI\_ISL\_722415, EPI\_ISL\_722416, EPI\_ISL\_722417, EPI\_ISL\_722418, EPI\_ISL\_722419, EPI\_ISL\_722420, EPI\_ISL\_722421, EPI\_ISL\_722422, EPI\_ISL\_722423, EPI\_ISL\_722424, EPI\_ISL\_722425, EPI\_ISL\_722426, EPI\_ISL\_722427, EPI\_ISL\_722428, EPI\_ISL\_722429, EPI\_ISL\_722430, EPI\_ISL\_722431, EPI\_ISL\_722432, EPI\_ISL\_722433, EPI\_ISL\_722434, EPI\_ISL\_722435, EPI\_ISL\_722436, EPI\_ISL\_722437, EPI\_ISL\_722438, EPI\_ISL\_722439, EPI\_ISL\_722440, EPI\_ISL\_722441, EPI\_ISL\_722442, EPI\_ISL\_722443, EPI\_ISL\_722444, EPI\_ISL\_722445, EPI\_ISL\_722446, EPI\_ISL\_722447, EPI\_ISL\_722448, EPI\_ISL\_722449, EPI\_ISL\_722450, EPI\_ISL\_722451, EPI\_ISL\_722452, EPI\_ISL\_722453, EPI\_ISL\_722454, EPI\_ISL\_722455, EPI\_ISL\_722456, EPI\_ISL\_722457, EPI\_ISL\_722458, EPI\_ISL\_722459, EPI\_ISL\_722460, EPI\_ISL\_722461, EPI\_ISL\_722462, EPI\_ISL\_722463, EPI\_ISL\_722464, EPI\_ISL\_722465, EPI\_ISL\_722466, EPI\_ISL\_722467, EPI\_ISL\_722468, EPI\_ISL\_722469, EPI\_ISL\_722470, EPI\_ISL\_722471, EPI\_ISL\_722472, EPI\_ISL\_722473, EPI\_ISL\_722474, EPI\_ISL\_722475, EPI\_ISL\_722476, EPI\_ISL\_722477, EPI\_ISL\_722478, EPI\_ISL\_722479, EPI\_ISL\_722480, EPI\_ISL\_722481, EPI\_ISL\_722482, EPI\_ISL\_722483, EPI\_ISL\_722484, EPI\_ISL\_722485, EPI\_ISL\_722486, EPI\_ISL\_722487, EPI\_ISL\_722488, EPI\_ISL\_722489, EPI\_ISL\_722490, EPI\_ISL\_722491, EPI\_ISL\_722492, EPI\_ISL\_722493, EPI\_ISL\_722494, EPI\_ISL\_722495, EPI\_ISL\_722496, EPI\_ISL\_722497, EPI\_ISL\_722498, EPI\_ISL\_722499, EPI\_ISL\_722500, EPI\_ISL\_722501, EPI\_ISL\_722502, EPI\_ISL\_722503, EPI\_ISL\_722504, EPI\_ISL\_722505, EPI\_ISL\_722506, EPI\_ISL\_722507, EPI\_ISL\_722508, EPI\_ISL\_722509, EPI\_ISL\_722510, EPI\_ISL\_722511, EPI\_ISL\_722512, EPI\_ISL\_722513, EPI\_ISL\_722514, EPI\_ISL\_722515, EPI\_ISL\_722516, EPI\_ISL\_722517, EPI\_ISL\_722518, EPI\_ISL\_722519, EPI\_ISL\_722520, EPI\_ISL\_722521, EPI\_ISL\_722522, EPI\_ISL\_722523, EPI\_ISL\_722524, EPI\_ISL\_722525, EPI\_ISL\_722526, EPI\_ISL\_722527, EPI\_ISL\_722528, EPI\_ISL\_722529, EPI\_ISL\_722530, EPI\_ISL\_722531, EPI\_ISL\_722532, EPI\_ISL\_722533, EPI\_ISL\_722534, EPI\_ISL\_722535, EPI\_ISL\_722536, EPI\_ISL\_722537, EPI\_ISL\_722538, EPI\_ISL\_722539, EPI\_ISL\_722540, EPI\_ISL\_722541, EPI\_ISL\_722542, EPI\_ISL\_722543, EPI\_ISL\_722544, EPI\_ISL\_722545, EPI\_ISL\_722546, EPI\_ISL\_722547, EPI\_ISL\_722548, EPI\_ISL\_722549, EPI\_ISL\_722550, EPI\_ISL\_722551, EPI\_ISL\_722552, EPI\_ISL\_722553, EPI\_ISL\_722554, EPI\_ISL\_722555, EPI\_ISL\_722556, EPI\_ISL\_722557, EPI\_ISL\_722558, EPI\_ISL\_722559, EPI\_ISL\_722560, EPI\_ISL\_722561, EPI\_ISL\_722562, EPI\_ISL\_722563, EPI\_ISL\_722564, EPI\_ISL\_722565, EPI\_ISL\_722566, EPI\_ISL\_722567, EPI\_ISL\_722568, EPI\_ISL\_722569, EPI\_ISL\_722570, EPI\_ISL\_722571, EPI\_ISL\_722572, EPI\_ISL\_722573, EPI\_ISL\_722574, EPI\_ISL\_722575, EPI\_ISL\_722576, EPI\_ISL\_722577, EPI\_ISL\_722578, EPI\_ISL\_722579, EPI\_ISL\_722580, EPI\_ISL\_722581, EPI\_ISL\_722582, EPI\_ISL\_722583, EPI\_ISL\_722584, EPI\_ISL\_722585, EPI\_ISL\_722586, EPI\_ISL\_722587, EPI\_ISL\_722588, EPI\_ISL\_722589, EPI\_ISL\_722590, EPI\_ISL\_722591, EPI\_ISL\_722592, EPI\_ISL\_722593, EPI\_ISL\_722594, EPI\_ISL\_722595, EPI\_ISL\_722596, EPI\_ISL\_722597, EPI\_ISL\_722598, EPI\_ISL\_722599, EPI\_ISL\_722600, EPI\_ISL\_722601, EPI\_ISL\_722602, EPI\_ISL\_722603, EPI\_ISL\_722604, EPI\_ISL\_722605, EPI\_ISL\_722606, EPI\_ISL\_722607, EPI\_ISL\_722608, EPI\_ISL\_722609, EPI\_ISL\_722610, EPI\_ISL\_722611, EPI\_ISL\_722612, EPI\_ISL\_722613, EPI\_ISL\_722614, EPI\_ISL\_722615, EPI\_ISL\_722616, EPI\_ISL\_722617, EPI\_ISL\_722618, EPI\_ISL\_722619, EPI\_ISL\_722620, EPI\_ISL\_722621, EPI\_ISL\_722622, EPI\_ISL\_722623, EPI\_ISL\_722624, EPI\_ISL\_722625, EPI\_ISL\_722626, EPI\_ISL\_722627, EPI\_ISL\_722628, EPI\_ISL\_722629, EPI\_ISL\_722630, EPI\_ISL\_722631, EPI\_ISL\_722632, EPI\_ISL\_722633, EPI\_ISL\_722634, EPI\_ISL\_722635, EPI\_ISL\_722636, EPI\_ISL\_722637, EPI\_ISL\_722638, EPI\_ISL\_722639, EPI\_ISL\_722640, EPI\_ISL\_722641, EPI\_ISL\_722642, EPI\_ISL\_722643, EPI\_ISL\_722644, EPI\_ISL\_722645, EPI\_ISL\_722646, EPI\_ISL\_722647, EPI\_ISL\_722648, EPI\_ISL\_722649, EPI\_ISL\_722650, EPI\_ISL\_722651, EPI\_ISL\_722652, EPI\_ISL\_722653, EPI\_ISL\_722654, EPI\_ISL\_722655, EPI\_ISL\_722656, EPI\_ISL\_722657, EPI\_ISL\_722658, EPI\_ISL\_722659, EPI\_ISL\_722660, EPI\_ISL\_722661, EPI\_ISL\_722662, EPI\_ISL\_722663, EPI\_ISL\_722664, EPI\_ISL\_722665, EPI\_ISL\_722666, EPI\_ISL\_722667, EPI\_ISL\_722668, EPI\_ISL\_722669, EPI\_ISL\_722670, EPI\_ISL\_722671, EPI\_ISL\_722672, EPI\_ISL\_722673, EPI\_ISL\_722674, EPI\_ISL\_722675, EPI\_ISL\_722676, EPI\_ISL\_722677, EPI\_ISL\_722678, EPI\_ISL\_722679, EPI\_ISL\_722680, EPI\_ISL\_722681, EPI\_ISL\_722682, EPI\_ISL\_722683, EPI\_ISL\_722684, EPI\_ISL\_722685, EPI\_ISL\_722686, EPI\_ISL\_722687, EPI\_ISL\_722688, EPI\_ISL\_722689, EPI\_ISL\_722690, EPI\_ISL\_722691, EPI\_ISL\_722692, EPI\_ISL\_722693, EPI\_ISL\_722694, EPI\_ISL\_722695, EPI\_ISL\_722696, EPI\_ISL\_722697, EPI\_ISL\_722698, EPI\_ISL\_722699, EPI\_ISL\_722700, EPI\_ISL\_722701, EPI\_ISL\_722702, EPI\_ISL\_722703, EPI\_ISL\_722704, EPI\_ISL\_722705, EPI\_ISL\_722706, EPI\_ISL\_722707, EPI\_ISL\_722708, EPI\_ISL\_722709, EPI\_ISL\_722710, EPI\_ISL\_722711, EPI\_ISL\_722712, EPI\_ISL\_722713, EPI\_ISL\_722714, EPI\_ISL\_722715, EPI\_ISL\_722716, EPI\_ISL\_722717, EPI\_ISL\_722718, EPI\_ISL\_722719, EPI\_ISL\_722720, EPI\_ISL\_722721, EPI\_ISL\_722722, EPI\_ISL\_722723, EPI\_ISL\_722724, EPI\_ISL\_722725, EPI\_ISL\_722726, EPI\_ISL\_722727, EPI\_ISL\_722728, EPI\_ISL\_722729, EPI\_ISL\_722730, EPI\_ISL\_722731, EPI\_ISL\_722732, EPI\_ISL\_722733, EPI\_ISL\_722734, EPI\_ISL\_722735, EPI\_ISL\_722736, EPI\_ISL\_722737, EPI\_ISL\_722738, EPI\_ISL\_722739, EPI\_ISL\_722740, EPI\_ISL\_722741, EPI\_ISL\_722742, EPI\_ISL\_722743, EPI\_ISL\_722744, EPI\_ISL\_722745, EPI\_ISL\_722746, EPI\_ISL\_722747, EPI\_ISL\_722748, EPI\_ISL\_722749, EPI\_ISL\_722750, EPI\_ISL\_722751, EPI\_ISL\_722752, EPI\_ISL\_722753, EPI\_ISL\_722754, EPI\_ISL\_722755, EPI\_ISL\_722756, EPI\_ISL\_722757, EPI\_ISL\_722758, EPI\_ISL\_722759, EPI\_ISL\_722760, EPI\_ISL\_722761, EPI\_ISL\_722762, EPI\_ISL\_722763, EPI\_ISL\_722764, EPI\_ISL\_722765, EPI\_ISL\_722766, EPI\_ISL\_722767, EPI\_ISL\_722768, EPI\_ISL\_722769, EPI\_ISL\_722770, EPI\_ISL\_722771, EPI\_ISL\_722772, EPI\_ISL\_722773, EPI\_ISL\_722774, EPI\_ISL\_722775, EPI\_ISL\_722776, EPI\_ISL\_722777, EPI\_ISL\_722778, EPI\_ISL\_722779, EPI\_ISL\_722780, EPI\_ISL\_722781, EPI\_ISL\_722782, EPI\_ISL\_722783, EPI\_ISL\_722784, EPI\_ISL\_722785, EPI\_ISL\_722786, EPI\_ISL\_722787, EPI\_ISL\_722788, EPI\_ISL\_722789, EPI\_ISL\_722790, EPI\_ISL\_722791, EPI\_ISL\_722792, EPI\_ISL\_722793, EPI\_ISL\_722794, EPI\_ISL\_722795, EPI\_ISL\_722796, EPI\_ISL\_722797, EPI\_ISL\_722798, EPI\_ISL\_722799, EPI\_ISL\_722800, EPI\_ISL\_722801, EPI\_ISL\_722802, EPI\_ISL\_722803, EPI\_ISL\_722804, EPI\_ISL\_722805, EPI\_ISL\_722806, EPI\_ISL\_722807, EPI\_ISL\_722808, EPI\_ISL\_722809, EPI\_ISL\_722810, EPI\_ISL\_722811, EPI\_ISL\_722812, EPI\_ISL\_722813, EPI\_ISL\_722814, EPI\_ISL\_722815, EPI\_ISL\_722816, EPI\_ISL\_722817, EPI\_ISL\_722818, EPI\_ISL\_722819, EPI\_ISL\_722820, EPI\_ISL\_722821, EPI\_ISL\_722822, EPI\_ISL\_722823, EPI\_ISL\_722824, EPI\_ISL\_722825, EPI\_ISL\_722826, EPI\_ISL\_722827, EPI\_ISL\_722828, EPI\_ISL\_722829, EPI\_ISL\_722830, EPI\_ISL\_722831, EPI\_ISL\_722832, EPI\_ISL\_722833, EPI\_ISL\_722834, EPI\_ISL\_722835, EPI\_ISL\_722836, EPI\_ISL\_722837, EPI\_ISL\_722838, EPI\_ISL\_722839, EPI\_ISL\_722840, EPI\_ISL\_722841, EPI\_ISL\_722842, EPI\_ISL\_722843, EPI\_ISL\_722844, EPI\_ISL\_722845, EPI\_ISL\_722846, EPI\_ISL\_722847, EPI\_ISL\_722848, EPI\_ISL\_722849, EPI\_ISL\_722850

see above

Dutch COVID-19 response team

Erasmus Medical Center

Bas Oude Munnink, Reina Sikkema, David Nieuwenhuijse, Irina Chestakova, Anne van der Linden, Marjan Boter, Emmanuelle Munger, Corine GeurtsvanKessel, Annemiek van der Eijk, Richard Molenkamp, Marion Koopmans, on behalf of the Dutch national COVID-19 response team.

EPI\_ISL\_724253, EPI\_ISL\_724254, EPI\_ISL\_724255, EPI\_ISL\_724256, EPI\_ISL\_724257, EPI\_ISL\_724258, EPI\_ISL\_724259, EPI\_ISL\_724260, EPI\_ISL\_724261, EPI\_ISL\_724262, EPI\_ISL\_724264, EPI\_ISL\_724265, EPI\_ISL\_724266, EPI\_ISL\_724267, EPI\_ISL\_724269, EPI\_ISL\_724272, EPI\_ISL\_724273, EPI\_ISL\_724274, EPI\_ISL\_724275, EPI\_ISL\_724276, EPI\_ISL\_724277, EPI\_ISL\_724278, EPI\_ISL\_724279, EPI\_ISL\_724280, EPI\_ISL\_724281, EPI\_ISL\_724282, EPI\_ISL\_724283, EPI\_ISL\_724284, EPI\_ISL\_724285, EPI\_ISL\_724286, EPI\_ISL\_724287, EPI\_ISL\_724288, EPI\_ISL\_724289, EPI\_ISL\_724290, EPI\_ISL\_724291, EPI\_ISL\_724292, EPI\_ISL\_724293, EPI\_ISL\_724294, EPI\_ISL\_724295, EPI\_ISL\_724296, EPI\_ISL\_724297, EPI\_ISL\_724298, EPI\_ISL\_724299, EPI\_ISL\_724300, EPI\_ISL\_724301, EPI\_ISL\_724302, EPI\_ISL\_724303, EPI\_ISL\_724304, EPI\_ISL\_724306, EPI\_ISL\_724309, EPI\_ISL\_724310, EPI\_ISL\_724311, EPI\_ISL\_724312, EPI\_ISL\_724314, EPI\_ISL\_724315, EPI\_ISL\_724317, EPI\_ISL\_724318, EPI\_ISL\_724319, EPI\_ISL\_724320, EPI\_ISL\_724322, EPI\_ISL\_724323, EPI\_ISL\_724326, EPI\_ISL\_724327, EPI\_ISL\_724328, EPI\_ISL\_724329, EPI\_ISL\_724330, EPI\_ISL\_724331, EPI\_ISL\_724333, EPI\_ISL\_724334, EPI\_ISL\_724335, EPI\_ISL\_724336, EPI\_ISL\_724337, EPI\_ISL\_724338, EPI\_ISL\_724339, EPI\_ISL\_724340, EPI\_ISL\_724341, EPI\_ISL\_724342, EPI\_ISL\_724343, EPI\_ISL\_724344, EPI\_ISL\_724346

see above

University of Exeter

COVID-19 Genomics UK (COG-UK) Consortium

Ben Temperton, Aaron Jeffries, Michelle Michelsen, Joanna Warwick-Dugdale, Audrey Farbos, Robyn Manley, Stephen Michell, Jane Masoli

|                |                                                                          |                                                                          |                                                                                                                                                                                                                                                    |
|----------------|--------------------------------------------------------------------------|--------------------------------------------------------------------------|----------------------------------------------------------------------------------------------------------------------------------------------------------------------------------------------------------------------------------------------------|
| EPI_ISL_728205 | Institute of Microbiology, Universidad San Francisco de Quito            | Institute of Microbiology, Universidad San Francisco de Quito            | Belén Prado-Vivar, Sully Márquez, Juan José Guadalupe, Monica Becerra-Wong, Diana Zambrano, Freddy Looz, Juan Zuñiga, Edison Chavez, Bernardo Gutiérrez, Verónica Barragán, Patricio Rojas-Silva, Gabriel Trueba, Michelle Grunauer, Paúl Cárdenas |
| EPI_ISL_728281 | National Institute for Infectious Diseases, INMI, "L. Spallanzani" IRCCS | National Institute for Infectious Diseases, INMI, "L. Spallanzani" IRCCS | B Bartolini, M Rueca, C.E.M Gruber, F Messina, E Giombini, A Di Caro, MR Capobianchi                                                                                                                                                               |
| EPI_ISL_728283 | National Institute for Infectious Diseases, INMI, "L. Spallanzani" IRCCS | National Institute for Infectious Diseases, INMI, "L. Spallanzani" IRCCS | B Bartolini, C.E.M Gruber, M Rueca, F Messina, E Giombini, MR Capobianchi, A Di Caro                                                                                                                                                               |

EPI\_ISL\_728304, EPI\_ISL\_728305, EPI\_ISL\_728306, EPI\_ISL\_728307, EPI\_ISL\_728308, EPI\_ISL\_728309, EPI\_ISL\_728310, EPI\_ISL\_728311, EPI\_ISL\_728312, EPI\_ISL\_728313, EPI\_ISL\_728314, EPI\_ISL\_728315, EPI\_ISL\_728316, EPI\_ISL\_728317, EPI\_ISL\_728318, EPI\_ISL\_728319, EPI\_ISL\_728320, EPI\_ISL\_728321, EPI\_ISL\_728322, EPI\_ISL\_728323, EPI\_ISL\_728324, EPI\_ISL\_728325, EPI\_ISL\_728326, EPI\_ISL\_728327, EPI\_ISL\_728328, EPI\_ISL\_728329, EPI\_ISL\_728330, EPI\_ISL\_728331, EPI\_ISL\_728332, EPI\_ISL\_728333, EPI\_ISL\_728334, EPI\_ISL\_728335, EPI\_ISL\_728336, EPI\_ISL\_728337, EPI\_ISL\_728338, EPI\_ISL\_728339, EPI\_ISL\_728340, EPI\_ISL\_728341, EPI\_ISL\_728342, EPI\_ISL\_728343, EPI\_ISL\_728344, EPI\_ISL\_728345, EPI\_ISL\_728346, EPI\_ISL\_728347, EPI\_ISL\_728348, EPI\_ISL\_728349, EPI\_ISL\_728350, EPI\_ISL\_728351, EPI\_ISL\_728352, EPI\_ISL\_728353, EPI\_ISL\_728354, EPI\_ISL\_728355, EPI\_ISL\_728356, EPI\_ISL\_728357, EPI\_ISL\_728358, EPI\_ISL\_728359, EPI\_ISL\_728360, EPI\_ISL\_728361, EPI\_ISL\_728362, EPI\_ISL\_728363, EPI\_ISL\_728364, EPI\_ISL\_728365, EPI\_ISL\_728366, EPI\_ISL\_728367, EPI\_ISL\_728368, EPI\_ISL\_728369, EPI\_ISL\_728370, EPI\_ISL\_728371, EPI\_ISL\_728372, EPI\_ISL\_728373

see above

CNR Virus des Infections Respiratoires - France SUD

CNR Virus des Infections Respiratoires - France SUD

Antonin Bal, Gregory Destras, Claudia Gonzalez, Gwendolynne Burfin, Quentin Semanas, Martine Valette, Bruno Lina, Laurence Josset

EPI\_ISL\_734166 Dutch COVID-19 response team Erasmus Medical Center Bas Oude Munnink, Reina Sikkema, David Nieuwenhuijse, Irina Chestakova, Anne van der Linden, Marjan Boter, Emmanuelle Munger, Corine GeurtsvanKessel, Annemiek van der Eijk, Richard Molenkamp, Marion Koopmans, on behalf of the Dutch national COVID-19 response team.

|                |           |                                                     |                                                                                                                                                                                                                                                                             |
|----------------|-----------|-----------------------------------------------------|-----------------------------------------------------------------------------------------------------------------------------------------------------------------------------------------------------------------------------------------------------------------------------|
| EPI_ISL_735391 | CHU Tours | CNR Virus des Infections Respiratoires - France SUD | Antonin Bal, Julien Marlet, Gregory Destras, Quentin Semanas, Hadrien Regue, Claudia Gonzalez, Yahia Mekki, Gwendolynne Burfin, Martine Valette, Catherine Gaudy-Graffin, Karl Stefic, Thibault Guinoiseau, Maude Bouscambert, Florence Morfin, Bruno Lina, Laurence Josset |
|----------------|-----------|-----------------------------------------------------|-----------------------------------------------------------------------------------------------------------------------------------------------------------------------------------------------------------------------------------------------------------------------------|

|                |                                                                                 |                                                                          |                                                                                                                                   |
|----------------|---------------------------------------------------------------------------------|--------------------------------------------------------------------------|-----------------------------------------------------------------------------------------------------------------------------------|
| EPI_ISL_735511 | Clinical Pathology and Microbiology, San Gallicano Dermatologic Institute IRCCS | National Institute for Infectious Diseases, INMI, "L. Spallanzani" IRCCS | B. Bartolini, C.E.M Gruber, F. Messina, E. Giombini, M. Rueca, F. Carletti, F. Pimpinelli, F. Ensoi, M.R. Capobianchi, A. Di Caro |
|----------------|---------------------------------------------------------------------------------|--------------------------------------------------------------------------|-----------------------------------------------------------------------------------------------------------------------------------|

|                                                                                                |          |                                                        |                                                                                                                                                                                                                                                          |
|------------------------------------------------------------------------------------------------|----------|--------------------------------------------------------|----------------------------------------------------------------------------------------------------------------------------------------------------------------------------------------------------------------------------------------------------------|
| EPI_ISL_736928, EPI_ISL_736929, EPI_ISL_736930, EPI_ISL_736931, EPI_ISL_736932, EPI_ISL_736933 | NHLS-UCT | KRISP, KZN Research Innovation and Sequencing Platform | Arash Iranzadeh, Deelan Doolabh, Lynn Tyers, Bruna Galvao, Innocent Mudau, Marvin Hsiao, Kruger Marais, Jennifer Giandhari, Sureshnee Pillay, Houriiyah Tegally, Emanuel James San, Tulio de Oliveira, Diana Hardie, Stephen Korsman, Carolyn Williamson |
|------------------------------------------------------------------------------------------------|----------|--------------------------------------------------------|----------------------------------------------------------------------------------------------------------------------------------------------------------------------------------------------------------------------------------------------------------|

|                                                                |                      |                                          |                                                                                                                                      |
|----------------------------------------------------------------|----------------------|------------------------------------------|--------------------------------------------------------------------------------------------------------------------------------------|
| EPI_ISL_741359, EPI_ISL_741360, EPI_ISL_741361, EPI_ISL_742117 | University of Exeter | COVID-19 Genomics UK (COG-UK) Consortium | Ben Temperton, Aaron Jeffries, Michelle Michelsen, Joanna Warwick-Dugdale, Audrey Farbos, Robyn Manley, Stephen Michell, Jane Masoli |
|----------------------------------------------------------------|----------------------|------------------------------------------|--------------------------------------------------------------------------------------------------------------------------------------|

|                |                             |                             |                                                                                                                                                                                 |
|----------------|-----------------------------|-----------------------------|---------------------------------------------------------------------------------------------------------------------------------------------------------------------------------|
| EPI_ISL_745033 | West Java Health Laboratory | West Java Health Laboratory | Azzania Fibrani, Ema Rahmawati, Ryan Bayusantika Ristandi, Rifky Waluyajati Rachman, Cut Nur Cinthia Alamanda, Isak Solihin, Rini Robiani, Miftahul Farid, Karimatu Khoirunnisa |
|----------------|-----------------------------|-----------------------------|---------------------------------------------------------------------------------------------------------------------------------------------------------------------------------|

|                                                                                |                                                     |                                                     |                                                                                                                                   |
|--------------------------------------------------------------------------------|-----------------------------------------------------|-----------------------------------------------------|-----------------------------------------------------------------------------------------------------------------------------------|
| EPI_ISL_745307, EPI_ISL_745308, EPI_ISL_745309, EPI_ISL_745310, EPI_ISL_745311 | CNR Virus des Infections Respiratoires - France SUD | CNR Virus des Infections Respiratoires - France SUD | Antonin Bal, Gregory Destras, Claudia Gonzalez, Gwendolynne Burfin, Quentin Semanas, Martine Valette, Bruno Lina, Laurence Josset |
|--------------------------------------------------------------------------------|-----------------------------------------------------|-----------------------------------------------------|-----------------------------------------------------------------------------------------------------------------------------------|

|                                                                |                      |                                                     |                                                                                                                                                                                                                                                                                              |
|----------------------------------------------------------------|----------------------|-----------------------------------------------------|----------------------------------------------------------------------------------------------------------------------------------------------------------------------------------------------------------------------------------------------------------------------------------------------|
| EPI_ISL_745312, EPI_ISL_745313, EPI_ISL_745314, EPI_ISL_745315 | CHU Clermont-Ferrand | CNR Virus des Infections Respiratoires - France SUD | Antonin Bal, Gregory Destras, Gwendolynne Burfin, Hadrien Règue, Quentin Semanas, Martine Valette, Bruno Lina, Christine Archimbaud, Amélie Brebion, Hélène Chabrolles, Martine Chambon, Audrey Mirand, Christel Regagnon, Maxime Bisseux, Patricia Combes, Cécile Henquell, Laurence Josset |
|----------------------------------------------------------------|----------------------|-----------------------------------------------------|----------------------------------------------------------------------------------------------------------------------------------------------------------------------------------------------------------------------------------------------------------------------------------------------|

EPI\_ISL\_745316, EPI\_ISL\_745317, EPI\_ISL\_745318, EPI\_ISL\_745319, EPI\_ISL\_745320, EPI\_ISL\_745321, EPI\_ISL\_745322, EPI\_ISL\_745323, EPI\_ISL\_745324, EPI\_ISL\_745325, EPI\_ISL\_745326, EPI\_ISL\_745327, EPI\_ISL\_745328, EPI\_ISL\_745329, EPI\_ISL\_745330, EPI\_ISL\_745331, EPI\_ISL\_745332, EPI\_ISL\_745333, EPI\_ISL\_745334

see above

CNR Virus des Infections Respiratoires - France SUD

CNR Virus des Infections Respiratoires - France SUD

Antonin Bal, Gregory Destras, Claudia Gonzalez, Gwendolynne Burfin, Quentin Semanas, Martine Valette, Bruno Lina, Laurence Josset

|                                |                      |                                                     |                                                                                                                                                                                                                                                                                              |
|--------------------------------|----------------------|-----------------------------------------------------|----------------------------------------------------------------------------------------------------------------------------------------------------------------------------------------------------------------------------------------------------------------------------------------------|
| EPI_ISL_745335, EPI_ISL_745336 | CHU Clermont-Ferrand | CNR Virus des Infections Respiratoires - France SUD | Antonin Bal, Gregory Destras, Gwendolynne Burfin, Hadrien Règue, Quentin Semanas, Martine Valette, Bruno Lina, Christine Archimbaud, Amélie Brebion, Hélène Chabrolles, Martine Chambon, Audrey Mirand, Christel Regagnon, Maxime Bisseux, Patricia Combes, Cécile Henquell, Laurence Josset |
|--------------------------------|----------------------|-----------------------------------------------------|----------------------------------------------------------------------------------------------------------------------------------------------------------------------------------------------------------------------------------------------------------------------------------------------|

EPI\_ISL\_745337, EPI\_ISL\_745338, EPI\_ISL\_745339, EPI\_ISL\_745340, EPI\_ISL\_745341, EPI\_ISL\_745342, EPI\_ISL\_745343, EPI\_ISL\_745344, EPI\_ISL\_745345, EPI\_ISL\_745346, EPI\_ISL\_745347, EPI\_ISL\_745348, EPI\_ISL\_745349, EPI\_ISL\_745350, EPI\_ISL\_745351, EPI\_ISL\_745352, EPI\_ISL\_745353, EPI\_ISL\_745354, EPI\_ISL\_745355, EPI\_ISL\_745356, EPI\_ISL\_745357, EPI\_ISL\_745358, EPI\_ISL\_745359, EPI\_ISL\_745360, EPI\_ISL\_745361, EPI\_ISL\_745362, EPI\_ISL\_745363, EPI\_ISL\_745364, EPI\_ISL\_745365, EPI\_ISL\_745366, EPI\_ISL\_745367, EPI\_ISL\_745368, EPI\_ISL\_745369, EPI\_ISL\_745370, EPI\_ISL\_745371, EPI\_ISL\_745372, EPI\_ISL\_745373, EPI\_ISL\_745374, EPI\_ISL\_745375, EPI\_ISL\_745376, EPI\_ISL\_745377, EPI\_ISL\_745378, EPI\_ISL\_745379, EPI\_ISL\_745380, EPI\_ISL\_745381, EPI\_ISL\_745382, EPI\_ISL\_745383, EPI\_ISL\_745384, EPI\_ISL\_745385, EPI\_ISL\_745386, EPI\_ISL\_745387, EPI\_ISL\_745388, EPI\_ISL\_745389, EPI\_ISL\_745390



|                                                                                                                                                                                                                                                                                                                                                                                                                                                                                                                                                                                                                                                                                                                                                                                                                                                                                                                                                                                                                                                                                                                                                                                                                                                                                                                                                                                                                                                                                                                                                                                                                                                                                                                                                                                                                                                                                                                                                                                                                                                                                                                                                                                                                                                                                                                                                                                                                                                                                                                                                                                                                                                                                                                                                                                                                                                                                                                                                                                                                                                                                                                                                                                                                                                                                                                                                                                                                                                                                                                                                                                                                                                                                                                                                                                                                                                                                                                                                                                                                                                                                                                                                                                                                                                                                                                                                                                                                                                                                                                                                                                                                                                                                                                                                                                                                                |                                                                                     |                                                                                                                |                                                                                                                                                                                                                                                                                                                                                            |
|--------------------------------------------------------------------------------------------------------------------------------------------------------------------------------------------------------------------------------------------------------------------------------------------------------------------------------------------------------------------------------------------------------------------------------------------------------------------------------------------------------------------------------------------------------------------------------------------------------------------------------------------------------------------------------------------------------------------------------------------------------------------------------------------------------------------------------------------------------------------------------------------------------------------------------------------------------------------------------------------------------------------------------------------------------------------------------------------------------------------------------------------------------------------------------------------------------------------------------------------------------------------------------------------------------------------------------------------------------------------------------------------------------------------------------------------------------------------------------------------------------------------------------------------------------------------------------------------------------------------------------------------------------------------------------------------------------------------------------------------------------------------------------------------------------------------------------------------------------------------------------------------------------------------------------------------------------------------------------------------------------------------------------------------------------------------------------------------------------------------------------------------------------------------------------------------------------------------------------------------------------------------------------------------------------------------------------------------------------------------------------------------------------------------------------------------------------------------------------------------------------------------------------------------------------------------------------------------------------------------------------------------------------------------------------------------------------------------------------------------------------------------------------------------------------------------------------------------------------------------------------------------------------------------------------------------------------------------------------------------------------------------------------------------------------------------------------------------------------------------------------------------------------------------------------------------------------------------------------------------------------------------------------------------------------------------------------------------------------------------------------------------------------------------------------------------------------------------------------------------------------------------------------------------------------------------------------------------------------------------------------------------------------------------------------------------------------------------------------------------------------------------------------------------------------------------------------------------------------------------------------------------------------------------------------------------------------------------------------------------------------------------------------------------------------------------------------------------------------------------------------------------------------------------------------------------------------------------------------------------------------------------------------------------------------------------------------------------------------------------------------------------------------------------------------------------------------------------------------------------------------------------------------------------------------------------------------------------------------------------------------------------------------------------------------------------------------------------------------------------------------------------------------------------------------------------------------|-------------------------------------------------------------------------------------|----------------------------------------------------------------------------------------------------------------|------------------------------------------------------------------------------------------------------------------------------------------------------------------------------------------------------------------------------------------------------------------------------------------------------------------------------------------------------------|
| EPI_ISL_768830<br>EPI_ISL_778843                                                                                                                                                                                                                                                                                                                                                                                                                                                                                                                                                                                                                                                                                                                                                                                                                                                                                                                                                                                                                                                                                                                                                                                                                                                                                                                                                                                                                                                                                                                                                                                                                                                                                                                                                                                                                                                                                                                                                                                                                                                                                                                                                                                                                                                                                                                                                                                                                                                                                                                                                                                                                                                                                                                                                                                                                                                                                                                                                                                                                                                                                                                                                                                                                                                                                                                                                                                                                                                                                                                                                                                                                                                                                                                                                                                                                                                                                                                                                                                                                                                                                                                                                                                                                                                                                                                                                                                                                                                                                                                                                                                                                                                                                                                                                                                               | Laboratoire BIOMED 05<br>Servicio Virosis Respiratorias-Departamento Virología-INEI | CNR Virus des Infections Respiratoires - France SUD<br>Instituto Nacional Enfermedades Infecciosas C.G.Malbran | Antonin Bal, Gregory Destras, Gwendolynne Burfin, Hadrien Règue, Quentin Semanas, Martine Valette, Bruno Lina, Laurence Josset<br>Baumeister E., Avaro M., Benedetti E., Russo M., Dattero ME, Pontoriero A., Cisterna D., Molina V., Perandones C., Tuduri E., Lorenzo F., Poklepovich T., Campos J.                                                      |
| EPI_ISL_779703, EPI_ISL_779705,<br>EPI_ISL_779706, EPI_ISL_779708,<br>EPI_ISL_779710                                                                                                                                                                                                                                                                                                                                                                                                                                                                                                                                                                                                                                                                                                                                                                                                                                                                                                                                                                                                                                                                                                                                                                                                                                                                                                                                                                                                                                                                                                                                                                                                                                                                                                                                                                                                                                                                                                                                                                                                                                                                                                                                                                                                                                                                                                                                                                                                                                                                                                                                                                                                                                                                                                                                                                                                                                                                                                                                                                                                                                                                                                                                                                                                                                                                                                                                                                                                                                                                                                                                                                                                                                                                                                                                                                                                                                                                                                                                                                                                                                                                                                                                                                                                                                                                                                                                                                                                                                                                                                                                                                                                                                                                                                                                           | The Foundation for Medical Research                                                 | The Foundation for Medical Research                                                                            | Ayan Mandal, Kayzad Nilgiriwala, Kalpana Sriraman, Ambreen Shaikh, Grishma Patel, Tejal Mestry, Smriti Vaswani, Swapneil Parikh, Shreevatsa Udupa, Nirjhar Chatterjee, Jayanthi Shastri, Nerges Mistry                                                                                                                                                     |
| EPI_ISL_779732, EPI_ISL_779733, EPI_ISL_779734, EPI_ISL_779735, EPI_ISL_779736, EPI_ISL_779737, EPI_ISL_779740, EPI_ISL_779753, EPI_ISL_779774, EPI_ISL_779775, EPI_ISL_779776, EPI_ISL_779777, EPI_ISL_779778, EPI_ISL_779779                                                                                                                                                                                                                                                                                                                                                                                                                                                                                                                                                                                                                                                                                                                                                                                                                                                                                                                                                                                                                                                                                                                                                                                                                                                                                                                                                                                                                                                                                                                                                                                                                                                                                                                                                                                                                                                                                                                                                                                                                                                                                                                                                                                                                                                                                                                                                                                                                                                                                                                                                                                                                                                                                                                                                                                                                                                                                                                                                                                                                                                                                                                                                                                                                                                                                                                                                                                                                                                                                                                                                                                                                                                                                                                                                                                                                                                                                                                                                                                                                                                                                                                                                                                                                                                                                                                                                                                                                                                                                                                                                                                                 | see above                                                                           | SeqCOVID-SPAIN consortium/IBV(CSIC)                                                                            | Antonio Rezusta López, Alexander Tristancho Baró, Ana Milagro, Yolanda Gracia Grataloup, Nieves Martínez Cameo and SeqCOVID-SPAIN consortium                                                                                                                                                                                                               |
| EPI_ISL_779780                                                                                                                                                                                                                                                                                                                                                                                                                                                                                                                                                                                                                                                                                                                                                                                                                                                                                                                                                                                                                                                                                                                                                                                                                                                                                                                                                                                                                                                                                                                                                                                                                                                                                                                                                                                                                                                                                                                                                                                                                                                                                                                                                                                                                                                                                                                                                                                                                                                                                                                                                                                                                                                                                                                                                                                                                                                                                                                                                                                                                                                                                                                                                                                                                                                                                                                                                                                                                                                                                                                                                                                                                                                                                                                                                                                                                                                                                                                                                                                                                                                                                                                                                                                                                                                                                                                                                                                                                                                                                                                                                                                                                                                                                                                                                                                                                 | CNR Virus des Infections Respiratoires - France SUD                                 | CNR Virus des Infections Respiratoires - France SUD                                                            | Antonin Bal, Gregory Destras, Gwendolynne Burfin, Hadrien Règue, Quentin Semanas, Martine Valette, Bruno Lina, Laurence Josset                                                                                                                                                                                                                             |
| EPI_ISL_779781, EPI_ISL_779782                                                                                                                                                                                                                                                                                                                                                                                                                                                                                                                                                                                                                                                                                                                                                                                                                                                                                                                                                                                                                                                                                                                                                                                                                                                                                                                                                                                                                                                                                                                                                                                                                                                                                                                                                                                                                                                                                                                                                                                                                                                                                                                                                                                                                                                                                                                                                                                                                                                                                                                                                                                                                                                                                                                                                                                                                                                                                                                                                                                                                                                                                                                                                                                                                                                                                                                                                                                                                                                                                                                                                                                                                                                                                                                                                                                                                                                                                                                                                                                                                                                                                                                                                                                                                                                                                                                                                                                                                                                                                                                                                                                                                                                                                                                                                                                                 | Laboratoire de virologie, CHU de Grenoble                                           | CNR Virus des Infections Respiratoires - France SUD                                                            | Antonin Bal, Gregory Destras, Gwendolynne Burfin, Hadrien Règue, Quentin Semanas, Martine Valette, Bruno Lina, Sylvie Larrat, Laurence Josset                                                                                                                                                                                                              |
| EPI_ISL_779783, EPI_ISL_779784                                                                                                                                                                                                                                                                                                                                                                                                                                                                                                                                                                                                                                                                                                                                                                                                                                                                                                                                                                                                                                                                                                                                                                                                                                                                                                                                                                                                                                                                                                                                                                                                                                                                                                                                                                                                                                                                                                                                                                                                                                                                                                                                                                                                                                                                                                                                                                                                                                                                                                                                                                                                                                                                                                                                                                                                                                                                                                                                                                                                                                                                                                                                                                                                                                                                                                                                                                                                                                                                                                                                                                                                                                                                                                                                                                                                                                                                                                                                                                                                                                                                                                                                                                                                                                                                                                                                                                                                                                                                                                                                                                                                                                                                                                                                                                                                 | CNR Virus des Infections Respiratoires - France SUD                                 | CNR Virus des Infections Respiratoires - France SUD                                                            | Antonin Bal, Gregory Destras, Gwendolynne Burfin, Hadrien Règue, Quentin Semanas, Martine Valette, Bruno Lina, Laurence Josset                                                                                                                                                                                                                             |
| EPI_ISL_779785                                                                                                                                                                                                                                                                                                                                                                                                                                                                                                                                                                                                                                                                                                                                                                                                                                                                                                                                                                                                                                                                                                                                                                                                                                                                                                                                                                                                                                                                                                                                                                                                                                                                                                                                                                                                                                                                                                                                                                                                                                                                                                                                                                                                                                                                                                                                                                                                                                                                                                                                                                                                                                                                                                                                                                                                                                                                                                                                                                                                                                                                                                                                                                                                                                                                                                                                                                                                                                                                                                                                                                                                                                                                                                                                                                                                                                                                                                                                                                                                                                                                                                                                                                                                                                                                                                                                                                                                                                                                                                                                                                                                                                                                                                                                                                                                                 | CHU Poitiers                                                                        | CNR Virus des Infections Respiratoires - France SUD                                                            | Antonin Bal, Gregory Destras, Gwendolynne Burfin, Hadrien Règue, Quentin Semanas, Martine Valette, Bruno Lina, Agnès Beby-Defaux, Magali Garcia, Clément Jousse, Nicolas Lévêque, Laurence Josset                                                                                                                                                          |
| EPI_ISL_779786                                                                                                                                                                                                                                                                                                                                                                                                                                                                                                                                                                                                                                                                                                                                                                                                                                                                                                                                                                                                                                                                                                                                                                                                                                                                                                                                                                                                                                                                                                                                                                                                                                                                                                                                                                                                                                                                                                                                                                                                                                                                                                                                                                                                                                                                                                                                                                                                                                                                                                                                                                                                                                                                                                                                                                                                                                                                                                                                                                                                                                                                                                                                                                                                                                                                                                                                                                                                                                                                                                                                                                                                                                                                                                                                                                                                                                                                                                                                                                                                                                                                                                                                                                                                                                                                                                                                                                                                                                                                                                                                                                                                                                                                                                                                                                                                                 | CHU Bordeaux                                                                        | CNR Virus des Infections Respiratoires - France SUD                                                            | Antonin Bal, Gregory Destras, Gwendolynne Burfin, Hadrien Règue, Quentin Semanas, Martine Valette, Bruno Lina, Pantxiika Bellecave, Camille Ciccone, Isabelle Garrigue, Marie-Edith Lafon, Pascale Trimoulet, Laurence Josset                                                                                                                              |
| EPI_ISL_779787, EPI_ISL_779788, EPI_ISL_779789, EPI_ISL_779790, EPI_ISL_779791, EPI_ISL_779792, EPI_ISL_779793, EPI_ISL_779794, EPI_ISL_779795, EPI_ISL_779796, EPI_ISL_779797, EPI_ISL_779798, EPI_ISL_779799, EPI_ISL_779800, EPI_ISL_779801, EPI_ISL_779802, EPI_ISL_779803, EPI_ISL_779804, EPI_ISL_779805, EPI_ISL_779806, EPI_ISL_779807, EPI_ISL_779808, EPI_ISL_779809, EPI_ISL_779810, EPI_ISL_779811, EPI_ISL_779812, EPI_ISL_779813                                                                                                                                                                                                                                                                                                                                                                                                                                                                                                                                                                                                                                                                                                                                                                                                                                                                                                                                                                                                                                                                                                                                                                                                                                                                                                                                                                                                                                                                                                                                                                                                                                                                                                                                                                                                                                                                                                                                                                                                                                                                                                                                                                                                                                                                                                                                                                                                                                                                                                                                                                                                                                                                                                                                                                                                                                                                                                                                                                                                                                                                                                                                                                                                                                                                                                                                                                                                                                                                                                                                                                                                                                                                                                                                                                                                                                                                                                                                                                                                                                                                                                                                                                                                                                                                                                                                                                                 | see above                                                                           | CNR Virus des Infections Respiratoires - France SUD                                                            | Antonin Bal, Gregory Destras, Gwendolynne Burfin, Hadrien Règue, Quentin Semanas, Martine Valette, Bruno Lina, Laurence Josset                                                                                                                                                                                                                             |
| EPI_ISL_779814, EPI_ISL_779815, EPI_ISL_779816, EPI_ISL_779817, EPI_ISL_779818, EPI_ISL_779819, EPI_ISL_779820, EPI_ISL_779821, EPI_ISL_779822, EPI_ISL_779823, EPI_ISL_779824, EPI_ISL_779825, EPI_ISL_779826, EPI_ISL_779827, EPI_ISL_779828, EPI_ISL_779829, EPI_ISL_779830, EPI_ISL_779831, EPI_ISL_779832, EPI_ISL_779833, EPI_ISL_779834, EPI_ISL_779835                                                                                                                                                                                                                                                                                                                                                                                                                                                                                                                                                                                                                                                                                                                                                                                                                                                                                                                                                                                                                                                                                                                                                                                                                                                                                                                                                                                                                                                                                                                                                                                                                                                                                                                                                                                                                                                                                                                                                                                                                                                                                                                                                                                                                                                                                                                                                                                                                                                                                                                                                                                                                                                                                                                                                                                                                                                                                                                                                                                                                                                                                                                                                                                                                                                                                                                                                                                                                                                                                                                                                                                                                                                                                                                                                                                                                                                                                                                                                                                                                                                                                                                                                                                                                                                                                                                                                                                                                                                                 | see above                                                                           | CNR Virus des Infections Respiratoires - France SUD                                                            | Antonin Bal, Gregory Destras, Gwendolynne Burfin, Hadrien Règue, Quentin Semanas, Martine Valette, Bruno Lina, Laurence Josset                                                                                                                                                                                                                             |
| EPI_ISL_779836                                                                                                                                                                                                                                                                                                                                                                                                                                                                                                                                                                                                                                                                                                                                                                                                                                                                                                                                                                                                                                                                                                                                                                                                                                                                                                                                                                                                                                                                                                                                                                                                                                                                                                                                                                                                                                                                                                                                                                                                                                                                                                                                                                                                                                                                                                                                                                                                                                                                                                                                                                                                                                                                                                                                                                                                                                                                                                                                                                                                                                                                                                                                                                                                                                                                                                                                                                                                                                                                                                                                                                                                                                                                                                                                                                                                                                                                                                                                                                                                                                                                                                                                                                                                                                                                                                                                                                                                                                                                                                                                                                                                                                                                                                                                                                                                                 | Laboratoire Mirialis                                                                | CNR Virus des Infections Respiratoires - France SUD                                                            | Antonin Bal, Gregory Destras, Gwendolynne Burfin, Hadrien Règue, Quentin Semanas, Martine Valette, Bruno Lina, Laurence Josset                                                                                                                                                                                                                             |
| EPI_ISL_779837, EPI_ISL_779838,<br>EPI_ISL_779839, EPI_ISL_779840,<br>EPI_ISL_779841, EPI_ISL_779842,<br>EPI_ISL_779843, EPI_ISL_779844                                                                                                                                                                                                                                                                                                                                                                                                                                                                                                                                                                                                                                                                                                                                                                                                                                                                                                                                                                                                                                                                                                                                                                                                                                                                                                                                                                                                                                                                                                                                                                                                                                                                                                                                                                                                                                                                                                                                                                                                                                                                                                                                                                                                                                                                                                                                                                                                                                                                                                                                                                                                                                                                                                                                                                                                                                                                                                                                                                                                                                                                                                                                                                                                                                                                                                                                                                                                                                                                                                                                                                                                                                                                                                                                                                                                                                                                                                                                                                                                                                                                                                                                                                                                                                                                                                                                                                                                                                                                                                                                                                                                                                                                                        | CHU Bordeaux                                                                        | CNR Virus des Infections Respiratoires - France SUD                                                            | Antonin Bal, Gregory Destras, Gwendolynne Burfin, Hadrien Règue, Quentin Semanas, Martine Valette, Bruno Lina, Pantxiika Bellecave, Camille Ciccone, Isabelle Garrigue, Marie-Edith Lafon, Pascale Trimoulet, Laurence Josset                                                                                                                              |
| EPI_ISL_779845                                                                                                                                                                                                                                                                                                                                                                                                                                                                                                                                                                                                                                                                                                                                                                                                                                                                                                                                                                                                                                                                                                                                                                                                                                                                                                                                                                                                                                                                                                                                                                                                                                                                                                                                                                                                                                                                                                                                                                                                                                                                                                                                                                                                                                                                                                                                                                                                                                                                                                                                                                                                                                                                                                                                                                                                                                                                                                                                                                                                                                                                                                                                                                                                                                                                                                                                                                                                                                                                                                                                                                                                                                                                                                                                                                                                                                                                                                                                                                                                                                                                                                                                                                                                                                                                                                                                                                                                                                                                                                                                                                                                                                                                                                                                                                                                                 | CNR Virus des Infections Respiratoires - France SUD                                 | CNR Virus des Infections Respiratoires - France SUD                                                            | Antonin Bal, Gregory Destras, Gwendolynne Burfin, Hadrien Règue, Quentin Semanas, Martine Valette, Bruno Lina, Laurence Josset                                                                                                                                                                                                                             |
| EPI_ISL_779846                                                                                                                                                                                                                                                                                                                                                                                                                                                                                                                                                                                                                                                                                                                                                                                                                                                                                                                                                                                                                                                                                                                                                                                                                                                                                                                                                                                                                                                                                                                                                                                                                                                                                                                                                                                                                                                                                                                                                                                                                                                                                                                                                                                                                                                                                                                                                                                                                                                                                                                                                                                                                                                                                                                                                                                                                                                                                                                                                                                                                                                                                                                                                                                                                                                                                                                                                                                                                                                                                                                                                                                                                                                                                                                                                                                                                                                                                                                                                                                                                                                                                                                                                                                                                                                                                                                                                                                                                                                                                                                                                                                                                                                                                                                                                                                                                 | CHU de Nice - Hôpital Archet 2                                                      | CNR Virus des Infections Respiratoires - France SUD                                                            | Antonin Bal, Géraldine Gonfrier, Gregory Destras, Gwendolynne Burfin, Hadrien Règue, Quentin Semanas, Martine Valette, Bruno Lina, Valérie Giordanengo, Laurence Josset                                                                                                                                                                                    |
| EPI_ISL_779847                                                                                                                                                                                                                                                                                                                                                                                                                                                                                                                                                                                                                                                                                                                                                                                                                                                                                                                                                                                                                                                                                                                                                                                                                                                                                                                                                                                                                                                                                                                                                                                                                                                                                                                                                                                                                                                                                                                                                                                                                                                                                                                                                                                                                                                                                                                                                                                                                                                                                                                                                                                                                                                                                                                                                                                                                                                                                                                                                                                                                                                                                                                                                                                                                                                                                                                                                                                                                                                                                                                                                                                                                                                                                                                                                                                                                                                                                                                                                                                                                                                                                                                                                                                                                                                                                                                                                                                                                                                                                                                                                                                                                                                                                                                                                                                                                 | Centre Hospitalier Cannes                                                           | CNR Virus des Infections Respiratoires - France SUD                                                            | Antonin Bal, Gregory Destras, Gwendolynne Burfin, Hadrien Règue, Quentin Semanas, Martine Valette, Bruno Lina, Laurence Josset                                                                                                                                                                                                                             |
| EPI_ISL_779848, EPI_ISL_779849                                                                                                                                                                                                                                                                                                                                                                                                                                                                                                                                                                                                                                                                                                                                                                                                                                                                                                                                                                                                                                                                                                                                                                                                                                                                                                                                                                                                                                                                                                                                                                                                                                                                                                                                                                                                                                                                                                                                                                                                                                                                                                                                                                                                                                                                                                                                                                                                                                                                                                                                                                                                                                                                                                                                                                                                                                                                                                                                                                                                                                                                                                                                                                                                                                                                                                                                                                                                                                                                                                                                                                                                                                                                                                                                                                                                                                                                                                                                                                                                                                                                                                                                                                                                                                                                                                                                                                                                                                                                                                                                                                                                                                                                                                                                                                                                 | Laboratoire BIOMED 05                                                               | CNR Virus des Infections Respiratoires - France SUD                                                            | Antonin Bal, Gregory Destras, Gwendolynne Burfin, Hadrien Règue, Quentin Semanas, Martine Valette, Bruno Lina, Laurence Josset                                                                                                                                                                                                                             |
| EPI_ISL_801404, EPI_ISL_801405, EPI_ISL_801406, EPI_ISL_801407, EPI_ISL_801408, EPI_ISL_801409, EPI_ISL_801410, EPI_ISL_801411, EPI_ISL_801412, EPI_ISL_801413, EPI_ISL_801414, EPI_ISL_801415, EPI_ISL_801416, EPI_ISL_801417, EPI_ISL_801418, EPI_ISL_801419, EPI_ISL_801420, EPI_ISL_801421, EPI_ISL_801422, EPI_ISL_801423, EPI_ISL_801424, EPI_ISL_801425, EPI_ISL_801426, EPI_ISL_801427, EPI_ISL_801428, EPI_ISL_801429, EPI_ISL_801430, EPI_ISL_801431, EPI_ISL_801432, EPI_ISL_801433, EPI_ISL_801434, EPI_ISL_801435, EPI_ISL_801436, EPI_ISL_801437, EPI_ISL_801438, EPI_ISL_801439, EPI_ISL_801440, EPI_ISL_801441, EPI_ISL_801442, EPI_ISL_801443, EPI_ISL_801444, EPI_ISL_801445, EPI_ISL_801446, EPI_ISL_801447, EPI_ISL_801448, EPI_ISL_801449, EPI_ISL_801450, EPI_ISL_801451, EPI_ISL_801452, EPI_ISL_801453, EPI_ISL_801454, EPI_ISL_801455, EPI_ISL_801456, EPI_ISL_801457, EPI_ISL_801458, EPI_ISL_801459, EPI_ISL_801460, EPI_ISL_801461, EPI_ISL_801462, EPI_ISL_801463, EPI_ISL_801464, EPI_ISL_801465, EPI_ISL_801466, EPI_ISL_801467, EPI_ISL_801468, EPI_ISL_801469, EPI_ISL_801470, EPI_ISL_801471, EPI_ISL_801472, EPI_ISL_801473, EPI_ISL_801474, EPI_ISL_801475, EPI_ISL_801476, EPI_ISL_801477, EPI_ISL_801478, EPI_ISL_801479, EPI_ISL_801480, EPI_ISL_801481, EPI_ISL_801482, EPI_ISL_801483, EPI_ISL_801484, EPI_ISL_801485, EPI_ISL_801486, EPI_ISL_801487, EPI_ISL_801488, EPI_ISL_801489, EPI_ISL_801490, EPI_ISL_801491, EPI_ISL_801494, EPI_ISL_801495, EPI_ISL_801496, EPI_ISL_801497, EPI_ISL_801498, EPI_ISL_801499, EPI_ISL_801500, EPI_ISL_801501, EPI_ISL_801502, EPI_ISL_801503, EPI_ISL_801504, EPI_ISL_801505, EPI_ISL_801506, EPI_ISL_801507, EPI_ISL_801508, EPI_ISL_801509, EPI_ISL_801510, EPI_ISL_801511, EPI_ISL_801512, EPI_ISL_801513, EPI_ISL_801514, EPI_ISL_801515, EPI_ISL_802506, EPI_ISL_802507, EPI_ISL_802508, EPI_ISL_802509, EPI_ISL_802510, EPI_ISL_802511, EPI_ISL_802512, EPI_ISL_802513, EPI_ISL_802514, EPI_ISL_802515, EPI_ISL_802516, EPI_ISL_802517, EPI_ISL_802518, EPI_ISL_802519, EPI_ISL_802520, EPI_ISL_802521, EPI_ISL_802522, EPI_ISL_802523, EPI_ISL_802524, EPI_ISL_802525, EPI_ISL_802526, EPI_ISL_802527, EPI_ISL_802528, EPI_ISL_802529, EPI_ISL_802530, EPI_ISL_802531, EPI_ISL_802532, EPI_ISL_802533, EPI_ISL_802534, EPI_ISL_802535, EPI_ISL_802536, EPI_ISL_802537, EPI_ISL_802538, EPI_ISL_802539, EPI_ISL_802540, EPI_ISL_802541, EPI_ISL_802542, EPI_ISL_802543, EPI_ISL_802544                                                                                                                                                                                                                                                                                                                                                                                                                                                                                                                                                                                                                                                                                                                                                                                                                                                                                                                                                                                                                                                                                                                                                                                                                                                                                                                                                                                                                                                                                                                                                                                                                                                                                                                                                                                                                                                                                                                                                                                                                                                                                                                                                                                                                                                                                                                                                 | see above                                                                           | Erasmus Medical Center                                                                                         | Bas Oude Munnink, Reina Sikkema, David Nieuwenhuijse, Irina Chestakova, Anne van der Linden, Marjan Boter, Emmanuelle Munger, Corine GeurtsvanKessel, Annemiek van der Eijk, Richard Molenkamp, Marion Koopmans, on behalf of the Dutch national COVID-19 response team                                                                                    |
| EPI_ISL_803118                                                                                                                                                                                                                                                                                                                                                                                                                                                                                                                                                                                                                                                                                                                                                                                                                                                                                                                                                                                                                                                                                                                                                                                                                                                                                                                                                                                                                                                                                                                                                                                                                                                                                                                                                                                                                                                                                                                                                                                                                                                                                                                                                                                                                                                                                                                                                                                                                                                                                                                                                                                                                                                                                                                                                                                                                                                                                                                                                                                                                                                                                                                                                                                                                                                                                                                                                                                                                                                                                                                                                                                                                                                                                                                                                                                                                                                                                                                                                                                                                                                                                                                                                                                                                                                                                                                                                                                                                                                                                                                                                                                                                                                                                                                                                                                                                 | National Institute of Laboratory Medicine and Referral Center                       | Genomic Research Lab, BCSIR                                                                                    | Barna Goswami, Mohammad Samir Uzzaman, Eshrar Osman, Md. Ahashan Habib, Shahina Akter, Tanjina Akhter Banu, Abu Sayeed Mohammad Mahmud, Md. Murshed Hasan Sarkar, Iflat Jaham, Md. Saddam Hossain, Tasnim Nafisa, Md. Masud Ahmed Molla, Mahmuda Yeasmin, Asish Kumar Ghosh, A. K. M. Shamsuzzaman, Monira Parveen, Md. Mamun Hossain Arif, Md. Salim Khan |
| EPI_ISL_803900                                                                                                                                                                                                                                                                                                                                                                                                                                                                                                                                                                                                                                                                                                                                                                                                                                                                                                                                                                                                                                                                                                                                                                                                                                                                                                                                                                                                                                                                                                                                                                                                                                                                                                                                                                                                                                                                                                                                                                                                                                                                                                                                                                                                                                                                                                                                                                                                                                                                                                                                                                                                                                                                                                                                                                                                                                                                                                                                                                                                                                                                                                                                                                                                                                                                                                                                                                                                                                                                                                                                                                                                                                                                                                                                                                                                                                                                                                                                                                                                                                                                                                                                                                                                                                                                                                                                                                                                                                                                                                                                                                                                                                                                                                                                                                                                                 | National Institute for Infectious Diseases, INMI, "L. Spallanzani" IRCCS            | National Institute for Infectious Diseases, INMI, "L. Spallanzani" IRCCS                                       | B Bartolini, O Butera, C.E.M Gruber, M Rueca, F Messina, E Giombini, MR Capobianchi, A Di Caro                                                                                                                                                                                                                                                             |
| EPI_ISL_804467, EPI_ISL_804468, EPI_ISL_804469, EPI_ISL_804470, EPI_ISL_804472, EPI_ISL_804473, EPI_ISL_804474, EPI_ISL_804476, EPI_ISL_804477, EPI_ISL_804479, EPI_ISL_804480, EPI_ISL_804481, EPI_ISL_804483, EPI_ISL_804484, EPI_ISL_804485, EPI_ISL_804486, EPI_ISL_804488, EPI_ISL_804489, EPI_ISL_804490, EPI_ISL_804491, EPI_ISL_804492, EPI_ISL_804493, EPI_ISL_804494, EPI_ISL_804495, EPI_ISL_804496, EPI_ISL_804497, EPI_ISL_804498, EPI_ISL_804499, EPI_ISL_804500, EPI_ISL_804501, EPI_ISL_804502, EPI_ISL_804503, EPI_ISL_804504, EPI_ISL_804505, EPI_ISL_804506, EPI_ISL_804507, EPI_ISL_804508, EPI_ISL_804509, EPI_ISL_804510, EPI_ISL_804511, EPI_ISL_804512, EPI_ISL_804513, EPI_ISL_804514, EPI_ISL_804515, EPI_ISL_804516, EPI_ISL_804517, EPI_ISL_804518, EPI_ISL_804519, EPI_ISL_804520, EPI_ISL_804521, EPI_ISL_804522, EPI_ISL_804523, EPI_ISL_804524, EPI_ISL_804525, EPI_ISL_804526, EPI_ISL_804527, EPI_ISL_804528, EPI_ISL_804529, EPI_ISL_804530, EPI_ISL_804531, EPI_ISL_804532, EPI_ISL_804533, EPI_ISL_804534, EPI_ISL_804535, EPI_ISL_804536, EPI_ISL_804537, EPI_ISL_804538, EPI_ISL_804539, EPI_ISL_804540, EPI_ISL_804541, EPI_ISL_804542, EPI_ISL_804543, EPI_ISL_804544, EPI_ISL_804545, EPI_ISL_804546, EPI_ISL_804547, EPI_ISL_804548, EPI_ISL_804549, EPI_ISL_804550, EPI_ISL_804551, EPI_ISL_804552, EPI_ISL_804553, EPI_ISL_804554, EPI_ISL_804555, EPI_ISL_804556, EPI_ISL_804557, EPI_ISL_804558, EPI_ISL_804559, EPI_ISL_804560, EPI_ISL_804561, EPI_ISL_804562, EPI_ISL_804563, EPI_ISL_804564, EPI_ISL_804565, EPI_ISL_804566, EPI_ISL_804567, EPI_ISL_804568, EPI_ISL_804569, EPI_ISL_804570, EPI_ISL_804571, EPI_ISL_804572, EPI_ISL_804573, EPI_ISL_804574, EPI_ISL_804575, EPI_ISL_804576, EPI_ISL_804577, EPI_ISL_804578, EPI_ISL_804579, EPI_ISL_804580, EPI_ISL_804581, EPI_ISL_804582, EPI_ISL_804583, EPI_ISL_804586, EPI_ISL_804587, EPI_ISL_804591                                                                                                                                                                                                                                                                                                                                                                                                                                                                                                                                                                                                                                                                                                                                                                                                                                                                                                                                                                                                                                                                                                                                                                                                                                                                                                                                                                                                                                                                                                                                                                                                                                                                                                                                                                                                                                                                                                                                                                                                                                                                                                                                                                                                                                                                                                                                                                                                                                                                                                                                                                                                                                                                                                                                                                                                                                                                                                                 | see above                                                                           | MEPHI, Aix Marseille University<br>MEPHI, Aix Marseille University                                             | Anthony LEVASSEUR                                                                                                                                                                                                                                                                                                                                          |
| EPI_ISL_813357, EPI_ISL_813358, EPI_ISL_813359, EPI_ISL_813360, EPI_ISL_813361, EPI_ISL_813362, EPI_ISL_813363, EPI_ISL_813364, EPI_ISL_813365, EPI_ISL_813366, EPI_ISL_813367, EPI_ISL_813368, EPI_ISL_813369, EPI_ISL_813370, EPI_ISL_813372, EPI_ISL_813373, EPI_ISL_813374, EPI_ISL_813375, EPI_ISL_813376, EPI_ISL_813377, EPI_ISL_813378, EPI_ISL_813379, EPI_ISL_813380, EPI_ISL_813381, EPI_ISL_813382, EPI_ISL_813383, EPI_ISL_813384, EPI_ISL_813385, EPI_ISL_813386, EPI_ISL_813387, EPI_ISL_813388, EPI_ISL_813389, EPI_ISL_813390, EPI_ISL_813391, EPI_ISL_813392, EPI_ISL_813393, EPI_ISL_813394, EPI_ISL_813395, EPI_ISL_813396, EPI_ISL_813397, EPI_ISL_813398, EPI_ISL_813400, EPI_ISL_813401, EPI_ISL_813402, EPI_ISL_813403, EPI_ISL_813404, EPI_ISL_813406, EPI_ISL_813407, EPI_ISL_813411, EPI_ISL_813412, EPI_ISL_813413, EPI_ISL_813414, EPI_ISL_813415, EPI_ISL_813416, EPI_ISL_813417, EPI_ISL_813418, EPI_ISL_813419, EPI_ISL_813420, EPI_ISL_813421, EPI_ISL_813422, EPI_ISL_813423, EPI_ISL_813425, EPI_ISL_813426, EPI_ISL_813427, EPI_ISL_813428, EPI_ISL_813429, EPI_ISL_813430, EPI_ISL_813432, EPI_ISL_813433, EPI_ISL_813434, EPI_ISL_813435, EPI_ISL_813436, EPI_ISL_813437, EPI_ISL_813438, EPI_ISL_813439, EPI_ISL_813440, EPI_ISL_813441, EPI_ISL_813442, EPI_ISL_813443, EPI_ISL_813444, EPI_ISL_813445, EPI_ISL_813446, EPI_ISL_813447, EPI_ISL_813448, EPI_ISL_813449, EPI_ISL_813450, EPI_ISL_813451, EPI_ISL_813452, EPI_ISL_813453, EPI_ISL_813454, EPI_ISL_813455, EPI_ISL_813456, EPI_ISL_813457, EPI_ISL_813458, EPI_ISL_813459, EPI_ISL_813460, EPI_ISL_813461, EPI_ISL_813462, EPI_ISL_813463, EPI_ISL_813464, EPI_ISL_813465, EPI_ISL_813466, EPI_ISL_813467, EPI_ISL_813468, EPI_ISL_813469, EPI_ISL_813470, EPI_ISL_813471, EPI_ISL_813472, EPI_ISL_813473, EPI_ISL_813474, EPI_ISL_813475, EPI_ISL_813476, EPI_ISL_813477, EPI_ISL_813478, EPI_ISL_813479, EPI_ISL_813480, EPI_ISL_813481, EPI_ISL_813482, EPI_ISL_813483, EPI_ISL_813484, EPI_ISL_813485, EPI_ISL_813486, EPI_ISL_813487, EPI_ISL_813488, EPI_ISL_813489, EPI_ISL_813490, EPI_ISL_813491, EPI_ISL_813492, EPI_ISL_813493, EPI_ISL_813494, EPI_ISL_813495, EPI_ISL_813496, EPI_ISL_813497, EPI_ISL_813498, EPI_ISL_813499, EPI_ISL_813500, EPI_ISL_813501, EPI_ISL_813502, EPI_ISL_813503, EPI_ISL_813504, EPI_ISL_813505, EPI_ISL_813506, EPI_ISL_813507, EPI_ISL_813508, EPI_ISL_813509, EPI_ISL_813510, EPI_ISL_813511, EPI_ISL_813512, EPI_ISL_813513, EPI_ISL_813514, EPI_ISL_813515, EPI_ISL_813516, EPI_ISL_813517, EPI_ISL_813518, EPI_ISL_813519, EPI_ISL_813520, EPI_ISL_813521, EPI_ISL_813522, EPI_ISL_813523, EPI_ISL_813524, EPI_ISL_813525, EPI_ISL_813526, EPI_ISL_813527, EPI_ISL_813528, EPI_ISL_813529, EPI_ISL_813530, EPI_ISL_813531, EPI_ISL_813532, EPI_ISL_813533, EPI_ISL_813534, EPI_ISL_813535, EPI_ISL_813536, EPI_ISL_813537, EPI_ISL_813538, EPI_ISL_813539, EPI_ISL_813540, EPI_ISL_813541, EPI_ISL_813542, EPI_ISL_813543, EPI_ISL_813544, EPI_ISL_813545, EPI_ISL_813546, EPI_ISL_813547, EPI_ISL_813548, EPI_ISL_813549, EPI_ISL_813550, EPI_ISL_813551, EPI_ISL_813552, EPI_ISL_813553, EPI_ISL_813554, EPI_ISL_813555, EPI_ISL_813556, EPI_ISL_813557, EPI_ISL_813558, EPI_ISL_813559, EPI_ISL_813560, EPI_ISL_813561, EPI_ISL_813562, EPI_ISL_813563, EPI_ISL_813564, EPI_ISL_813565, EPI_ISL_813566, EPI_ISL_813567, EPI_ISL_813568, EPI_ISL_813569, EPI_ISL_813570, EPI_ISL_813571, EPI_ISL_813572, EPI_ISL_813573, EPI_ISL_813574, EPI_ISL_813575, EPI_ISL_813576, EPI_ISL_813577, EPI_ISL_813578, EPI_ISL_813579, EPI_ISL_813580, EPI_ISL_813581, EPI_ISL_813582, EPI_ISL_813583, EPI_ISL_813584, EPI_ISL_813585, EPI_ISL_813586, EPI_ISL_813587, EPI_ISL_813588, EPI_ISL_813589, EPI_ISL_813590, EPI_ISL_813591, EPI_ISL_813592, EPI_ISL_813593, EPI_ISL_813594, EPI_ISL_813595, EPI_ISL_813596, EPI_ISL_813597, EPI_ISL_813598, EPI_ISL_813599, EPI_ISL_813600, EPI_ISL_813601, EPI_ISL_813602, EPI_ISL_813603, EPI_ISL_813604, EPI_ISL_813605, EPI_ISL_813606, EPI_ISL_813607, EPI_ISL_813608, EPI_ISL_813609, EPI_ISL_813610, EPI_ISL_813611, EPI_ISL_813612, EPI_ISL_813613, EPI_ISL_813614, EPI_ISL_813615, EPI_ISL_813616, EPI_ISL_813617, EPI_ISL_813618, EPI_ISL_813619, EPI_ISL_813620, EPI_ISL_813621, EPI_ISL_813622, EPI_ISL_813623, EPI_ISL_813624, EPI_ISL_813625, EPI_ISL_813626, EPI_ISL_813627, EPI_ISL_813628, EPI_ISL_813629, EPI_ISL_813630, EPI_ISL_813631, EPI_ISL_813632, EPI_ISL_813633, EPI_ISL_813634, EPI_ISL_813635, EPI_ISL_813636, EPI_ISL_813637, EPI_ISL_813638, EPI_ISL_813639, EPI_ISL_813640, EPI_ISL_813641, EPI_ISL_813642, EPI_ISL_813643, EPI_ISL_813644, EPI_ISL_813645, EPI_ISL_813646, EPI_ISL_813647, EPI_ISL_813648, EPI_ISL_813649, EPI_ISL_813650, EPI_ISL_813651, EPI_ISL_813652, EPI_ISL_813653, EPI_ISL_813654 | see above                                                                           | University of Exeter                                                                                           | COVID-19 Genomics UK (COG-UK) Consortium<br>Ben Temperton, Aaron Jeffries, Michelle Michelson, Joanna Warwick-Dugdale, Audrey Farbos, Robyn Manley, Stephen Michell, Jane Masoli                                                                                                                                                                           |
| EPI_ISL_824284, EPI_ISL_824285                                                                                                                                                                                                                                                                                                                                                                                                                                                                                                                                                                                                                                                                                                                                                                                                                                                                                                                                                                                                                                                                                                                                                                                                                                                                                                                                                                                                                                                                                                                                                                                                                                                                                                                                                                                                                                                                                                                                                                                                                                                                                                                                                                                                                                                                                                                                                                                                                                                                                                                                                                                                                                                                                                                                                                                                                                                                                                                                                                                                                                                                                                                                                                                                                                                                                                                                                                                                                                                                                                                                                                                                                                                                                                                                                                                                                                                                                                                                                                                                                                                                                                                                                                                                                                                                                                                                                                                                                                                                                                                                                                                                                                                                                                                                                                                                 | Institute of Microbiology, Universidad San Francisco de Quito                       | Institute of Microbiology, Universidad San Francisco de Quito                                                  | Belén Prado-Vivar, Sully Márquez, Juan José Guadalupe, Monica Becerra-Wong, Bernardo Gutiérrez, Tania Guayasamin, Patricio Reyes, Verónica Barragán, Patricio Rojas-Silva, Gabriel Trueba, Michelle Grunauer, Paúl Cárdenas                                                                                                                                |
| EPI_ISL_824286, EPI_ISL_824287                                                                                                                                                                                                                                                                                                                                                                                                                                                                                                                                                                                                                                                                                                                                                                                                                                                                                                                                                                                                                                                                                                                                                                                                                                                                                                                                                                                                                                                                                                                                                                                                                                                                                                                                                                                                                                                                                                                                                                                                                                                                                                                                                                                                                                                                                                                                                                                                                                                                                                                                                                                                                                                                                                                                                                                                                                                                                                                                                                                                                                                                                                                                                                                                                                                                                                                                                                                                                                                                                                                                                                                                                                                                                                                                                                                                                                                                                                                                                                                                                                                                                                                                                                                                                                                                                                                                                                                                                                                                                                                                                                                                                                                                                                                                                                                                 | Institute of Microbiology, Universidad San Francisco de Quito                       | Institute of Microbiology, Universidad San Francisco de Quito                                                  | Belén Prado-Vivar, Sully Márquez, Juan José Guadalupe, Monica Becerra-Wong, Bernardo Gutiérrez, Andrea Cunguan, Nabih Dahik, Verónica Barragán, Patricio Rojas-Silva, Gabriel Trueba, Michelle Grunauer, Paúl Cárdenas                                                                                                                                     |

|                                                                                                                                                                                                                                                                                                                                                                                                                                                                                                                                                                                                                                                                                                                                                                                                                                                                                                                                                                                                                                                                                                                                                                                                                                                                                                                                                                                                                                                                                                                                                                                                                                                                                                                                                                                                                                                                                                                                                                                                                                                                                                                                                                                                                                                                                                                                                                                                                                                                                                                                                                                                                                                                                                                                                                                                                                                                                                                                                                                                                                                                                                                                                                                                                                                                                                                                                                                                                                                                                                                                                                                                                                                                                                                                                                                                                                                                                                                |                                                                           |                                                                                                                                            |                                                                                                                                                                                                                                                                                                                                                            |                                                                                                                                                                     |
|----------------------------------------------------------------------------------------------------------------------------------------------------------------------------------------------------------------------------------------------------------------------------------------------------------------------------------------------------------------------------------------------------------------------------------------------------------------------------------------------------------------------------------------------------------------------------------------------------------------------------------------------------------------------------------------------------------------------------------------------------------------------------------------------------------------------------------------------------------------------------------------------------------------------------------------------------------------------------------------------------------------------------------------------------------------------------------------------------------------------------------------------------------------------------------------------------------------------------------------------------------------------------------------------------------------------------------------------------------------------------------------------------------------------------------------------------------------------------------------------------------------------------------------------------------------------------------------------------------------------------------------------------------------------------------------------------------------------------------------------------------------------------------------------------------------------------------------------------------------------------------------------------------------------------------------------------------------------------------------------------------------------------------------------------------------------------------------------------------------------------------------------------------------------------------------------------------------------------------------------------------------------------------------------------------------------------------------------------------------------------------------------------------------------------------------------------------------------------------------------------------------------------------------------------------------------------------------------------------------------------------------------------------------------------------------------------------------------------------------------------------------------------------------------------------------------------------------------------------------------------------------------------------------------------------------------------------------------------------------------------------------------------------------------------------------------------------------------------------------------------------------------------------------------------------------------------------------------------------------------------------------------------------------------------------------------------------------------------------------------------------------------------------------------------------------------------------------------------------------------------------------------------------------------------------------------------------------------------------------------------------------------------------------------------------------------------------------------------------------------------------------------------------------------------------------------------------------------------------------------------------------------------------------|---------------------------------------------------------------------------|--------------------------------------------------------------------------------------------------------------------------------------------|------------------------------------------------------------------------------------------------------------------------------------------------------------------------------------------------------------------------------------------------------------------------------------------------------------------------------------------------------------|---------------------------------------------------------------------------------------------------------------------------------------------------------------------|
| EPI_ISL_824288, EPI_ISL_824289                                                                                                                                                                                                                                                                                                                                                                                                                                                                                                                                                                                                                                                                                                                                                                                                                                                                                                                                                                                                                                                                                                                                                                                                                                                                                                                                                                                                                                                                                                                                                                                                                                                                                                                                                                                                                                                                                                                                                                                                                                                                                                                                                                                                                                                                                                                                                                                                                                                                                                                                                                                                                                                                                                                                                                                                                                                                                                                                                                                                                                                                                                                                                                                                                                                                                                                                                                                                                                                                                                                                                                                                                                                                                                                                                                                                                                                                                 | Institute of Microbiology, Universidad San Francisco de Quito             | Institute of Microbiology, Universidad San Francisco de Quito                                                                              | Belén Prado-Vivar, Sully Márquez, Juan José Guadalupe, Monica Becerra-Wong, Bernardo Gutiérrez, Tania Guayasamin, Patricio Reyes, Verónica Barragán, Patricio Rojas-Silva, Gabriel Trueba, Michelle Grunauer, Paúl Cárdenas                                                                                                                                |                                                                                                                                                                     |
| EPI_ISL_824290, EPI_ISL_824291                                                                                                                                                                                                                                                                                                                                                                                                                                                                                                                                                                                                                                                                                                                                                                                                                                                                                                                                                                                                                                                                                                                                                                                                                                                                                                                                                                                                                                                                                                                                                                                                                                                                                                                                                                                                                                                                                                                                                                                                                                                                                                                                                                                                                                                                                                                                                                                                                                                                                                                                                                                                                                                                                                                                                                                                                                                                                                                                                                                                                                                                                                                                                                                                                                                                                                                                                                                                                                                                                                                                                                                                                                                                                                                                                                                                                                                                                 | Institute of Microbiology, Universidad San Francisco de Quito             | Institute of Microbiology, Universidad San Francisco de Quito                                                                              | Belén Prado-Vivar, Sully Márquez, Juan José Guadalupe, Monica Becerra-Wong, Bernardo Gutiérrez, Andrea Cunguan, Nabih Dahik, Verónica Barragán, Patricio Rojas-Silva, Gabriel Trueba, Michelle Grunauer, Paúl Cárdenas                                                                                                                                     |                                                                                                                                                                     |
| EPI_ISL_824292                                                                                                                                                                                                                                                                                                                                                                                                                                                                                                                                                                                                                                                                                                                                                                                                                                                                                                                                                                                                                                                                                                                                                                                                                                                                                                                                                                                                                                                                                                                                                                                                                                                                                                                                                                                                                                                                                                                                                                                                                                                                                                                                                                                                                                                                                                                                                                                                                                                                                                                                                                                                                                                                                                                                                                                                                                                                                                                                                                                                                                                                                                                                                                                                                                                                                                                                                                                                                                                                                                                                                                                                                                                                                                                                                                                                                                                                                                 | Institute of Microbiology, Universidad San Francisco de Quito             | Institute of Microbiology, Universidad San Francisco de Quito                                                                              | Belén Prado-Vivar, Sully Márquez, Juan José Guadalupe, Monica Becerra-Wong, Bernardo Gutiérrez, Tania Guayasamin, Patricio Reyes, Verónica Barragán, Patricio Rojas-Silva, Gabriel Trueba, Michelle Grunauer, Paúl Cárdenas                                                                                                                                |                                                                                                                                                                     |
| EPI_ISL_824293, EPI_ISL_824294                                                                                                                                                                                                                                                                                                                                                                                                                                                                                                                                                                                                                                                                                                                                                                                                                                                                                                                                                                                                                                                                                                                                                                                                                                                                                                                                                                                                                                                                                                                                                                                                                                                                                                                                                                                                                                                                                                                                                                                                                                                                                                                                                                                                                                                                                                                                                                                                                                                                                                                                                                                                                                                                                                                                                                                                                                                                                                                                                                                                                                                                                                                                                                                                                                                                                                                                                                                                                                                                                                                                                                                                                                                                                                                                                                                                                                                                                 | Institute of Microbiology, Universidad San Francisco de Quito             | Institute of Microbiology, Universidad San Francisco de Quito                                                                              | Belén Prado-Vivar, Sully Márquez, Juan José Guadalupe, Monica Becerra-Wong, Bernardo Gutiérrez, Eulalia Pazmiño, Katalina Pacheco, Verónica Barragán, Patricio Rojas-Silva, Gabriel Trueba, Michelle Grunauer, Paúl Cárdenas                                                                                                                               |                                                                                                                                                                     |
| EPI_ISL_824408                                                                                                                                                                                                                                                                                                                                                                                                                                                                                                                                                                                                                                                                                                                                                                                                                                                                                                                                                                                                                                                                                                                                                                                                                                                                                                                                                                                                                                                                                                                                                                                                                                                                                                                                                                                                                                                                                                                                                                                                                                                                                                                                                                                                                                                                                                                                                                                                                                                                                                                                                                                                                                                                                                                                                                                                                                                                                                                                                                                                                                                                                                                                                                                                                                                                                                                                                                                                                                                                                                                                                                                                                                                                                                                                                                                                                                                                                                 | Istituto Nazionale Malattie Infettive Lazzaro Spallanzani IRCCS           | Istituto Nazionale Malattie Infettive Lazzaro Spallanzani IRCCS                                                                            | Barbara Bartolini, Ornella Butera, Cesare E.M. Gruber, Martina Rueca, Francesco Messina, Emanuela Giombini, Silvia Meschi, Francesca Colavita, Concetta Castilletti, Maria R. Capobianchi, Antonino Di Caro                                                                                                                                                |                                                                                                                                                                     |
| EPI_ISL_825042                                                                                                                                                                                                                                                                                                                                                                                                                                                                                                                                                                                                                                                                                                                                                                                                                                                                                                                                                                                                                                                                                                                                                                                                                                                                                                                                                                                                                                                                                                                                                                                                                                                                                                                                                                                                                                                                                                                                                                                                                                                                                                                                                                                                                                                                                                                                                                                                                                                                                                                                                                                                                                                                                                                                                                                                                                                                                                                                                                                                                                                                                                                                                                                                                                                                                                                                                                                                                                                                                                                                                                                                                                                                                                                                                                                                                                                                                                 | B.J. Medical College and Civil hospital, Ahmedabad                        | Gujarat Biotechnology Research Centre                                                                                                      | Apurvashin Puvar, Ramesh Pandit, Janvi Raval, Zarna Patel, Nitin Savaliya, Dinesh Kumar, Zuber Saiyed, Labdhi Pandya, Afzal Ansari, Nikha Trivedi, Pranay Shah, Kamlesh J Upadhyay, Sanjay Kapadia, Dipa Kinariwala, Chaitanya Joshi, Madhvi Joshi                                                                                                         |                                                                                                                                                                     |
| EPI_ISL_825045                                                                                                                                                                                                                                                                                                                                                                                                                                                                                                                                                                                                                                                                                                                                                                                                                                                                                                                                                                                                                                                                                                                                                                                                                                                                                                                                                                                                                                                                                                                                                                                                                                                                                                                                                                                                                                                                                                                                                                                                                                                                                                                                                                                                                                                                                                                                                                                                                                                                                                                                                                                                                                                                                                                                                                                                                                                                                                                                                                                                                                                                                                                                                                                                                                                                                                                                                                                                                                                                                                                                                                                                                                                                                                                                                                                                                                                                                                 | NHL Municipal Medical College, Ahmedbad                                   | Gujarat Biotechnology Research Centre                                                                                                      | Atit Shah, Zarna Patel, Nitin Savaliya, Dinesh Kumar, Zuber Saiyed, Labdhi Pandya, Afzal Ansari, Nikha Trivedi, Apurvashin Puvar, Ramesh Pandit, Janvi Raval, Jayshri Pethani, Monia Patel, NM Shaikh, Bimal Chauhan, Tanmay Mehta, Bhavin Prajapati, Chaitanya Joshi, Madhvi Joshi                                                                        |                                                                                                                                                                     |
| EPI_ISL_825052                                                                                                                                                                                                                                                                                                                                                                                                                                                                                                                                                                                                                                                                                                                                                                                                                                                                                                                                                                                                                                                                                                                                                                                                                                                                                                                                                                                                                                                                                                                                                                                                                                                                                                                                                                                                                                                                                                                                                                                                                                                                                                                                                                                                                                                                                                                                                                                                                                                                                                                                                                                                                                                                                                                                                                                                                                                                                                                                                                                                                                                                                                                                                                                                                                                                                                                                                                                                                                                                                                                                                                                                                                                                                                                                                                                                                                                                                                 | NHL Municipal Medical College, Ahmedbad                                   | Gujarat Biotechnology Research Centre                                                                                                      | Apurvashin Puvar, Ramesh Pandit, Janvi Raval, Zarna Patel, Nitin Savaliya, Dinesh Kumar, Zuber Saiyed, Labdhi Pandya, Afzal Ansari, Nikha Trivedi, Jayshri Pethani, Monia Patel, Atit Shah, NM Shaikh, Bimal Chauhan, Tanmay Mehta, Bhavin Prajapati, Chaitanya Joshi, Madhvi Joshi                                                                        |                                                                                                                                                                     |
| EPI_ISL_825061                                                                                                                                                                                                                                                                                                                                                                                                                                                                                                                                                                                                                                                                                                                                                                                                                                                                                                                                                                                                                                                                                                                                                                                                                                                                                                                                                                                                                                                                                                                                                                                                                                                                                                                                                                                                                                                                                                                                                                                                                                                                                                                                                                                                                                                                                                                                                                                                                                                                                                                                                                                                                                                                                                                                                                                                                                                                                                                                                                                                                                                                                                                                                                                                                                                                                                                                                                                                                                                                                                                                                                                                                                                                                                                                                                                                                                                                                                 | GMERS Medical College and Hospital, Gotri, Vadodara                       | Gujarat Biotechnology Research Centre                                                                                                      | Apurvashin Puvar, Ramesh Pandit, Janvi Raval, Zarna Patel, Nitin Savaliya, Dinesh Kumar, Zuber Saiyed, Afzal Ansari, Nikha Trivedi, Mitesh Kamothi, Bithika Duttaroy, Kalpesh Mistry, Chaitanya Joshi, Madhvi Joshi                                                                                                                                        |                                                                                                                                                                     |
| EPI_ISL_826275                                                                                                                                                                                                                                                                                                                                                                                                                                                                                                                                                                                                                                                                                                                                                                                                                                                                                                                                                                                                                                                                                                                                                                                                                                                                                                                                                                                                                                                                                                                                                                                                                                                                                                                                                                                                                                                                                                                                                                                                                                                                                                                                                                                                                                                                                                                                                                                                                                                                                                                                                                                                                                                                                                                                                                                                                                                                                                                                                                                                                                                                                                                                                                                                                                                                                                                                                                                                                                                                                                                                                                                                                                                                                                                                                                                                                                                                                                 | Sterling Hospital, Memnagar, Ahmedabad                                    | Gujarat Biotechnology Research Centre                                                                                                      | Atul K Patel, Nitin Savaliya, Dinesh Kumar, Zuber Saiyed, Labdhi Pandya, Afzal Ansari, Nikha Trivedi, Apurvashin Puvar, Ramesh Pandit, Janvi Raval, Zarna Patel, Naman Shashtri, Chaitanya Joshi, Madhvi Joshi                                                                                                                                             |                                                                                                                                                                     |
| EPI_ISL_833149                                                                                                                                                                                                                                                                                                                                                                                                                                                                                                                                                                                                                                                                                                                                                                                                                                                                                                                                                                                                                                                                                                                                                                                                                                                                                                                                                                                                                                                                                                                                                                                                                                                                                                                                                                                                                                                                                                                                                                                                                                                                                                                                                                                                                                                                                                                                                                                                                                                                                                                                                                                                                                                                                                                                                                                                                                                                                                                                                                                                                                                                                                                                                                                                                                                                                                                                                                                                                                                                                                                                                                                                                                                                                                                                                                                                                                                                                                 | Platform BIS UZA/UAntwerpen, University Hospital Antwerp, Edegem, Belgium | UAntwerp, Laboratory of Medical Microbiology, Campus Drie Eiken S6.26, Universiteitsplein 1, 2610, Wilrijk, Belgium                        | Basil Britto Xavier, Jasmine Coppens, Sahaya Glingston Rajakani, Christine Lammens, Veerle Matheussen, Herman Goossens                                                                                                                                                                                                                                     |                                                                                                                                                                     |
| EPI_ISL_833178                                                                                                                                                                                                                                                                                                                                                                                                                                                                                                                                                                                                                                                                                                                                                                                                                                                                                                                                                                                                                                                                                                                                                                                                                                                                                                                                                                                                                                                                                                                                                                                                                                                                                                                                                                                                                                                                                                                                                                                                                                                                                                                                                                                                                                                                                                                                                                                                                                                                                                                                                                                                                                                                                                                                                                                                                                                                                                                                                                                                                                                                                                                                                                                                                                                                                                                                                                                                                                                                                                                                                                                                                                                                                                                                                                                                                                                                                                 | National Institute of Laboratory Medicine and Referral Center             | Genomic Research Lab, BCSIR                                                                                                                | Barna Goswami, Mohammad Samir Uzzaman, Eshrar Osman, Md. Ahashan Habib, Shahina Akter, Tanjina Akhtar Banu, Abu Sayeed Mohammad Mahmud, Md. Murshed Hasan Sarkar, Iffat Jahan, Md. Saddam Hossain, Tasnim Nafisa, Md. Maruf Ahmed Molla, Mahmuda Yeasmin, Asish Kumar Ghosh, A. K. M. Shamsuzzaman, Monira Parveen, Md. Masum Hossain Arif, Md. Salim Khan |                                                                                                                                                                     |
| EPI_ISL_833191, EPI_ISL_833192, EPI_ISL_833193, EPI_ISL_833194, EPI_ISL_833195, EPI_ISL_833196, EPI_ISL_833197, EPI_ISL_833198, EPI_ISL_833199, EPI_ISL_833200                                                                                                                                                                                                                                                                                                                                                                                                                                                                                                                                                                                                                                                                                                                                                                                                                                                                                                                                                                                                                                                                                                                                                                                                                                                                                                                                                                                                                                                                                                                                                                                                                                                                                                                                                                                                                                                                                                                                                                                                                                                                                                                                                                                                                                                                                                                                                                                                                                                                                                                                                                                                                                                                                                                                                                                                                                                                                                                                                                                                                                                                                                                                                                                                                                                                                                                                                                                                                                                                                                                                                                                                                                                                                                                                                 | Hôpital Bichat Claude Bernard, Laboratoire de Virologie                   | IAME UMR1137 Inserm, Université de Paris, Hôpital Bichat                                                                                   | Antoine Bridier, Amélie Recoing, Quentin Le Hingrat, Lena Daniel, Shiam Hamri, Gilles Collin, Alexandre Storto, Mélanie Bertine, Charlotte Charpentier, Nadhira Houhou-Fidouh, Diane Descamps, Benoit Visseaux                                                                                                                                             |                                                                                                                                                                     |
| EPI_ISL_833433                                                                                                                                                                                                                                                                                                                                                                                                                                                                                                                                                                                                                                                                                                                                                                                                                                                                                                                                                                                                                                                                                                                                                                                                                                                                                                                                                                                                                                                                                                                                                                                                                                                                                                                                                                                                                                                                                                                                                                                                                                                                                                                                                                                                                                                                                                                                                                                                                                                                                                                                                                                                                                                                                                                                                                                                                                                                                                                                                                                                                                                                                                                                                                                                                                                                                                                                                                                                                                                                                                                                                                                                                                                                                                                                                                                                                                                                                                 | UZA/UAntwerpen (BIS lab), University Hospital Antwerp, Edegem, Belgium    | Laboratory of Medical Microbiology, University of Antwerp, Campus Drie Eiken, S6.26, Universiteitsplein 1, 2610, Wilrijk, Antwerp, Belgium | Basil Britto Xavier, Jasmine Coppens, Sahaya Glingston Rajakani, Christine Lammens, Veerle Matheussen, Herman Goossens                                                                                                                                                                                                                                     |                                                                                                                                                                     |
| EPI_ISL_833434, EPI_ISL_833456, EPI_ISL_833481, EPI_ISL_833483, EPI_ISL_833484, EPI_ISL_833486                                                                                                                                                                                                                                                                                                                                                                                                                                                                                                                                                                                                                                                                                                                                                                                                                                                                                                                                                                                                                                                                                                                                                                                                                                                                                                                                                                                                                                                                                                                                                                                                                                                                                                                                                                                                                                                                                                                                                                                                                                                                                                                                                                                                                                                                                                                                                                                                                                                                                                                                                                                                                                                                                                                                                                                                                                                                                                                                                                                                                                                                                                                                                                                                                                                                                                                                                                                                                                                                                                                                                                                                                                                                                                                                                                                                                 | UZA/UAntwerpen (BIS lab), University Hospital Antwerp, Edegem, Belgium    | Laboratory of Medical Microbiology, University of Antwerp, Campus Drie Eiken, S6.26, Universiteitsplein 1, 2610, Wilrijk, Antwerp, Belgium | Basil Britto Xavier, Jasmine Coppens, Christine Lammens, Veerle Matheussen, Herman Goossens                                                                                                                                                                                                                                                                |                                                                                                                                                                     |
| EPI_ISL_837834, EPI_ISL_837835, EPI_ISL_837836, EPI_ISL_838315, EPI_ISL_838316, EPI_ISL_838318, EPI_ISL_838319, EPI_ISL_838321, EPI_ISL_838322, EPI_ISL_838325, EPI_ISL_838326, EPI_ISL_838328, EPI_ISL_838329, EPI_ISL_838330, EPI_ISL_838332, EPI_ISL_838333, EPI_ISL_838334, EPI_ISL_838335, EPI_ISL_838337, EPI_ISL_838338, EPI_ISL_838339, EPI_ISL_838340, EPI_ISL_838341, EPI_ISL_838342                                                                                                                                                                                                                                                                                                                                                                                                                                                                                                                                                                                                                                                                                                                                                                                                                                                                                                                                                                                                                                                                                                                                                                                                                                                                                                                                                                                                                                                                                                                                                                                                                                                                                                                                                                                                                                                                                                                                                                                                                                                                                                                                                                                                                                                                                                                                                                                                                                                                                                                                                                                                                                                                                                                                                                                                                                                                                                                                                                                                                                                                                                                                                                                                                                                                                                                                                                                                                                                                                                                 | see above                                                                 | University of Exeter                                                                                                                       | COVID-19 Genomics UK (COG-UK) Consortium                                                                                                                                                                                                                                                                                                                   |                                                                                                                                                                     |
| EPI_ISL_849148, EPI_ISL_849149, EPI_ISL_849150, EPI_ISL_849151, EPI_ISL_849152, EPI_ISL_849153, EPI_ISL_849154, EPI_ISL_849155, EPI_ISL_849156, EPI_ISL_849157, EPI_ISL_849158, EPI_ISL_849159, EPI_ISL_849160, EPI_ISL_849161, EPI_ISL_849162, EPI_ISL_849163, EPI_ISL_849164, EPI_ISL_849165, EPI_ISL_849166, EPI_ISL_849167, EPI_ISL_849168, EPI_ISL_849169, EPI_ISL_849170, EPI_ISL_849171, EPI_ISL_849172, EPI_ISL_849173, EPI_ISL_849174, EPI_ISL_849175, EPI_ISL_849176, EPI_ISL_849177, EPI_ISL_849178, EPI_ISL_849179, EPI_ISL_849180, EPI_ISL_849181, EPI_ISL_849182, EPI_ISL_849183, EPI_ISL_849184, EPI_ISL_849185, EPI_ISL_849186, EPI_ISL_849187, EPI_ISL_849188, EPI_ISL_849189, EPI_ISL_849190, EPI_ISL_849191, EPI_ISL_849192, EPI_ISL_849193, EPI_ISL_849194, EPI_ISL_849195, EPI_ISL_849196, EPI_ISL_849197, EPI_ISL_849198, EPI_ISL_849199, EPI_ISL_849200, EPI_ISL_849201, EPI_ISL_849202, EPI_ISL_849203, EPI_ISL_849204, EPI_ISL_849205, EPI_ISL_849206, EPI_ISL_849207, EPI_ISL_849208, EPI_ISL_849209, EPI_ISL_849210, EPI_ISL_849211, EPI_ISL_849212, EPI_ISL_849213, EPI_ISL_849214, EPI_ISL_849215, EPI_ISL_849216, EPI_ISL_849217, EPI_ISL_849218, EPI_ISL_849219, EPI_ISL_849220, EPI_ISL_849221, EPI_ISL_849222, EPI_ISL_849223, EPI_ISL_849224, EPI_ISL_849225, EPI_ISL_849226, EPI_ISL_849227, EPI_ISL_849228, EPI_ISL_849229, EPI_ISL_849230, EPI_ISL_849231, EPI_ISL_849232, EPI_ISL_849233, EPI_ISL_849234, EPI_ISL_849235, EPI_ISL_849236, EPI_ISL_849237, EPI_ISL_849238, EPI_ISL_849239, EPI_ISL_849240, EPI_ISL_849241, EPI_ISL_849242, EPI_ISL_849243, EPI_ISL_849244, EPI_ISL_849245, EPI_ISL_849246, EPI_ISL_849247, EPI_ISL_849248, EPI_ISL_849249, EPI_ISL_849250, EPI_ISL_849251, EPI_ISL_849252, EPI_ISL_849253, EPI_ISL_849254, EPI_ISL_849255, EPI_ISL_849256, EPI_ISL_849257, EPI_ISL_849258, EPI_ISL_849259, EPI_ISL_849260, EPI_ISL_849261, EPI_ISL_849262, EPI_ISL_849263, EPI_ISL_849264, EPI_ISL_849265, EPI_ISL_849266, EPI_ISL_849267, EPI_ISL_849268, EPI_ISL_849269, EPI_ISL_849270, EPI_ISL_849271, EPI_ISL_849272, EPI_ISL_849273, EPI_ISL_849274, EPI_ISL_849275, EPI_ISL_849276, EPI_ISL_849277, EPI_ISL_849278, EPI_ISL_849279, EPI_ISL_849280, EPI_ISL_849281, EPI_ISL_849282, EPI_ISL_849283, EPI_ISL_849284, EPI_ISL_849285, EPI_ISL_849286, EPI_ISL_849287, EPI_ISL_849288, EPI_ISL_849289, EPI_ISL_849290, EPI_ISL_849291, EPI_ISL_849292, EPI_ISL_849293, EPI_ISL_849294, EPI_ISL_849295, EPI_ISL_849296, EPI_ISL_849297, EPI_ISL_849298, EPI_ISL_849299, EPI_ISL_849300, EPI_ISL_849301, EPI_ISL_849302, EPI_ISL_849303, EPI_ISL_849304, EPI_ISL_849305, EPI_ISL_849306, EPI_ISL_849307, EPI_ISL_849308, EPI_ISL_849309, EPI_ISL_849310, EPI_ISL_849311, EPI_ISL_849312, EPI_ISL_849313, EPI_ISL_849314, EPI_ISL_849315, EPI_ISL_849316, EPI_ISL_849317, EPI_ISL_849318, EPI_ISL_849319, EPI_ISL_849320, EPI_ISL_849321, EPI_ISL_849322, EPI_ISL_849323, EPI_ISL_849324, EPI_ISL_849325, EPI_ISL_849326, EPI_ISL_849327, EPI_ISL_849328, EPI_ISL_849329, EPI_ISL_849330, EPI_ISL_849331, EPI_ISL_849332, EPI_ISL_849333, EPI_ISL_849334, EPI_ISL_849335, EPI_ISL_849336, EPI_ISL_849337, EPI_ISL_849338, EPI_ISL_849339, EPI_ISL_849340, EPI_ISL_849341, EPI_ISL_849342, EPI_ISL_849343, EPI_ISL_849344, EPI_ISL_849345, EPI_ISL_849346, EPI_ISL_849347, EPI_ISL_849348, EPI_ISL_849349, EPI_ISL_849350, EPI_ISL_849351, EPI_ISL_849352, EPI_ISL_849353, EPI_ISL_849354, EPI_ISL_849355, EPI_ISL_849356, EPI_ISL_849357, EPI_ISL_849358, EPI_ISL_849359, EPI_ISL_849360, EPI_ISL_849361, EPI_ISL_849362, EPI_ISL_849363, EPI_ISL_849364, EPI_ISL_849365, EPI_ISL_849366, EPI_ISL_849367, EPI_ISL_849368, EPI_ISL_849369, EPI_ISL_849370, EPI_ISL_849371, EPI_ISL_849372, EPI_ISL_849373, EPI_ISL_849374, EPI_ISL_849375, EPI_ISL_849376, EPI_ISL_849377, EPI_ISL_849378, EPI_ISL_849379, EPI_ISL_849380, EPI_ISL_849381, EPI_ISL_849382 | see above                                                                 | Servicio Virosis Respiratorias-Departamento Virologia-INEI                                                                                 | Instituto Nacional Enfermedades Infecciosas C.G.Malbran                                                                                                                                                                                                                                                                                                    | Baumeister E., Avaro M., Benedetti E., Russo M., Dattero ME, Pontoriero A., Cisterna D., Molina V., Perandones C., Tuduri E., Lorenzo F., Poklepovich T., Campos J. |
| EPI_ISL_850180                                                                                                                                                                                                                                                                                                                                                                                                                                                                                                                                                                                                                                                                                                                                                                                                                                                                                                                                                                                                                                                                                                                                                                                                                                                                                                                                                                                                                                                                                                                                                                                                                                                                                                                                                                                                                                                                                                                                                                                                                                                                                                                                                                                                                                                                                                                                                                                                                                                                                                                                                                                                                                                                                                                                                                                                                                                                                                                                                                                                                                                                                                                                                                                                                                                                                                                                                                                                                                                                                                                                                                                                                                                                                                                                                                                                                                                                                                 | National Institute of Laboratory Medicine and Referral Center             | Genomic Research Lab, BCSIR                                                                                                                | Barna Goswami, Mohammad Samir Uzzaman, Eshrar Osman, Md. Ahashan Habib, Shahina Akter, Tanjina Akhtar Banu, Abu Sayeed Mohammad Mahmud, Md. Murshed Hasan Sarkar, Iffat Jahan, Md. Saddam Hossain, Tasnim Nafisa, Md. Maruf Ahmed Molla, Mahmuda Yeasmin, Asish Kumar Ghosh, A. K. M. Shamsuzzaman, Md. Salim Khan.                                        |                                                                                                                                                                     |
| EPI_ISL_856756, EPI_ISL_856757, EPI_ISL_856758, EPI_ISL_856759, EPI_ISL_856760, EPI_ISL_856761, EPI_ISL_856762, EPI_ISL_856763, EPI_ISL_856764, EPI_ISL_856765, EPI_ISL_856766, EPI_ISL_856767, EPI_ISL_856768, EPI_ISL_856769, EPI_ISL_856770, EPI_ISL_856771, EPI_ISL_856772, EPI_ISL_856773, EPI_ISL_856774, EPI_ISL_856775, EPI_ISL_856776, EPI_ISL_856777, EPI_ISL_856778, EPI_ISL_856779, EPI_ISL_856780, EPI_ISL_856781, EPI_ISL_856782, EPI_ISL_856783, EPI_ISL_856784, EPI_ISL_856785, EPI_ISL_856786, EPI_ISL_856787, EPI_ISL_856788, EPI_ISL_856789, EPI_ISL_856790, EPI_ISL_856791, EPI_ISL_856792, EPI_ISL_856793, EPI_ISL_856794, EPI_ISL_856795, EPI_ISL_856796, EPI_ISL_856797, EPI_ISL_856798, EPI_ISL_856799, EPI_ISL_856800, EPI_ISL_856801                                                                                                                                                                                                                                                                                                                                                                                                                                                                                                                                                                                                                                                                                                                                                                                                                                                                                                                                                                                                                                                                                                                                                                                                                                                                                                                                                                                                                                                                                                                                                                                                                                                                                                                                                                                                                                                                                                                                                                                                                                                                                                                                                                                                                                                                                                                                                                                                                                                                                                                                                                                                                                                                                                                                                                                                                                                                                                                                                                                                                                                                                                                                                 | see above                                                                 | Servicio Virosis Respiratorias-Departamento Virologia-INEI                                                                                 | Instituto Nacional Enfermedades Infecciosas C.G.Malbran                                                                                                                                                                                                                                                                                                    | Baumeister E., Avaro M., Benedetti E., Russo M., Dattero ME, Pontoriero A., Cisterna D., Molina V., Perandones C., Tuduri E., Lorenzo F., Poklepovich T., Campos J. |
| EPI_ISL_856972                                                                                                                                                                                                                                                                                                                                                                                                                                                                                                                                                                                                                                                                                                                                                                                                                                                                                                                                                                                                                                                                                                                                                                                                                                                                                                                                                                                                                                                                                                                                                                                                                                                                                                                                                                                                                                                                                                                                                                                                                                                                                                                                                                                                                                                                                                                                                                                                                                                                                                                                                                                                                                                                                                                                                                                                                                                                                                                                                                                                                                                                                                                                                                                                                                                                                                                                                                                                                                                                                                                                                                                                                                                                                                                                                                                                                                                                                                 | The Institute of Tropical Medicine in Antwerp, Belgium                    | UAntwerp, Laboratory of Medical Microbiology, Campus Drie Eiken S6.26, Universiteitsplein 1, 2610, Wilrijk, Antwerp, Belgium               | Basil Britto Xavier, Jasmine Coppens, Christine Lammens, Veerle Matheussen, Herman Goossens                                                                                                                                                                                                                                                                |                                                                                                                                                                     |
| EPI_ISL_856973, EPI_ISL_857040, EPI_ISL_857041, EPI_ISL_857042, EPI_ISL_857052, EPI_ISL_857053, EPI_ISL_857054, EPI_ISL_857055                                                                                                                                                                                                                                                                                                                                                                                                                                                                                                                                                                                                                                                                                                                                                                                                                                                                                                                                                                                                                                                                                                                                                                                                                                                                                                                                                                                                                                                                                                                                                                                                                                                                                                                                                                                                                                                                                                                                                                                                                                                                                                                                                                                                                                                                                                                                                                                                                                                                                                                                                                                                                                                                                                                                                                                                                                                                                                                                                                                                                                                                                                                                                                                                                                                                                                                                                                                                                                                                                                                                                                                                                                                                                                                                                                                 | Platform BIS UZA/UAntwerpen, University Hospital Antwerp, Edegem, Belgium | UAntwerp, Laboratory of Medical Microbiology, Campus Drie Eiken S6.26, Universiteitsplein 1, 2610, Wilrijk, Antwerp, Belgium               | Basil Britto Xavier, Jasmine Coppens, Christine Lammens, Veerle Matheussen, Herman Goossens                                                                                                                                                                                                                                                                |                                                                                                                                                                     |
| EPI_ISL_860093, EPI_ISL_860094                                                                                                                                                                                                                                                                                                                                                                                                                                                                                                                                                                                                                                                                                                                                                                                                                                                                                                                                                                                                                                                                                                                                                                                                                                                                                                                                                                                                                                                                                                                                                                                                                                                                                                                                                                                                                                                                                                                                                                                                                                                                                                                                                                                                                                                                                                                                                                                                                                                                                                                                                                                                                                                                                                                                                                                                                                                                                                                                                                                                                                                                                                                                                                                                                                                                                                                                                                                                                                                                                                                                                                                                                                                                                                                                                                                                                                                                                 | MEPHI, Aix Marseille University                                           | MEPHI, Aix Marseille University                                                                                                            | Anthony Levasseur                                                                                                                                                                                                                                                                                                                                          |                                                                                                                                                                     |
| EPI_ISL_861492                                                                                                                                                                                                                                                                                                                                                                                                                                                                                                                                                                                                                                                                                                                                                                                                                                                                                                                                                                                                                                                                                                                                                                                                                                                                                                                                                                                                                                                                                                                                                                                                                                                                                                                                                                                                                                                                                                                                                                                                                                                                                                                                                                                                                                                                                                                                                                                                                                                                                                                                                                                                                                                                                                                                                                                                                                                                                                                                                                                                                                                                                                                                                                                                                                                                                                                                                                                                                                                                                                                                                                                                                                                                                                                                                                                                                                                                                                 | Cerballiance Côte d'Azur                                                  | CERBA LAB                                                                                                                                  | Barrieu-Moussat S; Adoul O; Boudjahem Z; Roman E; Chaudet L; Martin L; Aankour N; Jaugin P; Gastaud S; Prots L.                                                                                                                                                                                                                                            |                                                                                                                                                                     |
| EPI_ISL_861496                                                                                                                                                                                                                                                                                                                                                                                                                                                                                                                                                                                                                                                                                                                                                                                                                                                                                                                                                                                                                                                                                                                                                                                                                                                                                                                                                                                                                                                                                                                                                                                                                                                                                                                                                                                                                                                                                                                                                                                                                                                                                                                                                                                                                                                                                                                                                                                                                                                                                                                                                                                                                                                                                                                                                                                                                                                                                                                                                                                                                                                                                                                                                                                                                                                                                                                                                                                                                                                                                                                                                                                                                                                                                                                                                                                                                                                                                                 | Cerballiance Côte d'Azur                                                  | CERBA LAB                                                                                                                                  | Bausset O; Juvet O; Prots L.                                                                                                                                                                                                                                                                                                                               |                                                                                                                                                                     |
| EPI_ISL_865163                                                                                                                                                                                                                                                                                                                                                                                                                                                                                                                                                                                                                                                                                                                                                                                                                                                                                                                                                                                                                                                                                                                                                                                                                                                                                                                                                                                                                                                                                                                                                                                                                                                                                                                                                                                                                                                                                                                                                                                                                                                                                                                                                                                                                                                                                                                                                                                                                                                                                                                                                                                                                                                                                                                                                                                                                                                                                                                                                                                                                                                                                                                                                                                                                                                                                                                                                                                                                                                                                                                                                                                                                                                                                                                                                                                                                                                                                                 | University of Exeter                                                      | COVID-19 Genomics UK (COG-UK) Consortium                                                                                                   | Ben Temperton, Aaron Jeffries, Michelle Michelsen, Joanna Warwick-Dugdale, Audrey Farbos, Robyn Manley, Stephen Michell, Jane Masoli                                                                                                                                                                                                                       |                                                                                                                                                                     |
| EPI_ISL_877551                                                                                                                                                                                                                                                                                                                                                                                                                                                                                                                                                                                                                                                                                                                                                                                                                                                                                                                                                                                                                                                                                                                                                                                                                                                                                                                                                                                                                                                                                                                                                                                                                                                                                                                                                                                                                                                                                                                                                                                                                                                                                                                                                                                                                                                                                                                                                                                                                                                                                                                                                                                                                                                                                                                                                                                                                                                                                                                                                                                                                                                                                                                                                                                                                                                                                                                                                                                                                                                                                                                                                                                                                                                                                                                                                                                                                                                                                                 | Institute of Microbiology, Universidad San Francisco de Quito             | Institute of Microbiology, Universidad San Francisco de Quito                                                                              | Belén Prado-Vivar, Sully Márquez, Juan José Guadalupe, Monica Becerra-Wong, Bernardo Gutiérrez, Marcos DiStefano, Verónica Barragán, Patricio Rojas-Silva, Gabriel Trueba, Michelle Grunauer, Paúl Cárdenas                                                                                                                                                |                                                                                                                                                                     |
| EPI_ISL_877552, EPI_ISL_877553, EPI_ISL_877554, EPI_ISL_877555                                                                                                                                                                                                                                                                                                                                                                                                                                                                                                                                                                                                                                                                                                                                                                                                                                                                                                                                                                                                                                                                                                                                                                                                                                                                                                                                                                                                                                                                                                                                                                                                                                                                                                                                                                                                                                                                                                                                                                                                                                                                                                                                                                                                                                                                                                                                                                                                                                                                                                                                                                                                                                                                                                                                                                                                                                                                                                                                                                                                                                                                                                                                                                                                                                                                                                                                                                                                                                                                                                                                                                                                                                                                                                                                                                                                                                                 | Institute of Microbiology, Universidad San Francisco de Quito             | Institute of Microbiology, Universidad San Francisco de Quito                                                                              | Belén Prado-Vivar, Sully Márquez, Juan José Guadalupe, Monica Becerra-Wong, Bernardo Gutiérrez, Kylen Briones, Edmundo Encalada, Ninfa Hernandez, Francisco Cordova, Verónica Barragán, Patricio Rojas-Silva, Gabriel Trueba, Michelle Grunauer, Paúl Cárdenas                                                                                             |                                                                                                                                                                     |

|                                                                                                                                                                                  |                                                                                                                                    |                                                                                                                                                                                                                                                                              |                                                                                                                                                                                                                                                                                                                                                                                                                                                                                                                                                                                                                                                                                                                                                                                                         |
|----------------------------------------------------------------------------------------------------------------------------------------------------------------------------------|------------------------------------------------------------------------------------------------------------------------------------|------------------------------------------------------------------------------------------------------------------------------------------------------------------------------------------------------------------------------------------------------------------------------|---------------------------------------------------------------------------------------------------------------------------------------------------------------------------------------------------------------------------------------------------------------------------------------------------------------------------------------------------------------------------------------------------------------------------------------------------------------------------------------------------------------------------------------------------------------------------------------------------------------------------------------------------------------------------------------------------------------------------------------------------------------------------------------------------------|
| EPI_ISL_877556, EPI_ISL_877557,<br>EPI_ISL_877558, EPI_ISL_877559,<br>EPI_ISL_877560<br><br>EPI_ISL_877561                                                                       | Institute of Microbiology, Universidad San Francisco de Quito<br><br>Institute of Microbiology, Universidad San Francisco de Quito | Institute of Microbiology, Universidad San Francisco de Quito<br><br>Institute of Microbiology, Universidad San Francisco de Quito                                                                                                                                           | Belén Prado-Vivar, Sully Márquez, Juan José Guadalupe, Monica Becerra-Wong, Bernardo Gutiérrez, Eulalia Pazmiño, Katalina Pacheco, Verónica Barragán, Patricio Rojas-Silva, Gabriel Trueba, Michelle Grunauer, Paúl Cárdenas<br><br>Belén Prado-Vivar, Sully Márquez, Juan José Guadalupe, Monica Becerra-Wong, Bernardo Gutiérrez, Manuel Jibaja, Maribel Cruz, Nelson Remache, Milton Tobar, Alexandra Noboa, Ana Diaz, Diego Morocho, Sayra Caiza, Diego Mora, Edgar Espinoza, Pablo Flores, Juan Monge, Vanesa Ramirez, Cristian Pelaez, Fernando Martinez, Jorge Caamaño, Marco Jiménez, Hector Moya, Veronica Paredes, Eduardo Males, Fabricio Picoita, Andres Moreno, Fernanda Garcia, Viviana Medina, Verónica Barragán, Patricio Rojas-Silva, Gabriel Trueba, Michelle Grunauer, Paúl Cárdenas |
| EPI_ISL_877562                                                                                                                                                                   | Institute of Microbiology, Universidad San Francisco de Quito                                                                      | Institute of Microbiology, Universidad San Francisco de Quito                                                                                                                                                                                                                | Belén Prado-Vivar, Sully Márquez, Juan José Guadalupe, Monica Becerra-Wong, Bernardo Gutiérrez, Piedad Villacis, Rosa Avila, Adriana Arnao, David Acosta-España, Alvaro Davalos de Castro, Verónica Barragán, Patricio Rojas-Silva, Gabriel Trueba, Michelle Grunauer, Paúl Cárdenas                                                                                                                                                                                                                                                                                                                                                                                                                                                                                                                    |
| EPI_ISL_882882, EPI_ISL_882883,<br>EPI_ISL_882896                                                                                                                                | Unit of Infectious Diseases, Azienda Socio Sanitaria<br>Territoriale di Cremona                                                    | Laboratory of Infectious Diseases, Department of Biomedical<br>and Clinical Sciences L. Sacco, University of Milan                                                                                                                                                           | Antonio Coluccello, Matteo Giorgi Pierfranceschi, Sophie Testa, Chiara Fornabaio, Alice Ferraresi, Fabio Sagradi, Alessia Lai, Annalisa Bergna, Carla Della Ventura, Claudia Balotta, Massimo Galli, Gianguglielmo Zehender on behalf of SARS-CoV-2 ITALIAN RESEARCH ENTERPRISE-(SCIRE)<br>Collaborative Group                                                                                                                                                                                                                                                                                                                                                                                                                                                                                          |
| EPI_ISL_882926, EPI_ISL_882931<br><br>EPI_ISL_882934<br><br>EPI_ISL_882939                                                                                                       | INMI Lazzaro Spallanzani IRCCS<br><br>Sant'Eugenio/CTO ASL Roma 2<br><br>Azienda Ospedaliera San Giovanni Addolorata               | INMI Lazzaro Spallanzani IRCCS<br><br>INMI Lazzaro Spallanzani IRCCS<br><br>INMI Lazzaro Spallanzani IRCCS                                                                                                                                                                   | B Bartolini, O Butera, C.E.M Gruber, M Rueca, F Messina, E Giombini, MR Capobianchi, A Di Caro<br><br>B Bartolini, O Butera, C.E.M Gruber, M Rueca, F Messina, E Giombini, F Bondanini, GC Cocciolillo, C Disegni, MR Capobianchi, A Di Caro<br><br>B Bartolini, O Butera, C.E.M Gruber, M Rueca, F Messina, E Giombini, M Gaudio, PM Placanica, MR Capobianchi, A Di Caro                                                                                                                                                                                                                                                                                                                                                                                                                              |
| EPI_ISL_886157, EPI_ISL_887106,<br>EPI_ISL_887107, EPI_ISL_887108,<br>EPI_ISL_887109, EPI_ISL_887110,<br>EPI_ISL_887111, EPI_ISL_887112,<br>EPI_ISL_887113, EPI_ISL_887114       | Institute of Medical Microbiology and Virology, University<br>Hospital Carl Gustav Carus, TU Dresden                               | DRESDEN-concept Genome Center, CMCB, TU Dresden                                                                                                                                                                                                                              | Beil J., Brown T., Büttner L., Gscheidel N., Hochauf-Stange K., Klemroth S., Lindemann D., Mehnert G., Petzold A., Reinhardt S., Rost F., Sameith K., Winkler S.                                                                                                                                                                                                                                                                                                                                                                                                                                                                                                                                                                                                                                        |
| EPI_ISL_887588, EPI_ISL_887590,<br>EPI_ISL_888590, EPI_ISL_888592,<br>EPI_ISL_888595, EPI_ISL_888623,<br>EPI_ISL_888626, EPI_ISL_888627,<br>EPI_ISL_888818<br><br>EPI_ISL_888821 | Platform BIS UZA/UAntwerpen, University Hospital Antwerp,<br>Edegem, Belgium<br><br>GZA Hospital Sint-Augustinus                   | UAntwerp, Laboratory of Medical Microbiology, Campus Drie<br>Eiken S6.26, Universiteitsplein 1, 2610, Wilrijk, Antwerp,<br>Belgium<br><br>UAntwerp, Laboratory of Medical Microbiology, Campus Drie<br>Eiken S6.26, Universiteitsplein 1, 2610, Wilrijk, Antwerp,<br>Belgium | Basil Britto Xavier, Jasmine Coppens, Christine Lammens, Veerle Matheoussen, Herman Goossens<br><br>Basil Britto Xavier, Jasmine Coppens, Christine Lammens, Veerle Matheoussen, Herman Goossens                                                                                                                                                                                                                                                                                                                                                                                                                                                                                                                                                                                                        |
| EPI_ISL_888822, EPI_ISL_888823,<br>EPI_ISL_888824, EPI_ISL_888825                                                                                                                | GZA Sint-Augustinus Hospital                                                                                                       | UAntwerp, Laboratory of Medical Microbiology, Campus Drie<br>Eiken S6.26, Universiteitsplein 1, 2610, Wilrijk, Antwerp,<br>Belgium                                                                                                                                           | Basil Britto Xavier, Jasmine Coppens, Christine Lammens, Veerle Matheoussen, Herman Goossens                                                                                                                                                                                                                                                                                                                                                                                                                                                                                                                                                                                                                                                                                                            |

We gratefully acknowledge the following Authors from the Originating laboratories responsible for obtaining the specimens, as well as the Submitting laboratories where the genome data were generated and shared via GISAID, on which this research is based.

All Submitters of data may be contacted directly via [www.gisaid.org](http://www.gisaid.org)

Authors are sorted alphabetically.

| Accession ID                                                                                                                   | Originating Laboratory                                                                  | Submitting Laboratory                                                                   | Authors                                                                                                                                                                                                                                                                                                                                                                                        |
|--------------------------------------------------------------------------------------------------------------------------------|-----------------------------------------------------------------------------------------|-----------------------------------------------------------------------------------------|------------------------------------------------------------------------------------------------------------------------------------------------------------------------------------------------------------------------------------------------------------------------------------------------------------------------------------------------------------------------------------------------|
| EPI_ISL_402132                                                                                                                 | Wuhan Jinyintan Hospital                                                                | Hubei Provincial Center for Disease Control and Prevention                              | Bin Fang, Xiang Li, Xiao Yu, Linlin Liu, Bo Yang, Faxian Zhan, Guojun Ye, Xixiang Huo, Junqiang Xu, Bo Yu, Kun Cai, Jing Li, Yongzhong Jiang.                                                                                                                                                                                                                                                  |
| EPI_ISL_407976                                                                                                                 | KU Leuven, Clinical and Epidemiological Virology                                        | KU Leuven, Clinical and Epidemiological Virology                                        | Bert Vanmechelen, Elke Wollants, Annabel Rector, Els Keyaerts, Lies Laenen, Marc Van Ranst, and Piet Maes                                                                                                                                                                                                                                                                                      |
| EPI_ISL_411951                                                                                                                 | Unit for Laboratory Development and Technology Transfer, Public Health Agency of Sweden | Unit for Laboratory Development and Technology Transfer, Public Health Agency of Sweden | Bengner,M., Palmerus,M., Lindsjo,O., Lind Karlberg,M., Monteil,V., Appelberg,S., Brave,A., Muradrasoli,S. and Tegmark-Wisell,K.                                                                                                                                                                                                                                                                |
| EPI_ISL_412459                                                                                                                 | Jingzhou Center for Disease Control and Prevention                                      | Hubei Provincial Center for Disease Control and Prevention                              | Bin Fang, Xiang Li, Xiao Yu, Linlin Liu, Bo Yang, Faxian Zhan, Guojun Ye, Xixiang Huo, Junqiang Xu, Bo Yu, Kun Cai, Jing Li, Maoyi Chen,Jie Hu, Chunlin Mao, Yongzhong Jiang.                                                                                                                                                                                                                  |
| EPI_ISL_412898, EPI_ISL_412899, EPI_ISL_412900                                                                                 | Wuhan Jinyintan Hospital                                                                | Hubei Provincial Center for Disease Control and Prevention                              | Bin Fang, Xiang Li, Xiao Yu, Linlin Liu, Bo Yang, Faxian Zhan, Guojun Ye, Xixiang Huo, Junqiang Xu, Bo Yu, Kun Cai, Jing Li, Yongzhong Jiang.                                                                                                                                                                                                                                                  |
| EPI_ISL_412978                                                                                                                 | The Central Hospital Of Wuhan                                                           | Hubei Provincial Center for Disease Control and Prevention                              | Bin Fang, Xiang Li, Xiao Yu, Linlin Liu, Bo Yang, Faxian Zhan, Guojun Ye, Xixiang Huo, Junqiang Xu, Bo Yu, Kun Cai, Jing Li, Yongzhong Jiang.                                                                                                                                                                                                                                                  |
| EPI_ISL_412979, EPI_ISL_412980                                                                                                 | Union Hospital of Tongji Medical College, Huazhong University of Science and Technology | Hubei Provincial Center for Disease Control and Prevention                              | Bin Fang, Xiang Li, Xiao Yu, Linlin Liu, Bo Yang, Faxian Zhan, Guojun Ye, Xixiang Huo, Junqiang Xu, Bo Yu, Kun Cai, Jing Li, Yongzhong Jiang.                                                                                                                                                                                                                                                  |
| EPI_ISL_412981                                                                                                                 | CR&WISCO GENERAL HOSPITAL                                                               | Hubei Provincial Center for Disease Control and Prevention                              | Bin Fang, Xiang Li, Xiao Yu, Linlin Liu, Bo Yang, Faxian Zhan, Guojun Ye, Xixiang Huo, Junqiang Xu, Bo Yu, Kun Cai, Jing Li, Yongzhong Jiang.                                                                                                                                                                                                                                                  |
| EPI_ISL_412982                                                                                                                 | Wuhan Lung Hospital                                                                     | Hubei Provincial Center for Disease Control and Prevention                              | Bin Fang, Xiang Li, Xiao Yu, Linlin Liu, Bo Yang, Faxian Zhan, Guojun Ye, Xixiang Huo, Junqiang Xu, Bo Yu, Kun Cai, Jing Li, Yongzhong Jiang.                                                                                                                                                                                                                                                  |
| EPI_ISL_412983                                                                                                                 | Tianmen Center for Disease Control and Prevention                                       | Hubei Provincial Center for Disease Control and Prevention                              | Bin Fang, Xiang Li, Xiao Yu, Linlin Liu, Bo Yang, Faxian Zhan, Guojun Ye, Xixiang Huo, Junqiang Xu, Bo Yu, Kun Cai, Jing Li, YiFa Zhu, Yangyang Tao,Xierong Li,Yongzhong Jiang.                                                                                                                                                                                                                |
| EPI_ISL_414414                                                                                                                 | Pathology Queensland                                                                    | Public Health Virology Laboratory                                                       | Bixing Huang, Alyssa Pyke, Amanda De Jong, Andrew Van Den Hurk, Carmel Taylor, David Warrilow, Doris Genge, Elisabeth Gamez, Glen Hewitson, Ian Maxwell Mackay, Inga Sultana, Jamie McMahon, Jean Barcelon, Judy Northill, Mitchell Finger, Natalie Simpson, Neelima Nair, Peter Burtonclay, Peter Moore, Sarah Wheatley, Sean Moody, Sonja Hall-Mendelin, Timothy Gardam, and Frederick Moore |
| EPI_ISL_415153                                                                                                                 | KU Leuven, Clinical and Epidemiological Virology                                        | KU Leuven, Clinical and Epidemiological Virology                                        | Bert Vanmechelen, Joan Marti-Carreras, Tony Wawina, Marc Van Ranst, Piet Maes                                                                                                                                                                                                                                                                                                                  |
| EPI_ISL_415154                                                                                                                 | KU Leuven, Clinical and Epidemiological Virology                                        | KU Leuven, Clinical and Epidemiological Virology                                        | Bert Vanmechelen, Joan Marti-Carreras, Tony Wawina, Marc Van Ranst, Piet Maes.                                                                                                                                                                                                                                                                                                                 |
| EPI_ISL_415155                                                                                                                 | KU Leuven, Clinical and Epidemiological Virology                                        | KU Leuven, Clinical and Epidemiological Virology                                        | Bert Vanmechelen, Joan Marti-Carreras, Tony Wawina, Marc Van Ranst, Piet Maes                                                                                                                                                                                                                                                                                                                  |
| EPI_ISL_415156, EPI_ISL_415157, EPI_ISL_415158, EPI_ISL_415159                                                                 | KU Leuven, Clinical and Epidemiological Virology                                        | KU Leuven, Clinical and Epidemiological Virology                                        | Bert Vanmechelen, Joan Marti-Carreras, Tony Wawina, Piet Maes                                                                                                                                                                                                                                                                                                                                  |
| EPI_ISL_416467, EPI_ISL_416468, EPI_ISL_416469, EPI_ISL_416470, EPI_ISL_416471, EPI_ISL_416472, EPI_ISL_416475, EPI_ISL_416476 | KU Leuven, Clinical and Epidemiological Virology                                        | KU Leuven, Clinical and Epidemiological Virology                                        | Bert Vanmechelen, Tony Wawina, Joan Marti-Carreras, Piet Maes                                                                                                                                                                                                                                                                                                                                  |
| EPI_ISL_417031                                                                                                                 | Pathology Queensland                                                                    | Public Health Virology Laboratory                                                       | Bixing Huang, Alyssa Pyke, Amanda De Jong, Andrew Van Den Hurk, Carmel Taylor, David Warrilow, Doris Genge, Elisabeth Gamez, Glen Hewitson, Ian Maxwell Mackay, Inga Sultana, Jamie McMahon, Jean Barcelon, Judy Northill, Mitchell Finger, Natalie Simpson, Neelima Nair, Peter Burtonclay, Peter Moore, Sarah Wheatley, Sean Moody, Sonja Hall-Mendelin, Timothy Gardam, and Frederick Moore |
| EPI_ISL_417032                                                                                                                 | Rockhampton Base Hospital                                                               | Public Health Virology Laboratory                                                       | Bixing Huang, Alyssa Pyke, Amanda De Jong, Andrew Van Den Hurk, Carmel Taylor, David Warrilow, Doris Genge, Elisabeth Gamez, Glen Hewitson, Ian Maxwell Mackay, Inga Sultana, Jamie McMahon, Jean Barcelon, Judy Northill, Mitchell Finger, Natalie Simpson, Neelima Nair, Peter Burtonclay, Peter Moore, Sarah Wheatley, Sean Moody, Sonja Hall-Mendelin, Timothy Gardam, and Frederick Moore |
| EPI_ISL_417033                                                                                                                 | Sullivan Nicolaidis Pathology                                                           | Public Health Virology Laboratory                                                       | Bixing Huang, Alyssa Pyke, Amanda De Jong, Andrew Van Den Hurk, Carmel Taylor, David Warrilow, Doris Genge, Elisabeth Gamez, Glen Hewitson, Ian Maxwell Mackay, Inga Sultana, Jamie McMahon, Jean Barcelon, Judy Northill, Mitchell Finger, Natalie Simpson, Neelima Nair, Peter Burtonclay, Peter Moore, Sarah Wheatley, Sean Moody, Sonja Hall-Mendelin, Timothy Gardam, and Frederick Moore |
| EPI_ISL_418792, EPI_ISL_418793                                                                                                 | KU Leuven, Clinical and Epidemiological Virology                                        | KU Leuven, Clinical and Epidemiological Virology                                        | Bert Vanmechelen, Tony Wawina, Joan Marti-Carreras, Piet Maes                                                                                                                                                                                                                                                                                                                                  |
| EPI_ISL_418794, EPI_ISL_418795, EPI_ISL_418796, EPI_ISL_418797, EPI_ISL_418798                                                 | KU Leuven, Clinical and Epidemiological Virology                                        | KU Leuven, Clinical and Epidemiological Virology                                        | Bert Vanmechelen, Joan Marti-Carreras, Tony Wawina, Piet Maes                                                                                                                                                                                                                                                                                                                                  |
| EPI_ISL_418799                                                                                                                 | Mater Pathology                                                                         | Public Health Virology Laboratory                                                       | Bixing Huang, Alyssa Pyke, Amanda De Jong, Andrew Van Den Hurk, Carmel Taylor, David Warrilow, Doris Genge, Elisabeth Gamez, Glen Hewitson, Ian Maxwell Mackay, Inga Sultana, Jamie McMahon, Jean Barcelon, Judy Northill, Mitchell Finger, Natalie Simpson, Neelima Nair, Peter Burtonclay, Peter Moore, Sarah Wheatley, Sean Moody, Sonja Hall-Mendelin, Timothy Gardam, and Frederick Moore |
| EPI_ISL_418800                                                                                                                 | KU Leuven, Clinical and Epidemiological Virology                                        | KU Leuven, Clinical and Epidemiological Virology                                        | Bert Vanmechelen, Joan Marti-Carreras, Tony Wawina, Piet Maes                                                                                                                                                                                                                                                                                                                                  |
| EPI_ISL_418801                                                                                                                 | Mater Pathology                                                                         | Public Health Virology Laboratory                                                       | Bixing Huang, Alyssa Pyke, Amanda De Jong, Andrew Van Den Hurk, Carmel Taylor, David Warrilow, Doris Genge, Elisabeth Gamez, Glen Hewitson, Ian Maxwell Mackay, Inga Sultana, Jamie McMahon, Jean Barcelon, Judy Northill, Mitchell Finger, Natalie Simpson, Neelima Nair, Peter Burtonclay, Peter Moore, Sarah Wheatley, Sean Moody, Sonja Hall-Mendelin, Timothy Gardam, and Frederick Moore |
| EPI_ISL_418802, EPI_ISL_418803, EPI_ISL_418804                                                                                 | Pathology Queensland                                                                    | Public Health Virology Laboratory                                                       | Bixing Huang, Alyssa Pyke, Amanda De Jong, Andrew Van Den Hurk, Carmel Taylor, David Warrilow, Doris Genge, Elisabeth Gamez, Glen Hewitson, Ian Maxwell Mackay, Inga Sultana, Jamie McMahon, Jean Barcelon, Judy Northill, Mitchell Finger, Natalie Simpson, Neelima Nair, Peter Burtonclay, Peter Moore, Sarah Wheatley, Sean Moody, Sonja Hall-Mendelin, Timothy Gardam, and Frederick Moore |
| EPI_ISL_418805, EPI_ISL_418806                                                                                                 | KU Leuven, Clinical and Epidemiological Virology                                        | KU Leuven, Clinical and Epidemiological Virology                                        | Bert Vanmechelen, Joan Marti-Carreras, Tony Wawina, Piet Maes                                                                                                                                                                                                                                                                                                                                  |
| EPI_ISL_418807, EPI_ISL_418808                                                                                                 | Pathology Queensland                                                                    | Public Health Virology Laboratory                                                       | Bixing Huang, Alyssa Pyke, Amanda De Jong, Andrew Van Den Hurk, Carmel Taylor, David Warrilow, Doris Genge, Elisabeth Gamez, Glen Hewitson, Ian Maxwell Mackay, Inga Sultana, Jamie McMahon, Jean Barcelon, Judy Northill, Mitchell Finger, Natalie Simpson, Neelima Nair, Peter Burtonclay, Peter Moore, Sarah Wheatley, Sean Moody, Sonja Hall-Mendelin, Timothy Gardam, and Frederick Moore |
| EPI_ISL_418863, EPI_ISL_418981, EPI_ISL_418982, EPI_ISL_418983, EPI_ISL_418984, EPI_ISL_418985, EPI_ISL_418986, EPI_ISL_418987 | KU Leuven, Clinical and Epidemiological Virology                                        | KU Leuven, Clinical and Epidemiological Virology                                        | Bert Vanmechelen, Joan Marti-Carreras, Tony Wawina, Piet Maes                                                                                                                                                                                                                                                                                                                                  |
| EPI_ISL_418988                                                                                                                 | Institute information KU Leuven, Clinical and Epidemiological Virology                  | Institute information KU Leuven, Clinical and Epidemiological Virology                  | Bert Vanmechelen, Joan Marti-Carreras, Tony Wawina, Piet Maes                                                                                                                                                                                                                                                                                                                                  |
| EPI_ISL_418989                                                                                                                 | KU Leuven, Clinical and Epidemiological Virology                                        | KU Leuven, Clinical and Epidemiological Virology                                        | Bert Vanmechelen, Joan Marti-Carreras, Tony Wawina, Piet Maes                                                                                                                                                                                                                                                                                                                                  |



|                                                                                                                                                                                                                                                                                                                                                                                                                                                                                                                                                                                                                                                                                                                                                                                                                                                                                                                                                                                                                                                                                                                                                                                                                                                                                                                                                                                                                                                                                                                                                                                                                                                                                                                                                                                                                                                                                                                                                                                                                                                                                                                                                                                                                                                                                                                                                                                                                                                                                                                                                                                                                                                                                                                                                                                                                                                                                                                                                                                                                |                                                                          |                                                                                                                 |                                                                                                                                                                                                                                                                                                                                                                                                                                                                                                              |                                                                                                                                                              |
|----------------------------------------------------------------------------------------------------------------------------------------------------------------------------------------------------------------------------------------------------------------------------------------------------------------------------------------------------------------------------------------------------------------------------------------------------------------------------------------------------------------------------------------------------------------------------------------------------------------------------------------------------------------------------------------------------------------------------------------------------------------------------------------------------------------------------------------------------------------------------------------------------------------------------------------------------------------------------------------------------------------------------------------------------------------------------------------------------------------------------------------------------------------------------------------------------------------------------------------------------------------------------------------------------------------------------------------------------------------------------------------------------------------------------------------------------------------------------------------------------------------------------------------------------------------------------------------------------------------------------------------------------------------------------------------------------------------------------------------------------------------------------------------------------------------------------------------------------------------------------------------------------------------------------------------------------------------------------------------------------------------------------------------------------------------------------------------------------------------------------------------------------------------------------------------------------------------------------------------------------------------------------------------------------------------------------------------------------------------------------------------------------------------------------------------------------------------------------------------------------------------------------------------------------------------------------------------------------------------------------------------------------------------------------------------------------------------------------------------------------------------------------------------------------------------------------------------------------------------------------------------------------------------------------------------------------------------------------------------------------------------|--------------------------------------------------------------------------|-----------------------------------------------------------------------------------------------------------------|--------------------------------------------------------------------------------------------------------------------------------------------------------------------------------------------------------------------------------------------------------------------------------------------------------------------------------------------------------------------------------------------------------------------------------------------------------------------------------------------------------------|--------------------------------------------------------------------------------------------------------------------------------------------------------------|
| EPI_ISL_420878, EPI_ISL_420879                                                                                                                                                                                                                                                                                                                                                                                                                                                                                                                                                                                                                                                                                                                                                                                                                                                                                                                                                                                                                                                                                                                                                                                                                                                                                                                                                                                                                                                                                                                                                                                                                                                                                                                                                                                                                                                                                                                                                                                                                                                                                                                                                                                                                                                                                                                                                                                                                                                                                                                                                                                                                                                                                                                                                                                                                                                                                                                                                                                 | Mater Pathology                                                          | Public Health Virology Laboratory                                                                               | Bixing Huang, Alyssa Pyke, Amanda De Jong, Andrew Van Den Hurk, Carmel Taylor, David Warrilow, Doris Genge, Elisabeth Gamez, Glen Hewitson, Ian Maxwell Mackay, Inga Sultana, Jamie McMahon, Jean Barcelon, Judy Northill, Mitchell Finger, Natalie Simpson, Neelima Nair, Peter Burtonclay, Peter Moore, Sarah Wheatley, Sean Moody, Sonja Hall-Mendelin, Timothy Gardam, and Frederick Moore                                                                                                               |                                                                                                                                                              |
| EPI_ISL_421636                                                                                                                                                                                                                                                                                                                                                                                                                                                                                                                                                                                                                                                                                                                                                                                                                                                                                                                                                                                                                                                                                                                                                                                                                                                                                                                                                                                                                                                                                                                                                                                                                                                                                                                                                                                                                                                                                                                                                                                                                                                                                                                                                                                                                                                                                                                                                                                                                                                                                                                                                                                                                                                                                                                                                                                                                                                                                                                                                                                                 | Pathology North                                                          | Public Health Virology Laboratory                                                                               | Bixing Huang, Alyssa Pyke, Amanda De Jong, Andrew Van Den Hurk, Carmel Taylor, David Warrilow, Doris Genge, Elisabeth Gamez, Glen Hewitson, Ian Maxwell Mackay, Inga Sultana, Jamie McMahon, Jean Barcelon, Judy Northill, Mitchell Finger, Natalie Simpson, Neelima Nair, Peter Burtonclay, Peter Moore, Sarah Wheatley, Sean Moody, Sonja Hall-Mendelin, Timothy Gardam, and Frederick Moore                                                                                                               |                                                                                                                                                              |
| EPI_ISL_424981, EPI_ISL_424982, EPI_ISL_424984, EPI_ISL_424985, EPI_ISL_424986, EPI_ISL_424988, EPI_ISL_424989, EPI_ISL_424990, EPI_ISL_424992                                                                                                                                                                                                                                                                                                                                                                                                                                                                                                                                                                                                                                                                                                                                                                                                                                                                                                                                                                                                                                                                                                                                                                                                                                                                                                                                                                                                                                                                                                                                                                                                                                                                                                                                                                                                                                                                                                                                                                                                                                                                                                                                                                                                                                                                                                                                                                                                                                                                                                                                                                                                                                                                                                                                                                                                                                                                 | Bureau of Laboratories, Michigan Department of Health and Human Services | Michigan Department of Health and Human Services                                                                | Blankenship HM, Riner D, Soehnlén MK                                                                                                                                                                                                                                                                                                                                                                                                                                                                         |                                                                                                                                                              |
| EPI_ISL_426484                                                                                                                                                                                                                                                                                                                                                                                                                                                                                                                                                                                                                                                                                                                                                                                                                                                                                                                                                                                                                                                                                                                                                                                                                                                                                                                                                                                                                                                                                                                                                                                                                                                                                                                                                                                                                                                                                                                                                                                                                                                                                                                                                                                                                                                                                                                                                                                                                                                                                                                                                                                                                                                                                                                                                                                                                                                                                                                                                                                                 | n/a                                                                      | Worobey Lab on behalf of the Arizona COVID-19 Genomics Union                                                    | Brendan B. Larsen, Megan Folkerts, Krystal Sheridan, Ashlyn Pfeiffer, Danielle Yasquez, Hayley Yaglom, Darrin Lemmer, Jolene Bowers, Evan Bolyen, Jason W. Sahl, Nicholas A. Bokulich, J. Gregory Caporaso, Crystal Hepp, Jason Ladner, David M. Engelthaler, Paul Keim, Michael Worobey                                                                                                                                                                                                                     |                                                                                                                                                              |
| EPI_ISL_428440, EPI_ISL_428441, EPI_ISL_428442, EPI_ISL_428443, EPI_ISL_428444, EPI_ISL_428445, EPI_ISL_428446, EPI_ISL_428447, EPI_ISL_428448, EPI_ISL_428449, EPI_ISL_428450, EPI_ISL_428451, EPI_ISL_428452, EPI_ISL_428453, EPI_ISL_428454, EPI_ISL_428455, EPI_ISL_428456, EPI_ISL_428457, EPI_ISL_428458, EPI_ISL_428459, EPI_ISL_428460, EPI_ISL_428461, EPI_ISL_428462, EPI_ISL_428463, EPI_ISL_428464, EPI_ISL_428465, EPI_ISL_428466, EPI_ISL_428467, EPI_ISL_428468, EPI_ISL_428469, EPI_ISL_428470, EPI_ISL_428471, EPI_ISL_428472, EPI_ISL_428473, EPI_ISL_428474, EPI_ISL_428475, EPI_ISL_428476, EPI_ISL_428477, EPI_ISL_428478                                                                                                                                                                                                                                                                                                                                                                                                                                                                                                                                                                                                                                                                                                                                                                                                                                                                                                                                                                                                                                                                                                                                                                                                                                                                                                                                                                                                                                                                                                                                                                                                                                                                                                                                                                                                                                                                                                                                                                                                                                                                                                                                                                                                                                                                                                                                                                 | see above                                                                | Guangdong Provincial Center for Diseases Control and Prevention/Guangdong Provincial Institute of Public Health | School of Public Health, The University of Hong Kong                                                                                                                                                                                                                                                                                                                                                                                                                                                         | Bosheng Li, Haoguo Gu, Lijun Liang, Zhencui Li, Hui-Ling Yen, Yao Hu, Yingchao Song, Hanri Zeng, Tie Song, Jie Wu, Luo L.M. Poon                             |
| EPI_ISL_434661, EPI_ISL_434662, EPI_ISL_434664                                                                                                                                                                                                                                                                                                                                                                                                                                                                                                                                                                                                                                                                                                                                                                                                                                                                                                                                                                                                                                                                                                                                                                                                                                                                                                                                                                                                                                                                                                                                                                                                                                                                                                                                                                                                                                                                                                                                                                                                                                                                                                                                                                                                                                                                                                                                                                                                                                                                                                                                                                                                                                                                                                                                                                                                                                                                                                                                                                 | Omtanken Grimmered                                                       | The Public Health Agency of Sweden                                                                              | Bernd Sengpiel, Oskar Karlsson Lindsjö, Maria Lind Karlberg, Anna-Malin Linde, Olov Svartstrom, Anna Risberg, Theresa Enkirch, Mia Brytting, Karin Tegmark-Wisell                                                                                                                                                                                                                                                                                                                                            |                                                                                                                                                              |
| EPI_ISL_434669                                                                                                                                                                                                                                                                                                                                                                                                                                                                                                                                                                                                                                                                                                                                                                                                                                                                                                                                                                                                                                                                                                                                                                                                                                                                                                                                                                                                                                                                                                                                                                                                                                                                                                                                                                                                                                                                                                                                                                                                                                                                                                                                                                                                                                                                                                                                                                                                                                                                                                                                                                                                                                                                                                                                                                                                                                                                                                                                                                                                 | Lakargruppen                                                             | The Public Health Agency of Sweden                                                                              | Boris Klanger, Oskar Karlsson Lindsjö, Maria Lind Karlberg, Anna-Malin Linde, Olov Svartstrom, Anna Risberg, Theresa Enkirch, Mia Brytting, Karin Tegmark-Wisell                                                                                                                                                                                                                                                                                                                                             |                                                                                                                                                              |
| EPI_ISL_434673                                                                                                                                                                                                                                                                                                                                                                                                                                                                                                                                                                                                                                                                                                                                                                                                                                                                                                                                                                                                                                                                                                                                                                                                                                                                                                                                                                                                                                                                                                                                                                                                                                                                                                                                                                                                                                                                                                                                                                                                                                                                                                                                                                                                                                                                                                                                                                                                                                                                                                                                                                                                                                                                                                                                                                                                                                                                                                                                                                                                 | Omtanken Grimmered                                                       | The Public Health Agency of Sweden                                                                              | Bernd Sengpiel, Oskar Karlsson Lindsjö, Maria Lind Karlberg, Anna-Malin Linde, Olov Svartstrom, Anna Risberg, Theresa Enkirch, Mia Brytting, Karin Tegmark-Wisell                                                                                                                                                                                                                                                                                                                                            |                                                                                                                                                              |
| EPI_ISL_436800, EPI_ISL_436801, EPI_ISL_436802, EPI_ISL_436803, EPI_ISL_436804, EPI_ISL_436805, EPI_ISL_436806, EPI_ISL_436807, EPI_ISL_436808, EPI_ISL_436809, EPI_ISL_436810, EPI_ISL_436811, EPI_ISL_436812, EPI_ISL_436813, EPI_ISL_436814, EPI_ISL_436815, EPI_ISL_436816, EPI_ISL_436817, EPI_ISL_436818, EPI_ISL_436819, EPI_ISL_436820, EPI_ISL_436821, EPI_ISL_436822, EPI_ISL_436823, EPI_ISL_436824, EPI_ISL_436825, EPI_ISL_436826, EPI_ISL_436827, EPI_ISL_436828, EPI_ISL_436829, EPI_ISL_436830, EPI_ISL_436831, EPI_ISL_436832, EPI_ISL_436833, EPI_ISL_436834, EPI_ISL_436835, EPI_ISL_436836, EPI_ISL_436837, EPI_ISL_436838, EPI_ISL_436839, EPI_ISL_436840, EPI_ISL_436841, EPI_ISL_436842, EPI_ISL_436843, EPI_ISL_436844, EPI_ISL_436845, EPI_ISL_436846, EPI_ISL_436847, EPI_ISL_436848, EPI_ISL_436849, EPI_ISL_436850, EPI_ISL_436851, EPI_ISL_436852, EPI_ISL_436853, EPI_ISL_436854, EPI_ISL_436855, EPI_ISL_436856, EPI_ISL_436857, EPI_ISL_436858, EPI_ISL_436859, EPI_ISL_436860, EPI_ISL_436861, EPI_ISL_436862, EPI_ISL_436863, EPI_ISL_436864, EPI_ISL_436865, EPI_ISL_436866, EPI_ISL_436867, EPI_ISL_436868, EPI_ISL_436869, EPI_ISL_436870, EPI_ISL_436871, EPI_ISL_436872, EPI_ISL_436873, EPI_ISL_436874, EPI_ISL_436875, EPI_ISL_436876, EPI_ISL_436877, EPI_ISL_436878, EPI_ISL_436879, EPI_ISL_436880, EPI_ISL_436881, EPI_ISL_436882, EPI_ISL_436883, EPI_ISL_436884, EPI_ISL_436885, EPI_ISL_436886, EPI_ISL_436887, EPI_ISL_436888, EPI_ISL_436889, EPI_ISL_436890, EPI_ISL_437097, EPI_ISL_437098, EPI_ISL_437099, EPI_ISL_437100, EPI_ISL_437101, EPI_ISL_437102, EPI_ISL_437103, EPI_ISL_437104, EPI_ISL_437105, EPI_ISL_437106, EPI_ISL_437107, EPI_ISL_437108, EPI_ISL_437109, EPI_ISL_437110, EPI_ISL_437111, EPI_ISL_437112, EPI_ISL_437113, EPI_ISL_437114, EPI_ISL_437115, EPI_ISL_437116, EPI_ISL_437117, EPI_ISL_437118, EPI_ISL_437119, EPI_ISL_437120, EPI_ISL_437121, EPI_ISL_437122, EPI_ISL_437123, EPI_ISL_437124, EPI_ISL_437125, EPI_ISL_437126, EPI_ISL_437127, EPI_ISL_437128, EPI_ISL_437129, EPI_ISL_437130, EPI_ISL_437131, EPI_ISL_437132, EPI_ISL_437133, EPI_ISL_437134, EPI_ISL_437135, EPI_ISL_437136, EPI_ISL_437137, EPI_ISL_437138, EPI_ISL_437139, EPI_ISL_437140, EPI_ISL_437141, EPI_ISL_437142, EPI_ISL_437143, EPI_ISL_437144, EPI_ISL_437145, EPI_ISL_437146, EPI_ISL_437147, EPI_ISL_437148, EPI_ISL_437149, EPI_ISL_437150, EPI_ISL_437151, EPI_ISL_437152, EPI_ISL_437153, EPI_ISL_437154, EPI_ISL_437155, EPI_ISL_437156, EPI_ISL_437157, EPI_ISL_437158, EPI_ISL_437159, EPI_ISL_437160, EPI_ISL_437161, EPI_ISL_437162, EPI_ISL_437163, EPI_ISL_437164, EPI_ISL_437165, EPI_ISL_437166, EPI_ISL_437167, EPI_ISL_437168, EPI_ISL_437169, EPI_ISL_437170, EPI_ISL_437171, EPI_ISL_437172, EPI_ISL_437173, EPI_ISL_437174, EPI_ISL_437175, EPI_ISL_437176, EPI_ISL_437177, EPI_ISL_437178, EPI_ISL_437179, EPI_ISL_437180, EPI_ISL_437181, EPI_ISL_437182, EPI_ISL_437183, EPI_ISL_437184, EPI_ISL_437185, EPI_ISL_437186 | see above                                                                | Michigan Department of Health and Human Services, Bureau of Laboratories                                        | Michigan Department of Health and Human Services, Bureau of Laboratories                                                                                                                                                                                                                                                                                                                                                                                                                                     | Blankenship HM, Riner D, Soehnlén MK                                                                                                                         |
| EPI_ISL_437446                                                                                                                                                                                                                                                                                                                                                                                                                                                                                                                                                                                                                                                                                                                                                                                                                                                                                                                                                                                                                                                                                                                                                                                                                                                                                                                                                                                                                                                                                                                                                                                                                                                                                                                                                                                                                                                                                                                                                                                                                                                                                                                                                                                                                                                                                                                                                                                                                                                                                                                                                                                                                                                                                                                                                                                                                                                                                                                                                                                                 | B.J. Medical College and Civil hospital                                  | Gujarat Biotechnology Research Centre                                                                           | Binita Aring, Neeta Khandelwal, Geeta Vaghela, Sonia Barve, Bhavesh Modi, Kairavi Joshi, Gaurishankar Shrimali, Nidhi Sood, Pranay Shah, R D Dixit, Snehal Bagatharia, Kamlesh J Upadhyay, Ramesh Pandit, Tejas Shah, Ankit Hinsu, Pritesh Sabara, Apurvasinh Puvar, Janvi Raval, Monika Gandhi, Pinal Trivedi, Maharshi Pandya, Amit Kanani, Akanksha Verma, Nitin Savaliya, Raghawendra Kumar, Dinesh Kumar, Zuber Saayed, Dipa Kinariwala, Disha Patel, Priti Pandita, Chaitanya Joshi, Madhvi Joshi      |                                                                                                                                                              |
| EPI_ISL_437450                                                                                                                                                                                                                                                                                                                                                                                                                                                                                                                                                                                                                                                                                                                                                                                                                                                                                                                                                                                                                                                                                                                                                                                                                                                                                                                                                                                                                                                                                                                                                                                                                                                                                                                                                                                                                                                                                                                                                                                                                                                                                                                                                                                                                                                                                                                                                                                                                                                                                                                                                                                                                                                                                                                                                                                                                                                                                                                                                                                                 | B.J. Medical College and Civil hospital                                  | Gujarat Biotechnology Research Centre                                                                           | Bhavesh Modi, Kairavi Joshi, Gaurishankar Shrimali, Nidhi Sood, Pranay Shah, R D Dixit, Snehal Bagatharia, Kamlesh J Upadhyay, Ramesh Pandit, Tejas Shah, Ankit Hinsu, Pritesh Sabara, Apurvasinh Puvar, Janvi Raval, Monika Gandhi, Pinal Trivedi, Maharshi Pandya, Amit Kanani, Akanksha Verma, Nitin Savaliya, Raghawendra Kumar, Dinesh Kumar, Zuber Saayed, Dipa Kinariwala, Disha Patel, Binita Aring, Neeta Khandelwal, Geeta Vaghela, Sonia Barve, Armi Chaudhari, Chaitanya Joshi, Madhvi Joshi     |                                                                                                                                                              |
| EPI_ISL_437520, EPI_ISL_437521, EPI_ISL_437522, EPI_ISL_437523, EPI_ISL_437524, EPI_ISL_437525, EPI_ISL_437526, EPI_ISL_437527, EPI_ISL_437528, EPI_ISL_437529, EPI_ISL_437530, EPI_ISL_437531, EPI_ISL_437532, EPI_ISL_437533, EPI_ISL_437534, EPI_ISL_437535                                                                                                                                                                                                                                                                                                                                                                                                                                                                                                                                                                                                                                                                                                                                                                                                                                                                                                                                                                                                                                                                                                                                                                                                                                                                                                                                                                                                                                                                                                                                                                                                                                                                                                                                                                                                                                                                                                                                                                                                                                                                                                                                                                                                                                                                                                                                                                                                                                                                                                                                                                                                                                                                                                                                                 | see above                                                                | OHSU Lab Services Molecular Microbiology Lab                                                                    | Oregon SARS-CoV-2 Genome Sequencing Center                                                                                                                                                                                                                                                                                                                                                                                                                                                                   | Brendan L. O'Connell, Ruth V. Nichols, Alec J. Hirsch, Guang Fan, Daniel N. Streblow, William B. Messer, Andrew C. Adey, Benjamin N. Bimber, Brian J. O'Roak |
| EPI_ISL_444476                                                                                                                                                                                                                                                                                                                                                                                                                                                                                                                                                                                                                                                                                                                                                                                                                                                                                                                                                                                                                                                                                                                                                                                                                                                                                                                                                                                                                                                                                                                                                                                                                                                                                                                                                                                                                                                                                                                                                                                                                                                                                                                                                                                                                                                                                                                                                                                                                                                                                                                                                                                                                                                                                                                                                                                                                                                                                                                                                                                                 | B.J. Medical College and Civil hospital                                  | Gujarat Biotechnology Research Centre                                                                           | Binita Aring, Neeta Khandelwal, Geeta Vaghela, Sonia Barve, Bhavesh Modi, Kairavi Joshi, Gaurishankar Shrimali, Nidhi Sood, Pranay Shah, R D Dixit, Snehal Bagatharia, Kamlesh J Upadhyay, Ramesh Pandit, Tejas Shah, Ankit Hinsu, Pritesh Sabara, Apurvasinh Puvar, Janvi Raval, Monika Gandhi, Pinal Trivedi, Maharshi Pandya, Amit Kanani, Akanksha Verma, Nitin Savaliya, Raghawendra Kumar, Dinesh Kumar, Zuber Saayed, Dipa Kinariwala, Disha Patel, Chaitanya Joshi, Madhvi Joshi, Dipeshwari Shewale |                                                                                                                                                              |
| EPI_ISL_444480                                                                                                                                                                                                                                                                                                                                                                                                                                                                                                                                                                                                                                                                                                                                                                                                                                                                                                                                                                                                                                                                                                                                                                                                                                                                                                                                                                                                                                                                                                                                                                                                                                                                                                                                                                                                                                                                                                                                                                                                                                                                                                                                                                                                                                                                                                                                                                                                                                                                                                                                                                                                                                                                                                                                                                                                                                                                                                                                                                                                 | B.J. Medical College and Civil hospital                                  | Gujarat Biotechnology Research Centre                                                                           | Bhavesh Modi, Kairavi Joshi, Gaurishankar Shrimali, Nidhi Sood, Pranay Shah, R D Dixit, Snehal Bagatharia, Kamlesh J Upadhyay, Ramesh Pandit, Tejas Shah, Ankit Hinsu, Pritesh Sabara, Apurvasinh Puvar, Janvi Raval, Monika Gandhi, Pinal Trivedi, Maharshi Pandya, Amit Kanani, Akanksha Verma, Nitin Savaliya, Raghawendra Kumar, Dinesh Kumar, Zuber Saayed, Dipa Kinariwala, Disha Patel, Binita Aring, Neeta Khandelwal, Geeta Vaghela, Sonia Barve, Priti Pandita, Chaitanya Joshi, Madhvi Joshi      |                                                                                                                                                              |
| EPI_ISL_444611                                                                                                                                                                                                                                                                                                                                                                                                                                                                                                                                                                                                                                                                                                                                                                                                                                                                                                                                                                                                                                                                                                                                                                                                                                                                                                                                                                                                                                                                                                                                                                                                                                                                                                                                                                                                                                                                                                                                                                                                                                                                                                                                                                                                                                                                                                                                                                                                                                                                                                                                                                                                                                                                                                                                                                                                                                                                                                                                                                                                 | Pathology Queensland                                                     | Public Health Virology Laboratory                                                                               | Bixing Huang, Alyssa Pyke, Amanda De Jong, Andrew Van Den Hurk, Carmel Taylor, David Warrilow, Doris Genge, Elisabeth Gamez, Glen Hewitson, Ian Maxwell Mackay, Inga Sultana, Jamie McMahon, Jean Barcelon, Judy Northill, Mitchell Finger, Natalie Simpson, Neelima Nair, Peter Burtonclay, Peter Moore, Sarah Wheatley, Sean Moody, Sonja Hall-Mendelin, Timothy Gardam, and Frederick Moore                                                                                                               |                                                                                                                                                              |
| EPI_ISL_444612                                                                                                                                                                                                                                                                                                                                                                                                                                                                                                                                                                                                                                                                                                                                                                                                                                                                                                                                                                                                                                                                                                                                                                                                                                                                                                                                                                                                                                                                                                                                                                                                                                                                                                                                                                                                                                                                                                                                                                                                                                                                                                                                                                                                                                                                                                                                                                                                                                                                                                                                                                                                                                                                                                                                                                                                                                                                                                                                                                                                 | QML Pathology                                                            | Public Health Virology Laboratory                                                                               | Bixing Huang, Alyssa Pyke, Amanda De Jong, Andrew Van Den Hurk, Carmel Taylor, David Warrilow, Doris Genge, Elisabeth Gamez, Glen Hewitson, Ian Maxwell Mackay, Inga Sultana, Jamie McMahon, Jean Barcelon, Judy Northill, Mitchell Finger, Natalie Simpson, Neelima Nair, Peter Burtonclay, Peter Moore, Sarah Wheatley, Sean Moody, Sonja Hall-Mendelin, Timothy Gardam, and Frederick Moore                                                                                                               |                                                                                                                                                              |
| EPI_ISL_444793                                                                                                                                                                                                                                                                                                                                                                                                                                                                                                                                                                                                                                                                                                                                                                                                                                                                                                                                                                                                                                                                                                                                                                                                                                                                                                                                                                                                                                                                                                                                                                                                                                                                                                                                                                                                                                                                                                                                                                                                                                                                                                                                                                                                                                                                                                                                                                                                                                                                                                                                                                                                                                                                                                                                                                                                                                                                                                                                                                                                 | Pathology Queensland                                                     | Public Health Virology Laboratory                                                                               | Bixing Huang, Alyssa Pyke, Amanda De Jong, Andrew Van Den Hurk, Carmel Taylor, David Warrilow, Doris Genge, Elisabeth Gamez, Glen Hewitson, Ian Maxwell Mackay, Inga Sultana, Jamie McMahon, Jean Barcelon, Judy Northill, Mitchell Finger, Natalie Simpson, Neelima Nair, Peter Burtonclay, Peter Moore, Sarah Wheatley, Sean Moody, Sonja Hall-Mendelin, Timothy Gardam, and Frederick Moore                                                                                                               |                                                                                                                                                              |
| EPI_ISL_444794                                                                                                                                                                                                                                                                                                                                                                                                                                                                                                                                                                                                                                                                                                                                                                                                                                                                                                                                                                                                                                                                                                                                                                                                                                                                                                                                                                                                                                                                                                                                                                                                                                                                                                                                                                                                                                                                                                                                                                                                                                                                                                                                                                                                                                                                                                                                                                                                                                                                                                                                                                                                                                                                                                                                                                                                                                                                                                                                                                                                 | Cairns Hospital                                                          | Public Health Virology Laboratory                                                                               | Bixing Huang, Alyssa Pyke, Amanda De Jong, Andrew Van Den Hurk, Carmel Taylor, David Warrilow, Doris Genge, Elisabeth Gamez, Glen Hewitson, Ian Maxwell Mackay, Inga Sultana, Jamie McMahon, Jean Barcelon, Judy Northill, Mitchell Finger, Natalie Simpson, Neelima Nair, Peter Burtonclay, Peter Moore, Sarah Wheatley, Sean Moody, Sonja Hall-Mendelin, Timothy Gardam, and Frederick Moore                                                                                                               |                                                                                                                                                              |
| EPI_ISL_447048                                                                                                                                                                                                                                                                                                                                                                                                                                                                                                                                                                                                                                                                                                                                                                                                                                                                                                                                                                                                                                                                                                                                                                                                                                                                                                                                                                                                                                                                                                                                                                                                                                                                                                                                                                                                                                                                                                                                                                                                                                                                                                                                                                                                                                                                                                                                                                                                                                                                                                                                                                                                                                                                                                                                                                                                                                                                                                                                                                                                 | GMERS Medical College and Hospital, Gandhinagar                          | Gujarat Biotechnology Research Centre                                                                           | Binita Aring, Neeta Khandelwal, Geeta Vaghela, Sonia Barve, Bhavesh Modi, Kairavi Joshi, Gaurishankar Shrimali, Nidhi Sood, Pranay Shah, R D Dixit, Snehal Bagatharia, Kamlesh J Upadhyay, Ramesh Pandit, Tejas Shah, Ankit Hinsu, Pritesh Sabara, Apurvasinh Puvar, Janvi Raval, Monika Gandhi, Pinal Trivedi, Maharshi Pandya, Amit Kanani, Akanksha Verma, Nitin Savaliya, Raghawendra Kumar, Dinesh Kumar, Zuber Saayed, Dipa Kinariwala, Disha Patel, Armi Chaudhari, Chaitanya Joshi, Madhvi Joshi     |                                                                                                                                                              |
| EPI_ISL_447052                                                                                                                                                                                                                                                                                                                                                                                                                                                                                                                                                                                                                                                                                                                                                                                                                                                                                                                                                                                                                                                                                                                                                                                                                                                                                                                                                                                                                                                                                                                                                                                                                                                                                                                                                                                                                                                                                                                                                                                                                                                                                                                                                                                                                                                                                                                                                                                                                                                                                                                                                                                                                                                                                                                                                                                                                                                                                                                                                                                                 | GMERS Medical College and Hospital, Gandhinagar                          | Gujarat Biotechnology Research Centre                                                                           | Bhavesh Modi, Kairavi Joshi, Gaurishankar Shrimali, Nidhi Sood, Pranay Shah, R D Dixit, Snehal Bagatharia, Kamlesh J Upadhyay, Ramesh Pandit, Tejas Shah, Ankit Hinsu, Pritesh Sabara, Apurvasinh Puvar, Janvi Raval, Monika Gandhi, Pinal Trivedi, Maharshi Pandya, Amit Kanani, Akanksha Verma, Nitin Savaliya, Raghawendra Kumar, Dinesh Kumar, Zuber Saayed, Dipa Kinariwala, Disha Patel, Binita Aring, Neeta Khandelwal, Geeta Vaghela, Sonia Barve, Sharmista Majumdar, Chaitanya Joshi, Madhvi Joshi |                                                                                                                                                              |

|                                                                                                                                                                                                                                                                                                                                                                                                                                                                                                                                                                                                                                                                                                                                                                                                                                                                                                                                                                                                                                                                                                                                                                                                                                                                                                                                                                                                                                                                                                                                                                                                                                                                                                                                                                                                                                                                                                                                                                                                                                                                                                                                                |           |                                                                          |                                                                                                                      |                                                                                                                                                                                                                                                                                                                                                                                                                                                                                                                      |
|------------------------------------------------------------------------------------------------------------------------------------------------------------------------------------------------------------------------------------------------------------------------------------------------------------------------------------------------------------------------------------------------------------------------------------------------------------------------------------------------------------------------------------------------------------------------------------------------------------------------------------------------------------------------------------------------------------------------------------------------------------------------------------------------------------------------------------------------------------------------------------------------------------------------------------------------------------------------------------------------------------------------------------------------------------------------------------------------------------------------------------------------------------------------------------------------------------------------------------------------------------------------------------------------------------------------------------------------------------------------------------------------------------------------------------------------------------------------------------------------------------------------------------------------------------------------------------------------------------------------------------------------------------------------------------------------------------------------------------------------------------------------------------------------------------------------------------------------------------------------------------------------------------------------------------------------------------------------------------------------------------------------------------------------------------------------------------------------------------------------------------------------|-----------|--------------------------------------------------------------------------|----------------------------------------------------------------------------------------------------------------------|----------------------------------------------------------------------------------------------------------------------------------------------------------------------------------------------------------------------------------------------------------------------------------------------------------------------------------------------------------------------------------------------------------------------------------------------------------------------------------------------------------------------|
| EPI_ISL_447057, EPI_ISL_447058, EPI_ISL_447059, EPI_ISL_447060, EPI_ISL_447061, EPI_ISL_447062, EPI_ISL_447063, EPI_ISL_447064, EPI_ISL_447065, EPI_ISL_447066, EPI_ISL_447067, EPI_ISL_447068, EPI_ISL_447069, EPI_ISL_447070, EPI_ISL_447071, EPI_ISL_447072, EPI_ISL_447073, EPI_ISL_447074, EPI_ISL_447075, EPI_ISL_447076, EPI_ISL_447077, EPI_ISL_447078, EPI_ISL_447079, EPI_ISL_447080, EPI_ISL_447081, EPI_ISL_447082, EPI_ISL_447083, EPI_ISL_447084, EPI_ISL_447085, EPI_ISL_447086, EPI_ISL_447087, EPI_ISL_447088, EPI_ISL_447089, EPI_ISL_447090, EPI_ISL_447091, EPI_ISL_447092, EPI_ISL_447093, EPI_ISL_447094, EPI_ISL_447095, EPI_ISL_447096, EPI_ISL_447097, EPI_ISL_447098, EPI_ISL_447099, EPI_ISL_447100, EPI_ISL_447101, EPI_ISL_447102, EPI_ISL_447103, EPI_ISL_447104, EPI_ISL_447105, EPI_ISL_447106, EPI_ISL_447107, EPI_ISL_447108, EPI_ISL_447109, EPI_ISL_447110, EPI_ISL_447111, EPI_ISL_447112, EPI_ISL_447113, EPI_ISL_447114, EPI_ISL_447115, EPI_ISL_447116, EPI_ISL_447117, EPI_ISL_447118, EPI_ISL_447163, EPI_ISL_447164, EPI_ISL_447165, EPI_ISL_447166, EPI_ISL_447167, EPI_ISL_447168, EPI_ISL_447169, EPI_ISL_447170, EPI_ISL_447171, EPI_ISL_447172, EPI_ISL_447173, EPI_ISL_447174, EPI_ISL_447175, EPI_ISL_447176, EPI_ISL_447177, EPI_ISL_447178, EPI_ISL_447179, EPI_ISL_447180, EPI_ISL_447181, EPI_ISL_447182, EPI_ISL_447183, EPI_ISL_447184, EPI_ISL_447185, EPI_ISL_447186, EPI_ISL_447187, EPI_ISL_447188, EPI_ISL_447189, EPI_ISL_447190, EPI_ISL_447191, EPI_ISL_447192, EPI_ISL_447193, EPI_ISL_447194, EPI_ISL_447195, EPI_ISL_447196, EPI_ISL_447197, EPI_ISL_447198, EPI_ISL_447199, EPI_ISL_447200, EPI_ISL_447201, EPI_ISL_447202, EPI_ISL_447203, EPI_ISL_447204, EPI_ISL_447205, EPI_ISL_447206, EPI_ISL_447207, EPI_ISL_447208, EPI_ISL_447209, EPI_ISL_447210, EPI_ISL_447211, EPI_ISL_447212, EPI_ISL_447213, EPI_ISL_447214, EPI_ISL_447215, EPI_ISL_447216, EPI_ISL_447217, EPI_ISL_447218, EPI_ISL_447219, EPI_ISL_447220, EPI_ISL_447221, EPI_ISL_447222, EPI_ISL_447223, EPI_ISL_447224, EPI_ISL_447225, EPI_ISL_447226, EPI_ISL_447227, EPI_ISL_447228, EPI_ISL_447229 | see above | Michigan Department of Health and Human Services, Bureau of Laboratories | Michigan Department of Health and Human Services, Bureau of Laboratories                                             | Blankenship HM, Riner D, Soehnlén MK                                                                                                                                                                                                                                                                                                                                                                                                                                                                                 |
| EPI_ISL_447594                                                                                                                                                                                                                                                                                                                                                                                                                                                                                                                                                                                                                                                                                                                                                                                                                                                                                                                                                                                                                                                                                                                                                                                                                                                                                                                                                                                                                                                                                                                                                                                                                                                                                                                                                                                                                                                                                                                                                                                                                                                                                                                                 |           | Caloundra Hospital                                                       | Public Health Virology Laboratory                                                                                    | Bixing Huang, Alyssa Pyke, Amanda De Jong, Andrew Van Den Hurk, Carmel Taylor, David Warrilow, Doris Genge, Elisabeth Gamez, Glen Hewitson, Ian Maxwell Mackay, Inga Sultana, Jamie McMahon, Jean Barcelon, Judy Northill, Mitchell Finger, Natalie Simpson, Neelima Nair, Peter Burtonclay, Peter Moore, Sarah Wheatley, Sean Moody, Sonja Hall-Mendelin, Timothy Gardam, and Frederick Moore                                                                                                                       |
| EPI_ISL_447595                                                                                                                                                                                                                                                                                                                                                                                                                                                                                                                                                                                                                                                                                                                                                                                                                                                                                                                                                                                                                                                                                                                                                                                                                                                                                                                                                                                                                                                                                                                                                                                                                                                                                                                                                                                                                                                                                                                                                                                                                                                                                                                                 |           | Pathology Queensland, Sunshine Coast University Hospital                 | Public Health Virology Laboratory                                                                                    | Bixing Huang, Alyssa Pyke, Amanda De Jong, Andrew Van Den Hurk, Carmel Taylor, David Warrilow, Doris Genge, Elisabeth Gamez, Glen Hewitson, Ian Maxwell Mackay, Inga Sultana, Jamie McMahon, Jean Barcelon, Judy Northill, Mitchell Finger, Natalie Simpson, Neelima Nair, Peter Burtonclay, Peter Moore, Sarah Wheatley, Sean Moody, Sonja Hall-Mendelin, Timothy Gardam, and Frederick Moore                                                                                                                       |
| EPI_ISL_450198, EPI_ISL_450199, EPI_ISL_450200, EPI_ISL_450201, EPI_ISL_450202, EPI_ISL_450203, EPI_ISL_450204, EPI_ISL_450205, EPI_ISL_450206, EPI_ISL_450207, EPI_ISL_450208, EPI_ISL_450209, EPI_ISL_450210, EPI_ISL_450211                                                                                                                                                                                                                                                                                                                                                                                                                                                                                                                                                                                                                                                                                                                                                                                                                                                                                                                                                                                                                                                                                                                                                                                                                                                                                                                                                                                                                                                                                                                                                                                                                                                                                                                                                                                                                                                                                                                 | see above | Department of Virology                                                   | Department of Virology                                                                                               | Boehmer.M.M., Buchholz.U., Corman.V.M., Hoch.M., Katz.K., Marosevic.D.V., Boehm.S., Woudenberg.T., Ackermann.N., Konrad.R., Eberle.U., Treis.B., Dangel.A., Bengs.K., Fingerle.V., Berger.A., Hoermansdorfer.S., Ippisch.S., Wicklein.B., Grah.A., Poertner.K., Muller.N., Zeitmann.N., Boender.T.S., Cai.W., Reich.A., an der Heiden.M., Rexroth.U., Hamouda.O., Schneider.J., Veith.T., Muehleman.B., Woelfel.R., Antwerpen.M., Walter.M., Protzer.U., Liebl.B., Haas.W., Sing.A., Drosten.C., Zapf.A., Jones.T.C. |
| EPI_ISL_450445, EPI_ISL_450446, EPI_ISL_450447, EPI_ISL_450448, EPI_ISL_450449, EPI_ISL_450450, EPI_ISL_450451, EPI_ISL_450452, EPI_ISL_450453, EPI_ISL_450454, EPI_ISL_450455, EPI_ISL_450456, EPI_ISL_450457, EPI_ISL_450458, EPI_ISL_450459, EPI_ISL_450460, EPI_ISL_450461, EPI_ISL_450462, EPI_ISL_450463, EPI_ISL_450464, EPI_ISL_450465, EPI_ISL_450466, EPI_ISL_450467, EPI_ISL_450468, EPI_ISL_450469, EPI_ISL_450470, EPI_ISL_450471, EPI_ISL_450472, EPI_ISL_450473, EPI_ISL_450474, EPI_ISL_450475, EPI_ISL_450476, EPI_ISL_450477, EPI_ISL_450478, EPI_ISL_450479, EPI_ISL_450480, EPI_ISL_450481                                                                                                                                                                                                                                                                                                                                                                                                                                                                                                                                                                                                                                                                                                                                                                                                                                                                                                                                                                                                                                                                                                                                                                                                                                                                                                                                                                                                                                                                                                                                 | see above | Stanford clinical virology lab                                           | Chan-Zuckerberg Biohub                                                                                               | Benjamin Pinksy, Katharine Walter, Victoria N. Parikh, John Gorzynski, Hannah N. DeJong, Matthew T. Wheeler, Jason Andrews, Manuel Rivas, Carlos Bustamante, Euan Ashley, with CZB Clichub Consortium                                                                                                                                                                                                                                                                                                                |
| EPI_ISL_450570, EPI_ISL_450571, EPI_ISL_450572, EPI_ISL_450573, EPI_ISL_450574, EPI_ISL_450575, EPI_ISL_450576, EPI_ISL_450577, EPI_ISL_450578, EPI_ISL_450579, EPI_ISL_450580, EPI_ISL_450581, EPI_ISL_450582, EPI_ISL_450583, EPI_ISL_450584, EPI_ISL_450585, EPI_ISL_450586, EPI_ISL_450587, EPI_ISL_450588, EPI_ISL_450589, EPI_ISL_450590, EPI_ISL_450591, EPI_ISL_450592, EPI_ISL_450593, EPI_ISL_450594, EPI_ISL_450595, EPI_ISL_450596, EPI_ISL_450597, EPI_ISL_450598, EPI_ISL_450599, EPI_ISL_450600                                                                                                                                                                                                                                                                                                                                                                                                                                                                                                                                                                                                                                                                                                                                                                                                                                                                                                                                                                                                                                                                                                                                                                                                                                                                                                                                                                                                                                                                                                                                                                                                                                 | see above | Michigan Department of Health and Human Services, Bureau of Laboratories | Michigan Department of Health and Human Services, Bureau of Laboratories                                             | Blankenship HM; Riner D; Soehnlén MK                                                                                                                                                                                                                                                                                                                                                                                                                                                                                 |
| EPI_ISL_450601, EPI_ISL_450602, EPI_ISL_450603, EPI_ISL_450604, EPI_ISL_450605, EPI_ISL_450606, EPI_ISL_450607, EPI_ISL_450608, EPI_ISL_450609, EPI_ISL_450610, EPI_ISL_450611, EPI_ISL_450612, EPI_ISL_450613, EPI_ISL_450614, EPI_ISL_450615, EPI_ISL_450616, EPI_ISL_450617, EPI_ISL_450618, EPI_ISL_450619, EPI_ISL_450620, EPI_ISL_450621, EPI_ISL_450622, EPI_ISL_450623, EPI_ISL_450624, EPI_ISL_450625, EPI_ISL_450626, EPI_ISL_450627, EPI_ISL_450628, EPI_ISL_450629, EPI_ISL_450630, EPI_ISL_450631, EPI_ISL_450632, EPI_ISL_450633, EPI_ISL_450634, EPI_ISL_450635, EPI_ISL_450636, EPI_ISL_450637                                                                                                                                                                                                                                                                                                                                                                                                                                                                                                                                                                                                                                                                                                                                                                                                                                                                                                                                                                                                                                                                                                                                                                                                                                                                                                                                                                                                                                                                                                                                 | see above | Michigan Department of Health and Human Services, Bureau of Laboratories | Michigan Department of Health and Human Services, Bureau of Laboratories                                             | Blankenship HM, Riner D, Soehnlén MK                                                                                                                                                                                                                                                                                                                                                                                                                                                                                 |
| EPI_ISL_451486                                                                                                                                                                                                                                                                                                                                                                                                                                                                                                                                                                                                                                                                                                                                                                                                                                                                                                                                                                                                                                                                                                                                                                                                                                                                                                                                                                                                                                                                                                                                                                                                                                                                                                                                                                                                                                                                                                                                                                                                                                                                                                                                 |           | Australian Clinical Labs                                                 | NSW Health Pathology - Institute of Clinical Pathology and Medical Research; Westmead Hospital; University of Sydney | CIDM-PH et al.                                                                                                                                                                                                                                                                                                                                                                                                                                                                                                       |
| EPI_ISL_451487, EPI_ISL_451488                                                                                                                                                                                                                                                                                                                                                                                                                                                                                                                                                                                                                                                                                                                                                                                                                                                                                                                                                                                                                                                                                                                                                                                                                                                                                                                                                                                                                                                                                                                                                                                                                                                                                                                                                                                                                                                                                                                                                                                                                                                                                                                 |           | Pathology North - NSW Health Pathology                                   | NSW Health Pathology - Institute of Clinical Pathology and Medical Research; Westmead Hospital; University of Sydney | CIDM-PH et al.                                                                                                                                                                                                                                                                                                                                                                                                                                                                                                       |
| EPI_ISL_451489                                                                                                                                                                                                                                                                                                                                                                                                                                                                                                                                                                                                                                                                                                                                                                                                                                                                                                                                                                                                                                                                                                                                                                                                                                                                                                                                                                                                                                                                                                                                                                                                                                                                                                                                                                                                                                                                                                                                                                                                                                                                                                                                 |           | Laverty Pathology                                                        | NSW Health Pathology - Institute of Clinical Pathology and Medical Research; Westmead Hospital; University of Sydney | CIDM-PH et al.                                                                                                                                                                                                                                                                                                                                                                                                                                                                                                       |
| EPI_ISL_451490, EPI_ISL_451491, EPI_ISL_451492, EPI_ISL_451493, EPI_ISL_451494, EPI_ISL_451495, EPI_ISL_451496, EPI_ISL_451497, EPI_ISL_451498, EPI_ISL_451499, EPI_ISL_451500, EPI_ISL_451501, EPI_ISL_451502, EPI_ISL_451503, EPI_ISL_451504, EPI_ISL_451505, EPI_ISL_451506, EPI_ISL_451507, EPI_ISL_451508, EPI_ISL_451509, EPI_ISL_451510, EPI_ISL_451511, EPI_ISL_451512, EPI_ISL_451513, EPI_ISL_451514, EPI_ISL_451515, EPI_ISL_451516                                                                                                                                                                                                                                                                                                                                                                                                                                                                                                                                                                                                                                                                                                                                                                                                                                                                                                                                                                                                                                                                                                                                                                                                                                                                                                                                                                                                                                                                                                                                                                                                                                                                                                 | see above | Pathology West - NSW Health Pathology                                    | NSW Health Pathology - Institute of Clinical Pathology and Medical Research; Westmead Hospital; University of Sydney | CIDM-PH et al.                                                                                                                                                                                                                                                                                                                                                                                                                                                                                                       |
| EPI_ISL_451517, EPI_ISL_451518, EPI_ISL_451519, EPI_ISL_451521                                                                                                                                                                                                                                                                                                                                                                                                                                                                                                                                                                                                                                                                                                                                                                                                                                                                                                                                                                                                                                                                                                                                                                                                                                                                                                                                                                                                                                                                                                                                                                                                                                                                                                                                                                                                                                                                                                                                                                                                                                                                                 |           | South Eastern Area Laboratory Services                                   | NSW Health Pathology - Institute of Clinical Pathology and Medical Research; Westmead Hospital; University of Sydney | CIDM-PH et al.                                                                                                                                                                                                                                                                                                                                                                                                                                                                                                       |
| EPI_ISL_451522, EPI_ISL_451523, EPI_ISL_451524, EPI_ISL_451525, EPI_ISL_451526, EPI_ISL_451527, EPI_ISL_451528, EPI_ISL_451529                                                                                                                                                                                                                                                                                                                                                                                                                                                                                                                                                                                                                                                                                                                                                                                                                                                                                                                                                                                                                                                                                                                                                                                                                                                                                                                                                                                                                                                                                                                                                                                                                                                                                                                                                                                                                                                                                                                                                                                                                 |           | Pathology West - NSW Health Pathology                                    | NSW Health Pathology - Institute of Clinical Pathology and Medical Research; Westmead Hospital; University of Sydney | CIDM-PH et al.                                                                                                                                                                                                                                                                                                                                                                                                                                                                                                       |
| EPI_ISL_451530, EPI_ISL_451531                                                                                                                                                                                                                                                                                                                                                                                                                                                                                                                                                                                                                                                                                                                                                                                                                                                                                                                                                                                                                                                                                                                                                                                                                                                                                                                                                                                                                                                                                                                                                                                                                                                                                                                                                                                                                                                                                                                                                                                                                                                                                                                 |           | Pathology Sydney South West - NSW Health Pathology                       | NSW Health Pathology - Institute of Clinical Pathology and Medical Research; Westmead Hospital; University of Sydney | CIDM-PH et al.                                                                                                                                                                                                                                                                                                                                                                                                                                                                                                       |
| EPI_ISL_451532                                                                                                                                                                                                                                                                                                                                                                                                                                                                                                                                                                                                                                                                                                                                                                                                                                                                                                                                                                                                                                                                                                                                                                                                                                                                                                                                                                                                                                                                                                                                                                                                                                                                                                                                                                                                                                                                                                                                                                                                                                                                                                                                 |           | Pathology West - NSW Health Pathology                                    | NSW Health Pathology - Institute of Clinical Pathology and Medical Research; Westmead Hospital; University of Sydney | CIDM-PH et al.                                                                                                                                                                                                                                                                                                                                                                                                                                                                                                       |
| EPI_ISL_451533                                                                                                                                                                                                                                                                                                                                                                                                                                                                                                                                                                                                                                                                                                                                                                                                                                                                                                                                                                                                                                                                                                                                                                                                                                                                                                                                                                                                                                                                                                                                                                                                                                                                                                                                                                                                                                                                                                                                                                                                                                                                                                                                 |           | Pathology Sydney South West - NSW Health Pathology                       | NSW Health Pathology - Institute of Clinical Pathology and Medical Research; Westmead Hospital; University of Sydney | CIDM-PH et al.                                                                                                                                                                                                                                                                                                                                                                                                                                                                                                       |
| EPI_ISL_451534                                                                                                                                                                                                                                                                                                                                                                                                                                                                                                                                                                                                                                                                                                                                                                                                                                                                                                                                                                                                                                                                                                                                                                                                                                                                                                                                                                                                                                                                                                                                                                                                                                                                                                                                                                                                                                                                                                                                                                                                                                                                                                                                 |           | Medlab Pathology                                                         | NSW Health Pathology - Institute of Clinical Pathology and Medical Research; Westmead Hospital; University of Sydney | CIDM-PH et al.                                                                                                                                                                                                                                                                                                                                                                                                                                                                                                       |
| EPI_ISL_451535                                                                                                                                                                                                                                                                                                                                                                                                                                                                                                                                                                                                                                                                                                                                                                                                                                                                                                                                                                                                                                                                                                                                                                                                                                                                                                                                                                                                                                                                                                                                                                                                                                                                                                                                                                                                                                                                                                                                                                                                                                                                                                                                 |           | Pathology West - NSW Health Pathology                                    | NSW Health Pathology - Institute of Clinical Pathology and Medical Research; Westmead Hospital; University of Sydney | CIDM-PH et al.                                                                                                                                                                                                                                                                                                                                                                                                                                                                                                       |
| EPI_ISL_451536                                                                                                                                                                                                                                                                                                                                                                                                                                                                                                                                                                                                                                                                                                                                                                                                                                                                                                                                                                                                                                                                                                                                                                                                                                                                                                                                                                                                                                                                                                                                                                                                                                                                                                                                                                                                                                                                                                                                                                                                                                                                                                                                 |           | Pathology Sydney South West - NSW Health Pathology                       | NSW Health Pathology - Institute of Clinical Pathology and Medical Research; Westmead Hospital; University of Sydney | CIDM-PH et al.                                                                                                                                                                                                                                                                                                                                                                                                                                                                                                       |
| EPI_ISL_451537, EPI_ISL_451538, EPI_ISL_451539                                                                                                                                                                                                                                                                                                                                                                                                                                                                                                                                                                                                                                                                                                                                                                                                                                                                                                                                                                                                                                                                                                                                                                                                                                                                                                                                                                                                                                                                                                                                                                                                                                                                                                                                                                                                                                                                                                                                                                                                                                                                                                 |           | Pathology West - NSW Health Pathology                                    | NSW Health Pathology - Institute of Clinical Pathology and Medical Research; Westmead Hospital; University of Sydney | CIDM-PH et al.                                                                                                                                                                                                                                                                                                                                                                                                                                                                                                       |
| EPI_ISL_451540                                                                                                                                                                                                                                                                                                                                                                                                                                                                                                                                                                                                                                                                                                                                                                                                                                                                                                                                                                                                                                                                                                                                                                                                                                                                                                                                                                                                                                                                                                                                                                                                                                                                                                                                                                                                                                                                                                                                                                                                                                                                                                                                 |           | ACT pathology                                                            | NSW Health Pathology - Institute of Clinical Pathology and Medical Research; Westmead Hospital; University of Sydney | CIDM-PH et al.                                                                                                                                                                                                                                                                                                                                                                                                                                                                                                       |
| EPI_ISL_451541                                                                                                                                                                                                                                                                                                                                                                                                                                                                                                                                                                                                                                                                                                                                                                                                                                                                                                                                                                                                                                                                                                                                                                                                                                                                                                                                                                                                                                                                                                                                                                                                                                                                                                                                                                                                                                                                                                                                                                                                                                                                                                                                 |           | Pathology West - NSW Health Pathology                                    | NSW Health Pathology - Institute of Clinical Pathology and Medical Research; Westmead Hospital; University of Sydney | CIDM-PH et al.                                                                                                                                                                                                                                                                                                                                                                                                                                                                                                       |
| EPI_ISL_451542, EPI_ISL_451543, EPI_ISL_451544                                                                                                                                                                                                                                                                                                                                                                                                                                                                                                                                                                                                                                                                                                                                                                                                                                                                                                                                                                                                                                                                                                                                                                                                                                                                                                                                                                                                                                                                                                                                                                                                                                                                                                                                                                                                                                                                                                                                                                                                                                                                                                 |           | Pathology Sydney South West - NSW Health Pathology                       | NSW Health Pathology - Institute of Clinical Pathology and Medical Research; Westmead Hospital; University of Sydney | CIDM-PH et al.                                                                                                                                                                                                                                                                                                                                                                                                                                                                                                       |
| EPI_ISL_451545                                                                                                                                                                                                                                                                                                                                                                                                                                                                                                                                                                                                                                                                                                                                                                                                                                                                                                                                                                                                                                                                                                                                                                                                                                                                                                                                                                                                                                                                                                                                                                                                                                                                                                                                                                                                                                                                                                                                                                                                                                                                                                                                 |           | Laverty Pathology                                                        | NSW Health Pathology - Institute of Clinical Pathology and Medical Research; Westmead Hospital; University of Sydney | CIDM-PH et al.                                                                                                                                                                                                                                                                                                                                                                                                                                                                                                       |





|                                                                                                                                                                                                                                                                                                                                                                                                                                                                                                                                                                                                                                                                                                                                                                                                                                                                                                                                                                                                                                                                                                                                                                                                                                                                                                                                                                                                                                                                                                                                                                                                                                                                                                                                                                                                                |                                                              |                                                                                                                                                                                   |                                                                                                                                                                                                                                                                                                                                                                                            |                                                                                                                                      |
|----------------------------------------------------------------------------------------------------------------------------------------------------------------------------------------------------------------------------------------------------------------------------------------------------------------------------------------------------------------------------------------------------------------------------------------------------------------------------------------------------------------------------------------------------------------------------------------------------------------------------------------------------------------------------------------------------------------------------------------------------------------------------------------------------------------------------------------------------------------------------------------------------------------------------------------------------------------------------------------------------------------------------------------------------------------------------------------------------------------------------------------------------------------------------------------------------------------------------------------------------------------------------------------------------------------------------------------------------------------------------------------------------------------------------------------------------------------------------------------------------------------------------------------------------------------------------------------------------------------------------------------------------------------------------------------------------------------------------------------------------------------------------------------------------------------|--------------------------------------------------------------|-----------------------------------------------------------------------------------------------------------------------------------------------------------------------------------|--------------------------------------------------------------------------------------------------------------------------------------------------------------------------------------------------------------------------------------------------------------------------------------------------------------------------------------------------------------------------------------------|--------------------------------------------------------------------------------------------------------------------------------------|
| EPI_ISL_455037                                                                                                                                                                                                                                                                                                                                                                                                                                                                                                                                                                                                                                                                                                                                                                                                                                                                                                                                                                                                                                                                                                                                                                                                                                                                                                                                                                                                                                                                                                                                                                                                                                                                                                                                                                                                 | Pathology Sydney South West - NSW Health Pathology           | Medical Research; Westmead Hospital; University of Sydney<br>NSW Health Pathology - Institute of Clinical Pathology and Medical Research; Westmead Hospital; University of Sydney | CIDM-PH et al.                                                                                                                                                                                                                                                                                                                                                                             |                                                                                                                                      |
| EPI_ISL_455038, EPI_ISL_455039, EPI_ISL_455040                                                                                                                                                                                                                                                                                                                                                                                                                                                                                                                                                                                                                                                                                                                                                                                                                                                                                                                                                                                                                                                                                                                                                                                                                                                                                                                                                                                                                                                                                                                                                                                                                                                                                                                                                                 | Pathology West - NSW Health Pathology                        | NSW Health Pathology - Institute of Clinical Pathology and Medical Research; Westmead Hospital; University of Sydney                                                              | CIDM-PH et al.                                                                                                                                                                                                                                                                                                                                                                             |                                                                                                                                      |
| EPI_ISL_455041                                                                                                                                                                                                                                                                                                                                                                                                                                                                                                                                                                                                                                                                                                                                                                                                                                                                                                                                                                                                                                                                                                                                                                                                                                                                                                                                                                                                                                                                                                                                                                                                                                                                                                                                                                                                 | Laverty Pathology                                            | NSW Health Pathology - Institute of Clinical Pathology and Medical Research; Westmead Hospital; University of Sydney                                                              | CIDM-PH et al.                                                                                                                                                                                                                                                                                                                                                                             |                                                                                                                                      |
| EPI_ISL_455042, EPI_ISL_455043                                                                                                                                                                                                                                                                                                                                                                                                                                                                                                                                                                                                                                                                                                                                                                                                                                                                                                                                                                                                                                                                                                                                                                                                                                                                                                                                                                                                                                                                                                                                                                                                                                                                                                                                                                                 | ACT Pathology                                                | NSW Health Pathology - Institute of Clinical Pathology and Medical Research; Westmead Hospital; University of Sydney                                                              | CIDM-PH et al.                                                                                                                                                                                                                                                                                                                                                                             |                                                                                                                                      |
| EPI_ISL_455044, EPI_ISL_455045, EPI_ISL_455046, EPI_ISL_455047                                                                                                                                                                                                                                                                                                                                                                                                                                                                                                                                                                                                                                                                                                                                                                                                                                                                                                                                                                                                                                                                                                                                                                                                                                                                                                                                                                                                                                                                                                                                                                                                                                                                                                                                                 | Pathology West - NSW Health Pathology                        | NSW Health Pathology - Institute of Clinical Pathology and Medical Research; Westmead Hospital; University of Sydney                                                              | CIDM-PH et al.                                                                                                                                                                                                                                                                                                                                                                             |                                                                                                                                      |
| EPI_ISL_455048                                                                                                                                                                                                                                                                                                                                                                                                                                                                                                                                                                                                                                                                                                                                                                                                                                                                                                                                                                                                                                                                                                                                                                                                                                                                                                                                                                                                                                                                                                                                                                                                                                                                                                                                                                                                 | Laverty Pathology                                            | NSW Health Pathology - Institute of Clinical Pathology and Medical Research; Westmead Hospital; University of Sydney                                                              | CIDM-PH et al.                                                                                                                                                                                                                                                                                                                                                                             |                                                                                                                                      |
| EPI_ISL_455049                                                                                                                                                                                                                                                                                                                                                                                                                                                                                                                                                                                                                                                                                                                                                                                                                                                                                                                                                                                                                                                                                                                                                                                                                                                                                                                                                                                                                                                                                                                                                                                                                                                                                                                                                                                                 | Pathology West - NSW Health Pathology                        | NSW Health Pathology - Institute of Clinical Pathology and Medical Research; Westmead Hospital; University of Sydney                                                              | CIDM-PH et al.                                                                                                                                                                                                                                                                                                                                                                             |                                                                                                                                      |
| EPI_ISL_455050                                                                                                                                                                                                                                                                                                                                                                                                                                                                                                                                                                                                                                                                                                                                                                                                                                                                                                                                                                                                                                                                                                                                                                                                                                                                                                                                                                                                                                                                                                                                                                                                                                                                                                                                                                                                 | ACT Pathology                                                | NSW Health Pathology - Institute of Clinical Pathology and Medical Research; Westmead Hospital; University of Sydney                                                              | CIDM-PH et al.                                                                                                                                                                                                                                                                                                                                                                             |                                                                                                                                      |
| EPI_ISL_455051, EPI_ISL_455052, EPI_ISL_455053                                                                                                                                                                                                                                                                                                                                                                                                                                                                                                                                                                                                                                                                                                                                                                                                                                                                                                                                                                                                                                                                                                                                                                                                                                                                                                                                                                                                                                                                                                                                                                                                                                                                                                                                                                 | Douglas Hanly Moir Pathology                                 | NSW Health Pathology - Institute of Clinical Pathology and Medical Research; Westmead Hospital; University of Sydney                                                              | CIDM-PH et al.                                                                                                                                                                                                                                                                                                                                                                             |                                                                                                                                      |
| EPI_ISL_455054                                                                                                                                                                                                                                                                                                                                                                                                                                                                                                                                                                                                                                                                                                                                                                                                                                                                                                                                                                                                                                                                                                                                                                                                                                                                                                                                                                                                                                                                                                                                                                                                                                                                                                                                                                                                 | South Eastern Area Laboratory Services                       | NSW Health Pathology - Institute of Clinical Pathology and Medical Research; Westmead Hospital; University of Sydney                                                              | CIDM-PH et al.                                                                                                                                                                                                                                                                                                                                                                             |                                                                                                                                      |
| EPI_ISL_455055, EPI_ISL_455056, EPI_ISL_455057, EPI_ISL_455058, EPI_ISL_455059, EPI_ISL_455060, EPI_ISL_455061, EPI_ISL_455062                                                                                                                                                                                                                                                                                                                                                                                                                                                                                                                                                                                                                                                                                                                                                                                                                                                                                                                                                                                                                                                                                                                                                                                                                                                                                                                                                                                                                                                                                                                                                                                                                                                                                 | Pathology West - NSW Health Pathology                        | NSW Health Pathology - Institute of Clinical Pathology and Medical Research; Westmead Hospital; University of Sydney                                                              | CIDM-PH et al.                                                                                                                                                                                                                                                                                                                                                                             |                                                                                                                                      |
| EPI_ISL_455063                                                                                                                                                                                                                                                                                                                                                                                                                                                                                                                                                                                                                                                                                                                                                                                                                                                                                                                                                                                                                                                                                                                                                                                                                                                                                                                                                                                                                                                                                                                                                                                                                                                                                                                                                                                                 | Laverty Pathology                                            | NSW Health Pathology - Institute of Clinical Pathology and Medical Research; Westmead Hospital; University of Sydney                                                              | CIDM-PH et al.                                                                                                                                                                                                                                                                                                                                                                             |                                                                                                                                      |
| EPI_ISL_455064                                                                                                                                                                                                                                                                                                                                                                                                                                                                                                                                                                                                                                                                                                                                                                                                                                                                                                                                                                                                                                                                                                                                                                                                                                                                                                                                                                                                                                                                                                                                                                                                                                                                                                                                                                                                 | Pathology West - NSW Health Pathology                        | NSW Health Pathology - Institute of Clinical Pathology and Medical Research; Westmead Hospital; University of Sydney                                                              | CIDM-PH et al.                                                                                                                                                                                                                                                                                                                                                                             |                                                                                                                                      |
| EPI_ISL_455065                                                                                                                                                                                                                                                                                                                                                                                                                                                                                                                                                                                                                                                                                                                                                                                                                                                                                                                                                                                                                                                                                                                                                                                                                                                                                                                                                                                                                                                                                                                                                                                                                                                                                                                                                                                                 | Douglas Hanly Moir Pathology                                 | NSW Health Pathology - Institute of Clinical Pathology and Medical Research; Westmead Hospital; University of Sydney                                                              | CIDM-PH et al.                                                                                                                                                                                                                                                                                                                                                                             |                                                                                                                                      |
| EPI_ISL_455066, EPI_ISL_455067                                                                                                                                                                                                                                                                                                                                                                                                                                                                                                                                                                                                                                                                                                                                                                                                                                                                                                                                                                                                                                                                                                                                                                                                                                                                                                                                                                                                                                                                                                                                                                                                                                                                                                                                                                                 | Pathology West - NSW Health Pathology                        | NSW Health Pathology - Institute of Clinical Pathology and Medical Research; Westmead Hospital; University of Sydney                                                              | CIDM-PH et al.                                                                                                                                                                                                                                                                                                                                                                             |                                                                                                                                      |
| EPI_ISL_455068                                                                                                                                                                                                                                                                                                                                                                                                                                                                                                                                                                                                                                                                                                                                                                                                                                                                                                                                                                                                                                                                                                                                                                                                                                                                                                                                                                                                                                                                                                                                                                                                                                                                                                                                                                                                 | Childrens Hospital Westmead                                  | NSW Health Pathology - Institute of Clinical Pathology and Medical Research; Westmead Hospital; University of Sydney                                                              | CIDM-PH et al.                                                                                                                                                                                                                                                                                                                                                                             |                                                                                                                                      |
| EPI_ISL_455069, EPI_ISL_455070                                                                                                                                                                                                                                                                                                                                                                                                                                                                                                                                                                                                                                                                                                                                                                                                                                                                                                                                                                                                                                                                                                                                                                                                                                                                                                                                                                                                                                                                                                                                                                                                                                                                                                                                                                                 | Pathology West - NSW Health Pathology                        | NSW Health Pathology - Institute of Clinical Pathology and Medical Research; Westmead Hospital; University of Sydney                                                              | CIDM-PH et al.                                                                                                                                                                                                                                                                                                                                                                             |                                                                                                                                      |
| EPI_ISL_455071                                                                                                                                                                                                                                                                                                                                                                                                                                                                                                                                                                                                                                                                                                                                                                                                                                                                                                                                                                                                                                                                                                                                                                                                                                                                                                                                                                                                                                                                                                                                                                                                                                                                                                                                                                                                 | Pathology Sydney South West - NSW Health Pathology           | NSW Health Pathology - Institute of Clinical Pathology and Medical Research; Westmead Hospital; University of Sydney                                                              | CIDM-PH et al.                                                                                                                                                                                                                                                                                                                                                                             |                                                                                                                                      |
| EPI_ISL_455072, EPI_ISL_455073                                                                                                                                                                                                                                                                                                                                                                                                                                                                                                                                                                                                                                                                                                                                                                                                                                                                                                                                                                                                                                                                                                                                                                                                                                                                                                                                                                                                                                                                                                                                                                                                                                                                                                                                                                                 | Sullivan Nicolaidis Pathology                                | NSW Health Pathology - Institute of Clinical Pathology and Medical Research; Westmead Hospital; University of Sydney                                                              | CIDM-PH et al.                                                                                                                                                                                                                                                                                                                                                                             |                                                                                                                                      |
| EPI_ISL_455074                                                                                                                                                                                                                                                                                                                                                                                                                                                                                                                                                                                                                                                                                                                                                                                                                                                                                                                                                                                                                                                                                                                                                                                                                                                                                                                                                                                                                                                                                                                                                                                                                                                                                                                                                                                                 | ACT Pathology                                                | NSW Health Pathology - Institute of Clinical Pathology and Medical Research; Westmead Hospital; University of Sydney                                                              | CIDM-PH et al.                                                                                                                                                                                                                                                                                                                                                                             |                                                                                                                                      |
| EPI_ISL_455075, EPI_ISL_455076, EPI_ISL_455077, EPI_ISL_455078, EPI_ISL_455079, EPI_ISL_455080, EPI_ISL_455081, EPI_ISL_455082, EPI_ISL_455083, EPI_ISL_455084, EPI_ISL_455085, EPI_ISL_455086, EPI_ISL_455087, EPI_ISL_455088, EPI_ISL_455089, EPI_ISL_455090, EPI_ISL_455091, EPI_ISL_455092, EPI_ISL_455093                                                                                                                                                                                                                                                                                                                                                                                                                                                                                                                                                                                                                                                                                                                                                                                                                                                                                                                                                                                                                                                                                                                                                                                                                                                                                                                                                                                                                                                                                                 | see above                                                    | South Eastern Area Laboratory Services                                                                                                                                            | NSW Health Pathology - Institute of Clinical Pathology and Medical Research; Westmead Hospital; University of Sydney                                                                                                                                                                                                                                                                       | CIDM-PH et al.                                                                                                                       |
| EPI_ISL_455094                                                                                                                                                                                                                                                                                                                                                                                                                                                                                                                                                                                                                                                                                                                                                                                                                                                                                                                                                                                                                                                                                                                                                                                                                                                                                                                                                                                                                                                                                                                                                                                                                                                                                                                                                                                                 | Pathology Sydney South West - NSW Health Pathology           | NSW Health Pathology - Institute of Clinical Pathology and Medical Research; Westmead Hospital; University of Sydney                                                              | CIDM-PH et al.                                                                                                                                                                                                                                                                                                                                                                             |                                                                                                                                      |
| EPI_ISL_455095                                                                                                                                                                                                                                                                                                                                                                                                                                                                                                                                                                                                                                                                                                                                                                                                                                                                                                                                                                                                                                                                                                                                                                                                                                                                                                                                                                                                                                                                                                                                                                                                                                                                                                                                                                                                 | Pathology West - NSW Health Pathology                        | NSW Health Pathology - Institute of Clinical Pathology and Medical Research; Westmead Hospital; University of Sydney                                                              | CIDM-PH et al.                                                                                                                                                                                                                                                                                                                                                                             |                                                                                                                                      |
| EPI_ISL_455096, EPI_ISL_455097, EPI_ISL_455098, EPI_ISL_455099                                                                                                                                                                                                                                                                                                                                                                                                                                                                                                                                                                                                                                                                                                                                                                                                                                                                                                                                                                                                                                                                                                                                                                                                                                                                                                                                                                                                                                                                                                                                                                                                                                                                                                                                                 | South Eastern Area Laboratory Services                       | NSW Health Pathology - Institute of Clinical Pathology and Medical Research; Westmead Hospital; University of Sydney                                                              | CIDM-PH et al.                                                                                                                                                                                                                                                                                                                                                                             |                                                                                                                                      |
| EPI_ISL_455111                                                                                                                                                                                                                                                                                                                                                                                                                                                                                                                                                                                                                                                                                                                                                                                                                                                                                                                                                                                                                                                                                                                                                                                                                                                                                                                                                                                                                                                                                                                                                                                                                                                                                                                                                                                                 | Olof Norrby                                                  | The Public Health Agency of Sweden                                                                                                                                                | Bla Kustens halsocentral, Anna-Malin Linde, Maria Lind Karlberg, Oskar Karlsson Lindsjo, Olov Svartstrom, Anna Risberg, Theresa Enkirch, Mia Brytting, Karin Tegmark-Wisell                                                                                                                                                                                                                |                                                                                                                                      |
| EPI_ISL_455625, EPI_ISL_455626, EPI_ISL_455627                                                                                                                                                                                                                                                                                                                                                                                                                                                                                                                                                                                                                                                                                                                                                                                                                                                                                                                                                                                                                                                                                                                                                                                                                                                                                                                                                                                                                                                                                                                                                                                                                                                                                                                                                                 | unknown                                                      | Instituto Nacional de Saude (INSA)                                                                                                                                                | Borges et al                                                                                                                                                                                                                                                                                                                                                                               |                                                                                                                                      |
| EPI_ISL_457030, EPI_ISL_457032, EPI_ISL_457033, EPI_ISL_457034, EPI_ISL_457035, EPI_ISL_457037, EPI_ISL_457042, EPI_ISL_457047, EPI_ISL_457049, EPI_ISL_457050, EPI_ISL_457052, EPI_ISL_457057, EPI_ISL_457069, EPI_ISL_457076, EPI_ISL_457090, EPI_ISL_457091, EPI_ISL_457094, EPI_ISL_457102, EPI_ISL_457121, EPI_ISL_457129, EPI_ISL_457131, EPI_ISL_457136, EPI_ISL_457157, EPI_ISL_457158, EPI_ISL_457159, EPI_ISL_457167, EPI_ISL_457174, EPI_ISL_457181, EPI_ISL_457194, EPI_ISL_457195, EPI_ISL_457201, EPI_ISL_457203, EPI_ISL_457205, EPI_ISL_457214, EPI_ISL_457216, EPI_ISL_457217, EPI_ISL_457239, EPI_ISL_457240, EPI_ISL_457246, EPI_ISL_457247                                                                                                                                                                                                                                                                                                                                                                                                                                                                                                                                                                                                                                                                                                                                                                                                                                                                                                                                                                                                                                                                                                                                                 | see above                                                    | University of Exeter                                                                                                                                                              | COVID-19 Genomics UK (COG-UK) Consortium                                                                                                                                                                                                                                                                                                                                                   | Ben Temperton, Aaron Jeffries, Michelle Michelsen, Joanna Warwick-Dugdale, Audrey Farbos, Robyn Manley, Stephen Michell, Jane Masoli |
| EPI_ISL_459992, EPI_ISL_459993, EPI_ISL_459994, EPI_ISL_459995, EPI_ISL_459996, EPI_ISL_459997, EPI_ISL_459998, EPI_ISL_459999, EPI_ISL_460000, EPI_ISL_460001, EPI_ISL_460002, EPI_ISL_460003, EPI_ISL_460004, EPI_ISL_460005, EPI_ISL_460006, EPI_ISL_460007, EPI_ISL_460008, EPI_ISL_460009, EPI_ISL_460010, EPI_ISL_460011, EPI_ISL_460012, EPI_ISL_460013, EPI_ISL_460014, EPI_ISL_460015, EPI_ISL_460016, EPI_ISL_460017, EPI_ISL_460018, EPI_ISL_460019, EPI_ISL_460020, EPI_ISL_460021, EPI_ISL_460022, EPI_ISL_460023, EPI_ISL_460024, EPI_ISL_460025, EPI_ISL_460026, EPI_ISL_460027, EPI_ISL_460028, EPI_ISL_460029, EPI_ISL_460030, EPI_ISL_460031, EPI_ISL_460032, EPI_ISL_460033, EPI_ISL_460034, EPI_ISL_460035, EPI_ISL_460036, EPI_ISL_460037, EPI_ISL_460038, EPI_ISL_460039, EPI_ISL_460040, EPI_ISL_460041, EPI_ISL_460042, EPI_ISL_460043, EPI_ISL_460044, EPI_ISL_460045, EPI_ISL_460046, EPI_ISL_460047, EPI_ISL_460048, EPI_ISL_460049, EPI_ISL_460050, EPI_ISL_460051, EPI_ISL_460052, EPI_ISL_460053, EPI_ISL_460054, EPI_ISL_460055, EPI_ISL_460056, EPI_ISL_460057, EPI_ISL_460058, EPI_ISL_460059, EPI_ISL_460060, EPI_ISL_460061, EPI_ISL_460062, EPI_ISL_460063, EPI_ISL_460064, EPI_ISL_460065, EPI_ISL_460066, EPI_ISL_460067, EPI_ISL_460068, EPI_ISL_460069, EPI_ISL_460070, EPI_ISL_460071, EPI_ISL_460072, EPI_ISL_460073, EPI_ISL_460074, EPI_ISL_460075, EPI_ISL_460076, EPI_ISL_460077, EPI_ISL_460078, EPI_ISL_460079, EPI_ISL_460080, EPI_ISL_460081, EPI_ISL_460082, EPI_ISL_460083, EPI_ISL_460084, EPI_ISL_460085, EPI_ISL_460086, EPI_ISL_460087, EPI_ISL_460088, EPI_ISL_460089, EPI_ISL_460090, EPI_ISL_460091, EPI_ISL_460092, EPI_ISL_460093, EPI_ISL_460094, EPI_ISL_460095, EPI_ISL_460096, EPI_ISL_460097, EPI_ISL_460098, EPI_ISL_460099, EPI_ISL_460100 | see above                                                    | Michigan Department of Health and Human Services, Bureau of Laboratories                                                                                                          | Michigan Department of Health and Human Services, Bureau of Laboratories                                                                                                                                                                                                                                                                                                                   | Blankenship HM, Riner D, Soehnen MK                                                                                                  |
| EPI_ISL_461481                                                                                                                                                                                                                                                                                                                                                                                                                                                                                                                                                                                                                                                                                                                                                                                                                                                                                                                                                                                                                                                                                                                                                                                                                                                                                                                                                                                                                                                                                                                                                                                                                                                                                                                                                                                                 | Pandit Deendayal Upadhyay Government Medical College, Rajkot | Gujarat Biotechnology Research Centre                                                                                                                                             | Bhavya Jindal, Dinesh Kumar, Zuber Saiyed, Komal Patel, Labdhi Pandya, Snehal Bagatharia, Prakash Modi, Sejul Antala, Manish Pattani, Tejas Shah, Ankit Hinsu, Pritesh Sabara, Apurvasinh Puvur, Janvi Raval, Zarna Patel, Monika Gandhi, Pinal Trivedi, Maharshi Pandya, Nidhi Patel, Nitin Savaiya, Raghawendra Kumar, R D Dixit, A M Kadri, Harsh Bakshi, Chaitanya Joshi, Madhvi Joshi |                                                                                                                                      |

|                                                                                                                                                                                                                                                                                                                                                                                                                                                                                                                                                                                                                                                                                                                                                                                                                                                                                                                                                                                                                                                                                                                                                                                                                                                                                                                                                                                                                                                                                                                                                                                                                                                                                                                                                                                                                                                                                                                                                                                                                                                                                                                                                                                                                                                                                                                                                                                                                                                                                                                                                                                                                                                                                                                                                                                                                                                                                                                                                                                                                                                                                                                                                                                                                                                                                                                                                                                                                                                                                                                                                                                                                                                                                                                                                                                                                                                                                                                |                                                                                                            |                                                                                                                      |                                                                                                                                                                                                                                                                                                                                                                                                                   |  |
|----------------------------------------------------------------------------------------------------------------------------------------------------------------------------------------------------------------------------------------------------------------------------------------------------------------------------------------------------------------------------------------------------------------------------------------------------------------------------------------------------------------------------------------------------------------------------------------------------------------------------------------------------------------------------------------------------------------------------------------------------------------------------------------------------------------------------------------------------------------------------------------------------------------------------------------------------------------------------------------------------------------------------------------------------------------------------------------------------------------------------------------------------------------------------------------------------------------------------------------------------------------------------------------------------------------------------------------------------------------------------------------------------------------------------------------------------------------------------------------------------------------------------------------------------------------------------------------------------------------------------------------------------------------------------------------------------------------------------------------------------------------------------------------------------------------------------------------------------------------------------------------------------------------------------------------------------------------------------------------------------------------------------------------------------------------------------------------------------------------------------------------------------------------------------------------------------------------------------------------------------------------------------------------------------------------------------------------------------------------------------------------------------------------------------------------------------------------------------------------------------------------------------------------------------------------------------------------------------------------------------------------------------------------------------------------------------------------------------------------------------------------------------------------------------------------------------------------------------------------------------------------------------------------------------------------------------------------------------------------------------------------------------------------------------------------------------------------------------------------------------------------------------------------------------------------------------------------------------------------------------------------------------------------------------------------------------------------------------------------------------------------------------------------------------------------------------------------------------------------------------------------------------------------------------------------------------------------------------------------------------------------------------------------------------------------------------------------------------------------------------------------------------------------------------------------------------------------------------------------------------------------------------------------|------------------------------------------------------------------------------------------------------------|----------------------------------------------------------------------------------------------------------------------|-------------------------------------------------------------------------------------------------------------------------------------------------------------------------------------------------------------------------------------------------------------------------------------------------------------------------------------------------------------------------------------------------------------------|--|
| EPI_ISL_461494                                                                                                                                                                                                                                                                                                                                                                                                                                                                                                                                                                                                                                                                                                                                                                                                                                                                                                                                                                                                                                                                                                                                                                                                                                                                                                                                                                                                                                                                                                                                                                                                                                                                                                                                                                                                                                                                                                                                                                                                                                                                                                                                                                                                                                                                                                                                                                                                                                                                                                                                                                                                                                                                                                                                                                                                                                                                                                                                                                                                                                                                                                                                                                                                                                                                                                                                                                                                                                                                                                                                                                                                                                                                                                                                                                                                                                                                                                 | B.J. Medical College and Civil hospital                                                                    | Gujarat Biotechnology Research Centre                                                                                | Bhavya Jindal, Monika Gandhi, Pinal Trivedi, Maharshi Pandya, Nidhi Patel, Nitin Savaliya, Raghavendra Kumar, Dinesh Kumar, Zuber Saiyed, Komal Patel, Labdhi Pandya, Snehal Bagatharia, Pranay Shah, Kamlesh J Upadhyay, Tejas Shah, Ankit Hinsu, Pritesh Sabara, Apurvasinh Puvar, Janvi Raval, Zarna Patel, R D Dixit, A M Kadri, Harsh Bakshi, Chaitanya Joshi, Madhvi Joshi                                  |  |
| EPI_ISL_462636, EPI_ISL_462637, EPI_ISL_462638, EPI_ISL_462639, EPI_ISL_462640, EPI_ISL_462641, EPI_ISL_462642, EPI_ISL_462643, EPI_ISL_462644, EPI_ISL_462645, EPI_ISL_462646, EPI_ISL_462647, EPI_ISL_462648, EPI_ISL_462649, EPI_ISL_462650, EPI_ISL_462651, EPI_ISL_462652, EPI_ISL_462653, EPI_ISL_462654, EPI_ISL_462655, EPI_ISL_462656, EPI_ISL_462657, EPI_ISL_462658, EPI_ISL_462659, EPI_ISL_462660, EPI_ISL_462661, EPI_ISL_462662, EPI_ISL_462663, EPI_ISL_462664, EPI_ISL_462665, EPI_ISL_462666, EPI_ISL_462667, EPI_ISL_462668, EPI_ISL_462669, EPI_ISL_462670, EPI_ISL_462671, EPI_ISL_462672, EPI_ISL_462673, EPI_ISL_462674, EPI_ISL_462675, EPI_ISL_462676, EPI_ISL_462677, EPI_ISL_462678, EPI_ISL_462679, EPI_ISL_462680, EPI_ISL_462681, EPI_ISL_462682, EPI_ISL_462683, EPI_ISL_462684, EPI_ISL_462685, EPI_ISL_462686, EPI_ISL_462687, EPI_ISL_462688, EPI_ISL_462689, EPI_ISL_462690, EPI_ISL_462691, EPI_ISL_462692, EPI_ISL_462693, EPI_ISL_462694, EPI_ISL_462695, EPI_ISL_462696, EPI_ISL_462697, EPI_ISL_462698, EPI_ISL_462699, EPI_ISL_462700, EPI_ISL_462701, EPI_ISL_462702, EPI_ISL_462703, EPI_ISL_462704, EPI_ISL_462705, EPI_ISL_462706, EPI_ISL_462707, EPI_ISL_462708, EPI_ISL_462709, EPI_ISL_462710, EPI_ISL_462711, EPI_ISL_462712, EPI_ISL_462713, EPI_ISL_462714, EPI_ISL_462715, EPI_ISL_462716, EPI_ISL_462717, EPI_ISL_462718, EPI_ISL_462719, EPI_ISL_462720, EPI_ISL_462721, EPI_ISL_462722, EPI_ISL_462723, EPI_ISL_462724, EPI_ISL_462725, EPI_ISL_462726, EPI_ISL_462727, EPI_ISL_462728, EPI_ISL_462729, EPI_ISL_462730, EPI_ISL_462731, EPI_ISL_462732, EPI_ISL_462733, EPI_ISL_462734, EPI_ISL_462735, EPI_ISL_462736                                                                                                                                                                                                                                                                                                                                                                                                                                                                                                                                                                                                                                                                                                                                                                                                                                                                                                                                                                                                                                                                                                                                                                                                                                                                                                                                                                                                                                                                                                                                                                                                                                                                                                                                                                                                                                                                                                                                                                                                                                                                                                                                                                                                                                 | Michigan Department of Health and Human Services, Bureau of Laboratories                                   | Michigan Department of Health and Human Services, Bureau of Laboratories                                             | Blankenship HM, Riner D, Soehnlén MK                                                                                                                                                                                                                                                                                                                                                                              |  |
| see above                                                                                                                                                                                                                                                                                                                                                                                                                                                                                                                                                                                                                                                                                                                                                                                                                                                                                                                                                                                                                                                                                                                                                                                                                                                                                                                                                                                                                                                                                                                                                                                                                                                                                                                                                                                                                                                                                                                                                                                                                                                                                                                                                                                                                                                                                                                                                                                                                                                                                                                                                                                                                                                                                                                                                                                                                                                                                                                                                                                                                                                                                                                                                                                                                                                                                                                                                                                                                                                                                                                                                                                                                                                                                                                                                                                                                                                                                                      |                                                                                                            |                                                                                                                      |                                                                                                                                                                                                                                                                                                                                                                                                                   |  |
| EPI_ISL_467031                                                                                                                                                                                                                                                                                                                                                                                                                                                                                                                                                                                                                                                                                                                                                                                                                                                                                                                                                                                                                                                                                                                                                                                                                                                                                                                                                                                                                                                                                                                                                                                                                                                                                                                                                                                                                                                                                                                                                                                                                                                                                                                                                                                                                                                                                                                                                                                                                                                                                                                                                                                                                                                                                                                                                                                                                                                                                                                                                                                                                                                                                                                                                                                                                                                                                                                                                                                                                                                                                                                                                                                                                                                                                                                                                                                                                                                                                                 | GMERS Medical College and Hospital, Gandhinagar                                                            | Gujarat Biotechnology Research Centre                                                                                | Bhavesh Modi, Bharti Rajani, Tejas Shah, Ankit Hinsu, Pritesh Sabara, Apurvasinh Puvar, Janvi Raval, Zarna Patel, Monika Gandhi, Pinal Trivedi, Maharshi Pandya, Nidhi Patel, Nitin Savaliya, Raghavendra Kumar, Dinesh Kumar, Zuber Saiyed, Komal Patel, Labdhi Pandya, Snehal Bagatharia, Seema Bhatt, Gaurishankar Shirmali, Pooja P Doshi, R D Dixit, A M Kadri, Harsh Bakshi, Chaitanya Joshi, Madhvi Joshi  |  |
| EPI_ISL_467032                                                                                                                                                                                                                                                                                                                                                                                                                                                                                                                                                                                                                                                                                                                                                                                                                                                                                                                                                                                                                                                                                                                                                                                                                                                                                                                                                                                                                                                                                                                                                                                                                                                                                                                                                                                                                                                                                                                                                                                                                                                                                                                                                                                                                                                                                                                                                                                                                                                                                                                                                                                                                                                                                                                                                                                                                                                                                                                                                                                                                                                                                                                                                                                                                                                                                                                                                                                                                                                                                                                                                                                                                                                                                                                                                                                                                                                                                                 | GMERS Medical College and Hospital, Gandhinagar                                                            | Gujarat Biotechnology Research Centre                                                                                | Bharti Rajani, Tejas Shah, Ankit Hinsu, Pritesh Sabara, Apurvasinh Puvar, Janvi Raval, Zarna Patel, Monika Gandhi, Pinal Trivedi, Maharshi Pandya, Nidhi Patel, Nitin Savaliya, Raghavendra Kumar, Dinesh Kumar, Zuber Saiyed, Komal Patel, Labdhi Pandya, Snehal Bagatharia, Seema Bhatt, Gaurishankar Shirmali, Bhavesh Modi, Akanksha Verma, R D Dixit, A M Kadri, Harsh Bakshi, Chaitanya Joshi, Madhvi Joshi |  |
| EPI_ISL_468080, EPI_ISL_468081, EPI_ISL_468082, EPI_ISL_468083, EPI_ISL_468084, EPI_ISL_468085, EPI_ISL_468086, EPI_ISL_468087, EPI_ISL_468088, EPI_ISL_468089, EPI_ISL_468090, EPI_ISL_468091, EPI_ISL_468092, EPI_ISL_468093, EPI_ISL_468094, EPI_ISL_468095, EPI_ISL_468096, EPI_ISL_468097, EPI_ISL_468098, EPI_ISL_468099, EPI_ISL_468100, EPI_ISL_468101, EPI_ISL_468102, EPI_ISL_468103, EPI_ISL_468104, EPI_ISL_468105, EPI_ISL_468106, EPI_ISL_468107, EPI_ISL_468108, EPI_ISL_468109, EPI_ISL_468110, EPI_ISL_468111, EPI_ISL_468112, EPI_ISL_468113, EPI_ISL_468114, EPI_ISL_468115, EPI_ISL_468116, EPI_ISL_468117, EPI_ISL_468118, EPI_ISL_468119, EPI_ISL_468120, EPI_ISL_468121, EPI_ISL_468122, EPI_ISL_468123, EPI_ISL_468124, EPI_ISL_468125, EPI_ISL_468126, EPI_ISL_468127, EPI_ISL_468128, EPI_ISL_468129                                                                                                                                                                                                                                                                                                                                                                                                                                                                                                                                                                                                                                                                                                                                                                                                                                                                                                                                                                                                                                                                                                                                                                                                                                                                                                                                                                                                                                                                                                                                                                                                                                                                                                                                                                                                                                                                                                                                                                                                                                                                                                                                                                                                                                                                                                                                                                                                                                                                                                                                                                                                                                                                                                                                                                                                                                                                                                                                                                                                                                                                                 | OHSU Lab Services Molecular Microbiology Lab                                                               | Oregon SARS-CoV-2 Genome Sequencing Center                                                                           | Brendan L. O'Connell, Ruth V. Nichols, Alec J. Hirsch, Guang Fan, Daniel N. Streblov, William B. Messer, Andrew C. Adey, Benjamin N. Bimber, Brian J. O'Roak                                                                                                                                                                                                                                                      |  |
| see above                                                                                                                                                                                                                                                                                                                                                                                                                                                                                                                                                                                                                                                                                                                                                                                                                                                                                                                                                                                                                                                                                                                                                                                                                                                                                                                                                                                                                                                                                                                                                                                                                                                                                                                                                                                                                                                                                                                                                                                                                                                                                                                                                                                                                                                                                                                                                                                                                                                                                                                                                                                                                                                                                                                                                                                                                                                                                                                                                                                                                                                                                                                                                                                                                                                                                                                                                                                                                                                                                                                                                                                                                                                                                                                                                                                                                                                                                                      |                                                                                                            |                                                                                                                      |                                                                                                                                                                                                                                                                                                                                                                                                                   |  |
| EPI_ISL_471676, EPI_ISL_471677, EPI_ISL_471678, EPI_ISL_471679, EPI_ISL_471680, EPI_ISL_471681, EPI_ISL_471682, EPI_ISL_471683, EPI_ISL_471684, EPI_ISL_471685, EPI_ISL_471686, EPI_ISL_471687, EPI_ISL_471688, EPI_ISL_471689, EPI_ISL_471690, EPI_ISL_471691, EPI_ISL_471692, EPI_ISL_471693, EPI_ISL_471694, EPI_ISL_471695, EPI_ISL_471696, EPI_ISL_471697, EPI_ISL_471698, EPI_ISL_471699, EPI_ISL_471700, EPI_ISL_471701, EPI_ISL_471702, EPI_ISL_471703, EPI_ISL_471704, EPI_ISL_471705, EPI_ISL_471706, EPI_ISL_471707, EPI_ISL_471708, EPI_ISL_471709, EPI_ISL_471710, EPI_ISL_471711, EPI_ISL_471712, EPI_ISL_471713, EPI_ISL_471714, EPI_ISL_471715, EPI_ISL_471716, EPI_ISL_471717, EPI_ISL_471718, EPI_ISL_471719, EPI_ISL_471720, EPI_ISL_471721, EPI_ISL_471722, EPI_ISL_471723, EPI_ISL_471724, EPI_ISL_471725, EPI_ISL_471726, EPI_ISL_471727, EPI_ISL_471728, EPI_ISL_471729, EPI_ISL_471730, EPI_ISL_471731, EPI_ISL_471732, EPI_ISL_471733, EPI_ISL_471734, EPI_ISL_471735, EPI_ISL_471736, EPI_ISL_471737, EPI_ISL_471738, EPI_ISL_471739, EPI_ISL_471740, EPI_ISL_471741, EPI_ISL_471742, EPI_ISL_471743, EPI_ISL_471744, EPI_ISL_471745, EPI_ISL_471746, EPI_ISL_471747, EPI_ISL_471748, EPI_ISL_471749, EPI_ISL_471750, EPI_ISL_471751, EPI_ISL_471752, EPI_ISL_471753, EPI_ISL_471754, EPI_ISL_471755, EPI_ISL_471756, EPI_ISL_471757, EPI_ISL_471758, EPI_ISL_471759, EPI_ISL_471760, EPI_ISL_471761, EPI_ISL_471762, EPI_ISL_471763, EPI_ISL_471764, EPI_ISL_471765, EPI_ISL_471766, EPI_ISL_471767, EPI_ISL_471768, EPI_ISL_471769, EPI_ISL_471770, EPI_ISL_471771, EPI_ISL_471772, EPI_ISL_471773, EPI_ISL_471774, EPI_ISL_471775, EPI_ISL_471776, EPI_ISL_471777, EPI_ISL_471778, EPI_ISL_471779, EPI_ISL_471780, EPI_ISL_471781, EPI_ISL_471782, EPI_ISL_471783, EPI_ISL_471784, EPI_ISL_471785, EPI_ISL_471786, EPI_ISL_471787, EPI_ISL_471788, EPI_ISL_471789, EPI_ISL_471790, EPI_ISL_471791, EPI_ISL_471792, EPI_ISL_471793, EPI_ISL_471794, EPI_ISL_471795, EPI_ISL_471796, EPI_ISL_471797, EPI_ISL_471798, EPI_ISL_471799, EPI_ISL_471800, EPI_ISL_471801, EPI_ISL_471802, EPI_ISL_471803, EPI_ISL_471804, EPI_ISL_471805, EPI_ISL_471806, EPI_ISL_471807, EPI_ISL_471808, EPI_ISL_471809, EPI_ISL_471810, EPI_ISL_471811, EPI_ISL_471812, EPI_ISL_471813, EPI_ISL_471814, EPI_ISL_471815, EPI_ISL_471816, EPI_ISL_471817, EPI_ISL_471818, EPI_ISL_471819, EPI_ISL_471820, EPI_ISL_471821, EPI_ISL_471822, EPI_ISL_471823, EPI_ISL_471824, EPI_ISL_471825, EPI_ISL_471826, EPI_ISL_471827, EPI_ISL_471828, EPI_ISL_471829, EPI_ISL_471830, EPI_ISL_471831, EPI_ISL_471832, EPI_ISL_471833, EPI_ISL_471834, EPI_ISL_471835, EPI_ISL_471836, EPI_ISL_471837, EPI_ISL_471838, EPI_ISL_471839, EPI_ISL_471840, EPI_ISL_471841, EPI_ISL_471842, EPI_ISL_471843, EPI_ISL_471844, EPI_ISL_471845, EPI_ISL_471846, EPI_ISL_471847, EPI_ISL_471848, EPI_ISL_471849, EPI_ISL_471850, EPI_ISL_471851, EPI_ISL_471852, EPI_ISL_471853, EPI_ISL_471854, EPI_ISL_471855, EPI_ISL_471856, EPI_ISL_471857, EPI_ISL_471858, EPI_ISL_471859, EPI_ISL_471860, EPI_ISL_471861, EPI_ISL_471862, EPI_ISL_471863, EPI_ISL_471864, EPI_ISL_471865, EPI_ISL_471866, EPI_ISL_471867, EPI_ISL_471868, EPI_ISL_471869, EPI_ISL_471870, EPI_ISL_471871, EPI_ISL_471872, EPI_ISL_471873, EPI_ISL_471874, EPI_ISL_471875, EPI_ISL_471876, EPI_ISL_471877, EPI_ISL_471878, EPI_ISL_471879, EPI_ISL_471880, EPI_ISL_471881, EPI_ISL_471882, EPI_ISL_471883, EPI_ISL_471884, EPI_ISL_471885, EPI_ISL_471886, EPI_ISL_471887, EPI_ISL_471888, EPI_ISL_471889, EPI_ISL_471890, EPI_ISL_471891, EPI_ISL_471892, EPI_ISL_471893, EPI_ISL_471894, EPI_ISL_471895, EPI_ISL_471896, EPI_ISL_471897, EPI_ISL_471898, EPI_ISL_471899, EPI_ISL_471900, EPI_ISL_471901, EPI_ISL_471902, EPI_ISL_471903, EPI_ISL_471904, EPI_ISL_471905, EPI_ISL_471906, EPI_ISL_471907, EPI_ISL_471908, EPI_ISL_471909, EPI_ISL_471910 | Michigan Department of Health and Human Services, Bureau of Laboratories                                   | Michigan Department of Health and Human Services, Bureau of Laboratories                                             | Blankenship HM, Riner D, Soehnlén MK                                                                                                                                                                                                                                                                                                                                                                              |  |
| see above                                                                                                                                                                                                                                                                                                                                                                                                                                                                                                                                                                                                                                                                                                                                                                                                                                                                                                                                                                                                                                                                                                                                                                                                                                                                                                                                                                                                                                                                                                                                                                                                                                                                                                                                                                                                                                                                                                                                                                                                                                                                                                                                                                                                                                                                                                                                                                                                                                                                                                                                                                                                                                                                                                                                                                                                                                                                                                                                                                                                                                                                                                                                                                                                                                                                                                                                                                                                                                                                                                                                                                                                                                                                                                                                                                                                                                                                                                      |                                                                                                            |                                                                                                                      |                                                                                                                                                                                                                                                                                                                                                                                                                   |  |
| EPI_ISL_471915, EPI_ISL_471916, EPI_ISL_471923, EPI_ISL_471936, EPI_ISL_471941, EPI_ISL_471960, EPI_ISL_471962, EPI_ISL_471968, EPI_ISL_471976, EPI_ISL_471980, EPI_ISL_471982, EPI_ISL_471983, EPI_ISL_471984, EPI_ISL_471986, EPI_ISL_471987, EPI_ISL_471989                                                                                                                                                                                                                                                                                                                                                                                                                                                                                                                                                                                                                                                                                                                                                                                                                                                                                                                                                                                                                                                                                                                                                                                                                                                                                                                                                                                                                                                                                                                                                                                                                                                                                                                                                                                                                                                                                                                                                                                                                                                                                                                                                                                                                                                                                                                                                                                                                                                                                                                                                                                                                                                                                                                                                                                                                                                                                                                                                                                                                                                                                                                                                                                                                                                                                                                                                                                                                                                                                                                                                                                                                                                 | University of Exeter                                                                                       | COVID-19 Genomics UK (COG-UK) Consortium                                                                             | Ben Temperton, Aaron Jeffries, Michelle Michelsen, Joanna Warwick-Dugdale, Audrey Farbos, Robyn Manley, Stephen Michell, Jane Masoli                                                                                                                                                                                                                                                                              |  |
| see above                                                                                                                                                                                                                                                                                                                                                                                                                                                                                                                                                                                                                                                                                                                                                                                                                                                                                                                                                                                                                                                                                                                                                                                                                                                                                                                                                                                                                                                                                                                                                                                                                                                                                                                                                                                                                                                                                                                                                                                                                                                                                                                                                                                                                                                                                                                                                                                                                                                                                                                                                                                                                                                                                                                                                                                                                                                                                                                                                                                                                                                                                                                                                                                                                                                                                                                                                                                                                                                                                                                                                                                                                                                                                                                                                                                                                                                                                                      |                                                                                                            |                                                                                                                      |                                                                                                                                                                                                                                                                                                                                                                                                                   |  |
| EPI_ISL_476027, EPI_ISL_476028, EPI_ISL_476029, EPI_ISL_476030, EPI_ISL_476031, EPI_ISL_476032, EPI_ISL_476033, EPI_ISL_476034, EPI_ISL_476035, EPI_ISL_476036, EPI_ISL_476037, EPI_ISL_476038, EPI_ISL_476039, EPI_ISL_476040, EPI_ISL_476041, EPI_ISL_476042, EPI_ISL_476043, EPI_ISL_476044, EPI_ISL_476045, EPI_ISL_476046, EPI_ISL_476047, EPI_ISL_476048, EPI_ISL_476049, EPI_ISL_476050, EPI_ISL_476051, EPI_ISL_476052, EPI_ISL_476053, EPI_ISL_476054, EPI_ISL_476055, EPI_ISL_476056, EPI_ISL_476057, EPI_ISL_476058, EPI_ISL_476059, EPI_ISL_476060, EPI_ISL_476061, EPI_ISL_476062, EPI_ISL_476063, EPI_ISL_476064, EPI_ISL_476065, EPI_ISL_476066                                                                                                                                                                                                                                                                                                                                                                                                                                                                                                                                                                                                                                                                                                                                                                                                                                                                                                                                                                                                                                                                                                                                                                                                                                                                                                                                                                                                                                                                                                                                                                                                                                                                                                                                                                                                                                                                                                                                                                                                                                                                                                                                                                                                                                                                                                                                                                                                                                                                                                                                                                                                                                                                                                                                                                                                                                                                                                                                                                                                                                                                                                                                                                                                                                                 | Michigan Department of Health and Human Services, Bureau of Laboratories                                   | Michigan Department of Health and Human Services, Bureau of Laboratories                                             | Blankenship HM, Riner D, Soehnlén MK                                                                                                                                                                                                                                                                                                                                                                              |  |
| see above                                                                                                                                                                                                                                                                                                                                                                                                                                                                                                                                                                                                                                                                                                                                                                                                                                                                                                                                                                                                                                                                                                                                                                                                                                                                                                                                                                                                                                                                                                                                                                                                                                                                                                                                                                                                                                                                                                                                                                                                                                                                                                                                                                                                                                                                                                                                                                                                                                                                                                                                                                                                                                                                                                                                                                                                                                                                                                                                                                                                                                                                                                                                                                                                                                                                                                                                                                                                                                                                                                                                                                                                                                                                                                                                                                                                                                                                                                      |                                                                                                            |                                                                                                                      |                                                                                                                                                                                                                                                                                                                                                                                                                   |  |
| EPI_ISL_476767, EPI_ISL_476768, EPI_ISL_476769, EPI_ISL_476770, EPI_ISL_476771, EPI_ISL_476772, EPI_ISL_476773, EPI_ISL_476774, EPI_ISL_476775, EPI_ISL_476776, EPI_ISL_476777, EPI_ISL_476778, EPI_ISL_476779, EPI_ISL_476780, EPI_ISL_476781, EPI_ISL_476782, EPI_ISL_476783, EPI_ISL_476784, EPI_ISL_476785, EPI_ISL_476786, EPI_ISL_476787, EPI_ISL_476788, EPI_ISL_476789, EPI_ISL_476790, EPI_ISL_476791, EPI_ISL_476792, EPI_ISL_476793, EPI_ISL_476794                                                                                                                                                                                                                                                                                                                                                                                                                                                                                                                                                                                                                                                                                                                                                                                                                                                                                                                                                                                                                                                                                                                                                                                                                                                                                                                                                                                                                                                                                                                                                                                                                                                                                                                                                                                                                                                                                                                                                                                                                                                                                                                                                                                                                                                                                                                                                                                                                                                                                                                                                                                                                                                                                                                                                                                                                                                                                                                                                                                                                                                                                                                                                                                                                                                                                                                                                                                                                                                 | Stanford clinical virology lab                                                                             | Chan-Zuckerberg Biohub                                                                                               | Benjamin Pinksy, Katharine Walter, Victoria N. Parikh, John Gorzynski, Hannah N. DeJong, Matthew T. Wheeler, Jason Andrews, Manuel Rivas, Carlos Bustamante, Euan Ashley, with CZB Ciliahub Consortium                                                                                                                                                                                                            |  |
| see above                                                                                                                                                                                                                                                                                                                                                                                                                                                                                                                                                                                                                                                                                                                                                                                                                                                                                                                                                                                                                                                                                                                                                                                                                                                                                                                                                                                                                                                                                                                                                                                                                                                                                                                                                                                                                                                                                                                                                                                                                                                                                                                                                                                                                                                                                                                                                                                                                                                                                                                                                                                                                                                                                                                                                                                                                                                                                                                                                                                                                                                                                                                                                                                                                                                                                                                                                                                                                                                                                                                                                                                                                                                                                                                                                                                                                                                                                                      |                                                                                                            |                                                                                                                      |                                                                                                                                                                                                                                                                                                                                                                                                                   |  |
| EPI_ISL_478276, EPI_ISL_478285                                                                                                                                                                                                                                                                                                                                                                                                                                                                                                                                                                                                                                                                                                                                                                                                                                                                                                                                                                                                                                                                                                                                                                                                                                                                                                                                                                                                                                                                                                                                                                                                                                                                                                                                                                                                                                                                                                                                                                                                                                                                                                                                                                                                                                                                                                                                                                                                                                                                                                                                                                                                                                                                                                                                                                                                                                                                                                                                                                                                                                                                                                                                                                                                                                                                                                                                                                                                                                                                                                                                                                                                                                                                                                                                                                                                                                                                                 | University of Exeter                                                                                       | COVID-19 Genomics UK (COG-UK) Consortium                                                                             | Ben Temperton, Aaron Jeffries, Michelle Michelsen, Joanna Warwick-Dugdale, Audrey Farbos, Robyn Manley, Stephen Michell, Jane Masoli                                                                                                                                                                                                                                                                              |  |
| EPI_ISL_478673, EPI_ISL_478674                                                                                                                                                                                                                                                                                                                                                                                                                                                                                                                                                                                                                                                                                                                                                                                                                                                                                                                                                                                                                                                                                                                                                                                                                                                                                                                                                                                                                                                                                                                                                                                                                                                                                                                                                                                                                                                                                                                                                                                                                                                                                                                                                                                                                                                                                                                                                                                                                                                                                                                                                                                                                                                                                                                                                                                                                                                                                                                                                                                                                                                                                                                                                                                                                                                                                                                                                                                                                                                                                                                                                                                                                                                                                                                                                                                                                                                                                 | Pathology North - Royal North Shore Hospital - NSW Health Pathology                                        | NSW Health Pathology - Institute of Clinical Pathology and Medical Research; Westmead Hospital; University of Sydney | CIDM-PH et al.                                                                                                                                                                                                                                                                                                                                                                                                    |  |
| EPI_ISL_478675, EPI_ISL_478676, EPI_ISL_478677, EPI_ISL_478678, EPI_ISL_478679, EPI_ISL_478680, EPI_ISL_478681, EPI_ISL_478682                                                                                                                                                                                                                                                                                                                                                                                                                                                                                                                                                                                                                                                                                                                                                                                                                                                                                                                                                                                                                                                                                                                                                                                                                                                                                                                                                                                                                                                                                                                                                                                                                                                                                                                                                                                                                                                                                                                                                                                                                                                                                                                                                                                                                                                                                                                                                                                                                                                                                                                                                                                                                                                                                                                                                                                                                                                                                                                                                                                                                                                                                                                                                                                                                                                                                                                                                                                                                                                                                                                                                                                                                                                                                                                                                                                 | Sydney South West Pathology Service (SSWPS) - Liverpool Hospital - NSW Health Pathology                    | NSW Health Pathology - Institute of Clinical Pathology and Medical Research; Westmead Hospital; University of Sydney | CIDM-PH et al.                                                                                                                                                                                                                                                                                                                                                                                                    |  |
| EPI_ISL_478683, EPI_ISL_478684, EPI_ISL_478685, EPI_ISL_478686, EPI_ISL_478687, EPI_ISL_478688, EPI_ISL_478689, EPI_ISL_478690, EPI_ISL_478691, EPI_ISL_478692, EPI_ISL_478693, EPI_ISL_478694, EPI_ISL_478695, EPI_ISL_478696, EPI_ISL_478697, EPI_ISL_478698, EPI_ISL_478699, EPI_ISL_478700, EPI_ISL_478701, EPI_ISL_478702, EPI_ISL_478703, EPI_ISL_478704, EPI_ISL_478705                                                                                                                                                                                                                                                                                                                                                                                                                                                                                                                                                                                                                                                                                                                                                                                                                                                                                                                                                                                                                                                                                                                                                                                                                                                                                                                                                                                                                                                                                                                                                                                                                                                                                                                                                                                                                                                                                                                                                                                                                                                                                                                                                                                                                                                                                                                                                                                                                                                                                                                                                                                                                                                                                                                                                                                                                                                                                                                                                                                                                                                                                                                                                                                                                                                                                                                                                                                                                                                                                                                                 | South Eastern Area Laboratory Services (SEALS)                                                             | NSW Health Pathology - Institute of Clinical Pathology and Medical Research; Westmead Hospital; University of Sydney | CIDM-PH et al.                                                                                                                                                                                                                                                                                                                                                                                                    |  |
| see above                                                                                                                                                                                                                                                                                                                                                                                                                                                                                                                                                                                                                                                                                                                                                                                                                                                                                                                                                                                                                                                                                                                                                                                                                                                                                                                                                                                                                                                                                                                                                                                                                                                                                                                                                                                                                                                                                                                                                                                                                                                                                                                                                                                                                                                                                                                                                                                                                                                                                                                                                                                                                                                                                                                                                                                                                                                                                                                                                                                                                                                                                                                                                                                                                                                                                                                                                                                                                                                                                                                                                                                                                                                                                                                                                                                                                                                                                                      |                                                                                                            |                                                                                                                      |                                                                                                                                                                                                                                                                                                                                                                                                                   |  |
| EPI_ISL_478706, EPI_ISL_478707                                                                                                                                                                                                                                                                                                                                                                                                                                                                                                                                                                                                                                                                                                                                                                                                                                                                                                                                                                                                                                                                                                                                                                                                                                                                                                                                                                                                                                                                                                                                                                                                                                                                                                                                                                                                                                                                                                                                                                                                                                                                                                                                                                                                                                                                                                                                                                                                                                                                                                                                                                                                                                                                                                                                                                                                                                                                                                                                                                                                                                                                                                                                                                                                                                                                                                                                                                                                                                                                                                                                                                                                                                                                                                                                                                                                                                                                                 | Sydney South West Pathology Service (SSWPS) - Liverpool Hospital - NSW Health Pathology                    | NSW Health Pathology - Institute of Clinical Pathology and Medical Research; Westmead Hospital; University of Sydney | CIDM-PH et al.                                                                                                                                                                                                                                                                                                                                                                                                    |  |
| EPI_ISL_478708, EPI_ISL_478709, EPI_ISL_478710, EPI_ISL_478711                                                                                                                                                                                                                                                                                                                                                                                                                                                                                                                                                                                                                                                                                                                                                                                                                                                                                                                                                                                                                                                                                                                                                                                                                                                                                                                                                                                                                                                                                                                                                                                                                                                                                                                                                                                                                                                                                                                                                                                                                                                                                                                                                                                                                                                                                                                                                                                                                                                                                                                                                                                                                                                                                                                                                                                                                                                                                                                                                                                                                                                                                                                                                                                                                                                                                                                                                                                                                                                                                                                                                                                                                                                                                                                                                                                                                                                 | South Eastern Area Laboratory Services (SEALS)                                                             | NSW Health Pathology - Institute of Clinical Pathology and Medical Research; Westmead Hospital; University of Sydney | CIDM-PH et al.                                                                                                                                                                                                                                                                                                                                                                                                    |  |
| EPI_ISL_478712, EPI_ISL_478713, EPI_ISL_478714, EPI_ISL_478715, EPI_ISL_478716                                                                                                                                                                                                                                                                                                                                                                                                                                                                                                                                                                                                                                                                                                                                                                                                                                                                                                                                                                                                                                                                                                                                                                                                                                                                                                                                                                                                                                                                                                                                                                                                                                                                                                                                                                                                                                                                                                                                                                                                                                                                                                                                                                                                                                                                                                                                                                                                                                                                                                                                                                                                                                                                                                                                                                                                                                                                                                                                                                                                                                                                                                                                                                                                                                                                                                                                                                                                                                                                                                                                                                                                                                                                                                                                                                                                                                 | Sydney South West Pathology Service (SSWPS) - Liverpool Hospital - NSW Health Pathology                    | NSW Health Pathology - Institute of Clinical Pathology and Medical Research; Westmead Hospital; University of Sydney | CIDM-PH et al.                                                                                                                                                                                                                                                                                                                                                                                                    |  |
| EPI_ISL_478717, EPI_ISL_478718                                                                                                                                                                                                                                                                                                                                                                                                                                                                                                                                                                                                                                                                                                                                                                                                                                                                                                                                                                                                                                                                                                                                                                                                                                                                                                                                                                                                                                                                                                                                                                                                                                                                                                                                                                                                                                                                                                                                                                                                                                                                                                                                                                                                                                                                                                                                                                                                                                                                                                                                                                                                                                                                                                                                                                                                                                                                                                                                                                                                                                                                                                                                                                                                                                                                                                                                                                                                                                                                                                                                                                                                                                                                                                                                                                                                                                                                                 | Sydney South West Pathology Service (SSWPS) - Concord Repatriation General Hospital - NSW Health Pathology | NSW Health Pathology - Institute of Clinical Pathology and Medical Research; Westmead Hospital; University of Sydney | CIDM-PH et al.                                                                                                                                                                                                                                                                                                                                                                                                    |  |
| EPI_ISL_479777, EPI_ISL_479778, EPI_ISL_479779, EPI_ISL_479780, EPI_ISL_479781, EPI_ISL_479782, EPI_ISL_479783, EPI_ISL_479784, EPI_ISL_479785, EPI_ISL_479786, EPI_ISL_479787, EPI_ISL_479788, EPI_ISL_479789                                                                                                                                                                                                                                                                                                                                                                                                                                                                                                                                                                                                                                                                                                                                                                                                                                                                                                                                                                                                                                                                                                                                                                                                                                                                                                                                                                                                                                                                                                                                                                                                                                                                                                                                                                                                                                                                                                                                                                                                                                                                                                                                                                                                                                                                                                                                                                                                                                                                                                                                                                                                                                                                                                                                                                                                                                                                                                                                                                                                                                                                                                                                                                                                                                                                                                                                                                                                                                                                                                                                                                                                                                                                                                 | Breuer Lab, UCL                                                                                            | Breuer Lab, UCL                                                                                                      | Breuer Lab                                                                                                                                                                                                                                                                                                                                                                                                        |  |
| see above                                                                                                                                                                                                                                                                                                                                                                                                                                                                                                                                                                                                                                                                                                                                                                                                                                                                                                                                                                                                                                                                                                                                                                                                                                                                                                                                                                                                                                                                                                                                                                                                                                                                                                                                                                                                                                                                                                                                                                                                                                                                                                                                                                                                                                                                                                                                                                                                                                                                                                                                                                                                                                                                                                                                                                                                                                                                                                                                                                                                                                                                                                                                                                                                                                                                                                                                                                                                                                                                                                                                                                                                                                                                                                                                                                                                                                                                                                      |                                                                                                            |                                                                                                                      |                                                                                                                                                                                                                                                                                                                                                                                                                   |  |
| EPI_ISL_483063, EPI_ISL_483064                                                                                                                                                                                                                                                                                                                                                                                                                                                                                                                                                                                                                                                                                                                                                                                                                                                                                                                                                                                                                                                                                                                                                                                                                                                                                                                                                                                                                                                                                                                                                                                                                                                                                                                                                                                                                                                                                                                                                                                                                                                                                                                                                                                                                                                                                                                                                                                                                                                                                                                                                                                                                                                                                                                                                                                                                                                                                                                                                                                                                                                                                                                                                                                                                                                                                                                                                                                                                                                                                                                                                                                                                                                                                                                                                                                                                                                                                 | unknown                                                                                                    | Virology, Ecole Nationale Veterinaire de Toulouse                                                                    | Bessiere, P., Cadiergues, M.-C., Croville, G., Walch, M., Dubois, M., Izopet, J., Guerin, J.-L.                                                                                                                                                                                                                                                                                                                   |  |
| EPI_ISL_490017, EPI_ISL_490018, EPI_ISL_490019                                                                                                                                                                                                                                                                                                                                                                                                                                                                                                                                                                                                                                                                                                                                                                                                                                                                                                                                                                                                                                                                                                                                                                                                                                                                                                                                                                                                                                                                                                                                                                                                                                                                                                                                                                                                                                                                                                                                                                                                                                                                                                                                                                                                                                                                                                                                                                                                                                                                                                                                                                                                                                                                                                                                                                                                                                                                                                                                                                                                                                                                                                                                                                                                                                                                                                                                                                                                                                                                                                                                                                                                                                                                                                                                                                                                                                                                 | South Eastern Area Laboratory Services (SEALS)                                                             | NSW Health Pathology - Institute of Clinical Pathology and Medical Research; Westmead Hospital; University of Sydney | CIDM-PH et al.                                                                                                                                                                                                                                                                                                                                                                                                    |  |











|                                                                                                                                                                                                                                                                                                                                                                                                                                                                                                                                                                                                                                                                                                                                                                                                                                                                                                                                                                                                                                                                                                                                                                                                                                                                                                                                                                                                                                                                                                                                                                                                                                                                                                                                                                                                                                                                                                                                                                                                                                                                                                                                                                                                                                                                                                                                                                                                                                                                                                                                                                                                                                                                                                                                                                                                                                                                                                                                                                                                                                                                                                                                                                                                                                                                                                                                                                                                                                                                                                                                                                                                                                                |                                                                                                   |                                                                                                                      |                                                                                                                                                                                                                                                                                                                       |
|------------------------------------------------------------------------------------------------------------------------------------------------------------------------------------------------------------------------------------------------------------------------------------------------------------------------------------------------------------------------------------------------------------------------------------------------------------------------------------------------------------------------------------------------------------------------------------------------------------------------------------------------------------------------------------------------------------------------------------------------------------------------------------------------------------------------------------------------------------------------------------------------------------------------------------------------------------------------------------------------------------------------------------------------------------------------------------------------------------------------------------------------------------------------------------------------------------------------------------------------------------------------------------------------------------------------------------------------------------------------------------------------------------------------------------------------------------------------------------------------------------------------------------------------------------------------------------------------------------------------------------------------------------------------------------------------------------------------------------------------------------------------------------------------------------------------------------------------------------------------------------------------------------------------------------------------------------------------------------------------------------------------------------------------------------------------------------------------------------------------------------------------------------------------------------------------------------------------------------------------------------------------------------------------------------------------------------------------------------------------------------------------------------------------------------------------------------------------------------------------------------------------------------------------------------------------------------------------------------------------------------------------------------------------------------------------------------------------------------------------------------------------------------------------------------------------------------------------------------------------------------------------------------------------------------------------------------------------------------------------------------------------------------------------------------------------------------------------------------------------------------------------------------------------------------------------------------------------------------------------------------------------------------------------------------------------------------------------------------------------------------------------------------------------------------------------------------------------------------------------------------------------------------------------------------------------------------------------------------------------------------------------|---------------------------------------------------------------------------------------------------|----------------------------------------------------------------------------------------------------------------------|-----------------------------------------------------------------------------------------------------------------------------------------------------------------------------------------------------------------------------------------------------------------------------------------------------------------------|
| EPI_ISL_513384, EPI_ISL_513385                                                                                                                                                                                                                                                                                                                                                                                                                                                                                                                                                                                                                                                                                                                                                                                                                                                                                                                                                                                                                                                                                                                                                                                                                                                                                                                                                                                                                                                                                                                                                                                                                                                                                                                                                                                                                                                                                                                                                                                                                                                                                                                                                                                                                                                                                                                                                                                                                                                                                                                                                                                                                                                                                                                                                                                                                                                                                                                                                                                                                                                                                                                                                                                                                                                                                                                                                                                                                                                                                                                                                                                                                 | St Vincent's Pathology (SydPath)                                                                  | NSW Health Pathology - Institute of Clinical Pathology and Medical Research; Westmead Hospital; University of Sydney | CIDM-PH et al.                                                                                                                                                                                                                                                                                                        |
| EPI_ISL_513386, EPI_ISL_513387, EPI_ISL_513388                                                                                                                                                                                                                                                                                                                                                                                                                                                                                                                                                                                                                                                                                                                                                                                                                                                                                                                                                                                                                                                                                                                                                                                                                                                                                                                                                                                                                                                                                                                                                                                                                                                                                                                                                                                                                                                                                                                                                                                                                                                                                                                                                                                                                                                                                                                                                                                                                                                                                                                                                                                                                                                                                                                                                                                                                                                                                                                                                                                                                                                                                                                                                                                                                                                                                                                                                                                                                                                                                                                                                                                                 | Pathology North - NSW Health Pathology                                                            | NSW Health Pathology - Institute of Clinical Pathology and Medical Research; Westmead Hospital; University of Sydney | CIDM-PH et al.                                                                                                                                                                                                                                                                                                        |
| EPI_ISL_513389                                                                                                                                                                                                                                                                                                                                                                                                                                                                                                                                                                                                                                                                                                                                                                                                                                                                                                                                                                                                                                                                                                                                                                                                                                                                                                                                                                                                                                                                                                                                                                                                                                                                                                                                                                                                                                                                                                                                                                                                                                                                                                                                                                                                                                                                                                                                                                                                                                                                                                                                                                                                                                                                                                                                                                                                                                                                                                                                                                                                                                                                                                                                                                                                                                                                                                                                                                                                                                                                                                                                                                                                                                 | Douglas Hanly Moir                                                                                | NSW Health Pathology - Institute of Clinical Pathology and Medical Research; Westmead Hospital; University of Sydney | CIDM-PH et al.                                                                                                                                                                                                                                                                                                        |
| EPI_ISL_513390, EPI_ISL_513391, EPI_ISL_513392, EPI_ISL_513393, EPI_ISL_513394, EPI_ISL_513395                                                                                                                                                                                                                                                                                                                                                                                                                                                                                                                                                                                                                                                                                                                                                                                                                                                                                                                                                                                                                                                                                                                                                                                                                                                                                                                                                                                                                                                                                                                                                                                                                                                                                                                                                                                                                                                                                                                                                                                                                                                                                                                                                                                                                                                                                                                                                                                                                                                                                                                                                                                                                                                                                                                                                                                                                                                                                                                                                                                                                                                                                                                                                                                                                                                                                                                                                                                                                                                                                                                                                 | Pathology West - NSW Health Pathology                                                             | NSW Health Pathology - Institute of Clinical Pathology and Medical Research; Westmead Hospital; University of Sydney | CIDM-PH et al.                                                                                                                                                                                                                                                                                                        |
| EPI_ISL_513396, EPI_ISL_513397, EPI_ISL_513398, EPI_ISL_513399                                                                                                                                                                                                                                                                                                                                                                                                                                                                                                                                                                                                                                                                                                                                                                                                                                                                                                                                                                                                                                                                                                                                                                                                                                                                                                                                                                                                                                                                                                                                                                                                                                                                                                                                                                                                                                                                                                                                                                                                                                                                                                                                                                                                                                                                                                                                                                                                                                                                                                                                                                                                                                                                                                                                                                                                                                                                                                                                                                                                                                                                                                                                                                                                                                                                                                                                                                                                                                                                                                                                                                                 | St Vincent's Pathology (SydPath)                                                                  | NSW Health Pathology - Institute of Clinical Pathology and Medical Research; Westmead Hospital; University of Sydney | CIDM-PH et al.                                                                                                                                                                                                                                                                                                        |
| EPI_ISL_513400                                                                                                                                                                                                                                                                                                                                                                                                                                                                                                                                                                                                                                                                                                                                                                                                                                                                                                                                                                                                                                                                                                                                                                                                                                                                                                                                                                                                                                                                                                                                                                                                                                                                                                                                                                                                                                                                                                                                                                                                                                                                                                                                                                                                                                                                                                                                                                                                                                                                                                                                                                                                                                                                                                                                                                                                                                                                                                                                                                                                                                                                                                                                                                                                                                                                                                                                                                                                                                                                                                                                                                                                                                 | Sydney South West Pathology Service (SSWPS) - Royal Prince Alfred Hospital - NSW Health Pathology | NSW Health Pathology - Institute of Clinical Pathology and Medical Research; Westmead Hospital; University of Sydney | CIDM-PH et al.                                                                                                                                                                                                                                                                                                        |
| EPI_ISL_513401                                                                                                                                                                                                                                                                                                                                                                                                                                                                                                                                                                                                                                                                                                                                                                                                                                                                                                                                                                                                                                                                                                                                                                                                                                                                                                                                                                                                                                                                                                                                                                                                                                                                                                                                                                                                                                                                                                                                                                                                                                                                                                                                                                                                                                                                                                                                                                                                                                                                                                                                                                                                                                                                                                                                                                                                                                                                                                                                                                                                                                                                                                                                                                                                                                                                                                                                                                                                                                                                                                                                                                                                                                 | Sydney South West Pathology Service (SSWPS) - Liverpool Hospital - NSW Health Pathology           | NSW Health Pathology - Institute of Clinical Pathology and Medical Research; Westmead Hospital; University of Sydney | CIDM-PH et al.                                                                                                                                                                                                                                                                                                        |
| EPI_ISL_513402                                                                                                                                                                                                                                                                                                                                                                                                                                                                                                                                                                                                                                                                                                                                                                                                                                                                                                                                                                                                                                                                                                                                                                                                                                                                                                                                                                                                                                                                                                                                                                                                                                                                                                                                                                                                                                                                                                                                                                                                                                                                                                                                                                                                                                                                                                                                                                                                                                                                                                                                                                                                                                                                                                                                                                                                                                                                                                                                                                                                                                                                                                                                                                                                                                                                                                                                                                                                                                                                                                                                                                                                                                 | 4Cyte Pathology                                                                                   | NSW Health Pathology - Institute of Clinical Pathology and Medical Research; Westmead Hospital; University of Sydney | CIDM-PH et al.                                                                                                                                                                                                                                                                                                        |
| EPI_ISL_513403, EPI_ISL_513404, EPI_ISL_513405, EPI_ISL_513406, EPI_ISL_513407, EPI_ISL_513408                                                                                                                                                                                                                                                                                                                                                                                                                                                                                                                                                                                                                                                                                                                                                                                                                                                                                                                                                                                                                                                                                                                                                                                                                                                                                                                                                                                                                                                                                                                                                                                                                                                                                                                                                                                                                                                                                                                                                                                                                                                                                                                                                                                                                                                                                                                                                                                                                                                                                                                                                                                                                                                                                                                                                                                                                                                                                                                                                                                                                                                                                                                                                                                                                                                                                                                                                                                                                                                                                                                                                 | Lavery Pathology                                                                                  | NSW Health Pathology - Institute of Clinical Pathology and Medical Research; Westmead Hospital; University of Sydney | CIDM-PH et al.                                                                                                                                                                                                                                                                                                        |
| EPI_ISL_513409, EPI_ISL_513410, EPI_ISL_513411, EPI_ISL_513412                                                                                                                                                                                                                                                                                                                                                                                                                                                                                                                                                                                                                                                                                                                                                                                                                                                                                                                                                                                                                                                                                                                                                                                                                                                                                                                                                                                                                                                                                                                                                                                                                                                                                                                                                                                                                                                                                                                                                                                                                                                                                                                                                                                                                                                                                                                                                                                                                                                                                                                                                                                                                                                                                                                                                                                                                                                                                                                                                                                                                                                                                                                                                                                                                                                                                                                                                                                                                                                                                                                                                                                 | Sydney South West Pathology Service (SSWPS) - Liverpool Hospital - NSW Health Pathology           | NSW Health Pathology - Institute of Clinical Pathology and Medical Research; Westmead Hospital; University of Sydney | CIDM-PH et al.                                                                                                                                                                                                                                                                                                        |
| EPI_ISL_513413                                                                                                                                                                                                                                                                                                                                                                                                                                                                                                                                                                                                                                                                                                                                                                                                                                                                                                                                                                                                                                                                                                                                                                                                                                                                                                                                                                                                                                                                                                                                                                                                                                                                                                                                                                                                                                                                                                                                                                                                                                                                                                                                                                                                                                                                                                                                                                                                                                                                                                                                                                                                                                                                                                                                                                                                                                                                                                                                                                                                                                                                                                                                                                                                                                                                                                                                                                                                                                                                                                                                                                                                                                 | 4Cyte Pathology                                                                                   | NSW Health Pathology - Institute of Clinical Pathology and Medical Research; Westmead Hospital; University of Sydney | CIDM-PH et al.                                                                                                                                                                                                                                                                                                        |
| EPI_ISL_513941, EPI_ISL_513942                                                                                                                                                                                                                                                                                                                                                                                                                                                                                                                                                                                                                                                                                                                                                                                                                                                                                                                                                                                                                                                                                                                                                                                                                                                                                                                                                                                                                                                                                                                                                                                                                                                                                                                                                                                                                                                                                                                                                                                                                                                                                                                                                                                                                                                                                                                                                                                                                                                                                                                                                                                                                                                                                                                                                                                                                                                                                                                                                                                                                                                                                                                                                                                                                                                                                                                                                                                                                                                                                                                                                                                                                 | Utah Public Health Laboratory, Utah Public Health Laboratory Infectious Disease submission group  | Utah Public Health Laboratory, Utah Public Health Laboratory Infectious Disease submission group                     | Butz,H.A., Young,E.L. and Oakeson,K.                                                                                                                                                                                                                                                                                  |
| EPI_ISL_514750                                                                                                                                                                                                                                                                                                                                                                                                                                                                                                                                                                                                                                                                                                                                                                                                                                                                                                                                                                                                                                                                                                                                                                                                                                                                                                                                                                                                                                                                                                                                                                                                                                                                                                                                                                                                                                                                                                                                                                                                                                                                                                                                                                                                                                                                                                                                                                                                                                                                                                                                                                                                                                                                                                                                                                                                                                                                                                                                                                                                                                                                                                                                                                                                                                                                                                                                                                                                                                                                                                                                                                                                                                 | Pirogov Russian National Research Medical University                                              | Pirogov Russian National Research Medical University, Research and Development                                       | Blagodatskikh, K.A.                                                                                                                                                                                                                                                                                                   |
| EPI_ISL_515894, EPI_ISL_515895, EPI_ISL_515896, EPI_ISL_515897, EPI_ISL_515898, EPI_ISL_515899, EPI_ISL_515900, EPI_ISL_515901, EPI_ISL_515902, EPI_ISL_515903, EPI_ISL_515904, EPI_ISL_515905, EPI_ISL_515906, EPI_ISL_515907, EPI_ISL_515908, EPI_ISL_515909, EPI_ISL_515910, EPI_ISL_515911, EPI_ISL_515912, EPI_ISL_515913, EPI_ISL_515914, EPI_ISL_515915, EPI_ISL_515916, EPI_ISL_515917, EPI_ISL_515918, EPI_ISL_515919, EPI_ISL_515920, EPI_ISL_515921, EPI_ISL_515922, EPI_ISL_515923, EPI_ISL_515924, EPI_ISL_515925, EPI_ISL_515926, EPI_ISL_515927, EPI_ISL_515928, EPI_ISL_515929                                                                                                                                                                                                                                                                                                                                                                                                                                                                                                                                                                                                                                                                                                                                                                                                                                                                                                                                                                                                                                                                                                                                                                                                                                                                                                                                                                                                                                                                                                                                                                                                                                                                                                                                                                                                                                                                                                                                                                                                                                                                                                                                                                                                                                                                                                                                                                                                                                                                                                                                                                                                                                                                                                                                                                                                                                                                                                                                                                                                                                                 | California Department of Public Health                                                            | California Department of Public Health                                                                               | CDPH IDLB COVIDNet                                                                                                                                                                                                                                                                                                    |
| see above                                                                                                                                                                                                                                                                                                                                                                                                                                                                                                                                                                                                                                                                                                                                                                                                                                                                                                                                                                                                                                                                                                                                                                                                                                                                                                                                                                                                                                                                                                                                                                                                                                                                                                                                                                                                                                                                                                                                                                                                                                                                                                                                                                                                                                                                                                                                                                                                                                                                                                                                                                                                                                                                                                                                                                                                                                                                                                                                                                                                                                                                                                                                                                                                                                                                                                                                                                                                                                                                                                                                                                                                                                      | California Department of Public Health                                                            | California Department of Public Health                                                                               | CDPH IDLB COVIDNet                                                                                                                                                                                                                                                                                                    |
| EPI_ISL_516194, EPI_ISL_516195, EPI_ISL_516196, EPI_ISL_516197, EPI_ISL_516198, EPI_ISL_516199, EPI_ISL_516200, EPI_ISL_516201, EPI_ISL_516202, EPI_ISL_516203, EPI_ISL_516204, EPI_ISL_516205, EPI_ISL_516206, EPI_ISL_516207, EPI_ISL_516208, EPI_ISL_516209, EPI_ISL_516210, EPI_ISL_516211, EPI_ISL_516212, EPI_ISL_516213, EPI_ISL_516214, EPI_ISL_516215, EPI_ISL_516216, EPI_ISL_516217, EPI_ISL_516218, EPI_ISL_516219, EPI_ISL_516220, EPI_ISL_516221, EPI_ISL_516222, EPI_ISL_516223, EPI_ISL_516224, EPI_ISL_516225, EPI_ISL_516226, EPI_ISL_516227, EPI_ISL_516228, EPI_ISL_516229, EPI_ISL_516230, EPI_ISL_516231, EPI_ISL_516232, EPI_ISL_516233, EPI_ISL_516234, EPI_ISL_516235, EPI_ISL_516236, EPI_ISL_516237, EPI_ISL_516238, EPI_ISL_516239, EPI_ISL_516240, EPI_ISL_516241, EPI_ISL_516242, EPI_ISL_516243, EPI_ISL_516244, EPI_ISL_516245, EPI_ISL_516246, EPI_ISL_516247, EPI_ISL_516248, EPI_ISL_516249, EPI_ISL_516250, EPI_ISL_516251, EPI_ISL_516252, EPI_ISL_516253, EPI_ISL_516254, EPI_ISL_516255, EPI_ISL_516256, EPI_ISL_516257, EPI_ISL_516258, EPI_ISL_516259, EPI_ISL_516260, EPI_ISL_516261, EPI_ISL_516262, EPI_ISL_516263, EPI_ISL_516264, EPI_ISL_516265, EPI_ISL_516266, EPI_ISL_516267, EPI_ISL_516268, EPI_ISL_516269, EPI_ISL_516270, EPI_ISL_516271, EPI_ISL_516272, EPI_ISL_516273, EPI_ISL_516274, EPI_ISL_516275, EPI_ISL_516276, EPI_ISL_516277, EPI_ISL_516278, EPI_ISL_516279, EPI_ISL_516280, EPI_ISL_516281, EPI_ISL_516282, EPI_ISL_516283, EPI_ISL_516284, EPI_ISL_516285, EPI_ISL_516286, EPI_ISL_516287, EPI_ISL_516288, EPI_ISL_516289, EPI_ISL_516290, EPI_ISL_516291, EPI_ISL_516292, EPI_ISL_516293, EPI_ISL_516294, EPI_ISL_516295, EPI_ISL_516296, EPI_ISL_516297, EPI_ISL_516298, EPI_ISL_516299, EPI_ISL_516300, EPI_ISL_516301, EPI_ISL_516302, EPI_ISL_516303, EPI_ISL_516304, EPI_ISL_516305, EPI_ISL_516306, EPI_ISL_516307, EPI_ISL_516308, EPI_ISL_516309, EPI_ISL_516310, EPI_ISL_516311, EPI_ISL_516312, EPI_ISL_516313, EPI_ISL_516314, EPI_ISL_516315, EPI_ISL_516316, EPI_ISL_516317, EPI_ISL_516318, EPI_ISL_516319, EPI_ISL_516320, EPI_ISL_516321, EPI_ISL_516322, EPI_ISL_516323, EPI_ISL_516324, EPI_ISL_516325, EPI_ISL_516326, EPI_ISL_516327, EPI_ISL_516328, EPI_ISL_516329, EPI_ISL_516330, EPI_ISL_516331, EPI_ISL_516332, EPI_ISL_516333, EPI_ISL_516334, EPI_ISL_516335, EPI_ISL_516336, EPI_ISL_516337, EPI_ISL_516338, EPI_ISL_516339, EPI_ISL_516340, EPI_ISL_516341, EPI_ISL_516342, EPI_ISL_516343, EPI_ISL_516344, EPI_ISL_516345, EPI_ISL_516346, EPI_ISL_516347, EPI_ISL_516348, EPI_ISL_516349, EPI_ISL_516350, EPI_ISL_516351, EPI_ISL_516352, EPI_ISL_516353, EPI_ISL_516354, EPI_ISL_516355, EPI_ISL_516356, EPI_ISL_516357, EPI_ISL_516358, EPI_ISL_516359, EPI_ISL_516360, EPI_ISL_516361, EPI_ISL_516362, EPI_ISL_516363, EPI_ISL_516364, EPI_ISL_516365, EPI_ISL_516366, EPI_ISL_516367, EPI_ISL_516368, EPI_ISL_516369, EPI_ISL_516370, EPI_ISL_516371, EPI_ISL_516372, EPI_ISL_516373, EPI_ISL_516374, EPI_ISL_516375, EPI_ISL_516376, EPI_ISL_516377, EPI_ISL_516378, EPI_ISL_516379, EPI_ISL_516380, EPI_ISL_516381, EPI_ISL_516382, EPI_ISL_516383, EPI_ISL_516384, EPI_ISL_516385, EPI_ISL_516386, EPI_ISL_516387, EPI_ISL_516388, EPI_ISL_516389, EPI_ISL_516390, EPI_ISL_516391, EPI_ISL_516392, EPI_ISL_516393, EPI_ISL_516394, EPI_ISL_516395, EPI_ISL_516396, EPI_ISL_516397, EPI_ISL_516398, EPI_ISL_516399, EPI_ISL_516400, EPI_ISL_516401, EPI_ISL_516402, EPI_ISL_516403, EPI_ISL_516404, EPI_ISL_516405, EPI_ISL_516406, EPI_ISL_516407, EPI_ISL_516408, EPI_ISL_516409, EPI_ISL_516410, EPI_ISL_516411, EPI_ISL_516412 | Michigan Department of Health and Human Services, Bureau of Laboratories                          | Michigan Department of Health and Human Services, Bureau of Laboratories                                             | Blankenship HM, Riner D, Soehnlenn MK                                                                                                                                                                                                                                                                                 |
| see above                                                                                                                                                                                                                                                                                                                                                                                                                                                                                                                                                                                                                                                                                                                                                                                                                                                                                                                                                                                                                                                                                                                                                                                                                                                                                                                                                                                                                                                                                                                                                                                                                                                                                                                                                                                                                                                                                                                                                                                                                                                                                                                                                                                                                                                                                                                                                                                                                                                                                                                                                                                                                                                                                                                                                                                                                                                                                                                                                                                                                                                                                                                                                                                                                                                                                                                                                                                                                                                                                                                                                                                                                                      | Michigan Department of Health and Human Services, Bureau of Laboratories                          | Michigan Department of Health and Human Services, Bureau of Laboratories                                             | Blankenship HM, Riner D, Soehnlenn MK                                                                                                                                                                                                                                                                                 |
| EPI_ISL_524746                                                                                                                                                                                                                                                                                                                                                                                                                                                                                                                                                                                                                                                                                                                                                                                                                                                                                                                                                                                                                                                                                                                                                                                                                                                                                                                                                                                                                                                                                                                                                                                                                                                                                                                                                                                                                                                                                                                                                                                                                                                                                                                                                                                                                                                                                                                                                                                                                                                                                                                                                                                                                                                                                                                                                                                                                                                                                                                                                                                                                                                                                                                                                                                                                                                                                                                                                                                                                                                                                                                                                                                                                                 | Sir M P Shah Government Medical College, Jamnagar                                                 | Gujarat Biotechnology Research Centre                                                                                | Binita Aring, Afzal Ansari, Nikha Trivedi, Apurvashin Puvar, Janvi Raval, Zarna Patel, Monika Gandhi, Pinal Trivedi, Maharshi Pandya, Nidhi Patel, Nitin Savaliya, Raghawendra Kumar, Dinesh Kumar, Zuber Saiyed, Komal Patel, Labdhi Pandya, R D Dixit, A M Kadri, Harsh Bakshi, Chaitanya Joshi, Madhvi Joshi       |
| EPI_ISL_525802                                                                                                                                                                                                                                                                                                                                                                                                                                                                                                                                                                                                                                                                                                                                                                                                                                                                                                                                                                                                                                                                                                                                                                                                                                                                                                                                                                                                                                                                                                                                                                                                                                                                                                                                                                                                                                                                                                                                                                                                                                                                                                                                                                                                                                                                                                                                                                                                                                                                                                                                                                                                                                                                                                                                                                                                                                                                                                                                                                                                                                                                                                                                                                                                                                                                                                                                                                                                                                                                                                                                                                                                                                 | OHSU Lab Services Molecular Microbiology Lab                                                      | Oregon SARS-CoV-2 Genome Sequencing Center                                                                           | Brendan L. O'Connell, Ruth V. Nichols, Alec J. Hirsch, Guang Fan, Daniel N. Streblow, William B. Messer, Andrew C. Adey, Benjamin N. Bimber, Brian J. O'Roak                                                                                                                                                          |
| EPI_ISL_525803                                                                                                                                                                                                                                                                                                                                                                                                                                                                                                                                                                                                                                                                                                                                                                                                                                                                                                                                                                                                                                                                                                                                                                                                                                                                                                                                                                                                                                                                                                                                                                                                                                                                                                                                                                                                                                                                                                                                                                                                                                                                                                                                                                                                                                                                                                                                                                                                                                                                                                                                                                                                                                                                                                                                                                                                                                                                                                                                                                                                                                                                                                                                                                                                                                                                                                                                                                                                                                                                                                                                                                                                                                 | OHSU Lab Services Molecular Microbiology Lab                                                      | Ginkgo Bioworks Clinical Laboratory                                                                                  | Brendan L. O'Connell, Ruth V. Nichols, Alec J. Hirsch, Guang Fan, Daniel N. Streblow, Malaika Mckenzie-Bennett, James McGann, Jim Griffin, Keith Robison, Alex Plocik, Becky Schilling, Rebecca Littlefield, Michelle Spencer, Birgitte Simen, William B. Messer, Andrew C. Adey, Benjamin N. Bimber, Brian J. O'Roak |
| EPI_ISL_525804, EPI_ISL_525805, EPI_ISL_525806, EPI_ISL_525807                                                                                                                                                                                                                                                                                                                                                                                                                                                                                                                                                                                                                                                                                                                                                                                                                                                                                                                                                                                                                                                                                                                                                                                                                                                                                                                                                                                                                                                                                                                                                                                                                                                                                                                                                                                                                                                                                                                                                                                                                                                                                                                                                                                                                                                                                                                                                                                                                                                                                                                                                                                                                                                                                                                                                                                                                                                                                                                                                                                                                                                                                                                                                                                                                                                                                                                                                                                                                                                                                                                                                                                 | OHSU Lab Services Molecular Microbiology Lab                                                      | Oregon SARS-CoV-2 Genome Sequencing Center                                                                           | Brendan L. O'Connell, Ruth V. Nichols, Alec J. Hirsch, Guang Fan, Daniel N. Streblow, William B. Messer, Andrew C. Adey, Benjamin N. Bimber, Brian J. O'Roak                                                                                                                                                          |
| EPI_ISL_525808, EPI_ISL_525809, EPI_ISL_525810, EPI_ISL_525811, EPI_ISL_525812, EPI_ISL_525813, EPI_ISL_525814, EPI_ISL_525815, EPI_ISL_525816, EPI_ISL_525817, EPI_ISL_525818, EPI_ISL_525819, EPI_ISL_525820, EPI_ISL_525821, EPI_ISL_525822, EPI_ISL_525823, EPI_ISL_525824                                                                                                                                                                                                                                                                                                                                                                                                                                                                                                                                                                                                                                                                                                                                                                                                                                                                                                                                                                                                                                                                                                                                                                                                                                                                                                                                                                                                                                                                                                                                                                                                                                                                                                                                                                                                                                                                                                                                                                                                                                                                                                                                                                                                                                                                                                                                                                                                                                                                                                                                                                                                                                                                                                                                                                                                                                                                                                                                                                                                                                                                                                                                                                                                                                                                                                                                                                 | OHSU Lab Services Molecular Microbiology Lab                                                      | Ginkgo Bioworks Clinical Laboratory                                                                                  | Brendan L. O'Connell, Ruth V. Nichols, Alec J. Hirsch, Guang Fan, Daniel N. Streblow, Malaika Mckenzie-Bennett, James McGann, Jim Griffin, Keith Robison, Alex Plocik, Becky Schilling, Rebecca Littlefield, Michelle Spencer, Birgitte Simen, William B. Messer, Andrew C. Adey, Benjamin N. Bimber, Brian J. O'Roak |
| see above                                                                                                                                                                                                                                                                                                                                                                                                                                                                                                                                                                                                                                                                                                                                                                                                                                                                                                                                                                                                                                                                                                                                                                                                                                                                                                                                                                                                                                                                                                                                                                                                                                                                                                                                                                                                                                                                                                                                                                                                                                                                                                                                                                                                                                                                                                                                                                                                                                                                                                                                                                                                                                                                                                                                                                                                                                                                                                                                                                                                                                                                                                                                                                                                                                                                                                                                                                                                                                                                                                                                                                                                                                      | OHSU Lab Services Molecular Microbiology Lab                                                      | Ginkgo Bioworks Clinical Laboratory                                                                                  | Brendan L. O'Connell, Ruth V. Nichols, Alec J. Hirsch, Guang Fan, Daniel N. Streblow, Malaika Mckenzie-Bennett, James McGann, Jim Griffin, Keith Robison, Alex Plocik, Becky Schilling, Rebecca Littlefield, Michelle Spencer, Birgitte Simen, William B. Messer, Andrew C. Adey, Benjamin N. Bimber, Brian J. O'Roak |
| EPI_ISL_525825                                                                                                                                                                                                                                                                                                                                                                                                                                                                                                                                                                                                                                                                                                                                                                                                                                                                                                                                                                                                                                                                                                                                                                                                                                                                                                                                                                                                                                                                                                                                                                                                                                                                                                                                                                                                                                                                                                                                                                                                                                                                                                                                                                                                                                                                                                                                                                                                                                                                                                                                                                                                                                                                                                                                                                                                                                                                                                                                                                                                                                                                                                                                                                                                                                                                                                                                                                                                                                                                                                                                                                                                                                 | OHSU Lab Services Molecular Microbiology Lab                                                      | Oregon SARS-CoV-2 Genome Sequencing Center                                                                           | Brendan L. O'Connell, Ruth V. Nichols, Alec J. Hirsch, Guang Fan, Daniel N. Streblow, William B. Messer, Andrew C. Adey, Benjamin N. Bimber, Brian J. O'Roak                                                                                                                                                          |
| EPI_ISL_525826                                                                                                                                                                                                                                                                                                                                                                                                                                                                                                                                                                                                                                                                                                                                                                                                                                                                                                                                                                                                                                                                                                                                                                                                                                                                                                                                                                                                                                                                                                                                                                                                                                                                                                                                                                                                                                                                                                                                                                                                                                                                                                                                                                                                                                                                                                                                                                                                                                                                                                                                                                                                                                                                                                                                                                                                                                                                                                                                                                                                                                                                                                                                                                                                                                                                                                                                                                                                                                                                                                                                                                                                                                 | OHSU Lab Services Molecular Microbiology Lab                                                      | Ginkgo Bioworks Clinical Laboratory                                                                                  | Brendan L. O'Connell, Ruth V. Nichols, Alec J. Hirsch, Guang Fan, Daniel N. Streblow, Malaika Mckenzie-Bennett, James McGann, Jim Griffin, Keith Robison, Alex Plocik, Becky Schilling, Rebecca Littlefield, Michelle Spencer, Birgitte Simen, William B. Messer, Andrew C. Adey, Benjamin N. Bimber, Brian J. O'Roak |
| EPI_ISL_525827                                                                                                                                                                                                                                                                                                                                                                                                                                                                                                                                                                                                                                                                                                                                                                                                                                                                                                                                                                                                                                                                                                                                                                                                                                                                                                                                                                                                                                                                                                                                                                                                                                                                                                                                                                                                                                                                                                                                                                                                                                                                                                                                                                                                                                                                                                                                                                                                                                                                                                                                                                                                                                                                                                                                                                                                                                                                                                                                                                                                                                                                                                                                                                                                                                                                                                                                                                                                                                                                                                                                                                                                                                 | OHSU Lab Services Molecular Microbiology Lab                                                      | Oregon SARS-CoV-2 Genome Sequencing Center                                                                           | Brendan L. O'Connell, Ruth V. Nichols, Alec J. Hirsch, Guang Fan, Daniel N. Streblow, William B. Messer, Andrew C. Adey, Benjamin N. Bimber, Brian J. O'Roak                                                                                                                                                          |
| EPI_ISL_525828, EPI_ISL_525829, EPI_ISL_525830, EPI_ISL_525831, EPI_ISL_525832                                                                                                                                                                                                                                                                                                                                                                                                                                                                                                                                                                                                                                                                                                                                                                                                                                                                                                                                                                                                                                                                                                                                                                                                                                                                                                                                                                                                                                                                                                                                                                                                                                                                                                                                                                                                                                                                                                                                                                                                                                                                                                                                                                                                                                                                                                                                                                                                                                                                                                                                                                                                                                                                                                                                                                                                                                                                                                                                                                                                                                                                                                                                                                                                                                                                                                                                                                                                                                                                                                                                                                 | OHSU Lab Services Molecular Microbiology Lab                                                      | Ginkgo Bioworks Clinical Laboratory                                                                                  | Brendan L. O'Connell, Ruth V. Nichols, Alec J. Hirsch, Guang Fan, Daniel N. Streblow, Malaika Mckenzie-Bennett, James McGann, Jim Griffin, Keith Robison, Alex Plocik, Becky Schilling, Rebecca Littlefield, Michelle Spencer, Birgitte Simen, William B. Messer, Andrew C. Adey, Benjamin N. Bimber, Brian J. O'Roak |
| EPI_ISL_525833                                                                                                                                                                                                                                                                                                                                                                                                                                                                                                                                                                                                                                                                                                                                                                                                                                                                                                                                                                                                                                                                                                                                                                                                                                                                                                                                                                                                                                                                                                                                                                                                                                                                                                                                                                                                                                                                                                                                                                                                                                                                                                                                                                                                                                                                                                                                                                                                                                                                                                                                                                                                                                                                                                                                                                                                                                                                                                                                                                                                                                                                                                                                                                                                                                                                                                                                                                                                                                                                                                                                                                                                                                 | OHSU Lab Services Molecular Microbiology Lab                                                      | Oregon SARS-CoV-2 Genome Sequencing Center                                                                           | Brendan L. O'Connell, Ruth V. Nichols, Alec J. Hirsch, Guang Fan, Daniel N. Streblow, William B. Messer, Andrew C. Adey, Benjamin N. Bimber, Brian J. O'Roak                                                                                                                                                          |
| EPI_ISL_525834, EPI_ISL_525835,                                                                                                                                                                                                                                                                                                                                                                                                                                                                                                                                                                                                                                                                                                                                                                                                                                                                                                                                                                                                                                                                                                                                                                                                                                                                                                                                                                                                                                                                                                                                                                                                                                                                                                                                                                                                                                                                                                                                                                                                                                                                                                                                                                                                                                                                                                                                                                                                                                                                                                                                                                                                                                                                                                                                                                                                                                                                                                                                                                                                                                                                                                                                                                                                                                                                                                                                                                                                                                                                                                                                                                                                                | OHSU Lab Services Molecular Microbiology Lab                                                      | Ginkgo Bioworks Clinical Laboratory                                                                                  | Brendan L. O'Connell, Ruth V. Nichols, Alec J. Hirsch, Guang Fan, Daniel N. Streblow, Malaika Mckenzie-Bennett, James McGann, Jim Griffin, Keith                                                                                                                                                                      |





|                                                                                                                                                                                                                                                                                                 |                                                                                                   |                                                                                                                                                                                                            |                |
|-------------------------------------------------------------------------------------------------------------------------------------------------------------------------------------------------------------------------------------------------------------------------------------------------|---------------------------------------------------------------------------------------------------|------------------------------------------------------------------------------------------------------------------------------------------------------------------------------------------------------------|----------------|
| EPI_ISL_526152                                                                                                                                                                                                                                                                                  | Pathology North - Hunter - NSW Health Pathology                                                   | Medical Research; Westmead Hospital; University of Sydney<br>NSW Health Pathology - Institute of Clinical Pathology and Medical Research; Westmead Hospital; University of Sydney                          | CIDM-PH et al. |
| EPI_ISL_526153                                                                                                                                                                                                                                                                                  | Douglass Hanly Moir Pathology                                                                     | NSW Health Pathology - Institute of Clinical Pathology and Medical Research; Westmead Hospital; University of Sydney                                                                                       | CIDM-PH et al. |
| EPI_ISL_526154, EPI_ISL_526155                                                                                                                                                                                                                                                                  | Pathology North - Royal North Shore Hospital - NSW Health Pathology                               | NSW Health Pathology - Institute of Clinical Pathology and Medical Research; Westmead Hospital; University of Sydney                                                                                       | CIDM-PH et al. |
| EPI_ISL_526156                                                                                                                                                                                                                                                                                  | Pathology West - NSW Health Pathology                                                             | NSW Health Pathology - Institute of Clinical Pathology and Medical Research; Westmead Hospital; University of Sydney                                                                                       | CIDM-PH et al. |
| EPI_ISL_526157, EPI_ISL_526158, EPI_ISL_526159, EPI_ISL_526160                                                                                                                                                                                                                                  | Sydney South West Pathology Service (SSWPS) - Liverpool Hospital - NSW Health Pathology           | NSW Health Pathology - Institute of Clinical Pathology and Medical Research; Westmead Hospital; University of Sydney                                                                                       | CIDM-PH et al. |
| EPI_ISL_526161, EPI_ISL_526162, EPI_ISL_526163, EPI_ISL_526164, EPI_ISL_526165                                                                                                                                                                                                                  | Pathology West - NSW Health Pathology                                                             | NSW Health Pathology - Institute of Clinical Pathology and Medical Research; Westmead Hospital; University of Sydney                                                                                       | CIDM-PH et al. |
| EPI_ISL_526166, EPI_ISL_526167, EPI_ISL_526168, EPI_ISL_526169                                                                                                                                                                                                                                  | Austech Medical Laboratories                                                                      | NSW Health Pathology - Institute of Clinical Pathology and Medical Research; Westmead Hospital; University of Sydney                                                                                       | CIDM-PH et al. |
| EPI_ISL_526170                                                                                                                                                                                                                                                                                  | Pathology North - Royal North Shore Hospital - NSW Health Pathology                               | NSW Health Pathology - Institute of Clinical Pathology and Medical Research; Westmead Hospital; University of Sydney                                                                                       | CIDM-PH et al. |
| EPI_ISL_526171                                                                                                                                                                                                                                                                                  | St Vincent's Pathology (SydPath)                                                                  | NSW Health Pathology - Institute of Clinical Pathology and Medical Research; Westmead Hospital; University of Sydney                                                                                       | CIDM-PH et al. |
| EPI_ISL_526172, EPI_ISL_526173, EPI_ISL_526174, EPI_ISL_526175, EPI_ISL_526176                                                                                                                                                                                                                  | Sydney South West Pathology Service (SSWPS) - Liverpool Hospital - NSW Health Pathology           | NSW Health Pathology - Institute of Clinical Pathology and Medical Research; Westmead Hospital; University of Sydney                                                                                       | CIDM-PH et al. |
| EPI_ISL_526177, EPI_ISL_526178, EPI_ISL_526179, EPI_ISL_526180, EPI_ISL_526181, EPI_ISL_526182, EPI_ISL_526183, EPI_ISL_526184, EPI_ISL_526185                                                                                                                                                  | St Vincent's Pathology (SydPath)                                                                  | NSW Health Pathology - Institute of Clinical Pathology and Medical Research; Westmead Hospital; University of Sydney                                                                                       | CIDM-PH et al. |
| EPI_ISL_526186                                                                                                                                                                                                                                                                                  | 4Cyte Pathology                                                                                   | NSW Health Pathology - Institute of Clinical Pathology and Medical Research; Westmead Hospital; University of Sydney                                                                                       | CIDM-PH et al. |
| EPI_ISL_526187, EPI_ISL_526188, EPI_ISL_526189, EPI_ISL_526190                                                                                                                                                                                                                                  | St Vincent's Pathology (SydPath)                                                                  | NSW Health Pathology - Institute of Clinical Pathology and Medical Research; Westmead Hospital; University of Sydney                                                                                       | CIDM-PH et al. |
| EPI_ISL_526191                                                                                                                                                                                                                                                                                  | South Eastern Area Laboratory Services (SEALS)                                                    | NSW Health Pathology - Institute of Clinical Pathology and Medical Research; Westmead Hospital; University of Sydney                                                                                       | CIDM-PH et al. |
| EPI_ISL_526192                                                                                                                                                                                                                                                                                  | Medlab Pathology                                                                                  | NSW Health Pathology - Institute of Clinical Pathology and Medical Research; Westmead Hospital; University of Sydney                                                                                       | CIDM-PH et al. |
| EPI_ISL_526193                                                                                                                                                                                                                                                                                  | Sydney South West Pathology Service (SSWPS) - Liverpool Hospital - NSW Health Pathology           | NSW Health Pathology - Institute of Clinical Pathology and Medical Research; Westmead Hospital; University of Sydney                                                                                       | CIDM-PH et al. |
| EPI_ISL_526194, EPI_ISL_526195                                                                                                                                                                                                                                                                  | St Vincent's Pathology (SydPath)                                                                  | NSW Health Pathology - Institute of Clinical Pathology and Medical Research; Westmead Hospital; University of Sydney                                                                                       | CIDM-PH et al. |
| EPI_ISL_526196                                                                                                                                                                                                                                                                                  | Sydney South West Pathology Service (SSWPS) - Royal Prince Alfred Hospital - NSW Health Pathology | NSW Health Pathology - Institute of Clinical Pathology and Medical Research; Westmead Hospital; University of Sydney                                                                                       | CIDM-PH et al. |
| EPI_ISL_526197, EPI_ISL_526198                                                                                                                                                                                                                                                                  | Sydney South West Pathology Service (SSWPS) - Liverpool Hospital - NSW Health Pathology           | NSW Health Pathology - Institute of Clinical Pathology and Medical Research; Westmead Hospital; University of Sydney                                                                                       | CIDM-PH et al. |
| EPI_ISL_526199                                                                                                                                                                                                                                                                                  | Pathology West - NSW Health Pathology                                                             | NSW Health Pathology - Institute of Clinical Pathology and Medical Research; Westmead Hospital; University of Sydney                                                                                       | CIDM-PH et al. |
| EPI_ISL_526200                                                                                                                                                                                                                                                                                  | St Vincent's Pathology (SydPath)                                                                  | NSW Health Pathology - Institute of Clinical Pathology and Medical Research; Westmead Hospital; University of Sydney                                                                                       | CIDM-PH et al. |
| EPI_ISL_526201                                                                                                                                                                                                                                                                                  | Sydney South West Pathology Service (SSWPS) - Royal Prince Alfred Hospital - NSW Health Pathology | NSW Health Pathology - Institute of Clinical Pathology and Medical Research; Westmead Hospital; University of Sydney                                                                                       | CIDM-PH et al. |
| EPI_ISL_526202, EPI_ISL_526203, EPI_ISL_526204                                                                                                                                                                                                                                                  | Laverty Pathology                                                                                 | NSW Health Pathology - Institute of Clinical Pathology and Medical Research; Westmead Hospital; University of Sydney                                                                                       | CIDM-PH et al. |
| EPI_ISL_526205                                                                                                                                                                                                                                                                                  | The Children's Hospital at Westmead                                                               | NSW Health Pathology - Institute of Clinical Pathology and Medical Research; Westmead Hospital; University of Sydney                                                                                       | CIDM-PH et al. |
| EPI_ISL_526206                                                                                                                                                                                                                                                                                  | Sydney South West Pathology Service (SSWPS) - Liverpool Hospital - NSW Health Pathology           | NSW Health Pathology - Institute of Clinical Pathology and Medical Research; Westmead Hospital; University of Sydney                                                                                       | CIDM-PH et al. |
| EPI_ISL_526207, EPI_ISL_526208, EPI_ISL_526209                                                                                                                                                                                                                                                  | Sydney South West Pathology Service (SSWPS) - Royal Prince Alfred Hospital - NSW Health Pathology | NSW Health Pathology - Institute of Clinical Pathology and Medical Research; Westmead Hospital; University of Sydney                                                                                       | CIDM-PH et al. |
| EPI_ISL_526210, EPI_ISL_526211                                                                                                                                                                                                                                                                  | Sydney South West Pathology Service (SSWPS) - Liverpool Hospital - NSW Health Pathology           | NSW Health Pathology - Institute of Clinical Pathology and Medical Research; Westmead Hospital; University of Sydney                                                                                       | CIDM-PH et al. |
| EPI_ISL_526212                                                                                                                                                                                                                                                                                  | Australian Clinical Labs (formerly Healthscope Pathology)                                         | NSW Health Pathology - Institute of Clinical Pathology and Medical Research; Westmead Hospital; University of Sydney                                                                                       | CIDM-PH et al. |
| EPI_ISL_526213, EPI_ISL_526214                                                                                                                                                                                                                                                                  | Douglass Hanly Moir Pathology                                                                     | NSW Health Pathology - Institute of Clinical Pathology and Medical Research; Westmead Hospital; University of Sydney                                                                                       | CIDM-PH et al. |
| EPI_ISL_526551, EPI_ISL_526552                                                                                                                                                                                                                                                                  | OHSU Lab Services Molecular Microbiology Lab                                                      | Oregon SARS-CoV-2 Genome Sequencing Center<br>Brendan L. O'Connell, Ruth V. Nichols, Alec J. Hirsch, Guang Fan, Daniel N. Streblow, William B. Messer, Andrew C. Adey, Benjamin N. Bimber, Brian J. O'Roak |                |
| EPI_ISL_526689                                                                                                                                                                                                                                                                                  | Pathology West - NSW Health Pathology                                                             | NSW Health Pathology - Institute of Clinical Pathology and Medical Research; Westmead Hospital; University of Sydney                                                                                       | CIDM-PH et al. |
| EPI_ISL_526697                                                                                                                                                                                                                                                                                  | South Eastern Area Laboratory Services (SEALS)                                                    | NSW Health Pathology - Institute of Clinical Pathology and Medical Research; Westmead Hospital; University of Sydney                                                                                       | CIDM-PH et al. |
| EPI_ISL_527820, EPI_ISL_527821, EPI_ISL_527822, EPI_ISL_527823, EPI_ISL_527824, EPI_ISL_527825, EPI_ISL_527826, EPI_ISL_527827, EPI_ISL_527828, EPI_ISL_527829, EPI_ISL_527830, EPI_ISL_527831, EPI_ISL_527832, EPI_ISL_527833, EPI_ISL_527834, EPI_ISL_527835, EPI_ISL_527836, EPI_ISL_527837, |                                                                                                   |                                                                                                                                                                                                            |                |

|                                                                                                                                                                                                                                                                                                                                                                                                                                                                                                                                                                                                                                                                                                                                                                                                                                                                                                                                                                                                                                                                                                                                                                                                                                                                                                                                                                                                                                                                                                                                                                                                                                                                                                                                |                                                                                                            |                                                                                                                        |                                                                                                                                  |                                                                                                                        |
|--------------------------------------------------------------------------------------------------------------------------------------------------------------------------------------------------------------------------------------------------------------------------------------------------------------------------------------------------------------------------------------------------------------------------------------------------------------------------------------------------------------------------------------------------------------------------------------------------------------------------------------------------------------------------------------------------------------------------------------------------------------------------------------------------------------------------------------------------------------------------------------------------------------------------------------------------------------------------------------------------------------------------------------------------------------------------------------------------------------------------------------------------------------------------------------------------------------------------------------------------------------------------------------------------------------------------------------------------------------------------------------------------------------------------------------------------------------------------------------------------------------------------------------------------------------------------------------------------------------------------------------------------------------------------------------------------------------------------------|------------------------------------------------------------------------------------------------------------|------------------------------------------------------------------------------------------------------------------------|----------------------------------------------------------------------------------------------------------------------------------|------------------------------------------------------------------------------------------------------------------------|
| EPI_ISL_527838, EPI_ISL_527839, EPI_ISL_527840, EPI_ISL_527841, EPI_ISL_527842, EPI_ISL_527843, EPI_ISL_527844, EPI_ISL_527845, EPI_ISL_527846, EPI_ISL_527847, EPI_ISL_527848, EPI_ISL_527849, EPI_ISL_527850, EPI_ISL_527851, EPI_ISL_527852, EPI_ISL_527853, EPI_ISL_527854, EPI_ISL_527855                                                                                                                                                                                                                                                                                                                                                                                                                                                                                                                                                                                                                                                                                                                                                                                                                                                                                                                                                                                                                                                                                                                                                                                                                                                                                                                                                                                                                                 | see above                                                                                                  | Texas Department of State Health Services                                                                              | Texas Department of State Health Services                                                                                        | Bonnie Oh, Rashmi Tuladhar, Jenny Zhang, Maliha Rahman, Anita Pokharel, Myong Koag, Chun Wang, Rachel Lee, Grace Kubin |
| EPI_ISL_529169                                                                                                                                                                                                                                                                                                                                                                                                                                                                                                                                                                                                                                                                                                                                                                                                                                                                                                                                                                                                                                                                                                                                                                                                                                                                                                                                                                                                                                                                                                                                                                                                                                                                                                                 | Michigan Department of Health and Human Services, Bureau of Laboratories                                   | Michigan Department of Health and Human Services, Bureau of Laboratories                                               | Blankenship,H.M., Riner,D., Soehnlén,M.                                                                                          |                                                                                                                        |
| EPI_ISL_529804, EPI_ISL_529805, EPI_ISL_529806, EPI_ISL_529807, EPI_ISL_529808, EPI_ISL_529809, EPI_ISL_529810, EPI_ISL_529811, EPI_ISL_529812, EPI_ISL_529813, EPI_ISL_529814, EPI_ISL_529815, EPI_ISL_529816, EPI_ISL_529817, EPI_ISL_529818, EPI_ISL_529819, EPI_ISL_529820, EPI_ISL_529821, EPI_ISL_529822, EPI_ISL_529823, EPI_ISL_529824, EPI_ISL_529825, EPI_ISL_529826, EPI_ISL_529827, EPI_ISL_529828, EPI_ISL_529829, EPI_ISL_529830, EPI_ISL_529831, EPI_ISL_529832, EPI_ISL_529833, EPI_ISL_529834, EPI_ISL_529835, EPI_ISL_529836, EPI_ISL_529837, EPI_ISL_529838, EPI_ISL_529839, EPI_ISL_529840, EPI_ISL_529841, EPI_ISL_529842, EPI_ISL_529843, EPI_ISL_529844, EPI_ISL_529845, EPI_ISL_529846, EPI_ISL_529847, EPI_ISL_529848, EPI_ISL_529849, EPI_ISL_529850, EPI_ISL_529851, EPI_ISL_529852, EPI_ISL_529853, EPI_ISL_529854, EPI_ISL_529855, EPI_ISL_529856, EPI_ISL_529857, EPI_ISL_529858, EPI_ISL_529859, EPI_ISL_529860, EPI_ISL_529861, EPI_ISL_529862, EPI_ISL_529863, EPI_ISL_529864, EPI_ISL_529865, EPI_ISL_529866, EPI_ISL_529867, EPI_ISL_529868, EPI_ISL_529869, EPI_ISL_529870, EPI_ISL_529871, EPI_ISL_529872, EPI_ISL_529873, EPI_ISL_529874, EPI_ISL_529875, EPI_ISL_529876, EPI_ISL_529877, EPI_ISL_529878, EPI_ISL_529879, EPI_ISL_529880, EPI_ISL_529881, EPI_ISL_529882, EPI_ISL_529883, EPI_ISL_529884, EPI_ISL_529885, EPI_ISL_529886, EPI_ISL_529887, EPI_ISL_529888, EPI_ISL_529889, EPI_ISL_529890, EPI_ISL_529891, EPI_ISL_529892, EPI_ISL_529893, EPI_ISL_529894, EPI_ISL_529895, EPI_ISL_529896, EPI_ISL_529897, EPI_ISL_529898, EPI_ISL_529899, EPI_ISL_529900, EPI_ISL_529901, EPI_ISL_529902, EPI_ISL_529903, EPI_ISL_529904, EPI_ISL_529905, EPI_ISL_529906, EPI_ISL_529907 | see above                                                                                                  | Michigan Department of Health and Human Services, Bureau of Laboratories                                               | Michigan Department of Health and Human Services, Bureau of Laboratories                                                         | Blankenship HM, Riner D, Soehnlén MK                                                                                   |
| EPI_ISL_535650, EPI_ISL_535652, EPI_ISL_535654, EPI_ISL_535658, EPI_ISL_535659, EPI_ISL_535661                                                                                                                                                                                                                                                                                                                                                                                                                                                                                                                                                                                                                                                                                                                                                                                                                                                                                                                                                                                                                                                                                                                                                                                                                                                                                                                                                                                                                                                                                                                                                                                                                                 | AR Dept. of Health-Public Health Lab                                                                       | Pathogen Discovery, Respiratory Viruses Branch, Division of Viral Diseases, Centers for Disease Control and Prevention | Brian Lynch, Yan Li, Jing Zhang, Ying Tao, Krista Queen, Anna Uehara, Clinton R. Paden, Rachel Marine, Haibin Wang, Suxiang Tong |                                                                                                                        |
| EPI_ISL_535675, EPI_ISL_535701, EPI_ISL_535708                                                                                                                                                                                                                                                                                                                                                                                                                                                                                                                                                                                                                                                                                                                                                                                                                                                                                                                                                                                                                                                                                                                                                                                                                                                                                                                                                                                                                                                                                                                                                                                                                                                                                 | CDPH, Microbial Diseases Laboratory                                                                        | Pathogen Discovery, Respiratory Viruses Branch, Division of Viral Diseases, Centers for Disease Control and Prevention | Brian Lynch, Yan Li, Jing Zhang, Ying Tao, Krista Queen, Anna Uehara, Clinton R. Paden, Rachel Marine, Haibin Wang, Suxiang Tong |                                                                                                                        |
| EPI_ISL_537380, EPI_ISL_537381                                                                                                                                                                                                                                                                                                                                                                                                                                                                                                                                                                                                                                                                                                                                                                                                                                                                                                                                                                                                                                                                                                                                                                                                                                                                                                                                                                                                                                                                                                                                                                                                                                                                                                 | Complejo Hospitalario Universitario de Vigo                                                                | SeqCOVID-SPAIN consortium/IBV(CSIC)                                                                                    | Benito Regueiro and SeqCOVID-SPAIN consortium                                                                                    |                                                                                                                        |
| EPI_ISL_538275, EPI_ISL_538276, EPI_ISL_538277, EPI_ISL_538278, EPI_ISL_538279, EPI_ISL_538280, EPI_ISL_538281, EPI_ISL_538282, EPI_ISL_538283, EPI_ISL_538284, EPI_ISL_538285, EPI_ISL_538286, EPI_ISL_538287, EPI_ISL_538288, EPI_ISL_538289, EPI_ISL_538290, EPI_ISL_538291, EPI_ISL_538292, EPI_ISL_538293, EPI_ISL_538294, EPI_ISL_538296, EPI_ISL_538297, EPI_ISL_538298, EPI_ISL_538299, EPI_ISL_538300, EPI_ISL_538301, EPI_ISL_538302, EPI_ISL_538303, EPI_ISL_538304, EPI_ISL_538305, EPI_ISL_538306, EPI_ISL_538307, EPI_ISL_538308, EPI_ISL_538309, EPI_ISL_538310, EPI_ISL_538311, EPI_ISL_538312, EPI_ISL_538313, EPI_ISL_538314, EPI_ISL_538315, EPI_ISL_538316, EPI_ISL_538317, EPI_ISL_538318, EPI_ISL_538319, EPI_ISL_538320                                                                                                                                                                                                                                                                                                                                                                                                                                                                                                                                                                                                                                                                                                                                                                                                                                                                                                                                                                                 | see above                                                                                                  | Texas Department of State Health Services                                                                              | Texas Department of State Health Services                                                                                        | Bonnie Oh, Rashmi Tuladhar, Jenny Zhang, Maliha Rahman, Anita Pokharel, Myong Koag, Chun Wang, Rachel Lee, Grace Kubin |
| EPI_ISL_540581                                                                                                                                                                                                                                                                                                                                                                                                                                                                                                                                                                                                                                                                                                                                                                                                                                                                                                                                                                                                                                                                                                                                                                                                                                                                                                                                                                                                                                                                                                                                                                                                                                                                                                                 | University of Exeter                                                                                       | COVID-19 Genomics UK (COG-UK) Consortium                                                                               | Ben Temperton,Aaron Jeffries,Michelle Michelsen,Joanna Warwick-Dugdale,Audrey Farbos,Robyn Manley,Stephen Michell,Jane Masoli    |                                                                                                                        |
| EPI_ISL_544955                                                                                                                                                                                                                                                                                                                                                                                                                                                                                                                                                                                                                                                                                                                                                                                                                                                                                                                                                                                                                                                                                                                                                                                                                                                                                                                                                                                                                                                                                                                                                                                                                                                                                                                 | Pathology West - NSW Health Pathology                                                                      | NSW Health Pathology - Institute of Clinical Pathology and Medical Research; Westmead Hospital; University of Sydney   | CIDM-PH et al.                                                                                                                   |                                                                                                                        |
| EPI_ISL_544956                                                                                                                                                                                                                                                                                                                                                                                                                                                                                                                                                                                                                                                                                                                                                                                                                                                                                                                                                                                                                                                                                                                                                                                                                                                                                                                                                                                                                                                                                                                                                                                                                                                                                                                 | Sydney South West Pathology Service (SSWPS) - Concord Repatriation General Hospital - NSW Health Pathology | NSW Health Pathology - Institute of Clinical Pathology and Medical Research; Westmead Hospital; University of Sydney   | CIDM-PH et al.                                                                                                                   |                                                                                                                        |
| EPI_ISL_544957                                                                                                                                                                                                                                                                                                                                                                                                                                                                                                                                                                                                                                                                                                                                                                                                                                                                                                                                                                                                                                                                                                                                                                                                                                                                                                                                                                                                                                                                                                                                                                                                                                                                                                                 | Laverty Pathology                                                                                          | NSW Health Pathology - Institute of Clinical Pathology and Medical Research; Westmead Hospital; University of Sydney   | CIDM-PH et al.                                                                                                                   |                                                                                                                        |
| EPI_ISL_544958, EPI_ISL_544959                                                                                                                                                                                                                                                                                                                                                                                                                                                                                                                                                                                                                                                                                                                                                                                                                                                                                                                                                                                                                                                                                                                                                                                                                                                                                                                                                                                                                                                                                                                                                                                                                                                                                                 | Sydney South West Pathology Service (SSWPS) - Liverpool Hospital - NSW Health Pathology                    | NSW Health Pathology - Institute of Clinical Pathology and Medical Research; Westmead Hospital; University of Sydney   | CIDM-PH et al.                                                                                                                   |                                                                                                                        |
| EPI_ISL_544960                                                                                                                                                                                                                                                                                                                                                                                                                                                                                                                                                                                                                                                                                                                                                                                                                                                                                                                                                                                                                                                                                                                                                                                                                                                                                                                                                                                                                                                                                                                                                                                                                                                                                                                 | Histopath                                                                                                  | NSW Health Pathology - Institute of Clinical Pathology and Medical Research; Westmead Hospital; University of Sydney   | CIDM-PH et al.                                                                                                                   |                                                                                                                        |
| EPI_ISL_544961                                                                                                                                                                                                                                                                                                                                                                                                                                                                                                                                                                                                                                                                                                                                                                                                                                                                                                                                                                                                                                                                                                                                                                                                                                                                                                                                                                                                                                                                                                                                                                                                                                                                                                                 | St Vincent's Pathology (SydPath)                                                                           | NSW Health Pathology - Institute of Clinical Pathology and Medical Research; Westmead Hospital; University of Sydney   | CIDM-PH et al.                                                                                                                   |                                                                                                                        |
| EPI_ISL_544962                                                                                                                                                                                                                                                                                                                                                                                                                                                                                                                                                                                                                                                                                                                                                                                                                                                                                                                                                                                                                                                                                                                                                                                                                                                                                                                                                                                                                                                                                                                                                                                                                                                                                                                 | Laverty Pathology                                                                                          | NSW Health Pathology - Institute of Clinical Pathology and Medical Research; Westmead Hospital; University of Sydney   | CIDM-PH et al.                                                                                                                   |                                                                                                                        |
| EPI_ISL_544963                                                                                                                                                                                                                                                                                                                                                                                                                                                                                                                                                                                                                                                                                                                                                                                                                                                                                                                                                                                                                                                                                                                                                                                                                                                                                                                                                                                                                                                                                                                                                                                                                                                                                                                 | The Children's Hospital at Westmead                                                                        | NSW Health Pathology - Institute of Clinical Pathology and Medical Research; Westmead Hospital; University of Sydney   | CIDM-PH et al.                                                                                                                   |                                                                                                                        |
| EPI_ISL_544964, EPI_ISL_544965                                                                                                                                                                                                                                                                                                                                                                                                                                                                                                                                                                                                                                                                                                                                                                                                                                                                                                                                                                                                                                                                                                                                                                                                                                                                                                                                                                                                                                                                                                                                                                                                                                                                                                 | Sydney South West Pathology Service (SSWPS) - Liverpool Hospital - NSW Health Pathology                    | NSW Health Pathology - Institute of Clinical Pathology and Medical Research; Westmead Hospital; University of Sydney   | CIDM-PH et al.                                                                                                                   |                                                                                                                        |
| EPI_ISL_544966, EPI_ISL_544967                                                                                                                                                                                                                                                                                                                                                                                                                                                                                                                                                                                                                                                                                                                                                                                                                                                                                                                                                                                                                                                                                                                                                                                                                                                                                                                                                                                                                                                                                                                                                                                                                                                                                                 | Australian Clinical Labs                                                                                   | NSW Health Pathology - Institute of Clinical Pathology and Medical Research; Westmead Hospital; University of Sydney   | CIDM-PH et al.                                                                                                                   |                                                                                                                        |
| EPI_ISL_544968                                                                                                                                                                                                                                                                                                                                                                                                                                                                                                                                                                                                                                                                                                                                                                                                                                                                                                                                                                                                                                                                                                                                                                                                                                                                                                                                                                                                                                                                                                                                                                                                                                                                                                                 | St Vincent's Pathology (SydPath)                                                                           | NSW Health Pathology - Institute of Clinical Pathology and Medical Research; Westmead Hospital; University of Sydney   | CIDM-PH et al.                                                                                                                   |                                                                                                                        |
| EPI_ISL_544969                                                                                                                                                                                                                                                                                                                                                                                                                                                                                                                                                                                                                                                                                                                                                                                                                                                                                                                                                                                                                                                                                                                                                                                                                                                                                                                                                                                                                                                                                                                                                                                                                                                                                                                 | Pathology North - Royal North Shore Hospital - NSW Health Pathology                                        | NSW Health Pathology - Institute of Clinical Pathology and Medical Research; Westmead Hospital; University of Sydney   | CIDM-PH et al.                                                                                                                   |                                                                                                                        |
| EPI_ISL_544970                                                                                                                                                                                                                                                                                                                                                                                                                                                                                                                                                                                                                                                                                                                                                                                                                                                                                                                                                                                                                                                                                                                                                                                                                                                                                                                                                                                                                                                                                                                                                                                                                                                                                                                 | South Eastern Area Laboratory Services (SEALS)                                                             | NSW Health Pathology - Institute of Clinical Pathology and Medical Research; Westmead Hospital; University of Sydney   | CIDM-PH et al.                                                                                                                   |                                                                                                                        |
| EPI_ISL_544971, EPI_ISL_544972, EPI_ISL_544973                                                                                                                                                                                                                                                                                                                                                                                                                                                                                                                                                                                                                                                                                                                                                                                                                                                                                                                                                                                                                                                                                                                                                                                                                                                                                                                                                                                                                                                                                                                                                                                                                                                                                 | St Vincent's Pathology (SydPath)                                                                           | NSW Health Pathology - Institute of Clinical Pathology and Medical Research; Westmead Hospital; University of Sydney   | CIDM-PH et al.                                                                                                                   |                                                                                                                        |
| EPI_ISL_544974                                                                                                                                                                                                                                                                                                                                                                                                                                                                                                                                                                                                                                                                                                                                                                                                                                                                                                                                                                                                                                                                                                                                                                                                                                                                                                                                                                                                                                                                                                                                                                                                                                                                                                                 | Sydney South West Pathology Service (SSWPS) - Royal Prince Alfred Hospital - NSW Health Pathology          | NSW Health Pathology - Institute of Clinical Pathology and Medical Research; Westmead Hospital; University of Sydney   | CIDM-PH et al.                                                                                                                   |                                                                                                                        |
| EPI_ISL_544975                                                                                                                                                                                                                                                                                                                                                                                                                                                                                                                                                                                                                                                                                                                                                                                                                                                                                                                                                                                                                                                                                                                                                                                                                                                                                                                                                                                                                                                                                                                                                                                                                                                                                                                 | Histopath                                                                                                  | NSW Health Pathology - Institute of Clinical Pathology and Medical Research; Westmead Hospital; University of Sydney   | CIDM-PH et al.                                                                                                                   |                                                                                                                        |
| EPI_ISL_544976                                                                                                                                                                                                                                                                                                                                                                                                                                                                                                                                                                                                                                                                                                                                                                                                                                                                                                                                                                                                                                                                                                                                                                                                                                                                                                                                                                                                                                                                                                                                                                                                                                                                                                                 | Pathology North - Royal North Shore Hospital - NSW Health Pathology                                        | NSW Health Pathology - Institute of Clinical Pathology and Medical Research; Westmead Hospital; University of Sydney   | CIDM-PH et al.                                                                                                                   |                                                                                                                        |
| EPI_ISL_544977, EPI_ISL_544978, EPI_ISL_544979, EPI_ISL_544980, EPI_ISL_544981                                                                                                                                                                                                                                                                                                                                                                                                                                                                                                                                                                                                                                                                                                                                                                                                                                                                                                                                                                                                                                                                                                                                                                                                                                                                                                                                                                                                                                                                                                                                                                                                                                                 | St Vincent's Pathology (SydPath)                                                                           | NSW Health Pathology - Institute of Clinical Pathology and Medical Research; Westmead Hospital; University of Sydney   | CIDM-PH et al.                                                                                                                   |                                                                                                                        |
| EPI_ISL_544982                                                                                                                                                                                                                                                                                                                                                                                                                                                                                                                                                                                                                                                                                                                                                                                                                                                                                                                                                                                                                                                                                                                                                                                                                                                                                                                                                                                                                                                                                                                                                                                                                                                                                                                 | Pathology North - Royal North Shore Hospital - NSW Health Pathology                                        | NSW Health Pathology - Institute of Clinical Pathology and Medical Research; Westmead Hospital; University of Sydney   | CIDM-PH et al.                                                                                                                   |                                                                                                                        |
| EPI_ISL_544983, EPI_ISL_544984                                                                                                                                                                                                                                                                                                                                                                                                                                                                                                                                                                                                                                                                                                                                                                                                                                                                                                                                                                                                                                                                                                                                                                                                                                                                                                                                                                                                                                                                                                                                                                                                                                                                                                 | South Eastern Area Laboratory Services (SEALS)                                                             | NSW Health Pathology - Institute of Clinical Pathology and Medical Research; Westmead Hospital; University of Sydney   | CIDM-PH et al.                                                                                                                   |                                                                                                                        |
| EPI_ISL_544985                                                                                                                                                                                                                                                                                                                                                                                                                                                                                                                                                                                                                                                                                                                                                                                                                                                                                                                                                                                                                                                                                                                                                                                                                                                                                                                                                                                                                                                                                                                                                                                                                                                                                                                 | Sydney South West Pathology Service (SSWPS) - Liverpool Hospital - NSW Health Pathology                    | NSW Health Pathology - Institute of Clinical Pathology and Medical Research; Westmead Hospital; University of Sydney   | CIDM-PH et al.                                                                                                                   |                                                                                                                        |
| EPI_ISL_544986                                                                                                                                                                                                                                                                                                                                                                                                                                                                                                                                                                                                                                                                                                                                                                                                                                                                                                                                                                                                                                                                                                                                                                                                                                                                                                                                                                                                                                                                                                                                                                                                                                                                                                                 | Pathology West - NSW Health Pathology                                                                      | NSW Health Pathology - Institute of Clinical Pathology and Medical Research; Westmead Hospital; University of Sydney   | CIDM-PH et al.                                                                                                                   |                                                                                                                        |
| EPI_ISL_544987                                                                                                                                                                                                                                                                                                                                                                                                                                                                                                                                                                                                                                                                                                                                                                                                                                                                                                                                                                                                                                                                                                                                                                                                                                                                                                                                                                                                                                                                                                                                                                                                                                                                                                                 | Histopath                                                                                                  | NSW Health Pathology - Institute of Clinical Pathology and Medical Research; Westmead Hospital; University of Sydney   | CIDM-PH et al.                                                                                                                   |                                                                                                                        |
| EPI_ISL_544988                                                                                                                                                                                                                                                                                                                                                                                                                                                                                                                                                                                                                                                                                                                                                                                                                                                                                                                                                                                                                                                                                                                                                                                                                                                                                                                                                                                                                                                                                                                                                                                                                                                                                                                 | Australian Clinical Labs                                                                                   | NSW Health Pathology - Institute of Clinical Pathology and                                                             | CIDM-PH et al.                                                                                                                   |                                                                                                                        |





|                                                                                                                                                                                                                                                                                                                                                                                                                                                                                                                                                                                                                                                                                                                                                                                                                                                                                                                                                                                                                                                                                                                                                                                                                                                                                                                                                                                                                                                                                                                                                                                                                                                                                                                                                                                                                                                                                                                                                                                                                                                                                                                                                                                                                                                                                                                                                                                                                                                                                                                                                                                                                                                                                                                                                                                                                                                                                                                                                                                                                                                                                |                                                                                                            |                                                                                                                      |                                                                                                                                                                                                                                                                                                                                  |
|--------------------------------------------------------------------------------------------------------------------------------------------------------------------------------------------------------------------------------------------------------------------------------------------------------------------------------------------------------------------------------------------------------------------------------------------------------------------------------------------------------------------------------------------------------------------------------------------------------------------------------------------------------------------------------------------------------------------------------------------------------------------------------------------------------------------------------------------------------------------------------------------------------------------------------------------------------------------------------------------------------------------------------------------------------------------------------------------------------------------------------------------------------------------------------------------------------------------------------------------------------------------------------------------------------------------------------------------------------------------------------------------------------------------------------------------------------------------------------------------------------------------------------------------------------------------------------------------------------------------------------------------------------------------------------------------------------------------------------------------------------------------------------------------------------------------------------------------------------------------------------------------------------------------------------------------------------------------------------------------------------------------------------------------------------------------------------------------------------------------------------------------------------------------------------------------------------------------------------------------------------------------------------------------------------------------------------------------------------------------------------------------------------------------------------------------------------------------------------------------------------------------------------------------------------------------------------------------------------------------------------------------------------------------------------------------------------------------------------------------------------------------------------------------------------------------------------------------------------------------------------------------------------------------------------------------------------------------------------------------------------------------------------------------------------------------------------|------------------------------------------------------------------------------------------------------------|----------------------------------------------------------------------------------------------------------------------|----------------------------------------------------------------------------------------------------------------------------------------------------------------------------------------------------------------------------------------------------------------------------------------------------------------------------------|
| EPI_ISL_545049                                                                                                                                                                                                                                                                                                                                                                                                                                                                                                                                                                                                                                                                                                                                                                                                                                                                                                                                                                                                                                                                                                                                                                                                                                                                                                                                                                                                                                                                                                                                                                                                                                                                                                                                                                                                                                                                                                                                                                                                                                                                                                                                                                                                                                                                                                                                                                                                                                                                                                                                                                                                                                                                                                                                                                                                                                                                                                                                                                                                                                                                 | Sydney South West Pathology Service (SSWPS) - Concord Repatriation General Hospital - NSW Health Pathology | NSW Health Pathology - Institute of Clinical Pathology and Medical Research; Westmead Hospital; University of Sydney | CIDM-PH et al.                                                                                                                                                                                                                                                                                                                   |
| EPI_ISL_545050                                                                                                                                                                                                                                                                                                                                                                                                                                                                                                                                                                                                                                                                                                                                                                                                                                                                                                                                                                                                                                                                                                                                                                                                                                                                                                                                                                                                                                                                                                                                                                                                                                                                                                                                                                                                                                                                                                                                                                                                                                                                                                                                                                                                                                                                                                                                                                                                                                                                                                                                                                                                                                                                                                                                                                                                                                                                                                                                                                                                                                                                 | Pathology West - NSW Health Pathology                                                                      | NSW Health Pathology - Institute of Clinical Pathology and Medical Research; Westmead Hospital; University of Sydney | CIDM-PH et al.                                                                                                                                                                                                                                                                                                                   |
| EPI_ISL_547594                                                                                                                                                                                                                                                                                                                                                                                                                                                                                                                                                                                                                                                                                                                                                                                                                                                                                                                                                                                                                                                                                                                                                                                                                                                                                                                                                                                                                                                                                                                                                                                                                                                                                                                                                                                                                                                                                                                                                                                                                                                                                                                                                                                                                                                                                                                                                                                                                                                                                                                                                                                                                                                                                                                                                                                                                                                                                                                                                                                                                                                                 | Sydney South West Pathology Service (SSWPS) - Liverpool Hospital - NSW Health Pathology                    | NSW Health Pathology - Institute of Clinical Pathology and Medical Research; Westmead Hospital; University of Sydney | CIDM-PH et al.                                                                                                                                                                                                                                                                                                                   |
| EPI_ISL_547595, EPI_ISL_547596                                                                                                                                                                                                                                                                                                                                                                                                                                                                                                                                                                                                                                                                                                                                                                                                                                                                                                                                                                                                                                                                                                                                                                                                                                                                                                                                                                                                                                                                                                                                                                                                                                                                                                                                                                                                                                                                                                                                                                                                                                                                                                                                                                                                                                                                                                                                                                                                                                                                                                                                                                                                                                                                                                                                                                                                                                                                                                                                                                                                                                                 | St Vincent's Pathology (SydPath)                                                                           | NSW Health Pathology - Institute of Clinical Pathology and Medical Research; Westmead Hospital; University of Sydney | CIDM-PH et al.                                                                                                                                                                                                                                                                                                                   |
| EPI_ISL_547597                                                                                                                                                                                                                                                                                                                                                                                                                                                                                                                                                                                                                                                                                                                                                                                                                                                                                                                                                                                                                                                                                                                                                                                                                                                                                                                                                                                                                                                                                                                                                                                                                                                                                                                                                                                                                                                                                                                                                                                                                                                                                                                                                                                                                                                                                                                                                                                                                                                                                                                                                                                                                                                                                                                                                                                                                                                                                                                                                                                                                                                                 | Australian Clinical Labs                                                                                   | NSW Health Pathology - Institute of Clinical Pathology and Medical Research; Westmead Hospital; University of Sydney | CIDM-PH et al.                                                                                                                                                                                                                                                                                                                   |
| EPI_ISL_547598                                                                                                                                                                                                                                                                                                                                                                                                                                                                                                                                                                                                                                                                                                                                                                                                                                                                                                                                                                                                                                                                                                                                                                                                                                                                                                                                                                                                                                                                                                                                                                                                                                                                                                                                                                                                                                                                                                                                                                                                                                                                                                                                                                                                                                                                                                                                                                                                                                                                                                                                                                                                                                                                                                                                                                                                                                                                                                                                                                                                                                                                 | Sydney South West Pathology Service (SSWPS) - Concord Repatriation General Hospital - NSW Health Pathology | NSW Health Pathology - Institute of Clinical Pathology and Medical Research; Westmead Hospital; University of Sydney | CIDM-PH et al.                                                                                                                                                                                                                                                                                                                   |
| EPI_ISL_547599                                                                                                                                                                                                                                                                                                                                                                                                                                                                                                                                                                                                                                                                                                                                                                                                                                                                                                                                                                                                                                                                                                                                                                                                                                                                                                                                                                                                                                                                                                                                                                                                                                                                                                                                                                                                                                                                                                                                                                                                                                                                                                                                                                                                                                                                                                                                                                                                                                                                                                                                                                                                                                                                                                                                                                                                                                                                                                                                                                                                                                                                 | Sydney South West Pathology Service (SSWPS) - Royal Prince Alfred Hospital - NSW Health Pathology          | NSW Health Pathology - Institute of Clinical Pathology and Medical Research; Westmead Hospital; University of Sydney | CIDM-PH et al.                                                                                                                                                                                                                                                                                                                   |
| EPI_ISL_547600                                                                                                                                                                                                                                                                                                                                                                                                                                                                                                                                                                                                                                                                                                                                                                                                                                                                                                                                                                                                                                                                                                                                                                                                                                                                                                                                                                                                                                                                                                                                                                                                                                                                                                                                                                                                                                                                                                                                                                                                                                                                                                                                                                                                                                                                                                                                                                                                                                                                                                                                                                                                                                                                                                                                                                                                                                                                                                                                                                                                                                                                 | Histopath                                                                                                  | NSW Health Pathology - Institute of Clinical Pathology and Medical Research; Westmead Hospital; University of Sydney | CIDM-PH et al.                                                                                                                                                                                                                                                                                                                   |
| EPI_ISL_547601                                                                                                                                                                                                                                                                                                                                                                                                                                                                                                                                                                                                                                                                                                                                                                                                                                                                                                                                                                                                                                                                                                                                                                                                                                                                                                                                                                                                                                                                                                                                                                                                                                                                                                                                                                                                                                                                                                                                                                                                                                                                                                                                                                                                                                                                                                                                                                                                                                                                                                                                                                                                                                                                                                                                                                                                                                                                                                                                                                                                                                                                 | South Eastern Area Laboratory Services (SEALS)                                                             | NSW Health Pathology - Institute of Clinical Pathology and Medical Research; Westmead Hospital; University of Sydney | CIDM-PH et al.                                                                                                                                                                                                                                                                                                                   |
| EPI_ISL_565833, EPI_ISL_565834, EPI_ISL_565835, EPI_ISL_565836, EPI_ISL_565837, EPI_ISL_565838, EPI_ISL_565839, EPI_ISL_565840, EPI_ISL_565841, EPI_ISL_565842, EPI_ISL_565843, EPI_ISL_565844, EPI_ISL_565845, EPI_ISL_565846, EPI_ISL_565847, EPI_ISL_565848, EPI_ISL_565849, EPI_ISL_565850, EPI_ISL_565851, EPI_ISL_565852, EPI_ISL_565853, EPI_ISL_565854, EPI_ISL_565855, EPI_ISL_565856, EPI_ISL_565857, EPI_ISL_565858, EPI_ISL_565859, EPI_ISL_565860, EPI_ISL_565861, EPI_ISL_565862, EPI_ISL_565863, EPI_ISL_565864, EPI_ISL_565865, EPI_ISL_565866, EPI_ISL_565867, EPI_ISL_565868, EPI_ISL_565869, EPI_ISL_565870, EPI_ISL_565871, EPI_ISL_565872, EPI_ISL_565873, EPI_ISL_565874, EPI_ISL_565875, EPI_ISL_565876, EPI_ISL_565877, EPI_ISL_565878, EPI_ISL_565879, EPI_ISL_565880, EPI_ISL_565881, EPI_ISL_565882, EPI_ISL_565883, EPI_ISL_565884, EPI_ISL_565885, EPI_ISL_565886, EPI_ISL_565887, EPI_ISL_565888, EPI_ISL_565889, EPI_ISL_565890, EPI_ISL_565891, EPI_ISL_565892, EPI_ISL_565893, EPI_ISL_565894, EPI_ISL_565895, EPI_ISL_565896, EPI_ISL_565897, EPI_ISL_565898, EPI_ISL_565899, EPI_ISL_565900, EPI_ISL_565901, EPI_ISL_565902, EPI_ISL_565903, EPI_ISL_565904, EPI_ISL_565905, EPI_ISL_565906, EPI_ISL_565907, EPI_ISL_565926, EPI_ISL_565927, EPI_ISL_565928, EPI_ISL_565929, EPI_ISL_565930, EPI_ISL_565931, EPI_ISL_565932, EPI_ISL_565933, EPI_ISL_565934, EPI_ISL_565935, EPI_ISL_565936, EPI_ISL_565937, EPI_ISL_565938, EPI_ISL_565939, EPI_ISL_565940, EPI_ISL_565941, EPI_ISL_565942, EPI_ISL_565943, EPI_ISL_565944, EPI_ISL_565945, EPI_ISL_565946, EPI_ISL_565947, EPI_ISL_565948, EPI_ISL_565949, EPI_ISL_565950, EPI_ISL_565951, EPI_ISL_565952, EPI_ISL_565953, EPI_ISL_565954, EPI_ISL_565955, EPI_ISL_565956, EPI_ISL_565957, EPI_ISL_565958, EPI_ISL_565959, EPI_ISL_565960, EPI_ISL_565961, EPI_ISL_565962, EPI_ISL_565963, EPI_ISL_565964, EPI_ISL_565965, EPI_ISL_565966, EPI_ISL_565967, EPI_ISL_565968, EPI_ISL_565969, EPI_ISL_565970, EPI_ISL_565971, EPI_ISL_565972, EPI_ISL_565973, EPI_ISL_565974, EPI_ISL_565975, EPI_ISL_565976, EPI_ISL_565977, EPI_ISL_565978, EPI_ISL_565979, EPI_ISL_565980, EPI_ISL_565981, EPI_ISL_565982, EPI_ISL_565983, EPI_ISL_565984, EPI_ISL_565985, EPI_ISL_565986, EPI_ISL_565987, EPI_ISL_565988, EPI_ISL_565989, EPI_ISL_565990, EPI_ISL_565991, EPI_ISL_565992, EPI_ISL_565993, EPI_ISL_565994, EPI_ISL_565995, EPI_ISL_565996, EPI_ISL_565997, EPI_ISL_565998, EPI_ISL_565999, EPI_ISL_566000, EPI_ISL_566001, EPI_ISL_566002, EPI_ISL_566003, EPI_ISL_566004, EPI_ISL_566005, EPI_ISL_566006, EPI_ISL_566007, EPI_ISL_566008, EPI_ISL_566009, EPI_ISL_566010, EPI_ISL_566011, EPI_ISL_566012, EPI_ISL_566013, EPI_ISL_566014, EPI_ISL_566015, EPI_ISL_566016, EPI_ISL_566017, EPI_ISL_566018, EPI_ISL_566019, EPI_ISL_566020, EPI_ISL_566021, EPI_ISL_566022, EPI_ISL_566023, EPI_ISL_566024, EPI_ISL_566025, EPI_ISL_566026, EPI_ISL_566027, EPI_ISL_566028, EPI_ISL_566029, EPI_ISL_566030, EPI_ISL_566031, EPI_ISL_566032, EPI_ISL_566033, EPI_ISL_566034, EPI_ISL_566035 |                                                                                                            |                                                                                                                      |                                                                                                                                                                                                                                                                                                                                  |
| see above                                                                                                                                                                                                                                                                                                                                                                                                                                                                                                                                                                                                                                                                                                                                                                                                                                                                                                                                                                                                                                                                                                                                                                                                                                                                                                                                                                                                                                                                                                                                                                                                                                                                                                                                                                                                                                                                                                                                                                                                                                                                                                                                                                                                                                                                                                                                                                                                                                                                                                                                                                                                                                                                                                                                                                                                                                                                                                                                                                                                                                                                      | Michigan Department of Health and Human Services, Bureau of Laboratories                                   | Michigan Department of Health and Human Services, Bureau of Laboratories                                             | Blankenship HM, Riner D, Soehnlén MK                                                                                                                                                                                                                                                                                             |
| EPI_ISL_576117, EPI_ISL_576118                                                                                                                                                                                                                                                                                                                                                                                                                                                                                                                                                                                                                                                                                                                                                                                                                                                                                                                                                                                                                                                                                                                                                                                                                                                                                                                                                                                                                                                                                                                                                                                                                                                                                                                                                                                                                                                                                                                                                                                                                                                                                                                                                                                                                                                                                                                                                                                                                                                                                                                                                                                                                                                                                                                                                                                                                                                                                                                                                                                                                                                 | Laboratory, The Bio Arte Limited                                                                           | Laboratory, The Bio Arte Limited                                                                                     | Biazzo,M., Madeddu,S., Santoro,F., Pinzauti,D.                                                                                                                                                                                                                                                                                   |
| EPI_ISL_576119                                                                                                                                                                                                                                                                                                                                                                                                                                                                                                                                                                                                                                                                                                                                                                                                                                                                                                                                                                                                                                                                                                                                                                                                                                                                                                                                                                                                                                                                                                                                                                                                                                                                                                                                                                                                                                                                                                                                                                                                                                                                                                                                                                                                                                                                                                                                                                                                                                                                                                                                                                                                                                                                                                                                                                                                                                                                                                                                                                                                                                                                 | Laboratory, The Bio Arte Limited                                                                           | Laboratory, The Bio Arte Limited                                                                                     | Biazzo,M., Madeddu,S., Santoro,F., Pinzauti,D.                                                                                                                                                                                                                                                                                   |
| EPI_ISL_576120, EPI_ISL_576121, EPI_ISL_576122, EPI_ISL_576123, EPI_ISL_576124, EPI_ISL_576125, EPI_ISL_576126                                                                                                                                                                                                                                                                                                                                                                                                                                                                                                                                                                                                                                                                                                                                                                                                                                                                                                                                                                                                                                                                                                                                                                                                                                                                                                                                                                                                                                                                                                                                                                                                                                                                                                                                                                                                                                                                                                                                                                                                                                                                                                                                                                                                                                                                                                                                                                                                                                                                                                                                                                                                                                                                                                                                                                                                                                                                                                                                                                 | Laboratory, The Bio Arte Limited                                                                           | Laboratory, The Bio Arte Limited                                                                                     | Biazzo,M., Madeddu,S., Santoro,F., Pinzauti,D.                                                                                                                                                                                                                                                                                   |
| EPI_ISL_576198, EPI_ISL_576199, EPI_ISL_576200, EPI_ISL_576201, EPI_ISL_576202, EPI_ISL_576203, EPI_ISL_576204, EPI_ISL_576205, EPI_ISL_576206, EPI_ISL_576207, EPI_ISL_576208, EPI_ISL_576209, EPI_ISL_576210, EPI_ISL_576211, EPI_ISL_576212, EPI_ISL_576213, EPI_ISL_576214, EPI_ISL_576215, EPI_ISL_576216, EPI_ISL_576217, EPI_ISL_576218, EPI_ISL_576219, EPI_ISL_576220, EPI_ISL_576221                                                                                                                                                                                                                                                                                                                                                                                                                                                                                                                                                                                                                                                                                                                                                                                                                                                                                                                                                                                                                                                                                                                                                                                                                                                                                                                                                                                                                                                                                                                                                                                                                                                                                                                                                                                                                                                                                                                                                                                                                                                                                                                                                                                                                                                                                                                                                                                                                                                                                                                                                                                                                                                                                 |                                                                                                            |                                                                                                                      |                                                                                                                                                                                                                                                                                                                                  |
| see above                                                                                                                                                                                                                                                                                                                                                                                                                                                                                                                                                                                                                                                                                                                                                                                                                                                                                                                                                                                                                                                                                                                                                                                                                                                                                                                                                                                                                                                                                                                                                                                                                                                                                                                                                                                                                                                                                                                                                                                                                                                                                                                                                                                                                                                                                                                                                                                                                                                                                                                                                                                                                                                                                                                                                                                                                                                                                                                                                                                                                                                                      | Michigan Department of Health and Human Services, Bureau of Laboratories                                   | Michigan Department of Health and Human Services, Bureau of Laboratories                                             | Blankenship HM, Riner D, Soehnlén MK                                                                                                                                                                                                                                                                                             |
| EPI_ISL_577223, EPI_ISL_577225, EPI_ISL_577226, EPI_ISL_577237, EPI_ISL_577240, EPI_ISL_577259, EPI_ISL_577260, EPI_ISL_577262, EPI_ISL_577271, EPI_ISL_577277, EPI_ISL_577282, EPI_ISL_577284, EPI_ISL_577289, EPI_ISL_577290, EPI_ISL_577293, EPI_ISL_577359, EPI_ISL_577360, EPI_ISL_577363, EPI_ISL_577378                                                                                                                                                                                                                                                                                                                                                                                                                                                                                                                                                                                                                                                                                                                                                                                                                                                                                                                                                                                                                                                                                                                                                                                                                                                                                                                                                                                                                                                                                                                                                                                                                                                                                                                                                                                                                                                                                                                                                                                                                                                                                                                                                                                                                                                                                                                                                                                                                                                                                                                                                                                                                                                                                                                                                                 |                                                                                                            |                                                                                                                      |                                                                                                                                                                                                                                                                                                                                  |
| see above                                                                                                                                                                                                                                                                                                                                                                                                                                                                                                                                                                                                                                                                                                                                                                                                                                                                                                                                                                                                                                                                                                                                                                                                                                                                                                                                                                                                                                                                                                                                                                                                                                                                                                                                                                                                                                                                                                                                                                                                                                                                                                                                                                                                                                                                                                                                                                                                                                                                                                                                                                                                                                                                                                                                                                                                                                                                                                                                                                                                                                                                      | University of Exeter                                                                                       | COVID-19 Genomics UK (COG-UK) Consortium                                                                             | Ben Temperton,Aaron Jeffries,Michelle Michelsen,Joanna Warwick-Dugdale,Audrey Farbos,Robyn Manley,Stephen Michell,Jane Masoli                                                                                                                                                                                                    |
| EPI_ISL_577547, EPI_ISL_577548, EPI_ISL_577549, EPI_ISL_577550, EPI_ISL_577551, EPI_ISL_577552, EPI_ISL_577553, EPI_ISL_577554, EPI_ISL_577555, EPI_ISL_577556, EPI_ISL_577557, EPI_ISL_577558, EPI_ISL_577559, EPI_ISL_577560, EPI_ISL_577561, EPI_ISL_577562, EPI_ISL_577563, EPI_ISL_577564, EPI_ISL_577565, EPI_ISL_577566, EPI_ISL_577567, EPI_ISL_577568, EPI_ISL_577569, EPI_ISL_577570, EPI_ISL_577571, EPI_ISL_577572, EPI_ISL_577573, EPI_ISL_577574, EPI_ISL_577575, EPI_ISL_577576, EPI_ISL_577577, EPI_ISL_577578, EPI_ISL_577579, EPI_ISL_577580, EPI_ISL_577581, EPI_ISL_577582, EPI_ISL_577583, EPI_ISL_577584, EPI_ISL_577585, EPI_ISL_577587, EPI_ISL_577588, EPI_ISL_577589, EPI_ISL_577590, EPI_ISL_577591, EPI_ISL_577592, EPI_ISL_577593, EPI_ISL_577594, EPI_ISL_577595, EPI_ISL_577596                                                                                                                                                                                                                                                                                                                                                                                                                                                                                                                                                                                                                                                                                                                                                                                                                                                                                                                                                                                                                                                                                                                                                                                                                                                                                                                                                                                                                                                                                                                                                                                                                                                                                                                                                                                                                                                                                                                                                                                                                                                                                                                                                                                                                                                                 |                                                                                                            |                                                                                                                      |                                                                                                                                                                                                                                                                                                                                  |
| see above                                                                                                                                                                                                                                                                                                                                                                                                                                                                                                                                                                                                                                                                                                                                                                                                                                                                                                                                                                                                                                                                                                                                                                                                                                                                                                                                                                                                                                                                                                                                                                                                                                                                                                                                                                                                                                                                                                                                                                                                                                                                                                                                                                                                                                                                                                                                                                                                                                                                                                                                                                                                                                                                                                                                                                                                                                                                                                                                                                                                                                                                      | Michigan Department of Health and Human Services, Bureau of Laboratories                                   | Michigan Department of Health and Human Services, Bureau of Laboratories                                             | Blankenship HM, Riner D, Soehnlén MK                                                                                                                                                                                                                                                                                             |
| EPI_ISL_577740, EPI_ISL_577741, EPI_ISL_577742                                                                                                                                                                                                                                                                                                                                                                                                                                                                                                                                                                                                                                                                                                                                                                                                                                                                                                                                                                                                                                                                                                                                                                                                                                                                                                                                                                                                                                                                                                                                                                                                                                                                                                                                                                                                                                                                                                                                                                                                                                                                                                                                                                                                                                                                                                                                                                                                                                                                                                                                                                                                                                                                                                                                                                                                                                                                                                                                                                                                                                 | Institute of Virology, Biomedical Research Center of the Slovak Academy of Sciences, Bratislava            | Faculty of Natural Sciences, Comenius University, Bratislava                                                         | Broa Brejová, Viktória Hodorová, Kristína Boršová, Viktória abanová, Dominika Friová, Sabina Fumaová Havlíková, Juraj Kopáček, Martina Liková, uborníra Lukáiková, Martina Neboháová, Monika Sláviková, Edita Staroová, Elena Tichá, Tomáš Vína, Jozef Nosek, Boris Klempa                                                       |
| EPI_ISL_582514, EPI_ISL_582515                                                                                                                                                                                                                                                                                                                                                                                                                                                                                                                                                                                                                                                                                                                                                                                                                                                                                                                                                                                                                                                                                                                                                                                                                                                                                                                                                                                                                                                                                                                                                                                                                                                                                                                                                                                                                                                                                                                                                                                                                                                                                                                                                                                                                                                                                                                                                                                                                                                                                                                                                                                                                                                                                                                                                                                                                                                                                                                                                                                                                                                 | unknown                                                                                                    | Instituto Nacional de Saude (INSA) and Instituto Gulbenkian de Ciencia (IGC)                                         | Borges et al                                                                                                                                                                                                                                                                                                                     |
| EPI_ISL_582516, EPI_ISL_582517, EPI_ISL_582518, EPI_ISL_582519, EPI_ISL_582520, EPI_ISL_582521                                                                                                                                                                                                                                                                                                                                                                                                                                                                                                                                                                                                                                                                                                                                                                                                                                                                                                                                                                                                                                                                                                                                                                                                                                                                                                                                                                                                                                                                                                                                                                                                                                                                                                                                                                                                                                                                                                                                                                                                                                                                                                                                                                                                                                                                                                                                                                                                                                                                                                                                                                                                                                                                                                                                                                                                                                                                                                                                                                                 | unknown                                                                                                    | Instituto Nacional de Saude (INSA)                                                                                   | Borges et al                                                                                                                                                                                                                                                                                                                     |
| EPI_ISL_582522, EPI_ISL_582523                                                                                                                                                                                                                                                                                                                                                                                                                                                                                                                                                                                                                                                                                                                                                                                                                                                                                                                                                                                                                                                                                                                                                                                                                                                                                                                                                                                                                                                                                                                                                                                                                                                                                                                                                                                                                                                                                                                                                                                                                                                                                                                                                                                                                                                                                                                                                                                                                                                                                                                                                                                                                                                                                                                                                                                                                                                                                                                                                                                                                                                 | unknown                                                                                                    | Instituto Nacional de Saude (INSA) and Instituto Gulbenkian de Ciencia (IGC)                                         | Borges et al                                                                                                                                                                                                                                                                                                                     |
| EPI_ISL_583487, EPI_ISL_583488                                                                                                                                                                                                                                                                                                                                                                                                                                                                                                                                                                                                                                                                                                                                                                                                                                                                                                                                                                                                                                                                                                                                                                                                                                                                                                                                                                                                                                                                                                                                                                                                                                                                                                                                                                                                                                                                                                                                                                                                                                                                                                                                                                                                                                                                                                                                                                                                                                                                                                                                                                                                                                                                                                                                                                                                                                                                                                                                                                                                                                                 | Institute of Virology, Biomedical Research Center of the Slovak Academy of Sciences, Bratislava            | Faculty of Natural Sciences, Comenius University, Bratislava                                                         | Broa Brejová, Viktória Hodorová, Kristína Boršová, Viktória abanová, Dominika Friová, Sabina Fumaová Havlíková, Juraj Kopáček, Martina Liková, uborníra Lukáiková, Martina Neboháová, Monika Sláviková, Edita Staroová, Elena Tichá, Tomáš Vína, Jozef Nosek, Boris Klempa                                                       |
| EPI_ISL_583506, EPI_ISL_583507, EPI_ISL_583508, EPI_ISL_583509, EPI_ISL_583510, EPI_ISL_583511, EPI_ISL_583512, EPI_ISL_583513, EPI_ISL_583514, EPI_ISL_583515, EPI_ISL_583516, EPI_ISL_583517, EPI_ISL_583518, EPI_ISL_583519, EPI_ISL_583520, EPI_ISL_583521, EPI_ISL_583522, EPI_ISL_583523, EPI_ISL_583524, EPI_ISL_583525, EPI_ISL_583526, EPI_ISL_583527, EPI_ISL_583528, EPI_ISL_583529, EPI_ISL_583530, EPI_ISL_583531, EPI_ISL_583532, EPI_ISL_583533, EPI_ISL_583534                                                                                                                                                                                                                                                                                                                                                                                                                                                                                                                                                                                                                                                                                                                                                                                                                                                                                                                                                                                                                                                                                                                                                                                                                                                                                                                                                                                                                                                                                                                                                                                                                                                                                                                                                                                                                                                                                                                                                                                                                                                                                                                                                                                                                                                                                                                                                                                                                                                                                                                                                                                                 |                                                                                                            |                                                                                                                      |                                                                                                                                                                                                                                                                                                                                  |
| see above                                                                                                                                                                                                                                                                                                                                                                                                                                                                                                                                                                                                                                                                                                                                                                                                                                                                                                                                                                                                                                                                                                                                                                                                                                                                                                                                                                                                                                                                                                                                                                                                                                                                                                                                                                                                                                                                                                                                                                                                                                                                                                                                                                                                                                                                                                                                                                                                                                                                                                                                                                                                                                                                                                                                                                                                                                                                                                                                                                                                                                                                      | Michigan Department of Health and Human Services, Bureau of Laboratories                                   | Michigan Department of Health and Human Services, Bureau of Laboratories                                             | Blankenship HM, Riner D, Soehnlén MK                                                                                                                                                                                                                                                                                             |
| EPI_ISL_584883, EPI_ISL_584890, EPI_ISL_584897, EPI_ISL_584903, EPI_ISL_585539, EPI_ISL_585544, EPI_ISL_585551, EPI_ISL_585556, EPI_ISL_585558, EPI_ISL_585564, EPI_ISL_585565, EPI_ISL_585568, EPI_ISL_585570, EPI_ISL_585572, EPI_ISL_585581                                                                                                                                                                                                                                                                                                                                                                                                                                                                                                                                                                                                                                                                                                                                                                                                                                                                                                                                                                                                                                                                                                                                                                                                                                                                                                                                                                                                                                                                                                                                                                                                                                                                                                                                                                                                                                                                                                                                                                                                                                                                                                                                                                                                                                                                                                                                                                                                                                                                                                                                                                                                                                                                                                                                                                                                                                 |                                                                                                            |                                                                                                                      |                                                                                                                                                                                                                                                                                                                                  |
| see above                                                                                                                                                                                                                                                                                                                                                                                                                                                                                                                                                                                                                                                                                                                                                                                                                                                                                                                                                                                                                                                                                                                                                                                                                                                                                                                                                                                                                                                                                                                                                                                                                                                                                                                                                                                                                                                                                                                                                                                                                                                                                                                                                                                                                                                                                                                                                                                                                                                                                                                                                                                                                                                                                                                                                                                                                                                                                                                                                                                                                                                                      | University of Exeter                                                                                       | COVID-19 Genomics UK (COG-UK) Consortium                                                                             | Ben Temperton,Aaron Jeffries,Michelle Michelsen,Joanna Warwick-Dugdale,Audrey Farbos,Robyn Manley,Stephen Michell,Jane Masoli                                                                                                                                                                                                    |
| EPI_ISL_586563                                                                                                                                                                                                                                                                                                                                                                                                                                                                                                                                                                                                                                                                                                                                                                                                                                                                                                                                                                                                                                                                                                                                                                                                                                                                                                                                                                                                                                                                                                                                                                                                                                                                                                                                                                                                                                                                                                                                                                                                                                                                                                                                                                                                                                                                                                                                                                                                                                                                                                                                                                                                                                                                                                                                                                                                                                                                                                                                                                                                                                                                 | GMERS GMERS Medical College and Hospital, Junagadh                                                         | Gujarat Biotechnology Research Centre                                                                                | Bhavesh Bagda , Ravi Dedaniya, Apurvashin Puvar, Janvi Raval, Zarna Patel, Monika Gandhi, Pinal Trivedi, Maharshi Pandya, Nidhi Patel, Nitin Savaliya, Raghawendra Kumar, Dinesh Kumar, Zuber Saiyed, Komal Patel, Labdhi Pandya, Afzal Ansari, Nikha Trivedi, R D Dixit, A M Kadri, Harsh Bakshi, Chaitanya Joshi, Madhvi Joshi |
| EPI_ISL_591336                                                                                                                                                                                                                                                                                                                                                                                                                                                                                                                                                                                                                                                                                                                                                                                                                                                                                                                                                                                                                                                                                                                                                                                                                                                                                                                                                                                                                                                                                                                                                                                                                                                                                                                                                                                                                                                                                                                                                                                                                                                                                                                                                                                                                                                                                                                                                                                                                                                                                                                                                                                                                                                                                                                                                                                                                                                                                                                                                                                                                                                                 | Dipartimento di Biotechnologie Mediche, University of Siena                                                | Dipartimento di Biotechnologie Mediche, University of Siena                                                          | COVID                                                                                                                                                                                                                                                                                                                            |
| EPI_ISL_591484                                                                                                                                                                                                                                                                                                                                                                                                                                                                                                                                                                                                                                                                                                                                                                                                                                                                                                                                                                                                                                                                                                                                                                                                                                                                                                                                                                                                                                                                                                                                                                                                                                                                                                                                                                                                                                                                                                                                                                                                                                                                                                                                                                                                                                                                                                                                                                                                                                                                                                                                                                                                                                                                                                                                                                                                                                                                                                                                                                                                                                                                 | Australian Clinical Labs                                                                                   | NSW Health Pathology - Institute of Clinical Pathology and Medical Research; Westmead Hospital; University of Sydney | CIDM-PH et al.                                                                                                                                                                                                                                                                                                                   |

|                                                                                                                                                                                                                                                                                                                                                                                                                                                                                                                                                                                                                                                                                                                                                                                                                                                                                                                                                                                                                                                                                                                                                                                                |                                                                                                            |                                                                                                                      |                                                                                      |
|------------------------------------------------------------------------------------------------------------------------------------------------------------------------------------------------------------------------------------------------------------------------------------------------------------------------------------------------------------------------------------------------------------------------------------------------------------------------------------------------------------------------------------------------------------------------------------------------------------------------------------------------------------------------------------------------------------------------------------------------------------------------------------------------------------------------------------------------------------------------------------------------------------------------------------------------------------------------------------------------------------------------------------------------------------------------------------------------------------------------------------------------------------------------------------------------|------------------------------------------------------------------------------------------------------------|----------------------------------------------------------------------------------------------------------------------|--------------------------------------------------------------------------------------|
| EPI_ISL_591485, EPI_ISL_591486                                                                                                                                                                                                                                                                                                                                                                                                                                                                                                                                                                                                                                                                                                                                                                                                                                                                                                                                                                                                                                                                                                                                                                 | Histopath                                                                                                  | NSW Health Pathology - Institute of Clinical Pathology and Medical Research; Westmead Hospital; University of Sydney | CIDM-PH et al.                                                                       |
| EPI_ISL_591487, EPI_ISL_591488, EPI_ISL_591489, EPI_ISL_591490, EPI_ISL_591491                                                                                                                                                                                                                                                                                                                                                                                                                                                                                                                                                                                                                                                                                                                                                                                                                                                                                                                                                                                                                                                                                                                 | Laverty Pathology                                                                                          | NSW Health Pathology - Institute of Clinical Pathology and Medical Research; Westmead Hospital; University of Sydney | CIDM-PH et al.                                                                       |
| EPI_ISL_591492                                                                                                                                                                                                                                                                                                                                                                                                                                                                                                                                                                                                                                                                                                                                                                                                                                                                                                                                                                                                                                                                                                                                                                                 | Medlab Pathology                                                                                           | NSW Health Pathology - Institute of Clinical Pathology and Medical Research; Westmead Hospital; University of Sydney | CIDM-PH et al.                                                                       |
| EPI_ISL_591493                                                                                                                                                                                                                                                                                                                                                                                                                                                                                                                                                                                                                                                                                                                                                                                                                                                                                                                                                                                                                                                                                                                                                                                 | Pathology North - Royal North Shore Hospital - NSW Health Pathology                                        | NSW Health Pathology - Institute of Clinical Pathology and Medical Research; Westmead Hospital; University of Sydney | CIDM-PH et al.                                                                       |
| EPI_ISL_591494, EPI_ISL_591495, EPI_ISL_591496, EPI_ISL_591497, EPI_ISL_591498, EPI_ISL_591499, EPI_ISL_591500, EPI_ISL_591501                                                                                                                                                                                                                                                                                                                                                                                                                                                                                                                                                                                                                                                                                                                                                                                                                                                                                                                                                                                                                                                                 | Pathology West - NSW Health Pathology                                                                      | NSW Health Pathology - Institute of Clinical Pathology and Medical Research; Westmead Hospital; University of Sydney | CIDM-PH et al.                                                                       |
| EPI_ISL_591502, EPI_ISL_591503, EPI_ISL_591504                                                                                                                                                                                                                                                                                                                                                                                                                                                                                                                                                                                                                                                                                                                                                                                                                                                                                                                                                                                                                                                                                                                                                 | South Eastern Area Laboratory Services (SEALS)                                                             | NSW Health Pathology - Institute of Clinical Pathology and Medical Research; Westmead Hospital; University of Sydney | CIDM-PH et al.                                                                       |
| EPI_ISL_591505, EPI_ISL_591506                                                                                                                                                                                                                                                                                                                                                                                                                                                                                                                                                                                                                                                                                                                                                                                                                                                                                                                                                                                                                                                                                                                                                                 | St Vincent's Pathology (SydPath)                                                                           | NSW Health Pathology - Institute of Clinical Pathology and Medical Research; Westmead Hospital; University of Sydney | CIDM-PH et al.                                                                       |
| EPI_ISL_591507                                                                                                                                                                                                                                                                                                                                                                                                                                                                                                                                                                                                                                                                                                                                                                                                                                                                                                                                                                                                                                                                                                                                                                                 | Sydney South West Pathology Service (SSWPS) - Concord Repatriation General Hospital - NSW Health Pathology | NSW Health Pathology - Institute of Clinical Pathology and Medical Research; Westmead Hospital; University of Sydney | CIDM-PH et al.                                                                       |
| EPI_ISL_591508, EPI_ISL_591509, EPI_ISL_591510, EPI_ISL_591511, EPI_ISL_591512, EPI_ISL_591513, EPI_ISL_591514, EPI_ISL_591515, EPI_ISL_591516                                                                                                                                                                                                                                                                                                                                                                                                                                                                                                                                                                                                                                                                                                                                                                                                                                                                                                                                                                                                                                                 | Sydney South West Pathology Service (SSWPS) - Liverpool Hospital - NSW Health Pathology                    | NSW Health Pathology - Institute of Clinical Pathology and Medical Research; Westmead Hospital; University of Sydney | CIDM-PH et al.                                                                       |
| EPI_ISL_591517                                                                                                                                                                                                                                                                                                                                                                                                                                                                                                                                                                                                                                                                                                                                                                                                                                                                                                                                                                                                                                                                                                                                                                                 | Sydney South West Pathology Service (SSWPS) - Royal Prince Alfred Hospital - NSW Health Pathology          | NSW Health Pathology - Institute of Clinical Pathology and Medical Research; Westmead Hospital; University of Sydney | CIDM-PH et al.                                                                       |
| EPI_ISL_591518                                                                                                                                                                                                                                                                                                                                                                                                                                                                                                                                                                                                                                                                                                                                                                                                                                                                                                                                                                                                                                                                                                                                                                                 | The Children's Hospital at Westmead                                                                        | NSW Health Pathology - Institute of Clinical Pathology and Medical Research; Westmead Hospital; University of Sydney | CIDM-PH et al.                                                                       |
| EPI_ISL_593646, EPI_ISL_593647, EPI_ISL_593648                                                                                                                                                                                                                                                                                                                                                                                                                                                                                                                                                                                                                                                                                                                                                                                                                                                                                                                                                                                                                                                                                                                                                 | 4Cyte Pathology                                                                                            | NSW Health Pathology - Institute of Clinical Pathology and Medical Research; Westmead Hospital; University of Sydney | CIDM-PH et al.                                                                       |
| EPI_ISL_593649                                                                                                                                                                                                                                                                                                                                                                                                                                                                                                                                                                                                                                                                                                                                                                                                                                                                                                                                                                                                                                                                                                                                                                                 | Austech Medical Laboratories                                                                               | NSW Health Pathology - Institute of Clinical Pathology and Medical Research; Westmead Hospital; University of Sydney | CIDM-PH et al.                                                                       |
| EPI_ISL_593650, EPI_ISL_593651                                                                                                                                                                                                                                                                                                                                                                                                                                                                                                                                                                                                                                                                                                                                                                                                                                                                                                                                                                                                                                                                                                                                                                 | Douglass Hanly Moir Pathology                                                                              | NSW Health Pathology - Institute of Clinical Pathology and Medical Research; Westmead Hospital; University of Sydney | CIDM-PH et al.                                                                       |
| EPI_ISL_593652                                                                                                                                                                                                                                                                                                                                                                                                                                                                                                                                                                                                                                                                                                                                                                                                                                                                                                                                                                                                                                                                                                                                                                                 | Histopath                                                                                                  | NSW Health Pathology - Institute of Clinical Pathology and Medical Research; Westmead Hospital; University of Sydney | CIDM-PH et al.                                                                       |
| EPI_ISL_593653                                                                                                                                                                                                                                                                                                                                                                                                                                                                                                                                                                                                                                                                                                                                                                                                                                                                                                                                                                                                                                                                                                                                                                                 | Laverty Pathology                                                                                          | NSW Health Pathology - Institute of Clinical Pathology and Medical Research; Westmead Hospital; University of Sydney | CIDM-PH et al.                                                                       |
| EPI_ISL_593654                                                                                                                                                                                                                                                                                                                                                                                                                                                                                                                                                                                                                                                                                                                                                                                                                                                                                                                                                                                                                                                                                                                                                                                 | Medlab Pathology                                                                                           | NSW Health Pathology - Institute of Clinical Pathology and Medical Research; Westmead Hospital; University of Sydney | CIDM-PH et al.                                                                       |
| EPI_ISL_593655, EPI_ISL_593656, EPI_ISL_593657, EPI_ISL_593658                                                                                                                                                                                                                                                                                                                                                                                                                                                                                                                                                                                                                                                                                                                                                                                                                                                                                                                                                                                                                                                                                                                                 | Pathology North - Hunter - NSW Health Pathology                                                            | NSW Health Pathology - Institute of Clinical Pathology and Medical Research; Westmead Hospital; University of Sydney | CIDM-PH et al.                                                                       |
| EPI_ISL_593659                                                                                                                                                                                                                                                                                                                                                                                                                                                                                                                                                                                                                                                                                                                                                                                                                                                                                                                                                                                                                                                                                                                                                                                 | Pathology North - Royal North Shore Hospital - NSW Health Pathology                                        | NSW Health Pathology - Institute of Clinical Pathology and Medical Research; Westmead Hospital; University of Sydney | CIDM-PH et al.                                                                       |
| EPI_ISL_593660, EPI_ISL_593661, EPI_ISL_593662, EPI_ISL_593663, EPI_ISL_593664, EPI_ISL_593665, EPI_ISL_593666, EPI_ISL_593667, EPI_ISL_593668, EPI_ISL_593669, EPI_ISL_593670, EPI_ISL_593671, EPI_ISL_593672, EPI_ISL_593673, EPI_ISL_593674, EPI_ISL_593675, EPI_ISL_593676, EPI_ISL_593677, EPI_ISL_593678, EPI_ISL_593679, EPI_ISL_593680, EPI_ISL_593681, EPI_ISL_593682                                                                                                                                                                                                                                                                                                                                                                                                                                                                                                                                                                                                                                                                                                                                                                                                                 |                                                                                                            |                                                                                                                      |                                                                                      |
| see above                                                                                                                                                                                                                                                                                                                                                                                                                                                                                                                                                                                                                                                                                                                                                                                                                                                                                                                                                                                                                                                                                                                                                                                      | Pathology West - NSW Health Pathology                                                                      | NSW Health Pathology - Institute of Clinical Pathology and Medical Research; Westmead Hospital; University of Sydney | CIDM-PH et al.                                                                       |
| EPI_ISL_593683, EPI_ISL_593684, EPI_ISL_593685, EPI_ISL_593686, EPI_ISL_593687, EPI_ISL_593688, EPI_ISL_593689, EPI_ISL_593690, EPI_ISL_593691, EPI_ISL_593692, EPI_ISL_593693, EPI_ISL_593694, EPI_ISL_593695, EPI_ISL_593696, EPI_ISL_593697, EPI_ISL_593698, EPI_ISL_593699, EPI_ISL_593700, EPI_ISL_593701, EPI_ISL_593702, EPI_ISL_593703, EPI_ISL_593704, EPI_ISL_593705, EPI_ISL_593706, EPI_ISL_593707, EPI_ISL_593708, EPI_ISL_593709, EPI_ISL_593710, EPI_ISL_593711, EPI_ISL_593712, EPI_ISL_593713, EPI_ISL_593714, EPI_ISL_593715, EPI_ISL_593716, EPI_ISL_593717, EPI_ISL_593718, EPI_ISL_593719, EPI_ISL_593720, EPI_ISL_593721, EPI_ISL_593722, EPI_ISL_593723, EPI_ISL_593724, EPI_ISL_593725, EPI_ISL_593726, EPI_ISL_593727, EPI_ISL_593728, EPI_ISL_593729, EPI_ISL_593730, EPI_ISL_593731, EPI_ISL_593732, EPI_ISL_593733, EPI_ISL_593734, EPI_ISL_593735, EPI_ISL_593736, EPI_ISL_593737, EPI_ISL_593738, EPI_ISL_593739, EPI_ISL_593740, EPI_ISL_593741, EPI_ISL_593742, EPI_ISL_593743, EPI_ISL_593744, EPI_ISL_593745, EPI_ISL_593746, EPI_ISL_593747, EPI_ISL_593748, EPI_ISL_593749, EPI_ISL_593750, EPI_ISL_593751, EPI_ISL_593752, EPI_ISL_593753, EPI_ISL_593754 |                                                                                                            |                                                                                                                      |                                                                                      |
| see above                                                                                                                                                                                                                                                                                                                                                                                                                                                                                                                                                                                                                                                                                                                                                                                                                                                                                                                                                                                                                                                                                                                                                                                      | South Eastern Area Laboratory Services (SEALS)                                                             | NSW Health Pathology - Institute of Clinical Pathology and Medical Research; Westmead Hospital; University of Sydney | CIDM-PH et al.                                                                       |
| EPI_ISL_593755, EPI_ISL_593756, EPI_ISL_593757, EPI_ISL_593758, EPI_ISL_593759, EPI_ISL_593760, EPI_ISL_593761, EPI_ISL_593762, EPI_ISL_593763, EPI_ISL_593764, EPI_ISL_593765                                                                                                                                                                                                                                                                                                                                                                                                                                                                                                                                                                                                                                                                                                                                                                                                                                                                                                                                                                                                                 |                                                                                                            |                                                                                                                      |                                                                                      |
| see above                                                                                                                                                                                                                                                                                                                                                                                                                                                                                                                                                                                                                                                                                                                                                                                                                                                                                                                                                                                                                                                                                                                                                                                      | Sydney South West Pathology Service (SSWPS) - Liverpool Hospital - NSW Health Pathology                    | NSW Health Pathology - Institute of Clinical Pathology and Medical Research; Westmead Hospital; University of Sydney | CIDM-PH et al.                                                                       |
| EPI_ISL_593766, EPI_ISL_593767, EPI_ISL_593768                                                                                                                                                                                                                                                                                                                                                                                                                                                                                                                                                                                                                                                                                                                                                                                                                                                                                                                                                                                                                                                                                                                                                 | Sydney South West Pathology Service (SSWPS) - Royal Prince Alfred Hospital - NSW Health Pathology          | NSW Health Pathology - Institute of Clinical Pathology and Medical Research; Westmead Hospital; University of Sydney | CIDM-PH et al.                                                                       |
| EPI_ISL_593769                                                                                                                                                                                                                                                                                                                                                                                                                                                                                                                                                                                                                                                                                                                                                                                                                                                                                                                                                                                                                                                                                                                                                                                 | The Children's Hospital at Westmead                                                                        | NSW Health Pathology - Institute of Clinical Pathology and Medical Research; Westmead Hospital; University of Sydney | CIDM-PH et al.                                                                       |
| EPI_ISL_593770                                                                                                                                                                                                                                                                                                                                                                                                                                                                                                                                                                                                                                                                                                                                                                                                                                                                                                                                                                                                                                                                                                                                                                                 | Pathology West - NSW Health Pathology                                                                      | NSW Health Pathology - Institute of Clinical Pathology and Medical Research; Westmead Hospital; University of Sydney | CIDM-PH et al.                                                                       |
| EPI_ISL_593771                                                                                                                                                                                                                                                                                                                                                                                                                                                                                                                                                                                                                                                                                                                                                                                                                                                                                                                                                                                                                                                                                                                                                                                 | South Eastern Area Laboratory Services (SEALS)                                                             | NSW Health Pathology - Institute of Clinical Pathology and Medical Research; Westmead Hospital; University of Sydney | CIDM-PH et al.                                                                       |
| EPI_ISL_594190, EPI_ISL_594191, EPI_ISL_594192, EPI_ISL_594193, EPI_ISL_594194, EPI_ISL_594195, EPI_ISL_594196, EPI_ISL_594197, EPI_ISL_594198, EPI_ISL_594199, EPI_ISL_594200, EPI_ISL_594201, EPI_ISL_594202, EPI_ISL_594203, EPI_ISL_594204, EPI_ISL_594205, EPI_ISL_594206, EPI_ISL_594207, EPI_ISL_594208, EPI_ISL_594209, EPI_ISL_594210, EPI_ISL_594211, EPI_ISL_594212, EPI_ISL_594213, EPI_ISL_594214, EPI_ISL_594215, EPI_ISL_594216, EPI_ISL_594217, EPI_ISL_594218                                                                                                                                                                                                                                                                                                                                                                                                                                                                                                                                                                                                                                                                                                                 |                                                                                                            |                                                                                                                      |                                                                                      |
| see above                                                                                                                                                                                                                                                                                                                                                                                                                                                                                                                                                                                                                                                                                                                                                                                                                                                                                                                                                                                                                                                                                                                                                                                      | Michigan Department of Health and Human Services, Bureau of Laboratories                                   | Michigan Department of Health and Human Services, Bureau of Laboratories                                             | Blankenship HM, Riner D, Soehnlén MK                                                 |
| EPI_ISL_609989                                                                                                                                                                                                                                                                                                                                                                                                                                                                                                                                                                                                                                                                                                                                                                                                                                                                                                                                                                                                                                                                                                                                                                                 | INMI Lazzaro Spallanzani IRCCS                                                                             | INMI Lazzaro Spallanzani IRCCS                                                                                       | C.E.M Gruber, B Bartolini, M Rueca, F Messina, E Giombini, A Di Caro, MR Capobianchi |
| EPI_ISL_609994                                                                                                                                                                                                                                                                                                                                                                                                                                                                                                                                                                                                                                                                                                                                                                                                                                                                                                                                                                                                                                                                                                                                                                                 | INMI Lazzaro Spallanzani IRCCS                                                                             | INMI Lazzaro Spallanzani IRCCS                                                                                       | C.E.M Gruber, F Messina, M Rueca, B Bartolini, E Giombini, MR Capobianchi, A Di Caro |





|                                                                                                                                                                                                                                                                                                                                                                                                                                                                                                                                                                                                                                                                                                                                                                                                                                                                                                                                                                                                                                                                                                                                                                                                                                                                                                                                                                                                                                                                                                                                                                                                                                                                                                                                                                                                                                                                                                                                                                                                                                                                                                                                                                                                                                                                                                                                                                                                                                                                                                                                                                                                                                                                                                                                                                                                                                                                                                                                                                                                                                                                                                                                                                                                                                                                                                                                                                                                                                                                                                                                                                                                                                                                                                                                                                                                                                                                                                                                                                                                                                                                                                                                                                |                                                                                                   |                                                                                                                      |                                                                                                                                                                                                                                                                            |                |
|----------------------------------------------------------------------------------------------------------------------------------------------------------------------------------------------------------------------------------------------------------------------------------------------------------------------------------------------------------------------------------------------------------------------------------------------------------------------------------------------------------------------------------------------------------------------------------------------------------------------------------------------------------------------------------------------------------------------------------------------------------------------------------------------------------------------------------------------------------------------------------------------------------------------------------------------------------------------------------------------------------------------------------------------------------------------------------------------------------------------------------------------------------------------------------------------------------------------------------------------------------------------------------------------------------------------------------------------------------------------------------------------------------------------------------------------------------------------------------------------------------------------------------------------------------------------------------------------------------------------------------------------------------------------------------------------------------------------------------------------------------------------------------------------------------------------------------------------------------------------------------------------------------------------------------------------------------------------------------------------------------------------------------------------------------------------------------------------------------------------------------------------------------------------------------------------------------------------------------------------------------------------------------------------------------------------------------------------------------------------------------------------------------------------------------------------------------------------------------------------------------------------------------------------------------------------------------------------------------------------------------------------------------------------------------------------------------------------------------------------------------------------------------------------------------------------------------------------------------------------------------------------------------------------------------------------------------------------------------------------------------------------------------------------------------------------------------------------------------------------------------------------------------------------------------------------------------------------------------------------------------------------------------------------------------------------------------------------------------------------------------------------------------------------------------------------------------------------------------------------------------------------------------------------------------------------------------------------------------------------------------------------------------------------------------------------------------------------------------------------------------------------------------------------------------------------------------------------------------------------------------------------------------------------------------------------------------------------------------------------------------------------------------------------------------------------------------------------------------------------------------------------------------------|---------------------------------------------------------------------------------------------------|----------------------------------------------------------------------------------------------------------------------|----------------------------------------------------------------------------------------------------------------------------------------------------------------------------------------------------------------------------------------------------------------------------|----------------|
| EPI_ISL_693576, EPI_ISL_693577, EPI_ISL_693578, EPI_ISL_693579, EPI_ISL_693580, EPI_ISL_693581, EPI_ISL_693582, EPI_ISL_693583, EPI_ISL_693584, EPI_ISL_693585, EPI_ISL_693586, EPI_ISL_693587, EPI_ISL_693588, EPI_ISL_693589, EPI_ISL_693590, EPI_ISL_693591, EPI_ISL_693592, EPI_ISL_693593, EPI_ISL_693594, EPI_ISL_693595, EPI_ISL_693596, EPI_ISL_693597, EPI_ISL_693598, EPI_ISL_693599, EPI_ISL_693600, EPI_ISL_693601, EPI_ISL_693602, EPI_ISL_693603, EPI_ISL_693604, EPI_ISL_693605, EPI_ISL_693606, EPI_ISL_693607, EPI_ISL_693608, EPI_ISL_693609, EPI_ISL_693610, EPI_ISL_693611, EPI_ISL_693612, EPI_ISL_693613, EPI_ISL_693614, EPI_ISL_693615, EPI_ISL_693616, EPI_ISL_693617, EPI_ISL_693618, EPI_ISL_693619, EPI_ISL_693620, EPI_ISL_693621, EPI_ISL_693622, EPI_ISL_693623, EPI_ISL_693624, EPI_ISL_693625, EPI_ISL_693626, EPI_ISL_693627, EPI_ISL_693628, EPI_ISL_693629                                                                                                                                                                                                                                                                                                                                                                                                                                                                                                                                                                                                                                                                                                                                                                                                                                                                                                                                                                                                                                                                                                                                                                                                                                                                                                                                                                                                                                                                                                                                                                                                                                                                                                                                                                                                                                                                                                                                                                                                                                                                                                                                                                                                                                                                                                                                                                                                                                                                                                                                                                                                                                                                                                                                                                                                                                                                                                                                                                                                                                                                                                                                                                                                                                                                 | see above                                                                                         | Instituto Nacional de Saude (INSA)                                                                                   | Instituto Nacional de Saude (INSA)                                                                                                                                                                                                                                         | Borges et al   |
| EPI_ISL_693630, EPI_ISL_693631, EPI_ISL_693632, EPI_ISL_693633, EPI_ISL_693634, EPI_ISL_693635, EPI_ISL_693636, EPI_ISL_693637, EPI_ISL_693638, EPI_ISL_693639, EPI_ISL_693640, EPI_ISL_693641, EPI_ISL_693642, EPI_ISL_693643, EPI_ISL_693644, EPI_ISL_693645, EPI_ISL_693646, EPI_ISL_693647, EPI_ISL_693648, EPI_ISL_693649, EPI_ISL_693650, EPI_ISL_693651, EPI_ISL_693652, EPI_ISL_693653, EPI_ISL_693654, EPI_ISL_693655, EPI_ISL_693656, EPI_ISL_693657                                                                                                                                                                                                                                                                                                                                                                                                                                                                                                                                                                                                                                                                                                                                                                                                                                                                                                                                                                                                                                                                                                                                                                                                                                                                                                                                                                                                                                                                                                                                                                                                                                                                                                                                                                                                                                                                                                                                                                                                                                                                                                                                                                                                                                                                                                                                                                                                                                                                                                                                                                                                                                                                                                                                                                                                                                                                                                                                                                                                                                                                                                                                                                                                                                                                                                                                                                                                                                                                                                                                                                                                                                                                                                 | see above                                                                                         | Hospital Vila Franca de Xira                                                                                         | Instituto Nacional de Saude (INSA)                                                                                                                                                                                                                                         | Borges et al   |
| EPI_ISL_699641                                                                                                                                                                                                                                                                                                                                                                                                                                                                                                                                                                                                                                                                                                                                                                                                                                                                                                                                                                                                                                                                                                                                                                                                                                                                                                                                                                                                                                                                                                                                                                                                                                                                                                                                                                                                                                                                                                                                                                                                                                                                                                                                                                                                                                                                                                                                                                                                                                                                                                                                                                                                                                                                                                                                                                                                                                                                                                                                                                                                                                                                                                                                                                                                                                                                                                                                                                                                                                                                                                                                                                                                                                                                                                                                                                                                                                                                                                                                                                                                                                                                                                                                                 | Sydney South West Pathology Service (SSWPS) - Liverpool Hospital - NSW Health Pathology           | NSW Health Pathology - Institute of Clinical Pathology and Medical Research; Westmead Hospital; University of Sydney |                                                                                                                                                                                                                                                                            | CIDM-PH et al. |
| EPI_ISL_699642                                                                                                                                                                                                                                                                                                                                                                                                                                                                                                                                                                                                                                                                                                                                                                                                                                                                                                                                                                                                                                                                                                                                                                                                                                                                                                                                                                                                                                                                                                                                                                                                                                                                                                                                                                                                                                                                                                                                                                                                                                                                                                                                                                                                                                                                                                                                                                                                                                                                                                                                                                                                                                                                                                                                                                                                                                                                                                                                                                                                                                                                                                                                                                                                                                                                                                                                                                                                                                                                                                                                                                                                                                                                                                                                                                                                                                                                                                                                                                                                                                                                                                                                                 | South Eastern Area Laboratory Services (SEALS)                                                    | NSW Health Pathology - Institute of Clinical Pathology and Medical Research; Westmead Hospital; University of Sydney |                                                                                                                                                                                                                                                                            | CIDM-PH et al. |
| EPI_ISL_699643                                                                                                                                                                                                                                                                                                                                                                                                                                                                                                                                                                                                                                                                                                                                                                                                                                                                                                                                                                                                                                                                                                                                                                                                                                                                                                                                                                                                                                                                                                                                                                                                                                                                                                                                                                                                                                                                                                                                                                                                                                                                                                                                                                                                                                                                                                                                                                                                                                                                                                                                                                                                                                                                                                                                                                                                                                                                                                                                                                                                                                                                                                                                                                                                                                                                                                                                                                                                                                                                                                                                                                                                                                                                                                                                                                                                                                                                                                                                                                                                                                                                                                                                                 | Medlab Pathology                                                                                  | NSW Health Pathology - Institute of Clinical Pathology and Medical Research; Westmead Hospital; University of Sydney |                                                                                                                                                                                                                                                                            | CIDM-PH et al. |
| EPI_ISL_699644                                                                                                                                                                                                                                                                                                                                                                                                                                                                                                                                                                                                                                                                                                                                                                                                                                                                                                                                                                                                                                                                                                                                                                                                                                                                                                                                                                                                                                                                                                                                                                                                                                                                                                                                                                                                                                                                                                                                                                                                                                                                                                                                                                                                                                                                                                                                                                                                                                                                                                                                                                                                                                                                                                                                                                                                                                                                                                                                                                                                                                                                                                                                                                                                                                                                                                                                                                                                                                                                                                                                                                                                                                                                                                                                                                                                                                                                                                                                                                                                                                                                                                                                                 | Laverty Pathology                                                                                 | NSW Health Pathology - Institute of Clinical Pathology and Medical Research; Westmead Hospital; University of Sydney |                                                                                                                                                                                                                                                                            | CIDM-PH et al. |
| EPI_ISL_699645, EPI_ISL_699646                                                                                                                                                                                                                                                                                                                                                                                                                                                                                                                                                                                                                                                                                                                                                                                                                                                                                                                                                                                                                                                                                                                                                                                                                                                                                                                                                                                                                                                                                                                                                                                                                                                                                                                                                                                                                                                                                                                                                                                                                                                                                                                                                                                                                                                                                                                                                                                                                                                                                                                                                                                                                                                                                                                                                                                                                                                                                                                                                                                                                                                                                                                                                                                                                                                                                                                                                                                                                                                                                                                                                                                                                                                                                                                                                                                                                                                                                                                                                                                                                                                                                                                                 | Pathology West - NSW Health Pathology                                                             | NSW Health Pathology - Institute of Clinical Pathology and Medical Research; Westmead Hospital; University of Sydney |                                                                                                                                                                                                                                                                            | CIDM-PH et al. |
| EPI_ISL_699647                                                                                                                                                                                                                                                                                                                                                                                                                                                                                                                                                                                                                                                                                                                                                                                                                                                                                                                                                                                                                                                                                                                                                                                                                                                                                                                                                                                                                                                                                                                                                                                                                                                                                                                                                                                                                                                                                                                                                                                                                                                                                                                                                                                                                                                                                                                                                                                                                                                                                                                                                                                                                                                                                                                                                                                                                                                                                                                                                                                                                                                                                                                                                                                                                                                                                                                                                                                                                                                                                                                                                                                                                                                                                                                                                                                                                                                                                                                                                                                                                                                                                                                                                 | Pathology Sydney South West - NSW Health Pathology                                                | NSW Health Pathology - Institute of Clinical Pathology and Medical Research; Westmead Hospital; University of Sydney |                                                                                                                                                                                                                                                                            | CIDM-PH et al. |
| EPI_ISL_699648                                                                                                                                                                                                                                                                                                                                                                                                                                                                                                                                                                                                                                                                                                                                                                                                                                                                                                                                                                                                                                                                                                                                                                                                                                                                                                                                                                                                                                                                                                                                                                                                                                                                                                                                                                                                                                                                                                                                                                                                                                                                                                                                                                                                                                                                                                                                                                                                                                                                                                                                                                                                                                                                                                                                                                                                                                                                                                                                                                                                                                                                                                                                                                                                                                                                                                                                                                                                                                                                                                                                                                                                                                                                                                                                                                                                                                                                                                                                                                                                                                                                                                                                                 | Pathology West - NSW Health Pathology                                                             | NSW Health Pathology - Institute of Clinical Pathology and Medical Research; Westmead Hospital; University of Sydney |                                                                                                                                                                                                                                                                            | CIDM-PH et al. |
| EPI_ISL_699649                                                                                                                                                                                                                                                                                                                                                                                                                                                                                                                                                                                                                                                                                                                                                                                                                                                                                                                                                                                                                                                                                                                                                                                                                                                                                                                                                                                                                                                                                                                                                                                                                                                                                                                                                                                                                                                                                                                                                                                                                                                                                                                                                                                                                                                                                                                                                                                                                                                                                                                                                                                                                                                                                                                                                                                                                                                                                                                                                                                                                                                                                                                                                                                                                                                                                                                                                                                                                                                                                                                                                                                                                                                                                                                                                                                                                                                                                                                                                                                                                                                                                                                                                 | South Eastern Area Laboratory Services                                                            | NSW Health Pathology - Institute of Clinical Pathology and Medical Research; Westmead Hospital; University of Sydney |                                                                                                                                                                                                                                                                            | CIDM-PH et al. |
| EPI_ISL_699650                                                                                                                                                                                                                                                                                                                                                                                                                                                                                                                                                                                                                                                                                                                                                                                                                                                                                                                                                                                                                                                                                                                                                                                                                                                                                                                                                                                                                                                                                                                                                                                                                                                                                                                                                                                                                                                                                                                                                                                                                                                                                                                                                                                                                                                                                                                                                                                                                                                                                                                                                                                                                                                                                                                                                                                                                                                                                                                                                                                                                                                                                                                                                                                                                                                                                                                                                                                                                                                                                                                                                                                                                                                                                                                                                                                                                                                                                                                                                                                                                                                                                                                                                 | Douglas Hanly Moir                                                                                | NSW Health Pathology - Institute of Clinical Pathology and Medical Research; Westmead Hospital; University of Sydney |                                                                                                                                                                                                                                                                            | CIDM-PH et al. |
| EPI_ISL_699651                                                                                                                                                                                                                                                                                                                                                                                                                                                                                                                                                                                                                                                                                                                                                                                                                                                                                                                                                                                                                                                                                                                                                                                                                                                                                                                                                                                                                                                                                                                                                                                                                                                                                                                                                                                                                                                                                                                                                                                                                                                                                                                                                                                                                                                                                                                                                                                                                                                                                                                                                                                                                                                                                                                                                                                                                                                                                                                                                                                                                                                                                                                                                                                                                                                                                                                                                                                                                                                                                                                                                                                                                                                                                                                                                                                                                                                                                                                                                                                                                                                                                                                                                 | Sydney South West Pathology Service (SSWPS) - Liverpool Hospital - NSW Health Pathology           | NSW Health Pathology - Institute of Clinical Pathology and Medical Research; Westmead Hospital; University of Sydney |                                                                                                                                                                                                                                                                            | CIDM-PH et al. |
| EPI_ISL_699652                                                                                                                                                                                                                                                                                                                                                                                                                                                                                                                                                                                                                                                                                                                                                                                                                                                                                                                                                                                                                                                                                                                                                                                                                                                                                                                                                                                                                                                                                                                                                                                                                                                                                                                                                                                                                                                                                                                                                                                                                                                                                                                                                                                                                                                                                                                                                                                                                                                                                                                                                                                                                                                                                                                                                                                                                                                                                                                                                                                                                                                                                                                                                                                                                                                                                                                                                                                                                                                                                                                                                                                                                                                                                                                                                                                                                                                                                                                                                                                                                                                                                                                                                 | Pathology West - NSW Health Pathology                                                             | NSW Health Pathology - Institute of Clinical Pathology and Medical Research; Westmead Hospital; University of Sydney |                                                                                                                                                                                                                                                                            | CIDM-PH et al. |
| EPI_ISL_699653, EPI_ISL_699654                                                                                                                                                                                                                                                                                                                                                                                                                                                                                                                                                                                                                                                                                                                                                                                                                                                                                                                                                                                                                                                                                                                                                                                                                                                                                                                                                                                                                                                                                                                                                                                                                                                                                                                                                                                                                                                                                                                                                                                                                                                                                                                                                                                                                                                                                                                                                                                                                                                                                                                                                                                                                                                                                                                                                                                                                                                                                                                                                                                                                                                                                                                                                                                                                                                                                                                                                                                                                                                                                                                                                                                                                                                                                                                                                                                                                                                                                                                                                                                                                                                                                                                                 | South Eastern Area Laboratory Services (SEALS)                                                    | NSW Health Pathology - Institute of Clinical Pathology and Medical Research; Westmead Hospital; University of Sydney |                                                                                                                                                                                                                                                                            | CIDM-PH et al. |
| EPI_ISL_702562, EPI_ISL_702994, EPI_ISL_705254                                                                                                                                                                                                                                                                                                                                                                                                                                                                                                                                                                                                                                                                                                                                                                                                                                                                                                                                                                                                                                                                                                                                                                                                                                                                                                                                                                                                                                                                                                                                                                                                                                                                                                                                                                                                                                                                                                                                                                                                                                                                                                                                                                                                                                                                                                                                                                                                                                                                                                                                                                                                                                                                                                                                                                                                                                                                                                                                                                                                                                                                                                                                                                                                                                                                                                                                                                                                                                                                                                                                                                                                                                                                                                                                                                                                                                                                                                                                                                                                                                                                                                                 | University of Exeter                                                                              | COVID-19 Genomics UK (COG-UK) Consortium                                                                             | Ben Temperton, Aaron Jeffries, Michelle Michelsen, Joanna Warwick-Dugdale, Audrey Farbos, Robyn Manley, Stephen Michell, Jane Masoli                                                                                                                                       |                |
| EPI_ISL_708200, EPI_ISL_708201, EPI_ISL_708202, EPI_ISL_708203, EPI_ISL_708204, EPI_ISL_708205, EPI_ISL_708206, EPI_ISL_708207, EPI_ISL_708208, EPI_ISL_708209, EPI_ISL_708210, EPI_ISL_708211, EPI_ISL_708212, EPI_ISL_708213, EPI_ISL_708214, EPI_ISL_708215, EPI_ISL_708216, EPI_ISL_708217, EPI_ISL_708218, EPI_ISL_708219, EPI_ISL_708220, EPI_ISL_708221, EPI_ISL_708222, EPI_ISL_708223, EPI_ISL_708224, EPI_ISL_708225, EPI_ISL_708226, EPI_ISL_708227, EPI_ISL_708228, EPI_ISL_708229, EPI_ISL_708230, EPI_ISL_708231, EPI_ISL_708232, EPI_ISL_708233, EPI_ISL_708234, EPI_ISL_708235, EPI_ISL_708236, EPI_ISL_708237, EPI_ISL_708238, EPI_ISL_708239, EPI_ISL_708240, EPI_ISL_708241, EPI_ISL_708242, EPI_ISL_708243, EPI_ISL_708244, EPI_ISL_708245, EPI_ISL_708246, EPI_ISL_708247, EPI_ISL_708248, EPI_ISL_708249, EPI_ISL_708250, EPI_ISL_708251, EPI_ISL_708252, EPI_ISL_708253, EPI_ISL_708254, EPI_ISL_708255, EPI_ISL_708256, EPI_ISL_708257, EPI_ISL_708258, EPI_ISL_708259, EPI_ISL_708260, EPI_ISL_708261, EPI_ISL_708262, EPI_ISL_708263, EPI_ISL_708264, EPI_ISL_708265, EPI_ISL_708266, EPI_ISL_708267, EPI_ISL_708268, EPI_ISL_708269, EPI_ISL_708270, EPI_ISL_708271, EPI_ISL_708272, EPI_ISL_708273, EPI_ISL_708274, EPI_ISL_708275, EPI_ISL_708276, EPI_ISL_708277, EPI_ISL_708278, EPI_ISL_708279, EPI_ISL_708280, EPI_ISL_708281, EPI_ISL_708282, EPI_ISL_708283, EPI_ISL_708284, EPI_ISL_708285, EPI_ISL_708286, EPI_ISL_708287, EPI_ISL_708288, EPI_ISL_708289, EPI_ISL_708290, EPI_ISL_708291, EPI_ISL_708292, EPI_ISL_708293, EPI_ISL_708294, EPI_ISL_708295, EPI_ISL_708296, EPI_ISL_708297, EPI_ISL_708298, EPI_ISL_708299, EPI_ISL_708300, EPI_ISL_708301, EPI_ISL_708302, EPI_ISL_708303, EPI_ISL_708304, EPI_ISL_708305, EPI_ISL_708309, EPI_ISL_708310, EPI_ISL_708311, EPI_ISL_708312, EPI_ISL_708313, EPI_ISL_708314, EPI_ISL_708316, EPI_ISL_708317, EPI_ISL_708318, EPI_ISL_708319, EPI_ISL_708320, EPI_ISL_708321, EPI_ISL_708322, EPI_ISL_708323, EPI_ISL_708324, EPI_ISL_708325, EPI_ISL_708326, EPI_ISL_708327, EPI_ISL_708328, EPI_ISL_708329, EPI_ISL_708330, EPI_ISL_708331, EPI_ISL_708332, EPI_ISL_708333, EPI_ISL_708334, EPI_ISL_708335, EPI_ISL_708336, EPI_ISL_708337, EPI_ISL_708338, EPI_ISL_708339, EPI_ISL_708340, EPI_ISL_708341, EPI_ISL_708342, EPI_ISL_708343, EPI_ISL_708344, EPI_ISL_708345, EPI_ISL_708346, EPI_ISL_708347, EPI_ISL_708348, EPI_ISL_708349, EPI_ISL_708350, EPI_ISL_708351, EPI_ISL_708352, EPI_ISL_708353, EPI_ISL_708354, EPI_ISL_708355, EPI_ISL_708356, EPI_ISL_708357, EPI_ISL_708358, EPI_ISL_708359, EPI_ISL_708360, EPI_ISL_708361, EPI_ISL_708362, EPI_ISL_708364, EPI_ISL_708365, EPI_ISL_708366, EPI_ISL_708367, EPI_ISL_708368, EPI_ISL_708369, EPI_ISL_708370, EPI_ISL_708371, EPI_ISL_708372, EPI_ISL_708373, EPI_ISL_708374, EPI_ISL_708375, EPI_ISL_708376, EPI_ISL_708377, EPI_ISL_708378, EPI_ISL_708531, EPI_ISL_708532, EPI_ISL_708533, EPI_ISL_708534, EPI_ISL_708535, EPI_ISL_708536, EPI_ISL_708537, EPI_ISL_708538, EPI_ISL_708539, EPI_ISL_708540, EPI_ISL_708541, EPI_ISL_708542, EPI_ISL_708543, EPI_ISL_708544, EPI_ISL_708545, EPI_ISL_708546, EPI_ISL_708547, EPI_ISL_708548, EPI_ISL_708549, EPI_ISL_708550, EPI_ISL_708551, EPI_ISL_708552, EPI_ISL_708553, EPI_ISL_708554, EPI_ISL_708555, EPI_ISL_708556, EPI_ISL_708557, EPI_ISL_708558, EPI_ISL_708559, EPI_ISL_708560, EPI_ISL_708561, EPI_ISL_708562, EPI_ISL_708563, EPI_ISL_708564, EPI_ISL_708565, EPI_ISL_708566, EPI_ISL_708567, EPI_ISL_708568, EPI_ISL_708569, EPI_ISL_708570, EPI_ISL_708571, EPI_ISL_708572, EPI_ISL_708573, EPI_ISL_708574, EPI_ISL_708575, EPI_ISL_708576, EPI_ISL_708577, EPI_ISL_708578, EPI_ISL_708579, EPI_ISL_708580, EPI_ISL_708581, EPI_ISL_708582, EPI_ISL_708583, EPI_ISL_708584, EPI_ISL_708585, EPI_ISL_708586, EPI_ISL_708587, EPI_ISL_708588, EPI_ISL_708589, EPI_ISL_708590, EPI_ISL_708591, EPI_ISL_708592, EPI_ISL_708593, EPI_ISL_708594, EPI_ISL_708595, EPI_ISL_708596, EPI_ISL_708597, EPI_ISL_708598, EPI_ISL_708599, EPI_ISL_708600, EPI_ISL_708601, EPI_ISL_708602, EPI_ISL_708603, EPI_ISL_708604, EPI_ISL_708605, EPI_ISL_708606 | Michigan Department of Health and Human Services, Bureau of Laboratories                          | Michigan Department of Health and Human Services, Bureau of Laboratories                                             | Blankenship HM, Riner D, Soehnlén MK                                                                                                                                                                                                                                       |                |
| EPI_ISL_708798                                                                                                                                                                                                                                                                                                                                                                                                                                                                                                                                                                                                                                                                                                                                                                                                                                                                                                                                                                                                                                                                                                                                                                                                                                                                                                                                                                                                                                                                                                                                                                                                                                                                                                                                                                                                                                                                                                                                                                                                                                                                                                                                                                                                                                                                                                                                                                                                                                                                                                                                                                                                                                                                                                                                                                                                                                                                                                                                                                                                                                                                                                                                                                                                                                                                                                                                                                                                                                                                                                                                                                                                                                                                                                                                                                                                                                                                                                                                                                                                                                                                                                                                                 | Sydney South West Pathology Service (SSWPS) - Royal Prince Alfred Hospital - NSW Health Pathology | NSW Health Pathology - Institute of Clinical Pathology and Medical Research; Westmead Hospital; University of Sydney |                                                                                                                                                                                                                                                                            | CIDM-PH et al. |
| EPI_ISL_708799                                                                                                                                                                                                                                                                                                                                                                                                                                                                                                                                                                                                                                                                                                                                                                                                                                                                                                                                                                                                                                                                                                                                                                                                                                                                                                                                                                                                                                                                                                                                                                                                                                                                                                                                                                                                                                                                                                                                                                                                                                                                                                                                                                                                                                                                                                                                                                                                                                                                                                                                                                                                                                                                                                                                                                                                                                                                                                                                                                                                                                                                                                                                                                                                                                                                                                                                                                                                                                                                                                                                                                                                                                                                                                                                                                                                                                                                                                                                                                                                                                                                                                                                                 | Pathology North - Royal North Shore Hospital - NSW Health Pathology                               | NSW Health Pathology - Institute of Clinical Pathology and Medical Research; Westmead Hospital; University of Sydney |                                                                                                                                                                                                                                                                            | CIDM-PH et al. |
| EPI_ISL_710120, EPI_ISL_710121, EPI_ISL_710122, EPI_ISL_710123, EPI_ISL_710124, EPI_ISL_710125, EPI_ISL_710126, EPI_ISL_710127, EPI_ISL_710128                                                                                                                                                                                                                                                                                                                                                                                                                                                                                                                                                                                                                                                                                                                                                                                                                                                                                                                                                                                                                                                                                                                                                                                                                                                                                                                                                                                                                                                                                                                                                                                                                                                                                                                                                                                                                                                                                                                                                                                                                                                                                                                                                                                                                                                                                                                                                                                                                                                                                                                                                                                                                                                                                                                                                                                                                                                                                                                                                                                                                                                                                                                                                                                                                                                                                                                                                                                                                                                                                                                                                                                                                                                                                                                                                                                                                                                                                                                                                                                                                 | South Eastern Area Laboratory Services (SEALS)                                                    | CIDM-PH et al.                                                                                                       |                                                                                                                                                                                                                                                                            | CIDM-PH et al. |
| EPI_ISL_710129                                                                                                                                                                                                                                                                                                                                                                                                                                                                                                                                                                                                                                                                                                                                                                                                                                                                                                                                                                                                                                                                                                                                                                                                                                                                                                                                                                                                                                                                                                                                                                                                                                                                                                                                                                                                                                                                                                                                                                                                                                                                                                                                                                                                                                                                                                                                                                                                                                                                                                                                                                                                                                                                                                                                                                                                                                                                                                                                                                                                                                                                                                                                                                                                                                                                                                                                                                                                                                                                                                                                                                                                                                                                                                                                                                                                                                                                                                                                                                                                                                                                                                                                                 | Pathology North - Royal North Shore Hospital - NSW Health Pathology                               | CIDM-PH et al.                                                                                                       |                                                                                                                                                                                                                                                                            | CIDM-PH et al. |
| EPI_ISL_710542                                                                                                                                                                                                                                                                                                                                                                                                                                                                                                                                                                                                                                                                                                                                                                                                                                                                                                                                                                                                                                                                                                                                                                                                                                                                                                                                                                                                                                                                                                                                                                                                                                                                                                                                                                                                                                                                                                                                                                                                                                                                                                                                                                                                                                                                                                                                                                                                                                                                                                                                                                                                                                                                                                                                                                                                                                                                                                                                                                                                                                                                                                                                                                                                                                                                                                                                                                                                                                                                                                                                                                                                                                                                                                                                                                                                                                                                                                                                                                                                                                                                                                                                                 | National Institute for Infectious Diseases, INMI, "L. Spallanzani" IRCCS                          | National Institute for Infectious Diseases, INMI, "L. Spallanzani" IRCCS                                             | C.E.M Gruber, B Bartolini, M Rueca, F Messina, E Giombini, A Di Caro, MR Capobianchi                                                                                                                                                                                       |                |
| EPI_ISL_717975                                                                                                                                                                                                                                                                                                                                                                                                                                                                                                                                                                                                                                                                                                                                                                                                                                                                                                                                                                                                                                                                                                                                                                                                                                                                                                                                                                                                                                                                                                                                                                                                                                                                                                                                                                                                                                                                                                                                                                                                                                                                                                                                                                                                                                                                                                                                                                                                                                                                                                                                                                                                                                                                                                                                                                                                                                                                                                                                                                                                                                                                                                                                                                                                                                                                                                                                                                                                                                                                                                                                                                                                                                                                                                                                                                                                                                                                                                                                                                                                                                                                                                                                                 | Institute of Virology, Biomedical Research Center of the Slovak Academy of Sciences, Bratislava   | Faculty of Natural Sciences, Comenius University, Bratislava                                                         | Broa Brejová, Viktória Hodorová, Kristína Boršová, Viktória abanová, Dominika Friová, Sabina Fumaová Havlíková, Juraj Kopáček, Martina Liková, ubomíra Lukáiková, Martina Neboháková, Monika Sláviková, Editá Staroová, Elena Tichá, Tomáš Vína, Jozef Nosek, Boris Klempa |                |
| EPI_ISL_718255, EPI_ISL_718256, EPI_ISL_718257, EPI_ISL_718259                                                                                                                                                                                                                                                                                                                                                                                                                                                                                                                                                                                                                                                                                                                                                                                                                                                                                                                                                                                                                                                                                                                                                                                                                                                                                                                                                                                                                                                                                                                                                                                                                                                                                                                                                                                                                                                                                                                                                                                                                                                                                                                                                                                                                                                                                                                                                                                                                                                                                                                                                                                                                                                                                                                                                                                                                                                                                                                                                                                                                                                                                                                                                                                                                                                                                                                                                                                                                                                                                                                                                                                                                                                                                                                                                                                                                                                                                                                                                                                                                                                                                                 | Institute of Virology, Biomedical Research Center of the Slovak Academy of Sciences, Bratislava   | Faculty of Natural Sciences, Comenius University, Bratislava                                                         | Broa Brejová, Viktória Hodorová, Kristína Boršová, Viktória abanová, Sabina Fumaová Havlíková, Juraj Kopáček, Martina Liková, ubomíra Lukáiková, Martina Neboháková, Monika Sláviková, Tomáš Vína, Jozef Nosek, Boris Klempa                                               |                |
| EPI_ISL_718262                                                                                                                                                                                                                                                                                                                                                                                                                                                                                                                                                                                                                                                                                                                                                                                                                                                                                                                                                                                                                                                                                                                                                                                                                                                                                                                                                                                                                                                                                                                                                                                                                                                                                                                                                                                                                                                                                                                                                                                                                                                                                                                                                                                                                                                                                                                                                                                                                                                                                                                                                                                                                                                                                                                                                                                                                                                                                                                                                                                                                                                                                                                                                                                                                                                                                                                                                                                                                                                                                                                                                                                                                                                                                                                                                                                                                                                                                                                                                                                                                                                                                                                                                 | National Institute for Infectious Diseases, INMI, "L. Spallanzani" IRCCS                          | National Institute for Infectious Diseases, INMI, "L. Spallanzani" IRCCS                                             | C.E.M Gruber, F Messina, M Rueca, B Bartolini, E Giombini, MR Capobianchi, A Di Caro                                                                                                                                                                                       |                |
| EPI_ISL_721624                                                                                                                                                                                                                                                                                                                                                                                                                                                                                                                                                                                                                                                                                                                                                                                                                                                                                                                                                                                                                                                                                                                                                                                                                                                                                                                                                                                                                                                                                                                                                                                                                                                                                                                                                                                                                                                                                                                                                                                                                                                                                                                                                                                                                                                                                                                                                                                                                                                                                                                                                                                                                                                                                                                                                                                                                                                                                                                                                                                                                                                                                                                                                                                                                                                                                                                                                                                                                                                                                                                                                                                                                                                                                                                                                                                                                                                                                                                                                                                                                                                                                                                                                 | National Institute for Infectious Diseases, INMI, "L. Spallanzani" IRCCS                          | National Institute for Infectious Diseases, INMI, "L. Spallanzani" IRCCS                                             | C.E.M Gruber, B Bartolini, M Rueca, F Messina, E Giombini, A Di Caro, MR Capobianchi                                                                                                                                                                                       |                |
| EPI_ISL_721987, EPI_ISL_721988, EPI_ISL_721989, EPI_ISL_721990, EPI_ISL_721991, EPI_ISL_721992, EPI_ISL_721993, EPI_ISL_721994, EPI_ISL_721995, EPI_ISL_721996, EPI_ISL_721997, EPI_ISL_721998, EPI_ISL_721999, EPI_ISL_722000, EPI_ISL_722001, EPI_ISL_722002, EPI_ISL_722003, EPI_ISL_722004, EPI_ISL_722005, EPI_ISL_722006, EPI_ISL_722007, EPI_ISL_722008, EPI_ISL_722009, EPI_ISL_722010, EPI_ISL_722011, EPI_ISL_722012, EPI_ISL_722013, EPI_ISL_722014, EPI_ISL_722015, EPI_ISL_722016, EPI_ISL_722017, EPI_ISL_722018, EPI_ISL_722019, EPI_ISL_722020, EPI_ISL_722021, EPI_ISL_722022, EPI_ISL_722023, EPI_ISL_722024, EPI_ISL_722025, EPI_ISL_722026, EPI_ISL_722027, EPI_ISL_722028, EPI_ISL_722029, EPI_ISL_722030, EPI_ISL_722031, EPI_ISL_722032, EPI_ISL_722033, EPI_ISL_722034, EPI_ISL_722035, EPI_ISL_722036, EPI_ISL_722037, EPI_ISL_722038, EPI_ISL_722039, EPI_ISL_722040,                                                                                                                                                                                                                                                                                                                                                                                                                                                                                                                                                                                                                                                                                                                                                                                                                                                                                                                                                                                                                                                                                                                                                                                                                                                                                                                                                                                                                                                                                                                                                                                                                                                                                                                                                                                                                                                                                                                                                                                                                                                                                                                                                                                                                                                                                                                                                                                                                                                                                                                                                                                                                                                                                                                                                                                                                                                                                                                                                                                                                                                                                                                                                                                                                                                                |                                                                                                   |                                                                                                                      |                                                                                                                                                                                                                                                                            |                |





|                                                                                                                                                                                                                                                                                                                                                |                                                                                                   |                                                                                                                                                                                              |                                                                                                                                                                                |
|------------------------------------------------------------------------------------------------------------------------------------------------------------------------------------------------------------------------------------------------------------------------------------------------------------------------------------------------|---------------------------------------------------------------------------------------------------|----------------------------------------------------------------------------------------------------------------------------------------------------------------------------------------------|--------------------------------------------------------------------------------------------------------------------------------------------------------------------------------|
| see above                                                                                                                                                                                                                                                                                                                                      | California Department of Public Health                                                            | California Department of Public Health                                                                                                                                                       | CDPH IDLB COVIDNet                                                                                                                                                             |
| EPI_ISL_759701                                                                                                                                                                                                                                                                                                                                 | RS UNS, Surakarta                                                                                 | UNS/RS-UNS, Faculty of Medicine                                                                                                                                                              | Betty Suryawati, Yulia Sari, Hartono, Maryani, Afif Avicenna Gufron, HanaHana Apsari Pawestri, Kartika Dewi Puspa, Hartanti Dian Ika, Arie Ardiansyah Nugraha, Vivi Setiawaty. |
| EPI_ISL_759702                                                                                                                                                                                                                                                                                                                                 | RS UNS Surakarta                                                                                  | Universitas Sebelas Maret (UNS), Rumah sakit Universitas Sebelas Maret (RS-UNS) Surakarta, National Institute of Health Research and Development, Indonesian Ministry of Health              | Betty Suryawati, Yulia sari, hartono, maryani, Afif Avicenna Gufron, Hana Apsari Pawestri, Kartika, Dewi Puspa, Hartanti Dian Ika, Arie Ardiansyah Nugraha, Vivi Setiawaty     |
| EPI_ISL_759703                                                                                                                                                                                                                                                                                                                                 | RSUD Bung Karno                                                                                   | Universitas Sebelas Maret (UNS), Rumah sakit Universitas Sebelas Maret (RS-UNS) Surakarta, National Institute of Health Research and Development, Indonesian Ministry of Health              | Betty Suryawati, Yulia sari, hartono, maryani, Afif Avicenna Gufron, Hana Apsari Pawestri, Kartika, Dewi Puspa, Hartanti Dian Ika, Arie Ardiansyah Nugraha, Vivi Setiawaty     |
| EPI_ISL_759705                                                                                                                                                                                                                                                                                                                                 | RSUD Bung Karno, Surakarta                                                                        | Universitas Sebelas Maret (UNS); Rumah Sakit Universitas Sebelas Maret (RS-UNS), Surakarta; National Institute of Health Research and Development, Indonesian Ministry of Health , Jakarta). | Betty Suryawati, Yulia Sari, Hartono, Maryani, Afif Avicenna Gufron, Hana Apsari Pawestri, Kartika, Dewi Puspa, Hartanti Dian Ika, Arie Ardiansyah Nugraha, Vivi Setiawaty.    |
| EPI_ISL_759707, EPI_ISL_759708, EPI_ISL_759709, EPI_ISL_759710, EPI_ISL_759711, EPI_ISL_759712, EPI_ISL_759713, EPI_ISL_759714, EPI_ISL_759715, EPI_ISL_759716, EPI_ISL_759717, EPI_ISL_759718, EPI_ISL_759719, EPI_ISL_759720, EPI_ISL_759721, EPI_ISL_759722, EPI_ISL_759723, EPI_ISL_759761, EPI_ISL_759762                                 |                                                                                                   |                                                                                                                                                                                              |                                                                                                                                                                                |
| see above                                                                                                                                                                                                                                                                                                                                      | Instituto Nacional de Saude (INSA)                                                                | Instituto Nacional de Saude (INSA)                                                                                                                                                           | Borges et al                                                                                                                                                                   |
| EPI_ISL_759842                                                                                                                                                                                                                                                                                                                                 | Rumah Sakit Universitas Sebelas Maret (RS-UNS)                                                    | Universitas Sebelas Maret (UNS); Rumah Sakit Universitas Sebelas Maret (RS-UNS), Surakarta; National Institute of Health Research and Development, Indonesian Ministry of Health, Jakarta.   | Betty Suryawati, Yulia Sari, Hartono, Maryani, Afif Avicenna Ghuftron, Hana Apsari Pawestri, Kartika, Dewi Puspa, Hartanti Dian Ika, Arie Ardiansyah Nugraha, Vivi Setiawaty.  |
| EPI_ISL_763063                                                                                                                                                                                                                                                                                                                                 | RS Panti Waluyo, Surakarta                                                                        | Universitas Sebelas Maret (UNS); Rumah Sakit UNS (RS-UNS); National Institute of Health Research and Development, Indonesian Ministry of Health.                                             | Betty Suryawati, Yulia Sari, Hartono, Maryani, Afif A Ghuftron, Revi G H Novika, Hana A Pawestri, Kartika, Dewi Puspa, Hartanti Dian Ika, Arie A Nugraha, Vivi Setiawaty.      |
| EPI_ISL_763064                                                                                                                                                                                                                                                                                                                                 | RS Kasih Ibu, Surakarta                                                                           | Universitas Sebelas Maret (UNS); Rumah Sakit UNS (RS-UNS); National Institute of Health Research and Development, Indonesian Ministry of Health.                                             | Betty Suryawati, Yulia Sari, Hartono, Maryani, Afif A Ghuftron, Revi G H Novika, Hana A Pawestri, Kartika, Dewi Puspa, Hartanti Dian Ika, Arie A Nugraha, Vivi Setiawaty.      |
| EPI_ISL_763385, EPI_ISL_763391, EPI_ISL_763412, EPI_ISL_763459, EPI_ISL_763527, EPI_ISL_763528, EPI_ISL_763534, EPI_ISL_763564, EPI_ISL_763629, EPI_ISL_763696, EPI_ISL_763716, EPI_ISL_763818, EPI_ISL_764139, EPI_ISL_764178, EPI_ISL_764181, EPI_ISL_764183, EPI_ISL_764185, EPI_ISL_764211, EPI_ISL_764223, EPI_ISL_764378, EPI_ISL_764380 |                                                                                                   |                                                                                                                                                                                              |                                                                                                                                                                                |
| see above                                                                                                                                                                                                                                                                                                                                      | University of Exeter                                                                              | COVID-19 Genomics UK (COG-UK) Consortium                                                                                                                                                     | Ben Temperton, Aaron Jeffries, Michelle Michelsen, Joanna Warwick-Dugdale, Audrey Farbos, Robyn Manley, Stephen Michell, Jane Masoli                                           |
| EPI_ISL_765210, EPI_ISL_765211, EPI_ISL_765212, EPI_ISL_765213, EPI_ISL_765214, EPI_ISL_765215                                                                                                                                                                                                                                                 | Instituto Nacional de Saude (INSA)                                                                | Instituto Nacional de Saude (INSA)                                                                                                                                                           | Borges et al                                                                                                                                                                   |
| EPI_ISL_765216, EPI_ISL_765217, EPI_ISL_765218                                                                                                                                                                                                                                                                                                 | Instituto Nacional de Saude (INSA) and Instituto Gulbenkian de Ciencia (IGC)                      | Instituto Nacional de Saude (INSA) and Instituto Gulbenkian de Ciencia (IGC)                                                                                                                 | Borges et al                                                                                                                                                                   |
| EPI_ISL_765219, EPI_ISL_765220, EPI_ISL_765221                                                                                                                                                                                                                                                                                                 | Instituto Nacional de Saude (INSA)                                                                | Instituto Nacional de Saude (INSA)                                                                                                                                                           | Borges et al                                                                                                                                                                   |
| EPI_ISL_765572                                                                                                                                                                                                                                                                                                                                 | National Institute for Infectious Diseases, INMI, "L. Spallanzani" IRCCS                          | National Institute for Infectious Diseases, INMI, "L. Spallanzani" IRCCS                                                                                                                     | C.E.M Gruber, M Rueca, B Bartolini, F Messina, E Giombini, O Butera, A Di Caro, MR Capobianchi                                                                                 |
| EPI_ISL_765942, EPI_ISL_765943, EPI_ISL_765944, EPI_ISL_765945, EPI_ISL_765946, EPI_ISL_765947, EPI_ISL_765948, EPI_ISL_765949, EPI_ISL_765950, EPI_ISL_765951, EPI_ISL_765952, EPI_ISL_765953, EPI_ISL_765954, EPI_ISL_765955, EPI_ISL_765956, EPI_ISL_765957, EPI_ISL_765958, EPI_ISL_765959                                                 |                                                                                                   |                                                                                                                                                                                              |                                                                                                                                                                                |
| see above                                                                                                                                                                                                                                                                                                                                      | Worobey Lab, Department of Ecology and Evolutionary Biology, University of Arizona                | Worobey Lab, Department of Ecology and Evolutionary Biology, University of Arizona                                                                                                           | Brendan Larsen, Grace Quirk, Thomas Watts, David Baltrus, Michael Worobey                                                                                                      |
| EPI_ISL_767344, EPI_ISL_767345, EPI_ISL_767346, EPI_ISL_767347, EPI_ISL_767348, EPI_ISL_767349, EPI_ISL_767350, EPI_ISL_767351, EPI_ISL_767352, EPI_ISL_767353, EPI_ISL_767354, EPI_ISL_767355, EPI_ISL_767356, EPI_ISL_767357, EPI_ISL_767358, EPI_ISL_767359, EPI_ISL_767360, EPI_ISL_767361                                                 |                                                                                                   |                                                                                                                                                                                              |                                                                                                                                                                                |
| see above                                                                                                                                                                                                                                                                                                                                      | Michigan Department of Health and Human Services, Bureau of Laboratories                          | Michigan Department of Health and Human Services, Bureau of Laboratories                                                                                                                     | Blankenship HM, Riner D, Soehnlén MK                                                                                                                                           |
| EPI_ISL_767850, EPI_ISL_767851, EPI_ISL_767852                                                                                                                                                                                                                                                                                                 | South Eastern Area Laboratory Services (SEALS)                                                    | NSW Health Pathology - Institute of Clinical Pathology and Medical Research; Westmead Hospital; University of Sydney                                                                         | CIDM-PH et al.                                                                                                                                                                 |
| EPI_ISL_767853, EPI_ISL_767854, EPI_ISL_767855, EPI_ISL_767856, EPI_ISL_767857, EPI_ISL_767858, EPI_ISL_767859, EPI_ISL_767860, EPI_ISL_767861, EPI_ISL_767862, EPI_ISL_767863, EPI_ISL_767864, EPI_ISL_767865, EPI_ISL_767866, EPI_ISL_767867                                                                                                 |                                                                                                   |                                                                                                                                                                                              |                                                                                                                                                                                |
| see above                                                                                                                                                                                                                                                                                                                                      | Sydney South West Pathology Service (SSWPS) - Royal Prince Alfred Hospital - NSW Health Pathology | NSW Health Pathology - Institute of Clinical Pathology and Medical Research; Westmead Hospital; University of Sydney                                                                         | CIDM-PH et al.                                                                                                                                                                 |
| EPI_ISL_767868                                                                                                                                                                                                                                                                                                                                 | Pathology North - Royal North Shore Hospital - NSW Health Pathology                               | NSW Health Pathology - Institute of Clinical Pathology and Medical Research; Westmead Hospital; University of Sydney                                                                         | CIDM-PH et al.                                                                                                                                                                 |
| EPI_ISL_767869                                                                                                                                                                                                                                                                                                                                 | Laverty Pathology                                                                                 | NSW Health Pathology - Institute of Clinical Pathology and Medical Research; Westmead Hospital; University of Sydney                                                                         | CIDM-PH et al.                                                                                                                                                                 |
| EPI_ISL_767870, EPI_ISL_767871                                                                                                                                                                                                                                                                                                                 | Pathology North - Royal North Shore Hospital - NSW Health Pathology                               | NSW Health Pathology - Institute of Clinical Pathology and Medical Research; Westmead Hospital; University of Sydney                                                                         | CIDM-PH et al.                                                                                                                                                                 |
| EPI_ISL_767872, EPI_ISL_767873, EPI_ISL_767874, EPI_ISL_767875                                                                                                                                                                                                                                                                                 | Histopath                                                                                         | NSW Health Pathology - Institute of Clinical Pathology and Medical Research; Westmead Hospital; University of Sydney                                                                         | CIDM-PH et al.                                                                                                                                                                 |
| EPI_ISL_767876                                                                                                                                                                                                                                                                                                                                 | Sydney South West Pathology Service (SSWPS) - Liverpool Hospital - NSW Health Pathology           | NSW Health Pathology - Institute of Clinical Pathology and Medical Research; Westmead Hospital; University of Sydney                                                                         | CIDM-PH et al.                                                                                                                                                                 |
| EPI_ISL_767877                                                                                                                                                                                                                                                                                                                                 | PALMS                                                                                             | NSW Health Pathology - Institute of Clinical Pathology and Medical Research; Westmead Hospital; University of Sydney                                                                         | CIDM-PH et al.                                                                                                                                                                 |
| EPI_ISL_767878, EPI_ISL_767879, EPI_ISL_767880                                                                                                                                                                                                                                                                                                 | Laverty Pathology                                                                                 | NSW Health Pathology - Institute of Clinical Pathology and Medical Research; Westmead Hospital; University of Sydney                                                                         | CIDM-PH et al.                                                                                                                                                                 |
| EPI_ISL_767881                                                                                                                                                                                                                                                                                                                                 | St Vincent's Pathology (SydPath)                                                                  | NSW Health Pathology - Institute of Clinical Pathology and Medical Research; Westmead Hospital; University of Sydney                                                                         | CIDM-PH et al.                                                                                                                                                                 |
| EPI_ISL_767882, EPI_ISL_767883                                                                                                                                                                                                                                                                                                                 | Medlab Pathology                                                                                  | NSW Health Pathology - Institute of Clinical Pathology and Medical Research; Westmead Hospital; University of Sydney                                                                         | CIDM-PH et al.                                                                                                                                                                 |
| EPI_ISL_767884                                                                                                                                                                                                                                                                                                                                 | Australian Clinical Labs (formerly Healthscope Pathology)                                         | NSW Health Pathology - Institute of Clinical Pathology and Medical Research; Westmead Hospital; University of Sydney                                                                         | CIDM-PH et al.                                                                                                                                                                 |







|                                                                                                                                                                                                                                                                                                                                                                                                                                                                                                                                                                                                                                                                                                                                                                                                                                                                                                                                                                                                                                                                                                                                                                                                                                                                                                                                                                                                                                                                                                                                                                                                                                                                                                                                                                                                                                                                                                                                                                                                                                                                                                                                                                                                                                                                                                                                                                                                                                                                                                                                                                                                                                                                                                                                                                                                                                                                                                                                                                                                                                                                                                                                                                                                                                                                                                                                                                                                                                                                                                                                                                                                                                                                                                                                                                                                                                                                                                                                                                                                                                                                                                                                                                                                                                                                                                                                                                                                                                                                                                                |                                                                                                            |                                                                                                                      |                                                                                                                                                                                                                                                                                      |
|----------------------------------------------------------------------------------------------------------------------------------------------------------------------------------------------------------------------------------------------------------------------------------------------------------------------------------------------------------------------------------------------------------------------------------------------------------------------------------------------------------------------------------------------------------------------------------------------------------------------------------------------------------------------------------------------------------------------------------------------------------------------------------------------------------------------------------------------------------------------------------------------------------------------------------------------------------------------------------------------------------------------------------------------------------------------------------------------------------------------------------------------------------------------------------------------------------------------------------------------------------------------------------------------------------------------------------------------------------------------------------------------------------------------------------------------------------------------------------------------------------------------------------------------------------------------------------------------------------------------------------------------------------------------------------------------------------------------------------------------------------------------------------------------------------------------------------------------------------------------------------------------------------------------------------------------------------------------------------------------------------------------------------------------------------------------------------------------------------------------------------------------------------------------------------------------------------------------------------------------------------------------------------------------------------------------------------------------------------------------------------------------------------------------------------------------------------------------------------------------------------------------------------------------------------------------------------------------------------------------------------------------------------------------------------------------------------------------------------------------------------------------------------------------------------------------------------------------------------------------------------------------------------------------------------------------------------------------------------------------------------------------------------------------------------------------------------------------------------------------------------------------------------------------------------------------------------------------------------------------------------------------------------------------------------------------------------------------------------------------------------------------------------------------------------------------------------------------------------------------------------------------------------------------------------------------------------------------------------------------------------------------------------------------------------------------------------------------------------------------------------------------------------------------------------------------------------------------------------------------------------------------------------------------------------------------------------------------------------------------------------------------------------------------------------------------------------------------------------------------------------------------------------------------------------------------------------------------------------------------------------------------------------------------------------------------------------------------------------------------------------------------------------------------------------------------------------------------------------------------------------------|------------------------------------------------------------------------------------------------------------|----------------------------------------------------------------------------------------------------------------------|--------------------------------------------------------------------------------------------------------------------------------------------------------------------------------------------------------------------------------------------------------------------------------------|
| EPI_ISL_804761, EPI_ISL_804762, EPI_ISL_804763, EPI_ISL_804764, EPI_ISL_804765, EPI_ISL_804766, EPI_ISL_804767, EPI_ISL_804768, EPI_ISL_804769, EPI_ISL_804770, EPI_ISL_804771, EPI_ISL_804772, EPI_ISL_804773, EPI_ISL_804774, EPI_ISL_804775, EPI_ISL_804776, EPI_ISL_804777, EPI_ISL_804778, EPI_ISL_804779, EPI_ISL_804780, EPI_ISL_804781, EPI_ISL_804782, EPI_ISL_804783, EPI_ISL_804784, EPI_ISL_804785, EPI_ISL_804786, EPI_ISL_804787, EPI_ISL_804788, EPI_ISL_804789, EPI_ISL_804790, EPI_ISL_804791, EPI_ISL_804792, EPI_ISL_804793, EPI_ISL_804794, EPI_ISL_804795, EPI_ISL_804796, EPI_ISL_804797, EPI_ISL_804798, EPI_ISL_804799, EPI_ISL_804800, EPI_ISL_804801, EPI_ISL_804802, EPI_ISL_804803, EPI_ISL_804804, EPI_ISL_804805, EPI_ISL_804806, EPI_ISL_804807, EPI_ISL_804808, EPI_ISL_804809, EPI_ISL_804810, EPI_ISL_804811                                                                                                                                                                                                                                                                                                                                                                                                                                                                                                                                                                                                                                                                                                                                                                                                                                                                                                                                                                                                                                                                                                                                                                                                                                                                                                                                                                                                                                                                                                                                                                                                                                                                                                                                                                                                                                                                                                                                                                                                                                                                                                                                                                                                                                                                                                                                                                                                                                                                                                                                                                                                                                                                                                                                                                                                                                                                                                                                                                                                                                                                                                                                                                                                                                                                                                                                                                                                                                                                                                                                                                                                                                                                 |                                                                                                            |                                                                                                                      |                                                                                                                                                                                                                                                                                      |
| see above                                                                                                                                                                                                                                                                                                                                                                                                                                                                                                                                                                                                                                                                                                                                                                                                                                                                                                                                                                                                                                                                                                                                                                                                                                                                                                                                                                                                                                                                                                                                                                                                                                                                                                                                                                                                                                                                                                                                                                                                                                                                                                                                                                                                                                                                                                                                                                                                                                                                                                                                                                                                                                                                                                                                                                                                                                                                                                                                                                                                                                                                                                                                                                                                                                                                                                                                                                                                                                                                                                                                                                                                                                                                                                                                                                                                                                                                                                                                                                                                                                                                                                                                                                                                                                                                                                                                                                                                                                                                                                      | Michigan Department of Health and Human Services, Bureau of Laboratories                                   | Michigan Department of Health and Human Services, Bureau of Laboratories                                             | Blankenship HM, Riner D, Soehnlén MK                                                                                                                                                                                                                                                 |
| EPI_ISL_806718                                                                                                                                                                                                                                                                                                                                                                                                                                                                                                                                                                                                                                                                                                                                                                                                                                                                                                                                                                                                                                                                                                                                                                                                                                                                                                                                                                                                                                                                                                                                                                                                                                                                                                                                                                                                                                                                                                                                                                                                                                                                                                                                                                                                                                                                                                                                                                                                                                                                                                                                                                                                                                                                                                                                                                                                                                                                                                                                                                                                                                                                                                                                                                                                                                                                                                                                                                                                                                                                                                                                                                                                                                                                                                                                                                                                                                                                                                                                                                                                                                                                                                                                                                                                                                                                                                                                                                                                                                                                                                 | Sydney South West Pathology Service (SSWPS) - Royal Prince Alfred Hospital - NSW Health Pathology          | NSW Health Pathology - Institute of Clinical Pathology and Medical Research; Westmead Hospital; University of Sydney | CIDM-PH et al.                                                                                                                                                                                                                                                                       |
| EPI_ISL_806719                                                                                                                                                                                                                                                                                                                                                                                                                                                                                                                                                                                                                                                                                                                                                                                                                                                                                                                                                                                                                                                                                                                                                                                                                                                                                                                                                                                                                                                                                                                                                                                                                                                                                                                                                                                                                                                                                                                                                                                                                                                                                                                                                                                                                                                                                                                                                                                                                                                                                                                                                                                                                                                                                                                                                                                                                                                                                                                                                                                                                                                                                                                                                                                                                                                                                                                                                                                                                                                                                                                                                                                                                                                                                                                                                                                                                                                                                                                                                                                                                                                                                                                                                                                                                                                                                                                                                                                                                                                                                                 | Pathology North - Royal North Shore Hospital - NSW Health Pathology                                        | NSW Health Pathology - Institute of Clinical Pathology and Medical Research; Westmead Hospital; University of Sydney | CIDM-PH et al.                                                                                                                                                                                                                                                                       |
| EPI_ISL_806720                                                                                                                                                                                                                                                                                                                                                                                                                                                                                                                                                                                                                                                                                                                                                                                                                                                                                                                                                                                                                                                                                                                                                                                                                                                                                                                                                                                                                                                                                                                                                                                                                                                                                                                                                                                                                                                                                                                                                                                                                                                                                                                                                                                                                                                                                                                                                                                                                                                                                                                                                                                                                                                                                                                                                                                                                                                                                                                                                                                                                                                                                                                                                                                                                                                                                                                                                                                                                                                                                                                                                                                                                                                                                                                                                                                                                                                                                                                                                                                                                                                                                                                                                                                                                                                                                                                                                                                                                                                                                                 | Laverty Pathology                                                                                          | NSW Health Pathology - Institute of Clinical Pathology and Medical Research; Westmead Hospital; University of Sydney | CIDM-PH et al.                                                                                                                                                                                                                                                                       |
| EPI_ISL_806721                                                                                                                                                                                                                                                                                                                                                                                                                                                                                                                                                                                                                                                                                                                                                                                                                                                                                                                                                                                                                                                                                                                                                                                                                                                                                                                                                                                                                                                                                                                                                                                                                                                                                                                                                                                                                                                                                                                                                                                                                                                                                                                                                                                                                                                                                                                                                                                                                                                                                                                                                                                                                                                                                                                                                                                                                                                                                                                                                                                                                                                                                                                                                                                                                                                                                                                                                                                                                                                                                                                                                                                                                                                                                                                                                                                                                                                                                                                                                                                                                                                                                                                                                                                                                                                                                                                                                                                                                                                                                                 | Histopath                                                                                                  | NSW Health Pathology - Institute of Clinical Pathology and Medical Research; Westmead Hospital; University of Sydney | CIDM-PH et al.                                                                                                                                                                                                                                                                       |
| EPI_ISL_806722                                                                                                                                                                                                                                                                                                                                                                                                                                                                                                                                                                                                                                                                                                                                                                                                                                                                                                                                                                                                                                                                                                                                                                                                                                                                                                                                                                                                                                                                                                                                                                                                                                                                                                                                                                                                                                                                                                                                                                                                                                                                                                                                                                                                                                                                                                                                                                                                                                                                                                                                                                                                                                                                                                                                                                                                                                                                                                                                                                                                                                                                                                                                                                                                                                                                                                                                                                                                                                                                                                                                                                                                                                                                                                                                                                                                                                                                                                                                                                                                                                                                                                                                                                                                                                                                                                                                                                                                                                                                                                 | South Eastern Area Laboratory Services (SEALS)                                                             | NSW Health Pathology - Institute of Clinical Pathology and Medical Research; Westmead Hospital; University of Sydney | CIDM-PH et al.                                                                                                                                                                                                                                                                       |
| EPI_ISL_806723                                                                                                                                                                                                                                                                                                                                                                                                                                                                                                                                                                                                                                                                                                                                                                                                                                                                                                                                                                                                                                                                                                                                                                                                                                                                                                                                                                                                                                                                                                                                                                                                                                                                                                                                                                                                                                                                                                                                                                                                                                                                                                                                                                                                                                                                                                                                                                                                                                                                                                                                                                                                                                                                                                                                                                                                                                                                                                                                                                                                                                                                                                                                                                                                                                                                                                                                                                                                                                                                                                                                                                                                                                                                                                                                                                                                                                                                                                                                                                                                                                                                                                                                                                                                                                                                                                                                                                                                                                                                                                 | 4Cyte Pathology                                                                                            | NSW Health Pathology - Institute of Clinical Pathology and Medical Research; Westmead Hospital; University of Sydney | CIDM-PH et al.                                                                                                                                                                                                                                                                       |
| EPI_ISL_806724                                                                                                                                                                                                                                                                                                                                                                                                                                                                                                                                                                                                                                                                                                                                                                                                                                                                                                                                                                                                                                                                                                                                                                                                                                                                                                                                                                                                                                                                                                                                                                                                                                                                                                                                                                                                                                                                                                                                                                                                                                                                                                                                                                                                                                                                                                                                                                                                                                                                                                                                                                                                                                                                                                                                                                                                                                                                                                                                                                                                                                                                                                                                                                                                                                                                                                                                                                                                                                                                                                                                                                                                                                                                                                                                                                                                                                                                                                                                                                                                                                                                                                                                                                                                                                                                                                                                                                                                                                                                                                 | Sydney South West Pathology Service (SSWPS) - Royal Prince Alfred Hospital - NSW Health Pathology          | NSW Health Pathology - Institute of Clinical Pathology and Medical Research; Westmead Hospital; University of Sydney | CIDM-PH et al.                                                                                                                                                                                                                                                                       |
| EPI_ISL_806725                                                                                                                                                                                                                                                                                                                                                                                                                                                                                                                                                                                                                                                                                                                                                                                                                                                                                                                                                                                                                                                                                                                                                                                                                                                                                                                                                                                                                                                                                                                                                                                                                                                                                                                                                                                                                                                                                                                                                                                                                                                                                                                                                                                                                                                                                                                                                                                                                                                                                                                                                                                                                                                                                                                                                                                                                                                                                                                                                                                                                                                                                                                                                                                                                                                                                                                                                                                                                                                                                                                                                                                                                                                                                                                                                                                                                                                                                                                                                                                                                                                                                                                                                                                                                                                                                                                                                                                                                                                                                                 | Medlab Pathology                                                                                           | NSW Health Pathology - Institute of Clinical Pathology and Medical Research; Westmead Hospital; University of Sydney | CIDM-PH et al.                                                                                                                                                                                                                                                                       |
| EPI_ISL_806726, EPI_ISL_806727                                                                                                                                                                                                                                                                                                                                                                                                                                                                                                                                                                                                                                                                                                                                                                                                                                                                                                                                                                                                                                                                                                                                                                                                                                                                                                                                                                                                                                                                                                                                                                                                                                                                                                                                                                                                                                                                                                                                                                                                                                                                                                                                                                                                                                                                                                                                                                                                                                                                                                                                                                                                                                                                                                                                                                                                                                                                                                                                                                                                                                                                                                                                                                                                                                                                                                                                                                                                                                                                                                                                                                                                                                                                                                                                                                                                                                                                                                                                                                                                                                                                                                                                                                                                                                                                                                                                                                                                                                                                                 | 4Cyte Pathology                                                                                            | NSW Health Pathology - Institute of Clinical Pathology and Medical Research; Westmead Hospital; University of Sydney | CIDM-PH et al.                                                                                                                                                                                                                                                                       |
| EPI_ISL_806728                                                                                                                                                                                                                                                                                                                                                                                                                                                                                                                                                                                                                                                                                                                                                                                                                                                                                                                                                                                                                                                                                                                                                                                                                                                                                                                                                                                                                                                                                                                                                                                                                                                                                                                                                                                                                                                                                                                                                                                                                                                                                                                                                                                                                                                                                                                                                                                                                                                                                                                                                                                                                                                                                                                                                                                                                                                                                                                                                                                                                                                                                                                                                                                                                                                                                                                                                                                                                                                                                                                                                                                                                                                                                                                                                                                                                                                                                                                                                                                                                                                                                                                                                                                                                                                                                                                                                                                                                                                                                                 | Sydney South West Pathology Service (SSWPS) - Liverpool Hospital - NSW Health Pathology                    | NSW Health Pathology - Institute of Clinical Pathology and Medical Research; Westmead Hospital; University of Sydney | CIDM-PH et al.                                                                                                                                                                                                                                                                       |
| EPI_ISL_806729                                                                                                                                                                                                                                                                                                                                                                                                                                                                                                                                                                                                                                                                                                                                                                                                                                                                                                                                                                                                                                                                                                                                                                                                                                                                                                                                                                                                                                                                                                                                                                                                                                                                                                                                                                                                                                                                                                                                                                                                                                                                                                                                                                                                                                                                                                                                                                                                                                                                                                                                                                                                                                                                                                                                                                                                                                                                                                                                                                                                                                                                                                                                                                                                                                                                                                                                                                                                                                                                                                                                                                                                                                                                                                                                                                                                                                                                                                                                                                                                                                                                                                                                                                                                                                                                                                                                                                                                                                                                                                 | Sydney South West Pathology Service (SSWPS) - Royal Prince Alfred Hospital - NSW Health Pathology          | NSW Health Pathology - Institute of Clinical Pathology and Medical Research; Westmead Hospital; University of Sydney | CIDM-PH et al.                                                                                                                                                                                                                                                                       |
| EPI_ISL_812518                                                                                                                                                                                                                                                                                                                                                                                                                                                                                                                                                                                                                                                                                                                                                                                                                                                                                                                                                                                                                                                                                                                                                                                                                                                                                                                                                                                                                                                                                                                                                                                                                                                                                                                                                                                                                                                                                                                                                                                                                                                                                                                                                                                                                                                                                                                                                                                                                                                                                                                                                                                                                                                                                                                                                                                                                                                                                                                                                                                                                                                                                                                                                                                                                                                                                                                                                                                                                                                                                                                                                                                                                                                                                                                                                                                                                                                                                                                                                                                                                                                                                                                                                                                                                                                                                                                                                                                                                                                                                                 | Sydney South West Pathology Service (SSWPS) - Concord Repatriation General Hospital - NSW Health Pathology | NSW Health Pathology - Institute of Clinical Pathology and Medical Research; Westmead Hospital; University of Sydney | CIDM-PH et al.                                                                                                                                                                                                                                                                       |
| EPI_ISL_812519, EPI_ISL_812520                                                                                                                                                                                                                                                                                                                                                                                                                                                                                                                                                                                                                                                                                                                                                                                                                                                                                                                                                                                                                                                                                                                                                                                                                                                                                                                                                                                                                                                                                                                                                                                                                                                                                                                                                                                                                                                                                                                                                                                                                                                                                                                                                                                                                                                                                                                                                                                                                                                                                                                                                                                                                                                                                                                                                                                                                                                                                                                                                                                                                                                                                                                                                                                                                                                                                                                                                                                                                                                                                                                                                                                                                                                                                                                                                                                                                                                                                                                                                                                                                                                                                                                                                                                                                                                                                                                                                                                                                                                                                 | South Eastern Area Laboratory Services (SEALS)                                                             | NSW Health Pathology - Institute of Clinical Pathology and Medical Research; Westmead Hospital; University of Sydney | CIDM-PH et al.                                                                                                                                                                                                                                                                       |
| EPI_ISL_812521                                                                                                                                                                                                                                                                                                                                                                                                                                                                                                                                                                                                                                                                                                                                                                                                                                                                                                                                                                                                                                                                                                                                                                                                                                                                                                                                                                                                                                                                                                                                                                                                                                                                                                                                                                                                                                                                                                                                                                                                                                                                                                                                                                                                                                                                                                                                                                                                                                                                                                                                                                                                                                                                                                                                                                                                                                                                                                                                                                                                                                                                                                                                                                                                                                                                                                                                                                                                                                                                                                                                                                                                                                                                                                                                                                                                                                                                                                                                                                                                                                                                                                                                                                                                                                                                                                                                                                                                                                                                                                 | Pathology North - Royal North Shore Hospital - NSW Health Pathology                                        | NSW Health Pathology - Institute of Clinical Pathology and Medical Research; Westmead Hospital; University of Sydney | CIDM-PH et al.                                                                                                                                                                                                                                                                       |
| EPI_ISL_813368, EPI_ISL_813371, EPI_ISL_813374, EPI_ISL_813375, EPI_ISL_813384, EPI_ISL_813394, EPI_ISL_813395, EPI_ISL_813399, EPI_ISL_813405, EPI_ISL_813408, EPI_ISL_813409, EPI_ISL_813410, EPI_ISL_813415, EPI_ISL_813424, EPI_ISL_813431, EPI_ISL_813442, EPI_ISL_813455, EPI_ISL_813460, EPI_ISL_813492, EPI_ISL_813495, EPI_ISL_813499, EPI_ISL_813501, EPI_ISL_813505, EPI_ISL_813507, EPI_ISL_813510, EPI_ISL_813514, EPI_ISL_813524, EPI_ISL_813526, EPI_ISL_813532, EPI_ISL_813535, EPI_ISL_813538, EPI_ISL_813541, EPI_ISL_813545, EPI_ISL_813548, EPI_ISL_813549, EPI_ISL_813550, EPI_ISL_813551, EPI_ISL_813553, EPI_ISL_813556, EPI_ISL_813558, EPI_ISL_813563, EPI_ISL_813564, EPI_ISL_813574, EPI_ISL_813581, EPI_ISL_813595, EPI_ISL_813597, EPI_ISL_813604, EPI_ISL_813612, EPI_ISL_813621, EPI_ISL_813623, EPI_ISL_813633, EPI_ISL_813636, EPI_ISL_813638, EPI_ISL_813640, EPI_ISL_813641, EPI_ISL_813642, EPI_ISL_813644, EPI_ISL_813648, EPI_ISL_813650                                                                                                                                                                                                                                                                                                                                                                                                                                                                                                                                                                                                                                                                                                                                                                                                                                                                                                                                                                                                                                                                                                                                                                                                                                                                                                                                                                                                                                                                                                                                                                                                                                                                                                                                                                                                                                                                                                                                                                                                                                                                                                                                                                                                                                                                                                                                                                                                                                                                                                                                                                                                                                                                                                                                                                                                                                                                                                                                                                                                                                                                                                                                                                                                                                                                                                                                                                                                                                                                                                                                 | University of Exeter                                                                                       | COVID-19 Genomics UK (COG-UK) Consortium                                                                             | Ben Temperton, Aaron Jeffries, Michelle Michelsen, Joanna Warwick-Dugdale, Audrey Farbos, Robyn Manley, Stephen Michell, Jane Masoli                                                                                                                                                 |
| EPI_ISL_824334, EPI_ISL_824335, EPI_ISL_824336, EPI_ISL_824337, EPI_ISL_824338, EPI_ISL_824339, EPI_ISL_824340, EPI_ISL_824341, EPI_ISL_824342, EPI_ISL_824343, EPI_ISL_824344, EPI_ISL_824345, EPI_ISL_824346, EPI_ISL_824347, EPI_ISL_824348, EPI_ISL_824349, EPI_ISL_824350, EPI_ISL_824351, EPI_ISL_824352, EPI_ISL_824353, EPI_ISL_824354, EPI_ISL_824355, EPI_ISL_824356, EPI_ISL_824357, EPI_ISL_824358, EPI_ISL_824359, EPI_ISL_824360, EPI_ISL_824361, EPI_ISL_824362, EPI_ISL_824363, EPI_ISL_824364, EPI_ISL_824365, EPI_ISL_824366, EPI_ISL_824367, EPI_ISL_824368, EPI_ISL_824369, EPI_ISL_824370, EPI_ISL_824371, EPI_ISL_824372, EPI_ISL_824373, EPI_ISL_824374, EPI_ISL_824375, EPI_ISL_824376, EPI_ISL_824377, EPI_ISL_824378, EPI_ISL_824379, EPI_ISL_824380, EPI_ISL_824381, EPI_ISL_824382, EPI_ISL_824383                                                                                                                                                                                                                                                                                                                                                                                                                                                                                                                                                                                                                                                                                                                                                                                                                                                                                                                                                                                                                                                                                                                                                                                                                                                                                                                                                                                                                                                                                                                                                                                                                                                                                                                                                                                                                                                                                                                                                                                                                                                                                                                                                                                                                                                                                                                                                                                                                                                                                                                                                                                                                                                                                                                                                                                                                                                                                                                                                                                                                                                                                                                                                                                                                                                                                                                                                                                                                                                                                                                                                                                                                                                                                 | Michigan Department of Health and Human Services, Bureau of Laboratories                                   | Michigan Department of Health and Human Services, Bureau of Laboratories                                             | Blankenship HM, Riner D, Soehnlén MK                                                                                                                                                                                                                                                 |
| EPI_ISL_824390, EPI_ISL_824391, EPI_ISL_824392, EPI_ISL_824393, EPI_ISL_824394, EPI_ISL_824395, EPI_ISL_824396, EPI_ISL_824397, EPI_ISL_824398, EPI_ISL_824399, EPI_ISL_824400, EPI_ISL_824401, EPI_ISL_824402, EPI_ISL_824403, EPI_ISL_824404, EPI_ISL_824405, EPI_ISL_824406                                                                                                                                                                                                                                                                                                                                                                                                                                                                                                                                                                                                                                                                                                                                                                                                                                                                                                                                                                                                                                                                                                                                                                                                                                                                                                                                                                                                                                                                                                                                                                                                                                                                                                                                                                                                                                                                                                                                                                                                                                                                                                                                                                                                                                                                                                                                                                                                                                                                                                                                                                                                                                                                                                                                                                                                                                                                                                                                                                                                                                                                                                                                                                                                                                                                                                                                                                                                                                                                                                                                                                                                                                                                                                                                                                                                                                                                                                                                                                                                                                                                                                                                                                                                                                 | California Department of Public Health                                                                     | California Department of Public Health                                                                               | CDPH IDLB COVIDNet                                                                                                                                                                                                                                                                   |
| EPI_ISL_825013                                                                                                                                                                                                                                                                                                                                                                                                                                                                                                                                                                                                                                                                                                                                                                                                                                                                                                                                                                                                                                                                                                                                                                                                                                                                                                                                                                                                                                                                                                                                                                                                                                                                                                                                                                                                                                                                                                                                                                                                                                                                                                                                                                                                                                                                                                                                                                                                                                                                                                                                                                                                                                                                                                                                                                                                                                                                                                                                                                                                                                                                                                                                                                                                                                                                                                                                                                                                                                                                                                                                                                                                                                                                                                                                                                                                                                                                                                                                                                                                                                                                                                                                                                                                                                                                                                                                                                                                                                                                                                 | Johns Hopkins Pathology                                                                                    | Johns Hopkins Hospital Department of Pathology                                                                       | C. Paul Morris, Chun Huai Luo, Adannaya Amadi, Nicholas Gallagher, Heba H. Mostafa                                                                                                                                                                                                   |
| EPI_ISL_825016                                                                                                                                                                                                                                                                                                                                                                                                                                                                                                                                                                                                                                                                                                                                                                                                                                                                                                                                                                                                                                                                                                                                                                                                                                                                                                                                                                                                                                                                                                                                                                                                                                                                                                                                                                                                                                                                                                                                                                                                                                                                                                                                                                                                                                                                                                                                                                                                                                                                                                                                                                                                                                                                                                                                                                                                                                                                                                                                                                                                                                                                                                                                                                                                                                                                                                                                                                                                                                                                                                                                                                                                                                                                                                                                                                                                                                                                                                                                                                                                                                                                                                                                                                                                                                                                                                                                                                                                                                                                                                 | Sydney South West Pathology Service (SSWPS) - Royal Prince Alfred Hospital - NSW Health Pathology          | NSW Health Pathology - Institute of Clinical Pathology and Medical Research; Westmead Hospital; University of Sydney | CIDM-PH et al.                                                                                                                                                                                                                                                                       |
| EPI_ISL_825047                                                                                                                                                                                                                                                                                                                                                                                                                                                                                                                                                                                                                                                                                                                                                                                                                                                                                                                                                                                                                                                                                                                                                                                                                                                                                                                                                                                                                                                                                                                                                                                                                                                                                                                                                                                                                                                                                                                                                                                                                                                                                                                                                                                                                                                                                                                                                                                                                                                                                                                                                                                                                                                                                                                                                                                                                                                                                                                                                                                                                                                                                                                                                                                                                                                                                                                                                                                                                                                                                                                                                                                                                                                                                                                                                                                                                                                                                                                                                                                                                                                                                                                                                                                                                                                                                                                                                                                                                                                                                                 | NHL Municipal Medical College, Ahmedbad                                                                    | Gujarat Biotechnology Research Centre                                                                                | Bimal Chauhan, Dinesh Kumar, Zuber Saiyed, Labdhi Pandya, Afzal Ansari, Nikha Trivedi, Apurvasinh Puvar, Ramesh Pandit, Janvi Raval, Zarna Patel, Nitin Savaliya, Jayshri Pethani, Monila Patel, Atit Shah, NM Shaikh, Tanmay Mehta, Bhavin Prajapati, Chaitanya Joshi, Madhvi Joshi |
| EPI_ISL_825049                                                                                                                                                                                                                                                                                                                                                                                                                                                                                                                                                                                                                                                                                                                                                                                                                                                                                                                                                                                                                                                                                                                                                                                                                                                                                                                                                                                                                                                                                                                                                                                                                                                                                                                                                                                                                                                                                                                                                                                                                                                                                                                                                                                                                                                                                                                                                                                                                                                                                                                                                                                                                                                                                                                                                                                                                                                                                                                                                                                                                                                                                                                                                                                                                                                                                                                                                                                                                                                                                                                                                                                                                                                                                                                                                                                                                                                                                                                                                                                                                                                                                                                                                                                                                                                                                                                                                                                                                                                                                                 | GMERS Medical College and Hospital, Gotri, Vadodara                                                        | Gujarat Biotechnology Research Centre                                                                                | Bithika Duttaroy, Labdhi Pandya, Afzal Ansari, Nikha Trivedi, Apurvasinh Puvar, Ramesh Pandit, Janvi Raval, Zarna Patel, Nitin Savaliya, Dinesh Kumar, Zuber Saiyed, Mitesh Kamothri, Kalpesh Mistry, Chaitanya Joshi, Madhvi Joshi                                                  |
| EPI_ISL_825051                                                                                                                                                                                                                                                                                                                                                                                                                                                                                                                                                                                                                                                                                                                                                                                                                                                                                                                                                                                                                                                                                                                                                                                                                                                                                                                                                                                                                                                                                                                                                                                                                                                                                                                                                                                                                                                                                                                                                                                                                                                                                                                                                                                                                                                                                                                                                                                                                                                                                                                                                                                                                                                                                                                                                                                                                                                                                                                                                                                                                                                                                                                                                                                                                                                                                                                                                                                                                                                                                                                                                                                                                                                                                                                                                                                                                                                                                                                                                                                                                                                                                                                                                                                                                                                                                                                                                                                                                                                                                                 | NHL Municipal Medical College, Ahmedbad                                                                    | Gujarat Biotechnology Research Centre                                                                                | Bhavin Prajapati, Nikha Trivedi, Apurvasinh Puvar, Ramesh Pandit, Janvi Raval, Zarna Patel, Nitin Savaliya, Dinesh Kumar, Zuber Saiyed, Labdhi Pandya, Afzal Ansari, Jayshri Pethani, Monila Patel, Atit Shah, NM Shaikh, Bimal Chauhan, Tanmay Mehta, Chaitanya Joshi, Madhvi Joshi |
| EPI_ISL_831664, EPI_ISL_831665, EPI_ISL_831671, EPI_ISL_831676                                                                                                                                                                                                                                                                                                                                                                                                                                                                                                                                                                                                                                                                                                                                                                                                                                                                                                                                                                                                                                                                                                                                                                                                                                                                                                                                                                                                                                                                                                                                                                                                                                                                                                                                                                                                                                                                                                                                                                                                                                                                                                                                                                                                                                                                                                                                                                                                                                                                                                                                                                                                                                                                                                                                                                                                                                                                                                                                                                                                                                                                                                                                                                                                                                                                                                                                                                                                                                                                                                                                                                                                                                                                                                                                                                                                                                                                                                                                                                                                                                                                                                                                                                                                                                                                                                                                                                                                                                                 | Institute of Virology, Biomedical Research Center of the Slovak Academy of Sciences, Bratislava            | Faculty of Natural Sciences, Comenius University, Bratislava                                                         | Broa Brejová, Viktória abanová, Kristína Boršová, Viktória Hodorová, Sabina Fumaová Havlíková, Juraj Kopáek, Martina Liková, ubomíra Lukáiková, Martina Neboháová, Monika Slávková, Tomáš Vína, Jozef Nosek, Boris Klempa                                                            |
| EPI_ISL_832127                                                                                                                                                                                                                                                                                                                                                                                                                                                                                                                                                                                                                                                                                                                                                                                                                                                                                                                                                                                                                                                                                                                                                                                                                                                                                                                                                                                                                                                                                                                                                                                                                                                                                                                                                                                                                                                                                                                                                                                                                                                                                                                                                                                                                                                                                                                                                                                                                                                                                                                                                                                                                                                                                                                                                                                                                                                                                                                                                                                                                                                                                                                                                                                                                                                                                                                                                                                                                                                                                                                                                                                                                                                                                                                                                                                                                                                                                                                                                                                                                                                                                                                                                                                                                                                                                                                                                                                                                                                                                                 | Michigan Department of Health and Human Services, Bureau of Laboratories                                   | Michigan Department of Health and Human Services, Bureau of Laboratories                                             | Blankenship HM, Riner D, Soehnlén MK                                                                                                                                                                                                                                                 |
| EPI_ISL_832405, EPI_ISL_832407, EPI_ISL_832408, EPI_ISL_832409, EPI_ISL_832410, EPI_ISL_832411, EPI_ISL_832412, EPI_ISL_832413, EPI_ISL_832414, EPI_ISL_832415, EPI_ISL_832416, EPI_ISL_832417, EPI_ISL_832418, EPI_ISL_832419, EPI_ISL_832420, EPI_ISL_832421, EPI_ISL_832422, EPI_ISL_832423, EPI_ISL_832424, EPI_ISL_832425, EPI_ISL_832426, EPI_ISL_832427, EPI_ISL_832428, EPI_ISL_832429, EPI_ISL_832430, EPI_ISL_832431, EPI_ISL_832432, EPI_ISL_832433, EPI_ISL_832434, EPI_ISL_832435, EPI_ISL_832436, EPI_ISL_832437, EPI_ISL_832438, EPI_ISL_832439, EPI_ISL_832440, EPI_ISL_832441, EPI_ISL_832442, EPI_ISL_832443, EPI_ISL_832444, EPI_ISL_832445, EPI_ISL_832446, EPI_ISL_832447, EPI_ISL_832448, EPI_ISL_832449, EPI_ISL_832450, EPI_ISL_832451, EPI_ISL_832452, EPI_ISL_832453, EPI_ISL_832454, EPI_ISL_832455, EPI_ISL_832456, EPI_ISL_832457, EPI_ISL_832458, EPI_ISL_832459, EPI_ISL_832460, EPI_ISL_832461, EPI_ISL_832462, EPI_ISL_832463, EPI_ISL_832464, EPI_ISL_832465, EPI_ISL_832466, EPI_ISL_832467, EPI_ISL_832468, EPI_ISL_832469, EPI_ISL_832470, EPI_ISL_832471, EPI_ISL_832472, EPI_ISL_832473, EPI_ISL_832474, EPI_ISL_832475, EPI_ISL_832476, EPI_ISL_832477, EPI_ISL_832478, EPI_ISL_832479, EPI_ISL_832480, EPI_ISL_832481, EPI_ISL_832482, EPI_ISL_832483, EPI_ISL_832484, EPI_ISL_832485, EPI_ISL_832486, EPI_ISL_832487, EPI_ISL_832488, EPI_ISL_832489, EPI_ISL_832490, EPI_ISL_832491, EPI_ISL_832492, EPI_ISL_832493, EPI_ISL_832494, EPI_ISL_832495, EPI_ISL_832496, EPI_ISL_832497, EPI_ISL_832498, EPI_ISL_832499, EPI_ISL_832500, EPI_ISL_832501, EPI_ISL_832502, EPI_ISL_832503, EPI_ISL_832504, EPI_ISL_832505, EPI_ISL_832506, EPI_ISL_832507, EPI_ISL_832508, EPI_ISL_832509, EPI_ISL_832510, EPI_ISL_832511, EPI_ISL_832512, EPI_ISL_832513, EPI_ISL_832514, EPI_ISL_832515, EPI_ISL_832516, EPI_ISL_832517, EPI_ISL_832518, EPI_ISL_832519, EPI_ISL_832520, EPI_ISL_832521, EPI_ISL_832522, EPI_ISL_832523, EPI_ISL_832524, EPI_ISL_832525, EPI_ISL_832526, EPI_ISL_832527, EPI_ISL_832528, EPI_ISL_832529, EPI_ISL_832530, EPI_ISL_832531, EPI_ISL_832532, EPI_ISL_832533, EPI_ISL_832534, EPI_ISL_832535, EPI_ISL_832536, EPI_ISL_832537, EPI_ISL_832538, EPI_ISL_832539, EPI_ISL_832540, EPI_ISL_832541, EPI_ISL_832542, EPI_ISL_832543, EPI_ISL_832544, EPI_ISL_832545, EPI_ISL_832546, EPI_ISL_832547, EPI_ISL_832548, EPI_ISL_832549, EPI_ISL_832550, EPI_ISL_832551, EPI_ISL_832552, EPI_ISL_832553, EPI_ISL_832554, EPI_ISL_832555, EPI_ISL_832556, EPI_ISL_832557, EPI_ISL_832558, EPI_ISL_832559, EPI_ISL_832560, EPI_ISL_832561, EPI_ISL_832562, EPI_ISL_832563, EPI_ISL_832564, EPI_ISL_832565, EPI_ISL_832566, EPI_ISL_832567, EPI_ISL_832568, EPI_ISL_832569, EPI_ISL_832570, EPI_ISL_832571, EPI_ISL_832572, EPI_ISL_832573, EPI_ISL_832574, EPI_ISL_832575, EPI_ISL_832576, EPI_ISL_832577, EPI_ISL_832578, EPI_ISL_832579, EPI_ISL_832580, EPI_ISL_832581, EPI_ISL_832582, EPI_ISL_832583, EPI_ISL_832584, EPI_ISL_832585, EPI_ISL_832586, EPI_ISL_832587, EPI_ISL_832588, EPI_ISL_832589, EPI_ISL_832590, EPI_ISL_832591, EPI_ISL_832592, EPI_ISL_832593, EPI_ISL_832594, EPI_ISL_832595, EPI_ISL_832596, EPI_ISL_832597, EPI_ISL_832598, EPI_ISL_832599, EPI_ISL_832600, EPI_ISL_832601, EPI_ISL_832602, EPI_ISL_832603, EPI_ISL_832604, EPI_ISL_832605, EPI_ISL_832606, EPI_ISL_832607, EPI_ISL_832608, EPI_ISL_832609, EPI_ISL_832610, EPI_ISL_832611, EPI_ISL_832612, EPI_ISL_832613, EPI_ISL_832614, EPI_ISL_832615, EPI_ISL_832616, EPI_ISL_832617, EPI_ISL_832618, EPI_ISL_832619, EPI_ISL_832620, EPI_ISL_832621, EPI_ISL_832622, EPI_ISL_832623, EPI_ISL_832624, EPI_ISL_832625, EPI_ISL_832626, EPI_ISL_832627, EPI_ISL_832628, EPI_ISL_832629, EPI_ISL_832630, EPI_ISL_832631, EPI_ISL_832632, EPI_ISL_832633, EPI_ISL_832634, EPI_ISL_832635, EPI_ISL_832636, EPI_ISL_832637, EPI_ISL_832638, EPI_ISL_832639, EPI_ISL_832640, EPI_ISL_832641, EPI_ISL_832642, EPI_ISL_832643, EPI_ISL_832644, EPI_ISL_832645, EPI_ISL_832646, EPI_ISL_832647, EPI_ISL_832648, EPI_ISL_832649, EPI_ISL_832650, EPI_ISL_832651, EPI_ISL_832652, EPI_ISL_832653, EPI_ISL_832654, EPI_ISL_832655, EPI_ISL_832656, EPI_ISL_832657, EPI_ISL_832658, EPI_ISL_832659, EPI_ISL_832660, EPI_ISL_832661, EPI_ISL_832662, EPI_ISL_832663, EPI_ISL_832664, EPI_ISL_832665, EPI_ISL_832666, EPI_ISL_832667, EPI_ISL_832668, EPI_ISL_832669, EPI_ISL_832670, EPI_ISL_832671, EPI_ISL_832672, EPI_ISL_832673, EPI_ISL_832674, EPI_ISL_832675, EPI_ISL_832676 | Michigan Department of Health and Human Services, Bureau of Laboratories                                   | Michigan Department of Health and Human Services, Bureau of Laboratories                                             | Blankenship HM, Riner D, Soehnlén MK                                                                                                                                                                                                                                                 |

|                                                                                                                                                                                                                                                                                                                                                                                                                                                                                                                                                                                                                                                                                                                                                                                                                                                                                                                                                                                                                                                                                                                                                                                                                                                                                                                                                                                                                                                                                                                                                                                                                                                                                                                                                                                                                                                                                                                                                                                                                                                                                                                                                                                                                                                                                                                                                                                                                                                                                                                                                                                                                                                                                                                                                                                                                                                                                |                                                                                                   |                                                                                                                      |                                                                                                                                      |                                                                                                                                                                                                                                                                                                                                                                                                                                                                                                                                                                                                                                                                                                                   |
|--------------------------------------------------------------------------------------------------------------------------------------------------------------------------------------------------------------------------------------------------------------------------------------------------------------------------------------------------------------------------------------------------------------------------------------------------------------------------------------------------------------------------------------------------------------------------------------------------------------------------------------------------------------------------------------------------------------------------------------------------------------------------------------------------------------------------------------------------------------------------------------------------------------------------------------------------------------------------------------------------------------------------------------------------------------------------------------------------------------------------------------------------------------------------------------------------------------------------------------------------------------------------------------------------------------------------------------------------------------------------------------------------------------------------------------------------------------------------------------------------------------------------------------------------------------------------------------------------------------------------------------------------------------------------------------------------------------------------------------------------------------------------------------------------------------------------------------------------------------------------------------------------------------------------------------------------------------------------------------------------------------------------------------------------------------------------------------------------------------------------------------------------------------------------------------------------------------------------------------------------------------------------------------------------------------------------------------------------------------------------------------------------------------------------------------------------------------------------------------------------------------------------------------------------------------------------------------------------------------------------------------------------------------------------------------------------------------------------------------------------------------------------------------------------------------------------------------------------------------------------------|---------------------------------------------------------------------------------------------------|----------------------------------------------------------------------------------------------------------------------|--------------------------------------------------------------------------------------------------------------------------------------|-------------------------------------------------------------------------------------------------------------------------------------------------------------------------------------------------------------------------------------------------------------------------------------------------------------------------------------------------------------------------------------------------------------------------------------------------------------------------------------------------------------------------------------------------------------------------------------------------------------------------------------------------------------------------------------------------------------------|
| EPI_ISL_832677, EPI_ISL_832678, EPI_ISL_832679, EPI_ISL_832680, EPI_ISL_832681, EPI_ISL_832682, EPI_ISL_832683, EPI_ISL_832684, EPI_ISL_832685, EPI_ISL_832686, EPI_ISL_832687, EPI_ISL_832688, EPI_ISL_832689, EPI_ISL_832690, EPI_ISL_832691, EPI_ISL_832692, EPI_ISL_832693, EPI_ISL_832694, EPI_ISL_832695, EPI_ISL_832696, EPI_ISL_832697, EPI_ISL_832698, EPI_ISL_832699, EPI_ISL_832700, EPI_ISL_832701, EPI_ISL_832702, EPI_ISL_832703, EPI_ISL_832704, EPI_ISL_832705, EPI_ISL_832706, EPI_ISL_832707, EPI_ISL_832708, EPI_ISL_832709, EPI_ISL_832710, EPI_ISL_832711, EPI_ISL_832712, EPI_ISL_832713, EPI_ISL_832714, EPI_ISL_832715, EPI_ISL_832716, EPI_ISL_832717, EPI_ISL_832718, EPI_ISL_832719, EPI_ISL_832720, EPI_ISL_832721, EPI_ISL_832722, EPI_ISL_832723, EPI_ISL_832724, EPI_ISL_832725, EPI_ISL_832726, EPI_ISL_832727, EPI_ISL_832728, EPI_ISL_832729, EPI_ISL_832730, EPI_ISL_832731, EPI_ISL_832732, EPI_ISL_832733, EPI_ISL_832734, EPI_ISL_832735, EPI_ISL_832736, EPI_ISL_832737, EPI_ISL_832738, EPI_ISL_832739, EPI_ISL_832740, EPI_ISL_832741, EPI_ISL_832742, EPI_ISL_832743, EPI_ISL_832744, EPI_ISL_832745, EPI_ISL_832746, EPI_ISL_832747, EPI_ISL_832748, EPI_ISL_832749, EPI_ISL_832750, EPI_ISL_832751, EPI_ISL_832752, EPI_ISL_832753, EPI_ISL_832754, EPI_ISL_832755, EPI_ISL_832756, EPI_ISL_832757, EPI_ISL_832758, EPI_ISL_832759, EPI_ISL_832760, EPI_ISL_832761, EPI_ISL_832762, EPI_ISL_832763, EPI_ISL_832764, EPI_ISL_832765, EPI_ISL_832766, EPI_ISL_832767, EPI_ISL_832768, EPI_ISL_832769, EPI_ISL_832770, EPI_ISL_832771, EPI_ISL_832772, EPI_ISL_832773, EPI_ISL_832774, EPI_ISL_832775, EPI_ISL_832776, EPI_ISL_832777, EPI_ISL_832778, EPI_ISL_832779, EPI_ISL_832780, EPI_ISL_832781, EPI_ISL_832782, EPI_ISL_832783, EPI_ISL_832784, EPI_ISL_832785, EPI_ISL_832786, EPI_ISL_832787, EPI_ISL_832788, EPI_ISL_832789, EPI_ISL_832790, EPI_ISL_832791, EPI_ISL_832792, EPI_ISL_832793, EPI_ISL_832794, EPI_ISL_832795, EPI_ISL_832796, EPI_ISL_832797, EPI_ISL_832798, EPI_ISL_832800, EPI_ISL_832801, EPI_ISL_832803, EPI_ISL_832805, EPI_ISL_832810, EPI_ISL_832811, EPI_ISL_832812, EPI_ISL_832813, EPI_ISL_832814                                                                                                                                                                                                                                                                                                                                                                                                                                                                                                                                                                                                                                                                                                 | see above                                                                                         | OHSU Lab Services Molecular Microbiology Lab                                                                         | Oregon SARS-CoV-2 Genome Sequencing Center                                                                                           | Brendan L. O'Connell, Ruth V. Nichols, Sally Grindstaff, Alec J. Hirsch, Donna Hansel, Guang Fan, Daniel N. Streblov, William B. Messer, Andrew C. Adey, Benjamin N. Bimber, Brian J. O'Roak                                                                                                                                                                                                                                                                                                                                                                                                                                                                                                                      |
| EPI_ISL_838317, EPI_ISL_838320, EPI_ISL_838323, EPI_ISL_838324, EPI_ISL_838327, EPI_ISL_838331, EPI_ISL_838336                                                                                                                                                                                                                                                                                                                                                                                                                                                                                                                                                                                                                                                                                                                                                                                                                                                                                                                                                                                                                                                                                                                                                                                                                                                                                                                                                                                                                                                                                                                                                                                                                                                                                                                                                                                                                                                                                                                                                                                                                                                                                                                                                                                                                                                                                                                                                                                                                                                                                                                                                                                                                                                                                                                                                                 | University of Exeter                                                                              | COVID-19 Genomics UK (COG-UK) Consortium                                                                             | Ben Temperton, Aaron Jeffries, Michelle Michelsen, Joanna Warwick-Dugdale, Audrey Farbos, Robyn Manley, Stephen Michell, Jane Masoli |                                                                                                                                                                                                                                                                                                                                                                                                                                                                                                                                                                                                                                                                                                                   |
| EPI_ISL_842793, EPI_ISL_842795, EPI_ISL_842796, EPI_ISL_842798, EPI_ISL_842801, EPI_ISL_842802, EPI_ISL_842804, EPI_ISL_842806, EPI_ISL_842808, EPI_ISL_842809, EPI_ISL_842814, EPI_ISL_842818, EPI_ISL_842820, EPI_ISL_842822, EPI_ISL_842823, EPI_ISL_842834, EPI_ISL_842836, EPI_ISL_842838, EPI_ISL_842843, EPI_ISL_842845, EPI_ISL_842847, EPI_ISL_842853, EPI_ISL_842858, EPI_ISL_842864, EPI_ISL_842866, EPI_ISL_842867, EPI_ISL_842870, EPI_ISL_842877, EPI_ISL_842886, EPI_ISL_842890, EPI_ISL_842894, EPI_ISL_842896, EPI_ISL_842905, EPI_ISL_842914, EPI_ISL_842915, EPI_ISL_842917, EPI_ISL_842918, EPI_ISL_842921, EPI_ISL_842923, EPI_ISL_842926, EPI_ISL_842931, EPI_ISL_842933, EPI_ISL_842935, EPI_ISL_842943, EPI_ISL_842946, EPI_ISL_842948, EPI_ISL_842949, EPI_ISL_842961, EPI_ISL_842965, EPI_ISL_842966, EPI_ISL_842968, EPI_ISL_842970, EPI_ISL_842974, EPI_ISL_842989, EPI_ISL_842990, EPI_ISL_842995, EPI_ISL_842996, EPI_ISL_842997, EPI_ISL_843000, EPI_ISL_843002, EPI_ISL_843004, EPI_ISL_843005, EPI_ISL_843011, EPI_ISL_843013, EPI_ISL_843020, EPI_ISL_843023, EPI_ISL_843031, EPI_ISL_843034, EPI_ISL_843036, EPI_ISL_843050, EPI_ISL_843051, EPI_ISL_843052, EPI_ISL_843054, EPI_ISL_843068, EPI_ISL_843071, EPI_ISL_843075, EPI_ISL_843078, EPI_ISL_843081, EPI_ISL_843085, EPI_ISL_843086, EPI_ISL_843088, EPI_ISL_843089, EPI_ISL_843091, EPI_ISL_843096, EPI_ISL_843100, EPI_ISL_843107, EPI_ISL_843109, EPI_ISL_843114, EPI_ISL_843117, EPI_ISL_843121, EPI_ISL_843127, EPI_ISL_843140, EPI_ISL_843142, EPI_ISL_843145                                                                                                                                                                                                                                                                                                                                                                                                                                                                                                                                                                                                                                                                                                                                                                                                                                                                                                                                                                                                                                                                                                                                                                                                                                                                                                                 | see above                                                                                         | Barts Health NHS Trust                                                                                               | COVID-19 Genomics UK (COG-UK) Consortium                                                                                             | CUTINO-MOGUEL, Maria-Teresa; HARRINGTON, David; OWOYEMI, Dola; SHYLINI, Raghavendran; BROAD, Claire; KELE, Beatrix                                                                                                                                                                                                                                                                                                                                                                                                                                                                                                                                                                                                |
| EPI_ISL_845784, EPI_ISL_845785, EPI_ISL_845786, EPI_ISL_845787, EPI_ISL_845788, EPI_ISL_845789, EPI_ISL_845790, EPI_ISL_845791, EPI_ISL_845792, EPI_ISL_845793, EPI_ISL_845794, EPI_ISL_845795                                                                                                                                                                                                                                                                                                                                                                                                                                                                                                                                                                                                                                                                                                                                                                                                                                                                                                                                                                                                                                                                                                                                                                                                                                                                                                                                                                                                                                                                                                                                                                                                                                                                                                                                                                                                                                                                                                                                                                                                                                                                                                                                                                                                                                                                                                                                                                                                                                                                                                                                                                                                                                                                                 | see above                                                                                         | South Eastern Area Laboratory Services (SEALS)                                                                       | NSW Health Pathology - Institute of Clinical Pathology and Medical Research; Westmead Hospital; University of Sydney                 | CIDM-PH et al.                                                                                                                                                                                                                                                                                                                                                                                                                                                                                                                                                                                                                                                                                                    |
| EPI_ISL_845796                                                                                                                                                                                                                                                                                                                                                                                                                                                                                                                                                                                                                                                                                                                                                                                                                                                                                                                                                                                                                                                                                                                                                                                                                                                                                                                                                                                                                                                                                                                                                                                                                                                                                                                                                                                                                                                                                                                                                                                                                                                                                                                                                                                                                                                                                                                                                                                                                                                                                                                                                                                                                                                                                                                                                                                                                                                                 | Histopath                                                                                         | NSW Health Pathology - Institute of Clinical Pathology and Medical Research; Westmead Hospital; University of Sydney | CIDM-PH et al.                                                                                                                       |                                                                                                                                                                                                                                                                                                                                                                                                                                                                                                                                                                                                                                                                                                                   |
| EPI_ISL_845797                                                                                                                                                                                                                                                                                                                                                                                                                                                                                                                                                                                                                                                                                                                                                                                                                                                                                                                                                                                                                                                                                                                                                                                                                                                                                                                                                                                                                                                                                                                                                                                                                                                                                                                                                                                                                                                                                                                                                                                                                                                                                                                                                                                                                                                                                                                                                                                                                                                                                                                                                                                                                                                                                                                                                                                                                                                                 | South Eastern Area Laboratory Services (SEALS)                                                    | NSW Health Pathology - Institute of Clinical Pathology and Medical Research; Westmead Hospital; University of Sydney | CIDM-PH et al.                                                                                                                       |                                                                                                                                                                                                                                                                                                                                                                                                                                                                                                                                                                                                                                                                                                                   |
| EPI_ISL_845798, EPI_ISL_845799                                                                                                                                                                                                                                                                                                                                                                                                                                                                                                                                                                                                                                                                                                                                                                                                                                                                                                                                                                                                                                                                                                                                                                                                                                                                                                                                                                                                                                                                                                                                                                                                                                                                                                                                                                                                                                                                                                                                                                                                                                                                                                                                                                                                                                                                                                                                                                                                                                                                                                                                                                                                                                                                                                                                                                                                                                                 | Sydney South West Pathology Service (SSWPS) - Royal Prince Alfred Hospital - NSW Health Pathology | NSW Health Pathology - Institute of Clinical Pathology and Medical Research; Westmead Hospital; University of Sydney | CIDM-PH et al.                                                                                                                       |                                                                                                                                                                                                                                                                                                                                                                                                                                                                                                                                                                                                                                                                                                                   |
| EPI_ISL_845802, EPI_ISL_845803, EPI_ISL_845804                                                                                                                                                                                                                                                                                                                                                                                                                                                                                                                                                                                                                                                                                                                                                                                                                                                                                                                                                                                                                                                                                                                                                                                                                                                                                                                                                                                                                                                                                                                                                                                                                                                                                                                                                                                                                                                                                                                                                                                                                                                                                                                                                                                                                                                                                                                                                                                                                                                                                                                                                                                                                                                                                                                                                                                                                                 | Medlab Pathology                                                                                  | NSW Health Pathology - Institute of Clinical Pathology and Medical Research; Westmead Hospital; University of Sydney | CIDM-PH et al.                                                                                                                       |                                                                                                                                                                                                                                                                                                                                                                                                                                                                                                                                                                                                                                                                                                                   |
| EPI_ISL_845805, EPI_ISL_845806                                                                                                                                                                                                                                                                                                                                                                                                                                                                                                                                                                                                                                                                                                                                                                                                                                                                                                                                                                                                                                                                                                                                                                                                                                                                                                                                                                                                                                                                                                                                                                                                                                                                                                                                                                                                                                                                                                                                                                                                                                                                                                                                                                                                                                                                                                                                                                                                                                                                                                                                                                                                                                                                                                                                                                                                                                                 | Sydney South West Pathology Service (SSWPS) - Royal Prince Alfred Hospital - NSW Health Pathology | NSW Health Pathology - Institute of Clinical Pathology and Medical Research; Westmead Hospital; University of Sydney | CIDM-PH et al.                                                                                                                       |                                                                                                                                                                                                                                                                                                                                                                                                                                                                                                                                                                                                                                                                                                                   |
| EPI_ISL_847978, EPI_ISL_847979, EPI_ISL_847980, EPI_ISL_847981, EPI_ISL_847982, EPI_ISL_847983, EPI_ISL_847984, EPI_ISL_847985, EPI_ISL_847986, EPI_ISL_847987, EPI_ISL_847988, EPI_ISL_847989, EPI_ISL_847990, EPI_ISL_847991, EPI_ISL_847992, EPI_ISL_847993, EPI_ISL_847994, EPI_ISL_847995, EPI_ISL_847996, EPI_ISL_847997, EPI_ISL_847998, EPI_ISL_847999, EPI_ISL_848000, EPI_ISL_848001, EPI_ISL_848002, EPI_ISL_848003, EPI_ISL_848004, EPI_ISL_848005, EPI_ISL_848006, EPI_ISL_848007, EPI_ISL_848008, EPI_ISL_848009, EPI_ISL_848010, EPI_ISL_848011, EPI_ISL_848012, EPI_ISL_848013, EPI_ISL_848014, EPI_ISL_848015, EPI_ISL_848016, EPI_ISL_848017, EPI_ISL_848018, EPI_ISL_848019, EPI_ISL_848020, EPI_ISL_848021, EPI_ISL_848022, EPI_ISL_848023, EPI_ISL_848024, EPI_ISL_848025, EPI_ISL_848026, EPI_ISL_848027, EPI_ISL_848028, EPI_ISL_848029, EPI_ISL_848030, EPI_ISL_848031, EPI_ISL_848032, EPI_ISL_848033, EPI_ISL_848034, EPI_ISL_848035, EPI_ISL_848036, EPI_ISL_848037, EPI_ISL_848038, EPI_ISL_848039, EPI_ISL_848040, EPI_ISL_848041, EPI_ISL_848042, EPI_ISL_848043, EPI_ISL_848044, EPI_ISL_848045, EPI_ISL_848046, EPI_ISL_848047, EPI_ISL_848048, EPI_ISL_848049, EPI_ISL_848050, EPI_ISL_848051, EPI_ISL_848052, EPI_ISL_848053, EPI_ISL_848054, EPI_ISL_848055, EPI_ISL_848056, EPI_ISL_848057, EPI_ISL_848058, EPI_ISL_848059, EPI_ISL_848060, EPI_ISL_848061, EPI_ISL_848062                                                                                                                                                                                                                                                                                                                                                                                                                                                                                                                                                                                                                                                                                                                                                                                                                                                                                                                                                                                                                                                                                                                                                                                                                                                                                                                                                                                                                                                                 | see above                                                                                         | Michigan Department of Health and Human Services, Bureau of Laboratories                                             | Michigan Department of Health and Human Services, Bureau of Laboratories                                                             | Blankenship HM, Riner D, Soehnlén MK                                                                                                                                                                                                                                                                                                                                                                                                                                                                                                                                                                                                                                                                              |
| EPI_ISL_855186, EPI_ISL_855187, EPI_ISL_855188, EPI_ISL_855189, EPI_ISL_855190, EPI_ISL_855191, EPI_ISL_855192, EPI_ISL_855193, EPI_ISL_855194, EPI_ISL_855195, EPI_ISL_855196, EPI_ISL_855197, EPI_ISL_855198, EPI_ISL_855199, EPI_ISL_855200, EPI_ISL_855201, EPI_ISL_855202, EPI_ISL_855203, EPI_ISL_855204, EPI_ISL_855205, EPI_ISL_855206, EPI_ISL_855207, EPI_ISL_855208, EPI_ISL_855209, EPI_ISL_855210, EPI_ISL_855211, EPI_ISL_855212, EPI_ISL_855213, EPI_ISL_855214, EPI_ISL_855215, EPI_ISL_855216, EPI_ISL_855217, EPI_ISL_855218, EPI_ISL_855219, EPI_ISL_855220, EPI_ISL_855221, EPI_ISL_855222, EPI_ISL_855223, EPI_ISL_855224, EPI_ISL_855225, EPI_ISL_855226, EPI_ISL_855227, EPI_ISL_855228, EPI_ISL_855229, EPI_ISL_855230, EPI_ISL_855231, EPI_ISL_855232, EPI_ISL_855233, EPI_ISL_855234, EPI_ISL_855235, EPI_ISL_855236, EPI_ISL_855237, EPI_ISL_855238, EPI_ISL_855239, EPI_ISL_855240, EPI_ISL_855241, EPI_ISL_855242, EPI_ISL_855243, EPI_ISL_855244, EPI_ISL_855245, EPI_ISL_855246, EPI_ISL_855247, EPI_ISL_855248, EPI_ISL_855249, EPI_ISL_855250, EPI_ISL_855251, EPI_ISL_855252, EPI_ISL_855253, EPI_ISL_855254, EPI_ISL_855255, EPI_ISL_855256, EPI_ISL_855257, EPI_ISL_855258, EPI_ISL_855259, EPI_ISL_855260, EPI_ISL_855261, EPI_ISL_855262, EPI_ISL_855263, EPI_ISL_855264, EPI_ISL_855265, EPI_ISL_855266, EPI_ISL_855267, EPI_ISL_855268, EPI_ISL_855269, EPI_ISL_855270, EPI_ISL_855271, EPI_ISL_855272, EPI_ISL_855273, EPI_ISL_855274, EPI_ISL_855275, EPI_ISL_855276, EPI_ISL_855277, EPI_ISL_855278, EPI_ISL_855279, EPI_ISL_855280, EPI_ISL_855281, EPI_ISL_855282, EPI_ISL_855283, EPI_ISL_855284, EPI_ISL_855285, EPI_ISL_855286, EPI_ISL_855287, EPI_ISL_855288, EPI_ISL_855289, EPI_ISL_855290, EPI_ISL_855291, EPI_ISL_855292, EPI_ISL_855293, EPI_ISL_855294, EPI_ISL_855295, EPI_ISL_855296, EPI_ISL_855297, EPI_ISL_855298, EPI_ISL_855299, EPI_ISL_855300, EPI_ISL_855301, EPI_ISL_855302, EPI_ISL_855303, EPI_ISL_855304, EPI_ISL_855305, EPI_ISL_855306, EPI_ISL_855307, EPI_ISL_855308, EPI_ISL_855309, EPI_ISL_855310, EPI_ISL_855311, EPI_ISL_855312, EPI_ISL_855313, EPI_ISL_855314, EPI_ISL_855315, EPI_ISL_855316, EPI_ISL_855317, EPI_ISL_855318, EPI_ISL_855319, EPI_ISL_855320, EPI_ISL_855321, EPI_ISL_855322, EPI_ISL_855323, EPI_ISL_855324, EPI_ISL_855325, EPI_ISL_855326, EPI_ISL_855327, EPI_ISL_855328, EPI_ISL_855329, EPI_ISL_855330, EPI_ISL_855331, EPI_ISL_855332, EPI_ISL_855333, EPI_ISL_855334, EPI_ISL_855335, EPI_ISL_855336, EPI_ISL_855337, EPI_ISL_855338, EPI_ISL_855339                                                                                                                                                                                                                                                                                                                 | see above                                                                                         | Institute for Computational Biomedicine, Weill Cornell Medicine                                                      | Institute for Computational Biomedicine, Weill Cornell Medicine                                                                      | Butler, D.J., Mozsary, C., Meydan, C., Danko, D., Foox, J., Rosiene, J., Shaiber, A., Afshinnekoo, E., MacKay, M., Sedlaczek, F.J., Ivanov, N.A., Sierra, M., Pohle, D., Zietz, M., Gisladottir, U., Ramialil, V., Westover, C.D., Ryon, K., Young, B., Bhattacharya, C., Ruggiero, P., Langhorst, B.W., Tanner, N., Gawrys, J., Meleshko, D., Xu, D., Steel, P.A.D., Shemesh, A.J., Xiang, J., Thierry-Mieg, J., Thierry-Mieg, D., Schwartz, R.E., Iftner, A., Bezdán, D., Siple, J., Cong, L., Craney, A., Velu, P., Melnick, A.M., Hajirasouliha, I., Horner, S.M., Iftner, T., Salvatore, M., Loda, M., Westblade, L.F., Cushing, M., Levy, S., Wu, S., Tatonetti, N., Imielski, M., Rennett, H., Mason, C.E. |
| EPI_ISL_855549                                                                                                                                                                                                                                                                                                                                                                                                                                                                                                                                                                                                                                                                                                                                                                                                                                                                                                                                                                                                                                                                                                                                                                                                                                                                                                                                                                                                                                                                                                                                                                                                                                                                                                                                                                                                                                                                                                                                                                                                                                                                                                                                                                                                                                                                                                                                                                                                                                                                                                                                                                                                                                                                                                                                                                                                                                                                 | Barts Health NHS Trust                                                                            | Barts Health NHS Trust                                                                                               | CUTINO-MOGUEL, Maria-Teresa; HARRINGTON, David; OWOYEMI, Dola; KULASEGARAN-SHYLINI, Raghavendran; BROAD, Claire; KELE, Beatrix       |                                                                                                                                                                                                                                                                                                                                                                                                                                                                                                                                                                                                                                                                                                                   |
| EPI_ISL_857308                                                                                                                                                                                                                                                                                                                                                                                                                                                                                                                                                                                                                                                                                                                                                                                                                                                                                                                                                                                                                                                                                                                                                                                                                                                                                                                                                                                                                                                                                                                                                                                                                                                                                                                                                                                                                                                                                                                                                                                                                                                                                                                                                                                                                                                                                                                                                                                                                                                                                                                                                                                                                                                                                                                                                                                                                                                                 | South Eastern Area Laboratory Services (SEALS)                                                    | NSW Health Pathology - Institute of Clinical Pathology and Medical Research; Westmead Hospital; University of Sydney | CIDM-PH et al.                                                                                                                       |                                                                                                                                                                                                                                                                                                                                                                                                                                                                                                                                                                                                                                                                                                                   |
| EPI_ISL_857309                                                                                                                                                                                                                                                                                                                                                                                                                                                                                                                                                                                                                                                                                                                                                                                                                                                                                                                                                                                                                                                                                                                                                                                                                                                                                                                                                                                                                                                                                                                                                                                                                                                                                                                                                                                                                                                                                                                                                                                                                                                                                                                                                                                                                                                                                                                                                                                                                                                                                                                                                                                                                                                                                                                                                                                                                                                                 | Medlab Pathology                                                                                  | NSW Health Pathology - Institute of Clinical Pathology and Medical Research; Westmead Hospital; University of Sydney | CIDM-PH et al.                                                                                                                       |                                                                                                                                                                                                                                                                                                                                                                                                                                                                                                                                                                                                                                                                                                                   |
| EPI_ISL_857310, EPI_ISL_857311, EPI_ISL_857312, EPI_ISL_857313                                                                                                                                                                                                                                                                                                                                                                                                                                                                                                                                                                                                                                                                                                                                                                                                                                                                                                                                                                                                                                                                                                                                                                                                                                                                                                                                                                                                                                                                                                                                                                                                                                                                                                                                                                                                                                                                                                                                                                                                                                                                                                                                                                                                                                                                                                                                                                                                                                                                                                                                                                                                                                                                                                                                                                                                                 | South Eastern Area Laboratory Services (SEALS)                                                    | NSW Health Pathology - Institute of Clinical Pathology and Medical Research; Westmead Hospital; University of Sydney | CIDM-PH et al.                                                                                                                       |                                                                                                                                                                                                                                                                                                                                                                                                                                                                                                                                                                                                                                                                                                                   |
| EPI_ISL_860932, EPI_ISL_860933, EPI_ISL_860934, EPI_ISL_860935, EPI_ISL_860936, EPI_ISL_860937, EPI_ISL_860938, EPI_ISL_860939, EPI_ISL_860940, EPI_ISL_860941, EPI_ISL_860942, EPI_ISL_860943, EPI_ISL_860944, EPI_ISL_860945, EPI_ISL_860946, EPI_ISL_860947, EPI_ISL_860948, EPI_ISL_860949, EPI_ISL_860950, EPI_ISL_860951, EPI_ISL_860952, EPI_ISL_860953, EPI_ISL_860954, EPI_ISL_860955, EPI_ISL_860956, EPI_ISL_860957, EPI_ISL_860958, EPI_ISL_860959, EPI_ISL_860960, EPI_ISL_860961, EPI_ISL_860962, EPI_ISL_860963, EPI_ISL_860964, EPI_ISL_860965, EPI_ISL_860966, EPI_ISL_860967, EPI_ISL_860968, EPI_ISL_860969, EPI_ISL_860970, EPI_ISL_860971, EPI_ISL_860972, EPI_ISL_860973, EPI_ISL_860974, EPI_ISL_860975, EPI_ISL_860976, EPI_ISL_860977, EPI_ISL_860978, EPI_ISL_860979, EPI_ISL_860980, EPI_ISL_860981, EPI_ISL_860982, EPI_ISL_860983, EPI_ISL_860984, EPI_ISL_860985, EPI_ISL_860986, EPI_ISL_860987, EPI_ISL_860988, EPI_ISL_860989, EPI_ISL_860990, EPI_ISL_860991, EPI_ISL_860992, EPI_ISL_860993, EPI_ISL_860994, EPI_ISL_860995, EPI_ISL_860996, EPI_ISL_860997, EPI_ISL_860998, EPI_ISL_860999, EPI_ISL_861000, EPI_ISL_861001, EPI_ISL_861002, EPI_ISL_861003, EPI_ISL_861004, EPI_ISL_861005, EPI_ISL_861006, EPI_ISL_861007, EPI_ISL_861008, EPI_ISL_861009, EPI_ISL_861010, EPI_ISL_861011, EPI_ISL_861012, EPI_ISL_861013, EPI_ISL_861014, EPI_ISL_861015, EPI_ISL_861016, EPI_ISL_861017, EPI_ISL_861018, EPI_ISL_861019, EPI_ISL_861020, EPI_ISL_861021, EPI_ISL_861022, EPI_ISL_861023, EPI_ISL_861024, EPI_ISL_861025, EPI_ISL_861026, EPI_ISL_861027, EPI_ISL_861028, EPI_ISL_861029, EPI_ISL_861030, EPI_ISL_861031, EPI_ISL_861032, EPI_ISL_861033, EPI_ISL_861034, EPI_ISL_861035, EPI_ISL_861036, EPI_ISL_861037, EPI_ISL_861038, EPI_ISL_861039, EPI_ISL_861040, EPI_ISL_861041, EPI_ISL_861042, EPI_ISL_861043, EPI_ISL_861044, EPI_ISL_861045, EPI_ISL_861046, EPI_ISL_861047, EPI_ISL_861048, EPI_ISL_861049, EPI_ISL_861050, EPI_ISL_861051, EPI_ISL_861052, EPI_ISL_861053, EPI_ISL_861054, EPI_ISL_861055, EPI_ISL_861056, EPI_ISL_861057, EPI_ISL_861058, EPI_ISL_861059, EPI_ISL_861060, EPI_ISL_861061, EPI_ISL_861062, EPI_ISL_861063, EPI_ISL_861064, EPI_ISL_861065, EPI_ISL_861066, EPI_ISL_861067, EPI_ISL_861068, EPI_ISL_861069, EPI_ISL_861070, EPI_ISL_861071, EPI_ISL_861072, EPI_ISL_861073, EPI_ISL_861074, EPI_ISL_861075, EPI_ISL_861076, EPI_ISL_861077, EPI_ISL_861078, EPI_ISL_861079, EPI_ISL_861080, EPI_ISL_861081, EPI_ISL_861082, EPI_ISL_861083, EPI_ISL_861084, EPI_ISL_861085, EPI_ISL_861086, EPI_ISL_861087, EPI_ISL_861088, EPI_ISL_861089, EPI_ISL_861090, EPI_ISL_861091, EPI_ISL_861092, EPI_ISL_861093, EPI_ISL_861094, EPI_ISL_861095, EPI_ISL_861096, EPI_ISL_861097, EPI_ISL_861098, EPI_ISL_861099, EPI_ISL_861100, EPI_ISL_861101, EPI_ISL_861102, EPI_ISL_861103, EPI_ISL_861104 | see above                                                                                         | Johns Hopkins Hospital Department of Pathology                                                                       | Johns Hopkins Hospital Department of Pathology                                                                                       | C. Paul Morris, Chun Huai Luo, Adannaya Amadi, Nicholas Gallagher, Heba H. Mostafa                                                                                                                                                                                                                                                                                                                                                                                                                                                                                                                                                                                                                                |
| EPI_ISL_861529, EPI_ISL_861530, EPI_ISL_861531, EPI_ISL_861532, EPI_ISL_861533, EPI_ISL_861534, EPI_ISL_861535, EPI_ISL_861536, EPI_ISL_861537, EPI_ISL_861538, EPI_ISL_861539, EPI_ISL_861540, EPI_ISL_861541, EPI_ISL_861542, EPI_ISL_861543, EPI_ISL_861544, EPI_ISL_861545, EPI_ISL_861546, EPI_ISL_861547, EPI_ISL_861548, EPI_ISL_861549, EPI_ISL_861550, EPI_ISL_861551, EPI_ISL_861552, EPI_ISL_861553, EPI_ISL_861554, EPI_ISL_861555, EPI_ISL_861556, EPI_ISL_861557, EPI_ISL_861558, EPI_ISL_861559, EPI_ISL_861560, EPI_ISL_861561, EPI_ISL_861562, EPI_ISL_861563, EPI_ISL_861564, EPI_ISL_861565, EPI_ISL_861566, EPI_ISL_861567, EPI_ISL_861568, EPI_ISL_861569, EPI_ISL_861570, EPI_ISL_861571, EPI_ISL_861572, EPI_ISL_861573, EPI_ISL_861574, EPI_ISL_861575, EPI_ISL_861576, EPI_ISL_861577, EPI_ISL_861578, EPI_ISL_861579, EPI_ISL_861580, EPI_ISL_861581, EPI_ISL_861582,                                                                                                                                                                                                                                                                                                                                                                                                                                                                                                                                                                                                                                                                                                                                                                                                                                                                                                                                                                                                                                                                                                                                                                                                                                                                                                                                                                                                                                                                                                                                                                                                                                                                                                                                                                                                                                                                                                                                                                                |                                                                                                   |                                                                                                                      |                                                                                                                                      |                                                                                                                                                                                                                                                                                                                                                                                                                                                                                                                                                                                                                                                                                                                   |

|                                                                                                                                                                                                                                                                                                                                                                                                                                                                                                                                                                                                                                                                                                                                                                                                                                                                                                                                                                                                                                                                                                                                                                                                                                                                                                                                                                                                                                                                                                                                                                                                                                                                                                                                                                                                                                                                                                                                                                                |                                                                                                   |                                                                                                                      |                                                                                                                                                                                                                            |
|--------------------------------------------------------------------------------------------------------------------------------------------------------------------------------------------------------------------------------------------------------------------------------------------------------------------------------------------------------------------------------------------------------------------------------------------------------------------------------------------------------------------------------------------------------------------------------------------------------------------------------------------------------------------------------------------------------------------------------------------------------------------------------------------------------------------------------------------------------------------------------------------------------------------------------------------------------------------------------------------------------------------------------------------------------------------------------------------------------------------------------------------------------------------------------------------------------------------------------------------------------------------------------------------------------------------------------------------------------------------------------------------------------------------------------------------------------------------------------------------------------------------------------------------------------------------------------------------------------------------------------------------------------------------------------------------------------------------------------------------------------------------------------------------------------------------------------------------------------------------------------------------------------------------------------------------------------------------------------|---------------------------------------------------------------------------------------------------|----------------------------------------------------------------------------------------------------------------------|----------------------------------------------------------------------------------------------------------------------------------------------------------------------------------------------------------------------------|
| EPI_ISL_861583, EPI_ISL_861584, EPI_ISL_861585, EPI_ISL_861586, EPI_ISL_861587, EPI_ISL_861588, EPI_ISL_861589, EPI_ISL_861590, EPI_ISL_861591, EPI_ISL_861592, EPI_ISL_861593, EPI_ISL_861594, EPI_ISL_861595, EPI_ISL_861596, EPI_ISL_861597, EPI_ISL_861598, EPI_ISL_861599, EPI_ISL_861600, EPI_ISL_861601, EPI_ISL_861602, EPI_ISL_861603, EPI_ISL_861604, EPI_ISL_861605, EPI_ISL_861606, EPI_ISL_861607, EPI_ISL_861608, EPI_ISL_861609, EPI_ISL_861610, EPI_ISL_861611, EPI_ISL_861612, EPI_ISL_861613, EPI_ISL_861614, EPI_ISL_861615, EPI_ISL_861616, EPI_ISL_861617, EPI_ISL_861618, EPI_ISL_861619, EPI_ISL_861620, EPI_ISL_861621, EPI_ISL_861622, EPI_ISL_861623, EPI_ISL_861624, EPI_ISL_861707, EPI_ISL_861708, EPI_ISL_861709                                                                                                                                                                                                                                                                                                                                                                                                                                                                                                                                                                                                                                                                                                                                                                                                                                                                                                                                                                                                                                                                                                                                                                                                                                 |                                                                                                   |                                                                                                                      |                                                                                                                                                                                                                            |
| see above                                                                                                                                                                                                                                                                                                                                                                                                                                                                                                                                                                                                                                                                                                                                                                                                                                                                                                                                                                                                                                                                                                                                                                                                                                                                                                                                                                                                                                                                                                                                                                                                                                                                                                                                                                                                                                                                                                                                                                      | Instituto Nacional de Saude (INSA)                                                                | Instituto Nacional de Saude (INSA)                                                                                   | Borges et al                                                                                                                                                                                                               |
| EPI_ISL_861916, EPI_ISL_861917, EPI_ISL_861918, EPI_ISL_861919, EPI_ISL_861921, EPI_ISL_861922, EPI_ISL_861923, EPI_ISL_861924, EPI_ISL_861925, EPI_ISL_861926, EPI_ISL_861927, EPI_ISL_861928, EPI_ISL_861929, EPI_ISL_861930, EPI_ISL_861931, EPI_ISL_861932, EPI_ISL_861933, EPI_ISL_861934, EPI_ISL_861935, EPI_ISL_861936, EPI_ISL_861937, EPI_ISL_861938, EPI_ISL_861939, EPI_ISL_861940, EPI_ISL_861941, EPI_ISL_861942, EPI_ISL_861943, EPI_ISL_861944, EPI_ISL_861945, EPI_ISL_861946, EPI_ISL_861947, EPI_ISL_861948, EPI_ISL_861949, EPI_ISL_861950, EPI_ISL_861951, EPI_ISL_861952, EPI_ISL_861953, EPI_ISL_861954, EPI_ISL_861955, EPI_ISL_861956, EPI_ISL_861957, EPI_ISL_861958, EPI_ISL_861959, EPI_ISL_861960, EPI_ISL_861961, EPI_ISL_861962, EPI_ISL_861963, EPI_ISL_861964, EPI_ISL_861965, EPI_ISL_861966, EPI_ISL_861967, EPI_ISL_861968, EPI_ISL_861969, EPI_ISL_861970, EPI_ISL_861971, EPI_ISL_861972, EPI_ISL_861973, EPI_ISL_861974, EPI_ISL_861975, EPI_ISL_861976, EPI_ISL_861977, EPI_ISL_861978, EPI_ISL_861979, EPI_ISL_861980, EPI_ISL_861981, EPI_ISL_861982, EPI_ISL_861983, EPI_ISL_861984, EPI_ISL_861985, EPI_ISL_861986, EPI_ISL_861987, EPI_ISL_861988, EPI_ISL_861989, EPI_ISL_861990, EPI_ISL_861991, EPI_ISL_861992, EPI_ISL_861993, EPI_ISL_861994, EPI_ISL_861995, EPI_ISL_861996, EPI_ISL_861997, EPI_ISL_861998, EPI_ISL_861999, EPI_ISL_862000, EPI_ISL_862001, EPI_ISL_862002, EPI_ISL_862003, EPI_ISL_862004, EPI_ISL_862005, EPI_ISL_862006, EPI_ISL_862007, EPI_ISL_862008, EPI_ISL_862009, EPI_ISL_862010, EPI_ISL_862011, EPI_ISL_862012, EPI_ISL_862013, EPI_ISL_862014, EPI_ISL_862015, EPI_ISL_862016, EPI_ISL_862017, EPI_ISL_862018, EPI_ISL_862019, EPI_ISL_862020, EPI_ISL_862021, EPI_ISL_862022, EPI_ISL_862023, EPI_ISL_862024, EPI_ISL_862025, EPI_ISL_862026, EPI_ISL_862027, EPI_ISL_862028, EPI_ISL_862029, EPI_ISL_862030, EPI_ISL_862031, EPI_ISL_862032, EPI_ISL_862033, EPI_ISL_862034, EPI_ISL_862035 |                                                                                                   |                                                                                                                      |                                                                                                                                                                                                                            |
| see above                                                                                                                                                                                                                                                                                                                                                                                                                                                                                                                                                                                                                                                                                                                                                                                                                                                                                                                                                                                                                                                                                                                                                                                                                                                                                                                                                                                                                                                                                                                                                                                                                                                                                                                                                                                                                                                                                                                                                                      | OHSU Lab Services Molecular Microbiology Lab                                                      | Oregon SARS-CoV-2 Genome Sequencing Center                                                                           | Brendan L. O'Connell, Sally Grindstaff, Kayla Carter, Ruth V. Nichols, Alec J. Hirsch, Donna Hansel, Guang Fan, Xuan Qin, Daniel N. Streblov, William B. Messer, Andrew C. Adey, Benjamin N. Bimber, Brian J. O'Roak       |
| EPI_ISL_862036, EPI_ISL_862037, EPI_ISL_862038                                                                                                                                                                                                                                                                                                                                                                                                                                                                                                                                                                                                                                                                                                                                                                                                                                                                                                                                                                                                                                                                                                                                                                                                                                                                                                                                                                                                                                                                                                                                                                                                                                                                                                                                                                                                                                                                                                                                 | Johns Hopkins Hospital Department of Pathology                                                    | Johns Hopkins Hospital Department of Pathology                                                                       | C. Paul Morris, Chun Hual Luo, Adannaya Amadi, Matthew Schwartz, Nicholas Gallagher, Heba H. Mostafa                                                                                                                       |
| EPI_ISL_862814                                                                                                                                                                                                                                                                                                                                                                                                                                                                                                                                                                                                                                                                                                                                                                                                                                                                                                                                                                                                                                                                                                                                                                                                                                                                                                                                                                                                                                                                                                                                                                                                                                                                                                                                                                                                                                                                                                                                                                 | Virology, Ecole Nationale Veterinaire de Toulouse                                                 | Virology, Ecole Nationale Veterinaire de Toulouse                                                                    | Bessiere,P., Walch,M., Fusade-Boyer,M., Lebre,L., Croville,G.,Cadiergues,M.-C. and Guerin,J.-L.                                                                                                                            |
| EPI_ISL_865493, EPI_ISL_865497, EPI_ISL_865500, EPI_ISL_865505, EPI_ISL_865506, EPI_ISL_865507, EPI_ISL_865510, EPI_ISL_865522, EPI_ISL_865527, EPI_ISL_865531, EPI_ISL_865537, EPI_ISL_865538, EPI_ISL_865539, EPI_ISL_865542, EPI_ISL_865548, EPI_ISL_865552, EPI_ISL_865561, EPI_ISL_865571, EPI_ISL_865572, EPI_ISL_865577                                                                                                                                                                                                                                                                                                                                                                                                                                                                                                                                                                                                                                                                                                                                                                                                                                                                                                                                                                                                                                                                                                                                                                                                                                                                                                                                                                                                                                                                                                                                                                                                                                                 |                                                                                                   |                                                                                                                      |                                                                                                                                                                                                                            |
| see above                                                                                                                                                                                                                                                                                                                                                                                                                                                                                                                                                                                                                                                                                                                                                                                                                                                                                                                                                                                                                                                                                                                                                                                                                                                                                                                                                                                                                                                                                                                                                                                                                                                                                                                                                                                                                                                                                                                                                                      | Barts Health NHS Trust                                                                            | COVID-19 Genomics UK (COG-UK) Consortium                                                                             | CUTINO-MOGUEL, Maria-Teresa; HARRINGTON, David; OWOYEMI, Dola; KULASEGARAN-SHYLINI, Raghavendran; BROAD, Claire; KELE, Beatrix                                                                                             |
| EPI_ISL_871820, EPI_ISL_871821, EPI_ISL_871822, EPI_ISL_871823, EPI_ISL_871824, EPI_ISL_871825, EPI_ISL_871826, EPI_ISL_871827, EPI_ISL_871828, EPI_ISL_871829, EPI_ISL_871830, EPI_ISL_871831, EPI_ISL_871832, EPI_ISL_871833, EPI_ISL_871834, EPI_ISL_871835, EPI_ISL_871836, EPI_ISL_871837, EPI_ISL_871838, EPI_ISL_871839                                                                                                                                                                                                                                                                                                                                                                                                                                                                                                                                                                                                                                                                                                                                                                                                                                                                                                                                                                                                                                                                                                                                                                                                                                                                                                                                                                                                                                                                                                                                                                                                                                                 |                                                                                                   |                                                                                                                      |                                                                                                                                                                                                                            |
| see above                                                                                                                                                                                                                                                                                                                                                                                                                                                                                                                                                                                                                                                                                                                                                                                                                                                                                                                                                                                                                                                                                                                                                                                                                                                                                                                                                                                                                                                                                                                                                                                                                                                                                                                                                                                                                                                                                                                                                                      | Jessa                                                                                             | Jessa                                                                                                                | Brigitte Maes, Bert Cruys                                                                                                                                                                                                  |
| EPI_ISL_872350, EPI_ISL_872351, EPI_ISL_872352, EPI_ISL_872353, EPI_ISL_872354, EPI_ISL_872355, EPI_ISL_872356, EPI_ISL_872357, EPI_ISL_872358, EPI_ISL_872359, EPI_ISL_872360, EPI_ISL_872361, EPI_ISL_872362, EPI_ISL_872363, EPI_ISL_872364, EPI_ISL_872365, EPI_ISL_872366, EPI_ISL_872367, EPI_ISL_872368, EPI_ISL_872369, EPI_ISL_872370, EPI_ISL_872371, EPI_ISL_872372, EPI_ISL_872373, EPI_ISL_872374, EPI_ISL_872375, EPI_ISL_872376, EPI_ISL_872377, EPI_ISL_872378, EPI_ISL_872379, EPI_ISL_872380, EPI_ISL_872381, EPI_ISL_872382, EPI_ISL_872383, EPI_ISL_872384, EPI_ISL_872385, EPI_ISL_872386, EPI_ISL_872387, EPI_ISL_872388, EPI_ISL_872389, EPI_ISL_872390, EPI_ISL_872391, EPI_ISL_872392, EPI_ISL_872393                                                                                                                                                                                                                                                                                                                                                                                                                                                                                                                                                                                                                                                                                                                                                                                                                                                                                                                                                                                                                                                                                                                                                                                                                                                 |                                                                                                   |                                                                                                                      |                                                                                                                                                                                                                            |
| see above                                                                                                                                                                                                                                                                                                                                                                                                                                                                                                                                                                                                                                                                                                                                                                                                                                                                                                                                                                                                                                                                                                                                                                                                                                                                                                                                                                                                                                                                                                                                                                                                                                                                                                                                                                                                                                                                                                                                                                      | Texas Department of State Health Services (TXDSHS)                                                | Texas Department of State Health Services (TXDSHS)                                                                   | Bonnie Oh, Anita Pokharel, James Daniel Bonser, Myong Koag, Chung Wang, Rachel Lee, Grace Kubin, Rashmi Tuladhar, Mayela Pedrueza, Maliha Rahman, Jenny Zhang                                                              |
| EPI_ISL_872572                                                                                                                                                                                                                                                                                                                                                                                                                                                                                                                                                                                                                                                                                                                                                                                                                                                                                                                                                                                                                                                                                                                                                                                                                                                                                                                                                                                                                                                                                                                                                                                                                                                                                                                                                                                                                                                                                                                                                                 | Sydney South West Pathology Service (SSWPS) - Liverpool Hospital - NSW Health Pathology           | NSW Health Pathology - Institute of Clinical Pathology and Medical Research; Westmead Hospital; University of Sydney | CIDM-PH et al.                                                                                                                                                                                                             |
| EPI_ISL_872573                                                                                                                                                                                                                                                                                                                                                                                                                                                                                                                                                                                                                                                                                                                                                                                                                                                                                                                                                                                                                                                                                                                                                                                                                                                                                                                                                                                                                                                                                                                                                                                                                                                                                                                                                                                                                                                                                                                                                                 | Laverty Pathology                                                                                 | NSW Health Pathology - Institute of Clinical Pathology and Medical Research; Westmead Hospital; University of Sydney | CIDM-PH et al.                                                                                                                                                                                                             |
| EPI_ISL_872574, EPI_ISL_872575                                                                                                                                                                                                                                                                                                                                                                                                                                                                                                                                                                                                                                                                                                                                                                                                                                                                                                                                                                                                                                                                                                                                                                                                                                                                                                                                                                                                                                                                                                                                                                                                                                                                                                                                                                                                                                                                                                                                                 | South Eastern Area Laboratory Services (SEALS)                                                    | NSW Health Pathology - Institute of Clinical Pathology and Medical Research; Westmead Hospital; University of Sydney | CIDM-PH et al.                                                                                                                                                                                                             |
| EPI_ISL_872576                                                                                                                                                                                                                                                                                                                                                                                                                                                                                                                                                                                                                                                                                                                                                                                                                                                                                                                                                                                                                                                                                                                                                                                                                                                                                                                                                                                                                                                                                                                                                                                                                                                                                                                                                                                                                                                                                                                                                                 | Laverty Pathology                                                                                 | NSW Health Pathology - Institute of Clinical Pathology and Medical Research; Westmead Hospital; University of Sydney | CIDM-PH et al.                                                                                                                                                                                                             |
| EPI_ISL_872577                                                                                                                                                                                                                                                                                                                                                                                                                                                                                                                                                                                                                                                                                                                                                                                                                                                                                                                                                                                                                                                                                                                                                                                                                                                                                                                                                                                                                                                                                                                                                                                                                                                                                                                                                                                                                                                                                                                                                                 | South Eastern Area Laboratory Services (SEALS)                                                    | NSW Health Pathology - Institute of Clinical Pathology and Medical Research; Westmead Hospital; University of Sydney | CIDM-PH et al.                                                                                                                                                                                                             |
| EPI_ISL_872578                                                                                                                                                                                                                                                                                                                                                                                                                                                                                                                                                                                                                                                                                                                                                                                                                                                                                                                                                                                                                                                                                                                                                                                                                                                                                                                                                                                                                                                                                                                                                                                                                                                                                                                                                                                                                                                                                                                                                                 | Sydney South West Pathology Service (SSWPS) - Liverpool Hospital - NSW Health Pathology           | NSW Health Pathology - Institute of Clinical Pathology and Medical Research; Westmead Hospital; University of Sydney | CIDM-PH et al.                                                                                                                                                                                                             |
| EPI_ISL_872579                                                                                                                                                                                                                                                                                                                                                                                                                                                                                                                                                                                                                                                                                                                                                                                                                                                                                                                                                                                                                                                                                                                                                                                                                                                                                                                                                                                                                                                                                                                                                                                                                                                                                                                                                                                                                                                                                                                                                                 | Sydney South West Pathology Service (SSWPS) - Royal Prince Alfred Hospital - NSW Health Pathology | NSW Health Pathology - Institute of Clinical Pathology and Medical Research; Westmead Hospital; University of Sydney | CIDM-PH et al.                                                                                                                                                                                                             |
| EPI_ISL_872580                                                                                                                                                                                                                                                                                                                                                                                                                                                                                                                                                                                                                                                                                                                                                                                                                                                                                                                                                                                                                                                                                                                                                                                                                                                                                                                                                                                                                                                                                                                                                                                                                                                                                                                                                                                                                                                                                                                                                                 | Histopath                                                                                         | NSW Health Pathology - Institute of Clinical Pathology and Medical Research; Westmead Hospital; University of Sydney | CIDM-PH et al.                                                                                                                                                                                                             |
| EPI_ISL_872581                                                                                                                                                                                                                                                                                                                                                                                                                                                                                                                                                                                                                                                                                                                                                                                                                                                                                                                                                                                                                                                                                                                                                                                                                                                                                                                                                                                                                                                                                                                                                                                                                                                                                                                                                                                                                                                                                                                                                                 | St Vincent's Pathology (SydPath)                                                                  | NSW Health Pathology - Institute of Clinical Pathology and Medical Research; Westmead Hospital; University of Sydney | CIDM-PH et al.                                                                                                                                                                                                             |
| EPI_ISL_872582, EPI_ISL_872583, EPI_ISL_872584                                                                                                                                                                                                                                                                                                                                                                                                                                                                                                                                                                                                                                                                                                                                                                                                                                                                                                                                                                                                                                                                                                                                                                                                                                                                                                                                                                                                                                                                                                                                                                                                                                                                                                                                                                                                                                                                                                                                 | South Eastern Area Laboratory Services (SEALS)                                                    | NSW Health Pathology - Institute of Clinical Pathology and Medical Research; Westmead Hospital; University of Sydney | CIDM-PH et al.                                                                                                                                                                                                             |
| EPI_ISL_872585                                                                                                                                                                                                                                                                                                                                                                                                                                                                                                                                                                                                                                                                                                                                                                                                                                                                                                                                                                                                                                                                                                                                                                                                                                                                                                                                                                                                                                                                                                                                                                                                                                                                                                                                                                                                                                                                                                                                                                 | Australian Clinical Labs                                                                          | NSW Health Pathology - Institute of Clinical Pathology and Medical Research; Westmead Hospital; University of Sydney | CIDM-PH et al.                                                                                                                                                                                                             |
| EPI_ISL_872586, EPI_ISL_872587, EPI_ISL_872588                                                                                                                                                                                                                                                                                                                                                                                                                                                                                                                                                                                                                                                                                                                                                                                                                                                                                                                                                                                                                                                                                                                                                                                                                                                                                                                                                                                                                                                                                                                                                                                                                                                                                                                                                                                                                                                                                                                                 | Sydney South West Pathology Service (SSWPS) - Royal Prince Alfred Hospital - NSW Health Pathology | NSW Health Pathology - Institute of Clinical Pathology and Medical Research; Westmead Hospital; University of Sydney | CIDM-PH et al.                                                                                                                                                                                                             |
| EPI_ISL_873210                                                                                                                                                                                                                                                                                                                                                                                                                                                                                                                                                                                                                                                                                                                                                                                                                                                                                                                                                                                                                                                                                                                                                                                                                                                                                                                                                                                                                                                                                                                                                                                                                                                                                                                                                                                                                                                                                                                                                                 | Virology, Ecole Nationale Veterinaire de Toulouse                                                 | Virology, Ecole Nationale Veterinaire de Toulouse                                                                    | Bessiere,P., Walch,M., Fusade-Boyer,M., Lebre,L., Croville,G.,Cadiergues,M.-C. and Guerin,J.-L.                                                                                                                            |
| EPI_ISL_875517, EPI_ISL_875518, EPI_ISL_875519, EPI_ISL_875526, EPI_ISL_875527, EPI_ISL_875532, EPI_ISL_875535                                                                                                                                                                                                                                                                                                                                                                                                                                                                                                                                                                                                                                                                                                                                                                                                                                                                                                                                                                                                                                                                                                                                                                                                                                                                                                                                                                                                                                                                                                                                                                                                                                                                                                                                                                                                                                                                 | Institute of Virology, Biomedical Research Center of the Slovak Academy of Sciences, Bratislava   | Faculty of Natural Sciences, Comenius University, Bratislava                                                         | Broa Břejová, Viktória abanová, Kristína Boršová, Viktória Hodorová, Sabina Fumaová Havlíková, Juraj Kopáek, Martina Liková, ubomíra Lukáiková, Martina Neboháová, Monika Sláviková, Tomáš Vína, Jozef Nosek, Boris Klempa |
| EPI_ISL_882919, EPI_ISL_882925, EPI_ISL_882929                                                                                                                                                                                                                                                                                                                                                                                                                                                                                                                                                                                                                                                                                                                                                                                                                                                                                                                                                                                                                                                                                                                                                                                                                                                                                                                                                                                                                                                                                                                                                                                                                                                                                                                                                                                                                                                                                                                                 | INMI Lazzaro Spallanzani IRCCS                                                                    | INMI Lazzaro Spallanzani IRCCS                                                                                       | C.E.M Gruber, B Bartolini, E Giombini, M Rueca, O Butera, F Messina, A Di Caro, MR Capobianchi                                                                                                                             |
| EPI_ISL_882938                                                                                                                                                                                                                                                                                                                                                                                                                                                                                                                                                                                                                                                                                                                                                                                                                                                                                                                                                                                                                                                                                                                                                                                                                                                                                                                                                                                                                                                                                                                                                                                                                                                                                                                                                                                                                                                                                                                                                                 | Azienda Ospedaliera San Giovanni Addolorata                                                       | INMI Lazzaro Spallanzani IRCCS                                                                                       | C.E.M Gruber, B Bartolini, E Giombini, M Rueca, O Butera, F Messina, PM Placanica, M Gaudio, A Di Caro, MR Capobianchi                                                                                                     |
| EPI_ISL_882941                                                                                                                                                                                                                                                                                                                                                                                                                                                                                                                                                                                                                                                                                                                                                                                                                                                                                                                                                                                                                                                                                                                                                                                                                                                                                                                                                                                                                                                                                                                                                                                                                                                                                                                                                                                                                                                                                                                                                                 | Ospedale San Camillo De Lellis Rieti                                                              | INMI Lazzaro Spallanzani IRCCS                                                                                       | C.E.M Gruber, B Bartolini, E Giombini, M Rueca, O Butera, F Messina, S Venarubea, L Casertano, A De Luca, A Di Caro, MR Capobianchi                                                                                        |
| EPI_ISL_887508, EPI_ISL_887509, EPI_ISL_887510, EPI_ISL_887511, EPI_ISL_887512, EPI_ISL_887513, EPI_ISL_887514, EPI_ISL_887515, EPI_ISL_887516, EPI_ISL_887517, EPI_ISL_887518, EPI_ISL_887519, EPI_ISL_887520, EPI_ISL_887521, EPI_ISL_887522, EPI_ISL_887523, EPI_ISL_887524, EPI_ISL_887525, EPI_ISL_887526, EPI_ISL_887527, EPI_ISL_887528, EPI_ISL_887529, EPI_ISL_887530, EPI_ISL_887531, EPI_ISL_887532, EPI_ISL_887533, EPI_ISL_887534, EPI_ISL_887535, EPI_ISL_887536, EPI_ISL_887537, EPI_ISL_887538, EPI_ISL_887539, EPI_ISL_887540, EPI_ISL_887541, EPI_ISL_887542, EPI_ISL_887543, EPI_ISL_887544, EPI_ISL_887545, EPI_ISL_887546, EPI_ISL_887547, EPI_ISL_887548, EPI_ISL_887549, EPI_ISL_887550, EPI_ISL_887551, EPI_ISL_887552, EPI_ISL_887553, EPI_ISL_887554, EPI_ISL_887555, EPI_ISL_887556, EPI_ISL_887557, EPI_ISL_887558, EPI_ISL_887559, EPI_ISL_887560, EPI_ISL_887561, EPI_ISL_887562, EPI_ISL_887563, EPI_ISL_887564, EPI_ISL_887565, EPI_ISL_887566, EPI_ISL_887567, EPI_ISL_887568, EPI_ISL_887569, EPI_ISL_887570, EPI_ISL_887571, EPI_ISL_887572, EPI_ISL_887573, EPI_ISL_887574, EPI_ISL_887575, EPI_ISL_887576, EPI_ISL_887577, EPI_ISL_887578, EPI_ISL_887579, EPI_ISL_887580, EPI_ISL_887581, EPI_ISL_887582, EPI_ISL_887583, EPI_ISL_887584, EPI_ISL_887585, EPI_ISL_887586                                                                                                                                                                                                                                                                                                                                                                                                                                                                                                                                                                                                                                                                 |                                                                                                   |                                                                                                                      |                                                                                                                                                                                                                            |
| see above                                                                                                                                                                                                                                                                                                                                                                                                                                                                                                                                                                                                                                                                                                                                                                                                                                                                                                                                                                                                                                                                                                                                                                                                                                                                                                                                                                                                                                                                                                                                                                                                                                                                                                                                                                                                                                                                                                                                                                      | Johns Hopkins Hospital Department of Pathology                                                    | Johns Hopkins Hospital Department of Pathology                                                                       | C. Paul Morris, Chun Hual Luo, Adannaya Amadi, Matthew Schwartz, Nicholas Gallagher, Heba H. Mostafa                                                                                                                       |
| EPI_ISL_888835, EPI_ISL_888836, EPI_ISL_888837, EPI_ISL_888838, EPI_ISL_888839, EPI_ISL_888840, EPI_ISL_888841, EPI_ISL_888842, EPI_ISL_888843, EPI_ISL_888844, EPI_ISL_888845, EPI_ISL_888846, EPI_ISL_888847, EPI_ISL_888848, EPI_ISL_888849, EPI_ISL_888850, EPI_ISL_888851, EPI_ISL_888852, EPI_ISL_888853, EPI_ISL_888854, EPI_ISL_888855, EPI_ISL_888856, EPI_ISL_888857, EPI_ISL_888858, EPI_ISL_888859, EPI_ISL_888860, EPI_ISL_888861, EPI_ISL_888862, EPI_ISL_888863, EPI_ISL_888864, EPI_ISL_888865, EPI_ISL_888866, EPI_ISL_888867, EPI_ISL_888868, EPI_ISL_888869, EPI_ISL_888870, EPI_ISL_888871, EPI_ISL_888872, EPI_ISL_888873, EPI_ISL_888874, EPI_ISL_888875, EPI_ISL_888876, EPI_ISL_888877, EPI_ISL_888878, EPI_ISL_888879, EPI_ISL_888880, EPI_ISL_888881, EPI_ISL_888882, EPI_ISL_888883, EPI_ISL_888884, EPI_ISL_888885, EPI_ISL_888886, EPI_ISL_888887, EPI_ISL_888888, EPI_ISL_888889, EPI_ISL_888890, EPI_ISL_888891, EPI_ISL_888892, EPI_ISL_888893, EPI_ISL_888894, EPI_ISL_888895, EPI_ISL_888896, EPI_ISL_888897, EPI_ISL_888898, EPI_ISL_888899, EPI_ISL_888900, EPI_ISL_888901, EPI_ISL_888902, EPI_ISL_888903, EPI_ISL_888904, EPI_ISL_888905, EPI_ISL_888906                                                                                                                                                                                                                                                                                                                                                                                                                                                                                                                                                                                                                                                                                                                                                                                 |                                                                                                   |                                                                                                                      |                                                                                                                                                                                                                            |
| see above                                                                                                                                                                                                                                                                                                                                                                                                                                                                                                                                                                                                                                                                                                                                                                                                                                                                                                                                                                                                                                                                                                                                                                                                                                                                                                                                                                                                                                                                                                                                                                                                                                                                                                                                                                                                                                                                                                                                                                      | Michigan Department of Health and Human Services, Bureau of Laboratories                          | Michigan Department of Health and Human Services, Bureau of Laboratories                                             | Blankenship HM, Riner D, Soehnlén MK                                                                                                                                                                                       |



We gratefully acknowledge the following Authors from the Originating Laboratories responsible for obtaining the specimens, as well as the Submitting laboratories where the genome data were generated and shared via GISAID, on which this research is based.

All Submitters of data may be contacted directly via [www.gisaid.org](http://www.gisaid.org)

Authors are sorted alphabetically.

| Accession ID                                                                                                                                                                                                                                                                                                                                                                                                                                                                                                                                                                                                                                                                                                                                                                                                                                                                                                                                                                                                                                                                                                                                                                                                                                                                                                                                                                                                                                                                                                                                                                                                                                                                                                                                                                                                                                                                                                                                                                                                                                                                                                                                                                                                                                                                                                                                                                                                                                                                                                                                                                                                                                                                                                                                                                                                                                                                                                                                                                                                                                                                                                                                                                                                                                                                                                                                                                                                                                                                                                                                                                                                                                                                                                                                                                                                                                                                                                                                                                                                                                                                                                                                                                                                                                                                                                                                                                                                                                                                                                                                                                                                                                                                                                                                                                                                                                                                                                                                                                                                                                                                                                                                                                                                                                                                                                                                                                                                                                                                                                                                                                                                                                                                                                                                                                                                                                                                                                                                                                                                                                                                                                                                                                                                                                                                                                                                                                                                                                                                                                                                                                                                                                                                                                                                                                                                                                                                                                                                                                                                                                                                                                                                                                                                                                                                                                                                                                                                                                                                                                                                                                                                                                                                                                                                                                                                                                                                                                                                                                                                                                                                                                                                                                                                                                                                                                                                                                                                                                                                                                                                                                                                                                                                                                                   | Originating Laboratory                                                                      | Submitting Laboratory                                                                                                                                                  | Authors                                                                                                                                                                                                                                                                                                                 |
|--------------------------------------------------------------------------------------------------------------------------------------------------------------------------------------------------------------------------------------------------------------------------------------------------------------------------------------------------------------------------------------------------------------------------------------------------------------------------------------------------------------------------------------------------------------------------------------------------------------------------------------------------------------------------------------------------------------------------------------------------------------------------------------------------------------------------------------------------------------------------------------------------------------------------------------------------------------------------------------------------------------------------------------------------------------------------------------------------------------------------------------------------------------------------------------------------------------------------------------------------------------------------------------------------------------------------------------------------------------------------------------------------------------------------------------------------------------------------------------------------------------------------------------------------------------------------------------------------------------------------------------------------------------------------------------------------------------------------------------------------------------------------------------------------------------------------------------------------------------------------------------------------------------------------------------------------------------------------------------------------------------------------------------------------------------------------------------------------------------------------------------------------------------------------------------------------------------------------------------------------------------------------------------------------------------------------------------------------------------------------------------------------------------------------------------------------------------------------------------------------------------------------------------------------------------------------------------------------------------------------------------------------------------------------------------------------------------------------------------------------------------------------------------------------------------------------------------------------------------------------------------------------------------------------------------------------------------------------------------------------------------------------------------------------------------------------------------------------------------------------------------------------------------------------------------------------------------------------------------------------------------------------------------------------------------------------------------------------------------------------------------------------------------------------------------------------------------------------------------------------------------------------------------------------------------------------------------------------------------------------------------------------------------------------------------------------------------------------------------------------------------------------------------------------------------------------------------------------------------------------------------------------------------------------------------------------------------------------------------------------------------------------------------------------------------------------------------------------------------------------------------------------------------------------------------------------------------------------------------------------------------------------------------------------------------------------------------------------------------------------------------------------------------------------------------------------------------------------------------------------------------------------------------------------------------------------------------------------------------------------------------------------------------------------------------------------------------------------------------------------------------------------------------------------------------------------------------------------------------------------------------------------------------------------------------------------------------------------------------------------------------------------------------------------------------------------------------------------------------------------------------------------------------------------------------------------------------------------------------------------------------------------------------------------------------------------------------------------------------------------------------------------------------------------------------------------------------------------------------------------------------------------------------------------------------------------------------------------------------------------------------------------------------------------------------------------------------------------------------------------------------------------------------------------------------------------------------------------------------------------------------------------------------------------------------------------------------------------------------------------------------------------------------------------------------------------------------------------------------------------------------------------------------------------------------------------------------------------------------------------------------------------------------------------------------------------------------------------------------------------------------------------------------------------------------------------------------------------------------------------------------------------------------------------------------------------------------------------------------------------------------------------------------------------------------------------------------------------------------------------------------------------------------------------------------------------------------------------------------------------------------------------------------------------------------------------------------------------------------------------------------------------------------------------------------------------------------------------------------------------------------------------------------------------------------------------------------------------------------------------------------------------------------------------------------------------------------------------------------------------------------------------------------------------------------------------------------------------------------------------------------------------------------------------------------------------------------------------------------------------------------------------------------------------------------------------------------------------------------------------------------------------------------------------------------------------------------------------------------------------------------------------------------------------------------------------------------------------------------------------------------------------------------------------------------------------------------------------------------------------------------------------------------------------------------------------------------------------------------------------------------------------------------------------------------------------------------------------------------------------------------------------------------------------------------------------------------------------------------------------------------------------------------------------------------------------------------------------------------------------------------------------------------------------------------------------------------------------------|---------------------------------------------------------------------------------------------|------------------------------------------------------------------------------------------------------------------------------------------------------------------------|-------------------------------------------------------------------------------------------------------------------------------------------------------------------------------------------------------------------------------------------------------------------------------------------------------------------------|
| EPI_ISL_406844                                                                                                                                                                                                                                                                                                                                                                                                                                                                                                                                                                                                                                                                                                                                                                                                                                                                                                                                                                                                                                                                                                                                                                                                                                                                                                                                                                                                                                                                                                                                                                                                                                                                                                                                                                                                                                                                                                                                                                                                                                                                                                                                                                                                                                                                                                                                                                                                                                                                                                                                                                                                                                                                                                                                                                                                                                                                                                                                                                                                                                                                                                                                                                                                                                                                                                                                                                                                                                                                                                                                                                                                                                                                                                                                                                                                                                                                                                                                                                                                                                                                                                                                                                                                                                                                                                                                                                                                                                                                                                                                                                                                                                                                                                                                                                                                                                                                                                                                                                                                                                                                                                                                                                                                                                                                                                                                                                                                                                                                                                                                                                                                                                                                                                                                                                                                                                                                                                                                                                                                                                                                                                                                                                                                                                                                                                                                                                                                                                                                                                                                                                                                                                                                                                                                                                                                                                                                                                                                                                                                                                                                                                                                                                                                                                                                                                                                                                                                                                                                                                                                                                                                                                                                                                                                                                                                                                                                                                                                                                                                                                                                                                                                                                                                                                                                                                                                                                                                                                                                                                                                                                                                                                                                                                                 | Monash Medical Centre                                                                       | Collaboration between the University of Melbourne at The Peter Doherty Institute for Infection and Immunity, and the Victorian Infectious Disease Reference Laboratory | Caly L., Seemann, T., Schultz, M., Druce, J. and Tairaoa, G                                                                                                                                                                                                                                                             |
| EPI_ISL_415787                                                                                                                                                                                                                                                                                                                                                                                                                                                                                                                                                                                                                                                                                                                                                                                                                                                                                                                                                                                                                                                                                                                                                                                                                                                                                                                                                                                                                                                                                                                                                                                                                                                                                                                                                                                                                                                                                                                                                                                                                                                                                                                                                                                                                                                                                                                                                                                                                                                                                                                                                                                                                                                                                                                                                                                                                                                                                                                                                                                                                                                                                                                                                                                                                                                                                                                                                                                                                                                                                                                                                                                                                                                                                                                                                                                                                                                                                                                                                                                                                                                                                                                                                                                                                                                                                                                                                                                                                                                                                                                                                                                                                                                                                                                                                                                                                                                                                                                                                                                                                                                                                                                                                                                                                                                                                                                                                                                                                                                                                                                                                                                                                                                                                                                                                                                                                                                                                                                                                                                                                                                                                                                                                                                                                                                                                                                                                                                                                                                                                                                                                                                                                                                                                                                                                                                                                                                                                                                                                                                                                                                                                                                                                                                                                                                                                                                                                                                                                                                                                                                                                                                                                                                                                                                                                                                                                                                                                                                                                                                                                                                                                                                                                                                                                                                                                                                                                                                                                                                                                                                                                                                                                                                                                                                 | Laboratorio de Referencia Nacional de Virus Respiratorio. Instituto Nacional de Salud, Peru | Laboratorio de Referencia Nacional de Biotecnología y Biología Molecular. Instituto Nacional de Salud, Peru                                                            | Carlos Padilla Rojas, Priscila Lope Pari, Karolyn Vega Chozo, Johanna Balbuena Torres, Omar Caceres Rey, Hemri Bailon Calderon, Maribel Huaringa Nuñez, Nancy Rojas Serrano                                                                                                                                             |
| EPI_ISL_416410, EPI_ISL_416411, EPI_ISL_416412, EPI_ISL_416413, EPI_ISL_416414, EPI_ISL_416415                                                                                                                                                                                                                                                                                                                                                                                                                                                                                                                                                                                                                                                                                                                                                                                                                                                                                                                                                                                                                                                                                                                                                                                                                                                                                                                                                                                                                                                                                                                                                                                                                                                                                                                                                                                                                                                                                                                                                                                                                                                                                                                                                                                                                                                                                                                                                                                                                                                                                                                                                                                                                                                                                                                                                                                                                                                                                                                                                                                                                                                                                                                                                                                                                                                                                                                                                                                                                                                                                                                                                                                                                                                                                                                                                                                                                                                                                                                                                                                                                                                                                                                                                                                                                                                                                                                                                                                                                                                                                                                                                                                                                                                                                                                                                                                                                                                                                                                                                                                                                                                                                                                                                                                                                                                                                                                                                                                                                                                                                                                                                                                                                                                                                                                                                                                                                                                                                                                                                                                                                                                                                                                                                                                                                                                                                                                                                                                                                                                                                                                                                                                                                                                                                                                                                                                                                                                                                                                                                                                                                                                                                                                                                                                                                                                                                                                                                                                                                                                                                                                                                                                                                                                                                                                                                                                                                                                                                                                                                                                                                                                                                                                                                                                                                                                                                                                                                                                                                                                                                                                                                                                                                                 | Victorian Infectious Diseases Reference Laboratory (VIDRL)                                  | Victorian Infectious Diseases Reference Laboratory and Microbiological Diagnostic Unit Public Health Laboratory, Doherty Institute                                     | Caly L., Seemann T., Schultz M., Druce J., Tairaoa, G.                                                                                                                                                                                                                                                                  |
| EPI_ISL_416514, EPI_ISL_416515, EPI_ISL_416516, EPI_ISL_416517, EPI_ISL_416518                                                                                                                                                                                                                                                                                                                                                                                                                                                                                                                                                                                                                                                                                                                                                                                                                                                                                                                                                                                                                                                                                                                                                                                                                                                                                                                                                                                                                                                                                                                                                                                                                                                                                                                                                                                                                                                                                                                                                                                                                                                                                                                                                                                                                                                                                                                                                                                                                                                                                                                                                                                                                                                                                                                                                                                                                                                                                                                                                                                                                                                                                                                                                                                                                                                                                                                                                                                                                                                                                                                                                                                                                                                                                                                                                                                                                                                                                                                                                                                                                                                                                                                                                                                                                                                                                                                                                                                                                                                                                                                                                                                                                                                                                                                                                                                                                                                                                                                                                                                                                                                                                                                                                                                                                                                                                                                                                                                                                                                                                                                                                                                                                                                                                                                                                                                                                                                                                                                                                                                                                                                                                                                                                                                                                                                                                                                                                                                                                                                                                                                                                                                                                                                                                                                                                                                                                                                                                                                                                                                                                                                                                                                                                                                                                                                                                                                                                                                                                                                                                                                                                                                                                                                                                                                                                                                                                                                                                                                                                                                                                                                                                                                                                                                                                                                                                                                                                                                                                                                                                                                                                                                                                                                 | Victorian Infectious Diseases Reference Laboratory (VIDRL)                                  | Victorian Infectious Diseases Reference Laboratory and Microbiological Diagnostic Unit Public Health Laboratory, Doherty Institute                                     | Caly L., Seemann T., Schultz M., Tairaoa, G., Druce J.                                                                                                                                                                                                                                                                  |
| EPI_ISL_417391, EPI_ISL_417408                                                                                                                                                                                                                                                                                                                                                                                                                                                                                                                                                                                                                                                                                                                                                                                                                                                                                                                                                                                                                                                                                                                                                                                                                                                                                                                                                                                                                                                                                                                                                                                                                                                                                                                                                                                                                                                                                                                                                                                                                                                                                                                                                                                                                                                                                                                                                                                                                                                                                                                                                                                                                                                                                                                                                                                                                                                                                                                                                                                                                                                                                                                                                                                                                                                                                                                                                                                                                                                                                                                                                                                                                                                                                                                                                                                                                                                                                                                                                                                                                                                                                                                                                                                                                                                                                                                                                                                                                                                                                                                                                                                                                                                                                                                                                                                                                                                                                                                                                                                                                                                                                                                                                                                                                                                                                                                                                                                                                                                                                                                                                                                                                                                                                                                                                                                                                                                                                                                                                                                                                                                                                                                                                                                                                                                                                                                                                                                                                                                                                                                                                                                                                                                                                                                                                                                                                                                                                                                                                                                                                                                                                                                                                                                                                                                                                                                                                                                                                                                                                                                                                                                                                                                                                                                                                                                                                                                                                                                                                                                                                                                                                                                                                                                                                                                                                                                                                                                                                                                                                                                                                                                                                                                                                                 | Centre for Infectious Diseases and Microbiology Public Health                               | NSW Health Pathology - Institute of Clinical Pathology and Medical Research; Westmead Hospital; University of Sydney                                                   | Carter I, Rahman H, Holmes EC, O'Sullivan MV, Sintchenko V, Chen SC, Maddocks S, Kok J, Dwyer DE, Rockett R, Eden J-S, Lam C, Gray K, Timms V, Gall M, Arnott A and Sadsad R for the 2019-nCoV Study Group                                                                                                              |
| EPI_ISL_417432                                                                                                                                                                                                                                                                                                                                                                                                                                                                                                                                                                                                                                                                                                                                                                                                                                                                                                                                                                                                                                                                                                                                                                                                                                                                                                                                                                                                                                                                                                                                                                                                                                                                                                                                                                                                                                                                                                                                                                                                                                                                                                                                                                                                                                                                                                                                                                                                                                                                                                                                                                                                                                                                                                                                                                                                                                                                                                                                                                                                                                                                                                                                                                                                                                                                                                                                                                                                                                                                                                                                                                                                                                                                                                                                                                                                                                                                                                                                                                                                                                                                                                                                                                                                                                                                                                                                                                                                                                                                                                                                                                                                                                                                                                                                                                                                                                                                                                                                                                                                                                                                                                                                                                                                                                                                                                                                                                                                                                                                                                                                                                                                                                                                                                                                                                                                                                                                                                                                                                                                                                                                                                                                                                                                                                                                                                                                                                                                                                                                                                                                                                                                                                                                                                                                                                                                                                                                                                                                                                                                                                                                                                                                                                                                                                                                                                                                                                                                                                                                                                                                                                                                                                                                                                                                                                                                                                                                                                                                                                                                                                                                                                                                                                                                                                                                                                                                                                                                                                                                                                                                                                                                                                                                                                                 | UCD National Virus Reference Laboratory                                                     | Public Health Wales Microbiology Cardiff                                                                                                                               | Catherine Dempsey, Olive Murphy, Michael Prentice, Cillian F De Gascun,                                                                                                                                                                                                                                                 |
| EPI_ISL_418137, EPI_ISL_418151                                                                                                                                                                                                                                                                                                                                                                                                                                                                                                                                                                                                                                                                                                                                                                                                                                                                                                                                                                                                                                                                                                                                                                                                                                                                                                                                                                                                                                                                                                                                                                                                                                                                                                                                                                                                                                                                                                                                                                                                                                                                                                                                                                                                                                                                                                                                                                                                                                                                                                                                                                                                                                                                                                                                                                                                                                                                                                                                                                                                                                                                                                                                                                                                                                                                                                                                                                                                                                                                                                                                                                                                                                                                                                                                                                                                                                                                                                                                                                                                                                                                                                                                                                                                                                                                                                                                                                                                                                                                                                                                                                                                                                                                                                                                                                                                                                                                                                                                                                                                                                                                                                                                                                                                                                                                                                                                                                                                                                                                                                                                                                                                                                                                                                                                                                                                                                                                                                                                                                                                                                                                                                                                                                                                                                                                                                                                                                                                                                                                                                                                                                                                                                                                                                                                                                                                                                                                                                                                                                                                                                                                                                                                                                                                                                                                                                                                                                                                                                                                                                                                                                                                                                                                                                                                                                                                                                                                                                                                                                                                                                                                                                                                                                                                                                                                                                                                                                                                                                                                                                                                                                                                                                                                                                 | Wales Specialist Virology Centre                                                            | Public Health Wales Microbiology Cardiff                                                                                                                               | Catherine Moore, Joanne Watkins, Sally Corden, Sara Rey, Matt Bull, Tom Connor                                                                                                                                                                                                                                          |
| EPI_ISL_418269                                                                                                                                                                                                                                                                                                                                                                                                                                                                                                                                                                                                                                                                                                                                                                                                                                                                                                                                                                                                                                                                                                                                                                                                                                                                                                                                                                                                                                                                                                                                                                                                                                                                                                                                                                                                                                                                                                                                                                                                                                                                                                                                                                                                                                                                                                                                                                                                                                                                                                                                                                                                                                                                                                                                                                                                                                                                                                                                                                                                                                                                                                                                                                                                                                                                                                                                                                                                                                                                                                                                                                                                                                                                                                                                                                                                                                                                                                                                                                                                                                                                                                                                                                                                                                                                                                                                                                                                                                                                                                                                                                                                                                                                                                                                                                                                                                                                                                                                                                                                                                                                                                                                                                                                                                                                                                                                                                                                                                                                                                                                                                                                                                                                                                                                                                                                                                                                                                                                                                                                                                                                                                                                                                                                                                                                                                                                                                                                                                                                                                                                                                                                                                                                                                                                                                                                                                                                                                                                                                                                                                                                                                                                                                                                                                                                                                                                                                                                                                                                                                                                                                                                                                                                                                                                                                                                                                                                                                                                                                                                                                                                                                                                                                                                                                                                                                                                                                                                                                                                                                                                                                                                                                                                                                                 | Microbiology and Immunology department, Pasteur institute in Ho Chi Minh city               | Microbiology and Immunology department, Pasteur institute in Ho Chi Minh city                                                                                          | Cao, T.M., Nguyen, H.T., Pham, H.T.T., Vu, N.P.H., Dao, M.H., Huynh, L.T.K., Nguyen, L.T., Nguyen, N.T., Nguyen, T.N., Nguyen, A.H., Luong, Q.C., Nguyen, T.V., Tran, K.C., Pham, Q.D., Tran, T., Hoang, C.Q., Nguyen, T.T., Le, H.Q., Phung, T.M., Vo, T.N.A., Nguyen, S.N., Pham, D.T., Phan, L.T. and Nguyen, T.V.   |
| EPI_ISL_419454                                                                                                                                                                                                                                                                                                                                                                                                                                                                                                                                                                                                                                                                                                                                                                                                                                                                                                                                                                                                                                                                                                                                                                                                                                                                                                                                                                                                                                                                                                                                                                                                                                                                                                                                                                                                                                                                                                                                                                                                                                                                                                                                                                                                                                                                                                                                                                                                                                                                                                                                                                                                                                                                                                                                                                                                                                                                                                                                                                                                                                                                                                                                                                                                                                                                                                                                                                                                                                                                                                                                                                                                                                                                                                                                                                                                                                                                                                                                                                                                                                                                                                                                                                                                                                                                                                                                                                                                                                                                                                                                                                                                                                                                                                                                                                                                                                                                                                                                                                                                                                                                                                                                                                                                                                                                                                                                                                                                                                                                                                                                                                                                                                                                                                                                                                                                                                                                                                                                                                                                                                                                                                                                                                                                                                                                                                                                                                                                                                                                                                                                                                                                                                                                                                                                                                                                                                                                                                                                                                                                                                                                                                                                                                                                                                                                                                                                                                                                                                                                                                                                                                                                                                                                                                                                                                                                                                                                                                                                                                                                                                                                                                                                                                                                                                                                                                                                                                                                                                                                                                                                                                                                                                                                                                                 | Wales Specialist Virology Centre                                                            | Public Health Wales Microbiology Cardiff                                                                                                                               | Catherine Moore, Joanne Watkins, Sally Corden, Sara Rey, Matt Bull, Tom Connor                                                                                                                                                                                                                                          |
| EPI_ISL_419733, EPI_ISL_419734, EPI_ISL_419735, EPI_ISL_419736, EPI_ISL_419737, EPI_ISL_419738, EPI_ISL_419739, EPI_ISL_419740, EPI_ISL_419741, EPI_ISL_419742, EPI_ISL_419743, EPI_ISL_419744, EPI_ISL_419745, EPI_ISL_419746, EPI_ISL_419747, EPI_ISL_419748, EPI_ISL_419749, EPI_ISL_419750, EPI_ISL_419751, EPI_ISL_419752, EPI_ISL_419753, EPI_ISL_419754, EPI_ISL_419755, EPI_ISL_419756, EPI_ISL_419757, EPI_ISL_419758, EPI_ISL_419759, EPI_ISL_419760, EPI_ISL_419761, EPI_ISL_419762, EPI_ISL_419763, EPI_ISL_419764, EPI_ISL_419765, EPI_ISL_419766, EPI_ISL_419767, EPI_ISL_419768, EPI_ISL_419769, EPI_ISL_419770, EPI_ISL_419771, EPI_ISL_419772, EPI_ISL_419773, EPI_ISL_419774, EPI_ISL_419775, EPI_ISL_419776, EPI_ISL_419777, EPI_ISL_419778, EPI_ISL_419779, EPI_ISL_419780, EPI_ISL_419781, EPI_ISL_419782, EPI_ISL_419783, EPI_ISL_419784, EPI_ISL_419785, EPI_ISL_419786, EPI_ISL_419787, EPI_ISL_419788, EPI_ISL_419789, EPI_ISL_419790, EPI_ISL_419791, EPI_ISL_419792, EPI_ISL_419793, EPI_ISL_419794, EPI_ISL_419795, EPI_ISL_419796, EPI_ISL_419797, EPI_ISL_419798, EPI_ISL_419799, EPI_ISL_419800, EPI_ISL_419801, EPI_ISL_419802, EPI_ISL_419803, EPI_ISL_419804, EPI_ISL_419805, EPI_ISL_419806, EPI_ISL_419807, EPI_ISL_419808, EPI_ISL_419809, EPI_ISL_419810, EPI_ISL_419811, EPI_ISL_419812, EPI_ISL_419813, EPI_ISL_419814, EPI_ISL_419815, EPI_ISL_419816, EPI_ISL_419817, EPI_ISL_419818, EPI_ISL_419819, EPI_ISL_419820, EPI_ISL_419821, EPI_ISL_419822, EPI_ISL_419823, EPI_ISL_419824, EPI_ISL_419825, EPI_ISL_419826, EPI_ISL_419827, EPI_ISL_419828, EPI_ISL_419829, EPI_ISL_419830, EPI_ISL_419831, EPI_ISL_419832, EPI_ISL_419833, EPI_ISL_419834, EPI_ISL_419835, EPI_ISL_419836, EPI_ISL_419837, EPI_ISL_419838, EPI_ISL_419839, EPI_ISL_419840, EPI_ISL_419841, EPI_ISL_419842, EPI_ISL_419843, EPI_ISL_419844, EPI_ISL_419845, EPI_ISL_419846, EPI_ISL_419847, EPI_ISL_419848, EPI_ISL_419849, EPI_ISL_419850, EPI_ISL_419851, EPI_ISL_419852, EPI_ISL_419853, EPI_ISL_419854, EPI_ISL_419855, EPI_ISL_419856, EPI_ISL_419857, EPI_ISL_419858, EPI_ISL_419859, EPI_ISL_419860, EPI_ISL_419861, EPI_ISL_419862, EPI_ISL_419863, EPI_ISL_419864, EPI_ISL_419865, EPI_ISL_419866, EPI_ISL_419867, EPI_ISL_419868, EPI_ISL_419869, EPI_ISL_419870, EPI_ISL_419871, EPI_ISL_419872, EPI_ISL_419873, EPI_ISL_419874, EPI_ISL_419875, EPI_ISL_419876, EPI_ISL_419877, EPI_ISL_419878, EPI_ISL_419879, EPI_ISL_419880, EPI_ISL_419881, EPI_ISL_419882, EPI_ISL_419883, EPI_ISL_419884, EPI_ISL_419885, EPI_ISL_419886, EPI_ISL_419887, EPI_ISL_419888, EPI_ISL_419889, EPI_ISL_419890, EPI_ISL_419891, EPI_ISL_419892, EPI_ISL_419893, EPI_ISL_419894, EPI_ISL_419895, EPI_ISL_419896, EPI_ISL_419897, EPI_ISL_419898, EPI_ISL_419899, EPI_ISL_419900, EPI_ISL_419901, EPI_ISL_419902, EPI_ISL_419903, EPI_ISL_419904, EPI_ISL_419905, EPI_ISL_419906, EPI_ISL_419907, EPI_ISL_419908, EPI_ISL_419909, EPI_ISL_419910, EPI_ISL_419911, EPI_ISL_419912, EPI_ISL_419913, EPI_ISL_419914, EPI_ISL_419915, EPI_ISL_419916, EPI_ISL_419917, EPI_ISL_419918, EPI_ISL_419919, EPI_ISL_419920, EPI_ISL_419921, EPI_ISL_419922, EPI_ISL_419923, EPI_ISL_419924, EPI_ISL_419925, EPI_ISL_419926, EPI_ISL_419927, EPI_ISL_419928, EPI_ISL_419929, EPI_ISL_419930, EPI_ISL_419931, EPI_ISL_419932, EPI_ISL_419933, EPI_ISL_419934, EPI_ISL_419935, EPI_ISL_419936, EPI_ISL_419937, EPI_ISL_419938, EPI_ISL_419939, EPI_ISL_419940, EPI_ISL_419941, EPI_ISL_419942, EPI_ISL_419943, EPI_ISL_419944, EPI_ISL_419945, EPI_ISL_419946, EPI_ISL_419947, EPI_ISL_419948, EPI_ISL_419949, EPI_ISL_419950, EPI_ISL_419951, EPI_ISL_419952, EPI_ISL_419953, EPI_ISL_419954, EPI_ISL_419955, EPI_ISL_419956, EPI_ISL_419957, EPI_ISL_419958, EPI_ISL_419959, EPI_ISL_419960, EPI_ISL_419961, EPI_ISL_419962, EPI_ISL_419963, EPI_ISL_419964, EPI_ISL_419965, EPI_ISL_419966, EPI_ISL_419967, EPI_ISL_419968, EPI_ISL_419969, EPI_ISL_419970, EPI_ISL_419971, EPI_ISL_419972, EPI_ISL_419973, EPI_ISL_419974, EPI_ISL_419975, EPI_ISL_419976, EPI_ISL_419977, EPI_ISL_419978, EPI_ISL_419979, EPI_ISL_419980, EPI_ISL_419981, EPI_ISL_419982, EPI_ISL_419983, EPI_ISL_419984, EPI_ISL_419985, EPI_ISL_419986, EPI_ISL_419987, EPI_ISL_419988, EPI_ISL_419989, EPI_ISL_419990, EPI_ISL_419991, EPI_ISL_419992, EPI_ISL_419993, EPI_ISL_419994, EPI_ISL_419995, EPI_ISL_419996, EPI_ISL_419997, EPI_ISL_419998, EPI_ISL_419999                                                                                                                                                                                                                                                                                                                                                                                                                                                                                                                                                                                                                                                                                                                                                                                                                                                                                                                                                                                                                                                                                                                                                                                                                                                                                                                                                                                                                                                                                                                                                                                                                                                                                                                                                                                                                                                                                                                                                                                                                                                                                                                                                                                                                                                                                                                                                                                                                                                                                                                                                                                                                                                                                                                                                                                                                                                                                                                                                                                                                                                                                                                                                                                                                                                                                                                                                                                                                                                                                                                                                                                                                                                                                                                                                                                                                                                                                                                                                                                                                                                                                                                                                                                                                                                                                 |                                                                                             |                                                                                                                                                                        |                                                                                                                                                                                                                                                                                                                         |
| see above                                                                                                                                                                                                                                                                                                                                                                                                                                                                                                                                                                                                                                                                                                                                                                                                                                                                                                                                                                                                                                                                                                                                                                                                                                                                                                                                                                                                                                                                                                                                                                                                                                                                                                                                                                                                                                                                                                                                                                                                                                                                                                                                                                                                                                                                                                                                                                                                                                                                                                                                                                                                                                                                                                                                                                                                                                                                                                                                                                                                                                                                                                                                                                                                                                                                                                                                                                                                                                                                                                                                                                                                                                                                                                                                                                                                                                                                                                                                                                                                                                                                                                                                                                                                                                                                                                                                                                                                                                                                                                                                                                                                                                                                                                                                                                                                                                                                                                                                                                                                                                                                                                                                                                                                                                                                                                                                                                                                                                                                                                                                                                                                                                                                                                                                                                                                                                                                                                                                                                                                                                                                                                                                                                                                                                                                                                                                                                                                                                                                                                                                                                                                                                                                                                                                                                                                                                                                                                                                                                                                                                                                                                                                                                                                                                                                                                                                                                                                                                                                                                                                                                                                                                                                                                                                                                                                                                                                                                                                                                                                                                                                                                                                                                                                                                                                                                                                                                                                                                                                                                                                                                                                                                                                                                                      | Victorian Infectious Diseases Reference Laboratory (VIDRL)                                  | Victorian Infectious Diseases Reference Laboratory and Microbiological Diagnostic Unit Public Health Laboratory, Doherty Institute                                     | Caly L., Seemann T., Sait, M., Schultz M., Druce J., Sherry, N.                                                                                                                                                                                                                                                         |
| EPI_ISL_420987, EPI_ISL_420990                                                                                                                                                                                                                                                                                                                                                                                                                                                                                                                                                                                                                                                                                                                                                                                                                                                                                                                                                                                                                                                                                                                                                                                                                                                                                                                                                                                                                                                                                                                                                                                                                                                                                                                                                                                                                                                                                                                                                                                                                                                                                                                                                                                                                                                                                                                                                                                                                                                                                                                                                                                                                                                                                                                                                                                                                                                                                                                                                                                                                                                                                                                                                                                                                                                                                                                                                                                                                                                                                                                                                                                                                                                                                                                                                                                                                                                                                                                                                                                                                                                                                                                                                                                                                                                                                                                                                                                                                                                                                                                                                                                                                                                                                                                                                                                                                                                                                                                                                                                                                                                                                                                                                                                                                                                                                                                                                                                                                                                                                                                                                                                                                                                                                                                                                                                                                                                                                                                                                                                                                                                                                                                                                                                                                                                                                                                                                                                                                                                                                                                                                                                                                                                                                                                                                                                                                                                                                                                                                                                                                                                                                                                                                                                                                                                                                                                                                                                                                                                                                                                                                                                                                                                                                                                                                                                                                                                                                                                                                                                                                                                                                                                                                                                                                                                                                                                                                                                                                                                                                                                                                                                                                                                                                                 | Wales Specialist Virology Centre                                                            | Public Health Wales Microbiology Cardiff                                                                                                                               | Catherine Moore, Joanne Watkins, Sally Corden, Malorie Perry, Simon Cottrell Sara Rey, Matt Bull, Tom Connor                                                                                                                                                                                                            |
| EPI_ISL_422199                                                                                                                                                                                                                                                                                                                                                                                                                                                                                                                                                                                                                                                                                                                                                                                                                                                                                                                                                                                                                                                                                                                                                                                                                                                                                                                                                                                                                                                                                                                                                                                                                                                                                                                                                                                                                                                                                                                                                                                                                                                                                                                                                                                                                                                                                                                                                                                                                                                                                                                                                                                                                                                                                                                                                                                                                                                                                                                                                                                                                                                                                                                                                                                                                                                                                                                                                                                                                                                                                                                                                                                                                                                                                                                                                                                                                                                                                                                                                                                                                                                                                                                                                                                                                                                                                                                                                                                                                                                                                                                                                                                                                                                                                                                                                                                                                                                                                                                                                                                                                                                                                                                                                                                                                                                                                                                                                                                                                                                                                                                                                                                                                                                                                                                                                                                                                                                                                                                                                                                                                                                                                                                                                                                                                                                                                                                                                                                                                                                                                                                                                                                                                                                                                                                                                                                                                                                                                                                                                                                                                                                                                                                                                                                                                                                                                                                                                                                                                                                                                                                                                                                                                                                                                                                                                                                                                                                                                                                                                                                                                                                                                                                                                                                                                                                                                                                                                                                                                                                                                                                                                                                                                                                                                                                 | Wales Specialist Virology Centre                                                            | Public Health Wales Microbiology Cardiff                                                                                                                               | Catherine Moore, Johnathan Evans, Malorie Perry, Simon Cottrell, Alec Birchley, Alexander Adams, Amy Gaskin, Bree Gatica-Wilcox, Jason Coombes, Lauren Gilbert, Lee Graham, Nicole Pacchiarini, Sara Kumziene-Summerhayes, Sarah Taylor, Sophie Jones, Sara Rey, Matthew Bull, Joanne Watkins, Sally Corden, Tom Connor |
| EPI_ISL_426637, EPI_ISL_426638, EPI_ISL_426639, EPI_ISL_426640, EPI_ISL_426641, EPI_ISL_426642, EPI_ISL_426643, EPI_ISL_426644, EPI_ISL_426645, EPI_ISL_426646, EPI_ISL_426647, EPI_ISL_426648, EPI_ISL_426649, EPI_ISL_426650, EPI_ISL_426651, EPI_ISL_426652, EPI_ISL_426653, EPI_ISL_426654, EPI_ISL_426655, EPI_ISL_426656, EPI_ISL_426657, EPI_ISL_426658, EPI_ISL_426659, EPI_ISL_426660, EPI_ISL_426661, EPI_ISL_426662, EPI_ISL_426663, EPI_ISL_426664, EPI_ISL_426665, EPI_ISL_426666, EPI_ISL_426667, EPI_ISL_426668, EPI_ISL_426669, EPI_ISL_426670, EPI_ISL_426671, EPI_ISL_426672, EPI_ISL_426673, EPI_ISL_426674, EPI_ISL_426675, EPI_ISL_426676, EPI_ISL_426677, EPI_ISL_426678, EPI_ISL_426679, EPI_ISL_426680, EPI_ISL_426681, EPI_ISL_426682, EPI_ISL_426683, EPI_ISL_426684, EPI_ISL_426685, EPI_ISL_426686, EPI_ISL_426687, EPI_ISL_426688, EPI_ISL_426689, EPI_ISL_426690, EPI_ISL_426691, EPI_ISL_426692, EPI_ISL_426693, EPI_ISL_426694, EPI_ISL_426695, EPI_ISL_426696, EPI_ISL_426697, EPI_ISL_426698, EPI_ISL_426699, EPI_ISL_426700, EPI_ISL_426701, EPI_ISL_426702, EPI_ISL_426703, EPI_ISL_426704, EPI_ISL_426705, EPI_ISL_426706, EPI_ISL_426707, EPI_ISL_426708, EPI_ISL_426709, EPI_ISL_426710, EPI_ISL_426711, EPI_ISL_426712, EPI_ISL_426713, EPI_ISL_426714, EPI_ISL_426715, EPI_ISL_426716, EPI_ISL_426717, EPI_ISL_426718, EPI_ISL_426719, EPI_ISL_426720, EPI_ISL_426721, EPI_ISL_426722, EPI_ISL_426723, EPI_ISL_426724, EPI_ISL_426725, EPI_ISL_426726, EPI_ISL_426727, EPI_ISL_426728, EPI_ISL_426729, EPI_ISL_426730, EPI_ISL_426731, EPI_ISL_426732, EPI_ISL_426733, EPI_ISL_426734, EPI_ISL_426735, EPI_ISL_426736, EPI_ISL_426737, EPI_ISL_426738, EPI_ISL_426739, EPI_ISL_426740, EPI_ISL_426741, EPI_ISL_426742, EPI_ISL_426743, EPI_ISL_426744, EPI_ISL_426745, EPI_ISL_426746, EPI_ISL_426747, EPI_ISL_426748, EPI_ISL_426749, EPI_ISL_426750, EPI_ISL_426751, EPI_ISL_426752, EPI_ISL_426753, EPI_ISL_426754, EPI_ISL_426755, EPI_ISL_426756, EPI_ISL_426757, EPI_ISL_426758, EPI_ISL_426759, EPI_ISL_426760, EPI_ISL_426761, EPI_ISL_426762, EPI_ISL_426763, EPI_ISL_426764, EPI_ISL_426765, EPI_ISL_426766, EPI_ISL_426767, EPI_ISL_426768, EPI_ISL_426769, EPI_ISL_426770, EPI_ISL_426771, EPI_ISL_426772, EPI_ISL_426773, EPI_ISL_426774, EPI_ISL_426775, EPI_ISL_426776, EPI_ISL_426777, EPI_ISL_426778, EPI_ISL_426779, EPI_ISL_426780, EPI_ISL_426781, EPI_ISL_426782, EPI_ISL_426783, EPI_ISL_426784, EPI_ISL_426785, EPI_ISL_426786, EPI_ISL_426787, EPI_ISL_426788, EPI_ISL_426789, EPI_ISL_426790, EPI_ISL_426791, EPI_ISL_426792, EPI_ISL_426793, EPI_ISL_426794, EPI_ISL_426795, EPI_ISL_426796, EPI_ISL_426797, EPI_ISL_426798, EPI_ISL_426799, EPI_ISL_426800, EPI_ISL_426801, EPI_ISL_426802, EPI_ISL_426803, EPI_ISL_426804, EPI_ISL_426805, EPI_ISL_426806, EPI_ISL_426807, EPI_ISL_426808, EPI_ISL_426809, EPI_ISL_426810, EPI_ISL_426811, EPI_ISL_426812, EPI_ISL_426813, EPI_ISL_426814, EPI_ISL_426815, EPI_ISL_426816, EPI_ISL_426817, EPI_ISL_426818, EPI_ISL_426819, EPI_ISL_426820, EPI_ISL_426821, EPI_ISL_426822, EPI_ISL_426823, EPI_ISL_426824, EPI_ISL_426825, EPI_ISL_426826, EPI_ISL_426827, EPI_ISL_426828, EPI_ISL_426829, EPI_ISL_426830, EPI_ISL_426831, EPI_ISL_426832, EPI_ISL_426833, EPI_ISL_426834, EPI_ISL_426835, EPI_ISL_426836, EPI_ISL_426837, EPI_ISL_426838, EPI_ISL_426839, EPI_ISL_426840, EPI_ISL_426841, EPI_ISL_426842, EPI_ISL_426843, EPI_ISL_426844, EPI_ISL_426845, EPI_ISL_426846, EPI_ISL_426847, EPI_ISL_426848, EPI_ISL_426849, EPI_ISL_426850, EPI_ISL_426851, EPI_ISL_426852, EPI_ISL_426853, EPI_ISL_426854, EPI_ISL_426855, EPI_ISL_426856, EPI_ISL_426857, EPI_ISL_426858, EPI_ISL_426859, EPI_ISL_426860, EPI_ISL_426861, EPI_ISL_426862, EPI_ISL_426863, EPI_ISL_426864, EPI_ISL_426865, EPI_ISL_426866, EPI_ISL_426867, EPI_ISL_426868, EPI_ISL_426869, EPI_ISL_426870, EPI_ISL_426871, EPI_ISL_426872, EPI_ISL_426873, EPI_ISL_426874, EPI_ISL_426875, EPI_ISL_426876, EPI_ISL_426877, EPI_ISL_426878, EPI_ISL_426879, EPI_ISL_426880, EPI_ISL_426881, EPI_ISL_426882, EPI_ISL_426883, EPI_ISL_426884, EPI_ISL_426885, EPI_ISL_426886, EPI_ISL_426887, EPI_ISL_426888, EPI_ISL_426889, EPI_ISL_426890, EPI_ISL_426891, EPI_ISL_426892, EPI_ISL_426893, EPI_ISL_426894, EPI_ISL_426895, EPI_ISL_426896, EPI_ISL_426897, EPI_ISL_426898, EPI_ISL_426899, EPI_ISL_426900, EPI_ISL_426901, EPI_ISL_426902, EPI_ISL_426903, EPI_ISL_426904, EPI_ISL_426905, EPI_ISL_426906, EPI_ISL_426907, EPI_ISL_426908, EPI_ISL_426909, EPI_ISL_426910, EPI_ISL_426911, EPI_ISL_426912, EPI_ISL_426913, EPI_ISL_426914, EPI_ISL_426915, EPI_ISL_426916, EPI_ISL_426917, EPI_ISL_426918, EPI_ISL_426919, EPI_ISL_426920, EPI_ISL_426921, EPI_ISL_426922, EPI_ISL_426923, EPI_ISL_426924, EPI_ISL_426925, EPI_ISL_426926, EPI_ISL_426927, EPI_ISL_426928, EPI_ISL_426929, EPI_ISL_426930, EPI_ISL_426931, EPI_ISL_426932, EPI_ISL_426933, EPI_ISL_426934, EPI_ISL_426935, EPI_ISL_426936, EPI_ISL_426937, EPI_ISL_426938, EPI_ISL_426939, EPI_ISL_426940, EPI_ISL_426941, EPI_ISL_426942, EPI_ISL_426943, EPI_ISL_426944, EPI_ISL_426945, EPI_ISL_426946, EPI_ISL_426947, EPI_ISL_426948, EPI_ISL_426949, EPI_ISL_426950, EPI_ISL_426951, EPI_ISL_426952, EPI_ISL_426953, EPI_ISL_426954, EPI_ISL_426955, EPI_ISL_426956, EPI_ISL_426957, EPI_ISL_426958, EPI_ISL_426959, EPI_ISL_426960, EPI_ISL_426961, EPI_ISL_426962, EPI_ISL_426963, EPI_ISL_426964, EPI_ISL_426965, EPI_ISL_426966, EPI_ISL_426967, EPI_ISL_426968, EPI_ISL_426969, EPI_ISL_426970, EPI_ISL_426971, EPI_ISL_426972, EPI_ISL_426973, EPI_ISL_426974, EPI_ISL_426975, EPI_ISL_426976, EPI_ISL_426977, EPI_ISL_426978, EPI_ISL_426979, EPI_ISL_426980, EPI_ISL_426981, EPI_ISL_426982, EPI_ISL_426983, EPI_ISL_426984, EPI_ISL_426985, EPI_ISL_426986, EPI_ISL_426987, EPI_ISL_426988, EPI_ISL_426989, EPI_ISL_426990, EPI_ISL_426991, EPI_ISL_426992, EPI_ISL_426993, EPI_ISL_426994, EPI_ISL_426995, EPI_ISL_426996, EPI_ISL_426997, EPI_ISL_426998, EPI_ISL_426999, EPI_ISL_427000, EPI_ISL_427001, EPI_ISL_427002, EPI_ISL_427003, EPI_ISL_427004, EPI_ISL_427005, EPI_ISL_427006, EPI_ISL_427007, EPI_ISL_427008, EPI_ISL_427009, EPI_ISL_427010, EPI_ISL_427011, EPI_ISL_427012, EPI_ISL_427013, EPI_ISL_427014, EPI_ISL_427015, EPI_ISL_427016, EPI_ISL_427017, EPI_ISL_427018, EPI_ISL_427019, EPI_ISL_427020, EPI_ISL_427021, EPI_ISL_427022, EPI_ISL_427023, EPI_ISL_427024, EPI_ISL_427025, EPI_ISL_427026, EPI_ISL_427027, EPI_ISL_427028, EPI_ISL_427029, EPI_ISL_427030, EPI_ISL_427031, EPI_ISL_427032, EPI_ISL_427033, EPI_ISL_427034, EPI_ISL_427035, EPI_ISL_427036, EPI_ISL_427037, EPI_ISL_427038, EPI_ISL_427039, EPI_ISL_427040, EPI_ISL_427041, EPI_ISL_427042, EPI_ISL_427043, EPI_ISL_427044, EPI_ISL_427045, EPI_ISL_427046, EPI_ISL_427047, EPI_ISL_427048, EPI_ISL_427049, EPI_ISL_427050, EPI_ISL_427051, EPI_ISL_427052, EPI_ISL_427053, EPI_ISL_427054, EPI_ISL_427055, EPI_ISL_427056, EPI_ISL_427057, EPI_ISL_427058, EPI_ISL_427059, EPI_ISL_427060, EPI_ISL_427061, EPI_ISL_427062, EPI_ISL_427063, EPI_ISL_427064, EPI_ISL_427065, EPI_ISL_427066, EPI_ISL_427067, EPI_ISL_427068, EPI_ISL_427069, EPI_ISL_427070, EPI_ISL_427071, EPI_ISL_427072, EPI_ISL_427073, EPI_ISL_427074, EPI_ISL_427075, EPI_ISL_427076, EPI_ISL_427077, EPI_ISL_427078, EPI_ISL_427079, EPI_ISL_427080, EPI_ISL_427081, EPI_ISL_427082, EPI_ISL_427083, EPI_ISL_427084, EPI_ISL_427085, EPI_ISL_427086, EPI_ISL_427087, EPI_ISL_427088, EPI_ISL_427089, EPI_ISL_427090, EPI_ISL_427091, EPI_ISL_427092, EPI_ISL_427093, EPI_ISL_427094, EPI_ISL_427095, EPI_ISL_427096, EPI_ISL_427097, EPI_ISL_427098, EPI_ISL_427099, EPI_ISL_427100, EPI_ISL_427101, EPI_ISL_427102, EPI_ISL_427103, EPI_ISL_427104, EPI_ISL_427105, EPI_ISL_427106, EPI_ISL_427107, EPI_ISL_427108, EPI_ISL_427109, EPI_ISL_427110, EPI_ISL_427111, EPI_ISL_427112, EPI_ISL_427113, EPI_ISL_427114, EPI_ISL_427115, EPI_ISL_427116, EPI_ISL_427117, EPI_ISL_427118, EPI_ISL_427119, EPI_ISL_427120, EPI_ISL_427121, EPI_ISL_427122, EPI_ISL_427123, EPI_ISL_427124, EPI_ISL_427125, EPI_ISL_427126, EPI_ISL_427127, EPI_ISL_427128, EPI_ISL_427129, EPI_ISL_427130, EPI_ISL_427131, EPI_ISL_427132, EPI_ISL_427133, EPI_ISL_427134, EPI_ISL_427135, EPI_ISL_427136, EPI_ISL_427137, EPI_ISL_427138, EPI_ISL_427139, EPI_ISL_427140, EPI_ISL_427141, EPI_ISL_427142, EPI_ISL_427143, EPI_ISL_427144, EPI_ISL_427145, EPI_ISL_427146, EPI_ISL_427147, EPI_ISL_427148, EPI_ISL_427149, EPI_ISL_427150, EPI_ISL_427151, EPI_ISL_427152, EPI_ISL_427153, EPI_ISL_427154, EPI_ISL_427155, EPI_ISL_427156, EPI_ISL_427157, EPI_ISL_427158, EPI_ISL_427159, EPI_ISL_427160 |                                                                                             |                                                                                                                                                                        |                                                                                                                                                                                                                                                                                                                         |
| see above                                                                                                                                                                                                                                                                                                                                                                                                                                                                                                                                                                                                                                                                                                                                                                                                                                                                                                                                                                                                                                                                                                                                                                                                                                                                                                                                                                                                                                                                                                                                                                                                                                                                                                                                                                                                                                                                                                                                                                                                                                                                                                                                                                                                                                                                                                                                                                                                                                                                                                                                                                                                                                                                                                                                                                                                                                                                                                                                                                                                                                                                                                                                                                                                                                                                                                                                                                                                                                                                                                                                                                                                                                                                                                                                                                                                                                                                                                                                                                                                                                                                                                                                                                                                                                                                                                                                                                                                                                                                                                                                                                                                                                                                                                                                                                                                                                                                                                                                                                                                                                                                                                                                                                                                                                                                                                                                                                                                                                                                                                                                                                                                                                                                                                                                                                                                                                                                                                                                                                                                                                                                                                                                                                                                                                                                                                                                                                                                                                                                                                                                                                                                                                                                                                                                                                                                                                                                                                                                                                                                                                                                                                                                                                                                                                                                                                                                                                                                                                                                                                                                                                                                                                                                                                                                                                                                                                                                                                                                                                                                                                                                                                                                                                                                                                                                                                                                                                                                                                                                                                                                                                                                                                                                                                                      | Victorian Infectious Diseases Reference Laboratory (VIDRL)                                  | Microbiological Diagnostic Unit Public Health Laboratory and                                                                                                           | Caly L., Seemann T., Sait, M., Schultz M., Druce J., Sherry, N.                                                                                                                                                                                                                                                         |

Victorian Infectious Diseases Reference Laboratory, Doherty Institute

|                                                                                                                                                                                                                                                                                                                                                                                                                                                                                                                                                                                                                                                                                                                                                                                                                                                                                                                                                                                                                                                                                                                                                                                                                                                                                                                                                                                                                                                                                                                                                                                                                                                                                                                                                                                                                                                                                                                                                                                                                                                                                                                                                                                                                                                                                                                                                                                                                                                                                                                                                                                                                                                                                                                                                                                                                                                                                                                                                                                                                                                                                                                                                                                                                                                                                                                                                                                                                                                                                                                |                |                                                                     |                                                                                                                                                                         |                                                                                                                                                                                                                                                                                                                                                                                                                                                                                                                                                    |
|----------------------------------------------------------------------------------------------------------------------------------------------------------------------------------------------------------------------------------------------------------------------------------------------------------------------------------------------------------------------------------------------------------------------------------------------------------------------------------------------------------------------------------------------------------------------------------------------------------------------------------------------------------------------------------------------------------------------------------------------------------------------------------------------------------------------------------------------------------------------------------------------------------------------------------------------------------------------------------------------------------------------------------------------------------------------------------------------------------------------------------------------------------------------------------------------------------------------------------------------------------------------------------------------------------------------------------------------------------------------------------------------------------------------------------------------------------------------------------------------------------------------------------------------------------------------------------------------------------------------------------------------------------------------------------------------------------------------------------------------------------------------------------------------------------------------------------------------------------------------------------------------------------------------------------------------------------------------------------------------------------------------------------------------------------------------------------------------------------------------------------------------------------------------------------------------------------------------------------------------------------------------------------------------------------------------------------------------------------------------------------------------------------------------------------------------------------------------------------------------------------------------------------------------------------------------------------------------------------------------------------------------------------------------------------------------------------------------------------------------------------------------------------------------------------------------------------------------------------------------------------------------------------------------------------------------------------------------------------------------------------------------------------------------------------------------------------------------------------------------------------------------------------------------------------------------------------------------------------------------------------------------------------------------------------------------------------------------------------------------------------------------------------------------------------------------------------------------------------------------------------------|----------------|---------------------------------------------------------------------|-------------------------------------------------------------------------------------------------------------------------------------------------------------------------|----------------------------------------------------------------------------------------------------------------------------------------------------------------------------------------------------------------------------------------------------------------------------------------------------------------------------------------------------------------------------------------------------------------------------------------------------------------------------------------------------------------------------------------------------|
| EPI_ISL_428990, EPI_ISL_428991, EPI_ISL_428992, EPI_ISL_428993, EPI_ISL_428994, EPI_ISL_428995, EPI_ISL_428996, EPI_ISL_428997, EPI_ISL_428998, EPI_ISL_428999, EPI_ISL_429000, EPI_ISL_429001, EPI_ISL_429002, EPI_ISL_429003, EPI_ISL_429004, EPI_ISL_429005, EPI_ISL_429006, EPI_ISL_429007, EPI_ISL_429008, EPI_ISL_429009, EPI_ISL_429010, EPI_ISL_429011, EPI_ISL_429012, EPI_ISL_429013, EPI_ISL_429014, EPI_ISL_429015, EPI_ISL_429016, EPI_ISL_429017, EPI_ISL_429018, EPI_ISL_429019, EPI_ISL_429020, EPI_ISL_429021, EPI_ISL_429022, EPI_ISL_429023, EPI_ISL_429024, EPI_ISL_429025, EPI_ISL_429026, EPI_ISL_429027, EPI_ISL_429028, EPI_ISL_429029, EPI_ISL_429030, EPI_ISL_429031, EPI_ISL_429032, EPI_ISL_429033, EPI_ISL_429034, EPI_ISL_429035, EPI_ISL_429036, EPI_ISL_429037, EPI_ISL_429038, EPI_ISL_429039, EPI_ISL_429040, EPI_ISL_429041, EPI_ISL_429042, EPI_ISL_429043, EPI_ISL_429044, EPI_ISL_429045, EPI_ISL_429046, EPI_ISL_429047, EPI_ISL_429048, EPI_ISL_429049, EPI_ISL_429050, EPI_ISL_429051, EPI_ISL_429052, EPI_ISL_429053, EPI_ISL_429054, EPI_ISL_429055, EPI_ISL_429056, EPI_ISL_429057, EPI_ISL_429058, EPI_ISL_429059, EPI_ISL_429060, EPI_ISL_429061, EPI_ISL_429062, EPI_ISL_429063, EPI_ISL_429064, EPI_ISL_429065, EPI_ISL_429066, EPI_ISL_429067, EPI_ISL_429068, EPI_ISL_429069, EPI_ISL_429070, EPI_ISL_429071, EPI_ISL_429072, EPI_ISL_429073                                                                                                                                                                                                                                                                                                                                                                                                                                                                                                                                                                                                                                                                                                                                                                                                                                                                                                                                                                                                                                                                                                                                                                                                                                                                                                                                                                                                                                                                                                                                                                                                                                                                                                                                                                                                                                                                                                                                                                                                                                                                                                                 | see above      | UCSF Clinical Microbiology Laboratory                               | Chan-Zuckerberg Biohub                                                                                                                                                  | CZB Ciiahub Consortium                                                                                                                                                                                                                                                                                                                                                                                                                                                                                                                             |
| EPI_ISL_430473, EPI_ISL_430474, EPI_ISL_430475, EPI_ISL_430476, EPI_ISL_430477, EPI_ISL_430478, EPI_ISL_430479, EPI_ISL_430480, EPI_ISL_430481, EPI_ISL_430482, EPI_ISL_430483, EPI_ISL_430484, EPI_ISL_430485, EPI_ISL_430486, EPI_ISL_430487, EPI_ISL_430488, EPI_ISL_430489, EPI_ISL_430490, EPI_ISL_430491, EPI_ISL_430492, EPI_ISL_430493, EPI_ISL_430494, EPI_ISL_430495, EPI_ISL_430496, EPI_ISL_430497, EPI_ISL_430498, EPI_ISL_430499, EPI_ISL_430500, EPI_ISL_430501, EPI_ISL_430502, EPI_ISL_430503, EPI_ISL_430504, EPI_ISL_430505, EPI_ISL_430506, EPI_ISL_430507, EPI_ISL_430508, EPI_ISL_430509, EPI_ISL_430510, EPI_ISL_430511, EPI_ISL_430512, EPI_ISL_430513, EPI_ISL_430514, EPI_ISL_430515, EPI_ISL_430516, EPI_ISL_430517, EPI_ISL_430518, EPI_ISL_430519, EPI_ISL_430520, EPI_ISL_430521, EPI_ISL_430522, EPI_ISL_430523, EPI_ISL_430524, EPI_ISL_430525, EPI_ISL_430526, EPI_ISL_430527, EPI_ISL_430528, EPI_ISL_430529, EPI_ISL_430530, EPI_ISL_430531, EPI_ISL_430532, EPI_ISL_430533, EPI_ISL_430534, EPI_ISL_430535, EPI_ISL_430536, EPI_ISL_430537, EPI_ISL_430538, EPI_ISL_430539, EPI_ISL_430540, EPI_ISL_430541, EPI_ISL_430542, EPI_ISL_430543, EPI_ISL_430544, EPI_ISL_430545, EPI_ISL_430546, EPI_ISL_430547, EPI_ISL_430548, EPI_ISL_430549, EPI_ISL_430550, EPI_ISL_430551, EPI_ISL_430552, EPI_ISL_430553, EPI_ISL_430554, EPI_ISL_430555, EPI_ISL_430556, EPI_ISL_430557, EPI_ISL_430558, EPI_ISL_430559, EPI_ISL_430560, EPI_ISL_430561, EPI_ISL_430562, EPI_ISL_430563, EPI_ISL_430564, EPI_ISL_430565, EPI_ISL_430566, EPI_ISL_430567, EPI_ISL_430568, EPI_ISL_430569, EPI_ISL_430570, EPI_ISL_430571, EPI_ISL_430572, EPI_ISL_430573, EPI_ISL_430574, EPI_ISL_430575, EPI_ISL_430576, EPI_ISL_430577, EPI_ISL_430578, EPI_ISL_430579, EPI_ISL_430580, EPI_ISL_430581, EPI_ISL_430582, EPI_ISL_430583, EPI_ISL_430584, EPI_ISL_430585, EPI_ISL_430586, EPI_ISL_430587, EPI_ISL_430588, EPI_ISL_430589, EPI_ISL_430590, EPI_ISL_430591, EPI_ISL_430592, EPI_ISL_430593, EPI_ISL_430594, EPI_ISL_430595, EPI_ISL_430596, EPI_ISL_430597, EPI_ISL_430598, EPI_ISL_430599, EPI_ISL_430600, EPI_ISL_430601, EPI_ISL_430602, EPI_ISL_430603, EPI_ISL_430604, EPI_ISL_430605, EPI_ISL_430606, EPI_ISL_430607, EPI_ISL_430608, EPI_ISL_430609, EPI_ISL_430610, EPI_ISL_430611, EPI_ISL_430612, EPI_ISL_430613, EPI_ISL_430614, EPI_ISL_430615, EPI_ISL_430616, EPI_ISL_430617, EPI_ISL_430618, EPI_ISL_430619, EPI_ISL_430620, EPI_ISL_430621, EPI_ISL_430622, EPI_ISL_430623, EPI_ISL_430624, EPI_ISL_430625, EPI_ISL_430626, EPI_ISL_430627, EPI_ISL_430628, EPI_ISL_430629, EPI_ISL_430630, EPI_ISL_430631, EPI_ISL_430632, EPI_ISL_430633, EPI_ISL_430634, EPI_ISL_430635, EPI_ISL_430636, EPI_ISL_430637, EPI_ISL_430638, EPI_ISL_430639, EPI_ISL_430640, EPI_ISL_430641, EPI_ISL_430642, EPI_ISL_430643, EPI_ISL_430644, EPI_ISL_430645, EPI_ISL_430646, EPI_ISL_430647, EPI_ISL_430648, EPI_ISL_430649, EPI_ISL_430650, EPI_ISL_430651, EPI_ISL_430652, EPI_ISL_430653, EPI_ISL_430654, EPI_ISL_430655, EPI_ISL_430656, EPI_ISL_430657, EPI_ISL_430658, EPI_ISL_430659, EPI_ISL_430660, EPI_ISL_430661, EPI_ISL_430662, EPI_ISL_430663, EPI_ISL_430664, EPI_ISL_430665, EPI_ISL_430666, EPI_ISL_430667, EPI_ISL_430668, EPI_ISL_430669, EPI_ISL_430670, EPI_ISL_430671, EPI_ISL_430672, EPI_ISL_430673, EPI_ISL_430674, EPI_ISL_430675, EPI_ISL_430676, EPI_ISL_430677, EPI_ISL_430678, EPI_ISL_430679, EPI_ISL_430680, EPI_ISL_430681, EPI_ISL_430682, EPI_ISL_430683 | see above      | Victorian Infectious Diseases Reference Laboratory (VIDRL)          | Microbiological Diagnostic Unit Public Health Laboratory and Victorian Infectious Diseases Reference Laboratory, The Peter Doherty Institute for Infection and Immunity | Caly L., Seemann T., Sait, M., Schultz M., Druce J., Sherry, N.                                                                                                                                                                                                                                                                                                                                                                                                                                                                                    |
| EPI_ISL_430791, EPI_ISL_430792                                                                                                                                                                                                                                                                                                                                                                                                                                                                                                                                                                                                                                                                                                                                                                                                                                                                                                                                                                                                                                                                                                                                                                                                                                                                                                                                                                                                                                                                                                                                                                                                                                                                                                                                                                                                                                                                                                                                                                                                                                                                                                                                                                                                                                                                                                                                                                                                                                                                                                                                                                                                                                                                                                                                                                                                                                                                                                                                                                                                                                                                                                                                                                                                                                                                                                                                                                                                                                                                                 | EPI_ISL_431833 | UCSF Clinical Microbiology Laboratory                               | Chan-Zuckerberg Biohub                                                                                                                                                  | CZB Ciiahub Consortium                                                                                                                                                                                                                                                                                                                                                                                                                                                                                                                             |
|                                                                                                                                                                                                                                                                                                                                                                                                                                                                                                                                                                                                                                                                                                                                                                                                                                                                                                                                                                                                                                                                                                                                                                                                                                                                                                                                                                                                                                                                                                                                                                                                                                                                                                                                                                                                                                                                                                                                                                                                                                                                                                                                                                                                                                                                                                                                                                                                                                                                                                                                                                                                                                                                                                                                                                                                                                                                                                                                                                                                                                                                                                                                                                                                                                                                                                                                                                                                                                                                                                                |                | National Institutes of Health, University of the Philippines Manila | Philippine Genome Center, University of the Philippines System                                                                                                          | Carlo M. Lapid, Francis A. Tablizo, Benedict A. Maralit, Jan Michael C. Yap, Raul V. Destura, Marissa M. Alejandria, El King D. Morado, Joshua Gregor A. Dizon, Jo-Hannah S. Llamas, Shiela Mae M. Araiza, Kris P. Punayan, Kristianne Arielle D. Gabriel, Shebna Rose D. Fabilloren, Shana F. Genavia, Jarvin E. Nipales, Alessandra C. Sanchez, Haifa L.Gaza, Joy Ann Petronio-Santos, Julius Aaron Mejia, Maribell Dollete, Sonia Salamat, Christina Tan, Bernard Demot, John Mark Velasco, Eva Maria Cutiongo-de la Paz, and Cynthia P. Saloma |
| EPI_ISL_431914, EPI_ISL_431947, EPI_ISL_431961, EPI_ISL_432000, EPI_ISL_432061, EPI_ISL_432075, EPI_ISL_432112, EPI_ISL_432185, EPI_ISL_432255, EPI_ISL_432288, EPI_ISL_432325, EPI_ISL_432338                                                                                                                                                                                                                                                                                                                                                                                                                                                                                                                                                                                                                                                                                                                                                                                                                                                                                                                                                                                                                                                                                                                                                                                                                                                                                                                                                                                                                                                                                                                                                                                                                                                                                                                                                                                                                                                                                                                                                                                                                                                                                                                                                                                                                                                                                                                                                                                                                                                                                                                                                                                                                                                                                                                                                                                                                                                                                                                                                                                                                                                                                                                                                                                                                                                                                                                 | see above      | Wales Specialist Virology Centre                                    | Public Health Wales Microbiology Cardiff                                                                                                                                | Catherine Moore, Johnathan Evans, Malorie Perry, Simon Cottrell, Alec Birchley, Alexander Adams, Amy Gaskin, Bree Gatica-Wilcox, Jason Coombes, Lauren Gilbert, Lee Graham, Nicole Pacchiarini, Sara Kumziene-Summerhayes, Sarah Taylor, Sophie Jones, Sara Rey, Matthew Bull, Joanne Watkins, Sally Corden, Tom Connor                                                                                                                                                                                                                            |
| EPI_ISL_434555, EPI_ISL_434556, EPI_ISL_434557, EPI_ISL_434558                                                                                                                                                                                                                                                                                                                                                                                                                                                                                                                                                                                                                                                                                                                                                                                                                                                                                                                                                                                                                                                                                                                                                                                                                                                                                                                                                                                                                                                                                                                                                                                                                                                                                                                                                                                                                                                                                                                                                                                                                                                                                                                                                                                                                                                                                                                                                                                                                                                                                                                                                                                                                                                                                                                                                                                                                                                                                                                                                                                                                                                                                                                                                                                                                                                                                                                                                                                                                                                 |                | National Institutes of Health, University of the Philippines Manila | Philippine Genome Center                                                                                                                                                | Carlo M. Lapid, Francis A. Tablizo, Benedict A. Maralit, Jan Michael C. Yap, Raul V. Destura, Marissa M. Alejandria, El King D. Morado, Joshua Gregor A. Dizon, Jo-Hannah S. Llamas, Shiela Mae M. Araiza, Kris P. Punayan, Kristianne Arielle D. Gabriel, Shebna Rose D. Fabilloren, Shana F. Genavia, Jarvin E. Nipales, Alessandra C. Sanchez, Haifa L.Gaza, Joy Ann Petronio-Santos, Julius Aaron Mejia, Maribell Dollete, Sonia Salamat, Christina Tan, Bernard Demot, John Mark Velasco, Eva Maria Cutiongo-de la Paz, and Cynthia P. Saloma |
| EPI_ISL_434666                                                                                                                                                                                                                                                                                                                                                                                                                                                                                                                                                                                                                                                                                                                                                                                                                                                                                                                                                                                                                                                                                                                                                                                                                                                                                                                                                                                                                                                                                                                                                                                                                                                                                                                                                                                                                                                                                                                                                                                                                                                                                                                                                                                                                                                                                                                                                                                                                                                                                                                                                                                                                                                                                                                                                                                                                                                                                                                                                                                                                                                                                                                                                                                                                                                                                                                                                                                                                                                                                                 |                | Hornefors Halsocentral                                              | The Public Health Agency of Sweden                                                                                                                                      | Camilla Eiback, Oskar Karlsson Lindsjo, Maria Lind Karlberg, Anna-Malin Linde, Olov Svartstrom, Anna Risberg, Theresa Enkirch, Mia Brytting, Karin Tegmark-Wisell                                                                                                                                                                                                                                                                                                                                                                                  |
| EPI_ISL_436111, EPI_ISL_436112, EPI_ISL_436113, EPI_ISL_436114, EPI_ISL_436115, EPI_ISL_436116, EPI_ISL_436117, EPI_ISL_436118, EPI_ISL_436119, EPI_ISL_436120, EPI_ISL_436121, EPI_ISL_436122, EPI_ISL_436123, EPI_ISL_436124, EPI_ISL_436125, EPI_ISL_436126, EPI_ISL_436127, EPI_ISL_436128, EPI_ISL_436129, EPI_ISL_436130, EPI_ISL_436131, EPI_ISL_436132                                                                                                                                                                                                                                                                                                                                                                                                                                                                                                                                                                                                                                                                                                                                                                                                                                                                                                                                                                                                                                                                                                                                                                                                                                                                                                                                                                                                                                                                                                                                                                                                                                                                                                                                                                                                                                                                                                                                                                                                                                                                                                                                                                                                                                                                                                                                                                                                                                                                                                                                                                                                                                                                                                                                                                                                                                                                                                                                                                                                                                                                                                                                                 | see above      | Victorian Infectious Diseases Reference Laboratory (VIDRL)          | Microbiological Diagnostic Unit Public Health Laboratory and Victorian Infectious Diseases Reference Laboratory, Doherty Institute                                      | Caly L., Seemann T., Sait, M., Schultz M., Druce J., Sherry, N.                                                                                                                                                                                                                                                                                                                                                                                                                                                                                    |
| EPI_ISL_436641, EPI_ISL_436642, EPI_ISL_436643, EPI_ISL_436644, EPI_ISL_436645, EPI_ISL_436646, EPI_ISL_436647, EPI_ISL_436648, EPI_ISL_436649, EPI_ISL_436650, EPI_ISL_436651, EPI_ISL_436652, EPI_ISL_436653, EPI_ISL_436654, EPI_ISL_436655, EPI_ISL_436656, EPI_ISL_436657, EPI_ISL_436658, EPI_ISL_436659, EPI_ISL_436660, EPI_ISL_436661, EPI_ISL_436662, EPI_ISL_436663, EPI_ISL_436664, EPI_ISL_436665, EPI_ISL_436666, EPI_ISL_436667, EPI_ISL_436668, EPI_ISL_436669, EPI_ISL_436670, EPI_ISL_436671, EPI_ISL_436672, EPI_ISL_436673, EPI_ISL_436674, EPI_ISL_436675, EPI_ISL_436676, EPI_ISL_436677, EPI_ISL_436678, EPI_ISL_436679, EPI_ISL_436680, EPI_ISL_436681, EPI_ISL_436682, EPI_ISL_436683                                                                                                                                                                                                                                                                                                                                                                                                                                                                                                                                                                                                                                                                                                                                                                                                                                                                                                                                                                                                                                                                                                                                                                                                                                                                                                                                                                                                                                                                                                                                                                                                                                                                                                                                                                                                                                                                                                                                                                                                                                                                                                                                                                                                                                                                                                                                                                                                                                                                                                                                                                                                                                                                                                                                                                                                 | see above      | County of Santa Clara Public Health Department                      | Chan-Zuckerberg Biohub                                                                                                                                                  | CZB Ciiahub Consortium                                                                                                                                                                                                                                                                                                                                                                                                                                                                                                                             |
| EPI_ISL_436688, EPI_ISL_436689                                                                                                                                                                                                                                                                                                                                                                                                                                                                                                                                                                                                                                                                                                                                                                                                                                                                                                                                                                                                                                                                                                                                                                                                                                                                                                                                                                                                                                                                                                                                                                                                                                                                                                                                                                                                                                                                                                                                                                                                                                                                                                                                                                                                                                                                                                                                                                                                                                                                                                                                                                                                                                                                                                                                                                                                                                                                                                                                                                                                                                                                                                                                                                                                                                                                                                                                                                                                                                                                                 |                | Victorian Infectious Diseases Reference Laboratory (VIDRL)          | Microbiological Diagnostic Unit Public Health Laboratory and Victorian Infectious Diseases Reference Laboratory, The Peter Doherty Institute for Infection & Immunity   | Caly L., Seemann T., Sait, M., Schultz M., Druce J., Sherry, N.                                                                                                                                                                                                                                                                                                                                                                                                                                                                                    |
| EPI_ISL_437043, EPI_ISL_437044, EPI_ISL_437045, EPI_ISL_437046, EPI_ISL_437047, EPI_ISL_437048, EPI_ISL_437049, EPI_ISL_437050, EPI_ISL_437051, EPI_ISL_437052, EPI_ISL_437053, EPI_ISL_437054, EPI_ISL_437055, EPI_ISL_437056, EPI_ISL_437057, EPI_ISL_437058, EPI_ISL_437059, EPI_ISL_437060, EPI_ISL_437061, EPI_ISL_437062, EPI_ISL_437063, EPI_ISL_437064, EPI_ISL_437065, EPI_ISL_437066, EPI_ISL_437067, EPI_ISL_437068, EPI_ISL_437069, EPI_ISL_437070, EPI_ISL_437071, EPI_ISL_437072, EPI_ISL_437073, EPI_ISL_437074, EPI_ISL_437075, EPI_ISL_437076, EPI_ISL_437077, EPI_ISL_437078, EPI_ISL_437079, EPI_ISL_437080, EPI_ISL_437081, EPI_ISL_437082, EPI_ISL_437083, EPI_ISL_437084, EPI_ISL_437085, EPI_ISL_437086, EPI_ISL_437087, EPI_ISL_437088, EPI_ISL_444023, EPI_ISL_444024, EPI_ISL_444025, EPI_ISL_444026                                                                                                                                                                                                                                                                                                                                                                                                                                                                                                                                                                                                                                                                                                                                                                                                                                                                                                                                                                                                                                                                                                                                                                                                                                                                                                                                                                                                                                                                                                                                                                                                                                                                                                                                                                                                                                                                                                                                                                                                                                                                                                                                                                                                                                                                                                                                                                                                                                                                                                                                                                                                                                                                                 | see above      | County of Santa Clara Public Health                                 | Chan-Zuckerberg Biohub                                                                                                                                                  | CZB Ciiahub Consortium                                                                                                                                                                                                                                                                                                                                                                                                                                                                                                                             |
| EPI_ISL_444051, EPI_ISL_444052, EPI_ISL_444053, EPI_ISL_444054, EPI_ISL_444055, EPI_ISL_444056, EPI_ISL_444057, EPI_ISL_444058, EPI_ISL_444059, EPI_ISL_444060, EPI_ISL_444061, EPI_ISL_444062, EPI_ISL_444063, EPI_ISL_444064, EPI_ISL_444065, EPI_ISL_444066, EPI_ISL_444067, EPI_ISL_444068, EPI_ISL_444069, EPI_ISL_444070, EPI_ISL_444071, EPI_ISL_444072, EPI_ISL_444073, EPI_ISL_444074, EPI_ISL_444075, EPI_ISL_444076, EPI_ISL_444077, EPI_ISL_444078, EPI_ISL_444079, EPI_ISL_444080, EPI_ISL_444081, EPI_ISL_444082, EPI_ISL_444083, EPI_ISL_444084, EPI_ISL_444085, EPI_ISL_444086, EPI_ISL_444087, EPI_ISL_444088, EPI_ISL_444089, EPI_ISL_444090, EPI_ISL_444091, EPI_ISL_444092, EPI_ISL_444093, EPI_ISL_444094, EPI_ISL_444095, EPI_ISL_444096, EPI_ISL_444097, EPI_ISL_444098, EPI_ISL_444099, EPI_ISL_444100, EPI_ISL_444101, EPI_ISL_444102, EPI_ISL_444103, EPI_ISL_444104, EPI_ISL_444105, EPI_ISL_444106, EPI_ISL_444107, EPI_ISL_444108, EPI_ISL_444109, EPI_ISL_444110, EPI_ISL_444111, EPI_ISL_444112, EPI_ISL_444113, EPI_ISL_444114, EPI_ISL_444115, EPI_ISL_444116, EPI_ISL_444117, EPI_ISL_444118, EPI_ISL_444119, EPI_ISL_444120, EPI_ISL_444121, EPI_ISL_444122, EPI_ISL_444123, EPI_ISL_444124, EPI_ISL_444125, EPI_ISL_444126, EPI_ISL_444127, EPI_ISL_444128, EPI_ISL_444129, EPI_ISL_444130, EPI_ISL_444131, EPI_ISL_444132, EPI_ISL_444133, EPI_ISL_444134, EPI_ISL_444135, EPI_ISL_444136, EPI_ISL_444137, EPI_ISL_444138, EPI_ISL_444139, EPI_ISL_444140, EPI_ISL_444141, EPI_ISL_444142, EPI_ISL_444143, EPI_ISL_444144, EPI_ISL_444145, EPI_ISL_444146, EPI_ISL_444147, EPI_ISL_444148, EPI_ISL_444149, EPI_ISL_444150, EPI_ISL_444151, EPI_ISL_444152, EPI_ISL_444153, EPI_ISL_444154, EPI_ISL_444155, EPI_ISL_444156, EPI_ISL_444157, EPI_ISL_444158, EPI_ISL_444159, EPI_ISL_444160, EPI_ISL_444161, EPI_ISL_444162, EPI_ISL_444163, EPI_ISL_444164, EPI_ISL_444165, EPI_ISL_444166, EPI_ISL_444167, EPI_ISL_444168, EPI_ISL_444169, EPI_ISL_444170, EPI_ISL_444171, EPI_ISL_444172, EPI_ISL_444173, EPI_ISL_444174, EPI_ISL_444175, EPI_ISL_444176, EPI_ISL_444177, EPI_ISL_444178, EPI_ISL_444179, EPI_ISL_444180, EPI_ISL_444181, EPI_ISL_444182                                                                                                                                                                                                                                                                                                                                                                                                                                                                                                                                                                                                                                                                                                                                                                                                                                                                                                                                                                                                                                                                                                                                                                                                                                                                                                                 | see above      | UCSF Clinical Microbiology Laboratory                               | Chan-Zuckerberg Biohub                                                                                                                                                  | CZB Ciiahub Consortium                                                                                                                                                                                                                                                                                                                                                                                                                                                                                                                             |
| EPI_ISL_445454, EPI_ISL_445507, EPI_ISL_445551, EPI_ISL_445577, EPI_ISL_445621, EPI_ISL_445654, EPI_ISL_445681, EPI_ISL_445718, EPI_ISL_445733, EPI_ISL_445765, EPI_ISL_445791, EPI_ISL_445813, EPI_ISL_445903, EPI_ISL_445923, EPI_ISL_446151, EPI_ISL_446185, EPI_ISL_446244, EPI_ISL_446327, EPI_ISL_446369, EPI_ISL_446427, EPI_ISL_446495, EPI_ISL_446758, EPI_ISL_446958                                                                                                                                                                                                                                                                                                                                                                                                                                                                                                                                                                                                                                                                                                                                                                                                                                                                                                                                                                                                                                                                                                                                                                                                                                                                                                                                                                                                                                                                                                                                                                                                                                                                                                                                                                                                                                                                                                                                                                                                                                                                                                                                                                                                                                                                                                                                                                                                                                                                                                                                                                                                                                                                                                                                                                                                                                                                                                                                                                                                                                                                                                                                 | see above      | Wales Specialist Virology Centre                                    | Public Health Wales Microbiology Cardiff                                                                                                                                | Catherine Moore, Johnathan Evans, Laura Gifford, Malorie Perry, Simon Cottrell, Alec Birchley, Alexander Adams, Amy Gaskin, Bree Gatica-Wilcox, Jason Coombes, Lauren Gilbert, Lee Graham, Nicole Pacchiarini, Sara Kumziene-Summerhayes, Sarah Taylor, Sophie Jones, Sara Rey, Matthew Bull, Joanne Watkins, Sally Corden, Tom Connor                                                                                                                                                                                                             |
| EPI_ISL_447887, EPI_ISL_447888, EPI_ISL_447889, EPI_ISL_447890, EPI_ISL_447891, EPI_ISL_447892, EPI_ISL_447893, EPI_ISL_447894, EPI_ISL_447895, EPI_ISL_447896                                                                                                                                                                                                                                                                                                                                                                                                                                                                                                                                                                                                                                                                                                                                                                                                                                                                                                                                                                                                                                                                                                                                                                                                                                                                                                                                                                                                                                                                                                                                                                                                                                                                                                                                                                                                                                                                                                                                                                                                                                                                                                                                                                                                                                                                                                                                                                                                                                                                                                                                                                                                                                                                                                                                                                                                                                                                                                                                                                                                                                                                                                                                                                                                                                                                                                                                                 |                | University of California, Davis                                     | Chan-Zuckerberg Biohub                                                                                                                                                  | CZB Ciiahub Consortium                                                                                                                                                                                                                                                                                                                                                                                                                                                                                                                             |
| EPI_ISL_450484, EPI_ISL_450485, EPI_ISL_450486, EPI_ISL_450487                                                                                                                                                                                                                                                                                                                                                                                                                                                                                                                                                                                                                                                                                                                                                                                                                                                                                                                                                                                                                                                                                                                                                                                                                                                                                                                                                                                                                                                                                                                                                                                                                                                                                                                                                                                                                                                                                                                                                                                                                                                                                                                                                                                                                                                                                                                                                                                                                                                                                                                                                                                                                                                                                                                                                                                                                                                                                                                                                                                                                                                                                                                                                                                                                                                                                                                                                                                                                                                 |                | unknown                                                             | Data Science                                                                                                                                                            | Carroll,T.D., Tran,N.K., Cohen,S.H., Miller,C.J.                                                                                                                                                                                                                                                                                                                                                                                                                                                                                                   |
| EPI_ISL_454607, EPI_ISL_454608, EPI_ISL_454609, EPI_ISL_454610, EPI_ISL_454611, EPI_ISL_454612, EPI_ISL_454613                                                                                                                                                                                                                                                                                                                                                                                                                                                                                                                                                                                                                                                                                                                                                                                                                                                                                                                                                                                                                                                                                                                                                                                                                                                                                                                                                                                                                                                                                                                                                                                                                                                                                                                                                                                                                                                                                                                                                                                                                                                                                                                                                                                                                                                                                                                                                                                                                                                                                                                                                                                                                                                                                                                                                                                                                                                                                                                                                                                                                                                                                                                                                                                                                                                                                                                                                                                                 |                | Alameda County Public Health Lab                                    | Chan-Zuckerberg Biohub                                                                                                                                                  | CZB Ciiahub Consortium                                                                                                                                                                                                                                                                                                                                                                                                                                                                                                                             |
| EPI_ISL_454614, EPI_ISL_454615, EPI_ISL_454616, EPI_ISL_454617, EPI_ISL_454618, EPI_ISL_454619, EPI_ISL_454620, EPI_ISL_454621, EPI_ISL_454622, EPI_ISL_454623, EPI_ISL_454624, EPI_ISL_454625, EPI_ISL_454626, EPI_ISL_454627, EPI_ISL_454628, EPI_ISL_454629, EPI_ISL_454630, EPI_ISL_454631, EPI_ISL_454632, EPI_ISL_454633, EPI_ISL_454634                                                                                                                                                                                                                                                                                                                                                                                                                                                                                                                                                                                                                                                                                                                                                                                                                                                                                                                                                                                                                                                                                                                                                                                                                                                                                                                                                                                                                                                                                                                                                                                                                                                                                                                                                                                                                                                                                                                                                                                                                                                                                                                                                                                                                                                                                                                                                                                                                                                                                                                                                                                                                                                                                                                                                                                                                                                                                                                                                                                                                                                                                                                                                                 |                |                                                                     |                                                                                                                                                                         |                                                                                                                                                                                                                                                                                                                                                                                                                                                                                                                                                    |



|                                                                                                                                                                                                                                                                                                                                                                                                                                                                                                                                                                                                                                                                                                                                                                                                                                                                                                                                                                                                                                                                                                                                                                                                                                                                                                                                                                                                                                                                                                                                                                                                                                                                                                                                                                                                                                                                                                                                                                                                                                                                                                                                                                                                                                                                                                                                                                                                                                                                                                                                                                                                                                                                                                                                                                                                                                                                                                                                                                                                                                                                                                                                                                                                                                                                                                                                                                                                                                                                                                                                                                                                                                                                                                                                                                                                                                                                                                                                                                                                                                                                                                |                                                                                     |                                                                                                                                    |                                                                                                                                                                                                                                                                                                                                                                          |
|------------------------------------------------------------------------------------------------------------------------------------------------------------------------------------------------------------------------------------------------------------------------------------------------------------------------------------------------------------------------------------------------------------------------------------------------------------------------------------------------------------------------------------------------------------------------------------------------------------------------------------------------------------------------------------------------------------------------------------------------------------------------------------------------------------------------------------------------------------------------------------------------------------------------------------------------------------------------------------------------------------------------------------------------------------------------------------------------------------------------------------------------------------------------------------------------------------------------------------------------------------------------------------------------------------------------------------------------------------------------------------------------------------------------------------------------------------------------------------------------------------------------------------------------------------------------------------------------------------------------------------------------------------------------------------------------------------------------------------------------------------------------------------------------------------------------------------------------------------------------------------------------------------------------------------------------------------------------------------------------------------------------------------------------------------------------------------------------------------------------------------------------------------------------------------------------------------------------------------------------------------------------------------------------------------------------------------------------------------------------------------------------------------------------------------------------------------------------------------------------------------------------------------------------------------------------------------------------------------------------------------------------------------------------------------------------------------------------------------------------------------------------------------------------------------------------------------------------------------------------------------------------------------------------------------------------------------------------------------------------------------------------------------------------------------------------------------------------------------------------------------------------------------------------------------------------------------------------------------------------------------------------------------------------------------------------------------------------------------------------------------------------------------------------------------------------------------------------------------------------------------------------------------------------------------------------------------------------------------------------------------------------------------------------------------------------------------------------------------------------------------------------------------------------------------------------------------------------------------------------------------------------------------------------------------------------------------------------------------------------------------------------------------------------------------------------------------------------|-------------------------------------------------------------------------------------|------------------------------------------------------------------------------------------------------------------------------------|--------------------------------------------------------------------------------------------------------------------------------------------------------------------------------------------------------------------------------------------------------------------------------------------------------------------------------------------------------------------------|
| see above                                                                                                                                                                                                                                                                                                                                                                                                                                                                                                                                                                                                                                                                                                                                                                                                                                                                                                                                                                                                                                                                                                                                                                                                                                                                                                                                                                                                                                                                                                                                                                                                                                                                                                                                                                                                                                                                                                                                                                                                                                                                                                                                                                                                                                                                                                                                                                                                                                                                                                                                                                                                                                                                                                                                                                                                                                                                                                                                                                                                                                                                                                                                                                                                                                                                                                                                                                                                                                                                                                                                                                                                                                                                                                                                                                                                                                                                                                                                                                                                                                                                                      | UCSF Clinical Microbiology Laboratory                                               | Chan-Zuckerberg Biohub                                                                                                             | CZB Ciliahub Consortium                                                                                                                                                                                                                                                                                                                                                  |
| EPI_ISL_454635                                                                                                                                                                                                                                                                                                                                                                                                                                                                                                                                                                                                                                                                                                                                                                                                                                                                                                                                                                                                                                                                                                                                                                                                                                                                                                                                                                                                                                                                                                                                                                                                                                                                                                                                                                                                                                                                                                                                                                                                                                                                                                                                                                                                                                                                                                                                                                                                                                                                                                                                                                                                                                                                                                                                                                                                                                                                                                                                                                                                                                                                                                                                                                                                                                                                                                                                                                                                                                                                                                                                                                                                                                                                                                                                                                                                                                                                                                                                                                                                                                                                                 | County Of San Luis Obispo Public Health Laboratory                                  | Chan-Zuckerberg Biohub                                                                                                             | CZB Ciliahub Consortium                                                                                                                                                                                                                                                                                                                                                  |
| EPI_ISL_454636, EPI_ISL_454637, EPI_ISL_454638, EPI_ISL_454639, EPI_ISL_454640, EPI_ISL_454641                                                                                                                                                                                                                                                                                                                                                                                                                                                                                                                                                                                                                                                                                                                                                                                                                                                                                                                                                                                                                                                                                                                                                                                                                                                                                                                                                                                                                                                                                                                                                                                                                                                                                                                                                                                                                                                                                                                                                                                                                                                                                                                                                                                                                                                                                                                                                                                                                                                                                                                                                                                                                                                                                                                                                                                                                                                                                                                                                                                                                                                                                                                                                                                                                                                                                                                                                                                                                                                                                                                                                                                                                                                                                                                                                                                                                                                                                                                                                                                                 | Humboldt County Public Health Laboratory                                            | Chan-Zuckerberg Biohub                                                                                                             | CZB Ciliahub Consortium                                                                                                                                                                                                                                                                                                                                                  |
| EPI_ISL_454653, EPI_ISL_454654, EPI_ISL_454655, EPI_ISL_454656, EPI_ISL_454657, EPI_ISL_454658, EPI_ISL_454659, EPI_ISL_454660, EPI_ISL_454661, EPI_ISL_454662, EPI_ISL_454663, EPI_ISL_454664, EPI_ISL_454665, EPI_ISL_454666, EPI_ISL_454667, EPI_ISL_454668, EPI_ISL_454669, EPI_ISL_454670, EPI_ISL_454671, EPI_ISL_454672, EPI_ISL_454673, EPI_ISL_454674, EPI_ISL_454675, EPI_ISL_454676, EPI_ISL_454677, EPI_ISL_454678, EPI_ISL_454679, EPI_ISL_454680, EPI_ISL_454681, EPI_ISL_454682, EPI_ISL_454683, EPI_ISL_454684, EPI_ISL_454685, EPI_ISL_454686, EPI_ISL_454687, EPI_ISL_454688, EPI_ISL_454689                                                                                                                                                                                                                                                                                                                                                                                                                                                                                                                                                                                                                                                                                                                                                                                                                                                                                                                                                                                                                                                                                                                                                                                                                                                                                                                                                                                                                                                                                                                                                                                                                                                                                                                                                                                                                                                                                                                                                                                                                                                                                                                                                                                                                                                                                                                                                                                                                                                                                                                                                                                                                                                                                                                                                                                                                                                                                                                                                                                                                                                                                                                                                                                                                                                                                                                                                                                                                                                                                 | County of Santa Clara Public Health Department                                      | Chan-Zuckerberg Biohub                                                                                                             | CZB Ciliahub Consortium                                                                                                                                                                                                                                                                                                                                                  |
| EPI_ISL_456410, EPI_ISL_456411, EPI_ISL_456412, EPI_ISL_456413, EPI_ISL_456414, EPI_ISL_456415, EPI_ISL_456416, EPI_ISL_456417, EPI_ISL_456418, EPI_ISL_456419, EPI_ISL_456420, EPI_ISL_456421, EPI_ISL_456422, EPI_ISL_456423, EPI_ISL_456424, EPI_ISL_456425, EPI_ISL_456426, EPI_ISL_456427, EPI_ISL_456428, EPI_ISL_456429, EPI_ISL_456430, EPI_ISL_456431, EPI_ISL_456432, EPI_ISL_456433, EPI_ISL_456434, EPI_ISL_456435, EPI_ISL_456436, EPI_ISL_456437, EPI_ISL_456438, EPI_ISL_456439, EPI_ISL_456440, EPI_ISL_456441, EPI_ISL_456442, EPI_ISL_456443, EPI_ISL_456444, EPI_ISL_456445, EPI_ISL_456446, EPI_ISL_456447, EPI_ISL_456448, EPI_ISL_456449, EPI_ISL_456450, EPI_ISL_456451, EPI_ISL_456452, EPI_ISL_456453, EPI_ISL_456454, EPI_ISL_456455, EPI_ISL_456456, EPI_ISL_456457, EPI_ISL_456458, EPI_ISL_456459, EPI_ISL_456460, EPI_ISL_456461, EPI_ISL_456462, EPI_ISL_456463, EPI_ISL_456464, EPI_ISL_456465, EPI_ISL_456466, EPI_ISL_456467, EPI_ISL_456468, EPI_ISL_456469, EPI_ISL_456470, EPI_ISL_456471, EPI_ISL_456472, EPI_ISL_456473, EPI_ISL_456474, EPI_ISL_456475, EPI_ISL_456476, EPI_ISL_456477, EPI_ISL_456478, EPI_ISL_456479, EPI_ISL_456480, EPI_ISL_456481, EPI_ISL_456482, EPI_ISL_456483, EPI_ISL_456484, EPI_ISL_456485, EPI_ISL_456486, EPI_ISL_456487, EPI_ISL_456488, EPI_ISL_456489, EPI_ISL_456490, EPI_ISL_456491, EPI_ISL_456492, EPI_ISL_456493, EPI_ISL_456494, EPI_ISL_456495, EPI_ISL_456496, EPI_ISL_456497, EPI_ISL_456498, EPI_ISL_456499, EPI_ISL_456500, EPI_ISL_456501, EPI_ISL_456502, EPI_ISL_456503, EPI_ISL_456504, EPI_ISL_456505, EPI_ISL_456506, EPI_ISL_456507, EPI_ISL_456508, EPI_ISL_456509, EPI_ISL_456510, EPI_ISL_456511, EPI_ISL_456512, EPI_ISL_456513, EPI_ISL_456514, EPI_ISL_456515, EPI_ISL_456516, EPI_ISL_456517, EPI_ISL_456518, EPI_ISL_456519, EPI_ISL_456520, EPI_ISL_456521, EPI_ISL_456522, EPI_ISL_456523, EPI_ISL_456524, EPI_ISL_456525, EPI_ISL_456526, EPI_ISL_456527, EPI_ISL_456528, EPI_ISL_456529, EPI_ISL_456530, EPI_ISL_456531, EPI_ISL_456532, EPI_ISL_456533, EPI_ISL_456534, EPI_ISL_456535, EPI_ISL_456536, EPI_ISL_456537, EPI_ISL_456538, EPI_ISL_456539, EPI_ISL_456540, EPI_ISL_456541, EPI_ISL_456542, EPI_ISL_456543, EPI_ISL_456544, EPI_ISL_456545, EPI_ISL_456546, EPI_ISL_456547, EPI_ISL_456548, EPI_ISL_456549, EPI_ISL_456550, EPI_ISL_456551, EPI_ISL_456552, EPI_ISL_456553, EPI_ISL_456554, EPI_ISL_456555, EPI_ISL_456556, EPI_ISL_456557, EPI_ISL_456558, EPI_ISL_456559, EPI_ISL_456560, EPI_ISL_456561, EPI_ISL_456562, EPI_ISL_456563, EPI_ISL_456564, EPI_ISL_456565, EPI_ISL_456566, EPI_ISL_456567, EPI_ISL_456568, EPI_ISL_456569, EPI_ISL_456570, EPI_ISL_456571, EPI_ISL_456572, EPI_ISL_456573, EPI_ISL_456574, EPI_ISL_456575, EPI_ISL_456576, EPI_ISL_456577, EPI_ISL_456578, EPI_ISL_456579, EPI_ISL_456580, EPI_ISL_456581, EPI_ISL_456582, EPI_ISL_456583, EPI_ISL_456584, EPI_ISL_456585, EPI_ISL_456586, EPI_ISL_456587, EPI_ISL_456588, EPI_ISL_456589, EPI_ISL_456590, EPI_ISL_456591, EPI_ISL_456592, EPI_ISL_456593, EPI_ISL_456594, EPI_ISL_456595, EPI_ISL_456596, EPI_ISL_456597, EPI_ISL_456598, EPI_ISL_456599, EPI_ISL_456600, EPI_ISL_456601, EPI_ISL_456602, EPI_ISL_456603, EPI_ISL_456604, EPI_ISL_456605, EPI_ISL_456606, EPI_ISL_456607, EPI_ISL_456608, EPI_ISL_456609, EPI_ISL_456610, EPI_ISL_456611, EPI_ISL_456612, EPI_ISL_456613, EPI_ISL_456614, EPI_ISL_456615, EPI_ISL_456616, EPI_ISL_456617, EPI_ISL_456618, EPI_ISL_456619, EPI_ISL_456620, EPI_ISL_456621, EPI_ISL_456622, EPI_ISL_456623, EPI_ISL_456624, EPI_ISL_456625, EPI_ISL_456626, EPI_ISL_456627, EPI_ISL_456628, EPI_ISL_456629, EPI_ISL_456630, EPI_ISL_456631, EPI_ISL_456632, EPI_ISL_456633, EPI_ISL_456634, EPI_ISL_456635, EPI_ISL_456636, EPI_ISL_456637, EPI_ISL_456638, EPI_ISL_456639, EPI_ISL_456640, EPI_ISL_456641, EPI_ISL_456642, EPI_ISL_456643, EPI_ISL_456644, EPI_ISL_456645, EPI_ISL_456646, EPI_ISL_456647, EPI_ISL_456648, EPI_ISL_456649, EPI_ISL_456650, EPI_ISL_456651, EPI_ISL_456652, EPI_ISL_456653, EPI_ISL_456654, EPI_ISL_456655 | Victorian Infectious Diseases Reference Laboratory (VIDRL)                          | Microbiological Diagnostic Unit Public Health Laboratory and Victorian Infectious Diseases Reference Laboratory, Doherty Institute | Caly L., Seemann T., Sait, M., Schultz M., Druce J., Sherry, N.                                                                                                                                                                                                                                                                                                          |
| EPI_ISL_467055, EPI_ISL_467056, EPI_ISL_467057, EPI_ISL_467058                                                                                                                                                                                                                                                                                                                                                                                                                                                                                                                                                                                                                                                                                                                                                                                                                                                                                                                                                                                                                                                                                                                                                                                                                                                                                                                                                                                                                                                                                                                                                                                                                                                                                                                                                                                                                                                                                                                                                                                                                                                                                                                                                                                                                                                                                                                                                                                                                                                                                                                                                                                                                                                                                                                                                                                                                                                                                                                                                                                                                                                                                                                                                                                                                                                                                                                                                                                                                                                                                                                                                                                                                                                                                                                                                                                                                                                                                                                                                                                                                                 | Servicio de Microbiología, Hospital Universitario Son Espases                       | SeqCOVID-SPAIN consortium/IBV(CSIC)                                                                                                | Carla López-Causapé, Jordi Reina y Antonio Oliver and SeqCOVID-SPAIN consortium                                                                                                                                                                                                                                                                                          |
| EPI_ISL_468067                                                                                                                                                                                                                                                                                                                                                                                                                                                                                                                                                                                                                                                                                                                                                                                                                                                                                                                                                                                                                                                                                                                                                                                                                                                                                                                                                                                                                                                                                                                                                                                                                                                                                                                                                                                                                                                                                                                                                                                                                                                                                                                                                                                                                                                                                                                                                                                                                                                                                                                                                                                                                                                                                                                                                                                                                                                                                                                                                                                                                                                                                                                                                                                                                                                                                                                                                                                                                                                                                                                                                                                                                                                                                                                                                                                                                                                                                                                                                                                                                                                                                 | Microbiology and Immunology, The Peter Doherty Institute for Infection and Immunity | Microbiology and Immunology, The Peter Doherty Institute for Infection and Immunity                                                | Caly, L., Seemann, T., Sait, M., Schultz, M. B., Druce, J., Sherry, N., Meumann, E., Soares da Silva, E., Dolores de Jesus da Costa, M., Salles de Sousa, A., Jayanti Pereira Tilman, A., Antonia da Costa, E., Barreto, I., Marr, I., Wapling, J., Francis, J., Ximenes, J., Canisia, D., Freeman, K., Dakh, F., Douglas, N. and Baird, R.                              |
| EPI_ISL_468345, EPI_ISL_468346, EPI_ISL_468347, EPI_ISL_468348, EPI_ISL_468349, EPI_ISL_468350, EPI_ISL_468351, EPI_ISL_468352, EPI_ISL_468353, EPI_ISL_468354, EPI_ISL_468355, EPI_ISL_468356                                                                                                                                                                                                                                                                                                                                                                                                                                                                                                                                                                                                                                                                                                                                                                                                                                                                                                                                                                                                                                                                                                                                                                                                                                                                                                                                                                                                                                                                                                                                                                                                                                                                                                                                                                                                                                                                                                                                                                                                                                                                                                                                                                                                                                                                                                                                                                                                                                                                                                                                                                                                                                                                                                                                                                                                                                                                                                                                                                                                                                                                                                                                                                                                                                                                                                                                                                                                                                                                                                                                                                                                                                                                                                                                                                                                                                                                                                 | County of Santa Clara Public Health Department                                      | Chan-Zuckerberg Biohub                                                                                                             | CZB Ciliahub Consortium                                                                                                                                                                                                                                                                                                                                                  |
| EPI_ISL_468357, EPI_ISL_468358, EPI_ISL_468359, EPI_ISL_468360, EPI_ISL_468361, EPI_ISL_468362, EPI_ISL_468363, EPI_ISL_468364, EPI_ISL_468365, EPI_ISL_468366, EPI_ISL_468367, EPI_ISL_468368, EPI_ISL_468369, EPI_ISL_468370, EPI_ISL_468371, EPI_ISL_468372, EPI_ISL_468373, EPI_ISL_468374, EPI_ISL_468375, EPI_ISL_468376, EPI_ISL_468377, EPI_ISL_468378, EPI_ISL_468379, EPI_ISL_468380, EPI_ISL_468381, EPI_ISL_468382, EPI_ISL_468383, EPI_ISL_468384, EPI_ISL_468385, EPI_ISL_468386, EPI_ISL_468387                                                                                                                                                                                                                                                                                                                                                                                                                                                                                                                                                                                                                                                                                                                                                                                                                                                                                                                                                                                                                                                                                                                                                                                                                                                                                                                                                                                                                                                                                                                                                                                                                                                                                                                                                                                                                                                                                                                                                                                                                                                                                                                                                                                                                                                                                                                                                                                                                                                                                                                                                                                                                                                                                                                                                                                                                                                                                                                                                                                                                                                                                                                                                                                                                                                                                                                                                                                                                                                                                                                                                                                 | Alameda County Public Health Lab                                                    | Chan-Zuckerberg Biohub                                                                                                             | CZB Ciliahub Consortium                                                                                                                                                                                                                                                                                                                                                  |
| EPI_ISL_468388, EPI_ISL_468389, EPI_ISL_468390, EPI_ISL_468391, EPI_ISL_468392, EPI_ISL_468393, EPI_ISL_468394, EPI_ISL_468395, EPI_ISL_468396, EPI_ISL_468397, EPI_ISL_468398, EPI_ISL_468399, EPI_ISL_468400, EPI_ISL_468401, EPI_ISL_468402, EPI_ISL_468403, EPI_ISL_468404, EPI_ISL_468405, EPI_ISL_468406, EPI_ISL_468407, EPI_ISL_468408, EPI_ISL_468409, EPI_ISL_468410, EPI_ISL_468411, EPI_ISL_468412, EPI_ISL_468413, EPI_ISL_468414, EPI_ISL_468415, EPI_ISL_468416, EPI_ISL_468417, EPI_ISL_468418, EPI_ISL_468419, EPI_ISL_468420, EPI_ISL_468421, EPI_ISL_468422, EPI_ISL_468423, EPI_ISL_468424, EPI_ISL_468425, EPI_ISL_468426, EPI_ISL_468427, EPI_ISL_468428, EPI_ISL_468429, EPI_ISL_468430, EPI_ISL_468431, EPI_ISL_468432, EPI_ISL_468433, EPI_ISL_468434, EPI_ISL_468435, EPI_ISL_468436, EPI_ISL_468437                                                                                                                                                                                                                                                                                                                                                                                                                                                                                                                                                                                                                                                                                                                                                                                                                                                                                                                                                                                                                                                                                                                                                                                                                                                                                                                                                                                                                                                                                                                                                                                                                                                                                                                                                                                                                                                                                                                                                                                                                                                                                                                                                                                                                                                                                                                                                                                                                                                                                                                                                                                                                                                                                                                                                                                                                                                                                                                                                                                                                                                                                                                                                                                                                                                                 | County of San Luis Obispo Public Health Laboratory                                  | Chan-Zuckerberg Biohub                                                                                                             | CZB Ciliahub Consortium                                                                                                                                                                                                                                                                                                                                                  |
| EPI_ISL_468438, EPI_ISL_468439, EPI_ISL_468440, EPI_ISL_468441, EPI_ISL_468442, EPI_ISL_468443, EPI_ISL_468444, EPI_ISL_468445, EPI_ISL_468446, EPI_ISL_468447, EPI_ISL_468448, EPI_ISL_468449, EPI_ISL_468450, EPI_ISL_468451, EPI_ISL_468452, EPI_ISL_468453, EPI_ISL_468454, EPI_ISL_468455, EPI_ISL_468456, EPI_ISL_468457, EPI_ISL_468458, EPI_ISL_468459, EPI_ISL_468460, EPI_ISL_468461                                                                                                                                                                                                                                                                                                                                                                                                                                                                                                                                                                                                                                                                                                                                                                                                                                                                                                                                                                                                                                                                                                                                                                                                                                                                                                                                                                                                                                                                                                                                                                                                                                                                                                                                                                                                                                                                                                                                                                                                                                                                                                                                                                                                                                                                                                                                                                                                                                                                                                                                                                                                                                                                                                                                                                                                                                                                                                                                                                                                                                                                                                                                                                                                                                                                                                                                                                                                                                                                                                                                                                                                                                                                                                 | Humboldt County Public Health Laboratory                                            | Chan-Zuckerberg Biohub                                                                                                             | CZB Ciliahub Consortium                                                                                                                                                                                                                                                                                                                                                  |
| EPI_ISL_468462, EPI_ISL_468463, EPI_ISL_468464, EPI_ISL_468465, EPI_ISL_468466, EPI_ISL_468467, EPI_ISL_468468, EPI_ISL_468469, EPI_ISL_468470, EPI_ISL_468471, EPI_ISL_468472, EPI_ISL_468473, EPI_ISL_468474, EPI_ISL_468475, EPI_ISL_468476, EPI_ISL_468477, EPI_ISL_468478, EPI_ISL_468479, EPI_ISL_468480, EPI_ISL_468481, EPI_ISL_468482, EPI_ISL_468483, EPI_ISL_468484, EPI_ISL_468485, EPI_ISL_468486, EPI_ISL_468487, EPI_ISL_468488, EPI_ISL_468489, EPI_ISL_468490, EPI_ISL_468491, EPI_ISL_468492, EPI_ISL_468493, EPI_ISL_468494, EPI_ISL_468495, EPI_ISL_468496, EPI_ISL_468497, EPI_ISL_468498, EPI_ISL_468499, EPI_ISL_468500, EPI_ISL_468501, EPI_ISL_468502, EPI_ISL_468503, EPI_ISL_468504, EPI_ISL_468505                                                                                                                                                                                                                                                                                                                                                                                                                                                                                                                                                                                                                                                                                                                                                                                                                                                                                                                                                                                                                                                                                                                                                                                                                                                                                                                                                                                                                                                                                                                                                                                                                                                                                                                                                                                                                                                                                                                                                                                                                                                                                                                                                                                                                                                                                                                                                                                                                                                                                                                                                                                                                                                                                                                                                                                                                                                                                                                                                                                                                                                                                                                                                                                                                                                                                                                                                                 | Ventura County Public Health Lab                                                    | Chan-Zuckerberg Biohub                                                                                                             | CZB Ciliahub Consortium                                                                                                                                                                                                                                                                                                                                                  |
| EPI_ISL_468506, EPI_ISL_468507, EPI_ISL_468508, EPI_ISL_468509, EPI_ISL_468510, EPI_ISL_468511, EPI_ISL_468512, EPI_ISL_468513, EPI_ISL_468514, EPI_ISL_468515, EPI_ISL_468516, EPI_ISL_468517, EPI_ISL_468518, EPI_ISL_468519, EPI_ISL_468520, EPI_ISL_468521, EPI_ISL_468522, EPI_ISL_468523, EPI_ISL_468524, EPI_ISL_468525, EPI_ISL_468526, EPI_ISL_468527, EPI_ISL_468528, EPI_ISL_468529, EPI_ISL_468530, EPI_ISL_468531, EPI_ISL_468532, EPI_ISL_468533, EPI_ISL_468534, EPI_ISL_468535, EPI_ISL_468536, EPI_ISL_468537, EPI_ISL_468538, EPI_ISL_468539, EPI_ISL_468540, EPI_ISL_468541, EPI_ISL_468542, EPI_ISL_468543, EPI_ISL_468544, EPI_ISL_468545, EPI_ISL_468546, EPI_ISL_468547, EPI_ISL_468548, EPI_ISL_468549, EPI_ISL_468550, EPI_ISL_468551, EPI_ISL_468552, EPI_ISL_468553, EPI_ISL_468554, EPI_ISL_468555, EPI_ISL_468556, EPI_ISL_468557, EPI_ISL_468558, EPI_ISL_468559, EPI_ISL_468560, EPI_ISL_468561, EPI_ISL_468562, EPI_ISL_468563, EPI_ISL_468564, EPI_ISL_468565, EPI_ISL_468566, EPI_ISL_468567, EPI_ISL_468568, EPI_ISL_468569, EPI_ISL_468570, EPI_ISL_468571, EPI_ISL_468572, EPI_ISL_468573, EPI_ISL_468574, EPI_ISL_468575, EPI_ISL_468576, EPI_ISL_468577, EPI_ISL_468578, EPI_ISL_468579, EPI_ISL_468580, EPI_ISL_468581, EPI_ISL_468582, EPI_ISL_468583, EPI_ISL_468584, EPI_ISL_468585, EPI_ISL_468586, EPI_ISL_468587, EPI_ISL_468588, EPI_ISL_468589, EPI_ISL_468590, EPI_ISL_468591, EPI_ISL_468592, EPI_ISL_468593, EPI_ISL_468594, EPI_ISL_468595, EPI_ISL_468596, EPI_ISL_468597, EPI_ISL_468598, EPI_ISL_468599, EPI_ISL_469000, EPI_ISL_469001, EPI_ISL_469002, EPI_ISL_469003, EPI_ISL_469004, EPI_ISL_469005, EPI_ISL_469006, EPI_ISL_469007, EPI_ISL_469008, EPI_ISL_469009, EPI_ISL_469010, EPI_ISL_469011, EPI_ISL_469012, EPI_ISL_469013, EPI_ISL_469014, EPI_ISL_469015                                                                                                                                                                                                                                                                                                                                                                                                                                                                                                                                                                                                                                                                                                                                                                                                                                                                                                                                                                                                                                                                                                                                                                                                                                                                                                                                                                                                                                                                                                                                                                                                                                                                                                                                                                                                                                                                                                                                                                                                                                                                                                                                                                                                                                                                 | Contra Costa Public Health Lab                                                      | Chan-Zuckerberg Biohub                                                                                                             | CZB Ciliahub Consortium                                                                                                                                                                                                                                                                                                                                                  |
| EPI_ISL_468952, EPI_ISL_468953, EPI_ISL_468954, EPI_ISL_468955, EPI_ISL_468956, EPI_ISL_468957, EPI_ISL_468958, EPI_ISL_468959, EPI_ISL_468960, EPI_ISL_468961, EPI_ISL_468962, EPI_ISL_468963, EPI_ISL_468964, EPI_ISL_468965, EPI_ISL_468966, EPI_ISL_468967, EPI_ISL_468968, EPI_ISL_468969, EPI_ISL_468970, EPI_ISL_468971, EPI_ISL_468972, EPI_ISL_468973, EPI_ISL_468974, EPI_ISL_468975, EPI_ISL_468976, EPI_ISL_468977, EPI_ISL_468978, EPI_ISL_468979, EPI_ISL_468980, EPI_ISL_468981, EPI_ISL_468982, EPI_ISL_468983, EPI_ISL_468984, EPI_ISL_468985, EPI_ISL_468986, EPI_ISL_468987, EPI_ISL_468988, EPI_ISL_468989, EPI_ISL_468990, EPI_ISL_468991, EPI_ISL_468992, EPI_ISL_468993, EPI_ISL_468994, EPI_ISL_468995, EPI_ISL_468996, EPI_ISL_468997, EPI_ISL_468998, EPI_ISL_468999, EPI_ISL_469000, EPI_ISL_469001, EPI_ISL_469002, EPI_ISL_469003, EPI_ISL_469004, EPI_ISL_469005, EPI_ISL_469006, EPI_ISL_469007, EPI_ISL_469008, EPI_ISL_469009, EPI_ISL_469010, EPI_ISL_469011, EPI_ISL_469012, EPI_ISL_469013, EPI_ISL_469014, EPI_ISL_469015                                                                                                                                                                                                                                                                                                                                                                                                                                                                                                                                                                                                                                                                                                                                                                                                                                                                                                                                                                                                                                                                                                                                                                                                                                                                                                                                                                                                                                                                                                                                                                                                                                                                                                                                                                                                                                                                                                                                                                                                                                                                                                                                                                                                                                                                                                                                                                                                                                                                                                                                                                                                                                                                                                                                                                                                                                                                                                                                                                                                                                 | Servicio de Microbiología, Hospital Universitario Son Espases                       | SeqCOVID-SPAIN consortium/IBV(CSIC)                                                                                                | Carla López-Causapé, Jordi Reina, Antonio Oliver and SeqCOVID-SPAIN consortium                                                                                                                                                                                                                                                                                           |
| EPI_ISL_471471                                                                                                                                                                                                                                                                                                                                                                                                                                                                                                                                                                                                                                                                                                                                                                                                                                                                                                                                                                                                                                                                                                                                                                                                                                                                                                                                                                                                                                                                                                                                                                                                                                                                                                                                                                                                                                                                                                                                                                                                                                                                                                                                                                                                                                                                                                                                                                                                                                                                                                                                                                                                                                                                                                                                                                                                                                                                                                                                                                                                                                                                                                                                                                                                                                                                                                                                                                                                                                                                                                                                                                                                                                                                                                                                                                                                                                                                                                                                                                                                                                                                                 | Victorian Infectious Diseases Reference Laboratory                                  | Victorian Infectious Diseases Reference Laboratory                                                                                 | Caly, L., Seemann, T., Sait, M., Schultz, M. B., Druce, J., Sherry, N., Meumann, E., Soares da Silva, E., Dolores de Jesus da Costa, M., Salles de Sousa, A., Jayanti Pereira Tilman, A., Antonia da Costa, E., Barreto, I., Marr, I., Wapling, J., Francis, J., Ximenes, J., Canisia, D., Freeman, K., Dakh, F., Douglas, N. and Baird, R.                              |
| EPI_ISL_472436, EPI_ISL_472532, EPI_ISL_472815, EPI_ISL_472948, EPI_ISL_472986, EPI_ISL_473029, EPI_ISL_473045, EPI_ISL_473065, EPI_ISL_473085, EPI_ISL_473143, EPI_ISL_473202, EPI_ISL_473207, EPI_ISL_473238, EPI_ISL_473990, EPI_ISL_474002, EPI_ISL_474015, EPI_ISL_474031, EPI_ISL_474178, EPI_ISL_474209, EPI_ISL_474216, EPI_ISL_474423, EPI_ISL_474614, EPI_ISL_474704, EPI_ISL_474735, EPI_ISL_474749                                                                                                                                                                                                                                                                                                                                                                                                                                                                                                                                                                                                                                                                                                                                                                                                                                                                                                                                                                                                                                                                                                                                                                                                                                                                                                                                                                                                                                                                                                                                                                                                                                                                                                                                                                                                                                                                                                                                                                                                                                                                                                                                                                                                                                                                                                                                                                                                                                                                                                                                                                                                                                                                                                                                                                                                                                                                                                                                                                                                                                                                                                                                                                                                                                                                                                                                                                                                                                                                                                                                                                                                                                                                                 | Wales Specialist Virology Centre Sequencing lab: Pathogen Genomics Unit             | COVID-19 Genomics UK (COG-UK) Consortium                                                                                           | Catherine Moore, Johnathan Evans, Laura Gifford, Malorie Perry, Simon Cottrell, Angela Marchbank, Alec Birchley, Alexander Adams, Amy Gaskin, Bree Gatica-Wilcox, Jason Coombes, Joel Southgate, Lauren Gilbert, Lee Graham, Nicole Pacchiaroni, Sara Kumziene-Summerhayes, Sarah Taylor, Sophie Jones, Sara Rey, Matthew Bull, Joanne Watkins, Sally Corden, Tom Connor |
| EPI_ISL_475762                                                                                                                                                                                                                                                                                                                                                                                                                                                                                                                                                                                                                                                                                                                                                                                                                                                                                                                                                                                                                                                                                                                                                                                                                                                                                                                                                                                                                                                                                                                                                                                                                                                                                                                                                                                                                                                                                                                                                                                                                                                                                                                                                                                                                                                                                                                                                                                                                                                                                                                                                                                                                                                                                                                                                                                                                                                                                                                                                                                                                                                                                                                                                                                                                                                                                                                                                                                                                                                                                                                                                                                                                                                                                                                                                                                                                                                                                                                                                                                                                                                                                 | Oklahoma State Department of Health                                                 | França Lab                                                                                                                         | Caio Martinelle B. de França, Graham Wiley, Samuel T. Dunn, and Matthew J. Miller.                                                                                                                                                                                                                                                                                       |
| EPI_ISL_478669, EPI_ISL_478670                                                                                                                                                                                                                                                                                                                                                                                                                                                                                                                                                                                                                                                                                                                                                                                                                                                                                                                                                                                                                                                                                                                                                                                                                                                                                                                                                                                                                                                                                                                                                                                                                                                                                                                                                                                                                                                                                                                                                                                                                                                                                                                                                                                                                                                                                                                                                                                                                                                                                                                                                                                                                                                                                                                                                                                                                                                                                                                                                                                                                                                                                                                                                                                                                                                                                                                                                                                                                                                                                                                                                                                                                                                                                                                                                                                                                                                                                                                                                                                                                                                                 | unknown                                                                             | Microbiology, Koc University                                                                                                       | Can, F., Ozer, B., Nurtop, E., Dogan, O.                                                                                                                                                                                                                                                                                                                                 |

|                                                                                                                                                                                                                                                                                                                                                                                                                                                                                                                                                                                                                                                                                                                                                                                                                                                                                                                                                                                                                                                                                                                                                                                                                                                                                                                                                                                                                                                                                                                                                                                                                                                                                                                                                                                                                                                                                                                                                                                                                                                                                                                                                                                                                                                                                                                                                                                                                                                                                                                                                                                                                                                                                                                                |                                                                                             |                                                                                                             |                                                                                                                                                                                                                                                                                                                                                                        |
|--------------------------------------------------------------------------------------------------------------------------------------------------------------------------------------------------------------------------------------------------------------------------------------------------------------------------------------------------------------------------------------------------------------------------------------------------------------------------------------------------------------------------------------------------------------------------------------------------------------------------------------------------------------------------------------------------------------------------------------------------------------------------------------------------------------------------------------------------------------------------------------------------------------------------------------------------------------------------------------------------------------------------------------------------------------------------------------------------------------------------------------------------------------------------------------------------------------------------------------------------------------------------------------------------------------------------------------------------------------------------------------------------------------------------------------------------------------------------------------------------------------------------------------------------------------------------------------------------------------------------------------------------------------------------------------------------------------------------------------------------------------------------------------------------------------------------------------------------------------------------------------------------------------------------------------------------------------------------------------------------------------------------------------------------------------------------------------------------------------------------------------------------------------------------------------------------------------------------------------------------------------------------------------------------------------------------------------------------------------------------------------------------------------------------------------------------------------------------------------------------------------------------------------------------------------------------------------------------------------------------------------------------------------------------------------------------------------------------------|---------------------------------------------------------------------------------------------|-------------------------------------------------------------------------------------------------------------|------------------------------------------------------------------------------------------------------------------------------------------------------------------------------------------------------------------------------------------------------------------------------------------------------------------------------------------------------------------------|
| EPI_ISL_479325, EPI_ISL_479334                                                                                                                                                                                                                                                                                                                                                                                                                                                                                                                                                                                                                                                                                                                                                                                                                                                                                                                                                                                                                                                                                                                                                                                                                                                                                                                                                                                                                                                                                                                                                                                                                                                                                                                                                                                                                                                                                                                                                                                                                                                                                                                                                                                                                                                                                                                                                                                                                                                                                                                                                                                                                                                                                                 | Wales Specialist Virology Centre Sequencing lab: Pathogen Genomics Unit                     | COVID-19 Genomics UK (COG-UK) Consortium                                                                    | Catherine Moore, Johnathan Evans, Laura Gifford, Malorie Perry, Simon Cottrell, Angela Marchbank, Alec Birchley, Alexander Adams, Amy Gaskin, Bree Gatica-Wilcox, Jason Coombes, Joel Southgate, Lauren Gilbert, Lee Graham, Nicole Pacchiari, Sara Kumziene-Summerhayes, Sarah Taylor, Sophie Jones, Sara Rey, Matthew Bull, Joanne Watkins, Sally Corden, Tom Connor |
| EPI_ISL_480557, EPI_ISL_480563, EPI_ISL_480564, EPI_ISL_480565, EPI_ISL_480566, EPI_ISL_480567, EPI_ISL_480568, EPI_ISL_480569, EPI_ISL_480570, EPI_ISL_480571, EPI_ISL_480572, EPI_ISL_480573, EPI_ISL_480574, EPI_ISL_480575, EPI_ISL_480576, EPI_ISL_480577, EPI_ISL_480579, EPI_ISL_480581, EPI_ISL_480582, EPI_ISL_480583, EPI_ISL_480584, EPI_ISL_480585, EPI_ISL_480586, EPI_ISL_480588, EPI_ISL_480589, EPI_ISL_480590, EPI_ISL_480591, EPI_ISL_480592, EPI_ISL_480593, EPI_ISL_480594, EPI_ISL_480595, EPI_ISL_480597, EPI_ISL_480598, EPI_ISL_480599, EPI_ISL_480600, EPI_ISL_480603, EPI_ISL_480604, EPI_ISL_480605, EPI_ISL_480606, EPI_ISL_480607, EPI_ISL_480608, EPI_ISL_480609, EPI_ISL_480610, EPI_ISL_480611, EPI_ISL_480621, EPI_ISL_480622, EPI_ISL_480624, EPI_ISL_480625, EPI_ISL_480626, EPI_ISL_480627, EPI_ISL_480628, EPI_ISL_480629, EPI_ISL_480630, EPI_ISL_480631, EPI_ISL_480632, EPI_ISL_480633, EPI_ISL_480634, EPI_ISL_480635, EPI_ISL_480636, EPI_ISL_480637, EPI_ISL_480638, EPI_ISL_480639, EPI_ISL_480640, EPI_ISL_480641, EPI_ISL_480642, EPI_ISL_480643, EPI_ISL_480644, EPI_ISL_480646, EPI_ISL_480647, EPI_ISL_480648, EPI_ISL_480649, EPI_ISL_480650, EPI_ISL_480651, EPI_ISL_480652, EPI_ISL_480653, EPI_ISL_480654, EPI_ISL_480655, EPI_ISL_480656, EPI_ISL_480657, EPI_ISL_480658, EPI_ISL_480659, EPI_ISL_480660, EPI_ISL_480661, EPI_ISL_480662, EPI_ISL_480663, EPI_ISL_480664, EPI_ISL_480665, EPI_ISL_480666, EPI_ISL_480667, EPI_ISL_480668, EPI_ISL_480669, EPI_ISL_480670, EPI_ISL_480671, EPI_ISL_480672, EPI_ISL_480673, EPI_ISL_480674, EPI_ISL_480675, EPI_ISL_480676, EPI_ISL_480677, EPI_ISL_480678, EPI_ISL_480679, EPI_ISL_480680, EPI_ISL_480681, EPI_ISL_480682, EPI_ISL_480683, EPI_ISL_480684, EPI_ISL_480685, EPI_ISL_480686, EPI_ISL_480687, EPI_ISL_480689, EPI_ISL_480690, EPI_ISL_480698, EPI_ISL_480699, EPI_ISL_480700, EPI_ISL_480701, EPI_ISL_480702, EPI_ISL_480703, EPI_ISL_480704, EPI_ISL_480705, EPI_ISL_480706, EPI_ISL_480707, EPI_ISL_480708, EPI_ISL_480709, EPI_ISL_480710, EPI_ISL_480711, EPI_ISL_480712, EPI_ISL_480713, EPI_ISL_480714, EPI_ISL_480715, EPI_ISL_480716, EPI_ISL_480717, EPI_ISL_480718, EPI_ISL_480719, EPI_ISL_480720, EPI_ISL_480721, EPI_ISL_480722, EPI_ISL_480723, EPI_ISL_480724, EPI_ISL_480725, EPI_ISL_480726, EPI_ISL_480727, EPI_ISL_480728, EPI_ISL_480729, EPI_ISL_480730, EPI_ISL_480731, EPI_ISL_480732, EPI_ISL_480733, EPI_ISL_480734, EPI_ISL_480735, EPI_ISL_480736, EPI_ISL_480737, EPI_ISL_480738, EPI_ISL_480739, EPI_ISL_480740, EPI_ISL_480741, EPI_ISL_480742, EPI_ISL_480743, EPI_ISL_480744, EPI_ISL_480745, EPI_ISL_480746, EPI_ISL_480747, EPI_ISL_480748, EPI_ISL_480749, EPI_ISL_480750 |                                                                                             |                                                                                                             |                                                                                                                                                                                                                                                                                                                                                                        |
| see above                                                                                                                                                                                                                                                                                                                                                                                                                                                                                                                                                                                                                                                                                                                                                                                                                                                                                                                                                                                                                                                                                                                                                                                                                                                                                                                                                                                                                                                                                                                                                                                                                                                                                                                                                                                                                                                                                                                                                                                                                                                                                                                                                                                                                                                                                                                                                                                                                                                                                                                                                                                                                                                                                                                      | Victorian Infectious Diseases Reference Laboratory (VIDRL)                                  | VIDRL and MDU-PHL                                                                                           | Caly L., Seemann T., Sait, M., Schultz M., Druce J., Sherry, N.                                                                                                                                                                                                                                                                                                        |
| EPI_ISL_482468                                                                                                                                                                                                                                                                                                                                                                                                                                                                                                                                                                                                                                                                                                                                                                                                                                                                                                                                                                                                                                                                                                                                                                                                                                                                                                                                                                                                                                                                                                                                                                                                                                                                                                                                                                                                                                                                                                                                                                                                                                                                                                                                                                                                                                                                                                                                                                                                                                                                                                                                                                                                                                                                                                                 | Laboratorio de Referencia Nacional de Virus Respiratorios. Instituto Nacional de Salud Peru | Laboratorio de Referencia Nacional de Biotecnología y Biología Molecular. Instituto Nacional de Salud Peru  | Carlos Padilla Rojas, Priscila Lope Pari, Karolyn Vega Chozo, Johanna Balbuena Torres, Omar Caceres Rey, Henri Bailon Calderon, Maribel Huaranga Nuñez, Nancy Rojas Serrano                                                                                                                                                                                            |
| EPI_ISL_486115, EPI_ISL_486116, EPI_ISL_486117, EPI_ISL_486118, EPI_ISL_486119                                                                                                                                                                                                                                                                                                                                                                                                                                                                                                                                                                                                                                                                                                                                                                                                                                                                                                                                                                                                                                                                                                                                                                                                                                                                                                                                                                                                                                                                                                                                                                                                                                                                                                                                                                                                                                                                                                                                                                                                                                                                                                                                                                                                                                                                                                                                                                                                                                                                                                                                                                                                                                                 | County of Santa Clara Public Health Department                                              | Chan-Zuckerberg Biohub                                                                                      | CZB Cllahub Consortium                                                                                                                                                                                                                                                                                                                                                 |
| EPI_ISL_486120, EPI_ISL_486121, EPI_ISL_486122, EPI_ISL_486123, EPI_ISL_486124, EPI_ISL_486125, EPI_ISL_486126, EPI_ISL_486127, EPI_ISL_486128, EPI_ISL_486129, EPI_ISL_486130, EPI_ISL_486131, EPI_ISL_486132, EPI_ISL_486133, EPI_ISL_486134, EPI_ISL_486135, EPI_ISL_486136, EPI_ISL_486137, EPI_ISL_486138, EPI_ISL_486139, EPI_ISL_486140, EPI_ISL_486141, EPI_ISL_486142, EPI_ISL_486143, EPI_ISL_486144, EPI_ISL_486145, EPI_ISL_486146, EPI_ISL_486147, EPI_ISL_486148, EPI_ISL_486149, EPI_ISL_486150, EPI_ISL_486151, EPI_ISL_486152, EPI_ISL_486153, EPI_ISL_486154, EPI_ISL_486155, EPI_ISL_486156, EPI_ISL_486157, EPI_ISL_486158, EPI_ISL_486159, EPI_ISL_486160, EPI_ISL_486161, EPI_ISL_486162, EPI_ISL_486163, EPI_ISL_486164, EPI_ISL_486165, EPI_ISL_486166, EPI_ISL_486167, EPI_ISL_486168, EPI_ISL_486169, EPI_ISL_486170, EPI_ISL_486171, EPI_ISL_486172, EPI_ISL_486173, EPI_ISL_486174, EPI_ISL_486175, EPI_ISL_486176, EPI_ISL_486177, EPI_ISL_486178, EPI_ISL_486179, EPI_ISL_486180, EPI_ISL_486181, EPI_ISL_486182, EPI_ISL_486183, EPI_ISL_486184, EPI_ISL_486185, EPI_ISL_486186, EPI_ISL_486187, EPI_ISL_486188, EPI_ISL_486189, EPI_ISL_486190, EPI_ISL_486191, EPI_ISL_486192, EPI_ISL_486193, EPI_ISL_486194, EPI_ISL_486195, EPI_ISL_486196, EPI_ISL_486197, EPI_ISL_486198, EPI_ISL_486199, EPI_ISL_486200, EPI_ISL_486201, EPI_ISL_486202, EPI_ISL_486203, EPI_ISL_486204, EPI_ISL_486205, EPI_ISL_486206, EPI_ISL_486207, EPI_ISL_486208, EPI_ISL_486209, EPI_ISL_486210, EPI_ISL_486211, EPI_ISL_486212, EPI_ISL_486213, EPI_ISL_486214, EPI_ISL_486215, EPI_ISL_486216, EPI_ISL_486217, EPI_ISL_486218, EPI_ISL_486219, EPI_ISL_486220, EPI_ISL_486221, EPI_ISL_486222, EPI_ISL_486223, EPI_ISL_486224, EPI_ISL_486225, EPI_ISL_486226, EPI_ISL_486227, EPI_ISL_486228, EPI_ISL_486229, EPI_ISL_486230, EPI_ISL_486231, EPI_ISL_486232, EPI_ISL_486233, EPI_ISL_486234, EPI_ISL_486235, EPI_ISL_486236, EPI_ISL_486237, EPI_ISL_486238, EPI_ISL_486239, EPI_ISL_486240, EPI_ISL_486241, EPI_ISL_486242, EPI_ISL_486243, EPI_ISL_486244, EPI_ISL_486245, EPI_ISL_486246, EPI_ISL_486247, EPI_ISL_486248, EPI_ISL_486249, EPI_ISL_486250, EPI_ISL_486251, EPI_ISL_486252, EPI_ISL_486253, EPI_ISL_486254, EPI_ISL_486255, EPI_ISL_486256, EPI_ISL_486257, EPI_ISL_486258, EPI_ISL_486259, EPI_ISL_486260, EPI_ISL_486261, EPI_ISL_486262, EPI_ISL_486263, EPI_ISL_486264, EPI_ISL_486265, EPI_ISL_486266, EPI_ISL_486267, EPI_ISL_486268, EPI_ISL_486269, EPI_ISL_486270, EPI_ISL_486271, EPI_ISL_486272, EPI_ISL_486273, EPI_ISL_486274, EPI_ISL_486275, EPI_ISL_486276, EPI_ISL_486277, EPI_ISL_486278, EPI_ISL_486279                                                                 |                                                                                             |                                                                                                             |                                                                                                                                                                                                                                                                                                                                                                        |
| see above                                                                                                                                                                                                                                                                                                                                                                                                                                                                                                                                                                                                                                                                                                                                                                                                                                                                                                                                                                                                                                                                                                                                                                                                                                                                                                                                                                                                                                                                                                                                                                                                                                                                                                                                                                                                                                                                                                                                                                                                                                                                                                                                                                                                                                                                                                                                                                                                                                                                                                                                                                                                                                                                                                                      | Orange County Public Health Laboratory                                                      | Chan-Zuckerberg Biohub                                                                                      | CZB Cllahub Consortium                                                                                                                                                                                                                                                                                                                                                 |
| EPI_ISL_486280, EPI_ISL_486281, EPI_ISL_486282, EPI_ISL_486283, EPI_ISL_486284, EPI_ISL_486285, EPI_ISL_486286                                                                                                                                                                                                                                                                                                                                                                                                                                                                                                                                                                                                                                                                                                                                                                                                                                                                                                                                                                                                                                                                                                                                                                                                                                                                                                                                                                                                                                                                                                                                                                                                                                                                                                                                                                                                                                                                                                                                                                                                                                                                                                                                                                                                                                                                                                                                                                                                                                                                                                                                                                                                                 | Humboldt County Public Health Laboratory                                                    | Chan-Zuckerberg Biohub                                                                                      | CZB Cllahub Consortium                                                                                                                                                                                                                                                                                                                                                 |
| EPI_ISL_486287, EPI_ISL_486288, EPI_ISL_486289, EPI_ISL_486290, EPI_ISL_486291, EPI_ISL_486292, EPI_ISL_486293, EPI_ISL_486294, EPI_ISL_486295, EPI_ISL_486296, EPI_ISL_486297, EPI_ISL_486298, EPI_ISL_486299, EPI_ISL_486300, EPI_ISL_486301, EPI_ISL_486302, EPI_ISL_486303, EPI_ISL_486304, EPI_ISL_486305, EPI_ISL_486306, EPI_ISL_486307, EPI_ISL_486308, EPI_ISL_486309, EPI_ISL_486310, EPI_ISL_486311, EPI_ISL_486312, EPI_ISL_486313, EPI_ISL_486314, EPI_ISL_486315, EPI_ISL_486316, EPI_ISL_486317, EPI_ISL_486318, EPI_ISL_486319, EPI_ISL_486320, EPI_ISL_486321, EPI_ISL_486322, EPI_ISL_486323, EPI_ISL_486324, EPI_ISL_486325, EPI_ISL_486326, EPI_ISL_486327, EPI_ISL_486328, EPI_ISL_486329, EPI_ISL_486330, EPI_ISL_486331, EPI_ISL_486332, EPI_ISL_486333, EPI_ISL_486334, EPI_ISL_486335, EPI_ISL_486336, EPI_ISL_486337, EPI_ISL_486338                                                                                                                                                                                                                                                                                                                                                                                                                                                                                                                                                                                                                                                                                                                                                                                                                                                                                                                                                                                                                                                                                                                                                                                                                                                                                                                                                                                                                                                                                                                                                                                                                                                                                                                                                                                                                                                                 |                                                                                             |                                                                                                             |                                                                                                                                                                                                                                                                                                                                                                        |
| see above                                                                                                                                                                                                                                                                                                                                                                                                                                                                                                                                                                                                                                                                                                                                                                                                                                                                                                                                                                                                                                                                                                                                                                                                                                                                                                                                                                                                                                                                                                                                                                                                                                                                                                                                                                                                                                                                                                                                                                                                                                                                                                                                                                                                                                                                                                                                                                                                                                                                                                                                                                                                                                                                                                                      | San Joaquin County Public Health Lab                                                        | Chan-Zuckerberg Biohub                                                                                      | CZB Cllahub Consortium                                                                                                                                                                                                                                                                                                                                                 |
| EPI_ISL_486339, EPI_ISL_486340, EPI_ISL_486341, EPI_ISL_486342, EPI_ISL_486343, EPI_ISL_486344, EPI_ISL_486345, EPI_ISL_486346, EPI_ISL_486347, EPI_ISL_486348, EPI_ISL_486349, EPI_ISL_486350, EPI_ISL_486351, EPI_ISL_486352, EPI_ISL_486353, EPI_ISL_486354, EPI_ISL_486355, EPI_ISL_486356, EPI_ISL_486357, EPI_ISL_486358, EPI_ISL_486359, EPI_ISL_486360, EPI_ISL_486361, EPI_ISL_486362, EPI_ISL_486363, EPI_ISL_486364, EPI_ISL_486365                                                                                                                                                                                                                                                                                                                                                                                                                                                                                                                                                                                                                                                                                                                                                                                                                                                                                                                                                                                                                                                                                                                                                                                                                                                                                                                                                                                                                                                                                                                                                                                                                                                                                                                                                                                                                                                                                                                                                                                                                                                                                                                                                                                                                                                                                 |                                                                                             |                                                                                                             |                                                                                                                                                                                                                                                                                                                                                                        |
| see above                                                                                                                                                                                                                                                                                                                                                                                                                                                                                                                                                                                                                                                                                                                                                                                                                                                                                                                                                                                                                                                                                                                                                                                                                                                                                                                                                                                                                                                                                                                                                                                                                                                                                                                                                                                                                                                                                                                                                                                                                                                                                                                                                                                                                                                                                                                                                                                                                                                                                                                                                                                                                                                                                                                      | UCSF Clinical Microbiology Laboratory                                                       | Chan-Zuckerberg Biohub                                                                                      | CZB Cllahub Consortium                                                                                                                                                                                                                                                                                                                                                 |
| EPI_ISL_487269                                                                                                                                                                                                                                                                                                                                                                                                                                                                                                                                                                                                                                                                                                                                                                                                                                                                                                                                                                                                                                                                                                                                                                                                                                                                                                                                                                                                                                                                                                                                                                                                                                                                                                                                                                                                                                                                                                                                                                                                                                                                                                                                                                                                                                                                                                                                                                                                                                                                                                                                                                                                                                                                                                                 | Laboratorio de Referencia Nacional de Virus Respiratorio. Instituto Nacional de Salud.      | Laboratorio de Referencia Nacional de Biotecnología y Biología Molecular. Instituto Nacional de Salud.      | Carlos Padilla Rojas, Karolyn Chozo Vega, Priscila Lope Pari, Omar Caceres Rey, Marco Galarza Perez, Maribel Huaranga Nuñez, Johanna Balbuena Torres, Henri Bailon Calderon, Nancy Rojas Serrano                                                                                                                                                                       |
| EPI_ISL_487271                                                                                                                                                                                                                                                                                                                                                                                                                                                                                                                                                                                                                                                                                                                                                                                                                                                                                                                                                                                                                                                                                                                                                                                                                                                                                                                                                                                                                                                                                                                                                                                                                                                                                                                                                                                                                                                                                                                                                                                                                                                                                                                                                                                                                                                                                                                                                                                                                                                                                                                                                                                                                                                                                                                 | unknown                                                                                     | MDU-PHL, The Peter Doherty Institute for Infection and Immunity                                             | Caly L., Seemann T., Sait, M., Schultz M.B., Sherry N., Meumann E., Baird R., Leong L., Lim C.K., Turra M., Bastian I., Higgins G., Soares da Silva E., Dolores de Jesus da Costa M., Salles de Sousa A., Jayanti Pereira Tilman A., Antonia da Costa E., Baretto I., Marr I., Wapling J., Francis J., Ximenes J., Canisla D., Freeman K., Dakh F., Douglas N.         |
| EPI_ISL_489836                                                                                                                                                                                                                                                                                                                                                                                                                                                                                                                                                                                                                                                                                                                                                                                                                                                                                                                                                                                                                                                                                                                                                                                                                                                                                                                                                                                                                                                                                                                                                                                                                                                                                                                                                                                                                                                                                                                                                                                                                                                                                                                                                                                                                                                                                                                                                                                                                                                                                                                                                                                                                                                                                                                 | Laboratorio de Referencia Nacional de Virus Respiratorio. Instituto Nacional de Salud Perú  | Laboratorio de Referencia Nacional de Biotecnología y Biología Molecular. Instituto Nacional de Salud Perú  | Carlos Padilla Rojas, Karolyn Chozo Vega, Priscila Lope Pari, Omar Caceres Rey, Marco Galarza Perez, Maribel Huaranga Nuñez, Johanna Balbuena Torres, Henri Bailon Calderon, Nancy Rojas Serrano                                                                                                                                                                       |
| EPI_ISL_489837, EPI_ISL_489838                                                                                                                                                                                                                                                                                                                                                                                                                                                                                                                                                                                                                                                                                                                                                                                                                                                                                                                                                                                                                                                                                                                                                                                                                                                                                                                                                                                                                                                                                                                                                                                                                                                                                                                                                                                                                                                                                                                                                                                                                                                                                                                                                                                                                                                                                                                                                                                                                                                                                                                                                                                                                                                                                                 | Laboratorio de Referencia Nacional de Virus Respiratorio. Instituto Nacional de Salud Perú  | Laboratorio de Referencia Nacional de Biotecnología y Biología Molecular. Instituto Nacional de Salud Perú  | Carlos Padilla Rojas, Karolyn Chozo Vega, Priscila Lope Pari, Omar Caceres Rey, Marco Galarza Perez, Maribel Huaranga Nuñez, Johanna Balbuena Torres, Henri Bailon Calderon, Nancy Rojas Serrano                                                                                                                                                                       |
| EPI_ISL_489839, EPI_ISL_489987, EPI_ISL_489988, EPI_ISL_489989, EPI_ISL_489990                                                                                                                                                                                                                                                                                                                                                                                                                                                                                                                                                                                                                                                                                                                                                                                                                                                                                                                                                                                                                                                                                                                                                                                                                                                                                                                                                                                                                                                                                                                                                                                                                                                                                                                                                                                                                                                                                                                                                                                                                                                                                                                                                                                                                                                                                                                                                                                                                                                                                                                                                                                                                                                 | Laboratorio de Referencia Nacional de Virus Respiratorio. Instituto Nacional de Salud Perú  | Laboratorio de Referencia Nacional de Biotecnología y Biología Molecular. Instituto Nacional de Salud Perú  | Carlos Padilla Rojas, Karolyn Chozo Vega, Priscila Lope Pari, Omar Caceres Rey, Marco Galarza Perez, Maribel Huaranga Nuñez, Johanna Balbuena Torres, Henri Bailon Calderon, Nancy Rojas Serrano                                                                                                                                                                       |
| EPI_ISL_490209, EPI_ISL_490315, EPI_ISL_490316                                                                                                                                                                                                                                                                                                                                                                                                                                                                                                                                                                                                                                                                                                                                                                                                                                                                                                                                                                                                                                                                                                                                                                                                                                                                                                                                                                                                                                                                                                                                                                                                                                                                                                                                                                                                                                                                                                                                                                                                                                                                                                                                                                                                                                                                                                                                                                                                                                                                                                                                                                                                                                                                                 | Laboratorio de Referencia Nacional de Virus Respiratorio. Instituto Nacional de Salud Perú  | Laboratorio de Referencia Nacional de Biotecnología y Biología Molecular. Instituto Nacional de Salud Perú  | Carlos Padilla Rojas, Karolyn Chozo Vega, Priscila Lope Pari, Omar Caceres Rey, Marco Galarza Perez, Maribel Huaranga Nuñez, Johanna Balbuena Torres, Henri Bailon Calderon, Nancy Rojas Serrano                                                                                                                                                                       |
| EPI_ISL_490765                                                                                                                                                                                                                                                                                                                                                                                                                                                                                                                                                                                                                                                                                                                                                                                                                                                                                                                                                                                                                                                                                                                                                                                                                                                                                                                                                                                                                                                                                                                                                                                                                                                                                                                                                                                                                                                                                                                                                                                                                                                                                                                                                                                                                                                                                                                                                                                                                                                                                                                                                                                                                                                                                                                 | Wales Specialist Virology Centre Sequencing lab: Pathogen Genomics Unit                     | COVID-19 Genomics UK (COG-UK) Consortium                                                                    | Catherine Moore, Johnathan Evans, Laura Gifford, Malorie Perry, Simon Cottrell, Angela Marchbank, Alec Birchley, Alexander Adams, Amy Gaskin, Bree Gatica-Wilcox, Jason Coombes, Joel Southgate, Lauren Gilbert, Lee Graham, Nicole Pacchiari, Sara Kumziene-Summerhayes, Sarah Taylor, Sophie Jones, Sara Rey, Matthew Bull, Joanne Watkins, Sally Corden, Tom Connor |
| EPI_ISL_490975, EPI_ISL_490976                                                                                                                                                                                                                                                                                                                                                                                                                                                                                                                                                                                                                                                                                                                                                                                                                                                                                                                                                                                                                                                                                                                                                                                                                                                                                                                                                                                                                                                                                                                                                                                                                                                                                                                                                                                                                                                                                                                                                                                                                                                                                                                                                                                                                                                                                                                                                                                                                                                                                                                                                                                                                                                                                                 | Laboratorio de Referencia Nacional de Virus Respiratorio. Instituto Nacional de Salud Perú  | Laboratorio de Referencia Nacional de Biotecnología y Biología Molecular. Instituto Nacional de Salud Perú  | Carlos Padilla Rojas, Karolyn Chozo Vega, Priscila Lope Pari, Omar Caceres Rey, Marco Galarza Perez, Maribel Huaranga Nuñez, Johanna Balbuena Torres, Henri Bailon Calderon, Nancy Rojas Serrano                                                                                                                                                                       |
| EPI_ISL_491172                                                                                                                                                                                                                                                                                                                                                                                                                                                                                                                                                                                                                                                                                                                                                                                                                                                                                                                                                                                                                                                                                                                                                                                                                                                                                                                                                                                                                                                                                                                                                                                                                                                                                                                                                                                                                                                                                                                                                                                                                                                                                                                                                                                                                                                                                                                                                                                                                                                                                                                                                                                                                                                                                                                 | Laboratorio de Referencia Nacional de Virus Respiratorio. Instituto Nacional de Salud Perú  | Laboratorio de Referencia Nacional de Biotecnología y Biología Molecular. Instituto Nacional de Salud Perú. | Carlos Padilla Rojas, Karolyn Chozo Vega, Priscila Lope Pari, Omar Caceres Rey, Marco Galarza Perez, Maribel Huaranga Nuñez, Johanna Balbuena Torres, Henri Bailon Calderon, Nancy Rojas Serrano                                                                                                                                                                       |
| EPI_ISL_491427                                                                                                                                                                                                                                                                                                                                                                                                                                                                                                                                                                                                                                                                                                                                                                                                                                                                                                                                                                                                                                                                                                                                                                                                                                                                                                                                                                                                                                                                                                                                                                                                                                                                                                                                                                                                                                                                                                                                                                                                                                                                                                                                                                                                                                                                                                                                                                                                                                                                                                                                                                                                                                                                                                                 | Laboratorio de Referencia Nacional de Virus Respiratorio. Instituto Nacional de Salud Perú  | Laboratorio de Referencia Nacional de Biotecnología y Biología Molecular. Instituto Nacional de Salud Perú  | Carlos Padilla Rojas, Karolyn Chozo Vega, Priscila Lope Pari, Omar Caceres Rey, Marco Galarza Perez, Maribel Huaranga Nuñez, Johanna Balbuena Torres, Henri Bailon Calderon, Nancy Rojas Serrano                                                                                                                                                                       |
| EPI_ISL_491428                                                                                                                                                                                                                                                                                                                                                                                                                                                                                                                                                                                                                                                                                                                                                                                                                                                                                                                                                                                                                                                                                                                                                                                                                                                                                                                                                                                                                                                                                                                                                                                                                                                                                                                                                                                                                                                                                                                                                                                                                                                                                                                                                                                                                                                                                                                                                                                                                                                                                                                                                                                                                                                                                                                 | Laboratorio de Referencia Nacional de Virus Respiratorio. Instituto Nacional de Salud Perú  | Laboratorio de Referencia Nacional de Biotecnología y Biología Molecular. Instituto Nacional de Salud Perú  | Carlos Padilla Rojas, Karolyn Vega Chozo, Priscila Lope Pari, Omar Caceres Rey, Marco Galarza Perez, Maribel Huaranga Nuñez, Johanna Balbuena Torres, Henri Bailon Calderon, Nancy Rojas Serrano                                                                                                                                                                       |
| EPI_ISL_491429                                                                                                                                                                                                                                                                                                                                                                                                                                                                                                                                                                                                                                                                                                                                                                                                                                                                                                                                                                                                                                                                                                                                                                                                                                                                                                                                                                                                                                                                                                                                                                                                                                                                                                                                                                                                                                                                                                                                                                                                                                                                                                                                                                                                                                                                                                                                                                                                                                                                                                                                                                                                                                                                                                                 | Laboratorio de Referencia Nacional de Virus Respiratorio. Instituto Nacional de Salud Perú  | Laboratorio de Referencia Nacional de Biotecnología y Biología Molecular. Instituto Nacional de Salud Perú  | Carlos Padilla Rojas, Karolyn Vega Chozo, Priscila Lope Pari, Omar Caceres Rey, Marco Galarza Perez, Maribel Huaranga Nuñez, Johanna Balbuena Torres, Henri Bailon Calderon, Nancy Rojas Serrano                                                                                                                                                                       |
| EPI_ISL_491430                                                                                                                                                                                                                                                                                                                                                                                                                                                                                                                                                                                                                                                                                                                                                                                                                                                                                                                                                                                                                                                                                                                                                                                                                                                                                                                                                                                                                                                                                                                                                                                                                                                                                                                                                                                                                                                                                                                                                                                                                                                                                                                                                                                                                                                                                                                                                                                                                                                                                                                                                                                                                                                                                                                 | Laboratorio de Referencia Nacional de Virus Respiratorio. Instituto Nacional de Salud Perú  | Laboratorio de Referencia Nacional de Biotecnología y Biología Molecular. Instituto Nacional de Salud Perú  | Carlos Padilla Rojas, Karolyn Vega Chozo, Priscila Lope Pari, Omar Caceres Rey, Marco Galarza Perez, Maribel Huaranga Nuñez, Johanna Balbuena Torres, Henri Bailon Calderon, Nancy Rojas Serrano                                                                                                                                                                       |
| EPI_ISL_491431                                                                                                                                                                                                                                                                                                                                                                                                                                                                                                                                                                                                                                                                                                                                                                                                                                                                                                                                                                                                                                                                                                                                                                                                                                                                                                                                                                                                                                                                                                                                                                                                                                                                                                                                                                                                                                                                                                                                                                                                                                                                                                                                                                                                                                                                                                                                                                                                                                                                                                                                                                                                                                                                                                                 | Laboratorio de Referencia Nacional de Virus Respiratorio. Instituto Nacional de Salud Perú  | Laboratorio de Referencia Nacional de Biotecnología y Biología Molecular. Instituto Nacional de Salud Perú  | Carlos Padilla Rojas, Karolyn Vega Chozo, Priscila Lope Pari, Omar Caceres Rey, Marco Galarza Perez, Maribel Huaranga Nuñez, Johanna Balbuena Torres, Henri Bailon Calderon, Nancy Rojas Serrano                                                                                                                                                                       |
| EPI_ISL_491432                                                                                                                                                                                                                                                                                                                                                                                                                                                                                                                                                                                                                                                                                                                                                                                                                                                                                                                                                                                                                                                                                                                                                                                                                                                                                                                                                                                                                                                                                                                                                                                                                                                                                                                                                                                                                                                                                                                                                                                                                                                                                                                                                                                                                                                                                                                                                                                                                                                                                                                                                                                                                                                                                                                 | Laboratorio de Referencia Nacional de Virus Respiratorio. Instituto Nacional de Salud Perú  | Laboratorio de Referencia Nacional de Biotecnología y Biología Molecular. Instituto Nacional de Salud Perú  | Carlos Padilla Rojas, Karolyn Vega Chozo, Priscila Lope Pari, Omar Caceres Rey, Marco Galarza Perez, Maribel Huaranga Nuñez, Johanna Balbuena Torres, Henri Bailon Calderon, Nancy Rojas Serrano                                                                                                                                                                       |
| EPI_ISL_491433, EPI_ISL_491434, EPI_ISL_491435                                                                                                                                                                                                                                                                                                                                                                                                                                                                                                                                                                                                                                                                                                                                                                                                                                                                                                                                                                                                                                                                                                                                                                                                                                                                                                                                                                                                                                                                                                                                                                                                                                                                                                                                                                                                                                                                                                                                                                                                                                                                                                                                                                                                                                                                                                                                                                                                                                                                                                                                                                                                                                                                                 | Laboratorio de Referencia Nacional de Virus Respiratorio. Instituto Nacional de Salud Perú  | Laboratorio de Referencia Nacional de Biotecnología y Biología Molecular. Instituto Nacional de Salud Perú  | Carlos Padilla Rojas, Karolyn Vega Chozo, Priscila Lope Pari, Omar Caceres Rey, Marco Galarza Perez, Maribel Huaranga Nuñez, Johanna Balbuena Torres, Henri Bailon Calderon, Nancy Rojas Serrano                                                                                                                                                                       |



















|                                                                                                                                                                                                                                                                                                                                                                                                                                                                                                                                                                                                                                                                                                                                                                                                                                                                                                                                                                                                                                                                                                                                                                                                                                                                                                                                                                                                                                                                                                                                                                                                                                                                                                                                                                                                                                                                                                                                                                                                                                                                                                                                                                                                                                                                                                                                                                                                                                                                                                                                                                                                                                                                                                                                                                                                                                                                                                                                                                                                                                                                                                                                                                                                                                                                                                                                                                                                                                                                                                                                                                                                                                                                                                                                                                                                                                                                                                                                                                                                                                                                                                                                                                                                                                                                                                                                                                                                                                                                                                                                                                                                                                                                                                                                                                                                                                                                                                                                                                                                                                                                                                                                                                                                                                                                                                                                                                                                                                                                                                                                                                                                                                                                                                                                                                                                                                                                                                                                                                                                                                                                                                                                                                                                                                                                                                                                                                                                                                                                                                                                                                                                                                                                                                |                                                                         |                                                                                                                                                                                                                                                                                                                                                                           |
|------------------------------------------------------------------------------------------------------------------------------------------------------------------------------------------------------------------------------------------------------------------------------------------------------------------------------------------------------------------------------------------------------------------------------------------------------------------------------------------------------------------------------------------------------------------------------------------------------------------------------------------------------------------------------------------------------------------------------------------------------------------------------------------------------------------------------------------------------------------------------------------------------------------------------------------------------------------------------------------------------------------------------------------------------------------------------------------------------------------------------------------------------------------------------------------------------------------------------------------------------------------------------------------------------------------------------------------------------------------------------------------------------------------------------------------------------------------------------------------------------------------------------------------------------------------------------------------------------------------------------------------------------------------------------------------------------------------------------------------------------------------------------------------------------------------------------------------------------------------------------------------------------------------------------------------------------------------------------------------------------------------------------------------------------------------------------------------------------------------------------------------------------------------------------------------------------------------------------------------------------------------------------------------------------------------------------------------------------------------------------------------------------------------------------------------------------------------------------------------------------------------------------------------------------------------------------------------------------------------------------------------------------------------------------------------------------------------------------------------------------------------------------------------------------------------------------------------------------------------------------------------------------------------------------------------------------------------------------------------------------------------------------------------------------------------------------------------------------------------------------------------------------------------------------------------------------------------------------------------------------------------------------------------------------------------------------------------------------------------------------------------------------------------------------------------------------------------------------------------------------------------------------------------------------------------------------------------------------------------------------------------------------------------------------------------------------------------------------------------------------------------------------------------------------------------------------------------------------------------------------------------------------------------------------------------------------------------------------------------------------------------------------------------------------------------------------------------------------------------------------------------------------------------------------------------------------------------------------------------------------------------------------------------------------------------------------------------------------------------------------------------------------------------------------------------------------------------------------------------------------------------------------------------------------------------------------------------------------------------------------------------------------------------------------------------------------------------------------------------------------------------------------------------------------------------------------------------------------------------------------------------------------------------------------------------------------------------------------------------------------------------------------------------------------------------------------------------------------------------------------------------------------------------------------------------------------------------------------------------------------------------------------------------------------------------------------------------------------------------------------------------------------------------------------------------------------------------------------------------------------------------------------------------------------------------------------------------------------------------------------------------------------------------------------------------------------------------------------------------------------------------------------------------------------------------------------------------------------------------------------------------------------------------------------------------------------------------------------------------------------------------------------------------------------------------------------------------------------------------------------------------------------------------------------------------------------------------------------------------------------------------------------------------------------------------------------------------------------------------------------------------------------------------------------------------------------------------------------------------------------------------------------------------------------------------------------------------------------------------------------------------------------------------------------------------------|-------------------------------------------------------------------------|---------------------------------------------------------------------------------------------------------------------------------------------------------------------------------------------------------------------------------------------------------------------------------------------------------------------------------------------------------------------------|
| EPI_ISL_583136, EPI_ISL_583137, EPI_ISL_583138, EPI_ISL_583139, EPI_ISL_583140, EPI_ISL_583141, EPI_ISL_583142, EPI_ISL_583143, EPI_ISL_583144, EPI_ISL_583145, EPI_ISL_583146, EPI_ISL_583147, EPI_ISL_583148, EPI_ISL_583149, EPI_ISL_583150, EPI_ISL_583151, EPI_ISL_583152, EPI_ISL_583153, EPI_ISL_583154, EPI_ISL_583155, EPI_ISL_583156, EPI_ISL_583157, EPI_ISL_583158, EPI_ISL_583159, EPI_ISL_583160, EPI_ISL_583161, EPI_ISL_583162, EPI_ISL_583163, EPI_ISL_583164, EPI_ISL_583165, EPI_ISL_583166, EPI_ISL_583167, EPI_ISL_583168, EPI_ISL_583169, EPI_ISL_583170                                                                                                                                                                                                                                                                                                                                                                                                                                                                                                                                                                                                                                                                                                                                                                                                                                                                                                                                                                                                                                                                                                                                                                                                                                                                                                                                                                                                                                                                                                                                                                                                                                                                                                                                                                                                                                                                                                                                                                                                                                                                                                                                                                                                                                                                                                                                                                                                                                                                                                                                                                                                                                                                                                                                                                                                                                                                                                                                                                                                                                                                                                                                                                                                                                                                                                                                                                                                                                                                                                                                                                                                                                                                                                                                                                                                                                                                                                                                                                                                                                                                                                                                                                                                                                                                                                                                                                                                                                                                                                                                                                                                                                                                                                                                                                                                                                                                                                                                                                                                                                                                                                                                                                                                                                                                                                                                                                                                                                                                                                                                                                                                                                                                                                                                                                                                                                                                                                                                                                                                                                                                                                                 | Chan-Zuckerberg Biohub                                                  | CZB Ciliahub Consortium                                                                                                                                                                                                                                                                                                                                                   |
| see above                                                                                                                                                                                                                                                                                                                                                                                                                                                                                                                                                                                                                                                                                                                                                                                                                                                                                                                                                                                                                                                                                                                                                                                                                                                                                                                                                                                                                                                                                                                                                                                                                                                                                                                                                                                                                                                                                                                                                                                                                                                                                                                                                                                                                                                                                                                                                                                                                                                                                                                                                                                                                                                                                                                                                                                                                                                                                                                                                                                                                                                                                                                                                                                                                                                                                                                                                                                                                                                                                                                                                                                                                                                                                                                                                                                                                                                                                                                                                                                                                                                                                                                                                                                                                                                                                                                                                                                                                                                                                                                                                                                                                                                                                                                                                                                                                                                                                                                                                                                                                                                                                                                                                                                                                                                                                                                                                                                                                                                                                                                                                                                                                                                                                                                                                                                                                                                                                                                                                                                                                                                                                                                                                                                                                                                                                                                                                                                                                                                                                                                                                                                                                                                                                      | Humboldt County Public Health Laboratory                                |                                                                                                                                                                                                                                                                                                                                                                           |
| EPI_ISL_583171, EPI_ISL_583172                                                                                                                                                                                                                                                                                                                                                                                                                                                                                                                                                                                                                                                                                                                                                                                                                                                                                                                                                                                                                                                                                                                                                                                                                                                                                                                                                                                                                                                                                                                                                                                                                                                                                                                                                                                                                                                                                                                                                                                                                                                                                                                                                                                                                                                                                                                                                                                                                                                                                                                                                                                                                                                                                                                                                                                                                                                                                                                                                                                                                                                                                                                                                                                                                                                                                                                                                                                                                                                                                                                                                                                                                                                                                                                                                                                                                                                                                                                                                                                                                                                                                                                                                                                                                                                                                                                                                                                                                                                                                                                                                                                                                                                                                                                                                                                                                                                                                                                                                                                                                                                                                                                                                                                                                                                                                                                                                                                                                                                                                                                                                                                                                                                                                                                                                                                                                                                                                                                                                                                                                                                                                                                                                                                                                                                                                                                                                                                                                                                                                                                                                                                                                                                                 | Tulare County Public Health Lab                                         | Chan-Zuckerberg Biohub                                                                                                                                                                                                                                                                                                                                                    |
| EPI_ISL_583173, EPI_ISL_583174, EPI_ISL_583175, EPI_ISL_583176, EPI_ISL_583177, EPI_ISL_583178, EPI_ISL_583179, EPI_ISL_583180, EPI_ISL_583181, EPI_ISL_583182, EPI_ISL_583183, EPI_ISL_583184, EPI_ISL_583185, EPI_ISL_583186, EPI_ISL_583187, EPI_ISL_583188, EPI_ISL_583189                                                                                                                                                                                                                                                                                                                                                                                                                                                                                                                                                                                                                                                                                                                                                                                                                                                                                                                                                                                                                                                                                                                                                                                                                                                                                                                                                                                                                                                                                                                                                                                                                                                                                                                                                                                                                                                                                                                                                                                                                                                                                                                                                                                                                                                                                                                                                                                                                                                                                                                                                                                                                                                                                                                                                                                                                                                                                                                                                                                                                                                                                                                                                                                                                                                                                                                                                                                                                                                                                                                                                                                                                                                                                                                                                                                                                                                                                                                                                                                                                                                                                                                                                                                                                                                                                                                                                                                                                                                                                                                                                                                                                                                                                                                                                                                                                                                                                                                                                                                                                                                                                                                                                                                                                                                                                                                                                                                                                                                                                                                                                                                                                                                                                                                                                                                                                                                                                                                                                                                                                                                                                                                                                                                                                                                                                                                                                                                                                 | Chan-Zuckerberg Biohub                                                  | CZB Ciliahub Consortium                                                                                                                                                                                                                                                                                                                                                   |
| see above                                                                                                                                                                                                                                                                                                                                                                                                                                                                                                                                                                                                                                                                                                                                                                                                                                                                                                                                                                                                                                                                                                                                                                                                                                                                                                                                                                                                                                                                                                                                                                                                                                                                                                                                                                                                                                                                                                                                                                                                                                                                                                                                                                                                                                                                                                                                                                                                                                                                                                                                                                                                                                                                                                                                                                                                                                                                                                                                                                                                                                                                                                                                                                                                                                                                                                                                                                                                                                                                                                                                                                                                                                                                                                                                                                                                                                                                                                                                                                                                                                                                                                                                                                                                                                                                                                                                                                                                                                                                                                                                                                                                                                                                                                                                                                                                                                                                                                                                                                                                                                                                                                                                                                                                                                                                                                                                                                                                                                                                                                                                                                                                                                                                                                                                                                                                                                                                                                                                                                                                                                                                                                                                                                                                                                                                                                                                                                                                                                                                                                                                                                                                                                                                                      | San Bernardino County Public Health Lab                                 |                                                                                                                                                                                                                                                                                                                                                                           |
| EPI_ISL_583190, EPI_ISL_583191, EPI_ISL_583192, EPI_ISL_583193, EPI_ISL_583194, EPI_ISL_583195, EPI_ISL_583196, EPI_ISL_583197                                                                                                                                                                                                                                                                                                                                                                                                                                                                                                                                                                                                                                                                                                                                                                                                                                                                                                                                                                                                                                                                                                                                                                                                                                                                                                                                                                                                                                                                                                                                                                                                                                                                                                                                                                                                                                                                                                                                                                                                                                                                                                                                                                                                                                                                                                                                                                                                                                                                                                                                                                                                                                                                                                                                                                                                                                                                                                                                                                                                                                                                                                                                                                                                                                                                                                                                                                                                                                                                                                                                                                                                                                                                                                                                                                                                                                                                                                                                                                                                                                                                                                                                                                                                                                                                                                                                                                                                                                                                                                                                                                                                                                                                                                                                                                                                                                                                                                                                                                                                                                                                                                                                                                                                                                                                                                                                                                                                                                                                                                                                                                                                                                                                                                                                                                                                                                                                                                                                                                                                                                                                                                                                                                                                                                                                                                                                                                                                                                                                                                                                                                 | San Francisco Public Health Laboratory                                  | Chan-Zuckerberg Biohub                                                                                                                                                                                                                                                                                                                                                    |
| EPI_ISL_583198                                                                                                                                                                                                                                                                                                                                                                                                                                                                                                                                                                                                                                                                                                                                                                                                                                                                                                                                                                                                                                                                                                                                                                                                                                                                                                                                                                                                                                                                                                                                                                                                                                                                                                                                                                                                                                                                                                                                                                                                                                                                                                                                                                                                                                                                                                                                                                                                                                                                                                                                                                                                                                                                                                                                                                                                                                                                                                                                                                                                                                                                                                                                                                                                                                                                                                                                                                                                                                                                                                                                                                                                                                                                                                                                                                                                                                                                                                                                                                                                                                                                                                                                                                                                                                                                                                                                                                                                                                                                                                                                                                                                                                                                                                                                                                                                                                                                                                                                                                                                                                                                                                                                                                                                                                                                                                                                                                                                                                                                                                                                                                                                                                                                                                                                                                                                                                                                                                                                                                                                                                                                                                                                                                                                                                                                                                                                                                                                                                                                                                                                                                                                                                                                                 | Marin County Public Health Department                                   | Chan-Zuckerberg Biohub                                                                                                                                                                                                                                                                                                                                                    |
| EPI_ISL_583199, EPI_ISL_583200, EPI_ISL_583201, EPI_ISL_583202, EPI_ISL_583203, EPI_ISL_583204, EPI_ISL_583205, EPI_ISL_583206, EPI_ISL_583207, EPI_ISL_583208, EPI_ISL_583209, EPI_ISL_583210, EPI_ISL_583211, EPI_ISL_583212, EPI_ISL_583213, EPI_ISL_583214, EPI_ISL_583215, EPI_ISL_583216, EPI_ISL_583217, EPI_ISL_583218, EPI_ISL_583219, EPI_ISL_583220, EPI_ISL_583221, EPI_ISL_583222, EPI_ISL_583223, EPI_ISL_583224, EPI_ISL_583225, EPI_ISL_583226, EPI_ISL_583227, EPI_ISL_583228, EPI_ISL_583229, EPI_ISL_583230, EPI_ISL_583231                                                                                                                                                                                                                                                                                                                                                                                                                                                                                                                                                                                                                                                                                                                                                                                                                                                                                                                                                                                                                                                                                                                                                                                                                                                                                                                                                                                                                                                                                                                                                                                                                                                                                                                                                                                                                                                                                                                                                                                                                                                                                                                                                                                                                                                                                                                                                                                                                                                                                                                                                                                                                                                                                                                                                                                                                                                                                                                                                                                                                                                                                                                                                                                                                                                                                                                                                                                                                                                                                                                                                                                                                                                                                                                                                                                                                                                                                                                                                                                                                                                                                                                                                                                                                                                                                                                                                                                                                                                                                                                                                                                                                                                                                                                                                                                                                                                                                                                                                                                                                                                                                                                                                                                                                                                                                                                                                                                                                                                                                                                                                                                                                                                                                                                                                                                                                                                                                                                                                                                                                                                                                                                                                 | Chan-Zuckerberg Biohub                                                  | CZB Ciliahub Consortium                                                                                                                                                                                                                                                                                                                                                   |
| see above                                                                                                                                                                                                                                                                                                                                                                                                                                                                                                                                                                                                                                                                                                                                                                                                                                                                                                                                                                                                                                                                                                                                                                                                                                                                                                                                                                                                                                                                                                                                                                                                                                                                                                                                                                                                                                                                                                                                                                                                                                                                                                                                                                                                                                                                                                                                                                                                                                                                                                                                                                                                                                                                                                                                                                                                                                                                                                                                                                                                                                                                                                                                                                                                                                                                                                                                                                                                                                                                                                                                                                                                                                                                                                                                                                                                                                                                                                                                                                                                                                                                                                                                                                                                                                                                                                                                                                                                                                                                                                                                                                                                                                                                                                                                                                                                                                                                                                                                                                                                                                                                                                                                                                                                                                                                                                                                                                                                                                                                                                                                                                                                                                                                                                                                                                                                                                                                                                                                                                                                                                                                                                                                                                                                                                                                                                                                                                                                                                                                                                                                                                                                                                                                                      | UCSF Clinical Microbiology Laboratory                                   |                                                                                                                                                                                                                                                                                                                                                                           |
| EPI_ISL_585781, EPI_ISL_585795, EPI_ISL_585834, EPI_ISL_585851, EPI_ISL_586003, EPI_ISL_586132, EPI_ISL_586163, EPI_ISL_586227                                                                                                                                                                                                                                                                                                                                                                                                                                                                                                                                                                                                                                                                                                                                                                                                                                                                                                                                                                                                                                                                                                                                                                                                                                                                                                                                                                                                                                                                                                                                                                                                                                                                                                                                                                                                                                                                                                                                                                                                                                                                                                                                                                                                                                                                                                                                                                                                                                                                                                                                                                                                                                                                                                                                                                                                                                                                                                                                                                                                                                                                                                                                                                                                                                                                                                                                                                                                                                                                                                                                                                                                                                                                                                                                                                                                                                                                                                                                                                                                                                                                                                                                                                                                                                                                                                                                                                                                                                                                                                                                                                                                                                                                                                                                                                                                                                                                                                                                                                                                                                                                                                                                                                                                                                                                                                                                                                                                                                                                                                                                                                                                                                                                                                                                                                                                                                                                                                                                                                                                                                                                                                                                                                                                                                                                                                                                                                                                                                                                                                                                                                 | Wales Specialist Virology Centre Sequencing lab: Pathogen Genomics Unit | COVID-19 Genomics UK (COG-UK) Consortium                                                                                                                                                                                                                                                                                                                                  |
|                                                                                                                                                                                                                                                                                                                                                                                                                                                                                                                                                                                                                                                                                                                                                                                                                                                                                                                                                                                                                                                                                                                                                                                                                                                                                                                                                                                                                                                                                                                                                                                                                                                                                                                                                                                                                                                                                                                                                                                                                                                                                                                                                                                                                                                                                                                                                                                                                                                                                                                                                                                                                                                                                                                                                                                                                                                                                                                                                                                                                                                                                                                                                                                                                                                                                                                                                                                                                                                                                                                                                                                                                                                                                                                                                                                                                                                                                                                                                                                                                                                                                                                                                                                                                                                                                                                                                                                                                                                                                                                                                                                                                                                                                                                                                                                                                                                                                                                                                                                                                                                                                                                                                                                                                                                                                                                                                                                                                                                                                                                                                                                                                                                                                                                                                                                                                                                                                                                                                                                                                                                                                                                                                                                                                                                                                                                                                                                                                                                                                                                                                                                                                                                                                                |                                                                         | Catherine Moore, Johnathan Evans, Laura Gifford, Malorie Perry, Simon Cottrell, Angela Marchbank, Alec Birchley, Alexander Adams, Amy Gaskin, Bree Gatica-Wilcox, Jason Coombes, Joel Southgate, Lauren Gilbert, Lee Graham, Nicole Pacchiariini, Sara Kumziene-Summerhayes, Sarah Taylor, Sophie Jones, Sara Rey, Matthew Bull, Joanne Watkins, Sally Corden, Tom Connor |
| EPI_ISL_591558, EPI_ISL_591561, EPI_ISL_591562, EPI_ISL_591565, EPI_ISL_591571, EPI_ISL_591573, EPI_ISL_591574, EPI_ISL_591578, EPI_ISL_591580, EPI_ISL_591584, EPI_ISL_591585, EPI_ISL_591587, EPI_ISL_591590, EPI_ISL_591591, EPI_ISL_591592, EPI_ISL_591595, EPI_ISL_591603, EPI_ISL_591609, EPI_ISL_591613, EPI_ISL_591615, EPI_ISL_591619, EPI_ISL_591621, EPI_ISL_591623, EPI_ISL_591626, EPI_ISL_591638, EPI_ISL_591640, EPI_ISL_591643, EPI_ISL_591645, EPI_ISL_591652, EPI_ISL_591653, EPI_ISL_591654, EPI_ISL_591656, EPI_ISL_591657, EPI_ISL_591659, EPI_ISL_591666, EPI_ISL_591667, EPI_ISL_591669, EPI_ISL_591670, EPI_ISL_591672, EPI_ISL_591679, EPI_ISL_591681, EPI_ISL_591684, EPI_ISL_591688, EPI_ISL_591698, EPI_ISL_591700, EPI_ISL_591703, EPI_ISL_591704, EPI_ISL_591706, EPI_ISL_591707, EPI_ISL_591708, EPI_ISL_591715, EPI_ISL_591721, EPI_ISL_591723, EPI_ISL_591725, EPI_ISL_591726, EPI_ISL_591729, EPI_ISL_591732, EPI_ISL_591734, EPI_ISL_591737, EPI_ISL_591740, EPI_ISL_591744, EPI_ISL_591746, EPI_ISL_591754, EPI_ISL_591755, EPI_ISL_591758, EPI_ISL_591760, EPI_ISL_591761, EPI_ISL_591763, EPI_ISL_591767, EPI_ISL_591769, EPI_ISL_591770, EPI_ISL_591771, EPI_ISL_591772, EPI_ISL_591773, EPI_ISL_591775, EPI_ISL_591778, EPI_ISL_591779, EPI_ISL_591782, EPI_ISL_591783, EPI_ISL_591786, EPI_ISL_591791, EPI_ISL_591792, EPI_ISL_591799, EPI_ISL_591800, EPI_ISL_591807, EPI_ISL_591822, EPI_ISL_591824, EPI_ISL_591825, EPI_ISL_591849, EPI_ISL_591850, EPI_ISL_591851, EPI_ISL_591852, EPI_ISL_591854, EPI_ISL_591855, EPI_ISL_591856, EPI_ISL_591857, EPI_ISL_591858, EPI_ISL_591859, EPI_ISL_591860, EPI_ISL_591861, EPI_ISL_591862, EPI_ISL_591863, EPI_ISL_591864, EPI_ISL_591865, EPI_ISL_591866, EPI_ISL_591867, EPI_ISL_591869, EPI_ISL_591870, EPI_ISL_591871, EPI_ISL_591872, EPI_ISL_591873, EPI_ISL_591874, EPI_ISL_591875, EPI_ISL_591876, EPI_ISL_591877, EPI_ISL_591878, EPI_ISL_591879, EPI_ISL_591880, EPI_ISL_591881, EPI_ISL_591882, EPI_ISL_591883, EPI_ISL_591884, EPI_ISL_591885, EPI_ISL_591886, EPI_ISL_591887, EPI_ISL_591888, EPI_ISL_591889, EPI_ISL_591891, EPI_ISL_591892, EPI_ISL_591893, EPI_ISL_591894, EPI_ISL_591895, EPI_ISL_591896, EPI_ISL_591897, EPI_ISL_591898, EPI_ISL_591899, EPI_ISL_591901, EPI_ISL_591902, EPI_ISL_591903, EPI_ISL_591904, EPI_ISL_591907, EPI_ISL_591908, EPI_ISL_591909, EPI_ISL_591912, EPI_ISL_591917, EPI_ISL_591919, EPI_ISL_591925, EPI_ISL_591928, EPI_ISL_591932, EPI_ISL_591940, EPI_ISL_591941, EPI_ISL_591942, EPI_ISL_591943, EPI_ISL_591944, EPI_ISL_591945, EPI_ISL_591946, EPI_ISL_591947, EPI_ISL_591948, EPI_ISL_591949, EPI_ISL_591950, EPI_ISL_591951, EPI_ISL_591952, EPI_ISL_591953, EPI_ISL_591954, EPI_ISL_591955, EPI_ISL_591956, EPI_ISL_591957, EPI_ISL_591958, EPI_ISL_591959, EPI_ISL_591960, EPI_ISL_592136, EPI_ISL_592137, EPI_ISL_592139, EPI_ISL_592141, EPI_ISL_592142, EPI_ISL_592143, EPI_ISL_592144, EPI_ISL_592145, EPI_ISL_592146, EPI_ISL_592147, EPI_ISL_592148, EPI_ISL_592149, EPI_ISL_592150, EPI_ISL_592151, EPI_ISL_592152, EPI_ISL_592153, EPI_ISL_592154, EPI_ISL_592155, EPI_ISL_592156, EPI_ISL_592157, EPI_ISL_592158, EPI_ISL_592159, EPI_ISL_592160, EPI_ISL_592161, EPI_ISL_592162, EPI_ISL_592163, EPI_ISL_592164, EPI_ISL_592165, EPI_ISL_592166, EPI_ISL_592167, EPI_ISL_592168, EPI_ISL_592169, EPI_ISL_592170, EPI_ISL_592171, EPI_ISL_592172, EPI_ISL_592173, EPI_ISL_592174, EPI_ISL_592175, EPI_ISL_592176, EPI_ISL_592177, EPI_ISL_592178, EPI_ISL_592179, EPI_ISL_592180, EPI_ISL_592181, EPI_ISL_592182, EPI_ISL_592183, EPI_ISL_592184, EPI_ISL_592185, EPI_ISL_592186, EPI_ISL_592187, EPI_ISL_592188, EPI_ISL_592189, EPI_ISL_592190, EPI_ISL_592191, EPI_ISL_592192, EPI_ISL_592193, EPI_ISL_592194, EPI_ISL_592195, EPI_ISL_592196, EPI_ISL_592197, EPI_ISL_592198, EPI_ISL_592199, EPI_ISL_592200, EPI_ISL_592201, EPI_ISL_592202, EPI_ISL_592203, EPI_ISL_592204, EPI_ISL_592205, EPI_ISL_592206, EPI_ISL_592207, EPI_ISL_592208, EPI_ISL_592209, EPI_ISL_592210, EPI_ISL_592211, EPI_ISL_592212, EPI_ISL_592213, EPI_ISL_592214, EPI_ISL_592215, EPI_ISL_592216, EPI_ISL_592217, EPI_ISL_592218, EPI_ISL_592219, EPI_ISL_592220, EPI_ISL_592221, EPI_ISL_592222, EPI_ISL_592223, EPI_ISL_592224, EPI_ISL_592225, EPI_ISL_592226, EPI_ISL_592227, EPI_ISL_592228, EPI_ISL_592229, EPI_ISL_592230, EPI_ISL_592231, EPI_ISL_592232, EPI_ISL_592233, EPI_ISL_592234, EPI_ISL_592235, EPI_ISL_592236, EPI_ISL_592237, EPI_ISL_592238, EPI_ISL_592239, EPI_ISL_592240, EPI_ISL_592241, EPI_ISL_592242, EPI_ISL_592243, EPI_ISL_592244, EPI_ISL_592245, EPI_ISL_592246, EPI_ISL_592247, EPI_ISL_592248, EPI_ISL_592249, EPI_ISL_592250, EPI_ISL_592251, EPI_ISL_592252, EPI_ISL_592253, EPI_ISL_592254, EPI_ISL_592255, EPI_ISL_592256, EPI_ISL_592257, EPI_ISL_592258, EPI_ISL_592259, EPI_ISL_592260, EPI_ISL_592261, EPI_ISL_592262, EPI_ISL_592263, EPI_ISL_592264, EPI_ISL_592265, EPI_ISL_592266, EPI_ISL_592267, EPI_ISL_592268, EPI_ISL_592269, EPI_ISL_592270, EPI_ISL_592271, EPI_ISL_592272, EPI_ISL_592273, EPI_ISL_592274, EPI_ISL_592275, EPI_ISL_592276, EPI_ISL_592277, EPI_ISL_592278, EPI_ISL_592279, EPI_ISL_592280, EPI_ISL_592281, EPI_ISL_592282, EPI_ISL_592283, EPI_ISL_592284, EPI_ISL_592285, EPI_ISL_592286, EPI_ISL_592287, EPI_ISL_592288, EPI_ISL_592289, EPI_ISL_592290, EPI_ISL_592291, EPI_ISL_592292, EPI_ISL_592293, EPI_ISL_592294, EPI_ISL_592295, EPI_ISL_592296, EPI_ISL_592297, EPI_ISL_592298, EPI_ISL_592299, EPI_ISL_592300, EPI_ISL_592301, EPI_ISL_592302, EPI_ISL_592303, EPI_ISL_592304, EPI_ISL_592305, EPI_ISL_592306, EPI_ISL_592307, EPI_ISL_592308, EPI_ISL_592309, EPI_ISL_592310, EPI_ISL_592311, EPI_ISL_592312, EPI_ISL_592313, EPI_ISL_592314, EPI_ISL_592315, EPI_ISL_592316, EPI_ISL_592317, EPI_ISL_592318, EPI_ISL_592319, EPI_ISL_592320, EPI_ISL_592321, EPI_ISL_592322, EPI_ISL_592323, EPI_ISL_592324, EPI_ISL_592325, EPI_ISL_592326, EPI_ISL_592327, EPI_ISL_592328, EPI_ISL_592329, EPI_ISL_592330, EPI_ISL_592331, EPI_ISL_592332, EPI_ISL_592333, EPI_ISL_592334, EPI_ISL_592335, EPI_ISL_592336, EPI_ISL_592337, EPI_ISL_592338, EPI_ISL_592339, EPI_ISL_592340, EPI_ISL_592341, EPI_ISL_592342, EPI_ISL_592343, EPI_ISL_592344, EPI_ISL_592345, EPI_ISL_592346, EPI_ISL_592347, EPI_ISL_592348, EPI_ISL_592349, EPI_ISL_592350, EPI_ISL_592351, EPI_ISL_592352, EPI_ISL_592353, EPI_ISL_592354, EPI_ISL_592355, EPI_ISL_592356, EPI_ISL_592357, EPI_ISL_592358, EPI_ISL_592359, EPI_ISL_592360, EPI_ISL_592361, EPI_ISL_592362, EPI_ISL_592363, EPI_ISL_592364, EPI_ISL_592365, EPI_ISL_592366, EPI_ISL_592367, EPI_ISL_592368, EPI_ISL_592369 | Victorian Infectious Diseases Reference Laboratory (VIDRL)              | VIDRL and MDU-PHL                                                                                                                                                                                                                                                                                                                                                         |
| see above                                                                                                                                                                                                                                                                                                                                                                                                                                                                                                                                                                                                                                                                                                                                                                                                                                                                                                                                                                                                                                                                                                                                                                                                                                                                                                                                                                                                                                                                                                                                                                                                                                                                                                                                                                                                                                                                                                                                                                                                                                                                                                                                                                                                                                                                                                                                                                                                                                                                                                                                                                                                                                                                                                                                                                                                                                                                                                                                                                                                                                                                                                                                                                                                                                                                                                                                                                                                                                                                                                                                                                                                                                                                                                                                                                                                                                                                                                                                                                                                                                                                                                                                                                                                                                                                                                                                                                                                                                                                                                                                                                                                                                                                                                                                                                                                                                                                                                                                                                                                                                                                                                                                                                                                                                                                                                                                                                                                                                                                                                                                                                                                                                                                                                                                                                                                                                                                                                                                                                                                                                                                                                                                                                                                                                                                                                                                                                                                                                                                                                                                                                                                                                                                                      |                                                                         | Caly L., Seemann T., Sait, M., Schultz, M. B., Druce J., Sherry, N.                                                                                                                                                                                                                                                                                                       |
| EPI_ISL_594134, EPI_ISL_594135, EPI_ISL_594136, EPI_ISL_594137, EPI_ISL_594138, EPI_ISL_594139, EPI_ISL_594140, EPI_ISL_594141, EPI_ISL_594142, EPI_ISL_594143, EPI_ISL_594144, EPI_ISL_594145, EPI_ISL_594146, EPI_ISL_594147                                                                                                                                                                                                                                                                                                                                                                                                                                                                                                                                                                                                                                                                                                                                                                                                                                                                                                                                                                                                                                                                                                                                                                                                                                                                                                                                                                                                                                                                                                                                                                                                                                                                                                                                                                                                                                                                                                                                                                                                                                                                                                                                                                                                                                                                                                                                                                                                                                                                                                                                                                                                                                                                                                                                                                                                                                                                                                                                                                                                                                                                                                                                                                                                                                                                                                                                                                                                                                                                                                                                                                                                                                                                                                                                                                                                                                                                                                                                                                                                                                                                                                                                                                                                                                                                                                                                                                                                                                                                                                                                                                                                                                                                                                                                                                                                                                                                                                                                                                                                                                                                                                                                                                                                                                                                                                                                                                                                                                                                                                                                                                                                                                                                                                                                                                                                                                                                                                                                                                                                                                                                                                                                                                                                                                                                                                                                                                                                                                                                 | MDU-PHL, The Peter Doherty Institute for Infection and Immunity         | MDU-PHL, The Peter Doherty Institute for Infection and Immunity                                                                                                                                                                                                                                                                                                           |
| see above                                                                                                                                                                                                                                                                                                                                                                                                                                                                                                                                                                                                                                                                                                                                                                                                                                                                                                                                                                                                                                                                                                                                                                                                                                                                                                                                                                                                                                                                                                                                                                                                                                                                                                                                                                                                                                                                                                                                                                                                                                                                                                                                                                                                                                                                                                                                                                                                                                                                                                                                                                                                                                                                                                                                                                                                                                                                                                                                                                                                                                                                                                                                                                                                                                                                                                                                                                                                                                                                                                                                                                                                                                                                                                                                                                                                                                                                                                                                                                                                                                                                                                                                                                                                                                                                                                                                                                                                                                                                                                                                                                                                                                                                                                                                                                                                                                                                                                                                                                                                                                                                                                                                                                                                                                                                                                                                                                                                                                                                                                                                                                                                                                                                                                                                                                                                                                                                                                                                                                                                                                                                                                                                                                                                                                                                                                                                                                                                                                                                                                                                                                                                                                                                                      |                                                                         | Caly,L., Seemann,T., Sait,M.L., Schultz,M.B., Druce,J., Sherry,N.L.                                                                                                                                                                                                                                                                                                       |
| EPI_ISL_595361, EPI_ISL_595536, EPI_ISL_612642, EPI_ISL_612716, EPI_ISL_612733, EPI_ISL_613010, EPI_ISL_613078, EPI_ISL_613105, EPI_ISL_613142, EPI_ISL_613222                                                                                                                                                                                                                                                                                                                                                                                                                                                                                                                                                                                                                                                                                                                                                                                                                                                                                                                                                                                                                                                                                                                                                                                                                                                                                                                                                                                                                                                                                                                                                                                                                                                                                                                                                                                                                                                                                                                                                                                                                                                                                                                                                                                                                                                                                                                                                                                                                                                                                                                                                                                                                                                                                                                                                                                                                                                                                                                                                                                                                                                                                                                                                                                                                                                                                                                                                                                                                                                                                                                                                                                                                                                                                                                                                                                                                                                                                                                                                                                                                                                                                                                                                                                                                                                                                                                                                                                                                                                                                                                                                                                                                                                                                                                                                                                                                                                                                                                                                                                                                                                                                                                                                                                                                                                                                                                                                                                                                                                                                                                                                                                                                                                                                                                                                                                                                                                                                                                                                                                                                                                                                                                                                                                                                                                                                                                                                                                                                                                                                                                                 | Wales Specialist Virology Centre Sequencing lab: Pathogen Genomics Unit | COVID-19 Genomics UK (COG-UK) Consortium                                                                                                                                                                                                                                                                                                                                  |
| EPI_ISL_623104, EPI_ISL_623105                                                                                                                                                                                                                                                                                                                                                                                                                                                                                                                                                                                                                                                                                                                                                                                                                                                                                                                                                                                                                                                                                                                                                                                                                                                                                                                                                                                                                                                                                                                                                                                                                                                                                                                                                                                                                                                                                                                                                                                                                                                                                                                                                                                                                                                                                                                                                                                                                                                                                                                                                                                                                                                                                                                                                                                                                                                                                                                                                                                                                                                                                                                                                                                                                                                                                                                                                                                                                                                                                                                                                                                                                                                                                                                                                                                                                                                                                                                                                                                                                                                                                                                                                                                                                                                                                                                                                                                                                                                                                                                                                                                                                                                                                                                                                                                                                                                                                                                                                                                                                                                                                                                                                                                                                                                                                                                                                                                                                                                                                                                                                                                                                                                                                                                                                                                                                                                                                                                                                                                                                                                                                                                                                                                                                                                                                                                                                                                                                                                                                                                                                                                                                                                                 | Simile Medicina Diagnóstica                                             | Bioinformatics Laboratory / LNCC                                                                                                                                                                                                                                                                                                                                          |
|                                                                                                                                                                                                                                                                                                                                                                                                                                                                                                                                                                                                                                                                                                                                                                                                                                                                                                                                                                                                                                                                                                                                                                                                                                                                                                                                                                                                                                                                                                                                                                                                                                                                                                                                                                                                                                                                                                                                                                                                                                                                                                                                                                                                                                                                                                                                                                                                                                                                                                                                                                                                                                                                                                                                                                                                                                                                                                                                                                                                                                                                                                                                                                                                                                                                                                                                                                                                                                                                                                                                                                                                                                                                                                                                                                                                                                                                                                                                                                                                                                                                                                                                                                                                                                                                                                                                                                                                                                                                                                                                                                                                                                                                                                                                                                                                                                                                                                                                                                                                                                                                                                                                                                                                                                                                                                                                                                                                                                                                                                                                                                                                                                                                                                                                                                                                                                                                                                                                                                                                                                                                                                                                                                                                                                                                                                                                                                                                                                                                                                                                                                                                                                                                                                |                                                                         | Carolina M Voloch, Ronaldo S Francisco Jr, Luiz G P de Almeida, Otavio J Brustolini, Cynthia C Cardoso, Alexandra L Gerber, Ana Paula de C Guimarães, Diana Mariani, Covid19-UFRJ Workgroup, Luis Cristóvão Pôrto, Renato S Aguiar, Terezinha M P P Castiñeiras, Orlando C. Ferreira, Amílcar Tanuri, Ana Tereza R de Vasconcelos                                         |
| EPI_ISL_623106, EPI_ISL_623107, EPI_ISL_623108, EPI_ISL_623109, EPI_ISL_623110, EPI_ISL_623111, EPI_ISL_623112, EPI_ISL_623113, EPI_ISL_623114, EPI_ISL_623115, EPI_ISL_623116, EPI_ISL_623117, EPI_ISL_623118, EPI_ISL_623119, EPI_ISL_623120, EPI_ISL_623121, EPI_ISL_623122, EPI_ISL_623123, EPI_ISL_623124, EPI_ISL_623125, EPI_ISL_623126, EPI_ISL_623127, EPI_ISL_623128, EPI_ISL_623129, EPI_ISL_623130, EPI_ISL_623131, EPI_ISL_623132, EPI_ISL_623133, EPI_ISL_623134, EPI_ISL_623135, EPI_ISL_623136, EPI_ISL_623137, EPI_ISL_623138, EPI_ISL_623139, EPI_ISL_623140, EPI_ISL_623141, EPI_ISL_623142, EPI_ISL_623143, EPI_ISL_623144, EPI_ISL_623145, EPI_ISL_623146, EPI_ISL_623147, EPI_ISL_623148, EPI_ISL_623149, EPI_ISL_623150, EPI_ISL_623151, EPI_ISL_623152, EPI_ISL_623153, EPI_ISL_623154, EPI_ISL_623155, EPI_ISL_623156, EPI_ISL_623157, EPI_ISL_623158, EPI_ISL_623159, EPI_ISL_623160, EPI_ISL_623161, EPI_ISL_623162, EPI_ISL_623163, EPI_ISL_623164, EPI_ISL_623165, EPI_ISL_623166, EPI_ISL_623167, EPI_ISL_623168, EPI_ISL_623169                                                                                                                                                                                                                                                                                                                                                                                                                                                                                                                                                                                                                                                                                                                                                                                                                                                                                                                                                                                                                                                                                                                                                                                                                                                                                                                                                                                                                                                                                                                                                                                                                                                                                                                                                                                                                                                                                                                                                                                                                                                                                                                                                                                                                                                                                                                                                                                                                                                                                                                                                                                                                                                                                                                                                                                                                                                                                                                                                                                                                                                                                                                                                                                                                                                                                                                                                                                                                                                                                                                                                                                                                                                                                                                                                                                                                                                                                                                                                                                                                                                                                                                                                                                                                                                                                                                                                                                                                                                                                                                                                                                                                                                                                                                                                                                                                                                                                                                                                                                                                                                                                                                                                                                                                                                                                                                                                                                                                                                                                                                                                                                                                                 | Laboratorio de Virologia Molecular / UFRJ                               | Bioinformatics Laboratory / LNCC                                                                                                                                                                                                                                                                                                                                          |
| see above                                                                                                                                                                                                                                                                                                                                                                                                                                                                                                                                                                                                                                                                                                                                                                                                                                                                                                                                                                                                                                                                                                                                                                                                                                                                                                                                                                                                                                                                                                                                                                                                                                                                                                                                                                                                                                                                                                                                                                                                                                                                                                                                                                                                                                                                                                                                                                                                                                                                                                                                                                                                                                                                                                                                                                                                                                                                                                                                                                                                                                                                                                                                                                                                                                                                                                                                                                                                                                                                                                                                                                                                                                                                                                                                                                                                                                                                                                                                                                                                                                                                                                                                                                                                                                                                                                                                                                                                                                                                                                                                                                                                                                                                                                                                                                                                                                                                                                                                                                                                                                                                                                                                                                                                                                                                                                                                                                                                                                                                                                                                                                                                                                                                                                                                                                                                                                                                                                                                                                                                                                                                                                                                                                                                                                                                                                                                                                                                                                                                                                                                                                                                                                                                                      |                                                                         | Carolina M Voloch, Ronaldo S Francisco Jr, Luiz G P de Almeida, Otavio J Brustolini, Cynthia C Cardoso, Alexandra L Gerber, Ana Paula de C Guimarães, Diana Mariani, Covid19-UFRJ Workgroup, Luis Cristóvão Pôrto, Renato S Aguiar, Terezinha M P P Castiñeiras, Orlando C. Ferreira, Amílcar Tanuri, Ana Tereza R de Vasconcelos                                         |
| EPI_ISL_625478, EPI_ISL_625479, EPI_ISL_625480, EPI_ISL_625481, EPI_ISL_625482, EPI_ISL_625483, EPI_ISL_625484, EPI_ISL_625485, EPI_ISL_625486, EPI_ISL_625487, EPI_ISL_625488, EPI_ISL_625489, EPI_ISL_625490, EPI_ISL_625491, EPI_ISL_625492, EPI_ISL_625493, EPI_ISL_625494, EPI_ISL_625495, EPI_ISL_625496, EPI_ISL_625497, EPI_ISL_625498, EPI_ISL_625499                                                                                                                                                                                                                                                                                                                                                                                                                                                                                                                                                                                                                                                                                                                                                                                                                                                                                                                                                                                                                                                                                                                                                                                                                                                                                                                                                                                                                                                                                                                                                                                                                                                                                                                                                                                                                                                                                                                                                                                                                                                                                                                                                                                                                                                                                                                                                                                                                                                                                                                                                                                                                                                                                                                                                                                                                                                                                                                                                                                                                                                                                                                                                                                                                                                                                                                                                                                                                                                                                                                                                                                                                                                                                                                                                                                                                                                                                                                                                                                                                                                                                                                                                                                                                                                                                                                                                                                                                                                                                                                                                                                                                                                                                                                                                                                                                                                                                                                                                                                                                                                                                                                                                                                                                                                                                                                                                                                                                                                                                                                                                                                                                                                                                                                                                                                                                                                                                                                                                                                                                                                                                                                                                                                                                                                                                                                                 | Santa Clara County Public Health Laboratory                             | Chan-Zuckerberg Biohub                                                                                                                                                                                                                                                                                                                                                    |
| see above                                                                                                                                                                                                                                                                                                                                                                                                                                                                                                                                                                                                                                                                                                                                                                                                                                                                                                                                                                                                                                                                                                                                                                                                                                                                                                                                                                                                                                                                                                                                                                                                                                                                                                                                                                                                                                                                                                                                                                                                                                                                                                                                                                                                                                                                                                                                                                                                                                                                                                                                                                                                                                                                                                                                                                                                                                                                                                                                                                                                                                                                                                                                                                                                                                                                                                                                                                                                                                                                                                                                                                                                                                                                                                                                                                                                                                                                                                                                                                                                                                                                                                                                                                                                                                                                                                                                                                                                                                                                                                                                                                                                                                                                                                                                                                                                                                                                                                                                                                                                                                                                                                                                                                                                                                                                                                                                                                                                                                                                                                                                                                                                                                                                                                                                                                                                                                                                                                                                                                                                                                                                                                                                                                                                                                                                                                                                                                                                                                                                                                                                                                                                                                                                                      |                                                                         | CZB Ciliahub Consortium                                                                                                                                                                                                                                                                                                                                                   |
| EPI_ISL_625500, EPI_ISL_625501, EPI_ISL_625502, EPI_ISL_625503, EPI_ISL_625504, EPI_ISL_625505, EPI_ISL_625506, EPI_ISL_625507, EPI_ISL_625508, EPI_ISL_625509, EPI_ISL_625510, EPI_ISL_625511, EPI_ISL_625512, EPI_ISL_625513, EPI_ISL_625514, EPI_ISL_625515, EPI_ISL_625516, EPI_ISL_625517, EPI_ISL_625518, EPI_ISL_625519, EPI_ISL_625520, EPI_ISL_625521, EPI_ISL_625522, EPI_ISL_625523, EPI_ISL_625524, EPI_ISL_625525, EPI_ISL_625526, EPI_ISL_625527, EPI_ISL_625528, EPI_ISL_625529, EPI_ISL_625530, EPI_ISL_625531, EPI_ISL_625532, EPI_ISL_625533, EPI_ISL_625534, EPI_ISL_625535, EPI_ISL_625536, EPI_ISL_625537, EPI_ISL_625538, EPI_ISL_625539, EPI_ISL_625540, EPI_ISL_625541, EPI_ISL_625542, EPI_ISL_625543, EPI_ISL_625544, EPI_ISL_625545, EPI_ISL_625546                                                                                                                                                                                                                                                                                                                                                                                                                                                                                                                                                                                                                                                                                                                                                                                                                                                                                                                                                                                                                                                                                                                                                                                                                                                                                                                                                                                                                                                                                                                                                                                                                                                                                                                                                                                                                                                                                                                                                                                                                                                                                                                                                                                                                                                                                                                                                                                                                                                                                                                                                                                                                                                                                                                                                                                                                                                                                                                                                                                                                                                                                                                                                                                                                                                                                                                                                                                                                                                                                                                                                                                                                                                                                                                                                                                                                                                                                                                                                                                                                                                                                                                                                                                                                                                                                                                                                                                                                                                                                                                                                                                                                                                                                                                                                                                                                                                                                                                                                                                                                                                                                                                                                                                                                                                                                                                                                                                                                                                                                                                                                                                                                                                                                                                                                                                                                                                                                                                 | Alameda County Public Health Lab                                        | Chan-Zuckerberg Biohub                                                                                                                                                                                                                                                                                                                                                    |
| see above                                                                                                                                                                                                                                                                                                                                                                                                                                                                                                                                                                                                                                                                                                                                                                                                                                                                                                                                                                                                                                                                                                                                                                                                                                                                                                                                                                                                                                                                                                                                                                                                                                                                                                                                                                                                                                                                                                                                                                                                                                                                                                                                                                                                                                                                                                                                                                                                                                                                                                                                                                                                                                                                                                                                                                                                                                                                                                                                                                                                                                                                                                                                                                                                                                                                                                                                                                                                                                                                                                                                                                                                                                                                                                                                                                                                                                                                                                                                                                                                                                                                                                                                                                                                                                                                                                                                                                                                                                                                                                                                                                                                                                                                                                                                                                                                                                                                                                                                                                                                                                                                                                                                                                                                                                                                                                                                                                                                                                                                                                                                                                                                                                                                                                                                                                                                                                                                                                                                                                                                                                                                                                                                                                                                                                                                                                                                                                                                                                                                                                                                                                                                                                                                                      | County of San Luis Obispo Public Health Laboratory                      | Chan-Zuckerberg Biohub                                                                                                                                                                                                                                                                                                                                                    |
| EPI_ISL_625550, EPI_ISL_625551, EPI_ISL_625552, EPI_ISL_625553, EPI_ISL_625554, EPI_ISL_625555, EPI_ISL_625556, EPI_ISL_625557, EPI_ISL_625558                                                                                                                                                                                                                                                                                                                                                                                                                                                                                                                                                                                                                                                                                                                                                                                                                                                                                                                                                                                                                                                                                                                                                                                                                                                                                                                                                                                                                                                                                                                                                                                                                                                                                                                                                                                                                                                                                                                                                                                                                                                                                                                                                                                                                                                                                                                                                                                                                                                                                                                                                                                                                                                                                                                                                                                                                                                                                                                                                                                                                                                                                                                                                                                                                                                                                                                                                                                                                                                                                                                                                                                                                                                                                                                                                                                                                                                                                                                                                                                                                                                                                                                                                                                                                                                                                                                                                                                                                                                                                                                                                                                                                                                                                                                                                                                                                                                                                                                                                                                                                                                                                                                                                                                                                                                                                                                                                                                                                                                                                                                                                                                                                                                                                                                                                                                                                                                                                                                                                                                                                                                                                                                                                                                                                                                                                                                                                                                                                                                                                                                                                 | UCSF Clinical Microbiology Laboratory                                   | Chan-Zuckerberg Biohub                                                                                                                                                                                                                                                                                                                                                    |
| see above                                                                                                                                                                                                                                                                                                                                                                                                                                                                                                                                                                                                                                                                                                                                                                                                                                                                                                                                                                                                                                                                                                                                                                                                                                                                                                                                                                                                                                                                                                                                                                                                                                                                                                                                                                                                                                                                                                                                                                                                                                                                                                                                                                                                                                                                                                                                                                                                                                                                                                                                                                                                                                                                                                                                                                                                                                                                                                                                                                                                                                                                                                                                                                                                                                                                                                                                                                                                                                                                                                                                                                                                                                                                                                                                                                                                                                                                                                                                                                                                                                                                                                                                                                                                                                                                                                                                                                                                                                                                                                                                                                                                                                                                                                                                                                                                                                                                                                                                                                                                                                                                                                                                                                                                                                                                                                                                                                                                                                                                                                                                                                                                                                                                                                                                                                                                                                                                                                                                                                                                                                                                                                                                                                                                                                                                                                                                                                                                                                                                                                                                                                                                                                                                                      |                                                                         | CZB Ciliahub Consortium                                                                                                                                                                                                                                                                                                                                                   |
| EPI_ISL_625559, EPI_ISL_625560, EPI_ISL_625561, EPI_ISL_625562, EPI_ISL_625563, EPI_ISL_625564, EPI_ISL_625565, EPI_ISL_625566, EPI_ISL_625567, EPI_ISL_625568, EPI_ISL_625569, EPI_ISL_625570, EPI_ISL_625571, EPI_ISL_625572, EPI_ISL_625573, EPI_ISL_625574, EPI_ISL_625575, EPI_ISL_625576, EPI_ISL_625577, EPI_ISL_625578, EPI_ISL_625579, EPI_ISL_625580, EPI_ISL_625581, EPI_ISL_625582, EPI_ISL_625583, EPI_ISL_625584, EPI_ISL_625585, EPI_ISL_625586, EPI_ISL_625587, EPI_ISL_625588, EPI_ISL_625589, EPI_ISL_625590, EPI_ISL_625591, EPI_ISL_625592, EPI_ISL_625593                                                                                                                                                                                                                                                                                                                                                                                                                                                                                                                                                                                                                                                                                                                                                                                                                                                                                                                                                                                                                                                                                                                                                                                                                                                                                                                                                                                                                                                                                                                                                                                                                                                                                                                                                                                                                                                                                                                                                                                                                                                                                                                                                                                                                                                                                                                                                                                                                                                                                                                                                                                                                                                                                                                                                                                                                                                                                                                                                                                                                                                                                                                                                                                                                                                                                                                                                                                                                                                                                                                                                                                                                                                                                                                                                                                                                                                                                                                                                                                                                                                                                                                                                                                                                                                                                                                                                                                                                                                                                                                                                                                                                                                                                                                                                                                                                                                                                                                                                                                                                                                                                                                                                                                                                                                                                                                                                                                                                                                                                                                                                                                                                                                                                                                                                                                                                                                                                                                                                                                                                                                                                                                 | NaN                                                                     | Chan-Zuckerberg Biohub                                                                                                                                                                                                                                                                                                                                                    |
| see above                                                                                                                                                                                                                                                                                                                                                                                                                                                                                                                                                                                                                                                                                                                                                                                                                                                                                                                                                                                                                                                                                                                                                                                                                                                                                                                                                                                                                                                                                                                                                                                                                                                                                                                                                                                                                                                                                                                                                                                                                                                                                                                                                                                                                                                                                                                                                                                                                                                                                                                                                                                                                                                                                                                                                                                                                                                                                                                                                                                                                                                                                                                                                                                                                                                                                                                                                                                                                                                                                                                                                                                                                                                                                                                                                                                                                                                                                                                                                                                                                                                                                                                                                                                                                                                                                                                                                                                                                                                                                                                                                                                                                                                                                                                                                                                                                                                                                                                                                                                                                                                                                                                                                                                                                                                                                                                                                                                                                                                                                                                                                                                                                                                                                                                                                                                                                                                                                                                                                                                                                                                                                                                                                                                                                                                                                                                                                                                                                                                                                                                                                                                                                                                                                      |                                                                         | CZB Ciliahub Consortium                                                                                                                                                                                                                                                                                                                                                   |
| EPI_ISL_625594, EPI_ISL_625595, EPI_ISL_625596, EPI_ISL_625597, EPI_ISL_625598, EPI_ISL_625599, EPI_ISL_625600, EPI_ISL_625601, EPI_ISL_625602, EPI_ISL_625603, EPI_ISL_625604, EPI_ISL_625605, EPI_ISL_625606, EPI_ISL_625607, EPI_ISL_625608, EPI_ISL_625609, EPI_ISL_625610                                                                                                                                                                                                                                                                                                                                                                                                                                                                                                                                                                                                                                                                                                                                                                                                                                                                                                                                                                                                                                                                                                                                                                                                                                                                                                                                                                                                                                                                                                                                                                                                                                                                                                                                                                                                                                                                                                                                                                                                                                                                                                                                                                                                                                                                                                                                                                                                                                                                                                                                                                                                                                                                                                                                                                                                                                                                                                                                                                                                                                                                                                                                                                                                                                                                                                                                                                                                                                                                                                                                                                                                                                                                                                                                                                                                                                                                                                                                                                                                                                                                                                                                                                                                                                                                                                                                                                                                                                                                                                                                                                                                                                                                                                                                                                                                                                                                                                                                                                                                                                                                                                                                                                                                                                                                                                                                                                                                                                                                                                                                                                                                                                                                                                                                                                                                                                                                                                                                                                                                                                                                                                                                                                                                                                                                                                                                                                                                                 |                                                                         |                                                                                                                                                                                                                                                                                                                                                                           |

|                                                                                                                                                                                                                                                                                                                                                                                                                                                                                                                                                                                                                                                                                                                                                                                                                                                                                                                                                                                                                                                                                                                                                                                                                                                                                                                                                                                                                                                                                                                                                                                                                                                                                                                                                                                                                                                                                                                |                                                                         |                                                                                   |                                                                                                                                                                                                                                                                                                                                                                          |
|----------------------------------------------------------------------------------------------------------------------------------------------------------------------------------------------------------------------------------------------------------------------------------------------------------------------------------------------------------------------------------------------------------------------------------------------------------------------------------------------------------------------------------------------------------------------------------------------------------------------------------------------------------------------------------------------------------------------------------------------------------------------------------------------------------------------------------------------------------------------------------------------------------------------------------------------------------------------------------------------------------------------------------------------------------------------------------------------------------------------------------------------------------------------------------------------------------------------------------------------------------------------------------------------------------------------------------------------------------------------------------------------------------------------------------------------------------------------------------------------------------------------------------------------------------------------------------------------------------------------------------------------------------------------------------------------------------------------------------------------------------------------------------------------------------------------------------------------------------------------------------------------------------------|-------------------------------------------------------------------------|-----------------------------------------------------------------------------------|--------------------------------------------------------------------------------------------------------------------------------------------------------------------------------------------------------------------------------------------------------------------------------------------------------------------------------------------------------------------------|
| see above                                                                                                                                                                                                                                                                                                                                                                                                                                                                                                                                                                                                                                                                                                                                                                                                                                                                                                                                                                                                                                                                                                                                                                                                                                                                                                                                                                                                                                                                                                                                                                                                                                                                                                                                                                                                                                                                                                      | Santa Clara County Public Health Laboratory                             | Chan-Zuckerberg Biohub                                                            | CZB Ciiahub Consortium                                                                                                                                                                                                                                                                                                                                                   |
| EPI_ISL_625611, EPI_ISL_625612, EPI_ISL_625613, EPI_ISL_625614, EPI_ISL_625615, EPI_ISL_625616, EPI_ISL_625617, EPI_ISL_625618, EPI_ISL_625619, EPI_ISL_625620, EPI_ISL_625621, EPI_ISL_625622                                                                                                                                                                                                                                                                                                                                                                                                                                                                                                                                                                                                                                                                                                                                                                                                                                                                                                                                                                                                                                                                                                                                                                                                                                                                                                                                                                                                                                                                                                                                                                                                                                                                                                                 |                                                                         |                                                                                   |                                                                                                                                                                                                                                                                                                                                                                          |
| see above                                                                                                                                                                                                                                                                                                                                                                                                                                                                                                                                                                                                                                                                                                                                                                                                                                                                                                                                                                                                                                                                                                                                                                                                                                                                                                                                                                                                                                                                                                                                                                                                                                                                                                                                                                                                                                                                                                      | Alameda County Public Health Lab                                        | Chan-Zuckerberg Biohub                                                            | CZB Ciiahub Consortium                                                                                                                                                                                                                                                                                                                                                   |
| EPI_ISL_625623, EPI_ISL_625624, EPI_ISL_625625, EPI_ISL_625626                                                                                                                                                                                                                                                                                                                                                                                                                                                                                                                                                                                                                                                                                                                                                                                                                                                                                                                                                                                                                                                                                                                                                                                                                                                                                                                                                                                                                                                                                                                                                                                                                                                                                                                                                                                                                                                 | County of San Luis Obispo Public Health Laboratory                      | Chan-Zuckerberg Biohub                                                            | CZB Ciiahub Consortium                                                                                                                                                                                                                                                                                                                                                   |
| EPI_ISL_625627, EPI_ISL_625628, EPI_ISL_625629, EPI_ISL_625630, EPI_ISL_625631, EPI_ISL_625632, EPI_ISL_625633, EPI_ISL_625634, EPI_ISL_625635, EPI_ISL_625636, EPI_ISL_625637, EPI_ISL_625638, EPI_ISL_625639, EPI_ISL_625640, EPI_ISL_625641, EPI_ISL_625642, EPI_ISL_625643, EPI_ISL_625644, EPI_ISL_625645, EPI_ISL_625646, EPI_ISL_625647, EPI_ISL_625648, EPI_ISL_625649, EPI_ISL_625650, EPI_ISL_625651, EPI_ISL_625652, EPI_ISL_625653, EPI_ISL_625654, EPI_ISL_625655, EPI_ISL_625656, EPI_ISL_625657, EPI_ISL_625658, EPI_ISL_625659                                                                                                                                                                                                                                                                                                                                                                                                                                                                                                                                                                                                                                                                                                                                                                                                                                                                                                                                                                                                                                                                                                                                                                                                                                                                                                                                                                 |                                                                         |                                                                                   |                                                                                                                                                                                                                                                                                                                                                                          |
| see above                                                                                                                                                                                                                                                                                                                                                                                                                                                                                                                                                                                                                                                                                                                                                                                                                                                                                                                                                                                                                                                                                                                                                                                                                                                                                                                                                                                                                                                                                                                                                                                                                                                                                                                                                                                                                                                                                                      | Orange County Public Health Lab                                         | Chan-Zuckerberg Biohub                                                            | CZB Ciiahub Consortium                                                                                                                                                                                                                                                                                                                                                   |
| EPI_ISL_625660                                                                                                                                                                                                                                                                                                                                                                                                                                                                                                                                                                                                                                                                                                                                                                                                                                                                                                                                                                                                                                                                                                                                                                                                                                                                                                                                                                                                                                                                                                                                                                                                                                                                                                                                                                                                                                                                                                 | San Joaquin County Public Health Lab                                    | Chan-Zuckerberg Biohub                                                            | CZB Ciiahub Consortium                                                                                                                                                                                                                                                                                                                                                   |
| EPI_ISL_625661, EPI_ISL_625662, EPI_ISL_625663, EPI_ISL_625664, EPI_ISL_625665, EPI_ISL_625666, EPI_ISL_625667, EPI_ISL_625668, EPI_ISL_625669, EPI_ISL_625670                                                                                                                                                                                                                                                                                                                                                                                                                                                                                                                                                                                                                                                                                                                                                                                                                                                                                                                                                                                                                                                                                                                                                                                                                                                                                                                                                                                                                                                                                                                                                                                                                                                                                                                                                 | UCSF Clinical Microbiology Laboratory                                   | Chan-Zuckerberg Biohub                                                            | CZB Ciiahub Consortium                                                                                                                                                                                                                                                                                                                                                   |
| EPI_ISL_626865, EPI_ISL_627055, EPI_ISL_627222, EPI_ISL_627864, EPI_ISL_627895, EPI_ISL_627931, EPI_ISL_628277, EPI_ISL_628289, EPI_ISL_637437, EPI_ISL_638104, EPI_ISL_638109, EPI_ISL_639064, EPI_ISL_639174, EPI_ISL_639450, EPI_ISL_639492, EPI_ISL_639581                                                                                                                                                                                                                                                                                                                                                                                                                                                                                                                                                                                                                                                                                                                                                                                                                                                                                                                                                                                                                                                                                                                                                                                                                                                                                                                                                                                                                                                                                                                                                                                                                                                 |                                                                         |                                                                                   |                                                                                                                                                                                                                                                                                                                                                                          |
| see above                                                                                                                                                                                                                                                                                                                                                                                                                                                                                                                                                                                                                                                                                                                                                                                                                                                                                                                                                                                                                                                                                                                                                                                                                                                                                                                                                                                                                                                                                                                                                                                                                                                                                                                                                                                                                                                                                                      | Wales Specialist Virology Centre Sequencing lab: Pathogen Genomics Unit | COVID-19 Genomics UK (COG-UK) Consortium                                          | Catherine Moore, Johnathan Evans, Laura Gifford, Malorie Perry, Simon Cottrell, Angela Marchbank, Alec Birchley, Alexander Adams, Amy Gaskin, Bree Gatica-Wilcox, Jason Coombes, Joel Southgate, Lauren Gilbert, Lee Graham, Nicole Pacchiari, Sara Kumziene-Summerhayes, Sarah Taylor, Sophie Jones, Sara Rey, Matthew Bull, Joanne Watkins, Sally Corden, Tom Connor   |
| EPI_ISL_640337, EPI_ISL_640391, EPI_ISL_640519, EPI_ISL_640583, EPI_ISL_640588, EPI_ISL_640607, EPI_ISL_640763, EPI_ISL_640784, EPI_ISL_640939, EPI_ISL_640942, EPI_ISL_641012, EPI_ISL_641017, EPI_ISL_641088, EPI_ISL_641102, EPI_ISL_641121, EPI_ISL_641125, EPI_ISL_641273                                                                                                                                                                                                                                                                                                                                                                                                                                                                                                                                                                                                                                                                                                                                                                                                                                                                                                                                                                                                                                                                                                                                                                                                                                                                                                                                                                                                                                                                                                                                                                                                                                 |                                                                         |                                                                                   |                                                                                                                                                                                                                                                                                                                                                                          |
| see above                                                                                                                                                                                                                                                                                                                                                                                                                                                                                                                                                                                                                                                                                                                                                                                                                                                                                                                                                                                                                                                                                                                                                                                                                                                                                                                                                                                                                                                                                                                                                                                                                                                                                                                                                                                                                                                                                                      | Victorian Infectious Diseases Reference Laboratory (VIDRL)              | VIDRL and MDU-PHL                                                                 | Caly L., Seemann T., Sait, M.L., Schultz M.B., Druce J., Sherry, N.L.                                                                                                                                                                                                                                                                                                    |
| EPI_ISL_648303, EPI_ISL_648304, EPI_ISL_648305, EPI_ISL_648306, EPI_ISL_648307, EPI_ISL_648308, EPI_ISL_648309, EPI_ISL_648310, EPI_ISL_648311, EPI_ISL_648312, EPI_ISL_648313, EPI_ISL_648314, EPI_ISL_648315, EPI_ISL_648316, EPI_ISL_648317, EPI_ISL_648318, EPI_ISL_648319, EPI_ISL_648320, EPI_ISL_648321, EPI_ISL_648322, EPI_ISL_648323, EPI_ISL_648324, EPI_ISL_648325, EPI_ISL_648326, EPI_ISL_648327, EPI_ISL_648328, EPI_ISL_648329, EPI_ISL_648330, EPI_ISL_648331, EPI_ISL_648332, EPI_ISL_648333, EPI_ISL_648334, EPI_ISL_648335, EPI_ISL_648336, EPI_ISL_648337, EPI_ISL_648338, EPI_ISL_648339, EPI_ISL_648340, EPI_ISL_648341, EPI_ISL_648342, EPI_ISL_648343, EPI_ISL_648344, EPI_ISL_648345, EPI_ISL_648346, EPI_ISL_648347, EPI_ISL_648348, EPI_ISL_648349, EPI_ISL_648350, EPI_ISL_648351, EPI_ISL_648352, EPI_ISL_648353, EPI_ISL_648354, EPI_ISL_648355, EPI_ISL_648356, EPI_ISL_648357, EPI_ISL_648358, EPI_ISL_648359, EPI_ISL_648360, EPI_ISL_648361, EPI_ISL_648362, EPI_ISL_648363, EPI_ISL_648364, EPI_ISL_648365, EPI_ISL_648366, EPI_ISL_648367, EPI_ISL_648368, EPI_ISL_648369, EPI_ISL_648370, EPI_ISL_648371, EPI_ISL_648372, EPI_ISL_648373, EPI_ISL_648374, EPI_ISL_648375, EPI_ISL_648376, EPI_ISL_648377, EPI_ISL_648378, EPI_ISL_648379                                                                                                                                                                                                                                                                                                                                                                                                                                                                                                                                                                                                                                 |                                                                         |                                                                                   |                                                                                                                                                                                                                                                                                                                                                                          |
| see above                                                                                                                                                                                                                                                                                                                                                                                                                                                                                                                                                                                                                                                                                                                                                                                                                                                                                                                                                                                                                                                                                                                                                                                                                                                                                                                                                                                                                                                                                                                                                                                                                                                                                                                                                                                                                                                                                                      | Laboratorio de Investigaciones de Baney                                 | University Hospital Basel, Clinical Bacteriology                                  | Carlos Cortes, Claudia Daubenberger, Adrian Egli, Guillermo Garcia, Salome Hosch, Bonifacio Manguire Nlavo, Alfredo Mari, Maximilian Mpina, Elizabeth Nyakarungu, Diosdado Odjama Nseng Ada, Mitoha Ondo O Ayekaba, Tim Roloff, Tobias Schindler, Helena Seth-Smith, Madlen Stange, Philip Wonder Phiri                                                                  |
| EPI_ISL_648381, EPI_ISL_648382, EPI_ISL_648383, EPI_ISL_648384, EPI_ISL_648385, EPI_ISL_648386, EPI_ISL_648387, EPI_ISL_648388, EPI_ISL_648389, EPI_ISL_648390, EPI_ISL_648391, EPI_ISL_648392, EPI_ISL_648393, EPI_ISL_648394, EPI_ISL_648395, EPI_ISL_648396, EPI_ISL_648397, EPI_ISL_648398, EPI_ISL_648399, EPI_ISL_648400, EPI_ISL_648401, EPI_ISL_648402, EPI_ISL_648403, EPI_ISL_648404, EPI_ISL_648405, EPI_ISL_648406, EPI_ISL_648407, EPI_ISL_648408, EPI_ISL_648409, EPI_ISL_648410, EPI_ISL_648411, EPI_ISL_648412, EPI_ISL_648413, EPI_ISL_648414, EPI_ISL_648415, EPI_ISL_648416, EPI_ISL_648417, EPI_ISL_648418, EPI_ISL_648419, EPI_ISL_648420, EPI_ISL_648421, EPI_ISL_648422, EPI_ISL_648423, EPI_ISL_648424, EPI_ISL_648425, EPI_ISL_648426, EPI_ISL_648427, EPI_ISL_648428, EPI_ISL_648429, EPI_ISL_648430, EPI_ISL_648431, EPI_ISL_648432, EPI_ISL_648433, EPI_ISL_648434, EPI_ISL_648435, EPI_ISL_648436, EPI_ISL_648437, EPI_ISL_648438, EPI_ISL_648439, EPI_ISL_648440, EPI_ISL_648441, EPI_ISL_648442, EPI_ISL_648443, EPI_ISL_648444, EPI_ISL_648445, EPI_ISL_648446, EPI_ISL_648447, EPI_ISL_648448, EPI_ISL_648449, EPI_ISL_648450, EPI_ISL_648451, EPI_ISL_648452, EPI_ISL_648453, EPI_ISL_648454, EPI_ISL_648455, EPI_ISL_648456, EPI_ISL_648457, EPI_ISL_648458, EPI_ISL_648459, EPI_ISL_648460, EPI_ISL_648461, EPI_ISL_648462, EPI_ISL_648463, EPI_ISL_648464, EPI_ISL_648465, EPI_ISL_648466, EPI_ISL_648467, EPI_ISL_648468, EPI_ISL_648469, EPI_ISL_648470, EPI_ISL_648471, EPI_ISL_648472, EPI_ISL_648473, EPI_ISL_648474, EPI_ISL_648475, EPI_ISL_648476, EPI_ISL_648477, EPI_ISL_648478, EPI_ISL_648479, EPI_ISL_648480, EPI_ISL_648481, EPI_ISL_648482, EPI_ISL_648483, EPI_ISL_648484, EPI_ISL_648485, EPI_ISL_648486, EPI_ISL_648487, EPI_ISL_648488, EPI_ISL_648489, EPI_ISL_648490, EPI_ISL_648491, EPI_ISL_648492, EPI_ISL_648493, EPI_ISL_648494, EPI_ISL_648495 |                                                                         |                                                                                   |                                                                                                                                                                                                                                                                                                                                                                          |
| see above                                                                                                                                                                                                                                                                                                                                                                                                                                                                                                                                                                                                                                                                                                                                                                                                                                                                                                                                                                                                                                                                                                                                                                                                                                                                                                                                                                                                                                                                                                                                                                                                                                                                                                                                                                                                                                                                                                      | Santa Clara County Public Health Laboratory                             | Chan-Zuckerberg Biohub                                                            | CZB Ciiahub Consortium                                                                                                                                                                                                                                                                                                                                                   |
| EPI_ISL_648496, EPI_ISL_648497, EPI_ISL_648498, EPI_ISL_648499, EPI_ISL_648500, EPI_ISL_648501, EPI_ISL_648502, EPI_ISL_648503, EPI_ISL_648504, EPI_ISL_648505, EPI_ISL_648506, EPI_ISL_648507, EPI_ISL_648508, EPI_ISL_648509, EPI_ISL_648510, EPI_ISL_648511, EPI_ISL_648512, EPI_ISL_648513, EPI_ISL_648514, EPI_ISL_648515, EPI_ISL_648516, EPI_ISL_648517, EPI_ISL_648518, EPI_ISL_648519, EPI_ISL_648520, EPI_ISL_648521, EPI_ISL_648522, EPI_ISL_648523, EPI_ISL_648524, EPI_ISL_648525, EPI_ISL_648526, EPI_ISL_648527, EPI_ISL_648528, EPI_ISL_648529, EPI_ISL_648530                                                                                                                                                                                                                                                                                                                                                                                                                                                                                                                                                                                                                                                                                                                                                                                                                                                                                                                                                                                                                                                                                                                                                                                                                                                                                                                                 |                                                                         |                                                                                   |                                                                                                                                                                                                                                                                                                                                                                          |
| see above                                                                                                                                                                                                                                                                                                                                                                                                                                                                                                                                                                                                                                                                                                                                                                                                                                                                                                                                                                                                                                                                                                                                                                                                                                                                                                                                                                                                                                                                                                                                                                                                                                                                                                                                                                                                                                                                                                      | Orange County Public Health Lab                                         | Chan-Zuckerberg Biohub                                                            | CZB Ciiahub Consortium                                                                                                                                                                                                                                                                                                                                                   |
| EPI_ISL_648531, EPI_ISL_648532, EPI_ISL_648533, EPI_ISL_648534, EPI_ISL_648535, EPI_ISL_648536, EPI_ISL_648537, EPI_ISL_648538, EPI_ISL_648539, EPI_ISL_648540, EPI_ISL_648541                                                                                                                                                                                                                                                                                                                                                                                                                                                                                                                                                                                                                                                                                                                                                                                                                                                                                                                                                                                                                                                                                                                                                                                                                                                                                                                                                                                                                                                                                                                                                                                                                                                                                                                                 |                                                                         |                                                                                   |                                                                                                                                                                                                                                                                                                                                                                          |
| see above                                                                                                                                                                                                                                                                                                                                                                                                                                                                                                                                                                                                                                                                                                                                                                                                                                                                                                                                                                                                                                                                                                                                                                                                                                                                                                                                                                                                                                                                                                                                                                                                                                                                                                                                                                                                                                                                                                      | Tulare County Public Health Lab                                         | Chan-Zuckerberg Biohub                                                            | CZB Ciiahub Consortium                                                                                                                                                                                                                                                                                                                                                   |
| EPI_ISL_648542                                                                                                                                                                                                                                                                                                                                                                                                                                                                                                                                                                                                                                                                                                                                                                                                                                                                                                                                                                                                                                                                                                                                                                                                                                                                                                                                                                                                                                                                                                                                                                                                                                                                                                                                                                                                                                                                                                 | Santa Clara County Public Health Laboratory                             | Chan-Zuckerberg Biohub                                                            | CZB Ciiahub Consortium                                                                                                                                                                                                                                                                                                                                                   |
| EPI_ISL_648543, EPI_ISL_648544                                                                                                                                                                                                                                                                                                                                                                                                                                                                                                                                                                                                                                                                                                                                                                                                                                                                                                                                                                                                                                                                                                                                                                                                                                                                                                                                                                                                                                                                                                                                                                                                                                                                                                                                                                                                                                                                                 | UCSF Clinical Microbiology Laboratory                                   | Chan-Zuckerberg Biohub                                                            | CZB Ciiahub Consortium                                                                                                                                                                                                                                                                                                                                                   |
| EPI_ISL_648545, EPI_ISL_648546, EPI_ISL_648547, EPI_ISL_648548, EPI_ISL_648549, EPI_ISL_648550, EPI_ISL_648551, EPI_ISL_648552, EPI_ISL_648553, EPI_ISL_648554                                                                                                                                                                                                                                                                                                                                                                                                                                                                                                                                                                                                                                                                                                                                                                                                                                                                                                                                                                                                                                                                                                                                                                                                                                                                                                                                                                                                                                                                                                                                                                                                                                                                                                                                                 | Madera County Department of Public Health                               | Chan-Zuckerberg Biohub                                                            | CZB Ciiahub Consortium                                                                                                                                                                                                                                                                                                                                                   |
| EPI_ISL_649155, EPI_ISL_649156, EPI_ISL_649157, EPI_ISL_649158, EPI_ISL_649159, EPI_ISL_649160, EPI_ISL_649161, EPI_ISL_649162, EPI_ISL_649163, EPI_ISL_649164, EPI_ISL_649165, EPI_ISL_649166, EPI_ISL_649167, EPI_ISL_649168, EPI_ISL_649169, EPI_ISL_649170, EPI_ISL_649171, EPI_ISL_649172                                                                                                                                                                                                                                                                                                                                                                                                                                                                                                                                                                                                                                                                                                                                                                                                                                                                                                                                                                                                                                                                                                                                                                                                                                                                                                                                                                                                                                                                                                                                                                                                                 |                                                                         |                                                                                   |                                                                                                                                                                                                                                                                                                                                                                          |
| see above                                                                                                                                                                                                                                                                                                                                                                                                                                                                                                                                                                                                                                                                                                                                                                                                                                                                                                                                                                                                                                                                                                                                                                                                                                                                                                                                                                                                                                                                                                                                                                                                                                                                                                                                                                                                                                                                                                      | Laboratorio de Investigaciones de Baney                                 | University Hospital Basel, Clinical Bacteriology                                  | Carlos Cortes, Claudia Daubenberger, Adrian Egli, Guillermo Garcia, Salome Hosch, Bonifacio Manguire Nlavo, Alfredo Mari, Maximilian Mpina, Elizabeth Nyakarungu, Diosdado Odjama Nseng Ada, Mitoha Ondo O Ayekaba, Tim Roloff, Tobias Schindler, Helena Seth-Smith, Madlen Stange, Philip Wonder Phiri                                                                  |
| EPI_ISL_651457, EPI_ISL_651459, EPI_ISL_652474, EPI_ISL_652516, EPI_ISL_652522, EPI_ISL_652532, EPI_ISL_652534                                                                                                                                                                                                                                                                                                                                                                                                                                                                                                                                                                                                                                                                                                                                                                                                                                                                                                                                                                                                                                                                                                                                                                                                                                                                                                                                                                                                                                                                                                                                                                                                                                                                                                                                                                                                 | Wales Specialist Virology Centre Sequencing lab: Pathogen Genomics Unit | COVID-19 Genomics UK (COG-UK) Consortium                                          | Catherine Moore, Johnathan Evans, Laura Gifford, Malorie Perry, Simon Cottrell, Angela Marchbank, Alec Birchley, Alexander Adams, Amy Gaskin, Bree Gatica-Wilcox, Jason Coombes, Joel Southgate, Lauren Gilbert, Lee Graham, Nicole Pacchiari, Sara Kumziene-Summerhayes, Sarah Taylor, Sophie Jones, Sara Rey, Matthew Bull, Joanne Watkins, Sally Corden, Tom Connor   |
| EPI_ISL_654866                                                                                                                                                                                                                                                                                                                                                                                                                                                                                                                                                                                                                                                                                                                                                                                                                                                                                                                                                                                                                                                                                                                                                                                                                                                                                                                                                                                                                                                                                                                                                                                                                                                                                                                                                                                                                                                                                                 | Pasteur Institute in Ho Chi Minh city                                   | Department of Microbiology and Immunology - Pasteur Institute in Ho Chi Minh city | Cao Minh Thng, Phm Th Thu Hng, V Phm Hng Nhung, ào Huy Mnh, Hnh Th Kim Loan, Nguny Hoång Qũn, Hnh Phng Tho, Hoång Nh ào, Nguny Trung Hiu, Nguny Hoång Anh, Nguny Thu Ngc, Nguny Trng Toån, Nguny Th Ngc Tho, ng Thanh Giang, Nguny Th Thanh Thng, Hoång Minh, Trn Th Hng Kim, Nguny Thanh Long, Phm Duy Quang, Lng Chn Quang, Hoång Quc Cng, Nguny V Thng, Phan Trng Lån |
| EPI_ISL_660108                                                                                                                                                                                                                                                                                                                                                                                                                                                                                                                                                                                                                                                                                                                                                                                                                                                                                                                                                                                                                                                                                                                                                                                                                                                                                                                                                                                                                                                                                                                                                                                                                                                                                                                                                                                                                                                                                                 | Santa Clara County Public Health Laboratory                             | Chan-Zuckerberg Biohub                                                            | CZB Ciiahub Consortium                                                                                                                                                                                                                                                                                                                                                   |
| EPI_ISL_665573, EPI_ISL_666118, EPI_ISL_666149, EPI_ISL_666163, EPI_ISL_666167, EPI_ISL_666246, EPI_ISL_666292, EPI_ISL_666349, EPI_ISL_666396, EPI_ISL_666525, EPI_ISL_666570                                                                                                                                                                                                                                                                                                                                                                                                                                                                                                                                                                                                                                                                                                                                                                                                                                                                                                                                                                                                                                                                                                                                                                                                                                                                                                                                                                                                                                                                                                                                                                                                                                                                                                                                 |                                                                         |                                                                                   |                                                                                                                                                                                                                                                                                                                                                                          |
| see above                                                                                                                                                                                                                                                                                                                                                                                                                                                                                                                                                                                                                                                                                                                                                                                                                                                                                                                                                                                                                                                                                                                                                                                                                                                                                                                                                                                                                                                                                                                                                                                                                                                                                                                                                                                                                                                                                                      | Wales Specialist Virology Centre Sequencing lab: Pathogen Genomics Unit | COVID-19 Genomics UK (COG-UK) Consortium                                          | Catherine Moore, Johnathan Evans, Laura Gifford, Malorie Perry, Simon Cottrell, Angela Marchbank, Alec Birchley, Alexander Adams, Amy Gaskin, Bree Gatica-Wilcox, Jason Coombes, Joel Southgate, Lauren Gilbert, Lee Graham, Nicole Pacchiari, Sara Kumziene-Summerhayes, Sarah Taylor, Sophie Jones, Sara Rey, Matthew Bull, Joanne Watkins, Sally Corden, Tom Connor   |
| EPI_ISL_671337, EPI_ISL_671338, EPI_ISL_671339, EPI_ISL_671340, EPI_ISL_671341, EPI_ISL_671342, EPI_ISL_671343, EPI_ISL_671344, EPI_ISL_671345, EPI_ISL_671346, EPI_ISL_671347, EPI_ISL_671348, EPI_ISL_671349, EPI_ISL_671350, EPI_ISL_671351, EPI_ISL_671352, EPI_ISL_671353, EPI_ISL_671354, EPI_ISL_671355, EPI_ISL_671356, EPI_ISL_671357, EPI_ISL_671358                                                                                                                                                                                                                                                                                                                                                                                                                                                                                                                                                                                                                                                                                                                                                                                                                                                                                                                                                                                                                                                                                                                                                                                                                                                                                                                                                                                                                                                                                                                                                 |                                                                         |                                                                                   |                                                                                                                                                                                                                                                                                                                                                                          |
| see above                                                                                                                                                                                                                                                                                                                                                                                                                                                                                                                                                                                                                                                                                                                                                                                                                                                                                                                                                                                                                                                                                                                                                                                                                                                                                                                                                                                                                                                                                                                                                                                                                                                                                                                                                                                                                                                                                                      | National Virus Reference Laboratory                                     | Irish Coronavirus Sequencing Consortium - Teagasc Moorepark                       | Calm Walsh, Genuity Ireland                                                                                                                                                                                                                                                                                                                                              |
| EPI_ISL_671359, EPI_ISL_671360, EPI_ISL_671361, EPI_ISL_671362, EPI_ISL_671363, EPI_ISL_671364, EPI_ISL_671365, EPI_ISL_671366, EPI_ISL_671367, EPI_ISL_671368, EPI_ISL_671369, EPI_ISL_671370, EPI_ISL_671371, EPI_ISL_671372, EPI_ISL_671373, EPI_ISL_671374, EPI_ISL_671375, EPI_ISL_671376, EPI_ISL_671377, EPI_ISL_671378, EPI_ISL_671379, EPI_ISL_671380, EPI_ISL_671381, EPI_ISL_671382, EPI_ISL_671383, EPI_ISL_671384, EPI_ISL_671385, EPI_ISL_671386, EPI_ISL_671387, EPI_ISL_671388, EPI_ISL_671389, EPI_ISL_671390, EPI_ISL_671391, EPI_ISL_671392, EPI_ISL_671393, EPI_ISL_671394, EPI_ISL_671395, EPI_ISL_671396, EPI_ISL_671397, EPI_ISL_671398, EPI_ISL_671399, EPI_ISL_671400, EPI_ISL_671401, EPI_ISL_671402, EPI_ISL_671403                                                                                                                                                                                                                                                                                                                                                                                                                                                                                                                                                                                                                                                                                                                                                                                                                                                                                                                                                                                                                                                                                                                                                                 |                                                                         |                                                                                   |                                                                                                                                                                                                                                                                                                                                                                          |

| see above                                      | National Virus Reference Laboratory                | Irish Coronavirus Sequencing Consortium - Teagasc Moorepark | Calum Walsh, Fiona Crispie, John Kenny, Paul Cotter |
|------------------------------------------------|----------------------------------------------------|-------------------------------------------------------------|-----------------------------------------------------|
| EPI_ISL_672013                                 | Santa Clara County Public Health Laboratory        | Chan-Zuckerberg Biohub                                      | CZB Ciiahub Consortium                              |
| EPI_ISL_672014                                 | Alameda County Public Health Lab                   | Chan-Zuckerberg Biohub                                      | CZB Ciiahub Consortium                              |
| EPI_ISL_672015, EPI_ISL_672016                 | UCSF Clinical Microbiology Laboratory              | Chan-Zuckerberg Biohub                                      | CZB Ciiahub Consortium                              |
| EPI_ISL_672017                                 | The Ashley Laboratory, Stanford University         | Chan-Zuckerberg Biohub                                      | CZB Ciiahub Consortium                              |
| EPI_ISL_672018                                 | UCSF Clinical Microbiology Laboratory              | Chan-Zuckerberg Biohub                                      | CZB Ciiahub Consortium                              |
| EPI_ISL_672019                                 | Madera County Department of Public Health          | Chan-Zuckerberg Biohub                                      | CZB Ciiahub Consortium                              |
| EPI_ISL_672020, EPI_ISL_672021                 | UCSF Clinical Microbiology Laboratory              | Chan-Zuckerberg Biohub                                      | CZB Ciiahub Consortium                              |
| EPI_ISL_672022                                 | Madera County Department of Public Health          | Chan-Zuckerberg Biohub                                      | CZB Ciiahub Consortium                              |
| EPI_ISL_672023, EPI_ISL_672024                 | Alameda County Public Health Lab                   | Chan-Zuckerberg Biohub                                      | CZB Ciiahub Consortium                              |
| EPI_ISL_672025                                 | UCSF Clinical Microbiology Laboratory              | Chan-Zuckerberg Biohub                                      | CZB Ciiahub Consortium                              |
| EPI_ISL_672026                                 | Madera County Department of Public Health          | Chan-Zuckerberg Biohub                                      | CZB Ciiahub Consortium                              |
| EPI_ISL_672027                                 | The Ashley Laboratory, Stanford University         | Chan-Zuckerberg Biohub                                      | CZB Ciiahub Consortium                              |
| EPI_ISL_672028                                 | County of San Luis Obispo Public Health Laboratory | Chan-Zuckerberg Biohub                                      | CZB Ciiahub Consortium                              |
| EPI_ISL_672029                                 | Alameda County Public Health Lab                   | Chan-Zuckerberg Biohub                                      | CZB Ciiahub Consortium                              |
| EPI_ISL_672030                                 | The Ashley Laboratory, Stanford University         | Chan-Zuckerberg Biohub                                      | CZB Ciiahub Consortium                              |
| EPI_ISL_672031                                 | Santa Clara County Public Health Laboratory        | Chan-Zuckerberg Biohub                                      | CZB Ciiahub Consortium                              |
| EPI_ISL_672032                                 | Alameda County Public Health Lab                   | Chan-Zuckerberg Biohub                                      | CZB Ciiahub Consortium                              |
| EPI_ISL_672033, EPI_ISL_672035                 | Santa Clara County Public Health Laboratory        | Chan-Zuckerberg Biohub                                      | CZB Ciiahub Consortium                              |
| EPI_ISL_672036                                 | Alameda County Public Health Lab                   | Chan-Zuckerberg Biohub                                      | CZB Ciiahub Consortium                              |
| EPI_ISL_672037                                 | Madera County Department of Public Health          | Chan-Zuckerberg Biohub                                      | CZB Ciiahub Consortium                              |
| EPI_ISL_672038, EPI_ISL_672039, EPI_ISL_672040 | Alameda County Public Health Lab                   | Chan-Zuckerberg Biohub                                      | CZB Ciiahub Consortium                              |
| EPI_ISL_672041                                 | Madera County Department of Public Health          | Chan-Zuckerberg Biohub                                      | CZB Ciiahub Consortium                              |
| EPI_ISL_672042                                 | The Ashley Laboratory, Stanford University         | Chan-Zuckerberg Biohub                                      | CZB Ciiahub Consortium                              |
| EPI_ISL_672043, EPI_ISL_672044                 | Santa Clara County Public Health Laboratory        | Chan-Zuckerberg Biohub                                      | CZB Ciiahub Consortium                              |
| EPI_ISL_672045                                 | Alameda County Public Health Lab                   | Chan-Zuckerberg Biohub                                      | CZB Ciiahub Consortium                              |
| EPI_ISL_672046                                 | Madera County Department of Public Health          | Chan-Zuckerberg Biohub                                      | CZB Ciiahub Consortium                              |
| EPI_ISL_672047                                 | The Ashley Laboratory, Stanford University         | Chan-Zuckerberg Biohub                                      | CZB Ciiahub Consortium                              |
| EPI_ISL_672048                                 | Madera County Department of Public Health          | Chan-Zuckerberg Biohub                                      | CZB Ciiahub Consortium                              |
| EPI_ISL_672049                                 | The Ashley Laboratory, Stanford University         | Chan-Zuckerberg Biohub                                      | CZB Ciiahub Consortium                              |
| EPI_ISL_672050                                 | Alameda County Public Health Lab                   | Chan-Zuckerberg Biohub                                      | CZB Ciiahub Consortium                              |
| EPI_ISL_672051                                 | The Ashley Laboratory, Stanford University         | Chan-Zuckerberg Biohub                                      | CZB Ciiahub Consortium                              |
| EPI_ISL_672052                                 | Santa Clara County Public Health Laboratory        | Chan-Zuckerberg Biohub                                      | CZB Ciiahub Consortium                              |
| EPI_ISL_672053, EPI_ISL_672054                 | Alameda County Public Health Lab                   | Chan-Zuckerberg Biohub                                      | CZB Ciiahub Consortium                              |
| EPI_ISL_672055, EPI_ISL_672056                 | The Ashley Laboratory, Stanford University         | Chan-Zuckerberg Biohub                                      | CZB Ciiahub Consortium                              |
| EPI_ISL_672057                                 | Santa Clara County Public Health Laboratory        | Chan-Zuckerberg Biohub                                      | CZB Ciiahub Consortium                              |
| EPI_ISL_672058                                 | The Ashley Laboratory, Stanford University         | Chan-Zuckerberg Biohub                                      | CZB Ciiahub Consortium                              |
| EPI_ISL_672059                                 | Madera County Department of Public Health          | Chan-Zuckerberg Biohub                                      | CZB Ciiahub Consortium                              |
| EPI_ISL_672060                                 | Alameda County Public Health Lab                   | Chan-Zuckerberg Biohub                                      | CZB Ciiahub Consortium                              |
| EPI_ISL_672061                                 | The Ashley Laboratory, Stanford University         | Chan-Zuckerberg Biohub                                      | CZB Ciiahub Consortium                              |
| EPI_ISL_672062                                 | Alameda County Public Health Lab                   | Chan-Zuckerberg Biohub                                      | CZB Ciiahub Consortium                              |
| EPI_ISL_672063                                 | The Ashley Laboratory, Stanford University         | Chan-Zuckerberg Biohub                                      | CZB Ciiahub Consortium                              |
| EPI_ISL_672064                                 | Alameda County Public Health Lab                   | Chan-Zuckerberg Biohub                                      | CZB Ciiahub Consortium                              |
| EPI_ISL_672065                                 | Santa Clara County Public Health Laboratory        | Chan-Zuckerberg Biohub                                      | CZB Ciiahub Consortium                              |
| EPI_ISL_672066                                 | Alameda County Public Health Lab                   | Chan-Zuckerberg Biohub                                      | CZB Ciiahub Consortium                              |
| EPI_ISL_672067                                 | Madera County Department of Public Health          | Chan-Zuckerberg Biohub                                      | CZB Ciiahub Consortium                              |
| EPI_ISL_672068                                 | County of San Luis Obispo Public Health Laboratory | Chan-Zuckerberg Biohub                                      | CZB Ciiahub Consortium                              |
| EPI_ISL_672069, EPI_ISL_672070                 | Santa Clara County Public Health Laboratory        | Chan-Zuckerberg Biohub                                      | CZB Ciiahub Consortium                              |
| EPI_ISL_672071                                 | The Ashley Laboratory, Stanford University         | Chan-Zuckerberg Biohub                                      | CZB Ciiahub Consortium                              |
| EPI_ISL_672072, EPI_ISL_672073                 | Santa Clara County Public Health Laboratory        | Chan-Zuckerberg Biohub                                      | CZB Ciiahub Consortium                              |
| EPI_ISL_672074                                 | The Ashley Laboratory, Stanford University         | Chan-Zuckerberg Biohub                                      | CZB Ciiahub Consortium                              |
| EPI_ISL_672075                                 | Orange County Public Health Lab                    | Chan-Zuckerberg Biohub                                      | CZB Ciiahub Consortium                              |
| EPI_ISL_672076                                 | Alameda County Public Health Lab                   | Chan-Zuckerberg Biohub                                      | CZB Ciiahub Consortium                              |
| EPI_ISL_672077                                 | San Francisco Public Health Laboratory             | Chan-Zuckerberg Biohub                                      | CZB Ciiahub Consortium                              |
| EPI_ISL_672078                                 | Alameda County Public Health Lab                   | Chan-Zuckerberg Biohub                                      | CZB Ciiahub Consortium                              |
| EPI_ISL_672079                                 | The Ashley Laboratory, Stanford University         | Chan-Zuckerberg Biohub                                      | CZB Ciiahub Consortium                              |
| EPI_ISL_672080                                 | Santa Clara County Public Health Laboratory        | Chan-Zuckerberg Biohub                                      | CZB Ciiahub Consortium                              |



|                                                                                                                                                                                                                                                                                                                                                                                                                                                                                                                                                                                                                                                                                                                                                                                                                                                                                                                                                                                                                                |                                                                         |                                                                     |                                                                                                                                                                                                                                                                                                                                                                          |                         |
|--------------------------------------------------------------------------------------------------------------------------------------------------------------------------------------------------------------------------------------------------------------------------------------------------------------------------------------------------------------------------------------------------------------------------------------------------------------------------------------------------------------------------------------------------------------------------------------------------------------------------------------------------------------------------------------------------------------------------------------------------------------------------------------------------------------------------------------------------------------------------------------------------------------------------------------------------------------------------------------------------------------------------------|-------------------------------------------------------------------------|---------------------------------------------------------------------|--------------------------------------------------------------------------------------------------------------------------------------------------------------------------------------------------------------------------------------------------------------------------------------------------------------------------------------------------------------------------|-------------------------|
| EPI_ISL_672475, EPI_ISL_672476                                                                                                                                                                                                                                                                                                                                                                                                                                                                                                                                                                                                                                                                                                                                                                                                                                                                                                                                                                                                 |                                                                         |                                                                     |                                                                                                                                                                                                                                                                                                                                                                          |                         |
| see above                                                                                                                                                                                                                                                                                                                                                                                                                                                                                                                                                                                                                                                                                                                                                                                                                                                                                                                                                                                                                      | Alameda County Public Health Lab                                        | Chan-Zuckerberg Biohub                                              |                                                                                                                                                                                                                                                                                                                                                                          | CZB Ciliahub Consortium |
| EPI_ISL_672477, EPI_ISL_672478, EPI_ISL_672479, EPI_ISL_672480, EPI_ISL_672481, EPI_ISL_672482, EPI_ISL_672483, EPI_ISL_672484, EPI_ISL_672485, EPI_ISL_672486, EPI_ISL_672487                                                                                                                                                                                                                                                                                                                                                                                                                                                                                                                                                                                                                                                                                                                                                                                                                                                 |                                                                         |                                                                     |                                                                                                                                                                                                                                                                                                                                                                          |                         |
| see above                                                                                                                                                                                                                                                                                                                                                                                                                                                                                                                                                                                                                                                                                                                                                                                                                                                                                                                                                                                                                      | Orange County Public Health Lab                                         | Chan-Zuckerberg Biohub                                              |                                                                                                                                                                                                                                                                                                                                                                          | CZB Ciliahub Consortium |
| EPI_ISL_672488, EPI_ISL_672489                                                                                                                                                                                                                                                                                                                                                                                                                                                                                                                                                                                                                                                                                                                                                                                                                                                                                                                                                                                                 | Contra Costa County Public Health Lab                                   | Chan-Zuckerberg Biohub                                              |                                                                                                                                                                                                                                                                                                                                                                          | CZB Ciliahub Consortium |
| EPI_ISL_672490, EPI_ISL_672491, EPI_ISL_672492, EPI_ISL_672493, EPI_ISL_672494, EPI_ISL_672495, EPI_ISL_672496, EPI_ISL_672497, EPI_ISL_672498, EPI_ISL_672499, EPI_ISL_672500, EPI_ISL_672501                                                                                                                                                                                                                                                                                                                                                                                                                                                                                                                                                                                                                                                                                                                                                                                                                                 |                                                                         |                                                                     |                                                                                                                                                                                                                                                                                                                                                                          |                         |
| see above                                                                                                                                                                                                                                                                                                                                                                                                                                                                                                                                                                                                                                                                                                                                                                                                                                                                                                                                                                                                                      | UCSF Clinical Microbiology Laboratory                                   | Chan-Zuckerberg Biohub                                              |                                                                                                                                                                                                                                                                                                                                                                          | CZB Ciliahub Consortium |
| EPI_ISL_672502, EPI_ISL_672503, EPI_ISL_672504, EPI_ISL_672505, EPI_ISL_672506, EPI_ISL_672507, EPI_ISL_672508, EPI_ISL_672509, EPI_ISL_672510, EPI_ISL_672511, EPI_ISL_672512, EPI_ISL_672513, EPI_ISL_672514, EPI_ISL_672515, EPI_ISL_672516, EPI_ISL_672517, EPI_ISL_672518, EPI_ISL_672519, EPI_ISL_672520, EPI_ISL_672521, EPI_ISL_672522, EPI_ISL_672523, EPI_ISL_672524, EPI_ISL_672525, EPI_ISL_672526, EPI_ISL_672527, EPI_ISL_672528, EPI_ISL_672529, EPI_ISL_672530                                                                                                                                                                                                                                                                                                                                                                                                                                                                                                                                                 |                                                                         |                                                                     |                                                                                                                                                                                                                                                                                                                                                                          |                         |
| see above                                                                                                                                                                                                                                                                                                                                                                                                                                                                                                                                                                                                                                                                                                                                                                                                                                                                                                                                                                                                                      | Madera County Department of Public Health                               | Chan-Zuckerberg Biohub                                              |                                                                                                                                                                                                                                                                                                                                                                          | CZB Ciliahub Consortium |
| EPI_ISL_680622, EPI_ISL_680776, EPI_ISL_681205, EPI_ISL_681206                                                                                                                                                                                                                                                                                                                                                                                                                                                                                                                                                                                                                                                                                                                                                                                                                                                                                                                                                                 | Wales Specialist Virology Centre Sequencing lab: Pathogen Genomics Unit | COVID-19 Genomics UK (COG-UK) Consortium                            | Catherine Moore, Johnathan Evans, Laura Gifford, Malorie Perry, Simon Cottrell, Angela Marchbank, Alec Birchley, Alexander Adams, Amy Gaskin, Bree Gatica-Wilcox, Jason Coombes, Joel Southgate, Lauren Gilbert, Lee Graham, Nicole Pacchiarini, Sara Kumziene-Summerhayes, Sarah Taylor, Sophie Jones, Sara Rey, Matthew Bull, Joanne Watkins, Sally Corden, Tom Connor |                         |
| EPI_ISL_691612, EPI_ISL_691613, EPI_ISL_691614, EPI_ISL_691615, EPI_ISL_691616, EPI_ISL_691617, EPI_ISL_691618, EPI_ISL_691619, EPI_ISL_691620, EPI_ISL_691621, EPI_ISL_691622, EPI_ISL_691624, EPI_ISL_691625, EPI_ISL_691626, EPI_ISL_691627, EPI_ISL_691628, EPI_ISL_691629, EPI_ISL_691630, EPI_ISL_691631, EPI_ISL_691632, EPI_ISL_691633, EPI_ISL_691634, EPI_ISL_691635, EPI_ISL_691636, EPI_ISL_691637, EPI_ISL_691638, EPI_ISL_691641, EPI_ISL_691642, EPI_ISL_691643, EPI_ISL_691644, EPI_ISL_691645, EPI_ISL_691646, EPI_ISL_691647, EPI_ISL_691648, EPI_ISL_691649, EPI_ISL_691650, EPI_ISL_691651, EPI_ISL_691652, EPI_ISL_691653, EPI_ISL_691654, EPI_ISL_691655, EPI_ISL_691656, EPI_ISL_691657, EPI_ISL_691658, EPI_ISL_691659, EPI_ISL_691660, EPI_ISL_691663, EPI_ISL_691664, EPI_ISL_691665, EPI_ISL_691667, EPI_ISL_691668, EPI_ISL_691669, EPI_ISL_691670, EPI_ISL_691671, EPI_ISL_691672, EPI_ISL_691673, EPI_ISL_691674, EPI_ISL_691675, EPI_ISL_691676, EPI_ISL_691678, EPI_ISL_691679, EPI_ISL_691680 |                                                                         |                                                                     |                                                                                                                                                                                                                                                                                                                                                                          |                         |
| see above                                                                                                                                                                                                                                                                                                                                                                                                                                                                                                                                                                                                                                                                                                                                                                                                                                                                                                                                                                                                                      | Servicio de Microbiología, Hospital Universitario Son Espases           | SeqCOVID-SPAIN consortium/IBV(CSIC)                                 | Carla López-Causapé, Jordi Reina, Antonio Oliver and SeqCOVID-SPAIN consortium                                                                                                                                                                                                                                                                                           |                         |
| EPI_ISL_705440, EPI_ISL_706463, EPI_ISL_706509, EPI_ISL_706521, EPI_ISL_706690                                                                                                                                                                                                                                                                                                                                                                                                                                                                                                                                                                                                                                                                                                                                                                                                                                                                                                                                                 | Wales Specialist Virology Centre Sequencing lab: Pathogen Genomics Unit | COVID-19 Genomics UK (COG-UK) Consortium                            | Catherine Moore, Johnathan Evans, Laura Gifford, Malorie Perry, Simon Cottrell, Angela Marchbank, Alec Birchley, Alexander Adams, Amy Gaskin, Bree Gatica-Wilcox, Jason Coombes, Joel Southgate, Lauren Gilbert, Lee Graham, Nicole Pacchiarini, Sara Kumziene-Summerhayes, Sarah Taylor, Sophie Jones, Sara Rey, Matthew Bull, Joanne Watkins, Sally Corden, Tom Connor |                         |
| EPI_ISL_710487, EPI_ISL_710488, EPI_ISL_710489, EPI_ISL_710490, EPI_ISL_710491, EPI_ISL_710492                                                                                                                                                                                                                                                                                                                                                                                                                                                                                                                                                                                                                                                                                                                                                                                                                                                                                                                                 | Virology (microbiology), Hospital Universitario Central de Asturias     | Virology (microbiology), Hospital Universitario Central de Asturias | Castello,C., Gomez-deOña,J., Martin-Rodriguez,G., Abreu,F., Costales,I., Boga,J.A., Coto,E., Rojo,S., Alvarez-Arqueelles,M.E., Perez-Martinez,Z., Sandoval,M., Melon,S.                                                                                                                                                                                                  |                         |
| EPI_ISL_717785, EPI_ISL_717786, EPI_ISL_717787, EPI_ISL_717788, EPI_ISL_717789, EPI_ISL_717790                                                                                                                                                                                                                                                                                                                                                                                                                                                                                                                                                                                                                                                                                                                                                                                                                                                                                                                                 | LACEN RJ - Noel Nutels                                                  | Bioinformatics Laboratory / LNCC                                    | Carolina M Voloch, Ronaldo da Silva F Jr, Luiz G P de Almeida, Cynthia C Cardoso, Otavio Bustrolini, Alexandra L Gerber, Ana Paula de C Guimarães, Diana Mariani, Andréa Cony Cavalcanti, Claudia dos Santos Rodrigues, Terezinha M P P Castifeira, Amilcar Tanuri, Ana Tereza R de Vasconcelos                                                                          |                         |
| EPI_ISL_717791                                                                                                                                                                                                                                                                                                                                                                                                                                                                                                                                                                                                                                                                                                                                                                                                                                                                                                                                                                                                                 | Laboratorio de Virologia Molecular / UFRJ                               | Bioinformatics Laboratory / LNCC                                    | Carolina M Voloch, Ronaldo da Silva F Jr, Luiz G P de Almeida, Cynthia C Cardoso, Otavio Bustrolini, Alexandra L Gerber, Ana Paula de C Guimarães, Diana Mariani, Andréa Cony Cavalcanti, Claudia dos Santos Rodrigues, Terezinha M P P Castifeira, Amilcar Tanuri, Ana Tereza R de Vasconcelos                                                                          |                         |
| EPI_ISL_717792                                                                                                                                                                                                                                                                                                                                                                                                                                                                                                                                                                                                                                                                                                                                                                                                                                                                                                                                                                                                                 | LACEN RJ - Noel Nutels                                                  | Bioinformatics Laboratory / LNCC                                    | Carolina M Voloch, Ronaldo da Silva F Jr, Luiz G P de Almeida, Cynthia C Cardoso, Otavio Bustrolini, Alexandra L Gerber, Ana Paula de C Guimarães, Diana Mariani, Andréa Cony Cavalcanti, Claudia dos Santos Rodrigues, Terezinha M P P Castifeira, Amilcar Tanuri, Ana Tereza R de Vasconcelos                                                                          |                         |
| EPI_ISL_717793                                                                                                                                                                                                                                                                                                                                                                                                                                                                                                                                                                                                                                                                                                                                                                                                                                                                                                                                                                                                                 | Laboratorio de Virologia Molecular / UFRJ                               | Bioinformatics Laboratory / LNCC                                    | Carolina M Voloch, Ronaldo da Silva F Jr, Luiz G P de Almeida, Cynthia C Cardoso, Otavio Bustrolini, Alexandra L Gerber, Ana Paula de C Guimarães, Diana Mariani, Andréa Cony Cavalcanti, Claudia dos Santos Rodrigues, Terezinha M P P Castifeira, Amilcar Tanuri, Ana Tereza R de Vasconcelos                                                                          |                         |
| EPI_ISL_717794, EPI_ISL_717795, EPI_ISL_717796, EPI_ISL_717797, EPI_ISL_717798, EPI_ISL_717799, EPI_ISL_717800                                                                                                                                                                                                                                                                                                                                                                                                                                                                                                                                                                                                                                                                                                                                                                                                                                                                                                                 | LACEN RJ - Noel Nutels                                                  | Bioinformatics Laboratory / LNCC                                    | Carolina M Voloch, Ronaldo da Silva F Jr, Luiz G P de Almeida, Cynthia C Cardoso, Otavio Bustrolini, Alexandra L Gerber, Ana Paula de C Guimarães, Diana Mariani, Andréa Cony Cavalcanti, Claudia dos Santos Rodrigues, Terezinha M P P Castifeira, Amilcar Tanuri, Ana Tereza R de Vasconcelos                                                                          |                         |
| EPI_ISL_717801, EPI_ISL_717802                                                                                                                                                                                                                                                                                                                                                                                                                                                                                                                                                                                                                                                                                                                                                                                                                                                                                                                                                                                                 | Laboratorio de Virologia Molecular / UFRJ                               | Bioinformatics Laboratory / LNCC                                    | Carolina M Voloch, Ronaldo da Silva F Jr, Luiz G P de Almeida, Cynthia C Cardoso, Otavio Bustrolini, Alexandra L Gerber, Ana Paula de C Guimarães, Diana Mariani, Andréa Cony Cavalcanti, Claudia dos Santos Rodrigues, Terezinha M P P Castifeira, Amilcar Tanuri, Ana Tereza R de Vasconcelos                                                                          |                         |
| EPI_ISL_717803, EPI_ISL_717804                                                                                                                                                                                                                                                                                                                                                                                                                                                                                                                                                                                                                                                                                                                                                                                                                                                                                                                                                                                                 | LACEN RJ - Noel Nutels                                                  | Bioinformatics Laboratory / LNCC                                    | Carolina M Voloch, Ronaldo da Silva F Jr, Luiz G P de Almeida, Cynthia C Cardoso, Otavio Bustrolini, Alexandra L Gerber, Ana Paula de C Guimarães, Diana Mariani, Andréa Cony Cavalcanti, Claudia dos Santos Rodrigues, Terezinha M P P Castifeira, Amilcar Tanuri, Ana Tereza R de Vasconcelos                                                                          |                         |
| EPI_ISL_717805, EPI_ISL_717806, EPI_ISL_717807, EPI_ISL_717808                                                                                                                                                                                                                                                                                                                                                                                                                                                                                                                                                                                                                                                                                                                                                                                                                                                                                                                                                                 | Laboratorio de Virologia Molecular / UFRJ                               | Bioinformatics Laboratory / LNCC                                    | Carolina M Voloch, Ronaldo da Silva F Jr, Luiz G P de Almeida, Cynthia C Cardoso, Otavio Bustrolini, Alexandra L Gerber, Ana Paula de C Guimarães, Diana Mariani, Andréa Cony Cavalcanti, Claudia dos Santos Rodrigues, Terezinha M P P Castifeira, Amilcar Tanuri, Ana Tereza R de Vasconcelos                                                                          |                         |
| EPI_ISL_717809                                                                                                                                                                                                                                                                                                                                                                                                                                                                                                                                                                                                                                                                                                                                                                                                                                                                                                                                                                                                                 | LACEN Dr. Francisco Rimolo Neto                                         | Bioinformatics Laboratory / LNCC                                    | Carolina M Voloch, Ronaldo da Silva F Jr, Luiz G P de Almeida, Cynthia C Cardoso, Otavio Bustrolini, Alexandra L Gerber, Ana Paula de C Guimarães, Diana Mariani, Andréa Cony Cavalcanti, Claudia dos Santos Rodrigues, Terezinha M P P Castifeira, Amilcar Tanuri, Ana Tereza R de Vasconcelos                                                                          |                         |
| EPI_ISL_717810, EPI_ISL_717811, EPI_ISL_717812, EPI_ISL_717813, EPI_ISL_717814, EPI_ISL_717815, EPI_ISL_717816, EPI_ISL_717817, EPI_ISL_717818, EPI_ISL_717819, EPI_ISL_717820, EPI_ISL_717821, EPI_ISL_717822, EPI_ISL_717823, EPI_ISL_717824, EPI_ISL_717825, EPI_ISL_717826, EPI_ISL_717827, EPI_ISL_717828, EPI_ISL_717829, EPI_ISL_717830, EPI_ISL_717831                                                                                                                                                                                                                                                                                                                                                                                                                                                                                                                                                                                                                                                                 |                                                                         |                                                                     |                                                                                                                                                                                                                                                                                                                                                                          |                         |
| see above                                                                                                                                                                                                                                                                                                                                                                                                                                                                                                                                                                                                                                                                                                                                                                                                                                                                                                                                                                                                                      | Laboratorio de Virologia Molecular / UFRJ                               | Bioinformatics Laboratory / LNCC                                    | Carolina M Voloch, Ronaldo da Silva F Jr, Luiz G P de Almeida, Cynthia C Cardoso, Otavio Bustrolini, Alexandra L Gerber, Ana Paula de C Guimarães, Diana Mariani, Andréa Cony Cavalcanti, Claudia dos Santos Rodrigues, Terezinha M P P Castifeira, Amilcar Tanuri, Ana Tereza R de Vasconcelos                                                                          |                         |
| EPI_ISL_717832, EPI_ISL_717833, EPI_ISL_717834, EPI_ISL_717835, EPI_ISL_717836                                                                                                                                                                                                                                                                                                                                                                                                                                                                                                                                                                                                                                                                                                                                                                                                                                                                                                                                                 | LACEN Dr. Francisco Rimolo Neto                                         | Bioinformatics Laboratory / LNCC                                    | Carolina M Voloch, Ronaldo da Silva F Jr, Luiz G P de Almeida, Cynthia C Cardoso, Otavio Bustrolini, Alexandra L Gerber, Ana Paula de C Guimarães, Diana Mariani, Andréa Cony Cavalcanti, Claudia dos Santos Rodrigues, Terezinha M P P Castifeira, Amilcar Tanuri, Ana Tereza R de Vasconcelos                                                                          |                         |
| EPI_ISL_717837, EPI_ISL_717838, EPI_ISL_717839, EPI_ISL_717840                                                                                                                                                                                                                                                                                                                                                                                                                                                                                                                                                                                                                                                                                                                                                                                                                                                                                                                                                                 | Laboratorio de Virologia Molecular / UFRJ                               | Bioinformatics Laboratory / LNCC                                    | Carolina M Voloch, Ronaldo da Silva F Jr, Luiz G P de Almeida, Cynthia C Cardoso, Otavio Bustrolini, Alexandra L Gerber, Ana Paula de C Guimarães, Diana Mariani, Andréa Cony Cavalcanti, Claudia dos Santos Rodrigues, Terezinha M P P Castifeira, Amilcar Tanuri, Ana Tereza R de Vasconcelos                                                                          |                         |
| EPI_ISL_717841                                                                                                                                                                                                                                                                                                                                                                                                                                                                                                                                                                                                                                                                                                                                                                                                                                                                                                                                                                                                                 | LACEN Dr. Francisco Rimolo Neto                                         | Bioinformatics Laboratory / LNCC                                    | Carolina M Voloch, Ronaldo da Silva F Jr, Luiz G P de Almeida, Cynthia C Cardoso, Otavio Bustrolini, Alexandra L Gerber, Ana Paula de C Guimarães, Diana Mariani, Andréa Cony Cavalcanti, Claudia dos Santos Rodrigues, Terezinha M P P Castifeira, Amilcar Tanuri, Ana Tereza R de Vasconcelos                                                                          |                         |
| EPI_ISL_717842, EPI_ISL_717843, EPI_ISL_717844, EPI_ISL_717845, EPI_ISL_717846, EPI_ISL_717847, EPI_ISL_717848, EPI_ISL_717849, EPI_ISL_717850, EPI_ISL_717851, EPI_ISL_717852, EPI_ISL_717853, EPI_ISL_717854, EPI_ISL_717855, EPI_ISL_717856, EPI_ISL_717857, EPI_ISL_717858, EPI_ISL_717859, EPI_ISL_717860, EPI_ISL_717861, EPI_ISL_717862, EPI_ISL_717863, EPI_ISL_717864, EPI_ISL_717865, EPI_ISL_717866, EPI_ISL_717867, EPI_ISL_717868, EPI_ISL_717869, EPI_ISL_717870, EPI_ISL_717871, EPI_ISL_717872, EPI_ISL_717873, EPI_ISL_717874, EPI_ISL_717875, EPI_ISL_717876, EPI_ISL_717877, EPI_ISL_717878, EPI_ISL_717879, EPI_ISL_717880, EPI_ISL_717881, EPI_ISL_717882, EPI_ISL_717883, EPI_ISL_717884, EPI_ISL_717885, EPI_ISL_717886, EPI_ISL_717887, EPI_ISL_717888, EPI_ISL_717889, EPI_ISL_717890, EPI_ISL_717891, EPI_ISL_717892, EPI_ISL_717893, EPI_ISL_717894, EPI_ISL_717895, EPI_ISL_717896, EPI_ISL_717897, EPI_ISL_717898                                                                                 |                                                                         |                                                                     |                                                                                                                                                                                                                                                                                                                                                                          |                         |
| see above                                                                                                                                                                                                                                                                                                                                                                                                                                                                                                                                                                                                                                                                                                                                                                                                                                                                                                                                                                                                                      | Laboratorio de Virologia Molecular / UFRJ                               | Bioinformatics Laboratory / LNCC                                    | Carolina M Voloch, Ronaldo da Silva F Jr, Luiz G P de Almeida, Cynthia C Cardoso, Otavio Bustrolini, Alexandra L Gerber, Ana Paula de C Guimarães, Diana Mariani, Andréa Cony Cavalcanti, Claudia dos Santos Rodrigues, Terezinha M P P Castifeira, Amilcar Tanuri, Ana Tereza R de Vasconcelos                                                                          |                         |
| EPI_ISL_717899, EPI_ISL_717900, EPI_ISL_717901, EPI_ISL_717902, EPI_ISL_717903, EPI_ISL_717904, EPI_ISL_717905, EPI_ISL_717906, EPI_ISL_717907, EPI_ISL_717908, EPI_ISL_717909                                                                                                                                                                                                                                                                                                                                                                                                                                                                                                                                                                                                                                                                                                                                                                                                                                                 |                                                                         |                                                                     |                                                                                                                                                                                                                                                                                                                                                                          |                         |
| see above                                                                                                                                                                                                                                                                                                                                                                                                                                                                                                                                                                                                                                                                                                                                                                                                                                                                                                                                                                                                                      | LACEN RJ - Noel Nutels                                                  | Bioinformatics Laboratory / LNCC                                    | Carolina M Voloch, Ronaldo da Silva F Jr, Luiz G P de Almeida, Cynthia C Cardoso, Otavio Bustrolini, Alexandra L Gerber, Ana Paula de C Guimarães, Diana Mariani, Andréa Cony Cavalcanti, Claudia dos Santos Rodrigues, Terezinha M P P Castifeira, Amilcar Tanuri, Ana Tereza R de Vasconcelos                                                                          |                         |
| EPI_ISL_717910, EPI_ISL_717911, EPI_ISL_717912, EPI_ISL_717913, EPI_ISL_717914, EPI_ISL_717915, EPI_ISL_717916, EPI_ISL_717917, EPI_ISL_717918, EPI_ISL_717919                                                                                                                                                                                                                                                                                                                                                                                                                                                                                                                                                                                                                                                                                                                                                                                                                                                                 | LACEN Dr. Francisco Rimolo Neto                                         | Bioinformatics Laboratory / LNCC                                    | Carolina M Voloch, Ronaldo da Silva F Jr, Luiz G P de Almeida, Cynthia C Cardoso, Otavio Bustrolini, Alexandra L Gerber, Ana Paula de C Guimarães, Diana Mariani, Andréa Cony Cavalcanti, Claudia dos Santos Rodrigues, Terezinha M P P Castifeira, Amilcar Tanuri, Ana Tereza R de Vasconcelos                                                                          |                         |
| EPI_ISL_717920, EPI_ISL_717921, EPI_ISL_717922, EPI_ISL_717923, EPI_ISL_717924, EPI_ISL_717925, EPI_ISL_717926, EPI_ISL_717927, EPI_ISL_717928, EPI_ISL_717929, EPI_ISL_717930, EPI_ISL_717931, EPI_ISL_717932, EPI_ISL_717933, EPI_ISL_717934, EPI_ISL_717935, EPI_ISL_717936, EPI_ISL_717937,                                                                                                                                                                                                                                                                                                                                                                                                                                                                                                                                                                                                                                                                                                                                |                                                                         |                                                                     |                                                                                                                                                                                                                                                                                                                                                                          |                         |

|                                                                                                                                                                                                                                                                                                                                                                                                                                                                                                                                                                                                |           |                                                                         |                                                    |                                                                                                                                                                                                                                                                                                                                                                          |
|------------------------------------------------------------------------------------------------------------------------------------------------------------------------------------------------------------------------------------------------------------------------------------------------------------------------------------------------------------------------------------------------------------------------------------------------------------------------------------------------------------------------------------------------------------------------------------------------|-----------|-------------------------------------------------------------------------|----------------------------------------------------|--------------------------------------------------------------------------------------------------------------------------------------------------------------------------------------------------------------------------------------------------------------------------------------------------------------------------------------------------------------------------|
| EPI_ISL_717938, EPI_ISL_717939, EPI_ISL_717940, EPI_ISL_717941, EPI_ISL_717942, EPI_ISL_717943, EPI_ISL_717944, EPI_ISL_717945, EPI_ISL_717946, EPI_ISL_717947, EPI_ISL_717948, EPI_ISL_717949, EPI_ISL_717950, EPI_ISL_717951, EPI_ISL_717952, EPI_ISL_717953, EPI_ISL_717954, EPI_ISL_717955, EPI_ISL_717956, EPI_ISL_717957                                                                                                                                                                                                                                                                 | see above | Laboratorio de Virologia Molecular / UFRJ                               | Bioinformatics Laboratory / LNCC                   | Carolina M Voloch, Ronaldo da Silva F Jr, Luiz G P de Almeida, Cynthia C Cardoso, Otavio Bustrolini, Alexandra L Gerber, Ana Paula de C Guimarães, Diana Mariani, Andréa Cony Cavalcanti, Claudia dos Santos Rodrigues, Terezinha M P P Castilheira, Amílcar Tanuri, Ana Tereza R de Vasconcelos                                                                         |
| EPI_ISL_717958                                                                                                                                                                                                                                                                                                                                                                                                                                                                                                                                                                                 |           | LACEN Dr. Francisco Rimolo Neto                                         | Bioinformatics Laboratory / LNCC                   | Carolina M Voloch, Ronaldo da Silva F Jr, Luiz G P de Almeida, Cynthia C Cardoso, Otavio Bustrolini, Alexandra L Gerber, Ana Paula de C Guimarães, Diana Mariani, Andréa Cony Cavalcanti, Claudia dos Santos Rodrigues, Terezinha M P P Castilheira, Amílcar Tanuri, Ana Tereza R de Vasconcelos                                                                         |
| EPI_ISL_717959, EPI_ISL_717960, EPI_ISL_717961                                                                                                                                                                                                                                                                                                                                                                                                                                                                                                                                                 |           | Laboratorio de Virologia Molecular / UFRJ                               | Bioinformatics Laboratory / LNCC                   | Carolina M Voloch, Ronaldo da Silva F Jr, Luiz G P de Almeida, Cynthia C Cardoso, Otavio Bustrolini, Alexandra L Gerber, Ana Paula de C Guimarães, Diana Mariani, Andréa Cony Cavalcanti, Claudia dos Santos Rodrigues, Terezinha M P P Castilheira, Amílcar Tanuri, Ana Tereza R de Vasconcelos                                                                         |
| EPI_ISL_717962                                                                                                                                                                                                                                                                                                                                                                                                                                                                                                                                                                                 |           | LACEN RJ - Noel Nutels                                                  | Bioinformatics Laboratory / LNCC                   | Carolina M Voloch, Ronaldo da Silva F Jr, Luiz G P de Almeida, Cynthia C Cardoso, Otavio Bustrolini, Alexandra L Gerber, Ana Paula de C Guimarães, Diana Mariani, Andréa Cony Cavalcanti, Claudia dos Santos Rodrigues, Terezinha M P P Castilheira, Amílcar Tanuri, Ana Tereza R de Vasconcelos                                                                         |
| EPI_ISL_717963, EPI_ISL_717964                                                                                                                                                                                                                                                                                                                                                                                                                                                                                                                                                                 |           | LACEN Dr. Francisco Rimolo Neto                                         | Bioinformatics Laboratory / LNCC                   | Carolina M Voloch, Ronaldo da Silva F Jr, Luiz G P de Almeida, Cynthia C Cardoso, Otavio Bustrolini, Alexandra L Gerber, Ana Paula de C Guimarães, Diana Mariani, Andréa Cony Cavalcanti, Claudia dos Santos Rodrigues, Terezinha M P P Castilheira, Amílcar Tanuri, Ana Tereza R de Vasconcelos                                                                         |
| EPI_ISL_723077, EPI_ISL_723078, EPI_ISL_723079, EPI_ISL_723080, EPI_ISL_723081, EPI_ISL_723082, EPI_ISL_723083, EPI_ISL_723084, EPI_ISL_723085, EPI_ISL_723086, EPI_ISL_723087, EPI_ISL_723088, EPI_ISL_723089, EPI_ISL_723090, EPI_ISL_723091, EPI_ISL_723092, EPI_ISL_723093, EPI_ISL_723094, EPI_ISL_723095, EPI_ISL_723096, EPI_ISL_723097, EPI_ISL_723098, EPI_ISL_723099, EPI_ISL_723100, EPI_ISL_723101, EPI_ISL_723102, EPI_ISL_723103, EPI_ISL_723104, EPI_ISL_723105, EPI_ISL_723106, EPI_ISL_723107, EPI_ISL_723108, EPI_ISL_723109, EPI_ISL_723110, EPI_ISL_723111, EPI_ISL_723112 | see above | Institute of Medical Genetics and Applied Genomics                      | Institute of Medical Genetics and Applied Genomics | Caspar Gross, Tina Ganzenmüller, Siri Göpel, Michaela Pogoda, Daniela Bezdán, Michael Sonnabend, Angel Angelov, Nicolas Casadei, Stephan Ossowski, Thomas Iftner, Michael Bitzer                                                                                                                                                                                         |
| EPI_ISL_725674, EPI_ISL_725703, EPI_ISL_725711, EPI_ISL_725743, EPI_ISL_725777, EPI_ISL_725813, EPI_ISL_725939, EPI_ISL_725946, EPI_ISL_725973, EPI_ISL_726107, EPI_ISL_726233, EPI_ISL_726314, EPI_ISL_726325, EPI_ISL_726326, EPI_ISL_726489, EPI_ISL_726548, EPI_ISL_726682, EPI_ISL_726683, EPI_ISL_726805, EPI_ISL_726835, EPI_ISL_726934, EPI_ISL_726973, EPI_ISL_727018, EPI_ISL_727121, EPI_ISL_727129, EPI_ISL_727133, EPI_ISL_727140, EPI_ISL_727200, EPI_ISL_727262, EPI_ISL_727288, EPI_ISL_727309, EPI_ISL_727396, EPI_ISL_727428, EPI_ISL_727437, EPI_ISL_727596, EPI_ISL_727649 | see above | Wales Specialist Virology Centre Sequencing lab: Pathogen Genomics Unit | COVID-19 Genomics UK (COG-UK) Consortium           | Catherine Moore, Johnathan Evans, Laura Gifford, Malorie Perry, Simon Cottrell, Angela Marchbank, Alec Birchley, Alexander Adams, Amy Gaskin, Bree Gatica-Wilcox, Jason Coombes, Joel Southgate, Lauren Gilbert, Lee Graham, Nicole Pacchiarini, Sara Kumziene-Summerhayes, Sarah Taylor, Sophie Jones, Sara Rey, Matthew Bull, Joanne Watkins, Sally Corden, Tom Connor |
| EPI_ISL_738500, EPI_ISL_738501, EPI_ISL_738502                                                                                                                                                                                                                                                                                                                                                                                                                                                                                                                                                 |           | Santa Clara County Public Health Laboratory                             | Chan-Zuckerberg Biohub                             | CZB Ciiahub Consortium                                                                                                                                                                                                                                                                                                                                                   |
| EPI_ISL_738503                                                                                                                                                                                                                                                                                                                                                                                                                                                                                                                                                                                 |           | Orange County Public Health Lab                                         | Chan-Zuckerberg Biohub                             | CZB Ciiahub Consortium                                                                                                                                                                                                                                                                                                                                                   |
| EPI_ISL_738504, EPI_ISL_738505                                                                                                                                                                                                                                                                                                                                                                                                                                                                                                                                                                 |           | Humboldt County Public Health Laboratory                                | Chan-Zuckerberg Biohub                             | CZB Ciiahub Consortium                                                                                                                                                                                                                                                                                                                                                   |
| EPI_ISL_738506                                                                                                                                                                                                                                                                                                                                                                                                                                                                                                                                                                                 |           | Monterey County Public Health Lab                                       | Chan-Zuckerberg Biohub                             | CZB Ciiahub Consortium                                                                                                                                                                                                                                                                                                                                                   |
| EPI_ISL_738507                                                                                                                                                                                                                                                                                                                                                                                                                                                                                                                                                                                 |           | Orange County Public Health Lab                                         | Chan-Zuckerberg Biohub                             | CZB Ciiahub Consortium                                                                                                                                                                                                                                                                                                                                                   |
| EPI_ISL_738508                                                                                                                                                                                                                                                                                                                                                                                                                                                                                                                                                                                 |           | Santa Clara County Public Health Laboratory                             | Chan-Zuckerberg Biohub                             | CZB Ciiahub Consortium                                                                                                                                                                                                                                                                                                                                                   |
| EPI_ISL_738509, EPI_ISL_738510                                                                                                                                                                                                                                                                                                                                                                                                                                                                                                                                                                 |           | Alameda County Public Health Lab                                        | Chan-Zuckerberg Biohub                             | CZB Ciiahub Consortium                                                                                                                                                                                                                                                                                                                                                   |
| EPI_ISL_738511                                                                                                                                                                                                                                                                                                                                                                                                                                                                                                                                                                                 |           | Santa Clara County Public Health Laboratory                             | Chan-Zuckerberg Biohub                             | CZB Ciiahub Consortium                                                                                                                                                                                                                                                                                                                                                   |
| EPI_ISL_738512                                                                                                                                                                                                                                                                                                                                                                                                                                                                                                                                                                                 |           | Napa-Solano-Yolo- Marin County (NSYM) Public Health Laboratories        | Chan-Zuckerberg Biohub                             | CZB Ciiahub Consortium                                                                                                                                                                                                                                                                                                                                                   |
| EPI_ISL_738513, EPI_ISL_738514                                                                                                                                                                                                                                                                                                                                                                                                                                                                                                                                                                 |           | Alameda County Public Health Lab                                        | Chan-Zuckerberg Biohub                             | CZB Ciiahub Consortium                                                                                                                                                                                                                                                                                                                                                   |
| EPI_ISL_738515                                                                                                                                                                                                                                                                                                                                                                                                                                                                                                                                                                                 |           | Orange County Public Health Lab                                         | Chan-Zuckerberg Biohub                             | CZB Ciiahub Consortium                                                                                                                                                                                                                                                                                                                                                   |
| EPI_ISL_738516, EPI_ISL_738517                                                                                                                                                                                                                                                                                                                                                                                                                                                                                                                                                                 |           | Santa Clara County Public Health Laboratory                             | Chan-Zuckerberg Biohub                             | CZB Ciiahub Consortium                                                                                                                                                                                                                                                                                                                                                   |
| EPI_ISL_738518                                                                                                                                                                                                                                                                                                                                                                                                                                                                                                                                                                                 |           | Orange County Public Health Lab                                         | Chan-Zuckerberg Biohub                             | CZB Ciiahub Consortium                                                                                                                                                                                                                                                                                                                                                   |
| EPI_ISL_738519                                                                                                                                                                                                                                                                                                                                                                                                                                                                                                                                                                                 |           | Alameda County Public Health Lab                                        | Chan-Zuckerberg Biohub                             | CZB Ciiahub Consortium                                                                                                                                                                                                                                                                                                                                                   |
| EPI_ISL_738520, EPI_ISL_738521                                                                                                                                                                                                                                                                                                                                                                                                                                                                                                                                                                 |           | Santa Clara County Public Health Laboratory                             | Chan-Zuckerberg Biohub                             | CZB Ciiahub Consortium                                                                                                                                                                                                                                                                                                                                                   |
| EPI_ISL_738522, EPI_ISL_738523, EPI_ISL_738524                                                                                                                                                                                                                                                                                                                                                                                                                                                                                                                                                 |           | Alameda County Public Health Lab                                        | Chan-Zuckerberg Biohub                             | CZB Ciiahub Consortium                                                                                                                                                                                                                                                                                                                                                   |
| EPI_ISL_738525, EPI_ISL_738526                                                                                                                                                                                                                                                                                                                                                                                                                                                                                                                                                                 |           | Santa Clara County Public Health Laboratory                             | Chan-Zuckerberg Biohub                             | CZB Ciiahub Consortium                                                                                                                                                                                                                                                                                                                                                   |
| EPI_ISL_738527, EPI_ISL_738528                                                                                                                                                                                                                                                                                                                                                                                                                                                                                                                                                                 |           | Alameda County Public Health Lab                                        | Chan-Zuckerberg Biohub                             | CZB Ciiahub Consortium                                                                                                                                                                                                                                                                                                                                                   |
| EPI_ISL_738529                                                                                                                                                                                                                                                                                                                                                                                                                                                                                                                                                                                 |           | Orange County Public Health Lab                                         | Chan-Zuckerberg Biohub                             | CZB Ciiahub Consortium                                                                                                                                                                                                                                                                                                                                                   |
| EPI_ISL_738530                                                                                                                                                                                                                                                                                                                                                                                                                                                                                                                                                                                 |           | Humboldt County Public Health Laboratory                                | Chan-Zuckerberg Biohub                             | CZB Ciiahub Consortium                                                                                                                                                                                                                                                                                                                                                   |
| EPI_ISL_738531                                                                                                                                                                                                                                                                                                                                                                                                                                                                                                                                                                                 |           | Alameda County Public Health Lab                                        | Chan-Zuckerberg Biohub                             | CZB Ciiahub Consortium                                                                                                                                                                                                                                                                                                                                                   |
| EPI_ISL_738532, EPI_ISL_738533, EPI_ISL_738534                                                                                                                                                                                                                                                                                                                                                                                                                                                                                                                                                 |           | Santa Clara County Public Health Laboratory                             | Chan-Zuckerberg Biohub                             | CZB Ciiahub Consortium                                                                                                                                                                                                                                                                                                                                                   |
| EPI_ISL_738535                                                                                                                                                                                                                                                                                                                                                                                                                                                                                                                                                                                 |           | Alameda County Public Health Lab                                        | Chan-Zuckerberg Biohub                             | CZB Ciiahub Consortium                                                                                                                                                                                                                                                                                                                                                   |
| EPI_ISL_738536                                                                                                                                                                                                                                                                                                                                                                                                                                                                                                                                                                                 |           | Santa Clara County Public Health Laboratory                             | Chan-Zuckerberg Biohub                             | CZB Ciiahub Consortium                                                                                                                                                                                                                                                                                                                                                   |
| EPI_ISL_738537, EPI_ISL_738538                                                                                                                                                                                                                                                                                                                                                                                                                                                                                                                                                                 |           | Alameda County Public Health Lab                                        | Chan-Zuckerberg Biohub                             | CZB Ciiahub Consortium                                                                                                                                                                                                                                                                                                                                                   |
| EPI_ISL_738539                                                                                                                                                                                                                                                                                                                                                                                                                                                                                                                                                                                 |           | Humboldt County Public Health Laboratory                                | Chan-Zuckerberg Biohub                             | CZB Ciiahub Consortium                                                                                                                                                                                                                                                                                                                                                   |
| EPI_ISL_738540                                                                                                                                                                                                                                                                                                                                                                                                                                                                                                                                                                                 |           | Alameda County Public Health Lab                                        | Chan-Zuckerberg Biohub                             | CZB Ciiahub Consortium                                                                                                                                                                                                                                                                                                                                                   |
| EPI_ISL_738541                                                                                                                                                                                                                                                                                                                                                                                                                                                                                                                                                                                 |           | Napa-Solano-Yolo- Marin County (NSYM) Public Health Laboratories        | Chan-Zuckerberg Biohub                             | CZB Ciiahub Consortium                                                                                                                                                                                                                                                                                                                                                   |
| EPI_ISL_738542, EPI_ISL_738543                                                                                                                                                                                                                                                                                                                                                                                                                                                                                                                                                                 |           | Santa Clara County Public Health Laboratory                             | Chan-Zuckerberg Biohub                             | CZB Ciiahub Consortium                                                                                                                                                                                                                                                                                                                                                   |
| EPI_ISL_738544                                                                                                                                                                                                                                                                                                                                                                                                                                                                                                                                                                                 |           | UCSF Clinical Microbiology Laboratory                                   | Chan-Zuckerberg Biohub                             | CZB Ciiahub Consortium                                                                                                                                                                                                                                                                                                                                                   |
| EPI_ISL_738545                                                                                                                                                                                                                                                                                                                                                                                                                                                                                                                                                                                 |           | Alameda County Public Health Lab                                        | Chan-Zuckerberg Biohub                             | CZB Ciiahub Consortium                                                                                                                                                                                                                                                                                                                                                   |
| EPI_ISL_738546                                                                                                                                                                                                                                                                                                                                                                                                                                                                                                                                                                                 |           | Santa Clara County Public Health Laboratory                             | Chan-Zuckerberg Biohub                             | CZB Ciiahub Consortium                                                                                                                                                                                                                                                                                                                                                   |
| EPI_ISL_738547                                                                                                                                                                                                                                                                                                                                                                                                                                                                                                                                                                                 |           | Alameda County Public Health Lab                                        | Chan-Zuckerberg Biohub                             | CZB Ciiahub Consortium                                                                                                                                                                                                                                                                                                                                                   |
| EPI_ISL_738548                                                                                                                                                                                                                                                                                                                                                                                                                                                                                                                                                                                 |           | Orange County Public Health Lab                                         | Chan-Zuckerberg Biohub                             | CZB Ciiahub Consortium                                                                                                                                                                                                                                                                                                                                                   |
| EPI_ISL_738549, EPI_ISL_738550, EPI_ISL_738551, EPI_ISL_738552                                                                                                                                                                                                                                                                                                                                                                                                                                                                                                                                 |           | Santa Clara County Public Health Laboratory                             | Chan-Zuckerberg Biohub                             | CZB Ciiahub Consortium                                                                                                                                                                                                                                                                                                                                                   |
| EPI_ISL_738553, EPI_ISL_738554                                                                                                                                                                                                                                                                                                                                                                                                                                                                                                                                                                 |           | Alameda County Public Health Lab                                        | Chan-Zuckerberg Biohub                             | CZB Ciiahub Consortium                                                                                                                                                                                                                                                                                                                                                   |
| EPI_ISL_738555, EPI_ISL_738556,                                                                                                                                                                                                                                                                                                                                                                                                                                                                                                                                                                |           | Santa Clara County Public Health Laboratory                             | Chan-Zuckerberg Biohub                             | CZB Ciiahub Consortium                                                                                                                                                                                                                                                                                                                                                   |



































|                                                                                                                                                                                                                                                                                                                                                                                                                                                                                                                                                                                                                                                                                                                                                                                                                                                                                                                                                                                                                                                                                                                                                                                                                                                                                                                                                                                                                                                                                                                                                                                                                                                                                                                                                                                                                                                                                                                                                                                                                                                                                                                                                                                                                                                |                                                                                                                                          |                                                                                  |                                                                                                                                                                                                                                                                                                                                                                          |
|------------------------------------------------------------------------------------------------------------------------------------------------------------------------------------------------------------------------------------------------------------------------------------------------------------------------------------------------------------------------------------------------------------------------------------------------------------------------------------------------------------------------------------------------------------------------------------------------------------------------------------------------------------------------------------------------------------------------------------------------------------------------------------------------------------------------------------------------------------------------------------------------------------------------------------------------------------------------------------------------------------------------------------------------------------------------------------------------------------------------------------------------------------------------------------------------------------------------------------------------------------------------------------------------------------------------------------------------------------------------------------------------------------------------------------------------------------------------------------------------------------------------------------------------------------------------------------------------------------------------------------------------------------------------------------------------------------------------------------------------------------------------------------------------------------------------------------------------------------------------------------------------------------------------------------------------------------------------------------------------------------------------------------------------------------------------------------------------------------------------------------------------------------------------------------------------------------------------------------------------|------------------------------------------------------------------------------------------------------------------------------------------|----------------------------------------------------------------------------------|--------------------------------------------------------------------------------------------------------------------------------------------------------------------------------------------------------------------------------------------------------------------------------------------------------------------------------------------------------------------------|
| EPI_ISL_739639                                                                                                                                                                                                                                                                                                                                                                                                                                                                                                                                                                                                                                                                                                                                                                                                                                                                                                                                                                                                                                                                                                                                                                                                                                                                                                                                                                                                                                                                                                                                                                                                                                                                                                                                                                                                                                                                                                                                                                                                                                                                                                                                                                                                                                 | Tulare County Public Health Lab                                                                                                          | Chan-Zuckerberg Biohub                                                           | CZB Ciiahub Consortium                                                                                                                                                                                                                                                                                                                                                   |
| EPI_ISL_739640                                                                                                                                                                                                                                                                                                                                                                                                                                                                                                                                                                                                                                                                                                                                                                                                                                                                                                                                                                                                                                                                                                                                                                                                                                                                                                                                                                                                                                                                                                                                                                                                                                                                                                                                                                                                                                                                                                                                                                                                                                                                                                                                                                                                                                 | Alameda County Public Health Lab                                                                                                         | Chan-Zuckerberg Biohub                                                           | CZB Ciiahub Consortium                                                                                                                                                                                                                                                                                                                                                   |
| EPI_ISL_739641                                                                                                                                                                                                                                                                                                                                                                                                                                                                                                                                                                                                                                                                                                                                                                                                                                                                                                                                                                                                                                                                                                                                                                                                                                                                                                                                                                                                                                                                                                                                                                                                                                                                                                                                                                                                                                                                                                                                                                                                                                                                                                                                                                                                                                 | Orange County Public Health Lab                                                                                                          | Chan-Zuckerberg Biohub                                                           | CZB Ciiahub Consortium                                                                                                                                                                                                                                                                                                                                                   |
| EPI_ISL_739642                                                                                                                                                                                                                                                                                                                                                                                                                                                                                                                                                                                                                                                                                                                                                                                                                                                                                                                                                                                                                                                                                                                                                                                                                                                                                                                                                                                                                                                                                                                                                                                                                                                                                                                                                                                                                                                                                                                                                                                                                                                                                                                                                                                                                                 | Santa Clara County Public Health Laboratory                                                                                              | Chan-Zuckerberg Biohub                                                           | CZB Ciiahub Consortium                                                                                                                                                                                                                                                                                                                                                   |
| EPI_ISL_739643, EPI_ISL_739644                                                                                                                                                                                                                                                                                                                                                                                                                                                                                                                                                                                                                                                                                                                                                                                                                                                                                                                                                                                                                                                                                                                                                                                                                                                                                                                                                                                                                                                                                                                                                                                                                                                                                                                                                                                                                                                                                                                                                                                                                                                                                                                                                                                                                 | Alameda County Public Health Lab                                                                                                         | Chan-Zuckerberg Biohub                                                           | CZB Ciiahub Consortium                                                                                                                                                                                                                                                                                                                                                   |
| EPI_ISL_739645                                                                                                                                                                                                                                                                                                                                                                                                                                                                                                                                                                                                                                                                                                                                                                                                                                                                                                                                                                                                                                                                                                                                                                                                                                                                                                                                                                                                                                                                                                                                                                                                                                                                                                                                                                                                                                                                                                                                                                                                                                                                                                                                                                                                                                 | Napa-Solano-Yolo- Marin County (NSYM) Public Health Laboratories                                                                         | Chan-Zuckerberg Biohub                                                           | CZB Ciiahub Consortium                                                                                                                                                                                                                                                                                                                                                   |
| EPI_ISL_739646                                                                                                                                                                                                                                                                                                                                                                                                                                                                                                                                                                                                                                                                                                                                                                                                                                                                                                                                                                                                                                                                                                                                                                                                                                                                                                                                                                                                                                                                                                                                                                                                                                                                                                                                                                                                                                                                                                                                                                                                                                                                                                                                                                                                                                 | Orange County Public Health Lab                                                                                                          | Chan-Zuckerberg Biohub                                                           | CZB Ciiahub Consortium                                                                                                                                                                                                                                                                                                                                                   |
| EPI_ISL_739647                                                                                                                                                                                                                                                                                                                                                                                                                                                                                                                                                                                                                                                                                                                                                                                                                                                                                                                                                                                                                                                                                                                                                                                                                                                                                                                                                                                                                                                                                                                                                                                                                                                                                                                                                                                                                                                                                                                                                                                                                                                                                                                                                                                                                                 | Santa Clara County Public Health Laboratory                                                                                              | Chan-Zuckerberg Biohub                                                           | CZB Ciiahub Consortium                                                                                                                                                                                                                                                                                                                                                   |
| EPI_ISL_739648                                                                                                                                                                                                                                                                                                                                                                                                                                                                                                                                                                                                                                                                                                                                                                                                                                                                                                                                                                                                                                                                                                                                                                                                                                                                                                                                                                                                                                                                                                                                                                                                                                                                                                                                                                                                                                                                                                                                                                                                                                                                                                                                                                                                                                 | Alameda County Public Health Lab                                                                                                         | Chan-Zuckerberg Biohub                                                           | CZB Ciiahub Consortium                                                                                                                                                                                                                                                                                                                                                   |
| EPI_ISL_739649, EPI_ISL_739650                                                                                                                                                                                                                                                                                                                                                                                                                                                                                                                                                                                                                                                                                                                                                                                                                                                                                                                                                                                                                                                                                                                                                                                                                                                                                                                                                                                                                                                                                                                                                                                                                                                                                                                                                                                                                                                                                                                                                                                                                                                                                                                                                                                                                 | Santa Clara County Public Health Laboratory                                                                                              | Chan-Zuckerberg Biohub                                                           | CZB Ciiahub Consortium                                                                                                                                                                                                                                                                                                                                                   |
| EPI_ISL_739651                                                                                                                                                                                                                                                                                                                                                                                                                                                                                                                                                                                                                                                                                                                                                                                                                                                                                                                                                                                                                                                                                                                                                                                                                                                                                                                                                                                                                                                                                                                                                                                                                                                                                                                                                                                                                                                                                                                                                                                                                                                                                                                                                                                                                                 | Humboldt County Public Health Laboratory                                                                                                 | Chan-Zuckerberg Biohub                                                           | CZB Ciiahub Consortium                                                                                                                                                                                                                                                                                                                                                   |
| EPI_ISL_739652                                                                                                                                                                                                                                                                                                                                                                                                                                                                                                                                                                                                                                                                                                                                                                                                                                                                                                                                                                                                                                                                                                                                                                                                                                                                                                                                                                                                                                                                                                                                                                                                                                                                                                                                                                                                                                                                                                                                                                                                                                                                                                                                                                                                                                 | Alameda County Public Health Lab                                                                                                         | Chan-Zuckerberg Biohub                                                           | CZB Ciiahub Consortium                                                                                                                                                                                                                                                                                                                                                   |
| EPI_ISL_739653                                                                                                                                                                                                                                                                                                                                                                                                                                                                                                                                                                                                                                                                                                                                                                                                                                                                                                                                                                                                                                                                                                                                                                                                                                                                                                                                                                                                                                                                                                                                                                                                                                                                                                                                                                                                                                                                                                                                                                                                                                                                                                                                                                                                                                 | Santa Clara County Public Health Laboratory                                                                                              | Chan-Zuckerberg Biohub                                                           | CZB Ciiahub Consortium                                                                                                                                                                                                                                                                                                                                                   |
| EPI_ISL_739654                                                                                                                                                                                                                                                                                                                                                                                                                                                                                                                                                                                                                                                                                                                                                                                                                                                                                                                                                                                                                                                                                                                                                                                                                                                                                                                                                                                                                                                                                                                                                                                                                                                                                                                                                                                                                                                                                                                                                                                                                                                                                                                                                                                                                                 | Orange County Public Health Lab                                                                                                          | Chan-Zuckerberg Biohub                                                           | CZB Ciiahub Consortium                                                                                                                                                                                                                                                                                                                                                   |
| EPI_ISL_739655                                                                                                                                                                                                                                                                                                                                                                                                                                                                                                                                                                                                                                                                                                                                                                                                                                                                                                                                                                                                                                                                                                                                                                                                                                                                                                                                                                                                                                                                                                                                                                                                                                                                                                                                                                                                                                                                                                                                                                                                                                                                                                                                                                                                                                 | Renegade                                                                                                                                 | Chan-Zuckerberg Biohub                                                           | CZB Ciiahub Consortium                                                                                                                                                                                                                                                                                                                                                   |
| EPI_ISL_739656                                                                                                                                                                                                                                                                                                                                                                                                                                                                                                                                                                                                                                                                                                                                                                                                                                                                                                                                                                                                                                                                                                                                                                                                                                                                                                                                                                                                                                                                                                                                                                                                                                                                                                                                                                                                                                                                                                                                                                                                                                                                                                                                                                                                                                 | Alameda County Public Health Lab                                                                                                         | Chan-Zuckerberg Biohub                                                           | CZB Ciiahub Consortium                                                                                                                                                                                                                                                                                                                                                   |
| EPI_ISL_739657                                                                                                                                                                                                                                                                                                                                                                                                                                                                                                                                                                                                                                                                                                                                                                                                                                                                                                                                                                                                                                                                                                                                                                                                                                                                                                                                                                                                                                                                                                                                                                                                                                                                                                                                                                                                                                                                                                                                                                                                                                                                                                                                                                                                                                 | Santa Clara County Public Health Laboratory                                                                                              | Chan-Zuckerberg Biohub                                                           | CZB Ciiahub Consortium                                                                                                                                                                                                                                                                                                                                                   |
| EPI_ISL_739658                                                                                                                                                                                                                                                                                                                                                                                                                                                                                                                                                                                                                                                                                                                                                                                                                                                                                                                                                                                                                                                                                                                                                                                                                                                                                                                                                                                                                                                                                                                                                                                                                                                                                                                                                                                                                                                                                                                                                                                                                                                                                                                                                                                                                                 | Orange County Public Health Lab                                                                                                          | Chan-Zuckerberg Biohub                                                           | CZB Ciiahub Consortium                                                                                                                                                                                                                                                                                                                                                   |
| EPI_ISL_742273, EPI_ISL_742557, EPI_ISL_742652, EPI_ISL_742701, EPI_ISL_742849, EPI_ISL_742887, EPI_ISL_743109, EPI_ISL_743172, EPI_ISL_743446, EPI_ISL_743480, EPI_ISL_743484, EPI_ISL_743542, EPI_ISL_743556, EPI_ISL_743728, EPI_ISL_743841, EPI_ISL_743901, EPI_ISL_743903, EPI_ISL_743980, EPI_ISL_744058, EPI_ISL_744064, EPI_ISL_744071                                                                                                                                                                                                                                                                                                                                                                                                                                                                                                                                                                                                                                                                                                                                                                                                                                                                                                                                                                                                                                                                                                                                                                                                                                                                                                                                                                                                                                                                                                                                                                                                                                                                                                                                                                                                                                                                                                 |                                                                                                                                          |                                                                                  |                                                                                                                                                                                                                                                                                                                                                                          |
| see above                                                                                                                                                                                                                                                                                                                                                                                                                                                                                                                                                                                                                                                                                                                                                                                                                                                                                                                                                                                                                                                                                                                                                                                                                                                                                                                                                                                                                                                                                                                                                                                                                                                                                                                                                                                                                                                                                                                                                                                                                                                                                                                                                                                                                                      | Wales Specialist Virology Centre Sequencing lab: Pathogen Genomics Unit                                                                  | COVID-19 Genomics UK (COG-UK) Consortium                                         | Catherine Moore, Johnathan Evans, Laura Gifford, Malorie Perry, Simon Cottrell, Angela Marchbank, Alec Birchley, Alexander Adams, Amy Gaskin, Bree Gatica-Wilcox, Jason Coombes, Joel Southgate, Lauren Gilbert, Lee Graham, Nicole Pacchiarini, Sara Kumziene-Summerhayes, Sarah Taylor, Sophie Jones, Sara Rey, Matthew Bull, Joanne Watkins, Sally Corden, Tom Connor |
| EPI_ISL_756293, EPI_ISL_756294                                                                                                                                                                                                                                                                                                                                                                                                                                                                                                                                                                                                                                                                                                                                                                                                                                                                                                                                                                                                                                                                                                                                                                                                                                                                                                                                                                                                                                                                                                                                                                                                                                                                                                                                                                                                                                                                                                                                                                                                                                                                                                                                                                                                                 | Center for Biotechnology and Cell Therapy, São Rafael Hospital, Salvador, Brazil                                                         | Center for Biotechnology and Cell Therapy, São Rafael Hospital, Salvador, Brazil | Carolina Kymie Vasques Nonaka, Marília Miranda Franco, Tiago Gräf, Ana Verena Almeida Mendes, Renato Santana de Aguiar, Marta Giovanetti, Bruno Solano de Freitas Souza                                                                                                                                                                                                  |
| EPI_ISL_763352                                                                                                                                                                                                                                                                                                                                                                                                                                                                                                                                                                                                                                                                                                                                                                                                                                                                                                                                                                                                                                                                                                                                                                                                                                                                                                                                                                                                                                                                                                                                                                                                                                                                                                                                                                                                                                                                                                                                                                                                                                                                                                                                                                                                                                 | National Virus Reference Laboratory                                                                                                      | Irish Coronavirus Sequencing Consortium - Teagasc Moorepark                      | Calum Walsh, Fiona Crispie, John Kenny, Paul Cotter                                                                                                                                                                                                                                                                                                                      |
| EPI_ISL_763522, EPI_ISL_764731, EPI_ISL_764944, EPI_ISL_764948, EPI_ISL_765060                                                                                                                                                                                                                                                                                                                                                                                                                                                                                                                                                                                                                                                                                                                                                                                                                                                                                                                                                                                                                                                                                                                                                                                                                                                                                                                                                                                                                                                                                                                                                                                                                                                                                                                                                                                                                                                                                                                                                                                                                                                                                                                                                                 | Wales Specialist Virology Centre Sequencing lab: Pathogen Genomics Unit                                                                  | COVID-19 Genomics UK (COG-UK) Consortium                                         | Catherine Moore, Johnathan Evans, Laura Gifford, Malorie Perry, Simon Cottrell, Angela Marchbank, Alec Birchley, Alexander Adams, Amy Gaskin, Bree Gatica-Wilcox, Jason Coombes, Joel Southgate, Lauren Gilbert, Lee Graham, Nicole Pacchiarini, Sara Kumziene-Summerhayes, Sarah Taylor, Sophie Jones, Sara Rey, Matthew Bull, Joanne Watkins, Sally Corden, Tom Connor |
| EPI_ISL_767716, EPI_ISL_767717, EPI_ISL_767718, EPI_ISL_767719, EPI_ISL_767720, EPI_ISL_767721, EPI_ISL_767722, EPI_ISL_767723, EPI_ISL_767724, EPI_ISL_767725, EPI_ISL_767726, EPI_ISL_767727, EPI_ISL_767728, EPI_ISL_767729, EPI_ISL_767730, EPI_ISL_767731, EPI_ISL_767732, EPI_ISL_767733, EPI_ISL_767734, EPI_ISL_767735, EPI_ISL_767736, EPI_ISL_767737, EPI_ISL_767738, EPI_ISL_767739, EPI_ISL_767740, EPI_ISL_767741, EPI_ISL_767742, EPI_ISL_767743, EPI_ISL_767744, EPI_ISL_767745, EPI_ISL_767746, EPI_ISL_767747, EPI_ISL_767748, EPI_ISL_767749, EPI_ISL_767750, EPI_ISL_767751, EPI_ISL_767752, EPI_ISL_767753, EPI_ISL_767754, EPI_ISL_767755, EPI_ISL_767756, EPI_ISL_767757, EPI_ISL_767758, EPI_ISL_767759, EPI_ISL_767760, EPI_ISL_767761, EPI_ISL_767762, EPI_ISL_767763, EPI_ISL_767764, EPI_ISL_767765, EPI_ISL_767766, EPI_ISL_767767, EPI_ISL_767768, EPI_ISL_767769, EPI_ISL_767770, EPI_ISL_767771, EPI_ISL_767772, EPI_ISL_767773, EPI_ISL_767774, EPI_ISL_767775, EPI_ISL_767776, EPI_ISL_767777, EPI_ISL_767778, EPI_ISL_767779, EPI_ISL_767780, EPI_ISL_767781, EPI_ISL_767782, EPI_ISL_767783, EPI_ISL_767784, EPI_ISL_767785, EPI_ISL_767786, EPI_ISL_767787, EPI_ISL_767788, EPI_ISL_767789, EPI_ISL_767790, EPI_ISL_767791, EPI_ISL_767792, EPI_ISL_767793, EPI_ISL_767794, EPI_ISL_767795, EPI_ISL_767796, EPI_ISL_767797, EPI_ISL_767798, EPI_ISL_767799, EPI_ISL_767800, EPI_ISL_767801, EPI_ISL_767802, EPI_ISL_767803, EPI_ISL_767804, EPI_ISL_767805, EPI_ISL_767806, EPI_ISL_767807, EPI_ISL_767808, EPI_ISL_767809, EPI_ISL_767810, EPI_ISL_767811, EPI_ISL_767812, EPI_ISL_767813, EPI_ISL_767814, EPI_ISL_767815, EPI_ISL_767816, EPI_ISL_767817, EPI_ISL_767818, EPI_ISL_767819, EPI_ISL_767820, EPI_ISL_767821, EPI_ISL_767822, EPI_ISL_767823, EPI_ISL_767824, EPI_ISL_767825, EPI_ISL_767826, EPI_ISL_767827, EPI_ISL_767828, EPI_ISL_767829, EPI_ISL_767830, EPI_ISL_767831, EPI_ISL_767832, EPI_ISL_767833, EPI_ISL_767834, EPI_ISL_767835, EPI_ISL_767836, EPI_ISL_767837, EPI_ISL_767838, EPI_ISL_767839, EPI_ISL_767840, EPI_ISL_767841, EPI_ISL_767842, EPI_ISL_767843, EPI_ISL_767844, EPI_ISL_767845, EPI_ISL_767846, EPI_ISL_768747, EPI_ISL_768748, EPI_ISL_768749, EPI_ISL_768750 |                                                                                                                                          |                                                                                  |                                                                                                                                                                                                                                                                                                                                                                          |
| see above                                                                                                                                                                                                                                                                                                                                                                                                                                                                                                                                                                                                                                                                                                                                                                                                                                                                                                                                                                                                                                                                                                                                                                                                                                                                                                                                                                                                                                                                                                                                                                                                                                                                                                                                                                                                                                                                                                                                                                                                                                                                                                                                                                                                                                      | National Virus Reference Laboratory                                                                                                      | Irish Coronavirus Sequencing Consortium - Teagasc Moorepark                      | Calum Walsh, Genuity Ireland                                                                                                                                                                                                                                                                                                                                             |
| EPI_ISL_779605, EPI_ISL_779606, EPI_ISL_779607, EPI_ISL_779609, EPI_ISL_779614, EPI_ISL_779615, EPI_ISL_779617, EPI_ISL_779619, EPI_ISL_779620, EPI_ISL_779621, EPI_ISL_779622, EPI_ISL_779623, EPI_ISL_779626, EPI_ISL_779631, EPI_ISL_779632, EPI_ISL_779633, EPI_ISL_779648, EPI_ISL_779649, EPI_ISL_779650                                                                                                                                                                                                                                                                                                                                                                                                                                                                                                                                                                                                                                                                                                                                                                                                                                                                                                                                                                                                                                                                                                                                                                                                                                                                                                                                                                                                                                                                                                                                                                                                                                                                                                                                                                                                                                                                                                                                 |                                                                                                                                          |                                                                                  |                                                                                                                                                                                                                                                                                                                                                                          |
| see above                                                                                                                                                                                                                                                                                                                                                                                                                                                                                                                                                                                                                                                                                                                                                                                                                                                                                                                                                                                                                                                                                                                                                                                                                                                                                                                                                                                                                                                                                                                                                                                                                                                                                                                                                                                                                                                                                                                                                                                                                                                                                                                                                                                                                                      | Victorian Infectious Diseases Reference Laboratory (VIDRL)                                                                               | VIDRL and MDU-PHL                                                                | Caly L., Seemann T., Sait, M.L., Druce J., Sherry, N.L.                                                                                                                                                                                                                                                                                                                  |
| EPI_ISL_779730                                                                                                                                                                                                                                                                                                                                                                                                                                                                                                                                                                                                                                                                                                                                                                                                                                                                                                                                                                                                                                                                                                                                                                                                                                                                                                                                                                                                                                                                                                                                                                                                                                                                                                                                                                                                                                                                                                                                                                                                                                                                                                                                                                                                                                 | Servicio de Microbiología Clínica (Complejo Hospitalario de Navarra, Pamplona), Instituto de Investigación Sanitaria de Navarra (IdiSNA) | SeqCOVID-SPAIN consortium/IBV(CSIC)                                              | Carmen Ezpeleta Baquedano, Ana Navascués, Ana Miqueleiz and SeqCOVID-SPAIN consortium                                                                                                                                                                                                                                                                                    |
| EPI_ISL_779850, EPI_ISL_779851, EPI_ISL_779852, EPI_ISL_779853, EPI_ISL_779854, EPI_ISL_779855, EPI_ISL_779856, EPI_ISL_779857, EPI_ISL_779858, EPI_ISL_779859, EPI_ISL_779860, EPI_ISL_779861, EPI_ISL_779862, EPI_ISL_779863, EPI_ISL_779864, EPI_ISL_779865, EPI_ISL_779866, EPI_ISL_779867, EPI_ISL_779868, EPI_ISL_779869, EPI_ISL_779870, EPI_ISL_779871, EPI_ISL_779872, EPI_ISL_779873, EPI_ISL_779874, EPI_ISL_779875, EPI_ISL_779876, EPI_ISL_779877, EPI_ISL_779878, EPI_ISL_779879, EPI_ISL_779880, EPI_ISL_779881, EPI_ISL_779882, EPI_ISL_779883, EPI_ISL_779884, EPI_ISL_779885, EPI_ISL_779886, EPI_ISL_779887, EPI_ISL_779888, EPI_ISL_779889, EPI_ISL_779890, EPI_ISL_779891, EPI_ISL_779892, EPI_ISL_779893, EPI_ISL_779894, EPI_ISL_779895, EPI_ISL_779896, EPI_ISL_779897, EPI_ISL_779898, EPI_ISL_779899, EPI_ISL_779900, EPI_ISL_779901, EPI_ISL_779902, EPI_ISL_779903, EPI_ISL_779904, EPI_ISL_779905, EPI_ISL_779906, EPI_ISL_779907, EPI_ISL_779908, EPI_ISL_779909, EPI_ISL_779910, EPI_ISL_779911, EPI_ISL_779912, EPI_ISL_779913, EPI_ISL_779914, EPI_ISL_779915, EPI_ISL_779916, EPI_ISL_779917, EPI_ISL_779918, EPI_ISL_779919, EPI_ISL_779920, EPI_ISL_779921                                                                                                                                                                                                                                                                                                                                                                                                                                                                                                                                                                                                                                                                                                                                                                                                                                                                                                                                                                                                                                                 |                                                                                                                                          |                                                                                  |                                                                                                                                                                                                                                                                                                                                                                          |
| see above                                                                                                                                                                                                                                                                                                                                                                                                                                                                                                                                                                                                                                                                                                                                                                                                                                                                                                                                                                                                                                                                                                                                                                                                                                                                                                                                                                                                                                                                                                                                                                                                                                                                                                                                                                                                                                                                                                                                                                                                                                                                                                                                                                                                                                      | Servicio de Microbiología, Hospital Universitario Son Espases                                                                            | SeqCOVID-SPAIN consortium/IBV(CSIC)                                              | Carla López-Causapé, Jordi Reina, Antonio Oliver and SeqCOVID-SPAIN consortium                                                                                                                                                                                                                                                                                           |
| EPI_ISL_812435, EPI_ISL_812436, EPI_ISL_812437, EPI_ISL_812438, EPI_ISL_812439, EPI_ISL_812440, EPI_ISL_812441, EPI_ISL_812442                                                                                                                                                                                                                                                                                                                                                                                                                                                                                                                                                                                                                                                                                                                                                                                                                                                                                                                                                                                                                                                                                                                                                                                                                                                                                                                                                                                                                                                                                                                                                                                                                                                                                                                                                                                                                                                                                                                                                                                                                                                                                                                 | Victorian Infectious Diseases Reference Laboratory (VIDRL)                                                                               | VIDRL and MDU-PHL                                                                | Caly L., Seemann T., Sait, M.L., Druce J., Sherry, N.L.                                                                                                                                                                                                                                                                                                                  |
| EPI_ISL_814354, EPI_ISL_814713, EPI_ISL_814812, EPI_ISL_815029, EPI_ISL_815095, EPI_ISL_815234                                                                                                                                                                                                                                                                                                                                                                                                                                                                                                                                                                                                                                                                                                                                                                                                                                                                                                                                                                                                                                                                                                                                                                                                                                                                                                                                                                                                                                                                                                                                                                                                                                                                                                                                                                                                                                                                                                                                                                                                                                                                                                                                                 | Wales Specialist Virology Centre Sequencing lab: Pathogen Genomics Unit                                                                  | COVID-19 Genomics UK (COG-UK) Consortium                                         | Catherine Moore, Johnathan Evans, Laura Gifford, Malorie Perry, Simon Cottrell, Angela Marchbank, Alec Birchley, Alexander Adams, Amy Gaskin, Bree Gatica-Wilcox, Jason Coombes, Joel Southgate, Lauren Gilbert, Lee Graham, Nicole Pacchiarini, Sara Kumziene-Summerhayes, Sarah Taylor, Sophie Jones, Sara Rey, Matthew Bull, Joanne Watkins, Sally Corden, Tom Connor |
| EPI_ISL_819128, EPI_ISL_819129, EPI_ISL_819130, EPI_ISL_819131, EPI_ISL_819132, EPI_ISL_819133, EPI_ISL_819134, EPI_ISL_819135, EPI_ISL_819136, EPI_ISL_819137, EPI_ISL_819138, EPI_ISL_819139, EPI_ISL_819140, EPI_ISL_819141, EPI_ISL_819142, EPI_ISL_819143, EPI_ISL_819144, EPI_ISL_819145, EPI_ISL_819146, EPI_ISL_819147, EPI_ISL_819148, EPI_ISL_819149, EPI_ISL_819150, EPI_ISL_819151, EPI_ISL_819152, EPI_ISL_819153, EPI_ISL_819154, EPI_ISL_819155, EPI_ISL_819156, EPI_ISL_819157, EPI_ISL_819158, EPI_ISL_819159, EPI_ISL_819160, EPI_ISL_819161, EPI_ISL_819162, EPI_ISL_819163, EPI_ISL_819164, EPI_ISL_819165, EPI_ISL_819166, EPI_ISL_819167, EPI_ISL_819168, EPI_ISL_819169, EPI_ISL_819170, EPI_ISL_819171, EPI_ISL_819172, EPI_ISL_819173, EPI_ISL_819174, EPI_ISL_819175, EPI_ISL_819176, EPI_ISL_819177, EPI_ISL_819178, EPI_ISL_819179, EPI_ISL_819180, EPI_ISL_819181, EPI_ISL_819182, EPI_ISL_819183, EPI_ISL_819184, EPI_ISL_819185, EPI_ISL_819186, EPI_ISL_819187, EPI_ISL_819188, EPI_ISL_819189, EPI_ISL_819190, EPI_ISL_819191, EPI_ISL_819192, EPI_ISL_819193, EPI_ISL_819194, EPI_ISL_819195, EPI_ISL_819196, EPI_ISL_819197, EPI_ISL_819198, EPI_ISL_819199                                                                                                                                                                                                                                                                                                                                                                                                                                                                                                                                                                                                                                                                                                                                                                                                                                                                                                                                                                                                                                                 |                                                                                                                                          |                                                                                  |                                                                                                                                                                                                                                                                                                                                                                          |
| see above                                                                                                                                                                                                                                                                                                                                                                                                                                                                                                                                                                                                                                                                                                                                                                                                                                                                                                                                                                                                                                                                                                                                                                                                                                                                                                                                                                                                                                                                                                                                                                                                                                                                                                                                                                                                                                                                                                                                                                                                                                                                                                                                                                                                                                      | Servicio de Microbiología, Hospital Universitario Son Espases                                                                            | SeqCOVID-SPAIN consortium/IBV(CSIC)                                              | Carla López-Causapé, Jordi Reina, Antonio Oliver and SeqCOVID-SPAIN consortium                                                                                                                                                                                                                                                                                           |
| EPI_ISL_822391, EPI_ISL_822428, EPI_ISL_822485, EPI_ISL_822534, EPI_ISL_822624, EPI_ISL_822859, EPI_ISL_822887, EPI_ISL_823101, EPI_ISL_823250, EPI_ISL_823268, EPI_ISL_823319, EPI_ISL_823376, EPI_ISL_823462, EPI_ISL_823541, EPI_ISL_823666, EPI_ISL_823706, EPI_ISL_823711, EPI_ISL_823751, EPI_ISL_823782, EPI_ISL_823785, EPI_ISL_823812                                                                                                                                                                                                                                                                                                                                                                                                                                                                                                                                                                                                                                                                                                                                                                                                                                                                                                                                                                                                                                                                                                                                                                                                                                                                                                                                                                                                                                                                                                                                                                                                                                                                                                                                                                                                                                                                                                 |                                                                                                                                          |                                                                                  |                                                                                                                                                                                                                                                                                                                                                                          |
| see above                                                                                                                                                                                                                                                                                                                                                                                                                                                                                                                                                                                                                                                                                                                                                                                                                                                                                                                                                                                                                                                                                                                                                                                                                                                                                                                                                                                                                                                                                                                                                                                                                                                                                                                                                                                                                                                                                                                                                                                                                                                                                                                                                                                                                                      | Wales Specialist Virology Centre Sequencing lab: Pathogen Genomics Unit                                                                  | COVID-19 Genomics UK (COG-UK) Consortium                                         | Catherine Moore, Johnathan Evans, Laura Gifford, Malorie Perry, Simon Cottrell, Angela Marchbank, Alec Birchley, Alexander Adams, Amy Gaskin, Bree Gatica-Wilcox, Jason Coombes, Joel Southgate, Lauren Gilbert, Lee Graham, Nicole Pacchiarini, Sara Kumziene-Summerhayes, Sarah Taylor, Sophie Jones, Sara Rey, Matthew Bull, Joanne Watkins, Sally Corden, Tom Connor |



|                                                                                                                                                                                                                                                                                                                                                                                                                                                                                                                                                                                                                                                                                                                                                                                                                                                                                                                                                                                                                                                                                                                                                                                                                                                                                                                                                                                                                                                                                                                                                                                                                                                                                                                                                                                                                                                                                                                                                                                                                                                                                                                                                                                                                                                                                                                                                                                                                                                                                                                                                                                                                                                                                                                                                                                                                                                                                                                                                                                                                                                                                                                                                                                                                                                                                                                                                                                                                                                                                                                                                                                                                                                                                                                                                                                                                                                                                                                                                                                                                                                                |                                                                                                                                          |                                                                                                                    |                                                                                                                                                                                                                                                                                                                                                                        |
|----------------------------------------------------------------------------------------------------------------------------------------------------------------------------------------------------------------------------------------------------------------------------------------------------------------------------------------------------------------------------------------------------------------------------------------------------------------------------------------------------------------------------------------------------------------------------------------------------------------------------------------------------------------------------------------------------------------------------------------------------------------------------------------------------------------------------------------------------------------------------------------------------------------------------------------------------------------------------------------------------------------------------------------------------------------------------------------------------------------------------------------------------------------------------------------------------------------------------------------------------------------------------------------------------------------------------------------------------------------------------------------------------------------------------------------------------------------------------------------------------------------------------------------------------------------------------------------------------------------------------------------------------------------------------------------------------------------------------------------------------------------------------------------------------------------------------------------------------------------------------------------------------------------------------------------------------------------------------------------------------------------------------------------------------------------------------------------------------------------------------------------------------------------------------------------------------------------------------------------------------------------------------------------------------------------------------------------------------------------------------------------------------------------------------------------------------------------------------------------------------------------------------------------------------------------------------------------------------------------------------------------------------------------------------------------------------------------------------------------------------------------------------------------------------------------------------------------------------------------------------------------------------------------------------------------------------------------------------------------------------------------------------------------------------------------------------------------------------------------------------------------------------------------------------------------------------------------------------------------------------------------------------------------------------------------------------------------------------------------------------------------------------------------------------------------------------------------------------------------------------------------------------------------------------------------------------------------------------------------------------------------------------------------------------------------------------------------------------------------------------------------------------------------------------------------------------------------------------------------------------------------------------------------------------------------------------------------------------------------------------------------------------------------------------------------|------------------------------------------------------------------------------------------------------------------------------------------|--------------------------------------------------------------------------------------------------------------------|------------------------------------------------------------------------------------------------------------------------------------------------------------------------------------------------------------------------------------------------------------------------------------------------------------------------------------------------------------------------|
| EPI_ISL_833038                                                                                                                                                                                                                                                                                                                                                                                                                                                                                                                                                                                                                                                                                                                                                                                                                                                                                                                                                                                                                                                                                                                                                                                                                                                                                                                                                                                                                                                                                                                                                                                                                                                                                                                                                                                                                                                                                                                                                                                                                                                                                                                                                                                                                                                                                                                                                                                                                                                                                                                                                                                                                                                                                                                                                                                                                                                                                                                                                                                                                                                                                                                                                                                                                                                                                                                                                                                                                                                                                                                                                                                                                                                                                                                                                                                                                                                                                                                                                                                                                                                 | Laboratorio de Referencia Nacional de Virus Respiratorio. Instituto Nacional de Salud Perú                                               | Laboratorio de Referencia Nacional de Biotecnología y Biología Molecular. Instituto Nacional de Salud Perú         | Carlos Padilla Rojas, Luis Barcena, Karolyn Vega Chozo, Priscila Lope Pari, Omar Caceres Rey, Marco Galarza Perez, Maribel Huaranga Nuñez, Johanna Balbuena Torrez, Henri Bailon Calderon, Nancy Rojas Serrano                                                                                                                                                         |
| EPI_ISL_840543, EPI_ISL_840751                                                                                                                                                                                                                                                                                                                                                                                                                                                                                                                                                                                                                                                                                                                                                                                                                                                                                                                                                                                                                                                                                                                                                                                                                                                                                                                                                                                                                                                                                                                                                                                                                                                                                                                                                                                                                                                                                                                                                                                                                                                                                                                                                                                                                                                                                                                                                                                                                                                                                                                                                                                                                                                                                                                                                                                                                                                                                                                                                                                                                                                                                                                                                                                                                                                                                                                                                                                                                                                                                                                                                                                                                                                                                                                                                                                                                                                                                                                                                                                                                                 | Originating lab: Wales Specialist Virology Centre Sequencing lab: Pathogen Genomics Unit                                                 | Public Health Wales Microbiology Cardiff Wales Specialist Virology Centre                                          | Catherine Moore, Johnathan Evans, Laura Gifford, Malorie Perry, Simon Cottrell, Angela Marchbank, Alec Birchley, Alexander Adams, Amy Gaskin, Bree Gatica-Wilcox, Jason Coombes, Joel Southgate, Lauren Gilbert, Lee Graham, Nicole Pacchiari, Sara Kumziene-Summerhayes, Sarah Taylor, Sophie Jones, Sara Rey, Matthew Bull, Joanne Watkins, Sally Corden, Tom Connor |
| EPI_ISL_840870, EPI_ISL_840945, EPI_ISL_841102, EPI_ISL_841182, EPI_ISL_841247, EPI_ISL_841278, EPI_ISL_841311                                                                                                                                                                                                                                                                                                                                                                                                                                                                                                                                                                                                                                                                                                                                                                                                                                                                                                                                                                                                                                                                                                                                                                                                                                                                                                                                                                                                                                                                                                                                                                                                                                                                                                                                                                                                                                                                                                                                                                                                                                                                                                                                                                                                                                                                                                                                                                                                                                                                                                                                                                                                                                                                                                                                                                                                                                                                                                                                                                                                                                                                                                                                                                                                                                                                                                                                                                                                                                                                                                                                                                                                                                                                                                                                                                                                                                                                                                                                                 | Wales Specialist Virology Centre Sequencing lab: Pathogen Genomics Unit                                                                  | Public Health Wales Microbiology Cardiff Wales Specialist Virology Centre                                          | Catherine Moore, Johnathan Evans, Laura Gifford, Malorie Perry, Simon Cottrell, Angela Marchbank, Alec Birchley, Alexander Adams, Amy Gaskin, Bree Gatica-Wilcox, Jason Coombes, Joel Southgate, Lauren Gilbert, Lee Graham, Nicole Pacchiari, Sara Kumziene-Summerhayes, Sarah Taylor, Sophie Jones, Sara Rey, Matthew Bull, Joanne Watkins, Sally Corden, Tom Connor |
| EPI_ISL_841364, EPI_ISL_841443, EPI_ISL_841480, EPI_ISL_841487, EPI_ISL_841670                                                                                                                                                                                                                                                                                                                                                                                                                                                                                                                                                                                                                                                                                                                                                                                                                                                                                                                                                                                                                                                                                                                                                                                                                                                                                                                                                                                                                                                                                                                                                                                                                                                                                                                                                                                                                                                                                                                                                                                                                                                                                                                                                                                                                                                                                                                                                                                                                                                                                                                                                                                                                                                                                                                                                                                                                                                                                                                                                                                                                                                                                                                                                                                                                                                                                                                                                                                                                                                                                                                                                                                                                                                                                                                                                                                                                                                                                                                                                                                 | Originating lab: Wales Specialist Virology Centre Sequencing lab: Pathogen Genomics Unit                                                 | Public Health Wales Microbiology Cardiff Wales Specialist Virology Centre                                          | Catherine Moore, Johnathan Evans, Laura Gifford, Malorie Perry, Simon Cottrell, Angela Marchbank, Alec Birchley, Alexander Adams, Amy Gaskin, Bree Gatica-Wilcox, Jason Coombes, Joel Southgate, Lauren Gilbert, Lee Graham, Nicole Pacchiari, Sara Kumziene-Summerhayes, Sarah Taylor, Sophie Jones, Sara Rey, Matthew Bull, Joanne Watkins, Sally Corden, Tom Connor |
| EPI_ISL_842794, EPI_ISL_842797, EPI_ISL_842799, EPI_ISL_842800, EPI_ISL_842805, EPI_ISL_842807, EPI_ISL_842811, EPI_ISL_842812, EPI_ISL_842813, EPI_ISL_842815, EPI_ISL_842816, EPI_ISL_842817, EPI_ISL_842819, EPI_ISL_842821, EPI_ISL_842822, EPI_ISL_842823, EPI_ISL_842824, EPI_ISL_842825, EPI_ISL_842826, EPI_ISL_842830, EPI_ISL_842831, EPI_ISL_842835, EPI_ISL_842837, EPI_ISL_842839, EPI_ISL_842840, EPI_ISL_842841, EPI_ISL_842842, EPI_ISL_842844, EPI_ISL_842846, EPI_ISL_842848, EPI_ISL_842849, EPI_ISL_842850, EPI_ISL_842851, EPI_ISL_842852, EPI_ISL_842854, EPI_ISL_842855, EPI_ISL_842856, EPI_ISL_842857, EPI_ISL_842859, EPI_ISL_842860, EPI_ISL_842861, EPI_ISL_842862, EPI_ISL_842863, EPI_ISL_842865, EPI_ISL_842866, EPI_ISL_842871, EPI_ISL_842872, EPI_ISL_842873, EPI_ISL_842874, EPI_ISL_842875, EPI_ISL_842876, EPI_ISL_842878, EPI_ISL_842879, EPI_ISL_842880, EPI_ISL_842881, EPI_ISL_842882, EPI_ISL_842883, EPI_ISL_842884, EPI_ISL_842885, EPI_ISL_842888, EPI_ISL_842889, EPI_ISL_842891, EPI_ISL_842892, EPI_ISL_842896, EPI_ISL_842893, EPI_ISL_842895, EPI_ISL_842897, EPI_ISL_842899, EPI_ISL_842900, EPI_ISL_842901, EPI_ISL_842910, EPI_ISL_842911, EPI_ISL_842912, EPI_ISL_842913, EPI_ISL_842914, EPI_ISL_842934, EPI_ISL_842936, EPI_ISL_842937, EPI_ISL_842938, EPI_ISL_842939, EPI_ISL_842940, EPI_ISL_842941, EPI_ISL_842942, EPI_ISL_842943, EPI_ISL_842944, EPI_ISL_842947, EPI_ISL_842947, EPI_ISL_842947, EPI_ISL_842950, EPI_ISL_842951, EPI_ISL_842952, EPI_ISL_842953, EPI_ISL_842954, EPI_ISL_842955, EPI_ISL_842956, EPI_ISL_842957, EPI_ISL_842958, EPI_ISL_842959, EPI_ISL_842962, EPI_ISL_842963, EPI_ISL_842964, EPI_ISL_842967, EPI_ISL_842969, EPI_ISL_842970, EPI_ISL_842971, EPI_ISL_842972, EPI_ISL_842973, EPI_ISL_842975, EPI_ISL_842976, EPI_ISL_842977, EPI_ISL_842978, EPI_ISL_842979, EPI_ISL_842980, EPI_ISL_842981, EPI_ISL_842982, EPI_ISL_842983, EPI_ISL_842984, EPI_ISL_842985, EPI_ISL_842986, EPI_ISL_842987, EPI_ISL_842988, EPI_ISL_842991, EPI_ISL_842992, EPI_ISL_842993, EPI_ISL_842998, EPI_ISL_842999, EPI_ISL_843001, EPI_ISL_843003, EPI_ISL_843006, EPI_ISL_843007, EPI_ISL_843007, EPI_ISL_843008, EPI_ISL_843009, EPI_ISL_843010, EPI_ISL_843012, EPI_ISL_843014, EPI_ISL_843015, EPI_ISL_843016, EPI_ISL_843017, EPI_ISL_843018, EPI_ISL_843019, EPI_ISL_843020, EPI_ISL_843021, EPI_ISL_843022, EPI_ISL_843024, EPI_ISL_843025, EPI_ISL_843026, EPI_ISL_843027, EPI_ISL_843028, EPI_ISL_843029, EPI_ISL_843030, EPI_ISL_843032, EPI_ISL_843033, EPI_ISL_843035, EPI_ISL_843037, EPI_ISL_843038, EPI_ISL_843039, EPI_ISL_843040, EPI_ISL_843041, EPI_ISL_843042, EPI_ISL_843043, EPI_ISL_843044, EPI_ISL_843045, EPI_ISL_843046, EPI_ISL_843047, EPI_ISL_843048, EPI_ISL_843049, EPI_ISL_843051, EPI_ISL_843053, EPI_ISL_843055, EPI_ISL_843056, EPI_ISL_843057, EPI_ISL_843058, EPI_ISL_843059, EPI_ISL_843060, EPI_ISL_843061, EPI_ISL_843062, EPI_ISL_843063, EPI_ISL_843064, EPI_ISL_843065, EPI_ISL_843066, EPI_ISL_843067, EPI_ISL_843069, EPI_ISL_843070, EPI_ISL_843072, EPI_ISL_843073, EPI_ISL_843074, EPI_ISL_843075, EPI_ISL_843076, EPI_ISL_843077, EPI_ISL_843079, EPI_ISL_843080, EPI_ISL_843082, EPI_ISL_843083, EPI_ISL_843084, EPI_ISL_843087, EPI_ISL_843090, EPI_ISL_843092, EPI_ISL_843093, EPI_ISL_843094, EPI_ISL_843095, EPI_ISL_843097, EPI_ISL_843098, EPI_ISL_843099, EPI_ISL_843101, EPI_ISL_843102, EPI_ISL_843103, EPI_ISL_843104, EPI_ISL_843105, EPI_ISL_843106, EPI_ISL_843108, EPI_ISL_843110, EPI_ISL_843111, EPI_ISL_843112, EPI_ISL_843113, EPI_ISL_843115, EPI_ISL_843116, EPI_ISL_843118, EPI_ISL_843119, EPI_ISL_843120, EPI_ISL_843122, EPI_ISL_843123, EPI_ISL_843124, EPI_ISL_843125, EPI_ISL_843126, EPI_ISL_843128, EPI_ISL_843129, EPI_ISL_843130, EPI_ISL_843131, EPI_ISL_843132, EPI_ISL_843133, EPI_ISL_843134, EPI_ISL_843135, EPI_ISL_843136, EPI_ISL_843137, EPI_ISL_843138, EPI_ISL_843139, EPI_ISL_843141, EPI_ISL_843143, EPI_ISL_843144, EPI_ISL_843147, EPI_ISL_843148, EPI_ISL_843149, EPI_ISL_843150 | COVID-19 Genomics UK (COG-UK) Consortium                                                                                                 | CUTINO-MOGUEL, Maria-Teresa; HARRINGTON, David; OWOYEMI, Dola; SHYLINI, Raghavendran; BROAD, Claire; KELE, Beatrix |                                                                                                                                                                                                                                                                                                                                                                        |
| see above                                                                                                                                                                                                                                                                                                                                                                                                                                                                                                                                                                                                                                                                                                                                                                                                                                                                                                                                                                                                                                                                                                                                                                                                                                                                                                                                                                                                                                                                                                                                                                                                                                                                                                                                                                                                                                                                                                                                                                                                                                                                                                                                                                                                                                                                                                                                                                                                                                                                                                                                                                                                                                                                                                                                                                                                                                                                                                                                                                                                                                                                                                                                                                                                                                                                                                                                                                                                                                                                                                                                                                                                                                                                                                                                                                                                                                                                                                                                                                                                                                                      | Barts Health NHS Trust                                                                                                                   | SeqCOVID-SPAIN consortium/IB(CSIC)                                                                                 | Carmen Ezpeleta Baquedano, Ana Navascués, Ana Miquelena and SeqCOVID-SPAIN consortium                                                                                                                                                                                                                                                                                  |
| EPI_ISL_846653, EPI_ISL_846654                                                                                                                                                                                                                                                                                                                                                                                                                                                                                                                                                                                                                                                                                                                                                                                                                                                                                                                                                                                                                                                                                                                                                                                                                                                                                                                                                                                                                                                                                                                                                                                                                                                                                                                                                                                                                                                                                                                                                                                                                                                                                                                                                                                                                                                                                                                                                                                                                                                                                                                                                                                                                                                                                                                                                                                                                                                                                                                                                                                                                                                                                                                                                                                                                                                                                                                                                                                                                                                                                                                                                                                                                                                                                                                                                                                                                                                                                                                                                                                                                                 | Servicio de Microbiología Clínica (Complejo Hospitalario de Navarra, Pamplona), Instituto de Investigación Sanitaria de Navarra (IdiSNA) | Chan-Zuckerberg Biohub                                                                                             | CZB Ciliahub Consortium                                                                                                                                                                                                                                                                                                                                                |
| EPI_ISL_849922                                                                                                                                                                                                                                                                                                                                                                                                                                                                                                                                                                                                                                                                                                                                                                                                                                                                                                                                                                                                                                                                                                                                                                                                                                                                                                                                                                                                                                                                                                                                                                                                                                                                                                                                                                                                                                                                                                                                                                                                                                                                                                                                                                                                                                                                                                                                                                                                                                                                                                                                                                                                                                                                                                                                                                                                                                                                                                                                                                                                                                                                                                                                                                                                                                                                                                                                                                                                                                                                                                                                                                                                                                                                                                                                                                                                                                                                                                                                                                                                                                                 | Orange County Public Health Lab                                                                                                          | Chan-Zuckerberg Biohub                                                                                             | CZB Ciliahub Consortium                                                                                                                                                                                                                                                                                                                                                |
| EPI_ISL_849923, EPI_ISL_849924, EPI_ISL_849925, EPI_ISL_849926, EPI_ISL_849927                                                                                                                                                                                                                                                                                                                                                                                                                                                                                                                                                                                                                                                                                                                                                                                                                                                                                                                                                                                                                                                                                                                                                                                                                                                                                                                                                                                                                                                                                                                                                                                                                                                                                                                                                                                                                                                                                                                                                                                                                                                                                                                                                                                                                                                                                                                                                                                                                                                                                                                                                                                                                                                                                                                                                                                                                                                                                                                                                                                                                                                                                                                                                                                                                                                                                                                                                                                                                                                                                                                                                                                                                                                                                                                                                                                                                                                                                                                                                                                 | UCSF Clinical Microbiology Laboratory                                                                                                    | Chan-Zuckerberg Biohub                                                                                             | CZB Ciliahub Consortium                                                                                                                                                                                                                                                                                                                                                |
| EPI_ISL_849928, EPI_ISL_849929, EPI_ISL_849930, EPI_ISL_849931, EPI_ISL_849932, EPI_ISL_849933, EPI_ISL_849934, EPI_ISL_849935, EPI_ISL_849936, EPI_ISL_849937, EPI_ISL_849938, EPI_ISL_849939, EPI_ISL_849940, EPI_ISL_849941, EPI_ISL_849942, EPI_ISL_849943, EPI_ISL_849944, EPI_ISL_849945, EPI_ISL_849946, EPI_ISL_849947, EPI_ISL_849948, EPI_ISL_849949, EPI_ISL_849950, EPI_ISL_849951, EPI_ISL_849952                                                                                                                                                                                                                                                                                                                                                                                                                                                                                                                                                                                                                                                                                                                                                                                                                                                                                                                                                                                                                                                                                                                                                                                                                                                                                                                                                                                                                                                                                                                                                                                                                                                                                                                                                                                                                                                                                                                                                                                                                                                                                                                                                                                                                                                                                                                                                                                                                                                                                                                                                                                                                                                                                                                                                                                                                                                                                                                                                                                                                                                                                                                                                                                                                                                                                                                                                                                                                                                                                                                                                                                                                                                 | UC Davis- Department of Pathology and Laboratory Medicine                                                                                | Chan-Zuckerberg Biohub                                                                                             | CZB Ciliahub Consortium                                                                                                                                                                                                                                                                                                                                                |
| see above                                                                                                                                                                                                                                                                                                                                                                                                                                                                                                                                                                                                                                                                                                                                                                                                                                                                                                                                                                                                                                                                                                                                                                                                                                                                                                                                                                                                                                                                                                                                                                                                                                                                                                                                                                                                                                                                                                                                                                                                                                                                                                                                                                                                                                                                                                                                                                                                                                                                                                                                                                                                                                                                                                                                                                                                                                                                                                                                                                                                                                                                                                                                                                                                                                                                                                                                                                                                                                                                                                                                                                                                                                                                                                                                                                                                                                                                                                                                                                                                                                                      | UC Davis- Department of Pathology and Laboratory Medicine                                                                                | Chan-Zuckerberg Biohub                                                                                             | CZB Ciliahub Consortium                                                                                                                                                                                                                                                                                                                                                |
| EPI_ISL_849953, EPI_ISL_849954, EPI_ISL_849955, EPI_ISL_849956, EPI_ISL_849957, EPI_ISL_849958, EPI_ISL_849959, EPI_ISL_849960, EPI_ISL_849961, EPI_ISL_849962, EPI_ISL_849963, EPI_ISL_849964, EPI_ISL_849965, EPI_ISL_849966, EPI_ISL_849967, EPI_ISL_849968, EPI_ISL_849969, EPI_ISL_849970, EPI_ISL_849971, EPI_ISL_849972, EPI_ISL_849973, EPI_ISL_849974, EPI_ISL_849975, EPI_ISL_849976, EPI_ISL_849977, EPI_ISL_849978, EPI_ISL_849979, EPI_ISL_849980, EPI_ISL_849981, EPI_ISL_849982, EPI_ISL_849983, EPI_ISL_849984, EPI_ISL_849985, EPI_ISL_849986, EPI_ISL_849987, EPI_ISL_849988, EPI_ISL_849989, EPI_ISL_849990, EPI_ISL_849991, EPI_ISL_849992, EPI_ISL_849993, EPI_ISL_849994, EPI_ISL_849995, EPI_ISL_849996, EPI_ISL_849997, EPI_ISL_849998, EPI_ISL_849999, EPI_ISL_850000, EPI_ISL_850001, EPI_ISL_850002, EPI_ISL_850003, EPI_ISL_850004, EPI_ISL_850005, EPI_ISL_850006, EPI_ISL_850007, EPI_ISL_850008, EPI_ISL_850009, EPI_ISL_850010, EPI_ISL_850011, EPI_ISL_850012, EPI_ISL_850013, EPI_ISL_850014, EPI_ISL_850015, EPI_ISL_850016, EPI_ISL_850017, EPI_ISL_850018                                                                                                                                                                                                                                                                                                                                                                                                                                                                                                                                                                                                                                                                                                                                                                                                                                                                                                                                                                                                                                                                                                                                                                                                                                                                                                                                                                                                                                                                                                                                                                                                                                                                                                                                                                                                                                                                                                                                                                                                                                                                                                                                                                                                                                                                                                                                                                                                                                                                                                                                                                                                                                                                                                                                                                                                                                                                                                                                                                 | Santa Clara County Public Health Laboratory                                                                                              | Chan-Zuckerberg Biohub                                                                                             | CZB Ciliahub Consortium                                                                                                                                                                                                                                                                                                                                                |
| see above                                                                                                                                                                                                                                                                                                                                                                                                                                                                                                                                                                                                                                                                                                                                                                                                                                                                                                                                                                                                                                                                                                                                                                                                                                                                                                                                                                                                                                                                                                                                                                                                                                                                                                                                                                                                                                                                                                                                                                                                                                                                                                                                                                                                                                                                                                                                                                                                                                                                                                                                                                                                                                                                                                                                                                                                                                                                                                                                                                                                                                                                                                                                                                                                                                                                                                                                                                                                                                                                                                                                                                                                                                                                                                                                                                                                                                                                                                                                                                                                                                                      | Santa Clara County Public Health Laboratory                                                                                              | Chan-Zuckerberg Biohub                                                                                             | CZB Ciliahub Consortium                                                                                                                                                                                                                                                                                                                                                |
| EPI_ISL_850019, EPI_ISL_850020, EPI_ISL_850021, EPI_ISL_850023, EPI_ISL_850024, EPI_ISL_850025, EPI_ISL_850026, EPI_ISL_850027, EPI_ISL_850028, EPI_ISL_850029, EPI_ISL_850030, EPI_ISL_850031, EPI_ISL_850032, EPI_ISL_850033, EPI_ISL_850034, EPI_ISL_850035, EPI_ISL_850036, EPI_ISL_850037, EPI_ISL_850038, EPI_ISL_850039, EPI_ISL_850040, EPI_ISL_850041, EPI_ISL_850042, EPI_ISL_850043, EPI_ISL_850044, EPI_ISL_850045, EPI_ISL_850046, EPI_ISL_850047, EPI_ISL_850048, EPI_ISL_850049, EPI_ISL_850050, EPI_ISL_850051, EPI_ISL_850052, EPI_ISL_850053, EPI_ISL_850054, EPI_ISL_850055, EPI_ISL_850056, EPI_ISL_850057, EPI_ISL_850058, EPI_ISL_850059, EPI_ISL_850060, EPI_ISL_850061, EPI_ISL_850062, EPI_ISL_850063, EPI_ISL_850064, EPI_ISL_850065, EPI_ISL_850066, EPI_ISL_850067, EPI_ISL_850068, EPI_ISL_850069, EPI_ISL_850070, EPI_ISL_850071, EPI_ISL_850072, EPI_ISL_850073, EPI_ISL_850074, EPI_ISL_850075, EPI_ISL_850076, EPI_ISL_850077, EPI_ISL_850078, EPI_ISL_850079, EPI_ISL_850080, EPI_ISL_850081, EPI_ISL_850082, EPI_ISL_850083, EPI_ISL_850084, EPI_ISL_850085, EPI_ISL_850086, EPI_ISL_850087, EPI_ISL_850088, EPI_ISL_850089, EPI_ISL_850090, EPI_ISL_850091, EPI_ISL_850092, EPI_ISL_850093, EPI_ISL_850094, EPI_ISL_850095, EPI_ISL_850096, EPI_ISL_850097, EPI_ISL_850098, EPI_ISL_850099, EPI_ISL_850100, EPI_ISL_850101, EPI_ISL_850102, EPI_ISL_850103, EPI_ISL_850104, EPI_ISL_850105, EPI_ISL_850106, EPI_ISL_850107, EPI_ISL_850108, EPI_ISL_850109, EPI_ISL_850110, EPI_ISL_850111, EPI_ISL_850112, EPI_ISL_850113, EPI_ISL_850114, EPI_ISL_850115, EPI_ISL_850116, EPI_ISL_850117, EPI_ISL_850118, EPI_ISL_850119, EPI_ISL_850120, EPI_ISL_850121, EPI_ISL_850122, EPI_ISL_850123, EPI_ISL_850124, EPI_ISL_850125, EPI_ISL_850126, EPI_ISL_850127, EPI_ISL_850128, EPI_ISL_850129, EPI_ISL_850130, EPI_ISL_850131, EPI_ISL_850132, EPI_ISL_850133, EPI_ISL_850134, EPI_ISL_850135, EPI_ISL_850136, EPI_ISL_850137, EPI_ISL_850138, EPI_ISL_850139, EPI_ISL_850140, EPI_ISL_850141, EPI_ISL_850142, EPI_ISL_850143, EPI_ISL_850144, EPI_ISL_850145, EPI_ISL_850146, EPI_ISL_850147, EPI_ISL_850148, EPI_ISL_850149, EPI_ISL_850150, EPI_ISL_850151, EPI_ISL_850152, EPI_ISL_850153, EPI_ISL_850154, EPI_ISL_850155, EPI_ISL_850156, EPI_ISL_850157, EPI_ISL_850158, EPI_ISL_850159, EPI_ISL_850160, EPI_ISL_850161, EPI_ISL_850162, EPI_ISL_850163, EPI_ISL_850164, EPI_ISL_850165, EPI_ISL_850166, EPI_ISL_850167, EPI_ISL_850168, EPI_ISL_850169, EPI_ISL_850170, EPI_ISL_850171, EPI_ISL_850172, EPI_ISL_850173, EPI_ISL_850174, EPI_ISL_850175, EPI_ISL_850176, EPI_ISL_850177, EPI_ISL_850178, EPI_ISL_850179                                                                                                                                                                                                                                                                                                                                                                                                                                                                                                                                                                                                                                                                                                                                                                                                                                                                                                                                                                                                                                                                                                                                                                                                                                                                                                                                                                                                 | Renegade                                                                                                                                 | Chan-Zuckerberg Biohub                                                                                             | CZB Ciliahub Consortium                                                                                                                                                                                                                                                                                                                                                |
| see above                                                                                                                                                                                                                                                                                                                                                                                                                                                                                                                                                                                                                                                                                                                                                                                                                                                                                                                                                                                                                                                                                                                                                                                                                                                                                                                                                                                                                                                                                                                                                                                                                                                                                                                                                                                                                                                                                                                                                                                                                                                                                                                                                                                                                                                                                                                                                                                                                                                                                                                                                                                                                                                                                                                                                                                                                                                                                                                                                                                                                                                                                                                                                                                                                                                                                                                                                                                                                                                                                                                                                                                                                                                                                                                                                                                                                                                                                                                                                                                                                                                      | Renegade                                                                                                                                 | Chan-Zuckerberg Biohub                                                                                             | CZB Ciliahub Consortium                                                                                                                                                                                                                                                                                                                                                |
| EPI_ISL_853416, EPI_ISL_853417, EPI_ISL_853418, EPI_ISL_853419, EPI_ISL_853420, EPI_ISL_853421, EPI_ISL_853422, EPI_ISL_853423, EPI_ISL_853424, EPI_ISL_853425, EPI_ISL_853426, EPI_ISL_853427, EPI_ISL_853428, EPI_ISL_853429, EPI_ISL_853430, EPI_ISL_853431, EPI_ISL_853432, EPI_ISL_853433, EPI_ISL_853434, EPI_ISL_853435, EPI_ISL_853436, EPI_ISL_853437, EPI_ISL_853438, EPI_ISL_853439, EPI_ISL_853440, EPI_ISL_853441, EPI_ISL_853442, EPI_ISL_853443, EPI_ISL_853444, EPI_ISL_853445, EPI_ISL_853446, EPI_ISL_853447, EPI_ISL_853448, EPI_ISL_853449, EPI_ISL_853450, EPI_ISL_853451, EPI_ISL_853452, EPI_ISL_853453, EPI_ISL_853454, EPI_ISL_853455, EPI_ISL_853456, EPI_ISL_853457, EPI_ISL_853458, EPI_ISL_853459, EPI_ISL_853460, EPI_ISL_853461, EPI_ISL_853462, EPI_ISL_853463, EPI_ISL_853464, EPI_ISL_853465, EPI_ISL_853466, EPI_ISL_853467, EPI_ISL_853468, EPI_ISL_853469, EPI_ISL_853470, EPI_ISL_853471, EPI_ISL_853472, EPI_ISL_853473, EPI_ISL_853474, EPI_ISL_853475, EPI_ISL_853476, EPI_ISL_853477, EPI_ISL_853478, EPI_ISL_853479, EPI_ISL_853480, EPI_ISL_853481, EPI_ISL_853482, EPI_ISL_853483, EPI_ISL_853484, EPI_ISL_853485, EPI_ISL_853486, EPI_ISL_853487, EPI_ISL_853488, EPI_ISL_853489, EPI_ISL_853490, EPI_ISL_853491, EPI_ISL_853492, EPI_ISL_853493, EPI_ISL_853494, EPI_ISL_853495, EPI_ISL_853496, EPI_ISL_853497, EPI_ISL_853498, EPI_ISL_853499, EPI_ISL_853500, EPI_ISL_853501, EPI_ISL_853502, EPI_ISL_853503, EPI_ISL_853504, EPI_ISL_853505, EPI_ISL_853506, EPI_ISL_853507, EPI_ISL_853508, EPI_ISL_853509, EPI_ISL_853510, EPI_ISL_853511, EPI_ISL_853512, EPI_ISL_853513, EPI_ISL_853514, EPI_ISL_853515, EPI_ISL_853516, EPI_ISL_853517, EPI_ISL_853518, EPI_ISL_853519, EPI_ISL_853520, EPI_ISL_853521, EPI_ISL_853522, EPI_ISL_853523, EPI_ISL_853524, EPI_ISL_853525, EPI_ISL_853526, EPI_ISL_853527, EPI_ISL_853528, EPI_ISL_853529, EPI_ISL_853530, EPI_ISL_853531, EPI_ISL_853532, EPI_ISL_853533, EPI_ISL_853534, EPI_ISL_853535, EPI_ISL_853536, EPI_ISL_853537, EPI_ISL_853538, EPI_ISL_853539, EPI_ISL_853540, EPI_ISL_853541, EPI_ISL_853542, EPI_ISL_853543, EPI_ISL_853544, EPI_ISL_853545, EPI_ISL_853546, EPI_ISL_853547, EPI_ISL_853548, EPI_ISL_853549, EPI_ISL_853550, EPI_ISL_853551, EPI_ISL_853552, EPI_ISL_853553, EPI_ISL_853554, EPI_ISL_853555, EPI_ISL_853556, EPI_ISL_853557, EPI_ISL_853558, EPI_ISL_853559, EPI_ISL_853560, EPI_ISL_853561, EPI_ISL_853562, EPI_ISL_853563, EPI_ISL_853564, EPI_ISL_853565                                                                                                                                                                                                                                                                                                                                                                                                                                                                                                                                                                                                                                                                                                                                                                                                                                                                                                                                                                                                                                                                                                                                                                                                                                                                                                                                                                                                                                                                                                                                                                 | Santa Clara County Public Health Laboratory                                                                                              | Chan-Zuckerberg Biohub                                                                                             | CZB Ciliahub Consortium                                                                                                                                                                                                                                                                                                                                                |
| EPI_ISL_854748, EPI_ISL_854749, EPI_ISL_854751, EPI_ISL_854752, EPI_ISL_854753, EPI_ISL_854757, EPI_ISL_854759, EPI_ISL_854762                                                                                                                                                                                                                                                                                                                                                                                                                                                                                                                                                                                                                                                                                                                                                                                                                                                                                                                                                                                                                                                                                                                                                                                                                                                                                                                                                                                                                                                                                                                                                                                                                                                                                                                                                                                                                                                                                                                                                                                                                                                                                                                                                                                                                                                                                                                                                                                                                                                                                                                                                                                                                                                                                                                                                                                                                                                                                                                                                                                                                                                                                                                                                                                                                                                                                                                                                                                                                                                                                                                                                                                                                                                                                                                                                                                                                                                                                                                                 | Victorian Infectious Diseases Reference Laboratory (VIDRL)                                                                               | VIDRL and MDU-PHL                                                                                                  | Caly L., Seemann T., Sait, M.L., Druce J., Sherry, N.L.                                                                                                                                                                                                                                                                                                                |
| EPI_ISL_856974, EPI_ISL_856975, EPI_ISL_856976, EPI_ISL_856977, EPI_ISL_856978, EPI_ISL_856979, EPI_ISL_856980, EPI_ISL_856981, EPI_ISL_856982, EPI_ISL_856983, EPI_ISL_856984, EPI_ISL_856985, EPI_ISL_856986, EPI_ISL_856987, EPI_ISL_856988, EPI_ISL_856989, EPI_ISL_856990, EPI_ISL_856991, EPI_ISL_856992, EPI_ISL_856993, EPI_ISL_856994, EPI_ISL_856995, EPI_ISL_856996, EPI_ISL_856997, EPI_ISL_856998, EPI_ISL_857000, EPI_ISL_857001, EPI_ISL_857002, EPI_ISL_857003, EPI_ISL_857004, EPI_ISL_857005, EPI_ISL_857006, EPI_ISL_857007, EPI_ISL_857008, EPI_ISL_857009, EPI_ISL_857010, EPI_ISL_857011, EPI_ISL_857012, EPI_ISL_857013, EPI_ISL_857014, EPI_ISL_857015, EPI_ISL_857016, EPI_ISL_857017, EPI_ISL_857018, EPI_ISL_857019, EPI_ISL_857020, EPI_ISL_857021, EPI_ISL_857022, EPI_ISL_857023, EPI_ISL_857024, EPI_ISL_857025, EPI_ISL_857026, EPI_ISL_857027, EPI_ISL_857028, EPI_ISL_857029, EPI_ISL_857030, EPI_ISL_857031, EPI_ISL_857032, EPI_ISL_857033, EPI_ISL_857034, EPI_ISL_857035, EPI_ISL_857036, EPI_ISL_857037, EPI_ISL_857038, EPI_ISL_857039                                                                                                                                                                                                                                                                                                                                                                                                                                                                                                                                                                                                                                                                                                                                                                                                                                                                                                                                                                                                                                                                                                                                                                                                                                                                                                                                                                                                                                                                                                                                                                                                                                                                                                                                                                                                                                                                                                                                                                                                                                                                                                                                                                                                                                                                                                                                                                                                                                                                                                                                                                                                                                                                                                                                                                                                                                                                                                                                                                                 | The Ashley Laboratory, Stanford University                                                                                               | Chan-Zuckerberg Biohub                                                                                             | CZB Ciliahub Consortium                                                                                                                                                                                                                                                                                                                                                |
| see above                                                                                                                                                                                                                                                                                                                                                                                                                                                                                                                                                                                                                                                                                                                                                                                                                                                                                                                                                                                                                                                                                                                                                                                                                                                                                                                                                                                                                                                                                                                                                                                                                                                                                                                                                                                                                                                                                                                                                                                                                                                                                                                                                                                                                                                                                                                                                                                                                                                                                                                                                                                                                                                                                                                                                                                                                                                                                                                                                                                                                                                                                                                                                                                                                                                                                                                                                                                                                                                                                                                                                                                                                                                                                                                                                                                                                                                                                                                                                                                                                                                      | The Ashley Laboratory, Stanford University                                                                                               | Chan-Zuckerberg Biohub                                                                                             | CZB Ciliahub Consortium                                                                                                                                                                                                                                                                                                                                                |
| EPI_ISL_865488, EPI_ISL_865489, EPI_ISL_865490, EPI_ISL_865491, EPI_ISL_865492, EPI_ISL_865494, EPI_ISL_865495, EPI_ISL_865496, EPI_ISL_865498, EPI_ISL_865499, EPI_ISL_865500, EPI_ISL_865501, EPI_ISL_865502, EPI_ISL_865503, EPI_ISL_865504, EPI_ISL_865505, EPI_ISL_865506, EPI_ISL_865507, EPI_ISL_865508, EPI_ISL_865509, EPI_ISL_865510, EPI_ISL_865511, EPI_ISL_865512, EPI_ISL_865513, EPI_ISL_865514, EPI_ISL_865515, EPI_ISL_865516, EPI_ISL_865517, EPI_ISL_865518, EPI_ISL_865519, EPI_ISL_865520, EPI_ISL_865521, EPI_ISL_865522, EPI_ISL_865523, EPI_ISL_865524, EPI_ISL_865525, EPI_ISL_865526, EPI_ISL_865527, EPI_ISL_865528, EPI_ISL_865529, EPI_ISL_865530, EPI_ISL_865531, EPI_ISL_865532, EPI_ISL_865533, EPI_ISL_865534, EPI_ISL_865535, EPI_ISL_865536, EPI_ISL_865537, EPI_ISL_865538, EPI_ISL_865539, EPI_ISL_865540, EPI_ISL_865541, EPI_ISL_865542, EPI_ISL_865543, EPI_ISL_865544, EPI_ISL_865545, EPI_ISL_865546, EPI_ISL_865547, EPI_ISL_865548, EPI_ISL_865549, EPI_ISL_865550, EPI_ISL_865551, EPI_ISL_865552, EPI_ISL_865553, EPI_ISL_865554, EPI_ISL_865555, EPI_ISL_865556, EPI_ISL_865557, EPI_ISL_865558, EPI_ISL_865559, EPI_ISL_865560, EPI_ISL_865562, EPI_ISL_865563, EPI_ISL_865564, EPI_ISL_865565, EPI_ISL_865566, EPI_ISL_865567, EPI_ISL_865568, EPI_ISL_865569, EPI_ISL_865570, EPI_ISL_865571, EPI_ISL_865572, EPI_ISL_865573, EPI_ISL_865574, EPI_ISL_865575, EPI_ISL_865576, EPI_ISL_865577, EPI_ISL_865578, EPI_ISL_865579, EPI_ISL_865580, EPI_ISL_865582, EPI_ISL_865583                                                                                                                                                                                                                                                                                                                                                                                                                                                                                                                                                                                                                                                                                                                                                                                                                                                                                                                                                                                                                                                                                                                                                                                                                                                                                                                                                                                                                                                                                                                                                                                                                                                                                                                                                                                                                                                                                                                                                                                                                                                                                                                                                                                                                                                                                                                                                                                                                                                                                                                                 | Santa Clara County Public Health Laboratory                                                                                              | Chan-Zuckerberg Biohub                                                                                             | CZB Ciliahub Consortium                                                                                                                                                                                                                                                                                                                                                |
| see above                                                                                                                                                                                                                                                                                                                                                                                                                                                                                                                                                                                                                                                                                                                                                                                                                                                                                                                                                                                                                                                                                                                                                                                                                                                                                                                                                                                                                                                                                                                                                                                                                                                                                                                                                                                                                                                                                                                                                                                                                                                                                                                                                                                                                                                                                                                                                                                                                                                                                                                                                                                                                                                                                                                                                                                                                                                                                                                                                                                                                                                                                                                                                                                                                                                                                                                                                                                                                                                                                                                                                                                                                                                                                                                                                                                                                                                                                                                                                                                                                                                      | Santa Clara County Public Health Laboratory                                                                                              | Chan-Zuckerberg Biohub                                                                                             | CZB Ciliahub Consortium                                                                                                                                                                                                                                                                                                                                                |
| see above                                                                                                                                                                                                                                                                                                                                                                                                                                                                                                                                                                                                                                                                                                                                                                                                                                                                                                                                                                                                                                                                                                                                                                                                                                                                                                                                                                                                                                                                                                                                                                                                                                                                                                                                                                                                                                                                                                                                                                                                                                                                                                                                                                                                                                                                                                                                                                                                                                                                                                                                                                                                                                                                                                                                                                                                                                                                                                                                                                                                                                                                                                                                                                                                                                                                                                                                                                                                                                                                                                                                                                                                                                                                                                                                                                                                                                                                                                                                                                                                                                                      | Barts Health NHS Trust                                                                                                                   | COVID-19 Genomics UK (COG-UK) Consortium                                                                           | CUTINO-MOGUEL, Maria-Teresa; HARRINGTON, David; OWOYEMI, Dola; KULASEGARAN-SHYLINI, Raghavendran; BROAD, Claire; KELE, Beatrix                                                                                                                                                                                                                                         |

|                                                                                                                                                                                                                                                                                                                                                                                                                                                                                                                                                                                                                                                                                                                                                                                                                                                                                                                                                                                                                                                                                                                                                                                                                                                                                                                                                                                                                                                                                                                                                                                                                                                                                                                                                                                                                                                                                                                                                                                                                                                                                                                                                                                                                                                                                                                                                                                                                                                                                                                                                                                                                                                                                                                                                                                                                                                                                                                                                                                                                                              |                                                                                             |                                                                                                                                                |                                                                                                                                                                                                                                                                                                                                                                                |
|----------------------------------------------------------------------------------------------------------------------------------------------------------------------------------------------------------------------------------------------------------------------------------------------------------------------------------------------------------------------------------------------------------------------------------------------------------------------------------------------------------------------------------------------------------------------------------------------------------------------------------------------------------------------------------------------------------------------------------------------------------------------------------------------------------------------------------------------------------------------------------------------------------------------------------------------------------------------------------------------------------------------------------------------------------------------------------------------------------------------------------------------------------------------------------------------------------------------------------------------------------------------------------------------------------------------------------------------------------------------------------------------------------------------------------------------------------------------------------------------------------------------------------------------------------------------------------------------------------------------------------------------------------------------------------------------------------------------------------------------------------------------------------------------------------------------------------------------------------------------------------------------------------------------------------------------------------------------------------------------------------------------------------------------------------------------------------------------------------------------------------------------------------------------------------------------------------------------------------------------------------------------------------------------------------------------------------------------------------------------------------------------------------------------------------------------------------------------------------------------------------------------------------------------------------------------------------------------------------------------------------------------------------------------------------------------------------------------------------------------------------------------------------------------------------------------------------------------------------------------------------------------------------------------------------------------------------------------------------------------------------------------------------------------|---------------------------------------------------------------------------------------------|------------------------------------------------------------------------------------------------------------------------------------------------|--------------------------------------------------------------------------------------------------------------------------------------------------------------------------------------------------------------------------------------------------------------------------------------------------------------------------------------------------------------------------------|
| EPI_ISL_867270, EPI_ISL_867390,<br>EPI_ISL_867405, EPI_ISL_867424,<br>EPI_ISL_867916                                                                                                                                                                                                                                                                                                                                                                                                                                                                                                                                                                                                                                                                                                                                                                                                                                                                                                                                                                                                                                                                                                                                                                                                                                                                                                                                                                                                                                                                                                                                                                                                                                                                                                                                                                                                                                                                                                                                                                                                                                                                                                                                                                                                                                                                                                                                                                                                                                                                                                                                                                                                                                                                                                                                                                                                                                                                                                                                                         | Originating lab: Wales Specialist Virology Centre Sequencing<br>lab: Pathogen Genomics Unit | Public Health Wales Microbiology Cardiff Wales Specialist<br>Virology Centre                                                                   | Catherine Moore, Johnathan Evans, Laura Gifford, Malorie Perry, Simon Cottrell, Angela Marchbank, Alec Birchley, Alexander Adams, Amy Gaskin, Bree<br>Gatica-Wilcox, Jason Coombes, Joel Southgate, Lauren Gilbert, Lee Graham, Nicole Pacchiarini, Sara Kumziene-Summerhayes, Sarah Taylor, Sophie<br>Jones, Sara Rey, Matthew Bull, Joanne Watkins, Sally Corden, Tom Connor |
| EPI_ISL_869144, EPI_ISL_869145, EPI_ISL_869146, EPI_ISL_869147, EPI_ISL_869148, EPI_ISL_869149, EPI_ISL_869150, EPI_ISL_869151, EPI_ISL_869152, EPI_ISL_869153, EPI_ISL_869154, EPI_ISL_869155, EPI_ISL_869156, EPI_ISL_869157, EPI_ISL_869158, EPI_ISL_869159, EPI_ISL_869160, EPI_ISL_869161,<br>EPI_ISL_869162, EPI_ISL_869163, EPI_ISL_869164, EPI_ISL_869165, EPI_ISL_871815                                                                                                                                                                                                                                                                                                                                                                                                                                                                                                                                                                                                                                                                                                                                                                                                                                                                                                                                                                                                                                                                                                                                                                                                                                                                                                                                                                                                                                                                                                                                                                                                                                                                                                                                                                                                                                                                                                                                                                                                                                                                                                                                                                                                                                                                                                                                                                                                                                                                                                                                                                                                                                                            | see above                                                                                   | National Virus Reference Laboratory                                                                                                            | Irish Coronavirus Sequencing Consortium - Teagasc<br>Moorepark<br>Calum Walsh, Genuity Ireland                                                                                                                                                                                                                                                                                 |
| EPI_ISL_871908, EPI_ISL_871909, EPI_ISL_871910, EPI_ISL_871913, EPI_ISL_871938, EPI_ISL_871939, EPI_ISL_871940, EPI_ISL_871941, EPI_ISL_871942, EPI_ISL_871943, EPI_ISL_871944, EPI_ISL_871945, EPI_ISL_871946, EPI_ISL_871947, EPI_ISL_871948, EPI_ISL_871949, EPI_ISL_871950, EPI_ISL_871951,<br>EPI_ISL_871952, EPI_ISL_871953, EPI_ISL_871954, EPI_ISL_871955, EPI_ISL_871956, EPI_ISL_871957, EPI_ISL_871958, EPI_ISL_871959, EPI_ISL_871960, EPI_ISL_871961, EPI_ISL_871962, EPI_ISL_871963, EPI_ISL_871964                                                                                                                                                                                                                                                                                                                                                                                                                                                                                                                                                                                                                                                                                                                                                                                                                                                                                                                                                                                                                                                                                                                                                                                                                                                                                                                                                                                                                                                                                                                                                                                                                                                                                                                                                                                                                                                                                                                                                                                                                                                                                                                                                                                                                                                                                                                                                                                                                                                                                                                            | see above                                                                                   | Servicio de Microbiología Clínica (Complejo Hospitalario de<br>Navarra, Pamplona), Instituto de Investigación Sanitaria de<br>Navarra (IdiSNA) | SeqCOVID-SPAIN consortium/IBV(CSIC)<br>Carmen Ezpeleta Baquedano, Ana Navascués, Ana Miqueleiz and SeqCOVID-SPAIN consortium                                                                                                                                                                                                                                                   |
| EPI_ISL_877564, EPI_ISL_877565, EPI_ISL_877566, EPI_ISL_877567, EPI_ISL_877568, EPI_ISL_877569, EPI_ISL_877576, EPI_ISL_877577, EPI_ISL_877578, EPI_ISL_877582, EPI_ISL_877583, EPI_ISL_877584                                                                                                                                                                                                                                                                                                                                                                                                                                                                                                                                                                                                                                                                                                                                                                                                                                                                                                                                                                                                                                                                                                                                                                                                                                                                                                                                                                                                                                                                                                                                                                                                                                                                                                                                                                                                                                                                                                                                                                                                                                                                                                                                                                                                                                                                                                                                                                                                                                                                                                                                                                                                                                                                                                                                                                                                                                               | see above                                                                                   | Victorian Infectious Diseases Reference Laboratory (VIDRIL)                                                                                    | VIDRIL and MDU-PHL<br>Caly L., Seemann T., Sait, M.L., Druce J., Sherry, N.L.                                                                                                                                                                                                                                                                                                  |
| EPI_ISL_884866, EPI_ISL_884867,<br>EPI_ISL_884868, EPI_ISL_884869,<br>EPI_ISL_884870                                                                                                                                                                                                                                                                                                                                                                                                                                                                                                                                                                                                                                                                                                                                                                                                                                                                                                                                                                                                                                                                                                                                                                                                                                                                                                                                                                                                                                                                                                                                                                                                                                                                                                                                                                                                                                                                                                                                                                                                                                                                                                                                                                                                                                                                                                                                                                                                                                                                                                                                                                                                                                                                                                                                                                                                                                                                                                                                                         | CA DPH Viral and Rickettsial Disease Laboratory                                             | Chan-Zuckerberg Biohub                                                                                                                         | CZB Ciiahub Consortium                                                                                                                                                                                                                                                                                                                                                         |
| EPI_ISL_884871, EPI_ISL_884872, EPI_ISL_884873, EPI_ISL_884874, EPI_ISL_884875, EPI_ISL_884876, EPI_ISL_884877, EPI_ISL_884878, EPI_ISL_884879, EPI_ISL_884880, EPI_ISL_884881, EPI_ISL_884882, EPI_ISL_884883, EPI_ISL_884884, EPI_ISL_884885, EPI_ISL_884886, EPI_ISL_884887, EPI_ISL_884888,<br>EPI_ISL_884889, EPI_ISL_884890, EPI_ISL_884891, EPI_ISL_884892, EPI_ISL_884893, EPI_ISL_884894, EPI_ISL_884895, EPI_ISL_884896, EPI_ISL_884897, EPI_ISL_884898, EPI_ISL_884899, EPI_ISL_884900, EPI_ISL_884901, EPI_ISL_884902, EPI_ISL_884903, EPI_ISL_884904, EPI_ISL_884905, EPI_ISL_884906,<br>EPI_ISL_884907, EPI_ISL_884908, EPI_ISL_884909, EPI_ISL_884910, EPI_ISL_884911, EPI_ISL_884912, EPI_ISL_884913, EPI_ISL_884914, EPI_ISL_884915, EPI_ISL_884916, EPI_ISL_884917, EPI_ISL_884918, EPI_ISL_884919, EPI_ISL_884920, EPI_ISL_884921, EPI_ISL_884922, EPI_ISL_884923, EPI_ISL_884924,<br>EPI_ISL_884925, EPI_ISL_884926, EPI_ISL_884927, EPI_ISL_884928, EPI_ISL_884929, EPI_ISL_884930, EPI_ISL_884931, EPI_ISL_884932, EPI_ISL_884933, EPI_ISL_884934, EPI_ISL_884935, EPI_ISL_884936, EPI_ISL_884937, EPI_ISL_884938, EPI_ISL_884939, EPI_ISL_884940, EPI_ISL_884941, EPI_ISL_884942,<br>EPI_ISL_884943, EPI_ISL_884944, EPI_ISL_884945, EPI_ISL_884946, EPI_ISL_884947, EPI_ISL_884948, EPI_ISL_884949, EPI_ISL_884950, EPI_ISL_884951, EPI_ISL_884952, EPI_ISL_884953, EPI_ISL_884954, EPI_ISL_884955, EPI_ISL_884956, EPI_ISL_884957, EPI_ISL_884958, EPI_ISL_884959, EPI_ISL_884960,<br>EPI_ISL_884961, EPI_ISL_884962, EPI_ISL_884963, EPI_ISL_884964, EPI_ISL_884965, EPI_ISL_884966, EPI_ISL_884967, EPI_ISL_884968, EPI_ISL_884969, EPI_ISL_884970, EPI_ISL_884971, EPI_ISL_884972, EPI_ISL_884973, EPI_ISL_884974, EPI_ISL_884975, EPI_ISL_884976, EPI_ISL_884977, EPI_ISL_884978,<br>EPI_ISL_884979, EPI_ISL_884980, EPI_ISL_884981, EPI_ISL_884982, EPI_ISL_884983, EPI_ISL_884984, EPI_ISL_884985, EPI_ISL_884986, EPI_ISL_884987, EPI_ISL_884988, EPI_ISL_884989, EPI_ISL_884990, EPI_ISL_884991, EPI_ISL_884992, EPI_ISL_884993, EPI_ISL_884994, EPI_ISL_884995, EPI_ISL_884996,<br>EPI_ISL_884997, EPI_ISL_884998, EPI_ISL_884999, EPI_ISL_885000, EPI_ISL_885001, EPI_ISL_885002, EPI_ISL_885003, EPI_ISL_885004, EPI_ISL_885005, EPI_ISL_885006, EPI_ISL_885007, EPI_ISL_885008, EPI_ISL_885009, EPI_ISL_885010, EPI_ISL_885011, EPI_ISL_885012, EPI_ISL_885013, EPI_ISL_885014,<br>EPI_ISL_885015, EPI_ISL_885016, EPI_ISL_885017, EPI_ISL_885018, EPI_ISL_885019, EPI_ISL_885020, EPI_ISL_885021, EPI_ISL_885022, EPI_ISL_885023, EPI_ISL_885024, EPI_ISL_885025, EPI_ISL_885026, EPI_ISL_885027, EPI_ISL_885028, EPI_ISL_885029, EPI_ISL_885030, EPI_ISL_885031, EPI_ISL_885032,<br>EPI_ISL_885033, EPI_ISL_885034, EPI_ISL_885035, EPI_ISL_885036, EPI_ISL_885037, EPI_ISL_885038, EPI_ISL_885039, EPI_ISL_885040, EPI_ISL_885041, EPI_ISL_885042, EPI_ISL_885043, EPI_ISL_885044, EPI_ISL_885045, EPI_ISL_885046, EPI_ISL_885047, EPI_ISL_885048, EPI_ISL_885049, EPI_ISL_885050,<br>EPI_ISL_885051 | see above                                                                                   | Santa Clara County Public Health Laboratory                                                                                                    | Chan-Zuckerberg Biohub<br>CZB Ciiahub Consortium                                                                                                                                                                                                                                                                                                                               |
| EPI_ISL_885052, EPI_ISL_885053, EPI_ISL_885054, EPI_ISL_885055, EPI_ISL_885056, EPI_ISL_885057, EPI_ISL_885058, EPI_ISL_885059, EPI_ISL_885060, EPI_ISL_885061, EPI_ISL_885062, EPI_ISL_885063, EPI_ISL_885064, EPI_ISL_885065, EPI_ISL_885066, EPI_ISL_885067, EPI_ISL_885068, EPI_ISL_885069,<br>EPI_ISL_885070, EPI_ISL_885071, EPI_ISL_885072, EPI_ISL_885073, EPI_ISL_885074, EPI_ISL_885075, EPI_ISL_885076, EPI_ISL_885077, EPI_ISL_885078, EPI_ISL_885079, EPI_ISL_885080, EPI_ISL_885081, EPI_ISL_885082, EPI_ISL_885083, EPI_ISL_885084, EPI_ISL_885085, EPI_ISL_885086, EPI_ISL_885087,<br>EPI_ISL_885088, EPI_ISL_885089, EPI_ISL_885090, EPI_ISL_885091, EPI_ISL_885092, EPI_ISL_885093, EPI_ISL_885094, EPI_ISL_885095, EPI_ISL_885096, EPI_ISL_885097, EPI_ISL_885098, EPI_ISL_885099, EPI_ISL_885100, EPI_ISL_885101, EPI_ISL_885102, EPI_ISL_885103, EPI_ISL_885104, EPI_ISL_885105,<br>EPI_ISL_885106, EPI_ISL_885107, EPI_ISL_885108, EPI_ISL_885109, EPI_ISL_885110, EPI_ISL_885111, EPI_ISL_885112, EPI_ISL_885113, EPI_ISL_885114, EPI_ISL_885115, EPI_ISL_885116, EPI_ISL_885117, EPI_ISL_885118, EPI_ISL_885119, EPI_ISL_885120, EPI_ISL_885121, EPI_ISL_885122, EPI_ISL_885123,<br>EPI_ISL_885124, EPI_ISL_885125, EPI_ISL_885126, EPI_ISL_885127                                                                                                                                                                                                                                                                                                                                                                                                                                                                                                                                                                                                                                                                                                                                                                                                                                                                                                                                                                                                                                                                                                                                                                                                                                                                                                                                                                                                                                                                                                                                                                                                                                                                                                                                                                   | see above                                                                                   | Orange County Public Health Lab                                                                                                                | Chan-Zuckerberg Biohub<br>CZB Ciiahub Consortium                                                                                                                                                                                                                                                                                                                               |
| EPI_ISL_885128, EPI_ISL_885129, EPI_ISL_885130, EPI_ISL_885131, EPI_ISL_885132, EPI_ISL_885133, EPI_ISL_885134, EPI_ISL_885135, EPI_ISL_885136, EPI_ISL_885137, EPI_ISL_885138                                                                                                                                                                                                                                                                                                                                                                                                                                                                                                                                                                                                                                                                                                                                                                                                                                                                                                                                                                                                                                                                                                                                                                                                                                                                                                                                                                                                                                                                                                                                                                                                                                                                                                                                                                                                                                                                                                                                                                                                                                                                                                                                                                                                                                                                                                                                                                                                                                                                                                                                                                                                                                                                                                                                                                                                                                                               | see above                                                                                   | California Institute of Technology                                                                                                             | Chan-Zuckerberg Biohub<br>CZB Ciiahub Consortium                                                                                                                                                                                                                                                                                                                               |

































EPI\_ISL\_867853, EPI\_ISL\_867856, EPI\_ISL\_867861, EPI\_ISL\_867868, EPI\_ISL\_867873, EPI\_ISL\_867876, EPI\_ISL\_867879, EPI\_ISL\_867880, EPI\_ISL\_867883, EPI\_ISL\_867884, EPI\_ISL\_867889, EPI\_ISL\_867893, EPI\_ISL\_867899, EPI\_ISL\_867900, EPI\_ISL\_867901, EPI\_ISL\_867904, EPI\_ISL\_867906, EPI\_ISL\_867911, EPI\_ISL\_867913, EPI\_ISL\_867914, EPI\_ISL\_867917, EPI\_ISL\_867923, EPI\_ISL\_867924, EPI\_ISL\_867926, EPI\_ISL\_867929

see above

Originating lab: Wales Specialist Virology Centre Sequencing  
lab: Pathogen Genomics Unit

Public Health Wales Microbiology Cardiff Wales Specialist  
Virology Centre

Catherine Moore, Johnathan Evans, Laura Gifford, Malorie Perry, Simon Cottrell, Angela Marchbank, Alec Birchley, Alexander Adams, Amy Gaskin, Bree Gatica-Wilcox, Jason Coombes, Joel Southgate, Lauren Gilbert, Lee Graham, Nicole Pacchiarini, Sara Kumziene-Summerhayes, Sarah Taylor, Sophie Jones, Sara Rey, Matthew Bull, Joanne Watkins, Sally Corden, Tom Connor

We gratefully acknowledge the following Authors from the Originating laboratories responsible for obtaining the specimens, as well as the Submitting laboratories where the genome data were generated and shared via GISAID, on which this research is based.

All Submitters of data may be contacted directly via [www.gisaid.org](http://www.gisaid.org)

Authors are sorted alphabetically.

| Accession ID                                                                                                                                                                                                                                                                                                                                                                                                                                                                                                                                                                                                                                                                                                                                                                                                                                                                                                                                                                                                                                                                                                                                                                                                                                                                                                                                                                                                                                                                                                                                                                                                                   | Originating Laboratory                                                                                 | Submitting Laboratory                                                                                                       | Authors                                                                                                                                                                                                                                                                                                                                                                                                |
|--------------------------------------------------------------------------------------------------------------------------------------------------------------------------------------------------------------------------------------------------------------------------------------------------------------------------------------------------------------------------------------------------------------------------------------------------------------------------------------------------------------------------------------------------------------------------------------------------------------------------------------------------------------------------------------------------------------------------------------------------------------------------------------------------------------------------------------------------------------------------------------------------------------------------------------------------------------------------------------------------------------------------------------------------------------------------------------------------------------------------------------------------------------------------------------------------------------------------------------------------------------------------------------------------------------------------------------------------------------------------------------------------------------------------------------------------------------------------------------------------------------------------------------------------------------------------------------------------------------------------------|--------------------------------------------------------------------------------------------------------|-----------------------------------------------------------------------------------------------------------------------------|--------------------------------------------------------------------------------------------------------------------------------------------------------------------------------------------------------------------------------------------------------------------------------------------------------------------------------------------------------------------------------------------------------|
| EPI_ISL_405839, EPI_ISL_406030                                                                                                                                                                                                                                                                                                                                                                                                                                                                                                                                                                                                                                                                                                                                                                                                                                                                                                                                                                                                                                                                                                                                                                                                                                                                                                                                                                                                                                                                                                                                                                                                 | The University of Hong Kong - Shenzhen Hospital                                                        | Li Ka Shing Faculty of Medicine, The University of Hong Kong                                                                | Chan,J.F.-W., Yuan,S., Kok,K.H., To,K.K.-W., Chu,H., Yang,J., Xing,F., Liu,J., Yip,C.C.-Y., Poon,R.W.-S., Tsai,H.W., Lo,S.K.-F., Chan,K.H., Poon,V.K.M., Chan,W.M., Ip,J.D., Cai,J.P., Cheng,V.C.-C., Chen,H., Hui,C.K.-M. and Yuen,K.Y.                                                                                                                                                               |
| EPI_ISL_406716, EPI_ISL_406717                                                                                                                                                                                                                                                                                                                                                                                                                                                                                                                                                                                                                                                                                                                                                                                                                                                                                                                                                                                                                                                                                                                                                                                                                                                                                                                                                                                                                                                                                                                                                                                                 | State Key Laboratory of Virology, Wuhan University                                                     | State Key Laboratory of Virology, Wuhan University                                                                          | Chen,L., Liu,W., Zhang,Q., Xu,K., Ye,G., Wu,W., Sun,Z., Liu,F., Wu,K., Mei,Y., Zhang,W., Chen,Y., Li,Y., Shi,M., Lan,K. and Liu,Y.                                                                                                                                                                                                                                                                     |
| EPI_ISL_411060, EPI_ISL_411066                                                                                                                                                                                                                                                                                                                                                                                                                                                                                                                                                                                                                                                                                                                                                                                                                                                                                                                                                                                                                                                                                                                                                                                                                                                                                                                                                                                                                                                                                                                                                                                                 | Fujian Center for Disease Control and Prevention                                                       | Fujian Center for Disease Control and Prevention                                                                            | Chen Wei, Zhang Yanhua, He Wenxiang, Weng Yuwei                                                                                                                                                                                                                                                                                                                                                        |
| EPI_ISL_412026                                                                                                                                                                                                                                                                                                                                                                                                                                                                                                                                                                                                                                                                                                                                                                                                                                                                                                                                                                                                                                                                                                                                                                                                                                                                                                                                                                                                                                                                                                                                                                                                                 | Second Hospital of Anhui Medical University                                                            | Second Hospital of Anhui Medical University                                                                                 | Changtai Wang, Zhongping Liu, Zixiang Chen, Xin Huang, Mengyuan Xua, Tengfei He, Mengji Lu, Zhenhua Zhang                                                                                                                                                                                                                                                                                              |
| EPI_ISL_413017, EPI_ISL_413018                                                                                                                                                                                                                                                                                                                                                                                                                                                                                                                                                                                                                                                                                                                                                                                                                                                                                                                                                                                                                                                                                                                                                                                                                                                                                                                                                                                                                                                                                                                                                                                                 | Department of Microbiology, Institute for Viral Diseases, College of Medicine, Korea University        | Department of Microbiology, Institute for Viral Diseases, College of Medicine, Korea University                             | Changmin Kang, Joon-Yong Bae, Jungmin Lee, Heedo Park, Juyoung Cho, Jeonghun Kim, Gee eun Lee, Cui Chunguang, Kyeong-ryeol Shin, Dong Min Kim, Jin Il Kim, Man-Seong Park                                                                                                                                                                                                                              |
| EPI_ISL_413456                                                                                                                                                                                                                                                                                                                                                                                                                                                                                                                                                                                                                                                                                                                                                                                                                                                                                                                                                                                                                                                                                                                                                                                                                                                                                                                                                                                                                                                                                                                                                                                                                 | Seattle Flu Study, University of Washington Medical Center                                             | Seattle Flu Study, University of Washington Medical Center                                                                  | Chu et al                                                                                                                                                                                                                                                                                                                                                                                              |
| EPI_ISL_413513                                                                                                                                                                                                                                                                                                                                                                                                                                                                                                                                                                                                                                                                                                                                                                                                                                                                                                                                                                                                                                                                                                                                                                                                                                                                                                                                                                                                                                                                                                                                                                                                                 | Division of Infectious Diseases, Department of Internal Medicine, Korea University College of Medicine | Department of Microbiology, Institute for Viral Diseases, College of Medicine, Korea University                             | Changmin Kang, Joon-Yong Bae, Jungmin Lee, Jin Gu Yoon, Heedo Park, Juyoung Cho, Jeonghun Kim, Gee Eun Lee, Cui Chunguang, Kyeong-ryeol Shin, Ji Yun Noh, Joon Young Song, Hee Jin Cheong, Woo Joo Kim, Jin Il Kim, Man-Seong Park                                                                                                                                                                     |
| EPI_ISL_413514                                                                                                                                                                                                                                                                                                                                                                                                                                                                                                                                                                                                                                                                                                                                                                                                                                                                                                                                                                                                                                                                                                                                                                                                                                                                                                                                                                                                                                                                                                                                                                                                                 | Department of Microbiology, Institute for Viral Diseases, College of Medicine, Korea University        | Department of Microbiology, Institute for Viral Diseases, College of Medicine, Korea University                             | Changmin Kang, Joon-Yong Bae, Jungmin Lee, Jin Gu Yoon, Heedo Park, Juyoung Cho, Jeonghun Kim, Gee Eun Lee, Cui Chunguang, Kyeong-ryeol Shin, Ji Yun Noh, Joon Young Song, Hee Jin Cheong, Woo Joo Kim, Jin Il Kim, Man-Seong Park                                                                                                                                                                     |
| EPI_ISL_413515                                                                                                                                                                                                                                                                                                                                                                                                                                                                                                                                                                                                                                                                                                                                                                                                                                                                                                                                                                                                                                                                                                                                                                                                                                                                                                                                                                                                                                                                                                                                                                                                                 | Division of Infectious Diseases, Department of Internal Medicine, Korea University College of Medicine | Department of Microbiology, Institute for Viral Diseases, College of Medicine, Korea University                             | Changmin Kang, Joon-Yong Bae, Jungmin Lee, Jin Gu Yoon, Heedo Park, Juyoung Cho, Jeonghun Kim, Gee Eun Lee, Cui Chunguang, Kyeong-ryeol Shin, Ji Yun Noh, Joon Young Song, Hee Jin Cheong, Woo Joo Kim, Jin Il Kim, Man-Seong Park                                                                                                                                                                     |
| EPI_ISL_413516                                                                                                                                                                                                                                                                                                                                                                                                                                                                                                                                                                                                                                                                                                                                                                                                                                                                                                                                                                                                                                                                                                                                                                                                                                                                                                                                                                                                                                                                                                                                                                                                                 | Department of Microbiology, Institute for Viral Diseases, College of Medicine, Korea University        | Department of Microbiology, Institute for Viral Diseases, College of Medicine, Korea University                             | Changmin Kang, Joon-Yong Bae, Jungmin Lee, Jin Gu Yoon, Heedo Park, Juyoung Cho, Jeonghun Kim, Gee Eun Lee, Cui Chunguang, Kyeong-ryeol Shin, Ji Yun Noh, Joon Young Song, Hee Jin Cheong, Woo Joo Kim, Jin Il Kim, Man-Seong Park                                                                                                                                                                     |
| EPI_ISL_413560                                                                                                                                                                                                                                                                                                                                                                                                                                                                                                                                                                                                                                                                                                                                                                                                                                                                                                                                                                                                                                                                                                                                                                                                                                                                                                                                                                                                                                                                                                                                                                                                                 | Seattle Flu Study                                                                                      | Seattle Flu Study                                                                                                           | Chu et al                                                                                                                                                                                                                                                                                                                                                                                              |
| EPI_ISL_414014                                                                                                                                                                                                                                                                                                                                                                                                                                                                                                                                                                                                                                                                                                                                                                                                                                                                                                                                                                                                                                                                                                                                                                                                                                                                                                                                                                                                                                                                                                                                                                                                                 | Hospital Israelita Albert Einstein                                                                     | Instituto Adolfo Lutz, Interdisciplinary Procedures Center, Strategic Laboratory                                            | Claudio Tavares Sacchi, Claudia Regina Gonçalves, Katia Correia dos Santos, Carlos Henrique Camargo, Maria do Carmo Sampaio Tavares Timenetsky, Terezinha Maria de Paiva, Ester Cerdeira Sabino                                                                                                                                                                                                        |
| EPI_ISL_414015                                                                                                                                                                                                                                                                                                                                                                                                                                                                                                                                                                                                                                                                                                                                                                                                                                                                                                                                                                                                                                                                                                                                                                                                                                                                                                                                                                                                                                                                                                                                                                                                                 | Hospital São Joaquim Beneficencia Portuguesa                                                           | Instituto Adolfo Lutz, Interdisciplinary Procedures Center, Strategic Laboratory                                            | Claudio Tavares Sacchi, Claudia Regina Gonçalves, Simone Guadagnucci Morillo, Carlos Henrique Camargo, Maria do Carmo Sampaio Tavares Timenetsky, Fabiana Cristina Pereira dos Santos Terezinha Maria de Paiva, Ester Cerdeira Sabino                                                                                                                                                                  |
| EPI_ISL_416028                                                                                                                                                                                                                                                                                                                                                                                                                                                                                                                                                                                                                                                                                                                                                                                                                                                                                                                                                                                                                                                                                                                                                                                                                                                                                                                                                                                                                                                                                                                                                                                                                 | National Influenza Center - Instituto Adolfo Lutz                                                      | Instituto Adolfo Lutz, Interdisciplinary Procedures Center, Strategic Laboratory                                            | Claudio Tavares Sacchi, Claudia Regina Gonçalves, Carlos Henrique Camargo, Fabiana Cristina Pereira dos Santos, Daniela Bernardes Borges da Silva, Simone Guadagnucci Morillo, Adriano Abbud, Adriana Bugno, Maria do Carmo Sampaio Tavares Timenetsky, Terezinha Maria de Paiva                                                                                                                       |
| EPI_ISL_416029                                                                                                                                                                                                                                                                                                                                                                                                                                                                                                                                                                                                                                                                                                                                                                                                                                                                                                                                                                                                                                                                                                                                                                                                                                                                                                                                                                                                                                                                                                                                                                                                                 | Laboratório Fleury                                                                                     | Instituto Adolfo Lutz, Interdisciplinary Procedures Center, Strategic Laboratory                                            | Claudio Tavares Sacchi, Claudia Regina Gonçalves, Carlos Henrique Camargo, Fabiana Cristina Pereira dos Santos, Daniela Bernardes Borges da Silva, Simone Guadagnucci Morillo, Adriano Abbud, Adriana Bugno, Maria do Carmo Sampaio Tavares Timenetsky, Terezinha Maria de Paiva                                                                                                                       |
| EPI_ISL_416032                                                                                                                                                                                                                                                                                                                                                                                                                                                                                                                                                                                                                                                                                                                                                                                                                                                                                                                                                                                                                                                                                                                                                                                                                                                                                                                                                                                                                                                                                                                                                                                                                 | National Influenza Center - Instituto Adolfo Lutz                                                      | Instituto Adolfo Lutz, Interdisciplinary Procedures Center, Strategic Laboratory                                            | Claudio Tavares Sacchi, Claudia Regina Gonçalves, Carlos Henrique Camargo, Fabiana Cristina Pereira dos Santos, Daniela Bernardes Borges da Silva, Simone Guadagnucci Morillo, Adriano Abbud, Adriana Bugno, Maria do Carmo Sampaio Tavares Timenetsky, Terezinha Maria de Paiva                                                                                                                       |
| EPI_ISL_416033                                                                                                                                                                                                                                                                                                                                                                                                                                                                                                                                                                                                                                                                                                                                                                                                                                                                                                                                                                                                                                                                                                                                                                                                                                                                                                                                                                                                                                                                                                                                                                                                                 | Hospital Israelita Albert Einstein                                                                     | Instituto Adolfo Lutz, Interdisciplinary Procedures Center, Strategic Laboratory                                            | Claudio Tavares Sacchi, Claudia Regina Gonçalves, Carlos Henrique Camargo, Erica Valessa Ramos Gomes, Fabiana Cristina Pereira dos Santos, Daniela Bernardes Borges da Silva, Simone Guadagnucci Morillo, Adriano Abbud, Adriana Bugno, Maria do Carmo Sampaio Tavares Timenetsky, Terezinha Maria de Paiva                                                                                            |
| EPI_ISL_416035                                                                                                                                                                                                                                                                                                                                                                                                                                                                                                                                                                                                                                                                                                                                                                                                                                                                                                                                                                                                                                                                                                                                                                                                                                                                                                                                                                                                                                                                                                                                                                                                                 | National Influenza Center - Instituto Adolfo Lutz                                                      | Instituto Adolfo Lutz, Interdisciplinary Procedures Center, Strategic Laboratory                                            | Claudio Tavares Sacchi, Claudia Regina Gonçalves, Carlos Henrique Camargo, Erica Valessa Ramos Gomes, Fabiana Cristina Pereira dos Santos, Daniela Bernardes Borges da Silva, Simone Guadagnucci Morillo, Adriano Abbud, Adriana Bugno, Maria do Carmo Sampaio Tavares Timenetsky, Terezinha Maria de Paiva                                                                                            |
| EPI_ISL_416459, EPI_ISL_416460, EPI_ISL_416461, EPI_ISL_416462, EPI_ISL_416463, EPI_ISL_416464, EPI_ISL_416465, EPI_ISL_416466                                                                                                                                                                                                                                                                                                                                                                                                                                                                                                                                                                                                                                                                                                                                                                                                                                                                                                                                                                                                                                                                                                                                                                                                                                                                                                                                                                                                                                                                                                 | Seattle Flu Study                                                                                      | Seattle Flu Study                                                                                                           | Chu et al                                                                                                                                                                                                                                                                                                                                                                                              |
| EPI_ISL_417065, EPI_ISL_417066, EPI_ISL_417067, EPI_ISL_417068, EPI_ISL_417069, EPI_ISL_417070, EPI_ISL_417071, EPI_ISL_417072, EPI_ISL_417073, EPI_ISL_417074, EPI_ISL_417075, EPI_ISL_417076, EPI_ISL_417077, EPI_ISL_417078, EPI_ISL_417079, EPI_ISL_417080, EPI_ISL_417081, EPI_ISL_417082, EPI_ISL_417083, EPI_ISL_417084, EPI_ISL_417085, EPI_ISL_417086, EPI_ISL_417087, EPI_ISL_417088, EPI_ISL_417089, EPI_ISL_417090, EPI_ISL_417091, EPI_ISL_417092, EPI_ISL_417093, EPI_ISL_417094, EPI_ISL_417095, EPI_ISL_417096, EPI_ISL_417097, EPI_ISL_417098, EPI_ISL_417099, EPI_ISL_417100, EPI_ISL_417101, EPI_ISL_417102, EPI_ISL_417103, EPI_ISL_417104, EPI_ISL_417105, EPI_ISL_417106, EPI_ISL_417107, EPI_ISL_417108, EPI_ISL_417109, EPI_ISL_417110, EPI_ISL_417111, EPI_ISL_417112, EPI_ISL_417113, EPI_ISL_417114, EPI_ISL_417115, EPI_ISL_417116, EPI_ISL_417117, EPI_ISL_417118, EPI_ISL_417119, EPI_ISL_417120, EPI_ISL_417121, EPI_ISL_417122, EPI_ISL_417123, EPI_ISL_417124, EPI_ISL_417125, EPI_ISL_417126, EPI_ISL_417127, EPI_ISL_417128, EPI_ISL_417129, EPI_ISL_417130, EPI_ISL_417131, EPI_ISL_417132, EPI_ISL_417133, EPI_ISL_417134, EPI_ISL_417135, EPI_ISL_417136, EPI_ISL_417137, EPI_ISL_417138, EPI_ISL_417139, EPI_ISL_417140, EPI_ISL_417141, EPI_ISL_417142, EPI_ISL_417143, EPI_ISL_417144, EPI_ISL_417145, EPI_ISL_417146, EPI_ISL_417147, EPI_ISL_417148, EPI_ISL_417149, EPI_ISL_417150, EPI_ISL_417151, EPI_ISL_417152, EPI_ISL_417153, EPI_ISL_417154, EPI_ISL_417155, EPI_ISL_417156, EPI_ISL_417157, EPI_ISL_417158, EPI_ISL_417159, EPI_ISL_417160, EPI_ISL_417161, EPI_ISL_417162 | Seattle Flu Study                                                                                      | Chu et al                                                                                                                   |                                                                                                                                                                                                                                                                                                                                                                                                        |
| see above                                                                                                                                                                                                                                                                                                                                                                                                                                                                                                                                                                                                                                                                                                                                                                                                                                                                                                                                                                                                                                                                                                                                                                                                                                                                                                                                                                                                                                                                                                                                                                                                                      | Washington State Department of Health                                                                  | Seattle Flu Study                                                                                                           | Chu et al                                                                                                                                                                                                                                                                                                                                                                                              |
| EPI_ISL_417163, EPI_ISL_417164, EPI_ISL_417165                                                                                                                                                                                                                                                                                                                                                                                                                                                                                                                                                                                                                                                                                                                                                                                                                                                                                                                                                                                                                                                                                                                                                                                                                                                                                                                                                                                                                                                                                                                                                                                 | Seattle Flu Study                                                                                      | Seattle Flu Study                                                                                                           | Chu et al                                                                                                                                                                                                                                                                                                                                                                                              |
| EPI_ISL_417166, EPI_ISL_417167, EPI_ISL_417168, EPI_ISL_417169, EPI_ISL_417170, EPI_ISL_417171, EPI_ISL_417172, EPI_ISL_417173, EPI_ISL_417174, EPI_ISL_417175                                                                                                                                                                                                                                                                                                                                                                                                                                                                                                                                                                                                                                                                                                                                                                                                                                                                                                                                                                                                                                                                                                                                                                                                                                                                                                                                                                                                                                                                 | Washington State Department of Health                                                                  | Seattle Flu Study                                                                                                           | Chu et al                                                                                                                                                                                                                                                                                                                                                                                              |
| EPI_ISL_417199                                                                                                                                                                                                                                                                                                                                                                                                                                                                                                                                                                                                                                                                                                                                                                                                                                                                                                                                                                                                                                                                                                                                                                                                                                                                                                                                                                                                                                                                                                                                                                                                                 | Department of Clinical Pathology, Pamela Youde Nethersole Eastern Hospital                             | Department of Health Technology and Informatics, Faculty of Health and Social Science, The Hong Kong Polytechnic University | Chong-Yee YAU, Hiu-Yin LAO, Ming-Pan CHOI, Kingsley King-Gee TAM, Lam-Kwong LEE, Barry Kin-Chung WONG, Alex Yat-Man HO, Kam-Tong Yip, Kwok-Cheung LUNG, Raymond Wai-To LIU, Eugene Yuk-Keung TSO, Wai-Shing LEUNG, Man-Chun CHAN, Yuk-Yung NG, Kit-Man SIN, Kitty Sau-Chun FUNG, Sandy Ka-Yee CHAU, Wing-Kin TO, Tak-Lun Que, David Ho-Keung SHUM, Shea Ping YIP, Wing Cheong YAM, Gilman Kit-Hang SIU |
| EPI_ISL_417396                                                                                                                                                                                                                                                                                                                                                                                                                                                                                                                                                                                                                                                                                                                                                                                                                                                                                                                                                                                                                                                                                                                                                                                                                                                                                                                                                                                                                                                                                                                                                                                                                 | Centre for Infectious Diseases and Microbiology Public Health                                          | NSW Health Pathology - Institute of Clinical Pathology and Medical Research; Westmead Hospital; University of Sydney        | Chen SC, Maddocks S, Kok J, Dwyer DE, Rockett R, Eden J-S, Lam C, Gray K, Timms V, Gall M, Arnott A, Sadsad R, Carter I, Rahman H, Holmes EC, O'Sullivan MV and Sintchenko V for the 2019-nCoV Study Group                                                                                                                                                                                             |
| EPI_ISL_417922                                                                                                                                                                                                                                                                                                                                                                                                                                                                                                                                                                                                                                                                                                                                                                                                                                                                                                                                                                                                                                                                                                                                                                                                                                                                                                                                                                                                                                                                                                                                                                                                                 | INMI Lazzaro Spallanzani IRCCS                                                                         | Laboratory of Virology, INMI Lazzaro Spallanzani IRCCS                                                                      | Cesare E. M. Gruber, Martina Rueca, Barbara Bartolini, Francesco Messina, Emanuela Giombini, Maria R. Capobianchi, Fabrizio Carletti, Francesca Colavita, Concetta Castilletti, Eleonora Lalle, Daniele Lapa, Giuseppe Ippolito.                                                                                                                                                                       |
| EPI_ISL_418088, EPI_ISL_418105, EPI_ISL_419492                                                                                                                                                                                                                                                                                                                                                                                                                                                                                                                                                                                                                                                                                                                                                                                                                                                                                                                                                                                                                                                                                                                                                                                                                                                                                                                                                                                                                                                                                                                                                                                 | Wales Specialist Virology Centre                                                                       | Public Health Wales Microbiology Cardiff                                                                                    | Catherine Moore, Joanne Watkins, Sally Corden, Sara Rey, Matt Bull, Tom Connor                                                                                                                                                                                                                                                                                                                         |
| EPI_ISL_420303                                                                                                                                                                                                                                                                                                                                                                                                                                                                                                                                                                                                                                                                                                                                                                                                                                                                                                                                                                                                                                                                                                                                                                                                                                                                                                                                                                                                                                                                                                                                                                                                                 | Alaska State Virology Laboratory                                                                       | Alaska State Virology Laboratory                                                                                            | Chen, J                                                                                                                                                                                                                                                                                                                                                                                                |

|                                                                                                                                                                                                                                                                                                                                                                                                                                                                                                                                                                                                                                                                                                                                                                                                                                                                                                                                                                                                                                                                                                                                                                                                                                                                                                                                                                                                                                                                                                                                                                                                                                                                                                                                                                                                                                                                                                                                                                                                                                                                                                                                                                                                                                                                |                                                                                        |                                                                                             |                                                                                                                                                                                                                                                                                                                         |
|----------------------------------------------------------------------------------------------------------------------------------------------------------------------------------------------------------------------------------------------------------------------------------------------------------------------------------------------------------------------------------------------------------------------------------------------------------------------------------------------------------------------------------------------------------------------------------------------------------------------------------------------------------------------------------------------------------------------------------------------------------------------------------------------------------------------------------------------------------------------------------------------------------------------------------------------------------------------------------------------------------------------------------------------------------------------------------------------------------------------------------------------------------------------------------------------------------------------------------------------------------------------------------------------------------------------------------------------------------------------------------------------------------------------------------------------------------------------------------------------------------------------------------------------------------------------------------------------------------------------------------------------------------------------------------------------------------------------------------------------------------------------------------------------------------------------------------------------------------------------------------------------------------------------------------------------------------------------------------------------------------------------------------------------------------------------------------------------------------------------------------------------------------------------------------------------------------------------------------------------------------------|----------------------------------------------------------------------------------------|---------------------------------------------------------------------------------------------|-------------------------------------------------------------------------------------------------------------------------------------------------------------------------------------------------------------------------------------------------------------------------------------------------------------------------|
| EPI_ISL_420304, EPI_ISL_420305, EPI_ISL_420306                                                                                                                                                                                                                                                                                                                                                                                                                                                                                                                                                                                                                                                                                                                                                                                                                                                                                                                                                                                                                                                                                                                                                                                                                                                                                                                                                                                                                                                                                                                                                                                                                                                                                                                                                                                                                                                                                                                                                                                                                                                                                                                                                                                                                 | Alaska State Virology Laboratory                                                       | Alaska State Virology Laboratory                                                            | Chen, J.                                                                                                                                                                                                                                                                                                                |
| EPI_ISL_420456                                                                                                                                                                                                                                                                                                                                                                                                                                                                                                                                                                                                                                                                                                                                                                                                                                                                                                                                                                                                                                                                                                                                                                                                                                                                                                                                                                                                                                                                                                                                                                                                                                                                                                                                                                                                                                                                                                                                                                                                                                                                                                                                                                                                                                                 | PathWest Laboratory Medicine WA                                                        | PathWest Laboratory Medicine WA                                                             | Chisha Sikazwe, Jurissa Lang, Avram Levy, David Smith and David Speers                                                                                                                                                                                                                                                  |
| EPI_ISL_420531, EPI_ISL_420532, EPI_ISL_420533, EPI_ISL_420534, EPI_ISL_420536, EPI_ISL_420537, EPI_ISL_420538, EPI_ISL_420539                                                                                                                                                                                                                                                                                                                                                                                                                                                                                                                                                                                                                                                                                                                                                                                                                                                                                                                                                                                                                                                                                                                                                                                                                                                                                                                                                                                                                                                                                                                                                                                                                                                                                                                                                                                                                                                                                                                                                                                                                                                                                                                                 | Department of Microbiology, PathWest QEII Medical Centre                               | Department of Microbiology, PathWest QEII Medical Centre                                    | Chisha Sikazwe, Jurissa Lang, Avram Levy, David Speers and David Smith                                                                                                                                                                                                                                                  |
| EPI_ISL_420855, EPI_ISL_420876, EPI_ISL_420877                                                                                                                                                                                                                                                                                                                                                                                                                                                                                                                                                                                                                                                                                                                                                                                                                                                                                                                                                                                                                                                                                                                                                                                                                                                                                                                                                                                                                                                                                                                                                                                                                                                                                                                                                                                                                                                                                                                                                                                                                                                                                                                                                                                                                 | Geelong Centre for Emerging Infectious Diseases                                        | Geelong Centre for Emerging Infectious Diseases                                             | Chamings,A., Raj Bhatta T., Alexandersen S.                                                                                                                                                                                                                                                                             |
| EPI_ISL_422042, EPI_ISL_422090, EPI_ISL_422228, EPI_ISL_422270, EPI_ISL_422273, EPI_ISL_422323                                                                                                                                                                                                                                                                                                                                                                                                                                                                                                                                                                                                                                                                                                                                                                                                                                                                                                                                                                                                                                                                                                                                                                                                                                                                                                                                                                                                                                                                                                                                                                                                                                                                                                                                                                                                                                                                                                                                                                                                                                                                                                                                                                 | Wales Specialist Virology Centre                                                       | Public Health Wales Microbiology Cardiff                                                    | Catherine Moore, Johnathan Evans, Malorie Perry, Simon Cottrell, Alec Birchley, Alexander Adams, Amy Gaskin, Bree Gatica-Wilcox, Jason Coombes, Lauren Gilbert, Lee Graham, Nicole Pacchiarini, Sara Kumziene-Summerhayes, Sarah Taylor, Sophie Jones, Sara Rey, Matthew Bull, Joanne Watkins, Sally Corden, Tom Connor |
| EPI_ISL_424346, EPI_ISL_424347                                                                                                                                                                                                                                                                                                                                                                                                                                                                                                                                                                                                                                                                                                                                                                                                                                                                                                                                                                                                                                                                                                                                                                                                                                                                                                                                                                                                                                                                                                                                                                                                                                                                                                                                                                                                                                                                                                                                                                                                                                                                                                                                                                                                                                 | Alaska State Virology Laboratory                                                       | Alaska State Virology Laboratory                                                            | Chen, J.                                                                                                                                                                                                                                                                                                                |
| EPI_ISL_426476, EPI_ISL_426477, EPI_ISL_426478                                                                                                                                                                                                                                                                                                                                                                                                                                                                                                                                                                                                                                                                                                                                                                                                                                                                                                                                                                                                                                                                                                                                                                                                                                                                                                                                                                                                                                                                                                                                                                                                                                                                                                                                                                                                                                                                                                                                                                                                                                                                                                                                                                                                                 | Microbial Genomics Laboratory, Institut Pasteur Montevideo                             | Microbial Genomics Laboratory, Institut Pasteur Montevideo, Uruguay                         | Cecilia Salazar, Florencia Diaz-Viraqué, Marianoel Pereira, Pilar Moreno, Gonzalo Moratorio, Gregorio Iraola                                                                                                                                                                                                            |
| EPI_ISL_426479, EPI_ISL_426480                                                                                                                                                                                                                                                                                                                                                                                                                                                                                                                                                                                                                                                                                                                                                                                                                                                                                                                                                                                                                                                                                                                                                                                                                                                                                                                                                                                                                                                                                                                                                                                                                                                                                                                                                                                                                                                                                                                                                                                                                                                                                                                                                                                                                                 | Microbial Genomics Laboratory, Institut Pasteur Montevideo                             | Microbial Genomics Laboratory, Institut Pasteur Montevideo                                  | Cecilia Salazar, Florencia Diaz-Viraqué, Marianoel Pereira, Pilar Moreno, Gonzalo Moratorio, Gregorio Iraola                                                                                                                                                                                                            |
| EPI_ISL_426481, EPI_ISL_426482                                                                                                                                                                                                                                                                                                                                                                                                                                                                                                                                                                                                                                                                                                                                                                                                                                                                                                                                                                                                                                                                                                                                                                                                                                                                                                                                                                                                                                                                                                                                                                                                                                                                                                                                                                                                                                                                                                                                                                                                                                                                                                                                                                                                                                 | Microbial Genomics Laboratory, Institut Pasteur Montevideo, Uruguay                    | Microbial Genomics Laboratory, Institut Pasteur Montevideo, Uruguay                         | Cecilia Salazar, Florencia Diaz-Viraqué, Marianoel Pereira, Pilar Moreno, Gonzalo Moratorio, Gregorio Iraola                                                                                                                                                                                                            |
| EPI_ISL_426583                                                                                                                                                                                                                                                                                                                                                                                                                                                                                                                                                                                                                                                                                                                                                                                                                                                                                                                                                                                                                                                                                                                                                                                                                                                                                                                                                                                                                                                                                                                                                                                                                                                                                                                                                                                                                                                                                                                                                                                                                                                                                                                                                                                                                                                 | Microbial Genomics Laboratory, Institut Pasteur Montevideo                             | Microbial Genomics Laboratory, Institut Pasteur Montevideo, Uruguay                         | Cecilia Salazar, Florencia Diaz-Viraqué, Marianoel Pereira, Pilar Moreno, Gonzalo Moratorio, Gregorio Iraola                                                                                                                                                                                                            |
| EPI_ISL_426584                                                                                                                                                                                                                                                                                                                                                                                                                                                                                                                                                                                                                                                                                                                                                                                                                                                                                                                                                                                                                                                                                                                                                                                                                                                                                                                                                                                                                                                                                                                                                                                                                                                                                                                                                                                                                                                                                                                                                                                                                                                                                                                                                                                                                                                 | Microbial Genomics Laboratory, Institut Pasteur Montevideo, Uruguay                    | Microbial Genomics Laboratory, Institut Pasteur Montevideo, Uruguay                         | Cecilia Salazar, Florencia Diaz-Viraqué, Marianoel Pereira, Pilar Moreno, Gonzalo Moratorio, Gregorio Iraola                                                                                                                                                                                                            |
| EPI_ISL_426629, EPI_ISL_426630                                                                                                                                                                                                                                                                                                                                                                                                                                                                                                                                                                                                                                                                                                                                                                                                                                                                                                                                                                                                                                                                                                                                                                                                                                                                                                                                                                                                                                                                                                                                                                                                                                                                                                                                                                                                                                                                                                                                                                                                                                                                                                                                                                                                                                 | TSGH-CP molecular lab                                                                  | TSGH-CP molecular lab                                                                       | Cherng-Lih Perng, Ming-Jr Jian, Chih-Kai Chang, Jung-Chung Lin, Kuo-Ming Yeh, Chien-Wen Chen, Sheng-Kang Chiu, Hsing-Yi Chung, Shih-Hung Tsai, Kuo-Sheng Hung, Feng-Yee Chang, Hung-Sheng Shang                                                                                                                         |
| EPI_ISL_426631, EPI_ISL_426632, EPI_ISL_427392, EPI_ISL_427393, EPI_ISL_427394, EPI_ISL_427395, EPI_ISL_427397, EPI_ISL_427398                                                                                                                                                                                                                                                                                                                                                                                                                                                                                                                                                                                                                                                                                                                                                                                                                                                                                                                                                                                                                                                                                                                                                                                                                                                                                                                                                                                                                                                                                                                                                                                                                                                                                                                                                                                                                                                                                                                                                                                                                                                                                                                                 | TSGH-CP molecular lab                                                                  | TSGH-CP molecular lab                                                                       | Cherng-Lih Perng, Ming-Jr Jian, Chih-Kai Chang, Jung-Chung Lin, Kuo-Ming Yeh, Chien-Wen Chen, Sheng-Kang Chiu, Hsing-Yi Chung, Shih-Hung Tsai, Kuo-Sheng Hung, Tien-Yao Chang, Feng-Yee Chang, Hung-Sheng Shang                                                                                                         |
| EPI_ISL_427619, EPI_ISL_427620, EPI_ISL_427621, EPI_ISL_427622                                                                                                                                                                                                                                                                                                                                                                                                                                                                                                                                                                                                                                                                                                                                                                                                                                                                                                                                                                                                                                                                                                                                                                                                                                                                                                                                                                                                                                                                                                                                                                                                                                                                                                                                                                                                                                                                                                                                                                                                                                                                                                                                                                                                 | Alaska State Virology Laboratory                                                       | Alaska State Virology Laboratory                                                            | Chen, J.                                                                                                                                                                                                                                                                                                                |
| EPI_ISL_428229, EPI_ISL_428230                                                                                                                                                                                                                                                                                                                                                                                                                                                                                                                                                                                                                                                                                                                                                                                                                                                                                                                                                                                                                                                                                                                                                                                                                                                                                                                                                                                                                                                                                                                                                                                                                                                                                                                                                                                                                                                                                                                                                                                                                                                                                                                                                                                                                                 | TSGH-CP molecular lab                                                                  | TSGH-CP molecular lab                                                                       | Cherng-Lih Perng, Ming-Jr Jian, Chih-Kai Chang, Jung-Chung Lin, Kuo-Ming Yeh, Chien-Wen Chen, Sheng-Kang Chiu, Hsing-Yi Chung, Shih-Hung Tsai, Kuo-Sheng Hung, Tien-Yao Chang, Feng-Yee Chang, Hung-Sheng Shang                                                                                                         |
| EPI_ISL_428231                                                                                                                                                                                                                                                                                                                                                                                                                                                                                                                                                                                                                                                                                                                                                                                                                                                                                                                                                                                                                                                                                                                                                                                                                                                                                                                                                                                                                                                                                                                                                                                                                                                                                                                                                                                                                                                                                                                                                                                                                                                                                                                                                                                                                                                 | TSGH-CP molecular lab                                                                  | TSGH-CP molecular lab                                                                       | Cherng-Lih Perng, Ming-Jr JIAN, Chih-Kai Chang, Jung-Chung Lin, Kuo-Ming Yeh, Chien-Wen Chen, Sheng-Kang Chiu, Hsing-Yi Chung, Shih-Hung Tsai, Kuo-Sheng Hung, Tien-Yao Chang, Feng-Yee Chang, Hung-Sheng Shang                                                                                                         |
| EPI_ISL_428479, EPI_ISL_428481, EPI_ISL_428482, EPI_ISL_428483, EPI_ISL_428484, EPI_ISL_428485, EPI_ISL_428486, EPI_ISL_428487                                                                                                                                                                                                                                                                                                                                                                                                                                                                                                                                                                                                                                                                                                                                                                                                                                                                                                                                                                                                                                                                                                                                                                                                                                                                                                                                                                                                                                                                                                                                                                                                                                                                                                                                                                                                                                                                                                                                                                                                                                                                                                                                 | District Surveillance Unit                                                             | Department of Neurovirology, National Institute of Mental Health and Neuroscience (NIMHANS) | Chitra Pattabiraman, Vijayalakshmi Reddy, Harsha PK, Risha Rasheed, Shafeeq S Hameed, Manjunatha Venkataswamy, Anita Desai, Ravi Vasanthapuram                                                                                                                                                                          |
| EPI_ISL_428670                                                                                                                                                                                                                                                                                                                                                                                                                                                                                                                                                                                                                                                                                                                                                                                                                                                                                                                                                                                                                                                                                                                                                                                                                                                                                                                                                                                                                                                                                                                                                                                                                                                                                                                                                                                                                                                                                                                                                                                                                                                                                                                                                                                                                                                 | Centre for Dengue Research                                                             | Centre for Dengue Research                                                                  | Chandima Jeewandara, Dinuka Ariyaratne, Laksiri Gomes, Deshni Jayathilaka, Ananda Wijewickrama, Eranga Narangoda, Damayanthi Idampitiya, Neelika Malaige                                                                                                                                                                |
| EPI_ISL_428671                                                                                                                                                                                                                                                                                                                                                                                                                                                                                                                                                                                                                                                                                                                                                                                                                                                                                                                                                                                                                                                                                                                                                                                                                                                                                                                                                                                                                                                                                                                                                                                                                                                                                                                                                                                                                                                                                                                                                                                                                                                                                                                                                                                                                                                 | Centre for Dengue Research                                                             | Centre for Dengue Research                                                                  | Chandima Jeewandara, Dinuka Ariyatane, Laksiri Gomes, Deshni Jayathilaka, Diyanath Ranasinghe, Ananda Wijewickrama, Eranga Narangoda, Damayanthi Idampitiya, Neelika Malaige                                                                                                                                            |
| EPI_ISL_428672, EPI_ISL_428673                                                                                                                                                                                                                                                                                                                                                                                                                                                                                                                                                                                                                                                                                                                                                                                                                                                                                                                                                                                                                                                                                                                                                                                                                                                                                                                                                                                                                                                                                                                                                                                                                                                                                                                                                                                                                                                                                                                                                                                                                                                                                                                                                                                                                                 | Centre for Dengue Research                                                             | Centre for Dengue Research                                                                  | Chandima Jeewandara, Dinuka Ariyaratne, Laksiri Gomes, Deshni Jayathilaka, Diyanath Ranasinghe, Ananda Wijewickrama, Eranga Narangoda, Damayanthi Idampitiya, Neelika Malaige                                                                                                                                           |
| EPI_ISL_429257                                                                                                                                                                                                                                                                                                                                                                                                                                                                                                                                                                                                                                                                                                                                                                                                                                                                                                                                                                                                                                                                                                                                                                                                                                                                                                                                                                                                                                                                                                                                                                                                                                                                                                                                                                                                                                                                                                                                                                                                                                                                                                                                                                                                                                                 | Microbial Genomics Laboratory, Institut Pasteur Montevideo                             | Microbial Genomics Laboratory, Institut Pasteur Montevideo                                  | Cecilia Salazar, Florencia Diaz-Viraqué, Marianoel Pereira, Pilar Moreno, Gonzalo Moratorio, Gregorio Iraola                                                                                                                                                                                                            |
| EPI_ISL_430018, EPI_ISL_430063                                                                                                                                                                                                                                                                                                                                                                                                                                                                                                                                                                                                                                                                                                                                                                                                                                                                                                                                                                                                                                                                                                                                                                                                                                                                                                                                                                                                                                                                                                                                                                                                                                                                                                                                                                                                                                                                                                                                                                                                                                                                                                                                                                                                                                 | Molecular Pathology Division, Department of Pathology, Hong Kong Sanatorium & Hospital | Molecular Pathology Division, Department of Pathology, Hong Kong Sanatorium & Hospital      | Chun Hang AU, Wai Sing CHAN, Ho Yin LAM, Dona N. HO, Simon Y.M. LAM, Jonpaul S.T. ZEE, Tsun Leung CHAN, Edmond S.K. MA                                                                                                                                                                                                  |
| EPI_ISL_430064, EPI_ISL_430065, EPI_ISL_430066                                                                                                                                                                                                                                                                                                                                                                                                                                                                                                                                                                                                                                                                                                                                                                                                                                                                                                                                                                                                                                                                                                                                                                                                                                                                                                                                                                                                                                                                                                                                                                                                                                                                                                                                                                                                                                                                                                                                                                                                                                                                                                                                                                                                                 | Geelong Centre for Emerging Infectious Diseases                                        | Geelong Centre for Emerging Infectious Diseases                                             | Chamings A., Bhatta T.R., Alexandersen S.                                                                                                                                                                                                                                                                               |
| EPI_ISL_430113, EPI_ISL_430114, EPI_ISL_430115, EPI_ISL_430116, EPI_ISL_430117, EPI_ISL_430118, EPI_ISL_430119, EPI_ISL_430120, EPI_ISL_430121, EPI_ISL_430122, EPI_ISL_430123, EPI_ISL_430124, EPI_ISL_430125, EPI_ISL_430126, EPI_ISL_430127, EPI_ISL_430128, EPI_ISL_430129, EPI_ISL_430130, EPI_ISL_430131, EPI_ISL_430132, EPI_ISL_430133, EPI_ISL_430134, EPI_ISL_430135, EPI_ISL_430136, EPI_ISL_430137, EPI_ISL_430138, EPI_ISL_430139, EPI_ISL_430140, EPI_ISL_430141, EPI_ISL_430142, EPI_ISL_430143, EPI_ISL_430144, EPI_ISL_430145, EPI_ISL_430146, EPI_ISL_430147, EPI_ISL_430148, EPI_ISL_430149, EPI_ISL_430150, EPI_ISL_430151, EPI_ISL_430152, EPI_ISL_430153, EPI_ISL_430154, EPI_ISL_430155, EPI_ISL_430156                                                                                                                                                                                                                                                                                                                                                                                                                                                                                                                                                                                                                                                                                                                                                                                                                                                                                                                                                                                                                                                                                                                                                                                                                                                                                                                                                                                                                                                                                                                                 | Seattle Flu Study                                                                      | Chu et al                                                                                   |                                                                                                                                                                                                                                                                                                                         |
| see above                                                                                                                                                                                                                                                                                                                                                                                                                                                                                                                                                                                                                                                                                                                                                                                                                                                                                                                                                                                                                                                                                                                                                                                                                                                                                                                                                                                                                                                                                                                                                                                                                                                                                                                                                                                                                                                                                                                                                                                                                                                                                                                                                                                                                                                      | Seattle Flu Study                                                                      | Seattle Flu Study                                                                           | Chu et al                                                                                                                                                                                                                                                                                                               |
| EPI_ISL_430160, EPI_ISL_430161, EPI_ISL_430162, EPI_ISL_430163, EPI_ISL_430164, EPI_ISL_430165, EPI_ISL_430166, EPI_ISL_430167, EPI_ISL_430168, EPI_ISL_430169, EPI_ISL_430170, EPI_ISL_430171, EPI_ISL_430172, EPI_ISL_430173, EPI_ISL_430174, EPI_ISL_430175, EPI_ISL_430176, EPI_ISL_430177, EPI_ISL_430178, EPI_ISL_430179, EPI_ISL_430180, EPI_ISL_430181, EPI_ISL_430182, EPI_ISL_430183, EPI_ISL_430184, EPI_ISL_430185, EPI_ISL_430186, EPI_ISL_430187, EPI_ISL_430188, EPI_ISL_430189, EPI_ISL_430190, EPI_ISL_430191, EPI_ISL_430192, EPI_ISL_430193, EPI_ISL_430194, EPI_ISL_430196, EPI_ISL_430197, EPI_ISL_430198, EPI_ISL_430199, EPI_ISL_430200, EPI_ISL_430201, EPI_ISL_430202, EPI_ISL_430203, EPI_ISL_430204, EPI_ISL_430205, EPI_ISL_430206, EPI_ISL_430207, EPI_ISL_430208, EPI_ISL_430209, EPI_ISL_430210, EPI_ISL_430211, EPI_ISL_430212, EPI_ISL_430213, EPI_ISL_430214, EPI_ISL_430215, EPI_ISL_430216, EPI_ISL_430217, EPI_ISL_430218, EPI_ISL_430219, EPI_ISL_430220, EPI_ISL_430221, EPI_ISL_430222, EPI_ISL_430223, EPI_ISL_430224, EPI_ISL_430225, EPI_ISL_430226, EPI_ISL_430227, EPI_ISL_430228, EPI_ISL_430229, EPI_ISL_430230, EPI_ISL_430231, EPI_ISL_430232, EPI_ISL_430233, EPI_ISL_430234, EPI_ISL_430235, EPI_ISL_430236, EPI_ISL_430237, EPI_ISL_430238, EPI_ISL_430239, EPI_ISL_430240, EPI_ISL_430241, EPI_ISL_430242, EPI_ISL_430243, EPI_ISL_430244, EPI_ISL_430245, EPI_ISL_430246, EPI_ISL_430247, EPI_ISL_430248, EPI_ISL_430249, EPI_ISL_430250, EPI_ISL_430251, EPI_ISL_430252, EPI_ISL_430253, EPI_ISL_430254, EPI_ISL_430255, EPI_ISL_430256, EPI_ISL_430257, EPI_ISL_430258, EPI_ISL_430259, EPI_ISL_430260, EPI_ISL_430261, EPI_ISL_430262, EPI_ISL_430263, EPI_ISL_430264, EPI_ISL_430265, EPI_ISL_430266, EPI_ISL_430267, EPI_ISL_430268, EPI_ISL_430269, EPI_ISL_430270, EPI_ISL_430271, EPI_ISL_430272, EPI_ISL_430273, EPI_ISL_430274, EPI_ISL_430275, EPI_ISL_430276, EPI_ISL_430277, EPI_ISL_430278, EPI_ISL_430279, EPI_ISL_430280, EPI_ISL_430281, EPI_ISL_430282, EPI_ISL_430283, EPI_ISL_430284, EPI_ISL_430285, EPI_ISL_430286, EPI_ISL_430287, EPI_ISL_430288, EPI_ISL_430289, EPI_ISL_430290, EPI_ISL_430291, EPI_ISL_430292, EPI_ISL_430293, EPI_ISL_430294, EPI_ISL_430295, EPI_ISL_430296 | Washington State Department of Health                                                  | Seattle Flu Study                                                                           | Chu et al                                                                                                                                                                                                                                                                                                               |
| see above                                                                                                                                                                                                                                                                                                                                                                                                                                                                                                                                                                                                                                                                                                                                                                                                                                                                                                                                                                                                                                                                                                                                                                                                                                                                                                                                                                                                                                                                                                                                                                                                                                                                                                                                                                                                                                                                                                                                                                                                                                                                                                                                                                                                                                                      | Washington State Department of Health                                                  | Seattle Flu Study                                                                           | Chu et al                                                                                                                                                                                                                                                                                                               |
| EPI_ISL_431943, EPI_ISL_432027, EPI_ISL_432036, EPI_ISL_432073, EPI_ISL_432142, EPI_ISL_432144, EPI_ISL_432393, EPI_ISL_432437                                                                                                                                                                                                                                                                                                                                                                                                                                                                                                                                                                                                                                                                                                                                                                                                                                                                                                                                                                                                                                                                                                                                                                                                                                                                                                                                                                                                                                                                                                                                                                                                                                                                                                                                                                                                                                                                                                                                                                                                                                                                                                                                 | Wales Specialist Virology Centre                                                       | Public Health Wales Microbiology Cardiff                                                    | Catherine Moore, Johnathan Evans, Malorie Perry, Simon Cottrell, Alec Birchley, Alexander Adams, Amy Gaskin, Bree Gatica-Wilcox, Jason Coombes, Lauren Gilbert, Lee Graham, Nicole Pacchiarini, Sara Kumziene-Summerhayes, Sarah Taylor, Sophie Jones, Sara Rey, Matthew Bull, Joanne Watkins, Sally Corden, Tom Connor |
| EPI_ISL_434063, EPI_ISL_434064, EPI_ISL_434065, EPI_ISL_434066, EPI_ISL_434068, EPI_ISL_434069, EPI_ISL_434070, EPI_ISL_434071, EPI_ISL_434072, EPI_ISL_434073, EPI_ISL_434074, EPI_ISL_434075, EPI_ISL_434076, EPI_ISL_434077, EPI_ISL_434078, EPI_ISL_434079, EPI_ISL_434080, EPI_ISL_434081, EPI_ISL_434082, EPI_ISL_434083, EPI_ISL_434084, EPI_ISL_434085, EPI_ISL_434086, EPI_ISL_434087, EPI_ISL_434088, EPI_ISL_434089, EPI_ISL_434090, EPI_ISL_434091, EPI_ISL_434092, EPI_ISL_434093, EPI_ISL_434094, EPI_ISL_434095, EPI_ISL_434096, EPI_ISL_434097, EPI_ISL_434098, EPI_ISL_434099, EPI_ISL_434100, EPI_ISL_434101, EPI_ISL_434102, EPI_ISL_434103, EPI_ISL_434104, EPI_ISL_434105, EPI_ISL_434106, EPI_ISL_434107, EPI_ISL_434108, EPI_ISL_434109, EPI_ISL_434110, EPI_ISL_434111, EPI_ISL_434112, EPI_ISL_434113, EPI_ISL_434114, EPI_ISL_434115, EPI_ISL_434116, EPI_ISL_434117, EPI_ISL_434118, EPI_ISL_434119, EPI_ISL_434120, EPI_ISL_434121, EPI_ISL_434122, EPI_ISL_434123, EPI_ISL_434124, EPI_ISL_434125, EPI_ISL_434126, EPI_ISL_434127, EPI_ISL_434128, EPI_ISL_434129, EPI_ISL_434130, EPI_ISL_434131, EPI_ISL_434132, EPI_ISL_434133, EPI_ISL_434134, EPI_ISL_434135, EPI_ISL_434136, EPI_ISL_434137, EPI_ISL_434138, EPI_ISL_434139, EPI_ISL_434140, EPI_ISL_434141, EPI_ISL_434142, EPI_ISL_434143, EPI_ISL_434144, EPI_ISL_434145, EPI_ISL_434146, EPI_ISL_434147, EPI_ISL_434148, EPI_ISL_434149, EPI_ISL_434150, EPI_ISL_434151, EPI_ISL_434152, EPI_ISL_434153, EPI_ISL_434154, EPI_ISL_434155, EPI_ISL_434156, EPI_ISL_434157, EPI_ISL_434158, EPI_ISL_434159, EPI_ISL_434160, EPI_ISL_434161, EPI_ISL_434162, EPI_ISL_434163, EPI_ISL_434164, EPI_ISL_434165, EPI_ISL_434166, EPI_ISL_434167, EPI_ISL_434168, EPI_ISL_434169, EPI_ISL_434170, EPI_ISL_434171, EPI_ISL_434172, EPI_ISL_434173, EPI_ISL_434174, EPI_ISL_434175, EPI_ISL_434176, EPI_ISL_434177, EPI_ISL_434178, EPI_ISL_434179, EPI_ISL_434180, EPI_ISL_434181, EPI_ISL_434182, EPI_ISL_434183, EPI_ISL_434184, EPI_ISL_434185, EPI_ISL_434186, EPI_ISL_434187, EPI_ISL_434188, EPI_ISL_434189, EPI_ISL_434190, EPI_ISL_434191, EPI_ISL_434192                                                                                                                 |                                                                                        |                                                                                             |                                                                                                                                                                                                                                                                                                                         |

|                                                                                                                                                                                                                                                                                                                                                                                                                                                                                                                                                                                                                                                                                                                                                                                                                                                                                                                                                                                                                                                                                                                                                                                                                                                                                                                                                                                                                                                                                                                                                                                                                                                                                                                                                                                                                                                                                                                                                                                                                                                                                                                                                                                                                                                                                                                                                                                                                                                                                                                                                                                                                                                                                                                                                                                                                                                                                                                                                                                                                                                                                                                                                                                                                                                                                                                                                                                                                                                                                                                                                                                                                                                                                                                                                                                                                                                                                                                                                                                                                                                                                                                                |           |                                                                                |                                                                                             |                                                                                                                                                                                                                                                                                                                                        |
|--------------------------------------------------------------------------------------------------------------------------------------------------------------------------------------------------------------------------------------------------------------------------------------------------------------------------------------------------------------------------------------------------------------------------------------------------------------------------------------------------------------------------------------------------------------------------------------------------------------------------------------------------------------------------------------------------------------------------------------------------------------------------------------------------------------------------------------------------------------------------------------------------------------------------------------------------------------------------------------------------------------------------------------------------------------------------------------------------------------------------------------------------------------------------------------------------------------------------------------------------------------------------------------------------------------------------------------------------------------------------------------------------------------------------------------------------------------------------------------------------------------------------------------------------------------------------------------------------------------------------------------------------------------------------------------------------------------------------------------------------------------------------------------------------------------------------------------------------------------------------------------------------------------------------------------------------------------------------------------------------------------------------------------------------------------------------------------------------------------------------------------------------------------------------------------------------------------------------------------------------------------------------------------------------------------------------------------------------------------------------------------------------------------------------------------------------------------------------------------------------------------------------------------------------------------------------------------------------------------------------------------------------------------------------------------------------------------------------------------------------------------------------------------------------------------------------------------------------------------------------------------------------------------------------------------------------------------------------------------------------------------------------------------------------------------------------------------------------------------------------------------------------------------------------------------------------------------------------------------------------------------------------------------------------------------------------------------------------------------------------------------------------------------------------------------------------------------------------------------------------------------------------------------------------------------------------------------------------------------------------------------------------------------------------------------------------------------------------------------------------------------------------------------------------------------------------------------------------------------------------------------------------------------------------------------------------------------------------------------------------------------------------------------------------------------------------------------------------------------------------------|-----------|--------------------------------------------------------------------------------|---------------------------------------------------------------------------------------------|----------------------------------------------------------------------------------------------------------------------------------------------------------------------------------------------------------------------------------------------------------------------------------------------------------------------------------------|
| EPI_ISL_434193, EPI_ISL_434194, EPI_ISL_434196, EPI_ISL_434197, EPI_ISL_434198, EPI_ISL_434199, EPI_ISL_434200, EPI_ISL_434201, EPI_ISL_434202, EPI_ISL_434204, EPI_ISL_434205, EPI_ISL_434206, EPI_ISL_434207, EPI_ISL_434208, EPI_ISL_434209, EPI_ISL_434210, EPI_ISL_434211, EPI_ISL_434212, EPI_ISL_434213, EPI_ISL_434214, EPI_ISL_434215, EPI_ISL_434216, EPI_ISL_434217, EPI_ISL_434218, EPI_ISL_434219, EPI_ISL_434220, EPI_ISL_434221, EPI_ISL_434222, EPI_ISL_434223, EPI_ISL_434224, EPI_ISL_434225, EPI_ISL_434226, EPI_ISL_434227, EPI_ISL_434228, EPI_ISL_434229, EPI_ISL_434230, EPI_ISL_434231, EPI_ISL_434232, EPI_ISL_434233, EPI_ISL_434234, EPI_ISL_434235, EPI_ISL_434236, EPI_ISL_434237, EPI_ISL_434238, EPI_ISL_434239, EPI_ISL_434240, EPI_ISL_434241, EPI_ISL_434242, EPI_ISL_434243, EPI_ISL_434244, EPI_ISL_434245, EPI_ISL_434246, EPI_ISL_434247, EPI_ISL_434248, EPI_ISL_434249, EPI_ISL_434250, EPI_ISL_434251, EPI_ISL_434252, EPI_ISL_434253, EPI_ISL_434254, EPI_ISL_434255, EPI_ISL_434256, EPI_ISL_434257, EPI_ISL_434258, EPI_ISL_434259, EPI_ISL_434260, EPI_ISL_434261, EPI_ISL_434262, EPI_ISL_434263, EPI_ISL_434264, EPI_ISL_434265, EPI_ISL_434266, EPI_ISL_434267, EPI_ISL_434268, EPI_ISL_434269, EPI_ISL_434270, EPI_ISL_434271, EPI_ISL_434272, EPI_ISL_434273, EPI_ISL_434274, EPI_ISL_434275, EPI_ISL_434276, EPI_ISL_434277, EPI_ISL_434278, EPI_ISL_434279, EPI_ISL_434280, EPI_ISL_434281, EPI_ISL_434282, EPI_ISL_434283, EPI_ISL_434284, EPI_ISL_434285, EPI_ISL_434286, EPI_ISL_434287, EPI_ISL_434288, EPI_ISL_434289, EPI_ISL_434290, EPI_ISL_434291, EPI_ISL_434293, EPI_ISL_434294, EPI_ISL_434296, EPI_ISL_434298, EPI_ISL_434299, EPI_ISL_434300, EPI_ISL_434301, EPI_ISL_434302, EPI_ISL_434303, EPI_ISL_434305, EPI_ISL_434306, EPI_ISL_434307, EPI_ISL_434308, EPI_ISL_434309, EPI_ISL_434310, EPI_ISL_434311, EPI_ISL_434313, EPI_ISL_434315, EPI_ISL_434316, EPI_ISL_434317, EPI_ISL_434319, EPI_ISL_434320, EPI_ISL_434321, EPI_ISL_434322, EPI_ISL_434323, EPI_ISL_434324, EPI_ISL_434325, EPI_ISL_434326, EPI_ISL_434327, EPI_ISL_434328, EPI_ISL_434329, EPI_ISL_434330, EPI_ISL_434331, EPI_ISL_434332, EPI_ISL_434333, EPI_ISL_434334, EPI_ISL_434335, EPI_ISL_434336, EPI_ISL_434337, EPI_ISL_434338, EPI_ISL_434339, EPI_ISL_434341, EPI_ISL_434342, EPI_ISL_434343, EPI_ISL_434344, EPI_ISL_434345, EPI_ISL_434346                                                                                                                                                                                                                                                                                                                                                                                                                                                                                                                                                                                                                                                                                                                                                                                                                                                                                                                                                                                                                                                                                                                                                                                                                                                                                                                                                                                                                                                                                                                                                                                                                                                                                                                                 | see above | Washington State Department of Health                                          | Seattle Flu Study                                                                           | Chu et al                                                                                                                                                                                                                                                                                                                              |
| EPI_ISL_434571                                                                                                                                                                                                                                                                                                                                                                                                                                                                                                                                                                                                                                                                                                                                                                                                                                                                                                                                                                                                                                                                                                                                                                                                                                                                                                                                                                                                                                                                                                                                                                                                                                                                                                                                                                                                                                                                                                                                                                                                                                                                                                                                                                                                                                                                                                                                                                                                                                                                                                                                                                                                                                                                                                                                                                                                                                                                                                                                                                                                                                                                                                                                                                                                                                                                                                                                                                                                                                                                                                                                                                                                                                                                                                                                                                                                                                                                                                                                                                                                                                                                                                                 |           | Microbiology, The University of Hong Kong                                      | Microbiology, The University of Hong Kong                                                   | Chan,J.F.W. and Yuen,K.-Y.                                                                                                                                                                                                                                                                                                             |
| EPI_ISL_436099                                                                                                                                                                                                                                                                                                                                                                                                                                                                                                                                                                                                                                                                                                                                                                                                                                                                                                                                                                                                                                                                                                                                                                                                                                                                                                                                                                                                                                                                                                                                                                                                                                                                                                                                                                                                                                                                                                                                                                                                                                                                                                                                                                                                                                                                                                                                                                                                                                                                                                                                                                                                                                                                                                                                                                                                                                                                                                                                                                                                                                                                                                                                                                                                                                                                                                                                                                                                                                                                                                                                                                                                                                                                                                                                                                                                                                                                                                                                                                                                                                                                                                                 |           | TSGH-CP molecular lab                                                          | TSGH-CP molecular lab                                                                       | Cherng-Lih Perng, Ming-Jr JIAN, Chih-Kai Chang, Jung-Chung Lin, Kuo-Ming Yeh, Chien-Wen Chen, Sheng-Kang Chiu, Hsing-Yi Chung, Shih-Hung Tsai, Kuo-Sheng Hung, Tien-Yao Chang, Feng-Yee Chang, Hung-Sheng Shang                                                                                                                        |
| EPI_ISL_436100                                                                                                                                                                                                                                                                                                                                                                                                                                                                                                                                                                                                                                                                                                                                                                                                                                                                                                                                                                                                                                                                                                                                                                                                                                                                                                                                                                                                                                                                                                                                                                                                                                                                                                                                                                                                                                                                                                                                                                                                                                                                                                                                                                                                                                                                                                                                                                                                                                                                                                                                                                                                                                                                                                                                                                                                                                                                                                                                                                                                                                                                                                                                                                                                                                                                                                                                                                                                                                                                                                                                                                                                                                                                                                                                                                                                                                                                                                                                                                                                                                                                                                                 |           | TSGH-CP molecular lab                                                          | TSGH-CP molecular lab                                                                       | Cherng-Lih Perng, Ming-Jr Jian, Chih-Kai Chang, Jung-Chung Lin, Kuo-Ming Yeh, Chien-Wen Chen, Sheng-Kang Chiu, Hsing-Yi Chung, Shih-Hung Tsai, Kuo-Sheng Hung, Tien-Yao Chang, Feng-Yee Chang, Hung-Sheng Shang                                                                                                                        |
| EPI_ISL_436101, EPI_ISL_436102, EPI_ISL_436103, EPI_ISL_436104                                                                                                                                                                                                                                                                                                                                                                                                                                                                                                                                                                                                                                                                                                                                                                                                                                                                                                                                                                                                                                                                                                                                                                                                                                                                                                                                                                                                                                                                                                                                                                                                                                                                                                                                                                                                                                                                                                                                                                                                                                                                                                                                                                                                                                                                                                                                                                                                                                                                                                                                                                                                                                                                                                                                                                                                                                                                                                                                                                                                                                                                                                                                                                                                                                                                                                                                                                                                                                                                                                                                                                                                                                                                                                                                                                                                                                                                                                                                                                                                                                                                 |           | TSGH-CP molecular lab                                                          | TSGH-CP molecular lab                                                                       | Cherng-Lih Perng, Ming-Jr JIAN, Chih-Kai Chang, Jung-Chung Lin, Kuo-Ming Yeh, Chien-Wen Chen, Sheng-Kang Chiu, Hsing-Yi Chung, Shih-Hung Tsai, Kuo-Sheng Hung, Tien-Yao Chang, Feng-Yee Chang, Hung-Sheng Shang                                                                                                                        |
| EPI_ISL_436105                                                                                                                                                                                                                                                                                                                                                                                                                                                                                                                                                                                                                                                                                                                                                                                                                                                                                                                                                                                                                                                                                                                                                                                                                                                                                                                                                                                                                                                                                                                                                                                                                                                                                                                                                                                                                                                                                                                                                                                                                                                                                                                                                                                                                                                                                                                                                                                                                                                                                                                                                                                                                                                                                                                                                                                                                                                                                                                                                                                                                                                                                                                                                                                                                                                                                                                                                                                                                                                                                                                                                                                                                                                                                                                                                                                                                                                                                                                                                                                                                                                                                                                 |           | TSGH-CP molecular lab                                                          | TSGH-CP molecular lab                                                                       | Cherng-Lih Perng, Ming-Jr Jian, Chih-Kai Chang, Jung-Chung Lin, Kuo-Ming Yeh, Chien-Wen Chen, Sheng-Kang Chiu, Hsing-Yi Chung, Shih-Hung Tsai, Kuo-Sheng Hung, Tien-Yao Chang, Feng-Yee Chang, Hung-Sheng Shang                                                                                                                        |
| EPI_ISL_436106, EPI_ISL_436107, EPI_ISL_436108                                                                                                                                                                                                                                                                                                                                                                                                                                                                                                                                                                                                                                                                                                                                                                                                                                                                                                                                                                                                                                                                                                                                                                                                                                                                                                                                                                                                                                                                                                                                                                                                                                                                                                                                                                                                                                                                                                                                                                                                                                                                                                                                                                                                                                                                                                                                                                                                                                                                                                                                                                                                                                                                                                                                                                                                                                                                                                                                                                                                                                                                                                                                                                                                                                                                                                                                                                                                                                                                                                                                                                                                                                                                                                                                                                                                                                                                                                                                                                                                                                                                                 |           | TSGH-CP molecular lab                                                          | TSGH-CP molecular lab                                                                       | Cherng-Lih Perng, Ming-Jr JIAN, Chih-Kai Chang, Jung-Chung Lin, Kuo-Ming Yeh, Chien-Wen Chen, Sheng-Kang Chiu, Hsing-Yi Chung, Shih-Hung Tsai, Kuo-Sheng Hung, Tien-Yao Chang, Feng-Yee Chang, Hung-Sheng Shang                                                                                                                        |
| EPI_ISL_436137, EPI_ISL_436138, EPI_ISL_436139, EPI_ISL_436140, EPI_ISL_436141, EPI_ISL_436156, EPI_ISL_436157                                                                                                                                                                                                                                                                                                                                                                                                                                                                                                                                                                                                                                                                                                                                                                                                                                                                                                                                                                                                                                                                                                                                                                                                                                                                                                                                                                                                                                                                                                                                                                                                                                                                                                                                                                                                                                                                                                                                                                                                                                                                                                                                                                                                                                                                                                                                                                                                                                                                                                                                                                                                                                                                                                                                                                                                                                                                                                                                                                                                                                                                                                                                                                                                                                                                                                                                                                                                                                                                                                                                                                                                                                                                                                                                                                                                                                                                                                                                                                                                                 |           | District Surveillance Unit                                                     | Department of Neurovirology, National Institute of Mental Health and Neuroscience (NIMHANS) | Chitra Pattabiraman, Vijayalakshmi Reddy, Harsha PK, Risha Rasheed, Shafeeq S Hameed, Manjunatha Venkataswamy, Anita Desai, Ravi Vasanthapuram                                                                                                                                                                                         |
| EPI_ISL_437336                                                                                                                                                                                                                                                                                                                                                                                                                                                                                                                                                                                                                                                                                                                                                                                                                                                                                                                                                                                                                                                                                                                                                                                                                                                                                                                                                                                                                                                                                                                                                                                                                                                                                                                                                                                                                                                                                                                                                                                                                                                                                                                                                                                                                                                                                                                                                                                                                                                                                                                                                                                                                                                                                                                                                                                                                                                                                                                                                                                                                                                                                                                                                                                                                                                                                                                                                                                                                                                                                                                                                                                                                                                                                                                                                                                                                                                                                                                                                                                                                                                                                                                 |           | TSGH-CP molecular lab, Division of Clinical Pathology, Department of Pathology | TSGH-CP molecular lab, Division of Clinical Pathology, Department of Pathology              | Cherng-Lih Perng, Ming-Jr JIAN, Chih-Kai Chang, Jung-Chung Lin, Kuo-Ming Yeh, Chien-Wen Chen, Sheng-Kang Chiu, Hsing-Yi Chung, Shih-Hung Tsai, Kuo-Sheng Hung, Tien-Yao Chang, Feng-Yee Chang, Hung-Sheng Shang                                                                                                                        |
| EPI_ISL_438140, EPI_ISL_438141, EPI_ISL_438142, EPI_ISL_438143, EPI_ISL_438144, EPI_ISL_438145, EPI_ISL_438146, EPI_ISL_438147, EPI_ISL_438148, EPI_ISL_438149, EPI_ISL_438150, EPI_ISL_438151, EPI_ISL_438152, EPI_ISL_438153, EPI_ISL_438154, EPI_ISL_438155, EPI_ISL_438156, EPI_ISL_438157, EPI_ISL_438158, EPI_ISL_438159, EPI_ISL_438160, EPI_ISL_438161, EPI_ISL_438162, EPI_ISL_438163, EPI_ISL_438164, EPI_ISL_438165, EPI_ISL_438166, EPI_ISL_438167, EPI_ISL_438168, EPI_ISL_438169, EPI_ISL_438170, EPI_ISL_438171, EPI_ISL_438172, EPI_ISL_438173, EPI_ISL_438174, EPI_ISL_438175                                                                                                                                                                                                                                                                                                                                                                                                                                                                                                                                                                                                                                                                                                                                                                                                                                                                                                                                                                                                                                                                                                                                                                                                                                                                                                                                                                                                                                                                                                                                                                                                                                                                                                                                                                                                                                                                                                                                                                                                                                                                                                                                                                                                                                                                                                                                                                                                                                                                                                                                                                                                                                                                                                                                                                                                                                                                                                                                                                                                                                                                                                                                                                                                                                                                                                                                                                                                                                                                                                                                 | see above | Seattle Flu Study                                                              | Seattle Flu Study                                                                           | Chu et al                                                                                                                                                                                                                                                                                                                              |
| EPI_ISL_438176, EPI_ISL_438177, EPI_ISL_438178, EPI_ISL_438179, EPI_ISL_438180, EPI_ISL_438181, EPI_ISL_438182, EPI_ISL_438183, EPI_ISL_438184, EPI_ISL_438185, EPI_ISL_438186, EPI_ISL_438187, EPI_ISL_438188, EPI_ISL_438189, EPI_ISL_438190, EPI_ISL_438191, EPI_ISL_438192, EPI_ISL_438193, EPI_ISL_438194, EPI_ISL_438195, EPI_ISL_438196, EPI_ISL_438197, EPI_ISL_438198, EPI_ISL_438199, EPI_ISL_438200, EPI_ISL_438201, EPI_ISL_438202, EPI_ISL_438203, EPI_ISL_438204, EPI_ISL_438205, EPI_ISL_438206, EPI_ISL_438207, EPI_ISL_438208, EPI_ISL_438209, EPI_ISL_438210, EPI_ISL_438211, EPI_ISL_438212, EPI_ISL_438213, EPI_ISL_438214, EPI_ISL_438215, EPI_ISL_438216, EPI_ISL_438217, EPI_ISL_438218, EPI_ISL_438219, EPI_ISL_438220, EPI_ISL_438221                                                                                                                                                                                                                                                                                                                                                                                                                                                                                                                                                                                                                                                                                                                                                                                                                                                                                                                                                                                                                                                                                                                                                                                                                                                                                                                                                                                                                                                                                                                                                                                                                                                                                                                                                                                                                                                                                                                                                                                                                                                                                                                                                                                                                                                                                                                                                                                                                                                                                                                                                                                                                                                                                                                                                                                                                                                                                                                                                                                                                                                                                                                                                                                                                                                                                                                                                                 | see above | Washington State Department of Health                                          | Seattle Flu Study                                                                           | Chu et al                                                                                                                                                                                                                                                                                                                              |
| EPI_ISL_445420, EPI_ISL_445431, EPI_ISL_445557, EPI_ISL_445709, EPI_ISL_445841, EPI_ISL_445863, EPI_ISL_445898, EPI_ISL_445932, EPI_ISL_445934, EPI_ISL_446014, EPI_ISL_446029, EPI_ISL_446060, EPI_ISL_446134, EPI_ISL_446283, EPI_ISL_446363, EPI_ISL_446449, EPI_ISL_446452, EPI_ISL_446636, EPI_ISL_446731, EPI_ISL_446746, EPI_ISL_446812, EPI_ISL_446885                                                                                                                                                                                                                                                                                                                                                                                                                                                                                                                                                                                                                                                                                                                                                                                                                                                                                                                                                                                                                                                                                                                                                                                                                                                                                                                                                                                                                                                                                                                                                                                                                                                                                                                                                                                                                                                                                                                                                                                                                                                                                                                                                                                                                                                                                                                                                                                                                                                                                                                                                                                                                                                                                                                                                                                                                                                                                                                                                                                                                                                                                                                                                                                                                                                                                                                                                                                                                                                                                                                                                                                                                                                                                                                                                                 | see above | Wales Specialist Virology Centre                                               | Public Health Wales Microbiology Cardiff                                                    | Catherine Moore, Johnathan Evans, Laura Gifford, Malorie Perry, Simon Cottrell, Alec Birchley, Alexander Adams, Amy Gaskin, Bree Gatica-Wilcox, Jason Coombes, Lauren Gilbert, Lee Graham, Nicole Pacchiarini, Sara Kumziene-Summerhayes, Sarah Taylor, Sophie Jones, Sara Rey, Matthew Bull, Joanne Watkins, Sally Corden, Tom Connor |
| EPI_ISL_447252, EPI_ISL_447253, EPI_ISL_447254, EPI_ISL_447255, EPI_ISL_447256, EPI_ISL_447257, EPI_ISL_447591, EPI_ISL_447592, EPI_ISL_447593                                                                                                                                                                                                                                                                                                                                                                                                                                                                                                                                                                                                                                                                                                                                                                                                                                                                                                                                                                                                                                                                                                                                                                                                                                                                                                                                                                                                                                                                                                                                                                                                                                                                                                                                                                                                                                                                                                                                                                                                                                                                                                                                                                                                                                                                                                                                                                                                                                                                                                                                                                                                                                                                                                                                                                                                                                                                                                                                                                                                                                                                                                                                                                                                                                                                                                                                                                                                                                                                                                                                                                                                                                                                                                                                                                                                                                                                                                                                                                                 | see above | TSGH-CP molecular lab                                                          | TSGH-CP molecular lab                                                                       | Cherng-Lih Perng, Ming-Jr JIAN, Chih-Kai Chang, Jung-Chung Lin, Kuo-Ming Yeh, Chien-Wen Chen, Sheng-Kang Chiu, Hsing-Yi Chung, Shih-Hung Tsai, Kuo-Sheng Hung, Tien-Yao Chang, Feng-Yee Chang, Hung-Sheng Shang                                                                                                                        |
| EPI_ISL_447922, EPI_ISL_447923, EPI_ISL_447924, EPI_ISL_447925, EPI_ISL_447926, EPI_ISL_447927, EPI_ISL_447928, EPI_ISL_447929, EPI_ISL_447930, EPI_ISL_447931, EPI_ISL_447932, EPI_ISL_447933, EPI_ISL_447934, EPI_ISL_447935, EPI_ISL_447936, EPI_ISL_447937, EPI_ISL_447938, EPI_ISL_447939, EPI_ISL_447940, EPI_ISL_447941, EPI_ISL_447942, EPI_ISL_447943, EPI_ISL_447944                                                                                                                                                                                                                                                                                                                                                                                                                                                                                                                                                                                                                                                                                                                                                                                                                                                                                                                                                                                                                                                                                                                                                                                                                                                                                                                                                                                                                                                                                                                                                                                                                                                                                                                                                                                                                                                                                                                                                                                                                                                                                                                                                                                                                                                                                                                                                                                                                                                                                                                                                                                                                                                                                                                                                                                                                                                                                                                                                                                                                                                                                                                                                                                                                                                                                                                                                                                                                                                                                                                                                                                                                                                                                                                                                 | see above | University of Birmingham                                                       | COVID-19 Genomics UK (COG-UK) Consortium                                                    | Claire McMurray, Joanne Stockton, Samuel Nicholls, Radoslaw Poplawski, Will Rowe, Josh Quick, Nicholas Loman, Celina M Whalley, Andrew Bosworth, Charlotte Poxon, Kasun Wanigasooriya, Oliver Pickles, Mike Kidd, Alex Richter, Andrew D Beggs, Husam Osman, Andrew Bosworth                                                           |
| EPI_ISL_449839, EPI_ISL_449840, EPI_ISL_449841, EPI_ISL_449842, EPI_ISL_449843, EPI_ISL_449844, EPI_ISL_449845, EPI_ISL_449846, EPI_ISL_449847, EPI_ISL_449848, EPI_ISL_449849, EPI_ISL_449850, EPI_ISL_449851, EPI_ISL_449852, EPI_ISL_449853, EPI_ISL_449854, EPI_ISL_449855, EPI_ISL_449856, EPI_ISL_449857, EPI_ISL_449858, EPI_ISL_449859, EPI_ISL_449860, EPI_ISL_449861, EPI_ISL_449862, EPI_ISL_449863, EPI_ISL_449864, EPI_ISL_449865, EPI_ISL_449866, EPI_ISL_449867, EPI_ISL_449868, EPI_ISL_449869, EPI_ISL_449870, EPI_ISL_449871, EPI_ISL_449872, EPI_ISL_449873, EPI_ISL_449874, EPI_ISL_449875, EPI_ISL_449876, EPI_ISL_449877, EPI_ISL_449878, EPI_ISL_449879, EPI_ISL_449880, EPI_ISL_449881, EPI_ISL_449882, EPI_ISL_449883, EPI_ISL_449884, EPI_ISL_449885, EPI_ISL_449886, EPI_ISL_449887, EPI_ISL_449888, EPI_ISL_449889, EPI_ISL_449890, EPI_ISL_449891, EPI_ISL_449892, EPI_ISL_449893, EPI_ISL_449894, EPI_ISL_449895, EPI_ISL_449896, EPI_ISL_449897, EPI_ISL_449898, EPI_ISL_449899, EPI_ISL_449900, EPI_ISL_449901, EPI_ISL_449902, EPI_ISL_449903, EPI_ISL_449904, EPI_ISL_449905, EPI_ISL_449906, EPI_ISL_449907, EPI_ISL_449908, EPI_ISL_449909, EPI_ISL_449910, EPI_ISL_449911, EPI_ISL_449912, EPI_ISL_449913, EPI_ISL_449914, EPI_ISL_449915, EPI_ISL_449916, EPI_ISL_449917, EPI_ISL_449918, EPI_ISL_449919, EPI_ISL_449920, EPI_ISL_449921, EPI_ISL_449922, EPI_ISL_449923, EPI_ISL_449924, EPI_ISL_449925, EPI_ISL_449926, EPI_ISL_449927, EPI_ISL_449928, EPI_ISL_449929, EPI_ISL_449930, EPI_ISL_449931, EPI_ISL_449932, EPI_ISL_449933, EPI_ISL_449934, EPI_ISL_449935, EPI_ISL_449936, EPI_ISL_449937, EPI_ISL_449938, EPI_ISL_449939, EPI_ISL_449940, EPI_ISL_449941, EPI_ISL_449942, EPI_ISL_449943, EPI_ISL_449944, EPI_ISL_449945, EPI_ISL_449946, EPI_ISL_449947, EPI_ISL_449948, EPI_ISL_449949, EPI_ISL_449950, EPI_ISL_449951, EPI_ISL_449952, EPI_ISL_449953, EPI_ISL_449954, EPI_ISL_449955, EPI_ISL_449956, EPI_ISL_449957, EPI_ISL_449958, EPI_ISL_449959, EPI_ISL_449960, EPI_ISL_449961, EPI_ISL_449962, EPI_ISL_449963, EPI_ISL_449964, EPI_ISL_449965, EPI_ISL_449966, EPI_ISL_449967, EPI_ISL_449968, EPI_ISL_449969, EPI_ISL_449970, EPI_ISL_449971, EPI_ISL_449972, EPI_ISL_449973, EPI_ISL_449974, EPI_ISL_449975, EPI_ISL_449976, EPI_ISL_449977, EPI_ISL_449978, EPI_ISL_449979, EPI_ISL_449980, EPI_ISL_449981, EPI_ISL_449982, EPI_ISL_449983, EPI_ISL_449984, EPI_ISL_449985, EPI_ISL_449986, EPI_ISL_449987, EPI_ISL_449988, EPI_ISL_449989, EPI_ISL_449990, EPI_ISL_449991, EPI_ISL_449992, EPI_ISL_449993, EPI_ISL_449994, EPI_ISL_449995, EPI_ISL_449996, EPI_ISL_449997, EPI_ISL_449998, EPI_ISL_449999, EPI_ISL_450000, EPI_ISL_450001, EPI_ISL_450002, EPI_ISL_450003                                                                                                                                                                                                                                                                                                                                                                                                                                                                                                                                                                                                                                                                                                                                                                                                                                                                                                                                                                                                                                                                                                                                                                                                                                                                                                                                                                                 | see above | Washington State Department of Health                                          | Seattle Flu Study                                                                           | Chu et al                                                                                                                                                                                                                                                                                                                              |
| EPI_ISL_451298, EPI_ISL_451300, EPI_ISL_451302, EPI_ISL_451304                                                                                                                                                                                                                                                                                                                                                                                                                                                                                                                                                                                                                                                                                                                                                                                                                                                                                                                                                                                                                                                                                                                                                                                                                                                                                                                                                                                                                                                                                                                                                                                                                                                                                                                                                                                                                                                                                                                                                                                                                                                                                                                                                                                                                                                                                                                                                                                                                                                                                                                                                                                                                                                                                                                                                                                                                                                                                                                                                                                                                                                                                                                                                                                                                                                                                                                                                                                                                                                                                                                                                                                                                                                                                                                                                                                                                                                                                                                                                                                                                                                                 |           | Laboratory of Virology, INMI Lazzaro Spallanzani IRCCS                         | Laboratory of Virology, INMI Lazzaro Spallanzani IRCCS                                      | Cesare E.M. Gruber, Martina Rueca, Barbara Bartolini, Francesco Messina, Antonino Di Caro, Maria R. Capobianchi, Giuseppe Ippolito                                                                                                                                                                                                     |
| EPI_ISL_451668, EPI_ISL_451669, EPI_ISL_451670, EPI_ISL_451671, EPI_ISL_451672, EPI_ISL_451673, EPI_ISL_451674, EPI_ISL_451675, EPI_ISL_451676, EPI_ISL_451677, EPI_ISL_451678, EPI_ISL_451679, EPI_ISL_451680, EPI_ISL_451681, EPI_ISL_451682, EPI_ISL_451683, EPI_ISL_451684, EPI_ISL_451685, EPI_ISL_451686, EPI_ISL_451687, EPI_ISL_451688, EPI_ISL_451689, EPI_ISL_451690, EPI_ISL_451691, EPI_ISL_451692, EPI_ISL_451693, EPI_ISL_451694, EPI_ISL_451695, EPI_ISL_451696, EPI_ISL_451697, EPI_ISL_451698, EPI_ISL_451699, EPI_ISL_451700, EPI_ISL_451701, EPI_ISL_451702, EPI_ISL_451703, EPI_ISL_451704, EPI_ISL_451705, EPI_ISL_451706, EPI_ISL_451707, EPI_ISL_451708, EPI_ISL_451709, EPI_ISL_451710, EPI_ISL_451711, EPI_ISL_451712, EPI_ISL_451713, EPI_ISL_451714, EPI_ISL_451715, EPI_ISL_451716, EPI_ISL_451717, EPI_ISL_451718, EPI_ISL_451719, EPI_ISL_451720, EPI_ISL_451721, EPI_ISL_451722, EPI_ISL_451723, EPI_ISL_451724, EPI_ISL_451725, EPI_ISL_451726, EPI_ISL_451727, EPI_ISL_451728, EPI_ISL_451729, EPI_ISL_451730, EPI_ISL_451731, EPI_ISL_451732, EPI_ISL_451733, EPI_ISL_451734, EPI_ISL_451735, EPI_ISL_451736, EPI_ISL_451737, EPI_ISL_451738, EPI_ISL_451739, EPI_ISL_451740, EPI_ISL_451741, EPI_ISL_451742, EPI_ISL_451743, EPI_ISL_451744, EPI_ISL_451745, EPI_ISL_451746, EPI_ISL_451747, EPI_ISL_451748, EPI_ISL_451749, EPI_ISL_451750, EPI_ISL_451751, EPI_ISL_451752, EPI_ISL_451753, EPI_ISL_451754, EPI_ISL_451755, EPI_ISL_451756, EPI_ISL_451757, EPI_ISL_451758, EPI_ISL_451759, EPI_ISL_451760, EPI_ISL_451761, EPI_ISL_451762, EPI_ISL_451763, EPI_ISL_451764, EPI_ISL_451765, EPI_ISL_451766, EPI_ISL_451767, EPI_ISL_451768, EPI_ISL_451769, EPI_ISL_451770, EPI_ISL_451771, EPI_ISL_451772, EPI_ISL_451773, EPI_ISL_451774, EPI_ISL_451775, EPI_ISL_451776, EPI_ISL_451777, EPI_ISL_451778, EPI_ISL_451779, EPI_ISL_451780, EPI_ISL_451781, EPI_ISL_451782, EPI_ISL_451783, EPI_ISL_451784, EPI_ISL_451785, EPI_ISL_451786, EPI_ISL_451787, EPI_ISL_451788, EPI_ISL_451789, EPI_ISL_451790, EPI_ISL_451791, EPI_ISL_451792, EPI_ISL_451793, EPI_ISL_451794, EPI_ISL_451795, EPI_ISL_451796, EPI_ISL_451797, EPI_ISL_451798, EPI_ISL_451799, EPI_ISL_451800, EPI_ISL_451801, EPI_ISL_451802, EPI_ISL_451803, EPI_ISL_451804, EPI_ISL_451805, EPI_ISL_451806, EPI_ISL_451807, EPI_ISL_451808, EPI_ISL_451809, EPI_ISL_451810, EPI_ISL_451811, EPI_ISL_451812, EPI_ISL_451813, EPI_ISL_451814, EPI_ISL_451815, EPI_ISL_451816, EPI_ISL_451817, EPI_ISL_451818, EPI_ISL_451819, EPI_ISL_451820, EPI_ISL_451821, EPI_ISL_451822, EPI_ISL_451823, EPI_ISL_451824, EPI_ISL_451825, EPI_ISL_451826, EPI_ISL_451827, EPI_ISL_451828, EPI_ISL_451829, EPI_ISL_451830, EPI_ISL_451831, EPI_ISL_451832, EPI_ISL_451833, EPI_ISL_451834, EPI_ISL_451835, EPI_ISL_451836, EPI_ISL_451837, EPI_ISL_451838, EPI_ISL_451839, EPI_ISL_451840, EPI_ISL_451841, EPI_ISL_451842, EPI_ISL_451843, EPI_ISL_451844, EPI_ISL_451845, EPI_ISL_451846, EPI_ISL_451847, EPI_ISL_451848, EPI_ISL_451849, EPI_ISL_451850, EPI_ISL_451851, EPI_ISL_451852, EPI_ISL_451853, EPI_ISL_451854, EPI_ISL_451855, EPI_ISL_451856, EPI_ISL_451857, EPI_ISL_451858, EPI_ISL_451859, EPI_ISL_451860, EPI_ISL_451861, EPI_ISL_451862, EPI_ISL_451863, EPI_ISL_451864, EPI_ISL_451865, EPI_ISL_451866, EPI_ISL_451867, EPI_ISL_451868, EPI_ISL_451869, EPI_ISL_451870, EPI_ISL_451871, EPI_ISL_451872, EPI_ISL_451873, EPI_ISL_451874, EPI_ISL_451875, EPI_ISL_451876, EPI_ISL_451877, EPI_ISL_451878, EPI_ISL_451879, EPI_ISL_451880, EPI_ISL_451881, EPI_ISL_451882, EPI_ISL_451883, EPI_ISL_451884, EPI_ISL_451885, EPI_ISL_451886, EPI_ISL_451887, EPI_ISL_451888, EPI_ISL_451889, EPI_ISL_451890, EPI_ISL_451891, EPI_ISL_451892, EPI_ISL_451893, EPI_ISL_451894, EPI_ISL_451895, EPI_ISL_451896, EPI_ISL_451897, EPI_ISL_451898, EPI_ISL_451899, EPI_ISL_451900, EPI_ISL_451901, EPI_ISL_451902, EPI_ISL_451903, EPI_ISL_451904, EPI_ISL_451905, EPI_ISL_451906, EPI_ISL_451907, EPI_ISL_451908, EPI_ISL_451909, EPI_ISL_451910, EPI_ISL_451911, EPI_ISL_451912, EPI_ISL_451913, EPI_ISL_451914, EPI_ISL_451915 | see above | Viollier AG                                                                    | Department of Biosystems Science and Engineering, ETH Zürich                                | Christian Beisel, Sarah Nadeau, Ivan Topolsky, Pedro Ferreira, Philipp Jablonski, Susana Posada-Céspedes, Tobias Schär, Ina Nissen, Natascha Santacrose, Elodie Burcklen, Christiane Beckmann, Maurice Redondo, Olivier Kobel, Christoph Nöppel, Sophie Seidel, Noemie Santamaria de Souza, Niko Beerenwinkel, Tanja Stadler           |

|                                                                                                                                                                                                                                                                                                                                                                                                                                                                                                                                                                                                                                                                                                                                                                                                                                                                                                                                                                                                                                                                                                                                                                                                                                                                                                                                                                                                                                                                                                                                                                                                                                                                                                                                                                                                                                                                                                                                                                                                                                                                                                                                                                                                                                                                                                                                                                                                                                                                                                                                                                                                                                                                                                                                                                                                                                                                                                                                                                                                                                                                                                                                                                                                                                                                                                                                                                                                                                                                                                                                                                                                                                                                                                                                                                                                                                                                                                                                                                                                                                                                                                                                                                                                                                                                                                                                                                                                                                                                                                                                                                                                                                                                                                                                                                                                                                                                                                                                                                                                                                                                                                                                                                                                                                                                                                                                                                                                                                                                                                                                                                                                                                                                                                                                                                                                                                                                                                                                                                                                                                                                                                                                                                                                                                                                                                                                                                |                                                                                        |                                                                                                                                                                                                                                                                                                                                                                                                                                                                                                                                                                                                                                                                                              |                                                                                                                                                                                                                                                                                                                                                                                                                                                                                                                                                                                                                                                                                              |
|----------------------------------------------------------------------------------------------------------------------------------------------------------------------------------------------------------------------------------------------------------------------------------------------------------------------------------------------------------------------------------------------------------------------------------------------------------------------------------------------------------------------------------------------------------------------------------------------------------------------------------------------------------------------------------------------------------------------------------------------------------------------------------------------------------------------------------------------------------------------------------------------------------------------------------------------------------------------------------------------------------------------------------------------------------------------------------------------------------------------------------------------------------------------------------------------------------------------------------------------------------------------------------------------------------------------------------------------------------------------------------------------------------------------------------------------------------------------------------------------------------------------------------------------------------------------------------------------------------------------------------------------------------------------------------------------------------------------------------------------------------------------------------------------------------------------------------------------------------------------------------------------------------------------------------------------------------------------------------------------------------------------------------------------------------------------------------------------------------------------------------------------------------------------------------------------------------------------------------------------------------------------------------------------------------------------------------------------------------------------------------------------------------------------------------------------------------------------------------------------------------------------------------------------------------------------------------------------------------------------------------------------------------------------------------------------------------------------------------------------------------------------------------------------------------------------------------------------------------------------------------------------------------------------------------------------------------------------------------------------------------------------------------------------------------------------------------------------------------------------------------------------------------------------------------------------------------------------------------------------------------------------------------------------------------------------------------------------------------------------------------------------------------------------------------------------------------------------------------------------------------------------------------------------------------------------------------------------------------------------------------------------------------------------------------------------------------------------------------------------------------------------------------------------------------------------------------------------------------------------------------------------------------------------------------------------------------------------------------------------------------------------------------------------------------------------------------------------------------------------------------------------------------------------------------------------------------------------------------------------------------------------------------------------------------------------------------------------------------------------------------------------------------------------------------------------------------------------------------------------------------------------------------------------------------------------------------------------------------------------------------------------------------------------------------------------------------------------------------------------------------------------------------------------------------------------------------------------------------------------------------------------------------------------------------------------------------------------------------------------------------------------------------------------------------------------------------------------------------------------------------------------------------------------------------------------------------------------------------------------------------------------------------------------------------------------------------------------------------------------------------------------------------------------------------------------------------------------------------------------------------------------------------------------------------------------------------------------------------------------------------------------------------------------------------------------------------------------------------------------------------------------------------------------------------------------------------------------------------------------------------------------------------------------------------------------------------------------------------------------------------------------------------------------------------------------------------------------------------------------------------------------------------------------------------------------------------------------------------------------------------------------------------------------------------------------------------------------------------------|----------------------------------------------------------------------------------------|----------------------------------------------------------------------------------------------------------------------------------------------------------------------------------------------------------------------------------------------------------------------------------------------------------------------------------------------------------------------------------------------------------------------------------------------------------------------------------------------------------------------------------------------------------------------------------------------------------------------------------------------------------------------------------------------|----------------------------------------------------------------------------------------------------------------------------------------------------------------------------------------------------------------------------------------------------------------------------------------------------------------------------------------------------------------------------------------------------------------------------------------------------------------------------------------------------------------------------------------------------------------------------------------------------------------------------------------------------------------------------------------------|
| EPI_ISL_451957                                                                                                                                                                                                                                                                                                                                                                                                                                                                                                                                                                                                                                                                                                                                                                                                                                                                                                                                                                                                                                                                                                                                                                                                                                                                                                                                                                                                                                                                                                                                                                                                                                                                                                                                                                                                                                                                                                                                                                                                                                                                                                                                                                                                                                                                                                                                                                                                                                                                                                                                                                                                                                                                                                                                                                                                                                                                                                                                                                                                                                                                                                                                                                                                                                                                                                                                                                                                                                                                                                                                                                                                                                                                                                                                                                                                                                                                                                                                                                                                                                                                                                                                                                                                                                                                                                                                                                                                                                                                                                                                                                                                                                                                                                                                                                                                                                                                                                                                                                                                                                                                                                                                                                                                                                                                                                                                                                                                                                                                                                                                                                                                                                                                                                                                                                                                                                                                                                                                                                                                                                                                                                                                                                                                                                                                                                                                                 | Molecular Pathology Division, Department of Pathology, Hong Kong Sanatorium & Hospital | Molecular Pathology Division, Department of Pathology, Hong Kong Sanatorium & Hospital                                                                                                                                                                                                                                                                                                                                                                                                                                                                                                                                                                                                       | Chun Hang AU, Wai Sing CHAN, Ho Yin LAM, Dona N. HO, Simon Y.M. LAM, Jonpaul S.T. ZEE, Tsun Leung CHAN, Edmond S.K. MA                                                                                                                                                                                                                                                                                                                                                                                                                                                                                                                                                                       |
| EPI_ISL_455110                                                                                                                                                                                                                                                                                                                                                                                                                                                                                                                                                                                                                                                                                                                                                                                                                                                                                                                                                                                                                                                                                                                                                                                                                                                                                                                                                                                                                                                                                                                                                                                                                                                                                                                                                                                                                                                                                                                                                                                                                                                                                                                                                                                                                                                                                                                                                                                                                                                                                                                                                                                                                                                                                                                                                                                                                                                                                                                                                                                                                                                                                                                                                                                                                                                                                                                                                                                                                                                                                                                                                                                                                                                                                                                                                                                                                                                                                                                                                                                                                                                                                                                                                                                                                                                                                                                                                                                                                                                                                                                                                                                                                                                                                                                                                                                                                                                                                                                                                                                                                                                                                                                                                                                                                                                                                                                                                                                                                                                                                                                                                                                                                                                                                                                                                                                                                                                                                                                                                                                                                                                                                                                                                                                                                                                                                                                                                 | Scania Halsocenter, B288                                                               | The Public Health Agency of Sweden                                                                                                                                                                                                                                                                                                                                                                                                                                                                                                                                                                                                                                                           | Christina Lergin, Anna-Malin Linde, Maria Lind Karlberg, Oskar Karlsson Lindsjö, Olov Svartstrom, Anna Risberg, Theresa Enkirch, Mia Brytting, Karin Tegmark-Wisell                                                                                                                                                                                                                                                                                                                                                                                                                                                                                                                          |
| EPI_ISL_457726, EPI_ISL_457730, EPI_ISL_457733, EPI_ISL_458029                                                                                                                                                                                                                                                                                                                                                                                                                                                                                                                                                                                                                                                                                                                                                                                                                                                                                                                                                                                                                                                                                                                                                                                                                                                                                                                                                                                                                                                                                                                                                                                                                                                                                                                                                                                                                                                                                                                                                                                                                                                                                                                                                                                                                                                                                                                                                                                                                                                                                                                                                                                                                                                                                                                                                                                                                                                                                                                                                                                                                                                                                                                                                                                                                                                                                                                                                                                                                                                                                                                                                                                                                                                                                                                                                                                                                                                                                                                                                                                                                                                                                                                                                                                                                                                                                                                                                                                                                                                                                                                                                                                                                                                                                                                                                                                                                                                                                                                                                                                                                                                                                                                                                                                                                                                                                                                                                                                                                                                                                                                                                                                                                                                                                                                                                                                                                                                                                                                                                                                                                                                                                                                                                                                                                                                                                                 | TSGH-CP molecular lab                                                                  | TSGH-CP molecular lab                                                                                                                                                                                                                                                                                                                                                                                                                                                                                                                                                                                                                                                                        | Cheng-Lih Perng, Ming-Jr JIAN, Chih-Kai Chang, Jung-Chung Lin, Kuo-Ming Yeh, Chien-Wen Chen, Sheng-Kang Chiu, Hsing-Yi Chung, Shih-Hung Tsai, Kuo-Sheng Hung, Tien-Yao Chang, Feng-Yee Chang, Hung-Sheng Shang                                                                                                                                                                                                                                                                                                                                                                                                                                                                               |
| EPI_ISL_458578, EPI_ISL_458579, EPI_ISL_458580, EPI_ISL_458581, EPI_ISL_458582, EPI_ISL_458583, EPI_ISL_458584, EPI_ISL_458585, EPI_ISL_458586, EPI_ISL_458587, EPI_ISL_458588, EPI_ISL_458589, EPI_ISL_458590, EPI_ISL_458591, EPI_ISL_458592, EPI_ISL_458593, EPI_ISL_458594, EPI_ISL_458595, EPI_ISL_458596, EPI_ISL_458597, EPI_ISL_458598, EPI_ISL_458599, EPI_ISL_458600, EPI_ISL_458601, EPI_ISL_458602, EPI_ISL_458603, EPI_ISL_458604, EPI_ISL_458605, EPI_ISL_458606, EPI_ISL_458607, EPI_ISL_458608, EPI_ISL_458609, EPI_ISL_458610, EPI_ISL_458611, EPI_ISL_458612, EPI_ISL_458613, EPI_ISL_458614, EPI_ISL_458615, EPI_ISL_458616, EPI_ISL_458617, EPI_ISL_458618, EPI_ISL_458619, EPI_ISL_458620, EPI_ISL_458621, EPI_ISL_458622, EPI_ISL_458623, EPI_ISL_458624, EPI_ISL_458625, EPI_ISL_458626, EPI_ISL_458627, EPI_ISL_458628, EPI_ISL_458629, EPI_ISL_458630, EPI_ISL_458631, EPI_ISL_458632, EPI_ISL_458633, EPI_ISL_458634, EPI_ISL_458635, EPI_ISL_458636, EPI_ISL_458637, EPI_ISL_458638, EPI_ISL_458639, EPI_ISL_458640, EPI_ISL_458641, EPI_ISL_458642, EPI_ISL_458643, EPI_ISL_458644, EPI_ISL_458645, EPI_ISL_458646, EPI_ISL_458647, EPI_ISL_458648, EPI_ISL_458649, EPI_ISL_458650, EPI_ISL_458651, EPI_ISL_458652, EPI_ISL_458653, EPI_ISL_458654, EPI_ISL_458655, EPI_ISL_458656, EPI_ISL_458657, EPI_ISL_458658, EPI_ISL_458659, EPI_ISL_458660, EPI_ISL_458661, EPI_ISL_458662, EPI_ISL_458663, EPI_ISL_458664, EPI_ISL_458665, EPI_ISL_458666, EPI_ISL_458667, EPI_ISL_458668, EPI_ISL_458669, EPI_ISL_458670, EPI_ISL_458671, EPI_ISL_458672, EPI_ISL_458673, EPI_ISL_458674, EPI_ISL_458675, EPI_ISL_458676, EPI_ISL_458677, EPI_ISL_458678, EPI_ISL_458679, EPI_ISL_458680, EPI_ISL_458681, EPI_ISL_458682, EPI_ISL_458683, EPI_ISL_458684, EPI_ISL_458685, EPI_ISL_458686, EPI_ISL_458687, EPI_ISL_458688, EPI_ISL_458689, EPI_ISL_458690, EPI_ISL_458691, EPI_ISL_458692, EPI_ISL_458693, EPI_ISL_458694, EPI_ISL_458695, EPI_ISL_458696, EPI_ISL_458697, EPI_ISL_458698, EPI_ISL_458699, EPI_ISL_458700, EPI_ISL_458701, EPI_ISL_458702, EPI_ISL_458703, EPI_ISL_458704, EPI_ISL_458705, EPI_ISL_458706, EPI_ISL_458707, EPI_ISL_458708, EPI_ISL_458709, EPI_ISL_458710, EPI_ISL_458711                                                                                                                                                                                                                                                                                                                                                                                                                                                                                                                                                                                                                                                                                                                                                                                                                                                                                                                                                                                                                                                                                                                                                                                                                                                                                                                                                                                                                                                                                                                                                                                                                                                                                                                                                                                                                                                                                                                                                                                                                                                                                                                                                                                                                                                                                                                                                                                                                                                                                                                                                                                                                                                                                                                                                                                                                                                                                                                                                                                                                                                                                                                                                                                                                                                                                                                                                                                                                                                                                                                                                                                                                                                                                                                                                                                                                                                                                                                                                                                                                                                                                                                                 | Wellcome Sanger Institute for the COVID-19 Genomics UK (COG-UK) consortium             | Chris Duncan, Sheaia Waugh, Shirelle Burton-Fanning, Gary Eltringham, Jennifer Collins, Brendan Payne, Yusri Taha, Emma Swindells, Jane Greenaway, Edward Barton, Garren Scott, Debra Padgett, Clive Graham, Sarah Essex, Steve Liggett, Paul Baker, Lynn Dover, Wen Yew, Gary Black, John Allan, Joshua Loh, Greg Young, Matthew Bashton, Andrew Nelson, Darren Smith and Alex Alderton, Roberto Amato, Sonia Goncalves, Ewan Harrison, David K. Jackson, Ian Johnston, Dominic Kwiatkowski, Cordelia Langford, John Sillitoe on behalf of the Wellcome Sanger Institute COVID-19 Surveillance Team ( <a href="http://www.sanger.ac.uk/covid-team">http://www.sanger.ac.uk/covid-team</a> ) |                                                                                                                                                                                                                                                                                                                                                                                                                                                                                                                                                                                                                                                                                              |
| see above                                                                                                                                                                                                                                                                                                                                                                                                                                                                                                                                                                                                                                                                                                                                                                                                                                                                                                                                                                                                                                                                                                                                                                                                                                                                                                                                                                                                                                                                                                                                                                                                                                                                                                                                                                                                                                                                                                                                                                                                                                                                                                                                                                                                                                                                                                                                                                                                                                                                                                                                                                                                                                                                                                                                                                                                                                                                                                                                                                                                                                                                                                                                                                                                                                                                                                                                                                                                                                                                                                                                                                                                                                                                                                                                                                                                                                                                                                                                                                                                                                                                                                                                                                                                                                                                                                                                                                                                                                                                                                                                                                                                                                                                                                                                                                                                                                                                                                                                                                                                                                                                                                                                                                                                                                                                                                                                                                                                                                                                                                                                                                                                                                                                                                                                                                                                                                                                                                                                                                                                                                                                                                                                                                                                                                                                                                                                                      | NU-OMICS DNA Sequencing research facility, Northumbria University                      | Wellcome Sanger Institute for the COVID-19 Genomics UK (COG-UK) Consortium                                                                                                                                                                                                                                                                                                                                                                                                                                                                                                                                                                                                                   | Chris Duncan, Sheaia Waugh, Shirelle Burton-Fanning, Gary Eltringham, Jennifer Collins, Brendan Payne, Yusri Taha, Emma Swindells, Jane Greenaway, Edward Barton, Garren Scott, Debra Padgett, Clive Graham, Sarah Essex, Steve Liggett, Paul Baker, Lynn Dover, Wen Yew, Gary Black, John Allan, Joshua Loh, Greg Young, Matthew Bashton, Andrew Nelson, Darren Smith and Alex Alderton, Roberto Amato, Sonia Goncalves, Ewan Harrison, David K. Jackson, Ian Johnston, Dominic Kwiatkowski, Cordelia Langford, John Sillitoe on behalf of the Wellcome Sanger Institute COVID-19 Surveillance Team ( <a href="http://www.sanger.ac.uk/covid-team">http://www.sanger.ac.uk/covid-team</a> ) |
| EPI_ISL_458712                                                                                                                                                                                                                                                                                                                                                                                                                                                                                                                                                                                                                                                                                                                                                                                                                                                                                                                                                                                                                                                                                                                                                                                                                                                                                                                                                                                                                                                                                                                                                                                                                                                                                                                                                                                                                                                                                                                                                                                                                                                                                                                                                                                                                                                                                                                                                                                                                                                                                                                                                                                                                                                                                                                                                                                                                                                                                                                                                                                                                                                                                                                                                                                                                                                                                                                                                                                                                                                                                                                                                                                                                                                                                                                                                                                                                                                                                                                                                                                                                                                                                                                                                                                                                                                                                                                                                                                                                                                                                                                                                                                                                                                                                                                                                                                                                                                                                                                                                                                                                                                                                                                                                                                                                                                                                                                                                                                                                                                                                                                                                                                                                                                                                                                                                                                                                                                                                                                                                                                                                                                                                                                                                                                                                                                                                                                                                 | NU-OMICS DNA Sequencing research facility, Northumbria University                      | Wellcome Sanger Institute for the COVID-19 Genomics UK (COG-UK) Consortium                                                                                                                                                                                                                                                                                                                                                                                                                                                                                                                                                                                                                   | Chris Duncan, Sheaia Waugh, Shirelle Burton-Fanning, Gary Eltringham, Jennifer Collins, Brendan Payne, Yusri Taha, Emma Swindells, Jane Greenaway, Edward Barton, Garren Scott, Debra Padgett, Clive Graham, Sarah Essex, Steve Liggett, Paul Baker, Lynn Dover, Wen Yew, Gary Black, John Allan, Joshua Loh, Greg Young, Matthew Bashton, Andrew Nelson, Darren Smith and Alex Alderton, Roberto Amato, Sonia Goncalves, Ewan Harrison, David K. Jackson, Ian Johnston, Dominic Kwiatkowski, Cordelia Langford, John Sillitoe on behalf of the Wellcome Sanger Institute COVID-19 Surveillance Team ( <a href="http://www.sanger.ac.uk/covid-team">http://www.sanger.ac.uk/covid-team</a> ) |
| EPI_ISL_458713, EPI_ISL_458714, EPI_ISL_458715, EPI_ISL_458716, EPI_ISL_458717, EPI_ISL_458718                                                                                                                                                                                                                                                                                                                                                                                                                                                                                                                                                                                                                                                                                                                                                                                                                                                                                                                                                                                                                                                                                                                                                                                                                                                                                                                                                                                                                                                                                                                                                                                                                                                                                                                                                                                                                                                                                                                                                                                                                                                                                                                                                                                                                                                                                                                                                                                                                                                                                                                                                                                                                                                                                                                                                                                                                                                                                                                                                                                                                                                                                                                                                                                                                                                                                                                                                                                                                                                                                                                                                                                                                                                                                                                                                                                                                                                                                                                                                                                                                                                                                                                                                                                                                                                                                                                                                                                                                                                                                                                                                                                                                                                                                                                                                                                                                                                                                                                                                                                                                                                                                                                                                                                                                                                                                                                                                                                                                                                                                                                                                                                                                                                                                                                                                                                                                                                                                                                                                                                                                                                                                                                                                                                                                                                                 | NU-OMICS DNA Sequencing research facility, Northumbria University                      | Wellcome Sanger Institute for the COVID-19 Genomics UK (COG-UK) consortium                                                                                                                                                                                                                                                                                                                                                                                                                                                                                                                                                                                                                   | Chris Duncan, Sheaia Waugh, Shirelle Burton-Fanning, Gary Eltringham, Jennifer Collins, Brendan Payne, Yusri Taha, Emma Swindells, Jane Greenaway, Edward Barton, Garren Scott, Debra Padgett, Clive Graham, Sarah Essex, Steve Liggett, Paul Baker, Lynn Dover, Wen Yew, Gary Black, John Allan, Joshua Loh, Greg Young, Matthew Bashton, Andrew Nelson, Darren Smith and Alex Alderton, Roberto Amato, Sonia Goncalves, Ewan Harrison, David K. Jackson, Ian Johnston, Dominic Kwiatkowski, Cordelia Langford, John Sillitoe on behalf of the Wellcome Sanger Institute COVID-19 Surveillance Team ( <a href="http://www.sanger.ac.uk/covid-team">http://www.sanger.ac.uk/covid-team</a> ) |
| EPI_ISL_460085                                                                                                                                                                                                                                                                                                                                                                                                                                                                                                                                                                                                                                                                                                                                                                                                                                                                                                                                                                                                                                                                                                                                                                                                                                                                                                                                                                                                                                                                                                                                                                                                                                                                                                                                                                                                                                                                                                                                                                                                                                                                                                                                                                                                                                                                                                                                                                                                                                                                                                                                                                                                                                                                                                                                                                                                                                                                                                                                                                                                                                                                                                                                                                                                                                                                                                                                                                                                                                                                                                                                                                                                                                                                                                                                                                                                                                                                                                                                                                                                                                                                                                                                                                                                                                                                                                                                                                                                                                                                                                                                                                                                                                                                                                                                                                                                                                                                                                                                                                                                                                                                                                                                                                                                                                                                                                                                                                                                                                                                                                                                                                                                                                                                                                                                                                                                                                                                                                                                                                                                                                                                                                                                                                                                                                                                                                                                                 | Molecular Virology Unit, Fondazione IRCCS Policlinico San Matteo, Pavia                | Laboratory of Virology, INMI Lazzaro Spallanzani IRCCS                                                                                                                                                                                                                                                                                                                                                                                                                                                                                                                                                                                                                                       | Cesare E.M. Gruber, Maria R. Capobianchi, Barbara Bartolini, Fausto Baldanti, Martina Rueca, Antonio Piralla, Antonino Di Caro                                                                                                                                                                                                                                                                                                                                                                                                                                                                                                                                                               |
| EPI_ISL_460087                                                                                                                                                                                                                                                                                                                                                                                                                                                                                                                                                                                                                                                                                                                                                                                                                                                                                                                                                                                                                                                                                                                                                                                                                                                                                                                                                                                                                                                                                                                                                                                                                                                                                                                                                                                                                                                                                                                                                                                                                                                                                                                                                                                                                                                                                                                                                                                                                                                                                                                                                                                                                                                                                                                                                                                                                                                                                                                                                                                                                                                                                                                                                                                                                                                                                                                                                                                                                                                                                                                                                                                                                                                                                                                                                                                                                                                                                                                                                                                                                                                                                                                                                                                                                                                                                                                                                                                                                                                                                                                                                                                                                                                                                                                                                                                                                                                                                                                                                                                                                                                                                                                                                                                                                                                                                                                                                                                                                                                                                                                                                                                                                                                                                                                                                                                                                                                                                                                                                                                                                                                                                                                                                                                                                                                                                                                                                 | Molecular Virology Unit, Fondazione IRCCS Policlinico San Matteo, Pavia                | Laboratory of Virology, INMI Lazzaro Spallanzani IRCCS                                                                                                                                                                                                                                                                                                                                                                                                                                                                                                                                                                                                                                       | Cesare E.M. Gruber, Maria R. Capobianchi, Martina Rueca, Barbara Bartolini, Antonino Di Caro, Antonio Piralla, Fausto Baldanti                                                                                                                                                                                                                                                                                                                                                                                                                                                                                                                                                               |
| EPI_ISL_460092                                                                                                                                                                                                                                                                                                                                                                                                                                                                                                                                                                                                                                                                                                                                                                                                                                                                                                                                                                                                                                                                                                                                                                                                                                                                                                                                                                                                                                                                                                                                                                                                                                                                                                                                                                                                                                                                                                                                                                                                                                                                                                                                                                                                                                                                                                                                                                                                                                                                                                                                                                                                                                                                                                                                                                                                                                                                                                                                                                                                                                                                                                                                                                                                                                                                                                                                                                                                                                                                                                                                                                                                                                                                                                                                                                                                                                                                                                                                                                                                                                                                                                                                                                                                                                                                                                                                                                                                                                                                                                                                                                                                                                                                                                                                                                                                                                                                                                                                                                                                                                                                                                                                                                                                                                                                                                                                                                                                                                                                                                                                                                                                                                                                                                                                                                                                                                                                                                                                                                                                                                                                                                                                                                                                                                                                                                                                                 | Molecular Virology Unit, Fondazione IRCCS Policlinico San Matteo, Pavia                | Laboratory of Virology, INMI Lazzaro Spallanzani IRCCS                                                                                                                                                                                                                                                                                                                                                                                                                                                                                                                                                                                                                                       | Cesare E.M. Gruber, Martina Rueca, Maria R. Capobianchi, Antonino Di Caro, Antonio Piralla, Barbara Bartolini, Fausto Baldanti                                                                                                                                                                                                                                                                                                                                                                                                                                                                                                                                                               |
| EPI_ISL_463324, EPI_ISL_463325, EPI_ISL_463326, EPI_ISL_463327, EPI_ISL_463328, EPI_ISL_463329, EPI_ISL_463330, EPI_ISL_463331, EPI_ISL_463332, EPI_ISL_463333, EPI_ISL_463334, EPI_ISL_463335, EPI_ISL_463336, EPI_ISL_463337, EPI_ISL_463338, EPI_ISL_463339, EPI_ISL_463340, EPI_ISL_463341, EPI_ISL_463342, EPI_ISL_463343, EPI_ISL_463344, EPI_ISL_463345, EPI_ISL_463346, EPI_ISL_463347, EPI_ISL_463348, EPI_ISL_463349, EPI_ISL_463350, EPI_ISL_463351, EPI_ISL_463352, EPI_ISL_463353, EPI_ISL_463354, EPI_ISL_463355, EPI_ISL_463356, EPI_ISL_463357, EPI_ISL_463358, EPI_ISL_463359, EPI_ISL_463360, EPI_ISL_463361, EPI_ISL_463362, EPI_ISL_463363, EPI_ISL_463364, EPI_ISL_463365, EPI_ISL_463366, EPI_ISL_463367, EPI_ISL_463368, EPI_ISL_463369, EPI_ISL_463370, EPI_ISL_463371, EPI_ISL_463372, EPI_ISL_463373, EPI_ISL_463374, EPI_ISL_463375, EPI_ISL_463376, EPI_ISL_463377, EPI_ISL_463378, EPI_ISL_463379, EPI_ISL_463380, EPI_ISL_463381, EPI_ISL_463382, EPI_ISL_463383, EPI_ISL_463384, EPI_ISL_463385, EPI_ISL_463386, EPI_ISL_463387, EPI_ISL_463388, EPI_ISL_463389, EPI_ISL_463390, EPI_ISL_463391, EPI_ISL_463392, EPI_ISL_463393, EPI_ISL_463394, EPI_ISL_463395, EPI_ISL_463396, EPI_ISL_463397, EPI_ISL_463398, EPI_ISL_463399, EPI_ISL_463400, EPI_ISL_463401, EPI_ISL_463402, EPI_ISL_463403, EPI_ISL_463404, EPI_ISL_463405, EPI_ISL_463406, EPI_ISL_463407, EPI_ISL_463408, EPI_ISL_463409, EPI_ISL_463410, EPI_ISL_463411, EPI_ISL_463412, EPI_ISL_463413, EPI_ISL_463414, EPI_ISL_463415, EPI_ISL_463416, EPI_ISL_463417, EPI_ISL_463418, EPI_ISL_463419, EPI_ISL_463420, EPI_ISL_463421, EPI_ISL_463422, EPI_ISL_463423, EPI_ISL_463424, EPI_ISL_463425, EPI_ISL_463426, EPI_ISL_463427, EPI_ISL_463428, EPI_ISL_463429, EPI_ISL_463430, EPI_ISL_463431, EPI_ISL_463432, EPI_ISL_463433, EPI_ISL_463434, EPI_ISL_463435, EPI_ISL_463436, EPI_ISL_463437, EPI_ISL_463438, EPI_ISL_463439, EPI_ISL_463440, EPI_ISL_463441, EPI_ISL_463442, EPI_ISL_463443, EPI_ISL_463444, EPI_ISL_463445, EPI_ISL_463446, EPI_ISL_463447, EPI_ISL_463448, EPI_ISL_463449, EPI_ISL_463450, EPI_ISL_463451, EPI_ISL_463452, EPI_ISL_463453, EPI_ISL_463454, EPI_ISL_463455, EPI_ISL_463456, EPI_ISL_463457, EPI_ISL_463458, EPI_ISL_463459, EPI_ISL_463460, EPI_ISL_463461, EPI_ISL_463462, EPI_ISL_463463, EPI_ISL_463464, EPI_ISL_463465, EPI_ISL_463466, EPI_ISL_463467, EPI_ISL_463468, EPI_ISL_463469, EPI_ISL_463470, EPI_ISL_463471, EPI_ISL_463472, EPI_ISL_463473, EPI_ISL_463474, EPI_ISL_463475, EPI_ISL_463476, EPI_ISL_463477, EPI_ISL_463478, EPI_ISL_463479, EPI_ISL_463480, EPI_ISL_463481, EPI_ISL_463482, EPI_ISL_463483, EPI_ISL_463484, EPI_ISL_463485, EPI_ISL_463486, EPI_ISL_463487, EPI_ISL_463488, EPI_ISL_463489, EPI_ISL_463490, EPI_ISL_463491, EPI_ISL_463492, EPI_ISL_463493, EPI_ISL_463494, EPI_ISL_463495, EPI_ISL_463496, EPI_ISL_463497, EPI_ISL_463498, EPI_ISL_463499, EPI_ISL_463500, EPI_ISL_463501, EPI_ISL_463502, EPI_ISL_463503, EPI_ISL_463504, EPI_ISL_463505, EPI_ISL_463506, EPI_ISL_463507, EPI_ISL_463508, EPI_ISL_463509, EPI_ISL_463510, EPI_ISL_463511, EPI_ISL_463512, EPI_ISL_463513, EPI_ISL_463514, EPI_ISL_463515, EPI_ISL_463516, EPI_ISL_463517, EPI_ISL_463518, EPI_ISL_463519, EPI_ISL_463520, EPI_ISL_463521, EPI_ISL_463522, EPI_ISL_463523, EPI_ISL_463524, EPI_ISL_463525, EPI_ISL_463526, EPI_ISL_463527, EPI_ISL_463528, EPI_ISL_463529, EPI_ISL_463530, EPI_ISL_463531, EPI_ISL_463532, EPI_ISL_463533, EPI_ISL_463534, EPI_ISL_463535, EPI_ISL_463536, EPI_ISL_463537, EPI_ISL_463538, EPI_ISL_463539, EPI_ISL_463540, EPI_ISL_463541, EPI_ISL_463542, EPI_ISL_463543, EPI_ISL_463544, EPI_ISL_463545, EPI_ISL_463546, EPI_ISL_463547, EPI_ISL_463548, EPI_ISL_463549, EPI_ISL_463550, EPI_ISL_463551, EPI_ISL_463552, EPI_ISL_463553, EPI_ISL_463554, EPI_ISL_463555, EPI_ISL_463556, EPI_ISL_463557, EPI_ISL_463558, EPI_ISL_463559, EPI_ISL_463560, EPI_ISL_463561, EPI_ISL_463562, EPI_ISL_463563, EPI_ISL_463564, EPI_ISL_463565, EPI_ISL_463566, EPI_ISL_463567, EPI_ISL_463568, EPI_ISL_463569, EPI_ISL_463570, EPI_ISL_463571, EPI_ISL_463572, EPI_ISL_463573, EPI_ISL_463574, EPI_ISL_463575, EPI_ISL_463576, EPI_ISL_463577, EPI_ISL_463578, EPI_ISL_463579, EPI_ISL_463580, EPI_ISL_463581, EPI_ISL_463582, EPI_ISL_463583, EPI_ISL_463584, EPI_ISL_463585, EPI_ISL_463586, EPI_ISL_463587, EPI_ISL_463588, EPI_ISL_463589, EPI_ISL_463590, EPI_ISL_463591, EPI_ISL_463592, EPI_ISL_463593, EPI_ISL_463594, EPI_ISL_463595, EPI_ISL_463596, EPI_ISL_463597, EPI_ISL_463598, EPI_ISL_463599, EPI_ISL_463600, EPI_ISL_463601, EPI_ISL_463602, EPI_ISL_463603, EPI_ISL_463604, EPI_ISL_463605, EPI_ISL_463606, EPI_ISL_463607, EPI_ISL_463608, EPI_ISL_463609, EPI_ISL_463610, EPI_ISL_463611, EPI_ISL_463612, EPI_ISL_463613, EPI_ISL_463614, EPI_ISL_463615, EPI_ISL_463616, EPI_ISL_463617, EPI_ISL_463618, EPI_ISL_463619, EPI_ISL_463620, EPI_ISL_463621, EPI_ISL_463622, EPI_ISL_463623, EPI_ISL_463624, EPI_ISL_463625, EPI_ISL_463626, EPI_ISL_463627, EPI_ISL_463628, EPI_ISL_463629, EPI_ISL_463630, EPI_ISL_463631, EPI_ISL_463632, EPI_ISL_463633, EPI_ISL_463634, EPI_ISL_463635, EPI_ISL_463636, EPI_ISL_463637, EPI_ISL_463638, EPI_ISL_463639, EPI_ISL_463640, EPI_ISL_463641, EPI_ISL_463642, EPI_ISL_463643, EPI_ISL_463644, EPI_ISL_463645, EPI_ISL_463646, EPI_ISL_463647, EPI_ISL_463648, EPI_ISL_463649, EPI_ISL_463650, EPI_ISL_463651, EPI_ISL_463652, EPI_ISL_463653, EPI_ISL_463654, EPI_ISL_463655, EPI_ISL_463656, EPI_ISL_463657, EPI_ISL_463658, EPI_ISL_463659, EPI_ISL_463660, EPI_ISL_463661, EPI_ISL_463662, EPI_ISL_463663, EPI_ISL_463664, EPI_ISL_463665, EPI_ISL_463666, EPI_ISL_463667, EPI_ISL_463668, EPI_ISL_463669, EPI_ISL_463670, EPI_ISL_463671, EPI_ISL_463672, EPI_ISL_463673, EPI_ISL_463674, EPI_ISL_463675, EPI_ISL_463676, EPI_ISL_463677, EPI_ISL_463678, EPI_ISL_463679, EPI_ISL_463680, EPI_ISL_463681, EPI_ISL_463682, EPI_ISL_463683, EPI_ISL_463684, EPI_ISL_463685, EPI_ISL_463686, EPI_ISL_463687, EPI_ISL_463688, EPI_ISL_463689, EPI_ISL_463690, EPI_ISL_463691, EPI_ISL_463692, EPI_ISL_463693, EPI_ISL_463694, EPI_ISL_463695, EPI_ISL_463696, EPI_ISL_463697, EPI_ISL_463698, EPI_ISL_463699, EPI_ISL_463700, EPI_ISL_463701, EPI_ISL_463702, EPI_ISL_463703, EPI_ISL_463704, EPI_ISL_463705 | Seattle Flu Study                                                                      | Chu et al                                                                                                                                                                                                                                                                                                                                                                                                                                                                                                                                                                                                                                                                                    |                                                                                                                                                                                                                                                                                                                                                                                                                                                                                                                                                                                                                                                                                              |
| see above                                                                                                                                                                                                                                                                                                                                                                                                                                                                                                                                                                                                                                                                                                                                                                                                                                                                                                                                                                                                                                                                                                                                                                                                                                                                                                                                                                                                                                                                                                                                                                                                                                                                                                                                                                                                                                                                                                                                                                                                                                                                                                                                                                                                                                                                                                                                                                                                                                                                                                                                                                                                                                                                                                                                                                                                                                                                                                                                                                                                                                                                                                                                                                                                                                                                                                                                                                                                                                                                                                                                                                                                                                                                                                                                                                                                                                                                                                                                                                                                                                                                                                                                                                                                                                                                                                                                                                                                                                                                                                                                                                                                                                                                                                                                                                                                                                                                                                                                                                                                                                                                                                                                                                                                                                                                                                                                                                                                                                                                                                                                                                                                                                                                                                                                                                                                                                                                                                                                                                                                                                                                                                                                                                                                                                                                                                                                                      | Washington State Department of Health                                                  | Seattle Flu Study                                                                                                                                                                                                                                                                                                                                                                                                                                                                                                                                                                                                                                                                            | Chu et al                                                                                                                                                                                                                                                                                                                                                                                                                                                                                                                                                                                                                                                                                    |
| EPI_ISL_466927, EPI_ISL_466928, EPI_ISL_466929, EPI_ISL_466930, EPI_ISL_466931, EPI_ISL_466932, EPI_ISL_466933, EPI_ISL_466934, EPI_ISL_466935, EPI_ISL_466936, EPI_ISL_466937, EPI_ISL_466938, EPI_ISL_466939, EPI_ISL_466940, EPI_ISL_466941, EPI_ISL_466942, EPI_ISL_466943, EPI_ISL_466944, EPI_ISL_466945, EPI_ISL_466946, EPI_ISL_466947, EPI_ISL_466948, EPI_ISL_466949, EPI_ISL_466950, EPI_ISL_466951, EPI_ISL_466952, EPI_ISL_466953, EPI_ISL_466954, EPI_ISL_466955, EPI_ISL_466956, EPI_ISL_466957, EPI_ISL_466958, EPI_ISL_466959, EPI_ISL_466960, EPI_ISL_466961, EPI_ISL_466962, EPI_ISL_466963, EPI_ISL_466964, EPI_ISL_466965, EPI_ISL_466966, EPI_ISL_466967, EPI_ISL_466968, EPI_ISL_466969, EPI_ISL_466970, EPI_ISL_466971, EPI_ISL_466972, EPI_ISL_466973, EPI_ISL_466974, EPI_ISL_466975, EPI_ISL_466976, EPI_ISL_466977, EPI_ISL_466978, EPI_ISL_466979, EPI_ISL_466980, EPI_ISL_466981, EPI_ISL_466982, EPI_ISL_466983, EPI_ISL_466984, EPI_ISL_466985, EPI_ISL_466986, EPI_ISL_466987, EPI_ISL_466988, EPI_ISL_466989, EPI_ISL_467000, EPI_ISL_467001, EPI_ISL_467002, EPI_ISL_467003, EPI_ISL_467004, EPI_ISL_467005, EPI_ISL_467006, EPI_ISL_467007, EPI_ISL_467008, EPI_ISL_467009, EPI_ISL_467010, EPI_ISL_467011, EPI_ISL_467012, EPI_ISL_467013, EPI_ISL_467014, EPI_ISL_467015, EPI_ISL_467016, EPI_ISL_468202, EPI_ISL_468203, EPI_ISL_468204, EPI_ISL_468205, EPI_ISL_468206, EPI_ISL_468207, EPI_ISL_468208, EPI_ISL_468209, EPI_ISL_468210, EPI_ISL_468211, EPI_ISL_468212, EPI_ISL_468213, EPI_ISL_468214, EPI_ISL_468215, EPI_ISL_468216, EPI_ISL_468217, EPI_ISL_468218, EPI_ISL_468219, EPI_ISL_468220, EPI_ISL_468221, EPI_ISL_468222, EPI_ISL_468223, EPI_ISL_468224, EPI_ISL_468225, EPI_ISL_468226, EPI_ISL_468227, EPI_ISL_468228, EPI_ISL_468229, EPI_ISL_468230, EPI_ISL_468231, EPI_ISL_468232, EPI_ISL_468233, EPI_ISL_468234, EPI_ISL_468235, EPI_ISL_468236, EPI_ISL_468237, EPI_ISL_468238, EPI_ISL_468239, EPI_ISL_468240, EPI_ISL_468241, EPI_ISL_468242, EPI_ISL_468243, EPI_ISL_468244, EPI_ISL_468245, EPI_ISL_468246, EPI_ISL_468247, EPI_ISL_468248, EPI_ISL_468249, EPI_ISL_468250, EPI_ISL_468251, EPI_ISL_468252, EPI_ISL_468253, EPI_ISL_468254, EPI_ISL_468255, EPI_ISL_468256, EPI_ISL_468257, EPI_ISL_468258, EPI_ISL_468259, EPI_ISL_468260, EPI_ISL_468261, EPI_ISL_468262, EPI_ISL_468263, EPI_ISL_468264, EPI_ISL_468265, EPI_ISL_468266, EPI_ISL_468267, EPI_ISL_468268, EPI_ISL_468269, EPI_ISL_468270, EPI_ISL_468271, EPI_ISL_468272, EPI_ISL_468273, EPI_ISL_468274, EPI_ISL_468275, EPI_ISL_468276, EPI_ISL_468277, EPI_ISL_468278, EPI_ISL_468279, EPI_ISL_468280, EPI_ISL_468281, EPI_ISL_468282, EPI_ISL_468283, EPI_ISL_468284, EPI_ISL_468285, EPI_ISL_468286, EPI_ISL_468287, EPI_ISL_468288, EPI_ISL_468289, EPI_ISL_468290, EPI_ISL_468291, EPI_ISL_468292, EPI_ISL_468293, EPI_ISL_468294, EPI_ISL_468295, EPI_ISL_468296, EPI_ISL_468298, EPI_ISL_468299, EPI_ISL_468300, EPI_ISL_468301, EPI_ISL_468302, EPI_ISL_468303, EPI_ISL_468304                                                                                                                                                                                                                                                                                                                                                                                                                                                                                                                                                                                                                                                                                                                                                                                                                                                                                                                                                                                                                                                                                                                                                                                                                                                                                                                                                                                                                                                                                                                                                                                                                                                                                                                                                                                                                                                                                                                                                                                                                                                                                                                                                                                                                                                                                                                                                                                                                                                                                                                                                                                                                                                                                                                                                                                                                                                                                                                                                                                                                                                                                                                                                                                                                                                                                                                                 | Department of Biosystems Science and Engineering, ETH Zürich                           | Christian Beisel, Sarah Nadeau, Ivan Topolsky, Pedro Ferreira, Philipp Jablonski, Susana Posada-Céspedes, Tobias Schär, Ina Nissen, Natascha Santacrocce, Elodie Burcklen, Christiane Beckmann, Maurice Redondo, Olivier Kobel, Christoph Noppen, Sophie Seidel, Noemie Santamaria de Souza, Niko Beerenwinkel, Tanja Stadler                                                                                                                                                                                                                                                                                                                                                                |                                                                                                                                                                                                                                                                                                                                                                                                                                                                                                                                                                                                                                                                                              |
| EPI_ISL_468312                                                                                                                                                                                                                                                                                                                                                                                                                                                                                                                                                                                                                                                                                                                                                                                                                                                                                                                                                                                                                                                                                                                                                                                                                                                                                                                                                                                                                                                                                                                                                                                                                                                                                                                                                                                                                                                                                                                                                                                                                                                                                                                                                                                                                                                                                                                                                                                                                                                                                                                                                                                                                                                                                                                                                                                                                                                                                                                                                                                                                                                                                                                                                                                                                                                                                                                                                                                                                                                                                                                                                                                                                                                                                                                                                                                                                                                                                                                                                                                                                                                                                                                                                                                                                                                                                                                                                                                                                                                                                                                                                                                                                                                                                                                                                                                                                                                                                                                                                                                                                                                                                                                                                                                                                                                                                                                                                                                                                                                                                                                                                                                                                                                                                                                                                                                                                                                                                                                                                                                                                                                                                                                                                                                                                                                                                                                                                 | Hospital Municipal Dr Ignacio Proenca de Gouvea                                        | Instituto Adolfo Lutz, Interdisciplinary Procedures Center, Strategic Laboratory                                                                                                                                                                                                                                                                                                                                                                                                                                                                                                                                                                                                             | Claudio Tavares Sacchi, Claudia Regina Gonçalves, Erica Valessa Ramos Gomes                                                                                                                                                                                                                                                                                                                                                                                                                                                                                                                                                                                                                  |
| EPI_ISL_468313                                                                                                                                                                                                                                                                                                                                                                                                                                                                                                                                                                                                                                                                                                                                                                                                                                                                                                                                                                                                                                                                                                                                                                                                                                                                                                                                                                                                                                                                                                                                                                                                                                                                                                                                                                                                                                                                                                                                                                                                                                                                                                                                                                                                                                                                                                                                                                                                                                                                                                                                                                                                                                                                                                                                                                                                                                                                                                                                                                                                                                                                                                                                                                                                                                                                                                                                                                                                                                                                                                                                                                                                                                                                                                                                                                                                                                                                                                                                                                                                                                                                                                                                                                                                                                                                                                                                                                                                                                                                                                                                                                                                                                                                                                                                                                                                                                                                                                                                                                                                                                                                                                                                                                                                                                                                                                                                                                                                                                                                                                                                                                                                                                                                                                                                                                                                                                                                                                                                                                                                                                                                                                                                                                                                                                                                                                                                                 | Vigilancia Epidemiologica de São Bernardo do Campo                                     | Instituto Adolfo Lutz, Interdisciplinary Procedures Center, Strategic Laboratory                                                                                                                                                                                                                                                                                                                                                                                                                                                                                                                                                                                                             | Claudio Tavares Sacchi, Claudia Regina Gonçalves, Erica Valessa Ramos Gomes                                                                                                                                                                                                                                                                                                                                                                                                                                                                                                                                                                                                                  |
| EPI_ISL_468314                                                                                                                                                                                                                                                                                                                                                                                                                                                                                                                                                                                                                                                                                                                                                                                                                                                                                                                                                                                                                                                                                                                                                                                                                                                                                                                                                                                                                                                                                                                                                                                                                                                                                                                                                                                                                                                                                                                                                                                                                                                                                                                                                                                                                                                                                                                                                                                                                                                                                                                                                                                                                                                                                                                                                                                                                                                                                                                                                                                                                                                                                                                                                                                                                                                                                                                                                                                                                                                                                                                                                                                                                                                                                                                                                                                                                                                                                                                                                                                                                                                                                                                                                                                                                                                                                                                                                                                                                                                                                                                                                                                                                                                                                                                                                                                                                                                                                                                                                                                                                                                                                                                                                                                                                                                                                                                                                                                                                                                                                                                                                                                                                                                                                                                                                                                                                                                                                                                                                                                                                                                                                                                                                                                                                                                                                                                                                 | CTA Centro de Testagem e Aconselhamento                                                | Instituto Adolfo Lutz, Interdisciplinary Procedures Center, Strategic Laboratory                                                                                                                                                                                                                                                                                                                                                                                                                                                                                                                                                                                                             | Claudio Tavares Sacchi, Claudia Regina Gonçalves, Erica Valessa Ramos Gomes                                                                                                                                                                                                                                                                                                                                                                                                                                                                                                                                                                                                                  |
| EPI_ISL_468316                                                                                                                                                                                                                                                                                                                                                                                                                                                                                                                                                                                                                                                                                                                                                                                                                                                                                                                                                                                                                                                                                                                                                                                                                                                                                                                                                                                                                                                                                                                                                                                                                                                                                                                                                                                                                                                                                                                                                                                                                                                                                                                                                                                                                                                                                                                                                                                                                                                                                                                                                                                                                                                                                                                                                                                                                                                                                                                                                                                                                                                                                                                                                                                                                                                                                                                                                                                                                                                                                                                                                                                                                                                                                                                                                                                                                                                                                                                                                                                                                                                                                                                                                                                                                                                                                                                                                                                                                                                                                                                                                                                                                                                                                                                                                                                                                                                                                                                                                                                                                                                                                                                                                                                                                                                                                                                                                                                                                                                                                                                                                                                                                                                                                                                                                                                                                                                                                                                                                                                                                                                                                                                                                                                                                                                                                                                                                 | UPA Vila Assis                                                                         | Instituto Adolfo Lutz, Interdisciplinary Procedures Center, Strategic Laboratory                                                                                                                                                                                                                                                                                                                                                                                                                                                                                                                                                                                                             | Claudio Tavares Sacchi, Claudia Regina Gonçalves, Erica Valessa Ramos Gomes                                                                                                                                                                                                                                                                                                                                                                                                                                                                                                                                                                                                                  |

|                                                                                                                                                                                                                                                                                                                                                                                                                                                                                                                                                                                                                                                                                                                                                                                                                                                                                                                                                                                                                                                                                                                                                                                                                                                                                                                                                                                |                                                                         |                                                                                  |                                                                                                                                                                                                                                                                                                                                                                                                                                                                                                                                                                                                                                                                                            |
|--------------------------------------------------------------------------------------------------------------------------------------------------------------------------------------------------------------------------------------------------------------------------------------------------------------------------------------------------------------------------------------------------------------------------------------------------------------------------------------------------------------------------------------------------------------------------------------------------------------------------------------------------------------------------------------------------------------------------------------------------------------------------------------------------------------------------------------------------------------------------------------------------------------------------------------------------------------------------------------------------------------------------------------------------------------------------------------------------------------------------------------------------------------------------------------------------------------------------------------------------------------------------------------------------------------------------------------------------------------------------------|-------------------------------------------------------------------------|----------------------------------------------------------------------------------|--------------------------------------------------------------------------------------------------------------------------------------------------------------------------------------------------------------------------------------------------------------------------------------------------------------------------------------------------------------------------------------------------------------------------------------------------------------------------------------------------------------------------------------------------------------------------------------------------------------------------------------------------------------------------------------------|
| EPI_ISL_468318                                                                                                                                                                                                                                                                                                                                                                                                                                                                                                                                                                                                                                                                                                                                                                                                                                                                                                                                                                                                                                                                                                                                                                                                                                                                                                                                                                 | Hospital Universitario da USP                                           | Instituto Adolfo Lutz, Interdisciplinary Procedures Center, Strategic Laboratory | Claudio Tavares Sacchi, Claudia Regina Gonçalves, Erica Valessa Ramos Gomes                                                                                                                                                                                                                                                                                                                                                                                                                                                                                                                                                                                                                |
| EPI_ISL_468319                                                                                                                                                                                                                                                                                                                                                                                                                                                                                                                                                                                                                                                                                                                                                                                                                                                                                                                                                                                                                                                                                                                                                                                                                                                                                                                                                                 | Vigilancia Epidemiologica de São Bernardo do Campo                      | Instituto Adolfo Lutz, Interdisciplinary Procedures Center, Strategic Laboratory | Claudio Tavares Sacchi, Claudia Regina Gonçalves, Erica Valessa Ramos Gomes                                                                                                                                                                                                                                                                                                                                                                                                                                                                                                                                                                                                                |
| EPI_ISL_468321                                                                                                                                                                                                                                                                                                                                                                                                                                                                                                                                                                                                                                                                                                                                                                                                                                                                                                                                                                                                                                                                                                                                                                                                                                                                                                                                                                 | Hospital Universitario da USP                                           | Instituto Adolfo Lutz, Interdisciplinary Procedures Center, Strategic Laboratory | Claudio Tavares Sacchi, Claudia Regina Gonçalves, Erica Valessa Ramos Gomes                                                                                                                                                                                                                                                                                                                                                                                                                                                                                                                                                                                                                |
| EPI_ISL_469302, EPI_ISL_469303, EPI_ISL_469304, EPI_ISL_469305, EPI_ISL_469306, EPI_ISL_469307, EPI_ISL_469308, EPI_ISL_469309, EPI_ISL_469310, EPI_ISL_469311, EPI_ISL_469312, EPI_ISL_469313, EPI_ISL_469314, EPI_ISL_469315, EPI_ISL_469316, EPI_ISL_469317, EPI_ISL_469318, EPI_ISL_469319, EPI_ISL_469320, EPI_ISL_469321, EPI_ISL_469322, EPI_ISL_469323, EPI_ISL_469324, EPI_ISL_469325, EPI_ISL_469326, EPI_ISL_469327, EPI_ISL_469328, EPI_ISL_469329, EPI_ISL_469330, EPI_ISL_469331, EPI_ISL_469332, EPI_ISL_469333, EPI_ISL_469334, EPI_ISL_469335, EPI_ISL_469336, EPI_ISL_469337, EPI_ISL_469338, EPI_ISL_469339, EPI_ISL_469340, EPI_ISL_469341, EPI_ISL_469342, EPI_ISL_469343, EPI_ISL_469344, EPI_ISL_469805, EPI_ISL_469915                                                                                                                                                                                                                                                                                                                                                                                                                                                                                                                                                                                                                                 |                                                                         |                                                                                  |                                                                                                                                                                                                                                                                                                                                                                                                                                                                                                                                                                                                                                                                                            |
| see above                                                                                                                                                                                                                                                                                                                                                                                                                                                                                                                                                                                                                                                                                                                                                                                                                                                                                                                                                                                                                                                                                                                                                                                                                                                                                                                                                                      | NU-OMICS DNA Sequencing research facility, Northumbria University       | Wellcome Sanger Institute for the COVID-19 Genomics UK (COG-UK) consortium       | Chris Duncan, Shea Waugh, Shirelle Burton-Fanning, Gary Eltringham, Jennifer Collins, Brendan Payne, Yusri Taha, Emma Swindells, Jane Greenaway, Edward Barton, Garren Scott, Debra Padgett, Clive Graham, Sarah Essex, Steve Liggett, Paul Baker, Lynn Dover, Wen Yew, Gary Black, John Allan, Joshua Loh, Greg Young, Matthew Bashton, Andrew Nelson, Darren Smith and Alex Alderton, Roberto Amato, Sonia Gonçalves, Ewan Harrison, David K. Jackson, Ian Johnston, Dominic Kwiatkowski, Cordelia Langford, John Sillitoe on behalf of the Wellcome Sanger Institute COVID-19 Surveillance Team ( <a href="http://www.sanger.ac.uk/covid-team">http://www.sanger.ac.uk/covid-team</a> ) |
| EPI_ISL_470830, EPI_ISL_470831, EPI_ISL_470832, EPI_ISL_470833, EPI_ISL_470834, EPI_ISL_470835, EPI_ISL_470836, EPI_ISL_470837, EPI_ISL_470839, EPI_ISL_470840, EPI_ISL_470841, EPI_ISL_470842, EPI_ISL_470843, EPI_ISL_470844, EPI_ISL_470845, EPI_ISL_470846, EPI_ISL_470847, EPI_ISL_470848, EPI_ISL_470849, EPI_ISL_470850, EPI_ISL_470851, EPI_ISL_470852, EPI_ISL_470853, EPI_ISL_470854, EPI_ISL_470855, EPI_ISL_470856, EPI_ISL_470857, EPI_ISL_470858, EPI_ISL_470859, EPI_ISL_470860, EPI_ISL_470861, EPI_ISL_470862, EPI_ISL_470863, EPI_ISL_470864, EPI_ISL_470865, EPI_ISL_470866, EPI_ISL_470867, EPI_ISL_470868, EPI_ISL_470869, EPI_ISL_470870, EPI_ISL_470871, EPI_ISL_470872, EPI_ISL_470873, EPI_ISL_470874, EPI_ISL_470875                                                                                                                                                                                                                                                                                                                                                                                                                                                                                                                                                                                                                                 |                                                                         |                                                                                  |                                                                                                                                                                                                                                                                                                                                                                                                                                                                                                                                                                                                                                                                                            |
| see above                                                                                                                                                                                                                                                                                                                                                                                                                                                                                                                                                                                                                                                                                                                                                                                                                                                                                                                                                                                                                                                                                                                                                                                                                                                                                                                                                                      | PathWest Laboratory Medicine WA                                         | PathWest Laboratory Medicine WA                                                  | Chisha Sikazwe, Jurissa Lang, Avram Levy, David Smith and David Speers                                                                                                                                                                                                                                                                                                                                                                                                                                                                                                                                                                                                                     |
| EPI_ISL_471543                                                                                                                                                                                                                                                                                                                                                                                                                                                                                                                                                                                                                                                                                                                                                                                                                                                                                                                                                                                                                                                                                                                                                                                                                                                                                                                                                                 | Centro de Saude I Tacito Leite de Carvalho e Silva                      | Instituto Adolfo Lutz, Interdisciplinary Procedures Center, Strategic Laboratory | Claudio Tavares Sacchi, Claudia Regina Gonçalves, Erica Valessa Ramos Gomes                                                                                                                                                                                                                                                                                                                                                                                                                                                                                                                                                                                                                |
| EPI_ISL_471546                                                                                                                                                                                                                                                                                                                                                                                                                                                                                                                                                                                                                                                                                                                                                                                                                                                                                                                                                                                                                                                                                                                                                                                                                                                                                                                                                                 | AMA DR Jose Soares Hungria                                              | Instituto Adolfo Lutz, Interdisciplinary Procedures Center, Strategic Laboratory | Claudio Tavares Sacchi, Claudia Regina Gonçalves, Erica Valessa Ramos Gomes                                                                                                                                                                                                                                                                                                                                                                                                                                                                                                                                                                                                                |
| EPI_ISL_471549                                                                                                                                                                                                                                                                                                                                                                                                                                                                                                                                                                                                                                                                                                                                                                                                                                                                                                                                                                                                                                                                                                                                                                                                                                                                                                                                                                 | Hospital Municipal Carmen Prudente                                      | Instituto Adolfo Lutz, Interdisciplinary Procedures Center, Strategic Laboratory | Claudio Tavares Sacchi, Claudia Regina Gonçalves, Erica Valessa Ramos Gomes                                                                                                                                                                                                                                                                                                                                                                                                                                                                                                                                                                                                                |
| EPI_ISL_471551                                                                                                                                                                                                                                                                                                                                                                                                                                                                                                                                                                                                                                                                                                                                                                                                                                                                                                                                                                                                                                                                                                                                                                                                                                                                                                                                                                 | Hospital Sao Paulo de Ensino da Unifesp                                 | Instituto Adolfo Lutz, Interdisciplinary Procedures Center, Strategic Laboratory | Claudio Tavares Sacchi, Claudia Regina Gonçalves, Erica Valessa Ramos Gomes                                                                                                                                                                                                                                                                                                                                                                                                                                                                                                                                                                                                                |
| EPI_ISL_471647                                                                                                                                                                                                                                                                                                                                                                                                                                                                                                                                                                                                                                                                                                                                                                                                                                                                                                                                                                                                                                                                                                                                                                                                                                                                                                                                                                 | Hospital Municipal de Barueri Dr. Francisco Moran                       | Instituto Adolfo Lutz, Interdisciplinary Procedures Center, Strategic Laboratory | Claudio Tavares Sacchi, Claudia Regina Gonçalves, Erica Valessa Ramos Gomes                                                                                                                                                                                                                                                                                                                                                                                                                                                                                                                                                                                                                |
| EPI_ISL_472465, EPI_ISL_472760, EPI_ISL_472868, EPI_ISL_473037, EPI_ISL_473171, EPI_ISL_473250, EPI_ISL_473957, EPI_ISL_474024, EPI_ISL_474281, EPI_ISL_474288, EPI_ISL_474376, EPI_ISL_474472, EPI_ISL_474493, EPI_ISL_474517, EPI_ISL_474554, EPI_ISL_474643, EPI_ISL_474684, EPI_ISL_474731                                                                                                                                                                                                                                                                                                                                                                                                                                                                                                                                                                                                                                                                                                                                                                                                                                                                                                                                                                                                                                                                                 |                                                                         |                                                                                  |                                                                                                                                                                                                                                                                                                                                                                                                                                                                                                                                                                                                                                                                                            |
| see above                                                                                                                                                                                                                                                                                                                                                                                                                                                                                                                                                                                                                                                                                                                                                                                                                                                                                                                                                                                                                                                                                                                                                                                                                                                                                                                                                                      | Wales Specialist Virology Centre Sequencing lab: Pathogen Genomics Unit | COVID-19 Genomics UK (COG-UK) Consortium                                         | Catherine Moore, Johnathan Evans, Laura Gifford, Malorie Perry, Simon Cottrell, Angela Marchbank, Alec Birchley, Alexander Adams, Amy Gaskin, Bree Gatica-Wilcox, Jason Coombes, Joel Southgate, Lauren Gilbert, Lee Graham, Nicole Pacchiari, Sara Kumziene-Summerhayes, Sarah Taylor, Sophie Jones, Sara Rey, Matthew Bull, Joanne Watkins, Sally Corden, Tom Connor                                                                                                                                                                                                                                                                                                                     |
| EPI_ISL_475717, EPI_ISL_475718, EPI_ISL_475719, EPI_ISL_475720, EPI_ISL_475721                                                                                                                                                                                                                                                                                                                                                                                                                                                                                                                                                                                                                                                                                                                                                                                                                                                                                                                                                                                                                                                                                                                                                                                                                                                                                                 | Microbiology, University Hospital Donostia                              | Microbiology, University Hospital Donostia                                       | Cilla, G., Montes, M., Pineiro, L., Marimon, J.M.                                                                                                                                                                                                                                                                                                                                                                                                                                                                                                                                                                                                                                          |
| EPI_ISL_476079, EPI_ISL_476080, EPI_ISL_476081, EPI_ISL_476082, EPI_ISL_476083, EPI_ISL_476084, EPI_ISL_476085, EPI_ISL_476086, EPI_ISL_476087, EPI_ISL_476088, EPI_ISL_476089, EPI_ISL_476090, EPI_ISL_476091, EPI_ISL_476092, EPI_ISL_476093, EPI_ISL_476094, EPI_ISL_476095, EPI_ISL_476096, EPI_ISL_476097, EPI_ISL_476098, EPI_ISL_476099, EPI_ISL_476100, EPI_ISL_476101, EPI_ISL_476102, EPI_ISL_476103, EPI_ISL_476104, EPI_ISL_476105, EPI_ISL_476106, EPI_ISL_476107, EPI_ISL_476108, EPI_ISL_476109, EPI_ISL_476110, EPI_ISL_476112, EPI_ISL_476113, EPI_ISL_476114, EPI_ISL_476115, EPI_ISL_476116, EPI_ISL_476117, EPI_ISL_476118, EPI_ISL_476119, EPI_ISL_476120, EPI_ISL_476121, EPI_ISL_476122, EPI_ISL_476123, EPI_ISL_476124, EPI_ISL_476125, EPI_ISL_476126, EPI_ISL_476127, EPI_ISL_476128, EPI_ISL_476129, EPI_ISL_476130, EPI_ISL_476131, EPI_ISL_476132, EPI_ISL_476133, EPI_ISL_476134                                                                                                                                                                                                                                                                                                                                                                                                                                                                 |                                                                         |                                                                                  |                                                                                                                                                                                                                                                                                                                                                                                                                                                                                                                                                                                                                                                                                            |
| see above                                                                                                                                                                                                                                                                                                                                                                                                                                                                                                                                                                                                                                                                                                                                                                                                                                                                                                                                                                                                                                                                                                                                                                                                                                                                                                                                                                      | Viollier AG                                                             | Department of Biosystems Science and Engineering, ETH Zürich                     | Christian Beisel, Sarah Nadeau, Ivan Topolsky, Pedro Ferreira, Philipp Jablonski, Susana Posada-Céspedes, Tobias Schär, Ina Nissen, Natascha Santacroce, Elodie Burcklen, Christiane Beckmann, Maurice Redondo, Olivier Kobel, Christoph Noppen, Sophie Seidel, Noemie Santamaria de Souza, Niko Beerenwinkel, Tanja Stadler                                                                                                                                                                                                                                                                                                                                                               |
| EPI_ISL_476795, EPI_ISL_476796, EPI_ISL_476797                                                                                                                                                                                                                                                                                                                                                                                                                                                                                                                                                                                                                                                                                                                                                                                                                                                                                                                                                                                                                                                                                                                                                                                                                                                                                                                                 | Department of Laboratory Medicine, Tan Tock Seng Hospital               | Department of Laboratory Medicine, Tan Tock Seng Hospital                        | Chen YYC, Zair X, Li C, Tang WY, Maurer-Stroh S, Barkham TMS, Nagarajan N, Sessions OM                                                                                                                                                                                                                                                                                                                                                                                                                                                                                                                                                                                                     |
| EPI_ISL_476805, EPI_ISL_476806, EPI_ISL_476807, EPI_ISL_476808, EPI_ISL_476809, EPI_ISL_476810, EPI_ISL_476811, EPI_ISL_476812                                                                                                                                                                                                                                                                                                                                                                                                                                                                                                                                                                                                                                                                                                                                                                                                                                                                                                                                                                                                                                                                                                                                                                                                                                                 | Department of Laboratory Medicine Tan Tock Seng Hospital                | Department of Laboratory Medicine Tan Tock Seng Hospital                         | Chen YYC, Zair X, Li C, Tang WY, Maurer-Stroh S, Barkham TMS, Nagarajan N, Sessions OM                                                                                                                                                                                                                                                                                                                                                                                                                                                                                                                                                                                                     |
| EPI_ISL_476813, EPI_ISL_476814, EPI_ISL_476815                                                                                                                                                                                                                                                                                                                                                                                                                                                                                                                                                                                                                                                                                                                                                                                                                                                                                                                                                                                                                                                                                                                                                                                                                                                                                                                                 | Department of Laboratory Medicine, Tan Tock Seng Hospital               | Department of Laboratory Medicine, Tan Tock Seng Hospital                        | Chen YYC, Zair X, Li C, Tang WY, Maurer-Stroh S, Barkham TMS, Nagarajan N, Sessions OM                                                                                                                                                                                                                                                                                                                                                                                                                                                                                                                                                                                                     |
| EPI_ISL_476816, EPI_ISL_476817, EPI_ISL_476818, EPI_ISL_476819, EPI_ISL_476820, EPI_ISL_476821                                                                                                                                                                                                                                                                                                                                                                                                                                                                                                                                                                                                                                                                                                                                                                                                                                                                                                                                                                                                                                                                                                                                                                                                                                                                                 | Department of Laboratory Medicine, Tan Tock Seng Hospital               | Department of Laboratory Medicine, Tan Tock Seng Hospital                        | Chen YYC, Zair X, Li C, Tang WY, Maurer-Stroh S, Barkham TMS, Nagarajan N, Sessions OM                                                                                                                                                                                                                                                                                                                                                                                                                                                                                                                                                                                                     |
| EPI_ISL_477170, EPI_ISL_477171                                                                                                                                                                                                                                                                                                                                                                                                                                                                                                                                                                                                                                                                                                                                                                                                                                                                                                                                                                                                                                                                                                                                                                                                                                                                                                                                                 | Department of Laboratory, Medicine Tan Tock Seng Hospital               | Department of Laboratory, Medicine Tan Tock Seng Hospital                        | Chen YYC, Zair X, Li C, Tang WY, Maurer-Stroh S, Barkham TMS, Nagarajan N, Sessions OM                                                                                                                                                                                                                                                                                                                                                                                                                                                                                                                                                                                                     |
| EPI_ISL_477172, EPI_ISL_477174, EPI_ISL_477175, EPI_ISL_477177, EPI_ISL_477178, EPI_ISL_477180, EPI_ISL_477182, EPI_ISL_477184, EPI_ISL_477187, EPI_ISL_477188, EPI_ISL_477189, EPI_ISL_477190, EPI_ISL_477191, EPI_ISL_477192                                                                                                                                                                                                                                                                                                                                                                                                                                                                                                                                                                                                                                                                                                                                                                                                                                                                                                                                                                                                                                                                                                                                                 | Department of Laboratory, Medicine Tan Tock Seng Hospital               | Department of Laboratory, Medicine Tan Tock Seng Hospital                        | Chen YYC, Zair X, Li C, Tang WY, Maurer-Stroh S, Barkham TMS, Nagarajan N, Sessions OM                                                                                                                                                                                                                                                                                                                                                                                                                                                                                                                                                                                                     |
| see above                                                                                                                                                                                                                                                                                                                                                                                                                                                                                                                                                                                                                                                                                                                                                                                                                                                                                                                                                                                                                                                                                                                                                                                                                                                                                                                                                                      | Department of Laboratory Medicine Tan Tock Seng Hospital                | Department of Laboratory Medicine Tan Tock Seng Hospital                         | Chen YYC, Zair X, Li C, Tang WY, Maurer-Stroh S, Barkham TMS, Nagarajan N, Sessions OM                                                                                                                                                                                                                                                                                                                                                                                                                                                                                                                                                                                                     |
| EPI_ISL_478289, EPI_ISL_478290, EPI_ISL_478291, EPI_ISL_478292, EPI_ISL_478293, EPI_ISL_478294, EPI_ISL_478295, EPI_ISL_478296, EPI_ISL_478297, EPI_ISL_478298, EPI_ISL_478299, EPI_ISL_478300, EPI_ISL_478301, EPI_ISL_478302, EPI_ISL_478303, EPI_ISL_478304, EPI_ISL_478305, EPI_ISL_478306, EPI_ISL_478307, EPI_ISL_478308, EPI_ISL_478309, EPI_ISL_478310, EPI_ISL_478311, EPI_ISL_478312, EPI_ISL_478313, EPI_ISL_478314, EPI_ISL_478315, EPI_ISL_478316, EPI_ISL_478317, EPI_ISL_478318, EPI_ISL_478319, EPI_ISL_478320, EPI_ISL_478321, EPI_ISL_478322, EPI_ISL_478323, EPI_ISL_478324, EPI_ISL_478325, EPI_ISL_478326, EPI_ISL_478327, EPI_ISL_478328, EPI_ISL_478329, EPI_ISL_478330, EPI_ISL_478331, EPI_ISL_478332, EPI_ISL_478333, EPI_ISL_478334, EPI_ISL_478335, EPI_ISL_478336, EPI_ISL_478337, EPI_ISL_478338, EPI_ISL_478339, EPI_ISL_478340, EPI_ISL_478341, EPI_ISL_478342, EPI_ISL_478343, EPI_ISL_478344, EPI_ISL_478345, EPI_ISL_478346, EPI_ISL_478347, EPI_ISL_478348, EPI_ISL_478349, EPI_ISL_478350, EPI_ISL_478351, EPI_ISL_478352, EPI_ISL_478353, EPI_ISL_478354, EPI_ISL_478355, EPI_ISL_478356, EPI_ISL_478357, EPI_ISL_478358, EPI_ISL_478359, EPI_ISL_478360, EPI_ISL_478361, EPI_ISL_478362, EPI_ISL_478363, EPI_ISL_478364, EPI_ISL_478365, EPI_ISL_478366, EPI_ISL_478367, EPI_ISL_478368, EPI_ISL_478369, EPI_ISL_478370, EPI_ISL_478371 |                                                                         |                                                                                  |                                                                                                                                                                                                                                                                                                                                                                                                                                                                                                                                                                                                                                                                                            |
| see above                                                                                                                                                                                                                                                                                                                                                                                                                                                                                                                                                                                                                                                                                                                                                                                                                                                                                                                                                                                                                                                                                                                                                                                                                                                                                                                                                                      | University Hospitals Of Leicester NHS Trust and DeepSeq Nottingham      | COVID-19 Genomics UK (COG-UK) Consortium                                         | Christopher Holmes, Paul Bird, Thomas Helmer, Karlie Fallon, Julian Tang, Jonathan Ball, Patrick McClure, Joseph Chappell, Nadine Holmes, Matthew Carlisle, Christopher Moore, Fei Sang, Johnny Debebe, Victoria Wright, Matthew Loose                                                                                                                                                                                                                                                                                                                                                                                                                                                     |
| EPI_ISL_479420, EPI_ISL_479456                                                                                                                                                                                                                                                                                                                                                                                                                                                                                                                                                                                                                                                                                                                                                                                                                                                                                                                                                                                                                                                                                                                                                                                                                                                                                                                                                 | Wales Specialist Virology Centre Sequencing lab: Pathogen Genomics Unit | COVID-19 Genomics UK (COG-UK) Consortium                                         | Catherine Moore, Johnathan Evans, Laura Gifford, Malorie Perry, Simon Cottrell, Angela Marchbank, Alec Birchley, Alexander Adams, Amy Gaskin, Bree Gatica-Wilcox, Jason Coombes, Joel Southgate, Lauren Gilbert, Lee Graham, Nicole Pacchiari, Sara Kumziene-Summerhayes, Sarah Taylor, Sophie Jones, Sara Rey, Matthew Bull, Joanne Watkins, Sally Corden, Tom Connor                                                                                                                                                                                                                                                                                                                     |
| EPI_ISL_479482, EPI_ISL_479483, EPI_ISL_479484, EPI_ISL_479485, EPI_ISL_479486, EPI_ISL_479487, EPI_ISL_479488, EPI_ISL_479489, EPI_ISL_479490, EPI_ISL_479491, EPI_ISL_479492                                                                                                                                                                                                                                                                                                                                                                                                                                                                                                                                                                                                                                                                                                                                                                                                                                                                                                                                                                                                                                                                                                                                                                                                 |                                                                         |                                                                                  |                                                                                                                                                                                                                                                                                                                                                                                                                                                                                                                                                                                                                                                                                            |
| see above                                                                                                                                                                                                                                                                                                                                                                                                                                                                                                                                                                                                                                                                                                                                                                                                                                                                                                                                                                                                                                                                                                                                                                                                                                                                                                                                                                      | Department of Laboratory Medicine Tan Tock Seng Hospital                | Department of Laboratory Medicine Tan Tock Seng Hospital                         | Chen YYC, Zair X, Li C, Tang WY, Maurer-Stroh S, Barkham TMS, Nagarajan N, Sessions OM                                                                                                                                                                                                                                                                                                                                                                                                                                                                                                                                                                                                     |
| EPI_ISL_480331, EPI_ISL_480332, EPI_ISL_480333, EPI_ISL_480334, EPI_ISL_480335, EPI_ISL_480336, EPI_ISL_480337, EPI_ISL_480338, EPI_ISL_480339, EPI_ISL_480340, EPI_ISL_480341, EPI_ISL_480342, EPI_ISL_480343, EPI_ISL_480344, EPI_ISL_480345, EPI_ISL_480346, EPI_ISL_480347, EPI_ISL_480348                                                                                                                                                                                                                                                                                                                                                                                                                                                                                                                                                                                                                                                                                                                                                                                                                                                                                                                                                                                                                                                                                 |                                                                         |                                                                                  |                                                                                                                                                                                                                                                                                                                                                                                                                                                                                                                                                                                                                                                                                            |
| see above                                                                                                                                                                                                                                                                                                                                                                                                                                                                                                                                                                                                                                                                                                                                                                                                                                                                                                                                                                                                                                                                                                                                                                                                                                                                                                                                                                      | Microbial Genomics Laboratory, Institut Pasteur de Montevideo           | Microbial Genomics Laboratory, Institut Pasteur de Montevideo                    | Cecilia Salazar, Marianoel Pereira, Ignacio Ferrés, Gonzalo Moratorio, Pilar Moreno, Gregorio Iraola                                                                                                                                                                                                                                                                                                                                                                                                                                                                                                                                                                                       |

|                                                                                                                                                                                                                                                                                                                                                                                                                                                                                                                                                                                                                                                                                                                                                                                                                                                                                                                                                                                                                                                                                                                                                                                                                                                                                                                                                                                                                                                                                                                                                                                                                                                                                                                                                                                                                                                                                                                                                                                                                                                                                                                                                                                                                                                                                                                                                                                                                                                                                                                                                                                                                                                                                                                                                                                                                                                                                                                                                                                                                                                                                                                                                                                                                                                                                                                                                                                                                                                                                                                                                                                                                                                                                                                                                                                                                                                                                                                                                                                                                                                                                                                                                                                                                                                                                                                                                                                                                                                                                                                                                                                                                                                                                                                                                                                                                                                                                                                                                                                                                                |           |                                                                                                                      |                                                                                             |                                                                                                                                                                                                                                                                                                                                                                          |
|--------------------------------------------------------------------------------------------------------------------------------------------------------------------------------------------------------------------------------------------------------------------------------------------------------------------------------------------------------------------------------------------------------------------------------------------------------------------------------------------------------------------------------------------------------------------------------------------------------------------------------------------------------------------------------------------------------------------------------------------------------------------------------------------------------------------------------------------------------------------------------------------------------------------------------------------------------------------------------------------------------------------------------------------------------------------------------------------------------------------------------------------------------------------------------------------------------------------------------------------------------------------------------------------------------------------------------------------------------------------------------------------------------------------------------------------------------------------------------------------------------------------------------------------------------------------------------------------------------------------------------------------------------------------------------------------------------------------------------------------------------------------------------------------------------------------------------------------------------------------------------------------------------------------------------------------------------------------------------------------------------------------------------------------------------------------------------------------------------------------------------------------------------------------------------------------------------------------------------------------------------------------------------------------------------------------------------------------------------------------------------------------------------------------------------------------------------------------------------------------------------------------------------------------------------------------------------------------------------------------------------------------------------------------------------------------------------------------------------------------------------------------------------------------------------------------------------------------------------------------------------------------------------------------------------------------------------------------------------------------------------------------------------------------------------------------------------------------------------------------------------------------------------------------------------------------------------------------------------------------------------------------------------------------------------------------------------------------------------------------------------------------------------------------------------------------------------------------------------------------------------------------------------------------------------------------------------------------------------------------------------------------------------------------------------------------------------------------------------------------------------------------------------------------------------------------------------------------------------------------------------------------------------------------------------------------------------------------------------------------------------------------------------------------------------------------------------------------------------------------------------------------------------------------------------------------------------------------------------------------------------------------------------------------------------------------------------------------------------------------------------------------------------------------------------------------------------------------------------------------------------------------------------------------------------------------------------------------------------------------------------------------------------------------------------------------------------------------------------------------------------------------------------------------------------------------------------------------------------------------------------------------------------------------------------------------------------------------------------------------------------------------------------|-----------|----------------------------------------------------------------------------------------------------------------------|---------------------------------------------------------------------------------------------|--------------------------------------------------------------------------------------------------------------------------------------------------------------------------------------------------------------------------------------------------------------------------------------------------------------------------------------------------------------------------|
| EPI_ISL_483648, EPI_ISL_483649, EPI_ISL_483650, EPI_ISL_483651, EPI_ISL_483652, EPI_ISL_483653, EPI_ISL_483654, EPI_ISL_483655, EPI_ISL_483656, EPI_ISL_483657, EPI_ISL_483658, EPI_ISL_483659, EPI_ISL_483660, EPI_ISL_483661, EPI_ISL_483662, EPI_ISL_483663, EPI_ISL_483664, EPI_ISL_483665, EPI_ISL_483666, EPI_ISL_483667                                                                                                                                                                                                                                                                                                                                                                                                                                                                                                                                                                                                                                                                                                                                                                                                                                                                                                                                                                                                                                                                                                                                                                                                                                                                                                                                                                                                                                                                                                                                                                                                                                                                                                                                                                                                                                                                                                                                                                                                                                                                                                                                                                                                                                                                                                                                                                                                                                                                                                                                                                                                                                                                                                                                                                                                                                                                                                                                                                                                                                                                                                                                                                                                                                                                                                                                                                                                                                                                                                                                                                                                                                                                                                                                                                                                                                                                                                                                                                                                                                                                                                                                                                                                                                                                                                                                                                                                                                                                                                                                                                                                                                                                                                 | see above | Viollier AG                                                                                                          | Department of Biosystems Science and Engineering, ETH Zürich                                | Christian Beisel, Sarah Nadeau, Ivan Topolsky, Pedro Ferreira, Philipp Jablonski, Susana Posada-Céspedes, Tobias Schär, Ina Nissen, Natascha Santacroce, Elodie Burcklen, Christiane Beckmann, Maurice Redondo, Olivier Kobel, Christoph Noppen, Sophie Seidel, Noemie Santamaria de Souza, Niko Beerenwinkel, Tanja Stadler                                             |
| EPI_ISL_483668, EPI_ISL_483669, EPI_ISL_483670, EPI_ISL_483671, EPI_ISL_483672, EPI_ISL_483673, EPI_ISL_483674, EPI_ISL_483675, EPI_ISL_483676, EPI_ISL_483677, EPI_ISL_483678, EPI_ISL_483679, EPI_ISL_483680, EPI_ISL_483681, EPI_ISL_483682, EPI_ISL_483683, EPI_ISL_483684, EPI_ISL_483685                                                                                                                                                                                                                                                                                                                                                                                                                                                                                                                                                                                                                                                                                                                                                                                                                                                                                                                                                                                                                                                                                                                                                                                                                                                                                                                                                                                                                                                                                                                                                                                                                                                                                                                                                                                                                                                                                                                                                                                                                                                                                                                                                                                                                                                                                                                                                                                                                                                                                                                                                                                                                                                                                                                                                                                                                                                                                                                                                                                                                                                                                                                                                                                                                                                                                                                                                                                                                                                                                                                                                                                                                                                                                                                                                                                                                                                                                                                                                                                                                                                                                                                                                                                                                                                                                                                                                                                                                                                                                                                                                                                                                                                                                                                                 | see above | University Hospital Zurich                                                                                           | Department of Biosystems Science and Engineering, ETH Zürich                                | Christian Beisel, Sarah Nadeau, Ivan Topolsky, Pedro Ferreira, Philipp Jablonski, Susana Posada-Céspedes, Tobias Schär, Ina Nissen, Natascha Santacroce, Elodie Burcklen, Julia Martinez-Gomez, Phil Cheng, Mitch Levesque, Philipp Bosshard, Niko Beerenwinkel, Tanja Stadler                                                                                           |
| EPI_ISL_483916, EPI_ISL_483917, EPI_ISL_483918, EPI_ISL_483919, EPI_ISL_483920, EPI_ISL_483921, EPI_ISL_483922, EPI_ISL_483923, EPI_ISL_483924, EPI_ISL_483925, EPI_ISL_483926, EPI_ISL_483927, EPI_ISL_483928, EPI_ISL_483929, EPI_ISL_483930, EPI_ISL_483931, EPI_ISL_483932, EPI_ISL_483933, EPI_ISL_483934, EPI_ISL_483935, EPI_ISL_483936, EPI_ISL_483937, EPI_ISL_483938, EPI_ISL_483939, EPI_ISL_483940, EPI_ISL_483941, EPI_ISL_483942, EPI_ISL_483943, EPI_ISL_483944, EPI_ISL_483945, EPI_ISL_483946, EPI_ISL_483947, EPI_ISL_483948, EPI_ISL_483949, EPI_ISL_483950, EPI_ISL_483951, EPI_ISL_483952, EPI_ISL_483953, EPI_ISL_483954, EPI_ISL_483955, EPI_ISL_483956, EPI_ISL_483957, EPI_ISL_483958, EPI_ISL_483959, EPI_ISL_483960, EPI_ISL_483961, EPI_ISL_483962, EPI_ISL_483963, EPI_ISL_483964, EPI_ISL_483965, EPI_ISL_483966, EPI_ISL_483967, EPI_ISL_483968, EPI_ISL_483969, EPI_ISL_483970, EPI_ISL_483971, EPI_ISL_483972, EPI_ISL_483973, EPI_ISL_483974, EPI_ISL_483975, EPI_ISL_483976, EPI_ISL_483977, EPI_ISL_483978, EPI_ISL_483979, EPI_ISL_483980, EPI_ISL_483981, EPI_ISL_483982, EPI_ISL_483983, EPI_ISL_483984, EPI_ISL_483985, EPI_ISL_483986, EPI_ISL_483987, EPI_ISL_483988, EPI_ISL_483989, EPI_ISL_483990, EPI_ISL_483991, EPI_ISL_483992, EPI_ISL_483993, EPI_ISL_483994, EPI_ISL_483995, EPI_ISL_483996, EPI_ISL_483997, EPI_ISL_483998, EPI_ISL_483999, EPI_ISL_484000, EPI_ISL_484001, EPI_ISL_484002, EPI_ISL_484003, EPI_ISL_484004, EPI_ISL_484005, EPI_ISL_484006, EPI_ISL_484007, EPI_ISL_484008, EPI_ISL_484009, EPI_ISL_484010, EPI_ISL_484011, EPI_ISL_484012, EPI_ISL_484013, EPI_ISL_484014, EPI_ISL_484015, EPI_ISL_484016, EPI_ISL_484017, EPI_ISL_484018, EPI_ISL_484019, EPI_ISL_484020, EPI_ISL_484021, EPI_ISL_484022, EPI_ISL_484023, EPI_ISL_484024, EPI_ISL_484025, EPI_ISL_484026, EPI_ISL_484027, EPI_ISL_484028, EPI_ISL_484029, EPI_ISL_484030, EPI_ISL_484031, EPI_ISL_484032, EPI_ISL_484033, EPI_ISL_484034, EPI_ISL_484035, EPI_ISL_484036, EPI_ISL_484037, EPI_ISL_484038, EPI_ISL_484039, EPI_ISL_484040, EPI_ISL_484041, EPI_ISL_484042, EPI_ISL_484043, EPI_ISL_484044, EPI_ISL_484045, EPI_ISL_484046, EPI_ISL_484047, EPI_ISL_484048, EPI_ISL_484049, EPI_ISL_484050, EPI_ISL_484051, EPI_ISL_484052, EPI_ISL_484053, EPI_ISL_484054, EPI_ISL_484055, EPI_ISL_484056, EPI_ISL_484057, EPI_ISL_484058, EPI_ISL_484059, EPI_ISL_484060, EPI_ISL_484061, EPI_ISL_484062, EPI_ISL_484063, EPI_ISL_484064, EPI_ISL_484065, EPI_ISL_484066, EPI_ISL_484067, EPI_ISL_484068, EPI_ISL_484069, EPI_ISL_484070, EPI_ISL_484071, EPI_ISL_484072, EPI_ISL_484073, EPI_ISL_484074, EPI_ISL_484075, EPI_ISL_484076, EPI_ISL_484077, EPI_ISL_484078, EPI_ISL_484079, EPI_ISL_484080, EPI_ISL_484081, EPI_ISL_484082, EPI_ISL_484083, EPI_ISL_484084, EPI_ISL_484085, EPI_ISL_484086, EPI_ISL_484087, EPI_ISL_484088, EPI_ISL_484089, EPI_ISL_484090, EPI_ISL_484091, EPI_ISL_484092, EPI_ISL_484093, EPI_ISL_484094, EPI_ISL_484095, EPI_ISL_484096, EPI_ISL_484097, EPI_ISL_484098, EPI_ISL_484099, EPI_ISL_484100, EPI_ISL_484101, EPI_ISL_484102, EPI_ISL_484103, EPI_ISL_484104, EPI_ISL_484105, EPI_ISL_484106, EPI_ISL_484107, EPI_ISL_484108, EPI_ISL_484109, EPI_ISL_484110, EPI_ISL_484111, EPI_ISL_484112, EPI_ISL_484113, EPI_ISL_484114, EPI_ISL_484115, EPI_ISL_484116, EPI_ISL_484117, EPI_ISL_484118, EPI_ISL_484119, EPI_ISL_484120, EPI_ISL_484121, EPI_ISL_484122, EPI_ISL_484123, EPI_ISL_484124, EPI_ISL_484125, EPI_ISL_484126, EPI_ISL_484127, EPI_ISL_484128, EPI_ISL_484129, EPI_ISL_484130, EPI_ISL_484131, EPI_ISL_484132, EPI_ISL_484133, EPI_ISL_484134, EPI_ISL_484135, EPI_ISL_484136, EPI_ISL_484137, EPI_ISL_484138, EPI_ISL_484139, EPI_ISL_484140, EPI_ISL_484141, EPI_ISL_484142, EPI_ISL_484143, EPI_ISL_484144, EPI_ISL_484145, EPI_ISL_484146, EPI_ISL_484147, EPI_ISL_484148, EPI_ISL_484149, EPI_ISL_484150, EPI_ISL_484151, EPI_ISL_484152, EPI_ISL_484153, EPI_ISL_484154, EPI_ISL_484155, EPI_ISL_484156, EPI_ISL_484157, EPI_ISL_484158, EPI_ISL_484159, EPI_ISL_484160, EPI_ISL_484161, EPI_ISL_484162, EPI_ISL_484163, EPI_ISL_484164, EPI_ISL_484165, EPI_ISL_484166, EPI_ISL_484167, EPI_ISL_484168, EPI_ISL_484169, EPI_ISL_484170, EPI_ISL_484171, EPI_ISL_484172, EPI_ISL_484173, EPI_ISL_484174, EPI_ISL_484175, EPI_ISL_484176, EPI_ISL_484177, EPI_ISL_484178, EPI_ISL_484179, EPI_ISL_484180, EPI_ISL_484181, EPI_ISL_484182, EPI_ISL_484183, EPI_ISL_484184, EPI_ISL_484185, EPI_ISL_484186, EPI_ISL_484187, EPI_ISL_484188, EPI_ISL_484189, EPI_ISL_484190, EPI_ISL_484191, EPI_ISL_484192, EPI_ISL_484193, EPI_ISL_484194, EPI_ISL_484195, EPI_ISL_484196, EPI_ISL_484197, EPI_ISL_484198, EPI_ISL_484199, EPI_ISL_484200, EPI_ISL_484201, EPI_ISL_484202, EPI_ISL_484203, EPI_ISL_484204, EPI_ISL_484205, EPI_ISL_484206, EPI_ISL_484207, EPI_ISL_484208, EPI_ISL_484209, EPI_ISL_484210, EPI_ISL_484211, EPI_ISL_484212, EPI_ISL_484213, EPI_ISL_484214, EPI_ISL_484215, EPI_ISL_484216, EPI_ISL_484217 | see above | Centre for Clinical Infection and Diagnostics Research and Genomics Innovation Unit, Guy's and St. Thomas' NHS Trust | COVID-19 Genomics UK (COG-UK) Consortium                                                    | Chloe Fisher, Luke Snell, Penny Cliff, Rahul Batra, Jonathan Edgeworth, Ali Raza Awan                                                                                                                                                                                                                                                                                    |
| EPI_ISL_484221, EPI_ISL_484222, EPI_ISL_484223, EPI_ISL_484224, EPI_ISL_484225, EPI_ISL_484226, EPI_ISL_484227, EPI_ISL_484228, EPI_ISL_484229, EPI_ISL_484230, EPI_ISL_484231, EPI_ISL_484232, EPI_ISL_484233, EPI_ISL_484234, EPI_ISL_484235, EPI_ISL_484236, EPI_ISL_484237, EPI_ISL_484238, EPI_ISL_484239, EPI_ISL_484240, EPI_ISL_484241, EPI_ISL_484242, EPI_ISL_484243, EPI_ISL_484244, EPI_ISL_484245, EPI_ISL_484246, EPI_ISL_484247, EPI_ISL_484248, EPI_ISL_484249, EPI_ISL_484250, EPI_ISL_484251, EPI_ISL_484252, EPI_ISL_484253, EPI_ISL_484254, EPI_ISL_484255, EPI_ISL_484256, EPI_ISL_484257, EPI_ISL_484258, EPI_ISL_484259, EPI_ISL_484260, EPI_ISL_484261, EPI_ISL_484262, EPI_ISL_484263, EPI_ISL_484264, EPI_ISL_484265, EPI_ISL_484266, EPI_ISL_484267, EPI_ISL_484268, EPI_ISL_484269, EPI_ISL_484270, EPI_ISL_484271, EPI_ISL_484272, EPI_ISL_484273, EPI_ISL_484274, EPI_ISL_484275, EPI_ISL_484276, EPI_ISL_484277, EPI_ISL_484278, EPI_ISL_484279, EPI_ISL_484280, EPI_ISL_484281, EPI_ISL_484282, EPI_ISL_484283, EPI_ISL_484284, EPI_ISL_484285, EPI_ISL_484286, EPI_ISL_484287, EPI_ISL_484288, EPI_ISL_484289                                                                                                                                                                                                                                                                                                                                                                                                                                                                                                                                                                                                                                                                                                                                                                                                                                                                                                                                                                                                                                                                                                                                                                                                                                                                                                                                                                                                                                                                                                                                                                                                                                                                                                                                                                                                                                                                                                                                                                                                                                                                                                                                                                                                                                                                                                                                                                                                                                                                                                                                                                                                                                                                                                                                                                                                                                                                                                                                                                                                                                                                                                                                                                                                                                                                                                                                                                                                                                                                                                                                                                                                                                                                                                                                                                                                                                                                                 | see above | University Hospitals Of Leicester NHS Trust and DeepSeq Nottingham                                                   | COVID-19 Genomics UK (COG-UK) Consortium                                                    | Christopher Holmes, Paul Bird, Thomas Helmer, Karlie Fallon, Julian Tang, Jonathan Ball, Patrick McClure, Joseph Chappell, Nadine Holmes, Matthew Carlisle, Christopher Moore, Fei Sang, Johnny Debebe, Victoria Wright, Matthew Loose                                                                                                                                   |
| EPI_ISL_484687                                                                                                                                                                                                                                                                                                                                                                                                                                                                                                                                                                                                                                                                                                                                                                                                                                                                                                                                                                                                                                                                                                                                                                                                                                                                                                                                                                                                                                                                                                                                                                                                                                                                                                                                                                                                                                                                                                                                                                                                                                                                                                                                                                                                                                                                                                                                                                                                                                                                                                                                                                                                                                                                                                                                                                                                                                                                                                                                                                                                                                                                                                                                                                                                                                                                                                                                                                                                                                                                                                                                                                                                                                                                                                                                                                                                                                                                                                                                                                                                                                                                                                                                                                                                                                                                                                                                                                                                                                                                                                                                                                                                                                                                                                                                                                                                                                                                                                                                                                                                                 |           | Wales Specialist Virology Centre Sequencing lab: Pathogen Genomics Unit                                              | COVID-19 Genomics UK (COG-UK) Consortium                                                    | Catherine Moore, Johnathan Evans, Laura Gifford, Malorie Perry, Simon Cottrell, Angela Marchbank, Alec Birchley, Alexander Adams, Amy Gaskin, Bree Gatica-Wilcox, Jason Coombes, Joel Southgate, Lauren Gilbert, Lee Graham, Nicole Pacchiarini, Sara Kumziene-Summerhayes, Sarah Taylor, Sophie Jones, Sara Rey, Matthew Bull, Joanne Watkins, Sally Corden, Tom Connor |
| EPI_ISL_486382                                                                                                                                                                                                                                                                                                                                                                                                                                                                                                                                                                                                                                                                                                                                                                                                                                                                                                                                                                                                                                                                                                                                                                                                                                                                                                                                                                                                                                                                                                                                                                                                                                                                                                                                                                                                                                                                                                                                                                                                                                                                                                                                                                                                                                                                                                                                                                                                                                                                                                                                                                                                                                                                                                                                                                                                                                                                                                                                                                                                                                                                                                                                                                                                                                                                                                                                                                                                                                                                                                                                                                                                                                                                                                                                                                                                                                                                                                                                                                                                                                                                                                                                                                                                                                                                                                                                                                                                                                                                                                                                                                                                                                                                                                                                                                                                                                                                                                                                                                                                                 |           | District Surveillance Unit                                                                                           | Department of Neurovirology, National Institute of Mental Health and Neuroscience (NIMHANS) | Chitra Pattabiraman, Vijayalakshmi Reddy, Harsha PK, Risha Rasheed, Shafeeq S Hameed, Manjunatha Venkataswamy, Anita Desai, Ravi Vasanthapuram                                                                                                                                                                                                                           |
| EPI_ISL_486383                                                                                                                                                                                                                                                                                                                                                                                                                                                                                                                                                                                                                                                                                                                                                                                                                                                                                                                                                                                                                                                                                                                                                                                                                                                                                                                                                                                                                                                                                                                                                                                                                                                                                                                                                                                                                                                                                                                                                                                                                                                                                                                                                                                                                                                                                                                                                                                                                                                                                                                                                                                                                                                                                                                                                                                                                                                                                                                                                                                                                                                                                                                                                                                                                                                                                                                                                                                                                                                                                                                                                                                                                                                                                                                                                                                                                                                                                                                                                                                                                                                                                                                                                                                                                                                                                                                                                                                                                                                                                                                                                                                                                                                                                                                                                                                                                                                                                                                                                                                                                 |           | CV Raman Hospital                                                                                                    | Department of Neurovirology, National Institute of Mental Health and Neuroscience (NIMHANS) | Chitra Pattabiraman, Vijayalakshmi Reddy, Harsha PK, Risha Rasheed, Shafeeq S Hameed, Manjunatha Venkataswamy, Anita Desai, Ravi Vasanthapuram                                                                                                                                                                                                                           |
| EPI_ISL_486384                                                                                                                                                                                                                                                                                                                                                                                                                                                                                                                                                                                                                                                                                                                                                                                                                                                                                                                                                                                                                                                                                                                                                                                                                                                                                                                                                                                                                                                                                                                                                                                                                                                                                                                                                                                                                                                                                                                                                                                                                                                                                                                                                                                                                                                                                                                                                                                                                                                                                                                                                                                                                                                                                                                                                                                                                                                                                                                                                                                                                                                                                                                                                                                                                                                                                                                                                                                                                                                                                                                                                                                                                                                                                                                                                                                                                                                                                                                                                                                                                                                                                                                                                                                                                                                                                                                                                                                                                                                                                                                                                                                                                                                                                                                                                                                                                                                                                                                                                                                                                 |           | DH                                                                                                                   | Department of Neurovirology, National Institute of Mental Health and Neuroscience (NIMHANS) | Chitra Pattabiraman, Vijayalakshmi Reddy, Harsha PK, Risha Rasheed, Shafeeq S Hameed, Manjunatha Venkataswamy, Anita Desai, Ravi Vasanthapuram                                                                                                                                                                                                                           |
| EPI_ISL_486385, EPI_ISL_486386                                                                                                                                                                                                                                                                                                                                                                                                                                                                                                                                                                                                                                                                                                                                                                                                                                                                                                                                                                                                                                                                                                                                                                                                                                                                                                                                                                                                                                                                                                                                                                                                                                                                                                                                                                                                                                                                                                                                                                                                                                                                                                                                                                                                                                                                                                                                                                                                                                                                                                                                                                                                                                                                                                                                                                                                                                                                                                                                                                                                                                                                                                                                                                                                                                                                                                                                                                                                                                                                                                                                                                                                                                                                                                                                                                                                                                                                                                                                                                                                                                                                                                                                                                                                                                                                                                                                                                                                                                                                                                                                                                                                                                                                                                                                                                                                                                                                                                                                                                                                 |           | Victoria Hospital                                                                                                    | Department of Neurovirology, National Institute of Mental Health and Neuroscience (NIMHANS) | Chitra Pattabiraman, Vijayalakshmi Reddy, Harsha PK, Risha Rasheed, Shafeeq S Hameed, Manjunatha Venkataswamy, Anita Desai, Ravi Vasanthapuram                                                                                                                                                                                                                           |
| EPI_ISL_486387, EPI_ISL_486388, EPI_ISL_486389                                                                                                                                                                                                                                                                                                                                                                                                                                                                                                                                                                                                                                                                                                                                                                                                                                                                                                                                                                                                                                                                                                                                                                                                                                                                                                                                                                                                                                                                                                                                                                                                                                                                                                                                                                                                                                                                                                                                                                                                                                                                                                                                                                                                                                                                                                                                                                                                                                                                                                                                                                                                                                                                                                                                                                                                                                                                                                                                                                                                                                                                                                                                                                                                                                                                                                                                                                                                                                                                                                                                                                                                                                                                                                                                                                                                                                                                                                                                                                                                                                                                                                                                                                                                                                                                                                                                                                                                                                                                                                                                                                                                                                                                                                                                                                                                                                                                                                                                                                                 |           | DH                                                                                                                   | Department of Neurovirology, National Institute of Mental Health and Neuroscience (NIMHANS) | Chitra Pattabiraman, Vijayalakshmi Reddy, Harsha PK, Risha Rasheed, Shafeeq S Hameed, Manjunatha Venkataswamy, Anita Desai, Ravi Vasanthapuram                                                                                                                                                                                                                           |
| EPI_ISL_486392                                                                                                                                                                                                                                                                                                                                                                                                                                                                                                                                                                                                                                                                                                                                                                                                                                                                                                                                                                                                                                                                                                                                                                                                                                                                                                                                                                                                                                                                                                                                                                                                                                                                                                                                                                                                                                                                                                                                                                                                                                                                                                                                                                                                                                                                                                                                                                                                                                                                                                                                                                                                                                                                                                                                                                                                                                                                                                                                                                                                                                                                                                                                                                                                                                                                                                                                                                                                                                                                                                                                                                                                                                                                                                                                                                                                                                                                                                                                                                                                                                                                                                                                                                                                                                                                                                                                                                                                                                                                                                                                                                                                                                                                                                                                                                                                                                                                                                                                                                                                                 |           | Victoria Hospital                                                                                                    | Department of Neurovirology, National Institute of Mental Health and Neuroscience (NIMHANS) | Chitra Pattabiraman, Vijayalakshmi Reddy, Harsha PK, Risha Rasheed, Shafeeq S Hameed, Manjunatha Venkataswamy, Anita Desai, Ravi Vasanthapuram                                                                                                                                                                                                                           |
| EPI_ISL_486393                                                                                                                                                                                                                                                                                                                                                                                                                                                                                                                                                                                                                                                                                                                                                                                                                                                                                                                                                                                                                                                                                                                                                                                                                                                                                                                                                                                                                                                                                                                                                                                                                                                                                                                                                                                                                                                                                                                                                                                                                                                                                                                                                                                                                                                                                                                                                                                                                                                                                                                                                                                                                                                                                                                                                                                                                                                                                                                                                                                                                                                                                                                                                                                                                                                                                                                                                                                                                                                                                                                                                                                                                                                                                                                                                                                                                                                                                                                                                                                                                                                                                                                                                                                                                                                                                                                                                                                                                                                                                                                                                                                                                                                                                                                                                                                                                                                                                                                                                                                                                 |           | SJMCH                                                                                                                | Department of Neurovirology, National Institute of Mental Health and Neuroscience (NIMHANS) | Chitra Pattabiraman, Vijayalakshmi Reddy, Harsha PK, Risha Rasheed, Shafeeq S Hameed, Manjunatha Venkataswamy, Anita Desai, Ravi Vasanthapuram                                                                                                                                                                                                                           |
| EPI_ISL_486394                                                                                                                                                                                                                                                                                                                                                                                                                                                                                                                                                                                                                                                                                                                                                                                                                                                                                                                                                                                                                                                                                                                                                                                                                                                                                                                                                                                                                                                                                                                                                                                                                                                                                                                                                                                                                                                                                                                                                                                                                                                                                                                                                                                                                                                                                                                                                                                                                                                                                                                                                                                                                                                                                                                                                                                                                                                                                                                                                                                                                                                                                                                                                                                                                                                                                                                                                                                                                                                                                                                                                                                                                                                                                                                                                                                                                                                                                                                                                                                                                                                                                                                                                                                                                                                                                                                                                                                                                                                                                                                                                                                                                                                                                                                                                                                                                                                                                                                                                                                                                 |           | MIMS                                                                                                                 | Department of Neurovirology, National Institute of Mental Health and Neuroscience (NIMHANS) | Chitra Pattabiraman, Vijayalakshmi Reddy, Harsha PK, Risha Rasheed, Shafeeq S Hameed, Manjunatha Venkataswamy, Anita Desai, Ravi Vasanthapuram                                                                                                                                                                                                                           |
| EPI_ISL_486395                                                                                                                                                                                                                                                                                                                                                                                                                                                                                                                                                                                                                                                                                                                                                                                                                                                                                                                                                                                                                                                                                                                                                                                                                                                                                                                                                                                                                                                                                                                                                                                                                                                                                                                                                                                                                                                                                                                                                                                                                                                                                                                                                                                                                                                                                                                                                                                                                                                                                                                                                                                                                                                                                                                                                                                                                                                                                                                                                                                                                                                                                                                                                                                                                                                                                                                                                                                                                                                                                                                                                                                                                                                                                                                                                                                                                                                                                                                                                                                                                                                                                                                                                                                                                                                                                                                                                                                                                                                                                                                                                                                                                                                                                                                                                                                                                                                                                                                                                                                                                 |           | BIMS                                                                                                                 | Department of Neurovirology, National Institute of Mental Health and Neuroscience (NIMHANS) | Chitra Pattabiraman, Vijayalakshmi Reddy, Harsha PK, Risha Rasheed, Shafeeq S Hameed, Manjunatha Venkataswamy, Anita Desai, Ravi Vasanthapuram                                                                                                                                                                                                                           |
| EPI_ISL_486396                                                                                                                                                                                                                                                                                                                                                                                                                                                                                                                                                                                                                                                                                                                                                                                                                                                                                                                                                                                                                                                                                                                                                                                                                                                                                                                                                                                                                                                                                                                                                                                                                                                                                                                                                                                                                                                                                                                                                                                                                                                                                                                                                                                                                                                                                                                                                                                                                                                                                                                                                                                                                                                                                                                                                                                                                                                                                                                                                                                                                                                                                                                                                                                                                                                                                                                                                                                                                                                                                                                                                                                                                                                                                                                                                                                                                                                                                                                                                                                                                                                                                                                                                                                                                                                                                                                                                                                                                                                                                                                                                                                                                                                                                                                                                                                                                                                                                                                                                                                                                 |           | Jayanagar General Hospital to Victoria Hospital                                                                      | Department of Neurovirology, National Institute of Mental Health and Neuroscience (NIMHANS) | Chitra Pattabiraman, Vijayalakshmi Reddy, Harsha PK, Risha Rasheed, Shafeeq S Hameed, Manjunatha Venkataswamy, Anita Desai, Ravi Vasanthapuram                                                                                                                                                                                                                           |
| EPI_ISL_486397                                                                                                                                                                                                                                                                                                                                                                                                                                                                                                                                                                                                                                                                                                                                                                                                                                                                                                                                                                                                                                                                                                                                                                                                                                                                                                                                                                                                                                                                                                                                                                                                                                                                                                                                                                                                                                                                                                                                                                                                                                                                                                                                                                                                                                                                                                                                                                                                                                                                                                                                                                                                                                                                                                                                                                                                                                                                                                                                                                                                                                                                                                                                                                                                                                                                                                                                                                                                                                                                                                                                                                                                                                                                                                                                                                                                                                                                                                                                                                                                                                                                                                                                                                                                                                                                                                                                                                                                                                                                                                                                                                                                                                                                                                                                                                                                                                                                                                                                                                                                                 |           | KC General Hospital                                                                                                  | Department of Neurovirology, National Institute of Mental Health and Neuroscience (NIMHANS) | Chitra Pattabiraman, Vijayalakshmi Reddy, Harsha PK, Risha Rasheed, Shafeeq S Hameed, Manjunatha Venkataswamy, Anita Desai, Ravi Vasanthapuram                                                                                                                                                                                                                           |
| EPI_ISL_486398, EPI_ISL_486399                                                                                                                                                                                                                                                                                                                                                                                                                                                                                                                                                                                                                                                                                                                                                                                                                                                                                                                                                                                                                                                                                                                                                                                                                                                                                                                                                                                                                                                                                                                                                                                                                                                                                                                                                                                                                                                                                                                                                                                                                                                                                                                                                                                                                                                                                                                                                                                                                                                                                                                                                                                                                                                                                                                                                                                                                                                                                                                                                                                                                                                                                                                                                                                                                                                                                                                                                                                                                                                                                                                                                                                                                                                                                                                                                                                                                                                                                                                                                                                                                                                                                                                                                                                                                                                                                                                                                                                                                                                                                                                                                                                                                                                                                                                                                                                                                                                                                                                                                                                                 |           | MIMS                                                                                                                 | Department of Neurovirology, National Institute of Mental Health and Neuroscience (NIMHANS) | Chitra Pattabiraman, Vijayalakshmi Reddy, Harsha PK, Risha Rasheed, Shafeeq S Hameed, Manjunatha Venkataswamy, Anita Desai, Ravi Vasanthapuram                                                                                                                                                                                                                           |
| EPI_ISL_486400                                                                                                                                                                                                                                                                                                                                                                                                                                                                                                                                                                                                                                                                                                                                                                                                                                                                                                                                                                                                                                                                                                                                                                                                                                                                                                                                                                                                                                                                                                                                                                                                                                                                                                                                                                                                                                                                                                                                                                                                                                                                                                                                                                                                                                                                                                                                                                                                                                                                                                                                                                                                                                                                                                                                                                                                                                                                                                                                                                                                                                                                                                                                                                                                                                                                                                                                                                                                                                                                                                                                                                                                                                                                                                                                                                                                                                                                                                                                                                                                                                                                                                                                                                                                                                                                                                                                                                                                                                                                                                                                                                                                                                                                                                                                                                                                                                                                                                                                                                                                                 |           | Victoria Hospital                                                                                                    | Department of Neurovirology, National Institute of Mental Health and Neuroscience (NIMHANS) | Chitra Pattabiraman, Vijayalakshmi Reddy, Harsha PK, Risha Rasheed, Shafeeq S Hameed, Manjunatha Venkataswamy, Anita Desai, Ravi Vasanthapuram                                                                                                                                                                                                                           |
| EPI_ISL_486401, EPI_ISL_486402, EPI_ISL_486403                                                                                                                                                                                                                                                                                                                                                                                                                                                                                                                                                                                                                                                                                                                                                                                                                                                                                                                                                                                                                                                                                                                                                                                                                                                                                                                                                                                                                                                                                                                                                                                                                                                                                                                                                                                                                                                                                                                                                                                                                                                                                                                                                                                                                                                                                                                                                                                                                                                                                                                                                                                                                                                                                                                                                                                                                                                                                                                                                                                                                                                                                                                                                                                                                                                                                                                                                                                                                                                                                                                                                                                                                                                                                                                                                                                                                                                                                                                                                                                                                                                                                                                                                                                                                                                                                                                                                                                                                                                                                                                                                                                                                                                                                                                                                                                                                                                                                                                                                                                 |           | DH                                                                                                                   | Department of Neurovirology, National Institute of Mental Health and Neuroscience (NIMHANS) | Chitra Pattabiraman, Vijayalakshmi Reddy, Harsha PK, Risha Rasheed, Shafeeq S Hameed, Manjunatha Venkataswamy, Anita Desai, Ravi Vasanthapuram                                                                                                                                                                                                                           |
| EPI_ISL_486404                                                                                                                                                                                                                                                                                                                                                                                                                                                                                                                                                                                                                                                                                                                                                                                                                                                                                                                                                                                                                                                                                                                                                                                                                                                                                                                                                                                                                                                                                                                                                                                                                                                                                                                                                                                                                                                                                                                                                                                                                                                                                                                                                                                                                                                                                                                                                                                                                                                                                                                                                                                                                                                                                                                                                                                                                                                                                                                                                                                                                                                                                                                                                                                                                                                                                                                                                                                                                                                                                                                                                                                                                                                                                                                                                                                                                                                                                                                                                                                                                                                                                                                                                                                                                                                                                                                                                                                                                                                                                                                                                                                                                                                                                                                                                                                                                                                                                                                                                                                                                 |           | Victoria Hospital                                                                                                    | Department of Neurovirology, National Institute of Mental Health and Neuroscience (NIMHANS) | Chitra Pattabiraman, Vijayalakshmi Reddy, Harsha PK, Risha Rasheed, Shafeeq S Hameed, Manjunatha Venkataswamy, Anita Desai, Ravi Vasanthapuram                                                                                                                                                                                                                           |
| EPI_ISL_486405, EPI_ISL_486406, EPI_ISL_486407, EPI_ISL_486408, EPI_ISL_486409                                                                                                                                                                                                                                                                                                                                                                                                                                                                                                                                                                                                                                                                                                                                                                                                                                                                                                                                                                                                                                                                                                                                                                                                                                                                                                                                                                                                                                                                                                                                                                                                                                                                                                                                                                                                                                                                                                                                                                                                                                                                                                                                                                                                                                                                                                                                                                                                                                                                                                                                                                                                                                                                                                                                                                                                                                                                                                                                                                                                                                                                                                                                                                                                                                                                                                                                                                                                                                                                                                                                                                                                                                                                                                                                                                                                                                                                                                                                                                                                                                                                                                                                                                                                                                                                                                                                                                                                                                                                                                                                                                                                                                                                                                                                                                                                                                                                                                                                                 |           | DH                                                                                                                   | Department of Neurovirology, National Institute of Mental Health and Neuroscience (NIMHANS) | Chitra Pattabiraman, Vijayalakshmi Reddy, Harsha PK, Risha Rasheed, Shafeeq S Hameed, Manjunatha Venkataswamy, Anita Desai, Ravi Vasanthapuram                                                                                                                                                                                                                           |
| EPI_ISL_486442, EPI_ISL_486443, EPI_ISL_486444, EPI_ISL_486445, EPI_ISL_486446, EPI_ISL_486447, EPI_ISL_486448, EPI_ISL_486449, EPI_ISL_486450, EPI_ISL_486451, EPI_ISL_486452, EPI_ISL_486453, EPI_ISL_486454, EPI_ISL_486455, EPI_ISL_486456, EPI_ISL_486457, EPI_ISL_486458, EPI_ISL_486459, EPI_ISL_486460, EPI_ISL_486461, EPI_ISL_486462, EPI_ISL_486463, EPI_ISL_486464, EPI_ISL_486465, EPI_ISL_486466, EPI_ISL_486467, EPI_ISL_486468, EPI_ISL_486469, EPI_ISL_486470, EPI_ISL_486471, EPI_ISL_486472, EPI_ISL_486473, EPI_ISL_486474, EPI_ISL_486475, EPI_ISL_486476, EPI_ISL_486477, EPI_ISL_486478, EPI_ISL_486479, EPI_ISL_486480, EPI_ISL_486481, EPI_ISL_486482, EPI_ISL_486483, EPI_ISL_486484, EPI_ISL_486485, EPI_ISL_486486, EPI_ISL_486487, EPI_ISL_486488, EPI_ISL_486489, EPI_ISL_486490, EPI_ISL_486491, EPI_ISL_486492, EPI_ISL_486493, EPI_ISL_486494, EPI_ISL_486495, EPI_ISL_486496, EPI_ISL_486497, EPI_ISL_486498, EPI_ISL_486499, EPI_ISL_486500, EPI_ISL_486501, EPI_ISL_486502, EPI_ISL_486503, EPI_ISL_486504, EPI_ISL_486505, EPI_ISL_486506, EPI_ISL_486507, EPI_ISL_486508, EPI_ISL_486509, EPI_ISL_486510, EPI_ISL_486511, EPI_ISL_486512, EPI_ISL_486513, EPI_ISL_486514, EPI_ISL_486515, EPI_ISL_486516, EPI_ISL_486517, EPI_ISL_486518, EPI_ISL_486519, EPI_ISL_486520, EPI_ISL_486521, EPI_ISL_486522, EPI_ISL_486523, EPI_ISL_486524, EPI_ISL_486525, EPI_ISL_486526, EPI_ISL_486527, EPI_ISL_486528, EPI_ISL_486529, EPI_ISL_486530, EPI_ISL_486531, EPI_ISL_486532, EPI_ISL_486533, EPI_ISL_486534, EPI_ISL_486535, EPI_ISL_486536, EPI_ISL_486537, EPI_ISL_486538                                                                                                                                                                                                                                                                                                                                                                                                                                                                                                                                                                                                                                                                                                                                                                                                                                                                                                                                                                                                                                                                                                                                                                                                                                                                                                                                                                                                                                                                                                                                                                                                                                                                                                                                                                                                                                                                                                                                                                                                                                                                                                                                                                                                                                                                                                                                                                                                                                                                                                                                                                                                                                                                                                                                                                                                                                                                                                                                                                                                                                                                                                                                                                                                                                                                                                                                                                                                                 |           |                                                                                                                      |                                                                                             |                                                                                                                                                                                                                                                                                                                                                                          |





|                                                                                                                                                                                                                                                                                                                                                                                                                                                                                                                                                                                                                                                                                                                                                                                                                                                                                                                                                                                                                                                                                                                                                                                                                                                                                                                                                                                                                                                                                                                                                                                                                                                                                                                                                                                                                                                                                                                                                                                                                                                                                                                                                                                                                                                                                                                                                                                                                                                                                                                                                                                                                                                                                                                                                                                                                                                                                                                                                                                                                                                                                                                                                                                                                                                                                                                                                                                                                                                                                                                                                                                                                                                                                                                                                                                                                                                                                                                                                                                                                                                                                                                                                                                                                                                                |           |                                                                                        |                                                                                        |                                                                                                                                                                                                                                                                                                                                                                                                                                                                                                                                                                                                                                                                                            |
|----------------------------------------------------------------------------------------------------------------------------------------------------------------------------------------------------------------------------------------------------------------------------------------------------------------------------------------------------------------------------------------------------------------------------------------------------------------------------------------------------------------------------------------------------------------------------------------------------------------------------------------------------------------------------------------------------------------------------------------------------------------------------------------------------------------------------------------------------------------------------------------------------------------------------------------------------------------------------------------------------------------------------------------------------------------------------------------------------------------------------------------------------------------------------------------------------------------------------------------------------------------------------------------------------------------------------------------------------------------------------------------------------------------------------------------------------------------------------------------------------------------------------------------------------------------------------------------------------------------------------------------------------------------------------------------------------------------------------------------------------------------------------------------------------------------------------------------------------------------------------------------------------------------------------------------------------------------------------------------------------------------------------------------------------------------------------------------------------------------------------------------------------------------------------------------------------------------------------------------------------------------------------------------------------------------------------------------------------------------------------------------------------------------------------------------------------------------------------------------------------------------------------------------------------------------------------------------------------------------------------------------------------------------------------------------------------------------------------------------------------------------------------------------------------------------------------------------------------------------------------------------------------------------------------------------------------------------------------------------------------------------------------------------------------------------------------------------------------------------------------------------------------------------------------------------------------------------------------------------------------------------------------------------------------------------------------------------------------------------------------------------------------------------------------------------------------------------------------------------------------------------------------------------------------------------------------------------------------------------------------------------------------------------------------------------------------------------------------------------------------------------------------------------------------------------------------------------------------------------------------------------------------------------------------------------------------------------------------------------------------------------------------------------------------------------------------------------------------------------------------------------------------------------------------------------------------------------------------------------------------------------|-----------|----------------------------------------------------------------------------------------|----------------------------------------------------------------------------------------|--------------------------------------------------------------------------------------------------------------------------------------------------------------------------------------------------------------------------------------------------------------------------------------------------------------------------------------------------------------------------------------------------------------------------------------------------------------------------------------------------------------------------------------------------------------------------------------------------------------------------------------------------------------------------------------------|
| EPI_ISL_492468, EPI_ISL_492469, EPI_ISL_492470, EPI_ISL_492471, EPI_ISL_492472, EPI_ISL_492473, EPI_ISL_492474, EPI_ISL_492475, EPI_ISL_492476, EPI_ISL_492477, EPI_ISL_492478, EPI_ISL_492479, EPI_ISL_492480, EPI_ISL_492481, EPI_ISL_492482, EPI_ISL_492483, EPI_ISL_492484, EPI_ISL_492485, EPI_ISL_492486, EPI_ISL_492487, EPI_ISL_492488, EPI_ISL_492489, EPI_ISL_492490, EPI_ISL_492491, EPI_ISL_492492, EPI_ISL_492493, EPI_ISL_492494, EPI_ISL_492495, EPI_ISL_492496, EPI_ISL_492497, EPI_ISL_492498, EPI_ISL_492499, EPI_ISL_492500, EPI_ISL_492501, EPI_ISL_492502, EPI_ISL_492503, EPI_ISL_492504, EPI_ISL_492505, EPI_ISL_492506, EPI_ISL_492507, EPI_ISL_492508, EPI_ISL_492509, EPI_ISL_492510, EPI_ISL_492511, EPI_ISL_492512, EPI_ISL_492513, EPI_ISL_492514, EPI_ISL_492515, EPI_ISL_492516, EPI_ISL_492517, EPI_ISL_492518, EPI_ISL_492519, EPI_ISL_492520, EPI_ISL_492521, EPI_ISL_492522, EPI_ISL_492523, EPI_ISL_492524, EPI_ISL_492525, EPI_ISL_492526, EPI_ISL_492527, EPI_ISL_492528                                                                                                                                                                                                                                                                                                                                                                                                                                                                                                                                                                                                                                                                                                                                                                                                                                                                                                                                                                                                                                                                                                                                                                                                                                                                                                                                                                                                                                                                                                                                                                                                                                                                                                                                                                                                                                                                                                                                                                                                                                                                                                                                                                                                                                                                                                                                                                                                                                                                                                                                                                                                                                                                                                                                                                                                                                                                                                                                                                                                                                                                                                                                                                                                                                                 | see above | NU-OMICS DNA Sequencing research facility, Northumbria University                      | Wellcome Sanger Institute for the COVID-19 Genomics UK (COG-UK) consortium             | Chris Duncan, Shea Waugh, Shirelle Burton-Fanning, Gary Eltringham, Jennifer Collins, Brendan Payne, Yusri Taha, Emma Swindells, Jane Greenaway, Edward Barton, Garren Scott, Debra Padgett, Clive Graham, Sarah Essex, Steve Liggett, Paul Baker, Lynn Dover, Wen Yew, Gary Black, John Allan, Joshua Loh, Greg Young, Matthew Bashton, Andrew Nelson, Darren Smith and Alex Alderton, Roberto Amato, Sonia Goncalves, Ewan Harrison, David K. Jackson, Ian Johnston, Dominic Kwiatkowski, Cordelia Langford, John Sillitoe on behalf of the Wellcome Sanger Institute COVID-19 Surveillance Team ( <a href="http://www.sanger.ac.uk/covid-team">http://www.sanger.ac.uk/covid-team</a> ) |
| EPI_ISL_492929                                                                                                                                                                                                                                                                                                                                                                                                                                                                                                                                                                                                                                                                                                                                                                                                                                                                                                                                                                                                                                                                                                                                                                                                                                                                                                                                                                                                                                                                                                                                                                                                                                                                                                                                                                                                                                                                                                                                                                                                                                                                                                                                                                                                                                                                                                                                                                                                                                                                                                                                                                                                                                                                                                                                                                                                                                                                                                                                                                                                                                                                                                                                                                                                                                                                                                                                                                                                                                                                                                                                                                                                                                                                                                                                                                                                                                                                                                                                                                                                                                                                                                                                                                                                                                                 |           | NU-OMICS DNA Sequencing research facility, Northumbria University                      | Wellcome Sanger Institute for the COVID-19 Genomics UK (COG-UK) Consortium             | Chris Duncan, Shea Waugh, Shirelle Burton-Fanning, Gary Eltringham, Jennifer Collins, Brendan Payne, Yusri Taha, Emma Swindells, Jane Greenaway, Edward Barton, Garren Scott, Debra Padgett, Clive Graham, Sarah Essex, Steve Liggett, Paul Baker, Lynn Dover, Wen Yew, Gary Black, John Allan, Joshua Loh, Greg Young, Matthew Bashton, Andrew Nelson, Darren Smith and Alex Alderton, Roberto Amato, Sonia Goncalves, Ewan Harrison, David K. Jackson, Ian Johnston, Dominic Kwiatkowski, Cordelia Langford, John Sillitoe on behalf of the Wellcome Sanger Institute COVID-19 Surveillance Team                                                                                         |
| EPI_ISL_492930                                                                                                                                                                                                                                                                                                                                                                                                                                                                                                                                                                                                                                                                                                                                                                                                                                                                                                                                                                                                                                                                                                                                                                                                                                                                                                                                                                                                                                                                                                                                                                                                                                                                                                                                                                                                                                                                                                                                                                                                                                                                                                                                                                                                                                                                                                                                                                                                                                                                                                                                                                                                                                                                                                                                                                                                                                                                                                                                                                                                                                                                                                                                                                                                                                                                                                                                                                                                                                                                                                                                                                                                                                                                                                                                                                                                                                                                                                                                                                                                                                                                                                                                                                                                                                                 |           | NU-OMICS DNA Sequencing research facility, Northumbria University                      | Wellcome Sanger Institute for the COVID-19 Genomics UK (COG-UK) consortium             | Chris Duncan, Shea Waugh, Shirelle Burton-Fanning, Gary Eltringham, Jennifer Collins, Brendan Payne, Yusri Taha, Emma Swindells, Jane Greenaway, Edward Barton, Garren Scott, Debra Padgett, Clive Graham, Sarah Essex, Steve Liggett, Paul Baker, Lynn Dover, Wen Yew, Gary Black, John Allan, Joshua Loh, Greg Young, Matthew Bashton, Andrew Nelson, Darren Smith and Alex Alderton, Roberto Amato, Sonia Goncalves, Ewan Harrison, David K. Jackson, Ian Johnston, Dominic Kwiatkowski, Cordelia Langford, John Sillitoe on behalf of the Wellcome Sanger Institute COVID-19 Surveillance Team ( <a href="http://www.sanger.ac.uk/covid-team">http://www.sanger.ac.uk/covid-team</a> ) |
| EPI_ISL_492931                                                                                                                                                                                                                                                                                                                                                                                                                                                                                                                                                                                                                                                                                                                                                                                                                                                                                                                                                                                                                                                                                                                                                                                                                                                                                                                                                                                                                                                                                                                                                                                                                                                                                                                                                                                                                                                                                                                                                                                                                                                                                                                                                                                                                                                                                                                                                                                                                                                                                                                                                                                                                                                                                                                                                                                                                                                                                                                                                                                                                                                                                                                                                                                                                                                                                                                                                                                                                                                                                                                                                                                                                                                                                                                                                                                                                                                                                                                                                                                                                                                                                                                                                                                                                                                 |           | NU-OMICS DNA Sequencing research facility, Northumbria University                      | Wellcome Sanger Institute for the COVID-19 Genomics UK (COG-UK) Consortium             | Chris Duncan, Shea Waugh, Shirelle Burton-Fanning, Gary Eltringham, Jennifer Collins, Brendan Payne, Yusri Taha, Emma Swindells, Jane Greenaway, Edward Barton, Garren Scott, Debra Padgett, Clive Graham, Sarah Essex, Steve Liggett, Paul Baker, Lynn Dover, Wen Yew, Gary Black, John Allan, Joshua Loh, Greg Young, Matthew Bashton, Andrew Nelson, Darren Smith and Alex Alderton, Roberto Amato, Sonia Goncalves, Ewan Harrison, David K. Jackson, Ian Johnston, Dominic Kwiatkowski, Cordelia Langford, John Sillitoe on behalf of the Wellcome Sanger Institute COVID-19 Surveillance Team                                                                                         |
| EPI_ISL_492932, EPI_ISL_492933, EPI_ISL_492934, EPI_ISL_492935, EPI_ISL_492936, EPI_ISL_492937, EPI_ISL_492938, EPI_ISL_492939, EPI_ISL_492940, EPI_ISL_492941, EPI_ISL_492942, EPI_ISL_492943, EPI_ISL_492944, EPI_ISL_492945, EPI_ISL_492946, EPI_ISL_492947, EPI_ISL_492948, EPI_ISL_492949, EPI_ISL_492950, EPI_ISL_492951, EPI_ISL_492952, EPI_ISL_492953, EPI_ISL_492954, EPI_ISL_492955, EPI_ISL_492956, EPI_ISL_492957, EPI_ISL_492958, EPI_ISL_492959, EPI_ISL_492960, EPI_ISL_492961, EPI_ISL_492962, EPI_ISL_492963, EPI_ISL_492964, EPI_ISL_492965, EPI_ISL_492966, EPI_ISL_492967, EPI_ISL_492968, EPI_ISL_492969, EPI_ISL_492970, EPI_ISL_492971, EPI_ISL_492972, EPI_ISL_492973, EPI_ISL_492974, EPI_ISL_492975, EPI_ISL_492976, EPI_ISL_492977                                                                                                                                                                                                                                                                                                                                                                                                                                                                                                                                                                                                                                                                                                                                                                                                                                                                                                                                                                                                                                                                                                                                                                                                                                                                                                                                                                                                                                                                                                                                                                                                                                                                                                                                                                                                                                                                                                                                                                                                                                                                                                                                                                                                                                                                                                                                                                                                                                                                                                                                                                                                                                                                                                                                                                                                                                                                                                                                                                                                                                                                                                                                                                                                                                                                                                                                                                                                                                                                                                 | see above | NU-OMICS DNA Sequencing research facility, Northumbria University                      | Wellcome Sanger Institute for the COVID-19 Genomics UK (COG-UK) consortium             | Chris Duncan, Shea Waugh, Shirelle Burton-Fanning, Gary Eltringham, Jennifer Collins, Brendan Payne, Yusri Taha, Emma Swindells, Jane Greenaway, Edward Barton, Garren Scott, Debra Padgett, Clive Graham, Sarah Essex, Steve Liggett, Paul Baker, Lynn Dover, Wen Yew, Gary Black, John Allan, Joshua Loh, Greg Young, Matthew Bashton, Andrew Nelson, Darren Smith and Alex Alderton, Roberto Amato, Sonia Goncalves, Ewan Harrison, David K. Jackson, Ian Johnston, Dominic Kwiatkowski, Cordelia Langford, John Sillitoe on behalf of the Wellcome Sanger Institute COVID-19 Surveillance Team ( <a href="http://www.sanger.ac.uk/covid-team">http://www.sanger.ac.uk/covid-team</a> ) |
| EPI_ISL_492978, EPI_ISL_492979                                                                                                                                                                                                                                                                                                                                                                                                                                                                                                                                                                                                                                                                                                                                                                                                                                                                                                                                                                                                                                                                                                                                                                                                                                                                                                                                                                                                                                                                                                                                                                                                                                                                                                                                                                                                                                                                                                                                                                                                                                                                                                                                                                                                                                                                                                                                                                                                                                                                                                                                                                                                                                                                                                                                                                                                                                                                                                                                                                                                                                                                                                                                                                                                                                                                                                                                                                                                                                                                                                                                                                                                                                                                                                                                                                                                                                                                                                                                                                                                                                                                                                                                                                                                                                 |           | Department of Laboratory Medicine Tan Tock Seng Hospital                               | Department of Laboratory Medicine Tan Tock Seng Hospital                               | Chen YYC, Zair X, Li C, Tang WY, Maurer-Stroh S, Barkham TMS, Nagarajan N, Sessions OM                                                                                                                                                                                                                                                                                                                                                                                                                                                                                                                                                                                                     |
| EPI_ISL_493330                                                                                                                                                                                                                                                                                                                                                                                                                                                                                                                                                                                                                                                                                                                                                                                                                                                                                                                                                                                                                                                                                                                                                                                                                                                                                                                                                                                                                                                                                                                                                                                                                                                                                                                                                                                                                                                                                                                                                                                                                                                                                                                                                                                                                                                                                                                                                                                                                                                                                                                                                                                                                                                                                                                                                                                                                                                                                                                                                                                                                                                                                                                                                                                                                                                                                                                                                                                                                                                                                                                                                                                                                                                                                                                                                                                                                                                                                                                                                                                                                                                                                                                                                                                                                                                 |           | INMI Lazzaro Spallanzani IRCCS                                                         | INMI Lazzaro Spallanzani IRCCS                                                         | Cesare E.M. Gruber, Martina Rueca, Barbara Bartolini, Francesco Messina, Maria R. Capobianchi, Antonino Di Caro                                                                                                                                                                                                                                                                                                                                                                                                                                                                                                                                                                            |
| EPI_ISL_493332                                                                                                                                                                                                                                                                                                                                                                                                                                                                                                                                                                                                                                                                                                                                                                                                                                                                                                                                                                                                                                                                                                                                                                                                                                                                                                                                                                                                                                                                                                                                                                                                                                                                                                                                                                                                                                                                                                                                                                                                                                                                                                                                                                                                                                                                                                                                                                                                                                                                                                                                                                                                                                                                                                                                                                                                                                                                                                                                                                                                                                                                                                                                                                                                                                                                                                                                                                                                                                                                                                                                                                                                                                                                                                                                                                                                                                                                                                                                                                                                                                                                                                                                                                                                                                                 |           | Istituto Zooprofilattico Sperimentale del Mezzogiorno                                  | INMI Lazzaro Spallanzani IRCCS                                                         | Cesare E.M. Gruber, Martina Rueca, Barbara Bartolini, Francesco Messina, Antonino Di Caro, Giovanna Fusco, Maurizio Viscardi, Giorgia Borriello, Maria R. Capobianchi                                                                                                                                                                                                                                                                                                                                                                                                                                                                                                                      |
| EPI_ISL_494086, EPI_ISL_494146, EPI_ISL_494174, EPI_ISL_494273                                                                                                                                                                                                                                                                                                                                                                                                                                                                                                                                                                                                                                                                                                                                                                                                                                                                                                                                                                                                                                                                                                                                                                                                                                                                                                                                                                                                                                                                                                                                                                                                                                                                                                                                                                                                                                                                                                                                                                                                                                                                                                                                                                                                                                                                                                                                                                                                                                                                                                                                                                                                                                                                                                                                                                                                                                                                                                                                                                                                                                                                                                                                                                                                                                                                                                                                                                                                                                                                                                                                                                                                                                                                                                                                                                                                                                                                                                                                                                                                                                                                                                                                                                                                 |           | Wales Specialist Virology Centre Sequencing lab: Pathogen Genomics Unit                | COVID-19 Genomics UK (COG-UK) Consortium                                               | Catherine Moore, Johnathan Evans, Laura Gifford, Malorie Perry, Simon Cottrell, Angela Marchbank, Alec Birchley, Alexander Adams, Amy Gaskin, Bree Gatica-Wilcox, Jason Coombes, Joel Southgate, Lauren Gilbert, Lee Graham, Nicole Pacchiarini, Sara Kumziene-Summerhayes, Sarah Taylor, Sophie Jones, Sara Rey, Matthew Bull, Joanne Watkins, Sally Corden, Tom Connor                                                                                                                                                                                                                                                                                                                   |
| EPI_ISL_498193                                                                                                                                                                                                                                                                                                                                                                                                                                                                                                                                                                                                                                                                                                                                                                                                                                                                                                                                                                                                                                                                                                                                                                                                                                                                                                                                                                                                                                                                                                                                                                                                                                                                                                                                                                                                                                                                                                                                                                                                                                                                                                                                                                                                                                                                                                                                                                                                                                                                                                                                                                                                                                                                                                                                                                                                                                                                                                                                                                                                                                                                                                                                                                                                                                                                                                                                                                                                                                                                                                                                                                                                                                                                                                                                                                                                                                                                                                                                                                                                                                                                                                                                                                                                                                                 |           | Molecular Pathology Division, Department of Pathology, Hong Kong Sanatorium & Hospital | Molecular Pathology Division, Department of Pathology, Hong Kong Sanatorium & Hospital | Chun Hang AU, Wai Sing CHAN, Ho Yin LAM, Dona N. HO, Simon Y.M. LAM, Jonpaul S.T. ZEE, Tsun Leung CHAN, Edmond S.K. MA                                                                                                                                                                                                                                                                                                                                                                                                                                                                                                                                                                     |
| EPI_ISL_498619, EPI_ISL_498620, EPI_ISL_498621, EPI_ISL_498622, EPI_ISL_498623, EPI_ISL_498624, EPI_ISL_498625, EPI_ISL_498626, EPI_ISL_498627                                                                                                                                                                                                                                                                                                                                                                                                                                                                                                                                                                                                                                                                                                                                                                                                                                                                                                                                                                                                                                                                                                                                                                                                                                                                                                                                                                                                                                                                                                                                                                                                                                                                                                                                                                                                                                                                                                                                                                                                                                                                                                                                                                                                                                                                                                                                                                                                                                                                                                                                                                                                                                                                                                                                                                                                                                                                                                                                                                                                                                                                                                                                                                                                                                                                                                                                                                                                                                                                                                                                                                                                                                                                                                                                                                                                                                                                                                                                                                                                                                                                                                                 |           | Viollier AG                                                                            | Department of Biosystems Science and Engineering, ETH Zürich                           | Christian Beisel, Sarah Nadeau, Ivan Topolsky, Pedro Ferreira, Philipp Jablonski, Susana Posada-Céspedes, Tobias Schär, Ina Nissen, Natascha Santacroce, Elodie Burcklen, Christiane Beckmann, Maurice Redondo, Olivier Kobel, Christoph Noppen, Sophie Seidel, Noemie Santamaria de Souza, Niko Beerenwinkel, Tanja Stadler                                                                                                                                                                                                                                                                                                                                                               |
| EPI_ISL_499357, EPI_ISL_499389                                                                                                                                                                                                                                                                                                                                                                                                                                                                                                                                                                                                                                                                                                                                                                                                                                                                                                                                                                                                                                                                                                                                                                                                                                                                                                                                                                                                                                                                                                                                                                                                                                                                                                                                                                                                                                                                                                                                                                                                                                                                                                                                                                                                                                                                                                                                                                                                                                                                                                                                                                                                                                                                                                                                                                                                                                                                                                                                                                                                                                                                                                                                                                                                                                                                                                                                                                                                                                                                                                                                                                                                                                                                                                                                                                                                                                                                                                                                                                                                                                                                                                                                                                                                                                 |           | Wales Specialist Virology Centre Sequencing lab: Pathogen Genomics Unit                | COVID-19 Genomics UK (COG-UK) Consortium                                               | Catherine Moore, Johnathan Evans, Laura Gifford, Malorie Perry, Simon Cottrell, Angela Marchbank, Alec Birchley, Alexander Adams, Amy Gaskin, Bree Gatica-Wilcox, Jason Coombes, Joel Southgate, Lauren Gilbert, Lee Graham, Nicole Pacchiarini, Sara Kumziene-Summerhayes, Sarah Taylor, Sophie Jones, Sara Rey, Matthew Bull, Joanne Watkins, Sally Corden, Tom Connor                                                                                                                                                                                                                                                                                                                   |
| EPI_ISL_499810, EPI_ISL_499828, EPI_ISL_499829, EPI_ISL_499858, EPI_ISL_499861, EPI_ISL_499869, EPI_ISL_499894, EPI_ISL_499895, EPI_ISL_499897, EPI_ISL_499910, EPI_ISL_499912, EPI_ISL_499913, EPI_ISL_499933, EPI_ISL_499950, EPI_ISL_499974, EPI_ISL_499975, EPI_ISL_499976, EPI_ISL_499977, EPI_ISL_499978, EPI_ISL_499979, EPI_ISL_499980, EPI_ISL_499981, EPI_ISL_499982, EPI_ISL_499983                                                                                                                                                                                                                                                                                                                                                                                                                                                                                                                                                                                                                                                                                                                                                                                                                                                                                                                                                                                                                                                                                                                                                                                                                                                                                                                                                                                                                                                                                                                                                                                                                                                                                                                                                                                                                                                                                                                                                                                                                                                                                                                                                                                                                                                                                                                                                                                                                                                                                                                                                                                                                                                                                                                                                                                                                                                                                                                                                                                                                                                                                                                                                                                                                                                                                                                                                                                                                                                                                                                                                                                                                                                                                                                                                                                                                                                                 | see above | University Hospitals Of Leicester NHS Trust and DeepSeq Nottingham                     | COVID-19 Genomics UK (COG-UK) Consortium                                               | Christopher Holmes, Paul Bird, Thomas Helmer, Karlie Fallon, Julian Tang, Jonathan Ball, Patrick McClure, Joseph Chappell, Nadine Holmes, Matthew Carlisle, Christopher Moore, Fei Sang, Johnny Debebe, Victoria Wright, Matthew Loose                                                                                                                                                                                                                                                                                                                                                                                                                                                     |
| EPI_ISL_500877, EPI_ISL_500878, EPI_ISL_500879, EPI_ISL_500880, EPI_ISL_500881, EPI_ISL_500882, EPI_ISL_500883, EPI_ISL_500884, EPI_ISL_500885, EPI_ISL_500886, EPI_ISL_500887, EPI_ISL_500888, EPI_ISL_500889, EPI_ISL_500890, EPI_ISL_500891, EPI_ISL_500892, EPI_ISL_500893, EPI_ISL_500894, EPI_ISL_500895, EPI_ISL_500896, EPI_ISL_500897, EPI_ISL_500898, EPI_ISL_500899, EPI_ISL_500900, EPI_ISL_500901, EPI_ISL_500902, EPI_ISL_500903, EPI_ISL_500904, EPI_ISL_500905, EPI_ISL_500906, EPI_ISL_500907, EPI_ISL_500908, EPI_ISL_500909, EPI_ISL_500910, EPI_ISL_500911, EPI_ISL_500912, EPI_ISL_500913, EPI_ISL_500914, EPI_ISL_500915, EPI_ISL_500916, EPI_ISL_500917, EPI_ISL_500918, EPI_ISL_500919, EPI_ISL_500920, EPI_ISL_500921, EPI_ISL_500922, EPI_ISL_500923, EPI_ISL_500924, EPI_ISL_500925, EPI_ISL_500926, EPI_ISL_500927, EPI_ISL_500928, EPI_ISL_500929, EPI_ISL_500930, EPI_ISL_500931, EPI_ISL_500932, EPI_ISL_500933, EPI_ISL_500934, EPI_ISL_500935, EPI_ISL_500936, EPI_ISL_500937, EPI_ISL_500938, EPI_ISL_500939, EPI_ISL_500940, EPI_ISL_500941, EPI_ISL_500942, EPI_ISL_500943, EPI_ISL_500944, EPI_ISL_500945                                                                                                                                                                                                                                                                                                                                                                                                                                                                                                                                                                                                                                                                                                                                                                                                                                                                                                                                                                                                                                                                                                                                                                                                                                                                                                                                                                                                                                                                                                                                                                                                                                                                                                                                                                                                                                                                                                                                                                                                                                                                                                                                                                                                                                                                                                                                                                                                                                                                                                                                                                                                                                                                                                                                                                                                                                                                                                                                                                                                                                                                                                                 | see above | Viollier AG                                                                            | Department of Biosystems Science and Engineering, ETH Zürich                           | Christian Beisel, Sarah Nadeau, Ivan Topolsky, Pedro Ferreira, Philipp Jablonski, Susana Posada-Céspedes, Tobias Schär, Ina Nissen, Natascha Santacroce, Elodie Burcklen, Christiane Beckmann, Maurice Redondo, Olivier Kobel, Christoph Noppen, Sophie Seidel, Noemie Santamaria de Souza, Niko Beerenwinkel, Tanja Stadler                                                                                                                                                                                                                                                                                                                                                               |
| EPI_ISL_507002, EPI_ISL_507003, EPI_ISL_507004, EPI_ISL_507005, EPI_ISL_507006                                                                                                                                                                                                                                                                                                                                                                                                                                                                                                                                                                                                                                                                                                                                                                                                                                                                                                                                                                                                                                                                                                                                                                                                                                                                                                                                                                                                                                                                                                                                                                                                                                                                                                                                                                                                                                                                                                                                                                                                                                                                                                                                                                                                                                                                                                                                                                                                                                                                                                                                                                                                                                                                                                                                                                                                                                                                                                                                                                                                                                                                                                                                                                                                                                                                                                                                                                                                                                                                                                                                                                                                                                                                                                                                                                                                                                                                                                                                                                                                                                                                                                                                                                                 |           | Department of Laboratory Medicine, Tan Tock Seng Hospital                              | Department of Laboratory Medicine, Tan Tock Seng Hospital                              | Chen YYC, Zair X, Li C, Tang WY, Maurer-Stroh S, Barkham TMS, Nagarajan N, Sessions OM                                                                                                                                                                                                                                                                                                                                                                                                                                                                                                                                                                                                     |
| EPI_ISL_508862, EPI_ISL_508863                                                                                                                                                                                                                                                                                                                                                                                                                                                                                                                                                                                                                                                                                                                                                                                                                                                                                                                                                                                                                                                                                                                                                                                                                                                                                                                                                                                                                                                                                                                                                                                                                                                                                                                                                                                                                                                                                                                                                                                                                                                                                                                                                                                                                                                                                                                                                                                                                                                                                                                                                                                                                                                                                                                                                                                                                                                                                                                                                                                                                                                                                                                                                                                                                                                                                                                                                                                                                                                                                                                                                                                                                                                                                                                                                                                                                                                                                                                                                                                                                                                                                                                                                                                                                                 |           | Virology Unit, Institut Pasteur de Madagascar                                          | Virology Unit, Institut Pasteur de Madagascar                                          | Christian Ranaivoson, Cara Brook, Norosoa Razanajatovo, Vida Ahyong, Tsiry Randriambolanantsoa, Michelle Tan, Vololoinaina Raharinosy, Helisoa Razafimanjato, Cristina M. Tato, Joseph L. DeRisi, Soa Fy Andriamandimby, Jean-Michel Heraud                                                                                                                                                                                                                                                                                                                                                                                                                                                |
| EPI_ISL_510690, EPI_ISL_510691, EPI_ISL_510692, EPI_ISL_510693, EPI_ISL_510694, EPI_ISL_510695, EPI_ISL_510696, EPI_ISL_510697, EPI_ISL_510698, EPI_ISL_510699, EPI_ISL_510700, EPI_ISL_510701, EPI_ISL_510702, EPI_ISL_510703, EPI_ISL_510704, EPI_ISL_510705, EPI_ISL_510706, EPI_ISL_510707, EPI_ISL_510708, EPI_ISL_510709, EPI_ISL_510710, EPI_ISL_510711, EPI_ISL_510712, EPI_ISL_510713, EPI_ISL_510714, EPI_ISL_510715, EPI_ISL_510716, EPI_ISL_510717, EPI_ISL_510718, EPI_ISL_510719, EPI_ISL_510720, EPI_ISL_510721, EPI_ISL_510722, EPI_ISL_510723, EPI_ISL_510724, EPI_ISL_510725, EPI_ISL_510726, EPI_ISL_510727, EPI_ISL_510728, EPI_ISL_510729, EPI_ISL_510730, EPI_ISL_510731, EPI_ISL_510732, EPI_ISL_510733, EPI_ISL_510734, EPI_ISL_510735, EPI_ISL_510736, EPI_ISL_510737, EPI_ISL_510738, EPI_ISL_510739, EPI_ISL_510740, EPI_ISL_510741, EPI_ISL_510742, EPI_ISL_510743, EPI_ISL_510744, EPI_ISL_510745, EPI_ISL_510746, EPI_ISL_510747, EPI_ISL_510748, EPI_ISL_510749, EPI_ISL_510750, EPI_ISL_510751, EPI_ISL_510752, EPI_ISL_510753, EPI_ISL_510754, EPI_ISL_510755, EPI_ISL_510756, EPI_ISL_510757, EPI_ISL_510758, EPI_ISL_510759, EPI_ISL_510760, EPI_ISL_510761, EPI_ISL_510762, EPI_ISL_510763, EPI_ISL_510764, EPI_ISL_510765, EPI_ISL_510766, EPI_ISL_510767, EPI_ISL_510768, EPI_ISL_510769, EPI_ISL_510770, EPI_ISL_510771, EPI_ISL_510772, EPI_ISL_510773, EPI_ISL_510774, EPI_ISL_510775, EPI_ISL_510776, EPI_ISL_510777, EPI_ISL_510778, EPI_ISL_510779, EPI_ISL_510780, EPI_ISL_510781, EPI_ISL_510782, EPI_ISL_510783, EPI_ISL_510784, EPI_ISL_510785, EPI_ISL_510786, EPI_ISL_510787, EPI_ISL_510788, EPI_ISL_510789, EPI_ISL_510790, EPI_ISL_510791, EPI_ISL_510792, EPI_ISL_510793, EPI_ISL_510794, EPI_ISL_510795, EPI_ISL_510796, EPI_ISL_510797, EPI_ISL_510798, EPI_ISL_510799, EPI_ISL_510800, EPI_ISL_510801, EPI_ISL_510802, EPI_ISL_510803, EPI_ISL_510804, EPI_ISL_510805, EPI_ISL_510806, EPI_ISL_510807, EPI_ISL_510808, EPI_ISL_510809, EPI_ISL_510810, EPI_ISL_510811, EPI_ISL_510812, EPI_ISL_510813, EPI_ISL_510814, EPI_ISL_510815, EPI_ISL_510816, EPI_ISL_510817, EPI_ISL_510818, EPI_ISL_510819, EPI_ISL_510820, EPI_ISL_510821, EPI_ISL_510822, EPI_ISL_510823, EPI_ISL_510824, EPI_ISL_510825, EPI_ISL_510826, EPI_ISL_510827, EPI_ISL_510828, EPI_ISL_510829, EPI_ISL_510830, EPI_ISL_510831, EPI_ISL_510832, EPI_ISL_510833, EPI_ISL_510834, EPI_ISL_510835, EPI_ISL_510836, EPI_ISL_510837, EPI_ISL_510838, EPI_ISL_510839, EPI_ISL_510840, EPI_ISL_510841, EPI_ISL_510842, EPI_ISL_510843, EPI_ISL_510844, EPI_ISL_510845, EPI_ISL_510846, EPI_ISL_510847, EPI_ISL_510848, EPI_ISL_510849, EPI_ISL_510850, EPI_ISL_510851, EPI_ISL_510852, EPI_ISL_510853, EPI_ISL_510854, EPI_ISL_510855, EPI_ISL_510856, EPI_ISL_510857, EPI_ISL_510858, EPI_ISL_510859, EPI_ISL_510860, EPI_ISL_510861, EPI_ISL_510862, EPI_ISL_510863, EPI_ISL_510864, EPI_ISL_510865, EPI_ISL_510866, EPI_ISL_510867, EPI_ISL_510868, EPI_ISL_510869, EPI_ISL_510870, EPI_ISL_510871, EPI_ISL_510872, EPI_ISL_510873, EPI_ISL_510874, EPI_ISL_510875, EPI_ISL_510876, EPI_ISL_510877, EPI_ISL_510878, EPI_ISL_510879, EPI_ISL_510880, EPI_ISL_510881, EPI_ISL_510882, EPI_ISL_510883, EPI_ISL_510884, EPI_ISL_510885, EPI_ISL_510886, EPI_ISL_510887, EPI_ISL_510888, EPI_ISL_510889, EPI_ISL_510890, EPI_ISL_510891, EPI_ISL_510892, EPI_ISL_510893, EPI_ISL_510894, EPI_ISL_510895, EPI_ISL_510896, EPI_ISL_510897, EPI_ISL_510898, EPI_ISL_510899, EPI_ISL_510900, EPI_ISL_510901, EPI_ISL_510902, EPI_ISL_510903, EPI_ISL_510904, EPI_ISL_510905, EPI_ISL_510906, EPI_ISL_510907, EPI_ISL_510908, EPI_ISL_510909, EPI_ISL_510910, EPI_ISL_510911, EPI_ISL_510912, EPI_ISL_510913, EPI_ISL_510914, EPI_ISL_510915, EPI_ISL_510916, EPI_ISL_510917, EPI_ISL_510918, EPI_ISL_510919, EPI_ISL_510920, EPI_ISL_510921, EPI_ISL_510922, EPI_ISL_510923, EPI_ISL_510924, EPI_ISL_510925, EPI_ISL_510926, EPI_ISL_510927, EPI_ISL_510928, EPI_ISL_510929, EPI_ISL_510930, EPI_ISL_510931, EPI_ISL_510932, EPI_ISL_510933, EPI_ISL_510934, EPI_ISL_510935, EPI_ISL_510936, EPI_ISL_510937, EPI_ISL_510938, EPI_ISL_510939, EPI_ISL_510940, EPI_ISL_510941, EPI_ISL_510942, EPI_ISL_510943, EPI_ISL_510944, EPI_ISL_510945 | see above | Viollier AG                                                                            | Department of Biosystems Science and Engineering, ETH Zürich                           | Christian Beisel, Sarah Nadeau, Ivan Topolsky, Pedro Ferreira, Philipp Jablonski, Susana Posada-Céspedes, Tobias Schär, Ina Nissen, Natascha Santacroce, Elodie Burcklen, Christiane Beckmann, Maurice Redondo, Olivier Kobel, Christoph Noppen, Sophie Seidel, Noemie Santamaria de Souza, Niko Beerenwinkel, Tanja Stadler                                                                                                                                                                                                                                                                                                                                                               |

|                                                                                                                                                                                                                                                                                                                                                                                |                                                                         |                                                                                             |                                                                                                                                                                                                                                                                                                                                                                          |
|--------------------------------------------------------------------------------------------------------------------------------------------------------------------------------------------------------------------------------------------------------------------------------------------------------------------------------------------------------------------------------|-------------------------------------------------------------------------|---------------------------------------------------------------------------------------------|--------------------------------------------------------------------------------------------------------------------------------------------------------------------------------------------------------------------------------------------------------------------------------------------------------------------------------------------------------------------------|
| EPI_ISL_512135, EPI_ISL_512136, EPI_ISL_512137, EPI_ISL_512138, EPI_ISL_512139, EPI_ISL_512140, EPI_ISL_512141, EPI_ISL_512142, EPI_ISL_512143, EPI_ISL_512144, EPI_ISL_512145, EPI_ISL_512146, EPI_ISL_512147, EPI_ISL_512148, EPI_ISL_512149, EPI_ISL_512150, EPI_ISL_512151, EPI_ISL_512152, EPI_ISL_512153, EPI_ISL_512154, EPI_ISL_512155, EPI_ISL_512156, EPI_ISL_512157 | Alaska State Virology Laboratory                                        | Alaska State Virology Laboratory                                                            | Chen J et al with Pathogenomics group Dagdag R, Redlinger M, Milton E, George W, Kovalenko A, Drown DM, Bortz E                                                                                                                                                                                                                                                          |
| see above<br>EPI_ISL_512504, EPI_ISL_512525                                                                                                                                                                                                                                                                                                                                    | Wales Specialist Virology Centre Sequencing lab: Pathogen Genomics Unit | COVID-19 Genomics UK (COG-UK) Consortium                                                    | Catherine Moore, Johnathan Evans, Laura Gifford, Malorie Perry, Simon Cottrell, Angela Marchbank, Alec Birchley, Alexander Adams, Amy Gaskin, Bree Gatica-Wilcox, Jason Coombes, Joel Southgate, Lauren Gilbert, Lee Graham, Nicole Pacchiarini, Sara Kumziene-Summerhayes, Sarah Taylor, Sophie Jones, Sara Rey, Matthew Bull, Joanne Watkins, Sally Corden, Tom Connor |
| EPI_ISL_515520                                                                                                                                                                                                                                                                                                                                                                 | Hospital Municipal do Tatuape Carmino Caricchio                         | Instituto Adolfo Lutz, Interdisciplinary Procedures Center, Strategic Laboratory            | Claudio Tavares Sacchi, Claudia Regina Gonçalves, Erica Valessa Ramos Gomes                                                                                                                                                                                                                                                                                              |
| EPI_ISL_515521                                                                                                                                                                                                                                                                                                                                                                 | Hospital Municipal Dr Waldemar Tebaldi                                  | Instituto Adolfo Lutz, Interdisciplinary Procedures Center, Strategic Laboratory            | Claudio Tavares Sacchi, Claudia Regina Gonçalves, Erica Valessa Ramos Gomes                                                                                                                                                                                                                                                                                              |
| EPI_ISL_515522                                                                                                                                                                                                                                                                                                                                                                 | UPA 24HS de Itatiba                                                     | Instituto Adolfo Lutz, Interdisciplinary Procedures Center, Strategic Laboratory            | Claudio Tavares Sacchi, Claudia Regina Gonçalves, Erica Valessa Ramos Gomes                                                                                                                                                                                                                                                                                              |
| EPI_ISL_515523                                                                                                                                                                                                                                                                                                                                                                 | PS Municipal Dr Lauro Ribas Braga                                       | Instituto Adolfo Lutz, Interdisciplinary Procedures Center, Strategic Laboratory            | Claudio Tavares Sacchi, Claudia Regina Gonçalves, Erica Valessa Ramos Gomes                                                                                                                                                                                                                                                                                              |
| EPI_ISL_515525                                                                                                                                                                                                                                                                                                                                                                 | National Influenza Center - Instituto Adolfo Lutz                       | Instituto Adolfo Lutz, Interdisciplinary Procedures Center, Strategic Laboratory            | Claudio Tavares Sacchi, Claudia Regina Gonçalves, Erica Valessa Ramos Gomes                                                                                                                                                                                                                                                                                              |
| EPI_ISL_515527                                                                                                                                                                                                                                                                                                                                                                 | Hospital Santa Clara                                                    | Instituto Adolfo Lutz, Interdisciplinary Procedures Center, Strategic Laboratory            | Claudio Tavares Sacchi, Claudia Regina Gonçalves, Erica Valessa Ramos Gomes                                                                                                                                                                                                                                                                                              |
| EPI_ISL_515529                                                                                                                                                                                                                                                                                                                                                                 | Pronto Socorro Municipal Julio Tupy                                     | Instituto Adolfo Lutz, Interdisciplinary Procedures Center, Strategic Laboratory            | Claudio Tavares Sacchi, Claudia Regina Gonçalves, Erica Valessa Ramos Gomes                                                                                                                                                                                                                                                                                              |
| EPI_ISL_515541                                                                                                                                                                                                                                                                                                                                                                 | Hospital Montemagno                                                     | Instituto Adolfo Lutz, Interdisciplinary Procedures Center, Strategic Laboratory            | Claudio Tavares Sacchi, Claudia Regina Gonçalves, Erica Valessa Ramos Gomes                                                                                                                                                                                                                                                                                              |
| EPI_ISL_515542                                                                                                                                                                                                                                                                                                                                                                 | Vigilância Epidemiológica de Leme                                       | Instituto Adolfo Lutz, Interdisciplinary Procedures Center, Strategic Laboratory            | Claudio Tavares Sacchi, Claudia Regina Gonçalves, Erica Valessa Ramos Gomes                                                                                                                                                                                                                                                                                              |
| EPI_ISL_515544                                                                                                                                                                                                                                                                                                                                                                 | Ama Dr Jose Soares Hungria                                              | Instituto Adolfo Lutz, Interdisciplinary Procedures Center, Strategic Laboratory            | Claudio Tavares Sacchi, Claudia Regina Gonçalves, Erica Valessa Ramos Gomes                                                                                                                                                                                                                                                                                              |
| EPI_ISL_515545                                                                                                                                                                                                                                                                                                                                                                 | Hospital Sao Paulo de Ensino da Unifesp                                 | Instituto Adolfo Lutz, Interdisciplinary Procedures Center, Strategic Laboratory            | Claudio Tavares Sacchi, Claudia Regina Gonçalves, Erica Valessa Ramos Gomes                                                                                                                                                                                                                                                                                              |
| EPI_ISL_515547                                                                                                                                                                                                                                                                                                                                                                 | Centro Medico da Policia Militar do Estado de Sao Paulo                 | Instituto Adolfo Lutz, Interdisciplinary Procedures Center, Strategic Laboratory            | Claudio Tavares Sacchi, Claudia Regina Gonçalves, Erica Valessa Ramos Gomes                                                                                                                                                                                                                                                                                              |
| EPI_ISL_515548                                                                                                                                                                                                                                                                                                                                                                 | Hospital Municipal Dr. Jose Soares Hungria                              | Instituto Adolfo Lutz, Interdisciplinary Procedures Center, Strategic Laboratory            | Claudio Tavares Sacchi, Claudia Regina Gonçalves, Erica Valessa Ramos Gomes                                                                                                                                                                                                                                                                                              |
| EPI_ISL_515550                                                                                                                                                                                                                                                                                                                                                                 | UPA Vila Santa Catarina                                                 | Instituto Adolfo Lutz, Interdisciplinary Procedures Center, Strategic Laboratory            | Claudio Tavares Sacchi, Claudia Regina Gonçalves, Erica Valessa Ramos Gomes                                                                                                                                                                                                                                                                                              |
| EPI_ISL_515555                                                                                                                                                                                                                                                                                                                                                                 | Hospital Geral de Vila Nova Cachoeirinha                                | Instituto Adolfo Lutz, Interdisciplinary Procedures Center, Strategic Laboratory            | Claudio Tavares Sacchi, Claudia Regina Gonçalves, Erica Valessa Ramos Gomes                                                                                                                                                                                                                                                                                              |
| EPI_ISL_515559                                                                                                                                                                                                                                                                                                                                                                 | Hospital Sao Paulo de Ensino da Unifesp                                 | Instituto Adolfo Lutz, Interdisciplinary Procedures Center, Strategic Laboratory            | Claudio Tavares Sacchi, Claudia Regina Gonçalves, Erica Valessa Ramos Gomes                                                                                                                                                                                                                                                                                              |
| EPI_ISL_515563                                                                                                                                                                                                                                                                                                                                                                 | Hospital Municipal Dr. Jose Soares Hungria                              | Instituto Adolfo Lutz, Interdisciplinary Procedures Center, Strategic Laboratory            | Claudio Tavares Sacchi, Claudia Regina Gonçalves, Erica Valessa Ramos Gomes                                                                                                                                                                                                                                                                                              |
| EPI_ISL_515564                                                                                                                                                                                                                                                                                                                                                                 | Hosp. Municipal Prof. Dr. Alípio Corrêa Netto                           | Instituto Adolfo Lutz, Interdisciplinary Procedures Center, Strategic Laboratory            | Claudio Tavares Sacchi, Claudia Regina Gonçalves, Erica Valessa Ramos Gomes                                                                                                                                                                                                                                                                                              |
| EPI_ISL_515565                                                                                                                                                                                                                                                                                                                                                                 | Hospital do Servidor Público Estadual Francisco Morato de Oliveira      | Instituto Adolfo Lutz, Interdisciplinary Procedures Center, Strategic Laboratory            | Claudio Tavares Sacchi, Claudia Regina Gonçalves, Erica Valessa Ramos Gomes                                                                                                                                                                                                                                                                                              |
| EPI_ISL_515566                                                                                                                                                                                                                                                                                                                                                                 | PS Municipal Dr Lauro Ribas Braga                                       | Instituto Adolfo Lutz, Interdisciplinary Procedures Center, Strategic Laboratory            | Claudio Tavares Sacchi, Claudia Regina Gonçalves, Erica Valessa Ramos Gomes                                                                                                                                                                                                                                                                                              |
| EPI_ISL_515932                                                                                                                                                                                                                                                                                                                                                                 | DH                                                                      | Department of Neurovirology, National Institute of Mental Health and Neuroscience (NIMHANS) | Chitra Pattabiraman, Vijayalakshmi Reddy, Harsha PK, Risha Rasheed, Pramada Prasad, Shafeeq S Hameed, Manjunatha Venkataswamy, Anita Desai, Ravi Vasanthapuram                                                                                                                                                                                                           |
| EPI_ISL_515933                                                                                                                                                                                                                                                                                                                                                                 | BIMS                                                                    | Department of Neurovirology, National Institute of Mental Health and Neuroscience (NIMHANS) | Chitra Pattabiraman, Vijayalakshmi Reddy, Harsha PK, Risha Rasheed, Pramada Prasad, Shafeeq S Hameed, Manjunatha Venkataswamy, Anita Desai, Ravi Vasanthapuram                                                                                                                                                                                                           |
| EPI_ISL_515934, EPI_ISL_515935, EPI_ISL_515936                                                                                                                                                                                                                                                                                                                                 | DH                                                                      | Department of Neurovirology, National Institute of Mental Health and Neuroscience (NIMHANS) | Chitra Pattabiraman, Vijayalakshmi Reddy, Harsha PK, Risha Rasheed, Pramada Prasad, Shafeeq S Hameed, Manjunatha Venkataswamy, Anita Desai, Ravi Vasanthapuram                                                                                                                                                                                                           |
| EPI_ISL_515937                                                                                                                                                                                                                                                                                                                                                                 | BIMS                                                                    | Department of Neurovirology, National Institute of Mental Health and Neuroscience (NIMHANS) | Chitra Pattabiraman, Vijayalakshmi Reddy, Harsha PK, Risha Rasheed, Pramada Prasad, Shafeeq S Hameed, Manjunatha Venkataswamy, Anita Desai, Ravi Vasanthapuram                                                                                                                                                                                                           |
| EPI_ISL_515938, EPI_ISL_515939, EPI_ISL_515940, EPI_ISL_515941, EPI_ISL_515942                                                                                                                                                                                                                                                                                                 | CV RAMAN HOSPITAL                                                       | Department of Neurovirology, National Institute of Mental Health and Neuroscience (NIMHANS) | Chitra Pattabiraman, Vijayalakshmi Reddy, Harsha PK, Risha Rasheed, Pramada Prasad, Shafeeq S Hameed, Manjunatha Venkataswamy, Anita Desai, Ravi Vasanthapuram                                                                                                                                                                                                           |
| EPI_ISL_515943, EPI_ISL_515944                                                                                                                                                                                                                                                                                                                                                 | ESIC                                                                    | Department of Neurovirology, National Institute of Mental Health and Neuroscience (NIMHANS) | Chitra Pattabiraman, Vijayalakshmi Reddy, Harsha PK, Risha Rasheed, Pramada Prasad, Shafeeq S Hameed, Manjunatha Venkataswamy, Anita Desai, Ravi Vasanthapuram                                                                                                                                                                                                           |
| EPI_ISL_515945, EPI_ISL_515946, EPI_ISL_515947, EPI_ISL_515948, EPI_ISL_515949                                                                                                                                                                                                                                                                                                 | DH                                                                      | Department of Neurovirology, National Institute of Mental Health and Neuroscience (NIMHANS) | Chitra Pattabiraman, Vijayalakshmi Reddy, Harsha PK, Risha Rasheed, Pramada Prasad, Shafeeq S Hameed, Manjunatha Venkataswamy, Anita Desai, Ravi Vasanthapuram                                                                                                                                                                                                           |
| EPI_ISL_515950, EPI_ISL_515951, EPI_ISL_515952, EPI_ISL_515953                                                                                                                                                                                                                                                                                                                 | VICTORIA HOSPITAL                                                       | Department of Neurovirology, National Institute of Mental Health and Neuroscience (NIMHANS) | Chitra Pattabiraman, Vijayalakshmi Reddy, Harsha PK, Risha Rasheed, Pramada Prasad, Shafeeq S Hameed, Manjunatha Venkataswamy, Anita Desai, Ravi Vasanthapuram                                                                                                                                                                                                           |
| EPI_ISL_515954, EPI_ISL_515955                                                                                                                                                                                                                                                                                                                                                 | DH                                                                      | Department of Neurovirology, National Institute of Mental Health and Neuroscience (NIMHANS) | Chitra Pattabiraman, Vijayalakshmi Reddy, Harsha PK, Risha Rasheed, Pramada Prasad, Shafeeq S Hameed, Manjunatha Venkataswamy, Anita Desai, Ravi Vasanthapuram                                                                                                                                                                                                           |
| EPI_ISL_515956                                                                                                                                                                                                                                                                                                                                                                 | SHEKAR HOSPITAL                                                         | Department of Neurovirology, National Institute of Mental Health and Neuroscience (NIMHANS) | Chitra Pattabiraman, Vijayalakshmi Reddy, Harsha PK, Risha Rasheed, Pramada Prasad, Shafeeq S Hameed, Manjunatha Venkataswamy, Anita Desai, Ravi Vasanthapuram                                                                                                                                                                                                           |
| EPI_ISL_515957, EPI_ISL_515958, EPI_ISL_515959                                                                                                                                                                                                                                                                                                                                 | DH                                                                      | Department of Neurovirology, National Institute of Mental Health and Neuroscience (NIMHANS) | Chitra Pattabiraman, Vijayalakshmi Reddy, Harsha PK, Risha Rasheed, Pramada Prasad, Shafeeq S Hameed, Manjunatha Venkataswamy, Anita Desai, Ravi Vasanthapuram                                                                                                                                                                                                           |
| EPI_ISL_515960                                                                                                                                                                                                                                                                                                                                                                 | JGH                                                                     | Department of Neurovirology, National Institute of Mental Health and Neuroscience (NIMHANS) | Chitra Pattabiraman, Vijayalakshmi Reddy, Harsha PK, Risha Rasheed, Pramada Prasad, Shafeeq S Hameed, Manjunatha Venkataswamy, Anita Desai, Ravi Vasanthapuram                                                                                                                                                                                                           |

|                                                                                                                                                                                                                                                                                                                                                                                                                                                                                                                                                                                                                                                                                                                                                                                                                                                                                                                                                                                                                                                                                                                                                                                |                                                                    |                                                                                             |                                                                                                                                                                                                                                                                                                                              |                    |
|--------------------------------------------------------------------------------------------------------------------------------------------------------------------------------------------------------------------------------------------------------------------------------------------------------------------------------------------------------------------------------------------------------------------------------------------------------------------------------------------------------------------------------------------------------------------------------------------------------------------------------------------------------------------------------------------------------------------------------------------------------------------------------------------------------------------------------------------------------------------------------------------------------------------------------------------------------------------------------------------------------------------------------------------------------------------------------------------------------------------------------------------------------------------------------|--------------------------------------------------------------------|---------------------------------------------------------------------------------------------|------------------------------------------------------------------------------------------------------------------------------------------------------------------------------------------------------------------------------------------------------------------------------------------------------------------------------|--------------------|
|                                                                                                                                                                                                                                                                                                                                                                                                                                                                                                                                                                                                                                                                                                                                                                                                                                                                                                                                                                                                                                                                                                                                                                                |                                                                    | Health and Neuroscience (NIMHANS)                                                           |                                                                                                                                                                                                                                                                                                                              | Ravi Vasanthapuram |
| EPI_ISL_515961, EPI_ISL_515962                                                                                                                                                                                                                                                                                                                                                                                                                                                                                                                                                                                                                                                                                                                                                                                                                                                                                                                                                                                                                                                                                                                                                 | DH                                                                 | Department of Neurovirology, National Institute of Mental Health and Neuroscience (NIMHANS) | Chitra Pattabiraman, Vijayalakshmi Reddy, Harsha PK, Risha Rasheed, Pramada Prasad, Shafeeq S Hameed, Manjunatha Venkataswamy, Anita Desai, Ravi Vasanthapuram                                                                                                                                                               |                    |
| EPI_ISL_515963, EPI_ISL_515964                                                                                                                                                                                                                                                                                                                                                                                                                                                                                                                                                                                                                                                                                                                                                                                                                                                                                                                                                                                                                                                                                                                                                 | VICTORIA HOSPITAL                                                  | Department of Neurovirology, National Institute of Mental Health and Neuroscience (NIMHANS) | Chitra Pattabiraman, Vijayalakshmi Reddy, Harsha PK, Risha Rasheed, Pramada Prasad, Shafeeq S Hameed, Manjunatha Venkataswamy, Anita Desai, Ravi Vasanthapuram                                                                                                                                                               |                    |
| EPI_ISL_515965                                                                                                                                                                                                                                                                                                                                                                                                                                                                                                                                                                                                                                                                                                                                                                                                                                                                                                                                                                                                                                                                                                                                                                 | DH                                                                 | Department of Neurovirology, National Institute of Mental Health and Neuroscience (NIMHANS) | Chitra Pattabiraman, Vijayalakshmi Reddy, Harsha PK, Risha Rasheed, Pramada Prasad, Shafeeq S Hameed, Manjunatha Venkataswamy, Anita Desai, Ravi Vasanthapuram                                                                                                                                                               |                    |
| EPI_ISL_515966, EPI_ISL_515967                                                                                                                                                                                                                                                                                                                                                                                                                                                                                                                                                                                                                                                                                                                                                                                                                                                                                                                                                                                                                                                                                                                                                 | VICTORIA HOSPITAL                                                  | Department of Neurovirology, National Institute of Mental Health and Neuroscience (NIMHANS) | Chitra Pattabiraman, Vijayalakshmi Reddy, Harsha PK, Risha Rasheed, Pramada Prasad, Shafeeq S Hameed, Manjunatha Venkataswamy, Anita Desai, Ravi Vasanthapuram                                                                                                                                                               |                    |
| EPI_ISL_515968, EPI_ISL_515969, EPI_ISL_515970, EPI_ISL_515971, EPI_ISL_515972, EPI_ISL_515973                                                                                                                                                                                                                                                                                                                                                                                                                                                                                                                                                                                                                                                                                                                                                                                                                                                                                                                                                                                                                                                                                 | MIMS                                                               | Department of Neurovirology, National Institute of Mental Health and Neuroscience (NIMHANS) | Chitra Pattabiraman, Vijayalakshmi Reddy, Harsha PK, Risha Rasheed, Pramada Prasad, Shafeeq S Hameed, Manjunatha Venkataswamy, Anita Desai, Ravi Vasanthapuram                                                                                                                                                               |                    |
| EPI_ISL_516075                                                                                                                                                                                                                                                                                                                                                                                                                                                                                                                                                                                                                                                                                                                                                                                                                                                                                                                                                                                                                                                                                                                                                                 | BIMS                                                               | Department of Neurovirology, National Institute of Mental Health and Neuroscience (NIMHANS) | Chitra Pattabiraman, Vijayalakshmi Reddy, Harsha PK, Risha Rasheed, Pramada Prasad, Shafeeq S Hameed, Manjunatha Venkataswamy, Anita Desai, Ravi Vasanthapuram                                                                                                                                                               |                    |
| EPI_ISL_516076, EPI_ISL_516077, EPI_ISL_516078                                                                                                                                                                                                                                                                                                                                                                                                                                                                                                                                                                                                                                                                                                                                                                                                                                                                                                                                                                                                                                                                                                                                 | VICTORIA HOSPITAL                                                  | Department of Neurovirology, National Institute of Mental Health and Neuroscience (NIMHANS) | Chitra Pattabiraman, Vijayalakshmi Reddy, Harsha PK, Risha Rasheed, Pramada Prasad, Shafeeq S Hameed, Manjunatha Venkataswamy, Anita Desai, Ravi Vasanthapuram                                                                                                                                                               |                    |
| EPI_ISL_516552, EPI_ISL_516553, EPI_ISL_516554, EPI_ISL_516555, EPI_ISL_516556, EPI_ISL_516557, EPI_ISL_516558, EPI_ISL_516559, EPI_ISL_516560, EPI_ISL_516561, EPI_ISL_516562, EPI_ISL_516563, EPI_ISL_516564, EPI_ISL_516565, EPI_ISL_516566, EPI_ISL_516567, EPI_ISL_516568, EPI_ISL_516569, EPI_ISL_516570, EPI_ISL_516571, EPI_ISL_516572, EPI_ISL_516573, EPI_ISL_516574, EPI_ISL_516575, EPI_ISL_516576, EPI_ISL_516577, EPI_ISL_516578, EPI_ISL_516579, EPI_ISL_516580, EPI_ISL_516581, EPI_ISL_516582, EPI_ISL_516583, EPI_ISL_516584, EPI_ISL_516585, EPI_ISL_516586, EPI_ISL_516587, EPI_ISL_516588, EPI_ISL_516589, EPI_ISL_516590, EPI_ISL_516591, EPI_ISL_516592, EPI_ISL_516593, EPI_ISL_516594, EPI_ISL_516595, EPI_ISL_516596, EPI_ISL_516597, EPI_ISL_516598, EPI_ISL_516599, EPI_ISL_516600, EPI_ISL_516601, EPI_ISL_516602, EPI_ISL_516603, EPI_ISL_516604, EPI_ISL_516605, EPI_ISL_516606, EPI_ISL_516607                                                                                                                                                                                                                                                 |                                                                    |                                                                                             |                                                                                                                                                                                                                                                                                                                              |                    |
| see above                                                                                                                                                                                                                                                                                                                                                                                                                                                                                                                                                                                                                                                                                                                                                                                                                                                                                                                                                                                                                                                                                                                                                                      | Viollier AG                                                        | Department of Biosystems Science and Engineering, ETH Zürich                                | Christian Beisel, Sarah Nadeau, Ivan Topolsky, Pedro Ferreira, Philipp Jablonski, Susana Posada-Céspedes, Tobias Schär, Ina Nissen, Natascha Santacroce, Elodie Burcklen, Christiane Beckmann, Maurice Redondo, Olivier Kobel, Christoph Noppen, Sophie Seidel, Noemie Santamaria de Souza, Niko Beerenwinkel, Tanja Stadler |                    |
| EPI_ISL_516801, EPI_ISL_516802, EPI_ISL_516803, EPI_ISL_516804, EPI_ISL_516805                                                                                                                                                                                                                                                                                                                                                                                                                                                                                                                                                                                                                                                                                                                                                                                                                                                                                                                                                                                                                                                                                                 | Department of Laboratory Medicine, Tan Tock Seng Hospital          | Department of Laboratory Medicine, Tan Tock Seng Hospital                                   | Chen YYC, Zair X, Li C, Tang WY, Maurer-Stroh S, Barkham TMS, Nagarajan N, Sessions OM                                                                                                                                                                                                                                       |                    |
| EPI_ISL_523856, EPI_ISL_523857, EPI_ISL_523858, EPI_ISL_523859, EPI_ISL_523860, EPI_ISL_523861, EPI_ISL_523862, EPI_ISL_523863, EPI_ISL_523864, EPI_ISL_523865, EPI_ISL_523866, EPI_ISL_523867, EPI_ISL_523868, EPI_ISL_523869, EPI_ISL_523870, EPI_ISL_523871, EPI_ISL_523872, EPI_ISL_523873, EPI_ISL_523874, EPI_ISL_523875, EPI_ISL_523876, EPI_ISL_523877, EPI_ISL_523878, EPI_ISL_523879, EPI_ISL_523880, EPI_ISL_523881, EPI_ISL_523882, EPI_ISL_523883, EPI_ISL_523884, EPI_ISL_523885, EPI_ISL_523886, EPI_ISL_523887, EPI_ISL_523888, EPI_ISL_523889, EPI_ISL_523890, EPI_ISL_523891, EPI_ISL_523892, EPI_ISL_523893, EPI_ISL_523894, EPI_ISL_523895, EPI_ISL_523896, EPI_ISL_523897, EPI_ISL_523898, EPI_ISL_523899, EPI_ISL_523900, EPI_ISL_523901, EPI_ISL_523902, EPI_ISL_523903, EPI_ISL_523904, EPI_ISL_523905, EPI_ISL_523906, EPI_ISL_523907, EPI_ISL_523908, EPI_ISL_523909, EPI_ISL_523910, EPI_ISL_523911, EPI_ISL_523912, EPI_ISL_523913, EPI_ISL_523914, EPI_ISL_523915, EPI_ISL_523916, EPI_ISL_523917, EPI_ISL_523918, EPI_ISL_523919, EPI_ISL_523920, EPI_ISL_523921, EPI_ISL_523922, EPI_ISL_523923, EPI_ISL_523924, EPI_ISL_523925, EPI_ISL_523926 |                                                                    |                                                                                             |                                                                                                                                                                                                                                                                                                                              |                    |
| see above                                                                                                                                                                                                                                                                                                                                                                                                                                                                                                                                                                                                                                                                                                                                                                                                                                                                                                                                                                                                                                                                                                                                                                      | Viollier AG                                                        | Department of Biosystems Science and Engineering, ETH Zürich                                | Christian Beisel, Sarah Nadeau, Ivan Topolsky, Pedro Ferreira, Philipp Jablonski, Susana Posada-Céspedes, Tobias Schär, Ina Nissen, Natascha Santacroce, Elodie Burcklen, Christiane Beckmann, Maurice Redondo, Olivier Kobel, Christoph Noppen, Sophie Seidel, Noemie Santamaria de Souza, Niko Beerenwinkel, Tanja Stadler |                    |
| EPI_ISL_523957                                                                                                                                                                                                                                                                                                                                                                                                                                                                                                                                                                                                                                                                                                                                                                                                                                                                                                                                                                                                                                                                                                                                                                 | Hospital Itamaraty                                                 | Instituto Adolfo Lutz, Interdisciplinary Procedures Center, Strategic Laboratory            | Claudio Tavares Sacchi, Claudia Regina Gonçalves, Erica Valessa Ramos Gomes                                                                                                                                                                                                                                                  |                    |
| EPI_ISL_523961                                                                                                                                                                                                                                                                                                                                                                                                                                                                                                                                                                                                                                                                                                                                                                                                                                                                                                                                                                                                                                                                                                                                                                 | Pronto Socorro Municipal 21 de Junho                               | Instituto Adolfo Lutz, Interdisciplinary Procedures Center, Strategic Laboratory            | Claudio Tavares Sacchi, Claudia Regina Gonçalves, Erica Valessa Ramos Gomes                                                                                                                                                                                                                                                  |                    |
| EPI_ISL_523963                                                                                                                                                                                                                                                                                                                                                                                                                                                                                                                                                                                                                                                                                                                                                                                                                                                                                                                                                                                                                                                                                                                                                                 | UBS Vila Silvia                                                    | Instituto Adolfo Lutz, Interdisciplinary Procedures Center, Strategic Laboratory            | Claudio Tavares Sacchi, Claudia Regina Gonçalves, Erica Valessa Ramos Gomes                                                                                                                                                                                                                                                  |                    |
| EPI_ISL_523967                                                                                                                                                                                                                                                                                                                                                                                                                                                                                                                                                                                                                                                                                                                                                                                                                                                                                                                                                                                                                                                                                                                                                                 | Hospital Sancta Maggiore                                           | Instituto Adolfo Lutz, Interdisciplinary Procedures Center, Strategic Laboratory            | Claudio Tavares Sacchi, Claudia Regina Gonçalves, Erica Valessa Ramos Gomes                                                                                                                                                                                                                                                  |                    |
| EPI_ISL_523972                                                                                                                                                                                                                                                                                                                                                                                                                                                                                                                                                                                                                                                                                                                                                                                                                                                                                                                                                                                                                                                                                                                                                                 | Hospital do Servidor Público Estadual Francisco Morato de Oliveira | Instituto Adolfo Lutz, Interdisciplinary Procedures Center, Strategic Laboratory            | Claudio Tavares Sacchi, Claudia Regina Gonçalves, Erica Valessa Ramos Gomes                                                                                                                                                                                                                                                  |                    |
| EPI_ISL_523976                                                                                                                                                                                                                                                                                                                                                                                                                                                                                                                                                                                                                                                                                                                                                                                                                                                                                                                                                                                                                                                                                                                                                                 | Hospital Municipal do Tatuape Carmino Caricchio                    | Instituto Adolfo Lutz, Interdisciplinary Procedures Center, Strategic Laboratory            | Claudio Tavares Sacchi, Claudia Regina Gonçalves, Erica Valessa Ramos Gomes                                                                                                                                                                                                                                                  |                    |
| EPI_ISL_523977                                                                                                                                                                                                                                                                                                                                                                                                                                                                                                                                                                                                                                                                                                                                                                                                                                                                                                                                                                                                                                                                                                                                                                 | Hosp. Municipal Prof. Dr. Alípio Corrêa Netto                      | Instituto Adolfo Lutz, Interdisciplinary Procedures Center, Strategic Laboratory            | Claudio Tavares Sacchi, Claudia Regina Gonçalves, Erica Valessa Ramos Gomes                                                                                                                                                                                                                                                  |                    |
| EPI_ISL_523981                                                                                                                                                                                                                                                                                                                                                                                                                                                                                                                                                                                                                                                                                                                                                                                                                                                                                                                                                                                                                                                                                                                                                                 | Hospital Sao Paulo de Ensino da Unifesp                            | Instituto Adolfo Lutz, Interdisciplinary Procedures Center, Strategic Laboratory            | Claudio Tavares Sacchi, Claudia Regina Gonçalves, Erica Valessa Ramos Gomes                                                                                                                                                                                                                                                  |                    |
| EPI_ISL_523984, EPI_ISL_523986                                                                                                                                                                                                                                                                                                                                                                                                                                                                                                                                                                                                                                                                                                                                                                                                                                                                                                                                                                                                                                                                                                                                                 | Ama Dr Jose Soares Hungria                                         | Instituto Adolfo Lutz, Interdisciplinary Procedures Center, Strategic Laboratory            | Claudio Tavares Sacchi, Claudia Regina Gonçalves, Erica Valessa Ramos Gomes                                                                                                                                                                                                                                                  |                    |
| EPI_ISL_523988                                                                                                                                                                                                                                                                                                                                                                                                                                                                                                                                                                                                                                                                                                                                                                                                                                                                                                                                                                                                                                                                                                                                                                 | Hospital Sao Paulo de Ensino da Unifesp                            | Instituto Adolfo Lutz, Interdisciplinary Procedures Center, Strategic Laboratory            | Claudio Tavares Sacchi, Claudia Regina Gonçalves, Erica Valessa Ramos Gomes                                                                                                                                                                                                                                                  |                    |
| EPI_ISL_523990                                                                                                                                                                                                                                                                                                                                                                                                                                                                                                                                                                                                                                                                                                                                                                                                                                                                                                                                                                                                                                                                                                                                                                 | AMA Jardim Peri                                                    | Instituto Adolfo Lutz, Interdisciplinary Procedures Center, Strategic Laboratory            | Claudio Tavares Sacchi, Claudia Regina Gonçalves, Erica Valessa Ramos Gomes                                                                                                                                                                                                                                                  |                    |
| EPI_ISL_523992                                                                                                                                                                                                                                                                                                                                                                                                                                                                                                                                                                                                                                                                                                                                                                                                                                                                                                                                                                                                                                                                                                                                                                 | Hospital Municipal Carmen Prudente                                 | Instituto Adolfo Lutz, Interdisciplinary Procedures Center, Strategic Laboratory            | Claudio Tavares Sacchi, Claudia Regina Gonçalves, Erica Valessa Ramos Gomes                                                                                                                                                                                                                                                  |                    |
| EPI_ISL_523993                                                                                                                                                                                                                                                                                                                                                                                                                                                                                                                                                                                                                                                                                                                                                                                                                                                                                                                                                                                                                                                                                                                                                                 | UPA Campo Limpo                                                    | Instituto Adolfo Lutz, Interdisciplinary Procedures Center, Strategic Laboratory            | Claudio Tavares Sacchi, Claudia Regina Gonçalves, Erica Valessa Ramos Gomes                                                                                                                                                                                                                                                  |                    |
| EPI_ISL_524462                                                                                                                                                                                                                                                                                                                                                                                                                                                                                                                                                                                                                                                                                                                                                                                                                                                                                                                                                                                                                                                                                                                                                                 | Hospital Metropolitan                                              | Instituto Adolfo Lutz, Interdisciplinary Procedures Center, Strategic Laboratory            | Claudio Tavares Sacchi, Claudia Regina Gonçalves, Erica Valessa Ramos Gomes                                                                                                                                                                                                                                                  |                    |
| EPI_ISL_524463                                                                                                                                                                                                                                                                                                                                                                                                                                                                                                                                                                                                                                                                                                                                                                                                                                                                                                                                                                                                                                                                                                                                                                 | Hospital Regional de Cotia                                         | Instituto Adolfo Lutz, Interdisciplinary Procedures Center, Strategic Laboratory            | Claudio Tavares Sacchi, Claudia Regina Gonçalves, Erica Valessa Ramos Gomes                                                                                                                                                                                                                                                  |                    |
| EPI_ISL_524465                                                                                                                                                                                                                                                                                                                                                                                                                                                                                                                                                                                                                                                                                                                                                                                                                                                                                                                                                                                                                                                                                                                                                                 | PS Municipal Dr. Caetano Virgílio Neto                             | Instituto Adolfo Lutz, Interdisciplinary Procedures Center, Strategic Laboratory            | Claudio Tavares Sacchi, Claudia Regina Gonçalves, Erica Valessa Ramos Gomes                                                                                                                                                                                                                                                  |                    |
| EPI_ISL_524466                                                                                                                                                                                                                                                                                                                                                                                                                                                                                                                                                                                                                                                                                                                                                                                                                                                                                                                                                                                                                                                                                                                                                                 | PS Municipal Dr Lauro Ribas Braga                                  | Instituto Adolfo Lutz, Interdisciplinary Procedures Center, Strategic Laboratory            | Claudio Tavares Sacchi, Claudia Regina Gonçalves, Erica Valessa Ramos Gomes                                                                                                                                                                                                                                                  |                    |
| EPI_ISL_524467                                                                                                                                                                                                                                                                                                                                                                                                                                                                                                                                                                                                                                                                                                                                                                                                                                                                                                                                                                                                                                                                                                                                                                 | Hospital Municipal Dr. Moisés Deutsch                              | Instituto Adolfo Lutz, Interdisciplinary Procedures Center, Strategic Laboratory            | Claudio Tavares Sacchi, Claudia Regina Gonçalves, Erica Valessa Ramos Gomes                                                                                                                                                                                                                                                  |                    |
| EPI_ISL_524468                                                                                                                                                                                                                                                                                                                                                                                                                                                                                                                                                                                                                                                                                                                                                                                                                                                                                                                                                                                                                                                                                                                                                                 | Hospital Municipal Vereador Jose Storopoli                         | Instituto Adolfo Lutz, Interdisciplinary Procedures Center, Strategic Laboratory            | Claudio Tavares Sacchi, Claudia Regina Gonçalves, Erica Valessa Ramos Gomes                                                                                                                                                                                                                                                  |                    |
| EPI_ISL_525474                                                                                                                                                                                                                                                                                                                                                                                                                                                                                                                                                                                                                                                                                                                                                                                                                                                                                                                                                                                                                                                                                                                                                                 | Centre for Dengue Research                                         | Centre for Dengue Research, USJ, SL                                                         | Chandima Jeewandara, Deshni Jayathilaka, Dinuka Ariyaratne, Laksiri Gomes, Diyanath Ranasinghe, Dinuka Guruge, Ruwan Wijayamuni, Gathsaurie                                                                                                                                                                                  |                    |

|                                                                                                                                                                                                                                                                                                                                                                                                                                                                                                                                                                                                                                                                                                                                                                                                                                                                                                                                                                                                                                                                                |                                                                                              |                                                                                                                                                                                                                                                                                                                              |                                                                                                                                                                                                                                                                                                                                                                                  |
|--------------------------------------------------------------------------------------------------------------------------------------------------------------------------------------------------------------------------------------------------------------------------------------------------------------------------------------------------------------------------------------------------------------------------------------------------------------------------------------------------------------------------------------------------------------------------------------------------------------------------------------------------------------------------------------------------------------------------------------------------------------------------------------------------------------------------------------------------------------------------------------------------------------------------------------------------------------------------------------------------------------------------------------------------------------------------------|----------------------------------------------------------------------------------------------|------------------------------------------------------------------------------------------------------------------------------------------------------------------------------------------------------------------------------------------------------------------------------------------------------------------------------|----------------------------------------------------------------------------------------------------------------------------------------------------------------------------------------------------------------------------------------------------------------------------------------------------------------------------------------------------------------------------------|
| EPI_ISL_525476                                                                                                                                                                                                                                                                                                                                                                                                                                                                                                                                                                                                                                                                                                                                                                                                                                                                                                                                                                                                                                                                 | Centre for Dengue Research                                                                   | Centre for Dengue Research                                                                                                                                                                                                                                                                                                   | Neelika Malavige<br>Chandima Jeewandara, Deshni Jayathilaka, Dinuka Ariyaratne, Laksiri Gomes, Diyanath Ranasinghe, Dinuka Guruge, Ruwan Wijayamuni, Gathsaurie Neelika Malavige                                                                                                                                                                                                 |
| EPI_ISL_525478, EPI_ISL_525479, EPI_ISL_525481                                                                                                                                                                                                                                                                                                                                                                                                                                                                                                                                                                                                                                                                                                                                                                                                                                                                                                                                                                                                                                 | Centre for Dengue Research                                                                   | Centre for Dengue Research                                                                                                                                                                                                                                                                                                   | Chandima Jeewandara, Deshni Jayathilaka, Dinuka Ariyaratne, Laksiri Gomes, Diyanath Ranasinghe, Ananda Wijewickrama, Eranga Narangoda, Damayanthi Idampitiya, Gathsaurie Neelika Malavige                                                                                                                                                                                        |
| EPI_ISL_525486, EPI_ISL_525488, EPI_ISL_525489                                                                                                                                                                                                                                                                                                                                                                                                                                                                                                                                                                                                                                                                                                                                                                                                                                                                                                                                                                                                                                 | Centre for Dengue Research                                                                   | Centre for Dengue Research                                                                                                                                                                                                                                                                                                   | Chandima Jeewandara, Deshni Jayathilaka, Dinuka Ariyaratne, Laksiri Gomes, Diyanath Ranasinghe, Ananda Wijewickrama, Malika Karunaratne, Eranga Narangoda, Damayanthi Idampitiya, Gathsaurie Neelika Malavige                                                                                                                                                                    |
| EPI_ISL_527856                                                                                                                                                                                                                                                                                                                                                                                                                                                                                                                                                                                                                                                                                                                                                                                                                                                                                                                                                                                                                                                                 | Hospital Municipal Prof. Waldomiro de Paula                                                  | Instituto Adolfo Lutz, Interdisciplinary Procedures Center, Strategic Laboratory                                                                                                                                                                                                                                             | Claudio Tavares Sacchi, Claudia Regina Gonçalves, Erica Valessa Ramos Gomes                                                                                                                                                                                                                                                                                                      |
| EPI_ISL_527857                                                                                                                                                                                                                                                                                                                                                                                                                                                                                                                                                                                                                                                                                                                                                                                                                                                                                                                                                                                                                                                                 | Hospital Regional Vale do Ribeira                                                            | Instituto Adolfo Lutz, Interdisciplinary Procedures Center, Strategic Laboratory                                                                                                                                                                                                                                             | Claudio Tavares Sacchi, Claudia Regina Gonçalves, Erica Valessa Ramos Gomes                                                                                                                                                                                                                                                                                                      |
| EPI_ISL_527860                                                                                                                                                                                                                                                                                                                                                                                                                                                                                                                                                                                                                                                                                                                                                                                                                                                                                                                                                                                                                                                                 | Hospital Municipal de Parelheiros Josanias Castanha Braga                                    | Instituto Adolfo Lutz, Interdisciplinary Procedures Center, Strategic Laboratory                                                                                                                                                                                                                                             | Claudio Tavares Sacchi, Claudia Regina Gonçalves, Erica Valessa Ramos Gomes                                                                                                                                                                                                                                                                                                      |
| EPI_ISL_527862                                                                                                                                                                                                                                                                                                                                                                                                                                                                                                                                                                                                                                                                                                                                                                                                                                                                                                                                                                                                                                                                 | Hospital Municipal de Urgência                                                               | Instituto Adolfo Lutz, Interdisciplinary Procedures Center, Strategic Laboratory                                                                                                                                                                                                                                             | Claudio Tavares Sacchi, Claudia Regina Gonçalves, Erica Valessa Ramos Gomes                                                                                                                                                                                                                                                                                                      |
| EPI_ISL_527863                                                                                                                                                                                                                                                                                                                                                                                                                                                                                                                                                                                                                                                                                                                                                                                                                                                                                                                                                                                                                                                                 | Hospital Municipal do Tatuape Carmino Caricchio                                              | Instituto Adolfo Lutz, Interdisciplinary Procedures Center, Strategic Laboratory                                                                                                                                                                                                                                             | Claudio Tavares Sacchi, Claudia Regina Gonçalves, Erica Valessa Ramos Gomes                                                                                                                                                                                                                                                                                                      |
| EPI_ISL_527864                                                                                                                                                                                                                                                                                                                                                                                                                                                                                                                                                                                                                                                                                                                                                                                                                                                                                                                                                                                                                                                                 | Hospital e Pronto Socorro Comunitário Vila Iolanda                                           | Instituto Adolfo Lutz, Interdisciplinary Procedures Center, Strategic Laboratory                                                                                                                                                                                                                                             | Claudio Tavares Sacchi, Claudia Regina Gonçalves, Erica Valessa Ramos Gomes                                                                                                                                                                                                                                                                                                      |
| EPI_ISL_527865                                                                                                                                                                                                                                                                                                                                                                                                                                                                                                                                                                                                                                                                                                                                                                                                                                                                                                                                                                                                                                                                 | Hospital e Maternidade São Cristóvão                                                         | Instituto Adolfo Lutz, Interdisciplinary Procedures Center, Strategic Laboratory                                                                                                                                                                                                                                             | Claudio Tavares Sacchi, Claudia Regina Gonçalves, Erica Valessa Ramos Gomes                                                                                                                                                                                                                                                                                                      |
| EPI_ISL_527867                                                                                                                                                                                                                                                                                                                                                                                                                                                                                                                                                                                                                                                                                                                                                                                                                                                                                                                                                                                                                                                                 | Pronto Socorro Municipal - Balneario São José                                                | Instituto Adolfo Lutz, Interdisciplinary Procedures Center, Strategic Laboratory                                                                                                                                                                                                                                             | Claudio Tavares Sacchi, Claudia Regina Gonçalves, Erica Valessa Ramos Gomes                                                                                                                                                                                                                                                                                                      |
| EPI_ISL_527869                                                                                                                                                                                                                                                                                                                                                                                                                                                                                                                                                                                                                                                                                                                                                                                                                                                                                                                                                                                                                                                                 | Hospital Municipal Carmen Prudente                                                           | Instituto Adolfo Lutz, Interdisciplinary Procedures Center, Strategic Laboratory                                                                                                                                                                                                                                             | Claudio Tavares Sacchi, Claudia Regina Gonçalves, Erica Valessa Ramos Gomes                                                                                                                                                                                                                                                                                                      |
| EPI_ISL_527870                                                                                                                                                                                                                                                                                                                                                                                                                                                                                                                                                                                                                                                                                                                                                                                                                                                                                                                                                                                                                                                                 | Hospital Municipal Mário Gatti                                                               | Instituto Adolfo Lutz, Interdisciplinary Procedures Center, Strategic Laboratory                                                                                                                                                                                                                                             | Claudio Tavares Sacchi, Claudia Regina Gonçalves, Erica Valessa Ramos Gomes                                                                                                                                                                                                                                                                                                      |
| EPI_ISL_528485, EPI_ISL_528486, EPI_ISL_528487, EPI_ISL_528488, EPI_ISL_528489, EPI_ISL_528490, EPI_ISL_528491, EPI_ISL_528492, EPI_ISL_528493, EPI_ISL_528494, EPI_ISL_528495, EPI_ISL_528496, EPI_ISL_528497, EPI_ISL_528498, EPI_ISL_528499, EPI_ISL_528500, EPI_ISL_528501, EPI_ISL_528502, EPI_ISL_528503, EPI_ISL_528504, EPI_ISL_528505, EPI_ISL_528506, EPI_ISL_528507, EPI_ISL_528508, EPI_ISL_528509, EPI_ISL_528510, EPI_ISL_528511, EPI_ISL_528512, EPI_ISL_528513, EPI_ISL_528514, EPI_ISL_528515, EPI_ISL_528516, EPI_ISL_528517, EPI_ISL_528518, EPI_ISL_528519, EPI_ISL_528520, EPI_ISL_528521, EPI_ISL_528522, EPI_ISL_528523, EPI_ISL_528524, EPI_ISL_528525, EPI_ISL_528526, EPI_ISL_528527, EPI_ISL_528528, EPI_ISL_528529, EPI_ISL_528530, EPI_ISL_528531, EPI_ISL_528532, EPI_ISL_528533, EPI_ISL_528534, EPI_ISL_528535, EPI_ISL_528536, EPI_ISL_528537                                                                                                                                                                                                 | Alaska State Virology Laboratory                                                             | Chen J et al with Pathogenomics group Dagdag R, Redlinger M, Milton E, George W, Kovalenko A, Drown DM, Bortz E                                                                                                                                                                                                              |                                                                                                                                                                                                                                                                                                                                                                                  |
| see above                                                                                                                                                                                                                                                                                                                                                                                                                                                                                                                                                                                                                                                                                                                                                                                                                                                                                                                                                                                                                                                                      | Alaska State Virology Laboratory                                                             | Alaska State Virology Laboratory                                                                                                                                                                                                                                                                                             | Chen J et al with Pathogenomics group Dagdag R, Redlinger M, Milton E, George W, Kovalenko A, Drown DM, Bortz E                                                                                                                                                                                                                                                                  |
| EPI_ISL_528747                                                                                                                                                                                                                                                                                                                                                                                                                                                                                                                                                                                                                                                                                                                                                                                                                                                                                                                                                                                                                                                                 | Santo Borromeus Hospital                                                                     | School of Pharmacy & School of Life Sciences and Technology - Institut Teknologi Bandung; Molecular Genetics Laboratory-Faculty of Medicine-Universitas Padjadjaran; Laboratorium Kesehatan Provinsi Jawa Barat                                                                                                              | Catur Riani, Marselina Irasonia Tan, Yunia Sribudiani, Azzania Fibriani, Husna Nugrahapraja, Tarwadi, Ema Rahmawati, Savira Ekawardhani, Hesti Lina Wiraswati, Ryan Bayusantika Ristandi, Rifky Waluyajati Rachman, Cut Nur Cinthia Alamanda, Lia Faridah, Miftahul Farid, Karimatu Khoirunnisa, Hammam Riza, Sony Solistia Wirawan, Agung Eru Wibowo, Irvan Faizal              |
| EPI_ISL_528752                                                                                                                                                                                                                                                                                                                                                                                                                                                                                                                                                                                                                                                                                                                                                                                                                                                                                                                                                                                                                                                                 | Dr. H. A. Rotinsulu Lung Hospital                                                            | School of Pharmacy & School of Life Sciences and Technology - Institut Teknologi Bandung; Molecular Genetics Laboratory-Faculty of Medicine-Universitas Padjadjaran; Laboratorium Kesehatan Provinsi Jawa Barat                                                                                                              | Catur Riani, Marselina Irasonia Tan, Yunia Sribudiani, Azzania Fibriani, Husna Nugrahapraja, Tarwadi, Ema Rahmawati, Savira Ekawardhani, Hesti Lina Wiraswati, Ryan Bayusantika Ristandi, Rifky Waluyajati Rachman, Cut Nur Cinthia Alamanda, Lia Faridah, Gusti Ayu Prani Pradani, Adelina Kristiani Rahayu, Hammam Riza, Sony Solistia Wirawan, Agung Eru Wibowo, Irvan Faizal |
| EPI_ISL_534311                                                                                                                                                                                                                                                                                                                                                                                                                                                                                                                                                                                                                                                                                                                                                                                                                                                                                                                                                                                                                                                                 | UPA III 26 de Agosto                                                                         | Instituto Adolfo Lutz, Interdisciplinary Procedures Center, Strategic Laboratory                                                                                                                                                                                                                                             | Claudio Tavares Sacchi, Claudia Regina Gonçalves, Erica Valessa Ramos Gomes                                                                                                                                                                                                                                                                                                      |
| EPI_ISL_534315                                                                                                                                                                                                                                                                                                                                                                                                                                                                                                                                                                                                                                                                                                                                                                                                                                                                                                                                                                                                                                                                 | Serviço de Verificação de Óbitos SVO Guarulhos                                               | Instituto Adolfo Lutz, Interdisciplinary Procedures Center, Strategic Laboratory                                                                                                                                                                                                                                             | Claudio Tavares Sacchi, Claudia Regina Gonçalves, Erica Valessa Ramos Gomes                                                                                                                                                                                                                                                                                                      |
| EPI_ISL_534316                                                                                                                                                                                                                                                                                                                                                                                                                                                                                                                                                                                                                                                                                                                                                                                                                                                                                                                                                                                                                                                                 | OS Mun Santana Lauro Ribas Braga                                                             | Instituto Adolfo Lutz, Interdisciplinary Procedures Center, Strategic Laboratory                                                                                                                                                                                                                                             | Claudio Tavares Sacchi, Claudia Regina Gonçalves, Erica Valessa Ramos Gomes                                                                                                                                                                                                                                                                                                      |
| EPI_ISL_534321                                                                                                                                                                                                                                                                                                                                                                                                                                                                                                                                                                                                                                                                                                                                                                                                                                                                                                                                                                                                                                                                 | PS e Maternidade Nair Fonseca Leitao Arantes                                                 | Instituto Adolfo Lutz, Interdisciplinary Procedures Center, Strategic Laboratory                                                                                                                                                                                                                                             | Claudio Tavares Sacchi, Claudia Regina Gonçalves, Erica Valessa Ramos Gomes                                                                                                                                                                                                                                                                                                      |
| EPI_ISL_534323                                                                                                                                                                                                                                                                                                                                                                                                                                                                                                                                                                                                                                                                                                                                                                                                                                                                                                                                                                                                                                                                 | Hospital e Pronto Socorro Comunitario Vila Yolanda                                           | Instituto Adolfo Lutz, Interdisciplinary Procedures Center, Strategic Laboratory                                                                                                                                                                                                                                             | Claudio Tavares Sacchi, Claudia Regina Gonçalves, Erica Valessa Ramos Gomes                                                                                                                                                                                                                                                                                                      |
| EPI_ISL_534324                                                                                                                                                                                                                                                                                                                                                                                                                                                                                                                                                                                                                                                                                                                                                                                                                                                                                                                                                                                                                                                                 | Hospital Mun Ver Jose Storopoli                                                              | Instituto Adolfo Lutz, Interdisciplinary Procedures Center, Strategic Laboratory                                                                                                                                                                                                                                             | Claudio Tavares Sacchi, Claudia Regina Gonçalves, Erica Valessa Ramos Gomes                                                                                                                                                                                                                                                                                                      |
| EPI_ISL_534325                                                                                                                                                                                                                                                                                                                                                                                                                                                                                                                                                                                                                                                                                                                                                                                                                                                                                                                                                                                                                                                                 | Unidade de Vigilancia em Saude de Guarulhos                                                  | Instituto Adolfo Lutz, Interdisciplinary Procedures Center, Strategic Laboratory                                                                                                                                                                                                                                             | Claudio Tavares Sacchi, Claudia Regina Gonçalves, Erica Valessa Ramos Gomes                                                                                                                                                                                                                                                                                                      |
| EPI_ISL_534326                                                                                                                                                                                                                                                                                                                                                                                                                                                                                                                                                                                                                                                                                                                                                                                                                                                                                                                                                                                                                                                                 | Notre Dame Intermedica Saude AS                                                              | Instituto Adolfo Lutz, Interdisciplinary Procedures Center, Strategic Laboratory                                                                                                                                                                                                                                             | Claudio Tavares Sacchi, Claudia Regina Gonçalves, Erica Valessa Ramos Gomes                                                                                                                                                                                                                                                                                                      |
| EPI_ISL_535244, EPI_ISL_535262                                                                                                                                                                                                                                                                                                                                                                                                                                                                                                                                                                                                                                                                                                                                                                                                                                                                                                                                                                                                                                                 | Wales Specialist Virology Centre Sequencing lab: Pathogen Genomics Unit                      | COVID-19 Genomics UK (COG-UK) Consortium                                                                                                                                                                                                                                                                                     | Catherine Moore, Johnathan Evans, Laura Gifford, Malorie Perry, Simon Cottrell, Angela Marchbank, Alec Birchley, Alexander Adams, Amy Gaskin, Bree Gatica-Wilcox, Jason Coombes, Joel Southgate, Lauren Gilbert, Lee Graham, Nicole Pacchiarini, Sara Kumziene-Summerhayes, Sarah Taylor, Sophie Jones, Sara Rey, Matthew Bull, Joanne Watkins, Sally Corden, Tom Connor         |
| EPI_ISL_535585, EPI_ISL_535586, EPI_ISL_535587, EPI_ISL_535588, EPI_ISL_535589, EPI_ISL_535590, EPI_ISL_535591, EPI_ISL_535592, EPI_ISL_535593, EPI_ISL_535594, EPI_ISL_535595, EPI_ISL_535596, EPI_ISL_535597, EPI_ISL_535598, EPI_ISL_535599, EPI_ISL_535600, EPI_ISL_535601, EPI_ISL_535602, EPI_ISL_535603, EPI_ISL_535604, EPI_ISL_535605, EPI_ISL_535606, EPI_ISL_535607, EPI_ISL_535608, EPI_ISL_535609, EPI_ISL_535610, EPI_ISL_535611, EPI_ISL_535612, EPI_ISL_535613, EPI_ISL_535614, EPI_ISL_535615, EPI_ISL_535616, EPI_ISL_535617, EPI_ISL_535618, EPI_ISL_535619, EPI_ISL_535620, EPI_ISL_535621, EPI_ISL_535622, EPI_ISL_535623, EPI_ISL_535624, EPI_ISL_535625, EPI_ISL_535626, EPI_ISL_535627, EPI_ISL_535628, EPI_ISL_535629, EPI_ISL_535630, EPI_ISL_535631, EPI_ISL_535632, EPI_ISL_535633, EPI_ISL_535634, EPI_ISL_535635, EPI_ISL_535636, EPI_ISL_535637, EPI_ISL_535638, EPI_ISL_535639, EPI_ISL_535640, EPI_ISL_535641, EPI_ISL_535642, EPI_ISL_535643, EPI_ISL_535644, EPI_ISL_535645, EPI_ISL_535646, EPI_ISL_535647, EPI_ISL_535648, EPI_ISL_535649 | Department of Biosystems Science and Engineering, ETH Zürich                                 | Christian Beisel, Sarah Nadeau, Ivan Topolsky, Pedro Ferreira, Philipp Jablonski, Susana Posada-Céspedes, Tobias Schär, Ina Nissen, Natascha Santacroce, Elodie Burcklen, Christiane Beckmann, Maurice Redondo, Olivier Kobel, Christoph Noppen, Sophie Seidel, Noemie Santamaria de Souza, Niko Beerenwinkel, Tanja Stadler |                                                                                                                                                                                                                                                                                                                                                                                  |
| see above                                                                                                                                                                                                                                                                                                                                                                                                                                                                                                                                                                                                                                                                                                                                                                                                                                                                                                                                                                                                                                                                      | Viollier AG                                                                                  | Department of Biosystems Science and Engineering, ETH Zürich                                                                                                                                                                                                                                                                 | Christian Beisel, Sarah Nadeau, Ivan Topolsky, Pedro Ferreira, Philipp Jablonski, Susana Posada-Céspedes, Tobias Schär, Ina Nissen, Natascha Santacroce, Elodie Burcklen, Christiane Beckmann, Maurice Redondo, Olivier Kobel, Christoph Noppen, Sophie Seidel, Noemie Santamaria de Souza, Niko Beerenwinkel, Tanja Stadler                                                     |
| EPI_ISL_538435, EPI_ISL_538436, EPI_ISL_538437, EPI_ISL_538438, EPI_ISL_538439, EPI_ISL_538440, EPI_ISL_538441, EPI_ISL_538442, EPI_ISL_538443, EPI_ISL_538444, EPI_ISL_538445, EPI_ISL_538446, EPI_ISL_538447, EPI_ISL_538448, EPI_ISL_538449, EPI_ISL_538450, EPI_ISL_538451, EPI_ISL_538452, EPI_ISL_538453, EPI_ISL_538454, EPI_ISL_538455, EPI_ISL_538456, EPI_ISL_538457, EPI_ISL_538458, EPI_ISL_538459, EPI_ISL_538460, EPI_ISL_538461, EPI_ISL_538462, EPI_ISL_538463, EPI_ISL_538464, EPI_ISL_538465, EPI_ISL_538466, EPI_ISL_538467, EPI_ISL_538468, EPI_ISL_538469, EPI_ISL_538470, EPI_ISL_538471, EPI_ISL_538472, EPI_ISL_538473, EPI_ISL_538474, EPI_ISL_538475, EPI_ISL_538476, EPI_ISL_538477, EPI_ISL_538478, EPI_ISL_538479, EPI_ISL_538480, EPI_ISL_538481, EPI_ISL_538482, EPI_ISL_538483, EPI_ISL_538484, EPI_ISL_538485, EPI_ISL_538486, EPI_ISL_538487, EPI_ISL_538488, EPI_ISL_538489, EPI_ISL_538490, EPI_ISL_538491, EPI_ISL_538492, EPI_ISL_538493, EPI_ISL_538494, EPI_ISL_538495, EPI_ISL_538496, EPI_ISL_538497                                 | Department of Laboratory Medicine, Tan Tock Seng Hospital                                    | Chen YYC, Zair X, Lim JX, Li C, Tang WY, Maurer-Stroh S, Barkham TMS, Nagarajan N, Sessions OM                                                                                                                                                                                                                               |                                                                                                                                                                                                                                                                                                                                                                                  |
| see above                                                                                                                                                                                                                                                                                                                                                                                                                                                                                                                                                                                                                                                                                                                                                                                                                                                                                                                                                                                                                                                                      | Department of Laboratory Medicine, Tan Tock Seng Hospital                                    | Department of Laboratory Medicine, Tan Tock Seng Hospital                                                                                                                                                                                                                                                                    | Chen YYC, Zair X, Lim JX, Li C, Tang WY, Maurer-Stroh S, Barkham TMS, Nagarajan N, Sessions OM                                                                                                                                                                                                                                                                                   |
| EPI_ISL_538514, EPI_ISL_538515, EPI_ISL_538516, EPI_ISL_538517                                                                                                                                                                                                                                                                                                                                                                                                                                                                                                                                                                                                                                                                                                                                                                                                                                                                                                                                                                                                                 | Infectious Diseases, North Carolina State Laboratory of Public Health COVID-19 Response Team | Infectious Diseases, North Carolina State Laboratory of Public Health COVID-19 Response Team                                                                                                                                                                                                                                 | Chase,K.                                                                                                                                                                                                                                                                                                                                                                         |



|                                                                                                                                                                                                                                                                                                                                                                                                                                                                                                                                                                                                                                                                                                                                                                                                                                                                                                                                                                                                                                                                                                                                                                                                                                                                                                                                                                                                                                                                                                                                                                                                                                                                                                                                                                                                                                                                                                                                                                                                                                                                                                                                                                                                                                                                                                                                                                                                |           |                                                                                                                      |                                                                                                                      |                                                                                                                                                                                                                                                                                                                                                                          |
|------------------------------------------------------------------------------------------------------------------------------------------------------------------------------------------------------------------------------------------------------------------------------------------------------------------------------------------------------------------------------------------------------------------------------------------------------------------------------------------------------------------------------------------------------------------------------------------------------------------------------------------------------------------------------------------------------------------------------------------------------------------------------------------------------------------------------------------------------------------------------------------------------------------------------------------------------------------------------------------------------------------------------------------------------------------------------------------------------------------------------------------------------------------------------------------------------------------------------------------------------------------------------------------------------------------------------------------------------------------------------------------------------------------------------------------------------------------------------------------------------------------------------------------------------------------------------------------------------------------------------------------------------------------------------------------------------------------------------------------------------------------------------------------------------------------------------------------------------------------------------------------------------------------------------------------------------------------------------------------------------------------------------------------------------------------------------------------------------------------------------------------------------------------------------------------------------------------------------------------------------------------------------------------------------------------------------------------------------------------------------------------------|-----------|----------------------------------------------------------------------------------------------------------------------|----------------------------------------------------------------------------------------------------------------------|--------------------------------------------------------------------------------------------------------------------------------------------------------------------------------------------------------------------------------------------------------------------------------------------------------------------------------------------------------------------------|
| EPI_ISL_560488, EPI_ISL_560489, EPI_ISL_560490, EPI_ISL_560491, EPI_ISL_560492, EPI_ISL_560493, EPI_ISL_560494, EPI_ISL_560495, EPI_ISL_560496, EPI_ISL_560497, EPI_ISL_560498, EPI_ISL_560499, EPI_ISL_560500, EPI_ISL_560501, EPI_ISL_560502, EPI_ISL_560503, EPI_ISL_560504, EPI_ISL_560505, EPI_ISL_560506, EPI_ISL_560507, EPI_ISL_560508, EPI_ISL_560509, EPI_ISL_560510, EPI_ISL_560511, EPI_ISL_560512, EPI_ISL_560513, EPI_ISL_560514, EPI_ISL_560515, EPI_ISL_560516, EPI_ISL_560517, EPI_ISL_560518, EPI_ISL_560519, EPI_ISL_560520, EPI_ISL_560521, EPI_ISL_560522, EPI_ISL_560523, EPI_ISL_560524, EPI_ISL_560525, EPI_ISL_560526, EPI_ISL_560527, EPI_ISL_560528, EPI_ISL_560529, EPI_ISL_560530, EPI_ISL_560531, EPI_ISL_560532, EPI_ISL_560533, EPI_ISL_560534, EPI_ISL_560535, EPI_ISL_560537, EPI_ISL_560538, EPI_ISL_560539, EPI_ISL_560541, EPI_ISL_560542, EPI_ISL_560543, EPI_ISL_560544, EPI_ISL_560545, EPI_ISL_560546, EPI_ISL_560547, EPI_ISL_560548, EPI_ISL_560549, EPI_ISL_560550, EPI_ISL_560551, EPI_ISL_560552, EPI_ISL_560553                                                                                                                                                                                                                                                                                                                                                                                                                                                                                                                                                                                                                                                                                                                                                                                                                                                                                                                                                                                                                                                                                                                                                                                                                                                                                                                                 | see above | Viollier AG                                                                                                          | Department of Biosystems Science and Engineering, ETH Zürich                                                         | Christian Beisel, Sarah Nadeau, Ivan Topolsky, Pedro Ferreira, Philipp Jablonski, Susana Posada-Céspedes, Tobias Schär, Ina Nissen, Natascha Santacroce, Elodie Burcklen, Christiane Beckmann, Maurice Redondo, Olivier Kobel, Christoph Noppen, Sophie Seidel, Noemie Santamaria de Souza, Niko Beerenwinkel, Tanja Stadler                                             |
| EPI_ISL_560649, EPI_ISL_560650, EPI_ISL_560651, EPI_ISL_560652, EPI_ISL_560653, EPI_ISL_560654, EPI_ISL_560655, EPI_ISL_560656, EPI_ISL_560657, EPI_ISL_560658, EPI_ISL_560659, EPI_ISL_560660, EPI_ISL_560661, EPI_ISL_560662, EPI_ISL_560663, EPI_ISL_560664, EPI_ISL_560665, EPI_ISL_560666, EPI_ISL_560667, EPI_ISL_560668, EPI_ISL_560669, EPI_ISL_560670, EPI_ISL_560671, EPI_ISL_560672, EPI_ISL_560673, EPI_ISL_560674, EPI_ISL_560675, EPI_ISL_560676, EPI_ISL_560677, EPI_ISL_560678, EPI_ISL_560679, EPI_ISL_560680, EPI_ISL_560681, EPI_ISL_560682, EPI_ISL_560683, EPI_ISL_560684, EPI_ISL_560685, EPI_ISL_560686, EPI_ISL_560687, EPI_ISL_560688, EPI_ISL_560689, EPI_ISL_560690, EPI_ISL_560691, EPI_ISL_560692, EPI_ISL_560693, EPI_ISL_560694, EPI_ISL_560695, EPI_ISL_560696, EPI_ISL_560697, EPI_ISL_560698, EPI_ISL_560699, EPI_ISL_560700, EPI_ISL_560701, EPI_ISL_560702, EPI_ISL_560703, EPI_ISL_560704, EPI_ISL_560705, EPI_ISL_560706, EPI_ISL_560707, EPI_ISL_560708, EPI_ISL_560709, EPI_ISL_560710, EPI_ISL_560711, EPI_ISL_560712, EPI_ISL_560713, EPI_ISL_560714, EPI_ISL_560715, EPI_ISL_560716, EPI_ISL_560717, EPI_ISL_560718, EPI_ISL_560719, EPI_ISL_560720, EPI_ISL_560721, EPI_ISL_560722, EPI_ISL_560723, EPI_ISL_560724, EPI_ISL_560725, EPI_ISL_560726, EPI_ISL_560727, EPI_ISL_560728, EPI_ISL_560729, EPI_ISL_560730, EPI_ISL_560731, EPI_ISL_560732, EPI_ISL_560733, EPI_ISL_560734, EPI_ISL_560735, EPI_ISL_560736, EPI_ISL_560737, EPI_ISL_560738, EPI_ISL_560739, EPI_ISL_560740, EPI_ISL_561363, EPI_ISL_561364, EPI_ISL_561365, EPI_ISL_561366, EPI_ISL_561367, EPI_ISL_561368, EPI_ISL_561369, EPI_ISL_561370, EPI_ISL_561371, EPI_ISL_561372, EPI_ISL_561373, EPI_ISL_561374                                                                                                                                                                                                                                                                                                                                                                                                                                                                                                                                                                                                                                                                 | see above | Centre for Clinical Infection and Diagnostics Research and Genomics Innovation Unit, Guy's and St. Thomas' NHS Trust | Centre for Clinical Infection and Diagnostics Research and Genomics Innovation Unit, Guy's and St. Thomas' NHS Trust | Chloe Fisher, Luke Snell, Rahul Batra, Jonathan Edgeworth, Ali Raza Awan                                                                                                                                                                                                                                                                                                 |
| EPI_ISL_568579                                                                                                                                                                                                                                                                                                                                                                                                                                                                                                                                                                                                                                                                                                                                                                                                                                                                                                                                                                                                                                                                                                                                                                                                                                                                                                                                                                                                                                                                                                                                                                                                                                                                                                                                                                                                                                                                                                                                                                                                                                                                                                                                                                                                                                                                                                                                                                                 |           | Virus Molecular Laboratory of the Microbiology and Virology Department                                               | INMI Lazzaro Spallanzani IRCCS                                                                                       | Cesare E.M. Gruber, Martina Rueca, Barbara Bartolini, Francesco Messina, Silvia Meschi, Francesca Colavita, Concetta Castilletti, Elena Percivalle, Irene Cassaniti, Edoardo Vecchio Nepita, Fausto Baldanti, Maria R. Capobianchi, Antonino Di Caro                                                                                                                     |
| EPI_ISL_572805, EPI_ISL_573874, EPI_ISL_574001, EPI_ISL_574089, EPI_ISL_574142, EPI_ISL_574147, EPI_ISL_574167                                                                                                                                                                                                                                                                                                                                                                                                                                                                                                                                                                                                                                                                                                                                                                                                                                                                                                                                                                                                                                                                                                                                                                                                                                                                                                                                                                                                                                                                                                                                                                                                                                                                                                                                                                                                                                                                                                                                                                                                                                                                                                                                                                                                                                                                                 |           | Wales Specialist Virology Centre Sequencing lab: Pathogen Genomics Unit                                              | COVID-19 Genomics UK (COG-UK) Consortium                                                                             | Catherine Moore, Johnathan Evans, Laura Gifford, Malorie Perry, Simon Cottrell, Angela Marchbank, Alec Birchley, Alexander Adams, Amy Gaskin, Bree Gatica-Wilcox, Jason Coombes, Joel Southgate, Lauren Gilbert, Lee Graham, Nicole Pacchiarini, Sara Kuzniene-Summerhayes, Sarah Taylor, Sophie Jones, Sara Rey, Matthew Bull, Joanne Watkins, Sally Corden, Tom Connor |
| EPI_ISL_574577                                                                                                                                                                                                                                                                                                                                                                                                                                                                                                                                                                                                                                                                                                                                                                                                                                                                                                                                                                                                                                                                                                                                                                                                                                                                                                                                                                                                                                                                                                                                                                                                                                                                                                                                                                                                                                                                                                                                                                                                                                                                                                                                                                                                                                                                                                                                                                                 |           | Hospital Municipal Dr. Ignacio Proença de Gouveia                                                                    | Instituto Adolfo Lutz, Interdisciplinary Procedures Center, Strategic Laboratory                                     | Claudio Tavares Sacchi, Claudia Regina Gonçalves, Erica Valessa Ramos Gomes, Karoline Rodrigues Campos                                                                                                                                                                                                                                                                   |
| EPI_ISL_574580                                                                                                                                                                                                                                                                                                                                                                                                                                                                                                                                                                                                                                                                                                                                                                                                                                                                                                                                                                                                                                                                                                                                                                                                                                                                                                                                                                                                                                                                                                                                                                                                                                                                                                                                                                                                                                                                                                                                                                                                                                                                                                                                                                                                                                                                                                                                                                                 |           | Hospital Cidade Tiradentes Carmen Prudente                                                                           | Instituto Adolfo Lutz, Interdisciplinary Procedures Center, Strategic Laboratory                                     | Claudio Tavares Sacchi, Claudia Regina Gonçalves, Erica Valessa Ramos Gomes, Karoline Rodrigues Campos                                                                                                                                                                                                                                                                   |
| EPI_ISL_574582                                                                                                                                                                                                                                                                                                                                                                                                                                                                                                                                                                                                                                                                                                                                                                                                                                                                                                                                                                                                                                                                                                                                                                                                                                                                                                                                                                                                                                                                                                                                                                                                                                                                                                                                                                                                                                                                                                                                                                                                                                                                                                                                                                                                                                                                                                                                                                                 |           | Hospital Municipal Dr. Jose Soares Hungria                                                                           | Instituto Adolfo Lutz, Interdisciplinary Procedures Center, Strategic Laboratory                                     | Claudio Tavares Sacchi, Claudia Regina Gonçalves, Erica Valessa Ramos Gomes, Karoline Rodrigues Campos                                                                                                                                                                                                                                                                   |
| EPI_ISL_574583                                                                                                                                                                                                                                                                                                                                                                                                                                                                                                                                                                                                                                                                                                                                                                                                                                                                                                                                                                                                                                                                                                                                                                                                                                                                                                                                                                                                                                                                                                                                                                                                                                                                                                                                                                                                                                                                                                                                                                                                                                                                                                                                                                                                                                                                                                                                                                                 |           | Secretaria Municipal de Saude de Jandira                                                                             | Instituto Adolfo Lutz, Interdisciplinary Procedures Center, Strategic Laboratory                                     | Claudio Tavares Sacchi, Claudia Regina Gonçalves, Erica Valessa Ramos Gomes, Karoline Rodrigues Campos                                                                                                                                                                                                                                                                   |
| EPI_ISL_574588                                                                                                                                                                                                                                                                                                                                                                                                                                                                                                                                                                                                                                                                                                                                                                                                                                                                                                                                                                                                                                                                                                                                                                                                                                                                                                                                                                                                                                                                                                                                                                                                                                                                                                                                                                                                                                                                                                                                                                                                                                                                                                                                                                                                                                                                                                                                                                                 |           | Hospital Estadual Sumare                                                                                             | Instituto Adolfo Lutz, Interdisciplinary Procedures Center, Strategic Laboratory                                     | Claudio Tavares Sacchi, Claudia Regina Gonçalves, Erica Valessa Ramos Gomes, Karoline Rodrigues Campos                                                                                                                                                                                                                                                                   |
| EPI_ISL_574589                                                                                                                                                                                                                                                                                                                                                                                                                                                                                                                                                                                                                                                                                                                                                                                                                                                                                                                                                                                                                                                                                                                                                                                                                                                                                                                                                                                                                                                                                                                                                                                                                                                                                                                                                                                                                                                                                                                                                                                                                                                                                                                                                                                                                                                                                                                                                                                 |           | Hospital Municipal Dr. Jose Soares Hungria                                                                           | Instituto Adolfo Lutz, Interdisciplinary Procedures Center, Strategic Laboratory                                     | Claudio Tavares Sacchi, Claudia Regina Gonçalves, Erica Valessa Ramos Gomes, Karoline Rodrigues Campos                                                                                                                                                                                                                                                                   |
| EPI_ISL_574590                                                                                                                                                                                                                                                                                                                                                                                                                                                                                                                                                                                                                                                                                                                                                                                                                                                                                                                                                                                                                                                                                                                                                                                                                                                                                                                                                                                                                                                                                                                                                                                                                                                                                                                                                                                                                                                                                                                                                                                                                                                                                                                                                                                                                                                                                                                                                                                 |           | Unidade de Pronto Atendimento UPA I Santa Isabel                                                                     | Instituto Adolfo Lutz, Interdisciplinary Procedures Center, Strategic Laboratory                                     | Claudio Tavares Sacchi, Claudia Regina Gonçalves, Erica Valessa Ramos Gomes, Karoline Rodrigues Campos                                                                                                                                                                                                                                                                   |
| EPI_ISL_574591                                                                                                                                                                                                                                                                                                                                                                                                                                                                                                                                                                                                                                                                                                                                                                                                                                                                                                                                                                                                                                                                                                                                                                                                                                                                                                                                                                                                                                                                                                                                                                                                                                                                                                                                                                                                                                                                                                                                                                                                                                                                                                                                                                                                                                                                                                                                                                                 |           | Hospital Domingos Leonardo Ceravolo Presidente Prudente                                                              | Instituto Adolfo Lutz, Interdisciplinary Procedures Center, Strategic Laboratory                                     | Claudio Tavares Sacchi, Claudia Regina Gonçalves, Erica Valessa Ramos Gomes, Karoline Rodrigues Campos                                                                                                                                                                                                                                                                   |
| EPI_ISL_574595                                                                                                                                                                                                                                                                                                                                                                                                                                                                                                                                                                                                                                                                                                                                                                                                                                                                                                                                                                                                                                                                                                                                                                                                                                                                                                                                                                                                                                                                                                                                                                                                                                                                                                                                                                                                                                                                                                                                                                                                                                                                                                                                                                                                                                                                                                                                                                                 |           | Hospital Geral de Vila Penteado Dr. Jose Pangella                                                                    | Instituto Adolfo Lutz, Interdisciplinary Procedures Center, Strategic Laboratory                                     | Claudio Tavares Sacchi, Claudia Regina Gonçalves, Erica Valessa Ramos Gomes, Karoline Rodrigues Campos                                                                                                                                                                                                                                                                   |
| EPI_ISL_574596                                                                                                                                                                                                                                                                                                                                                                                                                                                                                                                                                                                                                                                                                                                                                                                                                                                                                                                                                                                                                                                                                                                                                                                                                                                                                                                                                                                                                                                                                                                                                                                                                                                                                                                                                                                                                                                                                                                                                                                                                                                                                                                                                                                                                                                                                                                                                                                 |           | CS II Dr. Antonio Vicoso Moreira de Rezende Sumare                                                                   | Instituto Adolfo Lutz, Interdisciplinary Procedures Center, Strategic Laboratory                                     | Claudio Tavares Sacchi, Claudia Regina Gonçalves, Erica Valessa Ramos Gomes, Karoline Rodrigues Campos                                                                                                                                                                                                                                                                   |
| EPI_ISL_574876, EPI_ISL_574877, EPI_ISL_574878, EPI_ISL_574879, EPI_ISL_574880, EPI_ISL_574881, EPI_ISL_574882, EPI_ISL_574883, EPI_ISL_574884, EPI_ISL_574885, EPI_ISL_574886, EPI_ISL_574887, EPI_ISL_574888, EPI_ISL_574889, EPI_ISL_574890, EPI_ISL_574891, EPI_ISL_574892, EPI_ISL_574893, EPI_ISL_574894, EPI_ISL_574895, EPI_ISL_574896, EPI_ISL_574897, EPI_ISL_574898, EPI_ISL_574899, EPI_ISL_574900, EPI_ISL_574901, EPI_ISL_574902, EPI_ISL_574903, EPI_ISL_574904, EPI_ISL_574905, EPI_ISL_574906, EPI_ISL_574907, EPI_ISL_574908, EPI_ISL_574909, EPI_ISL_574910, EPI_ISL_574911, EPI_ISL_574912, EPI_ISL_574913, EPI_ISL_574914, EPI_ISL_574915, EPI_ISL_574916, EPI_ISL_574917, EPI_ISL_574918, EPI_ISL_574919, EPI_ISL_574920, EPI_ISL_574921, EPI_ISL_574922, EPI_ISL_574923, EPI_ISL_574924, EPI_ISL_574925, EPI_ISL_574926, EPI_ISL_574927, EPI_ISL_574928, EPI_ISL_574929, EPI_ISL_574930, EPI_ISL_574931, EPI_ISL_574932, EPI_ISL_574933, EPI_ISL_574934, EPI_ISL_574935, EPI_ISL_574936, EPI_ISL_574937, EPI_ISL_574938, EPI_ISL_574939, EPI_ISL_574940, EPI_ISL_574941, EPI_ISL_574942, EPI_ISL_574943, EPI_ISL_574944, EPI_ISL_574945, EPI_ISL_574946, EPI_ISL_574947, EPI_ISL_574948, EPI_ISL_574949, EPI_ISL_574950, EPI_ISL_574951, EPI_ISL_574952, EPI_ISL_574953, EPI_ISL_574954, EPI_ISL_574955, EPI_ISL_574956, EPI_ISL_574957, EPI_ISL_574958, EPI_ISL_574959, EPI_ISL_574960, EPI_ISL_574961, EPI_ISL_574962, EPI_ISL_574963, EPI_ISL_574964, EPI_ISL_574965, EPI_ISL_574966, EPI_ISL_574967, EPI_ISL_574968, EPI_ISL_574969, EPI_ISL_574970, EPI_ISL_574971, EPI_ISL_574972, EPI_ISL_574973, EPI_ISL_574974, EPI_ISL_574975, EPI_ISL_574976, EPI_ISL_574977, EPI_ISL_574978, EPI_ISL_574979, EPI_ISL_574980, EPI_ISL_574981, EPI_ISL_574982, EPI_ISL_574983, EPI_ISL_574984, EPI_ISL_574985, EPI_ISL_574986, EPI_ISL_574987, EPI_ISL_574988, EPI_ISL_574989, EPI_ISL_574990, EPI_ISL_574991, EPI_ISL_574992, EPI_ISL_574993, EPI_ISL_574994, EPI_ISL_574995, EPI_ISL_574996, EPI_ISL_574997, EPI_ISL_574998, EPI_ISL_574999, EPI_ISL_575000, EPI_ISL_575001, EPI_ISL_575002, EPI_ISL_575003, EPI_ISL_575004, EPI_ISL_575005, EPI_ISL_575006, EPI_ISL_575007, EPI_ISL_575008, EPI_ISL_575009, EPI_ISL_575010, EPI_ISL_575011, EPI_ISL_575012, EPI_ISL_575013, EPI_ISL_575014, EPI_ISL_575015, EPI_ISL_575016, EPI_ISL_575017, EPI_ISL_575018, EPI_ISL_575019 | see above | Viollier AG                                                                                                          | Department of Biosystems Science and Engineering, ETH Zürich                                                         | Christian Beisel, Sarah Nadeau, Ivan Topolsky, Pedro Ferreira, Philipp Jablonski, Susana Posada-Céspedes, Tobias Schär, Ina Nissen, Natascha Santacroce, Elodie Burcklen, Christiane Beckmann, Maurice Redondo, Olivier Kobel, Christoph Noppen, Sophie Seidel, Noemie Santamaria de Souza, Niko Beerenwinkel, Tanja Stadler                                             |
| EPI_ISL_577523, EPI_ISL_577536, EPI_ISL_577542                                                                                                                                                                                                                                                                                                                                                                                                                                                                                                                                                                                                                                                                                                                                                                                                                                                                                                                                                                                                                                                                                                                                                                                                                                                                                                                                                                                                                                                                                                                                                                                                                                                                                                                                                                                                                                                                                                                                                                                                                                                                                                                                                                                                                                                                                                                                                 |           | Wales Specialist Virology Centre Sequencing lab: Pathogen Genomics Unit                                              | COVID-19 Genomics UK (COG-UK) Consortium                                                                             | Catherine Moore, Johnathan Evans, Laura Gifford, Malorie Perry, Simon Cottrell, Angela Marchbank, Alec Birchley, Alexander Adams, Amy Gaskin, Bree Gatica-Wilcox, Jason Coombes, Joel Southgate, Lauren Gilbert, Lee Graham, Nicole Pacchiarini, Sara Kuzniene-Summerhayes, Sarah Taylor, Sophie Jones, Sara Rey, Matthew Bull, Joanne Watkins, Sally Corden, Tom Connor |
| EPI_ISL_578701, EPI_ISL_578702                                                                                                                                                                                                                                                                                                                                                                                                                                                                                                                                                                                                                                                                                                                                                                                                                                                                                                                                                                                                                                                                                                                                                                                                                                                                                                                                                                                                                                                                                                                                                                                                                                                                                                                                                                                                                                                                                                                                                                                                                                                                                                                                                                                                                                                                                                                                                                 |           | Molecular Pathology Division, Department of Pathology, Hong Kong Sanatorium & Hospital                               | Molecular Pathology Division, Department of Pathology, Hong Kong Sanatorium & Hospital                               | Chun Hang AU, Wai Sing CHAN, Ho Yin LAM, Dona N. HO, Simon Y.M. LAM, Jonpaul S.T. ZEE, Tsun Leung CHAN, Edmond S.K. MA                                                                                                                                                                                                                                                   |
| EPI_ISL_583493                                                                                                                                                                                                                                                                                                                                                                                                                                                                                                                                                                                                                                                                                                                                                                                                                                                                                                                                                                                                                                                                                                                                                                                                                                                                                                                                                                                                                                                                                                                                                                                                                                                                                                                                                                                                                                                                                                                                                                                                                                                                                                                                                                                                                                                                                                                                                                                 |           | Vigilância em Saúde de Cajamar                                                                                       | Instituto Adolfo Lutz, Interdisciplinary Procedures Center, Strategic Laboratory                                     | Claudio Tavares Sacchi, Claudia Regina Gonçalves, Erica Valessa Ramos Gomes, Karoline Rodrigues Campos                                                                                                                                                                                                                                                                   |
| EPI_ISL_583494                                                                                                                                                                                                                                                                                                                                                                                                                                                                                                                                                                                                                                                                                                                                                                                                                                                                                                                                                                                                                                                                                                                                                                                                                                                                                                                                                                                                                                                                                                                                                                                                                                                                                                                                                                                                                                                                                                                                                                                                                                                                                                                                                                                                                                                                                                                                                                                 |           | CS II Dr. Antonio Vicoso Moreira de Rezende Sumare                                                                   | Instituto Adolfo Lutz, Interdisciplinary Procedures Center, Strategic Laboratory                                     | Claudio Tavares Sacchi, Claudia Regina Gonçalves, Erica Valessa Ramos Gomes, Karoline Rodrigues Campos                                                                                                                                                                                                                                                                   |
| EPI_ISL_583495                                                                                                                                                                                                                                                                                                                                                                                                                                                                                                                                                                                                                                                                                                                                                                                                                                                                                                                                                                                                                                                                                                                                                                                                                                                                                                                                                                                                                                                                                                                                                                                                                                                                                                                                                                                                                                                                                                                                                                                                                                                                                                                                                                                                                                                                                                                                                                                 |           | Serviço de Verificação de Óbitos SVO Guarulhos                                                                       | Instituto Adolfo Lutz, Interdisciplinary Procedures Center, Strategic Laboratory                                     | Claudio Tavares Sacchi, Claudia Regina Gonçalves, Erica Valessa Ramos Gomes, Karoline Rodrigues Campos                                                                                                                                                                                                                                                                   |
| EPI_ISL_583496                                                                                                                                                                                                                                                                                                                                                                                                                                                                                                                                                                                                                                                                                                                                                                                                                                                                                                                                                                                                                                                                                                                                                                                                                                                                                                                                                                                                                                                                                                                                                                                                                                                                                                                                                                                                                                                                                                                                                                                                                                                                                                                                                                                                                                                                                                                                                                                 |           | UPA Jandira                                                                                                          | Instituto Adolfo Lutz, Interdisciplinary Procedures Center, Strategic Laboratory                                     | Claudio Tavares Sacchi, Claudia Regina Gonçalves, Erica Valessa Ramos Gomes, Karoline Rodrigues Campos                                                                                                                                                                                                                                                                   |
| EPI_ISL_583498                                                                                                                                                                                                                                                                                                                                                                                                                                                                                                                                                                                                                                                                                                                                                                                                                                                                                                                                                                                                                                                                                                                                                                                                                                                                                                                                                                                                                                                                                                                                                                                                                                                                                                                                                                                                                                                                                                                                                                                                                                                                                                                                                                                                                                                                                                                                                                                 |           | Hospital Municipal Dr. Waldemar Tebaldi                                                                              | Instituto Adolfo Lutz, Interdisciplinary Procedures Center, Strategic Laboratory                                     | Claudio Tavares Sacchi, Claudia Regina Gonçalves, Erica Valessa Ramos Gomes, Karoline Rodrigues Campos                                                                                                                                                                                                                                                                   |
| EPI_ISL_583500                                                                                                                                                                                                                                                                                                                                                                                                                                                                                                                                                                                                                                                                                                                                                                                                                                                                                                                                                                                                                                                                                                                                                                                                                                                                                                                                                                                                                                                                                                                                                                                                                                                                                                                                                                                                                                                                                                                                                                                                                                                                                                                                                                                                                                                                                                                                                                                 |           | Centro de Saude I Tacito Leite de Carvalho e Silva                                                                   | Instituto Adolfo Lutz, Interdisciplinary Procedures Center, Strategic Laboratory                                     | Claudio Tavares Sacchi, Claudia Regina Gonçalves, Erica Valessa Ramos Gomes, Karoline Rodrigues Campos                                                                                                                                                                                                                                                                   |
| EPI_ISL_583501                                                                                                                                                                                                                                                                                                                                                                                                                                                                                                                                                                                                                                                                                                                                                                                                                                                                                                                                                                                                                                                                                                                                                                                                                                                                                                                                                                                                                                                                                                                                                                                                                                                                                                                                                                                                                                                                                                                                                                                                                                                                                                                                                                                                                                                                                                                                                                                 |           | Hospital Estadual de Campanha COVID 19 Barradas                                                                      | Instituto Adolfo Lutz, Interdisciplinary Procedures Center, Strategic Laboratory                                     | Claudio Tavares Sacchi, Claudia Regina Gonçalves, Erica Valessa Ramos Gomes, Karoline Rodrigues Campos                                                                                                                                                                                                                                                                   |
| EPI_ISL_583502                                                                                                                                                                                                                                                                                                                                                                                                                                                                                                                                                                                                                                                                                                                                                                                                                                                                                                                                                                                                                                                                                                                                                                                                                                                                                                                                                                                                                                                                                                                                                                                                                                                                                                                                                                                                                                                                                                                                                                                                                                                                                                                                                                                                                                                                                                                                                                                 |           | Serv de Vig Sanitaria Epidemio e CTRL de Zoonoses Guaruja                                                            | Instituto Adolfo Lutz, Interdisciplinary Procedures Center, Strategic Laboratory                                     | Claudio Tavares Sacchi, Claudia Regina Gonçalves, Erica Valessa Ramos Gomes, Karoline Rodrigues Campos                                                                                                                                                                                                                                                                   |

|                                                                                                                                |                                                                             |                                                                                             |                                                                                                                                                                                                                                                                                                                                                                          |
|--------------------------------------------------------------------------------------------------------------------------------|-----------------------------------------------------------------------------|---------------------------------------------------------------------------------------------|--------------------------------------------------------------------------------------------------------------------------------------------------------------------------------------------------------------------------------------------------------------------------------------------------------------------------------------------------------------------------|
| EPI_ISL_583504, EPI_ISL_583505                                                                                                 | Casa de Saude Stella Maris                                                  | Instituto Adolfo Lutz, Interdisciplinary Procedures Center, Strategic Laboratory            | Claudio Tavares Sacchi, Claudia Regina Gonçalves, Erica Valessa Ramos Gomes, Karoline Rodrigues Campos                                                                                                                                                                                                                                                                   |
| EPI_ISL_583914                                                                                                                 | DH                                                                          | Department of Neurovirology, National Institute of Mental Health and Neuroscience (NIMHANS) | Chitra Pattabiraman, Vijayalakshmi Reddy, Harsha PK, Risha Rasheed, Pramada Prasad, Shafeeq S Hameed, Manjunatha Venkataswamy, Anita Desai, Ravi Vasanthapuram                                                                                                                                                                                                           |
| EPI_ISL_583915                                                                                                                 | Victoria Hospital                                                           | Department of Neurovirology, National Institute of Mental Health and Neuroscience (NIMHANS) | Chitra Pattabiraman, Vijayalakshmi Reddy, Harsha PK, Risha Rasheed, Pramada Prasad, Shafeeq S Hameed, Manjunatha Venkataswamy, Anita Desai, Ravi Vasanthapuram                                                                                                                                                                                                           |
| EPI_ISL_585720, EPI_ISL_585801, EPI_ISL_585832, EPI_ISL_586031, EPI_ISL_586037, EPI_ISL_586112, EPI_ISL_586162                 | Wales Specialist Virology Centre Sequencing lab: Pathogen Genomics Unit     | COVID-19 Genomics UK (COG-UK) Consortium                                                    | Catherine Moore, Johnathan Evans, Laura Gifford, Malorie Perry, Simon Cottrell, Angela Marchbank, Alec Birchley, Alexander Adams, Amy Gaskin, Bree Gatica-Wilcox, Jason Coombes, Joel Southgate, Lauren Gilbert, Lee Graham, Nicole Pacchiarini, Sara Kumziene-Summerhayes, Sarah Taylor, Sophie Jones, Sara Rey, Matthew Bull, Joanne Watkins, Sally Corden, Tom Connor |
| EPI_ISL_590695                                                                                                                 | INMI Lazzaro Spallanzani IRCCS                                              | INMI Lazzaro Spallanzani IRCCS                                                              | Cesare E.M. Gruber, Francesco Messina, Barbara Bartolini, Martina Rueca, Emanuela Giombini, Beatrice Valli, Eleonora Lalle, Simone Lanini, Francesco Vairo, Antonino Di Caro, Maria R. Capobianchi                                                                                                                                                                       |
| EPI_ISL_590696                                                                                                                 | INMI Lazzaro Spallanzani IRCCS                                              | INMI Lazzaro Spallanzani IRCCS                                                              | Cesare E.M. Gruber, Barbara Bartolini, Francesco Messina, Martina Rueca, Emanuela Giombini, Beatrice Valli, Eleonora Lalle, Simone Lanini, Francesco Vairo, Antonino Di Caro, Maria R. Capobianchi                                                                                                                                                                       |
| EPI_ISL_591540                                                                                                                 | St.Johns Hospital                                                           | Department of Neurovirology, National Institute of Mental Health and Neuroscience (NIMHANS) | Chitra Pattabiraman, Vijayalakshmi Reddy, Harsha PK, Risha Rasheed, Pramada Prasad, Shafeeq S Hameed, Manjunatha Venkataswamy, Anita Desai, Ravi Vasanthapuram                                                                                                                                                                                                           |
| EPI_ISL_595347, EPI_ISL_595357, EPI_ISL_595442                                                                                 | Wales Specialist Virology Centre Sequencing lab: Pathogen Genomics Unit     | COVID-19 Genomics UK (COG-UK) Consortium                                                    | Catherine Moore, Johnathan Evans, Laura Gifford, Malorie Perry, Simon Cottrell, Angela Marchbank, Alec Birchley, Alexander Adams, Amy Gaskin, Bree Gatica-Wilcox, Jason Coombes, Joel Southgate, Lauren Gilbert, Lee Graham, Nicole Pacchiarini, Sara Kumziene-Summerhayes, Sarah Taylor, Sophie Jones, Sara Rey, Matthew Bull, Joanne Watkins, Sally Corden, Tom Connor |
| EPI_ISL_596447, EPI_ISL_596448, EPI_ISL_602208, EPI_ISL_602209, EPI_ISL_602278, EPI_ISL_602279, EPI_ISL_602280, EPI_ISL_602281 | New Mexico Department of Health Scientific Laboratory Division              | Los Alamos National Laboratory Bioscience Division                                          | Chien-Chi Lo, Migun Shakya, Cheryl Gleasner, Kim McMurry, Alina Deshpande, Twila Kunde, Joseph Hicks, Michael Edwards, Patrick Chain                                                                                                                                                                                                                                     |
| EPI_ISL_602564                                                                                                                 | Centre for Dengue Research, Department of Immunology and Molecular Medicine | Centre for Dengue Research                                                                  | Chandima Jeewandara, Deshni Jayathilaka, Dinuka Ariyaratne, Diyanath Ranasinghe, Laksiri Gomes, Ananda Wijewickrama, Malika Karunaratne, Gathsaurie Neelika Malavige                                                                                                                                                                                                     |
| EPI_ISL_602565                                                                                                                 | Centre for Dengue Research, Department of Immunology and Molecular Medicine | Centre for Dengue Research, Department of Immunology and Molecular Medicine                 | Chandima Jeewandara, Deshni Jayathilaka, Dinuka Ariyaratne, Diyanath Ranasinghe, Laksiri Gomes, Dinuka Guruge, Ruwan Wijayamuni, Gathsaurie Neelika Malavige                                                                                                                                                                                                             |
| EPI_ISL_602566, EPI_ISL_602567, EPI_ISL_602568, EPI_ISL_602569                                                                 | Centre for Dengue Research, Department of Immunology and Molecular Medicine | Centre for Dengue Research, Department of Immunology and Molecular Medicine                 | Chandima Jeewandara, Deshni Jayathilaka, Dinuka Ariyaratne, Laksiri Gomes, Diyanath Ranasinghe, Gathsaurie Neelika Malavige                                                                                                                                                                                                                                              |
| EPI_ISL_602570, EPI_ISL_602571                                                                                                 | Centre for Dengue Research, Department of Immunology and Molecular Medicine | Centre for Dengue Research, Department of Immunology and Molecular Medicine                 | Chandima Jeewandara, Deshni Jayathilaka, Dinuka Ariyaratne, Laksiri Gomes, Diyanath Ranasinghe, Ananda Wijewickrama, Malika Karunaratne, Gathsaurie Neelika Malavige                                                                                                                                                                                                     |
| EPI_ISL_602572, EPI_ISL_602573                                                                                                 | Centre for Dengue Research, Department of Immunology and Molecular Medicine | Centre for Dengue Research, Department of Immunology and Molecular Medicine                 | Chandima Jeewandara, Deshni Jayathilaka, Dinuka Ariyaratne, Diyanath Ranasinghe, Laksiri Gomes, Dinuka Guruge, Ruwan Wijayamuni, Gathsaurie Neelika Malavige                                                                                                                                                                                                             |
| EPI_ISL_602574, EPI_ISL_602575, EPI_ISL_602576                                                                                 | Centre for Dengue Research, Department of Immunology and Molecular Medicine | Centre for Dengue Research, Department of Immunology and Molecular Medicine                 | Chandima Jeewandara, Deshni Jayathilaka, Dinuka Ariyaratne, Laksiri Gomes, Diyanath Ranasinghe, Gathsaurie Neelika Malavige                                                                                                                                                                                                                                              |
| EPI_ISL_603024                                                                                                                 | Santa Casa de Misericórdia de Araçatuba                                     | Instituto Adolfo Lutz, Interdisciplinary Procedures Center, Strategic Laboratory            | Claudio Tavares Sacchi, Claudia Regina Gonçalves, Erica Valessa Ramos Gomes, Karoline Rodrigues Campos                                                                                                                                                                                                                                                                   |
| EPI_ISL_603026                                                                                                                 | Santa Casa da Misericórdia de Presidente Prudente                           | Instituto Adolfo Lutz, Interdisciplinary Procedures Center, Strategic Laboratory            | Claudio Tavares Sacchi, Claudia Regina Gonçalves, Erica Valessa Ramos Gomes, Karoline Rodrigues Campos                                                                                                                                                                                                                                                                   |
| EPI_ISL_603028                                                                                                                 | Hospital Municipal Santa Ana                                                | Instituto Adolfo Lutz, Interdisciplinary Procedures Center, Strategic Laboratory            | Claudio Tavares Sacchi, Claudia Regina Gonçalves, Erica Valessa Ramos Gomes, Karoline Rodrigues Campos                                                                                                                                                                                                                                                                   |
| EPI_ISL_603030                                                                                                                 | Hospital Domingos Leonardo Ceravolo Presidente Prudente                     | Instituto Adolfo Lutz, Interdisciplinary Procedures Center, Strategic Laboratory            | Claudio Tavares Sacchi, Claudia Regina Gonçalves, Erica Valessa Ramos Gomes, Karoline Rodrigues Campos                                                                                                                                                                                                                                                                   |
| EPI_ISL_603031                                                                                                                 | Santa Casa de Presidente Epitácio                                           | Instituto Adolfo Lutz, Interdisciplinary Procedures Center, Strategic Laboratory            | Claudio Tavares Sacchi, Claudia Regina Gonçalves, Erica Valessa Ramos Gomes, Karoline Rodrigues Campos                                                                                                                                                                                                                                                                   |
| EPI_ISL_603034                                                                                                                 | Departamento de Vigilância à Saúde                                          | Instituto Adolfo Lutz, Interdisciplinary Procedures Center, Strategic Laboratory            | Claudio Tavares Sacchi, Claudia Regina Gonçalves, Erica Valessa Ramos Gomes, Karoline Rodrigues Campos                                                                                                                                                                                                                                                                   |
| EPI_ISL_603036                                                                                                                 | Hospital Santa Ana                                                          | Instituto Adolfo Lutz, Interdisciplinary Procedures Center, Strategic Laboratory            | Claudio Tavares Sacchi, Claudia Regina Gonçalves, Erica Valessa Ramos Gomes, Karoline Rodrigues Campos                                                                                                                                                                                                                                                                   |
| EPI_ISL_603038                                                                                                                 | Santa Casa de Misericórdia de Araçatuba                                     | Instituto Adolfo Lutz, Interdisciplinary Procedures Center, Strategic Laboratory            | Claudio Tavares Sacchi, Claudia Regina Gonçalves, Erica Valessa Ramos Gomes, Karoline Rodrigues Campos                                                                                                                                                                                                                                                                   |
| EPI_ISL_603039                                                                                                                 | Hospital Municipal Mário Gatti                                              | Instituto Adolfo Lutz, Interdisciplinary Procedures Center, Strategic Laboratory            | Claudio Tavares Sacchi, Claudia Regina Gonçalves, Erica Valessa Ramos Gomes, Karoline Rodrigues Campos                                                                                                                                                                                                                                                                   |
| EPI_ISL_603137                                                                                                                 | INMI Lazzaro Spallanzani IRCCS                                              | INMI Lazzaro Spallanzani IRCCS                                                              | Cesare E.M. Gruber, Martina Rueca, Barbara Bartolini, Francesco Messina, Emanuela Giombini, Simone Lanini, Antonino Di Caro, Maria R. Capobianchi                                                                                                                                                                                                                        |
| EPI_ISL_603144                                                                                                                 | INMI Lazzaro Spallanzani IRCCS                                              | INMI Lazzaro Spallanzani IRCCS                                                              | Cesare E.M. Gruber, Martina Rueca, Francesco Messina, Barbara Bartolini, Emanuela Giombini, Simone Lanini, Maria R. Capobianchi, Antonino Di Caro                                                                                                                                                                                                                        |
| EPI_ISL_603146                                                                                                                 | INMI Lazzaro Spallanzani IRCCS                                              | INMI Lazzaro Spallanzani IRCCS                                                              | Cesare E.M. Gruber, Martina Rueca, Barbara Bartolini, Emanuela Giombini, Francesco Messina, Simone Lanini, Maria R. Capobianchi, Antonino Di Caro                                                                                                                                                                                                                        |
| EPI_ISL_603147                                                                                                                 | INMI Lazzaro Spallanzani IRCCS                                              | INMI Lazzaro Spallanzani IRCCS                                                              | Cesare E.M. Gruber, Barbara Bartolini, Francesco Messina, Martina Rueca, Simone Lanini, Emanuela Giombini, Antonino Di Caro, Maria R. Capobianchi                                                                                                                                                                                                                        |
| EPI_ISL_603148                                                                                                                 | INMI Lazzaro Spallanzani IRCCS                                              | INMI Lazzaro Spallanzani IRCCS                                                              | Cesare E.M. Gruber, Francesco Messina, Martina Rueca, Simone Lanini, Emanuela Giombini, Barbara Bartolini, Maria R. Capobianchi, Antonino Di Caro                                                                                                                                                                                                                        |
| EPI_ISL_603161                                                                                                                 | INMI Lazzaro Spallanzani IRCCS                                              | INMI Lazzaro Spallanzani IRCCS                                                              | Cesare E.M. Gruber, Barbara Bartolini, Francesco Messina, Martina Rueca, Emanuela Giombini, Simone Lanini, Fulvia Pimpinelli, Antonino Di Caro, Maria R. Capobianchi                                                                                                                                                                                                     |
| EPI_ISL_603162                                                                                                                 | INMI Lazzaro Spallanzani IRCCS                                              | INMI Lazzaro Spallanzani IRCCS                                                              | Cesare E.M. Gruber, Francesco Messina, Martina Rueca, Barbara Bartolini, Emanuela Giombini, Simone Lanini, Fulvia Pimpinelli, Antonino Di Caro, Maria R. Capobianchi                                                                                                                                                                                                     |
| EPI_ISL_603163                                                                                                                 | INMI Lazzaro Spallanzani IRCCS                                              | INMI Lazzaro Spallanzani IRCCS                                                              | Cesare E.M. Gruber, Martina Rueca, Emanuela Giombini, Simone Lanini, Francesco Messina, Barbara Bartolini, Fulvia Pimpinelli, Maria R. Capobianchi, Antonino Di Caro                                                                                                                                                                                                     |
| EPI_ISL_603164                                                                                                                 | INMI Lazzaro Spallanzani IRCCS                                              | INMI Lazzaro Spallanzani IRCCS                                                              | Cesare E.M. Gruber, Francesco Messina, Martina Rueca, Barbara Bartolini, Emanuela Giombini, Simone Lanini, Fulvia Pimpinelli, Antonino Di Caro, Maria R. Capobianchi                                                                                                                                                                                                     |
| EPI_ISL_603172                                                                                                                 | INMI Lazzaro Spallanzani IRCCS                                              | INMI Lazzaro Spallanzani IRCCS                                                              | Cesare E.M. Gruber, Martina Rueca, Barbara Bartolini, Simone Lanini, Francesco Messina, Emanuela Giombini, Mariarosa Gaudio, Antonino Di Caro, Maria R. Capobianchi                                                                                                                                                                                                      |
| EPI_ISL_603176                                                                                                                 | INMI Lazzaro Spallanzani IRCCS                                              | INMI Lazzaro Spallanzani IRCCS                                                              | Cesare E.M. Gruber, Barbara Bartolini, Francesco Messina, Martina Rueca, Simone Lanini, Emanuela Giombini, Antonino Di Caro, Maria R. Capobianchi                                                                                                                                                                                                                        |
| EPI_ISL_603179                                                                                                                 | INMI Lazzaro Spallanzani IRCCS                                              | INMI Lazzaro Spallanzani IRCCS                                                              | Cesare E.M. Gruber, Barbara Bartolini, Francesco Messina, Martina Rueca, Emanuela Giombini, Simone Lanini, Antonino Di Caro, Maria R. Capobianchi                                                                                                                                                                                                                        |

|                                                                                                                                                                                                                                                                                                                                                                                                                                                                                                                                                                                                                                                                                                                                                                                                                                                                                                                                                                                                                                                                                                                                                                                                                                                                                                                                                                                                                                                                                                                                                                                                                                                                                                                                                                                                                                                                                                                                                                                                                                                                                                                                                                                                                                                                                                                                                                                                                                                                                                                                                                                                                                                                                                                                                                                                                                                                                                                                                                                                                                                                                                                                                                                                                                                                                                                                                                                                                                                                                                                                                                                                                                                                                                                                                                                                                                                                                                                                                                                                                                                                                                                                                                                                                                                                                                                                                                                                                                                                                                                                                                                                                                                                                                                                                                                                                                                                                                                                                                                                                                                                                                                                                                                                                                                                                                                                                                                                                                                                                                                                                                                                                                                                                                                                                                                                                                                                                                                                                                                                                                                                                                                                                                                                                                                                                                                                                                                                                                                                                                                                                                                                                                                                                                                                                                                                                                                                                                                                                                                                                                                                                                                                                                                                                                                                                                                                                                                                                                                                                                                                                                                                                                                                                                                                                                                                                                                                                                                                                                                                                                                                                                |                                                                         |                                                                                                     |                                                                                                                                                                                                                                                                                                                                                                          |                                                                                                                                                                                                                                                                                                                                            |
|------------------------------------------------------------------------------------------------------------------------------------------------------------------------------------------------------------------------------------------------------------------------------------------------------------------------------------------------------------------------------------------------------------------------------------------------------------------------------------------------------------------------------------------------------------------------------------------------------------------------------------------------------------------------------------------------------------------------------------------------------------------------------------------------------------------------------------------------------------------------------------------------------------------------------------------------------------------------------------------------------------------------------------------------------------------------------------------------------------------------------------------------------------------------------------------------------------------------------------------------------------------------------------------------------------------------------------------------------------------------------------------------------------------------------------------------------------------------------------------------------------------------------------------------------------------------------------------------------------------------------------------------------------------------------------------------------------------------------------------------------------------------------------------------------------------------------------------------------------------------------------------------------------------------------------------------------------------------------------------------------------------------------------------------------------------------------------------------------------------------------------------------------------------------------------------------------------------------------------------------------------------------------------------------------------------------------------------------------------------------------------------------------------------------------------------------------------------------------------------------------------------------------------------------------------------------------------------------------------------------------------------------------------------------------------------------------------------------------------------------------------------------------------------------------------------------------------------------------------------------------------------------------------------------------------------------------------------------------------------------------------------------------------------------------------------------------------------------------------------------------------------------------------------------------------------------------------------------------------------------------------------------------------------------------------------------------------------------------------------------------------------------------------------------------------------------------------------------------------------------------------------------------------------------------------------------------------------------------------------------------------------------------------------------------------------------------------------------------------------------------------------------------------------------------------------------------------------------------------------------------------------------------------------------------------------------------------------------------------------------------------------------------------------------------------------------------------------------------------------------------------------------------------------------------------------------------------------------------------------------------------------------------------------------------------------------------------------------------------------------------------------------------------------------------------------------------------------------------------------------------------------------------------------------------------------------------------------------------------------------------------------------------------------------------------------------------------------------------------------------------------------------------------------------------------------------------------------------------------------------------------------------------------------------------------------------------------------------------------------------------------------------------------------------------------------------------------------------------------------------------------------------------------------------------------------------------------------------------------------------------------------------------------------------------------------------------------------------------------------------------------------------------------------------------------------------------------------------------------------------------------------------------------------------------------------------------------------------------------------------------------------------------------------------------------------------------------------------------------------------------------------------------------------------------------------------------------------------------------------------------------------------------------------------------------------------------------------------------------------------------------------------------------------------------------------------------------------------------------------------------------------------------------------------------------------------------------------------------------------------------------------------------------------------------------------------------------------------------------------------------------------------------------------------------------------------------------------------------------------------------------------------------------------------------------------------------------------------------------------------------------------------------------------------------------------------------------------------------------------------------------------------------------------------------------------------------------------------------------------------------------------------------------------------------------------------------------------------------------------------------------------------------------------------------------------------------------------------------------------------------------------------------------------------------------------------------------------------------------------------------------------------------------------------------------------------------------------------------------------------------------------------------------------------------------------------------------------------------------------------------------------------------------------------------------------------------------------------------------------------------------------------------------------------------------------------------------------------------------------------------------------------------------------------------------------------------------------------------------------------------------------------------------------------------------------------------------------------------------------------------------------------------------------------------------------------------------------------|-------------------------------------------------------------------------|-----------------------------------------------------------------------------------------------------|--------------------------------------------------------------------------------------------------------------------------------------------------------------------------------------------------------------------------------------------------------------------------------------------------------------------------------------------------------------------------|--------------------------------------------------------------------------------------------------------------------------------------------------------------------------------------------------------------------------------------------------------------------------------------------------------------------------------------------|
| EPI_ISL_603185                                                                                                                                                                                                                                                                                                                                                                                                                                                                                                                                                                                                                                                                                                                                                                                                                                                                                                                                                                                                                                                                                                                                                                                                                                                                                                                                                                                                                                                                                                                                                                                                                                                                                                                                                                                                                                                                                                                                                                                                                                                                                                                                                                                                                                                                                                                                                                                                                                                                                                                                                                                                                                                                                                                                                                                                                                                                                                                                                                                                                                                                                                                                                                                                                                                                                                                                                                                                                                                                                                                                                                                                                                                                                                                                                                                                                                                                                                                                                                                                                                                                                                                                                                                                                                                                                                                                                                                                                                                                                                                                                                                                                                                                                                                                                                                                                                                                                                                                                                                                                                                                                                                                                                                                                                                                                                                                                                                                                                                                                                                                                                                                                                                                                                                                                                                                                                                                                                                                                                                                                                                                                                                                                                                                                                                                                                                                                                                                                                                                                                                                                                                                                                                                                                                                                                                                                                                                                                                                                                                                                                                                                                                                                                                                                                                                                                                                                                                                                                                                                                                                                                                                                                                                                                                                                                                                                                                                                                                                                                                                                                                                                 | INMI Lazzaro Spallanzani IRCCS                                          | INMI Lazzaro Spallanzani IRCCS                                                                      | Cesare E.M. Gruber, Martina Rueca, Barbara Bartolini, Francesco Messina, Simone Lanini, Emanuela Giombini, Maria R. Capobianchi, Antonio Di Caro                                                                                                                                                                                                                         |                                                                                                                                                                                                                                                                                                                                            |
| EPI_ISL_603187                                                                                                                                                                                                                                                                                                                                                                                                                                                                                                                                                                                                                                                                                                                                                                                                                                                                                                                                                                                                                                                                                                                                                                                                                                                                                                                                                                                                                                                                                                                                                                                                                                                                                                                                                                                                                                                                                                                                                                                                                                                                                                                                                                                                                                                                                                                                                                                                                                                                                                                                                                                                                                                                                                                                                                                                                                                                                                                                                                                                                                                                                                                                                                                                                                                                                                                                                                                                                                                                                                                                                                                                                                                                                                                                                                                                                                                                                                                                                                                                                                                                                                                                                                                                                                                                                                                                                                                                                                                                                                                                                                                                                                                                                                                                                                                                                                                                                                                                                                                                                                                                                                                                                                                                                                                                                                                                                                                                                                                                                                                                                                                                                                                                                                                                                                                                                                                                                                                                                                                                                                                                                                                                                                                                                                                                                                                                                                                                                                                                                                                                                                                                                                                                                                                                                                                                                                                                                                                                                                                                                                                                                                                                                                                                                                                                                                                                                                                                                                                                                                                                                                                                                                                                                                                                                                                                                                                                                                                                                                                                                                                                                 | INMI Lazzaro Spallanzani IRCCS                                          | INMI Lazzaro Spallanzani IRCCS                                                                      | Cesare E.M. Gruber, Martina Rueca, Francesco Messina, Barbara Bartolini, Simone Lanini, Emanuela Giombini, Antonio Di Caro, Maria R. Capobianchi                                                                                                                                                                                                                         |                                                                                                                                                                                                                                                                                                                                            |
| EPI_ISL_603267, EPI_ISL_603268, EPI_ISL_603269, EPI_ISL_603270, EPI_ISL_603271, EPI_ISL_603272, EPI_ISL_603273, EPI_ISL_603274, EPI_ISL_603275, EPI_ISL_603276, EPI_ISL_603277, EPI_ISL_603278, EPI_ISL_603279, EPI_ISL_603280, EPI_ISL_603281, EPI_ISL_603282, EPI_ISL_603283, EPI_ISL_603284, EPI_ISL_603285, EPI_ISL_603286, EPI_ISL_603287, EPI_ISL_603288, EPI_ISL_603289, EPI_ISL_603290, EPI_ISL_603291, EPI_ISL_603292, EPI_ISL_603293, EPI_ISL_603294, EPI_ISL_603295, EPI_ISL_603296, EPI_ISL_603297, EPI_ISL_603298, EPI_ISL_603299, EPI_ISL_603300, EPI_ISL_603301, EPI_ISL_603302, EPI_ISL_603303, EPI_ISL_603304, EPI_ISL_603305, EPI_ISL_603306, EPI_ISL_603307, EPI_ISL_603308, EPI_ISL_603309, EPI_ISL_603310, EPI_ISL_603311, EPI_ISL_603312, EPI_ISL_603313, EPI_ISL_603314, EPI_ISL_603315, EPI_ISL_603316, EPI_ISL_603317, EPI_ISL_603318, EPI_ISL_603319, EPI_ISL_603320, EPI_ISL_603321, EPI_ISL_603322, EPI_ISL_603323, EPI_ISL_603324, EPI_ISL_603325, EPI_ISL_603326, EPI_ISL_603327, EPI_ISL_603328, EPI_ISL_603329, EPI_ISL_603330, EPI_ISL_603331, EPI_ISL_603332, EPI_ISL_603333, EPI_ISL_603334, EPI_ISL_603335, EPI_ISL_603336, EPI_ISL_603337, EPI_ISL_603338, EPI_ISL_603339, EPI_ISL_603340, EPI_ISL_603341, EPI_ISL_603342, EPI_ISL_603343, EPI_ISL_603344, EPI_ISL_603345, EPI_ISL_603346, EPI_ISL_603347, EPI_ISL_603348, EPI_ISL_603349, EPI_ISL_603350, EPI_ISL_603351, EPI_ISL_603352, EPI_ISL_603353, EPI_ISL_603354, EPI_ISL_603355, EPI_ISL_603356, EPI_ISL_603357, EPI_ISL_603358, EPI_ISL_603359, EPI_ISL_603360, EPI_ISL_603361, EPI_ISL_603362, EPI_ISL_603363, EPI_ISL_603364, EPI_ISL_603365, EPI_ISL_603366, EPI_ISL_603367, EPI_ISL_603368, EPI_ISL_603369, EPI_ISL_603370, EPI_ISL_603371, EPI_ISL_603372, EPI_ISL_603373, EPI_ISL_603374, EPI_ISL_603375, EPI_ISL_603376, EPI_ISL_603377, EPI_ISL_603378, EPI_ISL_603379, EPI_ISL_603380, EPI_ISL_603381, EPI_ISL_603382, EPI_ISL_603383, EPI_ISL_603384, EPI_ISL_603385, EPI_ISL_603386, EPI_ISL_603387, EPI_ISL_603388, EPI_ISL_603389, EPI_ISL_603390, EPI_ISL_603391, EPI_ISL_603392, EPI_ISL_603393, EPI_ISL_603394, EPI_ISL_603395, EPI_ISL_603396, EPI_ISL_603397, EPI_ISL_603398, EPI_ISL_603399, EPI_ISL_603400, EPI_ISL_603401, EPI_ISL_603402, EPI_ISL_603403, EPI_ISL_603404, EPI_ISL_603405, EPI_ISL_603406, EPI_ISL_603407, EPI_ISL_603408, EPI_ISL_603409, EPI_ISL_603410, EPI_ISL_603411, EPI_ISL_603412, EPI_ISL_603413, EPI_ISL_603414, EPI_ISL_603415, EPI_ISL_603416, EPI_ISL_603417, EPI_ISL_603418, EPI_ISL_603419, EPI_ISL_603420, EPI_ISL_603421, EPI_ISL_603422, EPI_ISL_603423, EPI_ISL_603424, EPI_ISL_603425, EPI_ISL_603426, EPI_ISL_603427, EPI_ISL_603428, EPI_ISL_603429, EPI_ISL_603430, EPI_ISL_603431, EPI_ISL_603432, EPI_ISL_603433, EPI_ISL_603434, EPI_ISL_603435, EPI_ISL_603436, EPI_ISL_603437, EPI_ISL_603438, EPI_ISL_603439, EPI_ISL_603440, EPI_ISL_603441, EPI_ISL_603442, EPI_ISL_603443, EPI_ISL_603444, EPI_ISL_603445, EPI_ISL_603446, EPI_ISL_603447, EPI_ISL_603448, EPI_ISL_603449, EPI_ISL_603450, EPI_ISL_603451, EPI_ISL_603452, EPI_ISL_603453, EPI_ISL_603454, EPI_ISL_603455, EPI_ISL_603456, EPI_ISL_603457, EPI_ISL_603458, EPI_ISL_603459, EPI_ISL_603460, EPI_ISL_603461, EPI_ISL_603462, EPI_ISL_603463, EPI_ISL_603464, EPI_ISL_603465, EPI_ISL_603466, EPI_ISL_603467, EPI_ISL_603468, EPI_ISL_603469, EPI_ISL_603470, EPI_ISL_603471, EPI_ISL_603472, EPI_ISL_603473, EPI_ISL_603474, EPI_ISL_603475, EPI_ISL_603476, EPI_ISL_603477, EPI_ISL_603478, EPI_ISL_603479, EPI_ISL_603480, EPI_ISL_603481, EPI_ISL_603482, EPI_ISL_603483, EPI_ISL_603484, EPI_ISL_603485, EPI_ISL_603486, EPI_ISL_603487, EPI_ISL_603488, EPI_ISL_603489, EPI_ISL_603490, EPI_ISL_603491, EPI_ISL_603492, EPI_ISL_603493, EPI_ISL_603494, EPI_ISL_603495, EPI_ISL_603496, EPI_ISL_603497, EPI_ISL_603498, EPI_ISL_603499, EPI_ISL_603500, EPI_ISL_603501, EPI_ISL_603502, EPI_ISL_603503, EPI_ISL_603504, EPI_ISL_603505, EPI_ISL_603506, EPI_ISL_603507, EPI_ISL_603508, EPI_ISL_603509, EPI_ISL_603510, EPI_ISL_603511, EPI_ISL_603512, EPI_ISL_603513, EPI_ISL_603514, EPI_ISL_603515, EPI_ISL_603516, EPI_ISL_603517, EPI_ISL_603518, EPI_ISL_603519, EPI_ISL_603520, EPI_ISL_603521, EPI_ISL_603522, EPI_ISL_603523, EPI_ISL_603524, EPI_ISL_603525, EPI_ISL_603526, EPI_ISL_603527, EPI_ISL_603528, EPI_ISL_603529, EPI_ISL_603530, EPI_ISL_603531, EPI_ISL_603532, EPI_ISL_603533, EPI_ISL_603534, EPI_ISL_603535, EPI_ISL_603536, EPI_ISL_603537, EPI_ISL_603538, EPI_ISL_603539, EPI_ISL_603540, EPI_ISL_603541, EPI_ISL_603542, EPI_ISL_603543, EPI_ISL_603544, EPI_ISL_603545, EPI_ISL_603546, EPI_ISL_603547, EPI_ISL_603548, EPI_ISL_603549, EPI_ISL_603550, EPI_ISL_603551, EPI_ISL_603552, EPI_ISL_603553, EPI_ISL_603554, EPI_ISL_603555, EPI_ISL_603556, EPI_ISL_603557, EPI_ISL_603558, EPI_ISL_603559, EPI_ISL_603560, EPI_ISL_603561, EPI_ISL_603562, EPI_ISL_603563, EPI_ISL_603564, EPI_ISL_603565, EPI_ISL_603566, EPI_ISL_603567, EPI_ISL_603568, EPI_ISL_603569, EPI_ISL_603570, EPI_ISL_603571, EPI_ISL_603572, EPI_ISL_603573, EPI_ISL_603574, EPI_ISL_603575, EPI_ISL_603576, EPI_ISL_603577, EPI_ISL_603578, EPI_ISL_603579, EPI_ISL_603580, EPI_ISL_603581, EPI_ISL_603582, EPI_ISL_603583, EPI_ISL_603584, EPI_ISL_603585, EPI_ISL_603586, EPI_ISL_603587, EPI_ISL_603588, EPI_ISL_603589, EPI_ISL_603590, EPI_ISL_603591, EPI_ISL_603592, EPI_ISL_603593, EPI_ISL_603594, EPI_ISL_603595, EPI_ISL_603596, EPI_ISL_603597, EPI_ISL_603598, EPI_ISL_603599, EPI_ISL_603600, EPI_ISL_603601, EPI_ISL_603602, EPI_ISL_603603, EPI_ISL_603604, EPI_ISL_603605, EPI_ISL_603606, EPI_ISL_603607, EPI_ISL_603608, EPI_ISL_603609, EPI_ISL_603610, EPI_ISL_603611, EPI_ISL_603612, EPI_ISL_603613, EPI_ISL_603614, EPI_ISL_603615, EPI_ISL_603616, EPI_ISL_603617, EPI_ISL_603618, EPI_ISL_603619, EPI_ISL_603620, EPI_ISL_603621, EPI_ISL_603622, EPI_ISL_603623, EPI_ISL_603624, EPI_ISL_603625, EPI_ISL_603626, EPI_ISL_603627, EPI_ISL_603628, EPI_ISL_603629, EPI_ISL_603630, EPI_ISL_603631, EPI_ISL_603632, EPI_ISL_603633, EPI_ISL_603634, EPI_ISL_603635, EPI_ISL_603636, EPI_ISL_603637, EPI_ISL_603638, EPI_ISL_603639, EPI_ISL_603640, EPI_ISL_603641, EPI_ISL_603642, EPI_ISL_603643, EPI_ISL_603644, EPI_ISL_603645, EPI_ISL_603646, EPI_ISL_603647, EPI_ISL_603648, EPI_ISL_603649, EPI_ISL_603650, EPI_ISL_603651, EPI_ISL_603652, EPI_ISL_603653, EPI_ISL_603654, EPI_ISL_603655, EPI_ISL_603656, EPI_ISL_603657, EPI_ISL_603658, EPI_ISL_603659, EPI_ISL_603660, EPI_ISL_603661, EPI_ISL_603662, EPI_ISL_603663, EPI_ISL_603664, EPI_ISL_603665, EPI_ISL_603666, EPI_ISL_603667, EPI_ISL_603668, EPI_ISL_603669, EPI_ISL_603670, EPI_ISL_603671, EPI_ISL_603672, EPI_ISL_603673, EPI_ISL_603674, EPI_ISL_603675, EPI_ISL_603676, EPI_ISL_603677, EPI_ISL_603678, EPI_ISL_603679, EPI_ISL_603680, EPI_ISL_603681, EPI_ISL_603682, EPI_ISL_603683, EPI_ISL_603684, EPI_ISL_603685, EPI_ISL_603686, EPI_ISL_603687, EPI_ISL_603688, EPI_ISL_603689, EPI_ISL_603690, EPI_ISL_603691, EPI_ISL_603692, EPI_ISL_603693, EPI_ISL_603694, EPI_ISL_603695, EPI_ISL_603696, EPI_ISL_603697, EPI_ISL_603698, EPI_ISL_603699, EPI_ISL_603700, EPI_ISL_603701, EPI_ISL_603702, EPI_ISL_603703, EPI_ISL_603704, EPI_ISL_603705, EPI_ISL_603706, EPI_ISL_603707, EPI_ISL_603708, EPI_ISL_603709, EPI_ISL_603710, EPI_ISL_603711, EPI_ISL_603712, EPI_ISL_603713, EPI_ISL_603714, EPI_ISL_603715, EPI_ISL_603716, EPI_ISL_603717, EPI_ISL_603718, EPI_ISL_603719, EPI_ISL_603720, EPI_ISL_603721, EPI_ISL_603722, EPI_ISL_603723, EPI_ISL_603724, EPI_ISL_603725, EPI_ISL_603726, EPI_ISL_603727, EPI_ISL_603728, EPI_ISL_603729, EPI_ISL_603730, EPI_ISL_603731, EPI_ISL_603732, EPI_ISL_603733, EPI_ISL_603734, EPI_ISL_603735, EPI_ISL_603736, EPI_ISL_603737, EPI_ISL_603738, EPI_ISL_603739, EPI_ISL_603740, EPI_ISL_603741, EPI_ISL_603742, EPI_ISL_603743, EPI_ISL_603744, EPI_ISL_603745, EPI_ISL_603746, EPI_ISL_603747, EPI_ISL_603748, EPI_ISL_603749, EPI_ISL_603750, EPI_ISL_603751, EPI_ISL_603752 | see above                                                               | Viollier AG                                                                                         | Department of Biosystems Science and Engineering, ETH Zürich                                                                                                                                                                                                                                                                                                             | Christian Beisel, Sarah Nadeau, Ivan Topolsky, Pedro Ferreira, Philipp Jablonski, Susana Posada-Céspedes, Tobias Schär, Ina Nissen, Natascha Santacroce, Elodie Burcklen, Christiane Beckmann, Maurice Redondo, Olivier Kobel, Christoph Noppen, Sophie Seidel, Noemie Santamaria de Souza, Niko Beerenwinkel, Tanja Stadler               |
| EPI_ISL_612697, EPI_ISL_612842, EPI_ISL_612859, EPI_ISL_612911, EPI_ISL_612966, EPI_ISL_613076, EPI_ISL_613091, EPI_ISL_613118, EPI_ISL_613169, EPI_ISL_613275                                                                                                                                                                                                                                                                                                                                                                                                                                                                                                                                                                                                                                                                                                                                                                                                                                                                                                                                                                                                                                                                                                                                                                                                                                                                                                                                                                                                                                                                                                                                                                                                                                                                                                                                                                                                                                                                                                                                                                                                                                                                                                                                                                                                                                                                                                                                                                                                                                                                                                                                                                                                                                                                                                                                                                                                                                                                                                                                                                                                                                                                                                                                                                                                                                                                                                                                                                                                                                                                                                                                                                                                                                                                                                                                                                                                                                                                                                                                                                                                                                                                                                                                                                                                                                                                                                                                                                                                                                                                                                                                                                                                                                                                                                                                                                                                                                                                                                                                                                                                                                                                                                                                                                                                                                                                                                                                                                                                                                                                                                                                                                                                                                                                                                                                                                                                                                                                                                                                                                                                                                                                                                                                                                                                                                                                                                                                                                                                                                                                                                                                                                                                                                                                                                                                                                                                                                                                                                                                                                                                                                                                                                                                                                                                                                                                                                                                                                                                                                                                                                                                                                                                                                                                                                                                                                                                                                                                                                                                 | Wales Specialist Virology Centre Sequencing lab: Pathogen Genomics Unit | COVID-19 Genomics UK (COG-UK) Consortium                                                            | Catherine Moore, Johnathan Evans, Laura Gifford, Malorie Perry, Simon Cottrell, Angela Marchbank, Alec Birchley, Alexander Adams, Amy Gaskin, Bree Gatica-Wilcox, Jason Coombes, Joel Southgate, Lauren Gilbert, Lee Graham, Nicole Pacchiarini, Sara Kumziene-Summerhayes, Sarah Taylor, Sophie Jones, Sara Rey, Matthew Bull, Joanne Watkins, Sally Corden, Tom Connor |                                                                                                                                                                                                                                                                                                                                            |
| EPI_ISL_614347, EPI_ISL_614348, EPI_ISL_614349, EPI_ISL_614350, EPI_ISL_614351, EPI_ISL_614352, EPI_ISL_614353, EPI_ISL_614354, EPI_ISL_614355, EPI_ISL_614356, EPI_ISL_614357, EPI_ISL_614358, EPI_ISL_614359, EPI_ISL_614360, EPI_ISL_614361, EPI_ISL_614362, EPI_ISL_614363, EPI_ISL_614364, EPI_ISL_614365, EPI_ISL_614366, EPI_ISL_614367, EPI_ISL_614368, EPI_ISL_614369, EPI_ISL_614370, EPI_ISL_614371, EPI_ISL_614372, EPI_ISL_614373, EPI_ISL_614374, EPI_ISL_614375, EPI_ISL_614376, EPI_ISL_614377, EPI_ISL_614378, EPI_ISL_614379, EPI_ISL_614380, EPI_ISL_614381, EPI_ISL_614382, EPI_ISL_614383, EPI_ISL_614384, EPI_ISL_614385, EPI_ISL_614386, EPI_ISL_614387, EPI_ISL_614388, EPI_ISL_614389, EPI_ISL_614390, EPI_ISL_614391, EPI_ISL_614392, EPI_ISL_614393, EPI_ISL_614394, EPI_ISL_614395                                                                                                                                                                                                                                                                                                                                                                                                                                                                                                                                                                                                                                                                                                                                                                                                                                                                                                                                                                                                                                                                                                                                                                                                                                                                                                                                                                                                                                                                                                                                                                                                                                                                                                                                                                                                                                                                                                                                                                                                                                                                                                                                                                                                                                                                                                                                                                                                                                                                                                                                                                                                                                                                                                                                                                                                                                                                                                                                                                                                                                                                                                                                                                                                                                                                                                                                                                                                                                                                                                                                                                                                                                                                                                                                                                                                                                                                                                                                                                                                                                                                                                                                                                                                                                                                                                                                                                                                                                                                                                                                                                                                                                                                                                                                                                                                                                                                                                                                                                                                                                                                                                                                                                                                                                                                                                                                                                                                                                                                                                                                                                                                                                                                                                                                                                                                                                                                                                                                                                                                                                                                                                                                                                                                                                                                                                                                                                                                                                                                                                                                                                                                                                                                                                                                                                                                                                                                                                                                                                                                                                                                                                                                                                                                                                                                                 | see above                                                               | Molecular diagnostic unit for viral haemorrhagic fevers and emerging viruses, Bouaké CHU Laboratory | Project group Epidemiology of Highly Pathogenic Microorganisms, Robert Koch-Institute                                                                                                                                                                                                                                                                                    | Chantal Akoua-Koffi, Diané Bamourou, Etlié Aneh, Essia Belarbi, Safiatou Karidioula, Grit Schubert, Adjaratou Traoré, Soundélé Maïté, Monemo Pacome, Coulibaly Mbegnan, Bamba Fatoumata Touré, Kra Oufoué, Fabian Leendertz                                                                                                                |
| EPI_ISL_614893, EPI_ISL_614894, EPI_ISL_614895, EPI_ISL_614896, EPI_ISL_614897, EPI_ISL_614898, EPI_ISL_614899, EPI_ISL_614900, EPI_ISL_614901, EPI_ISL_614902, EPI_ISL_614903, EPI_ISL_614904, EPI_ISL_614905, EPI_ISL_614906, EPI_ISL_614907, EPI_ISL_614908, EPI_ISL_614909, EPI_ISL_614910, EPI_ISL_614911, EPI_ISL_614912, EPI_ISL_614913, EPI_ISL_614914, EPI_ISL_614915, EPI_ISL_614916, EPI_ISL_614917, EPI_ISL_614918, EPI_ISL_614919, EPI_ISL_614920, EPI_ISL_614921, EPI_ISL_614922, EPI_ISL_614923, EPI_ISL_614924, EPI_ISL_614925, EPI_ISL_614926, EPI_ISL_614927, EPI_ISL_614928, EPI_ISL_614929, EPI_ISL_614930, EPI_ISL_614931, EPI_ISL_614932, EPI_ISL_614933, EPI_ISL_614934, EPI_ISL_614935, EPI_ISL_614936, EPI_ISL_614937, EPI_ISL_614938, EPI_ISL_614939, EPI_ISL_614940, EPI_ISL_614941, EPI_ISL_614942, EPI_ISL_614943, EPI_ISL_614944, EPI_ISL_614945, EPI_ISL_614946, EPI_ISL_614947, EPI_ISL_614948, EPI_ISL_614949, EPI_ISL_614950, EPI_ISL_614951, EPI_ISL_614952, EPI_ISL_614953, EPI_ISL_614954, EPI_ISL_614955, EPI_ISL_614956, EPI_ISL_614957, EPI_ISL_614958, EPI_ISL_614959, EPI_ISL_614960, EPI_ISL_614961, EPI_ISL_614962, EPI_ISL_614963, EPI_ISL_614964, EPI_ISL_614965, EPI_ISL_614966, EPI_ISL_614967, EPI_ISL_614968, EPI_ISL_614969, EPI_ISL_614970, EPI_ISL_614971, EPI_ISL_614972, EPI_ISL_614973, EPI_ISL_614974, EPI_ISL_614975, EPI_ISL_614976, EPI_ISL_614977, EPI_ISL_614978, EPI_ISL_614979                                                                                                                                                                                                                                                                                                                                                                                                                                                                                                                                                                                                                                                                                                                                                                                                                                                                                                                                                                                                                                                                                                                                                                                                                                                                                                                                                                                                                                                                                                                                                                                                                                                                                                                                                                                                                                                                                                                                                                                                                                                                                                                                                                                                                                                                                                                                                                                                                                                                                                                                                                                                                                                                                                                                                                                                                                                                                                                                                                                                                                                                                                                                                                                                                                                                                                                                                                                                                                                                                                                                                                                                                                                                                                                                                                                                                                                                                                                                                                                                                                                                                                                                                                                                                                                                                                                                                                                                                                                                                                                                                                                                                                                                                                                                                                                                                                                                                                                                                                                                                                                                                                                                                                                                                                                                                                                                                                                                                                                                                                                                                                                                                                                                                                                                                                                                                                                                                                                                                                                                                                                                                                                                                                                                                                                                                                                                                                                                                                                                                                                                                                                                                                                 | see above                                                               | Viollier AG                                                                                         | Department of Biosystems Science and Engineering, ETH Zürich                                                                                                                                                                                                                                                                                                             | Christian Beisel, Sarah Nadeau, Ivan Topolsky, Pedro Ferreira, Philipp Jablonski, Susana Posada-Céspedes, Tobias Schär, Ina Nissen, Natascha Santacroce, Elodie Burcklen, Christiane Beckmann, Maurice Redondo, Olivier Kobel, Christoph Noppen, Sophie Seidel, Noemie Santamaria de Souza, Chaoran Chen, Niko Beerenwinkel, Tanja Stadler |
| EPI_ISL_625456                                                                                                                                                                                                                                                                                                                                                                                                                                                                                                                                                                                                                                                                                                                                                                                                                                                                                                                                                                                                                                                                                                                                                                                                                                                                                                                                                                                                                                                                                                                                                                                                                                                                                                                                                                                                                                                                                                                                                                                                                                                                                                                                                                                                                                                                                                                                                                                                                                                                                                                                                                                                                                                                                                                                                                                                                                                                                                                                                                                                                                                                                                                                                                                                                                                                                                                                                                                                                                                                                                                                                                                                                                                                                                                                                                                                                                                                                                                                                                                                                                                                                                                                                                                                                                                                                                                                                                                                                                                                                                                                                                                                                                                                                                                                                                                                                                                                                                                                                                                                                                                                                                                                                                                                                                                                                                                                                                                                                                                                                                                                                                                                                                                                                                                                                                                                                                                                                                                                                                                                                                                                                                                                                                                                                                                                                                                                                                                                                                                                                                                                                                                                                                                                                                                                                                                                                                                                                                                                                                                                                                                                                                                                                                                                                                                                                                                                                                                                                                                                                                                                                                                                                                                                                                                                                                                                                                                                                                                                                                                                                                                                                 | Virology Unit, Institut Pasteur de Madagascar                           | Virology Unit, Institut Pasteur de Madagascar                                                       | Christian Ranaivosoa, Cara Brook, Norosoa Razanajatovo, Vida Ahyong, Tsiry Randriambolanantsoa, Michelle Tan, Vololoinaina Raharinosy, Helisoa Razafimanjato, Cristina M. Tato, Joseph L. DeRisi, Soa Fy Andriamandimby, Jean-Michel Heraud, Philippe Dussart                                                                                                            |                                                                                                                                                                                                                                                                                                                                            |
| EPI_ISL_626928, EPI_ISL_627796, EPI_ISL_627888, EPI_ISL_627901, EPI_ISL_628100, EPI_ISL_628123, EPI_ISL_628240                                                                                                                                                                                                                                                                                                                                                                                                                                                                                                                                                                                                                                                                                                                                                                                                                                                                                                                                                                                                                                                                                                                                                                                                                                                                                                                                                                                                                                                                                                                                                                                                                                                                                                                                                                                                                                                                                                                                                                                                                                                                                                                                                                                                                                                                                                                                                                                                                                                                                                                                                                                                                                                                                                                                                                                                                                                                                                                                                                                                                                                                                                                                                                                                                                                                                                                                                                                                                                                                                                                                                                                                                                                                                                                                                                                                                                                                                                                                                                                                                                                                                                                                                                                                                                                                                                                                                                                                                                                                                                                                                                                                                                                                                                                                                                                                                                                                                                                                                                                                                                                                                                                                                                                                                                                                                                                                                                                                                                                                                                                                                                                                                                                                                                                                                                                                                                                                                                                                                                                                                                                                                                                                                                                                                                                                                                                                                                                                                                                                                                                                                                                                                                                                                                                                                                                                                                                                                                                                                                                                                                                                                                                                                                                                                                                                                                                                                                                                                                                                                                                                                                                                                                                                                                                                                                                                                                                                                                                                                                                 | Wales Specialist Virology Centre Sequencing lab: Pathogen Genomics Unit | COVID-19 Genomics UK (COG-UK) Consortium                                                            | Catherine Moore, Johnathan Evans, Laura Gifford, Malorie Perry, Simon Cottrell, Angela Marchbank, Alec Birchley, Alexander Adams, Amy Gaskin, Bree Gatica-Wilcox, Jason Coombes, Joel Southgate, Lauren Gilbert, Lee Graham, Nicole Pacchiarini, Sara Kumziene-Summerhayes, Sarah Taylor, Sophie Jones, Sara Rey, Matthew Bull, Joanne Watkins, Sally Corden, Tom Connor |                                                                                                                                                                                                                                                                                                                                            |
| EPI_ISL_632288, EPI_ISL_632289, EPI_ISL_632290, EPI_ISL_632291, EPI_ISL_632292, EPI_ISL_632293, EPI_ISL_632294, EPI_ISL_632295, EPI_ISL_632296, EPI_ISL_632297, EPI_ISL_632298, EPI_ISL_632299, EPI_ISL_632300, EPI_ISL_632301, EPI_ISL_632302, EPI_ISL_632303, EPI_ISL_632304, EPI_ISL_632305, EPI_ISL_632306, EPI_ISL_632307, EPI_ISL_632308, EPI_ISL_632309                                                                                                                                                                                                                                                                                                                                                                                                                                                                                                                                                                                                                                                                                                                                                                                                                                                                                                                                                                                                                                                                                                                                                                                                                                                                                                                                                                                                                                                                                                                                                                                                                                                                                                                                                                                                                                                                                                                                                                                                                                                                                                                                                                                                                                                                                                                                                                                                                                                                                                                                                                                                                                                                                                                                                                                                                                                                                                                                                                                                                                                                                                                                                                                                                                                                                                                                                                                                                                                                                                                                                                                                                                                                                                                                                                                                                                                                                                                                                                                                                                                                                                                                                                                                                                                                                                                                                                                                                                                                                                                                                                                                                                                                                                                                                                                                                                                                                                                                                                                                                                                                                                                                                                                                                                                                                                                                                                                                                                                                                                                                                                                                                                                                                                                                                                                                                                                                                                                                                                                                                                                                                                                                                                                                                                                                                                                                                                                                                                                                                                                                                                                                                                                                                                                                                                                                                                                                                                                                                                                                                                                                                                                                                                                                                                                                                                                                                                                                                                                                                                                                                                                                                                                                                                                                 | see above                                                               | Brigham and Women's Hospital                                                                        | Jonathan Li laboratory                                                                                                                                                                                                                                                                                                                                                   | Choudhary MC, Esmailzadeh E, Etemad B, Mohammadi A, Regan J, Li JZ                                                                                                                                                                                                                                                                         |
| EPI_ISL_638712, EPI_ISL_638721, EPI_ISL_639018, EPI_ISL_639229, EPI_ISL_639272, EPI_ISL_639355, EPI_ISL_639434, EPI_ISL_639468                                                                                                                                                                                                                                                                                                                                                                                                                                                                                                                                                                                                                                                                                                                                                                                                                                                                                                                                                                                                                                                                                                                                                                                                                                                                                                                                                                                                                                                                                                                                                                                                                                                                                                                                                                                                                                                                                                                                                                                                                                                                                                                                                                                                                                                                                                                                                                                                                                                                                                                                                                                                                                                                                                                                                                                                                                                                                                                                                                                                                                                                                                                                                                                                                                                                                                                                                                                                                                                                                                                                                                                                                                                                                                                                                                                                                                                                                                                                                                                                                                                                                                                                                                                                                                                                                                                                                                                                                                                                                                                                                                                                                                                                                                                                                                                                                                                                                                                                                                                                                                                                                                                                                                                                                                                                                                                                                                                                                                                                                                                                                                                                                                                                                                                                                                                                                                                                                                                                                                                                                                                                                                                                                                                                                                                                                                                                                                                                                                                                                                                                                                                                                                                                                                                                                                                                                                                                                                                                                                                                                                                                                                                                                                                                                                                                                                                                                                                                                                                                                                                                                                                                                                                                                                                                                                                                                                                                                                                                                                 | Wales Specialist Virology Centre Sequencing lab: Pathogen Genomics Unit | COVID-19 Genomics UK (COG-UK) Consortium                                                            | Catherine Moore, Johnathan Evans, Laura Gifford, Malorie Perry, Simon Cottrell, Angela Marchbank, Alec Birchley, Alexander Adams, Amy Gaskin, Bree Gatica-Wilcox, Jason Coombes, Joel Southgate, Lauren Gilbert, Lee Graham, Nicole Pacchiarini, Sara Kumziene-Summerhayes, Sarah Taylor, Sophie Jones, Sara Rey, Matthew Bull, Joanne Watkins, Sally Corden, Tom Connor |                                                                                                                                                                                                                                                                                                                                            |
| EPI_ISL_648043, EPI_ISL_648044, EPI_ISL_648045, EPI_ISL_648046, EPI_ISL_648047, EPI_ISL_648048, EPI_ISL_648049, EPI_ISL_648050, EPI_ISL_648051, EPI_ISL_648052, EPI_ISL_648053, EPI_ISL_648054, EPI_ISL_648055, EPI_ISL_648056, EPI_ISL_648057, EPI_ISL_648058, EPI_ISL_648059, EPI_ISL_648060, EPI_ISL_648061, EPI_ISL_648062, EPI_ISL_648063, EPI_ISL_648064, EPI_ISL_648065, EPI_ISL_648066, EPI_ISL_648067, EPI_ISL_648068, EPI_ISL_648069, EPI_ISL_648070, EPI_ISL_648071, EPI_ISL_648072, EPI_ISL_648073, EPI_ISL_648074, EPI_ISL_648075, EPI_ISL_648076, EPI_ISL_648077, EPI_ISL_648078, EPI_ISL_648079, EPI_ISL_648080, EPI_ISL_648081, EPI_ISL_648082, EPI_ISL_648083, EPI_ISL_648084, EPI_ISL_648085, EPI_ISL_648086, EPI_ISL_648087, EPI_ISL_648088, EPI_ISL_648089, EPI_ISL_648090, EPI_ISL_648091, EPI_ISL_648092, EPI_ISL_648093, EPI_ISL_648094, EPI_ISL_648095, EPI_ISL_648096, EPI_ISL_648097, EPI_ISL_648098, EPI_ISL_648099, EPI_ISL_648100, EPI_ISL_648101, EPI_ISL_648102, EPI_ISL_648103, EPI_ISL_648104, EPI_ISL_648105, EPI_ISL_648106, EPI_ISL_648107, EPI_ISL_648108, EPI_ISL_648109, EPI_ISL_648110, EPI_ISL_648111, EPI_ISL_648112, EPI_ISL_648113, EPI_ISL_648114, EPI_ISL_648115, EPI_ISL_648116, EPI_ISL_648117, EPI_ISL_648118, EPI_ISL_648119, EPI_ISL_648120, EPI_ISL_648121, EPI_ISL_648122, EPI_ISL_648123, EPI_ISL_648124, EPI_ISL_648125, EPI_ISL_648126, EPI_ISL_648127, EPI_ISL_648128, EPI_ISL_648129, EPI_ISL_648130, EPI_ISL_648131, EPI_ISL_648132, EPI_ISL_648133, EPI_ISL_648134, EPI_ISL_648135, EPI_ISL_648136, EPI_ISL_648137, EPI_ISL_648138, EPI_ISL_648139, EPI_ISL_648140, EPI_ISL_648141, EPI_ISL_648142, EPI_ISL_648143, EPI_ISL_648144, EPI_ISL_648145, EPI_ISL_648146, EPI_ISL_648147, EPI_ISL_648148, EPI_ISL_648149, EPI_ISL_648150, EPI_ISL_648151, EPI_ISL_648152, EPI_ISL_648153, EPI_ISL_648154, EPI_ISL_648155, EPI_ISL_648156, EPI_ISL_648157, EPI_ISL_648158, EPI_ISL_648159, EPI_ISL_648160, EPI_ISL_648161, EPI_ISL_648162, EPI_ISL_648163, EPI_ISL_648164, EPI_ISL_648165, EPI_ISL_648166, EPI_ISL_648167, EPI_ISL_648168, EPI_ISL_648169, EPI_ISL_648170, EPI_ISL_648171, EPI_ISL_648172, EPI_ISL_648173, EPI_ISL_648174, EPI_ISL_648175, EPI_ISL_648176, EPI_ISL_648177, EPI_ISL_648178, EPI_ISL_648179, EPI_ISL_648180, EPI_ISL_648181, EPI_ISL_648182, EPI_ISL_648183, EPI_ISL_648184, EPI_ISL_648185, EPI_ISL_648186, EPI_ISL_648187, EPI_ISL_648188, EPI_ISL_648189, EPI_ISL_648190, EPI_ISL_648191, EPI_ISL_648192, EPI_ISL_648193, EPI_ISL_648194, EPI_ISL_648195, EPI_ISL_648196, EPI_ISL_648197, EPI_ISL_648198, EPI_ISL_648199, EPI_ISL_648200, EPI_ISL_648201, EPI_ISL_648202, EPI_ISL_648203, EPI_ISL_648204, EPI_ISL_648205, EPI_ISL_648206, EPI_ISL_648207, EPI_ISL_648208, EPI_ISL_648209, EPI_ISL_648210, EPI_ISL_648211, EPI_ISL_648212, EPI_ISL_648213, EPI_ISL_648214, EPI_ISL_648215, EPI_ISL_648216, EPI_ISL_648217, EPI_ISL_648218, EPI_ISL_648219, EPI_ISL_648220, EPI_ISL_648221, EPI_ISL_648222, EPI_ISL_648223, EPI_ISL_648224, EPI_ISL_648225, EPI_ISL_648226, EPI_ISL_648227, EPI_ISL_648228, EPI_ISL_648229, EPI_ISL_648230, EPI_ISL_648231, EPI_ISL_648232, EPI_ISL_648233, EPI_ISL_648234, EPI_ISL_648235, EPI_ISL_648236, EPI_ISL_648237, EPI_ISL_648238, EPI_ISL_648239, EPI_ISL_648240, EPI_ISL_648241, EPI_ISL_648242, EPI_ISL_648243, EPI_ISL_648244, EPI_ISL_648245, EPI_ISL_648246, EPI_ISL_648247, EPI_ISL_648248, EPI_ISL_648249, EPI_ISL_648250, EPI_ISL_648251, EPI_ISL_648252, EPI_ISL_648253, EPI_ISL_648254, EPI_ISL_648255, EPI_ISL_648256, EPI_ISL_648257, EPI_ISL_648258, EPI_ISL_648259, EPI_ISL_648260, EPI_ISL_648261, EPI_ISL_648262, EPI_ISL_648263, EPI_ISL_648264, EPI_ISL_648265, EPI_ISL_648266, EPI_ISL_648267, EPI_ISL_648268, EPI_ISL_648269, EPI_ISL_648270, EPI_ISL_648271, EPI_ISL_648272, EPI_ISL_648273, EPI_ISL_648274, EPI_ISL_648275, EPI_ISL_648276, EPI_ISL_648277, EPI_ISL_648278, EPI_ISL_648279, EPI_ISL_648280, EPI_ISL_648281, EPI_ISL_648282, EPI_ISL_648283, EPI_ISL_648284, EPI_ISL_648285, EPI_ISL_648286, EPI_ISL_648287, EPI_ISL_648288, EPI_ISL_648289, EPI_ISL_6482                                                                                                                                                                                                                                                                                                                                                                                                                                                                                                                                                                                                                                                                                                                                                                                                                                                                                                                                                                                                                                                                                                                                                                                                                                                                                                                                                                                                                                                                                                                                                                                                                                                                                                                                                                                                                                                                                                                                                                                                                                                                                                                                                                                                                                                                                                                                                                                                                                                                                                                                                                                                                                                                                                                                                                                                                                                                                                                                                                                                                                                                                                                                                                                                                                                                                                                                                                                                                                                                                                                                                                                                                                                                                                                                                                                                                                                                                                                                                                   |                                                                         |                                                                                                     |                                                                                                                                                                                                                                                                                                                                                                          |                                                                                                                                                                                                                                                                                                                                            |



|                                                                                                                                                                                                                                                                                                                                                                                                                                                                                                                                                                                                                |           |                                                                                                     |                                                                                       |                                                                                                                                                                                                                                                                                                                                                                        |
|----------------------------------------------------------------------------------------------------------------------------------------------------------------------------------------------------------------------------------------------------------------------------------------------------------------------------------------------------------------------------------------------------------------------------------------------------------------------------------------------------------------------------------------------------------------------------------------------------------------|-----------|-----------------------------------------------------------------------------------------------------|---------------------------------------------------------------------------------------|------------------------------------------------------------------------------------------------------------------------------------------------------------------------------------------------------------------------------------------------------------------------------------------------------------------------------------------------------------------------|
| EPI_ISL_648784, EPI_ISL_648785, EPI_ISL_648786, EPI_ISL_648787, EPI_ISL_648788, EPI_ISL_648789, EPI_ISL_648790, EPI_ISL_648791, EPI_ISL_648792, EPI_ISL_648793, EPI_ISL_648794, EPI_ISL_648795, EPI_ISL_648796, EPI_ISL_648797, EPI_ISL_648798, EPI_ISL_648799, EPI_ISL_648800, EPI_ISL_648801, EPI_ISL_648802, EPI_ISL_648803, EPI_ISL_648804, EPI_ISL_648805, EPI_ISL_648806, EPI_ISL_648807, EPI_ISL_648808, EPI_ISL_648809, EPI_ISL_648810, EPI_ISL_648811, EPI_ISL_648812, EPI_ISL_648813, EPI_ISL_648814, EPI_ISL_648815, EPI_ISL_648816, EPI_ISL_648817, EPI_ISL_648818, EPI_ISL_648819, EPI_ISL_648820 | see above | Department of Laboratory Medicine, Tan Tock Seng Hospital                                           | Department of Laboratory Medicine, Tan Tock Seng Hospital                             | Chen YYC, Zair X, Lim JX, Li C, Tang WY, Maurer-Stroh S, Barkham TMS, Nagarajan N, Sessions OM                                                                                                                                                                                                                                                                         |
| EPI_ISL_650213, EPI_ISL_652441, EPI_ISL_652598, EPI_ISL_666265, EPI_ISL_666315, EPI_ISL_666350, EPI_ISL_666393, EPI_ISL_666458                                                                                                                                                                                                                                                                                                                                                                                                                                                                                 |           | Wales Specialist Virology Centre Sequencing lab: Pathogen Genomics Unit                             | COVID-19 Genomics UK (COG-UK) Consortium                                              | Catherine Moore, Johnathan Evans, Laura Gifford, Malorie Perry, Simon Cottrell, Angela Marchbank, Alec Birchley, Alexander Adams, Amy Gaskin, Bree Gatica-Wilcox, Jason Coombes, Joel Southgate, Lauren Gilbert, Lee Graham, Nicole Pacchiari, Sara Kumziene-Summerhayes, Sarah Taylor, Sophie Jones, Sara Rey, Matthew Bull, Joanne Watkins, Sally Corden, Tom Connor |
| EPI_ISL_668447, EPI_ISL_668448, EPI_ISL_668449, EPI_ISL_668450, EPI_ISL_668451, EPI_ISL_668452, EPI_ISL_668453, EPI_ISL_668454, EPI_ISL_668455                                                                                                                                                                                                                                                                                                                                                                                                                                                                 |           | Centre for Dengue Research, Department of Immunology and Molecular Medicine                         | Centre for Dengue Research, Department of Immunology and Molecular Medicine           | Chandima Jeewandara, Deshni Jayathilaka, Dinuka Ariyaratne, Diyanath Ranasinghe, Laksiri Gomes, Gathsaurie Neelika Malavige                                                                                                                                                                                                                                            |
| EPI_ISL_677634, EPI_ISL_677635, EPI_ISL_677636                                                                                                                                                                                                                                                                                                                                                                                                                                                                                                                                                                 |           | Virology Unit, Institut Pasteur de Madagascar                                                       | Virology Unit, Institut Pasteur de Madagascar                                         | Christian Ranaivoson, Cara E. Brook, Vida Ahyong, Soa Fy Andriamandimby, Vololoniaina Raharinosy, Tsiry Randriambolamanantsoa, Helisoa Razafimanjato, Norosoa Razanajatovo, Michelle Tan, Cristina M. Tato, Joseph L. DeRisi, Jean-Michel Heraud, Philippe Dussart                                                                                                     |
| EPI_ISL_680582, EPI_ISL_680655, EPI_ISL_680698, EPI_ISL_680821, EPI_ISL_680905, EPI_ISL_681134, EPI_ISL_681213                                                                                                                                                                                                                                                                                                                                                                                                                                                                                                 |           | Wales Specialist Virology Centre Sequencing lab: Pathogen Genomics Unit                             | COVID-19 Genomics UK (COG-UK) Consortium                                              | Catherine Moore, Johnathan Evans, Laura Gifford, Malorie Perry, Simon Cottrell, Angela Marchbank, Alec Birchley, Alexander Adams, Amy Gaskin, Bree Gatica-Wilcox, Jason Coombes, Joel Southgate, Lauren Gilbert, Lee Graham, Nicole Pacchiari, Sara Kumziene-Summerhayes, Sarah Taylor, Sophie Jones, Sara Rey, Matthew Bull, Joanne Watkins, Sally Corden, Tom Connor |
| EPI_ISL_681829, EPI_ISL_681830, EPI_ISL_681831, EPI_ISL_681832, EPI_ISL_681833, EPI_ISL_681834, EPI_ISL_681835, EPI_ISL_681836, EPI_ISL_681837, EPI_ISL_681838, EPI_ISL_681839, EPI_ISL_681840, EPI_ISL_681841, EPI_ISL_681842, EPI_ISL_682058, EPI_ISL_682059                                                                                                                                                                                                                                                                                                                                                 | see above | Molecular diagnostic unit for viral haemorrhagic fevers and emerging viruses, Bouaké CHU Laboratory | Project group Epidemiology of Highly Pathogenic Microorganisms, Robert Koch-Institute | Chantal Akoua-Koffi, Diané Bamourou, Etilé Aneh, Essia Belarbi, Safiatou Karidioula, Grit Schubert, Adjaratou Traoré, Soundélé Maité, Monome Pacome, Coulibaly Mbengan, Bamba Fatoumata Touré, Kra Oufoué, Fabian Leendertz                                                                                                                                            |
| EPI_ISL_693196                                                                                                                                                                                                                                                                                                                                                                                                                                                                                                                                                                                                 |           | Hospital Santa Clara                                                                                | Instituto Adolfo Lutz, Interdisciplinary Procedures Center, Strategic Laboratory      | Claudio Tavares Sacchi, Claudia Regina Gonçalves, Erica Valessa Ramos Gomes, Karoline Rodrigues Campos                                                                                                                                                                                                                                                                 |
| EPI_ISL_693198                                                                                                                                                                                                                                                                                                                                                                                                                                                                                                                                                                                                 |           | Santa Casa de Misericórdia de Sao Paulo - Hospital Central                                          | Instituto Adolfo Lutz, Interdisciplinary Procedures Center, Strategic Laboratory      | Claudio Tavares Sacchi, Claudia Regina Gonçalves, Erica Valessa Ramos Gomes, Karoline Rodrigues Campos                                                                                                                                                                                                                                                                 |
| EPI_ISL_693199                                                                                                                                                                                                                                                                                                                                                                                                                                                                                                                                                                                                 |           | Hospital do Servidor Publico Estadual Francisco Morato de Oliveira                                  | Instituto Adolfo Lutz, Interdisciplinary Procedures Center, Strategic Laboratory      | Claudio Tavares Sacchi, Claudia Regina Gonçalves, Erica Valessa Ramos Gomes, Karoline Rodrigues Campos                                                                                                                                                                                                                                                                 |
| EPI_ISL_693201                                                                                                                                                                                                                                                                                                                                                                                                                                                                                                                                                                                                 |           | Hospital Sao Paulo de Ensino da Unifesp                                                             | Instituto Adolfo Lutz, Interdisciplinary Procedures Center, Strategic Laboratory      | Claudio Tavares Sacchi, Claudia Regina Gonçalves, Erica Valessa Ramos Gomes, Karoline Rodrigues Campos                                                                                                                                                                                                                                                                 |
| EPI_ISL_693203                                                                                                                                                                                                                                                                                                                                                                                                                                                                                                                                                                                                 |           | Hospital Municipal Doutor Arthur Ribeiro de Saboya                                                  | Instituto Adolfo Lutz, Interdisciplinary Procedures Center, Strategic Laboratory      | Claudio Tavares Sacchi, Claudia Regina Gonçalves, Erica Valessa Ramos Gomes, Karoline Rodrigues Campos                                                                                                                                                                                                                                                                 |
| EPI_ISL_693204                                                                                                                                                                                                                                                                                                                                                                                                                                                                                                                                                                                                 |           | Pronto Socorro Dr. Conrado Cesarino Nuvolini                                                        | Instituto Adolfo Lutz, Interdisciplinary Procedures Center, Strategic Laboratory      | Claudio Tavares Sacchi, Claudia Regina Gonçalves, Erica Valessa Ramos Gomes, Karoline Rodrigues Campos                                                                                                                                                                                                                                                                 |
| EPI_ISL_693207                                                                                                                                                                                                                                                                                                                                                                                                                                                                                                                                                                                                 |           | Cs II Doutor Antonio Vicoso Moreira de Rezende                                                      | Instituto Adolfo Lutz, Interdisciplinary Procedures Center, Strategic Laboratory      | Claudio Tavares Sacchi, Claudia Regina Gonçalves, Erica Valessa Ramos Gomes, Karoline Rodrigues Campos                                                                                                                                                                                                                                                                 |
| EPI_ISL_693210                                                                                                                                                                                                                                                                                                                                                                                                                                                                                                                                                                                                 |           | Pronto-Socorro Dr. Osmar Mesquita                                                                   | Instituto Adolfo Lutz, Interdisciplinary Procedures Center, Strategic Laboratory      | Claudio Tavares Sacchi, Claudia Regina Gonçalves, Erica Valessa Ramos Gomes, Karoline Rodrigues Campos                                                                                                                                                                                                                                                                 |
| EPI_ISL_693211                                                                                                                                                                                                                                                                                                                                                                                                                                                                                                                                                                                                 |           | Santa Casa de Misericórdia e Maternidade                                                            | Instituto Adolfo Lutz, Interdisciplinary Procedures Center, Strategic Laboratory      | Claudio Tavares Sacchi, Claudia Regina Gonçalves, Erica Valessa Ramos Gomes, Karoline Rodrigues Campos                                                                                                                                                                                                                                                                 |
| EPI_ISL_693214                                                                                                                                                                                                                                                                                                                                                                                                                                                                                                                                                                                                 |           | Unidade de Pronto Atendimento Central de Caraguatatuba                                              | Instituto Adolfo Lutz, Interdisciplinary Procedures Center, Strategic Laboratory      | Claudio Tavares Sacchi, Claudia Regina Gonçalves, Erica Valessa Ramos Gomes, Karoline Rodrigues Campos                                                                                                                                                                                                                                                                 |
| EPI_ISL_693215                                                                                                                                                                                                                                                                                                                                                                                                                                                                                                                                                                                                 |           | Secretaria Municipal de Saúde de Iracemópolis                                                       | Instituto Adolfo Lutz, Interdisciplinary Procedures Center, Strategic Laboratory      | Claudio Tavares Sacchi, Claudia Regina Gonçalves, Erica Valessa Ramos Gomes, Karoline Rodrigues Campos                                                                                                                                                                                                                                                                 |
| EPI_ISL_693217                                                                                                                                                                                                                                                                                                                                                                                                                                                                                                                                                                                                 |           | Unidade de Vigilância Epidemiológica de Araras                                                      | Instituto Adolfo Lutz, Interdisciplinary Procedures Center, Strategic Laboratory      | Claudio Tavares Sacchi, Claudia Regina Gonçalves, Erica Valessa Ramos Gomes, Karoline Rodrigues Campos                                                                                                                                                                                                                                                                 |
| EPI_ISL_693218                                                                                                                                                                                                                                                                                                                                                                                                                                                                                                                                                                                                 |           | Hospital Domingos Leonardo Ceravolo Presidente Prudente                                             | Instituto Adolfo Lutz, Interdisciplinary Procedures Center, Strategic Laboratory      | Claudio Tavares Sacchi, Claudia Regina Gonçalves, Erica Valessa Ramos Gomes, Karoline Rodrigues Campos                                                                                                                                                                                                                                                                 |
| EPI_ISL_693219                                                                                                                                                                                                                                                                                                                                                                                                                                                                                                                                                                                                 |           | Santa Casa da Misericórdia de Presidente Prudente                                                   | Instituto Adolfo Lutz, Interdisciplinary Procedures Center, Strategic Laboratory      | Claudio Tavares Sacchi, Claudia Regina Gonçalves, Erica Valessa Ramos Gomes, Karoline Rodrigues Campos                                                                                                                                                                                                                                                                 |
| EPI_ISL_693221                                                                                                                                                                                                                                                                                                                                                                                                                                                                                                                                                                                                 |           | Secretaria Municipal de Saúde de Birigui                                                            | Instituto Adolfo Lutz, Interdisciplinary Procedures Center, Strategic Laboratory      | Claudio Tavares Sacchi, Claudia Regina Gonçalves, Erica Valessa Ramos Gomes, Karoline Rodrigues Campos                                                                                                                                                                                                                                                                 |
| EPI_ISL_693229                                                                                                                                                                                                                                                                                                                                                                                                                                                                                                                                                                                                 |           | Hospital 8 de Maio                                                                                  | Instituto Adolfo Lutz, Interdisciplinary Procedures Center, Strategic Laboratory      | Claudio Tavares Sacchi, Claudia Regina Gonçalves, Erica Valessa Ramos Gomes, Karoline Rodrigues Campos                                                                                                                                                                                                                                                                 |
| EPI_ISL_693230                                                                                                                                                                                                                                                                                                                                                                                                                                                                                                                                                                                                 |           | Hospital e Pronto Socorro Portinari                                                                 | Instituto Adolfo Lutz, Interdisciplinary Procedures Center, Strategic Laboratory      | Claudio Tavares Sacchi, Claudia Regina Gonçalves, Erica Valessa Ramos Gomes, Karoline Rodrigues Campos                                                                                                                                                                                                                                                                 |
| EPI_ISL_693231                                                                                                                                                                                                                                                                                                                                                                                                                                                                                                                                                                                                 |           | Pronto Socorro Municipal de Santa Branca                                                            | Instituto Adolfo Lutz, Interdisciplinary Procedures Center, Strategic Laboratory      | Claudio Tavares Sacchi, Claudia Regina Gonçalves, Erica Valessa Ramos Gomes, Karoline Rodrigues Campos                                                                                                                                                                                                                                                                 |
| EPI_ISL_693232                                                                                                                                                                                                                                                                                                                                                                                                                                                                                                                                                                                                 |           | Hospital e Pronto Socorro Portinari                                                                 | Instituto Adolfo Lutz, Interdisciplinary Procedures Center, Strategic Laboratory      | Claudio Tavares Sacchi, Claudia Regina Gonçalves, Erica Valessa Ramos Gomes, Karoline Rodrigues Campos                                                                                                                                                                                                                                                                 |
| EPI_ISL_693233                                                                                                                                                                                                                                                                                                                                                                                                                                                                                                                                                                                                 |           | Hospital Santa Cruz                                                                                 | Instituto Adolfo Lutz, Interdisciplinary Procedures Center, Strategic Laboratory      | Claudio Tavares Sacchi, Claudia Regina Gonçalves, Erica Valessa Ramos Gomes, Karoline Rodrigues Campos                                                                                                                                                                                                                                                                 |
| EPI_ISL_693234                                                                                                                                                                                                                                                                                                                                                                                                                                                                                                                                                                                                 |           | Upa Vereador Jose Da Rocha Goncalves                                                                | Instituto Adolfo Lutz, Interdisciplinary Procedures Center, Strategic Laboratory      | Claudio Tavares Sacchi, Claudia Regina Gonçalves, Erica Valessa Ramos Gomes, Karoline Rodrigues Campos                                                                                                                                                                                                                                                                 |
| EPI_ISL_693235                                                                                                                                                                                                                                                                                                                                                                                                                                                                                                                                                                                                 |           | Casmi Centro Atendimento Saude da Mulher e Infancia                                                 | Instituto Adolfo Lutz, Interdisciplinary Procedures Center, Strategic Laboratory      | Claudio Tavares Sacchi, Claudia Regina Gonçalves, Erica Valessa Ramos Gomes, Karoline Rodrigues Campos                                                                                                                                                                                                                                                                 |
| EPI_ISL_693237                                                                                                                                                                                                                                                                                                                                                                                                                                                                                                                                                                                                 |           | UPA Santa Isabel                                                                                    | Instituto Adolfo Lutz, Interdisciplinary Procedures Center, Strategic Laboratory      | Claudio Tavares Sacchi, Claudia Regina Gonçalves, Erica Valessa Ramos Gomes, Karoline Rodrigues Campos                                                                                                                                                                                                                                                                 |
| EPI_ISL_693238, EPI_ISL_693239                                                                                                                                                                                                                                                                                                                                                                                                                                                                                                                                                                                 |           | Secao Centro de Diagnostico Secedi                                                                  | Instituto Adolfo Lutz, Interdisciplinary Procedures Center, Strategic Laboratory      | Claudio Tavares Sacchi, Claudia Regina Gonçalves, Erica Valessa Ramos Gomes, Karoline Rodrigues Campos                                                                                                                                                                                                                                                                 |
| EPI_ISL_693240, EPI_ISL_693242                                                                                                                                                                                                                                                                                                                                                                                                                                                                                                                                                                                 |           | Centro de Vigilância a Saude de Diadema                                                             | Instituto Adolfo Lutz, Interdisciplinary Procedures Center, Strategic Laboratory      | Claudio Tavares Sacchi, Claudia Regina Gonçalves, Erica Valessa Ramos Gomes, Karoline Rodrigues Campos                                                                                                                                                                                                                                                                 |

|                                                                                                                                                                                                                                                                                                                                                                                                                                                                                                                                                                                                                                                                                                                                                                                                                                                                                                                                                                                                                                                                                                                                                                                                                                                                                                                                                                                                                                                                                                                                                                                                                                                                                                                                                                                                                                                                                                                                                                                                                                                                                                                                                                                                                                                                                                                                                                                                                                                                                                                                                                                                                                                                                                                                                                                                                                                                                                                                                                                                                                                                                                                                                                                                                                                                                                                                                                                                                                                                                                                                                                                                                                                                                                                                                                                                                                                                                                                                                                                                                                                                                                                                                                                                                                                                                                                                                                                                                                                                                                                                                                                                                                                                                                                                                                                                                                                                                                                                                                                                                                                                                                |                                                                                                    |                                                                                                    |                                                                                                                                                                                                                                                                                                                                                                        |                                                                                                                                                                                                                                                                                                                                                                                            |
|------------------------------------------------------------------------------------------------------------------------------------------------------------------------------------------------------------------------------------------------------------------------------------------------------------------------------------------------------------------------------------------------------------------------------------------------------------------------------------------------------------------------------------------------------------------------------------------------------------------------------------------------------------------------------------------------------------------------------------------------------------------------------------------------------------------------------------------------------------------------------------------------------------------------------------------------------------------------------------------------------------------------------------------------------------------------------------------------------------------------------------------------------------------------------------------------------------------------------------------------------------------------------------------------------------------------------------------------------------------------------------------------------------------------------------------------------------------------------------------------------------------------------------------------------------------------------------------------------------------------------------------------------------------------------------------------------------------------------------------------------------------------------------------------------------------------------------------------------------------------------------------------------------------------------------------------------------------------------------------------------------------------------------------------------------------------------------------------------------------------------------------------------------------------------------------------------------------------------------------------------------------------------------------------------------------------------------------------------------------------------------------------------------------------------------------------------------------------------------------------------------------------------------------------------------------------------------------------------------------------------------------------------------------------------------------------------------------------------------------------------------------------------------------------------------------------------------------------------------------------------------------------------------------------------------------------------------------------------------------------------------------------------------------------------------------------------------------------------------------------------------------------------------------------------------------------------------------------------------------------------------------------------------------------------------------------------------------------------------------------------------------------------------------------------------------------------------------------------------------------------------------------------------------------------------------------------------------------------------------------------------------------------------------------------------------------------------------------------------------------------------------------------------------------------------------------------------------------------------------------------------------------------------------------------------------------------------------------------------------------------------------------------------------------------------------------------------------------------------------------------------------------------------------------------------------------------------------------------------------------------------------------------------------------------------------------------------------------------------------------------------------------------------------------------------------------------------------------------------------------------------------------------------------------------------------------------------------------------------------------------------------------------------------------------------------------------------------------------------------------------------------------------------------------------------------------------------------------------------------------------------------------------------------------------------------------------------------------------------------------------------------------------------------------------------------------------------------------|----------------------------------------------------------------------------------------------------|----------------------------------------------------------------------------------------------------|------------------------------------------------------------------------------------------------------------------------------------------------------------------------------------------------------------------------------------------------------------------------------------------------------------------------------------------------------------------------|--------------------------------------------------------------------------------------------------------------------------------------------------------------------------------------------------------------------------------------------------------------------------------------------------------------------------------------------------------------------------------------------|
| EPI_ISL_693245                                                                                                                                                                                                                                                                                                                                                                                                                                                                                                                                                                                                                                                                                                                                                                                                                                                                                                                                                                                                                                                                                                                                                                                                                                                                                                                                                                                                                                                                                                                                                                                                                                                                                                                                                                                                                                                                                                                                                                                                                                                                                                                                                                                                                                                                                                                                                                                                                                                                                                                                                                                                                                                                                                                                                                                                                                                                                                                                                                                                                                                                                                                                                                                                                                                                                                                                                                                                                                                                                                                                                                                                                                                                                                                                                                                                                                                                                                                                                                                                                                                                                                                                                                                                                                                                                                                                                                                                                                                                                                                                                                                                                                                                                                                                                                                                                                                                                                                                                                                                                                                                                 | UPA Santa Isabel                                                                                   | Instituto Adolfo Lutz, Interdisciplinary Procedures Center, Strategic Laboratory                   | Claudio Tavares Sacchi, Claudia Regina Gonçalves, Erica Valessa Ramos Gomes, Karoline Rodrigues Campos                                                                                                                                                                                                                                                                 |                                                                                                                                                                                                                                                                                                                                                                                            |
| EPI_ISL_693246                                                                                                                                                                                                                                                                                                                                                                                                                                                                                                                                                                                                                                                                                                                                                                                                                                                                                                                                                                                                                                                                                                                                                                                                                                                                                                                                                                                                                                                                                                                                                                                                                                                                                                                                                                                                                                                                                                                                                                                                                                                                                                                                                                                                                                                                                                                                                                                                                                                                                                                                                                                                                                                                                                                                                                                                                                                                                                                                                                                                                                                                                                                                                                                                                                                                                                                                                                                                                                                                                                                                                                                                                                                                                                                                                                                                                                                                                                                                                                                                                                                                                                                                                                                                                                                                                                                                                                                                                                                                                                                                                                                                                                                                                                                                                                                                                                                                                                                                                                                                                                                                                 | Laboratório Municipal de Rio Grande da Serra                                                       | Instituto Adolfo Lutz, Interdisciplinary Procedures Center, Strategic Laboratory                   | Claudio Tavares Sacchi, Claudia Regina Gonçalves, Erica Valessa Ramos Gomes, Karoline Rodrigues Campos                                                                                                                                                                                                                                                                 |                                                                                                                                                                                                                                                                                                                                                                                            |
| EPI_ISL_693775, EPI_ISL_693776, EPI_ISL_693777, EPI_ISL_693778, EPI_ISL_693779, EPI_ISL_693780, EPI_ISL_693781, EPI_ISL_693782, EPI_ISL_693783, EPI_ISL_693784, EPI_ISL_693785, EPI_ISL_693786, EPI_ISL_693787, EPI_ISL_693788, EPI_ISL_693789, EPI_ISL_693790, EPI_ISL_693791, EPI_ISL_693792, EPI_ISL_693793, EPI_ISL_693794, EPI_ISL_693795, EPI_ISL_693796, EPI_ISL_693797, EPI_ISL_693798, EPI_ISL_693799, EPI_ISL_693800, EPI_ISL_693801, EPI_ISL_693802, EPI_ISL_693803, EPI_ISL_693804, EPI_ISL_693805, EPI_ISL_693806, EPI_ISL_693807, EPI_ISL_693808, EPI_ISL_693809, EPI_ISL_693810, EPI_ISL_693811, EPI_ISL_693812, EPI_ISL_693813, EPI_ISL_693814, EPI_ISL_693815, EPI_ISL_693816, EPI_ISL_693817, EPI_ISL_693818, EPI_ISL_693819, EPI_ISL_693820, EPI_ISL_693821, EPI_ISL_693822, EPI_ISL_693823, EPI_ISL_693824, EPI_ISL_693825, EPI_ISL_693826, EPI_ISL_693827, EPI_ISL_693828, EPI_ISL_693829, EPI_ISL_693830, EPI_ISL_693831, EPI_ISL_693832, EPI_ISL_693833, EPI_ISL_693834, EPI_ISL_693835, EPI_ISL_693836, EPI_ISL_693837, EPI_ISL_693838, EPI_ISL_693839, EPI_ISL_693840, EPI_ISL_693841, EPI_ISL_693842, EPI_ISL_693843, EPI_ISL_693844, EPI_ISL_693845, EPI_ISL_693846, EPI_ISL_693847, EPI_ISL_693848, EPI_ISL_693849, EPI_ISL_693850, EPI_ISL_693851, EPI_ISL_693852, EPI_ISL_693853, EPI_ISL_693854, EPI_ISL_693855, EPI_ISL_693856, EPI_ISL_693857, EPI_ISL_693858, EPI_ISL_693859, EPI_ISL_693860, EPI_ISL_693861, EPI_ISL_693862, EPI_ISL_693863, EPI_ISL_693864, EPI_ISL_693865, EPI_ISL_693866, EPI_ISL_693867, EPI_ISL_693868, EPI_ISL_693869, EPI_ISL_693870, EPI_ISL_693871, EPI_ISL_693872, EPI_ISL_693873, EPI_ISL_693874, EPI_ISL_693875, EPI_ISL_693876, EPI_ISL_693877, EPI_ISL_693878, EPI_ISL_693879, EPI_ISL_693880, EPI_ISL_693881, EPI_ISL_693882, EPI_ISL_693883, EPI_ISL_693884, EPI_ISL_693885, EPI_ISL_693886, EPI_ISL_693887, EPI_ISL_693888, EPI_ISL_693889, EPI_ISL_693890, EPI_ISL_693891, EPI_ISL_693892, EPI_ISL_693893, EPI_ISL_693894, EPI_ISL_693895, EPI_ISL_693896, EPI_ISL_693897, EPI_ISL_693898, EPI_ISL_693899, EPI_ISL_693900, EPI_ISL_693901, EPI_ISL_693902, EPI_ISL_693903, EPI_ISL_693904, EPI_ISL_693905, EPI_ISL_693906, EPI_ISL_693907, EPI_ISL_693908, EPI_ISL_693909, EPI_ISL_693910, EPI_ISL_693911, EPI_ISL_693912, EPI_ISL_693913, EPI_ISL_693914, EPI_ISL_693915, EPI_ISL_693916, EPI_ISL_693917, EPI_ISL_693918, EPI_ISL_693919, EPI_ISL_693920, EPI_ISL_693921, EPI_ISL_693922, EPI_ISL_693923, EPI_ISL_693924, EPI_ISL_693925, EPI_ISL_693926, EPI_ISL_693927, EPI_ISL_693928, EPI_ISL_693929, EPI_ISL_693930, EPI_ISL_693931, EPI_ISL_693932, EPI_ISL_693933, EPI_ISL_693934, EPI_ISL_693935, EPI_ISL_693936, EPI_ISL_693937, EPI_ISL_693938, EPI_ISL_693939, EPI_ISL_693940, EPI_ISL_693941, EPI_ISL_693942, EPI_ISL_693943, EPI_ISL_693944, EPI_ISL_693945, EPI_ISL_693946, EPI_ISL_693947, EPI_ISL_693948, EPI_ISL_693949, EPI_ISL_693950, EPI_ISL_693951, EPI_ISL_693952, EPI_ISL_693953, EPI_ISL_693954, EPI_ISL_693955, EPI_ISL_693956, EPI_ISL_693957, EPI_ISL_693958, EPI_ISL_693959, EPI_ISL_693960, EPI_ISL_693961, EPI_ISL_693962, EPI_ISL_693963, EPI_ISL_693964, EPI_ISL_693965, EPI_ISL_693966, EPI_ISL_693967, EPI_ISL_693968, EPI_ISL_693969, EPI_ISL_693970, EPI_ISL_693971, EPI_ISL_693972, EPI_ISL_693973, EPI_ISL_693974, EPI_ISL_693975, EPI_ISL_693976, EPI_ISL_693977, EPI_ISL_693978, EPI_ISL_693979, EPI_ISL_693980, EPI_ISL_693981, EPI_ISL_693982, EPI_ISL_693983, EPI_ISL_693984, EPI_ISL_693985, EPI_ISL_693986, EPI_ISL_693987, EPI_ISL_693988, EPI_ISL_693989, EPI_ISL_693990, EPI_ISL_693991, EPI_ISL_693992, EPI_ISL_693993, EPI_ISL_693994, EPI_ISL_693995, EPI_ISL_693996, EPI_ISL_693997, EPI_ISL_693998, EPI_ISL_693999, EPI_ISL_694000, EPI_ISL_694001, EPI_ISL_694002, EPI_ISL_694003, EPI_ISL_694004, EPI_ISL_694005, EPI_ISL_694006, EPI_ISL_694007, EPI_ISL_694008                                                                                                                                                                                                                                                                                                                                                                                                                                                                                                                                                                                                                                                                                                                                                                                                                                                                                                                                                                                                                                                                                                                                                                                                 | see above                                                                                          | Viollier AG                                                                                        | Department of Biosystems Science and Engineering, ETH Zürich                                                                                                                                                                                                                                                                                                           | Christian Beisel, Sarah Nadeau, Chaoran Chen, Ivan Topolsky, Pedro Ferreira, Philipp Jablonski, Susana Posada-Céspedes, Tobias Schär, Ina Nissen, Natascha Santacroce, Elodie Burcklen, Christiane Beckmann, Maurice Redondo, Olivier Kobel, Christoph Noppen, Sophie Seidel, Noemie Santamaria de Souza, Niko Beerenwinkel, Tanja Stadler                                                 |
| EPI_ISL_705434, EPI_ISL_705527, EPI_ISL_706570, EPI_ISL_706653, EPI_ISL_706655, EPI_ISL_706694, EPI_ISL_706813                                                                                                                                                                                                                                                                                                                                                                                                                                                                                                                                                                                                                                                                                                                                                                                                                                                                                                                                                                                                                                                                                                                                                                                                                                                                                                                                                                                                                                                                                                                                                                                                                                                                                                                                                                                                                                                                                                                                                                                                                                                                                                                                                                                                                                                                                                                                                                                                                                                                                                                                                                                                                                                                                                                                                                                                                                                                                                                                                                                                                                                                                                                                                                                                                                                                                                                                                                                                                                                                                                                                                                                                                                                                                                                                                                                                                                                                                                                                                                                                                                                                                                                                                                                                                                                                                                                                                                                                                                                                                                                                                                                                                                                                                                                                                                                                                                                                                                                                                                                 | Wales Specialist Virology Centre Sequencing lab: Pathogen Genomics Unit                            | COVID-19 Genomics UK (COG-UK) Consortium                                                           | Catherine Moore, Johnathan Evans, Laura Gifford, Malorie Perry, Simon Cottrell, Angela Marchbank, Alec Birchley, Alexander Adams, Amy Gaskin, Bree Gatica-Wilcox, Jason Coombes, Joel Southgate, Lauren Gilbert, Lee Graham, Nicole Pacchiari, Sara Kumziene-Summerhayes, Sarah Taylor, Sophie Jones, Sara Rey, Matthew Bull, Joanne Watkins, Sally Corden, Tom Connor |                                                                                                                                                                                                                                                                                                                                                                                            |
| EPI_ISL_707692                                                                                                                                                                                                                                                                                                                                                                                                                                                                                                                                                                                                                                                                                                                                                                                                                                                                                                                                                                                                                                                                                                                                                                                                                                                                                                                                                                                                                                                                                                                                                                                                                                                                                                                                                                                                                                                                                                                                                                                                                                                                                                                                                                                                                                                                                                                                                                                                                                                                                                                                                                                                                                                                                                                                                                                                                                                                                                                                                                                                                                                                                                                                                                                                                                                                                                                                                                                                                                                                                                                                                                                                                                                                                                                                                                                                                                                                                                                                                                                                                                                                                                                                                                                                                                                                                                                                                                                                                                                                                                                                                                                                                                                                                                                                                                                                                                                                                                                                                                                                                                                                                 | Medical Research Center, Faculty of Medicine, Syarif Hidayatullah State Islamic University Jakarta | Medical Research Center, Faculty of Medicine, Syarif Hidayatullah State Islamic University Jakarta | Chris Adhiyanto, Laifa Hendarmin, Erike Suwarsono, Zeti Harriyati, Rini Puspitaningrum, Ferania Mela, Dennis Nurjadi                                                                                                                                                                                                                                                   |                                                                                                                                                                                                                                                                                                                                                                                            |
| EPI_ISL_708530                                                                                                                                                                                                                                                                                                                                                                                                                                                                                                                                                                                                                                                                                                                                                                                                                                                                                                                                                                                                                                                                                                                                                                                                                                                                                                                                                                                                                                                                                                                                                                                                                                                                                                                                                                                                                                                                                                                                                                                                                                                                                                                                                                                                                                                                                                                                                                                                                                                                                                                                                                                                                                                                                                                                                                                                                                                                                                                                                                                                                                                                                                                                                                                                                                                                                                                                                                                                                                                                                                                                                                                                                                                                                                                                                                                                                                                                                                                                                                                                                                                                                                                                                                                                                                                                                                                                                                                                                                                                                                                                                                                                                                                                                                                                                                                                                                                                                                                                                                                                                                                                                 | Secretaria Municipal de Saude de Fernandópolis                                                     | Instituto Adolfo Lutz, Interdisciplinary Procedures Center, Strategic Laboratory                   | Claudio Tavares Sacchi, Claudia Regina Gonçalves, Erica Valessa Ramos Gomes, Carlos Henrique Camargo, Karoline Rodrigues Campos, Fernanda Modesto Tolentino Binhardi, Maricela Navarro Pinheiro Flores, Marcia Maria Costa Nunes Soares, Janaina Other Martins Montanha                                                                                                |                                                                                                                                                                                                                                                                                                                                                                                            |
| EPI_ISL_708652                                                                                                                                                                                                                                                                                                                                                                                                                                                                                                                                                                                                                                                                                                                                                                                                                                                                                                                                                                                                                                                                                                                                                                                                                                                                                                                                                                                                                                                                                                                                                                                                                                                                                                                                                                                                                                                                                                                                                                                                                                                                                                                                                                                                                                                                                                                                                                                                                                                                                                                                                                                                                                                                                                                                                                                                                                                                                                                                                                                                                                                                                                                                                                                                                                                                                                                                                                                                                                                                                                                                                                                                                                                                                                                                                                                                                                                                                                                                                                                                                                                                                                                                                                                                                                                                                                                                                                                                                                                                                                                                                                                                                                                                                                                                                                                                                                                                                                                                                                                                                                                                                 | Medical Research Center, Faculty of Medicine, Syarif Hidayatullah State Islamic University Jakarta | Medical Research Center, Faculty of Medicine, Syarif Hidayatullah State Islamic University Jakarta | Chris Adhiyanto, Laifa Hendarmin, Erike A Suwarsono, Zeti Harriyati, Endah Wulandari, Flori R Sari, Hari Hendarto                                                                                                                                                                                                                                                      |                                                                                                                                                                                                                                                                                                                                                                                            |
| EPI_ISL_721670, EPI_ISL_721671, EPI_ISL_721672, EPI_ISL_721673, EPI_ISL_721674, EPI_ISL_721675, EPI_ISL_721676, EPI_ISL_721677, EPI_ISL_721678, EPI_ISL_721679, EPI_ISL_721680, EPI_ISL_721681, EPI_ISL_721682, EPI_ISL_721683, EPI_ISL_721684, EPI_ISL_721685, EPI_ISL_721686, EPI_ISL_721687, EPI_ISL_721688, EPI_ISL_721689, EPI_ISL_721690, EPI_ISL_721691, EPI_ISL_721692, EPI_ISL_721693, EPI_ISL_721694, EPI_ISL_721695, EPI_ISL_721696, EPI_ISL_721697, EPI_ISL_721698, EPI_ISL_721699, EPI_ISL_721700, EPI_ISL_721701, EPI_ISL_721702, EPI_ISL_721703, EPI_ISL_721704, EPI_ISL_721705, EPI_ISL_721706, EPI_ISL_721707, EPI_ISL_721708, EPI_ISL_721709, EPI_ISL_721710, EPI_ISL_721711, EPI_ISL_721712, EPI_ISL_721713, EPI_ISL_721714, EPI_ISL_721715, EPI_ISL_721716, EPI_ISL_721717, EPI_ISL_721718, EPI_ISL_721719, EPI_ISL_721720, EPI_ISL_721721, EPI_ISL_721722, EPI_ISL_721723, EPI_ISL_721724, EPI_ISL_721725, EPI_ISL_721726, EPI_ISL_721727, EPI_ISL_721728, EPI_ISL_721729, EPI_ISL_721730, EPI_ISL_721731, EPI_ISL_721732, EPI_ISL_721733, EPI_ISL_721734, EPI_ISL_721735, EPI_ISL_721736, EPI_ISL_721737, EPI_ISL_721738, EPI_ISL_721739, EPI_ISL_721740, EPI_ISL_721741, EPI_ISL_721742, EPI_ISL_721743, EPI_ISL_721744, EPI_ISL_721745, EPI_ISL_721746, EPI_ISL_721747, EPI_ISL_721748, EPI_ISL_721749, EPI_ISL_721750, EPI_ISL_721751, EPI_ISL_721752, EPI_ISL_721753, EPI_ISL_721754, EPI_ISL_721755, EPI_ISL_721756, EPI_ISL_721757, EPI_ISL_721758, EPI_ISL_721759, EPI_ISL_721760, EPI_ISL_721761, EPI_ISL_721762, EPI_ISL_721763, EPI_ISL_721764, EPI_ISL_721765, EPI_ISL_721766, EPI_ISL_721767, EPI_ISL_721768, EPI_ISL_721769, EPI_ISL_721770, EPI_ISL_721771, EPI_ISL_721772, EPI_ISL_721773, EPI_ISL_721774, EPI_ISL_721775, EPI_ISL_721776, EPI_ISL_721777, EPI_ISL_721778, EPI_ISL_721779, EPI_ISL_721780, EPI_ISL_721781, EPI_ISL_721782, EPI_ISL_721783, EPI_ISL_721784, EPI_ISL_721785, EPI_ISL_721786, EPI_ISL_721787, EPI_ISL_721788, EPI_ISL_721789, EPI_ISL_721790, EPI_ISL_721791, EPI_ISL_721792, EPI_ISL_721793, EPI_ISL_721794, EPI_ISL_721795, EPI_ISL_721796, EPI_ISL_721797, EPI_ISL_721798, EPI_ISL_721799, EPI_ISL_721800, EPI_ISL_721801, EPI_ISL_721802, EPI_ISL_721803, EPI_ISL_721804, EPI_ISL_721805, EPI_ISL_721806, EPI_ISL_721807, EPI_ISL_721808, EPI_ISL_721809, EPI_ISL_721810, EPI_ISL_721811, EPI_ISL_721812, EPI_ISL_721813, EPI_ISL_721814, EPI_ISL_721815, EPI_ISL_721816, EPI_ISL_721817, EPI_ISL_721818, EPI_ISL_721819, EPI_ISL_721820, EPI_ISL_721821, EPI_ISL_721822, EPI_ISL_721823, EPI_ISL_721824, EPI_ISL_721825, EPI_ISL_721826, EPI_ISL_721827, EPI_ISL_721828, EPI_ISL_721829, EPI_ISL_721830, EPI_ISL_721831, EPI_ISL_721832, EPI_ISL_721833, EPI_ISL_721834, EPI_ISL_721835, EPI_ISL_721836, EPI_ISL_721837, EPI_ISL_721838, EPI_ISL_721839, EPI_ISL_721840, EPI_ISL_721841, EPI_ISL_721842, EPI_ISL_721843, EPI_ISL_721844, EPI_ISL_721845, EPI_ISL_721846, EPI_ISL_721847, EPI_ISL_721848, EPI_ISL_721849, EPI_ISL_721850, EPI_ISL_721851, EPI_ISL_721852, EPI_ISL_721853, EPI_ISL_721854, EPI_ISL_721855, EPI_ISL_721856, EPI_ISL_721857, EPI_ISL_721858, EPI_ISL_721859, EPI_ISL_721860, EPI_ISL_721861, EPI_ISL_721862, EPI_ISL_721863, EPI_ISL_721864, EPI_ISL_721865, EPI_ISL_721866, EPI_ISL_721867, EPI_ISL_721868, EPI_ISL_721869, EPI_ISL_721870, EPI_ISL_721871, EPI_ISL_721872, EPI_ISL_721873, EPI_ISL_721874, EPI_ISL_721875, EPI_ISL_721876, EPI_ISL_721877, EPI_ISL_721878, EPI_ISL_721879, EPI_ISL_721880, EPI_ISL_721881, EPI_ISL_721882, EPI_ISL_721883, EPI_ISL_721884, EPI_ISL_721885, EPI_ISL_721886, EPI_ISL_721887, EPI_ISL_721888, EPI_ISL_721889, EPI_ISL_721890, EPI_ISL_721891, EPI_ISL_721892, EPI_ISL_721893, EPI_ISL_721894, EPI_ISL_721895, EPI_ISL_721896, EPI_ISL_721897, EPI_ISL_721898, EPI_ISL_721899, EPI_ISL_721900, EPI_ISL_721901, EPI_ISL_721902, EPI_ISL_721903, EPI_ISL_721904, EPI_ISL_721905, EPI_ISL_721906, EPI_ISL_721907, EPI_ISL_721908, EPI_ISL_721909, EPI_ISL_721910, EPI_ISL_721911, EPI_ISL_721912, EPI_ISL_721913, EPI_ISL_721914, EPI_ISL_721915, EPI_ISL_721916, EPI_ISL_721917, EPI_ISL_721918, EPI_ISL_721919, EPI_ISL_721920, EPI_ISL_721921, EPI_ISL_721922, EPI_ISL_721923, EPI_ISL_721924, EPI_ISL_721925, EPI_ISL_721926, EPI_ISL_721927, EPI_ISL_721928, EPI_ISL_721929, EPI_ISL_721930, EPI_ISL_721931, EPI_ISL_721932, EPI_ISL_721933, EPI_ISL_721934, EPI_ISL_721935, EPI_ISL_721936, EPI_ISL_721937, EPI_ISL_721938, EPI_ISL_721939, EPI_ISL_721940, EPI_ISL_721941, EPI_ISL_721942, EPI_ISL_721943, EPI_ISL_721944, EPI_ISL_721945, EPI_ISL_721946, EPI_ISL_721947, EPI_ISL_721948, EPI_ISL_721949, EPI_ISL_721950, EPI_ISL_721951, EPI_ISL_721952, EPI_ISL_721953, EPI_ISL_721954, EPI_ISL_721955, EPI_ISL_721956, EPI_ISL_721957, EPI_ISL_721958, EPI_ISL_721959, EPI_ISL_721960, EPI_ISL_721961, EPI_ISL_721962, EPI_ISL_721963, EPI_ISL_721964, EPI_ISL_721965, EPI_ISL_721966, EPI_ISL_721967, EPI_ISL_721968, EPI_ISL_721969, EPI_ISL_721970, EPI_ISL_721971, EPI_ISL_721972, EPI_ISL_721973, EPI_ISL_721974, EPI_ISL_721975 | see above                                                                                          | Viollier AG                                                                                        | Department of Biosystems Science and Engineering, ETH Zürich                                                                                                                                                                                                                                                                                                           | Christian Beisel                                                                                                                                                                                                                                                                                                                                                                           |
| EPI_ISL_725671, EPI_ISL_725712, EPI_ISL_725748, EPI_ISL_725920, EPI_ISL_726049, EPI_ISL_726257, EPI_ISL_726347, EPI_ISL_726382, EPI_ISL_726431, EPI_ISL_726538, EPI_ISL_726599, EPI_ISL_726623, EPI_ISL_726634, EPI_ISL_726692, EPI_ISL_726855, EPI_ISL_726906, EPI_ISL_726943, EPI_ISL_727197, EPI_ISL_727208, EPI_ISL_727210, EPI_ISL_727213, EPI_ISL_727269, EPI_ISL_727307, EPI_ISL_727323, EPI_ISL_727325, EPI_ISL_727332, EPI_ISL_727344, EPI_ISL_727368, EPI_ISL_727395, EPI_ISL_727417, EPI_ISL_727499, EPI_ISL_727510, EPI_ISL_727578, EPI_ISL_727592, EPI_ISL_727693                                                                                                                                                                                                                                                                                                                                                                                                                                                                                                                                                                                                                                                                                                                                                                                                                                                                                                                                                                                                                                                                                                                                                                                                                                                                                                                                                                                                                                                                                                                                                                                                                                                                                                                                                                                                                                                                                                                                                                                                                                                                                                                                                                                                                                                                                                                                                                                                                                                                                                                                                                                                                                                                                                                                                                                                                                                                                                                                                                                                                                                                                                                                                                                                                                                                                                                                                                                                                                                                                                                                                                                                                                                                                                                                                                                                                                                                                                                                                                                                                                                                                                                                                                                                                                                                                                                                                                                                                                                                                                                 | see above                                                                                          | Wales Specialist Virology Centre Sequencing lab: Pathogen Genomics Unit                            | Catherine Moore, Johnathan Evans, Laura Gifford, Malorie Perry, Simon Cottrell, Angela Marchbank, Alec Birchley, Alexander Adams, Amy Gaskin, Bree Gatica-Wilcox, Jason Coombes, Joel Southgate, Lauren Gilbert, Lee Graham, Nicole Pacchiari, Sara Kumziene-Summerhayes, Sarah Taylor, Sophie Jones, Sara Rey, Matthew Bull, Joanne Watkins, Sally Corden, Tom Connor |                                                                                                                                                                                                                                                                                                                                                                                            |
| EPI_ISL_728764, EPI_ISL_728765, EPI_ISL_728766, EPI_ISL_728767, EPI_ISL_728768, EPI_ISL_728769, EPI_ISL_728770, EPI_ISL_728771, EPI_ISL_728772, EPI_ISL_728773, EPI_ISL_728774, EPI_ISL_728775                                                                                                                                                                                                                                                                                                                                                                                                                                                                                                                                                                                                                                                                                                                                                                                                                                                                                                                                                                                                                                                                                                                                                                                                                                                                                                                                                                                                                                                                                                                                                                                                                                                                                                                                                                                                                                                                                                                                                                                                                                                                                                                                                                                                                                                                                                                                                                                                                                                                                                                                                                                                                                                                                                                                                                                                                                                                                                                                                                                                                                                                                                                                                                                                                                                                                                                                                                                                                                                                                                                                                                                                                                                                                                                                                                                                                                                                                                                                                                                                                                                                                                                                                                                                                                                                                                                                                                                                                                                                                                                                                                                                                                                                                                                                                                                                                                                                                                 | see above                                                                                          | Viollier AG                                                                                        | Department of Biosystems Science and Engineering, ETH Zürich                                                                                                                                                                                                                                                                                                           | Chaoran Chen, Sarah Nadeau, Catharine Aquino, Ivan Topolsky, Pedro Ferreira, Philipp Jablonski, Susana Posada-Céspedes, Andreia Cabral de Gouveia, Maria Domenica Moccia, Simon Grüter, Timothy Sykes, Lennart Opitz, Ralph Schlapbach, Christiane Beckmann, Maurice Redondo, Olivier Kobel, Christoph Noppen, Sophie Seidel, Noemie Santamaria de Souza, Niko Beerenwinkel, Tanja Stadler |
| EPI_ISL_728776                                                                                                                                                                                                                                                                                                                                                                                                                                                                                                                                                                                                                                                                                                                                                                                                                                                                                                                                                                                                                                                                                                                                                                                                                                                                                                                                                                                                                                                                                                                                                                                                                                                                                                                                                                                                                                                                                                                                                                                                                                                                                                                                                                                                                                                                                                                                                                                                                                                                                                                                                                                                                                                                                                                                                                                                                                                                                                                                                                                                                                                                                                                                                                                                                                                                                                                                                                                                                                                                                                                                                                                                                                                                                                                                                                                                                                                                                                                                                                                                                                                                                                                                                                                                                                                                                                                                                                                                                                                                                                                                                                                                                                                                                                                                                                                                                                                                                                                                                                                                                                                                                 | Viollier AG                                                                                        | Department of Biosystems Science and Engineering, ETH Zürich                                       | Christian Beisel, Sarah Nadeau, Chaoran Chen, Ivan Topolsky, Pedro Ferreira, Philipp Jablonski, Susana Posada-Céspedes, Tobias Schär, Ina Nissen, Natascha Santacroce, Elodie Burcklen, Christiane Beckmann, Maurice Redondo, Olivier Kobel, Christoph Noppen, Sophie Seidel, Noemie Santamaria de Souza, Niko Beerenwinkel, Tanja Stadler                             |                                                                                                                                                                                                                                                                                                                                                                                            |
| EPI_ISL_728777, EPI_ISL_728778, EPI_ISL_728779, EPI_ISL_728780, EPI_ISL_728781, EPI_ISL_728782, EPI_ISL_728783, EPI_ISL_728784, EPI_ISL_728785, EPI_ISL_728786, EPI_ISL_728787, EPI_ISL_728788, EPI_ISL_728789, EPI_ISL_728790, EPI_ISL_728791, EPI_ISL_728792, EPI_ISL_728793, EPI_ISL_728794, EPI_ISL_728795, EPI_ISL_728796, EPI_ISL_728797, EPI_ISL_728798, EPI_ISL_728799, EPI_ISL_728800, EPI_ISL_728801, EPI_ISL_728802, EPI_ISL_728803, EPI_ISL_728804, EPI_ISL_728805, EPI_ISL_728806, EPI_ISL_728807                                                                                                                                                                                                                                                                                                                                                                                                                                                                                                                                                                                                                                                                                                                                                                                                                                                                                                                                                                                                                                                                                                                                                                                                                                                                                                                                                                                                                                                                                                                                                                                                                                                                                                                                                                                                                                                                                                                                                                                                                                                                                                                                                                                                                                                                                                                                                                                                                                                                                                                                                                                                                                                                                                                                                                                                                                                                                                                                                                                                                                                                                                                                                                                                                                                                                                                                                                                                                                                                                                                                                                                                                                                                                                                                                                                                                                                                                                                                                                                                                                                                                                                                                                                                                                                                                                                                                                                                                                                                                                                                                                                 | see above                                                                                          | Viollier AG                                                                                        | Department of Biosystems Science and Engineering, ETH Zürich                                                                                                                                                                                                                                                                                                           | Chaoran Chen, Sarah Nadeau, Catharine Aquino, Ivan Topolsky, Pedro Ferreira, Philipp Jablonski, Susana Posada-Céspedes, Andreia Cabral de Gouveia, Maria Domenica Moccia, Simon Grüter, Timothy Sykes, Lennart Opitz, Ralph Schlapbach, Christiane Beckmann, Maurice Redondo, Olivier Kobel, Christoph Noppen, Sophie Seidel, Noemie Santamaria de Souza, Niko Beerenwinkel, Tanja Stadler |
| EPI_ISL_728808                                                                                                                                                                                                                                                                                                                                                                                                                                                                                                                                                                                                                                                                                                                                                                                                                                                                                                                                                                                                                                                                                                                                                                                                                                                                                                                                                                                                                                                                                                                                                                                                                                                                                                                                                                                                                                                                                                                                                                                                                                                                                                                                                                                                                                                                                                                                                                                                                                                                                                                                                                                                                                                                                                                                                                                                                                                                                                                                                                                                                                                                                                                                                                                                                                                                                                                                                                                                                                                                                                                                                                                                                                                                                                                                                                                                                                                                                                                                                                                                                                                                                                                                                                                                                                                                                                                                                                                                                                                                                                                                                                                                                                                                                                                                                                                                                                                                                                                                                                                                                                                                                 | Viollier AG                                                                                        | Department of Biosystems Science and Engineering, ETH Zürich                                       | Christian Beisel, Sarah Nadeau, Chaoran Chen, Ivan Topolsky, Pedro Ferreira, Philipp Jablonski, Susana Posada-Céspedes, Tobias Schär, Ina Nissen, Natascha Santacroce, Elodie Burcklen, Christiane Beckmann, Maurice Redondo, Olivier Kobel, Christoph Noppen, Sophie Seidel, Noemie Santamaria de Souza, Niko Beerenwinkel, Tanja Stadler                             |                                                                                                                                                                                                                                                                                                                                                                                            |
| EPI_ISL_728809, EPI_ISL_728810, EPI_ISL_728811, EPI_ISL_728812, EPI_ISL_728813, EPI_ISL_728814, EPI_ISL_728815, EPI_ISL_728816, EPI_ISL_728817, EPI_ISL_728818, EPI_ISL_728819, EPI_ISL_728820, EPI_ISL_728821, EPI_ISL_728822, EPI_ISL_728823, EPI_ISL_728824, EPI_ISL_728825, EPI_ISL_728826                                                                                                                                                                                                                                                                                                                                                                                                                                                                                                                                                                                                                                                                                                                                                                                                                                                                                                                                                                                                                                                                                                                                                                                                                                                                                                                                                                                                                                                                                                                                                                                                                                                                                                                                                                                                                                                                                                                                                                                                                                                                                                                                                                                                                                                                                                                                                                                                                                                                                                                                                                                                                                                                                                                                                                                                                                                                                                                                                                                                                                                                                                                                                                                                                                                                                                                                                                                                                                                                                                                                                                                                                                                                                                                                                                                                                                                                                                                                                                                                                                                                                                                                                                                                                                                                                                                                                                                                                                                                                                                                                                                                                                                                                                                                                                                                 | see above                                                                                          | Viollier AG                                                                                        | Department of Biosystems Science and Engineering, ETH Zürich                                                                                                                                                                                                                                                                                                           | Chaoran Chen, Sarah Nadeau, Catharine Aquino, Ivan Topolsky, Pedro Ferreira, Philipp Jablonski, Susana Posada-Céspedes, Andreia Cabral de Gouveia, Maria Domenica Moccia, Simon Grüter, Timothy Sykes, Lennart Opitz, Ralph Schlapbach, Christiane Beckmann, Maurice Redondo, Olivier Kobel, Christoph Noppen, Sophie Seidel, Noemie Santamaria de Souza, Niko Beerenwinkel, Tanja Stadler |
| EPI_ISL_728827, EPI_ISL_728828                                                                                                                                                                                                                                                                                                                                                                                                                                                                                                                                                                                                                                                                                                                                                                                                                                                                                                                                                                                                                                                                                                                                                                                                                                                                                                                                                                                                                                                                                                                                                                                                                                                                                                                                                                                                                                                                                                                                                                                                                                                                                                                                                                                                                                                                                                                                                                                                                                                                                                                                                                                                                                                                                                                                                                                                                                                                                                                                                                                                                                                                                                                                                                                                                                                                                                                                                                                                                                                                                                                                                                                                                                                                                                                                                                                                                                                                                                                                                                                                                                                                                                                                                                                                                                                                                                                                                                                                                                                                                                                                                                                                                                                                                                                                                                                                                                                                                                                                                                                                                                                                 | Viollier AG                                                                                        | Department of Biosystems Science and Engineering, ETH Zürich                                       | Christian Beisel, Sarah Nadeau, Chaoran Chen, Ivan Topolsky, Pedro Ferreira, Philipp Jablonski, Susana Posada-Céspedes, Tobias Schär, Ina Nissen, Natascha Santacroce, Elodie Burcklen, Christiane Beckmann, Maurice Redondo, Olivier Kobel, Christoph Noppen, Sophie Seidel, Noemie Santamaria de Souza, Niko Beerenwinkel, Tanja Stadler                             |                                                                                                                                                                                                                                                                                                                                                                                            |



| Strategic Laboratory                                                                                                                                                                                                                                                                                                                                                                                                                                                                                                                                                                                                                                                                                                                                                                                                                                                                                                                                                                                                                                                                                                                                                                                                                                                                                                                                                                                                                                                                                                                                                                                                                                                                                                                                                                                                                                                                                                                                                                                                                                                                                                                                                                                                                                                                                                                                                                                                                                                                                                                                                                                                                                                                                                                                                                                                                                                                                                                                           |                                                        |                                                                                  |                                                                                                                                                                                                                                                                                                                                                                                                                                                                        |                                                                                                                                                                                                                                                                                                                                                                                                                                                                        |
|----------------------------------------------------------------------------------------------------------------------------------------------------------------------------------------------------------------------------------------------------------------------------------------------------------------------------------------------------------------------------------------------------------------------------------------------------------------------------------------------------------------------------------------------------------------------------------------------------------------------------------------------------------------------------------------------------------------------------------------------------------------------------------------------------------------------------------------------------------------------------------------------------------------------------------------------------------------------------------------------------------------------------------------------------------------------------------------------------------------------------------------------------------------------------------------------------------------------------------------------------------------------------------------------------------------------------------------------------------------------------------------------------------------------------------------------------------------------------------------------------------------------------------------------------------------------------------------------------------------------------------------------------------------------------------------------------------------------------------------------------------------------------------------------------------------------------------------------------------------------------------------------------------------------------------------------------------------------------------------------------------------------------------------------------------------------------------------------------------------------------------------------------------------------------------------------------------------------------------------------------------------------------------------------------------------------------------------------------------------------------------------------------------------------------------------------------------------------------------------------------------------------------------------------------------------------------------------------------------------------------------------------------------------------------------------------------------------------------------------------------------------------------------------------------------------------------------------------------------------------------------------------------------------------------------------------------------------|--------------------------------------------------------|----------------------------------------------------------------------------------|------------------------------------------------------------------------------------------------------------------------------------------------------------------------------------------------------------------------------------------------------------------------------------------------------------------------------------------------------------------------------------------------------------------------------------------------------------------------|------------------------------------------------------------------------------------------------------------------------------------------------------------------------------------------------------------------------------------------------------------------------------------------------------------------------------------------------------------------------------------------------------------------------------------------------------------------------|
| EPI_ISL_735399                                                                                                                                                                                                                                                                                                                                                                                                                                                                                                                                                                                                                                                                                                                                                                                                                                                                                                                                                                                                                                                                                                                                                                                                                                                                                                                                                                                                                                                                                                                                                                                                                                                                                                                                                                                                                                                                                                                                                                                                                                                                                                                                                                                                                                                                                                                                                                                                                                                                                                                                                                                                                                                                                                                                                                                                                                                                                                                                                 | Hospital Municipal Dr Ignacio de gouvea                | Instituto Adolfo Lutz, Interdisciplinary Procedures Center, Strategic Laboratory | Claudio Tavares Sacchi, Claudia Regina Gonçalves, Erica Valessa Ramos Gomes, Karoline Rodrigues Campos                                                                                                                                                                                                                                                                                                                                                                 |                                                                                                                                                                                                                                                                                                                                                                                                                                                                        |
| EPI_ISL_735400                                                                                                                                                                                                                                                                                                                                                                                                                                                                                                                                                                                                                                                                                                                                                                                                                                                                                                                                                                                                                                                                                                                                                                                                                                                                                                                                                                                                                                                                                                                                                                                                                                                                                                                                                                                                                                                                                                                                                                                                                                                                                                                                                                                                                                                                                                                                                                                                                                                                                                                                                                                                                                                                                                                                                                                                                                                                                                                                                 | Instituto Adolfo Lutz - Regional de Santos             | Instituto Adolfo Lutz, Interdisciplinary Procedures Center, Strategic Laboratory | Claudio Tavares Sacchi, Claudia Regina Gonçalves, Erica Valessa Ramos Gomes, Karoline Rodrigues Campos                                                                                                                                                                                                                                                                                                                                                                 |                                                                                                                                                                                                                                                                                                                                                                                                                                                                        |
| EPI_ISL_735401, EPI_ISL_735402                                                                                                                                                                                                                                                                                                                                                                                                                                                                                                                                                                                                                                                                                                                                                                                                                                                                                                                                                                                                                                                                                                                                                                                                                                                                                                                                                                                                                                                                                                                                                                                                                                                                                                                                                                                                                                                                                                                                                                                                                                                                                                                                                                                                                                                                                                                                                                                                                                                                                                                                                                                                                                                                                                                                                                                                                                                                                                                                 | Instituto Adolfo Lutz - Regional de Rio Claro          | Instituto Adolfo Lutz, Interdisciplinary Procedures Center, Strategic Laboratory | Claudio Tavares Sacchi, Claudia Regina Gonçalves, Erica Valessa Ramos Gomes, Karoline Rodrigues Campos                                                                                                                                                                                                                                                                                                                                                                 |                                                                                                                                                                                                                                                                                                                                                                                                                                                                        |
| EPI_ISL_735406                                                                                                                                                                                                                                                                                                                                                                                                                                                                                                                                                                                                                                                                                                                                                                                                                                                                                                                                                                                                                                                                                                                                                                                                                                                                                                                                                                                                                                                                                                                                                                                                                                                                                                                                                                                                                                                                                                                                                                                                                                                                                                                                                                                                                                                                                                                                                                                                                                                                                                                                                                                                                                                                                                                                                                                                                                                                                                                                                 | Unidade de Pronto Atendimento UPA I Sta Isabel         | Instituto Adolfo Lutz, Interdisciplinary Procedures Center, Strategic Laboratory | Claudio Tavares Sacchi, Claudia Regina Gonçalves, Erica Valessa Ramos Gomes, Karoline Rodrigues Campos                                                                                                                                                                                                                                                                                                                                                                 |                                                                                                                                                                                                                                                                                                                                                                                                                                                                        |
| EPI_ISL_735410                                                                                                                                                                                                                                                                                                                                                                                                                                                                                                                                                                                                                                                                                                                                                                                                                                                                                                                                                                                                                                                                                                                                                                                                                                                                                                                                                                                                                                                                                                                                                                                                                                                                                                                                                                                                                                                                                                                                                                                                                                                                                                                                                                                                                                                                                                                                                                                                                                                                                                                                                                                                                                                                                                                                                                                                                                                                                                                                                 | Instituto Adolfo Lutz - Regional de Rio Claro          | Instituto Adolfo Lutz, Interdisciplinary Procedures Center, Strategic Laboratory | Claudio Tavares Sacchi, Claudia Regina Gonçalves, Erica Valessa Ramos Gomes, Karoline Rodrigues Campos                                                                                                                                                                                                                                                                                                                                                                 |                                                                                                                                                                                                                                                                                                                                                                                                                                                                        |
| EPI_ISL_735411                                                                                                                                                                                                                                                                                                                                                                                                                                                                                                                                                                                                                                                                                                                                                                                                                                                                                                                                                                                                                                                                                                                                                                                                                                                                                                                                                                                                                                                                                                                                                                                                                                                                                                                                                                                                                                                                                                                                                                                                                                                                                                                                                                                                                                                                                                                                                                                                                                                                                                                                                                                                                                                                                                                                                                                                                                                                                                                                                 | Centro de Vigilancia a Saude de Diadema                | Instituto Adolfo Lutz, Interdisciplinary Procedures Center, Strategic Laboratory | Claudio Tavares Sacchi, Claudia Regina Gonçalves, Erica Valessa Ramos Gomes, Karoline Rodrigues Campos                                                                                                                                                                                                                                                                                                                                                                 |                                                                                                                                                                                                                                                                                                                                                                                                                                                                        |
| EPI_ISL_735412                                                                                                                                                                                                                                                                                                                                                                                                                                                                                                                                                                                                                                                                                                                                                                                                                                                                                                                                                                                                                                                                                                                                                                                                                                                                                                                                                                                                                                                                                                                                                                                                                                                                                                                                                                                                                                                                                                                                                                                                                                                                                                                                                                                                                                                                                                                                                                                                                                                                                                                                                                                                                                                                                                                                                                                                                                                                                                                                                 | Hospital e Pronto Socorro Portinari                    | Instituto Adolfo Lutz, Interdisciplinary Procedures Center, Strategic Laboratory | Claudio Tavares Sacchi, Claudia Regina Gonçalves, Erica Valessa Ramos Gomes, Karoline Rodrigues Campos                                                                                                                                                                                                                                                                                                                                                                 |                                                                                                                                                                                                                                                                                                                                                                                                                                                                        |
| EPI_ISL_735413                                                                                                                                                                                                                                                                                                                                                                                                                                                                                                                                                                                                                                                                                                                                                                                                                                                                                                                                                                                                                                                                                                                                                                                                                                                                                                                                                                                                                                                                                                                                                                                                                                                                                                                                                                                                                                                                                                                                                                                                                                                                                                                                                                                                                                                                                                                                                                                                                                                                                                                                                                                                                                                                                                                                                                                                                                                                                                                                                 | Militello Centro de Diagnosticos e Biopesquisa Clinica | Instituto Adolfo Lutz, Interdisciplinary Procedures Center, Strategic Laboratory | Claudio Tavares Sacchi, Claudia Regina Gonçalves, Erica Valessa Ramos Gomes, Karoline Rodrigues Campos                                                                                                                                                                                                                                                                                                                                                                 |                                                                                                                                                                                                                                                                                                                                                                                                                                                                        |
| EPI_ISL_735414, EPI_ISL_735415                                                                                                                                                                                                                                                                                                                                                                                                                                                                                                                                                                                                                                                                                                                                                                                                                                                                                                                                                                                                                                                                                                                                                                                                                                                                                                                                                                                                                                                                                                                                                                                                                                                                                                                                                                                                                                                                                                                                                                                                                                                                                                                                                                                                                                                                                                                                                                                                                                                                                                                                                                                                                                                                                                                                                                                                                                                                                                                                 | Unidade de Pronto Atendimento de Agenor de Campos      | Instituto Adolfo Lutz, Interdisciplinary Procedures Center, Strategic Laboratory | Claudio Tavares Sacchi, Claudia Regina Gonçalves, Erica Valessa Ramos Gomes, Karoline Rodrigues Campos                                                                                                                                                                                                                                                                                                                                                                 |                                                                                                                                                                                                                                                                                                                                                                                                                                                                        |
| EPI_ISL_735416                                                                                                                                                                                                                                                                                                                                                                                                                                                                                                                                                                                                                                                                                                                                                                                                                                                                                                                                                                                                                                                                                                                                                                                                                                                                                                                                                                                                                                                                                                                                                                                                                                                                                                                                                                                                                                                                                                                                                                                                                                                                                                                                                                                                                                                                                                                                                                                                                                                                                                                                                                                                                                                                                                                                                                                                                                                                                                                                                 | Centro de Saude II Dr Jose Paione Mococa               | Instituto Adolfo Lutz, Interdisciplinary Procedures Center, Strategic Laboratory | Claudio Tavares Sacchi, Claudia Regina Gonçalves, Erica Valessa Ramos Gomes, Karoline Rodrigues Campos                                                                                                                                                                                                                                                                                                                                                                 |                                                                                                                                                                                                                                                                                                                                                                                                                                                                        |
| EPI_ISL_735417                                                                                                                                                                                                                                                                                                                                                                                                                                                                                                                                                                                                                                                                                                                                                                                                                                                                                                                                                                                                                                                                                                                                                                                                                                                                                                                                                                                                                                                                                                                                                                                                                                                                                                                                                                                                                                                                                                                                                                                                                                                                                                                                                                                                                                                                                                                                                                                                                                                                                                                                                                                                                                                                                                                                                                                                                                                                                                                                                 | Unidade de Pronto Atendimento de Agenor de Campos      | Instituto Adolfo Lutz, Interdisciplinary Procedures Center, Strategic Laboratory | Claudio Tavares Sacchi, Claudia Regina Gonçalves, Erica Valessa Ramos Gomes, Karoline Rodrigues Campos                                                                                                                                                                                                                                                                                                                                                                 |                                                                                                                                                                                                                                                                                                                                                                                                                                                                        |
| EPI_ISL_735418                                                                                                                                                                                                                                                                                                                                                                                                                                                                                                                                                                                                                                                                                                                                                                                                                                                                                                                                                                                                                                                                                                                                                                                                                                                                                                                                                                                                                                                                                                                                                                                                                                                                                                                                                                                                                                                                                                                                                                                                                                                                                                                                                                                                                                                                                                                                                                                                                                                                                                                                                                                                                                                                                                                                                                                                                                                                                                                                                 | Hospital Regional do Vale do Paraiba                   | Instituto Adolfo Lutz, Interdisciplinary Procedures Center, Strategic Laboratory | Claudio Tavares Sacchi, Claudia Regina Gonçalves, Erica Valessa Ramos Gomes, Karoline Rodrigues Campos                                                                                                                                                                                                                                                                                                                                                                 |                                                                                                                                                                                                                                                                                                                                                                                                                                                                        |
| EPI_ISL_735422                                                                                                                                                                                                                                                                                                                                                                                                                                                                                                                                                                                                                                                                                                                                                                                                                                                                                                                                                                                                                                                                                                                                                                                                                                                                                                                                                                                                                                                                                                                                                                                                                                                                                                                                                                                                                                                                                                                                                                                                                                                                                                                                                                                                                                                                                                                                                                                                                                                                                                                                                                                                                                                                                                                                                                                                                                                                                                                                                 | UBS Dematchi                                           | Instituto Adolfo Lutz, Interdisciplinary Procedures Center, Strategic Laboratory | Claudio Tavares Sacchi, Claudia Regina Gonçalves, Erica Valessa Ramos Gomes, Karoline Rodrigues Campos                                                                                                                                                                                                                                                                                                                                                                 |                                                                                                                                                                                                                                                                                                                                                                                                                                                                        |
| EPI_ISL_735423                                                                                                                                                                                                                                                                                                                                                                                                                                                                                                                                                                                                                                                                                                                                                                                                                                                                                                                                                                                                                                                                                                                                                                                                                                                                                                                                                                                                                                                                                                                                                                                                                                                                                                                                                                                                                                                                                                                                                                                                                                                                                                                                                                                                                                                                                                                                                                                                                                                                                                                                                                                                                                                                                                                                                                                                                                                                                                                                                 | Centro de Vigilancia a Saude de Diadema                | Instituto Adolfo Lutz, Interdisciplinary Procedures Center, Strategic Laboratory | Claudio Tavares Sacchi, Claudia Regina Gonçalves, Erica Valessa Ramos Gomes, Karoline Rodrigues Campos                                                                                                                                                                                                                                                                                                                                                                 |                                                                                                                                                                                                                                                                                                                                                                                                                                                                        |
| EPI_ISL_735425                                                                                                                                                                                                                                                                                                                                                                                                                                                                                                                                                                                                                                                                                                                                                                                                                                                                                                                                                                                                                                                                                                                                                                                                                                                                                                                                                                                                                                                                                                                                                                                                                                                                                                                                                                                                                                                                                                                                                                                                                                                                                                                                                                                                                                                                                                                                                                                                                                                                                                                                                                                                                                                                                                                                                                                                                                                                                                                                                 | Hospital e Maternidade Sao Lucas                       | Instituto Adolfo Lutz, Interdisciplinary Procedures Center, Strategic Laboratory | Claudio Tavares Sacchi, Claudia Regina Gonçalves, Erica Valessa Ramos Gomes, Karoline Rodrigues Campos                                                                                                                                                                                                                                                                                                                                                                 |                                                                                                                                                                                                                                                                                                                                                                                                                                                                        |
| EPI_ISL_735426                                                                                                                                                                                                                                                                                                                                                                                                                                                                                                                                                                                                                                                                                                                                                                                                                                                                                                                                                                                                                                                                                                                                                                                                                                                                                                                                                                                                                                                                                                                                                                                                                                                                                                                                                                                                                                                                                                                                                                                                                                                                                                                                                                                                                                                                                                                                                                                                                                                                                                                                                                                                                                                                                                                                                                                                                                                                                                                                                 | Centro de Vigilancia a Saude de Diadema                | Instituto Adolfo Lutz, Interdisciplinary Procedures Center, Strategic Laboratory | Claudio Tavares Sacchi, Claudia Regina Gonçalves, Erica Valessa Ramos Gomes, Karoline Rodrigues Campos                                                                                                                                                                                                                                                                                                                                                                 |                                                                                                                                                                                                                                                                                                                                                                                                                                                                        |
| EPI_ISL_735427                                                                                                                                                                                                                                                                                                                                                                                                                                                                                                                                                                                                                                                                                                                                                                                                                                                                                                                                                                                                                                                                                                                                                                                                                                                                                                                                                                                                                                                                                                                                                                                                                                                                                                                                                                                                                                                                                                                                                                                                                                                                                                                                                                                                                                                                                                                                                                                                                                                                                                                                                                                                                                                                                                                                                                                                                                                                                                                                                 | Instituto Adolfo Lutz - Regional de Santos             | Instituto Adolfo Lutz, Interdisciplinary Procedures Center, Strategic Laboratory | Claudio Tavares Sacchi, Claudia Regina Gonçalves, Erica Valessa Ramos Gomes, Karoline Rodrigues Campos                                                                                                                                                                                                                                                                                                                                                                 |                                                                                                                                                                                                                                                                                                                                                                                                                                                                        |
| EPI_ISL_735428, EPI_ISL_735429                                                                                                                                                                                                                                                                                                                                                                                                                                                                                                                                                                                                                                                                                                                                                                                                                                                                                                                                                                                                                                                                                                                                                                                                                                                                                                                                                                                                                                                                                                                                                                                                                                                                                                                                                                                                                                                                                                                                                                                                                                                                                                                                                                                                                                                                                                                                                                                                                                                                                                                                                                                                                                                                                                                                                                                                                                                                                                                                 | Hospital Nipo Brasileiro                               | Instituto Adolfo Lutz, Interdisciplinary Procedures Center, Strategic Laboratory | Claudio Tavares Sacchi, Claudia Regina Gonçalves, Erica Valessa Ramos Gomes, Karoline Rodrigues Campos                                                                                                                                                                                                                                                                                                                                                                 |                                                                                                                                                                                                                                                                                                                                                                                                                                                                        |
| EPI_ISL_735430                                                                                                                                                                                                                                                                                                                                                                                                                                                                                                                                                                                                                                                                                                                                                                                                                                                                                                                                                                                                                                                                                                                                                                                                                                                                                                                                                                                                                                                                                                                                                                                                                                                                                                                                                                                                                                                                                                                                                                                                                                                                                                                                                                                                                                                                                                                                                                                                                                                                                                                                                                                                                                                                                                                                                                                                                                                                                                                                                 | Instituto Adolfo Lutz - Regional de Santos             | Instituto Adolfo Lutz, Interdisciplinary Procedures Center, Strategic Laboratory | Claudio Tavares Sacchi, Claudia Regina Gonçalves, Erica Valessa Ramos Gomes, Karoline Rodrigues Campos                                                                                                                                                                                                                                                                                                                                                                 |                                                                                                                                                                                                                                                                                                                                                                                                                                                                        |
| EPI_ISL_735431, EPI_ISL_735432                                                                                                                                                                                                                                                                                                                                                                                                                                                                                                                                                                                                                                                                                                                                                                                                                                                                                                                                                                                                                                                                                                                                                                                                                                                                                                                                                                                                                                                                                                                                                                                                                                                                                                                                                                                                                                                                                                                                                                                                                                                                                                                                                                                                                                                                                                                                                                                                                                                                                                                                                                                                                                                                                                                                                                                                                                                                                                                                 | Hospital Nipo Brasileiro                               | Instituto Adolfo Lutz, Interdisciplinary Procedures Center, Strategic Laboratory | Claudio Tavares Sacchi, Claudia Regina Gonçalves, Erica Valessa Ramos Gomes, Karoline Rodrigues Campos                                                                                                                                                                                                                                                                                                                                                                 |                                                                                                                                                                                                                                                                                                                                                                                                                                                                        |
| EPI_ISL_735433                                                                                                                                                                                                                                                                                                                                                                                                                                                                                                                                                                                                                                                                                                                                                                                                                                                                                                                                                                                                                                                                                                                                                                                                                                                                                                                                                                                                                                                                                                                                                                                                                                                                                                                                                                                                                                                                                                                                                                                                                                                                                                                                                                                                                                                                                                                                                                                                                                                                                                                                                                                                                                                                                                                                                                                                                                                                                                                                                 | Posto de Atendimento Saude Cidade Pasc Cajati          | Instituto Adolfo Lutz, Interdisciplinary Procedures Center, Strategic Laboratory | Claudio Tavares Sacchi, Claudia Regina Gonçalves, Erica Valessa Ramos Gomes, Karoline Rodrigues Campos                                                                                                                                                                                                                                                                                                                                                                 |                                                                                                                                                                                                                                                                                                                                                                                                                                                                        |
| EPI_ISL_737395, EPI_ISL_737396, EPI_ISL_737397, EPI_ISL_737398, EPI_ISL_737399, EPI_ISL_737400, EPI_ISL_737401, EPI_ISL_737402, EPI_ISL_737403, EPI_ISL_737404, EPI_ISL_737405, EPI_ISL_737406, EPI_ISL_737407, EPI_ISL_737408, EPI_ISL_737409, EPI_ISL_737410, EPI_ISL_737411, EPI_ISL_737412, EPI_ISL_737413, EPI_ISL_737414, EPI_ISL_737415, EPI_ISL_737416, EPI_ISL_737417, EPI_ISL_737418, EPI_ISL_737419, EPI_ISL_737420, EPI_ISL_737421, EPI_ISL_737422, EPI_ISL_737423, EPI_ISL_737424, EPI_ISL_737425, EPI_ISL_737426, EPI_ISL_737427, EPI_ISL_737428, EPI_ISL_737429, EPI_ISL_737430, EPI_ISL_737431, EPI_ISL_737432, EPI_ISL_737433, EPI_ISL_737434, EPI_ISL_737435, EPI_ISL_737436, EPI_ISL_737437, EPI_ISL_737438, EPI_ISL_737439, EPI_ISL_737440, EPI_ISL_737441, EPI_ISL_737442, EPI_ISL_737443, EPI_ISL_737444, EPI_ISL_737445, EPI_ISL_737446, EPI_ISL_737447, EPI_ISL_737448, EPI_ISL_737449, EPI_ISL_737450, EPI_ISL_737451, EPI_ISL_737452, EPI_ISL_737453, EPI_ISL_737454, EPI_ISL_737455, EPI_ISL_737456, EPI_ISL_737457, EPI_ISL_737458, EPI_ISL_737459, EPI_ISL_737460, EPI_ISL_737461, EPI_ISL_737462, EPI_ISL_737463, EPI_ISL_737464, EPI_ISL_737465, EPI_ISL_737466, EPI_ISL_737467, EPI_ISL_737468, EPI_ISL_737469, EPI_ISL_737470, EPI_ISL_737471, EPI_ISL_737472, EPI_ISL_737473, EPI_ISL_737474, EPI_ISL_737475, EPI_ISL_737476, EPI_ISL_737477, EPI_ISL_737478, EPI_ISL_737479, EPI_ISL_737480, EPI_ISL_737481, EPI_ISL_737482, EPI_ISL_737483, EPI_ISL_737484, EPI_ISL_737485, EPI_ISL_737486, EPI_ISL_737487, EPI_ISL_737488, EPI_ISL_737489, EPI_ISL_737490, EPI_ISL_737491, EPI_ISL_737492, EPI_ISL_737493, EPI_ISL_737494, EPI_ISL_737495, EPI_ISL_737496, EPI_ISL_737497, EPI_ISL_737498, EPI_ISL_737499, EPI_ISL_737500, EPI_ISL_737501, EPI_ISL_737502, EPI_ISL_737503, EPI_ISL_737504, EPI_ISL_737505, EPI_ISL_737506, EPI_ISL_737507, EPI_ISL_737508, EPI_ISL_737509, EPI_ISL_737510, EPI_ISL_737511, EPI_ISL_737512, EPI_ISL_737513, EPI_ISL_737514, EPI_ISL_737515, EPI_ISL_737516, EPI_ISL_737517, EPI_ISL_737518, EPI_ISL_737519, EPI_ISL_737520, EPI_ISL_737521, EPI_ISL_737522, EPI_ISL_737523, EPI_ISL_737524, EPI_ISL_737525, EPI_ISL_737526, EPI_ISL_737527, EPI_ISL_737528, EPI_ISL_737529, EPI_ISL_737530, EPI_ISL_737531, EPI_ISL_737532, EPI_ISL_737533, EPI_ISL_737534, EPI_ISL_737535, EPI_ISL_737536, EPI_ISL_737537, EPI_ISL_737538, EPI_ISL_737539, EPI_ISL_737540, EPI_ISL_737541, EPI_ISL_737542, EPI_ISL_737543, EPI_ISL_737544, EPI_ISL_737545, EPI_ISL_737546, EPI_ISL_737547, EPI_ISL_737548, EPI_ISL_737549, EPI_ISL_737550, EPI_ISL_737551, EPI_ISL_737552, EPI_ISL_737553, EPI_ISL_737554, EPI_ISL_737555, EPI_ISL_737556, EPI_ISL_737557, EPI_ISL_737558, EPI_ISL_737559, EPI_ISL_737560, EPI_ISL_737561, EPI_ISL_737562, EPI_ISL_737563, EPI_ISL_737564, EPI_ISL_737565, EPI_ISL_737566, EPI_ISL_737567, EPI_ISL_737568, EPI_ISL_737569, EPI_ISL_737570, EPI_ISL_737571, EPI_ISL_737572 | see above                                              | Viollier AG                                                                      | Department of Biosystems Science and Engineering, ETH Zürich                                                                                                                                                                                                                                                                                                                                                                                                           | Chaoran Chen, Sarah Nadeau, Catharine Aquino, Ivan Topolsky, Philipp Jablonski, Lara Fuhrmann, David Dreifuss, Katharina Jahn, Andrea Cabral de Gouvea, Maria Domenica Moccia, Simon Grüter, Timothy Sykes, Lennart Opitz, Griffin White, Laura Neff, Doris Popovic, Andrea Patignani, Jay Tracy, Ralph Schlapbach, Christiane Beckmann, Maurice Redondo, Olivier Kobel, Christoph Noppen, Sophie Seidel, Noemie Santamaria de Souza, Niko Beerenwinkel, Tanja Stadler |
| EPI_ISL_737573                                                                                                                                                                                                                                                                                                                                                                                                                                                                                                                                                                                                                                                                                                                                                                                                                                                                                                                                                                                                                                                                                                                                                                                                                                                                                                                                                                                                                                                                                                                                                                                                                                                                                                                                                                                                                                                                                                                                                                                                                                                                                                                                                                                                                                                                                                                                                                                                                                                                                                                                                                                                                                                                                                                                                                                                                                                                                                                                                 | Viollier AG                                            | Department of Biosystems Science and Engineering, ETH Zürich                     | Chaoran Chen, Sarah Nadeau, Ivan Topolsky, Emmanouil Dermizakis, Keith Harshman, Ioannis Xenarios, Henri Pegeot, Lorenzo Cerutti, Deborah Penet, Philipp Jablonski, Lara Fuhrmann, David Dreifuss, Katharina Jahn, Christiane Beckmann, Maurice Redondo, Olivier Kobel, Christoph Noppen, Sophie Seidel, Noemie Santamaria de Souza, Niko Beerenwinkel, Tanja Stadler                                                                                                  |                                                                                                                                                                                                                                                                                                                                                                                                                                                                        |
| EPI_ISL_737574, EPI_ISL_737575, EPI_ISL_737576, EPI_ISL_737577, EPI_ISL_737578, EPI_ISL_737579, EPI_ISL_737580, EPI_ISL_737581, EPI_ISL_737582, EPI_ISL_737583, EPI_ISL_737584, EPI_ISL_737585, EPI_ISL_737586, EPI_ISL_737587, EPI_ISL_737588, EPI_ISL_737589, EPI_ISL_737590, EPI_ISL_737591, EPI_ISL_737592                                                                                                                                                                                                                                                                                                                                                                                                                                                                                                                                                                                                                                                                                                                                                                                                                                                                                                                                                                                                                                                                                                                                                                                                                                                                                                                                                                                                                                                                                                                                                                                                                                                                                                                                                                                                                                                                                                                                                                                                                                                                                                                                                                                                                                                                                                                                                                                                                                                                                                                                                                                                                                                 | see above                                              | Viollier AG                                                                      | Department of Biosystems Science and Engineering, ETH Zürich                                                                                                                                                                                                                                                                                                                                                                                                           | Chaoran Chen, Sarah Nadeau, Catharine Aquino, Ivan Topolsky, Philipp Jablonski, Lara Fuhrmann, David Dreifuss, Katharina Jahn, Andrea Cabral de Gouvea, Maria Domenica Moccia, Simon Grüter, Timothy Sykes, Lennart Opitz, Griffin White, Laura Neff, Doris Popovic, Andrea Patignani, Jay Tracy, Ralph Schlapbach, Christiane Beckmann, Maurice Redondo, Olivier Kobel, Christoph Noppen, Sophie Seidel, Noemie Santamaria de Souza, Niko Beerenwinkel, Tanja Stadler |
| EPI_ISL_737593                                                                                                                                                                                                                                                                                                                                                                                                                                                                                                                                                                                                                                                                                                                                                                                                                                                                                                                                                                                                                                                                                                                                                                                                                                                                                                                                                                                                                                                                                                                                                                                                                                                                                                                                                                                                                                                                                                                                                                                                                                                                                                                                                                                                                                                                                                                                                                                                                                                                                                                                                                                                                                                                                                                                                                                                                                                                                                                                                 | Viollier AG                                            | Department of Biosystems Science and Engineering, ETH Zürich                     | Chaoran Chen, Sarah Nadeau, Ivan Topolsky, Emmanouil Dermizakis, Keith Harshman, Ioannis Xenarios, Henri Pegeot, Lorenzo Cerutti, Deborah Penet, Philipp Jablonski, Lara Fuhrmann, David Dreifuss, Katharina Jahn, Christiane Beckmann, Maurice Redondo, Olivier Kobel, Christoph Noppen, Sophie Seidel, Noemie Santamaria de Souza, Niko Beerenwinkel, Tanja Stadler                                                                                                  |                                                                                                                                                                                                                                                                                                                                                                                                                                                                        |
| EPI_ISL_737594                                                                                                                                                                                                                                                                                                                                                                                                                                                                                                                                                                                                                                                                                                                                                                                                                                                                                                                                                                                                                                                                                                                                                                                                                                                                                                                                                                                                                                                                                                                                                                                                                                                                                                                                                                                                                                                                                                                                                                                                                                                                                                                                                                                                                                                                                                                                                                                                                                                                                                                                                                                                                                                                                                                                                                                                                                                                                                                                                 | Viollier AG                                            | Department of Biosystems Science and Engineering, ETH Zürich                     | Chaoran Chen, Sarah Nadeau, Catharine Aquino, Ivan Topolsky, Philipp Jablonski, Lara Fuhrmann, David Dreifuss, Katharina Jahn, Andrea Cabral de Gouvea, Maria Domenica Moccia, Simon Grüter, Timothy Sykes, Lennart Opitz, Griffin White, Laura Neff, Doris Popovic, Andrea Patignani, Jay Tracy, Ralph Schlapbach, Christiane Beckmann, Maurice Redondo, Olivier Kobel, Christoph Noppen, Sophie Seidel, Noemie Santamaria de Souza, Niko Beerenwinkel, Tanja Stadler |                                                                                                                                                                                                                                                                                                                                                                                                                                                                        |



|                                                                                                                                                                                                                                                                                                                                                                                                                                                                                                                                                                                                                                                                                                                                                                                                                                                                                                                                                                                                                                                                                                                                                                                                                                |                                                                                                                                                                        |                                                                                                                                                                               |                                                                                                                                                                                                                                                                                                                                                                                                                                                                         |
|--------------------------------------------------------------------------------------------------------------------------------------------------------------------------------------------------------------------------------------------------------------------------------------------------------------------------------------------------------------------------------------------------------------------------------------------------------------------------------------------------------------------------------------------------------------------------------------------------------------------------------------------------------------------------------------------------------------------------------------------------------------------------------------------------------------------------------------------------------------------------------------------------------------------------------------------------------------------------------------------------------------------------------------------------------------------------------------------------------------------------------------------------------------------------------------------------------------------------------|------------------------------------------------------------------------------------------------------------------------------------------------------------------------|-------------------------------------------------------------------------------------------------------------------------------------------------------------------------------|-------------------------------------------------------------------------------------------------------------------------------------------------------------------------------------------------------------------------------------------------------------------------------------------------------------------------------------------------------------------------------------------------------------------------------------------------------------------------|
| see above                                                                                                                                                                                                                                                                                                                                                                                                                                                                                                                                                                                                                                                                                                                                                                                                                                                                                                                                                                                                                                                                                                                                                                                                                      | Viollier AG                                                                                                                                                            | Department of Biosystems Science and Engineering, ETH Zürich                                                                                                                  | Chaoran Chen, Sarah Nadeau, Ivan Topolsky, Emmanouil Dermatzakis, Keith Harshman, Ioannis Xenarios, Henri Pegeot, Lorenzo Cerutti, Deborah Penet, Philipp Jablonski, Lara Fuhrmann, David Dreifuss, Katharina Jahn, Christiane Beckmann, Maurice Redondo, Olivier Kobel, Christoph Noppen, Sophie Seidel, Noemie Santamaria de Souza, Niko Beerenwinkel, Tanja Stadler                                                                                                  |
| EPI_ISL_737840, EPI_ISL_737841, EPI_ISL_737842, EPI_ISL_737843, EPI_ISL_737844, EPI_ISL_737845, EPI_ISL_737846, EPI_ISL_737847, EPI_ISL_737848, EPI_ISL_737849, EPI_ISL_737850, EPI_ISL_737851, EPI_ISL_737852, EPI_ISL_737853, EPI_ISL_737854, EPI_ISL_737855, EPI_ISL_737856, EPI_ISL_737857, EPI_ISL_737858, EPI_ISL_737859, EPI_ISL_737860, EPI_ISL_737861, EPI_ISL_737862, EPI_ISL_737863, EPI_ISL_737864, EPI_ISL_737865, EPI_ISL_737866, EPI_ISL_737867, EPI_ISL_737868, EPI_ISL_737869, EPI_ISL_737870, EPI_ISL_737871, EPI_ISL_737872, EPI_ISL_737873, EPI_ISL_737874, EPI_ISL_737875, EPI_ISL_737876, EPI_ISL_737877, EPI_ISL_737878                                                                                                                                                                                                                                                                                                                                                                                                                                                                                                                                                                                 |                                                                                                                                                                        |                                                                                                                                                                               |                                                                                                                                                                                                                                                                                                                                                                                                                                                                         |
| see above                                                                                                                                                                                                                                                                                                                                                                                                                                                                                                                                                                                                                                                                                                                                                                                                                                                                                                                                                                                                                                                                                                                                                                                                                      | Viollier AG                                                                                                                                                            | Department of Biosystems Science and Engineering, ETH Zürich                                                                                                                  | Chaoran Chen, Sarah Nadeau, Catharine Aquino, Ivan Topolsky, Philipp Jablonski, Lara Fuhrmann, David Dreifuss, Katharina Jahn, Andreia Cabral de Gouvea, Maria Domenica Moccia, Simon Grüter, Timothy Sykes, Lennart Opitz, Griffin White, Laura Neff, Doris Popovic, Andrea Patignani, Jay Tracy, Ralph Schlapbach, Christiane Beckmann, Maurice Redondo, Olivier Kobel, Christoph Noppen, Sophie Seidel, Noemie Santamaria de Souza, Niko Beerenwinkel, Tanja Stadler |
| EPI_ISL_737879, EPI_ISL_737880, EPI_ISL_737881, EPI_ISL_737882, EPI_ISL_737883, EPI_ISL_737884, EPI_ISL_737885, EPI_ISL_737886, EPI_ISL_737887, EPI_ISL_737888, EPI_ISL_737889, EPI_ISL_737890, EPI_ISL_737891, EPI_ISL_737892, EPI_ISL_737893, EPI_ISL_737894, EPI_ISL_737895, EPI_ISL_737896, EPI_ISL_737897, EPI_ISL_737898, EPI_ISL_737899, EPI_ISL_737900                                                                                                                                                                                                                                                                                                                                                                                                                                                                                                                                                                                                                                                                                                                                                                                                                                                                 |                                                                                                                                                                        |                                                                                                                                                                               |                                                                                                                                                                                                                                                                                                                                                                                                                                                                         |
| see above                                                                                                                                                                                                                                                                                                                                                                                                                                                                                                                                                                                                                                                                                                                                                                                                                                                                                                                                                                                                                                                                                                                                                                                                                      | Viollier AG                                                                                                                                                            | Department of Biosystems Science and Engineering, ETH Zürich                                                                                                                  | Chaoran Chen, Sarah Nadeau, Ivan Topolsky, Emmanouil Dermatzakis, Keith Harshman, Ioannis Xenarios, Henri Pegeot, Lorenzo Cerutti, Deborah Penet, Philipp Jablonski, Lara Fuhrmann, David Dreifuss, Katharina Jahn, Christiane Beckmann, Maurice Redondo, Olivier Kobel, Christoph Noppen, Sophie Seidel, Noemie Santamaria de Souza, Niko Beerenwinkel, Tanja Stadler                                                                                                  |
| EPI_ISL_737901, EPI_ISL_737902, EPI_ISL_737903, EPI_ISL_737904, EPI_ISL_737905, EPI_ISL_737906, EPI_ISL_737907, EPI_ISL_737908, EPI_ISL_737909, EPI_ISL_737910, EPI_ISL_737911, EPI_ISL_737912, EPI_ISL_737913, EPI_ISL_737914, EPI_ISL_737915, EPI_ISL_737916, EPI_ISL_737917, EPI_ISL_737918, EPI_ISL_737919, EPI_ISL_737920, EPI_ISL_737921, EPI_ISL_737922, EPI_ISL_737923, EPI_ISL_737924, EPI_ISL_737925, EPI_ISL_737926, EPI_ISL_737927, EPI_ISL_737928, EPI_ISL_737929                                                                                                                                                                                                                                                                                                                                                                                                                                                                                                                                                                                                                                                                                                                                                 |                                                                                                                                                                        |                                                                                                                                                                               |                                                                                                                                                                                                                                                                                                                                                                                                                                                                         |
| see above                                                                                                                                                                                                                                                                                                                                                                                                                                                                                                                                                                                                                                                                                                                                                                                                                                                                                                                                                                                                                                                                                                                                                                                                                      | Viollier AG                                                                                                                                                            | Department of Biosystems Science and Engineering, ETH Zürich                                                                                                                  | Chaoran Chen, Sarah Nadeau, Catharine Aquino, Ivan Topolsky, Philipp Jablonski, Lara Fuhrmann, David Dreifuss, Katharina Jahn, Andreia Cabral de Gouvea, Maria Domenica Moccia, Simon Grüter, Timothy Sykes, Lennart Opitz, Griffin White, Laura Neff, Doris Popovic, Andrea Patignani, Jay Tracy, Ralph Schlapbach, Christiane Beckmann, Maurice Redondo, Olivier Kobel, Christoph Noppen, Sophie Seidel, Noemie Santamaria de Souza, Niko Beerenwinkel, Tanja Stadler |
| EPI_ISL_742350, EPI_ISL_742445, EPI_ISL_742559, EPI_ISL_742716, EPI_ISL_742943, EPI_ISL_742958, EPI_ISL_742997, EPI_ISL_743100, EPI_ISL_743175, EPI_ISL_743179, EPI_ISL_743202, EPI_ISL_743315, EPI_ISL_743370, EPI_ISL_743372, EPI_ISL_743410, EPI_ISL_743519, EPI_ISL_743528, EPI_ISL_743586, EPI_ISL_743594, EPI_ISL_743617, EPI_ISL_743619, EPI_ISL_743623, EPI_ISL_743628, EPI_ISL_743635, EPI_ISL_743645, EPI_ISL_743652, EPI_ISL_743672, EPI_ISL_743674, EPI_ISL_743675, EPI_ISL_743686, EPI_ISL_743911, EPI_ISL_744078                                                                                                                                                                                                                                                                                                                                                                                                                                                                                                                                                                                                                                                                                                 |                                                                                                                                                                        |                                                                                                                                                                               |                                                                                                                                                                                                                                                                                                                                                                                                                                                                         |
| see above                                                                                                                                                                                                                                                                                                                                                                                                                                                                                                                                                                                                                                                                                                                                                                                                                                                                                                                                                                                                                                                                                                                                                                                                                      | Wales Specialist Virology Centre Sequencing lab: Pathogen Genomics Unit                                                                                                | COVID-19 Genomics UK (COG-UK) Consortium                                                                                                                                      | Catherine Moore, Johnathan Evans, Laura Gifford, Malorie Perry, Simon Cottrell, Angela Marchbank, Alec Birchley, Alexander Adams, Amy Gaskin, Bree Gatica-Wilcox, Jason Coombes, Joel Southgate, Lauren Gilbert, Lee Graham, Nicole Pacchiari, Sara Kumziene-Summerhayes, Sarah Taylor, Sophie Jones, Sara Rey, Matthew Bull, Joanne Watkins, Sally Corden, Tom Connor<br>Cervantes-Luevano K, Martinez M, Saavedra A, Galindo C and Licea-Navarro A                    |
| EPI_ISL_747242                                                                                                                                                                                                                                                                                                                                                                                                                                                                                                                                                                                                                                                                                                                                                                                                                                                                                                                                                                                                                                                                                                                                                                                                                 | Pathogen Lab (BSL3), Biomedical Innovation Department, Applied and Experimental Biology Division, Scientific Research Center and High Education from Ensenada (CICESE) | Pathogen Laboratory (BSL3), Biomedical Innovation Department, Experimental and Applied Biology Division, Scientific Research Center and High Education from Ensenada (CICESE) |                                                                                                                                                                                                                                                                                                                                                                                                                                                                         |
| EPI_ISL_747243                                                                                                                                                                                                                                                                                                                                                                                                                                                                                                                                                                                                                                                                                                                                                                                                                                                                                                                                                                                                                                                                                                                                                                                                                 | General Hospital Laboratory                                                                                                                                            | Pathogen Laboratory (BSL3), Biomedical Innovation Department, Experimental and Applied Biology Division, Scientific Research Center and High Education from Ensenada (CICESE) | Cervantes-Luevano K., Martinez M.A., Saavedra-Flores A., Galindo C. and Licea-Navarro A.                                                                                                                                                                                                                                                                                                                                                                                |
| EPI_ISL_747244                                                                                                                                                                                                                                                                                                                                                                                                                                                                                                                                                                                                                                                                                                                                                                                                                                                                                                                                                                                                                                                                                                                                                                                                                 | BBMP Urban PHC                                                                                                                                                         | Department of Neurovirology, National Institute of Mental Health and Neurosciences (NIMHANS)                                                                                  | Chitra Pattabiraman, Pramada Prasad, Anita S Desai, V Ravi                                                                                                                                                                                                                                                                                                                                                                                                              |
| EPI_ISL_755640, EPI_ISL_755642, EPI_ISL_755643                                                                                                                                                                                                                                                                                                                                                                                                                                                                                                                                                                                                                                                                                                                                                                                                                                                                                                                                                                                                                                                                                                                                                                                 | Instituto Adolfo Lutz - Central                                                                                                                                        | Instituto Adolfo Lutz, Interdisciplinary Procedures Center, Strategic Laboratory                                                                                              | Claudio Tavares Sacchi, Claudia Regina Gonçalves, Erica Valessa Ramos Gomes, Karoline Rodrigues Campos                                                                                                                                                                                                                                                                                                                                                                  |
| EPI_ISL_755645                                                                                                                                                                                                                                                                                                                                                                                                                                                                                                                                                                                                                                                                                                                                                                                                                                                                                                                                                                                                                                                                                                                                                                                                                 | Lab LOC - Itapeperica da Serra                                                                                                                                         | Instituto Adolfo Lutz, Interdisciplinary Procedures Center, Strategic Laboratory                                                                                              | Claudio Tavares Sacchi, Claudia Regina Gonçalves, Erica Valessa Ramos Gomes, Karoline Rodrigues Campos                                                                                                                                                                                                                                                                                                                                                                  |
| EPI_ISL_755646, EPI_ISL_755647, EPI_ISL_755649                                                                                                                                                                                                                                                                                                                                                                                                                                                                                                                                                                                                                                                                                                                                                                                                                                                                                                                                                                                                                                                                                                                                                                                 | Instituto Adolfo Lutz - Regional de Santo Andre                                                                                                                        | Instituto Adolfo Lutz, Interdisciplinary Procedures Center, Strategic Laboratory                                                                                              | Claudio Tavares Sacchi, Claudia Regina Gonçalves, Erica Valessa Ramos Gomes, Karoline Rodrigues Campos                                                                                                                                                                                                                                                                                                                                                                  |
| EPI_ISL_755651                                                                                                                                                                                                                                                                                                                                                                                                                                                                                                                                                                                                                                                                                                                                                                                                                                                                                                                                                                                                                                                                                                                                                                                                                 | Instituto Adolfo Lutz - Central                                                                                                                                        | Instituto Adolfo Lutz, Interdisciplinary Procedures Center, Strategic Laboratory                                                                                              | Claudio Tavares Sacchi, Claudia Regina Gonçalves, Erica Valessa Ramos Gomes, Karoline Rodrigues Campos                                                                                                                                                                                                                                                                                                                                                                  |
| EPI_ISL_755652                                                                                                                                                                                                                                                                                                                                                                                                                                                                                                                                                                                                                                                                                                                                                                                                                                                                                                                                                                                                                                                                                                                                                                                                                 | Lab LOC - Itapeperica da Serra                                                                                                                                         | Instituto Adolfo Lutz, Interdisciplinary Procedures Center, Strategic Laboratory                                                                                              | Claudio Tavares Sacchi, Claudia Regina Gonçalves, Erica Valessa Ramos Gomes, Karoline Rodrigues Campos                                                                                                                                                                                                                                                                                                                                                                  |
| EPI_ISL_755654                                                                                                                                                                                                                                                                                                                                                                                                                                                                                                                                                                                                                                                                                                                                                                                                                                                                                                                                                                                                                                                                                                                                                                                                                 | Instituto Adolfo Lutz - Central                                                                                                                                        | Instituto Adolfo Lutz, Interdisciplinary Procedures Center, Strategic Laboratory                                                                                              | Claudio Tavares Sacchi, Claudia Regina Gonçalves, Erica Valessa Ramos Gomes, Karoline Rodrigues Campos                                                                                                                                                                                                                                                                                                                                                                  |
| EPI_ISL_755655                                                                                                                                                                                                                                                                                                                                                                                                                                                                                                                                                                                                                                                                                                                                                                                                                                                                                                                                                                                                                                                                                                                                                                                                                 | Instituto Adolfo Lutz - Regional de Campinas                                                                                                                           | Instituto Adolfo Lutz, Interdisciplinary Procedures Center, Strategic Laboratory                                                                                              | Claudio Tavares Sacchi, Claudia Regina Gonçalves, Erica Valessa Ramos Gomes, Karoline Rodrigues Campos                                                                                                                                                                                                                                                                                                                                                                  |
| EPI_ISL_755940, EPI_ISL_755941, EPI_ISL_755942                                                                                                                                                                                                                                                                                                                                                                                                                                                                                                                                                                                                                                                                                                                                                                                                                                                                                                                                                                                                                                                                                                                                                                                 | California Department of Public Health                                                                                                                                 | Chiu Laboratory, University of California, San Francisco                                                                                                                      | Charles Chiu, Xianding (Wayne) Deng, Candace Wang, Jill Hacker, Debra Wadford                                                                                                                                                                                                                                                                                                                                                                                           |
| EPI_ISL_763074                                                                                                                                                                                                                                                                                                                                                                                                                                                                                                                                                                                                                                                                                                                                                                                                                                                                                                                                                                                                                                                                                                                                                                                                                 | Diagnosticos da America - DASA                                                                                                                                         | Instituto Adolfo Lutz, Interdisciplinary Procedures Center, Strategic Laboratory                                                                                              | Claudio Tavares Sacchi, Claudia Regina Gonçalves, Erica Valessa Ramos Gomes, Karoline Rodrigues Campos                                                                                                                                                                                                                                                                                                                                                                  |
| EPI_ISL_763735, EPI_ISL_763788, EPI_ISL_764254, EPI_ISL_764576, EPI_ISL_764604, EPI_ISL_764831, EPI_ISL_764862, EPI_ISL_764989, EPI_ISL_765094                                                                                                                                                                                                                                                                                                                                                                                                                                                                                                                                                                                                                                                                                                                                                                                                                                                                                                                                                                                                                                                                                 | Wales Specialist Virology Centre Sequencing lab: Pathogen Genomics Unit                                                                                                | COVID-19 Genomics UK (COG-UK) Consortium                                                                                                                                      | Catherine Moore, Johnathan Evans, Laura Gifford, Malorie Perry, Simon Cottrell, Angela Marchbank, Alec Birchley, Alexander Adams, Amy Gaskin, Bree Gatica-Wilcox, Jason Coombes, Joel Southgate, Lauren Gilbert, Lee Graham, Nicole Pacchiari, Sara Kumziene-Summerhayes, Sarah Taylor, Sophie Jones, Sara Rey, Matthew Bull, Joanne Watkins, Sally Corden, Tom Connor                                                                                                  |
| EPI_ISL_767941, EPI_ISL_767942, EPI_ISL_767943, EPI_ISL_767944, EPI_ISL_767945, EPI_ISL_767946, EPI_ISL_767947, EPI_ISL_767948, EPI_ISL_767949, EPI_ISL_767950, EPI_ISL_767951, EPI_ISL_767952, EPI_ISL_767953, EPI_ISL_767954, EPI_ISL_767955, EPI_ISL_767956, EPI_ISL_767957, EPI_ISL_767958, EPI_ISL_767959, EPI_ISL_767960, EPI_ISL_767961, EPI_ISL_767962, EPI_ISL_767963, EPI_ISL_767964, EPI_ISL_767965, EPI_ISL_767966, EPI_ISL_767967, EPI_ISL_767968, EPI_ISL_767969, EPI_ISL_767970, EPI_ISL_767971, EPI_ISL_767972, EPI_ISL_767973, EPI_ISL_767974, EPI_ISL_767975, EPI_ISL_767976, EPI_ISL_767977, EPI_ISL_767978, EPI_ISL_767979, EPI_ISL_767980, EPI_ISL_767981, EPI_ISL_767982, EPI_ISL_767983, EPI_ISL_767984, EPI_ISL_767985, EPI_ISL_767986, EPI_ISL_767987, EPI_ISL_767988, EPI_ISL_767989, EPI_ISL_767990, EPI_ISL_767991, EPI_ISL_767992, EPI_ISL_767993, EPI_ISL_767994, EPI_ISL_767995, EPI_ISL_767996, EPI_ISL_767997, EPI_ISL_767998, EPI_ISL_767999, EPI_ISL_768000, EPI_ISL_768001, EPI_ISL_768002, EPI_ISL_768003, EPI_ISL_768004, EPI_ISL_768005, EPI_ISL_768006, EPI_ISL_768007, EPI_ISL_768008, EPI_ISL_768009, EPI_ISL_768010, EPI_ISL_768011, EPI_ISL_768012, EPI_ISL_768013, EPI_ISL_768014 |                                                                                                                                                                        |                                                                                                                                                                               |                                                                                                                                                                                                                                                                                                                                                                                                                                                                         |
| see above                                                                                                                                                                                                                                                                                                                                                                                                                                                                                                                                                                                                                                                                                                                                                                                                                                                                                                                                                                                                                                                                                                                                                                                                                      | Viollier AG                                                                                                                                                            | Department of Biosystems Science and Engineering, ETH Zürich                                                                                                                  | Chaoran Chen, Sarah Nadeau, Catharine Aquino, Ivan Topolsky, Philipp Jablonski, Lara Fuhrmann, David Dreifuss, Katharina Jahn, Andreia Cabral de Gouvea, Maria Domenica Moccia, Simon Grüter, Timothy Sykes, Lennart Opitz, Griffin White, Laura Neff, Doris Popovic, Andrea Patignani, Jay Tracy, Ralph Schlapbach, Christiane Beckmann, Maurice Redondo, Olivier Kobel, Christoph Noppen, Sophie Seidel, Noemie Santamaria de Souza, Niko Beerenwinkel, Tanja Stadler |
| EPI_ISL_768015                                                                                                                                                                                                                                                                                                                                                                                                                                                                                                                                                                                                                                                                                                                                                                                                                                                                                                                                                                                                                                                                                                                                                                                                                 | MCL Medizinische Laboratorien Hauptstandort Niederwangen                                                                                                               | Department of Biosystems Science and Engineering, ETH Zürich                                                                                                                  | Chaoran Chen, Sarah Nadeau, Catharine Aquino, Ivan Topolsky, Philipp Jablonski, Lara Fuhrmann, David Dreifuss, Katharina Jahn, Andreia Cabral de Gouvea, Maria Domenica Moccia, Simon Grüter, Timothy Sykes, Lennart Opitz, Griffin White, Laura Neff, Doris Popovic, Andrea Patignani, Jay Tracy, Ralph Schlapbach, Christiane Beckmann, Maurice Redondo, Olivier Kobel, Christoph Noppen, Sophie Seidel, Noemie Santamaria de Souza, Niko Beerenwinkel, Tanja Stadler |
| EPI_ISL_768016, EPI_ISL_768017, EPI_ISL_768018, EPI_ISL_768019, EPI_ISL_768020, EPI_ISL_768021, EPI_ISL_768022, EPI_ISL_768023, EPI_ISL_768024, EPI_ISL_768025, EPI_ISL_768026, EPI_ISL_768027, EPI_ISL_768028, EPI_ISL_768029, EPI_ISL_768030, EPI_ISL_768031, EPI_ISL_768032, EPI_ISL_768033, EPI_ISL_768034, EPI_ISL_768035, EPI_ISL_768036, EPI_ISL_768037, EPI_ISL_768038, EPI_ISL_768039, EPI_ISL_768040, EPI_ISL_768041, EPI_ISL_768042, EPI_ISL_768043, EPI_ISL_768044, EPI_ISL_768045, EPI_ISL_768046, EPI_ISL_768047, EPI_ISL_768048, EPI_ISL_768049, EPI_ISL_768050, EPI_ISL_768051, EPI_ISL_768052, EPI_ISL_768053, EPI_ISL_768054, EPI_ISL_768055, EPI_ISL_768056, EPI_ISL_768057, EPI_ISL_768058, EPI_ISL_768059, EPI_ISL_768060, EPI_ISL_768061, EPI_ISL_768062, EPI_ISL_768063, EPI_ISL_768064, EPI_ISL_768065, EPI_ISL_768066, EPI_ISL_768067, EPI_ISL_768068, EPI_ISL_768069,                                                                                                                                                                                                                                                                                                                                |                                                                                                                                                                        |                                                                                                                                                                               |                                                                                                                                                                                                                                                                                                                                                                                                                                                                         |



|                                                                                                                                                                                                                                                                                                                                                                                                                                                                                                                                                                                                                                                                                                                                                                                                                                                                                                                                                                                                                                                                                |                                                                                     |                                                                                                                                                                                                                                                                                                                                                                          |                                                                                                                                                                                                                                                                                                                                                                                                                                                                        |
|--------------------------------------------------------------------------------------------------------------------------------------------------------------------------------------------------------------------------------------------------------------------------------------------------------------------------------------------------------------------------------------------------------------------------------------------------------------------------------------------------------------------------------------------------------------------------------------------------------------------------------------------------------------------------------------------------------------------------------------------------------------------------------------------------------------------------------------------------------------------------------------------------------------------------------------------------------------------------------------------------------------------------------------------------------------------------------|-------------------------------------------------------------------------------------|--------------------------------------------------------------------------------------------------------------------------------------------------------------------------------------------------------------------------------------------------------------------------------------------------------------------------------------------------------------------------|------------------------------------------------------------------------------------------------------------------------------------------------------------------------------------------------------------------------------------------------------------------------------------------------------------------------------------------------------------------------------------------------------------------------------------------------------------------------|
| EPI_ISL_803903                                                                                                                                                                                                                                                                                                                                                                                                                                                                                                                                                                                                                                                                                                                                                                                                                                                                                                                                                                                                                                                                 | Shimoga Institute of Medical Sciences                                               | Department of Neurovirology, National Institute of Mental Health and Neurosciences (NIMHANS)                                                                                                                                                                                                                                                                             | Chitra Pattabiraman, Pramada Prasad, Anita S Desai, V Ravi                                                                                                                                                                                                                                                                                                                                                                                                             |
| EPI_ISL_803904                                                                                                                                                                                                                                                                                                                                                                                                                                                                                                                                                                                                                                                                                                                                                                                                                                                                                                                                                                                                                                                                 | BBMP Urban PHC                                                                      | Department of Neurovirology, National Institute of Mental Health and Neurosciences (NIMHANS)                                                                                                                                                                                                                                                                             | Chitra Pattabiraman, Pramada Prasad, Anita S Desai, V Ravi                                                                                                                                                                                                                                                                                                                                                                                                             |
| EPI_ISL_803905                                                                                                                                                                                                                                                                                                                                                                                                                                                                                                                                                                                                                                                                                                                                                                                                                                                                                                                                                                                                                                                                 | National Institute of Mental Health and Neurosciences (NIMHANS)                     | Department of Neurovirology, National Institute of Mental Health and Neurosciences (NIMHANS)                                                                                                                                                                                                                                                                             | Chitra Pattabiraman, Pramada Prasad, Anita S Desai, V Ravi                                                                                                                                                                                                                                                                                                                                                                                                             |
| EPI_ISL_803906, EPI_ISL_803907                                                                                                                                                                                                                                                                                                                                                                                                                                                                                                                                                                                                                                                                                                                                                                                                                                                                                                                                                                                                                                                 | Kidwai Memorial Institute of Oncology                                               | Department of Neurovirology, National Institute of Mental Health and Neurosciences (NIMHANS)                                                                                                                                                                                                                                                                             | Chitra Pattabiraman, Pramada Prasad, Anita S Desai, V Ravi                                                                                                                                                                                                                                                                                                                                                                                                             |
| EPI_ISL_803908                                                                                                                                                                                                                                                                                                                                                                                                                                                                                                                                                                                                                                                                                                                                                                                                                                                                                                                                                                                                                                                                 | BBMP Urban PHC                                                                      | Department of Neurovirology, National Institute of Mental Health and Neurosciences (NIMHANS)                                                                                                                                                                                                                                                                             | Chitra Pattabiraman, Pramada Prasad, Risha Rasheed, Anita S Desai, V Ravi                                                                                                                                                                                                                                                                                                                                                                                              |
| EPI_ISL_803909                                                                                                                                                                                                                                                                                                                                                                                                                                                                                                                                                                                                                                                                                                                                                                                                                                                                                                                                                                                                                                                                 | Shimoga Institute of Medical Sciences                                               | Department of Neurovirology, National Institute of Mental Health and Neurosciences (NIMHANS)                                                                                                                                                                                                                                                                             | Chitra Pattabiraman, Pramada Prasad, Anita S Desai, V Ravi                                                                                                                                                                                                                                                                                                                                                                                                             |
| EPI_ISL_803910                                                                                                                                                                                                                                                                                                                                                                                                                                                                                                                                                                                                                                                                                                                                                                                                                                                                                                                                                                                                                                                                 | Kidwai Memorial Institute of Oncology                                               | Department of Neurovirology, National Institute of Mental Health and Neurosciences (NIMHANS)                                                                                                                                                                                                                                                                             | Chitra Pattabiraman, Pramada Prasad, Anita S Desai, V Ravi                                                                                                                                                                                                                                                                                                                                                                                                             |
| EPI_ISL_803911                                                                                                                                                                                                                                                                                                                                                                                                                                                                                                                                                                                                                                                                                                                                                                                                                                                                                                                                                                                                                                                                 | BBMP Urban PHC                                                                      | Department of Neurovirology, National Institute of Mental Health and Neurosciences (NIMHANS)                                                                                                                                                                                                                                                                             | Chitra Pattabiraman, Pramada Prasad, Risha Rasheed, Anita S Desai, V Ravi                                                                                                                                                                                                                                                                                                                                                                                              |
| EPI_ISL_803912                                                                                                                                                                                                                                                                                                                                                                                                                                                                                                                                                                                                                                                                                                                                                                                                                                                                                                                                                                                                                                                                 | BBMP Urban PHC                                                                      | Department of Neurovirology, National Institute of Mental Health and Neurosciences (NIMHANS)                                                                                                                                                                                                                                                                             | Chitra Pattabiraman, Pramada Prasad, Anita S Desai, V Ravi                                                                                                                                                                                                                                                                                                                                                                                                             |
| EPI_ISL_803913                                                                                                                                                                                                                                                                                                                                                                                                                                                                                                                                                                                                                                                                                                                                                                                                                                                                                                                                                                                                                                                                 | Shimoga Institute of Medical Sciences                                               | Department of Neurovirology, National Institute of Mental Health and Neurosciences (NIMHANS)                                                                                                                                                                                                                                                                             | Chitra Pattabiraman, Pramada Prasad, Risha Rasheed, Anita S Desai, V Ravi                                                                                                                                                                                                                                                                                                                                                                                              |
| EPI_ISL_803914                                                                                                                                                                                                                                                                                                                                                                                                                                                                                                                                                                                                                                                                                                                                                                                                                                                                                                                                                                                                                                                                 | Kidwai Memorial Institute of Oncology                                               | Department of Neurovirology, National Institute of Mental Health and Neurosciences (NIMHANS)                                                                                                                                                                                                                                                                             | Chitra Pattabiraman, Pramada Prasad, Risha Rasheed, Anita S Desai, V Ravi                                                                                                                                                                                                                                                                                                                                                                                              |
| EPI_ISL_803915                                                                                                                                                                                                                                                                                                                                                                                                                                                                                                                                                                                                                                                                                                                                                                                                                                                                                                                                                                                                                                                                 | Kidwai Memorial Institute of Oncology                                               | Department of Neurovirology, National Institute of Mental Health and Neurosciences (NIMHANS)                                                                                                                                                                                                                                                                             | Chitra Pattabiraman, Pramada Prasad, Anita S Desai, V Ravi                                                                                                                                                                                                                                                                                                                                                                                                             |
| EPI_ISL_803916                                                                                                                                                                                                                                                                                                                                                                                                                                                                                                                                                                                                                                                                                                                                                                                                                                                                                                                                                                                                                                                                 | Shimoga Institute of Medical Sciences                                               | Department of Neurovirology, National Institute of Mental Health and Neurosciences (NIMHANS)                                                                                                                                                                                                                                                                             | Chitra Pattabiraman, Pramada Prasad, Anita S Desai, V Ravi                                                                                                                                                                                                                                                                                                                                                                                                             |
| EPI_ISL_807158                                                                                                                                                                                                                                                                                                                                                                                                                                                                                                                                                                                                                                                                                                                                                                                                                                                                                                                                                                                                                                                                 | BBMP Urban PHC                                                                      | Department of Neurovirology, National Institute of Mental Health and Neurosciences (NIMHANS)                                                                                                                                                                                                                                                                             | Chitra Pattabiraman, Pramada Prasad, Anita S Desai, V Ravi                                                                                                                                                                                                                                                                                                                                                                                                             |
| EPI_ISL_811129                                                                                                                                                                                                                                                                                                                                                                                                                                                                                                                                                                                                                                                                                                                                                                                                                                                                                                                                                                                                                                                                 | Viollier AG                                                                         | Department of Biosystems Science and Engineering, ETH Zürich                                                                                                                                                                                                                                                                                                             | Chaoran Chen, Sarah Nadeau, Catharine Aquino, Ivan Topolsky, Philipp Jablonski, Lara Fuhrmann, David Drefuss, Katharina Jahn, Andrea Cabral de Gouvea, Maria Domenica Moccia, Simon Grüter, Timothy Sykes, Lennart Opitz, Griffin White, Laura Neff, Doris Popovic, Andrea Patrignani, Jay Tracy, Ralph Schlapbach, Christiane Beckmann, Maurice Redondo, Olivier Kobel, Christoph Noppen, Sophie Seidel, Noemie Santamaria de Souza, Niko Beerenwinkel, Tanja Stadler |
| EPI_ISL_811130                                                                                                                                                                                                                                                                                                                                                                                                                                                                                                                                                                                                                                                                                                                                                                                                                                                                                                                                                                                                                                                                 | Institut Central des Hôpitaux Valaisans ICHV/ZIWS Service des Maladies Infectieuses | Department of Biosystems Science and Engineering, ETH Zürich                                                                                                                                                                                                                                                                                                             | Chaoran Chen, Sarah Nadeau, Catharine Aquino, Ivan Topolsky, Philipp Jablonski, Lara Fuhrmann, David Drefuss, Katharina Jahn, Andrea Cabral de Gouvea, Maria Domenica Moccia, Simon Grüter, Timothy Sykes, Lennart Opitz, Griffin White, Laura Neff, Doris Popovic, Andrea Patrignani, Jay Tracy, Ralph Schlapbach, Christiane Beckmann, Maurice Redondo, Olivier Kobel, Christoph Noppen, Sophie Seidel, Noemie Santamaria de Souza, Niko Beerenwinkel, Tanja Stadler |
| EPI_ISL_811131, EPI_ISL_811132, EPI_ISL_811133                                                                                                                                                                                                                                                                                                                                                                                                                                                                                                                                                                                                                                                                                                                                                                                                                                                                                                                                                                                                                                 | Viollier AG                                                                         | Department of Biosystems Science and Engineering, ETH Zürich                                                                                                                                                                                                                                                                                                             | Chaoran Chen, Sarah Nadeau, Catharine Aquino, Ivan Topolsky, Philipp Jablonski, Lara Fuhrmann, David Drefuss, Katharina Jahn, Andrea Cabral de Gouvea, Maria Domenica Moccia, Simon Grüter, Timothy Sykes, Lennart Opitz, Griffin White, Laura Neff, Doris Popovic, Andrea Patrignani, Jay Tracy, Ralph Schlapbach, Christiane Beckmann, Maurice Redondo, Olivier Kobel, Christoph Noppen, Sophie Seidel, Noemie Santamaria de Souza, Niko Beerenwinkel, Tanja Stadler |
| EPI_ISL_814353, EPI_ISL_814599, EPI_ISL_814697, EPI_ISL_814743, EPI_ISL_814794, EPI_ISL_814817, EPI_ISL_814913, EPI_ISL_815033, EPI_ISL_815045, EPI_ISL_815111, EPI_ISL_815225, EPI_ISL_822388, EPI_ISL_822398, EPI_ISL_822399, EPI_ISL_822439, EPI_ISL_822443, EPI_ISL_822456, EPI_ISL_822469, EPI_ISL_822476, EPI_ISL_822514, EPI_ISL_822515, EPI_ISL_822523, EPI_ISL_822570, EPI_ISL_822575, EPI_ISL_822580, EPI_ISL_822617, EPI_ISL_822622, EPI_ISL_822737, EPI_ISL_822907, EPI_ISL_823010, EPI_ISL_823017, EPI_ISL_823019, EPI_ISL_823024, EPI_ISL_823064, EPI_ISL_823067, EPI_ISL_823071, EPI_ISL_823083, EPI_ISL_823108, EPI_ISL_823131, EPI_ISL_823147, EPI_ISL_823188, EPI_ISL_823192, EPI_ISL_823222, EPI_ISL_823231, EPI_ISL_823232, EPI_ISL_823252, EPI_ISL_823289, EPI_ISL_823295, EPI_ISL_823457, EPI_ISL_823459, EPI_ISL_823480, EPI_ISL_823487, EPI_ISL_823489, EPI_ISL_823492, EPI_ISL_823496, EPI_ISL_823524, EPI_ISL_823540, EPI_ISL_823545, EPI_ISL_823549, EPI_ISL_823563, EPI_ISL_823653, EPI_ISL_823680, EPI_ISL_823709, EPI_ISL_823740, EPI_ISL_823777 | COVID-19 Genomics UK (COG-UK) Consortium                                            | Catherine Moore, Johnathan Evans, Laura Gifford, Malorie Perry, Simon Cottrell, Angela Marchbank, Alec Birchley, Alexander Adams, Amy Gaskin, Bree Gatica-Wilcox, Jason Coombes, Joel Southgate, Lauren Gilbert, Lee Graham, Nicole Pacchiarini, Sara Kumziene-Summerhayes, Sarah Taylor, Sophie Jones, Sara Rey, Matthew Bull, Joanne Watkins, Sally Corden, Tom Connor |                                                                                                                                                                                                                                                                                                                                                                                                                                                                        |
| see above                                                                                                                                                                                                                                                                                                                                                                                                                                                                                                                                                                                                                                                                                                                                                                                                                                                                                                                                                                                                                                                                      | Wales Specialist Virology Centre Sequencing lab: Pathogen Genomics Unit             | COVID-19 Genomics UK (COG-UK) Consortium                                                                                                                                                                                                                                                                                                                                 | Catherine Moore, Johnathan Evans, Laura Gifford, Malorie Perry, Simon Cottrell, Angela Marchbank, Alec Birchley, Alexander Adams, Amy Gaskin, Bree Gatica-Wilcox, Jason Coombes, Joel Southgate, Lauren Gilbert, Lee Graham, Nicole Pacchiarini, Sara Kumziene-Summerhayes, Sarah Taylor, Sophie Jones, Sara Rey, Matthew Bull, Joanne Watkins, Sally Corden, Tom Connor                                                                                               |
| EPI_ISL_825140                                                                                                                                                                                                                                                                                                                                                                                                                                                                                                                                                                                                                                                                                                                                                                                                                                                                                                                                                                                                                                                                 | Sanjay Gandhi Institute of Trauma & Orthopaedics                                    | Department of Neurovirology, National Institute of Mental Health and Neurosciences (NIMHANS)                                                                                                                                                                                                                                                                             | Chitra Pattabiraman, Pramada Prasad, Anita S Desai, V Ravi                                                                                                                                                                                                                                                                                                                                                                                                             |
| EPI_ISL_825141, EPI_ISL_825142, EPI_ISL_825143                                                                                                                                                                                                                                                                                                                                                                                                                                                                                                                                                                                                                                                                                                                                                                                                                                                                                                                                                                                                                                 | BBMP Urban PHC                                                                      | Department of Neurovirology, National Institute of Mental Health and Neurosciences (NIMHANS)                                                                                                                                                                                                                                                                             | Chitra Pattabiraman, Pramada Prasad, Anita S Desai, V Ravi                                                                                                                                                                                                                                                                                                                                                                                                             |
| EPI_ISL_825144                                                                                                                                                                                                                                                                                                                                                                                                                                                                                                                                                                                                                                                                                                                                                                                                                                                                                                                                                                                                                                                                 | Bangalore Medical College and Research Institute                                    | Department of Neurovirology, National Institute of Mental Health and Neurosciences (NIMHANS)                                                                                                                                                                                                                                                                             | Chitra Pattabiraman, Pramada Prasad, Anita S Desai, V Ravi                                                                                                                                                                                                                                                                                                                                                                                                             |
| EPI_ISL_825145                                                                                                                                                                                                                                                                                                                                                                                                                                                                                                                                                                                                                                                                                                                                                                                                                                                                                                                                                                                                                                                                 | Virus Research and Diagnostic Laboratory (DH-VRDL)                                  | Department of Neurovirology, National Institute of Mental Health and Neurosciences (NIMHANS)                                                                                                                                                                                                                                                                             | Chitra Pattabiraman, Pramada Prasad, Anita S Desai, V Ravi                                                                                                                                                                                                                                                                                                                                                                                                             |
| EPI_ISL_825146                                                                                                                                                                                                                                                                                                                                                                                                                                                                                                                                                                                                                                                                                                                                                                                                                                                                                                                                                                                                                                                                 | Kidwai Memorial Institute of Oncology                                               | Department of Neurovirology, National Institute of Mental Health and Neurosciences (NIMHANS)                                                                                                                                                                                                                                                                             | Chitra Pattabiraman, Pramada Prasad, Anita S Desai, V Ravi                                                                                                                                                                                                                                                                                                                                                                                                             |
| EPI_ISL_825147                                                                                                                                                                                                                                                                                                                                                                                                                                                                                                                                                                                                                                                                                                                                                                                                                                                                                                                                                                                                                                                                 | Narayana Nethralaya lab                                                             | Department of Neurovirology, National Institute of Mental Health and Neurosciences (NIMHANS)                                                                                                                                                                                                                                                                             | Chitra Pattabiraman, Pramada Prasad, Anita S Desai, V Ravi                                                                                                                                                                                                                                                                                                                                                                                                             |
| EPI_ISL_825148                                                                                                                                                                                                                                                                                                                                                                                                                                                                                                                                                                                                                                                                                                                                                                                                                                                                                                                                                                                                                                                                 | BBMP Urban PHC                                                                      | Department of Neurovirology, National Institute of Mental Health and Neurosciences (NIMHANS)                                                                                                                                                                                                                                                                             | Chitra Pattabiraman, Pramada Prasad, Anita S Desai, V Ravi                                                                                                                                                                                                                                                                                                                                                                                                             |
| EPI_ISL_825149                                                                                                                                                                                                                                                                                                                                                                                                                                                                                                                                                                                                                                                                                                                                                                                                                                                                                                                                                                                                                                                                 | National Institute of Virology Bangalore Unit (NIV BU)                              | Department of Neurovirology, National Institute of Mental Health and Neurosciences (NIMHANS)                                                                                                                                                                                                                                                                             | Chitra Pattabiraman, Pramada Prasad, Anita S Desai, V Ravi                                                                                                                                                                                                                                                                                                                                                                                                             |
| EPI_ISL_825150, EPI_ISL_825151                                                                                                                                                                                                                                                                                                                                                                                                                                                                                                                                                                                                                                                                                                                                                                                                                                                                                                                                                                                                                                                 | Kidwai Memorial Institute of Oncology                                               | Department of Neurovirology, National Institute of Mental Health and Neurosciences (NIMHANS)                                                                                                                                                                                                                                                                             | Chitra Pattabiraman, Pramada Prasad, Anita S Desai, V Ravi                                                                                                                                                                                                                                                                                                                                                                                                             |
| EPI_ISL_825152                                                                                                                                                                                                                                                                                                                                                                                                                                                                                                                                                                                                                                                                                                                                                                                                                                                                                                                                                                                                                                                                 | National Institute of Mental Health and Neurosciences (NIMHANS)                     | Department of Neurovirology, National Institute of Mental Health and Neurosciences (NIMHANS)                                                                                                                                                                                                                                                                             | Chitra Pattabiraman, Pramada Prasad, Anita S Desai, V Ravi                                                                                                                                                                                                                                                                                                                                                                                                             |
| EPI_ISL_825153, EPI_ISL_825154                                                                                                                                                                                                                                                                                                                                                                                                                                                                                                                                                                                                                                                                                                                                                                                                                                                                                                                                                                                                                                                 | Virus Research and Diagnostic Laboratory (DH-VRDL)                                  | Department of Neurovirology, National Institute of Mental Health and Neurosciences (NIMHANS)                                                                                                                                                                                                                                                                             | Chitra Pattabiraman, Pramada Prasad, Anita S Desai, V Ravi                                                                                                                                                                                                                                                                                                                                                                                                             |
| EPI_ISL_826284, EPI_ISL_826458                                                                                                                                                                                                                                                                                                                                                                                                                                                                                                                                                                                                                                                                                                                                                                                                                                                                                                                                                                                                                                                 | University of Bari Biomedical Sciences and Human Oncology                           | University of Bari Biomedical Sciences and Human Oncology                                                                                                                                                                                                                                                                                                                | Chironna Maria, Sallustio Anna, Loconsole Daniela, Accogli Marisa                                                                                                                                                                                                                                                                                                                                                                                                      |
| EPI_ISL_826520                                                                                                                                                                                                                                                                                                                                                                                                                                                                                                                                                                                                                                                                                                                                                                                                                                                                                                                                                                                                                                                                 | University of Bari Biomedical Sciences and Human Oncology                           | University of Bari Biomedical Sciences and Human Oncology                                                                                                                                                                                                                                                                                                                | Chironna M, Sallustio A., Loconsole D., Accogli M.                                                                                                                                                                                                                                                                                                                                                                                                                     |
| EPI_ISL_833152                                                                                                                                                                                                                                                                                                                                                                                                                                                                                                                                                                                                                                                                                                                                                                                                                                                                                                                                                                                                                                                                 | Instituto Adolfo Lutz - Central                                                     | Instituto Adolfo Lutz, Interdisciplinary Procedures Center,                                                                                                                                                                                                                                                                                                              | Claudio Tavares Sacchi, Claudia Regina Gonçalves, Erica Valessa Ramos Gomes, Karoline Rodrigues Campos                                                                                                                                                                                                                                                                                                                                                                 |



| Strategic Laboratory                                                                                                                                                                                                                                                                                                                                                                                                                                                                                                                                                                                                                                                                                                                                                                                                                                                                                                                                                                                                                                                                                                                                                                                                                                                                                                                                                                                                                                                                                                                                                                                                                                                                                                                                                                                                                                                                                                                                                                                                                                                                                                                                                                                                                                                                                                                                                                                                                                                                                                                                                                                                                                                                                                                                                                                                                                                                                                                                                                                                                                                                                                                                                                                                                                                                                                                                                                                                                                                                                                                                                           |                                                                                          |                                                                                              |                                                                                                                                                                                                                                                                                                                                                                          |
|--------------------------------------------------------------------------------------------------------------------------------------------------------------------------------------------------------------------------------------------------------------------------------------------------------------------------------------------------------------------------------------------------------------------------------------------------------------------------------------------------------------------------------------------------------------------------------------------------------------------------------------------------------------------------------------------------------------------------------------------------------------------------------------------------------------------------------------------------------------------------------------------------------------------------------------------------------------------------------------------------------------------------------------------------------------------------------------------------------------------------------------------------------------------------------------------------------------------------------------------------------------------------------------------------------------------------------------------------------------------------------------------------------------------------------------------------------------------------------------------------------------------------------------------------------------------------------------------------------------------------------------------------------------------------------------------------------------------------------------------------------------------------------------------------------------------------------------------------------------------------------------------------------------------------------------------------------------------------------------------------------------------------------------------------------------------------------------------------------------------------------------------------------------------------------------------------------------------------------------------------------------------------------------------------------------------------------------------------------------------------------------------------------------------------------------------------------------------------------------------------------------------------------------------------------------------------------------------------------------------------------------------------------------------------------------------------------------------------------------------------------------------------------------------------------------------------------------------------------------------------------------------------------------------------------------------------------------------------------------------------------------------------------------------------------------------------------------------------------------------------------------------------------------------------------------------------------------------------------------------------------------------------------------------------------------------------------------------------------------------------------------------------------------------------------------------------------------------------------------------------------------------------------------------------------------------------------|------------------------------------------------------------------------------------------|----------------------------------------------------------------------------------------------|--------------------------------------------------------------------------------------------------------------------------------------------------------------------------------------------------------------------------------------------------------------------------------------------------------------------------------------------------------------------------|
| EPI_ISL_833156                                                                                                                                                                                                                                                                                                                                                                                                                                                                                                                                                                                                                                                                                                                                                                                                                                                                                                                                                                                                                                                                                                                                                                                                                                                                                                                                                                                                                                                                                                                                                                                                                                                                                                                                                                                                                                                                                                                                                                                                                                                                                                                                                                                                                                                                                                                                                                                                                                                                                                                                                                                                                                                                                                                                                                                                                                                                                                                                                                                                                                                                                                                                                                                                                                                                                                                                                                                                                                                                                                                                                                 | Instituto Adolfo Lutz - Regional de Sorocaba                                             | Instituto Adolfo Lutz, Interdisciplinary Procedures Center, Strategic Laboratory             | Claudio Tavares Sacchi, Claudia Regina Gonçalves, Erica Valessa Ramos Gomes, Karoline Rodrigues Campos                                                                                                                                                                                                                                                                   |
| EPI_ISL_833157                                                                                                                                                                                                                                                                                                                                                                                                                                                                                                                                                                                                                                                                                                                                                                                                                                                                                                                                                                                                                                                                                                                                                                                                                                                                                                                                                                                                                                                                                                                                                                                                                                                                                                                                                                                                                                                                                                                                                                                                                                                                                                                                                                                                                                                                                                                                                                                                                                                                                                                                                                                                                                                                                                                                                                                                                                                                                                                                                                                                                                                                                                                                                                                                                                                                                                                                                                                                                                                                                                                                                                 | Instituto Adolfo Lutz - Regional de Santo Andre                                          | Instituto Adolfo Lutz, Interdisciplinary Procedures Center, Strategic Laboratory             | Claudio Tavares Sacchi, Claudia Regina Gonçalves, Erica Valessa Ramos Gomes, Karoline Rodrigues Campos                                                                                                                                                                                                                                                                   |
| EPI_ISL_833159, EPI_ISL_833161                                                                                                                                                                                                                                                                                                                                                                                                                                                                                                                                                                                                                                                                                                                                                                                                                                                                                                                                                                                                                                                                                                                                                                                                                                                                                                                                                                                                                                                                                                                                                                                                                                                                                                                                                                                                                                                                                                                                                                                                                                                                                                                                                                                                                                                                                                                                                                                                                                                                                                                                                                                                                                                                                                                                                                                                                                                                                                                                                                                                                                                                                                                                                                                                                                                                                                                                                                                                                                                                                                                                                 | Instituto Adolfo Lutz - Central                                                          | Instituto Adolfo Lutz, Interdisciplinary Procedures Center, Strategic Laboratory             | Claudio Tavares Sacchi, Claudia Regina Gonçalves, Erica Valessa Ramos Gomes, Karoline Rodrigues Campos                                                                                                                                                                                                                                                                   |
| EPI_ISL_833164                                                                                                                                                                                                                                                                                                                                                                                                                                                                                                                                                                                                                                                                                                                                                                                                                                                                                                                                                                                                                                                                                                                                                                                                                                                                                                                                                                                                                                                                                                                                                                                                                                                                                                                                                                                                                                                                                                                                                                                                                                                                                                                                                                                                                                                                                                                                                                                                                                                                                                                                                                                                                                                                                                                                                                                                                                                                                                                                                                                                                                                                                                                                                                                                                                                                                                                                                                                                                                                                                                                                                                 | Secretaria Municipal de Saude de Santa Barbara d'oeste                                   | Instituto Adolfo Lutz, Interdisciplinary Procedures Center, Strategic Laboratory             | Claudio Tavares Sacchi, Claudia Regina Gonçalves, Erica Valessa Ramos Gomes, Karoline Rodrigues Campos                                                                                                                                                                                                                                                                   |
| EPI_ISL_833165                                                                                                                                                                                                                                                                                                                                                                                                                                                                                                                                                                                                                                                                                                                                                                                                                                                                                                                                                                                                                                                                                                                                                                                                                                                                                                                                                                                                                                                                                                                                                                                                                                                                                                                                                                                                                                                                                                                                                                                                                                                                                                                                                                                                                                                                                                                                                                                                                                                                                                                                                                                                                                                                                                                                                                                                                                                                                                                                                                                                                                                                                                                                                                                                                                                                                                                                                                                                                                                                                                                                                                 | Hospital Samaritano                                                                      | Instituto Adolfo Lutz, Interdisciplinary Procedures Center, Strategic Laboratory             | Claudio Tavares Sacchi, Claudia Regina Gonçalves, Erica Valessa Ramos Gomes, Karoline Rodrigues Campos                                                                                                                                                                                                                                                                   |
| EPI_ISL_833172, EPI_ISL_833175, EPI_ISL_833176                                                                                                                                                                                                                                                                                                                                                                                                                                                                                                                                                                                                                                                                                                                                                                                                                                                                                                                                                                                                                                                                                                                                                                                                                                                                                                                                                                                                                                                                                                                                                                                                                                                                                                                                                                                                                                                                                                                                                                                                                                                                                                                                                                                                                                                                                                                                                                                                                                                                                                                                                                                                                                                                                                                                                                                                                                                                                                                                                                                                                                                                                                                                                                                                                                                                                                                                                                                                                                                                                                                                 | DB Diagnosticos do Brasil                                                                | Instituto Adolfo Lutz, Interdisciplinary Procedures Center, Strategic Laboratory             | Claudio Tavares Sacchi, Claudia Regina Gonçalves, Erica Valessa Ramos Gomes, Karoline Rodrigues Campos                                                                                                                                                                                                                                                                   |
| EPI_ISL_836143                                                                                                                                                                                                                                                                                                                                                                                                                                                                                                                                                                                                                                                                                                                                                                                                                                                                                                                                                                                                                                                                                                                                                                                                                                                                                                                                                                                                                                                                                                                                                                                                                                                                                                                                                                                                                                                                                                                                                                                                                                                                                                                                                                                                                                                                                                                                                                                                                                                                                                                                                                                                                                                                                                                                                                                                                                                                                                                                                                                                                                                                                                                                                                                                                                                                                                                                                                                                                                                                                                                                                                 | Hospital de Campanha COVID-19 de Mairipora                                               | Instituto Adolfo Lutz, Interdisciplinary Procedures Center, Strategic Laboratory             | Claudio Tavares Sacchi, Claudia Regina Gonçalves, Erica Valessa Ramos Gomes, Karoline Rodrigues Campos                                                                                                                                                                                                                                                                   |
| EPI_ISL_836977                                                                                                                                                                                                                                                                                                                                                                                                                                                                                                                                                                                                                                                                                                                                                                                                                                                                                                                                                                                                                                                                                                                                                                                                                                                                                                                                                                                                                                                                                                                                                                                                                                                                                                                                                                                                                                                                                                                                                                                                                                                                                                                                                                                                                                                                                                                                                                                                                                                                                                                                                                                                                                                                                                                                                                                                                                                                                                                                                                                                                                                                                                                                                                                                                                                                                                                                                                                                                                                                                                                                                                 | Hospital Municipal Dr. Jose de Carvalho Florence                                         | Instituto Adolfo Lutz, Interdisciplinary Procedures Center, Strategic Laboratory             | Claudio Tavares Sacchi, Claudia Regina Gonçalves, Erica Valessa Ramos Gomes, Karoline Rodrigues Campos                                                                                                                                                                                                                                                                   |
| EPI_ISL_836978                                                                                                                                                                                                                                                                                                                                                                                                                                                                                                                                                                                                                                                                                                                                                                                                                                                                                                                                                                                                                                                                                                                                                                                                                                                                                                                                                                                                                                                                                                                                                                                                                                                                                                                                                                                                                                                                                                                                                                                                                                                                                                                                                                                                                                                                                                                                                                                                                                                                                                                                                                                                                                                                                                                                                                                                                                                                                                                                                                                                                                                                                                                                                                                                                                                                                                                                                                                                                                                                                                                                                                 | Irmandade da Santa Casa de Misericordia de Lorena                                        | Instituto Adolfo Lutz, Interdisciplinary Procedures Center, Strategic Laboratory             | Claudio Tavares Sacchi, Claudia Regina Gonçalves, Erica Valessa Ramos Gomes, Karoline Rodrigues Campos                                                                                                                                                                                                                                                                   |
| EPI_ISL_837053                                                                                                                                                                                                                                                                                                                                                                                                                                                                                                                                                                                                                                                                                                                                                                                                                                                                                                                                                                                                                                                                                                                                                                                                                                                                                                                                                                                                                                                                                                                                                                                                                                                                                                                                                                                                                                                                                                                                                                                                                                                                                                                                                                                                                                                                                                                                                                                                                                                                                                                                                                                                                                                                                                                                                                                                                                                                                                                                                                                                                                                                                                                                                                                                                                                                                                                                                                                                                                                                                                                                                                 | UBS Darcy Alves e Robalinho                                                              | Instituto Adolfo Lutz, Interdisciplinary Procedures Center, Strategic Laboratory             | Claudio Tavares Sacchi, Claudia Regina Gonçalves, Erica Valessa Ramos Gomes, Karoline Rodrigues Campos                                                                                                                                                                                                                                                                   |
| EPI_ISL_837600, EPI_ISL_837601, EPI_ISL_837602, EPI_ISL_837603, EPI_ISL_837604, EPI_ISL_837605, EPI_ISL_837606, EPI_ISL_837607, EPI_ISL_837608, EPI_ISL_837609, EPI_ISL_837610, EPI_ISL_837611, EPI_ISL_837612, EPI_ISL_837613, EPI_ISL_837614, EPI_ISL_837615, EPI_ISL_837616, EPI_ISL_837617, EPI_ISL_837618, EPI_ISL_837619, EPI_ISL_837620, EPI_ISL_837621, EPI_ISL_837622, EPI_ISL_837623, EPI_ISL_837624, EPI_ISL_837625, EPI_ISL_837626, EPI_ISL_837627, EPI_ISL_837628, EPI_ISL_837629, EPI_ISL_837630, EPI_ISL_837631, EPI_ISL_837632, EPI_ISL_837633, EPI_ISL_837634, EPI_ISL_837635, EPI_ISL_837636, EPI_ISL_837637, EPI_ISL_837638, EPI_ISL_837639, EPI_ISL_837640, EPI_ISL_837641, EPI_ISL_837642, EPI_ISL_837643, EPI_ISL_837644, EPI_ISL_837645, EPI_ISL_837646, EPI_ISL_837647, EPI_ISL_837648, EPI_ISL_837649, EPI_ISL_837650, EPI_ISL_837651, EPI_ISL_837652, EPI_ISL_837653, EPI_ISL_837654, EPI_ISL_837655, EPI_ISL_837656, EPI_ISL_837657, EPI_ISL_837658, EPI_ISL_837659, EPI_ISL_837660, EPI_ISL_837661, EPI_ISL_837662, EPI_ISL_837663, EPI_ISL_837664, EPI_ISL_837665, EPI_ISL_837666, EPI_ISL_837667, EPI_ISL_837668, EPI_ISL_837669, EPI_ISL_837670, EPI_ISL_837671, EPI_ISL_837672, EPI_ISL_837673, EPI_ISL_837674, EPI_ISL_837675, EPI_ISL_837676, EPI_ISL_837677, EPI_ISL_837678, EPI_ISL_837679, EPI_ISL_837680, EPI_ISL_837681, EPI_ISL_837682, EPI_ISL_837683, EPI_ISL_837684, EPI_ISL_837685, EPI_ISL_837686, EPI_ISL_837687, EPI_ISL_837688, EPI_ISL_837689, EPI_ISL_837690, EPI_ISL_837691, EPI_ISL_837692, EPI_ISL_837693, EPI_ISL_837694, EPI_ISL_837695, EPI_ISL_837696, EPI_ISL_837697, EPI_ISL_837698, EPI_ISL_837699, EPI_ISL_837700, EPI_ISL_837701, EPI_ISL_837702, EPI_ISL_837703, EPI_ISL_837704, EPI_ISL_837705, EPI_ISL_837706, EPI_ISL_837707, EPI_ISL_837708, EPI_ISL_837709, EPI_ISL_837710, EPI_ISL_837711, EPI_ISL_837712, EPI_ISL_837713, EPI_ISL_837714, EPI_ISL_837715, EPI_ISL_837716, EPI_ISL_837717, EPI_ISL_837718, EPI_ISL_837719, EPI_ISL_837720, EPI_ISL_837721, EPI_ISL_837722, EPI_ISL_837723, EPI_ISL_837724, EPI_ISL_837725, EPI_ISL_837726, EPI_ISL_837727, EPI_ISL_837728, EPI_ISL_837729, EPI_ISL_837730, EPI_ISL_837731, EPI_ISL_837732, EPI_ISL_837733, EPI_ISL_837734, EPI_ISL_837735, EPI_ISL_837736, EPI_ISL_837737, EPI_ISL_837738, EPI_ISL_837739, EPI_ISL_837740, EPI_ISL_837741, EPI_ISL_837742, EPI_ISL_837743, EPI_ISL_837744, EPI_ISL_837745, EPI_ISL_837746, EPI_ISL_837747, EPI_ISL_837748, EPI_ISL_837749, EPI_ISL_837750, EPI_ISL_837751, EPI_ISL_837752, EPI_ISL_837753, EPI_ISL_837754, EPI_ISL_837755, EPI_ISL_837756, EPI_ISL_837757, EPI_ISL_837758, EPI_ISL_837759, EPI_ISL_837760, EPI_ISL_837761, EPI_ISL_837762, EPI_ISL_837763, EPI_ISL_837764, EPI_ISL_837765, EPI_ISL_837766, EPI_ISL_837767, EPI_ISL_837768, EPI_ISL_837769, EPI_ISL_837770, EPI_ISL_837771, EPI_ISL_837772, EPI_ISL_837773, EPI_ISL_837774, EPI_ISL_837775, EPI_ISL_837776, EPI_ISL_837777, EPI_ISL_837778, EPI_ISL_837779, EPI_ISL_837780, EPI_ISL_837781, EPI_ISL_837782, EPI_ISL_837783, EPI_ISL_837784, EPI_ISL_837785, EPI_ISL_837786, EPI_ISL_837787, EPI_ISL_837788, EPI_ISL_837789, EPI_ISL_837790, EPI_ISL_837791, EPI_ISL_837792, EPI_ISL_837793, EPI_ISL_837794, EPI_ISL_837795, EPI_ISL_837796, EPI_ISL_837797, EPI_ISL_837798, EPI_ISL_837799, EPI_ISL_837800, EPI_ISL_837801, EPI_ISL_837802, EPI_ISL_837803, EPI_ISL_837804, EPI_ISL_837805, EPI_ISL_837806, EPI_ISL_837807, EPI_ISL_837808, EPI_ISL_837809, EPI_ISL_837810, EPI_ISL_837811, EPI_ISL_837812, EPI_ISL_837813, EPI_ISL_837814 | Instituto Nacional de Enfermedades Respiratorias (INER)                                  | Instituto Nacional de Enfermedades Respiratorias (INER)                                      | Celia Boukaidia, Margarita Matías-Florentino, Alma Rincón-Rubio, Hector Esteban Paz-Juárez, Olivia Briceño, Edgar Sevilla-Reyes, Fidencio Mejía-Nepomuceno, Mario Mújica-Sánchez, Eduardo Becerril-Vargas, José Arturo Martínez-Orozco, Alejandra Hernández-Terán, Jorge Salas-Hernández, Santiago Ávila-Ríos, Joel Armando Vázquez-Pérez                                |
| EPI_ISL_840391, EPI_ISL_840487, EPI_ISL_840720, EPI_ISL_840761                                                                                                                                                                                                                                                                                                                                                                                                                                                                                                                                                                                                                                                                                                                                                                                                                                                                                                                                                                                                                                                                                                                                                                                                                                                                                                                                                                                                                                                                                                                                                                                                                                                                                                                                                                                                                                                                                                                                                                                                                                                                                                                                                                                                                                                                                                                                                                                                                                                                                                                                                                                                                                                                                                                                                                                                                                                                                                                                                                                                                                                                                                                                                                                                                                                                                                                                                                                                                                                                                                                 | Originating lab: Wales Specialist Virology Centre Sequencing lab: Pathogen Genomics Unit | Public Health Wales Microbiology Cardiff Wales Specialist Virology Centre                    | Catherine Moore, Johnathan Evans, Laura Gifford, Malorie Perry, Simon Cottrell, Angela Marchbank, Alec Birchley, Alexander Adams, Amy Gaskin, Bree Gatica-Wilcox, Jason Coombes, Joel Southgate, Lauren Gilbert, Lee Graham, Nicole Pacchiarini, Sara Kumziene-Summerhayes, Sarah Taylor, Sophie Jones, Sara Rey, Matthew Bull, Joanne Watkins, Sally Corden, Tom Connor |
| EPI_ISL_841103, EPI_ISL_841114, EPI_ISL_841142                                                                                                                                                                                                                                                                                                                                                                                                                                                                                                                                                                                                                                                                                                                                                                                                                                                                                                                                                                                                                                                                                                                                                                                                                                                                                                                                                                                                                                                                                                                                                                                                                                                                                                                                                                                                                                                                                                                                                                                                                                                                                                                                                                                                                                                                                                                                                                                                                                                                                                                                                                                                                                                                                                                                                                                                                                                                                                                                                                                                                                                                                                                                                                                                                                                                                                                                                                                                                                                                                                                                 | Wales Specialist Virology Centre Sequencing lab: Pathogen Genomics Unit                  | Public Health Wales Microbiology Cardiff Wales Specialist Virology Centre                    | Catherine Moore, Johnathan Evans, Laura Gifford, Malorie Perry, Simon Cottrell, Angela Marchbank, Alec Birchley, Alexander Adams, Amy Gaskin, Bree Gatica-Wilcox, Jason Coombes, Joel Southgate, Lauren Gilbert, Lee Graham, Nicole Pacchiarini, Sara Kumziene-Summerhayes, Sarah Taylor, Sophie Jones, Sara Rey, Matthew Bull, Joanne Watkins, Sally Corden, Tom Connor |
| EPI_ISL_841323, EPI_ISL_841333, EPI_ISL_841488, EPI_ISL_841709, EPI_ISL_841716                                                                                                                                                                                                                                                                                                                                                                                                                                                                                                                                                                                                                                                                                                                                                                                                                                                                                                                                                                                                                                                                                                                                                                                                                                                                                                                                                                                                                                                                                                                                                                                                                                                                                                                                                                                                                                                                                                                                                                                                                                                                                                                                                                                                                                                                                                                                                                                                                                                                                                                                                                                                                                                                                                                                                                                                                                                                                                                                                                                                                                                                                                                                                                                                                                                                                                                                                                                                                                                                                                 | Originating lab: Wales Specialist Virology Centre Sequencing lab: Pathogen Genomics Unit | Public Health Wales Microbiology Cardiff Wales Specialist Virology Centre                    | Catherine Moore, Johnathan Evans, Laura Gifford, Malorie Perry, Simon Cottrell, Angela Marchbank, Alec Birchley, Alexander Adams, Amy Gaskin, Bree Gatica-Wilcox, Jason Coombes, Joel Southgate, Lauren Gilbert, Lee Graham, Nicole Pacchiarini, Sara Kumziene-Summerhayes, Sarah Taylor, Sophie Jones, Sara Rey, Matthew Bull, Joanne Watkins, Sally Corden, Tom Connor |
| EPI_ISL_843191, EPI_ISL_843192                                                                                                                                                                                                                                                                                                                                                                                                                                                                                                                                                                                                                                                                                                                                                                                                                                                                                                                                                                                                                                                                                                                                                                                                                                                                                                                                                                                                                                                                                                                                                                                                                                                                                                                                                                                                                                                                                                                                                                                                                                                                                                                                                                                                                                                                                                                                                                                                                                                                                                                                                                                                                                                                                                                                                                                                                                                                                                                                                                                                                                                                                                                                                                                                                                                                                                                                                                                                                                                                                                                                                 | Instituto Nacional de Enfermedades Respiratorias (INER)                                  | Instituto Nacional de Enfermedades Respiratorias (INER)                                      | Celia Boukaidia, Margarita Matías-Florentino, Alma Rincón-Rubio, Hector Esteban Paz-Juárez, Olivia Briceño, Edgar Sevilla-Reyes, Fidencio Mejía-Nepomuceno, Mario Mújica-Sánchez, Eduardo Becerril-Vargas, José Arturo Martínez-Orozco, Alejandra Hernández-Terán, Jorge Salas-Hernández, Santiago Ávila-Ríos, Joel Armando Vázquez-Pérez                                |
| EPI_ISL_845874, EPI_ISL_845875, EPI_ISL_845876                                                                                                                                                                                                                                                                                                                                                                                                                                                                                                                                                                                                                                                                                                                                                                                                                                                                                                                                                                                                                                                                                                                                                                                                                                                                                                                                                                                                                                                                                                                                                                                                                                                                                                                                                                                                                                                                                                                                                                                                                                                                                                                                                                                                                                                                                                                                                                                                                                                                                                                                                                                                                                                                                                                                                                                                                                                                                                                                                                                                                                                                                                                                                                                                                                                                                                                                                                                                                                                                                                                                 | BBMP Urban PHC                                                                           | Department of Neurovirology, National Institute of Mental Health and Neurosciences (NIMHANS) | Chitra Pattabiraman, Pramada Prasad, Risha Rasheed, Darshan Sreenivas, Nakka Vijay Kiran Reddy, Anita S Desai, V Ravi                                                                                                                                                                                                                                                    |
| EPI_ISL_845877                                                                                                                                                                                                                                                                                                                                                                                                                                                                                                                                                                                                                                                                                                                                                                                                                                                                                                                                                                                                                                                                                                                                                                                                                                                                                                                                                                                                                                                                                                                                                                                                                                                                                                                                                                                                                                                                                                                                                                                                                                                                                                                                                                                                                                                                                                                                                                                                                                                                                                                                                                                                                                                                                                                                                                                                                                                                                                                                                                                                                                                                                                                                                                                                                                                                                                                                                                                                                                                                                                                                                                 | National Institute of Mental Health and Neurosciences (NIMHANS)                          | Department of Neurovirology, National Institute of Mental Health and Neurosciences (NIMHANS) | Chitra Pattabiraman, Pramada Prasad, Risha Rasheed, Darshan Sreenivas, Nakka Vijay Kiran Reddy, Anita S Desai, V Ravi                                                                                                                                                                                                                                                    |
| EPI_ISL_845878, EPI_ISL_845879, EPI_ISL_845880                                                                                                                                                                                                                                                                                                                                                                                                                                                                                                                                                                                                                                                                                                                                                                                                                                                                                                                                                                                                                                                                                                                                                                                                                                                                                                                                                                                                                                                                                                                                                                                                                                                                                                                                                                                                                                                                                                                                                                                                                                                                                                                                                                                                                                                                                                                                                                                                                                                                                                                                                                                                                                                                                                                                                                                                                                                                                                                                                                                                                                                                                                                                                                                                                                                                                                                                                                                                                                                                                                                                 | BBMP Urban PHC                                                                           | Department of Neurovirology, National Institute of Mental Health and Neurosciences (NIMHANS) | Chitra Pattabiraman, Pramada Prasad, Risha Rasheed, Darshan Sreenivas, Nakka Vijay Kiran Reddy, Anita S Desai, V Ravi                                                                                                                                                                                                                                                    |
| EPI_ISL_845881                                                                                                                                                                                                                                                                                                                                                                                                                                                                                                                                                                                                                                                                                                                                                                                                                                                                                                                                                                                                                                                                                                                                                                                                                                                                                                                                                                                                                                                                                                                                                                                                                                                                                                                                                                                                                                                                                                                                                                                                                                                                                                                                                                                                                                                                                                                                                                                                                                                                                                                                                                                                                                                                                                                                                                                                                                                                                                                                                                                                                                                                                                                                                                                                                                                                                                                                                                                                                                                                                                                                                                 | Kidwai Memorial Institute of Oncology                                                    | Department of Neurovirology, National Institute of Mental Health and Neurosciences (NIMHANS) | Chitra Pattabiraman, Pramada Prasad, Risha Rasheed, Darshan Sreenivas, Nakka Vijay Kiran Reddy, Anita S Desai, V Ravi                                                                                                                                                                                                                                                    |
| EPI_ISL_845882                                                                                                                                                                                                                                                                                                                                                                                                                                                                                                                                                                                                                                                                                                                                                                                                                                                                                                                                                                                                                                                                                                                                                                                                                                                                                                                                                                                                                                                                                                                                                                                                                                                                                                                                                                                                                                                                                                                                                                                                                                                                                                                                                                                                                                                                                                                                                                                                                                                                                                                                                                                                                                                                                                                                                                                                                                                                                                                                                                                                                                                                                                                                                                                                                                                                                                                                                                                                                                                                                                                                                                 | VRDL, Mysore Medical College                                                             | Department of Neurovirology, National Institute of Mental Health and Neurosciences (NIMHANS) | Chitra Pattabiraman, Pramada Prasad, Risha Rasheed, Darshan Sreenivas, Nakka Vijay Kiran Reddy, Anita S Desai, V Ravi                                                                                                                                                                                                                                                    |
| EPI_ISL_845883, EPI_ISL_845884                                                                                                                                                                                                                                                                                                                                                                                                                                                                                                                                                                                                                                                                                                                                                                                                                                                                                                                                                                                                                                                                                                                                                                                                                                                                                                                                                                                                                                                                                                                                                                                                                                                                                                                                                                                                                                                                                                                                                                                                                                                                                                                                                                                                                                                                                                                                                                                                                                                                                                                                                                                                                                                                                                                                                                                                                                                                                                                                                                                                                                                                                                                                                                                                                                                                                                                                                                                                                                                                                                                                                 | BBMP Urban PHC                                                                           | Department of Neurovirology, National Institute of Mental Health and Neurosciences (NIMHANS) | Chitra Pattabiraman, Pramada Prasad, Risha Rasheed, Darshan Sreenivas, Nakka Vijay Kiran Reddy, Anita S Desai, V Ravi                                                                                                                                                                                                                                                    |
| EPI_ISL_845885, EPI_ISL_845886                                                                                                                                                                                                                                                                                                                                                                                                                                                                                                                                                                                                                                                                                                                                                                                                                                                                                                                                                                                                                                                                                                                                                                                                                                                                                                                                                                                                                                                                                                                                                                                                                                                                                                                                                                                                                                                                                                                                                                                                                                                                                                                                                                                                                                                                                                                                                                                                                                                                                                                                                                                                                                                                                                                                                                                                                                                                                                                                                                                                                                                                                                                                                                                                                                                                                                                                                                                                                                                                                                                                                 | Railway Hospital                                                                         | Department of Neurovirology, National Institute of Mental Health and Neurosciences (NIMHANS) | Chitra Pattabiraman, Pramada Prasad, Risha Rasheed, Darshan Sreenivas, Nakka Vijay Kiran Reddy, Anita S Desai, V Ravi                                                                                                                                                                                                                                                    |
| EPI_ISL_845887, EPI_ISL_845888, EPI_ISL_845889, EPI_ISL_845890                                                                                                                                                                                                                                                                                                                                                                                                                                                                                                                                                                                                                                                                                                                                                                                                                                                                                                                                                                                                                                                                                                                                                                                                                                                                                                                                                                                                                                                                                                                                                                                                                                                                                                                                                                                                                                                                                                                                                                                                                                                                                                                                                                                                                                                                                                                                                                                                                                                                                                                                                                                                                                                                                                                                                                                                                                                                                                                                                                                                                                                                                                                                                                                                                                                                                                                                                                                                                                                                                                                 | BBMP Urban PHC                                                                           | Department of Neurovirology, National Institute of Mental Health and Neurosciences (NIMHANS) | Chitra Pattabiraman, Pramada Prasad, Risha Rasheed, Darshan Sreenivas, Nakka Vijay Kiran Reddy, Anita S Desai, V Ravi                                                                                                                                                                                                                                                    |
| EPI_ISL_847515                                                                                                                                                                                                                                                                                                                                                                                                                                                                                                                                                                                                                                                                                                                                                                                                                                                                                                                                                                                                                                                                                                                                                                                                                                                                                                                                                                                                                                                                                                                                                                                                                                                                                                                                                                                                                                                                                                                                                                                                                                                                                                                                                                                                                                                                                                                                                                                                                                                                                                                                                                                                                                                                                                                                                                                                                                                                                                                                                                                                                                                                                                                                                                                                                                                                                                                                                                                                                                                                                                                                                                 | Chiu Laboratory, University of California, San Francisco                                 | Chiu Laboratory, University of California, San Francisco                                     | Charles Chiu, Xianding (Wayne) Deng, Candace Wang, Brian Bushnell, Scot Federman, Jill Hacker, Debra Wadford                                                                                                                                                                                                                                                             |
| EPI_ISL_847516                                                                                                                                                                                                                                                                                                                                                                                                                                                                                                                                                                                                                                                                                                                                                                                                                                                                                                                                                                                                                                                                                                                                                                                                                                                                                                                                                                                                                                                                                                                                                                                                                                                                                                                                                                                                                                                                                                                                                                                                                                                                                                                                                                                                                                                                                                                                                                                                                                                                                                                                                                                                                                                                                                                                                                                                                                                                                                                                                                                                                                                                                                                                                                                                                                                                                                                                                                                                                                                                                                                                                                 | California Department of Public Health                                                   | Chiu Laboratory, University of California, San Francisco                                     | Charles Chiu, Xianding (Wayne) Deng, Candace Wang, Brian Bushnell, Scot Federman, Jill Hacker, Debra Wadford                                                                                                                                                                                                                                                             |
| EPI_ISL_847517                                                                                                                                                                                                                                                                                                                                                                                                                                                                                                                                                                                                                                                                                                                                                                                                                                                                                                                                                                                                                                                                                                                                                                                                                                                                                                                                                                                                                                                                                                                                                                                                                                                                                                                                                                                                                                                                                                                                                                                                                                                                                                                                                                                                                                                                                                                                                                                                                                                                                                                                                                                                                                                                                                                                                                                                                                                                                                                                                                                                                                                                                                                                                                                                                                                                                                                                                                                                                                                                                                                                                                 | Chiu Laboratory, University of California, San Francisco                                 | Chiu Laboratory, University of California, San Francisco                                     | Charles Chiu, Xianding (Wayne) Deng, Candace Wang, Brian Bushnell, Scot Federman, Jill Hacker, Debra Wadford                                                                                                                                                                                                                                                             |
| EPI_ISL_847518, EPI_ISL_847519, EPI_ISL_847520, EPI_ISL_847521, EPI_ISL_847522, EPI_ISL_847523, EPI_ISL_847524, EPI_ISL_847525, EPI_ISL_847526, EPI_ISL_847527, EPI_ISL_847528, EPI_ISL_847529, EPI_ISL_847530, EPI_ISL_847531, EPI_ISL_847532, EPI_ISL_847533, EPI_ISL_847534, EPI_ISL_847535                                                                                                                                                                                                                                                                                                                                                                                                                                                                                                                                                                                                                                                                                                                                                                                                                                                                                                                                                                                                                                                                                                                                                                                                                                                                                                                                                                                                                                                                                                                                                                                                                                                                                                                                                                                                                                                                                                                                                                                                                                                                                                                                                                                                                                                                                                                                                                                                                                                                                                                                                                                                                                                                                                                                                                                                                                                                                                                                                                                                                                                                                                                                                                                                                                                                                 | California Department of Public Health                                                   | Chiu Laboratory, University of California, San Francisco                                     | Charles Chiu, Xianding (Wayne) Deng, Candace Wang, Brian Bushnell, Scot Federman, Jill Hacker, Debra Wadford                                                                                                                                                                                                                                                             |
| see above                                                                                                                                                                                                                                                                                                                                                                                                                                                                                                                                                                                                                                                                                                                                                                                                                                                                                                                                                                                                                                                                                                                                                                                                                                                                                                                                                                                                                                                                                                                                                                                                                                                                                                                                                                                                                                                                                                                                                                                                                                                                                                                                                                                                                                                                                                                                                                                                                                                                                                                                                                                                                                                                                                                                                                                                                                                                                                                                                                                                                                                                                                                                                                                                                                                                                                                                                                                                                                                                                                                                                                      | California Department of Public Health                                                   | Chiu Laboratory, University of California, San Francisco                                     | Charles Chiu, Xianding (Wayne) Deng, Candace Wang, Brian Bushnell, Scot Federman, Jill Hacker, Debra Wadford                                                                                                                                                                                                                                                             |
| EPI_ISL_847536                                                                                                                                                                                                                                                                                                                                                                                                                                                                                                                                                                                                                                                                                                                                                                                                                                                                                                                                                                                                                                                                                                                                                                                                                                                                                                                                                                                                                                                                                                                                                                                                                                                                                                                                                                                                                                                                                                                                                                                                                                                                                                                                                                                                                                                                                                                                                                                                                                                                                                                                                                                                                                                                                                                                                                                                                                                                                                                                                                                                                                                                                                                                                                                                                                                                                                                                                                                                                                                                                                                                                                 | Chiu Laboratory, University of California, San Francisco                                 | Chiu Laboratory, University of California, San Francisco                                     | Charles Chiu, Xianding (Wayne) Deng, Candace Wang, Brian Bushnell, Scot Federman, Jill Hacker, Debra Wadford                                                                                                                                                                                                                                                             |
| EPI_ISL_847537, EPI_ISL_847538, EPI_ISL_847539                                                                                                                                                                                                                                                                                                                                                                                                                                                                                                                                                                                                                                                                                                                                                                                                                                                                                                                                                                                                                                                                                                                                                                                                                                                                                                                                                                                                                                                                                                                                                                                                                                                                                                                                                                                                                                                                                                                                                                                                                                                                                                                                                                                                                                                                                                                                                                                                                                                                                                                                                                                                                                                                                                                                                                                                                                                                                                                                                                                                                                                                                                                                                                                                                                                                                                                                                                                                                                                                                                                                 | California Department of Public Health                                                   | Chiu Laboratory, University of California, San Francisco                                     | Charles Chiu, Xianding (Wayne) Deng, Candace Wang, Brian Bushnell, Scot Federman, Jill Hacker, Debra Wadford                                                                                                                                                                                                                                                             |



|                                                                |                                                                 |                                                                                              |                                                                                                                                                                                                                                                                                             |
|----------------------------------------------------------------|-----------------------------------------------------------------|----------------------------------------------------------------------------------------------|---------------------------------------------------------------------------------------------------------------------------------------------------------------------------------------------------------------------------------------------------------------------------------------------|
| EPI_ISL_860189                                                 | BBMP Urban PHC                                                  | Department of Neurovirology, National Institute of Mental Health and Neurosciences (NIMHANS) | Chitra Pattabiraman, Pramada Prasad, Anson Kunjumon George, Risha Rasheed, Darshan Sreenivas, Nakka Vijay Kiran Reddy, Anita S Desai, V Ravi                                                                                                                                                |
| EPI_ISL_860190                                                 | Railway Hospital                                                | Department of Neurovirology, National Institute of Mental Health and Neurosciences (NIMHANS) | Chitra Pattabiraman, Pramada Prasad, Anson Kunjumon George, Risha Rasheed, Darshan Sreenivas, Nakka Vijay Kiran Reddy, Anita S Desai, V Ravi                                                                                                                                                |
| EPI_ISL_860191                                                 | National Institute of Mental Health and Neurosciences (NIMHANS) | Department of Neurovirology, National Institute of Mental Health and Neurosciences (NIMHANS) | Chitra Pattabiraman, Pramada Prasad, Anson Kunjumon George, Risha Rasheed, Darshan Sreenivas, Nakka Vijay Kiran Reddy, Anita S Desai, V Ravi                                                                                                                                                |
| EPI_ISL_860192                                                 | Railway Hospital                                                | Department of Neurovirology, National Institute of Mental Health and Neurosciences (NIMHANS) | Chitra Pattabiraman, Pramada Prasad, Anson Kunjumon George, Risha Rasheed, Darshan Sreenivas, Nakka Vijay Kiran Reddy, Anita S Desai, V Ravi                                                                                                                                                |
| EPI_ISL_860193                                                 | Jayanagar General Hospital                                      | Department of Neurovirology, National Institute of Mental Health and Neurosciences (NIMHANS) | Chitra Pattabiraman, Pramada Prasad, Anson Kunjumon George, Risha Rasheed, Darshan Sreenivas, Nakka Vijay Kiran Reddy, Anita S Desai, V Ravi                                                                                                                                                |
| EPI_ISL_860194, EPI_ISL_860195                                 | BBMP Urban PHC                                                  | Department of Neurovirology, National Institute of Mental Health and Neurosciences (NIMHANS) | Chitra Pattabiraman, Pramada Prasad, Anson Kunjumon George, Risha Rasheed, Darshan Sreenivas, Nakka Vijay Kiran Reddy, Anita S Desai, V Ravi                                                                                                                                                |
| EPI_ISL_860196                                                 | National Institute of Mental Health and Neurosciences (NIMHANS) | Department of Neurovirology, National Institute of Mental Health and Neurosciences (NIMHANS) | Chitra Pattabiraman, Pramada Prasad, Anson Kunjumon George, Risha Rasheed, Darshan Sreenivas, Nakka Vijay Kiran Reddy, Anita S Desai, V Ravi                                                                                                                                                |
| EPI_ISL_860197                                                 | BBMP Urban PHC                                                  | Department of Neurovirology, National Institute of Mental Health and Neurosciences (NIMHANS) | Chitra Pattabiraman, Pramada Prasad, Anson Kunjumon George, Risha Rasheed, Darshan Sreenivas, Nakka Vijay Kiran Reddy, Anita S Desai, V Ravi                                                                                                                                                |
| EPI_ISL_860198                                                 | Railway Hospital                                                | Department of Neurovirology, National Institute of Mental Health and Neurosciences (NIMHANS) | Chitra Pattabiraman, Pramada Prasad, Anson Kunjumon George, Risha Rasheed, Darshan Sreenivas, Nakka Vijay Kiran Reddy, Anita S Desai, V Ravi                                                                                                                                                |
| EPI_ISL_860199, EPI_ISL_860200, EPI_ISL_860201                 | BBMP Urban PHC                                                  | Department of Neurovirology, National Institute of Mental Health and Neurosciences (NIMHANS) | Chitra Pattabiraman, Pramada Prasad, Anson Kunjumon George, Risha Rasheed, Darshan Sreenivas, Nakka Vijay Kiran Reddy, Anita S Desai, V Ravi                                                                                                                                                |
| EPI_ISL_860633                                                 | Instituto Adolfo Lutz - Regional de Sorocaba                    | Instituto Adolfo Lutz, Interdisciplinary Procedures Center, Strategic Laboratory             | Claudio Tavares Sacchi, Claudia Regina Gonçalves, Erica Valessa Ramos Gomes, Karoline Rodrigues Campos                                                                                                                                                                                      |
| EPI_ISL_861421                                                 | Instituto de Diagnostico y Referencia Epidemiologicos (INDRE)   | Instituto de Diagnostico y Referencia Epidemiologicos (INDRE)                                | Claudia Wong-Arambula, Gisela Barrera-Badillo, Abril Rodriguez-Maldonado, Natividad Cruz-Ortiz, Tatiana Nunez-Garcia, Dayanira Arellano-Suarez, Fabiola Garces-Ayala, Adnan-Araiza Rodriguez, Edgar Mendieta-Condado, Lucia Hernandez-Rivas, Irma Lopez-Martinez, Ernesto Ramirez-Gonzalez. |
| EPI_ISL_861491                                                 | Cerballiance Côte d'Azur                                        | CERBA LAB                                                                                    | Chobert F; Prots.L                                                                                                                                                                                                                                                                          |
| EPI_ISL_861497                                                 | Cerballiance Centre Est                                         | CERBA LAB                                                                                    | Chanard C; Gazzano V; Munier C; Prots L.                                                                                                                                                                                                                                                    |
| EPI_ISL_861500, EPI_ISL_861501, EPI_ISL_861502                 | Cerballiance Centre Est                                         | CERBA LAB                                                                                    | Chanard E; Gazzano V; Munier C; Prots L.                                                                                                                                                                                                                                                    |
| EPI_ISL_861626, EPI_ISL_861627                                 | Instituto Adolfo Lutz - Central                                 | Instituto Adolfo Lutz, Interdisciplinary Procedures Center, Strategic Laboratory             | Claudio Tavares Sacchi, Claudia Regina Gonçalves, Erica Valessa Ramos Gomes, Karoline Rodrigues Campos                                                                                                                                                                                      |
| EPI_ISL_861628                                                 | Laboratorio Municipal de Guarulhos                              | Instituto Adolfo Lutz, Interdisciplinary Procedures Center, Strategic Laboratory             | Claudio Tavares Sacchi, Claudia Regina Gonçalves, Erica Valessa Ramos Gomes, Karoline Rodrigues Campos                                                                                                                                                                                      |
| EPI_ISL_861629, EPI_ISL_861630, EPI_ISL_861631, EPI_ISL_861632 | Instituto Adolfo Lutz - Central                                 | Instituto Adolfo Lutz, Interdisciplinary Procedures Center, Strategic Laboratory             | Claudio Tavares Sacchi, Claudia Regina Gonçalves, Erica Valessa Ramos Gomes, Karoline Rodrigues Campos                                                                                                                                                                                      |
| EPI_ISL_861635                                                 | Hospital e Maternidade Madre Theodora                           | Instituto Adolfo Lutz, Interdisciplinary Procedures Center, Strategic Laboratory             | Claudio Tavares Sacchi, Claudia Regina Gonçalves, Erica Valessa Ramos Gomes, Karoline Rodrigues Campos                                                                                                                                                                                      |
| EPI_ISL_861640                                                 | Hospital Municipal Dr. Moyses Deutsch                           | Instituto Adolfo Lutz, Interdisciplinary Procedures Center, Strategic Laboratory             | Claudio Tavares Sacchi, Claudia Regina Gonçalves, Erica Valessa Ramos Gomes, Karoline Rodrigues Campos                                                                                                                                                                                      |
| EPI_ISL_861643                                                 | Instituto Adolfo Lutz - Central                                 | Instituto Adolfo Lutz, Interdisciplinary Procedures Center, Strategic Laboratory             | Claudio Tavares Sacchi, Claudia Regina Gonçalves, Erica Valessa Ramos Gomes, Karoline Rodrigues Campos                                                                                                                                                                                      |
| EPI_ISL_861645                                                 | Hospital e Pronto Socorro Comunitario Vila Iolanda              | Instituto Adolfo Lutz, Interdisciplinary Procedures Center, Strategic Laboratory             | Claudio Tavares Sacchi, Claudia Regina Gonçalves, Erica Valessa Ramos Gomes, Karoline Rodrigues Campos                                                                                                                                                                                      |
| EPI_ISL_861646                                                 | Hospital Santa Marcelina Sao Paulo                              | Instituto Adolfo Lutz, Interdisciplinary Procedures Center, Strategic Laboratory             | Claudio Tavares Sacchi, Claudia Regina Gonçalves, Erica Valessa Ramos Gomes, Karoline Rodrigues Campos                                                                                                                                                                                      |
| EPI_ISL_861648                                                 | Hospital e Pronto Socorro Portinari                             | Instituto Adolfo Lutz, Interdisciplinary Procedures Center, Strategic Laboratory             | Claudio Tavares Sacchi, Claudia Regina Gonçalves, Erica Valessa Ramos Gomes, Karoline Rodrigues Campos                                                                                                                                                                                      |
| EPI_ISL_861649                                                 | Hospital Renascença Campinas                                    | Instituto Adolfo Lutz, Interdisciplinary Procedures Center, Strategic Laboratory             | Claudio Tavares Sacchi, Claudia Regina Gonçalves, Erica Valessa Ramos Gomes, Karoline Rodrigues Campos                                                                                                                                                                                      |
| EPI_ISL_861651                                                 | AMA Jardim Brasil                                               | Instituto Adolfo Lutz, Interdisciplinary Procedures Center, Strategic Laboratory             | Claudio Tavares Sacchi, Claudia Regina Gonçalves, Erica Valessa Ramos Gomes, Karoline Rodrigues Campos                                                                                                                                                                                      |
| EPI_ISL_861657                                                 | Hospital e Maternidade Sino Brasileiro                          | Instituto Adolfo Lutz, Interdisciplinary Procedures Center, Strategic Laboratory             | Claudio Tavares Sacchi, Claudia Regina Gonçalves, Erica Valessa Ramos Gomes, Karoline Rodrigues Campos                                                                                                                                                                                      |
| EPI_ISL_861658                                                 | Hospital Municipal Antônio Giglio                               | Instituto Adolfo Lutz, Interdisciplinary Procedures Center, Strategic Laboratory             | Claudio Tavares Sacchi, Claudia Regina Gonçalves, Erica Valessa Ramos Gomes, Karoline Rodrigues Campos                                                                                                                                                                                      |
| EPI_ISL_861660, EPI_ISL_861661                                 | PS e Maternidade Nair Fonseca Leitao Arantes                    | Instituto Adolfo Lutz, Interdisciplinary Procedures Center, Strategic Laboratory             | Claudio Tavares Sacchi, Claudia Regina Gonçalves, Erica Valessa Ramos Gomes, Karoline Rodrigues Campos                                                                                                                                                                                      |
| EPI_ISL_861662                                                 | CS I Tacito Leite de Carvalho e Silva                           | Instituto Adolfo Lutz, Interdisciplinary Procedures Center, Strategic Laboratory             | Claudio Tavares Sacchi, Claudia Regina Gonçalves, Erica Valessa Ramos Gomes, Karoline Rodrigues Campos                                                                                                                                                                                      |
| EPI_ISL_861663                                                 | Instituto Adolfo Lutz - Central                                 | Instituto Adolfo Lutz, Interdisciplinary Procedures Center, Strategic Laboratory             | Claudio Tavares Sacchi, Claudia Regina Gonçalves, Erica Valessa Ramos Gomes, Karoline Rodrigues Campos                                                                                                                                                                                      |
| EPI_ISL_861664                                                 | Instituto Adolfo Lutz - Regional de Campinas                    | Instituto Adolfo Lutz, Interdisciplinary Procedures Center, Strategic Laboratory             | Claudio Tavares Sacchi, Claudia Regina Gonçalves, Erica Valessa Ramos Gomes, Karoline Rodrigues Campos                                                                                                                                                                                      |
| EPI_ISL_861666                                                 | PSF Dr. Antonio Pires de Almeida                                | Instituto Adolfo Lutz, Interdisciplinary Procedures Center, Strategic Laboratory             | Claudio Tavares Sacchi, Claudia Regina Gonçalves, Erica Valessa Ramos Gomes, Karoline Rodrigues Campos                                                                                                                                                                                      |
| EPI_ISL_861667                                                 | Instituto Adolfo Lutz - Regional de Rio Claro                   | Instituto Adolfo Lutz, Interdisciplinary Procedures Center, Strategic Laboratory             | Claudio Tavares Sacchi, Claudia Regina Gonçalves, Erica Valessa Ramos Gomes, Karoline Rodrigues Campos                                                                                                                                                                                      |
| EPI_ISL_861669                                                 | Lab LOC - Itapeperica da Serra                                  | Instituto Adolfo Lutz, Interdisciplinary Procedures Center, Strategic Laboratory             | Claudio Tavares Sacchi, Claudia Regina Gonçalves, Erica Valessa Ramos Gomes, Karoline Rodrigues Campos                                                                                                                                                                                      |
| EPI_ISL_861670                                                 | Instituto Adolfo Lutz - Regional de Taubate                     | Instituto Adolfo Lutz, Interdisciplinary Procedures Center, Strategic Laboratory             | Claudio Tavares Sacchi, Claudia Regina Gonçalves, Erica Valessa Ramos Gomes, Karoline Rodrigues Campos                                                                                                                                                                                      |

|                                                                                                                                                                |                                                                                                    |                                                                                                                                         |                                                                                                                                                                                                                                                                                                                                                                                                                                                        |
|----------------------------------------------------------------------------------------------------------------------------------------------------------------|----------------------------------------------------------------------------------------------------|-----------------------------------------------------------------------------------------------------------------------------------------|--------------------------------------------------------------------------------------------------------------------------------------------------------------------------------------------------------------------------------------------------------------------------------------------------------------------------------------------------------------------------------------------------------------------------------------------------------|
| EPI_ISL_861671                                                                                                                                                 | Hospital Municipal Prefeito Waldemar Costa Filho                                                   | Instituto Adolfo Lutz, Interdisciplinary Procedures Center, Strategic Laboratory                                                        | Claudio Tavares Sacchi, Claudia Regina Gonçalves, Erica Valessa Ramos Gomes, Karoline Rodrigues Campos                                                                                                                                                                                                                                                                                                                                                 |
| EPI_ISL_861675                                                                                                                                                 | UPA Central de Caraguatatuba                                                                       | Instituto Adolfo Lutz, Interdisciplinary Procedures Center, Strategic Laboratory                                                        | Claudio Tavares Sacchi, Claudia Regina Gonçalves, Erica Valessa Ramos Gomes, Karoline Rodrigues Campos                                                                                                                                                                                                                                                                                                                                                 |
| EPI_ISL_861677                                                                                                                                                 | Instituto Adolfo Lutz - Central                                                                    | Instituto Adolfo Lutz, Interdisciplinary Procedures Center, Strategic Laboratory                                                        | Claudio Tavares Sacchi, Claudia Regina Gonçalves, Erica Valessa Ramos Gomes, Karoline Rodrigues Campos                                                                                                                                                                                                                                                                                                                                                 |
| EPI_ISL_861680                                                                                                                                                 | Hospital e Pronto Socorro Portinari                                                                | Instituto Adolfo Lutz, Interdisciplinary Procedures Center, Strategic Laboratory                                                        | Claudio Tavares Sacchi, Claudia Regina Gonçalves, Erica Valessa Ramos Gomes, Karoline Rodrigues Campos                                                                                                                                                                                                                                                                                                                                                 |
| EPI_ISL_861682                                                                                                                                                 | UPA Vila Santa Catarina                                                                            | Instituto Adolfo Lutz, Interdisciplinary Procedures Center, Strategic Laboratory                                                        | Claudio Tavares Sacchi, Claudia Regina Gonçalves, Erica Valessa Ramos Gomes, Karoline Rodrigues Campos                                                                                                                                                                                                                                                                                                                                                 |
| EPI_ISL_862716, EPI_ISL_862717, EPI_ISL_862718, EPI_ISL_862719, EPI_ISL_862720, EPI_ISL_862721                                                                 | Centre for Dengue Research and AICBU, Department of Immunology and Molecular Medicine              | Centre for Dengue Research and AICBU, Department of Immunology and Molecular Medicine                                                   | Chandima Jeewandara, Deshni Jayathilaka, Dinuka Ariyaratne, Diyanath Ranasinghe, Laksiri Gomes, Gathsaurie Neelika Malavige                                                                                                                                                                                                                                                                                                                            |
| EPI_ISL_862724, EPI_ISL_862725, EPI_ISL_862726, EPI_ISL_862727                                                                                                 | Centre for Dengue Research and AICBU, Department of Immunology and Molecular Medicine              | Centre for Dengue Research and AICBU, Department of Immunology and Molecular Medicine                                                   | Chandima Jeewandara, Deshni Jayathilaka, Dinuka Ariyaratne, Tibutius Thanesh Pramanayagam, Diyanath Ranasinghe, Laksiri Gomes, Gathsaurie Neelika Malavige                                                                                                                                                                                                                                                                                             |
| EPI_ISL_867290, EPI_ISL_867331, EPI_ISL_867368, EPI_ISL_867518, EPI_ISL_867596, EPI_ISL_867617, EPI_ISL_867706, EPI_ISL_867708, EPI_ISL_867721, EPI_ISL_867881 | Originating lab: Wales Specialist Virology Centre Sequencing lab: Pathogen Genomics Unit           | Public Health Wales Microbiology Cardiff Wales Specialist Virology Centre                                                               | Catherine Moore, Johnathan Evans, Laura Gifford, Malorie Perry, Simon Cottrell, Angela Marchbank, Alec Birchley, Alexander Adams, Amy Gaskin, Bree Gatica-Wilcox, Jason Coombes, Joel Southgate, Lauren Gilbert, Lee Graham, Nicole Pacchiari, Sara Kumziene-Summerhayes, Sarah Taylor, Sophie Jones, Sara Rey, Matthew Bull, Joanne Watkins, Sally Corden, Tom Connor                                                                                 |
| EPI_ISL_872090, EPI_ISL_872098                                                                                                                                 | Instituto de Diagnostico y Referencia Epidemiologicos (INDRE)                                      | Instituto de Diagnostico y Referencia Epidemiologicos (INDRE)                                                                           | Claudia Wong-Arambula, Gisela Barrera-Badillo, Abril Rodriguez-Maldonado, Natividad Cruz-Ortiz, Tatiana Nunez-Garcia, Dayanira Arellano-Suarez, Fabiola Garces-Ayala, Adnan-Araiza Rodriguez, Edgar Mendieta-Condado, Lucia Hernandez-Rivas, Irma Lopez-Martinez, Ernesto Ramirez-Gonzalez, Chandima Jeewandara, Deshni Jayathilaka, Dinuka Ariyaratne, Tibutius Thanesh Pramanayagam, Diyanath Ranasinghe, Laksiri Gomes, Gathsaurie Neelika Malavige |
| EPI_ISL_872394, EPI_ISL_872478, EPI_ISL_872567, EPI_ISL_872568                                                                                                 | Centre for Dengue Research and AICBU, Department of Immunology and Molecular Medicine              | Centre for Dengue Research and AICBU, Department of Immunology and Molecular Medicine                                                   | Chandima Jeewandara, Deshni Jayathilaka, Dinuka Ariyaratne, Tibutius Thanesh Pramanayagam, Diyanath Ranasinghe, Laksiri Gomes, Gathsaurie Neelika Malavige                                                                                                                                                                                                                                                                                             |
| EPI_ISL_875688                                                                                                                                                 | National Influenza Center - Instituto Adolfo Lutz                                                  | Instituto Adolfo Lutz, Interdisciplinary Procedures Center, Strategic Laboratory                                                        | Claudio Tavares Sacchi, Claudia Regina Gonçalves, Erica Valessa Ramos Gomes, Karoline Rodrigues Campos, Katia Correa de Oliveira Santos, Ana Lucia de Carvalho Avelino, Clovis Roberto Abe Constantino                                                                                                                                                                                                                                                 |
| EPI_ISL_875689                                                                                                                                                 | Hospital do Servidor Publico                                                                       | Instituto Adolfo Lutz, Interdisciplinary Procedures Center, Strategic Laboratory                                                        | Claudio Tavares Sacchi, Claudia Regina Gonçalves, Erica Valessa Ramos Gomes, Karoline Rodrigues Campos                                                                                                                                                                                                                                                                                                                                                 |
| EPI_ISL_882645                                                                                                                                                 | Medical Research Center, Faculty of Medicine, Syarif Hidayatullah State Islamic University Jakarta | Medical Research Center, Faculty of Medicine, Syarif Hidayatullah State Islamic University Jakarta                                      | Chris Adhiyanto, Erike A Suwarsono, Laifa Hendarmin, Zeti Harriyati, Endah Wulandari, Flori Ratna Sari, Fika Ekayanti, Hari Hendarto                                                                                                                                                                                                                                                                                                                   |
| EPI_ISL_882646                                                                                                                                                 | Medical Research Center, Faculty of Medicine, Syarif Hidayatullah State Islamic University Jakarta | Medical Research Center, Faculty of Medicine, Syarif Hidayatullah State Islamic University Jakarta                                      | Chris Adhiyanto, Laifa Hendarmin, Zeti Harriyati, Endah Wulandari, Flori Ratna Sari, Fika Ekayanti, Hari Hendarto                                                                                                                                                                                                                                                                                                                                      |
| EPI_ISL_882652                                                                                                                                                 | Laboratory of Microbiology and Virology, Ospedale Amedeo di Savoia, ASL "Città di Torino"          | U.O. Genomics, S.S. Genetics and Advanced Omics Techniques, Istituto Zooprofilattico Sperimentale del Piemonte, Liguria e Valle d'Aosta | Chiara Beltramo, Francesco Cerutti, Valeria Ghisetti, Elena Bozzetta, Pier Luigi Acutis, Simone Peletto                                                                                                                                                                                                                                                                                                                                                |
| EPI_ISL_882654                                                                                                                                                 | Laboratory of Microbiology and Virology, Ospedale Amedeo di Savoia, ASL "Città di Torino"          | U.O. Genomics, S.S. Genetics and Advanced Omics Techniques Istituto Zooprofilattico Sperimentale del Piemonte, Liguria e Valle d'Aosta  | Chiara Beltramo, Francesco Cerutti, Valeria Ghisetti, Elena Bozzetta, Pier Luigi Acutis, Simone Peletto                                                                                                                                                                                                                                                                                                                                                |
| EPI_ISL_882657                                                                                                                                                 | LACEN do Estado do Piaui, Dr. Costa Alvarenga                                                      | Instituto Adolfo Lutz, Interdisciplinary Procedures Center, Strategic Laboratory                                                        | Claudio Tavares Sacchi, Claudia Regina Gonçalves, Erica Valessa Ramos Gomes, Karoline Rodrigues Campos                                                                                                                                                                                                                                                                                                                                                 |
| EPI_ISL_882658                                                                                                                                                 | Secretaria Municipal de Saude                                                                      | Instituto Adolfo Lutz, Interdisciplinary Procedures Center, Strategic Laboratory                                                        | Claudio Tavares Sacchi, Claudia Regina Gonçalves, Erica Valessa Ramos Gomes, Karoline Rodrigues Campos                                                                                                                                                                                                                                                                                                                                                 |
| EPI_ISL_882659                                                                                                                                                 | Centro de Triagem Covid19                                                                          | Instituto Adolfo Lutz, Interdisciplinary Procedures Center, Strategic Laboratory                                                        | Claudio Tavares Sacchi, Claudia Regina Gonçalves, Erica Valessa Ramos Gomes, Karoline Rodrigues Campos                                                                                                                                                                                                                                                                                                                                                 |
| EPI_ISL_882660                                                                                                                                                 | Hospital Municipal Prefeito Waldemar Costa Filho                                                   | Instituto Adolfo Lutz, Interdisciplinary Procedures Center, Strategic Laboratory                                                        | Claudio Tavares Sacchi, Claudia Regina Gonçalves, Erica Valessa Ramos Gomes, Karoline Rodrigues Campos                                                                                                                                                                                                                                                                                                                                                 |
| EPI_ISL_882661, EPI_ISL_882662                                                                                                                                 | Hospital de Santa Barbara de Goias                                                                 | Instituto Adolfo Lutz, Interdisciplinary Procedures Center, Strategic Laboratory                                                        | Claudio Tavares Sacchi, Claudia Regina Gonçalves, Erica Valessa Ramos Gomes, Karoline Rodrigues Campos                                                                                                                                                                                                                                                                                                                                                 |
| EPI_ISL_882664                                                                                                                                                 | LACEN do Distrito Federal                                                                          | Instituto Adolfo Lutz, Interdisciplinary Procedures Center, Strategic Laboratory                                                        | Claudio Tavares Sacchi, Claudia Regina Gonçalves, Erica Valessa Ramos Gomes, Karoline Rodrigues Campos                                                                                                                                                                                                                                                                                                                                                 |
| EPI_ISL_882665                                                                                                                                                 | Unidade de Pronto Atendimento Dra Zilda Arns                                                       | Instituto Adolfo Lutz, Interdisciplinary Procedures Center, Strategic Laboratory                                                        | Claudio Tavares Sacchi, Claudia Regina Gonçalves, Erica Valessa Ramos Gomes, Karoline Rodrigues Campos                                                                                                                                                                                                                                                                                                                                                 |
| EPI_ISL_882666                                                                                                                                                 | UMS de Juquitiba                                                                                   | Instituto Adolfo Lutz, Interdisciplinary Procedures Center, Strategic Laboratory                                                        | Claudio Tavares Sacchi, Claudia Regina Gonçalves, Erica Valessa Ramos Gomes, Karoline Rodrigues Campos                                                                                                                                                                                                                                                                                                                                                 |
| EPI_ISL_882669                                                                                                                                                 | UPA Vila Santa Catarina                                                                            | Instituto Adolfo Lutz, Interdisciplinary Procedures Center, Strategic Laboratory                                                        | Claudio Tavares Sacchi, Claudia Regina Gonçalves, Erica Valessa Ramos Gomes, Karoline Rodrigues Campos                                                                                                                                                                                                                                                                                                                                                 |
| EPI_ISL_882672                                                                                                                                                 | Hospital Municipal Dr. Guido Guida                                                                 | Instituto Adolfo Lutz, Interdisciplinary Procedures Center, Strategic Laboratory                                                        | Claudio Tavares Sacchi, Claudia Regina Gonçalves, Erica Valessa Ramos Gomes, Karoline Rodrigues Campos                                                                                                                                                                                                                                                                                                                                                 |
| EPI_ISL_888596                                                                                                                                                 | Istituto Zooprofilattico Sperimentale del Piemonte, Liguria e Valle d'Aosta                        | U.O. Genomics, S.S. Genetics and Advanced Omics Techniques Istituto Zooprofilattico Sperimentale del Piemonte, Liguria e Valle d'Aosta  | Chiara Beltramo, Pier Luigi Acutis, Maria Goria, Elena Bozzetta, Simone Peletto                                                                                                                                                                                                                                                                                                                                                                        |

We gratefully acknowledge the following Authors from the Originating laboratories responsible for obtaining the specimens, as well as the Submitting laboratories where the genome data were generated and shared via GISAID, on which this research is based.

All Submitters of data may be contacted directly via [www.gisaid.org](http://www.gisaid.org)

Authors are sorted alphabetically.

| Accession ID                                                                                                                                                                                                                                                                                                                                                                                                                                                                                                                                                                                                   | Originating Laboratory                                                  | Submitting Laboratory                                                                                                   | Authors                                                                                                                                                                                                                                                                                                                                                                                                                                                                                                                                                                                                                                                                                                                                                                                   |                                                                                                                                                                                                                                                                                                                                                                                                                                                                                                                                                                                                                                                                                                                                                                                           |
|----------------------------------------------------------------------------------------------------------------------------------------------------------------------------------------------------------------------------------------------------------------------------------------------------------------------------------------------------------------------------------------------------------------------------------------------------------------------------------------------------------------------------------------------------------------------------------------------------------------|-------------------------------------------------------------------------|-------------------------------------------------------------------------------------------------------------------------|-------------------------------------------------------------------------------------------------------------------------------------------------------------------------------------------------------------------------------------------------------------------------------------------------------------------------------------------------------------------------------------------------------------------------------------------------------------------------------------------------------------------------------------------------------------------------------------------------------------------------------------------------------------------------------------------------------------------------------------------------------------------------------------------|-------------------------------------------------------------------------------------------------------------------------------------------------------------------------------------------------------------------------------------------------------------------------------------------------------------------------------------------------------------------------------------------------------------------------------------------------------------------------------------------------------------------------------------------------------------------------------------------------------------------------------------------------------------------------------------------------------------------------------------------------------------------------------------------|
| EPI_ISL_407987                                                                                                                                                                                                                                                                                                                                                                                                                                                                                                                                                                                                 | Singapore General Hospital                                              | Programme in Emerging Infectious Diseases, Duke-NUS Medical School                                                      | Danielle E Anderson, Martin Linster, Yan Zhuang, Jayanthi Jayakumar, Kian Sing Chan, Lynette LE Oon, Jenny GH Low, Yvonne CF Su, Linfa Wang, Gavin JD Smith                                                                                                                                                                                                                                                                                                                                                                                                                                                                                                                                                                                                                               |                                                                                                                                                                                                                                                                                                                                                                                                                                                                                                                                                                                                                                                                                                                                                                                           |
| EPI_ISL_407988                                                                                                                                                                                                                                                                                                                                                                                                                                                                                                                                                                                                 | National Centre for Infectious Diseases                                 | Programme in Emerging Infectious Diseases, Duke-NUS Medical School                                                      | Danielle E Anderson, Martin Linster, Yan Zhuang, Jayanthi Jayakumar, David CB Lye, Yee Sin Leo, Barnaby E Young, Yvonne CF Su, Linfa Wang, Gavin JD Smith                                                                                                                                                                                                                                                                                                                                                                                                                                                                                                                                                                                                                                 |                                                                                                                                                                                                                                                                                                                                                                                                                                                                                                                                                                                                                                                                                                                                                                                           |
| EPI_ISL_409067                                                                                                                                                                                                                                                                                                                                                                                                                                                                                                                                                                                                 | Massachusetts Department of Public Health                               | Pathogen Discovery, Respiratory Viruses Branch, Division of Viral Diseases, Centers for Diseases Control and Prevention | Clinton R. Paden, Jing Zhang, Krista Queen, Yan Li, Ying Tao, Anna Uehara, Xiaoyan Lu, Brian Lynch, Senthil Kumar K. Sakthivel, Brett L. Whitaker, Shifaq Kamili, Lijuan Wang, Janna' R. Murray, Susan I. Gerber, Stephen Lindstrom, Suxiang Tong                                                                                                                                                                                                                                                                                                                                                                                                                                                                                                                                         |                                                                                                                                                                                                                                                                                                                                                                                                                                                                                                                                                                                                                                                                                                                                                                                           |
| EPI_ISL_410535                                                                                                                                                                                                                                                                                                                                                                                                                                                                                                                                                                                                 | National Centre for Infectious Diseases                                 | Programme in Emerging Infectious Diseases, Duke-NUS Medical School                                                      | Danielle E Anderson, Martin Linster, Yan Zhuang, Jayanthi Jayakumar, David CB Lye, Yee Sin Leo, Barnaby E Young, Yvonne CF Su, Gavin JD Smith                                                                                                                                                                                                                                                                                                                                                                                                                                                                                                                                                                                                                                             |                                                                                                                                                                                                                                                                                                                                                                                                                                                                                                                                                                                                                                                                                                                                                                                           |
| EPI_ISL_410536, EPI_ISL_410537                                                                                                                                                                                                                                                                                                                                                                                                                                                                                                                                                                                 | Singapore General Hospital, Molecular Laboratory, Division of Pathology | Programme in Emerging Infectious Diseases, Duke-NUS Medical School                                                      | Danielle E Anderson, Martin Linster, Yan Zhuang, Jayanthi Jayakumar, Kian Sing Chan, Lynette LE Oon, Shirin Kalimuddin, Jenny GH Low, Yvonne CF Su, Gavin JD Smith                                                                                                                                                                                                                                                                                                                                                                                                                                                                                                                                                                                                                        |                                                                                                                                                                                                                                                                                                                                                                                                                                                                                                                                                                                                                                                                                                                                                                                           |
| EPI_ISL_413618, EPI_ISL_413619, EPI_ISL_413620, EPI_ISL_413621, EPI_ISL_413622, EPI_ISL_413623                                                                                                                                                                                                                                                                                                                                                                                                                                                                                                                 | unknown                                                                 | Pathogen Discovery, Respiratory Viruses Branch, Division of Viral Diseases, Centers for Diseases Control and Prevention | Clinton R. Paden, Ying Tao, Krista Queen, Anna Uehara, Jing Zhang, Yan Li, Haibin Wang, Shifaq Kamili, Xiaoyan Lu, Brian Lynch, Senthil Kumar K. Sakthivel, Brett L. Whitaker, Lijuan Wang, Janna' R. Murray, Jasmine Padilla, Justin Lee, Susan I. Gerber, Stephen Lindstrom, Suxiang Tong                                                                                                                                                                                                                                                                                                                                                                                                                                                                                               |                                                                                                                                                                                                                                                                                                                                                                                                                                                                                                                                                                                                                                                                                                                                                                                           |
| EPI_ISL_414016                                                                                                                                                                                                                                                                                                                                                                                                                                                                                                                                                                                                 | Hospital São Joaquim Beneficencia Portuguesa                            | Instituto Adolfo Lutz, Interdisciplinary Procedures Center, Strategic Laboratory                                        | Claudio Tavares Sacchi, Claudia Regina Gonçalves, Audrey Cilli, Carlos Henrique Camargo, Maria do Carmo Sampaio Tavares Timenetsky, Daniela Bernardes Borges da Silva, Terezinha Maria de Paiva, Ester Cerdeira Sabino                                                                                                                                                                                                                                                                                                                                                                                                                                                                                                                                                                    |                                                                                                                                                                                                                                                                                                                                                                                                                                                                                                                                                                                                                                                                                                                                                                                           |
| EPI_ISL_414017                                                                                                                                                                                                                                                                                                                                                                                                                                                                                                                                                                                                 | Hospital São Joaquim Beneficencia Portuguesa                            | Instituto Adolfo Lutz, Interdisciplinary Procedures Center, Strategic Laboratory                                        | Claudio Tavares Sacchi, Claudia Regina Gonçalves, Fabiana Cristina Pereira dos Santos, Carlos Henrique Camargo, Maria do Carmo Sampaio Tavares Timenetsky, Daniela Bernardes Borges da Silva, Terezinha Maria de Paiva, Ester Cerdeira Sabino                                                                                                                                                                                                                                                                                                                                                                                                                                                                                                                                             |                                                                                                                                                                                                                                                                                                                                                                                                                                                                                                                                                                                                                                                                                                                                                                                           |
| EPI_ISL_414378                                                                                                                                                                                                                                                                                                                                                                                                                                                                                                                                                                                                 | National Centre for Infectious Diseases                                 | Programme in Emerging Infectious Diseases, Duke-NUS Medical School                                                      | Danielle E Anderson, Martin Linster, Yan Zhuang, Jayanthi Jayakumar, Louisa Sun, David CB Lye, Yee Sin Leo, Barnaby E Young, Yvonne CF Su, Gavin JD Smith                                                                                                                                                                                                                                                                                                                                                                                                                                                                                                                                                                                                                                 |                                                                                                                                                                                                                                                                                                                                                                                                                                                                                                                                                                                                                                                                                                                                                                                           |
| EPI_ISL_414379, EPI_ISL_414380                                                                                                                                                                                                                                                                                                                                                                                                                                                                                                                                                                                 | National Centre for Infectious Diseases                                 | Programme in Emerging Infectious Diseases, Duke-NUS Medical School                                                      | Danielle E Anderson, Martin Linster, Yan Zhuang, Jayanthi Jayakumar, David CB Lye, Yee Sin Leo, Barnaby E Young, Yvonne CF Su, Gavin JD Smith                                                                                                                                                                                                                                                                                                                                                                                                                                                                                                                                                                                                                                             |                                                                                                                                                                                                                                                                                                                                                                                                                                                                                                                                                                                                                                                                                                                                                                                           |
| EPI_ISL_415152                                                                                                                                                                                                                                                                                                                                                                                                                                                                                                                                                                                                 | Gorgas Memorial Institute for Health Studies                            | Gorgas Memorial Institute for Health Studies                                                                            | Danilo Franco, Sandra Lopez-Verges, Elimelec Valdespino, Claudia Gonzalez, Oris Chavarria, Ambar Moreno, Yamika Diaz, Leyda Abrego, Juan M. Pascale, Alexander A. Martinez.                                                                                                                                                                                                                                                                                                                                                                                                                                                                                                                                                                                                               |                                                                                                                                                                                                                                                                                                                                                                                                                                                                                                                                                                                                                                                                                                                                                                                           |
| EPI_ISL_416031                                                                                                                                                                                                                                                                                                                                                                                                                                                                                                                                                                                                 | National Influenza Center - Instituto Adolfo Lutz                       | Instituto Adolfo Lutz, Interdisciplinary Procedures Center, Strategic Laboratory                                        | Claudio Tavares Sacchi, Claudia Regina Gonçalves, Carlos Henrique Camargo, Fabiana Cristina Pereira dos Santos, Daniela Bernardes Borges da Silva, Simone Guadagnucci Morillo, Adriano Abbud, Adriana Bugno, Maria do Carmo Sampaio Tavares Timenetsky, Terezinha Maria de Paiva                                                                                                                                                                                                                                                                                                                                                                                                                                                                                                          |                                                                                                                                                                                                                                                                                                                                                                                                                                                                                                                                                                                                                                                                                                                                                                                           |
| EPI_ISL_416034                                                                                                                                                                                                                                                                                                                                                                                                                                                                                                                                                                                                 | Hospital Israelita Albert Einstein                                      | Instituto Adolfo Lutz, Interdisciplinary Procedures Center, Strategic Laboratory                                        | Claudio Tavares Sacchi, Claudia Regina Gonçalves, Carlos Henrique Camargo, Erica Valessa Ramos Gomes, Fabiana Cristina Pereira dos Santos, Daniela Bernardes Borges da Silva, Simone Guadagnucci Morillo, Adriano Abbud, Adriana Bugno, Maria do Carmo Sampaio Tavares Timenetsky, Terezinha Maria de Paiva                                                                                                                                                                                                                                                                                                                                                                                                                                                                               |                                                                                                                                                                                                                                                                                                                                                                                                                                                                                                                                                                                                                                                                                                                                                                                           |
| EPI_ISL_416036                                                                                                                                                                                                                                                                                                                                                                                                                                                                                                                                                                                                 | National Influenza Center - Instituto Adolfo Lutz                       | Instituto Adolfo Lutz, Interdisciplinary Procedures Center, Strategic Laboratory                                        | Claudio Tavares Sacchi, Claudia Regina Gonçalves, Carlos Henrique Camargo, Erica Valessa Ramos Gomes, Fabiana Cristina Pereira dos Santos, Daniela Bernardes Borges da Silva, Simone Guadagnucci Morillo, Adriano Abbud, Adriana Bugno, Maria do Carmo Sampaio Tavares Timenetsky, Terezinha Maria de Paiva                                                                                                                                                                                                                                                                                                                                                                                                                                                                               |                                                                                                                                                                                                                                                                                                                                                                                                                                                                                                                                                                                                                                                                                                                                                                                           |
| EPI_ISL_417481                                                                                                                                                                                                                                                                                                                                                                                                                                                                                                                                                                                                 | deCODE genetics                                                         | deCODE genetics                                                                                                         | Daniel F Gudbjartsson; Agnar Helgason; Hakon Jonsson; Olafur T Magnusson; Pall Melsted; Gudmundur L Norddahl; Jona Saemundsdottir; Asgeir Sigurdsson; Patrick Sulem; Arna B Agustsdottir; Berglind Eiriksottir; Run Fridriksdottir; Elisabet E Gardarsdottir; Gudmundur Georgsson; Olafia S Gretarsdottir; Kjartan R Gudmundsson; Thora R Gunnarsdottir; Arnaldur Gylfason; Hilma Holm; Brynjar O Jansson; Aslaug Jonasdottir; Kamilla S Josefsdottir; Thordur Kristjansson; Droplaug N Magnusdottir; Louise le Roux; Gudrun Sigmundsdottir; Gardar Sveinbjornsson; Kristin E Sveinsdottir; Maney Sveinsdottir; Emil A Thorarensen; Bjarni Thorbjornsson; Gisli Masson; Ingileif Jonsdottir; Alma Moller; Thorolfur Gudnason; Karl G Kristinsson; Unnur Thorsteinsdottir; Kari Stefansson |                                                                                                                                                                                                                                                                                                                                                                                                                                                                                                                                                                                                                                                                                                                                                                                           |
| EPI_ISL_417535, EPI_ISL_417536, EPI_ISL_417537, EPI_ISL_417538, EPI_ISL_417539, EPI_ISL_417540, EPI_ISL_417541, EPI_ISL_417542, EPI_ISL_417543, EPI_ISL_417544, EPI_ISL_417545, EPI_ISL_417546, EPI_ISL_417547, EPI_ISL_417548, EPI_ISL_417549                                                                                                                                                                                                                                                                                                                                                                 | see above                                                               | deCODE genetics                                                                                                         | Daniel F Gudbjartsson; Agnar Helgason; Hakon Jonsson; Olafur T Magnusson; Pall Melsted; Gudmundur L Norddahl; Jona Saemundsdottir; Asgeir Sigurdsson; Patrick Sulem; Arna B Agustsdottir; Berglind Eiriksottir; Run Fridriksdottir; Elisabet E Gardarsdottir; Gudmundur Georgsson; Olafia S Gretarsdottir; Kjartan R Gudmundsson; Thora R Gunnarsdottir; Arnaldur Gylfason; Hilma Holm; Brynjar O Jansson; Aslaug Jonasdottir; Kamilla S Josefsdottir; Thordur Kristjansson; Droplaug N Magnusdottir; Louise le Roux; Gudrun Sigmundsdottir; Gardar Sveinbjornsson; Kristin E Sveinsdottir; Maney Sveinsdottir; Emil A Thorarensen; Bjarni Thorbjornsson; Gisli Masson; Ingileif Jonsdottir; Alma Moller; Thorolfur Gudnason; Karl G Kristinsson; Unnur Thorsteinsdottir; Kari Stefansson |                                                                                                                                                                                                                                                                                                                                                                                                                                                                                                                                                                                                                                                                                                                                                                                           |
| EPI_ISL_417550, EPI_ISL_417551                                                                                                                                                                                                                                                                                                                                                                                                                                                                                                                                                                                 | The National University Hospital of Iceland                             | deCODE genetics                                                                                                         | Daniel F Gudbjartsson; Agnar Helgason; Hakon Jonsson; Olafur T Magnusson; Pall Melsted; Gudmundur L Norddahl; Jona Saemundsdottir; Asgeir Sigurdsson; Patrick Sulem; Arna B Agustsdottir; Berglind Eiriksottir; Run Fridriksdottir; Elisabet E Gardarsdottir; Gudmundur Georgsson; Olafia S Gretarsdottir; Kjartan R Gudmundsson; Thora R Gunnarsdottir; Arnaldur Gylfason; Hilma Holm; Brynjar O Jansson; Aslaug Jonasdottir; Kamilla S Josefsdottir; Thordur Kristjansson; Droplaug N Magnusdottir; Louise le Roux; Gudrun Sigmundsdottir; Gardar Sveinbjornsson; Kristin E Sveinsdottir; Maney Sveinsdottir; Emil A Thorarensen; Bjarni Thorbjornsson; Gisli Masson; Ingileif Jonsdottir; Alma Moller; Thorolfur Gudnason; Karl G Kristinsson; Unnur Thorsteinsdottir; Kari Stefansson |                                                                                                                                                                                                                                                                                                                                                                                                                                                                                                                                                                                                                                                                                                                                                                                           |
| EPI_ISL_417552                                                                                                                                                                                                                                                                                                                                                                                                                                                                                                                                                                                                 | deCODE genetics                                                         | deCODE genetics                                                                                                         | Daniel F Gudbjartsson; Agnar Helgason; Hakon Jonsson; Olafur T Magnusson; Pall Melsted; Gudmundur L Norddahl; Jona Saemundsdottir; Asgeir Sigurdsson; Patrick Sulem; Arna B Agustsdottir; Berglind Eiriksottir; Run Fridriksdottir; Elisabet E Gardarsdottir; Gudmundur Georgsson; Olafia S Gretarsdottir; Kjartan R Gudmundsson; Thora R Gunnarsdottir; Arnaldur Gylfason; Hilma Holm; Brynjar O Jansson; Aslaug Jonasdottir; Kamilla S Josefsdottir; Thordur Kristjansson; Droplaug N Magnusdottir; Louise le Roux; Gudrun Sigmundsdottir; Gardar Sveinbjornsson; Kristin E Sveinsdottir; Maney Sveinsdottir; Emil A Thorarensen; Bjarni Thorbjornsson; Gisli Masson; Ingileif Jonsdottir; Alma Moller; Thorolfur Gudnason; Karl G Kristinsson; Unnur Thorsteinsdottir; Kari Stefansson |                                                                                                                                                                                                                                                                                                                                                                                                                                                                                                                                                                                                                                                                                                                                                                                           |
| EPI_ISL_417553, EPI_ISL_417554, EPI_ISL_417555, EPI_ISL_417556, EPI_ISL_417557, EPI_ISL_417558, EPI_ISL_417559, EPI_ISL_417560, EPI_ISL_417561, EPI_ISL_417562, EPI_ISL_417563, EPI_ISL_417564, EPI_ISL_417565, EPI_ISL_417566, EPI_ISL_417567, EPI_ISL_417568, EPI_ISL_417569, EPI_ISL_417570, EPI_ISL_417571, EPI_ISL_417572, EPI_ISL_417573, EPI_ISL_417574, EPI_ISL_417575, EPI_ISL_417576, EPI_ISL_417577, EPI_ISL_417578, EPI_ISL_417579, EPI_ISL_417580, EPI_ISL_417581, EPI_ISL_417582, EPI_ISL_417583, EPI_ISL_417584, EPI_ISL_417585, EPI_ISL_417586, EPI_ISL_417587, EPI_ISL_417588, EPI_ISL_417589 | see above                                                               | The National University Hospital of Iceland                                                                             | deCODE genetics                                                                                                                                                                                                                                                                                                                                                                                                                                                                                                                                                                                                                                                                                                                                                                           | Daniel F Gudbjartsson; Agnar Helgason; Hakon Jonsson; Olafur T Magnusson; Pall Melsted; Gudmundur L Norddahl; Jona Saemundsdottir; Asgeir Sigurdsson; Patrick Sulem; Arna B Agustsdottir; Berglind Eiriksottir; Run Fridriksdottir; Elisabet E Gardarsdottir; Gudmundur Georgsson; Olafia S Gretarsdottir; Kjartan R Gudmundsson; Thora R Gunnarsdottir; Arnaldur Gylfason; Hilma Holm; Brynjar O Jansson; Aslaug Jonasdottir; Kamilla S Josefsdottir; Thordur Kristjansson; Droplaug N Magnusdottir; Louise le Roux; Gudrun Sigmundsdottir; Gardar Sveinbjornsson; Kristin E Sveinsdottir; Maney Sveinsdottir; Emil A Thorarensen; Bjarni Thorbjornsson; Gisli Masson; Ingileif Jonsdottir; Alma Moller; Thorolfur Gudnason; Karl G Kristinsson; Unnur Thorsteinsdottir; Kari Stefansson |





|                                                                                                                                                                                                                                                                                                                                                                                                                                                                                                                                                                                                                                                                                                                                                                                                                                                                                                                                                                                                                                                                                                                                                                                                                                                                                                                                                                                                                                                                                                                                                                                                                                                                                                                                                                                                                                                                                                                                                                                                                                                                                                                                                                                                                                                                                                                                                                                                                                                                                                                                                                                                                                                                                                                                                                                                                                                                                                                                                                                                                                                                                                                                                                                                                                                                                                                                                                                                                                                                                                                                                                                                                                                                                                                                                                                                                                                                                                                                                                                                                                                                                                                                                                                                                                                                                                                                                                                                                                                                                                                                                                                                                                                                                                                                                                                                                                                                                                                                                                                                                                                                                                                                                                                                                                                                                                                                                                                                                                                                                                                                                                                                                                                                                                                                                                                                                                                                                                                                                                                                                                                                                                                                                                                                                                                                                                                                                                                                                                                                                                                                                                                                                                                                                                                                                                                                                                                                                                                                                                                                                                                                                                                                                                                                                                                                                                                                                                                                                                                                                                                                                                                                                                                                                                                                                                                                                                                                                                                                                                                                                                                                                                                                                                                                                                                                                                                                                                                                                                                                                                                                                                                                                                                                                                                                                                                                                                                                                                                                                                                                                                                                                                                                                                                                                                                                                                                                                                                                                                                                                                                                                                                                                                                                                                                                                                                                                                                                                                                                                                                                                                                           |                                                                        |                                                                    |                                                                                  |                                                                                                                                                                                                                                                                                                                                                                                                                                                                                                                                                                                                                                                                                                                                                                                          |
|-----------------------------------------------------------------------------------------------------------------------------------------------------------------------------------------------------------------------------------------------------------------------------------------------------------------------------------------------------------------------------------------------------------------------------------------------------------------------------------------------------------------------------------------------------------------------------------------------------------------------------------------------------------------------------------------------------------------------------------------------------------------------------------------------------------------------------------------------------------------------------------------------------------------------------------------------------------------------------------------------------------------------------------------------------------------------------------------------------------------------------------------------------------------------------------------------------------------------------------------------------------------------------------------------------------------------------------------------------------------------------------------------------------------------------------------------------------------------------------------------------------------------------------------------------------------------------------------------------------------------------------------------------------------------------------------------------------------------------------------------------------------------------------------------------------------------------------------------------------------------------------------------------------------------------------------------------------------------------------------------------------------------------------------------------------------------------------------------------------------------------------------------------------------------------------------------------------------------------------------------------------------------------------------------------------------------------------------------------------------------------------------------------------------------------------------------------------------------------------------------------------------------------------------------------------------------------------------------------------------------------------------------------------------------------------------------------------------------------------------------------------------------------------------------------------------------------------------------------------------------------------------------------------------------------------------------------------------------------------------------------------------------------------------------------------------------------------------------------------------------------------------------------------------------------------------------------------------------------------------------------------------------------------------------------------------------------------------------------------------------------------------------------------------------------------------------------------------------------------------------------------------------------------------------------------------------------------------------------------------------------------------------------------------------------------------------------------------------------------------------------------------------------------------------------------------------------------------------------------------------------------------------------------------------------------------------------------------------------------------------------------------------------------------------------------------------------------------------------------------------------------------------------------------------------------------------------------------------------------------------------------------------------------------------------------------------------------------------------------------------------------------------------------------------------------------------------------------------------------------------------------------------------------------------------------------------------------------------------------------------------------------------------------------------------------------------------------------------------------------------------------------------------------------------------------------------------------------------------------------------------------------------------------------------------------------------------------------------------------------------------------------------------------------------------------------------------------------------------------------------------------------------------------------------------------------------------------------------------------------------------------------------------------------------------------------------------------------------------------------------------------------------------------------------------------------------------------------------------------------------------------------------------------------------------------------------------------------------------------------------------------------------------------------------------------------------------------------------------------------------------------------------------------------------------------------------------------------------------------------------------------------------------------------------------------------------------------------------------------------------------------------------------------------------------------------------------------------------------------------------------------------------------------------------------------------------------------------------------------------------------------------------------------------------------------------------------------------------------------------------------------------------------------------------------------------------------------------------------------------------------------------------------------------------------------------------------------------------------------------------------------------------------------------------------------------------------------------------------------------------------------------------------------------------------------------------------------------------------------------------------------------------------------------------------------------------------------------------------------------------------------------------------------------------------------------------------------------------------------------------------------------------------------------------------------------------------------------------------------------------------------------------------------------------------------------------------------------------------------------------------------------------------------------------------------------------------------------------------------------------------------------------------------------------------------------------------------------------------------------------------------------------------------------------------------------------------------------------------------------------------------------------------------------------------------------------------------------------------------------------------------------------------------------------------------------------------------------------------------------------------------------------------------------------------------------------------------------------------------------------------------------------------------------------------------------------------------------------------------------------------------------------------------------------------------------------------------------------------------------------------------------------------------------------------------------------------------------------------------------------------------------------------------------------------------------------------------------------------------------------------------------------------------------------------------------------------------------------------------------------------------------------------------------------------------------------------------------------------------------------------------------------------------------------------------------------------------------------------------------------------------------------------------------------------------------------------------------------------------------------------------------------------------------------------------------------------------------------------------------------------------------------------------------------------------------------------------------------------------------------------------------------------------------------------------------------------------------------------------------------------------------------------------------------------------------------------------------------------------------------------------------------------------------------------------------------------------------------------------------------------------------------------------------------------------------------------------------------------------------------------------------------------------------------------------------------------------------------------------------------------------------------------------------------------------|------------------------------------------------------------------------|--------------------------------------------------------------------|----------------------------------------------------------------------------------|------------------------------------------------------------------------------------------------------------------------------------------------------------------------------------------------------------------------------------------------------------------------------------------------------------------------------------------------------------------------------------------------------------------------------------------------------------------------------------------------------------------------------------------------------------------------------------------------------------------------------------------------------------------------------------------------------------------------------------------------------------------------------------------|
| EPI_ISL_424589, EPI_ISL_424590, EPI_ISL_424591, EPI_ISL_424592, EPI_ISL_424593, EPI_ISL_424594, EPI_ISL_424595, EPI_ISL_424596, EPI_ISL_424597, EPI_ISL_424598, EPI_ISL_424599, EPI_ISL_424600, EPI_ISL_424601, EPI_ISL_424602, EPI_ISL_424603, EPI_ISL_424604, EPI_ISL_424605, EPI_ISL_424606, EPI_ISL_424607                                                                                                                                                                                                                                                                                                                                                                                                                                                                                                                                                                                                                                                                                                                                                                                                                                                                                                                                                                                                                                                                                                                                                                                                                                                                                                                                                                                                                                                                                                                                                                                                                                                                                                                                                                                                                                                                                                                                                                                                                                                                                                                                                                                                                                                                                                                                                                                                                                                                                                                                                                                                                                                                                                                                                                                                                                                                                                                                                                                                                                                                                                                                                                                                                                                                                                                                                                                                                                                                                                                                                                                                                                                                                                                                                                                                                                                                                                                                                                                                                                                                                                                                                                                                                                                                                                                                                                                                                                                                                                                                                                                                                                                                                                                                                                                                                                                                                                                                                                                                                                                                                                                                                                                                                                                                                                                                                                                                                                                                                                                                                                                                                                                                                                                                                                                                                                                                                                                                                                                                                                                                                                                                                                                                                                                                                                                                                                                                                                                                                                                                                                                                                                                                                                                                                                                                                                                                                                                                                                                                                                                                                                                                                                                                                                                                                                                                                                                                                                                                                                                                                                                                                                                                                                                                                                                                                                                                                                                                                                                                                                                                                                                                                                                                                                                                                                                                                                                                                                                                                                                                                                                                                                                                                                                                                                                                                                                                                                                                                                                                                                                                                                                                                                                                                                                                                                                                                                                                                                                                                                                                                                                                                                                                                                                                            | see above                                                              | The National University Hospital of Iceland                        | deCODE genetics                                                                  | Daniel F Gudbjartsson; Agnar Helgason; Hakon Jonsson; Olafur T Magnusson; Pall Melsted; Gudmundur L Norddahl; Jona Saemundsdottir; Asgeir Sigurdsson; Patrick Sulem; Arna B Agustsdottir; Berglind Eiriksottir; Run Fridriksdottir; Elisabet E Gardarsdottir; Gudmundur Georgsson; Olafia S Gretarsdottir; Kjartan R Gudmundsson; Thora R Gunnarsdottir; Arnaldur Gylfason; Hilma Holm; Brynjar O Jenson; Aslaug Jonasdottir; Kamilla S Josefsdottir; Thordur Kristjansson; Droplaug N Magnusdottir; Louise le Roux; Gudrun Sigmundsdottir; Gardar Sveinbjornsson; Kristin E Sveinsdottir; Maney Sveinsdottir; Emil A Thorarensen; Bjarni Thorbjornsson; Gisli Masson; Ingileif Jonsdottir; Alma Moller; Thorolfur Gudnason; Karl G Kristinsson; Unnur Thorsteinsdottir; Kari Stefansson |
| EPI_ISL_424608, EPI_ISL_424609                                                                                                                                                                                                                                                                                                                                                                                                                                                                                                                                                                                                                                                                                                                                                                                                                                                                                                                                                                                                                                                                                                                                                                                                                                                                                                                                                                                                                                                                                                                                                                                                                                                                                                                                                                                                                                                                                                                                                                                                                                                                                                                                                                                                                                                                                                                                                                                                                                                                                                                                                                                                                                                                                                                                                                                                                                                                                                                                                                                                                                                                                                                                                                                                                                                                                                                                                                                                                                                                                                                                                                                                                                                                                                                                                                                                                                                                                                                                                                                                                                                                                                                                                                                                                                                                                                                                                                                                                                                                                                                                                                                                                                                                                                                                                                                                                                                                                                                                                                                                                                                                                                                                                                                                                                                                                                                                                                                                                                                                                                                                                                                                                                                                                                                                                                                                                                                                                                                                                                                                                                                                                                                                                                                                                                                                                                                                                                                                                                                                                                                                                                                                                                                                                                                                                                                                                                                                                                                                                                                                                                                                                                                                                                                                                                                                                                                                                                                                                                                                                                                                                                                                                                                                                                                                                                                                                                                                                                                                                                                                                                                                                                                                                                                                                                                                                                                                                                                                                                                                                                                                                                                                                                                                                                                                                                                                                                                                                                                                                                                                                                                                                                                                                                                                                                                                                                                                                                                                                                                                                                                                                                                                                                                                                                                                                                                                                                                                                                                                                                                                                            |                                                                        |                                                                    | deCODE genetics                                                                  | Daniel F Gudbjartsson; Agnar Helgason; Hakon Jonsson; Olafur T Magnusson; Pall Melsted; Gudmundur L Norddahl; Jona Saemundsdottir; Asgeir Sigurdsson; Patrick Sulem; Arna B Agustsdottir; Berglind Eiriksottir; Run Fridriksdottir; Elisabet E Gardarsdottir; Gudmundur Georgsson; Olafia S Gretarsdottir; Kjartan R Gudmundsson; Thora R Gunnarsdottir; Arnaldur Gylfason; Hilma Holm; Brynjar O Jenson; Aslaug Jonasdottir; Kamilla S Josefsdottir; Thordur Kristjansson; Droplaug N Magnusdottir; Louise le Roux; Gudrun Sigmundsdottir; Gardar Sveinbjornsson; Kristin E Sveinsdottir; Maney Sveinsdottir; Emil A Thorarensen; Bjarni Thorbjornsson; Gisli Masson; Ingileif Jonsdottir; Alma Moller; Thorolfur Gudnason; Karl G Kristinsson; Unnur Thorsteinsdottir; Kari Stefansson |
| EPI_ISL_424610, EPI_ISL_424611, EPI_ISL_424612, EPI_ISL_424613, EPI_ISL_424614, EPI_ISL_424615, EPI_ISL_424616, EPI_ISL_424617, EPI_ISL_424618, EPI_ISL_424619, EPI_ISL_424620, EPI_ISL_424621, EPI_ISL_424622, EPI_ISL_424623, EPI_ISL_424624                                                                                                                                                                                                                                                                                                                                                                                                                                                                                                                                                                                                                                                                                                                                                                                                                                                                                                                                                                                                                                                                                                                                                                                                                                                                                                                                                                                                                                                                                                                                                                                                                                                                                                                                                                                                                                                                                                                                                                                                                                                                                                                                                                                                                                                                                                                                                                                                                                                                                                                                                                                                                                                                                                                                                                                                                                                                                                                                                                                                                                                                                                                                                                                                                                                                                                                                                                                                                                                                                                                                                                                                                                                                                                                                                                                                                                                                                                                                                                                                                                                                                                                                                                                                                                                                                                                                                                                                                                                                                                                                                                                                                                                                                                                                                                                                                                                                                                                                                                                                                                                                                                                                                                                                                                                                                                                                                                                                                                                                                                                                                                                                                                                                                                                                                                                                                                                                                                                                                                                                                                                                                                                                                                                                                                                                                                                                                                                                                                                                                                                                                                                                                                                                                                                                                                                                                                                                                                                                                                                                                                                                                                                                                                                                                                                                                                                                                                                                                                                                                                                                                                                                                                                                                                                                                                                                                                                                                                                                                                                                                                                                                                                                                                                                                                                                                                                                                                                                                                                                                                                                                                                                                                                                                                                                                                                                                                                                                                                                                                                                                                                                                                                                                                                                                                                                                                                                                                                                                                                                                                                                                                                                                                                                                                                                                                                                            | see above                                                              | The National University Hospital of Iceland                        | deCODE genetics                                                                  | Daniel F Gudbjartsson; Agnar Helgason; Hakon Jonsson; Olafur T Magnusson; Pall Melsted; Gudmundur L Norddahl; Jona Saemundsdottir; Asgeir Sigurdsson; Patrick Sulem; Arna B Agustsdottir; Berglind Eiriksottir; Run Fridriksdottir; Elisabet E Gardarsdottir; Gudmundur Georgsson; Olafia S Gretarsdottir; Kjartan R Gudmundsson; Thora R Gunnarsdottir; Arnaldur Gylfason; Hilma Holm; Brynjar O Jenson; Aslaug Jonasdottir; Kamilla S Josefsdottir; Thordur Kristjansson; Droplaug N Magnusdottir; Louise le Roux; Gudrun Sigmundsdottir; Gardar Sveinbjornsson; Kristin E Sveinsdottir; Maney Sveinsdottir; Emil A Thorarensen; Bjarni Thorbjornsson; Gisli Masson; Ingileif Jonsdottir; Alma Moller; Thorolfur Gudnason; Karl G Kristinsson; Unnur Thorsteinsdottir; Kari Stefansson |
| EPI_ISL_424993                                                                                                                                                                                                                                                                                                                                                                                                                                                                                                                                                                                                                                                                                                                                                                                                                                                                                                                                                                                                                                                                                                                                                                                                                                                                                                                                                                                                                                                                                                                                                                                                                                                                                                                                                                                                                                                                                                                                                                                                                                                                                                                                                                                                                                                                                                                                                                                                                                                                                                                                                                                                                                                                                                                                                                                                                                                                                                                                                                                                                                                                                                                                                                                                                                                                                                                                                                                                                                                                                                                                                                                                                                                                                                                                                                                                                                                                                                                                                                                                                                                                                                                                                                                                                                                                                                                                                                                                                                                                                                                                                                                                                                                                                                                                                                                                                                                                                                                                                                                                                                                                                                                                                                                                                                                                                                                                                                                                                                                                                                                                                                                                                                                                                                                                                                                                                                                                                                                                                                                                                                                                                                                                                                                                                                                                                                                                                                                                                                                                                                                                                                                                                                                                                                                                                                                                                                                                                                                                                                                                                                                                                                                                                                                                                                                                                                                                                                                                                                                                                                                                                                                                                                                                                                                                                                                                                                                                                                                                                                                                                                                                                                                                                                                                                                                                                                                                                                                                                                                                                                                                                                                                                                                                                                                                                                                                                                                                                                                                                                                                                                                                                                                                                                                                                                                                                                                                                                                                                                                                                                                                                                                                                                                                                                                                                                                                                                                                                                                                                                                                                                            | CHU Purpan - Laboratoire de Virologie - Institut Fédératif de Biologie | Laboratoire de virologie - École Nationale Vétérinaire de Toulouse |                                                                                  | Croville,G., Guerin,J.-L. and Izopet,J.                                                                                                                                                                                                                                                                                                                                                                                                                                                                                                                                                                                                                                                                                                                                                  |
| EPI_ISL_426159, EPI_ISL_426160, EPI_ISL_426161                                                                                                                                                                                                                                                                                                                                                                                                                                                                                                                                                                                                                                                                                                                                                                                                                                                                                                                                                                                                                                                                                                                                                                                                                                                                                                                                                                                                                                                                                                                                                                                                                                                                                                                                                                                                                                                                                                                                                                                                                                                                                                                                                                                                                                                                                                                                                                                                                                                                                                                                                                                                                                                                                                                                                                                                                                                                                                                                                                                                                                                                                                                                                                                                                                                                                                                                                                                                                                                                                                                                                                                                                                                                                                                                                                                                                                                                                                                                                                                                                                                                                                                                                                                                                                                                                                                                                                                                                                                                                                                                                                                                                                                                                                                                                                                                                                                                                                                                                                                                                                                                                                                                                                                                                                                                                                                                                                                                                                                                                                                                                                                                                                                                                                                                                                                                                                                                                                                                                                                                                                                                                                                                                                                                                                                                                                                                                                                                                                                                                                                                                                                                                                                                                                                                                                                                                                                                                                                                                                                                                                                                                                                                                                                                                                                                                                                                                                                                                                                                                                                                                                                                                                                                                                                                                                                                                                                                                                                                                                                                                                                                                                                                                                                                                                                                                                                                                                                                                                                                                                                                                                                                                                                                                                                                                                                                                                                                                                                                                                                                                                                                                                                                                                                                                                                                                                                                                                                                                                                                                                                                                                                                                                                                                                                                                                                                                                                                                                                                                                                                            | Gundersen Molecular Diagnostics Laboratory                             | Kabara Cancer Research Institute                                   |                                                                                  | Craig S. Richmond, Paraic A. Kenny                                                                                                                                                                                                                                                                                                                                                                                                                                                                                                                                                                                                                                                                                                                                                       |
| EPI_ISL_427526, EPI_ISL_427527, EPI_ISL_427528, EPI_ISL_427529, EPI_ISL_427530, EPI_ISL_427531, EPI_ISL_427532, EPI_ISL_427533, EPI_ISL_427534, EPI_ISL_427535, EPI_ISL_427536, EPI_ISL_427537, EPI_ISL_427538, EPI_ISL_427539, EPI_ISL_427540, EPI_ISL_427541, EPI_ISL_427542, EPI_ISL_427543, EPI_ISL_427544, EPI_ISL_427545, EPI_ISL_427546, EPI_ISL_427547, EPI_ISL_427548, EPI_ISL_427549, EPI_ISL_427550, EPI_ISL_427551, EPI_ISL_427552, EPI_ISL_427553, EPI_ISL_427554, EPI_ISL_427555, EPI_ISL_427556, EPI_ISL_427557, EPI_ISL_427558, EPI_ISL_427559, EPI_ISL_427560, EPI_ISL_427561, EPI_ISL_427562, EPI_ISL_427563, EPI_ISL_427564, EPI_ISL_427565, EPI_ISL_427566, EPI_ISL_427567, EPI_ISL_427568, EPI_ISL_427569, EPI_ISL_427570, EPI_ISL_427571, EPI_ISL_427572, EPI_ISL_427573, EPI_ISL_427574, EPI_ISL_427575, EPI_ISL_427576, EPI_ISL_427577, EPI_ISL_427578, EPI_ISL_427579, EPI_ISL_427580, EPI_ISL_427581, EPI_ISL_427582, EPI_ISL_427583, EPI_ISL_427584, EPI_ISL_427585, EPI_ISL_427586, EPI_ISL_427587, EPI_ISL_427588, EPI_ISL_427589, EPI_ISL_427590, EPI_ISL_427591, EPI_ISL_427592, EPI_ISL_427593, EPI_ISL_427594, EPI_ISL_427595, EPI_ISL_427596, EPI_ISL_427597, EPI_ISL_427598, EPI_ISL_427599, EPI_ISL_427600, EPI_ISL_427601, EPI_ISL_427602, EPI_ISL_427603, EPI_ISL_427604, EPI_ISL_427605, EPI_ISL_427606, EPI_ISL_427607, EPI_ISL_427608, EPI_ISL_427609, EPI_ISL_427610, EPI_ISL_427611, EPI_ISL_427612, EPI_ISL_427613, EPI_ISL_427614, EPI_ISL_427615, EPI_ISL_427616, EPI_ISL_427617, EPI_ISL_427618                                                                                                                                                                                                                                                                                                                                                                                                                                                                                                                                                                                                                                                                                                                                                                                                                                                                                                                                                                                                                                                                                                                                                                                                                                                                                                                                                                                                                                                                                                                                                                                                                                                                                                                                                                                                                                                                                                                                                                                                                                                                                                                                                                                                                                                                                                                                                                                                                                                                                                                                                                                                                                                                                                                                                                                                                                                                                                                                                                                                                                                                                                                                                                                                                                                                                                                                                                                                                                                                                                                                                                                                                                                                                                                                                                                                                                                                                                                                                                                                                                                                                                                                                                                                                                                                                                                                                                                                                                                                                                                                                                                                                                                                                                                                                                                                                                                                                                                                                                                                                                                                                                                                                                                                                                                                                                                                                                                                                                                                                                                                                                                                                                                                                                                                                                                                                                                                                                                                                                                                                                                                                                                                                                                                                                                                                                                                                                                                                                                                                                                                                                                                                                                                                                                                                                                                                                                                                                                                                                                                                                                                                                                                                                                                                                                                                                                                                                                                                                                                                                                                                                                                                                                                                                                                                                                                                                                                                                                                                                                                                                                                                                                                                                                                                                                                                                                                                                                                                                                                                                            | see above                                                              | NewYork-Presbyterian & Mason Lab                                   | Mason Lab                                                                        | Daniel J. Butler, Christopher Mozsary, Cem Meydan, David Danko, Jonathan Foon, Joel Rosiene, Alon Shaiber, Matthew MacKay, Ebrahim Afshinnekoo, Fritz J. Sedlazeck, Nikolay A. Ivanov, Maria Sierra, Craig D. Westover, Krista Ryon, Benjamin Young, Chandrima Bhattacharya, Phyllis Ruggiero, Justyna Gawrys, Iman Hajirasouliha, Dmitry Meleshko, Mirella Salvatore, Dong Xu, Jenny Xiang, John Siple, Lin Cong, Arryn Craney, Priya Velu, Lars F. Westblade, Massimo Loda, Shawn Levy, Melissa Cushing, Marcin Imielinski, Hanna Rennert, Christopher E. Mason                                                                                                                                                                                                                        |
| EPI_ISL_429843                                                                                                                                                                                                                                                                                                                                                                                                                                                                                                                                                                                                                                                                                                                                                                                                                                                                                                                                                                                                                                                                                                                                                                                                                                                                                                                                                                                                                                                                                                                                                                                                                                                                                                                                                                                                                                                                                                                                                                                                                                                                                                                                                                                                                                                                                                                                                                                                                                                                                                                                                                                                                                                                                                                                                                                                                                                                                                                                                                                                                                                                                                                                                                                                                                                                                                                                                                                                                                                                                                                                                                                                                                                                                                                                                                                                                                                                                                                                                                                                                                                                                                                                                                                                                                                                                                                                                                                                                                                                                                                                                                                                                                                                                                                                                                                                                                                                                                                                                                                                                                                                                                                                                                                                                                                                                                                                                                                                                                                                                                                                                                                                                                                                                                                                                                                                                                                                                                                                                                                                                                                                                                                                                                                                                                                                                                                                                                                                                                                                                                                                                                                                                                                                                                                                                                                                                                                                                                                                                                                                                                                                                                                                                                                                                                                                                                                                                                                                                                                                                                                                                                                                                                                                                                                                                                                                                                                                                                                                                                                                                                                                                                                                                                                                                                                                                                                                                                                                                                                                                                                                                                                                                                                                                                                                                                                                                                                                                                                                                                                                                                                                                                                                                                                                                                                                                                                                                                                                                                                                                                                                                                                                                                                                                                                                                                                                                                                                                                                                                                                                                                            | Gundersen Molecular Diagnostics Laboratory                             | Kabara Cancer Research Institute                                   |                                                                                  | Craig S. Richmond, Paraic A. Kenny                                                                                                                                                                                                                                                                                                                                                                                                                                                                                                                                                                                                                                                                                                                                                       |
| EPI_ISL_429844                                                                                                                                                                                                                                                                                                                                                                                                                                                                                                                                                                                                                                                                                                                                                                                                                                                                                                                                                                                                                                                                                                                                                                                                                                                                                                                                                                                                                                                                                                                                                                                                                                                                                                                                                                                                                                                                                                                                                                                                                                                                                                                                                                                                                                                                                                                                                                                                                                                                                                                                                                                                                                                                                                                                                                                                                                                                                                                                                                                                                                                                                                                                                                                                                                                                                                                                                                                                                                                                                                                                                                                                                                                                                                                                                                                                                                                                                                                                                                                                                                                                                                                                                                                                                                                                                                                                                                                                                                                                                                                                                                                                                                                                                                                                                                                                                                                                                                                                                                                                                                                                                                                                                                                                                                                                                                                                                                                                                                                                                                                                                                                                                                                                                                                                                                                                                                                                                                                                                                                                                                                                                                                                                                                                                                                                                                                                                                                                                                                                                                                                                                                                                                                                                                                                                                                                                                                                                                                                                                                                                                                                                                                                                                                                                                                                                                                                                                                                                                                                                                                                                                                                                                                                                                                                                                                                                                                                                                                                                                                                                                                                                                                                                                                                                                                                                                                                                                                                                                                                                                                                                                                                                                                                                                                                                                                                                                                                                                                                                                                                                                                                                                                                                                                                                                                                                                                                                                                                                                                                                                                                                                                                                                                                                                                                                                                                                                                                                                                                                                                                                                            | Gundersen Molecular Diagnostics Laboratory                             | Kabara Cancer Research Institute                                   |                                                                                  | Craig S. Richmond; Paraic A. Kenny                                                                                                                                                                                                                                                                                                                                                                                                                                                                                                                                                                                                                                                                                                                                                       |
| EPI_ISL_429845, EPI_ISL_429846, EPI_ISL_429847, EPI_ISL_429848, EPI_ISL_435394, EPI_ISL_435395, EPI_ISL_435396, EPI_ISL_435397, EPI_ISL_435398, EPI_ISL_435399, EPI_ISL_435400, EPI_ISL_435401, EPI_ISL_435402                                                                                                                                                                                                                                                                                                                                                                                                                                                                                                                                                                                                                                                                                                                                                                                                                                                                                                                                                                                                                                                                                                                                                                                                                                                                                                                                                                                                                                                                                                                                                                                                                                                                                                                                                                                                                                                                                                                                                                                                                                                                                                                                                                                                                                                                                                                                                                                                                                                                                                                                                                                                                                                                                                                                                                                                                                                                                                                                                                                                                                                                                                                                                                                                                                                                                                                                                                                                                                                                                                                                                                                                                                                                                                                                                                                                                                                                                                                                                                                                                                                                                                                                                                                                                                                                                                                                                                                                                                                                                                                                                                                                                                                                                                                                                                                                                                                                                                                                                                                                                                                                                                                                                                                                                                                                                                                                                                                                                                                                                                                                                                                                                                                                                                                                                                                                                                                                                                                                                                                                                                                                                                                                                                                                                                                                                                                                                                                                                                                                                                                                                                                                                                                                                                                                                                                                                                                                                                                                                                                                                                                                                                                                                                                                                                                                                                                                                                                                                                                                                                                                                                                                                                                                                                                                                                                                                                                                                                                                                                                                                                                                                                                                                                                                                                                                                                                                                                                                                                                                                                                                                                                                                                                                                                                                                                                                                                                                                                                                                                                                                                                                                                                                                                                                                                                                                                                                                                                                                                                                                                                                                                                                                                                                                                                                                                                                                                            | see above                                                              | Gundersen Molecular Diagnostics Laboratory                         | Kabara Cancer Research Institute                                                 | Craig S. Richmond, Paraic A. Kenny                                                                                                                                                                                                                                                                                                                                                                                                                                                                                                                                                                                                                                                                                                                                                       |
| EPI_ISL_436466, EPI_ISL_436467, EPI_ISL_436468, EPI_ISL_436469, EPI_ISL_436470, EPI_ISL_436471, EPI_ISL_436472, EPI_ISL_436473, EPI_ISL_436474, EPI_ISL_436475, EPI_ISL_436476, EPI_ISL_436477, EPI_ISL_436478, EPI_ISL_436479, EPI_ISL_436480, EPI_ISL_436481, EPI_ISL_436482, EPI_ISL_436483, EPI_ISL_436484, EPI_ISL_436485, EPI_ISL_436486, EPI_ISL_436487, EPI_ISL_436488, EPI_ISL_436489, EPI_ISL_436490, EPI_ISL_436491, EPI_ISL_436492, EPI_ISL_436493, EPI_ISL_436494, EPI_ISL_436495, EPI_ISL_436496, EPI_ISL_436497, EPI_ISL_436498, EPI_ISL_436499, EPI_ISL_436500, EPI_ISL_436501, EPI_ISL_436502, EPI_ISL_436503, EPI_ISL_436504                                                                                                                                                                                                                                                                                                                                                                                                                                                                                                                                                                                                                                                                                                                                                                                                                                                                                                                                                                                                                                                                                                                                                                                                                                                                                                                                                                                                                                                                                                                                                                                                                                                                                                                                                                                                                                                                                                                                                                                                                                                                                                                                                                                                                                                                                                                                                                                                                                                                                                                                                                                                                                                                                                                                                                                                                                                                                                                                                                                                                                                                                                                                                                                                                                                                                                                                                                                                                                                                                                                                                                                                                                                                                                                                                                                                                                                                                                                                                                                                                                                                                                                                                                                                                                                                                                                                                                                                                                                                                                                                                                                                                                                                                                                                                                                                                                                                                                                                                                                                                                                                                                                                                                                                                                                                                                                                                                                                                                                                                                                                                                                                                                                                                                                                                                                                                                                                                                                                                                                                                                                                                                                                                                                                                                                                                                                                                                                                                                                                                                                                                                                                                                                                                                                                                                                                                                                                                                                                                                                                                                                                                                                                                                                                                                                                                                                                                                                                                                                                                                                                                                                                                                                                                                                                                                                                                                                                                                                                                                                                                                                                                                                                                                                                                                                                                                                                                                                                                                                                                                                                                                                                                                                                                                                                                                                                                                                                                                                                                                                                                                                                                                                                                                                                                                                                                                                                                                                                            | see above                                                              | UPMC Clinical Laboratory                                           | Microbial Genome Sequencing Center, Microbial Genomic Epidemiological Laboratory | Dan Snyder, Stephanie L Mitchell, Mustapha M Mustapha, Marissa P Griffith, Vatsala R Srinivasa, Kady D Waggle, Chinelo Ezeonwuku, Jane W. Marsh, Lee H. Harrison, Vaughn S. Cooper                                                                                                                                                                                                                                                                                                                                                                                                                                                                                                                                                                                                       |
| EPI_ISL_436891, EPI_ISL_436892, EPI_ISL_436893, EPI_ISL_436894, EPI_ISL_436895, EPI_ISL_436896, EPI_ISL_436897, EPI_ISL_436898, EPI_ISL_436899, EPI_ISL_436900                                                                                                                                                                                                                                                                                                                                                                                                                                                                                                                                                                                                                                                                                                                                                                                                                                                                                                                                                                                                                                                                                                                                                                                                                                                                                                                                                                                                                                                                                                                                                                                                                                                                                                                                                                                                                                                                                                                                                                                                                                                                                                                                                                                                                                                                                                                                                                                                                                                                                                                                                                                                                                                                                                                                                                                                                                                                                                                                                                                                                                                                                                                                                                                                                                                                                                                                                                                                                                                                                                                                                                                                                                                                                                                                                                                                                                                                                                                                                                                                                                                                                                                                                                                                                                                                                                                                                                                                                                                                                                                                                                                                                                                                                                                                                                                                                                                                                                                                                                                                                                                                                                                                                                                                                                                                                                                                                                                                                                                                                                                                                                                                                                                                                                                                                                                                                                                                                                                                                                                                                                                                                                                                                                                                                                                                                                                                                                                                                                                                                                                                                                                                                                                                                                                                                                                                                                                                                                                                                                                                                                                                                                                                                                                                                                                                                                                                                                                                                                                                                                                                                                                                                                                                                                                                                                                                                                                                                                                                                                                                                                                                                                                                                                                                                                                                                                                                                                                                                                                                                                                                                                                                                                                                                                                                                                                                                                                                                                                                                                                                                                                                                                                                                                                                                                                                                                                                                                                                                                                                                                                                                                                                                                                                                                                                                                                                                                                                                            | see above                                                              | Gundersen Molecular Diagnostics Laboratory                         | Kabara Cancer Research Institute                                                 | Craig S. Richmond, Paraic A. Kenny                                                                                                                                                                                                                                                                                                                                                                                                                                                                                                                                                                                                                                                                                                                                                       |
| EPI_ISL_441355, EPI_ISL_441356, EPI_ISL_441357, EPI_ISL_441358, EPI_ISL_441359, EPI_ISL_441360, EPI_ISL_441361, EPI_ISL_441362, EPI_ISL_441363, EPI_ISL_441364, EPI_ISL_441365, EPI_ISL_441366, EPI_ISL_441367, EPI_ISL_441368, EPI_ISL_441369, EPI_ISL_441370, EPI_ISL_441371, EPI_ISL_441372, EPI_ISL_441373, EPI_ISL_441374, EPI_ISL_441375, EPI_ISL_441376, EPI_ISL_441377, EPI_ISL_441378, EPI_ISL_441379, EPI_ISL_441380, EPI_ISL_441381, EPI_ISL_441382, EPI_ISL_441383, EPI_ISL_441384, EPI_ISL_441385, EPI_ISL_441386, EPI_ISL_441387, EPI_ISL_441388, EPI_ISL_441389, EPI_ISL_441390, EPI_ISL_441391, EPI_ISL_441392, EPI_ISL_441393, EPI_ISL_441394, EPI_ISL_441395, EPI_ISL_441396, EPI_ISL_441397, EPI_ISL_441398, EPI_ISL_441399, EPI_ISL_441400, EPI_ISL_441401, EPI_ISL_441402, EPI_ISL_441403, EPI_ISL_441404, EPI_ISL_441405, EPI_ISL_441406, EPI_ISL_441407, EPI_ISL_441408, EPI_ISL_441409, EPI_ISL_441410, EPI_ISL_441411, EPI_ISL_441412, EPI_ISL_441413, EPI_ISL_441414, EPI_ISL_441415, EPI_ISL_441416, EPI_ISL_441417, EPI_ISL_441418, EPI_ISL_441419, EPI_ISL_441420, EPI_ISL_441421, EPI_ISL_441422, EPI_ISL_441423, EPI_ISL_441424, EPI_ISL_441425, EPI_ISL_441426, EPI_ISL_441427, EPI_ISL_441428, EPI_ISL_441429, EPI_ISL_441430, EPI_ISL_441431, EPI_ISL_441432, EPI_ISL_441433, EPI_ISL_441434, EPI_ISL_441435, EPI_ISL_441436                                                                                                                                                                                                                                                                                                                                                                                                                                                                                                                                                                                                                                                                                                                                                                                                                                                                                                                                                                                                                                                                                                                                                                                                                                                                                                                                                                                                                                                                                                                                                                                                                                                                                                                                                                                                                                                                                                                                                                                                                                                                                                                                                                                                                                                                                                                                                                                                                                                                                                                                                                                                                                                                                                                                                                                                                                                                                                                                                                                                                                                                                                                                                                                                                                                                                                                                                                                                                                                                                                                                                                                                                                                                                                                                                                                                                                                                                                                                                                                                                                                                                                                                                                                                                                                                                                                                                                                                                                                                                                                                                                                                                                                                                                                                                                                                                                                                                                                                                                                                                                                                                                                                                                                                                                                                                                                                                                                                                                                                                                                                                                                                                                                                                                                                                                                                                                                                                                                                                                                                                                                                                                                                                                                                                                                                                                                                                                                                                                                                                                                                                                                                                                                                                                                                                                                                                                                                                                                                                                                                                                                                                                                                                                                                                                                                                                                                                                                                                                                                                                                                                                                                                                                                                                                                                                                                                                                                                                                                                                                                                                                                                                                                                                                                                                                                                                                                                                                                                                                                                                                                                                                                                                                                                            | see above                                                              | Regional Virus Laboratory, Belfast Health and Social Care Trust    | COVID-19 Genomics UK (COG-UK) Consortium                                         | Conall McCaughey, James McKenna, Tanya Curran, Susan Feeney, Alison Watt, Ciara Cox, Mairead Connor, Zoltan Molnar, David Simpson, Derek Fairley                                                                                                                                                                                                                                                                                                                                                                                                                                                                                                                                                                                                                                         |
| EPI_ISL_441659, EPI_ISL_441662, EPI_ISL_441663, EPI_ISL_441670, EPI_ISL_441675, EPI_ISL_441676, EPI_ISL_441685, EPI_ISL_441690, EPI_ISL_441691, EPI_ISL_441693, EPI_ISL_441694, EPI_ISL_441696, EPI_ISL_441697, EPI_ISL_441700, EPI_ISL_441701, EPI_ISL_441714, EPI_ISL_441716, EPI_ISL_441719, EPI_ISL_441730, EPI_ISL_441733, EPI_ISL_441737, EPI_ISL_441751, EPI_ISL_441753, EPI_ISL_441754, EPI_ISL_441755, EPI_ISL_441756, EPI_ISL_441757, EPI_ISL_441758, EPI_ISL_441759, EPI_ISL_441760, EPI_ISL_441761, EPI_ISL_441762, EPI_ISL_441763, EPI_ISL_441764, EPI_ISL_441765, EPI_ISL_441766, EPI_ISL_441767, EPI_ISL_441768, EPI_ISL_441769, EPI_ISL_441770, EPI_ISL_441771, EPI_ISL_441772, EPI_ISL_441773, EPI_ISL_441774, EPI_ISL_441775, EPI_ISL_441776, EPI_ISL_441777, EPI_ISL_441778, EPI_ISL_441779, EPI_ISL_441780, EPI_ISL_441781, EPI_ISL_441782, EPI_ISL_441783, EPI_ISL_441784, EPI_ISL_441785, EPI_ISL_441786, EPI_ISL_441787, EPI_ISL_441788, EPI_ISL_441789, EPI_ISL_441790, EPI_ISL_441791, EPI_ISL_441792, EPI_ISL_441793, EPI_ISL_441794, EPI_ISL_441795, EPI_ISL_441796, EPI_ISL_441797, EPI_ISL_441798, EPI_ISL_441799, EPI_ISL_441800, EPI_ISL_441801, EPI_ISL_441802, EPI_ISL_441803, EPI_ISL_441804, EPI_ISL_441805, EPI_ISL_441806, EPI_ISL_441807, EPI_ISL_441808, EPI_ISL_441809, EPI_ISL_441810, EPI_ISL_441811, EPI_ISL_441812, EPI_ISL_441813, EPI_ISL_441814, EPI_ISL_441815, EPI_ISL_441816, EPI_ISL_441817, EPI_ISL_441818, EPI_ISL_441819, EPI_ISL_441820, EPI_ISL_441821, EPI_ISL_441822, EPI_ISL_441823, EPI_ISL_441824, EPI_ISL_441825, EPI_ISL_441826, EPI_ISL_441827, EPI_ISL_441828, EPI_ISL_441829, EPI_ISL_441830, EPI_ISL_441831, EPI_ISL_441832, EPI_ISL_441833, EPI_ISL_441834, EPI_ISL_441835, EPI_ISL_441836, EPI_ISL_441837, EPI_ISL_441838, EPI_ISL_441839, EPI_ISL_441840, EPI_ISL_441841, EPI_ISL_441842, EPI_ISL_441843, EPI_ISL_441844, EPI_ISL_441845, EPI_ISL_441846, EPI_ISL_441847, EPI_ISL_441848, EPI_ISL_441849, EPI_ISL_441850, EPI_ISL_441851, EPI_ISL_441852, EPI_ISL_441853, EPI_ISL_441854, EPI_ISL_441855, EPI_ISL_441856, EPI_ISL_441857, EPI_ISL_441858, EPI_ISL_441859, EPI_ISL_441860, EPI_ISL_441861, EPI_ISL_441862, EPI_ISL_441863, EPI_ISL_441864, EPI_ISL_441865, EPI_ISL_441866, EPI_ISL_441867, EPI_ISL_441868, EPI_ISL_441869, EPI_ISL_441870, EPI_ISL_441871, EPI_ISL_441872, EPI_ISL_441873, EPI_ISL_441874, EPI_ISL_441875, EPI_ISL_441876, EPI_ISL_441877, EPI_ISL_441878, EPI_ISL_441879, EPI_ISL_441880, EPI_ISL_441881, EPI_ISL_441882, EPI_ISL_441883, EPI_ISL_441884, EPI_ISL_441885, EPI_ISL_441886, EPI_ISL_441887, EPI_ISL_441888, EPI_ISL_441889, EPI_ISL_441890, EPI_ISL_441891, EPI_ISL_441892, EPI_ISL_441893, EPI_ISL_441894, EPI_ISL_441895, EPI_ISL_441896, EPI_ISL_441897, EPI_ISL_441898, EPI_ISL_441899, EPI_ISL_441900, EPI_ISL_441901, EPI_ISL_441902, EPI_ISL_441903, EPI_ISL_441904, EPI_ISL_441905, EPI_ISL_441906, EPI_ISL_441907, EPI_ISL_441908, EPI_ISL_441909, EPI_ISL_441910, EPI_ISL_441911, EPI_ISL_441912, EPI_ISL_441913, EPI_ISL_441914, EPI_ISL_441915, EPI_ISL_441916, EPI_ISL_441917, EPI_ISL_441918, EPI_ISL_441919, EPI_ISL_441920, EPI_ISL_441921, EPI_ISL_441922, EPI_ISL_441923, EPI_ISL_441924, EPI_ISL_441925, EPI_ISL_441926, EPI_ISL_441927, EPI_ISL_441928, EPI_ISL_441929, EPI_ISL_441930, EPI_ISL_441931, EPI_ISL_441932, EPI_ISL_441933, EPI_ISL_441934, EPI_ISL_441935, EPI_ISL_441936, EPI_ISL_441937, EPI_ISL_441938, EPI_ISL_441939, EPI_ISL_441940, EPI_ISL_441941, EPI_ISL_441942, EPI_ISL_441943, EPI_ISL_441944, EPI_ISL_441945, EPI_ISL_441946, EPI_ISL_441947, EPI_ISL_441948, EPI_ISL_441949, EPI_ISL_441950, EPI_ISL_441951, EPI_ISL_441952, EPI_ISL_441953, EPI_ISL_441954, EPI_ISL_441955, EPI_ISL_441956, EPI_ISL_441957, EPI_ISL_441958, EPI_ISL_441959, EPI_ISL_441960, EPI_ISL_441961, EPI_ISL_441962, EPI_ISL_441963, EPI_ISL_441964, EPI_ISL_441965, EPI_ISL_441966, EPI_ISL_441967, EPI_ISL_441968, EPI_ISL_441969, EPI_ISL_441970, EPI_ISL_441971, EPI_ISL_441972, EPI_ISL_441973, EPI_ISL_441974, EPI_ISL_441975, EPI_ISL_441976, EPI_ISL_441977, EPI_ISL_441978, EPI_ISL_441979, EPI_ISL_441980, EPI_ISL_441981, EPI_ISL_441982, EPI_ISL_441983, EPI_ISL_441984, EPI_ISL_441985, EPI_ISL_441986, EPI_ISL_441987, EPI_ISL_441988, EPI_ISL_441989, EPI_ISL_441990, EPI_ISL_441991, EPI_ISL_441992, EPI_ISL_441993, EPI_ISL_441994, EPI_ISL_441995, EPI_ISL_441996, EPI_ISL_441997, EPI_ISL_441998, EPI_ISL_441999, EPI_ISL_442000, EPI_ISL_442001, EPI_ISL_442002, EPI_ISL_442003, EPI_ISL_442004, EPI_ISL_442005, EPI_ISL_442006, EPI_ISL_442007, EPI_ISL_442008, EPI_ISL_442009, EPI_ISL_442010, EPI_ISL_442011, EPI_ISL_442012, EPI_ISL_442013, EPI_ISL_442014, EPI_ISL_442015, EPI_ISL_442016, EPI_ISL_442017, EPI_ISL_442018, EPI_ISL_442019, EPI_ISL_442020, EPI_ISL_442021, EPI_ISL_442022, EPI_ISL_442023, EPI_ISL_442024, EPI_ISL_442025, EPI_ISL_442026, EPI_ISL_442027, EPI_ISL_442028, EPI_ISL_442029, EPI_ISL_442030, EPI_ISL_442031, EPI_ISL_442032, EPI_ISL_442033, EPI_ISL_442034, EPI_ISL_442035, EPI_ISL_442036, EPI_ISL_442037, EPI_ISL_442038, EPI_ISL_442039, EPI_ISL_442040, EPI_ISL_442041, EPI_ISL_442042, EPI_ISL_442043, EPI_ISL_442044, EPI_ISL_442045, EPI_ISL_442046, EPI_ISL_442047, EPI_ISL_442048, EPI_ISL_442049, EPI_ISL_442050, EPI_ISL_442051, EPI_ISL_442052, EPI_ISL_442053, EPI_ISL_442054, EPI_ISL_442055, EPI_ISL_442056, EPI_ISL_442057, EPI_ISL_442058, EPI_ISL_442059, EPI_ISL_442060, EPI_ISL_442061, EPI_ISL_442062, EPI_ISL_442063, EPI_ISL_442064, EPI_ISL_442065, EPI_ISL_442066, EPI_ISL_442067, EPI_ISL_442068, EPI_ISL_442069, EPI_ISL_442070, EPI_ISL_442071, EPI_ISL_442072, EPI_ISL_442073, EPI_ISL_442074, EPI_ISL_442075, EPI_ISL_442076, EPI_ISL_442077, EPI_ISL_442078, EPI_ISL_442079, EPI_ISL_442080, EPI_ISL_442081, EPI_ISL_442082, EPI_ISL_442083, EPI_ISL_442084, EPI_ISL_442085, EPI_ISL_442086, EPI_ISL_442087, EPI_ISL_442088, EPI_ISL_442089, EPI_ISL_442090, EPI_ISL_442091, EPI_ISL_442092, EPI_ISL_442093, EPI_ISL_442094, EPI_ISL_442095, EPI_ISL_442096, EPI_ISL_442097, EPI_ISL_442098, EPI_ISL_442099, EPI_ISL_442100, EPI_ISL_442101, EPI_ISL_442102, EPI_ISL_442103, EPI_ISL_442104, EPI_ISL_442105, EPI_ISL_442106, EPI_ISL_442107, EPI_ISL_442108, EPI_ISL_442109, EPI_ISL_442110, EPI_ISL_442111, EPI_ISL_442112, EPI_ISL_442113, EPI_ISL_442114, EPI_ISL_442115, EPI_ISL_442116, EPI_ISL_442117, EPI_ISL_442118, EPI_ISL_442119, EPI_ISL_442120, EPI_ISL_442121, EPI_ISL_442122, EPI_ISL_442123, EPI_ISL_442124, EPI_ISL_442125, EPI_ISL_442126, EPI_ISL_442127, EPI_ISL_442128, EPI_ISL_442129, EPI_ISL_442130, EPI_ISL_442131, EPI_ISL_442132, EPI_ISL_442133, EPI_ISL_442134, EPI_ISL_442135, EPI_ISL_442136, EPI_ISL_442137, EPI_ISL_442138, EPI_ISL_442139, EPI_ISL_442140, EPI_ISL_442141, EPI_ISL_442142, EPI_ISL_442143, EPI_ISL_442144, EPI_ISL_442145, EPI_ISL_442146, EPI_ISL_442147, EPI_ISL_442148, EPI_ISL_442149, EPI_ISL_442150, EPI_ISL_442151, EPI_ISL_442152, EPI_ISL_442153, EPI_ISL_442154, EPI_ISL_442155, EPI_ISL_442156, EPI_ISL_442157, EPI_ISL_442158, EPI_ISL_442159, EPI_ISL_442160, EPI_ISL_442161, EPI_ISL_442162, EPI_ISL_442163, EPI_ISL_442164, EPI_ISL_442165, EPI_ISL_442166, EPI_ISL_442167, EPI_ISL_442168, EPI_ISL_442169, EPI_ISL_442170, EPI_ISL_442171, EPI_ISL_442172, EPI_ISL_442173, EPI_ISL_442174, EPI_ISL_442175, EPI_ISL_442176, EPI_ISL_442177, EPI_ISL_442178, EPI_ISL_442179, EPI_ISL_442180, EPI_ISL_442181, EPI_ISL_442182, EPI_ISL_442183, EPI_ISL_442184, EPI_ISL_442185, EPI_ISL_442186, EPI_ISL_442187, EPI_ISL_442188, EPI_ISL_442189, EPI_ISL_442190, EPI_ISL_442191, EPI_ISL_442192, EPI_ISL_442193, EPI_ISL_442194, EPI_ISL_442195, EPI_ISL_442196, EPI_ISL_442197, EPI_ISL_442198, EPI_ISL_442199, EPI_ISL_442200, EPI_ISL_442201, EPI_ISL_442202, EPI_ISL_442203, EPI_ISL_442204, EPI_ISL_442205, EPI_ISL_442206, EPI_ISL_442207, EPI_ISL_442208, EPI_ISL_442209, EPI_ISL_442210, EPI_ISL_442211, EPI_ISL_442212, EPI_ISL_442213, EPI_ISL_442214, EPI_ISL_442215, EPI_ISL_442216, EPI_ISL_442217, EPI_ISL_442218, EPI_ISL_442219, EPI_ISL_442220, EPI_ISL_442221, EPI_ISL_442222, EPI_ISL_442223, EPI_ISL_442224, EPI_ISL_442225, EPI_ISL_442226, EPI_ISL_442227, EPI_ISL_442228, EPI_ISL_442229, EPI_ISL_442230, EPI_ISL_442231, EPI_ISL_442232, EPI_ISL_442233, EPI_ISL_442234, EPI_ISL_442235, EPI_ISL_442236, EPI_ISL_442237, EPI_ISL_442238, EPI_ISL_442239, EPI_ISL_442240, EPI_ISL_442241, EPI_ISL_442242, EPI_ISL_442243, EPI_ISL_442244, EPI_ISL_442245, EPI_ISL_442246, EPI_ISL_442247, EPI_ISL_442248, EPI_ISL_442249, EPI_ISL_442250, EPI_ISL_442251, EPI_ISL_442252, EPI_ISL_442253, EPI_ISL_442254, EPI_ISL_442255, EPI_ISL_442256, EPI_ISL_442257, EPI_ISL_442258, EPI_ISL_442259, EPI_ISL_442260, EPI_ISL_442261, EPI_ISL_442262, EPI_ISL_442263, EPI_ISL_442264, EPI_ISL_442265, EPI_ISL_442266, EPI_ISL_442267, EPI_ISL_442268, EPI_ISL_442269, EPI_ISL_442270, EPI_ISL_442271, EPI_ISL_442272, EPI_ISL_442273, EPI_ISL_442274, EPI_ISL_442275, EPI_ISL_442276, EPI_ISL_442277, EPI_ISL_442278, EPI_ISL_442279, EPI_ISL_442280, EPI_ISL_442281, EPI_ISL_442282, EPI_ISL_442283, EPI_ISL_442284, EPI_ISL_442285, EPI_ISL_442286, EPI_ISL_442287, EPI_ISL_442288, EPI_ISL_442289, EPI_ISL_442290, EPI_ISL_442291, EPI_ISL_442292, EPI_ISL_442293, EPI_ISL_442294, EPI_ISL_442295, EPI_ISL_442296, EPI_ISL_442297, EPI_ISL_442298, EPI_ISL_442299, EPI_ISL_442300, EPI_ISL_442301, EPI_ISL_442302, EPI_ISL_442303, EPI_ISL_442304, EPI_ISL_442305, EPI_ISL_442306, EPI_ISL_442307, EPI_ISL_442308, EPI_ISL_442309, EPI_ISL_442310, EPI_ISL_442311, EPI_ISL_442312, EPI_ISL_442313, EPI_ISL_442314, EPI_ISL_442315, EPI_ISL_442316, EPI_ISL_442317, EPI_ISL_442318, EPI_ISL_442319, EPI_ISL_442320, EPI_ISL_442321, EPI_ISL_442322, EPI_ISL_442323, EPI_ISL_442324, EPI_ISL_442325, EPI_ISL_442326, EPI_ISL_442327, EPI_ISL_442328, EPI_ISL_442329, EPI_ISL_442330, EPI_ISL_442331, EPI_ISL_442332, EPI_ISL_442333, EPI_ISL_4 |                                                                        |                                                                    |                                                                                  |                                                                                                                                                                                                                                                                                                                                                                                                                                                                                                                                                                                                                                                                                                                                                                                          |



|                                                                                                                                                                                                                                                                                                                                                                                                                                                                                                                                                                                                                                                                                                                                                                                                                                                                                                                                                                                                                                                                                                                                                                                                                                                                                                                                                                                                                                                                                                                                                                                                                                                                                                                                                                                                                                                                                                                                                                                                                                                                                |                                                                                                    |                                                                                                    |                                                                                                                                                                                                                                                                                                                                                                                                                                                                         |
|--------------------------------------------------------------------------------------------------------------------------------------------------------------------------------------------------------------------------------------------------------------------------------------------------------------------------------------------------------------------------------------------------------------------------------------------------------------------------------------------------------------------------------------------------------------------------------------------------------------------------------------------------------------------------------------------------------------------------------------------------------------------------------------------------------------------------------------------------------------------------------------------------------------------------------------------------------------------------------------------------------------------------------------------------------------------------------------------------------------------------------------------------------------------------------------------------------------------------------------------------------------------------------------------------------------------------------------------------------------------------------------------------------------------------------------------------------------------------------------------------------------------------------------------------------------------------------------------------------------------------------------------------------------------------------------------------------------------------------------------------------------------------------------------------------------------------------------------------------------------------------------------------------------------------------------------------------------------------------------------------------------------------------------------------------------------------------|----------------------------------------------------------------------------------------------------|----------------------------------------------------------------------------------------------------|-------------------------------------------------------------------------------------------------------------------------------------------------------------------------------------------------------------------------------------------------------------------------------------------------------------------------------------------------------------------------------------------------------------------------------------------------------------------------|
| EPI_ISL_450337                                                                                                                                                                                                                                                                                                                                                                                                                                                                                                                                                                                                                                                                                                                                                                                                                                                                                                                                                                                                                                                                                                                                                                                                                                                                                                                                                                                                                                                                                                                                                                                                                                                                                                                                                                                                                                                                                                                                                                                                                                                                 | Hospital Universitari Vall d'Hebron - Vall d'Hebron Institut de Recerca                            | Hospital Universitari Vall d'Hebron - Vall d'Hebron Institut de Recerca                            | Cristina Andrés, María Piñana, Damir Garcia-Cehic, Mercedes Guerrero-Murillo, Ariadna Rando, Juliana Esperalba, María Gema Codina, María Carmen Martín, Tomás Pumarola, Josep Quer, Andrés Antón                                                                                                                                                                                                                                                                        |
| EPI_ISL_451183, EPI_ISL_451184, EPI_ISL_451185, EPI_ISL_451186, EPI_ISL_451187, EPI_ISL_451188, EPI_ISL_451189, EPI_ISL_451190, EPI_ISL_451191, EPI_ISL_451192, EPI_ISL_451193, EPI_ISL_451194, EPI_ISL_451195, EPI_ISL_451196, EPI_ISL_451197, EPI_ISL_451198, EPI_ISL_451199, EPI_ISL_451200, EPI_ISL_451201, EPI_ISL_451202                                                                                                                                                                                                                                                                                                                                                                                                                                                                                                                                                                                                                                                                                                                                                                                                                                                                                                                                                                                                                                                                                                                                                                                                                                                                                                                                                                                                                                                                                                                                                                                                                                                                                                                                                 |                                                                                                    |                                                                                                    |                                                                                                                                                                                                                                                                                                                                                                                                                                                                         |
| see above                                                                                                                                                                                                                                                                                                                                                                                                                                                                                                                                                                                                                                                                                                                                                                                                                                                                                                                                                                                                                                                                                                                                                                                                                                                                                                                                                                                                                                                                                                                                                                                                                                                                                                                                                                                                                                                                                                                                                                                                                                                                      | Uganda Virus Research Institute                                                                    | MRC/UVRi & LSHTM Uganda Research Unit                                                              | Dan Lule Bugembe, John Kaiyiwa, My V.T Phan, Phionah Tushabe, Stephen Balinandi, Beatrice Dhaala, Deogratius Ssemwanga, Jonas Lexow, Henry Mwebesa, Jane Aceng, Henry Kyobe, Julius Lutwama, Pontiano Kaleebu, Matthew Cotten                                                                                                                                                                                                                                           |
| EPI_ISL_453465, EPI_ISL_453466, EPI_ISL_453467, EPI_ISL_453468, EPI_ISL_453469, EPI_ISL_453470, EPI_ISL_453471, EPI_ISL_453472, EPI_ISL_453473, EPI_ISL_453474, EPI_ISL_453475, EPI_ISL_453476, EPI_ISL_453477, EPI_ISL_453478, EPI_ISL_453479, EPI_ISL_453480, EPI_ISL_453481, EPI_ISL_453482, EPI_ISL_453483, EPI_ISL_453484, EPI_ISL_453485                                                                                                                                                                                                                                                                                                                                                                                                                                                                                                                                                                                                                                                                                                                                                                                                                                                                                                                                                                                                                                                                                                                                                                                                                                                                                                                                                                                                                                                                                                                                                                                                                                                                                                                                 |                                                                                                    |                                                                                                    |                                                                                                                                                                                                                                                                                                                                                                                                                                                                         |
| see above                                                                                                                                                                                                                                                                                                                                                                                                                                                                                                                                                                                                                                                                                                                                                                                                                                                                                                                                                                                                                                                                                                                                                                                                                                                                                                                                                                                                                                                                                                                                                                                                                                                                                                                                                                                                                                                                                                                                                                                                                                                                      | Regional Virus Laboratory, Belfast Health and Social Care Trust                                    | COVID-19 Genomics UK (COG-UK) Consortium                                                           | Conall McCaughey, James McKenna, Tanya Curran, Susan Feeney, Alison Watt, Ciara Cox, Mairead Connor, Zoltan Molnar, David Simpson, Derek Fairley                                                                                                                                                                                                                                                                                                                        |
| EPI_ISL_454733                                                                                                                                                                                                                                                                                                                                                                                                                                                                                                                                                                                                                                                                                                                                                                                                                                                                                                                                                                                                                                                                                                                                                                                                                                                                                                                                                                                                                                                                                                                                                                                                                                                                                                                                                                                                                                                                                                                                                                                                                                                                 | Department of Medical, Biotechnologies University of Siena                                         | Department of Medical, Biotechnologies University of Siena                                         | Cusi,M.G., Pinzaui,D., Gandolfo,C., Anichini,G., Pozzi,G. and Santoro,F.                                                                                                                                                                                                                                                                                                                                                                                                |
| EPI_ISL_455568, EPI_ISL_455569, EPI_ISL_455570, EPI_ISL_455571, EPI_ISL_455572                                                                                                                                                                                                                                                                                                                                                                                                                                                                                                                                                                                                                                                                                                                                                                                                                                                                                                                                                                                                                                                                                                                                                                                                                                                                                                                                                                                                                                                                                                                                                                                                                                                                                                                                                                                                                                                                                                                                                                                                 | Gundersen Molecular Diagnostics Laboratory                                                         | Kabara Cancer Research Institute                                                                   | Craig S. Richmond, Paraic A. Kenny                                                                                                                                                                                                                                                                                                                                                                                                                                      |
| EPI_ISL_455573, EPI_ISL_455574                                                                                                                                                                                                                                                                                                                                                                                                                                                                                                                                                                                                                                                                                                                                                                                                                                                                                                                                                                                                                                                                                                                                                                                                                                                                                                                                                                                                                                                                                                                                                                                                                                                                                                                                                                                                                                                                                                                                                                                                                                                 | Gundersen Clinical Microbiology Laboratory                                                         | Kabara Cancer Research Institute                                                                   | Craig S. Richmond, Paraic A. Kenny                                                                                                                                                                                                                                                                                                                                                                                                                                      |
| EPI_ISL_455575, EPI_ISL_455576, EPI_ISL_455577, EPI_ISL_455578, EPI_ISL_455579                                                                                                                                                                                                                                                                                                                                                                                                                                                                                                                                                                                                                                                                                                                                                                                                                                                                                                                                                                                                                                                                                                                                                                                                                                                                                                                                                                                                                                                                                                                                                                                                                                                                                                                                                                                                                                                                                                                                                                                                 | Gundersen Molecular Diagnostics Laboratory                                                         | Kabara Cancer Research Institute                                                                   | Craig S. Richmond, Paraic A. Kenny                                                                                                                                                                                                                                                                                                                                                                                                                                      |
| EPI_ISL_455580, EPI_ISL_455581, EPI_ISL_455582                                                                                                                                                                                                                                                                                                                                                                                                                                                                                                                                                                                                                                                                                                                                                                                                                                                                                                                                                                                                                                                                                                                                                                                                                                                                                                                                                                                                                                                                                                                                                                                                                                                                                                                                                                                                                                                                                                                                                                                                                                 | Gundersen Clinical Microbiology Laboratory                                                         | Kabara Cancer Research Institute                                                                   | Craig S. Richmond, Paraic A. Kenny                                                                                                                                                                                                                                                                                                                                                                                                                                      |
| EPI_ISL_455680                                                                                                                                                                                                                                                                                                                                                                                                                                                                                                                                                                                                                                                                                                                                                                                                                                                                                                                                                                                                                                                                                                                                                                                                                                                                                                                                                                                                                                                                                                                                                                                                                                                                                                                                                                                                                                                                                                                                                                                                                                                                 | Institute of pathogenic microbiology, Jiangsu Provincial Center for Disease Control and Prevention | Institute of pathogenic microbiology, Jiangsu Provincial Center for Disease Control and Prevention | Cui,L.                                                                                                                                                                                                                                                                                                                                                                                                                                                                  |
| EPI_ISL_458130, EPI_ISL_458131, EPI_ISL_458132                                                                                                                                                                                                                                                                                                                                                                                                                                                                                                                                                                                                                                                                                                                                                                                                                                                                                                                                                                                                                                                                                                                                                                                                                                                                                                                                                                                                                                                                                                                                                                                                                                                                                                                                                                                                                                                                                                                                                                                                                                 | Hospital Universitari Vall d'Hebron - Vall d'Hebron Institut de Recerca                            | Hospital Universitari Vall d'Hebron - Vall d'Hebron Institut de Recerca                            | Cristina Andrés, María Piñana, Damir Garcia-Cehic, Mercedes Guerrero-Murillo, Ariadna Rando, Josep Gregori, Juliana Esperalba, María Gema Codina, María Carmen Martín, Tomás Pumarola, Josep Quer, Andrés Antón                                                                                                                                                                                                                                                         |
| EPI_ISL_459324, EPI_ISL_459325, EPI_ISL_459326, EPI_ISL_459327, EPI_ISL_459328, EPI_ISL_459329, EPI_ISL_459330, EPI_ISL_459331, EPI_ISL_459332, EPI_ISL_459333, EPI_ISL_459334, EPI_ISL_459335, EPI_ISL_459336, EPI_ISL_459337, EPI_ISL_459338, EPI_ISL_459339, EPI_ISL_459340, EPI_ISL_459341, EPI_ISL_459342, EPI_ISL_459343, EPI_ISL_459344, EPI_ISL_459345, EPI_ISL_459346, EPI_ISL_459347, EPI_ISL_459348, EPI_ISL_459349, EPI_ISL_459350, EPI_ISL_459351, EPI_ISL_459352, EPI_ISL_459353, EPI_ISL_459354, EPI_ISL_459355, EPI_ISL_459356, EPI_ISL_459357                                                                                                                                                                                                                                                                                                                                                                                                                                                                                                                                                                                                                                                                                                                                                                                                                                                                                                                                                                                                                                                                                                                                                                                                                                                                                                                                                                                                                                                                                                                 |                                                                                                    |                                                                                                    |                                                                                                                                                                                                                                                                                                                                                                                                                                                                         |
| see above                                                                                                                                                                                                                                                                                                                                                                                                                                                                                                                                                                                                                                                                                                                                                                                                                                                                                                                                                                                                                                                                                                                                                                                                                                                                                                                                                                                                                                                                                                                                                                                                                                                                                                                                                                                                                                                                                                                                                                                                                                                                      | Regional Virus Laboratory, Belfast Health and Social Care Trust                                    | Wellcome Sanger Institute for the COVID-19 Genomics UK (COG-UK) consortium                         | Conall McCaughey, James McKenna, Tanya Curran, Susan Feeney, Alison Watt, Ciara Cox, Mairead Connor, Zoltan Molnar, David Simpson, Derek Fairley; and Alex Alderton, Roberto Amato, Sonia Goncalves, Ewan Harrison, David K. Jackson, Ian Johnston, Dominic Kwiatkowski, Cordelia Langford, John Sillitoe on behalf of the Wellcome Sanger Institute COVID-19 Surveillance Team ( <a href="http://www.sanger.ac.uk/covid-team">http://www.sanger.ac.uk/covid-team</a> ) |
| EPI_ISL_459358                                                                                                                                                                                                                                                                                                                                                                                                                                                                                                                                                                                                                                                                                                                                                                                                                                                                                                                                                                                                                                                                                                                                                                                                                                                                                                                                                                                                                                                                                                                                                                                                                                                                                                                                                                                                                                                                                                                                                                                                                                                                 | Regional Virus Laboratory, Belfast Health and Social Care Trust                                    | Wellcome Sanger Institute for the COVID-19 Genomics UK (COG-UK) Consortium                         | Conall McCaughey, James McKenna, Tanya Curran, Susan Feeney, Alison Watt, Ciara Cox, Mairead Connor, Zoltan Molnar, David Simpson, Derek Fairley; and Alex Alderton, Roberto Amato, Sonia Goncalves, Ewan Harrison, David K. Jackson, Ian Johnston, Dominic Kwiatkowski, Cordelia Langford, John Sillitoe on behalf of the Wellcome Sanger Institute COVID-19 Surveillance Team                                                                                         |
| EPI_ISL_459359, EPI_ISL_459360, EPI_ISL_459361, EPI_ISL_459362, EPI_ISL_459363, EPI_ISL_459364, EPI_ISL_459365, EPI_ISL_459366, EPI_ISL_459367, EPI_ISL_459368, EPI_ISL_459369, EPI_ISL_459370, EPI_ISL_459371                                                                                                                                                                                                                                                                                                                                                                                                                                                                                                                                                                                                                                                                                                                                                                                                                                                                                                                                                                                                                                                                                                                                                                                                                                                                                                                                                                                                                                                                                                                                                                                                                                                                                                                                                                                                                                                                 |                                                                                                    |                                                                                                    |                                                                                                                                                                                                                                                                                                                                                                                                                                                                         |
| see above                                                                                                                                                                                                                                                                                                                                                                                                                                                                                                                                                                                                                                                                                                                                                                                                                                                                                                                                                                                                                                                                                                                                                                                                                                                                                                                                                                                                                                                                                                                                                                                                                                                                                                                                                                                                                                                                                                                                                                                                                                                                      | Regional Virus Laboratory, Belfast Health and Social Care Trust                                    | Wellcome Sanger Institute for the COVID-19 Genomics UK (COG-UK) consortium                         | Conall McCaughey, James McKenna, Tanya Curran, Susan Feeney, Alison Watt, Ciara Cox, Mairead Connor, Zoltan Molnar, David Simpson, Derek Fairley; and Alex Alderton, Roberto Amato, Sonia Goncalves, Ewan Harrison, David K. Jackson, Ian Johnston, Dominic Kwiatkowski, Cordelia Langford, John Sillitoe on behalf of the Wellcome Sanger Institute COVID-19 Surveillance Team ( <a href="http://www.sanger.ac.uk/covid-team">http://www.sanger.ac.uk/covid-team</a> ) |
| EPI_ISL_459372                                                                                                                                                                                                                                                                                                                                                                                                                                                                                                                                                                                                                                                                                                                                                                                                                                                                                                                                                                                                                                                                                                                                                                                                                                                                                                                                                                                                                                                                                                                                                                                                                                                                                                                                                                                                                                                                                                                                                                                                                                                                 | Regional Virus Laboratory, Belfast Health and Social Care Trust                                    | Wellcome Sanger Institute for the COVID-19 Genomics UK (COG-UK) Consortium                         | Conall McCaughey, James McKenna, Tanya Curran, Susan Feeney, Alison Watt, Ciara Cox, Mairead Connor, Zoltan Molnar, David Simpson, Derek Fairley; and Alex Alderton, Roberto Amato, Sonia Goncalves, Ewan Harrison, David K. Jackson, Ian Johnston, Dominic Kwiatkowski, Cordelia Langford, John Sillitoe on behalf of the Wellcome Sanger Institute COVID-19 Surveillance Team                                                                                         |
| EPI_ISL_459373, EPI_ISL_459374, EPI_ISL_459375, EPI_ISL_459376, EPI_ISL_459377, EPI_ISL_459378, EPI_ISL_459379, EPI_ISL_459380, EPI_ISL_459381, EPI_ISL_459382, EPI_ISL_459383, EPI_ISL_459384, EPI_ISL_459385, EPI_ISL_459386, EPI_ISL_459387, EPI_ISL_459388, EPI_ISL_459389, EPI_ISL_459390, EPI_ISL_459391, EPI_ISL_459392, EPI_ISL_459393, EPI_ISL_459394, EPI_ISL_459395, EPI_ISL_459396, EPI_ISL_459397, EPI_ISL_459398, EPI_ISL_459399, EPI_ISL_459400, EPI_ISL_459401, EPI_ISL_459402, EPI_ISL_459403, EPI_ISL_459404, EPI_ISL_459405, EPI_ISL_459406, EPI_ISL_459407, EPI_ISL_459408, EPI_ISL_459409                                                                                                                                                                                                                                                                                                                                                                                                                                                                                                                                                                                                                                                                                                                                                                                                                                                                                                                                                                                                                                                                                                                                                                                                                                                                                                                                                                                                                                                                 |                                                                                                    |                                                                                                    |                                                                                                                                                                                                                                                                                                                                                                                                                                                                         |
| see above                                                                                                                                                                                                                                                                                                                                                                                                                                                                                                                                                                                                                                                                                                                                                                                                                                                                                                                                                                                                                                                                                                                                                                                                                                                                                                                                                                                                                                                                                                                                                                                                                                                                                                                                                                                                                                                                                                                                                                                                                                                                      | Regional Virus Laboratory, Belfast Health and Social Care Trust                                    | Wellcome Sanger Institute for the COVID-19 Genomics UK (COG-UK) consortium                         | Conall McCaughey, James McKenna, Tanya Curran, Susan Feeney, Alison Watt, Ciara Cox, Mairead Connor, Zoltan Molnar, David Simpson, Derek Fairley; and Alex Alderton, Roberto Amato, Sonia Goncalves, Ewan Harrison, David K. Jackson, Ian Johnston, Dominic Kwiatkowski, Cordelia Langford, John Sillitoe on behalf of the Wellcome Sanger Institute COVID-19 Surveillance Team ( <a href="http://www.sanger.ac.uk/covid-team">http://www.sanger.ac.uk/covid-team</a> ) |
| EPI_ISL_461773, EPI_ISL_461774, EPI_ISL_461775, EPI_ISL_461776, EPI_ISL_461777, EPI_ISL_461778, EPI_ISL_461779, EPI_ISL_461780, EPI_ISL_461781, EPI_ISL_461782, EPI_ISL_461783, EPI_ISL_461784, EPI_ISL_461785, EPI_ISL_461786, EPI_ISL_461787, EPI_ISL_461788, EPI_ISL_461789, EPI_ISL_461790                                                                                                                                                                                                                                                                                                                                                                                                                                                                                                                                                                                                                                                                                                                                                                                                                                                                                                                                                                                                                                                                                                                                                                                                                                                                                                                                                                                                                                                                                                                                                                                                                                                                                                                                                                                 |                                                                                                    |                                                                                                    |                                                                                                                                                                                                                                                                                                                                                                                                                                                                         |
| see above                                                                                                                                                                                                                                                                                                                                                                                                                                                                                                                                                                                                                                                                                                                                                                                                                                                                                                                                                                                                                                                                                                                                                                                                                                                                                                                                                                                                                                                                                                                                                                                                                                                                                                                                                                                                                                                                                                                                                                                                                                                                      | Regional Virus Laboratory, Belfast Health and Social Care Trust                                    | COVID-19 Genomics UK (COG-UK) Consortium                                                           | Conall McCaughey, James McKenna, Tanya Curran, Susan Feeney, Alison Watt, Ciara Cox, Mairead Connor, Zoltan Molnar, David Simpson, Derek Fairley                                                                                                                                                                                                                                                                                                                        |
| EPI_ISL_468305, EPI_ISL_468307                                                                                                                                                                                                                                                                                                                                                                                                                                                                                                                                                                                                                                                                                                                                                                                                                                                                                                                                                                                                                                                                                                                                                                                                                                                                                                                                                                                                                                                                                                                                                                                                                                                                                                                                                                                                                                                                                                                                                                                                                                                 | Centro de Vigilancia a Saude de Diadema                                                            | Instituto Adolfo Lutz, Interdisciplinary Procedures Center, Strategic Laboratory                   | Claudio Tavares Sacchi, Claudia Regina Gonçalves, Erica Valessa Ramos Gomes                                                                                                                                                                                                                                                                                                                                                                                             |
| EPI_ISL_468308                                                                                                                                                                                                                                                                                                                                                                                                                                                                                                                                                                                                                                                                                                                                                                                                                                                                                                                                                                                                                                                                                                                                                                                                                                                                                                                                                                                                                                                                                                                                                                                                                                                                                                                                                                                                                                                                                                                                                                                                                                                                 | Hospital Municipal do Tatuape Carmino Caricchio                                                    | Instituto Adolfo Lutz, Interdisciplinary Procedures Center, Strategic Laboratory                   | Claudio Tavares Sacchi, Claudia Regina Gonçalves, Erica Valessa Ramos Gomes                                                                                                                                                                                                                                                                                                                                                                                             |
| EPI_ISL_468310                                                                                                                                                                                                                                                                                                                                                                                                                                                                                                                                                                                                                                                                                                                                                                                                                                                                                                                                                                                                                                                                                                                                                                                                                                                                                                                                                                                                                                                                                                                                                                                                                                                                                                                                                                                                                                                                                                                                                                                                                                                                 | Hospital Sao Paulo de Ensino da UNIFESP                                                            | Instituto Adolfo Lutz, Interdisciplinary Procedures Center, Strategic Laboratory                   | Claudio Tavares Sacchi, Claudia Regina Gonçalves, Erica Valessa Ramos Gomes                                                                                                                                                                                                                                                                                                                                                                                             |
| EPI_ISL_468311                                                                                                                                                                                                                                                                                                                                                                                                                                                                                                                                                                                                                                                                                                                                                                                                                                                                                                                                                                                                                                                                                                                                                                                                                                                                                                                                                                                                                                                                                                                                                                                                                                                                                                                                                                                                                                                                                                                                                                                                                                                                 | Hospital Municipal Dr Ignacio Proenca de Gouvea                                                    | Instituto Adolfo Lutz, Interdisciplinary Procedures Center, Strategic Laboratory                   | Claudio Tavares Sacchi, Claudia Regina Gonçalves, Erica Valessa Ramos Gomes                                                                                                                                                                                                                                                                                                                                                                                             |
| EPI_ISL_468315                                                                                                                                                                                                                                                                                                                                                                                                                                                                                                                                                                                                                                                                                                                                                                                                                                                                                                                                                                                                                                                                                                                                                                                                                                                                                                                                                                                                                                                                                                                                                                                                                                                                                                                                                                                                                                                                                                                                                                                                                                                                 | Hospital Municipal do Tatuape Carmino Caricchio                                                    | Instituto Adolfo Lutz, Interdisciplinary Procedures Center, Strategic Laboratory                   | Claudio Tavares Sacchi, Claudia Regina Gonçalves, Erica Valessa Ramos Gomes                                                                                                                                                                                                                                                                                                                                                                                             |
| EPI_ISL_468320                                                                                                                                                                                                                                                                                                                                                                                                                                                                                                                                                                                                                                                                                                                                                                                                                                                                                                                                                                                                                                                                                                                                                                                                                                                                                                                                                                                                                                                                                                                                                                                                                                                                                                                                                                                                                                                                                                                                                                                                                                                                 | Secretaria Municipal de Saude de Hortolandia                                                       | Instituto Adolfo Lutz, Interdisciplinary Procedures Center, Strategic Laboratory                   | Claudio Tavares Sacchi, Claudia Regina Gonçalves, Erica Valessa Ramos Gomes                                                                                                                                                                                                                                                                                                                                                                                             |
| EPI_ISL_469844, EPI_ISL_469845, EPI_ISL_469846, EPI_ISL_469847, EPI_ISL_469848, EPI_ISL_469849, EPI_ISL_469850, EPI_ISL_469851, EPI_ISL_469852, EPI_ISL_469853, EPI_ISL_469854, EPI_ISL_469855, EPI_ISL_469856, EPI_ISL_469857, EPI_ISL_469858, EPI_ISL_469859, EPI_ISL_469860, EPI_ISL_469861, EPI_ISL_469862, EPI_ISL_469863, EPI_ISL_469864, EPI_ISL_469865, EPI_ISL_469866, EPI_ISL_469867, EPI_ISL_469868, EPI_ISL_469869, EPI_ISL_469870, EPI_ISL_469871, EPI_ISL_469872, EPI_ISL_469873, EPI_ISL_469874, EPI_ISL_469875, EPI_ISL_469876, EPI_ISL_469877, EPI_ISL_469878, EPI_ISL_469879, EPI_ISL_469880, EPI_ISL_469881, EPI_ISL_469882, EPI_ISL_469883, EPI_ISL_469884, EPI_ISL_469885, EPI_ISL_469886, EPI_ISL_469887, EPI_ISL_469888, EPI_ISL_469889, EPI_ISL_469890, EPI_ISL_470013, EPI_ISL_470014, EPI_ISL_470015, EPI_ISL_470016, EPI_ISL_470017, EPI_ISL_470018, EPI_ISL_470019, EPI_ISL_470020, EPI_ISL_470021, EPI_ISL_470022, EPI_ISL_470023, EPI_ISL_470024, EPI_ISL_470025, EPI_ISL_470026, EPI_ISL_470027, EPI_ISL_470028, EPI_ISL_470029, EPI_ISL_470030, EPI_ISL_470031, EPI_ISL_470032, EPI_ISL_470033, EPI_ISL_470034, EPI_ISL_470035, EPI_ISL_470036, EPI_ISL_470037, EPI_ISL_470038, EPI_ISL_470039, EPI_ISL_470040, EPI_ISL_470041, EPI_ISL_470042, EPI_ISL_470043, EPI_ISL_470044, EPI_ISL_470045, EPI_ISL_470046, EPI_ISL_470047, EPI_ISL_470048, EPI_ISL_470049, EPI_ISL_470050, EPI_ISL_470051, EPI_ISL_470052, EPI_ISL_470053, EPI_ISL_470054, EPI_ISL_470055, EPI_ISL_470056, EPI_ISL_470057, EPI_ISL_470058, EPI_ISL_470059, EPI_ISL_470060, EPI_ISL_470061, EPI_ISL_470062, EPI_ISL_470063, EPI_ISL_470064, EPI_ISL_470065, EPI_ISL_470066, EPI_ISL_470067, EPI_ISL_470068, EPI_ISL_470069, EPI_ISL_470070, EPI_ISL_470071, EPI_ISL_470072, EPI_ISL_470073, EPI_ISL_470074, EPI_ISL_470075, EPI_ISL_470076, EPI_ISL_470077, EPI_ISL_470078, EPI_ISL_470079, EPI_ISL_470080, EPI_ISL_470081, EPI_ISL_470082, EPI_ISL_470083, EPI_ISL_470084, EPI_ISL_470085, EPI_ISL_470086, EPI_ISL_470087, EPI_ISL_470088, EPI_ISL_470089, EPI_ISL_470090 |                                                                                                    |                                                                                                    |                                                                                                                                                                                                                                                                                                                                                                                                                                                                         |
| see above                                                                                                                                                                                                                                                                                                                                                                                                                                                                                                                                                                                                                                                                                                                                                                                                                                                                                                                                                                                                                                                                                                                                                                                                                                                                                                                                                                                                                                                                                                                                                                                                                                                                                                                                                                                                                                                                                                                                                                                                                                                                      | Regional Virus Laboratory, Belfast Health and Social Care Trust                                    | Wellcome Sanger Institute for the COVID-19 Genomics UK (COG-UK) consortium                         | Conall McCaughey, James McKenna, Tanya Curran, Susan Feeney, Alison Watt, Ciara Cox, Mairead Connor, Zoltan Molnar, David Simpson, Derek Fairley; and Alex Alderton, Roberto Amato, Sonia Goncalves, Ewan Harrison, David K. Jackson, Ian Johnston, Dominic Kwiatkowski, Cordelia Langford, John Sillitoe on behalf of the Wellcome Sanger Institute COVID-19 Surveillance Team ( <a href="http://www.sanger.ac.uk/covid-team">http://www.sanger.ac.uk/covid-team</a> ) |
| EPI_ISL_471144, EPI_ISL_471145, EPI_ISL_471146, EPI_ISL_471147, EPI_ISL_471148, EPI_ISL_471149, EPI_ISL_471150, EPI_ISL_471151, EPI_ISL_471152, EPI_ISL_471153, EPI_ISL_471154, EPI_ISL_471155, EPI_ISL_471156                                                                                                                                                                                                                                                                                                                                                                                                                                                                                                                                                                                                                                                                                                                                                                                                                                                                                                                                                                                                                                                                                                                                                                                                                                                                                                                                                                                                                                                                                                                                                                                                                                                                                                                                                                                                                                                                 |                                                                                                    |                                                                                                    |                                                                                                                                                                                                                                                                                                                                                                                                                                                                         |
| see above                                                                                                                                                                                                                                                                                                                                                                                                                                                                                                                                                                                                                                                                                                                                                                                                                                                                                                                                                                                                                                                                                                                                                                                                                                                                                                                                                                                                                                                                                                                                                                                                                                                                                                                                                                                                                                                                                                                                                                                                                                                                      | Gundersen Molecular Diagnostics Laboratory                                                         | Kabara Cancer Research Institute                                                                   | Craig S. Richmond, Paraic A. Kenny                                                                                                                                                                                                                                                                                                                                                                                                                                      |

|                                                                                                                                                                                                                                                                                                                                                                                                                                                                                                                                                                                                                                                                                                                                                                                                                                                                                                                                                                                                                                                                                                                                                                                                                                                                                                                                                                                                                                                                                                                                                                                                                                                                                                                                                                                                                                                                                                                                                                                                                                                                                                                                                                                                                                                                                                                                                                                                |                                                                    |                                                                                  |                                                                                                                                                                                                                                                                                                                                                                                                                                                                         |
|------------------------------------------------------------------------------------------------------------------------------------------------------------------------------------------------------------------------------------------------------------------------------------------------------------------------------------------------------------------------------------------------------------------------------------------------------------------------------------------------------------------------------------------------------------------------------------------------------------------------------------------------------------------------------------------------------------------------------------------------------------------------------------------------------------------------------------------------------------------------------------------------------------------------------------------------------------------------------------------------------------------------------------------------------------------------------------------------------------------------------------------------------------------------------------------------------------------------------------------------------------------------------------------------------------------------------------------------------------------------------------------------------------------------------------------------------------------------------------------------------------------------------------------------------------------------------------------------------------------------------------------------------------------------------------------------------------------------------------------------------------------------------------------------------------------------------------------------------------------------------------------------------------------------------------------------------------------------------------------------------------------------------------------------------------------------------------------------------------------------------------------------------------------------------------------------------------------------------------------------------------------------------------------------------------------------------------------------------------------------------------------------|--------------------------------------------------------------------|----------------------------------------------------------------------------------|-------------------------------------------------------------------------------------------------------------------------------------------------------------------------------------------------------------------------------------------------------------------------------------------------------------------------------------------------------------------------------------------------------------------------------------------------------------------------|
| EPI_ISL_471157                                                                                                                                                                                                                                                                                                                                                                                                                                                                                                                                                                                                                                                                                                                                                                                                                                                                                                                                                                                                                                                                                                                                                                                                                                                                                                                                                                                                                                                                                                                                                                                                                                                                                                                                                                                                                                                                                                                                                                                                                                                                                                                                                                                                                                                                                                                                                                                 | Gundersen Clinical Microbiology Laboratory                         | Kabara Cancer Research Institute                                                 | Craig S. Richmond, Paraic A. Kenny                                                                                                                                                                                                                                                                                                                                                                                                                                      |
| EPI_ISL_471539                                                                                                                                                                                                                                                                                                                                                                                                                                                                                                                                                                                                                                                                                                                                                                                                                                                                                                                                                                                                                                                                                                                                                                                                                                                                                                                                                                                                                                                                                                                                                                                                                                                                                                                                                                                                                                                                                                                                                                                                                                                                                                                                                                                                                                                                                                                                                                                 | Hospital Universitario da USP Sao Paulo                            | Instituto Adolfo Lutz, Interdisciplinary Procedures Center, Strategic Laboratory | Claudio Tavares Sacchi, Claudia Regina Gonçalves, Erica Valessa Ramos Gomes                                                                                                                                                                                                                                                                                                                                                                                             |
| EPI_ISL_471541                                                                                                                                                                                                                                                                                                                                                                                                                                                                                                                                                                                                                                                                                                                                                                                                                                                                                                                                                                                                                                                                                                                                                                                                                                                                                                                                                                                                                                                                                                                                                                                                                                                                                                                                                                                                                                                                                                                                                                                                                                                                                                                                                                                                                                                                                                                                                                                 | Hospital Geral Santa Marcelina                                     | Instituto Adolfo Lutz, Interdisciplinary Procedures Center, Strategic Laboratory | Claudio Tavares Sacchi, Claudia Regina Gonçalves, Erica Valessa Ramos Gomes                                                                                                                                                                                                                                                                                                                                                                                             |
| EPI_ISL_471542                                                                                                                                                                                                                                                                                                                                                                                                                                                                                                                                                                                                                                                                                                                                                                                                                                                                                                                                                                                                                                                                                                                                                                                                                                                                                                                                                                                                                                                                                                                                                                                                                                                                                                                                                                                                                                                                                                                                                                                                                                                                                                                                                                                                                                                                                                                                                                                 | Secretaria de Saude de Mogi das Cruzes                             | Instituto Adolfo Lutz, Interdisciplinary Procedures Center, Strategic Laboratory | Claudio Tavares Sacchi, Claudia Regina Gonçalves, Erica Valessa Ramos Gomes                                                                                                                                                                                                                                                                                                                                                                                             |
| EPI_ISL_471545                                                                                                                                                                                                                                                                                                                                                                                                                                                                                                                                                                                                                                                                                                                                                                                                                                                                                                                                                                                                                                                                                                                                                                                                                                                                                                                                                                                                                                                                                                                                                                                                                                                                                                                                                                                                                                                                                                                                                                                                                                                                                                                                                                                                                                                                                                                                                                                 | Hospital Sao Paulo de Ensino da Unifesp                            | Instituto Adolfo Lutz, Interdisciplinary Procedures Center, Strategic Laboratory | Claudio Tavares Sacchi, Claudia Regina Gonçalves, Erica Valessa Ramos Gomes                                                                                                                                                                                                                                                                                                                                                                                             |
| EPI_ISL_471548                                                                                                                                                                                                                                                                                                                                                                                                                                                                                                                                                                                                                                                                                                                                                                                                                                                                                                                                                                                                                                                                                                                                                                                                                                                                                                                                                                                                                                                                                                                                                                                                                                                                                                                                                                                                                                                                                                                                                                                                                                                                                                                                                                                                                                                                                                                                                                                 | Hospital do Servidor Público Estadual Francisco Morato de Oliveira | Instituto Adolfo Lutz, Interdisciplinary Procedures Center, Strategic Laboratory | Claudio Tavares Sacchi, Claudia Regina Gonçalves, Erica Valessa Ramos Gomes                                                                                                                                                                                                                                                                                                                                                                                             |
| EPI_ISL_471552                                                                                                                                                                                                                                                                                                                                                                                                                                                                                                                                                                                                                                                                                                                                                                                                                                                                                                                                                                                                                                                                                                                                                                                                                                                                                                                                                                                                                                                                                                                                                                                                                                                                                                                                                                                                                                                                                                                                                                                                                                                                                                                                                                                                                                                                                                                                                                                 | Hospital Sancta Maggiore                                           | Instituto Adolfo Lutz, Interdisciplinary Procedures Center, Strategic Laboratory | Claudio Tavares Sacchi, Claudia Regina Gonçalves, Erica Valessa Ramos Gomes                                                                                                                                                                                                                                                                                                                                                                                             |
| EPI_ISL_471554                                                                                                                                                                                                                                                                                                                                                                                                                                                                                                                                                                                                                                                                                                                                                                                                                                                                                                                                                                                                                                                                                                                                                                                                                                                                                                                                                                                                                                                                                                                                                                                                                                                                                                                                                                                                                                                                                                                                                                                                                                                                                                                                                                                                                                                                                                                                                                                 | Hospital Bosque da Saúde                                           | Instituto Adolfo Lutz, Interdisciplinary Procedures Center, Strategic Laboratory | Claudio Tavares Sacchi, Claudia Regina Gonçalves, Erica Valessa Ramos Gomes                                                                                                                                                                                                                                                                                                                                                                                             |
| EPI_ISL_471556                                                                                                                                                                                                                                                                                                                                                                                                                                                                                                                                                                                                                                                                                                                                                                                                                                                                                                                                                                                                                                                                                                                                                                                                                                                                                                                                                                                                                                                                                                                                                                                                                                                                                                                                                                                                                                                                                                                                                                                                                                                                                                                                                                                                                                                                                                                                                                                 | Pronto Socorro Jose Ibrahim                                        | Instituto Adolfo Lutz, Interdisciplinary Procedures Center, Strategic Laboratory | Claudio Tavares Sacchi, Claudia Regina Gonçalves, Erica Valessa Ramos Gomes                                                                                                                                                                                                                                                                                                                                                                                             |
| EPI_ISL_471562, EPI_ISL_471581, EPI_ISL_471582                                                                                                                                                                                                                                                                                                                                                                                                                                                                                                                                                                                                                                                                                                                                                                                                                                                                                                                                                                                                                                                                                                                                                                                                                                                                                                                                                                                                                                                                                                                                                                                                                                                                                                                                                                                                                                                                                                                                                                                                                                                                                                                                                                                                                                                                                                                                                 | Hosp. Municipal Prof. Dr. Alípio Corrêa Netto                      | Instituto Adolfo Lutz, Interdisciplinary Procedures Center, Strategic Laboratory | Claudio Tavares Sacchi, Claudia Regina Gonçalves, Erica Valessa Ramos Gomes                                                                                                                                                                                                                                                                                                                                                                                             |
| EPI_ISL_471648                                                                                                                                                                                                                                                                                                                                                                                                                                                                                                                                                                                                                                                                                                                                                                                                                                                                                                                                                                                                                                                                                                                                                                                                                                                                                                                                                                                                                                                                                                                                                                                                                                                                                                                                                                                                                                                                                                                                                                                                                                                                                                                                                                                                                                                                                                                                                                                 | UBS e Pronto Socorro Jd. Jacira                                    | Instituto Adolfo Lutz, Interdisciplinary Procedures Center, Strategic Laboratory | Claudio Tavares Sacchi, Claudia Regina Gonçalves, Erica Valessa Ramos Gomes                                                                                                                                                                                                                                                                                                                                                                                             |
| EPI_ISL_472148                                                                                                                                                                                                                                                                                                                                                                                                                                                                                                                                                                                                                                                                                                                                                                                                                                                                                                                                                                                                                                                                                                                                                                                                                                                                                                                                                                                                                                                                                                                                                                                                                                                                                                                                                                                                                                                                                                                                                                                                                                                                                                                                                                                                                                                                                                                                                                                 | Regional Virus Laboratory, Belfast Health and Social Care Trust    | COVID-19 Genomics UK (COG-UK) Consortium                                         | Conall McCaughey, James McKenna, Tanya Curran, Susan Feeney, Alison Watt, Ciara Cox, Mairead Connor, Zoltan Molnar, David Simpson, Derek Fairley                                                                                                                                                                                                                                                                                                                        |
| EPI_ISL_476496                                                                                                                                                                                                                                                                                                                                                                                                                                                                                                                                                                                                                                                                                                                                                                                                                                                                                                                                                                                                                                                                                                                                                                                                                                                                                                                                                                                                                                                                                                                                                                                                                                                                                                                                                                                                                                                                                                                                                                                                                                                                                                                                                                                                                                                                                                                                                                                 | Hospital Garrahan                                                  | Héritas                                                                          | Dalmacio Pereyra, Roberta Crespo, Mauricio Grisolia, Cristian Rohr, Andrea Mangano, Maria Florencia Fernandez, Fabian Fay, Martin Vazquez                                                                                                                                                                                                                                                                                                                               |
| EPI_ISL_476563, EPI_ISL_476567                                                                                                                                                                                                                                                                                                                                                                                                                                                                                                                                                                                                                                                                                                                                                                                                                                                                                                                                                                                                                                                                                                                                                                                                                                                                                                                                                                                                                                                                                                                                                                                                                                                                                                                                                                                                                                                                                                                                                                                                                                                                                                                                                                                                                                                                                                                                                                 | Hospital de Pediatría "Prof. Dr. Juan P Garrahan"                  | Héritas                                                                          | Dalmacio Pereyra, Roberta Crespo, Mauricio Grisolia, Cristian Rohr, Andrea Mangano, Maria Florencia Fernandez, Fabian Fay, Martin Vazquez                                                                                                                                                                                                                                                                                                                               |
| EPI_ISL_476568                                                                                                                                                                                                                                                                                                                                                                                                                                                                                                                                                                                                                                                                                                                                                                                                                                                                                                                                                                                                                                                                                                                                                                                                                                                                                                                                                                                                                                                                                                                                                                                                                                                                                                                                                                                                                                                                                                                                                                                                                                                                                                                                                                                                                                                                                                                                                                                 | Hospital de Pediatría "Prof. Dr. Juan P Garrahan"                  | Héritas                                                                          | Cristian Rohr, Andrea Mangano, Maria Florencia Fernandez, Dalmacio Pereyra, Roberta Crespo, Mauricio Grisolia, Fabian Fay, Martin Vazquez                                                                                                                                                                                                                                                                                                                               |
| EPI_ISL_476571, EPI_ISL_476573                                                                                                                                                                                                                                                                                                                                                                                                                                                                                                                                                                                                                                                                                                                                                                                                                                                                                                                                                                                                                                                                                                                                                                                                                                                                                                                                                                                                                                                                                                                                                                                                                                                                                                                                                                                                                                                                                                                                                                                                                                                                                                                                                                                                                                                                                                                                                                 | Hospital de Pediatría "Prof. Dr. Juan P Garrahan"                  | Héritas                                                                          | Dalmacio Pereyra, Roberta Crespo, Mauricio Grisolia, Cristian Rohr, Andrea Mangano, Maria Florencia Fernandez, Fabian Fay, Martin Vazquez                                                                                                                                                                                                                                                                                                                               |
| EPI_ISL_482032, EPI_ISL_482033, EPI_ISL_482034, EPI_ISL_482035, EPI_ISL_482036, EPI_ISL_482037, EPI_ISL_482038, EPI_ISL_482039, EPI_ISL_482040, EPI_ISL_482041, EPI_ISL_482042, EPI_ISL_482043, EPI_ISL_482044, EPI_ISL_482045, EPI_ISL_482046, EPI_ISL_482047, EPI_ISL_482048, EPI_ISL_482049, EPI_ISL_482050, EPI_ISL_482051, EPI_ISL_482052, EPI_ISL_482053, EPI_ISL_482054, EPI_ISL_482055, EPI_ISL_482056, EPI_ISL_482070, EPI_ISL_482075, EPI_ISL_482077, EPI_ISL_482082, EPI_ISL_482091, EPI_ISL_482096, EPI_ISL_482097, EPI_ISL_482101, EPI_ISL_482102, EPI_ISL_482105, EPI_ISL_482115, EPI_ISL_482132, EPI_ISL_482133, EPI_ISL_482134, EPI_ISL_482135, EPI_ISL_482136, EPI_ISL_482137, EPI_ISL_482139, EPI_ISL_482140, EPI_ISL_482141, EPI_ISL_482142, EPI_ISL_482143, EPI_ISL_482144, EPI_ISL_482146, EPI_ISL_482147, EPI_ISL_482148, EPI_ISL_482149, EPI_ISL_482150, EPI_ISL_482151, EPI_ISL_482152, EPI_ISL_482153, EPI_ISL_482154, EPI_ISL_482155, EPI_ISL_482156, EPI_ISL_482157, EPI_ISL_482158, EPI_ISL_482159, EPI_ISL_482160, EPI_ISL_482161, EPI_ISL_482162, EPI_ISL_482163, EPI_ISL_482164, EPI_ISL_482165, EPI_ISL_482166, EPI_ISL_482167, EPI_ISL_482168, EPI_ISL_482169, EPI_ISL_482170, EPI_ISL_482171, EPI_ISL_482172, EPI_ISL_482173, EPI_ISL_482174, EPI_ISL_482175, EPI_ISL_482176, EPI_ISL_482177, EPI_ISL_482178, EPI_ISL_482179, EPI_ISL_482180, EPI_ISL_482181, EPI_ISL_482182, EPI_ISL_482183, EPI_ISL_482184, EPI_ISL_482185, EPI_ISL_482186, EPI_ISL_482187, EPI_ISL_482188, EPI_ISL_482189, EPI_ISL_482190, EPI_ISL_482191, EPI_ISL_482192, EPI_ISL_482193, EPI_ISL_482194, EPI_ISL_482195, EPI_ISL_482196, EPI_ISL_482197, EPI_ISL_482198, EPI_ISL_482199, EPI_ISL_482200, EPI_ISL_482201, EPI_ISL_482202, EPI_ISL_482203, EPI_ISL_482204, EPI_ISL_482205, EPI_ISL_482206, EPI_ISL_482207, EPI_ISL_482208, EPI_ISL_482209, EPI_ISL_482210, EPI_ISL_482211, EPI_ISL_482212                                                                                                                                                                                                                                                                                                                                                                                                                                                                                 |                                                                    |                                                                                  |                                                                                                                                                                                                                                                                                                                                                                                                                                                                         |
| see above                                                                                                                                                                                                                                                                                                                                                                                                                                                                                                                                                                                                                                                                                                                                                                                                                                                                                                                                                                                                                                                                                                                                                                                                                                                                                                                                                                                                                                                                                                                                                                                                                                                                                                                                                                                                                                                                                                                                                                                                                                                                                                                                                                                                                                                                                                                                                                                      | Regional Virus Laboratory, Belfast Health and Social Care Trust    | Wellcome Sanger Institute for the COVID-19 Genomics UK (COG-UK) consortium       | Conall McCaughey, James McKenna, Tanya Curran, Susan Feeney, Alison Watt, Ciara Cox, Mairead Connor, Zoltan Molnar, David Simpson, Derek Fairley; and Alex Alderton, Roberto Amato, Sonia Goncalves, Ewan Harrison, David K. Jackson, Ian Johnston, Dominic Kwiatkowski, Cordelia Langford, John Sillitoe on behalf of the Wellcome Sanger Institute COVID-19 Surveillance Team ( <a href="http://www.sanger.ac.uk/covid-team">http://www.sanger.ac.uk/covid-team</a> ) |
| EPI_ISL_489213                                                                                                                                                                                                                                                                                                                                                                                                                                                                                                                                                                                                                                                                                                                                                                                                                                                                                                                                                                                                                                                                                                                                                                                                                                                                                                                                                                                                                                                                                                                                                                                                                                                                                                                                                                                                                                                                                                                                                                                                                                                                                                                                                                                                                                                                                                                                                                                 | Regional Virus Laboratory, Belfast Health and Social Care Trust    | Wellcome Sanger Institute for the COVID-19 Genomics UK (COG-UK) Consortium       | Conall McCaughey, James McKenna, Tanya Curran, Susan Feeney, Alison Watt, Ciara Cox, Mairead Connor, Zoltan Molnar, David Simpson, Derek Fairley; and Alex Alderton, Roberto Amato, Sonia Goncalves, Ewan Harrison, David K. Jackson, Ian Johnston, Dominic Kwiatkowski, Cordelia Langford, John Sillitoe on behalf of the Wellcome Sanger Institute COVID-19 Surveillance Team                                                                                         |
| EPI_ISL_489214, EPI_ISL_489215, EPI_ISL_489216, EPI_ISL_489217, EPI_ISL_489218, EPI_ISL_489219, EPI_ISL_489220, EPI_ISL_489221, EPI_ISL_489222, EPI_ISL_489223, EPI_ISL_489224, EPI_ISL_489225, EPI_ISL_489226, EPI_ISL_489227, EPI_ISL_489228, EPI_ISL_489229, EPI_ISL_489230, EPI_ISL_489231, EPI_ISL_489232, EPI_ISL_489233, EPI_ISL_489234, EPI_ISL_489235, EPI_ISL_489236, EPI_ISL_489237, EPI_ISL_489238, EPI_ISL_489239, EPI_ISL_489240, EPI_ISL_489241, EPI_ISL_489242, EPI_ISL_489243, EPI_ISL_489244, EPI_ISL_489245, EPI_ISL_489246, EPI_ISL_489247, EPI_ISL_489248, EPI_ISL_489249, EPI_ISL_489250, EPI_ISL_489251, EPI_ISL_489252, EPI_ISL_489253, EPI_ISL_489254, EPI_ISL_489255, EPI_ISL_489256, EPI_ISL_489257, EPI_ISL_489258, EPI_ISL_489259, EPI_ISL_489260, EPI_ISL_489261, EPI_ISL_489262, EPI_ISL_489263, EPI_ISL_489264, EPI_ISL_489265, EPI_ISL_489266, EPI_ISL_489267, EPI_ISL_489268, EPI_ISL_489269, EPI_ISL_489270, EPI_ISL_489271, EPI_ISL_489272, EPI_ISL_489273, EPI_ISL_489274, EPI_ISL_489275, EPI_ISL_489276, EPI_ISL_489277, EPI_ISL_489278, EPI_ISL_489279, EPI_ISL_489280, EPI_ISL_489281, EPI_ISL_489282, EPI_ISL_489283, EPI_ISL_489284, EPI_ISL_489285, EPI_ISL_489286, EPI_ISL_489287, EPI_ISL_489288, EPI_ISL_489289, EPI_ISL_489290, EPI_ISL_489291, EPI_ISL_489292, EPI_ISL_489293, EPI_ISL_489294, EPI_ISL_489295, EPI_ISL_489296, EPI_ISL_489297, EPI_ISL_489298, EPI_ISL_489299, EPI_ISL_489300, EPI_ISL_489301, EPI_ISL_489302, EPI_ISL_489303, EPI_ISL_489304, EPI_ISL_489305, EPI_ISL_489306, EPI_ISL_489307, EPI_ISL_489308, EPI_ISL_489309, EPI_ISL_489310, EPI_ISL_489311, EPI_ISL_489312, EPI_ISL_489313, EPI_ISL_489314, EPI_ISL_489315, EPI_ISL_489316, EPI_ISL_489317, EPI_ISL_489318, EPI_ISL_489319, EPI_ISL_489320, EPI_ISL_489321, EPI_ISL_489322, EPI_ISL_489323, EPI_ISL_489324, EPI_ISL_489325, EPI_ISL_489326, EPI_ISL_489327, EPI_ISL_489328, EPI_ISL_489329, EPI_ISL_489330, EPI_ISL_489331, EPI_ISL_489332, EPI_ISL_489333, EPI_ISL_489334, EPI_ISL_489335, EPI_ISL_489336, EPI_ISL_489337, EPI_ISL_489338, EPI_ISL_489339, EPI_ISL_489340, EPI_ISL_489341, EPI_ISL_489342, EPI_ISL_489343, EPI_ISL_489344, EPI_ISL_489345, EPI_ISL_489346, EPI_ISL_489347, EPI_ISL_489348, EPI_ISL_489349, EPI_ISL_489350, EPI_ISL_489351, EPI_ISL_489352, EPI_ISL_489353, EPI_ISL_489354, EPI_ISL_489355, EPI_ISL_489356, EPI_ISL_489357 |                                                                    |                                                                                  |                                                                                                                                                                                                                                                                                                                                                                                                                                                                         |
| see above                                                                                                                                                                                                                                                                                                                                                                                                                                                                                                                                                                                                                                                                                                                                                                                                                                                                                                                                                                                                                                                                                                                                                                                                                                                                                                                                                                                                                                                                                                                                                                                                                                                                                                                                                                                                                                                                                                                                                                                                                                                                                                                                                                                                                                                                                                                                                                                      | Regional Virus Laboratory, Belfast Health and Social Care Trust    | Wellcome Sanger Institute for the COVID-19 Genomics UK (COG-UK) consortium       | Conall McCaughey, James McKenna, Tanya Curran, Susan Feeney, Alison Watt, Ciara Cox, Mairead Connor, Zoltan Molnar, David Simpson, Derek Fairley; and Alex Alderton, Roberto Amato, Sonia Goncalves, Ewan Harrison, David K. Jackson, Ian Johnston, Dominic Kwiatkowski, Cordelia Langford, John Sillitoe on behalf of the Wellcome Sanger Institute COVID-19 Surveillance Team ( <a href="http://www.sanger.ac.uk/covid-team">http://www.sanger.ac.uk/covid-team</a> ) |
| EPI_ISL_489358                                                                                                                                                                                                                                                                                                                                                                                                                                                                                                                                                                                                                                                                                                                                                                                                                                                                                                                                                                                                                                                                                                                                                                                                                                                                                                                                                                                                                                                                                                                                                                                                                                                                                                                                                                                                                                                                                                                                                                                                                                                                                                                                                                                                                                                                                                                                                                                 | Regional Virus Laboratory, Belfast Health and Social Care Trust    | Wellcome Sanger Institute for the COVID-19 Genomics UK (COG-UK) Consortium       | Conall McCaughey, James McKenna, Tanya Curran, Susan Feeney, Alison Watt, Ciara Cox, Mairead Connor, Zoltan Molnar, David Simpson, Derek Fairley; and Alex Alderton, Roberto Amato, Sonia Goncalves, Ewan Harrison, David K. Jackson, Ian Johnston, Dominic Kwiatkowski, Cordelia Langford, John Sillitoe on behalf of the Wellcome Sanger Institute COVID-19 Surveillance Team                                                                                         |
| EPI_ISL_489359, EPI_ISL_489360, EPI_ISL_489361, EPI_ISL_489362, EPI_ISL_489363, EPI_ISL_489364, EPI_ISL_489365, EPI_ISL_489366, EPI_ISL_489367, EPI_ISL_489368, EPI_ISL_489369, EPI_ISL_489370, EPI_ISL_489371, EPI_ISL_489372, EPI_ISL_489373, EPI_ISL_489374, EPI_ISL_489375, EPI_ISL_489376, EPI_ISL_489377, EPI_ISL_489378, EPI_ISL_489379                                                                                                                                                                                                                                                                                                                                                                                                                                                                                                                                                                                                                                                                                                                                                                                                                                                                                                                                                                                                                                                                                                                                                                                                                                                                                                                                                                                                                                                                                                                                                                                                                                                                                                                                                                                                                                                                                                                                                                                                                                                 |                                                                    |                                                                                  |                                                                                                                                                                                                                                                                                                                                                                                                                                                                         |
| see above                                                                                                                                                                                                                                                                                                                                                                                                                                                                                                                                                                                                                                                                                                                                                                                                                                                                                                                                                                                                                                                                                                                                                                                                                                                                                                                                                                                                                                                                                                                                                                                                                                                                                                                                                                                                                                                                                                                                                                                                                                                                                                                                                                                                                                                                                                                                                                                      | Regional Virus Laboratory, Belfast Health and Social Care Trust    | Wellcome Sanger Institute for the COVID-19 Genomics UK (COG-UK) consortium       | Conall McCaughey, James McKenna, Tanya Curran, Susan Feeney, Alison Watt, Ciara Cox, Mairead Connor, Zoltan Molnar, David Simpson, Derek Fairley; and Alex Alderton, Roberto Amato, Sonia Goncalves, Ewan Harrison, David K. Jackson, Ian Johnston, Dominic Kwiatkowski, Cordelia Langford, John Sillitoe on behalf of the Wellcome Sanger Institute COVID-19 Surveillance Team ( <a href="http://www.sanger.ac.uk/covid-team">http://www.sanger.ac.uk/covid-team</a> ) |
| EPI_ISL_489896, EPI_ISL_489897, EPI_ISL_489898, EPI_ISL_489899, EPI_ISL_489900, EPI_ISL_489901, EPI_ISL_489902, EPI_ISL_489903                                                                                                                                                                                                                                                                                                                                                                                                                                                                                                                                                                                                                                                                                                                                                                                                                                                                                                                                                                                                                                                                                                                                                                                                                                                                                                                                                                                                                                                                                                                                                                                                                                                                                                                                                                                                                                                                                                                                                                                                                                                                                                                                                                                                                                                                 | Gundersen Molecular Diagnostics Laboratory                         | Kabara Cancer Research Institute                                                 | Craig S. Richmond, Paraic A. Kenny                                                                                                                                                                                                                                                                                                                                                                                                                                      |
| EPI_ISL_489904                                                                                                                                                                                                                                                                                                                                                                                                                                                                                                                                                                                                                                                                                                                                                                                                                                                                                                                                                                                                                                                                                                                                                                                                                                                                                                                                                                                                                                                                                                                                                                                                                                                                                                                                                                                                                                                                                                                                                                                                                                                                                                                                                                                                                                                                                                                                                                                 | Gundersen Clinical Microbiology Laboratory                         | Kabara Cancer Research Institute                                                 | Craig S. Richmond, Paraic A. Kenny                                                                                                                                                                                                                                                                                                                                                                                                                                      |
| EPI_ISL_489905, EPI_ISL_489906, EPI_ISL_489907, EPI_ISL_489908, EPI_ISL_489909, EPI_ISL_489910, EPI_ISL_489911, EPI_ISL_489912, EPI_ISL_489913, EPI_ISL_489914, EPI_ISL_489915, EPI_ISL_489916, EPI_ISL_489917, EPI_ISL_489918, EPI_ISL_489919, EPI_ISL_489920, EPI_ISL_489921, EPI_ISL_489922, EPI_ISL_489923, EPI_ISL_489924, EPI_ISL_489925, EPI_ISL_489926, EPI_ISL_489927, EPI_ISL_489928, EPI_ISL_489929, EPI_ISL_489930, EPI_ISL_489931, EPI_ISL_489932, EPI_ISL_489933, EPI_ISL_489934, EPI_ISL_489935, EPI_ISL_489936, EPI_ISL_489937, EPI_ISL_489938, EPI_ISL_489939, EPI_ISL_489940, EPI_ISL_489941, EPI_ISL_489942, EPI_ISL_489943, EPI_ISL_489944, EPI_ISL_489945, EPI_ISL_489946, EPI_ISL_489947, EPI_ISL_489948, EPI_ISL_489949, EPI_ISL_489950, EPI_ISL_489951, EPI_ISL_489952, EPI_ISL_489953, EPI_ISL_489954, EPI_ISL_489955                                                                                                                                                                                                                                                                                                                                                                                                                                                                                                                                                                                                                                                                                                                                                                                                                                                                                                                                                                                                                                                                                                                                                                                                                                                                                                                                                                                                                                                                                                                                                 |                                                                    |                                                                                  |                                                                                                                                                                                                                                                                                                                                                                                                                                                                         |
| see above                                                                                                                                                                                                                                                                                                                                                                                                                                                                                                                                                                                                                                                                                                                                                                                                                                                                                                                                                                                                                                                                                                                                                                                                                                                                                                                                                                                                                                                                                                                                                                                                                                                                                                                                                                                                                                                                                                                                                                                                                                                                                                                                                                                                                                                                                                                                                                                      | Gundersen Molecular Diagnostics Laboratory                         | Kabara Cancer Research Institute                                                 | Craig S. Richmond, Paraic A. Kenny                                                                                                                                                                                                                                                                                                                                                                                                                                      |
| EPI_ISL_489956, EPI_ISL_489957, EPI_ISL_489958                                                                                                                                                                                                                                                                                                                                                                                                                                                                                                                                                                                                                                                                                                                                                                                                                                                                                                                                                                                                                                                                                                                                                                                                                                                                                                                                                                                                                                                                                                                                                                                                                                                                                                                                                                                                                                                                                                                                                                                                                                                                                                                                                                                                                                                                                                                                                 | Gundersen Clinical Microbiology Laboratory                         | Kabara Cancer Research Institute                                                 | Craig S. Richmond, Paraic A. Kenny                                                                                                                                                                                                                                                                                                                                                                                                                                      |
| EPI_ISL_496603, EPI_ISL_496604, EPI_ISL_496605, EPI_ISL_496606, EPI_ISL_496607, EPI_ISL_496608, EPI_ISL_496609, EPI_ISL_496610, EPI_ISL_496611, EPI_ISL_496612, EPI_ISL_496613, EPI_ISL_496614, EPI_ISL_496615, EPI_ISL_496616, EPI_ISL_496617, EPI_ISL_496618, EPI_ISL_496619, EPI_ISL_496620, EPI_ISL_496621, EPI_ISL_496622, EPI_ISL_496623, EPI_ISL_496624, EPI_ISL_496625, EPI_ISL_496626, EPI_ISL_496627, EPI_ISL_496628, EPI_ISL_496629, EPI_ISL_496630, EPI_ISL_496631, EPI_ISL_496632, EPI_ISL_496633, EPI_ISL_496634, EPI_ISL_496635, EPI_ISL_496636, EPI_ISL_496637, EPI_ISL_496638, EPI_ISL_496639, EPI_ISL_496640, EPI_ISL_496641, EPI_ISL_496642, EPI_ISL_496643, EPI_ISL_496644, EPI_ISL_496645, EPI_ISL_496646, EPI_ISL_496647, EPI_ISL_496648, EPI_ISL_496649, EPI_ISL_496650, EPI_ISL_496651, EPI_ISL_496652, EPI_ISL_496653, EPI_ISL_496654, EPI_ISL_496655, EPI_ISL_496656, EPI_ISL_496657                                                                                                                                                                                                                                                                                                                                                                                                                                                                                                                                                                                                                                                                                                                                                                                                                                                                                                                                                                                                                                                                                                                                                                                                                                                                                                                                                                                                                                                                                 |                                                                    |                                                                                  |                                                                                                                                                                                                                                                                                                                                                                                                                                                                         |

EPI\_ISL\_496658, EPI\_ISL\_496659, EPI\_ISL\_496660, EPI\_ISL\_496661, EPI\_ISL\_496662, EPI\_ISL\_496663, EPI\_ISL\_496664, EPI\_ISL\_496665, EPI\_ISL\_496666, EPI\_ISL\_496667, EPI\_ISL\_496668, EPI\_ISL\_496669, EPI\_ISL\_496670, EPI\_ISL\_496671, EPI\_ISL\_496672, EPI\_ISL\_496673, EPI\_ISL\_496674, EPI\_ISL\_496675, EPI\_ISL\_496676, EPI\_ISL\_496677, EPI\_ISL\_496678, EPI\_ISL\_496679, EPI\_ISL\_496680, EPI\_ISL\_496681, EPI\_ISL\_496682, EPI\_ISL\_496683, EPI\_ISL\_496685, EPI\_ISL\_496686, EPI\_ISL\_496687, EPI\_ISL\_496688, EPI\_ISL\_496689, EPI\_ISL\_496690, EPI\_ISL\_496691, EPI\_ISL\_496692, EPI\_ISL\_496693, EPI\_ISL\_496694, EPI\_ISL\_496695, EPI\_ISL\_496697, EPI\_ISL\_496698, EPI\_ISL\_496699, EPI\_ISL\_496700, EPI\_ISL\_496701, EPI\_ISL\_496702, EPI\_ISL\_496703, EPI\_ISL\_496704, EPI\_ISL\_496705, EPI\_ISL\_496706, EPI\_ISL\_496707, EPI\_ISL\_496708, EPI\_ISL\_496709, EPI\_ISL\_496710, EPI\_ISL\_496711, EPI\_ISL\_496712, EPI\_ISL\_496713, EPI\_ISL\_496714, EPI\_ISL\_496715, EPI\_ISL\_496716, EPI\_ISL\_496717, EPI\_ISL\_496718, EPI\_ISL\_496719, EPI\_ISL\_496720, EPI\_ISL\_496721, EPI\_ISL\_496722, EPI\_ISL\_496723, EPI\_ISL\_496724, EPI\_ISL\_496725, EPI\_ISL\_496726, EPI\_ISL\_496727, EPI\_ISL\_496728, EPI\_ISL\_496729, EPI\_ISL\_496730, EPI\_ISL\_496731, EPI\_ISL\_496732, EPI\_ISL\_496733, EPI\_ISL\_496734, EPI\_ISL\_496735, EPI\_ISL\_496736, EPI\_ISL\_496737, EPI\_ISL\_496738, EPI\_ISL\_496739, EPI\_ISL\_496740, EPI\_ISL\_496741, EPI\_ISL\_496742, EPI\_ISL\_496743, EPI\_ISL\_496744, EPI\_ISL\_496745, EPI\_ISL\_496746, EPI\_ISL\_496747, EPI\_ISL\_496748, EPI\_ISL\_496749, EPI\_ISL\_496750, EPI\_ISL\_496751, EPI\_ISL\_496752, EPI\_ISL\_496753, EPI\_ISL\_496754, EPI\_ISL\_496755, EPI\_ISL\_496756, EPI\_ISL\_496757, EPI\_ISL\_496758, EPI\_ISL\_496759, EPI\_ISL\_496760, EPI\_ISL\_496761, EPI\_ISL\_496762, EPI\_ISL\_496763, EPI\_ISL\_496764, EPI\_ISL\_496765, EPI\_ISL\_496766, EPI\_ISL\_496767, EPI\_ISL\_496768, EPI\_ISL\_496769, EPI\_ISL\_496770, EPI\_ISL\_496771, EPI\_ISL\_496772, EPI\_ISL\_496773, EPI\_ISL\_496774, EPI\_ISL\_496775, EPI\_ISL\_496776, EPI\_ISL\_496777, EPI\_ISL\_496778, EPI\_ISL\_496779, EPI\_ISL\_496780, EPI\_ISL\_496781, EPI\_ISL\_496782, EPI\_ISL\_496783, EPI\_ISL\_496784, EPI\_ISL\_496785, EPI\_ISL\_496786, EPI\_ISL\_496787, EPI\_ISL\_496788, EPI\_ISL\_496789, EPI\_ISL\_496790, EPI\_ISL\_496791, EPI\_ISL\_496792, EPI\_ISL\_496793, EPI\_ISL\_496794, EPI\_ISL\_496795, EPI\_ISL\_496796, EPI\_ISL\_496797, EPI\_ISL\_496798, EPI\_ISL\_496799, EPI\_ISL\_496800, EPI\_ISL\_496801, EPI\_ISL\_496802, EPI\_ISL\_496803, EPI\_ISL\_496804, EPI\_ISL\_496805, EPI\_ISL\_496806, EPI\_ISL\_496807, EPI\_ISL\_496808, EPI\_ISL\_496809, EPI\_ISL\_496810, EPI\_ISL\_496811, EPI\_ISL\_496812, EPI\_ISL\_496813, EPI\_ISL\_496814, EPI\_ISL\_496815, EPI\_ISL\_496816, EPI\_ISL\_496817, EPI\_ISL\_496818, EPI\_ISL\_496819, EPI\_ISL\_496820, EPI\_ISL\_496821, EPI\_ISL\_496822, EPI\_ISL\_496823, EPI\_ISL\_496824, EPI\_ISL\_496825, EPI\_ISL\_496826, EPI\_ISL\_496827, EPI\_ISL\_496828, EPI\_ISL\_496829, EPI\_ISL\_496830, EPI\_ISL\_496831, EPI\_ISL\_496832, EPI\_ISL\_496833, EPI\_ISL\_496834, EPI\_ISL\_496835, EPI\_ISL\_496836, EPI\_ISL\_496837, EPI\_ISL\_496838, EPI\_ISL\_496839, EPI\_ISL\_496840, EPI\_ISL\_496841, EPI\_ISL\_496842, EPI\_ISL\_496843, EPI\_ISL\_496844, EPI\_ISL\_496845, EPI\_ISL\_496846, EPI\_ISL\_496847, EPI\_ISL\_496848, EPI\_ISL\_496849, EPI\_ISL\_496850, EPI\_ISL\_496851, EPI\_ISL\_496852, EPI\_ISL\_496853, EPI\_ISL\_496854, EPI\_ISL\_496855, EPI\_ISL\_496856, EPI\_ISL\_496857, EPI\_ISL\_496858, EPI\_ISL\_496859, EPI\_ISL\_496860, EPI\_ISL\_496861, EPI\_ISL\_496862, EPI\_ISL\_496863, EPI\_ISL\_496864, EPI\_ISL\_496865, EPI\_ISL\_496866, EPI\_ISL\_496867, EPI\_ISL\_496868, EPI\_ISL\_496869, EPI\_ISL\_496870, EPI\_ISL\_496871, EPI\_ISL\_496872, EPI\_ISL\_496873, EPI\_ISL\_496874, EPI\_ISL\_496875, EPI\_ISL\_496876, EPI\_ISL\_496877, EPI\_ISL\_496878, EPI\_ISL\_496879, EPI\_ISL\_496880, EPI\_ISL\_496881, EPI\_ISL\_496882, EPI\_ISL\_496883, EPI\_ISL\_496884, EPI\_ISL\_496885, EPI\_ISL\_496886, EPI\_ISL\_496887, EPI\_ISL\_496888, EPI\_ISL\_496889, EPI\_ISL\_496890, EPI\_ISL\_496891, EPI\_ISL\_496892, EPI\_ISL\_496893, EPI\_ISL\_496894, EPI\_ISL\_496895, EPI\_ISL\_496896, EPI\_ISL\_496897, EPI\_ISL\_496898, EPI\_ISL\_496899, EPI\_ISL\_496900, EPI\_ISL\_496901, EPI\_ISL\_496902, EPI\_ISL\_496903, EPI\_ISL\_496904, EPI\_ISL\_496905, EPI\_ISL\_496906, EPI\_ISL\_496907, EPI\_ISL\_496908, EPI\_ISL\_496909, EPI\_ISL\_496910, EPI\_ISL\_496911, EPI\_ISL\_496912, EPI\_ISL\_496913, EPI\_ISL\_496914, EPI\_ISL\_496915

see above

Gorgas Memorial Laboratory of Health Studies

Gorgas Memorial Laboratory of Health Studies

Daniilo Franco, Claudia Gonzalez Sandra Lopez-Verges, Alexander A Martinez

EPI\_ISL\_500954, EPI\_ISL\_500955, EPI\_ISL\_500956, EPI\_ISL\_500957, EPI\_ISL\_500958, EPI\_ISL\_500959, EPI\_ISL\_500960, EPI\_ISL\_500961, EPI\_ISL\_500962, EPI\_ISL\_500963, EPI\_ISL\_500964, EPI\_ISL\_500965, EPI\_ISL\_500966, EPI\_ISL\_500967, EPI\_ISL\_500968, EPI\_ISL\_500969, EPI\_ISL\_500970, EPI\_ISL\_500971, EPI\_ISL\_500972, EPI\_ISL\_500973, EPI\_ISL\_500974, EPI\_ISL\_500975, EPI\_ISL\_500976, EPI\_ISL\_500977, EPI\_ISL\_500978, EPI\_ISL\_500979, EPI\_ISL\_500980, EPI\_ISL\_500981, EPI\_ISL\_500982, EPI\_ISL\_500983, EPI\_ISL\_500984, EPI\_ISL\_500985, EPI\_ISL\_500986, EPI\_ISL\_500987, EPI\_ISL\_500988, EPI\_ISL\_500989, EPI\_ISL\_500990, EPI\_ISL\_500991, EPI\_ISL\_500992, EPI\_ISL\_500993, EPI\_ISL\_500994, EPI\_ISL\_500995, EPI\_ISL\_500996, EPI\_ISL\_500997, EPI\_ISL\_500998, EPI\_ISL\_500999, EPI\_ISL\_501000, EPI\_ISL\_501001, EPI\_ISL\_501002, EPI\_ISL\_501003, EPI\_ISL\_501004, EPI\_ISL\_501005, EPI\_ISL\_501006, EPI\_ISL\_501007, EPI\_ISL\_501008, EPI\_ISL\_501009, EPI\_ISL\_501010, EPI\_ISL\_501011, EPI\_ISL\_501012, EPI\_ISL\_501013, EPI\_ISL\_501014, EPI\_ISL\_501015, EPI\_ISL\_501016, EPI\_ISL\_501017, EPI\_ISL\_501018, EPI\_ISL\_501019, EPI\_ISL\_501020, EPI\_ISL\_501021, EPI\_ISL\_501022, EPI\_ISL\_501023, EPI\_ISL\_501024, EPI\_ISL\_501025, EPI\_ISL\_501026, EPI\_ISL\_501027, EPI\_ISL\_501028, EPI\_ISL\_501029, EPI\_ISL\_501030, EPI\_ISL\_501031, EPI\_ISL\_501032, EPI\_ISL\_501033, EPI\_ISL\_501034, EPI\_ISL\_501035, EPI\_ISL\_501036, EPI\_ISL\_501037, EPI\_ISL\_501038, EPI\_ISL\_501039, EPI\_ISL\_501040, EPI\_ISL\_501041, EPI\_ISL\_501042, EPI\_ISL\_501043, EPI\_ISL\_501044, EPI\_ISL\_501045, EPI\_ISL\_501046, EPI\_ISL\_501047, EPI\_ISL\_501048, EPI\_ISL\_501049, EPI\_ISL\_501050, EPI\_ISL\_501051, EPI\_ISL\_501052, EPI\_ISL\_501053, EPI\_ISL\_501054, EPI\_ISL\_501055, EPI\_ISL\_501056, EPI\_ISL\_501057, EPI\_ISL\_501058, EPI\_ISL\_501059, EPI\_ISL\_501060, EPI\_ISL\_501061, EPI\_ISL\_501062, EPI\_ISL\_501063, EPI\_ISL\_501064, EPI\_ISL\_501065, EPI\_ISL\_501066, EPI\_ISL\_501067, EPI\_ISL\_501068, EPI\_ISL\_501069, EPI\_ISL\_501070, EPI\_ISL\_501071

see above

Regional Virus Laboratory, Belfast Health and Social Care Trust

Wellcome Sanger Institute for the COVID-19 Genomics UK (COG-UK) consortium

Conall McCaughey, James McKenna, Sanya Curran, Susan Feeney, Alison Watt, Ciara Cox, Mairead Connor, Zoltan Molnar, David Simpson, Derek Fairley; and Alex Alderton, Roberto Amato, Sonia Goncalves, Ewan Harrison, David K. Jackson, Ian Johnston, Dominic Kwiatkowski, Cordelia Langford, John Illitoe on behalf of the Wellcome Sanger Institute COVID-19 Surveillance Team (<http://www.sanger.ac.uk/covid-team>)

EPI\_ISL\_510305, EPI\_ISL\_510306, EPI\_ISL\_510307, EPI\_ISL\_510308, EPI\_ISL\_510309, EPI\_ISL\_510310, EPI\_ISL\_510311, EPI\_ISL\_510312, EPI\_ISL\_510313, EPI\_ISL\_510314, EPI\_ISL\_510315, EPI\_ISL\_510316, EPI\_ISL\_510317, EPI\_ISL\_510318, EPI\_ISL\_510319, EPI\_ISL\_510320, EPI\_ISL\_510321, EPI\_ISL\_510322, EPI\_ISL\_510323, EPI\_ISL\_510324, EPI\_ISL\_510325, EPI\_ISL\_510326, EPI\_ISL\_510327, EPI\_ISL\_510328, EPI\_ISL\_510329, EPI\_ISL\_510330, EPI\_ISL\_510331, EPI\_ISL\_510332

see above

Hospital San Pedro de Alcántara (Cáceres)

SeqCOVID-SPAIN consortium/IBV(CSIC)

Cristina Muñoz Cuevas, Guadalupe Rodríguez Rodríguez and SeqCOVID-SPAIN consortium

|                                                |                                                                                     |                                                                                    |                                                                             |
|------------------------------------------------|-------------------------------------------------------------------------------------|------------------------------------------------------------------------------------|-----------------------------------------------------------------------------|
| EPI_ISL_515524                                 | PS Municipal Dr Lauro Ribas Braga                                                   | Instituto Adolfo Lutz, Interdisciplinary Procedures Center, Strategic Laboratory   | Claudio Tavares Sacchi, Claudia Regina Gonçalves, Erica Valessa Ramos Gomes |
| EPI_ISL_515526                                 | Hospital Municipal do Tatuape Carmino Caricchio                                     | Instituto Adolfo Lutz, Interdisciplinary Procedures Center, Strategic Laboratory   | Claudio Tavares Sacchi, Claudia Regina Gonçalves, Erica Valessa Ramos Gomes |
| EPI_ISL_515528                                 | Hospital Sao Paulo de Ensino da Unifesp                                             | Instituto Adolfo Lutz, Interdisciplinary Procedures Center, Strategic Laboratory   | Claudio Tavares Sacchi, Claudia Regina Gonçalves, Erica Valessa Ramos Gomes |
| EPI_ISL_515543                                 | Serviço de Vigilância Sanitária e Epidemiológica                                    | Instituto Adolfo Lutz, Interdisciplinary Procedures Center, Strategic Laboratory   | Claudio Tavares Sacchi, Claudia Regina Gonçalves, Erica Valessa Ramos Gomes |
| EPI_ISL_515546, EPI_ISL_515551, EPI_ISL_515552 | Hospital Municipal do Tatuape Carmino Caricchio                                     | Instituto Adolfo Lutz, Interdisciplinary Procedures Center, Strategic Laboratory   | Claudio Tavares Sacchi, Claudia Regina Gonçalves, Erica Valessa Ramos Gomes |
| EPI_ISL_515553                                 | Hospital Municipal Dr. Ignacio Prouença de Gouvea                                   | Instituto Adolfo Lutz, Interdisciplinary Procedures Center, Strategic Laboratory   | Claudio Tavares Sacchi, Claudia Regina Gonçalves, Erica Valessa Ramos Gomes |
| EPI_ISL_515554                                 | Pronto Socorro Municipal de Perus                                                   | Instituto Adolfo Lutz, Interdisciplinary Procedures Center, Strategic Laboratory   | Claudio Tavares Sacchi, Claudia Regina Gonçalves, Erica Valessa Ramos Gomes |
| EPI_ISL_515557                                 | Hospital Municipal Dr. Moysés Deutsch                                               | Instituto Adolfo Lutz, Interdisciplinary Procedures Center, Strategic Laboratory   | Claudio Tavares Sacchi, Claudia Regina Gonçalves, Erica Valessa Ramos Gomes |
| EPI_ISL_515560                                 | Hospital Sao Paulo de Ensino da Unifesp                                             | Instituto Adolfo Lutz, Interdisciplinary Procedures Center, Strategic Laboratory   | Claudio Tavares Sacchi, Claudia Regina Gonçalves, Erica Valessa Ramos Gomes |
| EPI_ISL_515561                                 | Hospital Montemagno                                                                 | Instituto Adolfo Lutz, Interdisciplinary Procedures Center, Strategic Laboratory   | Claudio Tavares Sacchi, Claudia Regina Gonçalves, Erica Valessa Ramos Gomes |
| EPI_ISL_515562                                 | Hospital Municipal Doutor Alexandre Zaid                                            | Instituto Adolfo Lutz, Interdisciplinary Procedures Center, Strategic Laboratory   | Claudio Tavares Sacchi, Claudia Regina Gonçalves, Erica Valessa Ramos Gomes |
| EPI_ISL_515974                                 | Department of Virus and Microbiological Special Diagnostics, Statens Serum Institut | Albertsen lab, Department of Chemistry and Bioscience, Aalborg University, Denmark | Danish Corona Danica Consortia                                              |

EPI\_ISL\_522556, EPI\_ISL\_522557, EPI\_ISL\_522558, EPI\_ISL\_522559, EPI\_ISL\_522560, EPI\_ISL\_522561, EPI\_ISL\_522562, EPI\_ISL\_522563, EPI\_ISL\_522564, EPI\_ISL\_522565, EPI\_ISL\_522566, EPI\_ISL\_522567, EPI\_ISL\_522568, EPI\_ISL\_522569, EPI\_ISL\_522570, EPI\_ISL\_522571, EPI\_ISL\_522572, EPI\_ISL\_522573, EPI\_ISL\_522574, EPI\_ISL\_522575, EPI\_ISL\_522576, EPI\_ISL\_522577, EPI\_ISL\_522578, EPI\_ISL\_522579, EPI\_ISL\_522580, EPI\_ISL\_522581, EPI\_ISL\_522582, EPI\_ISL\_522583, EPI\_ISL\_522584, EPI\_ISL\_522585, EPI\_ISL\_522586, EPI\_ISL\_522587, EPI\_ISL\_522588, EPI\_ISL\_522589, EPI\_ISL\_522590, EPI\_ISL\_522591, EPI\_ISL\_522592, EPI\_ISL\_522593, EPI\_ISL\_522594, EPI\_ISL\_522595, EPI\_ISL\_522596, EPI\_ISL\_522597, EPI\_ISL\_522598, EPI\_ISL\_522599, EPI\_ISL\_522600, EPI\_ISL\_522601, EPI\_ISL\_522602, EPI\_ISL\_522603, EPI\_ISL\_522604, EPI\_ISL\_522605, EPI\_ISL\_522606, EPI\_ISL\_522607, EPI\_ISL\_522608, EPI\_ISL\_522609, EPI\_ISL\_522610, EPI\_ISL\_522611, EPI\_ISL\_522612, EPI\_ISL\_522613, EPI\_ISL\_522614, EPI\_ISL\_522615, EPI\_ISL\_522616, EPI\_ISL\_522617, EPI\_ISL\_522618, EPI\_ISL\_522619, EPI\_ISL\_522620, EPI\_ISL\_522621, EPI\_ISL\_522622, EPI\_ISL\_522623, EPI\_ISL\_522624, EPI\_ISL\_522625, EPI\_ISL\_522626, EPI\_ISL\_522627, EPI\_ISL\_522628, EPI\_ISL\_522629, EPI\_ISL\_522630, EPI\_ISL\_522631, EPI\_ISL\_522632, EPI\_ISL\_522633, EPI\_ISL\_522634, EPI\_ISL\_522635, EPI\_ISL\_522636, EPI\_ISL\_522637, EPI\_ISL\_522638, EPI\_ISL\_522639, EPI\_ISL\_522640, EPI\_ISL\_522641, EPI\_ISL\_522642, EPI\_ISL\_522643, EPI\_ISL\_522644, EPI\_ISL\_522645, EPI\_ISL\_522646, EPI\_ISL\_522647, EPI\_ISL\_522648, EPI\_ISL\_522649, EPI\_ISL\_522650, EPI\_ISL\_522651, EPI\_ISL\_522652, EPI\_ISL\_522653, EPI\_ISL\_522654, EPI\_ISL\_522655, EPI\_ISL\_522656, EPI\_ISL\_522657, EPI\_ISL\_522658, EPI\_ISL\_522659, EPI\_ISL\_522660, EPI\_ISL\_522661, EPI\_ISL\_522662, EPI\_ISL\_522663, EPI\_ISL\_522664, EPI\_ISL\_522665, EPI\_ISL\_522666, EPI\_ISL\_522667, EPI\_ISL\_522668, EPI\_ISL\_522669, EPI\_ISL\_522670, EPI\_ISL\_522671, EPI\_ISL\_522672, EPI\_ISL\_522673, EPI\_ISL\_522674, EPI\_ISL\_522675, EPI\_ISL\_522676, EPI\_ISL\_522677, EPI\_ISL\_522678, EPI\_ISL\_522679, EPI\_ISL\_522680, EPI\_ISL\_522681, EPI\_ISL\_522682, EPI\_ISL\_522683, EPI\_ISL\_522684, EPI\_ISL\_522685, EPI\_ISL\_522686, EPI\_ISL\_522687, EPI\_ISL\_522688, EPI\_ISL\_522689, EPI\_ISL\_522690, EPI\_ISL\_522691, EPI\_ISL\_522692, EPI\_ISL\_522693, EPI\_ISL\_522694, EPI\_ISL\_522695, EPI\_ISL\_522696, EPI\_ISL\_522697, EPI\_ISL\_522698, EPI\_ISL\_522699, EPI\_ISL\_522700, EPI\_ISL\_522701, EPI\_ISL\_522702, EPI\_ISL\_522703, EPI\_ISL\_522704, EPI\_ISL\_522705, EPI\_ISL\_522706, EPI\_ISL\_522707, EPI\_ISL\_522708, EPI\_ISL\_522709, EPI\_ISL\_522710, EPI\_ISL\_522711, EPI\_ISL\_522712, EPI\_ISL\_522713, EPI\_ISL\_522714, EPI\_ISL\_522715, EPI\_ISL\_522716, EPI\_ISL\_522717, EPI\_ISL\_522718, EPI\_ISL\_522719, EPI\_ISL\_522720, EPI\_ISL\_522721, EPI\_ISL\_522722, EPI\_ISL\_522723, EPI\_ISL\_522724, EPI\_ISL\_522725, EPI\_ISL\_522726, EPI\_ISL\_522727, EPI\_ISL\_522728, EPI\_ISL\_522729, EPI\_ISL\_522730, EPI\_ISL\_522731, EPI\_ISL\_522732, EPI\_ISL\_522733, EPI\_ISL\_522734, EPI\_ISL\_522735, EPI\_ISL\_522736, EPI\_ISL\_522737, EPI\_ISL\_522738, EPI\_ISL\_522739, EPI\_ISL\_522740, EPI\_ISL\_522741, EPI\_ISL\_522742, EPI\_ISL\_522743, EPI\_ISL\_522744, EPI\_ISL\_522745, EPI\_ISL\_522746, EPI\_ISL\_522747, EPI\_ISL\_522748, EPI\_ISL\_522749, EPI\_ISL\_522750, EPI\_ISL\_522751, EPI\_ISL\_522752, EPI\_ISL\_522753, EPI\_ISL\_522754, EPI\_ISL\_522755, EPI\_ISL\_522756, EPI\_ISL\_522757, EPI\_ISL\_522758, EPI\_ISL\_522759, EPI\_ISL\_522760, EPI\_ISL\_522761, EPI\_ISL\_522762, EPI\_ISL\_522763, EPI\_ISL\_522764, EPI\_ISL\_522765, EPI\_ISL\_522766, EPI\_ISL\_522767, EPI\_ISL\_522768, EPI\_ISL\_522769

see above

Royal Hobart Hospital Microbiology Department

MDU-PHL

Cooley L., van Haften R., Seemann T., Sait M., Schultz, M.B., Sherry N.

|                                |                                                                    |                                                                                  |                                                                             |
|--------------------------------|--------------------------------------------------------------------|----------------------------------------------------------------------------------|-----------------------------------------------------------------------------|
| EPI_ISL_523955                 | Hospital Municipal do Tatuape Carmino Caricchio                    | Instituto Adolfo Lutz, Interdisciplinary Procedures Center, Strategic Laboratory | Claudio Tavares Sacchi, Claudia Regina Gonçalves, Erica Valessa Ramos Gomes |
| EPI_ISL_523956                 | Hospital Regional de Assis                                         | Instituto Adolfo Lutz, Interdisciplinary Procedures Center, Strategic Laboratory | Claudio Tavares Sacchi, Claudia Regina Gonçalves, Erica Valessa Ramos Gomes |
| EPI_ISL_523958, EPI_ISL_523959 | Pronto Socorro Municipal de Perus                                  | Instituto Adolfo Lutz, Interdisciplinary Procedures Center, Strategic Laboratory | Claudio Tavares Sacchi, Claudia Regina Gonçalves, Erica Valessa Ramos Gomes |
| EPI_ISL_523965                 | Hospital do Servidor Público Estadual Francisco Morato de Oliveira | Instituto Adolfo Lutz, Interdisciplinary Procedures Center, Strategic Laboratory | Claudio Tavares Sacchi, Claudia Regina Gonçalves, Erica Valessa Ramos Gomes |
| EPI_ISL_523969                 | Hospital Sao Paulo de Ensino da Unifesp                            | Instituto Adolfo Lutz, Interdisciplinary Procedures Center, Strategic Laboratory | Claudio Tavares Sacchi, Claudia Regina Gonçalves, Erica Valessa Ramos Gomes |

|                                                                                                                                                                                                                                                                                                                                                                                                                                                                                                                                                                                                                                                                                                                                                                                                                                                                                                                |                                                                    |                                                                                  |                                                                                                        |                                    |
|----------------------------------------------------------------------------------------------------------------------------------------------------------------------------------------------------------------------------------------------------------------------------------------------------------------------------------------------------------------------------------------------------------------------------------------------------------------------------------------------------------------------------------------------------------------------------------------------------------------------------------------------------------------------------------------------------------------------------------------------------------------------------------------------------------------------------------------------------------------------------------------------------------------|--------------------------------------------------------------------|----------------------------------------------------------------------------------|--------------------------------------------------------------------------------------------------------|------------------------------------|
| EPI_ISL_523970                                                                                                                                                                                                                                                                                                                                                                                                                                                                                                                                                                                                                                                                                                                                                                                                                                                                                                 | Conjunto Hospitalar do Mandaqui                                    | Instituto Adolfo Lutz, Interdisciplinary Procedures Center, Strategic Laboratory | Claudio Tavares Sacchi, Claudia Regina Gonçalves, Erica Valessa Ramos Gomes                            |                                    |
| EPI_ISL_523971                                                                                                                                                                                                                                                                                                                                                                                                                                                                                                                                                                                                                                                                                                                                                                                                                                                                                                 | Hospital Geral Santa Marcelina                                     | Instituto Adolfo Lutz, Interdisciplinary Procedures Center, Strategic Laboratory | Claudio Tavares Sacchi, Claudia Regina Gonçalves, Erica Valessa Ramos Gomes                            |                                    |
| EPI_ISL_523973                                                                                                                                                                                                                                                                                                                                                                                                                                                                                                                                                                                                                                                                                                                                                                                                                                                                                                 | PS Municipal Dona Maria Antonieta Ferreira de Barros               | Instituto Adolfo Lutz, Interdisciplinary Procedures Center, Strategic Laboratory | Claudio Tavares Sacchi, Claudia Regina Gonçalves, Erica Valessa Ramos Gomes                            |                                    |
| EPI_ISL_523974                                                                                                                                                                                                                                                                                                                                                                                                                                                                                                                                                                                                                                                                                                                                                                                                                                                                                                 | Hospital Municipal do Tatuape Carmino Caricchio                    | Instituto Adolfo Lutz, Interdisciplinary Procedures Center, Strategic Laboratory | Claudio Tavares Sacchi, Claudia Regina Gonçalves, Erica Valessa Ramos Gomes                            |                                    |
| EPI_ISL_523975                                                                                                                                                                                                                                                                                                                                                                                                                                                                                                                                                                                                                                                                                                                                                                                                                                                                                                 | UPA Tito Lopes                                                     | Instituto Adolfo Lutz, Interdisciplinary Procedures Center, Strategic Laboratory | Claudio Tavares Sacchi, Claudia Regina Gonçalves, Erica Valessa Ramos Gomes                            |                                    |
| EPI_ISL_523978                                                                                                                                                                                                                                                                                                                                                                                                                                                                                                                                                                                                                                                                                                                                                                                                                                                                                                 | Hospital do Servidor Público Estadual Francisco Morato de Oliveira | Instituto Adolfo Lutz, Interdisciplinary Procedures Center, Strategic Laboratory | Claudio Tavares Sacchi, Claudia Regina Gonçalves, Erica Valessa Ramos Gomes                            |                                    |
| EPI_ISL_523980                                                                                                                                                                                                                                                                                                                                                                                                                                                                                                                                                                                                                                                                                                                                                                                                                                                                                                 | UPA Tito Lopes                                                     | Instituto Adolfo Lutz, Interdisciplinary Procedures Center, Strategic Laboratory | Claudio Tavares Sacchi, Claudia Regina Gonçalves, Erica Valessa Ramos Gomes                            |                                    |
| EPI_ISL_523982                                                                                                                                                                                                                                                                                                                                                                                                                                                                                                                                                                                                                                                                                                                                                                                                                                                                                                 | Hospital do Servidor Público Estadual Francisco Morato de Oliveira | Instituto Adolfo Lutz, Interdisciplinary Procedures Center, Strategic Laboratory | Claudio Tavares Sacchi, Claudia Regina Gonçalves, Erica Valessa Ramos Gomes                            |                                    |
| EPI_ISL_523983                                                                                                                                                                                                                                                                                                                                                                                                                                                                                                                                                                                                                                                                                                                                                                                                                                                                                                 | UPA Campo Limpo                                                    | Instituto Adolfo Lutz, Interdisciplinary Procedures Center, Strategic Laboratory | Claudio Tavares Sacchi, Claudia Regina Gonçalves, Erica Valessa Ramos Gomes                            |                                    |
| EPI_ISL_523985                                                                                                                                                                                                                                                                                                                                                                                                                                                                                                                                                                                                                                                                                                                                                                                                                                                                                                 | Hospital Municipal Dr. Benedicto Montenegro                        | Instituto Adolfo Lutz, Interdisciplinary Procedures Center, Strategic Laboratory | Claudio Tavares Sacchi, Claudia Regina Gonçalves, Erica Valessa Ramos Gomes                            |                                    |
| EPI_ISL_523989                                                                                                                                                                                                                                                                                                                                                                                                                                                                                                                                                                                                                                                                                                                                                                                                                                                                                                 | AMA Jardim Joamar                                                  | Instituto Adolfo Lutz, Interdisciplinary Procedures Center, Strategic Laboratory | Claudio Tavares Sacchi, Claudia Regina Gonçalves, Erica Valessa Ramos Gomes                            |                                    |
| EPI_ISL_523991                                                                                                                                                                                                                                                                                                                                                                                                                                                                                                                                                                                                                                                                                                                                                                                                                                                                                                 | Hospital Municipal Carmen Prudente                                 | Instituto Adolfo Lutz, Interdisciplinary Procedures Center, Strategic Laboratory | Claudio Tavares Sacchi, Claudia Regina Gonçalves, Erica Valessa Ramos Gomes                            |                                    |
| EPI_ISL_524464                                                                                                                                                                                                                                                                                                                                                                                                                                                                                                                                                                                                                                                                                                                                                                                                                                                                                                 | Santa Casa de Santa Isabel                                         | Instituto Adolfo Lutz, Interdisciplinary Procedures Center, Strategic Laboratory | Claudio Tavares Sacchi, Claudia Regina Gonçalves, Erica Valessa Ramos Gomes                            |                                    |
| EPI_ISL_524469                                                                                                                                                                                                                                                                                                                                                                                                                                                                                                                                                                                                                                                                                                                                                                                                                                                                                                 | Santa Casa de Misericordia de Sao Paulo                            | Instituto Adolfo Lutz, Interdisciplinary Procedures Center, Strategic Laboratory | Claudio Tavares Sacchi, Claudia Regina Gonçalves, Erica Valessa Ramos Gomes                            |                                    |
| EPI_ISL_524470                                                                                                                                                                                                                                                                                                                                                                                                                                                                                                                                                                                                                                                                                                                                                                                                                                                                                                 | Hospital do Servidor Público Estadual Francisco Morato de Oliveira | Instituto Adolfo Lutz, Interdisciplinary Procedures Center, Strategic Laboratory | Claudio Tavares Sacchi, Claudia Regina Gonçalves, Erica Valessa Ramos Gomes                            |                                    |
| EPI_ISL_527858                                                                                                                                                                                                                                                                                                                                                                                                                                                                                                                                                                                                                                                                                                                                                                                                                                                                                                 | Pronto Atendimento Sancta Maggiore Jardim Paulista                 | Instituto Adolfo Lutz, Interdisciplinary Procedures Center, Strategic Laboratory | Claudio Tavares Sacchi, Claudia Regina Gonçalves, Erica Valessa Ramos Gomes                            |                                    |
| EPI_ISL_527859                                                                                                                                                                                                                                                                                                                                                                                                                                                                                                                                                                                                                                                                                                                                                                                                                                                                                                 | Hospital Municipal Vereador Jose Storopoli                         | Instituto Adolfo Lutz, Interdisciplinary Procedures Center, Strategic Laboratory | Claudio Tavares Sacchi, Claudia Regina Gonçalves, Erica Valessa Ramos Gomes                            |                                    |
| EPI_ISL_527868                                                                                                                                                                                                                                                                                                                                                                                                                                                                                                                                                                                                                                                                                                                                                                                                                                                                                                 | Hospital e Maternidade do Braz                                     | Instituto Adolfo Lutz, Interdisciplinary Procedures Center, Strategic Laboratory | Claudio Tavares Sacchi, Claudia Regina Gonçalves, Erica Valessa Ramos Gomes                            |                                    |
| EPI_ISL_534312                                                                                                                                                                                                                                                                                                                                                                                                                                                                                                                                                                                                                                                                                                                                                                                                                                                                                                 | Distrito Sanitario Sul                                             | Instituto Adolfo Lutz, Interdisciplinary Procedures Center, Strategic Laboratory | Claudio Tavares Sacchi, Claudia Regina Gonçalves, Erica Valessa Ramos Gomes                            |                                    |
| EPI_ISL_534313                                                                                                                                                                                                                                                                                                                                                                                                                                                                                                                                                                                                                                                                                                                                                                                                                                                                                                 | Hospital da Sta Casa de Sto Amaro                                  | Instituto Adolfo Lutz, Interdisciplinary Procedures Center, Strategic Laboratory | Claudio Tavares Sacchi, Claudia Regina Gonçalves, Erica Valessa Ramos Gomes                            |                                    |
| EPI_ISL_534314                                                                                                                                                                                                                                                                                                                                                                                                                                                                                                                                                                                                                                                                                                                                                                                                                                                                                                 | Hospital Universitario da USP de SP                                | Instituto Adolfo Lutz, Interdisciplinary Procedures Center, Strategic Laboratory | Claudio Tavares Sacchi, Claudia Regina Gonçalves, Erica Valessa Ramos Gomes                            |                                    |
| EPI_ISL_534317                                                                                                                                                                                                                                                                                                                                                                                                                                                                                                                                                                                                                                                                                                                                                                                                                                                                                                 | Hospital Geral de Itapevi                                          | Instituto Adolfo Lutz, Interdisciplinary Procedures Center, Strategic Laboratory | Claudio Tavares Sacchi, Claudia Regina Gonçalves, Erica Valessa Ramos Gomes                            |                                    |
| EPI_ISL_534318                                                                                                                                                                                                                                                                                                                                                                                                                                                                                                                                                                                                                                                                                                                                                                                                                                                                                                 | Hospital Municipal Antonio Giglio                                  | Instituto Adolfo Lutz, Interdisciplinary Procedures Center, Strategic Laboratory | Claudio Tavares Sacchi, Claudia Regina Gonçalves, Erica Valessa Ramos Gomes                            |                                    |
| EPI_ISL_534319, EPI_ISL_534320                                                                                                                                                                                                                                                                                                                                                                                                                                                                                                                                                                                                                                                                                                                                                                                                                                                                                 | Hospital do Serv Pub ESTAFCO Morato de Oliveira                    | Instituto Adolfo Lutz, Interdisciplinary Procedures Center, Strategic Laboratory | Claudio Tavares Sacchi, Claudia Regina Gonçalves, Erica Valessa Ramos Gomes                            |                                    |
| EPI_ISL_534322                                                                                                                                                                                                                                                                                                                                                                                                                                                                                                                                                                                                                                                                                                                                                                                                                                                                                                 | PS Mun Julio Tupy                                                  | Instituto Adolfo Lutz, Interdisciplinary Procedures Center, Strategic Laboratory | Claudio Tavares Sacchi, Claudia Regina Gonçalves, Erica Valessa Ramos Gomes                            |                                    |
| EPI_ISL_547570                                                                                                                                                                                                                                                                                                                                                                                                                                                                                                                                                                                                                                                                                                                                                                                                                                                                                                 | PS Municipal Dr Augusto Gomes de Mattos                            | Instituto Adolfo Lutz, Interdisciplinary Procedures Center, Strategic Laboratory | Claudio Tavares Sacchi, Claudia Regina Gonçalves, Erica Valessa Ramos Gomes, Karoline Rodrigues Campos |                                    |
| EPI_ISL_547571                                                                                                                                                                                                                                                                                                                                                                                                                                                                                                                                                                                                                                                                                                                                                                                                                                                                                                 | Hospital Municipal Antônio Giglio                                  | Instituto Adolfo Lutz, Interdisciplinary Procedures Center, Strategic Laboratory | Claudio Tavares Sacchi, Claudia Regina Gonçalves, Erica Valessa Ramos Gomes, Karoline Rodrigues Campos |                                    |
| EPI_ISL_547574                                                                                                                                                                                                                                                                                                                                                                                                                                                                                                                                                                                                                                                                                                                                                                                                                                                                                                 | Hospital Universitario da USP                                      | Instituto Adolfo Lutz, Interdisciplinary Procedures Center, Strategic Laboratory | Claudio Tavares Sacchi, Claudia Regina Gonçalves, Erica Valessa Ramos Gomes, Karoline Rodrigues Campos |                                    |
| EPI_ISL_547575                                                                                                                                                                                                                                                                                                                                                                                                                                                                                                                                                                                                                                                                                                                                                                                                                                                                                                 | SVO Jundiá                                                         | Instituto Adolfo Lutz, Interdisciplinary Procedures Center, Strategic Laboratory | Claudio Tavares Sacchi, Claudia Regina Gonçalves, Erica Valessa Ramos Gomes, Karoline Rodrigues Campos |                                    |
| EPI_ISL_547577                                                                                                                                                                                                                                                                                                                                                                                                                                                                                                                                                                                                                                                                                                                                                                                                                                                                                                 | Hospital e Maternidade Nossa Senhora das Graças                    | Instituto Adolfo Lutz, Interdisciplinary Procedures Center, Strategic Laboratory | Claudio Tavares Sacchi, Claudia Regina Gonçalves, Erica Valessa Ramos Gomes, Karoline Rodrigues Campos |                                    |
| EPI_ISL_547602, EPI_ISL_547603, EPI_ISL_547604, EPI_ISL_547605, EPI_ISL_547606, EPI_ISL_547607                                                                                                                                                                                                                                                                                                                                                                                                                                                                                                                                                                                                                                                                                                                                                                                                                 | Gundersen Molecular Diagnostics Laboratory                         | Kabara Cancer Research Institute                                                 | Craig S. Richmond, Paraic A. Kenny                                                                     |                                    |
| EPI_ISL_547608, EPI_ISL_547609, EPI_ISL_547610                                                                                                                                                                                                                                                                                                                                                                                                                                                                                                                                                                                                                                                                                                                                                                                                                                                                 | Gundersen Clinical Microbiology Laboratory                         | Kabara Cancer Research Institute                                                 | Craig S. Richmond, Paraic A. Kenny                                                                     |                                    |
| EPI_ISL_547611, EPI_ISL_547612, EPI_ISL_547613, EPI_ISL_547614, EPI_ISL_547615, EPI_ISL_547616, EPI_ISL_547617, EPI_ISL_547618, EPI_ISL_547619, EPI_ISL_547620, EPI_ISL_547621, EPI_ISL_547622, EPI_ISL_547623, EPI_ISL_547624, EPI_ISL_547625, EPI_ISL_547626, EPI_ISL_547627, EPI_ISL_547628, EPI_ISL_547629, EPI_ISL_547630, EPI_ISL_547631, EPI_ISL_547632, EPI_ISL_547633, EPI_ISL_547634, EPI_ISL_547635, EPI_ISL_547636, EPI_ISL_547637, EPI_ISL_547638, EPI_ISL_547639, EPI_ISL_547640, EPI_ISL_547641, EPI_ISL_547642, EPI_ISL_547643, EPI_ISL_547644, EPI_ISL_547645, EPI_ISL_547646, EPI_ISL_547647, EPI_ISL_547648, EPI_ISL_547649, EPI_ISL_547650, EPI_ISL_547651, EPI_ISL_547652, EPI_ISL_547653, EPI_ISL_547654, EPI_ISL_547655, EPI_ISL_547656, EPI_ISL_547657, EPI_ISL_547658, EPI_ISL_547659, EPI_ISL_547660, EPI_ISL_547661, EPI_ISL_547662, EPI_ISL_547663, EPI_ISL_547664, EPI_ISL_547665 | see above                                                          | Gundersen Molecular Diagnostics Laboratory                                       | Kabara Cancer Research Institute                                                                       | Craig S. Richmond, Paraic A. Kenny |
| EPI_ISL_547666, EPI_ISL_547667, EPI_ISL_547668, EPI_ISL_547669, EPI_ISL_547670, EPI_ISL_547671, EPI_ISL_547672, EPI_ISL_547673, EPI_ISL_547674, EPI_ISL_547675, EPI_ISL_547676                                                                                                                                                                                                                                                                                                                                                                                                                                                                                                                                                                                                                                                                                                                                 |                                                                    |                                                                                  |                                                                                                        |                                    |

|                                                                                                                                                                                                                                                                                                                                                                                                                                                                                                                                                                                                                                                                                                                                                                                                                                                                                                                                                                                                                                                                                                                                                                                                                                                                                                                                                                                                                                                                                                                                                                                                                                                                                                                                                                                                                                                                                                                                                                                                                                                                                                                                                                                                                                                                                                                                                                                                                                                                                                                                                                                                                                                                                                                                                                                                |                                                                 |                                                                                  |                                                                                                                                                  |
|------------------------------------------------------------------------------------------------------------------------------------------------------------------------------------------------------------------------------------------------------------------------------------------------------------------------------------------------------------------------------------------------------------------------------------------------------------------------------------------------------------------------------------------------------------------------------------------------------------------------------------------------------------------------------------------------------------------------------------------------------------------------------------------------------------------------------------------------------------------------------------------------------------------------------------------------------------------------------------------------------------------------------------------------------------------------------------------------------------------------------------------------------------------------------------------------------------------------------------------------------------------------------------------------------------------------------------------------------------------------------------------------------------------------------------------------------------------------------------------------------------------------------------------------------------------------------------------------------------------------------------------------------------------------------------------------------------------------------------------------------------------------------------------------------------------------------------------------------------------------------------------------------------------------------------------------------------------------------------------------------------------------------------------------------------------------------------------------------------------------------------------------------------------------------------------------------------------------------------------------------------------------------------------------------------------------------------------------------------------------------------------------------------------------------------------------------------------------------------------------------------------------------------------------------------------------------------------------------------------------------------------------------------------------------------------------------------------------------------------------------------------------------------------------|-----------------------------------------------------------------|----------------------------------------------------------------------------------|--------------------------------------------------------------------------------------------------------------------------------------------------|
| see above                                                                                                                                                                                                                                                                                                                                                                                                                                                                                                                                                                                                                                                                                                                                                                                                                                                                                                                                                                                                                                                                                                                                                                                                                                                                                                                                                                                                                                                                                                                                                                                                                                                                                                                                                                                                                                                                                                                                                                                                                                                                                                                                                                                                                                                                                                                                                                                                                                                                                                                                                                                                                                                                                                                                                                                      | Gundersen Clinical Microbiology Laboratory                      | Kabara Cancer Research Institute                                                 | Craig S. Richmond, Paraic A. Kenny                                                                                                               |
| EPI_ISL_547677, EPI_ISL_547678, EPI_ISL_547679, EPI_ISL_547680, EPI_ISL_547681, EPI_ISL_547682                                                                                                                                                                                                                                                                                                                                                                                                                                                                                                                                                                                                                                                                                                                                                                                                                                                                                                                                                                                                                                                                                                                                                                                                                                                                                                                                                                                                                                                                                                                                                                                                                                                                                                                                                                                                                                                                                                                                                                                                                                                                                                                                                                                                                                                                                                                                                                                                                                                                                                                                                                                                                                                                                                 | Gundersen Molecular Diagnostics Laboratory                      | Kabara Cancer Research Institute                                                 | Craig S. Richmond, Paraic A. Kenny                                                                                                               |
| EPI_ISL_547683, EPI_ISL_547684                                                                                                                                                                                                                                                                                                                                                                                                                                                                                                                                                                                                                                                                                                                                                                                                                                                                                                                                                                                                                                                                                                                                                                                                                                                                                                                                                                                                                                                                                                                                                                                                                                                                                                                                                                                                                                                                                                                                                                                                                                                                                                                                                                                                                                                                                                                                                                                                                                                                                                                                                                                                                                                                                                                                                                 | Gundersen Clinical Microbiology Laboratory                      | Kabara Cancer Research Institute                                                 | Craig S. Richmond, Paraic A. Kenny                                                                                                               |
| EPI_ISL_547685, EPI_ISL_547686, EPI_ISL_547687, EPI_ISL_547688, EPI_ISL_547689, EPI_ISL_547690, EPI_ISL_547691, EPI_ISL_547692, EPI_ISL_547693, EPI_ISL_547694, EPI_ISL_547695, EPI_ISL_547696, EPI_ISL_547697, EPI_ISL_547698, EPI_ISL_547699, EPI_ISL_547700, EPI_ISL_547701, EPI_ISL_547702, EPI_ISL_547703, EPI_ISL_547704                                                                                                                                                                                                                                                                                                                                                                                                                                                                                                                                                                                                                                                                                                                                                                                                                                                                                                                                                                                                                                                                                                                                                                                                                                                                                                                                                                                                                                                                                                                                                                                                                                                                                                                                                                                                                                                                                                                                                                                                                                                                                                                                                                                                                                                                                                                                                                                                                                                                 | Gundersen Clinical Microbiology Laboratory                      | Kabara Cancer Research Institute                                                 | Craig S. Richmond, Paraic A. Kenny                                                                                                               |
| see above                                                                                                                                                                                                                                                                                                                                                                                                                                                                                                                                                                                                                                                                                                                                                                                                                                                                                                                                                                                                                                                                                                                                                                                                                                                                                                                                                                                                                                                                                                                                                                                                                                                                                                                                                                                                                                                                                                                                                                                                                                                                                                                                                                                                                                                                                                                                                                                                                                                                                                                                                                                                                                                                                                                                                                                      | Gundersen Molecular Diagnostics Laboratory                      | Kabara Cancer Research Institute                                                 | Craig S. Richmond, Paraic A. Kenny                                                                                                               |
| EPI_ISL_547705                                                                                                                                                                                                                                                                                                                                                                                                                                                                                                                                                                                                                                                                                                                                                                                                                                                                                                                                                                                                                                                                                                                                                                                                                                                                                                                                                                                                                                                                                                                                                                                                                                                                                                                                                                                                                                                                                                                                                                                                                                                                                                                                                                                                                                                                                                                                                                                                                                                                                                                                                                                                                                                                                                                                                                                 | Gundersen Clinical Microbiology Laboratory                      | Kabara Cancer Research Institute                                                 | Craig S. Richmond, Paraic A. Kenny                                                                                                               |
| EPI_ISL_547706, EPI_ISL_547707, EPI_ISL_547708, EPI_ISL_547709, EPI_ISL_547710, EPI_ISL_547711, EPI_ISL_547712, EPI_ISL_547713, EPI_ISL_547714, EPI_ISL_547715, EPI_ISL_547716, EPI_ISL_547717, EPI_ISL_547718, EPI_ISL_547719, EPI_ISL_547720, EPI_ISL_547721, EPI_ISL_547722, EPI_ISL_547723, EPI_ISL_547724, EPI_ISL_547725, EPI_ISL_547726, EPI_ISL_547727, EPI_ISL_547728, EPI_ISL_547729, EPI_ISL_547730, EPI_ISL_547731, EPI_ISL_547732, EPI_ISL_547733, EPI_ISL_547734, EPI_ISL_547735, EPI_ISL_547736, EPI_ISL_547737, EPI_ISL_547738, EPI_ISL_547739, EPI_ISL_547740, EPI_ISL_547741, EPI_ISL_547742, EPI_ISL_547743, EPI_ISL_547744, EPI_ISL_547745, EPI_ISL_547746, EPI_ISL_547747, EPI_ISL_547748, EPI_ISL_547749, EPI_ISL_547750, EPI_ISL_547751, EPI_ISL_547752, EPI_ISL_547753, EPI_ISL_547754, EPI_ISL_547755, EPI_ISL_547756, EPI_ISL_547757, EPI_ISL_547758, EPI_ISL_547759, EPI_ISL_547760, EPI_ISL_547761, EPI_ISL_547762, EPI_ISL_547763, EPI_ISL_547764, EPI_ISL_547765, EPI_ISL_547766, EPI_ISL_547767, EPI_ISL_547768, EPI_ISL_547769, EPI_ISL_547770, EPI_ISL_547771, EPI_ISL_547772, EPI_ISL_547773, EPI_ISL_547774, EPI_ISL_547775, EPI_ISL_547776, EPI_ISL_547777, EPI_ISL_547778, EPI_ISL_547779, EPI_ISL_547780, EPI_ISL_547781, EPI_ISL_547782, EPI_ISL_547783, EPI_ISL_547784, EPI_ISL_547785, EPI_ISL_547786, EPI_ISL_547787, EPI_ISL_547788, EPI_ISL_547789, EPI_ISL_547790, EPI_ISL_547791, EPI_ISL_547792, EPI_ISL_547793, EPI_ISL_547794, EPI_ISL_547795, EPI_ISL_547796, EPI_ISL_547797, EPI_ISL_547798, EPI_ISL_547799, EPI_ISL_547800, EPI_ISL_547801, EPI_ISL_547802, EPI_ISL_547803, EPI_ISL_547804, EPI_ISL_547805, EPI_ISL_547806, EPI_ISL_547807, EPI_ISL_547808, EPI_ISL_547809, EPI_ISL_547810, EPI_ISL_547811, EPI_ISL_547812, EPI_ISL_547813, EPI_ISL_547814, EPI_ISL_547815, EPI_ISL_547816, EPI_ISL_547817, EPI_ISL_547818, EPI_ISL_547819, EPI_ISL_547820, EPI_ISL_547821, EPI_ISL_547822, EPI_ISL_547823, EPI_ISL_547824, EPI_ISL_547825, EPI_ISL_547826, EPI_ISL_547827, EPI_ISL_547828, EPI_ISL_547829, EPI_ISL_547830, EPI_ISL_547831, EPI_ISL_547832, EPI_ISL_547833, EPI_ISL_547834, EPI_ISL_547835, EPI_ISL_547836, EPI_ISL_547837, EPI_ISL_547838, EPI_ISL_547839, EPI_ISL_547840, EPI_ISL_547841, EPI_ISL_547842, EPI_ISL_547843, EPI_ISL_547844, EPI_ISL_547845, EPI_ISL_547846, EPI_ISL_547847, EPI_ISL_547848, EPI_ISL_547849, EPI_ISL_547850, EPI_ISL_547851, EPI_ISL_547852, EPI_ISL_547853, EPI_ISL_547854, EPI_ISL_547855, EPI_ISL_547856, EPI_ISL_547857, EPI_ISL_547858, EPI_ISL_547859, EPI_ISL_547860, EPI_ISL_547861, EPI_ISL_547862, EPI_ISL_547863, EPI_ISL_547864, EPI_ISL_547865, EPI_ISL_547866, EPI_ISL_547867                                                                                                 | Gundersen Molecular Diagnostics Laboratory                      | Kabara Cancer Research Institute                                                 | Craig S. Richmond, Paraic A. Kenny                                                                                                               |
| see above                                                                                                                                                                                                                                                                                                                                                                                                                                                                                                                                                                                                                                                                                                                                                                                                                                                                                                                                                                                                                                                                                                                                                                                                                                                                                                                                                                                                                                                                                                                                                                                                                                                                                                                                                                                                                                                                                                                                                                                                                                                                                                                                                                                                                                                                                                                                                                                                                                                                                                                                                                                                                                                                                                                                                                                      | Gundersen Molecular Diagnostics Laboratory                      | Kabara Cancer Research Institute                                                 | Craig S. Richmond, Paraic A. Kenny                                                                                                               |
| EPI_ISL_574578                                                                                                                                                                                                                                                                                                                                                                                                                                                                                                                                                                                                                                                                                                                                                                                                                                                                                                                                                                                                                                                                                                                                                                                                                                                                                                                                                                                                                                                                                                                                                                                                                                                                                                                                                                                                                                                                                                                                                                                                                                                                                                                                                                                                                                                                                                                                                                                                                                                                                                                                                                                                                                                                                                                                                                                 | Hospital Municipal Mário Gatti                                  | Instituto Adolfo Lutz, Interdisciplinary Procedures Center, Strategic Laboratory | Claudio Tavares Sacchi, Claudia Regina Gonçalves, Erica Valessa Ramos Gomes, Karoline Rodrigues Campos                                           |
| EPI_ISL_574579                                                                                                                                                                                                                                                                                                                                                                                                                                                                                                                                                                                                                                                                                                                                                                                                                                                                                                                                                                                                                                                                                                                                                                                                                                                                                                                                                                                                                                                                                                                                                                                                                                                                                                                                                                                                                                                                                                                                                                                                                                                                                                                                                                                                                                                                                                                                                                                                                                                                                                                                                                                                                                                                                                                                                                                 | Hospital Municipal Dr. Ignacio Prouença de Gouveia              | Instituto Adolfo Lutz, Interdisciplinary Procedures Center, Strategic Laboratory | Claudio Tavares Sacchi, Claudia Regina Gonçalves, Erica Valessa Ramos Gomes, Karoline Rodrigues Campos                                           |
| EPI_ISL_574592                                                                                                                                                                                                                                                                                                                                                                                                                                                                                                                                                                                                                                                                                                                                                                                                                                                                                                                                                                                                                                                                                                                                                                                                                                                                                                                                                                                                                                                                                                                                                                                                                                                                                                                                                                                                                                                                                                                                                                                                                                                                                                                                                                                                                                                                                                                                                                                                                                                                                                                                                                                                                                                                                                                                                                                 | Hospital Domingos Leonardo Ceravolo Presidente Prudente         | Instituto Adolfo Lutz, Interdisciplinary Procedures Center, Strategic Laboratory | Claudio Tavares Sacchi, Claudia Regina Gonçalves, Erica Valessa Ramos Gomes, Karoline Rodrigues Campos                                           |
| EPI_ISL_574593                                                                                                                                                                                                                                                                                                                                                                                                                                                                                                                                                                                                                                                                                                                                                                                                                                                                                                                                                                                                                                                                                                                                                                                                                                                                                                                                                                                                                                                                                                                                                                                                                                                                                                                                                                                                                                                                                                                                                                                                                                                                                                                                                                                                                                                                                                                                                                                                                                                                                                                                                                                                                                                                                                                                                                                 | CS II Dr. Antonio Vicoso Moreira de Rezende Sumare              | Instituto Adolfo Lutz, Interdisciplinary Procedures Center, Strategic Laboratory | Claudio Tavares Sacchi, Claudia Regina Gonçalves, Erica Valessa Ramos Gomes, Karoline Rodrigues Campos                                           |
| EPI_ISL_574594                                                                                                                                                                                                                                                                                                                                                                                                                                                                                                                                                                                                                                                                                                                                                                                                                                                                                                                                                                                                                                                                                                                                                                                                                                                                                                                                                                                                                                                                                                                                                                                                                                                                                                                                                                                                                                                                                                                                                                                                                                                                                                                                                                                                                                                                                                                                                                                                                                                                                                                                                                                                                                                                                                                                                                                 | Hospital Escola da Universidade de Taubate                      | Instituto Adolfo Lutz, Interdisciplinary Procedures Center, Strategic Laboratory | Claudio Tavares Sacchi, Claudia Regina Gonçalves, Erica Valessa Ramos Gomes, Karoline Rodrigues Campos                                           |
| EPI_ISL_574597                                                                                                                                                                                                                                                                                                                                                                                                                                                                                                                                                                                                                                                                                                                                                                                                                                                                                                                                                                                                                                                                                                                                                                                                                                                                                                                                                                                                                                                                                                                                                                                                                                                                                                                                                                                                                                                                                                                                                                                                                                                                                                                                                                                                                                                                                                                                                                                                                                                                                                                                                                                                                                                                                                                                                                                 | Secretaria Municipal de Saude de Jarinu                         | Instituto Adolfo Lutz, Interdisciplinary Procedures Center, Strategic Laboratory | Claudio Tavares Sacchi, Claudia Regina Gonçalves, Erica Valessa Ramos Gomes, Karoline Rodrigues Campos                                           |
| EPI_ISL_574598                                                                                                                                                                                                                                                                                                                                                                                                                                                                                                                                                                                                                                                                                                                                                                                                                                                                                                                                                                                                                                                                                                                                                                                                                                                                                                                                                                                                                                                                                                                                                                                                                                                                                                                                                                                                                                                                                                                                                                                                                                                                                                                                                                                                                                                                                                                                                                                                                                                                                                                                                                                                                                                                                                                                                                                 | Servico de Verificacao de Obito SVO                             | Instituto Adolfo Lutz, Interdisciplinary Procedures Center, Strategic Laboratory | Claudio Tavares Sacchi, Claudia Regina Gonçalves, Erica Valessa Ramos Gomes, Karoline Rodrigues Campos                                           |
| EPI_ISL_577607                                                                                                                                                                                                                                                                                                                                                                                                                                                                                                                                                                                                                                                                                                                                                                                                                                                                                                                                                                                                                                                                                                                                                                                                                                                                                                                                                                                                                                                                                                                                                                                                                                                                                                                                                                                                                                                                                                                                                                                                                                                                                                                                                                                                                                                                                                                                                                                                                                                                                                                                                                                                                                                                                                                                                                                 | Royal Hobart Hospital                                           | Royal Hobart Hospital                                                            | Cooley L., van Haeften R.                                                                                                                        |
| EPI_ISL_583490                                                                                                                                                                                                                                                                                                                                                                                                                                                                                                                                                                                                                                                                                                                                                                                                                                                                                                                                                                                                                                                                                                                                                                                                                                                                                                                                                                                                                                                                                                                                                                                                                                                                                                                                                                                                                                                                                                                                                                                                                                                                                                                                                                                                                                                                                                                                                                                                                                                                                                                                                                                                                                                                                                                                                                                 | Hospital Estadual Sumare                                        | Instituto Adolfo Lutz, Interdisciplinary Procedures Center, Strategic Laboratory | Claudio Tavares Sacchi, Claudia Regina Gonçalves, Erica Valessa Ramos Gomes, Karoline Rodrigues Campos                                           |
| EPI_ISL_583491                                                                                                                                                                                                                                                                                                                                                                                                                                                                                                                                                                                                                                                                                                                                                                                                                                                                                                                                                                                                                                                                                                                                                                                                                                                                                                                                                                                                                                                                                                                                                                                                                                                                                                                                                                                                                                                                                                                                                                                                                                                                                                                                                                                                                                                                                                                                                                                                                                                                                                                                                                                                                                                                                                                                                                                 | Centro de Saude Est IV Zona Rual Domingos de SJ Rio Pardo       | Instituto Adolfo Lutz, Interdisciplinary Procedures Center, Strategic Laboratory | Claudio Tavares Sacchi, Claudia Regina Gonçalves, Erica Valessa Ramos Gomes, Karoline Rodrigues Campos                                           |
| EPI_ISL_583492                                                                                                                                                                                                                                                                                                                                                                                                                                                                                                                                                                                                                                                                                                                                                                                                                                                                                                                                                                                                                                                                                                                                                                                                                                                                                                                                                                                                                                                                                                                                                                                                                                                                                                                                                                                                                                                                                                                                                                                                                                                                                                                                                                                                                                                                                                                                                                                                                                                                                                                                                                                                                                                                                                                                                                                 | Santa Casa Anna Cintra                                          | Instituto Adolfo Lutz, Interdisciplinary Procedures Center, Strategic Laboratory | Claudio Tavares Sacchi, Claudia Regina Gonçalves, Erica Valessa Ramos Gomes, Karoline Rodrigues Campos                                           |
| EPI_ISL_583497                                                                                                                                                                                                                                                                                                                                                                                                                                                                                                                                                                                                                                                                                                                                                                                                                                                                                                                                                                                                                                                                                                                                                                                                                                                                                                                                                                                                                                                                                                                                                                                                                                                                                                                                                                                                                                                                                                                                                                                                                                                                                                                                                                                                                                                                                                                                                                                                                                                                                                                                                                                                                                                                                                                                                                                 | Complexo Hospitalar Ouro Verde de Campinas                      | Instituto Adolfo Lutz, Interdisciplinary Procedures Center, Strategic Laboratory | Claudio Tavares Sacchi, Claudia Regina Gonçalves, Erica Valessa Ramos Gomes, Karoline Rodrigues Campos                                           |
| EPI_ISL_583499                                                                                                                                                                                                                                                                                                                                                                                                                                                                                                                                                                                                                                                                                                                                                                                                                                                                                                                                                                                                                                                                                                                                                                                                                                                                                                                                                                                                                                                                                                                                                                                                                                                                                                                                                                                                                                                                                                                                                                                                                                                                                                                                                                                                                                                                                                                                                                                                                                                                                                                                                                                                                                                                                                                                                                                 | Distrito Sanitario Sul Campinas                                 | Instituto Adolfo Lutz, Interdisciplinary Procedures Center, Strategic Laboratory | Claudio Tavares Sacchi, Claudia Regina Gonçalves, Erica Valessa Ramos Gomes, Karoline Rodrigues Campos                                           |
| EPI_ISL_583503                                                                                                                                                                                                                                                                                                                                                                                                                                                                                                                                                                                                                                                                                                                                                                                                                                                                                                                                                                                                                                                                                                                                                                                                                                                                                                                                                                                                                                                                                                                                                                                                                                                                                                                                                                                                                                                                                                                                                                                                                                                                                                                                                                                                                                                                                                                                                                                                                                                                                                                                                                                                                                                                                                                                                                                 | CTA Centro de Testagem e Aconselhamento                         | Instituto Adolfo Lutz, Interdisciplinary Procedures Center, Strategic Laboratory | Claudio Tavares Sacchi, Claudia Regina Gonçalves, Erica Valessa Ramos Gomes, Karoline Rodrigues Campos                                           |
| EPI_ISL_585092, EPI_ISL_585093, EPI_ISL_585094, EPI_ISL_585095, EPI_ISL_585096, EPI_ISL_585097, EPI_ISL_585098, EPI_ISL_585099, EPI_ISL_585100, EPI_ISL_585101, EPI_ISL_585102, EPI_ISL_585103, EPI_ISL_585104, EPI_ISL_585105, EPI_ISL_585106, EPI_ISL_585107, EPI_ISL_585108, EPI_ISL_585109, EPI_ISL_585110, EPI_ISL_585111, EPI_ISL_585112, EPI_ISL_585113, EPI_ISL_585114, EPI_ISL_585115, EPI_ISL_585116, EPI_ISL_585117, EPI_ISL_585118, EPI_ISL_585119, EPI_ISL_585120, EPI_ISL_585121, EPI_ISL_585122, EPI_ISL_585123, EPI_ISL_585124, EPI_ISL_585125, EPI_ISL_585126, EPI_ISL_585127, EPI_ISL_585128, EPI_ISL_585129, EPI_ISL_585130, EPI_ISL_585131, EPI_ISL_585132, EPI_ISL_585133, EPI_ISL_585134, EPI_ISL_585135, EPI_ISL_585136, EPI_ISL_585137, EPI_ISL_585138, EPI_ISL_585139, EPI_ISL_585140, EPI_ISL_585141, EPI_ISL_585142, EPI_ISL_585143, EPI_ISL_585144, EPI_ISL_585145, EPI_ISL_585146, EPI_ISL_585147, EPI_ISL_585148, EPI_ISL_585149, EPI_ISL_585150, EPI_ISL_585151, EPI_ISL_585152, EPI_ISL_585153, EPI_ISL_585154, EPI_ISL_585155, EPI_ISL_585156, EPI_ISL_585157, EPI_ISL_585158, EPI_ISL_585159, EPI_ISL_585160, EPI_ISL_585161, EPI_ISL_585162, EPI_ISL_585163, EPI_ISL_585164, EPI_ISL_585165, EPI_ISL_585166, EPI_ISL_585167, EPI_ISL_585168, EPI_ISL_585169, EPI_ISL_585170, EPI_ISL_585171, EPI_ISL_585172, EPI_ISL_585173, EPI_ISL_585174, EPI_ISL_585175, EPI_ISL_585176, EPI_ISL_585177, EPI_ISL_585178, EPI_ISL_585179, EPI_ISL_585180, EPI_ISL_585181, EPI_ISL_585182, EPI_ISL_585183, EPI_ISL_585184, EPI_ISL_585185, EPI_ISL_585186, EPI_ISL_585187, EPI_ISL_585188, EPI_ISL_585189, EPI_ISL_585190, EPI_ISL_585191, EPI_ISL_585192, EPI_ISL_585193, EPI_ISL_585194, EPI_ISL_585195, EPI_ISL_585196, EPI_ISL_585197, EPI_ISL_585198, EPI_ISL_585199, EPI_ISL_585200, EPI_ISL_585201, EPI_ISL_585202, EPI_ISL_585203, EPI_ISL_585204, EPI_ISL_585205, EPI_ISL_585206, EPI_ISL_585207, EPI_ISL_585208, EPI_ISL_585209, EPI_ISL_585210, EPI_ISL_585211, EPI_ISL_585212, EPI_ISL_585213, EPI_ISL_585214, EPI_ISL_585215, EPI_ISL_585216, EPI_ISL_585217, EPI_ISL_585218, EPI_ISL_585219, EPI_ISL_585220, EPI_ISL_585221, EPI_ISL_585222, EPI_ISL_585223, EPI_ISL_585224, EPI_ISL_585225, EPI_ISL_585226, EPI_ISL_585227, EPI_ISL_585228, EPI_ISL_585229, EPI_ISL_585230, EPI_ISL_585231, EPI_ISL_585232, EPI_ISL_585233, EPI_ISL_585234, EPI_ISL_585235, EPI_ISL_585236, EPI_ISL_585237, EPI_ISL_585238, EPI_ISL_585239, EPI_ISL_585240, EPI_ISL_585241, EPI_ISL_585242, EPI_ISL_585243, EPI_ISL_585244, EPI_ISL_585245, EPI_ISL_585246, EPI_ISL_585247, EPI_ISL_585248, EPI_ISL_585249, EPI_ISL_585250, EPI_ISL_585251, EPI_ISL_585252, EPI_ISL_585253, EPI_ISL_585254, EPI_ISL_585255, EPI_ISL_585256, EPI_ISL_585257, EPI_ISL_585258, EPI_ISL_585259 | Regional Virus Laboratory, Belfast Health and Social Care Trust | COVID-19 Genomics UK (COG-UK) Consortium                                         | Conall McCaughey, James McKenna, Tanya Curran, Susan Feeney, Alison Watt, Ciara Cox, Mairead Connor, Zoltan Molnar, David Simpson, Derek Fairley |
| EPI_ISL_591326, EPI_ISL_591327, EPI_ISL_591328, EPI_ISL_591329, EPI_ISL_591330, EPI_ISL_591331, EPI_ISL_591332, EPI_ISL_591333, EPI_ISL_591334, EPI_ISL_591335, EPI_ISL_591337, EPI_ISL_591338, EPI_ISL_591339, EPI_ISL_591340                                                                                                                                                                                                                                                                                                                                                                                                                                                                                                                                                                                                                                                                                                                                                                                                                                                                                                                                                                                                                                                                                                                                                                                                                                                                                                                                                                                                                                                                                                                                                                                                                                                                                                                                                                                                                                                                                                                                                                                                                                                                                                                                                                                                                                                                                                                                                                                                                                                                                                                                                                 | Dipartimento di Biotecnologie Mediche, University of Siena      | Dipartimento di Biotecnologie Mediche, University of Siena                       | Cusi,M.G., Pinzauti,D., Gandolfo,C., Anichini,G., Pozzi,G., Santoro,F.                                                                           |
| see above                                                                                                                                                                                                                                                                                                                                                                                                                                                                                                                                                                                                                                                                                                                                                                                                                                                                                                                                                                                                                                                                                                                                                                                                                                                                                                                                                                                                                                                                                                                                                                                                                                                                                                                                                                                                                                                                                                                                                                                                                                                                                                                                                                                                                                                                                                                                                                                                                                                                                                                                                                                                                                                                                                                                                                                      | Dipartimento di Biotecnologie Mediche, University of Siena      | Dipartimento di Biotecnologie Mediche, University of Siena                       | Cusi,M.G., Pinzauti,D., Gandolfo,C., Anichini,G., Pozzi,G., Santoro,F.                                                                           |
| EPI_ISL_603021                                                                                                                                                                                                                                                                                                                                                                                                                                                                                                                                                                                                                                                                                                                                                                                                                                                                                                                                                                                                                                                                                                                                                                                                                                                                                                                                                                                                                                                                                                                                                                                                                                                                                                                                                                                                                                                                                                                                                                                                                                                                                                                                                                                                                                                                                                                                                                                                                                                                                                                                                                                                                                                                                                                                                                                 | Pronto Socorro Dr. Conrado Cesarino Nuvolini                    | Instituto Adolfo Lutz, Interdisciplinary Procedures Center, Strategic Laboratory | Claudio Tavares Sacchi, Claudia Regina Gonçalves, Erica Valessa Ramos Gomes, Karoline Rodrigues Campos                                           |
| EPI_ISL_603022                                                                                                                                                                                                                                                                                                                                                                                                                                                                                                                                                                                                                                                                                                                                                                                                                                                                                                                                                                                                                                                                                                                                                                                                                                                                                                                                                                                                                                                                                                                                                                                                                                                                                                                                                                                                                                                                                                                                                                                                                                                                                                                                                                                                                                                                                                                                                                                                                                                                                                                                                                                                                                                                                                                                                                                 | Departamento de Vigilância à Saúde                              | Instituto Adolfo Lutz, Interdisciplinary Procedures Center, Strategic Laboratory | Claudio Tavares Sacchi, Claudia Regina Gonçalves, Erica Valessa Ramos Gomes, Karoline Rodrigues Campos                                           |
| EPI_ISL_603023                                                                                                                                                                                                                                                                                                                                                                                                                                                                                                                                                                                                                                                                                                                                                                                                                                                                                                                                                                                                                                                                                                                                                                                                                                                                                                                                                                                                                                                                                                                                                                                                                                                                                                                                                                                                                                                                                                                                                                                                                                                                                                                                                                                                                                                                                                                                                                                                                                                                                                                                                                                                                                                                                                                                                                                 | Vigilância em Saúde Visa Sul                                    | Instituto Adolfo Lutz, Interdisciplinary Procedures Center, Strategic Laboratory | Claudio Tavares Sacchi, Claudia Regina Gonçalves, Erica Valessa Ramos Gomes, Karoline Rodrigues Campos                                           |
| EPI_ISL_603025                                                                                                                                                                                                                                                                                                                                                                                                                                                                                                                                                                                                                                                                                                                                                                                                                                                                                                                                                                                                                                                                                                                                                                                                                                                                                                                                                                                                                                                                                                                                                                                                                                                                                                                                                                                                                                                                                                                                                                                                                                                                                                                                                                                                                                                                                                                                                                                                                                                                                                                                                                                                                                                                                                                                                                                 | UPA Central de Caragatatuba                                     | Instituto Adolfo Lutz, Interdisciplinary Procedures Center, Strategic Laboratory | Claudio Tavares Sacchi, Claudia Regina Gonçalves, Erica Valessa Ramos Gomes, Karoline Rodrigues Campos                                           |
| EPI_ISL_603027                                                                                                                                                                                                                                                                                                                                                                                                                                                                                                                                                                                                                                                                                                                                                                                                                                                                                                                                                                                                                                                                                                                                                                                                                                                                                                                                                                                                                                                                                                                                                                                                                                                                                                                                                                                                                                                                                                                                                                                                                                                                                                                                                                                                                                                                                                                                                                                                                                                                                                                                                                                                                                                                                                                                                                                 | Santa Casa de Misericórdia de Araçatuba                         | Instituto Adolfo Lutz, Interdisciplinary Procedures Center, Strategic Laboratory | Claudio Tavares Sacchi, Claudia Regina Gonçalves, Erica Valessa Ramos Gomes, Karoline Rodrigues Campos                                           |
| EPI_ISL_603029                                                                                                                                                                                                                                                                                                                                                                                                                                                                                                                                                                                                                                                                                                                                                                                                                                                                                                                                                                                                                                                                                                                                                                                                                                                                                                                                                                                                                                                                                                                                                                                                                                                                                                                                                                                                                                                                                                                                                                                                                                                                                                                                                                                                                                                                                                                                                                                                                                                                                                                                                                                                                                                                                                                                                                                 | Hospital Municipal Mário Gatti                                  | Instituto Adolfo Lutz, Interdisciplinary Procedures Center,                      | Claudio Tavares Sacchi, Claudia Regina Gonçalves, Erica Valessa Ramos Gomes, Karoline Rodrigues Campos                                           |





| see above                                                                                                                                                                                                                                                                                                                                                                                                                                                                                                                                                                                                                                                                                                                                                                                                                                                                                                                                                                                                                                                                                                                                                                                                                                                                                                                                                                                                                                                                                                                                                                                                                                                                                                                                                                                                                                                                                                                                                                                                                                                                                                                                                                                                                                                                                                                                                                                                                                                                                                                                                                                                                                                                                                                                                                                                                                                                                                                                                                                                                                                                                                                                                                                                                                                                                                                                                                                                                                                                                                                                                                                                                                                                                                                                                                                                                                                                                                                                                                                                                                                      | Gundersen Molecular Diagnostics Laboratory                            | Kabara Cancer Research Institute                                                 | Craig S. Richmond, Paraic A. Kenny                                                                                                                                                                                                                                       |                                                                                                                                                  |
|----------------------------------------------------------------------------------------------------------------------------------------------------------------------------------------------------------------------------------------------------------------------------------------------------------------------------------------------------------------------------------------------------------------------------------------------------------------------------------------------------------------------------------------------------------------------------------------------------------------------------------------------------------------------------------------------------------------------------------------------------------------------------------------------------------------------------------------------------------------------------------------------------------------------------------------------------------------------------------------------------------------------------------------------------------------------------------------------------------------------------------------------------------------------------------------------------------------------------------------------------------------------------------------------------------------------------------------------------------------------------------------------------------------------------------------------------------------------------------------------------------------------------------------------------------------------------------------------------------------------------------------------------------------------------------------------------------------------------------------------------------------------------------------------------------------------------------------------------------------------------------------------------------------------------------------------------------------------------------------------------------------------------------------------------------------------------------------------------------------------------------------------------------------------------------------------------------------------------------------------------------------------------------------------------------------------------------------------------------------------------------------------------------------------------------------------------------------------------------------------------------------------------------------------------------------------------------------------------------------------------------------------------------------------------------------------------------------------------------------------------------------------------------------------------------------------------------------------------------------------------------------------------------------------------------------------------------------------------------------------------------------------------------------------------------------------------------------------------------------------------------------------------------------------------------------------------------------------------------------------------------------------------------------------------------------------------------------------------------------------------------------------------------------------------------------------------------------------------------------------------------------------------------------------------------------------------------------------------------------------------------------------------------------------------------------------------------------------------------------------------------------------------------------------------------------------------------------------------------------------------------------------------------------------------------------------------------------------------------------------------------------------------------------------------------------|-----------------------------------------------------------------------|----------------------------------------------------------------------------------|--------------------------------------------------------------------------------------------------------------------------------------------------------------------------------------------------------------------------------------------------------------------------|--------------------------------------------------------------------------------------------------------------------------------------------------|
| EPI_ISL_680198, EPI_ISL_680199, EPI_ISL_680200, EPI_ISL_680201, EPI_ISL_680202, EPI_ISL_680203, EPI_ISL_680204, EPI_ISL_680205, EPI_ISL_680206, EPI_ISL_680207, EPI_ISL_680208, EPI_ISL_680209, EPI_ISL_680210, EPI_ISL_680211, EPI_ISL_680212, EPI_ISL_680213, EPI_ISL_680214, EPI_ISL_680215, EPI_ISL_680216, EPI_ISL_680217, EPI_ISL_680218, EPI_ISL_680219, EPI_ISL_680220, EPI_ISL_680221, EPI_ISL_680222, EPI_ISL_680223, EPI_ISL_680224, EPI_ISL_680225, EPI_ISL_680226, EPI_ISL_680227, EPI_ISL_680228, EPI_ISL_680229, EPI_ISL_680230, EPI_ISL_680231, EPI_ISL_680232, EPI_ISL_680233, EPI_ISL_680234, EPI_ISL_680235, EPI_ISL_680236, EPI_ISL_680237, EPI_ISL_680238, EPI_ISL_680239, EPI_ISL_680240, EPI_ISL_680241, EPI_ISL_680242, EPI_ISL_680243, EPI_ISL_680244, EPI_ISL_680245, EPI_ISL_680246, EPI_ISL_680247, EPI_ISL_680248, EPI_ISL_680249, EPI_ISL_680250, EPI_ISL_680251, EPI_ISL_680252, EPI_ISL_680253, EPI_ISL_680254, EPI_ISL_680255, EPI_ISL_680256, EPI_ISL_680257, EPI_ISL_680258, EPI_ISL_680259, EPI_ISL_680260, EPI_ISL_680261, EPI_ISL_680262, EPI_ISL_680263, EPI_ISL_680264, EPI_ISL_680265, EPI_ISL_680266, EPI_ISL_680267, EPI_ISL_680268, EPI_ISL_680269, EPI_ISL_680270, EPI_ISL_680271, EPI_ISL_680272, EPI_ISL_680273, EPI_ISL_680274, EPI_ISL_680275, EPI_ISL_680276, EPI_ISL_680277, EPI_ISL_680278, EPI_ISL_680279, EPI_ISL_680280, EPI_ISL_680281, EPI_ISL_680282, EPI_ISL_680283, EPI_ISL_680284, EPI_ISL_680285, EPI_ISL_680286, EPI_ISL_680287, EPI_ISL_680288, EPI_ISL_680289, EPI_ISL_680290, EPI_ISL_680291, EPI_ISL_680292, EPI_ISL_680293, EPI_ISL_680294, EPI_ISL_680295, EPI_ISL_680296, EPI_ISL_680297, EPI_ISL_680298, EPI_ISL_680299, EPI_ISL_680300, EPI_ISL_680301, EPI_ISL_680302, EPI_ISL_680303, EPI_ISL_680304, EPI_ISL_680305, EPI_ISL_680306, EPI_ISL_680307, EPI_ISL_680308, EPI_ISL_680309, EPI_ISL_680310, EPI_ISL_680311, EPI_ISL_680312, EPI_ISL_680313, EPI_ISL_680314, EPI_ISL_680315, EPI_ISL_680316, EPI_ISL_680317, EPI_ISL_680318, EPI_ISL_680319, EPI_ISL_680320, EPI_ISL_680321, EPI_ISL_680322, EPI_ISL_680323, EPI_ISL_680324, EPI_ISL_680325, EPI_ISL_680326, EPI_ISL_680327, EPI_ISL_680328, EPI_ISL_680329, EPI_ISL_680330, EPI_ISL_680331, EPI_ISL_680332, EPI_ISL_680333, EPI_ISL_680334, EPI_ISL_680335, EPI_ISL_680336, EPI_ISL_680337, EPI_ISL_680338, EPI_ISL_680339, EPI_ISL_680340, EPI_ISL_680341, EPI_ISL_680342, EPI_ISL_680343, EPI_ISL_680344, EPI_ISL_680345, EPI_ISL_680346, EPI_ISL_680347, EPI_ISL_680348, EPI_ISL_680349, EPI_ISL_680350, EPI_ISL_680351, EPI_ISL_680352, EPI_ISL_680353, EPI_ISL_680354, EPI_ISL_680355, EPI_ISL_680356, EPI_ISL_680357, EPI_ISL_680358, EPI_ISL_680359, EPI_ISL_680360, EPI_ISL_680361, EPI_ISL_680362, EPI_ISL_680363, EPI_ISL_680364, EPI_ISL_680365, EPI_ISL_680366, EPI_ISL_680367, EPI_ISL_680368, EPI_ISL_680369, EPI_ISL_680370, EPI_ISL_680371, EPI_ISL_680372, EPI_ISL_680373, EPI_ISL_680374, EPI_ISL_680375, EPI_ISL_680376, EPI_ISL_680377, EPI_ISL_680378, EPI_ISL_680379, EPI_ISL_680380, EPI_ISL_680381, EPI_ISL_680382, EPI_ISL_680383, EPI_ISL_680384, EPI_ISL_680385, EPI_ISL_680386, EPI_ISL_680387, EPI_ISL_680388, EPI_ISL_680389, EPI_ISL_680390, EPI_ISL_680391, EPI_ISL_680392, EPI_ISL_680393, EPI_ISL_680394, EPI_ISL_680395, EPI_ISL_680396, EPI_ISL_680397, EPI_ISL_680398, EPI_ISL_680399, EPI_ISL_680400, EPI_ISL_680401, EPI_ISL_680402, EPI_ISL_680403, EPI_ISL_680404, EPI_ISL_680405, EPI_ISL_680406, EPI_ISL_680407, EPI_ISL_680408, EPI_ISL_680409, EPI_ISL_680410, EPI_ISL_680411, EPI_ISL_680412, EPI_ISL_680413, EPI_ISL_680414, EPI_ISL_680415, EPI_ISL_680416, EPI_ISL_680417, EPI_ISL_680418, EPI_ISL_680419, EPI_ISL_680420, EPI_ISL_680421, EPI_ISL_680422, EPI_ISL_680423, EPI_ISL_680424, EPI_ISL_680425, EPI_ISL_680426, EPI_ISL_680427, EPI_ISL_680428, EPI_ISL_680429, EPI_ISL_680430, EPI_ISL_680431, EPI_ISL_680432, EPI_ISL_680433, EPI_ISL_680434, EPI_ISL_680435, EPI_ISL_680436, EPI_ISL_680437, EPI_ISL_680438, EPI_ISL_680439, EPI_ISL_680440, EPI_ISL_680441 | see above                                                             | Regional Virus Laboratory, Belfast Health and Social Care Trust                  | COVID-19 Genomics UK (COG-UK) Consortium                                                                                                                                                                                                                                 | Conall McCaughey, James McKenna, Tanya Curran, Susan Feeney, Alison Watt, Ciara Cox, Mairead Connor, Zoltan Molnar, David Simpson, Derek Fairley |
| EPI_ISL_693195                                                                                                                                                                                                                                                                                                                                                                                                                                                                                                                                                                                                                                                                                                                                                                                                                                                                                                                                                                                                                                                                                                                                                                                                                                                                                                                                                                                                                                                                                                                                                                                                                                                                                                                                                                                                                                                                                                                                                                                                                                                                                                                                                                                                                                                                                                                                                                                                                                                                                                                                                                                                                                                                                                                                                                                                                                                                                                                                                                                                                                                                                                                                                                                                                                                                                                                                                                                                                                                                                                                                                                                                                                                                                                                                                                                                                                                                                                                                                                                                                                                 | Hospital e Pronto Socorro Portinari                                   | Instituto Adolfo Lutz, Interdisciplinary Procedures Center, Strategic Laboratory | Claudio Tavares Sacchi, Claudia Regina Gonçalves, Erica Valessa Ramos Gomes, Karoline Rodrigues Campos                                                                                                                                                                   |                                                                                                                                                  |
| EPI_ISL_693197                                                                                                                                                                                                                                                                                                                                                                                                                                                                                                                                                                                                                                                                                                                                                                                                                                                                                                                                                                                                                                                                                                                                                                                                                                                                                                                                                                                                                                                                                                                                                                                                                                                                                                                                                                                                                                                                                                                                                                                                                                                                                                                                                                                                                                                                                                                                                                                                                                                                                                                                                                                                                                                                                                                                                                                                                                                                                                                                                                                                                                                                                                                                                                                                                                                                                                                                                                                                                                                                                                                                                                                                                                                                                                                                                                                                                                                                                                                                                                                                                                                 | Central de Rede de Frio Municipal                                     | Instituto Adolfo Lutz, Interdisciplinary Procedures Center, Strategic Laboratory | Claudio Tavares Sacchi, Claudia Regina Gonçalves, Erica Valessa Ramos Gomes, Karoline Rodrigues Campos                                                                                                                                                                   |                                                                                                                                                  |
| EPI_ISL_693200                                                                                                                                                                                                                                                                                                                                                                                                                                                                                                                                                                                                                                                                                                                                                                                                                                                                                                                                                                                                                                                                                                                                                                                                                                                                                                                                                                                                                                                                                                                                                                                                                                                                                                                                                                                                                                                                                                                                                                                                                                                                                                                                                                                                                                                                                                                                                                                                                                                                                                                                                                                                                                                                                                                                                                                                                                                                                                                                                                                                                                                                                                                                                                                                                                                                                                                                                                                                                                                                                                                                                                                                                                                                                                                                                                                                                                                                                                                                                                                                                                                 | Hospital e Maternidade Mairipora                                      | Instituto Adolfo Lutz, Interdisciplinary Procedures Center, Strategic Laboratory | Claudio Tavares Sacchi, Claudia Regina Gonçalves, Erica Valessa Ramos Gomes, Karoline Rodrigues Campos                                                                                                                                                                   |                                                                                                                                                  |
| EPI_ISL_693202                                                                                                                                                                                                                                                                                                                                                                                                                                                                                                                                                                                                                                                                                                                                                                                                                                                                                                                                                                                                                                                                                                                                                                                                                                                                                                                                                                                                                                                                                                                                                                                                                                                                                                                                                                                                                                                                                                                                                                                                                                                                                                                                                                                                                                                                                                                                                                                                                                                                                                                                                                                                                                                                                                                                                                                                                                                                                                                                                                                                                                                                                                                                                                                                                                                                                                                                                                                                                                                                                                                                                                                                                                                                                                                                                                                                                                                                                                                                                                                                                                                 | Pronto Socorro Municipal Prof. Joao Catarin Mezomo                    | Instituto Adolfo Lutz, Interdisciplinary Procedures Center, Strategic Laboratory | Claudio Tavares Sacchi, Claudia Regina Gonçalves, Erica Valessa Ramos Gomes, Karoline Rodrigues Campos                                                                                                                                                                   |                                                                                                                                                  |
| EPI_ISL_693205                                                                                                                                                                                                                                                                                                                                                                                                                                                                                                                                                                                                                                                                                                                                                                                                                                                                                                                                                                                                                                                                                                                                                                                                                                                                                                                                                                                                                                                                                                                                                                                                                                                                                                                                                                                                                                                                                                                                                                                                                                                                                                                                                                                                                                                                                                                                                                                                                                                                                                                                                                                                                                                                                                                                                                                                                                                                                                                                                                                                                                                                                                                                                                                                                                                                                                                                                                                                                                                                                                                                                                                                                                                                                                                                                                                                                                                                                                                                                                                                                                                 | Hospital de Campanha Covid-19 Assis                                   | Instituto Adolfo Lutz, Interdisciplinary Procedures Center, Strategic Laboratory | Claudio Tavares Sacchi, Claudia Regina Gonçalves, Erica Valessa Ramos Gomes, Karoline Rodrigues Campos                                                                                                                                                                   |                                                                                                                                                  |
| EPI_ISL_693206                                                                                                                                                                                                                                                                                                                                                                                                                                                                                                                                                                                                                                                                                                                                                                                                                                                                                                                                                                                                                                                                                                                                                                                                                                                                                                                                                                                                                                                                                                                                                                                                                                                                                                                                                                                                                                                                                                                                                                                                                                                                                                                                                                                                                                                                                                                                                                                                                                                                                                                                                                                                                                                                                                                                                                                                                                                                                                                                                                                                                                                                                                                                                                                                                                                                                                                                                                                                                                                                                                                                                                                                                                                                                                                                                                                                                                                                                                                                                                                                                                                 | Hospital Municipal Mario Gatti                                        | Instituto Adolfo Lutz, Interdisciplinary Procedures Center, Strategic Laboratory | Claudio Tavares Sacchi, Claudia Regina Gonçalves, Erica Valessa Ramos Gomes, Karoline Rodrigues Campos                                                                                                                                                                   |                                                                                                                                                  |
| EPI_ISL_693208, EPI_ISL_693209                                                                                                                                                                                                                                                                                                                                                                                                                                                                                                                                                                                                                                                                                                                                                                                                                                                                                                                                                                                                                                                                                                                                                                                                                                                                                                                                                                                                                                                                                                                                                                                                                                                                                                                                                                                                                                                                                                                                                                                                                                                                                                                                                                                                                                                                                                                                                                                                                                                                                                                                                                                                                                                                                                                                                                                                                                                                                                                                                                                                                                                                                                                                                                                                                                                                                                                                                                                                                                                                                                                                                                                                                                                                                                                                                                                                                                                                                                                                                                                                                                 | Hospital Municipal Antonio Giglio                                     | Instituto Adolfo Lutz, Interdisciplinary Procedures Center, Strategic Laboratory | Claudio Tavares Sacchi, Claudia Regina Gonçalves, Erica Valessa Ramos Gomes, Karoline Rodrigues Campos                                                                                                                                                                   |                                                                                                                                                  |
| EPI_ISL_693212                                                                                                                                                                                                                                                                                                                                                                                                                                                                                                                                                                                                                                                                                                                                                                                                                                                                                                                                                                                                                                                                                                                                                                                                                                                                                                                                                                                                                                                                                                                                                                                                                                                                                                                                                                                                                                                                                                                                                                                                                                                                                                                                                                                                                                                                                                                                                                                                                                                                                                                                                                                                                                                                                                                                                                                                                                                                                                                                                                                                                                                                                                                                                                                                                                                                                                                                                                                                                                                                                                                                                                                                                                                                                                                                                                                                                                                                                                                                                                                                                                                 | Santa Casa de Misericórdia de Braganca Paulista                       | Instituto Adolfo Lutz, Interdisciplinary Procedures Center, Strategic Laboratory | Claudio Tavares Sacchi, Claudia Regina Gonçalves, Erica Valessa Ramos Gomes, Karoline Rodrigues Campos                                                                                                                                                                   |                                                                                                                                                  |
| EPI_ISL_693213                                                                                                                                                                                                                                                                                                                                                                                                                                                                                                                                                                                                                                                                                                                                                                                                                                                                                                                                                                                                                                                                                                                                                                                                                                                                                                                                                                                                                                                                                                                                                                                                                                                                                                                                                                                                                                                                                                                                                                                                                                                                                                                                                                                                                                                                                                                                                                                                                                                                                                                                                                                                                                                                                                                                                                                                                                                                                                                                                                                                                                                                                                                                                                                                                                                                                                                                                                                                                                                                                                                                                                                                                                                                                                                                                                                                                                                                                                                                                                                                                                                 | Hospital E Maternidade Municipal Governador Mario Covas               | Instituto Adolfo Lutz, Interdisciplinary Procedures Center, Strategic Laboratory | Claudio Tavares Sacchi, Claudia Regina Gonçalves, Erica Valessa Ramos Gomes, Karoline Rodrigues Campos                                                                                                                                                                   |                                                                                                                                                  |
| EPI_ISL_693216                                                                                                                                                                                                                                                                                                                                                                                                                                                                                                                                                                                                                                                                                                                                                                                                                                                                                                                                                                                                                                                                                                                                                                                                                                                                                                                                                                                                                                                                                                                                                                                                                                                                                                                                                                                                                                                                                                                                                                                                                                                                                                                                                                                                                                                                                                                                                                                                                                                                                                                                                                                                                                                                                                                                                                                                                                                                                                                                                                                                                                                                                                                                                                                                                                                                                                                                                                                                                                                                                                                                                                                                                                                                                                                                                                                                                                                                                                                                                                                                                                                 | Unidade de Vigilância Epidemiológica de Araras                        | Instituto Adolfo Lutz, Interdisciplinary Procedures Center, Strategic Laboratory | Claudio Tavares Sacchi, Claudia Regina Gonçalves, Erica Valessa Ramos Gomes, Karoline Rodrigues Campos                                                                                                                                                                   |                                                                                                                                                  |
| EPI_ISL_693220                                                                                                                                                                                                                                                                                                                                                                                                                                                                                                                                                                                                                                                                                                                                                                                                                                                                                                                                                                                                                                                                                                                                                                                                                                                                                                                                                                                                                                                                                                                                                                                                                                                                                                                                                                                                                                                                                                                                                                                                                                                                                                                                                                                                                                                                                                                                                                                                                                                                                                                                                                                                                                                                                                                                                                                                                                                                                                                                                                                                                                                                                                                                                                                                                                                                                                                                                                                                                                                                                                                                                                                                                                                                                                                                                                                                                                                                                                                                                                                                                                                 | Laboratório Municipal de Piracicaba                                   | Instituto Adolfo Lutz, Interdisciplinary Procedures Center, Strategic Laboratory | Claudio Tavares Sacchi, Claudia Regina Gonçalves, Erica Valessa Ramos Gomes, Karoline Rodrigues Campos                                                                                                                                                                   |                                                                                                                                                  |
| EPI_ISL_693222                                                                                                                                                                                                                                                                                                                                                                                                                                                                                                                                                                                                                                                                                                                                                                                                                                                                                                                                                                                                                                                                                                                                                                                                                                                                                                                                                                                                                                                                                                                                                                                                                                                                                                                                                                                                                                                                                                                                                                                                                                                                                                                                                                                                                                                                                                                                                                                                                                                                                                                                                                                                                                                                                                                                                                                                                                                                                                                                                                                                                                                                                                                                                                                                                                                                                                                                                                                                                                                                                                                                                                                                                                                                                                                                                                                                                                                                                                                                                                                                                                                 | Secretaria Municipal de Saúde de Birigui                              | Instituto Adolfo Lutz, Interdisciplinary Procedures Center, Strategic Laboratory | Claudio Tavares Sacchi, Claudia Regina Gonçalves, Erica Valessa Ramos Gomes, Karoline Rodrigues Campos                                                                                                                                                                   |                                                                                                                                                  |
| EPI_ISL_693223, EPI_ISL_693224                                                                                                                                                                                                                                                                                                                                                                                                                                                                                                                                                                                                                                                                                                                                                                                                                                                                                                                                                                                                                                                                                                                                                                                                                                                                                                                                                                                                                                                                                                                                                                                                                                                                                                                                                                                                                                                                                                                                                                                                                                                                                                                                                                                                                                                                                                                                                                                                                                                                                                                                                                                                                                                                                                                                                                                                                                                                                                                                                                                                                                                                                                                                                                                                                                                                                                                                                                                                                                                                                                                                                                                                                                                                                                                                                                                                                                                                                                                                                                                                                                 | Laboratório Municipal de Piracicaba                                   | Instituto Adolfo Lutz, Interdisciplinary Procedures Center, Strategic Laboratory | Claudio Tavares Sacchi, Claudia Regina Gonçalves, Erica Valessa Ramos Gomes, Karoline Rodrigues Campos                                                                                                                                                                   |                                                                                                                                                  |
| EPI_ISL_693225                                                                                                                                                                                                                                                                                                                                                                                                                                                                                                                                                                                                                                                                                                                                                                                                                                                                                                                                                                                                                                                                                                                                                                                                                                                                                                                                                                                                                                                                                                                                                                                                                                                                                                                                                                                                                                                                                                                                                                                                                                                                                                                                                                                                                                                                                                                                                                                                                                                                                                                                                                                                                                                                                                                                                                                                                                                                                                                                                                                                                                                                                                                                                                                                                                                                                                                                                                                                                                                                                                                                                                                                                                                                                                                                                                                                                                                                                                                                                                                                                                                 | Ubs Vila Rosa - Olímpia Gomes De Almeida                              | Instituto Adolfo Lutz, Interdisciplinary Procedures Center, Strategic Laboratory | Claudio Tavares Sacchi, Claudia Regina Gonçalves, Erica Valessa Ramos Gomes, Karoline Rodrigues Campos                                                                                                                                                                   |                                                                                                                                                  |
| EPI_ISL_693226                                                                                                                                                                                                                                                                                                                                                                                                                                                                                                                                                                                                                                                                                                                                                                                                                                                                                                                                                                                                                                                                                                                                                                                                                                                                                                                                                                                                                                                                                                                                                                                                                                                                                                                                                                                                                                                                                                                                                                                                                                                                                                                                                                                                                                                                                                                                                                                                                                                                                                                                                                                                                                                                                                                                                                                                                                                                                                                                                                                                                                                                                                                                                                                                                                                                                                                                                                                                                                                                                                                                                                                                                                                                                                                                                                                                                                                                                                                                                                                                                                                 | Unidade de Pronto Atendimento Sao José                                | Instituto Adolfo Lutz, Interdisciplinary Procedures Center, Strategic Laboratory | Claudio Tavares Sacchi, Claudia Regina Gonçalves, Erica Valessa Ramos Gomes, Karoline Rodrigues Campos                                                                                                                                                                   |                                                                                                                                                  |
| EPI_ISL_693227                                                                                                                                                                                                                                                                                                                                                                                                                                                                                                                                                                                                                                                                                                                                                                                                                                                                                                                                                                                                                                                                                                                                                                                                                                                                                                                                                                                                                                                                                                                                                                                                                                                                                                                                                                                                                                                                                                                                                                                                                                                                                                                                                                                                                                                                                                                                                                                                                                                                                                                                                                                                                                                                                                                                                                                                                                                                                                                                                                                                                                                                                                                                                                                                                                                                                                                                                                                                                                                                                                                                                                                                                                                                                                                                                                                                                                                                                                                                                                                                                                                 | UBS Vila Marchi                                                       | Instituto Adolfo Lutz, Interdisciplinary Procedures Center, Strategic Laboratory | Claudio Tavares Sacchi, Claudia Regina Gonçalves, Erica Valessa Ramos Gomes, Karoline Rodrigues Campos                                                                                                                                                                   |                                                                                                                                                  |
| EPI_ISL_693228                                                                                                                                                                                                                                                                                                                                                                                                                                                                                                                                                                                                                                                                                                                                                                                                                                                                                                                                                                                                                                                                                                                                                                                                                                                                                                                                                                                                                                                                                                                                                                                                                                                                                                                                                                                                                                                                                                                                                                                                                                                                                                                                                                                                                                                                                                                                                                                                                                                                                                                                                                                                                                                                                                                                                                                                                                                                                                                                                                                                                                                                                                                                                                                                                                                                                                                                                                                                                                                                                                                                                                                                                                                                                                                                                                                                                                                                                                                                                                                                                                                 | Secretaria Municipal de Sorocaba                                      | Instituto Adolfo Lutz, Interdisciplinary Procedures Center, Strategic Laboratory | Claudio Tavares Sacchi, Claudia Regina Gonçalves, Erica Valessa Ramos Gomes, Karoline Rodrigues Campos                                                                                                                                                                   |                                                                                                                                                  |
| EPI_ISL_693236                                                                                                                                                                                                                                                                                                                                                                                                                                                                                                                                                                                                                                                                                                                                                                                                                                                                                                                                                                                                                                                                                                                                                                                                                                                                                                                                                                                                                                                                                                                                                                                                                                                                                                                                                                                                                                                                                                                                                                                                                                                                                                                                                                                                                                                                                                                                                                                                                                                                                                                                                                                                                                                                                                                                                                                                                                                                                                                                                                                                                                                                                                                                                                                                                                                                                                                                                                                                                                                                                                                                                                                                                                                                                                                                                                                                                                                                                                                                                                                                                                                 | Hospital Santa Marcelina Sao Paulo                                    | Instituto Adolfo Lutz, Interdisciplinary Procedures Center, Strategic Laboratory | Claudio Tavares Sacchi, Claudia Regina Gonçalves, Erica Valessa Ramos Gomes, Karoline Rodrigues Campos                                                                                                                                                                   |                                                                                                                                                  |
| EPI_ISL_693241                                                                                                                                                                                                                                                                                                                                                                                                                                                                                                                                                                                                                                                                                                                                                                                                                                                                                                                                                                                                                                                                                                                                                                                                                                                                                                                                                                                                                                                                                                                                                                                                                                                                                                                                                                                                                                                                                                                                                                                                                                                                                                                                                                                                                                                                                                                                                                                                                                                                                                                                                                                                                                                                                                                                                                                                                                                                                                                                                                                                                                                                                                                                                                                                                                                                                                                                                                                                                                                                                                                                                                                                                                                                                                                                                                                                                                                                                                                                                                                                                                                 | Hospital e Maternidade Sao Lucas                                      | Instituto Adolfo Lutz, Interdisciplinary Procedures Center, Strategic Laboratory | Claudio Tavares Sacchi, Claudia Regina Gonçalves, Erica Valessa Ramos Gomes, Karoline Rodrigues Campos                                                                                                                                                                   |                                                                                                                                                  |
| EPI_ISL_693243                                                                                                                                                                                                                                                                                                                                                                                                                                                                                                                                                                                                                                                                                                                                                                                                                                                                                                                                                                                                                                                                                                                                                                                                                                                                                                                                                                                                                                                                                                                                                                                                                                                                                                                                                                                                                                                                                                                                                                                                                                                                                                                                                                                                                                                                                                                                                                                                                                                                                                                                                                                                                                                                                                                                                                                                                                                                                                                                                                                                                                                                                                                                                                                                                                                                                                                                                                                                                                                                                                                                                                                                                                                                                                                                                                                                                                                                                                                                                                                                                                                 | Laboratório Municipal de Piracicaba                                   | Instituto Adolfo Lutz, Interdisciplinary Procedures Center, Strategic Laboratory | Claudio Tavares Sacchi, Claudia Regina Gonçalves, Erica Valessa Ramos Gomes, Karoline Rodrigues Campos                                                                                                                                                                   |                                                                                                                                                  |
| EPI_ISL_693244                                                                                                                                                                                                                                                                                                                                                                                                                                                                                                                                                                                                                                                                                                                                                                                                                                                                                                                                                                                                                                                                                                                                                                                                                                                                                                                                                                                                                                                                                                                                                                                                                                                                                                                                                                                                                                                                                                                                                                                                                                                                                                                                                                                                                                                                                                                                                                                                                                                                                                                                                                                                                                                                                                                                                                                                                                                                                                                                                                                                                                                                                                                                                                                                                                                                                                                                                                                                                                                                                                                                                                                                                                                                                                                                                                                                                                                                                                                                                                                                                                                 | Centro Médico da Polícia Militar do Estado de Sao Paulo               | Instituto Adolfo Lutz, Interdisciplinary Procedures Center, Strategic Laboratory | Claudio Tavares Sacchi, Claudia Regina Gonçalves, Erica Valessa Ramos Gomes, Karoline Rodrigues Campos                                                                                                                                                                   |                                                                                                                                                  |
| EPI_ISL_693247                                                                                                                                                                                                                                                                                                                                                                                                                                                                                                                                                                                                                                                                                                                                                                                                                                                                                                                                                                                                                                                                                                                                                                                                                                                                                                                                                                                                                                                                                                                                                                                                                                                                                                                                                                                                                                                                                                                                                                                                                                                                                                                                                                                                                                                                                                                                                                                                                                                                                                                                                                                                                                                                                                                                                                                                                                                                                                                                                                                                                                                                                                                                                                                                                                                                                                                                                                                                                                                                                                                                                                                                                                                                                                                                                                                                                                                                                                                                                                                                                                                 | Secao Centro de Diagnostico Secedi                                    | Instituto Adolfo Lutz, Interdisciplinary Procedures Center, Strategic Laboratory | Claudio Tavares Sacchi, Claudia Regina Gonçalves, Erica Valessa Ramos Gomes, Karoline Rodrigues Campos                                                                                                                                                                   |                                                                                                                                                  |
| EPI_ISL_693248                                                                                                                                                                                                                                                                                                                                                                                                                                                                                                                                                                                                                                                                                                                                                                                                                                                                                                                                                                                                                                                                                                                                                                                                                                                                                                                                                                                                                                                                                                                                                                                                                                                                                                                                                                                                                                                                                                                                                                                                                                                                                                                                                                                                                                                                                                                                                                                                                                                                                                                                                                                                                                                                                                                                                                                                                                                                                                                                                                                                                                                                                                                                                                                                                                                                                                                                                                                                                                                                                                                                                                                                                                                                                                                                                                                                                                                                                                                                                                                                                                                 | Centro Municipal de Epidemiologia e Imunizações                       | Instituto Adolfo Lutz, Interdisciplinary Procedures Center, Strategic Laboratory | Claudio Tavares Sacchi, Claudia Regina Gonçalves, Erica Valessa Ramos Gomes, Karoline Rodrigues Campos                                                                                                                                                                   |                                                                                                                                                  |
| EPI_ISL_708306, EPI_ISL_708307, EPI_ISL_708308, EPI_ISL_708315, EPI_ISL_708379, EPI_ISL_708380, EPI_ISL_708381                                                                                                                                                                                                                                                                                                                                                                                                                                                                                                                                                                                                                                                                                                                                                                                                                                                                                                                                                                                                                                                                                                                                                                                                                                                                                                                                                                                                                                                                                                                                                                                                                                                                                                                                                                                                                                                                                                                                                                                                                                                                                                                                                                                                                                                                                                                                                                                                                                                                                                                                                                                                                                                                                                                                                                                                                                                                                                                                                                                                                                                                                                                                                                                                                                                                                                                                                                                                                                                                                                                                                                                                                                                                                                                                                                                                                                                                                                                                                 | University Hospitals of Geneva, Laboratory of Virology                | University Hospitals of Geneva, Laboratory of Virology                           | Cordey Samuel, Laubscher Florian                                                                                                                                                                                                                                         |                                                                                                                                                  |
| EPI_ISL_708529                                                                                                                                                                                                                                                                                                                                                                                                                                                                                                                                                                                                                                                                                                                                                                                                                                                                                                                                                                                                                                                                                                                                                                                                                                                                                                                                                                                                                                                                                                                                                                                                                                                                                                                                                                                                                                                                                                                                                                                                                                                                                                                                                                                                                                                                                                                                                                                                                                                                                                                                                                                                                                                                                                                                                                                                                                                                                                                                                                                                                                                                                                                                                                                                                                                                                                                                                                                                                                                                                                                                                                                                                                                                                                                                                                                                                                                                                                                                                                                                                                                 | Secretária Municipal de Saude de Fernandópolis                        | Instituto Adolfo Lutz, Interdisciplinary Procedures Center, Strategic Laboratory | Claudio Tavares Sacchi, Claudia Regina Gonçalves, Erica Valessa Ramos Gomes, Carlos Henrique Camargo, Karoline Rodrigues Campos, Fernanda Modesto Tolentino Binhardi, Maricelia Navarro Pinheiro Flores, Marcia Maria Costa Nunes Soares, Janaina Other Martins Montanha |                                                                                                                                                  |
| EPI_ISL_722241                                                                                                                                                                                                                                                                                                                                                                                                                                                                                                                                                                                                                                                                                                                                                                                                                                                                                                                                                                                                                                                                                                                                                                                                                                                                                                                                                                                                                                                                                                                                                                                                                                                                                                                                                                                                                                                                                                                                                                                                                                                                                                                                                                                                                                                                                                                                                                                                                                                                                                                                                                                                                                                                                                                                                                                                                                                                                                                                                                                                                                                                                                                                                                                                                                                                                                                                                                                                                                                                                                                                                                                                                                                                                                                                                                                                                                                                                                                                                                                                                                                 | Servicio de Microbiologia, Hospital Universitario Central de Asturias | SeqCOVID-SPAIN consortium/IBV(CSIC)                                              | Cristián Castelló Abietar, Jose A. Boga, Susana Rojo-Alba, Marta Elena Álvarez-Argüelles, Santiago Melón and SeqCOVID-SPAIN consortium                                                                                                                                   |                                                                                                                                                  |
| EPI_ISL_735396                                                                                                                                                                                                                                                                                                                                                                                                                                                                                                                                                                                                                                                                                                                                                                                                                                                                                                                                                                                                                                                                                                                                                                                                                                                                                                                                                                                                                                                                                                                                                                                                                                                                                                                                                                                                                                                                                                                                                                                                                                                                                                                                                                                                                                                                                                                                                                                                                                                                                                                                                                                                                                                                                                                                                                                                                                                                                                                                                                                                                                                                                                                                                                                                                                                                                                                                                                                                                                                                                                                                                                                                                                                                                                                                                                                                                                                                                                                                                                                                                                                 | Hospital de Camplanha COVID 19 SER                                    | Instituto Adolfo Lutz, Interdisciplinary Procedures Center, Strategic Laboratory | Claudio Tavares Sacchi, Claudia Regina Gonçalves, Erica Valessa Ramos Gomes, Karoline Rodrigues Campos                                                                                                                                                                   |                                                                                                                                                  |



|                                                                                                                                                                                                                                                                                                                                                                                                                                                                                                                                                                                                                                                                                                                                                                                                                                                                                                                                                |                                                                 |                                                                                  |                                                                                                                                                                                                                                                                                                                                                                                                                                                                                                                                                                                                                                                     |
|------------------------------------------------------------------------------------------------------------------------------------------------------------------------------------------------------------------------------------------------------------------------------------------------------------------------------------------------------------------------------------------------------------------------------------------------------------------------------------------------------------------------------------------------------------------------------------------------------------------------------------------------------------------------------------------------------------------------------------------------------------------------------------------------------------------------------------------------------------------------------------------------------------------------------------------------|-----------------------------------------------------------------|----------------------------------------------------------------------------------|-----------------------------------------------------------------------------------------------------------------------------------------------------------------------------------------------------------------------------------------------------------------------------------------------------------------------------------------------------------------------------------------------------------------------------------------------------------------------------------------------------------------------------------------------------------------------------------------------------------------------------------------------------|
| EPI_ISL_735403, EPI_ISL_735404                                                                                                                                                                                                                                                                                                                                                                                                                                                                                                                                                                                                                                                                                                                                                                                                                                                                                                                 | Instituto Adolfo Lutz - Regional de Rio Claro                   | Instituto Adolfo Lutz, Interdisciplinary Procedures Center, Strategic Laboratory | Claudio Tavares Sacchi, Claudia Regina Gonçalves, Erica Valessa Ramos Gomes, Karoline Rodrigues Campos                                                                                                                                                                                                                                                                                                                                                                                                                                                                                                                                              |
| EPI_ISL_735405                                                                                                                                                                                                                                                                                                                                                                                                                                                                                                                                                                                                                                                                                                                                                                                                                                                                                                                                 | Secretaria Municipal de Saude de Birigui                        | Instituto Adolfo Lutz, Interdisciplinary Procedures Center, Strategic Laboratory | Claudio Tavares Sacchi, Claudia Regina Gonçalves, Erica Valessa Ramos Gomes, Karoline Rodrigues Campos                                                                                                                                                                                                                                                                                                                                                                                                                                                                                                                                              |
| EPI_ISL_735407                                                                                                                                                                                                                                                                                                                                                                                                                                                                                                                                                                                                                                                                                                                                                                                                                                                                                                                                 | Santa Casa de Marília                                           | Instituto Adolfo Lutz, Interdisciplinary Procedures Center, Strategic Laboratory | Claudio Tavares Sacchi, Claudia Regina Gonçalves, Erica Valessa Ramos Gomes, Karoline Rodrigues Campos                                                                                                                                                                                                                                                                                                                                                                                                                                                                                                                                              |
| EPI_ISL_735408                                                                                                                                                                                                                                                                                                                                                                                                                                                                                                                                                                                                                                                                                                                                                                                                                                                                                                                                 | COVID 19 Centro de Combate ao Coronavirus CCC Jandira           | Instituto Adolfo Lutz, Interdisciplinary Procedures Center, Strategic Laboratory | Claudio Tavares Sacchi, Claudia Regina Gonçalves, Erica Valessa Ramos Gomes, Karoline Rodrigues Campos                                                                                                                                                                                                                                                                                                                                                                                                                                                                                                                                              |
| EPI_ISL_735409                                                                                                                                                                                                                                                                                                                                                                                                                                                                                                                                                                                                                                                                                                                                                                                                                                                                                                                                 | Unidade de Pronto Atendimento Carlos Lourenco                   | Instituto Adolfo Lutz, Interdisciplinary Procedures Center, Strategic Laboratory | Claudio Tavares Sacchi, Claudia Regina Gonçalves, Erica Valessa Ramos Gomes, Karoline Rodrigues Campos                                                                                                                                                                                                                                                                                                                                                                                                                                                                                                                                              |
| EPI_ISL_735419                                                                                                                                                                                                                                                                                                                                                                                                                                                                                                                                                                                                                                                                                                                                                                                                                                                                                                                                 | UBS Alvarenga                                                   | Instituto Adolfo Lutz, Interdisciplinary Procedures Center, Strategic Laboratory | Claudio Tavares Sacchi, Claudia Regina Gonçalves, Erica Valessa Ramos Gomes, Karoline Rodrigues Campos                                                                                                                                                                                                                                                                                                                                                                                                                                                                                                                                              |
| EPI_ISL_735420                                                                                                                                                                                                                                                                                                                                                                                                                                                                                                                                                                                                                                                                                                                                                                                                                                                                                                                                 | UBS Riacho Grande                                               | Instituto Adolfo Lutz, Interdisciplinary Procedures Center, Strategic Laboratory | Claudio Tavares Sacchi, Claudia Regina Gonçalves, Erica Valessa Ramos Gomes, Karoline Rodrigues Campos                                                                                                                                                                                                                                                                                                                                                                                                                                                                                                                                              |
| EPI_ISL_735421                                                                                                                                                                                                                                                                                                                                                                                                                                                                                                                                                                                                                                                                                                                                                                                                                                                                                                                                 | UBS Sta Terezinha                                               | Instituto Adolfo Lutz, Interdisciplinary Procedures Center, Strategic Laboratory | Claudio Tavares Sacchi, Claudia Regina Gonçalves, Erica Valessa Ramos Gomes, Karoline Rodrigues Campos                                                                                                                                                                                                                                                                                                                                                                                                                                                                                                                                              |
| EPI_ISL_735424                                                                                                                                                                                                                                                                                                                                                                                                                                                                                                                                                                                                                                                                                                                                                                                                                                                                                                                                 | Centro de Vigilancia a Saude de Diadema                         | Instituto Adolfo Lutz, Interdisciplinary Procedures Center, Strategic Laboratory | Claudio Tavares Sacchi, Claudia Regina Gonçalves, Erica Valessa Ramos Gomes, Karoline Rodrigues Campos                                                                                                                                                                                                                                                                                                                                                                                                                                                                                                                                              |
| EPI_ISL_738085                                                                                                                                                                                                                                                                                                                                                                                                                                                                                                                                                                                                                                                                                                                                                                                                                                                                                                                                 | University Hospitals of Geneva, Laboratory of Virology          | University Hospitals of Geneva, Laboratory of Virology                           | Cordey Samuel and Laubscher Florian                                                                                                                                                                                                                                                                                                                                                                                                                                                                                                                                                                                                                 |
| EPI_ISL_742118, EPI_ISL_742119, EPI_ISL_742120, EPI_ISL_742121, EPI_ISL_742122, EPI_ISL_742123, EPI_ISL_742124, EPI_ISL_742125, EPI_ISL_742126, EPI_ISL_742127, EPI_ISL_742128, EPI_ISL_742129, EPI_ISL_742130, EPI_ISL_742131, EPI_ISL_742132, EPI_ISL_742133, EPI_ISL_742134, EPI_ISL_742135, EPI_ISL_742136, EPI_ISL_742137, EPI_ISL_742138, EPI_ISL_742139, EPI_ISL_742140, EPI_ISL_742141, EPI_ISL_742142, EPI_ISL_742143, EPI_ISL_742144, EPI_ISL_742145, EPI_ISL_742146, EPI_ISL_742147, EPI_ISL_742148, EPI_ISL_742149, EPI_ISL_742150, EPI_ISL_742151, EPI_ISL_742152, EPI_ISL_742153, EPI_ISL_742154, EPI_ISL_742155, EPI_ISL_742156, EPI_ISL_742157, EPI_ISL_742158, EPI_ISL_742159, EPI_ISL_742160, EPI_ISL_742161, EPI_ISL_742162, EPI_ISL_742163, EPI_ISL_742164, EPI_ISL_742165, EPI_ISL_742166, EPI_ISL_742167, EPI_ISL_742168, EPI_ISL_742169, EPI_ISL_742170, EPI_ISL_742171, EPI_ISL_742172, EPI_ISL_742173, EPI_ISL_742174 |                                                                 |                                                                                  |                                                                                                                                                                                                                                                                                                                                                                                                                                                                                                                                                                                                                                                     |
| see above                                                                                                                                                                                                                                                                                                                                                                                                                                                                                                                                                                                                                                                                                                                                                                                                                                                                                                                                      | Regional Virus Laboratory, Belfast Health and Social Care Trust | COVID-19 Genomics UK (COG-UK) Consortium                                         | Conall McCaughey, James McKenna, Tanya Curran, Susan Feeney, Alison Watt, Ciara Cox, Mairead Connor, Zoltan Molnar, David Simpson, Derek Fairley                                                                                                                                                                                                                                                                                                                                                                                                                                                                                                    |
| EPI_ISL_747615, EPI_ISL_748138, EPI_ISL_748139, EPI_ISL_748140, EPI_ISL_748141, EPI_ISL_748142, EPI_ISL_748143, EPI_ISL_748144, EPI_ISL_748145                                                                                                                                                                                                                                                                                                                                                                                                                                                                                                                                                                                                                                                                                                                                                                                                 | Instituto de Investigaciones Biologicas Clemente Estable        | Institut Pasteur de Montevideo                                                   | Daiana Mir, Natalia Rego, Paola Cristina Resende, Fernando Lopez-Tort, Tamara Fernandez-Calero, Veronica Noya, Mariana Brandes, Tania Possi, Mailen Arleo, Natalia Reyes, Matias Victoria, Andres Lizasoain, Matias Castells, Leticia Maya, Matias Salvo, Tatiana Schäffer Gregianini, Marilda Tereza Mar da Rosa, Leticia Garay Martins, Cecilia Alonso, Yasser Vega, Cecilia Salazar, Ignacio Ferrés, Pablo Smircich, Jose Sotelo, Ighor Arantes, Luciana Appolinario, Ana Carolina Mendonça, Maria Jose Benitez-Galeano, Martin Graña, Camila Simoes, Fernando Motta, Marilda Mendonça Siqueira, Gonzalo Bello, Rodney Colina, Lucia Spangenberg |
| EPI_ISL_748667, EPI_ISL_749036, EPI_ISL_749148, EPI_ISL_749149, EPI_ISL_749150, EPI_ISL_749151, EPI_ISL_749152, EPI_ISL_749153, EPI_ISL_749154, EPI_ISL_749155, EPI_ISL_749238, EPI_ISL_749474, EPI_ISL_749706, EPI_ISL_749906, EPI_ISL_750108, EPI_ISL_750162                                                                                                                                                                                                                                                                                                                                                                                                                                                                                                                                                                                                                                                                                 | Sanatorio Americano                                             | Institut Pasteur de Montevideo                                                   | Daiana Mir, Natalia Rego, Paola Cristina Resende, Fernando Lopez-Tort, Tamara Fernandez-Calero, Veronica Noya, Mariana Brandes, Tania Possi, Mailen Arleo, Natalia Reyes, Matias Victoria, Andres Lizasoain, Matias Castells, Leticia Maya, Matias Salvo, Tatiana Schäffer Gregianini, Marilda Tereza Mar da Rosa, Leticia Garay Martins, Cecilia Alonso, Yasser Vega, Cecilia Salazar, Ignacio Ferrés, Pablo Smircich, Jose Sotelo, Ighor Arantes, Luciana Appolinario, Ana Carolina Mendonça, Maria Jose Benitez-Galeano, Martin Graña, Camila Simoes, Fernando Motta, Marilda Mendonça Siqueira, Gonzalo Bello, Rodney Colina, Lucia Spangenberg |
| EPI_ISL_750163, EPI_ISL_750164                                                                                                                                                                                                                                                                                                                                                                                                                                                                                                                                                                                                                                                                                                                                                                                                                                                                                                                 | Laboratorio DILAVE/MGAP-INIA-UdelaR - Tacuarembó                | Institut Pasteur de Montevideo                                                   | Daiana Mir, Natalia Rego, Paola Cristina Resende, Fernando Lopez-Tort, Tamara Fernandez-Calero, Veronica Noya, Mariana Brandes, Tania Possi, Mailen Arleo, Natalia Reyes, Matias Victoria, Andres Lizasoain, Matias Castells, Leticia Maya, Matias Salvo, Tatiana Schäffer Gregianini, Marilda Tereza Mar da Rosa, Leticia Garay Martins, Cecilia Alonso, Yasser Vega, Cecilia Salazar, Ignacio Ferrés, Pablo Smircich, Jose Sotelo, Ighor Arantes, Luciana Appolinario, Ana Carolina Mendonça, Maria Jose Benitez-Galeano, Martin Graña, Camila Simoes, Fernando Motta, Marilda Mendonça Siqueira, Gonzalo Bello, Rodney Colina, Lucia Spangenberg |
| EPI_ISL_750165                                                                                                                                                                                                                                                                                                                                                                                                                                                                                                                                                                                                                                                                                                                                                                                                                                                                                                                                 | CENUR Litoral Norte - UdelaR, Salto, Uruguay.                   | Institut Pasteur de Montevideo                                                   | Daiana Mir, Natalia Rego, Paola Cristina Resende, Fernando Lopez-Tort, Tamara Fernandez-Calero, Veronica Noya, Mariana Brandes, Tania Possi, Mailen Arleo, Natalia Reyes, Matias Victoria, Andres Lizasoain, Matias Castells, Leticia Maya, Matias Salvo, Tatiana Schäffer Gregianini, Marilda Tereza Mar da Rosa, Leticia Garay Martins, Cecilia Alonso, Yasser Vega, Cecilia Salazar, Ignacio Ferrés, Pablo Smircich, Jose Sotelo, Ighor Arantes, Luciana Appolinario, Ana Carolina Mendonça, Maria Jose Benitez-Galeano, Martin Graña, Camila Simoes, Fernando Motta, Marilda Mendonça Siqueira, Gonzalo Bello, Rodney Colina, Lucia Spangenberg |
| EPI_ISL_750166, EPI_ISL_750168, EPI_ISL_750169, EPI_ISL_750170, EPI_ISL_750171, EPI_ISL_750172, EPI_ISL_750173, EPI_ISL_750174                                                                                                                                                                                                                                                                                                                                                                                                                                                                                                                                                                                                                                                                                                                                                                                                                 | Sanatorio Americano                                             | Institut Pasteur de Montevideo                                                   | Daiana Mir, Natalia Rego, Paola Cristina Resende, Fernando Lopez-Tort, Tamara Fernandez-Calero, Veronica Noya, Mariana Brandes, Tania Possi, Mailen Arleo, Natalia Reyes, Matias Victoria, Andres Lizasoain, Matias Castells, Leticia Maya, Matias Salvo, Tatiana Schäffer Gregianini, Marilda Tereza Mar da Rosa, Leticia Garay Martins, Cecilia Alonso, Yasser Vega, Cecilia Salazar, Ignacio Ferrés, Pablo Smircich, Jose Sotelo, Ighor Arantes, Luciana Appolinario, Ana Carolina Mendonça, Maria Jose Benitez-Galeano, Martin Graña, Camila Simoes, Fernando Motta, Marilda Mendonça Siqueira, Gonzalo Bello, Rodney Colina, Lucia Spangenberg |
| EPI_ISL_750175                                                                                                                                                                                                                                                                                                                                                                                                                                                                                                                                                                                                                                                                                                                                                                                                                                                                                                                                 | CENUR Este-Sede Rocha-UdelaR                                    | Institut Pasteur de Montevideo                                                   | Daiana Mir, Natalia Rego, Paola Cristina Resende, Fernando Lopez-Tort, Tamara Fernandez-Calero, Veronica Noya, Mariana Brandes, Tania Possi, Mailen Arleo, Natalia Reyes, Matias Victoria, Andres Lizasoain, Matias Castells, Leticia Maya, Matias Salvo, Tatiana Schäffer Gregianini, Marilda Tereza Mar da Rosa, Leticia Garay Martins, Cecilia Alonso, Yasser Vega, Cecilia Salazar, Ignacio Ferrés, Pablo Smircich, Jose Sotelo, Ighor Arantes, Luciana Appolinario, Ana Carolina Mendonça, Maria Jose Benitez-Galeano, Martin Graña, Camila Simoes, Fernando Motta, Marilda Mendonça Siqueira, Gonzalo Bello, Rodney Colina, Lucia Spangenberg |
| EPI_ISL_750176, EPI_ISL_750177, EPI_ISL_750178, EPI_ISL_750179, EPI_ISL_750256, EPI_ISL_750430, EPI_ISL_750820, EPI_ISL_751011                                                                                                                                                                                                                                                                                                                                                                                                                                                                                                                                                                                                                                                                                                                                                                                                                 | Sanatorio Americano                                             | Institut Pasteur de Montevideo                                                   | Daiana Mir, Natalia Rego, Paola Cristina Resende, Fernando Lopez-Tort, Tamara Fernandez-Calero, Veronica Noya, Mariana Brandes, Tania Possi, Mailen Arleo, Natalia Reyes, Matias Victoria, Andres Lizasoain, Matias Castells, Leticia Maya, Matias Salvo, Tatiana Schäffer Gregianini, Marilda Tereza Mar da Rosa, Leticia Garay Martins, Cecilia Alonso, Yasser Vega, Cecilia Salazar, Ignacio Ferrés, Pablo Smircich, Jose Sotelo, Ighor Arantes, Luciana Appolinario, Ana Carolina Mendonça, Maria Jose Benitez-Galeano, Martin Graña, Camila Simoes, Fernando Motta, Marilda Mendonça Siqueira, Gonzalo Bello, Rodney Colina, Lucia Spangenberg |
| EPI_ISL_751184, EPI_ISL_751185, EPI_ISL_751186, EPI_ISL_751187, EPI_ISL_751188, EPI_ISL_751189, EPI_ISL_751190                                                                                                                                                                                                                                                                                                                                                                                                                                                                                                                                                                                                                                                                                                                                                                                                                                 | CENUR Litoral Norte - UdelaR, Salto, Uruguay                    | Institut Pasteur de Montevideo                                                   | Daiana Mir, Natalia Rego, Paola Cristina Resende, Fernando Lopez-Tort, Tamara Fernandez-Calero, Veronica Noya, Mariana Brandes, Tania Possi, Mailen Arleo, Natalia Reyes, Matias Victoria, Andres Lizasoain, Matias Castells, Leticia Maya, Matias Salvo, Tatiana Schäffer Gregianini, Marilda Tereza Mar da Rosa, Leticia Garay Martins, Cecilia Alonso, Yasser Vega, Cecilia Salazar, Ignacio Ferrés, Pablo Smircich, Jose Sotelo, Ighor Arantes, Luciana Appolinario, Ana Carolina Mendonça, Maria Jose Benitez-Galeano, Martin Graña, Camila Simoes, Fernando Motta, Marilda Mendonça Siqueira, Gonzalo Bello, Rodney Colina, Lucia Spangenberg |
| EPI_ISL_751201                                                                                                                                                                                                                                                                                                                                                                                                                                                                                                                                                                                                                                                                                                                                                                                                                                                                                                                                 | Laboratorio DILAVE/MGAP-INIA-UdelaR - Tacuarembó                | Institut Pasteur de Montevideo                                                   | Daiana Mir, Natalia Rego, Paola Cristina Resende, Fernando Lopez-Tort, Tamara Fernandez-Calero, Veronica Noya, Mariana Brandes, Tania Possi, Mailen Arleo, Natalia Reyes, Matias Victoria, Andres Lizasoain, Matias Castells, Leticia Maya, Matias Salvo, Tatiana Schäffer Gregianini, Marilda Tereza Mar da Rosa, Leticia Garay Martins, Cecilia Alonso, Yasser Vega, Cecilia Salazar, Ignacio Ferrés, Pablo Smircich, Jose Sotelo, Ighor Arantes, Luciana Appolinario, Ana Carolina Mendonça, Maria Jose Benitez-Galeano, Martin Graña, Camila Simoes, Fernando Motta, Marilda Mendonça Siqueira, Gonzalo Bello, Rodney Colina, Lucia Spangenberg |
| EPI_ISL_751802, EPI_ISL_751803, EPI_ISL_751804, EPI_ISL_751805, EPI_ISL_751806, EPI_ISL_751807, EPI_ISL_751808, EPI_ISL_751809, EPI_ISL_751810, EPI_ISL_751811, EPI_ISL_751812, EPI_ISL_751813, EPI_ISL_751814, EPI_ISL_751815, EPI_ISL_751816, EPI_ISL_751817, EPI_ISL_751818, EPI_ISL_751819, EPI_ISL_751820, EPI_ISL_751821, EPI_ISL_751822, EPI_ISL_751823, EPI_ISL_751824, EPI_ISL_751825, EPI_ISL_751826, EPI_ISL_751827, EPI_ISL_751828, EPI_ISL_751829, EPI_ISL_751830, EPI_ISL_751831, EPI_ISL_751832, EPI_ISL_751833, EPI_ISL_751834, EPI_ISL_751835, EPI_ISL_751836, EPI_ISL_751837, EPI_ISL_751838, EPI_ISL_751839, EPI_ISL_751840, EPI_ISL_751841, EPI_ISL_751842, EPI_ISL_751843, EPI_ISL_751844, EPI_ISL_751845, EPI_ISL_751846                                                                                                                                                                                                 |                                                                 |                                                                                  |                                                                                                                                                                                                                                                                                                                                                                                                                                                                                                                                                                                                                                                     |
| see above                                                                                                                                                                                                                                                                                                                                                                                                                                                                                                                                                                                                                                                                                                                                                                                                                                                                                                                                      | New Mexico Department of Health Scientific Laboratory           | New Mexico Department of Health Scientific Laboratory                            | D'eldra Malone, Ellie Johnson, Anastacia Griego-Fisher                                                                                                                                                                                                                                                                                                                                                                                                                                                                                                                                                                                              |



























|                                                                                                                                                                                                                                                                |                                             |                 |                                                                                                                                                                                                                                                                                                                                                                                                                                                                                                                                                                                                                                                                                                                                                                                                                                 |
|----------------------------------------------------------------------------------------------------------------------------------------------------------------------------------------------------------------------------------------------------------------|---------------------------------------------|-----------------|---------------------------------------------------------------------------------------------------------------------------------------------------------------------------------------------------------------------------------------------------------------------------------------------------------------------------------------------------------------------------------------------------------------------------------------------------------------------------------------------------------------------------------------------------------------------------------------------------------------------------------------------------------------------------------------------------------------------------------------------------------------------------------------------------------------------------------|
| EPI_ISL_827395, EPI_ISL_827396                                                                                                                                                                                                                                 | The National University Hospital of Iceland | deCODE genetics | Daniel F Gudbjartsson; Agnar Helgason; Hakon Jonsson; Olafur T Magnusson; Pall Melsted; Gudmundur L Norddahl; Jona Saemundsdottir; Asgeir Sigurdsson; Patrick Sulem; Arna B Agustsdottir; Hannes Eggertsson; Berglind Eiriksottir; Run Fridriksdottir; Elisabet E Gardarsdottir; Gudmundur Georgsson; Olafia S Gretarsdottir; Kjartan R Gudmundsson; Thora R Gunnarsdottir; Arnaldur Gylfason; Hilma Holm; Brynjar O Jenson; Aslaug Jonasdottir; Kamilla S Josefsdottir; Thordur Kristjansson; Droplaug N Magnusdottir; Solvi Rognvaldsson; Louise le Roux; Gudrun Sigmundsdottir; Gardar Sveinbjornsson; Kristin E Sveinsdottir; Maney Sveinsdottir; Emil A Thorarensen; Bjarni Thorbjornsson; Gisli Masson; Ingileif Jonsdottir; Alma Moller; Thorolfur Gudnason; Karl G Kristinsson; Unnur Thorsteinsdottir; Kari Stefansson |
| EPI_ISL_827397, EPI_ISL_827398, EPI_ISL_827399, EPI_ISL_827400, EPI_ISL_827401, EPI_ISL_827402, EPI_ISL_827403, EPI_ISL_827404, EPI_ISL_827405, EPI_ISL_827406, EPI_ISL_827407, EPI_ISL_827408, EPI_ISL_827409, EPI_ISL_827410, EPI_ISL_827411, EPI_ISL_827412 | see above                                   | deCODE genetics | deCODE genetics                                                                                                                                                                                                                                                                                                                                                                                                                                                                                                                                                                                                                                                                                                                                                                                                                 |
| EPI_ISL_827413                                                                                                                                                                                                                                                 | The National University Hospital of Iceland | deCODE genetics | Daniel F Gudbjartsson; Agnar Helgason; Hakon Jonsson; Olafur T Magnusson; Pall Melsted; Gudmundur L Norddahl; Jona Saemundsdottir; Asgeir Sigurdsson; Patrick Sulem; Arna B Agustsdottir; Hannes Eggertsson; Berglind Eiriksottir; Run Fridriksdottir; Elisabet E Gardarsdottir; Gudmundur Georgsson; Olafia S Gretarsdottir; Kjartan R Gudmundsson; Thora R Gunnarsdottir; Arnaldur Gylfason; Hilma Holm; Brynjar O Jenson; Aslaug Jonasdottir; Kamilla S Josefsdottir; Thordur Kristjansson; Droplaug N Magnusdottir; Solvi Rognvaldsson; Louise le Roux; Gudrun Sigmundsdottir; Gardar Sveinbjornsson; Kristin E Sveinsdottir; Maney Sveinsdottir; Emil A Thorarensen; Bjarni Thorbjornsson; Gisli Masson; Ingileif Jonsdottir; Alma Moller; Thorolfur Gudnason; Karl G Kristinsson; Unnur Thorsteinsdottir; Kari Stefansson |
| EPI_ISL_827414, EPI_ISL_827415, EPI_ISL_827416, EPI_ISL_827417, EPI_ISL_827418                                                                                                                                                                                 |                                             | deCODE genetics | deCODE genetics                                                                                                                                                                                                                                                                                                                                                                                                                                                                                                                                                                                                                                                                                                                                                                                                                 |
| EPI_ISL_827419                                                                                                                                                                                                                                                 | The National University Hospital of Iceland | deCODE genetics | Daniel F Gudbjartsson; Agnar Helgason; Hakon Jonsson; Olafur T Magnusson; Pall Melsted; Gudmundur L Norddahl; Jona Saemundsdottir; Asgeir Sigurdsson; Patrick Sulem; Arna B Agustsdottir; Hannes Eggertsson; Berglind Eiriksottir; Run Fridriksdottir; Elisabet E Gardarsdottir; Gudmundur Georgsson; Olafia S Gretarsdottir; Kjartan R Gudmundsson; Thora R Gunnarsdottir; Arnaldur Gylfason; Hilma Holm; Brynjar O Jenson; Aslaug Jonasdottir; Kamilla S Josefsdottir; Thordur Kristjansson; Droplaug N Magnusdottir; Solvi Rognvaldsson; Louise le Roux; Gudrun Sigmundsdottir; Gardar Sveinbjornsson; Kristin E Sveinsdottir; Maney Sveinsdottir; Emil A Thorarensen; Bjarni Thorbjornsson; Gisli Masson; Ingileif Jonsdottir; Alma Moller; Thorolfur Gudnason; Karl G Kristinsson; Unnur Thorsteinsdottir; Kari Stefansson |
| EPI_ISL_827420, EPI_ISL_827421, EPI_ISL_827422, EPI_ISL_827423, EPI_ISL_827424, EPI_ISL_827425, EPI_ISL_827426, EPI_ISL_827428, EPI_ISL_827429, EPI_ISL_827430, EPI_ISL_827431, EPI_ISL_827432, EPI_ISL_827433, EPI_ISL_827434                                 | see above                                   | deCODE genetics | deCODE genetics                                                                                                                                                                                                                                                                                                                                                                                                                                                                                                                                                                                                                                                                                                                                                                                                                 |
| EPI_ISL_827435                                                                                                                                                                                                                                                 | The National University Hospital of Iceland | deCODE genetics | Daniel F Gudbjartsson; Agnar Helgason; Hakon Jonsson; Olafur T Magnusson; Pall Melsted; Gudmundur L Norddahl; Jona Saemundsdottir; Asgeir Sigurdsson; Patrick Sulem; Arna B Agustsdottir; Hannes Eggertsson; Berglind Eiriksottir; Run Fridriksdottir; Elisabet E Gardarsdottir; Gudmundur Georgsson; Olafia S Gretarsdottir; Kjartan R Gudmundsson; Thora R Gunnarsdottir; Arnaldur Gylfason; Hilma Holm; Brynjar O Jenson; Aslaug Jonasdottir; Kamilla S Josefsdottir; Thordur Kristjansson; Droplaug N Magnusdottir; Solvi Rognvaldsson; Louise le Roux; Gudrun Sigmundsdottir; Gardar Sveinbjornsson; Kristin E Sveinsdottir; Maney Sveinsdottir; Emil A Thorarensen; Bjarni Thorbjornsson; Gisli Masson; Ingileif Jonsdottir; Alma Moller; Thorolfur Gudnason; Karl G Kristinsson; Unnur Thorsteinsdottir; Kari Stefansson |
| EPI_ISL_827436                                                                                                                                                                                                                                                 |                                             | deCODE genetics | deCODE genetics                                                                                                                                                                                                                                                                                                                                                                                                                                                                                                                                                                                                                                                                                                                                                                                                                 |
| EPI_ISL_827437                                                                                                                                                                                                                                                 | The National University Hospital of Iceland | deCODE genetics | Daniel F Gudbjartsson; Agnar Helgason; Hakon Jonsson; Olafur T Magnusson; Pall Melsted; Gudmundur L Norddahl; Jona Saemundsdottir; Asgeir Sigurdsson; Patrick Sulem; Arna B Agustsdottir; Hannes Eggertsson; Berglind Eiriksottir; Run Fridriksdottir; Elisabet E Gardarsdottir; Gudmundur Georgsson; Olafia S Gretarsdottir; Kjartan R Gudmundsson; Thora R Gunnarsdottir; Arnaldur Gylfason; Hilma Holm; Brynjar O Jenson; Aslaug Jonasdottir; Kamilla S Josefsdottir; Thordur Kristjansson; Droplaug N Magnusdottir; Solvi Rognvaldsson; Louise le Roux; Gudrun Sigmundsdottir; Gardar Sveinbjornsson; Kristin E Sveinsdottir; Maney Sveinsdottir; Emil A Thorarensen; Bjarni Thorbjornsson; Gisli Masson; Ingileif Jonsdottir; Alma Moller; Thorolfur Gudnason; Karl G Kristinsson; Unnur Thorsteinsdottir; Kari Stefansson |
| EPI_ISL_827440, EPI_ISL_827442, EPI_ISL_827444, EPI_ISL_827447, EPI_ISL_827448, EPI_ISL_827450, EPI_ISL_827451, EPI_ISL_827452, EPI_ISL_827453, EPI_ISL_827454, EPI_ISL_827455, EPI_ISL_827456, EPI_ISL_827457, EPI_ISL_827458, EPI_ISL_827459, EPI_ISL_827460 | see above                                   | deCODE genetics | deCODE genetics                                                                                                                                                                                                                                                                                                                                                                                                                                                                                                                                                                                                                                                                                                                                                                                                                 |
| EPI_ISL_827461                                                                                                                                                                                                                                                 | The National University Hospital of Iceland | deCODE genetics | Daniel F Gudbjartsson; Agnar Helgason; Hakon Jonsson; Olafur T Magnusson; Pall Melsted; Gudmundur L Norddahl; Jona Saemundsdottir; Asgeir Sigurdsson; Patrick Sulem; Arna B Agustsdottir; Hannes Eggertsson; Berglind Eiriksottir; Run Fridriksdottir; Elisabet E Gardarsdottir; Gudmundur Georgsson; Olafia S Gretarsdottir; Kjartan R Gudmundsson; Thora R Gunnarsdottir; Arnaldur Gylfason; Hilma Holm; Brynjar O Jenson; Aslaug Jonasdottir; Kamilla S Josefsdottir; Thordur Kristjansson; Droplaug N Magnusdottir; Solvi Rognvaldsson; Louise le Roux; Gudrun Sigmundsdottir; Gardar Sveinbjornsson; Kristin E Sveinsdottir; Maney Sveinsdottir; Emil A Thorarensen; Bjarni Thorbjornsson; Gisli Masson; Ingileif Jonsdottir; Alma Moller; Thorolfur Gudnason; Karl G Kristinsson; Unnur Thorsteinsdottir; Kari Stefansson |
| EPI_ISL_827462, EPI_ISL_827464, EPI_ISL_827465, EPI_ISL_827466, EPI_ISL_827467, EPI_ISL_827470, EPI_ISL_827471, EPI_ISL_827472, EPI_ISL_827474, EPI_ISL_827475, EPI_ISL_827478, EPI_ISL_827479, EPI_ISL_827480, EPI_ISL_827481, EPI_ISL_827483                 | see above                                   | deCODE genetics | deCODE genetics                                                                                                                                                                                                                                                                                                                                                                                                                                                                                                                                                                                                                                                                                                                                                                                                                 |
| EPI_ISL_827484, EPI_ISL_827485                                                                                                                                                                                                                                 | The National University Hospital of Iceland | deCODE genetics | Daniel F Gudbjartsson; Agnar Helgason; Hakon Jonsson; Olafur T Magnusson; Pall Melsted; Gudmundur L Norddahl; Jona Saemundsdottir; Asgeir Sigurdsson; Patrick Sulem; Arna B Agustsdottir; Hannes Eggertsson; Berglind Eiriksottir; Run Fridriksdottir; Elisabet E Gardarsdottir; Gudmundur Georgsson; Olafia S Gretarsdottir; Kjartan R Gudmundsson; Thora R Gunnarsdottir; Arnaldur Gylfason; Hilma Holm; Brynjar O Jenson; Aslaug                                                                                                                                                                                                                                                                                                                                                                                             |

































































































|                                                                                                                                                                                                                                                                                                |                                                                         |                                                                                  |                                                                                                                                                                                                                                                                                                                                                                                                                                                                                                                                                                                                                                                                                                                                                                                                                                 |
|------------------------------------------------------------------------------------------------------------------------------------------------------------------------------------------------------------------------------------------------------------------------------------------------|-------------------------------------------------------------------------|----------------------------------------------------------------------------------|---------------------------------------------------------------------------------------------------------------------------------------------------------------------------------------------------------------------------------------------------------------------------------------------------------------------------------------------------------------------------------------------------------------------------------------------------------------------------------------------------------------------------------------------------------------------------------------------------------------------------------------------------------------------------------------------------------------------------------------------------------------------------------------------------------------------------------|
| EPI_ISL_830568                                                                                                                                                                                                                                                                                 | The National University Hospital of Iceland                             | deCODE genetics                                                                  | Sveinbjornsson; Kristin E Sveinsdottir; Maney Sveinsdottir; Emil A Thorarensen; Bjarni Thorbjornsson; Gisli Masson; Ingileif Jonsdottir; Alma Moller; Thorolfur Gudnason; Karl G Kristinsson; Unnur Thorsteinsdottir; Kari Stefansson                                                                                                                                                                                                                                                                                                                                                                                                                                                                                                                                                                                           |
| EPI_ISL_830569, EPI_ISL_830570                                                                                                                                                                                                                                                                 |                                                                         | deCODE genetics                                                                  | Daniel F Gudbjartsson; Agnar Helgason; Hakon Jonsson; Olafur T Magnusson; Pall Melsted; Gudmundur L Norddahl; Jona Saemundsdottir; Asgeir Sigurdsson; Patrick Sulem; Arna B Agustsdottir; Hannes Eggertsson; Berglind Eiriksottir; Run Fridriksdottir; Elisabet E Gardarsdottir; Gudmundur Georgsson; Olafia S Gretarsdottir; Kjartan R Gudmundsson; Thora R Gunnarsdottir; Arnaldur Gylfason; Hilma Holm; Brynjar O Jenson; Aslaug Jonasdottir; Kamilla S Josefsdottir; Thordur Kristjansson; Droplaug N Magnusdottir; Solvi Rognvaldsson; Louise le Roux; Gudrun Sigmundsdottir; Gardar Sveinbjornsson; Kristin E Sveinsdottir; Maney Sveinsdottir; Emil A Thorarensen; Bjarni Thorbjornsson; Gisli Masson; Ingileif Jonsdottir; Alma Moller; Thorolfur Gudnason; Karl G Kristinsson; Unnur Thorsteinsdottir; Kari Stefansson |
| EPI_ISL_830649                                                                                                                                                                                                                                                                                 | Gundersen Molecular Diagnostics Laboratory                              | Kabara Cancer Research Institute                                                 | Craig S. Richmond, Paraic A. Kenny                                                                                                                                                                                                                                                                                                                                                                                                                                                                                                                                                                                                                                                                                                                                                                                              |
| EPI_ISL_833153, EPI_ISL_833154, EPI_ISL_833155                                                                                                                                                                                                                                                 | Instituto Adolfo Lutz - Central                                         | Instituto Adolfo Lutz, Interdisciplinary Procedures Center, Strategic Laboratory | Claudio Tavares Sacchi, Claudia Regina Goncalves, Erica Valessa Ramos Gomes, Karoline Rodrigues Campos                                                                                                                                                                                                                                                                                                                                                                                                                                                                                                                                                                                                                                                                                                                          |
| EPI_ISL_833158, EPI_ISL_833160                                                                                                                                                                                                                                                                 | Instituto Adolfo Lutz - Regional de Santo Andre                         | Instituto Adolfo Lutz, Interdisciplinary Procedures Center, Strategic Laboratory | Claudio Tavares Sacchi, Claudia Regina Goncalves, Erica Valessa Ramos Gomes, Karoline Rodrigues Campos                                                                                                                                                                                                                                                                                                                                                                                                                                                                                                                                                                                                                                                                                                                          |
| EPI_ISL_833162                                                                                                                                                                                                                                                                                 | Lab LOC - Itapecerica da Serra                                          | Instituto Adolfo Lutz, Interdisciplinary Procedures Center, Strategic Laboratory | Claudio Tavares Sacchi, Claudia Regina Goncalves, Erica Valessa Ramos Gomes, Karoline Rodrigues Campos                                                                                                                                                                                                                                                                                                                                                                                                                                                                                                                                                                                                                                                                                                                          |
| EPI_ISL_833163                                                                                                                                                                                                                                                                                 | Instituto Adolfo Lutz - Regional de Marilia                             | Instituto Adolfo Lutz, Interdisciplinary Procedures Center, Strategic Laboratory | Claudio Tavares Sacchi, Claudia Regina Goncalves, Erica Valessa Ramos Gomes, Karoline Rodrigues Campos                                                                                                                                                                                                                                                                                                                                                                                                                                                                                                                                                                                                                                                                                                                          |
| EPI_ISL_833166                                                                                                                                                                                                                                                                                 | Hospital Samaritano                                                     | Instituto Adolfo Lutz, Interdisciplinary Procedures Center, Strategic Laboratory | Claudio Tavares Sacchi, Claudia Regina Goncalves, Erica Valessa Ramos Gomes, Karoline Rodrigues Campos                                                                                                                                                                                                                                                                                                                                                                                                                                                                                                                                                                                                                                                                                                                          |
| EPI_ISL_833167, EPI_ISL_833168, EPI_ISL_833169, EPI_ISL_833170, EPI_ISL_833171, EPI_ISL_833173, EPI_ISL_833174                                                                                                                                                                                 | DB Diagnosticos do Brasil                                               | Instituto Adolfo Lutz, Interdisciplinary Procedures Center, Strategic Laboratory | Claudio Tavares Sacchi, Claudia Regina Goncalves, Erica Valessa Ramos Gomes, Karoline Rodrigues Campos                                                                                                                                                                                                                                                                                                                                                                                                                                                                                                                                                                                                                                                                                                                          |
| EPI_ISL_837054                                                                                                                                                                                                                                                                                 | UBS Jose Sabino Ferreira                                                | Instituto Adolfo Lutz, Interdisciplinary Procedures Center, Strategic Laboratory | Claudio Tavares Sacchi, Claudia Regina Goncalves, Erica Valessa Ramos Gomes, Karoline Rodrigues Campos                                                                                                                                                                                                                                                                                                                                                                                                                                                                                                                                                                                                                                                                                                                          |
| EPI_ISL_843151, EPI_ISL_843152, EPI_ISL_843153, EPI_ISL_843154, EPI_ISL_843155, EPI_ISL_843156, EPI_ISL_843157, EPI_ISL_843158, EPI_ISL_843159, EPI_ISL_843160, EPI_ISL_843161, EPI_ISL_843163, EPI_ISL_843164, EPI_ISL_843165, EPI_ISL_843166, EPI_ISL_843167, EPI_ISL_843168, EPI_ISL_843169 |                                                                         |                                                                                  |                                                                                                                                                                                                                                                                                                                                                                                                                                                                                                                                                                                                                                                                                                                                                                                                                                 |
| see above                                                                                                                                                                                                                                                                                      | Regional Virus Laboratory, Belfast Health and Social Care Trust         | COVID-19 Genomics UK (COG-UK) Consortium                                         | Conall McCaughey, James McKenna, Tanya Curran, Susan Feeney, Alison Watt, Ciara Cox, Mairead Connor, Zoltan Molnar, David Simpson, Derek Fairley                                                                                                                                                                                                                                                                                                                                                                                                                                                                                                                                                                                                                                                                                |
| EPI_ISL_850508                                                                                                                                                                                                                                                                                 | Hospital de Tortosa Verge de la Cinta                                   | Hospital Universitari Vall d'Hebron - Vall d'Hebron Institut de Recerca          | Cristina Andrés, Maria Piñana, Josep F Abril, Damir Garcia-Cehic, Ariadna Rando, Juliana Esperalba, Maria Gema Codina, Carla Castillo, Maria Carmen Martin, Tomás Pumarola, Josep Quer, Andrés Antón                                                                                                                                                                                                                                                                                                                                                                                                                                                                                                                                                                                                                            |
| EPI_ISL_850511, EPI_ISL_850512, EPI_ISL_850513, EPI_ISL_850515                                                                                                                                                                                                                                 | Hospital Universitari de Bellvitge                                      | Hospital Universitari Vall d'Hebron - Vall d'Hebron Institut de Recerca          | Cristina Andrés, Maria Piñana, Josep F Abril, Damir Garcia-Cehic, Ariadna Rando, Juliana Esperalba, Maria Gema Codina, Carla Castillo, Maria Carmen Martin, Tomás Pumarola, Josep Quer, Andrés Antón                                                                                                                                                                                                                                                                                                                                                                                                                                                                                                                                                                                                                            |
| EPI_ISL_850516                                                                                                                                                                                                                                                                                 | Hospital Universitari Vall d'Hebron - Vall d'Hebron Institut de Recerca | Hospital Universitari Vall d'Hebron - Vall d'Hebron Institut de Recerca          | Cristina Andrés, Maria Piñana, Josep F Abril, Damir Garcia-Cehic, Ariadna Rando, Juliana Esperalba, Maria Gema Codina, Carla Castillo, Maria Carmen Martin, Tomás Pumarola, Josep Quer, Andrés Antón                                                                                                                                                                                                                                                                                                                                                                                                                                                                                                                                                                                                                            |
| EPI_ISL_860317                                                                                                                                                                                                                                                                                 | Instituto Adolfo Lutz - Regional de Sorocaba                            | Instituto Adolfo Lutz, Interdisciplinary Procedures Center, Strategic Laboratory | Claudio Tavares Sacchi, Claudia Regina Goncalves, Erica Valessa Ramos Gomes, Karoline Rodrigues Campos                                                                                                                                                                                                                                                                                                                                                                                                                                                                                                                                                                                                                                                                                                                          |
| EPI_ISL_861472, EPI_ISL_861473, EPI_ISL_861474, EPI_ISL_861475                                                                                                                                                                                                                                 | Gundersen Molecular Diagnostics Laboratory                              | Kabara Cancer Research Institute                                                 | Craig S. Richmond, Paraic A. Kenny                                                                                                                                                                                                                                                                                                                                                                                                                                                                                                                                                                                                                                                                                                                                                                                              |
| EPI_ISL_861625, EPI_ISL_861633, EPI_ISL_861634                                                                                                                                                                                                                                                 | Instituto Adolfo Lutz - Central                                         | Instituto Adolfo Lutz, Interdisciplinary Procedures Center, Strategic Laboratory | Claudio Tavares Sacchi, Claudia Regina Goncalves, Erica Valessa Ramos Gomes, Karoline Rodrigues Campos                                                                                                                                                                                                                                                                                                                                                                                                                                                                                                                                                                                                                                                                                                                          |
| EPI_ISL_861636                                                                                                                                                                                                                                                                                 | Hospital Geral de Sao Mateus São Paulo                                  | Instituto Adolfo Lutz, Interdisciplinary Procedures Center, Strategic Laboratory | Claudio Tavares Sacchi, Claudia Regina Goncalves, Erica Valessa Ramos Gomes, Karoline Rodrigues Campos                                                                                                                                                                                                                                                                                                                                                                                                                                                                                                                                                                                                                                                                                                                          |
| EPI_ISL_861637                                                                                                                                                                                                                                                                                 | Hospital Nipo Brasileiro                                                | Instituto Adolfo Lutz, Interdisciplinary Procedures Center, Strategic Laboratory | Claudio Tavares Sacchi, Claudia Regina Goncalves, Erica Valessa Ramos Gomes, Karoline Rodrigues Campos                                                                                                                                                                                                                                                                                                                                                                                                                                                                                                                                                                                                                                                                                                                          |
| EPI_ISL_861638                                                                                                                                                                                                                                                                                 | Hospital Municipal Dr. Moyses Deutsch                                   | Instituto Adolfo Lutz, Interdisciplinary Procedures Center, Strategic Laboratory | Claudio Tavares Sacchi, Claudia Regina Goncalves, Erica Valessa Ramos Gomes, Karoline Rodrigues Campos                                                                                                                                                                                                                                                                                                                                                                                                                                                                                                                                                                                                                                                                                                                          |
| EPI_ISL_861639                                                                                                                                                                                                                                                                                 | Hospital Sao Paulo de Ensino da Unifesp                                 | Instituto Adolfo Lutz, Interdisciplinary Procedures Center, Strategic Laboratory | Claudio Tavares Sacchi, Claudia Regina Goncalves, Erica Valessa Ramos Gomes, Karoline Rodrigues Campos                                                                                                                                                                                                                                                                                                                                                                                                                                                                                                                                                                                                                                                                                                                          |
| EPI_ISL_861641                                                                                                                                                                                                                                                                                 | Hospital Municipal Dr. Moyses Deutsch                                   | Instituto Adolfo Lutz, Interdisciplinary Procedures Center, Strategic Laboratory | Claudio Tavares Sacchi, Claudia Regina Goncalves, Erica Valessa Ramos Gomes, Karoline Rodrigues Campos                                                                                                                                                                                                                                                                                                                                                                                                                                                                                                                                                                                                                                                                                                                          |
| EPI_ISL_861642                                                                                                                                                                                                                                                                                 | Instituto Adolfo Lutz - Central                                         | Instituto Adolfo Lutz, Interdisciplinary Procedures Center, Strategic Laboratory | Claudio Tavares Sacchi, Claudia Regina Goncalves, Erica Valessa Ramos Gomes, Karoline Rodrigues Campos                                                                                                                                                                                                                                                                                                                                                                                                                                                                                                                                                                                                                                                                                                                          |
| EPI_ISL_861644                                                                                                                                                                                                                                                                                 | Hospital Santa Virginia                                                 | Instituto Adolfo Lutz, Interdisciplinary Procedures Center, Strategic Laboratory | Claudio Tavares Sacchi, Claudia Regina Goncalves, Erica Valessa Ramos Gomes, Karoline Rodrigues Campos                                                                                                                                                                                                                                                                                                                                                                                                                                                                                                                                                                                                                                                                                                                          |
| EPI_ISL_861647, EPI_ISL_861650                                                                                                                                                                                                                                                                 | Hospital Santa Marcelina Sao Paulo                                      | Instituto Adolfo Lutz, Interdisciplinary Procedures Center, Strategic Laboratory | Claudio Tavares Sacchi, Claudia Regina Goncalves, Erica Valessa Ramos Gomes, Karoline Rodrigues Campos                                                                                                                                                                                                                                                                                                                                                                                                                                                                                                                                                                                                                                                                                                                          |
| EPI_ISL_861652                                                                                                                                                                                                                                                                                 | AMA Wamberto Dias da Costa                                              | Instituto Adolfo Lutz, Interdisciplinary Procedures Center, Strategic Laboratory | Claudio Tavares Sacchi, Claudia Regina Goncalves, Erica Valessa Ramos Gomes, Karoline Rodrigues Campos                                                                                                                                                                                                                                                                                                                                                                                                                                                                                                                                                                                                                                                                                                                          |
| EPI_ISL_861653                                                                                                                                                                                                                                                                                 | Hospital Santa Virginia                                                 | Instituto Adolfo Lutz, Interdisciplinary Procedures Center, Strategic Laboratory | Claudio Tavares Sacchi, Claudia Regina Goncalves, Erica Valessa Ramos Gomes, Karoline Rodrigues Campos                                                                                                                                                                                                                                                                                                                                                                                                                                                                                                                                                                                                                                                                                                                          |
| EPI_ISL_861654, EPI_ISL_861655                                                                                                                                                                                                                                                                 | Hospital Santa Marcelina Sao Paulo                                      | Instituto Adolfo Lutz, Interdisciplinary Procedures Center, Strategic Laboratory | Claudio Tavares Sacchi, Claudia Regina Goncalves, Erica Valessa Ramos Gomes, Karoline Rodrigues Campos                                                                                                                                                                                                                                                                                                                                                                                                                                                                                                                                                                                                                                                                                                                          |
| EPI_ISL_861656                                                                                                                                                                                                                                                                                 | UPA de Jandira                                                          | Instituto Adolfo Lutz, Interdisciplinary Procedures Center, Strategic Laboratory | Claudio Tavares Sacchi, Claudia Regina Goncalves, Erica Valessa Ramos Gomes, Karoline Rodrigues Campos                                                                                                                                                                                                                                                                                                                                                                                                                                                                                                                                                                                                                                                                                                                          |
| EPI_ISL_861659                                                                                                                                                                                                                                                                                 | PS e Maternidade Nair Fonseca Leitao Arantes                            | Instituto Adolfo Lutz, Interdisciplinary Procedures Center, Strategic Laboratory | Claudio Tavares Sacchi, Claudia Regina Goncalves, Erica Valessa Ramos Gomes, Karoline Rodrigues Campos                                                                                                                                                                                                                                                                                                                                                                                                                                                                                                                                                                                                                                                                                                                          |

|                                                                                                                                                                                                                                                                                                                                                                                                                                                                                                                                                                                                                                                                                                                                                                                                                                                                                                                                                                                                                                                                                                                                                                                                                                                                                                                                                                                                                                                                                                                                                                                                                                                                                                                                                                                                                                                                                                                                                                                                                                                                                                                                                                                                                                                                                                                                                                                                                                                                                                                                                                                                                                                                                                                                                                                                                                                                                                                                                                                                                                                                                                                                                                                                                                                                                                                                                                                                                                                                                                                                                                                                                                                                                                                                                                                                                                                                                                                                                                                                                                                                                |                                                                        |                                                                                                                                                                                                                                                                                                                                                                                                                                  |                                                                                                                                                                                                             |
|--------------------------------------------------------------------------------------------------------------------------------------------------------------------------------------------------------------------------------------------------------------------------------------------------------------------------------------------------------------------------------------------------------------------------------------------------------------------------------------------------------------------------------------------------------------------------------------------------------------------------------------------------------------------------------------------------------------------------------------------------------------------------------------------------------------------------------------------------------------------------------------------------------------------------------------------------------------------------------------------------------------------------------------------------------------------------------------------------------------------------------------------------------------------------------------------------------------------------------------------------------------------------------------------------------------------------------------------------------------------------------------------------------------------------------------------------------------------------------------------------------------------------------------------------------------------------------------------------------------------------------------------------------------------------------------------------------------------------------------------------------------------------------------------------------------------------------------------------------------------------------------------------------------------------------------------------------------------------------------------------------------------------------------------------------------------------------------------------------------------------------------------------------------------------------------------------------------------------------------------------------------------------------------------------------------------------------------------------------------------------------------------------------------------------------------------------------------------------------------------------------------------------------------------------------------------------------------------------------------------------------------------------------------------------------------------------------------------------------------------------------------------------------------------------------------------------------------------------------------------------------------------------------------------------------------------------------------------------------------------------------------------------------------------------------------------------------------------------------------------------------------------------------------------------------------------------------------------------------------------------------------------------------------------------------------------------------------------------------------------------------------------------------------------------------------------------------------------------------------------------------------------------------------------------------------------------------------------------------------------------------------------------------------------------------------------------------------------------------------------------------------------------------------------------------------------------------------------------------------------------------------------------------------------------------------------------------------------------------------------------------------------------------------------------------------------------------|------------------------------------------------------------------------|----------------------------------------------------------------------------------------------------------------------------------------------------------------------------------------------------------------------------------------------------------------------------------------------------------------------------------------------------------------------------------------------------------------------------------|-------------------------------------------------------------------------------------------------------------------------------------------------------------------------------------------------------------|
| EPI_ISL_861665                                                                                                                                                                                                                                                                                                                                                                                                                                                                                                                                                                                                                                                                                                                                                                                                                                                                                                                                                                                                                                                                                                                                                                                                                                                                                                                                                                                                                                                                                                                                                                                                                                                                                                                                                                                                                                                                                                                                                                                                                                                                                                                                                                                                                                                                                                                                                                                                                                                                                                                                                                                                                                                                                                                                                                                                                                                                                                                                                                                                                                                                                                                                                                                                                                                                                                                                                                                                                                                                                                                                                                                                                                                                                                                                                                                                                                                                                                                                                                                                                                                                 | Instituto Adolfo Lutz - Regional de Taubate                            | Instituto Adolfo Lutz, Interdisciplinary Procedures Center, Strategic Laboratory                                                                                                                                                                                                                                                                                                                                                 | Claudio Tavares Sacchi, Claudia Regina Gonçalves, Erica Valessa Ramos Gomes, Karoline Rodrigues Campos                                                                                                      |
| EPI_ISL_861668                                                                                                                                                                                                                                                                                                                                                                                                                                                                                                                                                                                                                                                                                                                                                                                                                                                                                                                                                                                                                                                                                                                                                                                                                                                                                                                                                                                                                                                                                                                                                                                                                                                                                                                                                                                                                                                                                                                                                                                                                                                                                                                                                                                                                                                                                                                                                                                                                                                                                                                                                                                                                                                                                                                                                                                                                                                                                                                                                                                                                                                                                                                                                                                                                                                                                                                                                                                                                                                                                                                                                                                                                                                                                                                                                                                                                                                                                                                                                                                                                                                                 | Centro de Triagem Covid19                                              | Instituto Adolfo Lutz, Interdisciplinary Procedures Center, Strategic Laboratory                                                                                                                                                                                                                                                                                                                                                 | Claudio Tavares Sacchi, Claudia Regina Gonçalves, Erica Valessa Ramos Gomes, Karoline Rodrigues Campos                                                                                                      |
| EPI_ISL_861672                                                                                                                                                                                                                                                                                                                                                                                                                                                                                                                                                                                                                                                                                                                                                                                                                                                                                                                                                                                                                                                                                                                                                                                                                                                                                                                                                                                                                                                                                                                                                                                                                                                                                                                                                                                                                                                                                                                                                                                                                                                                                                                                                                                                                                                                                                                                                                                                                                                                                                                                                                                                                                                                                                                                                                                                                                                                                                                                                                                                                                                                                                                                                                                                                                                                                                                                                                                                                                                                                                                                                                                                                                                                                                                                                                                                                                                                                                                                                                                                                                                                 | Day Hospital de Ermelino Matarazzo                                     | Instituto Adolfo Lutz, Interdisciplinary Procedures Center, Strategic Laboratory                                                                                                                                                                                                                                                                                                                                                 | Claudio Tavares Sacchi, Claudia Regina Gonçalves, Erica Valessa Ramos Gomes, Karoline Rodrigues Campos                                                                                                      |
| EPI_ISL_861673                                                                                                                                                                                                                                                                                                                                                                                                                                                                                                                                                                                                                                                                                                                                                                                                                                                                                                                                                                                                                                                                                                                                                                                                                                                                                                                                                                                                                                                                                                                                                                                                                                                                                                                                                                                                                                                                                                                                                                                                                                                                                                                                                                                                                                                                                                                                                                                                                                                                                                                                                                                                                                                                                                                                                                                                                                                                                                                                                                                                                                                                                                                                                                                                                                                                                                                                                                                                                                                                                                                                                                                                                                                                                                                                                                                                                                                                                                                                                                                                                                                                 | PA Novo Osasco                                                         | Instituto Adolfo Lutz, Interdisciplinary Procedures Center, Strategic Laboratory                                                                                                                                                                                                                                                                                                                                                 | Claudio Tavares Sacchi, Claudia Regina Gonçalves, Erica Valessa Ramos Gomes, Karoline Rodrigues Campos                                                                                                      |
| EPI_ISL_861674                                                                                                                                                                                                                                                                                                                                                                                                                                                                                                                                                                                                                                                                                                                                                                                                                                                                                                                                                                                                                                                                                                                                                                                                                                                                                                                                                                                                                                                                                                                                                                                                                                                                                                                                                                                                                                                                                                                                                                                                                                                                                                                                                                                                                                                                                                                                                                                                                                                                                                                                                                                                                                                                                                                                                                                                                                                                                                                                                                                                                                                                                                                                                                                                                                                                                                                                                                                                                                                                                                                                                                                                                                                                                                                                                                                                                                                                                                                                                                                                                                                                 | UPA Central de Caragatatuba                                            | Instituto Adolfo Lutz, Interdisciplinary Procedures Center, Strategic Laboratory                                                                                                                                                                                                                                                                                                                                                 | Claudio Tavares Sacchi, Claudia Regina Gonçalves, Erica Valessa Ramos Gomes, Karoline Rodrigues Campos                                                                                                      |
| EPI_ISL_861676                                                                                                                                                                                                                                                                                                                                                                                                                                                                                                                                                                                                                                                                                                                                                                                                                                                                                                                                                                                                                                                                                                                                                                                                                                                                                                                                                                                                                                                                                                                                                                                                                                                                                                                                                                                                                                                                                                                                                                                                                                                                                                                                                                                                                                                                                                                                                                                                                                                                                                                                                                                                                                                                                                                                                                                                                                                                                                                                                                                                                                                                                                                                                                                                                                                                                                                                                                                                                                                                                                                                                                                                                                                                                                                                                                                                                                                                                                                                                                                                                                                                 | UPA Vila Santa Catarina                                                | Instituto Adolfo Lutz, Interdisciplinary Procedures Center, Strategic Laboratory                                                                                                                                                                                                                                                                                                                                                 | Claudio Tavares Sacchi, Claudia Regina Gonçalves, Erica Valessa Ramos Gomes, Karoline Rodrigues Campos                                                                                                      |
| EPI_ISL_861678                                                                                                                                                                                                                                                                                                                                                                                                                                                                                                                                                                                                                                                                                                                                                                                                                                                                                                                                                                                                                                                                                                                                                                                                                                                                                                                                                                                                                                                                                                                                                                                                                                                                                                                                                                                                                                                                                                                                                                                                                                                                                                                                                                                                                                                                                                                                                                                                                                                                                                                                                                                                                                                                                                                                                                                                                                                                                                                                                                                                                                                                                                                                                                                                                                                                                                                                                                                                                                                                                                                                                                                                                                                                                                                                                                                                                                                                                                                                                                                                                                                                 | Laboratorio Municipal de Guarulhos                                     | Instituto Adolfo Lutz, Interdisciplinary Procedures Center, Strategic Laboratory                                                                                                                                                                                                                                                                                                                                                 | Claudio Tavares Sacchi, Claudia Regina Gonçalves, Erica Valessa Ramos Gomes, Karoline Rodrigues Campos                                                                                                      |
| EPI_ISL_861679                                                                                                                                                                                                                                                                                                                                                                                                                                                                                                                                                                                                                                                                                                                                                                                                                                                                                                                                                                                                                                                                                                                                                                                                                                                                                                                                                                                                                                                                                                                                                                                                                                                                                                                                                                                                                                                                                                                                                                                                                                                                                                                                                                                                                                                                                                                                                                                                                                                                                                                                                                                                                                                                                                                                                                                                                                                                                                                                                                                                                                                                                                                                                                                                                                                                                                                                                                                                                                                                                                                                                                                                                                                                                                                                                                                                                                                                                                                                                                                                                                                                 | Instituto Adolfo Lutz - Regional de Taubate                            | Instituto Adolfo Lutz, Interdisciplinary Procedures Center, Strategic Laboratory                                                                                                                                                                                                                                                                                                                                                 | Claudio Tavares Sacchi, Claudia Regina Gonçalves, Erica Valessa Ramos Gomes, Karoline Rodrigues Campos                                                                                                      |
| EPI_ISL_861681                                                                                                                                                                                                                                                                                                                                                                                                                                                                                                                                                                                                                                                                                                                                                                                                                                                                                                                                                                                                                                                                                                                                                                                                                                                                                                                                                                                                                                                                                                                                                                                                                                                                                                                                                                                                                                                                                                                                                                                                                                                                                                                                                                                                                                                                                                                                                                                                                                                                                                                                                                                                                                                                                                                                                                                                                                                                                                                                                                                                                                                                                                                                                                                                                                                                                                                                                                                                                                                                                                                                                                                                                                                                                                                                                                                                                                                                                                                                                                                                                                                                 | Hospital Municipal Dr. Waldemar Tebaldi                                | Instituto Adolfo Lutz, Interdisciplinary Procedures Center, Strategic Laboratory                                                                                                                                                                                                                                                                                                                                                 | Claudio Tavares Sacchi, Claudia Regina Gonçalves, Erica Valessa Ramos Gomes, Karoline Rodrigues Campos                                                                                                      |
| EPI_ISL_861683                                                                                                                                                                                                                                                                                                                                                                                                                                                                                                                                                                                                                                                                                                                                                                                                                                                                                                                                                                                                                                                                                                                                                                                                                                                                                                                                                                                                                                                                                                                                                                                                                                                                                                                                                                                                                                                                                                                                                                                                                                                                                                                                                                                                                                                                                                                                                                                                                                                                                                                                                                                                                                                                                                                                                                                                                                                                                                                                                                                                                                                                                                                                                                                                                                                                                                                                                                                                                                                                                                                                                                                                                                                                                                                                                                                                                                                                                                                                                                                                                                                                 | Complexo Hospitalar Padre Bento de Guarulhos                           | Instituto Adolfo Lutz, Interdisciplinary Procedures Center, Strategic Laboratory                                                                                                                                                                                                                                                                                                                                                 | Claudio Tavares Sacchi, Claudia Regina Gonçalves, Erica Valessa Ramos Gomes, Karoline Rodrigues Campos                                                                                                      |
| EPI_ISL_861684, EPI_ISL_861685                                                                                                                                                                                                                                                                                                                                                                                                                                                                                                                                                                                                                                                                                                                                                                                                                                                                                                                                                                                                                                                                                                                                                                                                                                                                                                                                                                                                                                                                                                                                                                                                                                                                                                                                                                                                                                                                                                                                                                                                                                                                                                                                                                                                                                                                                                                                                                                                                                                                                                                                                                                                                                                                                                                                                                                                                                                                                                                                                                                                                                                                                                                                                                                                                                                                                                                                                                                                                                                                                                                                                                                                                                                                                                                                                                                                                                                                                                                                                                                                                                                 | Hospital Pronto Socorro Itaquera                                       | Instituto Adolfo Lutz, Interdisciplinary Procedures Center, Strategic Laboratory                                                                                                                                                                                                                                                                                                                                                 | Claudio Tavares Sacchi, Claudia Regina Gonçalves, Erica Valessa Ramos Gomes, Karoline Rodrigues Campos                                                                                                      |
| EPI_ISL_862669, EPI_ISL_862670, EPI_ISL_862671, EPI_ISL_862672, EPI_ISL_862673, EPI_ISL_862674, EPI_ISL_862675, EPI_ISL_862676, EPI_ISL_862677, EPI_ISL_862678, EPI_ISL_862679, EPI_ISL_862680, EPI_ISL_862681, EPI_ISL_862682, EPI_ISL_862683, EPI_ISL_862684, EPI_ISL_862685, EPI_ISL_862686, EPI_ISL_862687, EPI_ISL_862688, EPI_ISL_862689, EPI_ISL_862690, EPI_ISL_862691, EPI_ISL_862692, EPI_ISL_862693, EPI_ISL_862694, EPI_ISL_862695, EPI_ISL_862696, EPI_ISL_862697, EPI_ISL_862698, EPI_ISL_862699, EPI_ISL_862700, EPI_ISL_862701, EPI_ISL_862702, EPI_ISL_862703, EPI_ISL_862704, EPI_ISL_862705, EPI_ISL_862706, EPI_ISL_862707, EPI_ISL_862708, EPI_ISL_862709, EPI_ISL_862710, EPI_ISL_862711, EPI_ISL_862712, EPI_ISL_862713                                                                                                                                                                                                                                                                                                                                                                                                                                                                                                                                                                                                                                                                                                                                                                                                                                                                                                                                                                                                                                                                                                                                                                                                                                                                                                                                                                                                                                                                                                                                                                                                                                                                                                                                                                                                                                                                                                                                                                                                                                                                                                                                                                                                                                                                                                                                                                                                                                                                                                                                                                                                                                                                                                                                                                                                                                                                                                                                                                                                                                                                                                                                                                                                                                                                                                                                 | New Mexico Department of Health Scientific Laboratory                  | D'eldra Malone, Ellie Johnson, Anastacia Griego-Fisher                                                                                                                                                                                                                                                                                                                                                                           |                                                                                                                                                                                                             |
| see above                                                                                                                                                                                                                                                                                                                                                                                                                                                                                                                                                                                                                                                                                                                                                                                                                                                                                                                                                                                                                                                                                                                                                                                                                                                                                                                                                                                                                                                                                                                                                                                                                                                                                                                                                                                                                                                                                                                                                                                                                                                                                                                                                                                                                                                                                                                                                                                                                                                                                                                                                                                                                                                                                                                                                                                                                                                                                                                                                                                                                                                                                                                                                                                                                                                                                                                                                                                                                                                                                                                                                                                                                                                                                                                                                                                                                                                                                                                                                                                                                                                                      | New Mexico Department of Health Scientific Laboratory                  | New Mexico Department of Health Scientific Laboratory                                                                                                                                                                                                                                                                                                                                                                            | D'eldra Malone, Ellie Johnson, Anastacia Griego-Fisher                                                                                                                                                      |
| EPI_ISL_866346, EPI_ISL_866347, EPI_ISL_866348, EPI_ISL_866349, EPI_ISL_866350, EPI_ISL_866351, EPI_ISL_866352, EPI_ISL_866353, EPI_ISL_866354, EPI_ISL_866355, EPI_ISL_866357, EPI_ISL_866358, EPI_ISL_866359, EPI_ISL_866360, EPI_ISL_866361, EPI_ISL_866362, EPI_ISL_866364, EPI_ISL_866365, EPI_ISL_866366, EPI_ISL_866367, EPI_ISL_866370, EPI_ISL_866372, EPI_ISL_866373, EPI_ISL_866374, EPI_ISL_866375, EPI_ISL_866376, EPI_ISL_866377, EPI_ISL_866378, EPI_ISL_866379, EPI_ISL_866380, EPI_ISL_866381, EPI_ISL_866382, EPI_ISL_866384, EPI_ISL_866385, EPI_ISL_866386, EPI_ISL_866387, EPI_ISL_866388, EPI_ISL_866389, EPI_ISL_866390, EPI_ISL_866391, EPI_ISL_866392, EPI_ISL_866393, EPI_ISL_866394, EPI_ISL_866395, EPI_ISL_866396, EPI_ISL_866397, EPI_ISL_866398, EPI_ISL_866399                                                                                                                                                                                                                                                                                                                                                                                                                                                                                                                                                                                                                                                                                                                                                                                                                                                                                                                                                                                                                                                                                                                                                                                                                                                                                                                                                                                                                                                                                                                                                                                                                                                                                                                                                                                                                                                                                                                                                                                                                                                                                                                                                                                                                                                                                                                                                                                                                                                                                                                                                                                                                                                                                                                                                                                                                                                                                                                                                                                                                                                                                                                                                                                                                                                                                 | Regional Virus Laboratory, Belfast Health and Social Care Trust        | Conall McCaughey, James McKenna, Tanya Curran, Susan Feeney, Alison Watt, Ciara Cox, Mairead Connor, Zoltan Molnar, David Simpson, Derek Fairley                                                                                                                                                                                                                                                                                 |                                                                                                                                                                                                             |
| see above                                                                                                                                                                                                                                                                                                                                                                                                                                                                                                                                                                                                                                                                                                                                                                                                                                                                                                                                                                                                                                                                                                                                                                                                                                                                                                                                                                                                                                                                                                                                                                                                                                                                                                                                                                                                                                                                                                                                                                                                                                                                                                                                                                                                                                                                                                                                                                                                                                                                                                                                                                                                                                                                                                                                                                                                                                                                                                                                                                                                                                                                                                                                                                                                                                                                                                                                                                                                                                                                                                                                                                                                                                                                                                                                                                                                                                                                                                                                                                                                                                                                      | Regional Virus Laboratory, Belfast Health and Social Care Trust        | COVID-19 Genomics UK (COG-UK) Consortium                                                                                                                                                                                                                                                                                                                                                                                         | Conall McCaughey, James McKenna, Tanya Curran, Susan Feeney, Alison Watt, Ciara Cox, Mairead Connor, Zoltan Molnar, David Simpson, Derek Fairley                                                            |
| EPI_ISL_872191, EPI_ISL_872192                                                                                                                                                                                                                                                                                                                                                                                                                                                                                                                                                                                                                                                                                                                                                                                                                                                                                                                                                                                                                                                                                                                                                                                                                                                                                                                                                                                                                                                                                                                                                                                                                                                                                                                                                                                                                                                                                                                                                                                                                                                                                                                                                                                                                                                                                                                                                                                                                                                                                                                                                                                                                                                                                                                                                                                                                                                                                                                                                                                                                                                                                                                                                                                                                                                                                                                                                                                                                                                                                                                                                                                                                                                                                                                                                                                                                                                                                                                                                                                                                                                 | Conjunto Hospitalar do Mandaqui de Sao Paulo                           | Instituto Adolfo Lutz, Interdisciplinary Procedures Center, Strategic Laboratory                                                                                                                                                                                                                                                                                                                                                 | Claudio Tavares Sacchi, Claudia Regina Gonçalves, Erica Valessa Ramos Gomes, Karoline Rodrigues Campos, Katia Correa de Oliveira Santos, Ana Lucia de Carvalho Avelino, Fabiana Cristina Pereira dos Santos |
| EPI_ISL_882663                                                                                                                                                                                                                                                                                                                                                                                                                                                                                                                                                                                                                                                                                                                                                                                                                                                                                                                                                                                                                                                                                                                                                                                                                                                                                                                                                                                                                                                                                                                                                                                                                                                                                                                                                                                                                                                                                                                                                                                                                                                                                                                                                                                                                                                                                                                                                                                                                                                                                                                                                                                                                                                                                                                                                                                                                                                                                                                                                                                                                                                                                                                                                                                                                                                                                                                                                                                                                                                                                                                                                                                                                                                                                                                                                                                                                                                                                                                                                                                                                                                                 | LACEN do Distrito Federal                                              | Instituto Adolfo Lutz, Interdisciplinary Procedures Center, Strategic Laboratory                                                                                                                                                                                                                                                                                                                                                 | Claudio Tavares Sacchi, Claudia Regina Gonçalves, Erica Valessa Ramos Gomes, Karoline Rodrigues Campos                                                                                                      |
| EPI_ISL_882667                                                                                                                                                                                                                                                                                                                                                                                                                                                                                                                                                                                                                                                                                                                                                                                                                                                                                                                                                                                                                                                                                                                                                                                                                                                                                                                                                                                                                                                                                                                                                                                                                                                                                                                                                                                                                                                                                                                                                                                                                                                                                                                                                                                                                                                                                                                                                                                                                                                                                                                                                                                                                                                                                                                                                                                                                                                                                                                                                                                                                                                                                                                                                                                                                                                                                                                                                                                                                                                                                                                                                                                                                                                                                                                                                                                                                                                                                                                                                                                                                                                                 | Hospital de Clinicas Caieiras                                          | Instituto Adolfo Lutz, Interdisciplinary Procedures Center, Strategic Laboratory                                                                                                                                                                                                                                                                                                                                                 | Claudio Tavares Sacchi, Claudia Regina Gonçalves, Erica Valessa Ramos Gomes, Karoline Rodrigues Campos                                                                                                      |
| EPI_ISL_882668                                                                                                                                                                                                                                                                                                                                                                                                                                                                                                                                                                                                                                                                                                                                                                                                                                                                                                                                                                                                                                                                                                                                                                                                                                                                                                                                                                                                                                                                                                                                                                                                                                                                                                                                                                                                                                                                                                                                                                                                                                                                                                                                                                                                                                                                                                                                                                                                                                                                                                                                                                                                                                                                                                                                                                                                                                                                                                                                                                                                                                                                                                                                                                                                                                                                                                                                                                                                                                                                                                                                                                                                                                                                                                                                                                                                                                                                                                                                                                                                                                                                 | UMS de Juquitiba                                                       | Instituto Adolfo Lutz, Interdisciplinary Procedures Center, Strategic Laboratory                                                                                                                                                                                                                                                                                                                                                 | Claudio Tavares Sacchi, Claudia Regina Gonçalves, Erica Valessa Ramos Gomes, Karoline Rodrigues Campos                                                                                                      |
| EPI_ISL_882670                                                                                                                                                                                                                                                                                                                                                                                                                                                                                                                                                                                                                                                                                                                                                                                                                                                                                                                                                                                                                                                                                                                                                                                                                                                                                                                                                                                                                                                                                                                                                                                                                                                                                                                                                                                                                                                                                                                                                                                                                                                                                                                                                                                                                                                                                                                                                                                                                                                                                                                                                                                                                                                                                                                                                                                                                                                                                                                                                                                                                                                                                                                                                                                                                                                                                                                                                                                                                                                                                                                                                                                                                                                                                                                                                                                                                                                                                                                                                                                                                                                                 | Hospital Samaritano Paulista                                           | Instituto Adolfo Lutz, Interdisciplinary Procedures Center, Strategic Laboratory                                                                                                                                                                                                                                                                                                                                                 | Claudio Tavares Sacchi, Claudia Regina Gonçalves, Erica Valessa Ramos Gomes, Karoline Rodrigues Campos                                                                                                      |
| EPI_ISL_882671, EPI_ISL_882673                                                                                                                                                                                                                                                                                                                                                                                                                                                                                                                                                                                                                                                                                                                                                                                                                                                                                                                                                                                                                                                                                                                                                                                                                                                                                                                                                                                                                                                                                                                                                                                                                                                                                                                                                                                                                                                                                                                                                                                                                                                                                                                                                                                                                                                                                                                                                                                                                                                                                                                                                                                                                                                                                                                                                                                                                                                                                                                                                                                                                                                                                                                                                                                                                                                                                                                                                                                                                                                                                                                                                                                                                                                                                                                                                                                                                                                                                                                                                                                                                                                 | Hospital Municipal Dr. Guido Guida                                     | Instituto Adolfo Lutz, Interdisciplinary Procedures Center, Strategic Laboratory                                                                                                                                                                                                                                                                                                                                                 | Claudio Tavares Sacchi, Claudia Regina Gonçalves, Erica Valessa Ramos Gomes, Karoline Rodrigues Campos                                                                                                      |
| EPI_ISL_884580, EPI_ISL_884581, EPI_ISL_884582, EPI_ISL_884583, EPI_ISL_884584, EPI_ISL_884585, EPI_ISL_884586, EPI_ISL_884587, EPI_ISL_884588, EPI_ISL_884589, EPI_ISL_884590, EPI_ISL_884591, EPI_ISL_884592, EPI_ISL_884593, EPI_ISL_884594, EPI_ISL_884595, EPI_ISL_884596, EPI_ISL_884597, EPI_ISL_884598, EPI_ISL_884599, EPI_ISL_884600, EPI_ISL_884601, EPI_ISL_884602, EPI_ISL_884603, EPI_ISL_884604, EPI_ISL_884605, EPI_ISL_884606, EPI_ISL_884607, EPI_ISL_884608, EPI_ISL_884609, EPI_ISL_884610, EPI_ISL_884611, EPI_ISL_884612, EPI_ISL_884613, EPI_ISL_884614, EPI_ISL_884615, EPI_ISL_884616, EPI_ISL_884617, EPI_ISL_884618, EPI_ISL_884619, EPI_ISL_884620, EPI_ISL_884621, EPI_ISL_884622, EPI_ISL_884623, EPI_ISL_884624, EPI_ISL_884625, EPI_ISL_884626, EPI_ISL_884627, EPI_ISL_884628, EPI_ISL_884629, EPI_ISL_884630, EPI_ISL_884631, EPI_ISL_884632, EPI_ISL_884633, EPI_ISL_884634, EPI_ISL_884635, EPI_ISL_884636, EPI_ISL_884637, EPI_ISL_884638, EPI_ISL_884639, EPI_ISL_884640, EPI_ISL_884641, EPI_ISL_884642, EPI_ISL_884643, EPI_ISL_884644, EPI_ISL_884645, EPI_ISL_884646, EPI_ISL_884647, EPI_ISL_884648, EPI_ISL_884649, EPI_ISL_884650, EPI_ISL_884651, EPI_ISL_884652, EPI_ISL_884653, EPI_ISL_884654, EPI_ISL_884655, EPI_ISL_884656, EPI_ISL_884657, EPI_ISL_884658, EPI_ISL_884659, EPI_ISL_884660, EPI_ISL_884661, EPI_ISL_884662, EPI_ISL_884663, EPI_ISL_884664, EPI_ISL_884665, EPI_ISL_884666, EPI_ISL_884667, EPI_ISL_884668, EPI_ISL_884669, EPI_ISL_884670, EPI_ISL_884671, EPI_ISL_884672, EPI_ISL_884673, EPI_ISL_884674, EPI_ISL_884675, EPI_ISL_884676, EPI_ISL_884677, EPI_ISL_884678, EPI_ISL_884679, EPI_ISL_884680, EPI_ISL_884681, EPI_ISL_884682, EPI_ISL_884683, EPI_ISL_884684, EPI_ISL_884685, EPI_ISL_884686, EPI_ISL_884687, EPI_ISL_884688, EPI_ISL_884689, EPI_ISL_884690, EPI_ISL_884691, EPI_ISL_884692, EPI_ISL_884693, EPI_ISL_884694, EPI_ISL_884695, EPI_ISL_884696, EPI_ISL_884697, EPI_ISL_884698, EPI_ISL_884699, EPI_ISL_884700, EPI_ISL_884701, EPI_ISL_884702, EPI_ISL_884703, EPI_ISL_884704, EPI_ISL_884705, EPI_ISL_884706, EPI_ISL_884707, EPI_ISL_884708, EPI_ISL_884709, EPI_ISL_884710, EPI_ISL_884711, EPI_ISL_884712, EPI_ISL_884713, EPI_ISL_884714, EPI_ISL_884715, EPI_ISL_884716, EPI_ISL_884717, EPI_ISL_884718, EPI_ISL_884719, EPI_ISL_884720, EPI_ISL_884721, EPI_ISL_884722, EPI_ISL_884723, EPI_ISL_884724, EPI_ISL_884725, EPI_ISL_884726, EPI_ISL_884727, EPI_ISL_884728, EPI_ISL_884729, EPI_ISL_884730, EPI_ISL_884731, EPI_ISL_884732, EPI_ISL_884733, EPI_ISL_884734, EPI_ISL_884735, EPI_ISL_884736, EPI_ISL_884737, EPI_ISL_884738, EPI_ISL_884739, EPI_ISL_884740, EPI_ISL_884741, EPI_ISL_884742, EPI_ISL_884743, EPI_ISL_884744, EPI_ISL_884745, EPI_ISL_884746, EPI_ISL_884747, EPI_ISL_884748, EPI_ISL_884749, EPI_ISL_884750, EPI_ISL_884751, EPI_ISL_884752, EPI_ISL_884753, EPI_ISL_884754, EPI_ISL_884755, EPI_ISL_884756, EPI_ISL_884757, EPI_ISL_884758, EPI_ISL_884759, EPI_ISL_884760, EPI_ISL_884761, EPI_ISL_884762, EPI_ISL_884763, EPI_ISL_884764, EPI_ISL_884765, EPI_ISL_884766, EPI_ISL_884767, EPI_ISL_884768, EPI_ISL_884769, EPI_ISL_884770, EPI_ISL_884771, EPI_ISL_884772, EPI_ISL_884773, EPI_ISL_884774, EPI_ISL_884775, EPI_ISL_884776, EPI_ISL_884777, EPI_ISL_884778, EPI_ISL_884779, EPI_ISL_884780, EPI_ISL_884781, EPI_ISL_884782, EPI_ISL_884783, EPI_ISL_884784, EPI_ISL_884785, EPI_ISL_884786, EPI_ISL_884787, EPI_ISL_884788, EPI_ISL_884789, EPI_ISL_884790, EPI_ISL_884791, EPI_ISL_884792, EPI_ISL_884793, EPI_ISL_884794, EPI_ISL_884795, EPI_ISL_884796, EPI_ISL_884797, EPI_ISL_884798, EPI_ISL_884799, EPI_ISL_884800, EPI_ISL_884801, EPI_ISL_884802, EPI_ISL_884803, EPI_ISL_884804, EPI_ISL_884805, EPI_ISL_884806, EPI_ISL_884807, EPI_ISL_884808, EPI_ISL_884809, EPI_ISL_884810, EPI_ISL_884811, EPI_ISL_884812, EPI_ISL_884813, EPI_ISL_884814, EPI_ISL_884815, EPI_ISL_884816, EPI_ISL_884817, EPI_ISL_884818, EPI_ISL_884819, EPI_ISL_884820, EPI_ISL_884821, EPI_ISL_884822, EPI_ISL_884823, EPI_ISL_884824 | Respiratory Viruses Branch, Centers for Disease Control and Prevention | Cook,P.W., Batra,D., Rambo-Martin,B.L., de Feo,E., Antico,J., Tran,C., Tolentino,M., Wickline,S., Gietzen,K., Sickler,B., Liu,J., Allen,E., Febbo,P., Galloway,S., Washington,N.L., White,S., Levan,G., Barret,K.S., Cirulli,E., Bolze,A., Ascencio,A., Rivera-Garcia,C., Cho,R., Nguyen,J., Wang,S., Ramirez,J., Cassens,T., Sandoval,E., Isaksson,M., Lee,W., Becker,D., Laurent,M., Lu,J., Paden,C.R., Tong,S., MacCannell,D. |                                                                                                                                                                                                             |

We gratefully acknowledge the following Authors from the Originating laboratories responsible for obtaining the specimens, as well as the Submitting laboratories where the genome data were generated and shared via GISAID, on which this research is based.

All Submitters of data may be contacted directly via [www.gisaid.org](http://www.gisaid.org)

Authors are sorted alphabetically.

| Accession ID   | Originating Laboratory | Submitting Laboratory | Authors        |
|----------------|------------------------|-----------------------|----------------|
| EPI_ISL_614404 | EPI_ISL_614405         | EPI_ISL_614407        | EPI_ISL_614408 |
| EPI_ISL_614426 | EPI_ISL_614428         | EPI_ISL_614429        | EPI_ISL_614430 |
| EPI_ISL_614448 | EPI_ISL_614449         | EPI_ISL_614450        | EPI_ISL_614451 |
| EPI_ISL_614466 | EPI_ISL_614467         | EPI_ISL_614469        | EPI_ISL_614470 |
| EPI_ISL_614489 | EPI_ISL_614490         | EPI_ISL_614491        | EPI_ISL_614493 |
| EPI_ISL_614510 | EPI_ISL_614511         | EPI_ISL_614512        | EPI_ISL_614513 |
| EPI_ISL_614534 | EPI_ISL_614535         | EPI_ISL_614536        | EPI_ISL_614538 |
| EPI_ISL_614560 | EPI_ISL_614561         | EPI_ISL_614562        | EPI_ISL_614563 |
| EPI_ISL_614584 | EPI_ISL_614585         | EPI_ISL_614586        | EPI_ISL_614587 |
| EPI_ISL_614606 | EPI_ISL_614608         | EPI_ISL_614609        | EPI_ISL_614610 |
| EPI_ISL_614626 | EPI_ISL_614627         | EPI_ISL_614628        | EPI_ISL_614629 |
| EPI_ISL_614647 | EPI_ISL_614648         | EPI_ISL_614649        | EPI_ISL_614651 |
| EPI_ISL_614667 | EPI_ISL_614668         | EPI_ISL_614669        | EPI_ISL_614671 |
| EPI_ISL_614687 | EPI_ISL_614688         | EPI_ISL_614689        | EPI_ISL_614690 |
| EPI_ISL_614709 | EPI_ISL_614710         | EPI_ISL_614711        | EPI_ISL_614712 |
| EPI_ISL_614733 | EPI_ISL_614735         | EPI_ISL_614737        | EPI_ISL_614738 |
| EPI_ISL_614756 | EPI_ISL_614757         | EPI_ISL_614758        | EPI_ISL_614760 |
| EPI_ISL_614779 | EPI_ISL_614782         | EPI_ISL_614783        | EPI_ISL_614784 |
| EPI_ISL_614804 | EPI_ISL_614807         | EPI_ISL_614808        | EPI_ISL_614811 |
| EPI_ISL_614828 | EPI_ISL_614829         | EPI_ISL_614830        | EPI_ISL_614831 |
| EPI_ISL_614852 | EPI_ISL_614853         | EPI_ISL_614854        | EPI_ISL_614855 |
| EPI_ISL_614874 | EPI_ISL_614876         | EPI_ISL_614877        | EPI_ISL_614878 |
| EPI_ISL_615178 | EPI_ISL_615180         | EPI_ISL_615182        | EPI_ISL_615184 |
| EPI_ISL_615199 | EPI_ISL_615200         | EPI_ISL_615201        | EPI_ISL_615202 |
| EPI_ISL_615219 | EPI_ISL_615221         | EPI_ISL_615222        | EPI_ISL_615223 |
| EPI_ISL_615241 | EPI_ISL_615242         | EPI_ISL_615243        | EPI_ISL_615244 |
| EPI_ISL_615263 | EPI_ISL_615265         | EPI_ISL_615266        | EPI_ISL_615267 |
| EPI_ISL_615285 | EPI_ISL_615286         | EPI_ISL_615287        | EPI_ISL_615288 |
| EPI_ISL_615309 | EPI_ISL_615310         | EPI_ISL_615311        | EPI_ISL_615312 |
| EPI_ISL_615328 | EPI_ISL_615329         | EPI_ISL_615330        | EPI_ISL_615331 |
| EPI_ISL_615348 | EPI_ISL_615350         | EPI_ISL_615351        | EPI_ISL_615352 |
| EPI_ISL_615369 | EPI_ISL_615370         | EPI_ISL_615371        | EPI_ISL_615372 |
| EPI_ISL_615389 | EPI_ISL_615390         | EPI_ISL_615391        | EPI_ISL_615392 |
| EPI_ISL_615409 | EPI_ISL_615410         | EPI_ISL_615411        | EPI_ISL_615412 |
| EPI_ISL_615435 | EPI_ISL_615436         | EPI_ISL_615437        | EPI_ISL_615438 |
| EPI_ISL_615459 | EPI_ISL_615460         | EPI_ISL_615461        | EPI_ISL_615462 |
| EPI_ISL_615481 | EPI_ISL_615482         | EPI_ISL_615483        | EPI_ISL_615484 |
| EPI_ISL_615504 | EPI_ISL_615506         | EPI_ISL_615507        | EPI_ISL_615508 |
| EPI_ISL_615528 | EPI_ISL_615529         | EPI_ISL_615530        | EPI_ISL_615531 |
| EPI_ISL_615547 | EPI_ISL_615548         | EPI_ISL_615550        | EPI_ISL_615551 |
| EPI_ISL_615572 | EPI_ISL_615575         | EPI_ISL_615576        | EPI_ISL_615577 |
| EPI_ISL_615593 | EPI_ISL_615594         | EPI_ISL_615595        | EPI_ISL_615596 |
| EPI_ISL_615615 | EPI_ISL_615616         | EPI_ISL_615618        | EPI_ISL_615621 |
| EPI_ISL_615636 | EPI_ISL_615637         | EPI_ISL_615638        | EPI_ISL_615640 |
| EPI_ISL_615656 | EPI_ISL_615657         | EPI_ISL_615658        | EPI_ISL_615660 |
| EPI_ISL_615677 | EPI_ISL_615678         | EPI_ISL_615680        | EPI_ISL_615683 |
| EPI_ISL_615702 | EPI_ISL_615704         | EPI_ISL_615705        | EPI_ISL_615708 |
| EPI_ISL_615722 | EPI_ISL_615724         | EPI_ISL_615725        | EPI_ISL_615727 |
| EPI_ISL_615748 | EPI_ISL_615751         | EPI_ISL_615752        | EPI_ISL_615753 |
| EPI_ISL_615777 | EPI_ISL_615778         | EPI_ISL_615779        | EPI_ISL_615781 |
| EPI_ISL_615798 | EPI_ISL_615801         | EPI_ISL_615802        | EPI_ISL_615803 |
| EPI_ISL_615827 | EPI_ISL_615828         | EPI_ISL_615829        | EPI_ISL_615831 |
| EPI_ISL_615848 | EPI_ISL_615849         | EPI_ISL_615850        | EPI_ISL_615851 |
| EPI_ISL_615873 | EPI_ISL_615874         | EPI_ISL_615875        | EPI_ISL_615876 |
| EPI_ISL_615899 | EPI_ISL_615900         | EPI_ISL_615901        | EPI_ISL_615902 |
| EPI_ISL_615926 | EPI_ISL_615927         | EPI_ISL_615928        | EPI_ISL_615930 |
| EPI_ISL_615948 | EPI_ISL_615950         | EPI_ISL_615951        | EPI_ISL_615952 |
| EPI_ISL_615973 | EPI_ISL_615974         | EPI_ISL_615975        | EPI_ISL_615976 |
| EPI_ISL_616019 | EPI_ISL_616020         | EPI_ISL_616021        | EPI_ISL_616022 |
| EPI_ISL_616039 | EPI_ISL_616042         | EPI_ISL_616043        | EPI_ISL_616044 |
| EPI_ISL_616062 | EPI_ISL_616063         | EPI_ISL_616064        | EPI_ISL_616065 |
| EPI_ISL_616082 | EPI_ISL_616083         | EPI_ISL_616084        | EPI_ISL_616086 |
| EPI_ISL_616105 | EPI_ISL_616106         | EPI_ISL_616107        | EPI_ISL_616108 |
| EPI_ISL_616126 | EPI_ISL_616127         | EPI_ISL_616128        | EPI_ISL_616129 |
| EPI_ISL_616151 | EPI_ISL_616152         | EPI_ISL_616153        | EPI_ISL_616154 |
| EPI_ISL_616176 | EPI_ISL_616177         | EPI_ISL_616178        | EPI_ISL_616179 |
| EPI_ISL_616203 | EPI_ISL_616204         | EPI_ISL_616205        | EPI_ISL_616206 |
| EPI_ISL_616223 | EPI_ISL_616224         | EPI_ISL_616225        | EPI_ISL_616226 |
| EPI_ISL_616243 | EPI_ISL_616244         | EPI_ISL_616245        | EPI_ISL_616246 |
| EPI_ISL_616267 | EPI_ISL_616268         | EPI_ISL_616270        | EPI_ISL_616271 |
| EPI_ISL_616289 | EPI_ISL_616290         | EPI_ISL_616291        | EPI_ISL_616292 |
| EPI_ISL_616314 | EPI_ISL_616316         | EPI_ISL_616317        | EPI_ISL_616318 |
| EPI_ISL_616336 | EPI_ISL_616337         | EPI_ISL_616338        | EPI_ISL_616339 |
| EPI_ISL_616358 | EPI_ISL_616359         | EPI_ISL_616360        | EPI_ISL_616361 |













































We gratefully acknowledge the following Authors from the Originating laboratories responsible for obtaining the specimens, as well as the Submitting laboratories where the genome data were generated and shared via GISAID, on which this research is based.

All Submitters of data may be contacted directly via [www.gisaid.org](http://www.gisaid.org)

Authors are sorted alphabetically.

| Accession ID                                                                                                                                                                                                                                                                                                                                                                                                                                                                                                                                                                                                                                                                                                                                                                                                                                                                                                                                                                                                                                                                                                                                                                                                                                                                                                                                                                                                                                                                                                                                                                                                                                                                                                                                                                                                                                                                                                                                                                                                                                                                                                                                                                                                                                                                                                                                                                                                                                                                                                                                                                                                                                                                                                                                                                                                                                                                                                                                                                                                                                                                                                                                                                                                                                                                                                                                                                                                                                                                                                                                                                                                                                                                                                                                                                                                                                                                                                                                                                                                                                                                   | Originating Laboratory                                                                                                                                                                                              | Submitting Laboratory                                                     | Authors                                                                                                                                                                                                                                                                                                                                                                                                                                                |
|--------------------------------------------------------------------------------------------------------------------------------------------------------------------------------------------------------------------------------------------------------------------------------------------------------------------------------------------------------------------------------------------------------------------------------------------------------------------------------------------------------------------------------------------------------------------------------------------------------------------------------------------------------------------------------------------------------------------------------------------------------------------------------------------------------------------------------------------------------------------------------------------------------------------------------------------------------------------------------------------------------------------------------------------------------------------------------------------------------------------------------------------------------------------------------------------------------------------------------------------------------------------------------------------------------------------------------------------------------------------------------------------------------------------------------------------------------------------------------------------------------------------------------------------------------------------------------------------------------------------------------------------------------------------------------------------------------------------------------------------------------------------------------------------------------------------------------------------------------------------------------------------------------------------------------------------------------------------------------------------------------------------------------------------------------------------------------------------------------------------------------------------------------------------------------------------------------------------------------------------------------------------------------------------------------------------------------------------------------------------------------------------------------------------------------------------------------------------------------------------------------------------------------------------------------------------------------------------------------------------------------------------------------------------------------------------------------------------------------------------------------------------------------------------------------------------------------------------------------------------------------------------------------------------------------------------------------------------------------------------------------------------------------------------------------------------------------------------------------------------------------------------------------------------------------------------------------------------------------------------------------------------------------------------------------------------------------------------------------------------------------------------------------------------------------------------------------------------------------------------------------------------------------------------------------------------------------------------------------------------------------------------------------------------------------------------------------------------------------------------------------------------------------------------------------------------------------------------------------------------------------------------------------------------------------------------------------------------------------------------------------------------------------------------------------------------------------|---------------------------------------------------------------------------------------------------------------------------------------------------------------------------------------------------------------------|---------------------------------------------------------------------------|--------------------------------------------------------------------------------------------------------------------------------------------------------------------------------------------------------------------------------------------------------------------------------------------------------------------------------------------------------------------------------------------------------------------------------------------------------|
| EPI_ISL_421272, EPI_ISL_421345, EPI_ISL_421346, EPI_ISL_421347, EPI_ISL_421543, EPI_ISL_421544, EPI_ISL_421545, EPI_ISL_421546, EPI_ISL_421547, EPI_ISL_421548, EPI_ISL_421549, EPI_ISL_421550, EPI_ISL_421551, EPI_ISL_421552, EPI_ISL_421553, EPI_ISL_421554<br>see above                                                                                                                                                                                                                                                                                                                                                                                                                                                                                                                                                                                                                                                                                                                                                                                                                                                                                                                                                                                                                                                                                                                                                                                                                                                                                                                                                                                                                                                                                                                                                                                                                                                                                                                                                                                                                                                                                                                                                                                                                                                                                                                                                                                                                                                                                                                                                                                                                                                                                                                                                                                                                                                                                                                                                                                                                                                                                                                                                                                                                                                                                                                                                                                                                                                                                                                                                                                                                                                                                                                                                                                                                                                                                                                                                                                                    | Wyoming Public Health Laboratory                                                                                                                                                                                    | Center for Global Health, University of New Mexico Health Sciences Center | Daryl Domman, Kurt Schwalm, Rob Christensen, Wanda Manley, Cari Sloma, Noah Hull, Darrell Dinwiddie                                                                                                                                                                                                                                                                                                                                                    |
| EPI_ISL_443183, EPI_ISL_443253, EPI_ISL_443254, EPI_ISL_443255, EPI_ISL_443256, EPI_ISL_443257, EPI_ISL_445077                                                                                                                                                                                                                                                                                                                                                                                                                                                                                                                                                                                                                                                                                                                                                                                                                                                                                                                                                                                                                                                                                                                                                                                                                                                                                                                                                                                                                                                                                                                                                                                                                                                                                                                                                                                                                                                                                                                                                                                                                                                                                                                                                                                                                                                                                                                                                                                                                                                                                                                                                                                                                                                                                                                                                                                                                                                                                                                                                                                                                                                                                                                                                                                                                                                                                                                                                                                                                                                                                                                                                                                                                                                                                                                                                                                                                                                                                                                                                                 | M Health Fairview                                                                                                                                                                                                   | University of Minnesota Genomics Center                                   | Daryl M. Gohl, John Garbe, Patrick Grady, Jerry Daniel, Ray Watson, Benjamin Auch, Andrew Nelson, Sophia Yohe, and Kenneth B. Beckman                                                                                                                                                                                                                                                                                                                  |
| EPI_ISL_448223, EPI_ISL_448224, EPI_ISL_448226, EPI_ISL_448229, EPI_ISL_448233, EPI_ISL_448235, EPI_ISL_448236, EPI_ISL_448237, EPI_ISL_448238, EPI_ISL_448239, EPI_ISL_448241, EPI_ISL_448242, EPI_ISL_448243, EPI_ISL_448244, EPI_ISL_448245, EPI_ISL_448250, EPI_ISL_448252, EPI_ISL_448254, EPI_ISL_448255, EPI_ISL_448256, EPI_ISL_448258, EPI_ISL_448259, EPI_ISL_448260, EPI_ISL_448261, EPI_ISL_448264, EPI_ISL_448265, EPI_ISL_448268, EPI_ISL_448269, EPI_ISL_448270, EPI_ISL_448272, EPI_ISL_448273, EPI_ISL_448276, EPI_ISL_448278, EPI_ISL_448279, EPI_ISL_448280, EPI_ISL_448281, EPI_ISL_448282, EPI_ISL_448284, EPI_ISL_448285, EPI_ISL_448286, EPI_ISL_448287, EPI_ISL_448288, EPI_ISL_448289, EPI_ISL_448290, EPI_ISL_448291, EPI_ISL_448292, EPI_ISL_448293, EPI_ISL_448294, EPI_ISL_448295, EPI_ISL_448296, EPI_ISL_448297, EPI_ISL_448298, EPI_ISL_448299, EPI_ISL_448301, EPI_ISL_448304, EPI_ISL_448306, EPI_ISL_448307, EPI_ISL_448311, EPI_ISL_448312, EPI_ISL_448313, EPI_ISL_448315, EPI_ISL_448316, EPI_ISL_448317, EPI_ISL_448318, EPI_ISL_448319, EPI_ISL_448320, EPI_ISL_448321, EPI_ISL_448322, EPI_ISL_448323, EPI_ISL_448324, EPI_ISL_448325, EPI_ISL_448329, EPI_ISL_448330, EPI_ISL_448333, EPI_ISL_448334, EPI_ISL_448335, EPI_ISL_448336, EPI_ISL_448337, EPI_ISL_448338, EPI_ISL_448339, EPI_ISL_448341, EPI_ISL_448342, EPI_ISL_448345, EPI_ISL_448346, EPI_ISL_448348, EPI_ISL_448349, EPI_ISL_448350, EPI_ISL_448351, EPI_ISL_448352, EPI_ISL_448353, EPI_ISL_448356, EPI_ISL_448357, EPI_ISL_448359, EPI_ISL_448361, EPI_ISL_448362, EPI_ISL_448364, EPI_ISL_448365, EPI_ISL_448367, EPI_ISL_448370, EPI_ISL_448374, EPI_ISL_448375, EPI_ISL_448377, EPI_ISL_448379, EPI_ISL_448382, EPI_ISL_448383, EPI_ISL_448384, EPI_ISL_448385, EPI_ISL_448386, EPI_ISL_448387, EPI_ISL_448388, EPI_ISL_448978, EPI_ISL_448979, EPI_ISL_448980, EPI_ISL_448981, EPI_ISL_448983, EPI_ISL_448984, EPI_ISL_448985, EPI_ISL_448986, EPI_ISL_448987, EPI_ISL_448988, EPI_ISL_448989, EPI_ISL_448990, EPI_ISL_448993, EPI_ISL_448994, EPI_ISL_448995, EPI_ISL_448996, EPI_ISL_448997, EPI_ISL_448998, EPI_ISL_449000, EPI_ISL_449001, EPI_ISL_449004, EPI_ISL_449005, EPI_ISL_449007, EPI_ISL_449008, EPI_ISL_449009, EPI_ISL_449010, EPI_ISL_449013, EPI_ISL_449017, EPI_ISL_449018, EPI_ISL_449020, EPI_ISL_449021, EPI_ISL_449022, EPI_ISL_449025, EPI_ISL_449026, EPI_ISL_449027, EPI_ISL_449028, EPI_ISL_449029, EPI_ISL_449031, EPI_ISL_449032, EPI_ISL_449033, EPI_ISL_449034, EPI_ISL_449036, EPI_ISL_449037, EPI_ISL_449038, EPI_ISL_449039, EPI_ISL_449040, EPI_ISL_449041, EPI_ISL_449042, EPI_ISL_449043, EPI_ISL_449048, EPI_ISL_449049, EPI_ISL_449050, EPI_ISL_449053, EPI_ISL_449054, EPI_ISL_449055, EPI_ISL_449056, EPI_ISL_449057, EPI_ISL_449059, EPI_ISL_449060, EPI_ISL_449061, EPI_ISL_449063, EPI_ISL_449065, EPI_ISL_449068, EPI_ISL_449069, EPI_ISL_449071, EPI_ISL_449073, EPI_ISL_449074, EPI_ISL_449075, EPI_ISL_449076, EPI_ISL_449077, EPI_ISL_449078, EPI_ISL_449079, EPI_ISL_449080, EPI_ISL_449081, EPI_ISL_449082, EPI_ISL_449083, EPI_ISL_449084, EPI_ISL_449086, EPI_ISL_449087, EPI_ISL_449088, EPI_ISL_449090, EPI_ISL_449091, EPI_ISL_449092, EPI_ISL_449093, EPI_ISL_449094, EPI_ISL_449095, EPI_ISL_449096, EPI_ISL_449097, EPI_ISL_449098, EPI_ISL_449100, EPI_ISL_449101, EPI_ISL_449102, EPI_ISL_449103, EPI_ISL_449104, EPI_ISL_449105, EPI_ISL_449106, EPI_ISL_449107, EPI_ISL_449108, EPI_ISL_449109, EPI_ISL_449113, EPI_ISL_449114, EPI_ISL_449117, EPI_ISL_449118, EPI_ISL_449119, EPI_ISL_449121, EPI_ISL_449122, EPI_ISL_449123, EPI_ISL_449124, EPI_ISL_449125, EPI_ISL_449127, EPI_ISL_449132, EPI_ISL_449133, EPI_ISL_449136, EPI_ISL_449137, EPI_ISL_449138, EPI_ISL_449139, EPI_ISL_449140, EPI_ISL_449142, EPI_ISL_449143, EPI_ISL_449144, EPI_ISL_449149, EPI_ISL_449150, EPI_ISL_449153, EPI_ISL_449154, EPI_ISL_449158, EPI_ISL_449162, EPI_ISL_449163, EPI_ISL_449164, EPI_ISL_449166, EPI_ISL_449167, EPI_ISL_449169, EPI_ISL_449171, EPI_ISL_449172, EPI_ISL_449174, EPI_ISL_449175 | Quadram Institute Bioscience                                                                                                                                                                                        | COVID-19 Genomics UK (COG-UK) Consortium                                  | Dave J. Baker, Gemma L. Kay, Alp Aydin, Thanh Le-Viet, Steven Rudder, Ana P. Tedim, Anastasia Kolyva, Maria Diaz, Leonardo de Oliveira Martins, Nabil-Fareed Alikhan, Lizzie Meadows, Rachael Stanley, Ngozi Elumogo, Muhammed Yasir, Nicholas M. Thomson, Alexander J Trotter, Rachel Gilroy, Samuel Bloomfield, Claire Stuart, Andrew Bell, Reenesh Prakash, Samir Derवेशic, Alison E. Mather, John Wain, Mark Webber, Andrew J. Page, Justin OGrady |
| EPI_ISL_453486, EPI_ISL_453487, EPI_ISL_453488, EPI_ISL_453489, EPI_ISL_453490, EPI_ISL_453491, EPI_ISL_453492, EPI_ISL_453493, EPI_ISL_453494, EPI_ISL_453495, EPI_ISL_453496, EPI_ISL_453497, EPI_ISL_453498, EPI_ISL_453499, EPI_ISL_453500, EPI_ISL_453501, EPI_ISL_453502, EPI_ISL_453503, EPI_ISL_453504, EPI_ISL_453505, EPI_ISL_453506, EPI_ISL_453507, EPI_ISL_453508, EPI_ISL_453509, EPI_ISL_453510, EPI_ISL_453511, EPI_ISL_453512, EPI_ISL_453513, EPI_ISL_453514, EPI_ISL_453515, EPI_ISL_453516, EPI_ISL_453517, EPI_ISL_453518, EPI_ISL_453519, EPI_ISL_453520, EPI_ISL_453521, EPI_ISL_453522, EPI_ISL_453523, EPI_ISL_453524, EPI_ISL_453525, EPI_ISL_453527, EPI_ISL_453528, EPI_ISL_453529, EPI_ISL_453530, EPI_ISL_453531, EPI_ISL_453532, EPI_ISL_453533, EPI_ISL_453534, EPI_ISL_453535, EPI_ISL_453536, EPI_ISL_453537, EPI_ISL_453538, EPI_ISL_453539, EPI_ISL_453540, EPI_ISL_453541, EPI_ISL_453542                                                                                                                                                                                                                                                                                                                                                                                                                                                                                                                                                                                                                                                                                                                                                                                                                                                                                                                                                                                                                                                                                                                                                                                                                                                                                                                                                                                                                                                                                                                                                                                                                                                                                                                                                                                                                                                                                                                                                                                                                                                                                                                                                                                                                                                                                                                                                                                                                                                                                                                                                                                                                                                                                                                                                                                                                                                                                                                                                                                                                                                                                                                                                 | Northumbria University / South Tees Hospitals NHS Foundation Trust / North Cumbria Integrated Care NHS Foundation Trust / North Tees and Hartlepool NHS Foundation Trust / Newcastle Hospitals NHS Foundation Trust | Northumbria University                                                    | Darren L Smith, Andrew Nelson, Matthew Bashton, Greg R Young, Joshua Loh, John Allan, Mohammad A Tariq, Giles S Holt, Gary Black, Wen C Yew, Lynn Dover, Paul Baker, Steve Liggett, Sarah Essex, Jane Greenaway, Debra Padgett, Clive Graham, Garren Scott, Edward Barton, Emma Swindells, Brendan Payne, Jennifer Collins, Yusrri Taha, Gary Eltringham                                                                                               |
| EPI_ISL_453543                                                                                                                                                                                                                                                                                                                                                                                                                                                                                                                                                                                                                                                                                                                                                                                                                                                                                                                                                                                                                                                                                                                                                                                                                                                                                                                                                                                                                                                                                                                                                                                                                                                                                                                                                                                                                                                                                                                                                                                                                                                                                                                                                                                                                                                                                                                                                                                                                                                                                                                                                                                                                                                                                                                                                                                                                                                                                                                                                                                                                                                                                                                                                                                                                                                                                                                                                                                                                                                                                                                                                                                                                                                                                                                                                                                                                                                                                                                                                                                                                                                                 | Northumbria University / South Tees Hospitals NHS Foundation Trust / North Cumbria Integrated Care NHS Foundation Trust / Newcastle Hospitals NHS Foundation Trust                                                  | Northumbria University                                                    | Darren L Smith, Andrew Nelson, Matthew Bashton, Greg R Young, Joshua Loh, John Allan, Mohammad A Tariq, Giles S Holt, Gary Black, Wen C Yew, Lynn Dover, Paul Baker, Steve Liggett, Sarah Essex, Jane Greenaway, Debra Padgett, Clive Graham, Garren Scott, Edward Barton, Emma Swindells, Brendan Payne, Jennifer Collins, Yusrri Taha, Gary Eltringham                                                                                               |
| EPI_ISL_453544                                                                                                                                                                                                                                                                                                                                                                                                                                                                                                                                                                                                                                                                                                                                                                                                                                                                                                                                                                                                                                                                                                                                                                                                                                                                                                                                                                                                                                                                                                                                                                                                                                                                                                                                                                                                                                                                                                                                                                                                                                                                                                                                                                                                                                                                                                                                                                                                                                                                                                                                                                                                                                                                                                                                                                                                                                                                                                                                                                                                                                                                                                                                                                                                                                                                                                                                                                                                                                                                                                                                                                                                                                                                                                                                                                                                                                                                                                                                                                                                                                                                 | Northumbria University / South Tees Hospitals NHS Foundation Trust / North Cumbria Integrated Care NHS Foundation Trust / North Tees and Hartlepool NHS Foundation Trust / Newcastle Hospitals NHS Foundation Trust | COVID-19 Genomics UK (COG-UK) Consortium                                  | Darren L Smith, Andrew Nelson, Matthew Bashton, Greg R Young, Joshua Loh, John Allan, Mohammad A Tariq, Giles S Holt, Gary Black, Wen C Yew, Lynn Dover, Paul Baker, Steve Liggett, Sarah Essex, Jane Greenaway, Debra Padgett, Clive Graham, Garren Scott, Edward Barton, Emma Swindells, Brendan Payne, Jennifer Collins, Yusrri Taha, Gary Eltringham                                                                                               |
| EPI_ISL_453545, EPI_ISL_453546, EPI_ISL_453547, EPI_ISL_453550, EPI_ISL_453551, EPI_ISL_453552, EPI_ISL_453554, EPI_ISL_453555, EPI_ISL_453557, EPI_ISL_453560, EPI_ISL_453561, EPI_ISL_453563, EPI_ISL_453564, EPI_ISL_453565, EPI_ISL_453566, EPI_ISL_453567, EPI_ISL_453569, EPI_ISL_453570, EPI_ISL_453571, EPI_ISL_453572, EPI_ISL_453573, EPI_ISL_453574, EPI_ISL_453575, EPI_ISL_453576, EPI_ISL_453577, EPI_ISL_453578, EPI_ISL_453579, EPI_ISL_453580, EPI_ISL_453581, EPI_ISL_453583, EPI_ISL_453585, EPI_ISL_453586, EPI_ISL_453587, EPI_ISL_453588, EPI_ISL_453589, EPI_ISL_453591, EPI_ISL_453592, EPI_ISL_453593, EPI_ISL_453594, EPI_ISL_453595, EPI_ISL_453597, EPI_ISL_453598, EPI_ISL_453599, EPI_ISL_453600, EPI_ISL_453601, EPI_ISL_453602, EPI_ISL_453603, EPI_ISL_453604, EPI_ISL_453606, EPI_ISL_453607, EPI_ISL_453608, EPI_ISL_453609, EPI_ISL_453610, EPI_ISL_453612, EPI_ISL_453613                                                                                                                                                                                                                                                                                                                                                                                                                                                                                                                                                                                                                                                                                                                                                                                                                                                                                                                                                                                                                                                                                                                                                                                                                                                                                                                                                                                                                                                                                                                                                                                                                                                                                                                                                                                                                                                                                                                                                                                                                                                                                                                                                                                                                                                                                                                                                                                                                                                                                                                                                                                                                                                                                                                                                                                                                                                                                                                                                                                                                                                                                                                                                                 | Quadram Institute Bioscience                                                                                                                                                                                        | COVID-19 Genomics UK (COG-UK) Consortium                                  | Dave J. Baker, Gemma L. Kay, Alp Aydin, Thanh Le-Viet, Steven Rudder, Ana P. Tedim, Anastasia Kolyva, Maria Diaz, Leonardo de Oliveira Martins, Nabil-Fareed Alikhan, Lizzie Meadows, Rachael Stanley, Ngozi Elumogo, Muhammed Yasir, Nicholas M. Thomson, Alexander J Trotter, Rachel Gilroy, Samuel Bloomfield, Claire Stuart, Andrew Bell, Reenesh Prakash, Samir Derवेशic, Alison E. Mather, John Wain, Mark Webber, Andrew J. Page, Justin OGrady |
| EPI_ISL_457303, EPI_ISL_457304, EPI_ISL_457305, EPI_ISL_457306, EPI_ISL_457307, EPI_ISL_457308, EPI_ISL_457309, EPI_ISL_457310, EPI_ISL_457311, EPI_ISL_457312, EPI_ISL_457313, EPI_ISL_457314, EPI_ISL_457315, EPI_ISL_457316, EPI_ISL_457317, EPI_ISL_457318, EPI_ISL_457319, EPI_ISL_457320, EPI_ISL_457321, EPI_ISL_457322, EPI_ISL_457323, EPI_ISL_457324, EPI_ISL_457325                                                                                                                                                                                                                                                                                                                                                                                                                                                                                                                                                                                                                                                                                                                                                                                                                                                                                                                                                                                                                                                                                                                                                                                                                                                                                                                                                                                                                                                                                                                                                                                                                                                                                                                                                                                                                                                                                                                                                                                                                                                                                                                                                                                                                                                                                                                                                                                                                                                                                                                                                                                                                                                                                                                                                                                                                                                                                                                                                                                                                                                                                                                                                                                                                                                                                                                                                                                                                                                                                                                                                                                                                                                                                                 | Northumbria University / South Tees Hospitals NHS Foundation Trust / North Cumbria Integrated Care NHS Foundation Trust / North Tees and Hartlepool NHS Foundation Trust / Newcastle Hospitals NHS Foundation Trust | COVID-19 Genomics UK (COG-UK) Consortium                                  | Darren L Smith, Andrew Nelson, Matthew Bashton, Greg R Young, Joshua Loh, John Allan, Mohammad A Tariq, Giles S Holt, Gary Black, Wen C Yew, Lynn Dover, Paul Baker, Steve Liggett, Sarah Essex, Jane Greenaway, Debra Padgett, Clive Graham, Garren Scott, Edward Barton, Emma Swindells, Brendan Payne, Jennifer Collins, Yusrri Taha, Gary Eltringham                                                                                               |
| EPI_ISL_457327, EPI_ISL_457328, EPI_ISL_457329, EPI_ISL_457330, EPI_ISL_457331, EPI_ISL_457334, EPI_ISL_457336, EPI_ISL_457337, EPI_ISL_457338, EPI_ISL_457339, EPI_ISL_457340, EPI_ISL_457341, EPI_ISL_457342, EPI_ISL_457343, EPI_ISL_457344, EPI_ISL_457347, EPI_ISL_457349, EPI_ISL_457350, EPI_ISL_457351, EPI_ISL_457352, EPI_ISL_457353, EPI_ISL_457354, EPI_ISL_457355, EPI_ISL_457356, EPI_ISL_457357, EPI_ISL_457358, EPI_ISL_457359, EPI_ISL_457360, EPI_ISL_457363, EPI_ISL_457364, EPI_ISL_457365, EPI_ISL_457366, EPI_ISL_457368, EPI_ISL_457369, EPI_ISL_457371, EPI_ISL_457372, EPI_ISL_457373, EPI_ISL_457374, EPI_ISL_457375, EPI_ISL_457376, EPI_ISL_457378, EPI_ISL_457379, EPI_ISL_457380, EPI_ISL_457381, EPI_ISL_457383, EPI_ISL_457385, EPI_ISL_457386, EPI_ISL_457387, EPI_ISL_457388, EPI_ISL_457389, EPI_ISL_457390, EPI_ISL_457391, EPI_ISL_457392, EPI_ISL_457393, EPI_ISL_457394, EPI_ISL_457395, EPI_ISL_457397, EPI_ISL_457398, EPI_ISL_457400, EPI_ISL_457402, EPI_ISL_457403, EPI_ISL_457404, EPI_ISL_457406, EPI_ISL_457409, EPI_ISL_457411, EPI_ISL_457412, EPI_ISL_457413, EPI_ISL_457414, EPI_ISL_457415, EPI_ISL_457416, EPI_ISL_457417, EPI_ISL_457418, EPI_ISL_457419, EPI_ISL_457420, EPI_ISL_457421, EPI_ISL_457422, EPI_ISL_457423, EPI_ISL_457424, EPI_ISL_457425, EPI_ISL_457426, EPI_ISL_457427, EPI_ISL_457428, EPI_ISL_457429, EPI_ISL_457431, EPI_ISL_457432, EPI_ISL_457433, EPI_ISL_457434, EPI_ISL_457435, EPI_ISL_457436, EPI_ISL_457437, EPI_ISL_457438, EPI_ISL_457439, EPI_ISL_457440, EPI_ISL_457441, EPI_ISL_457442, EPI_ISL_457443, EPI_ISL_457444, EPI_ISL_457445, EPI_ISL_457446, EPI_ISL_457447, EPI_ISL_457448, EPI_ISL_457449, EPI_ISL_457450, EPI_ISL_457451, EPI_ISL_457452, EPI_ISL_457454, EPI_ISL_457456, EPI_ISL_457457, EPI_ISL_457460, EPI_ISL_457461, EPI_ISL_457462, EPI_ISL_457463, EPI_ISL_457464, EPI_ISL_457465, EPI_ISL_457466, EPI_ISL_457468, EPI_ISL_457469, EPI_ISL_457470, EPI_ISL_457471, EPI_ISL_457472, EPI_ISL_457473, EPI_ISL_457474, EPI_ISL_457475, EPI_ISL_457476, EPI_ISL_457477, EPI_ISL_457479, EPI_ISL_457480, EPI_ISL_457481, EPI_ISL_457482, EPI_ISL_457483, EPI_ISL_457484, EPI_ISL_457485, EPI_ISL_457486, EPI_ISL_457488, EPI_ISL_457489, EPI_ISL_457490, EPI_ISL_457491, EPI_ISL_457492, EPI_ISL_457493, EPI_ISL_457494, EPI_ISL_457495, EPI_ISL_457497, EPI_ISL_457499, EPI_ISL_457501, EPI_ISL_457502, EPI_ISL_457503, EPI_ISL_457505, EPI_ISL_457506, EPI_ISL_457507, EPI_ISL_457509, EPI_ISL_457510, EPI_ISL_457511, EPI_ISL_457512, EPI_ISL_457513, EPI_ISL_457514, EPI_ISL_457515, EPI_ISL_457516, EPI_ISL_457517, EPI_ISL_457518, EPI_ISL_457519, EPI_ISL_457520, EPI_ISL_457521, EPI_ISL_457522, EPI_ISL_457523, EPI_ISL_457524, EPI_ISL_457525, EPI_ISL_457527, EPI_ISL_457528, EPI_ISL_457530, EPI_ISL_457531, EPI_ISL_457532, EPI_ISL_457533, EPI_ISL_457534, EPI_ISL_457536, EPI_ISL_457539, EPI_ISL_457540, EPI_ISL_457542, EPI_ISL_457543, EPI_ISL_457544, EPI_ISL_457545, EPI_ISL_457546, EPI_ISL_457547, EPI_ISL_457548, EPI_ISL_457550, EPI_ISL_457551, EPI_ISL_457552, EPI_ISL_457555, EPI_ISL_457556, EPI_ISL_457557, EPI_ISL_457558, EPI_ISL_457559, EPI_ISL_457560, EPI_ISL_457562, EPI_ISL_457563, EPI_ISL_457564, EPI_ISL_457565, EPI_ISL_457566, EPI_ISL_457568, EPI_ISL_457569, EPI_ISL_457571                                                                                                                                                                                                                                                                                                                                                                                                                                                                                                                                                                                                                                                                                                                                                 | Quadram Institute Bioscience                                                                                                                                                                                        | COVID-19 Genomics UK (COG-UK) Consortium                                  | Dave J. Baker, Gemma L. Kay, Alp Aydin, Thanh Le-Viet, Steven Rudder, Ana P. Tedim, Anastasia Kolyva, Maria Diaz, Leonardo de Oliveira Martins, Nabil-Fareed Alikhan, Lizzie Meadows, Rachael Stanley, Ngozi Elumogo, Muhammed Yasir, Nicholas M. Thomson, Alexander J Trotter, Rachel Gilroy, Samuel Bloomfield, Claire Stuart, Andrew Bell, Reenesh Prakash, Samir Derवेशic, Alison E. Mather, John Wain, Mark Webber, Andrew J. Page, Justin OGrady |







|                                                                                                                                                                                                                                                                                                                                                                                                                                                                                                                                                                                                                                                                                                                                                                                                                                                                                                                                                                                                                                                                                                                                                                                                                                                                                                                                                                                                                                                                                                                                                                                                                                                                                                                                                                                                                                                                                                                                                                                                                                                                                                                                                                                                                                                                                |                                                                                                                                                                                                                              |                                                                              |                                                                                                                                                                                                                                                                                                                                                                                                                                                           |
|--------------------------------------------------------------------------------------------------------------------------------------------------------------------------------------------------------------------------------------------------------------------------------------------------------------------------------------------------------------------------------------------------------------------------------------------------------------------------------------------------------------------------------------------------------------------------------------------------------------------------------------------------------------------------------------------------------------------------------------------------------------------------------------------------------------------------------------------------------------------------------------------------------------------------------------------------------------------------------------------------------------------------------------------------------------------------------------------------------------------------------------------------------------------------------------------------------------------------------------------------------------------------------------------------------------------------------------------------------------------------------------------------------------------------------------------------------------------------------------------------------------------------------------------------------------------------------------------------------------------------------------------------------------------------------------------------------------------------------------------------------------------------------------------------------------------------------------------------------------------------------------------------------------------------------------------------------------------------------------------------------------------------------------------------------------------------------------------------------------------------------------------------------------------------------------------------------------------------------------------------------------------------------|------------------------------------------------------------------------------------------------------------------------------------------------------------------------------------------------------------------------------|------------------------------------------------------------------------------|-----------------------------------------------------------------------------------------------------------------------------------------------------------------------------------------------------------------------------------------------------------------------------------------------------------------------------------------------------------------------------------------------------------------------------------------------------------|
|                                                                                                                                                                                                                                                                                                                                                                                                                                                                                                                                                                                                                                                                                                                                                                                                                                                                                                                                                                                                                                                                                                                                                                                                                                                                                                                                                                                                                                                                                                                                                                                                                                                                                                                                                                                                                                                                                                                                                                                                                                                                                                                                                                                                                                                                                | Foundation Trust / North Cumbria Integrated Care NHS<br>Foundation Trust / North Tees and Hartlepool NHS<br>Foundation Trust / Newcastle Hospitals NHS Foundation Trust                                                      |                                                                              | Dover,Paul Baker,Steve Liggett,Sarah Essex,Jane Greenaway,Debra Padgett,Clive Graham,Garren Scott,Edward Barton,Emma Swindells,Brendan Payne,Jennifer Collins,Yusri Taha,Gary Eltringham                                                                                                                                                                                                                                                                  |
| EPI_ISL_499603                                                                                                                                                                                                                                                                                                                                                                                                                                                                                                                                                                                                                                                                                                                                                                                                                                                                                                                                                                                                                                                                                                                                                                                                                                                                                                                                                                                                                                                                                                                                                                                                                                                                                                                                                                                                                                                                                                                                                                                                                                                                                                                                                                                                                                                                 | Quadram Institute Bioscience                                                                                                                                                                                                 | COVID-19 Genomics UK (COG-UK) Consortium                                     | Dave J. Baker, Gemma L. Kay, Alp Aydin, Thanh Le-Viet, Steven Rudder, Ana P. Tedim, Anastasia Kolyva, Maria Diaz, Leonardo de Oliveira Martins, Nabil-Fareed Alikhan, Lizzie Meadows, Rachael Stanley, Ngozi Elumogo, Muhammed Yasir, Nicholas M. Thomson, Alexander J Trotter, Rachel Gilroy, Samuel Bloomfield, Claire Stuart, Andrew Bell, Reenesh Prakash, Samir Dervisevic, Alison E. Mather, John Wain, Mark Webber, Andrew J. Page, Justin O'Grady |
| EPI_ISL_499606, EPI_ISL_499609, EPI_ISL_499610                                                                                                                                                                                                                                                                                                                                                                                                                                                                                                                                                                                                                                                                                                                                                                                                                                                                                                                                                                                                                                                                                                                                                                                                                                                                                                                                                                                                                                                                                                                                                                                                                                                                                                                                                                                                                                                                                                                                                                                                                                                                                                                                                                                                                                 | Northumbria University / South Tees Hospitals NHS<br>Foundation Trust / North Cumbria Integrated Care NHS<br>Foundation Trust / North Tees and Hartlepool NHS<br>Foundation Trust / Newcastle Hospitals NHS Foundation Trust | COVID-19 Genomics UK (COG-UK) Consortium                                     | Darren L Smith,Andrew Nelson,Matthew Bashton,Greg R Young,Joshua Loh,John Allan,Mohammad A Tariq,Giles S Holt,Gary Black,Wen C Yew,Lynn Dover,Paul Baker,Steve Liggett,Sarah Essex,Jane Greenaway,Debra Padgett,Clive Graham,Garren Scott,Edward Barton,Emma Swindells,Brendan Payne,Jennifer Collins,Yusri Taha,Gary Eltringham                                                                                                                          |
| EPI_ISL_499623                                                                                                                                                                                                                                                                                                                                                                                                                                                                                                                                                                                                                                                                                                                                                                                                                                                                                                                                                                                                                                                                                                                                                                                                                                                                                                                                                                                                                                                                                                                                                                                                                                                                                                                                                                                                                                                                                                                                                                                                                                                                                                                                                                                                                                                                 | Quadram Institute Bioscience                                                                                                                                                                                                 | COVID-19 Genomics UK (COG-UK) Consortium                                     | Dave J. Baker, Gemma L. Kay, Alp Aydin, Thanh Le-Viet, Steven Rudder, Ana P. Tedim, Anastasia Kolyva, Maria Diaz, Leonardo de Oliveira Martins, Nabil-Fareed Alikhan, Lizzie Meadows, Rachael Stanley, Ngozi Elumogo, Muhammed Yasir, Nicholas M. Thomson, Alexander J Trotter, Rachel Gilroy, Samuel Bloomfield, Claire Stuart, Andrew Bell, Reenesh Prakash, Samir Dervisevic, Alison E. Mather, John Wain, Mark Webber, Andrew J. Page, Justin O'Grady |
| EPI_ISL_499626                                                                                                                                                                                                                                                                                                                                                                                                                                                                                                                                                                                                                                                                                                                                                                                                                                                                                                                                                                                                                                                                                                                                                                                                                                                                                                                                                                                                                                                                                                                                                                                                                                                                                                                                                                                                                                                                                                                                                                                                                                                                                                                                                                                                                                                                 | Northumbria University / South Tees Hospitals NHS<br>Foundation Trust / North Cumbria Integrated Care NHS<br>Foundation Trust / North Tees and Hartlepool NHS<br>Foundation Trust / Newcastle Hospitals NHS Foundation Trust | COVID-19 Genomics UK (COG-UK) Consortium                                     | Darren L Smith,Andrew Nelson,Matthew Bashton,Greg R Young,Joshua Loh,John Allan,Mohammad A Tariq,Giles S Holt,Gary Black,Wen C Yew,Lynn Dover,Paul Baker,Steve Liggett,Sarah Essex,Jane Greenaway,Debra Padgett,Clive Graham,Garren Scott,Edward Barton,Emma Swindells,Brendan Payne,Jennifer Collins,Yusri Taha,Gary Eltringham                                                                                                                          |
| EPI_ISL_499631                                                                                                                                                                                                                                                                                                                                                                                                                                                                                                                                                                                                                                                                                                                                                                                                                                                                                                                                                                                                                                                                                                                                                                                                                                                                                                                                                                                                                                                                                                                                                                                                                                                                                                                                                                                                                                                                                                                                                                                                                                                                                                                                                                                                                                                                 | Quadram Institute Bioscience                                                                                                                                                                                                 | COVID-19 Genomics UK (COG-UK) Consortium                                     | Dave J. Baker, Gemma L. Kay, Alp Aydin, Thanh Le-Viet, Steven Rudder, Ana P. Tedim, Anastasia Kolyva, Maria Diaz, Leonardo de Oliveira Martins, Nabil-Fareed Alikhan, Lizzie Meadows, Rachael Stanley, Ngozi Elumogo, Muhammed Yasir, Nicholas M. Thomson, Alexander J Trotter, Rachel Gilroy, Samuel Bloomfield, Claire Stuart, Andrew Bell, Reenesh Prakash, Samir Dervisevic, Alison E. Mather, John Wain, Mark Webber, Andrew J. Page, Justin O'Grady |
| EPI_ISL_499777, EPI_ISL_499778, EPI_ISL_499779, EPI_ISL_499780, EPI_ISL_499781, EPI_ISL_499782, EPI_ISL_499783, EPI_ISL_499784, EPI_ISL_499785, EPI_ISL_499786, EPI_ISL_499787, EPI_ISL_499788, EPI_ISL_499789, EPI_ISL_499790, EPI_ISL_499791, EPI_ISL_499792, EPI_ISL_499793, EPI_ISL_499794, EPI_ISL_499795, EPI_ISL_499796, EPI_ISL_499797, EPI_ISL_499798, EPI_ISL_499799, EPI_ISL_499800, EPI_ISL_499801, EPI_ISL_499802, EPI_ISL_499803, EPI_ISL_499804, EPI_ISL_499805, EPI_ISL_499806, EPI_ISL_499807, EPI_ISL_507110, EPI_ISL_507111, EPI_ISL_507112, EPI_ISL_507113, EPI_ISL_507114, EPI_ISL_507115, EPI_ISL_507116, EPI_ISL_507117, EPI_ISL_507118, EPI_ISL_507119, EPI_ISL_507120, EPI_ISL_507121, EPI_ISL_507122, EPI_ISL_507123, EPI_ISL_507124, EPI_ISL_507125, EPI_ISL_507126, EPI_ISL_507127, EPI_ISL_507128, EPI_ISL_507129                                                                                                                                                                                                                                                                                                                                                                                                                                                                                                                                                                                                                                                                                                                                                                                                                                                                                                                                                                                                                                                                                                                                                                                                                                                                                                                                                                                                                                 |                                                                                                                                                                                                                              |                                                                              |                                                                                                                                                                                                                                                                                                                                                                                                                                                           |
| see above                                                                                                                                                                                                                                                                                                                                                                                                                                                                                                                                                                                                                                                                                                                                                                                                                                                                                                                                                                                                                                                                                                                                                                                                                                                                                                                                                                                                                                                                                                                                                                                                                                                                                                                                                                                                                                                                                                                                                                                                                                                                                                                                                                                                                                                                      | Northumbria University / South Tees Hospitals NHS<br>Foundation Trust / North Cumbria Integrated Care NHS<br>Foundation Trust / North Tees and Hartlepool NHS<br>Foundation Trust / Newcastle Hospitals NHS Foundation Trust | COVID-19 Genomics UK (COG-UK) Consortium                                     | Darren L Smith,Andrew Nelson,Matthew Bashton,Greg R Young,Joshua Loh,John Allan,Mohammad A Tariq,Giles S Holt,Gary Black,Wen C Yew,Lynn Dover,Paul Baker,Steve Liggett,Sarah Essex,Jane Greenaway,Debra Padgett,Clive Graham,Garren Scott,Edward Barton,Emma Swindells,Brendan Payne,Jennifer Collins,Yusri Taha,Gary Eltringham                                                                                                                          |
| EPI_ISL_507130                                                                                                                                                                                                                                                                                                                                                                                                                                                                                                                                                                                                                                                                                                                                                                                                                                                                                                                                                                                                                                                                                                                                                                                                                                                                                                                                                                                                                                                                                                                                                                                                                                                                                                                                                                                                                                                                                                                                                                                                                                                                                                                                                                                                                                                                 | Quadram Institute Bioscience                                                                                                                                                                                                 | COVID-19 Genomics UK (COG-UK) Consortium                                     | Dave J. Baker, Gemma L. Kay, Alp Aydin, Thanh Le-Viet, Steven Rudder, Ana P. Tedim, Anastasia Kolyva, Maria Diaz, Leonardo de Oliveira Martins, Nabil-Fareed Alikhan, Lizzie Meadows, Rachael Stanley, Ngozi Elumogo, Muhammed Yasir, Nicholas M. Thomson, Alexander J Trotter, Rachel Gilroy, Samuel Bloomfield, Claire Stuart, Andrew Bell, Reenesh Prakash, Samir Dervisevic, Alison E. Mather, John Wain, Mark Webber, Andrew J. Page, Justin O'Grady |
| EPI_ISL_507984, EPI_ISL_507985, EPI_ISL_507986, EPI_ISL_507987, EPI_ISL_507988, EPI_ISL_507989, EPI_ISL_507990, EPI_ISL_507991, EPI_ISL_507992, EPI_ISL_507993, EPI_ISL_507994, EPI_ISL_507995, EPI_ISL_507996, EPI_ISL_507997, EPI_ISL_507998, EPI_ISL_507999, EPI_ISL_508000, EPI_ISL_508001, EPI_ISL_508002, EPI_ISL_508003, EPI_ISL_508004, EPI_ISL_508005, EPI_ISL_508006, EPI_ISL_508007, EPI_ISL_508008, EPI_ISL_508009, EPI_ISL_508010, EPI_ISL_508011, EPI_ISL_508012, EPI_ISL_508013, EPI_ISL_508014, EPI_ISL_508015, EPI_ISL_508016, EPI_ISL_508017, EPI_ISL_508018, EPI_ISL_508019, EPI_ISL_508020, EPI_ISL_508021, EPI_ISL_508022, EPI_ISL_508023, EPI_ISL_508024, EPI_ISL_508025, EPI_ISL_508026, EPI_ISL_508027, EPI_ISL_508028, EPI_ISL_508029, EPI_ISL_508030, EPI_ISL_508031, EPI_ISL_508032, EPI_ISL_508033, EPI_ISL_508034, EPI_ISL_508035, EPI_ISL_508036, EPI_ISL_508037, EPI_ISL_508038, EPI_ISL_508039, EPI_ISL_508040, EPI_ISL_508041, EPI_ISL_508042, EPI_ISL_508043, EPI_ISL_508044, EPI_ISL_508045, EPI_ISL_508046, EPI_ISL_508047, EPI_ISL_508048, EPI_ISL_508049, EPI_ISL_508050, EPI_ISL_508051, EPI_ISL_508052, EPI_ISL_508053, EPI_ISL_508054, EPI_ISL_508055, EPI_ISL_508056, EPI_ISL_508057, EPI_ISL_508058, EPI_ISL_508059, EPI_ISL_508060, EPI_ISL_508061, EPI_ISL_508062, EPI_ISL_508063, EPI_ISL_508064, EPI_ISL_508065, EPI_ISL_508066, EPI_ISL_508067, EPI_ISL_508068, EPI_ISL_508069, EPI_ISL_508070, EPI_ISL_508071, EPI_ISL_508072, EPI_ISL_508073, EPI_ISL_508074, EPI_ISL_508075, EPI_ISL_508076, EPI_ISL_508077, EPI_ISL_508078, EPI_ISL_508079, EPI_ISL_508080, EPI_ISL_508081, EPI_ISL_508082, EPI_ISL_508083, EPI_ISL_508084, EPI_ISL_508085, EPI_ISL_508086, EPI_ISL_508087, EPI_ISL_508088, EPI_ISL_508089, EPI_ISL_508090, EPI_ISL_508091, EPI_ISL_508092, EPI_ISL_508093, EPI_ISL_508094, EPI_ISL_508095, EPI_ISL_508096, EPI_ISL_508097, EPI_ISL_508098, EPI_ISL_508099, EPI_ISL_508100, EPI_ISL_508101, EPI_ISL_508102, EPI_ISL_508103, EPI_ISL_508104, EPI_ISL_508105, EPI_ISL_508106, EPI_ISL_508107, EPI_ISL_508108, EPI_ISL_508109, EPI_ISL_508110, EPI_ISL_508111, EPI_ISL_508112, EPI_ISL_508113, EPI_ISL_508114, EPI_ISL_508115, EPI_ISL_508116, EPI_ISL_508117, EPI_ISL_508118, EPI_ISL_508119, EPI_ISL_508120 |                                                                                                                                                                                                                              |                                                                              |                                                                                                                                                                                                                                                                                                                                                                                                                                                           |
| see above                                                                                                                                                                                                                                                                                                                                                                                                                                                                                                                                                                                                                                                                                                                                                                                                                                                                                                                                                                                                                                                                                                                                                                                                                                                                                                                                                                                                                                                                                                                                                                                                                                                                                                                                                                                                                                                                                                                                                                                                                                                                                                                                                                                                                                                                      | New Mexico Department of Health Scientific Laboratory<br>Division                                                                                                                                                            | Center for Global Health, University of New Mexico Health<br>Sciences Center | Daryl Domman, Kurt Schwalm, Twila Kunde, Joseph Hicks, Michael Edwards, Darrell Dinwiddie                                                                                                                                                                                                                                                                                                                                                                 |
| EPI_ISL_512348, EPI_ISL_512349, EPI_ISL_512350, EPI_ISL_512351, EPI_ISL_512352, EPI_ISL_512353, EPI_ISL_512354, EPI_ISL_512355, EPI_ISL_512356, EPI_ISL_512357, EPI_ISL_512358, EPI_ISL_512359, EPI_ISL_512360, EPI_ISL_512361, EPI_ISL_512362, EPI_ISL_512363, EPI_ISL_512364, EPI_ISL_512365                                                                                                                                                                                                                                                                                                                                                                                                                                                                                                                                                                                                                                                                                                                                                                                                                                                                                                                                                                                                                                                                                                                                                                                                                                                                                                                                                                                                                                                                                                                                                                                                                                                                                                                                                                                                                                                                                                                                                                                 |                                                                                                                                                                                                                              |                                                                              |                                                                                                                                                                                                                                                                                                                                                                                                                                                           |
| see above                                                                                                                                                                                                                                                                                                                                                                                                                                                                                                                                                                                                                                                                                                                                                                                                                                                                                                                                                                                                                                                                                                                                                                                                                                                                                                                                                                                                                                                                                                                                                                                                                                                                                                                                                                                                                                                                                                                                                                                                                                                                                                                                                                                                                                                                      | Northumbria University / South Tees Hospitals NHS<br>Foundation Trust / North Cumbria Integrated Care NHS<br>Foundation Trust / North Tees and Hartlepool NHS<br>Foundation Trust / Newcastle Hospitals NHS Foundation Trust | COVID-19 Genomics UK (COG-UK) Consortium                                     | Darren L Smith,Andrew Nelson,Matthew Bashton,Greg R Young,Joshua Loh,John Allan,Mohammad A Tariq,Giles S Holt,Gary Black,Wen C Yew,Lynn Dover,Paul Baker,Steve Liggett,Sarah Essex,Jane Greenaway,Debra Padgett,Clive Graham,Garren Scott,Edward Barton,Emma Swindells,Brendan Payne,Jennifer Collins,Yusri Taha,Gary Eltringham                                                                                                                          |
| EPI_ISL_512366, EPI_ISL_512368, EPI_ISL_512370, EPI_ISL_512371, EPI_ISL_512372, EPI_ISL_512373, EPI_ISL_512377, EPI_ISL_512378, EPI_ISL_529238, EPI_ISL_529241, EPI_ISL_529242, EPI_ISL_529244, EPI_ISL_529245, EPI_ISL_529246, EPI_ISL_529247, EPI_ISL_529250, EPI_ISL_529273, EPI_ISL_529282, EPI_ISL_529286, EPI_ISL_529378, EPI_ISL_529388, EPI_ISL_529389, EPI_ISL_529416, EPI_ISL_529417, EPI_ISL_529437, EPI_ISL_529451, EPI_ISL_529457, EPI_ISL_529458, EPI_ISL_529459, EPI_ISL_529460, EPI_ISL_529469, EPI_ISL_529476, EPI_ISL_529487, EPI_ISL_529488, EPI_ISL_529489, EPI_ISL_529492, EPI_ISL_529506, EPI_ISL_529507, EPI_ISL_529523, EPI_ISL_529526, EPI_ISL_529557, EPI_ISL_529558, EPI_ISL_529560, EPI_ISL_529561, EPI_ISL_529562, EPI_ISL_529563, EPI_ISL_529564, EPI_ISL_529565, EPI_ISL_529566, EPI_ISL_529567, EPI_ISL_529568, EPI_ISL_529569, EPI_ISL_529570, EPI_ISL_529571, EPI_ISL_529572, EPI_ISL_529575, EPI_ISL_529576, EPI_ISL_529577, EPI_ISL_529578, EPI_ISL_529579, EPI_ISL_529581, EPI_ISL_529585, EPI_ISL_529586, EPI_ISL_529587, EPI_ISL_529588                                                                                                                                                                                                                                                                                                                                                                                                                                                                                                                                                                                                                                                                                                                                                                                                                                                                                                                                                                                                                                                                                                                                                                                                 |                                                                                                                                                                                                                              |                                                                              |                                                                                                                                                                                                                                                                                                                                                                                                                                                           |
| see above                                                                                                                                                                                                                                                                                                                                                                                                                                                                                                                                                                                                                                                                                                                                                                                                                                                                                                                                                                                                                                                                                                                                                                                                                                                                                                                                                                                                                                                                                                                                                                                                                                                                                                                                                                                                                                                                                                                                                                                                                                                                                                                                                                                                                                                                      | Quadram Institute Bioscience                                                                                                                                                                                                 | COVID-19 Genomics UK (COG-UK) Consortium                                     | Dave J. Baker, Gemma L. Kay, Alp Aydin, Thanh Le-Viet, Steven Rudder, Ana P. Tedim, Anastasia Kolyva, Maria Diaz, Leonardo de Oliveira Martins, Nabil-Fareed Alikhan, Lizzie Meadows, Rachael Stanley, Ngozi Elumogo, Muhammed Yasir, Nicholas M. Thomson, Alexander J Trotter, Rachel Gilroy, Samuel Bloomfield, Claire Stuart, Andrew Bell, Reenesh Prakash, Samir Dervisevic, Alison E. Mather, John Wain, Mark Webber, Andrew J. Page, Justin O'Grady |
| EPI_ISL_538233, EPI_ISL_538234, EPI_ISL_538235, EPI_ISL_538236, EPI_ISL_538237, EPI_ISL_538238, EPI_ISL_538239, EPI_ISL_538240, EPI_ISL_538241, EPI_ISL_538242, EPI_ISL_538243, EPI_ISL_538244, EPI_ISL_538245, EPI_ISL_538246, EPI_ISL_538247, EPI_ISL_538248, EPI_ISL_538249, EPI_ISL_538250, EPI_ISL_538251, EPI_ISL_538252, EPI_ISL_538253, EPI_ISL_538254, EPI_ISL_538255, EPI_ISL_538256, EPI_ISL_538257, EPI_ISL_538258, EPI_ISL_538259, EPI_ISL_538260, EPI_ISL_538261, EPI_ISL_538262, EPI_ISL_538263, EPI_ISL_538264                                                                                                                                                                                                                                                                                                                                                                                                                                                                                                                                                                                                                                                                                                                                                                                                                                                                                                                                                                                                                                                                                                                                                                                                                                                                                                                                                                                                                                                                                                                                                                                                                                                                                                                                                 |                                                                                                                                                                                                                              |                                                                              |                                                                                                                                                                                                                                                                                                                                                                                                                                                           |
| see above                                                                                                                                                                                                                                                                                                                                                                                                                                                                                                                                                                                                                                                                                                                                                                                                                                                                                                                                                                                                                                                                                                                                                                                                                                                                                                                                                                                                                                                                                                                                                                                                                                                                                                                                                                                                                                                                                                                                                                                                                                                                                                                                                                                                                                                                      | TriCore Reference Laboratories                                                                                                                                                                                               | Center for Global Health, University of New Mexico Health<br>Sciences Center | Daryl Domman, Kurt Schwalm, Twila Kunde, Joseph Hicks, Michael Edwards, Darrell Dinwiddie                                                                                                                                                                                                                                                                                                                                                                 |
| EPI_ISL_540693, EPI_ISL_540694, EPI_ISL_540695, EPI_ISL_540696, EPI_ISL_540697, EPI_ISL_540698                                                                                                                                                                                                                                                                                                                                                                                                                                                                                                                                                                                                                                                                                                                                                                                                                                                                                                                                                                                                                                                                                                                                                                                                                                                                                                                                                                                                                                                                                                                                                                                                                                                                                                                                                                                                                                                                                                                                                                                                                                                                                                                                                                                 | Quadram Institute Bioscience                                                                                                                                                                                                 | COVID-19 Genomics UK (COG-UK) Consortium                                     | Dave J. Baker, Gemma L. Kay, Alp Aydin, Thanh Le-Viet, Steven Rudder, Ana P. Tedim, Anastasia Kolyva, Maria Diaz, Leonardo de Oliveira Martins, Nabil-Fareed Alikhan, Lizzie Meadows, Rachael Stanley, Ngozi Elumogo, Muhammed Yasir, Nicholas M. Thomson, Alexander J Trotter, Rachel Gilroy, Samuel Bloomfield, Claire Stuart, Andrew Bell, Reenesh Prakash, Samir Dervisevic, Alison E. Mather, John Wain, Mark Webber, Andrew J. Page, Justin O'Grady |
| EPI_ISL_542935, EPI_ISL_542936, EPI_ISL_542937, EPI_ISL_542938, EPI_ISL_542939, EPI_ISL_542940, EPI_ISL_542941, EPI_ISL_542942, EPI_ISL_542943, EPI_ISL_542944, EPI_ISL_542945, EPI_ISL_542946, EPI_ISL_542947, EPI_ISL_542948, EPI_ISL_542949, EPI_ISL_542950, EPI_ISL_542951, EPI_ISL_542952, EPI_ISL_542953, EPI_ISL_542954, EPI_ISL_542955, EPI_ISL_542956, EPI_ISL_542957, EPI_ISL_542958, EPI_ISL_542959, EPI_ISL_542960, EPI_ISL_542961, EPI_ISL_542962, EPI_ISL_542963, EPI_ISL_542964, EPI_ISL_542965, EPI_ISL_542966, EPI_ISL_542967, EPI_ISL_542968, EPI_ISL_542969, EPI_ISL_542970, EPI_ISL_542971, EPI_ISL_542972, EPI_ISL_542973, EPI_ISL_542974, EPI_ISL_542975, EPI_ISL_542976, EPI_ISL_542977, EPI_ISL_542978, EPI_ISL_542979, EPI_ISL_542980, EPI_ISL_542981, EPI_ISL_542982, EPI_ISL_542983, EPI_ISL_542984, EPI_ISL_542985, EPI_ISL_542986, EPI_ISL_542987, EPI_ISL_542988, EPI_ISL_542989, EPI_ISL_542990, EPI_ISL_542991, EPI_ISL_542992, EPI_ISL_542993, EPI_ISL_542994, EPI_ISL_542995, EPI_ISL_542996, EPI_ISL_542997, EPI_ISL_542998, EPI_ISL_542999, EPI_ISL_543000, EPI_ISL_543001, EPI_ISL_543002, EPI_ISL_543003, EPI_ISL_543004, EPI_ISL_543005, EPI_ISL_543006                                                                                                                                                                                                                                                                                                                                                                                                                                                                                                                                                                                                                                                                                                                                                                                                                                                                                                                                                                                                                                                                                 |                                                                                                                                                                                                                              |                                                                              |                                                                                                                                                                                                                                                                                                                                                                                                                                                           |
| see above                                                                                                                                                                                                                                                                                                                                                                                                                                                                                                                                                                                                                                                                                                                                                                                                                                                                                                                                                                                                                                                                                                                                                                                                                                                                                                                                                                                                                                                                                                                                                                                                                                                                                                                                                                                                                                                                                                                                                                                                                                                                                                                                                                                                                                                                      | TriCore Reference Laboratories                                                                                                                                                                                               | Center for Global Health, University of New Mexico Health<br>Sciences Center | Daryl Domman, Kurt Schwalm, Twila Kunde, Joseph Hicks, Michael Edwards, Darrell Dinwiddie                                                                                                                                                                                                                                                                                                                                                                 |
| EPI_ISL_549336, EPI_ISL_549344, EPI_ISL_549350, EPI_ISL_549351, EPI_ISL_549353, EPI_ISL_549368, EPI_ISL_549369, EPI_ISL_549370, EPI_ISL_549377, EPI_ISL_549383, EPI_ISL_549384, EPI_ISL_549477, EPI_ISL_549478, EPI_ISL_549479, EPI_ISL_549480, EPI_ISL_549482, EPI_ISL_549483, EPI_ISL_549484, EPI_ISL_549485, EPI_ISL_549486, EPI_ISL_549487, EPI_ISL_549488                                                                                                                                                                                                                                                                                                                                                                                                                                                                                                                                                                                                                                                                                                                                                                                                                                                                                                                                                                                                                                                                                                                                                                                                                                                                                                                                                                                                                                                                                                                                                                                                                                                                                                                                                                                                                                                                                                                 |                                                                                                                                                                                                                              |                                                                              |                                                                                                                                                                                                                                                                                                                                                                                                                                                           |
| see above                                                                                                                                                                                                                                                                                                                                                                                                                                                                                                                                                                                                                                                                                                                                                                                                                                                                                                                                                                                                                                                                                                                                                                                                                                                                                                                                                                                                                                                                                                                                                                                                                                                                                                                                                                                                                                                                                                                                                                                                                                                                                                                                                                                                                                                                      | Quadram Institute Bioscience                                                                                                                                                                                                 | COVID-19 Genomics UK (COG-UK) Consortium                                     | Dave J. Baker, Gemma L. Kay, Alp Aydin, Thanh Le-Viet, Steven Rudder, Ana P. Tedim, Anastasia Kolyva, Maria Diaz, Leonardo de Oliveira Martins, Nabil-Fareed Alikhan, Lizzie Meadows, Rachael Stanley, Ngozi Elumogo, Muhammed Yasir, Nicholas M. Thomson, Alexander J Trotter, Rachel Gilroy, Samuel Bloomfield, Claire Stuart, Andrew Bell, Reenesh Prakash, Samir Dervisevic, Alison E. Mather, John Wain, Mark Webber, Andrew J. Page, Justin O'Grady |







|                                                                                                                                                                                                                                                                                                                                                                                                                                                                                                                                                                                                                                                                                                                                                                                                                                                                                                                                                                                                                                                                                                                                                                                                                                                                                |           |                                                                                                                                                                                                                     |                                                                           |                                                                                                                                                                                                                                                                                                                                                                                                                                                           |
|--------------------------------------------------------------------------------------------------------------------------------------------------------------------------------------------------------------------------------------------------------------------------------------------------------------------------------------------------------------------------------------------------------------------------------------------------------------------------------------------------------------------------------------------------------------------------------------------------------------------------------------------------------------------------------------------------------------------------------------------------------------------------------------------------------------------------------------------------------------------------------------------------------------------------------------------------------------------------------------------------------------------------------------------------------------------------------------------------------------------------------------------------------------------------------------------------------------------------------------------------------------------------------|-----------|---------------------------------------------------------------------------------------------------------------------------------------------------------------------------------------------------------------------|---------------------------------------------------------------------------|-----------------------------------------------------------------------------------------------------------------------------------------------------------------------------------------------------------------------------------------------------------------------------------------------------------------------------------------------------------------------------------------------------------------------------------------------------------|
| EPI_ISL_573374, EPI_ISL_573375, EPI_ISL_573376, EPI_ISL_573377, EPI_ISL_573378, EPI_ISL_573379, EPI_ISL_573380, EPI_ISL_573381, EPI_ISL_573382, EPI_ISL_573383, EPI_ISL_573384, EPI_ISL_573385, EPI_ISL_573386, EPI_ISL_573387, EPI_ISL_573388, EPI_ISL_573389, EPI_ISL_573390, EPI_ISL_573391, EPI_ISL_573392, EPI_ISL_573393, EPI_ISL_573394, EPI_ISL_573395, EPI_ISL_573396, EPI_ISL_573397, EPI_ISL_573398, EPI_ISL_573399, EPI_ISL_573400, EPI_ISL_573401, EPI_ISL_573402, EPI_ISL_573403, EPI_ISL_573404, EPI_ISL_573405, EPI_ISL_573406, EPI_ISL_573407, EPI_ISL_573408, EPI_ISL_573409, EPI_ISL_573410, EPI_ISL_573411, EPI_ISL_573412, EPI_ISL_573413                                                                                                                                                                                                                                                                                                                                                                                                                                                                                                                                                                                                                 | see above | Northumbria University / South Tees Hospitals NHS Foundation Trust / North Cumbria Integrated Care NHS Foundation Trust / North Tees and Hartlepool NHS Foundation Trust / Newcastle Hospitals NHS Foundation Trust | COVID-19 Genomics UK (COG-UK) Consortium                                  | Darren L Smith, Andrew Nelson, Matthew Bashton, Greg R Young, Joshua Loh, John Allan, Mohammad A Tariq, Giles S Holt, Gary Black, Wen C Yew, Lynn Dover, Paul Baker, Steve Liggett, Sarah Essex, Jane Greenaway, Debra Padgett, Clive Graham, Garren Scott, Edward Barton, Emma Swindells, Brendan Payne, Jennifer Collins, Yusri Taha, Gary Eltringham                                                                                                   |
| EPI_ISL_573414, EPI_ISL_573415, EPI_ISL_573416, EPI_ISL_573417                                                                                                                                                                                                                                                                                                                                                                                                                                                                                                                                                                                                                                                                                                                                                                                                                                                                                                                                                                                                                                                                                                                                                                                                                 | see above | Quadram Institute Bioscience                                                                                                                                                                                        | COVID-19 Genomics UK (COG-UK) Consortium                                  | Dave J. Baker, Gemma L. Kay, Alp Aydin, Thanh Le-Viet, Steven Rudder, Ana P. Tedim, Anastasia Kolyva, Maria Diaz, Leonardo de Oliveira Martins, Nabil-Fareed Alikhan, Lizzie Meadows, Rachael Stanley, Ngozi Elumogo, Muhammed Yasir, Nicholas M. Thomson, Alexander J Trotter, Rachel Gilroy, Samuel Bloomfield, Claire Stuart, Andrew Bell, Reenesh Prakash, Samir Dervisevic, Alison E. Mather, John Wain, Mark Webber, Andrew J. Page, Justin O'Grady |
| EPI_ISL_573760, EPI_ISL_573761, EPI_ISL_573799, EPI_ISL_573871, EPI_ISL_573872, EPI_ISL_576986, EPI_ISL_576987, EPI_ISL_576988, EPI_ISL_576989, EPI_ISL_576990, EPI_ISL_576991, EPI_ISL_576992, EPI_ISL_576993, EPI_ISL_576994, EPI_ISL_576995, EPI_ISL_576996, EPI_ISL_576997, EPI_ISL_576998, EPI_ISL_576999, EPI_ISL_577000, EPI_ISL_577001, EPI_ISL_577002, EPI_ISL_577003, EPI_ISL_577004, EPI_ISL_577005, EPI_ISL_577006, EPI_ISL_577007, EPI_ISL_577008, EPI_ISL_577009, EPI_ISL_577010, EPI_ISL_577011, EPI_ISL_577012, EPI_ISL_577013, EPI_ISL_577014, EPI_ISL_577015, EPI_ISL_577016, EPI_ISL_577017, EPI_ISL_577018, EPI_ISL_577019, EPI_ISL_577020, EPI_ISL_577021, EPI_ISL_577022, EPI_ISL_577023, EPI_ISL_577024, EPI_ISL_577025, EPI_ISL_577026, EPI_ISL_577027, EPI_ISL_577028, EPI_ISL_577029, EPI_ISL_577030, EPI_ISL_577031, EPI_ISL_577032, EPI_ISL_577033, EPI_ISL_577034, EPI_ISL_577035, EPI_ISL_577036, EPI_ISL_577037, EPI_ISL_577038, EPI_ISL_577039                                                                                                                                                                                                                                                                                                 | see above | Northumbria University / South Tees Hospitals NHS Foundation Trust / North Cumbria Integrated Care NHS Foundation Trust / North Tees and Hartlepool NHS Foundation Trust / Newcastle Hospitals NHS Foundation Trust | COVID-19 Genomics UK (COG-UK) Consortium                                  | Darren L Smith, Andrew Nelson, Matthew Bashton, Greg R Young, Joshua Loh, John Allan, Mohammad A Tariq, Giles S Holt, Gary Black, Wen C Yew, Lynn Dover, Paul Baker, Steve Liggett, Sarah Essex, Jane Greenaway, Debra Padgett, Clive Graham, Garren Scott, Edward Barton, Emma Swindells, Brendan Payne, Jennifer Collins, Yusri Taha, Gary Eltringham                                                                                                   |
| EPI_ISL_577096, EPI_ISL_577098, EPI_ISL_577099, EPI_ISL_577100, EPI_ISL_577101, EPI_ISL_577102, EPI_ISL_577103, EPI_ISL_577104, EPI_ISL_577105, EPI_ISL_577107, EPI_ISL_577108, EPI_ISL_577109                                                                                                                                                                                                                                                                                                                                                                                                                                                                                                                                                                                                                                                                                                                                                                                                                                                                                                                                                                                                                                                                                 | see above | Quadram Institute Bioscience                                                                                                                                                                                        | COVID-19 Genomics UK (COG-UK) Consortium                                  | Dave J. Baker, Gemma L. Kay, Alp Aydin, Thanh Le-Viet, Steven Rudder, Ana P. Tedim, Anastasia Kolyva, Maria Diaz, Leonardo de Oliveira Martins, Nabil-Fareed Alikhan, Lizzie Meadows, Rachael Stanley, Ngozi Elumogo, Muhammed Yasir, Nicholas M. Thomson, Alexander J Trotter, Rachel Gilroy, Samuel Bloomfield, Claire Stuart, Andrew Bell, Reenesh Prakash, Samir Dervisevic, Alison E. Mather, John Wain, Mark Webber, Andrew J. Page, Justin O'Grady |
| EPI_ISL_582148, EPI_ISL_582149, EPI_ISL_582150, EPI_ISL_582151, EPI_ISL_582152, EPI_ISL_582153, EPI_ISL_582154, EPI_ISL_582155, EPI_ISL_582156, EPI_ISL_582157, EPI_ISL_582158, EPI_ISL_582159, EPI_ISL_582160, EPI_ISL_582161, EPI_ISL_582162, EPI_ISL_582163, EPI_ISL_582164, EPI_ISL_582165, EPI_ISL_582166, EPI_ISL_582167, EPI_ISL_582168, EPI_ISL_582169, EPI_ISL_582170, EPI_ISL_582171, EPI_ISL_582172, EPI_ISL_582173, EPI_ISL_582174, EPI_ISL_582175, EPI_ISL_582176, EPI_ISL_582177, EPI_ISL_582178, EPI_ISL_582179, EPI_ISL_582180, EPI_ISL_582181, EPI_ISL_582182, EPI_ISL_582183, EPI_ISL_582184, EPI_ISL_582185, EPI_ISL_582186, EPI_ISL_582187, EPI_ISL_582188, EPI_ISL_582189, EPI_ISL_582190, EPI_ISL_582191, EPI_ISL_582192, EPI_ISL_582193, EPI_ISL_582194, EPI_ISL_582195, EPI_ISL_582196, EPI_ISL_582197, EPI_ISL_582198, EPI_ISL_582199, EPI_ISL_582200, EPI_ISL_582201, EPI_ISL_582202, EPI_ISL_582203, EPI_ISL_582205, EPI_ISL_582206, EPI_ISL_582207, EPI_ISL_582208, EPI_ISL_582209, EPI_ISL_582210, EPI_ISL_582211, EPI_ISL_582212, EPI_ISL_582213, EPI_ISL_582214, EPI_ISL_582215, EPI_ISL_582216, EPI_ISL_582217, EPI_ISL_582218, EPI_ISL_582219                                                                                                 | see above | TriCore Reference Laboratories                                                                                                                                                                                      | Center for Global Health, University of New Mexico Health Sciences Center | Daryl Domman, Kurt Schwalm, Twila Kunde, Joseph Hicks, Michael Edwards, Darrell Dinwiddie                                                                                                                                                                                                                                                                                                                                                                 |
| EPI_ISL_582220, EPI_ISL_582221, EPI_ISL_582222, EPI_ISL_582223, EPI_ISL_582224, EPI_ISL_582225, EPI_ISL_582226, EPI_ISL_582227, EPI_ISL_582228, EPI_ISL_582229, EPI_ISL_582230, EPI_ISL_582231, EPI_ISL_582232, EPI_ISL_582233, EPI_ISL_582234, EPI_ISL_582235, EPI_ISL_582236, EPI_ISL_582237, EPI_ISL_582238, EPI_ISL_582239, EPI_ISL_582240                                                                                                                                                                                                                                                                                                                                                                                                                                                                                                                                                                                                                                                                                                                                                                                                                                                                                                                                 | see above | Wyoming Public Health Laboratory                                                                                                                                                                                    | Center for Global Health, University of New Mexico Health Sciences Center | Daryl Domman, Kurt Schwalm, Rob Christensen, Wanda Manley, Cari Sloma, Noah Hull, Darrell Dinwiddie                                                                                                                                                                                                                                                                                                                                                       |
| EPI_ISL_582812, EPI_ISL_582813, EPI_ISL_582814, EPI_ISL_582815, EPI_ISL_582816, EPI_ISL_582817, EPI_ISL_582818, EPI_ISL_582819, EPI_ISL_582820, EPI_ISL_582821, EPI_ISL_582822, EPI_ISL_582823, EPI_ISL_582824, EPI_ISL_582825, EPI_ISL_582826, EPI_ISL_582827, EPI_ISL_582828, EPI_ISL_582829, EPI_ISL_582830, EPI_ISL_582831, EPI_ISL_582832, EPI_ISL_582833, EPI_ISL_582834                                                                                                                                                                                                                                                                                                                                                                                                                                                                                                                                                                                                                                                                                                                                                                                                                                                                                                 | see above | Hospital General Universitario Gregorio Marañón                                                                                                                                                                     | SeqCOVID-SPAIN consortium/IBV(CSIC)                                       | Darío García de Viedma, Laura Pérez-Lago, Marta Herranz, Jon Sicilia, Julia Suárez, Pilar Catalán, Patricia Muñoz and SeqCOVID-SPAIN consortium                                                                                                                                                                                                                                                                                                           |
| EPI_ISL_584165                                                                                                                                                                                                                                                                                                                                                                                                                                                                                                                                                                                                                                                                                                                                                                                                                                                                                                                                                                                                                                                                                                                                                                                                                                                                 | see above | Quadram Institute Bioscience                                                                                                                                                                                        | COVID-19 Genomics UK (COG-UK) Consortium                                  | Dave J. Baker, Gemma L. Kay, Alp Aydin, Thanh Le-Viet, Steven Rudder, Ana P. Tedim, Anastasia Kolyva, Maria Diaz, Leonardo de Oliveira Martins, Nabil-Fareed Alikhan, Lizzie Meadows, Rachael Stanley, Ngozi Elumogo, Muhammed Yasir, Nicholas M. Thomson, Alexander J Trotter, Rachel Gilroy, Samuel Bloomfield, Claire Stuart, Andrew Bell, Reenesh Prakash, Samir Dervisevic, Alison E. Mather, John Wain, Mark Webber, Andrew J. Page, Justin O'Grady |
| EPI_ISL_584681, EPI_ISL_584682, EPI_ISL_584683, EPI_ISL_584684, EPI_ISL_584685, EPI_ISL_584686, EPI_ISL_584687, EPI_ISL_584688, EPI_ISL_584689, EPI_ISL_584690, EPI_ISL_584691, EPI_ISL_584692, EPI_ISL_584693, EPI_ISL_584694, EPI_ISL_584695, EPI_ISL_584696, EPI_ISL_584697, EPI_ISL_584698, EPI_ISL_584699, EPI_ISL_584700, EPI_ISL_584701, EPI_ISL_584702, EPI_ISL_584703, EPI_ISL_584704, EPI_ISL_584705, EPI_ISL_584706, EPI_ISL_584707, EPI_ISL_584708, EPI_ISL_584709, EPI_ISL_584710, EPI_ISL_584711, EPI_ISL_584712, EPI_ISL_584713, EPI_ISL_584714, EPI_ISL_584715                                                                                                                                                                                                                                                                                                                                                                                                                                                                                                                                                                                                                                                                                                 | see above | Northumbria University / South Tees Hospitals NHS Foundation Trust / North Cumbria Integrated Care NHS Foundation Trust / North Tees and Hartlepool NHS Foundation Trust / Newcastle Hospitals NHS Foundation Trust | COVID-19 Genomics UK (COG-UK) Consortium                                  | Darren L Smith, Andrew Nelson, Matthew Bashton, Greg R Young, Joshua Loh, John Allan, Mohammad A Tariq, Giles S Holt, Gary Black, Wen C Yew, Lynn Dover, Paul Baker, Steve Liggett, Sarah Essex, Jane Greenaway, Debra Padgett, Clive Graham, Garren Scott, Edward Barton, Emma Swindells, Brendan Payne, Jennifer Collins, Yusri Taha, Gary Eltringham                                                                                                   |
| EPI_ISL_584716, EPI_ISL_584719, EPI_ISL_584720, EPI_ISL_584721, EPI_ISL_584722, EPI_ISL_584724, EPI_ISL_584726, EPI_ISL_584727, EPI_ISL_584730, EPI_ISL_584732, EPI_ISL_584733, EPI_ISL_584734, EPI_ISL_584735, EPI_ISL_584736, EPI_ISL_584737, EPI_ISL_584738, EPI_ISL_584739, EPI_ISL_584740, EPI_ISL_584741, EPI_ISL_584742, EPI_ISL_584743, EPI_ISL_584744, EPI_ISL_584745, EPI_ISL_584746, EPI_ISL_584747, EPI_ISL_584748, EPI_ISL_584749                                                                                                                                                                                                                                                                                                                                                                                                                                                                                                                                                                                                                                                                                                                                                                                                                                 | see above | Quadram Institute Bioscience                                                                                                                                                                                        | COVID-19 Genomics UK (COG-UK) Consortium                                  | Dave J. Baker, Gemma L. Kay, Alp Aydin, Thanh Le-Viet, Steven Rudder, Ana P. Tedim, Anastasia Kolyva, Maria Diaz, Leonardo de Oliveira Martins, Nabil-Fareed Alikhan, Lizzie Meadows, Rachael Stanley, Ngozi Elumogo, Muhammed Yasir, Nicholas M. Thomson, Alexander J Trotter, Rachel Gilroy, Samuel Bloomfield, Claire Stuart, Andrew Bell, Reenesh Prakash, Samir Dervisevic, Alison E. Mather, John Wain, Mark Webber, Andrew J. Page, Justin O'Grady |
| EPI_ISL_584847, EPI_ISL_584848, EPI_ISL_584849, EPI_ISL_584850, EPI_ISL_584851, EPI_ISL_584852, EPI_ISL_584853, EPI_ISL_584854, EPI_ISL_584855, EPI_ISL_584856, EPI_ISL_584857, EPI_ISL_584858, EPI_ISL_584859, EPI_ISL_584860, EPI_ISL_584861, EPI_ISL_584862, EPI_ISL_584863, EPI_ISL_584864, EPI_ISL_584865, EPI_ISL_584866, EPI_ISL_584867, EPI_ISL_584868, EPI_ISL_584869, EPI_ISL_584870, EPI_ISL_584871, EPI_ISL_584872, EPI_ISL_584873, EPI_ISL_584874, EPI_ISL_584875, EPI_ISL_584876, EPI_ISL_584877, EPI_ISL_584878, EPI_ISL_584879, EPI_ISL_584880, EPI_ISL_584881, EPI_ISL_584882                                                                                                                                                                                                                                                                                                                                                                                                                                                                                                                                                                                                                                                                                 | see above | Northumbria University / South Tees Hospitals NHS Foundation Trust / North Cumbria Integrated Care NHS Foundation Trust / North Tees and Hartlepool NHS Foundation Trust / Newcastle Hospitals NHS Foundation Trust | COVID-19 Genomics UK (COG-UK) Consortium                                  | Darren L Smith, Andrew Nelson, Matthew Bashton, Greg R Young, Joshua Loh, John Allan, Mohammad A Tariq, Giles S Holt, Gary Black, Wen C Yew, Lynn Dover, Paul Baker, Steve Liggett, Sarah Essex, Jane Greenaway, Debra Padgett, Clive Graham, Garren Scott, Edward Barton, Emma Swindells, Brendan Payne, Jennifer Collins, Yusri Taha, Gary Eltringham                                                                                                   |
| EPI_ISL_584906, EPI_ISL_584907, EPI_ISL_584908, EPI_ISL_584910, EPI_ISL_584911, EPI_ISL_584912, EPI_ISL_584914, EPI_ISL_584915, EPI_ISL_584916, EPI_ISL_584917, EPI_ISL_584918, EPI_ISL_584919, EPI_ISL_584920, EPI_ISL_584922, EPI_ISL_584923, EPI_ISL_584924, EPI_ISL_584927, EPI_ISL_584928, EPI_ISL_584929, EPI_ISL_584930, EPI_ISL_584931, EPI_ISL_584932, EPI_ISL_584933, EPI_ISL_584934, EPI_ISL_584935, EPI_ISL_584936, EPI_ISL_584937, EPI_ISL_584938, EPI_ISL_584940, EPI_ISL_584941, EPI_ISL_584942, EPI_ISL_584944, EPI_ISL_584945, EPI_ISL_584947, EPI_ISL_584948, EPI_ISL_584950, EPI_ISL_584951, EPI_ISL_584952, EPI_ISL_584953, EPI_ISL_584954, EPI_ISL_584955, EPI_ISL_584956, EPI_ISL_584957, EPI_ISL_584959, EPI_ISL_584961, EPI_ISL_584963, EPI_ISL_584965, EPI_ISL_584966, EPI_ISL_584967, EPI_ISL_584968, EPI_ISL_584970, EPI_ISL_584971, EPI_ISL_584972, EPI_ISL_584973, EPI_ISL_584976, EPI_ISL_584977, EPI_ISL_584982, EPI_ISL_584983, EPI_ISL_584985, EPI_ISL_584990, EPI_ISL_584992, EPI_ISL_584993, EPI_ISL_584994, EPI_ISL_584995, EPI_ISL_584996, EPI_ISL_584997, EPI_ISL_584998, EPI_ISL_584999, EPI_ISL_585000, EPI_ISL_585001, EPI_ISL_585002, EPI_ISL_585003, EPI_ISL_585005, EPI_ISL_585006, EPI_ISL_585007, EPI_ISL_585008, EPI_ISL_585260 | see above | Quadram Institute Bioscience                                                                                                                                                                                        | COVID-19 Genomics UK (COG-UK) Consortium                                  | Dave J. Baker, Gemma L. Kay, Alp Aydin, Thanh Le-Viet, Steven Rudder, Ana P. Tedim, Anastasia Kolyva, Maria Diaz, Leonardo de Oliveira Martins, Nabil-Fareed Alikhan, Lizzie Meadows, Rachael Stanley, Ngozi Elumogo, Muhammed Yasir, Nicholas M. Thomson, Alexander J Trotter, Rachel Gilroy, Samuel Bloomfield, Claire Stuart, Andrew Bell, Reenesh Prakash, Samir Dervisevic, Alison E. Mather, John Wain, Mark Webber, Andrew J. Page, Justin O'Grady |
| EPI_ISL_585504, EPI_ISL_585505, EPI_ISL_585506, EPI_ISL_585507, EPI_ISL_585508, EPI_ISL_585509, EPI_ISL_585510, EPI_ISL_585511, EPI_ISL_585512, EPI_ISL_585513, EPI_ISL_585514, EPI_ISL_585515, EPI_ISL_585516, EPI_ISL_585517, EPI_ISL_585518, EPI_ISL_585519, EPI_ISL_585520, EPI_ISL_585521, EPI_ISL_585522, EPI_ISL_585523, EPI_ISL_585524, EPI_ISL_585525, EPI_ISL_585526, EPI_ISL_585527, EPI_ISL_585528, EPI_ISL_585529, EPI_ISL_585530, EPI_ISL_585531, EPI_ISL_585532                                                                                                                                                                                                                                                                                                                                                                                                                                                                                                                                                                                                                                                                                                                                                                                                 | see above | Northumbria University / South Tees Hospitals NHS Foundation Trust / North Cumbria Integrated Care NHS Foundation Trust / North Tees and Hartlepool NHS Foundation Trust / Newcastle Hospitals NHS Foundation Trust | COVID-19 Genomics UK (COG-UK) Consortium                                  | Darren L Smith, Andrew Nelson, Matthew Bashton, Greg R Young, Joshua Loh, John Allan, Mohammad A Tariq, Giles S Holt, Gary Black, Wen C Yew, Lynn Dover, Paul Baker, Steve Liggett, Sarah Essex, Jane Greenaway, Debra Padgett, Clive Graham, Garren Scott, Edward Barton, Emma Swindells, Brendan Payne, Jennifer Collins, Yusri Taha, Gary Eltringham                                                                                                   |
| EPI_ISL_585583, EPI_ISL_585584, EPI_ISL_585585, EPI_ISL_585586, EPI_ISL_585587, EPI_ISL_585588, EPI_ISL_585589, EPI_ISL_585590, EPI_ISL_585591, EPI_ISL_585592, EPI_ISL_585593, EPI_ISL_585594, EPI_ISL_585595, EPI_ISL_585596, EPI_ISL_585599, EPI_ISL_585600, EPI_ISL_585601, EPI_ISL_585602,                                                                                                                                                                                                                                                                                                                                                                                                                                                                                                                                                                                                                                                                                                                                                                                                                                                                                                                                                                                |           |                                                                                                                                                                                                                     |                                                                           |                                                                                                                                                                                                                                                                                                                                                                                                                                                           |





|                                                                                                                                                                                                                                                                                                                                                                                                                                |           |                                                                                                                                                                                                                     |                                                                           |                                                                                                                                                                                                                                                                                                                                                                                                                                                           |
|--------------------------------------------------------------------------------------------------------------------------------------------------------------------------------------------------------------------------------------------------------------------------------------------------------------------------------------------------------------------------------------------------------------------------------|-----------|---------------------------------------------------------------------------------------------------------------------------------------------------------------------------------------------------------------------|---------------------------------------------------------------------------|-----------------------------------------------------------------------------------------------------------------------------------------------------------------------------------------------------------------------------------------------------------------------------------------------------------------------------------------------------------------------------------------------------------------------------------------------------------|
| EPI_ISL_632865, EPI_ISL_632866, EPI_ISL_632867, EPI_ISL_632868, EPI_ISL_632869, EPI_ISL_632870, EPI_ISL_632871, EPI_ISL_632872, EPI_ISL_632873, EPI_ISL_632874, EPI_ISL_632875, EPI_ISL_632876, EPI_ISL_632877, EPI_ISL_632878, EPI_ISL_632879, EPI_ISL_632880, EPI_ISL_632881, EPI_ISL_632882, EPI_ISL_632883, EPI_ISL_632884, EPI_ISL_632885, EPI_ISL_632886, EPI_ISL_632887, EPI_ISL_632888, EPI_ISL_632889                 | see above | Idaho Bureau of Laboratories                                                                                                                                                                                        | Center for Global Health, University of New Mexico Health Sciences Center | Daryl Domman, Kurt Schwalm, Matthew Burns, Robert Voermans, Christopher Ball, Darrell Dinwiddie                                                                                                                                                                                                                                                                                                                                                           |
| EPI_ISL_637280, EPI_ISL_637283                                                                                                                                                                                                                                                                                                                                                                                                 |           | Northumbria University / South Tees Hospitals NHS Foundation Trust / North Cumbria Integrated Care NHS Foundation Trust / North Tees and Hartlepool NHS Foundation Trust / Newcastle Hospitals NHS Foundation Trust | COVID-19 Genomics UK (COG-UK) Consortium                                  | Darren L Smith, Andrew Nelson, Matthew Bashton, Greg R Young, Joshua Loh, John Allan, Mohammad A Tariq, Giles S Holt, Gary Black, Wen C Yew, Lynn Dover, Paul Baker, Steve Liggett, Sarah Essex, Jane Greenaway, Debra Padgett, Clive Graham, Garren Scott, Edward Barton, Emma Swindells, Brendan Payne, Jennifer Collins, Yusri Taha, Gary Eltringham                                                                                                   |
| EPI_ISL_637284, EPI_ISL_637286, EPI_ISL_637301                                                                                                                                                                                                                                                                                                                                                                                 |           | Quadram Institute Bioscience                                                                                                                                                                                        | COVID-19 Genomics UK (COG-UK) Consortium                                  | Dave J. Baker, Gemma L. Kay, Alp Aydin, Thanh Le-Viet, Steven Rudder, Ana P. Tedim, Anastasia Kolyva, Maria Diaz, Leonardo de Oliveira Martins, Nabil-Fareed Alikhan, Lizzie Meadows, Rachael Stanley, Ngozi Elumogo, Muhammed Yasir, Nicholas M. Thomson, Alexander J Trotter, Rachel Gilroy, Samuel Bloomfield, Claire Stuart, Andrew Bell, Reenesh Prakash, Samir Dervisevic, Alison E. Mather, John Wain, Mark Webber, Andrew J. Page, Justin O'Grady |
| EPI_ISL_637311, EPI_ISL_637312, EPI_ISL_637322, EPI_ISL_637352, EPI_ISL_637373, EPI_ISL_637374, EPI_ISL_637375, EPI_ISL_637376, EPI_ISL_637377, EPI_ISL_637382, EPI_ISL_637383                                                                                                                                                                                                                                                 | see above | Northumbria University / South Tees Hospitals NHS Foundation Trust / North Cumbria Integrated Care NHS Foundation Trust / North Tees and Hartlepool NHS Foundation Trust / Newcastle Hospitals NHS Foundation Trust | COVID-19 Genomics UK (COG-UK) Consortium                                  | Darren L Smith, Andrew Nelson, Matthew Bashton, Greg R Young, Joshua Loh, John Allan, Mohammad A Tariq, Giles S Holt, Gary Black, Wen C Yew, Lynn Dover, Paul Baker, Steve Liggett, Sarah Essex, Jane Greenaway, Debra Padgett, Clive Graham, Garren Scott, Edward Barton, Emma Swindells, Brendan Payne, Jennifer Collins, Yusri Taha, Gary Eltringham                                                                                                   |
| EPI_ISL_637442                                                                                                                                                                                                                                                                                                                                                                                                                 |           | Quadram Institute Bioscience                                                                                                                                                                                        | COVID-19 Genomics UK (COG-UK) Consortium                                  | Dave J. Baker, Gemma L. Kay, Alp Aydin, Thanh Le-Viet, Steven Rudder, Ana P. Tedim, Anastasia Kolyva, Maria Diaz, Leonardo de Oliveira Martins, Nabil-Fareed Alikhan, Lizzie Meadows, Rachael Stanley, Ngozi Elumogo, Muhammed Yasir, Nicholas M. Thomson, Alexander J Trotter, Rachel Gilroy, Samuel Bloomfield, Claire Stuart, Andrew Bell, Reenesh Prakash, Samir Dervisevic, Alison E. Mather, John Wain, Mark Webber, Andrew J. Page, Justin O'Grady |
| EPI_ISL_637455, EPI_ISL_637463, EPI_ISL_637520, EPI_ISL_637521, EPI_ISL_637522, EPI_ISL_637523                                                                                                                                                                                                                                                                                                                                 |           | Northumbria University / South Tees Hospitals NHS Foundation Trust / North Cumbria Integrated Care NHS Foundation Trust / North Tees and Hartlepool NHS Foundation Trust / Newcastle Hospitals NHS Foundation Trust | COVID-19 Genomics UK (COG-UK) Consortium                                  | Darren L Smith, Andrew Nelson, Matthew Bashton, Greg R Young, Joshua Loh, John Allan, Mohammad A Tariq, Giles S Holt, Gary Black, Wen C Yew, Lynn Dover, Paul Baker, Steve Liggett, Sarah Essex, Jane Greenaway, Debra Padgett, Clive Graham, Garren Scott, Edward Barton, Emma Swindells, Brendan Payne, Jennifer Collins, Yusri Taha, Gary Eltringham                                                                                                   |
| EPI_ISL_637536, EPI_ISL_637550, EPI_ISL_637557                                                                                                                                                                                                                                                                                                                                                                                 |           | Quadram Institute Bioscience                                                                                                                                                                                        | COVID-19 Genomics UK (COG-UK) Consortium                                  | Dave J. Baker, Gemma L. Kay, Alp Aydin, Thanh Le-Viet, Steven Rudder, Ana P. Tedim, Anastasia Kolyva, Maria Diaz, Leonardo de Oliveira Martins, Nabil-Fareed Alikhan, Lizzie Meadows, Rachael Stanley, Ngozi Elumogo, Muhammed Yasir, Nicholas M. Thomson, Alexander J Trotter, Rachel Gilroy, Samuel Bloomfield, Claire Stuart, Andrew Bell, Reenesh Prakash, Samir Dervisevic, Alison E. Mather, John Wain, Mark Webber, Andrew J. Page, Justin O'Grady |
| EPI_ISL_637581                                                                                                                                                                                                                                                                                                                                                                                                                 |           | Northumbria University / South Tees Hospitals NHS Foundation Trust / North Cumbria Integrated Care NHS Foundation Trust / North Tees and Hartlepool NHS Foundation Trust / Newcastle Hospitals NHS Foundation Trust | COVID-19 Genomics UK (COG-UK) Consortium                                  | Darren L Smith, Andrew Nelson, Matthew Bashton, Greg R Young, Joshua Loh, John Allan, Mohammad A Tariq, Giles S Holt, Gary Black, Wen C Yew, Lynn Dover, Paul Baker, Steve Liggett, Sarah Essex, Jane Greenaway, Debra Padgett, Clive Graham, Garren Scott, Edward Barton, Emma Swindells, Brendan Payne, Jennifer Collins, Yusri Taha, Gary Eltringham                                                                                                   |
| EPI_ISL_637588, EPI_ISL_637589, EPI_ISL_637602                                                                                                                                                                                                                                                                                                                                                                                 |           | Quadram Institute Bioscience                                                                                                                                                                                        | COVID-19 Genomics UK (COG-UK) Consortium                                  | Dave J. Baker, Gemma L. Kay, Alp Aydin, Thanh Le-Viet, Steven Rudder, Ana P. Tedim, Anastasia Kolyva, Maria Diaz, Leonardo de Oliveira Martins, Nabil-Fareed Alikhan, Lizzie Meadows, Rachael Stanley, Ngozi Elumogo, Muhammed Yasir, Nicholas M. Thomson, Alexander J Trotter, Rachel Gilroy, Samuel Bloomfield, Claire Stuart, Andrew Bell, Reenesh Prakash, Samir Dervisevic, Alison E. Mather, John Wain, Mark Webber, Andrew J. Page, Justin O'Grady |
| EPI_ISL_637605, EPI_ISL_637784, EPI_ISL_637785, EPI_ISL_637786, EPI_ISL_637787, EPI_ISL_637788, EPI_ISL_637789, EPI_ISL_637790, EPI_ISL_637791, EPI_ISL_637792, EPI_ISL_637793, EPI_ISL_637794, EPI_ISL_637795, EPI_ISL_637796, EPI_ISL_637797                                                                                                                                                                                 | see above | Northumbria University / South Tees Hospitals NHS Foundation Trust / North Cumbria Integrated Care NHS Foundation Trust / North Tees and Hartlepool NHS Foundation Trust / Newcastle Hospitals NHS Foundation Trust | COVID-19 Genomics UK (COG-UK) Consortium                                  | Darren L Smith, Andrew Nelson, Matthew Bashton, Greg R Young, Joshua Loh, John Allan, Mohammad A Tariq, Giles S Holt, Gary Black, Wen C Yew, Lynn Dover, Paul Baker, Steve Liggett, Sarah Essex, Jane Greenaway, Debra Padgett, Clive Graham, Garren Scott, Edward Barton, Emma Swindells, Brendan Payne, Jennifer Collins, Yusri Taha, Gary Eltringham                                                                                                   |
| EPI_ISL_637857, EPI_ISL_637864, EPI_ISL_637865, EPI_ISL_637866, EPI_ISL_637876                                                                                                                                                                                                                                                                                                                                                 |           | Quadram Institute Bioscience                                                                                                                                                                                        | COVID-19 Genomics UK (COG-UK) Consortium                                  | Dave J. Baker, Gemma L. Kay, Alp Aydin, Thanh Le-Viet, Steven Rudder, Ana P. Tedim, Anastasia Kolyva, Maria Diaz, Leonardo de Oliveira Martins, Nabil-Fareed Alikhan, Lizzie Meadows, Rachael Stanley, Ngozi Elumogo, Muhammed Yasir, Nicholas M. Thomson, Alexander J Trotter, Rachel Gilroy, Samuel Bloomfield, Claire Stuart, Andrew Bell, Reenesh Prakash, Samir Dervisevic, Alison E. Mather, John Wain, Mark Webber, Andrew J. Page, Justin O'Grady |
| EPI_ISL_637883, EPI_ISL_637902                                                                                                                                                                                                                                                                                                                                                                                                 |           | Northumbria University / South Tees Hospitals NHS Foundation Trust / North Cumbria Integrated Care NHS Foundation Trust / North Tees and Hartlepool NHS Foundation Trust / Newcastle Hospitals NHS Foundation Trust | COVID-19 Genomics UK (COG-UK) Consortium                                  | Darren L Smith, Andrew Nelson, Matthew Bashton, Greg R Young, Joshua Loh, John Allan, Mohammad A Tariq, Giles S Holt, Gary Black, Wen C Yew, Lynn Dover, Paul Baker, Steve Liggett, Sarah Essex, Jane Greenaway, Debra Padgett, Clive Graham, Garren Scott, Edward Barton, Emma Swindells, Brendan Payne, Jennifer Collins, Yusri Taha, Gary Eltringham                                                                                                   |
| EPI_ISL_637922                                                                                                                                                                                                                                                                                                                                                                                                                 |           | Quadram Institute Bioscience                                                                                                                                                                                        | COVID-19 Genomics UK (COG-UK) Consortium                                  | Dave J. Baker, Gemma L. Kay, Alp Aydin, Thanh Le-Viet, Steven Rudder, Ana P. Tedim, Anastasia Kolyva, Maria Diaz, Leonardo de Oliveira Martins, Nabil-Fareed Alikhan, Lizzie Meadows, Rachael Stanley, Ngozi Elumogo, Muhammed Yasir, Nicholas M. Thomson, Alexander J Trotter, Rachel Gilroy, Samuel Bloomfield, Claire Stuart, Andrew Bell, Reenesh Prakash, Samir Dervisevic, Alison E. Mather, John Wain, Mark Webber, Andrew J. Page, Justin O'Grady |
| EPI_ISL_637943, EPI_ISL_637979, EPI_ISL_637988, EPI_ISL_637994, EPI_ISL_637996, EPI_ISL_638009, EPI_ISL_638010                                                                                                                                                                                                                                                                                                                 |           | Northumbria University / South Tees Hospitals NHS Foundation Trust / North Cumbria Integrated Care NHS Foundation Trust / North Tees and Hartlepool NHS Foundation Trust / Newcastle Hospitals NHS Foundation Trust | COVID-19 Genomics UK (COG-UK) Consortium                                  | Darren L Smith, Andrew Nelson, Matthew Bashton, Greg R Young, Joshua Loh, John Allan, Mohammad A Tariq, Giles S Holt, Gary Black, Wen C Yew, Lynn Dover, Paul Baker, Steve Liggett, Sarah Essex, Jane Greenaway, Debra Padgett, Clive Graham, Garren Scott, Edward Barton, Emma Swindells, Brendan Payne, Jennifer Collins, Yusri Taha, Gary Eltringham                                                                                                   |
| EPI_ISL_638033                                                                                                                                                                                                                                                                                                                                                                                                                 |           | Quadram Institute Bioscience                                                                                                                                                                                        | COVID-19 Genomics UK (COG-UK) Consortium                                  | Dave J. Baker, Gemma L. Kay, Alp Aydin, Thanh Le-Viet, Steven Rudder, Ana P. Tedim, Anastasia Kolyva, Maria Diaz, Leonardo de Oliveira Martins, Nabil-Fareed Alikhan, Lizzie Meadows, Rachael Stanley, Ngozi Elumogo, Muhammed Yasir, Nicholas M. Thomson, Alexander J Trotter, Rachel Gilroy, Samuel Bloomfield, Claire Stuart, Andrew Bell, Reenesh Prakash, Samir Dervisevic, Alison E. Mather, John Wain, Mark Webber, Andrew J. Page, Justin O'Grady |
| EPI_ISL_638555, EPI_ISL_638556, EPI_ISL_638557, EPI_ISL_638558, EPI_ISL_638559, EPI_ISL_638560, EPI_ISL_638561, EPI_ISL_638562, EPI_ISL_638563, EPI_ISL_638564, EPI_ISL_638565, EPI_ISL_638566, EPI_ISL_638567, EPI_ISL_638568, EPI_ISL_638569, EPI_ISL_638570, EPI_ISL_638571, EPI_ISL_638572, EPI_ISL_638573, EPI_ISL_638574, EPI_ISL_638575, EPI_ISL_638576, EPI_ISL_638577, EPI_ISL_638578, EPI_ISL_638579, EPI_ISL_638580 | see above | Northumbria University / South Tees Hospitals NHS Foundation Trust / North Cumbria Integrated Care NHS Foundation Trust / North Tees and Hartlepool NHS Foundation Trust / Newcastle Hospitals NHS Foundation Trust | COVID-19 Genomics UK (COG-UK) Consortium                                  | Darren L Smith, Andrew Nelson, Matthew Bashton, Greg R Young, Joshua Loh, John Allan, Mohammad A Tariq, Giles S Holt, Gary Black, Wen C Yew, Lynn Dover, Paul Baker, Steve Liggett, Sarah Essex, Jane Greenaway, Debra Padgett, Clive Graham, Garren Scott, Edward Barton, Emma Swindells, Brendan Payne, Jennifer Collins, Yusri Taha, Gary Eltringham                                                                                                   |
| EPI_ISL_638581, EPI_ISL_638582, EPI_ISL_638583, EPI_ISL_650113, EPI_ISL_650116, EPI_ISL_650117, EPI_ISL_650118, EPI_ISL_650120                                                                                                                                                                                                                                                                                                 |           | Quadram Institute Bioscience                                                                                                                                                                                        | COVID-19 Genomics UK (COG-UK) Consortium                                  | Dave J. Baker, Gemma L. Kay, Alp Aydin, Thanh Le-Viet, Steven Rudder, Ana P. Tedim, Anastasia Kolyva, Maria Diaz, Leonardo de Oliveira Martins, Nabil-Fareed Alikhan, Lizzie Meadows, Rachael Stanley, Ngozi Elumogo, Muhammed Yasir, Nicholas M. Thomson, Alexander J Trotter, Rachel Gilroy, Samuel Bloomfield, Claire Stuart, Andrew Bell, Reenesh Prakash, Samir Dervisevic, Alison E. Mather, John Wain, Mark Webber, Andrew J. Page, Justin O'Grady |
| EPI_ISL_650125                                                                                                                                                                                                                                                                                                                                                                                                                 |           | Northumbria University / South Tees Hospitals NHS Foundation Trust / North Cumbria Integrated Care NHS Foundation Trust / North Tees and Hartlepool NHS Foundation Trust / Newcastle Hospitals NHS Foundation Trust | COVID-19 Genomics UK (COG-UK) Consortium                                  | Darren L Smith, Andrew Nelson, Matthew Bashton, Greg R Young, Joshua Loh, John Allan, Mohammad A Tariq, Giles S Holt, Gary Black, Wen C Yew, Lynn Dover, Paul Baker, Steve Liggett, Sarah Essex, Jane Greenaway, Debra Padgett, Clive Graham, Garren Scott, Edward Barton, Emma Swindells, Brendan Payne, Jennifer Collins, Yusri Taha, Gary Eltringham                                                                                                   |



































EPI\_ISL\_877151, EPI\_ISL\_877152, EPI\_ISL\_877153, EPI\_ISL\_877154, EPI\_ISL\_877155, EPI\_ISL\_877156, EPI\_ISL\_877157, EPI\_ISL\_877158, EPI\_ISL\_877159, EPI\_ISL\_877160, EPI\_ISL\_877161, EPI\_ISL\_877162, EPI\_ISL\_877163, EPI\_ISL\_877164, EPI\_ISL\_877165, EPI\_ISL\_877166, EPI\_ISL\_877167, EPI\_ISL\_877168, EPI\_ISL\_877169, EPI\_ISL\_877170, EPI\_ISL\_877171, EPI\_ISL\_877172, EPI\_ISL\_877173, EPI\_ISL\_877174, EPI\_ISL\_877175, EPI\_ISL\_877176, EPI\_ISL\_877177, EPI\_ISL\_877178, EPI\_ISL\_877179, EPI\_ISL\_877180, EPI\_ISL\_877181, EPI\_ISL\_877182, EPI\_ISL\_877183, EPI\_ISL\_877184, EPI\_ISL\_877185, EPI\_ISL\_888628, EPI\_ISL\_888629, EPI\_ISL\_888630, EPI\_ISL\_888631, EPI\_ISL\_888632, EPI\_ISL\_888633, EPI\_ISL\_888634, EPI\_ISL\_888635, EPI\_ISL\_888636, EPI\_ISL\_888637, EPI\_ISL\_888638, EPI\_ISL\_888639, EPI\_ISL\_888640, EPI\_ISL\_888641, EPI\_ISL\_888642, EPI\_ISL\_888643, EPI\_ISL\_888644, EPI\_ISL\_888645, EPI\_ISL\_888646, EPI\_ISL\_888647, EPI\_ISL\_888648, EPI\_ISL\_888649, EPI\_ISL\_888650, EPI\_ISL\_888651, EPI\_ISL\_888791, EPI\_ISL\_888792, EPI\_ISL\_888793, EPI\_ISL\_888794, EPI\_ISL\_888795, EPI\_ISL\_888796, EPI\_ISL\_888797, EPI\_ISL\_888798, EPI\_ISL\_888799, EPI\_ISL\_888800, EPI\_ISL\_888801, EPI\_ISL\_888802, EPI\_ISL\_888803, EPI\_ISL\_888804, EPI\_ISL\_888805, EPI\_ISL\_888806, EPI\_ISL\_888807, EPI\_ISL\_888808, EPI\_ISL\_888809, EPI\_ISL\_888810, EPI\_ISL\_888811, EPI\_ISL\_888812, EPI\_ISL\_888813, EPI\_ISL\_888814, EPI\_ISL\_888815, EPI\_ISL\_888816, EPI\_ISL\_888817

see above

Univeristy of New Mexico Hospital

Center for Global Health, University of New Mexico Health  
Sciences Center

Daryl Domman, Kurt Schwalm, Justin Bacca, Jon Femling, Darrell Dinwiddie

We gratefully acknowledge the following Authors from the Originating laboratories responsible for obtaining the specimens, as well as the Submitting laboratories where the genome data were generated and shared via GISAID, on which this research is based.

All Submitters of data may be contacted directly via [www.gisaid.org](http://www.gisaid.org)

Authors are sorted alphabetically.

| Accession ID                   | Originating Laboratory                                                          | Submitting Laboratory                                                                                                                                                                                                                            | Authors                                                                                                                                                                                                                                                                                                                                                                                                                           |
|--------------------------------|---------------------------------------------------------------------------------|--------------------------------------------------------------------------------------------------------------------------------------------------------------------------------------------------------------------------------------------------|-----------------------------------------------------------------------------------------------------------------------------------------------------------------------------------------------------------------------------------------------------------------------------------------------------------------------------------------------------------------------------------------------------------------------------------|
| EPI_ISL_407893                 | Centre for Infectious Diseases and Microbiology Laboratory Services             | NSW Health Pathology - Institute of Clinical Pathology and Medical Research; Westmead Hospital; University of Sydney                                                                                                                             | Eden J-S, Carter I, Rahman H, Holmes EC, Rockett R, O'Sullivan MV, Sintchenko V, Chen SC, Maddocks S, Kok J and Dwyer DE for the 2019-nCoV Study Group                                                                                                                                                                                                                                                                            |
| EPI_ISL_408977                 | Serology, Virology and OTDS Laboratories (SAViD), NSW Health Pathology Randwick | NSW Health Pathology - Institute of Clinical Pathology and Medical Research; Centre for Infectious Diseases and Microbiology Laboratory Services; Westmead Hospital; University of Sydney                                                        | Eden J-S, Carter I, Rahman H, Rawlinson W, Holmes EC, Rockett R, O'Sullivan MV, Sintchenko V, Chen SC, Maddocks S, Kok J and Dwyer DE for the 2019-nCoV Study Group*                                                                                                                                                                                                                                                              |
| EPI_ISL_411902                 | Virology Unit, Institut Pasteur du Cambodge.                                    | Virology Unit, Institut Pasteur du Cambodge (Sequencing done by: Jessica E Manning/Jennifer A Bohl at Malaria and Vector Research Laboratory, National Institute of Allergy and Infectious Diseases and Vida Ahyong from Chan-Zuckerberg Biohub) | Erik A Karlsson, Jennifer A Bohl, Vida Ahyong, Veasna Duong, Philippe Dussart, Jessica E Manning.                                                                                                                                                                                                                                                                                                                                 |
| EPI_ISL_412028                 | Hong Kong Department of Health                                                  | School of Public Health, The University of Hong Kong                                                                                                                                                                                             | Dominic N.C. Tsang, Daniel K.W. Chu, Leo L.M. Poon, Malik Peiris                                                                                                                                                                                                                                                                                                                                                                  |
| EPI_ISL_412029                 | Hong Kong Department of Health                                                  | The University of Hong Kong                                                                                                                                                                                                                      | Dominic N.C. Tsang, Daniel K.W. Chu, Leo L.M. Poon, Malik Peiris                                                                                                                                                                                                                                                                                                                                                                  |
| EPI_ISL_412030                 | Hong Kong Department of Health                                                  | School of Public Health, The University of Hong Kong                                                                                                                                                                                             | Dominic N.C. Tsang, Daniel K.W. Chu, Leo L.M. Poon, Malik Peiris                                                                                                                                                                                                                                                                                                                                                                  |
| EPI_ISL_412975                 | Centre for Infectious Diseases and Microbiology Laboratory Services             | NSW Health Pathology - Institute of Clinical Pathology and Medical Research; Westmead Hospital; University of Sydney                                                                                                                             | Eden J-S, Carter I, Rahman H, Holmes EC, Rockett R, O'Sullivan MV, Sintchenko V, Chen SC, Maddocks S, Kok J and Dwyer DE for the 2019-nCoV Study Group                                                                                                                                                                                                                                                                            |
| EPI_ISL_413213, EPI_ISL_413214 | Centre for Infectious Diseases and Microbiology Laboratory Services             | NSW Health Pathology - Institute of Clinical Pathology and Medical Research; Westmead Hospital; University of Sydney                                                                                                                             | Eden J-S, Carter I, Rahman H, Holmes EC, Rockett R, O'Sullivan MV, Sintchenko V, Chen SC, Maddocks S, Kok J and Dwyer DE for the 2019-nCoV Study Group*                                                                                                                                                                                                                                                                           |
| EPI_ISL_413221                 | West of Scotland Specialist Virology Centre, NHSGCC                             | MRC-University of Glasgow Centre for Virus Research                                                                                                                                                                                              | Emma Thomson, Antonia Ho; James Shephard, Shirin Ashraf; Kathy Smollett, Daniel Mair, Stephen Carmichael, Ana da Silva Filipe; Richard Orton, Josh Singer, David L Robertson; Andrew Rambaut; Alasdair MacLean, Rory Gunson.                                                                                                                                                                                                      |
| EPI_ISL_413564                 | MHC West-Brabant                                                                | Erasmus Medical Center                                                                                                                                                                                                                           | David Nieuwenhuijse, Bas Oude Munnink, Reina Sikkema, Claudia Schapendonk, Irina Chestakova, Anne van der Linden, Mark Pronk, Pascal Lexmond, Corien Swaan, Manon Haverkate, Madelief Mollers, Mart Stein, Sandra Kengne Kamga Mobou, Jeroen van Kampen, Jolanda Voermans, Aura Timen, Corine GeurtsvanKessel, Annemiek van der Eijk, Richard Molenkamp, Marion Koopmans, on behalf of the Dutch national COVID-19 response team. |
| EPI_ISL_413565                 | Foundation Pamm                                                                 | Erasmus Medical Center                                                                                                                                                                                                                           | David Nieuwenhuijse, Bas Oude Munnink, Reina Sikkema, Claudia Schapendonk, Irina Chestakova, Anne van der Linden, Mark Pronk, Pascal Lexmond, Corien Swaan, Manon Haverkate, Madelief Mollers, Mart Stein, Sandra Kengne Kamga Mobou, Jeroen van Kampen, Jolanda Voermans, Aura Timen, Corine GeurtsvanKessel, Annemiek van der Eijk, Richard Molenkamp, Marion Koopmans, on behalf of the Dutch national COVID-19 response team. |
| EPI_ISL_413566                 | MHC Gooi & Vechtstreek                                                          | Erasmus Medical Center                                                                                                                                                                                                                           | David Nieuwenhuijse, Bas Oude Munnink, Reina Sikkema, Claudia Schapendonk, Irina Chestakova, Anne van der Linden, Mark Pronk, Pascal Lexmond, Corien Swaan, Manon Haverkate, Madelief Mollers, Mart Stein, Sandra Kengne Kamga Mobou, Jeroen van Kampen, Jolanda Voermans, Aura Timen, Corine GeurtsvanKessel, Annemiek van der Eijk, Richard Molenkamp, Marion Koopmans, on behalf of the Dutch national COVID-19 response team. |
| EPI_ISL_413567                 | unknown                                                                         | Erasmus Medical Center                                                                                                                                                                                                                           | David Nieuwenhuijse, Bas Oude Munnink, Reina Sikkema, Claudia Schapendonk, Irina Chestakova, Anne van der Linden, Mark Pronk, Pascal Lexmond, Corien Swaan, Manon Haverkate, Madelief Mollers, Mart Stein, Sandra Kengne Kamga Mobou, Jeroen van Kampen, Jolanda Voermans, Aura Timen, Corine GeurtsvanKessel, Annemiek van der Eijk, Richard Molenkamp, Marion Koopmans, on behalf of the Dutch national COVID-19 response team. |
| EPI_ISL_413568                 | MHC Drente                                                                      | Erasmus Medical Center                                                                                                                                                                                                                           | David Nieuwenhuijse, Bas Oude Munnink, Reina Sikkema, Claudia Schapendonk, Irina Chestakova, Anne van der Linden, Mark Pronk, Pascal Lexmond, Corien Swaan, Manon Haverkate, Madelief Mollers, Mart Stein, Sandra Kengne Kamga Mobou, Jeroen van Kampen, Jolanda Voermans, Aura Timen, Corine GeurtsvanKessel, Annemiek van der Eijk, Richard Molenkamp, Marion Koopmans, on behalf of the Dutch national COVID-19 response team. |
| EPI_ISL_413569, EPI_ISL_413570 | RIVM                                                                            | Erasmus Medical Center                                                                                                                                                                                                                           | David Nieuwenhuijse, Bas Oude Munnink, Reina Sikkema, Claudia Schapendonk, Irina Chestakova, Anne van der Linden, Mark Pronk, Pascal Lexmond, Corien Swaan, Manon Haverkate, Madelief Mollers, Mart Stein, Sandra Kengne Kamga Mobou, Jeroen van Kampen, Jolanda Voermans, Aura Timen, Corine GeurtsvanKessel, Annemiek van der Eijk, Richard Molenkamp, Marion Koopmans, on behalf of the Dutch national COVID-19 response team. |
| EPI_ISL_413571                 | MHC Brabant Zuidoost                                                            | Erasmus Medical Center                                                                                                                                                                                                                           | David Nieuwenhuijse, Bas Oude Munnink, Reina Sikkema, Claudia Schapendonk, Irina Chestakova, Anne van der Linden, Mark Pronk, Pascal Lexmond, Corien Swaan, Manon Haverkate, Madelief Mollers, Mart Stein, Sandra Kengne Kamga Mobou, Jeroen van Kampen, Jolanda Voermans, Aura Timen, Corine GeurtsvanKessel, Annemiek van der Eijk, Richard Molenkamp, Marion Koopmans, on behalf of the Dutch national COVID-19 response team. |
| EPI_ISL_413572                 | MHC Kennemerland                                                                | Erasmus Medical Center                                                                                                                                                                                                                           | David Nieuwenhuijse, Bas Oude Munnink, Reina Sikkema, Claudia Schapendonk, Irina Chestakova, Anne van der Linden, Mark Pronk, Pascal Lexmond, Corien Swaan, Manon Haverkate, Madelief Mollers, Mart Stein, Sandra Kengne Kamga Mobou, Jeroen van Kampen, Jolanda Voermans, Aura Timen, Corine GeurtsvanKessel, Annemiek van der Eijk, Richard Molenkamp, Marion Koopmans, on behalf of the Dutch national COVID-19 response team. |
| EPI_ISL_413573                 | Dienst Gezondheid & Jeugd Zuid-Holland Zuid                                     | Erasmus Medical Center                                                                                                                                                                                                                           | David Nieuwenhuijse, Bas Oude Munnink, Reina Sikkema, Claudia Schapendonk, Irina Chestakova, Anne van der Linden, Mark Pronk, Pascal Lexmond, Corien Swaan, Manon Haverkate, Madelief Mollers, Mart Stein, Sandra Kengne Kamga Mobou, Jeroen van Kampen, Jolanda Voermans, Aura Timen, Corine GeurtsvanKessel, Annemiek van der Eijk, Richard Molenkamp, Marion Koopmans, on behalf of the Dutch national COVID-19 response team. |
| EPI_ISL_413574                 | MHC West-Brabant                                                                | Erasmus Medical Center                                                                                                                                                                                                                           | David Nieuwenhuijse, Bas Oude Munnink, Reina Sikkema, Claudia Schapendonk, Irina Chestakova, Anne van der Linden, Mark Pronk, Pascal Lexmond, Corien Swaan, Manon Haverkate, Madelief Mollers, Mart Stein, Sandra Kengne Kamga Mobou, Jeroen van Kampen, Jolanda Voermans, Aura Timen, Corine GeurtsvanKessel, Annemiek van der Eijk, Richard Molenkamp, Marion Koopmans, on behalf of the Dutch national COVID-19 response team. |
| EPI_ISL_413575, EPI_ISL_413576 | RIVM                                                                            | Erasmus Medical Center                                                                                                                                                                                                                           | David Nieuwenhuijse, Bas Oude Munnink, Reina Sikkema, Claudia Schapendonk, Irina Chestakova, Anne van der Linden, Mark Pronk, Pascal Lexmond, Corien Swaan, Manon Haverkate, Madelief Mollers, Mart Stein, Sandra Kengne Kamga Mobou, Jeroen van Kampen, Jolanda Voermans, Aura Timen, Corine GeurtsvanKessel, Annemiek van der Eijk, Richard Molenkamp, Marion Koopmans, on behalf of the Dutch national COVID-19 response team. |
| EPI_ISL_413577                 | MHC Gooi & Vechtstreek                                                          | Erasmus Medical Center                                                                                                                                                                                                                           | David Nieuwenhuijse, Bas Oude Munnink, Reina Sikkema, Claudia Schapendonk, Irina Chestakova, Anne van der Linden, Mark Pronk, Pascal Lexmond, Corien Swaan, Manon Haverkate, Madelief Mollers, Mart Stein, Sandra Kengne Kamga Mobou, Jeroen van Kampen, Jolanda Voermans, Aura Timen, Corine GeurtsvanKessel, Annemiek van der Eijk, Richard Molenkamp, Marion Koopmans, on behalf of the Dutch national COVID-19 response team. |
| EPI_ISL_413578                 | ErasmusMC                                                                       | Erasmus Medical Center                                                                                                                                                                                                                           | David Nieuwenhuijse, Bas Oude Munnink, Reina Sikkema, Claudia Schapendonk, Irina Chestakova, Anne van der Linden, Mark Pronk, Pascal Lexmond, Corien Swaan, Manon Haverkate, Madelief Mollers, Mart Stein, Sandra Kengne Kamga Mobou, Jeroen van Kampen, Jolanda Voermans, Aura Timen, Corine GeurtsvanKessel, Annemiek van der Eijk, Richard Molenkamp, Marion Koopmans, on behalf of the Dutch national COVID-19 response team. |
| EPI_ISL_413579                 | MHC Haaglanden                                                                  | Erasmus Medical Center                                                                                                                                                                                                                           | David Nieuwenhuijse, Bas Oude Munnink, Reina Sikkema, Claudia Schapendonk, Irina Chestakova, Anne van der Linden, Mark Pronk, Pascal Lexmond, Corien Swaan, Manon Haverkate, Madelief Mollers, Mart Stein, Sandra Kengne Kamga Mobou, Jeroen van Kampen, Jolanda Voermans, Aura Timen, Corine GeurtsvanKessel, Annemiek van der Eijk, Richard Molenkamp, Marion Koopmans, on behalf of the Dutch national COVID-19 response team. |
| EPI_ISL_413580                 | MHC Hart voor Brabant                                                           | Erasmus Medical Center                                                                                                                                                                                                                           | David Nieuwenhuijse, Bas Oude Munnink, Reina Sikkema, Claudia Schapendonk, Irina Chestakova, Anne van der Linden, Mark Pronk, Pascal Lexmond, Corien Swaan, Manon Haverkate, Madelief Mollers, Mart Stein, Sandra Kengne Kamga Mobou, Jeroen van Kampen, Jolanda Voermans, Aura Timen, Corine GeurtsvanKessel, Annemiek van der Eijk, Richard Molenkamp, Marion Koopmans, on behalf of the Dutch national COVID-19 response team. |

|                                                                                                                                                                                                                                                                                                                                                                                                                                                                                                                                                                                                                                                                                                                                                                                                                                                                                                                                                                                                                                                                                                                                                                                                                                                                |                                                                     |                                                                                                                      |                                                                                                                                                                                                                                                                                                                                                                                                                                  |
|----------------------------------------------------------------------------------------------------------------------------------------------------------------------------------------------------------------------------------------------------------------------------------------------------------------------------------------------------------------------------------------------------------------------------------------------------------------------------------------------------------------------------------------------------------------------------------------------------------------------------------------------------------------------------------------------------------------------------------------------------------------------------------------------------------------------------------------------------------------------------------------------------------------------------------------------------------------------------------------------------------------------------------------------------------------------------------------------------------------------------------------------------------------------------------------------------------------------------------------------------------------|---------------------------------------------------------------------|----------------------------------------------------------------------------------------------------------------------|----------------------------------------------------------------------------------------------------------------------------------------------------------------------------------------------------------------------------------------------------------------------------------------------------------------------------------------------------------------------------------------------------------------------------------|
| EPI_ISL_413581                                                                                                                                                                                                                                                                                                                                                                                                                                                                                                                                                                                                                                                                                                                                                                                                                                                                                                                                                                                                                                                                                                                                                                                                                                                 | RIVM                                                                | Erasmus Medical Center                                                                                               | Corine GeurtsvanKessel, Anнемiek van der Eijk, Richard Molenkamp, Marion Koopmans, on behalf of the Dutch national COVID-19 response team.                                                                                                                                                                                                                                                                                       |
| EPI_ISL_413582                                                                                                                                                                                                                                                                                                                                                                                                                                                                                                                                                                                                                                                                                                                                                                                                                                                                                                                                                                                                                                                                                                                                                                                                                                                 | ErasmusMC                                                           | Erasmus Medical Center                                                                                               | David Nieuwenhuijse, Bas Oude Munnink, Reina Sikkema, Claudia Schapendonk, Irina Chestakova, Anne van der Linden, Mark Pronk, Pascal Lexmond, Corien Swaan, Manon Haverkate, Madelief Mollers, Mart Stein, Sandra Kengne Kanga Mbou, Jeroen van Kampen, Jolanda Voermans, Aura Timen, Corine GeurtsvanKessel, Anнемiek van der Eijk, Richard Molenkamp, Marion Koopmans, on behalf of the Dutch national COVID-19 response team. |
| EPI_ISL_413583                                                                                                                                                                                                                                                                                                                                                                                                                                                                                                                                                                                                                                                                                                                                                                                                                                                                                                                                                                                                                                                                                                                                                                                                                                                 | MHC Rotterdam-Rijnmond                                              | Erasmus Medical Center                                                                                               | David Nieuwenhuijse, Bas Oude Munnink, Reina Sikkema, Claudia Schapendonk, Irina Chestakova, Anne van der Linden, Mark Pronk, Pascal Lexmond, Corien Swaan, Manon Haverkate, Madelief Mollers, Mart Stein, Sandra Kengne Kanga Mbou, Jeroen van Kampen, Jolanda Voermans, Aura Timen, Corine GeurtsvanKessel, Anнемiek van der Eijk, Richard Molenkamp, Marion Koopmans, on behalf of the Dutch national COVID-19 response team. |
| EPI_ISL_413584, EPI_ISL_413585                                                                                                                                                                                                                                                                                                                                                                                                                                                                                                                                                                                                                                                                                                                                                                                                                                                                                                                                                                                                                                                                                                                                                                                                                                 | unknown                                                             | Erasmus Medical Center                                                                                               | David Nieuwenhuijse, Bas Oude Munnink, Reina Sikkema, Claudia Schapendonk, Irina Chestakova, Anne van der Linden, Mark Pronk, Pascal Lexmond, Corien Swaan, Manon Haverkate, Madelief Mollers, Mart Stein, Sandra Kengne Kanga Mbou, Jeroen van Kampen, Jolanda Voermans, Aura Timen, Corine GeurtsvanKessel, Anнемiek van der Eijk, Richard Molenkamp, Marion Koopmans, on behalf of the Dutch national COVID-19 response team. |
| EPI_ISL_413586, EPI_ISL_413587                                                                                                                                                                                                                                                                                                                                                                                                                                                                                                                                                                                                                                                                                                                                                                                                                                                                                                                                                                                                                                                                                                                                                                                                                                 | Foundation Elisabeth-Tweesteden Ziekenhuis                          | Erasmus Medical Center                                                                                               | David Nieuwenhuijse, Bas Oude Munnink, Reina Sikkema, Claudia Schapendonk, Irina Chestakova, Anne van der Linden, Mark Pronk, Pascal Lexmond, Corien Swaan, Manon Haverkate, Madelief Mollers, Mart Stein, Sandra Kengne Kanga Mbou, Jeroen van Kampen, Jolanda Voermans, Aura Timen, Corine GeurtsvanKessel, Anнемiek van der Eijk, Richard Molenkamp, Marion Koopmans, on behalf of the Dutch national COVID-19 response team. |
| EPI_ISL_413588, EPI_ISL_413589, EPI_ISL_413590                                                                                                                                                                                                                                                                                                                                                                                                                                                                                                                                                                                                                                                                                                                                                                                                                                                                                                                                                                                                                                                                                                                                                                                                                 | MHC Utrecht                                                         | Erasmus Medical Center                                                                                               | David Nieuwenhuijse, Bas Oude Munnink, Reina Sikkema, Claudia Schapendonk, Irina Chestakova, Anne van der Linden, Mark Pronk, Pascal Lexmond, Corien Swaan, Manon Haverkate, Madelief Mollers, Mart Stein, Sandra Kengne Kanga Mbou, Jeroen van Kampen, Jolanda Voermans, Aura Timen, Corine GeurtsvanKessel, Anнемiek van der Eijk, Richard Molenkamp, Marion Koopmans, on behalf of the Dutch national COVID-19 response team. |
| EPI_ISL_413591                                                                                                                                                                                                                                                                                                                                                                                                                                                                                                                                                                                                                                                                                                                                                                                                                                                                                                                                                                                                                                                                                                                                                                                                                                                 | MHC Flevoland                                                       | Erasmus Medical Center                                                                                               | David Nieuwenhuijse, Bas Oude Munnink, Reina Sikkema, Claudia Schapendonk, Irina Chestakova, Anne van der Linden, Mark Pronk, Pascal Lexmond, Corien Swaan, Manon Haverkate, Madelief Mollers, Mart Stein, Sandra Kengne Kanga Mbou, Jeroen van Kampen, Jolanda Voermans, Aura Timen, Corine GeurtsvanKessel, Anнемiek van der Eijk, Richard Molenkamp, Marion Koopmans, on behalf of the Dutch national COVID-19 response team. |
| EPI_ISL_413593                                                                                                                                                                                                                                                                                                                                                                                                                                                                                                                                                                                                                                                                                                                                                                                                                                                                                                                                                                                                                                                                                                                                                                                                                                                 | Laboratoire National de Santé                                       | Erasmus Medical Center                                                                                               | David Nieuwenhuijse, Bas Oude Munnink, Reina Sikkema, Claudia Schapendonk, Irina Chestakova, Anne van der Linden, Mark Pronk, Pascal Lexmond, T. Abdelrahman, G. Fournier, J. Mossong, T. Nguyen, Jeroen van Kampen, Jolanda Voermans, Corine GeurtsvanKessel, Anнемiek van der Eijk, Richard Molenkamp, Marion Koopmans, on behalf of the Dutch national COVID-19 response team.                                                |
| EPI_ISL_414024, EPI_ISL_414025, EPI_ISL_414026, EPI_ISL_414027                                                                                                                                                                                                                                                                                                                                                                                                                                                                                                                                                                                                                                                                                                                                                                                                                                                                                                                                                                                                                                                                                                                                                                                                 | West of Scotland Specialist Virology Centre, NHSGCC                 | MRC-University of Glasgow Centre for Virus Research                                                                  | Emma Thomson, Antonia Ho; Kathy Smollett, Daniel Mair, Stephen Carmichael, Ana da Silva Filipe; Richard Orton, David L Robertson; Alasdair MacLean, Rory Gunson.                                                                                                                                                                                                                                                                 |
| EPI_ISL_414423, EPI_ISL_414424, EPI_ISL_414425, EPI_ISL_414426, EPI_ISL_414427, EPI_ISL_414428, EPI_ISL_414429, EPI_ISL_414430, EPI_ISL_414431, EPI_ISL_414432, EPI_ISL_414433, EPI_ISL_414434, EPI_ISL_414435, EPI_ISL_414436, EPI_ISL_414437, EPI_ISL_414438, EPI_ISL_414439, EPI_ISL_414440, EPI_ISL_414441, EPI_ISL_414442, EPI_ISL_414443, EPI_ISL_414444, EPI_ISL_414445, EPI_ISL_414446, EPI_ISL_414447, EPI_ISL_414448, EPI_ISL_414449, EPI_ISL_414450, EPI_ISL_414451, EPI_ISL_414452, EPI_ISL_414453, EPI_ISL_414454, EPI_ISL_414455, EPI_ISL_414456, EPI_ISL_414457, EPI_ISL_414458, EPI_ISL_414459, EPI_ISL_414460, EPI_ISL_414461, EPI_ISL_414462, EPI_ISL_414463, EPI_ISL_414464, EPI_ISL_414465, EPI_ISL_414466, EPI_ISL_414467, EPI_ISL_414468, EPI_ISL_414469, EPI_ISL_414470, EPI_ISL_414471                                                                                                                                                                                                                                                                                                                                                                                                                                                 | Dutch COVID-19 response team                                        | Erasmus Medical Center                                                                                               | David Nieuwenhuijse, Bas Oude Munnink, Reina Sikkema, Claudia Schapendonk, Irina Chestakova, Anne van der Linden, Mark Pronk, Pascal Lexmond, Corien Swaan, Manon Haverkate, Madelief Mollers, Mart Stein, Sandra Kengne Kanga Mbou, Jeroen van Kampen, Jolanda Voermans, Aura Timen, Corine GeurtsvanKessel, Anнемiek van der Eijk, Richard Molenkamp, Marion Koopmans, on behalf of the Dutch national COVID-19 response team. |
| see above                                                                                                                                                                                                                                                                                                                                                                                                                                                                                                                                                                                                                                                                                                                                                                                                                                                                                                                                                                                                                                                                                                                                                                                                                                                      | Dutch COVID-19 response team                                        | Erasmus Medical Center                                                                                               | David Nieuwenhuijse, Bas Oude Munnink, Reina Sikkema, Claudia Schapendonk, Irina Chestakova, Anne van der Linden, Mark Pronk, Pascal Lexmond, Corien Swaan, Manon Haverkate, Madelief Mollers, Mart Stein, Sandra Kengne Kanga Mbou, Jeroen van Kampen, Jolanda Voermans, Aura Timen, Corine GeurtsvanKessel, Anнемiek van der Eijk, Richard Molenkamp, Marion Koopmans, on behalf of the Dutch national COVID-19 response team. |
| EPI_ISL_414495                                                                                                                                                                                                                                                                                                                                                                                                                                                                                                                                                                                                                                                                                                                                                                                                                                                                                                                                                                                                                                                                                                                                                                                                                                                 | Servicio Microbiologia. Hospital Clínico Universitario. Valencia.   | Sequencing and Bioinformatics Service. Molecular Epidemiology Laboratory. FISABIO-Public Health                      | David Navarro, María Alma Bracho, Giuseppe D'Auria, Griselda De Marco, Neris Garcia-Gonzalez, Fernando Gonzalez-Candelas                                                                                                                                                                                                                                                                                                         |
| EPI_ISL_414496                                                                                                                                                                                                                                                                                                                                                                                                                                                                                                                                                                                                                                                                                                                                                                                                                                                                                                                                                                                                                                                                                                                                                                                                                                                 | Servicio Microbiologia. Hospital Clínico Universitario. Valencia.   | Sequencing and Bioinformatics Service. Molecular Epidemiology Laboratory. FISABIO-Public Health                      | David Navarro, María Alma Bracho, Giuseppe D'Auria, Griselda De Marco, Neris Garcia-Gonzalez, Fernando Gonzalez-Candelas                                                                                                                                                                                                                                                                                                         |
| EPI_ISL_414517, EPI_ISL_414519, EPI_ISL_414527, EPI_ISL_414528                                                                                                                                                                                                                                                                                                                                                                                                                                                                                                                                                                                                                                                                                                                                                                                                                                                                                                                                                                                                                                                                                                                                                                                                 | Hong Kong Department of Health                                      | School of Public Health, The University of Hong Kong                                                                 | Dominic N.C. Tsang, Daniel K.W. Chu, Leo L.M. Poon, Malik Peiris                                                                                                                                                                                                                                                                                                                                                                 |
| EPI_ISL_414529, EPI_ISL_414530, EPI_ISL_414531, EPI_ISL_414532, EPI_ISL_414533, EPI_ISL_414534, EPI_ISL_414535, EPI_ISL_414536, EPI_ISL_414537, EPI_ISL_414538, EPI_ISL_414539, EPI_ISL_414540, EPI_ISL_414541, EPI_ISL_414542, EPI_ISL_414543, EPI_ISL_414544, EPI_ISL_414545, EPI_ISL_414546, EPI_ISL_414547, EPI_ISL_414548, EPI_ISL_414549, EPI_ISL_414550, EPI_ISL_414551, EPI_ISL_414552, EPI_ISL_414553, EPI_ISL_414554, EPI_ISL_414555, EPI_ISL_414556, EPI_ISL_414557, EPI_ISL_414558, EPI_ISL_414559, EPI_ISL_414560, EPI_ISL_414561, EPI_ISL_414562, EPI_ISL_414563, EPI_ISL_414564, EPI_ISL_414565, EPI_ISL_414566                                                                                                                                                                                                                                                                                                                                                                                                                                                                                                                                                                                                                                 | Dutch COVID-19 response team                                        | Erasmus Medical Center                                                                                               | David Nieuwenhuijse, Bas Oude Munnink, Reina Sikkema, Claudia Schapendonk, Irina Chestakova, Anne van der Linden, Mark Pronk, Pascal Lexmond, Corien Swaan, Manon Haverkate, Madelief Mollers, Mart Stein, Sandra Kengne Kanga Mbou, Jeroen van Kampen, Jolanda Voermans, Aura Timen, Corine GeurtsvanKessel, Anнемiek van der Eijk, Richard Molenkamp, Marion Koopmans, on behalf of the Dutch national COVID-19 response team. |
| see above                                                                                                                                                                                                                                                                                                                                                                                                                                                                                                                                                                                                                                                                                                                                                                                                                                                                                                                                                                                                                                                                                                                                                                                                                                                      | Dutch COVID-19 response team                                        | Erasmus Medical Center                                                                                               | David Nieuwenhuijse, Bas Oude Munnink, Reina Sikkema, Claudia Schapendonk, Irina Chestakova, Anne van der Linden, Mark Pronk, Pascal Lexmond, Corien Swaan, Manon Haverkate, Madelief Mollers, Mart Stein, Sandra Kengne Kanga Mbou, Jeroen van Kampen, Jolanda Voermans, Aura Timen, Corine GeurtsvanKessel, Anнемiek van der Eijk, Richard Molenkamp, Marion Koopmans, on behalf of the Dutch national COVID-19 response team. |
| EPI_ISL_414567, EPI_ISL_414569, EPI_ISL_414571                                                                                                                                                                                                                                                                                                                                                                                                                                                                                                                                                                                                                                                                                                                                                                                                                                                                                                                                                                                                                                                                                                                                                                                                                 | Hong Kong Department of Health                                      | School of Public Health, The University of Hong Kong                                                                 | Dominic N.C. Tsang, Daniel K.W. Chu, Leo L.M. Poon, Malik Peiris                                                                                                                                                                                                                                                                                                                                                                 |
| EPI_ISL_414598                                                                                                                                                                                                                                                                                                                                                                                                                                                                                                                                                                                                                                                                                                                                                                                                                                                                                                                                                                                                                                                                                                                                                                                                                                                 | Servicio Microbiologia, Hospital Clínico Universitario, Valencia    | Sequencing and Bioinformatics Service and Molecular Epidemiology Research Group. FISABIO-Public Health.              | David Navarro, María Alma Bracho, Giuseppe D'Auria, Griselda De Marco, Neris Garcia-Gonzalez, Fernando Gonzalez-Candelas                                                                                                                                                                                                                                                                                                         |
| EPI_ISL_415460, EPI_ISL_415461, EPI_ISL_415462, EPI_ISL_415463, EPI_ISL_415464, EPI_ISL_415465, EPI_ISL_415466, EPI_ISL_415467, EPI_ISL_415468, EPI_ISL_415469, EPI_ISL_415470, EPI_ISL_415471, EPI_ISL_415472, EPI_ISL_415473, EPI_ISL_415474, EPI_ISL_415475, EPI_ISL_415476, EPI_ISL_415477, EPI_ISL_415478, EPI_ISL_415479, EPI_ISL_415480, EPI_ISL_415481, EPI_ISL_415482, EPI_ISL_415483, EPI_ISL_415484, EPI_ISL_415485, EPI_ISL_415486, EPI_ISL_415487, EPI_ISL_415488, EPI_ISL_415489, EPI_ISL_415490, EPI_ISL_415491, EPI_ISL_415492, EPI_ISL_415493, EPI_ISL_415494, EPI_ISL_415495, EPI_ISL_415496, EPI_ISL_415497, EPI_ISL_415498, EPI_ISL_415499, EPI_ISL_415500, EPI_ISL_415501, EPI_ISL_415502, EPI_ISL_415503, EPI_ISL_415504, EPI_ISL_415505, EPI_ISL_415506, EPI_ISL_415507, EPI_ISL_415508, EPI_ISL_415509, EPI_ISL_415510, EPI_ISL_415511, EPI_ISL_415512, EPI_ISL_415513, EPI_ISL_415514, EPI_ISL_415515, EPI_ISL_415516, EPI_ISL_415517, EPI_ISL_415518, EPI_ISL_415519, EPI_ISL_415520, EPI_ISL_415521, EPI_ISL_415522, EPI_ISL_415523, EPI_ISL_415524, EPI_ISL_415525, EPI_ISL_415526, EPI_ISL_415527, EPI_ISL_415528, EPI_ISL_415529, EPI_ISL_415530, EPI_ISL_415531, EPI_ISL_415532, EPI_ISL_415533, EPI_ISL_415534, EPI_ISL_415535 | Dutch COVID-19 response team                                        | Erasmus Medical Center                                                                                               | David Nieuwenhuijse, Bas Oude Munnink, Reina Sikkema, Claudia Schapendonk, Irina Chestakova, Anne van der Linden, Mark Pronk, Pascal Lexmond, Corien Swaan, Manon Haverkate, Madelief Mollers, Mart Stein, Sandra Kengne Kanga Mbou, Jeroen van Kampen, Jolanda Voermans, Aura Timen, Corine GeurtsvanKessel, Anнемiek van der Eijk, Richard Molenkamp, Marion Koopmans, on behalf of the Dutch national COVID-19 response team. |
| see above                                                                                                                                                                                                                                                                                                                                                                                                                                                                                                                                                                                                                                                                                                                                                                                                                                                                                                                                                                                                                                                                                                                                                                                                                                                      | Dutch COVID-19 response team                                        | Erasmus Medical Center                                                                                               | David Nieuwenhuijse, Bas Oude Munnink, Reina Sikkema, Claudia Schapendonk, Irina Chestakova, Anne van der Linden, Mark Pronk, Pascal Lexmond, Corien Swaan, Manon Haverkate, Madelief Mollers, Mart Stein, Sandra Kengne Kanga Mbou, Jeroen van Kampen, Jolanda Voermans, Aura Timen, Corine GeurtsvanKessel, Anнемiek van der Eijk, Richard Molenkamp, Marion Koopmans, on behalf of the Dutch national COVID-19 response team. |
| EPI_ISL_415544                                                                                                                                                                                                                                                                                                                                                                                                                                                                                                                                                                                                                                                                                                                                                                                                                                                                                                                                                                                                                                                                                                                                                                                                                                                 | Utah Public Health Laboratory                                       | Utah Public Health Laboratory                                                                                        | Erin Young, Kelly Oakeson                                                                                                                                                                                                                                                                                                                                                                                                        |
| EPI_ISL_416997, EPI_ISL_417004, EPI_ISL_417005, EPI_ISL_417006, EPI_ISL_417008, EPI_ISL_417009, EPI_ISL_417011, EPI_ISL_417012, EPI_ISL_417013, EPI_ISL_417014, EPI_ISL_417015, EPI_ISL_417016, EPI_ISL_417017, EPI_ISL_417018, EPI_ISL_417019, EPI_ISL_417020, EPI_ISL_417021, EPI_ISL_417022, EPI_ISL_417023, EPI_ISL_417025                                                                                                                                                                                                                                                                                                                                                                                                                                                                                                                                                                                                                                                                                                                                                                                                                                                                                                                                 | Department of Clinical Microbiology                                 | GIGA Medical Genomics                                                                                                | Durkin Keith, Artesi Maria, Bontems Sébastien, Boreux Raphaël, Meex Cécile, Melin Pierrette, Hayette Marie-Pierre, Bours Vincent.                                                                                                                                                                                                                                                                                                |
| see above                                                                                                                                                                                                                                                                                                                                                                                                                                                                                                                                                                                                                                                                                                                                                                                                                                                                                                                                                                                                                                                                                                                                                                                                                                                      | Department of Clinical Microbiology                                 | GIGA Medical Genomics                                                                                                | Durkin Keith, Artesi Maria, Bontems Sébastien, Boreux Raphaël, Meex Cécile, Melin Pierrette, Hayette Marie-Pierre, Bours Vincent.                                                                                                                                                                                                                                                                                                |
| EPI_ISL_417030                                                                                                                                                                                                                                                                                                                                                                                                                                                                                                                                                                                                                                                                                                                                                                                                                                                                                                                                                                                                                                                                                                                                                                                                                                                 | Centre for Infectious Diseases and Microbiology Laboratory Services | NSW Health Pathology - Institute of Clinical Pathology and Medical Research; Westmead Hospital; University of Sydney | Eden J-S, Rockett R, Carter I, Rahman H, Holmes EC, O'Sullivan MV, Sintchenko V, Chen SC, Maddocks S, Kok J and Dwyer DE for the 2019-nCoV Study Group*                                                                                                                                                                                                                                                                          |
| EPI_ISL_417384                                                                                                                                                                                                                                                                                                                                                                                                                                                                                                                                                                                                                                                                                                                                                                                                                                                                                                                                                                                                                                                                                                                                                                                                                                                 | Centre for Infectious Diseases and Microbiology Public Health       | NSW Health Pathology - Institute of Clinical Pathology and Medical Research; Westmead Hospital; University of Sydney | Eden J-S, Lam C, Gray K, Timms V, Gall M, Arnott A, Sadsad R, Carter I, Rahman H, Holmes EC, O'Sullivan MV, Sintchenko V, Chen SC, Maddocks S, Kok J, Dwyer DE and Rockett R for the 2019-nCoV Study Group                                                                                                                                                                                                                       |
| EPI_ISL_417399                                                                                                                                                                                                                                                                                                                                                                                                                                                                                                                                                                                                                                                                                                                                                                                                                                                                                                                                                                                                                                                                                                                                                                                                                                                 | Centre for Infectious Diseases and Microbiology Public Health       | NSW Health Pathology - Institute of Clinical Pathology and Medical Research; Westmead Hospital; University of Sydney | Dwyer DE, Rockett R, Eden J-S, Lam C, Gray K, Timms V, Gall M, Arnott A, Sadsad R, Carter I, Rahman H, Holmes EC, O'Sullivan MV, Sintchenko V, Chen SC, Maddocks S and Kok J for the 2019-nCoV Study Group                                                                                                                                                                                                                       |
| EPI_ISL_417401                                                                                                                                                                                                                                                                                                                                                                                                                                                                                                                                                                                                                                                                                                                                                                                                                                                                                                                                                                                                                                                                                                                                                                                                                                                 | Centre for Infectious Diseases and Microbiology Public Health       | NSW Health Pathology - Institute of Clinical Pathology and Medical Research; Westmead Hospital; University of Sydney | Eden J-S, Lam C, Gray K, Timms V, Gall M, Arnott A, Sadsad R, Carter I, Rahman H, Holmes EC, O'Sullivan MV, Sintchenko V, Chen SC, Maddocks S, Kok J, Dwyer DE and Rockett R for the 2019-nCoV Study Group                                                                                                                                                                                                                       |
| EPI_ISL_417952, EPI_ISL_417954, EPI_ISL_417956, EPI_ISL_417957                                                                                                                                                                                                                                                                                                                                                                                                                                                                                                                                                                                                                                                                                                                                                                                                                                                                                                                                                                                                                                                                                                                                                                                                 | Hospital Universitario 12 de Octubre                                | Hospital Universitario La Paz                                                                                        | Elias Dahdouh, Sara González, Fernando Lázaro, Esther Viedma, Natalia Stella, Julio García, Juan Carlos Galán, Rafael Cantón, M <sup>a</sup> Dolores Folgueira, Rafael Delgado, Jesus Mingorance                                                                                                                                                                                                                                 |
| EPI_ISL_417960                                                                                                                                                                                                                                                                                                                                                                                                                                                                                                                                                                                                                                                                                                                                                                                                                                                                                                                                                                                                                                                                                                                                                                                                                                                 | Utah Public Health Laboratory                                       | Utah Public Health Laboratory                                                                                        | Erin Young, Kelly Oakeson                                                                                                                                                                                                                                                                                                                                                                                                        |
| EPI_ISL_417961, EPI_ISL_417963,                                                                                                                                                                                                                                                                                                                                                                                                                                                                                                                                                                                                                                                                                                                                                                                                                                                                                                                                                                                                                                                                                                                                                                                                                                | Hospital Universitario 12 de Octubre                                | Hospital Universitario La Paz                                                                                        | Elias Dahdouh, Sara González, Fernando Lázaro, Esther Viedma, Natalia Stella, Julio García, Juan Carlos Galán, Rafael Cantón, M <sup>a</sup> Dolores Folgueira,                                                                                                                                                                                                                                                                  |

|                                                                                                                                                                                                                                                                                                                                                |                                                                                 |                                                                                                                          |                                                                                                                                                                                                                                                                                                                                                        |
|------------------------------------------------------------------------------------------------------------------------------------------------------------------------------------------------------------------------------------------------------------------------------------------------------------------------------------------------|---------------------------------------------------------------------------------|--------------------------------------------------------------------------------------------------------------------------|--------------------------------------------------------------------------------------------------------------------------------------------------------------------------------------------------------------------------------------------------------------------------------------------------------------------------------------------------------|
| EPI_ISL_417967                                                                                                                                                                                                                                                                                                                                 |                                                                                 |                                                                                                                          | Rafael Delgado, Jesús Mingorance                                                                                                                                                                                                                                                                                                                       |
| EPI_ISL_417969, EPI_ISL_417972, EPI_ISL_417975                                                                                                                                                                                                                                                                                                 | Hospital Universitario La Paz                                                   | Hospital Universitario La Paz                                                                                            | Elias Dahdouh, Sara González, Fernando Lázaro, Esther Viedma, Natalia Stella, Julio García, Juan Carlos Galán, Rafael Cantón, M <sup>o</sup> Dolores Folgueira, Rafael Delgado, Jesús Mingorance                                                                                                                                                       |
| EPI_ISL_417976                                                                                                                                                                                                                                                                                                                                 | Utah Public Health Laboratory                                                   | Utah Public Health Laboratory                                                                                            | Erin Young, Kelly Oakeson                                                                                                                                                                                                                                                                                                                              |
| EPI_ISL_417978                                                                                                                                                                                                                                                                                                                                 | Hospital Universitario La Paz                                                   | Hospital Universitario La Paz                                                                                            | Elias Dahdouh, Sara González, Fernando Lázaro, Esther Viedma, Natalia Stella, Julio García, Juan Carlos Galán, Rafael Cantón, M <sup>o</sup> Dolores Folgueira, Rafael Delgado, Jesús Mingorance                                                                                                                                                       |
| EPI_ISL_417979, EPI_ISL_417980, EPI_ISL_417981                                                                                                                                                                                                                                                                                                 | Hospital Universitario Ramón y Cajal                                            | Hospital Universitario La Paz                                                                                            | Elias Dahdouh, Sara González, Fernando Lázaro, Esther Viedma, Natalia Stella, Julio García, Juan Carlos Galán, Rafael Cantón, M <sup>o</sup> Dolores Folgueira, Rafael Delgado, Jesús Mingorance                                                                                                                                                       |
| EPI_ISL_418182                                                                                                                                                                                                                                                                                                                                 | Hospital Universitario 12 de Octubre                                            | Hospital Universitario La Paz                                                                                            | Elias Dahdouh, Sara González, Fernando Lázaro, Esther Viedma, Natalia Stella, Julio García, Juan Carlos Galán, Rafael Cantón, M <sup>o</sup> Dolores Folgueira, Rafael Delgado, Jesús Mingorance                                                                                                                                                       |
| EPI_ISL_418963                                                                                                                                                                                                                                                                                                                                 | Utah Public Health Laboratory                                                   | Utah Public Health Laboratory                                                                                            | Erin Young, Kelly Oakeson                                                                                                                                                                                                                                                                                                                              |
| EPI_ISL_420125                                                                                                                                                                                                                                                                                                                                 | Servicio de Microbiología. Hospital Clínico Universitario de Valencia           | Sequencing and Bioinformatics Service and Molecular Epidemiology Research Group. FISABIO-Public Health                   | David Navarro, Giuseppe D'Auria, Lúcia Martínez-Priego, María Alma Bracho, Griselda De Marco, Beatriz Beamud, Lidia Ruiz Roldán, Marta Pla Diaz, Neris Garcia-Gonzalez, Loreto Ferrús Abad, Inma Galán Vendrell, Paula Ruiz-Hueso, Mariana Reyes-Prieto, Vicente Soriano Chirona, Fernando Gonzalez-Candelas                                           |
| EPI_ISL_420130                                                                                                                                                                                                                                                                                                                                 | Servicio de Microbiología. Hospital Clínico Universitario de Valencia           | Sequencing and Bioinformatics Service and Molecular Epidemiology Research Group. FISABIO-Public Health                   | David Navarro, Loreto Ferrús Abad, María Alma Bracho, Griselda De Marco, Beatriz Beamud, Lidia Ruiz Roldán, Marta Pla Diaz, Neris Garcia-Gonzalez, Inma Galán Vendrell, Paula Ruiz-Hueso, Mariana Reyes-Prieto, Vicente Soriano Chirona, Sandra Carbo, Ivan Ansari, Lúcia Martínez-Priego, Giuseppe D'Auria, Fernando Gonzalez-Candelas                |
| EPI_ISL_420805, EPI_ISL_420806, EPI_ISL_420811, EPI_ISL_420812, EPI_ISL_420821, EPI_ISL_420822, EPI_ISL_420823                                                                                                                                                                                                                                 | Utah Public Health Laboratory                                                   | Utah Public Health Laboratory                                                                                            | Erin Young, Kelly Oakeson                                                                                                                                                                                                                                                                                                                              |
| EPI_ISL_421519                                                                                                                                                                                                                                                                                                                                 | Servicio de Microbiología. Hospital Clínico Universitario de Valencia           | Sequencing and Bioinformatics Service and Molecular Epidemiology Research Group. FISABIO-Public Health                   | David Navarro, María Alma Bracho, Griselda De Marco, Beatriz Beamud, Lidia Ruiz Roldán, Marta Pla Diaz, Neris Garcia-Gonzalez, Inma Galán Vendrell, Sandra Carbo, Loreto Ferrús Abad, Paula Ruiz-Hueso, Mariana Reyes-Prieto, Vicente Soriano Chirona, Ivan Ansari, Lúcia Martínez-Priego, Giuseppe D'Auria, Fernando Gonzalez-Candelas                |
| EPI_ISL_421560, EPI_ISL_421562                                                                                                                                                                                                                                                                                                                 | Utah Public Health Laboratory                                                   | Utah Public Health Laboratory                                                                                            | Erin Young, Kelly Oakeson                                                                                                                                                                                                                                                                                                                              |
| EPI_ISL_423039, EPI_ISL_423040, EPI_ISL_423041, EPI_ISL_423042, EPI_ISL_423043                                                                                                                                                                                                                                                                 | Ramathibodi Hospital                                                            | COVID-19 Network Investigations (CONI) Alliance                                                                          | Elizabeth Batty, Wasun Chantratita, Thanat Chookajorn, Stefan Fernandez, Angkana Huang, Anthony R. Jones, Khajohn Joonsalak, Chonticha Klungtong, Theerarat Kochakarn, Namfon Kotanan, Krittikorn Kumpornsin, Wuditchai Manasatienkij, Bhakbhoom Panthan, Ekawat Pasomsob, Insee Sensor, Arporn Wangwiwatsin                                           |
| EPI_ISL_424344                                                                                                                                                                                                                                                                                                                                 | INMI Lazzaro Spallanzani IRCCS                                                  | Laboratory of Virology, INMI Lazzaro Spallanzani IRCCS                                                                   | Eleonora Lalle, Barbara Bartolini, Martina Rueda, Cesare Ernesto Maria Gruber, Francesco Messina, Fabrizio Carletti, Licia Bordi, Giulia Matusali, Francesca Colavita, Maria Rosaria Capobianchi, Concetta Castilletti, Francesco Vairo, Giuseppe Ippolito, Antonino Di Caro                                                                           |
| EPI_ISL_424350                                                                                                                                                                                                                                                                                                                                 | Environmental and Global Health                                                 | Environmental and Global Health                                                                                          | Elbadry,M.A., Subramaniam,K., Waltzek,T.B., Stephenson,C.J., Gibson,J.C., Alam,M., Morris,J.G. Jr. and Lednický,J.A.                                                                                                                                                                                                                                   |
| EPI_ISL_424351                                                                                                                                                                                                                                                                                                                                 | Environmental and Global Health                                                 | Environmental and Global Health                                                                                          | Elbadry,M.A., Subramaniam,K., Waltzek,T.B., Gibson,J.C., Stephenson,C.J., Morris,J.G. Jr. and Lednický,J.A.                                                                                                                                                                                                                                            |
| EPI_ISL_425178                                                                                                                                                                                                                                                                                                                                 | Servicio de Microbiología. Consorcio Hospital General Universitario de Valencia | Sequencing and Bioinformatics Service and Molecular Epidemiology Research Group. FISABIO-Public Health                   | David Navarro, María Alma Bracho, Griselda De Marco, Beatriz Beamud, Lidia Ruiz Roldán, Marta Pla Diaz, Neris Garcia-Gonzalez, Inma Galán Vendrell, Sandra Carbo, Loreto Ferrús Abad, Paula Ruiz-Hueso, Mariana Reyes-Prieto, Vicente Soriano Chirona, Ivan Ansari, Lúcia Martínez-Priego, Giuseppe D'Auria, Fernando Gonzalez-Candelas                |
| EPI_ISL_425179                                                                                                                                                                                                                                                                                                                                 | Servicio de Microbiología. Consorcio Hospital General Universitario de Valencia | Sequencing and Bioinformatics Service and Molecular Epidemiology Research Group. FISABIO-Public Health                   | David Navarro, María Alma Bracho, Griselda De Marco, Beatriz Beamud, Lidia Ruiz Roldán, Marta Pla Diaz, Neris Garcia-Gonzalez, Inma Galán Vendrell, Sandra Carbo, Loreto Ferrús Abad, Paula Ruiz-Hueso, Mariana Reyes-Prieto, Vicente Soriano Chirona, Ivan Ansari, David Navarro, Lúcia Martínez-Priego, Giuseppe D'Auria, Fernando Gonzalez-Candelas |
| EPI_ISL_425192, EPI_ISL_425212                                                                                                                                                                                                                                                                                                                 | Servicio de Microbiología. Consorcio Hospital General Universitario de Valencia | Sequencing and Bioinformatics Service and Molecular Epidemiology Research Group. FISABIO-Public Health                   | David Navarro, María Alma Bracho, Griselda De Marco, Beatriz Beamud, Lidia Ruiz Roldán, Marta Pla Diaz, Neris Garcia-Gonzalez, Inma Galán Vendrell, Sandra Carbo, Loreto Ferrús Abad, Paula Ruiz-Hueso, Mariana Reyes-Prieto, Vicente Soriano Chirona, Ivan Ansari, Lúcia Martínez-Priego, Giuseppe D'Auria, Fernando Gonzalez-Candelas                |
| EPI_ISL_427655, EPI_ISL_427676, EPI_ISL_427679, EPI_ISL_427680, EPI_ISL_427684, EPI_ISL_427690, EPI_ISL_427701, EPI_ISL_427722, EPI_ISL_427736, EPI_ISL_427741, EPI_ISL_427757, EPI_ISL_427766, EPI_ISL_427768, EPI_ISL_427784, EPI_ISL_427796, EPI_ISL_427799                                                                                 | see above                                                                       | Centre for Infectious Diseases and Microbiology Public Health                                                            | NSW Health Pathology - Institute of Clinical Pathology and Medical Research; Westmead Hospital; University of Sydney                                                                                                                                                                                                                                   |
| EPI_ISL_428674, EPI_ISL_428675, EPI_ISL_428676, EPI_ISL_428677, EPI_ISL_428678, EPI_ISL_428679, EPI_ISL_428680, EPI_ISL_428681, EPI_ISL_428682                                                                                                                                                                                                 | Hospital Universitario La Paz                                                   | Hospital Universitario 12 de Octubre                                                                                     | Elias Dahdouh, Sara González, Raúl Recio, Fernando Lázaro, Esther Viedma, Natalia Stella, Julio García, Juan Carlos Galán, Rafael Cantón, M <sup>o</sup> Dolores Folgueira, Rafael Delgado, Jesús Mingorance                                                                                                                                           |
| EPI_ISL_429164, EPI_ISL_429165, EPI_ISL_429166, EPI_ISL_429167, EPI_ISL_429168, EPI_ISL_429169, EPI_ISL_429170, EPI_ISL_429171, EPI_ISL_429172, EPI_ISL_429173, EPI_ISL_429174, EPI_ISL_429175, EPI_ISL_429176, EPI_ISL_429177, EPI_ISL_429178, EPI_ISL_429179, EPI_ISL_429180, EPI_ISL_429181, EPI_ISL_429182, EPI_ISL_429183, EPI_ISL_429184 | see above                                                                       | Ramathibodi Hospital                                                                                                     | COVID-19 Network Investigations (CONI) Alliance                                                                                                                                                                                                                                                                                                        |
| EPI_ISL_430020, EPI_ISL_430021, EPI_ISL_430022, EPI_ISL_430029, EPI_ISL_430034, EPI_ISL_430036, EPI_ISL_430041, EPI_ISL_430043, EPI_ISL_430047, EPI_ISL_430052, EPI_ISL_430059, EPI_ISL_430062                                                                                                                                                 | see above                                                                       | Utah Public Health Laboratory                                                                                            | Utah Public Health Laboratory                                                                                                                                                                                                                                                                                                                          |
| EPI_ISL_430719, EPI_ISL_430720, EPI_ISL_430721                                                                                                                                                                                                                                                                                                 | Hospital Universitario La Paz                                                   | Hospital Universitario 12 de Octubre                                                                                     | Elias Dahdouh, Sara González, Raúl Recio, Fernando Lázaro, Esther Viedma, Natalia Stella, Julio García, Juan Carlos Galán, Rafael Cantón, M <sup>o</sup> Dolores Folgueira, Rafael Delgado, Jesús Mingorance                                                                                                                                           |
| EPI_ISL_434636                                                                                                                                                                                                                                                                                                                                 | Lednický Laboratory, Emerging Pathogens Institute, University of Florida        | Lednický Laboratory at Emerging Pathogens Institute, University of Florida                                               | Elbadry,M.A., Subramaniam,K., Waltzek,T.B., Stephenson,C.J.,Gibson,J.C., Alam,M., Morris,J.G. Jr. and Lednický,J.A.                                                                                                                                                                                                                                    |
| EPI_ISL_434637                                                                                                                                                                                                                                                                                                                                 | Lednický Laboratory, Emerging Pathogens Institute, University of Florida.       | Lednický Laboratory, Emerging Pathogens Institute, University of Florida.                                                | Elbadry,M.A.; Subramaniam,K.; Waltzek,T.B.; Gibson,J.C.; Stephenson,C.J.; Morris,J.G. Jr. and Lednický,J.A.                                                                                                                                                                                                                                            |
| EPI_ISL_434663, EPI_ISL_434672, EPI_ISL_434675, EPI_ISL_434676                                                                                                                                                                                                                                                                                 | Surbrunns VC                                                                    | The Public Health Agency of Sweden                                                                                       | Erik Embring, Oskar Karlsson Lindsjo, Maria Lind Karlberg, Anna-Malin Linde, Olov Svartstrom, Anna Risberg, Theresa Enkirch, Mia Brytting, Karin Tegmark-Wisell                                                                                                                                                                                        |
| EPI_ISL_435144                                                                                                                                                                                                                                                                                                                                 | Hospital Universitario La Paz                                                   | Hospital Universitario 12 de Octubre                                                                                     | Elias Dahdouh, Sara González, Raúl Recio, Fernando Lázaro, Esther Viedma, Natalia Stella, Julio García, Juan Carlos Galán, Rafael Cantón, M <sup>o</sup> Dolores Folgueira, Rafael Delgado, Jesús Mingorance                                                                                                                                           |
| EPI_ISL_435281                                                                                                                                                                                                                                                                                                                                 | Medistra Hospital Jakarta                                                       | Eijkman Institute for Molecular Biology, Ministry of Research and Technology/National Agency for Research and Innovation | Edison Johar, Frilasita A Yudhaputri, Hidayat Trimarsanto, David H Mujiono, Safarina G Malik, Khin Saw Myint, Amin Soebandrio                                                                                                                                                                                                                          |
| EPI_ISL_435282, EPI_ISL_435283                                                                                                                                                                                                                                                                                                                 | RS Pondok Indah Hospital - Pondok Indah                                         | Eijkman Institute for Molecular Biology, Ministry of Research and Technology/National Agency for Research and Innovation | Edison Johar, Frilasita A Yudhaputri, Hidayat Trimarsanto, David H Mujiono, Safarina G Malik, Khin Saw Myint, Amin Soebandrio                                                                                                                                                                                                                          |
| EPI_ISL_435350, EPI_ISL_435351, EPI_ISL_435356, EPI_ISL_435357, EPI_ISL_435360, EPI_ISL_435363, EPI_ISL_435375, EPI_ISL_435376, EPI_ISL_435378, EPI_ISL_435380, EPI_ISL_435383, EPI_ISL_435385, EPI_ISL_435386                                                                                                                                 |                                                                                 |                                                                                                                          |                                                                                                                                                                                                                                                                                                                                                        |

|                                                                                                                                                |                                                                                                                                                                                              |                                                                                                                          |                                                                                                                                                                                                                                                                                                                                                                                                                                                                                                              |
|------------------------------------------------------------------------------------------------------------------------------------------------|----------------------------------------------------------------------------------------------------------------------------------------------------------------------------------------------|--------------------------------------------------------------------------------------------------------------------------|--------------------------------------------------------------------------------------------------------------------------------------------------------------------------------------------------------------------------------------------------------------------------------------------------------------------------------------------------------------------------------------------------------------------------------------------------------------------------------------------------------------|
| see above                                                                                                                                      | Utah Public Health Laboratory                                                                                                                                                                | Utah Public Health Laboratory                                                                                            | Erin Young, Kelly Oakeson                                                                                                                                                                                                                                                                                                                                                                                                                                                                                    |
| EPI_ISL_436278                                                                                                                                 | Servicio de Microbiología. Hospital Clínico Universitario de Valencia                                                                                                                        | Sequencing and Bioinformatics Service and Molecular Epidemiology Research Group. FISABIO-Public Health                   | David Navarro, María Alma Bracho, Griselda De Marco, Griselda De Marco, Beatriz Beamud, Lidia Ruiz Roldan, Marta Pla Diaz, Neris Garcia-Gonzalez, Inma Galán Vendrell, Sandra Carbo, Loreto Ferrús Abad, Paula Ruiz-Hueso, Mariana Reyes-Prieto, Vicente Soriano Chirona, Ivan Ansari, David Navarro, Lúcia Martínez-Priego, Giuseppe D'Auria, Fernando Gonzalez-Candelas                                                                                                                                    |
| EPI_ISL_436291                                                                                                                                 | Servicio de Microbiología. Hospital Clínico Universitario de Valencia                                                                                                                        | Sequencing and Bioinformatics Service and Molecular Epidemiology Research Group. FISABIO-Public Health                   | David Navarro, María Alma Bracho, Griselda De Marco, Beatriz Beamud, Lidia Ruiz Roldan, Marta Pla Diaz, Neris Garcia-Gonzalez, Inma Galán Vendrell, Sandra Carbo, Loreto Ferrús Abad, Paula Ruiz-Hueso, Mariana Reyes-Prieto, Vicente Soriano Chirona, Ivan Ansari, Lúcia Martínez-Priego, Giuseppe D'Auria, Fernando Gonzalez-Candelas                                                                                                                                                                      |
| EPI_ISL_436298                                                                                                                                 | Servicio de Microbiología. Hospital Clínico Universitario de Valencia                                                                                                                        | Sequencing and Bioinformatics Service and Molecular Epidemiology Research Group. FISABIO-Public Health                   | David Navarro, María Alma Bracho, Griselda De Marco, Beatriz Beamud, Lidia Ruiz Roldan, Marta Pla Diaz, Neris Garcia-Gonzalez, Inma Galán Vendrell, Sandra Carbo, Loreto Ferrús Abad, Paula Ruiz-Hueso, Mariana Reyes-Prieto, Vicente Soriano Chirona, Ivan Ansari, David Navarro, Lúcia Martínez-Priego, Giuseppe D'Auria, Fernando Gonzalez-Candelas                                                                                                                                                       |
| EPI_ISL_436311                                                                                                                                 | Servicio de Microbiología. Hospital Clínico Universitario de Valencia                                                                                                                        | Sequencing and Bioinformatics Service and Molecular Epidemiology Research Group. FISABIO-Public Health                   | David Navarro, María Alma Bracho, Griselda De Marco, Beatriz Beamud, Lidia Ruiz Roldan, Marta Pla Diaz, Neris Garcia-Gonzalez, Inma Galán Vendrell, Sandra Carbo, Loreto Ferrús Abad, Paula Ruiz-Hueso, Mariana Reyes-Prieto, Vicente Soriano Chirona, Ivan Ansari, Lúcia Martínez-Priego, Giuseppe D'Auria, Fernando Gonzalez-Candelas                                                                                                                                                                      |
| EPI_ISL_436318                                                                                                                                 | Servicio de Microbiología. Hospital Clínico Universitario de Valencia                                                                                                                        | Sequencing and Bioinformatics Service and Molecular Epidemiology Research Group. FISABIO-Public Health                   | David Navarro, María Alma Bracho, Griselda De Marco, Beatriz Beamud, Lidia Ruiz Roldan, Marta Pla Diaz, Neris Garcia-Gonzalez, Inma Galán Vendrell, Sandra Carbo, Loreto Ferrús Abad, Paula Ruiz-Hueso, Mariana Reyes-Prieto, Vicente Soriano Chirona, Ivan Ansari, David Navarro, Lúcia Martínez-Priego, Giuseppe D'Auria, Fernando Gonzalez-Candelas                                                                                                                                                       |
| EPI_ISL_436331                                                                                                                                 | Servicio de Microbiología. Hospital Clínico Universitario de Valencia                                                                                                                        | Sequencing and Bioinformatics Service and Molecular Epidemiology Research Group. FISABIO-Public Health                   | David Navarro, María Alma Bracho, Griselda De Marco, Beatriz Beamud, Lidia Ruiz Roldan, Marta Pla Diaz, Neris Garcia-Gonzalez, Inma Galán Vendrell, Sandra Carbo, Loreto Ferrús Abad, Paula Ruiz-Hueso, Mariana Reyes-Prieto, Vicente Soriano Chirona, Ivan Ansari, Lúcia Martínez-Priego, Giuseppe D'Auria, Fernando Gonzalez-Candelas                                                                                                                                                                      |
| EPI_ISL_436338                                                                                                                                 | Servicio de Microbiología. Hospital Clínico Universitario de Valencia                                                                                                                        | Sequencing and Bioinformatics Service and Molecular Epidemiology Research Group. FISABIO-Public Health                   | David Navarro, María Alma Bracho, Griselda De Marco, Beatriz Beamud, Lidia Ruiz Roldan, Marta Pla Diaz, Neris Garcia-Gonzalez, Inma Galán Vendrell, Sandra Carbo, Loreto Ferrús Abad, Paula Ruiz-Hueso, Mariana Reyes-Prieto, Vicente Soriano Chirona, Ivan Ansari, David Navarro, Lúcia Martínez-Priego, Giuseppe D'Auria, Fernando Gonzalez-Candelas                                                                                                                                                       |
| EPI_ISL_436351                                                                                                                                 | Servicio de Microbiología. Hospital Clínico Universitario de Valencia                                                                                                                        | Sequencing and Bioinformatics Service and Molecular Epidemiology Research Group. FISABIO-Public Health                   | David Navarro, María Alma Bracho, Griselda De Marco, Beatriz Beamud, Lidia Ruiz Roldan, Marta Pla Diaz, Neris Garcia-Gonzalez, Inma Galán Vendrell, Sandra Carbo, Loreto Ferrús Abad, Paula Ruiz-Hueso, Mariana Reyes-Prieto, Vicente Soriano Chirona, Ivan Ansari, Lúcia Martínez-Priego, Giuseppe D'Auria, Fernando Gonzalez-Candelas                                                                                                                                                                      |
| EPI_ISL_436362                                                                                                                                 | Servicio de Microbiología. Hospital Clínico Universitario de Valencia                                                                                                                        | Sequencing and Bioinformatics Service and Molecular Epidemiology Research Group. FISABIO-Public Health                   | David Navarro, María Alma Bracho, Griselda De Marco, Beatriz Beamud, Lidia Ruiz Roldan, Marta Pla Diaz, Neris Garcia-Gonzalez, Inma Galán Vendrell, Sandra Carbo, Loreto Ferrús Abad, Paula Ruiz-Hueso, Mariana Reyes-Prieto, Vicente Soriano Chirona, Ivan Ansari, David Navarro, Lúcia Martínez-Priego, Giuseppe D'Auria, Fernando Gonzalez-Candelas                                                                                                                                                       |
| EPI_ISL_436402                                                                                                                                 | Servicio de Microbiología. Hospital Clínico Universitario de Valencia                                                                                                                        | Sequencing and Bioinformatics Service and Molecular Epidemiology Research Group. FISABIO-Public Health                   | David Navarro, María Alma Bracho, Griselda De Marco, Beatriz Beamud, Lidia Ruiz Roldan, Marta Pla Diaz, Neris Garcia-Gonzalez, Inma Galán Vendrell, Sandra Carbo, Loreto Ferrús Abad, Paula Ruiz-Hueso, Mariana Reyes-Prieto, Vicente Soriano Chirona, Ivan Ansari, Lúcia Martínez-Priego, Giuseppe D'Auria, Fernando Gonzalez-Candelas                                                                                                                                                                      |
| EPI_ISL_436903, EPI_ISL_436908, EPI_ISL_436909, EPI_ISL_436910, EPI_ISL_436911, EPI_ISL_436921, EPI_ISL_436922, EPI_ISL_436927, EPI_ISL_436933 | Utah Public Health Laboratory                                                                                                                                                                | Utah Public Health Laboratory                                                                                            | Erin Young, Kelly Oakeson                                                                                                                                                                                                                                                                                                                                                                                                                                                                                    |
| EPI_ISL_437189                                                                                                                                 | Pusat Pertamina Hospital                                                                                                                                                                     | Eijkman Institute for Molecular Biology, Ministry of Research and Technology/National Agency for Research and Innovation | Edison Johar, Frilasita A Yudhaputri, Hidayat Trimarsanto, David H Muljono, Safarina G Malik, Khin Saw Myint, Amin Soebandrio                                                                                                                                                                                                                                                                                                                                                                                |
| EPI_ISL_437190, EPI_ISL_437191                                                                                                                 | RS Pondok Indah Hospital - Pondok Indah                                                                                                                                                      | Eijkman Institute for Molecular Biology, Ministry of Research and Technology/National Agency for Research and Innovation | Edison Johar, Frilasita A Yudhaputri, Hidayat Trimarsanto, David H Muljono, Safarina G Malik, Khin Saw Myint, Amin Soebandrio                                                                                                                                                                                                                                                                                                                                                                                |
| EPI_ISL_437192                                                                                                                                 | Mitra Keluarga Kelapa Gading Hospital                                                                                                                                                        | Eijkman Institute for Molecular Biology, Ministry of Research and Technology/National Agency for Research and Innovation | Edison Johar, Frilasita A Yudhaputri, Hidayat Trimarsanto, David H Muljono, Safarina G Malik, Khin Saw Myint, Amin Soebandrio                                                                                                                                                                                                                                                                                                                                                                                |
| EPI_ISL_437435, EPI_ISL_437436                                                                                                                 | Veterinary Specialized Institue Kraljevo                                                                                                                                                     | Veterinary Specialized Institue Kraljevo                                                                                 | Dejan Vidanovic, Bojana Tesovic, Milanko Sekler, Marko Dmitric, Kazimir Matovic, Zoran Debeljak, Nikola Vaskovic, Tamas Petrovic, Jeremy Volkening, Claudio L Afonso                                                                                                                                                                                                                                                                                                                                         |
| EPI_ISL_437442                                                                                                                                 | Department of MicroBiology, Government Medical College, Surat                                                                                                                                | Gujarat Biotechnology Research Centre                                                                                    | Dinesh Kumar, Zuber Saiyed, Dipa Kinariwala, Disha Patel, Binita Aring, Neeta Khandelwal, Geeta Vaghela, Sonia Barve, Bhavesh Modi, Kairavi Joshi, Gaurishankar Shrimali, Nidhi Sood, Pranay Shah, R D Dixit, Snehal Bagatharia, Kamlesh J Upadhyay, Ramesh Pandit, Tejas Shah, Ankit Hinsu, Pritesh Sabara, Apurvasinh Puvar, Janvi Raval, Monika Gandhi, Pinal Trivedi, Maharshi Pandya, Amit Kanani, Akanksha Verma, Nitin Savaliya, Raghawendra Kumar, Dipeshwari Shewale, Chaitanya Joshi, Madhvi Joshi |
| EPI_ISL_437444                                                                                                                                 | Department of MicroBiology, Government Medical College, Surat                                                                                                                                | Gujarat Biotechnology Research Centre                                                                                    | Dipa Kinariwala, Disha Patel, Binita Aring, Neeta Khandelwal, Geeta Vaghela, Sonia Barve, Bhavesh Modi, Kairavi Joshi, Gaurishankar Shrimali, Nidhi Sood, Pranay Shah, R D Dixit, Snehal Bagatharia, Kamlesh J Upadhyay, Ramesh Pandit, Tejas Shah, Ankit Hinsu, Pritesh Sabara, Apurvasinh Puvar, Janvi Raval, Monika Gandhi, Pinal Trivedi, Maharshi Pandya, Amit Kanani, Akanksha Verma, Nitin Savaliya, Raghawendra Kumar, Dinesh Kumar, Zuber Saiyed, Pooja P Doshi, Chaitanya Joshi, Madhvi Joshi      |
| EPI_ISL_437445                                                                                                                                 | B.J. Medical College and Civil hospital                                                                                                                                                      | Gujarat Biotechnology Research Centre                                                                                    | Disha Patel, Binita Aring, Neeta Khandelwal, Geeta Vaghela, Sonia Barve, Bhavesh Modi, Kairavi Joshi, Gaurishankar Shrimali, Nidhi Sood, Pranay Shah, R D Dixit, Snehal Bagatharia, Kamlesh J Upadhyay, Ramesh Pandit, Tejas Shah, Ankit Hinsu, Pritesh Sabara, Apurvasinh Puvar, Janvi Raval, Monika Gandhi, Pinal Trivedi, Maharshi Pandya, Amit Kanani, Akanksha Verma, Nitin Savaliya, Raghawendra Kumar, Dinesh Kumar, Zuber Saiyed, Dipa Kinariwala, Nidhi Patel, Chaitanya Joshi, Madhvi Joshi        |
| EPI_ISL_437625                                                                                                                                 | Laboratory of Genomics & Bioinformatics, Institute of Immunology and Experimental Therapy, Polish Academy of Sciences Oddzial Mikrobiologii Wojewodzkiej Stacji Sanitarno-Epidemiologicznej. | Laboratory of Genomics & Bioinformatics, Institute of Immunology and Experimental Therapy, Polish Academy of Sciences    | Dorota Kujawa, Aleksandra Herud, Dariusz Martynowski, Krzysztof Jakub Pawlik, Joanna Sikorska, Paulina Zebrowska, Grazyna Zalewska, Oskar Karpinski and Lukasz Laczmannski                                                                                                                                                                                                                                                                                                                                   |
| EPI_ISL_444472                                                                                                                                 | B.J. Medical College and Civil hospital                                                                                                                                                      | Gujarat Biotechnology Research Centre                                                                                    | Dinesh Kumar, Zuber Saiyed, Dipa Kinariwala, Disha Patel, Binita Aring, Neeta Khandelwal, Geeta Vaghela, Sonia Barve, Bhavesh Modi, Kairavi Joshi, Gaurishankar Shrimali, Nidhi Sood, Pranay Shah, R D Dixit, Snehal Bagatharia, Kamlesh J Upadhyay, Ramesh Pandit, Tejas Shah, Ankit Hinsu, Pritesh Sabara, Apurvasinh Puvar, Janvi Raval, Monika Gandhi, Pinal Trivedi, Maharshi Pandya, Amit Kanani, Akanksha Verma, Nitin Savaliya, Raghawendra Kumar, Neelam Nathani, Chaitanya Joshi, Madhvi Joshi     |
| EPI_ISL_444474                                                                                                                                 | B.J. Medical College and Civil hospital                                                                                                                                                      | Gujarat Biotechnology Research Centre                                                                                    | Dipa Kinariwala, Disha Patel, Binita Aring, Neeta Khandelwal, Geeta Vaghela, Sonia Barve, Bhavesh Modi, Kairavi Joshi, Gaurishankar Shrimali, Nidhi Sood, Pranay Shah, R D Dixit, Snehal Bagatharia, Kamlesh J Upadhyay, Ramesh Pandit, Tejas Shah, Ankit Hinsu, Pritesh Sabara, Apurvasinh Puvar, Janvi Raval, Monika Gandhi, Pinal Trivedi, Maharshi Pandya, Amit Kanani, Akanksha Verma, Nitin Savaliya, Raghawendra Kumar, Dinesh Kumar, Zuber Saiyed, Bhavya Jindal, Chaitanya Joshi, Madhvi Joshi      |
| EPI_ISL_444475                                                                                                                                 | B.J. Medical College and Civil hospital                                                                                                                                                      | Gujarat Biotechnology Research Centre                                                                                    | Disha Patel, Binita Aring, Neeta Khandelwal, Geeta Vaghela, Sonia Barve, Bhavesh Modi, Kairavi Joshi, Gaurishankar Shrimali, Nidhi Sood, Pranay Shah, R D Dixit, Snehal Bagatharia, Kamlesh J Upadhyay, Ramesh Pandit, Tejas Shah, Ankit Hinsu, Pritesh Sabara, Apurvasinh Puvar, Janvi Raval, Monika Gandhi, Pinal Trivedi, Maharshi Pandya, Amit Kanani, Akanksha Verma, Nitin Savaliya, Raghawendra Kumar, Dinesh Kumar, Zuber Saiyed, Dipa Kinariwala, Dipeshwari Shewale, Chaitanya Joshi, Madhvi Joshi |
| EPI_ISL_445225                                                                                                                                 | Surbrunns VC                                                                                                                                                                                 | The Public Health Agency of Sweden                                                                                       | Erik Embring, Oskar Karlsson Lindsjo, Maria Lind Karlberg, Anna-Malin Linde, Olov Svartstrom, Anna Risberg, Theresa Enkirch, Mia Brytting, Karin Tegmark-Wisell                                                                                                                                                                                                                                                                                                                                              |
| EPI_ISL_445238                                                                                                                                 | Å-resundslakarna                                                                                                                                                                             | The Public Health Agency of Sweden                                                                                       | Del Akrawi, Oskar Karlsson Lindsjo, Maria Lind Karlberg, Anna-Malin Linde, Olov Svartstrom, Anna Risberg, Theresa Enkirch, Mia Brytting, Karin                                                                                                                                                                                                                                                                                                                                                               |

| Tegmark-Wisell                                                                                                                                                                                                                                                                                                                                                                                                                                                                                                                                                                                                                                                                                                                                                                                                                                                                                                                                                                                                                                                                                                                                                                                                                                                                                                                                                                                                                                                                                                                                                                                                                                                                                                                                                                                                                                                                                                                                                 |                                                                       |                                                                                                        |                                                                                                                                                                                                                                                                                                                                                                                                                                                                                                              |  |
|----------------------------------------------------------------------------------------------------------------------------------------------------------------------------------------------------------------------------------------------------------------------------------------------------------------------------------------------------------------------------------------------------------------------------------------------------------------------------------------------------------------------------------------------------------------------------------------------------------------------------------------------------------------------------------------------------------------------------------------------------------------------------------------------------------------------------------------------------------------------------------------------------------------------------------------------------------------------------------------------------------------------------------------------------------------------------------------------------------------------------------------------------------------------------------------------------------------------------------------------------------------------------------------------------------------------------------------------------------------------------------------------------------------------------------------------------------------------------------------------------------------------------------------------------------------------------------------------------------------------------------------------------------------------------------------------------------------------------------------------------------------------------------------------------------------------------------------------------------------------------------------------------------------------------------------------------------------|-----------------------------------------------------------------------|--------------------------------------------------------------------------------------------------------|--------------------------------------------------------------------------------------------------------------------------------------------------------------------------------------------------------------------------------------------------------------------------------------------------------------------------------------------------------------------------------------------------------------------------------------------------------------------------------------------------------------|--|
| EPI_ISL_445380                                                                                                                                                                                                                                                                                                                                                                                                                                                                                                                                                                                                                                                                                                                                                                                                                                                                                                                                                                                                                                                                                                                                                                                                                                                                                                                                                                                                                                                                                                                                                                                                                                                                                                                                                                                                                                                                                                                                                 | Ramathibodi Hospital                                                  | COVID-19 Network Investigations (CONI) Alliance                                                        | Elizabeth Batty, Wasun Chantratita, Thanat Chookajorn, Stefan Fernandez, Angkana Huang, Anthony R. Jones, Khajohn Joonsalak, Chonticha Klungtong, Theerarat Kochakarn, Namfon Kotanan, Krittikorn Kumpornsin, Wudtichai Manasatienkij, Bhakbhoom Panthan, Ekawat Pasomsub, Kingkan Rakmanee, Insee Sensorn, Janjira Thaipadungpanit, Arporn Wangwiwatsin, Treewat Watthanachockchai                                                                                                                          |  |
| EPI_ISL_446696, EPI_ISL_446697, EPI_ISL_446698, EPI_ISL_446699, EPI_ISL_447000, EPI_ISL_447001, EPI_ISL_447002, EPI_ISL_447003, EPI_ISL_447004, EPI_ISL_447005, EPI_ISL_447006, EPI_ISL_447007, EPI_ISL_447008, EPI_ISL_447009, EPI_ISL_447010, EPI_ISL_447011, EPI_ISL_447012, EPI_ISL_447013, EPI_ISL_447014, EPI_ISL_447015, EPI_ISL_447016, EPI_ISL_447017, EPI_ISL_447018, EPI_ISL_447019, EPI_ISL_447020, EPI_ISL_447021, EPI_ISL_447022, EPI_ISL_447023, EPI_ISL_447024, EPI_ISL_447025, EPI_ISL_447026, EPI_ISL_447027, EPI_ISL_447028, EPI_ISL_447029                                                                                                                                                                                                                                                                                                                                                                                                                                                                                                                                                                                                                                                                                                                                                                                                                                                                                                                                                                                                                                                                                                                                                                                                                                                                                                                                                                                                 | Ramathibodi Hospital                                                  | COVID-19 Network Investigations (CONI) Alliance                                                        | Elizabeth Batty, Wasun Chantratita, Thanat Chookajorn, Stefan Fernandez, Angkana Huang, Anthony R. Jones, Khajohn Joonsalak, Chonticha Klungtong, Theerarat Kochakarn, Namfon Kotanan, Krittikorn Kumpornsin, Wudtichai Manasatienkij, Bhakbhoom Panthan, Ekawat Pasomsub, Kingkan Rakmanee, Insee Sensorn, Janjira Thaipadungpanit, Arporn Wangwiwatsin, Treewat Watthanachockchai                                                                                                                          |  |
| see above                                                                                                                                                                                                                                                                                                                                                                                                                                                                                                                                                                                                                                                                                                                                                                                                                                                                                                                                                                                                                                                                                                                                                                                                                                                                                                                                                                                                                                                                                                                                                                                                                                                                                                                                                                                                                                                                                                                                                      | Ramathibodi Hospital                                                  | COVID-19 Network Investigations (CONI) Alliance                                                        | Elizabeth Batty, Wasun Chantratita, Thanat Chookajorn, Stefan Fernandez, Angkana Huang, Anthony R. Jones, Khajohn Joonsalak, Chonticha Klungtong, Theerarat Kochakarn, Namfon Kotanan, Krittikorn Kumpornsin, Wudtichai Manasatienkij, Bhakbhoom Panthan, Ekawat Pasomsub, Kingkan Rakmanee, Insee Sensorn, Janjira Thaipadungpanit, Arporn Wangwiwatsin, Treewat Watthanachockchai                                                                                                                          |  |
| EPI_ISL_447044                                                                                                                                                                                                                                                                                                                                                                                                                                                                                                                                                                                                                                                                                                                                                                                                                                                                                                                                                                                                                                                                                                                                                                                                                                                                                                                                                                                                                                                                                                                                                                                                                                                                                                                                                                                                                                                                                                                                                 | B.J. Medical College and Civil hospital                               | Gujarat Biotechnology Research Centre                                                                  | Dinesh Kumar, Zuber Saiyed, Dipa Kinariwala, Disha Patel, Binita Aring, Neeta Khandelwal, Geeta Vaghela, Sonia Barve, Bhavesh Modi, Kairavi Joshi, Gaurishankar Shrimali, Nidhi Sood, Pranay Shah, R D Dixit, Snehal Bagatharia, Kamlesh J Upadhyay, Ramesh Pandit, Tejas Shah, Ankit Hinsu, Pritesh Sabara, Apurvasinh Puvar, Janvi Raval, Monika Gandhi, Pinal Trivedi, Maharshi Pandya, Amit Kanani, Akanksha Verma, Nitin Savaliya, Raghawendra Kumar, Priti Pandita, Chaitanya Joshi, Madhvi Joshi      |  |
| EPI_ISL_447046                                                                                                                                                                                                                                                                                                                                                                                                                                                                                                                                                                                                                                                                                                                                                                                                                                                                                                                                                                                                                                                                                                                                                                                                                                                                                                                                                                                                                                                                                                                                                                                                                                                                                                                                                                                                                                                                                                                                                 | B.J. Medical College and Civil hospital                               | Gujarat Biotechnology Research Centre                                                                  | Dipa Kinariwala, Disha Patel, Binita Aring, Neeta Khandelwal, Geeta Vaghela, Sonia Barve, Bhavesh Modi, Kairavi Joshi, Gaurishankar Shrimali, Nidhi Sood, Pranay Shah, R D Dixit, Snehal Bagatharia, Kamlesh J Upadhyay, Ramesh Pandit, Tejas Shah, Ankit Hinsu, Pritesh Sabara, Apurvasinh Puvar, Janvi Raval, Monika Gandhi, Pinal Trivedi, Maharshi Pandya, Amit Kanani, Akanksha Verma, Nitin Savaliya, Raghawendra Kumar, Dinesh Kumar, Zuber Saiyed, Afzal Ansari, Chaitanya Joshi, Madhvi Joshi       |  |
| EPI_ISL_447047                                                                                                                                                                                                                                                                                                                                                                                                                                                                                                                                                                                                                                                                                                                                                                                                                                                                                                                                                                                                                                                                                                                                                                                                                                                                                                                                                                                                                                                                                                                                                                                                                                                                                                                                                                                                                                                                                                                                                 | GMERS Medical College and Hospital, Gandhinagar                       | Gujarat Biotechnology Research Centre                                                                  | Disha Patel, Binita Aring, Neeta Khandelwal, Geeta Vaghela, Sonia Barve, Bhavesh Modi, Kairavi Joshi, Gaurishankar Shrimali, Nidhi Sood, Pranay Shah, R D Dixit, Snehal Bagatharia, Kamlesh J Upadhyay, Ramesh Pandit, Tejas Shah, Ankit Hinsu, Pritesh Sabara, Apurvasinh Puvar, Janvi Raval, Monika Gandhi, Pinal Trivedi, Maharshi Pandya, Amit Kanani, Akanksha Verma, Nitin Savaliya, Raghawendra Kumar, Dinesh Kumar, Zuber Saiyed, Afzal Ansari, Chaitanya Joshi, Madhvi Joshi                        |  |
| EPI_ISL_447470                                                                                                                                                                                                                                                                                                                                                                                                                                                                                                                                                                                                                                                                                                                                                                                                                                                                                                                                                                                                                                                                                                                                                                                                                                                                                                                                                                                                                                                                                                                                                                                                                                                                                                                                                                                                                                                                                                                                                 | Servicio de Microbiologia. Hospital Clinico Universitario de Valencia | Sequencing and Bioinformatics Service and Molecular Epidemiology Research Group. FISABIO-Public Health | David Navarro, Eliseo Albert, Maria Alma Bracho, Griselda De Marco, Lidia Ruiz Roldan, Neris Garcia-Gonzalez, Inma Galán Vendrell, Sandra Carbo, Loreto Ferrús Abad, Paula Ruiz-Hueso, Mariana Reyes-Prieto, Vicente Soriano Chirona, Ivan Ansari, Lúcia Martínez-Priego, Giuseppe Auria, Fernando Gonzalez-Candelas                                                                                                                                                                                         |  |
| EPI_ISL_447471                                                                                                                                                                                                                                                                                                                                                                                                                                                                                                                                                                                                                                                                                                                                                                                                                                                                                                                                                                                                                                                                                                                                                                                                                                                                                                                                                                                                                                                                                                                                                                                                                                                                                                                                                                                                                                                                                                                                                 | Servicio de Microbiologia. Hospital Clinico Universitario de Valencia | Sequencing and Bioinformatics Service and Molecular Epidemiology Research Group. FISABIO-Public Health | Eliseo Albert, Maria Alma Bracho, Griselda De Marco, Lidia Ruiz Roldan, Neris Garcia-Gonzalez, Inma Galán Vendrell, Sandra Carbo, Loreto Ferrús Abad, Paula Ruiz-Hueso, Mariana Reyes-Prieto, Vicente Soriano Chirona, Ivan Ansari, Lúcia Martínez-Priego, Giuseppe Auria, David Navarro, Fernando Gonzalez-Candelas                                                                                                                                                                                         |  |
| EPI_ISL_447484                                                                                                                                                                                                                                                                                                                                                                                                                                                                                                                                                                                                                                                                                                                                                                                                                                                                                                                                                                                                                                                                                                                                                                                                                                                                                                                                                                                                                                                                                                                                                                                                                                                                                                                                                                                                                                                                                                                                                 | Servicio de Microbiologia. Hospital Clinico Universitario de Valencia | Sequencing and Bioinformatics Service and Molecular Epidemiology Research Group. FISABIO-Public Health | David Navarro, Eliseo Albert, Maria Alma Bracho, Griselda De Marco, Lidia Ruiz Roldan, Neris Garcia-Gonzalez, Inma Galán Vendrell, Sandra Carbo, Loreto Ferrús Abad, Paula Ruiz-Hueso, Mariana Reyes-Prieto, Vicente Soriano Chirona, Ivan Ansari, Lúcia Martínez-Priego, Giuseppe Auria, Fernando Gonzalez-Candelas                                                                                                                                                                                         |  |
| EPI_ISL_447485                                                                                                                                                                                                                                                                                                                                                                                                                                                                                                                                                                                                                                                                                                                                                                                                                                                                                                                                                                                                                                                                                                                                                                                                                                                                                                                                                                                                                                                                                                                                                                                                                                                                                                                                                                                                                                                                                                                                                 | Servicio de Microbiologia. Hospital Clinico Universitario de Valencia | Sequencing and Bioinformatics Service and Molecular Epidemiology Research Group. FISABIO-Public Health | Eliseo Albert, Maria Alma Bracho, Griselda De Marco, Lidia Ruiz Roldan, Neris Garcia-Gonzalez, Inma Galán Vendrell, Sandra Carbo, Loreto Ferrús Abad, Paula Ruiz-Hueso, Mariana Reyes-Prieto, Vicente Soriano Chirona, Ivan Ansari, Lúcia Martínez-Priego, Giuseppe Auria, David Navarro, Fernando Gonzalez-Candelas                                                                                                                                                                                         |  |
| EPI_ISL_447498                                                                                                                                                                                                                                                                                                                                                                                                                                                                                                                                                                                                                                                                                                                                                                                                                                                                                                                                                                                                                                                                                                                                                                                                                                                                                                                                                                                                                                                                                                                                                                                                                                                                                                                                                                                                                                                                                                                                                 | Servicio de Microbiologia. Hospital Clinico Universitario de Valencia | Sequencing and Bioinformatics Service and Molecular Epidemiology Research Group. FISABIO-Public Health | David Navarro, Eliseo Albert, Maria Alma Bracho, Griselda De Marco, Lidia Ruiz Roldan, Neris Garcia-Gonzalez, Inma Galán Vendrell, Sandra Carbo, Loreto Ferrús Abad, Paula Ruiz-Hueso, Mariana Reyes-Prieto, Vicente Soriano Chirona, Ivan Ansari, Lúcia Martínez-Priego, Giuseppe Auria, Fernando Gonzalez-Candelas                                                                                                                                                                                         |  |
| EPI_ISL_447499                                                                                                                                                                                                                                                                                                                                                                                                                                                                                                                                                                                                                                                                                                                                                                                                                                                                                                                                                                                                                                                                                                                                                                                                                                                                                                                                                                                                                                                                                                                                                                                                                                                                                                                                                                                                                                                                                                                                                 | Servicio de Microbiologia. Hospital Clinico Universitario de Valencia | Sequencing and Bioinformatics Service and Molecular Epidemiology Research Group. FISABIO-Public Health | Eliseo Albert, Maria Alma Bracho, Griselda De Marco, Lidia Ruiz Roldan, Neris Garcia-Gonzalez, Inma Galán Vendrell, Sandra Carbo, Loreto Ferrús Abad, Paula Ruiz-Hueso, Mariana Reyes-Prieto, Vicente Soriano Chirona, Ivan Ansari, Lúcia Martínez-Priego, Giuseppe Auria, David Navarro, Fernando Gonzalez-Candelas                                                                                                                                                                                         |  |
| EPI_ISL_447512                                                                                                                                                                                                                                                                                                                                                                                                                                                                                                                                                                                                                                                                                                                                                                                                                                                                                                                                                                                                                                                                                                                                                                                                                                                                                                                                                                                                                                                                                                                                                                                                                                                                                                                                                                                                                                                                                                                                                 | Servicio de Microbiologia. Hospital Clinico Universitario de Valencia | Sequencing and Bioinformatics Service and Molecular Epidemiology Research Group. FISABIO-Public Health | David Navarro, Eliseo Albert, Maria Alma Bracho, Griselda De Marco, Lidia Ruiz Roldan, Neris Garcia-Gonzalez, Inma Galán Vendrell, Sandra Carbo, Loreto Ferrús Abad, Paula Ruiz-Hueso, Mariana Reyes-Prieto, Vicente Soriano Chirona, Ivan Ansari, Lúcia Martínez-Priego, Giuseppe Auria, Fernando Gonzalez-Candelas                                                                                                                                                                                         |  |
| EPI_ISL_447513                                                                                                                                                                                                                                                                                                                                                                                                                                                                                                                                                                                                                                                                                                                                                                                                                                                                                                                                                                                                                                                                                                                                                                                                                                                                                                                                                                                                                                                                                                                                                                                                                                                                                                                                                                                                                                                                                                                                                 | Servicio de Microbiologia. Hospital Clinico Universitario de Valencia | Sequencing and Bioinformatics Service and Molecular Epidemiology Research Group. FISABIO-Public Health | Eliseo Albert, Maria Alma Bracho, Griselda De Marco, Lidia Ruiz Roldan, Neris Garcia-Gonzalez, Inma Galán Vendrell, Sandra Carbo, Loreto Ferrús Abad, Paula Ruiz-Hueso, Mariana Reyes-Prieto, Vicente Soriano Chirona, Ivan Ansari, Lúcia Martínez-Priego, Giuseppe Auria, David Navarro, Fernando Gonzalez-Candelas                                                                                                                                                                                         |  |
| EPI_ISL_447525                                                                                                                                                                                                                                                                                                                                                                                                                                                                                                                                                                                                                                                                                                                                                                                                                                                                                                                                                                                                                                                                                                                                                                                                                                                                                                                                                                                                                                                                                                                                                                                                                                                                                                                                                                                                                                                                                                                                                 | Servicio de Microbiologia. Hospital Clinico Universitario de Valencia | Sequencing and Bioinformatics Service and Molecular Epidemiology Research Group. FISABIO-Public Health | David Navarro, Eliseo Albert, Maria Alma Bracho, Griselda De Marco, Lidia Ruiz Roldan, Neris Garcia-Gonzalez, Inma Galán Vendrell, Sandra Carbo, Loreto Ferrús Abad, Paula Ruiz-Hueso, Mariana Reyes-Prieto, Vicente Soriano Chirona, Ivan Ansari, Lúcia Martínez-Priego, Giuseppe Auria, Fernando Gonzalez-Candelas                                                                                                                                                                                         |  |
| EPI_ISL_447526                                                                                                                                                                                                                                                                                                                                                                                                                                                                                                                                                                                                                                                                                                                                                                                                                                                                                                                                                                                                                                                                                                                                                                                                                                                                                                                                                                                                                                                                                                                                                                                                                                                                                                                                                                                                                                                                                                                                                 | Servicio de Microbiologia. Hospital Clinico Universitario de Valencia | Sequencing and Bioinformatics Service and Molecular Epidemiology Research Group. FISABIO-Public Health | Eliseo Albert, Maria Alma Bracho, Griselda De Marco, Lidia Ruiz Roldan, Neris Garcia-Gonzalez, Inma Galán Vendrell, Sandra Carbo, Loreto Ferrús Abad, Paula Ruiz-Hueso, Mariana Reyes-Prieto, Vicente Soriano Chirona, Ivan Ansari, Lúcia Martínez-Priego, Giuseppe Auria, David Navarro, Fernando Gonzalez-Candelas                                                                                                                                                                                         |  |
| EPI_ISL_447553                                                                                                                                                                                                                                                                                                                                                                                                                                                                                                                                                                                                                                                                                                                                                                                                                                                                                                                                                                                                                                                                                                                                                                                                                                                                                                                                                                                                                                                                                                                                                                                                                                                                                                                                                                                                                                                                                                                                                 | GMERS Medical College and Hospital, Gandhinagar                       | Gujarat Biotechnology Research Centre                                                                  | Dinesh Kumar, Zuber Saiyed, Dipa Kinariwala, Disha Patel, Binita Aring, Neeta Khandelwal, Geeta Vaghela, Sonia Barve, Bhavesh Modi, Kairavi Joshi, Gaurishankar Shrimali, Nidhi Sood, Pranay Shah, R D Dixit, Snehal Bagatharia, Kamlesh J Upadhyay, Ramesh Pandit, Tejas Shah, Ankit Hinsu, Pritesh Sabara, Apurvasinh Puvar, Janvi Raval, Monika Gandhi, Pinal Trivedi, Maharshi Pandya, Amit Kanani, Akanksha Verma, Nitin Savaliya, Raghawendra Kumar, Dipeshwari Shewale, Chaitanya Joshi, Madhvi Joshi |  |
| EPI_ISL_447555                                                                                                                                                                                                                                                                                                                                                                                                                                                                                                                                                                                                                                                                                                                                                                                                                                                                                                                                                                                                                                                                                                                                                                                                                                                                                                                                                                                                                                                                                                                                                                                                                                                                                                                                                                                                                                                                                                                                                 | GMERS Medical College and Hospital, Gandhinagar                       | Gujarat Biotechnology Research Centre                                                                  | Dipa Kinariwala, Disha Patel, Binita Aring, Neeta Khandelwal, Geeta Vaghela, Sonia Barve, Bhavesh Modi, Kairavi Joshi, Gaurishankar Shrimali, Nidhi Sood, Pranay Shah, R D Dixit, Snehal Bagatharia, Kamlesh J Upadhyay, Ramesh Pandit, Tejas Shah, Ankit Hinsu, Pritesh Sabara, Apurvasinh Puvar, Janvi Raval, Monika Gandhi, Pinal Trivedi, Maharshi Pandya, Amit Kanani, Akanksha Verma, Nitin Savaliya, Raghawendra Kumar, Dinesh Kumar, Zuber Saiyed, Pooja P Doshi, Chaitanya Joshi, Madhvi Joshi      |  |
| EPI_ISL_447588                                                                                                                                                                                                                                                                                                                                                                                                                                                                                                                                                                                                                                                                                                                                                                                                                                                                                                                                                                                                                                                                                                                                                                                                                                                                                                                                                                                                                                                                                                                                                                                                                                                                                                                                                                                                                                                                                                                                                 | Lednický Lab                                                          | Lednický lab                                                                                           | Elbadry,M.A., Subramaniam,K., Waltzek,T.B., Gibson,J.C., Stephenson,C.J., Alam,M.M., Morris,J.G. Jr. and Lednický,J.A.                                                                                                                                                                                                                                                                                                                                                                                       |  |
| EPI_ISL_447589                                                                                                                                                                                                                                                                                                                                                                                                                                                                                                                                                                                                                                                                                                                                                                                                                                                                                                                                                                                                                                                                                                                                                                                                                                                                                                                                                                                                                                                                                                                                                                                                                                                                                                                                                                                                                                                                                                                                                 | University of Florida, Lednický Lab                                   | University of Florida, Lednický Lab                                                                    | Elbadry,M.A., Subramaniam,K., Waltzek,T.B., Gibson,J.C., Stephenson,C.J., Alam,M.M., Morris,J.G. Jr. and Lednický,J.A.                                                                                                                                                                                                                                                                                                                                                                                       |  |
| EPI_ISL_447656                                                                                                                                                                                                                                                                                                                                                                                                                                                                                                                                                                                                                                                                                                                                                                                                                                                                                                                                                                                                                                                                                                                                                                                                                                                                                                                                                                                                                                                                                                                                                                                                                                                                                                                                                                                                                                                                                                                                                 | unknown                                                               | Genomic platform                                                                                       | De Prost,N., Fourati,S., Lamoureux,C., Schmitz,D., Deveaux,I., Picard,O., Lepeule,R., Surgers,L., Mekontso-Dessap,A., Woerther,P.-L., Canoui-Poitrine,F., Pawlowsky,J.-M., Clinical Study Group,C., Rodrigue,C., Gricourt,G., N'debi,M., Demontant,V., Trawinski,E.                                                                                                                                                                                                                                          |  |
| EPI_ISL_447903                                                                                                                                                                                                                                                                                                                                                                                                                                                                                                                                                                                                                                                                                                                                                                                                                                                                                                                                                                                                                                                                                                                                                                                                                                                                                                                                                                                                                                                                                                                                                                                                                                                                                                                                                                                                                                                                                                                                                 | University of Florida                                                 | University of Florida                                                                                  | Elbadry,M.A., Subramaniam,K., Waltzek,T.B., Lauzardo,M., Gibson,J.C., Stephenson,C.J., Alam,M.M., Morris,J.G. Jr. and Lednický,J.A.                                                                                                                                                                                                                                                                                                                                                                          |  |
| EPI_ISL_447905                                                                                                                                                                                                                                                                                                                                                                                                                                                                                                                                                                                                                                                                                                                                                                                                                                                                                                                                                                                                                                                                                                                                                                                                                                                                                                                                                                                                                                                                                                                                                                                                                                                                                                                                                                                                                                                                                                                                                 | University of Florida                                                 | University of Florida                                                                                  | Elbadry,M.A., Subramaniam,K., Waltzek,T.B., Gibson,J.C., Stephenson,C.J., Alam,M.M., Morris,J.G. Jr. and Lednický,J.A.                                                                                                                                                                                                                                                                                                                                                                                       |  |
| EPI_ISL_448225, EPI_ISL_448227, EPI_ISL_448228, EPI_ISL_448230, EPI_ISL_448231, EPI_ISL_448232, EPI_ISL_448234, EPI_ISL_448240, EPI_ISL_448246, EPI_ISL_448247, EPI_ISL_448248, EPI_ISL_448249, EPI_ISL_448251, EPI_ISL_448253, EPI_ISL_448262, EPI_ISL_448263, EPI_ISL_448266, EPI_ISL_448267, EPI_ISL_448271, EPI_ISL_448274, EPI_ISL_448275, EPI_ISL_448277, EPI_ISL_448283, EPI_ISL_448300, EPI_ISL_448302, EPI_ISL_448303, EPI_ISL_448305, EPI_ISL_448308, EPI_ISL_448309, EPI_ISL_448310, EPI_ISL_448314, EPI_ISL_448326, EPI_ISL_448327, EPI_ISL_448328, EPI_ISL_448331, EPI_ISL_448332, EPI_ISL_448340, EPI_ISL_448343, EPI_ISL_448344, EPI_ISL_448347, EPI_ISL_448353, EPI_ISL_448354, EPI_ISL_448358, EPI_ISL_448363, EPI_ISL_448366, EPI_ISL_448368, EPI_ISL_448369, EPI_ISL_448371, EPI_ISL_448372, EPI_ISL_448373, EPI_ISL_448376, EPI_ISL_448378, EPI_ISL_448380, EPI_ISL_448381, EPI_ISL_448982, EPI_ISL_448991, EPI_ISL_448992, EPI_ISL_448995, EPI_ISL_448996, EPI_ISL_448999, EPI_ISL_449002, EPI_ISL_449003, EPI_ISL_449006, EPI_ISL_449011, EPI_ISL_449012, EPI_ISL_449014, EPI_ISL_449015, EPI_ISL_449017, EPI_ISL_449023, EPI_ISL_449024, EPI_ISL_449026, EPI_ISL_449027, EPI_ISL_449035, EPI_ISL_449039, EPI_ISL_449044, EPI_ISL_449045, EPI_ISL_449046, EPI_ISL_449047, EPI_ISL_449051, EPI_ISL_449052, EPI_ISL_449058, EPI_ISL_449062, EPI_ISL_449064, EPI_ISL_449066, EPI_ISL_449067, EPI_ISL_449070, EPI_ISL_449072, EPI_ISL_449085, EPI_ISL_449089, EPI_ISL_449099, EPI_ISL_449110, EPI_ISL_449111, EPI_ISL_449112, EPI_ISL_449115, EPI_ISL_449116, EPI_ISL_449129, EPI_ISL_449128, EPI_ISL_449129, EPI_ISL_449130, EPI_ISL_449131, EPI_ISL_449134, EPI_ISL_449135, EPI_ISL_449141, EPI_ISL_449144, EPI_ISL_449145, EPI_ISL_449146, EPI_ISL_449147, EPI_ISL_449151, EPI_ISL_449152, EPI_ISL_449155, EPI_ISL_449156, EPI_ISL_449157, EPI_ISL_449159, EPI_ISL_449160, EPI_ISL_449161, EPI_ISL_449168, EPI_ISL_449170, EPI_ISL_449173 | Quadram Institute Bioscience                                          | COVID-19 Genomics UK (COG-UK) Consortium                                                               | Dave J. Baker, Gemma L. Kay, Alp Aydin, Thanh Le-Viet, Steven Rudder, Ana P. Tedim, Anastasia Kolyva, Maria Diaz, Leonardo de Oliveira Martins, Nabil-Fareed Alikhan, Lizzie Meadows, Rachael Stanley, Ngozi Elumogo, Muhammed Yasir, Nicholas M. Thomson, Alexander J Trotter, Rachel Gilroy, Samuel Bloomfield, Claire Stuart, Andrew Bell, Reenesh Prakash, Samir Dervisevic, Alison E. Mather, John Wain, Mark Webber, Andrew J. Page, Justin                                                            |  |
| see above                                                                                                                                                                                                                                                                                                                                                                                                                                                                                                                                                                                                                                                                                                                                                                                                                                                                                                                                                                                                                                                                                                                                                                                                                                                                                                                                                                                                                                                                                                                                                                                                                                                                                                                                                                                                                                                                                                                                                      | Quadram Institute Bioscience                                          | COVID-19 Genomics UK (COG-UK) Consortium                                                               | Dave J. Baker, Gemma L. Kay, Alp Aydin, Thanh Le-Viet, Steven Rudder, Ana P. Tedim, Anastasia Kolyva, Maria Diaz, Leonardo de Oliveira Martins, Nabil-Fareed Alikhan, Lizzie Meadows, Rachael Stanley, Ngozi Elumogo, Muhammed Yasir, Nicholas M. Thomson, Alexander J Trotter, Rachel Gilroy, Samuel Bloomfield, Claire Stuart, Andrew Bell, Reenesh Prakash, Samir Dervisevic, Alison E. Mather, John Wain, Mark Webber, Andrew J. Page, Justin                                                            |  |

|                                                                                                                                                                                                                                                                                                                                                                |                                                                                                       |                                                                                                                                       |                                                                                                                                                                                                                                                                                                                                                                                                                                                                                                                                                                                                                                                                                                                                                                                                                                                                |
|----------------------------------------------------------------------------------------------------------------------------------------------------------------------------------------------------------------------------------------------------------------------------------------------------------------------------------------------------------------|-------------------------------------------------------------------------------------------------------|---------------------------------------------------------------------------------------------------------------------------------------|----------------------------------------------------------------------------------------------------------------------------------------------------------------------------------------------------------------------------------------------------------------------------------------------------------------------------------------------------------------------------------------------------------------------------------------------------------------------------------------------------------------------------------------------------------------------------------------------------------------------------------------------------------------------------------------------------------------------------------------------------------------------------------------------------------------------------------------------------------------|
|                                                                                                                                                                                                                                                                                                                                                                |                                                                                                       |                                                                                                                                       | O'Grady<br>Erin Young, Kelly Oakeson                                                                                                                                                                                                                                                                                                                                                                                                                                                                                                                                                                                                                                                                                                                                                                                                                           |
| EPI_ISL_449803, EPI_ISL_449804,<br>EPI_ISL_449813, EPI_ISL_449814,<br>EPI_ISL_449821, EPI_ISL_449823,<br>EPI_ISL_449826<br>EPI_ISL_450321                                                                                                                                                                                                                      | Utah Public Health Laboratory<br><br>NIV Pune                                                         | Utah Public Health Laboratory<br><br>CSIR-Centre for Cellular and Molecular Biology                                                   | Dr V A Potdar, Dr ML Choudhary, Dr Priya Abraham, V. Vipat, S. Jadhav, U. Saha, H. Kengle, A. Awhale, A. Jagtap, A. Gondhalikar, V. Malik, N. Srivastava, S. Digraskar, P. Malsane, S. Hundekar, K. Patel, Yogesh Balakartik, M. Kakade, S. Jadhav, R. Gunjkar, V. Awatade, S. Bhorekar, P. Shinde, S. Salve, B. Minhas S. Bharadwaj, H. Kaushal Y. Gurav, S. Tomar, Payel Mukherjee, Sofia Banu, Priya Singh, Dhiyava Vedagiri, Divya Gupta, Vishal Sah, Santosh Kumar Kuncha, Krishnan Harinivas Harshan, Archana Bharadwaj Siva, Karthik Bharadwaj Tallapaka, Shagufta Khan, Lamuk Zaveri, Namami Gaur, Sakshi Shambhavi, Tulasi Nagabandi, Purushotham Vodnala, G. Aditya Kumar, Koushick Sivakumar, Pooja Ramesh Gupta, Rajan Kumar Jha, Shraddha Vijay Lahoti, Deepak Kumar, Devi Prasad Vijayashankara, Disha Nanda, Divya Das, Jotin Gogoi, Manish     |
| EPI_ISL_450322                                                                                                                                                                                                                                                                                                                                                 | NIV Pune                                                                                              | CSIR-Centre for Cellular and Molecular Biology                                                                                        | Dr V A Potdar, Dr ML Choudhary, Dr Priya Abraham, V. Vipat, S. Jadhav, U. Saha, H. Kengle, A. Awhale, A. Jagtap, A. Gondhalikar, V. Malik, N. Srivastava, S. Digraskar, P. Malsane, S. Hundekar, K. Patel, Yogesh Balakartik, M. Kakade, S. Jadhav, R. Gunjkar, V. Awatade, S. Bhorekar, P. Shinde, S. Salve, B. Minhas S. Bharadwaj, H. Kaushal Y. Gurav, S. Tomar, Sofia Banu, Payel Mukherjee, Priya Singh, Dhiyava Vedagiri, Divya Gupta, Vishal Sah, Santosh Kumar Kuncha, Krishnan Harinivas Harshan, Archana Bharadwaj Siva, Karthik Bharadwaj Tallapaka, Shagufta Khan, Lamuk Zaveri, Namami Gaur, Sakshi Shambhavi, Tulasi Nagabandi, Purushotham Vodnala, Disha Nanda, Divya Das, Jotin Gogoi, Manish Bhattacharjee, Ravi Prasad Mukku, Renu Sudhakar, Somesh Gorde, Gangumala Srinivas Reddy, Sujoy Deb, Swati Bayyana, Zeba Rizvi, Rakesh K Mishra |
| EPI_ISL_450323                                                                                                                                                                                                                                                                                                                                                 | NIV Pune                                                                                              | CSIR-Centre for Cellular and Molecular Biology                                                                                        | Dr V A Potdar, Dr ML Choudhary, Dr Priya Abraham, V. Vipat, S. Jadhav, U. Saha, H. Kengle, A. Awhale, A. Jagtap, A. Gondhalikar, V. Malik, N. Srivastava, S. Digraskar, P. Malsane, S. Hundekar, K. Patel, Yogesh Balakartik, M. Kakade, S. Jadhav, R. Gunjkar, V. Awatade, S. Bhorekar, P. Shinde, S. Salve, B. Minhas S. Bharadwaj, H. Kaushal Y. Gurav, S. Tomar, Payel Mukherjee, Sofia Banu, Priya Singh, Dhiyava Vedagiri, Divya Gupta, Vishal Sah, Santosh Kumar Kuncha, Krishnan Harinivas Harshan, Archana Bharadwaj Siva, Karthik Bharadwaj Tallapaka, Shagufta Khan, Lamuk Zaveri, Namami Gaur, Sakshi Shambhavi, Tulasi Nagabandi, Purushotham Vodnala, G. Aditya Kumar, Koushick Sivakumar, Pooja Ramesh Gupta, Rajan Kumar Jha, Shraddha Vijay Lahoti, Deepak Kumar, Devi Prasad Vijayashankara, Disha Nanda, Divya Das, Jotin Gogoi, Manish     |
| EPI_ISL_450324                                                                                                                                                                                                                                                                                                                                                 | NIV Pune                                                                                              | CSIR-Centre for Cellular and Molecular Biology                                                                                        | Dr V A Potdar, Dr ML Choudhary, Dr Priya Abraham, V. Vipat, S. Jadhav, U. Saha, H. Kengle, A. Awhale, A. Jagtap, A. Gondhalikar, V. Malik, N. Srivastava, S. Digraskar, P. Malsane, S. Hundekar, K. Patel, Yogesh Balakartik, M. Kakade, S. Jadhav, R. Gunjkar, V. Awatade, S. Bhorekar, P. Shinde, S. Salve, B. Minhas S. Bharadwaj, H. Kaushal Y. Gurav, S. Tomar, Sofia Banu, Payel Mukherjee, Priya Singh, Dhiyava Vedagiri, Divya Gupta, Vishal Sah, Santosh Kumar Kuncha, Krishnan Harinivas Harshan, Archana Bharadwaj Siva, Karthik Bharadwaj Tallapaka, Shagufta Khan, Lamuk Zaveri, Namami Gaur, Sakshi Shambhavi, Tulasi Nagabandi, Purushotham Vodnala, Disha Nanda, Divya Das, Jotin Gogoi, Manish Bhattacharjee, Ravi Prasad Mukku, Renu Sudhakar, Somesh Gorde, Gangumala Srinivas Reddy, Sujoy Deb, Swati Bayyana, Zeba Rizvi, Rakesh K Mishra |
| EPI_ISL_450325                                                                                                                                                                                                                                                                                                                                                 | NIV Pune                                                                                              | CSIR-Centre for Cellular and Molecular Biology                                                                                        | Dr V A Potdar, Dr ML Choudhary, Dr Priya Abraham, V. Vipat, S. Jadhav, U. Saha, H. Kengle, A. Awhale, A. Jagtap, A. Gondhalikar, V. Malik, N. Srivastava, S. Digraskar, P. Malsane, S. Hundekar, K. Patel, Yogesh Balakartik, M. Kakade, S. Jadhav, R. Gunjkar, V. Awatade, S. Bhorekar, P. Shinde, S. Salve, B. Minhas S. Bharadwaj, H. Kaushal Y. Gurav, S. Tomar, Payel Mukherjee, Sofia Banu, Priya Singh, Dhiyava Vedagiri, Divya Gupta, Vishal Sah, Santosh Kumar Kuncha, Krishnan Harinivas Harshan, Archana Bharadwaj Siva, Karthik Bharadwaj Tallapaka, Shagufta Khan, Lamuk Zaveri, Namami Gaur, Sakshi Shambhavi, Tulasi Nagabandi, Purushotham Vodnala, G. Aditya Kumar, Koushick Sivakumar, Pooja Ramesh Gupta, Rajan Kumar Jha, Shraddha Vijay Lahoti, Deepak Kumar, Devi Prasad Vijayashankara, Disha Nanda, Divya Das, Jotin Gogoi, Manish     |
| EPI_ISL_450539, EPI_ISL_450541,<br>EPI_ISL_450542, EPI_ISL_450544,<br>EPI_ISL_450554, EPI_ISL_450555,<br>EPI_ISL_450561, EPI_ISL_450563,<br>EPI_ISL_450565, EPI_ISL_450568<br>EPI_ISL_450723                                                                                                                                                                   | Utah Public Health Laboratory<br><br>Ramathibodi Hospital                                             | Utah Public Health Laboratory<br><br>COVID-19 Network Investigations (CONI) Alliance                                                  | Erin Young, Kelly Oakeson<br><br>Elizabeth Batty, Wasun Chantratita, Thanat Chookajorn, Stefan Fernandez, Angkana Huang, Anthony R. Jones, Khajohn Joonsalak, Chonticha Klungtong, Theerarat Kochakarn, Namfon Kotanan, Krittikorn Kumpornsin, Wuditchai Manasatienkij, Bhakbhoom Panthan, Ekawat Pasomsob, Insee Sensor, Arporn Wangwiwatsin                                                                                                                                                                                                                                                                                                                                                                                                                                                                                                                  |
| EPI_ISL_451160                                                                                                                                                                                                                                                                                                                                                 | Government Medical College, Vadodara                                                                  | Gujarat Biotechnology Research Centre                                                                                                 | Dinesh Kumar, Zuber Saiyed, Komal Patel, Labdhi Pandya, Snehal Bagatharia, Ramesh Pandit, Tejas Shah, Ankit Hinsu, Pritesh Sabara, Apurvasinh Puvar, Janvi Raval, Zarna Patel, Monika Gandhi, Pinal Trivedi, Maharshi Pandya, Manish Pattani, Tanuja Javadekar, Amit Kanani, Nidhi Patel, Nitin Savaliya, Raghawendra Kumar, Bhavesh Modi, Gaurishankar Shrimail, R D Dixit, A M Kadri, Pooja P Doshi, Chaitanya Joshi, Madhvi Joshi                                                                                                                                                                                                                                                                                                                                                                                                                           |
| EPI_ISL_451963, EPI_ISL_451964,<br>EPI_ISL_451965, EPI_ISL_451966,<br>EPI_ISL_451967, EPI_ISL_451968,<br>EPI_ISL_451969, EPI_ISL_451970                                                                                                                                                                                                                        | Federal Budget Institution of Science, State Research Center for Applied Microbiology & Biotechnology | Federal Budget Institution of Science, State Research Center for Applied Microbiology & Biotechnology                                 | Dyatlov I, Shernyakin I, Khramov M, Bogun A, Kislichkina A, Frolov V, Shishkina L, Sizova A, Chekan L, Blagodatskikh S, Podkopaev Y, Koslova I, Koroleva-Ushakova A, Tyurin E, Galkina E, Slukina N, Shaikhutdinova R, Kalmantayev T, Kalmantayeva O, Fursova N, Silkina M, Gorbatov A, Titareva G, Firsova V, Makarova M, Gapelchenkova T, Solovieva E, Slukin P, Dentovskaya S, Detushev K, Vagayskaya A, Kartsev N, Detusheva E, Zeninskaya N, Ivanov S, Kartseva A, Platonov M, Hlyntseva A, Khomyakov A, Chernysh S, Krasilinikova E, Ryabko A, Solomentsov V, Teymurazov M, Bakhteeva I, Borzilov A, Skryabin Y, Kanashenko M, Abaimova A, Kolchanova A, Novikova T, Goncharova J, Timofeev V, Kuzina E, Fursov M, Zhumakaev R, Marin M, Denisenko E, Trunyakova A, Kuzin V                                                                              |
| EPI_ISL_452161, EPI_ISL_452163,<br>EPI_ISL_452176                                                                                                                                                                                                                                                                                                              | Utah Public Health Laboratory                                                                         | Utah Public Health Laboratory                                                                                                         | Erin Young, Kelly Oakeson                                                                                                                                                                                                                                                                                                                                                                                                                                                                                                                                                                                                                                                                                                                                                                                                                                      |
| EPI_ISL_453548, EPI_ISL_453549, EPI_ISL_453553, EPI_ISL_453556, EPI_ISL_453558, EPI_ISL_453559, EPI_ISL_453562, EPI_ISL_453568, EPI_ISL_453574, EPI_ISL_453576, EPI_ISL_453577, EPI_ISL_453578, EPI_ISL_453580, EPI_ISL_453581, EPI_ISL_453582, EPI_ISL_453583, EPI_ISL_453589, EPI_ISL_453590, EPI_ISL_453592, EPI_ISL_453594, EPI_ISL_453605, EPI_ISL_453611 |                                                                                                       |                                                                                                                                       |                                                                                                                                                                                                                                                                                                                                                                                                                                                                                                                                                                                                                                                                                                                                                                                                                                                                |
| see above                                                                                                                                                                                                                                                                                                                                                      | Quadram Institute Bioscience                                                                          | COVID-19 Genomics UK (COG-UK) Consortium                                                                                              | Dave J. Baker, Gemma L. Kay, Alp Aydin, Thanh Le-Viet, Steven Rudder, Ana P. Tedim, Anastasia Kolyva, Maria Diaz, Leonardo de Oliveira Martins, Nabil-Fareed Alikhan, Lizzie Meadows, Rachael Stanley, Ngozi Elumogo, Muhammed Yasir, Nicholas M. Thomson, Alexander J Trotter, Rachel Gilroy, Samuel Bloomfield, Claire Stuart, Andrew Bell, Reenesh Prakash, Samir Dervisevic, Alison E. Mather, John Wain, Mark Webber, Andrew J. Page, Justin O'Grady                                                                                                                                                                                                                                                                                                                                                                                                      |
| EPI_ISL_454713, EPI_ISL_454716,<br>EPI_ISL_454721, EPI_ISL_454724,<br>EPI_ISL_454726, EPI_ISL_454727,<br>EPI_ISL_454728, EPI_ISL_454731                                                                                                                                                                                                                        | Utah Public Health Laboratory                                                                         | Utah Public Health Laboratory                                                                                                         | Erin Young, Kelly Oakeson                                                                                                                                                                                                                                                                                                                                                                                                                                                                                                                                                                                                                                                                                                                                                                                                                                      |
| EPI_ISL_454732                                                                                                                                                                                                                                                                                                                                                 | Russian State Collection of Viruses                                                                   | Pathogenic Microorganisms Variability Laboratory                                                                                      | Denis Protsenko, Alexey Shchetinin, Maria Nikiforova, Elena Shidlovskaya, Nadezhda Kuznetsova, Vladimir Gushchin, Inna Dolzhikova, Daria Grousova, Andrey Botikov, Denis Logunov, Alexander Gintsburg, Alexey Mazus                                                                                                                                                                                                                                                                                                                                                                                                                                                                                                                                                                                                                                            |
| EPI_ISL_455106                                                                                                                                                                                                                                                                                                                                                 | Surbrunns VC                                                                                          | The Public Health Agency of Sweden                                                                                                    | Erik Embring, Anna-Malin Linde, Maria Lind Karlberg, Oskar Karlsson Lindsjö, Olov Svartstrom, Anna Risberg, Theresa Enkirch, Mia Brytting, Karin Tegmark-Wisell                                                                                                                                                                                                                                                                                                                                                                                                                                                                                                                                                                                                                                                                                                |
| EPI_ISL_455725                                                                                                                                                                                                                                                                                                                                                 | Servicio de Microbiología. Hospital Clínico Universitario de Valencia                                 | Sequencing and Bioinformatics Service and Molecular Epidemiology Research Group. FISABIO-Public Health, and SeqCOVID-Spain Consortium | Eliseo Albert, Maria Alma Bracho, Griselda De Marco, Lidia Ruiz Roldan, Neris Garcia-Gonzalez, Inma Galán Vendrell, Sandra Carbo, Loreto Ferrús Abad, Paula Ruiz-Hueso, Mariana Reyes-Prieto, Vicente Soriano Chirona, Ivan Ansari, Lúcia Martínez-Priego, Giuseppe Auria, David Navarro, Fernando Gonzalez-Candelas                                                                                                                                                                                                                                                                                                                                                                                                                                                                                                                                           |
| EPI_ISL_455727, EPI_ISL_455741                                                                                                                                                                                                                                                                                                                                 | Servicio de Microbiología. Hospital Clínico Universitario de Valencia                                 | Sequencing and Bioinformatics Service and Molecular Epidemiology Research Group. FISABIO-Public Health, and SeqCOVID-Spain Consortium | David Navarro, Eliseo Albert, Maria Alma Bracho, Griselda De Marco, Lidia Ruiz Roldan, Neris Garcia-Gonzalez, Inma Galán Vendrell, Sandra Carbo, Loreto Ferrús Abad, Paula Ruiz-Hueso, Mariana Reyes-Prieto, Vicente Soriano Chirona, Ivan Ansari, Lúcia Martínez-Priego, Giuseppe Auria, Fernando Gonzalez-Candelas                                                                                                                                                                                                                                                                                                                                                                                                                                                                                                                                           |
| EPI_ISL_455743                                                                                                                                                                                                                                                                                                                                                 | Servicio de Microbiología. Hospital Clínico Universitario de Valencia                                 | Sequencing and Bioinformatics Service and Molecular Epidemiology Research Group. FISABIO-Public Health, and SeqCOVID-Spain Consortium | Eliseo Albert, Maria Alma Bracho, Griselda De Marco, Lidia Ruiz Roldan, Neris Garcia-Gonzalez, Inma Galán Vendrell, Sandra Carbo, Loreto Ferrús Abad, Paula Ruiz-Hueso, Mariana Reyes-Prieto, Vicente Soriano Chirona, Ivan Ansari, Lúcia Martínez-Priego, Giuseppe Auria, David Navarro, Fernando Gonzalez-Candelas                                                                                                                                                                                                                                                                                                                                                                                                                                                                                                                                           |

|                                                                                                                                                                                                                                                                                                                                                                                                                                                                                                                                                                                                                                                                                                                                                                                                                                                                                                                                                                                                                                                                                |                                         |                                                                                                                          |                                                                                                                                                                                                                                                                                                                                                                                                                                                                                  |                                                                                                                                                                                                                                                                                                                                                                                                                                                                               |
|--------------------------------------------------------------------------------------------------------------------------------------------------------------------------------------------------------------------------------------------------------------------------------------------------------------------------------------------------------------------------------------------------------------------------------------------------------------------------------------------------------------------------------------------------------------------------------------------------------------------------------------------------------------------------------------------------------------------------------------------------------------------------------------------------------------------------------------------------------------------------------------------------------------------------------------------------------------------------------------------------------------------------------------------------------------------------------|-----------------------------------------|--------------------------------------------------------------------------------------------------------------------------|----------------------------------------------------------------------------------------------------------------------------------------------------------------------------------------------------------------------------------------------------------------------------------------------------------------------------------------------------------------------------------------------------------------------------------------------------------------------------------|-------------------------------------------------------------------------------------------------------------------------------------------------------------------------------------------------------------------------------------------------------------------------------------------------------------------------------------------------------------------------------------------------------------------------------------------------------------------------------|
| EPI_ISL_455908, EPI_ISL_455909, EPI_ISL_455910, EPI_ISL_455911, EPI_ISL_455912, EPI_ISL_455913, EPI_ISL_455914, EPI_ISL_455915, EPI_ISL_455916, EPI_ISL_455917, EPI_ISL_455918, EPI_ISL_455919, EPI_ISL_455920, EPI_ISL_455921, EPI_ISL_455922, EPI_ISL_455923, EPI_ISL_455924, EPI_ISL_455925, EPI_ISL_455926, EPI_ISL_455927, EPI_ISL_455928, EPI_ISL_455929, EPI_ISL_455930, EPI_ISL_455931, EPI_ISL_455932, EPI_ISL_455933, EPI_ISL_455934, EPI_ISL_455935, EPI_ISL_455936, EPI_ISL_455937, EPI_ISL_455938, EPI_ISL_455939, EPI_ISL_455940, EPI_ISL_455941, EPI_ISL_455942, EPI_ISL_455943, EPI_ISL_455944, EPI_ISL_455945, EPI_ISL_455946, EPI_ISL_455947, EPI_ISL_455948                                                                                                                                                                                                                                                                                                                                                                                                 | see above                               | Ramathibodi Hospital                                                                                                     | COVID-19 Network Investigations (CONI) Alliance                                                                                                                                                                                                                                                                                                                                                                                                                                  | Elizabeth Batty, Wasun Chantraita, Thanat Chookajorn, Stefan Fernandez, Angkana Huang, Anthony R. Jones, Khajohn Joonsalak, Chonticha Klungtong, Theerarat Kochakorn, Namfon Kotanan, Krittikorn Kumpornsin, Wudtichai Manasatienkij, Bhakbhoom Panthan, Ekawat Pasomsab, Kingkan Rakmanee, Insee Sensorn, Janjira Thaipadungpanit, Arporn Wangwiwatsin, Treewat Watthanachockchai                                                                                            |
| EPI_ISL_457326, EPI_ISL_457332, EPI_ISL_457333, EPI_ISL_457335, EPI_ISL_457345, EPI_ISL_457346, EPI_ISL_457348, EPI_ISL_457351, EPI_ISL_457353, EPI_ISL_457356, EPI_ISL_457361, EPI_ISL_457362, EPI_ISL_457367, EPI_ISL_457370, EPI_ISL_457377, EPI_ISL_457382, EPI_ISL_457384, EPI_ISL_457396, EPI_ISL_457399, EPI_ISL_457401, EPI_ISL_457405, EPI_ISL_457407, EPI_ISL_457408, EPI_ISL_457410, EPI_ISL_457415, EPI_ISL_457417, EPI_ISL_457418, EPI_ISL_457420, EPI_ISL_457421, EPI_ISL_457426, EPI_ISL_457427, EPI_ISL_457429, EPI_ISL_457443, EPI_ISL_457455, EPI_ISL_457458, EPI_ISL_457467, EPI_ISL_457469, EPI_ISL_457470, EPI_ISL_457478, EPI_ISL_457484, EPI_ISL_457485, EPI_ISL_457487, EPI_ISL_457489, EPI_ISL_457496, EPI_ISL_457498, EPI_ISL_457503, EPI_ISL_457504, EPI_ISL_457508, EPI_ISL_457515, EPI_ISL_457516, EPI_ISL_457517, EPI_ISL_457519, EPI_ISL_457520, EPI_ISL_457526, EPI_ISL_457529, EPI_ISL_457535, EPI_ISL_457537, EPI_ISL_457538, EPI_ISL_457541, EPI_ISL_457549, EPI_ISL_457553, EPI_ISL_457554, EPI_ISL_457564, EPI_ISL_457566, EPI_ISL_457570 | see above                               | Quadram Institute Bioscience                                                                                             | COVID-19 Genomics UK (COG-UK) Consortium                                                                                                                                                                                                                                                                                                                                                                                                                                         | Dave J. Baker, Gemma L. Kay, Alp Aydin, Thanh Le-Viet, Steven Rudder, Ana P. Tedim, Anastasia Kolyva, Maria Diaz, Leonardo de Oliveira Martins, Nabil-Fareed Alikhan, Lizzie Meadows, Rachael Stanley, Ngozi Elumogo, Muhammed Yasar, Nicholas M. Thomson, Alexander J Trotter, Rachel Gilroy, Samuel Bloomfield, Claire Stuart, Andrew Bell, Reenesh Prakash, Samir Derवेशic, Alison E. Mather, John Wain, Mark Webber, Andrew J. Page, Justin O'Grady                       |
| EPI_ISL_458023, EPI_ISL_458024, EPI_ISL_458025, EPI_ISL_458026, EPI_ISL_458027, EPI_ISL_458028                                                                                                                                                                                                                                                                                                                                                                                                                                                                                                                                                                                                                                                                                                                                                                                                                                                                                                                                                                                 |                                         | Hospital for Tropical Diseases                                                                                           | COVID-19 Network Investigations (CONI) Alliance                                                                                                                                                                                                                                                                                                                                                                                                                                  | Elizabeth Batty, Nantarar Chantawat, Wasun Chantraita, Thanat Chookajorn, Stefan Fernandez, Angkana Huang, Weena Janwithayayan, Akanitt Jittmittraphap, Anthony R. Jones, Khajohn Joonsalak, Chonticha Klungtong, Theerarat Kochakorn, Namfon Kotanan, Krittikorn Kumpornsin, Pornsawan Leuangwutiwong, Wudtichai Manasatienkij, Bhakbhoom Panthan, Ekawat Pasomsab, Kingkan Rakmanee, Insee Sensorn, Janjira Thaipadungpanit, Arporn Wangwiwatsin, Treewat Watthanachockchai |
| EPI_ISL_458072, EPI_ISL_458073, EPI_ISL_458074, EPI_ISL_458075, EPI_ISL_458076, EPI_ISL_458077                                                                                                                                                                                                                                                                                                                                                                                                                                                                                                                                                                                                                                                                                                                                                                                                                                                                                                                                                                                 |                                         | CSIR-Centre for Cellular and Molecular Biology                                                                           | CSIR-Centre for Cellular and Molecular Biology                                                                                                                                                                                                                                                                                                                                                                                                                                   | Dhiviya Vedagiri, Divya Gupta, Vishal Sah, Payel Mukherjee, Sofia Banu, Priya Singh, Santosh Kumar Kuncha, Archana Bharadwaj Siva, Karthik Bharadwaj Tallapaka, Shagutta Khan, Lamuk Zaveri, Namami Gaur, Sakshi Shambhavi, Tulasi Nagabandi, Purushotham Vodnala, Rakesh K Mishra, Divya Tej Sowpati, Krishnan Harinivas Harshan                                                                                                                                             |
| EPI_ISL_458086                                                                                                                                                                                                                                                                                                                                                                                                                                                                                                                                                                                                                                                                                                                                                                                                                                                                                                                                                                                                                                                                 | B.J. Medical College and Civil hospital | Gujarat Biotechnology Research Centre                                                                                    | Dhaval Vaghela, Ramesh Patel, Pranay Shah, Kamlesh J Upadhyay, Ramesh Pandit, Tejas Shah, Ankit Hinsu, Pritesh Sabara, Apurvasinh Puvar, Janvi Raval, Zarna Patel, Monika Gandhi, Pinal Trivedi, Maharshi Pandya, Amit Kanani, Nidhi Patel, Nitin Savaliya, Raghawendra Kumar, Dinesh Kumar, Zuber Saiyed, Komal Patel, Labdhi Pandya, Snehal Bagatharia, Neha Rajpara, Bhavesh Modi, Gaurishankar Shirmali, R D Dixit, A M Kadri, Umang Mishra, Chaitanya Joshi, Madhvi Joshi   |                                                                                                                                                                                                                                                                                                                                                                                                                                                                               |
| EPI_ISL_458096                                                                                                                                                                                                                                                                                                                                                                                                                                                                                                                                                                                                                                                                                                                                                                                                                                                                                                                                                                                                                                                                 | B.J. Medical College and Civil hospital | Gujarat Biotechnology Research Centre                                                                                    | Dinesh Kumar, Zuber Saiyed, Komal Patel, Labdhi Pandya, Snehal Bagatharia, Dhaval Vaghela, Ramesh Patel, Pranay Shah, Kamlesh J Upadhyay, Ramesh Pandit, Tejas Shah, Ankit Hinsu, Pritesh Sabara, Apurvasinh Puvar, Janvi Raval, Zarna Patel, Monika Gandhi, Pinal Trivedi, Maharshi Pandya, Amit Kanani, Nidhi Patel, Nitin Savaliya, Raghawendra Kumar, Akanksha Verma, Bhavesh Modi, Gaurishankar Shirmali, R D Dixit, A M Kadri, Umang Mishra, Chaitanya Joshi, Madhvi Joshi |                                                                                                                                                                                                                                                                                                                                                                                                                                                                               |
| EPI_ISL_458101                                                                                                                                                                                                                                                                                                                                                                                                                                                                                                                                                                                                                                                                                                                                                                                                                                                                                                                                                                                                                                                                 | B.J. Medical College and Civil hospital | Gujarat Biotechnology Research Centre                                                                                    | Dhaval Vaghela, Ramesh Patel, Pranay Shah, Kamlesh J Upadhyay, Ramesh Pandit, Tejas Shah, Ankit Hinsu, Pritesh Sabara, Apurvasinh Puvar, Janvi Raval, Zarna Patel, Monika Gandhi, Pinal Trivedi, Maharshi Pandya, Amit Kanani, Nidhi Patel, Nitin Savaliya, Raghawendra Kumar, Dinesh Kumar, Zuber Saiyed, Komal Patel, Labdhi Pandya, Snehal Bagatharia, Fenil Patel, Bhavesh Modi, Gaurishankar Shirmali, R D Dixit, A M Kadri, Umang Mishra, Chaitanya Joshi, Madhvi Joshi    |                                                                                                                                                                                                                                                                                                                                                                                                                                                                               |
| EPI_ISL_461483                                                                                                                                                                                                                                                                                                                                                                                                                                                                                                                                                                                                                                                                                                                                                                                                                                                                                                                                                                                                                                                                 | B.J. Medical College and Civil hospital | Gujarat Biotechnology Research Centre                                                                                    | Dipeshwari Shewale, Komal Patel, Labdhi Pandya, Snehal Bagatharia, Pranay Shah, Kamlesh J Upadhyay, Tejas Shah, Ankit Hinsu, Pritesh Sabara, Apurvasinh Puvar, Janvi Raval, Zarna Patel, Monika Gandhi, Pinal Trivedi, Maharshi Pandya, Nidhi Patel, Nitin Savaliya, Raghawendra Kumar, Dinesh Kumar, Zuber Saiyed, R D Dixit, A M Kadri, Harsh Bakshi, Chaitanya Joshi, Madhvi Joshi,                                                                                           |                                                                                                                                                                                                                                                                                                                                                                                                                                                                               |
| EPI_ISL_461496                                                                                                                                                                                                                                                                                                                                                                                                                                                                                                                                                                                                                                                                                                                                                                                                                                                                                                                                                                                                                                                                 | B.J. Medical College and Civil hospital | Gujarat Biotechnology Research Centre                                                                                    | Dipeshwari Shewale, Maharshi Pandya, Nidhi Patel, Nitin Savaliya, Raghawendra Kumar, Dinesh Kumar, Zuber Saiyed, Komal Patel, Labdhi Pandya, Snehal Bagatharia, Pranay Shah, Kamlesh J Upadhyay, Tejas Shah, Ankit Hinsu, Pritesh Sabara, Apurvasinh Puvar, Janvi Raval, Zarna Patel, Monika Gandhi, Pinal Trivedi, R D Dixit, A M Kadri, Harsh Bakshi, Chaitanya Joshi, Madhvi Joshi,                                                                                           |                                                                                                                                                                                                                                                                                                                                                                                                                                                                               |
| EPI_ISL_461805, EPI_ISL_461809, EPI_ISL_461812, EPI_ISL_461816, EPI_ISL_461818, EPI_ISL_461820, EPI_ISL_461821, EPI_ISL_461825, EPI_ISL_461826, EPI_ISL_461827, EPI_ISL_461830, EPI_ISL_461831, EPI_ISL_461832, EPI_ISL_461833, EPI_ISL_461834, EPI_ISL_461835, EPI_ISL_461838, EPI_ISL_461840, EPI_ISL_461841, EPI_ISL_461844, EPI_ISL_461848, EPI_ISL_461849, EPI_ISL_461850, EPI_ISL_461855, EPI_ISL_461857, EPI_ISL_461862, EPI_ISL_461869, EPI_ISL_461870, EPI_ISL_461872, EPI_ISL_461873, EPI_ISL_461874, EPI_ISL_461880, EPI_ISL_461882, EPI_ISL_461883, EPI_ISL_461888                                                                                                                                                                                                                                                                                                                                                                                                                                                                                                 | see above                               | Quadram Institute Bioscience                                                                                             | COVID-19 Genomics UK (COG-UK) Consortium                                                                                                                                                                                                                                                                                                                                                                                                                                         | Dave J. Baker, Gemma L. Kay, Alp Aydin, Thanh Le-Viet, Steven Rudder, Ana P. Tedim, Anastasia Kolyva, Maria Diaz, Leonardo de Oliveira Martins, Nabil-Fareed Alikhan, Lizzie Meadows, Rachael Stanley, Ngozi Elumogo, Muhammed Yasar, Nicholas M. Thomson, Alexander J Trotter, Rachel Gilroy, Samuel Bloomfield, Claire Stuart, Andrew Bell, Reenesh Prakash, Samir Derवेशic, Alison E. Mather, John Wain, Mark Webber, Andrew J. Page, Justin O'Grady                       |
| EPI_ISL_467047                                                                                                                                                                                                                                                                                                                                                                                                                                                                                                                                                                                                                                                                                                                                                                                                                                                                                                                                                                                                                                                                 | B.J. Medical College and Civil hospital | Gujarat Biotechnology Research Centre                                                                                    | Dinesh Kumar, Zuber Saiyed, Komal Patel, Labdhi Pandya, Snehal Bagatharia, Pranay Shah, Kamlesh J Upadhyay, Nirav Mungalpara, Tejas Shah, Ankit Hinsu, Pritesh Sabara, Apurvasinh Puvar, Janvi Raval, Zarna Patel, Monika Gandhi, Pinal Trivedi, Maharshi Pandya, Nidhi Patel, Nitin Savaliya, Raghawendra Kumar, Afzal Ansari, R D Dixit, A M Kadri, Harsh Bakshi, Chaitanya Joshi, Madhvi Joshi,                                                                               |                                                                                                                                                                                                                                                                                                                                                                                                                                                                               |
| EPI_ISL_467302, EPI_ISL_467304                                                                                                                                                                                                                                                                                                                                                                                                                                                                                                                                                                                                                                                                                                                                                                                                                                                                                                                                                                                                                                                 | Washington University in St. Louis      | Washington University in St. Louis                                                                                       | David Wang, Carey-Ann Burnham, Scott Handley, Lindsay Droit, Stephen Tahan                                                                                                                                                                                                                                                                                                                                                                                                       |                                                                                                                                                                                                                                                                                                                                                                                                                                                                               |
| EPI_ISL_467374                                                                                                                                                                                                                                                                                                                                                                                                                                                                                                                                                                                                                                                                                                                                                                                                                                                                                                                                                                                                                                                                 | Dinkes Samarinda                        | Eijkman Institute for Molecular Biology, Ministry of Research and Technology/National Agency for Research and Innovation | Edison Johar, Frilasis A Yudhaputri, Hidayat Trimarsanto, David H Muljono, Safarina G Malik, Khin Saw Myint, Amin Soebandrio                                                                                                                                                                                                                                                                                                                                                     |                                                                                                                                                                                                                                                                                                                                                                                                                                                                               |
| EPI_ISL_467375                                                                                                                                                                                                                                                                                                                                                                                                                                                                                                                                                                                                                                                                                                                                                                                                                                                                                                                                                                                                                                                                 | RSUP Prof. Dr. R. Kandou Manado         | Eijkman Institute for Molecular Biology, Ministry of Research and Technology/National Agency for Research and Innovation | Edison Johar, Frilasis A Yudhaputri, Hidayat Trimarsanto, David H Muljono, Safarina G Malik, Khin Saw Myint, Amin Soebandrio                                                                                                                                                                                                                                                                                                                                                     |                                                                                                                                                                                                                                                                                                                                                                                                                                                                               |
| EPI_ISL_467376                                                                                                                                                                                                                                                                                                                                                                                                                                                                                                                                                                                                                                                                                                                                                                                                                                                                                                                                                                                                                                                                 | RSUP Fatmawati                          | Eijkman Institute for Molecular Biology, Ministry of Research and Technology/National Agency for Research and Innovation | Edison Johar, Frilasis A Yudhaputri, Hidayat Trimarsanto, David H Muljono, Safarina G Malik, Khin Saw Myint, Amin Soebandrio                                                                                                                                                                                                                                                                                                                                                     |                                                                                                                                                                                                                                                                                                                                                                                                                                                                               |
| EPI_ISL_468719                                                                                                                                                                                                                                                                                                                                                                                                                                                                                                                                                                                                                                                                                                                                                                                                                                                                                                                                                                                                                                                                 | University of Florida                   | University of Florida                                                                                                    | Elbadry, M.A., Subramaniam, K., Waltzek, T.B., Stephenson, C.J., Gibson, J.C., Alam, M.M., Lauzardo, M., Morris, J.G., Lednický, J.A.                                                                                                                                                                                                                                                                                                                                            |                                                                                                                                                                                                                                                                                                                                                                                                                                                                               |
| EPI_ISL_468722                                                                                                                                                                                                                                                                                                                                                                                                                                                                                                                                                                                                                                                                                                                                                                                                                                                                                                                                                                                                                                                                 | University of Florida                   | University of Florida                                                                                                    | Elbadry, M.A., Subramaniam, K., Waltzek, T.B., Lauzardo, M., Morris, J.G., Lednický, J.A.                                                                                                                                                                                                                                                                                                                                                                                        |                                                                                                                                                                                                                                                                                                                                                                                                                                                                               |
| EPI_ISL_469036                                                                                                                                                                                                                                                                                                                                                                                                                                                                                                                                                                                                                                                                                                                                                                                                                                                                                                                                                                                                                                                                 | Government Medical College, Vadodara    | Gujarat Biotechnology Research Centre                                                                                    | Dinesh Kumar, Zuber Saiyed, Komal Patel, Labdhi Pandya, Snehal Bagatharia, Meenakshi Shah, Neena Doshi, Varsha Godbole, Tejas Shah, Ankit Hinsu, Pritesh Sabara, Apurvasinh Puvar, Janvi Raval, Zarna Patel, Monika Gandhi, Pinal Trivedi, Maharshi Pandya, Nidhi Patel, Nitin Savaliya, Raghawendra Kumar, Priti Pandita, R D Dixit, A M Kadri, Harsh Bakshi, Chaitanya Joshi, Madhvi Joshi                                                                                     |                                                                                                                                                                                                                                                                                                                                                                                                                                                                               |
| EPI_ISL_470542, EPI_ISL_470545, EPI_ISL_470546, EPI_ISL_470547, EPI_ISL_470548, EPI_ISL_470562, EPI_ISL_470563, EPI_ISL_470566, EPI_ISL_470658, EPI_ISL_470660, EPI_ISL_470663, EPI_ISL_470672, EPI_ISL_470690, EPI_ISL_470695, EPI_ISL_470704, EPI_ISL_470709, EPI_ISL_470711, EPI_ISL_470712, EPI_ISL_470717                                                                                                                                                                                                                                                                                                                                                                                                                                                                                                                                                                                                                                                                                                                                                                 | see above                               | Utah Public Health Laboratory                                                                                            | Utah Public Health Laboratory                                                                                                                                                                                                                                                                                                                                                                                                                                                    | Erin Young, Kelly Oakeson                                                                                                                                                                                                                                                                                                                                                                                                                                                     |
| EPI_ISL_471585, EPI_ISL_471587, EPI_ISL_471641, EPI_ISL_471642, EPI_ISL_471645, EPI_ISL_471646                                                                                                                                                                                                                                                                                                                                                                                                                                                                                                                                                                                                                                                                                                                                                                                                                                                                                                                                                                                 |                                         | CSIR-Centre for Cellular and Molecular Biology                                                                           | CSIR-Centre for Cellular and Molecular Biology                                                                                                                                                                                                                                                                                                                                                                                                                                   | Dhiviya Vedagiri, Divya Gupta, Vishal Sah, Payel Mukherjee, Sofia Banu, Priya Singh, Santosh Kumar Kuncha, Archana Bharadwaj Siva, Karthik Bharadwaj Tallapaka, Shagutta Khan, Lamuk Zaveri, Namami Gaur, Sakshi Shambhavi, Tulasi Nagabandi, Purushotham Vodnala, Rakesh K Mishra, Divya Tej Sowpati, Krishnan Harinivas Harshan                                                                                                                                             |
| EPI_ISL_472292, EPI_ISL_472293, EPI_ISL_472299, EPI_ISL_472300, EPI_ISL_472305, EPI_ISL_472315, EPI_ISL_472318, EPI_ISL_472319, EPI_ISL_472322, EPI_ISL_472326, EPI_ISL_472328, EPI_ISL_472329, EPI_ISL_472337, EPI_ISL_472339, EPI_ISL_472345, EPI_ISL_472346, EPI_ISL_472352, EPI_ISL_472355, EPI_ISL_472356, EPI_ISL_472358, EPI_ISL_472371, EPI_ISL_472374, EPI_ISL_472377, EPI_ISL_472378, EPI_ISL_472379, EPI_ISL_472380, EPI_ISL_472381, EPI_ISL_472383                                                                                                                                                                                                                                                                                                                                                                                                                                                                                                                                                                                                                 | see above                               | Quadram Institute Bioscience                                                                                             | COVID-19 Genomics UK (COG-UK) Consortium                                                                                                                                                                                                                                                                                                                                                                                                                                         | Dave J. Baker, Gemma L. Kay, Alp Aydin, Thanh Le-Viet, Steven Rudder, Ana P. Tedim, Anastasia Kolyva, Maria Diaz, Leonardo de Oliveira Martins, Nabil-Fareed Alikhan, Lizzie Meadows, Rachael Stanley, Ngozi Elumogo, Muhammed Yasar, Nicholas M. Thomson, Alexander J Trotter, Rachel Gilroy, Samuel Bloomfield, Claire Stuart, Andrew Bell, Reenesh Prakash, Samir Derवेशic, Alison E. Mather, John Wain, Mark Webber, Andrew J. Page, Justin O'Grady                       |
| EPI_ISL_474798, EPI_ISL_474799, EPI_ISL_474800, EPI_ISL_474801, EPI_ISL_474802, EPI_ISL_474803, EPI_ISL_474804, EPI_ISL_474805, EPI_ISL_474806, EPI_ISL_474807, EPI_ISL_474808, EPI_ISL_474809, EPI_ISL_474810, EPI_ISL_474811, EPI_ISL_474812, EPI_ISL_474813, EPI_ISL_474814, EPI_ISL_474815, EPI_ISL_474816, EPI_ISL_474817, EPI_ISL_474818, EPI_ISL_474819, EPI_ISL_474820, EPI_ISL_474821, EPI_ISL_474822, EPI_ISL_474823, EPI_ISL_474824, EPI_ISL_474825, EPI_ISL_474826, EPI_ISL_474827, EPI_ISL_474828, EPI_ISL_474829, EPI_ISL_474830, EPI_ISL_474831, EPI_ISL_474837, EPI_ISL_474838,                                                                                                                                                                                                                                                                                                                                                                                                                                                                                |                                         |                                                                                                                          |                                                                                                                                                                                                                                                                                                                                                                                                                                                                                  |                                                                                                                                                                                                                                                                                                                                                                                                                                                                               |



|                                                                                                                                                                                                                                                                                                                                                                                                                                |           |                                                                                                  |                                                                                                         |                                                                                                                                                                                                                                                                                                                                                                                                                                                           |
|--------------------------------------------------------------------------------------------------------------------------------------------------------------------------------------------------------------------------------------------------------------------------------------------------------------------------------------------------------------------------------------------------------------------------------|-----------|--------------------------------------------------------------------------------------------------|---------------------------------------------------------------------------------------------------------|-----------------------------------------------------------------------------------------------------------------------------------------------------------------------------------------------------------------------------------------------------------------------------------------------------------------------------------------------------------------------------------------------------------------------------------------------------------|
| EPI_ISL_474839, EPI_ISL_474840, EPI_ISL_474847, EPI_ISL_474848, EPI_ISL_474849, EPI_ISL_474853, EPI_ISL_474901, EPI_ISL_474902, EPI_ISL_474903, EPI_ISL_474904, EPI_ISL_474905, EPI_ISL_474906, EPI_ISL_474919, EPI_ISL_474921, EPI_ISL_474933, EPI_ISL_474940, EPI_ISL_474941, EPI_ISL_474945, EPI_ISL_474946, EPI_ISL_474947, EPI_ISL_474951, EPI_ISL_474952, EPI_ISL_474953, EPI_ISL_474954, EPI_ISL_474955, EPI_ISL_474956 | see above | Complejo Hospitalario Universitario de Albacete                                                  | SeqCOVID-SPAIN consortium/IBV(CSIC)                                                                     | Encarnacion Simarro Córdoba, Julia Lozano Serra, Lorena Robles Fonseca, Monica Parra Grandes, Caridad Sainz de Baranda Camino and SeqCOVID-SPAIN consortium                                                                                                                                                                                                                                                                                               |
| EPI_ISL_475038                                                                                                                                                                                                                                                                                                                                                                                                                 |           | Department of MicroBiology, Government Medical College, Surat                                    | Gujarat Biotechnology Research Centre                                                                   | Dinesh Kumar, Zuber Saiyed, Komal Patel, Labdhi Pandya, Snehal Bagatharia, Naresh Chauhan, Summaiya Mullan, Amit gamit, Pritesh Sabara, Apurvasinh Puvar, Janvi Raval, Zarna Patel, Monika Gandhi, Pinal Trivedi, Maharshi Pandya, Nidhi Patel, Nitin Savaliya, Raghawendra Kumar, Afzal Ansari, R D Dixit, A M Kadri, Harsh Bakshi, Chaitanya Joshi, Madhvi Joshi                                                                                        |
| EPI_ISL_475056                                                                                                                                                                                                                                                                                                                                                                                                                 |           | Dr. N. D. Desai Medical College & Hospital                                                       | Gujarat Biotechnology Research Centre                                                                   | Dinesh Kumar, Zuber Saiyed, Komal Patel, Labdhi Pandya, Snehal Bagatharia, J G Buch, Jigar Gusani, Supreet Prabhu, Pritesh Sabara, Apurvasinh Puvar, Janvi Raval, Zarna Patel, Monika Gandhi, Pinal Trivedi, Maharshi Pandya, Nidhi Patel, Nitin Savaliya, Raghawendra Kumar, Akanksha Verma, R D Dixit, A M Kadri, Harsh Bakshi, Chaitanya Joshi, Madhvi Joshi                                                                                           |
| EPI_ISL_475725, EPI_ISL_475727, EPI_ISL_475730, EPI_ISL_475733, EPI_ISL_475739                                                                                                                                                                                                                                                                                                                                                 |           | Utah Public Health Laboratory                                                                    | Utah Public Health Laboratory                                                                           | Erin Young, Kelly Oakeson                                                                                                                                                                                                                                                                                                                                                                                                                                 |
| EPI_ISL_476018, EPI_ISL_476019, EPI_ISL_476021                                                                                                                                                                                                                                                                                                                                                                                 |           | Washington University in St. Louis                                                               | Washington University in St. Louis                                                                      | David Wang, Carey-Ann Burnham, Scott Handley, Lindsay Droit, Stephen Tahan                                                                                                                                                                                                                                                                                                                                                                                |
| EPI_ISL_476068, EPI_ISL_476069, EPI_ISL_476070, EPI_ISL_476071, EPI_ISL_476072, EPI_ISL_476073, EPI_ISL_476074, EPI_ISL_476075, EPI_ISL_476076, EPI_ISL_476077                                                                                                                                                                                                                                                                 |           | University of Debrecen, Department of Medical Microbiology                                       | National Laboratory of Virology, Szentágotthai Research Centre                                          | Endre Gábor Tóth, Balázs Somogyi, Brigitta Zana, Eszter Csoma, Ferenc Jakab, Gábor Kemenesi                                                                                                                                                                                                                                                                                                                                                               |
| EPI_ISL_476078                                                                                                                                                                                                                                                                                                                                                                                                                 |           | University of Szeged, Institute of Clinical Microbiology                                         | National Laboratory of Virology, Szentágotthai Research Centre                                          | Endre Gábor Tóth, Balázs Somogyi, Brigitta Zana, Terhes Gabriella, Ferenc Jakab, Gábor Kemenesi                                                                                                                                                                                                                                                                                                                                                           |
| EPI_ISL_476801, EPI_ISL_476802, EPI_ISL_476803, EPI_ISL_476804                                                                                                                                                                                                                                                                                                                                                                 |           | Hong Kong Department of Health                                                                   | School of Public Health, The University of Hong Kong                                                    | Dominic N.C. Tsang, Daniel K.W. Chu, Leo L.M. Poon, Malik Peiris                                                                                                                                                                                                                                                                                                                                                                                          |
| EPI_ISL_476864                                                                                                                                                                                                                                                                                                                                                                                                                 |           | GMERS Medical College and Hospital, Gandhinagar                                                  | Gujarat Biotechnology Research Centre                                                                   | Dinesh Kumar, Zuber Saiyed, Komal Patel, Labdhi Pandya, Afzal Ansari, Nikha Trivedi, Seema Bhatt, Gaurishankar Shrimali, Bhavesh Modi, Bharti Rajani, Apurvasinh Puvar, Janvi Raval, Zarna Patel, Monika Gandhi, Pinal Trivedi, Maharshi Pandya, Nidhi Patel, Nitin Savaliya, Raghawendra Kumar, R D Dixit, A M Kadri, Harsh Bakshi, Chaitanya Joshi, Madhvi Joshi                                                                                        |
| EPI_ISL_476881                                                                                                                                                                                                                                                                                                                                                                                                                 |           | Department of MicroBiology, Government Medical College, Surat                                    | Gujarat Biotechnology Research Centre                                                                   | Dinesh Kumar, Zuber Saiyed, Komal Patel, Labdhi Pandya, Afzal Ansari, Nikha Trivedi, Naresh Chauhan, Summaiya Mullan, Amit gamit, Apurvasinh Puvar, Janvi Raval, Zarna Patel, Monika Gandhi, Pinal Trivedi, Maharshi Pandya, Nidhi Patel, Nitin Savaliya, Raghawendra Kumar, R D Dixit, A M Kadri, Harsh Bakshi, Chaitanya Joshi, Madhvi Joshi                                                                                                            |
| EPI_ISL_477008, EPI_ISL_477009, EPI_ISL_477010, EPI_ISL_477011, EPI_ISL_477012, EPI_ISL_477013                                                                                                                                                                                                                                                                                                                                 |           | University of Debrecen, Department of Medical Microbiology                                       | National Laboratory of Virology, Szentágotthai Research Centre                                          | Endre Gábor Tóth, Balázs Somogyi, Brigitta Zana, Eszter Csoma, Ferenc Jakab, Gábor Kemenesi                                                                                                                                                                                                                                                                                                                                                               |
| EPI_ISL_477615, EPI_ISL_477616, EPI_ISL_477617, EPI_ISL_477618, EPI_ISL_477619, EPI_ISL_477620, EPI_ISL_477621, EPI_ISL_477622, EPI_ISL_477623, EPI_ISL_477624, EPI_ISL_477625                                                                                                                                                                                                                                                 | see above | University of Szeged, Institute of Clinical Microbiology                                         | National Laboratory of Virology, Szentágotthai Research Centre                                          | Endre Gábor Tóth, Balázs Somogyi, Brigitta Zana, Terhes Gabriella, Ferenc Jakab, Gábor Kemenesi                                                                                                                                                                                                                                                                                                                                                           |
| EPI_ISL_479759, EPI_ISL_479760, EPI_ISL_479761, EPI_ISL_479762, EPI_ISL_479763, EPI_ISL_479764, EPI_ISL_479765, EPI_ISL_479766, EPI_ISL_479767, EPI_ISL_479768, EPI_ISL_479769, EPI_ISL_479770, EPI_ISL_479771, EPI_ISL_479772, EPI_ISL_479773, EPI_ISL_479774, EPI_ISL_479775                                                                                                                                                 | see above | University of Miami Immunology and Histocompatibility Laboratory                                 | University of Miami Immunology and Histocompatibility Laboratory                                        | Emilio Margolles-Clark, PhD and Phillip Ruiz, MD, PhD                                                                                                                                                                                                                                                                                                                                                                                                     |
| EPI_ISL_483060                                                                                                                                                                                                                                                                                                                                                                                                                 |           | unknown                                                                                          | Microbiology, Canterbury Health Laboratories                                                            | Dilcher, M., Anderson, T.                                                                                                                                                                                                                                                                                                                                                                                                                                 |
| EPI_ISL_483637                                                                                                                                                                                                                                                                                                                                                                                                                 |           | National Laboratory of Virology, Szentágotthai Research Centre                                   | National Laboratory of Virology, Szentágotthai Research Centre                                          | Endre Gábor Tóth, Balázs Somogyi, Ferenc Jakab, Gábor Kemenesi                                                                                                                                                                                                                                                                                                                                                                                            |
| EPI_ISL_483835                                                                                                                                                                                                                                                                                                                                                                                                                 |           | Pandit Deendayal Upadhyay Government Medical College, Rajkot                                     | Gujarat Biotechnology Research Centre                                                                   | Dinesh Kumar, Zuber Saiyed, Komal Patel, Labdhi Pandya, Afzal Ansari, Nikha Trivedi, Gauravi Dhruv, Arti Trivedi, Apurvasinh Puvar, Janvi Raval, Zarna Patel, Monika Gandhi, Pinal Trivedi, Maharshi Pandya, Nidhi Patel, Nitin Savaliya, Raghawendra Kumar, R D Dixit, A M Kadri, Harsh Bakshi, Chaitanya Joshi, Madhvi Joshi                                                                                                                            |
| EPI_ISL_483852, EPI_ISL_483870                                                                                                                                                                                                                                                                                                                                                                                                 |           | Department of Microbiology, Government Medical College, Surat                                    | Gujarat Biotechnology Research Centre                                                                   | Dinesh Kumar, Zuber Saiyed, Komal Patel, Labdhi Pandya, Afzal Ansari, Nikha Trivedi, Naresh Chauhan, Summaiya Mullan, Amit gamit, Apurvasinh Puvar, Janvi Raval, Zarna Patel, Monika Gandhi, Pinal Trivedi, Maharshi Pandya, Nidhi Patel, Nitin Savaliya, Raghawendra Kumar, R D Dixit, A M Kadri, Harsh Bakshi, Chaitanya Joshi, Madhvi Joshi                                                                                                            |
| EPI_ISL_484333, EPI_ISL_484335                                                                                                                                                                                                                                                                                                                                                                                                 |           | Quadram Institute Bioscience                                                                     | COVID-19 Genomics UK (COG-UK) Consortium                                                                | Dave J. Baker, Gemma L. Kay, Alp Aydin, Thanh Le-Viet, Steven Rudder, Ana P. Tedim, Anastasia Kolyva, Maria Diaz, Leonardo de Oliveira Martins, Nabil-Fareed Alikhan, Lizzie Meadows, Rachael Stanley, Ngozi Elumogo, Muhammed Yasir, Nicholas M. Thomson, Alexander J Trotter, Rachel Gilroy, Samuel Bloomfield, Claire Stuart, Andrew Bell, Reenesh Prakash, Samir Dervisevic, Alison E. Mather, John Wain, Mark Webber, Andrew J. Page, Justin O'Grady |
| EPI_ISL_487276                                                                                                                                                                                                                                                                                                                                                                                                                 |           | Department of Food Safety, Nutrition and Veterinary public health, Istituto Superiore di Sanita' | Department of Biomedical, Surgical and Dental Sciences and Department of Biomedical Sciences for Health | Delbue, S., Ferrante, P., Basilio, N., Parapini, S., Binda, S., D'Alessandro, S., Galli, C., Signorini, L., Primache, V., Anselmi, G., Pariani, E.                                                                                                                                                                                                                                                                                                        |
| EPI_ISL_490205, EPI_ISL_490206, EPI_ISL_490207, EPI_ISL_490208                                                                                                                                                                                                                                                                                                                                                                 |           | München Klinik Schwabing                                                                         | MGZ Medical Genetics Center                                                                             | Dieter A. Wolf, Elke Holinski-Feder                                                                                                                                                                                                                                                                                                                                                                                                                       |
| EPI_ISL_490497, EPI_ISL_490500, EPI_ISL_490502, EPI_ISL_490514, EPI_ISL_490517, EPI_ISL_490518, EPI_ISL_490525, EPI_ISL_490528, EPI_ISL_490530, EPI_ISL_490537, EPI_ISL_490538, EPI_ISL_490545, EPI_ISL_490549, EPI_ISL_490551, EPI_ISL_490557                                                                                                                                                                                 | see above | Quadram Institute Bioscience                                                                     | COVID-19 Genomics UK (COG-UK) Consortium                                                                | Dave J. Baker, Gemma L. Kay, Alp Aydin, Thanh Le-Viet, Steven Rudder, Ana P. Tedim, Anastasia Kolyva, Maria Diaz, Leonardo de Oliveira Martins, Nabil-Fareed Alikhan, Lizzie Meadows, Rachael Stanley, Ngozi Elumogo, Muhammed Yasir, Nicholas M. Thomson, Alexander J Trotter, Rachel Gilroy, Samuel Bloomfield, Claire Stuart, Andrew Bell, Reenesh Prakash, Samir Dervisevic, Alison E. Mather, John Wain, Mark Webber, Andrew J. Page, Justin O'Grady |
| EPI_ISL_491111, EPI_ISL_491112                                                                                                                                                                                                                                                                                                                                                                                                 |           | Friedrich-Loeffler-Institut, Laboratory for NGS and Microarray Diagnostics                       | Friedrich-Loeffler-Institut, Laboratory for NGS and Microarray Diagnostics                              | Dirk Höper, Laboratory for NGS and Microarray Diagnostics                                                                                                                                                                                                                                                                                                                                                                                                 |
| EPI_ISL_491933, EPI_ISL_491934, EPI_ISL_491935, EPI_ISL_491941                                                                                                                                                                                                                                                                                                                                                                 |           | Centro de Investigaciones, Universidad de Especialidades Espíritu Santo                          | Institute of Microbiology, Universidad San Francisco de Quito                                           | Derly Andrade, Juan Carlos Fernandez, Belén Prado-Vivar, Sully Márquez, Juan José Guadalupe, Monica Becerra-Wong, Bernardo Gutiérrez, Gabriel Morey, Ruben Armas, Jose Pedro Barberan, Fernando Espinoza, Edith Lopez, Verónica Barragán, Patricio Rojas-Silva, Gabriel Trueba, Michelle Grunauer, Paúl Cárdenas                                                                                                                                          |
| EPI_ISL_493069, EPI_ISL_493070, EPI_ISL_493071, EPI_ISL_493072, EPI_ISL_493073, EPI_ISL_493074, EPI_ISL_493075, EPI_ISL_493076, EPI_ISL_493077, EPI_ISL_493079, EPI_ISL_493080, EPI_ISL_493081, EPI_ISL_493082, EPI_ISL_493083, EPI_ISL_493084, EPI_ISL_493085, EPI_ISL_493086                                                                                                                                                 | see above | Washington University in St. Louis                                                               | Washington University in St. Louis                                                                      | David Wang, Carey-Ann Burnham, Scott Handley, Lindsay Droit, Stephen Tahan                                                                                                                                                                                                                                                                                                                                                                                |
| EPI_ISL_493541                                                                                                                                                                                                                                                                                                                                                                                                                 |           | Quadram Institute Bioscience                                                                     | COVID-19 Genomics UK (COG-UK) Consortium                                                                | Dave J. Baker, Gemma L. Kay, Alp Aydin, Thanh Le-Viet, Steven Rudder, Ana P. Tedim, Anastasia Kolyva, Maria Diaz, Leonardo de Oliveira Martins, Nabil-Fareed Alikhan, Lizzie Meadows, Rachael Stanley, Ngozi Elumogo, Muhammed Yasir, Nicholas M. Thomson, Alexander J Trotter, Rachel Gilroy, Samuel Bloomfield, Claire Stuart, Andrew Bell, Reenesh Prakash, Samir Dervisevic, Alison E. Mather, John Wain, Mark Webber, Andrew J. Page, Justin O'Grady |
| EPI_ISL_495025                                                                                                                                                                                                                                                                                                                                                                                                                 |           | Government Medical College, Bhavnagar                                                            | Gujarat Biotechnology Research Centre                                                                   | Dinesh Kumar, Zuber Saiyed, Komal Patel, Labdhi Pandya, Afzal Ansari, Nikha Trivedi, Kairavi Desai, Saklin Malek, Shirish Patel, Apurvasinh Puvar, Janvi                                                                                                                                                                                                                                                                                                  |





|                                                                                                                                                                                                                                                                                                                                                                                                                                                                                |                                                                                                                                                                                            |                                                                                                                                                                                                               |                                                                                                                                                                                                                                                                                                                                                                                                                                                                                      |
|--------------------------------------------------------------------------------------------------------------------------------------------------------------------------------------------------------------------------------------------------------------------------------------------------------------------------------------------------------------------------------------------------------------------------------------------------------------------------------|--------------------------------------------------------------------------------------------------------------------------------------------------------------------------------------------|---------------------------------------------------------------------------------------------------------------------------------------------------------------------------------------------------------------|--------------------------------------------------------------------------------------------------------------------------------------------------------------------------------------------------------------------------------------------------------------------------------------------------------------------------------------------------------------------------------------------------------------------------------------------------------------------------------------|
| see above                                                                                                                                                                                                                                                                                                                                                                                                                                                                      | Washington State Department of Health                                                                                                                                                      | Seattle Flu Study                                                                                                                                                                                             | Deborah A. Nickerson, Chris D. Frazier, Jover Lee, Benjamin Pelle, Matthew Richardson, Amanda Adler, Elisabeth Brandstetter, Peter D. Han, Kairsten Fay, Misja Ilcisin, Kirsten Lacombe, Thomas R. Sibley, Melissa Truong, Caitlin R. Wolf, Romesh Gautom, Geoff Melly, Brian Hiatt, Philip Dykema, Scott Lindquist, Michael Boeckh, Janet A. Englund, Michael Famulare, Barry R. Lutz, Mark J. Rieder, Lea M. Starita, Matthew Thompson, Helen Y. Chu, Jay Shendure, Trevor Bedford |
| EPI_ISL_497873, EPI_ISL_497874, EPI_ISL_497875, EPI_ISL_497876, EPI_ISL_497877, EPI_ISL_497878, EPI_ISL_497879                                                                                                                                                                                                                                                                                                                                                                 | National Centre For Cell Science                                                                                                                                                           | National Centre For Cell Science                                                                                                                                                                              | Dhiraj Paul, Kunal Jani, Radha Chauhan, Janesh Kumar, Vasudevan Seshadri, Girdhari Lal, Rajesh Karyakarte, Suvarna Joshi, Murlidhar Tambe, Sourav Sen, Santosh Karade, Kavita Bala Anand, Shelinder Pal Singh Shergill, Rajiv Mohan Gupta, Manoj Kumar Bhat, Arvind Sahu, Maharashtra COVID-19 Study Group, DBT's PAN-INDIA 1000 SARS-CoV2 RNA genome sequencing consortium, Yogesh S Shouche                                                                                        |
| EPI_ISL_497880, EPI_ISL_497881, EPI_ISL_497882, EPI_ISL_497883, EPI_ISL_497884, EPI_ISL_497885, EPI_ISL_497886, EPI_ISL_497887                                                                                                                                                                                                                                                                                                                                                 | Armed Forces Medical College                                                                                                                                                               | National Centre For Cell Science                                                                                                                                                                              | Dhiraj Paul, Kunal Jani, Radha Chauhan, Janesh Kumar, Vasudevan Seshadri, Girdhari Lal, Rajesh Karyakarte, Suvarna Joshi, Murlidhar Tambe, Sourav Sen, Santosh Karade, Kavita Bala Anand, Shelinder Pal Singh Shergill, Rajiv Mohan Gupta, Manoj Kumar Bhat, Arvind Sahu, Maharashtra COVID-19 Study Group, DBT's PAN-INDIA 1000 SARS-CoV2 RNA genome sequencing consortium, Yogesh S Shouche                                                                                        |
| EPI_ISL_497888, EPI_ISL_497889, EPI_ISL_497890, EPI_ISL_497891                                                                                                                                                                                                                                                                                                                                                                                                                 | B.J. Govt. Medical College                                                                                                                                                                 | National Centre For Cell Science                                                                                                                                                                              | Dhiraj Paul, Kunal Jani, Radha Chauhan, Janesh Kumar, Vasudevan Seshadri, Girdhari Lal, Rajesh Karyakarte, Suvarna Joshi, Murlidhar Tambe, Sourav Sen, Santosh Karade, Kavita Bala Anand, Shelinder Pal Singh Shergill, Rajiv Mohan Gupta, Manoj Kumar Bhat, Arvind Sahu, Maharashtra COVID-19 Study Group, DBT's PAN-INDIA 1000 SARS-CoV2 RNA genome sequencing consortium, Yogesh S Shouche                                                                                        |
| EPI_ISL_498255, EPI_ISL_498256, EPI_ISL_498257, EPI_ISL_498258, EPI_ISL_498259, EPI_ISL_498260, EPI_ISL_498261                                                                                                                                                                                                                                                                                                                                                                 | Hospital for Tropical Diseases                                                                                                                                                             | COVID-19 Network Investigations (CONI) Alliance                                                                                                                                                               | Elizabeth Batty, Nantarar Chantawat, Wasun Chantratrata, Thanat Chookajorn, Stefan Fernandez, Angkana Huang, Weena Janwithayan, Akanitt Jittmitrathap, Anthony R. Jones, Khajohn Joonsalak, Chonticha Klungtong, Theerarat Kochakarn, Namfon Kotanan, Krittikorn Kumpornsin, Pornsawan Leangwutiwong, Wudtichai Manasatienkij, Bhakbhoom Panthan, Ekawat Pasomsub, Kingkan Rakmanee, Insee Sensorn, Janjira Thaipadungpanit, Arporn Wangwiwatsin, Treewat Watthanachockchai          |
| EPI_ISL_498262, EPI_ISL_498263, EPI_ISL_498264, EPI_ISL_498265, EPI_ISL_498266                                                                                                                                                                                                                                                                                                                                                                                                 | Ramathibodi Hospital                                                                                                                                                                       | COVID-19 Network Investigations (CONI) Alliance                                                                                                                                                               | Elizabeth Batty, Wasun Chantratrata, Thanat Chookajorn, Stefan Fernandez, Angkana Huang, Anthony R. Jones, Khajohn Joonsalak, Chonticha Klungtong, Theerarat Kochakarn, Namfon Kotanan, Krittikorn Kumpornsin, Wudtichai Manasatienkij, Bhakbhoom Panthan, Ekawat Pasomsub, Kingkan Rakmanee, Insee Sensorn, Janjira Thaipadungpanit, Arporn Wangwiwatsin, Treewat Watthanachockchai                                                                                                 |
| EPI_ISL_499495                                                                                                                                                                                                                                                                                                                                                                                                                                                                 | Quadram Institute Bioscience                                                                                                                                                               | COVID-19 Genomics UK (COG-UK) Consortium                                                                                                                                                                      | Dave J. Baker, Gemma L. Kay, Alp Aydin, Thanh Le-Viet, Steven Rudder, Ana P. Tedim, Anastasia Kolyva, Maria Diaz, Leonardo de Oliveira Martins, Nabil-Fareed Alikhan, Lizzie Meadows, Rachael Stanley, Ngozi Elumogo, Muhammed Yasir, Nicholas M. Thomson, Alexander J Trotter, Rachel Gilroy, Samuel Bloomfield, Claire Stuart, Andrew Bell, Reenesh Prakash, Samir Dervisevic, Alison E. Mather, John Wain, Mark Webber, Andrew J. Page, Justin O'Grady                            |
| EPI_ISL_500157, EPI_ISL_500158, EPI_ISL_500159, EPI_ISL_500166, EPI_ISL_500207, EPI_ISL_500218                                                                                                                                                                                                                                                                                                                                                                                 | Complejo Hospitalario Universitario de Albacete                                                                                                                                            | SeqCOVID-SPAIN consortium/IBV(CSIC)                                                                                                                                                                           | Encarnacion Simarro Córdoba, Julia Lozano Serra, Lorena Robles Fonseca, Monica Parra Grandes, Caridad Sainz de Baranda Camino and SeqCOVID-SPAIN consortium                                                                                                                                                                                                                                                                                                                          |
| EPI_ISL_504185                                                                                                                                                                                                                                                                                                                                                                                                                                                                 | Discovery DNA                                                                                                                                                                              | Discovery DNA                                                                                                                                                                                                 | Dustin Hittel, Marina Kerr, Leo Dimnik, Desmond Koo, Alice Li, Aneal Khan                                                                                                                                                                                                                                                                                                                                                                                                            |
| EPI_ISL_505003                                                                                                                                                                                                                                                                                                                                                                                                                                                                 | Biology Dpt                                                                                                                                                                                | Microbiology and Infections Diseases                                                                                                                                                                          | Emmanuelle Billon-Denis, Audrey Ferrier-Rembert, Annabelle Garnier, Laurence Cheutin, Clarisse Vigne, Emilie Tessier, Jessica Denis, Olivier Gorgé, Flora Nolent, Isabelle Drouet, Noémie Verguet, Olivier Ferraris, Jean-Nicolas Tournier                                                                                                                                                                                                                                           |
| EPI_ISL_506041                                                                                                                                                                                                                                                                                                                                                                                                                                                                 | Biology Dpt, HIA Percy                                                                                                                                                                     | Microbiology and Infectious Diseases Dpt                                                                                                                                                                      | Emmanuelle Billon-Denis, Audrey Ferrier-Rembert, Annabelle Garnier, Laurence Cheutin, Clarisse Vigne, Emilie Tessier, Jessica Denis, Olivier Gorgé, Flora Nolent, Isabelle Drouet, Noémie Verguet, Olivier Ferraris, Jean-Nicolas Tournier                                                                                                                                                                                                                                           |
| EPI_ISL_510510, EPI_ISL_510511, EPI_ISL_510512, EPI_ISL_510513, EPI_ISL_510514, EPI_ISL_510515, EPI_ISL_510516, EPI_ISL_510517, EPI_ISL_510518, EPI_ISL_510519, EPI_ISL_510520, EPI_ISL_510521, EPI_ISL_510522, EPI_ISL_510523                                                                                                                                                                                                                                                 |                                                                                                                                                                                            |                                                                                                                                                                                                               |                                                                                                                                                                                                                                                                                                                                                                                                                                                                                      |
| see above                                                                                                                                                                                                                                                                                                                                                                                                                                                                      | Servicio de Microbiología, Laboratori Clínic Metropolitana Nord, Hospital Universitari Germans Trias i Pujol, Institut d'Investigació en Ciències de la Salut Germans Trias i Pujol (IGTP) | SeqCOVID-SPAIN consortium/IBV(CSIC)                                                                                                                                                                           | Elisa Martró, Antoni E. Bordoy, Anna Not, Adrián Antuori, Anabel Fernández, Nona Romani and SeqCOVID-SPAIN consortium                                                                                                                                                                                                                                                                                                                                                                |
| EPI_ISL_510530                                                                                                                                                                                                                                                                                                                                                                                                                                                                 | UMR 190 - Faculte de medecine, UMR 'Emergence des Pathologies Virales' (EPV: Aix-Marseille University - IRD 190 - Inserm 1207 - EHE                                                        | UMR 190 - Faculte de medecine, UMR 'Emergence des Pathologies Virales' (EPV: Aix-Marseille University - IRD 190 - Inserm 1207 - EHE                                                                           | Durand, G.A., Piorkowski,G., Pommier De Santi,V., De Laval,F., Leparo Goffart,I., Gilles,M., Geulen,M., Peduzzi,F., Le Flem,F.-X.                                                                                                                                                                                                                                                                                                                                                    |
| EPI_ISL_510878, EPI_ISL_510879, EPI_ISL_510880, EPI_ISL_510881, EPI_ISL_510882, EPI_ISL_510883, EPI_ISL_510884, EPI_ISL_510885, EPI_ISL_510886, EPI_ISL_510887, EPI_ISL_510888                                                                                                                                                                                                                                                                                                 |                                                                                                                                                                                            |                                                                                                                                                                                                               | Elie Johnson, Anastacia Griego-Fisher                                                                                                                                                                                                                                                                                                                                                                                                                                                |
| see above                                                                                                                                                                                                                                                                                                                                                                                                                                                                      | New Mexico Department of Health Scientific Laboratory                                                                                                                                      | New Mexico Department of Health Scientific Laboratory                                                                                                                                                         |                                                                                                                                                                                                                                                                                                                                                                                                                                                                                      |
| EPI_ISL_511878                                                                                                                                                                                                                                                                                                                                                                                                                                                                 | Santosa Hospital Bandung Kopu                                                                                                                                                              | Laboratorium Kesehatan Provinsi Jawa Barat; Molecular Genetics Laboratory-Faculty of Medicine-Universitas Padjadjaran; School of Life Sciences and Technology & School of Pharmacy-Institut Teknologi Bandung | Ema Rahmawati, Marselina Irasonia Tan, Yunia Sribudiani, Catur Riani, Azzania Fibriani, Husna Nugrahapraja, Tarwadi, Hesti Lina Wiraswati, Lia Faridah, Savira Ekawardhani, Ryan Bayusantika Ristandi, Rifky Waluyajati Rachman, Cut Nur Cynthia Alamanda, Hammam Riza, Soni Solistia Wirawan, Agung Eru Wibowo                                                                                                                                                                      |
| EPI_ISL_512064                                                                                                                                                                                                                                                                                                                                                                                                                                                                 | B.J. Medical College and Civil hospital, Ahmedabad                                                                                                                                         | Gujarat Biotechnology Research Centre                                                                                                                                                                         | Dinesh Kumar, Zuber Saiyed, Komal Patel, Labdhi Pandya, Afzal Ansari, Nikha Trivedi, Pranay Shah, Kamlesh J Upadhyay, Sanjay Kapadia, Apurvasinh Puvar, Janvi Raval, Zarna Patel, Monika Gandhi, Pinal Trivedi, Maharshi Pandya, Nidhi Patel, Nitin Savaliya, Raghawendra Kumar, R D Dixit, A M Kadri, Harsh Bakshi, Chaitanya Joshi, Madhvi Joshi                                                                                                                                   |
| EPI_ISL_512367, EPI_ISL_512369, EPI_ISL_512373, EPI_ISL_512374, EPI_ISL_512376                                                                                                                                                                                                                                                                                                                                                                                                 | Quadram Institute Bioscience                                                                                                                                                               | COVID-19 Genomics UK (COG-UK) Consortium                                                                                                                                                                      | Dave J. Baker, Gemma L. Kay, Alp Aydin, Thanh Le-Viet, Steven Rudder, Ana P. Tedim, Anastasia Kolyva, Maria Diaz, Leonardo de Oliveira Martins, Nabil-Fareed Alikhan, Lizzie Meadows, Rachael Stanley, Ngozi Elumogo, Muhammed Yasir, Nicholas M. Thomson, Alexander J Trotter, Rachel Gilroy, Samuel Bloomfield, Claire Stuart, Andrew Bell, Reenesh Prakash, Samir Dervisevic, Alison E. Mather, John Wain, Mark Webber, Andrew J. Page, Justin O'Grady                            |
| EPI_ISL_512847, EPI_ISL_512848, EPI_ISL_512849, EPI_ISL_512850, EPI_ISL_512851, EPI_ISL_512852, EPI_ISL_512853, EPI_ISL_512854, EPI_ISL_512855, EPI_ISL_512856, EPI_ISL_512857, EPI_ISL_512858, EPI_ISL_512859, EPI_ISL_512860, EPI_ISL_512861, EPI_ISL_512862, EPI_ISL_512863, EPI_ISL_512864, EPI_ISL_512865, EPI_ISL_512866, EPI_ISL_512867, EPI_ISL_512868, EPI_ISL_512869, EPI_ISL_512870, EPI_ISL_512871, EPI_ISL_512872                                                 |                                                                                                                                                                                            |                                                                                                                                                                                                               |                                                                                                                                                                                                                                                                                                                                                                                                                                                                                      |
| see above                                                                                                                                                                                                                                                                                                                                                                                                                                                                      | Ramathibodi Hospital                                                                                                                                                                       | COVID-19 Network Investigations (CONI) Alliance                                                                                                                                                               | Elizabeth Batty, Wasun Chantratrata, Thanat Chookajorn, Stefan Fernandez, Angkana Huang, Anthony R. Jones, Khajohn Joonsalak, Chonticha Klungtong, Theerarat Kochakarn, Namfon Kotanan, Krittikorn Kumpornsin, Wudtichai Manasatienkij, Bhakbhoom Panthan, Ekawat Pasomsub, Kingkan Rakmanee, Insee Sensorn, Janjira Thaipadungpanit, Arporn Wangwiwatsin, Treewat Watthanachockchai                                                                                                 |
| EPI_ISL_513265, EPI_ISL_513266, EPI_ISL_513267, EPI_ISL_513268, EPI_ISL_513269, EPI_ISL_513270, EPI_ISL_513271, EPI_ISL_513272, EPI_ISL_513273, EPI_ISL_513274, EPI_ISL_513275, EPI_ISL_513276, EPI_ISL_513277, EPI_ISL_513278, EPI_ISL_513279, EPI_ISL_513280, EPI_ISL_513281, EPI_ISL_513282, EPI_ISL_513283, EPI_ISL_513284, EPI_ISL_513285, EPI_ISL_513286, EPI_ISL_513287, EPI_ISL_513288, EPI_ISL_513289, EPI_ISL_513290, EPI_ISL_513291, EPI_ISL_513292, EPI_ISL_513293 |                                                                                                                                                                                            |                                                                                                                                                                                                               |                                                                                                                                                                                                                                                                                                                                                                                                                                                                                      |
| see above                                                                                                                                                                                                                                                                                                                                                                                                                                                                      | University of Miami Immunology and Histocompatibility Laboratory                                                                                                                           | University of Miami Immunology and Histocompatibility Laboratory                                                                                                                                              | Emilio Margolles-Clark, PhD and Phillip Ruiz, MD, PhD                                                                                                                                                                                                                                                                                                                                                                                                                                |
| EPI_ISL_514434                                                                                                                                                                                                                                                                                                                                                                                                                                                                 | NSTU COVID-19 Diagnostic Center,                                                                                                                                                           | NSU Genome Research Institute (NGRI), North South University                                                                                                                                                  | Dr. Muhammad Maqsud Hossain, Aura Rahman, Prof. Firoz Ahmed, Tahrima Huq, Abdus Sadique, Jahidul Alam, Md Aminul Islam, Prof. Md. Didar-Ul-Alam, Prof. Kazi Nadim Hasan, Prof. Abdul Khaleque, Prof. Hasan Mahmud Reza                                                                                                                                                                                                                                                               |
| EPI_ISL_514440                                                                                                                                                                                                                                                                                                                                                                                                                                                                 | NSTU COVID-19 Diagnostic Center                                                                                                                                                            | NSU Genome Research Institute (NGRI), North South University                                                                                                                                                  | Dr. Muhammad Maqsud Hossain, Aura Rahman, Prof. Firoz Ahmed, Tahrima Huq, Abdus Sadique, Jahidul Alam, Md Aminul Islam, Prof. Md. Didar-Ul-Alam, Prof. Kazi Nadim Hasan, Prof. Abdul Khaleque, Prof. Hasan Mahmud Reza                                                                                                                                                                                                                                                               |
| EPI_ISL_514441                                                                                                                                                                                                                                                                                                                                                                                                                                                                 | NSTU COVID-19 Diagnostic Center                                                                                                                                                            | NSU Genome Research Institute (NGRI), North South University                                                                                                                                                  | Dr. Muhammad Maqsud Hossain, Aura Rahman, Prof. Firoz Ahmed, Tahrima Huq, Abdus Sadique, Jahidul Alam, Md Aminul Islam, Prof. Md. Didar-Ul-Alam, Prof. Kazi Nadim Hasan, Prof. Abdul Khaleque, Prof. Hasan Mahmud Reza                                                                                                                                                                                                                                                               |
| EPI_ISL_514442, EPI_ISL_514580                                                                                                                                                                                                                                                                                                                                                                                                                                                 | NSTU COVID-19 Diagnostic Center                                                                                                                                                            | NSU Genome Research Institute (NGRI), North South University                                                                                                                                                  | Dr. Muhammad Maqsud Hossain, Aura Rahman, Prof. Firoz Ahmed, Tahrima Huq, Abdus Sadique, Jahidul Alam, Tamanna Afroze, Md Aminul Islam, Prof. Md. Didar-Ul-Alam, Prof. Kazi Nadim Hasan, Prof. Abdul Khaleque, Prof. Hasan Mahmud Reza                                                                                                                                                                                                                                               |
| EPI_ISL_514583, EPI_ISL_514601                                                                                                                                                                                                                                                                                                                                                                                                                                                 | B.J. Medical College and Civil hospital, Ahmedabad                                                                                                                                         | Gujarat Biotechnology Research Centre                                                                                                                                                                         | Dinesh Kumar, Zuber Saiyed, Komal Patel, Labdhi Pandya, Afzal Ansari, Nikha Trivedi, Pranay Shah, Kamlesh J Upadhyay, Sanjay Kapadia, Apurvasinh Puvar, Janvi Raval, Zarna Patel, Monika Gandhi, Pinal Trivedi, Maharshi Pandya, Nidhi Patel, Nitin Savaliya, Raghawendra Kumar, R D Dixit, A M Kadri,                                                                                                                                                                               |



|                                                                                                                                                                                                                                                                                                                                                                                                                                |                                                                         |                                                                                                                                                                                                               |                                                                                                                                                                                                                                                                                                                                                                                                                                                          |                                                                                                                                                                                                                                                                                                                                                                                                                                                           |
|--------------------------------------------------------------------------------------------------------------------------------------------------------------------------------------------------------------------------------------------------------------------------------------------------------------------------------------------------------------------------------------------------------------------------------|-------------------------------------------------------------------------|---------------------------------------------------------------------------------------------------------------------------------------------------------------------------------------------------------------|----------------------------------------------------------------------------------------------------------------------------------------------------------------------------------------------------------------------------------------------------------------------------------------------------------------------------------------------------------------------------------------------------------------------------------------------------------|-----------------------------------------------------------------------------------------------------------------------------------------------------------------------------------------------------------------------------------------------------------------------------------------------------------------------------------------------------------------------------------------------------------------------------------------------------------|
| EPI_ISL_525700, EPI_ISL_525701                                                                                                                                                                                                                                                                                                                                                                                                 | Seattle Flu Study                                                       | Seattle Flu Study                                                                                                                                                                                             | Janet A. Englund, Michael Famulare, Barry R. Lutz, Mark J. Rieder, Lea M. Starita, Matthew Thompson, Helen Y. Chu, Trevor Bedford, Jay Shendure                                                                                                                                                                                                                                                                                                          |                                                                                                                                                                                                                                                                                                                                                                                                                                                           |
| EPI_ISL_525702, EPI_ISL_525703, EPI_ISL_525704, EPI_ISL_525705                                                                                                                                                                                                                                                                                                                                                                 | Seattle Flu Study                                                       | Seattle Flu Study                                                                                                                                                                                             | Deborah A. Nickerson, Chris D. Frazar, Jover Lee, Benjamin Pelle, Matthew Richardson, Amanda Adler, Elisabeth Brandstetter, Peter D. Han, Kairsten Fay, Misja Ilcisin, Kirsten Lacombe, Thomas R. Sibley, Melissa Truong, Caitlin R. Wolf, Michael Boeckh, Janet A. Englund, Michael Famulare, Barry R. Lutz, Mark J. Rieder, Lea M. Starita, Matthew Thompson, Jay Shendure, Trevor Bedford, Helen Y. Chu                                               |                                                                                                                                                                                                                                                                                                                                                                                                                                                           |
| EPI_ISL_525706                                                                                                                                                                                                                                                                                                                                                                                                                 | Seattle Flu Study                                                       | Seattle Flu Study                                                                                                                                                                                             | Deborah A. Nickerson, Chris D. Frazar, Jover Lee, Benjamin Pelle, Matthew Richardson, Amanda Adler, Elisabeth Brandstetter, Peter D. Han, Kairsten Fay, Misja Ilcisin, Kirsten Lacombe, Thomas R. Sibley, Melissa Truong, Caitlin R. Wolf, Michael Boeckh, Janet A. Englund, Michael Famulare, Barry R. Lutz, Mark J. Rieder, Lea M. Starita, Matthew Thompson, Jay Shendure, Trevor Bedford, Helen Y. Chu                                               |                                                                                                                                                                                                                                                                                                                                                                                                                                                           |
| EPI_ISL_525707, EPI_ISL_525708, EPI_ISL_525709, EPI_ISL_525710, EPI_ISL_525711, EPI_ISL_525712, EPI_ISL_525713, EPI_ISL_525714, EPI_ISL_525715, EPI_ISL_525716, EPI_ISL_525717, EPI_ISL_525718, EPI_ISL_525719, EPI_ISL_525720, EPI_ISL_525721, EPI_ISL_525722, EPI_ISL_525723, EPI_ISL_525724, EPI_ISL_525725, EPI_ISL_525726, EPI_ISL_525727                                                                                 | see above                                                               | Seattle Flu Study                                                                                                                                                                                             | Deborah A. Nickerson, Chris D. Frazar, Jover Lee, Benjamin Pelle, Matthew Richardson, Amanda Adler, Elisabeth Brandstetter, Peter D. Han, Kairsten Fay, Misja Ilcisin, Kirsten Lacombe, Thomas R. Sibley, Melissa Truong, Caitlin R. Wolf, Karen Cowgill, Stephanie Schrag, Jeff Duchin, Michael Boeckh, Janet A. Englund, Michael Famulare, Barry R. Lutz, Mark J. Rieder, Lea M. Starita, Matthew Thompson, Jay Shendure, Trevor Bedford, Helen Y. Chu |                                                                                                                                                                                                                                                                                                                                                                                                                                                           |
| EPI_ISL_525728                                                                                                                                                                                                                                                                                                                                                                                                                 | Seattle Flu Study                                                       | Seattle Flu Study                                                                                                                                                                                             | Deborah A. Nickerson, Chris D. Frazar, Jover Lee, Benjamin Pelle, Matthew Richardson, Amanda Adler, Elisabeth Brandstetter, Peter D. Han, Kairsten Fay, Misja Ilcisin, Kirsten Lacombe, Thomas R. Sibley, Melissa Truong, Caitlin R. Wolf, Michael Boeckh, Janet A. Englund, Michael Famulare, Barry R. Lutz, Mark J. Rieder, Lea M. Starita, Matthew Thompson, Jay Shendure, Trevor Bedford, Helen Y. Chu                                               |                                                                                                                                                                                                                                                                                                                                                                                                                                                           |
| EPI_ISL_525729, EPI_ISL_525730, EPI_ISL_525731, EPI_ISL_525732, EPI_ISL_525733, EPI_ISL_525734, EPI_ISL_525735, EPI_ISL_525736, EPI_ISL_525737, EPI_ISL_525738, EPI_ISL_525739, EPI_ISL_525740, EPI_ISL_525741                                                                                                                                                                                                                 | see above                                                               | Seattle Flu Study                                                                                                                                                                                             | Deborah A. Nickerson, Chris D. Frazar, Jover Lee, Benjamin Pelle, Matthew Richardson, Amanda Adler, Elisabeth Brandstetter, Peter D. Han, Kairsten Fay, Misja Ilcisin, Kirsten Lacombe, Thomas R. Sibley, Melissa Truong, Caitlin R. Wolf, Karen Cowgill, Stephanie Schrag, Jeff Duchin, Michael Boeckh, Janet A. Englund, Michael Famulare, Barry R. Lutz, Mark J. Rieder, Lea M. Starita, Matthew Thompson, Helen Y. Chu, Trevor Bedford, Jay Shendure |                                                                                                                                                                                                                                                                                                                                                                                                                                                           |
| EPI_ISL_525742                                                                                                                                                                                                                                                                                                                                                                                                                 | Seattle Flu Study                                                       | Seattle Flu Study                                                                                                                                                                                             | Deborah A. Nickerson, Chris D. Frazar, Jover Lee, Benjamin Pelle, Matthew Richardson, Amanda Adler, Elisabeth Brandstetter, Peter D. Han, Kairsten Fay, Misja Ilcisin, Kirsten Lacombe, Thomas R. Sibley, Melissa Truong, Caitlin R. Wolf, Michael Boeckh, Janet A. Englund, Michael Famulare, Barry R. Lutz, Mark J. Rieder, Lea M. Starita, Matthew Thompson, Jay Shendure, Trevor Bedford, Helen Y. Chu                                               |                                                                                                                                                                                                                                                                                                                                                                                                                                                           |
| EPI_ISL_525743, EPI_ISL_525744, EPI_ISL_525745, EPI_ISL_525746, EPI_ISL_525747, EPI_ISL_525748, EPI_ISL_525749, EPI_ISL_525750, EPI_ISL_525751, EPI_ISL_525752, EPI_ISL_525753, EPI_ISL_525754, EPI_ISL_525755, EPI_ISL_525756                                                                                                                                                                                                 | see above                                                               | Seattle Flu Study                                                                                                                                                                                             | Deborah A. Nickerson, Chris D. Frazar, Jover Lee, Benjamin Pelle, Matthew Richardson, Amanda Adler, Elisabeth Brandstetter, Peter D. Han, Kairsten Fay, Misja Ilcisin, Kirsten Lacombe, Thomas R. Sibley, Melissa Truong, Caitlin R. Wolf, Karen Cowgill, Stephanie Schrag, Jeff Duchin, Michael Boeckh, Janet A. Englund, Michael Famulare, Barry R. Lutz, Mark J. Rieder, Lea M. Starita, Matthew Thompson, Helen Y. Chu, Trevor Bedford, Jay Shendure |                                                                                                                                                                                                                                                                                                                                                                                                                                                           |
| EPI_ISL_526215, EPI_ISL_526216, EPI_ISL_526217, EPI_ISL_526218, EPI_ISL_526219, EPI_ISL_526220, EPI_ISL_526221, EPI_ISL_526222, EPI_ISL_526223, EPI_ISL_526224, EPI_ISL_526225, EPI_ISL_526226, EPI_ISL_526227, EPI_ISL_526228, EPI_ISL_526229, EPI_ISL_526230, EPI_ISL_526231, EPI_ISL_526232, EPI_ISL_526233, EPI_ISL_526234, EPI_ISL_526235, EPI_ISL_526236, EPI_ISL_526237, EPI_ISL_526238                                 | see above                                                               | Hungarian Defence Forces Military Medical Centre                                                                                                                                                              | National Laboratory of Virology, Szentgáthai Research Centre                                                                                                                                                                                                                                                                                                                                                                                             | Endre Gábor Tóth, Balázs Somogyi, Bálint Eszenyi, Ferenc Jakab, Gábor Kemenesi                                                                                                                                                                                                                                                                                                                                                                            |
| EPI_ISL_527381, EPI_ISL_527382, EPI_ISL_527383, EPI_ISL_527384, EPI_ISL_527385, EPI_ISL_527386, EPI_ISL_527387, EPI_ISL_527388, EPI_ISL_527389, EPI_ISL_527390, EPI_ISL_527391, EPI_ISL_527392, EPI_ISL_527393, EPI_ISL_527394, EPI_ISL_527395, EPI_ISL_527396, EPI_ISL_527397, EPI_ISL_527398, EPI_ISL_527399                                                                                                                 | see above                                                               | University of Miami Immunology and Histocompatibility Laboratory                                                                                                                                              | University of Miami Immunology and Histocompatibility Laboratory                                                                                                                                                                                                                                                                                                                                                                                         | Emilio Margolles-Clark, PhD and Phillip Ruiz, MD, PhD                                                                                                                                                                                                                                                                                                                                                                                                     |
| EPI_ISL_527818, EPI_ISL_527819                                                                                                                                                                                                                                                                                                                                                                                                 | Centro de Investigaciones, Universidad de Especialidades Espiritu Santo | Institute of Microbiology, Universidad San Francisco de Quito                                                                                                                                                 | Derly Andrade, Juan Carlos Fernandez, Belén Prado-Vivar, Sully Márquez, Juan José Guadalupe, Monica Becerra-Wong, Bernardo Gutiérrez, Gabriel Morey, Ruben Armas, Jose Pedro Barberan, Fernando Espinoza, Edith Lopez, Verónica Barragán, Patricio Rojas-Silva, Gabriel Trueba, Michelle Grunauer, Paúl Cárdenas                                                                                                                                         |                                                                                                                                                                                                                                                                                                                                                                                                                                                           |
| EPI_ISL_528609, EPI_ISL_528610, EPI_ISL_528611, EPI_ISL_528612, EPI_ISL_528613, EPI_ISL_528614, EPI_ISL_528615, EPI_ISL_528616                                                                                                                                                                                                                                                                                                 | National Genomics Core-Center for DNA Fingerprinting and Diagnostics    | National Genomics Core-Center for DNA Fingerprinting and Diagnostics (NGC-CDFD)- DBT's PAN-INDIA-1000 Genome consortium                                                                                       | Divya Vashisht, Bala Pratyusha, Heena Shah, G Shashikanth, Vinay Donipadi, K.Manohar, Madhumohan Rao, SPR Prasad, Yogesh Patidar, Arijta Jaiswal, Arpita Singh, Devanshi Gupta, Romila Moirangthem, Sanjana Sarkar, Shivani Yadav, R Harinarayanan, Rashna Bhandari, Murali Dharan Bashyam, Debashish Mitra, Ashwin Dalal                                                                                                                                |                                                                                                                                                                                                                                                                                                                                                                                                                                                           |
| EPI_ISL_529167, EPI_ISL_529168                                                                                                                                                                                                                                                                                                                                                                                                 | Maryland Department of Health Laboratory                                | Maryland Department of Health Laboratory                                                                                                                                                                      | Eric Keller, Maryland Department of Health Laboratories Administration                                                                                                                                                                                                                                                                                                                                                                                   |                                                                                                                                                                                                                                                                                                                                                                                                                                                           |
| EPI_ISL_529240, EPI_ISL_529243, EPI_ISL_529248, EPI_ISL_529249, EPI_ISL_529267, EPI_ISL_529281, EPI_ISL_529290, EPI_ISL_529292, EPI_ISL_529294, EPI_ISL_529379, EPI_ISL_529380, EPI_ISL_529381, EPI_ISL_529382, EPI_ISL_529413, EPI_ISL_529415, EPI_ISL_529422, EPI_ISL_529452, EPI_ISL_529477, EPI_ISL_529559, EPI_ISL_529573, EPI_ISL_529574, EPI_ISL_529580, EPI_ISL_529582, EPI_ISL_529583, EPI_ISL_529584, EPI_ISL_529589 | see above                                                               | Quadram Institute Bioscience                                                                                                                                                                                  | COVID-19 Genomics UK (COG-UK) Consortium                                                                                                                                                                                                                                                                                                                                                                                                                 | Dave J. Baker, Gemma L. Kay, Alp Aydin, Thanh Le-Viet, Steven Rudder, Ana P. Tedim, Anastasia Kolyva, Maria Diaz, Leonardo de Oliveira Martins, Nabil-Fareed Alikhan, Lizzie Meadows, Rachael Stanley, Ngozi Elumogo, Muhammed Yasir, Nicholas M. Thomson, Alexander J Trotter, Rachel Gilroy, Samuel Bloomfield, Claire Stuart, Andrew Bell, Reenesh Prakash, Samir Dervisevic, Alison E. Mather, John Wain, Mark Webber, Andrew J. Page, Justin O'Grady |
| EPI_ISL_529718                                                                                                                                                                                                                                                                                                                                                                                                                 | Santo Borromeus Hospital                                                | Laboratorium Kesehatan Provinsi Jawa Barat; School of Life Sciences and Technology & School of Pharmacy-Institut Teknologi Bandung; Molecular Genetics Laboratory-Faculty of Medicine-Universitas Padjadjaran | Ema Rahmawati, Marselina Irasonia Tan, Yunia Sribudiani, Catur Riani, Azzania Fibrani, Husna Nugrahapraja, Tarwadi, Savira Ekawardhani, Hesti Lina Wiraswati, Ryan Bayusantika Ristandi, Rifky Waluyajati Rachman, Cut Nur Cinthia Alamanda, Lia Faridah, Gusti Ayu Prani Pradani, Adelina Khristiani Rahayu, Hammam Riza, Sony Solistia Wirawan, Agung Eru Wibowo, Irvan Faizal                                                                         |                                                                                                                                                                                                                                                                                                                                                                                                                                                           |
| EPI_ISL_529719                                                                                                                                                                                                                                                                                                                                                                                                                 | Sumedang Regional General Hospital                                      | Laboratorium Kesehatan Provinsi Jawa Barat; School of Life Sciences and Technology & School of Pharmacy-Institut Teknologi Bandung; Molecular Genetics Laboratory-Faculty of Medicine-Universitas Padjadjaran | Ema Rahmawati, Marselina Irasonia Tan, Yunia Sribudiani, Catur Riani, Azzania Fibrani, Husna Nugrahapraja, Tarwadi, Savira Ekawardhani, Hesti Lina Wiraswati, Ryan Bayusantika Ristandi, Rifky Waluyajati Rachman, Cut Nur Cinthia Alamanda, Lia Faridah, Gusti Ayu Prani Pradani, Adelina Khristiani Rahayu, Hammam Riza, Sony Solistia Wirawan, Agung Eru Wibowo, Irvan Faizal                                                                         |                                                                                                                                                                                                                                                                                                                                                                                                                                                           |
| EPI_ISL_530044, EPI_ISL_530045, EPI_ISL_530046, EPI_ISL_530047, EPI_ISL_530048, EPI_ISL_530049, EPI_ISL_530050, EPI_ISL_530051, EPI_ISL_530052, EPI_ISL_530053, EPI_ISL_530054, EPI_ISL_530055, EPI_ISL_530056, EPI_ISL_530057, EPI_ISL_530058, EPI_ISL_530059, EPI_ISL_530060, EPI_ISL_530061, EPI_ISL_530062, EPI_ISL_530063, EPI_ISL_530064, EPI_ISL_530065, EPI_ISL_530066, EPI_ISL_530067, EPI_ISL_530068, EPI_ISL_530069 | see above                                                               | Hospital Universitario La Paz                                                                                                                                                                                 | Hospital Universitario La Paz                                                                                                                                                                                                                                                                                                                                                                                                                            | Elias Dahdouh, Sara González, Raúl Recio, Fernando Lázaro, Esther Viedma, Natalia Stella, Julio García, Juan Carlos Galán, Rafael Cantón, Mª Dolores Folgueira, Rafael Delgado, Jesús Mingorance                                                                                                                                                                                                                                                          |
| EPI_ISL_530124, EPI_ISL_530125                                                                                                                                                                                                                                                                                                                                                                                                 | Seattle Flu Study                                                       | Seattle Flu Study                                                                                                                                                                                             | Deborah A. Nickerson, Chris D. Frazar, Jover Lee, Benjamin Pelle, Matthew Richardson, Amanda Adler, Elisabeth Brandstetter, Peter D. Han, Kairsten Fay, Misja Ilcisin, Kirsten Lacombe, Thomas R. Sibley, Melissa Truong, Caitlin R. Wolf, Michael Boeckh, Janet A. Englund, Michael Famulare, Barry R. Lutz, Mark J. Rieder, Lea M. Starita, Matthew Thompson, Jay Shendure, Trevor Bedford, Helen Y. Chu                                               |                                                                                                                                                                                                                                                                                                                                                                                                                                                           |
| EPI_ISL_530126, EPI_ISL_530127, EPI_ISL_530128, EPI_ISL_530129, EPI_ISL_530130, EPI_ISL_530131                                                                                                                                                                                                                                                                                                                                 | Seattle Flu Study                                                       | Seattle Flu Study                                                                                                                                                                                             | Deborah A. Nickerson, Chris D. Frazar, Jover Lee, Benjamin Pelle, Matthew Richardson, Amanda Adler, Elisabeth Brandstetter, Peter D. Han, Kairsten Fay, Misja Ilcisin, Kirsten Lacombe, Thomas R. Sibley, Melissa Truong, Caitlin R. Wolf, Karen Cowgill, Stephanie Schrag, Jeff Duchin, Michael Boeckh, Janet A. Englund, Michael Famulare, Barry R. Lutz, Mark J. Rieder, Lea M. Starita, Matthew Thompson, Helen Y. Chu, Trevor Bedford, Jay Shendure |                                                                                                                                                                                                                                                                                                                                                                                                                                                           |
| EPI_ISL_530132                                                                                                                                                                                                                                                                                                                                                                                                                 | Seattle Flu Study                                                       | Seattle Flu Study                                                                                                                                                                                             | Deborah A. Nickerson, Chris D. Frazar, Jover Lee, Benjamin Pelle, Matthew Richardson, Amanda Adler, Elisabeth Brandstetter, Peter D. Han, Kairsten Fay, Misja Ilcisin, Kirsten Lacombe, Thomas R. Sibley, Melissa Truong, Caitlin R. Wolf, Michael Boeckh, Janet A. Englund, Michael Famulare, Barry R. Lutz, Mark J. Rieder, Lea M. Starita, Matthew Thompson, Jay Shendure, Trevor Bedford, Helen Y. Chu                                               |                                                                                                                                                                                                                                                                                                                                                                                                                                                           |
| EPI_ISL_530133, EPI_ISL_530134, EPI_ISL_530135, EPI_ISL_530136, EPI_ISL_530137, EPI_ISL_530138, EPI_ISL_530139, EPI_ISL_530140, EPI_ISL_530141, EPI_ISL_530142, EPI_ISL_530143, EPI_ISL_530144, EPI_ISL_530145, EPI_ISL_530146, EPI_ISL_530147, EPI_ISL_530148, EPI_ISL_530149, EPI_ISL_530150,                                                                                                                                |                                                                         |                                                                                                                                                                                                               |                                                                                                                                                                                                                                                                                                                                                                                                                                                          |                                                                                                                                                                                                                                                                                                                                                                                                                                                           |

|                                                                                                                                                                                                                                                                                                                                                                                                                                                                                                                                                                                                                                                                                                                                                                                                                                                                                                                                                                                                                                                                                                                                                                                                                                                                                                                                                                                                                                                                                |           |                                                                  |                                                                  |                                                                                                                                                                                                                                                                                                                                                                                                                                                          |
|--------------------------------------------------------------------------------------------------------------------------------------------------------------------------------------------------------------------------------------------------------------------------------------------------------------------------------------------------------------------------------------------------------------------------------------------------------------------------------------------------------------------------------------------------------------------------------------------------------------------------------------------------------------------------------------------------------------------------------------------------------------------------------------------------------------------------------------------------------------------------------------------------------------------------------------------------------------------------------------------------------------------------------------------------------------------------------------------------------------------------------------------------------------------------------------------------------------------------------------------------------------------------------------------------------------------------------------------------------------------------------------------------------------------------------------------------------------------------------|-----------|------------------------------------------------------------------|------------------------------------------------------------------|----------------------------------------------------------------------------------------------------------------------------------------------------------------------------------------------------------------------------------------------------------------------------------------------------------------------------------------------------------------------------------------------------------------------------------------------------------|
| EPI_ISL_530151, EPI_ISL_530152, EPI_ISL_530153, EPI_ISL_530154, EPI_ISL_530155, EPI_ISL_530156, EPI_ISL_530157, EPI_ISL_530158, EPI_ISL_530159, EPI_ISL_530160, EPI_ISL_530161, EPI_ISL_530162                                                                                                                                                                                                                                                                                                                                                                                                                                                                                                                                                                                                                                                                                                                                                                                                                                                                                                                                                                                                                                                                                                                                                                                                                                                                                 | see above | Seattle Flu Study                                                | Seattle Flu Study                                                | Deborah A. Nickerson, Chris D. Frazar, Jover Lee, Benjamin Pelle, Matthew Richardson, Amanda Adler, Elisabeth Brandstetter, Peter D. Han, Kairsten Fay, Misja Ilcin, Kirsten Lacombe, Thomas R. Sibley, Melissa Truong, Caitlin R. Wolf, Karen Cowgill, Stephanie Schrag, Jeff Duchin, Michael Boeckh, Janet A. Englund, Michael Famulare, Barry R. Lutz, Mark J. Rieder, Lea M. Starita, Matthew Thompson, Helen Y. Chu, Trevor Bedford, Jay Shendure   |
| EPI_ISL_534693, EPI_ISL_534694, EPI_ISL_534695, EPI_ISL_534696, EPI_ISL_534697, EPI_ISL_534698                                                                                                                                                                                                                                                                                                                                                                                                                                                                                                                                                                                                                                                                                                                                                                                                                                                                                                                                                                                                                                                                                                                                                                                                                                                                                                                                                                                 |           | University of Miami Immunology and Histocompatibility Laboratory | University of Miami Immunology and Histocompatibility Laboratory | Emilio Margolles-Clark, PhD and Phillip Ruiz, MD, PhD                                                                                                                                                                                                                                                                                                                                                                                                    |
| EPI_ISL_535263, EPI_ISL_535264, EPI_ISL_535265, EPI_ISL_535266, EPI_ISL_535267, EPI_ISL_535268, EPI_ISL_535269, EPI_ISL_535270, EPI_ISL_535271, EPI_ISL_535272, EPI_ISL_535273, EPI_ISL_535274, EPI_ISL_535275, EPI_ISL_535276, EPI_ISL_535277, EPI_ISL_535278, EPI_ISL_535279, EPI_ISL_535280, EPI_ISL_535281, EPI_ISL_535282, EPI_ISL_535283, EPI_ISL_535284, EPI_ISL_535285, EPI_ISL_535286, EPI_ISL_535287, EPI_ISL_535288, EPI_ISL_535289, EPI_ISL_535290, EPI_ISL_535291, EPI_ISL_535292, EPI_ISL_535293, EPI_ISL_535294, EPI_ISL_535295, EPI_ISL_535296, EPI_ISL_535297, EPI_ISL_535298, EPI_ISL_535299, EPI_ISL_535300, EPI_ISL_535301, EPI_ISL_535302, EPI_ISL_535303                                                                                                                                                                                                                                                                                                                                                                                                                                                                                                                                                                                                                                                                                                                                                                                                 | see above | New Mexico Department of Health Scientific Laboratory            | New Mexico Department of Health Scientific Laboratory            | Ellie Johnson, Anastacia Griego-Fisher, D'Eldra Malone                                                                                                                                                                                                                                                                                                                                                                                                   |
| EPI_ISL_536411                                                                                                                                                                                                                                                                                                                                                                                                                                                                                                                                                                                                                                                                                                                                                                                                                                                                                                                                                                                                                                                                                                                                                                                                                                                                                                                                                                                                                                                                 |           | Medtimes Molecular Laboratory                                    | Medtimes Molecular Laboratory                                    | Eric Chan, Winsome Wong, Jacqueline Tam, Isaac Chow                                                                                                                                                                                                                                                                                                                                                                                                      |
| EPI_ISL_536477, EPI_ISL_536478, EPI_ISL_536479, EPI_ISL_536480, EPI_ISL_536481, EPI_ISL_536482, EPI_ISL_536483, EPI_ISL_536484, EPI_ISL_536485, EPI_ISL_536486, EPI_ISL_536487, EPI_ISL_536488, EPI_ISL_536489, EPI_ISL_536490, EPI_ISL_536491, EPI_ISL_536492, EPI_ISL_536493, EPI_ISL_536494, EPI_ISL_536495, EPI_ISL_536496, EPI_ISL_536497, EPI_ISL_536498, EPI_ISL_536499, EPI_ISL_536500, EPI_ISL_536501, EPI_ISL_536502, EPI_ISL_536503, EPI_ISL_536504, EPI_ISL_536505, EPI_ISL_536506, EPI_ISL_536507, EPI_ISL_536508, EPI_ISL_536509, EPI_ISL_536510, EPI_ISL_536511, EPI_ISL_536512, EPI_ISL_536513, EPI_ISL_536514, EPI_ISL_536515, EPI_ISL_536516, EPI_ISL_536517, EPI_ISL_536518, EPI_ISL_536519, EPI_ISL_536520, EPI_ISL_536521, EPI_ISL_536522, EPI_ISL_536523, EPI_ISL_536524, EPI_ISL_536525, EPI_ISL_536526, EPI_ISL_536527, EPI_ISL_536528, EPI_ISL_536529, EPI_ISL_536530, EPI_ISL_536531, EPI_ISL_536532, EPI_ISL_536533, EPI_ISL_536534, EPI_ISL_536535, EPI_ISL_536536, EPI_ISL_536537, EPI_ISL_536538, EPI_ISL_536539, EPI_ISL_536540, EPI_ISL_536541, EPI_ISL_536542, EPI_ISL_536543, EPI_ISL_536544, EPI_ISL_536545, EPI_ISL_536546, EPI_ISL_536547, EPI_ISL_536548, EPI_ISL_536549, EPI_ISL_536550, EPI_ISL_536551, EPI_ISL_536552, EPI_ISL_536553, EPI_ISL_536554, EPI_ISL_536555, EPI_ISL_536556, EPI_ISL_536557, EPI_ISL_536558, EPI_ISL_536559, EPI_ISL_536560, EPI_ISL_536561, EPI_ISL_536562, EPI_ISL_536563, EPI_ISL_536564, EPI_ISL_536565 | see above | Instituto Nacional de Salud                                      | Laboratorio de Infecciones Respiratorias Agudas                  | Eduardo Juscamayta Lopez, David Tarazona, Faviola Valdivia Guerrero, Nancy Rojas Serrano, Dennis Carhuarica, Lenin Maturrano Hernandez, Ronnie Gavilan Chavez                                                                                                                                                                                                                                                                                            |
| EPI_ISL_536793                                                                                                                                                                                                                                                                                                                                                                                                                                                                                                                                                                                                                                                                                                                                                                                                                                                                                                                                                                                                                                                                                                                                                                                                                                                                                                                                                                                                                                                                 |           | Medtimes Molecular Laboratory                                    | Medtimes Molecular Laboratory                                    | Eric Chan, Winsome Wong, Jacqueline Tam, Isaac Chow                                                                                                                                                                                                                                                                                                                                                                                                      |
| EPI_ISL_540691, EPI_ISL_540692                                                                                                                                                                                                                                                                                                                                                                                                                                                                                                                                                                                                                                                                                                                                                                                                                                                                                                                                                                                                                                                                                                                                                                                                                                                                                                                                                                                                                                                 |           | Quadram Institute Bioscience                                     | COVID-19 Genomics UK (COG-UK) Consortium                         | Dave J. Baker, Gemma L. Kay, Alp Aydin, Thanh Le-Viet, Steven Rudder, Ana P. Tedim, Anastasia Kolyva, Maria Diaz, Leonardo de Oliveira Martins, Nabil-Fareed Alikhan, Lizzie Meadows, Rachael Stanley, Ngozi Elumogo, Muhammed Yasir, Nicholas M. Thomson, Alexander J Trotter, Rachel Gilroy, Samuel Bloomfield, Claire Stuart, Andrew Bell, Reenesh Prakash, Samir Devisevic, Alison E. Mather, John Wain, Mark Webber, Andrew J. Page, Justin O'Grady |
| EPI_ISL_542012, EPI_ISL_542013, EPI_ISL_542014, EPI_ISL_542015, EPI_ISL_542016, EPI_ISL_542017, EPI_ISL_542018, EPI_ISL_542019, EPI_ISL_542020, EPI_ISL_542021, EPI_ISL_542022, EPI_ISL_542023, EPI_ISL_542024, EPI_ISL_542025, EPI_ISL_542026, EPI_ISL_542027, EPI_ISL_542028, EPI_ISL_542029, EPI_ISL_542030, EPI_ISL_542031, EPI_ISL_542032, EPI_ISL_542033, EPI_ISL_542034, EPI_ISL_542035, EPI_ISL_542036, EPI_ISL_542037, EPI_ISL_542038, EPI_ISL_542039, EPI_ISL_542040, EPI_ISL_542041, EPI_ISL_542042, EPI_ISL_542043, EPI_ISL_542044, EPI_ISL_542045, EPI_ISL_542046, EPI_ISL_542047, EPI_ISL_542048, EPI_ISL_542049, EPI_ISL_542050, EPI_ISL_542051, EPI_ISL_542052, EPI_ISL_542053, EPI_ISL_542054, EPI_ISL_542055, EPI_ISL_542056, EPI_ISL_542057, EPI_ISL_542058, EPI_ISL_542059, EPI_ISL_542060, EPI_ISL_542061, EPI_ISL_542062, EPI_ISL_542063, EPI_ISL_542064, EPI_ISL_542065, EPI_ISL_542066, EPI_ISL_542067, EPI_ISL_542068, EPI_ISL_542069, EPI_ISL_542070, EPI_ISL_542071, EPI_ISL_542072, EPI_ISL_542073, EPI_ISL_542074, EPI_ISL_542075, EPI_ISL_542076, EPI_ISL_542077, EPI_ISL_542078, EPI_ISL_542079, EPI_ISL_542080, EPI_ISL_542081, EPI_ISL_542082, EPI_ISL_542083, EPI_ISL_542084, EPI_ISL_542085, EPI_ISL_542086, EPI_ISL_542087, EPI_ISL_542088, EPI_ISL_542089, EPI_ISL_542090, EPI_ISL_542091, EPI_ISL_542092, EPI_ISL_542093, EPI_ISL_542094, EPI_ISL_542095, EPI_ISL_542096, EPI_ISL_542097                                                 | see above | New Mexico Department of Health Scientific Laboratory            | New Mexico Department of Health Scientific Laboratory            | Ellie Johnson, Anastacia Griego-Fisher, D'Eldra Malone                                                                                                                                                                                                                                                                                                                                                                                                   |
| EPI_ISL_549349, EPI_ISL_549355, EPI_ISL_549359, EPI_ISL_549367, EPI_ISL_549373, EPI_ISL_549378, EPI_ISL_549379, EPI_ISL_549382, EPI_ISL_549481, EPI_ISL_549489, EPI_ISL_549490                                                                                                                                                                                                                                                                                                                                                                                                                                                                                                                                                                                                                                                                                                                                                                                                                                                                                                                                                                                                                                                                                                                                                                                                                                                                                                 | see above | Quadram Institute Bioscience                                     | COVID-19 Genomics UK (COG-UK) Consortium                         | Dave J. Baker, Gemma L. Kay, Alp Aydin, Thanh Le-Viet, Steven Rudder, Ana P. Tedim, Anastasia Kolyva, Maria Diaz, Leonardo de Oliveira Martins, Nabil-Fareed Alikhan, Lizzie Meadows, Rachael Stanley, Ngozi Elumogo, Muhammed Yasir, Nicholas M. Thomson, Alexander J Trotter, Rachel Gilroy, Samuel Bloomfield, Claire Stuart, Andrew Bell, Reenesh Prakash, Samir Devisevic, Alison E. Mather, John Wain, Mark Webber, Andrew J. Page, Justin O'Grady |
| EPI_ISL_560834, EPI_ISL_560837, EPI_ISL_560841, EPI_ISL_560849, EPI_ISL_560852, EPI_ISL_560856, EPI_ISL_560876, EPI_ISL_560884, EPI_ISL_560895, EPI_ISL_560896, EPI_ISL_560902, EPI_ISL_560906, EPI_ISL_560907, EPI_ISL_560909, EPI_ISL_560912, EPI_ISL_560913, EPI_ISL_560914, EPI_ISL_560915, EPI_ISL_560916, EPI_ISL_560921                                                                                                                                                                                                                                                                                                                                                                                                                                                                                                                                                                                                                                                                                                                                                                                                                                                                                                                                                                                                                                                                                                                                                 | see above | Utah Public Health Laboratory                                    | Utah Public Health Laboratory                                    | Erin Young, Kelly Oakeson                                                                                                                                                                                                                                                                                                                                                                                                                                |
| EPI_ISL_568580, EPI_ISL_568581, EPI_ISL_568582, EPI_ISL_568583, EPI_ISL_568584, EPI_ISL_568585, EPI_ISL_568586                                                                                                                                                                                                                                                                                                                                                                                                                                                                                                                                                                                                                                                                                                                                                                                                                                                                                                                                                                                                                                                                                                                                                                                                                                                                                                                                                                 |           | Ramathibodi Hospital                                             | COVID-19 Network Investigations (CONI) Alliance                  | Elizabeth Batty, Wasun Chantratita, Thanat Chookajorn, Stefan Fernandez, Angkana Huang, Anthony R. Jones, Khajohn Joonsalak, Chonticha Klungtong, Theerarat Kochakarn, Namfon Kotanan, Krittikorn Kumpornsin, Wuttichai Manasatienkij, Bhakphoom Panthan, Ekawat Pasomsub, Kingkan Rakmanee, Insee Sensorn, Janjira Thaipadunpanit, Arporn Wangwiwatsin, Treewat Wattanachokchai                                                                         |
| EPI_ISL_569625, EPI_ISL_569626, EPI_ISL_569627, EPI_ISL_569628, EPI_ISL_569629, EPI_ISL_569630, EPI_ISL_569631, EPI_ISL_569632, EPI_ISL_569633, EPI_ISL_569634, EPI_ISL_569635, EPI_ISL_569636, EPI_ISL_569637, EPI_ISL_569638, EPI_ISL_569639, EPI_ISL_569640, EPI_ISL_569641, EPI_ISL_569642, EPI_ISL_569643, EPI_ISL_569644, EPI_ISL_569645, EPI_ISL_569646, EPI_ISL_569647, EPI_ISL_569648, EPI_ISL_569649, EPI_ISL_569650, EPI_ISL_569651, EPI_ISL_569652, EPI_ISL_569653, EPI_ISL_569654, EPI_ISL_569655, EPI_ISL_569656, EPI_ISL_569657, EPI_ISL_569658, EPI_ISL_569659, EPI_ISL_569660, EPI_ISL_569661, EPI_ISL_569662, EPI_ISL_569663                                                                                                                                                                                                                                                                                                                                                                                                                                                                                                                                                                                                                                                                                                                                                                                                                                 | see above | New Mexico Department of Health Scientific Laboratory            | New Mexico Department of Health Scientific Laboratory            | Ellie Johnson, Anastacia Griego-Fisher, D'Eldra Malone                                                                                                                                                                                                                                                                                                                                                                                                   |
| EPI_ISL_572329                                                                                                                                                                                                                                                                                                                                                                                                                                                                                                                                                                                                                                                                                                                                                                                                                                                                                                                                                                                                                                                                                                                                                                                                                                                                                                                                                                                                                                                                 |           | Public Health Authority of the Slovak Republic, Bratislava       | Faculty of Natural Sciences, Comenius University in Bratislava   | Dominika Friová, Viktória Hodorová, Kristína Boršová, Broa Brejová, Viktória abanová, Sabina Fumaová Havířková, Juraj Kopáek, Martina Liková, ubomira Lukáiková, Martina Neboháová, Monika Sláviková, Edita Staroová, Elena Tichá, Tomáš Vina, Boris Klempa, Jozef Nosek                                                                                                                                                                                 |
| EPI_ISL_572399, EPI_ISL_572403, EPI_ISL_572430, EPI_ISL_572449, EPI_ISL_572486, EPI_ISL_572505, EPI_ISL_572556, EPI_ISL_572583, EPI_ISL_572649, EPI_ISL_572651, EPI_ISL_572656, EPI_ISL_572673, EPI_ISL_572730, EPI_ISL_572732, EPI_ISL_572733, EPI_ISL_572759, EPI_ISL_572775, EPI_ISL_572785, EPI_ISL_572787, EPI_ISL_572789, EPI_ISL_572791, EPI_ISL_572797, EPI_ISL_572804, EPI_ISL_572812, EPI_ISL_572825, EPI_ISL_572831, EPI_ISL_572842, EPI_ISL_572899, EPI_ISL_572939, EPI_ISL_573085, EPI_ISL_573088, EPI_ISL_573089, EPI_ISL_573092, EPI_ISL_573093, EPI_ISL_573097, EPI_ISL_573104, EPI_ISL_573105, EPI_ISL_573111, EPI_ISL_573116, EPI_ISL_573117, EPI_ISL_573118, EPI_ISL_573124, EPI_ISL_573125, EPI_ISL_573128, EPI_ISL_573130                                                                                                                                                                                                                                                                                                                                                                                                                                                                                                                                                                                                                                                                                                                                 | see above | Quadram Institute Bioscience                                     | COVID-19 Genomics UK (COG-UK) Consortium                         | Dave J. Baker, Gemma L. Kay, Alp Aydin, Thanh Le-Viet, Steven Rudder, Ana P. Tedim, Anastasia Kolyva, Maria Diaz, Leonardo de Oliveira Martins, Nabil-Fareed Alikhan, Lizzie Meadows, Rachael Stanley, Ngozi Elumogo, Muhammed Yasir, Nicholas M. Thomson, Alexander J Trotter, Rachel Gilroy, Samuel Bloomfield, Claire Stuart, Andrew Bell, Reenesh Prakash, Samir Devisevic, Alison E. Mather, John Wain, Mark Webber, Andrew J. Page, Justin O'Grady |
| EPI_ISL_574260, EPI_ISL_574261, EPI_ISL_574262, EPI_ISL_574263, EPI_ISL_574264, EPI_ISL_574265, EPI_ISL_574266, EPI_ISL_574267, EPI_ISL_574268, EPI_ISL_574269, EPI_ISL_574270, EPI_ISL_574271, EPI_ISL_574272, EPI_ISL_574273, EPI_ISL_574274, EPI_ISL_574275, EPI_ISL_574276, EPI_ISL_574277, EPI_ISL_574278, EPI_ISL_574279, EPI_ISL_574280, EPI_ISL_574281, EPI_ISL_574282, EPI_ISL_574283, EPI_ISL_574284, EPI_ISL_574285, EPI_ISL_574286, EPI_ISL_574287, EPI_ISL_574288, EPI_ISL_574289, EPI_ISL_574290, EPI_ISL_574291                                                                                                                                                                                                                                                                                                                                                                                                                                                                                                                                                                                                                                                                                                                                                                                                                                                                                                                                                 | see above | New Mexico Department of Health Scientific Laboratory            | New Mexico Department of Health Scientific Laboratory            | Ellie Johnson, Anastacia Griego-Fisher, D'Eldra Malone                                                                                                                                                                                                                                                                                                                                                                                                   |
| EPI_ISL_574648                                                                                                                                                                                                                                                                                                                                                                                                                                                                                                                                                                                                                                                                                                                                                                                                                                                                                                                                                                                                                                                                                                                                                                                                                                                                                                                                                                                                                                                                 |           | Seattle Flu Study                                                | Seattle Flu Study                                                | Deborah A. Nickerson, Chris D. Frazar, Jover Lee, Benjamin Pelle, Matthew Richardson, Amanda Adler, Elisabeth Brandstetter, Peter D. Han, Kairsten Fay, Misja Ilcin, Kirsten Lacombe, Thomas R. Sibley, Melissa Truong, Caitlin R. Wolf, Michael Boeckh, Janet A. Englund, Michael Famulare, Barry R. Lutz, Mark J. Rieder, Lea M. Starita, Matthew Thompson, Jay Shendure, Trevor Bedford, Helen Y. Chu                                                 |
| EPI_ISL_574649, EPI_ISL_574650, EPI_ISL_574651, EPI_ISL_574652, EPI_ISL_574653, EPI_ISL_574654, EPI_ISL_574655, EPI_ISL_574656, EPI_ISL_574657, EPI_ISL_574658, EPI_ISL_574659, EPI_ISL_574660, EPI_ISL_574661, EPI_ISL_574662                                                                                                                                                                                                                                                                                                                                                                                                                                                                                                                                                                                                                                                                                                                                                                                                                                                                                                                                                                                                                                                                                                                                                                                                                                                 | see above | Seattle Flu Study                                                | Seattle Flu Study                                                | Deborah A. Nickerson, Chris D. Frazar, Jover Lee, Benjamin Pelle, Matthew Richardson, Amanda Adler, Elisabeth Brandstetter, Peter D. Han, Kairsten Fay, Misja Ilcin, Kirsten Lacombe, Thomas R. Sibley, Melissa Truong, Caitlin R. Wolf, Karen Cowgill, Stephanie Schrag, Jeff Duchin, Michael Boeckh, Janet A. Englund, Michael Famulare, Barry R. Lutz, Mark J. Rieder, Lea M. Starita, Matthew Thompson, Helen Y. Chu, Trevor Bedford, Jay Shendure   |
| EPI_ISL_574663, EPI_ISL_574664, EPI_ISL_574665, EPI_ISL_574666, EPI_ISL_574667                                                                                                                                                                                                                                                                                                                                                                                                                                                                                                                                                                                                                                                                                                                                                                                                                                                                                                                                                                                                                                                                                                                                                                                                                                                                                                                                                                                                 |           | Seattle Flu Study                                                | Seattle Flu Study                                                | Deborah A. Nickerson, Chris D. Frazar, Jover Lee, Benjamin Pelle, Matthew Richardson, Amanda Adler, Elisabeth Brandstetter, Peter D. Han, Kairsten Fay, Misja Ilcin, Kirsten Lacombe, Thomas R. Sibley, Melissa Truong, Caitlin R. Wolf, Michael Boeckh, Janet A. Englund, Michael Famulare, Barry R. Lutz, Mark J. Rieder, Lea M. Starita, Matthew Thompson, Jay Shendure, Trevor Bedford, Helen Y. Chu                                                 |
| EPI_ISL_574668, EPI_ISL_574669, EPI_ISL_574670, EPI_ISL_574671, EPI_ISL_574672, EPI_ISL_574673, EPI_ISL_574674, EPI_ISL_574675, EPI_ISL_574676, EPI_ISL_574677, EPI_ISL_574678                                                                                                                                                                                                                                                                                                                                                                                                                                                                                                                                                                                                                                                                                                                                                                                                                                                                                                                                                                                                                                                                                                                                                                                                                                                                                                 | see above | Seattle Flu Study                                                | Seattle Flu Study                                                | Deborah A. Nickerson, Chris D. Frazar, Jover Lee, Benjamin Pelle, Matthew Richardson, Amanda Adler, Elisabeth Brandstetter, Peter D. Han, Kairsten Fay, Misja Ilcin, Kirsten Lacombe, Thomas R. Sibley, Melissa Truong, Caitlin R. Wolf, Karen Cowgill, Stephanie Schrag, Jeff Duchin, Michael Boeckh, Janet A. Englund, Michael Famulare, Barry R. Lutz, Mark J. Rieder, Lea M. Starita, Matthew Thompson, Jay Shendure, Trevor Bedford, Helen Y. Chu   |
| EPI_ISL_574679                                                                                                                                                                                                                                                                                                                                                                                                                                                                                                                                                                                                                                                                                                                                                                                                                                                                                                                                                                                                                                                                                                                                                                                                                                                                                                                                                                                                                                                                 |           | Seattle Flu Study                                                | Seattle Flu Study                                                | Deborah A. Nickerson, Chris D. Frazar, Jover Lee, Benjamin Pelle, Matthew Richardson, Amanda Adler, Elisabeth Brandstetter, Peter D. Han, Kairsten                                                                                                                                                                                                                                                                                                       |

|                                                                                                                                                                                                                                                                                                                                                                                                                                                                                                                                                                                                                                                                                                                                                                                                                                                                                                                                                                                                                                                                                                |                                                                                                               |                                                                                                               |                                                                                                                                                                                                                                                                                                                                                                                                                                                                                    |                                                                                                                                                                                                                                                                                                                                                                                                                                                          |
|------------------------------------------------------------------------------------------------------------------------------------------------------------------------------------------------------------------------------------------------------------------------------------------------------------------------------------------------------------------------------------------------------------------------------------------------------------------------------------------------------------------------------------------------------------------------------------------------------------------------------------------------------------------------------------------------------------------------------------------------------------------------------------------------------------------------------------------------------------------------------------------------------------------------------------------------------------------------------------------------------------------------------------------------------------------------------------------------|---------------------------------------------------------------------------------------------------------------|---------------------------------------------------------------------------------------------------------------|------------------------------------------------------------------------------------------------------------------------------------------------------------------------------------------------------------------------------------------------------------------------------------------------------------------------------------------------------------------------------------------------------------------------------------------------------------------------------------|----------------------------------------------------------------------------------------------------------------------------------------------------------------------------------------------------------------------------------------------------------------------------------------------------------------------------------------------------------------------------------------------------------------------------------------------------------|
| EPI_ISL_574680, EPI_ISL_574681                                                                                                                                                                                                                                                                                                                                                                                                                                                                                                                                                                                                                                                                                                                                                                                                                                                                                                                                                                                                                                                                 | Seattle Flu Study                                                                                             | Seattle Flu Study                                                                                             | Fay, Misja Ilcisin, Kirsten Lacombe, Thomas R. Sibley, Melissa Truong, Caitlin R. Wolf, Michael Boeckh, Janet A. Englund, Michael Famulare, Barry R. Lutz, Mark J. Rieder, Lea M. Starita, Matthew Thompson, Jay Shendure, Trevor Bedford, Helen Y. Chu                                                                                                                                                                                                                            |                                                                                                                                                                                                                                                                                                                                                                                                                                                          |
| EPI_ISL_574682                                                                                                                                                                                                                                                                                                                                                                                                                                                                                                                                                                                                                                                                                                                                                                                                                                                                                                                                                                                                                                                                                 | Seattle Flu Study                                                                                             | Seattle Flu Study                                                                                             | Deborah A. Nickerson, Chris D. Frazar, Jover Lee, Benjamin Pelle, Matthew Richardson, Amanda Adler, Elisabeth Brandstetter, Peter D. Han, Kairsten Fay, Misja Ilcisin, Kirsten Lacombe, Thomas R. Sibley, Melissa Truong, Caitlin R. Wolf, Karen Cowgill, Stephanie Schrag, Jeff Duchin, Michael Boeckh, Janet A. Englund, Michael Famulare, Barry R. Lutz, Mark J. Rieder, Lea M. Starita, Matthew Thompson, Helen Y. Chu, Trevor Bedford, Jay Shendure                           |                                                                                                                                                                                                                                                                                                                                                                                                                                                          |
| EPI_ISL_574683                                                                                                                                                                                                                                                                                                                                                                                                                                                                                                                                                                                                                                                                                                                                                                                                                                                                                                                                                                                                                                                                                 | Seattle Flu Study                                                                                             | Seattle Flu Study                                                                                             | Deborah A. Nickerson, Chris D. Frazar, Jover Lee, Benjamin Pelle, Matthew Richardson, Amanda Adler, Elisabeth Brandstetter, Peter D. Han, Kairsten Fay, Misja Ilcisin, Kirsten Lacombe, Thomas R. Sibley, Melissa Truong, Caitlin R. Wolf, Karen Cowgill, Stephanie Schrag, Jeff Duchin, Michael Boeckh, Janet A. Englund, Michael Famulare, Barry R. Lutz, Mark J. Rieder, Lea M. Starita, Matthew Thompson, Helen Y. Chu, Trevor Bedford, Jay Shendure                           |                                                                                                                                                                                                                                                                                                                                                                                                                                                          |
| EPI_ISL_574684                                                                                                                                                                                                                                                                                                                                                                                                                                                                                                                                                                                                                                                                                                                                                                                                                                                                                                                                                                                                                                                                                 | Seattle Flu Study                                                                                             | Seattle Flu Study                                                                                             | Deborah A. Nickerson, Chris D. Frazar, Jover Lee, Benjamin Pelle, Matthew Richardson, Amanda Adler, Elisabeth Brandstetter, Peter D. Han, Kairsten Fay, Misja Ilcisin, Kirsten Lacombe, Thomas R. Sibley, Melissa Truong, Caitlin R. Wolf, Michael Boeckh, Janet A. Englund, Michael Famulare, Barry R. Lutz, Mark J. Rieder, Lea M. Starita, Matthew Thompson, Jay Shendure, Trevor Bedford, Helen Y. Chu                                                                         |                                                                                                                                                                                                                                                                                                                                                                                                                                                          |
| EPI_ISL_574685, EPI_ISL_574686, EPI_ISL_574687, EPI_ISL_574688, EPI_ISL_574689, EPI_ISL_574690, EPI_ISL_574691, EPI_ISL_575028, EPI_ISL_575029, EPI_ISL_575030, EPI_ISL_575031, EPI_ISL_575032                                                                                                                                                                                                                                                                                                                                                                                                                                                                                                                                                                                                                                                                                                                                                                                                                                                                                                 | see above                                                                                                     | Seattle Flu Study                                                                                             | Deborah A. Nickerson, Chris D. Frazar, Jover Lee, Benjamin Pelle, Matthew Richardson, Amanda Adler, Elisabeth Brandstetter, Peter D. Han, Kairsten Fay, Misja Ilcisin, Kirsten Lacombe, Thomas R. Sibley, Melissa Truong, Caitlin R. Wolf, Karen Cowgill, Stephanie Schrag, Jeff Duchin, Michael Boeckh, Janet A. Englund, Michael Famulare, Barry R. Lutz, Mark J. Rieder, Lea M. Starita, Matthew Thompson, Helen Y. Chu, Trevor Bedford, Jay Shendure                           |                                                                                                                                                                                                                                                                                                                                                                                                                                                          |
| EPI_ISL_575033                                                                                                                                                                                                                                                                                                                                                                                                                                                                                                                                                                                                                                                                                                                                                                                                                                                                                                                                                                                                                                                                                 | Seattle Flu Study                                                                                             | Seattle Flu Study                                                                                             | Deborah A. Nickerson, Chris D. Frazar, Jover Lee, Benjamin Pelle, Matthew Richardson, Amanda Adler, Elisabeth Brandstetter, Peter D. Han, Kairsten Fay, Misja Ilcisin, Kirsten Lacombe, Thomas R. Sibley, Melissa Truong, Caitlin R. Wolf, Romesh Gautom, Geoff Mely, Brian Hiatt, Philip Dykema, Scott Lindquist, Michael Boeckh, Janet A. Englund, Michael Famulare, Barry R. Lutz, Mark J. Rieder, Lea M. Starita, Matthew Thompson, Helen Y. Chu, Jay Shendure, Trevor Bedford |                                                                                                                                                                                                                                                                                                                                                                                                                                                          |
| EPI_ISL_575036, EPI_ISL_575044, EPI_ISL_575048, EPI_ISL_575050, EPI_ISL_575055, EPI_ISL_575056, EPI_ISL_575060, EPI_ISL_575065, EPI_ISL_575068, EPI_ISL_575071, EPI_ISL_575074, EPI_ISL_575077, EPI_ISL_575078, EPI_ISL_575084, EPI_ISL_575085, EPI_ISL_575086, EPI_ISL_575088, EPI_ISL_575090, EPI_ISL_575091, EPI_ISL_575094, EPI_ISL_575098, EPI_ISL_575102, EPI_ISL_575105, EPI_ISL_575108, EPI_ISL_575110, EPI_ISL_575113, EPI_ISL_575119, EPI_ISL_575120, EPI_ISL_575125, EPI_ISL_575133, EPI_ISL_575135, EPI_ISL_575137, EPI_ISL_575138, EPI_ISL_575139, EPI_ISL_575140, EPI_ISL_575142, EPI_ISL_575144, EPI_ISL_575149, EPI_ISL_575151, EPI_ISL_575157, EPI_ISL_575160, EPI_ISL_575163, EPI_ISL_575170, EPI_ISL_575171, EPI_ISL_575174, EPI_ISL_575179, EPI_ISL_575194, EPI_ISL_575196, EPI_ISL_575202, EPI_ISL_575205, EPI_ISL_575207, EPI_ISL_575211, EPI_ISL_575212, EPI_ISL_575214, EPI_ISL_575216, EPI_ISL_575217, EPI_ISL_575226, EPI_ISL_575228, EPI_ISL_575238, EPI_ISL_575245, EPI_ISL_575246, EPI_ISL_575247, EPI_ISL_575248, EPI_ISL_575250, EPI_ISL_575284, EPI_ISL_575288 | see above                                                                                                     | Utah Public Health Laboratory                                                                                 | Utah Public Health Laboratory                                                                                                                                                                                                                                                                                                                                                                                                                                                      | Erin Young, Kelly Oakeson                                                                                                                                                                                                                                                                                                                                                                                                                                |
| EPI_ISL_577097, EPI_ISL_577106                                                                                                                                                                                                                                                                                                                                                                                                                                                                                                                                                                                                                                                                                                                                                                                                                                                                                                                                                                                                                                                                 | Quadram Institute Bioscience                                                                                  | COVID-19 Genomics UK (COG-UK) Consortium                                                                      | Dave J. Baker, Gemma L. Kay, Alp Aydin, Thanh Le-Viet, Steven Rudder, Ana P. Tedim, Anastasia Kolyva, Maria Diaz, Leonardo de Oliveira Martins, Nabil-Fareed Alikhan, Lizzie Meadows, Rachael Stanley, Ngozi Elumogo, Muhammed Yasir, Nicholas M. Thomson, Alexander J Trotter, Rachel Gilroy, Samuel Bloomfield, Claire Stuart, Andrew Bell, Reenesh Prakash, Samir Devisevic, Alison E. Mather, John Wain, Mark Webber, Andrew J. Page, Justin O'Grady                           |                                                                                                                                                                                                                                                                                                                                                                                                                                                          |
| EPI_ISL_578697                                                                                                                                                                                                                                                                                                                                                                                                                                                                                                                                                                                                                                                                                                                                                                                                                                                                                                                                                                                                                                                                                 | Clinical Virology Laboratory, Institute of Liver and Biliary Sciences                                         | ILBS - IGIB                                                                                                   | Ekta Gupta, Sheetalnath Rooge, Abhishek Padhi, Reshu Agarwal, Jaswinder Singh Maras, Shridhar Sivasubbu, Vinod Scaria, Shvetank Sharma                                                                                                                                                                                                                                                                                                                                             |                                                                                                                                                                                                                                                                                                                                                                                                                                                          |
| EPI_ISL_584048                                                                                                                                                                                                                                                                                                                                                                                                                                                                                                                                                                                                                                                                                                                                                                                                                                                                                                                                                                                                                                                                                 | Laboratory of Molecular Virology, Department of Biomedical, Surgical and Dental Sciences University of Milano | Laboratory of Molecular Virology, Department of Biomedical, Surgical and Dental Sciences University of Milano | Delbue,S., Modenese,A., Bianchi,M., Fattori,M., D'Alessandro,S., Pariani,E., Basilio,N., Galli,C. and Ferrante,P.                                                                                                                                                                                                                                                                                                                                                                  |                                                                                                                                                                                                                                                                                                                                                                                                                                                          |
| EPI_ISL_584049                                                                                                                                                                                                                                                                                                                                                                                                                                                                                                                                                                                                                                                                                                                                                                                                                                                                                                                                                                                                                                                                                 | Laboratory of Molecular Virology, Department of Biomedical, Surgical and Dental Sciences University of Milano | Laboratory of Molecular Virology, Department of Biomedical, Surgical and Dental Sciences University of Milano | Delbue,S., Modenese,A., Bianchi,M., Fattori,M., D'Alessandro,S.,Pariani,E., Basilio,N., Galli,C. and Ferrante,P.                                                                                                                                                                                                                                                                                                                                                                   |                                                                                                                                                                                                                                                                                                                                                                                                                                                          |
| EPI_ISL_584051                                                                                                                                                                                                                                                                                                                                                                                                                                                                                                                                                                                                                                                                                                                                                                                                                                                                                                                                                                                                                                                                                 | Laboratory of Molecular Virology, Department of Biomedical, Surgical and Dental Sciences University of Milano | Laboratory of Molecular Virology, Department of Biomedical, Surgical and Dental Sciences University of Milano | Delbue,S., Ferrante,P., Basilio,N., Parapini,S., Binda,S., D'Alessandro,S., Galli,C., Signorini,L., Primache,V., Anselmi,G. and Pariani,E                                                                                                                                                                                                                                                                                                                                          |                                                                                                                                                                                                                                                                                                                                                                                                                                                          |
| EPI_ISL_584052                                                                                                                                                                                                                                                                                                                                                                                                                                                                                                                                                                                                                                                                                                                                                                                                                                                                                                                                                                                                                                                                                 | Laboratory of Molecular Virology, Department of Biomedical, Surgical and Dental Sciences University of Milano | Laboratory of Molecular Virology, Department of Biomedical, Surgical and Dental Sciences University of Milano | Delbue,S., D'Alessandro,S., Modenese,A., Signorini,L., Parapini,S.,Dolci,M., Binda,S., Primache,V., Taramelli,D., Incorvaia,B. and Ferrante,P.                                                                                                                                                                                                                                                                                                                                     |                                                                                                                                                                                                                                                                                                                                                                                                                                                          |
| EPI_ISL_584166, EPI_ISL_584717, EPI_ISL_584718, EPI_ISL_584723, EPI_ISL_584725, EPI_ISL_584728, EPI_ISL_584729, EPI_ISL_584731, EPI_ISL_584734, EPI_ISL_584735, EPI_ISL_584909, EPI_ISL_584913, EPI_ISL_584921, EPI_ISL_584925, EPI_ISL_584926, EPI_ISL_584939, EPI_ISL_584943, EPI_ISL_584946, EPI_ISL_584949, EPI_ISL_584958, EPI_ISL_584960, EPI_ISL_584962, EPI_ISL_584964, EPI_ISL_584969, EPI_ISL_584974, EPI_ISL_584975, EPI_ISL_584978, EPI_ISL_584979, EPI_ISL_584980, EPI_ISL_584981, EPI_ISL_584984, EPI_ISL_584986, EPI_ISL_584987, EPI_ISL_584988, EPI_ISL_584989, EPI_ISL_584991, EPI_ISL_585004, EPI_ISL_585597, EPI_ISL_585598, EPI_ISL_585605, EPI_ISL_585606, EPI_ISL_585607, EPI_ISL_585613, EPI_ISL_585615, EPI_ISL_585616, EPI_ISL_585617, EPI_ISL_585619, EPI_ISL_586242                                                                                                                                                                                                                                                                                                 | see above                                                                                                     | Quadram Institute Bioscience                                                                                  | COVID-19 Genomics UK (COG-UK) Consortium                                                                                                                                                                                                                                                                                                                                                                                                                                           | Dave J. Baker, Gemma L. Kay, Alp Aydin, Thanh Le-Viet, Steven Rudder, Ana P. Tedim, Anastasia Kolyva, Maria Diaz, Leonardo de Oliveira Martins, Nabil-Fareed Alikhan, Lizzie Meadows, Rachael Stanley, Ngozi Elumogo, Muhammed Yasir, Nicholas M. Thomson, Alexander J Trotter, Rachel Gilroy, Samuel Bloomfield, Claire Stuart, Andrew Bell, Reenesh Prakash, Samir Devisevic, Alison E. Mather, John Wain, Mark Webber, Andrew J. Page, Justin O'Grady |
| EPI_ISL_586518                                                                                                                                                                                                                                                                                                                                                                                                                                                                                                                                                                                                                                                                                                                                                                                                                                                                                                                                                                                                                                                                                 | B.J. Medical College and Civil hospital, Ahmedabad                                                            | Gujarat Biotechnology Research Centre                                                                         | Dinesh Kumar, Zuber Saiyed, Komal Patel, Labdhi Pandya, Afzal Ansari, Nikha Trivedi, Pranay Shah, Kamlesh J Upadhyay, Sanjay Kapadia, Apurvasinh Puvar, Janvi Raval, Zarna Patel, Monika Gandhi, Pinal Trivedi, Maharshi Pandya, Nidhi Patel, Nitin Savaliya, Raghawendra Kumar, R D Dixit, A M Kadri, Harsh Bakshi, Chaitanya Joshi, Madhvi Joshi                                                                                                                                 |                                                                                                                                                                                                                                                                                                                                                                                                                                                          |
| EPI_ISL_586533                                                                                                                                                                                                                                                                                                                                                                                                                                                                                                                                                                                                                                                                                                                                                                                                                                                                                                                                                                                                                                                                                 | General Hospital,Chhotaudepur                                                                                 | Gujarat Biotechnology Research Centre                                                                         | Dharak Pandya, Maharshi Pandya, Nidhi Patel, Nitin Savaliya, Raghawendra Kumar, Dinesh Kumar, Zuber Saiyed, Komal Patel, Labdhi Pandya, Afzal Ansari, Nikha Trivedi, Apurvasinh Puvar, Janvi Raval, Zarna Patel, Monika Gandhi, Pinal Trivedi, Yogesh Parmar, Arti Thakur, R D Dixit, A M Kadri, Harsh Bakshi, Chaitanya Joshi, Madhvi Joshi                                                                                                                                       |                                                                                                                                                                                                                                                                                                                                                                                                                                                          |
| EPI_ISL_586540                                                                                                                                                                                                                                                                                                                                                                                                                                                                                                                                                                                                                                                                                                                                                                                                                                                                                                                                                                                                                                                                                 | Zyodus Medical Hospital,Dahod                                                                                 | Gujarat Biotechnology Research Centre                                                                         | Dinesh Kumar, Zuber Saiyed, Komal Patel, Labdhi Pandya, Afzal Ansari, Nikha Trivedi, Apurvasinh Puvar, Janvi Raval, Zarna Patel, Monika Gandhi, Pinal Trivedi, Maharshi Pandya, Nidhi Patel, Kalpesh Labana, Mohit Desai, Nitin Savaliya, Raghawendra Kumar, R D Dixit, A M Kadri, Harsh Bakshi, Chaitanya Joshi, Madhvi Joshi                                                                                                                                                     |                                                                                                                                                                                                                                                                                                                                                                                                                                                          |
| EPI_ISL_586557                                                                                                                                                                                                                                                                                                                                                                                                                                                                                                                                                                                                                                                                                                                                                                                                                                                                                                                                                                                                                                                                                 | CCC,Veraval                                                                                                   | Gujarat Biotechnology Research Centre                                                                         | Dinesh Kumar, Zuber Saiyed, Komal Patel, Labdhi Pandya, Afzal Ansari, Nikha Trivedi, Jignesh Parmar, Jitendra Bamrotia, Apurvasinh Puvar, Janvi Raval, Zarna Patel, Monika Gandhi, Pinal Trivedi, Maharshi Pandya, Nidhi Patel, Nitin Savaliya, Raghawendra Kumar, R D Dixit, A M Kadri, Harsh Bakshi, Chaitanya Joshi, Madhvi Joshi                                                                                                                                               |                                                                                                                                                                                                                                                                                                                                                                                                                                                          |
| EPI_ISL_591285, EPI_ISL_591287, EPI_ISL_591289, EPI_ISL_591291, EPI_ISL_591303, EPI_ISL_591304, EPI_ISL_591305, EPI_ISL_591310, EPI_ISL_591314, EPI_ISL_591315, EPI_ISL_594001, EPI_ISL_594002, EPI_ISL_594005, EPI_ISL_594012, EPI_ISL_594016, EPI_ISL_594021, EPI_ISL_594022, EPI_ISL_594026, EPI_ISL_594034, EPI_ISL_594041, EPI_ISL_594044, EPI_ISL_594053, EPI_ISL_594058, EPI_ISL_594059, EPI_ISL_594067, EPI_ISL_594070, EPI_ISL_594074, EPI_ISL_594083, EPI_ISL_594088, EPI_ISL_594089, EPI_ISL_594090, EPI_ISL_594091, EPI_ISL_594095, EPI_ISL_594096, EPI_ISL_594098, EPI_ISL_594104, EPI_ISL_594106, EPI_ISL_594108, EPI_ISL_594110                                                                                                                                                                                                                                                                                                                                                                                                                                                 | see above                                                                                                     | Utah Public Health Laboratory                                                                                 | Utah Public Health Laboratory                                                                                                                                                                                                                                                                                                                                                                                                                                                      | Erin Young, Kelly Oakeson                                                                                                                                                                                                                                                                                                                                                                                                                                |
| EPI_ISL_594118                                                                                                                                                                                                                                                                                                                                                                                                                                                                                                                                                                                                                                                                                                                                                                                                                                                                                                                                                                                                                                                                                 | Centro de Investigaciones, Universidad de Especialidades Espiritu Santo                                       | Institute of Microbiology, Universidad San Francisco de Quito                                                 | Derly Andrade, Juan Carlos Fernandez, Belén Prado-Vivar, Sully Márquez, Juan José Guadalupe, Monica Becerra-Wong, Bernardo Gutiérrez, Gabriel Morey, Ruben Armas, Jose Pedro Barberan, Fernando Espinoza, Edith Lopez, Verónica Barragán, Patricio Rojas-Silva, Gabriel Trueba, Michelle Grunauer, Paúl Cárdenas                                                                                                                                                                   |                                                                                                                                                                                                                                                                                                                                                                                                                                                          |
| EPI_ISL_594248, EPI_ISL_594249, EPI_ISL_594261, EPI_ISL_594267, EPI_ISL_594268, EPI_ISL_594272, EPI_ISL_594395, EPI_ISL_594397, EPI_ISL_594400, EPI_ISL_594402, EPI_ISL_594403, EPI_ISL_594410, EPI_ISL_594416, EPI_ISL_594423, EPI_ISL_594436, EPI_ISL_594440, EPI_ISL_594442, EPI_ISL_594443, EPI_ISL_594444                                                                                                                                                                                                                                                                                                                                                                                                                                                                                                                                                                                                                                                                                                                                                                                 | see above                                                                                                     | Utah Public Health Laboratory                                                                                 | Utah Public Health Laboratory                                                                                                                                                                                                                                                                                                                                                                                                                                                      | Erin Young, Kelly Oakeson                                                                                                                                                                                                                                                                                                                                                                                                                                |
| EPI_ISL_595115, EPI_ISL_595118, EPI_ISL_595120, EPI_ISL_595127, EPI_ISL_595130, EPI_ISL_595138, EPI_ISL_595140, EPI_ISL_595141, EPI_ISL_595143, EPI_ISL_595145, EPI_ISL_595147, EPI_ISL_595148, EPI_ISL_595149, EPI_ISL_595152, EPI_ISL_595153, EPI_ISL_595158, EPI_ISL_595168, EPI_ISL_595172, EPI_ISL_595177, EPI_ISL_595179, EPI_ISL_595188, EPI_ISL_595192, EPI_ISL_595196, EPI_ISL_595197, EPI_ISL_595198, EPI_ISL_595200, EPI_ISL_595210, EPI_ISL_595211, EPI_ISL_595221, EPI_ISL_595230, EPI_ISL_595842, EPI_ISL_595850, EPI_ISL_595858, EPI_ISL_595862, EPI_ISL_595863, EPI_ISL_595868, EPI_ISL_595869, EPI_ISL_595871, EPI_ISL_595874, EPI_ISL_595881, EPI_ISL_595886, EPI_ISL_595892, EPI_ISL_595898, EPI_ISL_595899, EPI_ISL_595910, EPI_ISL_595913, EPI_ISL_595917, EPI_ISL_595919, EPI_ISL_595922, EPI_ISL_595927, EPI_ISL_595928, EPI_ISL_595936, EPI_ISL_595947, EPI_ISL_595960,                                                                                                                                                                                                | see above                                                                                                     | Utah Public Health Laboratory                                                                                 | Utah Public Health Laboratory                                                                                                                                                                                                                                                                                                                                                                                                                                                      | Erin Young, Kelly Oakeson                                                                                                                                                                                                                                                                                                                                                                                                                                |



|                                                                                                                                                                                                                                                                                                                                                                                                                                                                                                                                                                                                                                                                                                                                                                                                                                                                                                                                |           |                                                                                             |                                                                  |                                                                                                                                                                                                                                                                                                                                                                                                                                                           |
|--------------------------------------------------------------------------------------------------------------------------------------------------------------------------------------------------------------------------------------------------------------------------------------------------------------------------------------------------------------------------------------------------------------------------------------------------------------------------------------------------------------------------------------------------------------------------------------------------------------------------------------------------------------------------------------------------------------------------------------------------------------------------------------------------------------------------------------------------------------------------------------------------------------------------------|-----------|---------------------------------------------------------------------------------------------|------------------------------------------------------------------|-----------------------------------------------------------------------------------------------------------------------------------------------------------------------------------------------------------------------------------------------------------------------------------------------------------------------------------------------------------------------------------------------------------------------------------------------------------|
| EPI_ISL_595962, EPI_ISL_595969, EPI_ISL_595972, EPI_ISL_595973, EPI_ISL_595974, EPI_ISL_595979, EPI_ISL_595982, EPI_ISL_596006, EPI_ISL_596014, EPI_ISL_596017, EPI_ISL_596018, EPI_ISL_596019, EPI_ISL_596023, EPI_ISL_596024, EPI_ISL_596028, EPI_ISL_596029, EPI_ISL_596031, EPI_ISL_596035, EPI_ISL_596038, EPI_ISL_596039, EPI_ISL_596044, EPI_ISL_596045, EPI_ISL_596046, EPI_ISL_596047, EPI_ISL_596052, EPI_ISL_596059, EPI_ISL_596065, EPI_ISL_596068, EPI_ISL_596069, EPI_ISL_596075, EPI_ISL_596076, EPI_ISL_596078, EPI_ISL_596079, EPI_ISL_596088, EPI_ISL_596090, EPI_ISL_596094, EPI_ISL_596096, EPI_ISL_596102, EPI_ISL_596103, EPI_ISL_596114, EPI_ISL_596120, EPI_ISL_596131, EPI_ISL_596132, EPI_ISL_596135, EPI_ISL_596136, EPI_ISL_596147, EPI_ISL_596150, EPI_ISL_596158, EPI_ISL_596162, EPI_ISL_596165, EPI_ISL_596168, EPI_ISL_596173, EPI_ISL_596179, EPI_ISL_596183, EPI_ISL_596187, EPI_ISL_596190 | see above | Quadram Institute Bioscience                                                                | COVID-19 Genomics UK (COG-UK) Consortium                         | Dave J. Baker, Gemma L. Kay, Alp Aydin, Thanh Le-Viet, Steven Rudder, Ana P. Tedim, Anastasia Kolyva, Maria Diaz, Leonardo de Oliveira Martins, Nabil-Fareed Alikhan, Lizzie Meadows, Rachael Stanley, Ngozi Elumogo, Muhammed Yasin, Nicholas M. Thomson, Alexander J Trotter, Rachel Gilroy, Samuel Bloomfield, Claire Stuart, Andrew Bell, Reenesh Prakash, Samir Derwisevic, Alison E. Mather, John Wain, Mark Webber, Andrew J. Page, Justin O'Grady |
| EPI_ISL_596387                                                                                                                                                                                                                                                                                                                                                                                                                                                                                                                                                                                                                                                                                                                                                                                                                                                                                                                 |           | Seattle Flu Study                                                                           | Seattle Flu Study                                                | Deborah A. Nickerson, Chris D. Frazar, Jover Lee, Benjamin Pelle, Matthew Richardson, Amanda Adler, Elisabeth Brandstetter, Peter D. Han, Kairsten Fay, Misja Ilcinis, Kirsten Lacombe, Thomas R. Sibley, Melissa Truong, Caitlin R. Wolf, Michael Boeckh, Janet A. Englund, Michael Famulare, Barry R. Lutz, Mark J. Rieder, Lea M. Starita, Matthew Thompson, Jay Shendure, Trevor Bedford, Helen Y. Chu                                                |
| EPI_ISL_596388, EPI_ISL_596389, EPI_ISL_596390, EPI_ISL_596391, EPI_ISL_596392, EPI_ISL_596393                                                                                                                                                                                                                                                                                                                                                                                                                                                                                                                                                                                                                                                                                                                                                                                                                                 |           | Seattle Flu Study                                                                           | Seattle Flu Study                                                | Deborah A. Nickerson, Chris D. Frazar, Jover Lee, Benjamin Pelle, Matthew Richardson, Amanda Adler, Elisabeth Brandstetter, Peter D. Han, Kairsten Fay, Misja Ilcinis, Kirsten Lacombe, Thomas R. Sibley, Melissa Truong, Caitlin R. Wolf, Karen Cowgill, Stephanie Schrag, Jeff Duchin, Michael Boeckh, Janet A. Englund, Michael Famulare, Barry R. Lutz, Mark J. Rieder, Lea M. Starita, Matthew Thompson, Helen Y. Chu, Trevor Bedford, Jay Shendure  |
| EPI_ISL_596394, EPI_ISL_596395, EPI_ISL_596396, EPI_ISL_596397, EPI_ISL_596398, EPI_ISL_596399, EPI_ISL_596400, EPI_ISL_596401, EPI_ISL_596402, EPI_ISL_596403, EPI_ISL_596404, EPI_ISL_596405, EPI_ISL_596406, EPI_ISL_596407, EPI_ISL_596408, EPI_ISL_596409                                                                                                                                                                                                                                                                                                                                                                                                                                                                                                                                                                                                                                                                 | see above | Seattle Flu Study                                                                           | Seattle Flu Study                                                | Deborah A. Nickerson, Chris D. Frazar, Jover Lee, Benjamin Pelle, Matthew Richardson, Amanda Adler, Elisabeth Brandstetter, Peter D. Han, Kairsten Fay, Misja Ilcinis, Kirsten Lacombe, Thomas R. Sibley, Melissa Truong, Caitlin R. Wolf, Karen Cowgill, Stephanie Schrag, Jeff Duchin, Michael Boeckh, Janet A. Englund, Michael Famulare, Barry R. Lutz, Mark J. Rieder, Lea M. Starita, Matthew Thompson, Helen Y. Chu, Trevor Bedford, Jay Shendure  |
| EPI_ISL_596410                                                                                                                                                                                                                                                                                                                                                                                                                                                                                                                                                                                                                                                                                                                                                                                                                                                                                                                 |           | Seattle Flu Study                                                                           | Seattle Flu Study                                                | Deborah A. Nickerson, Chris D. Frazar, Jover Lee, Benjamin Pelle, Matthew Richardson, Amanda Adler, Elisabeth Brandstetter, Peter D. Han, Kairsten Fay, Misja Ilcinis, Kirsten Lacombe, Thomas R. Sibley, Melissa Truong, Caitlin R. Wolf, Michael Boeckh, Janet A. Englund, Michael Famulare, Barry R. Lutz, Mark J. Rieder, Lea M. Starita, Matthew Thompson, Jay Shendure, Trevor Bedford, Helen Y. Chu                                                |
| EPI_ISL_596411                                                                                                                                                                                                                                                                                                                                                                                                                                                                                                                                                                                                                                                                                                                                                                                                                                                                                                                 |           | Seattle Flu Study                                                                           | Seattle Flu Study                                                | Deborah A. Nickerson, Chris D. Frazar, Jover Lee, Benjamin Pelle, Matthew Richardson, Amanda Adler, Elisabeth Brandstetter, Peter D. Han, Kairsten Fay, Misja Ilcinis, Kirsten Lacombe, Thomas R. Sibley, Melissa Truong, Caitlin R. Wolf, Karen Cowgill, Stephanie Schrag, Jeff Duchin, Michael Boeckh, Janet A. Englund, Michael Famulare, Barry R. Lutz, Mark J. Rieder, Lea M. Starita, Matthew Thompson, Helen Y. Chu, Trevor Bedford, Jay Shendure  |
| EPI_ISL_596412, EPI_ISL_596413, EPI_ISL_596414                                                                                                                                                                                                                                                                                                                                                                                                                                                                                                                                                                                                                                                                                                                                                                                                                                                                                 |           | Seattle Flu Study                                                                           | Seattle Flu Study                                                | Deborah A. Nickerson, Chris D. Frazar, Jover Lee, Benjamin Pelle, Matthew Richardson, Amanda Adler, Elisabeth Brandstetter, Peter D. Han, Kairsten Fay, Misja Ilcinis, Kirsten Lacombe, Thomas R. Sibley, Melissa Truong, Caitlin R. Wolf, Michael Boeckh, Janet A. Englund, Michael Famulare, Barry R. Lutz, Mark J. Rieder, Lea M. Starita, Matthew Thompson, Jay Shendure, Trevor Bedford, Helen Y. Chu                                                |
| EPI_ISL_596415, EPI_ISL_596416                                                                                                                                                                                                                                                                                                                                                                                                                                                                                                                                                                                                                                                                                                                                                                                                                                                                                                 |           | Seattle Flu Study                                                                           | Seattle Flu Study                                                | Deborah A. Nickerson, Chris D. Frazar, Jover Lee, Benjamin Pelle, Matthew Richardson, Amanda Adler, Elisabeth Brandstetter, Peter D. Han, Kairsten Fay, Misja Ilcinis, Kirsten Lacombe, Thomas R. Sibley, Melissa Truong, Caitlin R. Wolf, Karen Cowgill, Stephanie Schrag, Jeff Duchin, Michael Boeckh, Janet A. Englund, Michael Famulare, Barry R. Lutz, Mark J. Rieder, Lea M. Starita, Matthew Thompson, Helen Y. Chu, Trevor Bedford, Jay Shendure  |
| EPI_ISL_596417, EPI_ISL_596418, EPI_ISL_596419, EPI_ISL_596420                                                                                                                                                                                                                                                                                                                                                                                                                                                                                                                                                                                                                                                                                                                                                                                                                                                                 |           | Seattle Flu Study                                                                           | Seattle Flu Study                                                | Deborah A. Nickerson, Chris D. Frazar, Jover Lee, Benjamin Pelle, Matthew Richardson, Amanda Adler, Elisabeth Brandstetter, Peter D. Han, Kairsten Fay, Misja Ilcinis, Kirsten Lacombe, Thomas R. Sibley, Melissa Truong, Caitlin R. Wolf, Michael Boeckh, Janet A. Englund, Michael Famulare, Barry R. Lutz, Mark J. Rieder, Lea M. Starita, Matthew Thompson, Jay Shendure, Trevor Bedford, Helen Y. Chu                                                |
| EPI_ISL_596421, EPI_ISL_596422, EPI_ISL_596423, EPI_ISL_596424, EPI_ISL_596425                                                                                                                                                                                                                                                                                                                                                                                                                                                                                                                                                                                                                                                                                                                                                                                                                                                 |           | Seattle Flu Study                                                                           | Seattle Flu Study                                                | Deborah A. Nickerson, Chris D. Frazar, Jover Lee, Benjamin Pelle, Matthew Richardson, Amanda Adler, Elisabeth Brandstetter, Peter D. Han, Kairsten Fay, Misja Ilcinis, Kirsten Lacombe, Thomas R. Sibley, Melissa Truong, Caitlin R. Wolf, Karen Cowgill, Stephanie Schrag, Jeff Duchin, Michael Boeckh, Janet A. Englund, Michael Famulare, Barry R. Lutz, Mark J. Rieder, Lea M. Starita, Matthew Thompson, Helen Y. Chu, Trevor Bedford, Jay Shendure  |
| EPI_ISL_596426, EPI_ISL_596427, EPI_ISL_596428, EPI_ISL_596429, EPI_ISL_596430, EPI_ISL_596431, EPI_ISL_596432, EPI_ISL_596433, EPI_ISL_596434, EPI_ISL_596435, EPI_ISL_596436                                                                                                                                                                                                                                                                                                                                                                                                                                                                                                                                                                                                                                                                                                                                                 | see above | Seattle Flu Study                                                                           | Seattle Flu Study                                                | Deborah A. Nickerson, Chris D. Frazar, Jover Lee, Benjamin Pelle, Matthew Richardson, Amanda Adler, Elisabeth Brandstetter, Peter D. Han, Kairsten Fay, Misja Ilcinis, Kirsten Lacombe, Thomas R. Sibley, Melissa Truong, Caitlin R. Wolf, Michael Boeckh, Janet A. Englund, Michael Famulare, Barry R. Lutz, Mark J. Rieder, Lea M. Starita, Matthew Thompson, Jay Shendure, Trevor Bedford, Helen Y. Chu                                                |
| EPI_ISL_596437, EPI_ISL_596438, EPI_ISL_596439                                                                                                                                                                                                                                                                                                                                                                                                                                                                                                                                                                                                                                                                                                                                                                                                                                                                                 |           | Seattle Flu Study                                                                           | Seattle Flu Study                                                | Deborah A. Nickerson, Chris D. Frazar, Jover Lee, Benjamin Pelle, Matthew Richardson, Amanda Adler, Elisabeth Brandstetter, Peter D. Han, Kairsten Fay, Misja Ilcinis, Kirsten Lacombe, Thomas R. Sibley, Melissa Truong, Caitlin R. Wolf, Karen Cowgill, Stephanie Schrag, Jeff Duchin, Michael Boeckh, Janet A. Englund, Michael Famulare, Barry R. Lutz, Mark J. Rieder, Lea M. Starita, Matthew Thompson, Helen Y. Chu, Trevor Bedford, Jay Shendure  |
| EPI_ISL_596440, EPI_ISL_596441, EPI_ISL_596442, EPI_ISL_596443, EPI_ISL_596444, EPI_ISL_596445                                                                                                                                                                                                                                                                                                                                                                                                                                                                                                                                                                                                                                                                                                                                                                                                                                 |           | Seattle Flu Study                                                                           | Seattle Flu Study                                                | Deborah A. Nickerson, Chris D. Frazar, Jover Lee, Benjamin Pelle, Matthew Richardson, Amanda Adler, Elisabeth Brandstetter, Peter D. Han, Kairsten Fay, Misja Ilcinis, Kirsten Lacombe, Thomas R. Sibley, Melissa Truong, Caitlin R. Wolf, Michael Boeckh, Janet A. Englund, Michael Famulare, Barry R. Lutz, Mark J. Rieder, Lea M. Starita, Matthew Thompson, Jay Shendure, Trevor Bedford, Helen Y. Chu                                                |
| EPI_ISL_596446                                                                                                                                                                                                                                                                                                                                                                                                                                                                                                                                                                                                                                                                                                                                                                                                                                                                                                                 |           | Seattle Flu Study                                                                           | Seattle Flu Study                                                | Deborah A. Nickerson, Chris D. Frazar, Jover Lee, Benjamin Pelle, Matthew Richardson, Amanda Adler, Elisabeth Brandstetter, Peter D. Han, Kairsten Fay, Misja Ilcinis, Kirsten Lacombe, Thomas R. Sibley, Melissa Truong, Caitlin R. Wolf, Karen Cowgill, Stephanie Schrag, Jeff Duchin, Michael Boeckh, Janet A. Englund, Michael Famulare, Barry R. Lutz, Mark J. Rieder, Lea M. Starita, Matthew Thompson, Helen Y. Chu, Trevor Bedford, Jay Shendure  |
| EPI_ISL_602162, EPI_ISL_602163, EPI_ISL_602164, EPI_ISL_602165, EPI_ISL_602166, EPI_ISL_602167, EPI_ISL_602168, EPI_ISL_602169, EPI_ISL_602170, EPI_ISL_602171, EPI_ISL_602172, EPI_ISL_602173, EPI_ISL_602174, EPI_ISL_602175, EPI_ISL_602176, EPI_ISL_602177, EPI_ISL_602178, EPI_ISL_602179, EPI_ISL_602180, EPI_ISL_602181, EPI_ISL_602182, EPI_ISL_602183, EPI_ISL_602184, EPI_ISL_602185, EPI_ISL_602186, EPI_ISL_602187, EPI_ISL_602188, EPI_ISL_602189, EPI_ISL_602190, EPI_ISL_602191, EPI_ISL_602192, EPI_ISL_602193, EPI_ISL_602194, EPI_ISL_602195, EPI_ISL_602196, EPI_ISL_602197, EPI_ISL_602198, EPI_ISL_602199, EPI_ISL_602200, EPI_ISL_602201, EPI_ISL_602202, EPI_ISL_602203, EPI_ISL_602204, EPI_ISL_602205, EPI_ISL_602206, EPI_ISL_602207                                                                                                                                                                 | see above | New Mexico Department of Health Scientific Laboratory                                       | New Mexico Department of Health Scientific Laboratory            | Ellie Johnson, Anastacia Griego-Fisher, D'Eldra Malone                                                                                                                                                                                                                                                                                                                                                                                                    |
| EPI_ISL_602282, EPI_ISL_602283, EPI_ISL_602284, EPI_ISL_602285, EPI_ISL_602286, EPI_ISL_602287, EPI_ISL_602288, EPI_ISL_602289, EPI_ISL_602290, EPI_ISL_602291, EPI_ISL_602292, EPI_ISL_602293, EPI_ISL_602294, EPI_ISL_602295, EPI_ISL_602296, EPI_ISL_602297, EPI_ISL_602298, EPI_ISL_602299, EPI_ISL_602300, EPI_ISL_602301, EPI_ISL_602302, EPI_ISL_602303                                                                                                                                                                                                                                                                                                                                                                                                                                                                                                                                                                 | see above | Evangelisches Klinikum Bethel, Institut für Laboratoriumsmedizin, Mikrobiologie und Hygiene | Bielefeld University                                             | David Brandt, Tobias Busche, Markus Haak, Jörn Kalinowski, Levin-Joe Klages, Christiane Scherer, Alexander Sczyrba, Marina Simunovic, Svenja Vinke                                                                                                                                                                                                                                                                                                        |
| EPI_ISL_602306, EPI_ISL_602307, EPI_ISL_602308, EPI_ISL_602309, EPI_ISL_602310, EPI_ISL_602311, EPI_ISL_602312, EPI_ISL_602313, EPI_ISL_602314, EPI_ISL_602315, EPI_ISL_602316, EPI_ISL_602317, EPI_ISL_602318, EPI_ISL_602319, EPI_ISL_602320, EPI_ISL_602321, EPI_ISL_602322, EPI_ISL_602323, EPI_ISL_602324, EPI_ISL_602325, EPI_ISL_602326, EPI_ISL_602327, EPI_ISL_602328                                                                                                                                                                                                                                                                                                                                                                                                                                                                                                                                                 | see above | University of Miami Immunology and Histocompatibility Laboratory                            | University of Miami Immunology and Histocompatibility Laboratory | Emilio Margolles-Clark, PhD and Phillip Ruiz, MD, PhD                                                                                                                                                                                                                                                                                                                                                                                                     |
| EPI_ISL_602559, EPI_ISL_602560, EPI_ISL_602561                                                                                                                                                                                                                                                                                                                                                                                                                                                                                                                                                                                                                                                                                                                                                                                                                                                                                 |           | Alaska State Virology Laboratory                                                            | Alaska State Virology Laboratory                                 | DeRonde,S., Deuling,H., Chen,J.                                                                                                                                                                                                                                                                                                                                                                                                                           |
| EPI_ISL_602932, EPI_ISL_602934, EPI_ISL_602937, EPI_ISL_602938, EPI_ISL_602939, EPI_ISL_602941, EPI_ISL_602948, EPI_ISL_602950, EPI_ISL_602952, EPI_ISL_602953, EPI_ISL_602955                                                                                                                                                                                                                                                                                                                                                                                                                                                                                                                                                                                                                                                                                                                                                 | see above | Utah Public Health Laboratory                                                               | Utah Public Health Laboratory                                    | Erin Young, Kelly Oakeson                                                                                                                                                                                                                                                                                                                                                                                                                                 |
| EPI_ISL_605147                                                                                                                                                                                                                                                                                                                                                                                                                                                                                                                                                                                                                                                                                                                                                                                                                                                                                                                 |           | University of Miami Immunology and Histocompatibility Laboratory                            | University of Miami Immunology and Histocompatibility Laboratory | Emilio Margolles-Clark, PhD and Phillip Ruiz, MD, PhD                                                                                                                                                                                                                                                                                                                                                                                                     |
| EPI_ISL_605148, EPI_ISL_605149, EPI_ISL_605150, EPI_ISL_605151, EPI_ISL_605152, EPI_ISL_605153, EPI_ISL_605154, EPI_ISL_605155, EPI_ISL_605156, EPI_ISL_605157, EPI_ISL_605158, EPI_ISL_605159, EPI_ISL_605160, EPI_ISL_605161, EPI_ISL_605162, EPI_ISL_605163, EPI_ISL_605164, EPI_ISL_605165, EPI_ISL_605166, EPI_ISL_605167, EPI_ISL_605168, EPI_ISL_605169, EPI_ISL_605170, EPI_ISL_605171, EPI_ISL_605172, EPI_ISL_605173, EPI_ISL_605174, EPI_ISL_605175, EPI_ISL_605176, EPI_ISL_605177, EPI_ISL_605178, EPI_ISL_605179, EPI_ISL_605180, EPI_ISL_605181, EPI_ISL_605182, EPI_ISL_605183, EPI_ISL_605184, EPI_ISL_605185, EPI_ISL_605186, EPI_ISL_605187, EPI_ISL_605188, EPI_ISL_605189, EPI_ISL_605190, EPI_ISL_605191, EPI_ISL_605192, EPI_ISL_605193, EPI_ISL_605194, EPI_ISL_605195, EPI_ISL_605196, EPI_ISL_605197, EPI_ISL_605198, EPI_ISL_605199, EPI_ISL_605200, EPI_ISL_605201,                                |           |                                                                                             |                                                                  |                                                                                                                                                                                                                                                                                                                                                                                                                                                           |

|                                                                                                                                                                                                                                                                                                                                                                                                                                                                                                                                                                                                                                                                                                                                                                                                                                                                                                                                                                                                                                                                                                                                                                                                                                                                                                                                                                                                                                                                                                                                                                                                                                                                                                                                                                                                                                                                                                                                                                                                                                                                                                                                                                                                                                                                                                                                                                                                                                                                                                                                                                                                                                                                                                                                                                                                                                                                                                                                                                                                                                                                                                                                                                                                                                                                                                                                                                                |           |                                                                                                                                                        |                                                                                    |                                                                                                                                                                                                                                                                                                                                                                                                                                                           |
|--------------------------------------------------------------------------------------------------------------------------------------------------------------------------------------------------------------------------------------------------------------------------------------------------------------------------------------------------------------------------------------------------------------------------------------------------------------------------------------------------------------------------------------------------------------------------------------------------------------------------------------------------------------------------------------------------------------------------------------------------------------------------------------------------------------------------------------------------------------------------------------------------------------------------------------------------------------------------------------------------------------------------------------------------------------------------------------------------------------------------------------------------------------------------------------------------------------------------------------------------------------------------------------------------------------------------------------------------------------------------------------------------------------------------------------------------------------------------------------------------------------------------------------------------------------------------------------------------------------------------------------------------------------------------------------------------------------------------------------------------------------------------------------------------------------------------------------------------------------------------------------------------------------------------------------------------------------------------------------------------------------------------------------------------------------------------------------------------------------------------------------------------------------------------------------------------------------------------------------------------------------------------------------------------------------------------------------------------------------------------------------------------------------------------------------------------------------------------------------------------------------------------------------------------------------------------------------------------------------------------------------------------------------------------------------------------------------------------------------------------------------------------------------------------------------------------------------------------------------------------------------------------------------------------------------------------------------------------------------------------------------------------------------------------------------------------------------------------------------------------------------------------------------------------------------------------------------------------------------------------------------------------------------------------------------------------------------------------------------------------------|-----------|--------------------------------------------------------------------------------------------------------------------------------------------------------|------------------------------------------------------------------------------------|-----------------------------------------------------------------------------------------------------------------------------------------------------------------------------------------------------------------------------------------------------------------------------------------------------------------------------------------------------------------------------------------------------------------------------------------------------------|
| EPI_ISL_605202, EPI_ISL_605203, EPI_ISL_605204, EPI_ISL_605205, EPI_ISL_605206, EPI_ISL_605207, EPI_ISL_605208, EPI_ISL_605209, EPI_ISL_605210, EPI_ISL_605211, EPI_ISL_605212, EPI_ISL_605213, EPI_ISL_605214, EPI_ISL_605215, EPI_ISL_605216, EPI_ISL_605217, EPI_ISL_605218, EPI_ISL_605219, EPI_ISL_605220, EPI_ISL_605221, EPI_ISL_605222, EPI_ISL_605223, EPI_ISL_605224, EPI_ISL_605225, EPI_ISL_605226, EPI_ISL_605227, EPI_ISL_605228, EPI_ISL_605229, EPI_ISL_605230, EPI_ISL_605231, EPI_ISL_605232, EPI_ISL_605233, EPI_ISL_605234, EPI_ISL_605235, EPI_ISL_605236, EPI_ISL_605237, EPI_ISL_605238, EPI_ISL_605239, EPI_ISL_605240, EPI_ISL_605241, EPI_ISL_605242, EPI_ISL_605243, EPI_ISL_605244, EPI_ISL_605245, EPI_ISL_605246, EPI_ISL_605247, EPI_ISL_605248, EPI_ISL_605249, EPI_ISL_605250, EPI_ISL_605251, EPI_ISL_605252, EPI_ISL_605253, EPI_ISL_605254, EPI_ISL_605255, EPI_ISL_605256, EPI_ISL_605257, EPI_ISL_605258, EPI_ISL_605259, EPI_ISL_605260, EPI_ISL_605261, EPI_ISL_605262, EPI_ISL_605263, EPI_ISL_605264, EPI_ISL_605265, EPI_ISL_605266, EPI_ISL_605267, EPI_ISL_605268, EPI_ISL_605269, EPI_ISL_605270, EPI_ISL_605271, EPI_ISL_605272, EPI_ISL_605273, EPI_ISL_605274, EPI_ISL_605275, EPI_ISL_605276, EPI_ISL_605277, EPI_ISL_605278, EPI_ISL_605279, EPI_ISL_605280, EPI_ISL_605281, EPI_ISL_605282, EPI_ISL_605283, EPI_ISL_605284, EPI_ISL_605285, EPI_ISL_605286, EPI_ISL_605287, EPI_ISL_605288, EPI_ISL_605289, EPI_ISL_605290, EPI_ISL_605291, EPI_ISL_605292, EPI_ISL_605293, EPI_ISL_605294, EPI_ISL_605295, EPI_ISL_605296, EPI_ISL_605297, EPI_ISL_605298, EPI_ISL_605299, EPI_ISL_605300, EPI_ISL_605301, EPI_ISL_605302, EPI_ISL_605303, EPI_ISL_605304, EPI_ISL_605305, EPI_ISL_605306, EPI_ISL_605307, EPI_ISL_605308, EPI_ISL_605309, EPI_ISL_605310, EPI_ISL_605311, EPI_ISL_605312, EPI_ISL_605313, EPI_ISL_605314, EPI_ISL_605315, EPI_ISL_605316, EPI_ISL_605317, EPI_ISL_605318, EPI_ISL_605319, EPI_ISL_605320, EPI_ISL_605321, EPI_ISL_605322, EPI_ISL_605323, EPI_ISL_605324, EPI_ISL_605325, EPI_ISL_605326, EPI_ISL_605327, EPI_ISL_605328, EPI_ISL_605329, EPI_ISL_605330, EPI_ISL_605331, EPI_ISL_605332, EPI_ISL_605333, EPI_ISL_605334, EPI_ISL_605335, EPI_ISL_605336, EPI_ISL_605337, EPI_ISL_605338, EPI_ISL_605339, EPI_ISL_605340, EPI_ISL_605341, EPI_ISL_605342, EPI_ISL_605343, EPI_ISL_605344, EPI_ISL_605345, EPI_ISL_605346, EPI_ISL_605347, EPI_ISL_605348, EPI_ISL_605349, EPI_ISL_605350, EPI_ISL_605351, EPI_ISL_605352, EPI_ISL_605353, EPI_ISL_605354, EPI_ISL_605355, EPI_ISL_605356, EPI_ISL_605357, EPI_ISL_605358, EPI_ISL_605359, EPI_ISL_605360, EPI_ISL_605361, EPI_ISL_605362, EPI_ISL_605363, EPI_ISL_605364, EPI_ISL_605365, EPI_ISL_605366, EPI_ISL_605367, EPI_ISL_605368, EPI_ISL_605369, EPI_ISL_605370, EPI_ISL_605371, EPI_ISL_605372, EPI_ISL_605373, EPI_ISL_605374, EPI_ISL_605375, EPI_ISL_605376, EPI_ISL_605377, EPI_ISL_605378, EPI_ISL_605379, EPI_ISL_605380, EPI_ISL_605381, EPI_ISL_605382, EPI_ISL_605383, EPI_ISL_605384, EPI_ISL_605385, EPI_ISL_605386, EPI_ISL_605387, EPI_ISL_605388, EPI_ISL_605389, EPI_ISL_605390, EPI_ISL_605391, EPI_ISL_605392, EPI_ISL_605393, EPI_ISL_605394, EPI_ISL_605395, EPI_ISL_605396, EPI_ISL_605397, EPI_ISL_605398, EPI_ISL_605399, EPI_ISL_605400, EPI_ISL_605401, EPI_ISL_605402, EPI_ISL_605403, EPI_ISL_605404 | see above | Utah Public Health Laboratory                                                                                                                          | Utah Public Health Laboratory                                                      | Erin L. Young, Kelly Oakeson, Tara Gallagher, Michael T. Pyne, E. Susan Slechta, Melanie A. Mallory, Jeffrey B. Stevenson, Salika M. Shakir, David R. Hillyard                                                                                                                                                                                                                                                                                            |
| EPI_ISL_605799, EPI_ISL_605800, EPI_ISL_605801, EPI_ISL_605802, EPI_ISL_605803, EPI_ISL_605804, EPI_ISL_605805, EPI_ISL_605806, EPI_ISL_605807, EPI_ISL_605808, EPI_ISL_605809, EPI_ISL_605810, EPI_ISL_605811, EPI_ISL_605812, EPI_ISL_605813, EPI_ISL_605814, EPI_ISL_605815, EPI_ISL_605816                                                                                                                                                                                                                                                                                                                                                                                                                                                                                                                                                                                                                                                                                                                                                                                                                                                                                                                                                                                                                                                                                                                                                                                                                                                                                                                                                                                                                                                                                                                                                                                                                                                                                                                                                                                                                                                                                                                                                                                                                                                                                                                                                                                                                                                                                                                                                                                                                                                                                                                                                                                                                                                                                                                                                                                                                                                                                                                                                                                                                                                                                 | see above | Clinical Virology Laboratory, Institute of Liver and Biliary Sciences                                                                                  | ILBS - IGIB                                                                        | Ekta Gupta, Sheetalnath Rooge, Abhishek Padhi, Reshu Agarwal, Jaswinder Singh Maras, Shridhar Sivasubbu, Vinod Scaria, Shvetank Sharma                                                                                                                                                                                                                                                                                                                    |
| EPI_ISL_609993                                                                                                                                                                                                                                                                                                                                                                                                                                                                                                                                                                                                                                                                                                                                                                                                                                                                                                                                                                                                                                                                                                                                                                                                                                                                                                                                                                                                                                                                                                                                                                                                                                                                                                                                                                                                                                                                                                                                                                                                                                                                                                                                                                                                                                                                                                                                                                                                                                                                                                                                                                                                                                                                                                                                                                                                                                                                                                                                                                                                                                                                                                                                                                                                                                                                                                                                                                 |           | INMI Lazzaro Spallanzani IRCCS                                                                                                                         | INMI Lazzaro Spallanzani IRCCS                                                     | E Giombini, M Rueca, B Bartolini, C.E.M Gruber, F Messina, A Di Caro, MR Capobianchi                                                                                                                                                                                                                                                                                                                                                                      |
| EPI_ISL_609995                                                                                                                                                                                                                                                                                                                                                                                                                                                                                                                                                                                                                                                                                                                                                                                                                                                                                                                                                                                                                                                                                                                                                                                                                                                                                                                                                                                                                                                                                                                                                                                                                                                                                                                                                                                                                                                                                                                                                                                                                                                                                                                                                                                                                                                                                                                                                                                                                                                                                                                                                                                                                                                                                                                                                                                                                                                                                                                                                                                                                                                                                                                                                                                                                                                                                                                                                                 |           | INMI Lazzaro Spallanzani IRCCS                                                                                                                         | INMI Lazzaro Spallanzani IRCCS                                                     | E Giombini, C.E.M Gruber, M Rueca, B Bartolini, F Messina, A Di Caro, MR Capobianchi                                                                                                                                                                                                                                                                                                                                                                      |
| EPI_ISL_610157, EPI_ISL_610159, EPI_ISL_610160                                                                                                                                                                                                                                                                                                                                                                                                                                                                                                                                                                                                                                                                                                                                                                                                                                                                                                                                                                                                                                                                                                                                                                                                                                                                                                                                                                                                                                                                                                                                                                                                                                                                                                                                                                                                                                                                                                                                                                                                                                                                                                                                                                                                                                                                                                                                                                                                                                                                                                                                                                                                                                                                                                                                                                                                                                                                                                                                                                                                                                                                                                                                                                                                                                                                                                                                 |           | Washington University in St. Louis                                                                                                                     | Washington University in St. Louis                                                 | David Wang, Carey-Ann Burnham, Bijal Parikh, Scott Handley, Lindsay Droit, Stephen Tahan                                                                                                                                                                                                                                                                                                                                                                  |
| EPI_ISL_611485, EPI_ISL_611487, EPI_ISL_611489, EPI_ISL_611491, EPI_ISL_611494, EPI_ISL_611497, EPI_ISL_611504, EPI_ISL_611509, EPI_ISL_623171, EPI_ISL_623174, EPI_ISL_623182, EPI_ISL_623187, EPI_ISL_623188, EPI_ISL_623195, EPI_ISL_623206, EPI_ISL_623207                                                                                                                                                                                                                                                                                                                                                                                                                                                                                                                                                                                                                                                                                                                                                                                                                                                                                                                                                                                                                                                                                                                                                                                                                                                                                                                                                                                                                                                                                                                                                                                                                                                                                                                                                                                                                                                                                                                                                                                                                                                                                                                                                                                                                                                                                                                                                                                                                                                                                                                                                                                                                                                                                                                                                                                                                                                                                                                                                                                                                                                                                                                 | see above | Utah Public Health Laboratory                                                                                                                          | Utah Public Health Laboratory                                                      | Erin Young, Kelly Oakeson                                                                                                                                                                                                                                                                                                                                                                                                                                 |
| EPI_ISL_626549, EPI_ISL_626550, EPI_ISL_626551, EPI_ISL_626552, EPI_ISL_626553, EPI_ISL_626554, EPI_ISL_626555, EPI_ISL_626556, EPI_ISL_626557, EPI_ISL_626558, EPI_ISL_626559, EPI_ISL_626560, EPI_ISL_626561, EPI_ISL_626562, EPI_ISL_626563, EPI_ISL_626564, EPI_ISL_626565                                                                                                                                                                                                                                                                                                                                                                                                                                                                                                                                                                                                                                                                                                                                                                                                                                                                                                                                                                                                                                                                                                                                                                                                                                                                                                                                                                                                                                                                                                                                                                                                                                                                                                                                                                                                                                                                                                                                                                                                                                                                                                                                                                                                                                                                                                                                                                                                                                                                                                                                                                                                                                                                                                                                                                                                                                                                                                                                                                                                                                                                                                 | see above | Laboratorio de Biología Molecular, Facultad de Medicina, Universidad de Atacama, Copiapo, Chile/ FONDAP CRG, Universidad Andrés Bello, Santiago, Chile | Center for Mathematical Modeling and Center for Genome Regulation, Santiago, Chile | Echeverría C, Manríquez R, Bastias M, Sanhueza D, Travisany D, Allende ML, Maass A, González M, Montecino, M, Orellana A, Castro E, Meneses C.                                                                                                                                                                                                                                                                                                            |
| EPI_ISL_626656, EPI_ISL_626657, EPI_ISL_626681, EPI_ISL_626689, EPI_ISL_626745, EPI_ISL_626779, EPI_ISL_626808, EPI_ISL_626858, EPI_ISL_626864, EPI_ISL_626893, EPI_ISL_626914, EPI_ISL_626964, EPI_ISL_627024, EPI_ISL_627072, EPI_ISL_627077, EPI_ISL_627080, EPI_ISL_627081, EPI_ISL_627083, EPI_ISL_627084, EPI_ISL_627099, EPI_ISL_627572, EPI_ISL_627575, EPI_ISL_627577, EPI_ISL_627578, EPI_ISL_627582, EPI_ISL_627585, EPI_ISL_627588, EPI_ISL_627589, EPI_ISL_627591, EPI_ISL_627593, EPI_ISL_627596, EPI_ISL_627597, EPI_ISL_627602, EPI_ISL_627608, EPI_ISL_627610, EPI_ISL_627611, EPI_ISL_627617, EPI_ISL_627618, EPI_ISL_627621, EPI_ISL_627623, EPI_ISL_627625, EPI_ISL_627626, EPI_ISL_627631, EPI_ISL_627637, EPI_ISL_627638, EPI_ISL_627639, EPI_ISL_627640, EPI_ISL_627642, EPI_ISL_627644, EPI_ISL_627648, EPI_ISL_627652, EPI_ISL_627655, EPI_ISL_627658, EPI_ISL_627660, EPI_ISL_627663, EPI_ISL_627664                                                                                                                                                                                                                                                                                                                                                                                                                                                                                                                                                                                                                                                                                                                                                                                                                                                                                                                                                                                                                                                                                                                                                                                                                                                                                                                                                                                                                                                                                                                                                                                                                                                                                                                                                                                                                                                                                                                                                                                                                                                                                                                                                                                                                                                                                                                                                                                                                                                 | see above | Quadram Institute Bioscience                                                                                                                           | COVID-19 Genomics UK (COG-UK) Consortium                                           | Dave J. Baker, Gemma L. Kay, Alp Aydin, Thanh Le-Viet, Steven Rudder, Ana P. Tedim, Anastasia Kolyva, Maria Diaz, Leonardo de Oliveira Martins, Nabil-Fareed Alikhan, Lizzie Meadows, Rachael Stanley, Ngozi Elumogo, Muhammed Yasin, Nicholas M. Thomson, Alexander J Trotter, Rachel Gilroy, Samuel Bloomfield, Claire Stuart, Andrew Bell, Reenesh Prakash, Samir Dervisevic, Alison E. Mather, John Wain, Mark Webber, Andrew J. Page, Justin O'Grady |
| EPI_ISL_628932, EPI_ISL_628933, EPI_ISL_628935, EPI_ISL_628946, EPI_ISL_628951, EPI_ISL_628953, EPI_ISL_628956, EPI_ISL_628958, EPI_ISL_628959, EPI_ISL_628966, EPI_ISL_628974, EPI_ISL_628984, EPI_ISL_628988, EPI_ISL_628992, EPI_ISL_628994, EPI_ISL_628995                                                                                                                                                                                                                                                                                                                                                                                                                                                                                                                                                                                                                                                                                                                                                                                                                                                                                                                                                                                                                                                                                                                                                                                                                                                                                                                                                                                                                                                                                                                                                                                                                                                                                                                                                                                                                                                                                                                                                                                                                                                                                                                                                                                                                                                                                                                                                                                                                                                                                                                                                                                                                                                                                                                                                                                                                                                                                                                                                                                                                                                                                                                 | see above | Utah Public Health Laboratory                                                                                                                          | Utah Public Health Laboratory                                                      | Erin Young, Kelly Oakeson                                                                                                                                                                                                                                                                                                                                                                                                                                 |
| EPI_ISL_631277, EPI_ISL_631278, EPI_ISL_631279, EPI_ISL_631281, EPI_ISL_631282, EPI_ISL_631283, EPI_ISL_631284, EPI_ISL_631285, EPI_ISL_631286, EPI_ISL_631287, EPI_ISL_631288, EPI_ISL_631289, EPI_ISL_631290, EPI_ISL_631291, EPI_ISL_631292, EPI_ISL_631293, EPI_ISL_631294, EPI_ISL_631295, EPI_ISL_631296, EPI_ISL_631297, EPI_ISL_631298, EPI_ISL_631299, EPI_ISL_631300, EPI_ISL_631301, EPI_ISL_631302, EPI_ISL_631303, EPI_ISL_632311                                                                                                                                                                                                                                                                                                                                                                                                                                                                                                                                                                                                                                                                                                                                                                                                                                                                                                                                                                                                                                                                                                                                                                                                                                                                                                                                                                                                                                                                                                                                                                                                                                                                                                                                                                                                                                                                                                                                                                                                                                                                                                                                                                                                                                                                                                                                                                                                                                                                                                                                                                                                                                                                                                                                                                                                                                                                                                                                 | see above | MVZ DIAMEDIS Diagnostische Medizin Sennestadt GmbH                                                                                                     | Bielefeld University                                                               | David Brandt, Tobias Busche, Markus Haak, Jörn Kalinowski, Levin-Joe Klages, Christiane Scherer, Alexander Sczyrba, Marina Simunovic, Svenja Vinke                                                                                                                                                                                                                                                                                                        |
| EPI_ISL_632823, EPI_ISL_632824, EPI_ISL_632825, EPI_ISL_632826, EPI_ISL_632828, EPI_ISL_632829, EPI_ISL_632830, EPI_ISL_632831, EPI_ISL_632832, EPI_ISL_632833, EPI_ISL_632834, EPI_ISL_632835, EPI_ISL_632836, EPI_ISL_632837, EPI_ISL_632838, EPI_ISL_632839, EPI_ISL_632840, EPI_ISL_632841, EPI_ISL_632842, EPI_ISL_632843, EPI_ISL_632844, EPI_ISL_632845                                                                                                                                                                                                                                                                                                                                                                                                                                                                                                                                                                                                                                                                                                                                                                                                                                                                                                                                                                                                                                                                                                                                                                                                                                                                                                                                                                                                                                                                                                                                                                                                                                                                                                                                                                                                                                                                                                                                                                                                                                                                                                                                                                                                                                                                                                                                                                                                                                                                                                                                                                                                                                                                                                                                                                                                                                                                                                                                                                                                                 | see above | New Mexico Department of Health Scientific Laboratory                                                                                                  | New Mexico Department of Health Scientific Laboratory                              | Ellie Johnson, Anastacia Griego-Fisher, D'Eldra Malone                                                                                                                                                                                                                                                                                                                                                                                                    |
| EPI_ISL_634896, EPI_ISL_634897, EPI_ISL_634898, EPI_ISL_634899, EPI_ISL_634900, EPI_ISL_634901, EPI_ISL_634902, EPI_ISL_634903, EPI_ISL_634904, EPI_ISL_634905, EPI_ISL_634906, EPI_ISL_634907, EPI_ISL_634908, EPI_ISL_634909, EPI_ISL_634910, EPI_ISL_634911, EPI_ISL_634912, EPI_ISL_634913, EPI_ISL_634914, EPI_ISL_634915, EPI_ISL_634916, EPI_ISL_634917, EPI_ISL_634918, EPI_ISL_634919, EPI_ISL_634920, EPI_ISL_634921, EPI_ISL_634922, EPI_ISL_634923, EPI_ISL_634924, EPI_ISL_634925, EPI_ISL_634926, EPI_ISL_634927, EPI_ISL_634928, EPI_ISL_634929, EPI_ISL_634930, EPI_ISL_634931, EPI_ISL_634932, EPI_ISL_634933                                                                                                                                                                                                                                                                                                                                                                                                                                                                                                                                                                                                                                                                                                                                                                                                                                                                                                                                                                                                                                                                                                                                                                                                                                                                                                                                                                                                                                                                                                                                                                                                                                                                                                                                                                                                                                                                                                                                                                                                                                                                                                                                                                                                                                                                                                                                                                                                                                                                                                                                                                                                                                                                                                                                                 | see above | Utah Public Health Laboratory                                                                                                                          | Utah Public Health Laboratory                                                      | Erin L. Young, Kelly F. Oakeson                                                                                                                                                                                                                                                                                                                                                                                                                           |
| EPI_ISL_637359                                                                                                                                                                                                                                                                                                                                                                                                                                                                                                                                                                                                                                                                                                                                                                                                                                                                                                                                                                                                                                                                                                                                                                                                                                                                                                                                                                                                                                                                                                                                                                                                                                                                                                                                                                                                                                                                                                                                                                                                                                                                                                                                                                                                                                                                                                                                                                                                                                                                                                                                                                                                                                                                                                                                                                                                                                                                                                                                                                                                                                                                                                                                                                                                                                                                                                                                                                 |           | Quadram Institute Bioscience                                                                                                                           | COVID-19 Genomics UK (COG-UK) Consortium                                           | Dave J. Baker, Gemma L. Kay, Alp Aydin, Thanh Le-Viet, Steven Rudder, Ana P. Tedim, Anastasia Kolyva, Maria Diaz, Leonardo de Oliveira Martins, Nabil-Fareed Alikhan, Lizzie Meadows, Rachael Stanley, Ngozi Elumogo, Muhammed Yasin, Nicholas M. Thomson, Alexander J Trotter, Rachel Gilroy, Samuel Bloomfield, Claire Stuart, Andrew Bell, Reenesh Prakash, Samir Dervisevic, Alison E. Mather, John Wain, Mark Webber, Andrew J. Page, Justin O'Grady |
| EPI_ISL_640282, EPI_ISL_640285, EPI_ISL_640292, EPI_ISL_640298, EPI_ISL_640299                                                                                                                                                                                                                                                                                                                                                                                                                                                                                                                                                                                                                                                                                                                                                                                                                                                                                                                                                                                                                                                                                                                                                                                                                                                                                                                                                                                                                                                                                                                                                                                                                                                                                                                                                                                                                                                                                                                                                                                                                                                                                                                                                                                                                                                                                                                                                                                                                                                                                                                                                                                                                                                                                                                                                                                                                                                                                                                                                                                                                                                                                                                                                                                                                                                                                                 |           | Utah Public Health Laboratory                                                                                                                          | Utah Public Health Laboratory                                                      | Erin Young, Kelly Oakeson                                                                                                                                                                                                                                                                                                                                                                                                                                 |
| EPI_ISL_641319                                                                                                                                                                                                                                                                                                                                                                                                                                                                                                                                                                                                                                                                                                                                                                                                                                                                                                                                                                                                                                                                                                                                                                                                                                                                                                                                                                                                                                                                                                                                                                                                                                                                                                                                                                                                                                                                                                                                                                                                                                                                                                                                                                                                                                                                                                                                                                                                                                                                                                                                                                                                                                                                                                                                                                                                                                                                                                                                                                                                                                                                                                                                                                                                                                                                                                                                                                 |           | Environmental and Global Health, University of Florida                                                                                                 | Environmental and Global Health, University of Florida                             | Elbadry,M.A., Subramanian,K., Waltzek,T.B., Loeb,J.C., Stephenson,C.J., Lauzardo,M., Morris,J.G., Lednický,J.A.                                                                                                                                                                                                                                                                                                                                           |
| EPI_ISL_644584, EPI_ISL_644585, EPI_ISL_644586, EPI_ISL_644587, EPI_ISL_644588, EPI_ISL_644589, EPI_ISL_644590, EPI_ISL_644591, EPI_ISL_644592, EPI_ISL_644593, EPI_ISL_644594, EPI_ISL_644595, EPI_ISL_644596, EPI_ISL_644597, EPI_ISL_644598, EPI_ISL_644599, EPI_ISL_644600, EPI_ISL_644601, EPI_ISL_644602, EPI_ISL_644603, EPI_ISL_644604, EPI_ISL_644605, EPI_ISL_644606, EPI_ISL_644607, EPI_ISL_644608, EPI_ISL_644609                                                                                                                                                                                                                                                                                                                                                                                                                                                                                                                                                                                                                                                                                                                                                                                                                                                                                                                                                                                                                                                                                                                                                                                                                                                                                                                                                                                                                                                                                                                                                                                                                                                                                                                                                                                                                                                                                                                                                                                                                                                                                                                                                                                                                                                                                                                                                                                                                                                                                                                                                                                                                                                                                                                                                                                                                                                                                                                                                 | see above | New Mexico Department of Health Scientific Laboratory                                                                                                  | New Mexico Department of Health Scientific Laboratory                              | Ellie Johnson, Anastacia Griego-Fisher, D'Eldra Malone                                                                                                                                                                                                                                                                                                                                                                                                    |
| EPI_ISL_644715, EPI_ISL_644716, EPI_ISL_644717, EPI_ISL_644718, EPI_ISL_644719                                                                                                                                                                                                                                                                                                                                                                                                                                                                                                                                                                                                                                                                                                                                                                                                                                                                                                                                                                                                                                                                                                                                                                                                                                                                                                                                                                                                                                                                                                                                                                                                                                                                                                                                                                                                                                                                                                                                                                                                                                                                                                                                                                                                                                                                                                                                                                                                                                                                                                                                                                                                                                                                                                                                                                                                                                                                                                                                                                                                                                                                                                                                                                                                                                                                                                 |           | Osmania Medical College                                                                                                                                | CSIR-Centre for Cellular and Molecular Biology                                     | Dr.V.Sudha Rani,Dr.S.Pavani,Dr.Satyaprasad,Dr.P.Shashikala Reddy,Tulasi Nagabandi,Namami Gaur,Sakshi Shambhavi,Lamuk Zaveri,Shaguftha Khan,Nikhil Hajirnis,M Soujanya Reddy,Pratheusa Maccha,Purushotham Vodnala,Blessy B John,Viswagithe S L,B Himasri,Payel Mukherjee,Sofia Banu,Priya Singh,Archana Bharadwaj Siva,Karthik Bharadwaj Tallapaka,Rakesh K Mishra,Divya Tej Sowpati                                                                       |
| EPI_ISL_644720, EPI_ISL_644721, EPI_ISL_644722, EPI_ISL_644723, EPI_ISL_644724                                                                                                                                                                                                                                                                                                                                                                                                                                                                                                                                                                                                                                                                                                                                                                                                                                                                                                                                                                                                                                                                                                                                                                                                                                                                                                                                                                                                                                                                                                                                                                                                                                                                                                                                                                                                                                                                                                                                                                                                                                                                                                                                                                                                                                                                                                                                                                                                                                                                                                                                                                                                                                                                                                                                                                                                                                                                                                                                                                                                                                                                                                                                                                                                                                                                                                 |           | Osmania Medical College                                                                                                                                | CSIR-Centre for Cellular and Molecular Biology                                     | Dr.V.Sudha Rani,Dr.S.Pavani,Dr.Satyaprasad,Dr.P.Shashikala Reddy,Lamuk Zaveri,Shaguftha Khan,Nikhil Hajirnis,M Soujanya Reddy,Pratheusa Maccha,Namami Gaur,Sakshi Shambhavi,Tulasi Nagabandi,Purushotham Vodnala,Blessy B John,Viswagithe S L,B Himasri,Payel Mukherjee,Sofia Banu,Priya Singh,Archana Bharadwaj Siva,Karthik Bharadwaj Tallapaka,Rakesh K Mishra,Divya Tej Sowpati                                                                       |
| EPI_ISL_644725, EPI_ISL_644726, EPI_ISL_644727, EPI_ISL_644728, EPI_ISL_644729                                                                                                                                                                                                                                                                                                                                                                                                                                                                                                                                                                                                                                                                                                                                                                                                                                                                                                                                                                                                                                                                                                                                                                                                                                                                                                                                                                                                                                                                                                                                                                                                                                                                                                                                                                                                                                                                                                                                                                                                                                                                                                                                                                                                                                                                                                                                                                                                                                                                                                                                                                                                                                                                                                                                                                                                                                                                                                                                                                                                                                                                                                                                                                                                                                                                                                 |           | Osmania Medical College                                                                                                                                | CSIR-Centre for Cellular and Molecular Biology                                     | Dr.V.Sudha Rani,Dr.S.Pavani,Dr.Satyaprasad,Dr.P.Shashikala Reddy,Pratheusa Maccha,Shaguftha Khan,Lamuk Zaveri,Namami Gaur,Sakshi Shambhavi,Tulasi Nagabandi,Nikhil Hajirnis,M Soujanya Reddy,Purushotham Vodnala,Blessy B John,Viswagithe S L,B Himasri,Payel Mukherjee,Sofia Banu,Priya Singh,Archana Bharadwaj Siva,Karthik Bharadwaj Tallapaka,Rakesh K Mishra,Divya Tej Sowpati                                                                       |
| EPI_ISL_644730, EPI_ISL_644731, EPI_ISL_644732, EPI_ISL_644733, EPI_ISL_644734                                                                                                                                                                                                                                                                                                                                                                                                                                                                                                                                                                                                                                                                                                                                                                                                                                                                                                                                                                                                                                                                                                                                                                                                                                                                                                                                                                                                                                                                                                                                                                                                                                                                                                                                                                                                                                                                                                                                                                                                                                                                                                                                                                                                                                                                                                                                                                                                                                                                                                                                                                                                                                                                                                                                                                                                                                                                                                                                                                                                                                                                                                                                                                                                                                                                                                 |           | Osmania Medical College                                                                                                                                | CSIR-Centre for Cellular and Molecular Biology                                     | Dr.V.Sudha Rani,Dr.S.Pavani,Dr.Satyaprasad,Dr.P.Shashikala Reddy,Namami Gaur,Sakshi Shambhavi,Lamuk Zaveri,Shaguftha Khan,Nikhil Hajirnis,M Soujanya Reddy,Pratheusa Maccha,Tulasi Nagabandi,Purushotham Vodnala,Blessy B John,Viswagithe S L,B Himasri,Payel Mukherjee,Sofia Banu,Priya Singh,Archana Bharadwaj Siva,Karthik Bharadwaj Tallapaka,Rakesh K Mishra,Divya Tej Sowpati                                                                       |
| EPI_ISL_644823                                                                                                                                                                                                                                                                                                                                                                                                                                                                                                                                                                                                                                                                                                                                                                                                                                                                                                                                                                                                                                                                                                                                                                                                                                                                                                                                                                                                                                                                                                                                                                                                                                                                                                                                                                                                                                                                                                                                                                                                                                                                                                                                                                                                                                                                                                                                                                                                                                                                                                                                                                                                                                                                                                                                                                                                                                                                                                                                                                                                                                                                                                                                                                                                                                                                                                                                                                 |           | Madigan Army Medical Center                                                                                                                            | U.S. Air Force School of Aerospace Medicine                                        | Emily Parsons, Matthew Timlin, Clarise Starr, Anthony Fries, Ronald Wells, Mattew Studer, Rebecca Sainato                                                                                                                                                                                                                                                                                                                                                 |
| EPI_ISL_648555, EPI_ISL_648561,                                                                                                                                                                                                                                                                                                                                                                                                                                                                                                                                                                                                                                                                                                                                                                                                                                                                                                                                                                                                                                                                                                                                                                                                                                                                                                                                                                                                                                                                                                                                                                                                                                                                                                                                                                                                                                                                                                                                                                                                                                                                                                                                                                                                                                                                                                                                                                                                                                                                                                                                                                                                                                                                                                                                                                                                                                                                                                                                                                                                                                                                                                                                                                                                                                                                                                                                                |           | Utah Public Health Laboratory                                                                                                                          | Utah Public Health Laboratory                                                      | Erin Young, Kelly Oakeson                                                                                                                                                                                                                                                                                                                                                                                                                                 |

|                                                                                                                                                                                                                                                                                                                                                                                                                                                                                                                                                                                                                                                                                                                                                                                                                                                                                                                                                                                                                                                                                                                                                                                                                                                                                                                                                                                                                                                                                                                                                                                                |                                                                     |                                                                                                                                                                                            |                                                                          |                                                                                                                                                                                                                                                                                                                                                                                                                                                           |
|------------------------------------------------------------------------------------------------------------------------------------------------------------------------------------------------------------------------------------------------------------------------------------------------------------------------------------------------------------------------------------------------------------------------------------------------------------------------------------------------------------------------------------------------------------------------------------------------------------------------------------------------------------------------------------------------------------------------------------------------------------------------------------------------------------------------------------------------------------------------------------------------------------------------------------------------------------------------------------------------------------------------------------------------------------------------------------------------------------------------------------------------------------------------------------------------------------------------------------------------------------------------------------------------------------------------------------------------------------------------------------------------------------------------------------------------------------------------------------------------------------------------------------------------------------------------------------------------|---------------------------------------------------------------------|--------------------------------------------------------------------------------------------------------------------------------------------------------------------------------------------|--------------------------------------------------------------------------|-----------------------------------------------------------------------------------------------------------------------------------------------------------------------------------------------------------------------------------------------------------------------------------------------------------------------------------------------------------------------------------------------------------------------------------------------------------|
| EPI_ISL_648562, EPI_ISL_648566,<br>EPI_ISL_648571, EPI_ISL_648574,<br>EPI_ISL_648581, EPI_ISL_648586,<br>EPI_ISL_648592, EPI_ISL_648593                                                                                                                                                                                                                                                                                                                                                                                                                                                                                                                                                                                                                                                                                                                                                                                                                                                                                                                                                                                                                                                                                                                                                                                                                                                                                                                                                                                                                                                        |                                                                     |                                                                                                                                                                                            |                                                                          |                                                                                                                                                                                                                                                                                                                                                                                                                                                           |
| EPI_ISL_650174, EPI_ISL_650190, EPI_ISL_650193, EPI_ISL_650294, EPI_ISL_650319, EPI_ISL_650387, EPI_ISL_650402, EPI_ISL_650409, EPI_ISL_650457, EPI_ISL_650460, EPI_ISL_650470, EPI_ISL_650475, EPI_ISL_650480, EPI_ISL_650487, EPI_ISL_650512, EPI_ISL_650516, EPI_ISL_650528, EPI_ISL_650552, EPI_ISL_650555, EPI_ISL_650677, EPI_ISL_650681, EPI_ISL_650683, EPI_ISL_650687, EPI_ISL_650696, EPI_ISL_650758, EPI_ISL_650883, EPI_ISL_650902, EPI_ISL_650912, EPI_ISL_650917, EPI_ISL_650931, EPI_ISL_650938, EPI_ISL_650944, EPI_ISL_650954, EPI_ISL_650958, EPI_ISL_651048, EPI_ISL_651082, EPI_ISL_651092, EPI_ISL_651102, EPI_ISL_651111, EPI_ISL_651118, EPI_ISL_651134, EPI_ISL_651159, EPI_ISL_651167, EPI_ISL_651180, EPI_ISL_651194, EPI_ISL_651214, EPI_ISL_651214, EPI_ISL_651220, EPI_ISL_651226, EPI_ISL_651226, EPI_ISL_651335, EPI_ISL_651337, EPI_ISL_651351, EPI_ISL_651371, EPI_ISL_651412, EPI_ISL_651434, EPI_ISL_651438, EPI_ISL_651515, EPI_ISL_651526, EPI_ISL_652151, EPI_ISL_652154, EPI_ISL_652217, EPI_ISL_652222, EPI_ISL_652224, EPI_ISL_652225, EPI_ISL_652226, EPI_ISL_652231, EPI_ISL_652237, EPI_ISL_652241, EPI_ISL_652242, EPI_ISL_652249, EPI_ISL_652250, EPI_ISL_652252, EPI_ISL_652257, EPI_ISL_652260, EPI_ISL_652267, EPI_ISL_652269, EPI_ISL_652270, EPI_ISL_652281, EPI_ISL_652283, EPI_ISL_652349, EPI_ISL_652350, EPI_ISL_652352, EPI_ISL_652354, EPI_ISL_652356, EPI_ISL_652358, EPI_ISL_652360, EPI_ISL_653027, EPI_ISL_653029, EPI_ISL_653035, EPI_ISL_653038, EPI_ISL_653044, EPI_ISL_653045, EPI_ISL_653050, EPI_ISL_653052, EPI_ISL_653058 | see above                                                           | Quadram Institute Bioscience                                                                                                                                                               | COVID-19 Genomics UK (COG-UK) Consortium                                 | Dave J. Baker, Gemma L. Kay, Alp Aydin, Thanh Le-Viet, Steven Rudder, Ana P. Tedim, Anastasia Kolyva, Maria Diaz, Leonardo de Oliveira Martins, Nabil-Fareed Alikhan, Lizzie Meadows, Rachael Stanley, Ngozi Elumogo, Muhammed Yasir, Nicholas M. Thomson, Alexander J Trotter, Rachel Gilroy, Samuel Bloomfield, Claire Stuart, Andrew Bell, Reenesh Prakash, Samir Derwisevic, Alison E. Mather, John Wain, Mark Webber, Andrew J. Page, Justin O'Grady |
| EPI_ISL_654483, EPI_ISL_654484, EPI_ISL_654485, EPI_ISL_654486, EPI_ISL_654487, EPI_ISL_654488, EPI_ISL_654489, EPI_ISL_654490, EPI_ISL_654491, EPI_ISL_654492, EPI_ISL_654493, EPI_ISL_654494, EPI_ISL_654495, EPI_ISL_654496, EPI_ISL_654497                                                                                                                                                                                                                                                                                                                                                                                                                                                                                                                                                                                                                                                                                                                                                                                                                                                                                                                                                                                                                                                                                                                                                                                                                                                                                                                                                 | see above                                                           | Servicio de Microbiología, Hospital Clínico Universitario de Valencia                                                                                                                      | SeqCOVID-SPAIN consortium/IBV(CSIC)                                      | David Navarro Ortega, Eliseo Albert Vicent, Ignacio Torres and SeqCOVID-SPAIN consortium                                                                                                                                                                                                                                                                                                                                                                  |
| EPI_ISL_654509, EPI_ISL_654510, EPI_ISL_654511, EPI_ISL_654512, EPI_ISL_654513, EPI_ISL_654514, EPI_ISL_654515, EPI_ISL_654516, EPI_ISL_654517, EPI_ISL_654518, EPI_ISL_654519, EPI_ISL_654520, EPI_ISL_654521, EPI_ISL_654522, EPI_ISL_654523, EPI_ISL_654524, EPI_ISL_654526, EPI_ISL_654527, EPI_ISL_654528, EPI_ISL_654529, EPI_ISL_654530, EPI_ISL_654531, EPI_ISL_654532, EPI_ISL_654533, EPI_ISL_654534, EPI_ISL_654535, EPI_ISL_654536, EPI_ISL_654537, EPI_ISL_654538, EPI_ISL_660265, EPI_ISL_660266, EPI_ISL_660267, EPI_ISL_660268, EPI_ISL_660269, EPI_ISL_660270, EPI_ISL_660271, EPI_ISL_660272, EPI_ISL_660273, EPI_ISL_660274, EPI_ISL_660275, EPI_ISL_660276, EPI_ISL_660277, EPI_ISL_660278, EPI_ISL_660279, EPI_ISL_660280, EPI_ISL_660281, EPI_ISL_660282, EPI_ISL_660283, EPI_ISL_660284, EPI_ISL_660285, EPI_ISL_660286, EPI_ISL_660287, EPI_ISL_660288, EPI_ISL_660289, EPI_ISL_660290, EPI_ISL_660291, EPI_ISL_660292, EPI_ISL_660293, EPI_ISL_660294, EPI_ISL_660295, EPI_ISL_660296, EPI_ISL_660297, EPI_ISL_660298, EPI_ISL_660299, EPI_ISL_660300, EPI_ISL_660301, EPI_ISL_660302, EPI_ISL_660303, EPI_ISL_660304, EPI_ISL_660305, EPI_ISL_660306, EPI_ISL_660307, EPI_ISL_660308, EPI_ISL_660309, EPI_ISL_660310, EPI_ISL_660311, EPI_ISL_660312, EPI_ISL_660313, EPI_ISL_660314, EPI_ISL_660315, EPI_ISL_660316, EPI_ISL_660317, EPI_ISL_660318, EPI_ISL_660319, EPI_ISL_660320, EPI_ISL_660321, EPI_ISL_660322                                                                                                                                                 | see above                                                           | Servicio de Microbiología, Laboratori Clínic Metropolitana Nord, Hospital Universitari Germans Trias i Pujol, Institut d'Investigació en Ciències de la Salut Germans Trias i Pujol (IGTP) | SeqCOVID-SPAIN consortium/IBV(CSIC)                                      | Elisa Martró, Antoni E. Bordoy, Anna Not, Adrián Antuori, Anabel Fernández, Nona Romani and SeqCOVID-SPAIN consortium                                                                                                                                                                                                                                                                                                                                     |
| EPI_ISL_661272                                                                                                                                                                                                                                                                                                                                                                                                                                                                                                                                                                                                                                                                                                                                                                                                                                                                                                                                                                                                                                                                                                                                                                                                                                                                                                                                                                                                                                                                                                                                                                                 | AI-Quds Nutrition and Health Research Institute, AI-Quds University | AI-Quds Nutrition and Health Research Institute, AI-Quds University                                                                                                                        | Ereqat,S., Nasereddin,A. and Al-Jawabreh,A.                              |                                                                                                                                                                                                                                                                                                                                                                                                                                                           |
| EPI_ISL_661273                                                                                                                                                                                                                                                                                                                                                                                                                                                                                                                                                                                                                                                                                                                                                                                                                                                                                                                                                                                                                                                                                                                                                                                                                                                                                                                                                                                                                                                                                                                                                                                 | Stockholm_StGoran                                                   | The Public Health Agency of Sweden                                                                                                                                                         | Department of Microbiology, The Public Health Agency of Sweden           |                                                                                                                                                                                                                                                                                                                                                                                                                                                           |
| EPI_ISL_661274, EPI_ISL_661275, EPI_ISL_661276, EPI_ISL_661277, EPI_ISL_661278                                                                                                                                                                                                                                                                                                                                                                                                                                                                                                                                                                                                                                                                                                                                                                                                                                                                                                                                                                                                                                                                                                                                                                                                                                                                                                                                                                                                                                                                                                                 | Klinisk mikrobiologi                                                | The Public Health Agency of Sweden                                                                                                                                                         | Department of Microbiology, The Public Health Agency of Sweden           |                                                                                                                                                                                                                                                                                                                                                                                                                                                           |
| EPI_ISL_661279                                                                                                                                                                                                                                                                                                                                                                                                                                                                                                                                                                                                                                                                                                                                                                                                                                                                                                                                                                                                                                                                                                                                                                                                                                                                                                                                                                                                                                                                                                                                                                                 | Klinisk mikrobiologi Linköping                                      | The Public Health Agency of Sweden                                                                                                                                                         | Department of Microbiology, The Public Health Agency of Sweden           |                                                                                                                                                                                                                                                                                                                                                                                                                                                           |
| EPI_ISL_661280, EPI_ISL_661281                                                                                                                                                                                                                                                                                                                                                                                                                                                                                                                                                                                                                                                                                                                                                                                                                                                                                                                                                                                                                                                                                                                                                                                                                                                                                                                                                                                                                                                                                                                                                                 | Klinisk mikrobiologi                                                | The Public Health Agency of Sweden                                                                                                                                                         | Department of Microbiology, The Public Health Agency of Sweden           |                                                                                                                                                                                                                                                                                                                                                                                                                                                           |
| EPI_ISL_661282                                                                                                                                                                                                                                                                                                                                                                                                                                                                                                                                                                                                                                                                                                                                                                                                                                                                                                                                                                                                                                                                                                                                                                                                                                                                                                                                                                                                                                                                                                                                                                                 | Orebro klinisk mikrobiologi                                         | The Public Health Agency of Sweden                                                                                                                                                         | Department of Microbiology, The Public Health Agency of Sweden           |                                                                                                                                                                                                                                                                                                                                                                                                                                                           |
| EPI_ISL_661283                                                                                                                                                                                                                                                                                                                                                                                                                                                                                                                                                                                                                                                                                                                                                                                                                                                                                                                                                                                                                                                                                                                                                                                                                                                                                                                                                                                                                                                                                                                                                                                 | Gavle klinisk mikrobiologi                                          | The Public Health Agency of Sweden                                                                                                                                                         | Department of Microbiology, The Public Health Agency of Sweden           |                                                                                                                                                                                                                                                                                                                                                                                                                                                           |
| EPI_ISL_661284, EPI_ISL_661285                                                                                                                                                                                                                                                                                                                                                                                                                                                                                                                                                                                                                                                                                                                                                                                                                                                                                                                                                                                                                                                                                                                                                                                                                                                                                                                                                                                                                                                                                                                                                                 | Klinisk mikrobiologi Linköping                                      | The Public Health Agency of Sweden                                                                                                                                                         | Department of Microbiology, The Public Health Agency of Sweden           |                                                                                                                                                                                                                                                                                                                                                                                                                                                           |
| EPI_ISL_661286, EPI_ISL_661287                                                                                                                                                                                                                                                                                                                                                                                                                                                                                                                                                                                                                                                                                                                                                                                                                                                                                                                                                                                                                                                                                                                                                                                                                                                                                                                                                                                                                                                                                                                                                                 | Gavle klinisk mikrobiologi                                          | The Public Health Agency of Sweden                                                                                                                                                         | Department of Microbiology, The Public Health Agency of Sweden           |                                                                                                                                                                                                                                                                                                                                                                                                                                                           |
| EPI_ISL_661288, EPI_ISL_661289                                                                                                                                                                                                                                                                                                                                                                                                                                                                                                                                                                                                                                                                                                                                                                                                                                                                                                                                                                                                                                                                                                                                                                                                                                                                                                                                                                                                                                                                                                                                                                 | Klinisk mikrobiologi                                                | The Public Health Agency of Sweden                                                                                                                                                         | Department of Microbiology, The Public Health Agency of Sweden           |                                                                                                                                                                                                                                                                                                                                                                                                                                                           |
| EPI_ISL_661290                                                                                                                                                                                                                                                                                                                                                                                                                                                                                                                                                                                                                                                                                                                                                                                                                                                                                                                                                                                                                                                                                                                                                                                                                                                                                                                                                                                                                                                                                                                                                                                 | Klinisk mikrobiologi, Viruslab                                      | The Public Health Agency of Sweden                                                                                                                                                         | Department of Microbiology, The Public Health Agency of Sweden           |                                                                                                                                                                                                                                                                                                                                                                                                                                                           |
| EPI_ISL_661291, EPI_ISL_661292                                                                                                                                                                                                                                                                                                                                                                                                                                                                                                                                                                                                                                                                                                                                                                                                                                                                                                                                                                                                                                                                                                                                                                                                                                                                                                                                                                                                                                                                                                                                                                 | Mikrobiologen                                                       | The Public Health Agency of Sweden                                                                                                                                                         | Department of Microbiology, The Public Health Agency of Sweden           |                                                                                                                                                                                                                                                                                                                                                                                                                                                           |
| EPI_ISL_661293                                                                                                                                                                                                                                                                                                                                                                                                                                                                                                                                                                                                                                                                                                                                                                                                                                                                                                                                                                                                                                                                                                                                                                                                                                                                                                                                                                                                                                                                                                                                                                                 | Klinisk mikrobiologi                                                | The Public Health Agency of Sweden                                                                                                                                                         | Department of Microbiology, The Public Health Agency of Sweden           |                                                                                                                                                                                                                                                                                                                                                                                                                                                           |
| EPI_ISL_661294, EPI_ISL_661295, EPI_ISL_661296, EPI_ISL_661297, EPI_ISL_661298                                                                                                                                                                                                                                                                                                                                                                                                                                                                                                                                                                                                                                                                                                                                                                                                                                                                                                                                                                                                                                                                                                                                                                                                                                                                                                                                                                                                                                                                                                                 | Unilabs                                                             | The Public Health Agency of Sweden                                                                                                                                                         | Department of Microbiology, The Public Health Agency of Sweden           |                                                                                                                                                                                                                                                                                                                                                                                                                                                           |
| EPI_ISL_661299, EPI_ISL_661300                                                                                                                                                                                                                                                                                                                                                                                                                                                                                                                                                                                                                                                                                                                                                                                                                                                                                                                                                                                                                                                                                                                                                                                                                                                                                                                                                                                                                                                                                                                                                                 | Laboratoriemedicin, Klinisk mikrobiologi                            | The Public Health Agency of Sweden                                                                                                                                                         | Department of Microbiology, The Public Health Agency of Sweden           |                                                                                                                                                                                                                                                                                                                                                                                                                                                           |
| EPI_ISL_661301                                                                                                                                                                                                                                                                                                                                                                                                                                                                                                                                                                                                                                                                                                                                                                                                                                                                                                                                                                                                                                                                                                                                                                                                                                                                                                                                                                                                                                                                                                                                                                                 | Klinisk Mikrobiologi                                                | The Public Health Agency of Sweden                                                                                                                                                         | Department of Microbiology, The Public Health Agency of Sweden           |                                                                                                                                                                                                                                                                                                                                                                                                                                                           |
| EPI_ISL_661302, EPI_ISL_661303                                                                                                                                                                                                                                                                                                                                                                                                                                                                                                                                                                                                                                                                                                                                                                                                                                                                                                                                                                                                                                                                                                                                                                                                                                                                                                                                                                                                                                                                                                                                                                 | Klinisk mikrobiologi                                                | The Public Health Agency of Sweden                                                                                                                                                         | Department of Microbiology, The Public Health Agency of Sweden           |                                                                                                                                                                                                                                                                                                                                                                                                                                                           |
| EPI_ISL_664300, EPI_ISL_664334, EPI_ISL_664351, EPI_ISL_664358, EPI_ISL_664366, EPI_ISL_664441, EPI_ISL_664450, EPI_ISL_664464, EPI_ISL_664476, EPI_ISL_664495, EPI_ISL_664508, EPI_ISL_664520, EPI_ISL_664628, EPI_ISL_664638, EPI_ISL_664688, EPI_ISL_664725, EPI_ISL_664741, EPI_ISL_664743, EPI_ISL_664760, EPI_ISL_664864, EPI_ISL_664869, EPI_ISL_664870, EPI_ISL_664873, EPI_ISL_664875, EPI_ISL_664877, EPI_ISL_664880, EPI_ISL_664881, EPI_ISL_664885, EPI_ISL_664890, EPI_ISL_664894, EPI_ISL_664899, EPI_ISL_664900, EPI_ISL_664905, EPI_ISL_664906, EPI_ISL_664910, EPI_ISL_664911, EPI_ISL_664915, EPI_ISL_664916, EPI_ISL_664918, EPI_ISL_664921, EPI_ISL_664925, EPI_ISL_664926, EPI_ISL_664931, EPI_ISL_664932, EPI_ISL_664934, EPI_ISL_664935, EPI_ISL_664939, EPI_ISL_665268, EPI_ISL_665269, EPI_ISL_665295, EPI_ISL_665362, EPI_ISL_665364, EPI_ISL_665377, EPI_ISL_665411, EPI_ISL_665423, EPI_ISL_665429, EPI_ISL_665445, EPI_ISL_665447, EPI_ISL_665457, EPI_ISL_665458, EPI_ISL_665461, EPI_ISL_665465, EPI_ISL_665467, EPI_ISL_665508, EPI_ISL_665593, EPI_ISL_665596, EPI_ISL_665671, EPI_ISL_665678, EPI_ISL_665684, EPI_ISL_665692, EPI_ISL_665749, EPI_ISL_665850, EPI_ISL_665880, EPI_ISL_665885, EPI_ISL_665886, EPI_ISL_665887, EPI_ISL_665891, EPI_ISL_665892, EPI_ISL_665897, EPI_ISL_665907, EPI_ISL_665962                                                                                                                                                                                                                                                 | see above                                                           | Quadram Institute Bioscience                                                                                                                                                               | COVID-19 Genomics UK (COG-UK) Consortium                                 | Dave J. Baker, Gemma L. Kay, Alp Aydin, Thanh Le-Viet, Steven Rudder, Ana P. Tedim, Anastasia Kolyva, Maria Diaz, Leonardo de Oliveira Martins, Nabil-Fareed Alikhan, Lizzie Meadows, Rachael Stanley, Ngozi Elumogo, Muhammed Yasir, Nicholas M. Thomson, Alexander J Trotter, Rachel Gilroy, Samuel Bloomfield, Claire Stuart, Andrew Bell, Reenesh Prakash, Samir Derwisevic, Alison E. Mather, John Wain, Mark Webber, Andrew J. Page, Justin O'Grady |
| EPI_ISL_671414, EPI_ISL_671415, EPI_ISL_671416, EPI_ISL_671417, EPI_ISL_671418                                                                                                                                                                                                                                                                                                                                                                                                                                                                                                                                                                                                                                                                                                                                                                                                                                                                                                                                                                                                                                                                                                                                                                                                                                                                                                                                                                                                                                                                                                                 | National Laboratory of Virology, Szentágotthai Research Centre      | National Laboratory of Virology, Szentágotthai Research Centre                                                                                                                             | Endre Gábor Tóth, Balázs Somogyi, Brigitta, Ferenc Jakab, Gábor Kemenesi |                                                                                                                                                                                                                                                                                                                                                                                                                                                           |
| EPI_ISL_671419, EPI_ISL_671420, EPI_ISL_671421, EPI_ISL_671422, EPI_ISL_671423, EPI_ISL_671424, EPI_ISL_671425, EPI_ISL_671426, EPI_ISL_671427, EPI_ISL_671428, EPI_ISL_671429, EPI_ISL_671430, EPI_ISL_671431, EPI_ISL_671432, EPI_ISL_671433, EPI_ISL_671434, EPI_ISL_671435, EPI_ISL_671436, EPI_ISL_671437, EPI_ISL_671438, EPI_ISL_671439, EPI_ISL_671440, EPI_ISL_671441, EPI_ISL_671442, EPI_ISL_671443, EPI_ISL_671444, EPI_ISL_671445, EPI_ISL_671446, EPI_ISL_671447, EPI_ISL_671448, EPI_ISL_671449, EPI_ISL_671450, EPI_ISL_671451, EPI_ISL_671452, EPI_ISL_671453, EPI_ISL_671454, EPI_ISL_671455, EPI_ISL_671456, EPI_ISL_671457, EPI_ISL_671458, EPI_ISL_671459, EPI_ISL_671460, EPI_ISL_671461, EPI_ISL_671462, EPI_ISL_671463, EPI_ISL_671464, EPI_ISL_671465, EPI_ISL_671466, EPI_ISL_671467, EPI_ISL_671468, EPI_ISL_671469, EPI_ISL_671470, EPI_ISL_671471, EPI_ISL_671472, EPI_ISL_671473, EPI_ISL_671474, EPI_ISL_671475, EPI_ISL_671476, EPI_ISL_671477, EPI_ISL_671478, EPI_ISL_671479, EPI_ISL_671480, EPI_ISL_671481, EPI_ISL_671482, EPI_ISL_671483, EPI_ISL_671484, EPI_ISL_671485, EPI_ISL_671486, EPI_ISL_671487, EPI_ISL_671488, EPI_ISL_671489, EPI_ISL_671490, EPI_ISL_671491, EPI_ISL_671492, EPI_ISL_671493, EPI_ISL_671494, EPI_ISL_671495                                                                                                                                                                                                                                                                                                                 | see above                                                           | University of Debrecen, Department of Medical Microbiology                                                                                                                                 | National Laboratory of Virology, Szentágotthai Research Centre           | Endre Gábor Tóth, Balázs Somogyi, Brigitta Zana, Eszter Csoma, Ferenc Jakab, Gábor Kemenesi                                                                                                                                                                                                                                                                                                                                                               |
| EPI_ISL_671834, EPI_ISL_671835, EPI_ISL_671836, EPI_ISL_671837, EPI_ISL_671838, EPI_ISL_671839, EPI_ISL_671840, EPI_ISL_671841, EPI_ISL_671842, EPI_ISL_671843, EPI_ISL_671844, EPI_ISL_671845, EPI_ISL_671846, EPI_ISL_671847, EPI_ISL_671848, EPI_ISL_671849, EPI_ISL_671850, EPI_ISL_671851, EPI_ISL_671852, EPI_ISL_671853, EPI_ISL_671854, EPI_ISL_671855, EPI_ISL_671856, EPI_ISL_671857, EPI_ISL_671858, EPI_ISL_671859, EPI_ISL_671860, EPI_ISL_671861, EPI_ISL_671862                                                                                                                                                                                                                                                                                                                                                                                                                                                                                                                                                                                                                                                                                                                                                                                                                                                                                                                                                                                                                                                                                                                 | see above                                                           | Servicio de Microbiología, Laboratori Clínic Metropolitana Nord, Hospital Universitari Germans Trias i Pujol, Institut d'Investigació en Ciències de la Salut Germans Trias i Pujol (IGTP) | SeqCOVID-SPAIN consortium/IBV(CSIC)                                      | Elisa Martró, Antoni E. Bordoy, Anna Not, Adrián Antuori, Anabel Fernández, Nona Romani, Verónica Saludes, Cristina Casañ and SeqCOVID-SPAIN consortium                                                                                                                                                                                                                                                                                                   |

|                                                                                                                                                                                                                                                                                                                                                                                                                                                                                                                                                                                                                                                                                                                                                                                                                                                                                                                                                                                                                                                                                                                                                                                                                                                                                                                                                                                                                                                                                                                                                                                |           |                                                                                                                                                                                            |                                                               |                                                                                                                                                                                                                                                                                                                                                                                                                                                           |
|--------------------------------------------------------------------------------------------------------------------------------------------------------------------------------------------------------------------------------------------------------------------------------------------------------------------------------------------------------------------------------------------------------------------------------------------------------------------------------------------------------------------------------------------------------------------------------------------------------------------------------------------------------------------------------------------------------------------------------------------------------------------------------------------------------------------------------------------------------------------------------------------------------------------------------------------------------------------------------------------------------------------------------------------------------------------------------------------------------------------------------------------------------------------------------------------------------------------------------------------------------------------------------------------------------------------------------------------------------------------------------------------------------------------------------------------------------------------------------------------------------------------------------------------------------------------------------|-----------|--------------------------------------------------------------------------------------------------------------------------------------------------------------------------------------------|---------------------------------------------------------------|-----------------------------------------------------------------------------------------------------------------------------------------------------------------------------------------------------------------------------------------------------------------------------------------------------------------------------------------------------------------------------------------------------------------------------------------------------------|
| EPI_ISL_671979, EPI_ISL_671980, EPI_ISL_671981, EPI_ISL_671982, EPI_ISL_671983, EPI_ISL_671984, EPI_ISL_671985, EPI_ISL_671986, EPI_ISL_671987, EPI_ISL_671988, EPI_ISL_671989, EPI_ISL_671990, EPI_ISL_671991, EPI_ISL_671992, EPI_ISL_671993, EPI_ISL_671994, EPI_ISL_671995, EPI_ISL_671996, EPI_ISL_671997, EPI_ISL_671998, EPI_ISL_671999, EPI_ISL_672000, EPI_ISL_672001, EPI_ISL_672002, EPI_ISL_672003, EPI_ISL_672004, EPI_ISL_672005, EPI_ISL_672006, EPI_ISL_672007, EPI_ISL_672008, EPI_ISL_672009, EPI_ISL_672010, EPI_ISL_672011                                                                                                                                                                                                                                                                                                                                                                                                                                                                                                                                                                                                                                                                                                                                                                                                                                                                                                                                                                                                                                 | see above | UEES BioLab                                                                                                                                                                                | Omics Sciences Laboratory                                     | Derly Andrade Molina, Rubén Armas González, Gabriel Morey León, Darlym Amaya, Katheryn Sacheri Viteri, Edith Lopez Montanero, Pedro Barberán, Fernando Espinoza Fuentes, Juan Carlos Fernández Cadena                                                                                                                                                                                                                                                     |
| EPI_ISL_672537, EPI_ISL_672542, EPI_ISL_672545, EPI_ISL_672548, EPI_ISL_672549, EPI_ISL_672552, EPI_ISL_672553, EPI_ISL_672555, EPI_ISL_672559, EPI_ISL_672565, EPI_ISL_672568                                                                                                                                                                                                                                                                                                                                                                                                                                                                                                                                                                                                                                                                                                                                                                                                                                                                                                                                                                                                                                                                                                                                                                                                                                                                                                                                                                                                 | see above | Utah Public Health Laboratory                                                                                                                                                              | Utah Public Health Laboratory                                 | Erin Young, Kelly Oakeson                                                                                                                                                                                                                                                                                                                                                                                                                                 |
| EPI_ISL_676489, EPI_ISL_676490, EPI_ISL_676491                                                                                                                                                                                                                                                                                                                                                                                                                                                                                                                                                                                                                                                                                                                                                                                                                                                                                                                                                                                                                                                                                                                                                                                                                                                                                                                                                                                                                                                                                                                                 |           | Klinisk mikrobiologi                                                                                                                                                                       | The Public Health Agency of Sweden                            | Department of Microbiology, The Public Health Agency of Sweden                                                                                                                                                                                                                                                                                                                                                                                            |
| EPI_ISL_676492                                                                                                                                                                                                                                                                                                                                                                                                                                                                                                                                                                                                                                                                                                                                                                                                                                                                                                                                                                                                                                                                                                                                                                                                                                                                                                                                                                                                                                                                                                                                                                 |           | Klinisk Mikrobiologi                                                                                                                                                                       | The Public Health Agency of Sweden                            | Department of Microbiology, The Public Health Agency of Sweden                                                                                                                                                                                                                                                                                                                                                                                            |
| EPI_ISL_676493                                                                                                                                                                                                                                                                                                                                                                                                                                                                                                                                                                                                                                                                                                                                                                                                                                                                                                                                                                                                                                                                                                                                                                                                                                                                                                                                                                                                                                                                                                                                                                 |           | Orebro klinisk mikrobiologi                                                                                                                                                                | The Public Health Agency of Sweden                            | Department of Microbiology, The Public Health Agency of Sweden                                                                                                                                                                                                                                                                                                                                                                                            |
| EPI_ISL_676494, EPI_ISL_676495, EPI_ISL_676496                                                                                                                                                                                                                                                                                                                                                                                                                                                                                                                                                                                                                                                                                                                                                                                                                                                                                                                                                                                                                                                                                                                                                                                                                                                                                                                                                                                                                                                                                                                                 |           | Klinisk mikrobiologi                                                                                                                                                                       | The Public Health Agency of Sweden                            | Department of Microbiology, The Public Health Agency of Sweden                                                                                                                                                                                                                                                                                                                                                                                            |
| EPI_ISL_676497, EPI_ISL_676498, EPI_ISL_676499, EPI_ISL_676500, EPI_ISL_676501                                                                                                                                                                                                                                                                                                                                                                                                                                                                                                                                                                                                                                                                                                                                                                                                                                                                                                                                                                                                                                                                                                                                                                                                                                                                                                                                                                                                                                                                                                 |           | Klinisk Mikrobiologi                                                                                                                                                                       | The Public Health Agency of Sweden                            | Department of Microbiology, The Public Health Agency of Sweden                                                                                                                                                                                                                                                                                                                                                                                            |
| EPI_ISL_676502, EPI_ISL_676503, EPI_ISL_676504, EPI_ISL_676505, EPI_ISL_676506, EPI_ISL_676507, EPI_ISL_676508                                                                                                                                                                                                                                                                                                                                                                                                                                                                                                                                                                                                                                                                                                                                                                                                                                                                                                                                                                                                                                                                                                                                                                                                                                                                                                                                                                                                                                                                 |           | Klinisk mikrobiologi                                                                                                                                                                       | The Public Health Agency of Sweden                            | Department of Microbiology, The Public Health Agency of Sweden                                                                                                                                                                                                                                                                                                                                                                                            |
| EPI_ISL_676512                                                                                                                                                                                                                                                                                                                                                                                                                                                                                                                                                                                                                                                                                                                                                                                                                                                                                                                                                                                                                                                                                                                                                                                                                                                                                                                                                                                                                                                                                                                                                                 |           | Klinsisk mikrobiologi Linköping                                                                                                                                                            | The Public Health Agency of Sweden                            | Department of Microbiology, The Public Health Agency of Sweden                                                                                                                                                                                                                                                                                                                                                                                            |
| EPI_ISL_676513                                                                                                                                                                                                                                                                                                                                                                                                                                                                                                                                                                                                                                                                                                                                                                                                                                                                                                                                                                                                                                                                                                                                                                                                                                                                                                                                                                                                                                                                                                                                                                 |           | Orebro klinisk mikrobiologi                                                                                                                                                                | The Public Health Agency of Sweden                            | Department of Microbiology, The Public Health Agency of Sweden                                                                                                                                                                                                                                                                                                                                                                                            |
| EPI_ISL_676514                                                                                                                                                                                                                                                                                                                                                                                                                                                                                                                                                                                                                                                                                                                                                                                                                                                                                                                                                                                                                                                                                                                                                                                                                                                                                                                                                                                                                                                                                                                                                                 |           | Gävleborg                                                                                                                                                                                  | The Public Health Agency of Sweden                            | Department of Microbiology, The Public Health Agency of Sweden                                                                                                                                                                                                                                                                                                                                                                                            |
| EPI_ISL_676515                                                                                                                                                                                                                                                                                                                                                                                                                                                                                                                                                                                                                                                                                                                                                                                                                                                                                                                                                                                                                                                                                                                                                                                                                                                                                                                                                                                                                                                                                                                                                                 |           | Klinisk mikrobiologi, Viruslab                                                                                                                                                             | The Public Health Agency of Sweden                            | Department of Microbiology, The Public Health Agency of Sweden                                                                                                                                                                                                                                                                                                                                                                                            |
| EPI_ISL_676516, EPI_ISL_676517                                                                                                                                                                                                                                                                                                                                                                                                                                                                                                                                                                                                                                                                                                                                                                                                                                                                                                                                                                                                                                                                                                                                                                                                                                                                                                                                                                                                                                                                                                                                                 |           | Laboratoriemedicin, Klinisk mikrobiologi                                                                                                                                                   | The Public Health Agency of Sweden                            | Department of Microbiology, The Public Health Agency of Sweden                                                                                                                                                                                                                                                                                                                                                                                            |
| EPI_ISL_676518                                                                                                                                                                                                                                                                                                                                                                                                                                                                                                                                                                                                                                                                                                                                                                                                                                                                                                                                                                                                                                                                                                                                                                                                                                                                                                                                                                                                                                                                                                                                                                 |           | Klinisk Mikrobiologi                                                                                                                                                                       | The Public Health Agency of Sweden                            | Department of Microbiology, The Public Health Agency of Sweden                                                                                                                                                                                                                                                                                                                                                                                            |
| EPI_ISL_676519                                                                                                                                                                                                                                                                                                                                                                                                                                                                                                                                                                                                                                                                                                                                                                                                                                                                                                                                                                                                                                                                                                                                                                                                                                                                                                                                                                                                                                                                                                                                                                 |           | Klinsisk mikrobiologi Linköping                                                                                                                                                            | The Public Health Agency of Sweden                            | Department of Microbiology, The Public Health Agency of Sweden                                                                                                                                                                                                                                                                                                                                                                                            |
| EPI_ISL_676520                                                                                                                                                                                                                                                                                                                                                                                                                                                                                                                                                                                                                                                                                                                                                                                                                                                                                                                                                                                                                                                                                                                                                                                                                                                                                                                                                                                                                                                                                                                                                                 |           | Klinisk mikrobiologi                                                                                                                                                                       | The Public Health Agency of Sweden                            | Department of Microbiology, The Public Health Agency of Sweden                                                                                                                                                                                                                                                                                                                                                                                            |
| EPI_ISL_676521, EPI_ISL_676522, EPI_ISL_676523, EPI_ISL_676524, EPI_ISL_676525, EPI_ISL_676526, EPI_ISL_676527, EPI_ISL_676528, EPI_ISL_676529, EPI_ISL_676530                                                                                                                                                                                                                                                                                                                                                                                                                                                                                                                                                                                                                                                                                                                                                                                                                                                                                                                                                                                                                                                                                                                                                                                                                                                                                                                                                                                                                 |           | Uppsala klinisk mikrobiologi                                                                                                                                                               | The Public Health Agency of Sweden                            | Department of Microbiology, The Public Health Agency of Sweden                                                                                                                                                                                                                                                                                                                                                                                            |
| EPI_ISL_676531, EPI_ISL_676532                                                                                                                                                                                                                                                                                                                                                                                                                                                                                                                                                                                                                                                                                                                                                                                                                                                                                                                                                                                                                                                                                                                                                                                                                                                                                                                                                                                                                                                                                                                                                 |           | Klinisk mikrobiologi                                                                                                                                                                       | The Public Health Agency of Sweden                            | Department of Microbiology, The Public Health Agency of Sweden                                                                                                                                                                                                                                                                                                                                                                                            |
| EPI_ISL_676533                                                                                                                                                                                                                                                                                                                                                                                                                                                                                                                                                                                                                                                                                                                                                                                                                                                                                                                                                                                                                                                                                                                                                                                                                                                                                                                                                                                                                                                                                                                                                                 |           | Karolinska Universitetslaboratoriet                                                                                                                                                        | The Public Health Agency of Sweden                            | Department of Microbiology, The Public Health Agency of Sweden                                                                                                                                                                                                                                                                                                                                                                                            |
| EPI_ISL_676534                                                                                                                                                                                                                                                                                                                                                                                                                                                                                                                                                                                                                                                                                                                                                                                                                                                                                                                                                                                                                                                                                                                                                                                                                                                                                                                                                                                                                                                                                                                                                                 |           | Kalmar klinisk mikrobiologi                                                                                                                                                                | The Public Health Agency of Sweden                            | Department of Microbiology, The Public Health Agency of Sweden                                                                                                                                                                                                                                                                                                                                                                                            |
| EPI_ISL_676535, EPI_ISL_676536, EPI_ISL_676537, EPI_ISL_676538, EPI_ISL_676539, EPI_ISL_676540                                                                                                                                                                                                                                                                                                                                                                                                                                                                                                                                                                                                                                                                                                                                                                                                                                                                                                                                                                                                                                                                                                                                                                                                                                                                                                                                                                                                                                                                                 |           | Laboratoriemedicin, Klinisk mikrobiologi                                                                                                                                                   | The Public Health Agency of Sweden                            | Department of Microbiology, The Public Health Agency of Sweden                                                                                                                                                                                                                                                                                                                                                                                            |
| EPI_ISL_677727, EPI_ISL_677728, EPI_ISL_677729, EPI_ISL_677730, EPI_ISL_677731, EPI_ISL_677732, EPI_ISL_677733, EPI_ISL_677734, EPI_ISL_677735, EPI_ISL_677736, EPI_ISL_677737, EPI_ISL_677738, EPI_ISL_677739, EPI_ISL_677740, EPI_ISL_677741, EPI_ISL_677742, EPI_ISL_677743, EPI_ISL_677744, EPI_ISL_677745, EPI_ISL_677746, EPI_ISL_677747, EPI_ISL_677748, EPI_ISL_677749, EPI_ISL_677750, EPI_ISL_677751, EPI_ISL_677752, EPI_ISL_677753, EPI_ISL_677754, EPI_ISL_677755, EPI_ISL_677756, EPI_ISL_677757, EPI_ISL_677758, EPI_ISL_677759, EPI_ISL_677760, EPI_ISL_677761, EPI_ISL_677762, EPI_ISL_677763, EPI_ISL_677764, EPI_ISL_677765, EPI_ISL_677766, EPI_ISL_677767, EPI_ISL_677768, EPI_ISL_677769, EPI_ISL_677770, EPI_ISL_677771, EPI_ISL_677772, EPI_ISL_677773, EPI_ISL_677774, EPI_ISL_677775, EPI_ISL_677776, EPI_ISL_677777, EPI_ISL_677778, EPI_ISL_677779, EPI_ISL_677780, EPI_ISL_677781, EPI_ISL_677782, EPI_ISL_677783, EPI_ISL_677784, EPI_ISL_677785, EPI_ISL_677786, EPI_ISL_677787, EPI_ISL_677788, EPI_ISL_677789, EPI_ISL_677790, EPI_ISL_677791, EPI_ISL_677792, EPI_ISL_677793, EPI_ISL_677794, EPI_ISL_677795, EPI_ISL_677796, EPI_ISL_677797, EPI_ISL_677798, EPI_ISL_677799, EPI_ISL_677800, EPI_ISL_677801, EPI_ISL_677802, EPI_ISL_677803, EPI_ISL_677804, EPI_ISL_677805, EPI_ISL_677806, EPI_ISL_677807, EPI_ISL_677808, EPI_ISL_677809, EPI_ISL_677810, EPI_ISL_677811, EPI_ISL_677812, EPI_ISL_677813, EPI_ISL_677814, EPI_ISL_677815, EPI_ISL_677817, EPI_ISL_677818, EPI_ISL_677819, EPI_ISL_677820, EPI_ISL_678290, EPI_ISL_678291 | see above | University of Szeged, Institute of Clinical Microbiology                                                                                                                                   | National Laboratory of Virology, Szentgáothai Research Centre | Endre Gábor Tóth, Balázs Somogyi, Brigitta, Gabriella Terhes, Ferenc Jakab, Gábor Kemenesi                                                                                                                                                                                                                                                                                                                                                                |
| EPI_ISL_678387, EPI_ISL_678388, EPI_ISL_678389, EPI_ISL_678390, EPI_ISL_678391, EPI_ISL_678392, EPI_ISL_678393, EPI_ISL_678394, EPI_ISL_678395, EPI_ISL_678396                                                                                                                                                                                                                                                                                                                                                                                                                                                                                                                                                                                                                                                                                                                                                                                                                                                                                                                                                                                                                                                                                                                                                                                                                                                                                                                                                                                                                 |           | University of Debrecen, Department of Medical Microbiology                                                                                                                                 | National Laboratory of Virology, Szentgáothai Research Centre | Endre Gábor Tóth, Balázs Somogyi, Brigitta Zana, Eszter Csoma, Ferenc Jakab, Gábor Kemenesi                                                                                                                                                                                                                                                                                                                                                               |
| EPI_ISL_678509, EPI_ISL_678517, EPI_ISL_678521, EPI_ISL_678528                                                                                                                                                                                                                                                                                                                                                                                                                                                                                                                                                                                                                                                                                                                                                                                                                                                                                                                                                                                                                                                                                                                                                                                                                                                                                                                                                                                                                                                                                                                 |           | Utah Public Health Laboratory                                                                                                                                                              | Utah Public Health Laboratory                                 | Erin Young, Kelly Oakeson                                                                                                                                                                                                                                                                                                                                                                                                                                 |
| EPI_ISL_678917, EPI_ISL_678919                                                                                                                                                                                                                                                                                                                                                                                                                                                                                                                                                                                                                                                                                                                                                                                                                                                                                                                                                                                                                                                                                                                                                                                                                                                                                                                                                                                                                                                                                                                                                 |           | Quadram Institute Bioscience                                                                                                                                                               | COVID-19 Genomics UK (COG-UK) Consortium                      | Dave J. Baker, Gemma L. Kay, Alp Aydin, Thanh Le-Viet, Steven Rudder, Ana P. Tedim, Anastasia Kolyva, Maria Diaz, Leonardo de Oliveira Martins, Nabil-Fareed Alikhan, Lizzie Meadows, Rachael Stanley, Ngozi Elumogo, Muhammed Yasir, Nicholas M. Thomson, Alexander J Trotter, Rachel Gilroy, Samuel Bloomfield, Claire Stuart, Andrew Bell, Reenesh Prakash, Samir Dervisevic, Alison E. Mather, John Wain, Mark Webber, Andrew J. Page, Justin O'Grady |
| EPI_ISL_683598, EPI_ISL_683599, EPI_ISL_683600, EPI_ISL_683601, EPI_ISL_683602, EPI_ISL_683603, EPI_ISL_683604, EPI_ISL_683605, EPI_ISL_683606, EPI_ISL_683607, EPI_ISL_683608, EPI_ISL_683609, EPI_ISL_683610, EPI_ISL_683611, EPI_ISL_683612, EPI_ISL_683613, EPI_ISL_683614, EPI_ISL_683615, EPI_ISL_683616, EPI_ISL_683617, EPI_ISL_683618, EPI_ISL_683619, EPI_ISL_683620, EPI_ISL_683621, EPI_ISL_683622, EPI_ISL_683623, EPI_ISL_683624, EPI_ISL_683625, EPI_ISL_683626, EPI_ISL_683627, EPI_ISL_683628, EPI_ISL_683629, EPI_ISL_683630, EPI_ISL_683631, EPI_ISL_683632, EPI_ISL_683633, EPI_ISL_683634, EPI_ISL_683635, EPI_ISL_683636, EPI_ISL_683637, EPI_ISL_683638, EPI_ISL_683639, EPI_ISL_683640, EPI_ISL_683641, EPI_ISL_683642, EPI_ISL_683643, EPI_ISL_683644, EPI_ISL_683645, EPI_ISL_683646, EPI_ISL_683647, EPI_ISL_683648, EPI_ISL_683649, EPI_ISL_683650, EPI_ISL_683651, EPI_ISL_683652, EPI_ISL_683653, EPI_ISL_683654, EPI_ISL_683655, EPI_ISL_683656                                                                                                                                                                                                                                                                                                                                                                                                                                                                                                                                                                                                 | see above | Servicio de Microbiología, Laboratori Clínic Metropolitana Nord, Hospital Universitari Germans Trias i Pujol, Institut d'Investigació en Ciències de la Salut Germans Trias i Pujol (IGTP) | SeqCOVID-SPAIN consortium/IBV(CSIC)                           | Elisa Matrró, Antoni E. Bordoy, Anna Not, Adrián Antuori, Anabel Fernández, Nona Romani, Verónica Saludes, Cristina Casañed and SeqCOVID-SPAIN consortium                                                                                                                                                                                                                                                                                                 |
| EPI_ISL_684002, EPI_ISL_684005, EPI_ISL_684007, EPI_ISL_684013, EPI_ISL_684015, EPI_ISL_684016, EPI_ISL_684019, EPI_ISL_684024, EPI_ISL_684027                                                                                                                                                                                                                                                                                                                                                                                                                                                                                                                                                                                                                                                                                                                                                                                                                                                                                                                                                                                                                                                                                                                                                                                                                                                                                                                                                                                                                                 |           | Utah Public Health Laboratory                                                                                                                                                              | Utah Public Health Laboratory                                 | Erin Young, Kelly Oakeson                                                                                                                                                                                                                                                                                                                                                                                                                                 |
| EPI_ISL_693334, EPI_ISL_693335, EPI_ISL_693336, EPI_ISL_693337, EPI_ISL_693338, EPI_ISL_693339, EPI_ISL_693340, EPI_ISL_693341, EPI_ISL_693342, EPI_ISL_693343, EPI_ISL_693344, EPI_ISL_693345, EPI_ISL_693346, EPI_ISL_693347, EPI_ISL_693348, EPI_ISL_693349, EPI_ISL_693350, EPI_ISL_693351, EPI_ISL_693352, EPI_ISL_693353, EPI_ISL_693354, EPI_ISL_693355, EPI_ISL_693356, EPI_ISL_693357, EPI_ISL_693358, EPI_ISL_693359, EPI_ISL_693360, EPI_ISL_693361, EPI_ISL_693362, EPI_ISL_693363, EPI_ISL_693364, EPI_ISL_693365, EPI_ISL_693366, EPI_ISL_693367, EPI_ISL_693368, EPI_ISL_693369                                                                                                                                                                                                                                                                                                                                                                                                                                                                                                                                                                                                                                                                                                                                                                                                                                                                                                                                                                                 |           |                                                                                                                                                                                            |                                                               |                                                                                                                                                                                                                                                                                                                                                                                                                                                           |

|                                                                                                                                                                                                                                                                                                                                                                                                                                                                                                                                                                                                                                                                                                                                                                                                                                                                                                                                                                                                                                                                                                                                                |                |                                                                                                                                                                            |                                                                                                                                                                                                                                                                                                                                                                                                                                                                                                       |                                                                                                                                                                                                                                                                                                                                                                                                                                                                                            |
|------------------------------------------------------------------------------------------------------------------------------------------------------------------------------------------------------------------------------------------------------------------------------------------------------------------------------------------------------------------------------------------------------------------------------------------------------------------------------------------------------------------------------------------------------------------------------------------------------------------------------------------------------------------------------------------------------------------------------------------------------------------------------------------------------------------------------------------------------------------------------------------------------------------------------------------------------------------------------------------------------------------------------------------------------------------------------------------------------------------------------------------------|----------------|----------------------------------------------------------------------------------------------------------------------------------------------------------------------------|-------------------------------------------------------------------------------------------------------------------------------------------------------------------------------------------------------------------------------------------------------------------------------------------------------------------------------------------------------------------------------------------------------------------------------------------------------------------------------------------------------|--------------------------------------------------------------------------------------------------------------------------------------------------------------------------------------------------------------------------------------------------------------------------------------------------------------------------------------------------------------------------------------------------------------------------------------------------------------------------------------------|
| EPI_ISL_693370, EPI_ISL_693371, EPI_ISL_693372, EPI_ISL_693373, EPI_ISL_693374, EPI_ISL_693375, EPI_ISL_693376, EPI_ISL_693377, EPI_ISL_693378, EPI_ISL_693379, EPI_ISL_693380, EPI_ISL_693381, EPI_ISL_693382, EPI_ISL_693383, EPI_ISL_693384, EPI_ISL_693385, EPI_ISL_693386                                                                                                                                                                                                                                                                                                                                                                                                                                                                                                                                                                                                                                                                                                                                                                                                                                                                 | see above      | Ramathubodi Hospital                                                                                                                                                       | COVID-19 Network Investigations (CONI) Alliance                                                                                                                                                                                                                                                                                                                                                                                                                                                       | Elizabeth Batty, Wasun Chantrata, Thanat Chookajorn, Stefan Fernandez, Angkana Huang, Anthony R. Jones, Khajohn Joonsalak, Chonticha Klungtong, Theerarat Kochakarn, Namfon Kotanan, Krittikorn Kumpornsin, Wudtichai Manasatienkij, Bhakbhoom Panthan, Ekawat Pasomsub, Kingkan Rakmanee, Insee Sensorn, Janjira Thaipadungpanit, Arporn Wangwiwatsin, Treewat Watthanachockchai                                                                                                          |
| EPI_ISL_693658, EPI_ISL_693659                                                                                                                                                                                                                                                                                                                                                                                                                                                                                                                                                                                                                                                                                                                                                                                                                                                                                                                                                                                                                                                                                                                 | EPI_ISL_697797 | Washington University in St. Louis<br>Centro de Investigaciones, Universidad de Especialidades<br>Espiritu Santo                                                           | Washington University in St. Louis<br>Institute of Microbiology, Universidad San Francisco de Quito                                                                                                                                                                                                                                                                                                                                                                                                   | David Wang, Carey-Ann Burnham, Bijal Parikh, Scott Handley, Lindsay Droit, Stephen Tahan<br>Derly Andrade, Juan Carlos Fernandez, Belén Prado-Vivar, Sully Márquez, Juan José Guadalupe, Monica Becerra-Wong, Bernardo Gutiérrez, Gabriel Morey, Ruben Armas, Jose Pedro Barberan, Fernando Espinoza, Edith Lopez, Verónica Barragan, Patricio Rojas-Silva, Gabriel Trueba, Michelle Grunauer, Paúl Cárdenas                                                                               |
| EPI_ISL_702478, EPI_ISL_702749, EPI_ISL_702825, EPI_ISL_702861, EPI_ISL_702873, EPI_ISL_702875, EPI_ISL_703187, EPI_ISL_703211, EPI_ISL_703714, EPI_ISL_703733, EPI_ISL_703905, EPI_ISL_703945, EPI_ISL_703974, EPI_ISL_703979, EPI_ISL_704073, EPI_ISL_704139, EPI_ISL_704142, EPI_ISL_704145, EPI_ISL_704181, EPI_ISL_704241, EPI_ISL_704622, EPI_ISL_704623, EPI_ISL_704631, EPI_ISL_704714, EPI_ISL_704739, EPI_ISL_704744, EPI_ISL_704749, EPI_ISL_704752, EPI_ISL_704754, EPI_ISL_704770, EPI_ISL_704777, EPI_ISL_704802, EPI_ISL_704847, EPI_ISL_704850, EPI_ISL_704887, EPI_ISL_704892, EPI_ISL_704908, EPI_ISL_704929, EPI_ISL_705256, EPI_ISL_705401, EPI_ISL_705422, EPI_ISL_705432, EPI_ISL_705567, EPI_ISL_705577, EPI_ISL_705585, EPI_ISL_705586, EPI_ISL_705589, EPI_ISL_705594, EPI_ISL_705598, EPI_ISL_705601, EPI_ISL_705604, EPI_ISL_705612, EPI_ISL_706365, EPI_ISL_706368, EPI_ISL_706369, EPI_ISL_706370, EPI_ISL_706374, EPI_ISL_706377, EPI_ISL_706386, EPI_ISL_706389, EPI_ISL_706390, EPI_ISL_706391, EPI_ISL_706392, EPI_ISL_706393, EPI_ISL_706398, EPI_ISL_706399, EPI_ISL_706407, EPI_ISL_706409, EPI_ISL_706413 | see above      | Quadram Institute Bioscience                                                                                                                                               | COVID-19 Genomics UK (COG-UK) Consortium<br>Dave J. Baker, Gemma L. Kay, Alp Aydin, Thanh Le-Viet, Steven Rudder, Ana P. Tedim, Anastasia Kolyva, Maria Diaz, Leonardo de Oliveira Martins, Nabil-Fareed Alikhan, Lizzie Meadows, Rachael Stanley, Ngozi Elumogo, Muhammed Yasir, Nicholas M. Thomson, Alexander J Trotter, Rachel Gilroy, Samuel Bloomfield, Claire Stuart, Andrew Bell, Reenesh Prakash, Samir Dervisevic, Alison E. Mather, John Wain, Mark Webber, Andrew J. Page, Justin O'Grady |                                                                                                                                                                                                                                                                                                                                                                                                                                                                                            |
| EPI_ISL_707709, EPI_ISL_707710                                                                                                                                                                                                                                                                                                                                                                                                                                                                                                                                                                                                                                                                                                                                                                                                                                                                                                                                                                                                                                                                                                                 |                | Hospital for Tropical Diseases                                                                                                                                             | COVID-19 Network Investigations (CONI) Alliance                                                                                                                                                                                                                                                                                                                                                                                                                                                       | Elizabeth Batty, Nantarar Chantawat, Wasun Chantrata, Thanat Chookajorn, Stefan Fernandez, Angkana Huang, Weena Janwithayanan, Akanitt Jitmittraphap, Anthony R. Jones, Khajohn Joonsalak, Chonticha Klungtong, Theerarat Kochakarn, Namfon Kotanan, Krittikorn Kumpornsin, Pornsawan Leaugwutiwong, Viravarn Luvira, Wudtichai Manasatienkij, Bhakbhoom Panthan, Ekawat Pasomsb, Kingkan Rakmanee, Insee Sensorn, Janjira Thaipadungpanit, Arporn Wangwiwatsin, Treewat Watthanachockchai |
| EPI_ISL_707711, EPI_ISL_707712, EPI_ISL_707713, EPI_ISL_707771, EPI_ISL_707772, EPI_ISL_707773, EPI_ISL_707774, EPI_ISL_707776, EPI_ISL_707777                                                                                                                                                                                                                                                                                                                                                                                                                                                                                                                                                                                                                                                                                                                                                                                                                                                                                                                                                                                                 |                | Rwanda National Reference Laboratory                                                                                                                                       | Rwanda National Reference Laboratory                                                                                                                                                                                                                                                                                                                                                                                                                                                                  | Enatha Mukantwari, Jeanne d'Arc Umuringa                                                                                                                                                                                                                                                                                                                                                                                                                                                   |
| EPI_ISL_707778                                                                                                                                                                                                                                                                                                                                                                                                                                                                                                                                                                                                                                                                                                                                                                                                                                                                                                                                                                                                                                                                                                                                 |                | Medical Research Center, Faculty of Medicine, Syarif Hidayatullah State Islamic University Jakarta                                                                         | Medical Research Center, Faculty of Medicine, Syarif Hidayatullah State Islamic University Jakarta                                                                                                                                                                                                                                                                                                                                                                                                    | Erike A Suwarsono, Chris Adhiyanto, Laifa Hendarmin, Zeti Harriyati, Rini Puspitaningrum, Ferania Mela, Dennis Nurjadi                                                                                                                                                                                                                                                                                                                                                                     |
| EPI_ISL_707779                                                                                                                                                                                                                                                                                                                                                                                                                                                                                                                                                                                                                                                                                                                                                                                                                                                                                                                                                                                                                                                                                                                                 |                | Rwanda National Reference Laboratory                                                                                                                                       | Rwanda National Reference Laboratory                                                                                                                                                                                                                                                                                                                                                                                                                                                                  | Enatha Mukantwari, Jeanne d'Arc Umuringa                                                                                                                                                                                                                                                                                                                                                                                                                                                   |
| EPI_ISL_707780                                                                                                                                                                                                                                                                                                                                                                                                                                                                                                                                                                                                                                                                                                                                                                                                                                                                                                                                                                                                                                                                                                                                 |                | Rwanda National Reference Laboratory                                                                                                                                       | Rwanda National Reference Laboratory                                                                                                                                                                                                                                                                                                                                                                                                                                                                  | Enatha Mukantwari, Jeanne d'Arc Umuringa                                                                                                                                                                                                                                                                                                                                                                                                                                                   |
| EPI_ISL_707783                                                                                                                                                                                                                                                                                                                                                                                                                                                                                                                                                                                                                                                                                                                                                                                                                                                                                                                                                                                                                                                                                                                                 |                | Rwanda National Reference Laboratory                                                                                                                                       | Rwanda National Reference Laboratory                                                                                                                                                                                                                                                                                                                                                                                                                                                                  | ENatha Mukantwari, Jeanne d'Arc Mukantwari                                                                                                                                                                                                                                                                                                                                                                                                                                                 |
| EPI_ISL_707787, EPI_ISL_707788                                                                                                                                                                                                                                                                                                                                                                                                                                                                                                                                                                                                                                                                                                                                                                                                                                                                                                                                                                                                                                                                                                                 |                | Rwanda National Reference Laboratory                                                                                                                                       | Rwanda National Reference Laboratory                                                                                                                                                                                                                                                                                                                                                                                                                                                                  | Enatha Mukantwari, Jeanne d'Arc Umuringa                                                                                                                                                                                                                                                                                                                                                                                                                                                   |
| EPI_ISL_707789                                                                                                                                                                                                                                                                                                                                                                                                                                                                                                                                                                                                                                                                                                                                                                                                                                                                                                                                                                                                                                                                                                                                 |                | Rwanda National Reference Laboratory                                                                                                                                       | Rwanda National Reference Laboratory                                                                                                                                                                                                                                                                                                                                                                                                                                                                  | Enatha Mukantwari, Jeanne d'Arc                                                                                                                                                                                                                                                                                                                                                                                                                                                            |
| EPI_ISL_707790                                                                                                                                                                                                                                                                                                                                                                                                                                                                                                                                                                                                                                                                                                                                                                                                                                                                                                                                                                                                                                                                                                                                 |                | Rwanda National Reference Laboratory                                                                                                                                       | Rwanda National Reference Laboratory                                                                                                                                                                                                                                                                                                                                                                                                                                                                  | Enatha Mukantwari, Jeanne d'Arc Umuringa                                                                                                                                                                                                                                                                                                                                                                                                                                                   |
| EPI_ISL_710546                                                                                                                                                                                                                                                                                                                                                                                                                                                                                                                                                                                                                                                                                                                                                                                                                                                                                                                                                                                                                                                                                                                                 |                | National Institute for Infectious Diseases, INMI, "L. Spallanzani" IRCCS                                                                                                   | National Institute for Infectious Diseases, INMI, "L. Spallanzani" IRCCS                                                                                                                                                                                                                                                                                                                                                                                                                              | E Giombini, M Rueca, B Bartolini, C.E.M Gruber, F Messina, A Di Caro, MR Capobianchi                                                                                                                                                                                                                                                                                                                                                                                                       |
| EPI_ISL_710576                                                                                                                                                                                                                                                                                                                                                                                                                                                                                                                                                                                                                                                                                                                                                                                                                                                                                                                                                                                                                                                                                                                                 |                | VC Sorgenfrimottagningen                                                                                                                                                   | The Public Health Agency of Sweden                                                                                                                                                                                                                                                                                                                                                                                                                                                                    | Department of Microbiology, The Public Health Agency of Sweden                                                                                                                                                                                                                                                                                                                                                                                                                             |
| EPI_ISL_710577, EPI_ISL_710578                                                                                                                                                                                                                                                                                                                                                                                                                                                                                                                                                                                                                                                                                                                                                                                                                                                                                                                                                                                                                                                                                                                 |                | Vardcentralen Brinken                                                                                                                                                      | The Public Health Agency of Sweden                                                                                                                                                                                                                                                                                                                                                                                                                                                                    | Department of Microbiology, The Public Health Agency of Sweden                                                                                                                                                                                                                                                                                                                                                                                                                             |
| EPI_ISL_710579, EPI_ISL_710580                                                                                                                                                                                                                                                                                                                                                                                                                                                                                                                                                                                                                                                                                                                                                                                                                                                                                                                                                                                                                                                                                                                 |                | Uppsala klinisk mikrobiologi                                                                                                                                               | The Public Health Agency of Sweden                                                                                                                                                                                                                                                                                                                                                                                                                                                                    | Department of Microbiology, The Public Health Agency of Sweden                                                                                                                                                                                                                                                                                                                                                                                                                             |
| EPI_ISL_710581, EPI_ISL_710582, EPI_ISL_710583                                                                                                                                                                                                                                                                                                                                                                                                                                                                                                                                                                                                                                                                                                                                                                                                                                                                                                                                                                                                                                                                                                 |                | The Public Health Agency of Sweden                                                                                                                                         | The Public Health Agency of Sweden                                                                                                                                                                                                                                                                                                                                                                                                                                                                    | Department of Microbiology, The Public Health Agency of Sweden                                                                                                                                                                                                                                                                                                                                                                                                                             |
| EPI_ISL_710584                                                                                                                                                                                                                                                                                                                                                                                                                                                                                                                                                                                                                                                                                                                                                                                                                                                                                                                                                                                                                                                                                                                                 |                | Skovde/Unilabs                                                                                                                                                             | The Public Health Agency of Sweden                                                                                                                                                                                                                                                                                                                                                                                                                                                                    | Department of Microbiology, The Public Health Agency of Sweden                                                                                                                                                                                                                                                                                                                                                                                                                             |
| EPI_ISL_710585, EPI_ISL_710586                                                                                                                                                                                                                                                                                                                                                                                                                                                                                                                                                                                                                                                                                                                                                                                                                                                                                                                                                                                                                                                                                                                 |                | Orsa VC                                                                                                                                                                    | The Public Health Agency of Sweden                                                                                                                                                                                                                                                                                                                                                                                                                                                                    | Department of Microbiology, The Public Health Agency of Sweden                                                                                                                                                                                                                                                                                                                                                                                                                             |
| EPI_ISL_710587, EPI_ISL_710588                                                                                                                                                                                                                                                                                                                                                                                                                                                                                                                                                                                                                                                                                                                                                                                                                                                                                                                                                                                                                                                                                                                 |                | Omtanken Grimmered                                                                                                                                                         | The Public Health Agency of Sweden                                                                                                                                                                                                                                                                                                                                                                                                                                                                    | Department of Microbiology, The Public Health Agency of Sweden                                                                                                                                                                                                                                                                                                                                                                                                                             |
| EPI_ISL_710589, EPI_ISL_710590, EPI_ISL_710591                                                                                                                                                                                                                                                                                                                                                                                                                                                                                                                                                                                                                                                                                                                                                                                                                                                                                                                                                                                                                                                                                                 |                | Narhalsan Fjallbacka VC                                                                                                                                                    | The Public Health Agency of Sweden                                                                                                                                                                                                                                                                                                                                                                                                                                                                    | Department of Microbiology, The Public Health Agency of Sweden                                                                                                                                                                                                                                                                                                                                                                                                                             |
| EPI_ISL_710592, EPI_ISL_710593                                                                                                                                                                                                                                                                                                                                                                                                                                                                                                                                                                                                                                                                                                                                                                                                                                                                                                                                                                                                                                                                                                                 |                | MLF Care AB                                                                                                                                                                | The Public Health Agency of Sweden                                                                                                                                                                                                                                                                                                                                                                                                                                                                    | Department of Microbiology, The Public Health Agency of Sweden                                                                                                                                                                                                                                                                                                                                                                                                                             |
| EPI_ISL_710594                                                                                                                                                                                                                                                                                                                                                                                                                                                                                                                                                                                                                                                                                                                                                                                                                                                                                                                                                                                                                                                                                                                                 |                | Klinisk mikrobiologi Vasternorrland                                                                                                                                        | The Public Health Agency of Sweden                                                                                                                                                                                                                                                                                                                                                                                                                                                                    | Department of Microbiology, The Public Health Agency of Sweden                                                                                                                                                                                                                                                                                                                                                                                                                             |
| EPI_ISL_710595, EPI_ISL_710596, EPI_ISL_710597, EPI_ISL_710598, EPI_ISL_710599, EPI_ISL_710600, EPI_ISL_710601, EPI_ISL_710602, EPI_ISL_710603, EPI_ISL_710604                                                                                                                                                                                                                                                                                                                                                                                                                                                                                                                                                                                                                                                                                                                                                                                                                                                                                                                                                                                 |                | Klinisk mikrobiologi                                                                                                                                                       | The Public Health Agency of Sweden                                                                                                                                                                                                                                                                                                                                                                                                                                                                    | Department of Microbiology, The Public Health Agency of Sweden                                                                                                                                                                                                                                                                                                                                                                                                                             |
| EPI_ISL_710605                                                                                                                                                                                                                                                                                                                                                                                                                                                                                                                                                                                                                                                                                                                                                                                                                                                                                                                                                                                                                                                                                                                                 |                | Kalmar klinisk mikrobiologi                                                                                                                                                | The Public Health Agency of Sweden                                                                                                                                                                                                                                                                                                                                                                                                                                                                    | Department of Microbiology, The Public Health Agency of Sweden                                                                                                                                                                                                                                                                                                                                                                                                                             |
| EPI_ISL_710606, EPI_ISL_710607                                                                                                                                                                                                                                                                                                                                                                                                                                                                                                                                                                                                                                                                                                                                                                                                                                                                                                                                                                                                                                                                                                                 |                | Halsomedicinskt Center                                                                                                                                                     | The Public Health Agency of Sweden                                                                                                                                                                                                                                                                                                                                                                                                                                                                    | Department of Microbiology, The Public Health Agency of Sweden                                                                                                                                                                                                                                                                                                                                                                                                                             |
| EPI_ISL_710608, EPI_ISL_710609                                                                                                                                                                                                                                                                                                                                                                                                                                                                                                                                                                                                                                                                                                                                                                                                                                                                                                                                                                                                                                                                                                                 |                | Gavle klinisk mikrobiologi                                                                                                                                                 | The Public Health Agency of Sweden                                                                                                                                                                                                                                                                                                                                                                                                                                                                    | Department of Microbiology, The Public Health Agency of Sweden                                                                                                                                                                                                                                                                                                                                                                                                                             |
| EPI_ISL_710610, EPI_ISL_710611                                                                                                                                                                                                                                                                                                                                                                                                                                                                                                                                                                                                                                                                                                                                                                                                                                                                                                                                                                                                                                                                                                                 |                | Ektorps Vardcentral                                                                                                                                                        | The Public Health Agency of Sweden                                                                                                                                                                                                                                                                                                                                                                                                                                                                    | Department of Microbiology, The Public Health Agency of Sweden                                                                                                                                                                                                                                                                                                                                                                                                                             |
| EPI_ISL_710612                                                                                                                                                                                                                                                                                                                                                                                                                                                                                                                                                                                                                                                                                                                                                                                                                                                                                                                                                                                                                                                                                                                                 |                | Capio Bro VC                                                                                                                                                               | The Public Health Agency of Sweden                                                                                                                                                                                                                                                                                                                                                                                                                                                                    | Department of Microbiology, The Public Health Agency of Sweden                                                                                                                                                                                                                                                                                                                                                                                                                             |
| EPI_ISL_710613                                                                                                                                                                                                                                                                                                                                                                                                                                                                                                                                                                                                                                                                                                                                                                                                                                                                                                                                                                                                                                                                                                                                 |                | Barnakuten                                                                                                                                                                 | The Public Health Agency of Sweden                                                                                                                                                                                                                                                                                                                                                                                                                                                                    | Department of Microbiology, The Public Health Agency of Sweden                                                                                                                                                                                                                                                                                                                                                                                                                             |
| EPI_ISL_717979                                                                                                                                                                                                                                                                                                                                                                                                                                                                                                                                                                                                                                                                                                                                                                                                                                                                                                                                                                                                                                                                                                                                 |                | Laboratory of Microbiology and Infectious Diseases, Faculty of Veterinary Medicine, Aristotle University of Thessaloniki, University Campus, 541 24, Thessaloniki, Greece. | Laboratory of Biology, Department of Medicine, Democritus University of Thrace, Alexandroupolis, Greece                                                                                                                                                                                                                                                                                                                                                                                               | Dovroilis N., Chaintoutis S., Dimitriou M., Bampali M., Dovas C., Karakasioti I.                                                                                                                                                                                                                                                                                                                                                                                                           |
| EPI_ISL_718132, EPI_ISL_718133, EPI_ISL_718134, EPI_ISL_718135, EPI_ISL_718136, EPI_ISL_718137, EPI_ISL_718138, EPI_ISL_718139, EPI_ISL_718140, EPI_ISL_718141, EPI_ISL_718142, EPI_ISL_718143, EPI_ISL_718144, EPI_ISL_718145, EPI_ISL_718146, EPI_ISL_718147, EPI_ISL_718148, EPI_ISL_718149, EPI_ISL_718150, EPI_ISL_718151, EPI_ISL_718152, EPI_ISL_718153, EPI_ISL_718154, EPI_ISL_718155, EPI_ISL_718156, EPI_ISL_718157, EPI_ISL_718158, EPI_ISL_718159, EPI_ISL_718160, EPI_ISL_718161, EPI_ISL_718162, EPI_ISL_718163, EPI_ISL_718164, EPI_ISL_718165, EPI_ISL_718166                                                                                                                                                                                                                                                                                                                                                                                                                                                                                                                                                                 | see above      | Ministry of Health Hospitals                                                                                                                                               | Institute of Health and Community Medicine                                                                                                                                                                                                                                                                                                                                                                                                                                                            | David Perera, Ooi Mong How, Chua Hock Hin, Tonnie Sia Loong Loong, Wong Jyn Shan, Wong Kiing Aik, Chan Chia Jui                                                                                                                                                                                                                                                                                                                                                                            |
| EPI_ISL_718167                                                                                                                                                                                                                                                                                                                                                                                                                                                                                                                                                                                                                                                                                                                                                                                                                                                                                                                                                                                                                                                                                                                                 |                | Borneo Medical Centre                                                                                                                                                      | Institute of Health and Community Medicine                                                                                                                                                                                                                                                                                                                                                                                                                                                            | David Perera, Ooi Mong How, Chua Hock Hin, Tonnie Sia Loong Loong, Wong Jyn Shan, Wong Kiing Aik, Chan Chia Jui                                                                                                                                                                                                                                                                                                                                                                            |
| EPI_ISL_718168, EPI_ISL_718169, EPI_ISL_718170, EPI_ISL_718171, EPI_ISL_718172, EPI_ISL_718173                                                                                                                                                                                                                                                                                                                                                                                                                                                                                                                                                                                                                                                                                                                                                                                                                                                                                                                                                                                                                                                 |                | Ministry of Health Hospitals                                                                                                                                               | Institute of Health and Community Medicine                                                                                                                                                                                                                                                                                                                                                                                                                                                            | David Perera, Ooi Mong How, Chua Hock Hin, Tonnie Sia Loong Loong, Wong Jyn Shan, Wong Kiing Aik, Chan Chia Jui                                                                                                                                                                                                                                                                                                                                                                            |
| EPI_ISL_718174                                                                                                                                                                                                                                                                                                                                                                                                                                                                                                                                                                                                                                                                                                                                                                                                                                                                                                                                                                                                                                                                                                                                 |                | Borneo Medical Centre                                                                                                                                                      | Institute of Health and Community Medicine                                                                                                                                                                                                                                                                                                                                                                                                                                                            | David Perera, Ooi Mong How, Chua Hock Hin, Tonnie Sia Loong Loong, Wong Jyn Shan, Wong Kiing Aik, Chan Chia Jui                                                                                                                                                                                                                                                                                                                                                                            |

|                                                                                                                                                                                                                                                                                                                                                                                                                                                                                                                                                                                                                                                                                                                                                                                                                                                                                                                                                                                                                                                                                                                                                                                                                                                                                                                                                                                                                                                                                                                                                                                                                                                                                                                                                                                                                                                                                                                                                                                                                                                                                                                                                                                                                                                                                                                                                                                                                                                                                |                                                                          |                                                                          |                                                                                                                                                                                                                                                                                                                                                                                                                                                           |
|--------------------------------------------------------------------------------------------------------------------------------------------------------------------------------------------------------------------------------------------------------------------------------------------------------------------------------------------------------------------------------------------------------------------------------------------------------------------------------------------------------------------------------------------------------------------------------------------------------------------------------------------------------------------------------------------------------------------------------------------------------------------------------------------------------------------------------------------------------------------------------------------------------------------------------------------------------------------------------------------------------------------------------------------------------------------------------------------------------------------------------------------------------------------------------------------------------------------------------------------------------------------------------------------------------------------------------------------------------------------------------------------------------------------------------------------------------------------------------------------------------------------------------------------------------------------------------------------------------------------------------------------------------------------------------------------------------------------------------------------------------------------------------------------------------------------------------------------------------------------------------------------------------------------------------------------------------------------------------------------------------------------------------------------------------------------------------------------------------------------------------------------------------------------------------------------------------------------------------------------------------------------------------------------------------------------------------------------------------------------------------------------------------------------------------------------------------------------------------|--------------------------------------------------------------------------|--------------------------------------------------------------------------|-----------------------------------------------------------------------------------------------------------------------------------------------------------------------------------------------------------------------------------------------------------------------------------------------------------------------------------------------------------------------------------------------------------------------------------------------------------|
| EPI_ISL_718175                                                                                                                                                                                                                                                                                                                                                                                                                                                                                                                                                                                                                                                                                                                                                                                                                                                                                                                                                                                                                                                                                                                                                                                                                                                                                                                                                                                                                                                                                                                                                                                                                                                                                                                                                                                                                                                                                                                                                                                                                                                                                                                                                                                                                                                                                                                                                                                                                                                                 | Ministry of Health Hospitals                                             | Institute of Health and Community Medicine                               | David Perera, Ooi Mong How, Chua Hock Hin, Tonnii Sia Loong Loong, Wong Jyn Shan, Wong Kiing Aik, Chan Chia Jui                                                                                                                                                                                                                                                                                                                                           |
| EPI_ISL_718176                                                                                                                                                                                                                                                                                                                                                                                                                                                                                                                                                                                                                                                                                                                                                                                                                                                                                                                                                                                                                                                                                                                                                                                                                                                                                                                                                                                                                                                                                                                                                                                                                                                                                                                                                                                                                                                                                                                                                                                                                                                                                                                                                                                                                                                                                                                                                                                                                                                                 | Borneo Medical Centre                                                    | Institute of Health and Community Medicine                               | David Perera, Ooi Mong How, Chua Hock Hin, Tonnii Sia Loong Loong, Wong Jyn Shan, Wong Kiing Aik, Chan Chia Jui                                                                                                                                                                                                                                                                                                                                           |
| EPI_ISL_718177                                                                                                                                                                                                                                                                                                                                                                                                                                                                                                                                                                                                                                                                                                                                                                                                                                                                                                                                                                                                                                                                                                                                                                                                                                                                                                                                                                                                                                                                                                                                                                                                                                                                                                                                                                                                                                                                                                                                                                                                                                                                                                                                                                                                                                                                                                                                                                                                                                                                 | Ministry of Health Hospitals                                             | Institute of Health and Community Medicine                               | David Perera, Ooi Mong How, Chua Hock Hin, Tonnii Sia Loong Loong, Wong Jyn Shan, Wong Kiing Aik, Chan Chia Jui                                                                                                                                                                                                                                                                                                                                           |
| EPI_ISL_718178                                                                                                                                                                                                                                                                                                                                                                                                                                                                                                                                                                                                                                                                                                                                                                                                                                                                                                                                                                                                                                                                                                                                                                                                                                                                                                                                                                                                                                                                                                                                                                                                                                                                                                                                                                                                                                                                                                                                                                                                                                                                                                                                                                                                                                                                                                                                                                                                                                                                 | Borneo Medical Centre                                                    | Institute of Health and Community Medicine                               | David Perera, Ooi Mong How, Chua Hock Hin, Tonnii Sia Loong Loong, Wong Jyn Shan, Wong Kiing Aik, Chan Chia Jui                                                                                                                                                                                                                                                                                                                                           |
| EPI_ISL_718179, EPI_ISL_718180, EPI_ISL_718181                                                                                                                                                                                                                                                                                                                                                                                                                                                                                                                                                                                                                                                                                                                                                                                                                                                                                                                                                                                                                                                                                                                                                                                                                                                                                                                                                                                                                                                                                                                                                                                                                                                                                                                                                                                                                                                                                                                                                                                                                                                                                                                                                                                                                                                                                                                                                                                                                                 | Ministry of Health Hospitals                                             | Institute of Health and Community Medicine                               | David Perera, Ooi Mong How, Chua Hock Hin, Tonnii Sia Loong Loong, Wong Jyn Shan, Wong Kiing Aik, Chan Chia Jui                                                                                                                                                                                                                                                                                                                                           |
| EPI_ISL_718182                                                                                                                                                                                                                                                                                                                                                                                                                                                                                                                                                                                                                                                                                                                                                                                                                                                                                                                                                                                                                                                                                                                                                                                                                                                                                                                                                                                                                                                                                                                                                                                                                                                                                                                                                                                                                                                                                                                                                                                                                                                                                                                                                                                                                                                                                                                                                                                                                                                                 | Borneo Medical Centre                                                    | Institute of Health and Community Medicine                               | David Perera, Ooi Mong How, Chua Hock Hin, Tonnii Sia Loong Loong, Wong Jyn Shan, Wong Kiing Aik, Chan Chia Jui                                                                                                                                                                                                                                                                                                                                           |
| EPI_ISL_718183, EPI_ISL_718184                                                                                                                                                                                                                                                                                                                                                                                                                                                                                                                                                                                                                                                                                                                                                                                                                                                                                                                                                                                                                                                                                                                                                                                                                                                                                                                                                                                                                                                                                                                                                                                                                                                                                                                                                                                                                                                                                                                                                                                                                                                                                                                                                                                                                                                                                                                                                                                                                                                 | Ministry of Health Hospitals                                             | Institute of Health and Community Medicine                               | David Perera, Ooi Mong How, Chua Hock Hin, Tonnii Sia Loong Loong, Wong Jyn Shan, Wong Kiing Aik, Chan Chia Jui                                                                                                                                                                                                                                                                                                                                           |
| EPI_ISL_718185                                                                                                                                                                                                                                                                                                                                                                                                                                                                                                                                                                                                                                                                                                                                                                                                                                                                                                                                                                                                                                                                                                                                                                                                                                                                                                                                                                                                                                                                                                                                                                                                                                                                                                                                                                                                                                                                                                                                                                                                                                                                                                                                                                                                                                                                                                                                                                                                                                                                 | Borneo Medical Centre                                                    | Institute of Health and Community Medicine                               | David Perera, Ooi Mong How, Chua Hock Hin, Tonnii Sia Loong Loong, Wong Jyn Shan, Wong Kiing Aik, Chan Chia Jui                                                                                                                                                                                                                                                                                                                                           |
| EPI_ISL_718186, EPI_ISL_718187, EPI_ISL_718188, EPI_ISL_718189, EPI_ISL_718190                                                                                                                                                                                                                                                                                                                                                                                                                                                                                                                                                                                                                                                                                                                                                                                                                                                                                                                                                                                                                                                                                                                                                                                                                                                                                                                                                                                                                                                                                                                                                                                                                                                                                                                                                                                                                                                                                                                                                                                                                                                                                                                                                                                                                                                                                                                                                                                                 | Ministry of Health Hospitals                                             | Institute of Health and Community Medicine                               | David Perera, Ooi Mong How, Chua Hock Hin, Tonnii Sia Loong Loong, Wong Jyn Shan, Wong Kiing Aik, Chan Chia Jui                                                                                                                                                                                                                                                                                                                                           |
| EPI_ISL_718191, EPI_ISL_718192                                                                                                                                                                                                                                                                                                                                                                                                                                                                                                                                                                                                                                                                                                                                                                                                                                                                                                                                                                                                                                                                                                                                                                                                                                                                                                                                                                                                                                                                                                                                                                                                                                                                                                                                                                                                                                                                                                                                                                                                                                                                                                                                                                                                                                                                                                                                                                                                                                                 | Borneo Medical Centre                                                    | Institute of Health and Community Medicine                               | David Perera, Ooi Mong How, Chua Hock Hin, Tonnii Sia Loong Loong, Wong Jyn Shan, Wong Kiing Aik, Chan Chia Jui                                                                                                                                                                                                                                                                                                                                           |
| EPI_ISL_718193, EPI_ISL_718194, EPI_ISL_718195, EPI_ISL_718196                                                                                                                                                                                                                                                                                                                                                                                                                                                                                                                                                                                                                                                                                                                                                                                                                                                                                                                                                                                                                                                                                                                                                                                                                                                                                                                                                                                                                                                                                                                                                                                                                                                                                                                                                                                                                                                                                                                                                                                                                                                                                                                                                                                                                                                                                                                                                                                                                 | Ministry of Health Hospitals                                             | Institute of Health and Community Medicine                               | David Perera, Ooi Mong How, Chua Hock Hin, Tonnii Sia Loong Loong, Wong Jyn Shan, Wong Kiing Aik, Chan Chia Jui                                                                                                                                                                                                                                                                                                                                           |
| EPI_ISL_718197, EPI_ISL_718198                                                                                                                                                                                                                                                                                                                                                                                                                                                                                                                                                                                                                                                                                                                                                                                                                                                                                                                                                                                                                                                                                                                                                                                                                                                                                                                                                                                                                                                                                                                                                                                                                                                                                                                                                                                                                                                                                                                                                                                                                                                                                                                                                                                                                                                                                                                                                                                                                                                 | Borneo Medical Centre                                                    | Institute of Health and Community Medicine                               | David Perera, Ooi Mong How, Chua Hock Hin, Tonnii Sia Loong Loong, Wong Jyn Shan, Wong Kiing Aik, Chan Chia Jui                                                                                                                                                                                                                                                                                                                                           |
| EPI_ISL_718199, EPI_ISL_718200, EPI_ISL_718201, EPI_ISL_718202                                                                                                                                                                                                                                                                                                                                                                                                                                                                                                                                                                                                                                                                                                                                                                                                                                                                                                                                                                                                                                                                                                                                                                                                                                                                                                                                                                                                                                                                                                                                                                                                                                                                                                                                                                                                                                                                                                                                                                                                                                                                                                                                                                                                                                                                                                                                                                                                                 | Ministry of Health Hospitals                                             | Institute of Health and Community Medicine                               | David Perera, Ooi Mong How, Chua Hock Hin, Tonnii Sia Loong Loong, Wong Jyn Shan, Wong Kiing Aik, Chan Chia Jui                                                                                                                                                                                                                                                                                                                                           |
| EPI_ISL_718203, EPI_ISL_718204, EPI_ISL_718205                                                                                                                                                                                                                                                                                                                                                                                                                                                                                                                                                                                                                                                                                                                                                                                                                                                                                                                                                                                                                                                                                                                                                                                                                                                                                                                                                                                                                                                                                                                                                                                                                                                                                                                                                                                                                                                                                                                                                                                                                                                                                                                                                                                                                                                                                                                                                                                                                                 | Borneo Medical Centre                                                    | Institute of Health and Community Medicine                               | David Perera, Ooi Mong How, Chua Hock Hin, Tonnii Sia Loong Loong, Wong Jyn Shan, Wong Kiing Aik, Chan Chia Jui                                                                                                                                                                                                                                                                                                                                           |
| EPI_ISL_718206, EPI_ISL_718207, EPI_ISL_718208, EPI_ISL_718209, EPI_ISL_718210, EPI_ISL_718211, EPI_ISL_718212, EPI_ISL_718213, EPI_ISL_718214, EPI_ISL_718215                                                                                                                                                                                                                                                                                                                                                                                                                                                                                                                                                                                                                                                                                                                                                                                                                                                                                                                                                                                                                                                                                                                                                                                                                                                                                                                                                                                                                                                                                                                                                                                                                                                                                                                                                                                                                                                                                                                                                                                                                                                                                                                                                                                                                                                                                                                 | Ministry of Health Hospitals                                             | Institute of Health and Community Medicine                               | David Perera, Ooi Mong How, Chua Hock Hin, Tonnii Sia Loong Loong, Wong Jyn Shan, Wong Kiing Aik, Chan Chia Jui                                                                                                                                                                                                                                                                                                                                           |
| EPI_ISL_718216                                                                                                                                                                                                                                                                                                                                                                                                                                                                                                                                                                                                                                                                                                                                                                                                                                                                                                                                                                                                                                                                                                                                                                                                                                                                                                                                                                                                                                                                                                                                                                                                                                                                                                                                                                                                                                                                                                                                                                                                                                                                                                                                                                                                                                                                                                                                                                                                                                                                 | Borneo Medical Centre                                                    | Institute of Health and Community Medicine                               | David Perera, Ooi Mong How, Chua Hock Hin, Tonnii Sia Loong Loong, Wong Jyn Shan, Wong Kiing Aik, Chan Chia Jui                                                                                                                                                                                                                                                                                                                                           |
| EPI_ISL_718217                                                                                                                                                                                                                                                                                                                                                                                                                                                                                                                                                                                                                                                                                                                                                                                                                                                                                                                                                                                                                                                                                                                                                                                                                                                                                                                                                                                                                                                                                                                                                                                                                                                                                                                                                                                                                                                                                                                                                                                                                                                                                                                                                                                                                                                                                                                                                                                                                                                                 | Ministry of Health Hospitals                                             | Institute of Health and Community Medicine                               | David Perera, Ooi Mong How, Chua Hock Hin, Tonnii Sia Loong Loong, Wong Jyn Shan, Wong Kiing Aik, Chan Chia Jui                                                                                                                                                                                                                                                                                                                                           |
| EPI_ISL_718218                                                                                                                                                                                                                                                                                                                                                                                                                                                                                                                                                                                                                                                                                                                                                                                                                                                                                                                                                                                                                                                                                                                                                                                                                                                                                                                                                                                                                                                                                                                                                                                                                                                                                                                                                                                                                                                                                                                                                                                                                                                                                                                                                                                                                                                                                                                                                                                                                                                                 | Borneo Medical Centre                                                    | Institute of Health and Community Medicine                               | David Perera, Ooi Mong How, Chua Hock Hin, Tonnii Sia Loong Loong, Wong Jyn Shan, Wong Kiing Aik, Chan Chia Jui                                                                                                                                                                                                                                                                                                                                           |
| EPI_ISL_718219, EPI_ISL_718220, EPI_ISL_718221                                                                                                                                                                                                                                                                                                                                                                                                                                                                                                                                                                                                                                                                                                                                                                                                                                                                                                                                                                                                                                                                                                                                                                                                                                                                                                                                                                                                                                                                                                                                                                                                                                                                                                                                                                                                                                                                                                                                                                                                                                                                                                                                                                                                                                                                                                                                                                                                                                 | Ministry of Health Hospitals                                             | Institute of Health and Community Medicine                               | David Perera, Ooi Mong How, Chua Hock Hin, Tonnii Sia Loong Loong, Wong Jyn Shan, Wong Kiing Aik, Chan Chia Jui                                                                                                                                                                                                                                                                                                                                           |
| EPI_ISL_718222                                                                                                                                                                                                                                                                                                                                                                                                                                                                                                                                                                                                                                                                                                                                                                                                                                                                                                                                                                                                                                                                                                                                                                                                                                                                                                                                                                                                                                                                                                                                                                                                                                                                                                                                                                                                                                                                                                                                                                                                                                                                                                                                                                                                                                                                                                                                                                                                                                                                 | Borneo Medical Centre                                                    | Institute of Health and Community Medicine                               | David Perera, Ooi Mong How, Chua Hock Hin, Tonnii Sia Loong Loong, Wong Jyn Shan, Wong Kiing Aik, Chan Chia Jui                                                                                                                                                                                                                                                                                                                                           |
| EPI_ISL_718263                                                                                                                                                                                                                                                                                                                                                                                                                                                                                                                                                                                                                                                                                                                                                                                                                                                                                                                                                                                                                                                                                                                                                                                                                                                                                                                                                                                                                                                                                                                                                                                                                                                                                                                                                                                                                                                                                                                                                                                                                                                                                                                                                                                                                                                                                                                                                                                                                                                                 | National Institute for Infectious Diseases, INMI, "L. Spallanzani" IRCCS | National Institute for Infectious Diseases, INMI, "L. Spallanzani" IRCCS | E Giombini, C.E.M Gruber, M Rueca, B Bartolini, F Messina, A Di Caro, MR Capobianchi                                                                                                                                                                                                                                                                                                                                                                      |
| EPI_ISL_721628                                                                                                                                                                                                                                                                                                                                                                                                                                                                                                                                                                                                                                                                                                                                                                                                                                                                                                                                                                                                                                                                                                                                                                                                                                                                                                                                                                                                                                                                                                                                                                                                                                                                                                                                                                                                                                                                                                                                                                                                                                                                                                                                                                                                                                                                                                                                                                                                                                                                 | National Institute for Infectious Diseases, INMI, "L. Spallanzani" IRCCS | National Institute for Infectious Diseases, INMI, "L. Spallanzani" IRCCS | E Giombini, M Rueca, B Bartolini, C.E.M Gruber, F Messina, A Di Caro, MR Capobianchi                                                                                                                                                                                                                                                                                                                                                                      |
| EPI_ISL_721629, EPI_ISL_721630, EPI_ISL_721631, EPI_ISL_721632, EPI_ISL_721633, EPI_ISL_721634, EPI_ISL_721635, EPI_ISL_721636, EPI_ISL_721637, EPI_ISL_721638, EPI_ISL_721639, EPI_ISL_721640, EPI_ISL_721641, EPI_ISL_721642, EPI_ISL_721643, EPI_ISL_721644, EPI_ISL_721645                                                                                                                                                                                                                                                                                                                                                                                                                                                                                                                                                                                                                                                                                                                                                                                                                                                                                                                                                                                                                                                                                                                                                                                                                                                                                                                                                                                                                                                                                                                                                                                                                                                                                                                                                                                                                                                                                                                                                                                                                                                                                                                                                                                                 |                                                                          |                                                                          |                                                                                                                                                                                                                                                                                                                                                                                                                                                           |
| see above                                                                                                                                                                                                                                                                                                                                                                                                                                                                                                                                                                                                                                                                                                                                                                                                                                                                                                                                                                                                                                                                                                                                                                                                                                                                                                                                                                                                                                                                                                                                                                                                                                                                                                                                                                                                                                                                                                                                                                                                                                                                                                                                                                                                                                                                                                                                                                                                                                                                      | Armed Forces Medical College                                             | National Centre For Cell Science                                         | Dhiraj Paul, Kunal Jani, Radha Chauhan, Janesh Kumar, Vasudevan Seshadri, Giridhari Lal, Rajesh Karyakarte, Suvarna Joshi, Murlidhar Tambe, Sourav Sen, Santosh Karade, Kavita Bala Anand, Shelinder Pal Singh Shergill, Rajiv Mohan Gupta, Manoj Kumar Bhat, Arvind Sahu, Yogesh S Shouche                                                                                                                                                               |
| EPI_ISL_721646, EPI_ISL_721647, EPI_ISL_721648, EPI_ISL_721649, EPI_ISL_721650, EPI_ISL_721651, EPI_ISL_721653, EPI_ISL_721654, EPI_ISL_721655, EPI_ISL_721656, EPI_ISL_721657, EPI_ISL_721658, EPI_ISL_721659, EPI_ISL_721660, EPI_ISL_721661, EPI_ISL_721662, EPI_ISL_721663, EPI_ISL_721664, EPI_ISL_721665, EPI_ISL_721666, EPI_ISL_721667, EPI_ISL_722177, EPI_ISL_722178, EPI_ISL_722179, EPI_ISL_722180, EPI_ISL_722181, EPI_ISL_722182, EPI_ISL_722183, EPI_ISL_722184, EPI_ISL_722185, EPI_ISL_722186                                                                                                                                                                                                                                                                                                                                                                                                                                                                                                                                                                                                                                                                                                                                                                                                                                                                                                                                                                                                                                                                                                                                                                                                                                                                                                                                                                                                                                                                                                                                                                                                                                                                                                                                                                                                                                                                                                                                                                 |                                                                          |                                                                          |                                                                                                                                                                                                                                                                                                                                                                                                                                                           |
| see above                                                                                                                                                                                                                                                                                                                                                                                                                                                                                                                                                                                                                                                                                                                                                                                                                                                                                                                                                                                                                                                                                                                                                                                                                                                                                                                                                                                                                                                                                                                                                                                                                                                                                                                                                                                                                                                                                                                                                                                                                                                                                                                                                                                                                                                                                                                                                                                                                                                                      | National Centre For Cell Science                                         | National Centre For Cell Science                                         | Dhiraj Paul, Kunal Jani, Radha Chauhan, Janesh Kumar, Vasudevan Seshadri, Giridhari Lal, Rajesh Karyakarte, Suvarna Joshi, Murlidhar Tambe, Sourav Sen, Santosh Karade, Kavita Bala Anand, Shelinder Pal Singh Shergill, Rajiv Mohan Gupta, Manoj Kumar Bhat, Arvind Sahu, Yogesh S Shouche                                                                                                                                                               |
| EPI_ISL_722187, EPI_ISL_722188, EPI_ISL_722189, EPI_ISL_722190, EPI_ISL_722191, EPI_ISL_722192, EPI_ISL_722193, EPI_ISL_722194, EPI_ISL_722195, EPI_ISL_722196, EPI_ISL_722197, EPI_ISL_722198, EPI_ISL_722199, EPI_ISL_722200                                                                                                                                                                                                                                                                                                                                                                                                                                                                                                                                                                                                                                                                                                                                                                                                                                                                                                                                                                                                                                                                                                                                                                                                                                                                                                                                                                                                                                                                                                                                                                                                                                                                                                                                                                                                                                                                                                                                                                                                                                                                                                                                                                                                                                                 |                                                                          |                                                                          |                                                                                                                                                                                                                                                                                                                                                                                                                                                           |
| see above                                                                                                                                                                                                                                                                                                                                                                                                                                                                                                                                                                                                                                                                                                                                                                                                                                                                                                                                                                                                                                                                                                                                                                                                                                                                                                                                                                                                                                                                                                                                                                                                                                                                                                                                                                                                                                                                                                                                                                                                                                                                                                                                                                                                                                                                                                                                                                                                                                                                      | Armed Forces Medical College                                             | National Centre For Cell Science                                         | Dhiraj Paul, Kunal Jani, Radha Chauhan, Janesh Kumar, Vasudevan Seshadri, Giridhari Lal, Rajesh Karyakarte, Suvarna Joshi, Murlidhar Tambe, Sourav Sen, Santosh Karade, Kavita Bala Anand, Shelinder Pal Singh Shergill, Rajiv Mohan Gupta, Manoj Kumar Bhat, Arvind Sahu, Yogesh S Shouche                                                                                                                                                               |
| EPI_ISL_724124, EPI_ISL_724127, EPI_ISL_724132, EPI_ISL_724134, EPI_ISL_724141, EPI_ISL_724142, EPI_ISL_724143, EPI_ISL_724146, EPI_ISL_724153, EPI_ISL_724160, EPI_ISL_724168, EPI_ISL_724171, EPI_ISL_724173, EPI_ISL_724174, EPI_ISL_724175, EPI_ISL_724181, EPI_ISL_724185, EPI_ISL_724189, EPI_ISL_724192, EPI_ISL_724196, EPI_ISL_724208, EPI_ISL_724209, EPI_ISL_725032, EPI_ISL_725034, EPI_ISL_725040, EPI_ISL_725042, EPI_ISL_725045, EPI_ISL_725047, EPI_ISL_725049, EPI_ISL_725052, EPI_ISL_725054, EPI_ISL_725064, EPI_ISL_725066, EPI_ISL_725074, EPI_ISL_725077, EPI_ISL_725078, EPI_ISL_725080, EPI_ISL_725082, EPI_ISL_725092, EPI_ISL_725095, EPI_ISL_725097, EPI_ISL_725099, EPI_ISL_725106, EPI_ISL_725109, EPI_ISL_725115, EPI_ISL_725116, EPI_ISL_725118, EPI_ISL_725123, EPI_ISL_725125, EPI_ISL_725136, EPI_ISL_725140, EPI_ISL_725141, EPI_ISL_725146, EPI_ISL_725148, EPI_ISL_725149, EPI_ISL_725160, EPI_ISL_725166, EPI_ISL_725167, EPI_ISL_725179, EPI_ISL_725180, EPI_ISL_725186, EPI_ISL_725189, EPI_ISL_725191, EPI_ISL_725194, EPI_ISL_725195, EPI_ISL_725197, EPI_ISL_725201, EPI_ISL_725205, EPI_ISL_725210, EPI_ISL_725217, EPI_ISL_725225, EPI_ISL_725228, EPI_ISL_725233, EPI_ISL_725234, EPI_ISL_725235, EPI_ISL_725236, EPI_ISL_725242, EPI_ISL_725243, EPI_ISL_725249, EPI_ISL_725267, EPI_ISL_725270, EPI_ISL_725272, EPI_ISL_725273, EPI_ISL_725274, EPI_ISL_725276, EPI_ISL_725277, EPI_ISL_725278, EPI_ISL_725280, EPI_ISL_725283, EPI_ISL_725288, EPI_ISL_725291, EPI_ISL_725292, EPI_ISL_725296, EPI_ISL_725299, EPI_ISL_725301, EPI_ISL_725303, EPI_ISL_725308, EPI_ISL_725311, EPI_ISL_725313, EPI_ISL_725317, EPI_ISL_725318, EPI_ISL_725319, EPI_ISL_725320, EPI_ISL_725321, EPI_ISL_725326, EPI_ISL_725328, EPI_ISL_725335, EPI_ISL_725354, EPI_ISL_725357, EPI_ISL_725361, EPI_ISL_725364, EPI_ISL_725365, EPI_ISL_725370, EPI_ISL_725375, EPI_ISL_725377, EPI_ISL_725387, EPI_ISL_725394, EPI_ISL_725404, EPI_ISL_725406, EPI_ISL_725409, EPI_ISL_725416, EPI_ISL_725418, EPI_ISL_725419, EPI_ISL_725426, EPI_ISL_725428, EPI_ISL_725440, EPI_ISL_725443, EPI_ISL_725450, EPI_ISL_725452, EPI_ISL_725453, EPI_ISL_725459, EPI_ISL_725460, EPI_ISL_725462, EPI_ISL_725463, EPI_ISL_725465, EPI_ISL_725467, EPI_ISL_725469, EPI_ISL_725470, EPI_ISL_725472, EPI_ISL_725477, EPI_ISL_725480, EPI_ISL_725481, EPI_ISL_725485, EPI_ISL_725486, EPI_ISL_725487, EPI_ISL_725490, EPI_ISL_725491, EPI_ISL_725512, EPI_ISL_725513 |                                                                          |                                                                          |                                                                                                                                                                                                                                                                                                                                                                                                                                                           |
| see above                                                                                                                                                                                                                                                                                                                                                                                                                                                                                                                                                                                                                                                                                                                                                                                                                                                                                                                                                                                                                                                                                                                                                                                                                                                                                                                                                                                                                                                                                                                                                                                                                                                                                                                                                                                                                                                                                                                                                                                                                                                                                                                                                                                                                                                                                                                                                                                                                                                                      | Quadram Institute Bioscience                                             | COVID-19 Genomics UK (COG-UK) Consortium                                 | Dave J. Baker, Gemma L. Kay, Alp Aydin, Thanh Le-Viet, Steven Rudder, Ana P. Tedim, Anastasia Kolyva, Maria Diaz, Leonardo de Oliveira Martins, Nabil-Fareed Alikhan, Lizzie Meadows, Rachael Stanley, Ngozi Elumogo, Muhammed Yasir, Nicholas M. Thomson, Alexander J Trotter, Rachel Gilroy, Samuel Bloomfield, Claire Stuart, Andrew Bell, Reenesh Prakash, Samir Dervisevic, Alison E. Mather, John Wain, Mark Webber, Andrew J. Page, Justin O'Grady |
| EPI_ISL_728254, EPI_ISL_728255, EPI_ISL_728256, EPI_ISL_728257, EPI_ISL_728258, EPI_ISL_728259, EPI_ISL_728260, EPI_ISL_728261, EPI_ISL_728262, EPI_ISL_728263, EPI_ISL_728264, EPI_ISL_728265, EPI_ISL_728266, EPI_ISL_728267, EPI_ISL_728268, EPI_ISL_728269, EPI_ISL_728270, EPI_ISL_728271                                                                                                                                                                                                                                                                                                                                                                                                                                                                                                                                                                                                                                                                                                                                                                                                                                                                                                                                                                                                                                                                                                                                                                                                                                                                                                                                                                                                                                                                                                                                                                                                                                                                                                                                                                                                                                                                                                                                                                                                                                                                                                                                                                                 |                                                                          |                                                                          |                                                                                                                                                                                                                                                                                                                                                                                                                                                           |
| see above                                                                                                                                                                                                                                                                                                                                                                                                                                                                                                                                                                                                                                                                                                                                                                                                                                                                                                                                                                                                                                                                                                                                                                                                                                                                                                                                                                                                                                                                                                                                                                                                                                                                                                                                                                                                                                                                                                                                                                                                                                                                                                                                                                                                                                                                                                                                                                                                                                                                      | B.J. Govt. Medical College                                               | National Centre For Cell Science                                         | Dhiraj Paul, Kunal Jani, Radha Chauhan, Janesh Kumar, Vasudevan Seshadri, Giridhari Lal, Rajesh Karyakarte, Suvarna Joshi, Murlidhar Tambe, Sourav Sen, Santosh Karade, Kavita Bala Anand, Shelinder Pal Singh Shergill, Rajiv Mohan Gupta, Manoj Kumar Bhat, Arvind Sahu, Yogesh S Shouche                                                                                                                                                               |
| EPI_ISL_728279                                                                                                                                                                                                                                                                                                                                                                                                                                                                                                                                                                                                                                                                                                                                                                                                                                                                                                                                                                                                                                                                                                                                                                                                                                                                                                                                                                                                                                                                                                                                                                                                                                                                                                                                                                                                                                                                                                                                                                                                                                                                                                                                                                                                                                                                                                                                                                                                                                                                 | National Institute for Infectious Diseases, INMI, "L. Spallanzani" IRCCS | National Institute for Infectious Diseases, INMI, "L. Spallanzani" IRCCS | E Giombini, C.E.M Gruber, M Rueca, B Bartolini, F Messina, A Di Caro, MR Capobianchi                                                                                                                                                                                                                                                                                                                                                                      |
| EPI_ISL_728286                                                                                                                                                                                                                                                                                                                                                                                                                                                                                                                                                                                                                                                                                                                                                                                                                                                                                                                                                                                                                                                                                                                                                                                                                                                                                                                                                                                                                                                                                                                                                                                                                                                                                                                                                                                                                                                                                                                                                                                                                                                                                                                                                                                                                                                                                                                                                                                                                                                                 | National Institute for Infectious Diseases, INMI, "L. Spallanzani" IRCCS | National Institute for Infectious Diseases, INMI, "L. Spallanzani" IRCCS | E Giombini, M Rueca, B Bartolini, C.E.M Gruber, F Messina, A Di Caro, MR Capobianchi                                                                                                                                                                                                                                                                                                                                                                      |
| EPI_ISL_728325, EPI_ISL_728326, EPI_ISL_728327, EPI_ISL_728328, EPI_ISL_728329, EPI_ISL_728330                                                                                                                                                                                                                                                                                                                                                                                                                                                                                                                                                                                                                                                                                                                                                                                                                                                                                                                                                                                                                                                                                                                                                                                                                                                                                                                                                                                                                                                                                                                                                                                                                                                                                                                                                                                                                                                                                                                                                                                                                                                                                                                                                                                                                                                                                                                                                                                 |                                                                          |                                                                          |                                                                                                                                                                                                                                                                                                                                                                                                                                                           |
| see above                                                                                                                                                                                                                                                                                                                                                                                                                                                                                                                                                                                                                                                                                                                                                                                                                                                                                                                                                                                                                                                                                                                                                                                                                                                                                                                                                                                                                                                                                                                                                                                                                                                                                                                                                                                                                                                                                                                                                                                                                                                                                                                                                                                                                                                                                                                                                                                                                                                                      | B.J. Govt. Medical College                                               | National Centre For Cell Science                                         | Dhiraj Paul, Kunal Jani, Radha Chauhan, Janesh Kumar, Vasudevan Seshadri, Giridhari Lal, Rajesh Karyakarte, Suvarna Joshi, Murlidhar Tambe, Sourav Sen, Santosh Karade, Kavita Bala Anand, Shelinder Pal Singh Shergill, Rajiv Mohan Gupta, Manoj Kumar Bhat, Arvind Sahu, Yogesh S Shouche                                                                                                                                                               |
| EPI_ISL_728358                                                                                                                                                                                                                                                                                                                                                                                                                                                                                                                                                                                                                                                                                                                                                                                                                                                                                                                                                                                                                                                                                                                                                                                                                                                                                                                                                                                                                                                                                                                                                                                                                                                                                                                                                                                                                                                                                                                                                                                                                                                                                                                                                                                                                                                                                                                                                                                                                                                                 | Servicio de Microbiología. Hospital Clínico Universitario de Valencia    | SeqCOVID-SPAIN consortium/IBV(CSIC)                                      | David Navarro Ortega, Eliseo Albert Vicent, Ignacio Torres and SeqCOVID-SPAIN consortium                                                                                                                                                                                                                                                                                                                                                                  |

|                                                                                                                                                                                                                                                                                                                                                                                                                                                                                                                                                                                                                                                                                                                                                                                                                                                                                                                                                                                                                                                                                                                                                                                                                                                                                                                                                                                                                                                                                                                                                                                                                                                                                                                                                                                                                                                                                                                                                                                                                                                                                                                                                                                                                                                                                                                                                                                                                                                                                                                                                                                                                                                                                                                                                                                                                                                                                                                                                                                                                                                                                                                                                                                                                                                                                                                                                                                                                                                                                                                                                                                                                                                                                                                                                                                                                                                                                                                                                                                                                                                                                                                                                                                                                                                                                                                                                                                                                                                                                                                                                                                                                                                                                                                                                                                                                                                                                                                                                                                                                                                                                                                                                                                                                                                                                                                                                                                                                                                                                                                                                                                                                                                                                                                                                                                                                                                                                                                                                                                                                                                                                                                                                                                                                                                                                                                |                                                                    |                                                                                           |                                                                                                                                                                                                                                                                                                                                                                                                                         |                                                                                                                                                                                                                                                                                                                                                                                                                                                           |
|----------------------------------------------------------------------------------------------------------------------------------------------------------------------------------------------------------------------------------------------------------------------------------------------------------------------------------------------------------------------------------------------------------------------------------------------------------------------------------------------------------------------------------------------------------------------------------------------------------------------------------------------------------------------------------------------------------------------------------------------------------------------------------------------------------------------------------------------------------------------------------------------------------------------------------------------------------------------------------------------------------------------------------------------------------------------------------------------------------------------------------------------------------------------------------------------------------------------------------------------------------------------------------------------------------------------------------------------------------------------------------------------------------------------------------------------------------------------------------------------------------------------------------------------------------------------------------------------------------------------------------------------------------------------------------------------------------------------------------------------------------------------------------------------------------------------------------------------------------------------------------------------------------------------------------------------------------------------------------------------------------------------------------------------------------------------------------------------------------------------------------------------------------------------------------------------------------------------------------------------------------------------------------------------------------------------------------------------------------------------------------------------------------------------------------------------------------------------------------------------------------------------------------------------------------------------------------------------------------------------------------------------------------------------------------------------------------------------------------------------------------------------------------------------------------------------------------------------------------------------------------------------------------------------------------------------------------------------------------------------------------------------------------------------------------------------------------------------------------------------------------------------------------------------------------------------------------------------------------------------------------------------------------------------------------------------------------------------------------------------------------------------------------------------------------------------------------------------------------------------------------------------------------------------------------------------------------------------------------------------------------------------------------------------------------------------------------------------------------------------------------------------------------------------------------------------------------------------------------------------------------------------------------------------------------------------------------------------------------------------------------------------------------------------------------------------------------------------------------------------------------------------------------------------------------------------------------------------------------------------------------------------------------------------------------------------------------------------------------------------------------------------------------------------------------------------------------------------------------------------------------------------------------------------------------------------------------------------------------------------------------------------------------------------------------------------------------------------------------------------------------------------------------------------------------------------------------------------------------------------------------------------------------------------------------------------------------------------------------------------------------------------------------------------------------------------------------------------------------------------------------------------------------------------------------------------------------------------------------------------------------------------------------------------------------------------------------------------------------------------------------------------------------------------------------------------------------------------------------------------------------------------------------------------------------------------------------------------------------------------------------------------------------------------------------------------------------------------------------------------------------------------------------------------------------------------------------------------------------------------------------------------------------------------------------------------------------------------------------------------------------------------------------------------------------------------------------------------------------------------------------------------------------------------------------------------------------------------------------------------------------------------------------------------------------------|--------------------------------------------------------------------|-------------------------------------------------------------------------------------------|-------------------------------------------------------------------------------------------------------------------------------------------------------------------------------------------------------------------------------------------------------------------------------------------------------------------------------------------------------------------------------------------------------------------------|-----------------------------------------------------------------------------------------------------------------------------------------------------------------------------------------------------------------------------------------------------------------------------------------------------------------------------------------------------------------------------------------------------------------------------------------------------------|
| EPI_ISL_730567, EPI_ISL_730568, EPI_ISL_730569, EPI_ISL_730570                                                                                                                                                                                                                                                                                                                                                                                                                                                                                                                                                                                                                                                                                                                                                                                                                                                                                                                                                                                                                                                                                                                                                                                                                                                                                                                                                                                                                                                                                                                                                                                                                                                                                                                                                                                                                                                                                                                                                                                                                                                                                                                                                                                                                                                                                                                                                                                                                                                                                                                                                                                                                                                                                                                                                                                                                                                                                                                                                                                                                                                                                                                                                                                                                                                                                                                                                                                                                                                                                                                                                                                                                                                                                                                                                                                                                                                                                                                                                                                                                                                                                                                                                                                                                                                                                                                                                                                                                                                                                                                                                                                                                                                                                                                                                                                                                                                                                                                                                                                                                                                                                                                                                                                                                                                                                                                                                                                                                                                                                                                                                                                                                                                                                                                                                                                                                                                                                                                                                                                                                                                                                                                                                                                                                                                 | Gazi University Faculty of Medicine, Medical Virology Laboratory   | Gazi University Faculty of Medicine, Medical Virology Laboratory                          | Erdem ahin, Hager Muftah, Selin Yiit, Shaknoza Sarzhanova, Özlem Güzel Tunçcan, Murat Dizbay, Il Fidan, Kayhan Çalar, Gülemdam Bozday                                                                                                                                                                                                                                                                                   |                                                                                                                                                                                                                                                                                                                                                                                                                                                           |
| EPI_ISL_730571, EPI_ISL_730572, EPI_ISL_730573, EPI_ISL_730574, EPI_ISL_730575, EPI_ISL_730576, EPI_ISL_730577, EPI_ISL_730620                                                                                                                                                                                                                                                                                                                                                                                                                                                                                                                                                                                                                                                                                                                                                                                                                                                                                                                                                                                                                                                                                                                                                                                                                                                                                                                                                                                                                                                                                                                                                                                                                                                                                                                                                                                                                                                                                                                                                                                                                                                                                                                                                                                                                                                                                                                                                                                                                                                                                                                                                                                                                                                                                                                                                                                                                                                                                                                                                                                                                                                                                                                                                                                                                                                                                                                                                                                                                                                                                                                                                                                                                                                                                                                                                                                                                                                                                                                                                                                                                                                                                                                                                                                                                                                                                                                                                                                                                                                                                                                                                                                                                                                                                                                                                                                                                                                                                                                                                                                                                                                                                                                                                                                                                                                                                                                                                                                                                                                                                                                                                                                                                                                                                                                                                                                                                                                                                                                                                                                                                                                                                                                                                                                 | Gazi University Faculty of Medicine, Medical Virology Laboratory   | Gazi University Faculty of Medicine, Medical Virology Laboratory                          | Erdem ahin, Gülemdam Bozday, Hager Muftah, Selin Yiit, Shaknoza Sarzhanova, Özlem Güzel Tunçcan, Murat Dizbay, Il Fidan, Kayhan Çalar                                                                                                                                                                                                                                                                                   |                                                                                                                                                                                                                                                                                                                                                                                                                                                           |
| EPI_ISL_732531, EPI_ISL_732532, EPI_ISL_732533, EPI_ISL_732534, EPI_ISL_732535, EPI_ISL_732536, EPI_ISL_732537, EPI_ISL_732538, EPI_ISL_732539, EPI_ISL_732540, EPI_ISL_732556, EPI_ISL_732557, EPI_ISL_732558, EPI_ISL_732559, EPI_ISL_732560                                                                                                                                                                                                                                                                                                                                                                                                                                                                                                                                                                                                                                                                                                                                                                                                                                                                                                                                                                                                                                                                                                                                                                                                                                                                                                                                                                                                                                                                                                                                                                                                                                                                                                                                                                                                                                                                                                                                                                                                                                                                                                                                                                                                                                                                                                                                                                                                                                                                                                                                                                                                                                                                                                                                                                                                                                                                                                                                                                                                                                                                                                                                                                                                                                                                                                                                                                                                                                                                                                                                                                                                                                                                                                                                                                                                                                                                                                                                                                                                                                                                                                                                                                                                                                                                                                                                                                                                                                                                                                                                                                                                                                                                                                                                                                                                                                                                                                                                                                                                                                                                                                                                                                                                                                                                                                                                                                                                                                                                                                                                                                                                                                                                                                                                                                                                                                                                                                                                                                                                                                                                 | see above                                                          | Bundeswehr Institute of Microbiology                                                      | Elham Khatamzas, Markus Antwerpen, Mathias Walter, Alexandra Rehn, Sabine Zange, Enrico Georgi, Michael von Bergwelt-Baildon, Roman Wölfel                                                                                                                                                                                                                                                                              |                                                                                                                                                                                                                                                                                                                                                                                                                                                           |
| EPI_ISL_732654                                                                                                                                                                                                                                                                                                                                                                                                                                                                                                                                                                                                                                                                                                                                                                                                                                                                                                                                                                                                                                                                                                                                                                                                                                                                                                                                                                                                                                                                                                                                                                                                                                                                                                                                                                                                                                                                                                                                                                                                                                                                                                                                                                                                                                                                                                                                                                                                                                                                                                                                                                                                                                                                                                                                                                                                                                                                                                                                                                                                                                                                                                                                                                                                                                                                                                                                                                                                                                                                                                                                                                                                                                                                                                                                                                                                                                                                                                                                                                                                                                                                                                                                                                                                                                                                                                                                                                                                                                                                                                                                                                                                                                                                                                                                                                                                                                                                                                                                                                                                                                                                                                                                                                                                                                                                                                                                                                                                                                                                                                                                                                                                                                                                                                                                                                                                                                                                                                                                                                                                                                                                                                                                                                                                                                                                                                 | Klinisk mikrobiologi                                               | The Public Health Agency of Sweden                                                        | Department of Microbiology, The Public Health Agency of Sweden                                                                                                                                                                                                                                                                                                                                                          |                                                                                                                                                                                                                                                                                                                                                                                                                                                           |
| EPI_ISL_732655, EPI_ISL_732656                                                                                                                                                                                                                                                                                                                                                                                                                                                                                                                                                                                                                                                                                                                                                                                                                                                                                                                                                                                                                                                                                                                                                                                                                                                                                                                                                                                                                                                                                                                                                                                                                                                                                                                                                                                                                                                                                                                                                                                                                                                                                                                                                                                                                                                                                                                                                                                                                                                                                                                                                                                                                                                                                                                                                                                                                                                                                                                                                                                                                                                                                                                                                                                                                                                                                                                                                                                                                                                                                                                                                                                                                                                                                                                                                                                                                                                                                                                                                                                                                                                                                                                                                                                                                                                                                                                                                                                                                                                                                                                                                                                                                                                                                                                                                                                                                                                                                                                                                                                                                                                                                                                                                                                                                                                                                                                                                                                                                                                                                                                                                                                                                                                                                                                                                                                                                                                                                                                                                                                                                                                                                                                                                                                                                                                                                 | Narhalsan Fjällbacka VC                                            | The Public Health Agency of Sweden                                                        | Department of Microbiology, The Public Health Agency of Sweden                                                                                                                                                                                                                                                                                                                                                          |                                                                                                                                                                                                                                                                                                                                                                                                                                                           |
| EPI_ISL_732657                                                                                                                                                                                                                                                                                                                                                                                                                                                                                                                                                                                                                                                                                                                                                                                                                                                                                                                                                                                                                                                                                                                                                                                                                                                                                                                                                                                                                                                                                                                                                                                                                                                                                                                                                                                                                                                                                                                                                                                                                                                                                                                                                                                                                                                                                                                                                                                                                                                                                                                                                                                                                                                                                                                                                                                                                                                                                                                                                                                                                                                                                                                                                                                                                                                                                                                                                                                                                                                                                                                                                                                                                                                                                                                                                                                                                                                                                                                                                                                                                                                                                                                                                                                                                                                                                                                                                                                                                                                                                                                                                                                                                                                                                                                                                                                                                                                                                                                                                                                                                                                                                                                                                                                                                                                                                                                                                                                                                                                                                                                                                                                                                                                                                                                                                                                                                                                                                                                                                                                                                                                                                                                                                                                                                                                                                                 | Barnakuten                                                         | The Public Health Agency of Sweden                                                        | Department of Microbiology, The Public Health Agency of Sweden                                                                                                                                                                                                                                                                                                                                                          |                                                                                                                                                                                                                                                                                                                                                                                                                                                           |
| EPI_ISL_732658                                                                                                                                                                                                                                                                                                                                                                                                                                                                                                                                                                                                                                                                                                                                                                                                                                                                                                                                                                                                                                                                                                                                                                                                                                                                                                                                                                                                                                                                                                                                                                                                                                                                                                                                                                                                                                                                                                                                                                                                                                                                                                                                                                                                                                                                                                                                                                                                                                                                                                                                                                                                                                                                                                                                                                                                                                                                                                                                                                                                                                                                                                                                                                                                                                                                                                                                                                                                                                                                                                                                                                                                                                                                                                                                                                                                                                                                                                                                                                                                                                                                                                                                                                                                                                                                                                                                                                                                                                                                                                                                                                                                                                                                                                                                                                                                                                                                                                                                                                                                                                                                                                                                                                                                                                                                                                                                                                                                                                                                                                                                                                                                                                                                                                                                                                                                                                                                                                                                                                                                                                                                                                                                                                                                                                                                                                 | Bundeswehr Institute of Microbiology                               | Bundeswehr Institute of Microbiology                                                      | Elham Khatamzas, Markus Antwerpen, Mathias Walter, Alexandra Rehn, Sabine Zange, Enrico Georgi, Michael von Bergwelt-Baildon, Roman Wölfel                                                                                                                                                                                                                                                                              |                                                                                                                                                                                                                                                                                                                                                                                                                                                           |
| EPI_ISL_732704, EPI_ISL_732705, EPI_ISL_732706, EPI_ISL_732707, EPI_ISL_732708, EPI_ISL_732709, EPI_ISL_732710, EPI_ISL_732711, EPI_ISL_732712, EPI_ISL_732713, EPI_ISL_732714, EPI_ISL_732715, EPI_ISL_732716, EPI_ISL_732717, EPI_ISL_732718, EPI_ISL_732719, EPI_ISL_732720, EPI_ISL_732721, EPI_ISL_732722, EPI_ISL_732723, EPI_ISL_732724, EPI_ISL_732725, EPI_ISL_732726, EPI_ISL_732727, EPI_ISL_732728, EPI_ISL_732729, EPI_ISL_732730, EPI_ISL_732731, EPI_ISL_732732, EPI_ISL_732733, EPI_ISL_732734, EPI_ISL_732735, EPI_ISL_732736, EPI_ISL_732737, EPI_ISL_732738, EPI_ISL_732739, EPI_ISL_732740, EPI_ISL_732741, EPI_ISL_732742, EPI_ISL_732743, EPI_ISL_732744, EPI_ISL_732745, EPI_ISL_732746, EPI_ISL_732747                                                                                                                                                                                                                                                                                                                                                                                                                                                                                                                                                                                                                                                                                                                                                                                                                                                                                                                                                                                                                                                                                                                                                                                                                                                                                                                                                                                                                                                                                                                                                                                                                                                                                                                                                                                                                                                                                                                                                                                                                                                                                                                                                                                                                                                                                                                                                                                                                                                                                                                                                                                                                                                                                                                                                                                                                                                                                                                                                                                                                                                                                                                                                                                                                                                                                                                                                                                                                                                                                                                                                                                                                                                                                                                                                                                                                                                                                                                                                                                                                                                                                                                                                                                                                                                                                                                                                                                                                                                                                                                                                                                                                                                                                                                                                                                                                                                                                                                                                                                                                                                                                                                                                                                                                                                                                                                                                                                                                                                                                                                                                                                 | see above                                                          | New Mexico Department of Health Scientific Laboratory                                     | Ellie Johnson, Anastacia Griego-Fisher, D'Eldra Malone                                                                                                                                                                                                                                                                                                                                                                  |                                                                                                                                                                                                                                                                                                                                                                                                                                                           |
| EPI_ISL_736996                                                                                                                                                                                                                                                                                                                                                                                                                                                                                                                                                                                                                                                                                                                                                                                                                                                                                                                                                                                                                                                                                                                                                                                                                                                                                                                                                                                                                                                                                                                                                                                                                                                                                                                                                                                                                                                                                                                                                                                                                                                                                                                                                                                                                                                                                                                                                                                                                                                                                                                                                                                                                                                                                                                                                                                                                                                                                                                                                                                                                                                                                                                                                                                                                                                                                                                                                                                                                                                                                                                                                                                                                                                                                                                                                                                                                                                                                                                                                                                                                                                                                                                                                                                                                                                                                                                                                                                                                                                                                                                                                                                                                                                                                                                                                                                                                                                                                                                                                                                                                                                                                                                                                                                                                                                                                                                                                                                                                                                                                                                                                                                                                                                                                                                                                                                                                                                                                                                                                                                                                                                                                                                                                                                                                                                                                                 | Istituto Zooprofilattico Sperimentale del Mezzogiorno              | National Institute for Infectious Diseases, INMI, "L. Spallanzani" IRCCS                  | E. Giombini, C.E.M Gruber, F. Messina, M. Rueca, B. Bartolini, F. Carletti, P. Cerino, B. Pierri, C. Buonerba, D. Di Concilio, M.C. Cuomo, A. Di Caro, M.R Capobianchi                                                                                                                                                                                                                                                  |                                                                                                                                                                                                                                                                                                                                                                                                                                                           |
| EPI_ISL_737200                                                                                                                                                                                                                                                                                                                                                                                                                                                                                                                                                                                                                                                                                                                                                                                                                                                                                                                                                                                                                                                                                                                                                                                                                                                                                                                                                                                                                                                                                                                                                                                                                                                                                                                                                                                                                                                                                                                                                                                                                                                                                                                                                                                                                                                                                                                                                                                                                                                                                                                                                                                                                                                                                                                                                                                                                                                                                                                                                                                                                                                                                                                                                                                                                                                                                                                                                                                                                                                                                                                                                                                                                                                                                                                                                                                                                                                                                                                                                                                                                                                                                                                                                                                                                                                                                                                                                                                                                                                                                                                                                                                                                                                                                                                                                                                                                                                                                                                                                                                                                                                                                                                                                                                                                                                                                                                                                                                                                                                                                                                                                                                                                                                                                                                                                                                                                                                                                                                                                                                                                                                                                                                                                                                                                                                                                                 | National Reference Laboratory, Nigeria Centre for Disease Control. | National Reference Laboratory, Nigeria Centre for Disease Control, Gaduwa, Abuja, Nigeria | Dr Ndodo Nnaemeka, Olusola Akanbi, Chimaobi Chukwu, Dr Adesuyi Omoare, Nwando Mba, Shirlee Wohl, Dr Chikwe Ihekweazu                                                                                                                                                                                                                                                                                                    |                                                                                                                                                                                                                                                                                                                                                                                                                                                           |
| EPI_ISL_737201                                                                                                                                                                                                                                                                                                                                                                                                                                                                                                                                                                                                                                                                                                                                                                                                                                                                                                                                                                                                                                                                                                                                                                                                                                                                                                                                                                                                                                                                                                                                                                                                                                                                                                                                                                                                                                                                                                                                                                                                                                                                                                                                                                                                                                                                                                                                                                                                                                                                                                                                                                                                                                                                                                                                                                                                                                                                                                                                                                                                                                                                                                                                                                                                                                                                                                                                                                                                                                                                                                                                                                                                                                                                                                                                                                                                                                                                                                                                                                                                                                                                                                                                                                                                                                                                                                                                                                                                                                                                                                                                                                                                                                                                                                                                                                                                                                                                                                                                                                                                                                                                                                                                                                                                                                                                                                                                                                                                                                                                                                                                                                                                                                                                                                                                                                                                                                                                                                                                                                                                                                                                                                                                                                                                                                                                                                 | National Reference Laboratory, Nigeria Centre for Disease Control. | National Reference Laboratory, Nigeria Centre for Disease Control, Gaduwa, Abuja, Nigeria | Dr Ndodo Nnaemeka, Olusola Akanbi, Chimaobi Chukwu, Dr Adesuyi Omoare, oluwaseyi Ajegbe, Grace Eesanmen, Nwando Mba, Shirlee Wohl, Anthony Ahumibe, Celestina Obiekea, Catherine Okoi, Akinpelu Afolabi, Kingsley Njoku, Dr Sikiru Badaru, Dr Chinwe Ochu, Dr Chikwe Ihekweazu                                                                                                                                          |                                                                                                                                                                                                                                                                                                                                                                                                                                                           |
| EPI_ISL_737205                                                                                                                                                                                                                                                                                                                                                                                                                                                                                                                                                                                                                                                                                                                                                                                                                                                                                                                                                                                                                                                                                                                                                                                                                                                                                                                                                                                                                                                                                                                                                                                                                                                                                                                                                                                                                                                                                                                                                                                                                                                                                                                                                                                                                                                                                                                                                                                                                                                                                                                                                                                                                                                                                                                                                                                                                                                                                                                                                                                                                                                                                                                                                                                                                                                                                                                                                                                                                                                                                                                                                                                                                                                                                                                                                                                                                                                                                                                                                                                                                                                                                                                                                                                                                                                                                                                                                                                                                                                                                                                                                                                                                                                                                                                                                                                                                                                                                                                                                                                                                                                                                                                                                                                                                                                                                                                                                                                                                                                                                                                                                                                                                                                                                                                                                                                                                                                                                                                                                                                                                                                                                                                                                                                                                                                                                                 | National Reference Laboratory, Nigeria Centre for Disease Control. | National Reference Laboratory, Nigeria Centre for Disease Control, Gaduwa, Abuja, Nigeria | Dr Ndodo Nnaemeka, Olusola Akanbi, Chimaobi Chukwu, Dr Adesuyi Omoare, Nwando Mba, Shirlee Wohl, (JHU), Anthony Ahumibe, Celestina Obiekea, Catherine Okoi, Peter Van Heusden (SANBI), Dr Chikwe Ihekweazu                                                                                                                                                                                                              |                                                                                                                                                                                                                                                                                                                                                                                                                                                           |
| EPI_ISL_737206                                                                                                                                                                                                                                                                                                                                                                                                                                                                                                                                                                                                                                                                                                                                                                                                                                                                                                                                                                                                                                                                                                                                                                                                                                                                                                                                                                                                                                                                                                                                                                                                                                                                                                                                                                                                                                                                                                                                                                                                                                                                                                                                                                                                                                                                                                                                                                                                                                                                                                                                                                                                                                                                                                                                                                                                                                                                                                                                                                                                                                                                                                                                                                                                                                                                                                                                                                                                                                                                                                                                                                                                                                                                                                                                                                                                                                                                                                                                                                                                                                                                                                                                                                                                                                                                                                                                                                                                                                                                                                                                                                                                                                                                                                                                                                                                                                                                                                                                                                                                                                                                                                                                                                                                                                                                                                                                                                                                                                                                                                                                                                                                                                                                                                                                                                                                                                                                                                                                                                                                                                                                                                                                                                                                                                                                                                 | National Reference Laboratory, Nigeria Centre for Disease Control. | National Reference Laboratory, Nigeria Centre for Disease Control, Gaduwa, Abuja, Nigeria | Dr Ndodo Nnaemeka, Olusola Akanbi, Chimaobi Chukwu, Dr Adesuyi Omoare, Grace Eesanmen, Nwando Mba, Shirlee Wohl, Anthony Ahumibe, Celestina Obiekea, Catherine Okoi, Dr Chinwe Ochu, Dr Chikwe Ihekweazu                                                                                                                                                                                                                |                                                                                                                                                                                                                                                                                                                                                                                                                                                           |
| EPI_ISL_737207                                                                                                                                                                                                                                                                                                                                                                                                                                                                                                                                                                                                                                                                                                                                                                                                                                                                                                                                                                                                                                                                                                                                                                                                                                                                                                                                                                                                                                                                                                                                                                                                                                                                                                                                                                                                                                                                                                                                                                                                                                                                                                                                                                                                                                                                                                                                                                                                                                                                                                                                                                                                                                                                                                                                                                                                                                                                                                                                                                                                                                                                                                                                                                                                                                                                                                                                                                                                                                                                                                                                                                                                                                                                                                                                                                                                                                                                                                                                                                                                                                                                                                                                                                                                                                                                                                                                                                                                                                                                                                                                                                                                                                                                                                                                                                                                                                                                                                                                                                                                                                                                                                                                                                                                                                                                                                                                                                                                                                                                                                                                                                                                                                                                                                                                                                                                                                                                                                                                                                                                                                                                                                                                                                                                                                                                                                 | National Reference Laboratory, Nigeria Centre for Disease Control. | National Reference Laboratory, Nigeria Centre for Disease Control, Gaduwa, Abuja, Nigeria | Dr Ndodo Nnaemeka, Olusola Akanbi, Chimaobi Chukwu, Dr Adesuyi Omoare, Shirlee Wohl, Anthony Ahumibe, Abdulmajid Musa, Nneamaka Uba, Barnidele Olurufemi, Kingsley Madubuike, Dr Sikiru Badaru, Adama Ahmad, Michael Popoola, Dr Chikwe Ihekweazu                                                                                                                                                                       |                                                                                                                                                                                                                                                                                                                                                                                                                                                           |
| EPI_ISL_738316, EPI_ISL_738357, EPI_ISL_738359                                                                                                                                                                                                                                                                                                                                                                                                                                                                                                                                                                                                                                                                                                                                                                                                                                                                                                                                                                                                                                                                                                                                                                                                                                                                                                                                                                                                                                                                                                                                                                                                                                                                                                                                                                                                                                                                                                                                                                                                                                                                                                                                                                                                                                                                                                                                                                                                                                                                                                                                                                                                                                                                                                                                                                                                                                                                                                                                                                                                                                                                                                                                                                                                                                                                                                                                                                                                                                                                                                                                                                                                                                                                                                                                                                                                                                                                                                                                                                                                                                                                                                                                                                                                                                                                                                                                                                                                                                                                                                                                                                                                                                                                                                                                                                                                                                                                                                                                                                                                                                                                                                                                                                                                                                                                                                                                                                                                                                                                                                                                                                                                                                                                                                                                                                                                                                                                                                                                                                                                                                                                                                                                                                                                                                                                 | Utah Public Health Laboratory                                      | Utah Public Health Laboratory                                                             | Erin Young, Kelly Oakeson, Tara Gallagher                                                                                                                                                                                                                                                                                                                                                                               |                                                                                                                                                                                                                                                                                                                                                                                                                                                           |
| EPI_ISL_741453, EPI_ISL_741460, EPI_ISL_741465, EPI_ISL_741469, EPI_ISL_741478, EPI_ISL_741480, EPI_ISL_741482, EPI_ISL_741486, EPI_ISL_741500, EPI_ISL_741501, EPI_ISL_741507, EPI_ISL_741510, EPI_ISL_741512, EPI_ISL_741513, EPI_ISL_741514, EPI_ISL_741515, EPI_ISL_741516, EPI_ISL_741517, EPI_ISL_741518, EPI_ISL_741519, EPI_ISL_741520, EPI_ISL_741521, EPI_ISL_741522, EPI_ISL_741523, EPI_ISL_741524, EPI_ISL_741525, EPI_ISL_741526, EPI_ISL_741527, EPI_ISL_741528, EPI_ISL_741529, EPI_ISL_741530, EPI_ISL_741531, EPI_ISL_741532, EPI_ISL_741533, EPI_ISL_741534, EPI_ISL_741535, EPI_ISL_741536, EPI_ISL_741537, EPI_ISL_741538, EPI_ISL_741539, EPI_ISL_741540, EPI_ISL_741541, EPI_ISL_741542, EPI_ISL_741543, EPI_ISL_741544, EPI_ISL_741545, EPI_ISL_741546, EPI_ISL_741547, EPI_ISL_741548, EPI_ISL_741549, EPI_ISL_741550, EPI_ISL_741551, EPI_ISL_741552, EPI_ISL_741553, EPI_ISL_741554, EPI_ISL_741555, EPI_ISL_741556, EPI_ISL_741557, EPI_ISL_741558, EPI_ISL_741559, EPI_ISL_741560, EPI_ISL_741561, EPI_ISL_741562, EPI_ISL_741563, EPI_ISL_741564, EPI_ISL_741565, EPI_ISL_741566, EPI_ISL_741567, EPI_ISL_741568, EPI_ISL_741569, EPI_ISL_741570, EPI_ISL_741571, EPI_ISL_741572, EPI_ISL_741573, EPI_ISL_741574, EPI_ISL_741575, EPI_ISL_741576, EPI_ISL_741577, EPI_ISL_741578, EPI_ISL_741579, EPI_ISL_741580, EPI_ISL_741581, EPI_ISL_741582, EPI_ISL_741583, EPI_ISL_741584, EPI_ISL_741585, EPI_ISL_741586, EPI_ISL_741587, EPI_ISL_741588, EPI_ISL_741589, EPI_ISL_741590, EPI_ISL_741591, EPI_ISL_741592, EPI_ISL_741593, EPI_ISL_741594, EPI_ISL_741595, EPI_ISL_741596, EPI_ISL_741597, EPI_ISL_741598, EPI_ISL_741599, EPI_ISL_741600, EPI_ISL_741601, EPI_ISL_741602, EPI_ISL_741603, EPI_ISL_741604, EPI_ISL_741605, EPI_ISL_741606, EPI_ISL_741607, EPI_ISL_741608                                                                                                                                                                                                                                                                                                                                                                                                                                                                                                                                                                                                                                                                                                                                                                                                                                                                                                                                                                                                                                                                                                                                                                                                                                                                                                                                                                                                                                                                                                                                                                                                                                                                                                                                                                                                                                                                                                                                                                                                                                                                                                                                                                                                                                                                                                                                                                                                                                                                                                                                                                                                                                                                                                                                                                                                                                                                                                                                                                                                                                                                                                                                                                                                                                                                                                                                                                                                                                                                                                                                                                                                                                                                                                                                                                                                                                                                                                                                                                                                                                                                                                                                                                                                                                                                                                                                                                                                                                                                                                 | see above                                                          | Quadram Institute Bioscience                                                              | COVID-19 Genomics UK (COG-UK) Consortium                                                                                                                                                                                                                                                                                                                                                                                | Dave J. Baker, Gemma L. Kay, Alp Aydin, Thach Le-Viet, Steven Rudder, Ana P. Tedim, Anastasia Kolyva, Maria Diaz, Leonardo de Oliveira Martins, Nabil-Fareed Alikhan, Lizzie Meadows, Raneel Stanley, Ngozi Elumogbo, Muhammed Yasir, Nicholas M. Thomson, Alexander J Trotter, Rachel Gilroy, Samuel Bloomfield, Claire Stuart, Andrew Bell, Reenesh Prakash, Samir Dervisevic, Alison E. Mather, John Wain, Mark Webber, Andrew J. Page, Justin O'Grady |
| EPI_ISL_745194, EPI_ISL_745195, EPI_ISL_745196                                                                                                                                                                                                                                                                                                                                                                                                                                                                                                                                                                                                                                                                                                                                                                                                                                                                                                                                                                                                                                                                                                                                                                                                                                                                                                                                                                                                                                                                                                                                                                                                                                                                                                                                                                                                                                                                                                                                                                                                                                                                                                                                                                                                                                                                                                                                                                                                                                                                                                                                                                                                                                                                                                                                                                                                                                                                                                                                                                                                                                                                                                                                                                                                                                                                                                                                                                                                                                                                                                                                                                                                                                                                                                                                                                                                                                                                                                                                                                                                                                                                                                                                                                                                                                                                                                                                                                                                                                                                                                                                                                                                                                                                                                                                                                                                                                                                                                                                                                                                                                                                                                                                                                                                                                                                                                                                                                                                                                                                                                                                                                                                                                                                                                                                                                                                                                                                                                                                                                                                                                                                                                                                                                                                                                                                 | Osmania Medical College                                            | CSIR-Centre for Cellular and Molecular Biology                                            | Dr.V.Sudha Rani, Dr.S.Pavani, Dr.Satyaprasad, Dr.P.Shashikala Reddy, Namami Gaur, Sakshi Shambhavi, Lamuk Zaveri, Shagufta Khan, Nikhil Hajirnis, M Soujanya Reddy, Pratheusa Maccha, Tulasi Nagabandi, Purushotham Vodnala, Blessy B John, Viswagithe S L B Himasri, Onkar Kulkarni, Payel Mukherjee, Sofia Banu, Priya Singh, Archana Bharadwaj Siva, Karthik Bharadwaj Tallapaka, Rakesh K Mishra, Divya Tej Sowpati |                                                                                                                                                                                                                                                                                                                                                                                                                                                           |
| EPI_ISL_745197                                                                                                                                                                                                                                                                                                                                                                                                                                                                                                                                                                                                                                                                                                                                                                                                                                                                                                                                                                                                                                                                                                                                                                                                                                                                                                                                                                                                                                                                                                                                                                                                                                                                                                                                                                                                                                                                                                                                                                                                                                                                                                                                                                                                                                                                                                                                                                                                                                                                                                                                                                                                                                                                                                                                                                                                                                                                                                                                                                                                                                                                                                                                                                                                                                                                                                                                                                                                                                                                                                                                                                                                                                                                                                                                                                                                                                                                                                                                                                                                                                                                                                                                                                                                                                                                                                                                                                                                                                                                                                                                                                                                                                                                                                                                                                                                                                                                                                                                                                                                                                                                                                                                                                                                                                                                                                                                                                                                                                                                                                                                                                                                                                                                                                                                                                                                                                                                                                                                                                                                                                                                                                                                                                                                                                                                                                 | Kakatiya Medical College                                           | CSIR-Centre for Cellular and Molecular Biology                                            | Dr.V.Sudha Rani, Dr.S.Pavani, Dr.Satyaprasad, Dr.P.Shashikala Reddy, Namami Gaur, Sakshi Shambhavi, Lamuk Zaveri, Shagufta Khan, Nikhil Hajirnis, M Soujanya Reddy, Pratheusa Maccha, Tulasi Nagabandi, Purushotham Vodnala, Blessy B John, Viswagithe S L B Himasri, Onkar Kulkarni, Payel Mukherjee, Sofia Banu, Priya Singh, Archana Bharadwaj Siva, Karthik Bharadwaj Tallapaka, Rakesh K Mishra, Divya Tej Sowpati |                                                                                                                                                                                                                                                                                                                                                                                                                                                           |
| EPI_ISL_745198                                                                                                                                                                                                                                                                                                                                                                                                                                                                                                                                                                                                                                                                                                                                                                                                                                                                                                                                                                                                                                                                                                                                                                                                                                                                                                                                                                                                                                                                                                                                                                                                                                                                                                                                                                                                                                                                                                                                                                                                                                                                                                                                                                                                                                                                                                                                                                                                                                                                                                                                                                                                                                                                                                                                                                                                                                                                                                                                                                                                                                                                                                                                                                                                                                                                                                                                                                                                                                                                                                                                                                                                                                                                                                                                                                                                                                                                                                                                                                                                                                                                                                                                                                                                                                                                                                                                                                                                                                                                                                                                                                                                                                                                                                                                                                                                                                                                                                                                                                                                                                                                                                                                                                                                                                                                                                                                                                                                                                                                                                                                                                                                                                                                                                                                                                                                                                                                                                                                                                                                                                                                                                                                                                                                                                                                                                 | ESI Hospital                                                       | CSIR-Centre for Cellular and Molecular Biology                                            | Dr.V.Sudha Rani, Dr.S.Pavani, Dr.Satyaprasad, Dr.P.Shashikala Reddy, Namami Gaur, Sakshi Shambhavi, Lamuk Zaveri, Shagufta Khan, Nikhil Hajirnis, M Soujanya Reddy, Pratheusa Maccha, Tulasi Nagabandi, Purushotham Vodnala, Blessy B John, Viswagithe S L B Himasri, Onkar Kulkarni, Payel Mukherjee, Sofia Banu, Priya Singh, Archana Bharadwaj Siva, Karthik Bharadwaj Tallapaka, Rakesh K Mishra, Divya Tej Sowpati |                                                                                                                                                                                                                                                                                                                                                                                                                                                           |
| EPI_ISL_745199                                                                                                                                                                                                                                                                                                                                                                                                                                                                                                                                                                                                                                                                                                                                                                                                                                                                                                                                                                                                                                                                                                                                                                                                                                                                                                                                                                                                                                                                                                                                                                                                                                                                                                                                                                                                                                                                                                                                                                                                                                                                                                                                                                                                                                                                                                                                                                                                                                                                                                                                                                                                                                                                                                                                                                                                                                                                                                                                                                                                                                                                                                                                                                                                                                                                                                                                                                                                                                                                                                                                                                                                                                                                                                                                                                                                                                                                                                                                                                                                                                                                                                                                                                                                                                                                                                                                                                                                                                                                                                                                                                                                                                                                                                                                                                                                                                                                                                                                                                                                                                                                                                                                                                                                                                                                                                                                                                                                                                                                                                                                                                                                                                                                                                                                                                                                                                                                                                                                                                                                                                                                                                                                                                                                                                                                                                 | Rangaraya Medical College                                          | CSIR-Centre for Cellular and Molecular Biology                                            | Dr.V.Sudha Rani, Dr.S.Pavani, Dr.Satyaprasad, Dr.P.Shashikala Reddy, Namami Gaur, Sakshi Shambhavi, Lamuk Zaveri, Shagufta Khan, Nikhil Hajirnis, M Soujanya Reddy, Pratheusa Maccha, Tulasi Nagabandi, Purushotham Vodnala, Blessy B John, Viswagithe S L B Himasri, Onkar Kulkarni, Payel Mukherjee, Sofia Banu, Priya Singh, Archana Bharadwaj Siva, Karthik Bharadwaj Tallapaka, Rakesh K Mishra, Divya Tej Sowpati |                                                                                                                                                                                                                                                                                                                                                                                                                                                           |
| EPI_ISL_745200                                                                                                                                                                                                                                                                                                                                                                                                                                                                                                                                                                                                                                                                                                                                                                                                                                                                                                                                                                                                                                                                                                                                                                                                                                                                                                                                                                                                                                                                                                                                                                                                                                                                                                                                                                                                                                                                                                                                                                                                                                                                                                                                                                                                                                                                                                                                                                                                                                                                                                                                                                                                                                                                                                                                                                                                                                                                                                                                                                                                                                                                                                                                                                                                                                                                                                                                                                                                                                                                                                                                                                                                                                                                                                                                                                                                                                                                                                                                                                                                                                                                                                                                                                                                                                                                                                                                                                                                                                                                                                                                                                                                                                                                                                                                                                                                                                                                                                                                                                                                                                                                                                                                                                                                                                                                                                                                                                                                                                                                                                                                                                                                                                                                                                                                                                                                                                                                                                                                                                                                                                                                                                                                                                                                                                                                                                 | Nizams Institute of Medical Sciences                               | CSIR-Centre for Cellular and Molecular Biology                                            | Dr.V.Sudha Rani, Dr.S.Pavani, Dr.Satyaprasad, Dr.P.Shashikala Reddy, Namami Gaur, Sakshi Shambhavi, Lamuk Zaveri, Shagufta Khan, Nikhil Hajirnis, M Soujanya Reddy, Pratheusa Maccha, Tulasi Nagabandi, Purushotham Vodnala, Blessy B John, Viswagithe S L B Himasri, Onkar Kulkarni, Payel Mukherjee, Sofia Banu, Priya Singh, Archana Bharadwaj Siva, Karthik Bharadwaj Tallapaka, Rakesh K Mishra, Divya Tej Sowpati |                                                                                                                                                                                                                                                                                                                                                                                                                                                           |
| EPI_ISL_745201                                                                                                                                                                                                                                                                                                                                                                                                                                                                                                                                                                                                                                                                                                                                                                                                                                                                                                                                                                                                                                                                                                                                                                                                                                                                                                                                                                                                                                                                                                                                                                                                                                                                                                                                                                                                                                                                                                                                                                                                                                                                                                                                                                                                                                                                                                                                                                                                                                                                                                                                                                                                                                                                                                                                                                                                                                                                                                                                                                                                                                                                                                                                                                                                                                                                                                                                                                                                                                                                                                                                                                                                                                                                                                                                                                                                                                                                                                                                                                                                                                                                                                                                                                                                                                                                                                                                                                                                                                                                                                                                                                                                                                                                                                                                                                                                                                                                                                                                                                                                                                                                                                                                                                                                                                                                                                                                                                                                                                                                                                                                                                                                                                                                                                                                                                                                                                                                                                                                                                                                                                                                                                                                                                                                                                                                                                 | Guntur General Hospital                                            | CSIR-Centre for Cellular and Molecular Biology                                            | Dr.V.Sudha Rani, Dr.S.Pavani, Dr.Satyaprasad, Dr.P.Shashikala Reddy, Namami Gaur, Sakshi Shambhavi, Lamuk Zaveri, Shagufta Khan, Nikhil Hajirnis, M Soujanya Reddy, Pratheusa Maccha, Tulasi Nagabandi, Purushotham Vodnala, Blessy B John, Viswagithe S L B Himasri, Onkar Kulkarni, Payel Mukherjee, Sofia Banu, Priya Singh, Archana Bharadwaj Siva, Karthik Bharadwaj Tallapaka, Rakesh K Mishra, Divya Tej Sowpati |                                                                                                                                                                                                                                                                                                                                                                                                                                                           |
| EPI_ISL_745471, EPI_ISL_745472, EPI_ISL_745473, EPI_ISL_745474, EPI_ISL_745475, EPI_ISL_745476, EPI_ISL_745477, EPI_ISL_745478, EPI_ISL_745479, EPI_ISL_745480, EPI_ISL_745481, EPI_ISL_745482, EPI_ISL_745483, EPI_ISL_745484, EPI_ISL_745485, EPI_ISL_745486, EPI_ISL_745487, EPI_ISL_745488, EPI_ISL_745489, EPI_ISL_745490, EPI_ISL_745491, EPI_ISL_745492, EPI_ISL_745493, EPI_ISL_745494, EPI_ISL_745495, EPI_ISL_745496, EPI_ISL_745497, EPI_ISL_745498, EPI_ISL_745499, EPI_ISL_745500, EPI_ISL_745501, EPI_ISL_745502, EPI_ISL_745503, EPI_ISL_745504, EPI_ISL_745505, EPI_ISL_745506, EPI_ISL_745507, EPI_ISL_745508, EPI_ISL_745509, EPI_ISL_745510, EPI_ISL_745511, EPI_ISL_745512, EPI_ISL_745513, EPI_ISL_745514, EPI_ISL_745515, EPI_ISL_745516, EPI_ISL_745517, EPI_ISL_745518, EPI_ISL_745519, EPI_ISL_745520, EPI_ISL_745521, EPI_ISL_745522, EPI_ISL_745523, EPI_ISL_745524, EPI_ISL_745525, EPI_ISL_745526, EPI_ISL_745527, EPI_ISL_745528, EPI_ISL_745529, EPI_ISL_745530, EPI_ISL_745531, EPI_ISL_745532, EPI_ISL_745533, EPI_ISL_745534, EPI_ISL_745535, EPI_ISL_745536, EPI_ISL_745537, EPI_ISL_745538, EPI_ISL_745539, EPI_ISL_745540, EPI_ISL_745541, EPI_ISL_745542, EPI_ISL_745543, EPI_ISL_745544, EPI_ISL_745545, EPI_ISL_745546, EPI_ISL_745547, EPI_ISL_745548, EPI_ISL_745549, EPI_ISL_745550, EPI_ISL_745551, EPI_ISL_745552, EPI_ISL_745553, EPI_ISL_745554, EPI_ISL_745555, EPI_ISL_745556, EPI_ISL_745557, EPI_ISL_745558, EPI_ISL_745559, EPI_ISL_745560, EPI_ISL_745561, EPI_ISL_745562, EPI_ISL_745563, EPI_ISL_745564, EPI_ISL_745565, EPI_ISL_745566, EPI_ISL_745567, EPI_ISL_745568, EPI_ISL_745569, EPI_ISL_745570, EPI_ISL_745571, EPI_ISL_745572, EPI_ISL_745573, EPI_ISL_745574, EPI_ISL_745575, EPI_ISL_745576, EPI_ISL_745577, EPI_ISL_745578, EPI_ISL_745579, EPI_ISL_745580, EPI_ISL_745581, EPI_ISL_745582, EPI_ISL_745583, EPI_ISL_745584, EPI_ISL_745585, EPI_ISL_745586, EPI_ISL_745587, EPI_ISL_745588, EPI_ISL_745589, EPI_ISL_745590, EPI_ISL_745591, EPI_ISL_745592, EPI_ISL_745593, EPI_ISL_745594, EPI_ISL_745595, EPI_ISL_745596, EPI_ISL_745597, EPI_ISL_745598, EPI_ISL_745599, EPI_ISL_745600, EPI_ISL_745601, EPI_ISL_745602, EPI_ISL_745603, EPI_ISL_745604, EPI_ISL_745605, EPI_ISL_745606, EPI_ISL_745607, EPI_ISL_745608, EPI_ISL_745609, EPI_ISL_745610, EPI_ISL_745611, EPI_ISL_745612, EPI_ISL_745613, EPI_ISL_745614, EPI_ISL_745615, EPI_ISL_745616, EPI_ISL_745617, EPI_ISL_745618, EPI_ISL_745619, EPI_ISL_745620, EPI_ISL_745621, EPI_ISL_745622, EPI_ISL_745623, EPI_ISL_745624, EPI_ISL_745625, EPI_ISL_745626, EPI_ISL_745627, EPI_ISL_745628, EPI_ISL_745629, EPI_ISL_745630, EPI_ISL_745631, EPI_ISL_745632, EPI_ISL_745633, EPI_ISL_745634, EPI_ISL_745635, EPI_ISL_745636, EPI_ISL_745637, EPI_ISL_745638, EPI_ISL_745639, EPI_ISL_745640, EPI_ISL_745641, EPI_ISL_745642, EPI_ISL_745643, EPI_ISL_745644, EPI_ISL_745645, EPI_ISL_745646, EPI_ISL_745647, EPI_ISL_745648, EPI_ISL_745649, EPI_ISL_745650, EPI_ISL_745651, EPI_ISL_745652, EPI_ISL_745653, EPI_ISL_745654, EPI_ISL_745655, EPI_ISL_745656, EPI_ISL_745657, EPI_ISL_745658, EPI_ISL_745659, EPI_ISL_745660, EPI_ISL_745661, EPI_ISL_745662, EPI_ISL_745663, EPI_ISL_745664, EPI_ISL_745665, EPI_ISL_745666, EPI_ISL_745667, EPI_ISL_745668, EPI_ISL_745669, EPI_ISL_745670, EPI_ISL_745671, EPI_ISL_745672, EPI_ISL_745673, EPI_ISL_745674, EPI_ISL_745675, EPI_ISL_745676, EPI_ISL_745677, EPI_ISL_745678, EPI_ISL_745679, EPI_ISL_745680, EPI_ISL_745681, EPI_ISL_745682, EPI_ISL_745683, EPI_ISL_745684, EPI_ISL_745685, EPI_ISL_745686, EPI_ISL_745687, EPI_ISL_745688, EPI_ISL_745689, EPI_ISL_745690, EPI_ISL_745691, EPI_ISL_745692, EPI_ISL_745693, EPI_ISL_745694, EPI_ISL_745695, EPI_ISL_745696, EPI_ISL_745697, EPI_ISL_745698, EPI_ISL_745699, EPI_ISL_745700, EPI_ISL_745701, EPI_ISL_745702, EPI_ISL_745703, EPI_ISL_745704, EPI_ISL_745705, EPI_ISL_745706, EPI_ISL_745707, EPI_ISL_745708, EPI_ISL_745709, EPI_ISL_745710, EPI_ISL_745711, EPI_ISL_745712, EPI_ISL_745713, EPI_ISL_745714, EPI_ISL_745715, EPI_ISL_745716, EPI_ISL_745717, EPI_ISL_745718, EPI_ISL_745719, EPI_ISL_745720, EPI_ISL_745721, EPI_ISL_745722, EPI_ISL_745723, EPI_ISL_745724, EPI_ISL_745725, EPI_ISL_745726, EPI_ISL_745727, EPI_ISL_745728, EPI_ISL_745729, EPI_ISL_745730, EPI_ISL_745731, EPI_ISL_745732, EPI_ISL_745733, EPI_ISL_745734, EPI_ISL_745735, EPI_ISL_745736, EPI_ISL_745737, EPI_ISL_745738, EPI_ISL_745739, EPI_ISL_745740, EPI_ISL_745741, EPI_ISL_745742, EPI_ISL_745743, EPI_ISL_745744, EPI_ISL_745745, EPI_ISL_745746, EPI_ISL_745747, EPI_ISL_745748, EPI_ISL_745749, EPI_ISL_745750, EPI_ISL_745751, EPI_ISL_745752, EPI_ISL_745753, EPI_ISL_745754, EPI_ISL_745755, EPI_ISL_745756, EPI_ISL_745757, EPI_ISL_745758, EPI_ISL_745759, EPI_ISL_745760, EPI_ISL_745761, EPI_ISL_745762, EPI_ISL_745763, EPI_ISL_745764, EPI_ISL_745765, EPI_ISL_745766, EPI_ISL_745767, EPI_ISL_745768, EPI_ISL_745769, EPI_ISL_745770, EPI_ISL_745771, EPI_ISL_745772, EPI_ISL_745773, EPI_ISL_745774, EPI_ISL_745775, EPI_ISL_745776, EPI_ISL_745777, EPI_ISL_745778, EPI_ISL_745779, EPI_ISL_745780, EPI_ISL_745781, EPI_ISL_745782, EPI_ISL_745783, EPI_ISL_745784, EPI_ISL_745785, EPI_ISL_745786, EPI_ISL_745787, EPI_ISL_745788, EPI_ISL_745789, EPI_ISL_745790, EPI_ISL_745791, EPI_ISL_745792, EPI_ISL_745793, EPI_ISL_745794, EPI_ISL_745795, EPI_ISL_745796, EPI_ISL_745797, EPI_ISL_745798, EPI_ISL_745799, EPI_ISL_745800, EPI_ISL_745801, EPI_ISL_745802, EPI_ISL_745803, EPI_ISL_745804, EPI_ISL_745805, EPI_ISL_745806, EPI_ISL_745807, EPI_ISL_745808, EPI_ISL_745809, EPI_ISL_745810, EPI_ISL_745811, EPI_ISL_745812, EPI_ISL_745813, EPI_ISL_745814, EPI_ISL_745815, EPI_ISL_745816, EPI_ISL_745817, EPI_ISL_745818, EPI_ISL_745819, EPI_ISL_745820, EPI_ISL_745821, EPI_ISL_745822, EPI_ISL_745823, EPI_ISL_745824, EPI_ISL_745825, EPI_ISL_745826, EPI_ISL_745827, EPI_ISL_745828, EPI_ISL_745829, EPI_ISL_745830, EPI_ISL_745831, EPI_ISL_745832, EPI_ISL_745833, EPI_ISL_745834, EPI_ISL_745835, EPI_ISL_745836, EPI_ISL_745837, EPI_ISL_745838, EPI_ISL_745839, EPI_ISL_745840, EPI_ISL_745841, EPI_ISL_745842, EPI_ISL_745843, EPI_ISL_745844, EPI_ISL_745845, EPI_ISL_745846, EPI_ISL_745847, EPI_ISL_745848, EPI_ISL_745849 |                                                                    |                                                                                           |                                                                                                                                                                                                                                                                                                                                                                                                                         |                                                                                                                                                                                                                                                                                                                                                                                                                                                           |

EPI\_ISL\_745850, EPI\_ISL\_745851, EPI\_ISL\_745852, EPI\_ISL\_745853, EPI\_ISL\_745854, EPI\_ISL\_745855, EPI\_ISL\_745856, EPI\_ISL\_745857, EPI\_ISL\_745858, EPI\_ISL\_745859, EPI\_ISL\_745860, EPI\_ISL\_745861, EPI\_ISL\_745862, EPI\_ISL\_745863, EPI\_ISL\_745864, EPI\_ISL\_745865, EPI\_ISL\_745866, EPI\_ISL\_745867, EPI\_ISL\_745868, EPI\_ISL\_745869, EPI\_ISL\_745870, EPI\_ISL\_745871, EPI\_ISL\_745872, EPI\_ISL\_745873, EPI\_ISL\_745874, EPI\_ISL\_745875, EPI\_ISL\_745876, EPI\_ISL\_745877, EPI\_ISL\_745878, EPI\_ISL\_745879, EPI\_ISL\_745880, EPI\_ISL\_745881, EPI\_ISL\_745882, EPI\_ISL\_745883, EPI\_ISL\_745884, EPI\_ISL\_745885, EPI\_ISL\_745886, EPI\_ISL\_745887, EPI\_ISL\_745888, EPI\_ISL\_745889, EPI\_ISL\_745890, EPI\_ISL\_745891, EPI\_ISL\_745892, EPI\_ISL\_745893, EPI\_ISL\_745894, EPI\_ISL\_745895, EPI\_ISL\_745896, EPI\_ISL\_745897, EPI\_ISL\_745898, EPI\_ISL\_745899, EPI\_ISL\_745900, EPI\_ISL\_745901, EPI\_ISL\_745902, EPI\_ISL\_745903, EPI\_ISL\_745904, EPI\_ISL\_745905, EPI\_ISL\_745906, EPI\_ISL\_745907, EPI\_ISL\_745908, EPI\_ISL\_745909, EPI\_ISL\_745910, EPI\_ISL\_745911, EPI\_ISL\_745912, EPI\_ISL\_745913, EPI\_ISL\_745914, EPI\_ISL\_745915, EPI\_ISL\_745916, EPI\_ISL\_745917, EPI\_ISL\_745918, EPI\_ISL\_745919, EPI\_ISL\_745920, EPI\_ISL\_745921, EPI\_ISL\_745922, EPI\_ISL\_745923, EPI\_ISL\_745924, EPI\_ISL\_745925, EPI\_ISL\_745926, EPI\_ISL\_745927, EPI\_ISL\_745928, EPI\_ISL\_745929, EPI\_ISL\_745930, EPI\_ISL\_745931, EPI\_ISL\_745932, EPI\_ISL\_745933, EPI\_ISL\_745934, EPI\_ISL\_745935, EPI\_ISL\_745936, EPI\_ISL\_745937, EPI\_ISL\_745938, EPI\_ISL\_745939, EPI\_ISL\_745940, EPI\_ISL\_745941, EPI\_ISL\_745942, EPI\_ISL\_745943, EPI\_ISL\_745944, EPI\_ISL\_745945, EPI\_ISL\_745946, EPI\_ISL\_745947, EPI\_ISL\_745948, EPI\_ISL\_745949, EPI\_ISL\_745950, EPI\_ISL\_745951, EPI\_ISL\_745952, EPI\_ISL\_745953, EPI\_ISL\_745954, EPI\_ISL\_745955, EPI\_ISL\_745956, EPI\_ISL\_745957, EPI\_ISL\_745958, EPI\_ISL\_745959, EPI\_ISL\_745960, EPI\_ISL\_745961, EPI\_ISL\_745962, EPI\_ISL\_745963, EPI\_ISL\_745964, EPI\_ISL\_745965, EPI\_ISL\_745966, EPI\_ISL\_745967, EPI\_ISL\_745968, EPI\_ISL\_745969, EPI\_ISL\_745970, EPI\_ISL\_745971, EPI\_ISL\_745972, EPI\_ISL\_745973, EPI\_ISL\_745974, EPI\_ISL\_745975, EPI\_ISL\_745976, EPI\_ISL\_745977, EPI\_ISL\_745978, EPI\_ISL\_745979, EPI\_ISL\_745980, EPI\_ISL\_745981, EPI\_ISL\_745982, EPI\_ISL\_745983, EPI\_ISL\_745984, EPI\_ISL\_745985, EPI\_ISL\_745986, EPI\_ISL\_745987, EPI\_ISL\_745988, EPI\_ISL\_745989, EPI\_ISL\_745990, EPI\_ISL\_745991, EPI\_ISL\_745992, EPI\_ISL\_745993, EPI\_ISL\_745994, EPI\_ISL\_745995, EPI\_ISL\_745996, EPI\_ISL\_745997, EPI\_ISL\_745998, EPI\_ISL\_745999, EPI\_ISL\_746000, EPI\_ISL\_746001, EPI\_ISL\_746002, EPI\_ISL\_746003, EPI\_ISL\_746004, EPI\_ISL\_746005, EPI\_ISL\_746006, EPI\_ISL\_746007, EPI\_ISL\_746008, EPI\_ISL\_746009, EPI\_ISL\_746010, EPI\_ISL\_746011, EPI\_ISL\_746012, EPI\_ISL\_746013, EPI\_ISL\_746014, EPI\_ISL\_746015, EPI\_ISL\_746016, EPI\_ISL\_746017, EPI\_ISL\_746018, EPI\_ISL\_746019, EPI\_ISL\_746020, EPI\_ISL\_746021, EPI\_ISL\_746022, EPI\_ISL\_746023, EPI\_ISL\_746024, EPI\_ISL\_746025, EPI\_ISL\_746026, EPI\_ISL\_746027, EPI\_ISL\_746028, EPI\_ISL\_746029, EPI\_ISL\_746030, EPI\_ISL\_746031, EPI\_ISL\_746032, EPI\_ISL\_746033, EPI\_ISL\_746034, EPI\_ISL\_746035, EPI\_ISL\_746036, EPI\_ISL\_746037, EPI\_ISL\_746038, EPI\_ISL\_746039, EPI\_ISL\_746040, EPI\_ISL\_746041, EPI\_ISL\_746042, EPI\_ISL\_746043, EPI\_ISL\_746044, EPI\_ISL\_746045, EPI\_ISL\_746046, EPI\_ISL\_746047, EPI\_ISL\_746048, EPI\_ISL\_746049, EPI\_ISL\_746050, EPI\_ISL\_746051, EPI\_ISL\_746052, EPI\_ISL\_746053, EPI\_ISL\_746054, EPI\_ISL\_746055, EPI\_ISL\_746056, EPI\_ISL\_746057, EPI\_ISL\_746058, EPI\_ISL\_746059, EPI\_ISL\_746060, EPI\_ISL\_746061, EPI\_ISL\_746062, EPI\_ISL\_746063, EPI\_ISL\_746064, EPI\_ISL\_746065, EPI\_ISL\_746066, EPI\_ISL\_746067, EPI\_ISL\_746068, EPI\_ISL\_746069, EPI\_ISL\_746070, EPI\_ISL\_746071, EPI\_ISL\_746072, EPI\_ISL\_746073, EPI\_ISL\_746074, EPI\_ISL\_746075, EPI\_ISL\_746076, EPI\_ISL\_746077, EPI\_ISL\_746078, EPI\_ISL\_746079, EPI\_ISL\_746080, EPI\_ISL\_746081, EPI\_ISL\_746082, EPI\_ISL\_746083, EPI\_ISL\_746084, EPI\_ISL\_746085, EPI\_ISL\_746086, EPI\_ISL\_746087, EPI\_ISL\_746088, EPI\_ISL\_746089, EPI\_ISL\_746090, EPI\_ISL\_746091, EPI\_ISL\_746092, EPI\_ISL\_746093, EPI\_ISL\_746094, EPI\_ISL\_746095, EPI\_ISL\_746096, EPI\_ISL\_746097, EPI\_ISL\_746098, EPI\_ISL\_746099, EPI\_ISL\_746100, EPI\_ISL\_746101, EPI\_ISL\_746102, EPI\_ISL\_746103, EPI\_ISL\_746104, EPI\_ISL\_746105, EPI\_ISL\_746106, EPI\_ISL\_746107, EPI\_ISL\_746108, EPI\_ISL\_746109, EPI\_ISL\_746110, EPI\_ISL\_746111, EPI\_ISL\_746112, EPI\_ISL\_746113, EPI\_ISL\_746114, EPI\_ISL\_746115, EPI\_ISL\_746116, EPI\_ISL\_746117, EPI\_ISL\_746118, EPI\_ISL\_746119, EPI\_ISL\_746120, EPI\_ISL\_746121, EPI\_ISL\_746122, EPI\_ISL\_746123, EPI\_ISL\_746124, EPI\_ISL\_746125, EPI\_ISL\_746126, EPI\_ISL\_746127, EPI\_ISL\_746128, EPI\_ISL\_746129, EPI\_ISL\_746130, EPI\_ISL\_746131, EPI\_ISL\_746132, EPI\_ISL\_746133, EPI\_ISL\_746134, EPI\_ISL\_746135, EPI\_ISL\_746136, EPI\_ISL\_746137, EPI\_ISL\_746138, EPI\_ISL\_746139, EPI\_ISL\_746140, EPI\_ISL\_746141, EPI\_ISL\_746142, EPI\_ISL\_746143, EPI\_ISL\_746144, EPI\_ISL\_746145, EPI\_ISL\_746146, EPI\_ISL\_746147, EPI\_ISL\_746148, EPI\_ISL\_746149, EPI\_ISL\_746150, EPI\_ISL\_746151, EPI\_ISL\_746152, EPI\_ISL\_746153, EPI\_ISL\_746154, EPI\_ISL\_746155, EPI\_ISL\_746156, EPI\_ISL\_746157, EPI\_ISL\_746158, EPI\_ISL\_746159, EPI\_ISL\_746160, EPI\_ISL\_746161, EPI\_ISL\_746162, EPI\_ISL\_746163, EPI\_ISL\_746164, EPI\_ISL\_746165, EPI\_ISL\_746166, EPI\_ISL\_746167, EPI\_ISL\_746168, EPI\_ISL\_746169, EPI\_ISL\_746170, EPI\_ISL\_746171, EPI\_ISL\_746172, EPI\_ISL\_746173, EPI\_ISL\_746174, EPI\_ISL\_746175, EPI\_ISL\_746176, EPI\_ISL\_746177, EPI\_ISL\_746178, EPI\_ISL\_746179, EPI\_ISL\_746180, EPI\_ISL\_746181, EPI\_ISL\_746182, EPI\_ISL\_746183, EPI\_ISL\_746184, EPI\_ISL\_746185, EPI\_ISL\_746186, EPI\_ISL\_746187, EPI\_ISL\_746188, EPI\_ISL\_746189, EPI\_ISL\_746190, EPI\_ISL\_746191, EPI\_ISL\_746192, EPI\_ISL\_746193, EPI\_ISL\_746194, EPI\_ISL\_746195, EPI\_ISL\_746196, EPI\_ISL\_746197, EPI\_ISL\_746198, EPI\_ISL\_746199, EPI\_ISL\_746200, EPI\_ISL\_746201, EPI\_ISL\_746202, EPI\_ISL\_746203, EPI\_ISL\_746204, EPI\_ISL\_746205, EPI\_ISL\_746206, EPI\_ISL\_746207, EPI\_ISL\_746208, EPI\_ISL\_746209, EPI\_ISL\_746210, EPI\_ISL\_746211, EPI\_ISL\_746212, EPI\_ISL\_746213, EPI\_ISL\_746214, EPI\_ISL\_746215, EPI\_ISL\_746216, EPI\_ISL\_746217, EPI\_ISL\_746218, EPI\_ISL\_746219, EPI\_ISL\_746220, EPI\_ISL\_746221, EPI\_ISL\_746222, EPI\_ISL\_746223, EPI\_ISL\_746224, EPI\_ISL\_746225, EPI\_ISL\_746226, EPI\_ISL\_746227, EPI\_ISL\_746228, EPI\_ISL\_746229, EPI\_ISL\_746230, EPI\_ISL\_746231, EPI\_ISL\_746232, EPI\_ISL\_746233, EPI\_ISL\_746234, EPI\_ISL\_746235, EPI\_ISL\_746236, EPI\_ISL\_746237, EPI\_ISL\_746238, EPI\_ISL\_746239, EPI\_ISL\_746240, EPI\_ISL\_746241, EPI\_ISL\_746242, EPI\_ISL\_746243, EPI\_ISL\_746244, EPI\_ISL\_746245, EPI\_ISL\_746246, EPI\_ISL\_746247, EPI\_ISL\_746248, EPI\_ISL\_746249, EPI\_ISL\_746250, EPI\_ISL\_746251, EPI\_ISL\_746252, EPI\_ISL\_746253, EPI\_ISL\_746254, EPI\_ISL\_746255, EPI\_ISL\_746256, EPI\_ISL\_746257, EPI\_ISL\_746258, EPI\_ISL\_746259, EPI\_ISL\_746260, EPI\_ISL\_746261, EPI\_ISL\_746262, EPI\_ISL\_746263, EPI\_ISL\_746264, EPI\_ISL\_746265, EPI\_ISL\_746266, EPI\_ISL\_746267, EPI\_ISL\_746268, EPI\_ISL\_746269, EPI\_ISL\_746270, EPI\_ISL\_746271, EPI\_ISL\_746272, EPI\_ISL\_746273, EPI\_ISL\_746274, EPI\_ISL\_746275, EPI\_ISL\_746276, EPI\_ISL\_746277, EPI\_ISL\_746278, EPI\_ISL\_746279, EPI\_ISL\_746280, EPI\_ISL\_746281, EPI\_ISL\_746282, EPI\_ISL\_746283, EPI\_ISL\_746284, EPI\_ISL\_746285, EPI\_ISL\_746286, EPI\_ISL\_746287, EPI\_ISL\_746288, EPI\_ISL\_746289, EPI\_ISL\_746290, EPI\_ISL\_746291, EPI\_ISL\_746292, EPI\_ISL\_746293, EPI\_ISL\_746294, EPI\_ISL\_746295, EPI\_ISL\_746296, EPI\_ISL\_746297, EPI\_ISL\_746298, EPI\_ISL\_746299, EPI\_ISL\_746300, EPI\_ISL\_746301, EPI\_ISL\_746302, EPI\_ISL\_746303, EPI\_ISL\_746304, EPI\_ISL\_746305, EPI\_ISL\_746306, EPI\_ISL\_746307, EPI\_ISL\_746308, EPI\_ISL\_746309, EPI\_ISL\_746310, EPI\_ISL\_746311, EPI\_ISL\_746312, EPI\_ISL\_746313, EPI\_ISL\_746314, EPI\_ISL\_746315, EPI\_ISL\_746316, EPI\_ISL\_746317

see above Ginkgo Bioworks Clinical Laboratory Utah Public Health Laboratory Erin L. Young, Kelly Oakeson, Tara Gallagher, Michael T. Pyme, E. Susan Slechta, Melanie A. Mallory, Jeffrey B. Stevenson, Saikha M. Shakir, David R. Hillyard, Malaika McKenzie-Bennett, James McGann, Jim Griffin, Keith Robison, Alex Plocik, Becky Schilling, Martha Pierson, Rebecca Littlefield, Michelle Spencer, Birgitte Simen

EPI\_ISL\_746326, EPI\_ISL\_746330, EPI\_ISL\_746334, EPI\_ISL\_746335, EPI\_ISL\_746336, EPI\_ISL\_746339, EPI\_ISL\_746340, EPI\_ISL\_746348, EPI\_ISL\_746356, EPI\_ISL\_746357, EPI\_ISL\_746360, EPI\_ISL\_746362, EPI\_ISL\_746366, EPI\_ISL\_746368, EPI\_ISL\_746373, EPI\_ISL\_746376, EPI\_ISL\_746380, EPI\_ISL\_746383, EPI\_ISL\_746394, EPI\_ISL\_746398, EPI\_ISL\_746406, EPI\_ISL\_746414, EPI\_ISL\_746417, EPI\_ISL\_746419, EPI\_ISL\_746421, EPI\_ISL\_746423, EPI\_ISL\_746427, EPI\_ISL\_746436, EPI\_ISL\_746441, EPI\_ISL\_746445, EPI\_ISL\_746450, EPI\_ISL\_746455, EPI\_ISL\_746458, EPI\_ISL\_746459, EPI\_ISL\_746461, EPI\_ISL\_746469, EPI\_ISL\_746477

see above Utah Public Health Laboratory Utah Public Health Laboratory Erin Young, Kelly Oakeson, Tara Gallagher

EPI\_ISL\_746830 National Institute for Infectious Diseases, INMI, "L. Spallanzani" IRCCS National Institute for Infectious Diseases, INMI, "L. Spallanzani" IRCCS E Giombini, M Rueca, B Bartolini, C.E.M Gruber, F Messina, A Di Caro, MR Capobianchi

EPI\_ISL\_746832 National Institute for Infectious Diseases, INMI, "L. Spallanzani" IRCCS National Institute for Infectious Diseases, INMI, "L. Spallanzani" IRCCS E Giombini, C.E.M Gruber, M Rueca, B Bartolini, F Messina, A Di Caro, MR Capobianchi

EPI\_ISL\_746836, EPI\_ISL\_746843, EPI\_ISL\_746845, EPI\_ISL\_746847, EPI\_ISL\_746848, EPI\_ISL\_746852, EPI\_ISL\_746855, EPI\_ISL\_746860, EPI\_ISL\_746861, EPI\_ISL\_746862, EPI\_ISL\_746872, EPI\_ISL\_746874, EPI\_ISL\_746876, EPI\_ISL\_746879, EPI\_ISL\_746886, EPI\_ISL\_746889, EPI\_ISL\_746890, EPI\_ISL\_746893, EPI\_ISL\_746895, EPI\_ISL\_746896, EPI\_ISL\_746904, EPI\_ISL\_746908, EPI\_ISL\_746909, EPI\_ISL\_746911, EPI\_ISL\_746913, EPI\_ISL\_746915, EPI\_ISL\_746917, EPI\_ISL\_746921, EPI\_ISL\_746924, EPI\_ISL\_746927, EPI\_ISL\_746931, EPI\_ISL\_746936, EPI\_ISL\_746940, EPI\_ISL\_746945, EPI\_ISL\_746947, EPI\_ISL\_746949, EPI\_ISL\_746962, EPI\_ISL\_746969, EPI\_ISL\_746970, EPI\_ISL\_746975, EPI\_ISL\_746981, EPI\_ISL\_746982, EPI\_ISL\_746983, EPI\_ISL\_746987, EPI\_ISL\_746992, EPI\_ISL\_746995, EPI\_ISL\_746999, EPI\_ISL\_747002, EPI\_ISL\_747003, EPI\_ISL\_747005, EPI\_ISL\_747006, EPI\_ISL\_747011, EPI\_ISL\_747013, EPI\_ISL\_747014, EPI\_ISL\_747015, EPI\_ISL\_747024, EPI\_ISL\_747027

see above Utah Public Health Laboratory Utah Public Health Laboratory Erin Young, Kelly Oakeson, Tara Gallagher

EPI\_ISL\_751799 Labor Dr. Wisplinghoff - Köln Robert Koch Institute, Bioinformatics MF1, Berlin, Germany Dr. R. Grosse, Stephan Fuchs, Stefan Kroeger, Marianne Wedde, Oliver Drechsel, Aleksandar Radonic, Rene Kmiecinski, Ralf Duerwald, Thorsten Wolff

EPI\_ISL\_752605 Faculty of Medicine, Al-Quds University Faculty of Medicine, Al-Quds University Ereqat,S., Nasereddin,A. and Al-Jawabreh,A.

EPI\_ISL\_754229, EPI\_ISL\_754230, EPI\_ISL\_754231, EPI\_ISL\_754232, EPI\_ISL\_754233, EPI\_ISL\_754234, EPI\_ISL\_754235 The Republican Research and Practical Center for Epidemiology and Microbiology (RRPCEM) WHO National Influenza Centre Russian Federation Elena Gasich, Kirill Bulda, Anatoly Krasko, Andrey Komissarov, Artem Fadeev, Anna Ivanova, Kseniya Komissarova, Dmitry Bazhenov, Daria Danilenko, Ksenia Safina, Elena Nabieva, Georgii Bazykin, Dmitry Liznov

EPI\_ISL\_755712, EPI\_ISL\_755713, EPI\_ISL\_755714, EPI\_ISL\_755715, EPI\_ISL\_755716, EPI\_ISL\_755717, EPI\_ISL\_755718, EPI\_ISL\_755719, EPI\_ISL\_755720, EPI\_ISL\_755721, EPI\_ISL\_755722, EPI\_ISL\_755723, EPI\_ISL\_755724, EPI\_ISL\_755725, EPI\_ISL\_755726, EPI\_ISL\_755727, EPI\_ISL\_755728, EPI\_ISL\_755729, EPI\_ISL\_755730, EPI\_ISL\_755731, EPI\_ISL\_755732, EPI\_ISL\_755733, EPI\_ISL\_755734, EPI\_ISL\_755735, EPI\_ISL\_755736

see above Toronto Invasive Bacterial Diseases Network McMaster University David Richardson, Allison McGeer, Patryk Aftanas, Hooman Derakhshani, Angel Li, Kuganya Nirmalarajah, Emily Panousis, Ahmed Draia, Jalees Nasir, Michael Surette, Samira Mubareka, Andrew G. McArthur

EPI\_ISL\_763406, EPI\_ISL\_763466, EPI\_ISL\_763478, EPI\_ISL\_763502, EPI\_ISL\_763665, EPI\_ISL\_763681, EPI\_ISL\_763689, EPI\_ISL\_763737, EPI\_ISL\_763749, EPI\_ISL\_763769, EPI\_ISL\_763777, EPI\_ISL\_763912, EPI\_ISL\_763920, EPI\_ISL\_763921, EPI\_ISL\_764113, EPI\_ISL\_764115, EPI\_ISL\_764116, EPI\_ISL\_764126, EPI\_ISL\_764445, EPI\_ISL\_764446, EPI\_ISL\_764447, EPI\_ISL\_764450, EPI\_ISL\_764451, EPI\_ISL\_764456, EPI\_ISL\_764457, EPI\_ISL\_764459, EPI\_ISL\_764461, EPI\_ISL\_764470, EPI\_ISL\_764474, EPI\_ISL\_764475, EPI\_ISL\_764476, EPI\_ISL\_764478, EPI\_ISL\_764484, EPI\_ISL\_764485, EPI\_ISL\_764487, EPI\_ISL\_764491

see above Quadram Institute Bioscience COVID-19 Genomics UK (COG-UK) Consortium Dave J. Baker, Gemma L. Kay, Al Aydin, Thanh Le-Viet, Steven Rudder, Ana P. Tedim, Anastasia Kolyva, Maria Diaz, Leonardo de Oliveira Martins, Nabil-Fareed Alikhan, Lizzie Meadows, Rachael Stanley, Ngozi Elumogo, Muhammed Yasir, Nicholas M. Thomson, Alexander J Trotter, Rachel Gilroy, Samuel Bloomfield, Claire Stuart, Andrew Bell, Reenesh Prakash, Samir Derवेशic, Alison E. Mather, John Wain, Mark Webber, Andrew J. Page, Justin OGrady

EPI\_ISL\_765567 National Institute for Infectious Diseases, INMI, "L. Spallanzani" IRCCS National Institute for Infectious Diseases, INMI, "L. Spallanzani" IRCCS E Giombini, C.E.M Gruber, M Rueca, B Bartolini, O Butera, F Messina, A Di Caro, G Parisi, MR Capobianchi

EPI\_ISL\_765571 National Institute for Infectious Diseases, INMI, "L. Spallanzani" IRCCS National Institute for Infectious Diseases, INMI, "L. Spallanzani" IRCCS E Giombini, B Bartolini, O Butera, C.E.M Gruber, M Rueca, F Messina, MR Capobianchi, A Di Caro

EPI\_ISL\_766051 Nigeria Centre For Disease Control, National reference Laboratory, NCDC, Gaduwa, Abuja Dr Ndofo Nnaemeka, Olusola Akanbi, Chimaobi Chukwu, Dr Omoare Adesuyi, Kingsley Madubuike, Anthony Ahumbe, Naidoo Dhamari, Nwando Mba, Dr Chikwe Ihekweazu

EPI\_ISL\_766591 Halsomedicinskt Center The Public Health Agency of Sweden Department of Microbiology, The Public Health Agency of Sweden

EPI\_ISL\_766592, EPI\_ISL\_766593 Klinisk mikrobiologi The Public Health Agency of Sweden Department of Microbiology, The Public Health Agency of Sweden

EPI\_ISL\_766594, EPI\_ISL\_766595, EPI\_ISL\_766596, EPI\_ISL\_766597, EPI\_ISL\_766598, EPI\_ISL\_766599, EPI\_ISL\_766600, EPI\_ISL\_766601, EPI\_ISL\_766602, EPI\_ISL\_766603, EPI\_ISL\_766604, EPI\_ISL\_766605, EPI\_ISL\_766606, EPI\_ISL\_766607

see above The Public Health Agency of Sweden The Public Health Agency of Sweden Department of Microbiology, The Public Health Agency of Sweden

EPI\_ISL\_766608, EPI\_ISL\_766609, EPI\_ISL\_766610, EPI\_ISL\_766611 Klinisk mikrobiologi The Public Health Agency of Sweden Department of Microbiology, The Public Health Agency of Sweden

EPI\_ISL\_766612 The Public Health Agency of Sweden The Public Health Agency of Sweden Department of Microbiology, The Public Health Agency of Sweden

EPI\_ISL\_766613 Klinisk mikrobiologi The Public Health Agency of Sweden Department of Microbiology, The Public Health Agency of Sweden

EPI\_ISL\_766614 unknown The Public Health Agency of Sweden Department of Microbiology, The Public Health Agency of Sweden

EPI\_ISL\_766615, EPI\_ISL\_766616, EPI\_ISL\_766617, EPI\_ISL\_766618, EPI\_ISL\_766619, EPI\_ISL\_766620, EPI\_ISL\_766621, EPI\_ISL\_766622, EPI\_ISL\_766623, EPI\_ISL\_766624, EPI\_ISL\_766625, EPI\_ISL\_766626, EPI\_ISL\_766627, EPI\_ISL\_766628, EPI\_ISL\_766629



|                                                                                                                                                                                                                                                                                                                                                                |                                          |                                    |                                                                                                                                                                                                                                                                                                                                                                                                                                                                                   |
|----------------------------------------------------------------------------------------------------------------------------------------------------------------------------------------------------------------------------------------------------------------------------------------------------------------------------------------------------------------|------------------------------------------|------------------------------------|-----------------------------------------------------------------------------------------------------------------------------------------------------------------------------------------------------------------------------------------------------------------------------------------------------------------------------------------------------------------------------------------------------------------------------------------------------------------------------------|
| see above                                                                                                                                                                                                                                                                                                                                                      | Klinisk mikrobiologi                     | The Public Health Agency of Sweden | Department of Microbiology, The Public Health Agency of Sweden                                                                                                                                                                                                                                                                                                                                                                                                                    |
| EPI_ISL_766630, EPI_ISL_766631, EPI_ISL_766632                                                                                                                                                                                                                                                                                                                 | Klinisk mikrobiologi, Viruslab           | The Public Health Agency of Sweden | Department of Microbiology, The Public Health Agency of Sweden                                                                                                                                                                                                                                                                                                                                                                                                                    |
| EPI_ISL_766633, EPI_ISL_766634, EPI_ISL_766635, EPI_ISL_766636, EPI_ISL_766637, EPI_ISL_766638, EPI_ISL_766639                                                                                                                                                                                                                                                 | Klinisk mikrobiologi                     | The Public Health Agency of Sweden | Department of Microbiology, The Public Health Agency of Sweden                                                                                                                                                                                                                                                                                                                                                                                                                    |
| EPI_ISL_766640, EPI_ISL_766641                                                                                                                                                                                                                                                                                                                                 | Laboratoriemedicin, Klinisk mikrobiologi | The Public Health Agency of Sweden | Department of Microbiology, The Public Health Agency of Sweden                                                                                                                                                                                                                                                                                                                                                                                                                    |
| EPI_ISL_766642, EPI_ISL_766643, EPI_ISL_766644                                                                                                                                                                                                                                                                                                                 | Vardcentralen Brinken                    | The Public Health Agency of Sweden | Department of Microbiology, The Public Health Agency of Sweden                                                                                                                                                                                                                                                                                                                                                                                                                    |
| EPI_ISL_766645                                                                                                                                                                                                                                                                                                                                                 | Barnakuten                               | The Public Health Agency of Sweden | Department of Microbiology, The Public Health Agency of Sweden                                                                                                                                                                                                                                                                                                                                                                                                                    |
| EPI_ISL_766692, EPI_ISL_766693                                                                                                                                                                                                                                                                                                                                 | Klinisk mikrobiologi, Laboratoriemedicin | The Public Health Agency of Sweden | Department of Microbiology, The Public Health Agency of Sweden                                                                                                                                                                                                                                                                                                                                                                                                                    |
| EPI_ISL_766694                                                                                                                                                                                                                                                                                                                                                 | Klinisk mikrobiologi                     | The Public Health Agency of Sweden | Department of Microbiology, The Public Health Agency of Sweden                                                                                                                                                                                                                                                                                                                                                                                                                    |
| EPI_ISL_766695                                                                                                                                                                                                                                                                                                                                                 | A05 Biomedicum                           | The Public Health Agency of Sweden | Department of Microbiology, The Public Health Agency of Sweden                                                                                                                                                                                                                                                                                                                                                                                                                    |
| EPI_ISL_766696                                                                                                                                                                                                                                                                                                                                                 | Klinisk Mikrobiologi                     | The Public Health Agency of Sweden | Department of Microbiology, The Public Health Agency of Sweden                                                                                                                                                                                                                                                                                                                                                                                                                    |
| EPI_ISL_766697                                                                                                                                                                                                                                                                                                                                                 | Klinisk mikrobiologi, bakteriologi       | The Public Health Agency of Sweden | Department of Microbiology, The Public Health Agency of Sweden                                                                                                                                                                                                                                                                                                                                                                                                                    |
| EPI_ISL_766698, EPI_ISL_766699                                                                                                                                                                                                                                                                                                                                 | A05 Biomedicum                           | The Public Health Agency of Sweden | Department of Microbiology, The Public Health Agency of Sweden                                                                                                                                                                                                                                                                                                                                                                                                                    |
| EPI_ISL_766700, EPI_ISL_766701, EPI_ISL_766702, EPI_ISL_766703, EPI_ISL_766704, EPI_ISL_766705, EPI_ISL_766706                                                                                                                                                                                                                                                 | The Public Health Agency of Sweden       | The Public Health Agency of Sweden | Department of Microbiology, The Public Health Agency of Sweden                                                                                                                                                                                                                                                                                                                                                                                                                    |
| EPI_ISL_766707                                                                                                                                                                                                                                                                                                                                                 | Klinisk mikrobiologi                     | The Public Health Agency of Sweden | Department of Microbiology, The Public Health Agency of Sweden                                                                                                                                                                                                                                                                                                                                                                                                                    |
| EPI_ISL_766708, EPI_ISL_766709                                                                                                                                                                                                                                                                                                                                 | A05 Biomedicum                           | The Public Health Agency of Sweden | Department of Microbiology, The Public Health Agency of Sweden                                                                                                                                                                                                                                                                                                                                                                                                                    |
| EPI_ISL_766710, EPI_ISL_766711, EPI_ISL_766712                                                                                                                                                                                                                                                                                                                 | Klinisk mikrobiologi                     | The Public Health Agency of Sweden | Department of Microbiology, The Public Health Agency of Sweden                                                                                                                                                                                                                                                                                                                                                                                                                    |
| EPI_ISL_766713                                                                                                                                                                                                                                                                                                                                                 | Klinisk Mikrobiologi                     | The Public Health Agency of Sweden | Department of Microbiology, The Public Health Agency of Sweden                                                                                                                                                                                                                                                                                                                                                                                                                    |
| EPI_ISL_766714                                                                                                                                                                                                                                                                                                                                                 | Klinisk mikrobiologi                     | The Public Health Agency of Sweden | Department of Microbiology, The Public Health Agency of Sweden                                                                                                                                                                                                                                                                                                                                                                                                                    |
| EPI_ISL_766715, EPI_ISL_766716, EPI_ISL_766717, EPI_ISL_766718, EPI_ISL_766719, EPI_ISL_766720, EPI_ISL_766721, EPI_ISL_766722, EPI_ISL_766723                                                                                                                                                                                                                 | A05 Biomedicum                           | The Public Health Agency of Sweden | Department of Microbiology, The Public Health Agency of Sweden                                                                                                                                                                                                                                                                                                                                                                                                                    |
| EPI_ISL_766724                                                                                                                                                                                                                                                                                                                                                 | TATAA Biocenter                          | The Public Health Agency of Sweden | Department of Microbiology, The Public Health Agency of Sweden                                                                                                                                                                                                                                                                                                                                                                                                                    |
| EPI_ISL_766725, EPI_ISL_766726, EPI_ISL_766727, EPI_ISL_766728, EPI_ISL_766729, EPI_ISL_766730                                                                                                                                                                                                                                                                 | Klinisk mikrobiologi                     | The Public Health Agency of Sweden | Department of Microbiology, The Public Health Agency of Sweden                                                                                                                                                                                                                                                                                                                                                                                                                    |
| EPI_ISL_771361, EPI_ISL_771362, EPI_ISL_771363, EPI_ISL_771364, EPI_ISL_771365, EPI_ISL_771366                                                                                                                                                                                                                                                                 | Washington State Department of Health    | Seattle Flu Study                  | Deborah A. Nickerson, Chris D. Frazar, Jover Lee, Benjamin Pelle, Matthew Richardson, Amanda Adler, Elisabeth Brandstetter, Peter D. Han, Kairsten Fay, Misja Ilcin, Kirsten Lacombe, Thomas R. Sibley, Melissa Truong, Caitlin R. Wolf, Romesh Gautam, Geoff Melly, Brian Hiatt, Philip Dykema, Scott Lindquist, Michael Boeckh, Janet A. Englund, Michael Famulare, Barry R. Lutz, Mark J. Rieder, Lea M. Starita, Matthew Thompson, Helen Y. Chu, Jay Shendure, Trevor Bedford |
| EPI_ISL_775531, EPI_ISL_775532                                                                                                                                                                                                                                                                                                                                 | Klinisk mikrobiologi, Viruslab           | The Public Health Agency of Sweden | Department of Microbiology, The Public Health Agency of Sweden                                                                                                                                                                                                                                                                                                                                                                                                                    |
| EPI_ISL_775533, EPI_ISL_775534, EPI_ISL_775535, EPI_ISL_775536, EPI_ISL_775537, EPI_ISL_775538, EPI_ISL_775539, EPI_ISL_775540, EPI_ISL_775541                                                                                                                                                                                                                 | ABC                                      | The Public Health Agency of Sweden | Department of Microbiology, The Public Health Agency of Sweden                                                                                                                                                                                                                                                                                                                                                                                                                    |
| EPI_ISL_775542, EPI_ISL_775543, EPI_ISL_775544, EPI_ISL_775545                                                                                                                                                                                                                                                                                                 | Klinisk mikrobiologi, Viruslab           | The Public Health Agency of Sweden | Department of Microbiology, The Public Health Agency of Sweden                                                                                                                                                                                                                                                                                                                                                                                                                    |
| EPI_ISL_775546, EPI_ISL_775547, EPI_ISL_775548                                                                                                                                                                                                                                                                                                                 | Klinisk Mikrobiologi                     | The Public Health Agency of Sweden | Department of Microbiology, The Public Health Agency of Sweden                                                                                                                                                                                                                                                                                                                                                                                                                    |
| EPI_ISL_775549                                                                                                                                                                                                                                                                                                                                                 | Klinisk mikrobiologi                     | The Public Health Agency of Sweden | Department of Microbiology, The Public Health Agency of Sweden                                                                                                                                                                                                                                                                                                                                                                                                                    |
| EPI_ISL_775550, EPI_ISL_775551, EPI_ISL_775552, EPI_ISL_775553, EPI_ISL_775554, EPI_ISL_775555, EPI_ISL_775556, EPI_ISL_775557, EPI_ISL_775558, EPI_ISL_775559, EPI_ISL_775560, EPI_ISL_775561, EPI_ISL_775562, EPI_ISL_775563, EPI_ISL_775564, EPI_ISL_775565, EPI_ISL_775566, EPI_ISL_775567, EPI_ISL_775568, EPI_ISL_775569, EPI_ISL_775570, EPI_ISL_775571 |                                          |                                    |                                                                                                                                                                                                                                                                                                                                                                                                                                                                                   |
| see above                                                                                                                                                                                                                                                                                                                                                      | ABC                                      | The Public Health Agency of Sweden | Department of Microbiology, The Public Health Agency of Sweden                                                                                                                                                                                                                                                                                                                                                                                                                    |
| EPI_ISL_775572, EPI_ISL_775573, EPI_ISL_775574                                                                                                                                                                                                                                                                                                                 | Klinisk mikrobiologi                     | The Public Health Agency of Sweden | Department of Microbiology, The Public Health Agency of Sweden                                                                                                                                                                                                                                                                                                                                                                                                                    |
| EPI_ISL_775575, EPI_ISL_775576, EPI_ISL_775577, EPI_ISL_775578, EPI_ISL_775579, EPI_ISL_775580, EPI_ISL_775581, EPI_ISL_775582                                                                                                                                                                                                                                 | ABC                                      | The Public Health Agency of Sweden | Department of Microbiology, The Public Health Agency of Sweden                                                                                                                                                                                                                                                                                                                                                                                                                    |
| EPI_ISL_775583                                                                                                                                                                                                                                                                                                                                                 | Synlab Medilab, Mikrobiologi             | The Public Health Agency of Sweden | Department of Microbiology, The Public Health Agency of Sweden                                                                                                                                                                                                                                                                                                                                                                                                                    |
| EPI_ISL_775584                                                                                                                                                                                                                                                                                                                                                 | Klinisk mikrobiologi                     | The Public Health Agency of Sweden | Department of Microbiology, The Public Health Agency of Sweden                                                                                                                                                                                                                                                                                                                                                                                                                    |
| EPI_ISL_775585, EPI_ISL_775586                                                                                                                                                                                                                                                                                                                                 | Unilabs AB                               | The Public Health Agency of Sweden | Department of Microbiology, The Public Health Agency of Sweden                                                                                                                                                                                                                                                                                                                                                                                                                    |
| EPI_ISL_775587                                                                                                                                                                                                                                                                                                                                                 | Synlab Medilab, Mikrobiologi             | The Public Health Agency of Sweden | Department of Microbiology, The Public Health Agency of Sweden                                                                                                                                                                                                                                                                                                                                                                                                                    |
| EPI_ISL_775588                                                                                                                                                                                                                                                                                                                                                 | Klinisk mikrobiologi                     | The Public Health Agency of Sweden | Department of Microbiology, The Public Health Agency of Sweden                                                                                                                                                                                                                                                                                                                                                                                                                    |
| EPI_ISL_775589                                                                                                                                                                                                                                                                                                                                                 | Laboratorium for klinisk mikrobiologi    | The Public Health Agency of Sweden | Department of Microbiology, The Public Health Agency of Sweden                                                                                                                                                                                                                                                                                                                                                                                                                    |
| EPI_ISL_775590, EPI_ISL_775591, EPI_ISL_775592                                                                                                                                                                                                                                                                                                                 | Klinisk mikrobiologi                     | The Public Health Agency of Sweden | Department of Microbiology, The Public Health Agency of Sweden                                                                                                                                                                                                                                                                                                                                                                                                                    |
| EPI_ISL_775593                                                                                                                                                                                                                                                                                                                                                 | TATAA Biocenter                          | The Public Health Agency of Sweden | Department of Microbiology, The Public Health Agency of Sweden                                                                                                                                                                                                                                                                                                                                                                                                                    |

|                                                                                                                                                                                                                                                                                                                                                                                                                                                                                                                                |                                                                                                                                                                                            |                                                                                                                                                                                                     |                                                                                                                                                                                                                                                                     |
|--------------------------------------------------------------------------------------------------------------------------------------------------------------------------------------------------------------------------------------------------------------------------------------------------------------------------------------------------------------------------------------------------------------------------------------------------------------------------------------------------------------------------------|--------------------------------------------------------------------------------------------------------------------------------------------------------------------------------------------|-----------------------------------------------------------------------------------------------------------------------------------------------------------------------------------------------------|---------------------------------------------------------------------------------------------------------------------------------------------------------------------------------------------------------------------------------------------------------------------|
| EPI_ISL_779731                                                                                                                                                                                                                                                                                                                                                                                                                                                                                                                 | Servicio de Microbiología, Laboratori Clínic Metropolitana Nord. Hospital Universitari Germans Trias i Pujol, Institut d'Investigació en Ciències de la Salut Germans Trias i Pujol (IGTP) | SeqCOVID-SPAIN consortium/IBV(CSIC)                                                                                                                                                                 | Elisa Martró, Antoni E. Bordoy, Anna Not, Adrián Antuori, Anabel Fernández, Nona Romani, Verónica Saludes, Cristina Casañ and SeqCOVID-SPAIN consortium                                                                                                             |
| EPI_ISL_788989, EPI_ISL_788990                                                                                                                                                                                                                                                                                                                                                                                                                                                                                                 | Klinisk mikrobiologi                                                                                                                                                                       | The Public Health Agency of Sweden                                                                                                                                                                  | Department of Microbiology, The Public Health Agency of Sweden                                                                                                                                                                                                      |
| EPI_ISL_788991, EPI_ISL_788992, EPI_ISL_788993, EPI_ISL_788994, EPI_ISL_788995, EPI_ISL_788996, EPI_ISL_788997, EPI_ISL_788998                                                                                                                                                                                                                                                                                                                                                                                                 | ABC                                                                                                                                                                                        | The Public Health Agency of Sweden                                                                                                                                                                  | Department of Microbiology, The Public Health Agency of Sweden                                                                                                                                                                                                      |
| EPI_ISL_788999                                                                                                                                                                                                                                                                                                                                                                                                                                                                                                                 | Klinisk mikrobiologi, virus F68                                                                                                                                                            | The Public Health Agency of Sweden                                                                                                                                                                  | Department of Microbiology, The Public Health Agency of Sweden                                                                                                                                                                                                      |
| EPI_ISL_789000, EPI_ISL_789001, EPI_ISL_789002, EPI_ISL_789003, EPI_ISL_789004, EPI_ISL_789005, EPI_ISL_789006, EPI_ISL_789007, EPI_ISL_789008, EPI_ISL_789009, EPI_ISL_789010, EPI_ISL_789011                                                                                                                                                                                                                                                                                                                                 | ABC                                                                                                                                                                                        | The Public Health Agency of Sweden                                                                                                                                                                  | Department of Microbiology, The Public Health Agency of Sweden                                                                                                                                                                                                      |
| see above                                                                                                                                                                                                                                                                                                                                                                                                                                                                                                                      | ABC                                                                                                                                                                                        | The Public Health Agency of Sweden                                                                                                                                                                  | Department of Microbiology, The Public Health Agency of Sweden                                                                                                                                                                                                      |
| EPI_ISL_789012, EPI_ISL_789013                                                                                                                                                                                                                                                                                                                                                                                                                                                                                                 | Klinisk mikrobiologi, Laboratoriemedicin                                                                                                                                                   | The Public Health Agency of Sweden                                                                                                                                                                  | Department of Microbiology, The Public Health Agency of Sweden                                                                                                                                                                                                      |
| EPI_ISL_789014, EPI_ISL_789015, EPI_ISL_789016                                                                                                                                                                                                                                                                                                                                                                                                                                                                                 | ABC                                                                                                                                                                                        | The Public Health Agency of Sweden                                                                                                                                                                  | Department of Microbiology, The Public Health Agency of Sweden                                                                                                                                                                                                      |
| EPI_ISL_789017                                                                                                                                                                                                                                                                                                                                                                                                                                                                                                                 | Klinisk Mikrobiologi                                                                                                                                                                       | The Public Health Agency of Sweden                                                                                                                                                                  | Department of Microbiology, The Public Health Agency of Sweden                                                                                                                                                                                                      |
| EPI_ISL_789018, EPI_ISL_789019, EPI_ISL_789020, EPI_ISL_789021, EPI_ISL_789022, EPI_ISL_789023, EPI_ISL_789024, EPI_ISL_789025, EPI_ISL_789026, EPI_ISL_789027, EPI_ISL_789028                                                                                                                                                                                                                                                                                                                                                 | ABC                                                                                                                                                                                        | The Public Health Agency of Sweden                                                                                                                                                                  | Department of Microbiology, The Public Health Agency of Sweden                                                                                                                                                                                                      |
| see above                                                                                                                                                                                                                                                                                                                                                                                                                                                                                                                      | ABC                                                                                                                                                                                        | The Public Health Agency of Sweden                                                                                                                                                                  | Department of Microbiology, The Public Health Agency of Sweden                                                                                                                                                                                                      |
| EPI_ISL_789029, EPI_ISL_789030, EPI_ISL_789031, EPI_ISL_789032, EPI_ISL_789033, EPI_ISL_789034, EPI_ISL_789035                                                                                                                                                                                                                                                                                                                                                                                                                 | Klinisk mikrobiologi, Laboratoriemedicin                                                                                                                                                   | The Public Health Agency of Sweden                                                                                                                                                                  | Department of Microbiology, The Public Health Agency of Sweden                                                                                                                                                                                                      |
| EPI_ISL_789036, EPI_ISL_789037, EPI_ISL_789038, EPI_ISL_789039, EPI_ISL_789040, EPI_ISL_789041, EPI_ISL_789042, EPI_ISL_789043, EPI_ISL_789044, EPI_ISL_789045                                                                                                                                                                                                                                                                                                                                                                 | Klinisk mikrobiologi                                                                                                                                                                       | The Public Health Agency of Sweden                                                                                                                                                                  | Department of Microbiology, The Public Health Agency of Sweden                                                                                                                                                                                                      |
| EPI_ISL_789046                                                                                                                                                                                                                                                                                                                                                                                                                                                                                                                 | unknown                                                                                                                                                                                    | The Public Health Agency of Sweden                                                                                                                                                                  | Department of Microbiology, The Public Health Agency of Sweden                                                                                                                                                                                                      |
| EPI_ISL_789047                                                                                                                                                                                                                                                                                                                                                                                                                                                                                                                 | Klinisk mikrobiologi                                                                                                                                                                       | The Public Health Agency of Sweden                                                                                                                                                                  | Department of Microbiology, The Public Health Agency of Sweden                                                                                                                                                                                                      |
| EPI_ISL_789048, EPI_ISL_789049, EPI_ISL_789050, EPI_ISL_789051, EPI_ISL_789052, EPI_ISL_789053                                                                                                                                                                                                                                                                                                                                                                                                                                 | Klinisk mikrobiologi, Viruslab                                                                                                                                                             | The Public Health Agency of Sweden                                                                                                                                                                  | Department of Microbiology, The Public Health Agency of Sweden                                                                                                                                                                                                      |
| EPI_ISL_789054                                                                                                                                                                                                                                                                                                                                                                                                                                                                                                                 | Unilabs AB                                                                                                                                                                                 | The Public Health Agency of Sweden                                                                                                                                                                  | Department of Microbiology, The Public Health Agency of Sweden                                                                                                                                                                                                      |
| EPI_ISL_789055, EPI_ISL_789056, EPI_ISL_789057, EPI_ISL_789058, EPI_ISL_789059                                                                                                                                                                                                                                                                                                                                                                                                                                                 | Klinisk mikrobiologi, Viruslab                                                                                                                                                             | The Public Health Agency of Sweden                                                                                                                                                                  | Department of Microbiology, The Public Health Agency of Sweden                                                                                                                                                                                                      |
| EPI_ISL_792059, EPI_ISL_792060, EPI_ISL_792061, EPI_ISL_792062, EPI_ISL_792063, EPI_ISL_792064, EPI_ISL_792065, EPI_ISL_792066, EPI_ISL_792067, EPI_ISL_792068, EPI_ISL_792069, EPI_ISL_792070, EPI_ISL_792071, EPI_ISL_792072, EPI_ISL_792073, EPI_ISL_792074, EPI_ISL_792075, EPI_ISL_792076, EPI_ISL_792077, EPI_ISL_792078, EPI_ISL_792079, EPI_ISL_792080, EPI_ISL_792081, EPI_ISL_792082, EPI_ISL_792083                                                                                                                 | Toronto Invasive Bacterial Diseases Network                                                                                                                                                | McMaster University                                                                                                                                                                                 | David Richardson, Allison McGeer, Patryk Aftanas, Hooman Derakhshani, Angel Li, Kuganya Nirmalarajah, Emily Panousis, Ahmed Draia, Jalees Nasir, Michael Surette, Samira Mubareka, Andrew G. McArthur                                                               |
| see above                                                                                                                                                                                                                                                                                                                                                                                                                                                                                                                      | Toronto Invasive Bacterial Diseases Network                                                                                                                                                | McMaster University                                                                                                                                                                                 | David Richardson, Allison McGeer, Patryk Aftanas, Hooman Derakhshani, Angel Li, Kuganya Nirmalarajah, Emily Panousis, Ahmed Draia, Jalees Nasir, Michael Surette, Samira Mubareka, Andrew G. McArthur                                                               |
| EPI_ISL_792500, EPI_ISL_792501, EPI_ISL_792502, EPI_ISL_792503, EPI_ISL_792504, EPI_ISL_792505, EPI_ISL_792506, EPI_ISL_792507, EPI_ISL_792508, EPI_ISL_792509, EPI_ISL_792510, EPI_ISL_792511                                                                                                                                                                                                                                                                                                                                 | Laboratorio de Inmunología del Hospital Perrando e Instituto de Medicina Regional de la UNNE                                                                                               | Grupo de Genómica y Bioinformática del Instituto de Investigación de la Cadena Láctea CONICET-INTA on behalf of 'Proyecto Argentino Interinstitucional de genómica de SARS-CoV-2' (PAIS Consortium) | Eberhardt, MF; Irazoqui, JM; Foussal, MD; Deluca, G; Ayala, NA; Gómez, MV; Giusiano, G; Lucero, H; Marin, M; Lescano, L; Cayré, A; Amadio, AF                                                                                                                       |
| see above                                                                                                                                                                                                                                                                                                                                                                                                                                                                                                                      | Laboratorio de Inmunología del Hospital Perrando e Instituto de Medicina Regional de la UNNE                                                                                               | Grupo de Genómica y Bioinformática del Instituto de Investigación de la Cadena Láctea CONICET-INTA on behalf of 'Proyecto Argentino Interinstitucional de genómica de SARS-CoV-2' (PAIS Consortium) | Eberhardt, MF; Irazoqui, JM; Ojeda, G; Rompato, G; Mugna, V; Pastor, C; Amadio, AF                                                                                                                                                                                  |
| EPI_ISL_792512, EPI_ISL_792513, EPI_ISL_792514, EPI_ISL_792515, EPI_ISL_792516, EPI_ISL_792517, EPI_ISL_792518, EPI_ISL_792519, EPI_ISL_792520, EPI_ISL_792521                                                                                                                                                                                                                                                                                                                                                                 | Laboratorio Central de la Ciudad de Santa Fe                                                                                                                                               | Grupo de Genómica y Bioinformática del Instituto de Investigación de la Cadena Láctea CONICET-INTA on behalf of 'Proyecto Argentino Interinstitucional de genómica de SARS-CoV-2' (PAIS Consortium) | Eberhardt, MF; Irazoqui, JM; Ojeda, G; Rompato, G; Mugna, V; Pastor, C; Amadio, AF                                                                                                                                                                                  |
| EPI_ISL_794605, EPI_ISL_794606, EPI_ISL_794607, EPI_ISL_794608                                                                                                                                                                                                                                                                                                                                                                                                                                                                 | Central Public Health Laboratories, Egyptian Ministry of Health and Population                                                                                                             | Central Public Health Laboratories, Egyptian Ministry of Health and Population                                                                                                                      | El-Shesheny,R., Roshdy,W.H., Kayed,A.E., Mostafa,A., Khalifa,M.K., Shehata,M., Shawky,S., Saleh,M., Gomaa,M., El Taweel,A., Mahmoud.S.H., Moatasim,Y., Kutkat,O., Kamel,M.N., Mahrous,N., El Sayes,M.A., El Guindy,N.M., Naguib,A., Kandeil,A., Kayali,G., Ali,M.A. |
| EPI_ISL_794818, EPI_ISL_794819, EPI_ISL_794820, EPI_ISL_794822, EPI_ISL_794823, EPI_ISL_794824                                                                                                                                                                                                                                                                                                                                                                                                                                 | Greek Genome Center, Biomedical Research Foundation of the Academy of Athens (BRFAA)                                                                                                       | Greek Genome Center, Biomedical Research Foundation of the Academy of Athens (BRFAA)                                                                                                                | Emmanouil Athanasiadis, Ioannis Vatsellas, Thodoris Loupis, Christina Maria Kravvari, Katerina Zoi, Dimitrios Thanos                                                                                                                                                |
| EPI_ISL_802545, EPI_ISL_802546, EPI_ISL_802547, EPI_ISL_802548, EPI_ISL_802549, EPI_ISL_802550, EPI_ISL_802551, EPI_ISL_802552, EPI_ISL_802553, EPI_ISL_802554, EPI_ISL_802555, EPI_ISL_802556, EPI_ISL_802557, EPI_ISL_802558, EPI_ISL_802559, EPI_ISL_802560, EPI_ISL_802561, EPI_ISL_802562, EPI_ISL_802563, EPI_ISL_802564, EPI_ISL_802565, EPI_ISL_802566                                                                                                                                                                 | Molecular Microbiology and Food Research Laboratory (MMFRLAB) - Universidad San Sebastián                                                                                                  | Facultad de Ciencias de la Vida, UNAB                                                                                                                                                               | Dayán Sanhueza, Macarena Bastías, César Echeverría, Sebastián Wolter, Waldo Díaz, Jorge Olivares, Eduardo Castro, Claudio Meneses                                                                                                                                   |
| see above                                                                                                                                                                                                                                                                                                                                                                                                                                                                                                                      | Molecular Microbiology and Food Research Laboratory (MMFRLAB) - Universidad San Sebastián                                                                                                  | Facultad de Ciencias de la Vida, UNAB                                                                                                                                                               | Dayán Sanhueza, Macarena Bastías, César Echeverría, Sebastián Wolter, Waldo Díaz, Jorge Olivares, Eduardo Castro, Claudio Meneses                                                                                                                                   |
| EPI_ISL_802852, EPI_ISL_802853, EPI_ISL_802854, EPI_ISL_802855, EPI_ISL_802856, EPI_ISL_802857, EPI_ISL_802858, EPI_ISL_802859, EPI_ISL_802860, EPI_ISL_802861, EPI_ISL_802862, EPI_ISL_802863                                                                                                                                                                                                                                                                                                                                 | Vilnius University Hospital Santaros Klinikos, Vilnius University                                                                                                                          | Institute of Biotechnology, Life Sciences Center, Vilnius University                                                                                                                                | Emilija Vasiliunaite, Milda Norkiene, Albertas Timinskas, Alma Gedvilaite, Aurelija Zvirbliene, Daniel Naumovas, Laimonas Griskevicius                                                                                                                              |
| see above                                                                                                                                                                                                                                                                                                                                                                                                                                                                                                                      | Vilnius University Hospital Santaros Klinikos, Vilnius University                                                                                                                          | Institute of Biotechnology, Life Sciences Center, Vilnius University                                                                                                                                | Emilija Vasiliunaite, Milda Norkiene, Albertas Timinskas, Alma Gedvilaite, Aurelija Zvirbliene, Daniel Naumovas, Laimonas Griskevicius                                                                                                                              |
| EPI_ISL_802868, EPI_ISL_802872, EPI_ISL_802877, EPI_ISL_802885, EPI_ISL_802886, EPI_ISL_802887, EPI_ISL_802889, EPI_ISL_802890, EPI_ISL_802896, EPI_ISL_802904, EPI_ISL_802906, EPI_ISL_802908, EPI_ISL_802910, EPI_ISL_802914, EPI_ISL_802916, EPI_ISL_802917, EPI_ISL_802919, EPI_ISL_802928, EPI_ISL_802929, EPI_ISL_802930, EPI_ISL_802932, EPI_ISL_802941, EPI_ISL_802942, EPI_ISL_802947, EPI_ISL_802949, EPI_ISL_802957, EPI_ISL_802963, EPI_ISL_802967, EPI_ISL_802971, EPI_ISL_802983, EPI_ISL_802985, EPI_ISL_802990 | Utah Public Health Laboratory                                                                                                                                                              | Utah Public Health Laboratory                                                                                                                                                                       | Erin Young, Kelly Oakeson, Tara Gallagher                                                                                                                                                                                                                           |
| see above                                                                                                                                                                                                                                                                                                                                                                                                                                                                                                                      | Utah Public Health Laboratory                                                                                                                                                              | Utah Public Health Laboratory                                                                                                                                                                       | Erin Young, Kelly Oakeson, Tara Gallagher                                                                                                                                                                                                                           |
| EPI_ISL_803899                                                                                                                                                                                                                                                                                                                                                                                                                                                                                                                 | Genomic Medicine Laboratory, IRCCS Santa Lucia Foundation                                                                                                                                  | National Institute for Infectious Diseases, INMI, "L. Spallanzani" IRCCS                                                                                                                            | E Giombini, M. Rueca, B Bartolini, O Butera, C.E.M Gruber, F Messina, E Giardina, MR Capobianchi, A Di Caro                                                                                                                                                         |
| EPI_ISL_803955, EPI_ISL_803956, EPI_ISL_803957                                                                                                                                                                                                                                                                                                                                                                                                                                                                                 | Labor Dr. Wisplinghoff - Köln                                                                                                                                                              | Robert Koch Institute, Influenza and respiratory viruses FG17 & Bioinformatics MF1, Berlin, Germany                                                                                                 | Dr. R. Grosser, Stephan Fuchs, Stefan Kroeger, Marianne Wedde, Oliver Drechsel, Aleksandar Radonic, Rene Kmiecinski, Ralf Duerrwald, Thorsten Wolff                                                                                                                 |
| EPI_ISL_804009, EPI_ISL_804010, EPI_ISL_804011, EPI_ISL_804012,                                                                                                                                                                                                                                                                                                                                                                                                                                                                | Grupo de Resistencia Antimicrobiana en bacterias patógenas y ambientales GRABPA                                                                                                            | Facultad de Ciencias de la Vida, UNAB                                                                                                                                                               | Dayán Sanhueza, Macarena Bastías, César Echeverría, Sebastián Wolter, Waldo Díaz, Jorge Olivares, Eduardo Castro, Claudio Meneses                                                                                                                                   |

|                                                                                                                                                                                                                                                                                                                                                                                                                                                                                                                                                                                                                                                                                                                                                                                                                                                                                                                                                                                                                                                                                                                                                                                                                                                                                                                                                                                                                                                                                                                                                                                                                                                                                                                                                                                                                                                                                                                                                                                                                                                                                                                                                                                                                                                                                                                                                                                                                                                                                                                                                                                                                                                                                                                                                                                                                                                                                                                                                                                                                                                                                                                                                                                                                                                                                                                                                                                                                                                                                                                                                                                                                                                                                                                                                                                                                                                                                                                                                                                                                                                                                                                                                                                                                                                                                                                                                                                                                                                                                                                                                                                                                                                                                                                                                                                                                                                                                                                |                                                                 |                                                                                                                                                                                                                                                                                                                                                                                                            |                                                                                                                                                                                                                                                                                                                                                                                                                                                                                     |  |
|----------------------------------------------------------------------------------------------------------------------------------------------------------------------------------------------------------------------------------------------------------------------------------------------------------------------------------------------------------------------------------------------------------------------------------------------------------------------------------------------------------------------------------------------------------------------------------------------------------------------------------------------------------------------------------------------------------------------------------------------------------------------------------------------------------------------------------------------------------------------------------------------------------------------------------------------------------------------------------------------------------------------------------------------------------------------------------------------------------------------------------------------------------------------------------------------------------------------------------------------------------------------------------------------------------------------------------------------------------------------------------------------------------------------------------------------------------------------------------------------------------------------------------------------------------------------------------------------------------------------------------------------------------------------------------------------------------------------------------------------------------------------------------------------------------------------------------------------------------------------------------------------------------------------------------------------------------------------------------------------------------------------------------------------------------------------------------------------------------------------------------------------------------------------------------------------------------------------------------------------------------------------------------------------------------------------------------------------------------------------------------------------------------------------------------------------------------------------------------------------------------------------------------------------------------------------------------------------------------------------------------------------------------------------------------------------------------------------------------------------------------------------------------------------------------------------------------------------------------------------------------------------------------------------------------------------------------------------------------------------------------------------------------------------------------------------------------------------------------------------------------------------------------------------------------------------------------------------------------------------------------------------------------------------------------------------------------------------------------------------------------------------------------------------------------------------------------------------------------------------------------------------------------------------------------------------------------------------------------------------------------------------------------------------------------------------------------------------------------------------------------------------------------------------------------------------------------------------------------------------------------------------------------------------------------------------------------------------------------------------------------------------------------------------------------------------------------------------------------------------------------------------------------------------------------------------------------------------------------------------------------------------------------------------------------------------------------------------------------------------------------------------------------------------------------------------------------------------------------------------------------------------------------------------------------------------------------------------------------------------------------------------------------------------------------------------------------------------------------------------------------------------------------------------------------------------------------------------------------------------------------------------------------------|-----------------------------------------------------------------|------------------------------------------------------------------------------------------------------------------------------------------------------------------------------------------------------------------------------------------------------------------------------------------------------------------------------------------------------------------------------------------------------------|-------------------------------------------------------------------------------------------------------------------------------------------------------------------------------------------------------------------------------------------------------------------------------------------------------------------------------------------------------------------------------------------------------------------------------------------------------------------------------------|--|
| EPI_ISL_804013, EPI_ISL_804014, EPI_ISL_804015                                                                                                                                                                                                                                                                                                                                                                                                                                                                                                                                                                                                                                                                                                                                                                                                                                                                                                                                                                                                                                                                                                                                                                                                                                                                                                                                                                                                                                                                                                                                                                                                                                                                                                                                                                                                                                                                                                                                                                                                                                                                                                                                                                                                                                                                                                                                                                                                                                                                                                                                                                                                                                                                                                                                                                                                                                                                                                                                                                                                                                                                                                                                                                                                                                                                                                                                                                                                                                                                                                                                                                                                                                                                                                                                                                                                                                                                                                                                                                                                                                                                                                                                                                                                                                                                                                                                                                                                                                                                                                                                                                                                                                                                                                                                                                                                                                                                 |                                                                 |                                                                                                                                                                                                                                                                                                                                                                                                            |                                                                                                                                                                                                                                                                                                                                                                                                                                                                                     |  |
| EPI_ISL_804016, EPI_ISL_804017                                                                                                                                                                                                                                                                                                                                                                                                                                                                                                                                                                                                                                                                                                                                                                                                                                                                                                                                                                                                                                                                                                                                                                                                                                                                                                                                                                                                                                                                                                                                                                                                                                                                                                                                                                                                                                                                                                                                                                                                                                                                                                                                                                                                                                                                                                                                                                                                                                                                                                                                                                                                                                                                                                                                                                                                                                                                                                                                                                                                                                                                                                                                                                                                                                                                                                                                                                                                                                                                                                                                                                                                                                                                                                                                                                                                                                                                                                                                                                                                                                                                                                                                                                                                                                                                                                                                                                                                                                                                                                                                                                                                                                                                                                                                                                                                                                                                                 | Facultad de Medicina, Universidad de Atacama                    | Facultad de Ciencias de la Vida, UNAB                                                                                                                                                                                                                                                                                                                                                                      | Dayán Sanhueza, Macarena Bastias, César Echeverría, Sebastián Wolter, Waldo Díaz, Jorge Olivares, Eduardo Castro, Claudio Meneses                                                                                                                                                                                                                                                                                                                                                   |  |
| EPI_ISL_806809                                                                                                                                                                                                                                                                                                                                                                                                                                                                                                                                                                                                                                                                                                                                                                                                                                                                                                                                                                                                                                                                                                                                                                                                                                                                                                                                                                                                                                                                                                                                                                                                                                                                                                                                                                                                                                                                                                                                                                                                                                                                                                                                                                                                                                                                                                                                                                                                                                                                                                                                                                                                                                                                                                                                                                                                                                                                                                                                                                                                                                                                                                                                                                                                                                                                                                                                                                                                                                                                                                                                                                                                                                                                                                                                                                                                                                                                                                                                                                                                                                                                                                                                                                                                                                                                                                                                                                                                                                                                                                                                                                                                                                                                                                                                                                                                                                                                                                 | Seattle Flu Study                                               | Seattle Flu Study                                                                                                                                                                                                                                                                                                                                                                                          | Deborah A. Nickerson, Chris D. Frazier, Jover Lee, Benjamin Pelle, Matthew Richardson, Amanda Adler, Elisabeth Brandtstetter, Peter D. Han, Kairsten Fay, Misja Ilcin, Kirsten Lacombe, Thomas R. Sibley, Melissa Truong, Caitlin R. Wolf, Michael Boeckh, Janet A. Englund, Michael Famulare, Barry R. Lutz, Mark J. Rieder, Lea M. Starita, Matthew Thompson, Jay Shendure, Trevor Bedford, Helen Y. Chu                                                                          |  |
| EPI_ISL_806853, EPI_ISL_806854, EPI_ISL_806855, EPI_ISL_806856, EPI_ISL_806857, EPI_ISL_806858, EPI_ISL_806859, EPI_ISL_806860, EPI_ISL_806861, EPI_ISL_806862, EPI_ISL_806863, EPI_ISL_806864, EPI_ISL_806865, EPI_ISL_806866, EPI_ISL_806867, EPI_ISL_806868, EPI_ISL_806869, EPI_ISL_806870, EPI_ISL_806871, EPI_ISL_806872, EPI_ISL_806873, EPI_ISL_806874, EPI_ISL_806875, EPI_ISL_806876, EPI_ISL_806877, EPI_ISL_806878, EPI_ISL_806879, EPI_ISL_806880, EPI_ISL_806881, EPI_ISL_806882, EPI_ISL_806883, EPI_ISL_806884, EPI_ISL_806885, EPI_ISL_806886, EPI_ISL_806887, EPI_ISL_806888, EPI_ISL_806889, EPI_ISL_806890, EPI_ISL_806891, EPI_ISL_806892, EPI_ISL_806893, EPI_ISL_806894, EPI_ISL_806895, EPI_ISL_806896, EPI_ISL_806897, EPI_ISL_806898, EPI_ISL_806899, EPI_ISL_806900, EPI_ISL_806901, EPI_ISL_806902, EPI_ISL_806903, EPI_ISL_806904, EPI_ISL_806905, EPI_ISL_806906, EPI_ISL_806907, EPI_ISL_806908, EPI_ISL_806909, EPI_ISL_806910, EPI_ISL_806911, EPI_ISL_806912, EPI_ISL_806913, EPI_ISL_806914, EPI_ISL_806915, EPI_ISL_806916, EPI_ISL_806917, EPI_ISL_806918, EPI_ISL_806919, EPI_ISL_806920, EPI_ISL_806921, EPI_ISL_806922, EPI_ISL_806923, EPI_ISL_806924, EPI_ISL_806925, EPI_ISL_806926, EPI_ISL_806927, EPI_ISL_806928, EPI_ISL_806929, EPI_ISL_806930, EPI_ISL_806931, EPI_ISL_806932, EPI_ISL_806933, EPI_ISL_806934, EPI_ISL_806935, EPI_ISL_806936, EPI_ISL_806937, EPI_ISL_806938, EPI_ISL_806939, EPI_ISL_806940, EPI_ISL_806941, EPI_ISL_806942, EPI_ISL_806943, EPI_ISL_806944, EPI_ISL_806945, EPI_ISL_806946, EPI_ISL_806947, EPI_ISL_806948, EPI_ISL_806949, EPI_ISL_806950, EPI_ISL_806951, EPI_ISL_806952, EPI_ISL_806953, EPI_ISL_806954, EPI_ISL_806955, EPI_ISL_806956, EPI_ISL_806957, EPI_ISL_806958, EPI_ISL_806959, EPI_ISL_806960, EPI_ISL_806961, EPI_ISL_806962, EPI_ISL_806963, EPI_ISL_806964, EPI_ISL_806965, EPI_ISL_806966, EPI_ISL_806967, EPI_ISL_806968, EPI_ISL_806969, EPI_ISL_806970, EPI_ISL_806971, EPI_ISL_806972, EPI_ISL_806973, EPI_ISL_806974, EPI_ISL_806975, EPI_ISL_806976, EPI_ISL_806977, EPI_ISL_806978, EPI_ISL_806979, EPI_ISL_806980, EPI_ISL_806981, EPI_ISL_806982, EPI_ISL_806983, EPI_ISL_806984, EPI_ISL_806985, EPI_ISL_806986, EPI_ISL_806987, EPI_ISL_806988, EPI_ISL_806989, EPI_ISL_806990, EPI_ISL_806991, EPI_ISL_806992, EPI_ISL_806993, EPI_ISL_806994, EPI_ISL_806995, EPI_ISL_806996, EPI_ISL_806997, EPI_ISL_806998, EPI_ISL_806999, EPI_ISL_807000, EPI_ISL_807001, EPI_ISL_807002, EPI_ISL_807003, EPI_ISL_807004, EPI_ISL_807005, EPI_ISL_807006, EPI_ISL_807007, EPI_ISL_807008, EPI_ISL_807009, EPI_ISL_807010, EPI_ISL_807011, EPI_ISL_807012, EPI_ISL_807013, EPI_ISL_807014, EPI_ISL_807015, EPI_ISL_807016, EPI_ISL_807017, EPI_ISL_807018, EPI_ISL_807019, EPI_ISL_807020, EPI_ISL_807021, EPI_ISL_807022, EPI_ISL_807023, EPI_ISL_807024, EPI_ISL_807025, EPI_ISL_807026, EPI_ISL_807027, EPI_ISL_807028, EPI_ISL_807029, EPI_ISL_807030, EPI_ISL_807031, EPI_ISL_807032, EPI_ISL_807033, EPI_ISL_807034, EPI_ISL_807035, EPI_ISL_807036, EPI_ISL_807037, EPI_ISL_807038, EPI_ISL_807039, EPI_ISL_807040, EPI_ISL_807041, EPI_ISL_807042, EPI_ISL_807043, EPI_ISL_807044, EPI_ISL_807045, EPI_ISL_807046, EPI_ISL_807047, EPI_ISL_807048, EPI_ISL_807049, EPI_ISL_807050, EPI_ISL_807051, EPI_ISL_807052, EPI_ISL_807053, EPI_ISL_807054, EPI_ISL_807055, EPI_ISL_807056, EPI_ISL_807057, EPI_ISL_807058, EPI_ISL_807059, EPI_ISL_807060, EPI_ISL_807061, EPI_ISL_807062, EPI_ISL_807063, EPI_ISL_807064, EPI_ISL_807065, EPI_ISL_807066, EPI_ISL_807067, EPI_ISL_807068, EPI_ISL_807069, EPI_ISL_807070, EPI_ISL_807071, EPI_ISL_807072, EPI_ISL_807073, EPI_ISL_807074, EPI_ISL_807075, EPI_ISL_807076, EPI_ISL_807077, EPI_ISL_807078, EPI_ISL_807079, EPI_ISL_807080, EPI_ISL_807081, EPI_ISL_807082, EPI_ISL_807083, EPI_ISL_807084, EPI_ISL_807085, EPI_ISL_807086, EPI_ISL_807087, EPI_ISL_807088, EPI_ISL_807089, EPI_ISL_807090, EPI_ISL_807091, EPI_ISL_807092, EPI_ISL_807093, EPI_ISL_807094, EPI_ISL_807095, EPI_ISL_807096, EPI_ISL_807097, EPI_ISL_807098, EPI_ISL_807099, EPI_ISL_807100, EPI_ISL_807101, EPI_ISL_807102, EPI_ISL_807103, EPI_ISL_807104, EPI_ISL_807105, EPI_ISL_807106, EPI_ISL_807107, EPI_ISL_807108, EPI_ISL_807109, EPI_ISL_807110, EPI_ISL_807111, EPI_ISL_807112, EPI_ISL_807113, EPI_ISL_807114, EPI_ISL_807115, EPI_ISL_807116, EPI_ISL_807117, EPI_ISL_807118, EPI_ISL_807119, EPI_ISL_807120, EPI_ISL_807121, EPI_ISL_807122, EPI_ISL_807123, EPI_ISL_807124, EPI_ISL_807125, EPI_ISL_807126, EPI_ISL_807127, EPI_ISL_807128, EPI_ISL_807129, EPI_ISL_807130, EPI_ISL_807131, EPI_ISL_807132, EPI_ISL_807133, EPI_ISL_807134, EPI_ISL_807135, EPI_ISL_807136, EPI_ISL_807137, EPI_ISL_807138, EPI_ISL_807139, EPI_ISL_807140, EPI_ISL_807141, EPI_ISL_807142, EPI_ISL_807143, EPI_ISL_807144, EPI_ISL_807145, EPI_ISL_807146, EPI_ISL_807147 | Seattle Flu Study                                               | Deborah A. Nickerson, Chris D. Frazier, Jover Lee, Benjamin Pelle, Matthew Richardson, Amanda Adler, Elisabeth Brandtstetter, Peter D. Han, Kairsten Fay, Misja Ilcin, Kirsten Lacombe, Thomas R. Sibley, Melissa Truong, Caitlin R. Wolf, Michael Boeckh, Janet A. Englund, Michael Famulare, Barry R. Lutz, Mark J. Rieder, Lea M. Starita, Matthew Thompson, Jay Shendure, Trevor Bedford, Helen Y. Chu |                                                                                                                                                                                                                                                                                                                                                                                                                                                                                     |  |
| see above                                                                                                                                                                                                                                                                                                                                                                                                                                                                                                                                                                                                                                                                                                                                                                                                                                                                                                                                                                                                                                                                                                                                                                                                                                                                                                                                                                                                                                                                                                                                                                                                                                                                                                                                                                                                                                                                                                                                                                                                                                                                                                                                                                                                                                                                                                                                                                                                                                                                                                                                                                                                                                                                                                                                                                                                                                                                                                                                                                                                                                                                                                                                                                                                                                                                                                                                                                                                                                                                                                                                                                                                                                                                                                                                                                                                                                                                                                                                                                                                                                                                                                                                                                                                                                                                                                                                                                                                                                                                                                                                                                                                                                                                                                                                                                                                                                                                                                      | Washington State Department of Health                           | Seattle Flu Study                                                                                                                                                                                                                                                                                                                                                                                          | Deborah A. Nickerson, Chris D. Frazier, Jover Lee, Benjamin Pelle, Matthew Richardson, Amanda Adler, Elisabeth Brandtstetter, Peter D. Han, Kairsten Fay, Misja Ilcin, Kirsten Lacombe, Thomas R. Sibley, Melissa Truong, Caitlin R. Wolf, Romesh Gautom, Geoff Melly, Brian Hiatt, Philip Dykema, Scott Lindquist, Michael Boeckh, Janet A. Englund, Michael Famulare, Barry R. Lutz, Mark J. Rieder, Lea M. Starita, Matthew Thompson, Helen Y. Chu, Jay Shendure, Trevor Bedford |  |
| EPI_ISL_811151, EPI_ISL_811152, EPI_ISL_811153, EPI_ISL_811154, EPI_ISL_811155, EPI_ISL_811156, EPI_ISL_811157, EPI_ISL_811158, EPI_ISL_811159, EPI_ISL_811160, EPI_ISL_811161, EPI_ISL_811162, EPI_ISL_811163, EPI_ISL_811164, EPI_ISL_811165, EPI_ISL_811166, EPI_ISL_811167, EPI_ISL_811168, EPI_ISL_811169, EPI_ISL_811170, EPI_ISL_811171, EPI_ISL_811172, EPI_ISL_811173, EPI_ISL_811174, EPI_ISL_811175, EPI_ISL_811176, EPI_ISL_811177, EPI_ISL_811178, EPI_ISL_811179, EPI_ISL_811180, EPI_ISL_811181, EPI_ISL_811182, EPI_ISL_811183, EPI_ISL_811184, EPI_ISL_811185, EPI_ISL_811186, EPI_ISL_811187, EPI_ISL_811188, EPI_ISL_811189, EPI_ISL_811190, EPI_ISL_811191, EPI_ISL_811192, EPI_ISL_811193                                                                                                                                                                                                                                                                                                                                                                                                                                                                                                                                                                                                                                                                                                                                                                                                                                                                                                                                                                                                                                                                                                                                                                                                                                                                                                                                                                                                                                                                                                                                                                                                                                                                                                                                                                                                                                                                                                                                                                                                                                                                                                                                                                                                                                                                                                                                                                                                                                                                                                                                                                                                                                                                                                                                                                                                                                                                                                                                                                                                                                                                                                                                                                                                                                                                                                                                                                                                                                                                                                                                                                                                                                                                                                                                                                                                                                                                                                                                                                                                                                                                                                                                                                                                 |                                                                 | CSIR Institute of Genomics and Integrative Biology                                                                                                                                                                                                                                                                                                                                                         | Dr. Shivarudrapp B Bhairapannavar, Rahul Bhoyar, Mohammed Imran, Mohit Divakar, Disha Sharma, Dr. Vijay A Yenagi, Dr. Suresh B Arakera, Dr. Amit Uarggol, Dr. Rgavendra B Nayak, Bani Jolly, Abhinav Jain, Paras Sehgal, Gyan Ranjan, Vinod Scaria, Sridhar Sivasubbu                                                                                                                                                                                                               |  |
| see above                                                                                                                                                                                                                                                                                                                                                                                                                                                                                                                                                                                                                                                                                                                                                                                                                                                                                                                                                                                                                                                                                                                                                                                                                                                                                                                                                                                                                                                                                                                                                                                                                                                                                                                                                                                                                                                                                                                                                                                                                                                                                                                                                                                                                                                                                                                                                                                                                                                                                                                                                                                                                                                                                                                                                                                                                                                                                                                                                                                                                                                                                                                                                                                                                                                                                                                                                                                                                                                                                                                                                                                                                                                                                                                                                                                                                                                                                                                                                                                                                                                                                                                                                                                                                                                                                                                                                                                                                                                                                                                                                                                                                                                                                                                                                                                                                                                                                                      | Dharwad                                                         | CSIR Institute of Genomics and Integrative Biology                                                                                                                                                                                                                                                                                                                                                         | Dr. Shivarudrapp B Bhairapannavar, Rahul Bhoyar, Mohammed Imran, Mohit Divakar, Disha Sharma, Dr. Vijay A Yenagi, Dr. Suresh B Arakera, Dr. Amit Uarggol, Dr. Rgavendra B Nayak, Bani Jolly, Abhinav Jain, Paras Sehgal, Gyan Ranjan, Vinod Scaria, Sridhar Sivasubbu                                                                                                                                                                                                               |  |
| EPI_ISL_812360, EPI_ISL_812361, EPI_ISL_812362, EPI_ISL_812363, EPI_ISL_812364, EPI_ISL_812365, EPI_ISL_812366, EPI_ISL_812367, EPI_ISL_812368, EPI_ISL_812369, EPI_ISL_812370, EPI_ISL_812371, EPI_ISL_812372, EPI_ISL_812373, EPI_ISL_812374, EPI_ISL_812375, EPI_ISL_812376, EPI_ISL_812377, EPI_ISL_812378, EPI_ISL_812379, EPI_ISL_812380, EPI_ISL_812381, EPI_ISL_812382, EPI_ISL_812383, EPI_ISL_812384, EPI_ISL_812385, EPI_ISL_812386, EPI_ISL_812387, EPI_ISL_812388, EPI_ISL_812389, EPI_ISL_812390, EPI_ISL_812391, EPI_ISL_812392, EPI_ISL_812393, EPI_ISL_812394, EPI_ISL_812395, EPI_ISL_812396, EPI_ISL_812397, EPI_ISL_812398, EPI_ISL_812399, EPI_ISL_812400, EPI_ISL_812401, EPI_ISL_812402, EPI_ISL_812403, EPI_ISL_812404, EPI_ISL_812405, EPI_ISL_812406, EPI_ISL_812407, EPI_ISL_812408, EPI_ISL_812409, EPI_ISL_812410, EPI_ISL_812411, EPI_ISL_812412, EPI_ISL_812413, EPI_ISL_812414, EPI_ISL_812415, EPI_ISL_812416, EPI_ISL_812417, EPI_ISL_812418, EPI_ISL_812419, EPI_ISL_812420                                                                                                                                                                                                                                                                                                                                                                                                                                                                                                                                                                                                                                                                                                                                                                                                                                                                                                                                                                                                                                                                                                                                                                                                                                                                                                                                                                                                                                                                                                                                                                                                                                                                                                                                                                                                                                                                                                                                                                                                                                                                                                                                                                                                                                                                                                                                                                                                                                                                                                                                                                                                                                                                                                                                                                                                                                                                                                                                                                                                                                                                                                                                                                                                                                                                                                                                                                                                                                                                                                                                                                                                                                                                                                                                                                                                                                                                                                 | Utah Public Health Laboratory                                   | Utah Public Health Laboratory                                                                                                                                                                                                                                                                                                                                                                              | Erin L. Young, Kelly F. Oakeson, Tara Gallagher                                                                                                                                                                                                                                                                                                                                                                                                                                     |  |
| see above                                                                                                                                                                                                                                                                                                                                                                                                                                                                                                                                                                                                                                                                                                                                                                                                                                                                                                                                                                                                                                                                                                                                                                                                                                                                                                                                                                                                                                                                                                                                                                                                                                                                                                                                                                                                                                                                                                                                                                                                                                                                                                                                                                                                                                                                                                                                                                                                                                                                                                                                                                                                                                                                                                                                                                                                                                                                                                                                                                                                                                                                                                                                                                                                                                                                                                                                                                                                                                                                                                                                                                                                                                                                                                                                                                                                                                                                                                                                                                                                                                                                                                                                                                                                                                                                                                                                                                                                                                                                                                                                                                                                                                                                                                                                                                                                                                                                                                      | Utah Public Health Laboratory                                   | Utah Public Health Laboratory                                                                                                                                                                                                                                                                                                                                                                              | Erin L. Young, Kelly F. Oakeson, Tara Gallagher                                                                                                                                                                                                                                                                                                                                                                                                                                     |  |
| EPI_ISL_812923, EPI_ISL_812924, EPI_ISL_812925, EPI_ISL_812926, EPI_ISL_812927, EPI_ISL_812928                                                                                                                                                                                                                                                                                                                                                                                                                                                                                                                                                                                                                                                                                                                                                                                                                                                                                                                                                                                                                                                                                                                                                                                                                                                                                                                                                                                                                                                                                                                                                                                                                                                                                                                                                                                                                                                                                                                                                                                                                                                                                                                                                                                                                                                                                                                                                                                                                                                                                                                                                                                                                                                                                                                                                                                                                                                                                                                                                                                                                                                                                                                                                                                                                                                                                                                                                                                                                                                                                                                                                                                                                                                                                                                                                                                                                                                                                                                                                                                                                                                                                                                                                                                                                                                                                                                                                                                                                                                                                                                                                                                                                                                                                                                                                                                                                 | Ramathibodi Hospital                                            | COVID-19 Network Investigations (CONI) Alliance                                                                                                                                                                                                                                                                                                                                                            | Elizabeth Batty, Wasun Chantratrai, Thanat Chookajorn, Stefan Fernandez, Angkana Huang, Anthony R. Jones, Khajohn Joonsalak, Chonticha Klungtong, Theerarat Kochakarn, Namfon Kotanan, Krittikorn Kumprorsin, Duangkamon Loesbanluetchai, Wudichai Manasatienkij, Bhatkhoom Panthan, Ekawat Pasomsub, Kingkan Rakmanee, Insee Semsorn, Janjira Thaipadungpanit, Arporn Wangwatsin, Treewat Wattanachokchai                                                                          |  |
| EPI_ISL_812966, EPI_ISL_812967                                                                                                                                                                                                                                                                                                                                                                                                                                                                                                                                                                                                                                                                                                                                                                                                                                                                                                                                                                                                                                                                                                                                                                                                                                                                                                                                                                                                                                                                                                                                                                                                                                                                                                                                                                                                                                                                                                                                                                                                                                                                                                                                                                                                                                                                                                                                                                                                                                                                                                                                                                                                                                                                                                                                                                                                                                                                                                                                                                                                                                                                                                                                                                                                                                                                                                                                                                                                                                                                                                                                                                                                                                                                                                                                                                                                                                                                                                                                                                                                                                                                                                                                                                                                                                                                                                                                                                                                                                                                                                                                                                                                                                                                                                                                                                                                                                                                                 | University Clinical Research Center, University of Sciences     | University Clinical Research Center, University of Sciences                                                                                                                                                                                                                                                                                                                                                | Diarra,B., Kone,A., Guindo,I., Bane,S., Diakite,M., Dao,S., Iknane,A.A., Doumbia,S.                                                                                                                                                                                                                                                                                                                                                                                                 |  |
| EPI_ISL_819366, EPI_ISL_819375, EPI_ISL_819377, EPI_ISL_819384, EPI_ISL_819389, EPI_ISL_819393, EPI_ISL_819395, EPI_ISL_819398, EPI_ISL_819401, EPI_ISL_819409, EPI_ISL_819417, EPI_ISL_819425, EPI_ISL_819429, EPI_ISL_819438, EPI_ISL_819440, EPI_ISL_819442, EPI_ISL_819877, EPI_ISL_819895, EPI_ISL_819903, EPI_ISL_819904, EPI_ISL_819908, EPI_ISL_819913, EPI_ISL_819914, EPI_ISL_819933, EPI_ISL_819963, EPI_ISL_819974, EPI_ISL_819977, EPI_ISL_820004, EPI_ISL_820005, EPI_ISL_820011, EPI_ISL_820022, EPI_ISL_820025, EPI_ISL_820041, EPI_ISL_820042, EPI_ISL_820074, EPI_ISL_820075, EPI_ISL_820080, EPI_ISL_820082, EPI_ISL_820093, EPI_ISL_820096, EPI_ISL_820103, EPI_ISL_820104, EPI_ISL_820119, EPI_ISL_820134, EPI_ISL_820136, EPI_ISL_820164, EPI_ISL_820169, EPI_ISL_820172, EPI_ISL_820173, EPI_ISL_820186, EPI_ISL_820221, EPI_ISL_820231, EPI_ISL_820261, EPI_ISL_820269, EPI_ISL_820294, EPI_ISL_820353, EPI_ISL_820371, EPI_ISL_820412, EPI_ISL_820426, EPI_ISL_820439, EPI_ISL_820451, EPI_ISL_820462, EPI_ISL_820467, EPI_ISL_820470, EPI_ISL_820483, EPI_ISL_820509, EPI_ISL_820511, EPI_ISL_820531, EPI_ISL_820536, EPI_ISL_820541, EPI_ISL_820549, EPI_ISL_820568, EPI_ISL_820570                                                                                                                                                                                                                                                                                                                                                                                                                                                                                                                                                                                                                                                                                                                                                                                                                                                                                                                                                                                                                                                                                                                                                                                                                                                                                                                                                                                                                                                                                                                                                                                                                                                                                                                                                                                                                                                                                                                                                                                                                                                                                                                                                                                                                                                                                                                                                                                                                                                                                                                                                                                                                                                                                                                                                                                                                                                                                                                                                                                                                                                                                                                                                                                                                                                                                                                                                                                                                                                                                                                                                                                                                                                                                                 | University Clinical Research Center, University of Sciences     | University Clinical Research Center, University of Sciences                                                                                                                                                                                                                                                                                                                                                | Diarra,B., Kone,A., Guindo,I., Bane,S., Diakite,M., Dao,S., Iknane,A.A., Doumbia,S.                                                                                                                                                                                                                                                                                                                                                                                                 |  |
| see above                                                                                                                                                                                                                                                                                                                                                                                                                                                                                                                                                                                                                                                                                                                                                                                                                                                                                                                                                                                                                                                                                                                                                                                                                                                                                                                                                                                                                                                                                                                                                                                                                                                                                                                                                                                                                                                                                                                                                                                                                                                                                                                                                                                                                                                                                                                                                                                                                                                                                                                                                                                                                                                                                                                                                                                                                                                                                                                                                                                                                                                                                                                                                                                                                                                                                                                                                                                                                                                                                                                                                                                                                                                                                                                                                                                                                                                                                                                                                                                                                                                                                                                                                                                                                                                                                                                                                                                                                                                                                                                                                                                                                                                                                                                                                                                                                                                                                                      | Quadram Institute Bioscience                                    | COVID-19 Genomics UK (COG-UK) Consortium                                                                                                                                                                                                                                                                                                                                                                   | Dave J. Baker, Gemma L. Kay, Alp Aydin, Thanh Le-Viet, Steven Rudder, Ana P. Tedim, Anastasia Kolyva, Maria Diaz, Leonardo de Oliveira Martins, Nabil-Fareed Alikhan, Lizzie Meadows, Rachael Stanley, Ngozi Elumogo, Muhammed Yasir, Nicholas M. Thomson, Alexander J Trotter, Rachel Gilroy, Samuel Bloomfield, Claire Stuart, Andrew Bell, Eemesh Prakash, Samir Derwisevic, Alison E. Mather, John Wain, Mark Webber, Andrew J. Page, Justin O'Grady                            |  |
| EPI_ISL_824407                                                                                                                                                                                                                                                                                                                                                                                                                                                                                                                                                                                                                                                                                                                                                                                                                                                                                                                                                                                                                                                                                                                                                                                                                                                                                                                                                                                                                                                                                                                                                                                                                                                                                                                                                                                                                                                                                                                                                                                                                                                                                                                                                                                                                                                                                                                                                                                                                                                                                                                                                                                                                                                                                                                                                                                                                                                                                                                                                                                                                                                                                                                                                                                                                                                                                                                                                                                                                                                                                                                                                                                                                                                                                                                                                                                                                                                                                                                                                                                                                                                                                                                                                                                                                                                                                                                                                                                                                                                                                                                                                                                                                                                                                                                                                                                                                                                                                                 | Istituto Nazionale Malattie Infettive Lazzaro Spallanzani IRCCS | Istituto Nazionale Malattie Infettive Lazzaro Spallanzani IRCCS                                                                                                                                                                                                                                                                                                                                            | Emanuela Giombini, Ornella Butera, Cesare E.M. Gruber, Martina Rueda, Francesco Messina, Barbara Bartolini, Silvia Meschi, Francesca Colavita, Concetta Castilletti, Antonino Di Caro, Maria R. Capobianchi                                                                                                                                                                                                                                                                         |  |
| EPI_ISL_824513, EPI_ISL_824514, EPI_ISL_824515, EPI_ISL_824516, EPI_ISL_824517, EPI_ISL_824518, EPI_ISL_824519, EPI_ISL_824520, EPI_ISL_824521, EPI_ISL_824522, EPI_ISL_824523, EPI_ISL_824524, EPI_ISL_824525, EPI_ISL_824526, EPI_ISL_824527, EPI_ISL_824528, EPI_ISL_824529, EPI_ISL_824530, EPI_ISL_824531, EPI_ISL_824532, EPI_ISL_824533, EPI_ISL_824534, EPI_ISL_824535, EPI_ISL_824536, EPI_ISL_824537, EPI_ISL_824538, EPI_ISL_824539, EPI_ISL_824540, EPI_ISL_824541, EPI_ISL_824542, EPI_ISL_824543, EPI_ISL_824544, EPI_ISL_824545, EPI_ISL_824546, EPI_ISL_824547, EPI_ISL_824548, EPI_ISL_824549, EPI_ISL_824550, EPI_ISL_824551, EPI_ISL_824552, EPI_ISL_824553, EPI_ISL_824554                                                                                                                                                                                                                                                                                                                                                                                                                                                                                                                                                                                                                                                                                                                                                                                                                                                                                                                                                                                                                                                                                                                                                                                                                                                                                                                                                                                                                                                                                                                                                                                                                                                                                                                                                                                                                                                                                                                                                                                                                                                                                                                                                                                                                                                                                                                                                                                                                                                                                                                                                                                                                                                                                                                                                                                                                                                                                                                                                                                                                                                                                                                                                                                                                                                                                                                                                                                                                                                                                                                                                                                                                                                                                                                                                                                                                                                                                                                                                                                                                                                                                                                                                                                                                 |                                                                 |                                                                                                                                                                                                                                                                                                                                                                                                            | Ellie Johnson, Anastacia Griego-Fisher, D'eldra Malone                                                                                                                                                                                                                                                                                                                                                                                                                              |  |
| see above                                                                                                                                                                                                                                                                                                                                                                                                                                                                                                                                                                                                                                                                                                                                                                                                                                                                                                                                                                                                                                                                                                                                                                                                                                                                                                                                                                                                                                                                                                                                                                                                                                                                                                                                                                                                                                                                                                                                                                                                                                                                                                                                                                                                                                                                                                                                                                                                                                                                                                                                                                                                                                                                                                                                                                                                                                                                                                                                                                                                                                                                                                                                                                                                                                                                                                                                                                                                                                                                                                                                                                                                                                                                                                                                                                                                                                                                                                                                                                                                                                                                                                                                                                                                                                                                                                                                                                                                                                                                                                                                                                                                                                                                                                                                                                                                                                                                                                      | New Mexico Department of Health Scientific Laboratory           | New Mexico Department of Health Scientific Laboratory                                                                                                                                                                                                                                                                                                                                                      | Ellie Johnson, Anastacia Griego-Fisher, D'eldra Malone                                                                                                                                                                                                                                                                                                                                                                                                                              |  |
| EPI_ISL_825036                                                                                                                                                                                                                                                                                                                                                                                                                                                                                                                                                                                                                                                                                                                                                                                                                                                                                                                                                                                                                                                                                                                                                                                                                                                                                                                                                                                                                                                                                                                                                                                                                                                                                                                                                                                                                                                                                                                                                                                                                                                                                                                                                                                                                                                                                                                                                                                                                                                                                                                                                                                                                                                                                                                                                                                                                                                                                                                                                                                                                                                                                                                                                                                                                                                                                                                                                                                                                                                                                                                                                                                                                                                                                                                                                                                                                                                                                                                                                                                                                                                                                                                                                                                                                                                                                                                                                                                                                                                                                                                                                                                                                                                                                                                                                                                                                                                                                                 | B.J. Medical College and Civil hospital, Ahmedabad              | Gujarat Biotechnology Research Centre                                                                                                                                                                                                                                                                                                                                                                      | Dipa Kinariwala, Dinesh Kumar, Zuber Saiyed, Labdhi Pandya, Afzal Ansari, Nikha Trivedi, Apurvasinh Puvar, Ramesh Pandit, Janvi Raval, Zarna Patel, Nitin Savaliya, Kamlesh J Upadhyay, Nilma Shah, Sanjay Kapadia, Pranay Shah, Chaitanya Joshi, Madhvi Joshi                                                                                                                                                                                                                      |  |
| EPI_ISL_825057                                                                                                                                                                                                                                                                                                                                                                                                                                                                                                                                                                                                                                                                                                                                                                                                                                                                                                                                                                                                                                                                                                                                                                                                                                                                                                                                                                                                                                                                                                                                                                                                                                                                                                                                                                                                                                                                                                                                                                                                                                                                                                                                                                                                                                                                                                                                                                                                                                                                                                                                                                                                                                                                                                                                                                                                                                                                                                                                                                                                                                                                                                                                                                                                                                                                                                                                                                                                                                                                                                                                                                                                                                                                                                                                                                                                                                                                                                                                                                                                                                                                                                                                                                                                                                                                                                                                                                                                                                                                                                                                                                                                                                                                                                                                                                                                                                                                                                 | GMERS Medical College and Hospital, Gotri, Vadodara             | Gujarat Biotechnology Research Centre                                                                                                                                                                                                                                                                                                                                                                      | Dinesh Kumar, Zuber Saiyed, Afzal Ansari, Nikha Trivedi, Apurvasinh Puvar, Ramesh Pandit, Janvi Raval, Zarna Patel, Nitin Savaliya, Mitesh Kamthoi, Bithika Duttaray, Kalpesh Mistry, Chaitanya Joshi, Madhvi Joshi                                                                                                                                                                                                                                                                 |  |
| EPI_ISL_825385                                                                                                                                                                                                                                                                                                                                                                                                                                                                                                                                                                                                                                                                                                                                                                                                                                                                                                                                                                                                                                                                                                                                                                                                                                                                                                                                                                                                                                                                                                                                                                                                                                                                                                                                                                                                                                                                                                                                                                                                                                                                                                                                                                                                                                                                                                                                                                                                                                                                                                                                                                                                                                                                                                                                                                                                                                                                                                                                                                                                                                                                                                                                                                                                                                                                                                                                                                                                                                                                                                                                                                                                                                                                                                                                                                                                                                                                                                                                                                                                                                                                                                                                                                                                                                                                                                                                                                                                                                                                                                                                                                                                                                                                                                                                                                                                                                                                                                 | Nigeria Centre For Disease Control                              | National reference Laboratory, NCDC, Gaduwa, Abuja                                                                                                                                                                                                                                                                                                                                                         | Dr Ndodo Nnaemeka, Olusola Anuoluwapo Akanbi, Chimaobi Chukwu, Dr Omoare Adesuyi, Kingsley Madubuike, Anthony Ahumibe, Naidoo Dhamari, Nwando Mba, Dr Chikwe Ihekweazu                                                                                                                                                                                                                                                                                                              |  |
| EPI_ISL_825437                                                                                                                                                                                                                                                                                                                                                                                                                                                                                                                                                                                                                                                                                                                                                                                                                                                                                                                                                                                                                                                                                                                                                                                                                                                                                                                                                                                                                                                                                                                                                                                                                                                                                                                                                                                                                                                                                                                                                                                                                                                                                                                                                                                                                                                                                                                                                                                                                                                                                                                                                                                                                                                                                                                                                                                                                                                                                                                                                                                                                                                                                                                                                                                                                                                                                                                                                                                                                                                                                                                                                                                                                                                                                                                                                                                                                                                                                                                                                                                                                                                                                                                                                                                                                                                                                                                                                                                                                                                                                                                                                                                                                                                                                                                                                                                                                                                                                                 | Nigeria Centre For Disease Control                              | National reference Laboratory, NCDC, Gaduwa, Abuja                                                                                                                                                                                                                                                                                                                                                         | Dr Ndodo Nnaemeka, Olusola Anuoluwapo Akanbi, Chimaobi Chukwu, Dr Omoare Adesuyi, Esebanmen Grace, Kingsley Njoku, Anthony Ahumibe, Naidoo Dhamari, Nwando Mba, Dr Chikwe Ihekweazu                                                                                                                                                                                                                                                                                                 |  |
| EPI_ISL_825617, EPI_ISL_825632, EPI_ISL_825633, EPI_ISL_825713, EPI_ISL_825714, EPI_ISL_825807                                                                                                                                                                                                                                                                                                                                                                                                                                                                                                                                                                                                                                                                                                                                                                                                                                                                                                                                                                                                                                                                                                                                                                                                                                                                                                                                                                                                                                                                                                                                                                                                                                                                                                                                                                                                                                                                                                                                                                                                                                                                                                                                                                                                                                                                                                                                                                                                                                                                                                                                                                                                                                                                                                                                                                                                                                                                                                                                                                                                                                                                                                                                                                                                                                                                                                                                                                                                                                                                                                                                                                                                                                                                                                                                                                                                                                                                                                                                                                                                                                                                                                                                                                                                                                                                                                                                                                                                                                                                                                                                                                                                                                                                                                                                                                                                                 | Nigeria Centre For Disease Control                              | National reference Laboratory, NCDC, Gaduwa, Abuja                                                                                                                                                                                                                                                                                                                                                         | Dr Ndodo Nnaemeka, Olusola Anuoluwapo Akanbi, Chimaobi Chukwu, Dr Omoare Adesuyi, Esebanmen Grace, Anthony Ahumibe, Naidoo Dhamari, Nwando Mba, Dr Chikwe Ihekweazu                                                                                                                                                                                                                                                                                                                 |  |
| EPI_ISL_826269, EPI_ISL_826270, EPI_ISL_826271, EPI_ISL_826272, EPI_ISL_826273                                                                                                                                                                                                                                                                                                                                                                                                                                                                                                                                                                                                                                                                                                                                                                                                                                                                                                                                                                                                                                                                                                                                                                                                                                                                                                                                                                                                                                                                                                                                                                                                                                                                                                                                                                                                                                                                                                                                                                                                                                                                                                                                                                                                                                                                                                                                                                                                                                                                                                                                                                                                                                                                                                                                                                                                                                                                                                                                                                                                                                                                                                                                                                                                                                                                                                                                                                                                                                                                                                                                                                                                                                                                                                                                                                                                                                                                                                                                                                                                                                                                                                                                                                                                                                                                                                                                                                                                                                                                                                                                                                                                                                                                                                                                                                                                                                 | University of Debrecen, Department of Medical Microbiology      | National Laboratory of Virology, Szentgöthai Research Centre                                                                                                                                                                                                                                                                                                                                               | Endre Gábor Tóth, Balázs Somogyi, Brigitta Zana, Eszter Csoma, Ferenc Jakob, Gábor Kemeneši                                                                                                                                                                                                                                                                                                                                                                                         |  |
| EPI_ISL_826276                                                                                                                                                                                                                                                                                                                                                                                                                                                                                                                                                                                                                                                                                                                                                                                                                                                                                                                                                                                                                                                                                                                                                                                                                                                                                                                                                                                                                                                                                                                                                                                                                                                                                                                                                                                                                                                                                                                                                                                                                                                                                                                                                                                                                                                                                                                                                                                                                                                                                                                                                                                                                                                                                                                                                                                                                                                                                                                                                                                                                                                                                                                                                                                                                                                                                                                                                                                                                                                                                                                                                                                                                                                                                                                                                                                                                                                                                                                                                                                                                                                                                                                                                                                                                                                                                                                                                                                                                                                                                                                                                                                                                                                                                                                                                                                                                                                                                                 | Sterling Hospital, Memnagar, Ahmedabad                          | Gujarat Biotechnology Research Centre                                                                                                                                                                                                                                                                                                                                                                      | Dinesh Kumar, Zuber Saiyed, Labdhi Pandya, Afzal Ansari, Nikha Trivedi, Apurvasinh Puvar, Ramesh Pandit, Janvi Raval, Zarna Patel, Nitin Savaliya, Atul K Patel, Naman Shashtri, Chaitanya Joshi, Madhvi Joshi                                                                                                                                                                                                                                                                      |  |
| EPI_ISL_831370, EPI_ISL_831371, EPI_ISL_831372                                                                                                                                                                                                                                                                                                                                                                                                                                                                                                                                                                                                                                                                                                                                                                                                                                                                                                                                                                                                                                                                                                                                                                                                                                                                                                                                                                                                                                                                                                                                                                                                                                                                                                                                                                                                                                                                                                                                                                                                                                                                                                                                                                                                                                                                                                                                                                                                                                                                                                                                                                                                                                                                                                                                                                                                                                                                                                                                                                                                                                                                                                                                                                                                                                                                                                                                                                                                                                                                                                                                                                                                                                                                                                                                                                                                                                                                                                                                                                                                                                                                                                                                                                                                                                                                                                                                                                                                                                                                                                                                                                                                                                                                                                                                                                                                                                                                 | Labor Krone                                                     | Robert Koch Institute, Influenza and respiratory viruses FG17 & Bioinformatics MF1, Berlin, Germany                                                                                                                                                                                                                                                                                                        | Dr. Münstermann. Prof. Tiemann , Stephan Fuchs, Stefan Kroeger, Marianne Wedde, Oliver Drechsel, Aleksandar Radonic, Rene Kmiecinski, Ralf Duerrwald, Thorsten Wolff                                                                                                                                                                                                                                                                                                                |  |
| EPI_ISL_831373                                                                                                                                                                                                                                                                                                                                                                                                                                                                                                                                                                                                                                                                                                                                                                                                                                                                                                                                                                                                                                                                                                                                                                                                                                                                                                                                                                                                                                                                                                                                                                                                                                                                                                                                                                                                                                                                                                                                                                                                                                                                                                                                                                                                                                                                                                                                                                                                                                                                                                                                                                                                                                                                                                                                                                                                                                                                                                                                                                                                                                                                                                                                                                                                                                                                                                                                                                                                                                                                                                                                                                                                                                                                                                                                                                                                                                                                                                                                                                                                                                                                                                                                                                                                                                                                                                                                                                                                                                                                                                                                                                                                                                                                                                                                                                                                                                                                                                 | Limbach - MVZ Labor Dr. Limbach & Kollegen                      | Robert Koch Institute, Influenza and respiratory viruses FG17                                                                                                                                                                                                                                                                                                                                              | Dr. Konrad Bode, Stephan Fuchs, Stefan Kroeger, Marianne Wedde, Oliver Drechsel, Aleksandar Radonic, Rene Kmiecinski, Ralf Duerrwald, Thorsten                                                                                                                                                                                                                                                                                                                                      |  |



|                                                                                                                                                                                                                                                                                                                                                                                                                                                                                                                                                                                                                                                                                                                                                                                                                                                                                                                                                                                                                                                                                                                                                                                                                                |                                                       |                                                       |                                                                                                                                                                                                                                                                                                                                                                                                                                                            |
|--------------------------------------------------------------------------------------------------------------------------------------------------------------------------------------------------------------------------------------------------------------------------------------------------------------------------------------------------------------------------------------------------------------------------------------------------------------------------------------------------------------------------------------------------------------------------------------------------------------------------------------------------------------------------------------------------------------------------------------------------------------------------------------------------------------------------------------------------------------------------------------------------------------------------------------------------------------------------------------------------------------------------------------------------------------------------------------------------------------------------------------------------------------------------------------------------------------------------------|-------------------------------------------------------|-------------------------------------------------------|------------------------------------------------------------------------------------------------------------------------------------------------------------------------------------------------------------------------------------------------------------------------------------------------------------------------------------------------------------------------------------------------------------------------------------------------------------|
| see above                                                                                                                                                                                                                                                                                                                                                                                                                                                                                                                                                                                                                                                                                                                                                                                                                                                                                                                                                                                                                                                                                                                                                                                                                      | New Mexico Department of Health Scientific Laboratory | New Mexico Department of Health Scientific Laboratory | Ellie Johnson, Anastacia Griego-Fisher, D'eldra Malone                                                                                                                                                                                                                                                                                                                                                                                                     |
| EPI_ISL_831941, EPI_ISL_831942                                                                                                                                                                                                                                                                                                                                                                                                                                                                                                                                                                                                                                                                                                                                                                                                                                                                                                                                                                                                                                                                                                                                                                                                 | Klinisk mikrobiologi                                  | The Public Health Agency of Sweden                    | Department of Microbiology, The Public Health Agency of Sweden                                                                                                                                                                                                                                                                                                                                                                                             |
| EPI_ISL_831943                                                                                                                                                                                                                                                                                                                                                                                                                                                                                                                                                                                                                                                                                                                                                                                                                                                                                                                                                                                                                                                                                                                                                                                                                 | Unilabs, Mikrobiologiska laboratoriet                 | The Public Health Agency of Sweden                    | Department of Microbiology, The Public Health Agency of Sweden                                                                                                                                                                                                                                                                                                                                                                                             |
| EPI_ISL_831944                                                                                                                                                                                                                                                                                                                                                                                                                                                                                                                                                                                                                                                                                                                                                                                                                                                                                                                                                                                                                                                                                                                                                                                                                 | ABC                                                   | The Public Health Agency of Sweden                    | Department of Microbiology, The Public Health Agency of Sweden                                                                                                                                                                                                                                                                                                                                                                                             |
| EPI_ISL_831945, EPI_ISL_831946                                                                                                                                                                                                                                                                                                                                                                                                                                                                                                                                                                                                                                                                                                                                                                                                                                                                                                                                                                                                                                                                                                                                                                                                 | Klinisk mikrobiologi, virus F68                       | The Public Health Agency of Sweden                    | Department of Microbiology, The Public Health Agency of Sweden                                                                                                                                                                                                                                                                                                                                                                                             |
| EPI_ISL_831947, EPI_ISL_831948, EPI_ISL_831949, EPI_ISL_831950, EPI_ISL_831951, EPI_ISL_831952                                                                                                                                                                                                                                                                                                                                                                                                                                                                                                                                                                                                                                                                                                                                                                                                                                                                                                                                                                                                                                                                                                                                 | ABC                                                   | The Public Health Agency of Sweden                    | Department of Microbiology, The Public Health Agency of Sweden                                                                                                                                                                                                                                                                                                                                                                                             |
| EPI_ISL_831953, EPI_ISL_831954, EPI_ISL_831955, EPI_ISL_831956, EPI_ISL_831957                                                                                                                                                                                                                                                                                                                                                                                                                                                                                                                                                                                                                                                                                                                                                                                                                                                                                                                                                                                                                                                                                                                                                 | Laboratoriemedicin, Klinisk mikrobiologi              | The Public Health Agency of Sweden                    | Department of Microbiology, The Public Health Agency of Sweden                                                                                                                                                                                                                                                                                                                                                                                             |
| EPI_ISL_831958                                                                                                                                                                                                                                                                                                                                                                                                                                                                                                                                                                                                                                                                                                                                                                                                                                                                                                                                                                                                                                                                                                                                                                                                                 | Klinisk mikrobiologi                                  | The Public Health Agency of Sweden                    | Department of Microbiology, The Public Health Agency of Sweden                                                                                                                                                                                                                                                                                                                                                                                             |
| EPI_ISL_831959                                                                                                                                                                                                                                                                                                                                                                                                                                                                                                                                                                                                                                                                                                                                                                                                                                                                                                                                                                                                                                                                                                                                                                                                                 | ABC                                                   | The Public Health Agency of Sweden                    | Department of Microbiology, The Public Health Agency of Sweden                                                                                                                                                                                                                                                                                                                                                                                             |
| EPI_ISL_831960, EPI_ISL_831961, EPI_ISL_831962, EPI_ISL_831963, EPI_ISL_831964, EPI_ISL_831965, EPI_ISL_831966, EPI_ISL_831967, EPI_ISL_831968                                                                                                                                                                                                                                                                                                                                                                                                                                                                                                                                                                                                                                                                                                                                                                                                                                                                                                                                                                                                                                                                                 | Orebro klinisk mikrobiologi                           | The Public Health Agency of Sweden                    | Department of Microbiology, The Public Health Agency of Sweden                                                                                                                                                                                                                                                                                                                                                                                             |
| EPI_ISL_831969                                                                                                                                                                                                                                                                                                                                                                                                                                                                                                                                                                                                                                                                                                                                                                                                                                                                                                                                                                                                                                                                                                                                                                                                                 | unknown                                               | The Public Health Agency of Sweden                    | Department of Microbiology, The Public Health Agency of Sweden                                                                                                                                                                                                                                                                                                                                                                                             |
| EPI_ISL_831970, EPI_ISL_831971, EPI_ISL_831972                                                                                                                                                                                                                                                                                                                                                                                                                                                                                                                                                                                                                                                                                                                                                                                                                                                                                                                                                                                                                                                                                                                                                                                 | Orebro klinisk mikrobiologi                           | The Public Health Agency of Sweden                    | Department of Microbiology, The Public Health Agency of Sweden                                                                                                                                                                                                                                                                                                                                                                                             |
| EPI_ISL_831973                                                                                                                                                                                                                                                                                                                                                                                                                                                                                                                                                                                                                                                                                                                                                                                                                                                                                                                                                                                                                                                                                                                                                                                                                 | Klinisk mikrobiologi                                  | The Public Health Agency of Sweden                    | Department of Microbiology, The Public Health Agency of Sweden                                                                                                                                                                                                                                                                                                                                                                                             |
| EPI_ISL_831974                                                                                                                                                                                                                                                                                                                                                                                                                                                                                                                                                                                                                                                                                                                                                                                                                                                                                                                                                                                                                                                                                                                                                                                                                 | Klinisk mikrobiologi NAL Trollhattan                  | The Public Health Agency of Sweden                    | Department of Microbiology, The Public Health Agency of Sweden                                                                                                                                                                                                                                                                                                                                                                                             |
| EPI_ISL_831975                                                                                                                                                                                                                                                                                                                                                                                                                                                                                                                                                                                                                                                                                                                                                                                                                                                                                                                                                                                                                                                                                                                                                                                                                 | Uppsala klinisk mikrobiologi                          | The Public Health Agency of Sweden                    | Department of Microbiology, The Public Health Agency of Sweden                                                                                                                                                                                                                                                                                                                                                                                             |
| EPI_ISL_831976                                                                                                                                                                                                                                                                                                                                                                                                                                                                                                                                                                                                                                                                                                                                                                                                                                                                                                                                                                                                                                                                                                                                                                                                                 | Orebro klinisk mikrobiologi                           | The Public Health Agency of Sweden                    | Department of Microbiology, The Public Health Agency of Sweden                                                                                                                                                                                                                                                                                                                                                                                             |
| EPI_ISL_831977, EPI_ISL_831978                                                                                                                                                                                                                                                                                                                                                                                                                                                                                                                                                                                                                                                                                                                                                                                                                                                                                                                                                                                                                                                                                                                                                                                                 | Gavle klinisk mikrobiologi                            | The Public Health Agency of Sweden                    | Department of Microbiology, The Public Health Agency of Sweden                                                                                                                                                                                                                                                                                                                                                                                             |
| EPI_ISL_831979                                                                                                                                                                                                                                                                                                                                                                                                                                                                                                                                                                                                                                                                                                                                                                                                                                                                                                                                                                                                                                                                                                                                                                                                                 | Klinisk mikrobiologi, Viruslab                        | The Public Health Agency of Sweden                    | Department of Microbiology, The Public Health Agency of Sweden                                                                                                                                                                                                                                                                                                                                                                                             |
| EPI_ISL_831980, EPI_ISL_831981                                                                                                                                                                                                                                                                                                                                                                                                                                                                                                                                                                                                                                                                                                                                                                                                                                                                                                                                                                                                                                                                                                                                                                                                 | Klinisk mikrobiologi                                  | The Public Health Agency of Sweden                    | Department of Microbiology, The Public Health Agency of Sweden                                                                                                                                                                                                                                                                                                                                                                                             |
| EPI_ISL_831982, EPI_ISL_831983, EPI_ISL_831984, EPI_ISL_831985                                                                                                                                                                                                                                                                                                                                                                                                                                                                                                                                                                                                                                                                                                                                                                                                                                                                                                                                                                                                                                                                                                                                                                 | ABC                                                   | The Public Health Agency of Sweden                    | Department of Microbiology, The Public Health Agency of Sweden                                                                                                                                                                                                                                                                                                                                                                                             |
| EPI_ISL_831986, EPI_ISL_831987, EPI_ISL_831988                                                                                                                                                                                                                                                                                                                                                                                                                                                                                                                                                                                                                                                                                                                                                                                                                                                                                                                                                                                                                                                                                                                                                                                 | Synlab Medilab, Mikrobiologi                          | The Public Health Agency of Sweden                    | Department of Microbiology, The Public Health Agency of Sweden                                                                                                                                                                                                                                                                                                                                                                                             |
| EPI_ISL_831989                                                                                                                                                                                                                                                                                                                                                                                                                                                                                                                                                                                                                                                                                                                                                                                                                                                                                                                                                                                                                                                                                                                                                                                                                 | Laboratorium for klinisk mikrobiologi                 | The Public Health Agency of Sweden                    | Department of Microbiology, The Public Health Agency of Sweden                                                                                                                                                                                                                                                                                                                                                                                             |
| EPI_ISL_831990, EPI_ISL_831991, EPI_ISL_831992                                                                                                                                                                                                                                                                                                                                                                                                                                                                                                                                                                                                                                                                                                                                                                                                                                                                                                                                                                                                                                                                                                                                                                                 | Klinisk mikrobiologi                                  | The Public Health Agency of Sweden                    | Department of Microbiology, The Public Health Agency of Sweden                                                                                                                                                                                                                                                                                                                                                                                             |
| EPI_ISL_831993, EPI_ISL_831994, EPI_ISL_831995                                                                                                                                                                                                                                                                                                                                                                                                                                                                                                                                                                                                                                                                                                                                                                                                                                                                                                                                                                                                                                                                                                                                                                                 | TATAA Biocenter                                       | The Public Health Agency of Sweden                    | Department of Microbiology, The Public Health Agency of Sweden                                                                                                                                                                                                                                                                                                                                                                                             |
| EPI_ISL_831996, EPI_ISL_831997                                                                                                                                                                                                                                                                                                                                                                                                                                                                                                                                                                                                                                                                                                                                                                                                                                                                                                                                                                                                                                                                                                                                                                                                 | Klinisk mikrobiologi                                  | The Public Health Agency of Sweden                    | Department of Microbiology, The Public Health Agency of Sweden                                                                                                                                                                                                                                                                                                                                                                                             |
| EPI_ISL_831998, EPI_ISL_831999                                                                                                                                                                                                                                                                                                                                                                                                                                                                                                                                                                                                                                                                                                                                                                                                                                                                                                                                                                                                                                                                                                                                                                                                 | Laboratoriemedicin, Klinisk mikrobiologi              | The Public Health Agency of Sweden                    | Department of Microbiology, The Public Health Agency of Sweden                                                                                                                                                                                                                                                                                                                                                                                             |
| EPI_ISL_832000                                                                                                                                                                                                                                                                                                                                                                                                                                                                                                                                                                                                                                                                                                                                                                                                                                                                                                                                                                                                                                                                                                                                                                                                                 | Unilabs, Mikrobiologiska laboratoriet                 | The Public Health Agency of Sweden                    | Department of Microbiology, The Public Health Agency of Sweden                                                                                                                                                                                                                                                                                                                                                                                             |
| EPI_ISL_832001, EPI_ISL_832002                                                                                                                                                                                                                                                                                                                                                                                                                                                                                                                                                                                                                                                                                                                                                                                                                                                                                                                                                                                                                                                                                                                                                                                                 | Klinisk mikrobiologi                                  | The Public Health Agency of Sweden                    | Department of Microbiology, The Public Health Agency of Sweden                                                                                                                                                                                                                                                                                                                                                                                             |
| EPI_ISL_832003, EPI_ISL_832004                                                                                                                                                                                                                                                                                                                                                                                                                                                                                                                                                                                                                                                                                                                                                                                                                                                                                                                                                                                                                                                                                                                                                                                                 | Mikrobiologen                                         | The Public Health Agency of Sweden                    | Department of Microbiology, The Public Health Agency of Sweden                                                                                                                                                                                                                                                                                                                                                                                             |
| EPI_ISL_832005                                                                                                                                                                                                                                                                                                                                                                                                                                                                                                                                                                                                                                                                                                                                                                                                                                                                                                                                                                                                                                                                                                                                                                                                                 | Klinisk Mikrobiologi                                  | The Public Health Agency of Sweden                    | Department of Microbiology, The Public Health Agency of Sweden                                                                                                                                                                                                                                                                                                                                                                                             |
| EPI_ISL_832006, EPI_ISL_832007                                                                                                                                                                                                                                                                                                                                                                                                                                                                                                                                                                                                                                                                                                                                                                                                                                                                                                                                                                                                                                                                                                                                                                                                 | Unilabs AB Skovde                                     | The Public Health Agency of Sweden                    | Department of Microbiology, The Public Health Agency of Sweden                                                                                                                                                                                                                                                                                                                                                                                             |
| EPI_ISL_832008                                                                                                                                                                                                                                                                                                                                                                                                                                                                                                                                                                                                                                                                                                                                                                                                                                                                                                                                                                                                                                                                                                                                                                                                                 | Unilabs, Mikrobiologiska laboratoriet                 | The Public Health Agency of Sweden                    | Department of Microbiology, The Public Health Agency of Sweden                                                                                                                                                                                                                                                                                                                                                                                             |
| EPI_ISL_832014                                                                                                                                                                                                                                                                                                                                                                                                                                                                                                                                                                                                                                                                                                                                                                                                                                                                                                                                                                                                                                                                                                                                                                                                                 | Utah Public Health Laboratory                         | Utah Public Health Laboratory                         | Erin L. Young, Kelly F. Oakeson, Tara Gallagher                                                                                                                                                                                                                                                                                                                                                                                                            |
| EPI_ISL_839824, EPI_ISL_839841, EPI_ISL_839850, EPI_ISL_839855, EPI_ISL_839858, EPI_ISL_839862, EPI_ISL_839864, EPI_ISL_839865, EPI_ISL_839866, EPI_ISL_839868, EPI_ISL_839879, EPI_ISL_839889, EPI_ISL_839890, EPI_ISL_839906, EPI_ISL_839907, EPI_ISL_839910, EPI_ISL_839914, EPI_ISL_839921, EPI_ISL_839923, EPI_ISL_839927, EPI_ISL_839929, EPI_ISL_839930, EPI_ISL_839933, EPI_ISL_839934, EPI_ISL_839940, EPI_ISL_839946, EPI_ISL_839949, EPI_ISL_839953, EPI_ISL_839960, EPI_ISL_839961, EPI_ISL_839966, EPI_ISL_839971, EPI_ISL_839972, EPI_ISL_839976, EPI_ISL_839978, EPI_ISL_842115                                                                                                                                                                                                                                                                                                                                                                                                                                                                                                                                                                                                                                 |                                                       |                                                       |                                                                                                                                                                                                                                                                                                                                                                                                                                                            |
| see above                                                                                                                                                                                                                                                                                                                                                                                                                                                                                                                                                                                                                                                                                                                                                                                                                                                                                                                                                                                                                                                                                                                                                                                                                      | Quadram Institute Bioscience                          | COVID-19 Genomics UK (COG-UK) Consortium              | Dave J. Baker, Gemma L. Kay, Alp Aydin, Thanh Le-Viet, Steven Rudder, Ana P. Tedim, Anastasia Kolyva, Maria Diaz, Leonardo de Oliveira Martins, Nabil-Fareed Alikhan, Lizzie Meadows, Rachael Stanley, Ngozi Elumogo, Muhammed Yasir, Nicholas M. Thomson, Alexander J Trotter, Rachel Gilroy, Samuel Bloomfield, Claire Stuart, Andrew Bell, Reenesha Prakash, Samir Dervisevic, Alison E. Mather, John Wain, Mark Webber, Andrew J. Page, Justin O'Grady |
| EPI_ISL_848188, EPI_ISL_848189, EPI_ISL_848190, EPI_ISL_848191, EPI_ISL_848193, EPI_ISL_848194, EPI_ISL_848195, EPI_ISL_848196, EPI_ISL_848197, EPI_ISL_848198                                                                                                                                                                                                                                                                                                                                                                                                                                                                                                                                                                                                                                                                                                                                                                                                                                                                                                                                                                                                                                                                 | Microbiology Lab                                      | NBCC Sequencing Facility                              | Dr. Jeff Wrana                                                                                                                                                                                                                                                                                                                                                                                                                                             |
| EPI_ISL_849205, EPI_ISL_849206, EPI_ISL_849207, EPI_ISL_849208, EPI_ISL_849209, EPI_ISL_849210, EPI_ISL_849211, EPI_ISL_849212, EPI_ISL_849213, EPI_ISL_849214, EPI_ISL_849215, EPI_ISL_849216, EPI_ISL_849217, EPI_ISL_849218, EPI_ISL_849219, EPI_ISL_849220, EPI_ISL_849221, EPI_ISL_849222, EPI_ISL_849223, EPI_ISL_849224, EPI_ISL_849225, EPI_ISL_849226, EPI_ISL_849227, EPI_ISL_849228, EPI_ISL_849229, EPI_ISL_849230, EPI_ISL_849231, EPI_ISL_849232, EPI_ISL_849233, EPI_ISL_849234, EPI_ISL_849235, EPI_ISL_849236, EPI_ISL_849237, EPI_ISL_849238, EPI_ISL_849239, EPI_ISL_849240, EPI_ISL_849241, EPI_ISL_849242, EPI_ISL_849243, EPI_ISL_849244, EPI_ISL_849245, EPI_ISL_849246, EPI_ISL_849247, EPI_ISL_849248, EPI_ISL_849249, EPI_ISL_849250, EPI_ISL_849251, EPI_ISL_849252, EPI_ISL_849253, EPI_ISL_849254, EPI_ISL_849255, EPI_ISL_849256, EPI_ISL_849257, EPI_ISL_849258, EPI_ISL_849259, EPI_ISL_849260, EPI_ISL_849261, EPI_ISL_849262, EPI_ISL_849263, EPI_ISL_849264, EPI_ISL_849265, EPI_ISL_849266, EPI_ISL_849267, EPI_ISL_849268, EPI_ISL_849269, EPI_ISL_849270, EPI_ISL_849271, EPI_ISL_849272, EPI_ISL_849273, EPI_ISL_849274, EPI_ISL_849275, EPI_ISL_849276, EPI_ISL_849277, EPI_ISL_849278 |                                                       |                                                       |                                                                                                                                                                                                                                                                                                                                                                                                                                                            |
| see above                                                                                                                                                                                                                                                                                                                                                                                                                                                                                                                                                                                                                                                                                                                                                                                                                                                                                                                                                                                                                                                                                                                                                                                                                      | Utah Public Health Laboratory                         | Utah Public Health Laboratory                         | Erin L. Young, Kelly F. Oakeson, Tara Gallagher                                                                                                                                                                                                                                                                                                                                                                                                            |
| EPI_ISL_849383, EPI_ISL_849384, EPI_ISL_849385, EPI_ISL_849386, EPI_ISL_849387, EPI_ISL_849388, EPI_ISL_849389, EPI_ISL_849390, EPI_ISL_849391, EPI_ISL_849392, EPI_ISL_849393, EPI_ISL_849394, EPI_ISL_849395, EPI_ISL_849396, EPI_ISL_849397, EPI_ISL_849398, EPI_ISL_849399, EPI_ISL_849400, EPI_ISL_849401, EPI_ISL_849402, EPI_ISL_849403, EPI_ISL_849405, EPI_ISL_849406, EPI_ISL_849407                                                                                                                                                                                                                                                                                                                                                                                                                                                                                                                                                                                                                                                                                                                                                                                                                                 |                                                       |                                                       |                                                                                                                                                                                                                                                                                                                                                                                                                                                            |
| see above                                                                                                                                                                                                                                                                                                                                                                                                                                                                                                                                                                                                                                                                                                                                                                                                                                                                                                                                                                                                                                                                                                                                                                                                                      | Washington State Department of Health                 | Seattle Flu Study                                     | Deborah A. Nickerson, Chris D. Frazar, Jover Lee, Benjamin Pelle, Matthew Richardson, Amanda Adler, Elisabeth Brandstetter, Peter D. Han, Kairsten Fay, Misja Ilcin, Kirsten Lacombe, Thomas R. Sibley, Melissa Truong, Caitlin R. Wolf, Romesh Gautom, Geoff Mely, Brian Hiatt, Philip Dykema, Scott                                                                                                                                                      |



|                                                                                                                                                                                                                                                                                                                                                                                                                                                                                                                                                                                                                                                                                                                                                                                                                                                                                                                                                                                                                                                                                                                                                                                                                                                                                                                                                                                                                                                                                                                                                                                                                                                                                                                                                                                                                                                                                                                                                                                                                                                                                                                                                                                                                                                                                                                                                                                                                                                                                                                                                                                                                                                                                                                                                                                                                                                                                                                                                                                                                                                                                                                                                                                                                                                                                                                                                                                                                                |                                          |                                                                                                                                                                                            |                                                                                                                                                                                                                                                                                                                                                                                                                                                                     |                                                                                                                                                                                                                                                                                                                                                                                                                                                                     |
|--------------------------------------------------------------------------------------------------------------------------------------------------------------------------------------------------------------------------------------------------------------------------------------------------------------------------------------------------------------------------------------------------------------------------------------------------------------------------------------------------------------------------------------------------------------------------------------------------------------------------------------------------------------------------------------------------------------------------------------------------------------------------------------------------------------------------------------------------------------------------------------------------------------------------------------------------------------------------------------------------------------------------------------------------------------------------------------------------------------------------------------------------------------------------------------------------------------------------------------------------------------------------------------------------------------------------------------------------------------------------------------------------------------------------------------------------------------------------------------------------------------------------------------------------------------------------------------------------------------------------------------------------------------------------------------------------------------------------------------------------------------------------------------------------------------------------------------------------------------------------------------------------------------------------------------------------------------------------------------------------------------------------------------------------------------------------------------------------------------------------------------------------------------------------------------------------------------------------------------------------------------------------------------------------------------------------------------------------------------------------------------------------------------------------------------------------------------------------------------------------------------------------------------------------------------------------------------------------------------------------------------------------------------------------------------------------------------------------------------------------------------------------------------------------------------------------------------------------------------------------------------------------------------------------------------------------------------------------------------------------------------------------------------------------------------------------------------------------------------------------------------------------------------------------------------------------------------------------------------------------------------------------------------------------------------------------------------------------------------------------------------------------------------------------------|------------------------------------------|--------------------------------------------------------------------------------------------------------------------------------------------------------------------------------------------|---------------------------------------------------------------------------------------------------------------------------------------------------------------------------------------------------------------------------------------------------------------------------------------------------------------------------------------------------------------------------------------------------------------------------------------------------------------------|---------------------------------------------------------------------------------------------------------------------------------------------------------------------------------------------------------------------------------------------------------------------------------------------------------------------------------------------------------------------------------------------------------------------------------------------------------------------|
| EPI_ISL_849571                                                                                                                                                                                                                                                                                                                                                                                                                                                                                                                                                                                                                                                                                                                                                                                                                                                                                                                                                                                                                                                                                                                                                                                                                                                                                                                                                                                                                                                                                                                                                                                                                                                                                                                                                                                                                                                                                                                                                                                                                                                                                                                                                                                                                                                                                                                                                                                                                                                                                                                                                                                                                                                                                                                                                                                                                                                                                                                                                                                                                                                                                                                                                                                                                                                                                                                                                                                                                 | Seattle Flu Study                        | Seattle Flu Study                                                                                                                                                                          | Deborah A. Nickerson, Chris D. Frazar, Jover Lee, Benjamin Pelle, Matthew Richardson, Amanda Adler, Elisabeth Brandstetter, Peter D. Han, Kairsten Fay, Misja Ilcin, Kirsten Lacombe, Thomas R. Sibley, Melissa Truong, Caitlin R. Wolf, Michael Boeckh, Janet A. Englund, Michael Famulare, Barry R. Lutz, Mark J. Rieder, Lea M. Starita, Matthew Thompson, Jay Shendure, Trevor Bedford, Helen Y. Chu                                                            |                                                                                                                                                                                                                                                                                                                                                                                                                                                                     |
| EPI_ISL_849572, EPI_ISL_849573, EPI_ISL_849574, EPI_ISL_849575, EPI_ISL_849576, EPI_ISL_849577, EPI_ISL_849578, EPI_ISL_849579, EPI_ISL_849580, EPI_ISL_849581, EPI_ISL_849582                                                                                                                                                                                                                                                                                                                                                                                                                                                                                                                                                                                                                                                                                                                                                                                                                                                                                                                                                                                                                                                                                                                                                                                                                                                                                                                                                                                                                                                                                                                                                                                                                                                                                                                                                                                                                                                                                                                                                                                                                                                                                                                                                                                                                                                                                                                                                                                                                                                                                                                                                                                                                                                                                                                                                                                                                                                                                                                                                                                                                                                                                                                                                                                                                                                 | see above                                | Washington State Department of Health                                                                                                                                                      | Seattle Flu Study                                                                                                                                                                                                                                                                                                                                                                                                                                                   | Deborah A. Nickerson, Chris D. Frazar, Jover Lee, Benjamin Pelle, Matthew Richardson, Amanda Adler, Elisabeth Brandstetter, Peter D. Han, Kairsten Fay, Misja Ilcin, Kirsten Lacombe, Thomas R. Sibley, Melissa Truong, Caitlin R. Wolf, Romesh Gautom, Geoff Melly, Brian Hiatt, Philip Dykema, Scott Lindquist, Michael Boeckh, Janet A. Englund, Michael Famulare, Barry R. Lutz, Mark J. Rieder, Lea M. Starita, Matthew Thompson, Jay Shendure, Trevor Bedford |
| EPI_ISL_849583, EPI_ISL_849584                                                                                                                                                                                                                                                                                                                                                                                                                                                                                                                                                                                                                                                                                                                                                                                                                                                                                                                                                                                                                                                                                                                                                                                                                                                                                                                                                                                                                                                                                                                                                                                                                                                                                                                                                                                                                                                                                                                                                                                                                                                                                                                                                                                                                                                                                                                                                                                                                                                                                                                                                                                                                                                                                                                                                                                                                                                                                                                                                                                                                                                                                                                                                                                                                                                                                                                                                                                                 | Seattle Flu Study                        | Seattle Flu Study                                                                                                                                                                          | Deborah A. Nickerson, Chris D. Frazar, Jover Lee, Benjamin Pelle, Matthew Richardson, Amanda Adler, Elisabeth Brandstetter, Peter D. Han, Kairsten Fay, Misja Ilcin, Kirsten Lacombe, Thomas R. Sibley, Melissa Truong, Caitlin R. Wolf, Michael Boeckh, Janet A. Englund, Michael Famulare, Barry R. Lutz, Mark J. Rieder, Lea M. Starita, Matthew Thompson, Jay Shendure, Trevor Bedford, Helen Y. Chu                                                            |                                                                                                                                                                                                                                                                                                                                                                                                                                                                     |
| EPI_ISL_849585, EPI_ISL_849586, EPI_ISL_849587, EPI_ISL_849588, EPI_ISL_849589                                                                                                                                                                                                                                                                                                                                                                                                                                                                                                                                                                                                                                                                                                                                                                                                                                                                                                                                                                                                                                                                                                                                                                                                                                                                                                                                                                                                                                                                                                                                                                                                                                                                                                                                                                                                                                                                                                                                                                                                                                                                                                                                                                                                                                                                                                                                                                                                                                                                                                                                                                                                                                                                                                                                                                                                                                                                                                                                                                                                                                                                                                                                                                                                                                                                                                                                                 | Washington State Department of Health    | Seattle Flu Study                                                                                                                                                                          | Deborah A. Nickerson, Chris D. Frazar, Jover Lee, Benjamin Pelle, Matthew Richardson, Amanda Adler, Elisabeth Brandstetter, Peter D. Han, Kairsten Fay, Misja Ilcin, Kirsten Lacombe, Thomas R. Sibley, Melissa Truong, Caitlin R. Wolf, Romesh Gautom, Geoff Melly, Brian Hiatt, Philip Dykema, Scott Lindquist, Michael Boeckh, Janet A. Englund, Michael Famulare, Barry R. Lutz, Mark J. Rieder, Lea M. Starita, Matthew Thompson, Jay Shendure, Trevor Bedford |                                                                                                                                                                                                                                                                                                                                                                                                                                                                     |
| EPI_ISL_849593                                                                                                                                                                                                                                                                                                                                                                                                                                                                                                                                                                                                                                                                                                                                                                                                                                                                                                                                                                                                                                                                                                                                                                                                                                                                                                                                                                                                                                                                                                                                                                                                                                                                                                                                                                                                                                                                                                                                                                                                                                                                                                                                                                                                                                                                                                                                                                                                                                                                                                                                                                                                                                                                                                                                                                                                                                                                                                                                                                                                                                                                                                                                                                                                                                                                                                                                                                                                                 | Seattle Flu Study                        | Seattle Flu Study                                                                                                                                                                          | Deborah A. Nickerson, Chris D. Frazar, Jover Lee, Benjamin Pelle, Matthew Richardson, Amanda Adler, Elisabeth Brandstetter, Peter D. Han, Kairsten Fay, Misja Ilcin, Kirsten Lacombe, Thomas R. Sibley, Melissa Truong, Caitlin R. Wolf, Karen Cowgill, Stephanie Schrag, Jeff Duchin, Michael Boeckh, Janet A. Englund, Michael Famulare, Barry R. Lutz, Mark J. Rieder, Lea M. Starita, Matthew Thompson, Helen Y. Chu, Trevor Bedford, Jay Shendure              |                                                                                                                                                                                                                                                                                                                                                                                                                                                                     |
| EPI_ISL_849594, EPI_ISL_849595                                                                                                                                                                                                                                                                                                                                                                                                                                                                                                                                                                                                                                                                                                                                                                                                                                                                                                                                                                                                                                                                                                                                                                                                                                                                                                                                                                                                                                                                                                                                                                                                                                                                                                                                                                                                                                                                                                                                                                                                                                                                                                                                                                                                                                                                                                                                                                                                                                                                                                                                                                                                                                                                                                                                                                                                                                                                                                                                                                                                                                                                                                                                                                                                                                                                                                                                                                                                 | Seattle Flu Study                        | Seattle Flu Study                                                                                                                                                                          | Deborah A. Nickerson, Chris D. Frazar, Jover Lee, Benjamin Pelle, Matthew Richardson, Amanda Adler, Elisabeth Brandstetter, Peter D. Han, Kairsten Fay, Misja Ilcin, Kirsten Lacombe, Thomas R. Sibley, Melissa Truong, Caitlin R. Wolf, Michael Boeckh, Janet A. Englund, Michael Famulare, Barry R. Lutz, Mark J. Rieder, Lea M. Starita, Matthew Thompson, Jay Shendure, Trevor Bedford, Helen Y. Chu                                                            |                                                                                                                                                                                                                                                                                                                                                                                                                                                                     |
| EPI_ISL_849596                                                                                                                                                                                                                                                                                                                                                                                                                                                                                                                                                                                                                                                                                                                                                                                                                                                                                                                                                                                                                                                                                                                                                                                                                                                                                                                                                                                                                                                                                                                                                                                                                                                                                                                                                                                                                                                                                                                                                                                                                                                                                                                                                                                                                                                                                                                                                                                                                                                                                                                                                                                                                                                                                                                                                                                                                                                                                                                                                                                                                                                                                                                                                                                                                                                                                                                                                                                                                 | Seattle Flu Study                        | Seattle Flu Study                                                                                                                                                                          | Deborah A. Nickerson, Chris D. Frazar, Jover Lee, Benjamin Pelle, Matthew Richardson, Amanda Adler, Elisabeth Brandstetter, Peter D. Han, Kairsten Fay, Misja Ilcin, Kirsten Lacombe, Thomas R. Sibley, Melissa Truong, Caitlin R. Wolf, Karen Cowgill, Stephanie Schrag, Jeff Duchin, Michael Boeckh, Janet A. Englund, Michael Famulare, Barry R. Lutz, Mark J. Rieder, Lea M. Starita, Matthew Thompson, Helen Y. Chu, Trevor Bedford, Jay Shendure              |                                                                                                                                                                                                                                                                                                                                                                                                                                                                     |
| EPI_ISL_849597, EPI_ISL_849598, EPI_ISL_849599, EPI_ISL_849600, EPI_ISL_849601, EPI_ISL_849602, EPI_ISL_849603, EPI_ISL_849604, EPI_ISL_849605, EPI_ISL_849606, EPI_ISL_849607, EPI_ISL_849608, EPI_ISL_849609, EPI_ISL_849610, EPI_ISL_849611, EPI_ISL_849612, EPI_ISL_849613, EPI_ISL_849614, EPI_ISL_849615                                                                                                                                                                                                                                                                                                                                                                                                                                                                                                                                                                                                                                                                                                                                                                                                                                                                                                                                                                                                                                                                                                                                                                                                                                                                                                                                                                                                                                                                                                                                                                                                                                                                                                                                                                                                                                                                                                                                                                                                                                                                                                                                                                                                                                                                                                                                                                                                                                                                                                                                                                                                                                                                                                                                                                                                                                                                                                                                                                                                                                                                                                                 | see above                                | Seattle Flu Study                                                                                                                                                                          | Seattle Flu Study                                                                                                                                                                                                                                                                                                                                                                                                                                                   | Deborah A. Nickerson, Chris D. Frazar, Jover Lee, Benjamin Pelle, Matthew Richardson, Amanda Adler, Elisabeth Brandstetter, Peter D. Han, Kairsten Fay, Misja Ilcin, Kirsten Lacombe, Thomas R. Sibley, Melissa Truong, Caitlin R. Wolf, Michael Boeckh, Janet A. Englund, Michael Famulare, Barry R. Lutz, Mark J. Rieder, Lea M. Starita, Matthew Thompson, Jay Shendure, Trevor Bedford, Helen Y. Chu                                                            |
| EPI_ISL_849616, EPI_ISL_849617, EPI_ISL_849618, EPI_ISL_849619, EPI_ISL_849620, EPI_ISL_849621, EPI_ISL_849622, EPI_ISL_849623, EPI_ISL_849624, EPI_ISL_849625, EPI_ISL_849626, EPI_ISL_849627, EPI_ISL_849628, EPI_ISL_849629, EPI_ISL_849630, EPI_ISL_849631, EPI_ISL_849632, EPI_ISL_849633                                                                                                                                                                                                                                                                                                                                                                                                                                                                                                                                                                                                                                                                                                                                                                                                                                                                                                                                                                                                                                                                                                                                                                                                                                                                                                                                                                                                                                                                                                                                                                                                                                                                                                                                                                                                                                                                                                                                                                                                                                                                                                                                                                                                                                                                                                                                                                                                                                                                                                                                                                                                                                                                                                                                                                                                                                                                                                                                                                                                                                                                                                                                 | see above                                | Washington State Department of Health                                                                                                                                                      | Seattle Flu Study                                                                                                                                                                                                                                                                                                                                                                                                                                                   | Deborah A. Nickerson, Chris D. Frazar, Jover Lee, Benjamin Pelle, Matthew Richardson, Amanda Adler, Elisabeth Brandstetter, Peter D. Han, Kairsten Fay, Misja Ilcin, Kirsten Lacombe, Thomas R. Sibley, Melissa Truong, Caitlin R. Wolf, Romesh Gautom, Geoff Melly, Brian Hiatt, Philip Dykema, Scott Lindquist, Michael Boeckh, Janet A. Englund, Michael Famulare, Barry R. Lutz, Mark J. Rieder, Lea M. Starita, Matthew Thompson, Jay Shendure, Trevor Bedford |
| EPI_ISL_849764, EPI_ISL_849765, EPI_ISL_849766, EPI_ISL_849767, EPI_ISL_849768, EPI_ISL_849769, EPI_ISL_849770, EPI_ISL_849771, EPI_ISL_849772, EPI_ISL_849773, EPI_ISL_849774, EPI_ISL_849775, EPI_ISL_849776, EPI_ISL_849777, EPI_ISL_849778, EPI_ISL_849779, EPI_ISL_849780, EPI_ISL_849781, EPI_ISL_849782, EPI_ISL_849783, EPI_ISL_849784, EPI_ISL_849785, EPI_ISL_849786, EPI_ISL_849787, EPI_ISL_849788, EPI_ISL_849789, EPI_ISL_849790, EPI_ISL_849791, EPI_ISL_849792, EPI_ISL_849793, EPI_ISL_849794, EPI_ISL_849795, EPI_ISL_849796, EPI_ISL_849797, EPI_ISL_849798, EPI_ISL_849799, EPI_ISL_849800, EPI_ISL_849801, EPI_ISL_849802, EPI_ISL_849803, EPI_ISL_849804, EPI_ISL_849805, EPI_ISL_849806, EPI_ISL_849807, EPI_ISL_849808, EPI_ISL_849809, EPI_ISL_849810, EPI_ISL_849811, EPI_ISL_849812, EPI_ISL_849813, EPI_ISL_849814, EPI_ISL_849815, EPI_ISL_849816, EPI_ISL_849817, EPI_ISL_849818, EPI_ISL_849819, EPI_ISL_849820, EPI_ISL_849821, EPI_ISL_849822, EPI_ISL_849823, EPI_ISL_849824, EPI_ISL_849825, EPI_ISL_849826, EPI_ISL_849827, EPI_ISL_849828, EPI_ISL_849829, EPI_ISL_849830, EPI_ISL_849831, EPI_ISL_849832, EPI_ISL_849833, EPI_ISL_849834, EPI_ISL_849835, EPI_ISL_849836, EPI_ISL_849837, EPI_ISL_849838, EPI_ISL_849839, EPI_ISL_849840, EPI_ISL_849841, EPI_ISL_849842, EPI_ISL_849843, EPI_ISL_849844, EPI_ISL_849845, EPI_ISL_849846, EPI_ISL_849847, EPI_ISL_849848, EPI_ISL_849849, EPI_ISL_849850, EPI_ISL_849851, EPI_ISL_849852, EPI_ISL_849853, EPI_ISL_849854, EPI_ISL_849855, EPI_ISL_849856, EPI_ISL_849857, EPI_ISL_849858, EPI_ISL_849859, EPI_ISL_849860, EPI_ISL_849861, EPI_ISL_849862, EPI_ISL_849863, EPI_ISL_849864, EPI_ISL_849865, EPI_ISL_849866, EPI_ISL_849867, EPI_ISL_849868, EPI_ISL_849869, EPI_ISL_849870, EPI_ISL_849871, EPI_ISL_849872, EPI_ISL_849873, EPI_ISL_849874, EPI_ISL_849875, EPI_ISL_849876, EPI_ISL_849877, EPI_ISL_849878, EPI_ISL_849879, EPI_ISL_849880, EPI_ISL_849881, EPI_ISL_849882, EPI_ISL_849883, EPI_ISL_849884, EPI_ISL_849885, EPI_ISL_849886, EPI_ISL_849887, EPI_ISL_849888, EPI_ISL_849889, EPI_ISL_849890, EPI_ISL_849891, EPI_ISL_849892, EPI_ISL_849893, EPI_ISL_849894, EPI_ISL_849895, EPI_ISL_849896, EPI_ISL_849897, EPI_ISL_849898, EPI_ISL_849899, EPI_ISL_849900, EPI_ISL_849901, EPI_ISL_849902, EPI_ISL_849903, EPI_ISL_849904, EPI_ISL_849905, EPI_ISL_849906, EPI_ISL_849907, EPI_ISL_849908, EPI_ISL_849909, EPI_ISL_849910, EPI_ISL_849911, EPI_ISL_849912, EPI_ISL_849913, EPI_ISL_849914, EPI_ISL_849915, EPI_ISL_849916, EPI_ISL_849917, EPI_ISL_849918, EPI_ISL_849919, EPI_ISL_849920                                                                                                                                                                                                                                                                                                                                                                                                                                                                                                                                                                                                                                                                                                                                                                                                                 | see above                                | Utah Public Health Laboratory                                                                                                                                                              | Utah Public Health Laboratory                                                                                                                                                                                                                                                                                                                                                                                                                                       | Erin L. Young, Kelly F. Oakeson, Tara Gallagher                                                                                                                                                                                                                                                                                                                                                                                                                     |
| EPI_ISL_852820, EPI_ISL_852822, EPI_ISL_852824, EPI_ISL_852826, EPI_ISL_852827, EPI_ISL_852829, EPI_ISL_852830, EPI_ISL_852831, EPI_ISL_852832, EPI_ISL_852833, EPI_ISL_852834, EPI_ISL_852835, EPI_ISL_852836, EPI_ISL_852837, EPI_ISL_852838, EPI_ISL_852839, EPI_ISL_852840, EPI_ISL_852841, EPI_ISL_852842, EPI_ISL_852843, EPI_ISL_852844, EPI_ISL_852845, EPI_ISL_852846, EPI_ISL_852847, EPI_ISL_852848, EPI_ISL_852849, EPI_ISL_852850, EPI_ISL_852851, EPI_ISL_852852, EPI_ISL_852853, EPI_ISL_852854, EPI_ISL_852855, EPI_ISL_852856, EPI_ISL_852857, EPI_ISL_852858, EPI_ISL_852859, EPI_ISL_852860, EPI_ISL_852861, EPI_ISL_852862, EPI_ISL_852863, EPI_ISL_852864, EPI_ISL_852865, EPI_ISL_852866, EPI_ISL_852867, EPI_ISL_852868, EPI_ISL_852869, EPI_ISL_852870, EPI_ISL_852871, EPI_ISL_852872, EPI_ISL_852873, EPI_ISL_852874, EPI_ISL_852875, EPI_ISL_852876, EPI_ISL_852877, EPI_ISL_852878, EPI_ISL_852879, EPI_ISL_852880, EPI_ISL_852881, EPI_ISL_852882, EPI_ISL_852883, EPI_ISL_852884, EPI_ISL_852885, EPI_ISL_852886, EPI_ISL_852887, EPI_ISL_852888, EPI_ISL_852889, EPI_ISL_852890, EPI_ISL_852891, EPI_ISL_852892, EPI_ISL_852893, EPI_ISL_852894, EPI_ISL_852895, EPI_ISL_852896, EPI_ISL_852897, EPI_ISL_852898, EPI_ISL_852899, EPI_ISL_852900, EPI_ISL_852901, EPI_ISL_852902, EPI_ISL_852903, EPI_ISL_852904, EPI_ISL_852905, EPI_ISL_852906, EPI_ISL_852907, EPI_ISL_852908, EPI_ISL_852909, EPI_ISL_852910, EPI_ISL_852911, EPI_ISL_852912, EPI_ISL_852913, EPI_ISL_852914, EPI_ISL_852915, EPI_ISL_852916, EPI_ISL_852917, EPI_ISL_852918, EPI_ISL_852919, EPI_ISL_852920                                                                                                                                                                                                                                                                                                                                                                                                                                                                                                                                                                                                                                                                                                                                                                                                                                                                                                                                                                                                                                                                                                                                                                                                                                                                                                                                                                                                                                                                                                                                                                                                                                                                                                                                                                                                                 | see above                                | Microbiology Lab                                                                                                                                                                           | NBCS Sequencing Facility                                                                                                                                                                                                                                                                                                                                                                                                                                            | Dr. Jeff Wrana                                                                                                                                                                                                                                                                                                                                                                                                                                                      |
| EPI_ISL_855409, EPI_ISL_855410, EPI_ISL_855411, EPI_ISL_855412, EPI_ISL_855413, EPI_ISL_855414, EPI_ISL_855415, EPI_ISL_855416, EPI_ISL_855417, EPI_ISL_855418, EPI_ISL_855419, EPI_ISL_855420, EPI_ISL_855421, EPI_ISL_855422, EPI_ISL_855423, EPI_ISL_855424, EPI_ISL_855425, EPI_ISL_855426, EPI_ISL_855427, EPI_ISL_855428, EPI_ISL_855429, EPI_ISL_855430, EPI_ISL_855431, EPI_ISL_855432, EPI_ISL_855433, EPI_ISL_855434, EPI_ISL_855435, EPI_ISL_855436, EPI_ISL_855437, EPI_ISL_855438, EPI_ISL_855439, EPI_ISL_855440, EPI_ISL_855441, EPI_ISL_855442, EPI_ISL_855443, EPI_ISL_855444, EPI_ISL_855445, EPI_ISL_855446, EPI_ISL_855447, EPI_ISL_855448, EPI_ISL_855449, EPI_ISL_855450, EPI_ISL_855451, EPI_ISL_855452, EPI_ISL_855453, EPI_ISL_855454, EPI_ISL_855455, EPI_ISL_855456, EPI_ISL_855457, EPI_ISL_855458, EPI_ISL_855459, EPI_ISL_855460, EPI_ISL_855461, EPI_ISL_855462, EPI_ISL_855463, EPI_ISL_855464, EPI_ISL_855465, EPI_ISL_855466, EPI_ISL_855467, EPI_ISL_855468, EPI_ISL_855469, EPI_ISL_855470, EPI_ISL_855471, EPI_ISL_855472, EPI_ISL_855473, EPI_ISL_855474, EPI_ISL_855475, EPI_ISL_855476, EPI_ISL_855477, EPI_ISL_855478, EPI_ISL_855479, EPI_ISL_855480, EPI_ISL_855481, EPI_ISL_855482, EPI_ISL_855483, EPI_ISL_855484, EPI_ISL_855485, EPI_ISL_855486, EPI_ISL_855487, EPI_ISL_855488, EPI_ISL_855489, EPI_ISL_855490, EPI_ISL_855491, EPI_ISL_855492, EPI_ISL_855493                                                                                                                                                                                                                                                                                                                                                                                                                                                                                                                                                                                                                                                                                                                                                                                                                                                                                                                                                                                                                                                                                                                                                                                                                                                                                                                                                                                                                                                                                                                                                                                                                                                                                                                                                                                                                                                                                                                                                                                                                 | see above                                | Servicio de Microbiología, Laboratori Clínic Metropolitana Nord, Hospital Universitari Germans Trias i Pujol, Institut d'Investigació en Ciències de la Salut Germans Trias i Pujol (IGTP) | SeqCOVID-SPAIN consortium/IBV(CSIC)                                                                                                                                                                                                                                                                                                                                                                                                                                 | Elisa Martró, Antoni E. Bordoy, Anna Not, Adrián Antuori, Anabel Fernández, Nona Romani, Verónica Saludes, Cristina Casañ and SeqCOVID-SPAIN consortium                                                                                                                                                                                                                                                                                                             |
| EPI_ISL_856802, EPI_ISL_856803, EPI_ISL_856804, EPI_ISL_856805, EPI_ISL_856806, EPI_ISL_856807, EPI_ISL_856808, EPI_ISL_856809, EPI_ISL_856810, EPI_ISL_856811, EPI_ISL_856812, EPI_ISL_856813, EPI_ISL_856814, EPI_ISL_856815, EPI_ISL_856816, EPI_ISL_856817, EPI_ISL_856818, EPI_ISL_856819, EPI_ISL_856820, EPI_ISL_856821, EPI_ISL_856822, EPI_ISL_856823, EPI_ISL_856824, EPI_ISL_856825, EPI_ISL_856826, EPI_ISL_856827, EPI_ISL_856828, EPI_ISL_856829, EPI_ISL_856830, EPI_ISL_856831, EPI_ISL_856832, EPI_ISL_856833, EPI_ISL_856834, EPI_ISL_856835, EPI_ISL_856836, EPI_ISL_856837, EPI_ISL_856838, EPI_ISL_856839, EPI_ISL_856840, EPI_ISL_856841, EPI_ISL_856842, EPI_ISL_856843, EPI_ISL_856844, EPI_ISL_856845, EPI_ISL_856846, EPI_ISL_856847, EPI_ISL_856848, EPI_ISL_856849, EPI_ISL_856850, EPI_ISL_856851, EPI_ISL_856852, EPI_ISL_856853, EPI_ISL_856854, EPI_ISL_856855, EPI_ISL_856856, EPI_ISL_856857, EPI_ISL_856858, EPI_ISL_856859, EPI_ISL_856860, EPI_ISL_856861, EPI_ISL_856862, EPI_ISL_856863, EPI_ISL_856864, EPI_ISL_856865, EPI_ISL_856866, EPI_ISL_856867, EPI_ISL_856868                                                                                                                                                                                                                                                                                                                                                                                                                                                                                                                                                                                                                                                                                                                                                                                                                                                                                                                                                                                                                                                                                                                                                                                                                                                                                                                                                                                                                                                                                                                                                                                                                                                                                                                                                                                                                                                                                                                                                                                                                                                                                                                                                                                                                                                                                                                 | see above                                | Utah Public Health Laboratory                                                                                                                                                              | Utah Public Health Laboratory                                                                                                                                                                                                                                                                                                                                                                                                                                       | Erin L. Young, Kelly F. Oakeson, Tara Gallagher                                                                                                                                                                                                                                                                                                                                                                                                                     |
| EPI_ISL_857395                                                                                                                                                                                                                                                                                                                                                                                                                                                                                                                                                                                                                                                                                                                                                                                                                                                                                                                                                                                                                                                                                                                                                                                                                                                                                                                                                                                                                                                                                                                                                                                                                                                                                                                                                                                                                                                                                                                                                                                                                                                                                                                                                                                                                                                                                                                                                                                                                                                                                                                                                                                                                                                                                                                                                                                                                                                                                                                                                                                                                                                                                                                                                                                                                                                                                                                                                                                                                 | S.M.S.Medical College, Jaipur, Rajasthan | S.M.S.Medical College, Jaipur, Rajasthan                                                                                                                                                   |                                                                                                                                                                                                                                                                                                                                                                                                                                                                     | Dr. Bharti Malhotra, Dr. Swati Gautam                                                                                                                                                                                                                                                                                                                                                                                                                               |
| EPI_ISL_860318, EPI_ISL_860319, EPI_ISL_860322, EPI_ISL_860323, EPI_ISL_860324, EPI_ISL_860325, EPI_ISL_860326, EPI_ISL_860327, EPI_ISL_860328, EPI_ISL_860329, EPI_ISL_860330, EPI_ISL_860331, EPI_ISL_860332, EPI_ISL_860333, EPI_ISL_860334, EPI_ISL_860335, EPI_ISL_860336, EPI_ISL_860337, EPI_ISL_860338, EPI_ISL_860339, EPI_ISL_860340, EPI_ISL_860341, EPI_ISL_860342, EPI_ISL_860343, EPI_ISL_860344, EPI_ISL_860345, EPI_ISL_860346, EPI_ISL_860347, EPI_ISL_860348, EPI_ISL_860349, EPI_ISL_860350, EPI_ISL_860351, EPI_ISL_860352, EPI_ISL_860353, EPI_ISL_860354, EPI_ISL_860355, EPI_ISL_860356, EPI_ISL_860357, EPI_ISL_860358, EPI_ISL_860359, EPI_ISL_860360, EPI_ISL_860361, EPI_ISL_860362, EPI_ISL_860363, EPI_ISL_860364, EPI_ISL_860365, EPI_ISL_860366, EPI_ISL_860367, EPI_ISL_860368, EPI_ISL_860369, EPI_ISL_860370, EPI_ISL_860371, EPI_ISL_860372, EPI_ISL_860373, EPI_ISL_860374, EPI_ISL_860375, EPI_ISL_860376, EPI_ISL_860377, EPI_ISL_860378, EPI_ISL_860379, EPI_ISL_860380, EPI_ISL_860381, EPI_ISL_860382, EPI_ISL_860383, EPI_ISL_860384, EPI_ISL_860385, EPI_ISL_860386, EPI_ISL_860387, EPI_ISL_860388, EPI_ISL_860389, EPI_ISL_860390, EPI_ISL_860391, EPI_ISL_860392, EPI_ISL_860393, EPI_ISL_860394, EPI_ISL_860395, EPI_ISL_860396, EPI_ISL_860397, EPI_ISL_860398, EPI_ISL_860399, EPI_ISL_860400, EPI_ISL_860401, EPI_ISL_860402, EPI_ISL_860403, EPI_ISL_860404, EPI_ISL_860405, EPI_ISL_860406, EPI_ISL_860407, EPI_ISL_860408, EPI_ISL_860409, EPI_ISL_860410, EPI_ISL_860411, EPI_ISL_860412, EPI_ISL_860413, EPI_ISL_860414, EPI_ISL_860415, EPI_ISL_860416, EPI_ISL_860417, EPI_ISL_860418, EPI_ISL_860419, EPI_ISL_860420, EPI_ISL_860421, EPI_ISL_860422, EPI_ISL_860423, EPI_ISL_860427, EPI_ISL_860429, EPI_ISL_860430, EPI_ISL_860432, EPI_ISL_860433, EPI_ISL_860434, EPI_ISL_860435, EPI_ISL_860436, EPI_ISL_860437, EPI_ISL_860438, EPI_ISL_860439, EPI_ISL_860440, EPI_ISL_860441, EPI_ISL_860442, EPI_ISL_860443, EPI_ISL_860444, EPI_ISL_860445, EPI_ISL_860446, EPI_ISL_860447, EPI_ISL_860448, EPI_ISL_860450, EPI_ISL_860451, EPI_ISL_860452, EPI_ISL_860453, EPI_ISL_860454, EPI_ISL_860455, EPI_ISL_860456, EPI_ISL_860457, EPI_ISL_860458, EPI_ISL_860459, EPI_ISL_860460, EPI_ISL_860461, EPI_ISL_860462, EPI_ISL_860463, EPI_ISL_860464, EPI_ISL_860465, EPI_ISL_860466, EPI_ISL_860467, EPI_ISL_860468, EPI_ISL_860469, EPI_ISL_860470, EPI_ISL_860471, EPI_ISL_860472, EPI_ISL_860473, EPI_ISL_860474, EPI_ISL_860475, EPI_ISL_860476, EPI_ISL_860477, EPI_ISL_860478, EPI_ISL_860480, EPI_ISL_860481, EPI_ISL_860482, EPI_ISL_860483, EPI_ISL_860485, EPI_ISL_860486, EPI_ISL_860489, EPI_ISL_860492, EPI_ISL_860493, EPI_ISL_860495, EPI_ISL_860497, EPI_ISL_860498, EPI_ISL_860499, EPI_ISL_860500, EPI_ISL_860501, EPI_ISL_860502, EPI_ISL_860503, EPI_ISL_860504, EPI_ISL_860505, EPI_ISL_860506, EPI_ISL_860507, EPI_ISL_860508, EPI_ISL_860509, EPI_ISL_860510, EPI_ISL_860511, EPI_ISL_860512, EPI_ISL_860514, EPI_ISL_860515, EPI_ISL_860516, EPI_ISL_860517, EPI_ISL_860518, EPI_ISL_860519, EPI_ISL_860520, EPI_ISL_860521, EPI_ISL_860522, EPI_ISL_860523, EPI_ISL_860524, EPI_ISL_860525, EPI_ISL_860526, EPI_ISL_860527, EPI_ISL_860528, EPI_ISL_860529, EPI_ISL_860530, EPI_ISL_860531, EPI_ISL_860532, EPI_ISL_860533, EPI_ISL_860534, EPI_ISL_860535, EPI_ISL_860537, EPI_ISL_860539, EPI_ISL_860542, EPI_ISL_860543, EPI_ISL_860544 | see above                                | MVZ Labor Krone Gbr                                                                                                                                                                        | Center of Medical Microbiology, Virology, and Hospital Hygiene, University of Duesseldorf                                                                                                                                                                                                                                                                                                                                                                           | Dennis Deschka, Alexander Dilthey, Julia Fazaal, André Heimbach, Per Hoffmann, Torsten Houwaart, Malte Kohns Vasconcelos, Klaus Pfeffer, Bärbel Lipke, Kerstin Ludwig, Janine Silvery, Carsten Tiemann, Jörg Timm, Andreas Walker, Tobias Wienemann                                                                                                                                                                                                                 |
| EPI_ISL_861490                                                                                                                                                                                                                                                                                                                                                                                                                                                                                                                                                                                                                                                                                                                                                                                                                                                                                                                                                                                                                                                                                                                                                                                                                                                                                                                                                                                                                                                                                                                                                                                                                                                                                                                                                                                                                                                                                                                                                                                                                                                                                                                                                                                                                                                                                                                                                                                                                                                                                                                                                                                                                                                                                                                                                                                                                                                                                                                                                                                                                                                                                                                                                                                                                                                                                                                                                                                                                 | Cerballiance Côte d'Azur                 | CERBA LAB                                                                                                                                                                                  |                                                                                                                                                                                                                                                                                                                                                                                                                                                                     | De La Chapelle A; Prots L;                                                                                                                                                                                                                                                                                                                                                                                                                                          |
| EPI_ISL_861503                                                                                                                                                                                                                                                                                                                                                                                                                                                                                                                                                                                                                                                                                                                                                                                                                                                                                                                                                                                                                                                                                                                                                                                                                                                                                                                                                                                                                                                                                                                                                                                                                                                                                                                                                                                                                                                                                                                                                                                                                                                                                                                                                                                                                                                                                                                                                                                                                                                                                                                                                                                                                                                                                                                                                                                                                                                                                                                                                                                                                                                                                                                                                                                                                                                                                                                                                                                                                 | Cerballiance Alpes Durance               | CERBA LAB                                                                                                                                                                                  |                                                                                                                                                                                                                                                                                                                                                                                                                                                                     | Dyen P; Prots L.                                                                                                                                                                                                                                                                                                                                                                                                                                                    |
| EPI_ISL_861504, EPI_ISL_861505                                                                                                                                                                                                                                                                                                                                                                                                                                                                                                                                                                                                                                                                                                                                                                                                                                                                                                                                                                                                                                                                                                                                                                                                                                                                                                                                                                                                                                                                                                                                                                                                                                                                                                                                                                                                                                                                                                                                                                                                                                                                                                                                                                                                                                                                                                                                                                                                                                                                                                                                                                                                                                                                                                                                                                                                                                                                                                                                                                                                                                                                                                                                                                                                                                                                                                                                                                                                 | Cerballiance Provence                    | CERBA LAB                                                                                                                                                                                  |                                                                                                                                                                                                                                                                                                                                                                                                                                                                     | Delaunay E; Roig JC; Prots L.                                                                                                                                                                                                                                                                                                                                                                                                                                       |
| EPI_ISL_861867, EPI_ISL_861868, EPI_ISL_861869, EPI_ISL_861870, EPI_ISL_861871, EPI_ISL_861872, EPI_ISL_861873, EPI_ISL_861874, EPI_ISL_861875, EPI_ISL_861876, EPI_ISL_861877, EPI_ISL_861878, EPI_ISL_861879, EPI_ISL_861880, EPI_ISL_861881, EPI_ISL_861882, EPI_ISL_861883, EPI_ISL_861884,                                                                                                                                                                                                                                                                                                                                                                                                                                                                                                                                                                                                                                                                                                                                                                                                                                                                                                                                                                                                                                                                                                                                                                                                                                                                                                                                                                                                                                                                                                                                                                                                                                                                                                                                                                                                                                                                                                                                                                                                                                                                                                                                                                                                                                                                                                                                                                                                                                                                                                                                                                                                                                                                                                                                                                                                                                                                                                                                                                                                                                                                                                                                |                                          |                                                                                                                                                                                            |                                                                                                                                                                                                                                                                                                                                                                                                                                                                     |                                                                                                                                                                                                                                                                                                                                                                                                                                                                     |

|                                                                                                                                                                                                                                                                                                                                                                                                                                                                                                                                                                                                                                                                                                                                                                                                                                                                                                                                                                                                                                                                                                                                                                                                                                                                                                                                                                                                                                                                                                                                                                                                                                                |                                                                                                    |                                                                                                                                                                                            |                                                                                                                          |                                                                                                                                                                                                                                                                                                                                                                                                                                                           |
|------------------------------------------------------------------------------------------------------------------------------------------------------------------------------------------------------------------------------------------------------------------------------------------------------------------------------------------------------------------------------------------------------------------------------------------------------------------------------------------------------------------------------------------------------------------------------------------------------------------------------------------------------------------------------------------------------------------------------------------------------------------------------------------------------------------------------------------------------------------------------------------------------------------------------------------------------------------------------------------------------------------------------------------------------------------------------------------------------------------------------------------------------------------------------------------------------------------------------------------------------------------------------------------------------------------------------------------------------------------------------------------------------------------------------------------------------------------------------------------------------------------------------------------------------------------------------------------------------------------------------------------------|----------------------------------------------------------------------------------------------------|--------------------------------------------------------------------------------------------------------------------------------------------------------------------------------------------|--------------------------------------------------------------------------------------------------------------------------|-----------------------------------------------------------------------------------------------------------------------------------------------------------------------------------------------------------------------------------------------------------------------------------------------------------------------------------------------------------------------------------------------------------------------------------------------------------|
| EPI_ISL_861885, EPI_ISL_861886, EPI_ISL_861887, EPI_ISL_861888                                                                                                                                                                                                                                                                                                                                                                                                                                                                                                                                                                                                                                                                                                                                                                                                                                                                                                                                                                                                                                                                                                                                                                                                                                                                                                                                                                                                                                                                                                                                                                                 | see above                                                                                          | LATE - Laboratório de Técnicas Especiais - Hospital Israelita Albert Einstein                                                                                                              | LATE - Laboratório de Técnicas Especiais - Hospital Israelita Albert Einstein                                            | Deyvid Amgarten, Fernanda de Mello Malta, Raquel Riyuzo, Ana Paula Moreira Salles, Pedro Henrique Sebe Rodrigues, João Renato Rebelo Pinho                                                                                                                                                                                                                                                                                                                |
| EPI_ISL_861889                                                                                                                                                                                                                                                                                                                                                                                                                                                                                                                                                                                                                                                                                                                                                                                                                                                                                                                                                                                                                                                                                                                                                                                                                                                                                                                                                                                                                                                                                                                                                                                                                                 | Genomika Einstein                                                                                  | LATE - Laboratório de Técnicas Especiais - Hospital Israelita Albert Einstein                                                                                                              | LATE - Laboratório de Técnicas Especiais - Hospital Israelita Albert Einstein                                            | Deyvid Amgarten, Fernanda de Mello Malta, Raquel Riyuzo, Ana Paula Moreira Salles, Pedro Henrique Sebe Rodrigues, João Bosco Oliveira Filho, João Renato Rebelo Pinho                                                                                                                                                                                                                                                                                     |
| EPI_ISL_861890, EPI_ISL_861891, EPI_ISL_861892, EPI_ISL_861893, EPI_ISL_861894, EPI_ISL_861895, EPI_ISL_861896, EPI_ISL_861897, EPI_ISL_861898, EPI_ISL_861899, EPI_ISL_861900, EPI_ISL_861901, EPI_ISL_861902, EPI_ISL_861903, EPI_ISL_861904, EPI_ISL_861905, EPI_ISL_861906, EPI_ISL_861907, EPI_ISL_861908, EPI_ISL_861909, EPI_ISL_861910                                                                                                                                                                                                                                                                                                                                                                                                                                                                                                                                                                                                                                                                                                                                                                                                                                                                                                                                                                                                                                                                                                                                                                                                                                                                                                 | see above                                                                                          | LATE - Laboratório de Técnicas Especiais - Hospital Israelita Albert Einstein                                                                                                              | LATE - Laboratório de Técnicas Especiais - Hospital Israelita Albert Einstein                                            | Deyvid Amgarten, Fernanda de Mello Malta, Raquel Riyuzo, Ana Paula Moreira Salles, Pedro Henrique Sebe Rodrigues, João Renato Rebelo Pinho                                                                                                                                                                                                                                                                                                                |
| EPI_ISL_861911                                                                                                                                                                                                                                                                                                                                                                                                                                                                                                                                                                                                                                                                                                                                                                                                                                                                                                                                                                                                                                                                                                                                                                                                                                                                                                                                                                                                                                                                                                                                                                                                                                 | Genomika Einstein                                                                                  | LATE - Laboratório de Técnicas Especiais - Hospital Israelita Albert Einstein                                                                                                              | LATE - Laboratório de Técnicas Especiais - Hospital Israelita Albert Einstein                                            | Deyvid Amgarten, Fernanda de Mello Malta, Raquel Riyuzo, Ana Paula Moreira Salles, Pedro Henrique Sebe Rodrigues, João Bosco Oliveira Filho, João Renato Rebelo Pinho                                                                                                                                                                                                                                                                                     |
| EPI_ISL_861912, EPI_ISL_861913                                                                                                                                                                                                                                                                                                                                                                                                                                                                                                                                                                                                                                                                                                                                                                                                                                                                                                                                                                                                                                                                                                                                                                                                                                                                                                                                                                                                                                                                                                                                                                                                                 | LATE - Laboratório de Técnicas Especiais - Hospital Israelita Albert Einstein                      | LATE - Laboratório de Técnicas Especiais - Hospital Israelita Albert Einstein                                                                                                              | LATE - Laboratório de Técnicas Especiais - Hospital Israelita Albert Einstein                                            | Deyvid Amgarten, Fernanda de Mello Malta, Raquel Riyuzo, Ana Paula Moreira Salles, Pedro Henrique Sebe Rodrigues, João Renato Rebelo Pinho                                                                                                                                                                                                                                                                                                                |
| EPI_ISL_861914                                                                                                                                                                                                                                                                                                                                                                                                                                                                                                                                                                                                                                                                                                                                                                                                                                                                                                                                                                                                                                                                                                                                                                                                                                                                                                                                                                                                                                                                                                                                                                                                                                 | Genomika Einstein                                                                                  | LATE - Laboratório de Técnicas Especiais - Hospital Israelita Albert Einstein                                                                                                              | LATE - Laboratório de Técnicas Especiais - Hospital Israelita Albert Einstein                                            | Deyvid Amgarten, Fernanda de Mello Malta, Raquel Riyuzo, Ana Paula Moreira Salles, Pedro Henrique Sebe Rodrigues, João Bosco Oliveira Filho, João Renato Rebelo Pinho                                                                                                                                                                                                                                                                                     |
| EPI_ISL_861915                                                                                                                                                                                                                                                                                                                                                                                                                                                                                                                                                                                                                                                                                                                                                                                                                                                                                                                                                                                                                                                                                                                                                                                                                                                                                                                                                                                                                                                                                                                                                                                                                                 | LATE - Laboratório de Técnicas Especiais - Hospital Israelita Albert Einstein                      | LATE - Laboratório de Técnicas Especiais - Hospital Israelita Albert Einstein                                                                                                              | LATE - Laboratório de Técnicas Especiais - Hospital Israelita Albert Einstein                                            | Deyvid Amgarten, Fernanda de Mello Malta, Raquel Riyuzo, Ana Paula Moreira Salles, Pedro Henrique Sebe Rodrigues, João Renato Rebelo Pinho                                                                                                                                                                                                                                                                                                                |
| EPI_ISL_866545, EPI_ISL_866556, EPI_ISL_866561, EPI_ISL_866565, EPI_ISL_866569, EPI_ISL_866576, EPI_ISL_866577, EPI_ISL_866581, EPI_ISL_866582, EPI_ISL_866590, EPI_ISL_866595, EPI_ISL_866596, EPI_ISL_866598, EPI_ISL_866602, EPI_ISL_866603, EPI_ISL_866604, EPI_ISL_866607, EPI_ISL_866608, EPI_ISL_866611, EPI_ISL_866621, EPI_ISL_866622, EPI_ISL_866637, EPI_ISL_866638, EPI_ISL_866653, EPI_ISL_866656, EPI_ISL_866671, EPI_ISL_866673, EPI_ISL_866678, EPI_ISL_866682, EPI_ISL_866683, EPI_ISL_866685, EPI_ISL_866686, EPI_ISL_866693, EPI_ISL_866695, EPI_ISL_866702, EPI_ISL_866704, EPI_ISL_866706, EPI_ISL_866709, EPI_ISL_866710, EPI_ISL_866712, EPI_ISL_866716, EPI_ISL_866717, EPI_ISL_866718, EPI_ISL_866719, EPI_ISL_866722, EPI_ISL_866727, EPI_ISL_866729, EPI_ISL_866731, EPI_ISL_866732, EPI_ISL_866734, EPI_ISL_866738, EPI_ISL_866739, EPI_ISL_866741, EPI_ISL_866746, EPI_ISL_866749, EPI_ISL_866750, EPI_ISL_866754, EPI_ISL_866757, EPI_ISL_866760, EPI_ISL_866761, EPI_ISL_866763, EPI_ISL_866765, EPI_ISL_866766, EPI_ISL_866767, EPI_ISL_866768, EPI_ISL_866770, EPI_ISL_866773, EPI_ISL_866774, EPI_ISL_866775, EPI_ISL_866779, EPI_ISL_866791, EPI_ISL_866795, EPI_ISL_866797, EPI_ISL_866805, EPI_ISL_866810, EPI_ISL_866811, EPI_ISL_866816, EPI_ISL_866821, EPI_ISL_866825, EPI_ISL_866826, EPI_ISL_866829, EPI_ISL_866831, EPI_ISL_866834, EPI_ISL_866836, EPI_ISL_866847, EPI_ISL_866851, EPI_ISL_866854, EPI_ISL_866856, EPI_ISL_866857, EPI_ISL_866860, EPI_ISL_866862, EPI_ISL_866871, EPI_ISL_866876, EPI_ISL_866878, EPI_ISL_866883, EPI_ISL_866884, EPI_ISL_866885, EPI_ISL_866887, EPI_ISL_866888 | see above                                                                                          | Quadram Institute Bioscience                                                                                                                                                               | COVID-19 Genomics UK (COG-UK) Consortium                                                                                 | Dave J. Baker, Gemma L. Kay, Alp Aydin, Thanh Le-Viet, Steven Rudder, Ana P. Tedim, Anastasia Kolyva, Maria Diaz, Leonardo de Oliveira Martins, Nabil-Fareed Alikhan, Lizzie Meadows, Rachael Stanley, Ngozi Elumogo, Muhammed Yasin, Nicholas M. Thomson, Alexander J Trotter, Rachel Gilroy, Samuel Bloomfield, Claire Stuart, Andrew Bell, Reenesh Prakash, Samir Dervisevic, Alison E. Mather, John Wain, Mark Webber, Andrew J. Page, Justin O'Grady |
| EPI_ISL_871891, EPI_ISL_871912, EPI_ISL_871914, EPI_ISL_871915, EPI_ISL_871916, EPI_ISL_871917, EPI_ISL_871918, EPI_ISL_871919, EPI_ISL_871920, EPI_ISL_871921, EPI_ISL_871922, EPI_ISL_871923, EPI_ISL_871924, EPI_ISL_871925, EPI_ISL_871926, EPI_ISL_871927, EPI_ISL_871928, EPI_ISL_871929, EPI_ISL_871930, EPI_ISL_871931, EPI_ISL_871932, EPI_ISL_871933, EPI_ISL_871934, EPI_ISL_871935, EPI_ISL_871936, EPI_ISL_871937                                                                                                                                                                                                                                                                                                                                                                                                                                                                                                                                                                                                                                                                                                                                                                                                                                                                                                                                                                                                                                                                                                                                                                                                                 | see above                                                                                          | Servicio de Microbiología, Laboratori Clinic Metropolitana Nord. Hospital Universitari Germans Trias i Pujol. Institut d'Investigació en Ciències de la Salut Germans Trias i Pujol (IGTP) | SeqCOVID-SPAIN consortium/IBV(CSIC)                                                                                      | Elisa Martró, Antoni E. Bordoy, Anna Not, Adrián Antuori, Anabel Fernández, Nona Romani, Verónica Saludes, Cristina Casañ and SeqCOVID-SPAIN consortium                                                                                                                                                                                                                                                                                                   |
| EPI_ISL_872093                                                                                                                                                                                                                                                                                                                                                                                                                                                                                                                                                                                                                                                                                                                                                                                                                                                                                                                                                                                                                                                                                                                                                                                                                                                                                                                                                                                                                                                                                                                                                                                                                                 | Instituto de Diagnostico y Referencia Epidemiologicos (INDRE)                                      | Instituto de Diagnostico y Referencia Epidemiologicos (INDRE)                                                                                                                              | Instituto de Diagnostico y Referencia Epidemiologicos (INDRE)                                                            | Edgar Mendieta-Condado, Ernesto Ramirez-Gonzalez, Adnan-Araiza Rodríguez, Claudia Wong-Arambula, Gisela Barrera-Badillo, Abril Rodriguez-Maldonado, Natividad Cruz-Ortiz, Tatiana Nunez-Garcia, Dayanira Arellano-Suarez, Fabiola Garces-Ayala, Lucia Hernandez-Rivas, Irma Lopez-Martinez.                                                                                                                                                               |
| EPI_ISL_873164, EPI_ISL_873165                                                                                                                                                                                                                                                                                                                                                                                                                                                                                                                                                                                                                                                                                                                                                                                                                                                                                                                                                                                                                                                                                                                                                                                                                                                                                                                                                                                                                                                                                                                                                                                                                 | Medical Laboratory Sciences, Arab American University                                              | Medical Laboratory Sciences, Arab American University                                                                                                                                      | Medical Laboratory Sciences, Arab American University                                                                    | Dumaidi,k., Al-Jawabreh,A., Ereqat,S., Al-Jawabreh,H., Nasereddin,A.                                                                                                                                                                                                                                                                                                                                                                                      |
| EPI_ISL_882656                                                                                                                                                                                                                                                                                                                                                                                                                                                                                                                                                                                                                                                                                                                                                                                                                                                                                                                                                                                                                                                                                                                                                                                                                                                                                                                                                                                                                                                                                                                                                                                                                                 | Medical Research Center, Faculty of Medicine, Syarif Hidayatullah State Islamic University Jakarta | Medical Research Center, Faculty of Medicine, Syarif Hidayatullah State Islamic University Jakarta                                                                                         | Medical Research Center, Faculty of Medicine, Syarif Hidayatullah State Islamic University Jakarta                       | Erike A Suwarsono, Chris Adhiyanto, Laifa Hendarmin, Zeti Harriyati, Flori Ratna Sari, Endah Wulandari, Fika Ekayanti                                                                                                                                                                                                                                                                                                                                     |
| EPI_ISL_882780                                                                                                                                                                                                                                                                                                                                                                                                                                                                                                                                                                                                                                                                                                                                                                                                                                                                                                                                                                                                                                                                                                                                                                                                                                                                                                                                                                                                                                                                                                                                                                                                                                 | Ramathibodi Chakri Naruebodindra Hospital                                                          | COVID-19 Network Investigations (CONI) Alliance                                                                                                                                            | COVID-19 Network Investigations (CONI) Alliance                                                                          | Elizabeth Batty, Wasun Chantrattita, Thanat Chookajorn, Stefan Fernandez, Angkana Huang, Anthony R. Jones, Khajohn Joonsalak, Chonticha Klungtong, Theerarat Kochakarn, Namfon Kotanan, Krittikorn Kumpornsinn, Wudtichai Manasatienkij, Bhakbhoom Panthan, Ekawat Pasomsob, Kingkan Rakmanee, Insee Sensorn, Janjira Thaipadunpanit, Arporn Wangwiwatsin, Treewat Watthanachockchai                                                                      |
| EPI_ISL_882918                                                                                                                                                                                                                                                                                                                                                                                                                                                                                                                                                                                                                                                                                                                                                                                                                                                                                                                                                                                                                                                                                                                                                                                                                                                                                                                                                                                                                                                                                                                                                                                                                                 | INMI Lazzaro Spallanzani IRCCS                                                                     | INMI Lazzaro Spallanzani IRCCS                                                                                                                                                             | INMI Lazzaro Spallanzani IRCCS                                                                                           | E Giombini, M. Rueca, B Bartolini, O Butera, C.E.M Gruber, F Messina, MR Capobianchi, A Di Caro                                                                                                                                                                                                                                                                                                                                                           |
| EPI_ISL_882922                                                                                                                                                                                                                                                                                                                                                                                                                                                                                                                                                                                                                                                                                                                                                                                                                                                                                                                                                                                                                                                                                                                                                                                                                                                                                                                                                                                                                                                                                                                                                                                                                                 | Sant'Eugenio/CTO ASL Roma 2                                                                        | INMI Lazzaro Spallanzani IRCCS                                                                                                                                                             | INMI Lazzaro Spallanzani IRCCS                                                                                           | E Giombini, M Rueca, B Bartolini, O Butera, C.E.M Gruber, F Messina, F Bondanini, GC Coccicillo, C Disegni, MR Capobianchi, A Di Caro                                                                                                                                                                                                                                                                                                                     |
| EPI_ISL_882923                                                                                                                                                                                                                                                                                                                                                                                                                                                                                                                                                                                                                                                                                                                                                                                                                                                                                                                                                                                                                                                                                                                                                                                                                                                                                                                                                                                                                                                                                                                                                                                                                                 | Istituto Zooprofilattico Sperimentale del Mezzogiorno                                              | INMI Lazzaro Spallanzani IRCCS                                                                                                                                                             | INMI Lazzaro Spallanzani IRCCS                                                                                           | E Giombini, B Bartolini, M. Rueca, C.E.M Gruber, F Messina, O Butera, P Cerino, B Pierri, C Buonerba, D Di Concilio, MC Cuomo, MR Capobianchi, A Di Caro                                                                                                                                                                                                                                                                                                  |
| EPI_ISL_882930                                                                                                                                                                                                                                                                                                                                                                                                                                                                                                                                                                                                                                                                                                                                                                                                                                                                                                                                                                                                                                                                                                                                                                                                                                                                                                                                                                                                                                                                                                                                                                                                                                 | INMI Lazzaro Spallanzani IRCCS                                                                     | INMI Lazzaro Spallanzani IRCCS                                                                                                                                                             | INMI Lazzaro Spallanzani IRCCS                                                                                           | E Giombini, M. Rueca, B Bartolini, O Butera, C.E.M Gruber, F Messina, MR Capobianchi, A Di Caro                                                                                                                                                                                                                                                                                                                                                           |
| EPI_ISL_882933                                                                                                                                                                                                                                                                                                                                                                                                                                                                                                                                                                                                                                                                                                                                                                                                                                                                                                                                                                                                                                                                                                                                                                                                                                                                                                                                                                                                                                                                                                                                                                                                                                 | Sant'Eugenio/CTO ASL Roma 2                                                                        | INMI Lazzaro Spallanzani IRCCS                                                                                                                                                             | INMI Lazzaro Spallanzani IRCCS                                                                                           | E Giombini, M. Rueca, B Bartolini, O Butera, C.E.M Gruber, F Bondanini, GC Coccicillo, C Disegni, F Messina, MR Capobianchi, A Di Caro                                                                                                                                                                                                                                                                                                                    |
| EPI_ISL_882936                                                                                                                                                                                                                                                                                                                                                                                                                                                                                                                                                                                                                                                                                                                                                                                                                                                                                                                                                                                                                                                                                                                                                                                                                                                                                                                                                                                                                                                                                                                                                                                                                                 | Sant'Eugenio/CTO ASL Roma 2                                                                        | INMI Lazzaro Spallanzani IRCCS                                                                                                                                                             | INMI Lazzaro Spallanzani IRCCS                                                                                           | E Giombini, M Rueca, B Bartolini, O Butera, C.E.M Gruber, F Messina, F Bondanini, GC Coccicillo, C Disegni, MR Capobianchi, A Di Caro                                                                                                                                                                                                                                                                                                                     |
| EPI_ISL_883957                                                                                                                                                                                                                                                                                                                                                                                                                                                                                                                                                                                                                                                                                                                                                                                                                                                                                                                                                                                                                                                                                                                                                                                                                                                                                                                                                                                                                                                                                                                                                                                                                                 | Medical Research Center, Faculty of Medicine, Syarif Hidayatullah State Islamic University Jakarta | Medical Research Center, Faculty of Medicine, Syarif Hidayatullah State Islamic University Jakarta                                                                                         | Medical Research Center, Faculty of Medicine, Syarif Hidayatullah State Islamic University Jakarta                       | Erike A Suwarsono, Chris Adhiyanto, Laifa Hendarmin, Zeti Harriyati, Endah Wulandari, Flori Ratna Sari, Fika Ekayanti, Hari Hendarto                                                                                                                                                                                                                                                                                                                      |
| EPI_ISL_884249, EPI_ISL_884250                                                                                                                                                                                                                                                                                                                                                                                                                                                                                                                                                                                                                                                                                                                                                                                                                                                                                                                                                                                                                                                                                                                                                                                                                                                                                                                                                                                                                                                                                                                                                                                                                 | LATE - Laboratório de Técnicas Especiais - Hospital Israelita Albert Einstein                      | LATE - Laboratório de Técnicas Especiais - Hospital Israelita Albert Einstein                                                                                                              | LATE - Laboratório de Técnicas Especiais - Hospital Israelita Albert Einstein                                            | Deyvid Amgarten, Fernanda de Mello Malta, Raquel Riyuzo, Ana Paula Moreira Salles, Pedro Henrique Sebe Rodrigues, João Renato Rebelo Pinho                                                                                                                                                                                                                                                                                                                |
| EPI_ISL_885143                                                                                                                                                                                                                                                                                                                                                                                                                                                                                                                                                                                                                                                                                                                                                                                                                                                                                                                                                                                                                                                                                                                                                                                                                                                                                                                                                                                                                                                                                                                                                                                                                                 | Central public health laboratory                                                                   | Molecular Diagnostics Department, Central public health laboratory                                                                                                                         | Molecular Diagnostics Department, Central public health laboratory                                                       | Dier,H., Dishad,H., Furat,S., Sharmeen,F.-A., Dalia,F., Mohsen,A.,Hemdad,A., Fahmi,A., Hemn,M. and Idrees,H.                                                                                                                                                                                                                                                                                                                                              |
| EPI_ISL_888674, EPI_ISL_888675, EPI_ISL_888676                                                                                                                                                                                                                                                                                                                                                                                                                                                                                                                                                                                                                                                                                                                                                                                                                                                                                                                                                                                                                                                                                                                                                                                                                                                                                                                                                                                                                                                                                                                                                                                                 | Center of Advanced Studies and Technology, Molecular Genetics Laboratory                           | Center of Advanced Studies and Technology, Molecular Genetics Laboratory                                                                                                                   | Center of Advanced Studies and Technology, Molecular Genetics Laboratory                                                 | De Fabritis Simone, Mandatori Domitilla, Ferrante Rossella                                                                                                                                                                                                                                                                                                                                                                                                |
| EPI_ISL_888982                                                                                                                                                                                                                                                                                                                                                                                                                                                                                                                                                                                                                                                                                                                                                                                                                                                                                                                                                                                                                                                                                                                                                                                                                                                                                                                                                                                                                                                                                                                                                                                                                                 | RS Pondok Indah Hospital - Pondok Indah                                                            | Eijkman Institute for Molecular Biology, Ministry of Research and Technology/National Agency for Research and Innovation                                                                   | Eijkman Institute for Molecular Biology, Ministry of Research and Technology/National Agency for Research and Innovation | Edison Johar, Frilasita A Yudhaputri, Hidayat Trimarsanto, Iskandar Adnan, Lydia V. Panggalo, Sukma Oktavianthi, Willy Agustine, Safarina G Malik, Khin Saw Myint, Amin Soebandrio                                                                                                                                                                                                                                                                        |
| EPI_ISL_888983                                                                                                                                                                                                                                                                                                                                                                                                                                                                                                                                                                                                                                                                                                                                                                                                                                                                                                                                                                                                                                                                                                                                                                                                                                                                                                                                                                                                                                                                                                                                                                                                                                 | RS Hermina Daan Mogot                                                                              | Eijkman Institute for Molecular Biology, Ministry of Research and Technology/National Agency for Research and Innovation                                                                   | Eijkman Institute for Molecular Biology, Ministry of Research and Technology/National Agency for Research and Innovation | Edison Johar, Frilasita A Yudhaputri, Hidayat Trimarsanto, Iskandar Adnan, Lydia V. Panggalo, Sukma Oktavianthi, Willy Agustine, Safarina G Malik, Khin Saw Myint, Amin Soebandrio                                                                                                                                                                                                                                                                        |
| EPI_ISL_888984                                                                                                                                                                                                                                                                                                                                                                                                                                                                                                                                                                                                                                                                                                                                                                                                                                                                                                                                                                                                                                                                                                                                                                                                                                                                                                                                                                                                                                                                                                                                                                                                                                 | RS Hermina Depok                                                                                   | Eijkman Institute for Molecular Biology, Ministry of Research and Technology/National Agency for Research and Innovation                                                                   | Eijkman Institute for Molecular Biology, Ministry of Research and Technology/National Agency for Research and Innovation | Edison Johar, Frilasita A Yudhaputri, Hidayat Trimarsanto, Iskandar Adnan, Lydia V. Panggalo, Sukma Oktavianthi, Willy Agustine, Safarina G Malik, Khin Saw Myint, Amin Soebandrio                                                                                                                                                                                                                                                                        |
| EPI_ISL_888985                                                                                                                                                                                                                                                                                                                                                                                                                                                                                                                                                                                                                                                                                                                                                                                                                                                                                                                                                                                                                                                                                                                                                                                                                                                                                                                                                                                                                                                                                                                                                                                                                                 | RS Hermina Serpong                                                                                 | Eijkman Institute for Molecular Biology, Ministry of Research and Technology/National Agency for Research and Innovation                                                                   | Eijkman Institute for Molecular Biology, Ministry of Research and Technology/National Agency for Research and Innovation | Edison Johar, Frilasita A Yudhaputri, Hidayat Trimarsanto, Iskandar Adnan, Lydia V. Panggalo, Sukma Oktavianthi, Willy Agustine, Safarina G Malik, Khin Saw Myint, Amin Soebandrio                                                                                                                                                                                                                                                                        |
| EPI_ISL_888986                                                                                                                                                                                                                                                                                                                                                                                                                                                                                                                                                                                                                                                                                                                                                                                                                                                                                                                                                                                                                                                                                                                                                                                                                                                                                                                                                                                                                                                                                                                                                                                                                                 | RSU Bhakti Kartini                                                                                 | Eijkman Institute for Molecular Biology, Ministry of Research and Technology/National Agency for Research and Innovation                                                                   | Eijkman Institute for Molecular Biology, Ministry of Research and Technology/National Agency for Research and Innovation | Edison Johar, Frilasita A Yudhaputri, Hidayat Trimarsanto, Iskandar Adnan, Lydia V. Panggalo, Sukma Oktavianthi, Willy Agustine, Safarina G Malik, Khin Saw Myint, Amin Soebandrio                                                                                                                                                                                                                                                                        |
| EPI_ISL_889008                                                                                                                                                                                                                                                                                                                                                                                                                                                                                                                                                                                                                                                                                                                                                                                                                                                                                                                                                                                                                                                                                                                                                                                                                                                                                                                                                                                                                                                                                                                                                                                                                                 | RS Sentra Medika Cibinong                                                                          | Eijkman Institute for Molecular Biology, Ministry of Research and Technology/National Agency for Research and Innovation                                                                   | Eijkman Institute for Molecular Biology, Ministry of Research and Technology/National Agency for Research and Innovation | Edison Johar, Frilasita A Yudhaputri, Hidayat Trimarsanto, Iskandar Adnan, Lydia V. Panggalo, Sukma Oktavianthi, Willy Agustine, Safarina G Malik, Khin Saw Myint, Amin Soebandrio                                                                                                                                                                                                                                                                        |
| EPI_ISL_889009                                                                                                                                                                                                                                                                                                                                                                                                                                                                                                                                                                                                                                                                                                                                                                                                                                                                                                                                                                                                                                                                                                                                                                                                                                                                                                                                                                                                                                                                                                                                                                                                                                 | RS Mitra Keluarga Bintaro                                                                          | Eijkman Institute for Molecular Biology, Ministry of Research and Technology/National Agency for Research and Innovation                                                                   | Eijkman Institute for Molecular Biology, Ministry of Research and Technology/National Agency for Research and Innovation | Edison Johar, Frilasita A Yudhaputri, Hidayat Trimarsanto, Iskandar Adnan, Lydia V. Panggalo, Sukma Oktavianthi, Willy Agustine, Safarina G Malik, Khin Saw Myint, Amin Soebandrio                                                                                                                                                                                                                                                                        |







We gratefully acknowledge the following Authors from the Originating laboratories responsible for obtaining the specimens, as well as the Submitting laboratories where the genome data were generated and shared via GISAID, on which this research is based.

All Submitters of data may be contacted directly via [www.gisaid.org](http://www.gisaid.org)

Authors are sorted alphabetically.

| Accession ID                                                                                                                                                                                                   | Originating Laboratory                                                               | Submitting Laboratory                                                                                                | Authors                                                                                                                                                                                                                                                                                                                                                                                                                                                                                                                                                                                                                                                                                              |
|----------------------------------------------------------------------------------------------------------------------------------------------------------------------------------------------------------------|--------------------------------------------------------------------------------------|----------------------------------------------------------------------------------------------------------------------|------------------------------------------------------------------------------------------------------------------------------------------------------------------------------------------------------------------------------------------------------------------------------------------------------------------------------------------------------------------------------------------------------------------------------------------------------------------------------------------------------------------------------------------------------------------------------------------------------------------------------------------------------------------------------------------------------|
| EPI_ISL_413600                                                                                                                                                                                                 | Centre for Infectious Diseases and Microbiology - Public Health                      | NSW Health Pathology - Institute of Clinical Pathology and Medical Research; Westmead Hospital; University of Sydney | Gall, M, Eden J-S, Lam C, Gray K, Timms, V, Rockett R, Carter I, Rahman H, Holmes EC, O'Sullivan MV, Sintchenko V, Chen SC, Maddocks S, Kok J and Dwyer DE for the 2019-nCoV Study Group*                                                                                                                                                                                                                                                                                                                                                                                                                                                                                                            |
| EPI_ISL_415539, EPI_ISL_415541, EPI_ISL_415542, EPI_ISL_415543                                                                                                                                                 | Utah Public Health Laboratory                                                        | Utah Public Health Laboratory                                                                                        | Erin Young, Kelly Oakeson                                                                                                                                                                                                                                                                                                                                                                                                                                                                                                                                                                                                                                                                            |
| EPI_ISL_416458                                                                                                                                                                                                 | Virology laboratory Ministry of Health Kuwait sequenced at Dasman Diabetes Institute | Dasman Diabetes Institute                                                                                            | Fahd Al-Mulla, Sumi John, Sara Alqabandi, Rasheeba Iqbal, Motasem Melhem, Ebaa alOzairi, Qais Al-Duwairi                                                                                                                                                                                                                                                                                                                                                                                                                                                                                                                                                                                             |
| EPI_ISL_416489, EPI_ISL_416491, EPI_ISL_416492, EPI_ISL_416523                                                                                                                                                 | University of Wisconsin-Madison AIDS Vaccine Research Laboratories                   | University of Wisconsin-Madison AIDS Vaccine Research Laboratories                                                   | Gage Moreno, Katarina Braun, et al. AIDS Vaccine Research Laboratories                                                                                                                                                                                                                                                                                                                                                                                                                                                                                                                                                                                                                               |
| EPI_ISL_416541                                                                                                                                                                                                 | Dasman Diabetes Institute and Virology Laboratory Ministry of Health                 | Dasman Diabetes Institute                                                                                            | Fahd Al-Mulla, Sumi John, Rasheeba Iqbal, Motasem Melhem, Ebaa AIOzairi, Sara Al-Qabandi, Qais Al-Duwairi                                                                                                                                                                                                                                                                                                                                                                                                                                                                                                                                                                                            |
| EPI_ISL_416542                                                                                                                                                                                                 | Dasman Diabetes Institute                                                            | Dasman Diabetes Institute                                                                                            | Fahd Al-Mulla, Sumi John, Rasheeba Iqbal, Motasem Melhem, Ebaa AIOzairi, Sara Al-Qabandi, Qais Al-Duwairi                                                                                                                                                                                                                                                                                                                                                                                                                                                                                                                                                                                            |
| EPI_ISL_416543                                                                                                                                                                                                 | Dasman Diabetes Institute                                                            | Dasman Diabetes Institute                                                                                            | Fahd Al-Mulla, Rasheeba Iqbal, Sumi John, Motasem Melhem, Ebaa AIOzairi, Sara Al-Qabandi, Qais Al-Duwairi                                                                                                                                                                                                                                                                                                                                                                                                                                                                                                                                                                                            |
| EPI_ISL_417026, EPI_ISL_417027, EPI_ISL_417028                                                                                                                                                                 | Utah Public Health Laboratory                                                        | Utah Public Health Laboratory                                                                                        | Erin Young, Kelly Oakeson                                                                                                                                                                                                                                                                                                                                                                                                                                                                                                                                                                                                                                                                            |
| EPI_ISL_417200, EPI_ISL_417201, EPI_ISL_417202, EPI_ISL_417203, EPI_ISL_417204                                                                                                                                 | University of Wisconsin-Madison AIDS Vaccine Research Laboratories                   | University of Wisconsin-Madison AIDS Vaccine Research Laboratories                                                   | Gage Moreno, Katarina Braun, et al. AIDS Vaccine Research Laboratories                                                                                                                                                                                                                                                                                                                                                                                                                                                                                                                                                                                                                               |
| EPI_ISL_417388, EPI_ISL_417405                                                                                                                                                                                 | Centre for Infectious Diseases and Microbiology Public Health                        | NSW Health Pathology - Institute of Clinical Pathology and Medical Research; Westmead Hospital; University of Sydney | Gall M, Arnott A, Sadsad R, Carter I, Rahman H, Holmes EC, O'Sullivan MV, Sintchenko V, Chen SC, Maddocks S, Kok J, Dwyer DE, Rockett R, Eden J-S, Lam C, Gray K and Timms V for the 2019-nCoV Study Group                                                                                                                                                                                                                                                                                                                                                                                                                                                                                           |
| EPI_ISL_417413                                                                                                                                                                                                 | Ministry of Health Turkey                                                            | Ministry of Health Turkey                                                                                            | Fatma Bayraktar,Aye Baak Alta,Yasemin Cogun,Gülay Korukluolu,Selçuk Kılıç                                                                                                                                                                                                                                                                                                                                                                                                                                                                                                                                                                                                                            |
| EPI_ISL_417504, EPI_ISL_417505, EPI_ISL_417506, EPI_ISL_417507, EPI_ISL_417508, EPI_ISL_417509, EPI_ISL_417510, EPI_ISL_417512, EPI_ISL_417513, EPI_ISL_417514, EPI_ISL_417515, EPI_ISL_417516, EPI_ISL_417517 | University of Wisconsin-Madison AIDS Vaccine Research Laboratories                   | University of Wisconsin-Madison AIDS Vaccine Research Laboratories                                                   | Gage Moreno, Katarina Braun, et al. AIDS Vaccine Research Laboratories                                                                                                                                                                                                                                                                                                                                                                                                                                                                                                                                                                                                                               |
| see above                                                                                                                                                                                                      | University of Wisconsin-Madison AIDS Vaccine Research Laboratories                   | University of Wisconsin-Madison AIDS Vaccine Research Laboratories                                                   | Gage Moreno, Katarina Braun, et al. AIDS Vaccine Research Laboratories                                                                                                                                                                                                                                                                                                                                                                                                                                                                                                                                                                                                                               |
| EPI_ISL_417923                                                                                                                                                                                                 | INMI Lazzaro Spallanzani IRCCS                                                       | Laboratory of Virology, INMI Lazzaro Spallanzani IRCCS                                                               | Francesco Messina, Barbara Bartolini, Martina Rueca, Cesare E. M. Gruber, Emanuela Giombini, Maria R. Capobianchi, Fabrizio Carletti, Francesca Colavita, Concetta Castilletti, Eleonora Lalle, Daniele Lapa, Giuseppe Ippolito.                                                                                                                                                                                                                                                                                                                                                                                                                                                                     |
| EPI_ISL_417925                                                                                                                                                                                                 | Laboratório Simili                                                                   | Bioinformatics Laboratory / LNCC                                                                                     | Filipe Romero, Ana Paula Guimarães, Mariane Talon, Luiz Gonzaga Paula de Almeida, Ronaldo da Silva, Francisco Junior, Diana Mariani, Lídia Boullosa, Alexandra Gerber, Jaqueline Goes de Jesus, Ingra Morales Claro, Ester Cerdeira Sabino, Nuno Rodrigues Faria, Terezinha Marta Pereira, Pinto Castifeiras, Isabela de Carvalho Leitão, Rafael de Mello Galliez, Cássia Cristina Alves Gonçalves, Érica Ramos dos Santos Nascimento, Richard Araújo Maia, Mauro Teixeira,Cristiano Xavier Lima, Orlando Ferreira Jr., Rodrigo Brindeiro, Luciana Jesus Costa e André Felipe Santos, Laboratorio Hermes Pardini, Laboratorio Simile, Amilcar Tanuri, Renato Santana Aguiar e Ana Tereza Vasconcelos |
| EPI_ISL_417926                                                                                                                                                                                                 | Laboratório Simili                                                                   | Bioinformatics Laboratory / LNCC                                                                                     | Filipe Romero, Ana Paula Guimarães, Mariane Talon, Luiz Gonzaga Paula de Almeida, Ronaldo da Silva Francisco Junior, Diana Mariani, Lídia Boullosa, Alexandra Gerber, Jaqueline Goes de Jesus, Ingra Morales Claro, Ester Cerdeira Sabino, Nuno Rodrigues Faria, Terezinha Marta Pereira, Pinto Castifeiras, Isabela de Carvalho Leitão, Rafael de Mello Galliez, Cássia Cristina Alves Gonçalves, Érica Ramos dos Santos Nascimento, Richard Araújo Maia, Mauro Teixeira,Cristiano Xavier Lima, Orlando Ferreira Jr., Rodrigo Brindeiro, Luciana Jesus Costa e André Felipe Santos, Laboratorio Hermes Pardini, Laboratorio Simile, Amilcar Tanuri, Renato Santana Aguiar e Ana Tereza Vasconcelos  |
| EPI_ISL_417928, EPI_ISL_417929, EPI_ISL_417930, EPI_ISL_417934, EPI_ISL_417936                                                                                                                                 | Laboratório Hermes Pardini                                                           | Bioinformatics Laboratory - LNCC                                                                                     | Filipe Romero, Ana Paula Guimarães, Mariane Talon, Luiz Gonzaga Paula de Almeida, Ronaldo da Silva Francisco Junior, Diana Mariani, Lídia Boullosa, Alexandra Gerber, Jaqueline Goes de Jesus, Ingra Morales Claro, Ester Cerdeira Sabino, Nuno Rodrigues Faria, Terezinha Marta Pereira, Pinto Castifeiras, Isabela de Carvalho Leitão, Rafael de Mello Galliez, Cássia Cristina Alves Gonçalves, Érica Ramos dos Santos Nascimento, Richard Araújo Maia, Mauro Teixeira,Cristiano Xavier Lima, Orlando Ferreira Jr., Rodrigo Brindeiro, Luciana Jesus Costa e André Felipe Santos, Laboratorio Hermes Pardini, Laboratorio Simile, Amilcar Tanuri, Renato Santana Aguiar e Ana Tereza Vasconcelos  |
| EPI_ISL_417940                                                                                                                                                                                                 | Laboratório Hermes Pardini                                                           | Bioinformatics Laboratory - LNCC                                                                                     | Filipe Romero, Ana Paula Guimarães, Mariane Talon, Luiz Gonzaga Paula de Almeida, Ronaldo da Silva Francisco Junior, Diana Mariani, Lídia Boullosa,Alexandra Gerber, Jaqueline Goes de Jesus, Ingra Morales Claro, Ester Cerdeira Sabino, Nuno Rodrigues Faria, Terezinha Marta Pereira, Pinto Castifeiras, Isabela de Carvalho Leitão, Rafael de Mello Galliez, Cássia Alves Gonçalves, Érica Ramos dos Santos Nascimento, Richard Araújo Maia, Mauro Teixeira,Cristiano Xavier Lima, Orlando Ferreira Jr., Rodrigo Brindeiro, Luciana Jesus Costa e André Felipe Santos, Laboratorio Hermes Pardini, Laboratorio Simile, Amilcar Tanuri, Renato Santana Aguiar e Ana Tereza Vasconcelos            |
| EPI_ISL_417943                                                                                                                                                                                                 | Laboratório Hermes Pardini                                                           | Bioinformatics Laboratory                                                                                            | Filipe Romero, Ana Paula Guimarães, Mariane Talon, Luiz Gonzaga Paula de Almeida, Ronaldo da Silva Francisco Junior, Diana Mariani, Lídia Boullosa,Alexandra Gerber, Jaqueline Goes de Jesus, Ingra Morales Claro, Ester Cerdeira Sabino, Nuno Rodrigues Faria, Terezinha Marta Pereira, Pinto Castifeiras, Isabela de Carvalho Leitão, Rafael de Mello Galliez, Cássia Alves Gonçalves, Érica Ramos dos Santos Nascimento, Richard Araújo Maia, Mauro Teixeira,Cristiano Xavier Lima, Orlando Ferreira Jr., Rodrigo Brindeiro, Luciana Jesus Costa e André Felipe Santos, Laboratorio Hermes Pardini, Laboratorio Simile, Amilcar Tanuri, Renato Santana Aguiar e Ana Tereza Vasconcelos            |
| EPI_ISL_417945, EPI_ISL_417949                                                                                                                                                                                 | Laboratório Hermes Pardini                                                           | Bioinformatics Laboratory - LNCC                                                                                     | Filipe Romero, Ana Paula Guimarães, Mariane Talon, Luiz Gonzaga Paula de Almeida, Ronaldo da Silva Francisco Junior, Diana Mariani, Lídia Boullosa,Alexandra Gerber, Jaqueline Goes de Jesus, Ingra Morales Claro, Ester Cerdeira Sabino, Nuno Rodrigues Faria, Terezinha Marta Pereira, Pinto Castifeiras, Isabela de Carvalho Leitão, Rafael de Mello Galliez, Cássia Alves Gonçalves, Érica Ramos dos Santos Nascimento, Richard Araújo Maia, Mauro Teixeira,Cristiano Xavier Lima, Orlando Ferreira Jr., Rodrigo Brindeiro, Luciana Jesus Costa e André Felipe Santos, Laboratorio Hermes Pardini, Laboratorio Simile, Amilcar Tanuri, Renato Santana Aguiar e Ana Tereza Vasconcelos            |
| EPI_ISL_417951, EPI_ISL_417953                                                                                                                                                                                 | Universidade Federal do Rio de Janeiro                                               | Bioinformatics Laboratory - LNCC                                                                                     | Filipe Romero, Ana Paula Guimarães, Mariane Talon, Luiz Gonzaga Paula de Almeida, Ronaldo da Silva Francisco Junior, Diana Mariani, Lídia Boullosa,Alexandra Gerber, Jaqueline Goes de Jesus, Ingra Morales Claro, Ester Cerdeira Sabino, Nuno Rodrigues Faria, Terezinha Marta Pereira, Pinto Castifeiras, Isabela de Carvalho Leitão, Rafael de Mello Galliez, Cássia Alves Gonçalves, Érica Ramos dos Santos Nascimento, Richard Araújo Maia, Mauro Teixeira,Cristiano Xavier Lima, Orlando Ferreira Jr., Rodrigo Brindeiro, Luciana Jesus Costa e André Felipe Santos, Laboratorio Hermes Pardini, Laboratorio Simile, Amilcar Tanuri, Renato Santana Aguiar e Ana Tereza Vasconcelos            |
| EPI_ISL_417958, EPI_ISL_417959, EPI_ISL_417964, EPI_ISL_417966, EPI_ISL_417970, EPI_ISL_417971, EPI_ISL_417973, EPI_ISL_417974, EPI_ISL_417977                                                                 | Utah Public Health Laboratory                                                        | Utah Public Health Laboratory                                                                                        | Erin Young, Kelly Oakeson                                                                                                                                                                                                                                                                                                                                                                                                                                                                                                                                                                                                                                                                            |

|                                                                                                                                                                                                                                                                                                                                                                                                                                                                                                                                                                                                                                                                                                                                                                                                                                                                                                                                                                                                                                                                                                                                                                                                                                                                                                                                                                                                                                                                                                                                                                                                                                                                                                                                                                                                                                                                                                                                                                                                                                                                                                                                                                                                                                                                                                                                                                                                                                                                                                                                                                                                                                                                                                                                                                                                                                                                                                                                                                                                                                                                                |                                                                              |                                                                                                                      |                                                                                                                                                                                                                                                                                                                                                                                                                                                                                                                                                                                                                                                                                                                                                                                       |
|--------------------------------------------------------------------------------------------------------------------------------------------------------------------------------------------------------------------------------------------------------------------------------------------------------------------------------------------------------------------------------------------------------------------------------------------------------------------------------------------------------------------------------------------------------------------------------------------------------------------------------------------------------------------------------------------------------------------------------------------------------------------------------------------------------------------------------------------------------------------------------------------------------------------------------------------------------------------------------------------------------------------------------------------------------------------------------------------------------------------------------------------------------------------------------------------------------------------------------------------------------------------------------------------------------------------------------------------------------------------------------------------------------------------------------------------------------------------------------------------------------------------------------------------------------------------------------------------------------------------------------------------------------------------------------------------------------------------------------------------------------------------------------------------------------------------------------------------------------------------------------------------------------------------------------------------------------------------------------------------------------------------------------------------------------------------------------------------------------------------------------------------------------------------------------------------------------------------------------------------------------------------------------------------------------------------------------------------------------------------------------------------------------------------------------------------------------------------------------------------------------------------------------------------------------------------------------------------------------------------------------------------------------------------------------------------------------------------------------------------------------------------------------------------------------------------------------------------------------------------------------------------------------------------------------------------------------------------------------------------------------------------------------------------------------------------------------|------------------------------------------------------------------------------|----------------------------------------------------------------------------------------------------------------------|---------------------------------------------------------------------------------------------------------------------------------------------------------------------------------------------------------------------------------------------------------------------------------------------------------------------------------------------------------------------------------------------------------------------------------------------------------------------------------------------------------------------------------------------------------------------------------------------------------------------------------------------------------------------------------------------------------------------------------------------------------------------------------------|
| EPI_ISL_417982, EPI_ISL_417983, EPI_ISL_417984, EPI_ISL_417985                                                                                                                                                                                                                                                                                                                                                                                                                                                                                                                                                                                                                                                                                                                                                                                                                                                                                                                                                                                                                                                                                                                                                                                                                                                                                                                                                                                                                                                                                                                                                                                                                                                                                                                                                                                                                                                                                                                                                                                                                                                                                                                                                                                                                                                                                                                                                                                                                                                                                                                                                                                                                                                                                                                                                                                                                                                                                                                                                                                                                 | Universidade Federal do Rio de Janeiro                                       | Bioinformatics Laboratory - LNCC                                                                                     | Filipe Romero, Ana Paula Guimarães, Mariane Talon, Luiz Gonzaga Paula de Almeida, Ronaldo da Silva Francisco Junior, Diana Mariani, Lidia Boullosa, Alexandra Gerber, Jaqueline Goes de Jesus, Ingra Moraes Claro, Ester Cerdeira Sabino, Nuno Rodrigues Faria, Terezinha Marta Pereira, Pinto Castiñeiras, Isabela de Carvalho Leitão, Rafael de Mello Galliez, Cássia Alves Gonçalves, Érica Ramos dos Santos Nascimento, Richard Araújo Maia, Mauro Teixeira, Cristiano Xavier Lima, Orlando Ferreira Jr., Rodrigo Brindeiro, Luciana Jesus Costa e André Felipe Santos, Laboratorio Hermes Pardini, Laboratorio Simile, Amílcar Tanuri, Renato Santana Aguiar e Ana Tereza Vasconcelos                                                                                            |
| EPI_ISL_418959                                                                                                                                                                                                                                                                                                                                                                                                                                                                                                                                                                                                                                                                                                                                                                                                                                                                                                                                                                                                                                                                                                                                                                                                                                                                                                                                                                                                                                                                                                                                                                                                                                                                                                                                                                                                                                                                                                                                                                                                                                                                                                                                                                                                                                                                                                                                                                                                                                                                                                                                                                                                                                                                                                                                                                                                                                                                                                                                                                                                                                                                 | Universidade Federal do Rio de Janeiro - UFRJ                                | Bioinformatics Laboratory - LNCC                                                                                     | Filipe Romero, Ana Paula Guimarães, Mariane Talon, Luiz Gonzaga Paula de Almeida, Ronaldo da Silva Francisco Junior, Diana Mariani, Lidia Boullosa, Alexandra Gerber, Jaqueline Goes de Jesus, Ingra Moraes Claro, Ester Cerdeira Sabino, Nuno Rodrigues Faria, Terezinha Marta Pereira, Pinto Castiñeiras, Isabela de Carvalho Leitão, Rafael de Mello Galliez, Cássia Cristina Alves Gonçalves, Érica Ramos dos Santos Nascimento, Richard Araújo Maia, Mauro Teixeira, Cristiano Xavier Lima, Orlando Ferreira Jr., Rodrigo Brindeiro, Luciana Jesus Costa e André Felipe Santos, Laboratorio Hermes Pardini, Laboratorio Simile, Amílcar Tanuri, Renato Santana Aguiar, e Ana Tereza Vasconcelos                                                                                  |
| EPI_ISL_418961, EPI_ISL_418962, EPI_ISL_418964, EPI_ISL_418965, EPI_ISL_418966, EPI_ISL_418967, EPI_ISL_420803, EPI_ISL_420804, EPI_ISL_420807, EPI_ISL_420808, EPI_ISL_420809, EPI_ISL_420810, EPI_ISL_420813, EPI_ISL_420814, EPI_ISL_420815, EPI_ISL_420816, EPI_ISL_420817, EPI_ISL_420818, EPI_ISL_420819, EPI_ISL_420820, EPI_ISL_420824, EPI_ISL_420825                                                                                                                                                                                                                                                                                                                                                                                                                                                                                                                                                                                                                                                                                                                                                                                                                                                                                                                                                                                                                                                                                                                                                                                                                                                                                                                                                                                                                                                                                                                                                                                                                                                                                                                                                                                                                                                                                                                                                                                                                                                                                                                                                                                                                                                                                                                                                                                                                                                                                                                                                                                                                                                                                                                 | Utah Public Health Laboratory                                                | Utah Public Health Laboratory                                                                                        | Erin Young, Kelly Oakeson                                                                                                                                                                                                                                                                                                                                                                                                                                                                                                                                                                                                                                                                                                                                                             |
| see above                                                                                                                                                                                                                                                                                                                                                                                                                                                                                                                                                                                                                                                                                                                                                                                                                                                                                                                                                                                                                                                                                                                                                                                                                                                                                                                                                                                                                                                                                                                                                                                                                                                                                                                                                                                                                                                                                                                                                                                                                                                                                                                                                                                                                                                                                                                                                                                                                                                                                                                                                                                                                                                                                                                                                                                                                                                                                                                                                                                                                                                                      | Hospital Universitario 12 de Octubre                                         | Hospital Universitario 12 de Octubre                                                                                 | Esther Viedma, Sara González, Elias Dahdouh, Raúl Recio, Fernando Lázaro, Julio García, M <sup>o</sup> Dolores Folgueira, Jesús Mingorance, Rafael Delgado                                                                                                                                                                                                                                                                                                                                                                                                                                                                                                                                                                                                                            |
| EPI_ISL_421171, EPI_ISL_421172, EPI_ISL_421173, EPI_ISL_421174, EPI_ISL_421175, EPI_ISL_421176, EPI_ISL_421177, EPI_ISL_421178, EPI_ISL_421179, EPI_ISL_421180                                                                                                                                                                                                                                                                                                                                                                                                                                                                                                                                                                                                                                                                                                                                                                                                                                                                                                                                                                                                                                                                                                                                                                                                                                                                                                                                                                                                                                                                                                                                                                                                                                                                                                                                                                                                                                                                                                                                                                                                                                                                                                                                                                                                                                                                                                                                                                                                                                                                                                                                                                                                                                                                                                                                                                                                                                                                                                                 | University of Wisconsin-Madison AIDS Vaccine Research Laboratories           | University of Wisconsin-Madison AIDS Vaccine Research Laboratories                                                   | Gage Moreno, Katarina Braun, et al. AIDS Vaccine Research Laboratories                                                                                                                                                                                                                                                                                                                                                                                                                                                                                                                                                                                                                                                                                                                |
| EPI_ISL_421283, EPI_ISL_421284, EPI_ISL_421285, EPI_ISL_421286, EPI_ISL_421287, EPI_ISL_421288, EPI_ISL_421289, EPI_ISL_421290, EPI_ISL_421291, EPI_ISL_421292, EPI_ISL_421293, EPI_ISL_421294, EPI_ISL_421295, EPI_ISL_421296, EPI_ISL_421297, EPI_ISL_421298, EPI_ISL_421299, EPI_ISL_421300, EPI_ISL_421301, EPI_ISL_421302, EPI_ISL_421303, EPI_ISL_421304, EPI_ISL_421305, EPI_ISL_421306, EPI_ISL_421307, EPI_ISL_421308, EPI_ISL_421309, EPI_ISL_421310, EPI_ISL_421311, EPI_ISL_421312, EPI_ISL_421313, EPI_ISL_421314, EPI_ISL_421315, EPI_ISL_421316, EPI_ISL_421317, EPI_ISL_421318, EPI_ISL_421319, EPI_ISL_421320, EPI_ISL_421321, EPI_ISL_421322, EPI_ISL_421323, EPI_ISL_421324, EPI_ISL_421325, EPI_ISL_421326, EPI_ISL_421327, EPI_ISL_421328, EPI_ISL_421329, EPI_ISL_421330, EPI_ISL_421331, EPI_ISL_421332, EPI_ISL_421333, EPI_ISL_421334, EPI_ISL_421335, EPI_ISL_421336, EPI_ISL_421338, EPI_ISL_421339, EPI_ISL_421340, EPI_ISL_421341, EPI_ISL_421342, EPI_ISL_421343                                                                                                                                                                                                                                                                                                                                                                                                                                                                                                                                                                                                                                                                                                                                                                                                                                                                                                                                                                                                                                                                                                                                                                                                                                                                                                                                                                                                                                                                                                                                                                                                                                                                                                                                                                                                                                                                                                                                                                                                                                                                                 | University of Wisconsin-Madison AIDS Vaccine Research Laboratories           | University of Wisconsin-Madison AIDS Vaccine Research Laboratories                                                   | Gage Moreno, Katarina Braun, et al. AIDS Vaccine Research Laboratories                                                                                                                                                                                                                                                                                                                                                                                                                                                                                                                                                                                                                                                                                                                |
| see above                                                                                                                                                                                                                                                                                                                                                                                                                                                                                                                                                                                                                                                                                                                                                                                                                                                                                                                                                                                                                                                                                                                                                                                                                                                                                                                                                                                                                                                                                                                                                                                                                                                                                                                                                                                                                                                                                                                                                                                                                                                                                                                                                                                                                                                                                                                                                                                                                                                                                                                                                                                                                                                                                                                                                                                                                                                                                                                                                                                                                                                                      | Utah Public Health Laboratory                                                | Utah Public Health Laboratory                                                                                        | Erin Young, Kelly Oakeson                                                                                                                                                                                                                                                                                                                                                                                                                                                                                                                                                                                                                                                                                                                                                             |
| EPI_ISL_421561, EPI_ISL_421563                                                                                                                                                                                                                                                                                                                                                                                                                                                                                                                                                                                                                                                                                                                                                                                                                                                                                                                                                                                                                                                                                                                                                                                                                                                                                                                                                                                                                                                                                                                                                                                                                                                                                                                                                                                                                                                                                                                                                                                                                                                                                                                                                                                                                                                                                                                                                                                                                                                                                                                                                                                                                                                                                                                                                                                                                                                                                                                                                                                                                                                 | Molecular Diagnostic Services and Flowpath                                   | KRISP, KZN Research Innovation and Sequencing Platform                                                               | Giandhari J, Pillay S, Ngcapu S, Samsunder N, Lessells R, Chimukangara B, Deforche K, Tegally H, Wilkinson E, de Oliveira T                                                                                                                                                                                                                                                                                                                                                                                                                                                                                                                                                                                                                                                           |
| EPI_ISL_421573, EPI_ISL_421574, EPI_ISL_421576                                                                                                                                                                                                                                                                                                                                                                                                                                                                                                                                                                                                                                                                                                                                                                                                                                                                                                                                                                                                                                                                                                                                                                                                                                                                                                                                                                                                                                                                                                                                                                                                                                                                                                                                                                                                                                                                                                                                                                                                                                                                                                                                                                                                                                                                                                                                                                                                                                                                                                                                                                                                                                                                                                                                                                                                                                                                                                                                                                                                                                 | Molecular Diagnostic Services                                                | KRISP, KZN Research Innovation and Sequencing Platform                                                               | Giandhari J, Pillay S, Ngcapu S, Samsunder N, Lessells R, Chimukangara B, Deforche K, Tegally H, Wilkinson E, de Oliveira T                                                                                                                                                                                                                                                                                                                                                                                                                                                                                                                                                                                                                                                           |
| EPI_ISL_421652                                                                                                                                                                                                                                                                                                                                                                                                                                                                                                                                                                                                                                                                                                                                                                                                                                                                                                                                                                                                                                                                                                                                                                                                                                                                                                                                                                                                                                                                                                                                                                                                                                                                                                                                                                                                                                                                                                                                                                                                                                                                                                                                                                                                                                                                                                                                                                                                                                                                                                                                                                                                                                                                                                                                                                                                                                                                                                                                                                                                                                                                 | Dasman Diabetes Institute                                                    | Dasman Diabetes Institute                                                                                            | Fahd Al-Mulla, Rasheeba Iqbal, Sumi John, Ebaa Al-Ozairi, Qais Al-Duwairi                                                                                                                                                                                                                                                                                                                                                                                                                                                                                                                                                                                                                                                                                                             |
| EPI_ISL_422424                                                                                                                                                                                                                                                                                                                                                                                                                                                                                                                                                                                                                                                                                                                                                                                                                                                                                                                                                                                                                                                                                                                                                                                                                                                                                                                                                                                                                                                                                                                                                                                                                                                                                                                                                                                                                                                                                                                                                                                                                                                                                                                                                                                                                                                                                                                                                                                                                                                                                                                                                                                                                                                                                                                                                                                                                                                                                                                                                                                                                                                                 | Jaber Al Ahmad Al Sabah Hospital                                             | Dasman diabetes Institute                                                                                            | Fahd Al-Mulla, Rasheeba Iqbal, Sumi John, Ebaa Al-Ozairi, Qais Al-Duwairi                                                                                                                                                                                                                                                                                                                                                                                                                                                                                                                                                                                                                                                                                                             |
| EPI_ISL_422426, EPI_ISL_422427                                                                                                                                                                                                                                                                                                                                                                                                                                                                                                                                                                                                                                                                                                                                                                                                                                                                                                                                                                                                                                                                                                                                                                                                                                                                                                                                                                                                                                                                                                                                                                                                                                                                                                                                                                                                                                                                                                                                                                                                                                                                                                                                                                                                                                                                                                                                                                                                                                                                                                                                                                                                                                                                                                                                                                                                                                                                                                                                                                                                                                                 | JABER AL AHMAD AL SABAH HOSPITAL - KUWAIT CITY                               | Dasman Diabetes Institute                                                                                            | Fahd Al-Mulla, Rasheeba Iqbal, Sumi John, Ebaa Al-Ozairi, Qais Al-Duwairi                                                                                                                                                                                                                                                                                                                                                                                                                                                                                                                                                                                                                                                                                                             |
| EPI_ISL_424343                                                                                                                                                                                                                                                                                                                                                                                                                                                                                                                                                                                                                                                                                                                                                                                                                                                                                                                                                                                                                                                                                                                                                                                                                                                                                                                                                                                                                                                                                                                                                                                                                                                                                                                                                                                                                                                                                                                                                                                                                                                                                                                                                                                                                                                                                                                                                                                                                                                                                                                                                                                                                                                                                                                                                                                                                                                                                                                                                                                                                                                                 | INMI Lazzaro Spallanzani IRCCS                                               | Laboratory of Virology, INMI Lazzaro Spallanzani IRCCS                                                               | Fabrizio Carletti, Barbara Bartolini, Martina Rueca, Cesare Ernesto Maria Gruber, Francesco Messina, Eleonora Lalle, Licia Bordini, Giulia Matusali, Francesca Colavita, Maria Rosaria Capobianchi, Concetta Castilletti, Francesco Vairo, Giuseppe Ippolito, Antonino Di Caro                                                                                                                                                                                                                                                                                                                                                                                                                                                                                                        |
| EPI_ISL_424352                                                                                                                                                                                                                                                                                                                                                                                                                                                                                                                                                                                                                                                                                                                                                                                                                                                                                                                                                                                                                                                                                                                                                                                                                                                                                                                                                                                                                                                                                                                                                                                                                                                                                                                                                                                                                                                                                                                                                                                                                                                                                                                                                                                                                                                                                                                                                                                                                                                                                                                                                                                                                                                                                                                                                                                                                                                                                                                                                                                                                                                                 | Clinical Laboratory, Fuyang City Center for Disease Control and Prevention   | Clinical Laboratory, Fuyang City Center for Disease Control and Prevention                                           | Ge.B.                                                                                                                                                                                                                                                                                                                                                                                                                                                                                                                                                                                                                                                                                                                                                                                 |
| EPI_ISL_424355, EPI_ISL_424356, EPI_ISL_424357, EPI_ISL_424358, EPI_ISL_424359, EPI_ISL_424360                                                                                                                                                                                                                                                                                                                                                                                                                                                                                                                                                                                                                                                                                                                                                                                                                                                                                                                                                                                                                                                                                                                                                                                                                                                                                                                                                                                                                                                                                                                                                                                                                                                                                                                                                                                                                                                                                                                                                                                                                                                                                                                                                                                                                                                                                                                                                                                                                                                                                                                                                                                                                                                                                                                                                                                                                                                                                                                                                                                 | Beijing Institute of Microbiology and Epidemiology                           | Beijing Institute of Microbiology and Epidemiology                                                                   | Fan,H., Qin,E., Wu,Y., Guo,Y., Zhang,X., Yong,Y., Hou,J., Xu,Z., Mu,J., Teng,Y., Mi,Z., Yang,R., Song,Y., Li,B. and Cui,Y.                                                                                                                                                                                                                                                                                                                                                                                                                                                                                                                                                                                                                                                            |
| EPI_ISL_424672                                                                                                                                                                                                                                                                                                                                                                                                                                                                                                                                                                                                                                                                                                                                                                                                                                                                                                                                                                                                                                                                                                                                                                                                                                                                                                                                                                                                                                                                                                                                                                                                                                                                                                                                                                                                                                                                                                                                                                                                                                                                                                                                                                                                                                                                                                                                                                                                                                                                                                                                                                                                                                                                                                                                                                                                                                                                                                                                                                                                                                                                 | Laboratorio Estatal de Salud Publica del Estado de Puebla                    | Instituto de Diagnostico y Referencia Epidemiologicos                                                                | Fabiola Garcós Ayala, Gisela Barrera Badillo, Irma López Martínez, Lucía Hernández Rivas, Edgar Mendieta Condado, Adnan Araiza Rodríguez, Celia Boukadida, Santiago Avila Rios, Mario Mújica Sánchez, José Arturo Martínez Orozco, Eduardo Becerril Vargas, Joel Armando Vázquez Pérez, Victor Hugo Borja Aburto, Concepción Grajales Muñiz, Cesar Raúl González Bonilla, Carolina González Torres, Francisco Javier Gaytán Cervantes, José Esteban Muñoz Medina, Guillermo M. Ruiz-Palacios, Pilar Ramos Cervantes, Violeta Ibarra Gonzalez, Fernando Ledesma Barrientos, Luis Alberto García Andrade, Alfredo Ponce de León Garduño, Blanca Taboada, Alejandro Sánchez, Pavel Isa, Ricardo Grande, Gloria Vázquez, Francisco Pulido, Carlos F. Arias, José Ernesto Ramírez González |
| EPI_ISL_424703                                                                                                                                                                                                                                                                                                                                                                                                                                                                                                                                                                                                                                                                                                                                                                                                                                                                                                                                                                                                                                                                                                                                                                                                                                                                                                                                                                                                                                                                                                                                                                                                                                                                                                                                                                                                                                                                                                                                                                                                                                                                                                                                                                                                                                                                                                                                                                                                                                                                                                                                                                                                                                                                                                                                                                                                                                                                                                                                                                                                                                                                 | Klinisk mikrobiologi, Region Västerbotten                                    | Unit for Biological Agents, Department for CBRN Defence and Security, Swedish Defence Research Agency                | FOI Bioinformatics team                                                                                                                                                                                                                                                                                                                                                                                                                                                                                                                                                                                                                                                                                                                                                               |
| EPI_ISL_425142, EPI_ISL_425143, EPI_ISL_425144, EPI_ISL_425145, EPI_ISL_425146, EPI_ISL_425147, EPI_ISL_425148, EPI_ISL_425149, EPI_ISL_425150, EPI_ISL_425151, EPI_ISL_425152, EPI_ISL_425153, EPI_ISL_425154, EPI_ISL_425155, EPI_ISL_425156, EPI_ISL_425157, EPI_ISL_425158, EPI_ISL_425159, EPI_ISL_425160, EPI_ISL_425161, EPI_ISL_425162, EPI_ISL_425163, EPI_ISL_425164, EPI_ISL_425165, EPI_ISL_425166, EPI_ISL_425167, EPI_ISL_425168, EPI_ISL_425169, EPI_ISL_425170, EPI_ISL_425171, EPI_ISL_425172, EPI_ISL_425173, EPI_ISL_425174, EPI_ISL_425175, EPI_ISL_425176                                                                                                                                                                                                                                                                                                                                                                                                                                                                                                                                                                                                                                                                                                                                                                                                                                                                                                                                                                                                                                                                                                                                                                                                                                                                                                                                                                                                                                                                                                                                                                                                                                                                                                                                                                                                                                                                                                                                                                                                                                                                                                                                                                                                                                                                                                                                                                                                                                                                                                 | University of Wisconsin-Madison AIDS Vaccine Research Laboratories           | University of Wisconsin-Madison AIDS Vaccine Research Laboratories                                                   | Gage Moreno, Katarina Braun, et al. AIDS Vaccine Research Laboratories                                                                                                                                                                                                                                                                                                                                                                                                                                                                                                                                                                                                                                                                                                                |
| see above                                                                                                                                                                                                                                                                                                                                                                                                                                                                                                                                                                                                                                                                                                                                                                                                                                                                                                                                                                                                                                                                                                                                                                                                                                                                                                                                                                                                                                                                                                                                                                                                                                                                                                                                                                                                                                                                                                                                                                                                                                                                                                                                                                                                                                                                                                                                                                                                                                                                                                                                                                                                                                                                                                                                                                                                                                                                                                                                                                                                                                                                      | University of Wisconsin-Madison AIDS Vaccine Research Laboratories           | University of Wisconsin-Madison AIDS Vaccine Research Laboratories                                                   | Gage Moreno, Katarina Braun, et al. AIDS Vaccine Research Laboratories                                                                                                                                                                                                                                                                                                                                                                                                                                                                                                                                                                                                                                                                                                                |
| EPI_ISL_425462, EPI_ISL_425463, EPI_ISL_425464, EPI_ISL_425465, EPI_ISL_425466, EPI_ISL_425467, EPI_ISL_425468, EPI_ISL_425469, EPI_ISL_425470, EPI_ISL_425471, EPI_ISL_425472, EPI_ISL_425473, EPI_ISL_425474, EPI_ISL_425475, EPI_ISL_425476, EPI_ISL_425477, EPI_ISL_425478, EPI_ISL_425479, EPI_ISL_425480, EPI_ISL_425481, EPI_ISL_425482, EPI_ISL_425483, EPI_ISL_425484, EPI_ISL_425485, EPI_ISL_425486, EPI_ISL_425487, EPI_ISL_425488, EPI_ISL_425489, EPI_ISL_425490, EPI_ISL_425491, EPI_ISL_425492, EPI_ISL_425493, EPI_ISL_425494, EPI_ISL_425495, EPI_ISL_425496, EPI_ISL_425497, EPI_ISL_425498, EPI_ISL_425499, EPI_ISL_425500, EPI_ISL_425501, EPI_ISL_425502, EPI_ISL_425503, EPI_ISL_425504, EPI_ISL_425505, EPI_ISL_425506, EPI_ISL_425507, EPI_ISL_425508, EPI_ISL_425509, EPI_ISL_425510, EPI_ISL_425511, EPI_ISL_425512, EPI_ISL_425513, EPI_ISL_425514, EPI_ISL_425515, EPI_ISL_425516, EPI_ISL_425517, EPI_ISL_425518, EPI_ISL_425519, EPI_ISL_425520, EPI_ISL_425521, EPI_ISL_425522, EPI_ISL_425523, EPI_ISL_425524, EPI_ISL_425525, EPI_ISL_425526, EPI_ISL_425527, EPI_ISL_425528, EPI_ISL_425529, EPI_ISL_425530, EPI_ISL_425531, EPI_ISL_425532, EPI_ISL_425533, EPI_ISL_425534, EPI_ISL_425535, EPI_ISL_425536, EPI_ISL_425537, EPI_ISL_425538, EPI_ISL_425539, EPI_ISL_425540, EPI_ISL_425541, EPI_ISL_425542, EPI_ISL_425543, EPI_ISL_425544, EPI_ISL_425545, EPI_ISL_425546, EPI_ISL_425547, EPI_ISL_425548, EPI_ISL_425549, EPI_ISL_425550, EPI_ISL_425551, EPI_ISL_425552, EPI_ISL_425553, EPI_ISL_425554, EPI_ISL_425555, EPI_ISL_425556, EPI_ISL_425557, EPI_ISL_425558, EPI_ISL_425559, EPI_ISL_425560, EPI_ISL_425561, EPI_ISL_425562, EPI_ISL_425563, EPI_ISL_425564, EPI_ISL_425565, EPI_ISL_425566, EPI_ISL_425567, EPI_ISL_425568, EPI_ISL_425569, EPI_ISL_425570, EPI_ISL_425571, EPI_ISL_425572, EPI_ISL_425573, EPI_ISL_425574, EPI_ISL_425575, EPI_ISL_425576, EPI_ISL_425577, EPI_ISL_425578, EPI_ISL_425579, EPI_ISL_425580, EPI_ISL_425581, EPI_ISL_425582, EPI_ISL_425583, EPI_ISL_425584, EPI_ISL_425585, EPI_ISL_425586, EPI_ISL_425587, EPI_ISL_425588, EPI_ISL_425589, EPI_ISL_425590, EPI_ISL_425591, EPI_ISL_425592, EPI_ISL_425593, EPI_ISL_425594, EPI_ISL_425595, EPI_ISL_425596, EPI_ISL_425597, EPI_ISL_425598, EPI_ISL_425599, EPI_ISL_425600, EPI_ISL_425601, EPI_ISL_425602, EPI_ISL_425603, EPI_ISL_425604, EPI_ISL_425605, EPI_ISL_425606, EPI_ISL_425607, EPI_ISL_425608, EPI_ISL_425609, EPI_ISL_425610, EPI_ISL_425611, EPI_ISL_425612, EPI_ISL_425613, EPI_ISL_425614, EPI_ISL_425615, EPI_ISL_425616, EPI_ISL_425617, EPI_ISL_425618, EPI_ISL_425619, EPI_ISL_425620, EPI_ISL_425621, EPI_ISL_425622, EPI_ISL_425623, EPI_ISL_425624, EPI_ISL_425625, EPI_ISL_425626, EPI_ISL_425627, EPI_ISL_425628, EPI_ISL_425629, EPI_ISL_425630, EPI_ISL_425631, EPI_ISL_425632, EPI_ISL_425633, EPI_ISL_425634, EPI_ISL_425635, EPI_ISL_425636, EPI_ISL_425637, EPI_ISL_425638, EPI_ISL_425639, EPI_ISL_425640, EPI_ISL_425641, EPI_ISL_425642, EPI_ISL_425643, EPI_ISL_425644, EPI_ISL_425645, EPI_ISL_425646 | Queens Medical Centre, Clinical Microbiology Department / DeepSeq Nottingham | COVID-19 Genomics UK (COG-UK) Consortium                                                                             | Gemma Clark, Wendy Smith, Manjinder Khakh, Hannah Howson-Wells, Jonathan Ball, Patrick McClure, Joseph Chappell, Theocharis Tsolieridis, Nadine Holmes, Matthew Carlisle, Christopher Moore, Fei Sang, Johnny Debebe, Victoria Wright, Matthew Loose                                                                                                                                                                                                                                                                                                                                                                                                                                                                                                                                  |
| see above                                                                                                                                                                                                                                                                                                                                                                                                                                                                                                                                                                                                                                                                                                                                                                                                                                                                                                                                                                                                                                                                                                                                                                                                                                                                                                                                                                                                                                                                                                                                                                                                                                                                                                                                                                                                                                                                                                                                                                                                                                                                                                                                                                                                                                                                                                                                                                                                                                                                                                                                                                                                                                                                                                                                                                                                                                                                                                                                                                                                                                                                      | Instituto Sabin                                                              | Laboratory of Virology                                                                                               | Fernando L Melo, Gustavo Barra, Ticiane H Santa-Rita, Pedro G Mesquita, Ikaro A Andrade, Tatsuya Nagata, Bergmann M Ribeiro                                                                                                                                                                                                                                                                                                                                                                                                                                                                                                                                                                                                                                                           |
| EPI_ISL_427427, EPI_ISL_427428, EPI_ISL_427429, EPI_ISL_427430, EPI_ISL_427431, EPI_ISL_427432, EPI_ISL_427433, EPI_ISL_427434, EPI_ISL_427435, EPI_ISL_427436, EPI_ISL_427437, EPI_ISL_427438, EPI_ISL_427439, EPI_ISL_427440, EPI_ISL_427441, EPI_ISL_427442, EPI_ISL_427443, EPI_ISL_427444, EPI_ISL_427445, EPI_ISL_427446, EPI_ISL_427447, EPI_ISL_427448, EPI_ISL_427449, EPI_ISL_427450, EPI_ISL_427451, EPI_ISL_427452, EPI_ISL_427453, EPI_ISL_427454, EPI_ISL_427455, EPI_ISL_427456, EPI_ISL_427457, EPI_ISL_427458, EPI_ISL_427459, EPI_ISL_427460, EPI_ISL_427461, EPI_ISL_427462                                                                                                                                                                                                                                                                                                                                                                                                                                                                                                                                                                                                                                                                                                                                                                                                                                                                                                                                                                                                                                                                                                                                                                                                                                                                                                                                                                                                                                                                                                                                                                                                                                                                                                                                                                                                                                                                                                                                                                                                                                                                                                                                                                                                                                                                                                                                                                                                                                                                                 | University of Wisconsin-Madison AIDS Vaccine Research Laboratories           | University of Wisconsin-Madison AIDS Vaccine Research Laboratories                                                   | Gage Moreno, Katarina Braun, et al. AIDS Vaccine Research Laboratories                                                                                                                                                                                                                                                                                                                                                                                                                                                                                                                                                                                                                                                                                                                |
| see above                                                                                                                                                                                                                                                                                                                                                                                                                                                                                                                                                                                                                                                                                                                                                                                                                                                                                                                                                                                                                                                                                                                                                                                                                                                                                                                                                                                                                                                                                                                                                                                                                                                                                                                                                                                                                                                                                                                                                                                                                                                                                                                                                                                                                                                                                                                                                                                                                                                                                                                                                                                                                                                                                                                                                                                                                                                                                                                                                                                                                                                                      | University of Wisconsin-Madison AIDS Vaccine Research Laboratories           | University of Wisconsin-Madison AIDS Vaccine Research Laboratories                                                   | Gage Moreno, Katarina Braun, et al. AIDS Vaccine Research Laboratories                                                                                                                                                                                                                                                                                                                                                                                                                                                                                                                                                                                                                                                                                                                |
| EPI_ISL_427650, EPI_ISL_427667, EPI_ISL_427674, EPI_ISL_427691, EPI_ISL_427697, EPI_ISL_427700, EPI_ISL_427729, EPI_ISL_427733, EPI_ISL_427746, EPI_ISL_427756, EPI_ISL_427764, EPI_ISL_427769, EPI_ISL_427772, EPI_ISL_427800, EPI_ISL_427807, EPI_ISL_427808                                                                                                                                                                                                                                                                                                                                                                                                                                                                                                                                                                                                                                                                                                                                                                                                                                                                                                                                                                                                                                                                                                                                                                                                                                                                                                                                                                                                                                                                                                                                                                                                                                                                                                                                                                                                                                                                                                                                                                                                                                                                                                                                                                                                                                                                                                                                                                                                                                                                                                                                                                                                                                                                                                                                                                                                                 | Centre for Infectious Diseases and Microbiology Public Health                | NSW Health Pathology - Institute of Clinical Pathology and Medical Research; Westmead Hospital; University of Sydney | Gall M, Arnott A, Sadsad R, Draper J, Sim E, Bachmann N, Rockett R, Lam C, Gray K, Timms V, Carter I, Holmes EC, O'Sullivan MV, Byun R, Sintchenko V, Chen SC, Eden JS, Maddocks S, Kok J, Propenko M, Sorrell T, Chang S, Basile K, Dwyer DE for the 2019-nCoV Study Group                                                                                                                                                                                                                                                                                                                                                                                                                                                                                                           |
| see above                                                                                                                                                                                                                                                                                                                                                                                                                                                                                                                                                                                                                                                                                                                                                                                                                                                                                                                                                                                                                                                                                                                                                                                                                                                                                                                                                                                                                                                                                                                                                                                                                                                                                                                                                                                                                                                                                                                                                                                                                                                                                                                                                                                                                                                                                                                                                                                                                                                                                                                                                                                                                                                                                                                                                                                                                                                                                                                                                                                                                                                                      | Centre for Infectious Diseases and Microbiology Public Health                | NSW Health Pathology - Institute of Clinical Pathology and Medical Research; Westmead Hospital; University of Sydney | Gall M, Arnott A, Sadsad R, Draper J, Sim E, Bachmann N, Rockett R, Lam C, Gray K, Timms V, Carter I, Holmes EC, O'Sullivan MV, Byun R, Sintchenko V, Chen SC, Eden JS, Maddocks S, Kok J, Propenko M, Sorrell T, Chang S, Basile K, Dwyer DE for the 2019-nCoV Study Group                                                                                                                                                                                                                                                                                                                                                                                                                                                                                                           |
| EPI_ISL_428148                                                                                                                                                                                                                                                                                                                                                                                                                                                                                                                                                                                                                                                                                                                                                                                                                                                                                                                                                                                                                                                                                                                                                                                                                                                                                                                                                                                                                                                                                                                                                                                                                                                                                                                                                                                                                                                                                                                                                                                                                                                                                                                                                                                                                                                                                                                                                                                                                                                                                                                                                                                                                                                                                                                                                                                                                                                                                                                                                                                                                                                                 | Klinisk mikrobiologi, Region Västerbotten                                    | Unit for Biological Agents, Department for CBRN Defence and Security, Swedish Defence Research Agency                | FOI bioinformatics team                                                                                                                                                                                                                                                                                                                                                                                                                                                                                                                                                                                                                                                                                                                                                               |

|                                                                                                                                                                                                                                                                                                                                                                                                                                                                                                                                                                                                                                                                                                                                                                                                                                                                                                                                                                                                                                                                                                                                                                                                                                                                                                                                                                                                                                                                                                                                                                                                                                                                                                                                                                                                                                                                                                                                                                                                                                                                                                                                                                                                                                                                                                                                                                                                                                                                                                                                                                                                                                                                                                                                                                                                                                                                                                                                                                                                                                                                                                                                                                                                                                                                                                                                                                                                                                                                                                                                                                                                                                                                                                                                                                                                                                                                                                                                                                                                                                                                                                                                                                                                                                                                                                                                                                                                                                                                                                                                                                                                                                                                                                                                                                                                                                                                                                                                                                                                                                                                                                                                                                                                                                                                                                                                                                                                                                                                                                                                                                                                                                                                                                                                                                                                                                                                                                                                                                                                                                                                                                                                                                                                                                                                                                                                                                                                                                                                                                                                                                                                                                                                |                                                                              |                                                                                                       |                                                                                                                                                                                                                                                     |
|----------------------------------------------------------------------------------------------------------------------------------------------------------------------------------------------------------------------------------------------------------------------------------------------------------------------------------------------------------------------------------------------------------------------------------------------------------------------------------------------------------------------------------------------------------------------------------------------------------------------------------------------------------------------------------------------------------------------------------------------------------------------------------------------------------------------------------------------------------------------------------------------------------------------------------------------------------------------------------------------------------------------------------------------------------------------------------------------------------------------------------------------------------------------------------------------------------------------------------------------------------------------------------------------------------------------------------------------------------------------------------------------------------------------------------------------------------------------------------------------------------------------------------------------------------------------------------------------------------------------------------------------------------------------------------------------------------------------------------------------------------------------------------------------------------------------------------------------------------------------------------------------------------------------------------------------------------------------------------------------------------------------------------------------------------------------------------------------------------------------------------------------------------------------------------------------------------------------------------------------------------------------------------------------------------------------------------------------------------------------------------------------------------------------------------------------------------------------------------------------------------------------------------------------------------------------------------------------------------------------------------------------------------------------------------------------------------------------------------------------------------------------------------------------------------------------------------------------------------------------------------------------------------------------------------------------------------------------------------------------------------------------------------------------------------------------------------------------------------------------------------------------------------------------------------------------------------------------------------------------------------------------------------------------------------------------------------------------------------------------------------------------------------------------------------------------------------------------------------------------------------------------------------------------------------------------------------------------------------------------------------------------------------------------------------------------------------------------------------------------------------------------------------------------------------------------------------------------------------------------------------------------------------------------------------------------------------------------------------------------------------------------------------------------------------------------------------------------------------------------------------------------------------------------------------------------------------------------------------------------------------------------------------------------------------------------------------------------------------------------------------------------------------------------------------------------------------------------------------------------------------------------------------------------------------------------------------------------------------------------------------------------------------------------------------------------------------------------------------------------------------------------------------------------------------------------------------------------------------------------------------------------------------------------------------------------------------------------------------------------------------------------------------------------------------------------------------------------------------------------------------------------------------------------------------------------------------------------------------------------------------------------------------------------------------------------------------------------------------------------------------------------------------------------------------------------------------------------------------------------------------------------------------------------------------------------------------------------------------------------------------------------------------------------------------------------------------------------------------------------------------------------------------------------------------------------------------------------------------------------------------------------------------------------------------------------------------------------------------------------------------------------------------------------------------------------------------------------------------------------------------------------------------------------------------------------------------------------------------------------------------------------------------------------------------------------------------------------------------------------------------------------------------------------------------------------------------------------------------------------------------------------------------------------------------------------------------------------------------------------------------------------------------------|------------------------------------------------------------------------------|-------------------------------------------------------------------------------------------------------|-----------------------------------------------------------------------------------------------------------------------------------------------------------------------------------------------------------------------------------------------------|
| EPI_ISL_428201                                                                                                                                                                                                                                                                                                                                                                                                                                                                                                                                                                                                                                                                                                                                                                                                                                                                                                                                                                                                                                                                                                                                                                                                                                                                                                                                                                                                                                                                                                                                                                                                                                                                                                                                                                                                                                                                                                                                                                                                                                                                                                                                                                                                                                                                                                                                                                                                                                                                                                                                                                                                                                                                                                                                                                                                                                                                                                                                                                                                                                                                                                                                                                                                                                                                                                                                                                                                                                                                                                                                                                                                                                                                                                                                                                                                                                                                                                                                                                                                                                                                                                                                                                                                                                                                                                                                                                                                                                                                                                                                                                                                                                                                                                                                                                                                                                                                                                                                                                                                                                                                                                                                                                                                                                                                                                                                                                                                                                                                                                                                                                                                                                                                                                                                                                                                                                                                                                                                                                                                                                                                                                                                                                                                                                                                                                                                                                                                                                                                                                                                                                                                                                                 | Klinisk mikrobiologi, Region Västerbotten                                    | Unit for Biological Agents, Department for CBRN Defence and Security, Swedish Defence Research Agency | FOI Bioinformatics team                                                                                                                                                                                                                             |
| EPI_ISL_428252, EPI_ISL_428253, EPI_ISL_428254, EPI_ISL_428255, EPI_ISL_428256, EPI_ISL_428257, EPI_ISL_428258, EPI_ISL_428259, EPI_ISL_428260, EPI_ISL_428261, EPI_ISL_428262, EPI_ISL_428263, EPI_ISL_428264, EPI_ISL_428265, EPI_ISL_428266, EPI_ISL_428267, EPI_ISL_428268, EPI_ISL_428269, EPI_ISL_428270, EPI_ISL_428271, EPI_ISL_428272, EPI_ISL_428273, EPI_ISL_428274, EPI_ISL_428275, EPI_ISL_428276, EPI_ISL_428277, EPI_ISL_428278, EPI_ISL_428279, EPI_ISL_428280, EPI_ISL_428281, EPI_ISL_428282, EPI_ISL_428283, EPI_ISL_428284, EPI_ISL_428285, EPI_ISL_428286, EPI_ISL_428287, EPI_ISL_428288, EPI_ISL_428289, EPI_ISL_428290, EPI_ISL_428291, EPI_ISL_428292, EPI_ISL_428293, EPI_ISL_428294, EPI_ISL_428295, EPI_ISL_428296, EPI_ISL_428297, EPI_ISL_428298, EPI_ISL_428299, EPI_ISL_428300, EPI_ISL_428301, EPI_ISL_428302, EPI_ISL_428303, EPI_ISL_428304, EPI_ISL_428305, EPI_ISL_428306, EPI_ISL_428307, EPI_ISL_428308, EPI_ISL_428309, EPI_ISL_428310, EPI_ISL_428311, EPI_ISL_428312, EPI_ISL_428313, EPI_ISL_428314, EPI_ISL_428315, EPI_ISL_428316, EPI_ISL_428317, EPI_ISL_428318, EPI_ISL_428319, EPI_ISL_428320, EPI_ISL_428321, EPI_ISL_428322, EPI_ISL_428323, EPI_ISL_428324, EPI_ISL_428325, EPI_ISL_428326, EPI_ISL_428327, EPI_ISL_428328, EPI_ISL_428329, EPI_ISL_428330, EPI_ISL_428331, EPI_ISL_428332, EPI_ISL_428333, EPI_ISL_428334, EPI_ISL_428335, EPI_ISL_428336, EPI_ISL_428337, EPI_ISL_428338, EPI_ISL_428339, EPI_ISL_428340, EPI_ISL_428341, EPI_ISL_428342, EPI_ISL_428343, EPI_ISL_428344, EPI_ISL_428345                                                                                                                                                                                                                                                                                                                                                                                                                                                                                                                                                                                                                                                                                                                                                                                                                                                                                                                                                                                                                                                                                                                                                                                                                                                                                                                                                                                                                                                                                                                                                                                                                                                                                                                                                                                                                                                                                                                                                                                                                                                                                                                                                                                                                                                                                                                                                                                                                                                                                                                                                                                                                                                                                                                                                                                                                                                                                                                                                                                                                                                                                                                                                                                                                                                                                                                                                                                                                                                                                                                                                                                                                                                                                                                                                                                                                                                                                                                                                                                                                                                                                                                                                                                                                                                                                                                                                                                                                                                                                                                                                                                                                                                                                                                                                                                                                                                                                                                                                                                                                                                                                                 | University of Wisconsin-Madison AIDS Vaccine Research Laboratories           | University of Wisconsin-Madison AIDS Vaccine Research Laboratories                                    | Gage Moreno, Katarina Braun, et al. AIDS Vaccine Research Laboratories                                                                                                                                                                              |
| see above                                                                                                                                                                                                                                                                                                                                                                                                                                                                                                                                                                                                                                                                                                                                                                                                                                                                                                                                                                                                                                                                                                                                                                                                                                                                                                                                                                                                                                                                                                                                                                                                                                                                                                                                                                                                                                                                                                                                                                                                                                                                                                                                                                                                                                                                                                                                                                                                                                                                                                                                                                                                                                                                                                                                                                                                                                                                                                                                                                                                                                                                                                                                                                                                                                                                                                                                                                                                                                                                                                                                                                                                                                                                                                                                                                                                                                                                                                                                                                                                                                                                                                                                                                                                                                                                                                                                                                                                                                                                                                                                                                                                                                                                                                                                                                                                                                                                                                                                                                                                                                                                                                                                                                                                                                                                                                                                                                                                                                                                                                                                                                                                                                                                                                                                                                                                                                                                                                                                                                                                                                                                                                                                                                                                                                                                                                                                                                                                                                                                                                                                                                                                                                                      | University of Wisconsin-Madison AIDS Vaccine Research Laboratories           | University of Wisconsin-Madison AIDS Vaccine Research Laboratories                                    | Gage Moreno, Katarina Braun, et al. AIDS Vaccine Research Laboratories                                                                                                                                                                              |
| EPI_ISL_428700, EPI_ISL_428701, EPI_ISL_428702, EPI_ISL_428703, EPI_ISL_428704, EPI_ISL_428705, EPI_ISL_428706, EPI_ISL_428707, EPI_ISL_428708, EPI_ISL_428709, EPI_ISL_428710, EPI_ISL_428711                                                                                                                                                                                                                                                                                                                                                                                                                                                                                                                                                                                                                                                                                                                                                                                                                                                                                                                                                                                                                                                                                                                                                                                                                                                                                                                                                                                                                                                                                                                                                                                                                                                                                                                                                                                                                                                                                                                                                                                                                                                                                                                                                                                                                                                                                                                                                                                                                                                                                                                                                                                                                                                                                                                                                                                                                                                                                                                                                                                                                                                                                                                                                                                                                                                                                                                                                                                                                                                                                                                                                                                                                                                                                                                                                                                                                                                                                                                                                                                                                                                                                                                                                                                                                                                                                                                                                                                                                                                                                                                                                                                                                                                                                                                                                                                                                                                                                                                                                                                                                                                                                                                                                                                                                                                                                                                                                                                                                                                                                                                                                                                                                                                                                                                                                                                                                                                                                                                                                                                                                                                                                                                                                                                                                                                                                                                                                                                                                                                                 | Hospital Universitario 12 de Octubre                                         | Hospital Universitario 12 de Octubre                                                                  | Esther Viedma, Sara González, Raúl Recio, Elias Dahdouh, Fernando Lázaro, Julio García, M <sup>o</sup> Dolores Folgueira, Jesús Mingorance, Rafael Delgado                                                                                          |
| see above                                                                                                                                                                                                                                                                                                                                                                                                                                                                                                                                                                                                                                                                                                                                                                                                                                                                                                                                                                                                                                                                                                                                                                                                                                                                                                                                                                                                                                                                                                                                                                                                                                                                                                                                                                                                                                                                                                                                                                                                                                                                                                                                                                                                                                                                                                                                                                                                                                                                                                                                                                                                                                                                                                                                                                                                                                                                                                                                                                                                                                                                                                                                                                                                                                                                                                                                                                                                                                                                                                                                                                                                                                                                                                                                                                                                                                                                                                                                                                                                                                                                                                                                                                                                                                                                                                                                                                                                                                                                                                                                                                                                                                                                                                                                                                                                                                                                                                                                                                                                                                                                                                                                                                                                                                                                                                                                                                                                                                                                                                                                                                                                                                                                                                                                                                                                                                                                                                                                                                                                                                                                                                                                                                                                                                                                                                                                                                                                                                                                                                                                                                                                                                                      | Hospital Universitario 12 de Octubre                                         | Hospital Universitario 12 de Octubre                                                                  | Esther Viedma, Sara González, Raúl Recio, Elias Dahdouh, Fernando Lázaro, Julio García, M <sup>o</sup> Dolores Folgueira, Jesús Mingorance, Rafael Delgado                                                                                          |
| EPI_ISL_428712, EPI_ISL_428713, EPI_ISL_428714, EPI_ISL_428715, EPI_ISL_428716, EPI_ISL_428717, EPI_ISL_428718, EPI_ISL_428719, EPI_ISL_428720, EPI_ISL_428721, EPI_ISL_428722, EPI_ISL_428723                                                                                                                                                                                                                                                                                                                                                                                                                                                                                                                                                                                                                                                                                                                                                                                                                                                                                                                                                                                                                                                                                                                                                                                                                                                                                                                                                                                                                                                                                                                                                                                                                                                                                                                                                                                                                                                                                                                                                                                                                                                                                                                                                                                                                                                                                                                                                                                                                                                                                                                                                                                                                                                                                                                                                                                                                                                                                                                                                                                                                                                                                                                                                                                                                                                                                                                                                                                                                                                                                                                                                                                                                                                                                                                                                                                                                                                                                                                                                                                                                                                                                                                                                                                                                                                                                                                                                                                                                                                                                                                                                                                                                                                                                                                                                                                                                                                                                                                                                                                                                                                                                                                                                                                                                                                                                                                                                                                                                                                                                                                                                                                                                                                                                                                                                                                                                                                                                                                                                                                                                                                                                                                                                                                                                                                                                                                                                                                                                                                                 | Ministry of Health Turkey                                                    | Ministry of Health Turkey                                                                             | Fatma Bayraktar,Aye Baak Alta,Yasemin Cogun,Gülay Korukluolu,Selçuk Kılıç                                                                                                                                                                           |
| see above                                                                                                                                                                                                                                                                                                                                                                                                                                                                                                                                                                                                                                                                                                                                                                                                                                                                                                                                                                                                                                                                                                                                                                                                                                                                                                                                                                                                                                                                                                                                                                                                                                                                                                                                                                                                                                                                                                                                                                                                                                                                                                                                                                                                                                                                                                                                                                                                                                                                                                                                                                                                                                                                                                                                                                                                                                                                                                                                                                                                                                                                                                                                                                                                                                                                                                                                                                                                                                                                                                                                                                                                                                                                                                                                                                                                                                                                                                                                                                                                                                                                                                                                                                                                                                                                                                                                                                                                                                                                                                                                                                                                                                                                                                                                                                                                                                                                                                                                                                                                                                                                                                                                                                                                                                                                                                                                                                                                                                                                                                                                                                                                                                                                                                                                                                                                                                                                                                                                                                                                                                                                                                                                                                                                                                                                                                                                                                                                                                                                                                                                                                                                                                                      | Ministry of Health Turkey                                                    | Ministry of Health Turkey                                                                             | Fatma Bayraktar,Aye Baak Alta,Yasemin Cogun,Gülay Korukluolu,Selçuk Kılıç                                                                                                                                                                           |
| EPI_ISL_428724, EPI_ISL_428725, EPI_ISL_428726, EPI_ISL_428727, EPI_ISL_428728, EPI_ISL_428729, EPI_ISL_428730, EPI_ISL_428731, EPI_ISL_428732, EPI_ISL_428935, EPI_ISL_428936                                                                                                                                                                                                                                                                                                                                                                                                                                                                                                                                                                                                                                                                                                                                                                                                                                                                                                                                                                                                                                                                                                                                                                                                                                                                                                                                                                                                                                                                                                                                                                                                                                                                                                                                                                                                                                                                                                                                                                                                                                                                                                                                                                                                                                                                                                                                                                                                                                                                                                                                                                                                                                                                                                                                                                                                                                                                                                                                                                                                                                                                                                                                                                                                                                                                                                                                                                                                                                                                                                                                                                                                                                                                                                                                                                                                                                                                                                                                                                                                                                                                                                                                                                                                                                                                                                                                                                                                                                                                                                                                                                                                                                                                                                                                                                                                                                                                                                                                                                                                                                                                                                                                                                                                                                                                                                                                                                                                                                                                                                                                                                                                                                                                                                                                                                                                                                                                                                                                                                                                                                                                                                                                                                                                                                                                                                                                                                                                                                                                                 | University of Wisconsin-Madison AIDS Vaccine Research Laboratories           | University of Wisconsin-Madison AIDS Vaccine Research Laboratories                                    | Gage Moreno, Katarina Braun, et al. AIDS Vaccine Research Laboratories                                                                                                                                                                              |
| see above                                                                                                                                                                                                                                                                                                                                                                                                                                                                                                                                                                                                                                                                                                                                                                                                                                                                                                                                                                                                                                                                                                                                                                                                                                                                                                                                                                                                                                                                                                                                                                                                                                                                                                                                                                                                                                                                                                                                                                                                                                                                                                                                                                                                                                                                                                                                                                                                                                                                                                                                                                                                                                                                                                                                                                                                                                                                                                                                                                                                                                                                                                                                                                                                                                                                                                                                                                                                                                                                                                                                                                                                                                                                                                                                                                                                                                                                                                                                                                                                                                                                                                                                                                                                                                                                                                                                                                                                                                                                                                                                                                                                                                                                                                                                                                                                                                                                                                                                                                                                                                                                                                                                                                                                                                                                                                                                                                                                                                                                                                                                                                                                                                                                                                                                                                                                                                                                                                                                                                                                                                                                                                                                                                                                                                                                                                                                                                                                                                                                                                                                                                                                                                                      | University of Wisconsin-Madison AIDS Vaccine Research Laboratories           | University of Wisconsin-Madison AIDS Vaccine Research Laboratories                                    | Gage Moreno, Katarina Braun, et al. AIDS Vaccine Research Laboratories                                                                                                                                                                              |
| EPI_ISL_429659, EPI_ISL_429663, EPI_ISL_429705, EPI_ISL_429792, EPI_ISL_429802, EPI_ISL_429803, EPI_ISL_429805                                                                                                                                                                                                                                                                                                                                                                                                                                                                                                                                                                                                                                                                                                                                                                                                                                                                                                                                                                                                                                                                                                                                                                                                                                                                                                                                                                                                                                                                                                                                                                                                                                                                                                                                                                                                                                                                                                                                                                                                                                                                                                                                                                                                                                                                                                                                                                                                                                                                                                                                                                                                                                                                                                                                                                                                                                                                                                                                                                                                                                                                                                                                                                                                                                                                                                                                                                                                                                                                                                                                                                                                                                                                                                                                                                                                                                                                                                                                                                                                                                                                                                                                                                                                                                                                                                                                                                                                                                                                                                                                                                                                                                                                                                                                                                                                                                                                                                                                                                                                                                                                                                                                                                                                                                                                                                                                                                                                                                                                                                                                                                                                                                                                                                                                                                                                                                                                                                                                                                                                                                                                                                                                                                                                                                                                                                                                                                                                                                                                                                                                                 | Institute for Public Health                                                  | Laboratory for advanced genomics                                                                      | Filip Roki, Lovro Trgovec-Greif, Neven Sui, Tomislav Rukavina, Igor Jurak, Oliver Vugrek                                                                                                                                                            |
| EPI_ISL_429861, EPI_ISL_429862, EPI_ISL_429863, EPI_ISL_429864, EPI_ISL_429865, EPI_ISL_429866, EPI_ISL_429867, EPI_ISL_429868, EPI_ISL_429869, EPI_ISL_429870, EPI_ISL_429871, EPI_ISL_429872, EPI_ISL_429873                                                                                                                                                                                                                                                                                                                                                                                                                                                                                                                                                                                                                                                                                                                                                                                                                                                                                                                                                                                                                                                                                                                                                                                                                                                                                                                                                                                                                                                                                                                                                                                                                                                                                                                                                                                                                                                                                                                                                                                                                                                                                                                                                                                                                                                                                                                                                                                                                                                                                                                                                                                                                                                                                                                                                                                                                                                                                                                                                                                                                                                                                                                                                                                                                                                                                                                                                                                                                                                                                                                                                                                                                                                                                                                                                                                                                                                                                                                                                                                                                                                                                                                                                                                                                                                                                                                                                                                                                                                                                                                                                                                                                                                                                                                                                                                                                                                                                                                                                                                                                                                                                                                                                                                                                                                                                                                                                                                                                                                                                                                                                                                                                                                                                                                                                                                                                                                                                                                                                                                                                                                                                                                                                                                                                                                                                                                                                                                                                                                 | Ministry of Health Turkey                                                    | Ministry of Health Turkey                                                                             | Fatma Bayraktar,Aye Baak Alta,Yasemin Cogun,Gülay Korukluolu,Selçuk Kılıç                                                                                                                                                                           |
| see above                                                                                                                                                                                                                                                                                                                                                                                                                                                                                                                                                                                                                                                                                                                                                                                                                                                                                                                                                                                                                                                                                                                                                                                                                                                                                                                                                                                                                                                                                                                                                                                                                                                                                                                                                                                                                                                                                                                                                                                                                                                                                                                                                                                                                                                                                                                                                                                                                                                                                                                                                                                                                                                                                                                                                                                                                                                                                                                                                                                                                                                                                                                                                                                                                                                                                                                                                                                                                                                                                                                                                                                                                                                                                                                                                                                                                                                                                                                                                                                                                                                                                                                                                                                                                                                                                                                                                                                                                                                                                                                                                                                                                                                                                                                                                                                                                                                                                                                                                                                                                                                                                                                                                                                                                                                                                                                                                                                                                                                                                                                                                                                                                                                                                                                                                                                                                                                                                                                                                                                                                                                                                                                                                                                                                                                                                                                                                                                                                                                                                                                                                                                                                                                      | Ministry of Health Turkey                                                    | Ministry of Health Turkey                                                                             | Fatma Bayraktar,Aye Baak Alta,Yasemin Cogun,Gülay Korukluolu,Selçuk Kılıç                                                                                                                                                                           |
| EPI_ISL_430019, EPI_ISL_430023, EPI_ISL_430024, EPI_ISL_430025, EPI_ISL_430026, EPI_ISL_430027, EPI_ISL_430028, EPI_ISL_430030, EPI_ISL_430031, EPI_ISL_430032, EPI_ISL_430033, EPI_ISL_430035, EPI_ISL_430037, EPI_ISL_430038, EPI_ISL_430039, EPI_ISL_430040, EPI_ISL_430042, EPI_ISL_430044, EPI_ISL_430045, EPI_ISL_430046, EPI_ISL_430048, EPI_ISL_430049, EPI_ISL_430050, EPI_ISL_430051, EPI_ISL_430053, EPI_ISL_430054, EPI_ISL_430055, EPI_ISL_430056, EPI_ISL_430057, EPI_ISL_430058, EPI_ISL_430060, EPI_ISL_430061                                                                                                                                                                                                                                                                                                                                                                                                                                                                                                                                                                                                                                                                                                                                                                                                                                                                                                                                                                                                                                                                                                                                                                                                                                                                                                                                                                                                                                                                                                                                                                                                                                                                                                                                                                                                                                                                                                                                                                                                                                                                                                                                                                                                                                                                                                                                                                                                                                                                                                                                                                                                                                                                                                                                                                                                                                                                                                                                                                                                                                                                                                                                                                                                                                                                                                                                                                                                                                                                                                                                                                                                                                                                                                                                                                                                                                                                                                                                                                                                                                                                                                                                                                                                                                                                                                                                                                                                                                                                                                                                                                                                                                                                                                                                                                                                                                                                                                                                                                                                                                                                                                                                                                                                                                                                                                                                                                                                                                                                                                                                                                                                                                                                                                                                                                                                                                                                                                                                                                                                                                                                                                                                 | Utah Public Health Laboratory                                                | Utah Public Health Laboratory                                                                         | Erin Young, Kelly Oakeson                                                                                                                                                                                                                           |
| see above                                                                                                                                                                                                                                                                                                                                                                                                                                                                                                                                                                                                                                                                                                                                                                                                                                                                                                                                                                                                                                                                                                                                                                                                                                                                                                                                                                                                                                                                                                                                                                                                                                                                                                                                                                                                                                                                                                                                                                                                                                                                                                                                                                                                                                                                                                                                                                                                                                                                                                                                                                                                                                                                                                                                                                                                                                                                                                                                                                                                                                                                                                                                                                                                                                                                                                                                                                                                                                                                                                                                                                                                                                                                                                                                                                                                                                                                                                                                                                                                                                                                                                                                                                                                                                                                                                                                                                                                                                                                                                                                                                                                                                                                                                                                                                                                                                                                                                                                                                                                                                                                                                                                                                                                                                                                                                                                                                                                                                                                                                                                                                                                                                                                                                                                                                                                                                                                                                                                                                                                                                                                                                                                                                                                                                                                                                                                                                                                                                                                                                                                                                                                                                                      | Utah Public Health Laboratory                                                | Utah Public Health Laboratory                                                                         | Erin Young, Kelly Oakeson                                                                                                                                                                                                                           |
| EPI_ISL_432668, EPI_ISL_432669, EPI_ISL_432670, EPI_ISL_432671, EPI_ISL_432672, EPI_ISL_432673, EPI_ISL_432674, EPI_ISL_432675, EPI_ISL_432676, EPI_ISL_432677, EPI_ISL_432678, EPI_ISL_432679, EPI_ISL_432680, EPI_ISL_432681, EPI_ISL_432682, EPI_ISL_432683, EPI_ISL_432684, EPI_ISL_432685, EPI_ISL_432686, EPI_ISL_432687, EPI_ISL_432688, EPI_ISL_432689, EPI_ISL_432690, EPI_ISL_432691, EPI_ISL_432692, EPI_ISL_432693, EPI_ISL_432694, EPI_ISL_432695, EPI_ISL_432696, EPI_ISL_432697, EPI_ISL_432698, EPI_ISL_432699, EPI_ISL_432700, EPI_ISL_432701, EPI_ISL_432702, EPI_ISL_432703, EPI_ISL_432704, EPI_ISL_432705, EPI_ISL_432706, EPI_ISL_432707, EPI_ISL_432708, EPI_ISL_432709, EPI_ISL_432710, EPI_ISL_432711, EPI_ISL_432712, EPI_ISL_432713, EPI_ISL_432714, EPI_ISL_432715, EPI_ISL_432716, EPI_ISL_432717, EPI_ISL_432718, EPI_ISL_432719, EPI_ISL_432720, EPI_ISL_432721, EPI_ISL_432722, EPI_ISL_432723, EPI_ISL_432724, EPI_ISL_432725, EPI_ISL_432726, EPI_ISL_432727, EPI_ISL_432728, EPI_ISL_432729, EPI_ISL_432730, EPI_ISL_432731, EPI_ISL_432732, EPI_ISL_432733, EPI_ISL_432734, EPI_ISL_432735, EPI_ISL_432736, EPI_ISL_432737, EPI_ISL_432738, EPI_ISL_432739, EPI_ISL_432740, EPI_ISL_432741, EPI_ISL_432742, EPI_ISL_432743, EPI_ISL_432744, EPI_ISL_432745, EPI_ISL_432746, EPI_ISL_432747, EPI_ISL_432748, EPI_ISL_432749, EPI_ISL_432750, EPI_ISL_432751, EPI_ISL_432752, EPI_ISL_432753, EPI_ISL_432754, EPI_ISL_432755, EPI_ISL_432756, EPI_ISL_432757, EPI_ISL_432758, EPI_ISL_432759, EPI_ISL_432760, EPI_ISL_432761, EPI_ISL_432762, EPI_ISL_432763, EPI_ISL_432764, EPI_ISL_432765, EPI_ISL_432766, EPI_ISL_432767, EPI_ISL_432768, EPI_ISL_432769, EPI_ISL_432770, EPI_ISL_432771, EPI_ISL_432772, EPI_ISL_432773, EPI_ISL_432774, EPI_ISL_432775, EPI_ISL_432776, EPI_ISL_432777, EPI_ISL_432778, EPI_ISL_432779, EPI_ISL_432780, EPI_ISL_432781, EPI_ISL_432782, EPI_ISL_432783, EPI_ISL_432784, EPI_ISL_432785, EPI_ISL_432786, EPI_ISL_432787, EPI_ISL_432788, EPI_ISL_432789, EPI_ISL_432790, EPI_ISL_432791, EPI_ISL_432792, EPI_ISL_432793, EPI_ISL_432794, EPI_ISL_432795, EPI_ISL_432796, EPI_ISL_432797, EPI_ISL_432798, EPI_ISL_432799, EPI_ISL_432800, EPI_ISL_432801, EPI_ISL_432802, EPI_ISL_432803, EPI_ISL_432804, EPI_ISL_432805, EPI_ISL_432806, EPI_ISL_432807, EPI_ISL_432808, EPI_ISL_432809, EPI_ISL_432810, EPI_ISL_432811, EPI_ISL_432812, EPI_ISL_432813, EPI_ISL_432814, EPI_ISL_432815, EPI_ISL_432816, EPI_ISL_432817, EPI_ISL_432818, EPI_ISL_432819, EPI_ISL_432820, EPI_ISL_432821, EPI_ISL_432822, EPI_ISL_432823, EPI_ISL_432824, EPI_ISL_432825, EPI_ISL_432826, EPI_ISL_432827, EPI_ISL_432828, EPI_ISL_432829, EPI_ISL_432830, EPI_ISL_432831, EPI_ISL_432832, EPI_ISL_432833, EPI_ISL_432834, EPI_ISL_432835, EPI_ISL_432836, EPI_ISL_432837, EPI_ISL_432838, EPI_ISL_432839, EPI_ISL_432840, EPI_ISL_432841, EPI_ISL_432842, EPI_ISL_432843, EPI_ISL_432844, EPI_ISL_432845, EPI_ISL_432846, EPI_ISL_432847, EPI_ISL_432848, EPI_ISL_432849, EPI_ISL_432850, EPI_ISL_432851, EPI_ISL_432852, EPI_ISL_432853, EPI_ISL_432854, EPI_ISL_432855, EPI_ISL_432856, EPI_ISL_432857, EPI_ISL_432858, EPI_ISL_432859, EPI_ISL_432860, EPI_ISL_432861, EPI_ISL_432862, EPI_ISL_432863, EPI_ISL_432864, EPI_ISL_432865, EPI_ISL_432866, EPI_ISL_432867, EPI_ISL_432868, EPI_ISL_432869, EPI_ISL_432870, EPI_ISL_432871, EPI_ISL_432872, EPI_ISL_432873, EPI_ISL_432874, EPI_ISL_432875, EPI_ISL_432876, EPI_ISL_432877, EPI_ISL_432878, EPI_ISL_432879, EPI_ISL_432880, EPI_ISL_432881, EPI_ISL_432882, EPI_ISL_432883, EPI_ISL_432884, EPI_ISL_432885, EPI_ISL_432886, EPI_ISL_432887, EPI_ISL_432888, EPI_ISL_432889, EPI_ISL_432890, EPI_ISL_432891, EPI_ISL_432892, EPI_ISL_432893, EPI_ISL_432894, EPI_ISL_432895, EPI_ISL_432896, EPI_ISL_432897, EPI_ISL_432898, EPI_ISL_432899, EPI_ISL_432900, EPI_ISL_432901, EPI_ISL_432902, EPI_ISL_432903, EPI_ISL_432904, EPI_ISL_432905, EPI_ISL_432906, EPI_ISL_432907, EPI_ISL_432908, EPI_ISL_432909, EPI_ISL_432910, EPI_ISL_432911, EPI_ISL_432912, EPI_ISL_432913, EPI_ISL_432914, EPI_ISL_432915, EPI_ISL_432916, EPI_ISL_432917, EPI_ISL_432918, EPI_ISL_432919, EPI_ISL_432920, EPI_ISL_432921, EPI_ISL_432922, EPI_ISL_432923, EPI_ISL_432924, EPI_ISL_432925, EPI_ISL_432926, EPI_ISL_432927, EPI_ISL_432928, EPI_ISL_432929, EPI_ISL_432930, EPI_ISL_432931, EPI_ISL_432932, EPI_ISL_432933, EPI_ISL_432934, EPI_ISL_432935, EPI_ISL_432936, EPI_ISL_432937, EPI_ISL_432938, EPI_ISL_432939, EPI_ISL_432940, EPI_ISL_432941, EPI_ISL_432942, EPI_ISL_432943, EPI_ISL_432944, EPI_ISL_432945, EPI_ISL_432946, EPI_ISL_432947, EPI_ISL_432948, EPI_ISL_432949, EPI_ISL_432950, EPI_ISL_432951, EPI_ISL_432952, EPI_ISL_432953, EPI_ISL_432954, EPI_ISL_432955, EPI_ISL_432956, EPI_ISL_432957, EPI_ISL_432958, EPI_ISL_432959, EPI_ISL_432960, EPI_ISL_432961, EPI_ISL_432962, EPI_ISL_432963, EPI_ISL_432964, EPI_ISL_432965, EPI_ISL_432966, EPI_ISL_432967, EPI_ISL_432968, EPI_ISL_432969, EPI_ISL_432970, EPI_ISL_432971, EPI_ISL_432972, EPI_ISL_432973, EPI_ISL_432974, EPI_ISL_432975, EPI_ISL_432976, EPI_ISL_432977, EPI_ISL_432978, EPI_ISL_432979, EPI_ISL_432980, EPI_ISL_432981, EPI_ISL_432982, EPI_ISL_432983, EPI_ISL_432984, EPI_ISL_432985, EPI_ISL_432986, EPI_ISL_432987, EPI_ISL_432988, EPI_ISL_432989, EPI_ISL_432990, EPI_ISL_432991, EPI_ISL_432992, EPI_ISL_432993, EPI_ISL_432994, EPI_ISL_432995, EPI_ISL_432996, EPI_ISL_432997, EPI_ISL_432998, EPI_ISL_432999, EPI_ISL_433000, EPI_ISL_433001, EPI_ISL_433002, EPI_ISL_433003, EPI_ISL_433004, EPI_ISL_433005, EPI_ISL_433006, EPI_ISL_433007, EPI_ISL_433008, EPI_ISL_433009, EPI_ISL_433010, EPI_ISL_433011, EPI_ISL_433012, EPI_ISL_433013, EPI_ISL_433014, EPI_ISL_433015, EPI_ISL_433016, EPI_ISL_433017, EPI_ISL_433018, EPI_ISL_433019, EPI_ISL_433020, EPI_ISL_433021, EPI_ISL_433022, EPI_ISL_433023, EPI_ISL_433024, EPI_ISL_433025, EPI_ISL_433026, EPI_ISL_433027, EPI_ISL_433028, EPI_ISL_433029, EPI_ISL_433030, EPI_ISL_433031, EPI_ISL_433032, EPI_ISL_433033, EPI_ISL_433034, EPI_ISL_433035, EPI_ISL_433036, EPI_ISL_433037, EPI_ISL_433038, EPI_ISL_433039, EPI_ISL_433040, EPI_ISL_433041, EPI_ISL_433042, EPI_ISL_433043, EPI_ISL_433044, EPI_ISL_433045, EPI_ISL_433046, EPI_ISL_433047, EPI_ISL_433048, EPI_ISL_433049, EPI_ISL_433050, EPI_ISL_433051, EPI_ISL_433052, EPI_ISL_433053, EPI_ISL_433054, EPI_ISL_433055, EPI_ISL_433056, EPI_ISL_433057, EPI_ISL_433058, EPI_ISL_433059, EPI_ISL_433060, EPI_ISL_433061, EPI_ISL_433062, EPI_ISL_433063, EPI_ISL_433064, EPI_ISL_433065, EPI_ISL_433066, EPI_ISL_433067 | Queens Medical Centre, Clinical Microbiology Department / DeepSeq Nottingham | COVID-19 Genomics UK (COG-UK) Consortium                                                              | Gemma Clark, Wendy Smith, Manjinder Khakh, Hannah Howson-Wells, Jonathan Ball, Patrick McClure, Joseph Chappell, Theocharis Tsoieridis, Nadine Holmes, Matthew Carlisle, Christopher Moore, Fei Sang, Johnny Debebe, Victoria Wright, Matthew Loose |
| EPI_ISL_434533, EPI_ISL_434535                                                                                                                                                                                                                                                                                                                                                                                                                                                                                                                                                                                                                                                                                                                                                                                                                                                                                                                                                                                                                                                                                                                                                                                                                                                                                                                                                                                                                                                                                                                                                                                                                                                                                                                                                                                                                                                                                                                                                                                                                                                                                                                                                                                                                                                                                                                                                                                                                                                                                                                                                                                                                                                                                                                                                                                                                                                                                                                                                                                                                                                                                                                                                                                                                                                                                                                                                                                                                                                                                                                                                                                                                                                                                                                                                                                                                                                                                                                                                                                                                                                                                                                                                                                                                                                                                                                                                                                                                                                                                                                                                                                                                                                                                                                                                                                                                                                                                                                                                                                                                                                                                                                                                                                                                                                                                                                                                                                                                                                                                                                                                                                                                                                                                                                                                                                                                                                                                                                                                                                                                                                                                                                                                                                                                                                                                                                                                                                                                                                                                                                                                                                                                                 | Area de Salud Alajuela Sur                                                   | Incienza, Instituto Costarricense de Investigación y Enseñanza en Nutrición y Salud                   | Francisco Duarte, Hebleen Porras, Claudio Soto-Garita, Estela Cordero, Adriana Godinez & Melany Calderon                                                                                                                                            |
| EPI_ISL_434536                                                                                                                                                                                                                                                                                                                                                                                                                                                                                                                                                                                                                                                                                                                                                                                                                                                                                                                                                                                                                                                                                                                                                                                                                                                                                                                                                                                                                                                                                                                                                                                                                                                                                                                                                                                                                                                                                                                                                                                                                                                                                                                                                                                                                                                                                                                                                                                                                                                                                                                                                                                                                                                                                                                                                                                                                                                                                                                                                                                                                                                                                                                                                                                                                                                                                                                                                                                                                                                                                                                                                                                                                                                                                                                                                                                                                                                                                                                                                                                                                                                                                                                                                                                                                                                                                                                                                                                                                                                                                                                                                                                                                                                                                                                                                                                                                                                                                                                                                                                                                                                                                                                                                                                                                                                                                                                                                                                                                                                                                                                                                                                                                                                                                                                                                                                                                                                                                                                                                                                                                                                                                                                                                                                                                                                                                                                                                                                                                                                                                                                                                                                                                                                 | Hospital San Vicente de Paul                                                 | Incienza, Instituto Costarricense de Investigación y Enseñanza en Nutrición y Salud                   | Francisco Duarte, Hebleen Porras, Claudio Soto-Garita, Estela Cordero, Adriana Godinez & Melany Calderon                                                                                                                                            |
| EPI_ISL_434538                                                                                                                                                                                                                                                                                                                                                                                                                                                                                                                                                                                                                                                                                                                                                                                                                                                                                                                                                                                                                                                                                                                                                                                                                                                                                                                                                                                                                                                                                                                                                                                                                                                                                                                                                                                                                                                                                                                                                                                                                                                                                                                                                                                                                                                                                                                                                                                                                                                                                                                                                                                                                                                                                                                                                                                                                                                                                                                                                                                                                                                                                                                                                                                                                                                                                                                                                                                                                                                                                                                                                                                                                                                                                                                                                                                                                                                                                                                                                                                                                                                                                                                                                                                                                                                                                                                                                                                                                                                                                                                                                                                                                                                                                                                                                                                                                                                                                                                                                                                                                                                                                                                                                                                                                                                                                                                                                                                                                                                                                                                                                                                                                                                                                                                                                                                                                                                                                                                                                                                                                                                                                                                                                                                                                                                                                                                                                                                                                                                                                                                                                                                                                                                 | COOPESAIN                                                                    | Incienza, Instituto Costarricense de Investigación y Enseñanza en Nutrición y Salud                   | Francisco Duarte, Hebleen Porras, Claudio Soto-Garita, Estela Cordero, Adriana Godinez & Melany Calderon                                                                                                                                            |
| EPI_ISL_434539                                                                                                                                                                                                                                                                                                                                                                                                                                                                                                                                                                                                                                                                                                                                                                                                                                                                                                                                                                                                                                                                                                                                                                                                                                                                                                                                                                                                                                                                                                                                                                                                                                                                                                                                                                                                                                                                                                                                                                                                                                                                                                                                                                                                                                                                                                                                                                                                                                                                                                                                                                                                                                                                                                                                                                                                                                                                                                                                                                                                                                                                                                                                                                                                                                                                                                                                                                                                                                                                                                                                                                                                                                                                                                                                                                                                                                                                                                                                                                                                                                                                                                                                                                                                                                                                                                                                                                                                                                                                                                                                                                                                                                                                                                                                                                                                                                                                                                                                                                                                                                                                                                                                                                                                                                                                                                                                                                                                                                                                                                                                                                                                                                                                                                                                                                                                                                                                                                                                                                                                                                                                                                                                                                                                                                                                                                                                                                                                                                                                                                                                                                                                                                                 | Area de Salud Orotina                                                        | Incienza, Instituto Costarricense de Investigación y Enseñanza en Nutrición y Salud                   | Francisco Duarte, Hebleen Porras, Claudio Soto-Garita, Estela Cordero, Adriana Godinez & Melany Calderon                                                                                                                                            |
| EPI_ISL_434540                                                                                                                                                                                                                                                                                                                                                                                                                                                                                                                                                                                                                                                                                                                                                                                                                                                                                                                                                                                                                                                                                                                                                                                                                                                                                                                                                                                                                                                                                                                                                                                                                                                                                                                                                                                                                                                                                                                                                                                                                                                                                                                                                                                                                                                                                                                                                                                                                                                                                                                                                                                                                                                                                                                                                                                                                                                                                                                                                                                                                                                                                                                                                                                                                                                                                                                                                                                                                                                                                                                                                                                                                                                                                                                                                                                                                                                                                                                                                                                                                                                                                                                                                                                                                                                                                                                                                                                                                                                                                                                                                                                                                                                                                                                                                                                                                                                                                                                                                                                                                                                                                                                                                                                                                                                                                                                                                                                                                                                                                                                                                                                                                                                                                                                                                                                                                                                                                                                                                                                                                                                                                                                                                                                                                                                                                                                                                                                                                                                                                                                                                                                                                                                 | EBAIS Concepción Norte                                                       | Incienza, Instituto Costarricense de Investigación y Enseñanza en Nutrición y Salud                   | Francisco Duarte, Hebleen Porras, Claudio Soto-Garita, Estela Cordero, Adriana Godinez & Melany Calderon                                                                                                                                            |
| EPI_ISL_434607, EPI_ISL_434608, EPI_ISL_434609, EPI_ISL_434610, EPI_ISL_434611, EPI_ISL_434612, EPI_ISL_434613, EPI_ISL_434614, EPI_ISL_434615                                                                                                                                                                                                                                                                                                                                                                                                                                                                                                                                                                                                                                                                                                                                                                                                                                                                                                                                                                                                                                                                                                                                                                                                                                                                                                                                                                                                                                                                                                                                                                                                                                                                                                                                                                                                                                                                                                                                                                                                                                                                                                                                                                                                                                                                                                                                                                                                                                                                                                                                                                                                                                                                                                                                                                                                                                                                                                                                                                                                                                                                                                                                                                                                                                                                                                                                                                                                                                                                                                                                                                                                                                                                                                                                                                                                                                                                                                                                                                                                                                                                                                                                                                                                                                                                                                                                                                                                                                                                                                                                                                                                                                                                                                                                                                                                                                                                                                                                                                                                                                                                                                                                                                                                                                                                                                                                                                                                                                                                                                                                                                                                                                                                                                                                                                                                                                                                                                                                                                                                                                                                                                                                                                                                                                                                                                                                                                                                                                                                                                                 | University of Wisconsin-Madison AIDS Vaccine Research Laboratories           | University of Wisconsin-Madison AIDS Vaccine Research Laboratories                                    | Gage Moreno, Katarina Braun, et al. AIDS Vaccine Research Laboratories                                                                                                                                                                              |
| EPI_ISL_434652                                                                                                                                                                                                                                                                                                                                                                                                                                                                                                                                                                                                                                                                                                                                                                                                                                                                                                                                                                                                                                                                                                                                                                                                                                                                                                                                                                                                                                                                                                                                                                                                                                                                                                                                                                                                                                                                                                                                                                                                                                                                                                                                                                                                                                                                                                                                                                                                                                                                                                                                                                                                                                                                                                                                                                                                                                                                                                                                                                                                                                                                                                                                                                                                                                                                                                                                                                                                                                                                                                                                                                                                                                                                                                                                                                                                                                                                                                                                                                                                                                                                                                                                                                                                                                                                                                                                                                                                                                                                                                                                                                                                                                                                                                                                                                                                                                                                                                                                                                                                                                                                                                                                                                                                                                                                                                                                                                                                                                                                                                                                                                                                                                                                                                                                                                                                                                                                                                                                                                                                                                                                                                                                                                                                                                                                                                                                                                                                                                                                                                                                                                                                                                                 | Ektorps Vardcentral                                                          | The Public Health Agency of Sweden                                                                    | Eva Espmark, Oskar Karlsson Lindsjö, Maria Lind Karlberg, Anna-Malin Linde, Olov Svartstrom, Anna Risberg, Theresa Enkirch, Mia Brytting, Karin Tegmark-Wisell                                                                                      |
| EPI_ISL_435348, EPI_ISL_435349, EPI_ISL_435352, EPI_ISL_435353, EPI_ISL_435354, EPI_ISL_435355, EPI_ISL_435356, EPI_ISL_435358, EPI_ISL_435359, EPI_ISL_435361, EPI_ISL_435362, EPI_ISL_435364, EPI_ISL_435365, EPI_ISL_435366, EPI_ISL_435367, EPI_ISL_435368, EPI_ISL_435369, EPI_ISL_435370, EPI_ISL_435371, EPI_ISL_435372, EPI_ISL_435373, EPI_ISL_435374, EPI_ISL_435377, EPI_ISL_435379, EPI_ISL_435381, EPI_ISL_435382, EPI_ISL_435384, EPI_ISL_435387, EPI_ISL_435388, EPI_ISL_435389, EPI_ISL_435390, EPI_ISL_435391, EPI_ISL_435392, EPI_ISL_435393                                                                                                                                                                                                                                                                                                                                                                                                                                                                                                                                                                                                                                                                                                                                                                                                                                                                                                                                                                                                                                                                                                                                                                                                                                                                                                                                                                                                                                                                                                                                                                                                                                                                                                                                                                                                                                                                                                                                                                                                                                                                                                                                                                                                                                                                                                                                                                                                                                                                                                                                                                                                                                                                                                                                                                                                                                                                                                                                                                                                                                                                                                                                                                                                                                                                                                                                                                                                                                                                                                                                                                                                                                                                                                                                                                                                                                                                                                                                                                                                                                                                                                                                                                                                                                                                                                                                                                                                                                                                                                                                                                                                                                                                                                                                                                                                                                                                                                                                                                                                                                                                                                                                                                                                                                                                                                                                                                                                                                                                                                                                                                                                                                                                                                                                                                                                                                                                                                                                                                                                                                                                                                 | Utah Public Health Laboratory                                                | Utah Public Health Laboratory                                                                         | Erin Young, Kelly Oakeson                                                                                                                                                                                                                           |
| see above                                                                                                                                                                                                                                                                                                                                                                                                                                                                                                                                                                                                                                                                                                                                                                                                                                                                                                                                                                                                                                                                                                                                                                                                                                                                                                                                                                                                                                                                                                                                                                                                                                                                                                                                                                                                                                                                                                                                                                                                                                                                                                                                                                                                                                                                                                                                                                                                                                                                                                                                                                                                                                                                                                                                                                                                                                                                                                                                                                                                                                                                                                                                                                                                                                                                                                                                                                                                                                                                                                                                                                                                                                                                                                                                                                                                                                                                                                                                                                                                                                                                                                                                                                                                                                                                                                                                                                                                                                                                                                                                                                                                                                                                                                                                                                                                                                                                                                                                                                                                                                                                                                                                                                                                                                                                                                                                                                                                                                                                                                                                                                                                                                                                                                                                                                                                                                                                                                                                                                                                                                                                                                                                                                                                                                                                                                                                                                                                                                                                                                                                                                                                                                                      | Utah Public Health Laboratory                                                | Utah Public Health Laboratory                                                                         | Erin Young, Kelly Oakeson                                                                                                                                                                                                                           |
| EPI_ISL_436564, EPI_ISL_436565, EPI_ISL_436566, EPI_ISL_436567, EPI_ISL_436568, EPI_ISL_436569, EPI_ISL_436570, EPI_ISL_436571, EPI_ISL_436572, EPI_ISL_436573, EPI_ISL_436574, EPI_ISL_436575, EPI_ISL_436576, EPI_ISL_436577, EPI_ISL_436578, EPI_ISL_436579, EPI_ISL_436580, EPI_ISL_436581, EPI_ISL_436582, EPI_ISL_436583, EPI_ISL_436584, EPI_ISL_436585, EPI_ISL_436586, EPI_ISL_436587, EPI_ISL_436588, EPI_ISL_436589, EPI_ISL_436590, EPI_ISL_436591, EPI_ISL_436592, EPI_ISL_436593, EPI_ISL_436594, EPI_ISL_436595, EPI_ISL_436596, EPI_ISL_436597, EPI_ISL_436598, EPI_ISL_436599, EPI_ISL_436600, EPI_ISL_436601, EPI_ISL_436602, EPI_ISL_436603, EPI_ISL_436604, EPI_ISL_436605, EPI_ISL_436606, EPI_ISL_436607, EPI_ISL_436608, EPI_ISL_436609, EPI_ISL_436610, EPI_ISL_436611, EPI_ISL_436612, EPI_ISL_436613, EPI_ISL_436614, EPI_ISL_436615, EPI_ISL_436616, EPI_ISL_436617, EPI_ISL_436618, EPI_ISL_436619, EPI_ISL_436620, EPI_ISL_436621, EPI_ISL_436622, EPI_ISL_436623, EPI_ISL_436624, EPI_ISL_436625, EPI_ISL_436626, EPI_ISL_436627, EPI_ISL_436628, EPI_ISL_436629, EPI_ISL_436630, EPI_ISL_436631, EPI_ISL_436632, EPI_ISL_436633, EPI_ISL_436634, EPI_ISL_436635, EPI_ISL_436636, EPI_ISL_436637, EPI_ISL_436638, EPI_ISL_436639, EPI_ISL_436640                                                                                                                                                                                                                                                                                                                                                                                                                                                                                                                                                                                                                                                                                                                                                                                                                                                                                                                                                                                                                                                                                                                                                                                                                                                                                                                                                                                                                                                                                                                                                                                                                                                                                                                                                                                                                                                                                                                                                                                                                                                                                                                                                                                                                                                                                                                                                                                                                                                                                                                                                                                                                                                                                                                                                                                                                                                                                                                                                                                                                                                                                                                                                                                                                                                                                                                                                                                                                                                                                                                                                                                                                                                                                                                                                                                                                                                                                                                                                                                                                                                                                                                                                                                                                                                                                                                                                                                                                                                                                                                                                                                                                                                                                                                                                                                                                                                                                                                                                                                                                                                                                                                                                                                                                                                                                                                                                                                 | University of Wisconsin-Madison AIDS Vaccine Research Laboratories           | University of Wisconsin-Madison AIDS Vaccine Research Laboratories                                    | Gage Moreno, Katarina Braun, et al. AIDS Vaccine Research Laboratories                                                                                                                                                                              |
| see above                                                                                                                                                                                                                                                                                                                                                                                                                                                                                                                                                                                                                                                                                                                                                                                                                                                                                                                                                                                                                                                                                                                                                                                                                                                                                                                                                                                                                                                                                                                                                                                                                                                                                                                                                                                                                                                                                                                                                                                                                                                                                                                                                                                                                                                                                                                                                                                                                                                                                                                                                                                                                                                                                                                                                                                                                                                                                                                                                                                                                                                                                                                                                                                                                                                                                                                                                                                                                                                                                                                                                                                                                                                                                                                                                                                                                                                                                                                                                                                                                                                                                                                                                                                                                                                                                                                                                                                                                                                                                                                                                                                                                                                                                                                                                                                                                                                                                                                                                                                                                                                                                                                                                                                                                                                                                                                                                                                                                                                                                                                                                                                                                                                                                                                                                                                                                                                                                                                                                                                                                                                                                                                                                                                                                                                                                                                                                                                                                                                                                                                                                                                                                                                      | University of Wisconsin-Madison AIDS Vaccine Research Laboratories           | University of Wisconsin-Madison AIDS Vaccine Research Laboratories                                    | Gage Moreno, Katarina Braun, et al. AIDS Vaccine Research Laboratories                                                                                                                                                                              |
| EPI_ISL_436685, EPI_ISL_436687                                                                                                                                                                                                                                                                                                                                                                                                                                                                                                                                                                                                                                                                                                                                                                                                                                                                                                                                                                                                                                                                                                                                                                                                                                                                                                                                                                                                                                                                                                                                                                                                                                                                                                                                                                                                                                                                                                                                                                                                                                                                                                                                                                                                                                                                                                                                                                                                                                                                                                                                                                                                                                                                                                                                                                                                                                                                                                                                                                                                                                                                                                                                                                                                                                                                                                                                                                                                                                                                                                                                                                                                                                                                                                                                                                                                                                                                                                                                                                                                                                                                                                                                                                                                                                                                                                                                                                                                                                                                                                                                                                                                                                                                                                                                                                                                                                                                                                                                                                                                                                                                                                                                                                                                                                                                                                                                                                                                                                                                                                                                                                                                                                                                                                                                                                                                                                                                                                                                                                                                                                                                                                                                                                                                                                                                                                                                                                                                                                                                                                                                                                                                                                 | KRISP, KZN Research Innovation and Sequencing Platform                       | KRISP, KZN Research Innovation and Sequencing Platform                                                | Giandhari J, Pillay S, Lessells R, Chimukangara B, Deforche K, Tegally H, Wilkinson E, de Oliveira T                                                                                                                                                |
| EPI_ISL_436901, EPI_ISL_436902, EPI_ISL_436904, EPI_ISL_436905, EPI_ISL_436906, EPI_ISL_436907, EPI_ISL_436912, EPI_ISL_436913, EPI_ISL_436914, EPI_ISL_436915, EPI_ISL_436916, EPI_ISL_436917, EPI_ISL_436918, EPI_ISL_436919, EPI_ISL_436920, EPI_ISL_436923, EPI_ISL_436924, EPI_ISL_436925                                                                                                                                                                                                                                                                                                                                                                                                                                                                                                                                                                                                                                                                                                                                                                                                                                                                                                                                                                                                                                                                                                                                                                                                                                                                                                                                                                                                                                                                                                                                                                                                                                                                                                                                                                                                                                                                                                                                                                                                                                                                                                                                                                                                                                                                                                                                                                                                                                                                                                                                                                                                                                                                                                                                                                                                                                                                                                                                                                                                                                                                                                                                                                                                                                                                                                                                                                                                                                                                                                                                                                                                                                                                                                                                                                                                                                                                                                                                                                                                                                                                                                                                                                                                                                                                                                                                                                                                                                                                                                                                                                                                                                                                                                                                                                                                                                                                                                                                                                                                                                                                                                                                                                                                                                                                                                                                                                                                                                                                                                                                                                                                                                                                                                                                                                                                                                                                                                                                                                                                                                                                                                                                                                                                                                                                                                                                                                 | Utah Public Health Laboratory                                                | Utah Public Health Laboratory                                                                         | Erin Young, Kelly Oakeson                                                                                                                                                                                                                           |
| see above                                                                                                                                                                                                                                                                                                                                                                                                                                                                                                                                                                                                                                                                                                                                                                                                                                                                                                                                                                                                                                                                                                                                                                                                                                                                                                                                                                                                                                                                                                                                                                                                                                                                                                                                                                                                                                                                                                                                                                                                                                                                                                                                                                                                                                                                                                                                                                                                                                                                                                                                                                                                                                                                                                                                                                                                                                                                                                                                                                                                                                                                                                                                                                                                                                                                                                                                                                                                                                                                                                                                                                                                                                                                                                                                                                                                                                                                                                                                                                                                                                                                                                                                                                                                                                                                                                                                                                                                                                                                                                                                                                                                                                                                                                                                                                                                                                                                                                                                                                                                                                                                                                                                                                                                                                                                                                                                                                                                                                                                                                                                                                                                                                                                                                                                                                                                                                                                                                                                                                                                                                                                                                                                                                                                                                                                                                                                                                                                                                                                                                                                                                                                                                                      | Utah Public Health Laboratory                                                | Utah Public Health Laboratory                                                                         | Erin Young, Kelly Oakeson                                                                                                                                                                                                                           |
| EPI_ISL_436926                                                                                                                                                                                                                                                                                                                                                                                                                                                                                                                                                                                                                                                                                                                                                                                                                                                                                                                                                                                                                                                                                                                                                                                                                                                                                                                                                                                                                                                                                                                                                                                                                                                                                                                                                                                                                                                                                                                                                                                                                                                                                                                                                                                                                                                                                                                                                                                                                                                                                                                                                                                                                                                                                                                                                                                                                                                                                                                                                                                                                                                                                                                                                                                                                                                                                                                                                                                                                                                                                                                                                                                                                                                                                                                                                                                                                                                                                                                                                                                                                                                                                                                                                                                                                                                                                                                                                                                                                                                                                                                                                                                                                                                                                                                                                                                                                                                                                                                                                                                                                                                                                                                                                                                                                                                                                                                                                                                                                                                                                                                                                                                                                                                                                                                                                                                                                                                                                                                                                                                                                                                                                                                                                                                                                                                                                                                                                                                                                                                                                                                                                                                                                                                 | x <sup>2</sup>                                                               | Utah Public Health Laboratory                                                                         | Erin Young, Kelly Oakeson                                                                                                                                                                                                                           |
| EPI_ISL_436928, EPI_ISL_436929,                                                                                                                                                                                                                                                                                                                                                                                                                                                                                                                                                                                                                                                                                                                                                                                                                                                                                                                                                                                                                                                                                                                                                                                                                                                                                                                                                                                                                                                                                                                                                                                                                                                                                                                                                                                                                                                                                                                                                                                                                                                                                                                                                                                                                                                                                                                                                                                                                                                                                                                                                                                                                                                                                                                                                                                                                                                                                                                                                                                                                                                                                                                                                                                                                                                                                                                                                                                                                                                                                                                                                                                                                                                                                                                                                                                                                                                                                                                                                                                                                                                                                                                                                                                                                                                                                                                                                                                                                                                                                                                                                                                                                                                                                                                                                                                                                                                                                                                                                                                                                                                                                                                                                                                                                                                                                                                                                                                                                                                                                                                                                                                                                                                                                                                                                                                                                                                                                                                                                                                                                                                                                                                                                                                                                                                                                                                                                                                                                                                                                                                                                                                                                                | Utah Public Health Laboratory                                                | Utah Public Health Laboratory                                                                         | Erin Young, Kelly Oakeson                                                                                                                                                                                                                           |

|                                                                                                                                                                                                                                                                                                                                                                                                                                                                                                                                                                                                                                                                                                                                                                                                                                                                                                                                                                                                                                                                                                                                                                                                                                                                                                                                                                                                                                                                                                                                                                                                                                                                                                                                                                                                                                                                                                                                                                                                                                                                                                                                                                                                                                                                                                                                                                                                                                                                                                                                                                                                                                                                                |                                                                              |                           |                                                                    |                                                                                                                                                                                                                                                                                                                                                                                                                                                                                                              |
|--------------------------------------------------------------------------------------------------------------------------------------------------------------------------------------------------------------------------------------------------------------------------------------------------------------------------------------------------------------------------------------------------------------------------------------------------------------------------------------------------------------------------------------------------------------------------------------------------------------------------------------------------------------------------------------------------------------------------------------------------------------------------------------------------------------------------------------------------------------------------------------------------------------------------------------------------------------------------------------------------------------------------------------------------------------------------------------------------------------------------------------------------------------------------------------------------------------------------------------------------------------------------------------------------------------------------------------------------------------------------------------------------------------------------------------------------------------------------------------------------------------------------------------------------------------------------------------------------------------------------------------------------------------------------------------------------------------------------------------------------------------------------------------------------------------------------------------------------------------------------------------------------------------------------------------------------------------------------------------------------------------------------------------------------------------------------------------------------------------------------------------------------------------------------------------------------------------------------------------------------------------------------------------------------------------------------------------------------------------------------------------------------------------------------------------------------------------------------------------------------------------------------------------------------------------------------------------------------------------------------------------------------------------------------------|------------------------------------------------------------------------------|---------------------------|--------------------------------------------------------------------|--------------------------------------------------------------------------------------------------------------------------------------------------------------------------------------------------------------------------------------------------------------------------------------------------------------------------------------------------------------------------------------------------------------------------------------------------------------------------------------------------------------|
| EPI_ISL_436930, EPI_ISL_436931, EPI_ISL_436932, EPI_ISL_436934, EPI_ISL_436935, EPI_ISL_436936, EPI_ISL_436937, EPI_ISL_436938                                                                                                                                                                                                                                                                                                                                                                                                                                                                                                                                                                                                                                                                                                                                                                                                                                                                                                                                                                                                                                                                                                                                                                                                                                                                                                                                                                                                                                                                                                                                                                                                                                                                                                                                                                                                                                                                                                                                                                                                                                                                                                                                                                                                                                                                                                                                                                                                                                                                                                                                                 |                                                                              |                           |                                                                    |                                                                                                                                                                                                                                                                                                                                                                                                                                                                                                              |
| EPI_ISL_437304, EPI_ISL_437305, EPI_ISL_437306, EPI_ISL_437307, EPI_ISL_437308, EPI_ISL_437309, EPI_ISL_437310, EPI_ISL_437311, EPI_ISL_437312, EPI_ISL_437313, EPI_ISL_437314, EPI_ISL_437315, EPI_ISL_437316, EPI_ISL_437317, EPI_ISL_437318                                                                                                                                                                                                                                                                                                                                                                                                                                                                                                                                                                                                                                                                                                                                                                                                                                                                                                                                                                                                                                                                                                                                                                                                                                                                                                                                                                                                                                                                                                                                                                                                                                                                                                                                                                                                                                                                                                                                                                                                                                                                                                                                                                                                                                                                                                                                                                                                                                 | see above                                                                    | Ministry of Health Turkey | Ministry of Health Turkey                                          | Fatma Bayraktar,Tülin Demir,Süleyman Yalçın, Selçuk Kılıç                                                                                                                                                                                                                                                                                                                                                                                                                                                    |
| EPI_ISL_437319, EPI_ISL_437320, EPI_ISL_437321                                                                                                                                                                                                                                                                                                                                                                                                                                                                                                                                                                                                                                                                                                                                                                                                                                                                                                                                                                                                                                                                                                                                                                                                                                                                                                                                                                                                                                                                                                                                                                                                                                                                                                                                                                                                                                                                                                                                                                                                                                                                                                                                                                                                                                                                                                                                                                                                                                                                                                                                                                                                                                 |                                                                              | Ministry of Health Turkey | Ministry of Health Turkey                                          | Fatma Bayraktar,Aye Baak Alta,Yasemin Cogun,Süleyman Yalçın, Gülşay Korukluolu,Selçuk Kılıç                                                                                                                                                                                                                                                                                                                                                                                                                  |
| EPI_ISL_437322                                                                                                                                                                                                                                                                                                                                                                                                                                                                                                                                                                                                                                                                                                                                                                                                                                                                                                                                                                                                                                                                                                                                                                                                                                                                                                                                                                                                                                                                                                                                                                                                                                                                                                                                                                                                                                                                                                                                                                                                                                                                                                                                                                                                                                                                                                                                                                                                                                                                                                                                                                                                                                                                 |                                                                              | Ministry of Health Turkey | Ministry of Health Turkey                                          | Fatma Bayraktar,Tülin Demir,Süleyman Yalçın, Selçuk Kılıç                                                                                                                                                                                                                                                                                                                                                                                                                                                    |
| EPI_ISL_437323, EPI_ISL_437324, EPI_ISL_437325, EPI_ISL_437326, EPI_ISL_437327, EPI_ISL_437328, EPI_ISL_437329, EPI_ISL_437330                                                                                                                                                                                                                                                                                                                                                                                                                                                                                                                                                                                                                                                                                                                                                                                                                                                                                                                                                                                                                                                                                                                                                                                                                                                                                                                                                                                                                                                                                                                                                                                                                                                                                                                                                                                                                                                                                                                                                                                                                                                                                                                                                                                                                                                                                                                                                                                                                                                                                                                                                 |                                                                              | Ministry of Health Turkey | Ministry of Health Turkey                                          | Fatma Bayraktar,Aye Baak Alta,Yasemin Cogun,Süleyman Yalçın, Gülşay Korukluolu,Selçuk Kılıç                                                                                                                                                                                                                                                                                                                                                                                                                  |
| EPI_ISL_437331                                                                                                                                                                                                                                                                                                                                                                                                                                                                                                                                                                                                                                                                                                                                                                                                                                                                                                                                                                                                                                                                                                                                                                                                                                                                                                                                                                                                                                                                                                                                                                                                                                                                                                                                                                                                                                                                                                                                                                                                                                                                                                                                                                                                                                                                                                                                                                                                                                                                                                                                                                                                                                                                 |                                                                              | Ministry of Health Turkey | Ministry of Health Turkey                                          | Fatma Bayraktar,Tülin Demir,Süleyman Yalçın, Selçuk Kılıç                                                                                                                                                                                                                                                                                                                                                                                                                                                    |
| EPI_ISL_437332, EPI_ISL_437333, EPI_ISL_437334, EPI_ISL_437335                                                                                                                                                                                                                                                                                                                                                                                                                                                                                                                                                                                                                                                                                                                                                                                                                                                                                                                                                                                                                                                                                                                                                                                                                                                                                                                                                                                                                                                                                                                                                                                                                                                                                                                                                                                                                                                                                                                                                                                                                                                                                                                                                                                                                                                                                                                                                                                                                                                                                                                                                                                                                 |                                                                              | Ministry of Health Turkey | Ministry of Health Turkey                                          | Fatma Bayraktar,Aye Baak Alta,Yasemin Cogun,Süleyman Yalçın, Gülşay Korukluolu,Selçuk Kılıç                                                                                                                                                                                                                                                                                                                                                                                                                  |
| EPI_ISL_437448                                                                                                                                                                                                                                                                                                                                                                                                                                                                                                                                                                                                                                                                                                                                                                                                                                                                                                                                                                                                                                                                                                                                                                                                                                                                                                                                                                                                                                                                                                                                                                                                                                                                                                                                                                                                                                                                                                                                                                                                                                                                                                                                                                                                                                                                                                                                                                                                                                                                                                                                                                                                                                                                 | B.J. Medical College and Civil hospital                                      |                           | Gujarat Biotechnology Research Centre                              | Geeta Vaghela, Sonia Barve, Bhavesh Modi, Kairavi Joshi, Gaurishankar Shrimali, Nidhi Sood, Pranay Shah, R D Dixit, Snehal Bagatharia, Kamlesh J Upadhyay, Ramesh Pandit, Tejas Shah, Ankit Hinsu, Pritesh Sabara, Apurvasinh Puvar, Janvi Raval, Monika Gandhi, Pinal Trivedi, Maharshi Pandya, Amit Kanani, Akanksha Verma, Nitin Savaliya, Raghawendra Kumar, Dinesh Kumar, Zuber Saiyed, Dipa Kinariwala, Disha Patel, Binita Aring, Neeta Khandelwal, Afzal Ansari, Chaitanya Joshi, Madhvi Joshi       |
| EPI_ISL_437452                                                                                                                                                                                                                                                                                                                                                                                                                                                                                                                                                                                                                                                                                                                                                                                                                                                                                                                                                                                                                                                                                                                                                                                                                                                                                                                                                                                                                                                                                                                                                                                                                                                                                                                                                                                                                                                                                                                                                                                                                                                                                                                                                                                                                                                                                                                                                                                                                                                                                                                                                                                                                                                                 | B.J. Medical College and Civil hospital                                      |                           | Gujarat Biotechnology Research Centre                              | Gaurishankar Shrimali, Nidhi Sood, Pranay Shah, R D Dixit, Snehal Bagatharia, Kamlesh J Upadhyay, Ramesh Pandit, Tejas Shah, Ankit Hinsu, Pritesh Sabara, Apurvasinh Puvar, Janvi Raval, Monika Gandhi, Pinal Trivedi, Maharshi Pandya, Amit Kanani, Akanksha Verma, Nitin Savaliya, Raghawendra Kumar, Dinesh Kumar, Zuber Saiyed, Dipa Kinariwala, Disha Patel, Binita Aring, Neeta Khandelwal, Geeta Vaghela, Sonia Barve, Bhavesh Modi, Kairavi Joshi, Chaitanya Joshi, Anjali Rajwar, Madhvi Joshi      |
| EPI_ISL_441437, EPI_ISL_441438, EPI_ISL_441439, EPI_ISL_441440, EPI_ISL_441441, EPI_ISL_441442, EPI_ISL_441443, EPI_ISL_441444, EPI_ISL_441445, EPI_ISL_441446, EPI_ISL_441447, EPI_ISL_441448, EPI_ISL_441449, EPI_ISL_441450, EPI_ISL_441451, EPI_ISL_441452, EPI_ISL_441453, EPI_ISL_441454, EPI_ISL_441455, EPI_ISL_441456, EPI_ISL_441457, EPI_ISL_441458, EPI_ISL_441459, EPI_ISL_441460, EPI_ISL_441461, EPI_ISL_441462, EPI_ISL_441463, EPI_ISL_441464, EPI_ISL_441465, EPI_ISL_441466, EPI_ISL_441467, EPI_ISL_441468, EPI_ISL_441469, EPI_ISL_441470, EPI_ISL_441471, EPI_ISL_441472, EPI_ISL_441473, EPI_ISL_441474, EPI_ISL_441475, EPI_ISL_441476, EPI_ISL_441477, EPI_ISL_441478, EPI_ISL_441479, EPI_ISL_441480, EPI_ISL_441481, EPI_ISL_441482, EPI_ISL_441483, EPI_ISL_441484, EPI_ISL_441485, EPI_ISL_441486, EPI_ISL_441487, EPI_ISL_441488, EPI_ISL_441489, EPI_ISL_441490, EPI_ISL_441491, EPI_ISL_441492, EPI_ISL_441493, EPI_ISL_441494, EPI_ISL_441495, EPI_ISL_441496, EPI_ISL_441497, EPI_ISL_441498, EPI_ISL_441499, EPI_ISL_441500, EPI_ISL_441501, EPI_ISL_441502, EPI_ISL_441503, EPI_ISL_441504, EPI_ISL_441505, EPI_ISL_441506, EPI_ISL_441507, EPI_ISL_441508, EPI_ISL_441509, EPI_ISL_441510, EPI_ISL_441511, EPI_ISL_441512, EPI_ISL_441513, EPI_ISL_441514, EPI_ISL_441515, EPI_ISL_441516, EPI_ISL_441517, EPI_ISL_441518, EPI_ISL_441519, EPI_ISL_441520, EPI_ISL_441521, EPI_ISL_441522, EPI_ISL_441523, EPI_ISL_441524, EPI_ISL_441525, EPI_ISL_441526, EPI_ISL_441527, EPI_ISL_441528, EPI_ISL_441529, EPI_ISL_441530, EPI_ISL_441531, EPI_ISL_441532, EPI_ISL_441533, EPI_ISL_441534, EPI_ISL_441535, EPI_ISL_441536, EPI_ISL_441537, EPI_ISL_441538, EPI_ISL_441539, EPI_ISL_441540, EPI_ISL_441541, EPI_ISL_441542, EPI_ISL_441543, EPI_ISL_441544, EPI_ISL_441545, EPI_ISL_441546, EPI_ISL_441847, EPI_ISL_441848, EPI_ISL_441849, EPI_ISL_441850, EPI_ISL_441851, EPI_ISL_441852, EPI_ISL_441853, EPI_ISL_441854, EPI_ISL_441855, EPI_ISL_441856, EPI_ISL_441857, EPI_ISL_441858, EPI_ISL_441859, EPI_ISL_441860, EPI_ISL_441861, EPI_ISL_441862, EPI_ISL_441863, EPI_ISL_441864, EPI_ISL_441865, EPI_ISL_441866, EPI_ISL_441867, EPI_ISL_441868, EPI_ISL_441869, EPI_ISL_441870, EPI_ISL_441871, EPI_ISL_441872, EPI_ISL_441873, EPI_ISL_441874, EPI_ISL_441875, EPI_ISL_441876, EPI_ISL_441877, EPI_ISL_441878, EPI_ISL_441879, EPI_ISL_441880, EPI_ISL_441881, EPI_ISL_441882, EPI_ISL_441883, EPI_ISL_441884, EPI_ISL_441885, EPI_ISL_441886, EPI_ISL_441887, EPI_ISL_441888, EPI_ISL_441889, EPI_ISL_441890, EPI_ISL_441891, EPI_ISL_441892, EPI_ISL_441893, EPI_ISL_441894, EPI_ISL_441895, EPI_ISL_441896, EPI_ISL_441897 |                                                                              |                           |                                                                    |                                                                                                                                                                                                                                                                                                                                                                                                                                                                                                              |
| see above                                                                                                                                                                                                                                                                                                                                                                                                                                                                                                                                                                                                                                                                                                                                                                                                                                                                                                                                                                                                                                                                                                                                                                                                                                                                                                                                                                                                                                                                                                                                                                                                                                                                                                                                                                                                                                                                                                                                                                                                                                                                                                                                                                                                                                                                                                                                                                                                                                                                                                                                                                                                                                                                      | Queens Medical Centre, Clinical Microbiology Department / DeepSeq Nottingham |                           | COVID-19 Genomics UK (COG-UK) Consortium                           | Gemma Clark, Wendy Smith, Manjinder Khakh, Hannah Howson-Wells, Jonathan Ball, Patrick McClure, Joseph Chappell, Theocharis Tsoileridis, Nadine Holmes, Matthew Carlisle, Christopher Moore, Fei Sang, Johnny Debebe, Victoria Wright, Matthew Loose                                                                                                                                                                                                                                                         |
| EPI_ISL_444478                                                                                                                                                                                                                                                                                                                                                                                                                                                                                                                                                                                                                                                                                                                                                                                                                                                                                                                                                                                                                                                                                                                                                                                                                                                                                                                                                                                                                                                                                                                                                                                                                                                                                                                                                                                                                                                                                                                                                                                                                                                                                                                                                                                                                                                                                                                                                                                                                                                                                                                                                                                                                                                                 | B.J. Medical College and Civil hospital                                      |                           | Gujarat Biotechnology Research Centre                              | Geeta Vaghela, Sonia Barve, Bhavesh Modi, Kairavi Joshi, Gaurishankar Shrimali, Nidhi Sood, Pranay Shah, R D Dixit, Snehal Bagatharia, Kamlesh J Upadhyay, Ramesh Pandit, Tejas Shah, Ankit Hinsu, Pritesh Sabara, Apurvasinh Puvar, Janvi Raval, Monika Gandhi, Pinal Trivedi, Maharshi Pandya, Amit Kanani, Akanksha Verma, Nitin Savaliya, Raghawendra Kumar, Dinesh Kumar, Zuber Saiyed, Dipa Kinariwala, Disha Patel, Binita Aring, Neeta Khandelwal, Pooja P Doshi, Chaitanya Joshi, Madhvi Joshi      |
| EPI_ISL_444482                                                                                                                                                                                                                                                                                                                                                                                                                                                                                                                                                                                                                                                                                                                                                                                                                                                                                                                                                                                                                                                                                                                                                                                                                                                                                                                                                                                                                                                                                                                                                                                                                                                                                                                                                                                                                                                                                                                                                                                                                                                                                                                                                                                                                                                                                                                                                                                                                                                                                                                                                                                                                                                                 | Gujarat Biotechnology Research Centre                                        |                           | Gujarat Biotechnology Research Centre                              | Gaurishankar Shrimali, Nidhi Sood, Pranay Shah, R D Dixit, Snehal Bagatharia, Kamlesh J Upadhyay, Ramesh Pandit, Tejas Shah, Ankit Hinsu, Pritesh Sabara, Apurvasinh Puvar, Janvi Raval, Monika Gandhi, Pinal Trivedi, Maharshi Pandya, Amit Kanani, Akanksha Verma, Nitin Savaliya, Raghawendra Kumar, Dinesh Kumar, Zuber Saiyed, Dipa Kinariwala, Disha Patel, Binita Aring, Neeta Khandelwal, Geeta Vaghela, Sonia Barve, Bhavesh Modi, Kairavi Joshi, Afzal Ansari, Chaitanya Joshi, Madhvi Joshi       |
| EPI_ISL_445221, EPI_ISL_445234, EPI_ISL_445235                                                                                                                                                                                                                                                                                                                                                                                                                                                                                                                                                                                                                                                                                                                                                                                                                                                                                                                                                                                                                                                                                                                                                                                                                                                                                                                                                                                                                                                                                                                                                                                                                                                                                                                                                                                                                                                                                                                                                                                                                                                                                                                                                                                                                                                                                                                                                                                                                                                                                                                                                                                                                                 | Wasterlakarna                                                                |                           | The Public Health Agency of Sweden                                 | Frida Ahlfors, Oskar Karlsson Lindsjö, Maria Lind Karlberg, Anna-Malin Linde, Olov Svartstrom, Anna Risberg, Theresa Enkirch, Mia Brytting, Karin Tegmark-Wisell                                                                                                                                                                                                                                                                                                                                             |
| EPI_ISL_447050                                                                                                                                                                                                                                                                                                                                                                                                                                                                                                                                                                                                                                                                                                                                                                                                                                                                                                                                                                                                                                                                                                                                                                                                                                                                                                                                                                                                                                                                                                                                                                                                                                                                                                                                                                                                                                                                                                                                                                                                                                                                                                                                                                                                                                                                                                                                                                                                                                                                                                                                                                                                                                                                 | GMERS Medical College and Hospital, Gandhinagar                              |                           | Gujarat Biotechnology Research Centre                              | Geeta Vaghela, Sonia Barve, Bhavesh Modi, Kairavi Joshi, Gaurishankar Shrimali, Nidhi Sood, Pranay Shah, R D Dixit, Snehal Bagatharia, Kamlesh J Upadhyay, Ramesh Pandit, Tejas Shah, Ankit Hinsu, Pritesh Sabara, Apurvasinh Puvar, Janvi Raval, Monika Gandhi, Pinal Trivedi, Maharshi Pandya, Amit Kanani, Akanksha Verma, Nitin Savaliya, Raghawendra Kumar, Dinesh Kumar, Zuber Saiyed, Dipa Kinariwala, Disha Patel, Binita Aring, Neeta Khandelwal, Dipeshwari Shewale, Chaitanya Joshi, Madhvi Joshi |
| EPI_ISL_447534                                                                                                                                                                                                                                                                                                                                                                                                                                                                                                                                                                                                                                                                                                                                                                                                                                                                                                                                                                                                                                                                                                                                                                                                                                                                                                                                                                                                                                                                                                                                                                                                                                                                                                                                                                                                                                                                                                                                                                                                                                                                                                                                                                                                                                                                                                                                                                                                                                                                                                                                                                                                                                                                 | Gujarat Biotechnology Research Centre                                        |                           | Gujarat Biotechnology Research Centre                              | Gaurishankar Shrimali, Nidhi Sood, Pranay Shah, R D Dixit, Snehal Bagatharia, Kamlesh J Upadhyay, Ramesh Pandit, Tejas Shah, Ankit Hinsu, Pritesh Sabara, Apurvasinh Puvar, Janvi Raval, Monika Gandhi, Pinal Trivedi, Maharshi Pandya, Amit Kanani, Akanksha Verma, Nitin Savaliya, Raghawendra Kumar, Dinesh Kumar, Zuber Saiyed, Dipa Kinariwala, Disha Patel, Binita Aring, Neeta Khandelwal, Geeta Vaghela, Sonia Barve, Bhavesh Modi, Kairavi Joshi, Nidhi Patel, Chaitanya Joshi, Madhvi Joshi        |
| EPI_ISL_448389, EPI_ISL_448390, EPI_ISL_448391, EPI_ISL_448392, EPI_ISL_448393, EPI_ISL_448394, EPI_ISL_448395, EPI_ISL_448396, EPI_ISL_448397, EPI_ISL_448398, EPI_ISL_448399, EPI_ISL_448400, EPI_ISL_448401, EPI_ISL_448402, EPI_ISL_448403, EPI_ISL_448404, EPI_ISL_448405, EPI_ISL_448406, EPI_ISL_448407, EPI_ISL_448408, EPI_ISL_448409, EPI_ISL_448410, EPI_ISL_448411, EPI_ISL_448412, EPI_ISL_448413, EPI_ISL_448414, EPI_ISL_448415, EPI_ISL_448416, EPI_ISL_448417, EPI_ISL_448418, EPI_ISL_448419, EPI_ISL_448420, EPI_ISL_448421, EPI_ISL_448422, EPI_ISL_448423, EPI_ISL_448424, EPI_ISL_448425, EPI_ISL_448426, EPI_ISL_448427, EPI_ISL_448428, EPI_ISL_448429, EPI_ISL_448430, EPI_ISL_448431, EPI_ISL_448432, EPI_ISL_448433, EPI_ISL_448434, EPI_ISL_448435, EPI_ISL_448436, EPI_ISL_448437, EPI_ISL_448438, EPI_ISL_448439, EPI_ISL_448440, EPI_ISL_448441, EPI_ISL_448442, EPI_ISL_448443, EPI_ISL_448444, EPI_ISL_448445, EPI_ISL_448446, EPI_ISL_448447, EPI_ISL_448448                                                                                                                                                                                                                                                                                                                                                                                                                                                                                                                                                                                                                                                                                                                                                                                                                                                                                                                                                                                                                                                                                                                                                                                                                                                                                                                                                                                                                                                                                                                                                                                                                                                                                 |                                                                              |                           |                                                                    |                                                                                                                                                                                                                                                                                                                                                                                                                                                                                                              |
| see above                                                                                                                                                                                                                                                                                                                                                                                                                                                                                                                                                                                                                                                                                                                                                                                                                                                                                                                                                                                                                                                                                                                                                                                                                                                                                                                                                                                                                                                                                                                                                                                                                                                                                                                                                                                                                                                                                                                                                                                                                                                                                                                                                                                                                                                                                                                                                                                                                                                                                                                                                                                                                                                                      | Queens Medical Centre, Clinical Microbiology Department / DeepSeq Nottingham |                           | COVID-19 Genomics UK (COG-UK) Consortium                           | Gemma Clark, Wendy Smith, Manjinder Khakh, Hannah Howson-Wells, Jonathan Ball, Patrick McClure, Joseph Chappell, Theocharis Tsoileridis, Nadine Holmes, Matthew Carlisle, Christopher Moore, Fei Sang, Johnny Debebe, Victoria Wright, Matthew Loose                                                                                                                                                                                                                                                         |
| EPI_ISL_449801, EPI_ISL_449802, EPI_ISL_449805, EPI_ISL_449806, EPI_ISL_449807, EPI_ISL_449808, EPI_ISL_449809, EPI_ISL_449810, EPI_ISL_449811, EPI_ISL_449812, EPI_ISL_449815, EPI_ISL_449816, EPI_ISL_449817, EPI_ISL_449818, EPI_ISL_449819, EPI_ISL_449820, EPI_ISL_449821, EPI_ISL_449822, EPI_ISL_449823, EPI_ISL_449824, EPI_ISL_449825, EPI_ISL_449827, EPI_ISL_449828, EPI_ISL_449829, EPI_ISL_449830, EPI_ISL_449831, EPI_ISL_449832, EPI_ISL_449833, EPI_ISL_449834, EPI_ISL_449835, EPI_ISL_449836, EPI_ISL_449837, EPI_ISL_449838, EPI_ISL_449839, EPI_ISL_449840, EPI_ISL_449841, EPI_ISL_449842, EPI_ISL_449843, EPI_ISL_449844, EPI_ISL_449845, EPI_ISL_449846, EPI_ISL_449847, EPI_ISL_449848, EPI_ISL_449849, EPI_ISL_449850, EPI_ISL_449851, EPI_ISL_449852, EPI_ISL_449853, EPI_ISL_449854, EPI_ISL_449855, EPI_ISL_449856, EPI_ISL_449857                                                                                                                                                                                                                                                                                                                                                                                                                                                                                                                                                                                                                                                                                                                                                                                                                                                                                                                                                                                                                                                                                                                                                                                                                                                                                                                                                                                                                                                                                                                                                                                                                                                                                                                                                                                                                 |                                                                              |                           |                                                                    |                                                                                                                                                                                                                                                                                                                                                                                                                                                                                                              |
| see above                                                                                                                                                                                                                                                                                                                                                                                                                                                                                                                                                                                                                                                                                                                                                                                                                                                                                                                                                                                                                                                                                                                                                                                                                                                                                                                                                                                                                                                                                                                                                                                                                                                                                                                                                                                                                                                                                                                                                                                                                                                                                                                                                                                                                                                                                                                                                                                                                                                                                                                                                                                                                                                                      | Utah Public Health Laboratory                                                |                           | Utah Public Health Laboratory                                      | Erin Young, Kelly Oakeson                                                                                                                                                                                                                                                                                                                                                                                                                                                                                    |
| EPI_ISL_450700, EPI_ISL_450701, EPI_ISL_450702, EPI_ISL_450703, EPI_ISL_450704, EPI_ISL_450705, EPI_ISL_450706, EPI_ISL_450707, EPI_ISL_450708, EPI_ISL_450709, EPI_ISL_450710, EPI_ISL_450711, EPI_ISL_450712, EPI_ISL_450713, EPI_ISL_450714, EPI_ISL_450715, EPI_ISL_450716, EPI_ISL_450717, EPI_ISL_450718, EPI_ISL_450719, EPI_ISL_450720, EPI_ISL_450721, EPI_ISL_450722                                                                                                                                                                                                                                                                                                                                                                                                                                                                                                                                                                                                                                                                                                                                                                                                                                                                                                                                                                                                                                                                                                                                                                                                                                                                                                                                                                                                                                                                                                                                                                                                                                                                                                                                                                                                                                                                                                                                                                                                                                                                                                                                                                                                                                                                                                 |                                                                              |                           |                                                                    |                                                                                                                                                                                                                                                                                                                                                                                                                                                                                                              |
| see above                                                                                                                                                                                                                                                                                                                                                                                                                                                                                                                                                                                                                                                                                                                                                                                                                                                                                                                                                                                                                                                                                                                                                                                                                                                                                                                                                                                                                                                                                                                                                                                                                                                                                                                                                                                                                                                                                                                                                                                                                                                                                                                                                                                                                                                                                                                                                                                                                                                                                                                                                                                                                                                                      | University of Wisconsin-Madison AIDS Vaccine Research Laboratories           |                           | University of Wisconsin-Madison AIDS Vaccine Research Laboratories | Gage Moreno, Katarina Braun, et al. AIDS Vaccine Research Laboratories                                                                                                                                                                                                                                                                                                                                                                                                                                       |
| EPI_ISL_450838                                                                                                                                                                                                                                                                                                                                                                                                                                                                                                                                                                                                                                                                                                                                                                                                                                                                                                                                                                                                                                                                                                                                                                                                                                                                                                                                                                                                                                                                                                                                                                                                                                                                                                                                                                                                                                                                                                                                                                                                                                                                                                                                                                                                                                                                                                                                                                                                                                                                                                                                                                                                                                                                 | Utah Public Health Laboratory                                                |                           | Utah Public Health Laboratory                                      | Erin Young, Kelly Oakeson                                                                                                                                                                                                                                                                                                                                                                                                                                                                                    |
| EPI_ISL_451307                                                                                                                                                                                                                                                                                                                                                                                                                                                                                                                                                                                                                                                                                                                                                                                                                                                                                                                                                                                                                                                                                                                                                                                                                                                                                                                                                                                                                                                                                                                                                                                                                                                                                                                                                                                                                                                                                                                                                                                                                                                                                                                                                                                                                                                                                                                                                                                                                                                                                                                                                                                                                                                                 | Molecular Virology Unit, Fondazione IRCCS Policlinico San Matteo , Pavia     |                           | Laboratory of Virology, INMI Lazzaro Spallanzani IRCCS             | Fausto Baldanti, Antonio Piralla, Antonino Di Caro, Cesare E.M. Gruber, Martina Rueca, Barbara Bartolini, Maria R. Capobianchi                                                                                                                                                                                                                                                                                                                                                                               |
| EPI_ISL_451309                                                                                                                                                                                                                                                                                                                                                                                                                                                                                                                                                                                                                                                                                                                                                                                                                                                                                                                                                                                                                                                                                                                                                                                                                                                                                                                                                                                                                                                                                                                                                                                                                                                                                                                                                                                                                                                                                                                                                                                                                                                                                                                                                                                                                                                                                                                                                                                                                                                                                                                                                                                                                                                                 | Molecular Virology Unit, Fondazione IRCCS Policlinico San Matteo , Pavia     |                           | Laboratory of Virology, INMI Lazzaro Spallanzani IRCCS             | Fausto Baldanti, Antonio Piralla, Cesare E.M. Gruber, Maria R. Capobianchi, Antonino Di Caro, Martina Rueca, Barbara Bartolini                                                                                                                                                                                                                                                                                                                                                                               |
| EPI_ISL_452153, EPI_ISL_452154, EPI_ISL_452155, EPI_ISL_452156, EPI_ISL_452157, EPI_ISL_452158, EPI_ISL_452159, EPI_ISL_452160, EPI_ISL_452162, EPI_ISL_452164, EPI_ISL_452165, EPI_ISL_452166, EPI_ISL_452167, EPI_ISL_452168, EPI_ISL_452169, EPI_ISL_452170, EPI_ISL_452171, EPI_ISL_452172, EPI_ISL_452173, EPI_ISL_452174, EPI_ISL_452175, EPI_ISL_452177                                                                                                                                                                                                                                                                                                                                                                                                                                                                                                                                                                                                                                                                                                                                                                                                                                                                                                                                                                                                                                                                                                                                                                                                                                                                                                                                                                                                                                                                                                                                                                                                                                                                                                                                                                                                                                                                                                                                                                                                                                                                                                                                                                                                                                                                                                                 |                                                                              |                           |                                                                    |                                                                                                                                                                                                                                                                                                                                                                                                                                                                                                              |

|                                                                                                                                                                                                                                                                                                                                                                                                                                                                                                                                                                                                                                                                                                                                                                                                                                                                                                                                                                                                                                                                                                                                                                                                                                                                |                                                                              |                                                                                    |                                                                                                                                                                                                                                                                                                                                                                                                                     |
|----------------------------------------------------------------------------------------------------------------------------------------------------------------------------------------------------------------------------------------------------------------------------------------------------------------------------------------------------------------------------------------------------------------------------------------------------------------------------------------------------------------------------------------------------------------------------------------------------------------------------------------------------------------------------------------------------------------------------------------------------------------------------------------------------------------------------------------------------------------------------------------------------------------------------------------------------------------------------------------------------------------------------------------------------------------------------------------------------------------------------------------------------------------------------------------------------------------------------------------------------------------|------------------------------------------------------------------------------|------------------------------------------------------------------------------------|---------------------------------------------------------------------------------------------------------------------------------------------------------------------------------------------------------------------------------------------------------------------------------------------------------------------------------------------------------------------------------------------------------------------|
| see above                                                                                                                                                                                                                                                                                                                                                                                                                                                                                                                                                                                                                                                                                                                                                                                                                                                                                                                                                                                                                                                                                                                                                                                                                                                      | Utah Public Health Laboratory                                                | Utah Public Health Laboratory                                                      | Erin Young, Kelly Oakeson                                                                                                                                                                                                                                                                                                                                                                                           |
| EPI_ISL_452242                                                                                                                                                                                                                                                                                                                                                                                                                                                                                                                                                                                                                                                                                                                                                                                                                                                                                                                                                                                                                                                                                                                                                                                                                                                 | Wernstedt Medical AB                                                         | The Public Health Agency of Sweden                                                 | Eva Sandberg, Anna-Malin Linde, Maria Lind Karlberg, Oskar Karlsson Lindsjö, Olov Svartstrom, Anna Risberg, Theresa Enkirch, Mia Brytting, Karin Tegmark-Wisell                                                                                                                                                                                                                                                     |
| EPI_ISL_453614, EPI_ISL_453615, EPI_ISL_453616, EPI_ISL_453617, EPI_ISL_453618, EPI_ISL_453619, EPI_ISL_453620, EPI_ISL_453621, EPI_ISL_453622, EPI_ISL_453623, EPI_ISL_453624, EPI_ISL_453625, EPI_ISL_453626, EPI_ISL_453627, EPI_ISL_453628, EPI_ISL_453629, EPI_ISL_453630, EPI_ISL_453631, EPI_ISL_453632, EPI_ISL_453633, EPI_ISL_453634, EPI_ISL_453635, EPI_ISL_453636, EPI_ISL_453637, EPI_ISL_453638, EPI_ISL_453639, EPI_ISL_453640, EPI_ISL_453641, EPI_ISL_453642, EPI_ISL_453643, EPI_ISL_453644, EPI_ISL_453645, EPI_ISL_453646, EPI_ISL_453647, EPI_ISL_453648, EPI_ISL_453649, EPI_ISL_453650, EPI_ISL_453651, EPI_ISL_453652, EPI_ISL_453653, EPI_ISL_453654, EPI_ISL_453655, EPI_ISL_453656, EPI_ISL_453657, EPI_ISL_453658, EPI_ISL_453659, EPI_ISL_453660, EPI_ISL_453661, EPI_ISL_453662, EPI_ISL_453663, EPI_ISL_453664                                                                                                                                                                                                                                                                                                                                                                                                                 |                                                                              |                                                                                    |                                                                                                                                                                                                                                                                                                                                                                                                                     |
| see above                                                                                                                                                                                                                                                                                                                                                                                                                                                                                                                                                                                                                                                                                                                                                                                                                                                                                                                                                                                                                                                                                                                                                                                                                                                      | Queens Medical Centre, Clinical Microbiology Department / DeepSeq Nottingham | COVID-19 Genomics UK (COG-UK) Consortium                                           | Gemma Clark, Wendy Smith, Manjinder Khakh, Hannah Howson-Wells, Jonathan Ball, Patrick McClure, Joseph Chappell, Theocharis Tsoleridis, Nadine Holmes, Matthew Carlisle, Christopher Moore, Fei Sang, Johnny Debebe, Victoria Wright, Matthew Loose                                                                                                                                                                 |
| EPI_ISL_454574                                                                                                                                                                                                                                                                                                                                                                                                                                                                                                                                                                                                                                                                                                                                                                                                                                                                                                                                                                                                                                                                                                                                                                                                                                                 | nstitute for Public Health                                                   | Laboratory for advanced genomics                                                   | Filip Roki, Lovro Trgovec-Greif, Neven Sui, Tomislav Rukavina, Igor Jurak, Oliver Vugrek                                                                                                                                                                                                                                                                                                                            |
| EPI_ISL_454605, EPI_ISL_454606                                                                                                                                                                                                                                                                                                                                                                                                                                                                                                                                                                                                                                                                                                                                                                                                                                                                                                                                                                                                                                                                                                                                                                                                                                 | Institute for Public Health                                                  | Laboratory for advanced genomics                                                   | Filip Roki, Lovro Trgovec-Greif, Neven Sui, Tomislav Rukavina, Igor Jurak, Oliver Vugrek                                                                                                                                                                                                                                                                                                                            |
| EPI_ISL_454707, EPI_ISL_454708, EPI_ISL_454709, EPI_ISL_454710, EPI_ISL_454711, EPI_ISL_454712, EPI_ISL_454714, EPI_ISL_454715, EPI_ISL_454717, EPI_ISL_454718, EPI_ISL_454719, EPI_ISL_454720, EPI_ISL_454722, EPI_ISL_454723, EPI_ISL_454725, EPI_ISL_454729, EPI_ISL_454730                                                                                                                                                                                                                                                                                                                                                                                                                                                                                                                                                                                                                                                                                                                                                                                                                                                                                                                                                                                 |                                                                              |                                                                                    |                                                                                                                                                                                                                                                                                                                                                                                                                     |
| see above                                                                                                                                                                                                                                                                                                                                                                                                                                                                                                                                                                                                                                                                                                                                                                                                                                                                                                                                                                                                                                                                                                                                                                                                                                                      | Utah Public Health Laboratory                                                | Utah Public Health Laboratory                                                      | Erin Young, Kelly Oakeson                                                                                                                                                                                                                                                                                                                                                                                           |
| EPI_ISL_455435                                                                                                                                                                                                                                                                                                                                                                                                                                                                                                                                                                                                                                                                                                                                                                                                                                                                                                                                                                                                                                                                                                                                                                                                                                                 | Instituto de Diagnostico y Referencia Epidemiologicos (INDRE)                | Instituto de Diagnostico y Referencia Epidemiologicos (INDRE)                      | Garces-Ayala Fabiola. Taboada Ramirez Blanca. Ramirez-Gonzalez Ernesto, Araiza-Rodriguez Adnan , Mendieta-Condado Edgar, Rodriguez-Maldonado Abril, Wong-Arambula Claudia, Barrera-Badillo Gisela, Hernandez-Rivas Lucia, Lopez-Martinez Irma                                                                                                                                                                       |
| EPI_ISL_455436                                                                                                                                                                                                                                                                                                                                                                                                                                                                                                                                                                                                                                                                                                                                                                                                                                                                                                                                                                                                                                                                                                                                                                                                                                                 | Instituto de Diagnostico y Referencia Epidemiologicos (INDRE)                | Instituto de Diagnostico y Referencia Epidemiologicos (INDRE)                      | Garces-Ayala Fabiola. Taboada Ramirez Blanca. Ramirez-Gonzalez Ernesto, Araiza-Rodriguez Adnan, Mendieta-Condado Edgar, Rodriguez-Maldonado Abril, Wong-Arambula Claudia, Barrera-Badillo Gisela, Hernandez-Rivas Lucia, Lopez-Martinez Irma.                                                                                                                                                                       |
| EPI_ISL_455566, EPI_ISL_455567                                                                                                                                                                                                                                                                                                                                                                                                                                                                                                                                                                                                                                                                                                                                                                                                                                                                                                                                                                                                                                                                                                                                                                                                                                 | Institute for Public Health                                                  | Laboratory for advanced genomics                                                   | Filip Roki, Lovro Trgovec-Greif, Neven Sui, Tomislav Rukavina, Igor Jurak, Oliver Vugrek                                                                                                                                                                                                                                                                                                                            |
| EPI_ISL_455630, EPI_ISL_455631, EPI_ISL_455634, EPI_ISL_455639                                                                                                                                                                                                                                                                                                                                                                                                                                                                                                                                                                                                                                                                                                                                                                                                                                                                                                                                                                                                                                                                                                                                                                                                 | KRISP, KZN Research Innovation and Sequencing Platform                       | KRISP, KZN Research Innovation and Sequencing Platform                             | Giandhari J, Pillay S, Lessells R, Chimukangara B, Deforche K, Tegally H, Wilkinson E, de Oliveira T                                                                                                                                                                                                                                                                                                                |
| EPI_ISL_455683, EPI_ISL_455684, EPI_ISL_455685, EPI_ISL_455686, EPI_ISL_455687, EPI_ISL_455688, EPI_ISL_455689, EPI_ISL_455690, EPI_ISL_455691, EPI_ISL_455692, EPI_ISL_455693                                                                                                                                                                                                                                                                                                                                                                                                                                                                                                                                                                                                                                                                                                                                                                                                                                                                                                                                                                                                                                                                                 |                                                                              |                                                                                    |                                                                                                                                                                                                                                                                                                                                                                                                                     |
| see above                                                                                                                                                                                                                                                                                                                                                                                                                                                                                                                                                                                                                                                                                                                                                                                                                                                                                                                                                                                                                                                                                                                                                                                                                                                      | unknown                                                                      | Department of Microbiology                                                         | Gao,Q., Bao,L., Mao,H., Wang,L., Xu,K., Yang,M., Li,Y., Zhu,L., Wang,N., Lv,Z., Gao,H., Ge,X., Kan,B., Hu,Y., Liu,J., Cai,F., Jiang,D., Yin,Y., Qin,C., Li,J., Gong,X., Lou,X., Shi,W., Wu,D., Zhang,H., Deng,W., Lu,J., Li,C., Wang,X., Yin,W., Zhang,Y., Sun,Y.                                                                                                                                                   |
| EPI_ISL_457573, EPI_ISL_457574, EPI_ISL_457575, EPI_ISL_457576, EPI_ISL_457577, EPI_ISL_457578, EPI_ISL_457579, EPI_ISL_457580                                                                                                                                                                                                                                                                                                                                                                                                                                                                                                                                                                                                                                                                                                                                                                                                                                                                                                                                                                                                                                                                                                                                 | Queens Medical Centre, Clinical Microbiology Department / DeepSeq Nottingham | COVID-19 Genomics UK (COG-UK) Consortium                                           | Gemma Clark, Wendy Smith, Manjinder Khakh, Hannah Howson-Wells, Jonathan Ball, Patrick McClure, Joseph Chappell, Theocharis Tsoleridis, Nadine Holmes, Matthew Carlisle, Christopher Moore, Fei Sang, Johnny Debebe, Victoria Wright, Matthew Loose                                                                                                                                                                 |
| EPI_ISL_457702                                                                                                                                                                                                                                                                                                                                                                                                                                                                                                                                                                                                                                                                                                                                                                                                                                                                                                                                                                                                                                                                                                                                                                                                                                                 | Oman-NIC                                                                     | Microbiology laboratory- Sultan Qaboos University Hospital                         | Fahad Zadjali, Samira Al-Maruqi, Amina Al Jardani, Khulood Al-Mammary, Hanan Al-kindi, Fatma BaAlawi, Hamida AL Barwani, Zeyana AL-Dahmani, Intisar Al-Shukri, Aisha Al-Busaidi, Aisha Al-Amri, Ahlam Al-Amri, Mohammed Al-Tobi, Samiha Al Kharusi, Abdulla Balkhair                                                                                                                                                |
| EPI_ISL_457703                                                                                                                                                                                                                                                                                                                                                                                                                                                                                                                                                                                                                                                                                                                                                                                                                                                                                                                                                                                                                                                                                                                                                                                                                                                 | Oman-NIC                                                                     | Department of Microbiology and Immunology- SQUH                                    | Fahad Zadjali, Samira Al-Maruqi, Amina Al Jardani, Khulood Al-Mammary, Hanan Al-kindi, Fatma BaAlawi, Hamida AL Barwani, Zeyana AL-Dahmani, Intisar Al-Shukri, Aisha Al-Busaidi, Aisha Al-Amri, Ahlam Al-Amri, Mohammed Al-Tobi, Samiha Al Kharusi, Abdulla Balkhair                                                                                                                                                |
| EPI_ISL_457705                                                                                                                                                                                                                                                                                                                                                                                                                                                                                                                                                                                                                                                                                                                                                                                                                                                                                                                                                                                                                                                                                                                                                                                                                                                 | OMAN-NIC                                                                     | Department of Microbiology and Immunology- SQUH                                    | Fahad Zadjali, Samira Al-Maruqi, Amina Al Jardani, Khulood Al-Mammary, Hanan Al-kindi, Fatma BaAlawi, Hamida AL Barwani, Zeyana AL-Dahmani, Intisar Al-Shukri, Aisha Al-Busaidi, Aisha Al-Amri, Ahlam Al-Amri, Mohammed Al-Tobi, Samiha Al Kharusi, Abdulla Balkhair                                                                                                                                                |
| EPI_ISL_457707                                                                                                                                                                                                                                                                                                                                                                                                                                                                                                                                                                                                                                                                                                                                                                                                                                                                                                                                                                                                                                                                                                                                                                                                                                                 | Oman-NIC                                                                     | Department of Microbiology and Immunology- SQUH                                    | Fahad Zadjali, Samira Al-Maruqi, Amina Al Jardani, Khulood Al-Mammary, Hanan Al-kindi, Fatma BaAlawi, Hamida AL Barwani, Zeyana AL-Dahmani, Intisar Al-Shukri, Aisha Al-Busaidi, Aisha Al-Amri, Ahlam Al-Amri, Mohammed Al-Tobi, Samiha Al Kharusi, Abdulla Balkhair                                                                                                                                                |
| EPI_ISL_457981, EPI_ISL_457982, EPI_ISL_457983, EPI_ISL_457984                                                                                                                                                                                                                                                                                                                                                                                                                                                                                                                                                                                                                                                                                                                                                                                                                                                                                                                                                                                                                                                                                                                                                                                                 | Oman-NIC                                                                     | Department of Microbiology and Immunology-SQUH                                     | Fahad Zadjali, Samira Al-Maruqi, Amina Al Jardani, Khulood Al-Mammary, Hanan Al-kindi, Fatma BaAlawi, Hamida AL Barwani, Zeyana AL-Dahmani, Intisar Al-Shukri, Aisha Al-Busaidi, Aisha Al-Amri, Ahlam Al-Amri, Mohammed Al-Tobi, Samiha Al Kharusi, Abdulla Balkhair                                                                                                                                                |
| EPI_ISL_458116, EPI_ISL_458117, EPI_ISL_458118, EPI_ISL_458119, EPI_ISL_458120, EPI_ISL_458121, EPI_ISL_458122, EPI_ISL_458123, EPI_ISL_458124, EPI_ISL_458125, EPI_ISL_458126, EPI_ISL_458127, EPI_ISL_458128                                                                                                                                                                                                                                                                                                                                                                                                                                                                                                                                                                                                                                                                                                                                                                                                                                                                                                                                                                                                                                                 |                                                                              |                                                                                    |                                                                                                                                                                                                                                                                                                                                                                                                                     |
| see above                                                                                                                                                                                                                                                                                                                                                                                                                                                                                                                                                                                                                                                                                                                                                                                                                                                                                                                                                                                                                                                                                                                                                                                                                                                      | Oman National Influenza Centre                                               | Department of Microbiology and Immunology-SQUH                                     | Fahad Zadjali, Samira Al-Maruqi, Amina Al Jardani, Khulood Al-Mammary, Hanan Al-kindi, Fatma BaAlawi, Hamida AL Barwani, Zeyana AL-Dahmani, Intisar Al-Shukri, Aisha Al-Busaidi, Aisha Al-Amri, Ahlam Al-Amri, Mohammed Al-Tobi, Samiha Al Kharusi, Abdulla Balkhair                                                                                                                                                |
| EPI_ISL_458137                                                                                                                                                                                                                                                                                                                                                                                                                                                                                                                                                                                                                                                                                                                                                                                                                                                                                                                                                                                                                                                                                                                                                                                                                                                 | Oman National Influenza Centre                                               | Department of Microbiology and Immunology                                          | Fahad Zadjali, Samira Al-Maruqi, Amina Al Jardani, Khulood Al-Mammary, Hanan Al-kindi, Fatma BaAlawi, Hamida AL Barwani, Zeyana AL-Dahmani, Intisar Al-Shukri, Aisha Al-Busaidi, Aisha Al-Amri, Ahlam Al-Amri, Mohammed Al-Tobi, Samiha Al Kharusi, Abdulla Balkhair                                                                                                                                                |
| EPI_ISL_459856, EPI_ISL_459857, EPI_ISL_459858, EPI_ISL_459859, EPI_ISL_459860, EPI_ISL_459861, EPI_ISL_459862, EPI_ISL_459863, EPI_ISL_459864                                                                                                                                                                                                                                                                                                                                                                                                                                                                                                                                                                                                                                                                                                                                                                                                                                                                                                                                                                                                                                                                                                                 | Center for Genome Regulation (CRG)                                           | Center for Mathematical Modeling and Center for Genome Regulation. Santiago, Chile | Gaete A, Travisany D, Palma R, Urta C, Varas M, Allende ML, Maass A, González M.                                                                                                                                                                                                                                                                                                                                    |
| EPI_ISL_460081                                                                                                                                                                                                                                                                                                                                                                                                                                                                                                                                                                                                                                                                                                                                                                                                                                                                                                                                                                                                                                                                                                                                                                                                                                                 | Molecular Virology Unit, Fondazione IRCCS Policlinico San Matteo , Pavia     | Laboratory of Virology, INMI Lazzaro Spallanzani IRCCS                             | Fausto Baldanti, Martina Rueca, Antonio Piralla, Antonino Di Caro, Maria R. Capobianchi, Cesare E.M. Gruber, Barbara Bartolini                                                                                                                                                                                                                                                                                      |
| EPI_ISL_460084                                                                                                                                                                                                                                                                                                                                                                                                                                                                                                                                                                                                                                                                                                                                                                                                                                                                                                                                                                                                                                                                                                                                                                                                                                                 | Molecular Virology Unit, Fondazione IRCCS Policlinico San Matteo , Pavia     | Laboratory of Virology, INMI Lazzaro Spallanzani IRCCS                             | Fausto Baldanti, Antonio Piralla, Martina Rueca, Barbara Bartolini, Maria R. Capobianchi, Cesare E.M. Gruber, Antonino Di Caro                                                                                                                                                                                                                                                                                      |
| EPI_ISL_461478                                                                                                                                                                                                                                                                                                                                                                                                                                                                                                                                                                                                                                                                                                                                                                                                                                                                                                                                                                                                                                                                                                                                                                                                                                                 | Government Medical College, Vadodara                                         | Gujarat Biotechnology Research Centre                                              | Penil Patel, Nidhi Patel, Nitin Savaliya, Raghawendra Kumar, Dinesh Kumar, Zuber Saiyed, Komal Patel, Labdhi Pandya, Snehal Bagatharia, Tanuja Javadekar , R N Daveswar, Tejas Shah, Ankit Hinsu, Pritesh Sabara, Apurvashin Puvar, Janvi Raval, Zarna Patel, Monika Gandhi, Pinal Trivedi, Maharshi Pandya, R D Dixit, A M Kadri, Harsh Bakshi, Chaitanya Joshi, Madhvi Joshi,                                     |
| EPI_ISL_461491                                                                                                                                                                                                                                                                                                                                                                                                                                                                                                                                                                                                                                                                                                                                                                                                                                                                                                                                                                                                                                                                                                                                                                                                                                                 | B.J. Medical College and Civil hospital                                      | Gujarat Biotechnology Research Centre                                              | Penil Patel, Apurvashin Puvar, Janvi Raval, Zarna Patel, Monika Gandhi, Pinal Trivedi, Maharshi Pandya, Nidhi Patel, Nitin Savaliya, Raghawendra Kumar, Dinesh Kumar, Zuber Saiyed, Komal Patel, Labdhi Pandya, Snehal Bagatharia, Pranay Shah, Kamlesh J Upadhiyay, Tejas Shah, Ankit Hinsu, Pritesh Sabara, R D Dixit, A M Kadri, Harsh Bakshi, Chaitanya Joshi, Madhvi Joshi,                                    |
| EPI_ISL_461894, EPI_ISL_461895, EPI_ISL_461896, EPI_ISL_461897, EPI_ISL_461898, EPI_ISL_461899, EPI_ISL_461900, EPI_ISL_461901, EPI_ISL_461902, EPI_ISL_461903, EPI_ISL_461904, EPI_ISL_461905, EPI_ISL_461906, EPI_ISL_461907, EPI_ISL_461908, EPI_ISL_461909, EPI_ISL_461910, EPI_ISL_461911, EPI_ISL_461912, EPI_ISL_461913, EPI_ISL_461914, EPI_ISL_461915, EPI_ISL_461916, EPI_ISL_461917, EPI_ISL_461918, EPI_ISL_461919, EPI_ISL_461920, EPI_ISL_461921, EPI_ISL_461922, EPI_ISL_461923, EPI_ISL_461924, EPI_ISL_461925, EPI_ISL_461926, EPI_ISL_461927, EPI_ISL_461928, EPI_ISL_461929, EPI_ISL_461930, EPI_ISL_461931, EPI_ISL_461932, EPI_ISL_461933, EPI_ISL_461934, EPI_ISL_461935, EPI_ISL_461936, EPI_ISL_461937, EPI_ISL_461938, EPI_ISL_461939, EPI_ISL_461940, EPI_ISL_461941, EPI_ISL_461942, EPI_ISL_461943, EPI_ISL_461944, EPI_ISL_461945, EPI_ISL_461946, EPI_ISL_461947, EPI_ISL_461948, EPI_ISL_461949, EPI_ISL_461950, EPI_ISL_461951, EPI_ISL_461952, EPI_ISL_461953, EPI_ISL_461954, EPI_ISL_461955, EPI_ISL_461956, EPI_ISL_461957, EPI_ISL_461958, EPI_ISL_461959, EPI_ISL_461960, EPI_ISL_461961, EPI_ISL_461962, EPI_ISL_461963, EPI_ISL_461964, EPI_ISL_461965, EPI_ISL_461966, EPI_ISL_461967, EPI_ISL_461968, EPI_ISL_461969 |                                                                              |                                                                                    |                                                                                                                                                                                                                                                                                                                                                                                                                     |
| see above                                                                                                                                                                                                                                                                                                                                                                                                                                                                                                                                                                                                                                                                                                                                                                                                                                                                                                                                                                                                                                                                                                                                                                                                                                                      | Queens Medical Centre, Clinical Microbiology Department / DeepSeq Nottingham | COVID-19 Genomics UK (COG-UK) Consortium                                           | Gemma Clark, Wendy Smith, Manjinder Khakh, Hannah Howson-Wells, Jonathan Ball, Patrick McClure, Joseph Chappell, Theocharis Tsoleridis, Nadine Holmes, Matthew Carlisle, Christopher Moore, Fei Sang, Johnny Debebe, Victoria Wright, Matthew Loose                                                                                                                                                                 |
| EPI_ISL_462991                                                                                                                                                                                                                                                                                                                                                                                                                                                                                                                                                                                                                                                                                                                                                                                                                                                                                                                                                                                                                                                                                                                                                                                                                                                 | Microbiology Division                                                        | Microbiology Division                                                              | Flores,H.                                                                                                                                                                                                                                                                                                                                                                                                           |
| EPI_ISL_463001, EPI_ISL_463002, EPI_ISL_463003, EPI_ISL_463004, EPI_ISL_463005, EPI_ISL_463006                                                                                                                                                                                                                                                                                                                                                                                                                                                                                                                                                                                                                                                                                                                                                                                                                                                                                                                                                                                                                                                                                                                                                                 | unknown                                                                      | Clinical virology                                                                  | Fares,W., Triki,H.                                                                                                                                                                                                                                                                                                                                                                                                  |
| EPI_ISL_467030                                                                                                                                                                                                                                                                                                                                                                                                                                                                                                                                                                                                                                                                                                                                                                                                                                                                                                                                                                                                                                                                                                                                                                                                                                                 | GMERS Medical College and Hospital, Gandhinagar                              | Gujarat Biotechnology Research Centre                                              | Gaurishankar Shrimali, Bhavesh Modi, Bharti Rajani, Tejas Shah, Ankit Hinsu, Pritesh Sabara, Apurvashin Puvar, Janvi Raval, Zarna Patel, Monika Gandhi, Pinal Trivedi, Maharshi Pandya, Nidhi Patel, Nitin Savaliya, Raghawendra Kumar, Dinesh Kumar, Zuber Saiyed, Komal Patel, Labdhi Pandya, Snehal Bagatharia, Seema Bhatt, Priyanka P Vatsa, R D Dixit, A M Kadri, Harsh Bakshi, Chaitanya Joshi, Madhvi Joshi |
| EPI_ISL_467431                                                                                                                                                                                                                                                                                                                                                                                                                                                                                                                                                                                                                                                                                                                                                                                                                                                                                                                                                                                                                                                                                                                                                                                                                                                 | Molecular Diagnostics Services (MDS)                                         | KRISP, KZN Research Innovation and Sequencing Platform                             | Giandhari J, Pillay S, Lessells R, Chimukangara B, Mlalose K, York D, Khan S, Tegally H, Wilkinson E, de Oliveira T                                                                                                                                                                                                                                                                                                 |

|                                                                                                                                                                                                                                                                                                                                                                                                                                                                                                                                                                                                                                                                                                                                                                                                                                                                                                                                                                                                                                                                                                                                                |                                                                                 |                                                                                    |                                                                                                                                                                                                                                                                                                                                |
|------------------------------------------------------------------------------------------------------------------------------------------------------------------------------------------------------------------------------------------------------------------------------------------------------------------------------------------------------------------------------------------------------------------------------------------------------------------------------------------------------------------------------------------------------------------------------------------------------------------------------------------------------------------------------------------------------------------------------------------------------------------------------------------------------------------------------------------------------------------------------------------------------------------------------------------------------------------------------------------------------------------------------------------------------------------------------------------------------------------------------------------------|---------------------------------------------------------------------------------|------------------------------------------------------------------------------------|--------------------------------------------------------------------------------------------------------------------------------------------------------------------------------------------------------------------------------------------------------------------------------------------------------------------------------|
| EPI_ISL_467435                                                                                                                                                                                                                                                                                                                                                                                                                                                                                                                                                                                                                                                                                                                                                                                                                                                                                                                                                                                                                                                                                                                                 | AMPATH-DBN                                                                      | KRISP, KZN Research Innovation and Sequencing Platform                             | Giandhari J, Pillay S, Lessells R, Chimukangara B, Mdlalose K, York D, Khan S, Tegally H, Wilkinson E, de Oliveira T                                                                                                                                                                                                           |
| EPI_ISL_467436, EPI_ISL_467437, EPI_ISL_467441, EPI_ISL_467442, EPI_ISL_467443                                                                                                                                                                                                                                                                                                                                                                                                                                                                                                                                                                                                                                                                                                                                                                                                                                                                                                                                                                                                                                                                 | NHLS-IALCH                                                                      | KRISP, KZN Research Innovation and Sequencing Platform                             | Giandhari J, Pillay S, Lessells R, Chimukangara B, Mdlalose K, York D, Khan S, Tegally H, Wilkinson E, de Oliveira T                                                                                                                                                                                                           |
| EPI_ISL_467446, EPI_ISL_467447                                                                                                                                                                                                                                                                                                                                                                                                                                                                                                                                                                                                                                                                                                                                                                                                                                                                                                                                                                                                                                                                                                                 | Molecular Diagnostics Services (MDS)                                            | KRISP, KZN Research Innovation and Sequencing Platform                             | Giandhari J, Pillay S, Lessells R, Chimukangara B, Mdlalose K, York D, Khan S, Tegally H, Wilkinson E, de Oliveira T                                                                                                                                                                                                           |
| EPI_ISL_467449, EPI_ISL_467450, EPI_ISL_467454, EPI_ISL_467458, EPI_ISL_467460, EPI_ISL_467462, EPI_ISL_467466, EPI_ISL_467467, EPI_ISL_467468, EPI_ISL_467469, EPI_ISL_467470, EPI_ISL_467472, EPI_ISL_467473                                                                                                                                                                                                                                                                                                                                                                                                                                                                                                                                                                                                                                                                                                                                                                                                                                                                                                                                 | AMPATH-DBN                                                                      | KRISP, KZN Research Innovation and Sequencing Platform                             | Giandhari J, Pillay S, Lessells R, Chimukangara B, Mdlalose K, York D, Khan S, Tegally H, Wilkinson E, de Oliveira T                                                                                                                                                                                                           |
| see above                                                                                                                                                                                                                                                                                                                                                                                                                                                                                                                                                                                                                                                                                                                                                                                                                                                                                                                                                                                                                                                                                                                                      | AMPATH-DBN                                                                      | KRISP, KZN Research Innovation and Sequencing Platform                             | Giandhari J, Pillay S, Lessells R, Chimukangara B, Mdlalose K, York D, Khan S, Tegally H, Wilkinson E, de Oliveira T                                                                                                                                                                                                           |
| EPI_ISL_467477, EPI_ISL_467478, EPI_ISL_467481, EPI_ISL_467482, EPI_ISL_467483, EPI_ISL_467485, EPI_ISL_467488, EPI_ISL_467491, EPI_ISL_467495, EPI_ISL_467498                                                                                                                                                                                                                                                                                                                                                                                                                                                                                                                                                                                                                                                                                                                                                                                                                                                                                                                                                                                 | Molecular Diagnostics Services (MDS)                                            | KRISP, KZN Research Innovation and Sequencing Platform                             | Giandhari J, Pillay S, Lessells R, Chimukangara B, Mdlalose K, York D, Khan S, Tegally H, Wilkinson E, de Oliveira T                                                                                                                                                                                                           |
| EPI_ISL_467507, EPI_ISL_467509, EPI_ISL_467515, EPI_ISL_467518, EPI_ISL_467519, EPI_ISL_467521                                                                                                                                                                                                                                                                                                                                                                                                                                                                                                                                                                                                                                                                                                                                                                                                                                                                                                                                                                                                                                                 | NHLS-IALCH                                                                      | KRISP, KZN Research Innovation and Sequencing Platform                             | Giandhari J, Pillay S, Lessells R, Chimukangara B, Mdlalose K, York D, Khan S, Tegally H, Wilkinson E, de Oliveira T                                                                                                                                                                                                           |
| EPI_ISL_468591, EPI_ISL_468656                                                                                                                                                                                                                                                                                                                                                                                                                                                                                                                                                                                                                                                                                                                                                                                                                                                                                                                                                                                                                                                                                                                 | Institute for Public Health                                                     | Laboratory for advanced genomics                                                   | Filip Roki, Lovro Trgovec-Greif, Neven Sui, Tomislav Rukavina, Igor Jurak, Oliver Vugrek                                                                                                                                                                                                                                       |
| EPI_ISL_468747, EPI_ISL_468748, EPI_ISL_468749, EPI_ISL_468750, EPI_ISL_468751                                                                                                                                                                                                                                                                                                                                                                                                                                                                                                                                                                                                                                                                                                                                                                                                                                                                                                                                                                                                                                                                 | Facultad de Medicina UC                                                         | Center for Mathematical Modeling and Center for Genome Regulation. Santiago, Chile | Gaete A, Travisany D, Palma R, Urrea C, Varas M, Allende ML, Maass A, González M, Ferres M.                                                                                                                                                                                                                                    |
| EPI_ISL_468752                                                                                                                                                                                                                                                                                                                                                                                                                                                                                                                                                                                                                                                                                                                                                                                                                                                                                                                                                                                                                                                                                                                                 | Center for Genome Regulation (CRG)                                              | Center for Mathematical Modeling and Center for Genome Regulation. Santiago, Chile | Gaete A, Travisany D, Palma R, Urrea C, Varas M, Allende ML, Maass A, González M.                                                                                                                                                                                                                                              |
| EPI_ISL_468753, EPI_ISL_468754, EPI_ISL_468755, EPI_ISL_468756, EPI_ISL_468757, EPI_ISL_468758, EPI_ISL_468759                                                                                                                                                                                                                                                                                                                                                                                                                                                                                                                                                                                                                                                                                                                                                                                                                                                                                                                                                                                                                                 | Laboratorio de Biología Molecular, Facultad de Medicina, Universidad de Atacama | Center for Mathematical Modeling and Center for Genome Regulation. Santiago, Chile | Gaete A, Travisany D, Palma R, Urrea C, Varas M, Allende ML, Maass A, González M, C Echeverria                                                                                                                                                                                                                                 |
| EPI_ISL_468760                                                                                                                                                                                                                                                                                                                                                                                                                                                                                                                                                                                                                                                                                                                                                                                                                                                                                                                                                                                                                                                                                                                                 | Center for Genome Regulation (CRG)                                              | Center for Mathematical Modeling and Center for Genome Regulation. Santiago, Chile | Gaete A, Travisany D, Palma R, Urrea C, Varas M, Allende ML, Maass A, González M.                                                                                                                                                                                                                                              |
| EPI_ISL_470541, EPI_ISL_470543, EPI_ISL_470544, EPI_ISL_470549, EPI_ISL_470550, EPI_ISL_470551, EPI_ISL_470552, EPI_ISL_470553, EPI_ISL_470554, EPI_ISL_470555, EPI_ISL_470556, EPI_ISL_470557, EPI_ISL_470558, EPI_ISL_470559, EPI_ISL_470560, EPI_ISL_470561, EPI_ISL_470564, EPI_ISL_470565, EPI_ISL_470567, EPI_ISL_470656, EPI_ISL_470657, EPI_ISL_470659, EPI_ISL_470661, EPI_ISL_470662, EPI_ISL_470664, EPI_ISL_470666, EPI_ISL_470667, EPI_ISL_470668, EPI_ISL_470669, EPI_ISL_470670, EPI_ISL_470671, EPI_ISL_470673, EPI_ISL_470674, EPI_ISL_470675, EPI_ISL_470676, EPI_ISL_470677, EPI_ISL_470678, EPI_ISL_470679, EPI_ISL_470680, EPI_ISL_470681, EPI_ISL_470682, EPI_ISL_470683, EPI_ISL_470684, EPI_ISL_470685, EPI_ISL_470686, EPI_ISL_470687, EPI_ISL_470688, EPI_ISL_470689, EPI_ISL_470691, EPI_ISL_470692, EPI_ISL_470693, EPI_ISL_470694, EPI_ISL_470696, EPI_ISL_470697, EPI_ISL_470698, EPI_ISL_470700, EPI_ISL_470701, EPI_ISL_470702, EPI_ISL_470703, EPI_ISL_470705, EPI_ISL_470706, EPI_ISL_470707, EPI_ISL_470708, EPI_ISL_470710, EPI_ISL_470713, EPI_ISL_470714, EPI_ISL_470715, EPI_ISL_470716, EPI_ISL_470718 | Utah Public Health Laboratory                                                   | Utah Public Health Laboratory                                                      | Erin Young, Kelly Oakeson                                                                                                                                                                                                                                                                                                      |
| see above                                                                                                                                                                                                                                                                                                                                                                                                                                                                                                                                                                                                                                                                                                                                                                                                                                                                                                                                                                                                                                                                                                                                      | Utah Public Health Laboratory                                                   | Utah Public Health Laboratory                                                      | Erin Young, Kelly Oakeson                                                                                                                                                                                                                                                                                                      |
| EPI_ISL_472384, EPI_ISL_472385, EPI_ISL_472386, EPI_ISL_472387, EPI_ISL_472388, EPI_ISL_472389, EPI_ISL_472390, EPI_ISL_472391, EPI_ISL_472392, EPI_ISL_472393, EPI_ISL_472394, EPI_ISL_472395, EPI_ISL_472396, EPI_ISL_472397, EPI_ISL_472398, EPI_ISL_472399, EPI_ISL_472401, EPI_ISL_472402, EPI_ISL_472403, EPI_ISL_472404, EPI_ISL_472405, EPI_ISL_472406, EPI_ISL_472407, EPI_ISL_472408, EPI_ISL_472409, EPI_ISL_472410, EPI_ISL_472411, EPI_ISL_472412, EPI_ISL_472413, EPI_ISL_472414, EPI_ISL_472415, EPI_ISL_472416, EPI_ISL_472417, EPI_ISL_472418, EPI_ISL_472419, EPI_ISL_472420, EPI_ISL_472421, EPI_ISL_472422, EPI_ISL_472423, EPI_ISL_472424, EPI_ISL_472425, EPI_ISL_472426, EPI_ISL_472427, EPI_ISL_472428, EPI_ISL_472429                                                                                                                                                                                                                                                                                                                                                                                                 | Queens Medical Centre, Clinical Microbiology Department / DeepSeq Nottingham    | COVID-19 Genomics UK (COG-UK) Consortium                                           | Gemma Clark, Wendy Smith, Manjinder Khakh, Vicki M Fleming, Michelle M Lister, Hannah Howson-Wells, Jonathan Ball, Patrick McClure, Joseph Chappell, Theocharis Tsoleridis, Nadine Holmes, Matthew Carlisle, Christopher Moore, Fei Sang, Johnny Debebe, Victoria Wright, Matthew Loose                                        |
| EPI_ISL_475726, EPI_ISL_475728, EPI_ISL_475729, EPI_ISL_475731, EPI_ISL_475732, EPI_ISL_475734, EPI_ISL_475735, EPI_ISL_475736, EPI_ISL_475737, EPI_ISL_475738, EPI_ISL_475740, EPI_ISL_475741, EPI_ISL_475742, EPI_ISL_475743, EPI_ISL_475744                                                                                                                                                                                                                                                                                                                                                                                                                                                                                                                                                                                                                                                                                                                                                                                                                                                                                                 | Utah Public Health Laboratory                                                   | Utah Public Health Laboratory                                                      | Erin Young, Kelly Oakeson                                                                                                                                                                                                                                                                                                      |
| see above                                                                                                                                                                                                                                                                                                                                                                                                                                                                                                                                                                                                                                                                                                                                                                                                                                                                                                                                                                                                                                                                                                                                      | Utah Public Health Laboratory                                                   | Utah Public Health Laboratory                                                      | Erin Young, Kelly Oakeson                                                                                                                                                                                                                                                                                                      |
| EPI_ISL_477205, EPI_ISL_477207, EPI_ISL_477208, EPI_ISL_477210, EPI_ISL_477211, EPI_ISL_477233, EPI_ISL_477237, EPI_ISL_477238, EPI_ISL_477239, EPI_ISL_477241, EPI_ISL_477242, EPI_ISL_477246, EPI_ISL_477247, EPI_ISL_477249, EPI_ISL_477250, EPI_ISL_477254, EPI_ISL_477255, EPI_ISL_477256, EPI_ISL_477258, EPI_ISL_477261                                                                                                                                                                                                                                                                                                                                                                                                                                                                                                                                                                                                                                                                                                                                                                                                                 | Institute for Stem Cell Science and Regenerative Medicine                       | National Centre for Biological Sciences                                            | Farhan Ali, Vanessa Molin Paynter, Srikar Krishna, Mohak Sharda, Shah-e-Jahan Gulzar, Awadesh Pandit, Varadha Sundarmurthy, Uma Ramakrishnan, Dasaradhi Palakodeti, Aswin Seshasayee                                                                                                                                           |
| see above                                                                                                                                                                                                                                                                                                                                                                                                                                                                                                                                                                                                                                                                                                                                                                                                                                                                                                                                                                                                                                                                                                                                      | Institute for Stem Cell Science and Regenerative Medicine                       | National Centre for Biological Sciences                                            | Farhan Ali, Vanessa Molin Paynter, Srikar Krishna, Mohak Sharda, Shah-e-Jahan Gulzar, Awadesh Pandit, Varadha Sundarmurthy, Uma Ramakrishnan, Dasaradhi Palakodeti, Aswin Seshasayee                                                                                                                                           |
| EPI_ISL_478721, EPI_ISL_478722, EPI_ISL_478723, EPI_ISL_478724, EPI_ISL_478725, EPI_ISL_478726, EPI_ISL_478727, EPI_ISL_478728                                                                                                                                                                                                                                                                                                                                                                                                                                                                                                                                                                                                                                                                                                                                                                                                                                                                                                                                                                                                                 | Queens Medical Centre, Clinical Microbiology Department / DeepSeq Nottingham    | COVID-19 Genomics UK (COG-UK) Consortium                                           | Gemma Clark, Wendy Smith, Manjinder Khakh, Vicki M Fleming, Michelle M Lister, Hannah Howson-Wells, Jonathan Ball, Patrick McClure, Joseph Chappell, Theocharis Tsoleridis, Nadine Holmes, Matthew Carlisle, Christopher Moore, Fei Sang, Johnny Debebe, Victoria Wright, Matthew Loose                                        |
| EPI_ISL_480351, EPI_ISL_480352, EPI_ISL_480353, EPI_ISL_480354, EPI_ISL_480355, EPI_ISL_480356, EPI_ISL_480357, EPI_ISL_480358, EPI_ISL_480359, EPI_ISL_480360, EPI_ISL_480361, EPI_ISL_480362, EPI_ISL_480363, EPI_ISL_480364, EPI_ISL_480365, EPI_ISL_480366, EPI_ISL_480367, EPI_ISL_480368, EPI_ISL_480369, EPI_ISL_480370, EPI_ISL_480371, EPI_ISL_480372, EPI_ISL_480373, EPI_ISL_480374, EPI_ISL_480375, EPI_ISL_480376, EPI_ISL_480377, EPI_ISL_480378, EPI_ISL_480379, EPI_ISL_480380, EPI_ISL_480381, EPI_ISL_480382, EPI_ISL_480383, EPI_ISL_480384, EPI_ISL_480385, EPI_ISL_480386, EPI_ISL_480387, EPI_ISL_480388, EPI_ISL_480389, EPI_ISL_480390, EPI_ISL_480391, EPI_ISL_480392, EPI_ISL_480393, EPI_ISL_480394, EPI_ISL_480395, EPI_ISL_480396, EPI_ISL_480397, EPI_ISL_480398, EPI_ISL_480399, EPI_ISL_480400, EPI_ISL_480401, EPI_ISL_480402, EPI_ISL_480403, EPI_ISL_480404, EPI_ISL_480405, EPI_ISL_480406, EPI_ISL_480407, EPI_ISL_480408, EPI_ISL_480409, EPI_ISL_480410, EPI_ISL_480411, EPI_ISL_480412, EPI_ISL_480413                                                                                                 | University of Wisconsin-Madison AIDS Vaccine Research Laboratories              | University of Wisconsin-Madison AIDS Vaccine Research Laboratories                 | Gage Moreno, Katarina Braun, et al. AIDS Vaccine Research Laboratories                                                                                                                                                                                                                                                         |
| see above                                                                                                                                                                                                                                                                                                                                                                                                                                                                                                                                                                                                                                                                                                                                                                                                                                                                                                                                                                                                                                                                                                                                      | University of Wisconsin-Madison AIDS Vaccine Research Laboratories              | University of Wisconsin-Madison AIDS Vaccine Research Laboratories                 | Gage Moreno, Katarina Braun, et al. AIDS Vaccine Research Laboratories                                                                                                                                                                                                                                                         |
| EPI_ISL_482706                                                                                                                                                                                                                                                                                                                                                                                                                                                                                                                                                                                                                                                                                                                                                                                                                                                                                                                                                                                                                                                                                                                                 | Molecular Diagnostics Services (MDS)                                            | KRISP, KZN Research Innovation and Sequencing Platform                             | Giandhari J, Pillay S, Lessells R, Chimukangara B, Mdlalose K, York D, Khan S, Tegally H, Wilkinson E, de Oliveira T                                                                                                                                                                                                           |
| EPI_ISL_482710, EPI_ISL_482712                                                                                                                                                                                                                                                                                                                                                                                                                                                                                                                                                                                                                                                                                                                                                                                                                                                                                                                                                                                                                                                                                                                 | NHLS-IALCH                                                                      | KRISP, KZN Research Innovation and Sequencing Platform                             | Giandhari J, Pillay S, Lessells R, Chimukangara B, Mdlalose K, York D, Khan S, Tegally H, Wilkinson E, de Oliveira T                                                                                                                                                                                                           |
| EPI_ISL_482716, EPI_ISL_482717, EPI_ISL_482718, EPI_ISL_482720, EPI_ISL_482722                                                                                                                                                                                                                                                                                                                                                                                                                                                                                                                                                                                                                                                                                                                                                                                                                                                                                                                                                                                                                                                                 | Molecular Diagnostics Services (MDS)                                            | KRISP, KZN Research Innovation and Sequencing Platform                             | Giandhari J, Pillay S, Lessells R, Chimukangara B, Mdlalose K, York D, Khan S, Tegally H, Wilkinson E, de Oliveira T                                                                                                                                                                                                           |
| EPI_ISL_482724, EPI_ISL_482725, EPI_ISL_482727, EPI_ISL_482728, EPI_ISL_482731, EPI_ISL_482848, EPI_ISL_482849, EPI_ISL_482850                                                                                                                                                                                                                                                                                                                                                                                                                                                                                                                                                                                                                                                                                                                                                                                                                                                                                                                                                                                                                 | NHLS-IALCH                                                                      | KRISP, KZN Research Innovation and Sequencing Platform                             | Giandhari J, Pillay S, Lessells R, Chimukangara B, Mdlalose K, York D, Khan S, Tegally H, Wilkinson E, de Oliveira T                                                                                                                                                                                                           |
| EPI_ISL_482854, EPI_ISL_482855, EPI_ISL_482857, EPI_ISL_482859, EPI_ISL_482860, EPI_ISL_482864, EPI_ISL_482865, EPI_ISL_482866                                                                                                                                                                                                                                                                                                                                                                                                                                                                                                                                                                                                                                                                                                                                                                                                                                                                                                                                                                                                                 | Molecular Diagnostics Services (MDS)                                            | KRISP, KZN Research Innovation and Sequencing Platform                             | Giandhari J, Pillay S, Lessells R, Chimukangara B, Mdlalose K, York D, Khan S, Tegally H, Wilkinson E, de Oliveira T                                                                                                                                                                                                           |
| EPI_ISL_483841                                                                                                                                                                                                                                                                                                                                                                                                                                                                                                                                                                                                                                                                                                                                                                                                                                                                                                                                                                                                                                                                                                                                 | Pandit Deendayal Upadhyay Government Medical College, Rajkot                    | Gujarat Biotechnology Research Centre                                              | Gauravi Dhruv, Arti Trivedi, Apurvasinh Puvar, Janvi Raval, Zarna Patel, Monika Gandhi, Pinal Trivedi, Maharshi Pandya, Nidhi Patel, Nitin Savaliya, Raghawendra Kumar, Dinesh Kumar, Zuber Saiyed, Komal Patel, Labdhi Pandya, Afzal Ansari, Nikha Trivedi, R D Dixit, A M Kadri, Harsh Bakshi, Chaitanya Joshi, Madhvi Joshi |
| EPI_ISL_484339, EPI_ISL_484340, EPI_ISL_484341, EPI_ISL_484342, EPI_ISL_484343, EPI_ISL_484344, EPI_ISL_484345, EPI_ISL_484346, EPI_ISL_484347, EPI_ISL_484348, EPI_ISL_484349, EPI_ISL_484350, EPI_ISL_484351, EPI_ISL_484352, EPI_ISL_484353, EPI_ISL_484374, EPI_ISL_484375, EPI_ISL_484390, EPI_ISL_484391                                                                                                                                                                                                                                                                                                                                                                                                                                                                                                                                                                                                                                                                                                                                                                                                                                 | Queens Medical Centre, Clinical Microbiology Department / DeepSeq Nottingham    | COVID-19 Genomics UK (COG-UK) Consortium                                           | Gemma Clark, Wendy Smith, Manjinder Khakh, Vicki M Fleming, Michelle M Lister, Hannah Howson-Wells, Jonathan Ball, Patrick McClure, Joseph Chappell, Theocharis Tsoleridis, Nadine Holmes, Matthew Carlisle, Christopher Moore, Fei Sang, Johnny Debebe, Victoria Wright, Matthew Loose                                        |
| see above                                                                                                                                                                                                                                                                                                                                                                                                                                                                                                                                                                                                                                                                                                                                                                                                                                                                                                                                                                                                                                                                                                                                      | Queens Medical Centre, Clinical Microbiology Department / DeepSeq Nottingham    | COVID-19 Genomics UK (COG-UK) Consortium                                           | Gemma Clark, Wendy Smith, Manjinder Khakh, Vicki M Fleming, Michelle M Lister, Hannah Howson-Wells, Jonathan Ball, Patrick McClure, Joseph Chappell, Theocharis Tsoleridis, Nadine Holmes, Matthew Carlisle, Christopher Moore, Fei Sang, Johnny Debebe, Victoria Wright, Matthew Loose                                        |



|                                                                                                                                                                                                                                                                                                                                                                                                                                                                                                                                                                                                                                                                                                                                                                                                                                                                                                                                                                                                                                                                                                                                                                                                                                                                                                                                                                                                                                                                                                                                                                                                                                                                                                                                                                                                                                                                                                                                                                                                                                                                                                                                                                                                                                                                                                                                                                                                                                                                                                                                                                                                                                                                                                                                                                                                                                                                                                                                                                                                                                                                                                                                                                                                                                |                                                                              |                                                                                                                  |                                                                                                                                                                                                                                                                                          |
|--------------------------------------------------------------------------------------------------------------------------------------------------------------------------------------------------------------------------------------------------------------------------------------------------------------------------------------------------------------------------------------------------------------------------------------------------------------------------------------------------------------------------------------------------------------------------------------------------------------------------------------------------------------------------------------------------------------------------------------------------------------------------------------------------------------------------------------------------------------------------------------------------------------------------------------------------------------------------------------------------------------------------------------------------------------------------------------------------------------------------------------------------------------------------------------------------------------------------------------------------------------------------------------------------------------------------------------------------------------------------------------------------------------------------------------------------------------------------------------------------------------------------------------------------------------------------------------------------------------------------------------------------------------------------------------------------------------------------------------------------------------------------------------------------------------------------------------------------------------------------------------------------------------------------------------------------------------------------------------------------------------------------------------------------------------------------------------------------------------------------------------------------------------------------------------------------------------------------------------------------------------------------------------------------------------------------------------------------------------------------------------------------------------------------------------------------------------------------------------------------------------------------------------------------------------------------------------------------------------------------------------------------------------------------------------------------------------------------------------------------------------------------------------------------------------------------------------------------------------------------------------------------------------------------------------------------------------------------------------------------------------------------------------------------------------------------------------------------------------------------------------------------------------------------------------------------------------------------------|------------------------------------------------------------------------------|------------------------------------------------------------------------------------------------------------------|------------------------------------------------------------------------------------------------------------------------------------------------------------------------------------------------------------------------------------------------------------------------------------------|
| EPI_ISL_484807, EPI_ISL_484808, EPI_ISL_484809, EPI_ISL_484810, EPI_ISL_484811, EPI_ISL_484812, EPI_ISL_484813, EPI_ISL_484814, EPI_ISL_484815, EPI_ISL_484816, EPI_ISL_484817, EPI_ISL_484818, EPI_ISL_484819, EPI_ISL_484820, EPI_ISL_484821, EPI_ISL_484822, EPI_ISL_484823, EPI_ISL_484824, EPI_ISL_484825, EPI_ISL_484826, EPI_ISL_484827, EPI_ISL_484828, EPI_ISL_484829, EPI_ISL_484830, EPI_ISL_484831, EPI_ISL_484832, EPI_ISL_484833, EPI_ISL_484834, EPI_ISL_484835, EPI_ISL_484836, EPI_ISL_484837, EPI_ISL_484838, EPI_ISL_484839, EPI_ISL_484840, EPI_ISL_484841, EPI_ISL_484842, EPI_ISL_484843, EPI_ISL_484844, EPI_ISL_484845, EPI_ISL_484846, EPI_ISL_484847, EPI_ISL_484848, EPI_ISL_484849, EPI_ISL_484850, EPI_ISL_484851, EPI_ISL_484852, EPI_ISL_484853, EPI_ISL_484854, EPI_ISL_484855, EPI_ISL_484856, EPI_ISL_484857, EPI_ISL_484858, EPI_ISL_484859, EPI_ISL_484860, EPI_ISL_484861, EPI_ISL_484862, EPI_ISL_484863, EPI_ISL_484864, EPI_ISL_484865, EPI_ISL_484866, EPI_ISL_484867, EPI_ISL_484868, EPI_ISL_484869, EPI_ISL_484870, EPI_ISL_484871, EPI_ISL_484872, EPI_ISL_484873, EPI_ISL_484874, EPI_ISL_484875, EPI_ISL_484876, EPI_ISL_484877, EPI_ISL_484878, EPI_ISL_484879, EPI_ISL_484880, EPI_ISL_484881, EPI_ISL_484882, EPI_ISL_484883, EPI_ISL_484884, EPI_ISL_484885, EPI_ISL_484886, EPI_ISL_484887, EPI_ISL_484888, EPI_ISL_484889, EPI_ISL_484890, EPI_ISL_484891, EPI_ISL_484892, EPI_ISL_484893, EPI_ISL_484894, EPI_ISL_484895, EPI_ISL_484896, EPI_ISL_484897, EPI_ISL_484898, EPI_ISL_484899, EPI_ISL_484900, EPI_ISL_484901, EPI_ISL_484902, EPI_ISL_484903, EPI_ISL_484904, EPI_ISL_484905, EPI_ISL_484906, EPI_ISL_484907, EPI_ISL_484908, EPI_ISL_484909, EPI_ISL_484910, EPI_ISL_484911, EPI_ISL_484912, EPI_ISL_484913, EPI_ISL_484914, EPI_ISL_484915, EPI_ISL_484916, EPI_ISL_484917, EPI_ISL_484918, EPI_ISL_484919, EPI_ISL_484920, EPI_ISL_484921, EPI_ISL_484922, EPI_ISL_484923, EPI_ISL_484924, EPI_ISL_484925, EPI_ISL_484926, EPI_ISL_484927, EPI_ISL_484928, EPI_ISL_484929, EPI_ISL_484930, EPI_ISL_484931, EPI_ISL_484932, EPI_ISL_484933, EPI_ISL_484934, EPI_ISL_484935, EPI_ISL_484936, EPI_ISL_484937, EPI_ISL_484938, EPI_ISL_484939, EPI_ISL_484940, EPI_ISL_484941, EPI_ISL_484942, EPI_ISL_484943, EPI_ISL_484944, EPI_ISL_484945, EPI_ISL_484946, EPI_ISL_484947, EPI_ISL_484948, EPI_ISL_484949, EPI_ISL_484950, EPI_ISL_484951, EPI_ISL_484952, EPI_ISL_484953, EPI_ISL_484954, EPI_ISL_484955, EPI_ISL_484956, EPI_ISL_484957, EPI_ISL_484958, EPI_ISL_484959, EPI_ISL_484960, EPI_ISL_484961, EPI_ISL_484962, EPI_ISL_484963, EPI_ISL_484964, EPI_ISL_484965, EPI_ISL_484966, EPI_ISL_484967, EPI_ISL_484968, EPI_ISL_484969, EPI_ISL_484970, EPI_ISL_484971, EPI_ISL_484972, EPI_ISL_484973, EPI_ISL_484974, EPI_ISL_484975, EPI_ISL_484976, EPI_ISL_484977, EPI_ISL_484978, EPI_ISL_484979, EPI_ISL_484980, EPI_ISL_484981, EPI_ISL_484982, EPI_ISL_484983, EPI_ISL_484984, EPI_ISL_484985, EPI_ISL_484986, EPI_ISL_484987, EPI_ISL_484988, EPI_ISL_484989, EPI_ISL_484990, EPI_ISL_484991, EPI_ISL_484992, EPI_ISL_484993, EPI_ISL_484994, EPI_ISL_484995, EPI_ISL_484996, EPI_ISL_484997, EPI_ISL_484998, EPI_ISL_484999, EPI_ISL_485000 | University of Wisconsin-Madison AIDS Vaccine Research Laboratories           | University of Wisconsin-Madison AIDS Vaccine Research Laboratories                                               | Gage Moreno, Katarina Braun, et al. AIDS Vaccine Research Laboratories                                                                                                                                                                                                                   |
| EPI_ISL_486666, EPI_ISL_486667, EPI_ISL_486668, EPI_ISL_486669, EPI_ISL_486670, EPI_ISL_486671, EPI_ISL_486672, EPI_ISL_486673, EPI_ISL_486674, EPI_ISL_486675, EPI_ISL_486676, EPI_ISL_486677, EPI_ISL_486678, EPI_ISL_486679, EPI_ISL_486680, EPI_ISL_486681, EPI_ISL_486682, EPI_ISL_486683, EPI_ISL_486684, EPI_ISL_486685, EPI_ISL_486686, EPI_ISL_486687, EPI_ISL_486688, EPI_ISL_486689, EPI_ISL_486690, EPI_ISL_486691, EPI_ISL_486692, EPI_ISL_486693, EPI_ISL_486694, EPI_ISL_486695, EPI_ISL_486696, EPI_ISL_486697, EPI_ISL_486698, EPI_ISL_486699, EPI_ISL_486700, EPI_ISL_486701, EPI_ISL_486702, EPI_ISL_486703, EPI_ISL_486704, EPI_ISL_486705, EPI_ISL_486706, EPI_ISL_486707, EPI_ISL_486708, EPI_ISL_486709, EPI_ISL_486710, EPI_ISL_486711, EPI_ISL_486712, EPI_ISL_486713, EPI_ISL_486714, EPI_ISL_486715, EPI_ISL_486716, EPI_ISL_486717, EPI_ISL_486718, EPI_ISL_486719, EPI_ISL_486720, EPI_ISL_486721, EPI_ISL_486722, EPI_ISL_486723, EPI_ISL_486724, EPI_ISL_486725, EPI_ISL_486726, EPI_ISL_486727, EPI_ISL_486728, EPI_ISL_486729, EPI_ISL_486730, EPI_ISL_486731, EPI_ISL_486732, EPI_ISL_486733, EPI_ISL_486734, EPI_ISL_486735, EPI_ISL_486736, EPI_ISL_486737, EPI_ISL_486738, EPI_ISL_486739, EPI_ISL_486740, EPI_ISL_486741, EPI_ISL_486742, EPI_ISL_486743, EPI_ISL_486744, EPI_ISL_486745, EPI_ISL_486746, EPI_ISL_486747, EPI_ISL_486748, EPI_ISL_486749, EPI_ISL_486750, EPI_ISL_486751, EPI_ISL_486752, EPI_ISL_486753, EPI_ISL_486754, EPI_ISL_486755, EPI_ISL_486756, EPI_ISL_486757, EPI_ISL_486758, EPI_ISL_486759, EPI_ISL_486760, EPI_ISL_486761, EPI_ISL_486762, EPI_ISL_486763, EPI_ISL_486764, EPI_ISL_486765, EPI_ISL_486766, EPI_ISL_486767, EPI_ISL_486768, EPI_ISL_486769, EPI_ISL_486770, EPI_ISL_486771, EPI_ISL_486772, EPI_ISL_486773, EPI_ISL_486774, EPI_ISL_486775, EPI_ISL_486776, EPI_ISL_486777, EPI_ISL_486778, EPI_ISL_486779, EPI_ISL_486780, EPI_ISL_486781, EPI_ISL_486782, EPI_ISL_486783, EPI_ISL_486784, EPI_ISL_486785, EPI_ISL_486786, EPI_ISL_486787, EPI_ISL_486788, EPI_ISL_486789, EPI_ISL_486790, EPI_ISL_486791, EPI_ISL_486792, EPI_ISL_486793, EPI_ISL_486794, EPI_ISL_486795, EPI_ISL_486796, EPI_ISL_486797, EPI_ISL_486798, EPI_ISL_486799, EPI_ISL_486800                                                                                                                                                                                                                                                                                                                                                                                                                                                                                                                                                                                                                                                                                                                                                                                                                                                                                                                                                                                 | Institute for Stem Cell Science and Regenerative Medicine                    | National Centre for Biological Sciences                                                                          | Farhan Ali, Vanessa Molin Paynter, Srikar Krishna, Mohak Sharda, Shah-e-Jahan Gulzar, Awadhesh Pandit, Varadha Sundarmurthy, Uma Ramakrishnan, Dasaradhi Palakodeti, Aswin Seshasayee                                                                                                    |
| EPI_ISL_487275                                                                                                                                                                                                                                                                                                                                                                                                                                                                                                                                                                                                                                                                                                                                                                                                                                                                                                                                                                                                                                                                                                                                                                                                                                                                                                                                                                                                                                                                                                                                                                                                                                                                                                                                                                                                                                                                                                                                                                                                                                                                                                                                                                                                                                                                                                                                                                                                                                                                                                                                                                                                                                                                                                                                                                                                                                                                                                                                                                                                                                                                                                                                                                                                                 | Department of Veterinary Pathology, University of Liege - FARAH              | Department of Veterinary Pathology, University of Liege - FARAH                                                  | Gargiany,M., Vanlaere,A.-S., Clercx,C., Giet,D., Escriou,N., Huon,C., van der Werf,S., Eloit,M., Desmecht,D.                                                                                                                                                                             |
| EPI_ISL_487278, EPI_ISL_487279, EPI_ISL_487280, EPI_ISL_487281, EPI_ISL_487282, EPI_ISL_487283, EPI_ISL_487284, EPI_ISL_487285, EPI_ISL_487286, EPI_ISL_487287, EPI_ISL_487288, EPI_ISL_487289, EPI_ISL_487290, EPI_ISL_487291, EPI_ISL_487292, EPI_ISL_487293, EPI_ISL_487294, EPI_ISL_487295, EPI_ISL_487296, EPI_ISL_487297, EPI_ISL_487298, EPI_ISL_487299, EPI_ISL_487300, EPI_ISL_487301, EPI_ISL_487302, EPI_ISL_487303, EPI_ISL_487304, EPI_ISL_487305, EPI_ISL_487306, EPI_ISL_487307, EPI_ISL_487308, EPI_ISL_487309, EPI_ISL_487310, EPI_ISL_487311, EPI_ISL_487312, EPI_ISL_487313, EPI_ISL_487314, EPI_ISL_487315, EPI_ISL_487316, EPI_ISL_487317, EPI_ISL_487318, EPI_ISL_487319, EPI_ISL_487320, EPI_ISL_487321, EPI_ISL_487322, EPI_ISL_487323, EPI_ISL_487324, EPI_ISL_487325, EPI_ISL_487326, EPI_ISL_487327, EPI_ISL_487328, EPI_ISL_487329, EPI_ISL_487330, EPI_ISL_487331, EPI_ISL_487332, EPI_ISL_487333, EPI_ISL_487334, EPI_ISL_487335, EPI_ISL_487336, EPI_ISL_487337, EPI_ISL_487338, EPI_ISL_487339, EPI_ISL_487340, EPI_ISL_487341, EPI_ISL_487342, EPI_ISL_487343, EPI_ISL_487344, EPI_ISL_487345, EPI_ISL_487346, EPI_ISL_487347, EPI_ISL_487348, EPI_ISL_487349, EPI_ISL_487350, EPI_ISL_487351, EPI_ISL_487352, EPI_ISL_487353, EPI_ISL_487354, EPI_ISL_487355, EPI_ISL_487356, EPI_ISL_487357, EPI_ISL_487358, EPI_ISL_487359, EPI_ISL_487360, EPI_ISL_487361, EPI_ISL_487362, EPI_ISL_487363, EPI_ISL_487364, EPI_ISL_487365, EPI_ISL_487366, EPI_ISL_487367, EPI_ISL_487368, EPI_ISL_487369, EPI_ISL_487370, EPI_ISL_487371, EPI_ISL_487372, EPI_ISL_487373, EPI_ISL_487374, EPI_ISL_487375, EPI_ISL_487376, EPI_ISL_487377, EPI_ISL_487378, EPI_ISL_487379, EPI_ISL_487380, EPI_ISL_487381, EPI_ISL_487382, EPI_ISL_487383, EPI_ISL_487384, EPI_ISL_487385, EPI_ISL_487386, EPI_ISL_487387, EPI_ISL_487388, EPI_ISL_487389, EPI_ISL_487390, EPI_ISL_487391, EPI_ISL_487392, EPI_ISL_487393, EPI_ISL_487394, EPI_ISL_487395, EPI_ISL_487396, EPI_ISL_487397, EPI_ISL_487398, EPI_ISL_487399, EPI_ISL_487400, EPI_ISL_487401, EPI_ISL_487402, EPI_ISL_487403, EPI_ISL_487404, EPI_ISL_487405, EPI_ISL_487406, EPI_ISL_487407, EPI_ISL_487408, EPI_ISL_487409, EPI_ISL_487410, EPI_ISL_487411, EPI_ISL_487412, EPI_ISL_487413, EPI_ISL_487414, EPI_ISL_487415, EPI_ISL_487416, EPI_ISL_487417, EPI_ISL_487418, EPI_ISL_487419, EPI_ISL_487420, EPI_ISL_487421, EPI_ISL_487422, EPI_ISL_487423, EPI_ISL_487424, EPI_ISL_487425, EPI_ISL_487426, EPI_ISL_487427, EPI_ISL_487428, EPI_ISL_487429, EPI_ISL_487430, EPI_ISL_487431, EPI_ISL_487432, EPI_ISL_487433, EPI_ISL_487434, EPI_ISL_487435, EPI_ISL_487436, EPI_ISL_487437, EPI_ISL_487438, EPI_ISL_487439, EPI_ISL_487440, EPI_ISL_487441, EPI_ISL_487442, EPI_ISL_487443, EPI_ISL_487444, EPI_ISL_487445, EPI_ISL_487446, EPI_ISL_487447, EPI_ISL_487448, EPI_ISL_487449, EPI_ISL_487450, EPI_ISL_487451, EPI_ISL_487452, EPI_ISL_487453, EPI_ISL_487454                                                                                                                                                                                                                                                                                 | NHLS-IALCH<br>Molecular Diagnostics Services (MDS)                           | KRISP, KZN Research Innovation and Sequencing Platform<br>KRISP, KZN Research Innovation and Sequencing Platform | Giandhari J, Pillay S, Lessells R, Chimukangara B, Mdlalose K, York D, Khan S, Tegally H, Wilkinson E, de Oliveira T<br>Giandhari J, Pillay S, Lessells R, Chimukangara B, Mdlalose K, York D, Khan S, Tegally H, Wilkinson E, de Oliveira T                                             |
| EPI_ISL_490560, EPI_ISL_490561, EPI_ISL_490562                                                                                                                                                                                                                                                                                                                                                                                                                                                                                                                                                                                                                                                                                                                                                                                                                                                                                                                                                                                                                                                                                                                                                                                                                                                                                                                                                                                                                                                                                                                                                                                                                                                                                                                                                                                                                                                                                                                                                                                                                                                                                                                                                                                                                                                                                                                                                                                                                                                                                                                                                                                                                                                                                                                                                                                                                                                                                                                                                                                                                                                                                                                                                                                 | Queens Medical Centre, Clinical Microbiology Department / DeepSeq Nottingham | COVID-19 Genomics UK (COG-UK) Consortium                                                                         | Gemma Clark, Wendy Smith, Manjinder Khakh, Vicki M Fleming, Michelle M Lister, Hannah Howson-Wells, Jonathan Ball, Patrick McClure, Joseph Chappell, Theocharis Tsoileridis, Nadine Holmes, Matthew Carlisle, Christopher Moore, Fei Sang, Johnny Debebe, Victoria Wright, Matthew Loose |
| EPI_ISL_491097, EPI_ISL_491098, EPI_ISL_491099, EPI_ISL_491100, EPI_ISL_491101, EPI_ISL_491102, EPI_ISL_491103, EPI_ISL_491104, EPI_ISL_491105, EPI_ISL_491106, EPI_ISL_491107, EPI_ISL_491108, EPI_ISL_491109, EPI_ISL_491110                                                                                                                                                                                                                                                                                                                                                                                                                                                                                                                                                                                                                                                                                                                                                                                                                                                                                                                                                                                                                                                                                                                                                                                                                                                                                                                                                                                                                                                                                                                                                                                                                                                                                                                                                                                                                                                                                                                                                                                                                                                                                                                                                                                                                                                                                                                                                                                                                                                                                                                                                                                                                                                                                                                                                                                                                                                                                                                                                                                                 | SC Department of Health and Environmental Control                            | SC Department of Health and Environmental Control                                                                | Flores,H.                                                                                                                                                                                                                                                                                |
| EPI_ISL_491299, EPI_ISL_491300, EPI_ISL_491301, EPI_ISL_491302, EPI_ISL_491303, EPI_ISL_491304, EPI_ISL_491305, EPI_ISL_491306, EPI_ISL_491307, EPI_ISL_491308, EPI_ISL_491309, EPI_ISL_491310, EPI_ISL_491311, EPI_ISL_491312, EPI_ISL_491313, EPI_ISL_491314, EPI_ISL_491315, EPI_ISL_491316, EPI_ISL_491317, EPI_ISL_491318, EPI_ISL_491319, EPI_ISL_491320, EPI_ISL_491321, EPI_ISL_491322, EPI_ISL_491323, EPI_ISL_491324, EPI_ISL_491325, EPI_ISL_491326, EPI_ISL_491327, EPI_ISL_491328, EPI_ISL_491329, EPI_ISL_491330, EPI_ISL_491331, EPI_ISL_491332, EPI_ISL_491333, EPI_ISL_491334, EPI_ISL_491335, EPI_ISL_491336, EPI_ISL_491337, EPI_ISL_491338, EPI_ISL_491339, EPI_ISL_491340, EPI_ISL_491341, EPI_ISL_491342, EPI_ISL_491343, EPI_ISL_491344, EPI_ISL_491345, EPI_ISL_491346, EPI_ISL_491347, EPI_ISL_491348, EPI_ISL_491349, EPI_ISL_491350, EPI_ISL_491351, EPI_ISL_491352, EPI_ISL_491353, EPI_ISL_491354, EPI_ISL_491355, EPI_ISL_491356, EPI_ISL_491357, EPI_ISL_491358, EPI_ISL_491359, EPI_ISL_491360, EPI_ISL_491361, EPI_ISL_491362, EPI_ISL_491363, EPI_ISL_491364, EPI_ISL_491365, EPI_ISL_491366, EPI_ISL_491367, EPI_ISL_491368, EPI_ISL_491369, EPI_ISL_491370, EPI_ISL_491371, EPI_ISL_491372, EPI_ISL_491373, EPI_ISL_491374, EPI_ISL_491375, EPI_ISL_491376, EPI_ISL_491377, EPI_ISL_491378, EPI_ISL_491379, EPI_ISL_491380, EPI_ISL_491381, EPI_ISL_491382, EPI_ISL_491383, EPI_ISL_491384, EPI_ISL_491385, EPI_ISL_491386, EPI_ISL_491387, EPI_ISL_491388, EPI_ISL_491389, EPI_ISL_491390, EPI_ISL_491391, EPI_ISL_491392, EPI_ISL_491393, EPI_ISL_491394, EPI_ISL_491395, EPI_ISL_491396, EPI_ISL_491397, EPI_ISL_491398, EPI_ISL_491399, EPI_ISL_491400, EPI_ISL_491401, EPI_ISL_491402, EPI_ISL_491403, EPI_ISL_491404, EPI_ISL_491405, EPI_ISL_491406, EPI_ISL_491407, EPI_ISL_491408, EPI_ISL_491409, EPI_ISL_491410, EPI_ISL_491411, EPI_ISL_491412, EPI_ISL_491413, EPI_ISL_491414, EPI_ISL_491415, EPI_ISL_491416, EPI_ISL_491417, EPI_ISL_491418, EPI_ISL_491419, EPI_ISL_491420, EPI_ISL_491421, EPI_ISL_491422, EPI_ISL_491423, EPI_ISL_491424, EPI_ISL_491425, EPI_ISL_491426                                                                                                                                                                                                                                                                                                                                                                                                                                                                                                                                                                                                                                                                                                                                                                                                                                                                                                                                                                                                                                                                                                 | University of Wisconsin-Madison AIDS Vaccine Research Laboratories           | University of Wisconsin-Madison AIDS Vaccine Research Laboratories                                               | Gage Moreno, Katarina Braun, et al. AIDS Vaccine Research Laboratories                                                                                                                                                                                                                   |
| EPI_ISL_491437                                                                                                                                                                                                                                                                                                                                                                                                                                                                                                                                                                                                                                                                                                                                                                                                                                                                                                                                                                                                                                                                                                                                                                                                                                                                                                                                                                                                                                                                                                                                                                                                                                                                                                                                                                                                                                                                                                                                                                                                                                                                                                                                                                                                                                                                                                                                                                                                                                                                                                                                                                                                                                                                                                                                                                                                                                                                                                                                                                                                                                                                                                                                                                                                                 | Area de Salud Escazu (Coopesana)                                             | Incienza, Instituto Costarricense de Investigación y Enseñanza en Nutrición y Salud                              | Francisco Duarte, Hebleen Brenes, Claudio Soto-Garita, Estela Cordero, Adriana Godinez & Melany Calderon                                                                                                                                                                                 |
| EPI_ISL_491438                                                                                                                                                                                                                                                                                                                                                                                                                                                                                                                                                                                                                                                                                                                                                                                                                                                                                                                                                                                                                                                                                                                                                                                                                                                                                                                                                                                                                                                                                                                                                                                                                                                                                                                                                                                                                                                                                                                                                                                                                                                                                                                                                                                                                                                                                                                                                                                                                                                                                                                                                                                                                                                                                                                                                                                                                                                                                                                                                                                                                                                                                                                                                                                                                 | Hospital San Rafael de Alajuela                                              | Incienza, Instituto Costarricense de Investigación y Enseñanza en Nutrición y Salud                              | Francisco Duarte, Hebleen Brenes, Claudio Soto-Garita, Estela Cordero, Adriana Godinez & Melany Calderon                                                                                                                                                                                 |
| EPI_ISL_491439                                                                                                                                                                                                                                                                                                                                                                                                                                                                                                                                                                                                                                                                                                                                                                                                                                                                                                                                                                                                                                                                                                                                                                                                                                                                                                                                                                                                                                                                                                                                                                                                                                                                                                                                                                                                                                                                                                                                                                                                                                                                                                                                                                                                                                                                                                                                                                                                                                                                                                                                                                                                                                                                                                                                                                                                                                                                                                                                                                                                                                                                                                                                                                                                                 | Hospital Calderon Guardia                                                    | Incienza, Instituto Costarricense de Investigación y Enseñanza en Nutrición y Salud                              | Francisco Duarte, Hebleen Brenes, Claudio Soto-Garita, Estela Cordero, Adriana Godinez & Melany Calderon                                                                                                                                                                                 |
| EPI_ISL_491440                                                                                                                                                                                                                                                                                                                                                                                                                                                                                                                                                                                                                                                                                                                                                                                                                                                                                                                                                                                                                                                                                                                                                                                                                                                                                                                                                                                                                                                                                                                                                                                                                                                                                                                                                                                                                                                                                                                                                                                                                                                                                                                                                                                                                                                                                                                                                                                                                                                                                                                                                                                                                                                                                                                                                                                                                                                                                                                                                                                                                                                                                                                                                                                                                 | Hospital San Rafael de Alajuela                                              | Incienza, Instituto Costarricense de Investigación y Enseñanza en Nutrición y Salud                              | Francisco Duarte, Hebleen Brenes, Claudio Soto-Garita, Estela Cordero, Adriana Godinez & Melany Calderon                                                                                                                                                                                 |
| EPI_ISL_491441, EPI_ISL_491442                                                                                                                                                                                                                                                                                                                                                                                                                                                                                                                                                                                                                                                                                                                                                                                                                                                                                                                                                                                                                                                                                                                                                                                                                                                                                                                                                                                                                                                                                                                                                                                                                                                                                                                                                                                                                                                                                                                                                                                                                                                                                                                                                                                                                                                                                                                                                                                                                                                                                                                                                                                                                                                                                                                                                                                                                                                                                                                                                                                                                                                                                                                                                                                                 | Hospital Clinica Biblica                                                     | Incienza, Instituto Costarricense de Investigación y Enseñanza en Nutrición y Salud                              | Francisco Duarte, Hebleen Brenes, Claudio Soto-Garita, Estela Cordero, Adriana Godinez & Melany Calderon                                                                                                                                                                                 |
| EPI_ISL_491443                                                                                                                                                                                                                                                                                                                                                                                                                                                                                                                                                                                                                                                                                                                                                                                                                                                                                                                                                                                                                                                                                                                                                                                                                                                                                                                                                                                                                                                                                                                                                                                                                                                                                                                                                                                                                                                                                                                                                                                                                                                                                                                                                                                                                                                                                                                                                                                                                                                                                                                                                                                                                                                                                                                                                                                                                                                                                                                                                                                                                                                                                                                                                                                                                 | Hospital Fernando Escalante Pradilla                                         | Incienza, Instituto Costarricense de Investigación y Enseñanza en Nutrición y Salud                              | Francisco Duarte, Hebleen Brenes, Claudio Soto-Garita, Estela Cordero, Adriana Godinez & Melany Calderon                                                                                                                                                                                 |
| EPI_ISL_491444                                                                                                                                                                                                                                                                                                                                                                                                                                                                                                                                                                                                                                                                                                                                                                                                                                                                                                                                                                                                                                                                                                                                                                                                                                                                                                                                                                                                                                                                                                                                                                                                                                                                                                                                                                                                                                                                                                                                                                                                                                                                                                                                                                                                                                                                                                                                                                                                                                                                                                                                                                                                                                                                                                                                                                                                                                                                                                                                                                                                                                                                                                                                                                                                                 | Area de Salud Escazu (Coopesana)                                             | Incienza, Instituto Costarricense de Investigación y Enseñanza en Nutrición y Salud                              | Francisco Duarte, Hebleen Brenes, Claudio Soto-Garita, Estela Cordero, Adriana Godinez & Melany Calderon                                                                                                                                                                                 |
| EPI_ISL_491445                                                                                                                                                                                                                                                                                                                                                                                                                                                                                                                                                                                                                                                                                                                                                                                                                                                                                                                                                                                                                                                                                                                                                                                                                                                                                                                                                                                                                                                                                                                                                                                                                                                                                                                                                                                                                                                                                                                                                                                                                                                                                                                                                                                                                                                                                                                                                                                                                                                                                                                                                                                                                                                                                                                                                                                                                                                                                                                                                                                                                                                                                                                                                                                                                 | Area de Salud Mata Redonda                                                   | Incienza, Instituto Costarricense de Investigación y Enseñanza en Nutrición y Salud                              | Francisco Duarte, Hebleen Brenes, Claudio Soto-Garita, Estela Cordero, Adriana Godinez & Melany Calderon                                                                                                                                                                                 |
| EPI_ISL_491446                                                                                                                                                                                                                                                                                                                                                                                                                                                                                                                                                                                                                                                                                                                                                                                                                                                                                                                                                                                                                                                                                                                                                                                                                                                                                                                                                                                                                                                                                                                                                                                                                                                                                                                                                                                                                                                                                                                                                                                                                                                                                                                                                                                                                                                                                                                                                                                                                                                                                                                                                                                                                                                                                                                                                                                                                                                                                                                                                                                                                                                                                                                                                                                                                 | Area de Salud Alajuela Central                                               | Incienza, Instituto Costarricense de Investigación y Enseñanza en Nutrición y Salud                              | Francisco Duarte, Hebleen Brenes, Claudio Soto-Garita, Estela Cordero, Adriana Godinez & Melany Calderon                                                                                                                                                                                 |
| EPI_ISL_491447                                                                                                                                                                                                                                                                                                                                                                                                                                                                                                                                                                                                                                                                                                                                                                                                                                                                                                                                                                                                                                                                                                                                                                                                                                                                                                                                                                                                                                                                                                                                                                                                                                                                                                                                                                                                                                                                                                                                                                                                                                                                                                                                                                                                                                                                                                                                                                                                                                                                                                                                                                                                                                                                                                                                                                                                                                                                                                                                                                                                                                                                                                                                                                                                                 | Hospital Fernando Escalante Pradilla                                         | Incienza, Instituto Costarricense de Investigación y Enseñanza en Nutrición y Salud                              | Francisco Duarte, Hebleen Brenes, Claudio Soto-Garita, Estela Cordero, Adriana Godinez & Melany Calderon                                                                                                                                                                                 |
| EPI_ISL_491448                                                                                                                                                                                                                                                                                                                                                                                                                                                                                                                                                                                                                                                                                                                                                                                                                                                                                                                                                                                                                                                                                                                                                                                                                                                                                                                                                                                                                                                                                                                                                                                                                                                                                                                                                                                                                                                                                                                                                                                                                                                                                                                                                                                                                                                                                                                                                                                                                                                                                                                                                                                                                                                                                                                                                                                                                                                                                                                                                                                                                                                                                                                                                                                                                 | Hospital San Rafael de Alajuela                                              | Incienza, Instituto Costarricense de Investigación y Enseñanza en Nutrición y Salud                              | Francisco Duarte, Hebleen Brenes, Claudio Soto-Garita, Estela Cordero, Adriana Godinez & Melany Calderon                                                                                                                                                                                 |
| EPI_ISL_491449                                                                                                                                                                                                                                                                                                                                                                                                                                                                                                                                                                                                                                                                                                                                                                                                                                                                                                                                                                                                                                                                                                                                                                                                                                                                                                                                                                                                                                                                                                                                                                                                                                                                                                                                                                                                                                                                                                                                                                                                                                                                                                                                                                                                                                                                                                                                                                                                                                                                                                                                                                                                                                                                                                                                                                                                                                                                                                                                                                                                                                                                                                                                                                                                                 | Area de Salud Alajuela Sur                                                   | Incienza, Instituto Costarricense de Investigación y Enseñanza en Nutrición y Salud                              | Francisco Duarte, Hebleen Brenes, Claudio Soto-Garita, Estela Cordero, Adriana Godinez & Melany Calderon                                                                                                                                                                                 |
| EPI_ISL_491450                                                                                                                                                                                                                                                                                                                                                                                                                                                                                                                                                                                                                                                                                                                                                                                                                                                                                                                                                                                                                                                                                                                                                                                                                                                                                                                                                                                                                                                                                                                                                                                                                                                                                                                                                                                                                                                                                                                                                                                                                                                                                                                                                                                                                                                                                                                                                                                                                                                                                                                                                                                                                                                                                                                                                                                                                                                                                                                                                                                                                                                                                                                                                                                                                 | Hospital San Juan de Dios                                                    | Incienza, Instituto Costarricense de Investigación y Enseñanza en Nutrición y Salud                              | Francisco Duarte, Hebleen Brenes, Claudio Soto-Garita, Estela Cordero, Adriana Godinez & Melany Calderon                                                                                                                                                                                 |
| EPI_ISL_491451                                                                                                                                                                                                                                                                                                                                                                                                                                                                                                                                                                                                                                                                                                                                                                                                                                                                                                                                                                                                                                                                                                                                                                                                                                                                                                                                                                                                                                                                                                                                                                                                                                                                                                                                                                                                                                                                                                                                                                                                                                                                                                                                                                                                                                                                                                                                                                                                                                                                                                                                                                                                                                                                                                                                                                                                                                                                                                                                                                                                                                                                                                                                                                                                                 | Hospital México                                                              | Incienza, Instituto Costarricense de Investigación y Enseñanza en Nutrición y Salud                              | Francisco Duarte, Hebleen Brenes, Claudio Soto-Garita, Estela Cordero, Adriana Godinez & Melany Calderon                                                                                                                                                                                 |
| EPI_ISL_491452                                                                                                                                                                                                                                                                                                                                                                                                                                                                                                                                                                                                                                                                                                                                                                                                                                                                                                                                                                                                                                                                                                                                                                                                                                                                                                                                                                                                                                                                                                                                                                                                                                                                                                                                                                                                                                                                                                                                                                                                                                                                                                                                                                                                                                                                                                                                                                                                                                                                                                                                                                                                                                                                                                                                                                                                                                                                                                                                                                                                                                                                                                                                                                                                                 | Hospital San Rafael de Alajuela                                              | Incienza, Instituto Costarricense de Investigación y Enseñanza en Nutrición y Salud                              | Francisco Duarte, Hebleen Brenes, Claudio Soto-Garita, Estela Cordero, Adriana Godinez & Melany Calderon                                                                                                                                                                                 |
| EPI_ISL_491453                                                                                                                                                                                                                                                                                                                                                                                                                                                                                                                                                                                                                                                                                                                                                                                                                                                                                                                                                                                                                                                                                                                                                                                                                                                                                                                                                                                                                                                                                                                                                                                                                                                                                                                                                                                                                                                                                                                                                                                                                                                                                                                                                                                                                                                                                                                                                                                                                                                                                                                                                                                                                                                                                                                                                                                                                                                                                                                                                                                                                                                                                                                                                                                                                 | Hospital México                                                              | Incienza, Instituto Costarricense de Investigación y Enseñanza en Nutrición y Salud                              | Francisco Duarte, Hebleen Brenes, Claudio Soto-Garita, Estela Cordero, Adriana Godinez & Melany Calderon                                                                                                                                                                                 |
| EPI_ISL_491454                                                                                                                                                                                                                                                                                                                                                                                                                                                                                                                                                                                                                                                                                                                                                                                                                                                                                                                                                                                                                                                                                                                                                                                                                                                                                                                                                                                                                                                                                                                                                                                                                                                                                                                                                                                                                                                                                                                                                                                                                                                                                                                                                                                                                                                                                                                                                                                                                                                                                                                                                                                                                                                                                                                                                                                                                                                                                                                                                                                                                                                                                                                                                                                                                 | Hospital San Juan de Dios                                                    | Incienza, Instituto Costarricense de Investigación y Enseñanza en Nutrición y Salud                              | Francisco Duarte, Hebleen Brenes, Claudio Soto-Garita, Estela Cordero, Adriana Godinez & Melany Calderon                                                                                                                                                                                 |

|                                                                                                                                                                                                                                                                                                                                                                                                                                                                                                                                                                                                                                                                                                                                                                                                                                                                                                                                                                                                                                                                                                                                                                                                                                                                                                                                                                                                                                                                                                                                                                                                                                                                                                                                                                                                                                                                                                                                                                                                                                                                                                                                                                                                                                                                                                                                                                                                                                                                                                                                                                                                                                                                                                                                                                                                                                                                                                                                                                                                                                                                                                                                                                                                                                                                                                                                                |                                                                                 |                                                                                     |                                                                                                                                                                                                                                                                                          |
|------------------------------------------------------------------------------------------------------------------------------------------------------------------------------------------------------------------------------------------------------------------------------------------------------------------------------------------------------------------------------------------------------------------------------------------------------------------------------------------------------------------------------------------------------------------------------------------------------------------------------------------------------------------------------------------------------------------------------------------------------------------------------------------------------------------------------------------------------------------------------------------------------------------------------------------------------------------------------------------------------------------------------------------------------------------------------------------------------------------------------------------------------------------------------------------------------------------------------------------------------------------------------------------------------------------------------------------------------------------------------------------------------------------------------------------------------------------------------------------------------------------------------------------------------------------------------------------------------------------------------------------------------------------------------------------------------------------------------------------------------------------------------------------------------------------------------------------------------------------------------------------------------------------------------------------------------------------------------------------------------------------------------------------------------------------------------------------------------------------------------------------------------------------------------------------------------------------------------------------------------------------------------------------------------------------------------------------------------------------------------------------------------------------------------------------------------------------------------------------------------------------------------------------------------------------------------------------------------------------------------------------------------------------------------------------------------------------------------------------------------------------------------------------------------------------------------------------------------------------------------------------------------------------------------------------------------------------------------------------------------------------------------------------------------------------------------------------------------------------------------------------------------------------------------------------------------------------------------------------------------------------------------------------------------------------------------------------------|---------------------------------------------------------------------------------|-------------------------------------------------------------------------------------|------------------------------------------------------------------------------------------------------------------------------------------------------------------------------------------------------------------------------------------------------------------------------------------|
| EPI_ISL_491455                                                                                                                                                                                                                                                                                                                                                                                                                                                                                                                                                                                                                                                                                                                                                                                                                                                                                                                                                                                                                                                                                                                                                                                                                                                                                                                                                                                                                                                                                                                                                                                                                                                                                                                                                                                                                                                                                                                                                                                                                                                                                                                                                                                                                                                                                                                                                                                                                                                                                                                                                                                                                                                                                                                                                                                                                                                                                                                                                                                                                                                                                                                                                                                                                                                                                                                                 | Hospital Clinica Biblica                                                        | Incienza, Instituto Costarricense de Investigación y Enseñanza en Nutrición y Salud | Francisco Duarte, Hebleen Brenes, Claudio Soto-Garita, Estela Cordero, Adriana Godinez & Melany Calderon                                                                                                                                                                                 |
| EPI_ISL_491456                                                                                                                                                                                                                                                                                                                                                                                                                                                                                                                                                                                                                                                                                                                                                                                                                                                                                                                                                                                                                                                                                                                                                                                                                                                                                                                                                                                                                                                                                                                                                                                                                                                                                                                                                                                                                                                                                                                                                                                                                                                                                                                                                                                                                                                                                                                                                                                                                                                                                                                                                                                                                                                                                                                                                                                                                                                                                                                                                                                                                                                                                                                                                                                                                                                                                                                                 | Hospital San Juan de Dios                                                       | Incienza, Instituto Costarricense de Investigación y Enseñanza en Nutrición y Salud | Francisco Duarte, Hebleen Brenes, Claudio Soto-Garita, Estela Cordero, Adriana Godinez & Melany Calderon                                                                                                                                                                                 |
| EPI_ISL_491457                                                                                                                                                                                                                                                                                                                                                                                                                                                                                                                                                                                                                                                                                                                                                                                                                                                                                                                                                                                                                                                                                                                                                                                                                                                                                                                                                                                                                                                                                                                                                                                                                                                                                                                                                                                                                                                                                                                                                                                                                                                                                                                                                                                                                                                                                                                                                                                                                                                                                                                                                                                                                                                                                                                                                                                                                                                                                                                                                                                                                                                                                                                                                                                                                                                                                                                                 | Area de Salud Los Santos                                                        | Incienza, Instituto Costarricense de Investigación y Enseñanza en Nutrición y Salud | Francisco Duarte, Hebleen Brenes, Claudio Soto-Garita, Estela Cordero, Adriana Godinez & Melany Calderon                                                                                                                                                                                 |
| EPI_ISL_491968, EPI_ISL_491969, EPI_ISL_491970, EPI_ISL_491971, EPI_ISL_491972, EPI_ISL_491973, EPI_ISL_491974, EPI_ISL_491975, EPI_ISL_491976, EPI_ISL_491977, EPI_ISL_491978, EPI_ISL_491979, EPI_ISL_491980, EPI_ISL_491981, EPI_ISL_491982, EPI_ISL_491983, EPI_ISL_491984, EPI_ISL_491985, EPI_ISL_491986, EPI_ISL_491988, EPI_ISL_491989, EPI_ISL_491990, EPI_ISL_491991, EPI_ISL_491992, EPI_ISL_491993, EPI_ISL_491994, EPI_ISL_491995, EPI_ISL_491996, EPI_ISL_491997, EPI_ISL_491998, EPI_ISL_492000, EPI_ISL_492001, EPI_ISL_492002, EPI_ISL_492003, EPI_ISL_492004, EPI_ISL_492005, EPI_ISL_492006, EPI_ISL_492007, EPI_ISL_492008, EPI_ISL_492009, EPI_ISL_492010, EPI_ISL_492011, EPI_ISL_492012, EPI_ISL_492013, EPI_ISL_492014, EPI_ISL_492015, EPI_ISL_492016, EPI_ISL_492017, EPI_ISL_492018, EPI_ISL_492019, EPI_ISL_492020, EPI_ISL_492021, EPI_ISL_492022, EPI_ISL_492023, EPI_ISL_492024, EPI_ISL_492025, EPI_ISL_492026                                                                                                                                                                                                                                                                                                                                                                                                                                                                                                                                                                                                                                                                                                                                                                                                                                                                                                                                                                                                                                                                                                                                                                                                                                                                                                                                                                                                                                                                                                                                                                                                                                                                                                                                                                                                                                                                                                                                                                                                                                                                                                                                                                                                                                                                                                                                                                                                 |                                                                                 |                                                                                     |                                                                                                                                                                                                                                                                                          |
| see above                                                                                                                                                                                                                                                                                                                                                                                                                                                                                                                                                                                                                                                                                                                                                                                                                                                                                                                                                                                                                                                                                                                                                                                                                                                                                                                                                                                                                                                                                                                                                                                                                                                                                                                                                                                                                                                                                                                                                                                                                                                                                                                                                                                                                                                                                                                                                                                                                                                                                                                                                                                                                                                                                                                                                                                                                                                                                                                                                                                                                                                                                                                                                                                                                                                                                                                                      | Oman-NIC                                                                        | Department of Microbiology and Immunology-SQUH                                      | Fahad Zadjali, Samira Al-Maruqi, Amina Al Jardani, Khulood Al-Mammary, Hanan Al-kindi, Fatma BaAlawi, Hamida AL Barwani, Zeyana AL-Dahmani, Intisar Al-Shukri, Aisha Al-Busaidi, Aisha Al-Amri, Ahlam Al-Amri, Mohammed Al-Tobi, Samiha Al Kharusi, Abdulla Balkhair                     |
| EPI_ISL_493342, EPI_ISL_493343                                                                                                                                                                                                                                                                                                                                                                                                                                                                                                                                                                                                                                                                                                                                                                                                                                                                                                                                                                                                                                                                                                                                                                                                                                                                                                                                                                                                                                                                                                                                                                                                                                                                                                                                                                                                                                                                                                                                                                                                                                                                                                                                                                                                                                                                                                                                                                                                                                                                                                                                                                                                                                                                                                                                                                                                                                                                                                                                                                                                                                                                                                                                                                                                                                                                                                                 | Instituto de Diagnostico y Referencia Epidemiologicos (INDRE)                   | Instituto de Diagnostico y Referencia Epidemiologicos (INDRE)                       | Ernesto Ramirez-Gonzalez, Abril Rodriguez-Maldonado, Claudia Wong-Arambula , Natividad Cruz-Ortiz, Tatiana Nunez-Garcia, Dayanira Arellano-Suarez, Adnan Araiza-Rodriguez, Edgar Mendieta-Condado, Lucia Hernandez-Rivas, Irma Lopez-Martinez, Gisela Barrera-Badillo.                   |
| EPI_ISL_493344, EPI_ISL_493345, EPI_ISL_493346, EPI_ISL_493347, EPI_ISL_493348, EPI_ISL_493349                                                                                                                                                                                                                                                                                                                                                                                                                                                                                                                                                                                                                                                                                                                                                                                                                                                                                                                                                                                                                                                                                                                                                                                                                                                                                                                                                                                                                                                                                                                                                                                                                                                                                                                                                                                                                                                                                                                                                                                                                                                                                                                                                                                                                                                                                                                                                                                                                                                                                                                                                                                                                                                                                                                                                                                                                                                                                                                                                                                                                                                                                                                                                                                                                                                 | Instituto de Diagnostico y Referencia Epidemiologicos (INDRE)                   | Instituto de Diagnostico y Referencia Epidemiologicos (INDRE)                       | Ernesto Ramirez-Gonzalez, Abril Rodriguez-Maldonado, Claudia Wong-Arambula , Natividad Cruz-Ortiz, Tatiana Nunez-Garcia, Dayanira Arellano-Suarez, Adnan Araiza-Rodriguez, Fabiola Garces-Ayala, Lucia Hernandez-Rivas, Irma Lopez-Martinez, Gisela Barrera-Badillo.                     |
| EPI_ISL_493547, EPI_ISL_493548, EPI_ISL_493601, EPI_ISL_493602, EPI_ISL_493606, EPI_ISL_493607, EPI_ISL_493608, EPI_ISL_493609                                                                                                                                                                                                                                                                                                                                                                                                                                                                                                                                                                                                                                                                                                                                                                                                                                                                                                                                                                                                                                                                                                                                                                                                                                                                                                                                                                                                                                                                                                                                                                                                                                                                                                                                                                                                                                                                                                                                                                                                                                                                                                                                                                                                                                                                                                                                                                                                                                                                                                                                                                                                                                                                                                                                                                                                                                                                                                                                                                                                                                                                                                                                                                                                                 | Queens Medical Centre, Clinical Microbiology Department / DeepSeq Nottingham    | COVID-19 Genomics UK (COG-UK) Consortium                                            | Gemma Clark, Wendy Smith, Manjinder Khakh, Vicki M Fleming, Michelle M Lister, Hannah Howson-Wells, Jonathan Ball, Patrick McClure, Joseph Chappell, Theocharis Tsoileridis, Nadine Holmes, Matthew Carlisle, Christopher Moore, Fei Sang, Johnny Debebe, Victoria Wright, Matthew Loose |
| EPI_ISL_495460, EPI_ISL_495461, EPI_ISL_495462, EPI_ISL_495463, EPI_ISL_495464, EPI_ISL_495465, EPI_ISL_495466, EPI_ISL_495467, EPI_ISL_495468, EPI_ISL_495469, EPI_ISL_495470, EPI_ISL_495471, EPI_ISL_495472, EPI_ISL_495473, EPI_ISL_495474, EPI_ISL_495475, EPI_ISL_495476, EPI_ISL_495477, EPI_ISL_495478, EPI_ISL_495479, EPI_ISL_495480, EPI_ISL_495481, EPI_ISL_495482, EPI_ISL_495483, EPI_ISL_495484, EPI_ISL_495485, EPI_ISL_495486, EPI_ISL_495487, EPI_ISL_495488, EPI_ISL_495489, EPI_ISL_495490, EPI_ISL_495491, EPI_ISL_495492, EPI_ISL_495493, EPI_ISL_495494, EPI_ISL_495495, EPI_ISL_495496, EPI_ISL_495497, EPI_ISL_495498, EPI_ISL_495499, EPI_ISL_495500, EPI_ISL_495501, EPI_ISL_495502, EPI_ISL_495503, EPI_ISL_495504, EPI_ISL_495505, EPI_ISL_495506, EPI_ISL_495507, EPI_ISL_495508, EPI_ISL_495509                                                                                                                                                                                                                                                                                                                                                                                                                                                                                                                                                                                                                                                                                                                                                                                                                                                                                                                                                                                                                                                                                                                                                                                                                                                                                                                                                                                                                                                                                                                                                                                                                                                                                                                                                                                                                                                                                                                                                                                                                                                                                                                                                                                                                                                                                                                                                                                                                                                                                                                 |                                                                                 |                                                                                     |                                                                                                                                                                                                                                                                                          |
| see above                                                                                                                                                                                                                                                                                                                                                                                                                                                                                                                                                                                                                                                                                                                                                                                                                                                                                                                                                                                                                                                                                                                                                                                                                                                                                                                                                                                                                                                                                                                                                                                                                                                                                                                                                                                                                                                                                                                                                                                                                                                                                                                                                                                                                                                                                                                                                                                                                                                                                                                                                                                                                                                                                                                                                                                                                                                                                                                                                                                                                                                                                                                                                                                                                                                                                                                                      | University of Wisconsin-Madison AIDS Vaccine Research Laboratories              | University of Wisconsin-Madison AIDS Vaccine Research Laboratories                  | Gage Moreno, Katarina Braun, et al. AIDS Vaccine Research Laboratories                                                                                                                                                                                                                   |
| EPI_ISL_495519, EPI_ISL_495520, EPI_ISL_495525, EPI_ISL_495526, EPI_ISL_495528, EPI_ISL_495529, EPI_ISL_495530, EPI_ISL_495532                                                                                                                                                                                                                                                                                                                                                                                                                                                                                                                                                                                                                                                                                                                                                                                                                                                                                                                                                                                                                                                                                                                                                                                                                                                                                                                                                                                                                                                                                                                                                                                                                                                                                                                                                                                                                                                                                                                                                                                                                                                                                                                                                                                                                                                                                                                                                                                                                                                                                                                                                                                                                                                                                                                                                                                                                                                                                                                                                                                                                                                                                                                                                                                                                 | NHLS-IALCH                                                                      | KRISP, KZN Research Innovation and Sequencing Platform                              | Giandhari J, Pillay S, Lessells R, Chimukangara B, Mdlalose K, York D, Khan S, Tegally H, Wilkinson E, de Oliveira T                                                                                                                                                                     |
| EPI_ISL_495535, EPI_ISL_495536, EPI_ISL_495537, EPI_ISL_495538, EPI_ISL_495539, EPI_ISL_495542                                                                                                                                                                                                                                                                                                                                                                                                                                                                                                                                                                                                                                                                                                                                                                                                                                                                                                                                                                                                                                                                                                                                                                                                                                                                                                                                                                                                                                                                                                                                                                                                                                                                                                                                                                                                                                                                                                                                                                                                                                                                                                                                                                                                                                                                                                                                                                                                                                                                                                                                                                                                                                                                                                                                                                                                                                                                                                                                                                                                                                                                                                                                                                                                                                                 | Medical Disagnostics Services (MDS)                                             | KRISP, KZN Research Innovation and Sequencing Platform                              | Giandhari J, Pillay S, Lessells R, Chimukangara B, Mdlalose K, York D, Khan S, Tegally H, Wilkinson E, de Oliveira T                                                                                                                                                                     |
| EPI_ISL_495543, EPI_ISL_495546, EPI_ISL_495547, EPI_ISL_495548, EPI_ISL_495551, EPI_ISL_495555, EPI_ISL_498054, EPI_ISL_498062, EPI_ISL_498064, EPI_ISL_498073, EPI_ISL_498074, EPI_ISL_498078, EPI_ISL_498079, EPI_ISL_498080, EPI_ISL_498082, EPI_ISL_498083, EPI_ISL_498084, EPI_ISL_498085, EPI_ISL_498088, EPI_ISL_498092, EPI_ISL_498095, EPI_ISL_498103, EPI_ISL_498105, EPI_ISL_498106, EPI_ISL_498112, EPI_ISL_498113, EPI_ISL_498114, EPI_ISL_498115, EPI_ISL_498116, EPI_ISL_498118, EPI_ISL_498124                                                                                                                                                                                                                                                                                                                                                                                                                                                                                                                                                                                                                                                                                                                                                                                                                                                                                                                                                                                                                                                                                                                                                                                                                                                                                                                                                                                                                                                                                                                                                                                                                                                                                                                                                                                                                                                                                                                                                                                                                                                                                                                                                                                                                                                                                                                                                                                                                                                                                                                                                                                                                                                                                                                                                                                                                                 |                                                                                 |                                                                                     |                                                                                                                                                                                                                                                                                          |
| see above                                                                                                                                                                                                                                                                                                                                                                                                                                                                                                                                                                                                                                                                                                                                                                                                                                                                                                                                                                                                                                                                                                                                                                                                                                                                                                                                                                                                                                                                                                                                                                                                                                                                                                                                                                                                                                                                                                                                                                                                                                                                                                                                                                                                                                                                                                                                                                                                                                                                                                                                                                                                                                                                                                                                                                                                                                                                                                                                                                                                                                                                                                                                                                                                                                                                                                                                      | NHLS-IALCH                                                                      | KRISP, KZN Research Innovation and Sequencing Platform                              | Giandhari J, Pillay S, Lessells R, Chimukangara B, Mdlalose K, York D, Khan S, Tegally H, Wilkinson E, de Oliveira T                                                                                                                                                                     |
| EPI_ISL_499266, EPI_ISL_499267, EPI_ISL_499268, EPI_ISL_499269, EPI_ISL_499808, EPI_ISL_499809                                                                                                                                                                                                                                                                                                                                                                                                                                                                                                                                                                                                                                                                                                                                                                                                                                                                                                                                                                                                                                                                                                                                                                                                                                                                                                                                                                                                                                                                                                                                                                                                                                                                                                                                                                                                                                                                                                                                                                                                                                                                                                                                                                                                                                                                                                                                                                                                                                                                                                                                                                                                                                                                                                                                                                                                                                                                                                                                                                                                                                                                                                                                                                                                                                                 | Queens Medical Centre, Clinical Microbiology Department / DeepSeq Nottingham    | COVID-19 Genomics UK (COG-UK) Consortium                                            | Gemma Clark, Wendy Smith, Manjinder Khakh, Vicki M Fleming, Michelle M Lister, Hannah Howson-Wells, Jonathan Ball, Patrick McClure, Joseph Chappell, Theocharis Tsoileridis, Nadine Holmes, Matthew Carlisle, Christopher Moore, Fei Sang, Johnny Debebe, Victoria Wright, Matthew Loose |
| EPI_ISL_509227, EPI_ISL_509228, EPI_ISL_509235, EPI_ISL_509239, EPI_ISL_509240, EPI_ISL_509241, EPI_ISL_509243, EPI_ISL_509247, EPI_ISL_509248, EPI_ISL_509251, EPI_ISL_509253, EPI_ISL_509254, EPI_ISL_509255, EPI_ISL_509257, EPI_ISL_509259, EPI_ISL_509260, EPI_ISL_509261, EPI_ISL_509263, EPI_ISL_509270, EPI_ISL_509272, EPI_ISL_509275, EPI_ISL_509276, EPI_ISL_509278, EPI_ISL_509282, EPI_ISL_509286, EPI_ISL_509288, EPI_ISL_509294, EPI_ISL_509304, EPI_ISL_509306, EPI_ISL_509309, EPI_ISL_509312, EPI_ISL_509313, EPI_ISL_509317, EPI_ISL_509321, EPI_ISL_509323, EPI_ISL_509331, EPI_ISL_509332, EPI_ISL_509333, EPI_ISL_509340, EPI_ISL_509343, EPI_ISL_509350, EPI_ISL_509353, EPI_ISL_509354, EPI_ISL_509355, EPI_ISL_509357, EPI_ISL_509359, EPI_ISL_509360, EPI_ISL_509363, EPI_ISL_509365, EPI_ISL_509367, EPI_ISL_509369                                                                                                                                                                                                                                                                                                                                                                                                                                                                                                                                                                                                                                                                                                                                                                                                                                                                                                                                                                                                                                                                                                                                                                                                                                                                                                                                                                                                                                                                                                                                                                                                                                                                                                                                                                                                                                                                                                                                                                                                                                                                                                                                                                                                                                                                                                                                                                                                                                                                                                 |                                                                                 |                                                                                     |                                                                                                                                                                                                                                                                                          |
| see above                                                                                                                                                                                                                                                                                                                                                                                                                                                                                                                                                                                                                                                                                                                                                                                                                                                                                                                                                                                                                                                                                                                                                                                                                                                                                                                                                                                                                                                                                                                                                                                                                                                                                                                                                                                                                                                                                                                                                                                                                                                                                                                                                                                                                                                                                                                                                                                                                                                                                                                                                                                                                                                                                                                                                                                                                                                                                                                                                                                                                                                                                                                                                                                                                                                                                                                                      | NHLS-IALCH                                                                      | KRISP, KZN Research Innovation and Sequencing Platform                              | Giandhari J, Pillay S, Lessells R, Mdlalose K, York D, Tegally H, Wilkinson E, de Oliveira T                                                                                                                                                                                             |
| EPI_ISL_509799, EPI_ISL_509800, EPI_ISL_509801, EPI_ISL_509802, EPI_ISL_509803, EPI_ISL_509804, EPI_ISL_509805, EPI_ISL_509806, EPI_ISL_509807, EPI_ISL_509808, EPI_ISL_509809, EPI_ISL_509810, EPI_ISL_509811, EPI_ISL_509812, EPI_ISL_509813, EPI_ISL_509814, EPI_ISL_509815, EPI_ISL_509816, EPI_ISL_509817, EPI_ISL_509818, EPI_ISL_509819, EPI_ISL_509820, EPI_ISL_509821, EPI_ISL_509822, EPI_ISL_509823, EPI_ISL_509824, EPI_ISL_509825, EPI_ISL_509826, EPI_ISL_509827, EPI_ISL_509828, EPI_ISL_509829, EPI_ISL_509830, EPI_ISL_509831, EPI_ISL_509832, EPI_ISL_509833, EPI_ISL_509834, EPI_ISL_509835, EPI_ISL_509836, EPI_ISL_509837, EPI_ISL_509838, EPI_ISL_509839, EPI_ISL_509840, EPI_ISL_509841, EPI_ISL_509842, EPI_ISL_509843, EPI_ISL_509844, EPI_ISL_509845, EPI_ISL_509846, EPI_ISL_509847, EPI_ISL_509848, EPI_ISL_509849, EPI_ISL_509850, EPI_ISL_509851, EPI_ISL_509852, EPI_ISL_509853, EPI_ISL_509854, EPI_ISL_509855, EPI_ISL_509856, EPI_ISL_509857, EPI_ISL_509858, EPI_ISL_509859, EPI_ISL_509860, EPI_ISL_509861, EPI_ISL_509862, EPI_ISL_509863, EPI_ISL_509864, EPI_ISL_509865, EPI_ISL_509866, EPI_ISL_509867, EPI_ISL_509868, EPI_ISL_509869, EPI_ISL_509870, EPI_ISL_509871, EPI_ISL_509872, EPI_ISL_509873, EPI_ISL_509874, EPI_ISL_509875, EPI_ISL_509876, EPI_ISL_509877, EPI_ISL_509878, EPI_ISL_509879, EPI_ISL_509880, EPI_ISL_509881, EPI_ISL_509882, EPI_ISL_509883, EPI_ISL_509884, EPI_ISL_509885, EPI_ISL_509886, EPI_ISL_509887, EPI_ISL_509888, EPI_ISL_509889, EPI_ISL_509890, EPI_ISL_509891, EPI_ISL_509892, EPI_ISL_509893, EPI_ISL_509894, EPI_ISL_509895, EPI_ISL_509896, EPI_ISL_509897, EPI_ISL_509898, EPI_ISL_509899, EPI_ISL_509900, EPI_ISL_509901, EPI_ISL_509902, EPI_ISL_509903, EPI_ISL_509904, EPI_ISL_509905, EPI_ISL_509906, EPI_ISL_509907, EPI_ISL_509908, EPI_ISL_509909, EPI_ISL_509910, EPI_ISL_509911, EPI_ISL_509912, EPI_ISL_509913, EPI_ISL_509914, EPI_ISL_509915, EPI_ISL_509916, EPI_ISL_509917, EPI_ISL_509918, EPI_ISL_509919, EPI_ISL_509920, EPI_ISL_509921, EPI_ISL_509922, EPI_ISL_509923, EPI_ISL_509924, EPI_ISL_509925, EPI_ISL_509926, EPI_ISL_509927, EPI_ISL_509928, EPI_ISL_509929, EPI_ISL_509930, EPI_ISL_509931, EPI_ISL_509932, EPI_ISL_509933, EPI_ISL_509934, EPI_ISL_509935, EPI_ISL_509936, EPI_ISL_509937, EPI_ISL_509938, EPI_ISL_509939, EPI_ISL_509940, EPI_ISL_509941, EPI_ISL_509942, EPI_ISL_509943, EPI_ISL_509944, EPI_ISL_509945, EPI_ISL_509946, EPI_ISL_509947, EPI_ISL_509948, EPI_ISL_509949, EPI_ISL_509950, EPI_ISL_509951, EPI_ISL_509952, EPI_ISL_509953, EPI_ISL_509954, EPI_ISL_509955, EPI_ISL_509956, EPI_ISL_509957, EPI_ISL_509958, EPI_ISL_509959, EPI_ISL_509960, EPI_ISL_509961, EPI_ISL_509962, EPI_ISL_509963, EPI_ISL_509964, EPI_ISL_509965, EPI_ISL_509966, EPI_ISL_509967, EPI_ISL_509968, EPI_ISL_509969, EPI_ISL_509970, EPI_ISL_509971, EPI_ISL_509972, EPI_ISL_509973, EPI_ISL_509974, EPI_ISL_509975, EPI_ISL_509976, EPI_ISL_509977, EPI_ISL_509978, EPI_ISL_509979, EPI_ISL_509980, EPI_ISL_509981, EPI_ISL_509982, EPI_ISL_509983, EPI_ISL_509984, EPI_ISL_509985, EPI_ISL_509986, EPI_ISL_509987, EPI_ISL_509988, EPI_ISL_509989, EPI_ISL_509990, EPI_ISL_509991, EPI_ISL_509992, EPI_ISL_509993, EPI_ISL_509994, EPI_ISL_509995, EPI_ISL_509996, EPI_ISL_509997, EPI_ISL_509998, EPI_ISL_509999 |                                                                                 |                                                                                     |                                                                                                                                                                                                                                                                                          |
| see above                                                                                                                                                                                                                                                                                                                                                                                                                                                                                                                                                                                                                                                                                                                                                                                                                                                                                                                                                                                                                                                                                                                                                                                                                                                                                                                                                                                                                                                                                                                                                                                                                                                                                                                                                                                                                                                                                                                                                                                                                                                                                                                                                                                                                                                                                                                                                                                                                                                                                                                                                                                                                                                                                                                                                                                                                                                                                                                                                                                                                                                                                                                                                                                                                                                                                                                                      | University of Wisconsin-Madison AIDS Vaccine Research Laboratories              | University of Wisconsin-Madison AIDS Vaccine Research Laboratories                  | Gage Moreno, Katarina Braun, et al. AIDS Vaccine Research Laboratories                                                                                                                                                                                                                   |
| EPI_ISL_510246, EPI_ISL_510247, EPI_ISL_510248, EPI_ISL_510249, EPI_ISL_510250, EPI_ISL_510251, EPI_ISL_510252, EPI_ISL_510253, EPI_ISL_510254, EPI_ISL_510255, EPI_ISL_510256, EPI_ISL_510257, EPI_ISL_510258, EPI_ISL_510259, EPI_ISL_510260, EPI_ISL_510261, EPI_ISL_510262, EPI_ISL_510263, EPI_ISL_510264, EPI_ISL_510265, EPI_ISL_510266, EPI_ISL_510267                                                                                                                                                                                                                                                                                                                                                                                                                                                                                                                                                                                                                                                                                                                                                                                                                                                                                                                                                                                                                                                                                                                                                                                                                                                                                                                                                                                                                                                                                                                                                                                                                                                                                                                                                                                                                                                                                                                                                                                                                                                                                                                                                                                                                                                                                                                                                                                                                                                                                                                                                                                                                                                                                                                                                                                                                                                                                                                                                                                 |                                                                                 |                                                                                     |                                                                                                                                                                                                                                                                                          |
| see above                                                                                                                                                                                                                                                                                                                                                                                                                                                                                                                                                                                                                                                                                                                                                                                                                                                                                                                                                                                                                                                                                                                                                                                                                                                                                                                                                                                                                                                                                                                                                                                                                                                                                                                                                                                                                                                                                                                                                                                                                                                                                                                                                                                                                                                                                                                                                                                                                                                                                                                                                                                                                                                                                                                                                                                                                                                                                                                                                                                                                                                                                                                                                                                                                                                                                                                                      | Hospital de la Santa Creu i Sant Pau. Servicio de Microbiología                 | SeqCOVID-SPAIN consortium/IBV(CSIC)                                                 | Ferran Navarro, Núria Rabella, Elisenda Miró and SeqCOVID-SPAIN consortium                                                                                                                                                                                                               |
| EPI_ISL_510524, EPI_ISL_510525                                                                                                                                                                                                                                                                                                                                                                                                                                                                                                                                                                                                                                                                                                                                                                                                                                                                                                                                                                                                                                                                                                                                                                                                                                                                                                                                                                                                                                                                                                                                                                                                                                                                                                                                                                                                                                                                                                                                                                                                                                                                                                                                                                                                                                                                                                                                                                                                                                                                                                                                                                                                                                                                                                                                                                                                                                                                                                                                                                                                                                                                                                                                                                                                                                                                                                                 | University of Wisconsin-Madison AIDS Vaccine Research Laboratories              | University of Wisconsin-Madison AIDS Vaccine Research Laboratories                  | Gage Moreno, Katarina Braun, et al. AIDS Vaccine Research Laboratories                                                                                                                                                                                                                   |
| EPI_ISL_510537                                                                                                                                                                                                                                                                                                                                                                                                                                                                                                                                                                                                                                                                                                                                                                                                                                                                                                                                                                                                                                                                                                                                                                                                                                                                                                                                                                                                                                                                                                                                                                                                                                                                                                                                                                                                                                                                                                                                                                                                                                                                                                                                                                                                                                                                                                                                                                                                                                                                                                                                                                                                                                                                                                                                                                                                                                                                                                                                                                                                                                                                                                                                                                                                                                                                                                                                 | Microbiology Division, SC DHEC                                                  | Microbiology Division, SC DHEC                                                      | Flores,H.                                                                                                                                                                                                                                                                                |
| EPI_ISL_512379, EPI_ISL_512380, EPI_ISL_512381, EPI_ISL_512382, EPI_ISL_512383                                                                                                                                                                                                                                                                                                                                                                                                                                                                                                                                                                                                                                                                                                                                                                                                                                                                                                                                                                                                                                                                                                                                                                                                                                                                                                                                                                                                                                                                                                                                                                                                                                                                                                                                                                                                                                                                                                                                                                                                                                                                                                                                                                                                                                                                                                                                                                                                                                                                                                                                                                                                                                                                                                                                                                                                                                                                                                                                                                                                                                                                                                                                                                                                                                                                 | Queens Medical Centre, Clinical Microbiology Department / DeepSeq Nottingham    | COVID-19 Genomics UK (COG-UK) Consortium                                            | Gemma Clark, Wendy Smith, Manjinder Khakh, Vicki M Fleming, Michelle M Lister, Hannah Howson-Wells, Jonathan Ball, Patrick McClure, Joseph Chappell, Theocharis Tsoileridis, Nadine Holmes, Matthew Carlisle, Christopher Moore, Fei Sang, Johnny Debebe, Victoria Wright, Matthew Loose |
| EPI_ISL_512653                                                                                                                                                                                                                                                                                                                                                                                                                                                                                                                                                                                                                                                                                                                                                                                                                                                                                                                                                                                                                                                                                                                                                                                                                                                                                                                                                                                                                                                                                                                                                                                                                                                                                                                                                                                                                                                                                                                                                                                                                                                                                                                                                                                                                                                                                                                                                                                                                                                                                                                                                                                                                                                                                                                                                                                                                                                                                                                                                                                                                                                                                                                                                                                                                                                                                                                                 | Area De Salud Desamparados 1 - Clinica Dr. Marcial Fallas [Grifo Alto/Desampara | Incienza, Instituto Costarricense de Investigación y Enseñanza en Nutrición y Salud | Francisco Duarte, Hebleen Porras, Claudio Soto-Garita, Estela Cordero, Adriana Godinez & Melany Calderon                                                                                                                                                                                 |
| EPI_ISL_512654                                                                                                                                                                                                                                                                                                                                                                                                                                                                                                                                                                                                                                                                                                                                                                                                                                                                                                                                                                                                                                                                                                                                                                                                                                                                                                                                                                                                                                                                                                                                                                                                                                                                                                                                                                                                                                                                                                                                                                                                                                                                                                                                                                                                                                                                                                                                                                                                                                                                                                                                                                                                                                                                                                                                                                                                                                                                                                                                                                                                                                                                                                                                                                                                                                                                                                                                 | Hospital Dr. Rafael A. Calderon Guardia [San Jose/San Jose]                     | Incienza, Instituto Costarricense de Investigación y Enseñanza en Nutrición y Salud | Francisco Duarte, Hebleen Porras, Claudio Soto-Garita, Estela Cordero, Adriana Godinez & Melany Calderon                                                                                                                                                                                 |
| EPI_ISL_512655                                                                                                                                                                                                                                                                                                                                                                                                                                                                                                                                                                                                                                                                                                                                                                                                                                                                                                                                                                                                                                                                                                                                                                                                                                                                                                                                                                                                                                                                                                                                                                                                                                                                                                                                                                                                                                                                                                                                                                                                                                                                                                                                                                                                                                                                                                                                                                                                                                                                                                                                                                                                                                                                                                                                                                                                                                                                                                                                                                                                                                                                                                                                                                                                                                                                                                                                 | Hospital De Niños Dr. Carlos Saenz Herrera [San Jose/San Jose]                  | Incienza, Instituto Costarricense de Investigación y Enseñanza en Nutrición y Salud | Francisco Duarte, Hebleen Porras, Claudio Soto-Garita, Estela Cordero, Adriana Godinez & Melany Calderon                                                                                                                                                                                 |
| EPI_ISL_512656                                                                                                                                                                                                                                                                                                                                                                                                                                                                                                                                                                                                                                                                                                                                                                                                                                                                                                                                                                                                                                                                                                                                                                                                                                                                                                                                                                                                                                                                                                                                                                                                                                                                                                                                                                                                                                                                                                                                                                                                                                                                                                                                                                                                                                                                                                                                                                                                                                                                                                                                                                                                                                                                                                                                                                                                                                                                                                                                                                                                                                                                                                                                                                                                                                                                                                                                 | Area De Salud Pavas (Coopesalud) [Pavas/San Jose]                               | Incienza, Instituto Costarricense de Investigación y                                | Francisco Duarte, Hebleen Porras, Claudio Soto-Garita, Estela Cordero, Adriana Godinez & Melany Calderon                                                                                                                                                                                 |

|                                                                                                                                                                                                                                                                                                                                                                                                                                                                                                                                                                                                                                                                                                                                                                                                                                                                                                                                                                                                                                                                                                                                                                                                                                                                                                                                                                                                                                                                                                                                                                                                                                                                                                                                                                                |                                                                                            | Enseñanza en Nutrición y Salud                                                      |                                                                                                                                                                                                                                                          |                                                                                                                                                                                                                                                                                                                                                                                                                     |  |
|--------------------------------------------------------------------------------------------------------------------------------------------------------------------------------------------------------------------------------------------------------------------------------------------------------------------------------------------------------------------------------------------------------------------------------------------------------------------------------------------------------------------------------------------------------------------------------------------------------------------------------------------------------------------------------------------------------------------------------------------------------------------------------------------------------------------------------------------------------------------------------------------------------------------------------------------------------------------------------------------------------------------------------------------------------------------------------------------------------------------------------------------------------------------------------------------------------------------------------------------------------------------------------------------------------------------------------------------------------------------------------------------------------------------------------------------------------------------------------------------------------------------------------------------------------------------------------------------------------------------------------------------------------------------------------------------------------------------------------------------------------------------------------|--------------------------------------------------------------------------------------------|-------------------------------------------------------------------------------------|----------------------------------------------------------------------------------------------------------------------------------------------------------------------------------------------------------------------------------------------------------|---------------------------------------------------------------------------------------------------------------------------------------------------------------------------------------------------------------------------------------------------------------------------------------------------------------------------------------------------------------------------------------------------------------------|--|
| EPI_ISL_512657                                                                                                                                                                                                                                                                                                                                                                                                                                                                                                                                                                                                                                                                                                                                                                                                                                                                                                                                                                                                                                                                                                                                                                                                                                                                                                                                                                                                                                                                                                                                                                                                                                                                                                                                                                 | Area De Salud Tibas-Uruca-Merced - Clinica Dr. Clorito Picado [Tibas/San Jose]             | Incienza, Instituto Costarricense de Investigación y Enseñanza en Nutrición y Salud |                                                                                                                                                                                                                                                          | Francisco Duarte, Hebleen Porras, Claudio Soto-Garita, Estela Cordero, Adriana Godinez & Melany Calderon                                                                                                                                                                                                                                                                                                            |  |
| EPI_ISL_512658                                                                                                                                                                                                                                                                                                                                                                                                                                                                                                                                                                                                                                                                                                                                                                                                                                                                                                                                                                                                                                                                                                                                                                                                                                                                                                                                                                                                                                                                                                                                                                                                                                                                                                                                                                 | Area De Salud Orotina-San Mateo [Orotina/Alajuela]                                         | Incienza, Instituto Costarricense de Investigación y Enseñanza en Nutrición y Salud |                                                                                                                                                                                                                                                          | Francisco Duarte, Hebleen Porras, Claudio Soto-Garita, Estela Cordero, Adriana Godinez & Melany Calderon                                                                                                                                                                                                                                                                                                            |  |
| EPI_ISL_512659                                                                                                                                                                                                                                                                                                                                                                                                                                                                                                                                                                                                                                                                                                                                                                                                                                                                                                                                                                                                                                                                                                                                                                                                                                                                                                                                                                                                                                                                                                                                                                                                                                                                                                                                                                 | Area De Salud Fortuna                                                                      | Incienza, Instituto Costarricense de Investigación y Enseñanza en Nutrición y Salud |                                                                                                                                                                                                                                                          | Francisco Duarte, Hebleen Porras, Claudio Soto-Garita, Estela Cordero, Adriana Godinez & Melany Calderon                                                                                                                                                                                                                                                                                                            |  |
| EPI_ISL_512660, EPI_ISL_512661                                                                                                                                                                                                                                                                                                                                                                                                                                                                                                                                                                                                                                                                                                                                                                                                                                                                                                                                                                                                                                                                                                                                                                                                                                                                                                                                                                                                                                                                                                                                                                                                                                                                                                                                                 | Area De Salud Los Chiles                                                                   | Incienza, Instituto Costarricense de Investigación y Enseñanza en Nutrición y Salud |                                                                                                                                                                                                                                                          | Francisco Duarte, Hebleen Porras, Claudio Soto-Garita, Estela Cordero, Adriana Godinez & Melany Calderon                                                                                                                                                                                                                                                                                                            |  |
| EPI_ISL_512662                                                                                                                                                                                                                                                                                                                                                                                                                                                                                                                                                                                                                                                                                                                                                                                                                                                                                                                                                                                                                                                                                                                                                                                                                                                                                                                                                                                                                                                                                                                                                                                                                                                                                                                                                                 | Area De Salud La Cruz                                                                      | Incienza, Instituto Costarricense de Investigación y Enseñanza en Nutrición y Salud |                                                                                                                                                                                                                                                          | Francisco Duarte, Hebleen Porras, Claudio Soto-Garita, Estela Cordero, Adriana Godinez & Melany Calderon                                                                                                                                                                                                                                                                                                            |  |
| EPI_ISL_512663, EPI_ISL_512664                                                                                                                                                                                                                                                                                                                                                                                                                                                                                                                                                                                                                                                                                                                                                                                                                                                                                                                                                                                                                                                                                                                                                                                                                                                                                                                                                                                                                                                                                                                                                                                                                                                                                                                                                 | Area De Salud Alajuela Norte - Clínica Dr. Marcial Rodriguez                               | Incienza, Instituto Costarricense de Investigación y Enseñanza en Nutrición y Salud |                                                                                                                                                                                                                                                          | Francisco Duarte, Hebleen Porras, Claudio Soto-Garita, Estela Cordero, Adriana Godinez & Melany Calderon                                                                                                                                                                                                                                                                                                            |  |
| EPI_ISL_512665                                                                                                                                                                                                                                                                                                                                                                                                                                                                                                                                                                                                                                                                                                                                                                                                                                                                                                                                                                                                                                                                                                                                                                                                                                                                                                                                                                                                                                                                                                                                                                                                                                                                                                                                                                 | Hospital De Las Mujeres Dr. Adolfo Carit                                                   | Incienza, Instituto Costarricense de Investigación y Enseñanza en Nutrición y Salud |                                                                                                                                                                                                                                                          | Francisco Duarte, Hebleen Porras, Claudio Soto-Garita, Estela Cordero, Adriana Godinez & Melany Calderon                                                                                                                                                                                                                                                                                                            |  |
| EPI_ISL_512666, EPI_ISL_512667                                                                                                                                                                                                                                                                                                                                                                                                                                                                                                                                                                                                                                                                                                                                                                                                                                                                                                                                                                                                                                                                                                                                                                                                                                                                                                                                                                                                                                                                                                                                                                                                                                                                                                                                                 | Area De Salud La Cruz                                                                      | Incienza, Instituto Costarricense de Investigación y Enseñanza en Nutrición y Salud |                                                                                                                                                                                                                                                          | Francisco Duarte, Hebleen Porras, Claudio Soto-Garita, Estela Cordero, Adriana Godinez & Melany Calderon                                                                                                                                                                                                                                                                                                            |  |
| EPI_ISL_512668                                                                                                                                                                                                                                                                                                                                                                                                                                                                                                                                                                                                                                                                                                                                                                                                                                                                                                                                                                                                                                                                                                                                                                                                                                                                                                                                                                                                                                                                                                                                                                                                                                                                                                                                                                 | Area De Salud Corredores                                                                   | Incienza, Instituto Costarricense de Investigación y Enseñanza en Nutrición y Salud |                                                                                                                                                                                                                                                          | Francisco Duarte, Hebleen Porras, Claudio Soto-Garita, Estela Cordero, Adriana Godinez & Melany Calderon                                                                                                                                                                                                                                                                                                            |  |
| EPI_ISL_512669                                                                                                                                                                                                                                                                                                                                                                                                                                                                                                                                                                                                                                                                                                                                                                                                                                                                                                                                                                                                                                                                                                                                                                                                                                                                                                                                                                                                                                                                                                                                                                                                                                                                                                                                                                 | Area De Salud Alajuela Norte - Clínica Dr. Marcial Rodriguez                               | Incienza, Instituto Costarricense de Investigación y Enseñanza en Nutrición y Salud |                                                                                                                                                                                                                                                          | Francisco Duarte, Hebleen Porras, Claudio Soto-Garita, Estela Cordero, Adriana Godinez & Melany Calderon                                                                                                                                                                                                                                                                                                            |  |
| EPI_ISL_512670                                                                                                                                                                                                                                                                                                                                                                                                                                                                                                                                                                                                                                                                                                                                                                                                                                                                                                                                                                                                                                                                                                                                                                                                                                                                                                                                                                                                                                                                                                                                                                                                                                                                                                                                                                 | Centro Nacional De Rehabilitacion Humberto Araya Rojas (Cenare)                            | Incienza, Instituto Costarricense de Investigación y Enseñanza en Nutrición y Salud |                                                                                                                                                                                                                                                          | Francisco Duarte, Hebleen Porras, Claudio Soto-Garita, Estela Cordero, Adriana Godinez & Melany Calderon                                                                                                                                                                                                                                                                                                            |  |
| EPI_ISL_512671                                                                                                                                                                                                                                                                                                                                                                                                                                                                                                                                                                                                                                                                                                                                                                                                                                                                                                                                                                                                                                                                                                                                                                                                                                                                                                                                                                                                                                                                                                                                                                                                                                                                                                                                                                 | Area De Salud La Cruz                                                                      | Incienza, Instituto Costarricense de Investigación y Enseñanza en Nutrición y Salud |                                                                                                                                                                                                                                                          | Francisco Duarte, Hebleen Porras, Claudio Soto-Garita, Estela Cordero, Adriana Godinez & Melany Calderon                                                                                                                                                                                                                                                                                                            |  |
| EPI_ISL_512672, EPI_ISL_512673, EPI_ISL_512674, EPI_ISL_512675                                                                                                                                                                                                                                                                                                                                                                                                                                                                                                                                                                                                                                                                                                                                                                                                                                                                                                                                                                                                                                                                                                                                                                                                                                                                                                                                                                                                                                                                                                                                                                                                                                                                                                                 | Hospital De Niños Dr. Carlos Saenz Herrera [San Jose/San Jose]                             | Incienza, Instituto Costarricense de Investigación y Enseñanza en Nutrición y Salud |                                                                                                                                                                                                                                                          | Francisco Duarte, Hebleen Porras, Claudio Soto-Garita, Estela Cordero, Adriana Godinez & Melany Calderon                                                                                                                                                                                                                                                                                                            |  |
| EPI_ISL_512785, EPI_ISL_512786, EPI_ISL_512787, EPI_ISL_512788, EPI_ISL_512789, EPI_ISL_512790, EPI_ISL_512791, EPI_ISL_512792, EPI_ISL_512793, EPI_ISL_512794, EPI_ISL_512795, EPI_ISL_512796, EPI_ISL_512797, EPI_ISL_512798, EPI_ISL_512799, EPI_ISL_512800, EPI_ISL_512801, EPI_ISL_512802, EPI_ISL_512803, EPI_ISL_512804, EPI_ISL_512805, EPI_ISL_512806, EPI_ISL_512807, EPI_ISL_512808, EPI_ISL_512809                                                                                                                                                                                                                                                                                                                                                                                                                                                                                                                                                                                                                                                                                                                                                                                                                                                                                                                                                                                                                                                                                                                                                                                                                                                                                                                                                                 |                                                                                            |                                                                                     |                                                                                                                                                                                                                                                          |                                                                                                                                                                                                                                                                                                                                                                                                                     |  |
| see above                                                                                                                                                                                                                                                                                                                                                                                                                                                                                                                                                                                                                                                                                                                                                                                                                                                                                                                                                                                                                                                                                                                                                                                                                                                                                                                                                                                                                                                                                                                                                                                                                                                                                                                                                                      | Public Health, United States Air Force School of Aerospace Medicine                        | Public Health, United States Air Force School of Aerospace Medicine                 |                                                                                                                                                                                                                                                          | Fries,A.C., Purves,S.M., Meyer,J.R., Javorina,A.K., Connors,B.C., Macias,E.A., Lambert,A.W., Chapleau,R.R., Starr,C.R.                                                                                                                                                                                                                                                                                              |  |
| EPI_ISL_512846                                                                                                                                                                                                                                                                                                                                                                                                                                                                                                                                                                                                                                                                                                                                                                                                                                                                                                                                                                                                                                                                                                                                                                                                                                                                                                                                                                                                                                                                                                                                                                                                                                                                                                                                                                 | O.I.J. MORGUE JUDICIAL                                                                     | Incienza, Instituto Costarricense de Investigación y Enseñanza en Nutrición y Salud |                                                                                                                                                                                                                                                          | Francisco Duarte, Hebleen Porras, Claudio Soto-Garita, Estela Cordero, Adriana Godinez & Melany Calderon                                                                                                                                                                                                                                                                                                            |  |
| EPI_ISL_512904, EPI_ISL_512905, EPI_ISL_512906, EPI_ISL_512907                                                                                                                                                                                                                                                                                                                                                                                                                                                                                                                                                                                                                                                                                                                                                                                                                                                                                                                                                                                                                                                                                                                                                                                                                                                                                                                                                                                                                                                                                                                                                                                                                                                                                                                 | Pathogen Genomics Lab King Abdullah University of Science and Technology(KAUST)            | Pathogen Genomics Lab King Abdullah University of Science and Technology(KAUST)     | Fathia Ben Rached, Raece Naeem, Sharif Hala, Fadwa Alofi, Rahul P Salunke, Sara Mfarrej, Amit Kumar Subudhi, Afrah Alsomali, Asim Khogeer, Ahmad Bakur Mahmoud, Anwar Hashem, Naif Almontashiri, Arnab Pain                                              |                                                                                                                                                                                                                                                                                                                                                                                                                     |  |
| EPI_ISL_512918, EPI_ISL_512919, EPI_ISL_512920, EPI_ISL_512921, EPI_ISL_512922, EPI_ISL_512923, EPI_ISL_512924, EPI_ISL_512925, EPI_ISL_512926, EPI_ISL_512927, EPI_ISL_512928, EPI_ISL_512929, EPI_ISL_512930, EPI_ISL_512931, EPI_ISL_512932, EPI_ISL_512933, EPI_ISL_512934, EPI_ISL_512935, EPI_ISL_512936, EPI_ISL_512937, EPI_ISL_512938, EPI_ISL_512939, EPI_ISL_512940, EPI_ISL_512941, EPI_ISL_512942, EPI_ISL_512943, EPI_ISL_512944, EPI_ISL_512945                                                                                                                                                                                                                                                                                                                                                                                                                                                                                                                                                                                                                                                                                                                                                                                                                                                                                                                                                                                                                                                                                                                                                                                                                                                                                                                 |                                                                                            |                                                                                     |                                                                                                                                                                                                                                                          |                                                                                                                                                                                                                                                                                                                                                                                                                     |  |
| see above                                                                                                                                                                                                                                                                                                                                                                                                                                                                                                                                                                                                                                                                                                                                                                                                                                                                                                                                                                                                                                                                                                                                                                                                                                                                                                                                                                                                                                                                                                                                                                                                                                                                                                                                                                      | Pathogen Genomics Lab King Abdullah University of Science and Technology(KAUST)            | Pathogen Genomics Lab King Abdullah University of Science and Technology(KAUST)     | Fadwa Alofi, Sharif Hala, Rahul P Salunke, Sara Mfarrej, Amit Kumar Subudhi, Fathia Ben Rached, Amanda, Luke, Afrah Alsomali, Asim Khogeer, Jumana Taha, Abdulaziz Alahmadi, Kahled Alghithami, Raece Naeem, Anwar Hashem, Naif Almontashiri, Arnab Pain |                                                                                                                                                                                                                                                                                                                                                                                                                     |  |
| EPI_ISL_513077, EPI_ISL_513078, EPI_ISL_513079, EPI_ISL_513080, EPI_ISL_513081, EPI_ISL_513082, EPI_ISL_513083, EPI_ISL_513084, EPI_ISL_513085, EPI_ISL_513086, EPI_ISL_513087, EPI_ISL_513088, EPI_ISL_513089, EPI_ISL_513090, EPI_ISL_513091, EPI_ISL_513092, EPI_ISL_513093, EPI_ISL_513094, EPI_ISL_513095, EPI_ISL_513096, EPI_ISL_513097, EPI_ISL_513098, EPI_ISL_513099, EPI_ISL_513100, EPI_ISL_513101, EPI_ISL_513102, EPI_ISL_513103, EPI_ISL_513104, EPI_ISL_513105, EPI_ISL_513106, EPI_ISL_513107, EPI_ISL_513108, EPI_ISL_513109, EPI_ISL_513110, EPI_ISL_513111, EPI_ISL_513112, EPI_ISL_513113, EPI_ISL_513114, EPI_ISL_513115, EPI_ISL_513116, EPI_ISL_513117, EPI_ISL_513118, EPI_ISL_513119, EPI_ISL_513120                                                                                                                                                                                                                                                                                                                                                                                                                                                                                                                                                                                                                                                                                                                                                                                                                                                                                                                                                                                                                                                 |                                                                                            |                                                                                     |                                                                                                                                                                                                                                                          |                                                                                                                                                                                                                                                                                                                                                                                                                     |  |
| see above                                                                                                                                                                                                                                                                                                                                                                                                                                                                                                                                                                                                                                                                                                                                                                                                                                                                                                                                                                                                                                                                                                                                                                                                                                                                                                                                                                                                                                                                                                                                                                                                                                                                                                                                                                      | Pathogen Genomics Lab King Abdullah University of Science and Technology(KAUST)            | Pathogen Genomics Lab King Abdullah University of Science and Technology(KAUST)     | Fathia Ben Rached, Raece Naeem, Sharif Hala, Fadwa Alofi, Rahul P Salunke, Sara Mfarrej, Amit Kumar Subudhi, Afrah Alsomali, Asim Khogeer, Ahmad Bakur Mahmoud, Anwar Hashem, Naif Almontashiri, Arnab Pain                                              |                                                                                                                                                                                                                                                                                                                                                                                                                     |  |
| EPI_ISL_513147, EPI_ISL_513148, EPI_ISL_513149, EPI_ISL_513150, EPI_ISL_513151, EPI_ISL_513152, EPI_ISL_513153, EPI_ISL_513154, EPI_ISL_513155, EPI_ISL_513156, EPI_ISL_513157, EPI_ISL_513158, EPI_ISL_513159, EPI_ISL_513160, EPI_ISL_513161, EPI_ISL_513162, EPI_ISL_513163, EPI_ISL_513164, EPI_ISL_513165, EPI_ISL_513166, EPI_ISL_513167                                                                                                                                                                                                                                                                                                                                                                                                                                                                                                                                                                                                                                                                                                                                                                                                                                                                                                                                                                                                                                                                                                                                                                                                                                                                                                                                                                                                                                 |                                                                                            |                                                                                     |                                                                                                                                                                                                                                                          |                                                                                                                                                                                                                                                                                                                                                                                                                     |  |
| see above                                                                                                                                                                                                                                                                                                                                                                                                                                                                                                                                                                                                                                                                                                                                                                                                                                                                                                                                                                                                                                                                                                                                                                                                                                                                                                                                                                                                                                                                                                                                                                                                                                                                                                                                                                      | Pathogen Genomics Lab King Abdullah University of Science and Technology(KAUST)            | Pathogen Genomics Lab King Abdullah University of Science and Technology(KAUST)     | Fadwa Alofi, Sharif Hala, Rahul P Salunke, Sara Mfarrej, Amit Kumar Subudhi, Fathia Ben Rached, Amanda, Luke, Afrah Alsomali, Asim Khogeer, Jumana Taha, Abdulaziz Alahmadi, Kahled Alghithami, Raece Naeem, Anwar Hashem, Naif Almontashiri, Arnab Pain |                                                                                                                                                                                                                                                                                                                                                                                                                     |  |
| EPI_ISL_513298, EPI_ISL_513299, EPI_ISL_513300, EPI_ISL_513301, EPI_ISL_513302, EPI_ISL_513303, EPI_ISL_513304, EPI_ISL_513305, EPI_ISL_513306, EPI_ISL_513307                                                                                                                                                                                                                                                                                                                                                                                                                                                                                                                                                                                                                                                                                                                                                                                                                                                                                                                                                                                                                                                                                                                                                                                                                                                                                                                                                                                                                                                                                                                                                                                                                 | Department of Infection Prevention and Infectious Diseases, University Hospital Regensburg | University Hospital Regensburg                                                      |                                                                                                                                                                                                                                                          | Fritsch,J., Holzmann,T., Schneider-Brachert,W.                                                                                                                                                                                                                                                                                                                                                                      |  |
| EPI_ISL_513310                                                                                                                                                                                                                                                                                                                                                                                                                                                                                                                                                                                                                                                                                                                                                                                                                                                                                                                                                                                                                                                                                                                                                                                                                                                                                                                                                                                                                                                                                                                                                                                                                                                                                                                                                                 | Public Health, United States Air Force School of Aerospace Medicine                        | Public Health, United States Air Force School of Aerospace Medicine                 |                                                                                                                                                                                                                                                          | Fries,A.C., Purves,S.M., Meyer,J.R., Javorina,A.K., Connors,B.C., Macias,E.A., Lambert,A.W., Chapleau,R.R. and Starr,C.R.                                                                                                                                                                                                                                                                                           |  |
| EPI_ISL_513311, EPI_ISL_513312, EPI_ISL_513313                                                                                                                                                                                                                                                                                                                                                                                                                                                                                                                                                                                                                                                                                                                                                                                                                                                                                                                                                                                                                                                                                                                                                                                                                                                                                                                                                                                                                                                                                                                                                                                                                                                                                                                                 | Public Health, United States Air Force School of Aerospace Medicine                        | Public Health, United States Air Force School of Aerospace Medicine                 |                                                                                                                                                                                                                                                          | Fries,A.C., Purves,S.M., Meyer,J.R., Javorina,A.K., Connors,B.C., Macias,E.A., Lambert,A.W., Chapleau,R.R. and Starr,C.R.                                                                                                                                                                                                                                                                                           |  |
| EPI_ISL_514452, EPI_ISL_514453, EPI_ISL_514454                                                                                                                                                                                                                                                                                                                                                                                                                                                                                                                                                                                                                                                                                                                                                                                                                                                                                                                                                                                                                                                                                                                                                                                                                                                                                                                                                                                                                                                                                                                                                                                                                                                                                                                                 | Queens Medical Centre, Clinical Microbiology Department / DeepSeq Nottingham               | COVID-19 Genomics UK (COG-UK) Consortium                                            |                                                                                                                                                                                                                                                          | Gemma Clark, Wendy Smith, Manjinder Khakh, Vicki M Fleming, Michelle M Lister, Hannah Howson-Wells, Jonathan Ball, Patrick McClure, Joseph Chappell, Theocharis Tsoleridis, Nadine Holmes, Matthew Carlisle, Christopher Moore, Fei Sang, Johnny Debebe, Victoria Wright, Matthew Loose                                                                                                                             |  |
| EPI_ISL_514612                                                                                                                                                                                                                                                                                                                                                                                                                                                                                                                                                                                                                                                                                                                                                                                                                                                                                                                                                                                                                                                                                                                                                                                                                                                                                                                                                                                                                                                                                                                                                                                                                                                                                                                                                                 | GMERS Medical College and Hospital, Gandhinagar                                            | Gujarat Biotechnology Research Centre                                               |                                                                                                                                                                                                                                                          | Gaurishankar Shrimali, Bhavesh Modi, Bharti Rajani, Apurvasinh Puvar, Janvi Ravai, Zarna Patel, Monika Gandhi, Pinal Trivedi, Maharshi Pandya, Nikhil Patel, Nitin Savaliya, Raghavendra Kumar, Dinesh Kumar, Zuber Saiyed, Komal Patel, Labhi Pandya, Afzal Ansari, Nikha Trivedi, Pranay Shah, Kamlesh J Upadhyay, Sanjay Kapadia, Seema Bhatt, R D Dixit, A M Kadri, Harsh Bakshi, Chaitanya Joshi, Madhvi Joshi |  |
| EPI_ISL_515571, EPI_ISL_515576, EPI_ISL_515577, EPI_ISL_515584, EPI_ISL_515585, EPI_ISL_515587, EPI_ISL_515588, EPI_ISL_515590, EPI_ISL_515591, EPI_ISL_515594, EPI_ISL_515596, EPI_ISL_515600, EPI_ISL_515603, EPI_ISL_515607, EPI_ISL_515612, EPI_ISL_515619, EPI_ISL_515620, EPI_ISL_515624, EPI_ISL_515625, EPI_ISL_515627, EPI_ISL_515629, EPI_ISL_515632, EPI_ISL_515633, EPI_ISL_515634, EPI_ISL_515635, EPI_ISL_515637, EPI_ISL_515638, EPI_ISL_515639, EPI_ISL_515644, EPI_ISL_515646, EPI_ISL_515648, EPI_ISL_515651, EPI_ISL_515653, EPI_ISL_515654, EPI_ISL_515659, EPI_ISL_515660, EPI_ISL_515661, EPI_ISL_515662, EPI_ISL_515665, EPI_ISL_515666, EPI_ISL_515668, EPI_ISL_515669, EPI_ISL_515674, EPI_ISL_515675, EPI_ISL_515676, EPI_ISL_515677, EPI_ISL_515678, EPI_ISL_515679, EPI_ISL_515680, EPI_ISL_515681, EPI_ISL_515682, EPI_ISL_515684, EPI_ISL_515685, EPI_ISL_515686, EPI_ISL_515687, EPI_ISL_515692, EPI_ISL_515693, EPI_ISL_515694, EPI_ISL_515696, EPI_ISL_515700, EPI_ISL_515702, EPI_ISL_515703, EPI_ISL_515704, EPI_ISL_515706, EPI_ISL_515707, EPI_ISL_515713, EPI_ISL_515714, EPI_ISL_515716, EPI_ISL_515717, EPI_ISL_515719, EPI_ISL_515722, EPI_ISL_515724, EPI_ISL_515725, EPI_ISL_515726, EPI_ISL_515727, EPI_ISL_515728, EPI_ISL_515730, EPI_ISL_515742, EPI_ISL_515743, EPI_ISL_515747, EPI_ISL_515749, EPI_ISL_515750, EPI_ISL_515754, EPI_ISL_515755, EPI_ISL_515758, EPI_ISL_515763, EPI_ISL_515765, EPI_ISL_515768, EPI_ISL_515769, EPI_ISL_515770, EPI_ISL_515774, EPI_ISL_515776, EPI_ISL_515780, EPI_ISL_515782, EPI_ISL_515783, EPI_ISL_515785, EPI_ISL_515786, EPI_ISL_515787, EPI_ISL_515788, EPI_ISL_515789, EPI_ISL_515790, EPI_ISL_515791, EPI_ISL_515792, EPI_ISL_515794, EPI_ISL_515796, EPI_ISL_515797, EPI_ISL_515799 |                                                                                            |                                                                                     |                                                                                                                                                                                                                                                          |                                                                                                                                                                                                                                                                                                                                                                                                                     |  |
| see above                                                                                                                                                                                                                                                                                                                                                                                                                                                                                                                                                                                                                                                                                                                                                                                                                                                                                                                                                                                                                                                                                                                                                                                                                                                                                                                                                                                                                                                                                                                                                                                                                                                                                                                                                                      | NHLIS-IALCH                                                                                | KRISP, KZN Research Innovation and Sequencing Platform                              |                                                                                                                                                                                                                                                          | Giandhari J, Pillay S, Lessells R, Mdlalose K, York D, Khan S, Tegally H, Wilkinson E, de Oliveira T                                                                                                                                                                                                                                                                                                                |  |
| EPI_ISL_515801, EPI_ISL_515802, EPI_ISL_515803, EPI_ISL_515804, EPI_ISL_515805, EPI_ISL_515806, EPI_ISL_515807, EPI_ISL_515808, EPI_ISL_515811, EPI_ISL_515813, EPI_ISL_515815, EPI_ISL_515816, EPI_ISL_515819, EPI_ISL_515820, EPI_ISL_515827, EPI_ISL_515830, EPI_ISL_515832, EPI_ISL_515833, EPI_ISL_515834, EPI_ISL_515836, EPI_ISL_515838, EPI_ISL_515846, EPI_ISL_515848, EPI_ISL_515850, EPI_ISL_515856, EPI_ISL_515858, EPI_ISL_515859, EPI_ISL_515865, EPI_ISL_515867, EPI_ISL_515871, EPI_ISL_515882, EPI_ISL_515884, EPI_ISL_515886, EPI_ISL_515889, EPI_ISL_515891, EPI_ISL_515893                                                                                                                                                                                                                                                                                                                                                                                                                                                                                                                                                                                                                                                                                                                                                                                                                                                                                                                                                                                                                                                                                                                                                                                 |                                                                                            |                                                                                     |                                                                                                                                                                                                                                                          |                                                                                                                                                                                                                                                                                                                                                                                                                     |  |
| see above                                                                                                                                                                                                                                                                                                                                                                                                                                                                                                                                                                                                                                                                                                                                                                                                                                                                                                                                                                                                                                                                                                                                                                                                                                                                                                                                                                                                                                                                                                                                                                                                                                                                                                                                                                      | Medical Disagnostics Services (MDS)                                                        | KRISP, KZN Research Innovation and Sequencing Platform                              |                                                                                                                                                                                                                                                          | Giandhari J, Pillay S, Lessells R, ChimukangaraB, Mdlalose K, York D, Khan S, Tegally H, Wilkinson E, de Oliveira T                                                                                                                                                                                                                                                                                                 |  |

|                                                                                                                                                                                                                                                                                                                                                                                                                                                                                                                                                                                                                                                                                                                                                                                                                                                                                                                                                                                                                                                                                                                                                                                                                                                                                                                                                                                                                                                                                                                                                                                                                                                                                                                                                                                                                                                                                                                                                                |                                                                                            |                                                                                            |                                                                                                                                                                                                                                                                                         |
|----------------------------------------------------------------------------------------------------------------------------------------------------------------------------------------------------------------------------------------------------------------------------------------------------------------------------------------------------------------------------------------------------------------------------------------------------------------------------------------------------------------------------------------------------------------------------------------------------------------------------------------------------------------------------------------------------------------------------------------------------------------------------------------------------------------------------------------------------------------------------------------------------------------------------------------------------------------------------------------------------------------------------------------------------------------------------------------------------------------------------------------------------------------------------------------------------------------------------------------------------------------------------------------------------------------------------------------------------------------------------------------------------------------------------------------------------------------------------------------------------------------------------------------------------------------------------------------------------------------------------------------------------------------------------------------------------------------------------------------------------------------------------------------------------------------------------------------------------------------------------------------------------------------------------------------------------------------|--------------------------------------------------------------------------------------------|--------------------------------------------------------------------------------------------|-----------------------------------------------------------------------------------------------------------------------------------------------------------------------------------------------------------------------------------------------------------------------------------------|
| EPI_ISL_516432, EPI_ISL_516433, EPI_ISL_516434, EPI_ISL_516435, EPI_ISL_516436, EPI_ISL_516437, EPI_ISL_516438, EPI_ISL_516439, EPI_ISL_516440, EPI_ISL_516441, EPI_ISL_516442, EPI_ISL_516443, EPI_ISL_516444, EPI_ISL_516445, EPI_ISL_516446, EPI_ISL_516447, EPI_ISL_516448, EPI_ISL_516449, EPI_ISL_516450, EPI_ISL_516451, EPI_ISL_516452, EPI_ISL_516453, EPI_ISL_516454, EPI_ISL_516455, EPI_ISL_516456, EPI_ISL_516457, EPI_ISL_516458, EPI_ISL_516459, EPI_ISL_516460, EPI_ISL_516461, EPI_ISL_516462, EPI_ISL_516463, EPI_ISL_516464, EPI_ISL_516465, EPI_ISL_516466, EPI_ISL_516467, EPI_ISL_516468, EPI_ISL_516469, EPI_ISL_516470, EPI_ISL_516471, EPI_ISL_516472, EPI_ISL_516473, EPI_ISL_516474, EPI_ISL_516475, EPI_ISL_516476, EPI_ISL_516477, EPI_ISL_516478, EPI_ISL_516479, EPI_ISL_516480, EPI_ISL_516481, EPI_ISL_516482, EPI_ISL_516483, EPI_ISL_516484, EPI_ISL_516485, EPI_ISL_516486, EPI_ISL_516487, EPI_ISL_516488, EPI_ISL_516489, EPI_ISL_516490, EPI_ISL_516491, EPI_ISL_516492, EPI_ISL_516493, EPI_ISL_516494, EPI_ISL_516495, EPI_ISL_516496, EPI_ISL_516497, EPI_ISL_516498, EPI_ISL_516499, EPI_ISL_516500, EPI_ISL_516501, EPI_ISL_516502, EPI_ISL_516503, EPI_ISL_516504, EPI_ISL_516505, EPI_ISL_516506, EPI_ISL_516507, EPI_ISL_516508, EPI_ISL_516509, EPI_ISL_516510, EPI_ISL_516511, EPI_ISL_516512, EPI_ISL_516513, EPI_ISL_516514, EPI_ISL_516515, EPI_ISL_516516, EPI_ISL_516517, EPI_ISL_516518, EPI_ISL_516519, EPI_ISL_516520, EPI_ISL_516521, EPI_ISL_516522, EPI_ISL_516523, EPI_ISL_516524, EPI_ISL_516525, EPI_ISL_516526, EPI_ISL_516527, EPI_ISL_516528, EPI_ISL_516529, EPI_ISL_516530, EPI_ISL_516531, EPI_ISL_516532, EPI_ISL_516533, EPI_ISL_516534, EPI_ISL_516535, EPI_ISL_516536, EPI_ISL_516537, EPI_ISL_516538, EPI_ISL_516539, EPI_ISL_516540, EPI_ISL_516541, EPI_ISL_516542, EPI_ISL_516543, EPI_ISL_516544, EPI_ISL_516545, EPI_ISL_516546, EPI_ISL_516547, EPI_ISL_516548, EPI_ISL_516549 | University of Wisconsin-Madison AIDS Vaccine Research Laboratories                         | University of Wisconsin-Madison AIDS Vaccine Research Laboratories                         | Gage Moreno, Katarina Braun, et al. AIDS Vaccine Research Laboratories                                                                                                                                                                                                                  |
| see above                                                                                                                                                                                                                                                                                                                                                                                                                                                                                                                                                                                                                                                                                                                                                                                                                                                                                                                                                                                                                                                                                                                                                                                                                                                                                                                                                                                                                                                                                                                                                                                                                                                                                                                                                                                                                                                                                                                                                      | University of Wisconsin-Madison AIDS Vaccine Research Laboratories                         | University of Wisconsin-Madison AIDS Vaccine Research Laboratories                         | Gage Moreno, Katarina Braun, et al. AIDS Vaccine Research Laboratories                                                                                                                                                                                                                  |
| EPI_ISL_516608                                                                                                                                                                                                                                                                                                                                                                                                                                                                                                                                                                                                                                                                                                                                                                                                                                                                                                                                                                                                                                                                                                                                                                                                                                                                                                                                                                                                                                                                                                                                                                                                                                                                                                                                                                                                                                                                                                                                                 | Instituto de Diagnostico y Referencia Epidemiologicos (INDRE)                              | Instituto de Diagnostico y Referencia Epidemiologicos (INDRE)                              | Ernesto Ramirez-Gonzalez, Abril Rodriguez-Maldonado, Claudia Wong-Arambula , Natividad Cruz-Ortiz, Tatiana Nunez-Garcia, Dayanira Arellano-Suarez, Adnan Araiza-Rodriguez, Edgar Mendieta-Condado, Lucia Hernandez-Rivas, Irma Lopez-Martinez, Gisela Barrera-Badillo.                  |
| EPI_ISL_516609, EPI_ISL_516610, EPI_ISL_516612                                                                                                                                                                                                                                                                                                                                                                                                                                                                                                                                                                                                                                                                                                                                                                                                                                                                                                                                                                                                                                                                                                                                                                                                                                                                                                                                                                                                                                                                                                                                                                                                                                                                                                                                                                                                                                                                                                                 | Instituto de Diagnostico y Referencia Epidemiologicos (INDRE)                              | Instituto de Diagnostico y Referencia Epidemiologicos (INDRE)                              | Ernesto Ramirez-Gonzalez, Abril Rodriguez-Maldonado, Claudia Wong-Arambula , Natividad Cruz-Ortiz, Tatiana Nunez-Garcia, Dayanira Arellano-Suarez, Adnan Araiza-Rodriguez, Fabiola Garces-Ayala, Lucia Hernandez-Rivas, Irma Lopez-Martinez, Gisela Barrera-Badillo.                    |
| EPI_ISL_516613                                                                                                                                                                                                                                                                                                                                                                                                                                                                                                                                                                                                                                                                                                                                                                                                                                                                                                                                                                                                                                                                                                                                                                                                                                                                                                                                                                                                                                                                                                                                                                                                                                                                                                                                                                                                                                                                                                                                                 | Instituto de Diagnostico y Referencia Epidemiologicos (INDRE)                              | Instituto de Diagnostico y Referencia Epidemiologicos (INDRE)                              | Ernesto Ramirez-Gonzalez, Abril Rodriguez-Maldonado, Claudia Wong-Arambula , Natividad Cruz-Ortiz, Tatiana Nunez-Garcia, Dayanira Arellano-Suarez, Adnan Araiza-Rodriguez, Edgar Mendieta-Condado, Lucia Hernandez-Rivas, Irma Lopez-Martinez, Gisela Barrera-Badillo.                  |
| EPI_ISL_516614, EPI_ISL_516615, EPI_ISL_516616, EPI_ISL_516617                                                                                                                                                                                                                                                                                                                                                                                                                                                                                                                                                                                                                                                                                                                                                                                                                                                                                                                                                                                                                                                                                                                                                                                                                                                                                                                                                                                                                                                                                                                                                                                                                                                                                                                                                                                                                                                                                                 | Instituto de Diagnostico y Referencia Epidemiologicos (INDRE)                              | Instituto de Diagnostico y Referencia Epidemiologicos (INDRE)                              | Ernesto Ramirez-Gonzalez, Abril Rodriguez-Maldonado, Claudia Wong-Arambula , Natividad Cruz-Ortiz, Tatiana Nunez-Garcia, Dayanira Arellano-Suarez, Adnan Araiza-Rodriguez, Fabiola Garces-Ayala, Lucia Hernandez-Rivas, Irma Lopez-Martinez, Gisela Barrera-Badillo.                    |
| EPI_ISL_518033, EPI_ISL_518035, EPI_ISL_518037, EPI_ISL_518038, EPI_ISL_518039, EPI_ISL_518041, EPI_ISL_518046, EPI_ISL_518048, EPI_ISL_518049, EPI_ISL_518050, EPI_ISL_518051, EPI_ISL_518052, EPI_ISL_518053                                                                                                                                                                                                                                                                                                                                                                                                                                                                                                                                                                                                                                                                                                                                                                                                                                                                                                                                                                                                                                                                                                                                                                                                                                                                                                                                                                                                                                                                                                                                                                                                                                                                                                                                                 | NHLS-IALCH                                                                                 | KRISP, KZN Research Innovation and Sequencing Platform                                     | Giandhari J, Pillay S, Lessells R, Mdlalose K, York D, Khan S, Tegally H, Wilkinson E, de Oliveira T                                                                                                                                                                                    |
| see above                                                                                                                                                                                                                                                                                                                                                                                                                                                                                                                                                                                                                                                                                                                                                                                                                                                                                                                                                                                                                                                                                                                                                                                                                                                                                                                                                                                                                                                                                                                                                                                                                                                                                                                                                                                                                                                                                                                                                      | NHLS-IALCH                                                                                 | KRISP, KZN Research Innovation and Sequencing Platform                                     | Giandhari J, Pillay S, Lessells R, Mdlalose K, York D, Khan S, Tegally H, Wilkinson E, de Oliveira T                                                                                                                                                                                    |
| EPI_ISL_522255, EPI_ISL_522256, EPI_ISL_522257, EPI_ISL_522258, EPI_ISL_522262, EPI_ISL_522264, EPI_ISL_522266, EPI_ISL_522267, EPI_ISL_522269, EPI_ISL_522270, EPI_ISL_522271, EPI_ISL_522272, EPI_ISL_522273, EPI_ISL_522274, EPI_ISL_522276, EPI_ISL_522278, EPI_ISL_522279, EPI_ISL_522281, EPI_ISL_522283, EPI_ISL_522284, EPI_ISL_522286, EPI_ISL_522287, EPI_ISL_522288, EPI_ISL_522289, EPI_ISL_522292, EPI_ISL_522293, EPI_ISL_522294, EPI_ISL_522295, EPI_ISL_522296, EPI_ISL_522297, EPI_ISL_522298, EPI_ISL_522299, EPI_ISL_522910, EPI_ISL_522911, EPI_ISL_522912, EPI_ISL_522913, EPI_ISL_522914, EPI_ISL_522915, EPI_ISL_522916, EPI_ISL_522917, EPI_ISL_522918, EPI_ISL_522919, EPI_ISL_522920, EPI_ISL_522921, EPI_ISL_522922, EPI_ISL_522923, EPI_ISL_522924, EPI_ISL_522925, EPI_ISL_522926, EPI_ISL_522927, EPI_ISL_522928, EPI_ISL_522929, EPI_ISL_522930, EPI_ISL_522931, EPI_ISL_522932, EPI_ISL_522933, EPI_ISL_522934, EPI_ISL_522935, EPI_ISL_522936, EPI_ISL_522937, EPI_ISL_522938, EPI_ISL_522939                                                                                                                                                                                                                                                                                                                                                                                                                                                                                                                                                                                                                                                                                                                                                                                                                                                                                                                                 | Utah Public Health Laboratory                                                              | Utah Public Health Laboratory                                                              | Erin Young, Kelly Oakeson                                                                                                                                                                                                                                                               |
| see above                                                                                                                                                                                                                                                                                                                                                                                                                                                                                                                                                                                                                                                                                                                                                                                                                                                                                                                                                                                                                                                                                                                                                                                                                                                                                                                                                                                                                                                                                                                                                                                                                                                                                                                                                                                                                                                                                                                                                      | Utah Public Health Laboratory                                                              | Utah Public Health Laboratory                                                              | Erin Young, Kelly Oakeson                                                                                                                                                                                                                                                               |
| EPI_ISL_522407, EPI_ISL_522408, EPI_ISL_522409                                                                                                                                                                                                                                                                                                                                                                                                                                                                                                                                                                                                                                                                                                                                                                                                                                                                                                                                                                                                                                                                                                                                                                                                                                                                                                                                                                                                                                                                                                                                                                                                                                                                                                                                                                                                                                                                                                                 | Department of Infection Prevention and Infectious Diseases, University Hospital Regensburg | Department of Infection Prevention and Infectious Diseases, University Hospital Regensburg | Fritsch,J., Holzmann,T., Schneider-Brachert,W.                                                                                                                                                                                                                                          |
| EPI_ISL_522881, EPI_ISL_522882, EPI_ISL_522883, EPI_ISL_522884, EPI_ISL_522885, EPI_ISL_522886, EPI_ISL_522887, EPI_ISL_522888, EPI_ISL_522889, EPI_ISL_522890, EPI_ISL_522891, EPI_ISL_522892, EPI_ISL_522893, EPI_ISL_522894, EPI_ISL_522895, EPI_ISL_522896, EPI_ISL_522897, EPI_ISL_522898, EPI_ISL_522899, EPI_ISL_522900, EPI_ISL_522901, EPI_ISL_522902, EPI_ISL_522903, EPI_ISL_522904, EPI_ISL_522905, EPI_ISL_522906, EPI_ISL_522907, EPI_ISL_522908, EPI_ISL_522909, EPI_ISL_522910, EPI_ISL_522911, EPI_ISL_522912, EPI_ISL_522913, EPI_ISL_522914, EPI_ISL_522915, EPI_ISL_522916, EPI_ISL_522917, EPI_ISL_522918, EPI_ISL_522919, EPI_ISL_522920, EPI_ISL_522921, EPI_ISL_522922, EPI_ISL_522923, EPI_ISL_522924, EPI_ISL_522925, EPI_ISL_522926, EPI_ISL_522927, EPI_ISL_522928, EPI_ISL_522929, EPI_ISL_522930, EPI_ISL_522931, EPI_ISL_522932, EPI_ISL_522933, EPI_ISL_522934, EPI_ISL_522935, EPI_ISL_522936, EPI_ISL_522937, EPI_ISL_522938, EPI_ISL_522939                                                                                                                                                                                                                                                                                                                                                                                                                                                                                                                                                                                                                                                                                                                                                                                                                                                                                                                                                                                 | University of Wisconsin-Madison AIDS Vaccine Research Laboratories                         | University of Wisconsin-Madison AIDS Vaccine Research Laboratories                         | Gage Moreno, Katarina Braun, et al. AIDS Vaccine Research Laboratories                                                                                                                                                                                                                  |
| see above                                                                                                                                                                                                                                                                                                                                                                                                                                                                                                                                                                                                                                                                                                                                                                                                                                                                                                                                                                                                                                                                                                                                                                                                                                                                                                                                                                                                                                                                                                                                                                                                                                                                                                                                                                                                                                                                                                                                                      | University of Wisconsin-Madison AIDS Vaccine Research Laboratories                         | University of Wisconsin-Madison AIDS Vaccine Research Laboratories                         | Gage Moreno, Katarina Braun, et al. AIDS Vaccine Research Laboratories                                                                                                                                                                                                                  |
| EPI_ISL_525338, EPI_ISL_525340, EPI_ISL_525341, EPI_ISL_525342, EPI_ISL_525343, EPI_ISL_525344, EPI_ISL_525345, EPI_ISL_525347, EPI_ISL_525351                                                                                                                                                                                                                                                                                                                                                                                                                                                                                                                                                                                                                                                                                                                                                                                                                                                                                                                                                                                                                                                                                                                                                                                                                                                                                                                                                                                                                                                                                                                                                                                                                                                                                                                                                                                                                 | Utah Public Health Laboratory                                                              | Utah Public Health Laboratory                                                              | Erin Young, Kelly Oakeson                                                                                                                                                                                                                                                               |
| EPI_ISL_526337, EPI_ISL_526338, EPI_ISL_526339, EPI_ISL_526340, EPI_ISL_526341, EPI_ISL_526342, EPI_ISL_526343, EPI_ISL_526344, EPI_ISL_526345, EPI_ISL_526346, EPI_ISL_526347, EPI_ISL_526348, EPI_ISL_526349, EPI_ISL_526350, EPI_ISL_526351, EPI_ISL_526352, EPI_ISL_526353, EPI_ISL_526354, EPI_ISL_526355, EPI_ISL_526356, EPI_ISL_526357, EPI_ISL_526358, EPI_ISL_526359, EPI_ISL_526360, EPI_ISL_526361, EPI_ISL_526362, EPI_ISL_526363, EPI_ISL_526364, EPI_ISL_526365, EPI_ISL_526366, EPI_ISL_526367, EPI_ISL_526368, EPI_ISL_526369, EPI_ISL_526370, EPI_ISL_526371, EPI_ISL_526372, EPI_ISL_526373, EPI_ISL_526374, EPI_ISL_526375, EPI_ISL_526376, EPI_ISL_526377, EPI_ISL_526378, EPI_ISL_526379, EPI_ISL_526380, EPI_ISL_526381, EPI_ISL_526382, EPI_ISL_526383, EPI_ISL_526384, EPI_ISL_526385, EPI_ISL_526386, EPI_ISL_526387, EPI_ISL_526388, EPI_ISL_526389, EPI_ISL_526390, EPI_ISL_526391, EPI_ISL_526392, EPI_ISL_526393, EPI_ISL_526394, EPI_ISL_526395, EPI_ISL_526396, EPI_ISL_526397, EPI_ISL_526398, EPI_ISL_526399, EPI_ISL_526400, EPI_ISL_526401, EPI_ISL_526402, EPI_ISL_526403, EPI_ISL_526404, EPI_ISL_526405, EPI_ISL_526406, EPI_ISL_526407, EPI_ISL_526408, EPI_ISL_526409, EPI_ISL_526410, EPI_ISL_526411, EPI_ISL_526412, EPI_ISL_526413, EPI_ISL_526414, EPI_ISL_526415, EPI_ISL_526416, EPI_ISL_526417, EPI_ISL_526418, EPI_ISL_526419, EPI_ISL_526420, EPI_ISL_526421, EPI_ISL_526422, EPI_ISL_526423, EPI_ISL_526424, EPI_ISL_526425, EPI_ISL_526426, EPI_ISL_526427, EPI_ISL_526428, EPI_ISL_526429, EPI_ISL_526430                                                                                                                                                                                                                                                                                                                                                                                                 | Queens Medical Centre, Clinical Microbiology Department / DeepSeq Nottingham               | COVID-19 Genomics UK (COG-UK) Consortium                                                   | Gemma Clark, Wendy Smith, Manjinder Khakh, Vicki M Fleming, Michelle M Lister, Hannah Howson-Wells, Jonathan Ball, Patrick McClure, Joseph Chappell, Theocharis Tsoferidis, Nadine Holmes, Matthew Carlisle, Christopher Moore, Fei Sang, Johnny Debebe, Victoria Wright, Matthew Loose |
| see above                                                                                                                                                                                                                                                                                                                                                                                                                                                                                                                                                                                                                                                                                                                                                                                                                                                                                                                                                                                                                                                                                                                                                                                                                                                                                                                                                                                                                                                                                                                                                                                                                                                                                                                                                                                                                                                                                                                                                      | Queens Medical Centre, Clinical Microbiology Department / DeepSeq Nottingham               | COVID-19 Genomics UK (COG-UK) Consortium                                                   | Gemma Clark, Wendy Smith, Manjinder Khakh, Vicki M Fleming, Michelle M Lister, Hannah Howson-Wells, Jonathan Ball, Patrick McClure, Joseph Chappell, Theocharis Tsoferidis, Nadine Holmes, Matthew Carlisle, Christopher Moore, Fei Sang, Johnny Debebe, Victoria Wright, Matthew Loose |
| EPI_ISL_527739                                                                                                                                                                                                                                                                                                                                                                                                                                                                                                                                                                                                                                                                                                                                                                                                                                                                                                                                                                                                                                                                                                                                                                                                                                                                                                                                                                                                                                                                                                                                                                                                                                                                                                                                                                                                                                                                                                                                                 | Hospital Mexico [San Jose/San Jose]                                                        | Incienza, Instituto Costarricense de Investigación y Enseñanza en Nutrición y Salud        | Francisco Duarte, Hebleen Porras, Claudio Soto-Garita, Estela Cordero, Adriana Godinez & Melany Calderon                                                                                                                                                                                |
| EPI_ISL_527740                                                                                                                                                                                                                                                                                                                                                                                                                                                                                                                                                                                                                                                                                                                                                                                                                                                                                                                                                                                                                                                                                                                                                                                                                                                                                                                                                                                                                                                                                                                                                                                                                                                                                                                                                                                                                                                                                                                                                 | Area De Salud Alajuela Norte - Clinica Dr. Marcial Rodriguez                               | Incienza, Instituto Costarricense de Investigación y Enseñanza en Nutrición y Salud        | Francisco Duarte, Hebleen Porras, Claudio Soto-Garita, Estela Cordero, Adriana Godinez & Melany Calderon                                                                                                                                                                                |
| EPI_ISL_527741                                                                                                                                                                                                                                                                                                                                                                                                                                                                                                                                                                                                                                                                                                                                                                                                                                                                                                                                                                                                                                                                                                                                                                                                                                                                                                                                                                                                                                                                                                                                                                                                                                                                                                                                                                                                                                                                                                                                                 | Hospital Metropolitan                                                                      | Incienza, Instituto Costarricense de Investigación y Enseñanza en Nutrición y Salud        | Francisco Duarte, Hebleen Porras, Claudio Soto-Garita, Estela Cordero, Adriana Godinez & Melany Calderon                                                                                                                                                                                |
| EPI_ISL_527742                                                                                                                                                                                                                                                                                                                                                                                                                                                                                                                                                                                                                                                                                                                                                                                                                                                                                                                                                                                                                                                                                                                                                                                                                                                                                                                                                                                                                                                                                                                                                                                                                                                                                                                                                                                                                                                                                                                                                 | Centro Nacional De Rehabilitacion Humberto Araya Rojas (Cenare)                            | Incienza, Instituto Costarricense de Investigación y Enseñanza en Nutrición y Salud        | Francisco Duarte, Hebleen Porras, Claudio Soto-Garita, Estela Cordero, Adriana Godinez & Melany Calderon                                                                                                                                                                                |
| EPI_ISL_527743, EPI_ISL_527744                                                                                                                                                                                                                                                                                                                                                                                                                                                                                                                                                                                                                                                                                                                                                                                                                                                                                                                                                                                                                                                                                                                                                                                                                                                                                                                                                                                                                                                                                                                                                                                                                                                                                                                                                                                                                                                                                                                                 | Hospital Cima                                                                              | Incienza, Instituto Costarricense de Investigación y Enseñanza en Nutrición y Salud        | Francisco Duarte, Hebleen Porras, Claudio Soto-Garita, Estela Cordero, Adriana Godinez & Melany Calderon                                                                                                                                                                                |
| EPI_ISL_527745                                                                                                                                                                                                                                                                                                                                                                                                                                                                                                                                                                                                                                                                                                                                                                                                                                                                                                                                                                                                                                                                                                                                                                                                                                                                                                                                                                                                                                                                                                                                                                                                                                                                                                                                                                                                                                                                                                                                                 | Area De Salud Corredores                                                                   | Incienza, Instituto Costarricense de Investigación y Enseñanza en Nutrición y Salud        | Francisco Duarte, Hebleen Porras, Claudio Soto-Garita, Estela Cordero, Adriana Godinez & Melany Calderon                                                                                                                                                                                |
| EPI_ISL_527746, EPI_ISL_527747                                                                                                                                                                                                                                                                                                                                                                                                                                                                                                                                                                                                                                                                                                                                                                                                                                                                                                                                                                                                                                                                                                                                                                                                                                                                                                                                                                                                                                                                                                                                                                                                                                                                                                                                                                                                                                                                                                                                 | Area De Salud La Cruz                                                                      | Incienza, Instituto Costarricense de Investigación y Enseñanza en Nutrición y Salud        | Francisco Duarte, Hebleen Porras, Claudio Soto-Garita, Estela Cordero, Adriana Godinez & Melany Calderon                                                                                                                                                                                |
| EPI_ISL_527748                                                                                                                                                                                                                                                                                                                                                                                                                                                                                                                                                                                                                                                                                                                                                                                                                                                                                                                                                                                                                                                                                                                                                                                                                                                                                                                                                                                                                                                                                                                                                                                                                                                                                                                                                                                                                                                                                                                                                 | Area De Salud Corredores                                                                   | Incienza, Instituto Costarricense de Investigación y Enseñanza en Nutrición y Salud        | Francisco Duarte, Hebleen Porras, Claudio Soto-Garita, Estela Cordero, Adriana Godinez & Melany Calderon                                                                                                                                                                                |
| EPI_ISL_527749                                                                                                                                                                                                                                                                                                                                                                                                                                                                                                                                                                                                                                                                                                                                                                                                                                                                                                                                                                                                                                                                                                                                                                                                                                                                                                                                                                                                                                                                                                                                                                                                                                                                                                                                                                                                                                                                                                                                                 | Area De Salud Alajuela Norte - Clinica Dr. Marcial Rodriguez                               | Incienza, Instituto Costarricense de Investigación y Enseñanza en Nutrición y Salud        | Francisco Duarte, Hebleen Porras, Claudio Soto-Garita, Estela Cordero, Adriana Godinez & Melany Calderon                                                                                                                                                                                |
| EPI_ISL_527750                                                                                                                                                                                                                                                                                                                                                                                                                                                                                                                                                                                                                                                                                                                                                                                                                                                                                                                                                                                                                                                                                                                                                                                                                                                                                                                                                                                                                                                                                                                                                                                                                                                                                                                                                                                                                                                                                                                                                 | Hospital De Niños Dr. Carlos Saenz Herrera [San Jose/San Jose]                             | Incienza, Instituto Costarricense de Investigación y Enseñanza en Nutrición y Salud        | Francisco Duarte, Hebleen Porras, Claudio Soto-Garita, Estela Cordero, Adriana Godinez & Melany Calderon                                                                                                                                                                                |
| EPI_ISL_527751                                                                                                                                                                                                                                                                                                                                                                                                                                                                                                                                                                                                                                                                                                                                                                                                                                                                                                                                                                                                                                                                                                                                                                                                                                                                                                                                                                                                                                                                                                                                                                                                                                                                                                                                                                                                                                                                                                                                                 | Area De Salud Corredores                                                                   | Incienza, Instituto Costarricense de Investigación y Enseñanza en Nutrición y Salud        | Francisco Duarte, Hebleen Porras, Claudio Soto-Garita, Estela Cordero, Adriana Godinez & Melany Calderon                                                                                                                                                                                |
| EPI_ISL_527752                                                                                                                                                                                                                                                                                                                                                                                                                                                                                                                                                                                                                                                                                                                                                                                                                                                                                                                                                                                                                                                                                                                                                                                                                                                                                                                                                                                                                                                                                                                                                                                                                                                                                                                                                                                                                                                                                                                                                 | Hospital Dr. Rafael A. Calderon Guardia                                                    | Incienza, Instituto Costarricense de Investigación y Enseñanza en Nutrición y Salud        | Francisco Duarte, Hebleen Porras, Claudio Soto-Garita, Estela Cordero, Adriana Godinez & Melany Calderon                                                                                                                                                                                |
| EPI_ISL_527753, EPI_ISL_527754                                                                                                                                                                                                                                                                                                                                                                                                                                                                                                                                                                                                                                                                                                                                                                                                                                                                                                                                                                                                                                                                                                                                                                                                                                                                                                                                                                                                                                                                                                                                                                                                                                                                                                                                                                                                                                                                                                                                 | Hospital San Vicente De Paul                                                               | Incienza, Instituto Costarricense de Investigación y Enseñanza en Nutrición y Salud        | Francisco Duarte, Hebleen Porras, Claudio Soto-Garita, Estela Cordero, Adriana Godinez & Melany Calderon                                                                                                                                                                                |
| EPI_ISL_527755                                                                                                                                                                                                                                                                                                                                                                                                                                                                                                                                                                                                                                                                                                                                                                                                                                                                                                                                                                                                                                                                                                                                                                                                                                                                                                                                                                                                                                                                                                                                                                                                                                                                                                                                                                                                                                                                                                                                                 | Centro Nacional De Rehabilitacion Humberto Araya Rojas (Cenare)                            | Incienza, Instituto Costarricense de Investigación y Enseñanza en Nutrición y Salud        | Francisco Duarte, Hebleen Porras, Claudio Soto-Garita, Estela Cordero, Adriana Godinez & Melany Calderon                                                                                                                                                                                |
| EPI_ISL_527756                                                                                                                                                                                                                                                                                                                                                                                                                                                                                                                                                                                                                                                                                                                                                                                                                                                                                                                                                                                                                                                                                                                                                                                                                                                                                                                                                                                                                                                                                                                                                                                                                                                                                                                                                                                                                                                                                                                                                 | Area De Salud Aserri                                                                       | Incienza, Instituto Costarricense de Investigación y                                       | Francisco Duarte, Hebleen Porras, Claudio Soto-Garita, Estela Cordero, Adriana Godinez & Melany Calderon                                                                                                                                                                                |

Enseñanza en Nutrición y Salud

|                                                                                                                                                                                                                                                                                                                                                                                                                                                                                                                                                                                                                                                                                                                                                                                                                                                                                                                                                                                                                                                                                                                                                                                                                                                                                                                                                                                                                                                                |                                                                              |                                                                                                                          |                                                                                                                                                                                                                                                                                                                                     |
|----------------------------------------------------------------------------------------------------------------------------------------------------------------------------------------------------------------------------------------------------------------------------------------------------------------------------------------------------------------------------------------------------------------------------------------------------------------------------------------------------------------------------------------------------------------------------------------------------------------------------------------------------------------------------------------------------------------------------------------------------------------------------------------------------------------------------------------------------------------------------------------------------------------------------------------------------------------------------------------------------------------------------------------------------------------------------------------------------------------------------------------------------------------------------------------------------------------------------------------------------------------------------------------------------------------------------------------------------------------------------------------------------------------------------------------------------------------|------------------------------------------------------------------------------|--------------------------------------------------------------------------------------------------------------------------|-------------------------------------------------------------------------------------------------------------------------------------------------------------------------------------------------------------------------------------------------------------------------------------------------------------------------------------|
| EPI_ISL_527757                                                                                                                                                                                                                                                                                                                                                                                                                                                                                                                                                                                                                                                                                                                                                                                                                                                                                                                                                                                                                                                                                                                                                                                                                                                                                                                                                                                                                                                 | Area De Salud Goicoechea 1                                                   | Incienza, Instituto Costarricense de Investigación y Enseñanza en Nutrición y Salud                                      | Francisco Duarte, Hebleen Porras, Claudio Soto-Garita, Estela Cordero, Adriana Godinez & Melany Calderon                                                                                                                                                                                                                            |
| EPI_ISL_527758                                                                                                                                                                                                                                                                                                                                                                                                                                                                                                                                                                                                                                                                                                                                                                                                                                                                                                                                                                                                                                                                                                                                                                                                                                                                                                                                                                                                                                                 | Hospital Mexico [San Jose/San Jose]                                          | Incienza, Instituto Costarricense de Investigación y Enseñanza en Nutrición y Salud                                      | Francisco Duarte, Hebleen Porras, Claudio Soto-Garita, Estela Cordero, Adriana Godinez & Melany Calderon                                                                                                                                                                                                                            |
| EPI_ISL_527759                                                                                                                                                                                                                                                                                                                                                                                                                                                                                                                                                                                                                                                                                                                                                                                                                                                                                                                                                                                                                                                                                                                                                                                                                                                                                                                                                                                                                                                 | Clinica Biblica                                                              | Incienza, Instituto Costarricense de Investigación y Enseñanza en Nutrición y Salud                                      | Francisco Duarte, Hebleen Porras, Claudio Soto-Garita, Estela Cordero, Adriana Godinez & Melany Calderon                                                                                                                                                                                                                            |
| EPI_ISL_527760                                                                                                                                                                                                                                                                                                                                                                                                                                                                                                                                                                                                                                                                                                                                                                                                                                                                                                                                                                                                                                                                                                                                                                                                                                                                                                                                                                                                                                                 | Area De Salud La Cruz                                                        | Incienza, Instituto Costarricense de Investigación y Enseñanza en Nutrición y Salud                                      | Francisco Duarte, Hebleen Porras, Claudio Soto-Garita, Estela Cordero, Adriana Godinez & Melany Calderon                                                                                                                                                                                                                            |
| EPI_ISL_527794, EPI_ISL_527795, EPI_ISL_527796, EPI_ISL_527797, EPI_ISL_527798, EPI_ISL_527799, EPI_ISL_527800, EPI_ISL_527801, EPI_ISL_527802, EPI_ISL_527803, EPI_ISL_527804, EPI_ISL_527805, EPI_ISL_527806, EPI_ISL_527807, EPI_ISL_527808                                                                                                                                                                                                                                                                                                                                                                                                                                                                                                                                                                                                                                                                                                                                                                                                                                                                                                                                                                                                                                                                                                                                                                                                                 | see above                                                                    | University of Wisconsin-Madison AIDS Vaccine Research Laboratories                                                       | Gage Moreno, Katarina Braun, et al. AIDS Vaccine Research Laboratories                                                                                                                                                                                                                                                              |
| EPI_ISL_528540, EPI_ISL_528541                                                                                                                                                                                                                                                                                                                                                                                                                                                                                                                                                                                                                                                                                                                                                                                                                                                                                                                                                                                                                                                                                                                                                                                                                                                                                                                                                                                                                                 | National Genomics Core-Center for DNA Fingerprinting and Diagnostics         | National Genomics Core- Center for DNA Fingerprinting and Diagnostics (NGC-CDFD)- DBT's PAN-INDIA-1000 Genome consortium | G Shashikanth, Heena Shah, Bala Pratyusha, Vinay Donipadi, K.Manohar, Madhumohan Rao, Shubhra Ganguli, Suchitra Upreti, Swathi Chodisetty, Vani Singh, R Harinarayanan, Rashna Bhandari, Murali Dharan Bhashyam, Debashish Mitra, Divya Vashisht, Ashwin Dalal                                                                      |
| EPI_ISL_528542, EPI_ISL_528543, EPI_ISL_528544, EPI_ISL_528545, EPI_ISL_528546, EPI_ISL_528547, EPI_ISL_528548, EPI_ISL_528549                                                                                                                                                                                                                                                                                                                                                                                                                                                                                                                                                                                                                                                                                                                                                                                                                                                                                                                                                                                                                                                                                                                                                                                                                                                                                                                                 | National Genomics Core-Center for DNA Fingerprinting and Diagnostics         | National Genomics Core- Center for DNA Fingerprinting and Diagnostics (NGC-CDFD)- DBT's PAN-INDIA-1000 Genome consortium | G Shashikanth, Heena Shah, Bala Pratyusha, Vinay Donipadi, S Vanantha Rani, M Sri Lalitha, R. Angalena, Usha Rani Dutta, Nimmala Naresh, Nanci Rani K, Ch Venkateshwar Goud, Devinder Singh Negi, R Harinarayanan, Rashna Bhandari, Murali Dharan Bhashyam, Debashish Mitra, Divya Vashisht, Ashwin Dalal                           |
| EPI_ISL_528565, EPI_ISL_528566, EPI_ISL_528567, EPI_ISL_528568, EPI_ISL_528569, EPI_ISL_528570, EPI_ISL_528571, EPI_ISL_528572                                                                                                                                                                                                                                                                                                                                                                                                                                                                                                                                                                                                                                                                                                                                                                                                                                                                                                                                                                                                                                                                                                                                                                                                                                                                                                                                 | National Genomics Core-Center for DNA Fingerprinting and Diagnostics         | National Genomics Core- Center for DNA Fingerprinting and Diagnostics (NGC-CDFD)- DBT's PAN-INDIA-1000 Genome consortium | G Shashikanth, Heena Shah, Bala Pratyusha, Vinay Donipadi, Rajitha Ponnala, Seyed Khaja Ali, B. Krishna Murthy, Akruhi Shah, Jayashree Ladke, Shivangi Wagh, Asodu Sandeep Sarma, Sunu Joseph, R Harinarayanan, Rashna Bhandari, Murali Dharan Bhashyam, Debashish Mitra, Divya Vashisht, Ashwin Dalal                              |
| EPI_ISL_528581, EPI_ISL_528582, EPI_ISL_528583, EPI_ISL_528584, EPI_ISL_528585, EPI_ISL_528586, EPI_ISL_528587                                                                                                                                                                                                                                                                                                                                                                                                                                                                                                                                                                                                                                                                                                                                                                                                                                                                                                                                                                                                                                                                                                                                                                                                                                                                                                                                                 | National Genomics Core-Center for DNA Fingerprinting and Diagnostics         | National Genomics Core- Center for DNA Fingerprinting and Diagnostics (NGC-CDFD)- DBT's PAN-INDIA-1000 Genome consortium | G Shashikanth, Heena Shah, Bala Pratyusha, Vinay Donipadi, Bathula Siddardha, Vineesha Oddi, Lavanya Banda, Surya Chodisetty, Abhijeeth Singh Thakur, Mohammad Mudassar, Nalini Raghunathan, Rajeshree Sanyal, R Harinarayanan, Rashna Bhandari, Murali Dharan Bhashyam, Debashish Mitra, Divya Vashisht, Ashwin Dalal              |
| EPI_ISL_528625, EPI_ISL_528626, EPI_ISL_528627, EPI_ISL_528628, EPI_ISL_528629, EPI_ISL_528630                                                                                                                                                                                                                                                                                                                                                                                                                                                                                                                                                                                                                                                                                                                                                                                                                                                                                                                                                                                                                                                                                                                                                                                                                                                                                                                                                                 | National Genomics Core-Center for DNA Fingerprinting and Diagnostics         | National Genomics Core- Center for DNA Fingerprinting and Diagnostics (NGC-CDFD)- DBT's PAN-INDIA-1000 Genome consortium | G Shashikanth, Heena Shah, Bala Pratyusha, Vinay Donipadi, K.Manohar, Madhumohan Rao, Shubhra Ganguli, Suchitra Upreti, Swathi Chodisetty, Vani Singh, R Harinarayanan, Rashna Bhandari, Murali Dharan Bhashyam, Debashish Mitra, Divya Vashisht, Ashwin Dalal                                                                      |
| EPI_ISL_528880                                                                                                                                                                                                                                                                                                                                                                                                                                                                                                                                                                                                                                                                                                                                                                                                                                                                                                                                                                                                                                                                                                                                                                                                                                                                                                                                                                                                                                                 | National Genomics Core-Center for DNA Fingerprinting and Diagnostics         | National Genomics Core- Center for DNA Fingerprinting and Diagnostics (NGC-CDFD)- DBT's PAN-INDIA-1000 Genome consortium | G Shashikanth, Heena Shah, Bala Pratyusha, Vinay Donipadi, Bathula Siddardha, Vineesha Oddi, Lavanya Banda, Surya Chodisetty, Abhijeeth Singh Thakur, Mohammad Mudassar, Nalini Raghunathan, Rajeshree Sanyal, R Harinarayanan, Rashna Bhandari, Murali Dharan Bhashyam, Debashish Mitra, Divya Vashisht, Ashwin Dalal              |
| EPI_ISL_529080, EPI_ISL_529081, EPI_ISL_529082, EPI_ISL_529083, EPI_ISL_529084, EPI_ISL_529085, EPI_ISL_529086, EPI_ISL_529087, EPI_ISL_529088, EPI_ISL_529089, EPI_ISL_529090, EPI_ISL_529091, EPI_ISL_529092, EPI_ISL_529093, EPI_ISL_529094, EPI_ISL_529095, EPI_ISL_529096, EPI_ISL_529097, EPI_ISL_529098, EPI_ISL_529099, EPI_ISL_529100, EPI_ISL_529101, EPI_ISL_529102, EPI_ISL_529103, EPI_ISL_529104, EPI_ISL_529105, EPI_ISL_529106, EPI_ISL_529107, EPI_ISL_529108                                                                                                                                                                                                                                                                                                                                                                                                                                                                                                                                                                                                                                                                                                                                                                                                                                                                                                                                                                                 | see above                                                                    | Microbiology Division, SC DHEC                                                                                           | Flores,H.<br>Erin Young, Kelly Oakeson                                                                                                                                                                                                                                                                                              |
| EPI_ISL_529201, EPI_ISL_529202, EPI_ISL_529203, EPI_ISL_529205, EPI_ISL_529206, EPI_ISL_529207                                                                                                                                                                                                                                                                                                                                                                                                                                                                                                                                                                                                                                                                                                                                                                                                                                                                                                                                                                                                                                                                                                                                                                                                                                                                                                                                                                 | Utah Public Health Laboratory                                                | Utah Public Health Laboratory                                                                                            |                                                                                                                                                                                                                                                                                                                                     |
| EPI_ISL_529213, EPI_ISL_529214, EPI_ISL_529215, EPI_ISL_529216, EPI_ISL_529217                                                                                                                                                                                                                                                                                                                                                                                                                                                                                                                                                                                                                                                                                                                                                                                                                                                                                                                                                                                                                                                                                                                                                                                                                                                                                                                                                                                 | Beijing Institute of Microbiology and Epidemiology                           | Beijing Institute of Microbiology and Epidemiology                                                                       | Fan, Hang; Qin, E.; Wu, Y.; Guo, Y.; Zhang, X.; Yong, Y.; Hou, J.; Xu, Z.; Mu, J.; Teng, Yue; Mi, Z.; Yang, R.; Song, Yajun.; Li, B.; Cui, Y.                                                                                                                                                                                       |
| EPI_ISL_529264, EPI_ISL_529266, EPI_ISL_529276, EPI_ISL_529279, EPI_ISL_529288, EPI_ISL_529306, EPI_ISL_529307, EPI_ISL_529308, EPI_ISL_529309, EPI_ISL_529310, EPI_ISL_529311, EPI_ISL_529383, EPI_ISL_529385, EPI_ISL_529387, EPI_ISL_529410, EPI_ISL_529411, EPI_ISL_529412, EPI_ISL_529414, EPI_ISL_529423, EPI_ISL_529436, EPI_ISL_529450, EPI_ISL_529454, EPI_ISL_529455, EPI_ISL_529456, EPI_ISL_529463, EPI_ISL_529464, EPI_ISL_529467, EPI_ISL_529479, EPI_ISL_529483, EPI_ISL_529486, EPI_ISL_529504, EPI_ISL_529519, EPI_ISL_529528, EPI_ISL_529529, EPI_ISL_529530, EPI_ISL_529531, EPI_ISL_529532, EPI_ISL_529533, EPI_ISL_529534, EPI_ISL_529535, EPI_ISL_529536, EPI_ISL_529537, EPI_ISL_529538, EPI_ISL_529539, EPI_ISL_529540, EPI_ISL_529541, EPI_ISL_529542, EPI_ISL_529543, EPI_ISL_529544, EPI_ISL_529545, EPI_ISL_529546, EPI_ISL_529547, EPI_ISL_529548, EPI_ISL_529549, EPI_ISL_529550, EPI_ISL_529551, EPI_ISL_529552, EPI_ISL_529553, EPI_ISL_529554, EPI_ISL_529555, EPI_ISL_529556, EPI_ISL_529567                                                                                                                                                                                                                                                                                                                                                                                                                                 | see above                                                                    | Queens Medical Centre, Clinical Microbiology Department / DeepSeq Nottingham                                             | COVID-19 Genomics UK (COG-UK) Consortium<br>Gemma Clark, Wendy Smith, Manjinder Khakh, Vicki M Fleming, Michelle M Lister, Hannah Howson-Wells, Jonathan Ball, Patrick McClure, Joseph Chappell, Theocharis Tsoleridis, Nadine Holmes, Matthew Carlisle, Christopher Moore, Fei Sang, Johnny Debebe, Victoria Wright, Matthew Loose |
| EPI_ISL_529723, EPI_ISL_529725, EPI_ISL_529728, EPI_ISL_529729, EPI_ISL_529733, EPI_ISL_529735, EPI_ISL_529736, EPI_ISL_529739, EPI_ISL_529741, EPI_ISL_529742, EPI_ISL_529745, EPI_ISL_529746, EPI_ISL_529747, EPI_ISL_529750, EPI_ISL_529753, EPI_ISL_529758, EPI_ISL_529761, EPI_ISL_529763, EPI_ISL_529767, EPI_ISL_529772, EPI_ISL_529775, EPI_ISL_529776, EPI_ISL_529777, EPI_ISL_529778, EPI_ISL_529780, EPI_ISL_529781, EPI_ISL_529783, EPI_ISL_529786, EPI_ISL_529788, EPI_ISL_529789, EPI_ISL_529797, EPI_ISL_529798, EPI_ISL_529800, EPI_ISL_529801                                                                                                                                                                                                                                                                                                                                                                                                                                                                                                                                                                                                                                                                                                                                                                                                                                                                                                 | see above                                                                    | NHLS-IALCH                                                                                                               | KRISP, KZN Research Innovation and Sequencing Platform<br>Giandhari J, Pillay S, Lessells R, Mdlalose K, York D, Khan S, Tegally H, Wilkinson E, de Oliveira T                                                                                                                                                                      |
| EPI_ISL_530007, EPI_ISL_530008, EPI_ISL_530009, EPI_ISL_530010, EPI_ISL_530011, EPI_ISL_530012, EPI_ISL_530013, EPI_ISL_530014, EPI_ISL_530015, EPI_ISL_530016, EPI_ISL_530017, EPI_ISL_530018, EPI_ISL_530019, EPI_ISL_530020, EPI_ISL_530021, EPI_ISL_530022, EPI_ISL_530023, EPI_ISL_530024                                                                                                                                                                                                                                                                                                                                                                                                                                                                                                                                                                                                                                                                                                                                                                                                                                                                                                                                                                                                                                                                                                                                                                 | see above                                                                    | Hospital Universitario 12 de Octubre                                                                                     | Hospital Universitario 12 de Octubre<br>Esther Viedma, Raúl Recio, Sara González, Elias Dahdouh, Fernando Lázaro, Natalia Stella, Julio García, Juan Carlos Galán, Rafael Cantón, Mª Dolores Folgueira, Rafael Delgado, Jesús Mingorance                                                                                            |
| EPI_ISL_534329                                                                                                                                                                                                                                                                                                                                                                                                                                                                                                                                                                                                                                                                                                                                                                                                                                                                                                                                                                                                                                                                                                                                                                                                                                                                                                                                                                                                                                                 | Hospital Universitario 12 de Octubre                                         | Hospital Universitario 12 de Octubre                                                                                     | Esther Viedma, Raúl Recio, Sara González, Elias Dahdouh, Fernando Lázaro, Natalia Stella, Julio García, Juan Carlos Galán, Rafael Cantón, Ma Dolores Folgueira, Rafael Delgado, Jesús Mingorance                                                                                                                                    |
| EPI_ISL_534756, EPI_ISL_534757, EPI_ISL_534758, EPI_ISL_534759, EPI_ISL_534760, EPI_ISL_534761, EPI_ISL_534762, EPI_ISL_535183                                                                                                                                                                                                                                                                                                                                                                                                                                                                                                                                                                                                                                                                                                                                                                                                                                                                                                                                                                                                                                                                                                                                                                                                                                                                                                                                 | Queens Medical Centre, Clinical Microbiology Department / DeepSeq Nottingham | COVID-19 Genomics UK (COG-UK) Consortium                                                                                 | Gemma Clark, Wendy Smith, Manjinder Khakh, Vicki M Fleming, Michelle M Lister, Hannah Howson-Wells, Jonathan Ball, Patrick McClure, Joseph Chappell, Theocharis Tsoleridis, Nadine Holmes, Matthew Carlisle, Christopher Moore, Fei Sang, Johnny Debebe, Victoria Wright, Matthew Loose                                             |
| EPI_ISL_535390, EPI_ISL_535391, EPI_ISL_535392, EPI_ISL_535394, EPI_ISL_535396, EPI_ISL_535398, EPI_ISL_535399, EPI_ISL_535401, EPI_ISL_535402, EPI_ISL_535403, EPI_ISL_535404, EPI_ISL_535405, EPI_ISL_535407, EPI_ISL_535409, EPI_ISL_535410, EPI_ISL_535411, EPI_ISL_535412, EPI_ISL_535417, EPI_ISL_535418, EPI_ISL_535419, EPI_ISL_535421, EPI_ISL_535422, EPI_ISL_535426, EPI_ISL_535428, EPI_ISL_535429, EPI_ISL_535431, EPI_ISL_535432, EPI_ISL_535434, EPI_ISL_535435, EPI_ISL_535437, EPI_ISL_535442, EPI_ISL_535445, EPI_ISL_535447, EPI_ISL_535451, EPI_ISL_535453, EPI_ISL_535457, EPI_ISL_535460, EPI_ISL_535462, EPI_ISL_535463, EPI_ISL_535465, EPI_ISL_535466, EPI_ISL_535474, EPI_ISL_535475, EPI_ISL_535476, EPI_ISL_535481, EPI_ISL_535482, EPI_ISL_535483, EPI_ISL_535484, EPI_ISL_535485, EPI_ISL_535486, EPI_ISL_535496, EPI_ISL_535498, EPI_ISL_535499, EPI_ISL_535500, EPI_ISL_535501, EPI_ISL_535504, EPI_ISL_535505, EPI_ISL_535510, EPI_ISL_535511, EPI_ISL_535512, EPI_ISL_535514, EPI_ISL_535515, EPI_ISL_535517, EPI_ISL_535518, EPI_ISL_535526, EPI_ISL_535528, EPI_ISL_535531, EPI_ISL_535532, EPI_ISL_535533, EPI_ISL_535536, EPI_ISL_535537, EPI_ISL_535538, EPI_ISL_535539, EPI_ISL_535540, EPI_ISL_535541, EPI_ISL_535542, EPI_ISL_535543, EPI_ISL_535544, EPI_ISL_535550, EPI_ISL_535551, EPI_ISL_535552, EPI_ISL_535555, EPI_ISL_535557, EPI_ISL_535559, EPI_ISL_535560, EPI_ISL_535564, EPI_ISL_535568, EPI_ISL_535571 | see above                                                                    | NHLS-IALCH                                                                                                               | KRISP, KZN Research Innovation and Sequencing Platform<br>Giandhari J, Pillay S, Lessells R, Mdlalose K, York D, Khan S, Tegally H, Wilkinson E, de Oliveira T                                                                                                                                                                      |
| EPI_ISL_536572, EPI_ISL_536573, EPI_ISL_536574, EPI_ISL_536575, EPI_ISL_536576, EPI_ISL_536577, EPI_ISL_536578, EPI_ISL_536579, EPI_ISL_536580, EPI_ISL_536581, EPI_ISL_536582, EPI_ISL_536583, EPI_ISL_536584, EPI_ISL_536585, EPI_ISL_536586, EPI_ISL_536587, EPI_ISL_536588, EPI_ISL_536589, EPI_ISL_536590, EPI_ISL_536591, EPI_ISL_536592, EPI_ISL_536593, EPI_ISL_536594, EPI_ISL_536595, EPI_ISL_536596, EPI_ISL_536597, EPI_ISL_536598, EPI_ISL_536599, EPI_ISL_536600, EPI_ISL_536601, EPI_ISL_536602, EPI_ISL_536603, EPI_ISL_536604, EPI_ISL_536605, EPI_ISL_536606, EPI_ISL_536607, EPI_ISL_536608, EPI_ISL_536609, EPI_ISL_536610, EPI_ISL_536611, EPI_ISL_536612, EPI_ISL_536613, EPI_ISL_536614, EPI_ISL_536615, EPI_ISL_536616, EPI_ISL_536617, EPI_ISL_536618, EPI_ISL_536619, EPI_ISL_536620, EPI_ISL_536621, EPI_ISL_536622, EPI_ISL_536623, EPI_ISL_536624, EPI_ISL_536625, EPI_ISL_536626, EPI_ISL_536627, EPI_ISL_536628, EPI_ISL_536629, EPI_ISL_536630, EPI_ISL_536631, EPI_ISL_536632, EPI_ISL_536633, EPI_ISL_536634, EPI_ISL_536635, EPI_ISL_536636, EPI_ISL_536637, EPI_ISL_536638, EPI_ISL_536639, EPI_ISL_536640, EPI_ISL_536641, EPI_ISL_536642, EPI_ISL_536643, EPI_ISL_536644, EPI_ISL_536645, EPI_ISL_536647, EPI_ISL_536648, EPI_ISL_536649, EPI_ISL_536650, EPI_ISL_536651, EPI_ISL_536652, EPI_ISL_536653, EPI_ISL_536654, EPI_ISL_536655                                                                                 | see above                                                                    | University of Wisconsin-Madison AIDS Vaccine Research Laboratories                                                       | Gage Moreno, Katarina Braun, et al. AIDS Vaccine Research Laboratories                                                                                                                                                                                                                                                              |

|                                                                                                                                                                                                                                                                                                                                                                                                                                                                                                                                                                                                                                                                                                                                                                                                                                                                                                                                                                                                                                                                                                                                                                                                                                                                                                                                                                                                                                                                                                                                                                                                                                                                                                                                                                                                                                                                                                                                                                                                                                                                                                                                                                                                                                                                                                                                                                                                                                                                                                                                                                                                                                                                                                                                                                                                                                                                                                                                                                                                                                                                                                                                                                                                                                                                                                                                                                                                                                                                                                                                                                                                                                                                                                                                                                                                                                                                                                                                                                                                                                                                                                                                                                                                                                                                                                                                                                                                                                                                                                                                                                                                                                                                                                                                                                |                                                                                      |                                                                                                       |                                                                                                                                                                                                                                                                                                                                                                |
|----------------------------------------------------------------------------------------------------------------------------------------------------------------------------------------------------------------------------------------------------------------------------------------------------------------------------------------------------------------------------------------------------------------------------------------------------------------------------------------------------------------------------------------------------------------------------------------------------------------------------------------------------------------------------------------------------------------------------------------------------------------------------------------------------------------------------------------------------------------------------------------------------------------------------------------------------------------------------------------------------------------------------------------------------------------------------------------------------------------------------------------------------------------------------------------------------------------------------------------------------------------------------------------------------------------------------------------------------------------------------------------------------------------------------------------------------------------------------------------------------------------------------------------------------------------------------------------------------------------------------------------------------------------------------------------------------------------------------------------------------------------------------------------------------------------------------------------------------------------------------------------------------------------------------------------------------------------------------------------------------------------------------------------------------------------------------------------------------------------------------------------------------------------------------------------------------------------------------------------------------------------------------------------------------------------------------------------------------------------------------------------------------------------------------------------------------------------------------------------------------------------------------------------------------------------------------------------------------------------------------------------------------------------------------------------------------------------------------------------------------------------------------------------------------------------------------------------------------------------------------------------------------------------------------------------------------------------------------------------------------------------------------------------------------------------------------------------------------------------------------------------------------------------------------------------------------------------------------------------------------------------------------------------------------------------------------------------------------------------------------------------------------------------------------------------------------------------------------------------------------------------------------------------------------------------------------------------------------------------------------------------------------------------------------------------------------------------------------------------------------------------------------------------------------------------------------------------------------------------------------------------------------------------------------------------------------------------------------------------------------------------------------------------------------------------------------------------------------------------------------------------------------------------------------------------------------------------------------------------------------------------------------------------------------------------------------------------------------------------------------------------------------------------------------------------------------------------------------------------------------------------------------------------------------------------------------------------------------------------------------------------------------------------------------------------------------------------------------------------------------------------|--------------------------------------------------------------------------------------|-------------------------------------------------------------------------------------------------------|----------------------------------------------------------------------------------------------------------------------------------------------------------------------------------------------------------------------------------------------------------------------------------------------------------------------------------------------------------------|
| EPI_ISL_536656, EPI_ISL_536657                                                                                                                                                                                                                                                                                                                                                                                                                                                                                                                                                                                                                                                                                                                                                                                                                                                                                                                                                                                                                                                                                                                                                                                                                                                                                                                                                                                                                                                                                                                                                                                                                                                                                                                                                                                                                                                                                                                                                                                                                                                                                                                                                                                                                                                                                                                                                                                                                                                                                                                                                                                                                                                                                                                                                                                                                                                                                                                                                                                                                                                                                                                                                                                                                                                                                                                                                                                                                                                                                                                                                                                                                                                                                                                                                                                                                                                                                                                                                                                                                                                                                                                                                                                                                                                                                                                                                                                                                                                                                                                                                                                                                                                                                                                                 | University of Wisconsin-Madison Campus AIDS Vaccine Research Laboratories            | University of Wisconsin-Madison AIDS Vaccine Research Laboratories                                    | Gage Moreno, Katarina Braun, et al. AIDS Vaccine Research Laboratories                                                                                                                                                                                                                                                                                         |
| EPI_ISL_536658, EPI_ISL_536659, EPI_ISL_536660, EPI_ISL_536661, EPI_ISL_536662, EPI_ISL_536663, EPI_ISL_536664, EPI_ISL_536665, EPI_ISL_536666, EPI_ISL_536667, EPI_ISL_536668, EPI_ISL_536669, EPI_ISL_536670, EPI_ISL_536671, EPI_ISL_536672, EPI_ISL_536673, EPI_ISL_536674, EPI_ISL_536675, EPI_ISL_536676, EPI_ISL_536677, EPI_ISL_536678, EPI_ISL_536679, EPI_ISL_536680, EPI_ISL_536681, EPI_ISL_536682, EPI_ISL_536683, EPI_ISL_536684, EPI_ISL_536685, EPI_ISL_536686, EPI_ISL_536687, EPI_ISL_536688, EPI_ISL_536689, EPI_ISL_536690, EPI_ISL_536691, EPI_ISL_536692, EPI_ISL_536693, EPI_ISL_536694, EPI_ISL_536695, EPI_ISL_536696, EPI_ISL_536697, EPI_ISL_536698, EPI_ISL_536699, EPI_ISL_536700, EPI_ISL_536701, EPI_ISL_536702, EPI_ISL_536703, EPI_ISL_536704, EPI_ISL_536705, EPI_ISL_536706, EPI_ISL_536707, EPI_ISL_536708, EPI_ISL_536709, EPI_ISL_536710, EPI_ISL_536711, EPI_ISL_536712, EPI_ISL_536713, EPI_ISL_536714, EPI_ISL_536715, EPI_ISL_536716, EPI_ISL_536717, EPI_ISL_536718, EPI_ISL_536719, EPI_ISL_536720, EPI_ISL_536721, EPI_ISL_536722, EPI_ISL_536723, EPI_ISL_536724, EPI_ISL_536725, EPI_ISL_536726, EPI_ISL_536727, EPI_ISL_536728, EPI_ISL_536729, EPI_ISL_536730, EPI_ISL_536731, EPI_ISL_536732, EPI_ISL_536733, EPI_ISL_536734, EPI_ISL_536735, EPI_ISL_536736, EPI_ISL_536737, EPI_ISL_536738, EPI_ISL_536739, EPI_ISL_536740, EPI_ISL_536741, EPI_ISL_536742, EPI_ISL_536743, EPI_ISL_536744, EPI_ISL_536745, EPI_ISL_536746, EPI_ISL_536747, EPI_ISL_536748, EPI_ISL_536749, EPI_ISL_536750, EPI_ISL_536751, EPI_ISL_536752, EPI_ISL_536753, EPI_ISL_536754, EPI_ISL_536755, EPI_ISL_536756, EPI_ISL_536757, EPI_ISL_536758, EPI_ISL_536759, EPI_ISL_536760, EPI_ISL_536761, EPI_ISL_536762, EPI_ISL_536763, EPI_ISL_536764, EPI_ISL_536765, EPI_ISL_536766, EPI_ISL_536767, EPI_ISL_536768, EPI_ISL_536769, EPI_ISL_536770, EPI_ISL_536771, EPI_ISL_536772, EPI_ISL_536773, EPI_ISL_536774, EPI_ISL_536775, EPI_ISL_536776, EPI_ISL_536777, EPI_ISL_536778, EPI_ISL_536779, EPI_ISL_536780, EPI_ISL_536781, EPI_ISL_536782, EPI_ISL_536783, EPI_ISL_536784                                                                                                                                                                                                                                                                                                                                                                                                                                                                                                                                                                                                                                                                                                                                                                                                                                                                                                                                                                                                                                                                                                                                                                                                                                                                                                                                                                                                                                                                                                                                                                                                                                                                                                                                                                                                                                                                                                                                                                                                                                                                                                                                                                                                                                                                                                                                                                                                                                                                                                                                                                                                                                                 | University of Wisconsin-Madison AIDS Vaccine Research Laboratories                   | University of Wisconsin-Madison AIDS Vaccine Research Laboratories                                    | Gage Moreno, Katarina Braun, et al. AIDS Vaccine Research Laboratories                                                                                                                                                                                                                                                                                         |
| see above                                                                                                                                                                                                                                                                                                                                                                                                                                                                                                                                                                                                                                                                                                                                                                                                                                                                                                                                                                                                                                                                                                                                                                                                                                                                                                                                                                                                                                                                                                                                                                                                                                                                                                                                                                                                                                                                                                                                                                                                                                                                                                                                                                                                                                                                                                                                                                                                                                                                                                                                                                                                                                                                                                                                                                                                                                                                                                                                                                                                                                                                                                                                                                                                                                                                                                                                                                                                                                                                                                                                                                                                                                                                                                                                                                                                                                                                                                                                                                                                                                                                                                                                                                                                                                                                                                                                                                                                                                                                                                                                                                                                                                                                                                                                                      | University of Wisconsin-Madison AIDS Vaccine Research Laboratories                   | University of Wisconsin-Madison AIDS Vaccine Research Laboratories                                    | Gage Moreno, Katarina Braun, et al. AIDS Vaccine Research Laboratories                                                                                                                                                                                                                                                                                         |
| EPI_ISL_536785                                                                                                                                                                                                                                                                                                                                                                                                                                                                                                                                                                                                                                                                                                                                                                                                                                                                                                                                                                                                                                                                                                                                                                                                                                                                                                                                                                                                                                                                                                                                                                                                                                                                                                                                                                                                                                                                                                                                                                                                                                                                                                                                                                                                                                                                                                                                                                                                                                                                                                                                                                                                                                                                                                                                                                                                                                                                                                                                                                                                                                                                                                                                                                                                                                                                                                                                                                                                                                                                                                                                                                                                                                                                                                                                                                                                                                                                                                                                                                                                                                                                                                                                                                                                                                                                                                                                                                                                                                                                                                                                                                                                                                                                                                                                                 | University of Wisconsin-Madison Campus AIDS Vaccine Research Laboratories            | University of Wisconsin-Madison AIDS Vaccine Research Laboratories                                    | Gage Moreno, Katarina Braun, et al. AIDS Vaccine Research Laboratories                                                                                                                                                                                                                                                                                         |
| EPI_ISL_536786, EPI_ISL_536787                                                                                                                                                                                                                                                                                                                                                                                                                                                                                                                                                                                                                                                                                                                                                                                                                                                                                                                                                                                                                                                                                                                                                                                                                                                                                                                                                                                                                                                                                                                                                                                                                                                                                                                                                                                                                                                                                                                                                                                                                                                                                                                                                                                                                                                                                                                                                                                                                                                                                                                                                                                                                                                                                                                                                                                                                                                                                                                                                                                                                                                                                                                                                                                                                                                                                                                                                                                                                                                                                                                                                                                                                                                                                                                                                                                                                                                                                                                                                                                                                                                                                                                                                                                                                                                                                                                                                                                                                                                                                                                                                                                                                                                                                                                                 | University of Wisconsin-Madison AIDS Vaccine Research Laboratories                   | University of Wisconsin-Madison AIDS Vaccine Research Laboratories                                    | Gage Moreno, Katarina Braun, et al. AIDS Vaccine Research Laboratories                                                                                                                                                                                                                                                                                         |
| EPI_ISL_538390, EPI_ISL_538391, EPI_ISL_538392, EPI_ISL_538393, EPI_ISL_538394, EPI_ISL_538395, EPI_ISL_538396, EPI_ISL_538397, EPI_ISL_538398, EPI_ISL_538399, EPI_ISL_538400, EPI_ISL_538401, EPI_ISL_538402, EPI_ISL_538403, EPI_ISL_538404, EPI_ISL_538405, EPI_ISL_538406, EPI_ISL_538407, EPI_ISL_538408, EPI_ISL_538409, EPI_ISL_538410, EPI_ISL_538411, EPI_ISL_538412, EPI_ISL_538413, EPI_ISL_538414, EPI_ISL_538415, EPI_ISL_538416, EPI_ISL_538417, EPI_ISL_538418, EPI_ISL_538419, EPI_ISL_538420, EPI_ISL_538421, EPI_ISL_538422, EPI_ISL_538423, EPI_ISL_538424, EPI_ISL_538425, EPI_ISL_538426, EPI_ISL_538427, EPI_ISL_538428, EPI_ISL_538429, EPI_ISL_538430, EPI_ISL_538431, EPI_ISL_538432, EPI_ISL_538433, EPI_ISL_538434                                                                                                                                                                                                                                                                                                                                                                                                                                                                                                                                                                                                                                                                                                                                                                                                                                                                                                                                                                                                                                                                                                                                                                                                                                                                                                                                                                                                                                                                                                                                                                                                                                                                                                                                                                                                                                                                                                                                                                                                                                                                                                                                                                                                                                                                                                                                                                                                                                                                                                                                                                                                                                                                                                                                                                                                                                                                                                                                                                                                                                                                                                                                                                                                                                                                                                                                                                                                                                                                                                                                                                                                                                                                                                                                                                                                                                                                                                                                                                                                                 | Microbiology Division, South Carolina Department of Health and Environmental Control | Microbiology Division, South Carolina Department of Health and Environmental Control                  | Flores,H.                                                                                                                                                                                                                                                                                                                                                      |
| see above                                                                                                                                                                                                                                                                                                                                                                                                                                                                                                                                                                                                                                                                                                                                                                                                                                                                                                                                                                                                                                                                                                                                                                                                                                                                                                                                                                                                                                                                                                                                                                                                                                                                                                                                                                                                                                                                                                                                                                                                                                                                                                                                                                                                                                                                                                                                                                                                                                                                                                                                                                                                                                                                                                                                                                                                                                                                                                                                                                                                                                                                                                                                                                                                                                                                                                                                                                                                                                                                                                                                                                                                                                                                                                                                                                                                                                                                                                                                                                                                                                                                                                                                                                                                                                                                                                                                                                                                                                                                                                                                                                                                                                                                                                                                                      | Microbiology Division, South Carolina Department of Health and Environmental Control | Microbiology Division, South Carolina Department of Health and Environmental Control                  | Flores,H.                                                                                                                                                                                                                                                                                                                                                      |
| EPI_ISL_539783, EPI_ISL_539784                                                                                                                                                                                                                                                                                                                                                                                                                                                                                                                                                                                                                                                                                                                                                                                                                                                                                                                                                                                                                                                                                                                                                                                                                                                                                                                                                                                                                                                                                                                                                                                                                                                                                                                                                                                                                                                                                                                                                                                                                                                                                                                                                                                                                                                                                                                                                                                                                                                                                                                                                                                                                                                                                                                                                                                                                                                                                                                                                                                                                                                                                                                                                                                                                                                                                                                                                                                                                                                                                                                                                                                                                                                                                                                                                                                                                                                                                                                                                                                                                                                                                                                                                                                                                                                                                                                                                                                                                                                                                                                                                                                                                                                                                                                                 | Universidad Regional Amazonica IKIAM                                                 | Institute of Microbiology, Universidad San Francisco de Quito                                         | Fabian Aguilar, Katherine Apunte, Andrea Carrera, Nina Espinoza de los Monteros, Giovanna Moran, Marcelo Ortiz, Yeimy Rojas, Sonia Sislema, Carolina Proaño-Bolaños, Belén Prado-Vivar, Sully Márquez, Juan José Guadalupe, Monica Becerra-Wong, Bernardo Gutiérrez, Verónica Barragán, Patricio Rojas-Silva, Gabriel Trueba, Michelle Grunauer, Paul Cárdenas |
| EPI_ISL_539879                                                                                                                                                                                                                                                                                                                                                                                                                                                                                                                                                                                                                                                                                                                                                                                                                                                                                                                                                                                                                                                                                                                                                                                                                                                                                                                                                                                                                                                                                                                                                                                                                                                                                                                                                                                                                                                                                                                                                                                                                                                                                                                                                                                                                                                                                                                                                                                                                                                                                                                                                                                                                                                                                                                                                                                                                                                                                                                                                                                                                                                                                                                                                                                                                                                                                                                                                                                                                                                                                                                                                                                                                                                                                                                                                                                                                                                                                                                                                                                                                                                                                                                                                                                                                                                                                                                                                                                                                                                                                                                                                                                                                                                                                                                                                 | Microbiology Division, South Carolina Department of Health and Environmental Control | Microbiology Division, South Carolina Department of Health and Environmental Control                  | Flores,H.                                                                                                                                                                                                                                                                                                                                                      |
| EPI_ISL_540640, EPI_ISL_540641, EPI_ISL_540642, EPI_ISL_540643, EPI_ISL_540644, EPI_ISL_540645, EPI_ISL_540646, EPI_ISL_540647, EPI_ISL_540648, EPI_ISL_540649, EPI_ISL_540650, EPI_ISL_540651, EPI_ISL_540652, EPI_ISL_540653, EPI_ISL_540654, EPI_ISL_540655, EPI_ISL_540656, EPI_ISL_540657, EPI_ISL_540658, EPI_ISL_540659, EPI_ISL_540660, EPI_ISL_540661, EPI_ISL_540662, EPI_ISL_540663, EPI_ISL_540664, EPI_ISL_540665, EPI_ISL_540666, EPI_ISL_540667, EPI_ISL_540668, EPI_ISL_540669, EPI_ISL_540670, EPI_ISL_540671, EPI_ISL_540672, EPI_ISL_540673, EPI_ISL_540674, EPI_ISL_540675, EPI_ISL_540676, EPI_ISL_540677, EPI_ISL_540678, EPI_ISL_540679, EPI_ISL_540680, EPI_ISL_540681, EPI_ISL_540682, EPI_ISL_540683, EPI_ISL_540684, EPI_ISL_540685, EPI_ISL_540686, EPI_ISL_540687, EPI_ISL_540688, EPI_ISL_540689, EPI_ISL_540690, EPI_ISL_540691, EPI_ISL_540692, EPI_ISL_540693, EPI_ISL_540694, EPI_ISL_540695, EPI_ISL_540696, EPI_ISL_540697, EPI_ISL_540698, EPI_ISL_540699, EPI_ISL_540700, EPI_ISL_540701, EPI_ISL_540702, EPI_ISL_540703, EPI_ISL_540704, EPI_ISL_540705, EPI_ISL_540706, EPI_ISL_540707, EPI_ISL_540708, EPI_ISL_540709, EPI_ISL_540710, EPI_ISL_540711, EPI_ISL_540712, EPI_ISL_540713, EPI_ISL_540714, EPI_ISL_540715, EPI_ISL_540716, EPI_ISL_540717, EPI_ISL_540718, EPI_ISL_540719, EPI_ISL_540720, EPI_ISL_540721, EPI_ISL_540722, EPI_ISL_540723, EPI_ISL_540724, EPI_ISL_540725, EPI_ISL_540726, EPI_ISL_540727, EPI_ISL_540728, EPI_ISL_540729, EPI_ISL_540730, EPI_ISL_540731, EPI_ISL_540732, EPI_ISL_540733, EPI_ISL_540734, EPI_ISL_540735, EPI_ISL_540736, EPI_ISL_540737, EPI_ISL_540738, EPI_ISL_540739, EPI_ISL_540740, EPI_ISL_540741, EPI_ISL_540742, EPI_ISL_540743, EPI_ISL_540744, EPI_ISL_540745, EPI_ISL_540746, EPI_ISL_540747, EPI_ISL_540748, EPI_ISL_540749, EPI_ISL_540750, EPI_ISL_540751, EPI_ISL_540752, EPI_ISL_540753, EPI_ISL_540754, EPI_ISL_540755, EPI_ISL_540756, EPI_ISL_540757, EPI_ISL_540758, EPI_ISL_540759, EPI_ISL_540760, EPI_ISL_540761, EPI_ISL_540762, EPI_ISL_540763, EPI_ISL_540764, EPI_ISL_540765, EPI_ISL_540766, EPI_ISL_540767, EPI_ISL_540768, EPI_ISL_540769, EPI_ISL_540770, EPI_ISL_540771, EPI_ISL_540772, EPI_ISL_540773, EPI_ISL_540774, EPI_ISL_540775, EPI_ISL_540776, EPI_ISL_540777, EPI_ISL_540778, EPI_ISL_540779, EPI_ISL_540780, EPI_ISL_540781, EPI_ISL_540782, EPI_ISL_540783, EPI_ISL_540784, EPI_ISL_540785, EPI_ISL_540786, EPI_ISL_540787, EPI_ISL_540788, EPI_ISL_540789, EPI_ISL_540790, EPI_ISL_540791, EPI_ISL_540792, EPI_ISL_540793, EPI_ISL_540794, EPI_ISL_540795, EPI_ISL_540796, EPI_ISL_540797, EPI_ISL_540798, EPI_ISL_540799, EPI_ISL_540800, EPI_ISL_540801, EPI_ISL_540802, EPI_ISL_540803, EPI_ISL_540804, EPI_ISL_540805, EPI_ISL_540806, EPI_ISL_540807, EPI_ISL_540808, EPI_ISL_540809, EPI_ISL_540810, EPI_ISL_540811, EPI_ISL_540812, EPI_ISL_540813, EPI_ISL_540814, EPI_ISL_540815, EPI_ISL_540816, EPI_ISL_540817, EPI_ISL_540818, EPI_ISL_540819, EPI_ISL_540820, EPI_ISL_540821, EPI_ISL_540822, EPI_ISL_540823, EPI_ISL_540824, EPI_ISL_540825, EPI_ISL_540826, EPI_ISL_540827, EPI_ISL_540828, EPI_ISL_540829, EPI_ISL_540830, EPI_ISL_540831, EPI_ISL_540832, EPI_ISL_540833, EPI_ISL_540834, EPI_ISL_540835, EPI_ISL_540836, EPI_ISL_540837, EPI_ISL_540838, EPI_ISL_540839, EPI_ISL_540840, EPI_ISL_540841, EPI_ISL_540842, EPI_ISL_540843, EPI_ISL_540844, EPI_ISL_540845, EPI_ISL_540846, EPI_ISL_540847, EPI_ISL_540848, EPI_ISL_540849, EPI_ISL_540850, EPI_ISL_540851, EPI_ISL_540852, EPI_ISL_540853, EPI_ISL_540854, EPI_ISL_540855, EPI_ISL_540856, EPI_ISL_540857, EPI_ISL_540858, EPI_ISL_540859, EPI_ISL_540860, EPI_ISL_540861, EPI_ISL_540862, EPI_ISL_540863, EPI_ISL_540864, EPI_ISL_540865, EPI_ISL_540866, EPI_ISL_540867, EPI_ISL_540868, EPI_ISL_540869, EPI_ISL_540870, EPI_ISL_540871, EPI_ISL_540872, EPI_ISL_540873, EPI_ISL_540874, EPI_ISL_540875, EPI_ISL_540876, EPI_ISL_540877, EPI_ISL_540878, EPI_ISL_540879, EPI_ISL_540880, EPI_ISL_540881, EPI_ISL_540882, EPI_ISL_540883, EPI_ISL_540884, EPI_ISL_540885, EPI_ISL_540886, EPI_ISL_540887, EPI_ISL_540888, EPI_ISL_540889, EPI_ISL_540890, EPI_ISL_540891, EPI_ISL_540892, EPI_ISL_540893, EPI_ISL_540894, EPI_ISL_540895, EPI_ISL_540896, EPI_ISL_540897, EPI_ISL_540898, EPI_ISL_540899, EPI_ISL_540900, EPI_ISL_540901, EPI_ISL_540902, EPI_ISL_540903, EPI_ISL_540904, EPI_ISL_540905, EPI_ISL_540906, EPI_ISL_540907, EPI_ISL_540908, EPI_ISL_540909, EPI_ISL_540910, EPI_ISL_540911, EPI_ISL_540912, EPI_ISL_540913, EPI_ISL_540914, EPI_ISL_540915, EPI_ISL_540916, EPI_ISL_540917, EPI_ISL_540918, EPI_ISL_540919, EPI_ISL_540920, EPI_ISL_540921, EPI_ISL_540922, EPI_ISL_540923, EPI_ISL_540924, EPI_ISL_540925 | Queens Medical Centre, Clinical Microbiology Department / DeepSeq Nottingham         | COVID-19 Genomics UK (COG-UK) Consortium                                                              | Gemma Clark, Wendy Smith, Manjinder Khakh, Vicki M Fleming, Michelle M Lister, Hannah Howson-Wells, Jonathan Ball, Patrick McClure, Joseph Chappell, Theocharis Tsoleridis, Nadine Holmes, Matthew Carlisle, Christopher Moore, Fei Sang, Johnny Debebe, Victoria Wright, Matthew Loose                                                                        |
| see above                                                                                                                                                                                                                                                                                                                                                                                                                                                                                                                                                                                                                                                                                                                                                                                                                                                                                                                                                                                                                                                                                                                                                                                                                                                                                                                                                                                                                                                                                                                                                                                                                                                                                                                                                                                                                                                                                                                                                                                                                                                                                                                                                                                                                                                                                                                                                                                                                                                                                                                                                                                                                                                                                                                                                                                                                                                                                                                                                                                                                                                                                                                                                                                                                                                                                                                                                                                                                                                                                                                                                                                                                                                                                                                                                                                                                                                                                                                                                                                                                                                                                                                                                                                                                                                                                                                                                                                                                                                                                                                                                                                                                                                                                                                                                      | Queens Medical Centre, Clinical Microbiology Department / DeepSeq Nottingham         | COVID-19 Genomics UK (COG-UK) Consortium                                                              | Gemma Clark, Wendy Smith, Manjinder Khakh, Vicki M Fleming, Michelle M Lister, Hannah Howson-Wells, Jonathan Ball, Patrick McClure, Joseph Chappell, Theocharis Tsoleridis, Nadine Holmes, Matthew Carlisle, Christopher Moore, Fei Sang, Johnny Debebe, Victoria Wright, Matthew Loose                                                                        |
| EPI_ISL_541067, EPI_ISL_541068, EPI_ISL_541069, EPI_ISL_541070, EPI_ISL_541071, EPI_ISL_541072, EPI_ISL_541073, EPI_ISL_541074, EPI_ISL_541075, EPI_ISL_541076, EPI_ISL_541077, EPI_ISL_541078, EPI_ISL_541079, EPI_ISL_541080, EPI_ISL_541081                                                                                                                                                                                                                                                                                                                                                                                                                                                                                                                                                                                                                                                                                                                                                                                                                                                                                                                                                                                                                                                                                                                                                                                                                                                                                                                                                                                                                                                                                                                                                                                                                                                                                                                                                                                                                                                                                                                                                                                                                                                                                                                                                                                                                                                                                                                                                                                                                                                                                                                                                                                                                                                                                                                                                                                                                                                                                                                                                                                                                                                                                                                                                                                                                                                                                                                                                                                                                                                                                                                                                                                                                                                                                                                                                                                                                                                                                                                                                                                                                                                                                                                                                                                                                                                                                                                                                                                                                                                                                                                 | Hospital de la Santa Creu i Sant Pau. Servicio de Microbiología                      | SeqCOVID-SPAIN consortium/Institute of Biomedicine of Valencia, IBV-CSIC                              | Ferran Navarro, Núria Rabella, Elisenda Miró and SeqCOVID-SPAIN consortium                                                                                                                                                                                                                                                                                     |
| EPI_ISL_541540, EPI_ISL_541541, EPI_ISL_541542, EPI_ISL_541543, EPI_ISL_541544, EPI_ISL_541545, EPI_ISL_541546, EPI_ISL_541547, EPI_ISL_541548, EPI_ISL_541549, EPI_ISL_541550                                                                                                                                                                                                                                                                                                                                                                                                                                                                                                                                                                                                                                                                                                                                                                                                                                                                                                                                                                                                                                                                                                                                                                                                                                                                                                                                                                                                                                                                                                                                                                                                                                                                                                                                                                                                                                                                                                                                                                                                                                                                                                                                                                                                                                                                                                                                                                                                                                                                                                                                                                                                                                                                                                                                                                                                                                                                                                                                                                                                                                                                                                                                                                                                                                                                                                                                                                                                                                                                                                                                                                                                                                                                                                                                                                                                                                                                                                                                                                                                                                                                                                                                                                                                                                                                                                                                                                                                                                                                                                                                                                                 | University of Wisconsin-Madison AIDS Vaccine Research Laboratories                   | University of Wisconsin-Madison AIDS Vaccine Research Laboratories                                    | Gage Moreno, Katarina Braun, et al. AIDS Vaccine Research Laboratories                                                                                                                                                                                                                                                                                         |
| see above                                                                                                                                                                                                                                                                                                                                                                                                                                                                                                                                                                                                                                                                                                                                                                                                                                                                                                                                                                                                                                                                                                                                                                                                                                                                                                                                                                                                                                                                                                                                                                                                                                                                                                                                                                                                                                                                                                                                                                                                                                                                                                                                                                                                                                                                                                                                                                                                                                                                                                                                                                                                                                                                                                                                                                                                                                                                                                                                                                                                                                                                                                                                                                                                                                                                                                                                                                                                                                                                                                                                                                                                                                                                                                                                                                                                                                                                                                                                                                                                                                                                                                                                                                                                                                                                                                                                                                                                                                                                                                                                                                                                                                                                                                                                                      | University of Wisconsin-Madison AIDS Vaccine Research Laboratories                   | University of Wisconsin-Madison AIDS Vaccine Research Laboratories                                    | Gage Moreno, Katarina Braun, et al. AIDS Vaccine Research Laboratories                                                                                                                                                                                                                                                                                         |
| EPI_ISL_541551, EPI_ISL_541552, EPI_ISL_541553, EPI_ISL_541554, EPI_ISL_541555, EPI_ISL_541556, EPI_ISL_541557, EPI_ISL_541558, EPI_ISL_541559, EPI_ISL_541560, EPI_ISL_541561, EPI_ISL_541562, EPI_ISL_541563, EPI_ISL_541564, EPI_ISL_541565                                                                                                                                                                                                                                                                                                                                                                                                                                                                                                                                                                                                                                                                                                                                                                                                                                                                                                                                                                                                                                                                                                                                                                                                                                                                                                                                                                                                                                                                                                                                                                                                                                                                                                                                                                                                                                                                                                                                                                                                                                                                                                                                                                                                                                                                                                                                                                                                                                                                                                                                                                                                                                                                                                                                                                                                                                                                                                                                                                                                                                                                                                                                                                                                                                                                                                                                                                                                                                                                                                                                                                                                                                                                                                                                                                                                                                                                                                                                                                                                                                                                                                                                                                                                                                                                                                                                                                                                                                                                                                                 | University of Wisconsin-Madison Campus AIDS Vaccine Research Laboratories            | University of Wisconsin-Madison AIDS Vaccine Research Laboratories                                    | Gage Moreno, Katarina Braun, et al. AIDS Vaccine Research Laboratories                                                                                                                                                                                                                                                                                         |
| see above                                                                                                                                                                                                                                                                                                                                                                                                                                                                                                                                                                                                                                                                                                                                                                                                                                                                                                                                                                                                                                                                                                                                                                                                                                                                                                                                                                                                                                                                                                                                                                                                                                                                                                                                                                                                                                                                                                                                                                                                                                                                                                                                                                                                                                                                                                                                                                                                                                                                                                                                                                                                                                                                                                                                                                                                                                                                                                                                                                                                                                                                                                                                                                                                                                                                                                                                                                                                                                                                                                                                                                                                                                                                                                                                                                                                                                                                                                                                                                                                                                                                                                                                                                                                                                                                                                                                                                                                                                                                                                                                                                                                                                                                                                                                                      | University of Wisconsin-Madison Campus AIDS Vaccine Research Laboratories            | University of Wisconsin-Madison AIDS Vaccine Research Laboratories                                    | Gage Moreno, Katarina Braun, et al. AIDS Vaccine Research Laboratories                                                                                                                                                                                                                                                                                         |
| EPI_ISL_541566, EPI_ISL_541567                                                                                                                                                                                                                                                                                                                                                                                                                                                                                                                                                                                                                                                                                                                                                                                                                                                                                                                                                                                                                                                                                                                                                                                                                                                                                                                                                                                                                                                                                                                                                                                                                                                                                                                                                                                                                                                                                                                                                                                                                                                                                                                                                                                                                                                                                                                                                                                                                                                                                                                                                                                                                                                                                                                                                                                                                                                                                                                                                                                                                                                                                                                                                                                                                                                                                                                                                                                                                                                                                                                                                                                                                                                                                                                                                                                                                                                                                                                                                                                                                                                                                                                                                                                                                                                                                                                                                                                                                                                                                                                                                                                                                                                                                                                                 | University of Wisconsin-Madison AIDS Vaccine Research Laboratories                   | University of Wisconsin-Madison AIDS Vaccine Research Laboratories                                    | Gage Moreno, Katarina Braun, et al. AIDS Vaccine Research Laboratories                                                                                                                                                                                                                                                                                         |
| EPI_ISL_541568                                                                                                                                                                                                                                                                                                                                                                                                                                                                                                                                                                                                                                                                                                                                                                                                                                                                                                                                                                                                                                                                                                                                                                                                                                                                                                                                                                                                                                                                                                                                                                                                                                                                                                                                                                                                                                                                                                                                                                                                                                                                                                                                                                                                                                                                                                                                                                                                                                                                                                                                                                                                                                                                                                                                                                                                                                                                                                                                                                                                                                                                                                                                                                                                                                                                                                                                                                                                                                                                                                                                                                                                                                                                                                                                                                                                                                                                                                                                                                                                                                                                                                                                                                                                                                                                                                                                                                                                                                                                                                                                                                                                                                                                                                                                                 | University of Wisconsin-Madison Campus AIDS Vaccine Research Laboratories            | University of Wisconsin-Madison AIDS Vaccine Research Laboratories                                    | Gage Moreno, Katarina Braun, et al. AIDS Vaccine Research Laboratories                                                                                                                                                                                                                                                                                         |
| EPI_ISL_541569, EPI_ISL_541570, EPI_ISL_541571, EPI_ISL_541572, EPI_ISL_541573, EPI_ISL_541574, EPI_ISL_541575, EPI_ISL_541576, EPI_ISL_541577, EPI_ISL_541578, EPI_ISL_541579, EPI_ISL_541580, EPI_ISL_541581, EPI_ISL_541582, EPI_ISL_541583, EPI_ISL_541584, EPI_ISL_541585, EPI_ISL_541586, EPI_ISL_541587, EPI_ISL_541588, EPI_ISL_541589, EPI_ISL_541590, EPI_ISL_541591, EPI_ISL_541592, EPI_ISL_541593, EPI_ISL_541594, EPI_ISL_541595, EPI_ISL_541596, EPI_ISL_541597, EPI_ISL_541598, EPI_ISL_541599, EPI_ISL_541600, EPI_ISL_541601, EPI_ISL_541602, EPI_ISL_541603, EPI_ISL_541604, EPI_ISL_541605, EPI_ISL_541606, EPI_ISL_541607, EPI_ISL_541608, EPI_ISL_541609, EPI_ISL_541610, EPI_ISL_541611, EPI_ISL_541612, EPI_ISL_541613, EPI_ISL_541614, EPI_ISL_541615, EPI_ISL_541616, EPI_ISL_541617, EPI_ISL_541618, EPI_ISL_541619, EPI_ISL_541620, EPI_ISL_541621, EPI_ISL_541622, EPI_ISL_541623, EPI_ISL_541624, EPI_ISL_541625, EPI_ISL_541626, EPI_ISL_541627, EPI_ISL_541628, EPI_ISL_541629, EPI_ISL_541630, EPI_ISL_541631, EPI_ISL_541632, EPI_ISL_541633, EPI_ISL_541634, EPI_ISL_541635, EPI_ISL_541636, EPI_ISL_541637, EPI_ISL_541638, EPI_ISL_541639, EPI_ISL_541640, EPI_ISL_541641, EPI_ISL_541642, EPI_ISL_541643, EPI_ISL_541644, EPI_ISL_541645, EPI_ISL_541646, EPI_ISL_541647, EPI_ISL_541648                                                                                                                                                                                                                                                                                                                                                                                                                                                                                                                                                                                                                                                                                                                                                                                                                                                                                                                                                                                                                                                                                                                                                                                                                                                                                                                                                                                                                                                                                                                                                                                                                                                                                                                                                                                                                                                                                                                                                                                                                                                                                                                                                                                                                                                                                                                                                                                                                                                                                                                                                                                                                                                                                                                                                                                                                                                                                                                                                                                                                                                                                                                                                                                                                                                                                                                                                                                                                                 | University of Wisconsin-Madison AIDS Vaccine Research Laboratories                   | University of Wisconsin-Madison AIDS Vaccine Research Laboratories                                    | Gage Moreno, Katarina Braun, et al. AIDS Vaccine Research Laboratories                                                                                                                                                                                                                                                                                         |
| see above                                                                                                                                                                                                                                                                                                                                                                                                                                                                                                                                                                                                                                                                                                                                                                                                                                                                                                                                                                                                                                                                                                                                                                                                                                                                                                                                                                                                                                                                                                                                                                                                                                                                                                                                                                                                                                                                                                                                                                                                                                                                                                                                                                                                                                                                                                                                                                                                                                                                                                                                                                                                                                                                                                                                                                                                                                                                                                                                                                                                                                                                                                                                                                                                                                                                                                                                                                                                                                                                                                                                                                                                                                                                                                                                                                                                                                                                                                                                                                                                                                                                                                                                                                                                                                                                                                                                                                                                                                                                                                                                                                                                                                                                                                                                                      | University of Wisconsin-Madison AIDS Vaccine Research Laboratories                   | University of Wisconsin-Madison AIDS Vaccine Research Laboratories                                    | Gage Moreno, Katarina Braun, et al. AIDS Vaccine Research Laboratories                                                                                                                                                                                                                                                                                         |
| EPI_ISL_541663, EPI_ISL_541664, EPI_ISL_541665, EPI_ISL_541666, EPI_ISL_541667, EPI_ISL_541668, EPI_ISL_541669, EPI_ISL_541670, EPI_ISL_541671, EPI_ISL_541672, EPI_ISL_541673, EPI_ISL_541674, EPI_ISL_541675, EPI_ISL_541676, EPI_ISL_541677, EPI_ISL_541678, EPI_ISL_541679                                                                                                                                                                                                                                                                                                                                                                                                                                                                                                                                                                                                                                                                                                                                                                                                                                                                                                                                                                                                                                                                                                                                                                                                                                                                                                                                                                                                                                                                                                                                                                                                                                                                                                                                                                                                                                                                                                                                                                                                                                                                                                                                                                                                                                                                                                                                                                                                                                                                                                                                                                                                                                                                                                                                                                                                                                                                                                                                                                                                                                                                                                                                                                                                                                                                                                                                                                                                                                                                                                                                                                                                                                                                                                                                                                                                                                                                                                                                                                                                                                                                                                                                                                                                                                                                                                                                                                                                                                                                                 | Microbiology Division, South Carolina Department of Health and Environmental Control | Microbiology Division, South Carolina Department of Health and Environmental Control                  | Flores,H.                                                                                                                                                                                                                                                                                                                                                      |
| see above                                                                                                                                                                                                                                                                                                                                                                                                                                                                                                                                                                                                                                                                                                                                                                                                                                                                                                                                                                                                                                                                                                                                                                                                                                                                                                                                                                                                                                                                                                                                                                                                                                                                                                                                                                                                                                                                                                                                                                                                                                                                                                                                                                                                                                                                                                                                                                                                                                                                                                                                                                                                                                                                                                                                                                                                                                                                                                                                                                                                                                                                                                                                                                                                                                                                                                                                                                                                                                                                                                                                                                                                                                                                                                                                                                                                                                                                                                                                                                                                                                                                                                                                                                                                                                                                                                                                                                                                                                                                                                                                                                                                                                                                                                                                                      | Microbiology Division, South Carolina Department of Health and Environmental Control | Microbiology Division, South Carolina Department of Health and Environmental Control                  | Flores,H.                                                                                                                                                                                                                                                                                                                                                      |
| EPI_ISL_541970                                                                                                                                                                                                                                                                                                                                                                                                                                                                                                                                                                                                                                                                                                                                                                                                                                                                                                                                                                                                                                                                                                                                                                                                                                                                                                                                                                                                                                                                                                                                                                                                                                                                                                                                                                                                                                                                                                                                                                                                                                                                                                                                                                                                                                                                                                                                                                                                                                                                                                                                                                                                                                                                                                                                                                                                                                                                                                                                                                                                                                                                                                                                                                                                                                                                                                                                                                                                                                                                                                                                                                                                                                                                                                                                                                                                                                                                                                                                                                                                                                                                                                                                                                                                                                                                                                                                                                                                                                                                                                                                                                                                                                                                                                                                                 | Influenza Centre, University of Bergen                                               | Norwegian Institute of Public Health, Department of Virology                                          | Fan Zhou, Rebecca J Cox, Karl A Brokstad, Bjørn Blomberg, Kathrine Stene-Johansen, Kamilla Heddeland Instefjord, Hilde Elishaug, Rasmus Riis Kopperud, Hilde Synnøve Vollan, Karoline Bragstad, Olav Hungnes                                                                                                                                                   |
| EPI_ISL_547581, EPI_ISL_547582, EPI_ISL_547583                                                                                                                                                                                                                                                                                                                                                                                                                                                                                                                                                                                                                                                                                                                                                                                                                                                                                                                                                                                                                                                                                                                                                                                                                                                                                                                                                                                                                                                                                                                                                                                                                                                                                                                                                                                                                                                                                                                                                                                                                                                                                                                                                                                                                                                                                                                                                                                                                                                                                                                                                                                                                                                                                                                                                                                                                                                                                                                                                                                                                                                                                                                                                                                                                                                                                                                                                                                                                                                                                                                                                                                                                                                                                                                                                                                                                                                                                                                                                                                                                                                                                                                                                                                                                                                                                                                                                                                                                                                                                                                                                                                                                                                                                                                 | University of Wisconsin-Madison AIDS Vaccine Research Laboratories                   | University of Wisconsin-Madison AIDS Vaccine Research Laboratories                                    | Gage Moreno, Katarina Braun, et al. AIDS Vaccine Research Laboratories                                                                                                                                                                                                                                                                                         |
| EPI_ISL_548962, EPI_ISL_548963, EPI_ISL_549024, EPI_ISL_549026, EPI_ISL_549176                                                                                                                                                                                                                                                                                                                                                                                                                                                                                                                                                                                                                                                                                                                                                                                                                                                                                                                                                                                                                                                                                                                                                                                                                                                                                                                                                                                                                                                                                                                                                                                                                                                                                                                                                                                                                                                                                                                                                                                                                                                                                                                                                                                                                                                                                                                                                                                                                                                                                                                                                                                                                                                                                                                                                                                                                                                                                                                                                                                                                                                                                                                                                                                                                                                                                                                                                                                                                                                                                                                                                                                                                                                                                                                                                                                                                                                                                                                                                                                                                                                                                                                                                                                                                                                                                                                                                                                                                                                                                                                                                                                                                                                                                 | Klinisk mikrobiologi, Region Västerbotten                                            | Unit for Biological Agents, Department for CBRN Defence and Security, Swedish Defence Research Agency | FOI Bioinformatics team                                                                                                                                                                                                                                                                                                                                        |
| EPI_ISL_549334, EPI_ISL_549357, EPI_ISL_549361, EPI_ISL_549376, EPI_ISL_549380, EPI_ISL_549385, EPI_ISL_549491, EPI_ISL_549492, EPI_ISL_549493, EPI_ISL_549494, EPI_ISL_549495, EPI_ISL_549496, EPI_ISL_549497, EPI_ISL_549498, EPI_ISL_549499, EPI_ISL_549500, EPI_ISL_549501, EPI_ISL_549502, EPI_ISL_549503, EPI_ISL_549504, EPI_ISL_549505, EPI_ISL_549506, EPI_ISL_549507, EPI_ISL_549508, EPI_ISL_549509, EPI_ISL_549510, EPI_ISL_549511, EPI_ISL_549512, EPI_ISL_549513, EPI_ISL_549514, EPI_ISL_549515, EPI_ISL_549516                                                                                                                                                                                                                                                                                                                                                                                                                                                                                                                                                                                                                                                                                                                                                                                                                                                                                                                                                                                                                                                                                                                                                                                                                                                                                                                                                                                                                                                                                                                                                                                                                                                                                                                                                                                                                                                                                                                                                                                                                                                                                                                                                                                                                                                                                                                                                                                                                                                                                                                                                                                                                                                                                                                                                                                                                                                                                                                                                                                                                                                                                                                                                                                                                                                                                                                                                                                                                                                                                                                                                                                                                                                                                                                                                                                                                                                                                                                                                                                                                                                                                                                                                                                                                                 | Queens Medical Centre, Clinical Microbiology Department / DeepSeq Nottingham         | COVID-19 Genomics UK (COG-UK) Consortium                                                              | Gemma Clark, Wendy Smith, Manjinder Khakh, Vicki M Fleming, Michelle M Lister, Hannah Howson-Wells, Jonathan Ball, Patrick McClure, Joseph Chappell, Theocharis Tsoleridis, Nadine Holmes, Matthew Carlisle, Christopher Moore, Fei Sang, Johnny Debebe, Victoria Wright, Matthew Loose                                                                        |
| see above                                                                                                                                                                                                                                                                                                                                                                                                                                                                                                                                                                                                                                                                                                                                                                                                                                                                                                                                                                                                                                                                                                                                                                                                                                                                                                                                                                                                                                                                                                                                                                                                                                                                                                                                                                                                                                                                                                                                                                                                                                                                                                                                                                                                                                                                                                                                                                                                                                                                                                                                                                                                                                                                                                                                                                                                                                                                                                                                                                                                                                                                                                                                                                                                                                                                                                                                                                                                                                                                                                                                                                                                                                                                                                                                                                                                                                                                                                                                                                                                                                                                                                                                                                                                                                                                                                                                                                                                                                                                                                                                                                                                                                                                                                                                                      | Queens Medical Centre, Clinical Microbiology Department / DeepSeq Nottingham         | COVID-19 Genomics UK (COG-UK) Consortium                                                              | Gemma Clark, Wendy Smith, Manjinder Khakh, Vicki M Fleming, Michelle M Lister, Hannah Howson-Wells, Jonathan Ball, Patrick McClure, Joseph Chappell, Theocharis Tsoleridis, Nadine Holmes, Matthew Carlisle, Christopher Moore, Fei Sang, Johnny Debebe, Victoria Wright, Matthew Loose                                                                        |
| EPI_ISL_560833, EPI_ISL_560835, EPI_ISL_560836, EPI_ISL_560838, EPI_ISL_560839, EPI_ISL_560840, EPI_ISL_560842, EPI_ISL_560843, EPI_ISL_560844, EPI_ISL_560845, EPI_ISL_560846, EPI_ISL_560847, EPI_ISL_560848, EPI_ISL_560849, EPI_ISL_560850, EPI_ISL_560851, EPI_ISL_560852, EPI_ISL_560853, EPI_ISL_560854, EPI_ISL_560855, EPI_ISL_560857, EPI_ISL_560858, EPI_ISL_560859, EPI_ISL_560860, EPI_ISL_560862, EPI_ISL_560863, EPI_ISL_560864, EPI_ISL_560865, EPI_ISL_560866, EPI_ISL_560867, EPI_ISL_560868, EPI_ISL_560869, EPI_ISL_560870, EPI_ISL_560871, EPI_ISL_560872, EPI_ISL_560873, EPI_ISL_560874, EPI_ISL_560875, EPI_ISL_560876, EPI_ISL_560877, EPI_ISL_560878, EPI_ISL_560879, EPI_ISL_560880, EPI_ISL_560881, EPI_ISL_560882, EPI_ISL_560883, EPI_ISL_560884, EPI_ISL_560885, EPI_ISL_560886, EPI_ISL_560887, EPI_ISL_560888, EPI_ISL_560889, EPI_ISL_560890, EPI_ISL_560891, EPI_ISL_560892, EPI_ISL_560893, EPI_ISL_560894, EPI_ISL_560895, EPI_ISL_560896, EPI_ISL_560897, EPI_ISL_560898, EPI_ISL_560899, EPI_ISL_560900, EPI_ISL_560901, EPI_ISL_560903, EPI_ISL_560904, EPI_ISL_560905, EPI_ISL_560906, EPI_ISL_560907, EPI_ISL_560908, EPI_ISL_560909, EPI_ISL_560910, EPI_ISL_560911, EPI_ISL_560912, EPI_ISL_560913, EPI_ISL_560914, EPI_ISL_560915, EPI_ISL_560916, EPI_ISL_560917, EPI_ISL_560918, EPI_ISL_560919, EPI_ISL_560920, EPI_ISL_560922, EPI_ISL_560923, EPI_ISL_560924, EPI_ISL_560925                                                                                                                                                                                                                                                                                                                                                                                                                                                                                                                                                                                                                                                                                                                                                                                                                                                                                                                                                                                                                                                                                                                                                                                                                                                                                                                                                                                                                                                                                                                                                                                                                                                                                                                                                                                                                                                                                                                                                                                                                                                                                                                                                                                                                                                                                                                                                                                                                                                                                                                                                                                                                                                                                                                                                                                                                                                                                                                                                                                                                                                                                                                                                                                                                                                                                                                                 | Utah Public Health Laboratory                                                        | Utah Public Health Laboratory                                                                         | Erin Young, Kelly Oakeson                                                                                                                                                                                                                                                                                                                                      |
| see above                                                                                                                                                                                                                                                                                                                                                                                                                                                                                                                                                                                                                                                                                                                                                                                                                                                                                                                                                                                                                                                                                                                                                                                                                                                                                                                                                                                                                                                                                                                                                                                                                                                                                                                                                                                                                                                                                                                                                                                                                                                                                                                                                                                                                                                                                                                                                                                                                                                                                                                                                                                                                                                                                                                                                                                                                                                                                                                                                                                                                                                                                                                                                                                                                                                                                                                                                                                                                                                                                                                                                                                                                                                                                                                                                                                                                                                                                                                                                                                                                                                                                                                                                                                                                                                                                                                                                                                                                                                                                                                                                                                                                                                                                                                                                      | Utah Public Health Laboratory                                                        | Utah Public Health Laboratory                                                                         | Erin Young, Kelly Oakeson                                                                                                                                                                                                                                                                                                                                      |

|                                                                                                                                                                                                                                                                                                                                                                                                                                                                                                                                                                                                                                                                                                                                                                                                                                                                                                                                                                                                                                                                                                                                                                                                                                                                                                                                                                                                                                                                                                                                                                                                                                                                                                                                                                                                                                                                                                                                                                                                                                                                                                                                                                                                                                                                                                                                                                                                                                                                                                                                                                                                                                                                                                                                                                                                                                                                                                                                                |                                                                                                                          |                                                                                                                                                                                  |                                                                                                                                                                                                                                                                                          |
|------------------------------------------------------------------------------------------------------------------------------------------------------------------------------------------------------------------------------------------------------------------------------------------------------------------------------------------------------------------------------------------------------------------------------------------------------------------------------------------------------------------------------------------------------------------------------------------------------------------------------------------------------------------------------------------------------------------------------------------------------------------------------------------------------------------------------------------------------------------------------------------------------------------------------------------------------------------------------------------------------------------------------------------------------------------------------------------------------------------------------------------------------------------------------------------------------------------------------------------------------------------------------------------------------------------------------------------------------------------------------------------------------------------------------------------------------------------------------------------------------------------------------------------------------------------------------------------------------------------------------------------------------------------------------------------------------------------------------------------------------------------------------------------------------------------------------------------------------------------------------------------------------------------------------------------------------------------------------------------------------------------------------------------------------------------------------------------------------------------------------------------------------------------------------------------------------------------------------------------------------------------------------------------------------------------------------------------------------------------------------------------------------------------------------------------------------------------------------------------------------------------------------------------------------------------------------------------------------------------------------------------------------------------------------------------------------------------------------------------------------------------------------------------------------------------------------------------------------------------------------------------------------------------------------------------------|--------------------------------------------------------------------------------------------------------------------------|----------------------------------------------------------------------------------------------------------------------------------------------------------------------------------|------------------------------------------------------------------------------------------------------------------------------------------------------------------------------------------------------------------------------------------------------------------------------------------|
| EPI_ISL_568686                                                                                                                                                                                                                                                                                                                                                                                                                                                                                                                                                                                                                                                                                                                                                                                                                                                                                                                                                                                                                                                                                                                                                                                                                                                                                                                                                                                                                                                                                                                                                                                                                                                                                                                                                                                                                                                                                                                                                                                                                                                                                                                                                                                                                                                                                                                                                                                                                                                                                                                                                                                                                                                                                                                                                                                                                                                                                                                                 | RSUD Prof. DR. Margono Soekarjo                                                                                          | Eijkman Institute for Molecular Biology, Ministry of Research and Technology/National Agency for Research and Innovation                                                         | Frilasita A Yudhaputri, Edison Johar, Hidayat Trimarsanto, Iskandar A Adnan, Willy Agustine, David H Muljono, Safarina G Malik, Herawati Sudoyo, Khin Saw Myint, Amin Soebandrio                                                                                                         |
| EPI_ISL_568687                                                                                                                                                                                                                                                                                                                                                                                                                                                                                                                                                                                                                                                                                                                                                                                                                                                                                                                                                                                                                                                                                                                                                                                                                                                                                                                                                                                                                                                                                                                                                                                                                                                                                                                                                                                                                                                                                                                                                                                                                                                                                                                                                                                                                                                                                                                                                                                                                                                                                                                                                                                                                                                                                                                                                                                                                                                                                                                                 | RSUP Fatmawati                                                                                                           | Eijkman Institute for Molecular Biology, Ministry of Research and Technology/National Agency for Research and Innovation                                                         | Frilasita A Yudhaputri, Edison Johar, Hidayat Trimarsanto, Iskandar A Adnan, Willy Agustine, David H Muljono, Safarina G Malik, Herawati Sudoyo, Khin Saw Myint, Amin Soebandrio                                                                                                         |
| EPI_ISL_568688                                                                                                                                                                                                                                                                                                                                                                                                                                                                                                                                                                                                                                                                                                                                                                                                                                                                                                                                                                                                                                                                                                                                                                                                                                                                                                                                                                                                                                                                                                                                                                                                                                                                                                                                                                                                                                                                                                                                                                                                                                                                                                                                                                                                                                                                                                                                                                                                                                                                                                                                                                                                                                                                                                                                                                                                                                                                                                                                 | RS Pelni                                                                                                                 | Eijkman Institute for Molecular Biology, Ministry of Research and Technology/National Agency for Research and Innovation                                                         | Frilasita A Yudhaputri, Edison Johar, Hidayat Trimarsanto, Iskandar A Adnan, Willy Agustine, David H Muljono, Safarina G Malik, Herawati Sudoyo, Khin Saw Myint, Amin Soebandrio                                                                                                         |
| EPI_ISL_568689                                                                                                                                                                                                                                                                                                                                                                                                                                                                                                                                                                                                                                                                                                                                                                                                                                                                                                                                                                                                                                                                                                                                                                                                                                                                                                                                                                                                                                                                                                                                                                                                                                                                                                                                                                                                                                                                                                                                                                                                                                                                                                                                                                                                                                                                                                                                                                                                                                                                                                                                                                                                                                                                                                                                                                                                                                                                                                                                 | RS Pondok Indah Puri Indah                                                                                               | Eijkman Institute for Molecular Biology, Ministry of Research and Technology/National Agency for Research and Innovation                                                         | Frilasita A Yudhaputri, Edison Johar, Hidayat Trimarsanto, Iskandar A Adnan, Willy Agustine, David H Muljono, Safarina G Malik, Herawati Sudoyo, Khin Saw Myint, Amin Soebandrio                                                                                                         |
| EPI_ISL_568690, EPI_ISL_568691                                                                                                                                                                                                                                                                                                                                                                                                                                                                                                                                                                                                                                                                                                                                                                                                                                                                                                                                                                                                                                                                                                                                                                                                                                                                                                                                                                                                                                                                                                                                                                                                                                                                                                                                                                                                                                                                                                                                                                                                                                                                                                                                                                                                                                                                                                                                                                                                                                                                                                                                                                                                                                                                                                                                                                                                                                                                                                                 | RSUP Fatmawati                                                                                                           | Eijkman Institute for Molecular Biology, Ministry of Research and Technology/National Agency for Research and Innovation                                                         | Frilasita A Yudhaputri, Edison Johar, Hidayat Trimarsanto, Iskandar A Adnan, Willy Agustine, David H Muljono, Safarina G Malik, Herawati Sudoyo, Khin Saw Myint, Amin Soebandrio                                                                                                         |
| EPI_ISL_568692                                                                                                                                                                                                                                                                                                                                                                                                                                                                                                                                                                                                                                                                                                                                                                                                                                                                                                                                                                                                                                                                                                                                                                                                                                                                                                                                                                                                                                                                                                                                                                                                                                                                                                                                                                                                                                                                                                                                                                                                                                                                                                                                                                                                                                                                                                                                                                                                                                                                                                                                                                                                                                                                                                                                                                                                                                                                                                                                 | RS Kramat 128                                                                                                            | Eijkman Institute for Molecular Biology, Ministry of Research and Technology/National Agency for Research and Innovation                                                         | Frilasita A Yudhaputri, Edison Johar, Hidayat Trimarsanto, Iskandar A Adnan, Willy Agustine, David H Muljono, Safarina G Malik, Herawati Sudoyo, Khin Saw Myint, Amin Soebandrio                                                                                                         |
| EPI_ISL_568693                                                                                                                                                                                                                                                                                                                                                                                                                                                                                                                                                                                                                                                                                                                                                                                                                                                                                                                                                                                                                                                                                                                                                                                                                                                                                                                                                                                                                                                                                                                                                                                                                                                                                                                                                                                                                                                                                                                                                                                                                                                                                                                                                                                                                                                                                                                                                                                                                                                                                                                                                                                                                                                                                                                                                                                                                                                                                                                                 | RS Freeport Tembagapura                                                                                                  | Eijkman Institute for Molecular Biology, Ministry of Research and Technology/National Agency for Research and Innovation                                                         | Frilasita A Yudhaputri, Edison Johar, Hidayat Trimarsanto, Iskandar A Adnan, Willy Agustine, David H Muljono, Safarina G Malik, Herawati Sudoyo, Khin Saw Myint, Amin Soebandrio                                                                                                         |
| EPI_ISL_568694                                                                                                                                                                                                                                                                                                                                                                                                                                                                                                                                                                                                                                                                                                                                                                                                                                                                                                                                                                                                                                                                                                                                                                                                                                                                                                                                                                                                                                                                                                                                                                                                                                                                                                                                                                                                                                                                                                                                                                                                                                                                                                                                                                                                                                                                                                                                                                                                                                                                                                                                                                                                                                                                                                                                                                                                                                                                                                                                 | RSUP Prof. Dr. R. Kandou Manado                                                                                          | Eijkman Institute for Molecular Biology, Ministry of Research and Technology/National Agency for Research and Innovation                                                         | Frilasita A Yudhaputri, Edison Johar, Hidayat Trimarsanto, Iskandar A Adnan, Willy Agustine, David H Muljono, Safarina G Malik, Herawati Sudoyo, Khin Saw Myint, Amin Soebandrio                                                                                                         |
| EPI_ISL_572444, EPI_ISL_572460, EPI_ISL_572475, EPI_ISL_572476, EPI_ISL_572509, EPI_ISL_572582, EPI_ISL_572598, EPI_ISL_572603, EPI_ISL_572706, EPI_ISL_572799, EPI_ISL_572833, EPI_ISL_572872, EPI_ISL_573418, EPI_ISL_573419, EPI_ISL_573420, EPI_ISL_573421, EPI_ISL_573422, EPI_ISL_573423, EPI_ISL_573424, EPI_ISL_573425, EPI_ISL_573426, EPI_ISL_573427, EPI_ISL_573428, EPI_ISL_573429, EPI_ISL_573430, EPI_ISL_573431, EPI_ISL_573432, EPI_ISL_573433, EPI_ISL_573434, EPI_ISL_573435, EPI_ISL_573436, EPI_ISL_573451, EPI_ISL_573452, EPI_ISL_573453, EPI_ISL_573454, EPI_ISL_573455, EPI_ISL_573456, EPI_ISL_573457, EPI_ISL_573458, EPI_ISL_573459, EPI_ISL_573460, EPI_ISL_573461, EPI_ISL_573462, EPI_ISL_573463, EPI_ISL_573464, EPI_ISL_573465, EPI_ISL_573466, EPI_ISL_573467, EPI_ISL_573468, EPI_ISL_573469, EPI_ISL_573470, EPI_ISL_573471, EPI_ISL_573472, EPI_ISL_573473, EPI_ISL_573474, EPI_ISL_573475, EPI_ISL_573476, EPI_ISL_573477                                                                                                                                                                                                                                                                                                                                                                                                                                                                                                                                                                                                                                                                                                                                                                                                                                                                                                                                                                                                                                                                                                                                                                                                                                                                                                                                                                                                                                                                                                                                                                                                                                                                                                                                                                                                                                                                                                                                                                                 | Eijkman Institute for Molecular Biology, Ministry of Research and Technology/National Agency for Research and Innovation | Frilasita A Yudhaputri, Edison Johar, Hidayat Trimarsanto, Iskandar A Adnan, Willy Agustine, David H Muljono, Safarina G Malik, Herawati Sudoyo, Khin Saw Myint, Amin Soebandrio |                                                                                                                                                                                                                                                                                          |
| see above                                                                                                                                                                                                                                                                                                                                                                                                                                                                                                                                                                                                                                                                                                                                                                                                                                                                                                                                                                                                                                                                                                                                                                                                                                                                                                                                                                                                                                                                                                                                                                                                                                                                                                                                                                                                                                                                                                                                                                                                                                                                                                                                                                                                                                                                                                                                                                                                                                                                                                                                                                                                                                                                                                                                                                                                                                                                                                                                      | Queens Medical Centre, Clinical Microbiology Department / DeepSeq Nottingham                                             | COVID-19 Genomics UK (COG-UK) Consortium                                                                                                                                         | Gemma Clark, Wendy Smith, Manjinder Khakh, Vicki M Fleming, Michelle M Lister, Hannah Howson-Wells, Jonathan Ball, Patrick McClure, Joseph Chappell, Theocharis Tsoileridis, Nadine Holmes, Matthew Carlisle, Christopher Moore, Fei Sang, Johnny Debebe, Victoria Wright, Matthew Loose |
| EPI_ISL_574543, EPI_ISL_574544, EPI_ISL_574545, EPI_ISL_574546, EPI_ISL_574547, EPI_ISL_574548, EPI_ISL_574549, EPI_ISL_574550, EPI_ISL_574551, EPI_ISL_574552, EPI_ISL_574553, EPI_ISL_574554, EPI_ISL_574555, EPI_ISL_574556, EPI_ISL_574557, EPI_ISL_574558, EPI_ISL_574559, EPI_ISL_574560, EPI_ISL_574561, EPI_ISL_574562, EPI_ISL_574563, EPI_ISL_574564, EPI_ISL_574565, EPI_ISL_574566, EPI_ISL_574567, EPI_ISL_574568, EPI_ISL_574569, EPI_ISL_574570, EPI_ISL_574571, EPI_ISL_574572, EPI_ISL_574573, EPI_ISL_574574, EPI_ISL_574575                                                                                                                                                                                                                                                                                                                                                                                                                                                                                                                                                                                                                                                                                                                                                                                                                                                                                                                                                                                                                                                                                                                                                                                                                                                                                                                                                                                                                                                                                                                                                                                                                                                                                                                                                                                                                                                                                                                                                                                                                                                                                                                                                                                                                                                                                                                                                                                                 | Microbiology Division, South Carolina Department of Health and Environmental Control                                     | Flores,H.                                                                                                                                                                        |                                                                                                                                                                                                                                                                                          |
| see above                                                                                                                                                                                                                                                                                                                                                                                                                                                                                                                                                                                                                                                                                                                                                                                                                                                                                                                                                                                                                                                                                                                                                                                                                                                                                                                                                                                                                                                                                                                                                                                                                                                                                                                                                                                                                                                                                                                                                                                                                                                                                                                                                                                                                                                                                                                                                                                                                                                                                                                                                                                                                                                                                                                                                                                                                                                                                                                                      | Microbiology Division, South Carolina Department of Health and Environmental Control                                     | Microbiology Division, South Carolina Department of Health and Environmental Control                                                                                             |                                                                                                                                                                                                                                                                                          |
| EPI_ISL_574603                                                                                                                                                                                                                                                                                                                                                                                                                                                                                                                                                                                                                                                                                                                                                                                                                                                                                                                                                                                                                                                                                                                                                                                                                                                                                                                                                                                                                                                                                                                                                                                                                                                                                                                                                                                                                                                                                                                                                                                                                                                                                                                                                                                                                                                                                                                                                                                                                                                                                                                                                                                                                                                                                                                                                                                                                                                                                                                                 | RS Freeport Tembagapura                                                                                                  | Eijkman Institute for Molecular Biology, Ministry of Research and Technology/National Agency for Research and Innovation                                                         | Frilasita A Yudhaputri, Edison Johar, Hidayat Trimarsanto, Iskandar A Adnan, Willy Agustine, David H Muljono, Safarina G Malik, Herawati Sudoyo, Khin Saw Myint, Amin Soebandrio                                                                                                         |
| EPI_ISL_574604                                                                                                                                                                                                                                                                                                                                                                                                                                                                                                                                                                                                                                                                                                                                                                                                                                                                                                                                                                                                                                                                                                                                                                                                                                                                                                                                                                                                                                                                                                                                                                                                                                                                                                                                                                                                                                                                                                                                                                                                                                                                                                                                                                                                                                                                                                                                                                                                                                                                                                                                                                                                                                                                                                                                                                                                                                                                                                                                 | RSUP Prof. Dr. R. Kandou Manado                                                                                          | Eijkman Institute for Molecular Biology, Ministry of Research and Technology/National Agency for Research and Innovation                                                         | Frilasita A Yudhaputri, Edison Johar, Hidayat Trimarsanto, Iskandar A Adnan, Willy Agustine, David H Muljono, Safarina G Malik, Herawati Sudoyo, Khin Saw Myint, Amin Soebandrio                                                                                                         |
| EPI_ISL_574605                                                                                                                                                                                                                                                                                                                                                                                                                                                                                                                                                                                                                                                                                                                                                                                                                                                                                                                                                                                                                                                                                                                                                                                                                                                                                                                                                                                                                                                                                                                                                                                                                                                                                                                                                                                                                                                                                                                                                                                                                                                                                                                                                                                                                                                                                                                                                                                                                                                                                                                                                                                                                                                                                                                                                                                                                                                                                                                                 | RSUP dr. Sardjito                                                                                                        | Eijkman Institute for Molecular Biology, Ministry of Research and Technology/National Agency for Research and Innovation                                                         | Frilasita A Yudhaputri, Edison Johar, Hidayat Trimarsanto, Iskandar A Adnan, Willy Agustine, David H Muljono, Safarina G Malik, Herawati Sudoyo, Khin Saw Myint, Amin Soebandrio                                                                                                         |
| EPI_ISL_574606                                                                                                                                                                                                                                                                                                                                                                                                                                                                                                                                                                                                                                                                                                                                                                                                                                                                                                                                                                                                                                                                                                                                                                                                                                                                                                                                                                                                                                                                                                                                                                                                                                                                                                                                                                                                                                                                                                                                                                                                                                                                                                                                                                                                                                                                                                                                                                                                                                                                                                                                                                                                                                                                                                                                                                                                                                                                                                                                 | RS Siloam Purwakarta                                                                                                     | Eijkman Institute for Molecular Biology, Ministry of Research and Technology/National Agency for Research and Innovation                                                         | Frilasita A Yudhaputri, Edison Johar, Hidayat Trimarsanto, Iskandar A Adnan, Willy Agustine, David H Muljono, Safarina G Malik, Herawati Sudoyo, Khin Saw Myint, Amin Soebandrio                                                                                                         |
| EPI_ISL_574607                                                                                                                                                                                                                                                                                                                                                                                                                                                                                                                                                                                                                                                                                                                                                                                                                                                                                                                                                                                                                                                                                                                                                                                                                                                                                                                                                                                                                                                                                                                                                                                                                                                                                                                                                                                                                                                                                                                                                                                                                                                                                                                                                                                                                                                                                                                                                                                                                                                                                                                                                                                                                                                                                                                                                                                                                                                                                                                                 | RS Husada                                                                                                                | Eijkman Institute for Molecular Biology, Ministry of Research and Technology/National Agency for Research and Innovation                                                         | Frilasita A Yudhaputri, Edison Johar, Hidayat Trimarsanto, Iskandar A Adnan, Willy Agustine, David H Muljono, Safarina G Malik, Herawati Sudoyo, Khin Saw Myint, Amin Soebandrio                                                                                                         |
| EPI_ISL_574608                                                                                                                                                                                                                                                                                                                                                                                                                                                                                                                                                                                                                                                                                                                                                                                                                                                                                                                                                                                                                                                                                                                                                                                                                                                                                                                                                                                                                                                                                                                                                                                                                                                                                                                                                                                                                                                                                                                                                                                                                                                                                                                                                                                                                                                                                                                                                                                                                                                                                                                                                                                                                                                                                                                                                                                                                                                                                                                                 | RS Mitra Keluarga Kelapa Gading                                                                                          | Eijkman Institute for Molecular Biology, Ministry of Research and Technology/National Agency for Research and Innovation                                                         | Frilasita A Yudhaputri, Edison Johar, Hidayat Trimarsanto, Iskandar A Adnan, Willy Agustine, David H Muljono, Safarina G Malik, Herawati Sudoyo, Khin Saw Myint, Amin Soebandrio                                                                                                         |
| EPI_ISL_574609                                                                                                                                                                                                                                                                                                                                                                                                                                                                                                                                                                                                                                                                                                                                                                                                                                                                                                                                                                                                                                                                                                                                                                                                                                                                                                                                                                                                                                                                                                                                                                                                                                                                                                                                                                                                                                                                                                                                                                                                                                                                                                                                                                                                                                                                                                                                                                                                                                                                                                                                                                                                                                                                                                                                                                                                                                                                                                                                 | RSJPD Harapan Kita                                                                                                       | Eijkman Institute for Molecular Biology, Ministry of Research and Technology/National Agency for Research and Innovation                                                         | Frilasita A Yudhaputri, Edison Johar, Hidayat Trimarsanto, Iskandar A Adnan, Willy Agustine, David H Muljono, Safarina G Malik, Herawati Sudoyo, Khin Saw Myint, Amin Soebandrio                                                                                                         |
| EPI_ISL_574610                                                                                                                                                                                                                                                                                                                                                                                                                                                                                                                                                                                                                                                                                                                                                                                                                                                                                                                                                                                                                                                                                                                                                                                                                                                                                                                                                                                                                                                                                                                                                                                                                                                                                                                                                                                                                                                                                                                                                                                                                                                                                                                                                                                                                                                                                                                                                                                                                                                                                                                                                                                                                                                                                                                                                                                                                                                                                                                                 | Puskesmas Tambora                                                                                                        | Eijkman Institute for Molecular Biology, Ministry of Research and Technology/National Agency for Research and Innovation                                                         | Frilasita A Yudhaputri, Edison Johar, Hidayat Trimarsanto, Iskandar A Adnan, Willy Agustine, David H Muljono, Safarina G Malik, Herawati Sudoyo, Khin Saw Myint, Amin Soebandrio                                                                                                         |
| EPI_ISL_574611                                                                                                                                                                                                                                                                                                                                                                                                                                                                                                                                                                                                                                                                                                                                                                                                                                                                                                                                                                                                                                                                                                                                                                                                                                                                                                                                                                                                                                                                                                                                                                                                                                                                                                                                                                                                                                                                                                                                                                                                                                                                                                                                                                                                                                                                                                                                                                                                                                                                                                                                                                                                                                                                                                                                                                                                                                                                                                                                 | RS Premier Bintaro                                                                                                       | Eijkman Institute for Molecular Biology, Ministry of Research and Technology/National Agency for Research and Innovation                                                         | Frilasita A Yudhaputri, Edison Johar, Hidayat Trimarsanto, Iskandar A Adnan, Willy Agustine, David H Muljono, Safarina G Malik, Herawati Sudoyo, Khin Saw Myint, Amin Soebandrio                                                                                                         |
| EPI_ISL_574612                                                                                                                                                                                                                                                                                                                                                                                                                                                                                                                                                                                                                                                                                                                                                                                                                                                                                                                                                                                                                                                                                                                                                                                                                                                                                                                                                                                                                                                                                                                                                                                                                                                                                                                                                                                                                                                                                                                                                                                                                                                                                                                                                                                                                                                                                                                                                                                                                                                                                                                                                                                                                                                                                                                                                                                                                                                                                                                                 | RS Hermina Mekarsari                                                                                                     | Eijkman Institute for Molecular Biology, Ministry of Research and Technology/National Agency for Research and Innovation                                                         | Frilasita A Yudhaputri, Edison Johar, Hidayat Trimarsanto, Iskandar A Adnan, Willy Agustine, David H Muljono, Safarina G Malik, Herawati Sudoyo, Khin Saw Myint, Amin Soebandrio                                                                                                         |
| EPI_ISL_574613                                                                                                                                                                                                                                                                                                                                                                                                                                                                                                                                                                                                                                                                                                                                                                                                                                                                                                                                                                                                                                                                                                                                                                                                                                                                                                                                                                                                                                                                                                                                                                                                                                                                                                                                                                                                                                                                                                                                                                                                                                                                                                                                                                                                                                                                                                                                                                                                                                                                                                                                                                                                                                                                                                                                                                                                                                                                                                                                 | RS Harapan Bunda                                                                                                         | Eijkman Institute for Molecular Biology, Ministry of Research and Technology/National Agency for Research and Innovation                                                         | Frilasita A Yudhaputri, Edison Johar, Hidayat Trimarsanto, Iskandar A Adnan, Willy Agustine, David H Muljono, Safarina G Malik, Herawati Sudoyo, Khin Saw Myint, Amin Soebandrio                                                                                                         |
| EPI_ISL_574614                                                                                                                                                                                                                                                                                                                                                                                                                                                                                                                                                                                                                                                                                                                                                                                                                                                                                                                                                                                                                                                                                                                                                                                                                                                                                                                                                                                                                                                                                                                                                                                                                                                                                                                                                                                                                                                                                                                                                                                                                                                                                                                                                                                                                                                                                                                                                                                                                                                                                                                                                                                                                                                                                                                                                                                                                                                                                                                                 | RS Kramat 128                                                                                                            | Eijkman Institute for Molecular Biology, Ministry of Research and Technology/National Agency for Research and Innovation                                                         | Frilasita A Yudhaputri, Edison Johar, Hidayat Trimarsanto, Iskandar A Adnan, Willy Agustine, David H Muljono, Safarina G Malik, Herawati Sudoyo, Khin Saw Myint, Amin Soebandrio                                                                                                         |
| EPI_ISL_574615                                                                                                                                                                                                                                                                                                                                                                                                                                                                                                                                                                                                                                                                                                                                                                                                                                                                                                                                                                                                                                                                                                                                                                                                                                                                                                                                                                                                                                                                                                                                                                                                                                                                                                                                                                                                                                                                                                                                                                                                                                                                                                                                                                                                                                                                                                                                                                                                                                                                                                                                                                                                                                                                                                                                                                                                                                                                                                                                 | RS Harapan Bunda                                                                                                         | Eijkman Institute for Molecular Biology, Ministry of Research and Technology/National Agency for Research and Innovation                                                         | Frilasita A Yudhaputri, Edison Johar, Hidayat Trimarsanto, Iskandar A Adnan, Willy Agustine, David H Muljono, Safarina G Malik, Herawati Sudoyo, Khin Saw Myint, Amin Soebandrio                                                                                                         |
| EPI_ISL_574616, EPI_ISL_574617                                                                                                                                                                                                                                                                                                                                                                                                                                                                                                                                                                                                                                                                                                                                                                                                                                                                                                                                                                                                                                                                                                                                                                                                                                                                                                                                                                                                                                                                                                                                                                                                                                                                                                                                                                                                                                                                                                                                                                                                                                                                                                                                                                                                                                                                                                                                                                                                                                                                                                                                                                                                                                                                                                                                                                                                                                                                                                                 | RS Kramat 128                                                                                                            | Eijkman Institute for Molecular Biology, Ministry of Research and Technology/National Agency for Research and Innovation                                                         | Frilasita A Yudhaputri, Edison Johar, Hidayat Trimarsanto, Iskandar A Adnan, Willy Agustine, David H Muljono, Safarina G Malik, Herawati Sudoyo, Khin Saw Myint, Amin Soebandrio                                                                                                         |
| EPI_ISL_575034, EPI_ISL_575035, EPI_ISL_575037, EPI_ISL_575038, EPI_ISL_575039, EPI_ISL_575040, EPI_ISL_575041, EPI_ISL_575042, EPI_ISL_575043, EPI_ISL_575045, EPI_ISL_575046, EPI_ISL_575047, EPI_ISL_575048, EPI_ISL_575049, EPI_ISL_575051, EPI_ISL_575052, EPI_ISL_575053, EPI_ISL_575054, EPI_ISL_575057, EPI_ISL_575058, EPI_ISL_575059, EPI_ISL_575061, EPI_ISL_575062, EPI_ISL_575063, EPI_ISL_575064, EPI_ISL_575066, EPI_ISL_575067, EPI_ISL_575069, EPI_ISL_575070, EPI_ISL_575072, EPI_ISL_575073, EPI_ISL_575075, EPI_ISL_575076, EPI_ISL_575077, EPI_ISL_575078, EPI_ISL_575079, EPI_ISL_575080, EPI_ISL_575081, EPI_ISL_575082, EPI_ISL_575083, EPI_ISL_575087, EPI_ISL_575089, EPI_ISL_575092, EPI_ISL_575093, EPI_ISL_575095, EPI_ISL_575096, EPI_ISL_575097, EPI_ISL_575099, EPI_ISL_575100, EPI_ISL_575101, EPI_ISL_575103, EPI_ISL_575104, EPI_ISL_575106, EPI_ISL_575107, EPI_ISL_575109, EPI_ISL_575111, EPI_ISL_575112, EPI_ISL_575114, EPI_ISL_575115, EPI_ISL_575116, EPI_ISL_575117, EPI_ISL_575118, EPI_ISL_575121, EPI_ISL_575122, EPI_ISL_575123, EPI_ISL_575124, EPI_ISL_575126, EPI_ISL_575127, EPI_ISL_575128, EPI_ISL_575129, EPI_ISL_575130, EPI_ISL_575131, EPI_ISL_575132, EPI_ISL_575134, EPI_ISL_575136, EPI_ISL_575141, EPI_ISL_575143, EPI_ISL_575145, EPI_ISL_575146, EPI_ISL_575147, EPI_ISL_575148, EPI_ISL_575150, EPI_ISL_575152, EPI_ISL_575153, EPI_ISL_575154, EPI_ISL_575155, EPI_ISL_575156, EPI_ISL_575158, EPI_ISL_575159, EPI_ISL_575161, EPI_ISL_575162, EPI_ISL_575164, EPI_ISL_575165, EPI_ISL_575166, EPI_ISL_575167, EPI_ISL_575168, EPI_ISL_575169, EPI_ISL_575172, EPI_ISL_575173, EPI_ISL_575175, EPI_ISL_575176, EPI_ISL_575177, EPI_ISL_575178, EPI_ISL_575180, EPI_ISL_575181, EPI_ISL_575182, EPI_ISL_575183, EPI_ISL_575184, EPI_ISL_575185, EPI_ISL_575186, EPI_ISL_575187, EPI_ISL_575188, EPI_ISL_575189, EPI_ISL_575190, EPI_ISL_575191, EPI_ISL_575192, EPI_ISL_575193, EPI_ISL_575195, EPI_ISL_575197, EPI_ISL_575198, EPI_ISL_575199, EPI_ISL_575200, EPI_ISL_575201, EPI_ISL_575203, EPI_ISL_575204, EPI_ISL_575206, EPI_ISL_575208, EPI_ISL_575209, EPI_ISL_575210, EPI_ISL_575213, EPI_ISL_575215, EPI_ISL_575218, EPI_ISL_575220, EPI_ISL_575221, EPI_ISL_575222, EPI_ISL_575223, EPI_ISL_575224, EPI_ISL_575225, EPI_ISL_575227, EPI_ISL_575229, EPI_ISL_575230, EPI_ISL_575231, EPI_ISL_575232, EPI_ISL_575233, EPI_ISL_575234, EPI_ISL_575235, EPI_ISL_575236, EPI_ISL_575237, EPI_ISL_575239, EPI_ISL_575240, EPI_ISL_575241, EPI_ISL_575242, EPI_ISL_575243, EPI_ISL_575244, EPI_ISL_575249, EPI_ISL_575252, EPI_ISL_575254, EPI_ISL_575256, EPI_ISL_575258, EPI_ISL_575259, EPI_ISL_575261, EPI_ISL_575263, EPI_ISL_575264, EPI_ISL_575265, EPI_ISL_575266, EPI_ISL_575268, EPI_ISL_575269, EPI_ISL_575270, EPI_ISL_575273, EPI_ISL_575276, EPI_ISL_575277, EPI_ISL_575281, EPI_ISL_575282, EPI_ISL_575283, EPI_ISL_575285, EPI_ISL_575286, EPI_ISL_575287 | Utah Public Health Laboratory                                                                                            | Utah Public Health Laboratory                                                                                                                                                    | Erin Young, Kelly Oakeson                                                                                                                                                                                                                                                                |
| see above                                                                                                                                                                                                                                                                                                                                                                                                                                                                                                                                                                                                                                                                                                                                                                                                                                                                                                                                                                                                                                                                                                                                                                                                                                                                                                                                                                                                                                                                                                                                                                                                                                                                                                                                                                                                                                                                                                                                                                                                                                                                                                                                                                                                                                                                                                                                                                                                                                                                                                                                                                                                                                                                                                                                                                                                                                                                                                                                      | Utah Public Health Laboratory                                                                                            | Utah Public Health Laboratory                                                                                                                                                    |                                                                                                                                                                                                                                                                                          |
| EPI_ISL_576264, EPI_ISL_576265                                                                                                                                                                                                                                                                                                                                                                                                                                                                                                                                                                                                                                                                                                                                                                                                                                                                                                                                                                                                                                                                                                                                                                                                                                                                                                                                                                                                                                                                                                                                                                                                                                                                                                                                                                                                                                                                                                                                                                                                                                                                                                                                                                                                                                                                                                                                                                                                                                                                                                                                                                                                                                                                                                                                                                                                                                                                                                                 | Instituto de Diagnostico y Referencia Epidemiologicos (INDRE)                                                            | Instituto de Diagnostico y Referencia Epidemiologicos (INDRE)                                                                                                                    | Ernesto Ramirez-Gonzalez, Abril Rodriguez-Maldonado, Claudia Wong-Arambula , Natividad Cruz-Ortiz, Tatiana Nunez-Garcia, Dayanira Arellano-Suarez, Adnan Araiza-Rodriguez, Edgar Mendieta-Condado, Lucia Hernandez-Rivas, Irma Lopez-Martinez, Gisela Barrera-Badillo.                   |
| EPI_ISL_576266, EPI_ISL_576267, EPI_ISL_576268, EPI_ISL_576269, EPI_ISL_576270, EPI_ISL_576271, EPI_ISL_576273                                                                                                                                                                                                                                                                                                                                                                                                                                                                                                                                                                                                                                                                                                                                                                                                                                                                                                                                                                                                                                                                                                                                                                                                                                                                                                                                                                                                                                                                                                                                                                                                                                                                                                                                                                                                                                                                                                                                                                                                                                                                                                                                                                                                                                                                                                                                                                                                                                                                                                                                                                                                                                                                                                                                                                                                                                 | Instituto de Diagnostico y Referencia Epidemiologicos (INDRE)                                                            | Instituto de Diagnostico y Referencia Epidemiologicos (INDRE)                                                                                                                    | Ernesto Ramirez-Gonzalez, Abril Rodriguez-Maldonado, Claudia Wong-Arambula , Natividad Cruz-Ortiz, Tatiana Nunez-Garcia, Dayanira Arellano-Suarez, Adnan Araiza-Rodriguez, Fabiola Garces-Ayala, Lucia Hernandez-Rivas, Irma Lopez-Martinez, Gisela Barrera-Badillo.                     |
| EPI_ISL_576277, EPI_ISL_576278                                                                                                                                                                                                                                                                                                                                                                                                                                                                                                                                                                                                                                                                                                                                                                                                                                                                                                                                                                                                                                                                                                                                                                                                                                                                                                                                                                                                                                                                                                                                                                                                                                                                                                                                                                                                                                                                                                                                                                                                                                                                                                                                                                                                                                                                                                                                                                                                                                                                                                                                                                                                                                                                                                                                                                                                                                                                                                                 | Instituto de Diagnostico y Referencia Epidemiologicos (INDRE)                                                            | Instituto de Diagnostico y Referencia Epidemiologicos (INDRE)                                                                                                                    | Ernesto Ramirez-Gonzalez, Abril Rodriguez-Maldonado, Claudia Wong-Arambula , Natividad Cruz-Ortiz, Tatiana Nunez-Garcia, Dayanira Arellano-Suarez, Adnan Araiza-Rodriguez, Edgar Mendieta-Condado, Lucia Hernandez-Rivas, Irma Lopez-Martinez, Gisela Barrera-Badillo.                   |







|                                                                                                                                                                                                                                                                                                                                                                                                                                                                                                                                                                                                                                                                                                                                                                                                                                                                                                                                                                                                                                                                                                                                                                                                                                                                                                                                                                                                                                                                                                                                                                                                                                                                                                                                                                                                                                                                                                                                                                                                                                                                                                                                                                                                                                                                                                                                                                                                                                                                                                                                                                                                                                                                                                                                                                                                                                                                                                                                                                                                                                                                                                                                                                                                                                                                |                |                                                                                          |                                                                                 |                                                                                                                                                                                                                                                                                                                                                                                                                    |
|----------------------------------------------------------------------------------------------------------------------------------------------------------------------------------------------------------------------------------------------------------------------------------------------------------------------------------------------------------------------------------------------------------------------------------------------------------------------------------------------------------------------------------------------------------------------------------------------------------------------------------------------------------------------------------------------------------------------------------------------------------------------------------------------------------------------------------------------------------------------------------------------------------------------------------------------------------------------------------------------------------------------------------------------------------------------------------------------------------------------------------------------------------------------------------------------------------------------------------------------------------------------------------------------------------------------------------------------------------------------------------------------------------------------------------------------------------------------------------------------------------------------------------------------------------------------------------------------------------------------------------------------------------------------------------------------------------------------------------------------------------------------------------------------------------------------------------------------------------------------------------------------------------------------------------------------------------------------------------------------------------------------------------------------------------------------------------------------------------------------------------------------------------------------------------------------------------------------------------------------------------------------------------------------------------------------------------------------------------------------------------------------------------------------------------------------------------------------------------------------------------------------------------------------------------------------------------------------------------------------------------------------------------------------------------------------------------------------------------------------------------------------------------------------------------------------------------------------------------------------------------------------------------------------------------------------------------------------------------------------------------------------------------------------------------------------------------------------------------------------------------------------------------------------------------------------------------------------------------------------------------------|----------------|------------------------------------------------------------------------------------------|---------------------------------------------------------------------------------|--------------------------------------------------------------------------------------------------------------------------------------------------------------------------------------------------------------------------------------------------------------------------------------------------------------------------------------------------------------------------------------------------------------------|
| EPI_ISL_634978, EPI_ISL_634980, EPI_ISL_634982, EPI_ISL_634985, EPI_ISL_634986, EPI_ISL_634987, EPI_ISL_634988, EPI_ISL_634989, EPI_ISL_634990, EPI_ISL_634991, EPI_ISL_634993, EPI_ISL_634995, EPI_ISL_634996, EPI_ISL_634997, EPI_ISL_634998, EPI_ISL_634999, EPI_ISL_635000, EPI_ISL_635002, EPI_ISL_635006, EPI_ISL_635010, EPI_ISL_635011, EPI_ISL_635012, EPI_ISL_635013, EPI_ISL_635016, EPI_ISL_635017, EPI_ISL_635023, EPI_ISL_635024, EPI_ISL_635027, EPI_ISL_635029, EPI_ISL_635031, EPI_ISL_635032, EPI_ISL_635033, EPI_ISL_635035, EPI_ISL_635036, EPI_ISL_635041, EPI_ISL_635045, EPI_ISL_635050, EPI_ISL_635053, EPI_ISL_635055, EPI_ISL_635056                                                                                                                                                                                                                                                                                                                                                                                                                                                                                                                                                                                                                                                                                                                                                                                                                                                                                                                                                                                                                                                                                                                                                                                                                                                                                                                                                                                                                                                                                                                                                                                                                                                                                                                                                                                                                                                                                                                                                                                                                                                                                                                                                                                                                                                                                                                                                                                                                                                                                                                                                                                                 | see above      | National Health Laboratory Service - Inkosi Albert Luthuli Central Hospital (NHLS-IALCH) | KRISP, KZN Research Innovation and Sequencing Platform                          | Gandhari J, Pillay S, Lessells R, Mdlalose K, York D, Khan S, Tegally H, Wilkinson E, de Oliveira T                                                                                                                                                                                                                                                                                                                |
| EPI_ISL_636961                                                                                                                                                                                                                                                                                                                                                                                                                                                                                                                                                                                                                                                                                                                                                                                                                                                                                                                                                                                                                                                                                                                                                                                                                                                                                                                                                                                                                                                                                                                                                                                                                                                                                                                                                                                                                                                                                                                                                                                                                                                                                                                                                                                                                                                                                                                                                                                                                                                                                                                                                                                                                                                                                                                                                                                                                                                                                                                                                                                                                                                                                                                                                                                                                                                 |                | Pathogen Genomics Lab King Abdullah University of Science and Technology(KAUST)          | Pathogen Genomics Lab King Abdullah University of Science and Technology(KAUST) | Fadwa Alofi, Sharif Hala, Rahul P Salunke, Sara Mfarrej, Amit Kumar Subudhi, Fathia Ben Rached, Amanda, Luke, Afrah Alsomali, Asim Khogeer, Jumana Taha, Abdulaziz Alahmadi, Kahled Alghithami, Raaeece Naem, Anwar Hashem, Naif Almontashiri, Arnab Pain                                                                                                                                                          |
| EPI_ISL_636966, EPI_ISL_636967, EPI_ISL_636968                                                                                                                                                                                                                                                                                                                                                                                                                                                                                                                                                                                                                                                                                                                                                                                                                                                                                                                                                                                                                                                                                                                                                                                                                                                                                                                                                                                                                                                                                                                                                                                                                                                                                                                                                                                                                                                                                                                                                                                                                                                                                                                                                                                                                                                                                                                                                                                                                                                                                                                                                                                                                                                                                                                                                                                                                                                                                                                                                                                                                                                                                                                                                                                                                 |                | Pathogen Genomics Lab King Abdullah University of Science and Technology(KAUST)          | Pathogen Genomics Lab King Abdullah University of Science and Technology(KAUST) | Fathia Ben Rached, Raaeece Naem, Sharif Hala, Fadwa Alofi, Rahul P Salunke, Sara Mfarrej, Amit Kumar Subudhi, Afrah Alsomali, Asim Khogeer, Ahmad Bakur Mahmoud, Anwar Hashem, Naif Almontashiri, Arnab Pain                                                                                                                                                                                                       |
| EPI_ISL_637110, EPI_ISL_637111, EPI_ISL_637112, EPI_ISL_637113                                                                                                                                                                                                                                                                                                                                                                                                                                                                                                                                                                                                                                                                                                                                                                                                                                                                                                                                                                                                                                                                                                                                                                                                                                                                                                                                                                                                                                                                                                                                                                                                                                                                                                                                                                                                                                                                                                                                                                                                                                                                                                                                                                                                                                                                                                                                                                                                                                                                                                                                                                                                                                                                                                                                                                                                                                                                                                                                                                                                                                                                                                                                                                                                 |                | Rafik Hariri University Hospital                                                         | Microbial Pathogenomics Lab                                                     | Georgi Merhi, Tamara Salloum, Rita Feghali, Sima Tokajian                                                                                                                                                                                                                                                                                                                                                          |
| EPI_ISL_637298, EPI_ISL_637300, EPI_ISL_637342, EPI_ISL_637343, EPI_ISL_637344, EPI_ISL_637419, EPI_ISL_637427, EPI_ISL_637555, EPI_ISL_637558, EPI_ISL_637582, EPI_ISL_637660, EPI_ISL_637661, EPI_ISL_637798, EPI_ISL_637799, EPI_ISL_637800, EPI_ISL_637935, EPI_ISL_638584, EPI_ISL_638585, EPI_ISL_638586, EPI_ISL_638587, EPI_ISL_638589, EPI_ISL_638588, EPI_ISL_638590, EPI_ISL_638591, EPI_ISL_638592, EPI_ISL_638593, EPI_ISL_638594, EPI_ISL_638595, EPI_ISL_638596, EPI_ISL_638597, EPI_ISL_638598, EPI_ISL_638599, EPI_ISL_638600, EPI_ISL_638601, EPI_ISL_638602, EPI_ISL_638603, EPI_ISL_638604, EPI_ISL_638605, EPI_ISL_638606, EPI_ISL_638607, EPI_ISL_638608, EPI_ISL_638609, EPI_ISL_638610, EPI_ISL_638611, EPI_ISL_638612, EPI_ISL_638613                                                                                                                                                                                                                                                                                                                                                                                                                                                                                                                                                                                                                                                                                                                                                                                                                                                                                                                                                                                                                                                                                                                                                                                                                                                                                                                                                                                                                                                                                                                                                                                                                                                                                                                                                                                                                                                                                                                                                                                                                                                                                                                                                                                                                                                                                                                                                                                                                                                                                                 | see above      | Queens Medical Centre, Clinical Microbiology Department / DeepSeq Nottingham             | COVID-19 Genomics UK (COG-UK) Consortium                                        | Gemma Clark, Wendy Smith, Manjinder Khakh, Vicki M Fleming, Michelle M Lister, Hannah Howson-Wells, Jonathan Ball, Patrick McClure, Joseph Chappell, Theocharis Tsoleridis, Nadine Holmes, Matthew Carlisle, Christopher Moore, Fei Sang, Johnny Debebe, Victoria Wright, Matthew Loose                                                                                                                            |
| EPI_ISL_640276, EPI_ISL_640277, EPI_ISL_640278, EPI_ISL_640279, EPI_ISL_640280, EPI_ISL_640281, EPI_ISL_640283, EPI_ISL_640284, EPI_ISL_640286, EPI_ISL_640287, EPI_ISL_640288, EPI_ISL_640289, EPI_ISL_640291, EPI_ISL_640293, EPI_ISL_640295, EPI_ISL_640296, EPI_ISL_640297, EPI_ISL_640300, EPI_ISL_648556, EPI_ISL_648557, EPI_ISL_648558, EPI_ISL_648559, EPI_ISL_648560, EPI_ISL_648563, EPI_ISL_648564, EPI_ISL_648565, EPI_ISL_648566, EPI_ISL_648567, EPI_ISL_648568, EPI_ISL_648569, EPI_ISL_648570, EPI_ISL_648572, EPI_ISL_648573, EPI_ISL_648575, EPI_ISL_648576, EPI_ISL_648577, EPI_ISL_648578, EPI_ISL_648579, EPI_ISL_648580, EPI_ISL_648582, EPI_ISL_648583, EPI_ISL_648584, EPI_ISL_648585, EPI_ISL_648587, EPI_ISL_648588, EPI_ISL_648589, EPI_ISL_648590, EPI_ISL_648591, EPI_ISL_648594                                                                                                                                                                                                                                                                                                                                                                                                                                                                                                                                                                                                                                                                                                                                                                                                                                                                                                                                                                                                                                                                                                                                                                                                                                                                                                                                                                                                                                                                                                                                                                                                                                                                                                                                                                                                                                                                                                                                                                                                                                                                                                                                                                                                                                                                                                                                                                                                                                                 | see above      | Utah Public Health Laboratory                                                            | Utah Public Health Laboratory                                                   | Erin Young, Kelly Oakeson                                                                                                                                                                                                                                                                                                                                                                                          |
| EPI_ISL_650136, EPI_ISL_650150, EPI_ISL_650154, EPI_ISL_650157, EPI_ISL_650178, EPI_ISL_650186, EPI_ISL_650187, EPI_ISL_650238, EPI_ISL_650266, EPI_ISL_650276, EPI_ISL_650291, EPI_ISL_650295, EPI_ISL_650314, EPI_ISL_650347, EPI_ISL_650386, EPI_ISL_650430, EPI_ISL_650443, EPI_ISL_650449, EPI_ISL_650450, EPI_ISL_650471, EPI_ISL_650556, EPI_ISL_650558, EPI_ISL_650599, EPI_ISL_650611, EPI_ISL_650641, EPI_ISL_650701, EPI_ISL_650723, EPI_ISL_650738, EPI_ISL_650767, EPI_ISL_650786, EPI_ISL_650803, EPI_ISL_650811, EPI_ISL_650820, EPI_ISL_650821, EPI_ISL_650830, EPI_ISL_650835, EPI_ISL_650846, EPI_ISL_650937, EPI_ISL_650979, EPI_ISL_650987, EPI_ISL_651065, EPI_ISL_651071, EPI_ISL_651072, EPI_ISL_651073, EPI_ISL_651096, EPI_ISL_651107, EPI_ISL_651166, EPI_ISL_651189, EPI_ISL_651232, EPI_ISL_651249, EPI_ISL_651260, EPI_ISL_651274, EPI_ISL_651285, EPI_ISL_651286, EPI_ISL_651293, EPI_ISL_651308, EPI_ISL_651309, EPI_ISL_651313, EPI_ISL_651386, EPI_ISL_651389, EPI_ISL_651398, EPI_ISL_651401, EPI_ISL_651408, EPI_ISL_651466, EPI_ISL_651504, EPI_ISL_651528, EPI_ISL_651584, EPI_ISL_651585, EPI_ISL_652184, EPI_ISL_652185, EPI_ISL_652186, EPI_ISL_652187, EPI_ISL_652188, EPI_ISL_652189, EPI_ISL_652190, EPI_ISL_652191, EPI_ISL_652192, EPI_ISL_652193, EPI_ISL_652194, EPI_ISL_652195, EPI_ISL_652196, EPI_ISL_652197, EPI_ISL_652199, EPI_ISL_652200, EPI_ISL_652201, EPI_ISL_652202, EPI_ISL_652203, EPI_ISL_652204, EPI_ISL_652205, EPI_ISL_652206, EPI_ISL_652207, EPI_ISL_652208, EPI_ISL_652209, EPI_ISL_652210, EPI_ISL_652211, EPI_ISL_652212, EPI_ISL_652213, EPI_ISL_652214, EPI_ISL_652215, EPI_ISL_652364, EPI_ISL_652365, EPI_ISL_652366, EPI_ISL_652367, EPI_ISL_652368, EPI_ISL_652369, EPI_ISL_652370, EPI_ISL_652371, EPI_ISL_652372, EPI_ISL_652373, EPI_ISL_652374, EPI_ISL_652375, EPI_ISL_652376, EPI_ISL_652377, EPI_ISL_652378, EPI_ISL_652379, EPI_ISL_652380, EPI_ISL_652381, EPI_ISL_652382, EPI_ISL_652383, EPI_ISL_652384, EPI_ISL_652385, EPI_ISL_652386, EPI_ISL_652387, EPI_ISL_652388, EPI_ISL_652389, EPI_ISL_652390, EPI_ISL_652391, EPI_ISL_652392, EPI_ISL_652393, EPI_ISL_652394, EPI_ISL_652395, EPI_ISL_652396, EPI_ISL_652397, EPI_ISL_652398, EPI_ISL_652399, EPI_ISL_652400, EPI_ISL_652401, EPI_ISL_652402, EPI_ISL_652403, EPI_ISL_652404, EPI_ISL_652405, EPI_ISL_652406, EPI_ISL_652407, EPI_ISL_652408, EPI_ISL_652409, EPI_ISL_652410, EPI_ISL_652411, EPI_ISL_652412, EPI_ISL_652413, EPI_ISL_652627, EPI_ISL_652628, EPI_ISL_652629, EPI_ISL_652630, EPI_ISL_652631, EPI_ISL_652632, EPI_ISL_652633, EPI_ISL_652634, EPI_ISL_652635, EPI_ISL_652637, EPI_ISL_652638, EPI_ISL_652639, EPI_ISL_652640, EPI_ISL_652641, EPI_ISL_652642, EPI_ISL_652643, EPI_ISL_652644, EPI_ISL_652645, EPI_ISL_652646, EPI_ISL_652647, EPI_ISL_652648, EPI_ISL_652649, EPI_ISL_652650, EPI_ISL_652651, EPI_ISL_652652, EPI_ISL_652653, EPI_ISL_652654, EPI_ISL_652655, EPI_ISL_652656, EPI_ISL_652657, EPI_ISL_652658, EPI_ISL_652659, EPI_ISL_652660, EPI_ISL_652661, EPI_ISL_652662, EPI_ISL_652663, EPI_ISL_652664, EPI_ISL_652665, EPI_ISL_652666, EPI_ISL_652667, EPI_ISL_652668, EPI_ISL_652669, EPI_ISL_652670, EPI_ISL_652671, EPI_ISL_652672, EPI_ISL_652673, EPI_ISL_652674 | see above      | Queens Medical Centre, Clinical Microbiology Department / DeepSeq Nottingham             | COVID-19 Genomics UK (COG-UK) Consortium                                        | Gemma Clark, Wendy Smith, Manjinder Khakh, Vicki M Fleming, Michelle M Lister, Hannah Howson-Wells, Jonathan Ball, Patrick McClure, Joseph Chappell, Theocharis Tsoleridis, Nadine Holmes, Matthew Carlisle, Christopher Moore, Fei Sang, Johnny Debebe, Victoria Wright, Matthew Loose                                                                                                                            |
| EPI_ISL_658878, EPI_ISL_658880, EPI_ISL_658883, EPI_ISL_658886, EPI_ISL_658888, EPI_ISL_658891, EPI_ISL_658893, EPI_ISL_658896, EPI_ISL_658901                                                                                                                                                                                                                                                                                                                                                                                                                                                                                                                                                                                                                                                                                                                                                                                                                                                                                                                                                                                                                                                                                                                                                                                                                                                                                                                                                                                                                                                                                                                                                                                                                                                                                                                                                                                                                                                                                                                                                                                                                                                                                                                                                                                                                                                                                                                                                                                                                                                                                                                                                                                                                                                                                                                                                                                                                                                                                                                                                                                                                                                                                                                 | EPI_ISL_658904 | Instituto de Diagnostico y Referencia Epidemiologicos (INDRE)                            | Instituto de Diagnostico y Referencia Epidemiologicos (INDRE)                   | Ernesto Ramirez-Gonzalez, Abril Rodriguez-Maldonado, Claudia Wong-Arambula , Natividad Cruz-Ortiz, Tatiana Nunez-Garcia, Dayanira Arellano-Suarez, Fabiola Garces-Ayala, Lucia Hernandez-Rivas, Irma Lopez-Martinez, Gisela Barrera-Badillo.                                                                                                                                                                       |
| EPI_ISL_660069, EPI_ISL_660070                                                                                                                                                                                                                                                                                                                                                                                                                                                                                                                                                                                                                                                                                                                                                                                                                                                                                                                                                                                                                                                                                                                                                                                                                                                                                                                                                                                                                                                                                                                                                                                                                                                                                                                                                                                                                                                                                                                                                                                                                                                                                                                                                                                                                                                                                                                                                                                                                                                                                                                                                                                                                                                                                                                                                                                                                                                                                                                                                                                                                                                                                                                                                                                                                                 |                | Zurita & Zurita Laboratorios                                                             | Zurita & Zurita Laboratorios                                                    | Ernesto Ramirez-Gonzalez, Abril Rodriguez-Maldonado, Claudia Wong-Arambula , Natividad Cruz-Ortiz, Tatiana Nunez-Garcia, Dayanira Arellano-Suarez, Fabiola Garces-Ayala, Lucia Hernandez-Rivas, Irma Lopez-Martinez, Gisela Barrera-Badillo, Marisol Galindo-Galindo, Linda Andarade-Sanchez, Octavio Ruiz-Muñiz, Pamela Ramirez-Medina, Roman Canul-Aguilar, Gaudalope Herrera-Ramirez, Jazmin Galicia-Hernandez. |
| EPI_ISL_660159                                                                                                                                                                                                                                                                                                                                                                                                                                                                                                                                                                                                                                                                                                                                                                                                                                                                                                                                                                                                                                                                                                                                                                                                                                                                                                                                                                                                                                                                                                                                                                                                                                                                                                                                                                                                                                                                                                                                                                                                                                                                                                                                                                                                                                                                                                                                                                                                                                                                                                                                                                                                                                                                                                                                                                                                                                                                                                                                                                                                                                                                                                                                                                                                                                                 |                | NHLS-IALCH                                                                               | KRISP, KZN Research Innovation and Sequencing Platform                          | Gabriela Sevillano Camilo Zurita-Salinas Karen Loaiza David Ortega-Paredes Jeannette Zurita                                                                                                                                                                                                                                                                                                                        |
| EPI_ISL_660165, EPI_ISL_660166, EPI_ISL_660167, EPI_ISL_660168, EPI_ISL_660169, EPI_ISL_660170, EPI_ISL_660171, EPI_ISL_660172, EPI_ISL_660173, EPI_ISL_660174, EPI_ISL_660175, EPI_ISL_660176, EPI_ISL_660177, EPI_ISL_660178, EPI_ISL_660179, EPI_ISL_660180, EPI_ISL_660181, EPI_ISL_660182, EPI_ISL_660183, EPI_ISL_660184, EPI_ISL_660185                                                                                                                                                                                                                                                                                                                                                                                                                                                                                                                                                                                                                                                                                                                                                                                                                                                                                                                                                                                                                                                                                                                                                                                                                                                                                                                                                                                                                                                                                                                                                                                                                                                                                                                                                                                                                                                                                                                                                                                                                                                                                                                                                                                                                                                                                                                                                                                                                                                                                                                                                                                                                                                                                                                                                                                                                                                                                                                 | see above      | NHLS-IALCH                                                                               | KRISP, KZN Research Innovation and Sequencing Platform                          | Gandhari J, Pillay S, Lessells R, Mdlalose K, York D, Khan S, Tegally H, Wilkinson E, de Oliveira T                                                                                                                                                                                                                                                                                                                |
| EPI_ISL_660186, EPI_ISL_660195, EPI_ISL_660198, EPI_ISL_660201, EPI_ISL_660204, EPI_ISL_660210, EPI_ISL_660215, EPI_ISL_660218                                                                                                                                                                                                                                                                                                                                                                                                                                                                                                                                                                                                                                                                                                                                                                                                                                                                                                                                                                                                                                                                                                                                                                                                                                                                                                                                                                                                                                                                                                                                                                                                                                                                                                                                                                                                                                                                                                                                                                                                                                                                                                                                                                                                                                                                                                                                                                                                                                                                                                                                                                                                                                                                                                                                                                                                                                                                                                                                                                                                                                                                                                                                 |                | NHLS-IALCH                                                                               | KRISP, KZN Research Innovation and Sequencing Platform                          | Gazy I, Sigal A, Karim F, Cele S, Gandhari J, Pillay S, Tegally H, Wilkinson E, de Oliveira T                                                                                                                                                                                                                                                                                                                      |
| EPI_ISL_660221                                                                                                                                                                                                                                                                                                                                                                                                                                                                                                                                                                                                                                                                                                                                                                                                                                                                                                                                                                                                                                                                                                                                                                                                                                                                                                                                                                                                                                                                                                                                                                                                                                                                                                                                                                                                                                                                                                                                                                                                                                                                                                                                                                                                                                                                                                                                                                                                                                                                                                                                                                                                                                                                                                                                                                                                                                                                                                                                                                                                                                                                                                                                                                                                                                                 |                | KRISP, KZN Research Innovation and Sequencing Platform                                   | KRISP, KZN Research Innovation and Sequencing Platform                          | Gandhari J, Pillay S, Lessells R, Mdlalose K, York D, Khan S, Tegally H, Wilkinson E, de Oliveira T                                                                                                                                                                                                                                                                                                                |
| EPI_ISL_660223, EPI_ISL_660224, EPI_ISL_660225, EPI_ISL_660226                                                                                                                                                                                                                                                                                                                                                                                                                                                                                                                                                                                                                                                                                                                                                                                                                                                                                                                                                                                                                                                                                                                                                                                                                                                                                                                                                                                                                                                                                                                                                                                                                                                                                                                                                                                                                                                                                                                                                                                                                                                                                                                                                                                                                                                                                                                                                                                                                                                                                                                                                                                                                                                                                                                                                                                                                                                                                                                                                                                                                                                                                                                                                                                                 |                | NHLS-IALCH                                                                               | KRISP, KZN Research Innovation and Sequencing Platform                          | Gandhari J, Pillay S, Lessells R, Mdlalose K, York D, Khan S, Tegally H, Wilkinson E, de Oliveira T                                                                                                                                                                                                                                                                                                                |
| EPI_ISL_660228                                                                                                                                                                                                                                                                                                                                                                                                                                                                                                                                                                                                                                                                                                                                                                                                                                                                                                                                                                                                                                                                                                                                                                                                                                                                                                                                                                                                                                                                                                                                                                                                                                                                                                                                                                                                                                                                                                                                                                                                                                                                                                                                                                                                                                                                                                                                                                                                                                                                                                                                                                                                                                                                                                                                                                                                                                                                                                                                                                                                                                                                                                                                                                                                                                                 |                | KRISP, KZN Research Innovation and Sequencing Platform                                   | KRISP, KZN Research Innovation and Sequencing Platform                          | Gandhari J, Pillay S, Lessells R, Mdlalose K, York D, Khan S, Tegally H, Wilkinson E, de Oliveira T                                                                                                                                                                                                                                                                                                                |
| EPI_ISL_660234, EPI_ISL_660236, EPI_ISL_660238, EPI_ISL_660239, EPI_ISL_660240, EPI_ISL_660241, EPI_ISL_660243, EPI_ISL_660250, EPI_ISL_660251                                                                                                                                                                                                                                                                                                                                                                                                                                                                                                                                                                                                                                                                                                                                                                                                                                                                                                                                                                                                                                                                                                                                                                                                                                                                                                                                                                                                                                                                                                                                                                                                                                                                                                                                                                                                                                                                                                                                                                                                                                                                                                                                                                                                                                                                                                                                                                                                                                                                                                                                                                                                                                                                                                                                                                                                                                                                                                                                                                                                                                                                                                                 |                | NHLS-IALCH                                                                               | KRISP, KZN Research Innovation and Sequencing Platform                          | Gandhari J, Pillay S, Lessells R, Mdlalose K, York D, Khan S, Tegally H, Wilkinson E, de Oliveira T                                                                                                                                                                                                                                                                                                                |
| EPI_ISL_660259, EPI_ISL_660261, EPI_ISL_660262, EPI_ISL_660263                                                                                                                                                                                                                                                                                                                                                                                                                                                                                                                                                                                                                                                                                                                                                                                                                                                                                                                                                                                                                                                                                                                                                                                                                                                                                                                                                                                                                                                                                                                                                                                                                                                                                                                                                                                                                                                                                                                                                                                                                                                                                                                                                                                                                                                                                                                                                                                                                                                                                                                                                                                                                                                                                                                                                                                                                                                                                                                                                                                                                                                                                                                                                                                                 |                | Molecularr Diagnostic Services (MDS)                                                     | KRISP, KZN Research Innovation and Sequencing Platform                          | Gandhari J, Pillay S, Lessells R, Mdlalose K, York D, Khan S, Tegally H, Wilkinson E, de Oliveira T                                                                                                                                                                                                                                                                                                                |
| EPI_ISL_660609, EPI_ISL_660611, EPI_ISL_660616, EPI_ISL_660620, EPI_ISL_660623, EPI_ISL_660626, EPI_ISL_660627, EPI_ISL_660628, EPI_ISL_660635, EPI_ISL_660636, EPI_ISL_660639, EPI_ISL_660642, EPI_ISL_660644, EPI_ISL_660647, EPI_ISL_660653, EPI_ISL_660657, EPI_ISL_660658, EPI_ISL_660660                                                                                                                                                                                                                                                                                                                                                                                                                                                                                                                                                                                                                                                                                                                                                                                                                                                                                                                                                                                                                                                                                                                                                                                                                                                                                                                                                                                                                                                                                                                                                                                                                                                                                                                                                                                                                                                                                                                                                                                                                                                                                                                                                                                                                                                                                                                                                                                                                                                                                                                                                                                                                                                                                                                                                                                                                                                                                                                                                                 | see above      | NHLS-IALCH                                                                               | KRISP, KZN Research Innovation and Sequencing Platform                          | Gandhari J, Pillay S, Lessells R, Mdlalose K, York D, Khan S, Tegally H, Wilkinson E, de Oliveira T                                                                                                                                                                                                                                                                                                                |
| EPI_ISL_665290, EPI_ISL_665291, EPI_ISL_665344, EPI_ISL_665345, EPI_ISL_665365, EPI_ISL_665366, EPI_ISL_665367, EPI_ISL_665415, EPI_ISL_665420, EPI_ISL_665421, EPI_ISL_665424, EPI_ISL_665426, EPI_ISL_665430, EPI_ISL_665441, EPI_ISL_665443, EPI_ISL_665452, EPI_ISL_665510, EPI_ISL_665512, EPI_ISL_665513, EPI_ISL_665528, EPI_ISL_665543, EPI_ISL_665544, EPI_ISL_665545, EPI_ISL_665550, EPI_ISL_665551, EPI_ISL_665561, EPI_ISL_665562, EPI_ISL_665601, EPI_ISL_665610, EPI_ISL_665612, EPI_ISL_665622, EPI_ISL_665623, EPI_ISL_665650, EPI_ISL_665659, EPI_ISL_665724, EPI_ISL_665740, EPI_ISL_665761, EPI_ISL_665789, EPI_ISL_665898, EPI_ISL_665899, EPI_ISL_665900, EPI_ISL_665901, EPI_ISL_665902, EPI_ISL_665903, EPI_ISL_665904, EPI_ISL_665905, EPI_ISL_665906, EPI_ISL_665907, EPI_ISL_665908, EPI_ISL_665909, EPI_ISL_665910, EPI_ISL_665911, EPI_ISL_665912, EPI_ISL_665913, EPI_ISL_665914, EPI_ISL_665915, EPI_ISL_665916, EPI_ISL_665917, EPI_ISL_665918, EPI_ISL_665919, EPI_ISL_665920, EPI_ISL_665921, EPI_ISL_665922, EPI_ISL_665923, EPI_ISL_665924, EPI_ISL_665925, EPI_ISL_665926, EPI_ISL_665927, EPI_ISL_665928, EPI_ISL_665929, EPI_ISL_665930, EPI_ISL_665931, EPI_ISL_665932, EPI_ISL_665933, EPI_ISL_665934, EPI_ISL_665935, EPI_ISL_665936, EPI_ISL_665937, EPI_ISL_665938, EPI_ISL_665939, EPI_ISL_665940, EPI_ISL_665941, EPI_ISL_665942, EPI_ISL_665943, EPI_ISL_665944, EPI_ISL_665945, EPI_ISL_665971, EPI_ISL_665972, EPI_ISL_665973, EPI_ISL_665974, EPI_ISL_665975, EPI_ISL_665976, EPI_ISL_665977, EPI_ISL_665978, EPI_ISL_665979, EPI_ISL_665980, EPI_ISL_665981, EPI_ISL_665982                                                                                                                                                                                                                                                                                                                                                                                                                                                                                                                                                                                                                                                                                                                                                                                                                                                                                                                                                                                                                                                                                                                                                                                                                                                                                                                                                                                                                                                                                                                                                                                                                                 | see above      | Queens Medical Centre, Clinical Microbiology Department / DeepSeq Nottingham             | COVID-19 Genomics UK (COG-UK) Consortium                                        | Gemma Clark, Wendy Smith, Manjinder Khakh, Vicki M Fleming, Michelle M Lister, Hannah Howson-Wells, Jonathan Ball, Patrick McClure, Joseph Chappell, Theocharis Tsoleridis, Nadine Holmes, Matthew Carlisle, Christopher Moore, Fei Sang, Johnny Debebe, Victoria Wright, Matthew Loose                                                                                                                            |
| EPI_ISL_671805, EPI_ISL_671806, EPI_ISL_671807, EPI_ISL_671808, EPI_ISL_671809, EPI_ISL_671810, EPI_ISL_671811, EPI_ISL_671812, EPI_ISL_671813, EPI_ISL_671814, EPI_ISL_671815, EPI_ISL_671816, EPI_ISL_671817, EPI_ISL_671818, EPI_ISL_671819, EPI_ISL_671820, EPI_ISL_671821, EPI_ISL_671822, EPI_ISL_671823, EPI_ISL_671824, EPI_ISL_671825, EPI_ISL_671826, EPI_ISL_671827, EPI_ISL_671828, EPI_ISL_671829, EPI_ISL_671830, EPI_ISL_671831, EPI_ISL_671832, EPI_ISL_671833                                                                                                                                                                                                                                                                                                                                                                                                                                                                                                                                                                                                                                                                                                                                                                                                                                                                                                                                                                                                                                                                                                                                                                                                                                                                                                                                                                                                                                                                                                                                                                                                                                                                                                                                                                                                                                                                                                                                                                                                                                                                                                                                                                                                                                                                                                                                                                                                                                                                                                                                                                                                                                                                                                                                                                                 | see above      | Queens Medical Centre, Clinical Microbiology Department / DeepSeq Nottingham             | COVID-19 Genomics UK (COG-UK) Consortium                                        | Gemma Clark, Wendy Smith, Manjinder Khakh, Vicki M Fleming, Michelle M Lister, Hannah Howson-Wells, Jonathan Ball, Patrick McClure, Joseph Chappell, Theocharis Tsoleridis, Nadine Holmes, Matthew Carlisle, Christopher Moore, Fei Sang, Johnny Debebe, Victoria Wright, Matthew Loose                                                                                                                            |



|                                                                                                                                                                                                                                                                                                                                                                                                                                                                                                                                                                                                                                                                                                |                                                                                                     |                                                                                                                                   |                                                                                                                                                                                                                                                                                                                                                                 |
|------------------------------------------------------------------------------------------------------------------------------------------------------------------------------------------------------------------------------------------------------------------------------------------------------------------------------------------------------------------------------------------------------------------------------------------------------------------------------------------------------------------------------------------------------------------------------------------------------------------------------------------------------------------------------------------------|-----------------------------------------------------------------------------------------------------|-----------------------------------------------------------------------------------------------------------------------------------|-----------------------------------------------------------------------------------------------------------------------------------------------------------------------------------------------------------------------------------------------------------------------------------------------------------------------------------------------------------------|
| EPI_ISL_682240                                                                                                                                                                                                                                                                                                                                                                                                                                                                                                                                                                                                                                                                                 | AREA DE SALUD GOICOCHEA 1                                                                           | Incienza, Instituto Costarricense de Investigación y Enseñanza en Nutrición y Salud                                               | Francisco Duarte, Hebleen Porras, Claudio Soto-Garita, Estela Cordero, Adriana Godinez & Melany Calderon                                                                                                                                                                                                                                                        |
| EPI_ISL_682241                                                                                                                                                                                                                                                                                                                                                                                                                                                                                                                                                                                                                                                                                 | HOSPITAL SAN JUAN DE DIOS                                                                           | Incienza, Instituto Costarricense de Investigación y Enseñanza en Nutrición y Salud                                               | Francisco Duarte, Hebleen Porras, Claudio Soto-Garita, Estela Cordero, Adriana Godinez & Melany Calderon                                                                                                                                                                                                                                                        |
| EPI_ISL_682242                                                                                                                                                                                                                                                                                                                                                                                                                                                                                                                                                                                                                                                                                 | HOSPITAL SAN VICENTE DE PAUL                                                                        | Incienza, Instituto Costarricense de Investigación y Enseñanza en Nutrición y Salud                                               | Francisco Duarte, Hebleen Porras, Claudio Soto-Garita, Estela Cordero, Adriana Godinez, Melany Calderon & Mariel López                                                                                                                                                                                                                                          |
| EPI_ISL_682243                                                                                                                                                                                                                                                                                                                                                                                                                                                                                                                                                                                                                                                                                 | HOSPITAL SAN JUAN DE DIOS                                                                           | Incienza, Instituto Costarricense de Investigación y Enseñanza en Nutrición y Salud                                               | Francisco Duarte, Hebleen Porras, Claudio Soto-Garita, Estela Cordero, Adriana Godinez & Melany Calderon                                                                                                                                                                                                                                                        |
| EPI_ISL_682244                                                                                                                                                                                                                                                                                                                                                                                                                                                                                                                                                                                                                                                                                 | AREA DE SALUD LA CRUZ                                                                               | Incienza, Instituto Costarricense de Investigación y Enseñanza en Nutrición y Salud                                               | Francisco Duarte, Hebleen Porras, Claudio Soto-Garita, Estela Cordero, Adriana Godinez, Melany Calderon & Mariel López                                                                                                                                                                                                                                          |
| EPI_ISL_682245, EPI_ISL_682246                                                                                                                                                                                                                                                                                                                                                                                                                                                                                                                                                                                                                                                                 | HOSPITAL SAN JUAN DE DIOS                                                                           | Incienza, Instituto Costarricense de Investigación y Enseñanza en Nutrición y Salud                                               | Francisco Duarte, Hebleen Porras, Claudio Soto-Garita, Estela Cordero, Adriana Godinez & Melany Calderon                                                                                                                                                                                                                                                        |
| EPI_ISL_682247                                                                                                                                                                                                                                                                                                                                                                                                                                                                                                                                                                                                                                                                                 | AREA DE SALUD CIUDAD QUESADA                                                                        | Incienza, Instituto Costarricense de Investigación y Enseñanza en Nutrición y Salud                                               | Francisco Duarte, Hebleen Porras, Claudio Soto-Garita, Estela Cordero, Adriana Godinez & Melany Calderon                                                                                                                                                                                                                                                        |
| EPI_ISL_682248                                                                                                                                                                                                                                                                                                                                                                                                                                                                                                                                                                                                                                                                                 | AREA DE SALUD CIUDAD QUESADA                                                                        | Incienza, Instituto Costarricense de Investigación y Enseñanza en Nutrición y Salud                                               | Francisco Duarte, Hebleen Porras, Claudio Soto-Garita, Estela Cordero, Adriana Godinez, Melany Calderon & Mariel López                                                                                                                                                                                                                                          |
| EPI_ISL_682249                                                                                                                                                                                                                                                                                                                                                                                                                                                                                                                                                                                                                                                                                 | AREA DE SALUD LA UNION                                                                              | Incienza, Instituto Costarricense de Investigación y Enseñanza en Nutrición y Salud                                               | Francisco Duarte, Hebleen Porras, Claudio Soto-Garita, Estela Cordero, Adriana Godinez, Melany Calderon & Mariel López                                                                                                                                                                                                                                          |
| EPI_ISL_682250, EPI_ISL_682251, EPI_ISL_682252                                                                                                                                                                                                                                                                                                                                                                                                                                                                                                                                                                                                                                                 | AREA DE SALUD ESCAZU (COOPESANA)                                                                    | Incienza, Instituto Costarricense de Investigación y Enseñanza en Nutrición y Salud                                               | Francisco Duarte, Hebleen Porras, Claudio Soto-Garita, Estela Cordero, Adriana Godinez & Melany Calderon                                                                                                                                                                                                                                                        |
| EPI_ISL_682253, EPI_ISL_682254                                                                                                                                                                                                                                                                                                                                                                                                                                                                                                                                                                                                                                                                 | HOSPITAL SAN JUAN DE DIOS                                                                           | Incienza, Instituto Costarricense de Investigación y Enseñanza en Nutrición y Salud                                               | Francisco Duarte, Hebleen Porras, Claudio Soto-Garita, Estela Cordero, Adriana Godinez & Melany Calderon                                                                                                                                                                                                                                                        |
| EPI_ISL_682255                                                                                                                                                                                                                                                                                                                                                                                                                                                                                                                                                                                                                                                                                 | HOSPITAL SAN VICENTE DE PAUL                                                                        | Incienza, Instituto Costarricense de Investigación y Enseñanza en Nutrición y Salud                                               | Francisco Duarte, Hebleen Porras, Claudio Soto-Garita, Estela Cordero, Adriana Godinez & Melany Calderon                                                                                                                                                                                                                                                        |
| EPI_ISL_682256                                                                                                                                                                                                                                                                                                                                                                                                                                                                                                                                                                                                                                                                                 | AREA DE SALUD CORREDORES                                                                            | Incienza, Instituto Costarricense de Investigación y Enseñanza en Nutrición y Salud                                               | Francisco Duarte, Hebleen Porras, Claudio Soto-Garita, Estela Cordero, Adriana Godinez, Melany Calderon & Mariel López                                                                                                                                                                                                                                          |
| EPI_ISL_682257                                                                                                                                                                                                                                                                                                                                                                                                                                                                                                                                                                                                                                                                                 | HOSPITAL SAN JUAN DE DIOS                                                                           | Incienza, Instituto Costarricense de Investigación y Enseñanza en Nutrición y Salud                                               | Francisco Duarte, Hebleen Porras, Claudio Soto-Garita, Estela Cordero, Adriana Godinez & Melany Calderon                                                                                                                                                                                                                                                        |
| EPI_ISL_682258                                                                                                                                                                                                                                                                                                                                                                                                                                                                                                                                                                                                                                                                                 | AREA DE SALUD ALAJUELA NORTE - CLINICA DR. MARCIAL RODRIGUEZ                                        | Incienza, Instituto Costarricense de Investigación y Enseñanza en Nutrición y Salud                                               | Francisco Duarte, Hebleen Porras, Claudio Soto-Garita, Estela Cordero, Adriana Godinez & Melany Calderon                                                                                                                                                                                                                                                        |
| EPI_ISL_682259                                                                                                                                                                                                                                                                                                                                                                                                                                                                                                                                                                                                                                                                                 | AREA DE SALUD ALAJUELA NORTE - CLINICA DR. MARCIAL RODRIGUEZ                                        | Incienza, Instituto Costarricense de Investigación y Enseñanza en Nutrición y Salud                                               | Francisco Duarte, Hebleen Porras, Claudio Soto-Garita, Estela Cordero, Adriana Godinez, Melany Calderon & Mariel López                                                                                                                                                                                                                                          |
| EPI_ISL_682260                                                                                                                                                                                                                                                                                                                                                                                                                                                                                                                                                                                                                                                                                 | AREA DE SALUD CATEDRAL NORESTE                                                                      | Incienza, Instituto Costarricense de Investigación y Enseñanza en Nutrición y Salud                                               | Francisco Duarte, Hebleen Porras, Claudio Soto-Garita, Estela Cordero, Adriana Godinez, Melany Calderon & Mariel López                                                                                                                                                                                                                                          |
| EPI_ISL_682261                                                                                                                                                                                                                                                                                                                                                                                                                                                                                                                                                                                                                                                                                 | TAMIZAJE COMUNITARIO- PASO CANOAS                                                                   | Incienza, Instituto Costarricense de Investigación y Enseñanza en Nutrición y Salud                                               | Francisco Duarte, Hebleen Porras, Claudio Soto-Garita, Estela Cordero, Adriana Godinez & Melany Calderon                                                                                                                                                                                                                                                        |
| EPI_ISL_682262, EPI_ISL_682263, EPI_ISL_682264                                                                                                                                                                                                                                                                                                                                                                                                                                                                                                                                                                                                                                                 | HOSPITAL SAN JUAN DE DIOS                                                                           | Incienza, Instituto Costarricense de Investigación y Enseñanza en Nutrición y Salud                                               | Francisco Duarte, Hebleen Porras, Claudio Soto-Garita, Estela Cordero, Adriana Godinez & Melany Calderon                                                                                                                                                                                                                                                        |
| EPI_ISL_682265                                                                                                                                                                                                                                                                                                                                                                                                                                                                                                                                                                                                                                                                                 | HOSPITAL UPALA                                                                                      | Incienza, Instituto Costarricense de Investigación y Enseñanza en Nutrición y Salud                                               | Francisco Duarte, Hebleen Porras, Claudio Soto-Garita, Estela Cordero, Adriana Godinez & Melany Calderon                                                                                                                                                                                                                                                        |
| EPI_ISL_682266, EPI_ISL_682267, EPI_ISL_682268, EPI_ISL_682269, EPI_ISL_682270, EPI_ISL_682271, EPI_ISL_682272, EPI_ISL_682273, EPI_ISL_682274                                                                                                                                                                                                                                                                                                                                                                                                                                                                                                                                                 | HOSPITAL SAN JUAN DE DIOS                                                                           | Incienza, Instituto Costarricense de Investigación y Enseñanza en Nutrición y Salud                                               | Francisco Duarte, Hebleen Porras, Claudio Soto-Garita, Estela Cordero, Adriana Godinez & Melany Calderon                                                                                                                                                                                                                                                        |
| EPI_ISL_682275, EPI_ISL_682276, EPI_ISL_682277                                                                                                                                                                                                                                                                                                                                                                                                                                                                                                                                                                                                                                                 | LABORATORIOS LABIN                                                                                  | Incienza, Instituto Costarricense de Investigación y Enseñanza en Nutrición y Salud                                               | Francisco Duarte, Hebleen Porras, Claudio Soto-Garita, Estela Cordero, Adriana Godinez, Melany Calderon & Pei Ling Chan                                                                                                                                                                                                                                         |
| EPI_ISL_684000, EPI_ISL_684001, EPI_ISL_684003, EPI_ISL_684004, EPI_ISL_684006, EPI_ISL_684008, EPI_ISL_684009, EPI_ISL_684010, EPI_ISL_684011, EPI_ISL_684012, EPI_ISL_684014, EPI_ISL_684017, EPI_ISL_684018, EPI_ISL_684020, EPI_ISL_684021, EPI_ISL_684022, EPI_ISL_684023, EPI_ISL_684025, EPI_ISL_684026                                                                                                                                                                                                                                                                                                                                                                                 |                                                                                                     |                                                                                                                                   |                                                                                                                                                                                                                                                                                                                                                                 |
| see above                                                                                                                                                                                                                                                                                                                                                                                                                                                                                                                                                                                                                                                                                      | Utah Public Health Laboratory                                                                       | Utah Public Health Laboratory                                                                                                     | Erin Young, Kelly Oakeson                                                                                                                                                                                                                                                                                                                                       |
| EPI_ISL_697796                                                                                                                                                                                                                                                                                                                                                                                                                                                                                                                                                                                                                                                                                 | Universidad Regional Amazonica IKIAM                                                                | Institute of Microbiology, Universidad San Francisco de Quito                                                                     | Fabian Aguilar, Katherine Apunte, Andrea Carrera, Nina Espinoza de los Monteros, Giovanna Moran, Marcelo Ortiz, Yeimy Rojas, Sonia Sisilema, Carolina Proaño-Bolaños, Belén Prado-Vivar, Sully Márquez, Juan José Guadalupe, Monica Becerra-Wong, Bernardo Gutiérrez, Verónica Barragán, Patricio Rojas-Silva, Gabriel Trueba, Michelle Grunauer, Paúl Cárdenas |
| EPI_ISL_702841, EPI_ISL_702846, EPI_ISL_702879, EPI_ISL_702889, EPI_ISL_703124, EPI_ISL_703720, EPI_ISL_703775, EPI_ISL_703776, EPI_ISL_703789, EPI_ISL_703792, EPI_ISL_703794, EPI_ISL_703853, EPI_ISL_704315, EPI_ISL_704581, EPI_ISL_704582, EPI_ISL_704583, EPI_ISL_704780, EPI_ISL_705094, EPI_ISL_705213, EPI_ISL_705223, EPI_ISL_705380, EPI_ISL_705487, EPI_ISL_705613, EPI_ISL_705614, EPI_ISL_706420, EPI_ISL_706421, EPI_ISL_706422, EPI_ISL_706423, EPI_ISL_706424, EPI_ISL_706425, EPI_ISL_706426, EPI_ISL_706427, EPI_ISL_706428, EPI_ISL_706429, EPI_ISL_706430, EPI_ISL_706431, EPI_ISL_706432, EPI_ISL_706433, EPI_ISL_706434, EPI_ISL_706435, EPI_ISL_706436, EPI_ISL_706437 |                                                                                                     |                                                                                                                                   |                                                                                                                                                                                                                                                                                                                                                                 |
| see above                                                                                                                                                                                                                                                                                                                                                                                                                                                                                                                                                                                                                                                                                      | Queens Medical Centre, Clinical Microbiology Department / DeepSeq Nottingham                        | COVID-19 Genomics UK (COG-UK) Consortium                                                                                          | Gemma Clark, Wendy Smith, Manjinder Khakh, Vicki M Fleming, Michelle M Lister, Hannah Howson-Wells, Jonathan Ball, Patrick McClure, Joseph Chappell, Theocharis Tsoleridis, Nadine Holmes, Matthew Carlisle, Christopher Moore, Fei Sang, Johnny Debebe, Victoria Wright, Matthew Loose                                                                         |
| EPI_ISL_707891, EPI_ISL_707892, EPI_ISL_707893, EPI_ISL_707894, EPI_ISL_707895, EPI_ISL_707896, EPI_ISL_707897, EPI_ISL_707898, EPI_ISL_707899, EPI_ISL_707900, EPI_ISL_707901, EPI_ISL_707902                                                                                                                                                                                                                                                                                                                                                                                                                                                                                                 |                                                                                                     |                                                                                                                                   |                                                                                                                                                                                                                                                                                                                                                                 |
| see above                                                                                                                                                                                                                                                                                                                                                                                                                                                                                                                                                                                                                                                                                      | Area of Virology, Serology and Virology Division (SAVID), New South Wales Health Pathology Randwick | Virology Research Laboratory; Area of Virology, Serology and Virology Division (SAVID), New South Wales Health Pathology Randwick | Foster, C.; Au, J.; Ruiz Silva, M.; Deveson, I.; Bull, R.; Van Hal, S.; Rawlinson, W.                                                                                                                                                                                                                                                                           |
| EPI_ISL_710545                                                                                                                                                                                                                                                                                                                                                                                                                                                                                                                                                                                                                                                                                 | National Institute for Infectious Diseases, INMI, "L. Spallanzani" IRCCS                            | National Institute for Infectious Diseases, INMI, "L. Spallanzani" IRCCS                                                          | F Messina, E Giombini, M Rueca, B Bartolini, C.E.M Gruber, MR Capobianchi, A Di Caro                                                                                                                                                                                                                                                                            |
| EPI_ISL_717701, EPI_ISL_717702, EPI_ISL_717703, EPI_ISL_717704, EPI_ISL_717705, EPI_ISL_717706, EPI_ISL_717707, EPI_ISL_717708, EPI_ISL_717709, EPI_ISL_717710, EPI_ISL_717711, EPI_ISL_717712, EPI_ISL_717713                                                                                                                                                                                                                                                                                                                                                                                                                                                                                 |                                                                                                     |                                                                                                                                   |                                                                                                                                                                                                                                                                                                                                                                 |
| see above                                                                                                                                                                                                                                                                                                                                                                                                                                                                                                                                                                                                                                                                                      | Area of Virology, Serology and Virology Division (SAVID), New South Wales Health Pathology Randwick | Virology Research Laboratory; Area of Virology, Serology and Virology Division (SAVID), New South Wales Health Pathology Randwick | Foster, C.; Au, J.; Ruiz Silva, M.; Deveson, I.; Bull, R.; Van Hal, S.; Rawlinson, W.                                                                                                                                                                                                                                                                           |
| EPI_ISL_718264                                                                                                                                                                                                                                                                                                                                                                                                                                                                                                                                                                                                                                                                                 | National Institute for Infectious Diseases, INMI, "L. Spallanzani" IRCCS                            | National Institute for Infectious Diseases, INMI, "L. Spallanzani" IRCCS                                                          | F Messina, M Rueca, B Bartolini, C.E.M Gruber, E Giombini, MR Capobianchi, A Di Caro                                                                                                                                                                                                                                                                            |
| EPI_ISL_721627                                                                                                                                                                                                                                                                                                                                                                                                                                                                                                                                                                                                                                                                                 | National Institute for Infectious Diseases, INMI, "L.                                               | National Institute for Infectious Diseases, INMI, "L.                                                                             | F Messina, E Giombini, M Rueca, B Bartolini, C.E.M Gruber, MR Capobianchi, A Di Caro                                                                                                                                                                                                                                                                            |

| Spallanzani* IRCCS                                                                                                                                                                                                                                                                                                                                                                                                                                                                                                                                                                                                                                                                                                                                                                                                                                                                                                                                                                                                                                                                                                                                                                                                                                                                                                                                                                                                                                                                                                                                                                                                                                                                                                                                                                                                                                                                                                                                                                                                                                                                                                                                                                                                                                                                                                                                                                                                                                                                                                                                                                                                                                                             |           | Spallanzani* IRCCS                                                              |                                                                                 |                                                                                                                                                                                                                                                                                        |
|--------------------------------------------------------------------------------------------------------------------------------------------------------------------------------------------------------------------------------------------------------------------------------------------------------------------------------------------------------------------------------------------------------------------------------------------------------------------------------------------------------------------------------------------------------------------------------------------------------------------------------------------------------------------------------------------------------------------------------------------------------------------------------------------------------------------------------------------------------------------------------------------------------------------------------------------------------------------------------------------------------------------------------------------------------------------------------------------------------------------------------------------------------------------------------------------------------------------------------------------------------------------------------------------------------------------------------------------------------------------------------------------------------------------------------------------------------------------------------------------------------------------------------------------------------------------------------------------------------------------------------------------------------------------------------------------------------------------------------------------------------------------------------------------------------------------------------------------------------------------------------------------------------------------------------------------------------------------------------------------------------------------------------------------------------------------------------------------------------------------------------------------------------------------------------------------------------------------------------------------------------------------------------------------------------------------------------------------------------------------------------------------------------------------------------------------------------------------------------------------------------------------------------------------------------------------------------------------------------------------------------------------------------------------------------|-----------|---------------------------------------------------------------------------------|---------------------------------------------------------------------------------|----------------------------------------------------------------------------------------------------------------------------------------------------------------------------------------------------------------------------------------------------------------------------------------|
| EPI_ISL_725519, EPI_ISL_725520, EPI_ISL_725521, EPI_ISL_725522, EPI_ISL_725523, EPI_ISL_725524, EPI_ISL_725525, EPI_ISL_725526, EPI_ISL_725527, EPI_ISL_725528, EPI_ISL_725529, EPI_ISL_725530, EPI_ISL_725531, EPI_ISL_725532, EPI_ISL_725533, EPI_ISL_725534, EPI_ISL_725535, EPI_ISL_725536, EPI_ISL_725537, EPI_ISL_725538, EPI_ISL_725539, EPI_ISL_725540, EPI_ISL_725541, EPI_ISL_725542, EPI_ISL_725543, EPI_ISL_725544, EPI_ISL_725545, EPI_ISL_725546, EPI_ISL_725547, EPI_ISL_725548, EPI_ISL_725549, EPI_ISL_725550, EPI_ISL_725551, EPI_ISL_725552, EPI_ISL_725553, EPI_ISL_725554, EPI_ISL_725555, EPI_ISL_725556, EPI_ISL_725557, EPI_ISL_725558, EPI_ISL_725559, EPI_ISL_725560, EPI_ISL_725561, EPI_ISL_725562, EPI_ISL_725563, EPI_ISL_725564, EPI_ISL_725565, EPI_ISL_725566, EPI_ISL_725567, EPI_ISL_725568, EPI_ISL_725569                                                                                                                                                                                                                                                                                                                                                                                                                                                                                                                                                                                                                                                                                                                                                                                                                                                                                                                                                                                                                                                                                                                                                                                                                                                                                                                                                                                                                                                                                                                                                                                                                                                                                                                                                                                                                                 | see above | Queens Medical Centre, Clinical Microbiology Department / DeepSeq Nottingham    | COVID-19 Genomics UK (COG-UK) Consortium                                        | Gemma Clark, Wendy Smith, Manjinder Khakh, Vicki M Fleming, Michelle M Lister, Hannah Howson-Wells, Jonathan Ball, Patrick McClure, Joseph Chappell, Theocharis Tsolearis, Nadine Holmes, Matthew Carlisle, Christopher Moore, Fei Sang, Johnny Debebe, Victoria Wright, Matthew Loose |
| EPI_ISL_728001, EPI_ISL_728002, EPI_ISL_728003, EPI_ISL_728004, EPI_ISL_728005, EPI_ISL_728006, EPI_ISL_728007, EPI_ISL_728008, EPI_ISL_728009, EPI_ISL_728010, EPI_ISL_728011, EPI_ISL_728012, EPI_ISL_728013, EPI_ISL_728014, EPI_ISL_728015, EPI_ISL_728016, EPI_ISL_728017, EPI_ISL_728018, EPI_ISL_728019, EPI_ISL_728020, EPI_ISL_728021, EPI_ISL_728022, EPI_ISL_728023, EPI_ISL_728024, EPI_ISL_728025, EPI_ISL_728026, EPI_ISL_728027, EPI_ISL_728028, EPI_ISL_728029, EPI_ISL_728030, EPI_ISL_728031, EPI_ISL_728032, EPI_ISL_728033, EPI_ISL_728034, EPI_ISL_728035, EPI_ISL_728036, EPI_ISL_728037, EPI_ISL_728038, EPI_ISL_728039, EPI_ISL_728040, EPI_ISL_728041, EPI_ISL_728042, EPI_ISL_728043, EPI_ISL_728044, EPI_ISL_728045, EPI_ISL_728046, EPI_ISL_728047, EPI_ISL_728048, EPI_ISL_728049, EPI_ISL_728050, EPI_ISL_728051, EPI_ISL_728052, EPI_ISL_728053, EPI_ISL_728054, EPI_ISL_728055, EPI_ISL_728056, EPI_ISL_728057, EPI_ISL_728058, EPI_ISL_728059, EPI_ISL_728060, EPI_ISL_728061, EPI_ISL_728062, EPI_ISL_728063, EPI_ISL_728064, EPI_ISL_728065, EPI_ISL_728066, EPI_ISL_728067, EPI_ISL_728068, EPI_ISL_728069, EPI_ISL_728070, EPI_ISL_728071, EPI_ISL_728072, EPI_ISL_728073, EPI_ISL_728074, EPI_ISL_728075, EPI_ISL_728076, EPI_ISL_728077, EPI_ISL_728078, EPI_ISL_728079, EPI_ISL_728080, EPI_ISL_728081, EPI_ISL_728082, EPI_ISL_728083, EPI_ISL_728084, EPI_ISL_728085, EPI_ISL_728086, EPI_ISL_728087, EPI_ISL_728088, EPI_ISL_728089, EPI_ISL_728090, EPI_ISL_728091, EPI_ISL_728092, EPI_ISL_728093, EPI_ISL_728094, EPI_ISL_728095, EPI_ISL_728096, EPI_ISL_728097, EPI_ISL_728098, EPI_ISL_728099, EPI_ISL_728100, EPI_ISL_728101, EPI_ISL_728102, EPI_ISL_728103, EPI_ISL_728104, EPI_ISL_728105, EPI_ISL_728106, EPI_ISL_728107, EPI_ISL_728108, EPI_ISL_728109, EPI_ISL_728110, EPI_ISL_728111, EPI_ISL_728112, EPI_ISL_728113, EPI_ISL_728114, EPI_ISL_728115, EPI_ISL_728116, EPI_ISL_728117, EPI_ISL_728118, EPI_ISL_728119, EPI_ISL_728120, EPI_ISL_728121, EPI_ISL_728122, EPI_ISL_728123, EPI_ISL_728124, EPI_ISL_728125, EPI_ISL_728126, EPI_ISL_728127, EPI_ISL_728128, EPI_ISL_728129, EPI_ISL_728130, EPI_ISL_728131, EPI_ISL_728132, EPI_ISL_728133, EPI_ISL_728134, EPI_ISL_728135, EPI_ISL_728136, EPI_ISL_728137, EPI_ISL_728138, EPI_ISL_728139, EPI_ISL_728140, EPI_ISL_728141, EPI_ISL_728142, EPI_ISL_728143, EPI_ISL_728144, EPI_ISL_728145, EPI_ISL_728146, EPI_ISL_728147, EPI_ISL_728148, EPI_ISL_728149, EPI_ISL_728150, EPI_ISL_728151, EPI_ISL_728152                                                                                                                                                 | see above | University of Wisconsin-Madison AIDS Vaccine Research Laboratories              | University of Wisconsin-Madison AIDS Vaccine Research Laboratories              | Gage Moreno, Katarina Braun, et al. AIDS Vaccine Research Laboratories                                                                                                                                                                                                                 |
| EPI_ISL_728280                                                                                                                                                                                                                                                                                                                                                                                                                                                                                                                                                                                                                                                                                                                                                                                                                                                                                                                                                                                                                                                                                                                                                                                                                                                                                                                                                                                                                                                                                                                                                                                                                                                                                                                                                                                                                                                                                                                                                                                                                                                                                                                                                                                                                                                                                                                                                                                                                                                                                                                                                                                                                                                                 |           | National Institute for Infectious Diseases, INMI, "L. Spallanzani" IRCCS        | National Institute for Infectious Diseases, INMI, "L. Spallanzani" IRCCS        | F Messina, M Rueca, B Bartolini, C.E.M Gruber, E Giombini, MR Capobianchi, A Di Caro                                                                                                                                                                                                   |
| EPI_ISL_728285                                                                                                                                                                                                                                                                                                                                                                                                                                                                                                                                                                                                                                                                                                                                                                                                                                                                                                                                                                                                                                                                                                                                                                                                                                                                                                                                                                                                                                                                                                                                                                                                                                                                                                                                                                                                                                                                                                                                                                                                                                                                                                                                                                                                                                                                                                                                                                                                                                                                                                                                                                                                                                                                 |           | National Institute for Infectious Diseases, INMI, "L. Spallanzani" IRCCS        | National Institute for Infectious Diseases, INMI, "L. Spallanzani" IRCCS        | F Messina, E Giombini, M Rueca, B Bartolini, C.E.M Gruber, MR Capobianchi, A Di Caro                                                                                                                                                                                                   |
| EPI_ISL_728552, EPI_ISL_728553, EPI_ISL_728554, EPI_ISL_728555, EPI_ISL_728556                                                                                                                                                                                                                                                                                                                                                                                                                                                                                                                                                                                                                                                                                                                                                                                                                                                                                                                                                                                                                                                                                                                                                                                                                                                                                                                                                                                                                                                                                                                                                                                                                                                                                                                                                                                                                                                                                                                                                                                                                                                                                                                                                                                                                                                                                                                                                                                                                                                                                                                                                                                                 |           | University of Wisconsin-Madison AIDS Vaccine Research Laboratories              | University of Wisconsin-Madison AIDS Vaccine Research Laboratories              | Gage Moreno, Katarina Braun, et al. AIDS Vaccine Research Laboratories                                                                                                                                                                                                                 |
| EPI_ISL_736927                                                                                                                                                                                                                                                                                                                                                                                                                                                                                                                                                                                                                                                                                                                                                                                                                                                                                                                                                                                                                                                                                                                                                                                                                                                                                                                                                                                                                                                                                                                                                                                                                                                                                                                                                                                                                                                                                                                                                                                                                                                                                                                                                                                                                                                                                                                                                                                                                                                                                                                                                                                                                                                                 |           | MDS                                                                             | KRISP, KZN Research Innovation and Sequencing Platform                          | Giandhari J, Pillay S, Lessells R, ChimukangaraB, Mdlalose K, York D, Khan S, Tegally H, Wilkinson E, de Oliveira T                                                                                                                                                                    |
| EPI_ISL_736931, EPI_ISL_736933, EPI_ISL_736934, EPI_ISL_736944, EPI_ISL_736949, EPI_ISL_736950, EPI_ISL_736953, EPI_ISL_736956, EPI_ISL_736957, EPI_ISL_736960                                                                                                                                                                                                                                                                                                                                                                                                                                                                                                                                                                                                                                                                                                                                                                                                                                                                                                                                                                                                                                                                                                                                                                                                                                                                                                                                                                                                                                                                                                                                                                                                                                                                                                                                                                                                                                                                                                                                                                                                                                                                                                                                                                                                                                                                                                                                                                                                                                                                                                                 |           | NHLS-IALCH                                                                      | KRISP, KZN Research Innovation and Sequencing Platform                          | Giandhari J, Pillay S, Lessells R, ChimukangaraB, Mdlalose K, York D, Khan S, Tegally H, Wilkinson E, de Oliveira T                                                                                                                                                                    |
| EPI_ISL_736967                                                                                                                                                                                                                                                                                                                                                                                                                                                                                                                                                                                                                                                                                                                                                                                                                                                                                                                                                                                                                                                                                                                                                                                                                                                                                                                                                                                                                                                                                                                                                                                                                                                                                                                                                                                                                                                                                                                                                                                                                                                                                                                                                                                                                                                                                                                                                                                                                                                                                                                                                                                                                                                                 |           | MDS                                                                             | KRISP, KZN Research Innovation and Sequencing Platform                          | Giandhari J, Pillay S, Lessells R, ChimukangaraB, Mdlalose K, York D, Khan S, Tegally H, Wilkinson E, de Oliveira T                                                                                                                                                                    |
| EPI_ISL_736975, EPI_ISL_736977, EPI_ISL_736978, EPI_ISL_736980, EPI_ISL_736985, EPI_ISL_736986, EPI_ISL_736991, EPI_ISL_736994                                                                                                                                                                                                                                                                                                                                                                                                                                                                                                                                                                                                                                                                                                                                                                                                                                                                                                                                                                                                                                                                                                                                                                                                                                                                                                                                                                                                                                                                                                                                                                                                                                                                                                                                                                                                                                                                                                                                                                                                                                                                                                                                                                                                                                                                                                                                                                                                                                                                                                                                                 |           | NHLS-IALCH                                                                      | KRISP, KZN Research Innovation and Sequencing Platform                          | Giandhari J, Pillay S, Lessells R, ChimukangaraB, Mdlalose K, York D, Khan S, Tegally H, Wilkinson E, de Oliveira T                                                                                                                                                                    |
| EPI_ISL_736995                                                                                                                                                                                                                                                                                                                                                                                                                                                                                                                                                                                                                                                                                                                                                                                                                                                                                                                                                                                                                                                                                                                                                                                                                                                                                                                                                                                                                                                                                                                                                                                                                                                                                                                                                                                                                                                                                                                                                                                                                                                                                                                                                                                                                                                                                                                                                                                                                                                                                                                                                                                                                                                                 |           | MDS                                                                             | KRISP, KZN Research Innovation and Sequencing Platform                          | Giandhari J, Pillay S, Lessells R, ChimukangaraB, Mdlalose K, York D, Khan S, Tegally H, Wilkinson E, de Oliveira T                                                                                                                                                                    |
| EPI_ISL_736997                                                                                                                                                                                                                                                                                                                                                                                                                                                                                                                                                                                                                                                                                                                                                                                                                                                                                                                                                                                                                                                                                                                                                                                                                                                                                                                                                                                                                                                                                                                                                                                                                                                                                                                                                                                                                                                                                                                                                                                                                                                                                                                                                                                                                                                                                                                                                                                                                                                                                                                                                                                                                                                                 |           | Istituto Zooprofilattico Sperimentale del Mezzogiorno                           | National Institute for Infectious Diseases, INMI, "L. Spallanzani" IRCCS        | F. Messina, C.E.M Gruber, M. Rueca, B. Bartolini, E. Giombini, F. Carletti, P. Cerino, B. Pierrri, C. Buonerba, D. Di Concilio, M.C. Cuomo, M.R. Capobianchi, A. Di Caro                                                                                                               |
| EPI_ISL_738350, EPI_ISL_738351, EPI_ISL_738352, EPI_ISL_738353, EPI_ISL_738354, EPI_ISL_738355, EPI_ISL_738356, EPI_ISL_738358                                                                                                                                                                                                                                                                                                                                                                                                                                                                                                                                                                                                                                                                                                                                                                                                                                                                                                                                                                                                                                                                                                                                                                                                                                                                                                                                                                                                                                                                                                                                                                                                                                                                                                                                                                                                                                                                                                                                                                                                                                                                                                                                                                                                                                                                                                                                                                                                                                                                                                                                                 |           | Utah Public Health Laboratory                                                   | Utah Public Health Laboratory                                                   | Erin Young, Kelly Oakeson, Tara Gallagher                                                                                                                                                                                                                                              |
| EPI_ISL_741609, EPI_ISL_741610, EPI_ISL_741611, EPI_ISL_741612, EPI_ISL_741613, EPI_ISL_741614, EPI_ISL_741615, EPI_ISL_741616, EPI_ISL_741617, EPI_ISL_741618, EPI_ISL_741619, EPI_ISL_741620, EPI_ISL_741621, EPI_ISL_741622, EPI_ISL_741623, EPI_ISL_741624, EPI_ISL_741625, EPI_ISL_741626, EPI_ISL_741627, EPI_ISL_741628, EPI_ISL_741629, EPI_ISL_741630, EPI_ISL_741631, EPI_ISL_741632, EPI_ISL_741633, EPI_ISL_741634, EPI_ISL_741635, EPI_ISL_741636, EPI_ISL_741637, EPI_ISL_741638, EPI_ISL_741639, EPI_ISL_741640, EPI_ISL_741641, EPI_ISL_741642, EPI_ISL_741643, EPI_ISL_741644, EPI_ISL_741645, EPI_ISL_741646, EPI_ISL_741647, EPI_ISL_741648, EPI_ISL_741649, EPI_ISL_741650, EPI_ISL_741651, EPI_ISL_741652, EPI_ISL_741653, EPI_ISL_741654, EPI_ISL_741655, EPI_ISL_741656, EPI_ISL_741657                                                                                                                                                                                                                                                                                                                                                                                                                                                                                                                                                                                                                                                                                                                                                                                                                                                                                                                                                                                                                                                                                                                                                                                                                                                                                                                                                                                                                                                                                                                                                                                                                                                                                                                                                                                                                                                                 | see above | Queens Medical Centre, Clinical Microbiology Department / DeepSeq Nottingham    | COVID-19 Genomics UK (COG-UK) Consortium                                        | Gemma Clark, Wendy Smith, Manjinder Khakh, Vicki M Fleming, Michelle M Lister, Hannah Howson-Wells, Jonathan Ball, Patrick McClure, Joseph Chappell, Theocharis Tsolearis, Nadine Holmes, Matthew Carlisle, Christopher Moore, Fei Sang, Johnny Debebe, Victoria Wright, Matthew Loose |
| EPI_ISL_746325, EPI_ISL_746327, EPI_ISL_746328, EPI_ISL_746329, EPI_ISL_746331, EPI_ISL_746332, EPI_ISL_746333, EPI_ISL_746337, EPI_ISL_746338, EPI_ISL_746341, EPI_ISL_746342, EPI_ISL_746343, EPI_ISL_746344, EPI_ISL_746345, EPI_ISL_746346, EPI_ISL_746347, EPI_ISL_746349, EPI_ISL_746350, EPI_ISL_746351, EPI_ISL_746352, EPI_ISL_746353, EPI_ISL_746354, EPI_ISL_746355, EPI_ISL_746358, EPI_ISL_746359, EPI_ISL_746361, EPI_ISL_746363, EPI_ISL_746364, EPI_ISL_746365, EPI_ISL_746367, EPI_ISL_746369, EPI_ISL_746370, EPI_ISL_746371, EPI_ISL_746372, EPI_ISL_746374, EPI_ISL_746375, EPI_ISL_746377, EPI_ISL_746378, EPI_ISL_746379, EPI_ISL_746381, EPI_ISL_746382, EPI_ISL_746384, EPI_ISL_746385, EPI_ISL_746386, EPI_ISL_746387, EPI_ISL_746388, EPI_ISL_746389, EPI_ISL_746390, EPI_ISL_746391, EPI_ISL_746392, EPI_ISL_746393, EPI_ISL_746395, EPI_ISL_746396, EPI_ISL_746397, EPI_ISL_746400, EPI_ISL_746401, EPI_ISL_746402, EPI_ISL_746403, EPI_ISL_746404, EPI_ISL_746405, EPI_ISL_746407, EPI_ISL_746408, EPI_ISL_746409, EPI_ISL_746410, EPI_ISL_746411, EPI_ISL_746412, EPI_ISL_746413, EPI_ISL_746414, EPI_ISL_746415, EPI_ISL_746416, EPI_ISL_746417, EPI_ISL_746418, EPI_ISL_746419, EPI_ISL_746420, EPI_ISL_746422, EPI_ISL_746424, EPI_ISL_746425, EPI_ISL_746426, EPI_ISL_746428, EPI_ISL_746429, EPI_ISL_746430, EPI_ISL_746431, EPI_ISL_746432, EPI_ISL_746433, EPI_ISL_746434, EPI_ISL_746435, EPI_ISL_746437, EPI_ISL_746438, EPI_ISL_746439, EPI_ISL_746440, EPI_ISL_746441, EPI_ISL_746444, EPI_ISL_746446, EPI_ISL_746447, EPI_ISL_746448, EPI_ISL_746449, EPI_ISL_746451, EPI_ISL_746452, EPI_ISL_746453, EPI_ISL_746454, EPI_ISL_746456, EPI_ISL_746457, EPI_ISL_746460, EPI_ISL_746462, EPI_ISL_746463, EPI_ISL_746464, EPI_ISL_746465, EPI_ISL_746466, EPI_ISL_746467, EPI_ISL_746468, EPI_ISL_746470, EPI_ISL_746471, EPI_ISL_746472, EPI_ISL_746473, EPI_ISL_746474, EPI_ISL_746475, EPI_ISL_746476                                                                                                                                                                                                                                                                                                                                                                                                                                                                                                                                                                                                                                                                                                                                 | see above | Utah Public Health Laboratory                                                   | Utah Public Health Laboratory                                                   | Erin Young, Kelly Oakeson, Tara Gallagher                                                                                                                                                                                                                                              |
| EPI_ISL_746829                                                                                                                                                                                                                                                                                                                                                                                                                                                                                                                                                                                                                                                                                                                                                                                                                                                                                                                                                                                                                                                                                                                                                                                                                                                                                                                                                                                                                                                                                                                                                                                                                                                                                                                                                                                                                                                                                                                                                                                                                                                                                                                                                                                                                                                                                                                                                                                                                                                                                                                                                                                                                                                                 |           | National Institute for Infectious Diseases, INMI, "L. Spallanzani" IRCCS        | National Institute for Infectious Diseases, INMI, "L. Spallanzani" IRCCS        | F Messina, E Giombini, M Rueca, B Bartolini, C.E.M Gruber, MR Capobianchi, A Di Caro                                                                                                                                                                                                   |
| EPI_ISL_746833                                                                                                                                                                                                                                                                                                                                                                                                                                                                                                                                                                                                                                                                                                                                                                                                                                                                                                                                                                                                                                                                                                                                                                                                                                                                                                                                                                                                                                                                                                                                                                                                                                                                                                                                                                                                                                                                                                                                                                                                                                                                                                                                                                                                                                                                                                                                                                                                                                                                                                                                                                                                                                                                 |           | National Institute for Infectious Diseases, INMI, "L. Spallanzani" IRCCS        | National Institute for Infectious Diseases, INMI, "L. Spallanzani" IRCCS        | F Messina, M Rueca, B Bartolini, C.E.M Gruber, E Giombini, MR Capobianchi, A Di Caro                                                                                                                                                                                                   |
| EPI_ISL_746837, EPI_ISL_746838, EPI_ISL_746839, EPI_ISL_746840, EPI_ISL_746841, EPI_ISL_746842, EPI_ISL_746844, EPI_ISL_746846, EPI_ISL_746849, EPI_ISL_746850, EPI_ISL_746851, EPI_ISL_746853, EPI_ISL_746854, EPI_ISL_746856, EPI_ISL_746857, EPI_ISL_746858, EPI_ISL_746859, EPI_ISL_746863, EPI_ISL_746864, EPI_ISL_746865, EPI_ISL_746866, EPI_ISL_746867, EPI_ISL_746868, EPI_ISL_746869, EPI_ISL_746870, EPI_ISL_746871, EPI_ISL_746873, EPI_ISL_746875, EPI_ISL_746877, EPI_ISL_746878, EPI_ISL_746880, EPI_ISL_746881, EPI_ISL_746882, EPI_ISL_746883, EPI_ISL_746884, EPI_ISL_746885, EPI_ISL_746886, EPI_ISL_746887, EPI_ISL_746888, EPI_ISL_746889, EPI_ISL_746890, EPI_ISL_746891, EPI_ISL_746892, EPI_ISL_746893, EPI_ISL_746894, EPI_ISL_746895, EPI_ISL_746896, EPI_ISL_746897, EPI_ISL_746898, EPI_ISL_746899, EPI_ISL_746900, EPI_ISL_746901, EPI_ISL_746902, EPI_ISL_746903, EPI_ISL_746904, EPI_ISL_746905, EPI_ISL_746906, EPI_ISL_746907, EPI_ISL_746908, EPI_ISL_746909, EPI_ISL_746910, EPI_ISL_746911, EPI_ISL_746912, EPI_ISL_746914, EPI_ISL_746916, EPI_ISL_746918, EPI_ISL_746919, EPI_ISL_746920, EPI_ISL_746922, EPI_ISL_746923, EPI_ISL_746925, EPI_ISL_746926, EPI_ISL_746928, EPI_ISL_746929, EPI_ISL_746930, EPI_ISL_746932, EPI_ISL_746933, EPI_ISL_746934, EPI_ISL_746935, EPI_ISL_746937, EPI_ISL_746938, EPI_ISL_746939, EPI_ISL_746941, EPI_ISL_746942, EPI_ISL_746943, EPI_ISL_746944, EPI_ISL_746946, EPI_ISL_746948, EPI_ISL_746950, EPI_ISL_746951, EPI_ISL_746952, EPI_ISL_746953, EPI_ISL_746954, EPI_ISL_746955, EPI_ISL_746956, EPI_ISL_746957, EPI_ISL_746958, EPI_ISL_746959, EPI_ISL_746960, EPI_ISL_746961, EPI_ISL_746963, EPI_ISL_746964, EPI_ISL_746965, EPI_ISL_746966, EPI_ISL_746967, EPI_ISL_746968, EPI_ISL_746971, EPI_ISL_746972, EPI_ISL_746973, EPI_ISL_746974, EPI_ISL_746975, EPI_ISL_746976, EPI_ISL_746977, EPI_ISL_746978, EPI_ISL_746979, EPI_ISL_746980, EPI_ISL_746981, EPI_ISL_746982, EPI_ISL_746983, EPI_ISL_746984, EPI_ISL_746985, EPI_ISL_746986, EPI_ISL_746987, EPI_ISL_746988, EPI_ISL_746989, EPI_ISL_746991, EPI_ISL_746993, EPI_ISL_746994, EPI_ISL_746996, EPI_ISL_746997, EPI_ISL_746998, EPI_ISL_747000, EPI_ISL_747001, EPI_ISL_747002, EPI_ISL_747003, EPI_ISL_747004, EPI_ISL_747005, EPI_ISL_747006, EPI_ISL_747007, EPI_ISL_747008, EPI_ISL_747009, EPI_ISL_747010, EPI_ISL_747011, EPI_ISL_747012, EPI_ISL_747013, EPI_ISL_747014, EPI_ISL_747015, EPI_ISL_747016, EPI_ISL_747017, EPI_ISL_747018, EPI_ISL_747019, EPI_ISL_747020, EPI_ISL_747021, EPI_ISL_747022, EPI_ISL_747023, EPI_ISL_747025, EPI_ISL_747026, EPI_ISL_747028, EPI_ISL_747029, EPI_ISL_747030, EPI_ISL_747031 | see above | Utah Public Health Laboratory                                                   | Utah Public Health Laboratory                                                   | Erin Young, Kelly Oakeson, Tara Gallagher                                                                                                                                                                                                                                              |
| EPI_ISL_747194                                                                                                                                                                                                                                                                                                                                                                                                                                                                                                                                                                                                                                                                                                                                                                                                                                                                                                                                                                                                                                                                                                                                                                                                                                                                                                                                                                                                                                                                                                                                                                                                                                                                                                                                                                                                                                                                                                                                                                                                                                                                                                                                                                                                                                                                                                                                                                                                                                                                                                                                                                                                                                                                 |           | Clinical Microbiology Laboratory, Faculty of Medicine, Universitas Indonesia    | Clinical Microbiology Laboratory, Faculty of Medicine, Universitas Indonesia    | Fera Ibrahim, Augustine Natasha, Andi Yasmon, Pratiwi Sudarmono, Yulia Rosa Saharman, Anis Karuniawati, Fithriyah                                                                                                                                                                      |
| EPI_ISL_751205, EPI_ISL_751207                                                                                                                                                                                                                                                                                                                                                                                                                                                                                                                                                                                                                                                                                                                                                                                                                                                                                                                                                                                                                                                                                                                                                                                                                                                                                                                                                                                                                                                                                                                                                                                                                                                                                                                                                                                                                                                                                                                                                                                                                                                                                                                                                                                                                                                                                                                                                                                                                                                                                                                                                                                                                                                 |           | Pathogen Genomics Lab King Abdullah University of Science and Technology(KAUST) | Pathogen Genomics Lab King Abdullah University of Science and Technology(KAUST) | Fathia Ben Rached, Sharif Hala, Raushan Nugmanova, Olga Douvropoulou, Sara Mfarrej, Raece Naem, Rahul P Salunke, Asim Khogeer, Fadwa Alofi, Afrah Alsomali, Jumana Taha, Abdulaziz Alahmadi, Kahled Alghithami, Anwar Hashem, Naif Almontashiri, Arnab Pain                            |
| EPI_ISL_751219, EPI_ISL_751220                                                                                                                                                                                                                                                                                                                                                                                                                                                                                                                                                                                                                                                                                                                                                                                                                                                                                                                                                                                                                                                                                                                                                                                                                                                                                                                                                                                                                                                                                                                                                                                                                                                                                                                                                                                                                                                                                                                                                                                                                                                                                                                                                                                                                                                                                                                                                                                                                                                                                                                                                                                                                                                 |           | Pathogen Genomics Lab King Abdullah University of Science                       | Pathogen Genomics Lab King Abdullah University of Science                       | Fathia Ben Rached, Sharif Hala, Olga Douvropoulou, Raushan Nugmanova, Raece Naem, Rahul P Salunke, Afrah Alsomali, Fadwa Alofi, Asim                                                                                                                                                   |

|                                                                                                                                                                                                                                                                                                                                                                                                                                                                                                                                                                                                                                                                                                                                                                                                                                                                                                                                                                                                                                                                                                                                                                                                                                                                                                                                                                                                                                                                                                                                                                                                                                                                                                                                                                                                                                                                                                                                                                                                                                                                                                                                                                                                                                                                                                                                                                                                                                                                                                                                                                                                                                                                                                                                                                                                                                                                                                                                                                                                                                                                                                                                                                                                                                                                                                                                                                                                                                                                                                                                                                                                                                                                                                                                                                                                                                                                                                                                                                                                                                                                                                                                                                                                                                                                                                                                                                                                                                                                                                                                                                                                                                                                                                                                                                                                                                                                                                                                                                                                                                                                                                                                                                                                                                                                                                                                                                                                                                                                                                                                                                                                                                                                                                                                                                                                                                                                                                                                                                                                                                                                                                                                                                                                                                                                                                                                                                                                                                                                                                                                                                                                                                                                                                                                                                                                                                                                                                                                                                                                                                                                                                                                                                | and Technology(KAUST)                                                                            | and Technology(KAUST)                                                                                                    | Khoeger, Jurmana Taha, Abdulaziz Alahmadi, Kahled Alghithami, Anwar Hashem, Naif Almontashiri, Arnab Pain                                                                                                                                                                               |
|----------------------------------------------------------------------------------------------------------------------------------------------------------------------------------------------------------------------------------------------------------------------------------------------------------------------------------------------------------------------------------------------------------------------------------------------------------------------------------------------------------------------------------------------------------------------------------------------------------------------------------------------------------------------------------------------------------------------------------------------------------------------------------------------------------------------------------------------------------------------------------------------------------------------------------------------------------------------------------------------------------------------------------------------------------------------------------------------------------------------------------------------------------------------------------------------------------------------------------------------------------------------------------------------------------------------------------------------------------------------------------------------------------------------------------------------------------------------------------------------------------------------------------------------------------------------------------------------------------------------------------------------------------------------------------------------------------------------------------------------------------------------------------------------------------------------------------------------------------------------------------------------------------------------------------------------------------------------------------------------------------------------------------------------------------------------------------------------------------------------------------------------------------------------------------------------------------------------------------------------------------------------------------------------------------------------------------------------------------------------------------------------------------------------------------------------------------------------------------------------------------------------------------------------------------------------------------------------------------------------------------------------------------------------------------------------------------------------------------------------------------------------------------------------------------------------------------------------------------------------------------------------------------------------------------------------------------------------------------------------------------------------------------------------------------------------------------------------------------------------------------------------------------------------------------------------------------------------------------------------------------------------------------------------------------------------------------------------------------------------------------------------------------------------------------------------------------------------------------------------------------------------------------------------------------------------------------------------------------------------------------------------------------------------------------------------------------------------------------------------------------------------------------------------------------------------------------------------------------------------------------------------------------------------------------------------------------------------------------------------------------------------------------------------------------------------------------------------------------------------------------------------------------------------------------------------------------------------------------------------------------------------------------------------------------------------------------------------------------------------------------------------------------------------------------------------------------------------------------------------------------------------------------------------------------------------------------------------------------------------------------------------------------------------------------------------------------------------------------------------------------------------------------------------------------------------------------------------------------------------------------------------------------------------------------------------------------------------------------------------------------------------------------------------------------------------------------------------------------------------------------------------------------------------------------------------------------------------------------------------------------------------------------------------------------------------------------------------------------------------------------------------------------------------------------------------------------------------------------------------------------------------------------------------------------------------------------------------------------------------------------------------------------------------------------------------------------------------------------------------------------------------------------------------------------------------------------------------------------------------------------------------------------------------------------------------------------------------------------------------------------------------------------------------------------------------------------------------------------------------------------------------------------------------------------------------------------------------------------------------------------------------------------------------------------------------------------------------------------------------------------------------------------------------------------------------------------------------------------------------------------------------------------------------------------------------------------------------------------------------------------------------------------------------------------------------------------------------------------------------------------------------------------------------------------------------------------------------------------------------------------------------------------------------------------------------------------------------------------------------------------------------------------------------------------------------------------------------------------------------------------------------------------------|--------------------------------------------------------------------------------------------------|--------------------------------------------------------------------------------------------------------------------------|-----------------------------------------------------------------------------------------------------------------------------------------------------------------------------------------------------------------------------------------------------------------------------------------|
| EPI_ISL_752600                                                                                                                                                                                                                                                                                                                                                                                                                                                                                                                                                                                                                                                                                                                                                                                                                                                                                                                                                                                                                                                                                                                                                                                                                                                                                                                                                                                                                                                                                                                                                                                                                                                                                                                                                                                                                                                                                                                                                                                                                                                                                                                                                                                                                                                                                                                                                                                                                                                                                                                                                                                                                                                                                                                                                                                                                                                                                                                                                                                                                                                                                                                                                                                                                                                                                                                                                                                                                                                                                                                                                                                                                                                                                                                                                                                                                                                                                                                                                                                                                                                                                                                                                                                                                                                                                                                                                                                                                                                                                                                                                                                                                                                                                                                                                                                                                                                                                                                                                                                                                                                                                                                                                                                                                                                                                                                                                                                                                                                                                                                                                                                                                                                                                                                                                                                                                                                                                                                                                                                                                                                                                                                                                                                                                                                                                                                                                                                                                                                                                                                                                                                                                                                                                                                                                                                                                                                                                                                                                                                                                                                                                                                                                 | Utah Public Health Laboratory, Utah Public Health Laboratory Infectious Disease submission group | Utah Public Health Laboratory, Utah Public Health Laboratory Infectious Disease submission group                         | Gallagher,T., Young,E., Oakeson,K.                                                                                                                                                                                                                                                      |
| EPI_ISL_752601, EPI_ISL_752602, EPI_ISL_752603, EPI_ISL_752604                                                                                                                                                                                                                                                                                                                                                                                                                                                                                                                                                                                                                                                                                                                                                                                                                                                                                                                                                                                                                                                                                                                                                                                                                                                                                                                                                                                                                                                                                                                                                                                                                                                                                                                                                                                                                                                                                                                                                                                                                                                                                                                                                                                                                                                                                                                                                                                                                                                                                                                                                                                                                                                                                                                                                                                                                                                                                                                                                                                                                                                                                                                                                                                                                                                                                                                                                                                                                                                                                                                                                                                                                                                                                                                                                                                                                                                                                                                                                                                                                                                                                                                                                                                                                                                                                                                                                                                                                                                                                                                                                                                                                                                                                                                                                                                                                                                                                                                                                                                                                                                                                                                                                                                                                                                                                                                                                                                                                                                                                                                                                                                                                                                                                                                                                                                                                                                                                                                                                                                                                                                                                                                                                                                                                                                                                                                                                                                                                                                                                                                                                                                                                                                                                                                                                                                                                                                                                                                                                                                                                                                                                                 | Utah Public Health Laboratory, Utah Public Health Laboratory Infectious Disease submission group | Utah Public Health Laboratory, Utah Public Health Laboratory Infectious Disease submission group                         | Gallagher,T., Young,E.L., Oakeson,K.F.                                                                                                                                                                                                                                                  |
| EPI_ISL_753262, EPI_ISL_753263, EPI_ISL_753265, EPI_ISL_753266, EPI_ISL_753267, EPI_ISL_753268, EPI_ISL_753269, EPI_ISL_753270, EPI_ISL_753271, EPI_ISL_753272, EPI_ISL_753273, EPI_ISL_753274, EPI_ISL_753275, EPI_ISL_753276, EPI_ISL_753277, EPI_ISL_753278, EPI_ISL_753279, EPI_ISL_753280, EPI_ISL_753281, EPI_ISL_753282, EPI_ISL_753283, EPI_ISL_753284, EPI_ISL_753285, EPI_ISL_753286, EPI_ISL_753287, EPI_ISL_753288, EPI_ISL_753289, EPI_ISL_753290, EPI_ISL_753291, EPI_ISL_753292, EPI_ISL_753293, EPI_ISL_753294, EPI_ISL_753295, EPI_ISL_753296, EPI_ISL_753297, EPI_ISL_753298, EPI_ISL_753299, EPI_ISL_753300, EPI_ISL_753301, EPI_ISL_753302, EPI_ISL_753303, EPI_ISL_753304, EPI_ISL_753305, EPI_ISL_753306, EPI_ISL_753307, EPI_ISL_753308, EPI_ISL_753309, EPI_ISL_753310, EPI_ISL_753311, EPI_ISL_753312, EPI_ISL_753313, EPI_ISL_753314, EPI_ISL_753315, EPI_ISL_753316, EPI_ISL_753317, EPI_ISL_753318, EPI_ISL_753319, EPI_ISL_753320, EPI_ISL_753321, EPI_ISL_753322, EPI_ISL_753323, EPI_ISL_753324, EPI_ISL_753325, EPI_ISL_753326, EPI_ISL_753327, EPI_ISL_753328, EPI_ISL_753329, EPI_ISL_753330, EPI_ISL_753331, EPI_ISL_753332, EPI_ISL_753333, EPI_ISL_753334, EPI_ISL_753335, EPI_ISL_753336, EPI_ISL_753337, EPI_ISL_753338, EPI_ISL_753339, EPI_ISL_753340, EPI_ISL_753341, EPI_ISL_753342, EPI_ISL_753343, EPI_ISL_753344, EPI_ISL_753345, EPI_ISL_753346, EPI_ISL_753347, EPI_ISL_753348, EPI_ISL_753349, EPI_ISL_753350, EPI_ISL_753351, EPI_ISL_753352, EPI_ISL_753353, EPI_ISL_753354, EPI_ISL_753355, EPI_ISL_753356, EPI_ISL_753357, EPI_ISL_753358, EPI_ISL_753359, EPI_ISL_753360, EPI_ISL_753361, EPI_ISL_753362, EPI_ISL_753363, EPI_ISL_753364, EPI_ISL_753365, EPI_ISL_753366, EPI_ISL_753367, EPI_ISL_753368, EPI_ISL_753369, EPI_ISL_753370, EPI_ISL_753371, EPI_ISL_753372, EPI_ISL_753373, EPI_ISL_753374, EPI_ISL_753375, EPI_ISL_753376, EPI_ISL_753377, EPI_ISL_753378, EPI_ISL_753379, EPI_ISL_753380, EPI_ISL_753381, EPI_ISL_753382, EPI_ISL_753383, EPI_ISL_753384, EPI_ISL_753385, EPI_ISL_753386, EPI_ISL_753387, EPI_ISL_753388, EPI_ISL_753389, EPI_ISL_753390, EPI_ISL_753391, EPI_ISL_753392, EPI_ISL_753393, EPI_ISL_753394, EPI_ISL_753395, EPI_ISL_753396, EPI_ISL_753397, EPI_ISL_753398, EPI_ISL_753399, EPI_ISL_753400, EPI_ISL_753401, EPI_ISL_753402, EPI_ISL_753403, EPI_ISL_753404, EPI_ISL_753405, EPI_ISL_753406, EPI_ISL_753407, EPI_ISL_753408, EPI_ISL_753409, EPI_ISL_753410, EPI_ISL_753411, EPI_ISL_753412, EPI_ISL_753413, EPI_ISL_753414, EPI_ISL_753415, EPI_ISL_753416, EPI_ISL_753417, EPI_ISL_753418, EPI_ISL_753419, EPI_ISL_753420, EPI_ISL_753421, EPI_ISL_753422, EPI_ISL_753423, EPI_ISL_753424, EPI_ISL_753425, EPI_ISL_753426, EPI_ISL_753427, EPI_ISL_753428, EPI_ISL_753429, EPI_ISL_753430, EPI_ISL_753431, EPI_ISL_753432, EPI_ISL_753433, EPI_ISL_753434, EPI_ISL_753435, EPI_ISL_753436, EPI_ISL_753437, EPI_ISL_753438, EPI_ISL_753439, EPI_ISL_753440, EPI_ISL_753441, EPI_ISL_753442, EPI_ISL_753443, EPI_ISL_753444, EPI_ISL_753445, EPI_ISL_753446, EPI_ISL_753447, EPI_ISL_753448, EPI_ISL_753449, EPI_ISL_753450, EPI_ISL_753451, EPI_ISL_753452, EPI_ISL_753453, EPI_ISL_753454, EPI_ISL_753455, EPI_ISL_753456, EPI_ISL_753457, EPI_ISL_753458, EPI_ISL_753459, EPI_ISL_753460, EPI_ISL_753461, EPI_ISL_753462, EPI_ISL_753463, EPI_ISL_753464, EPI_ISL_753465, EPI_ISL_753466, EPI_ISL_753467, EPI_ISL_753468, EPI_ISL_753469, EPI_ISL_753470, EPI_ISL_753471, EPI_ISL_753472, EPI_ISL_753473, EPI_ISL_753474, EPI_ISL_753475, EPI_ISL_753476, EPI_ISL_753477, EPI_ISL_753478, EPI_ISL_753479, EPI_ISL_753480, EPI_ISL_753481, EPI_ISL_753482, EPI_ISL_753483, EPI_ISL_753484, EPI_ISL_753485, EPI_ISL_753486, EPI_ISL_753487, EPI_ISL_753488, EPI_ISL_753489, EPI_ISL_753490, EPI_ISL_753491, EPI_ISL_753492, EPI_ISL_753493, EPI_ISL_753494, EPI_ISL_753495, EPI_ISL_753496, EPI_ISL_753497, EPI_ISL_753498, EPI_ISL_753499, EPI_ISL_753500, EPI_ISL_753501, EPI_ISL_753502, EPI_ISL_753503, EPI_ISL_753504, EPI_ISL_753505, EPI_ISL_753506, EPI_ISL_753507, EPI_ISL_753508, EPI_ISL_753509, EPI_ISL_753510, EPI_ISL_753511, EPI_ISL_753512, EPI_ISL_753513, EPI_ISL_753514, EPI_ISL_753515, EPI_ISL_753516, EPI_ISL_753517, EPI_ISL_753518, EPI_ISL_753519, EPI_ISL_753520, EPI_ISL_753521, EPI_ISL_753522, EPI_ISL_753523, EPI_ISL_753524, EPI_ISL_753525, EPI_ISL_753526, EPI_ISL_753527, EPI_ISL_753528, EPI_ISL_753529, EPI_ISL_753530, EPI_ISL_753531, EPI_ISL_753532, EPI_ISL_753533, EPI_ISL_753534, EPI_ISL_753535, EPI_ISL_753536, EPI_ISL_753537, EPI_ISL_753538, EPI_ISL_753539, EPI_ISL_753540, EPI_ISL_753541, EPI_ISL_753542, EPI_ISL_753543, EPI_ISL_753544, EPI_ISL_753545, EPI_ISL_753546, EPI_ISL_753547, EPI_ISL_753548, EPI_ISL_753549, EPI_ISL_753550, EPI_ISL_753551, EPI_ISL_753552, EPI_ISL_753553, EPI_ISL_753554, EPI_ISL_753555, EPI_ISL_753556, EPI_ISL_753557, EPI_ISL_753558, EPI_ISL_753559, EPI_ISL_753560, EPI_ISL_753561, EPI_ISL_753562, EPI_ISL_753563, EPI_ISL_753564, EPI_ISL_753565, EPI_ISL_753566, EPI_ISL_753567, EPI_ISL_753568, EPI_ISL_753569, EPI_ISL_753570, EPI_ISL_753571, EPI_ISL_753572, EPI_ISL_753573, EPI_ISL_753574, EPI_ISL_753575, EPI_ISL_753576, EPI_ISL_753577, EPI_ISL_753578, EPI_ISL_753579, EPI_ISL_753580, EPI_ISL_753581, EPI_ISL_753582, EPI_ISL_753583, EPI_ISL_753584, EPI_ISL_753585, EPI_ISL_753586, EPI_ISL_753587, EPI_ISL_753588, EPI_ISL_753589, EPI_ISL_753590, EPI_ISL_753591, EPI_ISL_753592, EPI_ISL_753593, EPI_ISL_753594, EPI_ISL_753595, EPI_ISL_753596, EPI_ISL_753597, EPI_ISL_753598, EPI_ISL_753599, EPI_ISL_753600, EPI_ISL_753601, EPI_ISL_753602, EPI_ISL_753603, EPI_ISL_753604, EPI_ISL_753605, EPI_ISL_753606, EPI_ISL_753607, EPI_ISL_753608, EPI_ISL_753609, EPI_ISL_753610, EPI_ISL_753611, EPI_ISL_753612, EPI_ISL_753613, EPI_ISL_753614, EPI_ISL_753615, EPI_ISL_753616, EPI_ISL_753617, EPI_ISL_753618, EPI_ISL_753619, EPI_ISL_753620, EPI_ISL_753621, EPI_ISL_753622, EPI_ISL_753623, EPI_ISL_753624, EPI_ISL_753625, EPI_ISL_753626, EPI_ISL_753627, EPI_ISL_753628, EPI_ISL_753629, EPI_ISL_753630, EPI_ISL_753631, EPI_ISL_753632, EPI_ISL_753633, EPI_ISL_753634, EPI_ISL_753635, EPI_ISL_753636, EPI_ISL_753637, EPI_ISL_753638, EPI_ISL_753639, EPI_ISL_753640, EPI_ISL_753641, EPI_ISL_753642, EPI_ISL_753643, EPI_ISL_753644, EPI_ISL_753645, EPI_ISL_753646, EPI_ISL_753647, EPI_ISL_753648, EPI_ISL_753649, EPI_ISL_753650, EPI_ISL_753651, EPI_ISL_753652, EPI_ISL_753653, EPI_ISL_753654, EPI_ISL_753655, EPI_ISL_753656, EPI_ISL_753657, EPI_ISL_753658, EPI_ISL_753659, EPI_ISL_753660, EPI_ISL_753661, EPI_ISL_753662, EPI_ISL_753663, EPI_ISL_753664, EPI_ISL_753665, EPI_ISL_753666, EPI_ISL_753667, EPI_ISL_753668, EPI_ISL_753669, EPI_ISL_753670, EPI_ISL_753671, EPI_ISL_753672, EPI_ISL_753673, EPI_ISL_753674, EPI_ISL_753675, EPI_ISL_753676, EPI_ISL_753677, EPI_ISL_753678, EPI_ISL_753679, EPI_ISL_753680, EPI_ISL_753681, EPI_ISL_753682, EPI_ISL_753683, EPI_ISL_753684, EPI_ISL_753685, EPI_ISL_753686, EPI_ISL_753687, EPI_ISL_753688, EPI_ISL_753689, EPI_ISL_753690, EPI_ISL_753691, EPI_ISL_753692 | Utah Public Health Laboratory, Utah Public Health Laboratory Infectious Disease submission group | Utah Public Health Laboratory, Utah Public Health Laboratory Infectious Disease submission group                         | Gallagher,T., Young,E., Oakeson,K.                                                                                                                                                                                                                                                      |
| see above                                                                                                                                                                                                                                                                                                                                                                                                                                                                                                                                                                                                                                                                                                                                                                                                                                                                                                                                                                                                                                                                                                                                                                                                                                                                                                                                                                                                                                                                                                                                                                                                                                                                                                                                                                                                                                                                                                                                                                                                                                                                                                                                                                                                                                                                                                                                                                                                                                                                                                                                                                                                                                                                                                                                                                                                                                                                                                                                                                                                                                                                                                                                                                                                                                                                                                                                                                                                                                                                                                                                                                                                                                                                                                                                                                                                                                                                                                                                                                                                                                                                                                                                                                                                                                                                                                                                                                                                                                                                                                                                                                                                                                                                                                                                                                                                                                                                                                                                                                                                                                                                                                                                                                                                                                                                                                                                                                                                                                                                                                                                                                                                                                                                                                                                                                                                                                                                                                                                                                                                                                                                                                                                                                                                                                                                                                                                                                                                                                                                                                                                                                                                                                                                                                                                                                                                                                                                                                                                                                                                                                                                                                                                                      | Clinical virology Laboratory, Children's Hospital Los Angeles                                    | Center for Personalized Medicine, Children's Hospital Los Angeles                                                        | Gai et al                                                                                                                                                                                                                                                                               |
| EPI_ISL_754619, EPI_ISL_754620, EPI_ISL_754621, EPI_ISL_754622, EPI_ISL_754623, EPI_ISL_754624, EPI_ISL_754625, EPI_ISL_754626, EPI_ISL_754627, EPI_ISL_754628, EPI_ISL_754629, EPI_ISL_754630, EPI_ISL_754631, EPI_ISL_754632, EPI_ISL_754633, EPI_ISL_754634, EPI_ISL_754635, EPI_ISL_754636, EPI_ISL_754637, EPI_ISL_754638, EPI_ISL_754639, EPI_ISL_754640, EPI_ISL_754641, EPI_ISL_754642, EPI_ISL_754643, EPI_ISL_754644, EPI_ISL_754645, EPI_ISL_754646, EPI_ISL_754647, EPI_ISL_754648, EPI_ISL_754649, EPI_ISL_754650, EPI_ISL_754651, EPI_ISL_754652, EPI_ISL_754653, EPI_ISL_754654, EPI_ISL_754655, EPI_ISL_754656, EPI_ISL_754657, EPI_ISL_754658, EPI_ISL_754659, EPI_ISL_754660, EPI_ISL_754661, EPI_ISL_754662, EPI_ISL_754663, EPI_ISL_754664, EPI_ISL_754665, EPI_ISL_754666, EPI_ISL_754667, EPI_ISL_754668, EPI_ISL_754669, EPI_ISL_754670, EPI_ISL_754671, EPI_ISL_754672, EPI_ISL_754673, EPI_ISL_754674, EPI_ISL_754675, EPI_ISL_754676                                                                                                                                                                                                                                                                                                                                                                                                                                                                                                                                                                                                                                                                                                                                                                                                                                                                                                                                                                                                                                                                                                                                                                                                                                                                                                                                                                                                                                                                                                                                                                                                                                                                                                                                                                                                                                                                                                                                                                                                                                                                                                                                                                                                                                                                                                                                                                                                                                                                                                                                                                                                                                                                                                                                                                                                                                                                                                                                                                                                                                                                                                                                                                                                                                                                                                                                                                                                                                                                                                                                                                                                                                                                                                                                                                                                                                                                                                                                                                                                                                                                                                                                                                                                                                                                                                                                                                                                                                                                                                                                                                                                                                                                                                                                                                                                                                                                                                                                                                                                                                                                                                                                                                                                                                                                                                                                                                                                                                                                                                                                                                                                                                                                                                                                                                                                                                                                                                                                                                                                                                                                                                                                                                                                 | University of Wisconsin-Madison AIDS Vaccine Research Laboratories                               | University of Wisconsin-Madison AIDS Vaccine Research Laboratories                                                       | Gage Moreno, Katarina Braun, et al. AIDS Vaccine Research Laboratories                                                                                                                                                                                                                  |
| EPI_ISL_755572, EPI_ISL_755573, EPI_ISL_755574                                                                                                                                                                                                                                                                                                                                                                                                                                                                                                                                                                                                                                                                                                                                                                                                                                                                                                                                                                                                                                                                                                                                                                                                                                                                                                                                                                                                                                                                                                                                                                                                                                                                                                                                                                                                                                                                                                                                                                                                                                                                                                                                                                                                                                                                                                                                                                                                                                                                                                                                                                                                                                                                                                                                                                                                                                                                                                                                                                                                                                                                                                                                                                                                                                                                                                                                                                                                                                                                                                                                                                                                                                                                                                                                                                                                                                                                                                                                                                                                                                                                                                                                                                                                                                                                                                                                                                                                                                                                                                                                                                                                                                                                                                                                                                                                                                                                                                                                                                                                                                                                                                                                                                                                                                                                                                                                                                                                                                                                                                                                                                                                                                                                                                                                                                                                                                                                                                                                                                                                                                                                                                                                                                                                                                                                                                                                                                                                                                                                                                                                                                                                                                                                                                                                                                                                                                                                                                                                                                                                                                                                                                                 | Center of Advanced Studies and Technology, CAST                                                  | Center of Advanced Studies and Technology, CAST                                                                          | Ferrante,R., Mandatori,D., De Fabritiis,S.                                                                                                                                                                                                                                              |
| EPI_ISL_755575, EPI_ISL_755576, EPI_ISL_755577, EPI_ISL_755578, EPI_ISL_755579, EPI_ISL_755580, EPI_ISL_755581, EPI_ISL_755582, EPI_ISL_755583, EPI_ISL_755584, EPI_ISL_755585, EPI_ISL_755586                                                                                                                                                                                                                                                                                                                                                                                                                                                                                                                                                                                                                                                                                                                                                                                                                                                                                                                                                                                                                                                                                                                                                                                                                                                                                                                                                                                                                                                                                                                                                                                                                                                                                                                                                                                                                                                                                                                                                                                                                                                                                                                                                                                                                                                                                                                                                                                                                                                                                                                                                                                                                                                                                                                                                                                                                                                                                                                                                                                                                                                                                                                                                                                                                                                                                                                                                                                                                                                                                                                                                                                                                                                                                                                                                                                                                                                                                                                                                                                                                                                                                                                                                                                                                                                                                                                                                                                                                                                                                                                                                                                                                                                                                                                                                                                                                                                                                                                                                                                                                                                                                                                                                                                                                                                                                                                                                                                                                                                                                                                                                                                                                                                                                                                                                                                                                                                                                                                                                                                                                                                                                                                                                                                                                                                                                                                                                                                                                                                                                                                                                                                                                                                                                                                                                                                                                                                                                                                                                                 | Utah Public Health Laboratory, Utah Public Health Laboratory Infectious Disease submission group | Utah Public Health Laboratory, Utah Public Health Laboratory Infectious Disease submission group                         | Gallagher,T., Young,E.L., Oakeson,K.F.                                                                                                                                                                                                                                                  |
| see above                                                                                                                                                                                                                                                                                                                                                                                                                                                                                                                                                                                                                                                                                                                                                                                                                                                                                                                                                                                                                                                                                                                                                                                                                                                                                                                                                                                                                                                                                                                                                                                                                                                                                                                                                                                                                                                                                                                                                                                                                                                                                                                                                                                                                                                                                                                                                                                                                                                                                                                                                                                                                                                                                                                                                                                                                                                                                                                                                                                                                                                                                                                                                                                                                                                                                                                                                                                                                                                                                                                                                                                                                                                                                                                                                                                                                                                                                                                                                                                                                                                                                                                                                                                                                                                                                                                                                                                                                                                                                                                                                                                                                                                                                                                                                                                                                                                                                                                                                                                                                                                                                                                                                                                                                                                                                                                                                                                                                                                                                                                                                                                                                                                                                                                                                                                                                                                                                                                                                                                                                                                                                                                                                                                                                                                                                                                                                                                                                                                                                                                                                                                                                                                                                                                                                                                                                                                                                                                                                                                                                                                                                                                                                      | Utah Public Health Laboratory, Utah Public Health Laboratory Infectious Disease submission group | Utah Public Health Laboratory, Utah Public Health Laboratory Infectious Disease submission group                         | Gallagher,T., Young,E.L., Oakeson,K.F.                                                                                                                                                                                                                                                  |
| EPI_ISL_759706, EPI_ISL_759724, EPI_ISL_759725, EPI_ISL_759726, EPI_ISL_759727, EPI_ISL_759728, EPI_ISL_759729, EPI_ISL_759730, EPI_ISL_759731, EPI_ISL_759732, EPI_ISL_759733, EPI_ISL_759734, EPI_ISL_759735, EPI_ISL_759736, EPI_ISL_759737, EPI_ISL_759738, EPI_ISL_759739, EPI_ISL_759740, EPI_ISL_759741, EPI_ISL_759742, EPI_ISL_759743, EPI_ISL_759744, EPI_ISL_759745, EPI_ISL_759746, EPI_ISL_759747, EPI_ISL_759748, EPI_ISL_759749, EPI_ISL_759750, EPI_ISL_759751, EPI_ISL_759752, EPI_ISL_759753, EPI_ISL_759754, EPI_ISL_759755, EPI_ISL_759756, EPI_ISL_759757, EPI_ISL_759758, EPI_ISL_759759, EPI_ISL_759760                                                                                                                                                                                                                                                                                                                                                                                                                                                                                                                                                                                                                                                                                                                                                                                                                                                                                                                                                                                                                                                                                                                                                                                                                                                                                                                                                                                                                                                                                                                                                                                                                                                                                                                                                                                                                                                                                                                                                                                                                                                                                                                                                                                                                                                                                                                                                                                                                                                                                                                                                                                                                                                                                                                                                                                                                                                                                                                                                                                                                                                                                                                                                                                                                                                                                                                                                                                                                                                                                                                                                                                                                                                                                                                                                                                                                                                                                                                                                                                                                                                                                                                                                                                                                                                                                                                                                                                                                                                                                                                                                                                                                                                                                                                                                                                                                                                                                                                                                                                                                                                                                                                                                                                                                                                                                                                                                                                                                                                                                                                                                                                                                                                                                                                                                                                                                                                                                                                                                                                                                                                                                                                                                                                                                                                                                                                                                                                                                                                                                                                                 | University of Wisconsin-Madison AIDS Vaccine Research Laboratories                               | University of Wisconsin-Madison AIDS Vaccine Research Laboratories                                                       | Gage Moreno, Katarina Braun, et al. AIDS Vaccine Research Laboratories                                                                                                                                                                                                                  |
| EPI_ISL_763389, EPI_ISL_763444, EPI_ISL_763449, EPI_ISL_763489, EPI_ISL_763547, EPI_ISL_763580, EPI_ISL_763650, EPI_ISL_763663, EPI_ISL_763673, EPI_ISL_763675, EPI_ISL_763678, EPI_ISL_763726, EPI_ISL_763819, EPI_ISL_763854, EPI_ISL_763855, EPI_ISL_763856, EPI_ISL_763857, EPI_ISL_763858, EPI_ISL_763925, EPI_ISL_763926, EPI_ISL_763927, EPI_ISL_764189, EPI_ISL_764190, EPI_ISL_764230, EPI_ISL_764233, EPI_ISL_764493, EPI_ISL_764494, EPI_ISL_764495, EPI_ISL_764496, EPI_ISL_764501, EPI_ISL_764502, EPI_ISL_764503, EPI_ISL_764504, EPI_ISL_764505, EPI_ISL_764506, EPI_ISL_764507, EPI_ISL_764508, EPI_ISL_764509, EPI_ISL_764510, EPI_ISL_764511, EPI_ISL_764512, EPI_ISL_764513, EPI_ISL_764514, EPI_ISL_764515, EPI_ISL_764516, EPI_ISL_764517, EPI_ISL_764518, EPI_ISL_764519, EPI_ISL_764520, EPI_ISL_764521, EPI_ISL_764522, EPI_ISL_764523, EPI_ISL_764524                                                                                                                                                                                                                                                                                                                                                                                                                                                                                                                                                                                                                                                                                                                                                                                                                                                                                                                                                                                                                                                                                                                                                                                                                                                                                                                                                                                                                                                                                                                                                                                                                                                                                                                                                                                                                                                                                                                                                                                                                                                                                                                                                                                                                                                                                                                                                                                                                                                                                                                                                                                                                                                                                                                                                                                                                                                                                                                                                                                                                                                                                                                                                                                                                                                                                                                                                                                                                                                                                                                                                                                                                                                                                                                                                                                                                                                                                                                                                                                                                                                                                                                                                                                                                                                                                                                                                                                                                                                                                                                                                                                                                                                                                                                                                                                                                                                                                                                                                                                                                                                                                                                                                                                                                                                                                                                                                                                                                                                                                                                                                                                                                                                                                                                                                                                                                                                                                                                                                                                                                                                                                                                                                                                                                                                                                 | Queens Medical Centre, Clinical Microbiology Department / DeepSeq Nottingham                     | COVID-19 Genomics UK (COG-UK) Consortium                                                                                 | Gemma Clark, Wendy Smith, Manjinder Khakh, Vicki M Fleming, Michelle M Lister, Hannah Howson-Wells, Jonathan Ball, Patrick McClure, Joseph Chappell, Theocharis Tsoleridis, Nadine Holmes, Matthew Carlisle, Christopher Moore, Fei Sang, Johnny Debebe, Victoria Wright, Matthew Loose |
| EPI_ISL_765573                                                                                                                                                                                                                                                                                                                                                                                                                                                                                                                                                                                                                                                                                                                                                                                                                                                                                                                                                                                                                                                                                                                                                                                                                                                                                                                                                                                                                                                                                                                                                                                                                                                                                                                                                                                                                                                                                                                                                                                                                                                                                                                                                                                                                                                                                                                                                                                                                                                                                                                                                                                                                                                                                                                                                                                                                                                                                                                                                                                                                                                                                                                                                                                                                                                                                                                                                                                                                                                                                                                                                                                                                                                                                                                                                                                                                                                                                                                                                                                                                                                                                                                                                                                                                                                                                                                                                                                                                                                                                                                                                                                                                                                                                                                                                                                                                                                                                                                                                                                                                                                                                                                                                                                                                                                                                                                                                                                                                                                                                                                                                                                                                                                                                                                                                                                                                                                                                                                                                                                                                                                                                                                                                                                                                                                                                                                                                                                                                                                                                                                                                                                                                                                                                                                                                                                                                                                                                                                                                                                                                                                                                                                                                 | National Institute for Infectious Diseases, INMI, "L. Spallanzani" IRCCS                         | National Institute for Infectious Diseases, INMI, "L. Spallanzani" IRCCS                                                 | F Messina, E Giombini, M Rueca, B Bartolini, C.E.M Gruber, MR Capobianchi, O Butera, A Di Caro                                                                                                                                                                                          |
| EPI_ISL_766032                                                                                                                                                                                                                                                                                                                                                                                                                                                                                                                                                                                                                                                                                                                                                                                                                                                                                                                                                                                                                                                                                                                                                                                                                                                                                                                                                                                                                                                                                                                                                                                                                                                                                                                                                                                                                                                                                                                                                                                                                                                                                                                                                                                                                                                                                                                                                                                                                                                                                                                                                                                                                                                                                                                                                                                                                                                                                                                                                                                                                                                                                                                                                                                                                                                                                                                                                                                                                                                                                                                                                                                                                                                                                                                                                                                                                                                                                                                                                                                                                                                                                                                                                                                                                                                                                                                                                                                                                                                                                                                                                                                                                                                                                                                                                                                                                                                                                                                                                                                                                                                                                                                                                                                                                                                                                                                                                                                                                                                                                                                                                                                                                                                                                                                                                                                                                                                                                                                                                                                                                                                                                                                                                                                                                                                                                                                                                                                                                                                                                                                                                                                                                                                                                                                                                                                                                                                                                                                                                                                                                                                                                                                                                 | RSUP Dr. Sardjito                                                                                | Eijkman Institute for Molecular Biology, Ministry of Research and Technology/National Agency for Research and Innovation | Frilasita A Yudhaputri, Edison Johar, Hidayat Trimarsanto, David H Muljono, Safarina G Malik, Khin Saw Myint, Amin Soebandrio                                                                                                                                                           |
| EPI_ISL_766033                                                                                                                                                                                                                                                                                                                                                                                                                                                                                                                                                                                                                                                                                                                                                                                                                                                                                                                                                                                                                                                                                                                                                                                                                                                                                                                                                                                                                                                                                                                                                                                                                                                                                                                                                                                                                                                                                                                                                                                                                                                                                                                                                                                                                                                                                                                                                                                                                                                                                                                                                                                                                                                                                                                                                                                                                                                                                                                                                                                                                                                                                                                                                                                                                                                                                                                                                                                                                                                                                                                                                                                                                                                                                                                                                                                                                                                                                                                                                                                                                                                                                                                                                                                                                                                                                                                                                                                                                                                                                                                                                                                                                                                                                                                                                                                                                                                                                                                                                                                                                                                                                                                                                                                                                                                                                                                                                                                                                                                                                                                                                                                                                                                                                                                                                                                                                                                                                                                                                                                                                                                                                                                                                                                                                                                                                                                                                                                                                                                                                                                                                                                                                                                                                                                                                                                                                                                                                                                                                                                                                                                                                                                                                 | RSUD Prof. DR. W. Z. Johannes Kupang                                                             | Eijkman Institute for Molecular Biology, Ministry of Research and Technology/National Agency for Research and Innovation | Frilasita A Yudhaputri, Edison Johar, Hidayat Trimarsanto, David H Muljono, Safarina G Malik, Khin Saw Myint, Amin Soebandrio                                                                                                                                                           |
| EPI_ISL_766034                                                                                                                                                                                                                                                                                                                                                                                                                                                                                                                                                                                                                                                                                                                                                                                                                                                                                                                                                                                                                                                                                                                                                                                                                                                                                                                                                                                                                                                                                                                                                                                                                                                                                                                                                                                                                                                                                                                                                                                                                                                                                                                                                                                                                                                                                                                                                                                                                                                                                                                                                                                                                                                                                                                                                                                                                                                                                                                                                                                                                                                                                                                                                                                                                                                                                                                                                                                                                                                                                                                                                                                                                                                                                                                                                                                                                                                                                                                                                                                                                                                                                                                                                                                                                                                                                                                                                                                                                                                                                                                                                                                                                                                                                                                                                                                                                                                                                                                                                                                                                                                                                                                                                                                                                                                                                                                                                                                                                                                                                                                                                                                                                                                                                                                                                                                                                                                                                                                                                                                                                                                                                                                                                                                                                                                                                                                                                                                                                                                                                                                                                                                                                                                                                                                                                                                                                                                                                                                                                                                                                                                                                                                                                 | RS Mitra Keluarga Bintaro                                                                        | Eijkman Institute for Molecular Biology, Ministry of Research and Technology/National Agency for Research and Innovation | Frilasita A Yudhaputri, Edison Johar, Hidayat Trimarsanto, David H Muljono, Safarina G Malik, Khin Saw Myint, Amin Soebandrio                                                                                                                                                           |
| EPI_ISL_766035                                                                                                                                                                                                                                                                                                                                                                                                                                                                                                                                                                                                                                                                                                                                                                                                                                                                                                                                                                                                                                                                                                                                                                                                                                                                                                                                                                                                                                                                                                                                                                                                                                                                                                                                                                                                                                                                                                                                                                                                                                                                                                                                                                                                                                                                                                                                                                                                                                                                                                                                                                                                                                                                                                                                                                                                                                                                                                                                                                                                                                                                                                                                                                                                                                                                                                                                                                                                                                                                                                                                                                                                                                                                                                                                                                                                                                                                                                                                                                                                                                                                                                                                                                                                                                                                                                                                                                                                                                                                                                                                                                                                                                                                                                                                                                                                                                                                                                                                                                                                                                                                                                                                                                                                                                                                                                                                                                                                                                                                                                                                                                                                                                                                                                                                                                                                                                                                                                                                                                                                                                                                                                                                                                                                                                                                                                                                                                                                                                                                                                                                                                                                                                                                                                                                                                                                                                                                                                                                                                                                                                                                                                                                                 | RS Bhayangkara Brimob Kelapa Dua                                                                 | Eijkman Institute for Molecular Biology, Ministry of Research and Technology/National Agency for Research and Innovation | Frilasita A Yudhaputri, Edison Johar, Hidayat Trimarsanto, David H Muljono, Safarina G Malik, Khin Saw Myint, Amin Soebandrio                                                                                                                                                           |
| EPI_ISL_766036                                                                                                                                                                                                                                                                                                                                                                                                                                                                                                                                                                                                                                                                                                                                                                                                                                                                                                                                                                                                                                                                                                                                                                                                                                                                                                                                                                                                                                                                                                                                                                                                                                                                                                                                                                                                                                                                                                                                                                                                                                                                                                                                                                                                                                                                                                                                                                                                                                                                                                                                                                                                                                                                                                                                                                                                                                                                                                                                                                                                                                                                                                                                                                                                                                                                                                                                                                                                                                                                                                                                                                                                                                                                                                                                                                                                                                                                                                                                                                                                                                                                                                                                                                                                                                                                                                                                                                                                                                                                                                                                                                                                                                                                                                                                                                                                                                                                                                                                                                                                                                                                                                                                                                                                                                                                                                                                                                                                                                                                                                                                                                                                                                                                                                                                                                                                                                                                                                                                                                                                                                                                                                                                                                                                                                                                                                                                                                                                                                                                                                                                                                                                                                                                                                                                                                                                                                                                                                                                                                                                                                                                                                                                                 | RS Mitra Keluarga Bintaro                                                                        | Eijkman Institute for Molecular Biology, Ministry of Research and Technology/National Agency for Research and Innovation | Frilasita A Yudhaputri, Edison Johar, Hidayat Trimarsanto, David H Muljono, Safarina G Malik, Khin Saw Myint, Amin Soebandrio                                                                                                                                                           |
| EPI_ISL_766037                                                                                                                                                                                                                                                                                                                                                                                                                                                                                                                                                                                                                                                                                                                                                                                                                                                                                                                                                                                                                                                                                                                                                                                                                                                                                                                                                                                                                                                                                                                                                                                                                                                                                                                                                                                                                                                                                                                                                                                                                                                                                                                                                                                                                                                                                                                                                                                                                                                                                                                                                                                                                                                                                                                                                                                                                                                                                                                                                                                                                                                                                                                                                                                                                                                                                                                                                                                                                                                                                                                                                                                                                                                                                                                                                                                                                                                                                                                                                                                                                                                                                                                                                                                                                                                                                                                                                                                                                                                                                                                                                                                                                                                                                                                                                                                                                                                                                                                                                                                                                                                                                                                                                                                                                                                                                                                                                                                                                                                                                                                                                                                                                                                                                                                                                                                                                                                                                                                                                                                                                                                                                                                                                                                                                                                                                                                                                                                                                                                                                                                                                                                                                                                                                                                                                                                                                                                                                                                                                                                                                                                                                                                                                 | Puskesmas Palmerah                                                                               | Eijkman Institute for Molecular Biology, Ministry of Research and Technology/National Agency for Research and Innovation | Frilasita A Yudhaputri, Edison Johar, Hidayat Trimarsanto, David H Muljono, Safarina G Malik, Khin Saw Myint, Amin Soebandrio                                                                                                                                                           |
| EPI_ISL_766038                                                                                                                                                                                                                                                                                                                                                                                                                                                                                                                                                                                                                                                                                                                                                                                                                                                                                                                                                                                                                                                                                                                                                                                                                                                                                                                                                                                                                                                                                                                                                                                                                                                                                                                                                                                                                                                                                                                                                                                                                                                                                                                                                                                                                                                                                                                                                                                                                                                                                                                                                                                                                                                                                                                                                                                                                                                                                                                                                                                                                                                                                                                                                                                                                                                                                                                                                                                                                                                                                                                                                                                                                                                                                                                                                                                                                                                                                                                                                                                                                                                                                                                                                                                                                                                                                                                                                                                                                                                                                                                                                                                                                                                                                                                                                                                                                                                                                                                                                                                                                                                                                                                                                                                                                                                                                                                                                                                                                                                                                                                                                                                                                                                                                                                                                                                                                                                                                                                                                                                                                                                                                                                                                                                                                                                                                                                                                                                                                                                                                                                                                                                                                                                                                                                                                                                                                                                                                                                                                                                                                                                                                                                                                 | RSJPD Harapan Kita                                                                               | Eijkman Institute for Molecular Biology, Ministry of Research and Technology/National Agency for Research and Innovation | Frilasita A Yudhaputri, Edison Johar, Hidayat Trimarsanto, David H Muljono, Safarina G Malik, Khin Saw Myint, Amin Soebandrio                                                                                                                                                           |
| EPI_ISL_766039                                                                                                                                                                                                                                                                                                                                                                                                                                                                                                                                                                                                                                                                                                                                                                                                                                                                                                                                                                                                                                                                                                                                                                                                                                                                                                                                                                                                                                                                                                                                                                                                                                                                                                                                                                                                                                                                                                                                                                                                                                                                                                                                                                                                                                                                                                                                                                                                                                                                                                                                                                                                                                                                                                                                                                                                                                                                                                                                                                                                                                                                                                                                                                                                                                                                                                                                                                                                                                                                                                                                                                                                                                                                                                                                                                                                                                                                                                                                                                                                                                                                                                                                                                                                                                                                                                                                                                                                                                                                                                                                                                                                                                                                                                                                                                                                                                                                                                                                                                                                                                                                                                                                                                                                                                                                                                                                                                                                                                                                                                                                                                                                                                                                                                                                                                                                                                                                                                                                                                                                                                                                                                                                                                                                                                                                                                                                                                                                                                                                                                                                                                                                                                                                                                                                                                                                                                                                                                                                                                                                                                                                                                                                                 | RS Bhayangkara Tk. III                                                                           | Eijkman Institute for Molecular Biology, Ministry of Research and Technology/National Agency for Research and Innovation | Frilasita A Yudhaputri, Edison Johar, Hidayat Trimarsanto, David H Muljono, Safarina G Malik, Khin Saw Myint, Amin Soebandrio                                                                                                                                                           |
| EPI_ISL_766040                                                                                                                                                                                                                                                                                                                                                                                                                                                                                                                                                                                                                                                                                                                                                                                                                                                                                                                                                                                                                                                                                                                                                                                                                                                                                                                                                                                                                                                                                                                                                                                                                                                                                                                                                                                                                                                                                                                                                                                                                                                                                                                                                                                                                                                                                                                                                                                                                                                                                                                                                                                                                                                                                                                                                                                                                                                                                                                                                                                                                                                                                                                                                                                                                                                                                                                                                                                                                                                                                                                                                                                                                                                                                                                                                                                                                                                                                                                                                                                                                                                                                                                                                                                                                                                                                                                                                                                                                                                                                                                                                                                                                                                                                                                                                                                                                                                                                                                                                                                                                                                                                                                                                                                                                                                                                                                                                                                                                                                                                                                                                                                                                                                                                                                                                                                                                                                                                                                                                                                                                                                                                                                                                                                                                                                                                                                                                                                                                                                                                                                                                                                                                                                                                                                                                                                                                                                                                                                                                                                                                                                                                                                                                 | RS Tingkat II Moh. Ridwan Meuraksa                                                               | Eijkman Institute for Molecular Biology, Ministry of Research and Technology/National Agency for Research and Innovation | Frilasita A Yudhaputri, Edison Johar, Hidayat Trimarsanto, David H Muljono, Safarina G Malik, Khin Saw Myint, Amin Soebandrio                                                                                                                                                           |
| EPI_ISL_766041                                                                                                                                                                                                                                                                                                                                                                                                                                                                                                                                                                                                                                                                                                                                                                                                                                                                                                                                                                                                                                                                                                                                                                                                                                                                                                                                                                                                                                                                                                                                                                                                                                                                                                                                                                                                                                                                                                                                                                                                                                                                                                                                                                                                                                                                                                                                                                                                                                                                                                                                                                                                                                                                                                                                                                                                                                                                                                                                                                                                                                                                                                                                                                                                                                                                                                                                                                                                                                                                                                                                                                                                                                                                                                                                                                                                                                                                                                                                                                                                                                                                                                                                                                                                                                                                                                                                                                                                                                                                                                                                                                                                                                                                                                                                                                                                                                                                                                                                                                                                                                                                                                                                                                                                                                                                                                                                                                                                                                                                                                                                                                                                                                                                                                                                                                                                                                                                                                                                                                                                                                                                                                                                                                                                                                                                                                                                                                                                                                                                                                                                                                                                                                                                                                                                                                                                                                                                                                                                                                                                                                                                                                                                                 | RS Polri                                                                                         | Eijkman Institute for Molecular Biology, Ministry of Research and Technology/National Agency for Research and Innovation | Frilasita A Yudhaputri, Edison Johar, Hidayat Trimarsanto, David H Muljono, Safarina G Malik, Khin Saw Myint, Amin Soebandrio                                                                                                                                                           |

|                                                                |                                                         |                                                                                                                          |                                                                                                                                    |
|----------------------------------------------------------------|---------------------------------------------------------|--------------------------------------------------------------------------------------------------------------------------|------------------------------------------------------------------------------------------------------------------------------------|
| EPI_ISL_766042                                                 | RS Sari Asih Ciledug                                    | Eijkman Institute for Molecular Biology, Ministry of Research and Technology/National Agency for Research and Innovation | Frilasita A Yudhaputri, Edison Johar, Hidayat Trimarsanto, David H Muljono, Safarina G Malik, Khin Saw Myint, Amin Soebandrio      |
| EPI_ISL_766043                                                 | RS Pelni                                                | Eijkman Institute for Molecular Biology, Ministry of Research and Technology/National Agency for Research and Innovation | Frilasita A Yudhaputri, Edison Johar, Hidayat Trimarsanto, David H Muljono, Safarina G Malik, Khin Saw Myint, Amin Soebandrio      |
| EPI_ISL_766044                                                 | RSUP Fatmawati                                          | Eijkman Institute for Molecular Biology, Ministry of Research and Technology/National Agency for Research and Innovation | Frilasita A Yudhaputri, Edison Johar, Hidayat Trimarsanto, David H Muljono, Safarina G Malik, Khin Saw Myint, Amin Soebandrio      |
| EPI_ISL_766045                                                 | RS Pelni                                                | Eijkman Institute for Molecular Biology, Ministry of Research and Technology/National Agency for Research and Innovation | Frilasita A Yudhaputri, Edison Johar, Hidayat Trimarsanto, David H Muljono, Safarina G Malik, Khin Saw Myint, Amin Soebandrio      |
| EPI_ISL_766046                                                 | RSUP Fatmawati                                          | Eijkman Institute for Molecular Biology, Ministry of Research and Technology/National Agency for Research and Innovation | Frilasita A Yudhaputri, Edison Johar, Hidayat Trimarsanto, David H Muljono, Safarina G Malik, Khin Saw Myint, Amin Soebandrio      |
| EPI_ISL_766047                                                 | RS Kramat 128                                           | Eijkman Institute for Molecular Biology, Ministry of Research and Technology/National Agency for Research and Innovation | Frilasita A Yudhaputri, Edison Johar, Hidayat Trimarsanto, David H Muljono, Safarina G Malik, Khin Saw Myint, Amin Soebandrio      |
| EPI_ISL_766048                                                 | RS Bhayangkara Tk. III                                  | Eijkman Institute for Molecular Biology, Ministry of Research and Technology/National Agency for Research and Innovation | Frilasita A Yudhaputri, Edison Johar, Hidayat Trimarsanto, David H Muljono, Safarina G Malik, Khin Saw Myint, Amin Soebandrio      |
| EPI_ISL_769986                                                 | Area De Salud Catedral Noreste                          | Incienza, Instituto Costarricense de Investigación y Enseñanza en Nutrición y Salud                                      | Francisco Duarte, Hebleen Porras, Claudio Soto-Garita, Estela Cordero, Adriana Godínez, Melany Calderón & Mariel López             |
| EPI_ISL_769987                                                 | Laboratorio Clinico Labin                               | Incienza, Instituto Costarricense de Investigación y Enseñanza en Nutrición y Salud                                      | Francisco Duarte, Hebleen Porras, Claudio Soto-Garita, Estela Cordero, Adriana Godínez, Melany Calderon & Pei Chan Ma              |
| EPI_ISL_769988, EPI_ISL_769989                                 | Area De Salud San Francisco-San Antonio (Coopesana)     | Incienza, Instituto Costarricense de Investigación y Enseñanza en Nutrición y Salud                                      | Francisco Duarte, Hebleen Porras, Claudio Soto-Garita, Estela Cordero, Adriana Godínez, Melany Calderón & Mariel López             |
| EPI_ISL_769990                                                 | Hospital Dr. Rafael A. Calderon Guardia                 | Incienza, Instituto Costarricense de Investigación y Enseñanza en Nutrición y Salud                                      | Francisco Duarte, Hebleen Porras, Claudio Soto-Garita, Estela Cordero, Adriana Godínez, Melany Calderón & Mariel López             |
| EPI_ISL_769991                                                 | Laboratorio Clinico Labin                               | Incienza, Instituto Costarricense de Investigación y Enseñanza en Nutrición y Salud                                      | Francisco Duarte, Hebleen Porras, Claudio Soto-Garita, Estela Cordero, Adriana Godínez, Melany Calderón & Mariel López             |
| EPI_ISL_769992                                                 | Hospital Metropolitano                                  | Incienza, Instituto Costarricense de Investigación y Enseñanza en Nutrición y Salud                                      | Francisco Duarte, Hebleen Porras, Claudio Soto-Garita, Estela Cordero, Adriana Godínez, Melany Calderón & Margarita Lee Lui        |
| EPI_ISL_769993                                                 | Area De Salud El Guarco                                 | Incienza, Instituto Costarricense de Investigación y Enseñanza en Nutrición y Salud                                      | Francisco Duarte, Hebleen Porras, Claudio Soto-Garita, Estela Cordero, Adriana Godínez, Melany Calderón & Mariel López             |
| EPI_ISL_769994                                                 | Area De Salud Catedral Noreste                          | Incienza, Instituto Costarricense de Investigación y Enseñanza en Nutrición y Salud                                      | Francisco Duarte, Hebleen Porras, Claudio Soto-Garita, Estela Cordero, Adriana Godínez, Melany Calderón & Mariel López             |
| EPI_ISL_769995                                                 | Hospital Metropolitano                                  | Incienza, Instituto Costarricense de Investigación y Enseñanza en Nutrición y Salud                                      | Francisco Duarte, Hebleen Porras, Claudio Soto-Garita, Estela Cordero, Adriana Godínez, Melany Calderón & Margarita Lee Lui        |
| EPI_ISL_769996                                                 | Area De Salud San Juan-San Diego-Concepcion 2           | Incienza, Instituto Costarricense de Investigación y Enseñanza en Nutrición y Salud                                      | Francisco Duarte, Hebleen Porras, Claudio Soto-Garita, Estela Cordero, Adriana Godínez, Melany Calderón & Mariel López             |
| EPI_ISL_769997, EPI_ISL_769998                                 | Area De Salud Catedral Noreste                          | Incienza, Instituto Costarricense de Investigación y Enseñanza en Nutrición y Salud                                      | Francisco Duarte, Hebleen Porras, Claudio Soto-Garita, Estela Cordero, Adriana Godínez, Melany Calderón & Mariel López             |
| EPI_ISL_769999                                                 | Area De Salud Paraiso-Cervantes                         | Incienza, Instituto Costarricense de Investigación y Enseñanza en Nutrición y Salud                                      | Francisco Duarte, Hebleen Porras, Claudio Soto-Garita, Estela Cordero, Adriana Godínez, Melany Calderón & Mariel López             |
| EPI_ISL_770000, EPI_ISL_770001, EPI_ISL_770002, EPI_ISL_770003 | Area De Salud La Cruz                                   | Incienza, Instituto Costarricense de Investigación y Enseñanza en Nutrición y Salud                                      | Francisco Duarte, Hebleen Porras, Claudio Soto-Garita, Estela Cordero, Adriana Godínez, Melany Calderón & Mariel López             |
| EPI_ISL_770004                                                 | Clinica Biblica                                         | Incienza, Instituto Costarricense de Investigación y Enseñanza en Nutrición y Salud                                      | Francisco Duarte, Hebleen Porras, Claudio Soto-Garita, Estela Cordero, Adriana Godínez, Melany Calderón & Karla Gutiérrez-González |
| EPI_ISL_770005                                                 | Area De Salud Moravia                                   | Incienza, Instituto Costarricense de Investigación y Enseñanza en Nutrición y Salud                                      | Francisco Duarte, Hebleen Porras, Claudio Soto-Garita, Estela Cordero, Adriana Godínez, Melany Calderón & Mariel López             |
| EPI_ISL_770006                                                 | Hle - Asociacion Hogar De Ancianos De Palmar Sur De Osa | Incienza, Instituto Costarricense de Investigación y Enseñanza en Nutrición y Salud                                      | Francisco Duarte, Hebleen Porras, Claudio Soto-Garita, Estela Cordero, Adriana Godínez, Melany Calderón & Mariel López             |
| EPI_ISL_770007                                                 | Area De Salud San Rafael                                | Incienza, Instituto Costarricense de Investigación y Enseñanza en Nutrición y Salud                                      | Francisco Duarte, Hebleen Porras, Claudio Soto-Garita, Estela Cordero, Adriana Godínez, Melany Calderón & Mariel López             |
| EPI_ISL_770008                                                 | Area De Salud Corredores                                | Incienza, Instituto Costarricense de Investigación y Enseñanza en Nutrición y Salud                                      | Francisco Duarte, Hebleen Porras, Claudio Soto-Garita, Estela Cordero, Adriana Godínez, Melany Calderón & Mariel López             |
| EPI_ISL_770009                                                 | Area De Salud Escazu (Coopesana)                        | Incienza, Instituto Costarricense de Investigación y Enseñanza en Nutrición y Salud                                      | Francisco Duarte, Hebleen Porras, Claudio Soto-Garita, Estela Cordero, Adriana Godínez & Melany Calderón                           |
| EPI_ISL_770010                                                 | Area De Salud Escazu (Coopesana)                        | Incienza, Instituto Costarricense de Investigación y Enseñanza en Nutrición y Salud                                      | Francisco Duarte, Hebleen Porras, Claudio Soto-Garita, Estela Cordero, Adriana Godínez, Melany Calderón & Mariel López             |
| EPI_ISL_770011, EPI_ISL_770012                                 | Area De Salud Coronado                                  | Incienza, Instituto Costarricense de Investigación y Enseñanza en Nutrición y Salud                                      | Francisco Duarte, Hebleen Porras, Claudio Soto-Garita, Estela Cordero, Adriana Godínez, Melany Calderón & Mariel López             |
| EPI_ISL_770013                                                 | Hle - Asilos De Ancianos                                | Incienza, Instituto Costarricense de Investigación y Enseñanza en Nutrición y Salud                                      | Francisco Duarte, Hebleen Porras, Claudio Soto-Garita, Estela Cordero, Adriana Godínez, Melany Calderón & Mariel López             |
| EPI_ISL_770014                                                 | Area De Salud Curridabat 2                              | Incienza, Instituto Costarricense de Investigación y Enseñanza en Nutrición y Salud                                      | Francisco Duarte, Hebleen Porras, Claudio Soto-Garita, Estela Cordero, Adriana Godínez, Melany Calderón & Mariel López             |
| EPI_ISL_770015                                                 | Area De Salud San Francisco-San Antonio (Coopesana)     | Incienza, Instituto Costarricense de Investigación y Enseñanza en Nutrición y Salud                                      | Francisco Duarte, Hebleen Porras, Claudio Soto-Garita, Estela Cordero, Adriana Godínez, Melany Calderón & Mariel López             |
| EPI_ISL_770016                                                 | Area De Salud Goicoechea 2 - Clinica Dr. Jimenez Nuñez  | Incienza, Instituto Costarricense de Investigación y Enseñanza en Nutrición y Salud                                      | Francisco Duarte, Hebleen Porras, Claudio Soto-Garita, Estela Cordero, Adriana Godínez, Melany Calderón & Mariel López             |
| EPI_ISL_770017                                                 | Area De Salud Perez Zeledon                             | Incienza, Instituto Costarricense de Investigación y Enseñanza en Nutrición y Salud                                      | Francisco Duarte, Hebleen Porras, Claudio Soto-Garita, Estela Cordero, Adriana Godínez, Melany Calderón & Mariel López             |
| EPI_ISL_770018, EPI_ISL_770019                                 | Laboratorio Cenahce                                     | Incienza, Instituto Costarricense de Investigación y Enseñanza en Nutrición y Salud                                      | Francisco Duarte, Hebleen Porras, Claudio Soto-Garita, Estela Cordero, Adriana Godínez, Melany Calderón & Andrés Feoil-Grant       |
| EPI_ISL_770020                                                 | Area De Salud Goicoechea 2 - Clinica Dr. Jimenez Nuñez  | Incienza, Instituto Costarricense de Investigación y Enseñanza en Nutrición y Salud                                      | Francisco Duarte, Hebleen Porras, Claudio Soto-Garita, Estela Cordero, Adriana Godínez, Melany Calderón & Mariel López             |

|                                                                                                                                                                                                                                                                                                                                                                                                                                                                                                                                                                                                                                                                                                                                                                                                                                                                                                                                                                                                                                                                                                                                                                                                                                                                                                                                                                                                                                                                                                                                                                                                                                                                                                                                                                                                                                                                                                                                                                                                                                                                                                                                                                                                                                                                                                                                                                                                                                                                                                                                                                                                                                                                                                                                                                                                                                                                                                                                                                                                                                                                                                                                                                                                                                                                                                                                                                                                                                                                                                                                                                                                                                                                                                                                                                                                |                                                                                                                                             |                                                                                                                                   |                                                                                                                                                                                                                                                                                                                                                                                                                                                                              |
|------------------------------------------------------------------------------------------------------------------------------------------------------------------------------------------------------------------------------------------------------------------------------------------------------------------------------------------------------------------------------------------------------------------------------------------------------------------------------------------------------------------------------------------------------------------------------------------------------------------------------------------------------------------------------------------------------------------------------------------------------------------------------------------------------------------------------------------------------------------------------------------------------------------------------------------------------------------------------------------------------------------------------------------------------------------------------------------------------------------------------------------------------------------------------------------------------------------------------------------------------------------------------------------------------------------------------------------------------------------------------------------------------------------------------------------------------------------------------------------------------------------------------------------------------------------------------------------------------------------------------------------------------------------------------------------------------------------------------------------------------------------------------------------------------------------------------------------------------------------------------------------------------------------------------------------------------------------------------------------------------------------------------------------------------------------------------------------------------------------------------------------------------------------------------------------------------------------------------------------------------------------------------------------------------------------------------------------------------------------------------------------------------------------------------------------------------------------------------------------------------------------------------------------------------------------------------------------------------------------------------------------------------------------------------------------------------------------------------------------------------------------------------------------------------------------------------------------------------------------------------------------------------------------------------------------------------------------------------------------------------------------------------------------------------------------------------------------------------------------------------------------------------------------------------------------------------------------------------------------------------------------------------------------------------------------------------------------------------------------------------------------------------------------------------------------------------------------------------------------------------------------------------------------------------------------------------------------------------------------------------------------------------------------------------------------------------------------------------------------------------------------------------------------------|---------------------------------------------------------------------------------------------------------------------------------------------|-----------------------------------------------------------------------------------------------------------------------------------|------------------------------------------------------------------------------------------------------------------------------------------------------------------------------------------------------------------------------------------------------------------------------------------------------------------------------------------------------------------------------------------------------------------------------------------------------------------------------|
| EPI_ISL_770021                                                                                                                                                                                                                                                                                                                                                                                                                                                                                                                                                                                                                                                                                                                                                                                                                                                                                                                                                                                                                                                                                                                                                                                                                                                                                                                                                                                                                                                                                                                                                                                                                                                                                                                                                                                                                                                                                                                                                                                                                                                                                                                                                                                                                                                                                                                                                                                                                                                                                                                                                                                                                                                                                                                                                                                                                                                                                                                                                                                                                                                                                                                                                                                                                                                                                                                                                                                                                                                                                                                                                                                                                                                                                                                                                                                 | Area De Salud Catedral Noreste                                                                                                              | Incienza, Instituto Costarricense de Investigación y Enseñanza en Nutrición y Salud                                               | Francisco Duarte, Hebleen Porras, Claudio Soto-Garita, Estela Cordero, Adriana Godínez, Melany Calderón & Mariel López                                                                                                                                                                                                                                                                                                                                                       |
| EPI_ISL_770022                                                                                                                                                                                                                                                                                                                                                                                                                                                                                                                                                                                                                                                                                                                                                                                                                                                                                                                                                                                                                                                                                                                                                                                                                                                                                                                                                                                                                                                                                                                                                                                                                                                                                                                                                                                                                                                                                                                                                                                                                                                                                                                                                                                                                                                                                                                                                                                                                                                                                                                                                                                                                                                                                                                                                                                                                                                                                                                                                                                                                                                                                                                                                                                                                                                                                                                                                                                                                                                                                                                                                                                                                                                                                                                                                                                 | Area De Salud Perez Zeledon                                                                                                                 | Incienza, Instituto Costarricense de Investigación y Enseñanza en Nutrición y Salud                                               | Francisco Duarte, Hebleen Porras, Claudio Soto-Garita, Estela Cordero, Adriana Godínez, Melany Calderón & Mariel López                                                                                                                                                                                                                                                                                                                                                       |
| EPI_ISL_770023                                                                                                                                                                                                                                                                                                                                                                                                                                                                                                                                                                                                                                                                                                                                                                                                                                                                                                                                                                                                                                                                                                                                                                                                                                                                                                                                                                                                                                                                                                                                                                                                                                                                                                                                                                                                                                                                                                                                                                                                                                                                                                                                                                                                                                                                                                                                                                                                                                                                                                                                                                                                                                                                                                                                                                                                                                                                                                                                                                                                                                                                                                                                                                                                                                                                                                                                                                                                                                                                                                                                                                                                                                                                                                                                                                                 | Area De Salud San Francisco-San Antonio (Coopesana)                                                                                         | Incienza, Instituto Costarricense de Investigación y Enseñanza en Nutrición y Salud                                               | Francisco Duarte, Hebleen Porras, Claudio Soto-Garita, Estela Cordero, Adriana Godínez, Melany Calderón & Mariel López                                                                                                                                                                                                                                                                                                                                                       |
| EPI_ISL_770024                                                                                                                                                                                                                                                                                                                                                                                                                                                                                                                                                                                                                                                                                                                                                                                                                                                                                                                                                                                                                                                                                                                                                                                                                                                                                                                                                                                                                                                                                                                                                                                                                                                                                                                                                                                                                                                                                                                                                                                                                                                                                                                                                                                                                                                                                                                                                                                                                                                                                                                                                                                                                                                                                                                                                                                                                                                                                                                                                                                                                                                                                                                                                                                                                                                                                                                                                                                                                                                                                                                                                                                                                                                                                                                                                                                 | Hle - Asociacion Hogar De Ancianos Santiago Crespo Calvo                                                                                    | Incienza, Instituto Costarricense de Investigación y Enseñanza en Nutrición y Salud                                               | Francisco Duarte, Hebleen Porras, Claudio Soto-Garita, Estela Cordero, Adriana Godínez, Melany Calderón & Mariel López                                                                                                                                                                                                                                                                                                                                                       |
| EPI_ISL_770025                                                                                                                                                                                                                                                                                                                                                                                                                                                                                                                                                                                                                                                                                                                                                                                                                                                                                                                                                                                                                                                                                                                                                                                                                                                                                                                                                                                                                                                                                                                                                                                                                                                                                                                                                                                                                                                                                                                                                                                                                                                                                                                                                                                                                                                                                                                                                                                                                                                                                                                                                                                                                                                                                                                                                                                                                                                                                                                                                                                                                                                                                                                                                                                                                                                                                                                                                                                                                                                                                                                                                                                                                                                                                                                                                                                 | Area De Salud San Juan-San Diego-Concepcion 2                                                                                               | Incienza, Instituto Costarricense de Investigación y Enseñanza en Nutrición y Salud                                               | Francisco Duarte, Hebleen Porras, Claudio Soto-Garita, Estela Cordero, Adriana Godínez, Melany Calderón & Mariel López                                                                                                                                                                                                                                                                                                                                                       |
| EPI_ISL_770026                                                                                                                                                                                                                                                                                                                                                                                                                                                                                                                                                                                                                                                                                                                                                                                                                                                                                                                                                                                                                                                                                                                                                                                                                                                                                                                                                                                                                                                                                                                                                                                                                                                                                                                                                                                                                                                                                                                                                                                                                                                                                                                                                                                                                                                                                                                                                                                                                                                                                                                                                                                                                                                                                                                                                                                                                                                                                                                                                                                                                                                                                                                                                                                                                                                                                                                                                                                                                                                                                                                                                                                                                                                                                                                                                                                 | Area De Salud Catedral Noreste                                                                                                              | Incienza, Instituto Costarricense de Investigación y Enseñanza en Nutrición y Salud                                               | Francisco Duarte, Hebleen Porras, Claudio Soto-Garita, Estela Cordero, Adriana Godínez, Melany Calderón & Mariel López                                                                                                                                                                                                                                                                                                                                                       |
| EPI_ISL_770027                                                                                                                                                                                                                                                                                                                                                                                                                                                                                                                                                                                                                                                                                                                                                                                                                                                                                                                                                                                                                                                                                                                                                                                                                                                                                                                                                                                                                                                                                                                                                                                                                                                                                                                                                                                                                                                                                                                                                                                                                                                                                                                                                                                                                                                                                                                                                                                                                                                                                                                                                                                                                                                                                                                                                                                                                                                                                                                                                                                                                                                                                                                                                                                                                                                                                                                                                                                                                                                                                                                                                                                                                                                                                                                                                                                 | Area De Salud La Cruz                                                                                                                       | Incienza, Instituto Costarricense de Investigación y Enseñanza en Nutrición y Salud                                               | Francisco Duarte, Hebleen Porras, Claudio Soto-Garita, Estela Cordero, Adriana Godínez, Melany Calderón & Mariel López                                                                                                                                                                                                                                                                                                                                                       |
| EPI_ISL_770028                                                                                                                                                                                                                                                                                                                                                                                                                                                                                                                                                                                                                                                                                                                                                                                                                                                                                                                                                                                                                                                                                                                                                                                                                                                                                                                                                                                                                                                                                                                                                                                                                                                                                                                                                                                                                                                                                                                                                                                                                                                                                                                                                                                                                                                                                                                                                                                                                                                                                                                                                                                                                                                                                                                                                                                                                                                                                                                                                                                                                                                                                                                                                                                                                                                                                                                                                                                                                                                                                                                                                                                                                                                                                                                                                                                 | Hospital Dr. Raul Blanco Cervantes                                                                                                          | Incienza, Instituto Costarricense de Investigación y Enseñanza en Nutrición y Salud                                               | Francisco Duarte, Hebleen Porras, Claudio Soto-Garita, Estela Cordero, Adriana Godínez, Melany Calderón & Mariel López                                                                                                                                                                                                                                                                                                                                                       |
| EPI_ISL_770029                                                                                                                                                                                                                                                                                                                                                                                                                                                                                                                                                                                                                                                                                                                                                                                                                                                                                                                                                                                                                                                                                                                                                                                                                                                                                                                                                                                                                                                                                                                                                                                                                                                                                                                                                                                                                                                                                                                                                                                                                                                                                                                                                                                                                                                                                                                                                                                                                                                                                                                                                                                                                                                                                                                                                                                                                                                                                                                                                                                                                                                                                                                                                                                                                                                                                                                                                                                                                                                                                                                                                                                                                                                                                                                                                                                 | Area De Salud Corredores                                                                                                                    | Incienza, Instituto Costarricense de Investigación y Enseñanza en Nutrición y Salud                                               | Francisco Duarte, Hebleen Porras, Claudio Soto-Garita, Estela Cordero, Adriana Godínez, Melany Calderón & Mariel López                                                                                                                                                                                                                                                                                                                                                       |
| EPI_ISL_770030                                                                                                                                                                                                                                                                                                                                                                                                                                                                                                                                                                                                                                                                                                                                                                                                                                                                                                                                                                                                                                                                                                                                                                                                                                                                                                                                                                                                                                                                                                                                                                                                                                                                                                                                                                                                                                                                                                                                                                                                                                                                                                                                                                                                                                                                                                                                                                                                                                                                                                                                                                                                                                                                                                                                                                                                                                                                                                                                                                                                                                                                                                                                                                                                                                                                                                                                                                                                                                                                                                                                                                                                                                                                                                                                                                                 | Area De Salud Buenos Aires                                                                                                                  | Incienza, Instituto Costarricense de Investigación y Enseñanza en Nutrición y Salud                                               | Francisco Duarte, Hebleen Porras, Claudio Soto-Garita, Estela Cordero, Adriana Godínez, Melany Calderón & Mariel López                                                                                                                                                                                                                                                                                                                                                       |
| EPI_ISL_770031, EPI_ISL_770032                                                                                                                                                                                                                                                                                                                                                                                                                                                                                                                                                                                                                                                                                                                                                                                                                                                                                                                                                                                                                                                                                                                                                                                                                                                                                                                                                                                                                                                                                                                                                                                                                                                                                                                                                                                                                                                                                                                                                                                                                                                                                                                                                                                                                                                                                                                                                                                                                                                                                                                                                                                                                                                                                                                                                                                                                                                                                                                                                                                                                                                                                                                                                                                                                                                                                                                                                                                                                                                                                                                                                                                                                                                                                                                                                                 | Hle-Asociacion De Atencion Integral Del Anciano San Cayetano                                                                                | Incienza, Instituto Costarricense de Investigación y Enseñanza en Nutrición y Salud                                               | Francisco Duarte, Hebleen Porras, Claudio Soto-Garita, Estela Cordero, Adriana Godínez, Melany Calderón & Mariel López                                                                                                                                                                                                                                                                                                                                                       |
| EPI_ISL_770551, EPI_ISL_770552, EPI_ISL_770553, EPI_ISL_770554, EPI_ISL_770555, EPI_ISL_770556, EPI_ISL_770557, EPI_ISL_770558, EPI_ISL_770559, EPI_ISL_770560, EPI_ISL_770561, EPI_ISL_770562, EPI_ISL_770563, EPI_ISL_770564, EPI_ISL_770565, EPI_ISL_770566, EPI_ISL_770567, EPI_ISL_770568, EPI_ISL_770569, EPI_ISL_770570, EPI_ISL_770571, EPI_ISL_770572, EPI_ISL_770573, EPI_ISL_770574, EPI_ISL_770575, EPI_ISL_770576, EPI_ISL_770577, EPI_ISL_770578, EPI_ISL_770579, EPI_ISL_770580, EPI_ISL_770581, EPI_ISL_770582, EPI_ISL_770583, EPI_ISL_770584, EPI_ISL_770585, EPI_ISL_770586, EPI_ISL_770587, EPI_ISL_770588, EPI_ISL_770589, EPI_ISL_770590, EPI_ISL_770591, EPI_ISL_770592, EPI_ISL_770593, EPI_ISL_770594, EPI_ISL_770595, EPI_ISL_770596, EPI_ISL_770597, EPI_ISL_770598, EPI_ISL_770599, EPI_ISL_770600, EPI_ISL_770601, EPI_ISL_770602, EPI_ISL_770603, EPI_ISL_770604, EPI_ISL_770605, EPI_ISL_770606, EPI_ISL_770607, EPI_ISL_770608, EPI_ISL_770609, EPI_ISL_770610, EPI_ISL_770611, EPI_ISL_770612, EPI_ISL_770613, EPI_ISL_770614, EPI_ISL_770615, EPI_ISL_770616, EPI_ISL_770617, EPI_ISL_770618, EPI_ISL_770619, EPI_ISL_770620, EPI_ISL_770621, EPI_ISL_770622, EPI_ISL_770623, EPI_ISL_770624, EPI_ISL_770625, EPI_ISL_770626, EPI_ISL_770627, EPI_ISL_770628, EPI_ISL_770629, EPI_ISL_770630, EPI_ISL_779155, EPI_ISL_779156, EPI_ISL_779157, EPI_ISL_779158, EPI_ISL_779159, EPI_ISL_779160, EPI_ISL_779161, EPI_ISL_779162, EPI_ISL_779163, EPI_ISL_779164, EPI_ISL_779165, EPI_ISL_779166, EPI_ISL_779167, EPI_ISL_779168                                                                                                                                                                                                                                                                                                                                                                                                                                                                                                                                                                                                                                                                                                                                                                                                                                                                                                                                                                                                                                                                                                                                                                                                                                                                                                                                                                                                                                                                                                                                                                                                                                                                                                                                                                                                                                                                                                                                                                                                                                                                                                                                                                                                                                 | Incienza, Instituto Costarricense de Investigación y Enseñanza en Nutrición y Salud                                                         | Francisco Duarte, Hebleen Porras, Claudio Soto-Garita, Estela Cordero, Adriana Godínez, Melany Calderón & Mariel López            |                                                                                                                                                                                                                                                                                                                                                                                                                                                                              |
| see above                                                                                                                                                                                                                                                                                                                                                                                                                                                                                                                                                                                                                                                                                                                                                                                                                                                                                                                                                                                                                                                                                                                                                                                                                                                                                                                                                                                                                                                                                                                                                                                                                                                                                                                                                                                                                                                                                                                                                                                                                                                                                                                                                                                                                                                                                                                                                                                                                                                                                                                                                                                                                                                                                                                                                                                                                                                                                                                                                                                                                                                                                                                                                                                                                                                                                                                                                                                                                                                                                                                                                                                                                                                                                                                                                                                      | Laboratório de Microbiologia Molecular - Universidade FEEVALE                                                                               | Bioinformatics Laboratory / LNCC                                                                                                  | Felipe Benites, Fernando Rosado Pilki, Alana Witt Hansen, Juliane Deise Fleck, Juliana Schons, Meriane Demoliner, Ana Karolina Eisen Antunes, Fagner Henrique Heldt, Larissa Mallmann, Bruna Hermann, Ana Luiza Ziulkoski, Vyctoria Goes, Karoline Schallenberg, Mathews Nunes Weber, Paula Rodrigues de Almeida, Alessandra Pavan Lamarca da Silva, Ronaldo da Silva F Jr , Luiz G P de Almeida, Alexandra L Gerber , Ana Paula de C Guimarães, Ana Tereza R de Vasconcelos |
| EPI_ISL_779291, EPI_ISL_779292, EPI_ISL_779293, EPI_ISL_779294, EPI_ISL_779295, EPI_ISL_779296, EPI_ISL_779297, EPI_ISL_779298, EPI_ISL_779299, EPI_ISL_779300, EPI_ISL_779301, EPI_ISL_779302, EPI_ISL_779303, EPI_ISL_779304, EPI_ISL_779305, EPI_ISL_779306, EPI_ISL_779307, EPI_ISL_779308, EPI_ISL_779309, EPI_ISL_779310, EPI_ISL_779311, EPI_ISL_779312, EPI_ISL_779313, EPI_ISL_779314, EPI_ISL_779315, EPI_ISL_779316, EPI_ISL_779317, EPI_ISL_779318                                                                                                                                                                                                                                                                                                                                                                                                                                                                                                                                                                                                                                                                                                                                                                                                                                                                                                                                                                                                                                                                                                                                                                                                                                                                                                                                                                                                                                                                                                                                                                                                                                                                                                                                                                                                                                                                                                                                                                                                                                                                                                                                                                                                                                                                                                                                                                                                                                                                                                                                                                                                                                                                                                                                                                                                                                                                                                                                                                                                                                                                                                                                                                                                                                                                                                                                 | Utah Public Health Laboratory, Utah Public Health Laboratory Infectious Disease submission group                                            | Utah Public Health Laboratory, Utah Public Health Laboratory Infectious Disease submission group                                  | Gallagher,T., Young,E.L., Oakeson,K.F.                                                                                                                                                                                                                                                                                                                                                                                                                                       |
| see above                                                                                                                                                                                                                                                                                                                                                                                                                                                                                                                                                                                                                                                                                                                                                                                                                                                                                                                                                                                                                                                                                                                                                                                                                                                                                                                                                                                                                                                                                                                                                                                                                                                                                                                                                                                                                                                                                                                                                                                                                                                                                                                                                                                                                                                                                                                                                                                                                                                                                                                                                                                                                                                                                                                                                                                                                                                                                                                                                                                                                                                                                                                                                                                                                                                                                                                                                                                                                                                                                                                                                                                                                                                                                                                                                                                      | University of Wisconsin-Madison AIDS Vaccine Research Laboratories                                                                          | University of Wisconsin-Madison AIDS Vaccine Research Laboratories                                                                | Gage Moreno, Katarina Braun, et al. AIDS Vaccine Research Laboratories                                                                                                                                                                                                                                                                                                                                                                                                       |
| EPI_ISL_779319, EPI_ISL_779320, EPI_ISL_779321, EPI_ISL_779322, EPI_ISL_779323, EPI_ISL_779324, EPI_ISL_779325, EPI_ISL_779326, EPI_ISL_779327, EPI_ISL_779328, EPI_ISL_779329, EPI_ISL_779330, EPI_ISL_779331, EPI_ISL_779332, EPI_ISL_779333, EPI_ISL_779334, EPI_ISL_779335, EPI_ISL_779336, EPI_ISL_779337, EPI_ISL_779338, EPI_ISL_779339, EPI_ISL_779340, EPI_ISL_779341, EPI_ISL_779342, EPI_ISL_779343, EPI_ISL_779344, EPI_ISL_779345, EPI_ISL_779346, EPI_ISL_779347, EPI_ISL_779348, EPI_ISL_779349, EPI_ISL_779350, EPI_ISL_779351, EPI_ISL_779352, EPI_ISL_779353, EPI_ISL_779354, EPI_ISL_779355, EPI_ISL_779356, EPI_ISL_779357, EPI_ISL_779358, EPI_ISL_779359, EPI_ISL_779360, EPI_ISL_779361, EPI_ISL_779362, EPI_ISL_779363, EPI_ISL_779364, EPI_ISL_779365, EPI_ISL_779366, EPI_ISL_779367, EPI_ISL_779368, EPI_ISL_779369, EPI_ISL_779370, EPI_ISL_779371, EPI_ISL_779372, EPI_ISL_779373, EPI_ISL_779374, EPI_ISL_779375, EPI_ISL_779376, EPI_ISL_779377, EPI_ISL_779378, EPI_ISL_779379, EPI_ISL_779380, EPI_ISL_779381, EPI_ISL_779382, EPI_ISL_779383, EPI_ISL_779384, EPI_ISL_779385, EPI_ISL_779386, EPI_ISL_779387, EPI_ISL_779388, EPI_ISL_779389, EPI_ISL_779390, EPI_ISL_779391, EPI_ISL_779392, EPI_ISL_779393, EPI_ISL_779394, EPI_ISL_779395, EPI_ISL_779396, EPI_ISL_779397, EPI_ISL_779398, EPI_ISL_779399, EPI_ISL_779400, EPI_ISL_779401, EPI_ISL_779402, EPI_ISL_779403, EPI_ISL_779404, EPI_ISL_779405, EPI_ISL_779406, EPI_ISL_779407, EPI_ISL_779408, EPI_ISL_779409, EPI_ISL_779410, EPI_ISL_779411, EPI_ISL_779412, EPI_ISL_779413, EPI_ISL_779414, EPI_ISL_779415, EPI_ISL_779416, EPI_ISL_779417, EPI_ISL_779418, EPI_ISL_779419, EPI_ISL_779420, EPI_ISL_779421, EPI_ISL_779422, EPI_ISL_779423, EPI_ISL_779424, EPI_ISL_779425, EPI_ISL_779426, EPI_ISL_779427, EPI_ISL_779428, EPI_ISL_779429, EPI_ISL_779430, EPI_ISL_779431, EPI_ISL_779432, EPI_ISL_779433, EPI_ISL_779434, EPI_ISL_779435, EPI_ISL_779436, EPI_ISL_779437, EPI_ISL_779438, EPI_ISL_779439, EPI_ISL_779440, EPI_ISL_779441, EPI_ISL_779442, EPI_ISL_779443, EPI_ISL_779444, EPI_ISL_779445, EPI_ISL_779446, EPI_ISL_779447, EPI_ISL_779448, EPI_ISL_779449, EPI_ISL_779450, EPI_ISL_779451, EPI_ISL_779452, EPI_ISL_779453, EPI_ISL_779454, EPI_ISL_779455, EPI_ISL_779456, EPI_ISL_779457, EPI_ISL_779458, EPI_ISL_779459, EPI_ISL_779460, EPI_ISL_779461, EPI_ISL_779462, EPI_ISL_779463, EPI_ISL_779464, EPI_ISL_779465, EPI_ISL_779466, EPI_ISL_779467, EPI_ISL_779468, EPI_ISL_779469, EPI_ISL_779470, EPI_ISL_779471, EPI_ISL_779472, EPI_ISL_779473, EPI_ISL_779474, EPI_ISL_779475, EPI_ISL_779476, EPI_ISL_779477, EPI_ISL_779478, EPI_ISL_779479, EPI_ISL_779480, EPI_ISL_779481, EPI_ISL_779482, EPI_ISL_779483, EPI_ISL_779484, EPI_ISL_779485, EPI_ISL_779486, EPI_ISL_779487, EPI_ISL_779488, EPI_ISL_779489, EPI_ISL_779490, EPI_ISL_779491, EPI_ISL_779492, EPI_ISL_779493, EPI_ISL_779494, EPI_ISL_779495, EPI_ISL_779496, EPI_ISL_779497, EPI_ISL_779498, EPI_ISL_779499, EPI_ISL_779500, EPI_ISL_779501, EPI_ISL_779502, EPI_ISL_779503, EPI_ISL_779504, EPI_ISL_779505, EPI_ISL_779506, EPI_ISL_779507, EPI_ISL_779508, EPI_ISL_779509, EPI_ISL_779510, EPI_ISL_779511, EPI_ISL_779512, EPI_ISL_779513, EPI_ISL_779514, EPI_ISL_779515, EPI_ISL_779516, EPI_ISL_779517, EPI_ISL_779518, EPI_ISL_779519, EPI_ISL_779520, EPI_ISL_779521, EPI_ISL_779522, EPI_ISL_779523, EPI_ISL_779524, EPI_ISL_779525, EPI_ISL_779526, EPI_ISL_779527, EPI_ISL_779528, EPI_ISL_779529, EPI_ISL_779530, EPI_ISL_779531, EPI_ISL_779532, EPI_ISL_779533, EPI_ISL_779534, EPI_ISL_779535, EPI_ISL_779536, EPI_ISL_779537, EPI_ISL_779538, EPI_ISL_779539, EPI_ISL_779540, EPI_ISL_779541, EPI_ISL_779542, EPI_ISL_779543, EPI_ISL_779544, EPI_ISL_779545, EPI_ISL_779546 | Instituto de Patologia Vegetal (CIAP-INTA) on behalf of 'Proyecto Argentino Interinstitucional de genómica de SARS-CoV-2' (PAIS Consortium) | Fernández, FD; Debat, HJ., Re, V; Pisano, MB; Castro, G.; Barbas, G.                                                              |                                                                                                                                                                                                                                                                                                                                                                                                                                                                              |
| EPI_ISL_802864, EPI_ISL_802865, EPI_ISL_802866, EPI_ISL_802867, EPI_ISL_802869, EPI_ISL_802870, EPI_ISL_802871, EPI_ISL_802873, EPI_ISL_802874, EPI_ISL_802875, EPI_ISL_802876, EPI_ISL_802878, EPI_ISL_802879, EPI_ISL_802880, EPI_ISL_802881, EPI_ISL_802882, EPI_ISL_802883, EPI_ISL_802884, EPI_ISL_802885, EPI_ISL_802886, EPI_ISL_802887, EPI_ISL_802889, EPI_ISL_802890, EPI_ISL_802891, EPI_ISL_802892, EPI_ISL_802893, EPI_ISL_802894, EPI_ISL_802895, EPI_ISL_802896, EPI_ISL_802897, EPI_ISL_802898, EPI_ISL_802899, EPI_ISL_802900, EPI_ISL_802901, EPI_ISL_802902, EPI_ISL_802903, EPI_ISL_802904, EPI_ISL_802905, EPI_ISL_802906, EPI_ISL_802907, EPI_ISL_802908, EPI_ISL_802909, EPI_ISL_802910, EPI_ISL_802911, EPI_ISL_802912, EPI_ISL_802913, EPI_ISL_802914, EPI_ISL_802915, EPI_ISL_802916, EPI_ISL_802917, EPI_ISL_802918, EPI_ISL_802919, EPI_ISL_802920, EPI_ISL_802921, EPI_ISL_802922, EPI_ISL_802923, EPI_ISL_802924, EPI_ISL_802925, EPI_ISL_802926, EPI_ISL_802927, EPI_ISL_802928, EPI_ISL_802929, EPI_ISL_802930, EPI_ISL_802931, EPI_ISL_802932, EPI_ISL_802933, EPI_ISL_802934, EPI_ISL_802935, EPI_ISL_802936, EPI_ISL_802937, EPI_ISL_802938, EPI_ISL_802939, EPI_ISL_802940, EPI_ISL_802941, EPI_ISL_802942, EPI_ISL_802943, EPI_ISL_802944, EPI_ISL_802945, EPI_ISL_802946, EPI_ISL_802947, EPI_ISL_802948, EPI_ISL_802949, EPI_ISL_802950, EPI_ISL_802951, EPI_ISL_802952, EPI_ISL_802953, EPI_ISL_802954, EPI_ISL_802955, EPI_ISL_802956, EPI_ISL_802957, EPI_ISL_802958, EPI_ISL_802959, EPI_ISL_802960, EPI_ISL_802961, EPI_ISL_802962, EPI_ISL_802963, EPI_ISL_802964, EPI_ISL_802965, EPI_ISL_802966, EPI_ISL_802967, EPI_ISL_802968, EPI_ISL_802969, EPI_ISL_802970, EPI_ISL_802971, EPI_ISL_802972, EPI_ISL_802973, EPI_ISL_802974, EPI_ISL_802975, EPI_ISL_802976, EPI_ISL_802977, EPI_ISL_802978, EPI_ISL_802979, EPI_ISL_802980, EPI_ISL_802981, EPI_ISL_802982, EPI_ISL_802983, EPI_ISL_802984, EPI_ISL_802985, EPI_ISL_802986, EPI_ISL_802987, EPI_ISL_802988, EPI_ISL_802989, EPI_ISL_802990, EPI_ISL_802991, EPI_ISL_802992, EPI_ISL_802993                                                                                                                                                                                                                                                                                                                                                                                                                                                                                                                                                                                                                                                                                                                                                                                                                                                                                                                                                                                                                                                                                                                                                                                                                                                                                                                                                                                                                                                                                                                                                                                                                                                                                                 | Utah Public Health Laboratory                                                                                                               | Utah Public Health Laboratory                                                                                                     | Erin Young, Kelly Oakeson, Tara Gallagher                                                                                                                                                                                                                                                                                                                                                                                                                                    |
| EPI_ISL_803897                                                                                                                                                                                                                                                                                                                                                                                                                                                                                                                                                                                                                                                                                                                                                                                                                                                                                                                                                                                                                                                                                                                                                                                                                                                                                                                                                                                                                                                                                                                                                                                                                                                                                                                                                                                                                                                                                                                                                                                                                                                                                                                                                                                                                                                                                                                                                                                                                                                                                                                                                                                                                                                                                                                                                                                                                                                                                                                                                                                                                                                                                                                                                                                                                                                                                                                                                                                                                                                                                                                                                                                                                                                                                                                                                                                 | National Institute for Infectious Diseases, INMI, "L. Spallanzani" IRCCS                                                                    | National Institute for Infectious Diseases, INMI, "L. Spallanzani" IRCCS                                                          | F Messina, O Butera, E Giombini, M Rueca, B Bartolini, C.E.M Gruber, MR Capobianchi, A Di Caro                                                                                                                                                                                                                                                                                                                                                                               |
| EPI_ISL_811136, EPI_ISL_811137, EPI_ISL_811138, EPI_ISL_811139, EPI_ISL_811140, EPI_ISL_811141, EPI_ISL_811142, EPI_ISL_811143                                                                                                                                                                                                                                                                                                                                                                                                                                                                                                                                                                                                                                                                                                                                                                                                                                                                                                                                                                                                                                                                                                                                                                                                                                                                                                                                                                                                                                                                                                                                                                                                                                                                                                                                                                                                                                                                                                                                                                                                                                                                                                                                                                                                                                                                                                                                                                                                                                                                                                                                                                                                                                                                                                                                                                                                                                                                                                                                                                                                                                                                                                                                                                                                                                                                                                                                                                                                                                                                                                                                                                                                                                                                 | Ministry of Health Turkey                                                                                                                   | Ministry of Health Turkey                                                                                                         | Fatma Bayraktar, Yasemin Cogun, Süleyman Yalcin, Aye Baak Alta, Gülay Korkukluolu                                                                                                                                                                                                                                                                                                                                                                                            |
| EPI_ISL_812347                                                                                                                                                                                                                                                                                                                                                                                                                                                                                                                                                                                                                                                                                                                                                                                                                                                                                                                                                                                                                                                                                                                                                                                                                                                                                                                                                                                                                                                                                                                                                                                                                                                                                                                                                                                                                                                                                                                                                                                                                                                                                                                                                                                                                                                                                                                                                                                                                                                                                                                                                                                                                                                                                                                                                                                                                                                                                                                                                                                                                                                                                                                                                                                                                                                                                                                                                                                                                                                                                                                                                                                                                                                                                                                                                                                 | Area of Virology, Serology and Virology Division (SAVID), New South Wales Health Pathology Randwick                                         | Virology Research Laboratory; Area of Virology, Serology and Virology Division (SAVID), New South Wales Health Pathology Randwick | Foster, C.; Au, J.; Ruiz Silva, M.; Deveson, I.; Bull, R.; Van Hal, S.; Rawlinson, W.                                                                                                                                                                                                                                                                                                                                                                                        |
| EPI_ISL_812348                                                                                                                                                                                                                                                                                                                                                                                                                                                                                                                                                                                                                                                                                                                                                                                                                                                                                                                                                                                                                                                                                                                                                                                                                                                                                                                                                                                                                                                                                                                                                                                                                                                                                                                                                                                                                                                                                                                                                                                                                                                                                                                                                                                                                                                                                                                                                                                                                                                                                                                                                                                                                                                                                                                                                                                                                                                                                                                                                                                                                                                                                                                                                                                                                                                                                                                                                                                                                                                                                                                                                                                                                                                                                                                                                                                 | University of Wisconsin-Madison AIDS Vaccine Research Laboratories                                                                          | University of Wisconsin-Madison AIDS Vaccine Research Laboratories                                                                | Gage Moreno, Katarina Braun, et al. AIDS Vaccine Research Laboratories                                                                                                                                                                                                                                                                                                                                                                                                       |
| EPI_ISL_812359                                                                                                                                                                                                                                                                                                                                                                                                                                                                                                                                                                                                                                                                                                                                                                                                                                                                                                                                                                                                                                                                                                                                                                                                                                                                                                                                                                                                                                                                                                                                                                                                                                                                                                                                                                                                                                                                                                                                                                                                                                                                                                                                                                                                                                                                                                                                                                                                                                                                                                                                                                                                                                                                                                                                                                                                                                                                                                                                                                                                                                                                                                                                                                                                                                                                                                                                                                                                                                                                                                                                                                                                                                                                                                                                                                                 | Area of Virology, Serology and Virology Division (SAVID), New South Wales Health Pathology Randwick                                         | Virology Research Laboratory; Area of Virology, Serology and Virology Division (SAVID), New South Wales Health Pathology Randwick | Foster, C.; Au, J.; Ruiz Silva, M.; Deveson, I.; Bull, R.; Van Hal, S.; Rawlinson, W.                                                                                                                                                                                                                                                                                                                                                                                        |





|                                                                                                                                                                                                                                                                                                                                                                                                                                                                                |                                                                                                |                                                                                                                          |                                                                                                                                                                                    |
|--------------------------------------------------------------------------------------------------------------------------------------------------------------------------------------------------------------------------------------------------------------------------------------------------------------------------------------------------------------------------------------------------------------------------------------------------------------------------------|------------------------------------------------------------------------------------------------|--------------------------------------------------------------------------------------------------------------------------|------------------------------------------------------------------------------------------------------------------------------------------------------------------------------------|
| EPI_ISL_872868, EPI_ISL_872869, EPI_ISL_872870, EPI_ISL_872871, EPI_ISL_872872, EPI_ISL_872873, EPI_ISL_872874, EPI_ISL_872875, EPI_ISL_872876, EPI_ISL_872877, EPI_ISL_872878, EPI_ISL_872879, EPI_ISL_872880, EPI_ISL_872881, EPI_ISL_872882, EPI_ISL_872883, EPI_ISL_872884, EPI_ISL_872885, EPI_ISL_872886, EPI_ISL_872887, EPI_ISL_872888, EPI_ISL_872889, EPI_ISL_872890, EPI_ISL_872891, EPI_ISL_872892, EPI_ISL_872893, EPI_ISL_872894, EPI_ISL_872895, EPI_ISL_872896 | University of Wisconsin-Madison AIDS Vaccine Research Laboratories                             | University of Wisconsin-Madison AIDS Vaccine Research Laboratories                                                       | Gage Moreno, Katarina Braun, et al. AIDS Vaccine Research Laboratories                                                                                                             |
| see above                                                                                                                                                                                                                                                                                                                                                                                                                                                                      |                                                                                                |                                                                                                                          |                                                                                                                                                                                    |
| EPI_ISL_873166, EPI_ISL_873167, EPI_ISL_873168, EPI_ISL_873169, EPI_ISL_873170, EPI_ISL_873171, EPI_ISL_873172, EPI_ISL_873173, EPI_ISL_873174, EPI_ISL_873175, EPI_ISL_873176, EPI_ISL_873177, EPI_ISL_873178, EPI_ISL_873179, EPI_ISL_873180, EPI_ISL_873181, EPI_ISL_873182, EPI_ISL_873183, EPI_ISL_873184, EPI_ISL_873185, EPI_ISL_873186, EPI_ISL_873187, EPI_ISL_873188, EPI_ISL_873189, EPI_ISL_873190, EPI_ISL_873191, EPI_ISL_873192, EPI_ISL_873193                 | Microbiology Division, South Carolina Department of Health and Environmental Control (SC DHEC) | Microbiology Division, South Carolina Department of Health and Environmental Control (SC DHEC)                           | Flores,H., Freeman,J.                                                                                                                                                              |
| see above                                                                                                                                                                                                                                                                                                                                                                                                                                                                      |                                                                                                |                                                                                                                          |                                                                                                                                                                                    |
| EPI_ISL_882924, EPI_ISL_882928, EPI_ISL_882932                                                                                                                                                                                                                                                                                                                                                                                                                                 | INMI Lazzaro Spallanzani IRCCS                                                                 | INMI Lazzaro Spallanzani IRCCS                                                                                           | F Messina, O Butera, E Giombini, M Rueca, B Bartolini, C.E.M Gruber, MR Capobianchi, A Di Caro                                                                                     |
| EPI_ISL_882935                                                                                                                                                                                                                                                                                                                                                                                                                                                                 | Sant'Eugenio/CTO ASL Roma 2                                                                    | INMI Lazzaro Spallanzani IRCCS                                                                                           | F Messina, O Butera, E Giombini, M Rueca, B Bartolini, C.E.M Gruber, F Bondanini, C Disegni, GC Cocciofillo, MR Capobianchi, A Di Caro                                             |
| EPI_ISL_882937                                                                                                                                                                                                                                                                                                                                                                                                                                                                 | Azienda Ospedaliera San Giovanni Addolorata                                                    | INMI Lazzaro Spallanzani IRCCS                                                                                           | F Messina, O Butera, E Giombini, M Rueca, B Bartolini, C.E.M Gruber, M Gaudio, PM Placanica, MR Capobianchi, A Di Caro                                                             |
| EPI_ISL_888987                                                                                                                                                                                                                                                                                                                                                                                                                                                                 | RS Citra Medika Depok                                                                          | Eijkman Institute for Molecular Biology, Ministry of Research and Technology/National Agency for Research and Innovation | Frilasita A Yudhaputri, Hidayat Trimarsanto, Iskandar Adnan, Lydia V. Panggalo, Sukma Oktavianthi, Willy Agustine, Edison Johar, Safarina G Malik, Khin Saw Myint, Amin Soebandrio |
| EPI_ISL_888988                                                                                                                                                                                                                                                                                                                                                                                                                                                                 | RS Qadr                                                                                        | Eijkman Institute for Molecular Biology, Ministry of Research and Technology/National Agency for Research and Innovation | Frilasita A Yudhaputri, Hidayat Trimarsanto, Iskandar Adnan, Lydia V. Panggalo, Sukma Oktavianthi, Willy Agustine, Edison Johar, Safarina G Malik, Khin Saw Myint, Amin Soebandrio |
| EPI_ISL_888989, EPI_ISL_888990                                                                                                                                                                                                                                                                                                                                                                                                                                                 | RS Pondok Indah Bintaro Jaya                                                                   | Eijkman Institute for Molecular Biology, Ministry of Research and Technology/National Agency for Research and Innovation | Frilasita A Yudhaputri, Hidayat Trimarsanto, Iskandar Adnan, Lydia V. Panggalo, Sukma Oktavianthi, Willy Agustine, Edison Johar, Safarina G Malik, Khin Saw Myint, Amin Soebandrio |
| EPI_ISL_888991                                                                                                                                                                                                                                                                                                                                                                                                                                                                 | RS Mitra Keluarga Gading Serpong                                                               | Eijkman Institute for Molecular Biology, Ministry of Research and Technology/National Agency for Research and Innovation | Frilasita A Yudhaputri, Hidayat Trimarsanto, Iskandar Adnan, Lydia V. Panggalo, Sukma Oktavianthi, Willy Agustine, Edison Johar, Safarina G Malik, Khin Saw Myint, Amin Soebandrio |
| EPI_ISL_889010                                                                                                                                                                                                                                                                                                                                                                                                                                                                 | RSU Medika Dramaga                                                                             | Eijkman Institute for Molecular Biology, Ministry of Research and Technology/National Agency for Research and Innovation | Frilasita A Yudhaputri, Hidayat Trimarsanto, Iskandar Adnan, Lydia V. Panggalo, Sukma Oktavianthi, Willy Agustine, Edison Johar, Safarina G Malik, Khin Saw Myint, Amin Soebandrio |
| EPI_ISL_891145, EPI_ISL_891146, EPI_ISL_891147, EPI_ISL_891148, EPI_ISL_891149, EPI_ISL_891150                                                                                                                                                                                                                                                                                                                                                                                 | University of Wisconsin-Madison AIDS Vaccine Research Laboratories                             | University of Wisconsin-Madison AIDS Vaccine Research Laboratories                                                       | Gage Moreno, Katarina Braun, et al. AIDS Vaccine Research Laboratories                                                                                                             |

We gratefully acknowledge the following Authors from the Originating laboratories responsible for obtaining the specimens, as well as the Submitting laboratories where the genome data were generated and shared via GISAID, on which this research is based.

All Submitters of data may be contacted directly via [www.gisaid.org](http://www.gisaid.org)

Authors are sorted alphabetically.

| Accession ID                                                                                                   | Originating Laboratory                                                                                                                                                                                                         | Submitting Laboratory                                                                                                                                                                                                          | Authors                                                                                                                                                                                                                                                                                                                                                                                                                                                                                                                                                          |
|----------------------------------------------------------------------------------------------------------------|--------------------------------------------------------------------------------------------------------------------------------------------------------------------------------------------------------------------------------|--------------------------------------------------------------------------------------------------------------------------------------------------------------------------------------------------------------------------------|------------------------------------------------------------------------------------------------------------------------------------------------------------------------------------------------------------------------------------------------------------------------------------------------------------------------------------------------------------------------------------------------------------------------------------------------------------------------------------------------------------------------------------------------------------------|
| EPI_ISL_413598                                                                                                 | Centre for Infectious Diseases and Microbiology - Public Health                                                                                                                                                                | NSW Health Pathology - Institute of Clinical Pathology and Medical Research; Westmead Hospital; University of Sydney                                                                                                           | Gray K, Eden J-S, Lam C, Rockett R, Timms, V, Gall, M, Carter I, Rahman H, Holmes EC, O'Sullivan MV, Sintchenko V, Chen SC, Maddocks S, Kok J and Dwyer DE for the 2019-nCoV Study Group*                                                                                                                                                                                                                                                                                                                                                                        |
| EPI_ISL_414476                                                                                                 | MSHS Clinical Microbiology Laboratories                                                                                                                                                                                        | MSHS Pathogen Surveillance Program                                                                                                                                                                                             | Gopi Patel, Emilia Sordillo, Melissa Gitman, Alberto Paniz-mondolfi, Matthew Hernandez, Shelcie Fabre, Jose Polanco, Ana Sylvia Gonzalez-Reiche, Zenab Khan, Nancy Francoeur, Melissa Smith, Robert Sebra, Lisa Miorin, Wen-chun Liu, Randy Albrecht, Judith Aberg, Florian Krammer, Adolfo Garcia-Sarstre, Viviana Simon, Harm van Bakel                                                                                                                                                                                                                        |
| EPI_ISL_415151                                                                                                 | MSHS Clinical Microbiology Laboratories                                                                                                                                                                                        | MSHS Pathogen Surveillance Program                                                                                                                                                                                             | Gopi Patel, Emilia Sordillo, Melissa Gitman, Alberto Paniz-mondolfi, Matthew Hernandez, Shelcie Fabre, Jose Polanco, Ana Silvia Gonzalez-Reiche, Zenab Khan, Nancy Francoeur, Melissa Smith, Robert Sebra, Lisa Miorin, Wen-chun Liu, Randy Albrecht, Judith Aberg, Florian Krammer, Adolfo Garcia-Sarstre, Viviana Simon, Harm van Bakel                                                                                                                                                                                                                        |
| EPI_ISL_415709, EPI_ISL_415711, EPI_ISL_416042                                                                 | State Key Laboratory for Diagnosis and Treatment of Infectious Diseases, National Clinical Research Center for Infectious Diseases, First Affiliated Hospital, Zhejiang University School of Medicine, Hangzhou, China. 310003 | State Key Laboratory for Diagnosis and Treatment of Infectious Diseases, National Clinical Research Center for Infectious Diseases, First Affiliated Hospital, Zhejiang University School of Medicine, Hangzhou, China. 310003 | Hangping Yao, Nanping Wu, Chao Jiang, Xiangyun Lu, Linfang Cheng, Fumin Liu, Zhigang Wu, Haibo Wu, Changzhong Jin, Min Zheng, Lanjuan Li                                                                                                                                                                                                                                                                                                                                                                                                                         |
| EPI_ISL_416044, EPI_ISL_416046, EPI_ISL_416047, EPI_ISL_416425, EPI_ISL_416473, EPI_ISL_416474                 | State Key Laboratory for Diagnosis and Treatment of Infectious Diseases, National Clinical Research Center for Infectious Diseases, First Affiliated Hospital, Zhejiang University School of Medicine, Hangzhou, China 310003  | State Key Laboratory for Diagnosis and Treatment of Infectious Diseases, National Clinical Research Center for Infectious Diseases, First Affiliated Hospital, Zhejiang University School of Medicine, Hangzhou, China 310003  | Hangping Yao, Nanping Wu, Chao Jiang, Xiangyun Lu, Linfang Cheng, Fumin Liu, Zhigang Wu, Haibo Wu, Changzhong Jin, Min Zheng, Lanjuan Li                                                                                                                                                                                                                                                                                                                                                                                                                         |
| EPI_ISL_416481                                                                                                 | R. G. Lugar Center for Public Health Research, National Center for Disease Control and Public Health (NCDC) of Georgia.                                                                                                        | R. G. Lugar Center for Public Health Research, National Center for Disease Control and Public Health (NCDC) of Georgia.                                                                                                        | Gvantsa Chanturia, Marine Murtskhaladze, Nato Kotaria, Ann Machablashvili, Lela Sabadze, Mari Gavashelidze, Ana Papkiauri, Meri Pantsulaia, Gvantsa Brachveli, Tata Imnadze, Tamar Jashlashvili, Tea Tevdoradze, Ketevan Sidamonidze, Ekaterine Khmaladze, Ekaterine Zhghenti, Roena Sukhlishvili, Mariam Zakalashvili, Lela Urushadze, Magda Dgebuadze, Giorgi Tomashvili, Davit Tsaguria, Ekaterine Zangaladze, Nino Berishvili, Adam Kotorashvili, Maia Alkhasashvili, Irma Burjanadze, Anna Kasradze, Khatuna Zakhshvili, Paata Imnadze, Amiran Gamkrelidze. |
| EPI_ISL_416485                                                                                                 | Servicio de Microbiología. Consorcio Hospital General Universitario de Valencia                                                                                                                                                | Sequencing and Bioinformatics Service and Molecular Epidemiology Research Group. FISABIO-Public Health                                                                                                                         | Griselda De Marco, Neris Garcia-Gonzalez, Maria Alma Bracho, Maria Dolores Ocete, Concepcion Gimeno, Giuseppe D'Auria, Fernando Gonzalez-Candelas                                                                                                                                                                                                                                                                                                                                                                                                                |
| EPI_ISL_416487                                                                                                 | Servicio de Microbiología. Consorcio Hospital General Universitario de Valencia                                                                                                                                                | Sequencing and Bioinformatics Service and Molecular Epidemiology Research Group. FISABIO-Public Health                                                                                                                         | Giuseppe D'Auria, Griselda De Marco, Neris Garcia-Gonzalez, Maria Alma Bracho, Maria Dolores Ocete, Concepcion Gimeno, Fernando Gonzalez-Candelas                                                                                                                                                                                                                                                                                                                                                                                                                |
| EPI_ISL_417386, EPI_ISL_417403                                                                                 | Centre for Infectious Diseases and Microbiology Public Health                                                                                                                                                                  | NSW Health Pathology - Institute of Clinical Pathology and Medical Research; Westmead Hospital; University of Sydney                                                                                                           | Gray K, Timms V, Gall M, Arnott A, Sadsad R, Carter I, Rahman H, Holmes EC, O'Sullivan MV, Sintchenko V, Chen SC, Maddocks S, Kok J, Dwyer DE, Rockett R, Eden J-S and Lam C for the 2019-nCoV Study Group                                                                                                                                                                                                                                                                                                                                                       |
| EPI_ISL_417445, EPI_ISL_417446, EPI_ISL_417447                                                                 | Laboratory of Infectious Diseases, Department of Biomedical and Clinical Sciences L. Sacco, University of Milan                                                                                                                | Laboratory of Infectious Diseases, Department of Biomedical and Clinical Sciences L. Sacco, University of Milan                                                                                                                | Giangueliemo Zehender, Alessia Lai, Annalisa Bergna, Luca Meroni, Agostino Riva, Claudia Balotta, Maciej Tarkowski, Arianna Gabrieli, Dario Bernacchia, Stefano Rusconi, Giuliano Rizzardini, Spinello Antinori, Massimo Galli                                                                                                                                                                                                                                                                                                                                   |
| EPI_ISL_417986, EPI_ISL_417987                                                                                 | Centro Hospitalar e Universitário de Sao Joao, Porto                                                                                                                                                                           | Instituto Nacional de Saude (INSA)                                                                                                                                                                                             | Guiomar et al                                                                                                                                                                                                                                                                                                                                                                                                                                                                                                                                                    |
| EPI_ISL_417988                                                                                                 | CHULC - H Curry Cabral                                                                                                                                                                                                         | Instituto Nacional de Saude (INSA)                                                                                                                                                                                             | Guiomar et al                                                                                                                                                                                                                                                                                                                                                                                                                                                                                                                                                    |
| EPI_ISL_417989                                                                                                 | Centro Hospitalar e Universitário de Sao Joao, Porto                                                                                                                                                                           | Instituto Nacional de Saude (INSA)                                                                                                                                                                                             | Guiomar et al                                                                                                                                                                                                                                                                                                                                                                                                                                                                                                                                                    |
| EPI_ISL_417990, EPI_ISL_417991                                                                                 | CHULC - H Curry Cabral                                                                                                                                                                                                         | Instituto Nacional de Saude (INSA)                                                                                                                                                                                             | Guiomar et al                                                                                                                                                                                                                                                                                                                                                                                                                                                                                                                                                    |
| EPI_ISL_417992, EPI_ISL_417993                                                                                 | CHULC - H D Estefania                                                                                                                                                                                                          | Instituto Nacional de Saude (INSA)                                                                                                                                                                                             | Guiomar et al                                                                                                                                                                                                                                                                                                                                                                                                                                                                                                                                                    |
| EPI_ISL_417994, EPI_ISL_417995, EPI_ISL_417996                                                                 | CHULC - H Curry Cabral                                                                                                                                                                                                         | Instituto Nacional de Saude (INSA)                                                                                                                                                                                             | Guiomar et al                                                                                                                                                                                                                                                                                                                                                                                                                                                                                                                                                    |
| EPI_ISL_417997, EPI_ISL_417998, EPI_ISL_417999                                                                 | Centro Hospital do Porto, E.P.E. - H. Geral de Santo Antonio                                                                                                                                                                   | Instituto Nacional de Saude (INSA)                                                                                                                                                                                             | Guiomar et al                                                                                                                                                                                                                                                                                                                                                                                                                                                                                                                                                    |
| EPI_ISL_418000, EPI_ISL_418001                                                                                 | ARS Algarve - Laboratório Laura Ayres                                                                                                                                                                                          | Instituto Nacional de Saude (INSA)                                                                                                                                                                                             | Guiomar et al                                                                                                                                                                                                                                                                                                                                                                                                                                                                                                                                                    |
| EPI_ISL_418002                                                                                                 | CHU Coimbra                                                                                                                                                                                                                    | Instituto Nacional de Saude (INSA)                                                                                                                                                                                             | Guiomar et al                                                                                                                                                                                                                                                                                                                                                                                                                                                                                                                                                    |
| EPI_ISL_418003                                                                                                 | H Braga                                                                                                                                                                                                                        | Instituto Nacional de Saude (INSA)                                                                                                                                                                                             | Guiomar et al                                                                                                                                                                                                                                                                                                                                                                                                                                                                                                                                                    |
| EPI_ISL_418004                                                                                                 | ARS Algarve - Laboratório Laura Ayres                                                                                                                                                                                          | Instituto Nacional de Saude (INSA)                                                                                                                                                                                             | Guiomar et al                                                                                                                                                                                                                                                                                                                                                                                                                                                                                                                                                    |
| EPI_ISL_418005                                                                                                 | CHU Coimbra - Pediátrico                                                                                                                                                                                                       | Instituto Nacional de Saude (INSA)                                                                                                                                                                                             | Guiomar et al                                                                                                                                                                                                                                                                                                                                                                                                                                                                                                                                                    |
| EPI_ISL_418006                                                                                                 | CHBarreiro Montijo                                                                                                                                                                                                             | Instituto Nacional de Saude (INSA)                                                                                                                                                                                             | Guiomar et al                                                                                                                                                                                                                                                                                                                                                                                                                                                                                                                                                    |
| EPI_ISL_418007, EPI_ISL_418008                                                                                 | H Braga                                                                                                                                                                                                                        | Instituto Nacional de Saude (INSA)                                                                                                                                                                                             | Guiomar et al                                                                                                                                                                                                                                                                                                                                                                                                                                                                                                                                                    |
| EPI_ISL_418009                                                                                                 | HSE Ilha Terceira - Angra do Heroismo                                                                                                                                                                                          | Instituto Nacional de Saude (INSA)                                                                                                                                                                                             | Guiomar et al                                                                                                                                                                                                                                                                                                                                                                                                                                                                                                                                                    |
| EPI_ISL_418010, EPI_ISL_418011, EPI_ISL_418012, EPI_ISL_418013, EPI_ISL_418014, EPI_ISL_418015, EPI_ISL_418016 | CHULC - H Curry Cabral                                                                                                                                                                                                         | Instituto Nacional de Saude (INSA)                                                                                                                                                                                             | Guiomar et al                                                                                                                                                                                                                                                                                                                                                                                                                                                                                                                                                    |
| EPI_ISL_418017                                                                                                 | CHMT                                                                                                                                                                                                                           | Instituto Nacional de Saude (INSA)                                                                                                                                                                                             | Guiomar et al                                                                                                                                                                                                                                                                                                                                                                                                                                                                                                                                                    |
| EPI_ISL_418018                                                                                                 | H Garcia de Orta                                                                                                                                                                                                               | Instituto Nacional de Saude (INSA)                                                                                                                                                                                             | Guiomar et al                                                                                                                                                                                                                                                                                                                                                                                                                                                                                                                                                    |
| EPI_ISL_418019, EPI_ISL_418020, EPI_ISL_418021, EPI_ISL_418022                                                 | H Braga                                                                                                                                                                                                                        | Instituto Nacional de Saude (INSA)                                                                                                                                                                                             | Guiomar et al                                                                                                                                                                                                                                                                                                                                                                                                                                                                                                                                                    |
| EPI_ISL_418023                                                                                                 | H Evora                                                                                                                                                                                                                        | Instituto Nacional de Saude (INSA)                                                                                                                                                                                             | Guiomar et al                                                                                                                                                                                                                                                                                                                                                                                                                                                                                                                                                    |
| EPI_ISL_418024                                                                                                 | CHUA - Faro                                                                                                                                                                                                                    | Instituto Nacional de Saude (INSA)                                                                                                                                                                                             | Guiomar et al                                                                                                                                                                                                                                                                                                                                                                                                                                                                                                                                                    |
| EPI_ISL_418025                                                                                                 | H Santarem                                                                                                                                                                                                                     | Instituto Nacional de Saude (INSA)                                                                                                                                                                                             | Guiomar et al                                                                                                                                                                                                                                                                                                                                                                                                                                                                                                                                                    |
| EPI_ISL_418026                                                                                                 | H Dr. Nelió Mendonca - Funchal                                                                                                                                                                                                 | Instituto Nacional de Saude (INSA)                                                                                                                                                                                             | Guiomar et al                                                                                                                                                                                                                                                                                                                                                                                                                                                                                                                                                    |
| EPI_ISL_418027                                                                                                 | CHTMAD                                                                                                                                                                                                                         | Instituto Nacional de Saude (INSA)                                                                                                                                                                                             | Guiomar et al                                                                                                                                                                                                                                                                                                                                                                                                                                                                                                                                                    |

|                                                                                                                |                                                                                                                                                                                                                               |                                                                                                                                                                                                                               |                                                                                                                                                                                                                                                                                                                                                                                                                                                                                                                                                                 |
|----------------------------------------------------------------------------------------------------------------|-------------------------------------------------------------------------------------------------------------------------------------------------------------------------------------------------------------------------------|-------------------------------------------------------------------------------------------------------------------------------------------------------------------------------------------------------------------------------|-----------------------------------------------------------------------------------------------------------------------------------------------------------------------------------------------------------------------------------------------------------------------------------------------------------------------------------------------------------------------------------------------------------------------------------------------------------------------------------------------------------------------------------------------------------------|
| EPI_ISL_418990, EPI_ISL_418991                                                                                 | State Key Laboratory for Diagnosis and Treatment of Infectious Diseases, National Clinical Research Center for Infectious Diseases, First Affiliated Hospital, Zhejiang University School of Medicine, Hangzhou, China 310003 | State Key Laboratory for Diagnosis and Treatment of Infectious Diseases, National Clinical Research Center for Infectious Diseases, First Affiliated Hospital, Zhejiang University School of Medicine, Hangzhou, China 310003 | Hangping Yao, Nanping Wu, Chao Jiang, Xiangyun Lu, Linfang Cheng, Fumin Liu, Zhigang Wu, Haibo Wu, Changzhong Jin, Min Zheng, Lanjuan Li                                                                                                                                                                                                                                                                                                                                                                                                                        |
| EPI_ISL_419677                                                                                                 | Servicio de Microbiología. Consorcio Hospital General Universitario de Valencia                                                                                                                                               | Sequencing and Bioinformatics Service and Molecular Epidemiology Research Group. FISABIO-Public Health                                                                                                                        | Giuseppe D'Auria, Griselda De Marco, Neris Garcia-Gonzalez, Maria Alma Bracho, Maria Dolores Ocete, Concepcion Gimeno, Fernando Gonzalez-Candelas                                                                                                                                                                                                                                                                                                                                                                                                               |
| EPI_ISL_419678                                                                                                 | Servicio de Microbiología. Consorcio Hospital General Universitario de Valencia                                                                                                                                               | Sequencing and Bioinformatics Service and Molecular Epidemiology Research Group. FISABIO-Public Health                                                                                                                        | Griselda De Marco, Neris Garcia-Gonzalez, Maria Alma Bracho, Maria Dolores Ocete, Giuseppe D'Auria, Concepcion Gimeno, Fernando Gonzalez-Candelas                                                                                                                                                                                                                                                                                                                                                                                                               |
| EPI_ISL_419682                                                                                                 | Servicio de Microbiología. Consorcio Hospital General Universitario de Valencia                                                                                                                                               | Sequencing and Bioinformatics Service and Molecular Epidemiology Research Group. FISABIO-Public Health                                                                                                                        | Giuseppe D'Auria, Griselda De Marco, Neris Garcia-Gonzalez, Maria Alma Bracho, Maria Dolores Ocete, Concepcion Gimeno, Fernando Gonzalez-Candelas                                                                                                                                                                                                                                                                                                                                                                                                               |
| EPI_ISL_419683                                                                                                 | Servicio de Microbiología. Consorcio Hospital General Universitario de Valencia                                                                                                                                               | Sequencing and Bioinformatics Service and Molecular Epidemiology Research Group. FISABIO-Public Health                                                                                                                        | Griselda De Marco, Neris Garcia-Gonzalez, Maria Alma Bracho, Maria Dolores Ocete, Giuseppe D'Auria, Concepcion Gimeno, Fernando Gonzalez-Candelas                                                                                                                                                                                                                                                                                                                                                                                                               |
| EPI_ISL_419687                                                                                                 | Servicio de Microbiología. Consorcio Hospital General Universitario de Valencia                                                                                                                                               | Sequencing and Bioinformatics Service and Molecular Epidemiology Research Group. FISABIO-Public Health                                                                                                                        | Giuseppe D'Auria, Griselda De Marco, Neris Garcia-Gonzalez, Maria Alma Bracho, Maria Dolores Ocete, Concepcion Gimeno, Fernando Gonzalez-Candelas                                                                                                                                                                                                                                                                                                                                                                                                               |
| EPI_ISL_419688                                                                                                 | Servicio de Microbiología. Consorcio Hospital General Universitario de Valencia                                                                                                                                               | Sequencing and Bioinformatics Service and Molecular Epidemiology Research Group. FISABIO-Public Health                                                                                                                        | Griselda De Marco, Neris Garcia-Gonzalez, Maria Alma Bracho, Maria Dolores Ocete, Giuseppe D'Auria, Concepcion Gimeno, Fernando Gonzalez-Candelas                                                                                                                                                                                                                                                                                                                                                                                                               |
| EPI_ISL_420114                                                                                                 | Servicio de Microbiología. Consorcio Hospital General Universitario de Valencia                                                                                                                                               | Sequencing and Bioinformatics Service and Molecular Epidemiology Research Group. FISABIO-Public Health                                                                                                                        | Griselda De Marco, Beatriz Beamud, Lidia Ruiz Roldan, Marta Pla Diaz, Neris Garcia-Gonzalez, Loreto Ferrús Abad, Inma Galán Vendrell, Paula Ruiz-Hueso, Mariana Reyes-Prieto, Vicente Soriano Chirona, Maria Alma Bracho, Maria Dolores Ocete, Lidia Martínez-Priego, Concepcion Gimeno, Giuseppe D'Auria, Fernando Gonzalez-Candelas                                                                                                                                                                                                                           |
| EPI_ISL_420128                                                                                                 | Servicio de Microbiología. Hospital Clínico Universitario de Valencia                                                                                                                                                         | Sequencing and Bioinformatics Service and Molecular Epidemiology Research Group. FISABIO-Public Health                                                                                                                        | Griselda De Marco, Beatriz Beamud, Lidia Ruiz Roldan, Marta Pla Diaz, Neris Garcia-Gonzalez, Loreto Ferrús Abad, Inma Galán Vendrell, Paula Ruiz-Hueso, Mariana Reyes-Prieto, Vicente Soriano Chirona, David Navarro, Maria Alma Bracho, Lidia Martínez-Priego, Giuseppe D'Auria, Fernando Gonzalez-Candelas                                                                                                                                                                                                                                                    |
| EPI_ISL_420132                                                                                                 | Servicio de Microbiología. Hospital Clínico Universitario de Valencia                                                                                                                                                         | Sequencing and Bioinformatics Service and Molecular Epidemiology Research Group. FISABIO-Public Health                                                                                                                        | Giuseppe D'Auria, Sandra Carbo, Loreto Ferrús Abad, Maria Alma Bracho, Griselda De Marco, Beatriz Beamud, Lidia Ruiz Roldan, Marta Pla Diaz, Neris Garcia-Gonzalez, Inma Galán Vendrell, Paula Ruiz-Hueso, Mariana Reyes-Prieto, Vicente Soriano Chirona, Ivan Ansari, David Navarro, Lidia Martínez-Priego, Fernando Gonzalez-Candelas                                                                                                                                                                                                                         |
| EPI_ISL_420144                                                                                                 | Department for Virology, Molecular Biology and Genome Research, R. G. Lugar Center for Public Health Research, National Center for Disease Control and Public Health (NCDC) of Georgia.                                       | Department for Virology, Molecular Biology and Genome Research, R. G. Lugar Center for Public Health Research, National Center for Disease Control and Public Health (NCDC) of Georgia.                                       | Gvantsa Chanturia, Ann Machablashvili, Nato Kotaria, Marine Murtskhvaladze, Lela Sabadze, Mari Gavashelidze, Ana Papkiauri, Meri Pantsulaia, Gvantsa Brachveli, Tata Imnadze, Tamar Jashiasvili, Tea Tevdoradze, Ketevan Sidamonidze, Ekaterine Khmaladze, Ekaterine Zhghenti, Roena Sukhiasvili, Mariam Zakalashvili, Lela Urushadze, Magda Dgebuadze, Giorgi Tomashvili, Davit Tsaguria, Ekaterine Zangaladze, Nino Berishvili, Adam Kotorashvili, Maia Alkhaszhvili, Irma Burjanadze, Anna Kasradze, Khatuna Zakhashvili, Paata Imnadze, Amiran Gamkrelidze. |
| EPI_ISL_421446, EPI_ISL_421447, EPI_ISL_421448                                                                 | H Guimaraes                                                                                                                                                                                                                   | Instituto Nacional de Saude (INSA)                                                                                                                                                                                            | Guimar et al                                                                                                                                                                                                                                                                                                                                                                                                                                                                                                                                                    |
| EPI_ISL_421449                                                                                                 | H Dr. Nelio Mendonca - Funchal                                                                                                                                                                                                | Instituto Nacional de Saude (INSA)                                                                                                                                                                                            | Guimar et al                                                                                                                                                                                                                                                                                                                                                                                                                                                                                                                                                    |
| EPI_ISL_421450, EPI_ISL_421451, EPI_ISL_421452                                                                 | Instituto Nacional de Saude (INSA)                                                                                                                                                                                            | Instituto Nacional de Saude (INSA)                                                                                                                                                                                            | Guimar et al                                                                                                                                                                                                                                                                                                                                                                                                                                                                                                                                                    |
| EPI_ISL_421453                                                                                                 | CHTMAD                                                                                                                                                                                                                        | Instituto Nacional de Saude (INSA)                                                                                                                                                                                            | Guimar et al                                                                                                                                                                                                                                                                                                                                                                                                                                                                                                                                                    |
| EPI_ISL_421454                                                                                                 | H Beatriz Angelo                                                                                                                                                                                                              | Instituto Nacional de Saude (INSA)                                                                                                                                                                                            | Guimar et al                                                                                                                                                                                                                                                                                                                                                                                                                                                                                                                                                    |
| EPI_ISL_421455                                                                                                 | CH Barreiro Montijo                                                                                                                                                                                                           | Instituto Nacional de Saude (INSA)                                                                                                                                                                                            | Guimar et al                                                                                                                                                                                                                                                                                                                                                                                                                                                                                                                                                    |
| EPI_ISL_421456                                                                                                 | Instituto Nacional de Saude (INSA)                                                                                                                                                                                            | Instituto Nacional de Saude (INSA)                                                                                                                                                                                            | Guimar et al                                                                                                                                                                                                                                                                                                                                                                                                                                                                                                                                                    |
| EPI_ISL_421457                                                                                                 | H Dr Nelio Mendonca - Funchal                                                                                                                                                                                                 | Instituto Nacional de Saude (INSA)                                                                                                                                                                                            | Guimar et al                                                                                                                                                                                                                                                                                                                                                                                                                                                                                                                                                    |
| EPI_ISL_421458                                                                                                 | H Beatriz Angelo                                                                                                                                                                                                              | Instituto Nacional de Saude (INSA)                                                                                                                                                                                            | Guimar et al                                                                                                                                                                                                                                                                                                                                                                                                                                                                                                                                                    |
| EPI_ISL_421459, EPI_ISL_421460, EPI_ISL_421461                                                                 | H Dr. Nelio Mendonca - Funchal                                                                                                                                                                                                | Instituto Nacional de Saude (INSA)                                                                                                                                                                                            | Guimar et al                                                                                                                                                                                                                                                                                                                                                                                                                                                                                                                                                    |
| EPI_ISL_421462                                                                                                 | H Santarem                                                                                                                                                                                                                    | Instituto Nacional de Saude (INSA)                                                                                                                                                                                            | Guimar et al                                                                                                                                                                                                                                                                                                                                                                                                                                                                                                                                                    |
| EPI_ISL_421463                                                                                                 | HSE Ilha Terceira - Angra do Heroismo                                                                                                                                                                                         | Instituto Nacional de Saude (INSA)                                                                                                                                                                                            | Guimar et al                                                                                                                                                                                                                                                                                                                                                                                                                                                                                                                                                    |
| EPI_ISL_421464, EPI_ISL_421465                                                                                 | CHTMAD                                                                                                                                                                                                                        | Instituto Nacional de Saude (INSA)                                                                                                                                                                                            | Guimar et al                                                                                                                                                                                                                                                                                                                                                                                                                                                                                                                                                    |
| EPI_ISL_421466, EPI_ISL_421467                                                                                 | H Evora                                                                                                                                                                                                                       | Instituto Nacional de Saude (INSA)                                                                                                                                                                                            | Guimar et al                                                                                                                                                                                                                                                                                                                                                                                                                                                                                                                                                    |
| EPI_ISL_421468, EPI_ISL_421469, EPI_ISL_421470, EPI_ISL_421471                                                 | H Santarem                                                                                                                                                                                                                    | Instituto Nacional de Saude (INSA)                                                                                                                                                                                            | Guimar et al                                                                                                                                                                                                                                                                                                                                                                                                                                                                                                                                                    |
| EPI_ISL_421472, EPI_ISL_421473, EPI_ISL_421474, EPI_ISL_421475, EPI_ISL_421476, EPI_ISL_421477, EPI_ISL_421478 | Instituto Nacional de Saude (INSA)                                                                                                                                                                                            | Instituto Nacional de Saude (INSA)                                                                                                                                                                                            | Guimar et al                                                                                                                                                                                                                                                                                                                                                                                                                                                                                                                                                    |
| EPI_ISL_421479, EPI_ISL_421480                                                                                 | CH Barreiro Montijo                                                                                                                                                                                                           | Instituto Nacional de Saude (INSA)                                                                                                                                                                                            | Guimar et al                                                                                                                                                                                                                                                                                                                                                                                                                                                                                                                                                    |
| EPI_ISL_421481                                                                                                 | H Beatriz Angelo                                                                                                                                                                                                              | Instituto Nacional de Saude (INSA)                                                                                                                                                                                            | Guimar et al                                                                                                                                                                                                                                                                                                                                                                                                                                                                                                                                                    |
| EPI_ISL_421482, EPI_ISL_421483, EPI_ISL_421484                                                                 | CH VN Gaia - Espinho                                                                                                                                                                                                          | Instituto Nacional de Saude (INSA)                                                                                                                                                                                            | Guimar et al                                                                                                                                                                                                                                                                                                                                                                                                                                                                                                                                                    |
| EPI_ISL_421485, EPI_ISL_421486                                                                                 | CH Barreiro Montijo                                                                                                                                                                                                           | Instituto Nacional de Saude (INSA)                                                                                                                                                                                            | Guimar et al                                                                                                                                                                                                                                                                                                                                                                                                                                                                                                                                                    |
| EPI_ISL_421487                                                                                                 | H Beatriz Angelo                                                                                                                                                                                                              | Instituto Nacional de Saude (INSA)                                                                                                                                                                                            | Guimar et al                                                                                                                                                                                                                                                                                                                                                                                                                                                                                                                                                    |
| EPI_ISL_421488                                                                                                 | H Santarem                                                                                                                                                                                                                    | Instituto Nacional de Saude (INSA)                                                                                                                                                                                            | Guimar et al                                                                                                                                                                                                                                                                                                                                                                                                                                                                                                                                                    |
| EPI_ISL_421489                                                                                                 | HSE Ilha Terceira - Angra do Heroismo                                                                                                                                                                                         | Instituto Nacional de Saude (INSA)                                                                                                                                                                                            | Guimar et al                                                                                                                                                                                                                                                                                                                                                                                                                                                                                                                                                    |
| EPI_ISL_421490                                                                                                 | H Santarem                                                                                                                                                                                                                    | Instituto Nacional de Saude (INSA)                                                                                                                                                                                            | Guimar et al                                                                                                                                                                                                                                                                                                                                                                                                                                                                                                                                                    |
| EPI_ISL_421491                                                                                                 | H Beatriz Angelo                                                                                                                                                                                                              | Instituto Nacional de Saude (INSA)                                                                                                                                                                                            | Guimar et al                                                                                                                                                                                                                                                                                                                                                                                                                                                                                                                                                    |
| EPI_ISL_421492                                                                                                 | H Santarem                                                                                                                                                                                                                    | Instituto Nacional de Saude (INSA)                                                                                                                                                                                            | Guimar et al                                                                                                                                                                                                                                                                                                                                                                                                                                                                                                                                                    |
| EPI_ISL_421493, EPI_ISL_421494                                                                                 | HSE Ilha Terceira - Angra do Heroismo                                                                                                                                                                                         | Instituto Nacional de Saude (INSA)                                                                                                                                                                                            | Guimar et al                                                                                                                                                                                                                                                                                                                                                                                                                                                                                                                                                    |
| EPI_ISL_421495                                                                                                 | H Santarem                                                                                                                                                                                                                    | Instituto Nacional de Saude (INSA)                                                                                                                                                                                            | Guimar et al                                                                                                                                                                                                                                                                                                                                                                                                                                                                                                                                                    |
| EPI_ISL_421496, EPI_ISL_421497, EPI_ISL_421498, EPI_ISL_421499                                                 | Instituto Nacional de Saude (INSA)                                                                                                                                                                                            | Instituto Nacional de Saude (INSA)                                                                                                                                                                                            | Guimar et al                                                                                                                                                                                                                                                                                                                                                                                                                                                                                                                                                    |
| EPI_ISL_421515                                                                                                 | Servicio de Microbiología. Hospital Clínico Universitario de                                                                                                                                                                  | Sequencing and Bioinformatics Service and Molecular                                                                                                                                                                           | Giuseppe D'Auria, Lidia Martínez-Priego, Maria Alma Bracho, Griselda De Marco, Beatriz Beamud, Lidia Ruiz Roldan, Marta Pla Diaz, Neris                                                                                                                                                                                                                                                                                                                                                                                                                         |

|                                                                                                                                                                                                                                                                                                                                |                                                                                 |                                                                                                                      |                                                                                                                                                                                                                                                                                                                                                                                                                                                                                                                                                                                                                                                                                                                                                                                       |
|--------------------------------------------------------------------------------------------------------------------------------------------------------------------------------------------------------------------------------------------------------------------------------------------------------------------------------|---------------------------------------------------------------------------------|----------------------------------------------------------------------------------------------------------------------|---------------------------------------------------------------------------------------------------------------------------------------------------------------------------------------------------------------------------------------------------------------------------------------------------------------------------------------------------------------------------------------------------------------------------------------------------------------------------------------------------------------------------------------------------------------------------------------------------------------------------------------------------------------------------------------------------------------------------------------------------------------------------------------|
|                                                                                                                                                                                                                                                                                                                                | Valencia                                                                        | Epidemiology Research Group. FISABIO-Public Health                                                                   | Garcia-Gonzalez, Loreto Ferrús Abad, Inma Galán Vendrell, Paula Ruiz-Hueso, Mariana Reyes-Prieto, Vicente Soriano Chirona, David Navarro, Fernando Gonzalez-Candelas                                                                                                                                                                                                                                                                                                                                                                                                                                                                                                                                                                                                                  |
| EPI_ISL_421575                                                                                                                                                                                                                                                                                                                 | Molecular Diagnostic Services                                                   | KRISP, KZN Research Innovation and Sequencing Platform                                                               | Giandhari J, Pillay S, Ngcapu S, Samsunder N, Lessells R, Chimukangara B, Deforche K, Tegally H, Wilkinson E, de Oliveira T                                                                                                                                                                                                                                                                                                                                                                                                                                                                                                                                                                                                                                                           |
| EPI_ISL_424670                                                                                                                                                                                                                                                                                                                 | Laboratorio Estatal de Salud Publica del Estado de Queretaro                    | Instituto de Diagnóstico y Referencia Epidemiologicos                                                                | Gisela Barrera Badillo, Irma López Martínez, Lucia Hernández Rivas, Edgar Mendieta Condado, Fabiola Garcés Ayala, Adnan Araiza Rodríguez, Celia Boukadida, Santiago Avila Ríos, Mario Mújica Sánchez, José Arturo Martínez Orozco, Eduardo Becerril Vargas, Joel Armando Vázquez Pérez, Victor Hugo Borja Aburto, Concepción Grajales Muñoz, Cesar Raúl González Bonilla, Carolina González Torres, Francisco Javier Gaytán Cervantes, José Esteban Muñoz Medina, Guillermo M. Ruiz-Palacios, Pilar Ramos Cervantes, Violeta Ibarra Gonzalez, Fernando Ledesma Barrientos, Luis Alberto García Andrade, Alfredo Ponce de León Garduño, Blanca Taboada, Alejandro Sánchez, Pavel Isa, Ricardo Grande, Gloria Vázquez, Francisco Pulido, Carlos F. Arias, José Ernesto Ramírez González |
| EPI_ISL_425180, EPI_ISL_425194                                                                                                                                                                                                                                                                                                 | Servicio de Microbiología. Consorcio Hospital General Universitario de Valencia | Sequencing and Bioinformatics Service and Molecular Epidemiology Research Group. FISABIO-Public Health               | Griselda De Marco, Beatriz Beamud, Lidia Ruiz Roldan, Marta Pla Diaz, Neris Garcia-Gonzalez, Inma Galán Vendrell, Sandra Carbo, Loreto Ferrús Abad, Paula Ruiz-Hueso, Mariana Reyes-Prieto, Vicente Soriano Chirona, Ivan Ansari, David Navarro, Maria Alma Bracho, Lúcia Martínez-Priego, Giuseppe D'Auria, Fernando Gonzalez-Candelas                                                                                                                                                                                                                                                                                                                                                                                                                                               |
| EPI_ISL_425205                                                                                                                                                                                                                                                                                                                 | Servicio de Microbiología. Hospital Clínico Universitario de Valencia           | Sequencing and Bioinformatics Service and Molecular Epidemiology Research Group. FISABIO-Public Health               | Griselda De Marco, Beatriz Beamud, Lidia Ruiz Roldan, Marta Pla Diaz, Neris Garcia-Gonzalez, Loreto Ferrús Abad, María Dolores Ocete, Inma Galán Vendrell, Paula Ruiz-Hueso, Mariana Reyes-Prieto, Vicente Soriano Chirona, Maria Alma Bracho, Lúcia Martínez-Priego, Concepcion Gimeno, Giuseppe D'Auria, Fernando Gonzalez-Candelas                                                                                                                                                                                                                                                                                                                                                                                                                                                 |
| EPI_ISL_425214                                                                                                                                                                                                                                                                                                                 | Servicio de Microbiología. Consorcio Hospital General Universitario de Valencia | Sequencing and Bioinformatics Service and Molecular Epidemiology Research Group. FISABIO-Public Health               | Griselda De Marco, Beatriz Beamud, Lidia Ruiz Roldan, Marta Pla Diaz, Neris Garcia-Gonzalez, Inma Galán Vendrell, Sandra Carbo, Loreto Ferrús Abad, Paula Ruiz-Hueso, Mariana Reyes-Prieto, Vicente Soriano Chirona, Ivan Ansari, David Navarro, Maria Alma Bracho, Lúcia Martínez-Priego, Giuseppe D'Auria, Fernando Gonzalez-Candelas                                                                                                                                                                                                                                                                                                                                                                                                                                               |
| EPI_ISL_426361, EPI_ISL_426362, EPI_ISL_426363                                                                                                                                                                                                                                                                                 | Instituto Nacional de Ciencias Medicas y Nutricion Salvador Zubiran             | Instituto Nacional de Ciencias Medicas y Nutricion Salvador Zubiran                                                  | Guillermo M. Ruiz-Palacios, Pilar Ramos Cervantes, Violeta Ibarra Gonzalez, Fernando Ledesma Barrientos, Luis Alberto García Andrade, Alfredo Ponce de León Garduño, Irma López Martínez, Lucia Hernández Rivas, Gisela Barrera Badillo, Edgar Mendieta Condado, Fabiola Garcés Ayala, Adnan Araiza Rodríguez, José Ernesto Ramírez González, Celia Boukadida, Santiago Avila Ríos, Mario Mújica Sánchez, José Arturo Martínez Orozco, Eduardo Becerril Vargas, Joel Armando Vázquez Pérez, Victor Hugo Borja Aburto, Concepción Grajales Muñoz, Cesar Raúl González Bonilla, Carolina González Torres, Francisco Javier Gaytán Cervantes, José Esteban Muñoz Medina, Blanca Taboada, Alejandro Sánchez, Pavel Isa, Ricardo Grande, Gloria Vázquez, Francisco Pulido, Carlos F. Arias |
| EPI_ISL_426364                                                                                                                                                                                                                                                                                                                 | Instituto Nacional de Ciencias Medicas y Nutricion Salvador Zubiran             | Instituto Nacional de Ciencias Medicas y Nutricion Zubiran                                                           | Guillermo M. Ruiz-Palacios, Pilar Ramos Cervantes, Violeta Ibarra Gonzalez, Fernando Ledesma Barrientos, Luis Alberto García Andrade, Alfredo Ponce de León Garduño, Irma López Martínez, Lucia Hernández Rivas, Gisela Barrera Badillo, Edgar Mendieta Condado, Fabiola Garcés Ayala, Adnan Araiza Rodríguez, José Ernesto Ramírez González, Celia Boukadida, Santiago Avila Ríos, Mario Mújica Sánchez, José Arturo Martínez Orozco, Eduardo Becerril Vargas, Joel Armando Vázquez Pérez, Victor Hugo Borja Aburto, Concepción Grajales Muñoz, Cesar Raúl González Bonilla, Carolina González Torres, Francisco Javier Gaytán Cervantes, José Esteban Muñoz Medina, Blanca Taboada, Alejandro Sánchez, Pavel Isa, Ricardo Grande, Gloria Vázquez, Francisco Pulido, Carlos F. Arias |
| EPI_ISL_426365                                                                                                                                                                                                                                                                                                                 | Instituto Nacional de Ciencias Medicas y Nutricion Salvador Zubiran             | Instituto Nacional de Ciencias Medicas y Nutricion Salvador Zubiran                                                  | Guillermo M. Ruiz-Palacios, Pilar Ramos Cervantes, Violeta Ibarra Gonzalez, Fernando Ledesma Barrientos, Luis Alberto García Andrade, Alfredo Ponce de León Garduño, Irma López Martínez, Lucia Hernández Rivas, Gisela Barrera Badillo, Edgar Mendieta Condado, Fabiola Garcés Ayala, Adnan Araiza Rodríguez, José Ernesto Ramírez González, Celia Boukadida, Santiago Avila Ríos, Mario Mújica Sánchez, José Arturo Martínez Orozco, Eduardo Becerril Vargas, Joel Armando Vázquez Pérez, Victor Hugo Borja Aburto, Concepción Grajales Muñoz, Cesar Raúl González Bonilla, Carolina González Torres, Francisco Javier Gaytán Cervantes, José Esteban Muñoz Medina, Blanca Taboada, Alejandro Sánchez, Pavel Isa, Ricardo Grande, Gloria Vázquez, Francisco Pulido, Carlos F. Arias |
| EPI_ISL_427645, EPI_ISL_427647, EPI_ISL_427672, EPI_ISL_427673, EPI_ISL_427686, EPI_ISL_427687, EPI_ISL_427696, EPI_ISL_427703, EPI_ISL_427708                                                                                                                                                                                 | Centre for Infectious Diseases and Microbiology Public Health                   | NSW Health Pathology - Institute of Clinical Pathology and Medical Research; Westmead Hospital; University of Sydney | Gray K, Timms V, Gall M, Arnott A, Sadsad R, Draper J, Sim E, Bachmann N, Rockett R, Lam C, Carter I, Holmes EC, O'Sullivan MV, Byun R, Sintchenko V, Chen SC, Eden JS, Maddocks S, Kok J, Propenko M, Sorrell T, Chang S, Basile K, Dwyer DE for the 2019-nCoV Study Group                                                                                                                                                                                                                                                                                                                                                                                                                                                                                                           |
| EPI_ISL_427718                                                                                                                                                                                                                                                                                                                 | ACT Pathology, The Canberra Hospital                                            | NSW Health Pathology - Institute of Clinical Pathology and Medical Research; Westmead Hospital; University of Sydney | Gray K, Timms V, Gall M, Arnott A, Sadsad R, Draper J, Sim E, Bachmann N, Rockett R, Lam C, Carter I, Holmes EC, O'Sullivan MV, Byun R, Sintchenko V, Chen SC, Eden JS, Maddocks S, Kok J, Propenko M, Sorrell T, Chang S, Basile K, Dwyer DE for the 2019-nCoV Study Group                                                                                                                                                                                                                                                                                                                                                                                                                                                                                                           |
| EPI_ISL_427730, EPI_ISL_427731, EPI_ISL_427732, EPI_ISL_427745, EPI_ISL_427767, EPI_ISL_427785, EPI_ISL_427793                                                                                                                                                                                                                 | Centre for Infectious Diseases and Microbiology Public Health                   | NSW Health Pathology - Institute of Clinical Pathology and Medical Research; Westmead Hospital; University of Sydney | Gray K, Timms V, Gall M, Arnott A, Sadsad R, Draper J, Sim E, Bachmann N, Rockett R, Lam C, Carter I, Holmes EC, O'Sullivan MV, Byun R, Sintchenko V, Chen SC, Eden JS, Maddocks S, Kok J, Propenko M, Sorrell T, Chang S, Basile K, Dwyer DE for the 2019-nCoV Study Group                                                                                                                                                                                                                                                                                                                                                                                                                                                                                                           |
| EPI_ISL_434541, EPI_ISL_434542, EPI_ISL_434543, EPI_ISL_434544, EPI_ISL_434545, EPI_ISL_434546, EPI_ISL_434547, EPI_ISL_434548, EPI_ISL_434549, EPI_ISL_434550, EPI_ISL_434551, EPI_ISL_434552, EPI_ISL_434553                                                                                                                 | Puerto Rico Department of Health                                                | Centers for Disease Control and Prevention, Dengue Branch                                                            | Gilberto A. Santiago, Glenda Gonzalez, Betzabel Flores, Keyla Charriez, Fabiola Cruz, Chaney Kalinich, Joseph Fauver, Jessica I. Falcon, Nathan Grubaugh, Jorge L. Munoz-Jordan                                                                                                                                                                                                                                                                                                                                                                                                                                                                                                                                                                                                       |
| EPI_ISL_434616, EPI_ISL_434617, EPI_ISL_434618, EPI_ISL_434619, EPI_ISL_434620, EPI_ISL_434621, EPI_ISL_434622, EPI_ISL_434623, EPI_ISL_434624, EPI_ISL_434625, EPI_ISL_434626, EPI_ISL_434627, EPI_ISL_434628, EPI_ISL_434629, EPI_ISL_434630, EPI_ISL_434631, EPI_ISL_434632, EPI_ISL_434633, EPI_ISL_434634, EPI_ISL_434635 | CHU Purpan - Laboratoire de Virologie - Institut Fédératif de Biologie          | Laboratoire de virologie - École Nationale Vétérinaire de Toulouse                                                   | Guillaume Croville, Jean-Luc Guérin, Jacques Izopet                                                                                                                                                                                                                                                                                                                                                                                                                                                                                                                                                                                                                                                                                                                                   |
| EPI_ISL_436196, EPI_ISL_436204, EPI_ISL_436212, EPI_ISL_436220, EPI_ISL_436227, EPI_ISL_436271                                                                                                                                                                                                                                 | Servicio de Microbiología. Consorcio Hospital General Universitario de Valencia | Sequencing and Bioinformatics Service and Molecular Epidemiology Research Group. FISABIO-Public Health               | Griselda De Marco, Beatriz Beamud, Lidia Ruiz Roldan, Marta Pla Diaz, Neris Garcia-Gonzalez, Loreto Ferrús Abad, María Dolores Ocete, Inma Galán Vendrell, Paula Ruiz-Hueso, Mariana Reyes-Prieto, Vicente Soriano Chirona, Maria Alma Bracho, Lúcia Martínez-Priego, Concepcion Gimeno, Giuseppe D'Auria, Fernando Gonzalez-Candelas                                                                                                                                                                                                                                                                                                                                                                                                                                                 |
| EPI_ISL_436279                                                                                                                                                                                                                                                                                                                 | Servicio de Microbiología. Hospital Clínico Universitario de Valencia           | Sequencing and Bioinformatics Service and Molecular Epidemiology Research Group. FISABIO-Public Health               | Griselda De Marco, Beatriz Beamud, Lidia Ruiz Roldan, Marta Pla Diaz, Neris Garcia-Gonzalez, Inma Galán Vendrell, Sandra Carbo, Loreto Ferrús Abad, Paula Ruiz-Hueso, Mariana Reyes-Prieto, Vicente Soriano Chirona, Ivan Ansari, David Navarro, Maria Alma Bracho, Lúcia Martínez-Priego, Giuseppe D'Auria, Fernando Gonzalez-Candelas                                                                                                                                                                                                                                                                                                                                                                                                                                               |
| EPI_ISL_436293                                                                                                                                                                                                                                                                                                                 | Servicio de Microbiología. Hospital Clínico Universitario de Valencia           | Sequencing and Bioinformatics Service and Molecular Epidemiology Research Group. FISABIO-Public Health               | Griselda De Marco, Beatriz Beamud, Lidia Ruiz Roldan, Marta Pla Diaz, Neris Garcia-Gonzalez, Inma Galán Vendrell, Sandra Carbo, Loreto Ferrús Abad, Paula Ruiz-Hueso, Mariana Reyes-Prieto, Vicente Soriano Chirona, Ivan Ansari, David Navarro, Maria Alma Bracho, Lúcia Martínez-Priego, Giuseppe D'Auria, Fernando Gonzalez-Candelas                                                                                                                                                                                                                                                                                                                                                                                                                                               |
| EPI_ISL_436299                                                                                                                                                                                                                                                                                                                 | Servicio de Microbiología. Hospital Clínico Universitario de Valencia           | Sequencing and Bioinformatics Service and Molecular Epidemiology Research Group. FISABIO-Public Health               | Griselda De Marco, Beatriz Beamud, Lidia Ruiz Roldan, Marta Pla Diaz, Neris Garcia-Gonzalez, Inma Galán Vendrell, Sandra Carbo, Loreto Ferrús Abad, Paula Ruiz-Hueso, Mariana Reyes-Prieto, Vicente Soriano Chirona, Ivan Ansari, David Navarro, Maria Alma Bracho, Lúcia Martínez-Priego, Giuseppe D'Auria, Fernando Gonzalez-Candelas                                                                                                                                                                                                                                                                                                                                                                                                                                               |
| EPI_ISL_436313                                                                                                                                                                                                                                                                                                                 | Servicio de Microbiología. Hospital Clínico Universitario de Valencia           | Sequencing and Bioinformatics Service and Molecular Epidemiology Research Group. FISABIO-Public Health               | Griselda De Marco, Beatriz Beamud, Lidia Ruiz Roldan, Marta Pla Diaz, Neris Garcia-Gonzalez, Inma Galán Vendrell, Sandra Carbo, Loreto Ferrús Abad, Paula Ruiz-Hueso, Mariana Reyes-Prieto, Vicente Soriano Chirona, Ivan Ansari, David Navarro, Maria Alma Bracho, Lúcia Martínez-Priego, Giuseppe D'Auria, Fernando Gonzalez-Candelas                                                                                                                                                                                                                                                                                                                                                                                                                                               |
| EPI_ISL_436319                                                                                                                                                                                                                                                                                                                 | Servicio de Microbiología. Hospital Clínico Universitario de Valencia           | Sequencing and Bioinformatics Service and Molecular Epidemiology Research Group. FISABIO-Public Health               | Griselda De Marco, Beatriz Beamud, Lidia Ruiz Roldan, Marta Pla Diaz, Neris Garcia-Gonzalez, Inma Galán Vendrell, Sandra Carbo, Loreto Ferrús Abad, Paula Ruiz-Hueso, Mariana Reyes-Prieto, Vicente Soriano Chirona, Ivan Ansari, David Navarro, Maria Alma Bracho, Lúcia Martínez-Priego, Giuseppe D'Auria, Fernando Gonzalez-Candelas                                                                                                                                                                                                                                                                                                                                                                                                                                               |
| EPI_ISL_436333                                                                                                                                                                                                                                                                                                                 | Servicio de Microbiología. Hospital Clínico Universitario de Valencia           | Sequencing and Bioinformatics Service and Molecular Epidemiology Research Group. FISABIO-Public Health               | Griselda De Marco, Beatriz Beamud, Lidia Ruiz Roldan, Marta Pla Diaz, Neris Garcia-Gonzalez, Inma Galán Vendrell, Sandra Carbo, Loreto Ferrús Abad, Paula Ruiz-Hueso, Mariana Reyes-Prieto, Vicente Soriano Chirona, Ivan Ansari, David Navarro, Maria Alma Bracho, Lúcia Martínez-Priego, Giuseppe D'Auria, Fernando Gonzalez-Candelas                                                                                                                                                                                                                                                                                                                                                                                                                                               |
| EPI_ISL_436339                                                                                                                                                                                                                                                                                                                 | Servicio de Microbiología. Hospital Clínico Universitario de                    | Sequencing and Bioinformatics Service and Molecular                                                                  | Griselda De Marco, Beatriz Beamud, Lidia Ruiz Roldan, Marta Pla Diaz, Neris Garcia-Gonzalez, Inma Galán Vendrell, Sandra Carbo, Loreto Ferrús Abad,                                                                                                                                                                                                                                                                                                                                                                                                                                                                                                                                                                                                                                   |

|                                                                                                                                                                                                                                                                                                                                                                                                                                                                                                                                                                                                                                                                                                                                                                                                                                                                                                                                                                                                                                                                                                                                                                                                                                                |                                                                                       |                                                                                                                                                                                                                                 |                                                                                                                                                                                                                                                                                                                                         |                                                                                                                                                            |
|------------------------------------------------------------------------------------------------------------------------------------------------------------------------------------------------------------------------------------------------------------------------------------------------------------------------------------------------------------------------------------------------------------------------------------------------------------------------------------------------------------------------------------------------------------------------------------------------------------------------------------------------------------------------------------------------------------------------------------------------------------------------------------------------------------------------------------------------------------------------------------------------------------------------------------------------------------------------------------------------------------------------------------------------------------------------------------------------------------------------------------------------------------------------------------------------------------------------------------------------|---------------------------------------------------------------------------------------|---------------------------------------------------------------------------------------------------------------------------------------------------------------------------------------------------------------------------------|-----------------------------------------------------------------------------------------------------------------------------------------------------------------------------------------------------------------------------------------------------------------------------------------------------------------------------------------|------------------------------------------------------------------------------------------------------------------------------------------------------------|
|                                                                                                                                                                                                                                                                                                                                                                                                                                                                                                                                                                                                                                                                                                                                                                                                                                                                                                                                                                                                                                                                                                                                                                                                                                                | Valencia                                                                              | Epidemiology Research Group. FISABIO-Public Health                                                                                                                                                                              | Paula Ruiz-Hueso, Mariana Reyes-Prieto, Vicente Soriano Chirona, Ivan Ansari, David Navarro, María Alma Bracho, Lúcia Martínez-Priego, Giuseppe D'Auria, Fernando Gonzalez-Candelas                                                                                                                                                     |                                                                                                                                                            |
| EPI_ISL_436353                                                                                                                                                                                                                                                                                                                                                                                                                                                                                                                                                                                                                                                                                                                                                                                                                                                                                                                                                                                                                                                                                                                                                                                                                                 | Servicio de Microbiología. Hospital Clínico Universitario de Valencia                 | Sequencing and Bioinformatics Service and Molecular Epidemiology Research Group. FISABIO-Public Health                                                                                                                          | Griselda De Marco, Beatriz Beamud, Lidia Ruiz Roldan, Marta Pla Diaz, Neris Garcia-Gonzalez, Inma Galán Vendrell, Sandra Carbo, Loreto Ferrús Abad, Paula Ruiz-Hueso, Mariana Reyes-Prieto, Vicente Soriano Chirona, Ivan Ansari, David Navarro, María Alma Bracho, Lúcia Martínez-Priego, Giuseppe D'Auria, Fernando Gonzalez-Candelas |                                                                                                                                                            |
| EPI_ISL_436363                                                                                                                                                                                                                                                                                                                                                                                                                                                                                                                                                                                                                                                                                                                                                                                                                                                                                                                                                                                                                                                                                                                                                                                                                                 | Servicio de Microbiología. Hospital Clínico Universitario de Valencia                 | Sequencing and Bioinformatics Service and Molecular Epidemiology Research Group. FISABIO-Public Health                                                                                                                          | Griselda De Marco, Beatriz Beamud, Lidia Ruiz Roldan, Marta Pla Diaz, Neris Garcia-Gonzalez, Inma Galán Vendrell, Sandra Carbo, Loreto Ferrús Abad, Paula Ruiz-Hueso, Mariana Reyes-Prieto, Vicente Soriano Chirona, Ivan Ansari, David Navarro, María Alma Bracho, Lúcia Martínez-Priego, Giuseppe D'Auria, Fernando Gonzalez-Candelas |                                                                                                                                                            |
| EPI_ISL_436384, EPI_ISL_436391                                                                                                                                                                                                                                                                                                                                                                                                                                                                                                                                                                                                                                                                                                                                                                                                                                                                                                                                                                                                                                                                                                                                                                                                                 | Servicio de Microbiología. Consorcio Hospital General Universitario de Valencia       | Sequencing and Bioinformatics Service and Molecular Epidemiology Research Group. FISABIO-Public Health                                                                                                                          | Griselda De Marco, Beatriz Beamud, Lidia Ruiz Roldan, Marta Pla Diaz, Neris Garcia-Gonzalez, Loreto Ferrús Abad, María Dolores Ocete, Inma Galán Vendrell, Paula Ruiz-Hueso, Mariana Reyes-Prieto, Vicente Soriano Chirona, María Alma Bracho, Lúcia Martínez-Priego, Concepcion Gimeno, Giuseppe D'Auria, Fernando Gonzalez-Candelas   |                                                                                                                                                            |
| EPI_ISL_436404                                                                                                                                                                                                                                                                                                                                                                                                                                                                                                                                                                                                                                                                                                                                                                                                                                                                                                                                                                                                                                                                                                                                                                                                                                 | Servicio de Microbiología. Hospital Clínico Universitario de Valencia                 | Sequencing and Bioinformatics Service and Molecular Epidemiology Research Group. FISABIO-Public Health                                                                                                                          | Griselda De Marco, Beatriz Beamud, Lidia Ruiz Roldan, Marta Pla Diaz, Neris Garcia-Gonzalez, Inma Galán Vendrell, Sandra Carbo, Loreto Ferrús Abad, Paula Ruiz-Hueso, Mariana Reyes-Prieto, Vicente Soriano Chirona, Ivan Ansari, David Navarro, María Alma Bracho, Lúcia Martínez-Priego, Giuseppe D'Auria, Fernando Gonzalez-Candelas |                                                                                                                                                            |
| EPI_ISL_436684, EPI_ISL_436686                                                                                                                                                                                                                                                                                                                                                                                                                                                                                                                                                                                                                                                                                                                                                                                                                                                                                                                                                                                                                                                                                                                                                                                                                 | KRISP, KZN Research Innovation and Sequencing Platform                                | KRISP, KZN Research Innovation and Sequencing Platform                                                                                                                                                                          | Giandhari J, Pillay S, Lessells R, Chimukangara B, Deforche K, Tegally H, Wilkinson E, de Oliveira T                                                                                                                                                                                                                                    |                                                                                                                                                            |
| EPI_ISL_447473                                                                                                                                                                                                                                                                                                                                                                                                                                                                                                                                                                                                                                                                                                                                                                                                                                                                                                                                                                                                                                                                                                                                                                                                                                 | Servicio de Microbiología. Hospital Clínico Universitario de Valencia                 | Sequencing and Bioinformatics Service and Molecular Epidemiology Research Group. FISABIO-Public Health                                                                                                                          | Griselda De Marco, Lidia Ruiz Roldan, Neris Garcia-Gonzalez, Inma Galán Vendrell, Sandra Carbo, Loreto Ferrús Abad, Paula Ruiz-Hueso, Mariana Reyes-Prieto, Vicente Soriano Chirona, Ivan Ansari, Lúcia Martínez-Priego, Giuseppe 'Auria, David Navarro, Eliseo Albert, María Alma Bracho, Fernando Gonzalez-Candelas                   |                                                                                                                                                            |
| EPI_ISL_447482                                                                                                                                                                                                                                                                                                                                                                                                                                                                                                                                                                                                                                                                                                                                                                                                                                                                                                                                                                                                                                                                                                                                                                                                                                 | Servicio de Microbiología. Hospital Clínico Universitario de Valencia                 | Sequencing and Bioinformatics Service and Molecular Epidemiology Research Group. FISABIO-Public Health                                                                                                                          | Giuseppe 'Auria, David Navarro, Eliseo Albert, María Alma Bracho, Lidia Ruiz Roldan, Neris Garcia-Gonzalez, Inma Galán Vendrell, Sandra Carbo, Loreto Ferrús Abad, Paula Ruiz-Hueso, Mariana Reyes-Prieto, Vicente Soriano Chirona, Ivan Ansari, Lúcia Martínez-Priego, Fernando Gonzalez-Candelas                                      |                                                                                                                                                            |
| EPI_ISL_447487                                                                                                                                                                                                                                                                                                                                                                                                                                                                                                                                                                                                                                                                                                                                                                                                                                                                                                                                                                                                                                                                                                                                                                                                                                 | Servicio de Microbiología. Hospital Clínico Universitario de Valencia                 | Sequencing and Bioinformatics Service and Molecular Epidemiology Research Group. FISABIO-Public Health                                                                                                                          | Griselda De Marco, Lidia Ruiz Roldan, Neris Garcia-Gonzalez, Inma Galán Vendrell, Sandra Carbo, Loreto Ferrús Abad, Paula Ruiz-Hueso, Mariana Reyes-Prieto, Vicente Soriano Chirona, Ivan Ansari, Lúcia Martínez-Priego, Giuseppe 'Auria, David Navarro, Eliseo Albert, María Alma Bracho, Fernando Gonzalez-Candelas                   |                                                                                                                                                            |
| EPI_ISL_447496                                                                                                                                                                                                                                                                                                                                                                                                                                                                                                                                                                                                                                                                                                                                                                                                                                                                                                                                                                                                                                                                                                                                                                                                                                 | Servicio de Microbiología. Hospital Clínico Universitario de Valencia                 | Sequencing and Bioinformatics Service and Molecular Epidemiology Research Group. FISABIO-Public Health                                                                                                                          | Giuseppe 'Auria, David Navarro, Eliseo Albert, María Alma Bracho, Lidia Ruiz Roldan, Neris Garcia-Gonzalez, Inma Galán Vendrell, Sandra Carbo, Loreto Ferrús Abad, Paula Ruiz-Hueso, Mariana Reyes-Prieto, Vicente Soriano Chirona, Ivan Ansari, Lúcia Martínez-Priego, Fernando Gonzalez-Candelas                                      |                                                                                                                                                            |
| EPI_ISL_447501                                                                                                                                                                                                                                                                                                                                                                                                                                                                                                                                                                                                                                                                                                                                                                                                                                                                                                                                                                                                                                                                                                                                                                                                                                 | Servicio de Microbiología. Hospital Clínico Universitario de Valencia                 | Sequencing and Bioinformatics Service and Molecular Epidemiology Research Group. FISABIO-Public Health                                                                                                                          | Griselda De Marco, Lidia Ruiz Roldan, Neris Garcia-Gonzalez, Inma Galán Vendrell, Sandra Carbo, Loreto Ferrús Abad, Paula Ruiz-Hueso, Mariana Reyes-Prieto, Vicente Soriano Chirona, Ivan Ansari, Lúcia Martínez-Priego, Giuseppe 'Auria, David Navarro, Eliseo Albert, María Alma Bracho, Fernando Gonzalez-Candelas                   |                                                                                                                                                            |
| EPI_ISL_447510                                                                                                                                                                                                                                                                                                                                                                                                                                                                                                                                                                                                                                                                                                                                                                                                                                                                                                                                                                                                                                                                                                                                                                                                                                 | Servicio de Microbiología. Hospital Clínico Universitario de Valencia                 | Sequencing and Bioinformatics Service and Molecular Epidemiology Research Group. FISABIO-Public Health                                                                                                                          | Giuseppe 'Auria, David Navarro, Eliseo Albert, María Alma Bracho, Lidia Ruiz Roldan, Neris Garcia-Gonzalez, Inma Galán Vendrell, Sandra Carbo, Loreto Ferrús Abad, Paula Ruiz-Hueso, Mariana Reyes-Prieto, Vicente Soriano Chirona, Ivan Ansari, Lúcia Martínez-Priego, Fernando Gonzalez-Candelas                                      |                                                                                                                                                            |
| EPI_ISL_447515                                                                                                                                                                                                                                                                                                                                                                                                                                                                                                                                                                                                                                                                                                                                                                                                                                                                                                                                                                                                                                                                                                                                                                                                                                 | Servicio de Microbiología. Hospital Clínico Universitario de Valencia                 | Sequencing and Bioinformatics Service and Molecular Epidemiology Research Group. FISABIO-Public Health                                                                                                                          | Griselda De Marco, Lidia Ruiz Roldan, Neris Garcia-Gonzalez, Inma Galán Vendrell, Sandra Carbo, Loreto Ferrús Abad, Paula Ruiz-Hueso, Mariana Reyes-Prieto, Vicente Soriano Chirona, Ivan Ansari, Lúcia Martínez-Priego, Giuseppe 'Auria, David Navarro, Eliseo Albert, María Alma Bracho, Fernando Gonzalez-Candelas                   |                                                                                                                                                            |
| EPI_ISL_447523                                                                                                                                                                                                                                                                                                                                                                                                                                                                                                                                                                                                                                                                                                                                                                                                                                                                                                                                                                                                                                                                                                                                                                                                                                 | Servicio de Microbiología. Hospital Clínico Universitario de Valencia                 | Sequencing and Bioinformatics Service and Molecular Epidemiology Research Group. FISABIO-Public Health                                                                                                                          | Giuseppe 'Auria, David Navarro, Eliseo Albert, María Alma Bracho, Lidia Ruiz Roldan, Neris Garcia-Gonzalez, Inma Galán Vendrell, Sandra Carbo, Loreto Ferrús Abad, Paula Ruiz-Hueso, Mariana Reyes-Prieto, Vicente Soriano Chirona, Ivan Ansari, Lúcia Martínez-Priego, Fernando Gonzalez-Candelas                                      |                                                                                                                                                            |
| EPI_ISL_447528                                                                                                                                                                                                                                                                                                                                                                                                                                                                                                                                                                                                                                                                                                                                                                                                                                                                                                                                                                                                                                                                                                                                                                                                                                 | Servicio de Microbiología. Hospital Clínico Universitario de Valencia                 | Sequencing and Bioinformatics Service and Molecular Epidemiology Research Group. FISABIO-Public Health                                                                                                                          | Griselda De Marco, Lidia Ruiz Roldan, Neris Garcia-Gonzalez, Inma Galán Vendrell, Sandra Carbo, Loreto Ferrús Abad, Paula Ruiz-Hueso, Mariana Reyes-Prieto, Vicente Soriano Chirona, Ivan Ansari, Lúcia Martínez-Priego, Giuseppe 'Auria, David Navarro, Eliseo Albert, María Alma Bracho, Fernando Gonzalez-Candelas                   |                                                                                                                                                            |
| EPI_ISL_450821, EPI_ISL_450822                                                                                                                                                                                                                                                                                                                                                                                                                                                                                                                                                                                                                                                                                                                                                                                                                                                                                                                                                                                                                                                                                                                                                                                                                 | Jarpens HC                                                                            | The Public Health Agency of Sweden                                                                                                                                                                                              | Gunilla Johansson, Anna-Malin Linde, Maria Lind Karlberg, Oskar Karlsson Lindsjo, Olov Svartstrom, Anna Risberg, Theresa Enkirch, Mia Brytting, Karin Tegmark-Wisell                                                                                                                                                                    |                                                                                                                                                            |
| EPI_ISL_452544, EPI_ISL_452545, EPI_ISL_452546, EPI_ISL_452547, EPI_ISL_452548, EPI_ISL_452549, EPI_ISL_452550, EPI_ISL_452551, EPI_ISL_452552, EPI_ISL_452553, EPI_ISL_452554, EPI_ISL_452555, EPI_ISL_452556, EPI_ISL_452557, EPI_ISL_452558, EPI_ISL_452559, EPI_ISL_452560, EPI_ISL_452561, EPI_ISL_452562, EPI_ISL_452563, EPI_ISL_452564, EPI_ISL_452565, EPI_ISL_452566, EPI_ISL_452567, EPI_ISL_452568, EPI_ISL_452569, EPI_ISL_452570, EPI_ISL_452571, EPI_ISL_452572, EPI_ISL_452573, EPI_ISL_452574, EPI_ISL_452575, EPI_ISL_452576, EPI_ISL_452577, EPI_ISL_452578, EPI_ISL_452579, EPI_ISL_452580, EPI_ISL_452581, EPI_ISL_452582, EPI_ISL_452583, EPI_ISL_452584, EPI_ISL_452585, EPI_ISL_452586, EPI_ISL_452587, EPI_ISL_452588, EPI_ISL_452589, EPI_ISL_452590, EPI_ISL_452591, EPI_ISL_452592, EPI_ISL_452593, EPI_ISL_452594, EPI_ISL_452595, EPI_ISL_452596, EPI_ISL_452597, EPI_ISL_452598, EPI_ISL_452599, EPI_ISL_452600, EPI_ISL_452601, EPI_ISL_452602, EPI_ISL_452603, EPI_ISL_452604, EPI_ISL_452605, EPI_ISL_452606, EPI_ISL_452607, EPI_ISL_452608, EPI_ISL_452609, EPI_ISL_452610, EPI_ISL_452611, EPI_ISL_452612, EPI_ISL_452613, EPI_ISL_452614, EPI_ISL_452615, EPI_ISL_452616                                 | see above                                                                             | Servicio de Microbiología y Parasitología clínica. UCEIMP. Hospital Universitario Virgen del Rocío/IBIS/CSIC/US.                                                                                                                | SeqCOVID-SPAIN consortium/IBV/CSIC                                                                                                                                                                                                                                                                                                      | Guillermo Martí-n Gutiérrez, Ángel Rodri-guez Villodres, Lidia Gálvez Benitez, Verónica González Galán, Javier Aznar Martí-n and SeqCOVID-SPAIN consortium |
| EPI_ISL_452617, EPI_ISL_452618, EPI_ISL_452619, EPI_ISL_452620, EPI_ISL_452621, EPI_ISL_452622, EPI_ISL_452623, EPI_ISL_452624, EPI_ISL_452625, EPI_ISL_452626, EPI_ISL_452627, EPI_ISL_452628, EPI_ISL_452629, EPI_ISL_452630, EPI_ISL_452631, EPI_ISL_452632, EPI_ISL_452633, EPI_ISL_452634, EPI_ISL_452635, EPI_ISL_452636, EPI_ISL_452637, EPI_ISL_452638, EPI_ISL_452639, EPI_ISL_452640, EPI_ISL_452641, EPI_ISL_452642, EPI_ISL_452643, EPI_ISL_452644, EPI_ISL_452645, EPI_ISL_452646, EPI_ISL_452647, EPI_ISL_452648, EPI_ISL_452649, EPI_ISL_452650, EPI_ISL_452651, EPI_ISL_452652, EPI_ISL_452653, EPI_ISL_452654, EPI_ISL_452655, EPI_ISL_452656, EPI_ISL_452657, EPI_ISL_452658, EPI_ISL_452659, EPI_ISL_452660, EPI_ISL_452661, EPI_ISL_452662, EPI_ISL_452663, EPI_ISL_452664, EPI_ISL_452665, EPI_ISL_452666, EPI_ISL_452667, EPI_ISL_452668, EPI_ISL_452669, EPI_ISL_452670, EPI_ISL_452671, EPI_ISL_452672, EPI_ISL_452673, EPI_ISL_452674, EPI_ISL_452675, EPI_ISL_452676, EPI_ISL_452677, EPI_ISL_452678, EPI_ISL_452679, EPI_ISL_452680, EPI_ISL_452681, EPI_ISL_452682, EPI_ISL_452683, EPI_ISL_452684, EPI_ISL_452685, EPI_ISL_452686, EPI_ISL_452687, EPI_ISL_452688, EPI_ISL_452689, EPI_ISL_452690, EPI_ISL_452691 | see above                                                                             | Servicio de Microbiología. Hospital Universitario Donostia. OSI Donostialdea. Área de Enfermedades Infecciosas, Grupo de Infección Respiratoria y Resistencia Antimicrobiana. Instituto de Investigación Sanitaria Biodonostia. | SeqCOVID-SPAIN consortium/IBV/CSIC                                                                                                                                                                                                                                                                                                      | Gustavo Cilla, Milagrosa Montes, Luis Piñeiro, Jose Maria Marimón and SeqCOVID-SPAIN consortium                                                            |
| EPI_ISL_454417, EPI_ISL_454418                                                                                                                                                                                                                                                                                                                                                                                                                                                                                                                                                                                                                                                                                                                                                                                                                                                                                                                                                                                                                                                                                                                                                                                                                 | Research and Experiment Center, Meizhou People Hospital                               | Research and Experiment Center, Meizhou People Hospital                                                                                                                                                                         | Guo,X., Zeng,L. and Yu.Z.                                                                                                                                                                                                                                                                                                               |                                                                                                                                                            |
| EPI_ISL_455313                                                                                                                                                                                                                                                                                                                                                                                                                                                                                                                                                                                                                                                                                                                                                                                                                                                                                                                                                                                                                                                                                                                                                                                                                                 | Microbiology Unit, Department of Pathology & Laboratory Medicine, IIUM Medical Centre | SEA Microbiome Unit, Faculty of Industrial Sciences & Technology, Universiti Malaysia Pahang                                                                                                                                    | Hajar Fauzan Ahmad, Norhidayah Kamarudin, Ahmad Hafiz Zulkifly, IIUM Medical Centre Covid19 Taskforce, UMP Covid19 Team                                                                                                                                                                                                                 |                                                                                                                                                            |
| EPI_ISL_455629, EPI_ISL_455632, EPI_ISL_455633, EPI_ISL_455635, EPI_ISL_455636, EPI_ISL_455637, EPI_ISL_455638                                                                                                                                                                                                                                                                                                                                                                                                                                                                                                                                                                                                                                                                                                                                                                                                                                                                                                                                                                                                                                                                                                                                 | KRISP, KZN Research Innovation and Sequencing Platform                                | KRISP, KZN Research Innovation and Sequencing Platform                                                                                                                                                                          | Giandhari J, Pillay S, Lessells R, Chimukangara B, Deforche K, Tegally H, Wilkinson E, de Oliveira T                                                                                                                                                                                                                                    |                                                                                                                                                            |
| EPI_ISL_455722                                                                                                                                                                                                                                                                                                                                                                                                                                                                                                                                                                                                                                                                                                                                                                                                                                                                                                                                                                                                                                                                                                                                                                                                                                 | Servicio de Microbiología. Hospital Clínico Universitario de Valencia                 | Sequencing and Bioinformatics Service and Molecular Epidemiology Research Group. FISABIO-Public Health, and SeqCOVID-Spain Consortium                                                                                           | Giuseppe 'Auria, David Navarro, Eliseo Albert, María Alma Bracho, Lidia Ruiz Roldan, Neris Garcia-Gonzalez, Inma Galán Vendrell, Sandra Carbo, Loreto Ferrús Abad, Paula Ruiz-Hueso, Mariana Reyes-Prieto, Vicente Soriano Chirona, Ivan Ansari, Lúcia Martínez-Priego, Fernando Gonzalez-Candelas                                      |                                                                                                                                                            |
| EPI_ISL_455734, EPI_ISL_455737                                                                                                                                                                                                                                                                                                                                                                                                                                                                                                                                                                                                                                                                                                                                                                                                                                                                                                                                                                                                                                                                                                                                                                                                                 | Servicio de Microbiología. Hospital Clínico Universitario de Valencia                 | Sequencing and Bioinformatics Service and Molecular Epidemiology Research Group. FISABIO-Public Health, and SeqCOVID-Spain Consortium                                                                                           | Griselda De Marco, Lidia Ruiz Roldan, Neris Garcia-Gonzalez, Inma Galán Vendrell, Sandra Carbo, Loreto Ferrús Abad, Paula Ruiz-Hueso, Mariana Reyes-Prieto, Vicente Soriano Chirona, Ivan Ansari, Lúcia Martínez-Priego, Giuseppe 'Auria, David Navarro, Eliseo Albert, María Alma Bracho, Fernando Gonzalez-Candelas                   |                                                                                                                                                            |
| EPI_ISL_457827, EPI_ISL_457828, EPI_ISL_457829, EPI_ISL_457830, EPI_ISL_457831, EPI_ISL_457832, EPI_ISL_457833, EPI_ISL_457834, EPI_ISL_457835, EPI_ISL_457836, EPI_ISL_457837, EPI_ISL_457838, EPI_ISL_457839, EPI_ISL_457840, EPI_ISL_457841, EPI_ISL_457842, EPI_ISL_457843, EPI_ISL_457844                                                                                                                                                                                                                                                                                                                                                                                                                                                                                                                                                                                                                                                                                                                                                                                                                                                                                                                                                 | see above                                                                             | National Public Health Laboratory                                                                                                                                                                                               | KEMRI-Wellcome Trust Research Programme/KEMRI-CGMR-C Kilifi<br>Githinji G. et al 2020                                                                                                                                                                                                                                                   |                                                                                                                                                            |
| EPI_ISL_457845, EPI_ISL_457846, EPI_ISL_457847, EPI_ISL_457848, EPI_ISL_457849, EPI_ISL_457850, EPI_ISL_457851, EPI_ISL_457852, EPI_ISL_457853, EPI_ISL_457854, EPI_ISL_457855, EPI_ISL_457856, EPI_ISL_457857, EPI_ISL_457858, EPI_ISL_457859, EPI_ISL_457860, EPI_ISL_457861, EPI_ISL_457862, EPI_ISL_457863, EPI_ISL_457864, EPI_ISL_457865, EPI_ISL_457866, EPI_ISL_457867, EPI_ISL_457868, EPI_ISL_457869, EPI_ISL_457870, EPI_ISL_457871, EPI_ISL_457872, EPI_ISL_457873, EPI_ISL_457874, EPI_ISL_457875, EPI_ISL_457876, EPI_ISL_457877, EPI_ISL_457878, EPI_ISL_457879, EPI_ISL_457880, EPI_ISL_457881, EPI_ISL_457882, EPI_ISL_457883, EPI_ISL_457884, EPI_ISL_457885, EPI_ISL_457886, EPI_ISL_457887, EPI_ISL_457888, EPI_ISL_457889, EPI_ISL_457890, EPI_ISL_457891, EPI_ISL_457892, EPI_ISL_457893, EPI_ISL_457894, EPI_ISL_457895, EPI_ISL_457896, EPI_ISL_457897, EPI_ISL_457898, EPI_ISL_457899                                                                                                                                                                                                                                                                                                                                 | see above                                                                             | National Public Health Laboratory                                                                                                                                                                                               | KEMRI-Wellcome Trust Research Programme/KEMRI-CGMR-C Kilifi<br>Githinji G. et al 2020                                                                                                                                                                                                                                                   |                                                                                                                                                            |

|                                                                                                                                                                                                                                                                                                                                                                                                                                                                                                                                                                                                                                                                                                                                                                                                                                                                                                                                                                                                                                                                                                                                                                                                                                                                                                                                                                                                                                                                                                                |           |                                                                                                                                                                                                                                 |                                                                                                                                                                                         |                                                                                                                                                                                                                                                                                                                                                                                                                                                                                                                                                                  |
|----------------------------------------------------------------------------------------------------------------------------------------------------------------------------------------------------------------------------------------------------------------------------------------------------------------------------------------------------------------------------------------------------------------------------------------------------------------------------------------------------------------------------------------------------------------------------------------------------------------------------------------------------------------------------------------------------------------------------------------------------------------------------------------------------------------------------------------------------------------------------------------------------------------------------------------------------------------------------------------------------------------------------------------------------------------------------------------------------------------------------------------------------------------------------------------------------------------------------------------------------------------------------------------------------------------------------------------------------------------------------------------------------------------------------------------------------------------------------------------------------------------|-----------|---------------------------------------------------------------------------------------------------------------------------------------------------------------------------------------------------------------------------------|-----------------------------------------------------------------------------------------------------------------------------------------------------------------------------------------|------------------------------------------------------------------------------------------------------------------------------------------------------------------------------------------------------------------------------------------------------------------------------------------------------------------------------------------------------------------------------------------------------------------------------------------------------------------------------------------------------------------------------------------------------------------|
| EPI_ISL_457899, EPI_ISL_457900, EPI_ISL_457901, EPI_ISL_457902, EPI_ISL_457903, EPI_ISL_457904, EPI_ISL_457905, EPI_ISL_457906, EPI_ISL_457907, EPI_ISL_457908, EPI_ISL_457909, EPI_ISL_457910, EPI_ISL_457911, EPI_ISL_457912, EPI_ISL_457913, EPI_ISL_457914, EPI_ISL_457915, EPI_ISL_457916, EPI_ISL_457917, EPI_ISL_457918, EPI_ISL_457919, EPI_ISL_457920, EPI_ISL_457921, EPI_ISL_457922, EPI_ISL_457923, EPI_ISL_457924, EPI_ISL_457925, EPI_ISL_457926, EPI_ISL_457927, EPI_ISL_457928, EPI_ISL_457929, EPI_ISL_457930, EPI_ISL_457931                                                                                                                                                                                                                                                                                                                                                                                                                                                                                                                                                                                                                                                                                                                                                                                                                                                                                                                                                                 | see above | KEMRI-CGMR-C                                                                                                                                                                                                                    | KEMRI-Wellcome Trust Research Programme/KEMRI-CGMR-C Kilifi                                                                                                                             | Githinji G. et al 2020                                                                                                                                                                                                                                                                                                                                                                                                                                                                                                                                           |
| EPI_ISL_457932, EPI_ISL_457933, EPI_ISL_457934, EPI_ISL_457935, EPI_ISL_457936                                                                                                                                                                                                                                                                                                                                                                                                                                                                                                                                                                                                                                                                                                                                                                                                                                                                                                                                                                                                                                                                                                                                                                                                                                                                                                                                                                                                                                 |           | KEMRI-Centre for Virus Research                                                                                                                                                                                                 | KEMRI-Wellcome Trust Research Programme/KEMRI-CGMR-C Kilifi                                                                                                                             | Githinji G. et al 2020                                                                                                                                                                                                                                                                                                                                                                                                                                                                                                                                           |
| EPI_ISL_458285, EPI_ISL_458286                                                                                                                                                                                                                                                                                                                                                                                                                                                                                                                                                                                                                                                                                                                                                                                                                                                                                                                                                                                                                                                                                                                                                                                                                                                                                                                                                                                                                                                                                 |           | unknown                                                                                                                                                                                                                         | Bundeswehr Institute of Microbiology                                                                                                                                                    | Handrick,S., Bestehorn-Willmann,M.S., Eckstein,S., Walter,M.C., Antwerpen,M.H., Rehn,A., Najja,H., Stoecker,K., Woelfel,R. and Ben Moussa,M.                                                                                                                                                                                                                                                                                                                                                                                                                     |
| EPI_ISL_462753                                                                                                                                                                                                                                                                                                                                                                                                                                                                                                                                                                                                                                                                                                                                                                                                                                                                                                                                                                                                                                                                                                                                                                                                                                                                                                                                                                                                                                                                                                 |           | University Clinical Hospital of Mostar                                                                                                                                                                                          | University of Sarajevo Veterinary Faculty                                                                                                                                               | Goletic, T., Softic, A., Goletic, S., Ostojic, M., Hukic, M., Eterovic, T., Seho-Alic, A.                                                                                                                                                                                                                                                                                                                                                                                                                                                                        |
| EPI_ISL_462995, EPI_ISL_462996, EPI_ISL_462997, EPI_ISL_462998, EPI_ISL_462999, EPI_ISL_463000                                                                                                                                                                                                                                                                                                                                                                                                                                                                                                                                                                                                                                                                                                                                                                                                                                                                                                                                                                                                                                                                                                                                                                                                                                                                                                                                                                                                                 |           | Molecular Genetics                                                                                                                                                                                                              | Molecular Genetics                                                                                                                                                                      | Gomez,J., Coto,E.                                                                                                                                                                                                                                                                                                                                                                                                                                                                                                                                                |
| EPI_ISL_467432, EPI_ISL_467433, EPI_ISL_467434                                                                                                                                                                                                                                                                                                                                                                                                                                                                                                                                                                                                                                                                                                                                                                                                                                                                                                                                                                                                                                                                                                                                                                                                                                                                                                                                                                                                                                                                 |           | AMPATH-DBN                                                                                                                                                                                                                      | KRISP, KZN Research Innovation and Sequencing Platform                                                                                                                                  | Giandhari J, Pillay S, Lessells R, Chimukangara B, Mdlalose K, York D, Khan S, Tegally H, Wilkinson E, de Oliveira T                                                                                                                                                                                                                                                                                                                                                                                                                                             |
| EPI_ISL_467438, EPI_ISL_467439, EPI_ISL_467440                                                                                                                                                                                                                                                                                                                                                                                                                                                                                                                                                                                                                                                                                                                                                                                                                                                                                                                                                                                                                                                                                                                                                                                                                                                                                                                                                                                                                                                                 |           | NHLS-IALCH                                                                                                                                                                                                                      | KRISP, KZN Research Innovation and Sequencing Platform                                                                                                                                  | Giandhari J, Pillay S, Lessells R, Chimukangara B, Mdlalose K, York D, Khan S, Tegally H, Wilkinson E, de Oliveira T                                                                                                                                                                                                                                                                                                                                                                                                                                             |
| EPI_ISL_467444, EPI_ISL_467445, EPI_ISL_467448                                                                                                                                                                                                                                                                                                                                                                                                                                                                                                                                                                                                                                                                                                                                                                                                                                                                                                                                                                                                                                                                                                                                                                                                                                                                                                                                                                                                                                                                 |           | Molecular Diagnostics Services (MDS)                                                                                                                                                                                            | KRISP, KZN Research Innovation and Sequencing Platform                                                                                                                                  | Giandhari J, Pillay S, Lessells R, Chimukangara B, Mdlalose K, York D, Khan S, Tegally H, Wilkinson E, de Oliveira T                                                                                                                                                                                                                                                                                                                                                                                                                                             |
| EPI_ISL_467451, EPI_ISL_467452, EPI_ISL_467453, EPI_ISL_467455, EPI_ISL_467456, EPI_ISL_467457, EPI_ISL_467459, EPI_ISL_467461, EPI_ISL_467463, EPI_ISL_467464, EPI_ISL_467465, EPI_ISL_467471, EPI_ISL_467474                                                                                                                                                                                                                                                                                                                                                                                                                                                                                                                                                                                                                                                                                                                                                                                                                                                                                                                                                                                                                                                                                                                                                                                                                                                                                                 | see above | AMPATH-DBN                                                                                                                                                                                                                      | KRISP, KZN Research Innovation and Sequencing Platform                                                                                                                                  | Giandhari J, Pillay S, Lessells R, Chimukangara B, Mdlalose K, York D, Khan S, Tegally H, Wilkinson E, de Oliveira T                                                                                                                                                                                                                                                                                                                                                                                                                                             |
| EPI_ISL_467475, EPI_ISL_467476, EPI_ISL_467479, EPI_ISL_467480, EPI_ISL_467484, EPI_ISL_467486, EPI_ISL_467487, EPI_ISL_467489, EPI_ISL_467490                                                                                                                                                                                                                                                                                                                                                                                                                                                                                                                                                                                                                                                                                                                                                                                                                                                                                                                                                                                                                                                                                                                                                                                                                                                                                                                                                                 |           | Molecular Diagnostics Services (MDS)                                                                                                                                                                                            | KRISP, KZN Research Innovation and Sequencing Platform                                                                                                                                  | Giandhari J, Pillay S, Lessells R, Chimukangara B, Mdlalose K, York D, Khan S, Tegally H, Wilkinson E, de Oliveira T                                                                                                                                                                                                                                                                                                                                                                                                                                             |
| EPI_ISL_467492, EPI_ISL_467493                                                                                                                                                                                                                                                                                                                                                                                                                                                                                                                                                                                                                                                                                                                                                                                                                                                                                                                                                                                                                                                                                                                                                                                                                                                                                                                                                                                                                                                                                 |           | NHLS-IALCH                                                                                                                                                                                                                      | KRISP, KZN Research Innovation and Sequencing Platform                                                                                                                                  | Giandhari J, Pillay S, Lessells R, Chimukangara B, Mdlalose K, York D, Khan S, Tegally H, Wilkinson E, de Oliveira T                                                                                                                                                                                                                                                                                                                                                                                                                                             |
| EPI_ISL_467494, EPI_ISL_467496, EPI_ISL_467497, EPI_ISL_467499, EPI_ISL_467500, EPI_ISL_467501, EPI_ISL_467502, EPI_ISL_467503, EPI_ISL_467504, EPI_ISL_467505, EPI_ISL_467506                                                                                                                                                                                                                                                                                                                                                                                                                                                                                                                                                                                                                                                                                                                                                                                                                                                                                                                                                                                                                                                                                                                                                                                                                                                                                                                                 | see above | Molecular Diagnostics Services (MDS)                                                                                                                                                                                            | KRISP, KZN Research Innovation and Sequencing Platform                                                                                                                                  | Giandhari J, Pillay S, Lessells R, Chimukangara B, Mdlalose K, York D, Khan S, Tegally H, Wilkinson E, de Oliveira T                                                                                                                                                                                                                                                                                                                                                                                                                                             |
| EPI_ISL_467508, EPI_ISL_467510, EPI_ISL_467511, EPI_ISL_467512, EPI_ISL_467513, EPI_ISL_467514                                                                                                                                                                                                                                                                                                                                                                                                                                                                                                                                                                                                                                                                                                                                                                                                                                                                                                                                                                                                                                                                                                                                                                                                                                                                                                                                                                                                                 |           | NHLS-IALCH                                                                                                                                                                                                                      | KRISP, KZN Research Innovation and Sequencing Platform                                                                                                                                  | Giandhari J, Pillay S, Lessells R, Chimukangara B, Mdlalose K, York D, Khan S, Tegally H, Wilkinson E, de Oliveira T                                                                                                                                                                                                                                                                                                                                                                                                                                             |
| EPI_ISL_467516                                                                                                                                                                                                                                                                                                                                                                                                                                                                                                                                                                                                                                                                                                                                                                                                                                                                                                                                                                                                                                                                                                                                                                                                                                                                                                                                                                                                                                                                                                 |           | CAPRISA                                                                                                                                                                                                                         | KRISP, KZN Research Innovation and Sequencing Platform                                                                                                                                  | Giandhari J, Pillay S, Lessells R, Chimukangara B, Mdlalose K, York D, Khan S, Tegally H, Wilkinson E, de Oliveira T                                                                                                                                                                                                                                                                                                                                                                                                                                             |
| EPI_ISL_467517, EPI_ISL_467520, EPI_ISL_467522, EPI_ISL_467523, EPI_ISL_467524                                                                                                                                                                                                                                                                                                                                                                                                                                                                                                                                                                                                                                                                                                                                                                                                                                                                                                                                                                                                                                                                                                                                                                                                                                                                                                                                                                                                                                 |           | NHLS-IALCH                                                                                                                                                                                                                      | KRISP, KZN Research Innovation and Sequencing Platform                                                                                                                                  | Giandhari J, Pillay S, Lessells R, Chimukangara B, Mdlalose K, York D, Khan S, Tegally H, Wilkinson E, de Oliveira T                                                                                                                                                                                                                                                                                                                                                                                                                                             |
| EPI_ISL_468860, EPI_ISL_468861, EPI_ISL_468862, EPI_ISL_468863, EPI_ISL_468864, EPI_ISL_468865, EPI_ISL_468866, EPI_ISL_468867, EPI_ISL_468868, EPI_ISL_468869, EPI_ISL_468870, EPI_ISL_468871, EPI_ISL_468872, EPI_ISL_468873, EPI_ISL_468874, EPI_ISL_468875, EPI_ISL_468876, EPI_ISL_468877, EPI_ISL_468878, EPI_ISL_468879, EPI_ISL_468880, EPI_ISL_468881, EPI_ISL_468882, EPI_ISL_468883, EPI_ISL_468884, EPI_ISL_468885, EPI_ISL_468886, EPI_ISL_468887, EPI_ISL_468888, EPI_ISL_468889, EPI_ISL_468890, EPI_ISL_468891, EPI_ISL_468892, EPI_ISL_468893, EPI_ISL_468894, EPI_ISL_468895, EPI_ISL_468896, EPI_ISL_468897, EPI_ISL_468898, EPI_ISL_468899, EPI_ISL_468900, EPI_ISL_468901, EPI_ISL_468902, EPI_ISL_468903, EPI_ISL_468904, EPI_ISL_468905, EPI_ISL_468906, EPI_ISL_468907, EPI_ISL_468908, EPI_ISL_468909, EPI_ISL_468910, EPI_ISL_468911, EPI_ISL_468912, EPI_ISL_468913, EPI_ISL_468915, EPI_ISL_468916, EPI_ISL_468917, EPI_ISL_468918, EPI_ISL_468919, EPI_ISL_468920, EPI_ISL_468921, EPI_ISL_468922, EPI_ISL_468923, EPI_ISL_468924, EPI_ISL_468925, EPI_ISL_468926, EPI_ISL_468927, EPI_ISL_468928, EPI_ISL_468929, EPI_ISL_468930, EPI_ISL_468931, EPI_ISL_468932, EPI_ISL_468933, EPI_ISL_468934, EPI_ISL_468935, EPI_ISL_468936, EPI_ISL_468937, EPI_ISL_468938, EPI_ISL_468939, EPI_ISL_468940, EPI_ISL_468941, EPI_ISL_468942, EPI_ISL_468943, EPI_ISL_468944, EPI_ISL_468945, EPI_ISL_468946, EPI_ISL_468947, EPI_ISL_468948, EPI_ISL_468949, EPI_ISL_468950, EPI_ISL_468951 | see above | Servicio de Microbiología. Hospital Universitario Donostia. OSI Donostialdea. Área de Enfermedades Infecciosas, Grupo de Infección Respiratoria y Resistencia Antimicrobiana. Instituto de Investigación Sanitaria Biodonostia. | SeqCOVID-SPAIN consortium/IBV(CSIC)                                                                                                                                                     | Gustavo Cilla, Milagrosa Montes, Luis Piñeiro, Jose Maria Marimón and SeqCOVID-SPAIN consortium                                                                                                                                                                                                                                                                                                                                                                                                                                                                  |
| EPI_ISL_470876                                                                                                                                                                                                                                                                                                                                                                                                                                                                                                                                                                                                                                                                                                                                                                                                                                                                                                                                                                                                                                                                                                                                                                                                                                                                                                                                                                                                                                                                                                 |           | Department for Virology, Molecular Biology and Genome Research, R. G. Lugar Center for Public Health Research, National Center for Disease Control and Public Health (NCDC) of Georgia.                                         | Department for Virology, Molecular Biology and Genome Research, R. G. Lugar Center for Public Health Research, National Center for Disease Control and Public Health (NCDC) of Georgia. | Giorgi Tomashvili, Meri Pantsulaia, Gvantsa Brachveli, Gvantsa Chanturia, Ann Machabishvili, Nato Kotaria, Marine Murtskhvaladze, Lela Sabadze, Mari Gavashelidze, Ana Papkauri, Tata Imnadze, Tamar Jashiasvili, Tea Tvevdoradze, Ketevan Sidamonidze, Ekaterine Khmaladze, Ekaterine Zhghenti, Roena Sukhiasvili, Mariam Zakalashvili, Lela Urushadze, Magda Dgebuadze, Davit Tsaguria, Ekaterine Zangaladze, Nino Berishvili, Adam Kotorashvili, Maia Alkhaszashvili, Irma Burjanadze, Anna Kasradze, Khatuna Zakhashvili, Paata Imnadze, Amiran Gamkrelidze. |
| EPI_ISL_470877                                                                                                                                                                                                                                                                                                                                                                                                                                                                                                                                                                                                                                                                                                                                                                                                                                                                                                                                                                                                                                                                                                                                                                                                                                                                                                                                                                                                                                                                                                 |           | Department for Virology, Molecular Biology and Genome Research, R. G. Lugar Center for Public Health Research, National Center for Disease Control and Public Health (NCDC) of Georgia.                                         | Department for Virology, Molecular Biology and Genome Research, R. G. Lugar Center for Public Health Research, National Center for Disease Control and Public Health (NCDC) of Georgia. | Gvantsa Brachveli, Meri Pantsulaia, Giorgi Tomashvili, Gvantsa Chanturia, Ann Machabishvili, Nato Kotaria, Marine Murtskhvaladze, Lela Sabadze, Mari Gavashelidze, Ana Papkauri, Tata Imnadze, Tamar Jashiasvili, Tea Tvevdoradze, Ketevan Sidamonidze, Ekaterine Khmaladze, Ekaterine Zhghenti, Roena Sukhiasvili, Mariam Zakalashvili, Lela Urushadze, Magda Dgebuadze, Davit Tsaguria, Ekaterine Zangaladze, Nino Berishvili, Adam Kotorashvili, Maia Alkhaszashvili, Irma Burjanadze, Anna Kasradze, Khatuna Zakhashvili, Paata Imnadze, Amiran Gamkrelidze. |
| EPI_ISL_476559                                                                                                                                                                                                                                                                                                                                                                                                                                                                                                                                                                                                                                                                                                                                                                                                                                                                                                                                                                                                                                                                                                                                                                                                                                                                                                                                                                                                                                                                                                 |           | unknown                                                                                                                                                                                                                         | Laboratoire Sciences et Technologies de la Santé (STS) Institut Supérieur des Sciences de la Santé Université Hassan 1er, Settat, Morocco                                               | Hajar Lemriss, Sanaâ Lemriss, Amal Souiri, Narjis Amar, Mustapha Mouallif, Touria Essayagh, Jawad Bouzid, Saâd EL Kabbaj, Abderraouf Hilali                                                                                                                                                                                                                                                                                                                                                                                                                      |
| EPI_ISL_480952, EPI_ISL_480953, EPI_ISL_480954, EPI_ISL_480955, EPI_ISL_480956, EPI_ISL_480957, EPI_ISL_480958, EPI_ISL_480959, EPI_ISL_480960, EPI_ISL_480962, EPI_ISL_480963, EPI_ISL_480964, EPI_ISL_480965, EPI_ISL_480966, EPI_ISL_480967, EPI_ISL_480968, EPI_ISL_480969, EPI_ISL_480970, EPI_ISL_480971, EPI_ISL_480972, EPI_ISL_480973, EPI_ISL_480974, EPI_ISL_480976, EPI_ISL_480977, EPI_ISL_480978, EPI_ISL_480979, EPI_ISL_480980, EPI_ISL_480982, EPI_ISL_480983, EPI_ISL_480984, EPI_ISL_480985, EPI_ISL_480986, EPI_ISL_480987, EPI_ISL_480988, EPI_ISL_480989, EPI_ISL_480991, EPI_ISL_480992, EPI_ISL_480993, EPI_ISL_480994, EPI_ISL_480996, EPI_ISL_480997, EPI_ISL_480998, EPI_ISL_480999, EPI_ISL_481000, EPI_ISL_481001, EPI_ISL_481002, EPI_ISL_481004, EPI_ISL_481005, EPI_ISL_481006, EPI_ISL_481007, EPI_ISL_481008, EPI_ISL_481009, EPI_ISL_481010, EPI_ISL_481011, EPI_ISL_481012, EPI_ISL_481013, EPI_ISL_481014, EPI_ISL_481015, EPI_ISL_481016, EPI_ISL_481018, EPI_ISL_481019, EPI_ISL_481020, EPI_ISL_481021, EPI_ISL_481022, EPI_ISL_481023, EPI_ISL_481024, EPI_ISL_481026, EPI_ISL_481027, EPI_ISL_481028, EPI_ISL_481030, EPI_ISL_481031, EPI_ISL_481032, EPI_ISL_481033, EPI_ISL_481036, EPI_ISL_481037, EPI_ISL_481038, EPI_ISL_481039, EPI_ISL_481040                                                                                                                                                                                                                 | see above | Servicio de Microbiología. Hospital Universitario Donostia. OSI Donostialdea. Área de Enfermedades Infecciosas, Grupo de Infección Respiratoria y Resistencia Antimicrobiana. Instituto de Investigación Sanitaria Biodonostia  | SeqCOVID-SPAIN consortium/IBV(CSIC)                                                                                                                                                     | Gustavo Cilla, Milagrosa Montes, Luis Piñeiro, Jose Maria Marimón and SeqCOVID-SPAIN consortium                                                                                                                                                                                                                                                                                                                                                                                                                                                                  |
| EPI_ISL_482702, EPI_ISL_482703, EPI_ISL_482704, EPI_ISL_482705, EPI_ISL_482707, EPI_ISL_482708, EPI_ISL_482709                                                                                                                                                                                                                                                                                                                                                                                                                                                                                                                                                                                                                                                                                                                                                                                                                                                                                                                                                                                                                                                                                                                                                                                                                                                                                                                                                                                                 |           | Molecular Diagnostics Services (MDS)                                                                                                                                                                                            | KRISP, KZN Research Innovation and Sequencing Platform                                                                                                                                  | Giandhari J, Pillay S, Lessells R, Chimukangara B, Mdlalose K, York D, Khan S, Tegally H, Wilkinson E, de Oliveira T                                                                                                                                                                                                                                                                                                                                                                                                                                             |
| EPI_ISL_482711, EPI_ISL_482713                                                                                                                                                                                                                                                                                                                                                                                                                                                                                                                                                                                                                                                                                                                                                                                                                                                                                                                                                                                                                                                                                                                                                                                                                                                                                                                                                                                                                                                                                 |           | NHLS-IALCH                                                                                                                                                                                                                      | KRISP, KZN Research Innovation and Sequencing Platform                                                                                                                                  | Giandhari J, Pillay S, Lessells R, Chimukangara B, Mdlalose K, York D, Khan S, Tegally H, Wilkinson E, de Oliveira T                                                                                                                                                                                                                                                                                                                                                                                                                                             |
| EPI_ISL_482714, EPI_ISL_482715, EPI_ISL_482719, EPI_ISL_482721, EPI_ISL_482723                                                                                                                                                                                                                                                                                                                                                                                                                                                                                                                                                                                                                                                                                                                                                                                                                                                                                                                                                                                                                                                                                                                                                                                                                                                                                                                                                                                                                                 |           | Molecular Diagnostics Services (MDS)                                                                                                                                                                                            | KRISP, KZN Research Innovation and Sequencing Platform                                                                                                                                  | Giandhari J, Pillay S, Lessells R, Chimukangara B, Mdlalose K, York D, Khan S, Tegally H, Wilkinson E, de Oliveira T                                                                                                                                                                                                                                                                                                                                                                                                                                             |





|                                                                                                                                                                                                                                                                                                                                                                                                                                                                                                                                                                                                                                                                                                                                                                                                                                                                                                                                                                                                                                                                                                                                                                                                                                                                                                                                                                                                                                                                |           |                                                                                 |                                                                                                                                                                                                                                                                                                                                                                                                                                                                  |                                                                                                                                                                                                                                                                                                                                                                                                                                                              |
|----------------------------------------------------------------------------------------------------------------------------------------------------------------------------------------------------------------------------------------------------------------------------------------------------------------------------------------------------------------------------------------------------------------------------------------------------------------------------------------------------------------------------------------------------------------------------------------------------------------------------------------------------------------------------------------------------------------------------------------------------------------------------------------------------------------------------------------------------------------------------------------------------------------------------------------------------------------------------------------------------------------------------------------------------------------------------------------------------------------------------------------------------------------------------------------------------------------------------------------------------------------------------------------------------------------------------------------------------------------------------------------------------------------------------------------------------------------|-----------|---------------------------------------------------------------------------------|------------------------------------------------------------------------------------------------------------------------------------------------------------------------------------------------------------------------------------------------------------------------------------------------------------------------------------------------------------------------------------------------------------------------------------------------------------------|--------------------------------------------------------------------------------------------------------------------------------------------------------------------------------------------------------------------------------------------------------------------------------------------------------------------------------------------------------------------------------------------------------------------------------------------------------------|
| EPI_ISL_515734, EPI_ISL_515735, EPI_ISL_515736, EPI_ISL_515737, EPI_ISL_515738, EPI_ISL_515739, EPI_ISL_515740, EPI_ISL_515741, EPI_ISL_515744, EPI_ISL_515745, EPI_ISL_515746, EPI_ISL_515748, EPI_ISL_515751, EPI_ISL_515752, EPI_ISL_515753, EPI_ISL_515756, EPI_ISL_515757, EPI_ISL_515759, EPI_ISL_515760, EPI_ISL_515761, EPI_ISL_515762, EPI_ISL_515764, EPI_ISL_515766, EPI_ISL_515767, EPI_ISL_515771, EPI_ISL_515772, EPI_ISL_515773, EPI_ISL_515775, EPI_ISL_515777, EPI_ISL_515778, EPI_ISL_515779, EPI_ISL_515781, EPI_ISL_515784, EPI_ISL_515793, EPI_ISL_515795, EPI_ISL_515798                                                                                                                                                                                                                                                                                                                                                                                                                                                                                                                                                                                                                                                                                                                                                                                                                                                                 | see above | NHLS-IALCH                                                                      | KRISP, KZN Research Innovation and Sequencing Platform                                                                                                                                                                                                                                                                                                                                                                                                           | Giandhari J, Pillay S, Lessells R, Mdlalose K, York D, Khan S, Tegally H, Wilkinson E, de Oliveira T                                                                                                                                                                                                                                                                                                                                                         |
| EPI_ISL_515800, EPI_ISL_515809, EPI_ISL_515810, EPI_ISL_515812, EPI_ISL_515814, EPI_ISL_515817, EPI_ISL_515818, EPI_ISL_515821, EPI_ISL_515822, EPI_ISL_515823, EPI_ISL_515824, EPI_ISL_515825, EPI_ISL_515826, EPI_ISL_515828, EPI_ISL_515829, EPI_ISL_515831, EPI_ISL_515835, EPI_ISL_515837, EPI_ISL_515839, EPI_ISL_515840, EPI_ISL_515841, EPI_ISL_515842, EPI_ISL_515843, EPI_ISL_515844, EPI_ISL_515845, EPI_ISL_515847, EPI_ISL_515849, EPI_ISL_515851, EPI_ISL_515852, EPI_ISL_515853, EPI_ISL_515854, EPI_ISL_515855, EPI_ISL_515857, EPI_ISL_515860, EPI_ISL_515861, EPI_ISL_515862, EPI_ISL_515863, EPI_ISL_515864, EPI_ISL_515866, EPI_ISL_515868, EPI_ISL_515869, EPI_ISL_515870, EPI_ISL_515872, EPI_ISL_515873, EPI_ISL_515874, EPI_ISL_515875, EPI_ISL_515876, EPI_ISL_515877, EPI_ISL_515878, EPI_ISL_515879, EPI_ISL_515880, EPI_ISL_515881, EPI_ISL_515883, EPI_ISL_515885, EPI_ISL_515887, EPI_ISL_515888, EPI_ISL_515890, EPI_ISL_515892                                                                                                                                                                                                                                                                                                                                                                                                                                                                                                 | see above | Medical Disagnostics Services (MDS)                                             | KRISP, KZN Research Innovation and Sequencing Platform                                                                                                                                                                                                                                                                                                                                                                                                           | Giandhari J, Pillay S, Lessells R, ChimukangaraB, Mdlalose K, York D, Khan S, Tegally H, Wilkinson E, de Oliveira T                                                                                                                                                                                                                                                                                                                                          |
| EPI_ISL_516611, EPI_ISL_516618, EPI_ISL_516619                                                                                                                                                                                                                                                                                                                                                                                                                                                                                                                                                                                                                                                                                                                                                                                                                                                                                                                                                                                                                                                                                                                                                                                                                                                                                                                                                                                                                 |           | Instituto de Diagnostico y Referencia Epidemiologicos (INDRE)                   | Instituto de Diagnostico y Referencia Epidemiologicos (INDRE)                                                                                                                                                                                                                                                                                                                                                                                                    | Gisela Barrera-Badillo , Abril Rodriguez-Maldonado, Claudia Wong-Arambula , Natividad Cruz-Ortiz, Tatiana Nunez-Garcia, Dayanira Arellano-Suarez, Fabiola Garces-Ayala, Edgar Mendieta-Condado, Lucia Hernandez-Rivas, Irma Lopez-Martinez, Ernesto Ramirez-Gonzalez.                                                                                                                                                                                        |
| EPI_ISL_516620, EPI_ISL_516621                                                                                                                                                                                                                                                                                                                                                                                                                                                                                                                                                                                                                                                                                                                                                                                                                                                                                                                                                                                                                                                                                                                                                                                                                                                                                                                                                                                                                                 |           | Instituto de Diagnostico y Referencia Epidemiologicos (INDRE)                   | Instituto de Diagnostico y Referencia Epidemiologicos (INDRE)                                                                                                                                                                                                                                                                                                                                                                                                    | Gisela Barrera-Badillo , Abril Rodriguez-Maldonado, Claudia Wong-Arambula , Natividad Cruz-Ortiz, Tatiana Nunez-Garcia, Dayanira Arellano-Suarez, Adnan Araiza-Rodriguez, Edgar Mendieta-Condado, Lucia Hernandez-Rivas, Irma Lopez-Martinez, Ernesto Ramirez-Gonzalez.                                                                                                                                                                                      |
| EPI_ISL_516622                                                                                                                                                                                                                                                                                                                                                                                                                                                                                                                                                                                                                                                                                                                                                                                                                                                                                                                                                                                                                                                                                                                                                                                                                                                                                                                                                                                                                                                 |           | Instituto de Diagnostico y Referencia Epidemiologicos (INDRE)                   | Instituto de Diagnostico y Referencia Epidemiologicos (INDRE)                                                                                                                                                                                                                                                                                                                                                                                                    | Gisela Barrera-Badillo , Abril Rodriguez-Maldonado, Claudia Wong-Arambula , Natividad Cruz-Ortiz, Tatiana Nunez-Garcia, Dayanira Arellano-Suarez, Fabiola Garces-Ayala, Edgar Mendieta-Condado, Lucia Hernandez-Rivas, Irma Lopez-Martinez, Ernesto Ramirez-Gonzalez.                                                                                                                                                                                        |
| EPI_ISL_516623                                                                                                                                                                                                                                                                                                                                                                                                                                                                                                                                                                                                                                                                                                                                                                                                                                                                                                                                                                                                                                                                                                                                                                                                                                                                                                                                                                                                                                                 |           | Instituto de Diagnostico y Referencia Epidemiologicos (INDRE)                   | Instituto de Diagnostico y Referencia Epidemiologicos (INDRE)                                                                                                                                                                                                                                                                                                                                                                                                    | Gisela Barrera-Badillo , Abril Rodriguez-Maldonado, Claudia Wong-Arambula , Natividad Cruz-Ortiz, Tatiana Nunez-Garcia, Dayanira Arellano-Suarez, Adnan Araiza-Rodriguez, Edgar Mendieta-Condado, Lucia Hernandez-Rivas, Irma Lopez-Martinez, Ernesto Ramirez-Gonzalez.                                                                                                                                                                                      |
| EPI_ISL_516624, EPI_ISL_516625                                                                                                                                                                                                                                                                                                                                                                                                                                                                                                                                                                                                                                                                                                                                                                                                                                                                                                                                                                                                                                                                                                                                                                                                                                                                                                                                                                                                                                 |           | Instituto de Diagnostico y Referencia Epidemiologicos (INDRE)                   | Instituto de Diagnostico y Referencia Epidemiologicos (INDRE)                                                                                                                                                                                                                                                                                                                                                                                                    | Gisela Barrera-Badillo , Abril Rodriguez-Maldonado, Claudia Wong-Arambula , Natividad Cruz-Ortiz, Tatiana Nunez-Garcia, Dayanira Arellano-Suarez, Fabiola Garces-Ayala, Edgar Mendieta-Condado, Lucia Hernandez-Rivas, Irma Lopez-Martinez, Ernesto Ramirez-Gonzalez.                                                                                                                                                                                        |
| EPI_ISL_516800                                                                                                                                                                                                                                                                                                                                                                                                                                                                                                                                                                                                                                                                                                                                                                                                                                                                                                                                                                                                                                                                                                                                                                                                                                                                                                                                                                                                                                                 |           | Rumah Sakit Akademik Universitas Gadjah Mada                                    | Genetics Working Group (Pokja Genetik) Faculty of Medicine, Public Health and Nursing Universitas Gadjah Mada (FK-KMK UGM); Disease Investigation Center Wates Ministry of Agriculture Indonesia; Department of Microbiology FK-KMK UGM; Laboratorium Diagnostik Yayasan Tahija World Mosquito Program (WMP) Yogyakarta Center for Tropical Medicine FK-KMK UGM; Integrated Research center FK-KMK UGM; Department of Computer Science and Electronics FMIPA UGM | Gunadi, Hendra Wibawa, , Marcellus, Mohamad S. Hakim, Edwin W. Daniwijaya, Ludhang P. Rizki, Endah Supriyati, Eggi Arguni, Titik Nuryastuti, Tri Wibawa, Dwi AA Nugrahaningsih, Afiahayati, Siswanto, Alvin S. Kalim, Desyifa Mursalin                                                                                                                                                                                                                       |
| EPI_ISL_516806                                                                                                                                                                                                                                                                                                                                                                                                                                                                                                                                                                                                                                                                                                                                                                                                                                                                                                                                                                                                                                                                                                                                                                                                                                                                                                                                                                                                                                                 |           | Rumah Sakit PKU Gamping                                                         | Genetics Working Group (Pokja Genetik) Faculty of Medicine, Public Health and Nursing Universitas Gadjah Mada (FK-KMK UGM); Disease Investigation Center Wates Ministry of Agriculture Indonesia; Department of Microbiology FK-KMK UGM; Laboratorium Diagnostik Yayasan Tahija World Mosquito Program (WMP) Yogyakarta Center for Tropical Medicine FK-KMK UGM; Integrated Research center FK-KMK UGM; Department of Computer Science and Electronics FMIPA UGM | Gunadi, Hendra Wibawa, , Marcellus, Mohamad S. Hakim, Edwin W. Daniwijaya, Ludhang P. Rizki, Endah Supriyati, Eggi Arguni, Titik Nuryastuti, Tri Wibawa, Dwi AA Nugrahaningsih, . Afiahayati, . Siswanto, Ardorisye Saptya Forna, Kemala Athollah                                                                                                                                                                                                            |
| EPI_ISL_516829                                                                                                                                                                                                                                                                                                                                                                                                                                                                                                                                                                                                                                                                                                                                                                                                                                                                                                                                                                                                                                                                                                                                                                                                                                                                                                                                                                                                                                                 |           | RSUD Nyi Ageng Serang                                                           | Genetics Working Group (Pokja Genetik) Faculty of Medicine, Public Health and Nursing Universitas Gadjah Mada (FK-KMK UGM); Disease Investigation Center Wates Ministry of Agriculture Indonesia, Department of Microbiology FK-KMK UGM, Laboratorium Diagnostik Yayasan Tahija World Mosquito Program (WMP) Yogyakarta Center for Tropical Medicine FK-KMK UGM, Integrated Research Center FK-KMK UGM, Department of Computer Science and Electronics FMIPA UGM | Gunadi, Hendra Wibawa, , Marcellus, Mohamad S. Hakim, Edwin W. Daniwijaya, Ludhang P. Rizki, Endah Supriyati, Eggi Arguni, Titik Nuryastuti, Tri Wibawa, Dwi AA Nugrahaningsih, Afiahayati, . Siswanto, Beby Dewi Sartika, Dyah Ayu Puspiarani                                                                                                                                                                                                               |
| EPI_ISL_518034, EPI_ISL_518036, EPI_ISL_518040, EPI_ISL_518042, EPI_ISL_518043, EPI_ISL_518044, EPI_ISL_518045, EPI_ISL_518047                                                                                                                                                                                                                                                                                                                                                                                                                                                                                                                                                                                                                                                                                                                                                                                                                                                                                                                                                                                                                                                                                                                                                                                                                                                                                                                                 |           | NHLS-IALCH                                                                      | KRISP, KZN Research Innovation and Sequencing Platform                                                                                                                                                                                                                                                                                                                                                                                                           | Giandhari J, Pillay S, Lessells R, Mdlalose K, York D, Khan S, Tegally H, Wilkinson E, de Oliveira T                                                                                                                                                                                                                                                                                                                                                         |
| EPI_ISL_524735                                                                                                                                                                                                                                                                                                                                                                                                                                                                                                                                                                                                                                                                                                                                                                                                                                                                                                                                                                                                                                                                                                                                                                                                                                                                                                                                                                                                                                                 |           | Government General Hospital, Jam Khambhaliya, Devbhoomi Dwarka                  | Gujarat Biotechnology Research Centre                                                                                                                                                                                                                                                                                                                                                                                                                            | Harish Matani, Janvi Raval, Zarna Patel, Monika Gandhi, Pinal Trivedi, Maharshi Pandya, Nidhi Patel, Nitin Savaliya, Raghawendra Kumar, Dinesh Kumar, Zuber Sayyed, Komal Patel, Labdhi Pandya, Afzal Ansari, Nikha Trivedi, Apurvasinh Puvart, R D Dixit, A M Kadri, Harsh Bakshi, Chaitanya Joshi, Madhvi Joshi                                                                                                                                            |
| EPI_ISL_525492                                                                                                                                                                                                                                                                                                                                                                                                                                                                                                                                                                                                                                                                                                                                                                                                                                                                                                                                                                                                                                                                                                                                                                                                                                                                                                                                                                                                                                                 |           | RSUP dr. SOERADJI TIRTONEGORO                                                   | Genetics Working Group (Pokja Genetik) Faculty of Medicine, Public Health and Nursing Universitas Gadjah Mada (FK-KMK UGM), Disease Investigation Center Wates Ministry of Agriculture Indonesia, Department of Microbiology FK-KMK UGM, Laboratorium Diagnostik Yayasan Tahija World Mosquito Program (WMP) Yogyakarta Center for Tropical Medicine FK-KMK UGM, Integrated Research Center FK-KMK UGM, Department of Computer Science and Electronics FMIPA UGM | Gunadi, Hendra Wibawa, , Marcellus, Mohamad S. Hakim, Edwin W. Daniwijaya, Ludhang P. Rizki, Endah Supriyati, Eggi Arguni, Titik Nuryastuti, Tri Wibawa, Dwi AA Nugrahaningsih, Afiahayati, . Siswanto, Kurniyanto, Indah Juliana, Alvin S. Kalim, Dwiki Afandy                                                                                                                                                                                              |
| EPI_ISL_526686, EPI_ISL_526687, EPI_ISL_526688                                                                                                                                                                                                                                                                                                                                                                                                                                                                                                                                                                                                                                                                                                                                                                                                                                                                                                                                                                                                                                                                                                                                                                                                                                                                                                                                                                                                                 |           | Faith Laboratory, Immunology Institute, Icahn School of Medicine at Mount Sinai | van Bakel Laboratory, Genetics and Genomics Sciences, Icahn School of Medicine at Mount Sinai                                                                                                                                                                                                                                                                                                                                                                    | Graham J. Britton, Alice Chen-Liaw, Francesca Cossarini, Alexandra Livanos, Matthew P. Spindler, Tamar Plitt, Joseph Eggers, Ilaria Mogno, Ana S. Gonzalez-Reiche, Sophia Sui, Michael Tankelevich, Lauren Tal Grinspan, Rebekah E. Dixon, Divya Jha, Gustavo Martinez-Delgado, Fatima Amanat, Daisy Hoagland, Benjamin R. tenOever, Maria C. Dubinsky, Miriam Merad, Harm Van Bakel, Florian Krammer, Gerold Bongers, Saurabh Mehndru and Jeremiah J. Faith |
| EPI_ISL_527401, EPI_ISL_527402, EPI_ISL_527403, EPI_ISL_527404, EPI_ISL_527405, EPI_ISL_527406, EPI_ISL_527407, EPI_ISL_527408, EPI_ISL_527409, EPI_ISL_527410, EPI_ISL_527411, EPI_ISL_527412, EPI_ISL_527413, EPI_ISL_527414, EPI_ISL_527415, EPI_ISL_527416, EPI_ISL_527417, EPI_ISL_527418, EPI_ISL_527419, EPI_ISL_527420, EPI_ISL_527421, EPI_ISL_527422, EPI_ISL_527423, EPI_ISL_527424, EPI_ISL_527425, EPI_ISL_527426, EPI_ISL_527427, EPI_ISL_527428, EPI_ISL_527429, EPI_ISL_527430, EPI_ISL_527431, EPI_ISL_527432, EPI_ISL_527433, EPI_ISL_527434, EPI_ISL_527435, EPI_ISL_527436, EPI_ISL_527437, EPI_ISL_527438, EPI_ISL_527439, EPI_ISL_527440, EPI_ISL_527441, EPI_ISL_527442, EPI_ISL_527443, EPI_ISL_527444, EPI_ISL_527445, EPI_ISL_527446, EPI_ISL_527447, EPI_ISL_527448, EPI_ISL_527449, EPI_ISL_527450, EPI_ISL_527451, EPI_ISL_527452, EPI_ISL_527453, EPI_ISL_527454, EPI_ISL_527455, EPI_ISL_527456, EPI_ISL_527457, EPI_ISL_527458, EPI_ISL_527459, EPI_ISL_527460, EPI_ISL_527461, EPI_ISL_527462, EPI_ISL_527463, EPI_ISL_527464, EPI_ISL_527465, EPI_ISL_527466, EPI_ISL_527467, EPI_ISL_527468, EPI_ISL_527469, EPI_ISL_527470, EPI_ISL_527471, EPI_ISL_527472, EPI_ISL_527473, EPI_ISL_527474, EPI_ISL_527475, EPI_ISL_527476, EPI_ISL_527477, EPI_ISL_527478, EPI_ISL_527479, EPI_ISL_527480, EPI_ISL_527481, EPI_ISL_527482, EPI_ISL_527483, EPI_ISL_527484, EPI_ISL_527485, EPI_ISL_527486, EPI_ISL_527487, EPI_ISL_527488 | see above | Colorado State University - Ebel Lab                                            | Colorado State University - Ebel Lab                                                                                                                                                                                                                                                                                                                                                                                                                             | Greg Ebel et al.                                                                                                                                                                                                                                                                                                                                                                                                                                             |
| EPI_ISL_528539                                                                                                                                                                                                                                                                                                                                                                                                                                                                                                                                                                                                                                                                                                                                                                                                                                                                                                                                                                                                                                                                                                                                                                                                                                                                                                                                                                                                                                                 |           | LVM/UFRJ                                                                        | LNCC                                                                                                                                                                                                                                                                                                                                                                                                                                                             | Gustavo M. Romário M. de Souza; Bruno B. Bezerra; Lucio A. Caldas; Fabio Limonte; Elena Cobos; Sharton V. A. Coelho; Luiz Almeida; Luiza Higga; Isadora A. Correa; Diana Marianni; Luciana B. Arruda; Marcelo Bozza; Orlando Ferreira; Wanderley de Souza; Ana Teresa R. Vasconcelos; Terezinha M. Castineiras; Amílcar Tanuri; Luciana J. Costa.                                                                                                            |
| EPI_ISL_528637, EPI_ISL_528638                                                                                                                                                                                                                                                                                                                                                                                                                                                                                                                                                                                                                                                                                                                                                                                                                                                                                                                                                                                                                                                                                                                                                                                                                                                                                                                                                                                                                                 |           | LVM/UFRJ                                                                        | Bioinformatics Laboratory / LNCC                                                                                                                                                                                                                                                                                                                                                                                                                                 | Gustavo D. P. Silva; M. Romário M. de Souza; Bruno B. Bezerra; Lucio A. Caldas; Fabio Limonte; Elena Cobos; Sharton V. A. Coelho; Luiz Almeida; Luiza Higga; Isadora A. Correa; Diana Marianni; Luciana B. Arruda; Marcelo Bozza; Orlando Ferreira; Wanderley de Souza; Ana Teresa R. Vasconcelos; Terezinha M. Castineiras; Amílcar Tanuri; Luciana J. Costa                                                                                                |

|                                                                                                                                                                                                                                                                                                                                                                                                                                                                                                                                                                                                                                                                                                                                                                                                                                                                                                                                                                                                                                                                                                                                                                                                                                                                                                                                                                                                                                                                                                                |                                                                      |                                                                            |                                                                                                                                                                                                                                                                                                                                                                                                     |
|----------------------------------------------------------------------------------------------------------------------------------------------------------------------------------------------------------------------------------------------------------------------------------------------------------------------------------------------------------------------------------------------------------------------------------------------------------------------------------------------------------------------------------------------------------------------------------------------------------------------------------------------------------------------------------------------------------------------------------------------------------------------------------------------------------------------------------------------------------------------------------------------------------------------------------------------------------------------------------------------------------------------------------------------------------------------------------------------------------------------------------------------------------------------------------------------------------------------------------------------------------------------------------------------------------------------------------------------------------------------------------------------------------------------------------------------------------------------------------------------------------------|----------------------------------------------------------------------|----------------------------------------------------------------------------|-----------------------------------------------------------------------------------------------------------------------------------------------------------------------------------------------------------------------------------------------------------------------------------------------------------------------------------------------------------------------------------------------------|
| EPI_ISL_529146                                                                                                                                                                                                                                                                                                                                                                                                                                                                                                                                                                                                                                                                                                                                                                                                                                                                                                                                                                                                                                                                                                                                                                                                                                                                                                                                                                                                                                                                                                 | Goethe University Hospital Frankfurt, Institute for Medical Virology | Goethe University Hospital Frankfurt, Institute for Medical Virology       | Grabmair,T.T., Hoehl,S., Westhaus,S., Bojkova,D., Berger,A., Rotter,B., Hoffmeier,K., Cinatti,J., Ciesek,S., Widera,M.                                                                                                                                                                                                                                                                              |
| EPI_ISL_529171, EPI_ISL_529172, EPI_ISL_529173, EPI_ISL_529174, EPI_ISL_529175, EPI_ISL_529176, EPI_ISL_529177, EPI_ISL_529178, EPI_ISL_529180, EPI_ISL_529181, EPI_ISL_529182, EPI_ISL_529183, EPI_ISL_529184, EPI_ISL_529185, EPI_ISL_529186, EPI_ISL_529187, EPI_ISL_529188, EPI_ISL_529189, EPI_ISL_529190, EPI_ISL_529191, EPI_ISL_529192, EPI_ISL_529193, EPI_ISL_529194, EPI_ISL_529195, EPI_ISL_529196, EPI_ISL_529197, EPI_ISL_529198, EPI_ISL_529199                                                                                                                                                                                                                                                                                                                                                                                                                                                                                                                                                                                                                                                                                                                                                                                                                                                                                                                                                                                                                                                 |                                                                      |                                                                            |                                                                                                                                                                                                                                                                                                                                                                                                     |
| see above                                                                                                                                                                                                                                                                                                                                                                                                                                                                                                                                                                                                                                                                                                                                                                                                                                                                                                                                                                                                                                                                                                                                                                                                                                                                                                                                                                                                                                                                                                      | South Carolina Department of Health and Environmental Control        | South Carolina Department of Health and Environmental Control              | Haley V. Flores                                                                                                                                                                                                                                                                                                                                                                                     |
| EPI_ISL_529720, EPI_ISL_529721, EPI_ISL_529722, EPI_ISL_529724, EPI_ISL_529726, EPI_ISL_529727, EPI_ISL_529730, EPI_ISL_529731, EPI_ISL_529732, EPI_ISL_529734, EPI_ISL_529737, EPI_ISL_529738, EPI_ISL_529740, EPI_ISL_529743, EPI_ISL_529744, EPI_ISL_529748, EPI_ISL_529749, EPI_ISL_529751, EPI_ISL_529752, EPI_ISL_529754, EPI_ISL_529755, EPI_ISL_529756, EPI_ISL_529757, EPI_ISL_529759, EPI_ISL_529760, EPI_ISL_529764, EPI_ISL_529765, EPI_ISL_529766, EPI_ISL_529768, EPI_ISL_529769, EPI_ISL_529770, EPI_ISL_529771, EPI_ISL_529773, EPI_ISL_529774, EPI_ISL_529779, EPI_ISL_529782, EPI_ISL_529784, EPI_ISL_529785, EPI_ISL_529787, EPI_ISL_529791, EPI_ISL_529792, EPI_ISL_529793, EPI_ISL_529794, EPI_ISL_529795, EPI_ISL_529796, EPI_ISL_529799, EPI_ISL_529802, EPI_ISL_529803                                                                                                                                                                                                                                                                                                                                                                                                                                                                                                                                                                                                                                                                                                                 |                                                                      |                                                                            |                                                                                                                                                                                                                                                                                                                                                                                                     |
| see above                                                                                                                                                                                                                                                                                                                                                                                                                                                                                                                                                                                                                                                                                                                                                                                                                                                                                                                                                                                                                                                                                                                                                                                                                                                                                                                                                                                                                                                                                                      | NHLIS-IALCH                                                          | KRISP, KZN Research Innovation and Sequencing Platform                     | Gandhari J, Pillay S, Lessells R, Mdlalose K, York D, Khan S, Tegally H, Wilkinson E, de Oliveira T                                                                                                                                                                                                                                                                                                 |
| EPI_ISL_530353, EPI_ISL_530355, EPI_ISL_530367, EPI_ISL_530368, EPI_ISL_530369, EPI_ISL_530373, EPI_ISL_530376                                                                                                                                                                                                                                                                                                                                                                                                                                                                                                                                                                                                                                                                                                                                                                                                                                                                                                                                                                                                                                                                                                                                                                                                                                                                                                                                                                                                 | Lighthouse Lab in Glasgow                                            | Wellcome Sanger Institute for the COVID-19 Genomics UK (COG-UK) consortium | Harper VanSteenhouse, Yumi Kasai, David Gray, Carol Clugston, Anna Dominiczak and Alex Alderton, Roberto Amato, Sonia Goncalves, Ewan Harrison, David K. Jackson, Ian Johnston, Dominic Kwiatkowski, Cordelia Langford, John Sillitoe                                                                                                                                                               |
| EPI_ISL_530393                                                                                                                                                                                                                                                                                                                                                                                                                                                                                                                                                                                                                                                                                                                                                                                                                                                                                                                                                                                                                                                                                                                                                                                                                                                                                                                                                                                                                                                                                                 | Lighthouse Lab in Glasgow                                            | Wellcome Sanger Institute for the COVID-19 Genomics UK (COG-UK) consortium | Harper VanSteenhouse, Yumi Kasai, David Gray, Carol Clugston, Anna Dominiczak and Alex Alderton, Roberto Amato, Sonia Goncalves, Ewan Harrison, David K. Jackson, Ian Johnston, Dominic Kwiatkowski, Cordelia Langford, John Sillitoe on behalf of the Wellcome Sanger Institute COVID-19 Surveillance Team ( <a href="http://www.sanger.ac.uk/covid-team">http://www.sanger.ac.uk/covid-team</a> ) |
| EPI_ISL_530395, EPI_ISL_530409, EPI_ISL_530420, EPI_ISL_530422, EPI_ISL_530427, EPI_ISL_530434, EPI_ISL_530437, EPI_ISL_530441, EPI_ISL_530442, EPI_ISL_530443, EPI_ISL_530444, EPI_ISL_530446, EPI_ISL_530450, EPI_ISL_530458, EPI_ISL_530461, EPI_ISL_530463, EPI_ISL_530479                                                                                                                                                                                                                                                                                                                                                                                                                                                                                                                                                                                                                                                                                                                                                                                                                                                                                                                                                                                                                                                                                                                                                                                                                                 |                                                                      |                                                                            |                                                                                                                                                                                                                                                                                                                                                                                                     |
| see above                                                                                                                                                                                                                                                                                                                                                                                                                                                                                                                                                                                                                                                                                                                                                                                                                                                                                                                                                                                                                                                                                                                                                                                                                                                                                                                                                                                                                                                                                                      | Lighthouse Lab in Glasgow                                            | Wellcome Sanger Institute for the COVID-19 Genomics UK (COG-UK) consortium | Harper VanSteenhouse, Yumi Kasai, David Gray, Carol Clugston, Anna Dominiczak and Alex Alderton, Roberto Amato, Sonia Goncalves, Ewan Harrison, David K. Jackson, Ian Johnston, Dominic Kwiatkowski, Cordelia Langford, John Sillitoe                                                                                                                                                               |
| EPI_ISL_530482                                                                                                                                                                                                                                                                                                                                                                                                                                                                                                                                                                                                                                                                                                                                                                                                                                                                                                                                                                                                                                                                                                                                                                                                                                                                                                                                                                                                                                                                                                 | Lighthouse Lab in Glasgow                                            | Wellcome Sanger Institute for the COVID-19 Genomics UK (COG-UK) Consortium | Harper VanSteenhouse, Yumi Kasai, David Gray, Carol Clugston, Anna Dominiczak and Alex Alderton, Roberto Amato, Sonia Goncalves, Ewan Harrison, David K. Jackson, Ian Johnston, Dominic Kwiatkowski, Cordelia Langford, John Sillitoe on behalf of the Wellcome Sanger Institute COVID-19 Surveillance Team                                                                                         |
| EPI_ISL_530483, EPI_ISL_530504, EPI_ISL_530505, EPI_ISL_530510, EPI_ISL_530516, EPI_ISL_530530, EPI_ISL_530534, EPI_ISL_530547, EPI_ISL_530564, EPI_ISL_530580, EPI_ISL_530584, EPI_ISL_530592, EPI_ISL_530594, EPI_ISL_530598, EPI_ISL_530618, EPI_ISL_530620, EPI_ISL_530624, EPI_ISL_530625, EPI_ISL_530632, EPI_ISL_530636, EPI_ISL_530637, EPI_ISL_530645, EPI_ISL_530651, EPI_ISL_530655, EPI_ISL_530666, EPI_ISL_530669, EPI_ISL_530671, EPI_ISL_530672, EPI_ISL_530687, EPI_ISL_530688, EPI_ISL_530697, EPI_ISL_530715, EPI_ISL_530716, EPI_ISL_530725, EPI_ISL_530726, EPI_ISL_530733, EPI_ISL_530741, EPI_ISL_530749, EPI_ISL_530753, EPI_ISL_530762, EPI_ISL_530773, EPI_ISL_530802, EPI_ISL_530805, EPI_ISL_530820, EPI_ISL_530823, EPI_ISL_530848, EPI_ISL_530852, EPI_ISL_530879, EPI_ISL_530884, EPI_ISL_530887, EPI_ISL_530897                                                                                                                                                                                                                                                                                                                                                                                                                                                                                                                                                                                                                                                                 |                                                                      |                                                                            |                                                                                                                                                                                                                                                                                                                                                                                                     |
| see above                                                                                                                                                                                                                                                                                                                                                                                                                                                                                                                                                                                                                                                                                                                                                                                                                                                                                                                                                                                                                                                                                                                                                                                                                                                                                                                                                                                                                                                                                                      | Lighthouse Lab in Glasgow                                            | Wellcome Sanger Institute for the COVID-19 Genomics UK (COG-UK) consortium | Harper VanSteenhouse, Yumi Kasai, David Gray, Carol Clugston, Anna Dominiczak and Alex Alderton, Roberto Amato, Sonia Goncalves, Ewan Harrison, David K. Jackson, Ian Johnston, Dominic Kwiatkowski, Cordelia Langford, John Sillitoe                                                                                                                                                               |
| EPI_ISL_530898                                                                                                                                                                                                                                                                                                                                                                                                                                                                                                                                                                                                                                                                                                                                                                                                                                                                                                                                                                                                                                                                                                                                                                                                                                                                                                                                                                                                                                                                                                 | Lighthouse Lab in Glasgow                                            | Wellcome Sanger Institute for the COVID-19 Genomics UK (COG-UK) consortium | Harper VanSteenhouse, Yumi Kasai, David Gray, Carol Clugston, Anna Dominiczak and Alex Alderton, Roberto Amato, Sonia Goncalves, Ewan Harrison, David K. Jackson, Ian Johnston, Dominic Kwiatkowski, Cordelia Langford, John Sillitoe on behalf of the Wellcome Sanger Institute COVID-19 Surveillance Team ( <a href="http://www.sanger.ac.uk/covid-team">http://www.sanger.ac.uk/covid-team</a> ) |
| EPI_ISL_530899                                                                                                                                                                                                                                                                                                                                                                                                                                                                                                                                                                                                                                                                                                                                                                                                                                                                                                                                                                                                                                                                                                                                                                                                                                                                                                                                                                                                                                                                                                 | Lighthouse Lab in Glasgow                                            | Wellcome Sanger Institute for the COVID-19 Genomics UK (COG-UK) Consortium | Harper VanSteenhouse, Yumi Kasai, David Gray, Carol Clugston, Anna Dominiczak and Alex Alderton, Roberto Amato, Sonia Goncalves, Ewan Harrison, David K. Jackson, Ian Johnston, Dominic Kwiatkowski, Cordelia Langford, John Sillitoe on behalf of the Wellcome Sanger Institute COVID-19 Surveillance Team                                                                                         |
| EPI_ISL_530900, EPI_ISL_530903, EPI_ISL_530915, EPI_ISL_530928, EPI_ISL_530930, EPI_ISL_530935, EPI_ISL_530936, EPI_ISL_530937, EPI_ISL_530940, EPI_ISL_530951                                                                                                                                                                                                                                                                                                                                                                                                                                                                                                                                                                                                                                                                                                                                                                                                                                                                                                                                                                                                                                                                                                                                                                                                                                                                                                                                                 | Lighthouse Lab in Glasgow                                            | Wellcome Sanger Institute for the COVID-19 Genomics UK (COG-UK) consortium | Harper VanSteenhouse, Yumi Kasai, David Gray, Carol Clugston, Anna Dominiczak and Alex Alderton, Roberto Amato, Sonia Goncalves, Ewan Harrison, David K. Jackson, Ian Johnston, Dominic Kwiatkowski, Cordelia Langford, John Sillitoe                                                                                                                                                               |
| EPI_ISL_530963                                                                                                                                                                                                                                                                                                                                                                                                                                                                                                                                                                                                                                                                                                                                                                                                                                                                                                                                                                                                                                                                                                                                                                                                                                                                                                                                                                                                                                                                                                 | Lighthouse Lab in Glasgow                                            | Wellcome Sanger Institute for the COVID-19 Genomics UK (COG-UK) Consortium | Harper VanSteenhouse, Yumi Kasai, David Gray, Carol Clugston, Anna Dominiczak and Alex Alderton, Roberto Amato, Sonia Goncalves, Ewan Harrison, David K. Jackson, Ian Johnston, Dominic Kwiatkowski, Cordelia Langford, John Sillitoe on behalf of the Wellcome Sanger Institute COVID-19 Surveillance Team                                                                                         |
| EPI_ISL_530977, EPI_ISL_530987                                                                                                                                                                                                                                                                                                                                                                                                                                                                                                                                                                                                                                                                                                                                                                                                                                                                                                                                                                                                                                                                                                                                                                                                                                                                                                                                                                                                                                                                                 | Lighthouse Lab in Glasgow                                            | Wellcome Sanger Institute for the COVID-19 Genomics UK (COG-UK) consortium | Harper VanSteenhouse, Yumi Kasai, David Gray, Carol Clugston, Anna Dominiczak and Alex Alderton, Roberto Amato, Sonia Goncalves, Ewan Harrison, David K. Jackson, Ian Johnston, Dominic Kwiatkowski, Cordelia Langford, John Sillitoe                                                                                                                                                               |
| EPI_ISL_531025                                                                                                                                                                                                                                                                                                                                                                                                                                                                                                                                                                                                                                                                                                                                                                                                                                                                                                                                                                                                                                                                                                                                                                                                                                                                                                                                                                                                                                                                                                 | Lighthouse Lab in Glasgow                                            | Wellcome Sanger Institute for the COVID-19 Genomics UK (COG-UK) consortium | Harper VanSteenhouse, Yumi Kasai, David Gray, Carol Clugston, Anna Dominiczak and Alex Alderton, Roberto Amato, Sonia Goncalves, Ewan Harrison, David K. Jackson, Ian Johnston, Dominic Kwiatkowski, Cordelia Langford, John Sillitoe on behalf of the Wellcome Sanger Institute COVID-19 Surveillance Team ( <a href="http://www.sanger.ac.uk/covid-team">http://www.sanger.ac.uk/covid-team</a> ) |
| EPI_ISL_531026, EPI_ISL_531035, EPI_ISL_531037, EPI_ISL_531041, EPI_ISL_531044, EPI_ISL_531067, EPI_ISL_531084, EPI_ISL_531086, EPI_ISL_531120, EPI_ISL_531122, EPI_ISL_531124, EPI_ISL_531125, EPI_ISL_531135, EPI_ISL_531141, EPI_ISL_531169, EPI_ISL_531173, EPI_ISL_531184, EPI_ISL_531185, EPI_ISL_531190, EPI_ISL_531196, EPI_ISL_531213, EPI_ISL_531221, EPI_ISL_531227, EPI_ISL_531242, EPI_ISL_531244, EPI_ISL_531250, EPI_ISL_531252, EPI_ISL_531253, EPI_ISL_531262, EPI_ISL_531294, EPI_ISL_531295, EPI_ISL_531297, EPI_ISL_531298, EPI_ISL_531300, EPI_ISL_531305, EPI_ISL_531311, EPI_ISL_531314, EPI_ISL_531319, EPI_ISL_531323, EPI_ISL_531327, EPI_ISL_531329, EPI_ISL_531331, EPI_ISL_531333, EPI_ISL_531334, EPI_ISL_531341, EPI_ISL_531344, EPI_ISL_531362, EPI_ISL_531373, EPI_ISL_531379, EPI_ISL_531389, EPI_ISL_531394, EPI_ISL_531400, EPI_ISL_531407, EPI_ISL_531417, EPI_ISL_531427, EPI_ISL_531436, EPI_ISL_531439, EPI_ISL_531440, EPI_ISL_531448, EPI_ISL_531454, EPI_ISL_531456, EPI_ISL_531463, EPI_ISL_531502, EPI_ISL_531520, EPI_ISL_531525, EPI_ISL_531528, EPI_ISL_531532, EPI_ISL_531536, EPI_ISL_531551, EPI_ISL_531554, EPI_ISL_531558, EPI_ISL_531561, EPI_ISL_531571, EPI_ISL_531576, EPI_ISL_531578, EPI_ISL_531579, EPI_ISL_531580, EPI_ISL_531582, EPI_ISL_531593, EPI_ISL_531604, EPI_ISL_531605, EPI_ISL_531612, EPI_ISL_531623, EPI_ISL_531635, EPI_ISL_531641, EPI_ISL_531642, EPI_ISL_531645, EPI_ISL_531664, EPI_ISL_531665, EPI_ISL_531666, EPI_ISL_531676 |                                                                      |                                                                            |                                                                                                                                                                                                                                                                                                                                                                                                     |
| see above                                                                                                                                                                                                                                                                                                                                                                                                                                                                                                                                                                                                                                                                                                                                                                                                                                                                                                                                                                                                                                                                                                                                                                                                                                                                                                                                                                                                                                                                                                      | Lighthouse Lab in Glasgow                                            | Wellcome Sanger Institute for the COVID-19 Genomics UK (COG-UK) consortium | Harper VanSteenhouse, Yumi Kasai, David Gray, Carol Clugston, Anna Dominiczak and Alex Alderton, Roberto Amato, Sonia Goncalves, Ewan Harrison, David K. Jackson, Ian Johnston, Dominic Kwiatkowski, Cordelia Langford, John Sillitoe                                                                                                                                                               |
| EPI_ISL_531688                                                                                                                                                                                                                                                                                                                                                                                                                                                                                                                                                                                                                                                                                                                                                                                                                                                                                                                                                                                                                                                                                                                                                                                                                                                                                                                                                                                                                                                                                                 | Lighthouse Lab in Glasgow                                            | Wellcome Sanger Institute for the COVID-19 Genomics UK (COG-UK) Consortium | Harper VanSteenhouse, Yumi Kasai, David Gray, Carol Clugston, Anna Dominiczak and Alex Alderton, Roberto Amato, Sonia Goncalves, Ewan Harrison, David K. Jackson, Ian Johnston, Dominic Kwiatkowski, Cordelia Langford, John Sillitoe on behalf of the Wellcome Sanger Institute COVID-19 Surveillance Team                                                                                         |
| EPI_ISL_531692, EPI_ISL_531693, EPI_ISL_531706, EPI_ISL_531720, EPI_ISL_531722, EPI_ISL_531724, EPI_ISL_531733, EPI_ISL_531735, EPI_ISL_531745, EPI_ISL_531748, EPI_ISL_531757, EPI_ISL_531770, EPI_ISL_531777, EPI_ISL_531782, EPI_ISL_531785, EPI_ISL_531786, EPI_ISL_531793, EPI_ISL_531794, EPI_ISL_531797, EPI_ISL_531807, EPI_ISL_531813, EPI_ISL_531816, EPI_ISL_531817, EPI_ISL_531820                                                                                                                                                                                                                                                                                                                                                                                                                                                                                                                                                                                                                                                                                                                                                                                                                                                                                                                                                                                                                                                                                                                 |                                                                      |                                                                            |                                                                                                                                                                                                                                                                                                                                                                                                     |
| see above                                                                                                                                                                                                                                                                                                                                                                                                                                                                                                                                                                                                                                                                                                                                                                                                                                                                                                                                                                                                                                                                                                                                                                                                                                                                                                                                                                                                                                                                                                      | Lighthouse Lab in Glasgow                                            | Wellcome Sanger Institute for the COVID-19 Genomics UK (COG-UK) consortium | Harper VanSteenhouse, Yumi Kasai, David Gray, Carol Clugston, Anna Dominiczak and Alex Alderton, Roberto Amato, Sonia Goncalves, Ewan Harrison, David K. Jackson, Ian Johnston, Dominic Kwiatkowski, Cordelia Langford, John Sillitoe                                                                                                                                                               |
| EPI_ISL_531826                                                                                                                                                                                                                                                                                                                                                                                                                                                                                                                                                                                                                                                                                                                                                                                                                                                                                                                                                                                                                                                                                                                                                                                                                                                                                                                                                                                                                                                                                                 | Lighthouse Lab in Glasgow                                            | Wellcome Sanger Institute for the COVID-19 Genomics UK (COG-UK) consortium | Harper VanSteenhouse, Yumi Kasai, David Gray, Carol Clugston, Anna Dominiczak and Alex Alderton, Roberto Amato, Sonia Goncalves, Ewan Harrison, David K. Jackson, Ian Johnston, Dominic Kwiatkowski, Cordelia Langford, John Sillitoe on behalf of the Wellcome Sanger Institute COVID-19 Surveillance Team ( <a href="http://www.sanger.ac.uk/covid-team">http://www.sanger.ac.uk/covid-team</a> ) |
| EPI_ISL_531827, EPI_ISL_531829, EPI_ISL_531834, EPI_ISL_531835, EPI_ISL_531846, EPI_ISL_531848, EPI_ISL_531864, EPI_ISL_531868                                                                                                                                                                                                                                                                                                                                                                                                                                                                                                                                                                                                                                                                                                                                                                                                                                                                                                                                                                                                                                                                                                                                                                                                                                                                                                                                                                                 | Lighthouse Lab in Glasgow                                            | Wellcome Sanger Institute for the COVID-19 Genomics UK (COG-UK) consortium | Harper VanSteenhouse, Yumi Kasai, David Gray, Carol Clugston, Anna Dominiczak and Alex Alderton, Roberto Amato, Sonia Goncalves, Ewan Harrison, David K. Jackson, Ian Johnston, Dominic Kwiatkowski, Cordelia Langford, John Sillitoe                                                                                                                                                               |
| EPI_ISL_531872                                                                                                                                                                                                                                                                                                                                                                                                                                                                                                                                                                                                                                                                                                                                                                                                                                                                                                                                                                                                                                                                                                                                                                                                                                                                                                                                                                                                                                                                                                 | Lighthouse Lab in Glasgow                                            | Wellcome Sanger Institute for the COVID-19 Genomics UK (COG-UK) Consortium | Harper VanSteenhouse, Yumi Kasai, David Gray, Carol Clugston, Anna Dominiczak and Alex Alderton, Roberto Amato, Sonia Goncalves, Ewan Harrison, David K. Jackson, Ian Johnston, Dominic Kwiatkowski, Cordelia Langford, John Sillitoe on behalf of the Wellcome Sanger Institute COVID-19 Surveillance Team                                                                                         |
| EPI_ISL_531879, EPI_ISL_531885, EPI_ISL_531888, EPI_ISL_531899, EPI_ISL_531904, EPI_ISL_531906, EPI_ISL_531930, EPI_ISL_531931, EPI_ISL_531946, EPI_ISL_531953, EPI_ISL_531955, EPI_ISL_531966, EPI_ISL_531969, EPI_ISL_531981, EPI_ISL_531994, EPI_ISL_532000, EPI_ISL_532002, EPI_ISL_532011, EPI_ISL_532026, EPI_ISL_532027, EPI_ISL_532043, EPI_ISL_532047, EPI_ISL_532050, EPI_ISL_532063, EPI_ISL_532069, EPI_ISL_532074, EPI_ISL_532091, EPI_ISL_532115, EPI_ISL_532122, EPI_ISL_532128, EPI_ISL_532137, EPI_ISL_532142, EPI_ISL_532145, EPI_ISL_532154, EPI_ISL_532157, EPI_ISL_532158, EPI_ISL_532168, EPI_ISL_532170, EPI_ISL_532171, EPI_ISL_532172, EPI_ISL_532173, EPI_ISL_532174, EPI_ISL_532175, EPI_ISL_532176, EPI_ISL_532177, EPI_ISL_532178, EPI_ISL_532179, EPI_ISL_532180, EPI_ISL_532181, EPI_ISL_532182, EPI_ISL_532183, EPI_ISL_532184, EPI_ISL_532185, EPI_ISL_532186, EPI_ISL_532187, EPI_ISL_532188, EPI_ISL_532189, EPI_ISL_532190, EPI_ISL_532191, EPI_ISL_532192, EPI_ISL_532193, EPI_ISL_532194, EPI_ISL_532195, EPI_ISL_532196, EPI_ISL_532197, EPI_ISL_532198, EPI_ISL_532199                                                                                                                                                                                                                                                                                                                                                                                                 |                                                                      |                                                                            |                                                                                                                                                                                                                                                                                                                                                                                                     |



|                                                                                                                                                                                                                                                                                                                                                                                                                                                                                                                                                                                                                                                                                                                                                                                                                                                                                                                                                                                                                                                                                                                                                                                                                                                                                                                                                                                                                                                                                                                                                                                                                                                                                                                                                                                                                                                                                                                                                                                                                                                                                                                                                                                                                                                                                                                                                                                                                                                                                                                |           |                                                                                                                                                                                                                                |                                                                            |                                                                                                                                                                                                                                                                                                             |
|----------------------------------------------------------------------------------------------------------------------------------------------------------------------------------------------------------------------------------------------------------------------------------------------------------------------------------------------------------------------------------------------------------------------------------------------------------------------------------------------------------------------------------------------------------------------------------------------------------------------------------------------------------------------------------------------------------------------------------------------------------------------------------------------------------------------------------------------------------------------------------------------------------------------------------------------------------------------------------------------------------------------------------------------------------------------------------------------------------------------------------------------------------------------------------------------------------------------------------------------------------------------------------------------------------------------------------------------------------------------------------------------------------------------------------------------------------------------------------------------------------------------------------------------------------------------------------------------------------------------------------------------------------------------------------------------------------------------------------------------------------------------------------------------------------------------------------------------------------------------------------------------------------------------------------------------------------------------------------------------------------------------------------------------------------------------------------------------------------------------------------------------------------------------------------------------------------------------------------------------------------------------------------------------------------------------------------------------------------------------------------------------------------------------------------------------------------------------------------------------------------------|-----------|--------------------------------------------------------------------------------------------------------------------------------------------------------------------------------------------------------------------------------|----------------------------------------------------------------------------|-------------------------------------------------------------------------------------------------------------------------------------------------------------------------------------------------------------------------------------------------------------------------------------------------------------|
| EPI_ISL_537521, EPI_ISL_537522, EPI_ISL_537523, EPI_ISL_537524, EPI_ISL_537525, EPI_ISL_537526, EPI_ISL_537527, EPI_ISL_537528, EPI_ISL_537529, EPI_ISL_537530, EPI_ISL_537531, EPI_ISL_537532, EPI_ISL_537533, EPI_ISL_537534, EPI_ISL_537535, EPI_ISL_537536, EPI_ISL_537537, EPI_ISL_537538, EPI_ISL_537539, EPI_ISL_537540, EPI_ISL_537541, EPI_ISL_537542, EPI_ISL_537543, EPI_ISL_537544, EPI_ISL_537545, EPI_ISL_537546, EPI_ISL_537547, EPI_ISL_537548, EPI_ISL_537549, EPI_ISL_537550, EPI_ISL_537551, EPI_ISL_537552, EPI_ISL_537553, EPI_ISL_537554, EPI_ISL_537555, EPI_ISL_537556, EPI_ISL_537557, EPI_ISL_537558, EPI_ISL_537559, EPI_ISL_537560, EPI_ISL_537561, EPI_ISL_537562, EPI_ISL_537563, EPI_ISL_537564, EPI_ISL_537565, EPI_ISL_537566, EPI_ISL_537567, EPI_ISL_537568, EPI_ISL_537569, EPI_ISL_537570, EPI_ISL_537571, EPI_ISL_537572, EPI_ISL_537573, EPI_ISL_537574, EPI_ISL_537575, EPI_ISL_537576, EPI_ISL_537577, EPI_ISL_537578, EPI_ISL_537579, EPI_ISL_537580, EPI_ISL_537581, EPI_ISL_537582, EPI_ISL_537583, EPI_ISL_537584, EPI_ISL_537585, EPI_ISL_537586, EPI_ISL_537587, EPI_ISL_537588, EPI_ISL_537589, EPI_ISL_537590, EPI_ISL_537591, EPI_ISL_537592, EPI_ISL_537593, EPI_ISL_537594, EPI_ISL_537595, EPI_ISL_537596, EPI_ISL_537597, EPI_ISL_537598, EPI_ISL_537599, EPI_ISL_537600, EPI_ISL_537601, EPI_ISL_537602, EPI_ISL_537603, EPI_ISL_537604, EPI_ISL_537605, EPI_ISL_537606, EPI_ISL_537607                                                                                                                                                                                                                                                                                                                                                                                                                                                                                                                                                                                                                                                                                                                                                                                                                                                                                                                                                                                                                                                                 | see above | UCLA Pathology Clinical Microbiology Lab                                                                                                                                                                                       | Kruglyak Lab                                                               | Guo et al.                                                                                                                                                                                                                                                                                                  |
| EPI_ISL_538055, EPI_ISL_538056, EPI_ISL_538057, EPI_ISL_538058, EPI_ISL_538059, EPI_ISL_538060, EPI_ISL_538061                                                                                                                                                                                                                                                                                                                                                                                                                                                                                                                                                                                                                                                                                                                                                                                                                                                                                                                                                                                                                                                                                                                                                                                                                                                                                                                                                                                                                                                                                                                                                                                                                                                                                                                                                                                                                                                                                                                                                                                                                                                                                                                                                                                                                                                                                                                                                                                                 |           | Servicio de Microbiología y Parasitología clínica. UCEIMP. Hospital Universitario Virgen del Rocío/IBIS/CSIC/US                                                                                                                | SeqCOVID-SPAIN consortium/IBV(CSIC)                                        | Guillermo Martín Gutiérrez, Ángel Rodríguez Villodres, Lidia Gálvez Benitez, Verónica González Galán, Javier Aznar Martín and SeqCOVID-SPAIN consortium                                                                                                                                                     |
| EPI_ISL_538062, EPI_ISL_538063, EPI_ISL_538064, EPI_ISL_538065, EPI_ISL_538066, EPI_ISL_538067, EPI_ISL_538068, EPI_ISL_538069, EPI_ISL_538070, EPI_ISL_538071, EPI_ISL_538072, EPI_ISL_538073, EPI_ISL_538074, EPI_ISL_538075, EPI_ISL_538076, EPI_ISL_538077, EPI_ISL_538078, EPI_ISL_538079, EPI_ISL_538080, EPI_ISL_538081                                                                                                                                                                                                                                                                                                                                                                                                                                                                                                                                                                                                                                                                                                                                                                                                                                                                                                                                                                                                                                                                                                                                                                                                                                                                                                                                                                                                                                                                                                                                                                                                                                                                                                                                                                                                                                                                                                                                                                                                                                                                                                                                                                                 | see above | Servicio de Microbiología. Hospital Universitario Donostia. OSI Donostialdea. Área de Enfermedades Infecciosas, Grupo de Infección Respiratoria y Resistencia Antimicrobiana. Instituto de Investigación Sanitaria Biodonostia | SeqCOVID-SPAIN consortium/IBV(CSIC)                                        | Gustavo Cilla, Milagrosa Montes, Luis Piñeiro, Jose Maria Marimón and SeqCOVID-SPAIN consortium                                                                                                                                                                                                             |
| EPI_ISL_538119, EPI_ISL_538120, EPI_ISL_538121, EPI_ISL_538122, EPI_ISL_538123, EPI_ISL_538124, EPI_ISL_538125, EPI_ISL_538126, EPI_ISL_538127, EPI_ISL_538128, EPI_ISL_538129, EPI_ISL_538130, EPI_ISL_538131, EPI_ISL_538132, EPI_ISL_538133, EPI_ISL_538134, EPI_ISL_538135, EPI_ISL_538136, EPI_ISL_538137, EPI_ISL_538138, EPI_ISL_538139, EPI_ISL_538140, EPI_ISL_538141, EPI_ISL_538142, EPI_ISL_538143, EPI_ISL_538144, EPI_ISL_538145, EPI_ISL_538146, EPI_ISL_538147, EPI_ISL_538148, EPI_ISL_538149, EPI_ISL_538150, EPI_ISL_538151, EPI_ISL_538152, EPI_ISL_538153, EPI_ISL_538154, EPI_ISL_538155, EPI_ISL_538156, EPI_ISL_538157, EPI_ISL_538158, EPI_ISL_538159, EPI_ISL_538160, EPI_ISL_538161, EPI_ISL_538162, EPI_ISL_538163, EPI_ISL_538164, EPI_ISL_538165, EPI_ISL_538166, EPI_ISL_538167, EPI_ISL_538168, EPI_ISL_538169, EPI_ISL_538170, EPI_ISL_538171, EPI_ISL_538172, EPI_ISL_538173, EPI_ISL_538174, EPI_ISL_538175, EPI_ISL_538176, EPI_ISL_538177, EPI_ISL_538178, EPI_ISL_538179, EPI_ISL_538180, EPI_ISL_538181, EPI_ISL_538182, EPI_ISL_538183, EPI_ISL_538184, EPI_ISL_538185, EPI_ISL_538186, EPI_ISL_538187, EPI_ISL_538188, EPI_ISL_538189, EPI_ISL_538190, EPI_ISL_538191, EPI_ISL_538192, EPI_ISL_538193, EPI_ISL_538194, EPI_ISL_538195, EPI_ISL_538196, EPI_ISL_538197, EPI_ISL_538198, EPI_ISL_538199, EPI_ISL_538200, EPI_ISL_538201, EPI_ISL_538202, EPI_ISL_538203, EPI_ISL_538204, EPI_ISL_538205, EPI_ISL_538206, EPI_ISL_538207, EPI_ISL_538208, EPI_ISL_538209, EPI_ISL_538210, EPI_ISL_538211, EPI_ISL_538212, EPI_ISL_538213, EPI_ISL_538214, EPI_ISL_538215, EPI_ISL_538216, EPI_ISL_538217, EPI_ISL_538218, EPI_ISL_538219, EPI_ISL_538220, EPI_ISL_538221, EPI_ISL_538222, EPI_ISL_538223, EPI_ISL_538224, EPI_ISL_538225, EPI_ISL_538226, EPI_ISL_538227, EPI_ISL_538228, EPI_ISL_538229, EPI_ISL_538230, EPI_ISL_538568, EPI_ISL_538569, EPI_ISL_538570, EPI_ISL_538571, EPI_ISL_538572, EPI_ISL_538573, EPI_ISL_538574, EPI_ISL_538575, EPI_ISL_538576, EPI_ISL_538577, EPI_ISL_538578, EPI_ISL_538579, EPI_ISL_538580, EPI_ISL_538581, EPI_ISL_538582, EPI_ISL_538583, EPI_ISL_538584, EPI_ISL_538585, EPI_ISL_538586, EPI_ISL_538587, EPI_ISL_538588, EPI_ISL_538589, EPI_ISL_538590, EPI_ISL_538591, EPI_ISL_538592, EPI_ISL_538593, EPI_ISL_538594, EPI_ISL_538595, EPI_ISL_538596, EPI_ISL_538597, EPI_ISL_538598, EPI_ISL_538599, EPI_ISL_538600, EPI_ISL_538601, EPI_ISL_538602, EPI_ISL_538603, EPI_ISL_538604, EPI_ISL_538605, EPI_ISL_538606 | see above | Servicio de Microbiología y Parasitología clínica. UCEIMP. Hospital Universitario Virgen del Rocío/IBIS/CSIC/US                                                                                                                | SeqCOVID-SPAIN consortium/IBV(CSIC)                                        | Guillermo Martín Gutiérrez, Ángel Rodríguez Villodres, Lidia Gálvez Benitez, Verónica González Galán, Javier Aznar Martín and SeqCOVID-SPAIN consortium                                                                                                                                                     |
| EPI_ISL_539495                                                                                                                                                                                                                                                                                                                                                                                                                                                                                                                                                                                                                                                                                                                                                                                                                                                                                                                                                                                                                                                                                                                                                                                                                                                                                                                                                                                                                                                                                                                                                                                                                                                                                                                                                                                                                                                                                                                                                                                                                                                                                                                                                                                                                                                                                                                                                                                                                                                                                                 |           | Centers for Disease Control and Prevention, Dengue Branch                                                                                                                                                                      | Centers for Disease Control and Prevention, Dengue Branch                  | Gilberto A. Santiago, Glenda Gonzalez, Betzabel Flores, Keyla Charriez, Jorge L. Munoz-Jordan, Gabriela Paz-Bailey, Janice Perez, Vanessa Rivera-Amill, Diego Sainz de la Peña, Jorge Bertran                                                                                                               |
| EPI_ISL_539902                                                                                                                                                                                                                                                                                                                                                                                                                                                                                                                                                                                                                                                                                                                                                                                                                                                                                                                                                                                                                                                                                                                                                                                                                                                                                                                                                                                                                                                                                                                                                                                                                                                                                                                                                                                                                                                                                                                                                                                                                                                                                                                                                                                                                                                                                                                                                                                                                                                                                                 |           | Lighthouse Lab in Glasgow                                                                                                                                                                                                      | Wellcome Sanger Institute for the COVID-19 Genomics UK (COG-UK) consortium | Harper VanSteenhouse, Yumi Kasai, David Gray, Carol Clugston, Anna Dominiczak and Alex Alderton, Roberto Amato, Sonia Goncalves, Ewan Harrison, David K. Jackson, Ian Johnston, Dominic Kwiatkowski, Cordelia Langford, John Sillitoe on behalf of the Wellcome Sanger Institute COVID-19 Surveillance Team |
| EPI_ISL_539906                                                                                                                                                                                                                                                                                                                                                                                                                                                                                                                                                                                                                                                                                                                                                                                                                                                                                                                                                                                                                                                                                                                                                                                                                                                                                                                                                                                                                                                                                                                                                                                                                                                                                                                                                                                                                                                                                                                                                                                                                                                                                                                                                                                                                                                                                                                                                                                                                                                                                                 |           | Lighthouse Lab in Glasgow                                                                                                                                                                                                      | Wellcome Sanger Institute for the COVID-19 Genomics UK (COG-UK) Consortium | Harper VanSteenhouse, Yumi Kasai, David Gray, Carol Clugston, Anna Dominiczak and Alex Alderton, Roberto Amato, Sonia Goncalves, Ewan Harrison, David K. Jackson, Ian Johnston, Dominic Kwiatkowski, Cordelia Langford, John Sillitoe on behalf of the Wellcome Sanger Institute COVID-19 Surveillance Team |
| EPI_ISL_539907, EPI_ISL_539909, EPI_ISL_539912, EPI_ISL_539920, EPI_ISL_539923, EPI_ISL_539927, EPI_ISL_539936, EPI_ISL_539941, EPI_ISL_539945, EPI_ISL_539946, EPI_ISL_539951, EPI_ISL_539961, EPI_ISL_539968, EPI_ISL_539970, EPI_ISL_539974, EPI_ISL_539980, EPI_ISL_539981, EPI_ISL_539986, EPI_ISL_540000, EPI_ISL_540008, EPI_ISL_540012, EPI_ISL_540013, EPI_ISL_540018, EPI_ISL_540028                                                                                                                                                                                                                                                                                                                                                                                                                                                                                                                                                                                                                                                                                                                                                                                                                                                                                                                                                                                                                                                                                                                                                                                                                                                                                                                                                                                                                                                                                                                                                                                                                                                                                                                                                                                                                                                                                                                                                                                                                                                                                                                 | see above | Lighthouse Lab in Glasgow                                                                                                                                                                                                      | Wellcome Sanger Institute for the COVID-19 Genomics UK (COG-UK) consortium | Harper VanSteenhouse, Yumi Kasai, David Gray, Carol Clugston, Anna Dominiczak and Alex Alderton, Roberto Amato, Sonia Goncalves, Ewan Harrison, David K. Jackson, Ian Johnston, Dominic Kwiatkowski, Cordelia Langford, John Sillitoe on behalf of the Wellcome Sanger Institute COVID-19 Surveillance Team |
| EPI_ISL_540030                                                                                                                                                                                                                                                                                                                                                                                                                                                                                                                                                                                                                                                                                                                                                                                                                                                                                                                                                                                                                                                                                                                                                                                                                                                                                                                                                                                                                                                                                                                                                                                                                                                                                                                                                                                                                                                                                                                                                                                                                                                                                                                                                                                                                                                                                                                                                                                                                                                                                                 |           | Lighthouse Lab in Glasgow                                                                                                                                                                                                      | Wellcome Sanger Institute for the COVID-19 Genomics UK (COG-UK) Consortium | Harper VanSteenhouse, Yumi Kasai, David Gray, Carol Clugston, Anna Dominiczak and Alex Alderton, Roberto Amato, Sonia Goncalves, Ewan Harrison, David K. Jackson, Ian Johnston, Dominic Kwiatkowski, Cordelia Langford, John Sillitoe on behalf of the Wellcome Sanger Institute COVID-19 Surveillance Team |
| EPI_ISL_540039, EPI_ISL_540040, EPI_ISL_540044, EPI_ISL_540047, EPI_ISL_540064, EPI_ISL_540067, EPI_ISL_540073, EPI_ISL_540078, EPI_ISL_540089, EPI_ISL_540091, EPI_ISL_540094, EPI_ISL_540096, EPI_ISL_540107, EPI_ISL_540112, EPI_ISL_540116, EPI_ISL_540130, EPI_ISL_540142, EPI_ISL_540143, EPI_ISL_540146, EPI_ISL_540147, EPI_ISL_540160, EPI_ISL_540164, EPI_ISL_540173, EPI_ISL_540176, EPI_ISL_540187, EPI_ISL_540191, EPI_ISL_540199, EPI_ISL_540205, EPI_ISL_540210, EPI_ISL_540212, EPI_ISL_540213, EPI_ISL_540219, EPI_ISL_540223, EPI_ISL_540228, EPI_ISL_540247, EPI_ISL_540249, EPI_ISL_540253, EPI_ISL_540272, EPI_ISL_540277                                                                                                                                                                                                                                                                                                                                                                                                                                                                                                                                                                                                                                                                                                                                                                                                                                                                                                                                                                                                                                                                                                                                                                                                                                                                                                                                                                                                                                                                                                                                                                                                                                                                                                                                                                                                                                                                 | see above | Lighthouse Lab in Glasgow                                                                                                                                                                                                      | Wellcome Sanger Institute for the COVID-19 Genomics UK (COG-UK) consortium | Harper VanSteenhouse, Yumi Kasai, David Gray, Carol Clugston, Anna Dominiczak and Alex Alderton, Roberto Amato, Sonia Goncalves, Ewan Harrison, David K. Jackson, Ian Johnston, Dominic Kwiatkowski, Cordelia Langford, John Sillitoe on behalf of the Wellcome Sanger Institute COVID-19 Surveillance Team |
| EPI_ISL_540278                                                                                                                                                                                                                                                                                                                                                                                                                                                                                                                                                                                                                                                                                                                                                                                                                                                                                                                                                                                                                                                                                                                                                                                                                                                                                                                                                                                                                                                                                                                                                                                                                                                                                                                                                                                                                                                                                                                                                                                                                                                                                                                                                                                                                                                                                                                                                                                                                                                                                                 |           | Lighthouse Lab in Glasgow                                                                                                                                                                                                      | Wellcome Sanger Institute for the COVID-19 Genomics UK (COG-UK) Consortium | Harper VanSteenhouse, Yumi Kasai, David Gray, Carol Clugston, Anna Dominiczak and Alex Alderton, Roberto Amato, Sonia Goncalves, Ewan Harrison, David K. Jackson, Ian Johnston, Dominic Kwiatkowski, Cordelia Langford, John Sillitoe on behalf of the Wellcome Sanger Institute COVID-19 Surveillance Team |
| EPI_ISL_540279                                                                                                                                                                                                                                                                                                                                                                                                                                                                                                                                                                                                                                                                                                                                                                                                                                                                                                                                                                                                                                                                                                                                                                                                                                                                                                                                                                                                                                                                                                                                                                                                                                                                                                                                                                                                                                                                                                                                                                                                                                                                                                                                                                                                                                                                                                                                                                                                                                                                                                 |           | Lighthouse Lab in Glasgow                                                                                                                                                                                                      | Wellcome Sanger Institute for the COVID-19 Genomics UK (COG-UK) consortium | Harper VanSteenhouse, Yumi Kasai, David Gray, Carol Clugston, Anna Dominiczak and Alex Alderton, Roberto Amato, Sonia Goncalves, Ewan Harrison, David K. Jackson, Ian Johnston, Dominic Kwiatkowski, Cordelia Langford, John Sillitoe on behalf of the Wellcome Sanger Institute COVID-19 Surveillance Team |
| EPI_ISL_540281                                                                                                                                                                                                                                                                                                                                                                                                                                                                                                                                                                                                                                                                                                                                                                                                                                                                                                                                                                                                                                                                                                                                                                                                                                                                                                                                                                                                                                                                                                                                                                                                                                                                                                                                                                                                                                                                                                                                                                                                                                                                                                                                                                                                                                                                                                                                                                                                                                                                                                 |           | Lighthouse Lab in Glasgow                                                                                                                                                                                                      | Wellcome Sanger Institute for the COVID-19 Genomics UK (COG-UK) Consortium | Harper VanSteenhouse, Yumi Kasai, David Gray, Carol Clugston, Anna Dominiczak and Alex Alderton, Roberto Amato, Sonia Goncalves, Ewan Harrison, David K. Jackson, Ian Johnston, Dominic Kwiatkowski, Cordelia Langford, John Sillitoe on behalf of the Wellcome Sanger Institute COVID-19 Surveillance Team |
| EPI_ISL_540282, EPI_ISL_540286, EPI_ISL_540290, EPI_ISL_540294, EPI_ISL_540291, EPI_ISL_540294, EPI_ISL_540297, EPI_ISL_540298, EPI_ISL_540305, EPI_ISL_540312, EPI_ISL_540314, EPI_ISL_540318, EPI_ISL_540320, EPI_ISL_540321, EPI_ISL_540330, EPI_ISL_540332, EPI_ISL_540333, EPI_ISL_540334, EPI_ISL_540335, EPI_ISL_540365, EPI_ISL_540368, EPI_ISL_540374, EPI_ISL_540376, EPI_ISL_540377, EPI_ISL_540379, EPI_ISL_540380, EPI_ISL_540382, EPI_ISL_540385, EPI_ISL_540389, EPI_ISL_540393, EPI_ISL_540396, EPI_ISL_540407, EPI_ISL_540414, EPI_ISL_540415, EPI_ISL_540417                                                                                                                                                                                                                                                                                                                                                                                                                                                                                                                                                                                                                                                                                                                                                                                                                                                                                                                                                                                                                                                                                                                                                                                                                                                                                                                                                                                                                                                                                                                                                                                                                                                                                                                                                                                                                                                                                                                                 | see above | Lighthouse Lab in Glasgow                                                                                                                                                                                                      | Wellcome Sanger Institute for the COVID-19 Genomics UK (COG-UK) consortium | Harper VanSteenhouse, Yumi Kasai, David Gray, Carol Clugston, Anna Dominiczak and Alex Alderton, Roberto Amato, Sonia Goncalves, Ewan Harrison, David K. Jackson, Ian Johnston, Dominic Kwiatkowski, Cordelia Langford, John Sillitoe on behalf of the Wellcome Sanger Institute COVID-19 Surveillance Team |
| EPI_ISL_541083, EPI_ISL_541084, EPI_ISL_541085, EPI_ISL_541086, EPI_ISL_541087, EPI_ISL_541088, EPI_ISL_541089, EPI_ISL_541090, EPI_ISL_541091, EPI_ISL_541092, EPI_ISL_541093, EPI_ISL_541094, EPI_ISL_541095, EPI_ISL_541096, EPI_ISL_541097, EPI_ISL_541098, EPI_ISL_541099, EPI_ISL_541100, EPI_ISL_541101, EPI_ISL_541102, EPI_ISL_541103, EPI_ISL_541104, EPI_ISL_541105, EPI_ISL_541106, EPI_ISL_541107, EPI_ISL_541108, EPI_ISL_541109, EPI_ISL_541110, EPI_ISL_541111, EPI_ISL_541112, EPI_ISL_541113, EPI_ISL_541114, EPI_ISL_541115, EPI_ISL_541116, EPI_ISL_541117, EPI_ISL_541118, EPI_ISL_541119, EPI_ISL_541120, EPI_ISL_541121, EPI_ISL_541122, EPI_ISL_541123, EPI_ISL_541124, EPI_ISL_541125, EPI_ISL_541126, EPI_ISL_541127, EPI_ISL_541128, EPI_ISL_541129, EPI_ISL_541130, EPI_ISL_541131, EPI_ISL_541132, EPI_ISL_541133, EPI_ISL_541134, EPI_ISL_541135, EPI_ISL_541136, EPI_ISL_541137                                                                                                                                                                                                                                                                                                                                                                                                                                                                                                                                                                                                                                                                                                                                                                                                                                                                                                                                                                                                                                                                                                                                                                                                                                                                                                                                                                                                                                                                                                                                                                                                 | see above | Servicio de Microbiología. Hospital Universitario Donostia. OSI Donostialdea. Área de Enfermedades Infecciosas, Grupo de Infección Respiratoria y Resistencia Antimicrobiana. Instituto de Investigación Sanitaria Biodonostia | SeqCOVID-SPAIN consortium/Institute of Biomedicine of Valencia, IBV-CSIC   | Gustavo Cilla, Milagrosa Montes, Luis Piñeiro, Jose Maria Marimón and SeqCOVID-SPAIN consortium                                                                                                                                                                                                             |
| EPI_ISL_541788, EPI_ISL_541789, EPI_ISL_541792, EPI_ISL_541808, EPI_ISL_541816, EPI_ISL_541827, EPI_ISL_541828, EPI_ISL_541836, EPI_ISL_541845                                                                                                                                                                                                                                                                                                                                                                                                                                                                                                                                                                                                                                                                                                                                                                                                                                                                                                                                                                                                                                                                                                                                                                                                                                                                                                                                                                                                                                                                                                                                                                                                                                                                                                                                                                                                                                                                                                                                                                                                                                                                                                                                                                                                                                                                                                                                                                 |           | Lighthouse Lab in Glasgow                                                                                                                                                                                                      | Wellcome Sanger Institute for the COVID-19 Genomics UK (COG-UK) consortium | Harper VanSteenhouse, Yumi Kasai, David Gray, Carol Clugston, Anna Dominiczak and Alex Alderton, Roberto Amato, Sonia Goncalves, Ewan Harrison, David K. Jackson, Ian Johnston, Dominic Kwiatkowski, Cordelia Langford, John Sillitoe on behalf of the Wellcome Sanger Institute COVID-19 Surveillance Team |

|                                                                                                                                                                                                                                                                                                                                                                                                                                                                                                                                                                                                                                                                                                                                                                                                                                                                                                                                                                                                                                                                                                                                                                                                                                                                                                                                                                                                                                                |                                                                                                                                                                                                                                |                                                                                               |                                                                                                                                                                                                                                                                                                                                                                                                                                                                |
|------------------------------------------------------------------------------------------------------------------------------------------------------------------------------------------------------------------------------------------------------------------------------------------------------------------------------------------------------------------------------------------------------------------------------------------------------------------------------------------------------------------------------------------------------------------------------------------------------------------------------------------------------------------------------------------------------------------------------------------------------------------------------------------------------------------------------------------------------------------------------------------------------------------------------------------------------------------------------------------------------------------------------------------------------------------------------------------------------------------------------------------------------------------------------------------------------------------------------------------------------------------------------------------------------------------------------------------------------------------------------------------------------------------------------------------------|--------------------------------------------------------------------------------------------------------------------------------------------------------------------------------------------------------------------------------|-----------------------------------------------------------------------------------------------|----------------------------------------------------------------------------------------------------------------------------------------------------------------------------------------------------------------------------------------------------------------------------------------------------------------------------------------------------------------------------------------------------------------------------------------------------------------|
| EPI_ISL_548243, EPI_ISL_548244                                                                                                                                                                                                                                                                                                                                                                                                                                                                                                                                                                                                                                                                                                                                                                                                                                                                                                                                                                                                                                                                                                                                                                                                                                                                                                                                                                                                                 | Faith Laboratory, Immunology Institute, Icahn School of Medicine at Mount Sinai                                                                                                                                                | van Bakel Laboratory, Genetics and Genomics Sciences, Icahn School of Medicine at Mount Sinai | Graham J. Britton, Alice Chen-Liaw, Francesca Cossarini, Alexandra Livanos, Matthew P. Spindler, Tamar Plitt, Joseph Eggers, Ilaria Mogno, Ana S. Gonzalez-Reiche, Sophia Sui, Michael Tankelevich, Lauren Tal Grinspan, Rebekah E. Dixon, Divya Jha, Gustavo Martinez-Delgado, Fatima Amanat, Daisy Hoagland, Benjamin R. tenOever, Maria C. Dubinsky, Miriam Merad, Harm Van Bakel, Florian Krammer, Gerold Bongers, Saurabh Mehmandru and Jeremiah J. Faith |
| EPI_ISL_549548, EPI_ISL_549551, EPI_ISL_549554, EPI_ISL_549558, EPI_ISL_549565, EPI_ISL_549567, EPI_ISL_549570, EPI_ISL_549574, EPI_ISL_549581, EPI_ISL_549582, EPI_ISL_549600, EPI_ISL_549601, EPI_ISL_549609, EPI_ISL_549612, EPI_ISL_549613, EPI_ISL_549619, EPI_ISL_549638, EPI_ISL_549647, EPI_ISL_549650, EPI_ISL_549665, EPI_ISL_549677, EPI_ISL_549682, EPI_ISL_549698, EPI_ISL_549701, EPI_ISL_549705, EPI_ISL_549707, EPI_ISL_549711, EPI_ISL_549714, EPI_ISL_549719, EPI_ISL_549720, EPI_ISL_549721, EPI_ISL_549722, EPI_ISL_549729, EPI_ISL_549734, EPI_ISL_549744, EPI_ISL_549752, EPI_ISL_549754, EPI_ISL_549757, EPI_ISL_549763, EPI_ISL_549766, EPI_ISL_549770                                                                                                                                                                                                                                                                                                                                                                                                                                                                                                                                                                                                                                                                                                                                                                 |                                                                                                                                                                                                                                |                                                                                               |                                                                                                                                                                                                                                                                                                                                                                                                                                                                |
| see above                                                                                                                                                                                                                                                                                                                                                                                                                                                                                                                                                                                                                                                                                                                                                                                                                                                                                                                                                                                                                                                                                                                                                                                                                                                                                                                                                                                                                                      | Lighthouse Lab in Glasgow                                                                                                                                                                                                      | Wellcome Sanger Institute for the COVID-19 Genomics UK (COG-UK) consortium                    | Harper VanSteenhouse, Yumi Kasai, David Gray, Carol Clugston, Anna Dominiczak and Alex Alderton, Roberto Amato, Sonia Goncalves, Ewan Harrison, David K. Jackson, Ian Johnston, Dominic Kwiatkowski, Cordelia Langford, John Sillitoe on behalf of the Wellcome Sanger Institute COVID-19 Surveillance Team                                                                                                                                                    |
| EPI_ISL_549772                                                                                                                                                                                                                                                                                                                                                                                                                                                                                                                                                                                                                                                                                                                                                                                                                                                                                                                                                                                                                                                                                                                                                                                                                                                                                                                                                                                                                                 | Lighthouse Lab in Glasgow                                                                                                                                                                                                      | Wellcome Sanger Institute for the COVID-19 Genomics UK (COG-UK) Consortium                    | Harper VanSteenhouse, Yumi Kasai, David Gray, Carol Clugston, Anna Dominiczak and Alex Alderton, Roberto Amato, Sonia Goncalves, Ewan Harrison, David K. Jackson, Ian Johnston, Dominic Kwiatkowski, Cordelia Langford, John Sillitoe on behalf of the Wellcome Sanger Institute COVID-19 Surveillance Team                                                                                                                                                    |
| EPI_ISL_549774, EPI_ISL_549782, EPI_ISL_549792, EPI_ISL_549800, EPI_ISL_549801, EPI_ISL_549802, EPI_ISL_549805, EPI_ISL_549806                                                                                                                                                                                                                                                                                                                                                                                                                                                                                                                                                                                                                                                                                                                                                                                                                                                                                                                                                                                                                                                                                                                                                                                                                                                                                                                 | Lighthouse Lab in Glasgow                                                                                                                                                                                                      | Wellcome Sanger Institute for the COVID-19 Genomics UK (COG-UK) consortium                    | Harper VanSteenhouse, Yumi Kasai, David Gray, Carol Clugston, Anna Dominiczak and Alex Alderton, Roberto Amato, Sonia Goncalves, Ewan Harrison, David K. Jackson, Ian Johnston, Dominic Kwiatkowski, Cordelia Langford, John Sillitoe on behalf of the Wellcome Sanger Institute COVID-19 Surveillance Team                                                                                                                                                    |
| EPI_ISL_560307, EPI_ISL_560406, EPI_ISL_560567, EPI_ISL_560647, EPI_ISL_560648, EPI_ISL_560741, EPI_ISL_560742, EPI_ISL_561335, EPI_ISL_561336, EPI_ISL_561345, EPI_ISL_561346, EPI_ISL_561347, EPI_ISL_561349, EPI_ISL_561350, EPI_ISL_561351, EPI_ISL_561352, EPI_ISL_561353, EPI_ISL_561356, EPI_ISL_561357, EPI_ISL_561358, EPI_ISL_561359, EPI_ISL_561360, EPI_ISL_561362, EPI_ISL_565830, EPI_ISL_565831, EPI_ISL_565832                                                                                                                                                                                                                                                                                                                                                                                                                                                                                                                                                                                                                                                                                                                                                                                                                                                                                                                                                                                                                 |                                                                                                                                                                                                                                |                                                                                               |                                                                                                                                                                                                                                                                                                                                                                                                                                                                |
| see above                                                                                                                                                                                                                                                                                                                                                                                                                                                                                                                                                                                                                                                                                                                                                                                                                                                                                                                                                                                                                                                                                                                                                                                                                                                                                                                                                                                                                                      | Delaware Public Health Lab                                                                                                                                                                                                     | Delaware Public Health Lab                                                                    | Gregory Hovan                                                                                                                                                                                                                                                                                                                                                                                                                                                  |
| EPI_ISL_565920, EPI_ISL_565921, EPI_ISL_565922, EPI_ISL_565923, EPI_ISL_565924, EPI_ISL_565925                                                                                                                                                                                                                                                                                                                                                                                                                                                                                                                                                                                                                                                                                                                                                                                                                                                                                                                                                                                                                                                                                                                                                                                                                                                                                                                                                 | Servicio de Microbiología. Hospital Universitario Donostia. OSI Donostialdea. Área de Enfermedades Infecciosas, Grupo de Infección Respiratoria y Resistencia Antimicrobiana. Instituto de Investigación Sanitaria Biodonostia | SeqCOVID-SPAIN consortium/IBV(CSIC)                                                           | Gustavo Cilla, Milagrosa Montes, Luis Piñeiro, Jose Maria Marimón and SeqCOVID-SPAIN consortium                                                                                                                                                                                                                                                                                                                                                                |
| EPI_ISL_566084, EPI_ISL_566108, EPI_ISL_566109                                                                                                                                                                                                                                                                                                                                                                                                                                                                                                                                                                                                                                                                                                                                                                                                                                                                                                                                                                                                                                                                                                                                                                                                                                                                                                                                                                                                 | Delaware Public Health Lab                                                                                                                                                                                                     | Delaware Public Health Lab                                                                    | Gregory Hovan                                                                                                                                                                                                                                                                                                                                                                                                                                                  |
| EPI_ISL_567001, EPI_ISL_567002, EPI_ISL_567008, EPI_ISL_567011                                                                                                                                                                                                                                                                                                                                                                                                                                                                                                                                                                                                                                                                                                                                                                                                                                                                                                                                                                                                                                                                                                                                                                                                                                                                                                                                                                                 | Lighthouse Lab in Glasgow                                                                                                                                                                                                      | Wellcome Sanger Institute for the COVID-19 Genomics UK (COG-UK) consortium                    | Harper VanSteenhouse, Yumi Kasai, David Gray, Carol Clugston, Anna Dominiczak and Alex Alderton, Roberto Amato, Sonia Goncalves, Ewan Harrison, David K. Jackson, Ian Johnston, Dominic Kwiatkowski, Cordelia Langford, John Sillitoe on behalf of the Wellcome Sanger Institute COVID-19 Surveillance Team                                                                                                                                                    |
| EPI_ISL_567024                                                                                                                                                                                                                                                                                                                                                                                                                                                                                                                                                                                                                                                                                                                                                                                                                                                                                                                                                                                                                                                                                                                                                                                                                                                                                                                                                                                                                                 | Lighthouse Lab in Glasgow                                                                                                                                                                                                      | Wellcome Sanger Institute for the COVID-19 Genomics UK (COG-UK) Consortium                    | Harper VanSteenhouse, Yumi Kasai, David Gray, Carol Clugston, Anna Dominiczak and Alex Alderton, Roberto Amato, Sonia Goncalves, Ewan Harrison, David K. Jackson, Ian Johnston, Dominic Kwiatkowski, Cordelia Langford, John Sillitoe on behalf of the Wellcome Sanger Institute COVID-19 Surveillance Team                                                                                                                                                    |
| EPI_ISL_567027, EPI_ISL_567034, EPI_ISL_567051, EPI_ISL_567052, EPI_ISL_567057, EPI_ISL_567061, EPI_ISL_567083, EPI_ISL_567092, EPI_ISL_567095, EPI_ISL_567100, EPI_ISL_567109, EPI_ISL_567112, EPI_ISL_567121, EPI_ISL_567131, EPI_ISL_567134, EPI_ISL_567141, EPI_ISL_567159, EPI_ISL_567163, EPI_ISL_567165, EPI_ISL_567173, EPI_ISL_567183, EPI_ISL_567186, EPI_ISL_567189, EPI_ISL_567191, EPI_ISL_567208, EPI_ISL_567209, EPI_ISL_567214, EPI_ISL_567229, EPI_ISL_567235, EPI_ISL_567244, EPI_ISL_567248, EPI_ISL_567256, EPI_ISL_567267, EPI_ISL_567279, EPI_ISL_567306, EPI_ISL_567310, EPI_ISL_567323, EPI_ISL_567339, EPI_ISL_567344, EPI_ISL_567346, EPI_ISL_567356, EPI_ISL_567359, EPI_ISL_567363, EPI_ISL_567371, EPI_ISL_567382, EPI_ISL_567389, EPI_ISL_567390, EPI_ISL_567391, EPI_ISL_567392, EPI_ISL_567404, EPI_ISL_567405, EPI_ISL_567420, EPI_ISL_567425, EPI_ISL_567431, EPI_ISL_567437, EPI_ISL_567441, EPI_ISL_567442, EPI_ISL_567444, EPI_ISL_567446, EPI_ISL_567450, EPI_ISL_567456, EPI_ISL_567462, EPI_ISL_567468, EPI_ISL_567471, EPI_ISL_567472, EPI_ISL_567493, EPI_ISL_567497, EPI_ISL_567502, EPI_ISL_567503, EPI_ISL_567504, EPI_ISL_567511, EPI_ISL_567516, EPI_ISL_567518, EPI_ISL_567519, EPI_ISL_567524, EPI_ISL_567526, EPI_ISL_567529, EPI_ISL_568234, EPI_ISL_568241, EPI_ISL_568246, EPI_ISL_568251, EPI_ISL_568256, EPI_ISL_568276, EPI_ISL_568278, EPI_ISL_568292, EPI_ISL_568294, EPI_ISL_568295 |                                                                                                                                                                                                                                |                                                                                               |                                                                                                                                                                                                                                                                                                                                                                                                                                                                |
| see above                                                                                                                                                                                                                                                                                                                                                                                                                                                                                                                                                                                                                                                                                                                                                                                                                                                                                                                                                                                                                                                                                                                                                                                                                                                                                                                                                                                                                                      | Lighthouse Lab in Glasgow                                                                                                                                                                                                      | Wellcome Sanger Institute for the COVID-19 Genomics UK (COG-UK) consortium                    | Harper VanSteenhouse, Yumi Kasai, David Gray, Carol Clugston, Anna Dominiczak and Alex Alderton, Roberto Amato, Sonia Goncalves, Ewan Harrison, David K. Jackson, Ian Johnston, Dominic Kwiatkowski, Cordelia Langford, John Sillitoe on behalf of the Wellcome Sanger Institute COVID-19 Surveillance Team                                                                                                                                                    |
| EPI_ISL_568301                                                                                                                                                                                                                                                                                                                                                                                                                                                                                                                                                                                                                                                                                                                                                                                                                                                                                                                                                                                                                                                                                                                                                                                                                                                                                                                                                                                                                                 | Lighthouse Lab in Glasgow                                                                                                                                                                                                      | Wellcome Sanger Institute for the COVID-19 Genomics UK (COG-UK) Consortium                    | Harper VanSteenhouse, Yumi Kasai, David Gray, Carol Clugston, Anna Dominiczak and Alex Alderton, Roberto Amato, Sonia Goncalves, Ewan Harrison, David K. Jackson, Ian Johnston, Dominic Kwiatkowski, Cordelia Langford, John Sillitoe on behalf of the Wellcome Sanger Institute COVID-19 Surveillance Team                                                                                                                                                    |
| EPI_ISL_568308, EPI_ISL_568311                                                                                                                                                                                                                                                                                                                                                                                                                                                                                                                                                                                                                                                                                                                                                                                                                                                                                                                                                                                                                                                                                                                                                                                                                                                                                                                                                                                                                 | Lighthouse Lab in Glasgow                                                                                                                                                                                                      | Wellcome Sanger Institute for the COVID-19 Genomics UK (COG-UK) consortium                    | Harper VanSteenhouse, Yumi Kasai, David Gray, Carol Clugston, Anna Dominiczak and Alex Alderton, Roberto Amato, Sonia Goncalves, Ewan Harrison, David K. Jackson, Ian Johnston, Dominic Kwiatkowski, Cordelia Langford, John Sillitoe on behalf of the Wellcome Sanger Institute COVID-19 Surveillance Team                                                                                                                                                    |
| EPI_ISL_568315                                                                                                                                                                                                                                                                                                                                                                                                                                                                                                                                                                                                                                                                                                                                                                                                                                                                                                                                                                                                                                                                                                                                                                                                                                                                                                                                                                                                                                 | Lighthouse Lab in Glasgow                                                                                                                                                                                                      | Wellcome Sanger Institute for the COVID-19 Genomics UK (COG-UK) Consortium                    | Harper VanSteenhouse, Yumi Kasai, David Gray, Carol Clugston, Anna Dominiczak and Alex Alderton, Roberto Amato, Sonia Goncalves, Ewan Harrison, David K. Jackson, Ian Johnston, Dominic Kwiatkowski, Cordelia Langford, John Sillitoe on behalf of the Wellcome Sanger Institute COVID-19 Surveillance Team                                                                                                                                                    |
| EPI_ISL_568316                                                                                                                                                                                                                                                                                                                                                                                                                                                                                                                                                                                                                                                                                                                                                                                                                                                                                                                                                                                                                                                                                                                                                                                                                                                                                                                                                                                                                                 | Lighthouse Lab in Glasgow                                                                                                                                                                                                      | Wellcome Sanger Institute for the COVID-19 Genomics UK (COG-UK) consortium                    | Harper VanSteenhouse, Yumi Kasai, David Gray, Carol Clugston, Anna Dominiczak and Alex Alderton, Roberto Amato, Sonia Goncalves, Ewan Harrison, David K. Jackson, Ian Johnston, Dominic Kwiatkowski, Cordelia Langford, John Sillitoe on behalf of the Wellcome Sanger Institute COVID-19 Surveillance Team                                                                                                                                                    |
| EPI_ISL_568317                                                                                                                                                                                                                                                                                                                                                                                                                                                                                                                                                                                                                                                                                                                                                                                                                                                                                                                                                                                                                                                                                                                                                                                                                                                                                                                                                                                                                                 | Lighthouse Lab in Glasgow                                                                                                                                                                                                      | Wellcome Sanger Institute for the COVID-19 Genomics UK (COG-UK) Consortium                    | Harper VanSteenhouse, Yumi Kasai, David Gray, Carol Clugston, Anna Dominiczak and Alex Alderton, Roberto Amato, Sonia Goncalves, Ewan Harrison, David K. Jackson, Ian Johnston, Dominic Kwiatkowski, Cordelia Langford, John Sillitoe on behalf of the Wellcome Sanger Institute COVID-19 Surveillance Team                                                                                                                                                    |
| EPI_ISL_568334, EPI_ISL_568335, EPI_ISL_568342                                                                                                                                                                                                                                                                                                                                                                                                                                                                                                                                                                                                                                                                                                                                                                                                                                                                                                                                                                                                                                                                                                                                                                                                                                                                                                                                                                                                 | Lighthouse Lab in Glasgow                                                                                                                                                                                                      | Wellcome Sanger Institute for the COVID-19 Genomics UK (COG-UK) consortium                    | Harper VanSteenhouse, Yumi Kasai, David Gray, Carol Clugston, Anna Dominiczak and Alex Alderton, Roberto Amato, Sonia Goncalves, Ewan Harrison, David K. Jackson, Ian Johnston, Dominic Kwiatkowski, Cordelia Langford, John Sillitoe on behalf of the Wellcome Sanger Institute COVID-19 Surveillance Team                                                                                                                                                    |
| EPI_ISL_568344                                                                                                                                                                                                                                                                                                                                                                                                                                                                                                                                                                                                                                                                                                                                                                                                                                                                                                                                                                                                                                                                                                                                                                                                                                                                                                                                                                                                                                 | Lighthouse Lab in Glasgow                                                                                                                                                                                                      | Wellcome Sanger Institute for the COVID-19 Genomics UK (COG-UK) Consortium                    | Harper VanSteenhouse, Yumi Kasai, David Gray, Carol Clugston, Anna Dominiczak and Alex Alderton, Roberto Amato, Sonia Goncalves, Ewan Harrison, David K. Jackson, Ian Johnston, Dominic Kwiatkowski, Cordelia Langford, John Sillitoe on behalf of the Wellcome Sanger Institute COVID-19 Surveillance Team                                                                                                                                                    |
| EPI_ISL_568346, EPI_ISL_568353, EPI_ISL_568369, EPI_ISL_568383                                                                                                                                                                                                                                                                                                                                                                                                                                                                                                                                                                                                                                                                                                                                                                                                                                                                                                                                                                                                                                                                                                                                                                                                                                                                                                                                                                                 | Lighthouse Lab in Glasgow                                                                                                                                                                                                      | Wellcome Sanger Institute for the COVID-19 Genomics UK (COG-UK) consortium                    | Harper VanSteenhouse, Yumi Kasai, David Gray, Carol Clugston, Anna Dominiczak and Alex Alderton, Roberto Amato, Sonia Goncalves, Ewan Harrison, David K. Jackson, Ian Johnston, Dominic Kwiatkowski, Cordelia Langford, John Sillitoe on behalf of the Wellcome Sanger Institute COVID-19 Surveillance Team                                                                                                                                                    |
| EPI_ISL_568392, EPI_ISL_568398                                                                                                                                                                                                                                                                                                                                                                                                                                                                                                                                                                                                                                                                                                                                                                                                                                                                                                                                                                                                                                                                                                                                                                                                                                                                                                                                                                                                                 | Lighthouse Lab in Glasgow                                                                                                                                                                                                      | Wellcome Sanger Institute for the COVID-19 Genomics UK (COG-UK) Consortium                    | Harper VanSteenhouse, Yumi Kasai, David Gray, Carol Clugston, Anna Dominiczak and Alex Alderton, Roberto Amato, Sonia Goncalves, Ewan Harrison, David K. Jackson, Ian Johnston, Dominic Kwiatkowski, Cordelia Langford, John Sillitoe on behalf of the Wellcome Sanger Institute COVID-19 Surveillance Team                                                                                                                                                    |
| EPI_ISL_568406, EPI_ISL_568414, EPI_ISL_568418, EPI_ISL_568419, EPI_ISL_568421, EPI_ISL_568423, EPI_ISL_568430, EPI_ISL_568431, EPI_ISL_568435, EPI_ISL_568437, EPI_ISL_568446, EPI_ISL_568447                                                                                                                                                                                                                                                                                                                                                                                                                                                                                                                                                                                                                                                                                                                                                                                                                                                                                                                                                                                                                                                                                                                                                                                                                                                 |                                                                                                                                                                                                                                |                                                                                               |                                                                                                                                                                                                                                                                                                                                                                                                                                                                |
| see above                                                                                                                                                                                                                                                                                                                                                                                                                                                                                                                                                                                                                                                                                                                                                                                                                                                                                                                                                                                                                                                                                                                                                                                                                                                                                                                                                                                                                                      | Lighthouse Lab in Glasgow                                                                                                                                                                                                      | Wellcome Sanger Institute for the COVID-19 Genomics UK (COG-UK) consortium                    | Harper VanSteenhouse, Yumi Kasai, David Gray, Carol Clugston, Anna Dominiczak and Alex Alderton, Roberto Amato, Sonia Goncalves, Ewan Harrison, David K. Jackson, Ian Johnston, Dominic Kwiatkowski, Cordelia Langford, John Sillitoe on behalf of the Wellcome Sanger Institute COVID-19 Surveillance Team                                                                                                                                                    |
| EPI_ISL_568695, EPI_ISL_568696, EPI_ISL_568697, EPI_ISL_568698, EPI_ISL_568699, EPI_ISL_568700, EPI_ISL_568701, EPI_ISL_568702, EPI_ISL_568703, EPI_ISL_568704, EPI_ISL_568706, EPI_ISL_568707, EPI_ISL_568708, EPI_ISL_568709, EPI_ISL_568710, EPI_ISL_568711, EPI_ISL_568712, EPI_ISL_568713, EPI_ISL_568714, EPI_ISL_568715, EPI_ISL_568716, EPI_ISL_568717, EPI_ISL_568718, EPI_ISL_568719, EPI_ISL_568720, EPI_ISL_568721, EPI_ISL_568722, EPI_ISL_568723, EPI_ISL_568724, EPI_ISL_568725, EPI_ISL_568726, EPI_ISL_568727, EPI_ISL_568728, EPI_ISL_568729, EPI_ISL_568730, EPI_ISL_568731, EPI_ISL_568732, EPI_ISL_568733, EPI_ISL_568734, EPI_ISL_568735, EPI_ISL_568736, EPI_ISL_568737, EPI_ISL_568738, EPI_ISL_568739, EPI_ISL_568740, EPI_ISL_568741, EPI_ISL_568742, EPI_ISL_568743, EPI_ISL_568744, EPI_ISL_568745, EPI_ISL_568746, EPI_ISL_568747, EPI_ISL_568748, EPI_ISL_568749, EPI_ISL_568750, EPI_ISL_568751, EPI_ISL_568752, EPI_ISL_568753, EPI_ISL_568754, EPI_ISL_568755, EPI_ISL_568756, EPI_ISL_568757, EPI_ISL_568758, EPI_ISL_568759, EPI_ISL_568760, EPI_ISL_568761, EPI_ISL_568762, EPI_ISL_568763, EPI_ISL_568764, EPI_ISL_568765, EPI_ISL_568766                                                                                                                                                                                                                                                                 |                                                                                                                                                                                                                                |                                                                                               |                                                                                                                                                                                                                                                                                                                                                                                                                                                                |

|                                                                                                                                                                                                                                                                                                                                                                                                                                                                                                                                                                                                                                                                                                                                                                                                                                                                                                                                                                                                                                                                                                                                                                                                                                                                                                                                                                                                                                                                                                                                                                                                                                                                                                                                                                |                            |                                                                                                                                                                                                                                                                                                                                                                                                                                                                  |                                                                                                                                                                                                                                                                                                                                                                                                                                                                                                                                                                      |                     |
|----------------------------------------------------------------------------------------------------------------------------------------------------------------------------------------------------------------------------------------------------------------------------------------------------------------------------------------------------------------------------------------------------------------------------------------------------------------------------------------------------------------------------------------------------------------------------------------------------------------------------------------------------------------------------------------------------------------------------------------------------------------------------------------------------------------------------------------------------------------------------------------------------------------------------------------------------------------------------------------------------------------------------------------------------------------------------------------------------------------------------------------------------------------------------------------------------------------------------------------------------------------------------------------------------------------------------------------------------------------------------------------------------------------------------------------------------------------------------------------------------------------------------------------------------------------------------------------------------------------------------------------------------------------------------------------------------------------------------------------------------------------|----------------------------|------------------------------------------------------------------------------------------------------------------------------------------------------------------------------------------------------------------------------------------------------------------------------------------------------------------------------------------------------------------------------------------------------------------------------------------------------------------|----------------------------------------------------------------------------------------------------------------------------------------------------------------------------------------------------------------------------------------------------------------------------------------------------------------------------------------------------------------------------------------------------------------------------------------------------------------------------------------------------------------------------------------------------------------------|---------------------|
| EPI_ISL_568767, EPI_ISL_568768, EPI_ISL_568769, EPI_ISL_568770, EPI_ISL_568771, EPI_ISL_568772, EPI_ISL_568773, EPI_ISL_568774, EPI_ISL_568775, EPI_ISL_568776, EPI_ISL_568777, EPI_ISL_568778, EPI_ISL_568779, EPI_ISL_568780, EPI_ISL_568781, EPI_ISL_568782, EPI_ISL_568783, EPI_ISL_568784, EPI_ISL_568785, EPI_ISL_568786, EPI_ISL_568787, EPI_ISL_568788, EPI_ISL_568789, EPI_ISL_568790, EPI_ISL_568791, EPI_ISL_568792, EPI_ISL_568793, EPI_ISL_568794, EPI_ISL_568795, EPI_ISL_568796, EPI_ISL_568797, EPI_ISL_568798, EPI_ISL_568799, EPI_ISL_568800, EPI_ISL_568801, EPI_ISL_568802, EPI_ISL_568803, EPI_ISL_568804, EPI_ISL_568805, EPI_ISL_568806, EPI_ISL_568807, EPI_ISL_568808, EPI_ISL_568809, EPI_ISL_568810, EPI_ISL_568811, EPI_ISL_568812, EPI_ISL_568813, EPI_ISL_568814, EPI_ISL_568815, EPI_ISL_568816, EPI_ISL_568817, EPI_ISL_568818, EPI_ISL_568819, EPI_ISL_568820, EPI_ISL_568821, EPI_ISL_568822, EPI_ISL_568823, EPI_ISL_568824, EPI_ISL_568825, EPI_ISL_568826, EPI_ISL_568827, EPI_ISL_568828, EPI_ISL_568829, EPI_ISL_568830, EPI_ISL_568831, EPI_ISL_568832, EPI_ISL_568833, EPI_ISL_568834, EPI_ISL_568835, EPI_ISL_568836, EPI_ISL_568837, EPI_ISL_568838, EPI_ISL_568839, EPI_ISL_568840, EPI_ISL_568841, EPI_ISL_568842, EPI_ISL_568843, EPI_ISL_568844, EPI_ISL_568845, EPI_ISL_568846, EPI_ISL_568847, EPI_ISL_568848, EPI_ISL_568849, EPI_ISL_568850, EPI_ISL_568851, EPI_ISL_568852, EPI_ISL_568853, EPI_ISL_568854, EPI_ISL_568855, EPI_ISL_568856, EPI_ISL_568857, EPI_ISL_568858, EPI_ISL_568859, EPI_ISL_568860, EPI_ISL_568861, EPI_ISL_568862, EPI_ISL_568863, EPI_ISL_568864, EPI_ISL_568865, EPI_ISL_568866, EPI_ISL_568867, EPI_ISL_568868, EPI_ISL_568869, EPI_ISL_568870, EPI_ISL_568871, EPI_ISL_568872 | see above                  | KEMRI-Wellcome Trust Research Programme/KEMRI-CGMR-C Kilifi                                                                                                                                                                                                                                                                                                                                                                                                      | KEMRI-Wellcome Trust Research Programme/KEMRI-CGMR-C Kilifi                                                                                                                                                                                                                                                                                                                                                                                                                                                                                                          | Githinji et al 2020 |
| EPI_ISL_574581, EPI_ISL_574584, EPI_ISL_574585, EPI_ISL_574586, EPI_ISL_574599                                                                                                                                                                                                                                                                                                                                                                                                                                                                                                                                                                                                                                                                                                                                                                                                                                                                                                                                                                                                                                                                                                                                                                                                                                                                                                                                                                                                                                                                                                                                                                                                                                                                                 |                            | Delaware Public Health Lab                                                                                                                                                                                                                                                                                                                                                                                                                                       | Delaware Public Health Lab                                                                                                                                                                                                                                                                                                                                                                                                                                                                                                                                           | Gregory Hovan       |
| EPI_ISL_575331                                                                                                                                                                                                                                                                                                                                                                                                                                                                                                                                                                                                                                                                                                                                                                                                                                                                                                                                                                                                                                                                                                                                                                                                                                                                                                                                                                                                                                                                                                                                                                                                                                                                                                                                                 | RSUD Wates                 | Genetics Working Group (Pokja Genetik) Faculty of Medicine, Public Health and Nursing Universitas Gadjah Mada (FK-KMK UGM); Disease Investigation Center Wates Ministry of Agriculture Indonesia; Department of Microbiology FK-KMK UGM; Laboratorium Diagnostik Yayasan Tahija World Mosquito Program (WMP) Yogyakarta Center for Tropical Medicine FK-KMK UGM; Integrated Research Center FK-KMK UGM; Department of Computer Science and Electronics FMIPA UGM | Gunadi, Hendra Wibawa, . Marcellus, Mohamad S. Hakim, Edwin W. Daniwijaya, Ludhang P. Rizki, Endah Supriyati, Eggi Arguni, Titik Nuryastuti, Tri Wibawa, Dwi AA Nugrahaningsih, Afiahayati, Siswanto, Kristy Iskandar, Nungki Anggorowati, Bastianto Kusumajaya, Zunrahi Ahmad, Alvin S. Kalim, Susan Simanjaya                                                                                                                                                                                                                                                      |                     |
| EPI_ISL_575335                                                                                                                                                                                                                                                                                                                                                                                                                                                                                                                                                                                                                                                                                                                                                                                                                                                                                                                                                                                                                                                                                                                                                                                                                                                                                                                                                                                                                                                                                                                                                                                                                                                                                                                                                 | Delaware Public Health Lab | Delaware Public Health Lab                                                                                                                                                                                                                                                                                                                                                                                                                                       | Gregory Hovan                                                                                                                                                                                                                                                                                                                                                                                                                                                                                                                                                        |                     |
| EPI_ISL_575339, EPI_ISL_575341, EPI_ISL_575370, EPI_ISL_575371, EPI_ISL_575375, EPI_ISL_575376, EPI_ISL_575384, EPI_ISL_575395                                                                                                                                                                                                                                                                                                                                                                                                                                                                                                                                                                                                                                                                                                                                                                                                                                                                                                                                                                                                                                                                                                                                                                                                                                                                                                                                                                                                                                                                                                                                                                                                                                 | Lighthouse Lab in Glasgow  | Wellcome Sanger Institute for the COVID-19 Genomics UK (COG-UK) consortium                                                                                                                                                                                                                                                                                                                                                                                       | Harper VanSteenhouse, Yumi Kasai, David Gray, Carol Clugston, Anna Dominicczak and Alex Alderton, Roberto Amato, Sonia Goncalves, Ewan Harrison, David K. Jackson, Ian Johnston, Dominic Kwiatkowski, Cordelia Langford, John Sillitoe on behalf of the Wellcome Sanger Institute COVID-19 Surveillance Team                                                                                                                                                                                                                                                         |                     |
| EPI_ISL_575995, EPI_ISL_576008, EPI_ISL_576011, EPI_ISL_576022, EPI_ISL_576035, EPI_ISL_576038, EPI_ISL_576042                                                                                                                                                                                                                                                                                                                                                                                                                                                                                                                                                                                                                                                                                                                                                                                                                                                                                                                                                                                                                                                                                                                                                                                                                                                                                                                                                                                                                                                                                                                                                                                                                                                 | Lighthouse Lab in Glasgow  | Wellcome Sanger Institute for the COVID-19 Genomics UK (COG-UK) consortium                                                                                                                                                                                                                                                                                                                                                                                       | Harper VanSteenhouse, Yumi Kasai, David Gray, Carol Clugston, Anna Dominicczak and Alex Alderton, Roberto Amato, Sonia Goncalves, Ewan Harrison, David K. Jackson, Ian Johnston, Dominic Kwiatkowski, Cordelia Langford, John Sillitoe on behalf of the Wellcome Sanger Institute COVID-19 Surveillance Team ( <a href="http://www.sanger.ac.uk/covid-team">http://www.sanger.ac.uk/covid-team</a> )                                                                                                                                                                 |                     |
| EPI_ISL_576050                                                                                                                                                                                                                                                                                                                                                                                                                                                                                                                                                                                                                                                                                                                                                                                                                                                                                                                                                                                                                                                                                                                                                                                                                                                                                                                                                                                                                                                                                                                                                                                                                                                                                                                                                 | Lighthouse Lab in Glasgow  | Wellcome Sanger Institute for the COVID-19 Genomics UK (COG-UK) Consortium                                                                                                                                                                                                                                                                                                                                                                                       | Harper VanSteenhouse, Yumi Kasai, David Gray, Carol Clugston, Anna Dominicczak and Alex Alderton, Roberto Amato, Sonia Goncalves, Ewan Harrison, David K. Jackson, Ian Johnston, Dominic Kwiatkowski, Cordelia Langford, John Sillitoe on behalf of the Wellcome Sanger Institute COVID-19 Surveillance Team                                                                                                                                                                                                                                                         |                     |
| EPI_ISL_576054, EPI_ISL_576058, EPI_ISL_576059                                                                                                                                                                                                                                                                                                                                                                                                                                                                                                                                                                                                                                                                                                                                                                                                                                                                                                                                                                                                                                                                                                                                                                                                                                                                                                                                                                                                                                                                                                                                                                                                                                                                                                                 | Lighthouse Lab in Glasgow  | Wellcome Sanger Institute for the COVID-19 Genomics UK (COG-UK) consortium                                                                                                                                                                                                                                                                                                                                                                                       | Harper VanSteenhouse, Yumi Kasai, David Gray, Carol Clugston, Anna Dominicczak and Alex Alderton, Roberto Amato, Sonia Goncalves, Ewan Harrison, David K. Jackson, Ian Johnston, Dominic Kwiatkowski, Cordelia Langford, John Sillitoe on behalf of the Wellcome Sanger Institute COVID-19 Surveillance Team ( <a href="http://www.sanger.ac.uk/covid-team">http://www.sanger.ac.uk/covid-team</a> )                                                                                                                                                                 |                     |
| EPI_ISL_576064                                                                                                                                                                                                                                                                                                                                                                                                                                                                                                                                                                                                                                                                                                                                                                                                                                                                                                                                                                                                                                                                                                                                                                                                                                                                                                                                                                                                                                                                                                                                                                                                                                                                                                                                                 | Lighthouse Lab in Glasgow  | Wellcome Sanger Institute for the COVID-19 Genomics UK (COG-UK) Consortium                                                                                                                                                                                                                                                                                                                                                                                       | Harper VanSteenhouse, Yumi Kasai, David Gray, Carol Clugston, Anna Dominicczak and Alex Alderton, Roberto Amato, Sonia Goncalves, Ewan Harrison, David K. Jackson, Ian Johnston, Dominic Kwiatkowski, Cordelia Langford, John Sillitoe on behalf of the Wellcome Sanger Institute COVID-19 Surveillance Team                                                                                                                                                                                                                                                         |                     |
| EPI_ISL_576087, EPI_ISL_576092                                                                                                                                                                                                                                                                                                                                                                                                                                                                                                                                                                                                                                                                                                                                                                                                                                                                                                                                                                                                                                                                                                                                                                                                                                                                                                                                                                                                                                                                                                                                                                                                                                                                                                                                 | Lighthouse Lab in Glasgow  | Wellcome Sanger Institute for the COVID-19 Genomics UK (COG-UK) consortium                                                                                                                                                                                                                                                                                                                                                                                       | Harper VanSteenhouse, Yumi Kasai, David Gray, Carol Clugston, Anna Dominicczak and Alex Alderton, Roberto Amato, Sonia Goncalves, Ewan Harrison, David K. Jackson, Ian Johnston, Dominic Kwiatkowski, Cordelia Langford, John Sillitoe on behalf of the Wellcome Sanger Institute COVID-19 Surveillance Team ( <a href="http://www.sanger.ac.uk/covid-team">http://www.sanger.ac.uk/covid-team</a> )                                                                                                                                                                 |                     |
| EPI_ISL_576113                                                                                                                                                                                                                                                                                                                                                                                                                                                                                                                                                                                                                                                                                                                                                                                                                                                                                                                                                                                                                                                                                                                                                                                                                                                                                                                                                                                                                                                                                                                                                                                                                                                                                                                                                 | RSUP Dr. Sardjito          | Genetics Working Group (Pokja Genetik) Faculty of Medicine, Public Health and Nursing Universitas Gadjah Mada (FK-KMK UGM); Disease Investigation Center Wates Ministry of Agriculture Indonesia; Department of Microbiology FK-KMK UGM; Laboratorium Diagnostik Yayasan Tahija World Mosquito Program (WMP) Yogyakarta Center for Tropical Medicine FK-KMK UGM; Integrated Research Center FK-KMK UGM; Department of Computer Science and Electronics FMIPA UGM | Gunadi, Hendra Wibawa, . Marcellus, Mohamad S. Hakim, Edwin W. Daniwijaya, Ludhang P. Rizki, Endah Supriyati, Eggi Arguni, Titik Nuryastuti, Tri Wibawa, Dwi AA Nugrahaningsih, Afiahayati, Siswanto, Kristy Iskandar, Nungki Anggorowati, Ika Trisnawati, Riat El Khair, William Widiatjirso, Fadil Fahri                                                                                                                                                                                                                                                           |                     |
| EPI_ISL_576114                                                                                                                                                                                                                                                                                                                                                                                                                                                                                                                                                                                                                                                                                                                                                                                                                                                                                                                                                                                                                                                                                                                                                                                                                                                                                                                                                                                                                                                                                                                                                                                                                                                                                                                                                 | RSUP Dr. Sardjito          | Genetics Working Group (Pokja Genetik) Faculty of Medicine, Public Health and Nursing Universitas Gadjah Mada (FK-KMK UGM); Disease Investigation Center Wates Ministry of Agriculture Indonesia; Department of Microbiology FK-KMK UGM; Laboratorium Diagnostik Yayasan Tahija World Mosquito Program (WMP) Yogyakarta Center for Tropical Medicine FK-KMK UGM; Integrated Research Center FK-KMK UGM; Department of Computer Science and Electronics FMIPA UGM | Gunadi, Hendra Wibawa, . Marcellus, Mohamad S. Hakim, Edwin W. Daniwijaya, Ludhang P. Rizki, Endah Supriyati, Eggi Arguni, Titik Nuryastuti, Tri Wibawa, Dwi AA Nugrahaningsih, Afiahayati, Siswanto, Kristy Iskandar, Nungki Anggorowati, Ika Trisnawati, Riat El Khair, Audric Kenny Tedja, Aditya Rifqi Fauzi                                                                                                                                                                                                                                                     |                     |
| EPI_ISL_576115                                                                                                                                                                                                                                                                                                                                                                                                                                                                                                                                                                                                                                                                                                                                                                                                                                                                                                                                                                                                                                                                                                                                                                                                                                                                                                                                                                                                                                                                                                                                                                                                                                                                                                                                                 | RSUP Dr Sardjito           | Genetics Working Group (Pokja Genetik) Faculty of Medicine, Public Health and Nursing Universitas Gadjah Mada (FK-KMK UGM); Disease Investigation Center Wates Ministry of Agriculture Indonesia; Department of Microbiology FK-KMK UGM; Laboratorium Diagnostik Yayasan Tahija World Mosquito Program (WMP) Yogyakarta Center for Tropical Medicine FK-KMK UGM; Integrated Research Center FK-KMK UGM; Department of Computer Science and Electronics FMIPA UGM | Gunadi, Hendra Wibawa, . Marcellus, Mohamad S. Hakim, Edwin W. Daniwijaya, Ludhang P. Rizki, Endah Supriyati, Eggi Arguni, Titik Nuryastuti, Tri Wibawa, Dwi AA Nugrahaningsih, Afiahayati, Siswanto, Kristy Iskandar, Nungki Anggorowati, Ika Trisnawati, Riat El Khair, Yunika Puspawati, Osman Sianipar, Umi Solekhah Intansari, Elizabeth Henny Heringtiyas, Ira Puspitawati, Nur Imma Fatimah Harahap, Untung Wirawan, Maria Patricia Inggriani                                                                                                                 |                     |
| EPI_ISL_576116                                                                                                                                                                                                                                                                                                                                                                                                                                                                                                                                                                                                                                                                                                                                                                                                                                                                                                                                                                                                                                                                                                                                                                                                                                                                                                                                                                                                                                                                                                                                                                                                                                                                                                                                                 | RSUP Dr. Sardjito          | Genetics Working Group (Pokja Genetik) Faculty of Medicine, Public Health and Nursing Universitas Gadjah Mada (FK-KMK UGM); Disease Investigation Center Wates Ministry of Agriculture Indonesia; Department of Microbiology FK-KMK UGM; Laboratorium Diagnostik Yayasan Tahija World Mosquito Program (WMP) Yogyakarta Center for Tropical Medicine FK-KMK UGM; Integrated Research Center FK-KMK UGM; Department of Computer Science and Electronics FMIPA UGM | Gunadi, Hendra Wibawa, . Marcellus, Mohamad S. Hakim, Edwin W. Daniwijaya, Ludhang P. Rizki, Endah Supriyati, Eggi Arguni, Titik Nuryastuti, Tri Wibawa, Dwi AA Nugrahaningsih, Afiahayati, Siswanto, Kristy Iskandar, Nungki Anggorowati, Ika Trisnawati, Sumardi, Eko Budiono, Bambang Sigit Riyanto, Heni Retnowulan, Munawar Gani, Satria Maulana, Nur Rahmi Ananda, Riat El Khair, Yunika Puspawati, Osman Sianipar, Umi Solekhah Intansari, Elizabeth Henny Heringtiyas, Ira Puspitawati, Nur Imma Fatimah Harahap, Ririn Enggy Yuliyanti, Alvin Santoso Kalim |                     |
| EPI_ISL_576128                                                                                                                                                                                                                                                                                                                                                                                                                                                                                                                                                                                                                                                                                                                                                                                                                                                                                                                                                                                                                                                                                                                                                                                                                                                                                                                                                                                                                                                                                                                                                                                                                                                                                                                                                 | RSUP Dr. Sardjito          | Genetics Working Group (Pokja Genetik) Faculty of Medicine, Public Health and Nursing Universitas Gadjah Mada (FK-KMK UGM); Disease Investigation Center Wates Ministry of                                                                                                                                                                                                                                                                                       | Gunadi, Hendra Wibawa, Marcellus, Mohamad S. Hakim, Edwin W. Daniwijaya, Ludhang P. Rizki, Endah Supriyati, Eggi Arguni, Titik Nuryastuti, Tri Wibawa, Dwi AA Nugrahaningsih, Afiahayati, Siswanto, Kristy Iskandar, Nungki Anggorowati, Ika Trisnawati, Sumardi, Eko Budiono, Bambang Sigit Riyanto, Heni Retnowulan, Munawar Gani, Satria Maulana, Nur Rahmi Ananda, Riat El Khair, Yunika Puspawati, Osman Sianipar, Umi Solekhah                                                                                                                                 |                     |

|                                                                                                                                                                                                                                                                                                                                                                                                                                                                                                                                                                                                                                                                                                                                                                                                                                                                                                                                                                                                                                                                                                                                                                                                                                                                                                                                                                                                                                                                                                                                                                                                                                                                                                                                                                                                                                                                                                                                                                                                                                                                                 |                                                                                                                                                                                                                                |                                                                                                                                                                                                                                                                                                                                                                                                                                                                                                                                                          |                                                                                                                                                                                                                                                                                                                                                                                                                                                                                                                                                                                     |
|---------------------------------------------------------------------------------------------------------------------------------------------------------------------------------------------------------------------------------------------------------------------------------------------------------------------------------------------------------------------------------------------------------------------------------------------------------------------------------------------------------------------------------------------------------------------------------------------------------------------------------------------------------------------------------------------------------------------------------------------------------------------------------------------------------------------------------------------------------------------------------------------------------------------------------------------------------------------------------------------------------------------------------------------------------------------------------------------------------------------------------------------------------------------------------------------------------------------------------------------------------------------------------------------------------------------------------------------------------------------------------------------------------------------------------------------------------------------------------------------------------------------------------------------------------------------------------------------------------------------------------------------------------------------------------------------------------------------------------------------------------------------------------------------------------------------------------------------------------------------------------------------------------------------------------------------------------------------------------------------------------------------------------------------------------------------------------|--------------------------------------------------------------------------------------------------------------------------------------------------------------------------------------------------------------------------------|----------------------------------------------------------------------------------------------------------------------------------------------------------------------------------------------------------------------------------------------------------------------------------------------------------------------------------------------------------------------------------------------------------------------------------------------------------------------------------------------------------------------------------------------------------|-------------------------------------------------------------------------------------------------------------------------------------------------------------------------------------------------------------------------------------------------------------------------------------------------------------------------------------------------------------------------------------------------------------------------------------------------------------------------------------------------------------------------------------------------------------------------------------|
|                                                                                                                                                                                                                                                                                                                                                                                                                                                                                                                                                                                                                                                                                                                                                                                                                                                                                                                                                                                                                                                                                                                                                                                                                                                                                                                                                                                                                                                                                                                                                                                                                                                                                                                                                                                                                                                                                                                                                                                                                                                                                 |                                                                                                                                                                                                                                | Agriculture Indonesia; Department of Microbiology FK-KMK UGM; Laboratorium Diagnostik Yayasan Tahija World Mosquito Program (WMP) Yogyakarta Center for Tropical Medicine FK-KMK UGM; Integrated Research Center FK-KMK UGM; Department of Computer Science and Electronics FMIPA UGM                                                                                                                                                                                                                                                                    | Intansari, Elizabeth Henny Herningtiyas, Ira Puspitawati, Nur Imma Fatimah Harahap, Dyah Ayu Puspitarani, Kemala Athollah                                                                                                                                                                                                                                                                                                                                                                                                                                                           |
| EPI_ISL_576130                                                                                                                                                                                                                                                                                                                                                                                                                                                                                                                                                                                                                                                                                                                                                                                                                                                                                                                                                                                                                                                                                                                                                                                                                                                                                                                                                                                                                                                                                                                                                                                                                                                                                                                                                                                                                                                                                                                                                                                                                                                                  | RSUP Dr. Sardjito                                                                                                                                                                                                              | Genetics Working Group (Pokja Genetik) Faculty of Medicine, Public Health and Nursing Universitas Gadjah Mada (FK-KMK UGM); Disease Investigation Center Wates Ministry of Agriculture Indonesia; Department of Microbiology FK-KMK UGM; Laboratorium Diagnostik Yayasan Tahija World Mosquito Program (WMP) Yogyakarta Center for Tropical Medicine FK-KMK UGM; Integrated Research Center FK-KMK UGM; Department of Computer Science and Electronics FMIPA UGM                                                                                         | Gunadi, Hendra Wibawa, Marcellus, Mohamad S. Hakim, Edwin W. Daniwijaya, Ludhang P. Rizki, Endah Supriyati, Eggi Arguni, Titik Nuryastuti, Tri Wibawa, Dwi AA Nugrahaningsih, Afiahayati, Siswanto, Kristy Iskandar, Nungki Anggorowati, Rina Triasih, Amalia Setyadi, Dwikisworo Setyowireni, Ida Safitri Laksanawati, Cahya Dewi Satira, Tiis Widowati, Elisabeth Siti Herini, Riat El Khair, Yunika Puspadewi, Osman Sianipar, Umi Solekha Intansari, Elizabeth Henny Herningtiyas, Ira Puspitawati, Nur Imma Fatimah Harahap, Alvin S. Kalim, Susan Simanjaya, Desyifa Mursalin |
| EPI_ISL_576145                                                                                                                                                                                                                                                                                                                                                                                                                                                                                                                                                                                                                                                                                                                                                                                                                                                                                                                                                                                                                                                                                                                                                                                                                                                                                                                                                                                                                                                                                                                                                                                                                                                                                                                                                                                                                                                                                                                                                                                                                                                                  | RSA Universitas Gadjah Mada                                                                                                                                                                                                    | Genetics Working Group (Pokja Genetik) Faculty of Medicine, Public Health and Nursing Universitas Gadjah Mada (FK-KMK UGM); Disease Investigation Center Wates Ministry of Agriculture Indonesia; Department of Microbiology FK-KMK UGM; Laboratorium Diagnostik Yayasan Tahija World Mosquito Program (WMP) Yogyakarta Center for Tropical Medicine FK-KMK UGM; Integrated Research Center FK-KMK UGM; Department of Computer Science and Electronics FMIPA UGM                                                                                         | Gunadi, Hendra Wibawa, Marcellus, Mohamad S. Hakim, Edwin W. Daniwijaya, Ludhang P. Rizki, Endah Supriyati, Eggi Arguni, Titik Nuryastuti, Tri Wibawa, Dwi AA Nugrahaningsih, Afiahayati, Siswanto, Kristy Iskandar, Nungki Anggorowati, William Widitjarsro, Fadil Fahri                                                                                                                                                                                                                                                                                                           |
| EPI_ISL_576150, EPI_ISL_576151, EPI_ISL_576152, EPI_ISL_576153, EPI_ISL_576154, EPI_ISL_576155, EPI_ISL_576156, EPI_ISL_576157, EPI_ISL_576158, EPI_ISL_576159, EPI_ISL_576160, EPI_ISL_576161, EPI_ISL_576162, EPI_ISL_576163, EPI_ISL_576164, EPI_ISL_576165, EPI_ISL_576166, EPI_ISL_576167, EPI_ISL_576168, EPI_ISL_576169, EPI_ISL_576222, EPI_ISL_576223, EPI_ISL_576224, EPI_ISL_576225, EPI_ISL_576226, EPI_ISL_576227                                                                                                                                                                                                                                                                                                                                                                                                                                                                                                                                                                                                                                                                                                                                                                                                                                                                                                                                                                                                                                                                                                                                                                                                                                                                                                                                                                                                                                                                                                                                                                                                                                                  |                                                                                                                                                                                                                                |                                                                                                                                                                                                                                                                                                                                                                                                                                                                                                                                                          |                                                                                                                                                                                                                                                                                                                                                                                                                                                                                                                                                                                     |
| see above                                                                                                                                                                                                                                                                                                                                                                                                                                                                                                                                                                                                                                                                                                                                                                                                                                                                                                                                                                                                                                                                                                                                                                                                                                                                                                                                                                                                                                                                                                                                                                                                                                                                                                                                                                                                                                                                                                                                                                                                                                                                       | Delaware Public Health Lab                                                                                                                                                                                                     | Delaware Public Health Lab                                                                                                                                                                                                                                                                                                                                                                                                                                                                                                                               | Gregory Hovan                                                                                                                                                                                                                                                                                                                                                                                                                                                                                                                                                                       |
| EPI_ISL_576257, EPI_ISL_576258, EPI_ISL_576259, EPI_ISL_576260                                                                                                                                                                                                                                                                                                                                                                                                                                                                                                                                                                                                                                                                                                                                                                                                                                                                                                                                                                                                                                                                                                                                                                                                                                                                                                                                                                                                                                                                                                                                                                                                                                                                                                                                                                                                                                                                                                                                                                                                                  | Instituto de Diagnostico y Referencia Epidemiologicos (INDRE)                                                                                                                                                                  | Instituto de Diagnostico y Referencia Epidemiologicos (INDRE)                                                                                                                                                                                                                                                                                                                                                                                                                                                                                            | Gisela Barrera-Badillo , Abril Rodriguez-Maldonado, Claudia Wong-Arambula , Natividad Cruz-Ortiz, Tatiana Nunez-Garcia, Dayanira Arellano-Suarez, Fabiola Garces-Ayala, Edgar Mendieta-Condado, Lucia Hernandez-Rivas, Irma Lopez-Martinez, Ernesto Ramirez-Gonzalez.                                                                                                                                                                                                                                                                                                               |
| EPI_ISL_576261, EPI_ISL_576262, EPI_ISL_576263                                                                                                                                                                                                                                                                                                                                                                                                                                                                                                                                                                                                                                                                                                                                                                                                                                                                                                                                                                                                                                                                                                                                                                                                                                                                                                                                                                                                                                                                                                                                                                                                                                                                                                                                                                                                                                                                                                                                                                                                                                  | Instituto de Diagnostico y Referencia Epidemiologicos (INDRE)                                                                                                                                                                  | Instituto de Diagnostico y Referencia Epidemiologicos (INDRE)                                                                                                                                                                                                                                                                                                                                                                                                                                                                                            | Gisela Barrera-Badillo , Abril Rodriguez-Maldonado, Claudia Wong-Arambula , Natividad Cruz-Ortiz, Tatiana Nunez-Garcia, Dayanira Arellano-Suarez, Adnan Araiza-Rodriguez, Edgar Mendieta-Condado, Lucia Hernandez-Rivas, Irma Lopez-Martinez, Ernesto Ramirez-Gonzalez.                                                                                                                                                                                                                                                                                                             |
| EPI_ISL_576272                                                                                                                                                                                                                                                                                                                                                                                                                                                                                                                                                                                                                                                                                                                                                                                                                                                                                                                                                                                                                                                                                                                                                                                                                                                                                                                                                                                                                                                                                                                                                                                                                                                                                                                                                                                                                                                                                                                                                                                                                                                                  | Instituto de Diagnostico y Referencia Epidemiologicos (INDRE)                                                                                                                                                                  | Instituto de Diagnostico y Referencia Epidemiologicos (INDRE)                                                                                                                                                                                                                                                                                                                                                                                                                                                                                            | Gisela Barrera-Badillo , Abril Rodriguez-Maldonado, Claudia Wong-Arambula , Natividad Cruz-Ortiz, Tatiana Nunez-Garcia, Dayanira Arellano-Suarez, Fabiola Garces-Ayala, Edgar Mendieta-Condado, Lucia Hernandez-Rivas, Irma Lopez-Martinez, Ernesto Ramirez-Gonzalez.                                                                                                                                                                                                                                                                                                               |
| EPI_ISL_576274, EPI_ISL_576275, EPI_ISL_576276                                                                                                                                                                                                                                                                                                                                                                                                                                                                                                                                                                                                                                                                                                                                                                                                                                                                                                                                                                                                                                                                                                                                                                                                                                                                                                                                                                                                                                                                                                                                                                                                                                                                                                                                                                                                                                                                                                                                                                                                                                  | Instituto de Diagnostico y Referencia Epidemiologicos (INDRE)                                                                                                                                                                  | Instituto de Diagnostico y Referencia Epidemiologicos (INDRE)                                                                                                                                                                                                                                                                                                                                                                                                                                                                                            | Gisela Barrera-Badillo , Abril Rodriguez-Maldonado, Claudia Wong-Arambula , Natividad Cruz-Ortiz, Tatiana Nunez-Garcia, Dayanira Arellano-Suarez, Adnan Araiza-Rodriguez, Edgar Mendieta-Condado, Lucia Hernandez-Rivas, Irma Lopez-Martinez, Ernesto Ramirez-Gonzalez.                                                                                                                                                                                                                                                                                                             |
| EPI_ISL_576383                                                                                                                                                                                                                                                                                                                                                                                                                                                                                                                                                                                                                                                                                                                                                                                                                                                                                                                                                                                                                                                                                                                                                                                                                                                                                                                                                                                                                                                                                                                                                                                                                                                                                                                                                                                                                                                                                                                                                                                                                                                                  | RSUD Budi Rahayu Kota Magelang                                                                                                                                                                                                 | Genetics Working Group (Pokja Genetik) Faculty of Medicine, Public Health and Nursing Universitas Gadjah Mada (FK-KMK UGM); Disease Investigation Center Wates Ministry of Agriculture Indonesia; Department of Microbiology FK-KMK UGM; Laboratorium Diagnostik Yayasan Tahija World Mosquito Program (WMP) Yogyakarta Center for Tropical Medicine FK-KMK UGM; Integrated Research Center FK-KMK UGM; Department of Computer Science and Electronics FMIPA UGM; Balai Besar Teknik Kesehatan Lingkungan dan Pengendalian Penyakit (BBTKLPP) Yogyakarta | Gunadi, Hendra Wibawa, Marcellus, Mohamad S. Hakim, Edwin W. Daniwijaya, Ludhang P. Rizki, Endah Supriyati, Eggi Arguni, Titik Nuryastuti, Tri Wibawa, Dwi AA Nugrahaningsih, Afiahayati, Siswanto, Kristy Iskandar, Nungki Anggorowati, Irene, Indaryati, Havid Setyawan, Ari Meliyanti, Merliana Sari Stumeang, Audric Kenny Tedja, Aditya Rifqi Fauzi                                                                                                                                                                                                                            |
| EPI_ISL_579762, EPI_ISL_579763, EPI_ISL_579765, EPI_ISL_579770, EPI_ISL_579781, EPI_ISL_579785, EPI_ISL_579802, EPI_ISL_579814, EPI_ISL_579819, EPI_ISL_579821                                                                                                                                                                                                                                                                                                                                                                                                                                                                                                                                                                                                                                                                                                                                                                                                                                                                                                                                                                                                                                                                                                                                                                                                                                                                                                                                                                                                                                                                                                                                                                                                                                                                                                                                                                                                                                                                                                                  | Lighthouse Lab in Glasgow                                                                                                                                                                                                      | Wellcome Sanger Institute for the COVID-19 Genomics UK (COG-UK) consortium                                                                                                                                                                                                                                                                                                                                                                                                                                                                               | Harper VanSteenhouse, Yumi Kasai, David Gray, Carol Clugston, Anna Dominiczak and Alex Alderton, Roberto Amato, Sonia Goncalves, Ewan Harrison, David K. Jackson, Ian Johnston, Dominic Kwiatkowski, Cordelia Langford, John Sillitoe on behalf of the Wellcome Sanger Institute COVID-19 Surveillance Team                                                                                                                                                                                                                                                                         |
| EPI_ISL_579835                                                                                                                                                                                                                                                                                                                                                                                                                                                                                                                                                                                                                                                                                                                                                                                                                                                                                                                                                                                                                                                                                                                                                                                                                                                                                                                                                                                                                                                                                                                                                                                                                                                                                                                                                                                                                                                                                                                                                                                                                                                                  | Lighthouse Lab in Glasgow                                                                                                                                                                                                      | Wellcome Sanger Institute for the COVID-19 Genomics UK (COG-UK) Consortium                                                                                                                                                                                                                                                                                                                                                                                                                                                                               | Harper VanSteenhouse, Yumi Kasai, David Gray, Carol Clugston, Anna Dominiczak and Alex Alderton, Roberto Amato, Sonia Goncalves, Ewan Harrison, David K. Jackson, Ian Johnston, Dominic Kwiatkowski, Cordelia Langford, John Sillitoe on behalf of the Wellcome Sanger Institute COVID-19 Surveillance Team                                                                                                                                                                                                                                                                         |
| EPI_ISL_579842, EPI_ISL_579845, EPI_ISL_579846, EPI_ISL_579848, EPI_ISL_579855, EPI_ISL_579857, EPI_ISL_579865, EPI_ISL_579868, EPI_ISL_579870, EPI_ISL_579873, EPI_ISL_579874, EPI_ISL_579877, EPI_ISL_579882, EPI_ISL_579887, EPI_ISL_579892, EPI_ISL_579893, EPI_ISL_579899, EPI_ISL_579908, EPI_ISL_579911, EPI_ISL_579915, EPI_ISL_580867, EPI_ISL_580870, EPI_ISL_580872, EPI_ISL_580890, EPI_ISL_580901, EPI_ISL_580905, EPI_ISL_580914, EPI_ISL_580920, EPI_ISL_580938, EPI_ISL_580943, EPI_ISL_580947, EPI_ISL_580949, EPI_ISL_580954, EPI_ISL_580968, EPI_ISL_580973, EPI_ISL_580987, EPI_ISL_581005, EPI_ISL_581014, EPI_ISL_581015, EPI_ISL_581027, EPI_ISL_581036, EPI_ISL_581039, EPI_ISL_581055, EPI_ISL_581059, EPI_ISL_581080, EPI_ISL_581087, EPI_ISL_581101, EPI_ISL_581102, EPI_ISL_581105, EPI_ISL_581109, EPI_ISL_581132, EPI_ISL_581141, EPI_ISL_581226, EPI_ISL_581247, EPI_ISL_581261, EPI_ISL_581329, EPI_ISL_581341, EPI_ISL_581403, EPI_ISL_581410                                                                                                                                                                                                                                                                                                                                                                                                                                                                                                                                                                                                                                                                                                                                                                                                                                                                                                                                                                                                                                                                                                  |                                                                                                                                                                                                                                |                                                                                                                                                                                                                                                                                                                                                                                                                                                                                                                                                          |                                                                                                                                                                                                                                                                                                                                                                                                                                                                                                                                                                                     |
| see above                                                                                                                                                                                                                                                                                                                                                                                                                                                                                                                                                                                                                                                                                                                                                                                                                                                                                                                                                                                                                                                                                                                                                                                                                                                                                                                                                                                                                                                                                                                                                                                                                                                                                                                                                                                                                                                                                                                                                                                                                                                                       | Lighthouse Lab in Glasgow                                                                                                                                                                                                      | Wellcome Sanger Institute for the COVID-19 Genomics UK (COG-UK) consortium                                                                                                                                                                                                                                                                                                                                                                                                                                                                               | Harper VanSteenhouse, Yumi Kasai, David Gray, Carol Clugston, Anna Dominiczak and Alex Alderton, Roberto Amato, Sonia Goncalves, Ewan Harrison, David K. Jackson, Ian Johnston, Dominic Kwiatkowski, Cordelia Langford, John Sillitoe on behalf of the Wellcome Sanger Institute COVID-19 Surveillance Team                                                                                                                                                                                                                                                                         |
| EPI_ISL_582034, EPI_ISL_582035, EPI_ISL_582036, EPI_ISL_582037, EPI_ISL_582038, EPI_ISL_582039, EPI_ISL_582040, EPI_ISL_582041, EPI_ISL_582042, EPI_ISL_582043, EPI_ISL_582044, EPI_ISL_582045, EPI_ISL_582046, EPI_ISL_582047, EPI_ISL_582048, EPI_ISL_582049, EPI_ISL_582050, EPI_ISL_582051, EPI_ISL_582052, EPI_ISL_582053, EPI_ISL_582054, EPI_ISL_582055, EPI_ISL_582056, EPI_ISL_582057, EPI_ISL_582058, EPI_ISL_582059, EPI_ISL_582060, EPI_ISL_582061, EPI_ISL_582062, EPI_ISL_582064, EPI_ISL_582065, EPI_ISL_582066, EPI_ISL_582067, EPI_ISL_582068, EPI_ISL_582069, EPI_ISL_582070, EPI_ISL_582071, EPI_ISL_582072, EPI_ISL_582073, EPI_ISL_582074, EPI_ISL_582075, EPI_ISL_582076, EPI_ISL_582077, EPI_ISL_582078, EPI_ISL_582079, EPI_ISL_582080, EPI_ISL_582081, EPI_ISL_582082, EPI_ISL_582083, EPI_ISL_582084, EPI_ISL_582085, EPI_ISL_582086, EPI_ISL_582087, EPI_ISL_582088, EPI_ISL_582089, EPI_ISL_582090                                                                                                                                                                                                                                                                                                                                                                                                                                                                                                                                                                                                                                                                                                                                                                                                                                                                                                                                                                                                                                                                                                                                                  |                                                                                                                                                                                                                                |                                                                                                                                                                                                                                                                                                                                                                                                                                                                                                                                                          |                                                                                                                                                                                                                                                                                                                                                                                                                                                                                                                                                                                     |
| see above                                                                                                                                                                                                                                                                                                                                                                                                                                                                                                                                                                                                                                                                                                                                                                                                                                                                                                                                                                                                                                                                                                                                                                                                                                                                                                                                                                                                                                                                                                                                                                                                                                                                                                                                                                                                                                                                                                                                                                                                                                                                       | Servicio de Microbiología. Hospital Universitario Donostia. OSI Donostialdea. Área de Enfermedades Infecciosas, Grupo de Infección Respiratoria y Resistencia Antimicrobiana. Instituto de Investigación Sanitaria Biodonostia | SeqCOVID-SPAIN consortium/IBV(CSIC)                                                                                                                                                                                                                                                                                                                                                                                                                                                                                                                      | Gustavo Cilla, Milagrosa Montes, Luis Piñeiro, Jose Maria Marimón and SeqCOVID-SPAIN consortium                                                                                                                                                                                                                                                                                                                                                                                                                                                                                     |
| EPI_ISL_582133, EPI_ISL_583246, EPI_ISL_583247, EPI_ISL_583248, EPI_ISL_583994, EPI_ISL_583995, EPI_ISL_584013, EPI_ISL_584014                                                                                                                                                                                                                                                                                                                                                                                                                                                                                                                                                                                                                                                                                                                                                                                                                                                                                                                                                                                                                                                                                                                                                                                                                                                                                                                                                                                                                                                                                                                                                                                                                                                                                                                                                                                                                                                                                                                                                  | Delaware Public Health Lab                                                                                                                                                                                                     | Delaware Public Health Lab                                                                                                                                                                                                                                                                                                                                                                                                                                                                                                                               | Gregory Hovan                                                                                                                                                                                                                                                                                                                                                                                                                                                                                                                                                                       |
| EPI_ISL_587326, EPI_ISL_587328, EPI_ISL_587331, EPI_ISL_587333, EPI_ISL_587338, EPI_ISL_587352, EPI_ISL_587354, EPI_ISL_587362, EPI_ISL_587363, EPI_ISL_587370, EPI_ISL_587381, EPI_ISL_587399, EPI_ISL_587402, EPI_ISL_587407, EPI_ISL_587409, EPI_ISL_587420, EPI_ISL_587429, EPI_ISL_587435, EPI_ISL_587445, EPI_ISL_587446, EPI_ISL_587454, EPI_ISL_587455, EPI_ISL_587459, EPI_ISL_587474, EPI_ISL_587478, EPI_ISL_587480, EPI_ISL_587481, EPI_ISL_587486, EPI_ISL_587488, EPI_ISL_587491, EPI_ISL_587492, EPI_ISL_587503, EPI_ISL_587504, EPI_ISL_587505, EPI_ISL_587506, EPI_ISL_587510, EPI_ISL_587514, EPI_ISL_587518, EPI_ISL_587529, EPI_ISL_587547, EPI_ISL_587551, EPI_ISL_587554, EPI_ISL_587570, EPI_ISL_587578, EPI_ISL_587579, EPI_ISL_587581, EPI_ISL_587584, EPI_ISL_587588, EPI_ISL_587596, EPI_ISL_587598, EPI_ISL_587605, EPI_ISL_587613, EPI_ISL_587614, EPI_ISL_587615, EPI_ISL_587618, EPI_ISL_587623, EPI_ISL_587625, EPI_ISL_587633, EPI_ISL_587636, EPI_ISL_587646, EPI_ISL_587651, EPI_ISL_587654, EPI_ISL_587657, EPI_ISL_587671, EPI_ISL_587680, EPI_ISL_587685, EPI_ISL_587686, EPI_ISL_587690, EPI_ISL_587694, EPI_ISL_587695, EPI_ISL_587705, EPI_ISL_588064, EPI_ISL_588070, EPI_ISL_588081, EPI_ISL_588089, EPI_ISL_588091, EPI_ISL_588105, EPI_ISL_588107, EPI_ISL_588113, EPI_ISL_588122, EPI_ISL_588137, EPI_ISL_588150, EPI_ISL_588163, EPI_ISL_588168, EPI_ISL_588182, EPI_ISL_588191, EPI_ISL_588198, EPI_ISL_588199, EPI_ISL_588205, EPI_ISL_588212, EPI_ISL_588214, EPI_ISL_588229, EPI_ISL_588241, EPI_ISL_588245, EPI_ISL_588247, EPI_ISL_588248, EPI_ISL_588249, EPI_ISL_588256, EPI_ISL_588263, EPI_ISL_588264, EPI_ISL_588267, EPI_ISL_588272, EPI_ISL_588277, EPI_ISL_588285, EPI_ISL_588286, EPI_ISL_588287, EPI_ISL_588288, EPI_ISL_588313, EPI_ISL_588322, EPI_ISL_588330, EPI_ISL_588332, EPI_ISL_588335, EPI_ISL_588338, EPI_ISL_588342, EPI_ISL_588350, EPI_ISL_588360, EPI_ISL_588361, EPI_ISL_588366, EPI_ISL_588372, EPI_ISL_588380, EPI_ISL_588388, EPI_ISL_588389, EPI_ISL_588398, EPI_ISL_588401, EPI_ISL_588407, |                                                                                                                                                                                                                                |                                                                                                                                                                                                                                                                                                                                                                                                                                                                                                                                                          |                                                                                                                                                                                                                                                                                                                                                                                                                                                                                                                                                                                     |









|                                                                                                                                                                                                                                                                                                                                                                                                                                                                                                                                                                                                                                                                                                                                                                                                                                                                                                                                                                                                                                                                                                                                                                                                                                                                                                                                                                                                                                                                                                                                                                                                                                                                                                                                                                                                                                                                                                                                                                                                                                                                                                                                                                                                                                                                                                                                                                                                                                                                                                                                                                                                                                                                                                                                                                |           |                                                                                                                                                                                                                              |                                                                                         |                                                                                                                                                                                                                                                                                                                                                  |
|----------------------------------------------------------------------------------------------------------------------------------------------------------------------------------------------------------------------------------------------------------------------------------------------------------------------------------------------------------------------------------------------------------------------------------------------------------------------------------------------------------------------------------------------------------------------------------------------------------------------------------------------------------------------------------------------------------------------------------------------------------------------------------------------------------------------------------------------------------------------------------------------------------------------------------------------------------------------------------------------------------------------------------------------------------------------------------------------------------------------------------------------------------------------------------------------------------------------------------------------------------------------------------------------------------------------------------------------------------------------------------------------------------------------------------------------------------------------------------------------------------------------------------------------------------------------------------------------------------------------------------------------------------------------------------------------------------------------------------------------------------------------------------------------------------------------------------------------------------------------------------------------------------------------------------------------------------------------------------------------------------------------------------------------------------------------------------------------------------------------------------------------------------------------------------------------------------------------------------------------------------------------------------------------------------------------------------------------------------------------------------------------------------------------------------------------------------------------------------------------------------------------------------------------------------------------------------------------------------------------------------------------------------------------------------------------------------------------------------------------------------------|-----------|------------------------------------------------------------------------------------------------------------------------------------------------------------------------------------------------------------------------------|-----------------------------------------------------------------------------------------|--------------------------------------------------------------------------------------------------------------------------------------------------------------------------------------------------------------------------------------------------------------------------------------------------------------------------------------------------|
| EPI_ISL_647067, EPI_ISL_647855, EPI_ISL_647856, EPI_ISL_647857, EPI_ISL_647863, EPI_ISL_647873, EPI_ISL_647882, EPI_ISL_647888, EPI_ISL_647896, EPI_ISL_647898, EPI_ISL_647904, EPI_ISL_647907, EPI_ISL_647912, EPI_ISL_647919, EPI_ISL_647921, EPI_ISL_647933, EPI_ISL_647945, EPI_ISL_647954, EPI_ISL_647957, EPI_ISL_647960                                                                                                                                                                                                                                                                                                                                                                                                                                                                                                                                                                                                                                                                                                                                                                                                                                                                                                                                                                                                                                                                                                                                                                                                                                                                                                                                                                                                                                                                                                                                                                                                                                                                                                                                                                                                                                                                                                                                                                                                                                                                                                                                                                                                                                                                                                                                                                                                                                 | see above | Lighthouse Lab in Glasgow                                                                                                                                                                                                    | Wellcome Sanger Institute for the COVID-19 Genomics UK (COG-UK) Consortium              | Harper VanSteenhouse, Yumi Kasai, David Gray, Carol Clugston, Anna Dominiczak and Alex Alderton, Roberto Amato, Sonia Goncalves, Ewan Harrison, David K. Jackson, Ian Johnston, Dominic Kwiatkowski, Cordelia Langford, John Sillitoe on behalf of the Wellcome Sanger Institute COVID-19 Surveillance Team                                      |
| EPI_ISL_649501, EPI_ISL_649507, EPI_ISL_649512, EPI_ISL_649514, EPI_ISL_649525, EPI_ISL_649528, EPI_ISL_649535, EPI_ISL_649558, EPI_ISL_649560, EPI_ISL_649563, EPI_ISL_649564, EPI_ISL_649574, EPI_ISL_649579, EPI_ISL_649580, EPI_ISL_649599, EPI_ISL_649602, EPI_ISL_649608, EPI_ISL_649611, EPI_ISL_649614, EPI_ISL_649615, EPI_ISL_649623, EPI_ISL_649636, EPI_ISL_649642, EPI_ISL_649644, EPI_ISL_649666, EPI_ISL_649667, EPI_ISL_649672, EPI_ISL_649677, EPI_ISL_649695, EPI_ISL_649702, EPI_ISL_649717, EPI_ISL_649719, EPI_ISL_649744, EPI_ISL_649745, EPI_ISL_649754, EPI_ISL_649758, EPI_ISL_649760, EPI_ISL_649764, EPI_ISL_649776, EPI_ISL_649778, EPI_ISL_649781, EPI_ISL_649782                                                                                                                                                                                                                                                                                                                                                                                                                                                                                                                                                                                                                                                                                                                                                                                                                                                                                                                                                                                                                                                                                                                                                                                                                                                                                                                                                                                                                                                                                                                                                                                                                                                                                                                                                                                                                                                                                                                                                                                                                                                                 | see above | Lighthouse Lab in Glasgow                                                                                                                                                                                                    | Wellcome Sanger Institute for the COVID-19 Genomics UK (COG-UK) Consortium              | Harper VanSteenhouse, Yumi Kasai, David Gray, Carol Clugston, Anna Dominiczak and Alex Alderton, Roberto Amato, Sonia Goncalves, Ewan Harrison, David K. Jackson, Ian Johnston, Dominic Kwiatkowski, Cordelia Langford, John Sillitoe on behalf of the Wellcome Sanger Institute COVID-19 Surveillance Team (http://www.sanger.ac.uk/covid-team) |
| EPI_ISL_654539, EPI_ISL_654540, EPI_ISL_654541, EPI_ISL_654542, EPI_ISL_654543, EPI_ISL_654544, EPI_ISL_654545, EPI_ISL_654546, EPI_ISL_654547, EPI_ISL_654548, EPI_ISL_654549, EPI_ISL_654550, EPI_ISL_654551, EPI_ISL_654552, EPI_ISL_654553, EPI_ISL_654554, EPI_ISL_654555, EPI_ISL_654556, EPI_ISL_654557, EPI_ISL_654558, EPI_ISL_654559, EPI_ISL_654560, EPI_ISL_654561, EPI_ISL_654562, EPI_ISL_654563, EPI_ISL_654564, EPI_ISL_654565, EPI_ISL_654566, EPI_ISL_654567, EPI_ISL_654568, EPI_ISL_654569, EPI_ISL_654570, EPI_ISL_654571, EPI_ISL_654572, EPI_ISL_654573, EPI_ISL_654574, EPI_ISL_654575, EPI_ISL_654576, EPI_ISL_654577, EPI_ISL_654578, EPI_ISL_654579, EPI_ISL_654580, EPI_ISL_654581, EPI_ISL_654582, EPI_ISL_654583, EPI_ISL_654584, EPI_ISL_654585, EPI_ISL_654586, EPI_ISL_654587, EPI_ISL_654588, EPI_ISL_654589, EPI_ISL_654590, EPI_ISL_654591, EPI_ISL_654592, EPI_ISL_654593, EPI_ISL_654594, EPI_ISL_654595, EPI_ISL_654596, EPI_ISL_654597, EPI_ISL_654598, EPI_ISL_654599, EPI_ISL_654600, EPI_ISL_654601, EPI_ISL_654602, EPI_ISL_654603, EPI_ISL_654604, EPI_ISL_654605, EPI_ISL_654606, EPI_ISL_654607, EPI_ISL_654608, EPI_ISL_654609, EPI_ISL_654610, EPI_ISL_654611, EPI_ISL_654612, EPI_ISL_654613, EPI_ISL_654614, EPI_ISL_654615                                                                                                                                                                                                                                                                                                                                                                                                                                                                                                                                                                                                                                                                                                                                                                                                                                                                                                                                                                                                                                                                                                                                                                                                                                                                                                                                                                                                                                                                                 | see above | Servicio de Microbiología. Hospital Universitario Donostia. OSI Donostialdea. Área de Enfermedades Infecciosas, Grupo de Infección Respiratoria y Resistencia Antimicrobiana. Instituto de Investigación Sanitaria Bionostia | SeqCOVID-SPAIN consortium/IBV(CSIC)                                                     | Gustavo Cilla Eguiluz, Milagrosa Montes Ros, Luis Piñeiro Vázquez, Ane Sorrairain, Jose Maria Marimón and SeqCOVID-SPAIN consortium                                                                                                                                                                                                              |
| EPI_ISL_654965, EPI_ISL_654966, EPI_ISL_654971, EPI_ISL_654980, EPI_ISL_654989, EPI_ISL_655001, EPI_ISL_655009, EPI_ISL_655011, EPI_ISL_655013, EPI_ISL_655027, EPI_ISL_655029, EPI_ISL_655037, EPI_ISL_655039, EPI_ISL_655043, EPI_ISL_655050, EPI_ISL_655068, EPI_ISL_655070, EPI_ISL_655073, EPI_ISL_655076, EPI_ISL_655078, EPI_ISL_655090, EPI_ISL_655093, EPI_ISL_655095, EPI_ISL_655102, EPI_ISL_655103, EPI_ISL_655104, EPI_ISL_655105, EPI_ISL_655109, EPI_ISL_655115, EPI_ISL_655121, EPI_ISL_655125, EPI_ISL_655131, EPI_ISL_655133, EPI_ISL_655134, EPI_ISL_655135, EPI_ISL_655136, EPI_ISL_655144, EPI_ISL_655166, EPI_ISL_655170, EPI_ISL_655174, EPI_ISL_655176, EPI_ISL_655183, EPI_ISL_655184, EPI_ISL_655190, EPI_ISL_655204, EPI_ISL_655206, EPI_ISL_655207, EPI_ISL_655214, EPI_ISL_655217, EPI_ISL_655224, EPI_ISL_655233, EPI_ISL_655234, EPI_ISL_655236, EPI_ISL_655237, EPI_ISL_655238, EPI_ISL_655243, EPI_ISL_655248, EPI_ISL_655263, EPI_ISL_655265, EPI_ISL_655267, EPI_ISL_655269, EPI_ISL_655271, EPI_ISL_655561, EPI_ISL_655694, EPI_ISL_655711, EPI_ISL_655723, EPI_ISL_655762, EPI_ISL_655788, EPI_ISL_655798, EPI_ISL_655841, EPI_ISL_655891, EPI_ISL_655933, EPI_ISL_657032, EPI_ISL_657034, EPI_ISL_657041, EPI_ISL_657044, EPI_ISL_657047, EPI_ISL_657051, EPI_ISL_657060, EPI_ISL_657063, EPI_ISL_657076, EPI_ISL_657077, EPI_ISL_657089, EPI_ISL_657102, EPI_ISL_657103, EPI_ISL_657104, EPI_ISL_657112, EPI_ISL_657137, EPI_ISL_657150, EPI_ISL_657158, EPI_ISL_657167, EPI_ISL_657171, EPI_ISL_657174, EPI_ISL_657175, EPI_ISL_657183, EPI_ISL_657186, EPI_ISL_657189, EPI_ISL_657194, EPI_ISL_657195, EPI_ISL_657200, EPI_ISL_657210, EPI_ISL_657225, EPI_ISL_657226, EPI_ISL_657229, EPI_ISL_657236, EPI_ISL_657237, EPI_ISL_657239, EPI_ISL_657249, EPI_ISL_657255, EPI_ISL_657258, EPI_ISL_657262, EPI_ISL_657277, EPI_ISL_657292, EPI_ISL_657305, EPI_ISL_657309, EPI_ISL_657319, EPI_ISL_657323, EPI_ISL_657347, EPI_ISL_657350, EPI_ISL_658416, EPI_ISL_658419, EPI_ISL_658426, EPI_ISL_658433, EPI_ISL_658439, EPI_ISL_658441, EPI_ISL_658443, EPI_ISL_658451, EPI_ISL_658493, EPI_ISL_658494, EPI_ISL_658498, EPI_ISL_658501, EPI_ISL_658512, EPI_ISL_658536, EPI_ISL_658548, EPI_ISL_658554, EPI_ISL_658555, EPI_ISL_658556, EPI_ISL_658557, EPI_ISL_658575, EPI_ISL_658579, EPI_ISL_658584, EPI_ISL_658586, EPI_ISL_658587, EPI_ISL_658588, EPI_ISL_658594, EPI_ISL_658599, EPI_ISL_658602, EPI_ISL_658603, EPI_ISL_658612, EPI_ISL_658625, EPI_ISL_658628, EPI_ISL_658632, EPI_ISL_658642, EPI_ISL_658644, EPI_ISL_658648, EPI_ISL_658651, EPI_ISL_658664, EPI_ISL_658672, EPI_ISL_658683, EPI_ISL_658692, EPI_ISL_658700, EPI_ISL_658713, EPI_ISL_658723, EPI_ISL_658725, EPI_ISL_658729, EPI_ISL_658740 | see above | Lighthouse Lab in Glasgow                                                                                                                                                                                                    | Wellcome Sanger Institute for the COVID-19 Genomics UK (COG-UK) Consortium              | Harper VanSteenhouse, Yumi Kasai, David Gray, Carol Clugston, Anna Dominiczak and Alex Alderton, Roberto Amato, Sonia Goncalves, Ewan Harrison, David K. Jackson, Ian Johnston, Dominic Kwiatkowski, Cordelia Langford, John Sillitoe on behalf of the Wellcome Sanger Institute COVID-19 Surveillance Team                                      |
| EPI_ISL_658863, EPI_ISL_658865, EPI_ISL_658868, EPI_ISL_658870                                                                                                                                                                                                                                                                                                                                                                                                                                                                                                                                                                                                                                                                                                                                                                                                                                                                                                                                                                                                                                                                                                                                                                                                                                                                                                                                                                                                                                                                                                                                                                                                                                                                                                                                                                                                                                                                                                                                                                                                                                                                                                                                                                                                                                                                                                                                                                                                                                                                                                                                                                                                                                                                                                 |           | Instituto de Diagnostico y Referencia Epidemiologicos (INDRE)                                                                                                                                                                | Instituto de Diagnostico y Referencia Epidemiologicos (INDRE)                           | Gisela Barrera-Badillo , Abril Rodriguez-Maldonado, Claudia Wong-Arambula , Natividad Cruz-Ortiz, Tatiana Nunez-Garcia, Dayanira Arellano-Suarez, Fabiola Garces-Ayala, Lucia Hernandez-Rivas, Irma Lopez-Martinez, Ernesto Ramirez-Gonzalez.                                                                                                    |
| EPI_ISL_658873, EPI_ISL_658875                                                                                                                                                                                                                                                                                                                                                                                                                                                                                                                                                                                                                                                                                                                                                                                                                                                                                                                                                                                                                                                                                                                                                                                                                                                                                                                                                                                                                                                                                                                                                                                                                                                                                                                                                                                                                                                                                                                                                                                                                                                                                                                                                                                                                                                                                                                                                                                                                                                                                                                                                                                                                                                                                                                                 |           | Instituto de Diagnostico y Referencia Epidemiologicos (INDRE)                                                                                                                                                                | Instituto de Diagnostico y Referencia Epidemiologicos (INDRE)                           | Gisela Barrera-Badillo , Abril Rodriguez-Maldonado, Claudia Wong-Arambula , Natividad Cruz-Ortiz, Tatiana Nunez-Garcia, Dayanira Arellano-Suarez, Fabiola Garces-Ayala, Lucia Hernandez-Rivas, Irma Lopez-Martinez, Ernesto Ramirez-Gonzalez.                                                                                                    |
| EPI_ISL_658899                                                                                                                                                                                                                                                                                                                                                                                                                                                                                                                                                                                                                                                                                                                                                                                                                                                                                                                                                                                                                                                                                                                                                                                                                                                                                                                                                                                                                                                                                                                                                                                                                                                                                                                                                                                                                                                                                                                                                                                                                                                                                                                                                                                                                                                                                                                                                                                                                                                                                                                                                                                                                                                                                                                                                 |           | Instituto de Diagnostico y Referencia Epidemiologicos (INDRE)                                                                                                                                                                | Instituto de Diagnostico y Referencia Epidemiologicos (INDRE)                           | Gisela Barrera-Badillo , Abril Rodriguez-Maldonado, Claudia Wong-Arambula , Natividad Cruz-Ortiz, Tatiana Nunez-Garcia, Dayanira Arellano-Suarez, Fabiola Garces-Ayala, Lucia Hernandez-Rivas, Irma Lopez-Martinez, Ernesto Ramirez-Gonzalez.                                                                                                    |
| EPI_ISL_659751, EPI_ISL_659755, EPI_ISL_659757, EPI_ISL_659759, EPI_ISL_659765, EPI_ISL_659769, EPI_ISL_659776, EPI_ISL_659782, EPI_ISL_659795, EPI_ISL_659796, EPI_ISL_659799, EPI_ISL_659801, EPI_ISL_659811, EPI_ISL_659819, EPI_ISL_659824, EPI_ISL_659825, EPI_ISL_659826, EPI_ISL_659834, EPI_ISL_659836, EPI_ISL_659840, EPI_ISL_659842, EPI_ISL_659845, EPI_ISL_659851, EPI_ISL_659855, EPI_ISL_659861, EPI_ISL_659881, EPI_ISL_659883, EPI_ISL_659886, EPI_ISL_659894, EPI_ISL_659895, EPI_ISL_659896, EPI_ISL_659900, EPI_ISL_659901, EPI_ISL_659915, EPI_ISL_659919, EPI_ISL_659920, EPI_ISL_659922, EPI_ISL_659929, EPI_ISL_659941, EPI_ISL_659944, EPI_ISL_659948, EPI_ISL_659960, EPI_ISL_659968, EPI_ISL_659969, EPI_ISL_659973, EPI_ISL_659974, EPI_ISL_659976, EPI_ISL_659977, EPI_ISL_659980, EPI_ISL_659982                                                                                                                                                                                                                                                                                                                                                                                                                                                                                                                                                                                                                                                                                                                                                                                                                                                                                                                                                                                                                                                                                                                                                                                                                                                                                                                                                                                                                                                                                                                                                                                                                                                                                                                                                                                                                                                                                                                                 | see above | Lighthouse Lab in Glasgow                                                                                                                                                                                                    | Wellcome Sanger Institute for the COVID-19 Genomics UK (COG-UK) Consortium              | Harper VanSteenhouse, Yumi Kasai, David Gray, Carol Clugston, Anna Dominiczak and Alex Alderton, Roberto Amato, Sonia Goncalves, Ewan Harrison, David K. Jackson, Ian Johnston, Dominic Kwiatkowski, Cordelia Langford, John Sillitoe on behalf of the Wellcome Sanger Institute COVID-19 Surveillance Team                                      |
| EPI_ISL_659988, EPI_ISL_659993, EPI_ISL_659997, EPI_ISL_660000, EPI_ISL_660004, EPI_ISL_660005, EPI_ISL_660007, EPI_ISL_660009, EPI_ISL_660018, EPI_ISL_660019, EPI_ISL_660024, EPI_ISL_660025, EPI_ISL_660028, EPI_ISL_660032, EPI_ISL_660035, EPI_ISL_660057, EPI_ISL_660063, EPI_ISL_660064                                                                                                                                                                                                                                                                                                                                                                                                                                                                                                                                                                                                                                                                                                                                                                                                                                                                                                                                                                                                                                                                                                                                                                                                                                                                                                                                                                                                                                                                                                                                                                                                                                                                                                                                                                                                                                                                                                                                                                                                                                                                                                                                                                                                                                                                                                                                                                                                                                                                 | see above | Lighthouse Lab in Glasgow                                                                                                                                                                                                    | Wellcome Sanger Institute for the COVID-19 Genomics UK (COG-UK) Consortium              | Harper VanSteenhouse, Yumi Kasai, David Gray, Carol Clugston, Anna Dominiczak and Alex Alderton, Roberto Amato, Sonia Goncalves, Ewan Harrison, David K. Jackson, Ian Johnston, Dominic Kwiatkowski, Cordelia Langford, John Sillitoe on behalf of the Wellcome Sanger Institute COVID-19 Surveillance Team (http://www.sanger.ac.uk/covid-team) |
| EPI_ISL_660068                                                                                                                                                                                                                                                                                                                                                                                                                                                                                                                                                                                                                                                                                                                                                                                                                                                                                                                                                                                                                                                                                                                                                                                                                                                                                                                                                                                                                                                                                                                                                                                                                                                                                                                                                                                                                                                                                                                                                                                                                                                                                                                                                                                                                                                                                                                                                                                                                                                                                                                                                                                                                                                                                                                                                 |           | Instituto de Diagnostico y Referencia Epidemiologicos (INDRE)                                                                                                                                                                | Instituto de diagnóstico y Referencia Epidemiologicos (INDRE) Departamento de Virología | Gisela Barrera-Badillo , Abril Rodriguez-Maldonado, Claudia Wong-Arambula , Natividad Cruz-Ortiz, Tatiana Nunez-Garcia, Dayanira Arellano-Suarez, Fabiola Garces-Ayala, Lucia Hernandez-Rivas, Irma Lopez-Martinez, Ernesto Ramirez-Gonzalez.                                                                                                    |
| EPI_ISL_660160, EPI_ISL_660161, EPI_ISL_660162, EPI_ISL_660163, EPI_ISL_660164, EPI_ISL_660187, EPI_ISL_660188, EPI_ISL_660189, EPI_ISL_660190, EPI_ISL_660191, EPI_ISL_660192, EPI_ISL_660193, EPI_ISL_660194, EPI_ISL_660196, EPI_ISL_660197, EPI_ISL_660199, EPI_ISL_660200, EPI_ISL_660203, EPI_ISL_660205, EPI_ISL_660206, EPI_ISL_660207, EPI_ISL_660208, EPI_ISL_660209, EPI_ISL_660211, EPI_ISL_660212, EPI_ISL_660213, EPI_ISL_660218, EPI_ISL_660219, EPI_ISL_660216, EPI_ISL_660217, EPI_ISL_660219, EPI_ISL_660220                                                                                                                                                                                                                                                                                                                                                                                                                                                                                                                                                                                                                                                                                                                                                                                                                                                                                                                                                                                                                                                                                                                                                                                                                                                                                                                                                                                                                                                                                                                                                                                                                                                                                                                                                                                                                                                                                                                                                                                                                                                                                                                                                                                                                                 | see above | NHLS-IALCH                                                                                                                                                                                                                   | KRISP, KZN Research Innovation and Sequencing Platform                                  | Giandhari J, Pillay S, Lessells R, Mdlalose K, York D, Khan S, Tegally H, Wilkinson E, de Oliveira T                                                                                                                                                                                                                                             |
| EPI_ISL_660222                                                                                                                                                                                                                                                                                                                                                                                                                                                                                                                                                                                                                                                                                                                                                                                                                                                                                                                                                                                                                                                                                                                                                                                                                                                                                                                                                                                                                                                                                                                                                                                                                                                                                                                                                                                                                                                                                                                                                                                                                                                                                                                                                                                                                                                                                                                                                                                                                                                                                                                                                                                                                                                                                                                                                 |           | KRISP, KZN Research Innovation and Sequencing Platform                                                                                                                                                                       | KRISP, KZN Research Innovation and Sequencing Platform                                  | Giandhari J, Pillay S, Lessells R, Mdlalose K, York D, Khan S, Tegally H, Wilkinson E, de Oliveira T                                                                                                                                                                                                                                             |
| EPI_ISL_660227                                                                                                                                                                                                                                                                                                                                                                                                                                                                                                                                                                                                                                                                                                                                                                                                                                                                                                                                                                                                                                                                                                                                                                                                                                                                                                                                                                                                                                                                                                                                                                                                                                                                                                                                                                                                                                                                                                                                                                                                                                                                                                                                                                                                                                                                                                                                                                                                                                                                                                                                                                                                                                                                                                                                                 |           | NHLS-IALCH                                                                                                                                                                                                                   | KRISP, KZN Research Innovation and Sequencing Platform                                  | Giandhari J, Pillay S, Lessells R, Mdlalose K, York D, Khan S, Tegally H, Wilkinson E, de Oliveira T                                                                                                                                                                                                                                             |
| EPI_ISL_660229, EPI_ISL_660230, EPI_ISL_660231, EPI_ISL_660232, EPI_ISL_660233                                                                                                                                                                                                                                                                                                                                                                                                                                                                                                                                                                                                                                                                                                                                                                                                                                                                                                                                                                                                                                                                                                                                                                                                                                                                                                                                                                                                                                                                                                                                                                                                                                                                                                                                                                                                                                                                                                                                                                                                                                                                                                                                                                                                                                                                                                                                                                                                                                                                                                                                                                                                                                                                                 |           | KRISP, KZN Research Innovation and Sequencing Platform                                                                                                                                                                       | KRISP, KZN Research Innovation and Sequencing Platform                                  | Giandhari J, Pillay S, Lessells R, Mdlalose K, York D, Khan S, Tegally H, Wilkinson E, de Oliveira T                                                                                                                                                                                                                                             |
| EPI_ISL_660235, EPI_ISL_660237, EPI_ISL_660242, EPI_ISL_660244, EPI_ISL_660245, EPI_ISL_660246, EPI_ISL_660247, EPI_ISL_660248, EPI_ISL_660249, EPI_ISL_660252, EPI_ISL_660253, EPI_ISL_660254, EPI_ISL_660255                                                                                                                                                                                                                                                                                                                                                                                                                                                                                                                                                                                                                                                                                                                                                                                                                                                                                                                                                                                                                                                                                                                                                                                                                                                                                                                                                                                                                                                                                                                                                                                                                                                                                                                                                                                                                                                                                                                                                                                                                                                                                                                                                                                                                                                                                                                                                                                                                                                                                                                                                 | see above | NHLS-IALCH                                                                                                                                                                                                                   | KRISP, KZN Research Innovation and Sequencing Platform                                  | Giandhari J, Pillay S, Lessells R, Mdlalose K, York D, Khan S, Tegally H, Wilkinson E, de Oliveira T                                                                                                                                                                                                                                             |
| EPI_ISL_660256, EPI_ISL_660257, EPI_ISL_660258                                                                                                                                                                                                                                                                                                                                                                                                                                                                                                                                                                                                                                                                                                                                                                                                                                                                                                                                                                                                                                                                                                                                                                                                                                                                                                                                                                                                                                                                                                                                                                                                                                                                                                                                                                                                                                                                                                                                                                                                                                                                                                                                                                                                                                                                                                                                                                                                                                                                                                                                                                                                                                                                                                                 |           | KRISP, KZN Research Innovation and Sequencing Platform                                                                                                                                                                       | KRISP, KZN Research Innovation and Sequencing Platform                                  | Giandhari J, Pillay S, Lessells R, Mdlalose K, York D, Khan S, Tegally H, Wilkinson E, de Oliveira T                                                                                                                                                                                                                                             |
| EPI_ISL_660260                                                                                                                                                                                                                                                                                                                                                                                                                                                                                                                                                                                                                                                                                                                                                                                                                                                                                                                                                                                                                                                                                                                                                                                                                                                                                                                                                                                                                                                                                                                                                                                                                                                                                                                                                                                                                                                                                                                                                                                                                                                                                                                                                                                                                                                                                                                                                                                                                                                                                                                                                                                                                                                                                                                                                 |           | Molecuar Diagnostic Services (MDS)                                                                                                                                                                                           | KRISP, KZN Research Innovation and Sequencing Platform                                  | Giandhari J, Pillay S, Lessells R, Mdlalose K, York D, Khan S, Tegally H, Wilkinson E, de Oliveira T                                                                                                                                                                                                                                             |
| EPI_ISL_660605, EPI_ISL_660606, EPI_ISL_660607, EPI_ISL_660608, EPI_ISL_660610, EPI_ISL_660612, EPI_ISL_660613, EPI_ISL_660614, EPI_ISL_660615, EPI_ISL_660617, EPI_ISL_660618, EPI_ISL_660619, EPI_ISL_660621, EPI_ISL_660622, EPI_ISL_660624, EPI_ISL_660625, EPI_ISL_660626, EPI_ISL_660627, EPI_ISL_660628, EPI_ISL_660629, EPI_ISL_660630, EPI_ISL_660632, EPI_ISL_660633, EPI_ISL_660634, EPI_ISL_660637, EPI_ISL_660638, EPI_ISL_660640, EPI_ISL_660641, EPI_ISL_660643, EPI_ISL_660645, EPI_ISL_660646, EPI_ISL_660648, EPI_ISL_660649, EPI_ISL_660651, EPI_ISL_660652, EPI_ISL_660653, EPI_ISL_660654, EPI_ISL_660655, EPI_ISL_660656, EPI_ISL_660659, EPI_ISL_660661, EPI_ISL_660662, EPI_ISL_660663                                                                                                                                                                                                                                                                                                                                                                                                                                                                                                                                                                                                                                                                                                                                                                                                                                                                                                                                                                                                                                                                                                                                                                                                                                                                                                                                                                                                                                                                                                                                                                                                                                                                                                                                                                                                                                                                                                                                                                                                                                                 | see above | NHLS-IALCH                                                                                                                                                                                                                   | KRISP, KZN Research Innovation and Sequencing Platform                                  | Giandhari J, Pillay S, Lessells R, Mdlalose K, York D, Khan S, Tegally H, Wilkinson E, de Oliveira T                                                                                                                                                                                                                                             |
| EPI_ISL_660664                                                                                                                                                                                                                                                                                                                                                                                                                                                                                                                                                                                                                                                                                                                                                                                                                                                                                                                                                                                                                                                                                                                                                                                                                                                                                                                                                                                                                                                                                                                                                                                                                                                                                                                                                                                                                                                                                                                                                                                                                                                                                                                                                                                                                                                                                                                                                                                                                                                                                                                                                                                                                                                                                                                                                 |           | KRISP, KZN Research Innovation and Sequencing Platform                                                                                                                                                                       | KRISP, KZN Research Innovation and Sequencing Platform                                  | Giandhari J, Pillay S, Lessells R, Mdlalose K, York D, Khan S, Tegally H, Wilkinson E, de Oliveira T                                                                                                                                                                                                                                             |
| EPI_ISL_661325, EPI_ISL_661328, EPI_ISL_661334, EPI_ISL_661339, EPI_ISL_661344, EPI_ISL_661345, EPI_ISL_661347, EPI_ISL_661355, EPI_ISL_661356, EPI_ISL_661361, EPI_ISL_661368, EPI_ISL_661373, EPI_ISL_661374, EPI_ISL_661377, EPI_ISL_661378, EPI_ISL_661380, EPI_ISL_661384, EPI_ISL_661393, EPI_ISL_661397, EPI_ISL_661398, EPI_ISL_661400, EPI_ISL_661403, EPI_ISL_661404, EPI_ISL_661433, EPI_ISL_661434, EPI_ISL_661445, EPI_ISL_661438, EPI_ISL_661445, EPI_ISL_661450, EPI_ISL_661451, EPI_ISL_661452, EPI_ISL_661455, EPI_ISL_661459, EPI_ISL_661463, EPI_ISL_661472, EPI_ISL_661479, EPI_ISL_661480, EPI_ISL_661490, EPI_ISL_661491, EPI_ISL_661493, EPI_ISL_661498, EPI_ISL_661502, EPI_ISL_661507, EPI_ISL_661509, EPI_ISL_661517, EPI_ISL_661521, EPI_ISL_661522, EPI_ISL_661534, EPI_ISL_661538, EPI_ISL_661540, EPI_ISL_661546, EPI_ISL_661551, EPI_ISL_661553, EPI_ISL_661559, EPI_ISL_661563, EPI_ISL_661566, EPI_ISL_661568, EPI_ISL_661575, EPI_ISL_661581, EPI_ISL_661591, EPI_ISL_661617, EPI_ISL_661618, EPI_ISL_661620, EPI_ISL_661628, EPI_ISL_661629, EPI_ISL_661642, EPI_ISL_661644, EPI_ISL_661645, EPI_ISL_661658, EPI_ISL_661661, EPI_ISL_661667, EPI_ISL_661671, EPI_ISL_661683,                                                                                                                                                                                                                                                                                                                                                                                                                                                                                                                                                                                                                                                                                                                                                                                                                                                                                                                                                                                                                                                                                                                                                                                                                                                                                                                                                                                                                                                                                                                                                | see above | NHLS-IALCH                                                                                                                                                                                                                   | KRISP, KZN Research Innovation and Sequencing Platform                                  | Giandhari J, Pillay S, Lessells R, Mdlalose K, York D, Khan S, Tegally H, Wilkinson E, de Oliveira T                                                                                                                                                                                                                                             |



|                                                                                                                                                                                                                                                                                                                                                                                                                                                                                                                                                                                                                                                                                                                                                                                                                                                                                                                                                                                                                                                                                                                                                                                                                                                                                                                                                                                                                                                                                                                                                                                                                                                                                                                                                                                                                                                                                                                                                                                                                                                                                                                                                                                                                                                                                                                                                                                                                                                                                                                                                                                                                                                                                                                                                                                                                                                                                                                                                                                                                                                                                                                                                                                                                                                                                                                                                                                                                                                                                                                                                                                                                                                                                                                                                                                                                                                                                                                                                                |           |                                                                                                                                                                                         |                                                                                                                                                                                         |                                                                                                                                                                                                                                                                                                                                                                                                                                                                                                                                                                |
|----------------------------------------------------------------------------------------------------------------------------------------------------------------------------------------------------------------------------------------------------------------------------------------------------------------------------------------------------------------------------------------------------------------------------------------------------------------------------------------------------------------------------------------------------------------------------------------------------------------------------------------------------------------------------------------------------------------------------------------------------------------------------------------------------------------------------------------------------------------------------------------------------------------------------------------------------------------------------------------------------------------------------------------------------------------------------------------------------------------------------------------------------------------------------------------------------------------------------------------------------------------------------------------------------------------------------------------------------------------------------------------------------------------------------------------------------------------------------------------------------------------------------------------------------------------------------------------------------------------------------------------------------------------------------------------------------------------------------------------------------------------------------------------------------------------------------------------------------------------------------------------------------------------------------------------------------------------------------------------------------------------------------------------------------------------------------------------------------------------------------------------------------------------------------------------------------------------------------------------------------------------------------------------------------------------------------------------------------------------------------------------------------------------------------------------------------------------------------------------------------------------------------------------------------------------------------------------------------------------------------------------------------------------------------------------------------------------------------------------------------------------------------------------------------------------------------------------------------------------------------------------------------------------------------------------------------------------------------------------------------------------------------------------------------------------------------------------------------------------------------------------------------------------------------------------------------------------------------------------------------------------------------------------------------------------------------------------------------------------------------------------------------------------------------------------------------------------------------------------------------------------------------------------------------------------------------------------------------------------------------------------------------------------------------------------------------------------------------------------------------------------------------------------------------------------------------------------------------------------------------------------------------------------------------------------------------------------|-----------|-----------------------------------------------------------------------------------------------------------------------------------------------------------------------------------------|-----------------------------------------------------------------------------------------------------------------------------------------------------------------------------------------|----------------------------------------------------------------------------------------------------------------------------------------------------------------------------------------------------------------------------------------------------------------------------------------------------------------------------------------------------------------------------------------------------------------------------------------------------------------------------------------------------------------------------------------------------------------|
| EPI_ISL_710626, EPI_ISL_710633, EPI_ISL_710639, EPI_ISL_710642, EPI_ISL_710646, EPI_ISL_710672, EPI_ISL_710678, EPI_ISL_710686, EPI_ISL_710691, EPI_ISL_710692, EPI_ISL_710695, EPI_ISL_710759, EPI_ISL_710760, EPI_ISL_710763, EPI_ISL_710773, EPI_ISL_710774, EPI_ISL_710777, EPI_ISL_710787, EPI_ISL_710792, EPI_ISL_710804, EPI_ISL_710810, EPI_ISL_710809, EPI_ISL_710810, EPI_ISL_710815, EPI_ISL_710820, EPI_ISL_710845, EPI_ISL_710848, EPI_ISL_710849, EPI_ISL_710853, EPI_ISL_710854, EPI_ISL_710858, EPI_ISL_710859, EPI_ISL_710860, EPI_ISL_710861, EPI_ISL_710872, EPI_ISL_710877, EPI_ISL_710905, EPI_ISL_711007, EPI_ISL_719606, EPI_ISL_719608, EPI_ISL_719614, EPI_ISL_719618, EPI_ISL_719622, EPI_ISL_719628, EPI_ISL_719629, EPI_ISL_719633, EPI_ISL_719635, EPI_ISL_719636, EPI_ISL_719648, EPI_ISL_719655, EPI_ISL_719660, EPI_ISL_719665, EPI_ISL_719668, EPI_ISL_719673, EPI_ISL_719679, EPI_ISL_719680, EPI_ISL_719681, EPI_ISL_719682, EPI_ISL_719684, EPI_ISL_719689, EPI_ISL_719692, EPI_ISL_719696, EPI_ISL_719697, EPI_ISL_719702, EPI_ISL_719703, EPI_ISL_719704, EPI_ISL_719741, EPI_ISL_719759, EPI_ISL_719764, EPI_ISL_719769, EPI_ISL_719780, EPI_ISL_719790, EPI_ISL_719799, EPI_ISL_719800, EPI_ISL_719812, EPI_ISL_719836, EPI_ISL_719838, EPI_ISL_719841, EPI_ISL_719845, EPI_ISL_719859, EPI_ISL_719862, EPI_ISL_719870, EPI_ISL_719883, EPI_ISL_719889, EPI_ISL_719901, EPI_ISL_719909, EPI_ISL_719916, EPI_ISL_719920, EPI_ISL_719923, EPI_ISL_719924, EPI_ISL_719929, EPI_ISL_719939, EPI_ISL_719940, EPI_ISL_719950, EPI_ISL_719964, EPI_ISL_719971, EPI_ISL_719974, EPI_ISL_719975, EPI_ISL_719978, EPI_ISL_719985, EPI_ISL_720668, EPI_ISL_720704, EPI_ISL_720726, EPI_ISL_720728, EPI_ISL_720761, EPI_ISL_720805, EPI_ISL_720834, EPI_ISL_720867, EPI_ISL_720870, EPI_ISL_720917, EPI_ISL_720922, EPI_ISL_720923, EPI_ISL_720928, EPI_ISL_720937, EPI_ISL_720940, EPI_ISL_720942, EPI_ISL_720944, EPI_ISL_720946, EPI_ISL_720949, EPI_ISL_720950, EPI_ISL_720961, EPI_ISL_720966, EPI_ISL_720972, EPI_ISL_720981, EPI_ISL_720989, EPI_ISL_720997, EPI_ISL_720999, EPI_ISL_721008, EPI_ISL_721012, EPI_ISL_721015, EPI_ISL_721022, EPI_ISL_721025, EPI_ISL_721027, EPI_ISL_721029, EPI_ISL_721033, EPI_ISL_721035, EPI_ISL_721038, EPI_ISL_721044, EPI_ISL_721049, EPI_ISL_721058, EPI_ISL_721063, EPI_ISL_721067, EPI_ISL_721071, EPI_ISL_721073, EPI_ISL_721085, EPI_ISL_721096, EPI_ISL_721107, EPI_ISL_721112, EPI_ISL_721118, EPI_ISL_721127, EPI_ISL_721129, EPI_ISL_721137, EPI_ISL_721142, EPI_ISL_721143, EPI_ISL_721145, EPI_ISL_721169, EPI_ISL_721181, EPI_ISL_721182, EPI_ISL_721536, EPI_ISL_721537, EPI_ISL_721548, EPI_ISL_721553, EPI_ISL_721557, EPI_ISL_721557, EPI_ISL_721566, EPI_ISL_721564, EPI_ISL_730785, EPI_ISL_730796, EPI_ISL_730808, EPI_ISL_730831, EPI_ISL_730840, EPI_ISL_730847, EPI_ISL_730875, EPI_ISL_730889, EPI_ISL_731258, EPI_ISL_731261, EPI_ISL_731264, EPI_ISL_731267, EPI_ISL_731290, EPI_ISL_731293, EPI_ISL_731299, EPI_ISL_731305, EPI_ISL_731306, EPI_ISL_731319, EPI_ISL_731330, EPI_ISL_731332, EPI_ISL_731338, EPI_ISL_731357, EPI_ISL_731372, EPI_ISL_731373, EPI_ISL_731376, EPI_ISL_731379, EPI_ISL_731386, EPI_ISL_731405, EPI_ISL_731421, EPI_ISL_731435, EPI_ISL_731450, EPI_ISL_731452, EPI_ISL_731482, EPI_ISL_731494, EPI_ISL_731507, EPI_ISL_731535, EPI_ISL_731537, EPI_ISL_733920, EPI_ISL_733930, EPI_ISL_733936, EPI_ISL_733951, EPI_ISL_733972, EPI_ISL_733977, EPI_ISL_733982, EPI_ISL_733986, EPI_ISL_733994, EPI_ISL_734015, EPI_ISL_734024, EPI_ISL_734027, EPI_ISL_734031, EPI_ISL_734046, EPI_ISL_734052, EPI_ISL_734056, EPI_ISL_734057, EPI_ISL_734062, EPI_ISL_734071, EPI_ISL_734075, EPI_ISL_734077, EPI_ISL_734087, EPI_ISL_734091, EPI_ISL_734094, EPI_ISL_734098, EPI_ISL_734106, EPI_ISL_734112, EPI_ISL_734120, EPI_ISL_734130, EPI_ISL_734131, EPI_ISL_734132, EPI_ISL_734137, EPI_ISL_734155, EPI_ISL_734156, EPI_ISL_734161 | see above | Lighthouse Lab in Glasgow                                                                                                                                                               | Wellcome Sanger Institute for the COVID-19 Genomics UK (COG-UK) Consortium                                                                                                              | Harper VanSteenhouse, Yumi Kasai, David Gray, Carol Clugston, Anna Dominiczak and Alex Alderton, Roberto Amato, Sonia Goncalves, Ewan Harrison, David K. Jackson, Ian Johnston, Dominic Kwiatkowski, Cordelia Langford, John Sillitoe on behalf of the Wellcome Sanger Institute COVID-19 Surveillance Team                                                                                                                                                                                                                                                    |
| EPI_ISL_735500                                                                                                                                                                                                                                                                                                                                                                                                                                                                                                                                                                                                                                                                                                                                                                                                                                                                                                                                                                                                                                                                                                                                                                                                                                                                                                                                                                                                                                                                                                                                                                                                                                                                                                                                                                                                                                                                                                                                                                                                                                                                                                                                                                                                                                                                                                                                                                                                                                                                                                                                                                                                                                                                                                                                                                                                                                                                                                                                                                                                                                                                                                                                                                                                                                                                                                                                                                                                                                                                                                                                                                                                                                                                                                                                                                                                                                                                                                                                                 |           | University of Chittagong                                                                                                                                                                | Central Biological Research Laboratory and Department of Biochemistry and Molecular Biology                                                                                             | H. M. Abdullah Al Masud, Mohammad Omar Faruque, Sajib Rudra, Md. Khondakar Raziur Rahman, Imam Hossen, Md. Arif Hossain, Shanta Paul, Md. Omer Faruq, Md. Imranul Hoq, Robiul Hasan Bhuiyan                                                                                                                                                                                                                                                                                                                                                                    |
| EPI_ISL_735501, EPI_ISL_735502                                                                                                                                                                                                                                                                                                                                                                                                                                                                                                                                                                                                                                                                                                                                                                                                                                                                                                                                                                                                                                                                                                                                                                                                                                                                                                                                                                                                                                                                                                                                                                                                                                                                                                                                                                                                                                                                                                                                                                                                                                                                                                                                                                                                                                                                                                                                                                                                                                                                                                                                                                                                                                                                                                                                                                                                                                                                                                                                                                                                                                                                                                                                                                                                                                                                                                                                                                                                                                                                                                                                                                                                                                                                                                                                                                                                                                                                                                                                 |           | Abdul Malek Ukil Medical College, Noakhali                                                                                                                                              | Central Biological Research Laboratory and Department of Biochemistry and Molecular Biology                                                                                             | H. M. Abdullah Al Masud, Mohammad Omar Faruque, Sajib Rudra, Md. Khondakar Raziur Rahman, Imam Hossen, Md. Arif Hossain, Shanta Paul, Md. Omer Faruq, Md. Imranul Hoq, Robiul Hasan Bhuiyan                                                                                                                                                                                                                                                                                                                                                                    |
| EPI_ISL_735864, EPI_ISL_735894, EPI_ISL_735909, EPI_ISL_735934, EPI_ISL_735982, EPI_ISL_735993, EPI_ISL_736001, EPI_ISL_736010, EPI_ISL_736102, EPI_ISL_736115, EPI_ISL_736124, EPI_ISL_736183, EPI_ISL_736220, EPI_ISL_736250, EPI_ISL_736258, EPI_ISL_736271, EPI_ISL_736284, EPI_ISL_736301, EPI_ISL_736304, EPI_ISL_736311, EPI_ISL_736343, EPI_ISL_736352, EPI_ISL_736358, EPI_ISL_736383, EPI_ISL_736419, EPI_ISL_736429, EPI_ISL_736431, EPI_ISL_736444, EPI_ISL_736445, EPI_ISL_736461, EPI_ISL_736466, EPI_ISL_736476, EPI_ISL_736483, EPI_ISL_736489, EPI_ISL_736490, EPI_ISL_736529, EPI_ISL_736532, EPI_ISL_736533, EPI_ISL_736556, EPI_ISL_736573, EPI_ISL_736582, EPI_ISL_736620, EPI_ISL_736659, EPI_ISL_736668, EPI_ISL_736695, EPI_ISL_736734, EPI_ISL_736737, EPI_ISL_736752                                                                                                                                                                                                                                                                                                                                                                                                                                                                                                                                                                                                                                                                                                                                                                                                                                                                                                                                                                                                                                                                                                                                                                                                                                                                                                                                                                                                                                                                                                                                                                                                                                                                                                                                                                                                                                                                                                                                                                                                                                                                                                                                                                                                                                                                                                                                                                                                                                                                                                                                                                                                                                                                                                                                                                                                                                                                                                                                                                                                                                                                                                                                                                 | see above | Lighthouse Lab in Glasgow                                                                                                                                                               | Wellcome Sanger Institute for the COVID-19 Genomics UK (COG-UK) Consortium                                                                                                              | Harper VanSteenhouse, Yumi Kasai, David Gray, Carol Clugston, Anna Dominiczak and Alex Alderton, Roberto Amato, Sonia Goncalves, Ewan Harrison, David K. Jackson, Ian Johnston, Dominic Kwiatkowski, Cordelia Langford, John Sillitoe on behalf of the Wellcome Sanger Institute COVID-19 Surveillance Team                                                                                                                                                                                                                                                    |
| EPI_ISL_736925, EPI_ISL_736926                                                                                                                                                                                                                                                                                                                                                                                                                                                                                                                                                                                                                                                                                                                                                                                                                                                                                                                                                                                                                                                                                                                                                                                                                                                                                                                                                                                                                                                                                                                                                                                                                                                                                                                                                                                                                                                                                                                                                                                                                                                                                                                                                                                                                                                                                                                                                                                                                                                                                                                                                                                                                                                                                                                                                                                                                                                                                                                                                                                                                                                                                                                                                                                                                                                                                                                                                                                                                                                                                                                                                                                                                                                                                                                                                                                                                                                                                                                                 |           | NHLS-IALCH                                                                                                                                                                              | KRISP, KZN Research Innovation and Sequencing Platform                                                                                                                                  | Giandhari J, Pillay S, Lessells R, ChimukangaraB, Mdlalose K, York D, Khan S, Tegally H, Wilkinson E, de Oliveira T                                                                                                                                                                                                                                                                                                                                                                                                                                            |
| EPI_ISL_736930                                                                                                                                                                                                                                                                                                                                                                                                                                                                                                                                                                                                                                                                                                                                                                                                                                                                                                                                                                                                                                                                                                                                                                                                                                                                                                                                                                                                                                                                                                                                                                                                                                                                                                                                                                                                                                                                                                                                                                                                                                                                                                                                                                                                                                                                                                                                                                                                                                                                                                                                                                                                                                                                                                                                                                                                                                                                                                                                                                                                                                                                                                                                                                                                                                                                                                                                                                                                                                                                                                                                                                                                                                                                                                                                                                                                                                                                                                                                                 |           | MDS                                                                                                                                                                                     | KRISP, KZN Research Innovation and Sequencing Platform                                                                                                                                  | Giandhari J, Pillay S, Lessells R, ChimukangaraB, Mdlalose K, York D, Khan S, Tegally H, Wilkinson E, de Oliveira T                                                                                                                                                                                                                                                                                                                                                                                                                                            |
| EPI_ISL_736932, EPI_ISL_736935                                                                                                                                                                                                                                                                                                                                                                                                                                                                                                                                                                                                                                                                                                                                                                                                                                                                                                                                                                                                                                                                                                                                                                                                                                                                                                                                                                                                                                                                                                                                                                                                                                                                                                                                                                                                                                                                                                                                                                                                                                                                                                                                                                                                                                                                                                                                                                                                                                                                                                                                                                                                                                                                                                                                                                                                                                                                                                                                                                                                                                                                                                                                                                                                                                                                                                                                                                                                                                                                                                                                                                                                                                                                                                                                                                                                                                                                                                                                 |           | NHLS-IALCH                                                                                                                                                                              | KRISP, KZN Research Innovation and Sequencing Platform                                                                                                                                  | Giandhari J, Pillay S, Lessells R, ChimukangaraB, Mdlalose K, York D, Khan S, Tegally H, Wilkinson E, de Oliveira T                                                                                                                                                                                                                                                                                                                                                                                                                                            |
| EPI_ISL_736936, EPI_ISL_736937                                                                                                                                                                                                                                                                                                                                                                                                                                                                                                                                                                                                                                                                                                                                                                                                                                                                                                                                                                                                                                                                                                                                                                                                                                                                                                                                                                                                                                                                                                                                                                                                                                                                                                                                                                                                                                                                                                                                                                                                                                                                                                                                                                                                                                                                                                                                                                                                                                                                                                                                                                                                                                                                                                                                                                                                                                                                                                                                                                                                                                                                                                                                                                                                                                                                                                                                                                                                                                                                                                                                                                                                                                                                                                                                                                                                                                                                                                                                 |           | Netcare                                                                                                                                                                                 | KRISP, KZN Research Innovation and Sequencing Platform                                                                                                                                  | Giandhari J, Pillay S, Lessells R, ChimukangaraB, Mdlalose K, York D, Khan S, Tegally H, Wilkinson E, de Oliveira T                                                                                                                                                                                                                                                                                                                                                                                                                                            |
| EPI_ISL_736938, EPI_ISL_736940, EPI_ISL_736941, EPI_ISL_736942, EPI_ISL_736943, EPI_ISL_736945, EPI_ISL_736946, EPI_ISL_736947, EPI_ISL_736948, EPI_ISL_736951, EPI_ISL_736952, EPI_ISL_736954, EPI_ISL_736955, EPI_ISL_736958, EPI_ISL_736959                                                                                                                                                                                                                                                                                                                                                                                                                                                                                                                                                                                                                                                                                                                                                                                                                                                                                                                                                                                                                                                                                                                                                                                                                                                                                                                                                                                                                                                                                                                                                                                                                                                                                                                                                                                                                                                                                                                                                                                                                                                                                                                                                                                                                                                                                                                                                                                                                                                                                                                                                                                                                                                                                                                                                                                                                                                                                                                                                                                                                                                                                                                                                                                                                                                                                                                                                                                                                                                                                                                                                                                                                                                                                                                 | see above | NHLS-IALCH                                                                                                                                                                              | KRISP, KZN Research Innovation and Sequencing Platform                                                                                                                                  | Giandhari J, Pillay S, Lessells R, ChimukangaraB, Mdlalose K, York D, Khan S, Tegally H, Wilkinson E, de Oliveira T                                                                                                                                                                                                                                                                                                                                                                                                                                            |
| EPI_ISL_736961, EPI_ISL_736962, EPI_ISL_736963, EPI_ISL_736964, EPI_ISL_736965                                                                                                                                                                                                                                                                                                                                                                                                                                                                                                                                                                                                                                                                                                                                                                                                                                                                                                                                                                                                                                                                                                                                                                                                                                                                                                                                                                                                                                                                                                                                                                                                                                                                                                                                                                                                                                                                                                                                                                                                                                                                                                                                                                                                                                                                                                                                                                                                                                                                                                                                                                                                                                                                                                                                                                                                                                                                                                                                                                                                                                                                                                                                                                                                                                                                                                                                                                                                                                                                                                                                                                                                                                                                                                                                                                                                                                                                                 |           | Netcare                                                                                                                                                                                 | KRISP, KZN Research Innovation and Sequencing Platform                                                                                                                                  | Giandhari J, Pillay S, Lessells R, ChimukangaraB, Mdlalose K, York D, Khan S, Tegally H, Wilkinson E, de Oliveira T                                                                                                                                                                                                                                                                                                                                                                                                                                            |
| EPI_ISL_736966, EPI_ISL_736968                                                                                                                                                                                                                                                                                                                                                                                                                                                                                                                                                                                                                                                                                                                                                                                                                                                                                                                                                                                                                                                                                                                                                                                                                                                                                                                                                                                                                                                                                                                                                                                                                                                                                                                                                                                                                                                                                                                                                                                                                                                                                                                                                                                                                                                                                                                                                                                                                                                                                                                                                                                                                                                                                                                                                                                                                                                                                                                                                                                                                                                                                                                                                                                                                                                                                                                                                                                                                                                                                                                                                                                                                                                                                                                                                                                                                                                                                                                                 |           | MDS                                                                                                                                                                                     | KRISP, KZN Research Innovation and Sequencing Platform                                                                                                                                  | Giandhari J, Pillay S, Lessells R, ChimukangaraB, Mdlalose K, York D, Khan S, Tegally H, Wilkinson E, de Oliveira T                                                                                                                                                                                                                                                                                                                                                                                                                                            |
| EPI_ISL_736969, EPI_ISL_736970, EPI_ISL_736971, EPI_ISL_736972, EPI_ISL_736973, EPI_ISL_736974, EPI_ISL_736976, EPI_ISL_736977, EPI_ISL_736979, EPI_ISL_736984, EPI_ISL_736987, EPI_ISL_736988, EPI_ISL_736989, EPI_ISL_736990, EPI_ISL_736992, EPI_ISL_736993                                                                                                                                                                                                                                                                                                                                                                                                                                                                                                                                                                                                                                                                                                                                                                                                                                                                                                                                                                                                                                                                                                                                                                                                                                                                                                                                                                                                                                                                                                                                                                                                                                                                                                                                                                                                                                                                                                                                                                                                                                                                                                                                                                                                                                                                                                                                                                                                                                                                                                                                                                                                                                                                                                                                                                                                                                                                                                                                                                                                                                                                                                                                                                                                                                                                                                                                                                                                                                                                                                                                                                                                                                                                                                 | see above | NHLS-IALCH                                                                                                                                                                              | KRISP, KZN Research Innovation and Sequencing Platform                                                                                                                                  | Giandhari J, Pillay S, Lessells R, ChimukangaraB, Mdlalose K, York D, Khan S, Tegally H, Wilkinson E, de Oliveira T                                                                                                                                                                                                                                                                                                                                                                                                                                            |
| EPI_ISL_753700                                                                                                                                                                                                                                                                                                                                                                                                                                                                                                                                                                                                                                                                                                                                                                                                                                                                                                                                                                                                                                                                                                                                                                                                                                                                                                                                                                                                                                                                                                                                                                                                                                                                                                                                                                                                                                                                                                                                                                                                                                                                                                                                                                                                                                                                                                                                                                                                                                                                                                                                                                                                                                                                                                                                                                                                                                                                                                                                                                                                                                                                                                                                                                                                                                                                                                                                                                                                                                                                                                                                                                                                                                                                                                                                                                                                                                                                                                                                                 |           | Specialized Lab for COVID-19 Detection, Department of Genetic Engineering and Biotechnology                                                                                             | Specialized Lab for COVID-19 Detection, Department of Genetic Engineering and Biotechnology                                                                                             | Hammadul Hoque, Aijt Ghosh, Nurnabi Azad Jewel, Md. Nazmul Hasan, Shamsul H. Proadhan, Amit Kumar Mondal, Fahmid H. Bhuiyan, Md. Rakib Wazed Nayon                                                                                                                                                                                                                                                                                                                                                                                                             |
| EPI_ISL_754109                                                                                                                                                                                                                                                                                                                                                                                                                                                                                                                                                                                                                                                                                                                                                                                                                                                                                                                                                                                                                                                                                                                                                                                                                                                                                                                                                                                                                                                                                                                                                                                                                                                                                                                                                                                                                                                                                                                                                                                                                                                                                                                                                                                                                                                                                                                                                                                                                                                                                                                                                                                                                                                                                                                                                                                                                                                                                                                                                                                                                                                                                                                                                                                                                                                                                                                                                                                                                                                                                                                                                                                                                                                                                                                                                                                                                                                                                                                                                 |           | Specialized Lab for COVID-19 Detection, Department of Genetic Engineering and Biotechnology                                                                                             | Specialized Lab for COVID-19 Detection, Department of Genetic Engineering and Biotechnology                                                                                             | Hammadul Hoque, Nurnabi Azad Jewel, Md. Nazmul Hasan, Shamsul H. Proadhan, Md. Mosarof Hossen, Md. Mashiur Rahman                                                                                                                                                                                                                                                                                                                                                                                                                                              |
| EPI_ISL_754179                                                                                                                                                                                                                                                                                                                                                                                                                                                                                                                                                                                                                                                                                                                                                                                                                                                                                                                                                                                                                                                                                                                                                                                                                                                                                                                                                                                                                                                                                                                                                                                                                                                                                                                                                                                                                                                                                                                                                                                                                                                                                                                                                                                                                                                                                                                                                                                                                                                                                                                                                                                                                                                                                                                                                                                                                                                                                                                                                                                                                                                                                                                                                                                                                                                                                                                                                                                                                                                                                                                                                                                                                                                                                                                                                                                                                                                                                                                                                 |           | Specialized Lab for COVID-19 Detection, Department of Genetic Engineering and Biotechnology                                                                                             | Specialized Lab for COVID-19 Detection, Department of Genetic Engineering and Biotechnology                                                                                             | Hammadul Hoque, Nurnabi Azad Jewel, Md. Nazmul Hasan, Shamsul H. Proadhan                                                                                                                                                                                                                                                                                                                                                                                                                                                                                      |
| EPI_ISL_756696, EPI_ISL_756702, EPI_ISL_756705, EPI_ISL_756744, EPI_ISL_756800, EPI_ISL_756803, EPI_ISL_756805, EPI_ISL_756824, EPI_ISL_756849, EPI_ISL_756879, EPI_ISL_756885, EPI_ISL_756894, EPI_ISL_756910, EPI_ISL_756912, EPI_ISL_756953, EPI_ISL_756977, EPI_ISL_756982, EPI_ISL_757018, EPI_ISL_757032, EPI_ISL_757034, EPI_ISL_757036, EPI_ISL_757037, EPI_ISL_757043, EPI_ISL_757044, EPI_ISL_757051, EPI_ISL_757053, EPI_ISL_757055, EPI_ISL_757059, EPI_ISL_757065, EPI_ISL_757076, EPI_ISL_757084, EPI_ISL_757091, EPI_ISL_757117, EPI_ISL_757122, EPI_ISL_757134, EPI_ISL_757136, EPI_ISL_757137, EPI_ISL_757151, EPI_ISL_757153, EPI_ISL_757166, EPI_ISL_757167, EPI_ISL_757170, EPI_ISL_757173, EPI_ISL_757177, EPI_ISL_757188, EPI_ISL_757196, EPI_ISL_757198, EPI_ISL_757210, EPI_ISL_757201, EPI_ISL_757203, EPI_ISL_757214, EPI_ISL_757233, EPI_ISL_757249, EPI_ISL_757251, EPI_ISL_757252, EPI_ISL_757257, EPI_ISL_757261, EPI_ISL_757265, EPI_ISL_757266, EPI_ISL_757273, EPI_ISL_757280, EPI_ISL_760256, EPI_ISL_760275, EPI_ISL_760280, EPI_ISL_760300, EPI_ISL_760304, EPI_ISL_760322, EPI_ISL_760323, EPI_ISL_760324, EPI_ISL_760330, EPI_ISL_760336, EPI_ISL_760347, EPI_ISL_760354, EPI_ISL_760366, EPI_ISL_760375, EPI_ISL_760394, EPI_ISL_760403, EPI_ISL_760407, EPI_ISL_760433, EPI_ISL_760444, EPI_ISL_760446, EPI_ISL_760456, EPI_ISL_760479, EPI_ISL_760481, EPI_ISL_760487, EPI_ISL_760510, EPI_ISL_760514, EPI_ISL_760550, EPI_ISL_760554, EPI_ISL_760560, EPI_ISL_760577, EPI_ISL_760579, EPI_ISL_760611, EPI_ISL_760618, EPI_ISL_760619, EPI_ISL_760630, EPI_ISL_760642, EPI_ISL_760651, EPI_ISL_760655, EPI_ISL_760659, EPI_ISL_760668, EPI_ISL_760678, EPI_ISL_760695, EPI_ISL_760725, EPI_ISL_760764, EPI_ISL_760770, EPI_ISL_760782, EPI_ISL_760791, EPI_ISL_760828, EPI_ISL_760831, EPI_ISL_760836, EPI_ISL_760854, EPI_ISL_760876, EPI_ISL_760935, EPI_ISL_760946, EPI_ISL_760953, EPI_ISL_760965, EPI_ISL_760972, EPI_ISL_760981, EPI_ISL_760984, EPI_ISL_760991, EPI_ISL_760993, EPI_ISL_761004, EPI_ISL_761010, EPI_ISL_761031, EPI_ISL_761034, EPI_ISL_761037, EPI_ISL_761047, EPI_ISL_761058, EPI_ISL_761078, EPI_ISL_761114, EPI_ISL_761118, EPI_ISL_761131, EPI_ISL_761194, EPI_ISL_761204, EPI_ISL_761289, EPI_ISL_761298, EPI_ISL_761302, EPI_ISL_761307, EPI_ISL_761339, EPI_ISL_761351, EPI_ISL_761353, EPI_ISL_761933, EPI_ISL_761959, EPI_ISL_761960, EPI_ISL_761962, EPI_ISL_761963, EPI_ISL_761966, EPI_ISL_761969, EPI_ISL_761974, EPI_ISL_761987, EPI_ISL_761990, EPI_ISL_762002, EPI_ISL_762006, EPI_ISL_762039, EPI_ISL_762056, EPI_ISL_762068, EPI_ISL_762094, EPI_ISL_762104, EPI_ISL_762105, EPI_ISL_762120, EPI_ISL_762123, EPI_ISL_762145, EPI_ISL_762151, EPI_ISL_762157, EPI_ISL_762180, EPI_ISL_762556, EPI_ISL_762560, EPI_ISL_762633, EPI_ISL_762646, EPI_ISL_762652, EPI_ISL_762653, EPI_ISL_762661, EPI_ISL_762673, EPI_ISL_762749, EPI_ISL_762758, EPI_ISL_762770, EPI_ISL_762802, EPI_ISL_762814, EPI_ISL_762850, EPI_ISL_762851, EPI_ISL_762859, EPI_ISL_762865, EPI_ISL_762881, EPI_ISL_762897, EPI_ISL_762918, EPI_ISL_762928, EPI_ISL_762941, EPI_ISL_762942, EPI_ISL_762950, EPI_ISL_762958, EPI_ISL_762960, EPI_ISL_762985, EPI_ISL_762987                                                                                                                                                                                                                                                                                                                                                                                                                                                                                                                                                                                                                                                                                                                                 | see above | Lighthouse Lab in Glasgow                                                                                                                                                               | Wellcome Sanger Institute for the COVID-19 Genomics UK (COG-UK) Consortium                                                                                                              | Harper VanSteenhouse, Yumi Kasai, David Gray, Carol Clugston, Anna Dominiczak and Alex Alderton, Roberto Amato, Sonia Goncalves, Ewan Harrison, David K. Jackson, Ian Johnston, Dominic Kwiatkowski, Cordelia Langford, John Sillitoe on behalf of the Wellcome Sanger Institute COVID-19 Surveillance Team                                                                                                                                                                                                                                                    |
| EPI_ISL_763062                                                                                                                                                                                                                                                                                                                                                                                                                                                                                                                                                                                                                                                                                                                                                                                                                                                                                                                                                                                                                                                                                                                                                                                                                                                                                                                                                                                                                                                                                                                                                                                                                                                                                                                                                                                                                                                                                                                                                                                                                                                                                                                                                                                                                                                                                                                                                                                                                                                                                                                                                                                                                                                                                                                                                                                                                                                                                                                                                                                                                                                                                                                                                                                                                                                                                                                                                                                                                                                                                                                                                                                                                                                                                                                                                                                                                                                                                                                                                 |           | Department for Virology, Molecular Biology and Genome Research, R. G. Lugar Center for Public Health Research, National Center for Disease Control and Public Health (NCDC) of Georgia. | Department for Virology, Molecular Biology and Genome Research, R. G. Lugar Center for Public Health Research, National Center for Disease Control and Public Health (NCDC) of Georgia. | Giorgi Tomashvili, Gvantsa Brachveli, Meri Pantsulaia, Nino Berishvili, Tata Imnadze, Anna Papiakuri, Gvantsa Chanturia, Ann Machabishvili, Nato Kotaria, Marine Murtskhvaladze, Lela Sabadze, Mari Gavashvidze, Tamar Jashishvili, Tea Tvedoradz, Ketevan Sidamonidze, Ekaterine Khmaladze, Ekaterine Zhghenti, Roena Sukhishvili, Mariam Zakalashvili, Lela Urushadze, Magda Dgebuadze, Davit Tsaguria, Ekaterine Zangaladze, Adam Kotorashvili, Maia Alkhaszashvili, Irma Burjanadze, Anna Kasradze, Khatuna Zakhshvili, Paata Imnadze, Amiran Gamkrelidze. |
| EPI_ISL_766971, EPI_ISL_766972, EPI_ISL_766973, EPI_ISL_766974, EPI_ISL_766975, EPI_ISL_766976, EPI_ISL_766977, EPI_ISL_766978, EPI_ISL_766979, EPI_ISL_766980, EPI_ISL_766981, EPI_ISL_766982, EPI_ISL_766983, EPI_ISL_766984, EPI_ISL_766985, EPI_ISL_766986, EPI_ISL_766987, EPI_ISL_766988, EPI_ISL_766989, EPI_ISL_766990, EPI_ISL_766991, EPI_ISL_766993, EPI_ISL_766994, EPI_ISL_766995, EPI_ISL_766996, EPI_ISL_766997, EPI_ISL_766998, EPI_ISL_766999, EPI_ISL_767000, EPI_ISL_767001, EPI_ISL_767002, EPI_ISL_767003, EPI_ISL_767004, EPI_ISL_767005, EPI_ISL_767006, EPI_ISL_767007, EPI_ISL_767008, EPI_ISL_767009, EPI_ISL_767010, EPI_ISL_767011, EPI_ISL_767012                                                                                                                                                                                                                                                                                                                                                                                                                                                                                                                                                                                                                                                                                                                                                                                                                                                                                                                                                                                                                                                                                                                                                                                                                                                                                                                                                                                                                                                                                                                                                                                                                                                                                                                                                                                                                                                                                                                                                                                                                                                                                                                                                                                                                                                                                                                                                                                                                                                                                                                                                                                                                                                                                                                                                                                                                                                                                                                                                                                                                                                                                                                                                                                                                                                                                 | see above | Delaware Public Health Laboratory                                                                                                                                                       | Delaware Public Health Laboratory                                                                                                                                                       | Gregory Hovan                                                                                                                                                                                                                                                                                                                                                                                                                                                                                                                                                  |
| EPI_ISL_767092                                                                                                                                                                                                                                                                                                                                                                                                                                                                                                                                                                                                                                                                                                                                                                                                                                                                                                                                                                                                                                                                                                                                                                                                                                                                                                                                                                                                                                                                                                                                                                                                                                                                                                                                                                                                                                                                                                                                                                                                                                                                                                                                                                                                                                                                                                                                                                                                                                                                                                                                                                                                                                                                                                                                                                                                                                                                                                                                                                                                                                                                                                                                                                                                                                                                                                                                                                                                                                                                                                                                                                                                                                                                                                                                                                                                                                                                                                                                                 |           | Lighthouse Lab in Glasgow                                                                                                                                                               | Wellcome Sanger Institute for the COVID-19 Genomics UK (COG-UK) Consortium                                                                                                              | Harper VanSteenhouse, Yumi Kasai, David Gray, Carol Clugston, Anna Dominiczak and Alex Alderton, Roberto Amato, Sonia Goncalves, Ewan Harrison, David K. Jackson, Ian Johnston, Dominic Kwiatkowski, Cordelia Langford, John Sillitoe on behalf of the Wellcome Sanger Institute COVID-19 Surveillance Team                                                                                                                                                                                                                                                    |
| EPI_ISL_768743                                                                                                                                                                                                                                                                                                                                                                                                                                                                                                                                                                                                                                                                                                                                                                                                                                                                                                                                                                                                                                                                                                                                                                                                                                                                                                                                                                                                                                                                                                                                                                                                                                                                                                                                                                                                                                                                                                                                                                                                                                                                                                                                                                                                                                                                                                                                                                                                                                                                                                                                                                                                                                                                                                                                                                                                                                                                                                                                                                                                                                                                                                                                                                                                                                                                                                                                                                                                                                                                                                                                                                                                                                                                                                                                                                                                                                                                                                                                                 |           | MoPH (Lebanese ministry of public health)                                                                                                                                               | Microbial Genomics Lab LAU Byblos                                                                                                                                                       | Hamad Hassan, Sima Tokajian, Georgi Merhi, Tamara Salloum, Jad Koweyes                                                                                                                                                                                                                                                                                                                                                                                                                                                                                         |
| EPI_ISL_768751                                                                                                                                                                                                                                                                                                                                                                                                                                                                                                                                                                                                                                                                                                                                                                                                                                                                                                                                                                                                                                                                                                                                                                                                                                                                                                                                                                                                                                                                                                                                                                                                                                                                                                                                                                                                                                                                                                                                                                                                                                                                                                                                                                                                                                                                                                                                                                                                                                                                                                                                                                                                                                                                                                                                                                                                                                                                                                                                                                                                                                                                                                                                                                                                                                                                                                                                                                                                                                                                                                                                                                                                                                                                                                                                                                                                                                                                                                                                                 |           | MoPH (Lebanese Ministry of public health)                                                                                                                                               | Microbial Genomics Lab LAU                                                                                                                                                              | Hamad Hassan, Sima Tokajian, Georgi Merhi, Tamara Salloum, Jad Koweyes                                                                                                                                                                                                                                                                                                                                                                                                                                                                                         |
| EPI_ISL_768798                                                                                                                                                                                                                                                                                                                                                                                                                                                                                                                                                                                                                                                                                                                                                                                                                                                                                                                                                                                                                                                                                                                                                                                                                                                                                                                                                                                                                                                                                                                                                                                                                                                                                                                                                                                                                                                                                                                                                                                                                                                                                                                                                                                                                                                                                                                                                                                                                                                                                                                                                                                                                                                                                                                                                                                                                                                                                                                                                                                                                                                                                                                                                                                                                                                                                                                                                                                                                                                                                                                                                                                                                                                                                                                                                                                                                                                                                                                                                 |           | MoPH (Lebanese ministry of Public Health)                                                                                                                                               | Microbial genomics lab LAU                                                                                                                                                              | Hamad Hassan, Sima Tokajian, Georgi Merhi, Tamara Salloum, Jad Koweyes                                                                                                                                                                                                                                                                                                                                                                                                                                                                                         |





|                                                                                                                                                                                                                                                                                                                                                                                                                                                                                                                                                                                                                                                                                                                                                                                                                                                                                                                                                                                                                                                                                                                                                                                                                                                                                                                                                                                                                                                                                                                                                                                                                                                                                                                                                                                                                                                                                                                                                                                                                                                                                                                                                                                                                                                                                                                                                                                                                                                                                                                                |                                                                                                                                  |                                                                                                                                                                                                                                                                                                                                                                                                                                                                                     |                                                                                                                                                                                                                                                                                                                                                                                                                                                                                                                                                                    |                                                                                                                                                                                                                                                                                                             |
|--------------------------------------------------------------------------------------------------------------------------------------------------------------------------------------------------------------------------------------------------------------------------------------------------------------------------------------------------------------------------------------------------------------------------------------------------------------------------------------------------------------------------------------------------------------------------------------------------------------------------------------------------------------------------------------------------------------------------------------------------------------------------------------------------------------------------------------------------------------------------------------------------------------------------------------------------------------------------------------------------------------------------------------------------------------------------------------------------------------------------------------------------------------------------------------------------------------------------------------------------------------------------------------------------------------------------------------------------------------------------------------------------------------------------------------------------------------------------------------------------------------------------------------------------------------------------------------------------------------------------------------------------------------------------------------------------------------------------------------------------------------------------------------------------------------------------------------------------------------------------------------------------------------------------------------------------------------------------------------------------------------------------------------------------------------------------------------------------------------------------------------------------------------------------------------------------------------------------------------------------------------------------------------------------------------------------------------------------------------------------------------------------------------------------------------------------------------------------------------------------------------------------------|----------------------------------------------------------------------------------------------------------------------------------|-------------------------------------------------------------------------------------------------------------------------------------------------------------------------------------------------------------------------------------------------------------------------------------------------------------------------------------------------------------------------------------------------------------------------------------------------------------------------------------|--------------------------------------------------------------------------------------------------------------------------------------------------------------------------------------------------------------------------------------------------------------------------------------------------------------------------------------------------------------------------------------------------------------------------------------------------------------------------------------------------------------------------------------------------------------------|-------------------------------------------------------------------------------------------------------------------------------------------------------------------------------------------------------------------------------------------------------------------------------------------------------------|
| EPI_ISL_833340, EPI_ISL_833341                                                                                                                                                                                                                                                                                                                                                                                                                                                                                                                                                                                                                                                                                                                                                                                                                                                                                                                                                                                                                                                                                                                                                                                                                                                                                                                                                                                                                                                                                                                                                                                                                                                                                                                                                                                                                                                                                                                                                                                                                                                                                                                                                                                                                                                                                                                                                                                                                                                                                                 | Batangas City Health Office                                                                                                      | Research Institute for Tropical Medicine                                                                                                                                                                                                                                                                                                                                                                                                                                            | Hannah Leah Morito, Othoniel Jan Onza, John Leonard Chan, Ma Angelica Tujan, Francisco Gerardo Polotan, Inez Andrea Medado, Kirstyn Brunker, Edelwisa Mercado, Daria Manalo, Catalino Demetria                                                                                                                                                                                                                                                                                                                                                                     |                                                                                                                                                                                                                                                                                                             |
| EPI_ISL_833342                                                                                                                                                                                                                                                                                                                                                                                                                                                                                                                                                                                                                                                                                                                                                                                                                                                                                                                                                                                                                                                                                                                                                                                                                                                                                                                                                                                                                                                                                                                                                                                                                                                                                                                                                                                                                                                                                                                                                                                                                                                                                                                                                                                                                                                                                                                                                                                                                                                                                                                 | Quezon Medical Center                                                                                                            | Research Institute for Tropical Medicine                                                                                                                                                                                                                                                                                                                                                                                                                                            | Hannah Leah Morito, Othoniel Jan Onza, John Leonard Chan, Ma Angelica Tujan, Francisco Gerardo Polotan, Inez Andrea Medado, Kirstyn Brunker, Edelwisa Mercado, Daria Manalo, Catalino Demetria                                                                                                                                                                                                                                                                                                                                                                     |                                                                                                                                                                                                                                                                                                             |
| EPI_ISL_833343                                                                                                                                                                                                                                                                                                                                                                                                                                                                                                                                                                                                                                                                                                                                                                                                                                                                                                                                                                                                                                                                                                                                                                                                                                                                                                                                                                                                                                                                                                                                                                                                                                                                                                                                                                                                                                                                                                                                                                                                                                                                                                                                                                                                                                                                                                                                                                                                                                                                                                                 | Buenavista Rural Health Unit                                                                                                     | Research Institute for Tropical Medicine                                                                                                                                                                                                                                                                                                                                                                                                                                            | Hannah Leah Morito, Othoniel Jan Onza, John Leonard Chan, Ma Angelica Tujan, Francisco Gerardo Polotan, Inez Andrea Medado, Kirstyn Brunker, Edelwisa Mercado, Daria Manalo, Catalino Demetria                                                                                                                                                                                                                                                                                                                                                                     |                                                                                                                                                                                                                                                                                                             |
| EPI_ISL_834553, EPI_ISL_834554, EPI_ISL_834565, EPI_ISL_834581, EPI_ISL_834584, EPI_ISL_834596, EPI_ISL_834602, EPI_ISL_834604, EPI_ISL_834616, EPI_ISL_834619, EPI_ISL_834625, EPI_ISL_834636, EPI_ISL_834649, EPI_ISL_834655, EPI_ISL_834666, EPI_ISL_834668, EPI_ISL_834670, EPI_ISL_834672, EPI_ISL_834679, EPI_ISL_834688, EPI_ISL_834691, EPI_ISL_834692, EPI_ISL_834698, EPI_ISL_834701, EPI_ISL_834705, EPI_ISL_834708, EPI_ISL_834713, EPI_ISL_834716, EPI_ISL_834723, EPI_ISL_834727, EPI_ISL_834735, EPI_ISL_834746, EPI_ISL_834758, EPI_ISL_834760, EPI_ISL_834767, EPI_ISL_834769, EPI_ISL_834777, EPI_ISL_834780, EPI_ISL_834794, EPI_ISL_834795, EPI_ISL_834796, EPI_ISL_835149, EPI_ISL_835155, EPI_ISL_835156, EPI_ISL_835162, EPI_ISL_835166, EPI_ISL_835187, EPI_ISL_835188, EPI_ISL_835189, EPI_ISL_835190, EPI_ISL_835194, EPI_ISL_835204, EPI_ISL_835220, EPI_ISL_835222, EPI_ISL_835236, EPI_ISL_835239, EPI_ISL_835268, EPI_ISL_835271, EPI_ISL_835272, EPI_ISL_835274, EPI_ISL_835278, EPI_ISL_835284, EPI_ISL_835286, EPI_ISL_835298, EPI_ISL_835300, EPI_ISL_835310, EPI_ISL_835316, EPI_ISL_835321, EPI_ISL_835323, EPI_ISL_835327, EPI_ISL_835347, EPI_ISL_835349, EPI_ISL_835364, EPI_ISL_835367, EPI_ISL_835375, EPI_ISL_835376, EPI_ISL_835386, EPI_ISL_835387, EPI_ISL_835389, EPI_ISL_835389, EPI_ISL_835403, EPI_ISL_835412, EPI_ISL_835413, EPI_ISL_835420, EPI_ISL_835425, EPI_ISL_835454, EPI_ISL_835464, EPI_ISL_835502, EPI_ISL_835503, EPI_ISL_835533, EPI_ISL_835547, EPI_ISL_835548, EPI_ISL_835553, EPI_ISL_835564, EPI_ISL_835569, EPI_ISL_835610, EPI_ISL_835616, EPI_ISL_835622, EPI_ISL_835651, EPI_ISL_835695, EPI_ISL_835703, EPI_ISL_836750, EPI_ISL_836755, EPI_ISL_836761, EPI_ISL_836768, EPI_ISL_836779, EPI_ISL_836793, EPI_ISL_836808, EPI_ISL_836810, EPI_ISL_836816, EPI_ISL_836830, EPI_ISL_836845, EPI_ISL_836853, EPI_ISL_836856, EPI_ISL_836865, EPI_ISL_836873, EPI_ISL_836882, EPI_ISL_836932, EPI_ISL_836938, EPI_ISL_836943, EPI_ISL_836944, EPI_ISL_836963, EPI_ISL_836972, EPI_ISL_846530                                                                                                                                                                                                                                                                                                                                                                                                                                                                 | see above                                                                                                                        | Lighthouse Lab in Glasgow                                                                                                                                                                                                                                                                                                                                                                                                                                                           | Wellcome Sanger Institute for the COVID-19 Genomics UK (COG-UK) Consortium                                                                                                                                                                                                                                                                                                                                                                                                                                                                                         | Harper VanSteenhouse, Yumi Kasai, David Gray, Carol Clugston, Anna Dominiczak and Alex Alderton, Roberto Amato, Sonia Goncalves, Ewan Harrison, David K. Jackson, Ian Johnston, Dominic Kwiatkowski, Cordelia Langford, John Sillitoe on behalf of the Wellcome Sanger Institute COVID-19 Surveillance Team |
| EPI_ISL_846541, EPI_ISL_846542, EPI_ISL_846543, EPI_ISL_846544, EPI_ISL_846545, EPI_ISL_846546, EPI_ISL_846547, EPI_ISL_846548, EPI_ISL_846549, EPI_ISL_846550, EPI_ISL_846551, EPI_ISL_846552, EPI_ISL_846553, EPI_ISL_846554, EPI_ISL_846555, EPI_ISL_846556, EPI_ISL_846557, EPI_ISL_846558, EPI_ISL_846559, EPI_ISL_846560, EPI_ISL_846561, EPI_ISL_846562, EPI_ISL_846563, EPI_ISL_846564, EPI_ISL_846565, EPI_ISL_846566, EPI_ISL_846567, EPI_ISL_846568, EPI_ISL_846569, EPI_ISL_846570, EPI_ISL_846571, EPI_ISL_846572, EPI_ISL_846573, EPI_ISL_846574, EPI_ISL_846575, EPI_ISL_846576, EPI_ISL_846577, EPI_ISL_846578, EPI_ISL_846579, EPI_ISL_846580                                                                                                                                                                                                                                                                                                                                                                                                                                                                                                                                                                                                                                                                                                                                                                                                                                                                                                                                                                                                                                                                                                                                                                                                                                                                                                                                                                                                                                                                                                                                                                                                                                                                                                                                                                                                                                                                 | see above                                                                                                                        | Lab voor klinische biologie                                                                                                                                                                                                                                                                                                                                                                                                                                                         | Lab voor klinische biologie                                                                                                                                                                                                                                                                                                                                                                                                                                                                                                                                        | Hannelore Hamerlinck, Bruno Verhasselt                                                                                                                                                                                                                                                                      |
| EPI_ISL_849322, EPI_ISL_849323, EPI_ISL_849324, EPI_ISL_849325, EPI_ISL_849326, EPI_ISL_849327, EPI_ISL_849328, EPI_ISL_849329, EPI_ISL_849330, EPI_ISL_849331, EPI_ISL_849332, EPI_ISL_849333, EPI_ISL_849334, EPI_ISL_849335, EPI_ISL_849336, EPI_ISL_849337, EPI_ISL_849338, EPI_ISL_849339                                                                                                                                                                                                                                                                                                                                                                                                                                                                                                                                                                                                                                                                                                                                                                                                                                                                                                                                                                                                                                                                                                                                                                                                                                                                                                                                                                                                                                                                                                                                                                                                                                                                                                                                                                                                                                                                                                                                                                                                                                                                                                                                                                                                                                 | see above                                                                                                                        | Delaware Public Health Lab                                                                                                                                                                                                                                                                                                                                                                                                                                                          | Delaware Public Health Lab                                                                                                                                                                                                                                                                                                                                                                                                                                                                                                                                         | Gregory Hovan                                                                                                                                                                                                                                                                                               |
| EPI_ISL_851077, EPI_ISL_851102, EPI_ISL_851107, EPI_ISL_851126, EPI_ISL_851146, EPI_ISL_851178, EPI_ISL_851246, EPI_ISL_851252, EPI_ISL_851296, EPI_ISL_851307, EPI_ISL_851335, EPI_ISL_851346, EPI_ISL_851358, EPI_ISL_851380, EPI_ISL_851382, EPI_ISL_851389, EPI_ISL_851391, EPI_ISL_851393, EPI_ISL_851418, EPI_ISL_851421, EPI_ISL_851426, EPI_ISL_851428, EPI_ISL_851452, EPI_ISL_851460, EPI_ISL_851461, EPI_ISL_851462, EPI_ISL_851464, EPI_ISL_851468, EPI_ISL_851475, EPI_ISL_851484, EPI_ISL_851494, EPI_ISL_851498, EPI_ISL_851516, EPI_ISL_851520, EPI_ISL_851530, EPI_ISL_851539, EPI_ISL_851545, EPI_ISL_851551, EPI_ISL_851554, EPI_ISL_851566, EPI_ISL_851577, EPI_ISL_851579, EPI_ISL_851582, EPI_ISL_851590, EPI_ISL_851599, EPI_ISL_851612, EPI_ISL_851629, EPI_ISL_851633, EPI_ISL_851638, EPI_ISL_851643, EPI_ISL_851655, EPI_ISL_851660, EPI_ISL_851661, EPI_ISL_851664, EPI_ISL_851667, EPI_ISL_851686, EPI_ISL_851727, EPI_ISL_851754, EPI_ISL_851780, EPI_ISL_851781, EPI_ISL_851794, EPI_ISL_851847, EPI_ISL_851856, EPI_ISL_851859, EPI_ISL_851870, EPI_ISL_851871, EPI_ISL_851876, EPI_ISL_851895, EPI_ISL_851922, EPI_ISL_851940, EPI_ISL_852288, EPI_ISL_852291, EPI_ISL_852296, EPI_ISL_852304, EPI_ISL_852309, EPI_ISL_852315, EPI_ISL_852333, EPI_ISL_852334, EPI_ISL_852339, EPI_ISL_852345, EPI_ISL_852354, EPI_ISL_852357, EPI_ISL_852362, EPI_ISL_852371, EPI_ISL_852375, EPI_ISL_852382, EPI_ISL_852392, EPI_ISL_852408, EPI_ISL_852410, EPI_ISL_852418, EPI_ISL_852419, EPI_ISL_852423, EPI_ISL_852436, EPI_ISL_852440, EPI_ISL_852443, EPI_ISL_852444, EPI_ISL_852447, EPI_ISL_852464, EPI_ISL_852469, EPI_ISL_852466, EPI_ISL_852471, EPI_ISL_852481, EPI_ISL_852492, EPI_ISL_852502, EPI_ISL_852503, EPI_ISL_852504, EPI_ISL_852508, EPI_ISL_852516, EPI_ISL_852520, EPI_ISL_852522, EPI_ISL_852541, EPI_ISL_852547, EPI_ISL_852549, EPI_ISL_852550, EPI_ISL_852562, EPI_ISL_852563                                                                                                                                                                                                                                                                                                                                                                                                                                                                                                                                                                                                 | see above                                                                                                                        | Lighthouse Lab in Glasgow                                                                                                                                                                                                                                                                                                                                                                                                                                                           | Wellcome Sanger Institute for the COVID-19 Genomics UK (COG-UK) Consortium                                                                                                                                                                                                                                                                                                                                                                                                                                                                                         | Harper VanSteenhouse, Yumi Kasai, David Gray, Carol Clugston, Anna Dominiczak and Alex Alderton, Roberto Amato, Sonia Goncalves, Ewan Harrison, David K. Jackson, Ian Johnston, Dominic Kwiatkowski, Cordelia Langford, John Sillitoe on behalf of the Wellcome Sanger Institute COVID-19 Surveillance Team |
| EPI_ISL_854461, EPI_ISL_854462, EPI_ISL_854463, EPI_ISL_854464, EPI_ISL_854465, EPI_ISL_854466, EPI_ISL_854467, EPI_ISL_854468, EPI_ISL_854469, EPI_ISL_854470, EPI_ISL_854471, EPI_ISL_854472, EPI_ISL_854473, EPI_ISL_854474, EPI_ISL_854475, EPI_ISL_854476, EPI_ISL_854477, EPI_ISL_854478, EPI_ISL_854479, EPI_ISL_854480, EPI_ISL_854481, EPI_ISL_854482, EPI_ISL_854483, EPI_ISL_854484, EPI_ISL_854485, EPI_ISL_854486, EPI_ISL_854487, EPI_ISL_854488, EPI_ISL_854489, EPI_ISL_854490, EPI_ISL_854491, EPI_ISL_854492, EPI_ISL_854493, EPI_ISL_854494, EPI_ISL_854495, EPI_ISL_854496, EPI_ISL_854497, EPI_ISL_854498, EPI_ISL_854499, EPI_ISL_854500, EPI_ISL_854501, EPI_ISL_854502, EPI_ISL_854503, EPI_ISL_854504, EPI_ISL_854505, EPI_ISL_854506, EPI_ISL_854507, EPI_ISL_854508, EPI_ISL_854509, EPI_ISL_854510, EPI_ISL_854511, EPI_ISL_854512, EPI_ISL_854513, EPI_ISL_854514, EPI_ISL_854515, EPI_ISL_854516, EPI_ISL_854517, EPI_ISL_854518, EPI_ISL_854519, EPI_ISL_854520, EPI_ISL_854521, EPI_ISL_854522, EPI_ISL_854523, EPI_ISL_854524, EPI_ISL_854525, EPI_ISL_854526, EPI_ISL_854527, EPI_ISL_854528, EPI_ISL_854529, EPI_ISL_854530, EPI_ISL_854531, EPI_ISL_854532, EPI_ISL_854533, EPI_ISL_854534, EPI_ISL_854535, EPI_ISL_854536, EPI_ISL_854537, EPI_ISL_854538, EPI_ISL_854539, EPI_ISL_854540, EPI_ISL_854541, EPI_ISL_854542, EPI_ISL_854543, EPI_ISL_854544, EPI_ISL_854545, EPI_ISL_854546, EPI_ISL_854547, EPI_ISL_854548, EPI_ISL_854549, EPI_ISL_854550, EPI_ISL_854551, EPI_ISL_854552, EPI_ISL_854553, EPI_ISL_854554, EPI_ISL_854555, EPI_ISL_854556, EPI_ISL_854557, EPI_ISL_854558, EPI_ISL_854559, EPI_ISL_854560, EPI_ISL_854561, EPI_ISL_854562, EPI_ISL_854563, EPI_ISL_854564, EPI_ISL_854565, EPI_ISL_854566, EPI_ISL_854567, EPI_ISL_854568, EPI_ISL_854569, EPI_ISL_854570, EPI_ISL_854571, EPI_ISL_854572, EPI_ISL_854573, EPI_ISL_854574, EPI_ISL_854575, EPI_ISL_854576, EPI_ISL_854577, EPI_ISL_854578, EPI_ISL_854579, EPI_ISL_854580, EPI_ISL_854581, EPI_ISL_854582, EPI_ISL_854583, EPI_ISL_854584, EPI_ISL_854585, EPI_ISL_854586, EPI_ISL_854587, EPI_ISL_854588, EPI_ISL_854589, EPI_ISL_854590, EPI_ISL_854591, EPI_ISL_854592                                                                                                                                                                                                                                                                                                                                 | see above                                                                                                                        | Alberta Precision Labs (APL)                                                                                                                                                                                                                                                                                                                                                                                                                                                        | Alberta Precision Labs (APL)                                                                                                                                                                                                                                                                                                                                                                                                                                                                                                                                       | Gordon P, Lam LG, Pabbaraju K, Wong A, Ma R, Li V, Melin A, Tipples G, Berenger B, Zelyas N, Kellner J, Bernier F, Chui L, Croxen M                                                                                                                                                                         |
| EPI_ISL_855494, EPI_ISL_855495, EPI_ISL_855496, EPI_ISL_855497, EPI_ISL_855498, EPI_ISL_855499, EPI_ISL_855500, EPI_ISL_855501, EPI_ISL_855502, EPI_ISL_855503, EPI_ISL_855504, EPI_ISL_855505, EPI_ISL_855506, EPI_ISL_855507, EPI_ISL_855508, EPI_ISL_855509, EPI_ISL_855510, EPI_ISL_855511, EPI_ISL_855512, EPI_ISL_855513, EPI_ISL_855514, EPI_ISL_855515, EPI_ISL_855516, EPI_ISL_855517, EPI_ISL_855518, EPI_ISL_855519, EPI_ISL_855520, EPI_ISL_855521, EPI_ISL_855522, EPI_ISL_855523, EPI_ISL_855524, EPI_ISL_855525, EPI_ISL_855526, EPI_ISL_855527, EPI_ISL_855528, EPI_ISL_855529, EPI_ISL_855530, EPI_ISL_855531, EPI_ISL_855532, EPI_ISL_855533, EPI_ISL_855534, EPI_ISL_855535, EPI_ISL_855536, EPI_ISL_855537, EPI_ISL_855538, EPI_ISL_855539, EPI_ISL_855540, EPI_ISL_855541, EPI_ISL_855542, EPI_ISL_855543, EPI_ISL_855544, EPI_ISL_855545, EPI_ISL_855546, EPI_ISL_855547, EPI_ISL_855548                                                                                                                                                                                                                                                                                                                                                                                                                                                                                                                                                                                                                                                                                                                                                                                                                                                                                                                                                                                                                                                                                                                                                                                                                                                                                                                                                                                                                                                                                                                                                                                                                 | see above                                                                                                                        | KEMRI-Wellcome Trust Research Programme/KEMRI-CGMR-C Kilifi                                                                                                                                                                                                                                                                                                                                                                                                                         | KEMRI-Wellcome Trust Research Programme/KEMRI-CGMR-C Kilifi                                                                                                                                                                                                                                                                                                                                                                                                                                                                                                        | Githinji et al                                                                                                                                                                                                                                                                                              |
| EPI_ISL_856971                                                                                                                                                                                                                                                                                                                                                                                                                                                                                                                                                                                                                                                                                                                                                                                                                                                                                                                                                                                                                                                                                                                                                                                                                                                                                                                                                                                                                                                                                                                                                                                                                                                                                                                                                                                                                                                                                                                                                                                                                                                                                                                                                                                                                                                                                                                                                                                                                                                                                                                 | Laboratory of Histology-Embryology, Molecular Carcinogenesis Group Medical School National and Kapodistrian University of Athens | Prof. Gorgoulis Lab                                                                                                                                                                                                                                                                                                                                                                                                                                                                 | Gorgoulis V.G.                                                                                                                                                                                                                                                                                                                                                                                                                                                                                                                                                     |                                                                                                                                                                                                                                                                                                             |
| EPI_ISL_857885, EPI_ISL_857888, EPI_ISL_857901, EPI_ISL_857907, EPI_ISL_857910, EPI_ISL_857929, EPI_ISL_857942, EPI_ISL_857956, EPI_ISL_858017, EPI_ISL_858020, EPI_ISL_858021, EPI_ISL_858022, EPI_ISL_858028, EPI_ISL_858037, EPI_ISL_858038, EPI_ISL_858041, EPI_ISL_858042, EPI_ISL_858046, EPI_ISL_858053, EPI_ISL_858055, EPI_ISL_858057, EPI_ISL_858060, EPI_ISL_858158, EPI_ISL_858159, EPI_ISL_858163, EPI_ISL_858167, EPI_ISL_858174, EPI_ISL_858179, EPI_ISL_858188, EPI_ISL_858191, EPI_ISL_858224, EPI_ISL_858234, EPI_ISL_858235, EPI_ISL_858242, EPI_ISL_858244, EPI_ISL_858259, EPI_ISL_858271, EPI_ISL_858279, EPI_ISL_858300, EPI_ISL_858302, EPI_ISL_858310, EPI_ISL_858313, EPI_ISL_858315, EPI_ISL_858316, EPI_ISL_858320, EPI_ISL_858339, EPI_ISL_858345, EPI_ISL_858353, EPI_ISL_858358, EPI_ISL_858374, EPI_ISL_858380, EPI_ISL_858383, EPI_ISL_858396, EPI_ISL_858405, EPI_ISL_858410, EPI_ISL_858420, EPI_ISL_858423, EPI_ISL_858426, EPI_ISL_858434, EPI_ISL_858436, EPI_ISL_858448, EPI_ISL_858453, EPI_ISL_858459, EPI_ISL_858465, EPI_ISL_858466, EPI_ISL_858468, EPI_ISL_858470, EPI_ISL_858476, EPI_ISL_858477, EPI_ISL_858478, EPI_ISL_858480, EPI_ISL_858484, EPI_ISL_858487, EPI_ISL_858489, EPI_ISL_858507, EPI_ISL_858509, EPI_ISL_858511, EPI_ISL_858519, EPI_ISL_858520, EPI_ISL_858528, EPI_ISL_858530, EPI_ISL_858532, EPI_ISL_858535, EPI_ISL_858536, EPI_ISL_858538, EPI_ISL_858543, EPI_ISL_858545, EPI_ISL_858546, EPI_ISL_858549, EPI_ISL_858553, EPI_ISL_858604, EPI_ISL_858620, EPI_ISL_858623, EPI_ISL_858628, EPI_ISL_858630, EPI_ISL_858639, EPI_ISL_858716, EPI_ISL_858741, EPI_ISL_858744, EPI_ISL_858745, EPI_ISL_858775, EPI_ISL_858778, EPI_ISL_858794, EPI_ISL_858796, EPI_ISL_858799, EPI_ISL_858843, EPI_ISL_858958, EPI_ISL_859037, EPI_ISL_859047, EPI_ISL_859053, EPI_ISL_859058, EPI_ISL_859077, EPI_ISL_859084, EPI_ISL_859120, EPI_ISL_859127, EPI_ISL_859130, EPI_ISL_859151, EPI_ISL_859153, EPI_ISL_859158, EPI_ISL_859162, EPI_ISL_859174, EPI_ISL_859177, EPI_ISL_859185, EPI_ISL_859187, EPI_ISL_859189, EPI_ISL_859196, EPI_ISL_859200, EPI_ISL_859205, EPI_ISL_859225, EPI_ISL_859256, EPI_ISL_859304, EPI_ISL_859311, EPI_ISL_859463, EPI_ISL_859464, EPI_ISL_859477, EPI_ISL_859479, EPI_ISL_859480, EPI_ISL_859485, EPI_ISL_859498, EPI_ISL_859500, EPI_ISL_859504, EPI_ISL_859505, EPI_ISL_859510, EPI_ISL_859512, EPI_ISL_859519, EPI_ISL_859521, EPI_ISL_859525, EPI_ISL_859526, EPI_ISL_859541, EPI_ISL_859543, EPI_ISL_859545, EPI_ISL_859552 | see above                                                                                                                        | Lighthouse Lab in Glasgow                                                                                                                                                                                                                                                                                                                                                                                                                                                           | Wellcome Sanger Institute for the COVID-19 Genomics UK (COG-UK) Consortium                                                                                                                                                                                                                                                                                                                                                                                                                                                                                         | Harper VanSteenhouse, Yumi Kasai, David Gray, Carol Clugston, Anna Dominiczak and Alex Alderton, Roberto Amato, Sonia Goncalves, Ewan Harrison, David K. Jackson, Ian Johnston, Dominic Kwiatkowski, Cordelia Langford, John Sillitoe on behalf of the Wellcome Sanger Institute COVID-19 Surveillance Team |
| EPI_ISL_860554, EPI_ISL_860555, EPI_ISL_860556, EPI_ISL_860557, EPI_ISL_860558, EPI_ISL_860559, EPI_ISL_860560, EPI_ISL_860563, EPI_ISL_860564, EPI_ISL_860567, EPI_ISL_860568, EPI_ISL_860569, EPI_ISL_860600, EPI_ISL_860602, EPI_ISL_860605, EPI_ISL_860607, EPI_ISL_860608, EPI_ISL_860609, EPI_ISL_860610, EPI_ISL_860611, EPI_ISL_860613, EPI_ISL_860615, EPI_ISL_860622, EPI_ISL_860624, EPI_ISL_860625, EPI_ISL_860626, EPI_ISL_860627, EPI_ISL_860628, EPI_ISL_860629                                                                                                                                                                                                                                                                                                                                                                                                                                                                                                                                                                                                                                                                                                                                                                                                                                                                                                                                                                                                                                                                                                                                                                                                                                                                                                                                                                                                                                                                                                                                                                                                                                                                                                                                                                                                                                                                                                                                                                                                                                                 | see above                                                                                                                        | NHLS-IALCH                                                                                                                                                                                                                                                                                                                                                                                                                                                                          | KRISP, Kzn Research Innovation and Sequencing Platform                                                                                                                                                                                                                                                                                                                                                                                                                                                                                                             | Giandhari J, Pillay S, Lessells R, Mdlalose K, York D, Khan S, Tegally H, Wilkinson E, de Oliveira T                                                                                                                                                                                                        |
| EPI_ISL_862039                                                                                                                                                                                                                                                                                                                                                                                                                                                                                                                                                                                                                                                                                                                                                                                                                                                                                                                                                                                                                                                                                                                                                                                                                                                                                                                                                                                                                                                                                                                                                                                                                                                                                                                                                                                                                                                                                                                                                                                                                                                                                                                                                                                                                                                                                                                                                                                                                                                                                                                 | RSUP Dr. Sardjito                                                                                                                | Genetics Working Group (Pokja Genetik) Faculty of Medicine, Public Health and Nursing Universitas Gadjah Mada (FK-KMK UGM); Disease Investigation Center Wates Ministry of Agriculture Indonesia; Department of Microbiology FK-KMK UGM; Laboratorium Diagnostik Yayasan Tahaja World Mosquito Program (WMP) Yogyakarta Center for Tropical Medicine FK-KMK UGM; Integrated Research Center FK-KMK UGM; Department of Computer Science and Electronics FMIPA UGM; RSUP Dr. Sardjito | Gunadi, Hendra Wibawa, Marcellus, Mohamad S. Hakim, Edwin W. Daniwijaya, Ludhang P. Rizki, Endah Supriyati, Eggi Arguni, Titik Nuryastuti, Tri Wibawa, Dwi Ana Nugrahansih, Afiahayati, Siswanto, Kristy Iskandar, Nungki Anggorowati, Ika Trisnawati, Sumardi, Oko Budiono, Bambang Sigit Riyanto, Heni Retnowulan, Munawar Gan. Satria Maulana, Nur Rahmi Ananda, Riati El Khair, Yunkita Puspawati, Sman Sianjar, Umi Solekhah Intansari, Elizabeth Henny Herningtyas, Ira Puspitawati, Nur Imma Fatimah Harahap, William Widitjarsro, Maria Patricia Inggriani |                                                                                                                                                                                                                                                                                                             |



|                                                                                                                                                                                                                                                                                                                                                                                                                                                                                                                                                                                                                                                                                                                                                                                                                |                                                                                                                                                                                                                                                                                                                                                                                                                                                                                                  |                                                                                                                                                                                                                                                                                                                                                                                                                                                                                     |                                                                                                                                                                                                                                                                                                                                                                                                                                                                                                                                                                                                                                                                                                                                                                                                                                                            |
|----------------------------------------------------------------------------------------------------------------------------------------------------------------------------------------------------------------------------------------------------------------------------------------------------------------------------------------------------------------------------------------------------------------------------------------------------------------------------------------------------------------------------------------------------------------------------------------------------------------------------------------------------------------------------------------------------------------------------------------------------------------------------------------------------------------|--------------------------------------------------------------------------------------------------------------------------------------------------------------------------------------------------------------------------------------------------------------------------------------------------------------------------------------------------------------------------------------------------------------------------------------------------------------------------------------------------|-------------------------------------------------------------------------------------------------------------------------------------------------------------------------------------------------------------------------------------------------------------------------------------------------------------------------------------------------------------------------------------------------------------------------------------------------------------------------------------|------------------------------------------------------------------------------------------------------------------------------------------------------------------------------------------------------------------------------------------------------------------------------------------------------------------------------------------------------------------------------------------------------------------------------------------------------------------------------------------------------------------------------------------------------------------------------------------------------------------------------------------------------------------------------------------------------------------------------------------------------------------------------------------------------------------------------------------------------------|
| EPI_ISL_862040                                                                                                                                                                                                                                                                                                                                                                                                                                                                                                                                                                                                                                                                                                                                                                                                 | RSUP Dr. Sardjito                                                                                                                                                                                                                                                                                                                                                                                                                                                                                | Genetics Working Group (Pokja Genetik) Faculty of Medicine, Public Health and Nursing Universitas Gadjah Mada (FK-KMK UGM); Disease Investigation Center Wates Ministry of Agriculture Indonesia; Department of Microbiology FK-KMK UGM; Laboratorium Diagnostik Yayasan Tahija World Mosquito Program (WMP) Yogyakarta Center for Tropical Medicine FK-KMK UGM; Integrated Research Center FK-KMK UGM; Department of Computer Science and Electronics FMIPA UGM; RSUP Dr. Sardjito | Gunadi, Hendra Wibawa, . Marcellus, Mohamad S. Hakim, Edwin W. Daniwijaya, Ludhang P. Rizki, Endah Supriyati, Eggi Arguni, Titik Nuryastuti, Tri Wibawa, Dwi AA Nugrahaningsih, Afiahayati, Siswanto, Kristy Iskandar, Nungki Anggorowati, Ika Trisnawati, Sumardi, Eko Budiono, Bambang Sigit Riyanto, Heni Retnowulan, Munawar Gani, Satria Maulana, Nur Rahmi Ananda, Riat El Khair, Yunika Puspawati, Osman Sianipar, Umi Solekhah Intansari, Elizabeth Henny Herningtyas, Ira Puspitawati, Nur Imma Fatimah Harahap, Alvin Santoso Kalim, Untung Riawan                                                                                                                                                                                                                                                                                               |
| EPI_ISL_862041                                                                                                                                                                                                                                                                                                                                                                                                                                                                                                                                                                                                                                                                                                                                                                                                 | RSUP Dr. Sardjito                                                                                                                                                                                                                                                                                                                                                                                                                                                                                | Genetics Working Group (Pokja Genetik) Faculty of Medicine, Public Health and Nursing Universitas Gadjah Mada (FK-KMK UGM); Disease Investigation Center Wates Ministry of Agriculture Indonesia; Department of Microbiology FK-KMK UGM; Laboratorium Diagnostik Yayasan Tahija World Mosquito Program (WMP) Yogyakarta Center for Tropical Medicine FK-KMK UGM; Integrated Research Center FK-KMK UGM; Department of Computer Science and Electronics FMIPA UGM; RSUP Dr. Sardjito | Gunadi, Hendra Wibawa, . Marcellus, Mohamad S. Hakim, Edwin W. Daniwijaya, Ludhang P. Rizki, Endah Supriyati, Eggi Arguni, Titik Nuryastuti, Tri Wibawa, Dwi AA Nugrahaningsih, Afiahayati, Siswanto, Kristy Iskandar, Nungki Anggorowati, Ika Trisnawati, Sumardi, Eko Budiono, Bambang Sigit Riyanto, Heni Retnowulan, Munawar Gani, Satria Maulana, Nur Rahmi Ananda, Riat El Khair, Yunika Puspawati, Osman Sianipar, Umi Solekhah Intansari, Elizabeth Henny Herningtyas, Ira Puspitawati, Nur Imma Fatimah Harahap, Dyah Ayu Puspitarani, Audric Kenny Tedja                                                                                                                                                                                                                                                                                         |
| EPI_ISL_863246, EPI_ISL_863248, EPI_ISL_863257, EPI_ISL_863261, EPI_ISL_863265, EPI_ISL_863269, EPI_ISL_863273, EPI_ISL_863278, EPI_ISL_863288, EPI_ISL_863294, EPI_ISL_863297, EPI_ISL_863304, EPI_ISL_863313, EPI_ISL_863316, EPI_ISL_863322, EPI_ISL_863328, EPI_ISL_863329, EPI_ISL_863350, EPI_ISL_863376, EPI_ISL_863381, EPI_ISL_863398, EPI_ISL_863402, EPI_ISL_863465, EPI_ISL_863468, EPI_ISL_863481, EPI_ISL_863483, EPI_ISL_863485, EPI_ISL_863496, EPI_ISL_863497, EPI_ISL_863508, EPI_ISL_863521, EPI_ISL_863528, EPI_ISL_863631, EPI_ISL_863639, EPI_ISL_863645, EPI_ISL_863721, EPI_ISL_863729                                                                                                                                                                                                 | Lighthouse Lab in Glasgow                                                                                                                                                                                                                                                                                                                                                                                                                                                                        | Wellcome Sanger Institute for the COVID-19 Genomics UK (COG-UK) Consortium                                                                                                                                                                                                                                                                                                                                                                                                          | Harper VanSteenhouse, Yumi Kasai, David Gray, Carol Clugston, Anna Dominiczak and Alex Alderton, Roberto Amato, Sonia Goncalves, Ewan Harrison, David K. Jackson, Ian Johnston, Dominic Kwiatkowski, Cordelia Langford, John Sillitoe on behalf of the Wellcome Sanger Institute COVID-19 Surveillance Team                                                                                                                                                                                                                                                                                                                                                                                                                                                                                                                                                |
| EPI_ISL_872188                                                                                                                                                                                                                                                                                                                                                                                                                                                                                                                                                                                                                                                                                                                                                                                                 | RSUP Dr. Sardjito                                                                                                                                                                                                                                                                                                                                                                                                                                                                                | Genetics Working Group (Pokja Genetik) Faculty of Medicine, Public Health and Nursing Universitas Gadjah Mada (FK-KMK UGM); Disease Investigation Center Wates Ministry of Agriculture Indonesia; Department of Microbiology FK-KMK UGM; Laboratorium Diagnostik Yayasan Tahija World Mosquito Program (WMP) Yogyakarta Center for Tropical Medicine FK-KMK UGM; Integrated Research Center FK-KMK UGM; Department of Computer Science and Electronics FMIPA UGM; RSUP Dr. Sardjito | Gunadi, Hendra Wibawa, . Marcellus, Mohamad S. Hakim, Edwin W. Daniwijaya, Ludhang P. Rizki, Endah Supriyati, Eggi Arguni, Titik Nuryastuti, Tri Wibawa, Dwi AA Nugrahaningsih, Afiahayati, Siswanto, Kristy Iskandar, Nungki Anggorowati, Ika Trisnawati, Sumardi, Eko Budiono, Bambang Sigit Riyanto, Heni Retnowulan, Munawar Gani, Satria Maulana, Nur Rahmi Ananda, Riat El Khair, Yunika Puspawati, Osman Sianipar, Umi Solekhah Intansari, Elizabeth Henny Herningtyas, Ira Puspitawati, Nur Imma Fatimah Harahap, Aditya Rifqi Fauzi, Fadil Fahri                                                                                                                                                                                                                                                                                                  |
| EPI_ISL_872189                                                                                                                                                                                                                                                                                                                                                                                                                                                                                                                                                                                                                                                                                                                                                                                                 | RSUP Dr. Sardjito                                                                                                                                                                                                                                                                                                                                                                                                                                                                                | Genetics Working Group (Pokja Genetik) Faculty of Medicine, Public Health and Nursing Universitas Gadjah Mada (FK-KMK UGM); Disease Investigation Center Wates Ministry of Agriculture Indonesia; Department of Microbiology FK-KMK UGM; Laboratorium Diagnostik Yayasan Tahija World Mosquito Program (WMP) Yogyakarta Center for Tropical Medicine FK-KMK UGM; Integrated Research Center FK-KMK UGM; Department of Computer Science and Electronics FMIPA UGM; RSUP Dr. Sardjito | Gunadi, Hendra Wibawa, . Marcellus, Mohamad S. Hakim, Edwin W. Daniwijaya, Ludhang P. Rizki, Endah Supriyati, Eggi Arguni, Titik Nuryastuti, Tri Wibawa, Dwi AA Nugrahaningsih, Afiahayati, Siswanto, Kristy Iskandar, Nungki Anggorowati, Ika Trisnawati, Sumardi, Eko Budiono, Bambang Sigit Riyanto, Heni Retnowulan, Munawar Gani, Satria Maulana, Nur Rahmi Ananda, Riat El Khair, Yunika Puspawati, Osman Sianipar, Umi Solekhah Intansari, Elizabeth Henny Herningtyas, Ira Puspitawati, Nur Imma Fatimah Harahap, Alvin S. Kalim, Dwiki afandy                                                                                                                                                                                                                                                                                                     |
| EPI_ISL_872190                                                                                                                                                                                                                                                                                                                                                                                                                                                                                                                                                                                                                                                                                                                                                                                                 | RSUP Dr. Sardjito                                                                                                                                                                                                                                                                                                                                                                                                                                                                                | Genetics Working Group (Pokja Genetik) Faculty of Medicine, Public Health and Nursing Universitas Gadjah Mada (FK-KMK UGM); Disease Investigation Center Wates Ministry of Agriculture Indonesia; Department of Microbiology FK-KMK UGM; Laboratorium Diagnostik Yayasan Tahija World Mosquito Program (WMP) Yogyakarta Center for Tropical Medicine FK-KMK UGM; Integrated Research Center FK-KMK UGM; Department of Computer Science and Electronics FMIPA UGM; RSUP Dr. Sardjito | Gunadi, Hendra Wibawa, . Marcellus, Mohamad S. Hakim, Edwin W. Daniwijaya, Ludhang P. Rizki, Endah Supriyati, Eggi Arguni, Titik Nuryastuti, Tri Wibawa, Dwi AA Nugrahaningsih, Afiahayati, Siswanto, Kristy Iskandar, Nungki Anggorowati, Ika Trisnawati, Sumardi, Eko Budiono, Bambang Sigit Riyanto, Heni Retnowulan, Munawar Gani, Satria Maulana, Nur Rahmi Ananda, Riat El Khair, Yunika Puspawati, Osman Sianipar, Umi Solekhah Intansari, Elizabeth Henny Herningtyas, Ira Puspitawati, Nur Imma Fatimah Harahap, Dyah Ayu Puspitarani, Kemala Athollah                                                                                                                                                                                                                                                                                            |
| EPI_ISL_874737, EPI_ISL_874943                                                                                                                                                                                                                                                                                                                                                                                                                                                                                                                                                                                                                                                                                                                                                                                 | Lighthouse Lab in Glasgow                                                                                                                                                                                                                                                                                                                                                                                                                                                                        | Wellcome Sanger Institute for the COVID-19 Genomics UK (COG-UK) Consortium                                                                                                                                                                                                                                                                                                                                                                                                          | Harper VanSteenhouse, Yumi Kasai, David Gray, Carol Clugston, Anna Dominiczak and Alex Alderton, Roberto Amato, Sonia Goncalves, Ewan Harrison, David K. Jackson, Ian Johnston, Dominic Kwiatkowski, Cordelia Langford, John Sillitoe on behalf of the Wellcome Sanger Institute COVID-19 Surveillance Team                                                                                                                                                                                                                                                                                                                                                                                                                                                                                                                                                |
| EPI_ISL_876970, EPI_ISL_876972, EPI_ISL_876974, EPI_ISL_876975, EPI_ISL_876977, EPI_ISL_876980, EPI_ISL_876981, EPI_ISL_876982, EPI_ISL_876983, EPI_ISL_876984, EPI_ISL_876985, EPI_ISL_876986, EPI_ISL_876987, EPI_ISL_876988, EPI_ISL_876989, EPI_ISL_876990, EPI_ISL_876991, EPI_ISL_876992, EPI_ISL_876994, EPI_ISL_876995, EPI_ISL_876996, EPI_ISL_877000, EPI_ISL_877002, EPI_ISL_877004, EPI_ISL_877005, EPI_ISL_877006, EPI_ISL_877007, EPI_ISL_877008, EPI_ISL_877009, EPI_ISL_877013, EPI_ISL_877014, EPI_ISL_877015, EPI_ISL_877016, EPI_ISL_877017, EPI_ISL_877018, EPI_ISL_877019, EPI_ISL_877020, EPI_ISL_877021, EPI_ISL_877022, EPI_ISL_877023, EPI_ISL_877025, EPI_ISL_877026, EPI_ISL_877027, EPI_ISL_877028, EPI_ISL_877029, EPI_ISL_877030, EPI_ISL_877031, EPI_ISL_877032, EPI_ISL_877034 | 1. AO Universitaria 'S. Giovanni di Dio e Ruggi D' Aragona, Scuola Medica Salernitana' Hospital / 2.UOC di Virologia e Microbiologia, Università della Campania 'L. Vanvitelli' / 3.AO Universitaria 'Federico II' Napoli Hospital / 4.AORN 'San Giuseppe Moscati' Avellino Hospital / 5.AO 'San Pio - presidio G. Rummo' Benevento Hospital / 6.AO 'Sant'Anna e San Sebastiano' Caserta Hospital / 7.PO 'Maria Santissima Addolorata' Eboli Hospital / 8.Biogram Istituto di Ricerche Genetiche | 1. Genome Research Center for Health (CRGS) / 2. Laboratory of Molecular Medicine and Genomics(LMMGe) / 3. Center for Research in Pure and Applied Mathematics (CRMPA)                                                                                                                                                                                                                                                                                                              | Giorgio Giurato (Corresponding Author), Francesca Rizzo (Corresponding Author), Alessandro Weisz (Corresponding Author), Gianluigi Franci, Giovanni Nassa, Pasquale Pagliano, Roberta Tarallo, Elena Alexandrova, Ylenia D'Agostino, Carlo Ferravante, Jessica Lamberti, Viola Melone, Domenico Memoli, Valeria Mirici Cappa, Domenico Palumbo, Giovanni Pecoraro, Assunta Sellitto, Oriana Strianese, Ilaria Tarenzi, Giuseppe Fenza, Aniello Gentile, Antonello Saccomanno, Sonia Amabile, Teresa Rocco, Annamaria Salvati, Emilia Vaccaro, Massimiliano Galdiro, Michele Cennamo, Giuseppe Portella, Maria Grazia Foti, Mariarosaria Ingino, Maria Landi, Maurizio Fumi, Vincenzo Rocco, Rita Greco, Vittoria Letizia, Arnolfo Petruzzello, Maddalena Schioppa, Gregorio Goffredi, Francesca Marciano, Michele Caraglia, Alessia Cossu, Marianna Scrima |
| EPI_ISL_877126                                                                                                                                                                                                                                                                                                                                                                                                                                                                                                                                                                                                                                                                                                                                                                                                 | Academic Hospital of Gadjah Mada University (RSA UGM)                                                                                                                                                                                                                                                                                                                                                                                                                                            | Genetics Working Group (Pokja Genetik) Faculty of Medicine, Public Health and Nursing Universitas Gadjah Mada (FK-KMK UGM); Disease Investigation Center Wates Ministry of Agriculture Indonesia; Department of Microbiology FK-KMK UGM; Laboratorium Diagnostik Yayasan Tahija World Mosquito Program (WMP) Yogyakarta Center for Tropical Medicine FK-KMK UGM; Integrated Research center FK-KMK UGM; Department of Computer Science and Electronics FMIPA UGM                    | Gunadi, Hendra Wibawa, Marcellus, Mohamad S. Hakim, Edwin W. Daniwijaya, Ludhang P. Rizki, Endah Supriyati, Eggi Arguni, Titik Nuryastuti, Tri Wibawa, Dwi AA Nugrahaningsih, Afiahayati, Siswanto, Untung Riawan, William Widitjarso                                                                                                                                                                                                                                                                                                                                                                                                                                                                                                                                                                                                                      |
| EPI_ISL_877127                                                                                                                                                                                                                                                                                                                                                                                                                                                                                                                                                                                                                                                                                                                                                                                                 | Academic Hospital of Gadjah Mada University (RSA UGM)                                                                                                                                                                                                                                                                                                                                                                                                                                            | Genetics Working Group (Pokja Genetik) Faculty of Medicine, Public Health and Nursing Universitas Gadjah Mada (FK-KMK UGM); Disease Investigation Center Wates Ministry of Agriculture Indonesia; Department of Microbiology FK-KMK UGM; Laboratorium Diagnostik Yayasan Tahija World Mosquito Program (WMP) Yogyakarta Center for Tropical Medicine FK-KMK UGM; Integrated Research center FK-KMK UGM                                                                              | Gunadi, Hendra Wibawa, Marcellus, Mohamad S. Hakim, Edwin W. Daniwijaya, Ludhang P. Rizki, Endah Supriyati, Eggi Arguni, Titik Nuryastuti, Tri Wibawa, Dwi AA Nugrahaningsih, Afiahayati, Siswanto, Audric Kenny Tedja, Maria Patricia Inggriani                                                                                                                                                                                                                                                                                                                                                                                                                                                                                                                                                                                                           |

|                                                                                                                                                                                                                                                                                                                                                                                                                                                                                                                                                                                                                                                                                                                                                                                                                                                                                                                                                                                                                                |                                                                                                                                                                                                                                                                                                                                                                                                                                                                                               |                                                                                                                                                                                                                                                                                                                                                                                                                                                                                                                                                                                                                                                                                                                                                                                        |                                                                                                                                                                                                                                                                                                                                                                                                                                                                                                                                                                                                                                                                                                                                                                                        |
|--------------------------------------------------------------------------------------------------------------------------------------------------------------------------------------------------------------------------------------------------------------------------------------------------------------------------------------------------------------------------------------------------------------------------------------------------------------------------------------------------------------------------------------------------------------------------------------------------------------------------------------------------------------------------------------------------------------------------------------------------------------------------------------------------------------------------------------------------------------------------------------------------------------------------------------------------------------------------------------------------------------------------------|-----------------------------------------------------------------------------------------------------------------------------------------------------------------------------------------------------------------------------------------------------------------------------------------------------------------------------------------------------------------------------------------------------------------------------------------------------------------------------------------------|----------------------------------------------------------------------------------------------------------------------------------------------------------------------------------------------------------------------------------------------------------------------------------------------------------------------------------------------------------------------------------------------------------------------------------------------------------------------------------------------------------------------------------------------------------------------------------------------------------------------------------------------------------------------------------------------------------------------------------------------------------------------------------------|----------------------------------------------------------------------------------------------------------------------------------------------------------------------------------------------------------------------------------------------------------------------------------------------------------------------------------------------------------------------------------------------------------------------------------------------------------------------------------------------------------------------------------------------------------------------------------------------------------------------------------------------------------------------------------------------------------------------------------------------------------------------------------------|
|                                                                                                                                                                                                                                                                                                                                                                                                                                                                                                                                                                                                                                                                                                                                                                                                                                                                                                                                                                                                                                |                                                                                                                                                                                                                                                                                                                                                                                                                                                                                               | UGM; Department of Computer Science and Electronics FMIPA UGM                                                                                                                                                                                                                                                                                                                                                                                                                                                                                                                                                                                                                                                                                                                          |                                                                                                                                                                                                                                                                                                                                                                                                                                                                                                                                                                                                                                                                                                                                                                                        |
| EPI_ISL_877128                                                                                                                                                                                                                                                                                                                                                                                                                                                                                                                                                                                                                                                                                                                                                                                                                                                                                                                                                                                                                 | Academic Hospital of Gajdah Mada University (RSA UGM)                                                                                                                                                                                                                                                                                                                                                                                                                                         | Genetics Working Group (Pokja Genetik) Faculty of Medicine, Public Health and Nursing Universitas Gadjah Mada (FK-KMK UGM); Disease Investigation Center Wates Ministry of Agriculture Indonesia; Department of Microbiology FK-KMK UGM; Laboratorium Diagnostik Yayasan Tahija World Mosquito Program (WMP) Yogyakarta Center for Tropical Medicine FK-KMK UGM; Integrated Research center FK-KMK UGM; Department of Computer Science and Electronics FMIPA UGM                                                                                                                                                                                                                                                                                                                       | Gunadi, Hendra Wibawa, Marcellus, Mohamad S. Hakim, Edwin W. Daniwijaya, Ludhang P. Rizki, Endah Supriyati, Eggi Arguni, Titik Nuryastuti, Tri Wibawa, Dwi AA Nugrahaningsih, Afiahayati, Siswanto, Kristy Iskandar, Nungki Anggorowati, Aditya Rifqi Fauzi, Fadil Fahri                                                                                                                                                                                                                                                                                                                                                                                                                                                                                                               |
| EPI_ISL_877129                                                                                                                                                                                                                                                                                                                                                                                                                                                                                                                                                                                                                                                                                                                                                                                                                                                                                                                                                                                                                 | Academic Hospital of Gajdah Mada University (RSA UGM)                                                                                                                                                                                                                                                                                                                                                                                                                                         | Genetics Working Group (Pokja Genetik) Faculty of Medicine, Public Health and Nursing Universitas Gadjah Mada (FK-KMK UGM); Disease Investigation Center Wates Ministry of Agriculture Indonesia; Department of Microbiology FK-KMK UGM; Laboratorium Diagnostik Yayasan Tahija World Mosquito Program (WMP) Yogyakarta Center for Tropical Medicine FK-KMK UGM; Integrated Research Center FK-KMK UGM; Department of Computer Science and Electronics FMIPA UGM                                                                                                                                                                                                                                                                                                                       | Gunadi, Hendra Wibawa, Marcellus, Mohamad S. Hakim, Edwin W. Daniwijaya, Ludhang P. Rizki, Endah Supriyati, Eggi Arguni, Titik Nuryastuti, Tri Wibawa, Dwi AA Nugrahaningsih, Afiahayati, Siswanto, Kristy Iskandar, Nungki Anggorowati, Dwiki afandiy, Dyah Ayu Puspitarani                                                                                                                                                                                                                                                                                                                                                                                                                                                                                                           |
| EPI_ISL_877130                                                                                                                                                                                                                                                                                                                                                                                                                                                                                                                                                                                                                                                                                                                                                                                                                                                                                                                                                                                                                 | Academic Hospital of Gajdah Mada University (RSA UGM)                                                                                                                                                                                                                                                                                                                                                                                                                                         | Genetics Working Group (Pokja Genetik) Faculty of Medicine, Public Health and Nursing Universitas Gadjah Mada (FK-KMK UGM); Disease Investigation Center Wates Ministry of Agriculture Indonesia; Department of Microbiology FK-KMK UGM; Laboratorium Diagnostik Yayasan Tahija World Mosquito Program (WMP) Yogyakarta Center for Tropical Medicine FK-KMK UGM; Integrated Research center FK-KMK UGM; Department of Computer Science and Electronics FMIPA UGM                                                                                                                                                                                                                                                                                                                       | Gunadi, Hendra Wibawa, Marcellus, Mohamad S. Hakim, Edwin W. Daniwijaya, Ludhang P. Rizki, Endah Supriyati, Eggi Arguni, Titik Nuryastuti, Tri Wibawa, Dwi AA Nugrahaningsih, Afiahayati, Siswanto, Kristy Iskandar, Nungki Anggorowati, Kemala Athollah, Desyifa Mursalin                                                                                                                                                                                                                                                                                                                                                                                                                                                                                                             |
| EPI_ISL_877131                                                                                                                                                                                                                                                                                                                                                                                                                                                                                                                                                                                                                                                                                                                                                                                                                                                                                                                                                                                                                 | Academic Hospital of Gajdah Mada University (RSA UGM)                                                                                                                                                                                                                                                                                                                                                                                                                                         | Genetics Working Group (Pokja Genetik) Faculty of Medicine, Public Health and Nursing Universitas Gadjah Mada (FK-KMK UGM); Disease Investigation Center Wates Ministry of Agriculture Indonesia; Department of Microbiology FK-KMK UGM; Laboratorium Diagnostik Yayasan Tahija World Mosquito Program (WMP) Yogyakarta Center for Tropical Medicine FK-KMK UGM; Integrated Research center FK-KMK UGM; Department of Computer Science and Electronics FMIPA UGM                                                                                                                                                                                                                                                                                                                       | Gunadi, Hendra Wibawa, Marcellus, Mohamad S. Hakim, Edwin W. Daniwijaya, Ludhang P. Rizki, Endah Supriyati, Eggi Arguni, Titik Nuryastuti, Tri Wibawa, Dwi AA Nugrahaningsih, Afiahayati, Siswanto, Kristy Iskandar, Nungki Anggorowati, Susan Simanjaya, Alvin Santoso Kalim                                                                                                                                                                                                                                                                                                                                                                                                                                                                                                          |
| EPI_ISL_882677, EPI_ISL_882678, EPI_ISL_882684, EPI_ISL_882689, EPI_ISL_882690, EPI_ISL_882691, EPI_ISL_882693, EPI_ISL_882694, EPI_ISL_882695, EPI_ISL_882696, EPI_ISL_882697, EPI_ISL_882698, EPI_ISL_882699, EPI_ISL_882703, EPI_ISL_882704, EPI_ISL_882705, EPI_ISL_882706, EPI_ISL_882707, EPI_ISL_882708, EPI_ISL_882709, EPI_ISL_882710, EPI_ISL_882711, EPI_ISL_882712, EPI_ISL_882714, EPI_ISL_882716, EPI_ISL_882717, EPI_ISL_882719, EPI_ISL_882720, EPI_ISL_882722, EPI_ISL_882723, EPI_ISL_882726, EPI_ISL_882727, EPI_ISL_882728, EPI_ISL_882729, EPI_ISL_882730, EPI_ISL_882731, EPI_ISL_882733, EPI_ISL_882734, EPI_ISL_882735, EPI_ISL_882736, EPI_ISL_882737, EPI_ISL_882738, EPI_ISL_882740, EPI_ISL_882741, EPI_ISL_882742, EPI_ISL_882744, EPI_ISL_882745, EPI_ISL_882749, EPI_ISL_882750, EPI_ISL_882751, EPI_ISL_882752, EPI_ISL_882753, EPI_ISL_882754, EPI_ISL_882757, EPI_ISL_882758, EPI_ISL_882759, EPI_ISL_882761, EPI_ISL_882762, EPI_ISL_882765, EPI_ISL_882766, EPI_ISL_882767, EPI_ISL_883499 |                                                                                                                                                                                                                                                                                                                                                                                                                                                                                               | Giorgio Giurato, Francesca Rizzo, Alessandro Weisz, Gianluigi Franci, Giovanni Nassa, Pasquale Pagliano, Roberta Tarallo, Elena Alexandrova, Ylenia D'Agostino, Carlo Ferravante, Jessica Lamberti, Viola Melone, Domenico Memoli, Valeria Mirici Cappa, Domenico Palumbo, Giovanni Pecoraro, Assunta Sellitto, Oriana Strianese, Ilaria Terenzi, Giuseppe Fenza, Aniello Gentile, Antonello Saccomanno, Sonia Amabile, Teresa Rocco, Annamaria Salvati, Emilia Vaccaro, Massimiliano Galdiero, Michele Cennamo, Giuseppe Portella, Maria Grazia Foti, Mariarosaria Ingino, Maria Landi, Maurizio Fumi, Vincenzo Rocco, Rita Greco, Vittoria Letizia, Arnolfo Petruzzello, Maddalena Schioppa, Gregorio Goffredi, Francesca Marciano, Michele Caraglia, Alessia Cossu, Marianna Scrima |                                                                                                                                                                                                                                                                                                                                                                                                                                                                                                                                                                                                                                                                                                                                                                                        |
| see above                                                                                                                                                                                                                                                                                                                                                                                                                                                                                                                                                                                                                                                                                                                                                                                                                                                                                                                                                                                                                      | 1.AO Universitaria 'S. Giovanni di Dio e Ruggi D'Aragona, Scuola Medica Salernitana' Hospital / 2.UOC di Virologia e Microbiologia, Università della Campania 'L. Vanvitelli' / 3.AO Universitaria 'Federico II' Napoli Hospital / 4.AORN 'San Giuseppe Moscati' Avellino Hospital / 5.AO 'San Pio - presidio G. Rummo' Benevento Hospital / 6.AO 'Sant'Anna e San Sebastiano' Caserta Hospital / 7.PO 'Maria Santissima Addolorata' Eboli Hospital / 8.Biogem Istituto di Ricerche Genetiche | 1. Genome Research Center for Health (CRGS) / 2. Laboratory of Molecular Medicine and Genomics(LMMGe) / 3. Center for Research in Pure and Applied Mathematics (CRMPA)                                                                                                                                                                                                                                                                                                                                                                                                                                                                                                                                                                                                                 |                                                                                                                                                                                                                                                                                                                                                                                                                                                                                                                                                                                                                                                                                                                                                                                        |
| EPI_ISL_884295                                                                                                                                                                                                                                                                                                                                                                                                                                                                                                                                                                                                                                                                                                                                                                                                                                                                                                                                                                                                                 | Microbiology Division, South Carolina Department of Health and Environmental Control Public Health Laboratory (SC DHEC PHL)                                                                                                                                                                                                                                                                                                                                                                   | Microbiology Division, South Carolina Department of Health and Environmental Control Public Health Laboratory (SC DHEC PHL)                                                                                                                                                                                                                                                                                                                                                                                                                                                                                                                                                                                                                                                            | Haley Flores, Jessica Freeman                                                                                                                                                                                                                                                                                                                                                                                                                                                                                                                                                                                                                                                                                                                                                          |
| EPI_ISL_885142                                                                                                                                                                                                                                                                                                                                                                                                                                                                                                                                                                                                                                                                                                                                                                                                                                                                                                                                                                                                                 | RSUP Dr. Sardjito                                                                                                                                                                                                                                                                                                                                                                                                                                                                             | Genetics Working Group (Pokja Genetik) Faculty of Medicine, Public Health and Nursing Universitas Gadjah Mada (FK-KMK UGM); Disease Investigation Center Wates Ministry of Agriculture Indonesia; Department of Microbiology FK-KMK UGM; Laboratorium Diagnostik Yayasan Tahija World Mosquito Program (WMP) Yogyakarta Center for Tropical Medicine FK-KMK UGM; Integrated Research Center FK-KMK UGM; Department of Computer Science and Electronics FMIPA UGM; RSUP Dr. Sardjito                                                                                                                                                                                                                                                                                                    | Gunadi, Hendra Wibawa, Marcellus, Mohamad S. Hakim, Edwin W. Daniwijaya, Ludhang P. Rizki, Endah Supriyati, Eggi Arguni, Titik Nuryastuti, Tri Wibawa, Dwi AA Nugrahaningsih, Afiahayati, Siswanto, Kristy Iskandar, Nungki Anggorowati, Ika Trisnawati, Sumardi, Eko Budiono, Bambang Sigit Riyanto, Heni Retnowulan, Munawar Gani, Satria Maulana, Nur Rahmi Ananda, Riat El Khair, Yunika Puspawati, Osman Sianipar, Umi Solekha Intansari, Elizabeth Henny Herringtiyas, Ira Puspitiawati, Nur Imma Fatimah Harahap, Alvin Santoso Kalim, Susan Simanjaya                                                                                                                                                                                                                          |
| EPI_ISL_887506, EPI_ISL_887507                                                                                                                                                                                                                                                                                                                                                                                                                                                                                                                                                                                                                                                                                                                                                                                                                                                                                                                                                                                                 | 1.AO Universitaria 'S. Giovanni di Dio e Ruggi D'Aragona, Scuola Medica Salernitana' Hospital / 2.UOC di Virologia e Microbiologia, Università della Campania 'L. Vanvitelli' / 3.AO Universitaria 'Federico II' Napoli Hospital / 4.AORN 'San Giuseppe Moscati' Avellino Hospital / 5.AO 'San Pio - presidio G. Rummo' Benevento Hospital / 6.AO 'Sant'Anna e San Sebastiano' Caserta Hospital / 7.PO 'Maria Santissima Addolorata' Eboli Hospital / 8.Biogem Istituto di Ricerche Genetiche | 1. Genome Research Center for Health (CRGS) / 2. Laboratory of Molecular Medicine and Genomics(LMMGe) / 3. Center for Research in Pure and Applied Mathematics (CRMPA)                                                                                                                                                                                                                                                                                                                                                                                                                                                                                                                                                                                                                 | Giorgio Giurato, Francesca Rizzo, Alessandro Weisz, Gianluigi Franci, Giovanni Nassa, Pasquale Pagliano, Roberta Tarallo, Elena Alexandrova, Ylenia D'Agostino, Carlo Ferravante, Jessica Lamberti, Viola Melone, Domenico Memoli, Valeria Mirici Cappa, Domenico Palumbo, Giovanni Pecoraro, Assunta Sellitto, Oriana Strianese, Ilaria Terenzi, Giuseppe Fenza, Aniello Gentile, Antonello Saccomanno, Sonia Amabile, Teresa Rocco, Annamaria Salvati, Emilia Vaccaro, Massimiliano Galdiero, Michele Cennamo, Giuseppe Portella, Maria Grazia Foti, Mariarosaria Ingino, Maria Landi, Maurizio Fumi, Vincenzo Rocco, Rita Greco, Vittoria Letizia, Arnolfo Petruzzello, Maddalena Schioppa, Gregorio Goffredi, Francesca Marciano, Michele Caraglia, Alessia Cossu, Marianna Scrima |
| EPI_ISL_890185                                                                                                                                                                                                                                                                                                                                                                                                                                                                                                                                                                                                                                                                                                                                                                                                                                                                                                                                                                                                                 | Academic Hospital of Gadjah Mada University (RSA UGM)                                                                                                                                                                                                                                                                                                                                                                                                                                         | Genetics Working Group (Pokja Genetik) Faculty of Medicine, Public Health and Nursing Universitas Gadjah Mada (FK-KMK UGM); Disease Investigation Center Wates Ministry of Agriculture Indonesia; Department of Microbiology FK-KMK UGM; Laboratorium Diagnostik Yayasan Tahija World Mosquito Program (WMP) Yogyakarta Center for Tropical Medicine FK-KMK UGM; Integrated Research center FK-KMK UGM; Department of Computer Science and Electronics FMIPA UGM                                                                                                                                                                                                                                                                                                                       | Gunadi, Hendra Wibawa, Marcellus, Mohamad S. Hakim, Edwin W. Daniwijaya, Ludhang P. Rizki, Endah Supriyati, Eggi Arguni, Titik Nuryastuti, Tri Wibawa, Dwi AA Nugrahaningsih, Afiahayati, Siswanto, Kristy Iskandar, Nungki Anggorowati, Aditya Rifqi Fauzi, Fadil Fahri                                                                                                                                                                                                                                                                                                                                                                                                                                                                                                               |
| EPI_ISL_890186                                                                                                                                                                                                                                                                                                                                                                                                                                                                                                                                                                                                                                                                                                                                                                                                                                                                                                                                                                                                                 | Academic Hospital of Gadjah Mada University (RSA UGM)                                                                                                                                                                                                                                                                                                                                                                                                                                         | Genetics Working Group (Pokja Genetik) Faculty of Medicine,                                                                                                                                                                                                                                                                                                                                                                                                                                                                                                                                                                                                                                                                                                                            | Gunadi, Hendra Wibawa, Marcellus, Mohamad S. Hakim, Edwin W. Daniwijaya, Ludhang P. Rizki, Endah Supriyati, Eggi Arguni, Titik Nuryastuti, Tri                                                                                                                                                                                                                                                                                                                                                                                                                                                                                                                                                                                                                                         |

|                |                                                       |                                                                                                                                                                                                                                                                                                                                                                                                                                                                                                                                                                                                                                                                                                                                                                                                                                                                                     |                                                                                                                                                                                                                                                                                                                                                                                                                                 |
|----------------|-------------------------------------------------------|-------------------------------------------------------------------------------------------------------------------------------------------------------------------------------------------------------------------------------------------------------------------------------------------------------------------------------------------------------------------------------------------------------------------------------------------------------------------------------------------------------------------------------------------------------------------------------------------------------------------------------------------------------------------------------------------------------------------------------------------------------------------------------------------------------------------------------------------------------------------------------------|---------------------------------------------------------------------------------------------------------------------------------------------------------------------------------------------------------------------------------------------------------------------------------------------------------------------------------------------------------------------------------------------------------------------------------|
| EPI_ISL_890187 | Academic Hospital of Gadjah Mada University (RSA UGM) | <p>Public Health and Nursing Universitas Gadjah Mada (FK-KMK UGM); Disease Investigation Center Wates Ministry of Agriculture Indonesia; Department of Microbiology FK-KMK UGM; Laboratorium Diagnostik Yayasan Tahija World Mosquito Program (WMP) Yogyakarta Center for Tropical Medicine FK-KMK UGM; Integrated Research center FK-KMK UGM; Department of Computer Science and Electronics FMIPA UGM</p> <p>Genetics Working Group (Pokja Genetik) Faculty of Medicine, Public Health and Nursing Universitas Gadjah Mada (FK-KMK UGM); Disease Investigation Center Wates Ministry of Agriculture Indonesia; Department of Microbiology FK-KMK UGM; Laboratorium Diagnostik Yayasan Tahija World Mosquito Program (WMP) Yogyakarta Center for Tropical Medicine FK-KMK UGM; Integrated Research center FK-KMK UGM; Department of Computer Science and Electronics FMIPA UGM</p> | <p>Wibawa, Dwi AA Nugrahaningsih, Afiahayati, Siswanto, Kristy Iskandar, Nungki Anggorowati, Audric Kenny Tedja, Maria Patricia Inggriani</p> <p>Gunadi, Hendra Wibawa, Marcellus, Mohamad S. Hakim, Edwin W. Daniwijaya, Ludhang P. Rizki, Endah Supriyati, Eggi Arguni, Titik Nuryastuti, Tri Wibawa, Dwi AA Nugrahaningsih, Afiahayati, Siswanto, Kristy Iskandar, Nungki Anggorowati, Untung Riawan, William Widitjarso</p> |
|----------------|-------------------------------------------------------|-------------------------------------------------------------------------------------------------------------------------------------------------------------------------------------------------------------------------------------------------------------------------------------------------------------------------------------------------------------------------------------------------------------------------------------------------------------------------------------------------------------------------------------------------------------------------------------------------------------------------------------------------------------------------------------------------------------------------------------------------------------------------------------------------------------------------------------------------------------------------------------|---------------------------------------------------------------------------------------------------------------------------------------------------------------------------------------------------------------------------------------------------------------------------------------------------------------------------------------------------------------------------------------------------------------------------------|



























EPI\_ISL\_858874, EPI\_ISL\_858900, EPI\_ISL\_858901, EPI\_ISL\_858904, EPI\_ISL\_858908, EPI\_ISL\_858911, EPI\_ISL\_858927, EPI\_ISL\_858928, EPI\_ISL\_858945, EPI\_ISL\_858953, EPI\_ISL\_858960, EPI\_ISL\_858974, EPI\_ISL\_858975, EPI\_ISL\_859003, EPI\_ISL\_859012, EPI\_ISL\_859032, EPI\_ISL\_859033, EPI\_ISL\_859040, EPI\_ISL\_859041, EPI\_ISL\_859042, EPI\_ISL\_859050, EPI\_ISL\_859052, EPI\_ISL\_859059, EPI\_ISL\_859060, EPI\_ISL\_859065, EPI\_ISL\_859072, EPI\_ISL\_859074, EPI\_ISL\_859079, EPI\_ISL\_859081, EPI\_ISL\_859083, EPI\_ISL\_859100, EPI\_ISL\_859106, EPI\_ISL\_859108, EPI\_ISL\_859118, EPI\_ISL\_859123, EPI\_ISL\_859133, EPI\_ISL\_859137, EPI\_ISL\_859140, EPI\_ISL\_859155, EPI\_ISL\_859156, EPI\_ISL\_859157, EPI\_ISL\_859164, EPI\_ISL\_859166, EPI\_ISL\_859170, EPI\_ISL\_859171, EPI\_ISL\_859172, EPI\_ISL\_859175, EPI\_ISL\_859178, EPI\_ISL\_859183, EPI\_ISL\_859184, EPI\_ISL\_859188, EPI\_ISL\_859191, EPI\_ISL\_859192, EPI\_ISL\_859197, EPI\_ISL\_859218, EPI\_ISL\_859232, EPI\_ISL\_859234, EPI\_ISL\_859253, EPI\_ISL\_859263, EPI\_ISL\_859265, EPI\_ISL\_859268, EPI\_ISL\_859270, EPI\_ISL\_859280, EPI\_ISL\_859294, EPI\_ISL\_859295, EPI\_ISL\_859303, EPI\_ISL\_859312, EPI\_ISL\_859313, EPI\_ISL\_859316, EPI\_ISL\_859317, EPI\_ISL\_859319, EPI\_ISL\_859323, EPI\_ISL\_859324, EPI\_ISL\_859422, EPI\_ISL\_859435, EPI\_ISL\_859459, EPI\_ISL\_859462, EPI\_ISL\_859466, EPI\_ISL\_859467, EPI\_ISL\_859471, EPI\_ISL\_859473, EPI\_ISL\_859475, EPI\_ISL\_859476, EPI\_ISL\_859488, EPI\_ISL\_859490, EPI\_ISL\_859493, EPI\_ISL\_859495, EPI\_ISL\_859502, EPI\_ISL\_859507, EPI\_ISL\_859515, EPI\_ISL\_859520, EPI\_ISL\_859522, EPI\_ISL\_859523, EPI\_ISL\_859524, EPI\_ISL\_859527, EPI\_ISL\_859529, EPI\_ISL\_859531, EPI\_ISL\_859532, EPI\_ISL\_859542, EPI\_ISL\_859547, EPI\_ISL\_859548, EPI\_ISL\_859551, EPI\_ISL\_863252, EPI\_ISL\_863255, EPI\_ISL\_863260, EPI\_ISL\_863262, EPI\_ISL\_863266, EPI\_ISL\_863267, EPI\_ISL\_863276, EPI\_ISL\_863282, EPI\_ISL\_863284, EPI\_ISL\_863292, EPI\_ISL\_863295, EPI\_ISL\_863296, EPI\_ISL\_863300, EPI\_ISL\_863303, EPI\_ISL\_863305, EPI\_ISL\_863308, EPI\_ISL\_863317, EPI\_ISL\_863320, EPI\_ISL\_863321, EPI\_ISL\_863327, EPI\_ISL\_863331, EPI\_ISL\_863336, EPI\_ISL\_863337, EPI\_ISL\_863339, EPI\_ISL\_863344, EPI\_ISL\_863347, EPI\_ISL\_863351, EPI\_ISL\_863354, EPI\_ISL\_863358, EPI\_ISL\_863359, EPI\_ISL\_863365, EPI\_ISL\_863366, EPI\_ISL\_863371, EPI\_ISL\_863378, EPI\_ISL\_863390, EPI\_ISL\_863393, EPI\_ISL\_863400, EPI\_ISL\_863407, EPI\_ISL\_863419, EPI\_ISL\_863422, EPI\_ISL\_863428, EPI\_ISL\_863431, EPI\_ISL\_863436, EPI\_ISL\_863441, EPI\_ISL\_863444, EPI\_ISL\_863449, EPI\_ISL\_863452, EPI\_ISL\_863455, EPI\_ISL\_863458, EPI\_ISL\_863460, EPI\_ISL\_863463, EPI\_ISL\_863469, EPI\_ISL\_863471, EPI\_ISL\_863472, EPI\_ISL\_863473, EPI\_ISL\_863475, EPI\_ISL\_863476, EPI\_ISL\_863480, EPI\_ISL\_863487, EPI\_ISL\_863489, EPI\_ISL\_863494, EPI\_ISL\_863501, EPI\_ISL\_863502, EPI\_ISL\_863509, EPI\_ISL\_863518, EPI\_ISL\_863522, EPI\_ISL\_863525, EPI\_ISL\_863526, EPI\_ISL\_863530, EPI\_ISL\_863532, EPI\_ISL\_863590, EPI\_ISL\_863600, EPI\_ISL\_863707, EPI\_ISL\_863811, EPI\_ISL\_863830, EPI\_ISL\_863841, EPI\_ISL\_863853, EPI\_ISL\_874676, EPI\_ISL\_874736, EPI\_ISL\_874806, EPI\_ISL\_874808, EPI\_ISL\_874896, EPI\_ISL\_874898, EPI\_ISL\_874950, EPI\_ISL\_874965, EPI\_ISL\_882609

see above

Lighthouse Lab in Glasgow

Wellcome Sanger Institute for the COVID-19 Genomics UK (COG-UK) Consortium

Harper VanSteenhouse, Yumi Kasai, David Gray, Carol Clugston, Anna Dominiczak and Alex Alderton, Roberto Amato, Sonia Goncalves, Ewan Harrison, David K. Jackson, Ian Johnston, Dominic Kwiatkowski, Cordelia Langford, John Sillitoe on behalf of the Wellcome Sanger Institute COVID-19 Surveillance Team

























We gratefully acknowledge the following Authors from the Originating laboratories responsible for obtaining the specimens, as well as the Submitting laboratories where the genome data were generated and shared via GISAID, on which this research is based.

All Submitters of data may be contacted directly via [www.gisaid.org](http://www.gisaid.org)

Authors are sorted alphabetically.

| Accession ID                                                                                                                                                                                                                                                                                                                                                                                                                                                                                                                                                                                                                                                                                                                   | Originating Laboratory                                           | Submitting Laboratory                                                                                                | Authors                                                                                                                                                                                                                                                                                                                                           |
|--------------------------------------------------------------------------------------------------------------------------------------------------------------------------------------------------------------------------------------------------------------------------------------------------------------------------------------------------------------------------------------------------------------------------------------------------------------------------------------------------------------------------------------------------------------------------------------------------------------------------------------------------------------------------------------------------------------------------------|------------------------------------------------------------------|----------------------------------------------------------------------------------------------------------------------|---------------------------------------------------------------------------------------------------------------------------------------------------------------------------------------------------------------------------------------------------------------------------------------------------------------------------------------------------|
| EPI_ISL_412965                                                                                                                                                                                                                                                                                                                                                                                                                                                                                                                                                                                                                                                                                                                 | BCCDC Public Health Laboratory                                   | BCCDC Public Health Laboratory                                                                                       | Harrigan, Prystajecy, Krajden, Lee, Kamelian, Lapointe, Choi, Hoang, Sekirov, Levett, Tyson, Loman, Quick, Li, Gilmour                                                                                                                                                                                                                            |
| EPI_ISL_412968, EPI_ISL_412969                                                                                                                                                                                                                                                                                                                                                                                                                                                                                                                                                                                                                                                                                                 | Takayuki Hishiki Kanagawa Prefectural Institute of Public Health | Takayuki Hishiki Kanagawa Prefectural Institute of Public Health                                                     | Hishiki,T., Suzuki,R., Sakuragi,J., Usui,K., Tanaka,Y., Kawai,J., Kogo,Y., Matsuki,Y., An,T., Hayashizaki,Y. and Takasaki,T.                                                                                                                                                                                                                      |
| EPI_ISL_412970                                                                                                                                                                                                                                                                                                                                                                                                                                                                                                                                                                                                                                                                                                                 | Washington State Department of Health                            | Seattle Flu Study                                                                                                    | Helen Chu, Michael Boeckh, Janet Englund, Michael Famulare, Barry Lutz, Deborah Nickerson, Mark Rieder, Lea Starita, Matthew Thompson, Jay Shendure, and Trevor Bedford                                                                                                                                                                           |
| EPI_ISL_415577, EPI_ISL_415578, EPI_ISL_415579, EPI_ISL_415580, EPI_ISL_415581, EPI_ISL_415582, EPI_ISL_415583, EPI_ISL_415584, EPI_ISL_415585, EPI_ISL_415586, EPI_ISL_415587, EPI_ISL_415588, EPI_ISL_415589, EPI_ISL_415590                                                                                                                                                                                                                                                                                                                                                                                                                                                                                                 | see above                                                        | BCCDC Public Health Laboratory                                                                                       | Harrigan, Prystajecy, Krajden, Lee, Kamelian, Lapointe, Choi, Hoang, Sekirov, Levett, Tyson, Snutch, Loman, Quick, Li, Gilmour                                                                                                                                                                                                                    |
| EPI_ISL_416994                                                                                                                                                                                                                                                                                                                                                                                                                                                                                                                                                                                                                                                                                                                 | COMPLEJO ASISTENCIAL UNIVERSITARIO DE BURGOS                     | Instituto de Salud Carlos III                                                                                        | Iglesias-Caballero, M. Molinero Calamita, M. González-Esguevillas, M. Camarero S. Pozo F. Casas I. Jiménez P. Jiménez M. Zaballos A. Monzón, S. Varona, S. Juliá M. Cuesta I. Megias Lobón, G. Hospital: -----                                                                                                                                    |
| EPI_ISL_417007                                                                                                                                                                                                                                                                                                                                                                                                                                                                                                                                                                                                                                                                                                                 | HOSPITAL SANTA MARIA NAI                                         | Instituto de Salud Carlos III                                                                                        | Iglesias-Caballero, M. Molinero Calamita, M. Camarero S. Pozo F. Casas I. Jiménez P. Jiménez, M. Zaballos, A. Monzón, S. Varona, S. Juliá, M. Cuesta, I. García Costa, J.                                                                                                                                                                         |
| EPI_ISL_417010                                                                                                                                                                                                                                                                                                                                                                                                                                                                                                                                                                                                                                                                                                                 | FUNDACION JIMENEZ DIAZ                                           | Instituto de Salud Carlos III                                                                                        | Iglesias-Caballero, M. Molinero Calamita, M. González-Esguevillas, M. Camarero, S. Pozo, F. Casas, I. Jiménez, P. Jiménez, M. Zaballos, A. Monzón, S. Varona, S. Juliá, M. Cuesta, I. Fernández Roblas, R.                                                                                                                                        |
| EPI_ISL_417393, EPI_ISL_417410                                                                                                                                                                                                                                                                                                                                                                                                                                                                                                                                                                                                                                                                                                 | Centre for Infectious Diseases and Microbiology Public Health    | NSW Health Pathology - Institute of Clinical Pathology and Medical Research; Westmead Hospital; University of Sydney | Holmes EC, O'Sullivan MV, Sintchenko V, Chen SC, Maddocks S, Kok J, Dwyer DE, Rockett R, Eden J-S, Lam C, Gray K, Timms V, Gall M, Arnott A, Sadsad R, Carter I and Rahman H for the 2019-nCoV Study Group                                                                                                                                        |
| EPI_ISL_418243, EPI_ISL_418244                                                                                                                                                                                                                                                                                                                                                                                                                                                                                                                                                                                                                                                                                                 | HOSPITAL UNIVERSITARIO VIRGEN DE LAS NIEVES                      | Instituto de Salud Carlos III                                                                                        | Iglesias-Caballero, M. Molinero Calamita, M. González-Esguevillas, M. Camarero, S. Pozo, F. Casas, I. Jiménez, P. Jiménez, M. Zaballos, A. Monzón, S. Varona, S. Juliá, M. Cuesta, I. Sanbonmatsu S.                                                                                                                                              |
| EPI_ISL_418245, EPI_ISL_418246                                                                                                                                                                                                                                                                                                                                                                                                                                                                                                                                                                                                                                                                                                 | Hospital General y Universitario de Guadalajara                  | Instituto de Salud Carlos III                                                                                        | Iglesias-Caballero, M. Molinero Calamita, M. González-Esguevillas, M. Camarero, S. Pozo, F. Casas, I. Jiménez, P. Jiménez, M. Zaballos, A. Monzón, S. Varona, S. Juliá, M. Cuesta, I. Gonzalez-Praetorius A.                                                                                                                                      |
| EPI_ISL_418247                                                                                                                                                                                                                                                                                                                                                                                                                                                                                                                                                                                                                                                                                                                 | HOSPITAL GENERAL DE SEGOVIA                                      | Instituto de Salud Carlos III                                                                                        | Iglesias-Caballero, M. Molinero Calamita, M. González-Esguevillas, M. Camarero, S. Pozo, F. Casas, I. Jiménez, P. Jiménez, M. Zaballos, A. Monzón, S. Varona, S. Juliá, M. Cuesta, I. Fernando-Real S.                                                                                                                                            |
| EPI_ISL_418248, EPI_ISL_418249                                                                                                                                                                                                                                                                                                                                                                                                                                                                                                                                                                                                                                                                                                 | COMPLEJO ASISTENCIAL UNIVERSITARIO DE BURGOS                     | Instituto de Salud Carlos III                                                                                        | Iglesias-Caballero, M. Molinero Calamita, M. González-Esguevillas, M. Camarero, S. Pozo, F. Casas, I. Jiménez, P. Jiménez, M. Zaballos, A. Monzón, S. Varona, S. Juliá, M. Cuesta, I. Megias-Lobon G.                                                                                                                                             |
| EPI_ISL_418250                                                                                                                                                                                                                                                                                                                                                                                                                                                                                                                                                                                                                                                                                                                 | HOSPITAL CLINIC                                                  | Instituto de Salud Carlos III                                                                                        | Iglesias-Caballero, M. Molinero Calamita, M. González-Esguevillas, M. Camarero, S. Pozo, F. Casas, I. Jiménez, P. Jiménez, M. Zaballos, A. Monzón, S. Varona, S. Juliá, M. Cuesta, I. Marcos M.A                                                                                                                                                  |
| EPI_ISL_418251                                                                                                                                                                                                                                                                                                                                                                                                                                                                                                                                                                                                                                                                                                                 | HOSPITAL UNIVERSITARIO LA PAZ                                    | Instituto de Salud Carlos III                                                                                        | Iglesias-Caballero, M. Molinero Calamita, M. González-Esguevillas, M. Camarero, S. Pozo, F. Casas, I. Jiménez, P. Jiménez, M. Zaballos, A. Monzón, S. Varona, S. Juliá, M. Cuesta, I. Romero P.                                                                                                                                                   |
| EPI_ISL_418252                                                                                                                                                                                                                                                                                                                                                                                                                                                                                                                                                                                                                                                                                                                 | FUNDACION JIMENEZ DIAZ                                           | Instituto de Salud Carlos III                                                                                        | Iglesias-Caballero, M. Molinero Calamita, M. González-Esguevillas, M. Camarero, S. Pozo, F. Casas, I. Jiménez, P. Jiménez, M. Zaballos, A. Monzón, S. Varona, S. Juliá, M. Cuesta, I. Fernández Roblas, R.                                                                                                                                        |
| EPI_ISL_418253                                                                                                                                                                                                                                                                                                                                                                                                                                                                                                                                                                                                                                                                                                                 | HOSPITAL TXAGORRITXU                                             | Instituto de Salud Carlos III                                                                                        | Iglesias-Caballero, M. Molinero Calamita, M. González-Esguevillas, M. Camarero, S. Pozo, F. Casas, I. Jiménez, P. Jiménez, M. Zaballos, A. Monzón, S. Varona, S. Juliá, M. Cuesta, I. Gomez-Gonzalez C.                                                                                                                                           |
| EPI_ISL_418271, EPI_ISL_418273                                                                                                                                                                                                                                                                                                                                                                                                                                                                                                                                                                                                                                                                                                 | University Hospital Basel, Clinical Virology                     | University Hospital Basel, Labormedizin                                                                              | Hirsch, H., Leuzinger, K., Seth-Smith, H., Mari, A., Roloff, T., Egli, A.                                                                                                                                                                                                                                                                         |
| EPI_ISL_418275, EPI_ISL_418277, EPI_ISL_418278, EPI_ISL_418279, EPI_ISL_418280, EPI_ISL_418281, EPI_ISL_418282, EPI_ISL_418283, EPI_ISL_418284, EPI_ISL_418433, EPI_ISL_418434, EPI_ISL_418435                                                                                                                                                                                                                                                                                                                                                                                                                                                                                                                                 | see above                                                        | University Hospital Basel, Clinical Bacteriology                                                                     | Hirsch, H., Leuzinger, K., Seth-Smith, H., Mari, A., Roloff, T., Egli, A.                                                                                                                                                                                                                                                                         |
| EPI_ISL_418436                                                                                                                                                                                                                                                                                                                                                                                                                                                                                                                                                                                                                                                                                                                 | University Hospital Basel, Clinical Virology                     | University Hospital Basel, Clinical Virology                                                                         | Hirsch, H., Leuzinger, K., Seth-Smith, H., Mari, A., Roloff, T., Egli, A.                                                                                                                                                                                                                                                                         |
| EPI_ISL_418438, EPI_ISL_418439, EPI_ISL_418440                                                                                                                                                                                                                                                                                                                                                                                                                                                                                                                                                                                                                                                                                 | University Hospital Basel, Clinical Virology                     | University Hospital Basel, Clinical Bacteriology                                                                     | Hirsch, H., Leuzinger, K., Seth-Smith, H., Mari, A., Roloff, T., Egli, A.                                                                                                                                                                                                                                                                         |
| EPI_ISL_418816, EPI_ISL_418817, EPI_ISL_418818, EPI_ISL_418819, EPI_ISL_418820, EPI_ISL_418821, EPI_ISL_418822, EPI_ISL_418823, EPI_ISL_418824, EPI_ISL_418825, EPI_ISL_418826, EPI_ISL_418827, EPI_ISL_418828, EPI_ISL_418829, EPI_ISL_418830, EPI_ISL_418831, EPI_ISL_418832, EPI_ISL_418833, EPI_ISL_418834, EPI_ISL_418835, EPI_ISL_418836, EPI_ISL_418837, EPI_ISL_418838, EPI_ISL_418839, EPI_ISL_418840, EPI_ISL_418841, EPI_ISL_418842, EPI_ISL_418843, EPI_ISL_418844, EPI_ISL_418845, EPI_ISL_418846, EPI_ISL_418847, EPI_ISL_418848, EPI_ISL_418849, EPI_ISL_418850, EPI_ISL_418851, EPI_ISL_418852, EPI_ISL_418853, EPI_ISL_418854, EPI_ISL_418855, EPI_ISL_418856, EPI_ISL_418857, EPI_ISL_418858, EPI_ISL_418859 | see above                                                        | BCCDC Public Health Laboratory                                                                                       | Harrigan, Prystajecy, Krajden, Lee, Kamelian, Lapointe, Choi, Hoang, Sekirov, Levett, Tyson, Snutch, Loman, Quick, Li, Gilmour                                                                                                                                                                                                                    |
| EPI_ISL_419210                                                                                                                                                                                                                                                                                                                                                                                                                                                                                                                                                                                                                                                                                                                 | The Chaim Sheba Medical Center                                   | Israel Institute for Biological Research                                                                             | Inbar Cohen-Gihon, Ofir Israeli, Ohad Shifman, Dana Stein, Sharon Melamed, Nir Paran, Tomer Israely, Hagit Achdout, Yfat Yahalom Ronen, Hadas Tamir, Boaz Politi, Lilach Cherry, Einat Vitner, Orly Laskar, Shay Weiss, Michal Mandelboim, Oran Erster, Gili Regev-Yochay, Gadi Segal, Shmuel Yitzhaki, Shmuel C. Shapira, Adi Beth-Din, Anat Zvi |
| EPI_ISL_419211                                                                                                                                                                                                                                                                                                                                                                                                                                                                                                                                                                                                                                                                                                                 | Central Virology Laboratory                                      | Israel Institute for Biological Research                                                                             | Inbar Cohen-Gihon, Ofir Israeli, Ohad Shifman, Dana Stein, Sharon Melamed, Nir Paran, Tomer Israely, Hagit Achdout, Yfat Yahalom Ronen, Hadas Tamir, Boaz Politi, Lilach Cherry, Einat Vitner, Orly Laskar, Shay Weiss, Michal Mandelboim, Oran Erster, Gili Regev-Yochay, Gadi Segal, Shmuel Yitzhaki, Shmuel C. Shapira, Adi Beth-Din, Anat Zvi |
| EPI_ISL_419230                                                                                                                                                                                                                                                                                                                                                                                                                                                                                                                                                                                                                                                                                                                 | Hospital Universitario Virgen de las Nieves                      | Instituto de Salud Carlos III                                                                                        | Iglesias-Caballero, M.; Molinero Calamita, M.; González-Esguevillas, M.; Camarero, S.; Pozo, F.; Casas, I.; Jiménez, P.; Jiménez, M.; Zaballos, A.; Monzón, S.; Varona, S.; Juliá, M.; Cuesta, I.; Sanbonmatsu, S.                                                                                                                                |
| EPI_ISL_419233                                                                                                                                                                                                                                                                                                                                                                                                                                                                                                                                                                                                                                                                                                                 | Hospital Universitario de Canarias                               | Instituto de Salud Carlos III                                                                                        | Iglesias-Caballero, M.; Molinero Calamita, M.; González-Esguevillas, M.; Camarero, S.; Pozo, F.; Casas, I.; Jiménez, P.; Jiménez, M.; Zaballos, A.; Monzón, S.; Varona, S.; Juliá, M.; Cuesta, I.; Castro, B.                                                                                                                                     |
| EPI_ISL_419234                                                                                                                                                                                                                                                                                                                                                                                                                                                                                                                                                                                                                                                                                                                 | Hospital San Pedro                                               | Instituto de Salud Carlos III                                                                                        | Iglesias-Caballero, M.; Molinero Calamita, M.; González-Esguevillas, M.; Camarero, S.; Pozo, F.; Casas, I.; Jiménez, P.; Jiménez, M.; Zaballos, A.; Monzón, S.; Varona, S.; Juliá, M.; Cuesta, I.; Alonso, C.                                                                                                                                     |
| EPI_ISL_419235, EPI_ISL_419236, EPI_ISL_419237                                                                                                                                                                                                                                                                                                                                                                                                                                                                                                                                                                                                                                                                                 | Fundacion Jimenez Diaz                                           | Instituto de Salud Carlos III                                                                                        | Iglesias-Caballero, M.; Molinero Calamita, M.; González-Esguevillas, M.; Camarero, S.; Pozo, F.; Casas, I.; Jiménez, P.; Jiménez, M.; Zaballos, A.; Monzón, S.; Varona, S.; Juliá, M.; Cuesta, I.; Fernández, R.                                                                                                                                  |
| EPI_ISL_419238                                                                                                                                                                                                                                                                                                                                                                                                                                                                                                                                                                                                                                                                                                                 | HOSPITAL DE CRUCES.                                              | Instituto de Salud Carlos III                                                                                        | Iglesias-Caballero, M. Molinero Calamita, M. González-Esguevillas, M. Camarero, S. Pozo, F. Casas, I. Jiménez, P. Jiménez, M. Zaballos, A. Monzón, S. Varona, S. Juliá, M. Cuesta, I. Aranzamendi, M.                                                                                                                                             |
| EPI_ISL_419240                                                                                                                                                                                                                                                                                                                                                                                                                                                                                                                                                                                                                                                                                                                 | HOSPITAL TXAGORRITXU                                             | Instituto de Salud Carlos III                                                                                        | Iglesias-Caballero, M. Molinero Calamita, M. González-Esguevillas, M. Camarero, S. Pozo, F. Casas, I. Jiménez, P. Jiménez, M. Zaballos, A. Monzón, S. Varona, S. Juliá, M. Cuesta, I. Gómez, C                                                                                                                                                    |

|                                                                                                                                                                                                                                                                                                |                                                                                                              |                                                                                                        |                                                                                                                                                                                                                                                                                                                                                                                                                                                                                                                                                                                                                                                                                                                                                                                        |
|------------------------------------------------------------------------------------------------------------------------------------------------------------------------------------------------------------------------------------------------------------------------------------------------|--------------------------------------------------------------------------------------------------------------|--------------------------------------------------------------------------------------------------------|----------------------------------------------------------------------------------------------------------------------------------------------------------------------------------------------------------------------------------------------------------------------------------------------------------------------------------------------------------------------------------------------------------------------------------------------------------------------------------------------------------------------------------------------------------------------------------------------------------------------------------------------------------------------------------------------------------------------------------------------------------------------------------------|
| EPI_ISL_419707                                                                                                                                                                                                                                                                                 | HOSPITAL CLINIC                                                                                              | Instituto de Salud Carlos III                                                                          | Iglesias-Caballero, M. Molinero Calamita, M. González-Esguevillas, M. Camarero S. Pozo F. Casas I. Jiménez, P. Jiménez, M. Zaballos, A. Monzón, S. Varona, S. Juliá, M. Cuesta, I. Marcos, M.A                                                                                                                                                                                                                                                                                                                                                                                                                                                                                                                                                                                         |
| EPI_ISL_419709                                                                                                                                                                                                                                                                                 | HOSPITAL TXAGORRITXU                                                                                         | Instituto de Salud Carlos III                                                                          | Iglesias-Caballero, M. Molinero Calamita, M. González-Esguevillas, M. Camarero S. Pozo F. Casas I. Jiménez, P. Jiménez, M. Zaballos, A. Monzón, S. Varona, S. Juliá, M. Cuesta, I. Gómez, C.                                                                                                                                                                                                                                                                                                                                                                                                                                                                                                                                                                                           |
| EPI_ISL_420118                                                                                                                                                                                                                                                                                 | Servicio de Microbiología. Consorcio Hospital General Universitario de Valencia                              | Sequencing and Bioinformatics Service and Molecular Epidemiology Research Group. FISABIO-Public Health | Inma Galán Vendrell, Paula Ruiz-Hueso, Mariana Reyes-Prieto, Vicente Soriano Chirona, María Alma Bracho, Griselda De Marco, Beatriz Beamud, Lidia Ruiz Roldan, Marta Pla Diaz, Neris Garcia-Gonzalez, Loreto Ferrús Abad, María Dolores Ocete, Lúcia Martínez-Priego, Concepcion Gimeno, Giuseppe D'Auria, Fernando Gonzalez-Candelas                                                                                                                                                                                                                                                                                                                                                                                                                                                  |
| EPI_ISL_420129                                                                                                                                                                                                                                                                                 | Servicio de Microbiología. Hospital Clinico Universitario de Valencia                                        | Sequencing and Bioinformatics Service and Molecular Epidemiology Research Group. FISABIO-Public Health | Inma Galán Vendrell, Loreto Ferrús Abad, María Alma Bracho, Griselda De Marco, Beatriz Beamud, Lidia Ruiz Roldan, Marta Pla Diaz, Neris Garcia-Gonzalez, Paula Ruiz-Hueso, Mariana Reyes-Prieto, Vicente Soriano Chirona, David Navarro, Lúcia Martínez-Priego, Giuseppe D'Auria, Fernando Gonzalez-Candelas                                                                                                                                                                                                                                                                                                                                                                                                                                                                           |
| EPI_ISL_420889, EPI_ISL_420890                                                                                                                                                                                                                                                                 | Takayuki Hishiki Kanagawa Prefectural Institute of Public Health                                             | Takayuki Hishiki Kanagawa Prefectural Institute of Public Health                                       | Hishiki,T., Suzuki,R., Sakuragi,J., Usui,K., Tanaka,Y., Kawai,J., Kogo,Y., Matsuki,Y., An,T., Hayashizaki,Y. and Takasaki,T.                                                                                                                                                                                                                                                                                                                                                                                                                                                                                                                                                                                                                                                           |
| EPI_ISL_421518                                                                                                                                                                                                                                                                                 | Servicio de Microbiología. Hospital Clinico Universitario de Valencia                                        | Sequencing and Bioinformatics Service and Molecular Epidemiology Research Group. FISABIO-Public Health | Inma Galán Vendrell, Paula Ruiz-Hueso, Sandra Carbo, Loreto Ferrús Abad, María Alma Bracho, Griselda De Marco, Beatriz Beamud, Lidia Ruiz Roldan, Marta Pla Diaz, Neris Garcia-Gonzalez, Mariana Reyes-Prieto, Vicente Soriano Chirona, Ivan Ansari, David Navarro, Lúcia Martínez-Priego, Giuseppe D'Auria, Fernando Gonzalez-Candelas                                                                                                                                                                                                                                                                                                                                                                                                                                                |
| EPI_ISL_421653, EPI_ISL_421654, EPI_ISL_421655, EPI_ISL_421656                                                                                                                                                                                                                                 | E. Gulbja Laboratorija                                                                                       | Latvian Biomedical Research and Study Centre                                                           | Ivars Silamielis, Kaspars Megnis, Monta Ustinova, ikitā Zrelavs, Vita Rovte, Mikus Gavars, Dmitrijs Perminovs, Uga Dumpis, Jnis Kloviš                                                                                                                                                                                                                                                                                                                                                                                                                                                                                                                                                                                                                                                 |
| EPI_ISL_421660                                                                                                                                                                                                                                                                                 | The Ohio State University                                                                                    | The Ohio State University-James Molecular Lab at Polaris                                               | Huolin Tu, Matthew Avenarius, Preeti Pancholi, Sean Caruthers, Joan-Miquel Balada-Llasat, Jason Garee, Matt Hunt, Xiaokang Pan, Dan Jones                                                                                                                                                                                                                                                                                                                                                                                                                                                                                                                                                                                                                                              |
| EPI_ISL_421675                                                                                                                                                                                                                                                                                 | The Ohio State University Wexner Medical Center                                                              | The Ohio State University James Molecular lab                                                          | Huolin Tu, Sean Caruthers, Matthew Avenarius, Joan-Miquel Balada-Llasat, Matthew Hunt, Preeti Pancholi, Xiaokang Pen, Jason Garee, Pam Snyder, Dan Jones                                                                                                                                                                                                                                                                                                                                                                                                                                                                                                                                                                                                                               |
| EPI_ISL_424667                                                                                                                                                                                                                                                                                 | Laboratorio Estatal de Salud Publica del Estado de México                                                    | Instituto de Diagnóstico y Referencia Epidemiológicos                                                  | Irma López Martínez, José Ernesto Ramírez González, Lucia Hernández Rivas, Gisela Barrera Badillo, Edgar Mendieta Condado, Fabiola Garcés Ayala, Adnan Araiza Rodríguez, Celia Boukadida, Santiago Avila Rios, Mario Mujica Sánchez, José Arturo Martínez Orozco, Eduardo Becerril Vargas, Joel Armando Vázquez Pérez, Víctor Hugo Borja Aburto, Concepción Grajales Muñiz, Cesar Raúl González Bonilla, Carolina González Torres, Francisco Javier Gaytán Cervantes, José Esteban Muñoz Medina, Guillermo M. Ruiz-Palacios, Pilar Ramos Cervantes, Violeta Ibarra Gonzalez, Fernando Ledesma Barrientos, Luis Alberto García Andrade, Alfredo Ponce de León Garduño, Blanca Taboada, Alejandro Sánchez, Pavel Isa, Ricardo Grande, Gloria Vázquez, Francisco Pulido, Carlos F. Arias. |
| EPI_ISL_425185                                                                                                                                                                                                                                                                                 | Servicio de Microbiología. Consorcio Hospital General Universitario de Valencia                              | Sequencing and Bioinformatics Service and Molecular Epidemiology Research Group. FISABIO-Public Health | Inma Galán Vendrell, Sandra Carbo, Loreto Ferrús Abad, Paula Ruiz-Hueso, Mariana Reyes-Prieto, Vicente Soriano Chirona, Ivan Ansari, David Navarro, María Alma Bracho, Griselda De Marco, Beatriz Beamud, Lidia Ruiz Roldan, Marta Pla Diaz, Neris Garcia-Gonzalez, Lúcia Martínez-Priego, Giuseppe D'Auria, Fernando Gonzalez-Candelas                                                                                                                                                                                                                                                                                                                                                                                                                                                |
| EPI_ISL_425191                                                                                                                                                                                                                                                                                 | Servicio de Microbiología. Consorcio Hospital General Universitario de Valencia                              | Sequencing and Bioinformatics Service and Molecular Epidemiology Research Group. FISABIO-Public Health | Ivan Ansari, David Navarro, María Alma Bracho, Griselda De Marco, Beatriz Beamud, Lidia Ruiz Roldan, Marta Pla Diaz, Neris Garcia-Gonzalez, Inma Galán Vendrell, Sandra Carbo, Loreto Ferrús Abad, Paula Ruiz-Hueso, Mariana Reyes-Prieto, Vicente Soriano Chirona, Lúcia Martínez-Priego, Giuseppe D'Auria, Fernando Gonzalez-Candelas                                                                                                                                                                                                                                                                                                                                                                                                                                                |
| EPI_ISL_425199                                                                                                                                                                                                                                                                                 | Servicio de Microbiología. Hospital Clinico Universitario de Valencia                                        | Sequencing and Bioinformatics Service and Molecular Epidemiology Research Group. FISABIO-Public Health | Inma Galán Vendrell, Paula Ruiz-Hueso, Mariana Reyes-Prieto, Vicente Soriano Chirona, María Alma Bracho, Griselda De Marco, Beatriz Beamud, Lidia Ruiz Roldan, Marta Pla Diaz, Neris Garcia-Gonzalez, Loreto Ferrús Abad, María Dolores Ocete, Lúcia Martínez-Priego, Concepcion Gimeno, Giuseppe D'Auria, Fernando Gonzalez-Candelas                                                                                                                                                                                                                                                                                                                                                                                                                                                  |
| EPI_ISL_425220                                                                                                                                                                                                                                                                                 | Servicio de Microbiología. Consorcio Hospital General Universitario de Valencia                              | Sequencing and Bioinformatics Service and Molecular Epidemiology Research Group. FISABIO-Public Health | Inma Galán Vendrell, Sandra Carbo, Loreto Ferrús Abad, Paula Ruiz-Hueso, Mariana Reyes-Prieto, Vicente Soriano Chirona, Ivan Ansari, David Navarro, María Alma Bracho, Griselda De Marco, Beatriz Beamud, Lidia Ruiz Roldan, Marta Pla Diaz, Neris Garcia-Gonzalez, Lúcia Martínez-Priego, Giuseppe D'Auria, Fernando Gonzalez-Candelas                                                                                                                                                                                                                                                                                                                                                                                                                                                |
| EPI_ISL_426285, EPI_ISL_426286, EPI_ISL_426287, EPI_ISL_426288, EPI_ISL_426289                                                                                                                                                                                                                 | E. Gulbja Laboratorija                                                                                       | Latvian Biomedical Research and Study Centre                                                           | Ivars Silamielis, Kaspars Megnis, Monta Ustinova, ikitā Zrelavs, Vita Rovte, Mikus Gavars, Dmitrijs Perminovs, Uga Dumpis, Jnis Kloviš                                                                                                                                                                                                                                                                                                                                                                                                                                                                                                                                                                                                                                                 |
| EPI_ISL_427288                                                                                                                                                                                                                                                                                 | The Ohio State University                                                                                    | The Ohio State University-James Molecular Lab at Polaris                                               | Huolin Tu, Preeti Pancholi, Jason Garee, Matthew Hunt, Joan-Miquel Balada-Llasat, Erica Vincent, Weiqiang Zhao, Dan Jones                                                                                                                                                                                                                                                                                                                                                                                                                                                                                                                                                                                                                                                              |
| EPI_ISL_427289                                                                                                                                                                                                                                                                                 | The Ohio State University                                                                                    | The Ohio State University-James Molecular Lab at Polaris                                               | Huolin Tu, Joan-Miquel Balada-Llasat, Jason Garee, Matthew Hunt, Preeti Pancholi, Erica Vincent, Xiaokang Zhao, Dan Jones                                                                                                                                                                                                                                                                                                                                                                                                                                                                                                                                                                                                                                                              |
| EPI_ISL_427290                                                                                                                                                                                                                                                                                 | The Ohio State University                                                                                    | The Ohio State University-James Molecular Lab at Polaris                                               | Huolin Tu, Jason Garee, Matthew Hunt, Joan-Miquel Balada-Llasat, Preeti Pancholi, Erica Vincent, Rongqin Ren, Dan Jones                                                                                                                                                                                                                                                                                                                                                                                                                                                                                                                                                                                                                                                                |
| EPI_ISL_427291                                                                                                                                                                                                                                                                                 | The Ohio State University                                                                                    | The Ohio State University-James Molecular Lab at Polaris                                               | Huolin Tu, Matthew Hunt, Preeti Pancholi, Jason Garee, Joan-Miquel Balada-Llasat, Erica Vincent, Weiqiang Zhao, Dan Jones                                                                                                                                                                                                                                                                                                                                                                                                                                                                                                                                                                                                                                                              |
| EPI_ISL_427391                                                                                                                                                                                                                                                                                 | Genomic Laboratory (GLAB) (Conjoint lab of Health Directorate of Istanbul and Istanbul Technical University) | Genomic Laboratory (GLAB), Istanbul Technical University                                               | Ilker Karacan, Tugba Kizilboga Akgun, Bugra Agaoglu, Gizem Alkurt, Jale Yildiz, Betsi Köse, Elifnaz Çelik, Mehtap Aydn, Levent Doganay, Gizem Dinler Doganay                                                                                                                                                                                                                                                                                                                                                                                                                                                                                                                                                                                                                           |
| EPI_ISL_428346, EPI_ISL_428368                                                                                                                                                                                                                                                                 | Genomic Laboratory (GLAB) (Conjoint lab of Health Directorate of Istanbul and Istanbul Technical University) | Genomic Laboratory (GLAB), Istanbul Technical University                                               | Ilker Karacan, Tugba Kizilboga Akgun, Bugra Agaoglu, Gizem Alkurt, Jale Yildiz, Betsi Köse, Elifnaz Çelik, Arzu Irvem, Yasemin Kendir Demirkol, Ozlem Arkan Dogan, Mehtap Aydn, Levent Doganay, Gizem Dinler Doganay                                                                                                                                                                                                                                                                                                                                                                                                                                                                                                                                                                   |
| EPI_ISL_429992, EPI_ISL_429993, EPI_ISL_429994, EPI_ISL_429995, EPI_ISL_429996, EPI_ISL_429997, EPI_ISL_429998, EPI_ISL_429999, EPI_ISL_430000, EPI_ISL_430001, EPI_ISL_430002, EPI_ISL_430003, EPI_ISL_430004, EPI_ISL_430005, EPI_ISL_430006, EPI_ISL_430007, EPI_ISL_430008, EPI_ISL_430009 | see above                                                                                                    | Biolab Diagnostic Laboratories                                                                         | Issa Abu-Dayyeh, Ahmad Tibi, Lama Hussein, Lina Mohammad, Zein Naber, Amid Abdelnour with SEARCH Alliance San Diego                                                                                                                                                                                                                                                                                                                                                                                                                                                                                                                                                                                                                                                                    |
| EPI_ISL_430010                                                                                                                                                                                                                                                                                 | OSU Wexner Medical Center                                                                                    | James Molecular Lab - OSUWMC                                                                           | Huolin Tu, Preeti Pancholi, Matt Avenarius, Erica Vincent, Matt Hunt, Dan Jones                                                                                                                                                                                                                                                                                                                                                                                                                                                                                                                                                                                                                                                                                                        |
| EPI_ISL_430011, EPI_ISL_430012, EPI_ISL_430013, EPI_ISL_430014, EPI_ISL_430015                                                                                                                                                                                                                 | Biolab Diagnostic Laboratories                                                                               | Andersen lab at Scripps Research                                                                       | Issa Abu-Dayyeh, Ahmad Tibi, Lama Hussein, Lina Mohammad, Zein Naber, Amid Abdelnour with SEARCH Alliance San Diego                                                                                                                                                                                                                                                                                                                                                                                                                                                                                                                                                                                                                                                                    |
| EPI_ISL_431013                                                                                                                                                                                                                                                                                 | Alaska State Virology Laboratory                                                                             | Alaska State Virology Laboratory                                                                       | Jack Chen                                                                                                                                                                                                                                                                                                                                                                                                                                                                                                                                                                                                                                                                                                                                                                              |
| EPI_ISL_431014, EPI_ISL_431015, EPI_ISL_431016, EPI_ISL_431017, EPI_ISL_431018, EPI_ISL_431019                                                                                                                                                                                                 | Alaska State Virology Laboratory                                                                             | Alaska State Virology Laboratory                                                                       | Jack Chen, Ph.D.                                                                                                                                                                                                                                                                                                                                                                                                                                                                                                                                                                                                                                                                                                                                                                       |
| EPI_ISL_434516                                                                                                                                                                                                                                                                                 | Biolab Diagnostic Laboratories                                                                               | Andersen lab at Scripps Research                                                                       | Issa Abu-Dayyeh, Ahmad Tibi, Lama Hussein, Lina Mohammad, Zein Naber, Amid Abdelnour with SEARCH Alliance San Diego                                                                                                                                                                                                                                                                                                                                                                                                                                                                                                                                                                                                                                                                    |
| EPI_ISL_434646, EPI_ISL_434667                                                                                                                                                                                                                                                                 | Ulltuna Vardcentral                                                                                          | The Public Health Agency of Sweden                                                                     | Heidi Lindback, Oskar Karlsson Lindsjö, Maria Lind Karlberg, Anna-Malin Linde, Olov Svartstrom, Anna Risberg, Theresa Enkirch, Mia Brytting, Karin Tegmark-Wisell                                                                                                                                                                                                                                                                                                                                                                                                                                                                                                                                                                                                                      |
| EPI_ISL_435441, EPI_ISL_435442, EPI_ISL_435443, EPI_ISL_435444                                                                                                                                                                                                                                 | Alaska State Virology Laboratory                                                                             | Alaska State Virology Laboratory                                                                       | Jack Chen, Ph.D.                                                                                                                                                                                                                                                                                                                                                                                                                                                                                                                                                                                                                                                                                                                                                                       |
| EPI_ISL_436284                                                                                                                                                                                                                                                                                 | Servicio de Microbiología. Hospital Clinico Universitario de Valencia                                        | Sequencing and Bioinformatics Service and Molecular Epidemiology Research Group. FISABIO-Public Health | Inma Galán Vendrell, Sandra Carbo, Loreto Ferrús Abad, Paula Ruiz-Hueso, Mariana Reyes-Prieto, Vicente Soriano Chirona, Ivan Ansari, David Navarro, María Alma Bracho, Griselda De Marco, Beatriz Beamud, Lidia Ruiz Roldan, Marta Pla Diaz, Neris Garcia-Gonzalez, Lúcia Martínez-Priego, Giuseppe D'Auria, Fernando Gonzalez-Candelas                                                                                                                                                                                                                                                                                                                                                                                                                                                |
| EPI_ISL_436290                                                                                                                                                                                                                                                                                 | Servicio de Microbiología. Hospital Clinico Universitario de Valencia                                        | Sequencing and Bioinformatics Service and Molecular Epidemiology Research Group. FISABIO-Public Health | Ivan Ansari, David Navarro, María Alma Bracho, Griselda De Marco, Beatriz Beamud, Lidia Ruiz Roldan, Marta Pla Diaz, Neris Garcia-Gonzalez, Inma Galán Vendrell, Sandra Carbo, Loreto Ferrús Abad, Paula Ruiz-Hueso, Mariana Reyes-Prieto, Vicente Soriano Chirona, Lúcia Martínez-Priego, Giuseppe D'Auria, Fernando Gonzalez-Candelas                                                                                                                                                                                                                                                                                                                                                                                                                                                |
| EPI_ISL_436304                                                                                                                                                                                                                                                                                 | Servicio de Microbiología. Hospital Clinico Universitario de Valencia                                        | Sequencing and Bioinformatics Service and Molecular Epidemiology Research Group. FISABIO-Public Health | Inma Galán Vendrell, Sandra Carbo, Loreto Ferrús Abad, Paula Ruiz-Hueso, Mariana Reyes-Prieto, Vicente Soriano Chirona, Ivan Ansari, David Navarro, María Alma Bracho, Griselda De Marco, Beatriz Beamud, Lidia Ruiz Roldan, Marta Pla Diaz, Neris Garcia-Gonzalez, Lúcia Martínez-Priego, Giuseppe D'Auria, Fernando Gonzalez-Candelas                                                                                                                                                                                                                                                                                                                                                                                                                                                |

|                                                                                                                                                                                                                                                                                                                                                                                                                                                                                                                                                                                                                                                                                                                                                                                                                                                                                                                                                                                                                                                                                                                                                                                                                                                                                                                                                                                                                                                                |                                                                                 |                                                                                                                     |                                                                                                                                                                                                                                                                                                                                         |
|----------------------------------------------------------------------------------------------------------------------------------------------------------------------------------------------------------------------------------------------------------------------------------------------------------------------------------------------------------------------------------------------------------------------------------------------------------------------------------------------------------------------------------------------------------------------------------------------------------------------------------------------------------------------------------------------------------------------------------------------------------------------------------------------------------------------------------------------------------------------------------------------------------------------------------------------------------------------------------------------------------------------------------------------------------------------------------------------------------------------------------------------------------------------------------------------------------------------------------------------------------------------------------------------------------------------------------------------------------------------------------------------------------------------------------------------------------------|---------------------------------------------------------------------------------|---------------------------------------------------------------------------------------------------------------------|-----------------------------------------------------------------------------------------------------------------------------------------------------------------------------------------------------------------------------------------------------------------------------------------------------------------------------------------|
| EPI_ISL_436310                                                                                                                                                                                                                                                                                                                                                                                                                                                                                                                                                                                                                                                                                                                                                                                                                                                                                                                                                                                                                                                                                                                                                                                                                                                                                                                                                                                                                                                 | Servicio de Microbiología. Hospital Clínico Universitario de Valencia           | Sequencing and Bioinformatics Service and Molecular Epidemiology Research Group. FISABIO-Public Health              | Ivan Ansari, David Navarro, Maria Alma Bracho, Griselda De Marco, Beatriz Beamud, Lidia Ruiz Roldan, Marta Pla Diaz, Neris Garcia-Gonzalez, Inma Galán Vendrell, Sandra Carbo, Loreto Ferrús Abad, Paula Ruiz-Hueso, Mariana Reyes-Prieto, Vicente Soriano Chirona, Lúcia Martínez-Priego, Giuseppe D'Auria, Fernando Gonzalez-Candelas |
| EPI_ISL_436324                                                                                                                                                                                                                                                                                                                                                                                                                                                                                                                                                                                                                                                                                                                                                                                                                                                                                                                                                                                                                                                                                                                                                                                                                                                                                                                                                                                                                                                 | Servicio de Microbiología. Hospital Clínico Universitario de Valencia           | Sequencing and Bioinformatics Service and Molecular Epidemiology Research Group. FISABIO-Public Health              | Inma Galán Vendrell, Sandra Carbo, Loreto Ferrús Abad, Paula Ruiz-Hueso, Mariana Reyes-Prieto, Vicente Soriano Chirona, Ivan Ansari, David Navarro, Maria Alma Bracho, Griselda De Marco, Beatriz Beamud, Lidia Ruiz Roldan, Marta Pla Diaz, Neris Garcia-Gonzalez, Lúcia Martínez-Priego, Giuseppe D'Auria, Fernando Gonzalez-Candelas |
| EPI_ISL_436330                                                                                                                                                                                                                                                                                                                                                                                                                                                                                                                                                                                                                                                                                                                                                                                                                                                                                                                                                                                                                                                                                                                                                                                                                                                                                                                                                                                                                                                 | Servicio de Microbiología. Hospital Clínico Universitario de Valencia           | Sequencing and Bioinformatics Service and Molecular Epidemiology Research Group. FISABIO-Public Health              | Ivan Ansari, David Navarro, Maria Alma Bracho, Griselda De Marco, Beatriz Beamud, Lidia Ruiz Roldan, Marta Pla Diaz, Neris Garcia-Gonzalez, Inma Galán Vendrell, Sandra Carbo, Loreto Ferrús Abad, Paula Ruiz-Hueso, Mariana Reyes-Prieto, Vicente Soriano Chirona, Lúcia Martínez-Priego, Giuseppe D'Auria, Fernando Gonzalez-Candelas |
| EPI_ISL_436344                                                                                                                                                                                                                                                                                                                                                                                                                                                                                                                                                                                                                                                                                                                                                                                                                                                                                                                                                                                                                                                                                                                                                                                                                                                                                                                                                                                                                                                 | Servicio de Microbiología. Hospital Clínico Universitario de Valencia           | Sequencing and Bioinformatics Service and Molecular Epidemiology Research Group. FISABIO-Public Health              | Inma Galán Vendrell, Sandra Carbo, Loreto Ferrús Abad, Paula Ruiz-Hueso, Mariana Reyes-Prieto, Vicente Soriano Chirona, Ivan Ansari, David Navarro, Maria Alma Bracho, Griselda De Marco, Beatriz Beamud, Lidia Ruiz Roldan, Marta Pla Diaz, Neris Garcia-Gonzalez, Lúcia Martínez-Priego, Giuseppe D'Auria, Fernando Gonzalez-Candelas |
| EPI_ISL_436350                                                                                                                                                                                                                                                                                                                                                                                                                                                                                                                                                                                                                                                                                                                                                                                                                                                                                                                                                                                                                                                                                                                                                                                                                                                                                                                                                                                                                                                 | Servicio de Microbiología. Hospital Clínico Universitario de Valencia           | Sequencing and Bioinformatics Service and Molecular Epidemiology Research Group. FISABIO-Public Health              | Ivan Ansari, David Navarro, Maria Alma Bracho, Griselda De Marco, Beatriz Beamud, Lidia Ruiz Roldan, Marta Pla Diaz, Neris Garcia-Gonzalez, Inma Galán Vendrell, Sandra Carbo, Loreto Ferrús Abad, Paula Ruiz-Hueso, Mariana Reyes-Prieto, Vicente Soriano Chirona, Lúcia Martínez-Priego, Giuseppe D'Auria, Fernando Gonzalez-Candelas |
| EPI_ISL_436368                                                                                                                                                                                                                                                                                                                                                                                                                                                                                                                                                                                                                                                                                                                                                                                                                                                                                                                                                                                                                                                                                                                                                                                                                                                                                                                                                                                                                                                 | Servicio de Microbiología. Hospital Clínico Universitario de Valencia           | Sequencing and Bioinformatics Service and Molecular Epidemiology Research Group. FISABIO-Public Health              | Inma Galán Vendrell, Sandra Carbo, Loreto Ferrús Abad, Paula Ruiz-Hueso, Mariana Reyes-Prieto, Vicente Soriano Chirona, Ivan Ansari, David Navarro, Maria Alma Bracho, Griselda De Marco, Beatriz Beamud, Lidia Ruiz Roldan, Marta Pla Diaz, Neris Garcia-Gonzalez, Lúcia Martínez-Priego, Giuseppe D'Auria, Fernando Gonzalez-Candelas |
| EPI_ISL_436401                                                                                                                                                                                                                                                                                                                                                                                                                                                                                                                                                                                                                                                                                                                                                                                                                                                                                                                                                                                                                                                                                                                                                                                                                                                                                                                                                                                                                                                 | Servicio de Microbiología. Hospital Clínico Universitario de Valencia           | Sequencing and Bioinformatics Service and Molecular Epidemiology Research Group. FISABIO-Public Health              | Ivan Ansari, David Navarro, Maria Alma Bracho, Griselda De Marco, Beatriz Beamud, Lidia Ruiz Roldan, Marta Pla Diaz, Neris Garcia-Gonzalez, Inma Galán Vendrell, Sandra Carbo, Loreto Ferrús Abad, Paula Ruiz-Hueso, Mariana Reyes-Prieto, Vicente Soriano Chirona, Lúcia Martínez-Priego, Giuseppe D'Auria, Fernando Gonzalez-Candelas |
| EPI_ISL_436464                                                                                                                                                                                                                                                                                                                                                                                                                                                                                                                                                                                                                                                                                                                                                                                                                                                                                                                                                                                                                                                                                                                                                                                                                                                                                                                                                                                                                                                 | Alaska State Virology Laboratory                                                | Alaska State Virology Laboratory                                                                                    | Jack Chen                                                                                                                                                                                                                                                                                                                               |
| EPI_ISL_437089, EPI_ISL_437090, EPI_ISL_437091, EPI_ISL_437092, EPI_ISL_437093, EPI_ISL_437094, EPI_ISL_437095, EPI_ISL_437096                                                                                                                                                                                                                                                                                                                                                                                                                                                                                                                                                                                                                                                                                                                                                                                                                                                                                                                                                                                                                                                                                                                                                                                                                                                                                                                                 | Latvijas Infektoloijas centrs                                                   | Latvian Biomedical Research and Study Centre                                                                        | Ivars Silamielis, Kaspars Megnis, Monta Ustinova, ikitā Zrelovs, Vita Rovte, Jeena Storoženko, Tatjana Kolupajeva, Oksana Savicka, Uga Dumpis, Jnis Kloviš                                                                                                                                                                              |
| EPI_ISL_437437, EPI_ISL_437513, EPI_ISL_437514, EPI_ISL_437515, EPI_ISL_437516, EPI_ISL_437517, EPI_ISL_437518, EPI_ISL_437873                                                                                                                                                                                                                                                                                                                                                                                                                                                                                                                                                                                                                                                                                                                                                                                                                                                                                                                                                                                                                                                                                                                                                                                                                                                                                                                                 | Alaska State Virology Laboratory                                                | Alaska State Virology Laboratory                                                                                    | Jack Chen, Ph.D.                                                                                                                                                                                                                                                                                                                        |
| EPI_ISL_445183                                                                                                                                                                                                                                                                                                                                                                                                                                                                                                                                                                                                                                                                                                                                                                                                                                                                                                                                                                                                                                                                                                                                                                                                                                                                                                                                                                                                                                                 | Takayuki Hishiki Kanagawa Prefectural Institute of Public Health                | Takayuki Hishiki Kanagawa Prefectural Institute of Public Health                                                    | Hishiki,T., Suzuki,R., Sakuragi,J., Usui,K., Tanaka,Y., Kawai,J., Kogo,Y., Matsuki,Y., An,T., Hayashizaki,Y. and Takasaki.T.                                                                                                                                                                                                            |
| EPI_ISL_445228, EPI_ISL_445240                                                                                                                                                                                                                                                                                                                                                                                                                                                                                                                                                                                                                                                                                                                                                                                                                                                                                                                                                                                                                                                                                                                                                                                                                                                                                                                                                                                                                                 | Ulltuna Vardcentral                                                             | The Public Health Agency of Sweden                                                                                  | Heidi Lindback, Oskar Karlsson Lindsjo, Maria Lind Karlberg, Anna-Malin Linde, Olov Svartstrom, Anna Risberg, Theresa Enkirsch, Mia Brytting, Karin Tegmark-Wisell                                                                                                                                                                      |
| EPI_ISL_447476, EPI_ISL_447490, EPI_ISL_447504, EPI_ISL_447518, EPI_ISL_447531                                                                                                                                                                                                                                                                                                                                                                                                                                                                                                                                                                                                                                                                                                                                                                                                                                                                                                                                                                                                                                                                                                                                                                                                                                                                                                                                                                                 | Servicio de Microbiología. Hospital Clínico Universitario de Valencia           | Sequencing and Bioinformatics Service and Molecular Epidemiology Research Group. FISABIO-Public Health              | Inma Galán Vendrell, Sandra Carbo, Loreto Ferrús Abad, Paula Ruiz-Hueso, Mariana Reyes-Prieto, Vicente Soriano Chirona, Ivan Ansari, Lúcia Martínez-Priego, Giuseppe D'Auria, David Navarro, Eliseo Albert, Maria Alma Bracho, Lidia Ruiz Roldan, Neris Garcia-Gonzalez, Fernando Gonzalez-Candelas                                     |
| EPI_ISL_450186, EPI_ISL_450187, EPI_ISL_450188, EPI_ISL_450189                                                                                                                                                                                                                                                                                                                                                                                                                                                                                                                                                                                                                                                                                                                                                                                                                                                                                                                                                                                                                                                                                                                                                                                                                                                                                                                                                                                                 | Biolab Diagnostic Laboratories                                                  | Andersen lab at Scripps Research                                                                                    | Issa Abu-Dayyeh, Ahmad Tibi, Lama Hussein, Lina Mohammad, Zein Naber, Amid Abdelnour with SEARCH Alliance San Diego                                                                                                                                                                                                                     |
| EPI_ISL_450413                                                                                                                                                                                                                                                                                                                                                                                                                                                                                                                                                                                                                                                                                                                                                                                                                                                                                                                                                                                                                                                                                                                                                                                                                                                                                                                                                                                                                                                 | Center for Diagnostics, Institute of Medical Microbiology, Virology and Hygiene | University Medical Center Hamburg-Eppendorf                                                                         | Huang,J., Pfeifferle,S. and Fischer,N.                                                                                                                                                                                                                                                                                                  |
| EPI_ISL_450518, EPI_ISL_450519                                                                                                                                                                                                                                                                                                                                                                                                                                                                                                                                                                                                                                                                                                                                                                                                                                                                                                                                                                                                                                                                                                                                                                                                                                                                                                                                                                                                                                 | E. Gulbja Laboratorija                                                          | Latvian Biomedical Research and Study Centre                                                                        | Ivars Silamielis, Kaspars Megnis, Monta Ustinova, ikitā Zrelovs, Vita Rovte, Mikus Gavars, Dmitrijs Perminovs, Uga Dumpis, Jnis Kloviš                                                                                                                                                                                                  |
| EPI_ISL_450520, EPI_ISL_450521, EPI_ISL_450522, EPI_ISL_450523, EPI_ISL_450524                                                                                                                                                                                                                                                                                                                                                                                                                                                                                                                                                                                                                                                                                                                                                                                                                                                                                                                                                                                                                                                                                                                                                                                                                                                                                                                                                                                 | Centri Laboratorija                                                             | Latvian Biomedical Research and Study Centre                                                                        | Ivars Silamielis, Kaspars Megnis, Monta Ustinova, ikitā Zrelovs, Vita Rovte, Stella Lapia, Jana Oste, Marta Priedte, Uga Dumpis, Jnis Kloviš                                                                                                                                                                                            |
| EPI_ISL_450824                                                                                                                                                                                                                                                                                                                                                                                                                                                                                                                                                                                                                                                                                                                                                                                                                                                                                                                                                                                                                                                                                                                                                                                                                                                                                                                                                                                                                                                 | Ulltuna Vardcentral                                                             | The Public Health Agency of Sweden                                                                                  | Heidi Lindback, Anna-Malin Linde, Maria Lind Karlberg, Oskar Karlsson Lindsjo, Olov Svartstrom, Anna Risberg, Theresa Enkirsch, Mia Brytting, Karin Tegmark-Wisell                                                                                                                                                                      |
| EPI_ISL_452140                                                                                                                                                                                                                                                                                                                                                                                                                                                                                                                                                                                                                                                                                                                                                                                                                                                                                                                                                                                                                                                                                                                                                                                                                                                                                                                                                                                                                                                 | CUB Hopital Erasme Laboratoire d'Anatomie Pathologique                          | CUB Hopital Erasme Laboratoire d'Anatomie Pathologique                                                              | Isabelle Salmon, Nicky D'Haene                                                                                                                                                                                                                                                                                                          |
| EPI_ISL_452142                                                                                                                                                                                                                                                                                                                                                                                                                                                                                                                                                                                                                                                                                                                                                                                                                                                                                                                                                                                                                                                                                                                                                                                                                                                                                                                                                                                                                                                 | CUB Hopital Erasme Laboratoire d'Anatomie Pathologique                          | CUB Hopital Erasme Laboratoire d'Anatomie Pathologique                                                              | Isabelle Salmon, Nicky D'Haene                                                                                                                                                                                                                                                                                                          |
| EPI_ISL_452148, EPI_ISL_452149                                                                                                                                                                                                                                                                                                                                                                                                                                                                                                                                                                                                                                                                                                                                                                                                                                                                                                                                                                                                                                                                                                                                                                                                                                                                                                                                                                                                                                 | CUB Hopital Erasme Laboratoire d'Anatomie Pathologique                          | CUB Hopital Erasme Laboratoire d'Anatomie Pathologique                                                              | Isabelle Salmon, Nicky D'Haene                                                                                                                                                                                                                                                                                                          |
| EPI_ISL_452234                                                                                                                                                                                                                                                                                                                                                                                                                                                                                                                                                                                                                                                                                                                                                                                                                                                                                                                                                                                                                                                                                                                                                                                                                                                                                                                                                                                                                                                 | Din Klinik                                                                      | The Public Health Agency of Sweden                                                                                  | Helene Warnborg, Anna-Malin Linde, Maria Lind Karlberg, Oskar Karlsson Lindsjo, Olov Svartstrom, Anna Risberg, Theresa Enkirsch, Mia Brytting, Karin Tegmark-Wisell                                                                                                                                                                     |
| EPI_ISL_452365, EPI_ISL_452366, EPI_ISL_452367, EPI_ISL_452368, EPI_ISL_452369, EPI_ISL_452370, EPI_ISL_452371, EPI_ISL_452372, EPI_ISL_452373, EPI_ISL_452374, EPI_ISL_452375, EPI_ISL_452376, EPI_ISL_452377, EPI_ISL_452378, EPI_ISL_452379, EPI_ISL_452380, EPI_ISL_452381, EPI_ISL_452382, EPI_ISL_452383, EPI_ISL_452384, EPI_ISL_452385, EPI_ISL_452386, EPI_ISL_452387, EPI_ISL_452388, EPI_ISL_452389, EPI_ISL_452390, EPI_ISL_452391, EPI_ISL_452392, EPI_ISL_452393, EPI_ISL_452394, EPI_ISL_452395, EPI_ISL_452396, EPI_ISL_452397, EPI_ISL_452398, EPI_ISL_452399, EPI_ISL_452400, EPI_ISL_452401, EPI_ISL_452402, EPI_ISL_452403, EPI_ISL_452404, EPI_ISL_452405, EPI_ISL_452406, EPI_ISL_452407, EPI_ISL_452408, EPI_ISL_452409, EPI_ISL_452410, EPI_ISL_452411, EPI_ISL_452412, EPI_ISL_452413, EPI_ISL_452414, EPI_ISL_452415, EPI_ISL_452416, EPI_ISL_452417, EPI_ISL_452418, EPI_ISL_452419, EPI_ISL_452420, EPI_ISL_452421, EPI_ISL_452422, EPI_ISL_452423, EPI_ISL_452424, EPI_ISL_452425, EPI_ISL_452426, EPI_ISL_452427, EPI_ISL_452428, EPI_ISL_452429, EPI_ISL_452430, EPI_ISL_452431, EPI_ISL_452432, EPI_ISL_452433, EPI_ISL_452434, EPI_ISL_452435, EPI_ISL_452436, EPI_ISL_452437, EPI_ISL_452438, EPI_ISL_452439, EPI_ISL_452440, EPI_ISL_452441, EPI_ISL_452442, EPI_ISL_452443, EPI_ISL_452444, EPI_ISL_452445, EPI_ISL_452446, EPI_ISL_452447, EPI_ISL_452448, EPI_ISL_452449, EPI_ISL_452450, EPI_ISL_452451, EPI_ISL_452452 | SeqCOVID-SPAIN consortium/IBV(CSIC)                                             | Inmaculada de Toro Peinado, Maria Concepción Mediavilla Gradolph, Begoña Palop Borrás and SeqCOVID-SPAIN consortium |                                                                                                                                                                                                                                                                                                                                         |
| EPI_ISL_454578, EPI_ISL_454581, EPI_ISL_454583, EPI_ISL_454588, EPI_ISL_454592, EPI_ISL_454595                                                                                                                                                                                                                                                                                                                                                                                                                                                                                                                                                                                                                                                                                                                                                                                                                                                                                                                                                                                                                                                                                                                                                                                                                                                                                                                                                                 | University Hospital for Infectious Diseases "Dr. Fran Mihaljevi", Research Unit | University of Zagreb, Centre for research and knowledge transfer in biotechnology                                   | Ivan-Christian Kuroti, Jelena Ivancic Jelecki, Anamarija Slovic                                                                                                                                                                                                                                                                         |
| EPI_ISL_454602                                                                                                                                                                                                                                                                                                                                                                                                                                                                                                                                                                                                                                                                                                                                                                                                                                                                                                                                                                                                                                                                                                                                                                                                                                                                                                                                                                                                                                                 | Croatian Institute of Public Health                                             | University of Zagreb, Centre for research and knowledge transfer in biotechnology                                   | Irena Tabain, Tatjana Vilbic-Cavlek, Jelena Ivancic Jelecki, Anamarija Slovic                                                                                                                                                                                                                                                           |
| EPI_ISL_455104, EPI_ISL_455109                                                                                                                                                                                                                                                                                                                                                                                                                                                                                                                                                                                                                                                                                                                                                                                                                                                                                                                                                                                                                                                                                                                                                                                                                                                                                                                                                                                                                                 | Ulltuna Vardcentral                                                             | The Public Health Agency of Sweden                                                                                  | Heidi Lindback, Anna-Malin Linde, Maria Lind Karlberg, Oskar Karlsson Lindsjo, Olov Svartstrom, Anna Risberg, Theresa Enkirsch, Mia Brytting, Karin Tegmark-Wisell                                                                                                                                                                      |
| EPI_ISL_455314                                                                                                                                                                                                                                                                                                                                                                                                                                                                                                                                                                                                                                                                                                                                                                                                                                                                                                                                                                                                                                                                                                                                                                                                                                                                                                                                                                                                                                                 | Hospital Virgen del Rocío                                                       | Instituto de Salud Carlos III                                                                                       | Iglesias-Caballero, M. Molinero Calamita, M. González-Esguevillas, M. Camarero, S. Pozo, F. Casas, I. Jiménez, P. Jiménez, M. Zaballos, A. Monzón, S. Varona, S. Juliá, M. Cuesta, I, J. Lepe                                                                                                                                           |
| EPI_ISL_455315, EPI_ISL_455316, EPI_ISL_455317, EPI_ISL_455318, EPI_ISL_455319, EPI_ISL_455320, EPI_ISL_455321, EPI_ISL_455322                                                                                                                                                                                                                                                                                                                                                                                                                                                                                                                                                                                                                                                                                                                                                                                                                                                                                                                                                                                                                                                                                                                                                                                                                                                                                                                                 | Hospital Virgen de las Nieves                                                   | Instituto de Salud Carlos III                                                                                       | Iglesias-Caballero, M. Molinero Calamita, M. González-Esguevillas, M. Camarero, S. Pozo, F. Casas, I. Jiménez, P. Jiménez, M. Zaballos, A. Monzón, S. Varona, S. Juliá, M. Cuesta, I, S. Sanbonmatsu                                                                                                                                    |
| EPI_ISL_455323                                                                                                                                                                                                                                                                                                                                                                                                                                                                                                                                                                                                                                                                                                                                                                                                                                                                                                                                                                                                                                                                                                                                                                                                                                                                                                                                                                                                                                                 | Hospital Virgen del Rocío                                                       | Instituto de Salud Carlos III                                                                                       | Iglesias-Caballero, M. Molinero Calamita, M. González-Esguevillas, M. Camarero, S. Pozo, F. Casas, I. Jiménez, P. Jiménez, M. Zaballos, A. Monzón, S.                                                                                                                                                                                   |

|                                                                                                                                                                                                                                                                                                                                                                                                                                                                                                                                                                                                                                                                                                                                                                                                                                                                                                                                                                                                                                                                                                                                                                                                                                                                                                                                                                                                                                                                                                                |                                                                       |                                                                                                                                       |                                                                                                                                                                                                                                                                                                    |                                                                                                                                                                                                                                                                                                                                                                                                            |
|----------------------------------------------------------------------------------------------------------------------------------------------------------------------------------------------------------------------------------------------------------------------------------------------------------------------------------------------------------------------------------------------------------------------------------------------------------------------------------------------------------------------------------------------------------------------------------------------------------------------------------------------------------------------------------------------------------------------------------------------------------------------------------------------------------------------------------------------------------------------------------------------------------------------------------------------------------------------------------------------------------------------------------------------------------------------------------------------------------------------------------------------------------------------------------------------------------------------------------------------------------------------------------------------------------------------------------------------------------------------------------------------------------------------------------------------------------------------------------------------------------------|-----------------------------------------------------------------------|---------------------------------------------------------------------------------------------------------------------------------------|----------------------------------------------------------------------------------------------------------------------------------------------------------------------------------------------------------------------------------------------------------------------------------------------------|------------------------------------------------------------------------------------------------------------------------------------------------------------------------------------------------------------------------------------------------------------------------------------------------------------------------------------------------------------------------------------------------------------|
|                                                                                                                                                                                                                                                                                                                                                                                                                                                                                                                                                                                                                                                                                                                                                                                                                                                                                                                                                                                                                                                                                                                                                                                                                                                                                                                                                                                                                                                                                                                |                                                                       |                                                                                                                                       |                                                                                                                                                                                                                                                                                                    | Varona, S. Juliá, M. Cuesta, I, J. Lepe                                                                                                                                                                                                                                                                                                                                                                    |
| EPI_ISL_455324                                                                                                                                                                                                                                                                                                                                                                                                                                                                                                                                                                                                                                                                                                                                                                                                                                                                                                                                                                                                                                                                                                                                                                                                                                                                                                                                                                                                                                                                                                 | Hospital Virgen de las Nieves                                         | Instituto de Salud Carlos III                                                                                                         | Iglesias-Caballero, M. Molinero Calamita, M. González-Esguevillas, M. Camarero, S. Pozo, F. Casas, I. Jiménez, P. Jiménez, M. Zaballos, A. Monzón, S. Varona, S. Juliá, M. Cuesta, I, S. Sanbonmatsu                                                                                               |                                                                                                                                                                                                                                                                                                                                                                                                            |
| EPI_ISL_455325                                                                                                                                                                                                                                                                                                                                                                                                                                                                                                                                                                                                                                                                                                                                                                                                                                                                                                                                                                                                                                                                                                                                                                                                                                                                                                                                                                                                                                                                                                 | Hospital Universitario de Canarias                                    | Instituto de Salud Carlos III                                                                                                         | Iglesias-Caballero, M. Molinero Calamita, M. González-Esguevillas, M. Camarero, S. Pozo, F. Casas, I. Jiménez, P. Jiménez, M. Zaballos, A. Monzón, S. Varona, S. Juliá, M. Cuesta, I, B. Castro                                                                                                    |                                                                                                                                                                                                                                                                                                                                                                                                            |
| EPI_ISL_455326                                                                                                                                                                                                                                                                                                                                                                                                                                                                                                                                                                                                                                                                                                                                                                                                                                                                                                                                                                                                                                                                                                                                                                                                                                                                                                                                                                                                                                                                                                 | Hospital Universitario Insular de Gran Canaria                        | Instituto de Salud Carlos III                                                                                                         | Iglesias-Caballero, M. Molinero Calamita, M. González-Esguevillas, M. Camarero, S. Pozo, F. Casas, I. Jiménez, P. Jiménez, M. Zaballos, A. Monzón, S. Varona, S. Juliá, M. Cuesta, I, A. Hernández                                                                                                 |                                                                                                                                                                                                                                                                                                                                                                                                            |
| EPI_ISL_455327                                                                                                                                                                                                                                                                                                                                                                                                                                                                                                                                                                                                                                                                                                                                                                                                                                                                                                                                                                                                                                                                                                                                                                                                                                                                                                                                                                                                                                                                                                 | Consejería de Sanidad y Asuntos Sociales                              | Instituto de Salud Carlos III                                                                                                         | Iglesias-Caballero, M. Molinero Calamita, M. González-Esguevillas, M. Camarero, S. Pozo, F. Casas, I. Jiménez, P. Jiménez, M. Zaballos, A. Monzón, S. Varona, S. Juliá, M. Cuesta, I, G. Gutiérrez                                                                                                 |                                                                                                                                                                                                                                                                                                                                                                                                            |
| EPI_ISL_455328, EPI_ISL_455329, EPI_ISL_455330, EPI_ISL_455331                                                                                                                                                                                                                                                                                                                                                                                                                                                                                                                                                                                                                                                                                                                                                                                                                                                                                                                                                                                                                                                                                                                                                                                                                                                                                                                                                                                                                                                 | Complejo Hospitalario Universitario La Coruna                         | Instituto de Salud Carlos III                                                                                                         | Iglesias-Caballero, M. Molinero Calamita, M. González-Esguevillas, M. Camarero, S. Pozo, F. Casas, I. Jiménez, P. Jiménez, M. Zaballos, A. Monzón, S. Varona, S. Juliá, M. Cuesta, I, M.A Canizares                                                                                                |                                                                                                                                                                                                                                                                                                                                                                                                            |
| EPI_ISL_455332                                                                                                                                                                                                                                                                                                                                                                                                                                                                                                                                                                                                                                                                                                                                                                                                                                                                                                                                                                                                                                                                                                                                                                                                                                                                                                                                                                                                                                                                                                 | Xerencia de Xestión Integrada de Pontevedra e o Salnés                | Instituto de Salud Carlos III                                                                                                         | Iglesias-Caballero, M. Molinero Calamita, M. González-Esguevillas, M. Camarero, S. Pozo, F. Casas, I. Jiménez, P. Jiménez, M. Zaballos, A. Monzón, S. Varona, S. Juliá, M. Cuesta, I, M. García                                                                                                    |                                                                                                                                                                                                                                                                                                                                                                                                            |
| EPI_ISL_455333                                                                                                                                                                                                                                                                                                                                                                                                                                                                                                                                                                                                                                                                                                                                                                                                                                                                                                                                                                                                                                                                                                                                                                                                                                                                                                                                                                                                                                                                                                 | Complejo Hospitalario Universitario de Santiago                       | Instituto de Salud Carlos III                                                                                                         | Iglesias-Caballero, M. Molinero Calamita, M. González-Esguevillas, M. Camarero, S. Pozo, F. Casas, I. Jiménez, P. Jiménez, M. Zaballos, A. Monzón, S. Varona, S. Juliá, M. Cuesta, I, J. Llovo                                                                                                     |                                                                                                                                                                                                                                                                                                                                                                                                            |
| EPI_ISL_455334, EPI_ISL_455335                                                                                                                                                                                                                                                                                                                                                                                                                                                                                                                                                                                                                                                                                                                                                                                                                                                                                                                                                                                                                                                                                                                                                                                                                                                                                                                                                                                                                                                                                 | Complejo Hospitalario de Orense                                       | Instituto de Salud Carlos III                                                                                                         | Iglesias-Caballero, M. Molinero Calamita, M. González-Esguevillas, M. Camarero, S. Pozo, F. Casas, I. Jiménez, P. Jiménez, M. Zaballos, A. Monzón, S. Varona, S. Juliá, M. Cuesta, I, M. Paz                                                                                                       |                                                                                                                                                                                                                                                                                                                                                                                                            |
| EPI_ISL_455336, EPI_ISL_455337, EPI_ISL_455338, EPI_ISL_455339, EPI_ISL_455340, EPI_ISL_455341, EPI_ISL_455342, EPI_ISL_455343                                                                                                                                                                                                                                                                                                                                                                                                                                                                                                                                                                                                                                                                                                                                                                                                                                                                                                                                                                                                                                                                                                                                                                                                                                                                                                                                                                                 | Hospital San Pedro                                                    | Instituto de Salud Carlos III                                                                                                         | Iglesias-Caballero, M. Molinero Calamita, M. González-Esguevillas, M. Camarero, S. Pozo, F. Casas, I. Jiménez, P. Jiménez, M. Zaballos, A. Monzón, S. Varona, S. Juliá, M. Cuesta, I, C. Alonso                                                                                                    |                                                                                                                                                                                                                                                                                                                                                                                                            |
| EPI_ISL_455344, EPI_ISL_455345, EPI_ISL_455346, EPI_ISL_455347, EPI_ISL_455348, EPI_ISL_455349                                                                                                                                                                                                                                                                                                                                                                                                                                                                                                                                                                                                                                                                                                                                                                                                                                                                                                                                                                                                                                                                                                                                                                                                                                                                                                                                                                                                                 | Hospital Comarcal de Melilla                                          | Instituto de Salud Carlos III                                                                                                         | Iglesias-Caballero, M. Molinero Calamita, M. González-Esguevillas, M. Camarero, S. Pozo, F. Casas, I. Jiménez, P. Jiménez, M. Zaballos, A. Monzón, S. Varona, S. Juliá, M. Cuesta, I, I. Pérez                                                                                                     |                                                                                                                                                                                                                                                                                                                                                                                                            |
| EPI_ISL_455350, EPI_ISL_455351                                                                                                                                                                                                                                                                                                                                                                                                                                                                                                                                                                                                                                                                                                                                                                                                                                                                                                                                                                                                                                                                                                                                                                                                                                                                                                                                                                                                                                                                                 | Hospital Txagorritxu                                                  | Instituto de Salud Carlos III                                                                                                         | Iglesias-Caballero, M. Molinero Calamita, M. González-Esguevillas, M. Camarero, S. Pozo, F. Casas, I. Jiménez, P. Jiménez, M. Zaballos, A. Monzón, S. Varona, S. Juliá, M. Cuesta, I, C. Gómez                                                                                                     |                                                                                                                                                                                                                                                                                                                                                                                                            |
| EPI_ISL_455352, EPI_ISL_455353, EPI_ISL_455354                                                                                                                                                                                                                                                                                                                                                                                                                                                                                                                                                                                                                                                                                                                                                                                                                                                                                                                                                                                                                                                                                                                                                                                                                                                                                                                                                                                                                                                                 | Hospital de Cruces                                                    | Instituto de Salud Carlos III                                                                                                         | Iglesias-Caballero, M. Molinero Calamita, M. González-Esguevillas, M. Camarero, S. Pozo, F. Casas, I. Jiménez, P. Jiménez, M. Zaballos, A. Monzón, S. Varona, S. Juliá, M. Cuesta, I, M. Aranzamendi                                                                                               |                                                                                                                                                                                                                                                                                                                                                                                                            |
| EPI_ISL_455726                                                                                                                                                                                                                                                                                                                                                                                                                                                                                                                                                                                                                                                                                                                                                                                                                                                                                                                                                                                                                                                                                                                                                                                                                                                                                                                                                                                                                                                                                                 | Servicio de Microbiología. Hospital Clínico Universitario de Valencia | Sequencing and Bioinformatics Service and Molecular Epidemiology Research Group, FISABIO-Public Health, and SeqCOVID-Spain Consortium | Inma Galán Vendrell, Sandra Carbo, Loreto Ferrús Abad, Paula Ruiz-Hueso, Mariana Reyes-Prieto, Vicente Soriano Chirona, Ivan Ansari, Lúcia Martínez-Priego, Giuseppe 'Auria, David Navarro, Eliseo Albert, Maria Alma Bracho, Lidia Ruiz Roldan, Neris Garcia-Gonzalez, Fernando Gonzalez-Candelas |                                                                                                                                                                                                                                                                                                                                                                                                            |
| EPI_ISL_460606, EPI_ISL_460607, EPI_ISL_460608, EPI_ISL_460609, EPI_ISL_460610, EPI_ISL_460611, EPI_ISL_460612, EPI_ISL_460613, EPI_ISL_460614, EPI_ISL_460615, EPI_ISL_460616                                                                                                                                                                                                                                                                                                                                                                                                                                                                                                                                                                                                                                                                                                                                                                                                                                                                                                                                                                                                                                                                                                                                                                                                                                                                                                                                 |                                                                       |                                                                                                                                       |                                                                                                                                                                                                                                                                                                    |                                                                                                                                                                                                                                                                                                                                                                                                            |
| see above                                                                                                                                                                                                                                                                                                                                                                                                                                                                                                                                                                                                                                                                                                                                                                                                                                                                                                                                                                                                                                                                                                                                                                                                                                                                                                                                                                                                                                                                                                      | BCCDC Public Health Laboratory                                        | BCCDC Public Health Laboratory                                                                                                        |                                                                                                                                                                                                                                                                                                    | Harrigan, Prystajecy, Krajden, Lee, Kamelian, Lapointe, Choi, Hoang, Sekirov, Levett, Tyson, Li, Gilmour                                                                                                                                                                                                                                                                                                   |
| EPI_ISL_462091                                                                                                                                                                                                                                                                                                                                                                                                                                                                                                                                                                                                                                                                                                                                                                                                                                                                                                                                                                                                                                                                                                                                                                                                                                                                                                                                                                                                                                                                                                 | National Institute of Laboratory Medicine and Referral Center         | Genomic Research Lab, BCSIR                                                                                                           |                                                                                                                                                                                                                                                                                                    | Iffat Jahan, Abu Sayeed Mohammad Mahmud, Mohammad Samir Uzzaman, Eshrar Osman, Md. Ahasan Habib, Shahina Akter, Tanjina Akhter Banu, Barna Goswami, Md. Saddam Hossain, Tasnim Nafisa, Md. Maruf Ahmed Molla, Mahmuda Yeasmin, Ashish Kumar Ghos, Bayzid Bin Monir, Arifa Akram, Sheikh Md. Selim Al Din, Salek Ahmed Sajib, Utpal Chandra Ray, Md. Salim Khan                                             |
| EPI_ISL_462477                                                                                                                                                                                                                                                                                                                                                                                                                                                                                                                                                                                                                                                                                                                                                                                                                                                                                                                                                                                                                                                                                                                                                                                                                                                                                                                                                                                                                                                                                                 | Hospital Costa del Sol                                                | Instituto de Salud Carlos III                                                                                                         |                                                                                                                                                                                                                                                                                                    | Iglesias-Caballero, M. Molinero Calamita, M. González-Esguevillas, M. Camarero, S. Pozo, F. Casas, I. Jiménez, P. Jiménez, M. Zaballos, A. Monzón, S. Varona, S. Juliá, M. Cuesta, I, F. Fernández                                                                                                                                                                                                         |
| EPI_ISL_462478                                                                                                                                                                                                                                                                                                                                                                                                                                                                                                                                                                                                                                                                                                                                                                                                                                                                                                                                                                                                                                                                                                                                                                                                                                                                                                                                                                                                                                                                                                 | Fundación Jiménez Díaz                                                | Instituto de Salud Carlos III                                                                                                         |                                                                                                                                                                                                                                                                                                    | Iglesias-Caballero, M. Molinero Calamita, M. González-Esguevillas, M. Camarero, S. Pozo, F. Casas, I. Jiménez, P. Jiménez, M. Zaballos, A. Monzón, S. Varona, S. Juliá, M. Cuesta, I, R. Fernández                                                                                                                                                                                                         |
| EPI_ISL_462479                                                                                                                                                                                                                                                                                                                                                                                                                                                                                                                                                                                                                                                                                                                                                                                                                                                                                                                                                                                                                                                                                                                                                                                                                                                                                                                                                                                                                                                                                                 | Hospital Clinic                                                       | Instituto de Salud Carlos III                                                                                                         |                                                                                                                                                                                                                                                                                                    | Iglesias-Caballero, M. Molinero Calamita, M. González-Esguevillas, M. Camarero, S. Pozo, F. Casas, I. Jiménez, P. Jiménez, M. Zaballos, A. Monzón, S. Varona, S. Juliá, M. Cuesta, I, M.A Marcos                                                                                                                                                                                                           |
| EPI_ISL_462754, EPI_ISL_462755, EPI_ISL_462756, EPI_ISL_462757, EPI_ISL_462758, EPI_ISL_462759, EPI_ISL_462760, EPI_ISL_462761, EPI_ISL_462762, EPI_ISL_462763, EPI_ISL_462764, EPI_ISL_462765, EPI_ISL_462766, EPI_ISL_462767, EPI_ISL_462768, EPI_ISL_462769, EPI_ISL_462770, EPI_ISL_462771, EPI_ISL_462772, EPI_ISL_462773, EPI_ISL_462774, EPI_ISL_462775, EPI_ISL_462776, EPI_ISL_462777, EPI_ISL_462778, EPI_ISL_462779, EPI_ISL_462780, EPI_ISL_462781, EPI_ISL_462782, EPI_ISL_462783, EPI_ISL_462784, EPI_ISL_462785, EPI_ISL_462786, EPI_ISL_462787, EPI_ISL_462788, EPI_ISL_462789, EPI_ISL_462790, EPI_ISL_462791, EPI_ISL_462792, EPI_ISL_462793, EPI_ISL_462794, EPI_ISL_462795, EPI_ISL_462796, EPI_ISL_462797, EPI_ISL_462798, EPI_ISL_462799, EPI_ISL_462800, EPI_ISL_462801, EPI_ISL_462802, EPI_ISL_462803, EPI_ISL_462804, EPI_ISL_462805, EPI_ISL_462806, EPI_ISL_462807, EPI_ISL_462808, EPI_ISL_462809, EPI_ISL_462810, EPI_ISL_462811, EPI_ISL_462812, EPI_ISL_462813, EPI_ISL_462814, EPI_ISL_462815, EPI_ISL_462816, EPI_ISL_462817, EPI_ISL_462818, EPI_ISL_462819, EPI_ISL_462820, EPI_ISL_462821, EPI_ISL_462822, EPI_ISL_462823, EPI_ISL_462824, EPI_ISL_462825, EPI_ISL_462826, EPI_ISL_462827, EPI_ISL_462828, EPI_ISL_462829, EPI_ISL_462830, EPI_ISL_462831, EPI_ISL_462832, EPI_ISL_462833, EPI_ISL_462834, EPI_ISL_462835, EPI_ISL_462836, EPI_ISL_462837, EPI_ISL_462838, EPI_ISL_462839, EPI_ISL_462840, EPI_ISL_462841, EPI_ISL_462842, EPI_ISL_462843, EPI_ISL_462844 |                                                                       |                                                                                                                                       |                                                                                                                                                                                                                                                                                                    |                                                                                                                                                                                                                                                                                                                                                                                                            |
| see above                                                                                                                                                                                                                                                                                                                                                                                                                                                                                                                                                                                                                                                                                                                                                                                                                                                                                                                                                                                                                                                                                                                                                                                                                                                                                                                                                                                                                                                                                                      | BCCDC Public Health Laboratory                                        | BCCDC Public Health Laboratory                                                                                                        |                                                                                                                                                                                                                                                                                                    | Harrigan, Prystajecy, Krajden, Lee, Kamelian, Lapointe, Choi, Hoang, Sekirov, Levett, Tyson, Li, Gilmour                                                                                                                                                                                                                                                                                                   |
| EPI_ISL_465163, EPI_ISL_465164                                                                                                                                                                                                                                                                                                                                                                                                                                                                                                                                                                                                                                                                                                                                                                                                                                                                                                                                                                                                                                                                                                                                                                                                                                                                                                                                                                                                                                                                                 | National Institute of Laboratory Medicine and Referral Center         | Genomic Research Lab, BCSIR                                                                                                           |                                                                                                                                                                                                                                                                                                    | Iffat Jahan, Abu Sayeed Mohammad Mahmud, Mohammad Samir Uzzaman, Eshrar Osman, Md. Ahasan Habib, Shahina Akter, Tanjina Akhter Banu, Md. Murshed Hasan Sarker, Barna Goswami, Md. Saddam Hossain, Tasnim Nafisa, Md. Maruf Ahmed Molla, Mahmuda Yeasmin, Ashish Kumar Ghosh, Arifa Akram, A. K. M. Shamsuzzaman, Sheikh Md. Selim Al Din, Utpal Chandra Ray, Salek Ahmed Sajib, Md. Salim Khan             |
| EPI_ISL_467945                                                                                                                                                                                                                                                                                                                                                                                                                                                                                                                                                                                                                                                                                                                                                                                                                                                                                                                                                                                                                                                                                                                                                                                                                                                                                                                                                                                                                                                                                                 | Montefiore Medical Center, Dept. of Pathology, Clinical Virology      | Albert Einstein College of Medicine, Dept. of Microbiology & Immunology, Chandran lab                                                 |                                                                                                                                                                                                                                                                                                    | J. Maximilian Fels, Saad Khan, Ryan Forster, Karin A. Skalina, Ariel S. Wirchanski, Denise Haslwanter, Catalina Florez, Robert H. Bortz III, M. Eugenia Dieterle, Ethan Lauderimilch, Rohit K. Jangra, Amanda Mengotto, Duncan Kimmel, Shahina B. Maqbool, John M. Grealley, Wendy A. Szymczak, Amy S. Fox, Michael B. Prystowsky, D. Yitzchak Goldstein, Johanna P. Daily, Libusha Kelly, Kartik Chandran |
| EPI_ISL_469043                                                                                                                                                                                                                                                                                                                                                                                                                                                                                                                                                                                                                                                                                                                                                                                                                                                                                                                                                                                                                                                                                                                                                                                                                                                                                                                                                                                                                                                                                                 | Dr. N. D. Desai Medical College & Hospital                            | Gujarat Biotechnology Research Centre                                                                                                 |                                                                                                                                                                                                                                                                                                    | J G Buch, Jigar Gusani, Supreet Prabhu, Tejas Shah, Ankit Hinsu, Pritesh Sabara, Apurvasinh Puvar, Janvi Ravai, Zarina Patel, Monika Gandhi, Pinal Trivedi, Maharshi Pandya, Nidhi Patel, Nitin Savaliya, Raghawendra Kumar, Dinesh Kumar, Zuber Sayed, Komal Patel, Labdhi Pandya, Snehal Bagatharia, Bhavya Jindal, R D Dixit, A M Kadri, Harsh Bakshi, Chaitanya Joshi, Madhvi Joshi                    |
| EPI_ISL_469299                                                                                                                                                                                                                                                                                                                                                                                                                                                                                                                                                                                                                                                                                                                                                                                                                                                                                                                                                                                                                                                                                                                                                                                                                                                                                                                                                                                                                                                                                                 | National Institute of Laboratory Medicine and Referral Center         | Genomic Research Lab, BCSIR                                                                                                           |                                                                                                                                                                                                                                                                                                    | Iffat Jahan, Abu Sayeed Mohammad Mahmud, Mohammad Samir Uzzaman, Eshrar Osman, Md. Ahasan Habib, Shahina Akter, Tanjina Akhter Banu, Md. Murshed Hasan Sarker, Barna Goswami, Md. Saddam Hossain, Tasnim Nafisa, Md. Maruf Ahmed Molla, Mahmuda Yeasmin, Ashish Kumar Ghosh, Bayzid Bin Monir, A. K. M. Shamsuzzaman, Sheikh Md. Selim Al Din, Utpal Chandra Ray, Salek Ahmed Sajib, Md. Salim Khan        |
| EPI_ISL_470719, EPI_ISL_470720, EPI_ISL_470721, EPI_ISL_470722, EPI_ISL_470723, EPI_ISL_470724, EPI_ISL_470725, EPI_ISL_470726, EPI_ISL_470727, EPI_ISL_470728, EPI_ISL_470729, EPI_ISL_470730, EPI_ISL_470731, EPI_ISL_470732, EPI_ISL_470733, EPI_ISL_470734, EPI_ISL_470735, EPI_ISL_470736, EPI_ISL_470737, EPI_ISL_470738, EPI_ISL_470740, EPI_ISL_470741, EPI_ISL_470742, EPI_ISL_470743, EPI_ISL_470744, EPI_ISL_470745, EPI_ISL_470746                                                                                                                                                                                                                                                                                                                                                                                                                                                                                                                                                                                                                                                                                                                                                                                                                                                                                                                                                                                                                                                                 |                                                                       |                                                                                                                                       |                                                                                                                                                                                                                                                                                                    |                                                                                                                                                                                                                                                                                                                                                                                                            |
| see above                                                                                                                                                                                                                                                                                                                                                                                                                                                                                                                                                                                                                                                                                                                                                                                                                                                                                                                                                                                                                                                                                                                                                                                                                                                                                                                                                                                                                                                                                                      | Utah Public Health Laboratory                                         | Utah Public Health Laboratory                                                                                                         |                                                                                                                                                                                                                                                                                                    | Heidi Butz, Erin Young, Kelly Oakeson                                                                                                                                                                                                                                                                                                                                                                      |
| EPI_ISL_470801                                                                                                                                                                                                                                                                                                                                                                                                                                                                                                                                                                                                                                                                                                                                                                                                                                                                                                                                                                                                                                                                                                                                                                                                                                                                                                                                                                                                                                                                                                 | Virology                                                              | Virology                                                                                                                              |                                                                                                                                                                                                                                                                                                    | Hossain,M.E., Hasan,R., Miah,M., Hasan,M.M., Sumaiya,M.K., Rahman,M.M., Alam,M.S., Clemens,J.D., Ahmed,T., Rahman,M.Z. and Rahman,M.                                                                                                                                                                                                                                                                       |
| EPI_ISL_471456, EPI_ISL_471457, EPI_ISL_471458, EPI_ISL_471459, EPI_ISL_471460                                                                                                                                                                                                                                                                                                                                                                                                                                                                                                                                                                                                                                                                                                                                                                                                                                                                                                                                                                                                                                                                                                                                                                                                                                                                                                                                                                                                                                 | Centre de Virologie des Maladies Tropicales                           | Functional Genomic Platform/Service Analyses Biologique/UATRS/ Centre National Pour la Recherche Scientifique (CNRS)                  |                                                                                                                                                                                                                                                                                                    | Hicham EL ANNAZ, Elmoustafa EL FAHIME, Marouane MELLOUL, Youssef AKHOUD, Mly Abdelaziz ELALAOUI, Ahmed REGGAD, Sanaa ALAOUI-Amine, Rachid ABI, Rida TAGAJDID, Zohour KASMY, Safae ELKOCHE, Nadia TOULI, Farida HILALI, Abdelkader LAATIRIS, Abdelillah LARAQUI, Tahar BAJJOU, Yassine SEKHOKH , Idriss-Amine LAHLOU, Mostafa ELOUENASS, Khalid ENNBI                                                       |
| EPI_ISL_473306, EPI_ISL_473307, EPI_ISL_473308, EPI_ISL_473309, EPI_ISL_473310, EPI_ISL_473311, EPI_ISL_473312, EPI_ISL_473313, EPI_ISL_473314, EPI_ISL_473315, EPI_ISL_473316, EPI_ISL_473317, EPI_ISL_473318, EPI_ISL_473319, EPI_ISL_473320, EPI_ISL_473321, EPI_ISL_473322, EPI_ISL_473323, EPI_ISL_473324, EPI_ISL_473325, EPI_ISL_473326, EPI_ISL_473327, EPI_ISL_473328, EPI_ISL_473329, EPI_ISL_473330, EPI_ISL_473331, EPI_ISL_473332, EPI_ISL_473333, EPI_ISL_473334, EPI_ISL_473335, EPI_ISL_473336, EPI_ISL_473337, EPI_ISL_473338, EPI_ISL_473339, EPI_ISL_473340, EPI_ISL_473341, EPI_ISL_473342, EPI_ISL_473343, EPI_ISL_473344, EPI_ISL_473345, EPI_ISL_473346, EPI_ISL_473347, EPI_ISL_473348, EPI_ISL_473349, EPI_ISL_473350, EPI_ISL_473351, EPI_ISL_473352, EPI_ISL_473353, EPI_ISL_473354, EPI_ISL_473355, EPI_ISL_473356, EPI_ISL_473357, EPI_ISL_473358, EPI_ISL_473359, EPI_ISL_473360, EPI_ISL_473361, EPI_ISL_473362, EPI_ISL_473363, EPI_ISL_473364, EPI_ISL_473365, EPI_ISL_473366, EPI_ISL_473367, EPI_ISL_473368, EPI_ISL_473369, EPI_ISL_473370, EPI_ISL_473371, EPI_ISL_473372, EPI_ISL_473373, EPI_ISL_473374, EPI_ISL_473375, EPI_ISL_473376, EPI_ISL_473377, EPI_ISL_473378, EPI_ISL_473379, EPI_ISL_473380, EPI_ISL_473381, EPI_ISL_473382, EPI_ISL_473383, EPI_ISL_473384, EPI_ISL_473385, EPI_ISL_473386, EPI_ISL_473387, EPI_ISL_473388, EPI_ISL_473389, EPI_ISL_473390, EPI_ISL_473391, EPI_ISL_473392, EPI_ISL_473393, EPI_ISL_473394, EPI_ISL_473395                 |                                                                       |                                                                                                                                       |                                                                                                                                                                                                                                                                                                    |                                                                                                                                                                                                                                                                                                                                                                                                            |

|                                                                                                                                                                                                                                                                                                                                                                                                                                                                                                                                                                                                                                                                                                                                                                                                                                                                                                                                                                                                                                                                                |           |                                                                                                              |                                                                    |                                                                                                                                                                                                                                                                                                                                                                                                                                         |
|--------------------------------------------------------------------------------------------------------------------------------------------------------------------------------------------------------------------------------------------------------------------------------------------------------------------------------------------------------------------------------------------------------------------------------------------------------------------------------------------------------------------------------------------------------------------------------------------------------------------------------------------------------------------------------------------------------------------------------------------------------------------------------------------------------------------------------------------------------------------------------------------------------------------------------------------------------------------------------------------------------------------------------------------------------------------------------|-----------|--------------------------------------------------------------------------------------------------------------|--------------------------------------------------------------------|-----------------------------------------------------------------------------------------------------------------------------------------------------------------------------------------------------------------------------------------------------------------------------------------------------------------------------------------------------------------------------------------------------------------------------------------|
| EPI_ISL_473396, EPI_ISL_473397, EPI_ISL_473398, EPI_ISL_473399, EPI_ISL_473400, EPI_ISL_473401, EPI_ISL_473402, EPI_ISL_473403, EPI_ISL_473404, EPI_ISL_473405, EPI_ISL_473406, EPI_ISL_473407, EPI_ISL_473408, EPI_ISL_473409, EPI_ISL_473410, EPI_ISL_473411, EPI_ISL_473412, EPI_ISL_473413, EPI_ISL_473414, EPI_ISL_473415, EPI_ISL_473416, EPI_ISL_473417, EPI_ISL_473418, EPI_ISL_473419, EPI_ISL_473420, EPI_ISL_473421, EPI_ISL_473422, EPI_ISL_473423, EPI_ISL_473424, EPI_ISL_473425, EPI_ISL_473426, EPI_ISL_473427, EPI_ISL_473428, EPI_ISL_473429, EPI_ISL_473430, EPI_ISL_473431, EPI_ISL_473432, EPI_ISL_473433, EPI_ISL_473434, EPI_ISL_473435, EPI_ISL_473436, EPI_ISL_473437, EPI_ISL_473438, EPI_ISL_473439, EPI_ISL_473440, EPI_ISL_473441, EPI_ISL_473442, EPI_ISL_473443, EPI_ISL_473444, EPI_ISL_473445, EPI_ISL_473446, EPI_ISL_473447, EPI_ISL_473448, EPI_ISL_473449, EPI_ISL_473450                                                                                                                                                                 | see above | University of Birmingham                                                                                     | COVID-19 Genomics UK (COG-UK) Consortium                           | Institute of Microbiology, University of Birmingham: Claire McMurray, Joanne Stockton, Samuel Nicholls, Radoslaw Poplawski, Will Rowe, Josh Quick, Nicholas Loman, University of Birmingham Testing Laboratory: Celina M Whalley, Andrew Bosworth, Charlotte Poxon, Kasun Wanigasooriya, Oliver Pickles, Mike Kidd, Alex Richter, Andrew D Beggs PHE Heartlands Lab: Husam Osman, Andrew Bosworth. Queen Elizabeth Hospital: Anna Casey |
| EPI_ISL_475059                                                                                                                                                                                                                                                                                                                                                                                                                                                                                                                                                                                                                                                                                                                                                                                                                                                                                                                                                                                                                                                                 |           | GAIMS & G K General Hospital                                                                                 | Gujarat Biotechnology Research Centre                              | Hitesh Assudani, Babulal Babhoriya, Labdhi Pandya, Snehal Bagatharia, Pritesh Sabara, Apurvashin Puvar, Janvi Raval, Zarna Patel, Monika Gandhi, Pinal Trivedi, Maharshi Pandya, Nidhi Patel, Nitin Savaliya, Raghawendra Kumar, Dinesh Kumar, Zuber Saiyed, Komal Patel, Neha Rajpara, R D Dixit, A M Kadri, Harsh Bakshi, Chaitanya Joshi, Madhvi Joshi                                                                               |
| EPI_ISL_475168                                                                                                                                                                                                                                                                                                                                                                                                                                                                                                                                                                                                                                                                                                                                                                                                                                                                                                                                                                                                                                                                 |           | National Institute of Laboratory Medicine and Referral Center                                                | Genomic Research Lab, BCSIR                                        | Iffat Jahan, Abu Sayeed Mohammad Mahmud, Mohammad Samir Uzzaman, Eshrar Osman, Md. Ahasan Habib, Shahina Akter, Tanjina Akhter Banu, Md. Murshed Hasan Sarkar, Barna Goswami, Md. Saddam Hossain, Tasnim Nafisa, Md. Maruf Ahmed Molla, Mahmuda Yeasmin, Asish Kumar Ghosh, Bayzid Bin Monir, A. K. M. Shamsuzzaman, Sheikh Md. Selim Al Din, Utpal Chandra Ray, Salek Ahmed Sajib, Md. Salim Khan                                      |
| EPI_ISL_475571                                                                                                                                                                                                                                                                                                                                                                                                                                                                                                                                                                                                                                                                                                                                                                                                                                                                                                                                                                                                                                                                 |           | Genome Center                                                                                                | Genome Center                                                      | Hassan M. Al-Emran, Md. Shazid Hasan, Ovinu Kibria Islam, A. S. M. Rubayet- Ul- Alam, Pravas Chandra Roy, Selina Akter, Shireen Nigar, Shovon Lal Sarkar, Md. Tanvir Islam, Mithun Talukder Md. Tawaybur, Md. Tajul Islam, Provakar Mondol, Md. Muzaahidul Islam, Md. Iqbal Kabir Jahid Md. Anwar Hossain                                                                                                                               |
| EPI_ISL_475745, EPI_ISL_475746, EPI_ISL_475747, EPI_ISL_475748, EPI_ISL_475749, EPI_ISL_475750, EPI_ISL_475751, EPI_ISL_475752, EPI_ISL_475753                                                                                                                                                                                                                                                                                                                                                                                                                                                                                                                                                                                                                                                                                                                                                                                                                                                                                                                                 |           | Medical Ain Shams Research Institute (MASRI), Ain Shams University                                           | Medical Ain Shams Research Institute (MASRI), Ain Shams University | Hesham Elghazaly , Sara Hassan Agwa, Mahmoud Elmettini , Ahmad Moustafa , Ashraf Omar, Osama Mansour, Samia Abdo, Hala Hafez, Ghada Ismael , Shaimaa Moustafa , Aya Mohamed, Reham Mamdouh , Hoda Abd Elsatar, Manal Hamdy Elsaid, Fatma Ebied                                                                                                                                                                                          |
| EPI_ISL_475758                                                                                                                                                                                                                                                                                                                                                                                                                                                                                                                                                                                                                                                                                                                                                                                                                                                                                                                                                                                                                                                                 |           | National Institute of Laboratory Medicine and Referral Center                                                | Genomic Research Lab, BCSIR                                        | Iffat Jahan, Abu Sayeed Mohammad Mahmud, Mohammad Samir Uzzaman, Eshrar Osman, Md. Ahasan Habib, Shahina Akter, Tanjina Akhter Banu, Md. Murshed Hasan Sarkar, Barna Goswami, Md. Saddam Hossain, Tasnim Nafisa, Md. Maruf Ahmed Molla, Mahmuda Yeasmin, Asish Kumar Ghosh, Arifa Akram, A. K. M. Shamsuzzaman, Sheikh Md. Selim Al Din, Utpal Chandra Ray, Salek Ahmed Sajib, Md. Salim Khan                                           |
| EPI_ISL_476898, EPI_ISL_476899                                                                                                                                                                                                                                                                                                                                                                                                                                                                                                                                                                                                                                                                                                                                                                                                                                                                                                                                                                                                                                                 |           | Alaska State Virology Laboratory                                                                             | Alaska State Virology Laboratory                                   | Jack Chen, Ph.D.                                                                                                                                                                                                                                                                                                                                                                                                                        |
| EPI_ISL_477727, EPI_ISL_477728, EPI_ISL_477729, EPI_ISL_477730, EPI_ISL_477731, EPI_ISL_477732, EPI_ISL_477733, EPI_ISL_477734, EPI_ISL_477735, EPI_ISL_477736, EPI_ISL_477737, EPI_ISL_477738, EPI_ISL_477739, EPI_ISL_477740, EPI_ISL_477741, EPI_ISL_477742, EPI_ISL_477743, EPI_ISL_477744, EPI_ISL_477745, EPI_ISL_477746, EPI_ISL_477747, EPI_ISL_477748, EPI_ISL_477749, EPI_ISL_477750, EPI_ISL_477751, EPI_ISL_477752, EPI_ISL_477753, EPI_ISL_477754, EPI_ISL_477755, EPI_ISL_477756, EPI_ISL_477757, EPI_ISL_477758, EPI_ISL_477759, EPI_ISL_477760, EPI_ISL_477761, EPI_ISL_477762, EPI_ISL_477763, EPI_ISL_477764, EPI_ISL_477765, EPI_ISL_477766, EPI_ISL_477767, EPI_ISL_477768, EPI_ISL_477769, EPI_ISL_477770, EPI_ISL_477771, EPI_ISL_477772, EPI_ISL_477773, EPI_ISL_477774, EPI_ISL_477775, EPI_ISL_477776, EPI_ISL_477777, EPI_ISL_477778, EPI_ISL_477779, EPI_ISL_477780, EPI_ISL_477781, EPI_ISL_477782                                                                                                                                                 |           | University of Birmingham                                                                                     | COVID-19 Genomics UK (COG-UK) Consortium                           | Institute of Microbiology, University of Birmingham: Claire McMurray, Joanne Stockton, Samuel Nicholls, Radoslaw Poplawski, Will Rowe, Josh Quick, Nicholas Loman, University of Birmingham Testing Laboratory: Celina M Whalley, Andrew Bosworth, Charlotte Poxon, Kasun Wanigasooriya, Oliver Pickles, Mike Kidd, Alex Richter, Andrew D Beggs PHE Heartlands Lab: Husam Osman, Andrew Bosworth. Queen Elizabeth Hospital: Anna Casey |
| EPI_ISL_480224                                                                                                                                                                                                                                                                                                                                                                                                                                                                                                                                                                                                                                                                                                                                                                                                                                                                                                                                                                                                                                                                 |           | National Reference Laboratory "Influenza and acute respiratory diseases"                                     | NRL-HIV                                                            | Ivan Ivanov, Ivailo Alexiev, Ivva Philipova                                                                                                                                                                                                                                                                                                                                                                                             |
| EPI_ISL_480228, EPI_ISL_480229, EPI_ISL_480230, EPI_ISL_480231, EPI_ISL_480232, EPI_ISL_480233, EPI_ISL_480234, EPI_ISL_480235, EPI_ISL_480236, EPI_ISL_480237, EPI_ISL_480238, EPI_ISL_480239, EPI_ISL_480240, EPI_ISL_480241, EPI_ISL_480242, EPI_ISL_480243, EPI_ISL_480244, EPI_ISL_480245, EPI_ISL_480246, EPI_ISL_480247, EPI_ISL_480248, EPI_ISL_480249, EPI_ISL_480250, EPI_ISL_480251, EPI_ISL_480252, EPI_ISL_480253, EPI_ISL_480254, EPI_ISL_480255, EPI_ISL_480256, EPI_ISL_480257, EPI_ISL_480258, EPI_ISL_480259, EPI_ISL_480260, EPI_ISL_480261, EPI_ISL_480262, EPI_ISL_480263, EPI_ISL_480264, EPI_ISL_480265, EPI_ISL_480266, EPI_ISL_480267, EPI_ISL_480268, EPI_ISL_480269, EPI_ISL_480270, EPI_ISL_480271, EPI_ISL_480272, EPI_ISL_480273, EPI_ISL_480274, EPI_ISL_480275, EPI_ISL_480276, EPI_ISL_480277, EPI_ISL_480278, EPI_ISL_480279, EPI_ISL_480280, EPI_ISL_480281, EPI_ISL_480282, EPI_ISL_480283, EPI_ISL_480284, EPI_ISL_480285, EPI_ISL_480286, EPI_ISL_480287, EPI_ISL_480288, EPI_ISL_480289, EPI_ISL_480290, EPI_ISL_480291, EPI_ISL_480292 |           | Genomic Laboratory (GLAB) (Conjoint lab of Health Directorate of Istanbul and Istanbul Technical University) | Genomic Laboratory (GLAB), Istanbul Technical University           | Ilker Karacan, Tugba Kiziboga Akgun, Bugra Agaoglu, Gizem Alkurt, Jale Yildiz, Betsi Köse, Elifnaz Çelik, Arzu Irvem, Yasemin Kendir Demirkol, Ozlem Doganoglan, Dogan Mehmet Aydin, Levent Doganay, Gizem Dinler Doganay                                                                                                                                                                                                               |
| EPI_ISL_480297, EPI_ISL_480298, EPI_ISL_480299, EPI_ISL_480300, EPI_ISL_480301, EPI_ISL_480302, EPI_ISL_480303, EPI_ISL_480304, EPI_ISL_480305, EPI_ISL_480306, EPI_ISL_480307, EPI_ISL_480308, EPI_ISL_480309, EPI_ISL_480310                                                                                                                                                                                                                                                                                                                                                                                                                                                                                                                                                                                                                                                                                                                                                                                                                                                 |           | National Reference Laboratory "Influenza and acute respiratory diseases"                                     | NRL-HIV                                                            | Ivan Ivanov, Ivailo Alexiev, Ivva Philipova                                                                                                                                                                                                                                                                                                                                                                                             |
| EPI_ISL_480443, EPI_ISL_480444                                                                                                                                                                                                                                                                                                                                                                                                                                                                                                                                                                                                                                                                                                                                                                                                                                                                                                                                                                                                                                                 |           | National Institute of Laboratory Medicine and Referral Center                                                | Bangladesh Council of Scientific and Industrial Research           | Iffat Jahan, Abu Sayeed Mohammad Mahmud, Mohammad Samir Uzzaman, Eshrar Osman, Md. Ahasan Habib, Shahina Akter, Tanjina Akhter Banu, Md. Murshed Hasan Sarkar, Barna Goswami, Md. Saddam Hossain, Tasnim Nafisa, Md. Maruf Ahmed Molla, Mahmuda Yeasmin, Asish Kumar Ghosh, Shahjahan Siddique, A. K. M. Shamsuzzaman, Sheikh Md. Selim Al Din, Utpal Chandra Ray, Salek Ahmed Sajib, Md. Salim Khan                                    |
| EPI_ISL_482759, EPI_ISL_482760, EPI_ISL_482761, EPI_ISL_482762, EPI_ISL_482763, EPI_ISL_482764, EPI_ISL_482765, EPI_ISL_482766, EPI_ISL_482767, EPI_ISL_482768, EPI_ISL_482769, EPI_ISL_482770, EPI_ISL_482771, EPI_ISL_482772, EPI_ISL_482773, EPI_ISL_482774, EPI_ISL_482775                                                                                                                                                                                                                                                                                                                                                                                                                                                                                                                                                                                                                                                                                                                                                                                                 |           | Medical Ain Shams Research Institute (MASRI), Ain Shams University                                           | Medical Ain Shams Research Institute (MASRI), Ain Shams University | Hesham Elghazaly, Sara Hassan Agwa, Ahmad Moustafa, Hala Hafez, Sara Elnakeep, Shaimaa Moustafa, Aya Mohamed, Reham Mamdouh, Ghada Ismael, Ashraf Omar, Osama Mansour, Mahmoud Elmettini                                                                                                                                                                                                                                                |
| EPI_ISL_482820                                                                                                                                                                                                                                                                                                                                                                                                                                                                                                                                                                                                                                                                                                                                                                                                                                                                                                                                                                                                                                                                 |           | Centre de Recerca en Sanitat Animal (IRTA-CReSA)                                                             | IrsiCaixa AIDS Research Lab                                        | J. Segalés, M. Puig, J. Rodon, C. Avila-Nieto, J. Carrillo, G. Cantero, M.T. Terrón, S. Cruz, M. Parera, J.M. Noguera-Julían, N. Izquierdo-Useros, V. Guallar, E. Vidal, A. Valencia, I. Blanco, J. Blanco, B. Clotet, J. Vergara-Alert                                                                                                                                                                                                 |
| EPI_ISL_483018, EPI_ISL_483019, EPI_ISL_483020, EPI_ISL_483021, EPI_ISL_483022, EPI_ISL_483023, EPI_ISL_483024, EPI_ISL_483025, EPI_ISL_483026, EPI_ISL_483027, EPI_ISL_483028, EPI_ISL_483029, EPI_ISL_483030, EPI_ISL_483031, EPI_ISL_483032, EPI_ISL_483033                                                                                                                                                                                                                                                                                                                                                                                                                                                                                                                                                                                                                                                                                                                                                                                                                 |           | Utah Public Health Laboratory                                                                                | Utah Public Health Laboratory                                      | Heidi Butz, Erin Young, Kelly Oakeson                                                                                                                                                                                                                                                                                                                                                                                                   |
| EPI_ISL_483035, EPI_ISL_483036, EPI_ISL_483037, EPI_ISL_483038                                                                                                                                                                                                                                                                                                                                                                                                                                                                                                                                                                                                                                                                                                                                                                                                                                                                                                                                                                                                                 |           | Medical Ain Shams Research Institute (MASRI), Ain Shams University                                           | Medical Ain Shams Research Institute (MASRI), Ain Shams University | Hesham Elghazaly, Sara Hassan Agwa, Ahmad Moustafa, Hala Hafez, Sara Elnakeep, Shaimaa Moustafa, Aya Mohamed, Reham Mamdouh, Ghada Ismael, Ashraf Omar, Osama Mansour, Mahmoud Elmettini                                                                                                                                                                                                                                                |
| EPI_ISL_483059                                                                                                                                                                                                                                                                                                                                                                                                                                                                                                                                                                                                                                                                                                                                                                                                                                                                                                                                                                                                                                                                 |           | Hospital Universitari Germans Trias i Pujol                                                                  | IrsiCaixa AIDS Research Lab                                        | J. Segalés, M. Puig, J. Rodon, C. Avila-Nieto, J. Carrillo, G. Cantero, M.T. Terrón, S. Cruz, M. Parera, J.M. Noguera-Julían, N. Izquierdo-Useros, V. Guallar, E. Vidal, A. Valencia, I. Blanco, J. Blanco, B. Clotet, J. Vergara-Alert                                                                                                                                                                                                 |
| EPI_ISL_483643, EPI_ISL_483644                                                                                                                                                                                                                                                                                                                                                                                                                                                                                                                                                                                                                                                                                                                                                                                                                                                                                                                                                                                                                                                 |           | National Institute of Laboratory Medicine and Referral Center                                                | Genomic Research Lab, BCSIR                                        | Iffat Jahan, Abu Sayeed Mohammad Mahmud, Mohammad Samir Uzzaman, Eshrar Osman, Md. Ahasan Habib, Shahina Akter, Tanjina Akhter Banu, Md. Murshed Hasan Sarkar, Barna Goswami, Md. Saddam Hossain, Tasnim Nafisa, Md. Maruf Ahmed Molla, Mahmuda Yeasmin, Asish Kumar Ghosh, A. K. M. Shamsuzzaman, Sheikh Md. Selim Al Din, Utpal Chandra Ray, Salek Ahmed Sajib, Md. Salim Khan                                                        |
| EPI_ISL_483824                                                                                                                                                                                                                                                                                                                                                                                                                                                                                                                                                                                                                                                                                                                                                                                                                                                                                                                                                                                                                                                                 |           | GMERS Medical College Himmatnagar                                                                            | Gujarat Biotechnology Research Centre                              | Himanshu Khatri, Mayur Gandhi, Apurvashin Puvar, Janvi Raval, Zarna Patel, Monika Gandhi, Pinal Trivedi, Maharshi Pandya, Nidhi Patel, Nitin Savaliya, Raghawendra Kumar, Dinesh Kumar, Zuber Saiyed, Komal Patel, Labdhi Pandya, Afzal Ansari, Nikha Trivedi, R D Dixit, A M Kadri, Harsh Bakshi, Chaitanya Joshi, Madhvi Joshi                                                                                                        |
| EPI_ISL_483880, EPI_ISL_483881, EPI_ISL_483882, EPI_ISL_483883, EPI_ISL_483884, EPI_ISL_483885, EPI_ISL_483886, EPI_ISL_483887, EPI_ISL_483888, EPI_ISL_483889, EPI_ISL_483900, EPI_ISL_483901, EPI_ISL_483902, EPI_ISL_483903, EPI_ISL_483904, EPI_ISL_483905, EPI_ISL_483906, EPI_ISL_483907, EPI_ISL_483908, EPI_ISL_483909, EPI_ISL_483910, EPI_ISL_483911, EPI_ISL_483912, EPI_ISL_484218, EPI_ISL_484219, EPI_ISL_484220                                                                                                                                                                                                                                                                                                                                                                                                                                                                                                                                                                                                                                                 |           | University of Birmingham                                                                                     | COVID-19 Genomics UK (COG-UK) Consortium                           | Institute of Microbiology, University of Birmingham: Claire McMurray, Joanne Stockton, Samuel Nicholls, Radoslaw Poplawski, Will Rowe, Josh Quick, Nicholas Loman, University of Birmingham Testing Laboratory: Celina M Whalley, Andrew Bosworth, Charlotte Poxon, Kasun Wanigasooriya, Oliver Pickles, Mike Kidd, Alex Richter, Andrew D Beggs PHE Heartlands Lab: Husam Osman, Andrew Bosworth. Queen Elizabeth Hospital: Anna Casey |
| EPI_ISL_486390, EPI_ISL_486391                                                                                                                                                                                                                                                                                                                                                                                                                                                                                                                                                                                                                                                                                                                                                                                                                                                                                                                                                                                                                                                 |           | Centrl laboratorija                                                                                          | Latvian Biomedical Research and Study Centre                       | Ivars Silamielis, Kaspars Megnis, Monta Ustinova, ika Zrelavs, Vita Rovte, Stella Lapia, Jana Oste, Marta Priedte, Uga Dumpis, Jnis Kliviš                                                                                                                                                                                                                                                                                              |
| EPI_ISL_486410                                                                                                                                                                                                                                                                                                                                                                                                                                                                                                                                                                                                                                                                                                                                                                                                                                                                                                                                                                                                                                                                 |           | Centrala laboratorija                                                                                        | Latvian Biomedical Research and Study Centre                       | Ivars Silamielis, Kaspars Megnis, Monta Ustinova, ika Zrelavs, Vita Rovte, Stella Lapia, Jana Oste, Marta Priedte, Uga Dumpis, Jnis Kliviš                                                                                                                                                                                                                                                                                              |
| EPI_ISL_486411, EPI_ISL_486412, EPI_ISL_486413, EPI_ISL_486414, EPI_ISL_486415, EPI_ISL_486416                                                                                                                                                                                                                                                                                                                                                                                                                                                                                                                                                                                                                                                                                                                                                                                                                                                                                                                                                                                 |           | Centrl laboratorija                                                                                          | Latvian Biomedical Research and Study Centre                       | Ivars Silamielis, Kaspars Megnis, Monta Ustinova, ika Zrelavs, Vita Rovte, Stella Lapia, Jana Oste, Marta Priedte, Uga Dumpis, Jnis Kliviš                                                                                                                                                                                                                                                                                              |
| EPI_ISL_486417                                                                                                                                                                                                                                                                                                                                                                                                                                                                                                                                                                                                                                                                                                                                                                                                                                                                                                                                                                                                                                                                 |           | Centrala laboratorija                                                                                        | Latvian Biomedical Research and Study Centre                       | Ivars Silamielis, Kaspars Megnis, Monta Ustinova, ika Zrelavs, Vita Rovte, Stella Lapia, Jana Oste, Marta Priedte, Uga Dumpis, Jnis Kliviš                                                                                                                                                                                                                                                                                              |

|                                                                                                                                                                                                                                                                                                                                                                                                                                                                                                                                                                                                                                                                                                                                                                                                                                                                                                                                                                                                                                                                                                                                                                                                                                                                                                                                                                                                                                                                                                                                                                                                                                                                                                                                                                                                                                                                                                                                                                                                                |                                                                                |                                                                                |                                                                                                                                                                                                                                                                                                                                                                                  |                                                                                                                                                                                                                                                                                                                                                                                                                                         |
|----------------------------------------------------------------------------------------------------------------------------------------------------------------------------------------------------------------------------------------------------------------------------------------------------------------------------------------------------------------------------------------------------------------------------------------------------------------------------------------------------------------------------------------------------------------------------------------------------------------------------------------------------------------------------------------------------------------------------------------------------------------------------------------------------------------------------------------------------------------------------------------------------------------------------------------------------------------------------------------------------------------------------------------------------------------------------------------------------------------------------------------------------------------------------------------------------------------------------------------------------------------------------------------------------------------------------------------------------------------------------------------------------------------------------------------------------------------------------------------------------------------------------------------------------------------------------------------------------------------------------------------------------------------------------------------------------------------------------------------------------------------------------------------------------------------------------------------------------------------------------------------------------------------------------------------------------------------------------------------------------------------|--------------------------------------------------------------------------------|--------------------------------------------------------------------------------|----------------------------------------------------------------------------------------------------------------------------------------------------------------------------------------------------------------------------------------------------------------------------------------------------------------------------------------------------------------------------------|-----------------------------------------------------------------------------------------------------------------------------------------------------------------------------------------------------------------------------------------------------------------------------------------------------------------------------------------------------------------------------------------------------------------------------------------|
| EPI_ISL_486418, EPI_ISL_486419, EPI_ISL_486420, EPI_ISL_486421                                                                                                                                                                                                                                                                                                                                                                                                                                                                                                                                                                                                                                                                                                                                                                                                                                                                                                                                                                                                                                                                                                                                                                                                                                                                                                                                                                                                                                                                                                                                                                                                                                                                                                                                                                                                                                                                                                                                                 | Centri laboratorija                                                            | Latvian Biomedical Research and Study Centre                                   | Ivars Silamielis, Kaspars Megnis, Monta Ustinova, ikitā Zrelovs, Vita Rovte, Stella Lapia, Jana Oste, Marta Priedte, Uga Dumpis, Jnis Kloviš                                                                                                                                                                                                                                     |                                                                                                                                                                                                                                                                                                                                                                                                                                         |
| EPI_ISL_486422, EPI_ISL_486423, EPI_ISL_486424, EPI_ISL_486425, EPI_ISL_486426, EPI_ISL_486428, EPI_ISL_486430, EPI_ISL_486431, EPI_ISL_486432, EPI_ISL_486433, EPI_ISL_486434, EPI_ISL_486435, EPI_ISL_486436                                                                                                                                                                                                                                                                                                                                                                                                                                                                                                                                                                                                                                                                                                                                                                                                                                                                                                                                                                                                                                                                                                                                                                                                                                                                                                                                                                                                                                                                                                                                                                                                                                                                                                                                                                                                 | see above                                                                      | Latvian Biomedical Research and Study Centre                                   | Ivars Silamielis, Kaspars Megnis, Monta Ustinova, ikitā Zrelovs, Vita Rovte, Jeena Storoženko, Tatjana Kolupajeva, Oksana Savicka, Uga Dumpis, Jnis Kloviš                                                                                                                                                                                                                       |                                                                                                                                                                                                                                                                                                                                                                                                                                         |
| EPI_ISL_486437                                                                                                                                                                                                                                                                                                                                                                                                                                                                                                                                                                                                                                                                                                                                                                                                                                                                                                                                                                                                                                                                                                                                                                                                                                                                                                                                                                                                                                                                                                                                                                                                                                                                                                                                                                                                                                                                                                                                                                                                 | Centri laboratorija                                                            | Latvian Biomedical Research and Study Centre                                   | Ivars Silamielis, Kaspars Megnis, Monta Ustinova, ikitā Zrelovs, Vita Rovte, Stella Lapia, Jana Oste, Marta Priedte, Uga Dumpis, Jnis Kloviš                                                                                                                                                                                                                                     |                                                                                                                                                                                                                                                                                                                                                                                                                                         |
| EPI_ISL_486438                                                                                                                                                                                                                                                                                                                                                                                                                                                                                                                                                                                                                                                                                                                                                                                                                                                                                                                                                                                                                                                                                                                                                                                                                                                                                                                                                                                                                                                                                                                                                                                                                                                                                                                                                                                                                                                                                                                                                                                                 | E. Gulbja laboratorija                                                         | Latvian Biomedical Research and Study Centre                                   | Ivars Silamielis, Kaspars Megnis, Monta Ustinova, ikitā Zrelovs, Vita Rovte, Mikus Gavars, Dmitrijs Perminovs, Uga Dumpis, Jnis Kloviš                                                                                                                                                                                                                                           |                                                                                                                                                                                                                                                                                                                                                                                                                                         |
| EPI_ISL_487193, EPI_ISL_487194, EPI_ISL_487195, EPI_ISL_487196, EPI_ISL_487197, EPI_ISL_487198, EPI_ISL_487199, EPI_ISL_487200, EPI_ISL_487201, EPI_ISL_487202, EPI_ISL_487203, EPI_ISL_487204, EPI_ISL_487205, EPI_ISL_487206, EPI_ISL_487207, EPI_ISL_487208, EPI_ISL_487209, EPI_ISL_487210, EPI_ISL_487211, EPI_ISL_487212, EPI_ISL_487213, EPI_ISL_487214, EPI_ISL_487215, EPI_ISL_487216, EPI_ISL_487217, EPI_ISL_487218, EPI_ISL_487219, EPI_ISL_487220, EPI_ISL_487221, EPI_ISL_487222, EPI_ISL_487223, EPI_ISL_487224, EPI_ISL_487225, EPI_ISL_487226, EPI_ISL_487227, EPI_ISL_487228, EPI_ISL_487244, EPI_ISL_487245, EPI_ISL_487246, EPI_ISL_487247, EPI_ISL_487248, EPI_ISL_487249, EPI_ISL_487250, EPI_ISL_487251, EPI_ISL_487252, EPI_ISL_487253, EPI_ISL_487254, EPI_ISL_487255, EPI_ISL_487256, EPI_ISL_487257, EPI_ISL_487258, EPI_ISL_487259, EPI_ISL_487260, EPI_ISL_487261, EPI_ISL_487262, EPI_ISL_487263, EPI_ISL_487264, EPI_ISL_487265, EPI_ISL_487266, EPI_ISL_487267, EPI_ISL_487268                                                                                                                                                                                                                                                                                                                                                                                                                                                                                                                                                                                                                                                                                                                                                                                                                                                                                                                                                                                                 | see above                                                                      | Utah Public Health Laboratory                                                  | Utah Public Health Laboratory                                                                                                                                                                                                                                                                                                                                                    | Heidi Butz, Erin Young, Kelly Oakeson                                                                                                                                                                                                                                                                                                                                                                                                   |
| EPI_ISL_487372, EPI_ISL_487373, EPI_ISL_490164                                                                                                                                                                                                                                                                                                                                                                                                                                                                                                                                                                                                                                                                                                                                                                                                                                                                                                                                                                                                                                                                                                                                                                                                                                                                                                                                                                                                                                                                                                                                                                                                                                                                                                                                                                                                                                                                                                                                                                 | National Institute of Laboratory Medicine and Referral Center                  | Genomic Research Lab, BCSIR                                                    | Iffat Jahan, Abu Sayeed Mohammad Mahmud, Mohammad Samir Uzzaman, Eshrar Osman, Md. Hasana Habib, Shahina Akter, Tanjina Akhter Banu, Md. Murshed Hasan Sarkar, Barna Goswami, Md. Saddam Hossain, Tasnim Nafisa, Md. Maruf Ahmed Molla, Mahmuda Yeasmin, Asish Kumar Ghosh, A. K. M. Shamsuzzaman, Sheikh Md. Selim Al Din, Utpal Chandra Ray, Salek Ahmed Sajib, Md. Salim Khan |                                                                                                                                                                                                                                                                                                                                                                                                                                         |
| EPI_ISL_492988, EPI_ISL_492989, EPI_ISL_492990, EPI_ISL_492991, EPI_ISL_492992                                                                                                                                                                                                                                                                                                                                                                                                                                                                                                                                                                                                                                                                                                                                                                                                                                                                                                                                                                                                                                                                                                                                                                                                                                                                                                                                                                                                                                                                                                                                                                                                                                                                                                                                                                                                                                                                                                                                 | Centri laboratorija                                                            | Latvian Biomedical Research and Study Centre                                   | Ivars Silamielis, Kaspars Megnis, Monta Ustinova, ikitā Zrelovs, Vita Rovte, Stella Lapia, Jana Oste, Marta Priedte, Uga Dumpis, Jnis Kloviš                                                                                                                                                                                                                                     |                                                                                                                                                                                                                                                                                                                                                                                                                                         |
| EPI_ISL_492993, EPI_ISL_492994, EPI_ISL_492995, EPI_ISL_492996, EPI_ISL_492997, EPI_ISL_492998, EPI_ISL_492999, EPI_ISL_493000                                                                                                                                                                                                                                                                                                                                                                                                                                                                                                                                                                                                                                                                                                                                                                                                                                                                                                                                                                                                                                                                                                                                                                                                                                                                                                                                                                                                                                                                                                                                                                                                                                                                                                                                                                                                                                                                                 | E. Gulbja Laboratorija                                                         | Latvian Biomedical Research and Study Centre                                   | Ivars Silamielis, Kaspars Megnis, Monta Ustinova, ikitā Zrelovs, Vita Rovte, Mikus Gavars, Dmitrijs Perminovs, Uga Dumpis, Jnis Kloviš                                                                                                                                                                                                                                           |                                                                                                                                                                                                                                                                                                                                                                                                                                         |
| EPI_ISL_493004, EPI_ISL_493005, EPI_ISL_493006, EPI_ISL_493007, EPI_ISL_493008, EPI_ISL_493009, EPI_ISL_493010, EPI_ISL_493011, EPI_ISL_493012, EPI_ISL_493013, EPI_ISL_493014, EPI_ISL_493015, EPI_ISL_493016, EPI_ISL_493017, EPI_ISL_493018, EPI_ISL_493019, EPI_ISL_493020, EPI_ISL_493021, EPI_ISL_493022, EPI_ISL_493023, EPI_ISL_493024, EPI_ISL_493025, EPI_ISL_493026, EPI_ISL_493027, EPI_ISL_493028, EPI_ISL_493029, EPI_ISL_493030, EPI_ISL_493031, EPI_ISL_493032, EPI_ISL_493033, EPI_ISL_493034, EPI_ISL_493035, EPI_ISL_493036, EPI_ISL_493037, EPI_ISL_493038, EPI_ISL_493039, EPI_ISL_493040, EPI_ISL_493041, EPI_ISL_493042, EPI_ISL_493043, EPI_ISL_493044, EPI_ISL_493045, EPI_ISL_493046, EPI_ISL_493047, EPI_ISL_493048, EPI_ISL_493049, EPI_ISL_493050, EPI_ISL_493051, EPI_ISL_493052, EPI_ISL_493053, EPI_ISL_493054, EPI_ISL_493055, EPI_ISL_493056, EPI_ISL_493057, EPI_ISL_493058, EPI_ISL_493059, EPI_ISL_493060, EPI_ISL_493061, EPI_ISL_493062, EPI_ISL_493063, EPI_ISL_493064, EPI_ISL_493065, EPI_ISL_493066, EPI_ISL_493067, EPI_ISL_493068, EPI_ISL_493069, EPI_ISL_493070, EPI_ISL_493071, EPI_ISL_493072, EPI_ISL_493073, EPI_ISL_493074, EPI_ISL_493075, EPI_ISL_493076, EPI_ISL_493077, EPI_ISL_493078, EPI_ISL_493079, EPI_ISL_493080, EPI_ISL_493081, EPI_ISL_493082, EPI_ISL_493083, EPI_ISL_493084, EPI_ISL_493085, EPI_ISL_493086, EPI_ISL_493087, EPI_ISL_493088, EPI_ISL_493089, EPI_ISL_493090, EPI_ISL_493091, EPI_ISL_493092, EPI_ISL_493093, EPI_ISL_493094, EPI_ISL_493095, EPI_ISL_493096, EPI_ISL_493097, EPI_ISL_493098, EPI_ISL_493099, EPI_ISL_493100, EPI_ISL_493101, EPI_ISL_493102, EPI_ISL_493103, EPI_ISL_493104, EPI_ISL_493105, EPI_ISL_493106, EPI_ISL_493107, EPI_ISL_493108, EPI_ISL_493109, EPI_ISL_493110, EPI_ISL_493111, EPI_ISL_493112, EPI_ISL_493113, EPI_ISL_493114, EPI_ISL_493115, EPI_ISL_493116, EPI_ISL_493117, EPI_ISL_493118, EPI_ISL_493119, EPI_ISL_493120, EPI_ISL_493121, EPI_ISL_493122, EPI_ISL_493123, EPI_ISL_493124 | see above                                                                      | Utah Public Health Laboratory                                                  | Utah Public Health Laboratory                                                                                                                                                                                                                                                                                                                                                    | Heidi Butz, Erin Young, Kelly Oakeson                                                                                                                                                                                                                                                                                                                                                                                                   |
| EPI_ISL_493198, EPI_ISL_493199, EPI_ISL_493200, EPI_ISL_493201, EPI_ISL_493202, EPI_ISL_493203, EPI_ISL_493204, EPI_ISL_493205, EPI_ISL_493206, EPI_ISL_493207                                                                                                                                                                                                                                                                                                                                                                                                                                                                                                                                                                                                                                                                                                                                                                                                                                                                                                                                                                                                                                                                                                                                                                                                                                                                                                                                                                                                                                                                                                                                                                                                                                                                                                                                                                                                                                                 | Virology Lab, Department of Pathology, National Cheng Kung University Hospital | Virology Lab, Department of Pathology, National Cheng Kung University Hospital | Huey-Pin Tsai, et al                                                                                                                                                                                                                                                                                                                                                             |                                                                                                                                                                                                                                                                                                                                                                                                                                         |
| EPI_ISL_493208                                                                                                                                                                                                                                                                                                                                                                                                                                                                                                                                                                                                                                                                                                                                                                                                                                                                                                                                                                                                                                                                                                                                                                                                                                                                                                                                                                                                                                                                                                                                                                                                                                                                                                                                                                                                                                                                                                                                                                                                 | Virology Lab, Department of Pathology, National Cheng Kung University Hospital | Virology Lab, Department of Pathology, National Cheng Kung University Hospital | Huey-Pin Tsai et al                                                                                                                                                                                                                                                                                                                                                              |                                                                                                                                                                                                                                                                                                                                                                                                                                         |
| EPI_ISL_493428, EPI_ISL_493429, EPI_ISL_493430, EPI_ISL_493431, EPI_ISL_493432, EPI_ISL_493433, EPI_ISL_493434, EPI_ISL_493435, EPI_ISL_493436, EPI_ISL_493437, EPI_ISL_493438, EPI_ISL_493439, EPI_ISL_493440, EPI_ISL_493441, EPI_ISL_493442, EPI_ISL_493443, EPI_ISL_493444, EPI_ISL_493445, EPI_ISL_493446, EPI_ISL_493447, EPI_ISL_493448, EPI_ISL_493449, EPI_ISL_493450, EPI_ISL_493451                                                                                                                                                                                                                                                                                                                                                                                                                                                                                                                                                                                                                                                                                                                                                                                                                                                                                                                                                                                                                                                                                                                                                                                                                                                                                                                                                                                                                                                                                                                                                                                                                 | see above                                                                      | University of Birmingham                                                       | COVID-19 Genomics UK (COG-UK) Consortium                                                                                                                                                                                                                                                                                                                                         | Institute of Microbiology, University of Birmingham: Claire McMurray, Joanne Stockton, Samuel Nicholls, Radoslaw Poplawski, Will Rowe, Josh Quick, Nicholas Loman. University of Birmingham Testing Laboratory: Celina M Whalley, Andrew Bosworth, Charlotte Poxon, Kasun Wanigasooriya, Oliver Pickles, Mike Kidd, Alex Richter, Andrew D Beggs PHE Heartlands Lab: Husam Osman, Andrew Bosworth. Queen Elizabeth Hospital: Anna Casey |
| EPI_ISL_494747                                                                                                                                                                                                                                                                                                                                                                                                                                                                                                                                                                                                                                                                                                                                                                                                                                                                                                                                                                                                                                                                                                                                                                                                                                                                                                                                                                                                                                                                                                                                                                                                                                                                                                                                                                                                                                                                                                                                                                                                 | Virology Lab, Department of Pathology, National Cheng Kung University Hospital | Virology Lab, Department of Pathology, National Cheng Kung University Hospital | Huey-Pin Tsai, et al                                                                                                                                                                                                                                                                                                                                                             |                                                                                                                                                                                                                                                                                                                                                                                                                                         |
| EPI_ISL_494756, EPI_ISL_494757, EPI_ISL_494759, EPI_ISL_494761, EPI_ISL_494762, EPI_ISL_494763, EPI_ISL_494771, EPI_ISL_494774, EPI_ISL_494775, EPI_ISL_494776                                                                                                                                                                                                                                                                                                                                                                                                                                                                                                                                                                                                                                                                                                                                                                                                                                                                                                                                                                                                                                                                                                                                                                                                                                                                                                                                                                                                                                                                                                                                                                                                                                                                                                                                                                                                                                                 | INT Fondazione Pascale                                                         | INT Fondazione Pascale                                                         | INT Fondazione Pascale                                                                                                                                                                                                                                                                                                                                                           |                                                                                                                                                                                                                                                                                                                                                                                                                                         |
| EPI_ISL_495067                                                                                                                                                                                                                                                                                                                                                                                                                                                                                                                                                                                                                                                                                                                                                                                                                                                                                                                                                                                                                                                                                                                                                                                                                                                                                                                                                                                                                                                                                                                                                                                                                                                                                                                                                                                                                                                                                                                                                                                                 | Dr. N. D. Desai Medical College & Hospital                                     | Gujarat Biotechnology Research Centre                                          | J G Buch, Jigar Gusani, Supreet Prabhu, Apurvash Puvar, Janvi Raval, Zarna Patel, Monika Gandhi, Pinal Trivedi, Maharshi Pandya, Nidhi Patel, Niitin Savaliya, Raghawendra Kumar, Dinesh Kumar, Zuber Saiyed, Komal Patel, Labhi Pandya, Afzal Ansari, Nikha Trivedi, R D Dixit, A M Kadri, Harsh Bakshi, Chaitanya Joshi, Madhvi Joshi                                          |                                                                                                                                                                                                                                                                                                                                                                                                                                         |
| EPI_ISL_498272, EPI_ISL_498273                                                                                                                                                                                                                                                                                                                                                                                                                                                                                                                                                                                                                                                                                                                                                                                                                                                                                                                                                                                                                                                                                                                                                                                                                                                                                                                                                                                                                                                                                                                                                                                                                                                                                                                                                                                                                                                                                                                                                                                 | National Institute of Laboratory Medicine and Referral Center                  | Genomic Research Lab, BCSIR                                                    | Iffat Jahan, Abu Sayeed Mohammad Mahmud, Mohammad Samir Uzzaman, Eshrar Osman, Md. Hasana Habib, Shahina Akter, Tanjina Akhter Banu, Md. Murshed Hasan Sarkar, Barna Goswami, Md. Saddam Hossain, Tasnim Nafisa, Md. Maruf Ahmed Molla, Mahmuda Yeasmin, Asish Kumar Ghosh, A. K. M. Shamsuzzaman, Sheikh Md. Selim Al Din, Utpal Chandra Ray, Salek Ahmed Sajib, Md. Salim Khan |                                                                                                                                                                                                                                                                                                                                                                                                                                         |
| EPI_ISL_498630, EPI_ISL_498631, EPI_ISL_498632, EPI_ISL_498633, EPI_ISL_498634, EPI_ISL_498635, EPI_ISL_498636, EPI_ISL_498637, EPI_ISL_498638, EPI_ISL_498639, EPI_ISL_498640, EPI_ISL_498641, EPI_ISL_498642, EPI_ISL_498643, EPI_ISL_498644, EPI_ISL_498645, EPI_ISL_498646, EPI_ISL_498647, EPI_ISL_498648, EPI_ISL_498649, EPI_ISL_498650, EPI_ISL_498651, EPI_ISL_498652, EPI_ISL_498653, EPI_ISL_498654, EPI_ISL_498655, EPI_ISL_498656, EPI_ISL_498657, EPI_ISL_498658, EPI_ISL_498659, EPI_ISL_498660, EPI_ISL_498661, EPI_ISL_498662, EPI_ISL_498663, EPI_ISL_498664, EPI_ISL_498665, EPI_ISL_498666, EPI_ISL_498667, EPI_ISL_498668, EPI_ISL_498669, EPI_ISL_498670, EPI_ISL_498671, EPI_ISL_498672, EPI_ISL_498673, EPI_ISL_498674, EPI_ISL_498675, EPI_ISL_498676, EPI_ISL_498677, EPI_ISL_498678, EPI_ISL_498679, EPI_ISL_498680, EPI_ISL_498681, EPI_ISL_498682, EPI_ISL_498683, EPI_ISL_498684, EPI_ISL_498685, EPI_ISL_498686, EPI_ISL_498687, EPI_ISL_498688, EPI_ISL_498689, EPI_ISL_498690                                                                                                                                                                                                                                                                                                                                                                                                                                                                                                                                                                                                                                                                                                                                                                                                                                                                                                                                                                                                 | see above                                                                      | Utah Public Health Laboratory                                                  | Utah Public Health Laboratory                                                                                                                                                                                                                                                                                                                                                    | Heidi Butz, Erin Young, Kelly Oakeson                                                                                                                                                                                                                                                                                                                                                                                                   |
| EPI_ISL_499830, EPI_ISL_499831, EPI_ISL_499832, EPI_ISL_499833, EPI_ISL_499834, EPI_ISL_499835, EPI_ISL_499836, EPI_ISL_499837, EPI_ISL_499838, EPI_ISL_499839, EPI_ISL_499840, EPI_ISL_499841, EPI_ISL_499842, EPI_ISL_499843, EPI_ISL_499844, EPI_ISL_499845, EPI_ISL_499846, EPI_ISL_499847, EPI_ISL_499848, EPI_ISL_499849, EPI_ISL_499850, EPI_ISL_499851, EPI_ISL_499852, EPI_ISL_499853, EPI_ISL_499854, EPI_ISL_499855, EPI_ISL_499856, EPI_ISL_499857, EPI_ISL_499858, EPI_ISL_499859, EPI_ISL_499860, EPI_ISL_499861, EPI_ISL_499862, EPI_ISL_499863, EPI_ISL_499864, EPI_ISL_499865, EPI_ISL_499866, EPI_ISL_499867, EPI_ISL_499868, EPI_ISL_499869, EPI_ISL_499870, EPI_ISL_499871, EPI_ISL_499872, EPI_ISL_499873, EPI_ISL_499874, EPI_ISL_499875, EPI_ISL_499876, EPI_ISL_499877, EPI_ISL_499878, EPI_ISL_499879, EPI_ISL_499880, EPI_ISL_499881, EPI_ISL_499882, EPI_ISL_499883, EPI_ISL_499884, EPI_ISL_499885, EPI_ISL_499886, EPI_ISL_499887, EPI_ISL_499888, EPI_ISL_499889, EPI_ISL_499890                                                                                                                                                                                                                                                                                                                                                                                                                                                                                                                                                                                                                                                                                                                                                                                                                                                                                                                                                                                                 | see above                                                                      | University of Birmingham                                                       | COVID-19 Genomics UK (COG-UK) Consortium                                                                                                                                                                                                                                                                                                                                         | Institute of Microbiology, University of Birmingham: Claire McMurray, Joanne Stockton, Samuel Nicholls, Radoslaw Poplawski, Will Rowe, Josh Quick, Nicholas Loman. University of Birmingham Testing Laboratory: Celina M Whalley, Andrew Bosworth, Charlotte Poxon, Kasun Wanigasooriya, Oliver Pickles, Mike Kidd, Alex Richter, Andrew D Beggs PHE Heartlands Lab: Husam Osman, Andrew Bosworth. Queen Elizabeth Hospital: Anna Casey |
| EPI_ISL_501275, EPI_ISL_501284, EPI_ISL_501285                                                                                                                                                                                                                                                                                                                                                                                                                                                                                                                                                                                                                                                                                                                                                                                                                                                                                                                                                                                                                                                                                                                                                                                                                                                                                                                                                                                                                                                                                                                                                                                                                                                                                                                                                                                                                                                                                                                                                                 | E. Gulbja Laboratorija                                                         | Latvian Biomedical Research and Study Centre                                   | Ivars Silamielis, Kaspars Megnis, Monta Ustinova, ikitā Zrelovs, Vita Rovte, Mikus Gavars, Dmitrijs Perminovs, Uga Dumpis, Jnis Kloviš                                                                                                                                                                                                                                           |                                                                                                                                                                                                                                                                                                                                                                                                                                         |
| EPI_ISL_501286, EPI_ISL_501287, EPI_ISL_501288, EPI_ISL_501289, EPI_ISL_501808, EPI_ISL_501817                                                                                                                                                                                                                                                                                                                                                                                                                                                                                                                                                                                                                                                                                                                                                                                                                                                                                                                                                                                                                                                                                                                                                                                                                                                                                                                                                                                                                                                                                                                                                                                                                                                                                                                                                                                                                                                                                                                 | Centri laboratorija                                                            | Latvian Biomedical Research and Study Centre                                   | Ivars Silamielis, Kaspars Megnis, Monta Ustinova, ikitā Zrelovs, Vita Rovte, Stella Lapia, Jana Oste, Marta Priedte, Uga Dumpis, Jnis Kloviš                                                                                                                                                                                                                                     |                                                                                                                                                                                                                                                                                                                                                                                                                                         |
| EPI_ISL_501823, EPI_ISL_501829, EPI_ISL_501833, EPI_ISL_501839, EPI_ISL_501849, EPI_ISL_501894                                                                                                                                                                                                                                                                                                                                                                                                                                                                                                                                                                                                                                                                                                                                                                                                                                                                                                                                                                                                                                                                                                                                                                                                                                                                                                                                                                                                                                                                                                                                                                                                                                                                                                                                                                                                                                                                                                                 | E. Gulbja Laboratorija                                                         | Latvian Biomedical Research and Study Centre                                   | Ivars Silamielis, Kaspars Megnis, Monta Ustinova, ikitā Zrelovs, Vita Rovte, Mikus Gavars, Dmitrijs Perminovs, Uga Dumpis, Jnis Kloviš                                                                                                                                                                                                                                           |                                                                                                                                                                                                                                                                                                                                                                                                                                         |
| EPI_ISL_501895, EPI_ISL_501896, EPI_ISL_501915, EPI_ISL_501922                                                                                                                                                                                                                                                                                                                                                                                                                                                                                                                                                                                                                                                                                                                                                                                                                                                                                                                                                                                                                                                                                                                                                                                                                                                                                                                                                                                                                                                                                                                                                                                                                                                                                                                                                                                                                                                                                                                                                 | Centri laboratorija                                                            | Latvian Biomedical Research and Study Centre                                   | Ivars Silamielis, Kaspars Megnis, Monta Ustinova, ikitā Zrelovs, Vita Rovte, Stella Lapia, Jana Oste, Marta Priedte, Uga Dumpis, Jnis Kloviš                                                                                                                                                                                                                                     |                                                                                                                                                                                                                                                                                                                                                                                                                                         |
| EPI_ISL_501929, EPI_ISL_501936                                                                                                                                                                                                                                                                                                                                                                                                                                                                                                                                                                                                                                                                                                                                                                                                                                                                                                                                                                                                                                                                                                                                                                                                                                                                                                                                                                                                                                                                                                                                                                                                                                                                                                                                                                                                                                                                                                                                                                                 | E. Gulbja Laboratorija                                                         | Latvian Biomedical Research and Study Centre                                   | Ivars Silamielis, Kaspars Megnis, Monta Ustinova, ikitā Zrelovs, Vita Rovte, Mikus Gavars, Dmitrijs Perminovs, Uga Dumpis, Jnis Kloviš                                                                                                                                                                                                                                           |                                                                                                                                                                                                                                                                                                                                                                                                                                         |
| EPI_ISL_509527, EPI_ISL_509528, EPI_ISL_509529, EPI_ISL_509530, EPI_ISL_509531, EPI_ISL_509532, EPI_ISL_509533, EPI_ISL_509534, EPI_ISL_509535, EPI_ISL_509536, EPI_ISL_509537, EPI_ISL_509538, EPI_ISL_509539, EPI_ISL_509540, EPI_ISL_509541, EPI_ISL_509542, EPI_ISL_509543, EPI_ISL_509544, EPI_ISL_509545, EPI_ISL_509546, EPI_ISL_509547, EPI_ISL_509548, EPI_ISL_509549, EPI_ISL_509550, EPI_ISL_509551, EPI_ISL_509552, EPI_ISL_509553, EPI_ISL_509554, EPI_ISL_509555, EPI_ISL_509556, EPI_ISL_509557, EPI_ISL_509558, EPI_ISL_509559, EPI_ISL_509560, EPI_ISL_509561, EPI_ISL_509562                                                                                                                                                                                                                                                                                                                                                                                                                                                                                                                                                                                                                                                                                                                                                                                                                                                                                                                                                                                                                                                                                                                                                                                                                                                                                                                                                                                                                 |                                                                                |                                                                                |                                                                                                                                                                                                                                                                                                                                                                                  |                                                                                                                                                                                                                                                                                                                                                                                                                                         |



|                                                                                                                                                                                                                                                                                                                                                                                                                                                                                                                                                                                                                                                                                                                                                                                                                                                                                                                                                                                                                                                                                                                |           |                                                                                |                                                                                                                          |                                                                                                                                                                                                                                                                                                                                                                                                                                         |
|----------------------------------------------------------------------------------------------------------------------------------------------------------------------------------------------------------------------------------------------------------------------------------------------------------------------------------------------------------------------------------------------------------------------------------------------------------------------------------------------------------------------------------------------------------------------------------------------------------------------------------------------------------------------------------------------------------------------------------------------------------------------------------------------------------------------------------------------------------------------------------------------------------------------------------------------------------------------------------------------------------------------------------------------------------------------------------------------------------------|-----------|--------------------------------------------------------------------------------|--------------------------------------------------------------------------------------------------------------------------|-----------------------------------------------------------------------------------------------------------------------------------------------------------------------------------------------------------------------------------------------------------------------------------------------------------------------------------------------------------------------------------------------------------------------------------------|
| EPI_ISL_509563, EPI_ISL_509567, EPI_ISL_509568, EPI_ISL_509569, EPI_ISL_509570, EPI_ISL_509571, EPI_ISL_509572, EPI_ISL_509573, EPI_ISL_509574, EPI_ISL_509575, EPI_ISL_509576, EPI_ISL_509577, EPI_ISL_509578, EPI_ISL_509579, EPI_ISL_509580, EPI_ISL_509581, EPI_ISL_509582, EPI_ISL_509583, EPI_ISL_509584, EPI_ISL_509585, EPI_ISL_509586, EPI_ISL_509587, EPI_ISL_509588, EPI_ISL_509589, EPI_ISL_509590, EPI_ISL_509591, EPI_ISL_509592, EPI_ISL_509593, EPI_ISL_509594, EPI_ISL_509595, EPI_ISL_509596, EPI_ISL_509597, EPI_ISL_509598, EPI_ISL_509599, EPI_ISL_509600                                                                                                                                                                                                                                                                                                                                                                                                                                                                                                                                 | see above | Utah Public Health Laboratory                                                  | Utah Public Health Laboratory                                                                                            | Heidi Butz, Erin Young, Kelly Oakeson                                                                                                                                                                                                                                                                                                                                                                                                   |
| EPI_ISL_509602, EPI_ISL_509603, EPI_ISL_509604, EPI_ISL_509605, EPI_ISL_509606, EPI_ISL_509607, EPI_ISL_509608, EPI_ISL_509609, EPI_ISL_509611, EPI_ISL_509619, EPI_ISL_509620, EPI_ISL_509621, EPI_ISL_509622, EPI_ISL_509623, EPI_ISL_509624, EPI_ISL_509625, EPI_ISL_509626, EPI_ISL_509627, EPI_ISL_509628, EPI_ISL_509629, EPI_ISL_509630, EPI_ISL_509631, EPI_ISL_509632, EPI_ISL_510044, EPI_ISL_510045, EPI_ISL_510046, EPI_ISL_510047, EPI_ISL_510048, EPI_ISL_510049, EPI_ISL_510050, EPI_ISL_510051, EPI_ISL_510052, EPI_ISL_510053, EPI_ISL_510054, EPI_ISL_510055, EPI_ISL_510056, EPI_ISL_510057, EPI_ISL_510058, EPI_ISL_510059, EPI_ISL_510060, EPI_ISL_510061, EPI_ISL_510062, EPI_ISL_510063                                                                                                                                                                                                                                                                                                                                                                                                 | see above | Servicio de Microbiología. HRU de Málaga. Servicio Andaluz de Salud            | SeqCOVID-SPAIN consortium/IBV(CSIC)                                                                                      | Inmaculada de Toro Peinado. M <sup>o</sup> Concepción Mediavilla Gradolph. Begoña Palop Borrás and SeqCOVID-SPAIN consortium                                                                                                                                                                                                                                                                                                            |
| EPI_ISL_510545                                                                                                                                                                                                                                                                                                                                                                                                                                                                                                                                                                                                                                                                                                                                                                                                                                                                                                                                                                                                                                                                                                 |           | Takayuki Hishiki Kanagawa Prefectural Institute of Public Health               | Takayuki Hishiki Kanagawa Prefectural Institute of Public Health                                                         | Hishiki,T., Suzuki,R., Sakuragi,J., Shimizu,H., Usui,K., Tanaka,Y., Kawai,J., Kogo,Y., Matsuki,Y., An,T., Hayashizaki,Y. and Takasaki,T.                                                                                                                                                                                                                                                                                                |
| EPI_ISL_512072                                                                                                                                                                                                                                                                                                                                                                                                                                                                                                                                                                                                                                                                                                                                                                                                                                                                                                                                                                                                                                                                                                 |           | Saikrishna Hospital, Mehsana                                                   | Gujarat Biotechnology Research Centre                                                                                    | Harshadhbhai Parmar, Apurvasinh Puvar, Janvi Raval, Zarna Patel, Monika Gandhi, Pinal Trivedi, Maharshi Pandya, Nidhi Patel, Nitin Savaliya, Raghawendra Kumar, Dinesh Kumar, Zuber Saiyed, Komal Patel, Labdhi Pandya, Afzal Ansari, Nikha Trivedi, R D Dixit, A M Kadri, Harsh Bakshi, Chaitanya Joshi, Madhvi Joshi                                                                                                                  |
| EPI_ISL_512313, EPI_ISL_512314, EPI_ISL_512645, EPI_ISL_512646                                                                                                                                                                                                                                                                                                                                                                                                                                                                                                                                                                                                                                                                                                                                                                                                                                                                                                                                                                                                                                                 |           | E. Gulbja Laboratorija                                                         | Latvian Biomedical Research and Study Centre                                                                             | Ivars Silamielis, Kaspars Megnis, Monta Ustinova, ikita Zrelovs, Vita Rovte, Mikus Gavars, Dmitrijs Perminovs, Uga Dumpis, Jnis Kloviš                                                                                                                                                                                                                                                                                                  |
| EPI_ISL_512647, EPI_ISL_512648, EPI_ISL_512649, EPI_ISL_512650, EPI_ISL_512651, EPI_ISL_512652                                                                                                                                                                                                                                                                                                                                                                                                                                                                                                                                                                                                                                                                                                                                                                                                                                                                                                                                                                                                                 |           | Latvijas Infektoloijas centrs                                                  | Latvian Biomedical Research and Study Centre                                                                             | Ivars Silamielis, Kaspars Megnis, Monta Ustinova, ikita Zrelovs, Vita Rovte, Jeena Storoženko, Tatjana Kolupajeva, Oksana Savicka, Uga Dumpis, Jnis Kloviš                                                                                                                                                                                                                                                                              |
| EPI_ISL_513640, EPI_ISL_513641, EPI_ISL_513642, EPI_ISL_513643, EPI_ISL_513644, EPI_ISL_513645, EPI_ISL_513646, EPI_ISL_513647, EPI_ISL_513648, EPI_ISL_513649, EPI_ISL_513650, EPI_ISL_513651, EPI_ISL_513652, EPI_ISL_513653, EPI_ISL_513654, EPI_ISL_513655, EPI_ISL_513656, EPI_ISL_513657, EPI_ISL_513658, EPI_ISL_513659, EPI_ISL_513660, EPI_ISL_513661, EPI_ISL_513662, EPI_ISL_513663, EPI_ISL_513664, EPI_ISL_513665, EPI_ISL_513666, EPI_ISL_513667, EPI_ISL_513668, EPI_ISL_513669, EPI_ISL_513670, EPI_ISL_513671, EPI_ISL_513672, EPI_ISL_513673, EPI_ISL_513674, EPI_ISL_513675, EPI_ISL_513676, EPI_ISL_513677, EPI_ISL_513678, EPI_ISL_513679, EPI_ISL_513680, EPI_ISL_513681, EPI_ISL_513682, EPI_ISL_513683, EPI_ISL_513684, EPI_ISL_513685, EPI_ISL_513686, EPI_ISL_513687, EPI_ISL_513688, EPI_ISL_513689, EPI_ISL_513690, EPI_ISL_513691, EPI_ISL_513692, EPI_ISL_513693, EPI_ISL_513694, EPI_ISL_513695, EPI_ISL_513696, EPI_ISL_513697, EPI_ISL_513698, EPI_ISL_513699, EPI_ISL_513700, EPI_ISL_513701, EPI_ISL_513702, EPI_ISL_513703, EPI_ISL_513704, EPI_ISL_513705, EPI_ISL_513706 | see above | Utah Public Health Laboratory                                                  | Utah Public Health Laboratory                                                                                            | Heidi Butz, Erin Young, Kelly Oakeson                                                                                                                                                                                                                                                                                                                                                                                                   |
| EPI_ISL_514245, EPI_ISL_514246, EPI_ISL_514247                                                                                                                                                                                                                                                                                                                                                                                                                                                                                                                                                                                                                                                                                                                                                                                                                                                                                                                                                                                                                                                                 |           | National Institute of Laboratory Medicine and Referral Center                  | Genomic Research Lab, BCSIR                                                                                              | Iffat Jahan, Abu Sayeed Mohammad Mahmud, Mohammad Samir Uzzaman, Eshrar Osman, Md. Ahashan Habib, Shahina Akter, Tanjina Akhter Banu, Md. Murshed Hasan Sarkar, Barna Goswami, Md. Saddam Hossain, Tasnim Nafisa, Md. Maruf Ahmed Molla, Mahmuda Yeasmin, Asish Kumar Ghosh, A. K. M. Shamsuzzaman, Sheikh Md. Selim Al Din, Utpal Chandra Ray, Salek Ahmed Sajib, Md. Salim Khan                                                       |
| EPI_ISL_514435                                                                                                                                                                                                                                                                                                                                                                                                                                                                                                                                                                                                                                                                                                                                                                                                                                                                                                                                                                                                                                                                                                 |           | Dr. RSS Hospital, Modasa                                                       | Gujarat Biotechnology Research Centre                                                                                    | Harsh Chaudhari, Zarna Patel, Monika Gandhi, Pinal Trivedi, Maharshi Pandya, Nidhi Patel, Nitin Savaliya, Raghawendra Kumar, Dinesh Kumar, Zuber Saiyed, Komal Patel, Labdhi Pandya, Afzal Ansari, Nikha Trivedi, Apurvasinh Puvar, Janvi Raval, R D Dixit, A M Kadri, Harsh Bakshi, Chaitanya Joshi, Madhvi Joshi                                                                                                                      |
| EPI_ISL_515185, EPI_ISL_515186                                                                                                                                                                                                                                                                                                                                                                                                                                                                                                                                                                                                                                                                                                                                                                                                                                                                                                                                                                                                                                                                                 |           | Latvijas Infektoloijas centrs                                                  | Latvian Biomedical Research and Study Centre                                                                             | Ivars Silamielis, Kaspars Megnis, Monta Ustinova, ikita Zrelovs, Vita Rovte, Jeena Storoženko, Tatjana Kolupajeva, Oksana Savicka, Uga Dumpis, Jnis Kloviš                                                                                                                                                                                                                                                                              |
| EPI_ISL_515187, EPI_ISL_515188, EPI_ISL_515189, EPI_ISL_515190, EPI_ISL_515191, EPI_ISL_515192, EPI_ISL_515193, EPI_ISL_515194, EPI_ISL_515195                                                                                                                                                                                                                                                                                                                                                                                                                                                                                                                                                                                                                                                                                                                                                                                                                                                                                                                                                                 |           | E. Gulbja Laboratorija                                                         | Latvian Biomedical Research and Study Centre                                                                             | Ivars Silamielis, Kaspars Megnis, Monta Ustinova, ikita Zrelovs, Vita Rovte, Mikus Gavars, Dmitrijs Perminovs, Uga Dumpis, Jnis Kloviš                                                                                                                                                                                                                                                                                                  |
| EPI_ISL_515196                                                                                                                                                                                                                                                                                                                                                                                                                                                                                                                                                                                                                                                                                                                                                                                                                                                                                                                                                                                                                                                                                                 |           | Centri laboratorija                                                            | Latvian Biomedical Research and Study Centre                                                                             | Ivars Silamielis, Kaspars Megnis, Monta Ustinova, ikita Zrelovs, Vita Rovte, Stella Lapia, Jana Oste, Marta Priedte, Uga Dumpis, Jnis Kloviš                                                                                                                                                                                                                                                                                            |
| EPI_ISL_522396, EPI_ISL_522397, EPI_ISL_522398, EPI_ISL_522399, EPI_ISL_522400, EPI_ISL_522401, EPI_ISL_522402, EPI_ISL_522403, EPI_ISL_522404, EPI_ISL_522405                                                                                                                                                                                                                                                                                                                                                                                                                                                                                                                                                                                                                                                                                                                                                                                                                                                                                                                                                 |           | Alaska State Virology Laboratory                                               | Alaska State Virology Laboratory                                                                                         | Jack Chen, Ph.D.                                                                                                                                                                                                                                                                                                                                                                                                                        |
| EPI_ISL_522872                                                                                                                                                                                                                                                                                                                                                                                                                                                                                                                                                                                                                                                                                                                                                                                                                                                                                                                                                                                                                                                                                                 |           | Instituto Nacional de Medicina Genómica                                        | Instituto Nacional de Medicina Genómica                                                                                  | Hidalgo-Miranda A, Mendoza-Vargas A, Reyes-Grajeda JP, Cisneros-Villanueva M, Cedro-Tanda A, Hurtado-Cordova E, Peñaloza-Figueroa F, Herrera-Montalvo LA                                                                                                                                                                                                                                                                                |
| EPI_ISL_522873, EPI_ISL_522874, EPI_ISL_522875, EPI_ISL_522876, EPI_ISL_522877                                                                                                                                                                                                                                                                                                                                                                                                                                                                                                                                                                                                                                                                                                                                                                                                                                                                                                                                                                                                                                 |           | Instituto Nacional de Medicina Genómica                                        | Instituto Nacional de Medicina Genómica                                                                                  | Hidalgo-Miranda A, Mendoza-Vargas A, Reyes-Grajeda JP, Cisneros-Villanueva M, Cedro-Tanda A, Hurtado-Cordova E, Peñaloza-Figueroa F, Herrera-Montalvo LA                                                                                                                                                                                                                                                                                |
| EPI_ISL_522878                                                                                                                                                                                                                                                                                                                                                                                                                                                                                                                                                                                                                                                                                                                                                                                                                                                                                                                                                                                                                                                                                                 |           | Instituto Nacional de Medicina Genómica                                        | Instituto Nacional de Medicina Genómica                                                                                  | Hidalgo-Miranda A, Mendoza-Vargas A, Reyes-Grajeda JP, Cisneros-Villanueva M, Hurtado-Cordova E, Cedro-Tanda A, Peñaloza-Figueroa F, Herrera-Montalvo LA                                                                                                                                                                                                                                                                                |
| EPI_ISL_522879, EPI_ISL_522880, EPI_ISL_522940, EPI_ISL_522941, EPI_ISL_522942, EPI_ISL_522978, EPI_ISL_522979, EPI_ISL_522980, EPI_ISL_522981, EPI_ISL_522982, EPI_ISL_522983, EPI_ISL_522984, EPI_ISL_522985, EPI_ISL_522986, EPI_ISL_523500                                                                                                                                                                                                                                                                                                                                                                                                                                                                                                                                                                                                                                                                                                                                                                                                                                                                 | see above | Instituto Nacional de Medicina Genómica                                        | Instituto Nacional de Medicina Genómica                                                                                  | Hidalgo-Miranda A, Mendoza-Vargas A, Reyes-Grajeda JP, Cisneros-Villanueva M, Cedro-Tanda A, Hurtado-Cordova E, Peñaloza-Figueroa F, Herrera-Montalvo LA                                                                                                                                                                                                                                                                                |
| EPI_ISL_524732                                                                                                                                                                                                                                                                                                                                                                                                                                                                                                                                                                                                                                                                                                                                                                                                                                                                                                                                                                                                                                                                                                 |           | Dr. RSS Hospital, Modasa                                                       | Gujarat Biotechnology Research Centre                                                                                    | Harsh Chaudhari, Apurvasinh Puvar, Janvi Raval, Zarna Patel, Monika Gandhi, Pinal Trivedi, Maharshi Pandya, Nidhi Patel, Nitin Savaliya, Raghawendra Kumar, Dinesh Kumar, Zuber Saiyed, Komal Patel, Labdhi Pandya, Afzal Ansari, Nikha Trivedi, R D Dixit, A M Kadri, Harsh Bakshi, Chaitanya Joshi, Madhvi Joshi, Neena Doshi, Varsha Godbole                                                                                         |
| EPI_ISL_525472, EPI_ISL_525473                                                                                                                                                                                                                                                                                                                                                                                                                                                                                                                                                                                                                                                                                                                                                                                                                                                                                                                                                                                                                                                                                 |           | Institute of Clinical Microbiology and Hygiene, University Hospital Regensburg | Institute of Clinical Microbiology and Hygiene, University Hospital Regensburg                                           | Hiergeist, A.                                                                                                                                                                                                                                                                                                                                                                                                                           |
| EPI_ISL_525758, EPI_ISL_525759, EPI_ISL_525760                                                                                                                                                                                                                                                                                                                                                                                                                                                                                                                                                                                                                                                                                                                                                                                                                                                                                                                                                                                                                                                                 |           | Alaska State Virology Laboratory                                               | Alaska State Virology Laboratory                                                                                         | Jack Chen, Ph.D.                                                                                                                                                                                                                                                                                                                                                                                                                        |
| EPI_ISL_526287, EPI_ISL_526288, EPI_ISL_526289, EPI_ISL_526290, EPI_ISL_526291, EPI_ISL_526292, EPI_ISL_526293, EPI_ISL_526294, EPI_ISL_526295, EPI_ISL_526296, EPI_ISL_526297, EPI_ISL_526298, EPI_ISL_526299, EPI_ISL_526300, EPI_ISL_526301, EPI_ISL_526302, EPI_ISL_526303, EPI_ISL_526304, EPI_ISL_526305, EPI_ISL_526306, EPI_ISL_526307, EPI_ISL_526308, EPI_ISL_526309, EPI_ISL_526310, EPI_ISL_526311, EPI_ISL_526312, EPI_ISL_526313, EPI_ISL_526314, EPI_ISL_526315, EPI_ISL_526316, EPI_ISL_526317, EPI_ISL_526318, EPI_ISL_526319, EPI_ISL_526320, EPI_ISL_526321, EPI_ISL_526322, EPI_ISL_526323, EPI_ISL_526324, EPI_ISL_526325, EPI_ISL_526326, EPI_ISL_526327, EPI_ISL_526328, EPI_ISL_526329, EPI_ISL_526330, EPI_ISL_526331, EPI_ISL_526332, EPI_ISL_526333, EPI_ISL_526334, EPI_ISL_526335, EPI_ISL_526336                                                                                                                                                                                                                                                                                 | see above | University of Birmingham                                                       | COVID-19 Genomics UK (COG-UK) Consortium                                                                                 | Institute of Microbiology, University of Birmingham: Claire McMurray, Joanne Stockton, Samuel Nicholls, Radoslaw Poplawski, Will Rowe, Josh Quick, Nicholas Loman. University of Birmingham Testing Laboratory: Celina M Whalley, Andrew Bosworth, Charlotte Poxon, Kasun Wanigasooriya, Oliver Pickles, Mike Kidd, Alex Richter, Andrew D Beggs PHE Heartlands Lab: Husam Osman, Andrew Bosworth. Queen Elizabeth Hospital: Anna Casey |
| EPI_ISL_528550, EPI_ISL_528551, EPI_ISL_528552, EPI_ISL_528553, EPI_ISL_528554, EPI_ISL_528555, EPI_ISL_528556                                                                                                                                                                                                                                                                                                                                                                                                                                                                                                                                                                                                                                                                                                                                                                                                                                                                                                                                                                                                 |           | National Genomics Core-Center for DNA Fingerprinting and Diagnostics           | National Genomics Core- Center for DNA Fingerprinting and Diagnostics (NGC-CDFD)- DBT's PAN-INDIA-1000 Genome consortium | Heena Shah, G Shashikanth, Bala Pratyusha, Vinay Donipadi, Shruti Dasgupta, Kandali Sreethi Sreenivasulu Reddy, Chandra Shekhar Singh, Sunke Vijayakumar, R Lakshmi Vaishna, Jenige Aravindh Kumar, Muthulakshmi, V Naga Sailaja, R Harinarayanan, Rashna Bhandari, Murali Dharan Bashyam, Debashish Mitra, Divya Vashisht, Ashwin Dalal                                                                                                |
| EPI_ISL_528557, EPI_ISL_528558, EPI_ISL_528559, EPI_ISL_528560, EPI_ISL_528561, EPI_ISL_528562, EPI_ISL_528563, EPI_ISL_528564                                                                                                                                                                                                                                                                                                                                                                                                                                                                                                                                                                                                                                                                                                                                                                                                                                                                                                                                                                                 |           | National Genomics Core-Center for DNA Fingerprinting and Diagnostics           | National Genomics Core- Center for DNA Fingerprinting and Diagnostics (NGC-CDFD)- DBT's PAN-INDIA-1000 Genome consortium | Heena Shah, G Shashikanth, Bala Pratyusha, Vinay Donipadi, Binod Bhari Pradhan, Jamal Md Nurul Jain, Srinivas G, C Bala Maddeleti, R. Manorama, T. Navaneetha, Surya Vamshi, Chandra Shekar P, R Harinarayanan, Rashna Bhandari, Murali Dharan Bashyam, Debashish Mitra, Divya Vashisht, Ashwin Dalal                                                                                                                                   |
| EPI_ISL_528588, EPI_ISL_528589,                                                                                                                                                                                                                                                                                                                                                                                                                                                                                                                                                                                                                                                                                                                                                                                                                                                                                                                                                                                                                                                                                |           | National Genomics Core-Center for DNA Fingerprinting and                       | National Genomics Core- Center for DNA Fingerprinting and                                                                | Heena Shah, G Shashikanth, Bala Pratyusha, Vinay Donipadi, Raju Kumar, Ajay Kumar Chaudhary, Akash Chinchole, Brahmaji Sontyana, C. Arun Kumar,                                                                                                                                                                                                                                                                                         |

|                                                                                                                                                                                                                                                                                                                                                                                                                                                                                                                                                                                                                                                                                                                                                                                                                                                                                                                                                                                                                                                                                                                                                                                                                                                                                                                                                                                                                                                                                                                                                                                                                                                                                                                                                                                                                                                                                                                                                                                                                                                                                                                                                                                                                                                                                                                                                                                                                                                                                                                                                                                                                                                                                                                                                                                                                                                                                                                                                                                                                                                                                                                                                                                                                                                                                                                                                                                                                                                                                                                                                                                                                                                                                                                                                                                                                                                                                                                                                                                                                                                                                                                                                                                                                                                                                                                                                                                                                                                                                                                                                                                                                                                                                                                                                                                                                                                                                                                                                                                                                                                                                                                                                                                                                                                                                                                                                                                                                                                                                                                                                                                                                                                                                                                                                                                                                                                                                                                                                                                                                                                                                                                                                                                                                                                                                                                                                                                                                                                                                                                                                                                                                                                                                                                                                                                                                                                                                                                                                                                                                                                                                                                                                                                                                                                                                                                                                                                                                                                                                |                                                                      |                                                                                                                                                                                                               |                                                                                                                                                                                                                                                                                                                                                                                                                                         |                                                                                                                                                                                                                                                                                                                                                                                                     |
|--------------------------------------------------------------------------------------------------------------------------------------------------------------------------------------------------------------------------------------------------------------------------------------------------------------------------------------------------------------------------------------------------------------------------------------------------------------------------------------------------------------------------------------------------------------------------------------------------------------------------------------------------------------------------------------------------------------------------------------------------------------------------------------------------------------------------------------------------------------------------------------------------------------------------------------------------------------------------------------------------------------------------------------------------------------------------------------------------------------------------------------------------------------------------------------------------------------------------------------------------------------------------------------------------------------------------------------------------------------------------------------------------------------------------------------------------------------------------------------------------------------------------------------------------------------------------------------------------------------------------------------------------------------------------------------------------------------------------------------------------------------------------------------------------------------------------------------------------------------------------------------------------------------------------------------------------------------------------------------------------------------------------------------------------------------------------------------------------------------------------------------------------------------------------------------------------------------------------------------------------------------------------------------------------------------------------------------------------------------------------------------------------------------------------------------------------------------------------------------------------------------------------------------------------------------------------------------------------------------------------------------------------------------------------------------------------------------------------------------------------------------------------------------------------------------------------------------------------------------------------------------------------------------------------------------------------------------------------------------------------------------------------------------------------------------------------------------------------------------------------------------------------------------------------------------------------------------------------------------------------------------------------------------------------------------------------------------------------------------------------------------------------------------------------------------------------------------------------------------------------------------------------------------------------------------------------------------------------------------------------------------------------------------------------------------------------------------------------------------------------------------------------------------------------------------------------------------------------------------------------------------------------------------------------------------------------------------------------------------------------------------------------------------------------------------------------------------------------------------------------------------------------------------------------------------------------------------------------------------------------------------------------------------------------------------------------------------------------------------------------------------------------------------------------------------------------------------------------------------------------------------------------------------------------------------------------------------------------------------------------------------------------------------------------------------------------------------------------------------------------------------------------------------------------------------------------------------------------------------------------------------------------------------------------------------------------------------------------------------------------------------------------------------------------------------------------------------------------------------------------------------------------------------------------------------------------------------------------------------------------------------------------------------------------------------------------------------------------------------------------------------------------------------------------------------------------------------------------------------------------------------------------------------------------------------------------------------------------------------------------------------------------------------------------------------------------------------------------------------------------------------------------------------------------------------------------------------------------------------------------------------------------------------------------------------------------------------------------------------------------------------------------------------------------------------------------------------------------------------------------------------------------------------------------------------------------------------------------------------------------------------------------------------------------------------------------------------------------------------------------------------------------------------------------------------------------------------------------------------------------------------------------------------------------------------------------------------------------------------------------------------------------------------------------------------------------------------------------------------------------------------------------------------------------------------------------------------------------------------------------------------------------------------------------------------------------------------------------------------------------------------------------------------------------------------------------------------------------------------------------------------------------------------------------------------------------------------------------------------------------------------------------------------------------------------------------------------------------------------------------------------------------------------------------------------------------------------------------------|----------------------------------------------------------------------|---------------------------------------------------------------------------------------------------------------------------------------------------------------------------------------------------------------|-----------------------------------------------------------------------------------------------------------------------------------------------------------------------------------------------------------------------------------------------------------------------------------------------------------------------------------------------------------------------------------------------------------------------------------------|-----------------------------------------------------------------------------------------------------------------------------------------------------------------------------------------------------------------------------------------------------------------------------------------------------------------------------------------------------------------------------------------------------|
| EPI_ISL_528590, EPI_ISL_528591, EPI_ISL_528592, EPI_ISL_528593, EPI_ISL_528594, EPI_ISL_528595                                                                                                                                                                                                                                                                                                                                                                                                                                                                                                                                                                                                                                                                                                                                                                                                                                                                                                                                                                                                                                                                                                                                                                                                                                                                                                                                                                                                                                                                                                                                                                                                                                                                                                                                                                                                                                                                                                                                                                                                                                                                                                                                                                                                                                                                                                                                                                                                                                                                                                                                                                                                                                                                                                                                                                                                                                                                                                                                                                                                                                                                                                                                                                                                                                                                                                                                                                                                                                                                                                                                                                                                                                                                                                                                                                                                                                                                                                                                                                                                                                                                                                                                                                                                                                                                                                                                                                                                                                                                                                                                                                                                                                                                                                                                                                                                                                                                                                                                                                                                                                                                                                                                                                                                                                                                                                                                                                                                                                                                                                                                                                                                                                                                                                                                                                                                                                                                                                                                                                                                                                                                                                                                                                                                                                                                                                                                                                                                                                                                                                                                                                                                                                                                                                                                                                                                                                                                                                                                                                                                                                                                                                                                                                                                                                                                                                                                                                                 | Diagnostics                                                          | Diagnostics (NGC-CDFD)- DBT's PAN-INDIA-1000 Genome consortium                                                                                                                                                | Chandra Shekhar V, Chilakala Gangi Reddy, Chinthakindi KrishnaPrasad, R Harinarayanan, Rashna Bhandari, Murali Dharan Bashyam, Debashish Mitra, Divya Vashisht, Ashwin Dalal                                                                                                                                                                                                                                                            |                                                                                                                                                                                                                                                                                                                                                                                                     |
| EPI_ISL_528617, EPI_ISL_528618, EPI_ISL_528619, EPI_ISL_528620, EPI_ISL_528621, EPI_ISL_528622, EPI_ISL_528623, EPI_ISL_528624                                                                                                                                                                                                                                                                                                                                                                                                                                                                                                                                                                                                                                                                                                                                                                                                                                                                                                                                                                                                                                                                                                                                                                                                                                                                                                                                                                                                                                                                                                                                                                                                                                                                                                                                                                                                                                                                                                                                                                                                                                                                                                                                                                                                                                                                                                                                                                                                                                                                                                                                                                                                                                                                                                                                                                                                                                                                                                                                                                                                                                                                                                                                                                                                                                                                                                                                                                                                                                                                                                                                                                                                                                                                                                                                                                                                                                                                                                                                                                                                                                                                                                                                                                                                                                                                                                                                                                                                                                                                                                                                                                                                                                                                                                                                                                                                                                                                                                                                                                                                                                                                                                                                                                                                                                                                                                                                                                                                                                                                                                                                                                                                                                                                                                                                                                                                                                                                                                                                                                                                                                                                                                                                                                                                                                                                                                                                                                                                                                                                                                                                                                                                                                                                                                                                                                                                                                                                                                                                                                                                                                                                                                                                                                                                                                                                                                                                                 | National Genomics Core-Center for DNA Fingerprinting and Diagnostics | National Genomics Core-Center for DNA Fingerprinting and Diagnostics (NGC-CDFD)- DBT's PAN-INDIA-1000 Genome consortium                                                                                       | Heena Shah, G Shashikanth, Bala Pratyusha, Vinay Donipadi, K.Manohar, Madhumohan Rao, Shubhra Ganguli, Suchitra Upreti, Swathi Chodisetty, Vani Singh, R Harinarayanan, Rashna Bhandari, Murali Dharan Bashyam, Debashish Mitra, Divya Vashisht, Ashwin Dalal                                                                                                                                                                           |                                                                                                                                                                                                                                                                                                                                                                                                     |
| EPI_ISL_528631, EPI_ISL_528632, EPI_ISL_528633, EPI_ISL_528634, EPI_ISL_528635, EPI_ISL_528636                                                                                                                                                                                                                                                                                                                                                                                                                                                                                                                                                                                                                                                                                                                                                                                                                                                                                                                                                                                                                                                                                                                                                                                                                                                                                                                                                                                                                                                                                                                                                                                                                                                                                                                                                                                                                                                                                                                                                                                                                                                                                                                                                                                                                                                                                                                                                                                                                                                                                                                                                                                                                                                                                                                                                                                                                                                                                                                                                                                                                                                                                                                                                                                                                                                                                                                                                                                                                                                                                                                                                                                                                                                                                                                                                                                                                                                                                                                                                                                                                                                                                                                                                                                                                                                                                                                                                                                                                                                                                                                                                                                                                                                                                                                                                                                                                                                                                                                                                                                                                                                                                                                                                                                                                                                                                                                                                                                                                                                                                                                                                                                                                                                                                                                                                                                                                                                                                                                                                                                                                                                                                                                                                                                                                                                                                                                                                                                                                                                                                                                                                                                                                                                                                                                                                                                                                                                                                                                                                                                                                                                                                                                                                                                                                                                                                                                                                                                 | National Genomics Core-Center for DNA Fingerprinting and Diagnostics | National Genomics Core-Center for DNA Fingerprinting and Diagnostics (NGC-CDFD)- DBT's PAN-INDIA-1000 Genome consortium                                                                                       | Heena Shah, G Shashikanth, Bala Pratyusha, Vinay Donipadi, K.Manohar, Madhumohan Rao, Shruti Dasgupta, Kandali Sreethi Sreenivasulu Reddy, Chandra Shekhar Singh, Sunke Vijayakumar, R Lakshmi Vaishna, Jenige Aravindh Kumar, Muthalakshmi, V Naga Sailaja, R Harinarayanan, Rashna Bhandari, Murali Dharan Bashyam, Debashish Mitra, Divya Vashisht, Ashwin Dalal                                                                     |                                                                                                                                                                                                                                                                                                                                                                                                     |
| EPI_ISL_528749                                                                                                                                                                                                                                                                                                                                                                                                                                                                                                                                                                                                                                                                                                                                                                                                                                                                                                                                                                                                                                                                                                                                                                                                                                                                                                                                                                                                                                                                                                                                                                                                                                                                                                                                                                                                                                                                                                                                                                                                                                                                                                                                                                                                                                                                                                                                                                                                                                                                                                                                                                                                                                                                                                                                                                                                                                                                                                                                                                                                                                                                                                                                                                                                                                                                                                                                                                                                                                                                                                                                                                                                                                                                                                                                                                                                                                                                                                                                                                                                                                                                                                                                                                                                                                                                                                                                                                                                                                                                                                                                                                                                                                                                                                                                                                                                                                                                                                                                                                                                                                                                                                                                                                                                                                                                                                                                                                                                                                                                                                                                                                                                                                                                                                                                                                                                                                                                                                                                                                                                                                                                                                                                                                                                                                                                                                                                                                                                                                                                                                                                                                                                                                                                                                                                                                                                                                                                                                                                                                                                                                                                                                                                                                                                                                                                                                                                                                                                                                                                 | Santosa Hospital Bandung Central                                     | School of Life Sciences and Technology & School of Pharmacy-Institut Teknologi Bandung; Molecular Genetics Laboratory-Faculty of Medicine-Universitas Padjadjaran; Laboratorium Kesehatan Provinsi Jawa Barat | Husna Nugrahapraja, Azzania Fibriani, Catur Riani, Marselina Irasonia Tan, Yunia Sribudiani, Tarwadi, Ema Rahmawati, Savira Ekawardhani, Hesti Lina Wiraswati, Ryan Bayusantika Ristandi, Rifky Waluyajati Rachman, Cut Nur Cinthia Alamanda, Lia Faridah, Davin H. E. Setiarmarga, Rizki Mardian, Hammam Riza, Sony Solistia Wirawan, Agung Eru Wibowo, Ivan Faizal                                                                    |                                                                                                                                                                                                                                                                                                                                                                                                     |
| EPI_ISL_528759                                                                                                                                                                                                                                                                                                                                                                                                                                                                                                                                                                                                                                                                                                                                                                                                                                                                                                                                                                                                                                                                                                                                                                                                                                                                                                                                                                                                                                                                                                                                                                                                                                                                                                                                                                                                                                                                                                                                                                                                                                                                                                                                                                                                                                                                                                                                                                                                                                                                                                                                                                                                                                                                                                                                                                                                                                                                                                                                                                                                                                                                                                                                                                                                                                                                                                                                                                                                                                                                                                                                                                                                                                                                                                                                                                                                                                                                                                                                                                                                                                                                                                                                                                                                                                                                                                                                                                                                                                                                                                                                                                                                                                                                                                                                                                                                                                                                                                                                                                                                                                                                                                                                                                                                                                                                                                                                                                                                                                                                                                                                                                                                                                                                                                                                                                                                                                                                                                                                                                                                                                                                                                                                                                                                                                                                                                                                                                                                                                                                                                                                                                                                                                                                                                                                                                                                                                                                                                                                                                                                                                                                                                                                                                                                                                                                                                                                                                                                                                                                 | Santo Borromeus Hospital                                             | School of Life Sciences and Technology & School of Pharmacy-Institut Teknologi Bandung; Molecular Genetics Laboratory-Faculty of Medicine-Universitas Padjadjaran; Laboratorium Kesehatan Provinsi Jawa Barat | Husna Nugrahapraja, Azzania Fibriani, Catur Riani, Marselina Irasonia Tan, Yunia Sribudiani, Tarwadi, Ema Rahmawati, Savira Ekawardhani, Hesti Lina Wiraswati, Ryan Bayusantika Ristandi, Rifky Waluyajati Rachman, Cut Nur Cinthia Alamanda, Lia Faridah, Tri Hanggono Achmad, Mas Rizky A.A. Syamsunarno, Fensi Amalina, Hammam Riza, Sony Solistia Wirawan, Agung Eru Wibowo, Ivan Faizal                                            |                                                                                                                                                                                                                                                                                                                                                                                                     |
| EPI_ISL_529149, EPI_ISL_529150                                                                                                                                                                                                                                                                                                                                                                                                                                                                                                                                                                                                                                                                                                                                                                                                                                                                                                                                                                                                                                                                                                                                                                                                                                                                                                                                                                                                                                                                                                                                                                                                                                                                                                                                                                                                                                                                                                                                                                                                                                                                                                                                                                                                                                                                                                                                                                                                                                                                                                                                                                                                                                                                                                                                                                                                                                                                                                                                                                                                                                                                                                                                                                                                                                                                                                                                                                                                                                                                                                                                                                                                                                                                                                                                                                                                                                                                                                                                                                                                                                                                                                                                                                                                                                                                                                                                                                                                                                                                                                                                                                                                                                                                                                                                                                                                                                                                                                                                                                                                                                                                                                                                                                                                                                                                                                                                                                                                                                                                                                                                                                                                                                                                                                                                                                                                                                                                                                                                                                                                                                                                                                                                                                                                                                                                                                                                                                                                                                                                                                                                                                                                                                                                                                                                                                                                                                                                                                                                                                                                                                                                                                                                                                                                                                                                                                                                                                                                                                                 | Technology Centre, Guangzhou Customs                                 | Technology Centre, Guangzhou Customs                                                                                                                                                                          | Huang, J., Shi, Y., Sun, J., Zheng, K., Zhu, ., Sun, F., Zhuang, Z., Dai, J., Zhang, Z., Huang, S., Wang, Y., Li, X.                                                                                                                                                                                                                                                                                                                    |                                                                                                                                                                                                                                                                                                                                                                                                     |
| EPI_ISL_529218, EPI_ISL_529219, EPI_ISL_529220, EPI_ISL_529221, EPI_ISL_529222, EPI_ISL_529223, EPI_ISL_529224, EPI_ISL_529225, EPI_ISL_529226, EPI_ISL_529227, EPI_ISL_529228, EPI_ISL_529229, EPI_ISL_529230, EPI_ISL_529231, EPI_ISL_529232, EPI_ISL_529233, EPI_ISL_529234, EPI_ISL_529235, EPI_ISL_529236, EPI_ISL_529237, EPI_ISL_529238, EPI_ISL_529239, EPI_ISL_529240, EPI_ISL_529241, EPI_ISL_529242, EPI_ISL_529243, EPI_ISL_529244, EPI_ISL_529245, EPI_ISL_529246, EPI_ISL_529247, EPI_ISL_529248, EPI_ISL_529249, EPI_ISL_529250, EPI_ISL_529251, EPI_ISL_529252, EPI_ISL_529253, EPI_ISL_529254, EPI_ISL_529255, EPI_ISL_529256, EPI_ISL_529257, EPI_ISL_529258, EPI_ISL_529259, EPI_ISL_529260, EPI_ISL_529261, EPI_ISL_529262, EPI_ISL_529263, EPI_ISL_529264, EPI_ISL_529265, EPI_ISL_529266, EPI_ISL_529267, EPI_ISL_529268, EPI_ISL_529269, EPI_ISL_529270, EPI_ISL_529271, EPI_ISL_529272, EPI_ISL_529273, EPI_ISL_529274, EPI_ISL_529275, EPI_ISL_529276, EPI_ISL_529277, EPI_ISL_529278, EPI_ISL_529279, EPI_ISL_529280, EPI_ISL_529281, EPI_ISL_529282, EPI_ISL_529283, EPI_ISL_529284, EPI_ISL_529285, EPI_ISL_529286, EPI_ISL_529287, EPI_ISL_529288, EPI_ISL_529289, EPI_ISL_529290, EPI_ISL_529291, EPI_ISL_529292, EPI_ISL_529293, EPI_ISL_529294, EPI_ISL_529295, EPI_ISL_529296, EPI_ISL_529297, EPI_ISL_529298, EPI_ISL_529299, EPI_ISL_529300, EPI_ISL_529301, EPI_ISL_529302, EPI_ISL_529303, EPI_ISL_529304, EPI_ISL_529305, EPI_ISL_529306, EPI_ISL_529307, EPI_ISL_529308, EPI_ISL_529309, EPI_ISL_529310, EPI_ISL_529311, EPI_ISL_529312, EPI_ISL_529313, EPI_ISL_529314, EPI_ISL_529315, EPI_ISL_529316, EPI_ISL_529317, EPI_ISL_529318, EPI_ISL_529319, EPI_ISL_529320, EPI_ISL_529321, EPI_ISL_529322, EPI_ISL_529323, EPI_ISL_529324, EPI_ISL_529325, EPI_ISL_529326, EPI_ISL_529327, EPI_ISL_529328, EPI_ISL_529329, EPI_ISL_529330, EPI_ISL_529331, EPI_ISL_529332, EPI_ISL_529333, EPI_ISL_529334, EPI_ISL_529335, EPI_ISL_529336, EPI_ISL_529337, EPI_ISL_529338, EPI_ISL_529339, EPI_ISL_529340, EPI_ISL_529341, EPI_ISL_529342, EPI_ISL_529343, EPI_ISL_529344, EPI_ISL_529345, EPI_ISL_529346, EPI_ISL_529347, EPI_ISL_529348, EPI_ISL_529349, EPI_ISL_529350, EPI_ISL_529351, EPI_ISL_529352, EPI_ISL_529353, EPI_ISL_529354, EPI_ISL_529355, EPI_ISL_529356, EPI_ISL_529357, EPI_ISL_529358, EPI_ISL_529359, EPI_ISL_529360, EPI_ISL_529361, EPI_ISL_529362, EPI_ISL_529363, EPI_ISL_529364, EPI_ISL_529365, EPI_ISL_529366, EPI_ISL_529367, EPI_ISL_529368, EPI_ISL_529369, EPI_ISL_529370, EPI_ISL_529371, EPI_ISL_529372, EPI_ISL_529373, EPI_ISL_529374, EPI_ISL_529375, EPI_ISL_529376, EPI_ISL_529377, EPI_ISL_529378, EPI_ISL_529379, EPI_ISL_529380, EPI_ISL_529381, EPI_ISL_529382, EPI_ISL_529383, EPI_ISL_529384, EPI_ISL_529385, EPI_ISL_529386, EPI_ISL_529387, EPI_ISL_529388, EPI_ISL_529389, EPI_ISL_529390, EPI_ISL_529391, EPI_ISL_529392, EPI_ISL_529393, EPI_ISL_529394, EPI_ISL_529395, EPI_ISL_529396, EPI_ISL_529397, EPI_ISL_529398, EPI_ISL_529399, EPI_ISL_529400, EPI_ISL_529401, EPI_ISL_529402, EPI_ISL_529403, EPI_ISL_529404, EPI_ISL_529405, EPI_ISL_529406, EPI_ISL_529407, EPI_ISL_529408, EPI_ISL_529409, EPI_ISL_529410, EPI_ISL_529411, EPI_ISL_529412, EPI_ISL_529413, EPI_ISL_529414, EPI_ISL_529415, EPI_ISL_529416, EPI_ISL_529417, EPI_ISL_529418, EPI_ISL_529419, EPI_ISL_529420, EPI_ISL_529421, EPI_ISL_529422, EPI_ISL_529423, EPI_ISL_529424, EPI_ISL_529425, EPI_ISL_529426, EPI_ISL_529427, EPI_ISL_529428, EPI_ISL_529429, EPI_ISL_529430, EPI_ISL_529431, EPI_ISL_529432, EPI_ISL_529433, EPI_ISL_529434, EPI_ISL_529435, EPI_ISL_529436, EPI_ISL_529437, EPI_ISL_529438, EPI_ISL_529439, EPI_ISL_529440, EPI_ISL_529441, EPI_ISL_529442, EPI_ISL_529443, EPI_ISL_529444, EPI_ISL_529445, EPI_ISL_529446, EPI_ISL_529447, EPI_ISL_529448, EPI_ISL_529449, EPI_ISL_529450, EPI_ISL_529451, EPI_ISL_529452, EPI_ISL_529453, EPI_ISL_529454, EPI_ISL_529455, EPI_ISL_529456, EPI_ISL_529457, EPI_ISL_529458, EPI_ISL_529459, EPI_ISL_529460, EPI_ISL_529461, EPI_ISL_529462, EPI_ISL_529463, EPI_ISL_529464, EPI_ISL_529465, EPI_ISL_529466, EPI_ISL_529467, EPI_ISL_529468, EPI_ISL_529469, EPI_ISL_529470, EPI_ISL_529471, EPI_ISL_529472, EPI_ISL_529473, EPI_ISL_529474, EPI_ISL_529475, EPI_ISL_529476, EPI_ISL_529477, EPI_ISL_529478, EPI_ISL_529479, EPI_ISL_529480, EPI_ISL_529481, EPI_ISL_529482, EPI_ISL_529483, EPI_ISL_529484, EPI_ISL_529485, EPI_ISL_529486, EPI_ISL_529487, EPI_ISL_529488, EPI_ISL_529489, EPI_ISL_529490, EPI_ISL_529491, EPI_ISL_529492, EPI_ISL_529493, EPI_ISL_529494, EPI_ISL_529495, EPI_ISL_529496, EPI_ISL_529497, EPI_ISL_529498, EPI_ISL_529499, EPI_ISL_529500, EPI_ISL_529501, EPI_ISL_529502, EPI_ISL_529503, EPI_ISL_529504, EPI_ISL_529505, EPI_ISL_529506, EPI_ISL_529507, EPI_ISL_529508, EPI_ISL_529509, EPI_ISL_529510, EPI_ISL_529511, EPI_ISL_529512, EPI_ISL_529513, EPI_ISL_529514, EPI_ISL_529515, EPI_ISL_529516, EPI_ISL_529517, EPI_ISL_529518, EPI_ISL_529519, EPI_ISL_529520, EPI_ISL_529521, EPI_ISL_529522, EPI_ISL_529523, EPI_ISL_529524, EPI_ISL_529525, EPI_ISL_529526, EPI_ISL_529527, EPI_ISL_529528, EPI_ISL_529529, EPI_ISL_529530, EPI_ISL_529531, EPI_ISL_529532, EPI_ISL_529533, EPI_ISL_529534, EPI_ISL_529535, EPI_ISL_529536, EPI_ISL_529537, EPI_ISL_529538, EPI_ISL_529539, EPI_ISL_529540, EPI_ISL_529541, EPI_ISL_529542, EPI_ISL_529543, EPI_ISL_529544, EPI_ISL_529545, EPI_ISL_529546, EPI_ISL_529547, EPI_ISL_529548, EPI_ISL_529549, EPI_ISL_529550, EPI_ISL_529551, EPI_ISL_529552, EPI_ISL_529553, EPI_ISL_529554, EPI_ISL_529555, EPI_ISL_529556, EPI_ISL_529557, EPI_ISL_529558, EPI_ISL_529559, EPI_ISL_529560, EPI_ISL_529561, EPI_ISL_529562, EPI_ISL_529563, EPI_ISL_529564, EPI_ISL_529565, EPI_ISL_529566, EPI_ISL_529567, EPI_ISL_529568, EPI_ISL_529569, EPI_ISL_529570, EPI_ISL_529571, EPI_ISL_529572, EPI_ISL_529573, EPI_ISL_529574, EPI_ISL_529575, EPI_ISL_529576, EPI_ISL_529577, EPI_ISL_529578, EPI_ISL_529579, EPI_ISL_529580, EPI_ISL_529581, EPI_ISL_529582, EPI_ISL_529583, EPI_ISL_529584, EPI_ISL_529585, EPI_ISL_529586, EPI_ISL_529587, EPI_ISL_529588, EPI_ISL_529589, EPI_ISL_529590, EPI_ISL_529591, EPI_ISL_529592, EPI_ISL_529593, EPI_ISL_529594, EPI_ISL_529595, EPI_ISL_529596, EPI_ISL_529597, EPI_ISL_529598, EPI_ISL_529599, EPI_ISL_529600, EPI_ISL_529601, EPI_ISL_529602, EPI_ISL_529603, EPI_ISL_529604, EPI_ISL_529605, EPI_ISL_529606, EPI_ISL_529607, EPI_ISL_529608, EPI_ISL_529609, EPI_ISL_529610, EPI_ISL_529611, EPI_ISL_529612, EPI_ISL_529613, EPI_ISL_529614, EPI_ISL_529615, EPI_ISL_529616, EPI_ISL_529617, EPI_ISL_529618, EPI_ISL_529619, EPI_ISL_529620, EPI_ISL_529621, EPI_ISL_529622, EPI_ISL_529623, EPI_ISL_529624, EPI_ISL_529625, EPI_ISL_529626, EPI_ISL_529627, EPI_ISL_529628, EPI_ISL_529629, EPI_ISL_529630, EPI_ISL_529631, EPI_ISL_529632, EPI_ISL_529633, EPI_ISL_529634, EPI_ISL_529635, EPI_ISL_529636, EPI_ISL_529637, EPI_ISL_529638, EPI_ISL_529639, EPI_ISL_529640, EPI_ISL_529641, EPI_ISL_529642, EPI_ISL_529643, EPI_ISL_529644, EPI_ISL_529645, EPI_ISL_529646, EPI_ISL_529647, EPI_ISL_529648, EPI_ISL_529649, EPI_ISL_529650, EPI_ISL_529651, EPI_ISL_529652, EPI_ISL_529653, EPI_ISL_529654, EPI_ISL_529655, EPI_ISL_529656, EPI_ISL_529657, EPI_ISL_529658, EPI_ISL_529659, EPI_ISL_529660, EPI_ISL_529661, EPI_ISL_529662, EPI_ISL_529663, EPI_ISL_529664, EPI_ISL_529665, EPI_ISL_529666 | University of Birmingham                                             | COVID-19 Genomics UK (COG-UK) Consortium                                                                                                                                                                      | Institute of Microbiology, University of Birmingham: Claire McMurray, Joanne Stockton, Samuel Nicholls, Radoslaw Poplawski, Will Rowe, Josh Quick, Nicholas Loman. University of Birmingham Testing Laboratory: Celina M Whalley, Andrew Bosworth, Charlotte Poxon, Kasun Wanigasooriya, Oliver Pickles, Mike Kidd, Alex Richter, Andrew D Beggs PHE Heartlands Lab: Husam Osman, Andrew Bosworth, Queen Elizabeth Hospital: Anna Casey |                                                                                                                                                                                                                                                                                                                                                                                                     |
| EPI_ISL_530387, EPI_ISL_530392, EPI_ISL_530402, EPI_ISL_530425, EPI_ISL_530449, EPI_ISL_530487, EPI_ISL_530496, EPI_ISL_530503, EPI_ISL_530522, EPI_ISL_530539, EPI_ISL_530549, EPI_ISL_530554, EPI_ISL_530576, EPI_ISL_530581, EPI_ISL_530582, EPI_ISL_530590, EPI_ISL_530602, EPI_ISL_530621, EPI_ISL_530644, EPI_ISL_530654, EPI_ISL_530677, EPI_ISL_530680, EPI_ISL_530683, EPI_ISL_530696, EPI_ISL_530709, EPI_ISL_530717, EPI_ISL_530718, EPI_ISL_530731, EPI_ISL_530751, EPI_ISL_530772, EPI_ISL_530788, EPI_ISL_530789, EPI_ISL_530791, EPI_ISL_530793, EPI_ISL_530804, EPI_ISL_530817, EPI_ISL_530818, EPI_ISL_530825, EPI_ISL_530827, EPI_ISL_530830, EPI_ISL_530833, EPI_ISL_530834, EPI_ISL_530841, EPI_ISL_530855, EPI_ISL_530863, EPI_ISL_530881, EPI_ISL_530909, EPI_ISL_530918, EPI_ISL_530924, EPI_ISL_530928, EPI_ISL_530957, EPI_ISL_530967, EPI_ISL_531008, EPI_ISL_531010, EPI_ISL_531047, EPI_ISL_531050, EPI_ISL_531059, EPI_ISL_531063, EPI_ISL_531066, EPI_ISL_531076, EPI_ISL_531097, EPI_ISL_531101, EPI_ISL_531108, EPI_ISL_531143, EPI_ISL_531144, EPI_ISL_531147, EPI_ISL_531177, EPI_ISL_531194, EPI_ISL_531220, EPI_ISL_531228, EPI_ISL_531232, EPI_ISL_531235, EPI_ISL_531247, EPI_ISL_531258, EPI_ISL_531269, EPI_ISL_531282, EPI_ISL_531286, EPI_ISL_531293, EPI_ISL_531296, EPI_ISL_531320, EPI_ISL_531320, EPI_ISL_531332, EPI_ISL_531337, EPI_ISL_531352, EPI_ISL_531358, EPI_ISL_531360, EPI_ISL_531361, EPI_ISL_531367, EPI_ISL_531396, EPI_ISL_531410, EPI_ISL_531415, EPI_ISL_531446, EPI_ISL_531460, EPI_ISL_531475, EPI_ISL_531479, EPI_ISL_531515, EPI_ISL_531519, EPI_ISL_531529, EPI_ISL_531543, EPI_ISL_531572, EPI_ISL_531581, EPI_ISL_531587, EPI_ISL_531600, EPI_ISL_531614, EPI_ISL_531637, EPI_ISL_531643, EPI_ISL_531648, EPI_ISL_531657, EPI_ISL_531697, EPI_ISL_531719, EPI_ISL_531731                                                                                                                                                                                                                                                                                                                                                                                                                                                                                                                                                                                                                                                                                                                                                                                                                                                                                                                                                                                                                                                                                                                                                                                                                                                                                                                                                                                                                                                                                                                                                                                                                                                                                                                                                                                                                                                                                                                                                                                                                                                                                                                                                                                                                                                                                                                                                                                                                                                                                                                                                                                                                                                                                                                                                                                                                                                                                                                                                                                                                                                                                                                                                                                                                                                                                                                                                                                                                                                                                                                                                                                                                                                                                                                                                                                                                                                                                                                                                                                                                                                                                                                                                                                                                                                                                                                                                                                                                                                                                                                                                                                                                                                                                                                                                                                                                                                                                                                                                                                                                                                                                                                                                                                                                                                                                                                                                                                                                                                                                                                                                                                                                                 | see above                                                            | Lighthouse Lab in Glasgow                                                                                                                                                                                     | Wellcome Sanger Institute for the COVID-19 Genomics UK (COG-UK) consortium                                                                                                                                                                                                                                                                                                                                                              | Harper VanSteenhouse, Yumi Kasai, David Gray, Carol Clugston, Anna Dominiczak and Alex Alderton, Roberto Amato, Sonia Goncalves, Ewan Harrison, David K. Jackson, Ian Johnston, Dominic Kwiatkowski, Cordelia Langford, John Sillitoe                                                                                                                                                               |
| EPI_ISL_531734                                                                                                                                                                                                                                                                                                                                                                                                                                                                                                                                                                                                                                                                                                                                                                                                                                                                                                                                                                                                                                                                                                                                                                                                                                                                                                                                                                                                                                                                                                                                                                                                                                                                                                                                                                                                                                                                                                                                                                                                                                                                                                                                                                                                                                                                                                                                                                                                                                                                                                                                                                                                                                                                                                                                                                                                                                                                                                                                                                                                                                                                                                                                                                                                                                                                                                                                                                                                                                                                                                                                                                                                                                                                                                                                                                                                                                                                                                                                                                                                                                                                                                                                                                                                                                                                                                                                                                                                                                                                                                                                                                                                                                                                                                                                                                                                                                                                                                                                                                                                                                                                                                                                                                                                                                                                                                                                                                                                                                                                                                                                                                                                                                                                                                                                                                                                                                                                                                                                                                                                                                                                                                                                                                                                                                                                                                                                                                                                                                                                                                                                                                                                                                                                                                                                                                                                                                                                                                                                                                                                                                                                                                                                                                                                                                                                                                                                                                                                                                                                 | see above                                                            | Lighthouse Lab in Glasgow                                                                                                                                                                                     | Wellcome Sanger Institute for the COVID-19 Genomics UK (COG-UK) consortium                                                                                                                                                                                                                                                                                                                                                              | Harper VanSteenhouse, Yumi Kasai, David Gray, Carol Clugston, Anna Dominiczak and Alex Alderton, Roberto Amato, Sonia Goncalves, Ewan Harrison, David K. Jackson, Ian Johnston, Dominic Kwiatkowski, Cordelia Langford, John Sillitoe on behalf of the Wellcome Sanger Institute COVID-19 Surveillance Team ( <a href="http://www.sanger.ac.uk/covid-team">http://www.sanger.ac.uk/covid-team</a> ) |
| EPI_ISL_531746, EPI_ISL_531756, EPI_ISL_531764, EPI_ISL_531766, EPI_ISL_531787, EPI_ISL_531795, EPI_ISL_531803, EPI_ISL_531837, EPI_ISL_531839, EPI_ISL_531841, EPI_ISL_531843, EPI_ISL_531869, EPI_ISL_531874, EPI_ISL_531882, EPI_ISL_531916, EPI_ISL_531926, EPI_ISL_531939, EPI_ISL_531941, EPI_ISL_531949, EPI_ISL_531968, EPI_ISL_531986, EPI_ISL_531997, EPI_ISL_532014, EPI_ISL_532044, EPI_ISL_532092, EPI_ISL_532097, EPI_ISL_532108, EPI_ISL_532127, EPI_ISL_532160, EPI_ISL_532199, EPI_ISL_532219, EPI_ISL_532229, EPI_ISL_532239, EPI_ISL_532247, EPI_ISL_532282, EPI_ISL_532307, EPI_ISL_532324, EPI_ISL_532333, EPI_ISL_532366, EPI_ISL_532373, EPI_ISL_532380, EPI_ISL_532406, EPI_ISL_532433, EPI_ISL_532447, EPI_ISL_532458, EPI_ISL_532476, EPI_ISL_532526, EPI_ISL_532533, EPI_ISL_532534, EPI_ISL_532543, EPI_ISL_532570, EPI_ISL_532581, EPI_ISL_532590, EPI_ISL_532602, EPI_ISL_532603, EPI_ISL_532607, EPI_ISL_532612, EPI_ISL_532637, EPI_ISL_532645, EPI_ISL_532660, EPI_ISL_532690, EPI_ISL_532696, EPI_ISL_532718, EPI_ISL_532721, EPI_ISL_532723, EPI_ISL_532731, EPI_ISL_532751, EPI_ISL_532800, EPI_ISL_532833, EPI_ISL_532868, EPI_ISL_532872, EPI_ISL_532888, EPI_ISL_532895, EPI_ISL_532917, EPI_ISL_532937, EPI_ISL_532947, EPI_ISL_532965, EPI_ISL_532970, EPI_ISL_532974, EPI_ISL_533001, EPI_ISL_533011, EPI_ISL_533051, EPI_ISL_533102, EPI_ISL_533109, EPI_ISL_533118, EPI_ISL_533162, EPI_ISL_533175, EPI_ISL_533192, EPI_ISL_533196, EPI_ISL_533217, EPI_ISL_533223, EPI_ISL_533263, EPI_ISL_533277, EPI_ISL_533293, EPI_ISL_533297, EPI_ISL_533312, EPI_ISL_533317, EPI_ISL_533333, EPI_ISL_533342, EPI_ISL_533360, EPI_ISL_533366, EPI_ISL_533370, EPI_ISL_533379, EPI_ISL_533389, EPI_ISL_533412, EPI_ISL_533425                                                                                                                                                                                                                                                                                                                                                                                                                                                                                                                                                                                                                                                                                                                                                                                                                                                                                                                                                                                                                                                                                                                                                                                                                                                                                                                                                                                                                                                                                                                                                                                                                                                                                                                                                                                                                                                                                                                                                                                                                                                                                                                                                                                                                                                                                                                                                                                                                                                                                                                                                                                                                                                                                                                                                                                                                                                                                                                                                                                                                                                                                                                                                                                                                                                                                                                                                                                                                                                                                                                                                                                                                                                                                                                                                                                                                                                                                                                                                                                                                                                                                                                                                                                                                                                                                                                                                                                                                                                                                                                                                                                                                                                                                                                                                                                                                                                                                                                                                                                                                                                                                                                                                                                                                                                                                                                                                                                                                                                                                                                                                                                                                                                                                                                 | see above                                                            | Lighthouse Lab in Glasgow                                                                                                                                                                                     | Wellcome Sanger Institute for the COVID-19 Genomics UK (COG-UK) consortium                                                                                                                                                                                                                                                                                                                                                              | Harper VanSteenhouse, Yumi Kasai, David Gray, Carol Clugston, Anna Dominiczak and Alex Alderton, Roberto Amato, Sonia Goncalves, Ewan Harrison, David K. Jackson, Ian Johnston, Dominic Kwiatkowski, Cordelia Langford, John Sillitoe                                                                                                                                                               |
| EPI_ISL_534199                                                                                                                                                                                                                                                                                                                                                                                                                                                                                                                                                                                                                                                                                                                                                                                                                                                                                                                                                                                                                                                                                                                                                                                                                                                                                                                                                                                                                                                                                                                                                                                                                                                                                                                                                                                                                                                                                                                                                                                                                                                                                                                                                                                                                                                                                                                                                                                                                                                                                                                                                                                                                                                                                                                                                                                                                                                                                                                                                                                                                                                                                                                                                                                                                                                                                                                                                                                                                                                                                                                                                                                                                                                                                                                                                                                                                                                                                                                                                                                                                                                                                                                                                                                                                                                                                                                                                                                                                                                                                                                                                                                                                                                                                                                                                                                                                                                                                                                                                                                                                                                                                                                                                                                                                                                                                                                                                                                                                                                                                                                                                                                                                                                                                                                                                                                                                                                                                                                                                                                                                                                                                                                                                                                                                                                                                                                                                                                                                                                                                                                                                                                                                                                                                                                                                                                                                                                                                                                                                                                                                                                                                                                                                                                                                                                                                                                                                                                                                                                                 | E. Gulbja Laboratorija                                               | Latvian Biomedical Research and Study Centre                                                                                                                                                                  | Ivars Silamielis, Jnis Pjalkovskis, Kaspars Megnis, Monta Ustinova, ikitā Zrelavs, Vita Rovte, Mikus Gavars, Dmitrijs Perminovs, Uga Dumpis, Jnis Klovīš                                                                                                                                                                                                                                                                                |                                                                                                                                                                                                                                                                                                                                                                                                     |
| EPI_ISL_534200, EPI_ISL_534201, EPI_ISL_534202                                                                                                                                                                                                                                                                                                                                                                                                                                                                                                                                                                                                                                                                                                                                                                                                                                                                                                                                                                                                                                                                                                                                                                                                                                                                                                                                                                                                                                                                                                                                                                                                                                                                                                                                                                                                                                                                                                                                                                                                                                                                                                                                                                                                                                                                                                                                                                                                                                                                                                                                                                                                                                                                                                                                                                                                                                                                                                                                                                                                                                                                                                                                                                                                                                                                                                                                                                                                                                                                                                                                                                                                                                                                                                                                                                                                                                                                                                                                                                                                                                                                                                                                                                                                                                                                                                                                                                                                                                                                                                                                                                                                                                                                                                                                                                                                                                                                                                                                                                                                                                                                                                                                                                                                                                                                                                                                                                                                                                                                                                                                                                                                                                                                                                                                                                                                                                                                                                                                                                                                                                                                                                                                                                                                                                                                                                                                                                                                                                                                                                                                                                                                                                                                                                                                                                                                                                                                                                                                                                                                                                                                                                                                                                                                                                                                                                                                                                                                                                 | Centrl laboratorija                                                  | Latvian Biomedical Research and Study Centre                                                                                                                                                                  | Ivars Silamielis, Jnis Pjalkovskis, Kaspars Megnis, Monta Ustinova, ikitā Zrelavs, Vita Rovte, Stella Lapija, Jana Oste, Marta Priedte, Uga Dumpis, Jnis Klovīš                                                                                                                                                                                                                                                                         |                                                                                                                                                                                                                                                                                                                                                                                                     |
| EPI_ISL_534203                                                                                                                                                                                                                                                                                                                                                                                                                                                                                                                                                                                                                                                                                                                                                                                                                                                                                                                                                                                                                                                                                                                                                                                                                                                                                                                                                                                                                                                                                                                                                                                                                                                                                                                                                                                                                                                                                                                                                                                                                                                                                                                                                                                                                                                                                                                                                                                                                                                                                                                                                                                                                                                                                                                                                                                                                                                                                                                                                                                                                                                                                                                                                                                                                                                                                                                                                                                                                                                                                                                                                                                                                                                                                                                                                                                                                                                                                                                                                                                                                                                                                                                                                                                                                                                                                                                                                                                                                                                                                                                                                                                                                                                                                                                                                                                                                                                                                                                                                                                                                                                                                                                                                                                                                                                                                                                                                                                                                                                                                                                                                                                                                                                                                                                                                                                                                                                                                                                                                                                                                                                                                                                                                                                                                                                                                                                                                                                                                                                                                                                                                                                                                                                                                                                                                                                                                                                                                                                                                                                                                                                                                                                                                                                                                                                                                                                                                                                                                                                                 | E. Gulbja Laboratorija                                               | Latvian Biomedical Research and Study Centre                                                                                                                                                                  | Ivars Silamielis, Jnis Pjalkovskis, Kaspars Megnis, Monta Ustinova, ikitā Zrelavs, Vita Rovte, Mikus Gavars, Dmitrijs Perminovs, Uga Dumpis, Jnis Klovīš                                                                                                                                                                                                                                                                                |                                                                                                                                                                                                                                                                                                                                                                                                     |
| EPI_ISL_534204, EPI_ISL_534205                                                                                                                                                                                                                                                                                                                                                                                                                                                                                                                                                                                                                                                                                                                                                                                                                                                                                                                                                                                                                                                                                                                                                                                                                                                                                                                                                                                                                                                                                                                                                                                                                                                                                                                                                                                                                                                                                                                                                                                                                                                                                                                                                                                                                                                                                                                                                                                                                                                                                                                                                                                                                                                                                                                                                                                                                                                                                                                                                                                                                                                                                                                                                                                                                                                                                                                                                                                                                                                                                                                                                                                                                                                                                                                                                                                                                                                                                                                                                                                                                                                                                                                                                                                                                                                                                                                                                                                                                                                                                                                                                                                                                                                                                                                                                                                                                                                                                                                                                                                                                                                                                                                                                                                                                                                                                                                                                                                                                                                                                                                                                                                                                                                                                                                                                                                                                                                                                                                                                                                                                                                                                                                                                                                                                                                                                                                                                                                                                                                                                                                                                                                                                                                                                                                                                                                                                                                                                                                                                                                                                                                                                                                                                                                                                                                                                                                                                                                                                                                 | Latvijas Infektoloijas centrs                                        | Latvian Biomedical Research and Study Centre                                                                                                                                                                  | Ivars Silamielis, Jnis Pjalkovskis, Kaspars Megnis, Monta Ustinova, ikitā Zrelavs, Vita Rovte, Jeena Storozenko, Tatjana Kolupajeva, Oksana Savicka, Uga Dumpis, Jnis Klovīš                                                                                                                                                                                                                                                            |                                                                                                                                                                                                                                                                                                                                                                                                     |
| EPI_ISL_534206, EPI_ISL_534207, EPI_ISL_534208                                                                                                                                                                                                                                                                                                                                                                                                                                                                                                                                                                                                                                                                                                                                                                                                                                                                                                                                                                                                                                                                                                                                                                                                                                                                                                                                                                                                                                                                                                                                                                                                                                                                                                                                                                                                                                                                                                                                                                                                                                                                                                                                                                                                                                                                                                                                                                                                                                                                                                                                                                                                                                                                                                                                                                                                                                                                                                                                                                                                                                                                                                                                                                                                                                                                                                                                                                                                                                                                                                                                                                                                                                                                                                                                                                                                                                                                                                                                                                                                                                                                                                                                                                                                                                                                                                                                                                                                                                                                                                                                                                                                                                                                                                                                                                                                                                                                                                                                                                                                                                                                                                                                                                                                                                                                                                                                                                                                                                                                                                                                                                                                                                                                                                                                                                                                                                                                                                                                                                                                                                                                                                                                                                                                                                                                                                                                                                                                                                                                                                                                                                                                                                                                                                                                                                                                                                                                                                                                                                                                                                                                                                                                                                                                                                                                                                                                                                                                                                 | Centrl laboratorija                                                  | Latvian Biomedical Research and Study Centre                                                                                                                                                                  | Ivars Silamielis, Jnis Pjalkovskis, Kaspars Megnis, Monta Ustinova, ikitā Zrelavs, Vita Rovte, Stella Lapija, Jana Oste, Marta Priedte, Uga Dumpis, Jnis Klovīš                                                                                                                                                                                                                                                                         |                                                                                                                                                                                                                                                                                                                                                                                                     |
| EPI_ISL_534209                                                                                                                                                                                                                                                                                                                                                                                                                                                                                                                                                                                                                                                                                                                                                                                                                                                                                                                                                                                                                                                                                                                                                                                                                                                                                                                                                                                                                                                                                                                                                                                                                                                                                                                                                                                                                                                                                                                                                                                                                                                                                                                                                                                                                                                                                                                                                                                                                                                                                                                                                                                                                                                                                                                                                                                                                                                                                                                                                                                                                                                                                                                                                                                                                                                                                                                                                                                                                                                                                                                                                                                                                                                                                                                                                                                                                                                                                                                                                                                                                                                                                                                                                                                                                                                                                                                                                                                                                                                                                                                                                                                                                                                                                                                                                                                                                                                                                                                                                                                                                                                                                                                                                                                                                                                                                                                                                                                                                                                                                                                                                                                                                                                                                                                                                                                                                                                                                                                                                                                                                                                                                                                                                                                                                                                                                                                                                                                                                                                                                                                                                                                                                                                                                                                                                                                                                                                                                                                                                                                                                                                                                                                                                                                                                                                                                                                                                                                                                                                                 | Latvijas Infektoloijas centrs                                        | Latvian Biomedical Research and Study Centre                                                                                                                                                                  | Ivars Silamielis, Jnis Pjalkovskis, Kaspars Megnis, Monta Ustinova, ikitā Zrelavs, Vita Rovte, Jeena Storozenko, Tatjana Kolupajeva, Oksana Savicka, Uga Dumpis, Jnis Klovīš                                                                                                                                                                                                                                                            |                                                                                                                                                                                                                                                                                                                                                                                                     |
| EPI_ISL_534210, EPI_ISL_534211                                                                                                                                                                                                                                                                                                                                                                                                                                                                                                                                                                                                                                                                                                                                                                                                                                                                                                                                                                                                                                                                                                                                                                                                                                                                                                                                                                                                                                                                                                                                                                                                                                                                                                                                                                                                                                                                                                                                                                                                                                                                                                                                                                                                                                                                                                                                                                                                                                                                                                                                                                                                                                                                                                                                                                                                                                                                                                                                                                                                                                                                                                                                                                                                                                                                                                                                                                                                                                                                                                                                                                                                                                                                                                                                                                                                                                                                                                                                                                                                                                                                                                                                                                                                                                                                                                                                                                                                                                                                                                                                                                                                                                                                                                                                                                                                                                                                                                                                                                                                                                                                                                                                                                                                                                                                                                                                                                                                                                                                                                                                                                                                                                                                                                                                                                                                                                                                                                                                                                                                                                                                                                                                                                                                                                                                                                                                                                                                                                                                                                                                                                                                                                                                                                                                                                                                                                                                                                                                                                                                                                                                                                                                                                                                                                                                                                                                                                                                                                                 | Centrl laboratorija                                                  | Latvian Biomedical Research and Study Centre                                                                                                                                                                  | Ivars Silamielis, Jnis Pjalkovskis, Kaspars Megnis, Monta Ustinova, ikitā Zrelavs, Vita Rovte, Stella Lapija, Jana Oste, Marta Priedte, Uga Dumpis, Jnis Klovīš                                                                                                                                                                                                                                                                         |                                                                                                                                                                                                                                                                                                                                                                                                     |
| EPI_ISL_534212, EPI_ISL_534213, EPI_ISL_534214, EPI_ISL_534215, EPI_ISL_534216, EPI_ISL_534218, EPI_ISL_534219                                                                                                                                                                                                                                                                                                                                                                                                                                                                                                                                                                                                                                                                                                                                                                                                                                                                                                                                                                                                                                                                                                                                                                                                                                                                                                                                                                                                                                                                                                                                                                                                                                                                                                                                                                                                                                                                                                                                                                                                                                                                                                                                                                                                                                                                                                                                                                                                                                                                                                                                                                                                                                                                                                                                                                                                                                                                                                                                                                                                                                                                                                                                                                                                                                                                                                                                                                                                                                                                                                                                                                                                                                                                                                                                                                                                                                                                                                                                                                                                                                                                                                                                                                                                                                                                                                                                                                                                                                                                                                                                                                                                                                                                                                                                                                                                                                                                                                                                                                                                                                                                                                                                                                                                                                                                                                                                                                                                                                                                                                                                                                                                                                                                                                                                                                                                                                                                                                                                                                                                                                                                                                                                                                                                                                                                                                                                                                                                                                                                                                                                                                                                                                                                                                                                                                                                                                                                                                                                                                                                                                                                                                                                                                                                                                                                                                                                                                 | E. Gulbja Laboratorija                                               | Latvian Biomedical Research and Study Centre                                                                                                                                                                  | Ivars Silamielis, Jnis Pjalkovskis, Kaspars Megnis, Monta Ustinova, ikitā Zrelavs, Vita Rovte, Mikus Gavars, Dmitrijs Perminovs, Uga Dumpis, Jnis Klovīš                                                                                                                                                                                                                                                                                |                                                                                                                                                                                                                                                                                                                                                                                                     |
| EPI_ISL_534220                                                                                                                                                                                                                                                                                                                                                                                                                                                                                                                                                                                                                                                                                                                                                                                                                                                                                                                                                                                                                                                                                                                                                                                                                                                                                                                                                                                                                                                                                                                                                                                                                                                                                                                                                                                                                                                                                                                                                                                                                                                                                                                                                                                                                                                                                                                                                                                                                                                                                                                                                                                                                                                                                                                                                                                                                                                                                                                                                                                                                                                                                                                                                                                                                                                                                                                                                                                                                                                                                                                                                                                                                                                                                                                                                                                                                                                                                                                                                                                                                                                                                                                                                                                                                                                                                                                                                                                                                                                                                                                                                                                                                                                                                                                                                                                                                                                                                                                                                                                                                                                                                                                                                                                                                                                                                                                                                                                                                                                                                                                                                                                                                                                                                                                                                                                                                                                                                                                                                                                                                                                                                                                                                                                                                                                                                                                                                                                                                                                                                                                                                                                                                                                                                                                                                                                                                                                                                                                                                                                                                                                                                                                                                                                                                                                                                                                                                                                                                                                                 | Centrl laboratorija                                                  | Latvian Biomedical Research and Study Centre                                                                                                                                                                  | Ivars Silamielis, Jnis Pjalkovskis, Kaspars Megnis, Monta Ustinova, ikitā Zrelavs, Vita Rovte, Stella Lapija, Jana Oste, Marta Priedte, Uga Dumpis, Jnis Klovīš                                                                                                                                                                                                                                                                         |                                                                                                                                                                                                                                                                                                                                                                                                     |
| EPI_ISL_534221                                                                                                                                                                                                                                                                                                                                                                                                                                                                                                                                                                                                                                                                                                                                                                                                                                                                                                                                                                                                                                                                                                                                                                                                                                                                                                                                                                                                                                                                                                                                                                                                                                                                                                                                                                                                                                                                                                                                                                                                                                                                                                                                                                                                                                                                                                                                                                                                                                                                                                                                                                                                                                                                                                                                                                                                                                                                                                                                                                                                                                                                                                                                                                                                                                                                                                                                                                                                                                                                                                                                                                                                                                                                                                                                                                                                                                                                                                                                                                                                                                                                                                                                                                                                                                                                                                                                                                                                                                                                                                                                                                                                                                                                                                                                                                                                                                                                                                                                                                                                                                                                                                                                                                                                                                                                                                                                                                                                                                                                                                                                                                                                                                                                                                                                                                                                                                                                                                                                                                                                                                                                                                                                                                                                                                                                                                                                                                                                                                                                                                                                                                                                                                                                                                                                                                                                                                                                                                                                                                                                                                                                                                                                                                                                                                                                                                                                                                                                                                                                 | E. Gulbja Laboratorija                                               | Latvian Biomedical Research and Study Centre                                                                                                                                                                  | Ivars Silamielis, Jnis Pjalkovskis, Kaspars Megnis, Monta Ustinova, ikitā Zrelavs, Vita Rovte, Mikus Gavars, Dmitrijs Perminovs, Uga Dumpis, Jnis Klovīš                                                                                                                                                                                                                                                                                |                                                                                                                                                                                                                                                                                                                                                                                                     |
| EPI_ISL_534222, EPI_ISL_534223                                                                                                                                                                                                                                                                                                                                                                                                                                                                                                                                                                                                                                                                                                                                                                                                                                                                                                                                                                                                                                                                                                                                                                                                                                                                                                                                                                                                                                                                                                                                                                                                                                                                                                                                                                                                                                                                                                                                                                                                                                                                                                                                                                                                                                                                                                                                                                                                                                                                                                                                                                                                                                                                                                                                                                                                                                                                                                                                                                                                                                                                                                                                                                                                                                                                                                                                                                                                                                                                                                                                                                                                                                                                                                                                                                                                                                                                                                                                                                                                                                                                                                                                                                                                                                                                                                                                                                                                                                                                                                                                                                                                                                                                                                                                                                                                                                                                                                                                                                                                                                                                                                                                                                                                                                                                                                                                                                                                                                                                                                                                                                                                                                                                                                                                                                                                                                                                                                                                                                                                                                                                                                                                                                                                                                                                                                                                                                                                                                                                                                                                                                                                                                                                                                                                                                                                                                                                                                                                                                                                                                                                                                                                                                                                                                                                                                                                                                                                                                                 | Centrl laboratorija                                                  | Latvian Biomedical Research and Study Centre                                                                                                                                                                  | Ivars Silamielis, Jnis Pjalkovskis, Kaspars Megnis, Monta Ustinova, ikitā Zrelavs, Vita Rovte, Stella Lapija, Jana Oste, Marta Priedte, Uga Dumpis, Jnis Klovīš                                                                                                                                                                                                                                                                         |                                                                                                                                                                                                                                                                                                                                                                                                     |
| EPI_ISL_536826, EPI_ISL_536827, EPI_ISL_536865, EPI_ISL_536867, EPI_ISL_536868, EPI_ISL_536883, EPI_ISL_536891, EPI_ISL_536902, EPI_ISL_536904, EPI_ISL_536915, EPI_ISL_536949, EPI_ISL_536952, EPI_ISL_536966, EPI_ISL_536974, EPI_ISL_536981, EPI_ISL_536982, EPI_ISL_536984, EPI_ISL_536986, EPI_ISL_536994, EPI_ISL_537020, EPI_ISL_537041, EPI_ISL_537051, EPI_ISL_537053, EPI_ISL_537062, EPI_ISL_537088, EPI_ISL_537118, EPI_ISL_537150, EPI_ISL_537159, EPI_ISL_537165, EPI_ISL_537169, EPI_ISL_537179, EPI_ISL_537194                                                                                                                                                                                                                                                                                                                                                                                                                                                                                                                                                                                                                                                                                                                                                                                                                                                                                                                                                                                                                                                                                                                                                                                                                                                                                                                                                                                                                                                                                                                                                                                                                                                                                                                                                                                                                                                                                                                                                                                                                                                                                                                                                                                                                                                                                                                                                                                                                                                                                                                                                                                                                                                                                                                                                                                                                                                                                                                                                                                                                                                                                                                                                                                                                                                                                                                                                                                                                                                                                                                                                                                                                                                                                                                                                                                                                                                                                                                                                                                                                                                                                                                                                                                                                                                                                                                                                                                                                                                                                                                                                                                                                                                                                                                                                                                                                                                                                                                                                                                                                                                                                                                                                                                                                                                                                                                                                                                                                                                                                                                                                                                                                                                                                                                                                                                                                                                                                                                                                                                                                                                                                                                                                                                                                                                                                                                                                                                                                                                                                                                                                                                                                                                                                                                                                                                                                                                                                                                                                 |                                                                      |                                                                                                                                                                                                               |                                                                                                                                                                                                                                                                                                                                                                                                                                         |                                                                                                                                                                                                                                                                                                                                                                                                     |

|                                                                                                                                                                                                                                                                                                                                                                                                |                                                        |                                                                            |                                                                                                                                                                                                                                                                                                             |
|------------------------------------------------------------------------------------------------------------------------------------------------------------------------------------------------------------------------------------------------------------------------------------------------------------------------------------------------------------------------------------------------|--------------------------------------------------------|----------------------------------------------------------------------------|-------------------------------------------------------------------------------------------------------------------------------------------------------------------------------------------------------------------------------------------------------------------------------------------------------------|
| see above                                                                                                                                                                                                                                                                                                                                                                                      | Lighthouse Lab in Glasgow                              | Wellcome Sanger Institute for the COVID-19 Genomics UK (COG-UK) consortium | Harper VanSteenhouse, Yumi Kasai, David Gray, Carol Clugston, Anna Dominiczak and Alex Alderton, Roberto Amato, Sonia Goncalves, Ewan Harrison, David K. Jackson, Ian Johnston, Dominic Kwiatkowski, Cordelia Langford, John Sillitoe on behalf of the Wellcome Sanger Institute COVID-19 Surveillance Team |
| EPI_ISL_539496                                                                                                                                                                                                                                                                                                                                                                                 | Hospital Nostra Senyora de Meritxell                   | Instituto de Salud Carlos III                                              | Iglesias-Caballero, M. Molinero Calamita, M. González-Esguevillas, M. Camarero, S. Pozo, F. Casas, I. Jiménez, P. Jiménez, M. Zaballos, A. Monzón, S. Varona, S. Juliá, M. Cuesta, I, F. Fernández                                                                                                          |
| EPI_ISL_539497, EPI_ISL_539498                                                                                                                                                                                                                                                                                                                                                                 | Hospital Virgen de las Nieves                          | Instituto de Salud Carlos III                                              | Iglesias-Caballero, M. Molinero Calamita, M. González-Esguevillas, M. Camarero, S. Pozo, F. Casas, I. Jiménez, P. Jiménez, M. Zaballos, A. Monzón, S. Varona, S. Juliá, M. Cuesta, I, J. Lepe                                                                                                               |
| EPI_ISL_539499                                                                                                                                                                                                                                                                                                                                                                                 | Hospital Costa del Sol                                 | Instituto de Salud Carlos III                                              | Iglesias-Caballero, M. Molinero Calamita, M. González-Esguevillas, M. Camarero, S. Pozo, F. Casas, I. Jiménez, P. Jiménez, M. Zaballos, A. Monzón, S. Varona, S. Juliá, M. Cuesta, I, F. Fernández                                                                                                          |
| EPI_ISL_539500, EPI_ISL_539501, EPI_ISL_539502                                                                                                                                                                                                                                                                                                                                                 | Hospital Clínico Universitario Lozano Blesa            | Instituto de Salud Carlos III                                              | Iglesias-Caballero, M. Molinero Calamita, M. González-Esguevillas, M. Camarero, S. Pozo, F. Casas, I. Jiménez, P. Jiménez, M. Zaballos, A. Monzón, S. Varona, S. Juliá, M. Cuesta, I, R. Benito                                                                                                             |
| EPI_ISL_539503                                                                                                                                                                                                                                                                                                                                                                                 | Hospital Universitario Miguel Servet                   | Instituto de Salud Carlos III                                              | Iglesias-Caballero, M. Molinero Calamita, M. González-Esguevillas, M. Camarero, S. Pozo, F. Casas, I. Jiménez, P. Jiménez, M. Zaballos, A. Monzón, S. Varona, S. Juliá, M. Cuesta, I, A. Rezusta                                                                                                            |
| EPI_ISL_539504                                                                                                                                                                                                                                                                                                                                                                                 | Hospital Universitario Miguel Servet                   | Instituto de Salud Carlos III                                              | Iglesias-Caballero, M. Molinero Calamita, M. González-Esguevillas, M. Camarero, S. Pozo, F. Casas, I. Jiménez, P. Jiménez, M. Zaballos, A. Monzón, S. Varona, S. Juliá, M. Cuesta, I, R. Benito                                                                                                             |
| EPI_ISL_539505, EPI_ISL_539506, EPI_ISL_539507, EPI_ISL_539508                                                                                                                                                                                                                                                                                                                                 | Hospital Universitario Miguel Servet                   | Instituto de Salud Carlos III                                              | Iglesias-Caballero, M. Molinero Calamita, M. González-Esguevillas, M. Camarero, S. Pozo, F. Casas, I. Jiménez, P. Jiménez, M. Zaballos, A. Monzón, S. Varona, S. Juliá, M. Cuesta, I, A. Rezusta                                                                                                            |
| EPI_ISL_539509, EPI_ISL_539510, EPI_ISL_539511, EPI_ISL_539512                                                                                                                                                                                                                                                                                                                                 | Hospital Clínico Universitario Lozano Blesa            | Instituto de Salud Carlos III                                              | Iglesias-Caballero, M. Molinero Calamita, M. González-Esguevillas, M. Camarero, S. Pozo, F. Casas, I. Jiménez, P. Jiménez, M. Zaballos, A. Monzón, S. Varona, S. Juliá, M. Cuesta, I, R. Benito                                                                                                             |
| EPI_ISL_539513, EPI_ISL_539514, EPI_ISL_539515, EPI_ISL_539516, EPI_ISL_539517, EPI_ISL_539518, EPI_ISL_539519                                                                                                                                                                                                                                                                                 | Hospital Universitario Miguel Servet                   | Instituto de Salud Carlos III                                              | Iglesias-Caballero, M. Molinero Calamita, M. González-Esguevillas, M. Camarero, S. Pozo, F. Casas, I. Jiménez, P. Jiménez, M. Zaballos, A. Monzón, S. Varona, S. Juliá, M. Cuesta, I, A. Rezusta                                                                                                            |
| EPI_ISL_539520, EPI_ISL_539521                                                                                                                                                                                                                                                                                                                                                                 | Hospital Universitario de Ceuta                        | Instituto de Salud Carlos III                                              | Iglesias-Caballero, M. Molinero Calamita, M. González-Esguevillas, M. Camarero, S. Pozo, F. Casas, I. Jiménez, P. Jiménez, M. Zaballos, A. Monzón, S. Varona, S. Juliá, M. Cuesta, I, J. López                                                                                                              |
| EPI_ISL_539522                                                                                                                                                                                                                                                                                                                                                                                 | Hospital Universitario de Ceuta                        | Instituto de Salud Carlos III                                              | Iglesias-Caballero, M. Molinero Calamita, M. González-Esguevillas, M. Camarero, S. Pozo, F. Casas, I. Jiménez, P. Jiménez, M. Zaballos, A. Monzón, S. Varona, S. Juliá, M. Cuesta, I, G. Sánchez                                                                                                            |
| EPI_ISL_539523                                                                                                                                                                                                                                                                                                                                                                                 | Hospital General de Segovia                            | Instituto de Salud Carlos III                                              | Iglesias-Caballero, M. Molinero Calamita, M. González-Esguevillas, M. Camarero, S. Pozo, F. Casas, I. Jiménez, P. Jiménez, M. Zaballos, A. Monzón, S. Varona, S. Juliá, M. Cuesta, I, S. Hernando                                                                                                           |
| EPI_ISL_539524                                                                                                                                                                                                                                                                                                                                                                                 | Gerencia de Asistencia Sanitaria de Soria              | Instituto de Salud Carlos III                                              | Iglesias-Caballero, M. Molinero Calamita, M. González-Esguevillas, M. Camarero, S. Pozo, F. Casas, I. Jiménez, P. Jiménez, M. Zaballos, A. Monzón, S. Varona, S. Juliá, M. Cuesta, I, C. Aldea                                                                                                              |
| EPI_ISL_539525                                                                                                                                                                                                                                                                                                                                                                                 | Hospital Nuestra Señora de Sonsoles                    | Instituto de Salud Carlos III                                              | Iglesias-Caballero, M. Molinero Calamita, M. González-Esguevillas, M. Camarero, S. Pozo, F. Casas, I. Jiménez, P. Jiménez, M. Zaballos, A. Monzón, S. Varona, S. Juliá, M. Cuesta, I, A. San Pedro                                                                                                          |
| EPI_ISL_539526, EPI_ISL_539527, EPI_ISL_539528, EPI_ISL_539529, EPI_ISL_539530                                                                                                                                                                                                                                                                                                                 | Consejería de Sanidad y Asuntos Sociales               | Instituto de Salud Carlos III                                              | Iglesias-Caballero, M. Molinero Calamita, M. González-Esguevillas, M. Camarero, S. Pozo, F. Casas, I. Jiménez, P. Jiménez, M. Zaballos, A. Monzón, S. Varona, S. Juliá, M. Cuesta, I, G. Gutiérrez                                                                                                          |
| EPI_ISL_539531                                                                                                                                                                                                                                                                                                                                                                                 | C.H.U Nuestra Señora de Candelaria                     | Instituto de Salud Carlos III                                              | Iglesias-Caballero, M. Molinero Calamita, M. González-Esguevillas, M. Camarero, S. Pozo, F. Casas, I. Jiménez, P. Jiménez, M. Zaballos, A. Monzón, S. Varona, S. Juliá, M. Cuesta, I, O. Diez                                                                                                               |
| EPI_ISL_539532                                                                                                                                                                                                                                                                                                                                                                                 | Hospital Universitario de Canarias                     | Instituto de Salud Carlos III                                              | Iglesias-Caballero, M. Molinero Calamita, M. González-Esguevillas, M. Camarero, S. Pozo, F. Casas, I. Jiménez, P. Jiménez, M. Zaballos, A. Monzón, S. Varona, S. Juliá, M. Cuesta, I, B. Castro                                                                                                             |
| EPI_ISL_539533, EPI_ISL_539534, EPI_ISL_539535, EPI_ISL_539536, EPI_ISL_539537, EPI_ISL_539538, EPI_ISL_539539, EPI_ISL_539540, EPI_ISL_539541, EPI_ISL_539542, EPI_ISL_539543, EPI_ISL_539544, EPI_ISL_539545, EPI_ISL_539546, EPI_ISL_539547, EPI_ISL_539548, EPI_ISL_539549, EPI_ISL_539550, EPI_ISL_539551, EPI_ISL_539552, EPI_ISL_539553, EPI_ISL_539554, EPI_ISL_539555, EPI_ISL_539556 | Hospital Clinic                                        | Instituto de Salud Carlos III                                              | Iglesias-Caballero, M. Molinero Calamita, M. González-Esguevillas, M. Camarero, S. Pozo, F. Casas, I. Jiménez, P. Jiménez, M. Zaballos, A. Monzón, S. Varona, S. Juliá, M. Cuesta, I, M.A Marcos                                                                                                            |
| see above                                                                                                                                                                                                                                                                                                                                                                                      | Hospital Clinic                                        | Instituto de Salud Carlos III                                              | Iglesias-Caballero, M. Molinero Calamita, M. González-Esguevillas, M. Camarero, S. Pozo, F. Casas, I. Jiménez, P. Jiménez, M. Zaballos, A. Monzón, S. Varona, S. Juliá, M. Cuesta, I, C. Pazos                                                                                                              |
| EPI_ISL_539557                                                                                                                                                                                                                                                                                                                                                                                 | Gerencia del área de salud de Badajoz, Llerena y Zafra | Instituto de Salud Carlos III                                              | Iglesias-Caballero, M. Molinero Calamita, M. González-Esguevillas, M. Camarero, S. Pozo, F. Casas, I. Jiménez, P. Jiménez, M. Zaballos, A. Monzón, S. Varona, S. Juliá, M. Cuesta, I, E. Cerro                                                                                                              |
| EPI_ISL_539558                                                                                                                                                                                                                                                                                                                                                                                 | Hospital San Pedro de Alcántara                        | Instituto de Salud Carlos III                                              | Iglesias-Caballero, M. Molinero Calamita, M. González-Esguevillas, M. Camarero, S. Pozo, F. Casas, I. Jiménez, P. Jiménez, M. Zaballos, A. Monzón, S. Varona, S. Juliá, M. Cuesta, I, G. Rodríguez                                                                                                          |
| EPI_ISL_539559                                                                                                                                                                                                                                                                                                                                                                                 | Hospital Campo Arañuelo                                | Instituto de Salud Carlos III                                              | Iglesias-Caballero, M. Molinero Calamita, M. González-Esguevillas, M. Camarero, S. Pozo, F. Casas, I. Jiménez, P. Jiménez, M. Zaballos, A. Monzón, S. Varona, S. Juliá, M. Cuesta, I, J. López                                                                                                              |
| EPI_ISL_539560                                                                                                                                                                                                                                                                                                                                                                                 | Hospital Campo Arañuelo                                | Instituto de Salud Carlos III                                              | Iglesias-Caballero, M. Molinero Calamita, M. González-Esguevillas, M. Camarero, S. Pozo, F. Casas, I. Jiménez, P. Jiménez, M. Zaballos, A. Monzón, S. Varona, S. Juliá, M. Cuesta, I, G. Rodríguez                                                                                                          |
| EPI_ISL_539561                                                                                                                                                                                                                                                                                                                                                                                 | Hospital San Pedro de Alcántara                        | Instituto de Salud Carlos III                                              | Iglesias-Caballero, M. Molinero Calamita, M. González-Esguevillas, M. Camarero, S. Pozo, F. Casas, I. Jiménez, P. Jiménez, M. Zaballos, A. Monzón, S. Varona, S. Juliá, M. Cuesta, I, J. López                                                                                                              |
| EPI_ISL_539562                                                                                                                                                                                                                                                                                                                                                                                 | Hospital San Pedro de Alcántara                        | Instituto de Salud Carlos III                                              | Iglesias-Caballero, M. Molinero Calamita, M. González-Esguevillas, M. Camarero, S. Pozo, F. Casas, I. Jiménez, P. Jiménez, M. Zaballos, A. Monzón, S. Varona, S. Juliá, M. Cuesta, I, M.A Cañizares                                                                                                         |
| EPI_ISL_539563                                                                                                                                                                                                                                                                                                                                                                                 | Complejo Hospitalario Universitario La Coruna          | Instituto de Salud Carlos III                                              | Iglesias-Caballero, M. Molinero Calamita, M. González-Esguevillas, M. Camarero, S. Pozo, F. Casas, I. Jiménez, P. Jiménez, M. Zaballos, A. Monzón, S. Varona, S. Juliá, M. Cuesta, I, J. López                                                                                                              |
| EPI_ISL_539564                                                                                                                                                                                                                                                                                                                                                                                 | Complejo Hospitalario Universitario La Coruna          | Instituto de Salud Carlos III                                              | Iglesias-Caballero, M. Molinero Calamita, M. González-Esguevillas, M. Camarero, S. Pozo, F. Casas, I. Jiménez, P. Jiménez, M. Zaballos, A. Monzón, S. Varona, S. Juliá, M. Cuesta, I, M.I Paz                                                                                                               |
| EPI_ISL_539565                                                                                                                                                                                                                                                                                                                                                                                 | Xerencia de Xestión Integrada de Pontevedra e o Salnés | Instituto de Salud Carlos III                                              | Iglesias-Caballero, M. Molinero Calamita, M. González-Esguevillas, M. Camarero, S. Pozo, F. Casas, I. Jiménez, P. Jiménez, M. Zaballos, A. Monzón, S. Varona, S. Juliá, M. Cuesta, I, J. López                                                                                                              |
| EPI_ISL_539566                                                                                                                                                                                                                                                                                                                                                                                 | Xerencia de Xestión Integrada de Pontevedra e o Salnés | Instituto de Salud Carlos III                                              | Iglesias-Caballero, M. Molinero Calamita, M. González-Esguevillas, M. Camarero, S. Pozo, F. Casas, I. Jiménez, P. Jiménez, M. Zaballos, A. Monzón, S. Varona, S. Juliá, M. Cuesta, I, I. Pérez                                                                                                              |
| EPI_ISL_539567                                                                                                                                                                                                                                                                                                                                                                                 | Hospital Comarcal de Melilla                           | Instituto de Salud Carlos III                                              | Iglesias-Caballero, M. Molinero Calamita, M. González-Esguevillas, M. Camarero, S. Pozo, F. Casas, I. Jiménez, P. Jiménez, M. Zaballos, A. Monzón, S. Varona, S. Juliá, M. Cuesta, I, J. López                                                                                                              |
| EPI_ISL_539568                                                                                                                                                                                                                                                                                                                                                                                 | Hospital Comarcal de Melilla                           | Instituto de Salud Carlos III                                              | Iglesias-Caballero, M. Molinero Calamita, M. González-Esguevillas, M. Camarero, S. Pozo, F. Casas, I. Jiménez, P. Jiménez, M. Zaballos, A. Monzón, S. Varona, S. Juliá, M. Cuesta, I, C. Ezpeleta                                                                                                           |
| EPI_ISL_539569, EPI_ISL_539570, EPI_ISL_539571, EPI_ISL_539572                                                                                                                                                                                                                                                                                                                                 | Complejo Hospitalario de Navarra                       | Instituto de Salud Carlos III                                              | Iglesias-Caballero, M. Molinero Calamita, M. González-Esguevillas, M. Camarero, S. Pozo, F. Casas, I. Jiménez, P. Jiménez, M. Zaballos, A. Monzón, S. Varona, S. Juliá, M. Cuesta, I, J. López                                                                                                              |
| EPI_ISL_539573, EPI_ISL_539574,                                                                                                                                                                                                                                                                                                                                                                | Centre de Recherches Medicales de Lambarene (CERMEL)   | Department of Emerging Infectious Diseases, Institute of                   | Haruka Abe, Yuri Ushijima, Rodrigue Bikangui, Akim A. Adegnikna, Bertrand Lell, Jiro Yasuda                                                                                                                                                                                                                 |

|                                                                                                                                                                                                                                                                                                                                                                                                                                                                                                                                                                                                                                                                                                                                                                                                                                                                                                                                                                                                                                                                                                                                                                                                                                                                |                                               |                                                                                                                          |                                                                                                                                                                                                                                                                                                                                                                                                     |                                                                                                                                                                                                                                                                                                                                                                                                                                         |
|----------------------------------------------------------------------------------------------------------------------------------------------------------------------------------------------------------------------------------------------------------------------------------------------------------------------------------------------------------------------------------------------------------------------------------------------------------------------------------------------------------------------------------------------------------------------------------------------------------------------------------------------------------------------------------------------------------------------------------------------------------------------------------------------------------------------------------------------------------------------------------------------------------------------------------------------------------------------------------------------------------------------------------------------------------------------------------------------------------------------------------------------------------------------------------------------------------------------------------------------------------------|-----------------------------------------------|--------------------------------------------------------------------------------------------------------------------------|-----------------------------------------------------------------------------------------------------------------------------------------------------------------------------------------------------------------------------------------------------------------------------------------------------------------------------------------------------------------------------------------------------|-----------------------------------------------------------------------------------------------------------------------------------------------------------------------------------------------------------------------------------------------------------------------------------------------------------------------------------------------------------------------------------------------------------------------------------------|
| EPI_ISL_539575, EPI_ISL_539576                                                                                                                                                                                                                                                                                                                                                                                                                                                                                                                                                                                                                                                                                                                                                                                                                                                                                                                                                                                                                                                                                                                                                                                                                                 | Tropical Medicine, Nagasaki University        |                                                                                                                          |                                                                                                                                                                                                                                                                                                                                                                                                     |                                                                                                                                                                                                                                                                                                                                                                                                                                         |
| EPI_ISL_539911, EPI_ISL_539917, EPI_ISL_539925, EPI_ISL_539934, EPI_ISL_539937, EPI_ISL_539959, EPI_ISL_539971, EPI_ISL_539984, EPI_ISL_539987, EPI_ISL_539991, EPI_ISL_539999, EPI_ISL_540001, EPI_ISL_540026, EPI_ISL_540042, EPI_ISL_540072, EPI_ISL_540098, EPI_ISL_540108, EPI_ISL_540127, EPI_ISL_540148, EPI_ISL_540152, EPI_ISL_540159, EPI_ISL_540174, EPI_ISL_540181, EPI_ISL_540183, EPI_ISL_540188, EPI_ISL_540206, EPI_ISL_540242, EPI_ISL_540269, EPI_ISL_540276, EPI_ISL_540289, EPI_ISL_540299, EPI_ISL_540323, EPI_ISL_540328, EPI_ISL_540335, EPI_ISL_540350, EPI_ISL_540372, EPI_ISL_540409, EPI_ISL_540413, EPI_ISL_540416, EPI_ISL_541786, EPI_ISL_541794, EPI_ISL_541800, EPI_ISL_541801, EPI_ISL_541814, EPI_ISL_541820, EPI_ISL_541821, EPI_ISL_549559, EPI_ISL_549571, EPI_ISL_549576, EPI_ISL_549586, EPI_ISL_549592, EPI_ISL_549594, EPI_ISL_549623, EPI_ISL_549628, EPI_ISL_549632, EPI_ISL_549649, EPI_ISL_549659, EPI_ISL_549660, EPI_ISL_549662, EPI_ISL_549680, EPI_ISL_549693, EPI_ISL_549694, EPI_ISL_549703, EPI_ISL_549706, EPI_ISL_549712, EPI_ISL_549718, EPI_ISL_549726, EPI_ISL_549727, EPI_ISL_549733, EPI_ISL_549746, EPI_ISL_549760, EPI_ISL_549769, EPI_ISL_549783, EPI_ISL_549785, EPI_ISL_549788, EPI_ISL_549803 | see above                                     | Lighthouse Lab in Glasgow                                                                                                | Wellcome Sanger Institute for the COVID-19 Genomics UK (COG-UK) consortium                                                                                                                                                                                                                                                                                                                          | Harper VanSteenhouse, Yumi Kasai, David Gray, Carol Clugston, Anna Dominiczak and Alex Alderton, Roberto Amato, Sonia Goncalves, Ewan Harrison, David K. Jackson, Ian Johnston, Dominic Kwiatkowski, Cordelia Langford, John Sillitoe on behalf of the Wellcome Sanger Institute COVID-19 Surveillance Team                                                                                                                             |
| EPI_ISL_560554, EPI_ISL_560555, EPI_ISL_560556, EPI_ISL_560557, EPI_ISL_560558, EPI_ISL_560559, EPI_ISL_560560, EPI_ISL_560561, EPI_ISL_560562, EPI_ISL_560563, EPI_ISL_560564, EPI_ISL_560565, EPI_ISL_560566                                                                                                                                                                                                                                                                                                                                                                                                                                                                                                                                                                                                                                                                                                                                                                                                                                                                                                                                                                                                                                                 | see above                                     | Alaska State Virology Laboratory                                                                                         | Alaska State Virology Laboratory                                                                                                                                                                                                                                                                                                                                                                    | Jack Chen, Ph.D.                                                                                                                                                                                                                                                                                                                                                                                                                        |
| EPI_ISL_565908, EPI_ISL_565909, EPI_ISL_565910, EPI_ISL_565911, EPI_ISL_565912, EPI_ISL_565913, EPI_ISL_565914, EPI_ISL_565915, EPI_ISL_565916, EPI_ISL_565917, EPI_ISL_565918, EPI_ISL_565919                                                                                                                                                                                                                                                                                                                                                                                                                                                                                                                                                                                                                                                                                                                                                                                                                                                                                                                                                                                                                                                                 | see above                                     | Servicio de Microbiología. HRU de Málaga. Servicio Andaluz de Salud                                                      | SeqCOVID-SPAIN consortium/IBV(CSIC)                                                                                                                                                                                                                                                                                                                                                                 | Inmaculada de Toro Peinado, Ma Concepción Mediavilla Gradolph, Begoña Palop Borrás and SeqCOVID-SPAIN consortium                                                                                                                                                                                                                                                                                                                        |
| EPI_ISL_566117, EPI_ISL_566131, EPI_ISL_566146, EPI_ISL_566148, EPI_ISL_566163, EPI_ISL_566175, EPI_ISL_566182, EPI_ISL_566188, EPI_ISL_566197, EPI_ISL_566218, EPI_ISL_566219, EPI_ISL_566236, EPI_ISL_566252, EPI_ISL_566261, EPI_ISL_566276, EPI_ISL_566283, EPI_ISL_566286, EPI_ISL_566292, EPI_ISL_566297, EPI_ISL_566307, EPI_ISL_566340, EPI_ISL_566345, EPI_ISL_566349, EPI_ISL_566364, EPI_ISL_566395, EPI_ISL_566400, EPI_ISL_566413, EPI_ISL_566416                                                                                                                                                                                                                                                                                                                                                                                                                                                                                                                                                                                                                                                                                                                                                                                                 | see above                                     | Lighthouse Lab in Alderley Park                                                                                          | Wellcome Sanger Institute for the COVID-19 Genomics UK (COG-UK) consortium                                                                                                                                                                                                                                                                                                                          | Jacquelyn Wynn, Mairead Hyland, The Lighthouse Lab in Alderley Park and Alex Alderton, Roberto Amato, Sonia Goncalves, Ewan Harrison, David K. Jackson, Ian Johnston, Dominic Kwiatkowski, Cordelia Langford, John Sillitoe on behalf of the Wellcome Sanger Institute COVID-19 Surveillance Team                                                                                                                                       |
| EPI_ISL_567005, EPI_ISL_567006, EPI_ISL_567016, EPI_ISL_567021, EPI_ISL_567033, EPI_ISL_567039, EPI_ISL_567041, EPI_ISL_567063, EPI_ISL_567076, EPI_ISL_567085, EPI_ISL_567104, EPI_ISL_567110, EPI_ISL_567135, EPI_ISL_567156, EPI_ISL_567161, EPI_ISL_567172, EPI_ISL_567182, EPI_ISL_567185, EPI_ISL_567196, EPI_ISL_567199, EPI_ISL_567224, EPI_ISL_567234, EPI_ISL_567240, EPI_ISL_567250, EPI_ISL_567266, EPI_ISL_567271, EPI_ISL_567274, EPI_ISL_567292, EPI_ISL_567322, EPI_ISL_567324, EPI_ISL_567377, EPI_ISL_567386, EPI_ISL_567396, EPI_ISL_567401, EPI_ISL_567403, EPI_ISL_567419, EPI_ISL_567426, EPI_ISL_567469, EPI_ISL_567476, EPI_ISL_567482, EPI_ISL_567488, EPI_ISL_567492, EPI_ISL_567501, EPI_ISL_567507, EPI_ISL_567510                                                                                                                                                                                                                                                                                                                                                                                                                                                                                                                 | see above                                     | Lighthouse Lab in Glasgow                                                                                                | Wellcome Sanger Institute for the COVID-19 Genomics UK (COG-UK) consortium                                                                                                                                                                                                                                                                                                                          | Harper VanSteenhouse, Yumi Kasai, David Gray, Carol Clugston, Anna Dominiczak and Alex Alderton, Roberto Amato, Sonia Goncalves, Ewan Harrison, David K. Jackson, Ian Johnston, Dominic Kwiatkowski, Cordelia Langford, John Sillitoe on behalf of the Wellcome Sanger Institute COVID-19 Surveillance Team                                                                                                                             |
| EPI_ISL_567535, EPI_ISL_567537, EPI_ISL_567542, EPI_ISL_567552, EPI_ISL_567556, EPI_ISL_567568, EPI_ISL_567570, EPI_ISL_567576, EPI_ISL_567595, EPI_ISL_567629, EPI_ISL_567644, EPI_ISL_567651, EPI_ISL_567677, EPI_ISL_567692, EPI_ISL_567703, EPI_ISL_567711, EPI_ISL_567718, EPI_ISL_567725, EPI_ISL_567751, EPI_ISL_567755, EPI_ISL_567768, EPI_ISL_567770, EPI_ISL_567786, EPI_ISL_567790, EPI_ISL_567823, EPI_ISL_567878, EPI_ISL_567889, EPI_ISL_567893, EPI_ISL_567906, EPI_ISL_567928, EPI_ISL_567933, EPI_ISL_567952, EPI_ISL_567954, EPI_ISL_567962, EPI_ISL_567969, EPI_ISL_567971, EPI_ISL_567981, EPI_ISL_568003, EPI_ISL_568020, EPI_ISL_568021, EPI_ISL_568022, EPI_ISL_568041, EPI_ISL_568057, EPI_ISL_568073, EPI_ISL_568087, EPI_ISL_568098, EPI_ISL_568113, EPI_ISL_568116, EPI_ISL_568129, EPI_ISL_568131, EPI_ISL_568134, EPI_ISL_568146, EPI_ISL_568170, EPI_ISL_568173, EPI_ISL_568187, EPI_ISL_568190, EPI_ISL_568206                                                                                                                                                                                                                                                                                                                 | see above                                     | Lighthouse Lab in Alderley Park                                                                                          | Wellcome Sanger Institute for the COVID-19 Genomics UK (COG-UK) consortium                                                                                                                                                                                                                                                                                                                          | Jacquelyn Wynn, Mairead Hyland, The Lighthouse Lab in Alderley Park and Alex Alderton, Roberto Amato, Sonia Goncalves, Ewan Harrison, David K. Jackson, Ian Johnston, Dominic Kwiatkowski, Cordelia Langford, John Sillitoe on behalf of the Wellcome Sanger Institute COVID-19 Surveillance Team                                                                                                                                       |
| EPI_ISL_568235, EPI_ISL_568240, EPI_ISL_568262, EPI_ISL_568277, EPI_ISL_568291, EPI_ISL_568298, EPI_ISL_568310, EPI_ISL_568324, EPI_ISL_568325, EPI_ISL_568340, EPI_ISL_568367, EPI_ISL_568378, EPI_ISL_568401, EPI_ISL_568402, EPI_ISL_568429, EPI_ISL_568440, EPI_ISL_568465                                                                                                                                                                                                                                                                                                                                                                                                                                                                                                                                                                                                                                                                                                                                                                                                                                                                                                                                                                                 | see above                                     | Lighthouse Lab in Glasgow                                                                                                | Wellcome Sanger Institute for the COVID-19 Genomics UK (COG-UK) consortium                                                                                                                                                                                                                                                                                                                          | Harper VanSteenhouse, Yumi Kasai, David Gray, Carol Clugston, Anna Dominiczak and Alex Alderton, Roberto Amato, Sonia Goncalves, Ewan Harrison, David K. Jackson, Ian Johnston, Dominic Kwiatkowski, Cordelia Langford, John Sillitoe on behalf of the Wellcome Sanger Institute COVID-19 Surveillance Team                                                                                                                             |
| EPI_ISL_574618                                                                                                                                                                                                                                                                                                                                                                                                                                                                                                                                                                                                                                                                                                                                                                                                                                                                                                                                                                                                                                                                                                                                                                                                                                                 | RS Kramat 128                                 | Eijkman Institute for Molecular Biology, Ministry of Research and Technology/National Agency for Research and Innovation | Hidayat Trimarsanto, Frilasis A Yudhaputri, Edison Johar, Iskandar A Adnan, Willy Agustine, David H Muljono, Safarina G Malik, Herawati Sudoyo, Khin Saw Myint, Amin Soebandrio                                                                                                                                                                                                                     |                                                                                                                                                                                                                                                                                                                                                                                                                                         |
| EPI_ISL_574619, EPI_ISL_574620, EPI_ISL_574621, EPI_ISL_574622, EPI_ISL_574623                                                                                                                                                                                                                                                                                                                                                                                                                                                                                                                                                                                                                                                                                                                                                                                                                                                                                                                                                                                                                                                                                                                                                                                 | BTKLPP Kelas I Manado                         | Eijkman Institute for Molecular Biology, Ministry of Research and Technology/National Agency for Research and Innovation | Hidayat Trimarsanto, Frilasis A Yudhaputri, Edison Johar, Iskandar A Adnan, Willy Agustine, David H Muljono, Safarina G Malik, Herawati Sudoyo, Khin Saw Myint, Amin Soebandrio                                                                                                                                                                                                                     |                                                                                                                                                                                                                                                                                                                                                                                                                                         |
| EPI_ISL_575361, EPI_ISL_575382, EPI_ISL_575389                                                                                                                                                                                                                                                                                                                                                                                                                                                                                                                                                                                                                                                                                                                                                                                                                                                                                                                                                                                                                                                                                                                                                                                                                 | Lighthouse Lab in Glasgow                     | Wellcome Sanger Institute for the COVID-19 Genomics UK (COG-UK) consortium                                               | Harper VanSteenhouse, Yumi Kasai, David Gray, Carol Clugston, Anna Dominiczak and Alex Alderton, Roberto Amato, Sonia Goncalves, Ewan Harrison, David K. Jackson, Ian Johnston, Dominic Kwiatkowski, Cordelia Langford, John Sillitoe on behalf of the Wellcome Sanger Institute COVID-19 Surveillance Team                                                                                         |                                                                                                                                                                                                                                                                                                                                                                                                                                         |
| EPI_ISL_575404, EPI_ISL_575409, EPI_ISL_575415, EPI_ISL_575417, EPI_ISL_575419, EPI_ISL_575423, EPI_ISL_575431, EPI_ISL_575445, EPI_ISL_575462, EPI_ISL_575479, EPI_ISL_575487, EPI_ISL_575501, EPI_ISL_575502, EPI_ISL_575503, EPI_ISL_575514, EPI_ISL_575517, EPI_ISL_575519, EPI_ISL_575534, EPI_ISL_575551, EPI_ISL_575560, EPI_ISL_575566, EPI_ISL_575574, EPI_ISL_575578, EPI_ISL_575586, EPI_ISL_575589, EPI_ISL_575597, EPI_ISL_575602, EPI_ISL_575603, EPI_ISL_575607, EPI_ISL_575621, EPI_ISL_575648, EPI_ISL_575654, EPI_ISL_575659, EPI_ISL_575666, EPI_ISL_575676, EPI_ISL_575682, EPI_ISL_575688, EPI_ISL_575699, EPI_ISL_575719, EPI_ISL_575723, EPI_ISL_575731, EPI_ISL_575733, EPI_ISL_575742, EPI_ISL_575744                                                                                                                                                                                                                                                                                                                                                                                                                                                                                                                                 | see above                                     | Lighthouse Lab in Alderley Park                                                                                          | Wellcome Sanger Institute for the COVID-19 Genomics UK (COG-UK) consortium                                                                                                                                                                                                                                                                                                                          | Jacquelyn Wynn, Mairead Hyland, The Lighthouse Lab in Alderley Park and Alex Alderton, Roberto Amato, Sonia Goncalves, Ewan Harrison, David K. Jackson, Ian Johnston, Dominic Kwiatkowski, Cordelia Langford, John Sillitoe on behalf of the Wellcome Sanger Institute COVID-19 Surveillance Team                                                                                                                                       |
| EPI_ISL_575996, EPI_ISL_576032, EPI_ISL_576034, EPI_ISL_576036, EPI_ISL_576045, EPI_ISL_576057, EPI_ISL_576072, EPI_ISL_576076                                                                                                                                                                                                                                                                                                                                                                                                                                                                                                                                                                                                                                                                                                                                                                                                                                                                                                                                                                                                                                                                                                                                 | Lighthouse Lab in Glasgow                     | Wellcome Sanger Institute for the COVID-19 Genomics UK (COG-UK) consortium                                               | Harper VanSteenhouse, Yumi Kasai, David Gray, Carol Clugston, Anna Dominiczak and Alex Alderton, Roberto Amato, Sonia Goncalves, Ewan Harrison, David K. Jackson, Ian Johnston, Dominic Kwiatkowski, Cordelia Langford, John Sillitoe on behalf of the Wellcome Sanger Institute COVID-19 Surveillance Team ( <a href="http://www.sanger.ac.uk/covid-team">http://www.sanger.ac.uk/covid-team</a> ) |                                                                                                                                                                                                                                                                                                                                                                                                                                         |
| EPI_ISL_576111, EPI_ISL_576112                                                                                                                                                                                                                                                                                                                                                                                                                                                                                                                                                                                                                                                                                                                                                                                                                                                                                                                                                                                                                                                                                                                                                                                                                                 | Alaska State Virology Laboratory              | Alaska State Virology Laboratory                                                                                         | Jack Chen, Ph.D.                                                                                                                                                                                                                                                                                                                                                                                    |                                                                                                                                                                                                                                                                                                                                                                                                                                         |
| EPI_ISL_576877, EPI_ISL_576878, EPI_ISL_576879, EPI_ISL_576880, EPI_ISL_576881, EPI_ISL_576882, EPI_ISL_576883, EPI_ISL_576884, EPI_ISL_576885, EPI_ISL_576886, EPI_ISL_576887, EPI_ISL_576888, EPI_ISL_576889, EPI_ISL_576890, EPI_ISL_576891, EPI_ISL_576892, EPI_ISL_576893, EPI_ISL_576894, EPI_ISL_576895, EPI_ISL_576896                                                                                                                                                                                                                                                                                                                                                                                                                                                                                                                                                                                                                                                                                                                                                                                                                                                                                                                                 | see above                                     | University of Birmingham                                                                                                 | COVID-19 Genomics UK (COG-UK) Consortium                                                                                                                                                                                                                                                                                                                                                            | Institute of Microbiology, University of Birmingham: Claire McMurray, Joanne Stockton, Samuel Nicholls, Radoslaw Poplawski, Will Rowe, Josh Quick, Nicholas Loman. University of Birmingham Testing Laboratory: Celina M Whalley, Andrew Bosworth, Charlotte Poxon, Kasun Wanigasooriya, Oliver Pickles, Mike Kidd, Alex Richter, Andrew D Beggs PHE Heartlands Lab: Husam Osman, Andrew Bosworth. Queen Elizabeth Hospital: Anna Casey |
| EPI_ISL_578186                                                                                                                                                                                                                                                                                                                                                                                                                                                                                                                                                                                                                                                                                                                                                                                                                                                                                                                                                                                                                                                                                                                                                                                                                                                 | Hospital General Juan Ramón Jiménez           | Instituto de Salud Carlos III                                                                                            | Iglesias-Caballero, M. Molinero Calamita, M. González-Esguevillas, M. Camarero, S. Pozo, F. Casas, I. Jiménez, P. Jiménez, M. Zaballos, A. Monzón, S. Varona, S. Juliá, M. Cuesta, I, J. Saavedra                                                                                                                                                                                                   |                                                                                                                                                                                                                                                                                                                                                                                                                                         |
| EPI_ISL_578187, EPI_ISL_578188                                                                                                                                                                                                                                                                                                                                                                                                                                                                                                                                                                                                                                                                                                                                                                                                                                                                                                                                                                                                                                                                                                                                                                                                                                 | Hospital Virgen de las Nieves                 | Instituto de Salud Carlos III                                                                                            | Iglesias-Caballero, M. Molinero Calamita, M. González-Esguevillas, M. Camarero, S. Pozo, F. Casas, I. Jiménez, P. Jiménez, M. Zaballos, A. Monzón, S. Varona, S. Juliá, M. Cuesta, I, J.M Navarro                                                                                                                                                                                                   |                                                                                                                                                                                                                                                                                                                                                                                                                                         |
| EPI_ISL_578189                                                                                                                                                                                                                                                                                                                                                                                                                                                                                                                                                                                                                                                                                                                                                                                                                                                                                                                                                                                                                                                                                                                                                                                                                                                 | Hospital Universitario Miguel Servet          | Instituto de Salud Carlos III                                                                                            | Iglesias-Caballero, M. Molinero Calamita, M. González-Esguevillas, M. Camarero, S. Pozo, F. Casas, I. Jiménez, P. Jiménez, M. Zaballos, A. Monzón, S. Varona, S. Juliá, M. Cuesta, I, A. Rezusta                                                                                                                                                                                                    |                                                                                                                                                                                                                                                                                                                                                                                                                                         |
| EPI_ISL_578190, EPI_ISL_578191                                                                                                                                                                                                                                                                                                                                                                                                                                                                                                                                                                                                                                                                                                                                                                                                                                                                                                                                                                                                                                                                                                                                                                                                                                 | Hospital Clínico Universitario Lozano Blesa   | Instituto de Salud Carlos III                                                                                            | Iglesias-Caballero, M. Molinero Calamita, M. González-Esguevillas, M. Camarero, S. Pozo, F. Casas, I. Jiménez, P. Jiménez, M. Zaballos, A. Monzón, S. Varona, S. Juliá, M. Cuesta, I, R. Benito                                                                                                                                                                                                     |                                                                                                                                                                                                                                                                                                                                                                                                                                         |
| EPI_ISL_578192, EPI_ISL_578193                                                                                                                                                                                                                                                                                                                                                                                                                                                                                                                                                                                                                                                                                                                                                                                                                                                                                                                                                                                                                                                                                                                                                                                                                                 | Hospital Universitario Miguel Servet          | Instituto de Salud Carlos III                                                                                            | Iglesias-Caballero, M. Molinero Calamita, M. González-Esguevillas, M. Camarero, S. Pozo, F. Casas, I. Jiménez, P. Jiménez, M. Zaballos, A. Monzón, S. Varona, S. Juliá, M. Cuesta, I, A. Rezusta                                                                                                                                                                                                    |                                                                                                                                                                                                                                                                                                                                                                                                                                         |
| EPI_ISL_578194                                                                                                                                                                                                                                                                                                                                                                                                                                                                                                                                                                                                                                                                                                                                                                                                                                                                                                                                                                                                                                                                                                                                                                                                                                                 | Complejo Hospitalario Universitario La Coruna | Instituto de Salud Carlos III                                                                                            | Iglesias-Caballero, M. Molinero Calamita, M. González-Esguevillas, M. Camarero, S. Pozo, F. Casas, I. Jiménez, P. Jiménez, M. Zaballos, A. Monzón, S. Varona, S. Juliá, M. Cuesta, I, J. López                                                                                                                                                                                                      |                                                                                                                                                                                                                                                                                                                                                                                                                                         |
| EPI_ISL_578195                                                                                                                                                                                                                                                                                                                                                                                                                                                                                                                                                                                                                                                                                                                                                                                                                                                                                                                                                                                                                                                                                                                                                                                                                                                 | Complejo Hospitalario de Orense               | Instituto de Salud Carlos III                                                                                            | Iglesias-Caballero, M. Molinero Calamita, M. González-Esguevillas, M. Camarero, S. Pozo, F. Casas, I. Jiménez, P. Jiménez, M. Zaballos, A. Monzón, S. Varona, S. Juliá, M. Cuesta, I, M. García                                                                                                                                                                                                     |                                                                                                                                                                                                                                                                                                                                                                                                                                         |

|                                                                                                                                                                                                                                                                                                                                                                                                                                                                                                                                                                                                                                                                                                                                                                                                                                                                                                                                                                                |                                 |                                                                            |                                                                                                                                                                                                                                                                                                                                                                                           |                                                                                                                                                                                                                                                                                                                                                                                           |
|--------------------------------------------------------------------------------------------------------------------------------------------------------------------------------------------------------------------------------------------------------------------------------------------------------------------------------------------------------------------------------------------------------------------------------------------------------------------------------------------------------------------------------------------------------------------------------------------------------------------------------------------------------------------------------------------------------------------------------------------------------------------------------------------------------------------------------------------------------------------------------------------------------------------------------------------------------------------------------|---------------------------------|----------------------------------------------------------------------------|-------------------------------------------------------------------------------------------------------------------------------------------------------------------------------------------------------------------------------------------------------------------------------------------------------------------------------------------------------------------------------------------|-------------------------------------------------------------------------------------------------------------------------------------------------------------------------------------------------------------------------------------------------------------------------------------------------------------------------------------------------------------------------------------------|
| EPI_ISL_578196                                                                                                                                                                                                                                                                                                                                                                                                                                                                                                                                                                                                                                                                                                                                                                                                                                                                                                                                                                 | Hospital San Pedro              | Instituto de Salud Carlos III                                              | Iglesias-Caballero, M. Molinero Calamita, M. González-Esguevillas, M. Camarero, S. Pozo, F. Casas, I. Jiménez, P. Jiménez, M. Zaballos, A. Monzón, S. Varona, S. Juliá, M. Cuesta, I, J.M Azcona                                                                                                                                                                                          |                                                                                                                                                                                                                                                                                                                                                                                           |
| EPI_ISL_578197                                                                                                                                                                                                                                                                                                                                                                                                                                                                                                                                                                                                                                                                                                                                                                                                                                                                                                                                                                 | Hospital San Pedro              | Instituto de Salud Carlos III                                              | Iglesias-Caballero, M. Molinero Calamita, M. González-Esguevillas, M. Camarero, S. Pozo, F. Casas, I. Jiménez, P. Jiménez, M. Zaballos, A. Monzón, S. Varona, S. Juliá, M. Cuesta, I, C. Alonso                                                                                                                                                                                           |                                                                                                                                                                                                                                                                                                                                                                                           |
| EPI_ISL_578198, EPI_ISL_578199                                                                                                                                                                                                                                                                                                                                                                                                                                                                                                                                                                                                                                                                                                                                                                                                                                                                                                                                                 | Hospital San Pedro              | Instituto de Salud Carlos III                                              | Iglesias-Caballero, M. Molinero Calamita, M. González-Esguevillas, M. Camarero, S. Pozo, F. Casas, I. Jiménez, P. Jiménez, M. Zaballos, A. Monzón, S. Varona, S. Juliá, M. Cuesta, I, M. Blasco                                                                                                                                                                                           |                                                                                                                                                                                                                                                                                                                                                                                           |
| EPI_ISL_578200, EPI_ISL_578201                                                                                                                                                                                                                                                                                                                                                                                                                                                                                                                                                                                                                                                                                                                                                                                                                                                                                                                                                 | Hospital San Pedro              | Instituto de Salud Carlos III                                              | Iglesias-Caballero, M. Molinero Calamita, M. González-Esguevillas, M. Camarero, S. Pozo, F. Casas, I. Jiménez, P. Jiménez, M. Zaballos, A. Monzón, S. Varona, S. Juliá, M. Cuesta, I, C. Alonso                                                                                                                                                                                           |                                                                                                                                                                                                                                                                                                                                                                                           |
| EPI_ISL_579768, EPI_ISL_579769, EPI_ISL_579773, EPI_ISL_579780, EPI_ISL_579788, EPI_ISL_579799, EPI_ISL_579813, EPI_ISL_579815, EPI_ISL_579824, EPI_ISL_579838, EPI_ISL_579849, EPI_ISL_579871, EPI_ISL_579910                                                                                                                                                                                                                                                                                                                                                                                                                                                                                                                                                                                                                                                                                                                                                                 |                                 |                                                                            |                                                                                                                                                                                                                                                                                                                                                                                           |                                                                                                                                                                                                                                                                                                                                                                                           |
| see above                                                                                                                                                                                                                                                                                                                                                                                                                                                                                                                                                                                                                                                                                                                                                                                                                                                                                                                                                                      | Lighthouse Lab in Glasgow       | Wellcome Sanger Institute for the COVID-19 Genomics UK (COG-UK) consortium | Harper VanSteenhouse, Yumi Kasai, David Gray, Carol Clugston, Anna Dominiczak and Alex Alderton, Roberto Amato, Sonia Goncalves, Ewan Harrison, David K. Jackson, Ian Johnston, Dominic Kwiatkowski, Cordelia Langford, John Sillitoe on behalf of the Wellcome Sanger Institute COVID-19 Surveillance Team                                                                               |                                                                                                                                                                                                                                                                                                                                                                                           |
| EPI_ISL_579930, EPI_ISL_579962, EPI_ISL_579969, EPI_ISL_579976, EPI_ISL_579977, EPI_ISL_579979, EPI_ISL_579982, EPI_ISL_579991, EPI_ISL_580001, EPI_ISL_580025, EPI_ISL_580028, EPI_ISL_580032, EPI_ISL_580035, EPI_ISL_580058, EPI_ISL_580073, EPI_ISL_580082, EPI_ISL_580113, EPI_ISL_580118, EPI_ISL_580122, EPI_ISL_580129, EPI_ISL_580160, EPI_ISL_580166, EPI_ISL_580167, EPI_ISL_580173, EPI_ISL_580178, EPI_ISL_580200, EPI_ISL_580224, EPI_ISL_580235, EPI_ISL_580260, EPI_ISL_580268, EPI_ISL_580272, EPI_ISL_580284, EPI_ISL_580295, EPI_ISL_580308, EPI_ISL_580326, EPI_ISL_580329, EPI_ISL_580377, EPI_ISL_580383, EPI_ISL_580406, EPI_ISL_580429, EPI_ISL_580441, EPI_ISL_580494, EPI_ISL_580521, EPI_ISL_580525, EPI_ISL_580540, EPI_ISL_580546, EPI_ISL_580581, EPI_ISL_580599, EPI_ISL_580606, EPI_ISL_580611, EPI_ISL_580612, EPI_ISL_580622, EPI_ISL_580623, EPI_ISL_580650, EPI_ISL_580660, EPI_ISL_580679, EPI_ISL_580690, EPI_ISL_580695                 | see above                       | Lighthouse Lab in Alderley Park                                            | Wellcome Sanger Institute for the COVID-19 Genomics UK (COG-UK) consortium                                                                                                                                                                                                                                                                                                                | Jacquelyn Wynn, Mairead Hyland, The Lighthouse Lab in Alderley Park and Alex Alderton, Roberto Amato, Sonia Goncalves, Ewan Harrison, David K. Jackson, Ian Johnston, Dominic Kwiatkowski, Cordelia Langford, John Sillitoe on behalf of the Wellcome Sanger Institute COVID-19 Surveillance Team                                                                                         |
| EPI_ISL_580780                                                                                                                                                                                                                                                                                                                                                                                                                                                                                                                                                                                                                                                                                                                                                                                                                                                                                                                                                                 | Lighthouse Lab in Alderley Park | Wellcome Sanger Institute for the COVID-19 Genomics UK (COG-UK) Consortium | Jacquelyn Wynn, Mairead Hyland, The Lighthouse Lab in Alderley Park and Alex Alderton, Roberto Amato, Sonia Goncalves, Ewan Harrison, David K. Jackson, Ian Johnston, Dominic Kwiatkowski, Cordelia Langford, John Sillitoe on behalf of the Wellcome Sanger Institute COVID-19 Surveillance Team                                                                                         |                                                                                                                                                                                                                                                                                                                                                                                           |
| EPI_ISL_580825, EPI_ISL_580833                                                                                                                                                                                                                                                                                                                                                                                                                                                                                                                                                                                                                                                                                                                                                                                                                                                                                                                                                 | Lighthouse Lab in Alderley Park | Wellcome Sanger Institute for the COVID-19 Genomics UK (COG-UK) consortium | Jacquelyn Wynn, Mairead Hyland, The Lighthouse Lab in Alderley Park and Alex Alderton, Roberto Amato, Sonia Goncalves, Ewan Harrison, David K. Jackson, Ian Johnston, Dominic Kwiatkowski, Cordelia Langford, John Sillitoe on behalf of the Wellcome Sanger Institute COVID-19 Surveillance Team                                                                                         |                                                                                                                                                                                                                                                                                                                                                                                           |
| EPI_ISL_580884, EPI_ISL_580893, EPI_ISL_580939, EPI_ISL_580956, EPI_ISL_580989, EPI_ISL_581017, EPI_ISL_581034, EPI_ISL_581066, EPI_ISL_581088, EPI_ISL_581098, EPI_ISL_581110, EPI_ISL_581214, EPI_ISL_581291, EPI_ISL_581324, EPI_ISL_581334                                                                                                                                                                                                                                                                                                                                                                                                                                                                                                                                                                                                                                                                                                                                 | see above                       | Lighthouse Lab in Glasgow                                                  | Wellcome Sanger Institute for the COVID-19 Genomics UK (COG-UK) consortium                                                                                                                                                                                                                                                                                                                | Harper VanSteenhouse, Yumi Kasai, David Gray, Carol Clugston, Anna Dominiczak and Alex Alderton, Roberto Amato, Sonia Goncalves, Ewan Harrison, David K. Jackson, Ian Johnston, Dominic Kwiatkowski, Cordelia Langford, John Sillitoe on behalf of the Wellcome Sanger Institute COVID-19 Surveillance Team                                                                               |
| EPI_ISL_581367                                                                                                                                                                                                                                                                                                                                                                                                                                                                                                                                                                                                                                                                                                                                                                                                                                                                                                                                                                 | Lighthouse Lab in Alderley Park | Wellcome Sanger Institute for the COVID-19 Genomics UK (COG-UK) consortium | Jacquelyn Wynn, Mairead Hyland, The Lighthouse Lab in Alderley Park and Alex Alderton, Roberto Amato, Sonia Goncalves, Ewan Harrison, David K. Jackson, Ian Johnston, Dominic Kwiatkowski, Cordelia Langford, John Sillitoe on behalf of the Wellcome Sanger Institute COVID-19 Surveillance Team                                                                                         |                                                                                                                                                                                                                                                                                                                                                                                           |
| EPI_ISL_581405                                                                                                                                                                                                                                                                                                                                                                                                                                                                                                                                                                                                                                                                                                                                                                                                                                                                                                                                                                 | Lighthouse Lab in Glasgow       | Wellcome Sanger Institute for the COVID-19 Genomics UK (COG-UK) consortium | Harper VanSteenhouse, Yumi Kasai, David Gray, Carol Clugston, Anna Dominiczak and Alex Alderton, Roberto Amato, Sonia Goncalves, Ewan Harrison, David K. Jackson, Ian Johnston, Dominic Kwiatkowski, Cordelia Langford, John Sillitoe on behalf of the Wellcome Sanger Institute COVID-19 Surveillance Team                                                                               |                                                                                                                                                                                                                                                                                                                                                                                           |
| EPI_ISL_581423                                                                                                                                                                                                                                                                                                                                                                                                                                                                                                                                                                                                                                                                                                                                                                                                                                                                                                                                                                 | Lighthouse Lab in Alderley Park | Wellcome Sanger Institute for the COVID-19 Genomics UK (COG-UK) Consortium | Jacquelyn Wynn, Mairead Hyland, The Lighthouse Lab in Alderley Park and Alex Alderton, Roberto Amato, Sonia Goncalves, Ewan Harrison, David K. Jackson, Ian Johnston, Dominic Kwiatkowski, Cordelia Langford, John Sillitoe on behalf of the Wellcome Sanger Institute COVID-19 Surveillance Team                                                                                         |                                                                                                                                                                                                                                                                                                                                                                                           |
| EPI_ISL_586243, EPI_ISL_586244, EPI_ISL_586245, EPI_ISL_586246, EPI_ISL_586247, EPI_ISL_586248, EPI_ISL_586249, EPI_ISL_586250, EPI_ISL_586251, EPI_ISL_586252, EPI_ISL_586253, EPI_ISL_586254, EPI_ISL_586255, EPI_ISL_586256, EPI_ISL_586257, EPI_ISL_586258, EPI_ISL_586259, EPI_ISL_586260, EPI_ISL_586261, EPI_ISL_586262, EPI_ISL_586263, EPI_ISL_586264, EPI_ISL_586265, EPI_ISL_586266                                                                                                                                                                                                                                                                                                                                                                                                                                                                                                                                                                                 | see above                       | Alaska State Virology Laboratory                                           | Alaska State Virology Laboratory                                                                                                                                                                                                                                                                                                                                                          | Jack Chen, Ph.D.                                                                                                                                                                                                                                                                                                                                                                          |
| EPI_ISL_586570                                                                                                                                                                                                                                                                                                                                                                                                                                                                                                                                                                                                                                                                                                                                                                                                                                                                                                                                                                 | GCRI,Ahmedabad                  | Gujarat Biotechnology Research Centre                                      | Harsha Panchal, Apurvashin Puvar, Janvi Ravai, Zarna Patel, Monika Gandhi, Pinal Trivedi, Maharshi Pandya, Nidhi Patel, Nitin Savaliya, Raghawendra Kumar, Dinesh Kumar, Zuber Saiyed, Komal Patel, Labdhi Pandya, Afzal Ansari, Nikha Trivedi, Shashank Pandya, R D Dixit, A M Kadri, Harsh Bakshi, Chaitanya Joshi, Madhvi Joshi                                                        |                                                                                                                                                                                                                                                                                                                                                                                           |
| EPI_ISL_586580, EPI_ISL_586622, EPI_ISL_586632, EPI_ISL_586634, EPI_ISL_586636, EPI_ISL_586637, EPI_ISL_586647, EPI_ISL_586648, EPI_ISL_586657, EPI_ISL_586659, EPI_ISL_586672, EPI_ISL_586676, EPI_ISL_586679, EPI_ISL_586682, EPI_ISL_586688, EPI_ISL_586712, EPI_ISL_586721, EPI_ISL_586734, EPI_ISL_586751, EPI_ISL_586753, EPI_ISL_586768, EPI_ISL_586775, EPI_ISL_586782, EPI_ISL_586788, EPI_ISL_586791, EPI_ISL_586803, EPI_ISL_586806, EPI_ISL_586814, EPI_ISL_586822, EPI_ISL_586839, EPI_ISL_586867, EPI_ISL_586871, EPI_ISL_586872, EPI_ISL_586876, EPI_ISL_586879, EPI_ISL_586881, EPI_ISL_586882, EPI_ISL_586888, EPI_ISL_586901, EPI_ISL_586904                                                                                                                                                                                                                                                                                                                 | see above                       | Lighthouse Lab in Alderley Park                                            | Wellcome Sanger Institute for the COVID-19 Genomics UK (COG-UK) consortium                                                                                                                                                                                                                                                                                                                | Jacquelyn Wynn, Mairead Hyland, The Lighthouse Lab in Alderley Park and Alex Alderton, Roberto Amato, Sonia Goncalves, Ewan Harrison, David K. Jackson, Ian Johnston, Dominic Kwiatkowski, Cordelia Langford, John Sillitoe on behalf of the Wellcome Sanger Institute COVID-19 Surveillance Team ( <a href="http://www.sanger.ac.uk/covid-team">http://www.sanger.ac.uk/covid-team</a> ) |
| EPI_ISL_586907                                                                                                                                                                                                                                                                                                                                                                                                                                                                                                                                                                                                                                                                                                                                                                                                                                                                                                                                                                 | Lighthouse Lab in Alderley Park | Wellcome Sanger Institute for the COVID-19 Genomics UK (COG-UK) Consortium | Jacquelyn Wynn, Mairead Hyland, The Lighthouse Lab in Alderley Park and Alex Alderton, Roberto Amato, Sonia Goncalves, Ewan Harrison, David K. Jackson, Ian Johnston, Dominic Kwiatkowski, Cordelia Langford, John Sillitoe on behalf of the Wellcome Sanger Institute COVID-19 Surveillance Team ( <a href="http://www.sanger.ac.uk/covid-team">http://www.sanger.ac.uk/covid-team</a> ) |                                                                                                                                                                                                                                                                                                                                                                                           |
| EPI_ISL_586910, EPI_ISL_586912, EPI_ISL_586945, EPI_ISL_586960, EPI_ISL_586986, EPI_ISL_586990, EPI_ISL_586996, EPI_ISL_587002, EPI_ISL_587021, EPI_ISL_587034, EPI_ISL_587035                                                                                                                                                                                                                                                                                                                                                                                                                                                                                                                                                                                                                                                                                                                                                                                                 | see above                       | Lighthouse Lab in Alderley Park                                            | Wellcome Sanger Institute for the COVID-19 Genomics UK (COG-UK) consortium                                                                                                                                                                                                                                                                                                                | Jacquelyn Wynn, Mairead Hyland, The Lighthouse Lab in Alderley Park and Alex Alderton, Roberto Amato, Sonia Goncalves, Ewan Harrison, David K. Jackson, Ian Johnston, Dominic Kwiatkowski, Cordelia Langford, John Sillitoe on behalf of the Wellcome Sanger Institute COVID-19 Surveillance Team ( <a href="http://www.sanger.ac.uk/covid-team">http://www.sanger.ac.uk/covid-team</a> ) |
| EPI_ISL_587073, EPI_ISL_587076, EPI_ISL_587091, EPI_ISL_587092, EPI_ISL_587101, EPI_ISL_587114, EPI_ISL_587128, EPI_ISL_587133, EPI_ISL_587137, EPI_ISL_587159, EPI_ISL_587235, EPI_ISL_587242, EPI_ISL_587253, EPI_ISL_587255, EPI_ISL_587294                                                                                                                                                                                                                                                                                                                                                                                                                                                                                                                                                                                                                                                                                                                                 | see above                       | Lighthouse Lab in Alderley Park                                            | Wellcome Sanger Institute for the COVID-19 Genomics UK (COG-UK) consortium                                                                                                                                                                                                                                                                                                                | Jacquelyn Wynn, Mairead Hyland, The Lighthouse Lab in Alderley Park and Alex Alderton, Roberto Amato, Sonia Goncalves, Ewan Harrison, David K. Jackson, Ian Johnston, Dominic Kwiatkowski, Cordelia Langford, John Sillitoe on behalf of the Wellcome Sanger Institute COVID-19 Surveillance Team                                                                                         |
| EPI_ISL_587303                                                                                                                                                                                                                                                                                                                                                                                                                                                                                                                                                                                                                                                                                                                                                                                                                                                                                                                                                                 | Lighthouse Lab in Glasgow       | Wellcome Sanger Institute for the COVID-19 Genomics UK (COG-UK) Consortium | Harper VanSteenhouse, Yumi Kasai, David Gray, Carol Clugston, Anna Dominiczak and Alex Alderton, Roberto Amato, Sonia Goncalves, Ewan Harrison, David K. Jackson, Ian Johnston, Dominic Kwiatkowski, Cordelia Langford, John Sillitoe on behalf of the Wellcome Sanger Institute COVID-19 Surveillance Team                                                                               |                                                                                                                                                                                                                                                                                                                                                                                           |
| EPI_ISL_587308, EPI_ISL_587310, EPI_ISL_587329, EPI_ISL_587335, EPI_ISL_587340, EPI_ISL_587341, EPI_ISL_587357, EPI_ISL_587383, EPI_ISL_587391, EPI_ISL_587396, EPI_ISL_587410, EPI_ISL_587412, EPI_ISL_587416, EPI_ISL_587444, EPI_ISL_587457, EPI_ISL_587468, EPI_ISL_587502, EPI_ISL_587541, EPI_ISL_587543, EPI_ISL_587545, EPI_ISL_587546, EPI_ISL_587569, EPI_ISL_587604, EPI_ISL_587635, EPI_ISL_587663, EPI_ISL_587688, EPI_ISL_587696                                                                                                                                                                                                                                                                                                                                                                                                                                                                                                                                 | see above                       | Lighthouse Lab in Glasgow                                                  | Wellcome Sanger Institute for the COVID-19 Genomics UK (COG-UK) consortium                                                                                                                                                                                                                                                                                                                | Harper VanSteenhouse, Yumi Kasai, David Gray, Carol Clugston, Anna Dominiczak and Alex Alderton, Roberto Amato, Sonia Goncalves, Ewan Harrison, David K. Jackson, Ian Johnston, Dominic Kwiatkowski, Cordelia Langford, John Sillitoe on behalf of the Wellcome Sanger Institute COVID-19 Surveillance Team                                                                               |
| EPI_ISL_587721, EPI_ISL_587783, EPI_ISL_587786, EPI_ISL_587788, EPI_ISL_587792, EPI_ISL_587799, EPI_ISL_587809, EPI_ISL_587846, EPI_ISL_587849, EPI_ISL_587855, EPI_ISL_587870, EPI_ISL_587888, EPI_ISL_587894, EPI_ISL_587895, EPI_ISL_587902, EPI_ISL_587905, EPI_ISL_587913, EPI_ISL_587924, EPI_ISL_587939, EPI_ISL_587942, EPI_ISL_587973, EPI_ISL_587976, EPI_ISL_587979, EPI_ISL_587982, EPI_ISL_587984, EPI_ISL_587996, EPI_ISL_587997, EPI_ISL_588001, EPI_ISL_588002, EPI_ISL_588016, EPI_ISL_588049, EPI_ISL_588054, EPI_ISL_588057                                                                                                                                                                                                                                                                                                                                                                                                                                 | see above                       | Lighthouse Lab in Alderley Park                                            | Wellcome Sanger Institute for the COVID-19 Genomics UK (COG-UK) consortium                                                                                                                                                                                                                                                                                                                | Jacquelyn Wynn, Mairead Hyland, The Lighthouse Lab in Alderley Park and Alex Alderton, Roberto Amato, Sonia Goncalves, Ewan Harrison, David K. Jackson, Ian Johnston, Dominic Kwiatkowski, Cordelia Langford, John Sillitoe on behalf of the Wellcome Sanger Institute COVID-19 Surveillance Team                                                                                         |
| EPI_ISL_588066, EPI_ISL_588073, EPI_ISL_588079, EPI_ISL_588135, EPI_ISL_588154, EPI_ISL_588186, EPI_ISL_588195, EPI_ISL_588201, EPI_ISL_588219, EPI_ISL_588253, EPI_ISL_588255, EPI_ISL_588271, EPI_ISL_588275, EPI_ISL_588290, EPI_ISL_588315, EPI_ISL_588320, EPI_ISL_588344, EPI_ISL_588356, EPI_ISL_588362, EPI_ISL_588383, EPI_ISL_588397, EPI_ISL_588426, EPI_ISL_588456, EPI_ISL_588474, EPI_ISL_588482, EPI_ISL_588484, EPI_ISL_588495, EPI_ISL_588517, EPI_ISL_588534, EPI_ISL_588575, EPI_ISL_588580, EPI_ISL_588593, EPI_ISL_588601, EPI_ISL_588609, EPI_ISL_588637, EPI_ISL_588650, EPI_ISL_588655, EPI_ISL_588671, EPI_ISL_588704, EPI_ISL_588715, EPI_ISL_588741, EPI_ISL_588746, EPI_ISL_588748, EPI_ISL_588750, EPI_ISL_588751, EPI_ISL_588753, EPI_ISL_588771, EPI_ISL_588772, EPI_ISL_588783, EPI_ISL_588786, EPI_ISL_588794, EPI_ISL_588801, EPI_ISL_588802, EPI_ISL_588806, EPI_ISL_588811, EPI_ISL_588816, EPI_ISL_588817, EPI_ISL_588823, EPI_ISL_588839 | see above                       | Lighthouse Lab in Glasgow                                                  | Wellcome Sanger Institute for the COVID-19 Genomics UK                                                                                                                                                                                                                                                                                                                                    | Harper VanSteenhouse, Yumi Kasai, David Gray, Carol Clugston, Anna Dominiczak and Alex Alderton, Roberto Amato, Sonia Goncalves, Ewan Harrison,                                                                                                                                                                                                                                           |

|                                                                                                                                                                                                                                                                                                                                                                                                                                                                                                                                                                                                                                                                                                                                                                                                                                                                                                                                                                                                                                                                                                                                                                                                                                                                                                                                                                                                                                                                                                                                                                                                                                                                                                                                                                                                                                                                                                                                                                                                                                                                                                                                                                                                                |                                 |                                                                            |                                                                                                                                                                                                                                                                                                                                                                                                     |                                                                                                                                                                                                                                                                                                                                                                                                                                        |
|----------------------------------------------------------------------------------------------------------------------------------------------------------------------------------------------------------------------------------------------------------------------------------------------------------------------------------------------------------------------------------------------------------------------------------------------------------------------------------------------------------------------------------------------------------------------------------------------------------------------------------------------------------------------------------------------------------------------------------------------------------------------------------------------------------------------------------------------------------------------------------------------------------------------------------------------------------------------------------------------------------------------------------------------------------------------------------------------------------------------------------------------------------------------------------------------------------------------------------------------------------------------------------------------------------------------------------------------------------------------------------------------------------------------------------------------------------------------------------------------------------------------------------------------------------------------------------------------------------------------------------------------------------------------------------------------------------------------------------------------------------------------------------------------------------------------------------------------------------------------------------------------------------------------------------------------------------------------------------------------------------------------------------------------------------------------------------------------------------------------------------------------------------------------------------------------------------------|---------------------------------|----------------------------------------------------------------------------|-----------------------------------------------------------------------------------------------------------------------------------------------------------------------------------------------------------------------------------------------------------------------------------------------------------------------------------------------------------------------------------------------------|----------------------------------------------------------------------------------------------------------------------------------------------------------------------------------------------------------------------------------------------------------------------------------------------------------------------------------------------------------------------------------------------------------------------------------------|
|                                                                                                                                                                                                                                                                                                                                                                                                                                                                                                                                                                                                                                                                                                                                                                                                                                                                                                                                                                                                                                                                                                                                                                                                                                                                                                                                                                                                                                                                                                                                                                                                                                                                                                                                                                                                                                                                                                                                                                                                                                                                                                                                                                                                                |                                 | (COG-UK) consortium                                                        | David K. Jackson, Ian Johnston, Dominic Kwiatkowski, Cordelia Langford, John Sillitoe on behalf of the Wellcome Sanger Institute COVID-19 Surveillance Team                                                                                                                                                                                                                                         |                                                                                                                                                                                                                                                                                                                                                                                                                                        |
| EPI_ISL_588844, EPI_ISL_588845                                                                                                                                                                                                                                                                                                                                                                                                                                                                                                                                                                                                                                                                                                                                                                                                                                                                                                                                                                                                                                                                                                                                                                                                                                                                                                                                                                                                                                                                                                                                                                                                                                                                                                                                                                                                                                                                                                                                                                                                                                                                                                                                                                                 | Lighthouse Lab in Glasgow       | Wellcome Sanger Institute for the COVID-19 Genomics UK (COG-UK) Consortium | Harper VanSteenhouse, Yumi Kasai, David Gray, Carol Clugston, Anna Dominiczak and Alex Alderton, Roberto Amato, Sonia Goncalves, Ewan Harrison, David K. Jackson, Ian Johnston, Dominic Kwiatkowski, Cordelia Langford, John Sillitoe on behalf of the Wellcome Sanger Institute COVID-19 Surveillance Team                                                                                         |                                                                                                                                                                                                                                                                                                                                                                                                                                        |
| EPI_ISL_588856, EPI_ISL_588858, EPI_ISL_588886, EPI_ISL_588896, EPI_ISL_588899, EPI_ISL_588907, EPI_ISL_588913, EPI_ISL_588925, EPI_ISL_588934, EPI_ISL_588949, EPI_ISL_588990, EPI_ISL_589002, EPI_ISL_589038, EPI_ISL_589119, EPI_ISL_589131, EPI_ISL_589142, EPI_ISL_589162, EPI_ISL_589197, EPI_ISL_589210, EPI_ISL_589228, EPI_ISL_589249                                                                                                                                                                                                                                                                                                                                                                                                                                                                                                                                                                                                                                                                                                                                                                                                                                                                                                                                                                                                                                                                                                                                                                                                                                                                                                                                                                                                                                                                                                                                                                                                                                                                                                                                                                                                                                                                 | see above                       | Lighthouse Lab in Glasgow                                                  | Wellcome Sanger Institute for the COVID-19 Genomics UK (COG-UK) consortium                                                                                                                                                                                                                                                                                                                          | Harper VanSteenhouse, Yumi Kasai, David Gray, Carol Clugston, Anna Dominiczak and Alex Alderton, Roberto Amato, Sonia Goncalves, Ewan Harrison, David K. Jackson, Ian Johnston, Dominic Kwiatkowski, Cordelia Langford, John Sillitoe on behalf of the Wellcome Sanger Institute COVID-19 Surveillance Team                                                                                                                            |
| EPI_ISL_589269, EPI_ISL_589274, EPI_ISL_589285, EPI_ISL_589308, EPI_ISL_589325, EPI_ISL_589336, EPI_ISL_589356, EPI_ISL_589360, EPI_ISL_589390, EPI_ISL_589401, EPI_ISL_589403, EPI_ISL_589429, EPI_ISL_589435, EPI_ISL_589437, EPI_ISL_589439, EPI_ISL_589447, EPI_ISL_589461, EPI_ISL_589482, EPI_ISL_589491, EPI_ISL_589515, EPI_ISL_589522, EPI_ISL_589538, EPI_ISL_589547, EPI_ISL_589548, EPI_ISL_589554, EPI_ISL_589555, EPI_ISL_589558, EPI_ISL_589560, EPI_ISL_589566                                                                                                                                                                                                                                                                                                                                                                                                                                                                                                                                                                                                                                                                                                                                                                                                                                                                                                                                                                                                                                                                                                                                                                                                                                                                                                                                                                                                                                                                                                                                                                                                                                                                                                                                 | see above                       | Lighthouse Lab in Alderley Park                                            | Wellcome Sanger Institute for the COVID-19 Genomics UK (COG-UK) consortium                                                                                                                                                                                                                                                                                                                          | Jacquelyn Wynn, Mairead Hyland, The Lighthouse Lab in Alderley Park and Alex Alderton, Roberto Amato, Sonia Goncalves, Ewan Harrison, David K. Jackson, Ian Johnston, Dominic Kwiatkowski, Cordelia Langford, John Sillitoe on behalf of the Wellcome Sanger Institute COVID-19 Surveillance Team                                                                                                                                      |
| EPI_ISL_589779                                                                                                                                                                                                                                                                                                                                                                                                                                                                                                                                                                                                                                                                                                                                                                                                                                                                                                                                                                                                                                                                                                                                                                                                                                                                                                                                                                                                                                                                                                                                                                                                                                                                                                                                                                                                                                                                                                                                                                                                                                                                                                                                                                                                 | Lighthouse Lab in Alderley Park | Wellcome Sanger Institute for the COVID-19 Genomics UK (COG-UK) consortium | Jacquelyn Wynn, Mairead Hyland, The Lighthouse Lab in Alderley Park and Alex Alderton, Roberto Amato, Sonia Goncalves, Ewan Harrison, David K. Jackson, Ian Johnston, Dominic Kwiatkowski, Cordelia Langford, John Sillitoe on behalf of the Wellcome Sanger Institute COVID-19 Surveillance Team ( <a href="http://www.sanger.ac.uk/covid-team">http://www.sanger.ac.uk/covid-team</a> )           |                                                                                                                                                                                                                                                                                                                                                                                                                                        |
| EPI_ISL_589829, EPI_ISL_589835, EPI_ISL_589836, EPI_ISL_589856, EPI_ISL_589866, EPI_ISL_589867, EPI_ISL_589884, EPI_ISL_589886, EPI_ISL_589916, EPI_ISL_589933, EPI_ISL_589944, EPI_ISL_589955, EPI_ISL_589967, EPI_ISL_590010, EPI_ISL_590020, EPI_ISL_590032, EPI_ISL_590060, EPI_ISL_590061, EPI_ISL_590086, EPI_ISL_590114, EPI_ISL_590120, EPI_ISL_590121, EPI_ISL_590126, EPI_ISL_590141, EPI_ISL_590146, EPI_ISL_590156, EPI_ISL_590158, EPI_ISL_590161, EPI_ISL_590177, EPI_ISL_590204, EPI_ISL_590229, EPI_ISL_590230, EPI_ISL_590243                                                                                                                                                                                                                                                                                                                                                                                                                                                                                                                                                                                                                                                                                                                                                                                                                                                                                                                                                                                                                                                                                                                                                                                                                                                                                                                                                                                                                                                                                                                                                                                                                                                                 | see above                       | Lighthouse Lab in Glasgow                                                  | Wellcome Sanger Institute for the COVID-19 Genomics UK (COG-UK) consortium                                                                                                                                                                                                                                                                                                                          | Harper VanSteenhouse, Yumi Kasai, David Gray, Carol Clugston, Anna Dominiczak and Alex Alderton, Roberto Amato, Sonia Goncalves, Ewan Harrison, David K. Jackson, Ian Johnston, Dominic Kwiatkowski, Cordelia Langford, John Sillitoe on behalf of the Wellcome Sanger Institute COVID-19 Surveillance Team ( <a href="http://www.sanger.ac.uk/covid-team">http://www.sanger.ac.uk/covid-team</a> )                                    |
| EPI_ISL_590286                                                                                                                                                                                                                                                                                                                                                                                                                                                                                                                                                                                                                                                                                                                                                                                                                                                                                                                                                                                                                                                                                                                                                                                                                                                                                                                                                                                                                                                                                                                                                                                                                                                                                                                                                                                                                                                                                                                                                                                                                                                                                                                                                                                                 | Lighthouse Lab in Alderley Park | Wellcome Sanger Institute for the COVID-19 Genomics UK (COG-UK) consortium | Jacquelyn Wynn, Mairead Hyland, The Lighthouse Lab in Alderley Park and Alex Alderton, Roberto Amato, Sonia Goncalves, Ewan Harrison, David K. Jackson, Ian Johnston, Dominic Kwiatkowski, Cordelia Langford, John Sillitoe on behalf of the Wellcome Sanger Institute COVID-19 Surveillance Team ( <a href="http://www.sanger.ac.uk/covid-team">http://www.sanger.ac.uk/covid-team</a> )           |                                                                                                                                                                                                                                                                                                                                                                                                                                        |
| EPI_ISL_590311                                                                                                                                                                                                                                                                                                                                                                                                                                                                                                                                                                                                                                                                                                                                                                                                                                                                                                                                                                                                                                                                                                                                                                                                                                                                                                                                                                                                                                                                                                                                                                                                                                                                                                                                                                                                                                                                                                                                                                                                                                                                                                                                                                                                 | Lighthouse Lab in Glasgow       | Wellcome Sanger Institute for the COVID-19 Genomics UK (COG-UK) consortium | Harper VanSteenhouse, Yumi Kasai, David Gray, Carol Clugston, Anna Dominiczak and Alex Alderton, Roberto Amato, Sonia Goncalves, Ewan Harrison, David K. Jackson, Ian Johnston, Dominic Kwiatkowski, Cordelia Langford, John Sillitoe on behalf of the Wellcome Sanger Institute COVID-19 Surveillance Team ( <a href="http://www.sanger.ac.uk/covid-team">http://www.sanger.ac.uk/covid-team</a> ) |                                                                                                                                                                                                                                                                                                                                                                                                                                        |
| EPI_ISL_590329, EPI_ISL_590337                                                                                                                                                                                                                                                                                                                                                                                                                                                                                                                                                                                                                                                                                                                                                                                                                                                                                                                                                                                                                                                                                                                                                                                                                                                                                                                                                                                                                                                                                                                                                                                                                                                                                                                                                                                                                                                                                                                                                                                                                                                                                                                                                                                 | Lighthouse Lab in Alderley Park | Wellcome Sanger Institute for the COVID-19 Genomics UK (COG-UK) consortium | Jacquelyn Wynn, Mairead Hyland, The Lighthouse Lab in Alderley Park and Alex Alderton, Roberto Amato, Sonia Goncalves, Ewan Harrison, David K. Jackson, Ian Johnston, Dominic Kwiatkowski, Cordelia Langford, John Sillitoe on behalf of the Wellcome Sanger Institute COVID-19 Surveillance Team ( <a href="http://www.sanger.ac.uk/covid-team">http://www.sanger.ac.uk/covid-team</a> )           |                                                                                                                                                                                                                                                                                                                                                                                                                                        |
| EPI_ISL_590338, EPI_ISL_590340, EPI_ISL_590358, EPI_ISL_590368, EPI_ISL_590378, EPI_ISL_590382, EPI_ISL_590385, EPI_ISL_590430                                                                                                                                                                                                                                                                                                                                                                                                                                                                                                                                                                                                                                                                                                                                                                                                                                                                                                                                                                                                                                                                                                                                                                                                                                                                                                                                                                                                                                                                                                                                                                                                                                                                                                                                                                                                                                                                                                                                                                                                                                                                                 | Lighthouse Lab in Glasgow       | Wellcome Sanger Institute for the COVID-19 Genomics UK (COG-UK) consortium | Harper VanSteenhouse, Yumi Kasai, David Gray, Carol Clugston, Anna Dominiczak and Alex Alderton, Roberto Amato, Sonia Goncalves, Ewan Harrison, David K. Jackson, Ian Johnston, Dominic Kwiatkowski, Cordelia Langford, John Sillitoe on behalf of the Wellcome Sanger Institute COVID-19 Surveillance Team ( <a href="http://www.sanger.ac.uk/covid-team">http://www.sanger.ac.uk/covid-team</a> ) |                                                                                                                                                                                                                                                                                                                                                                                                                                        |
| EPI_ISL_590442                                                                                                                                                                                                                                                                                                                                                                                                                                                                                                                                                                                                                                                                                                                                                                                                                                                                                                                                                                                                                                                                                                                                                                                                                                                                                                                                                                                                                                                                                                                                                                                                                                                                                                                                                                                                                                                                                                                                                                                                                                                                                                                                                                                                 | Lighthouse Lab in Alderley Park | Wellcome Sanger Institute for the COVID-19 Genomics UK (COG-UK) consortium | Jacquelyn Wynn, Mairead Hyland, The Lighthouse Lab in Alderley Park and Alex Alderton, Roberto Amato, Sonia Goncalves, Ewan Harrison, David K. Jackson, Ian Johnston, Dominic Kwiatkowski, Cordelia Langford, John Sillitoe on behalf of the Wellcome Sanger Institute COVID-19 Surveillance Team ( <a href="http://www.sanger.ac.uk/covid-team">http://www.sanger.ac.uk/covid-team</a> )           |                                                                                                                                                                                                                                                                                                                                                                                                                                        |
| EPI_ISL_590458, EPI_ISL_590483, EPI_ISL_590490, EPI_ISL_590508, EPI_ISL_590514, EPI_ISL_590515, EPI_ISL_590543, EPI_ISL_590550, EPI_ISL_590557, EPI_ISL_590564, EPI_ISL_590571, EPI_ISL_590578, EPI_ISL_590598, EPI_ISL_590600, EPI_ISL_590604, EPI_ISL_590608, EPI_ISL_590613, EPI_ISL_590621, EPI_ISL_590630, EPI_ISL_590639, EPI_ISL_590640, EPI_ISL_590659, EPI_ISL_590686                                                                                                                                                                                                                                                                                                                                                                                                                                                                                                                                                                                                                                                                                                                                                                                                                                                                                                                                                                                                                                                                                                                                                                                                                                                                                                                                                                                                                                                                                                                                                                                                                                                                                                                                                                                                                                 | see above                       | Lighthouse Lab in Glasgow                                                  | Wellcome Sanger Institute for the COVID-19 Genomics UK (COG-UK) consortium                                                                                                                                                                                                                                                                                                                          | Harper VanSteenhouse, Yumi Kasai, David Gray, Carol Clugston, Anna Dominiczak and Alex Alderton, Roberto Amato, Sonia Goncalves, Ewan Harrison, David K. Jackson, Ian Johnston, Dominic Kwiatkowski, Cordelia Langford, John Sillitoe on behalf of the Wellcome Sanger Institute COVID-19 Surveillance Team ( <a href="http://www.sanger.ac.uk/covid-team">http://www.sanger.ac.uk/covid-team</a> )                                    |
| EPI_ISL_591270, EPI_ISL_591271, EPI_ISL_591272, EPI_ISL_591273, EPI_ISL_591274, EPI_ISL_591275, EPI_ISL_591276, EPI_ISL_591277, EPI_ISL_591278, EPI_ISL_591279, EPI_ISL_591280                                                                                                                                                                                                                                                                                                                                                                                                                                                                                                                                                                                                                                                                                                                                                                                                                                                                                                                                                                                                                                                                                                                                                                                                                                                                                                                                                                                                                                                                                                                                                                                                                                                                                                                                                                                                                                                                                                                                                                                                                                 | see above                       | National Institute for Viral Disease Control and Prevention, China CDC     | National Institute for Viral Disease Control and Prevention, China CDC                                                                                                                                                                                                                                                                                                                              | Huilai Ma, Zhaoguo Wang, Xiang Zhao, Jun Han, Yong Zhang, Hong Wang, Cao Chen, Ji Wang, Jingdong Song, Yao Meng, Yuchao Wu, Zhixiao Chen, Dayan Wang, Ruqin Gao, George F.Gao, Wenbo Xu                                                                                                                                                                                                                                                |
| EPI_ISL_594484, EPI_ISL_594485, EPI_ISL_594486, EPI_ISL_594487, EPI_ISL_594488, EPI_ISL_594489, EPI_ISL_594490, EPI_ISL_594491, EPI_ISL_594492, EPI_ISL_594493, EPI_ISL_594494, EPI_ISL_594495, EPI_ISL_594496, EPI_ISL_594497, EPI_ISL_594498, EPI_ISL_594499, EPI_ISL_594500, EPI_ISL_594501, EPI_ISL_594502, EPI_ISL_594503, EPI_ISL_594504, EPI_ISL_594505, EPI_ISL_594506, EPI_ISL_594507, EPI_ISL_594508, EPI_ISL_594509, EPI_ISL_594510, EPI_ISL_594511, EPI_ISL_594512, EPI_ISL_594513, EPI_ISL_594514, EPI_ISL_594515, EPI_ISL_594516, EPI_ISL_594517, EPI_ISL_594518, EPI_ISL_594519, EPI_ISL_594520, EPI_ISL_594521, EPI_ISL_594522, EPI_ISL_594523, EPI_ISL_594524, EPI_ISL_594525, EPI_ISL_594526, EPI_ISL_594527, EPI_ISL_594528, EPI_ISL_594529, EPI_ISL_594530, EPI_ISL_594531, EPI_ISL_594532, EPI_ISL_594533, EPI_ISL_594534, EPI_ISL_594535, EPI_ISL_594536, EPI_ISL_594537, EPI_ISL_594538, EPI_ISL_594539, EPI_ISL_594540, EPI_ISL_594541, EPI_ISL_594542, EPI_ISL_594543, EPI_ISL_594544, EPI_ISL_594545, EPI_ISL_594546, EPI_ISL_594547, EPI_ISL_594548, EPI_ISL_594549, EPI_ISL_594550, EPI_ISL_594551, EPI_ISL_594552, EPI_ISL_594553, EPI_ISL_594554, EPI_ISL_594555, EPI_ISL_594556, EPI_ISL_594557, EPI_ISL_594558, EPI_ISL_594559, EPI_ISL_594560, EPI_ISL_594561, EPI_ISL_594562, EPI_ISL_594563, EPI_ISL_594564, EPI_ISL_594565, EPI_ISL_594566, EPI_ISL_594567, EPI_ISL_594568, EPI_ISL_594569, EPI_ISL_594570, EPI_ISL_594571, EPI_ISL_594572, EPI_ISL_594573, EPI_ISL_594574, EPI_ISL_594575, EPI_ISL_594576, EPI_ISL_594577, EPI_ISL_594578, EPI_ISL_594579, EPI_ISL_594580, EPI_ISL_594581, EPI_ISL_594582, EPI_ISL_594583, EPI_ISL_594584, EPI_ISL_594585, EPI_ISL_594586, EPI_ISL_594587, EPI_ISL_594588, EPI_ISL_594589, EPI_ISL_594590, EPI_ISL_594591, EPI_ISL_594592, EPI_ISL_594593, EPI_ISL_594594, EPI_ISL_594595, EPI_ISL_594596, EPI_ISL_594597, EPI_ISL_594598, EPI_ISL_594599, EPI_ISL_594600, EPI_ISL_594601, EPI_ISL_594602, EPI_ISL_594603, EPI_ISL_594604, EPI_ISL_594605, EPI_ISL_594606, EPI_ISL_594607, EPI_ISL_594608, EPI_ISL_594609, EPI_ISL_594610, EPI_ISL_594611, EPI_ISL_594612, EPI_ISL_594613, EPI_ISL_594614, EPI_ISL_594615, EPI_ISL_594616 | see above                       | University of Birmingham                                                   | COVID-19 Genomics UK (COG-UK) Consortium                                                                                                                                                                                                                                                                                                                                                            | Institute of Microbiology, University of Birmingham: Claire McMurray, Joanne Stockton, Samuel Nicholls, Radoslaw Poplawski, Will Rowe, Josh Quick, Nicholas Loman. University of Birmingham Testing Laboratory: Celina M Whalley, Andrew Bosworth, Charlotte Poxon, Kasun Wanigasekera, Oliver Pickles, Mike Kidd, Alex Richter, Andrew D Beggs PHE Heartlands Lab: Husam Osman, Andrew Bosworth. Queen Elizabeth Hospital: Anna Casey |
| EPI_ISL_597244, EPI_ISL_597267, EPI_ISL_597268, EPI_ISL_597272, EPI_ISL_597288, EPI_ISL_597302, EPI_ISL_597328, EPI_ISL_597386, EPI_ISL_597404, EPI_ISL_597406, EPI_ISL_597436, EPI_ISL_597439, EPI_ISL_597444, EPI_ISL_597456, EPI_ISL_597482, EPI_ISL_597491, EPI_ISL_597500, EPI_ISL_597518                                                                                                                                                                                                                                                                                                                                                                                                                                                                                                                                                                                                                                                                                                                                                                                                                                                                                                                                                                                                                                                                                                                                                                                                                                                                                                                                                                                                                                                                                                                                                                                                                                                                                                                                                                                                                                                                                                                 | see above                       | Lighthouse Lab in Glasgow                                                  | Wellcome Sanger Institute for the COVID-19 Genomics UK (COG-UK) consortium                                                                                                                                                                                                                                                                                                                          | Harper VanSteenhouse, Yumi Kasai, David Gray, Carol Clugston, Anna Dominiczak and Alex Alderton, Roberto Amato, Sonia Goncalves, Ewan Harrison, David K. Jackson, Ian Johnston, Dominic Kwiatkowski, Cordelia Langford, John Sillitoe on behalf of the Wellcome Sanger Institute COVID-19 Surveillance Team ( <a href="http://www.sanger.ac.uk/covid-team">http://www.sanger.ac.uk/covid-team</a> )                                    |
| EPI_ISL_597526, EPI_ISL_597540, EPI_ISL_597562, EPI_ISL_597567, EPI_ISL_597574, EPI_ISL_597598, EPI_ISL_597610, EPI_ISL_597616, EPI_ISL_597625, EPI_ISL_597629, EPI_ISL_597647, EPI_ISL_597654, EPI_ISL_597655, EPI_ISL_597664, EPI_ISL_597675, EPI_ISL_597676, EPI_ISL_597687, EPI_ISL_597697, EPI_ISL_597704, EPI_ISL_597705, EPI_ISL_597715, EPI_ISL_597718, EPI_ISL_597756, EPI_ISL_597765, EPI_ISL_597767, EPI_ISL_597795, EPI_ISL_597804, EPI_ISL_597806, EPI_ISL_597816, EPI_ISL_597837, EPI_ISL_597873, EPI_ISL_597876, EPI_ISL_597884, EPI_ISL_597900, EPI_ISL_597907, EPI_ISL_597937, EPI_ISL_597942, EPI_ISL_597961, EPI_ISL_597963, EPI_ISL_597982, EPI_ISL_597997, EPI_ISL_598008, EPI_ISL_598022, EPI_ISL_598043, EPI_ISL_598044, EPI_ISL_598054, EPI_ISL_598064, EPI_ISL_598068, EPI_ISL_598069, EPI_ISL_598072, EPI_ISL_598092, EPI_ISL_598097, EPI_ISL_598101, EPI_ISL_598111, EPI_ISL_598113, EPI_ISL_598117, EPI_ISL_598120, EPI_ISL_598124, EPI_ISL_598130, EPI_ISL_598145, EPI_ISL_598171, EPI_ISL_598180, EPI_ISL_598189, EPI_ISL_598208, EPI_ISL_598212, EPI_ISL_598826                                                                                                                                                                                                                                                                                                                                                                                                                                                                                                                                                                                                                                                                                                                                                                                                                                                                                                                                                                                                                                                                                                                 | see above                       | Lighthouse Lab in Alderley Park                                            | Wellcome Sanger Institute for the COVID-19 Genomics UK (COG-UK) consortium                                                                                                                                                                                                                                                                                                                          | Jacquelyn Wynn, Mairead Hyland, The Lighthouse Lab in Alderley Park and Alex Alderton, Roberto Amato, Sonia Goncalves, Ewan Harrison, David K. Jackson, Ian Johnston, Dominic Kwiatkowski, Cordelia Langford, John Sillitoe on behalf of the Wellcome Sanger Institute COVID-19 Surveillance Team ( <a href="http://www.sanger.ac.uk/covid-team">http://www.sanger.ac.uk/covid-team</a> )                                              |
| EPI_ISL_598881, EPI_ISL_598894, EPI_ISL_598912, EPI_ISL_598919, EPI_ISL_598926, EPI_ISL_598965, EPI_ISL_598983, EPI_ISL_598985, EPI_ISL_598993, EPI_ISL_598999, EPI_ISL_599001, EPI_ISL_599016, EPI_ISL_599020, EPI_ISL_599026, EPI_ISL_599036, EPI_ISL_599057, EPI_ISL_599061, EPI_ISL_599065                                                                                                                                                                                                                                                                                                                                                                                                                                                                                                                                                                                                                                                                                                                                                                                                                                                                                                                                                                                                                                                                                                                                                                                                                                                                                                                                                                                                                                                                                                                                                                                                                                                                                                                                                                                                                                                                                                                 | see above                       | Lighthouse Lab in Glasgow                                                  | Wellcome Sanger Institute for the COVID-19 Genomics UK (COG-UK) consortium                                                                                                                                                                                                                                                                                                                          | Harper VanSteenhouse, Yumi Kasai, David Gray, Carol Clugston, Anna Dominiczak and Alex Alderton, Roberto Amato, Sonia Goncalves, Ewan Harrison, David K. Jackson, Ian Johnston, Dominic Kwiatkowski, Cordelia Langford, John Sillitoe on behalf of the Wellcome Sanger Institute COVID-19 Surveillance Team ( <a href="http://www.sanger.ac.uk/covid-team">http://www.sanger.ac.uk/covid-team</a> )                                    |
| EPI_ISL_599077                                                                                                                                                                                                                                                                                                                                                                                                                                                                                                                                                                                                                                                                                                                                                                                                                                                                                                                                                                                                                                                                                                                                                                                                                                                                                                                                                                                                                                                                                                                                                                                                                                                                                                                                                                                                                                                                                                                                                                                                                                                                                                                                                                                                 | Lighthouse Lab in Glasgow       | Wellcome Sanger Institute for the COVID-19 Genomics UK (COG-UK) Consortium | Harper VanSteenhouse, Yumi Kasai, David Gray, Carol Clugston, Anna Dominiczak and Alex Alderton, Roberto Amato, Sonia Goncalves, Ewan Harrison, David K. Jackson, Ian Johnston, Dominic Kwiatkowski, Cordelia Langford, John Sillitoe on behalf of the Wellcome Sanger Institute COVID-19 Surveillance Team                                                                                         |                                                                                                                                                                                                                                                                                                                                                                                                                                        |

| Team                                                                                                                                                                                                                                                                                                                                                                                                                                                                                                                                                                                                                                                                                                                                                                                                                                                                                                                                                                                                                                                                                                                                                                                                                                                                                                                                                                                                                                                                                                                                                                                                                                                                                                                                                                                                                                                                                                                                                                                                                                                                                                                                                                                                                                                                                                                                                                                                                                                                                                                                                                           |                                                               |                                 |                                                                            |                                                                                                                                                                                                                                                                                                                                                                                                                                         |
|--------------------------------------------------------------------------------------------------------------------------------------------------------------------------------------------------------------------------------------------------------------------------------------------------------------------------------------------------------------------------------------------------------------------------------------------------------------------------------------------------------------------------------------------------------------------------------------------------------------------------------------------------------------------------------------------------------------------------------------------------------------------------------------------------------------------------------------------------------------------------------------------------------------------------------------------------------------------------------------------------------------------------------------------------------------------------------------------------------------------------------------------------------------------------------------------------------------------------------------------------------------------------------------------------------------------------------------------------------------------------------------------------------------------------------------------------------------------------------------------------------------------------------------------------------------------------------------------------------------------------------------------------------------------------------------------------------------------------------------------------------------------------------------------------------------------------------------------------------------------------------------------------------------------------------------------------------------------------------------------------------------------------------------------------------------------------------------------------------------------------------------------------------------------------------------------------------------------------------------------------------------------------------------------------------------------------------------------------------------------------------------------------------------------------------------------------------------------------------------------------------------------------------------------------------------------------------|---------------------------------------------------------------|---------------------------------|----------------------------------------------------------------------------|-----------------------------------------------------------------------------------------------------------------------------------------------------------------------------------------------------------------------------------------------------------------------------------------------------------------------------------------------------------------------------------------------------------------------------------------|
| EPI_ISL_599101, EPI_ISL_599108, EPI_ISL_599109, EPI_ISL_599121, EPI_ISL_599137, EPI_ISL_599152, EPI_ISL_599157, EPI_ISL_599170, EPI_ISL_599180, EPI_ISL_599217, EPI_ISL_599220, EPI_ISL_599222, EPI_ISL_599242, EPI_ISL_599249, EPI_ISL_599254, EPI_ISL_599280, EPI_ISL_599327, EPI_ISL_599332, EPI_ISL_599342, EPI_ISL_599348, EPI_ISL_599352, EPI_ISL_599370, EPI_ISL_599376, EPI_ISL_599408, EPI_ISL_599411, EPI_ISL_599412, EPI_ISL_599419, EPI_ISL_599442, EPI_ISL_599445, EPI_ISL_599454, EPI_ISL_599465, EPI_ISL_599466, EPI_ISL_599503, EPI_ISL_599520, EPI_ISL_599522, EPI_ISL_599524, EPI_ISL_599528, EPI_ISL_599531, EPI_ISL_599540, EPI_ISL_599572, EPI_ISL_599602, EPI_ISL_599623, EPI_ISL_599628, EPI_ISL_599630, EPI_ISL_599639, EPI_ISL_599644, EPI_ISL_599697, EPI_ISL_599713, EPI_ISL_599718, EPI_ISL_599729, EPI_ISL_599732, EPI_ISL_599736, EPI_ISL_599751, EPI_ISL_599763, EPI_ISL_599778, EPI_ISL_599798, EPI_ISL_599812, EPI_ISL_600129, EPI_ISL_600138, EPI_ISL_600155, EPI_ISL_600163, EPI_ISL_600165, EPI_ISL_600192, EPI_ISL_600217, EPI_ISL_600222, EPI_ISL_600256, EPI_ISL_600257, EPI_ISL_600266, EPI_ISL_600270, EPI_ISL_600281, EPI_ISL_600305, EPI_ISL_600321, EPI_ISL_600333, EPI_ISL_600337, EPI_ISL_600345, EPI_ISL_600359, EPI_ISL_600382, EPI_ISL_600383, EPI_ISL_600418, EPI_ISL_600426, EPI_ISL_600460, EPI_ISL_600470, EPI_ISL_600475, EPI_ISL_600477, EPI_ISL_600482, EPI_ISL_600485                                                                                                                                                                                                                                                                                                                                                                                                                                                                                                                                                                                                                                                                                                                                                                                                                                                                                                                                                                                                                                                                                                                                                 | see above                                                     | Lighthouse Lab in Glasgow       | Wellcome Sanger Institute for the COVID-19 Genomics UK (COG-UK) consortium | Harper VanSteenhouse, Yumi Kasai, David Gray, Carol Clugston, Anna Dominiczak and Alex Alderton, Roberto Amato, Sonia Goncalves, Ewan Harrison, David K. Jackson, Ian Johnston, Dominic Kwiatkowski, Cordelia Langford, John Sillitoe on behalf of the Wellcome Sanger Institute COVID-19 Surveillance Team ( <a href="http://www.sanger.ac.uk/covid-team">http://www.sanger.ac.uk/covid-team</a> )                                     |
| EPI_ISL_600523                                                                                                                                                                                                                                                                                                                                                                                                                                                                                                                                                                                                                                                                                                                                                                                                                                                                                                                                                                                                                                                                                                                                                                                                                                                                                                                                                                                                                                                                                                                                                                                                                                                                                                                                                                                                                                                                                                                                                                                                                                                                                                                                                                                                                                                                                                                                                                                                                                                                                                                                                                 |                                                               | Lighthouse Lab in Alderley Park | Wellcome Sanger Institute for the COVID-19 Genomics UK (COG-UK) consortium | Jacquelyn Wynn, Mairead Hyland, The Lighthouse Lab in Alderley Park and Alex Alderton, Roberto Amato, Sonia Goncalves, Ewan Harrison, David K. Jackson, Ian Johnston, Dominic Kwiatkowski, Cordelia Langford, John Sillitoe on behalf of the Wellcome Sanger Institute COVID-19 Surveillance Team ( <a href="http://www.sanger.ac.uk/covid-team">http://www.sanger.ac.uk/covid-team</a> )                                               |
| EPI_ISL_600553, EPI_ISL_600600, EPI_ISL_600609, EPI_ISL_600622, EPI_ISL_600623, EPI_ISL_600631, EPI_ISL_600646, EPI_ISL_600650, EPI_ISL_600655, EPI_ISL_600661, EPI_ISL_600665, EPI_ISL_600672, EPI_ISL_600674, EPI_ISL_600682, EPI_ISL_600689, EPI_ISL_600694, EPI_ISL_600696, EPI_ISL_600721, EPI_ISL_600729, EPI_ISL_600754, EPI_ISL_600772, EPI_ISL_600776, EPI_ISL_600778, EPI_ISL_600783, EPI_ISL_600789, EPI_ISL_600804, EPI_ISL_600809, EPI_ISL_600844, EPI_ISL_600854, EPI_ISL_600855, EPI_ISL_600865, EPI_ISL_600872, EPI_ISL_600882, EPI_ISL_600883, EPI_ISL_600895, EPI_ISL_600905, EPI_ISL_600907, EPI_ISL_600910, EPI_ISL_600918, EPI_ISL_600957, EPI_ISL_600959, EPI_ISL_600980, EPI_ISL_600990, EPI_ISL_600991, EPI_ISL_601005, EPI_ISL_601010, EPI_ISL_601027, EPI_ISL_601033, EPI_ISL_601043, EPI_ISL_601048, EPI_ISL_601050, EPI_ISL_601051, EPI_ISL_601059, EPI_ISL_601073, EPI_ISL_601094, EPI_ISL_601108, EPI_ISL_601122, EPI_ISL_601141, EPI_ISL_601147, EPI_ISL_601160, EPI_ISL_601165, EPI_ISL_601173, EPI_ISL_601211, EPI_ISL_601222, EPI_ISL_601238, EPI_ISL_601261, EPI_ISL_601300, EPI_ISL_601453, EPI_ISL_601477, EPI_ISL_601482, EPI_ISL_601486, EPI_ISL_601791, EPI_ISL_601803, EPI_ISL_601814, EPI_ISL_601823, EPI_ISL_601837, EPI_ISL_601844, EPI_ISL_601847, EPI_ISL_601860, EPI_ISL_601873, EPI_ISL_601916, EPI_ISL_601919, EPI_ISL_601932, EPI_ISL_601965, EPI_ISL_601966, EPI_ISL_601970, EPI_ISL_601992, EPI_ISL_602002, EPI_ISL_602005, EPI_ISL_602012, EPI_ISL_602016, EPI_ISL_602031, EPI_ISL_602034, EPI_ISL_602036, EPI_ISL_602039, EPI_ISL_602052, EPI_ISL_602064, EPI_ISL_602088, EPI_ISL_602096, EPI_ISL_602141, EPI_ISL_602157                                                                                                                                                                                                                                                                                                                                                                                                                                                                                                                                                                                                                                                                                                                                                                                                                                                                                                 | see above                                                     | Lighthouse Lab in Glasgow       | Wellcome Sanger Institute for the COVID-19 Genomics UK (COG-UK) consortium | Harper VanSteenhouse, Yumi Kasai, David Gray, Carol Clugston, Anna Dominiczak and Alex Alderton, Roberto Amato, Sonia Goncalves, Ewan Harrison, David K. Jackson, Ian Johnston, Dominic Kwiatkowski, Cordelia Langford, John Sillitoe on behalf of the Wellcome Sanger Institute COVID-19 Surveillance Team ( <a href="http://www.sanger.ac.uk/covid-team">http://www.sanger.ac.uk/covid-team</a> )                                     |
| EPI_ISL_603244, EPI_ISL_603245                                                                                                                                                                                                                                                                                                                                                                                                                                                                                                                                                                                                                                                                                                                                                                                                                                                                                                                                                                                                                                                                                                                                                                                                                                                                                                                                                                                                                                                                                                                                                                                                                                                                                                                                                                                                                                                                                                                                                                                                                                                                                                                                                                                                                                                                                                                                                                                                                                                                                                                                                 | National Institute of Laboratory Medicine and Referral Center |                                 | Genomic Research Lab, BCSIR                                                | Iffat Jahan, Abu Sayeed Mohammad Mahmud, Mohammad Samir Uzzaman, Eshrah Osman, Md. Ahashan Habib, Shahina Akter, Tanjina Akhter Banu, Md. Murshed Hasan Sarkar, Barna Goswami, Md. Saddam Hossain, Tasnim Nafisa, Md. Maruf Ahmed Molla, Mahmuda Yeasmin, Asish Kumar Ghosh, A. K. M. Shamsuzzaman, Monira Parveen, Md. Masum Hossain Arif, Md. Salim Khan                                                                              |
| EPI_ISL_605945, EPI_ISL_605953, EPI_ISL_605956, EPI_ISL_605965, EPI_ISL_605983, EPI_ISL_605989, EPI_ISL_605990, EPI_ISL_605993, EPI_ISL_605995, EPI_ISL_605998, EPI_ISL_606027, EPI_ISL_606029, EPI_ISL_606073, EPI_ISL_606110, EPI_ISL_606112, EPI_ISL_606132, EPI_ISL_606146, EPI_ISL_606155, EPI_ISL_606156, EPI_ISL_606162, EPI_ISL_606164, EPI_ISL_606166, EPI_ISL_606169, EPI_ISL_606170, EPI_ISL_606176, EPI_ISL_606187, EPI_ISL_606199, EPI_ISL_606200, EPI_ISL_606229, EPI_ISL_606270, EPI_ISL_606285, EPI_ISL_606293, EPI_ISL_606952, EPI_ISL_606953, EPI_ISL_606956, EPI_ISL_606964, EPI_ISL_606971, EPI_ISL_606973, EPI_ISL_606976, EPI_ISL_606979, EPI_ISL_606986, EPI_ISL_606990, EPI_ISL_607010, EPI_ISL_607020, EPI_ISL_607023, EPI_ISL_607030, EPI_ISL_607049, EPI_ISL_607063, EPI_ISL_607066, EPI_ISL_607080, EPI_ISL_607087, EPI_ISL_607093, EPI_ISL_607122, EPI_ISL_607127, EPI_ISL_607158, EPI_ISL_607168, EPI_ISL_607171, EPI_ISL_607173, EPI_ISL_607187, EPI_ISL_607205, EPI_ISL_607211, EPI_ISL_607217, EPI_ISL_607220, EPI_ISL_607247, EPI_ISL_607260, EPI_ISL_607288, EPI_ISL_607684, EPI_ISL_607704, EPI_ISL_607731, EPI_ISL_607737, EPI_ISL_607757, EPI_ISL_607764, EPI_ISL_607772, EPI_ISL_607775, EPI_ISL_607776, EPI_ISL_607796, EPI_ISL_607816, EPI_ISL_607818, EPI_ISL_607823, EPI_ISL_607828, EPI_ISL_607840, EPI_ISL_607855, EPI_ISL_607857, EPI_ISL_607884, EPI_ISL_607890, EPI_ISL_607911, EPI_ISL_607917, EPI_ISL_607929, EPI_ISL_607933, EPI_ISL_607941, EPI_ISL_607947, EPI_ISL_607953, EPI_ISL_607957, EPI_ISL_607970, EPI_ISL_607990, EPI_ISL_608027, EPI_ISL_608029, EPI_ISL_608042, EPI_ISL_608079, EPI_ISL_608088, EPI_ISL_608091, EPI_ISL_608096, EPI_ISL_608097, EPI_ISL_608101, EPI_ISL_608102, EPI_ISL_608104, EPI_ISL_608111, EPI_ISL_608131, EPI_ISL_608149, EPI_ISL_608160, EPI_ISL_608170, EPI_ISL_608173, EPI_ISL_608173, EPI_ISL_608204, EPI_ISL_608209, EPI_ISL_608236, EPI_ISL_608245, EPI_ISL_608259, EPI_ISL_608270, EPI_ISL_608280, EPI_ISL_608294, EPI_ISL_608303, EPI_ISL_608308, EPI_ISL_608309, EPI_ISL_608326, EPI_ISL_608328, EPI_ISL_608331, EPI_ISL_608345, EPI_ISL_608383, EPI_ISL_608405, EPI_ISL_608409, EPI_ISL_608457, EPI_ISL_608465, EPI_ISL_608483, EPI_ISL_608502, EPI_ISL_608517, EPI_ISL_608584, EPI_ISL_608586, EPI_ISL_608646, EPI_ISL_608649, EPI_ISL_608655, EPI_ISL_608672, EPI_ISL_608864, EPI_ISL_608866, EPI_ISL_608903, EPI_ISL_608909, EPI_ISL_608911, EPI_ISL_608919, EPI_ISL_608934, EPI_ISL_608973, EPI_ISL_608976, EPI_ISL_608980, EPI_ISL_608994, EPI_ISL_609127, EPI_ISL_609133 | see above                                                     | Lighthouse Lab in Alderley Park | Wellcome Sanger Institute for the COVID-19 Genomics UK (COG-UK) consortium | Jacquelyn Wynn, Mairead Hyland, The Lighthouse Lab in Alderley Park and Alex Alderton, Roberto Amato, Sonia Goncalves, Ewan Harrison, David K. Jackson, Ian Johnston, Dominic Kwiatkowski, Cordelia Langford, John Sillitoe on behalf of the Wellcome Sanger Institute COVID-19 Surveillance Team                                                                                                                                       |
| EPI_ISL_609184                                                                                                                                                                                                                                                                                                                                                                                                                                                                                                                                                                                                                                                                                                                                                                                                                                                                                                                                                                                                                                                                                                                                                                                                                                                                                                                                                                                                                                                                                                                                                                                                                                                                                                                                                                                                                                                                                                                                                                                                                                                                                                                                                                                                                                                                                                                                                                                                                                                                                                                                                                 |                                                               | Lighthouse Lab in Glasgow       | Wellcome Sanger Institute for the COVID-19 Genomics UK (COG-UK) consortium | Harper VanSteenhouse, Yumi Kasai, David Gray, Carol Clugston, Anna Dominiczak and Alex Alderton, Roberto Amato, Sonia Goncalves, Ewan Harrison, David K. Jackson, Ian Johnston, Dominic Kwiatkowski, Cordelia Langford, John Sillitoe on behalf of the Wellcome Sanger Institute COVID-19 Surveillance Team                                                                                                                             |
| EPI_ISL_609210, EPI_ISL_610291, EPI_ISL_610296, EPI_ISL_610316, EPI_ISL_610327, EPI_ISL_610379, EPI_ISL_610381, EPI_ISL_610388, EPI_ISL_610395, EPI_ISL_610397, EPI_ISL_610403, EPI_ISL_610413, EPI_ISL_610414, EPI_ISL_610424, EPI_ISL_610456, EPI_ISL_610474, EPI_ISL_610480, EPI_ISL_610497                                                                                                                                                                                                                                                                                                                                                                                                                                                                                                                                                                                                                                                                                                                                                                                                                                                                                                                                                                                                                                                                                                                                                                                                                                                                                                                                                                                                                                                                                                                                                                                                                                                                                                                                                                                                                                                                                                                                                                                                                                                                                                                                                                                                                                                                                 | see above                                                     | Lighthouse Lab in Alderley Park | Wellcome Sanger Institute for the COVID-19 Genomics UK (COG-UK) consortium | Jacquelyn Wynn, Mairead Hyland, The Lighthouse Lab in Alderley Park and Alex Alderton, Roberto Amato, Sonia Goncalves, Ewan Harrison, David K. Jackson, Ian Johnston, Dominic Kwiatkowski, Cordelia Langford, John Sillitoe on behalf of the Wellcome Sanger Institute COVID-19 Surveillance Team                                                                                                                                       |
| EPI_ISL_610502                                                                                                                                                                                                                                                                                                                                                                                                                                                                                                                                                                                                                                                                                                                                                                                                                                                                                                                                                                                                                                                                                                                                                                                                                                                                                                                                                                                                                                                                                                                                                                                                                                                                                                                                                                                                                                                                                                                                                                                                                                                                                                                                                                                                                                                                                                                                                                                                                                                                                                                                                                 |                                                               | Lighthouse Lab in Alderley Park | Wellcome Sanger Institute for the COVID-19 Genomics UK (COG-UK) Consortium | Jacquelyn Wynn, Mairead Hyland, The Lighthouse Lab in Alderley Park and Alex Alderton, Roberto Amato, Sonia Goncalves, Ewan Harrison, David K. Jackson, Ian Johnston, Dominic Kwiatkowski, Cordelia Langford, John Sillitoe on behalf of the Wellcome Sanger Institute COVID-19 Surveillance Team                                                                                                                                       |
| EPI_ISL_610523, EPI_ISL_610527, EPI_ISL_610528, EPI_ISL_610530, EPI_ISL_610558, EPI_ISL_610580, EPI_ISL_610585, EPI_ISL_610598, EPI_ISL_610612, EPI_ISL_610621                                                                                                                                                                                                                                                                                                                                                                                                                                                                                                                                                                                                                                                                                                                                                                                                                                                                                                                                                                                                                                                                                                                                                                                                                                                                                                                                                                                                                                                                                                                                                                                                                                                                                                                                                                                                                                                                                                                                                                                                                                                                                                                                                                                                                                                                                                                                                                                                                 |                                                               | Lighthouse Lab in Alderley Park | Wellcome Sanger Institute for the COVID-19 Genomics UK (COG-UK) consortium | Jacquelyn Wynn, Mairead Hyland, The Lighthouse Lab in Alderley Park and Alex Alderton, Roberto Amato, Sonia Goncalves, Ewan Harrison, David K. Jackson, Ian Johnston, Dominic Kwiatkowski, Cordelia Langford, John Sillitoe on behalf of the Wellcome Sanger Institute COVID-19 Surveillance Team                                                                                                                                       |
| EPI_ISL_610922, EPI_ISL_610924, EPI_ISL_610929, EPI_ISL_610931, EPI_ISL_610937, EPI_ISL_610941, EPI_ISL_610942, EPI_ISL_610949, EPI_ISL_610965, EPI_ISL_610968, EPI_ISL_610975, EPI_ISL_610988, EPI_ISL_610998, EPI_ISL_611043, EPI_ISL_611049, EPI_ISL_611051, EPI_ISL_611067, EPI_ISL_611070, EPI_ISL_611080, EPI_ISL_611088, EPI_ISL_611090, EPI_ISL_611096, EPI_ISL_611105, EPI_ISL_611107, EPI_ISL_611115, EPI_ISL_611118, EPI_ISL_611129, EPI_ISL_611160, EPI_ISL_611195, EPI_ISL_611197, EPI_ISL_611200, EPI_ISL_611205, EPI_ISL_611213, EPI_ISL_611228, EPI_ISL_611249, EPI_ISL_611260, EPI_ISL_611263, EPI_ISL_611273, EPI_ISL_611285                                                                                                                                                                                                                                                                                                                                                                                                                                                                                                                                                                                                                                                                                                                                                                                                                                                                                                                                                                                                                                                                                                                                                                                                                                                                                                                                                                                                                                                                                                                                                                                                                                                                                                                                                                                                                                                                                                                                 | see above                                                     | Lighthouse Lab in Alderley Park | Wellcome Sanger Institute for the COVID-19 Genomics UK (COG-UK) consortium | Jacquelyn Wynn, Mairead Hyland, The Lighthouse Lab in Alderley Park and Alex Alderton, Roberto Amato, Sonia Goncalves, Ewan Harrison, David K. Jackson, Ian Johnston, Dominic Kwiatkowski, Cordelia Langford, John Sillitoe on behalf of the Wellcome Sanger Institute COVID-19 Surveillance Team ( <a href="http://www.sanger.ac.uk/covid-team">http://www.sanger.ac.uk/covid-team</a> )                                               |
| EPI_ISL_611319, EPI_ISL_611330, EPI_ISL_611365, EPI_ISL_611372, EPI_ISL_611374, EPI_ISL_611389, EPI_ISL_611404, EPI_ISL_611424, EPI_ISL_611439, EPI_ISL_611474, EPI_ISL_611481                                                                                                                                                                                                                                                                                                                                                                                                                                                                                                                                                                                                                                                                                                                                                                                                                                                                                                                                                                                                                                                                                                                                                                                                                                                                                                                                                                                                                                                                                                                                                                                                                                                                                                                                                                                                                                                                                                                                                                                                                                                                                                                                                                                                                                                                                                                                                                                                 | see above                                                     | Lighthouse Lab in Glasgow       | Wellcome Sanger Institute for the COVID-19 Genomics UK (COG-UK) consortium | Harper VanSteenhouse, Yumi Kasai, David Gray, Carol Clugston, Anna Dominiczak and Alex Alderton, Roberto Amato, Sonia Goncalves, Ewan Harrison, David K. Jackson, Ian Johnston, Dominic Kwiatkowski, Cordelia Langford, John Sillitoe on behalf of the Wellcome Sanger Institute COVID-19 Surveillance Team ( <a href="http://www.sanger.ac.uk/covid-team">http://www.sanger.ac.uk/covid-team</a> )                                     |
| EPI_ISL_611550, EPI_ISL_611554, EPI_ISL_611556, EPI_ISL_611608, EPI_ISL_611612, EPI_ISL_611671, EPI_ISL_611692, EPI_ISL_611696, EPI_ISL_611700, EPI_ISL_611705, EPI_ISL_611776, EPI_ISL_611814, EPI_ISL_611825, EPI_ISL_611847, EPI_ISL_611855, EPI_ISL_611856, EPI_ISL_611858, EPI_ISL_611859, EPI_ISL_611860, EPI_ISL_612011, EPI_ISL_612015, EPI_ISL_612047, EPI_ISL_612073, EPI_ISL_612207, EPI_ISL_612208, EPI_ISL_612209, EPI_ISL_612210, EPI_ISL_612211, EPI_ISL_612212, EPI_ISL_612213, EPI_ISL_612214, EPI_ISL_612215, EPI_ISL_612216, EPI_ISL_612217, EPI_ISL_612218, EPI_ISL_612219, EPI_ISL_612220, EPI_ISL_612221, EPI_ISL_612222, EPI_ISL_612223, EPI_ISL_612224, EPI_ISL_612225, EPI_ISL_612226, EPI_ISL_612227, EPI_ISL_612228, EPI_ISL_612229, EPI_ISL_612230, EPI_ISL_612231, EPI_ISL_612232, EPI_ISL_612233, EPI_ISL_612234, EPI_ISL_612235, EPI_ISL_612236, EPI_ISL_612237, EPI_ISL_612238, EPI_ISL_612239, EPI_ISL_612241, EPI_ISL_612242, EPI_ISL_612243, EPI_ISL_612244, EPI_ISL_612245, EPI_ISL_612246, EPI_ISL_612247, EPI_ISL_612248, EPI_ISL_612249, EPI_ISL_612250, EPI_ISL_612251, EPI_ISL_612252, EPI_ISL_612253, EPI_ISL_612254, EPI_ISL_612255, EPI_ISL_612256, EPI_ISL_612257, EPI_ISL_612258, EPI_ISL_612259, EPI_ISL_612260                                                                                                                                                                                                                                                                                                                                                                                                                                                                                                                                                                                                                                                                                                                                                                                                                                                                                                                                                                                                                                                                                                                                                                                                                                                                                                                 | see above                                                     | University of Birmingham        | COVID-19 Genomics UK (COG-UK) Consortium                                   | Institute of Microbiology, University of Birmingham: Claire McMurray, Joanne Stockton, Samuel Nicholls, Radoslaw Poplawski, Will Rowe, Josh Quick, Nicholas Loman. University of Birmingham Testing Laboratory: Celina M Whalley, Andrew Bosworth, Charlotte Poxon, Kasun Wanigasooriya, Oliver Pickles, Mike Kidd, Alex Richter, Andrew D Beggs PHE Heartlands Lab: Husam Osman, Andrew Bosworth. Queen Elizabeth Hospital: Anna Casey |
| EPI_ISL_623858, EPI_ISL_623891, EPI_ISL_623899, EPI_ISL_623909, EPI_ISL_623910, EPI_ISL_623920                                                                                                                                                                                                                                                                                                                                                                                                                                                                                                                                                                                                                                                                                                                                                                                                                                                                                                                                                                                                                                                                                                                                                                                                                                                                                                                                                                                                                                                                                                                                                                                                                                                                                                                                                                                                                                                                                                                                                                                                                                                                                                                                                                                                                                                                                                                                                                                                                                                                                 |                                                               | Lighthouse Lab in Alderley Park | Wellcome Sanger Institute for the COVID-19 Genomics UK (COG-UK) consortium | Jacquelyn Wynn, Mairead Hyland, The Lighthouse Lab in Alderley Park and Alex Alderton, Roberto Amato, Sonia Goncalves, Ewan Harrison, David K. Jackson, Ian Johnston, Dominic Kwiatkowski, Cordelia Langford, John Sillitoe on behalf of the Wellcome Sanger Institute COVID-19 Surveillance Team ( <a href="http://www.sanger.ac.uk/covid-team">http://www.sanger.ac.uk/covid-team</a> )                                               |
| EPI_ISL_623921                                                                                                                                                                                                                                                                                                                                                                                                                                                                                                                                                                                                                                                                                                                                                                                                                                                                                                                                                                                                                                                                                                                                                                                                                                                                                                                                                                                                                                                                                                                                                                                                                                                                                                                                                                                                                                                                                                                                                                                                                                                                                                                                                                                                                                                                                                                                                                                                                                                                                                                                                                 |                                                               | Lighthouse Lab in Glasgow       | Wellcome Sanger Institute for the COVID-19 Genomics UK (COG-UK) consortium | Harper VanSteenhouse, Yumi Kasai, David Gray, Carol Clugston, Anna Dominiczak and Alex Alderton, Roberto Amato, Sonia Goncalves, Ewan Harrison, David K. Jackson, Ian Johnston, Dominic Kwiatkowski, Cordelia Langford, John Sillitoe on behalf of the Wellcome Sanger Institute COVID-19 Surveillance Team ( <a href="http://www.sanger.ac.uk/covid-team">http://www.sanger.ac.uk/covid-team</a> )                                     |
| EPI_ISL_623932, EPI_ISL_623946, EPI_ISL_623955                                                                                                                                                                                                                                                                                                                                                                                                                                                                                                                                                                                                                                                                                                                                                                                                                                                                                                                                                                                                                                                                                                                                                                                                                                                                                                                                                                                                                                                                                                                                                                                                                                                                                                                                                                                                                                                                                                                                                                                                                                                                                                                                                                                                                                                                                                                                                                                                                                                                                                                                 |                                                               | Lighthouse Lab in Alderley Park | Wellcome Sanger Institute for the COVID-19 Genomics UK (COG-UK) consortium | Jacquelyn Wynn, Mairead Hyland, The Lighthouse Lab in Alderley Park and Alex Alderton, Roberto Amato, Sonia Goncalves, Ewan Harrison, David K. Jackson, Ian Johnston, Dominic Kwiatkowski, Cordelia Langford, John Sillitoe on behalf of the Wellcome Sanger Institute COVID-19 Surveillance Team ( <a href="http://www.sanger.ac.uk/covid-team">http://www.sanger.ac.uk/covid-team</a> )                                               |
| EPI_ISL_623956                                                                                                                                                                                                                                                                                                                                                                                                                                                                                                                                                                                                                                                                                                                                                                                                                                                                                                                                                                                                                                                                                                                                                                                                                                                                                                                                                                                                                                                                                                                                                                                                                                                                                                                                                                                                                                                                                                                                                                                                                                                                                                                                                                                                                                                                                                                                                                                                                                                                                                                                                                 |                                                               | Lighthouse Lab in Glasgow       | Wellcome Sanger Institute for the COVID-19 Genomics UK                     | Harper VanSteenhouse, Yumi Kasai, David Gray, Carol Clugston, Anna Dominiczak and Alex Alderton, Roberto Amato, Sonia Goncalves, Ewan Harrison,                                                                                                                                                                                                                                                                                         |





|                                                                                                                                                                                                                                                                                                                                                                                                                                                                                                                                                                                                                                                                                                                |                                                                                                                                                                       |                                                                                                                                                                                                                                                                                                                                                                          |                                                                                                                                                                                                                                                                                                                                                                                                     |  |
|----------------------------------------------------------------------------------------------------------------------------------------------------------------------------------------------------------------------------------------------------------------------------------------------------------------------------------------------------------------------------------------------------------------------------------------------------------------------------------------------------------------------------------------------------------------------------------------------------------------------------------------------------------------------------------------------------------------|-----------------------------------------------------------------------------------------------------------------------------------------------------------------------|--------------------------------------------------------------------------------------------------------------------------------------------------------------------------------------------------------------------------------------------------------------------------------------------------------------------------------------------------------------------------|-----------------------------------------------------------------------------------------------------------------------------------------------------------------------------------------------------------------------------------------------------------------------------------------------------------------------------------------------------------------------------------------------------|--|
| EPI_ISL_630854                                                                                                                                                                                                                                                                                                                                                                                                                                                                                                                                                                                                                                                                                                 |                                                                                                                                                                       |                                                                                                                                                                                                                                                                                                                                                                          |                                                                                                                                                                                                                                                                                                                                                                                                     |  |
| EPI_ISL_630872, EPI_ISL_630876                                                                                                                                                                                                                                                                                                                                                                                                                                                                                                                                                                                                                                                                                 | Lighthouse Lab in Glasgow                                                                                                                                             | Wellcome Sanger Institute for the COVID-19 Genomics UK (COG-UK) consortium                                                                                                                                                                                                                                                                                               | Harper VanSteenhouse, Yumi Kasai, David Gray, Carol Clugston, Anna Dominiczak and Alex Alderton, Roberto Amato, Sonia Goncalves, Ewan Harrison, David K. Jackson, Ian Johnston, Dominic Kwiatkowski, Cordelia Langford, John Sillitoe on behalf of the Wellcome Sanger Institute COVID-19 Surveillance Team                                                                                         |  |
| EPI_ISL_630893                                                                                                                                                                                                                                                                                                                                                                                                                                                                                                                                                                                                                                                                                                 | Lighthouse Lab in Alderley Park                                                                                                                                       | Wellcome Sanger Institute for the COVID-19 Genomics UK (COG-UK) consortium                                                                                                                                                                                                                                                                                               | Jacquelyn Wynn, Mairead Hyland, The Lighthouse Lab in Alderley Park and Alex Alderton, Roberto Amato, Sonia Goncalves, Ewan Harrison, David K. Jackson, Ian Johnston, Dominic Kwiatkowski, Cordelia Langford, John Sillitoe on behalf of the Wellcome Sanger Institute COVID-19 Surveillance Team                                                                                                   |  |
| EPI_ISL_630900                                                                                                                                                                                                                                                                                                                                                                                                                                                                                                                                                                                                                                                                                                 | Lighthouse Lab in Glasgow                                                                                                                                             | Wellcome Sanger Institute for the COVID-19 Genomics UK (COG-UK) consortium                                                                                                                                                                                                                                                                                               | Harper VanSteenhouse, Yumi Kasai, David Gray, Carol Clugston, Anna Dominiczak and Alex Alderton, Roberto Amato, Sonia Goncalves, Ewan Harrison, David K. Jackson, Ian Johnston, Dominic Kwiatkowski, Cordelia Langford, John Sillitoe on behalf of the Wellcome Sanger Institute COVID-19 Surveillance Team                                                                                         |  |
| EPI_ISL_630916, EPI_ISL_630961, EPI_ISL_630969, EPI_ISL_630992, EPI_ISL_631014, EPI_ISL_631018, EPI_ISL_631050, EPI_ISL_631217                                                                                                                                                                                                                                                                                                                                                                                                                                                                                                                                                                                 | Lighthouse Lab in Alderley Park                                                                                                                                       | Wellcome Sanger Institute for the COVID-19 Genomics UK (COG-UK) consortium                                                                                                                                                                                                                                                                                               | Jacquelyn Wynn, Mairead Hyland, The Lighthouse Lab in Alderley Park and Alex Alderton, Roberto Amato, Sonia Goncalves, Ewan Harrison, David K. Jackson, Ian Johnston, Dominic Kwiatkowski, Cordelia Langford, John Sillitoe on behalf of the Wellcome Sanger Institute COVID-19 Surveillance Team                                                                                                   |  |
| EPI_ISL_632310                                                                                                                                                                                                                                                                                                                                                                                                                                                                                                                                                                                                                                                                                                 | 1-Laboratory of Microbiology, National Reference Lab, Charles Nicolle Hospital; 2-University of Tunis ElManar, Faculty of Medicine of Tunis, LR99ES09, Tunis, Tunisia | 1-Clinical and Experimental Pharmacology Lab, LR16SP02, National Center of Pharmacovigilance, University of Tunis El Manar, Tunis, Tunisia. 2-Neurodegenerative diseases and psychiatric troubles, LR18SP03, Razi Hospital, University of Tunis El Manar, Tunis, Tunisia. 3- Ministry of Health, National Observatory of New and Emerging Diseases, 1006, Tunis, Tunisia | Ilhem Boutiba-Ben Boubaker, Sameh Trabelsi, Nissaf Ben Alaya, Maher Kharrat, Alia Ben Kahla, Jalila Ben Khelil, Salma Abid, Sana Ferjani, Mouna Ben Sassi, Mouna Safer, Imen Mkada, Imen Kacem, Gaies Emma, Soumaya Rammeh, Riadh Dagfous, Riadh Gouider.                                                                                                                                           |  |
| EPI_ISL_633119, EPI_ISL_633180, EPI_ISL_633181, EPI_ISL_633209, EPI_ISL_633268, EPI_ISL_633289, EPI_ISL_633304, EPI_ISL_633305, EPI_ISL_633309, EPI_ISL_633327, EPI_ISL_633331, EPI_ISL_633358                                                                                                                                                                                                                                                                                                                                                                                                                                                                                                                 |                                                                                                                                                                       |                                                                                                                                                                                                                                                                                                                                                                          |                                                                                                                                                                                                                                                                                                                                                                                                     |  |
| see above                                                                                                                                                                                                                                                                                                                                                                                                                                                                                                                                                                                                                                                                                                      | Lighthouse Lab in Glasgow                                                                                                                                             | Wellcome Sanger Institute for the COVID-19 Genomics UK (COG-UK) consortium                                                                                                                                                                                                                                                                                               | Harper VanSteenhouse, Yumi Kasai, David Gray, Carol Clugston, Anna Dominiczak and Alex Alderton, Roberto Amato, Sonia Goncalves, Ewan Harrison, David K. Jackson, Ian Johnston, Dominic Kwiatkowski, Cordelia Langford, John Sillitoe on behalf of the Wellcome Sanger Institute COVID-19 Surveillance Team                                                                                         |  |
| EPI_ISL_633361                                                                                                                                                                                                                                                                                                                                                                                                                                                                                                                                                                                                                                                                                                 | Lighthouse Lab in Glasgow                                                                                                                                             | Wellcome Sanger Institute for the COVID-19 Genomics UK (COG-UK) Consortium                                                                                                                                                                                                                                                                                               | Harper VanSteenhouse, Yumi Kasai, David Gray, Carol Clugston, Anna Dominiczak and Alex Alderton, Roberto Amato, Sonia Goncalves, Ewan Harrison, David K. Jackson, Ian Johnston, Dominic Kwiatkowski, Cordelia Langford, John Sillitoe on behalf of the Wellcome Sanger Institute COVID-19 Surveillance Team                                                                                         |  |
| EPI_ISL_633382, EPI_ISL_633391, EPI_ISL_633396, EPI_ISL_633402, EPI_ISL_633412, EPI_ISL_633424, EPI_ISL_633427, EPI_ISL_633430, EPI_ISL_633460, EPI_ISL_633465, EPI_ISL_633503, EPI_ISL_633529, EPI_ISL_633545, EPI_ISL_633561, EPI_ISL_633574                                                                                                                                                                                                                                                                                                                                                                                                                                                                 |                                                                                                                                                                       |                                                                                                                                                                                                                                                                                                                                                                          |                                                                                                                                                                                                                                                                                                                                                                                                     |  |
| see above                                                                                                                                                                                                                                                                                                                                                                                                                                                                                                                                                                                                                                                                                                      | Lighthouse Lab in Glasgow                                                                                                                                             | Wellcome Sanger Institute for the COVID-19 Genomics UK (COG-UK) consortium                                                                                                                                                                                                                                                                                               | Harper VanSteenhouse, Yumi Kasai, David Gray, Carol Clugston, Anna Dominiczak and Alex Alderton, Roberto Amato, Sonia Goncalves, Ewan Harrison, David K. Jackson, Ian Johnston, Dominic Kwiatkowski, Cordelia Langford, John Sillitoe on behalf of the Wellcome Sanger Institute COVID-19 Surveillance Team                                                                                         |  |
| EPI_ISL_633577                                                                                                                                                                                                                                                                                                                                                                                                                                                                                                                                                                                                                                                                                                 | Lighthouse Lab in Glasgow                                                                                                                                             | Wellcome Sanger Institute for the COVID-19 Genomics UK (COG-UK) Consortium                                                                                                                                                                                                                                                                                               | Harper VanSteenhouse, Yumi Kasai, David Gray, Carol Clugston, Anna Dominiczak and Alex Alderton, Roberto Amato, Sonia Goncalves, Ewan Harrison, David K. Jackson, Ian Johnston, Dominic Kwiatkowski, Cordelia Langford, John Sillitoe on behalf of the Wellcome Sanger Institute COVID-19 Surveillance Team                                                                                         |  |
| EPI_ISL_633578, EPI_ISL_633582, EPI_ISL_633588, EPI_ISL_633589, EPI_ISL_633604, EPI_ISL_633617, EPI_ISL_633625, EPI_ISL_633631, EPI_ISL_633642, EPI_ISL_633643                                                                                                                                                                                                                                                                                                                                                                                                                                                                                                                                                 | Lighthouse Lab in Glasgow                                                                                                                                             | Wellcome Sanger Institute for the COVID-19 Genomics UK (COG-UK) consortium                                                                                                                                                                                                                                                                                               | Harper VanSteenhouse, Yumi Kasai, David Gray, Carol Clugston, Anna Dominiczak and Alex Alderton, Roberto Amato, Sonia Goncalves, Ewan Harrison, David K. Jackson, Ian Johnston, Dominic Kwiatkowski, Cordelia Langford, John Sillitoe on behalf of the Wellcome Sanger Institute COVID-19 Surveillance Team                                                                                         |  |
| EPI_ISL_633653                                                                                                                                                                                                                                                                                                                                                                                                                                                                                                                                                                                                                                                                                                 | Lighthouse Lab in Glasgow                                                                                                                                             | Wellcome Sanger Institute for the COVID-19 Genomics UK (COG-UK) Consortium                                                                                                                                                                                                                                                                                               | Harper VanSteenhouse, Yumi Kasai, David Gray, Carol Clugston, Anna Dominiczak and Alex Alderton, Roberto Amato, Sonia Goncalves, Ewan Harrison, David K. Jackson, Ian Johnston, Dominic Kwiatkowski, Cordelia Langford, John Sillitoe on behalf of the Wellcome Sanger Institute COVID-19 Surveillance Team                                                                                         |  |
| EPI_ISL_633658, EPI_ISL_633668, EPI_ISL_633672, EPI_ISL_633685, EPI_ISL_633707, EPI_ISL_633718, EPI_ISL_633744, EPI_ISL_633750                                                                                                                                                                                                                                                                                                                                                                                                                                                                                                                                                                                 | Lighthouse Lab in Glasgow                                                                                                                                             | Wellcome Sanger Institute for the COVID-19 Genomics UK (COG-UK) consortium                                                                                                                                                                                                                                                                                               | Harper VanSteenhouse, Yumi Kasai, David Gray, Carol Clugston, Anna Dominiczak and Alex Alderton, Roberto Amato, Sonia Goncalves, Ewan Harrison, David K. Jackson, Ian Johnston, Dominic Kwiatkowski, Cordelia Langford, John Sillitoe on behalf of the Wellcome Sanger Institute COVID-19 Surveillance Team                                                                                         |  |
| EPI_ISL_633760                                                                                                                                                                                                                                                                                                                                                                                                                                                                                                                                                                                                                                                                                                 | Lighthouse Lab in Glasgow                                                                                                                                             | Wellcome Sanger Institute for the COVID-19 Genomics UK (COG-UK) Consortium                                                                                                                                                                                                                                                                                               | Harper VanSteenhouse, Yumi Kasai, David Gray, Carol Clugston, Anna Dominiczak and Alex Alderton, Roberto Amato, Sonia Goncalves, Ewan Harrison, David K. Jackson, Ian Johnston, Dominic Kwiatkowski, Cordelia Langford, John Sillitoe on behalf of the Wellcome Sanger Institute COVID-19 Surveillance Team                                                                                         |  |
| EPI_ISL_633783, EPI_ISL_633784, EPI_ISL_633786, EPI_ISL_633787, EPI_ISL_633793, EPI_ISL_633795                                                                                                                                                                                                                                                                                                                                                                                                                                                                                                                                                                                                                 | Lighthouse Lab in Glasgow                                                                                                                                             | Wellcome Sanger Institute for the COVID-19 Genomics UK (COG-UK) consortium                                                                                                                                                                                                                                                                                               | Harper VanSteenhouse, Yumi Kasai, David Gray, Carol Clugston, Anna Dominiczak and Alex Alderton, Roberto Amato, Sonia Goncalves, Ewan Harrison, David K. Jackson, Ian Johnston, Dominic Kwiatkowski, Cordelia Langford, John Sillitoe on behalf of the Wellcome Sanger Institute COVID-19 Surveillance Team                                                                                         |  |
| EPI_ISL_633799                                                                                                                                                                                                                                                                                                                                                                                                                                                                                                                                                                                                                                                                                                 | Lighthouse Lab in Glasgow                                                                                                                                             | Wellcome Sanger Institute for the COVID-19 Genomics UK (COG-UK) Consortium                                                                                                                                                                                                                                                                                               | Harper VanSteenhouse, Yumi Kasai, David Gray, Carol Clugston, Anna Dominiczak and Alex Alderton, Roberto Amato, Sonia Goncalves, Ewan Harrison, David K. Jackson, Ian Johnston, Dominic Kwiatkowski, Cordelia Langford, John Sillitoe on behalf of the Wellcome Sanger Institute COVID-19 Surveillance Team                                                                                         |  |
| EPI_ISL_633809, EPI_ISL_633818, EPI_ISL_633827, EPI_ISL_633831, EPI_ISL_633837, EPI_ISL_633851, EPI_ISL_633879, EPI_ISL_633886, EPI_ISL_633893, EPI_ISL_633904, EPI_ISL_633909, EPI_ISL_633944, EPI_ISL_633964, EPI_ISL_633970, EPI_ISL_633990, EPI_ISL_634058, EPI_ISL_634069, EPI_ISL_634073, EPI_ISL_634095, EPI_ISL_634096, EPI_ISL_634102, EPI_ISL_634122, EPI_ISL_634127, EPI_ISL_634128, EPI_ISL_634138, EPI_ISL_634179, EPI_ISL_634187, EPI_ISL_634188, EPI_ISL_634192, EPI_ISL_634202, EPI_ISL_634204, EPI_ISL_634242, EPI_ISL_634247, EPI_ISL_634248, EPI_ISL_634528, EPI_ISL_634529, EPI_ISL_634548, EPI_ISL_634557, EPI_ISL_634569, EPI_ISL_634572, EPI_ISL_634578, EPI_ISL_634584, EPI_ISL_634587 |                                                                                                                                                                       |                                                                                                                                                                                                                                                                                                                                                                          |                                                                                                                                                                                                                                                                                                                                                                                                     |  |
| see above                                                                                                                                                                                                                                                                                                                                                                                                                                                                                                                                                                                                                                                                                                      | Lighthouse Lab in Glasgow                                                                                                                                             | Wellcome Sanger Institute for the COVID-19 Genomics UK (COG-UK) consortium                                                                                                                                                                                                                                                                                               | Harper VanSteenhouse, Yumi Kasai, David Gray, Carol Clugston, Anna Dominiczak and Alex Alderton, Roberto Amato, Sonia Goncalves, Ewan Harrison, David K. Jackson, Ian Johnston, Dominic Kwiatkowski, Cordelia Langford, John Sillitoe on behalf of the Wellcome Sanger Institute COVID-19 Surveillance Team                                                                                         |  |
| EPI_ISL_634600, EPI_ISL_634611, EPI_ISL_634622, EPI_ISL_634644, EPI_ISL_634659, EPI_ISL_634661                                                                                                                                                                                                                                                                                                                                                                                                                                                                                                                                                                                                                 | Lighthouse Lab in Glasgow                                                                                                                                             | Wellcome Sanger Institute for the COVID-19 Genomics UK (COG-UK) consortium                                                                                                                                                                                                                                                                                               | Harper VanSteenhouse, Yumi Kasai, David Gray, Carol Clugston, Anna Dominiczak and Alex Alderton, Roberto Amato, Sonia Goncalves, Ewan Harrison, David K. Jackson, Ian Johnston, Dominic Kwiatkowski, Cordelia Langford, John Sillitoe on behalf of the Wellcome Sanger Institute COVID-19 Surveillance Team ( <a href="http://www.sanger.ac.uk/covid-team">http://www.sanger.ac.uk/covid-team</a> ) |  |
| EPI_ISL_634678                                                                                                                                                                                                                                                                                                                                                                                                                                                                                                                                                                                                                                                                                                 | Lighthouse Lab in Glasgow                                                                                                                                             | Wellcome Sanger Institute for the COVID-19 Genomics UK (COG-UK) Consortium                                                                                                                                                                                                                                                                                               | Harper VanSteenhouse, Yumi Kasai, David Gray, Carol Clugston, Anna Dominiczak and Alex Alderton, Roberto Amato, Sonia Goncalves, Ewan Harrison, David K. Jackson, Ian Johnston, Dominic Kwiatkowski, Cordelia Langford, John Sillitoe on behalf of the Wellcome Sanger Institute COVID-19 Surveillance Team ( <a href="http://www.sanger.ac.uk/covid-team">http://www.sanger.ac.uk/covid-team</a> ) |  |
| EPI_ISL_634687, EPI_ISL_634698, EPI_ISL_634700, EPI_ISL_634717, EPI_ISL_634735, EPI_ISL_634748, EPI_ISL_634753                                                                                                                                                                                                                                                                                                                                                                                                                                                                                                                                                                                                 | Lighthouse Lab in Glasgow                                                                                                                                             | Wellcome Sanger Institute for the COVID-19 Genomics UK (COG-UK) consortium                                                                                                                                                                                                                                                                                               | Harper VanSteenhouse, Yumi Kasai, David Gray, Carol Clugston, Anna Dominiczak and Alex Alderton, Roberto Amato, Sonia Goncalves, Ewan Harrison, David K. Jackson, Ian Johnston, Dominic Kwiatkowski, Cordelia Langford, John Sillitoe on behalf of the Wellcome Sanger Institute COVID-19 Surveillance Team ( <a href="http://www.sanger.ac.uk/covid-team">http://www.sanger.ac.uk/covid-team</a> ) |  |
| EPI_ISL_634760, EPI_ISL_634765                                                                                                                                                                                                                                                                                                                                                                                                                                                                                                                                                                                                                                                                                 | Lighthouse Lab in Alderley Park                                                                                                                                       | Wellcome Sanger Institute for the COVID-19 Genomics UK (COG-UK) consortium                                                                                                                                                                                                                                                                                               | Jacquelyn Wynn, Mairead Hyland, The Lighthouse Lab in Alderley Park and Alex Alderton, Roberto Amato, Sonia Goncalves, Ewan Harrison, David K. Jackson, Ian Johnston, Dominic Kwiatkowski, Cordelia Langford, John Sillitoe on behalf of the Wellcome Sanger Institute COVID-19 Surveillance Team ( <a href="http://www.sanger.ac.uk/covid-team">http://www.sanger.ac.uk/covid-team</a> )           |  |
| EPI_ISL_634977, EPI_ISL_635059,                                                                                                                                                                                                                                                                                                                                                                                                                                                                                                                                                                                                                                                                                | 1-Laboratory of Microbiology, National Reference Lab,                                                                                                                 | 1-Clinical and Experimental Pharmacology Lab, LR16SP02,                                                                                                                                                                                                                                                                                                                  | Ilhem Boutiba-Ben Boubaker, Sameh Trabelsi, Nissaf Ben Alaya, Maher Kharrat, Alia Ben Kahla, Jalila Ben Khelil, Salma Abid, Sana Ferjani, Mouna Ben                                                                                                                                                                                                                                                 |  |

|                                                                                                                                                                                                                                                                                                                                                                                                                                                                                                                                                                                                                                                                                                                                                                                                                                                                                                                                                                                                                                                                                                                                                                                                                                                                                                                                                                                                                                                                                                                                                                                                                                                                                                                                                                                                                                                                                                                                                                                |                                                                                                                 |                                                                                                                                                                                                                                                                                                                  |                                                                                                                                                                                                                                                                                                             |
|--------------------------------------------------------------------------------------------------------------------------------------------------------------------------------------------------------------------------------------------------------------------------------------------------------------------------------------------------------------------------------------------------------------------------------------------------------------------------------------------------------------------------------------------------------------------------------------------------------------------------------------------------------------------------------------------------------------------------------------------------------------------------------------------------------------------------------------------------------------------------------------------------------------------------------------------------------------------------------------------------------------------------------------------------------------------------------------------------------------------------------------------------------------------------------------------------------------------------------------------------------------------------------------------------------------------------------------------------------------------------------------------------------------------------------------------------------------------------------------------------------------------------------------------------------------------------------------------------------------------------------------------------------------------------------------------------------------------------------------------------------------------------------------------------------------------------------------------------------------------------------------------------------------------------------------------------------------------------------|-----------------------------------------------------------------------------------------------------------------|------------------------------------------------------------------------------------------------------------------------------------------------------------------------------------------------------------------------------------------------------------------------------------------------------------------|-------------------------------------------------------------------------------------------------------------------------------------------------------------------------------------------------------------------------------------------------------------------------------------------------------------|
| EPI_ISL_635060, EPI_ISL_635061, EPI_ISL_635062                                                                                                                                                                                                                                                                                                                                                                                                                                                                                                                                                                                                                                                                                                                                                                                                                                                                                                                                                                                                                                                                                                                                                                                                                                                                                                                                                                                                                                                                                                                                                                                                                                                                                                                                                                                                                                                                                                                                 | Charles Nicolle Hospital; 2-University of Tunis ElManar, Faculty of Medicine of Tunis, LR99ES09, Tunis, Tunisia | National Center of Pharmacovigilance, University of Tunis El Manar, Tunis, Tunisia. 2-Neurodegenerative diseases and psychiatric troubles, LR18SP03, Razi Hospital, University of Tunis El Manar, Tunis, Tunisia. 3- Ministry of Health, National Observatory of New and Emerging Diseases, 1006, Tunis, Tunisia | Sassi, Mouna Safer, Imen Mkada, Imen Kacem, Gaies Emna, Soumaya Rammeh, Riadh Daghfous, Riadh Gouider.                                                                                                                                                                                                      |
| EPI_ISL_635777, EPI_ISL_635778, EPI_ISL_635779, EPI_ISL_635780, EPI_ISL_635781, EPI_ISL_635782, EPI_ISL_636279, EPI_ISL_636280, EPI_ISL_636281, EPI_ISL_636282, EPI_ISL_636283, EPI_ISL_636284, EPI_ISL_636297, EPI_ISL_636298, EPI_ISL_636299, EPI_ISL_636300, EPI_ISL_636301, EPI_ISL_636302, EPI_ISL_636315, EPI_ISL_636316, EPI_ISL_636317, EPI_ISL_636318, EPI_ISL_636319, EPI_ISL_636320, EPI_ISL_636333, EPI_ISL_636334, EPI_ISL_636335, EPI_ISL_636336, EPI_ISL_636337, EPI_ISL_636338, EPI_ISL_636351, EPI_ISL_636352, EPI_ISL_636353, EPI_ISL_636354, EPI_ISL_636355, EPI_ISL_636356, EPI_ISL_636369, EPI_ISL_636370, EPI_ISL_636371, EPI_ISL_636372, EPI_ISL_636373, EPI_ISL_636374, EPI_ISL_636387, EPI_ISL_636388, EPI_ISL_636389, EPI_ISL_636390, EPI_ISL_636391, EPI_ISL_636405, EPI_ISL_636406, EPI_ISL_636407, EPI_ISL_636408, EPI_ISL_636409, EPI_ISL_636423, EPI_ISL_636424, EPI_ISL_636425, EPI_ISL_636426, EPI_ISL_636441, EPI_ISL_636442, EPI_ISL_636443, EPI_ISL_636444, EPI_ISL_636445, EPI_ISL_636446                                                                                                                                                                                                                                                                                                                                                                                                                                                                                                                                                                                                                                                                                                                                                                                                                                                                                                                                                 | Biolab Diagnostic Laboratories                                                                                  | Andersen lab at Scripps Research                                                                                                                                                                                                                                                                                 | Issa Abu-Dayyeh, Ahmad Tibi, Lama Hussein, Lina Mohammad, Zein Naber, Amid Abdelnour with SEARCH Alliance San Diego                                                                                                                                                                                         |
| see above                                                                                                                                                                                                                                                                                                                                                                                                                                                                                                                                                                                                                                                                                                                                                                                                                                                                                                                                                                                                                                                                                                                                                                                                                                                                                                                                                                                                                                                                                                                                                                                                                                                                                                                                                                                                                                                                                                                                                                      | HP Pemba                                                                                                        | KRISP, KZN Research Innovation and Sequencing Platform                                                                                                                                                                                                                                                           | Ismael N, Giandhari J, Pillay S, Tegally H, Wilkinson E, de Oliveira T, Nadia Siteo, Paulo Arnaldo, Nedio Mabunda                                                                                                                                                                                           |
| EPI_ISL_636975, EPI_ISL_636976, EPI_ISL_636977, EPI_ISL_636978, EPI_ISL_636979                                                                                                                                                                                                                                                                                                                                                                                                                                                                                                                                                                                                                                                                                                                                                                                                                                                                                                                                                                                                                                                                                                                                                                                                                                                                                                                                                                                                                                                                                                                                                                                                                                                                                                                                                                                                                                                                                                 | CS Xai Xai                                                                                                      | KRISP, KZN Research Innovation and Sequencing Platform                                                                                                                                                                                                                                                           | Ismael N, Giandhari J, Pillay S, Tegally H, Wilkinson E, de Oliveira T, Nadia Siteo, Paulo Arnaldo, Nedio Mabunda                                                                                                                                                                                           |
| EPI_ISL_636981                                                                                                                                                                                                                                                                                                                                                                                                                                                                                                                                                                                                                                                                                                                                                                                                                                                                                                                                                                                                                                                                                                                                                                                                                                                                                                                                                                                                                                                                                                                                                                                                                                                                                                                                                                                                                                                                                                                                                                 | City of Chimoio                                                                                                 | KRISP, KZN Research Innovation and Sequencing Platform                                                                                                                                                                                                                                                           | Ismael N, Giandhari J, Pillay S, Tegally H, Wilkinson E, de Oliveira T, Nadia Siteo, Paulo Arnaldo, Nedio Mabunda                                                                                                                                                                                           |
| EPI_ISL_639631                                                                                                                                                                                                                                                                                                                                                                                                                                                                                                                                                                                                                                                                                                                                                                                                                                                                                                                                                                                                                                                                                                                                                                                                                                                                                                                                                                                                                                                                                                                                                                                                                                                                                                                                                                                                                                                                                                                                                                 | E. Gulbja Laboratorija                                                                                          | Latvian Biomedical Research and Study Centre                                                                                                                                                                                                                                                                     | Ivars Silamielis, Kaspars Megnis, Monta Ustinova, ikita Zrelovs, Vita Rovte, Mikus Gavars, Dmitrijs Perminovs, Uga Dumpis, Jnis Kloviš                                                                                                                                                                      |
| EPI_ISL_639632, EPI_ISL_639633                                                                                                                                                                                                                                                                                                                                                                                                                                                                                                                                                                                                                                                                                                                                                                                                                                                                                                                                                                                                                                                                                                                                                                                                                                                                                                                                                                                                                                                                                                                                                                                                                                                                                                                                                                                                                                                                                                                                                 | Centrl Laboratorija                                                                                             | Latvian Biomedical Research and Study Centre                                                                                                                                                                                                                                                                     | Ivars Silamielis, Kaspars Megnis, Monta Ustinova, ikita Zrelovs, Vita Rovte, Stella Lapia, Jana Oste, Marta Priedte, Uga Dumpis, Jnis Kloviš                                                                                                                                                                |
| EPI_ISL_639634                                                                                                                                                                                                                                                                                                                                                                                                                                                                                                                                                                                                                                                                                                                                                                                                                                                                                                                                                                                                                                                                                                                                                                                                                                                                                                                                                                                                                                                                                                                                                                                                                                                                                                                                                                                                                                                                                                                                                                 | Latvijas Infektoloijas centrs                                                                                   | Latvian Biomedical Research and Study Centre                                                                                                                                                                                                                                                                     | Ivars Silamielis, Kaspars Megnis, Monta Ustinova, ikita Zrelovs, Vita Rovte, Jeena Storozenko, Tatjana Kolupajeva, Oksana Savicka, Uga Dumpis, Jnis Kloviš                                                                                                                                                  |
| EPI_ISL_639635                                                                                                                                                                                                                                                                                                                                                                                                                                                                                                                                                                                                                                                                                                                                                                                                                                                                                                                                                                                                                                                                                                                                                                                                                                                                                                                                                                                                                                                                                                                                                                                                                                                                                                                                                                                                                                                                                                                                                                 | E. Gulbja Laboratorija                                                                                          | Latvian Biomedical Research and Study Centre                                                                                                                                                                                                                                                                     | Ivars Silamielis, Kaspars Megnis, Monta Ustinova, ikita Zrelovs, Vita Rovte, Mikus Gavars, Dmitrijs Perminovs, Uga Dumpis, Jnis Kloviš                                                                                                                                                                      |
| EPI_ISL_639636                                                                                                                                                                                                                                                                                                                                                                                                                                                                                                                                                                                                                                                                                                                                                                                                                                                                                                                                                                                                                                                                                                                                                                                                                                                                                                                                                                                                                                                                                                                                                                                                                                                                                                                                                                                                                                                                                                                                                                 | Centrl Laboratorija                                                                                             | Latvian Biomedical Research and Study Centre                                                                                                                                                                                                                                                                     | Ivars Silamielis, Kaspars Megnis, Monta Ustinova, ikita Zrelovs, Vita Rovte, Stella Lapia, Jana Oste, Marta Priedte, Uga Dumpis, Jnis Kloviš                                                                                                                                                                |
| EPI_ISL_639637, EPI_ISL_639638                                                                                                                                                                                                                                                                                                                                                                                                                                                                                                                                                                                                                                                                                                                                                                                                                                                                                                                                                                                                                                                                                                                                                                                                                                                                                                                                                                                                                                                                                                                                                                                                                                                                                                                                                                                                                                                                                                                                                 | E. Gulbja Laboratorija                                                                                          | Latvian Biomedical Research and Study Centre                                                                                                                                                                                                                                                                     | Ivars Silamielis, Kaspars Megnis, Monta Ustinova, ikita Zrelovs, Vita Rovte, Mikus Gavars, Dmitrijs Perminovs, Uga Dumpis, Jnis Kloviš                                                                                                                                                                      |
| EPI_ISL_639639                                                                                                                                                                                                                                                                                                                                                                                                                                                                                                                                                                                                                                                                                                                                                                                                                                                                                                                                                                                                                                                                                                                                                                                                                                                                                                                                                                                                                                                                                                                                                                                                                                                                                                                                                                                                                                                                                                                                                                 | Latvijas Infektoloijas centrs                                                                                   | Latvian Biomedical Research and Study Centre                                                                                                                                                                                                                                                                     | Ivars Silamielis, Kaspars Megnis, Monta Ustinova, ikita Zrelovs, Vita Rovte, Jeena Storozenko, Tatjana Kolupajeva, Oksana Savicka, Uga Dumpis, Jnis Kloviš                                                                                                                                                  |
| EPI_ISL_639640                                                                                                                                                                                                                                                                                                                                                                                                                                                                                                                                                                                                                                                                                                                                                                                                                                                                                                                                                                                                                                                                                                                                                                                                                                                                                                                                                                                                                                                                                                                                                                                                                                                                                                                                                                                                                                                                                                                                                                 | Centrl Laboratorija                                                                                             | Latvian Biomedical Research and Study Centre                                                                                                                                                                                                                                                                     | Ivars Silamielis, Kaspars Megnis, Monta Ustinova, ikita Zrelovs, Vita Rovte, Stella Lapia, Jana Oste, Marta Priedte, Uga Dumpis, Jnis Kloviš                                                                                                                                                                |
| EPI_ISL_639641                                                                                                                                                                                                                                                                                                                                                                                                                                                                                                                                                                                                                                                                                                                                                                                                                                                                                                                                                                                                                                                                                                                                                                                                                                                                                                                                                                                                                                                                                                                                                                                                                                                                                                                                                                                                                                                                                                                                                                 | E. Gulbja Laboratorija                                                                                          | Latvian Biomedical Research and Study Centre                                                                                                                                                                                                                                                                     | Ivars Silamielis, Kaspars Megnis, Monta Ustinova, ikita Zrelovs, Vita Rovte, Mikus Gavars, Dmitrijs Perminovs, Uga Dumpis, Jnis Kloviš                                                                                                                                                                      |
| EPI_ISL_639642                                                                                                                                                                                                                                                                                                                                                                                                                                                                                                                                                                                                                                                                                                                                                                                                                                                                                                                                                                                                                                                                                                                                                                                                                                                                                                                                                                                                                                                                                                                                                                                                                                                                                                                                                                                                                                                                                                                                                                 | Centrl Laboratorija                                                                                             | Latvian Biomedical Research and Study Centre                                                                                                                                                                                                                                                                     | Ivars Silamielis, Kaspars Megnis, Monta Ustinova, ikita Zrelovs, Vita Rovte, Stella Lapia, Jana Oste, Marta Priedte, Uga Dumpis, Jnis Kloviš                                                                                                                                                                |
| EPI_ISL_639643, EPI_ISL_639644, EPI_ISL_639645, EPI_ISL_639646, EPI_ISL_639647                                                                                                                                                                                                                                                                                                                                                                                                                                                                                                                                                                                                                                                                                                                                                                                                                                                                                                                                                                                                                                                                                                                                                                                                                                                                                                                                                                                                                                                                                                                                                                                                                                                                                                                                                                                                                                                                                                 | E. Gulbja Laboratorija                                                                                          | Latvian Biomedical Research and Study Centre                                                                                                                                                                                                                                                                     | Ivars Silamielis, Kaspars Megnis, Monta Ustinova, ikita Zrelovs, Vita Rovte, Mikus Gavars, Dmitrijs Perminovs, Uga Dumpis, Jnis Kloviš                                                                                                                                                                      |
| EPI_ISL_639648                                                                                                                                                                                                                                                                                                                                                                                                                                                                                                                                                                                                                                                                                                                                                                                                                                                                                                                                                                                                                                                                                                                                                                                                                                                                                                                                                                                                                                                                                                                                                                                                                                                                                                                                                                                                                                                                                                                                                                 | Centrl Laboratorija                                                                                             | Latvian Biomedical Research and Study Centre                                                                                                                                                                                                                                                                     | Ivars Silamielis, Kaspars Megnis, Monta Ustinova, ikita Zrelovs, Vita Rovte, Stella Lapia, Jana Oste, Marta Priedte, Uga Dumpis, Jnis Kloviš                                                                                                                                                                |
| EPI_ISL_639649                                                                                                                                                                                                                                                                                                                                                                                                                                                                                                                                                                                                                                                                                                                                                                                                                                                                                                                                                                                                                                                                                                                                                                                                                                                                                                                                                                                                                                                                                                                                                                                                                                                                                                                                                                                                                                                                                                                                                                 | E. Gulbja Laboratorija                                                                                          | Latvian Biomedical Research and Study Centre                                                                                                                                                                                                                                                                     | Ivars Silamielis, Kaspars Megnis, Monta Ustinova, ikita Zrelovs, Vita Rovte, Mikus Gavars, Dmitrijs Perminovs, Uga Dumpis, Jnis Kloviš                                                                                                                                                                      |
| EPI_ISL_639650, EPI_ISL_639651                                                                                                                                                                                                                                                                                                                                                                                                                                                                                                                                                                                                                                                                                                                                                                                                                                                                                                                                                                                                                                                                                                                                                                                                                                                                                                                                                                                                                                                                                                                                                                                                                                                                                                                                                                                                                                                                                                                                                 | Centrl Laboratorija                                                                                             | Latvian Biomedical Research and Study Centre                                                                                                                                                                                                                                                                     | Ivars Silamielis, Kaspars Megnis, Monta Ustinova, ikita Zrelovs, Vita Rovte, Stella Lapia, Jana Oste, Marta Priedte, Uga Dumpis, Jnis Kloviš                                                                                                                                                                |
| EPI_ISL_639652, EPI_ISL_639653                                                                                                                                                                                                                                                                                                                                                                                                                                                                                                                                                                                                                                                                                                                                                                                                                                                                                                                                                                                                                                                                                                                                                                                                                                                                                                                                                                                                                                                                                                                                                                                                                                                                                                                                                                                                                                                                                                                                                 | E. Gulbja Laboratorija                                                                                          | Latvian Biomedical Research and Study Centre                                                                                                                                                                                                                                                                     | Ivars Silamielis, Kaspars Megnis, Monta Ustinova, ikita Zrelovs, Vita Rovte, Mikus Gavars, Dmitrijs Perminovs, Uga Dumpis, Jnis Kloviš                                                                                                                                                                      |
| EPI_ISL_639654, EPI_ISL_639655, EPI_ISL_639656, EPI_ISL_639657                                                                                                                                                                                                                                                                                                                                                                                                                                                                                                                                                                                                                                                                                                                                                                                                                                                                                                                                                                                                                                                                                                                                                                                                                                                                                                                                                                                                                                                                                                                                                                                                                                                                                                                                                                                                                                                                                                                 | Centrl Laboratorija                                                                                             | Latvian Biomedical Research and Study Centre                                                                                                                                                                                                                                                                     | Ivars Silamielis, Kaspars Megnis, Monta Ustinova, ikita Zrelovs, Vita Rovte, Stella Lapia, Jana Oste, Marta Priedte, Uga Dumpis, Jnis Kloviš                                                                                                                                                                |
| EPI_ISL_639658, EPI_ISL_639659, EPI_ISL_639660, EPI_ISL_639661, EPI_ISL_639662                                                                                                                                                                                                                                                                                                                                                                                                                                                                                                                                                                                                                                                                                                                                                                                                                                                                                                                                                                                                                                                                                                                                                                                                                                                                                                                                                                                                                                                                                                                                                                                                                                                                                                                                                                                                                                                                                                 | E. Gulbja Laboratorija                                                                                          | Latvian Biomedical Research and Study Centre                                                                                                                                                                                                                                                                     | Ivars Silamielis, Kaspars Megnis, Monta Ustinova, ikita Zrelovs, Vita Rovte, Mikus Gavars, Dmitrijs Perminovs, Uga Dumpis, Jnis Kloviš                                                                                                                                                                      |
| EPI_ISL_639663                                                                                                                                                                                                                                                                                                                                                                                                                                                                                                                                                                                                                                                                                                                                                                                                                                                                                                                                                                                                                                                                                                                                                                                                                                                                                                                                                                                                                                                                                                                                                                                                                                                                                                                                                                                                                                                                                                                                                                 | Centrl Laboratorija                                                                                             | Latvian Biomedical Research and Study Centre                                                                                                                                                                                                                                                                     | Ivars Silamielis, Kaspars Megnis, Monta Ustinova, ikita Zrelovs, Vita Rovte, Stella Lapia, Jana Oste, Marta Priedte, Uga Dumpis, Jnis Kloviš                                                                                                                                                                |
| EPI_ISL_639664, EPI_ISL_639665, EPI_ISL_639666, EPI_ISL_639667, EPI_ISL_639668, EPI_ISL_639669, EPI_ISL_639670, EPI_ISL_639671                                                                                                                                                                                                                                                                                                                                                                                                                                                                                                                                                                                                                                                                                                                                                                                                                                                                                                                                                                                                                                                                                                                                                                                                                                                                                                                                                                                                                                                                                                                                                                                                                                                                                                                                                                                                                                                 | E. Gulbja Laboratorija                                                                                          | Latvian Biomedical Research and Study Centre                                                                                                                                                                                                                                                                     | Ivars Silamielis, Kaspars Megnis, Monta Ustinova, ikita Zrelovs, Vita Rovte, Mikus Gavars, Dmitrijs Perminovs, Uga Dumpis, Jnis Kloviš                                                                                                                                                                      |
| EPI_ISL_639672                                                                                                                                                                                                                                                                                                                                                                                                                                                                                                                                                                                                                                                                                                                                                                                                                                                                                                                                                                                                                                                                                                                                                                                                                                                                                                                                                                                                                                                                                                                                                                                                                                                                                                                                                                                                                                                                                                                                                                 | Centrl Laboratorija                                                                                             | Latvian Biomedical Research and Study Centre                                                                                                                                                                                                                                                                     | Ivars Silamielis, Kaspars Megnis, Monta Ustinova, ikita Zrelovs, Vita Rovte, Stella Lapia, Jana Oste, Marta Priedte, Uga Dumpis, Jnis Kloviš                                                                                                                                                                |
| EPI_ISL_639673, EPI_ISL_639674, EPI_ISL_639675                                                                                                                                                                                                                                                                                                                                                                                                                                                                                                                                                                                                                                                                                                                                                                                                                                                                                                                                                                                                                                                                                                                                                                                                                                                                                                                                                                                                                                                                                                                                                                                                                                                                                                                                                                                                                                                                                                                                 | E. Gulbja Laboratorija                                                                                          | Latvian Biomedical Research and Study Centre                                                                                                                                                                                                                                                                     | Ivars Silamielis, Kaspars Megnis, Monta Ustinova, ikita Zrelovs, Vita Rovte, Mikus Gavars, Dmitrijs Perminovs, Uga Dumpis, Jnis Kloviš                                                                                                                                                                      |
| EPI_ISL_639676, EPI_ISL_639677, EPI_ISL_639678, EPI_ISL_639679, EPI_ISL_639680                                                                                                                                                                                                                                                                                                                                                                                                                                                                                                                                                                                                                                                                                                                                                                                                                                                                                                                                                                                                                                                                                                                                                                                                                                                                                                                                                                                                                                                                                                                                                                                                                                                                                                                                                                                                                                                                                                 | Centrl Laboratorija                                                                                             | Latvian Biomedical Research and Study Centre                                                                                                                                                                                                                                                                     | Ivars Silamielis, Kaspars Megnis, Monta Ustinova, ikita Zrelovs, Vita Rovte, Stella Lapia, Jana Oste, Marta Priedte, Uga Dumpis, Jnis Kloviš                                                                                                                                                                |
| EPI_ISL_639681, EPI_ISL_639682                                                                                                                                                                                                                                                                                                                                                                                                                                                                                                                                                                                                                                                                                                                                                                                                                                                                                                                                                                                                                                                                                                                                                                                                                                                                                                                                                                                                                                                                                                                                                                                                                                                                                                                                                                                                                                                                                                                                                 | E. Gulbja Laboratorija                                                                                          | Latvian Biomedical Research and Study Centre                                                                                                                                                                                                                                                                     | Ivars Silamielis, Kaspars Megnis, Monta Ustinova, ikita Zrelovs, Vita Rovte, Mikus Gavars, Dmitrijs Perminovs, Uga Dumpis, Jnis Kloviš                                                                                                                                                                      |
| EPI_ISL_639683                                                                                                                                                                                                                                                                                                                                                                                                                                                                                                                                                                                                                                                                                                                                                                                                                                                                                                                                                                                                                                                                                                                                                                                                                                                                                                                                                                                                                                                                                                                                                                                                                                                                                                                                                                                                                                                                                                                                                                 | Centrl Laboratorija                                                                                             | Latvian Biomedical Research and Study Centre                                                                                                                                                                                                                                                                     | Ivars Silamielis, Kaspars Megnis, Monta Ustinova, ikita Zrelovs, Vita Rovte, Stella Lapia, Jana Oste, Marta Priedte, Uga Dumpis, Jnis Kloviš                                                                                                                                                                |
| EPI_ISL_639684, EPI_ISL_639685, EPI_ISL_639686, EPI_ISL_639687, EPI_ISL_639688, EPI_ISL_639689, EPI_ISL_639690, EPI_ISL_639691, EPI_ISL_639692, EPI_ISL_639693, EPI_ISL_639694                                                                                                                                                                                                                                                                                                                                                                                                                                                                                                                                                                                                                                                                                                                                                                                                                                                                                                                                                                                                                                                                                                                                                                                                                                                                                                                                                                                                                                                                                                                                                                                                                                                                                                                                                                                                 | E. Gulbja Laboratorija                                                                                          | Latvian Biomedical Research and Study Centre                                                                                                                                                                                                                                                                     | Ivars Silamielis, Kaspars Megnis, Monta Ustinova, ikita Zrelovs, Vita Rovte, Mikus Gavars, Dmitrijs Perminovs, Uga Dumpis, Jnis Kloviš                                                                                                                                                                      |
| see above                                                                                                                                                                                                                                                                                                                                                                                                                                                                                                                                                                                                                                                                                                                                                                                                                                                                                                                                                                                                                                                                                                                                                                                                                                                                                                                                                                                                                                                                                                                                                                                                                                                                                                                                                                                                                                                                                                                                                                      | E. Gulbja Laboratorija                                                                                          | Latvian Biomedical Research and Study Centre                                                                                                                                                                                                                                                                     | Ivars Silamielis, Kaspars Megnis, Monta Ustinova, ikita Zrelovs, Vita Rovte, Mikus Gavars, Dmitrijs Perminovs, Uga Dumpis, Jnis Kloviš                                                                                                                                                                      |
| EPI_ISL_641619, EPI_ISL_641643, EPI_ISL_641657, EPI_ISL_641659, EPI_ISL_641660, EPI_ISL_641677, EPI_ISL_641678, EPI_ISL_641692, EPI_ISL_641713, EPI_ISL_641731, EPI_ISL_641743, EPI_ISL_641752, EPI_ISL_641756, EPI_ISL_641766, EPI_ISL_641805, EPI_ISL_641812, EPI_ISL_641822, EPI_ISL_641827, EPI_ISL_641835, EPI_ISL_641848, EPI_ISL_641856, EPI_ISL_641863, EPI_ISL_641872, EPI_ISL_641875, EPI_ISL_641888, EPI_ISL_641905, EPI_ISL_641909, EPI_ISL_641933, EPI_ISL_641935, EPI_ISL_641937, EPI_ISL_641940, EPI_ISL_641950, EPI_ISL_641961, EPI_ISL_641995, EPI_ISL_641996, EPI_ISL_642014, EPI_ISL_642051, EPI_ISL_642061, EPI_ISL_642063, EPI_ISL_642071, EPI_ISL_642077, EPI_ISL_642085, EPI_ISL_642125, EPI_ISL_642132, EPI_ISL_642164, EPI_ISL_642174, EPI_ISL_642179, EPI_ISL_642185, EPI_ISL_642213, EPI_ISL_642222, EPI_ISL_642235, EPI_ISL_642260, EPI_ISL_642281, EPI_ISL_642282, EPI_ISL_642296, EPI_ISL_642302, EPI_ISL_642303, EPI_ISL_642306, EPI_ISL_642332, EPI_ISL_642352, EPI_ISL_642355, EPI_ISL_642363, EPI_ISL_642377, EPI_ISL_642378, EPI_ISL_642384, EPI_ISL_642414, EPI_ISL_642428, EPI_ISL_642458, EPI_ISL_642499, EPI_ISL_642504, EPI_ISL_642508, EPI_ISL_642558, EPI_ISL_642596, EPI_ISL_642625, EPI_ISL_642644, EPI_ISL_642654, EPI_ISL_642673, EPI_ISL_642680, EPI_ISL_642692, EPI_ISL_642694, EPI_ISL_642699, EPI_ISL_642711, EPI_ISL_642727, EPI_ISL_642730, EPI_ISL_642744, EPI_ISL_642748, EPI_ISL_642749, EPI_ISL_643061, EPI_ISL_643062, EPI_ISL_643064, EPI_ISL_643067, EPI_ISL_643077, EPI_ISL_643091, EPI_ISL_643123, EPI_ISL_643143, EPI_ISL_643146, EPI_ISL_643162, EPI_ISL_643174, EPI_ISL_643180, EPI_ISL_643210, EPI_ISL_643227, EPI_ISL_643238, EPI_ISL_643245, EPI_ISL_643247, EPI_ISL_643273, EPI_ISL_643281, EPI_ISL_643304, EPI_ISL_643307, EPI_ISL_643310, EPI_ISL_643398, EPI_ISL_644004, EPI_ISL_644007, EPI_ISL_644009, EPI_ISL_644015, EPI_ISL_644016, EPI_ISL_644019, EPI_ISL_644034, EPI_ISL_644036, EPI_ISL_644048 | Wellcome Sanger Institute for the COVID-19 Genomics UK (COG-UK) Consortium                                      | Harper VanSteenhouse, Yumi Kasai, David Gray, Carol Clugston, Anna Dominiczak and Alex Alderton, Roberto Amato, Sonia Goncalves, Ewan Harrison, David K. Jackson, Ian Johnston, Dominic Kwiatkowski, Cordelia Langford, John Sillitoe on behalf of the Wellcome Sanger Institute COVID-19 Surveillance Team      |                                                                                                                                                                                                                                                                                                             |
| see above                                                                                                                                                                                                                                                                                                                                                                                                                                                                                                                                                                                                                                                                                                                                                                                                                                                                                                                                                                                                                                                                                                                                                                                                                                                                                                                                                                                                                                                                                                                                                                                                                                                                                                                                                                                                                                                                                                                                                                      | Lighthouse Lab in Glasgow                                                                                       | Wellcome Sanger Institute for the COVID-19 Genomics UK (COG-UK) Consortium                                                                                                                                                                                                                                       | Harper VanSteenhouse, Yumi Kasai, David Gray, Carol Clugston, Anna Dominiczak and Alex Alderton, Roberto Amato, Sonia Goncalves, Ewan Harrison, David K. Jackson, Ian Johnston, Dominic Kwiatkowski, Cordelia Langford, John Sillitoe on behalf of the Wellcome Sanger Institute COVID-19 Surveillance Team |
| EPI_ISL_644100, EPI_ISL_645418, EPI_ISL_645502, EPI_ISL_645535, EPI_ISL_645541, EPI_ISL_645565, EPI_ISL_645596, EPI_ISL_645600, EPI_ISL_645608, EPI_ISL_645642, EPI_ISL_645649, EPI_ISL_645660, EPI_ISL_645676, EPI_ISL_645683, EPI_ISL_645690, EPI_ISL_645699, EPI_ISL_645711, EPI_ISL_645713,                                                                                                                                                                                                                                                                                                                                                                                                                                                                                                                                                                                                                                                                                                                                                                                                                                                                                                                                                                                                                                                                                                                                                                                                                                                                                                                                                                                                                                                                                                                                                                                                                                                                                |                                                                                                                 |                                                                                                                                                                                                                                                                                                                  |                                                                                                                                                                                                                                                                                                             |



|                                                                                                                                                                                                                                                                                                                                                                                                                                                                                                                                                                                                                                                                                                                                                                                                                                                                                                                                                                                                                                                                                                                                                                                                                                                                                                                                                                                                                                                                                                                                                                                                                                                                                                                                                                                                                                                                                                                                                                                                                                                                                                                                                                                                                                                                                                                                                                                                                                                                                                                                                                                                                                                                                                                                                                                                                                                                                |                                                                                                                                                                     |                                                                                                                                                                                                                                                                                                                                                                          |                                                                                                                                                                                                                                                                                                                                                                                                                                          |
|--------------------------------------------------------------------------------------------------------------------------------------------------------------------------------------------------------------------------------------------------------------------------------------------------------------------------------------------------------------------------------------------------------------------------------------------------------------------------------------------------------------------------------------------------------------------------------------------------------------------------------------------------------------------------------------------------------------------------------------------------------------------------------------------------------------------------------------------------------------------------------------------------------------------------------------------------------------------------------------------------------------------------------------------------------------------------------------------------------------------------------------------------------------------------------------------------------------------------------------------------------------------------------------------------------------------------------------------------------------------------------------------------------------------------------------------------------------------------------------------------------------------------------------------------------------------------------------------------------------------------------------------------------------------------------------------------------------------------------------------------------------------------------------------------------------------------------------------------------------------------------------------------------------------------------------------------------------------------------------------------------------------------------------------------------------------------------------------------------------------------------------------------------------------------------------------------------------------------------------------------------------------------------------------------------------------------------------------------------------------------------------------------------------------------------------------------------------------------------------------------------------------------------------------------------------------------------------------------------------------------------------------------------------------------------------------------------------------------------------------------------------------------------------------------------------------------------------------------------------------------------|---------------------------------------------------------------------------------------------------------------------------------------------------------------------|--------------------------------------------------------------------------------------------------------------------------------------------------------------------------------------------------------------------------------------------------------------------------------------------------------------------------------------------------------------------------|------------------------------------------------------------------------------------------------------------------------------------------------------------------------------------------------------------------------------------------------------------------------------------------------------------------------------------------------------------------------------------------------------------------------------------------|
| EPI_ISL_646818                                                                                                                                                                                                                                                                                                                                                                                                                                                                                                                                                                                                                                                                                                                                                                                                                                                                                                                                                                                                                                                                                                                                                                                                                                                                                                                                                                                                                                                                                                                                                                                                                                                                                                                                                                                                                                                                                                                                                                                                                                                                                                                                                                                                                                                                                                                                                                                                                                                                                                                                                                                                                                                                                                                                                                                                                                                                 | Lighthouse Lab in Glasgow                                                                                                                                           | Wellcome Sanger Institute for the COVID-19 Genomics UK (COG-UK) Consortium                                                                                                                                                                                                                                                                                               | Harper VanSteenhouse, Yumi Kasai, David Gray, Carol Clugston, Anna Dominiczak and Alex Alderton, Roberto Amato, Sonia Goncalves, Ewan Harrison, David K. Jackson, Ian Johnston, Dominic Kwiatkowski, Cordelia Langford, John Sillitoe on behalf of the Wellcome Sanger Institute COVID-19 Surveillance Team                                                                                                                              |
| EPI_ISL_646823, EPI_ISL_646833, EPI_ISL_646857                                                                                                                                                                                                                                                                                                                                                                                                                                                                                                                                                                                                                                                                                                                                                                                                                                                                                                                                                                                                                                                                                                                                                                                                                                                                                                                                                                                                                                                                                                                                                                                                                                                                                                                                                                                                                                                                                                                                                                                                                                                                                                                                                                                                                                                                                                                                                                                                                                                                                                                                                                                                                                                                                                                                                                                                                                 | Lighthouse Lab in Alderley Park                                                                                                                                     | Wellcome Sanger Institute for the COVID-19 Genomics UK (COG-UK) Consortium                                                                                                                                                                                                                                                                                               | Jacquelyn Wynn, Mairead Hyland, The Lighthouse Lab in Alderley Park and Alex Alderton, Roberto Amato, Sonia Goncalves, Ewan Harrison, David K. Jackson, Ian Johnston, Dominic Kwiatkowski, Cordelia Langford, John Sillitoe on behalf of the Wellcome Sanger Institute COVID-19 Surveillance Team                                                                                                                                        |
| EPI_ISL_646868, EPI_ISL_646870, EPI_ISL_646915                                                                                                                                                                                                                                                                                                                                                                                                                                                                                                                                                                                                                                                                                                                                                                                                                                                                                                                                                                                                                                                                                                                                                                                                                                                                                                                                                                                                                                                                                                                                                                                                                                                                                                                                                                                                                                                                                                                                                                                                                                                                                                                                                                                                                                                                                                                                                                                                                                                                                                                                                                                                                                                                                                                                                                                                                                 | Lighthouse Lab in Glasgow                                                                                                                                           | Wellcome Sanger Institute for the COVID-19 Genomics UK (COG-UK) Consortium                                                                                                                                                                                                                                                                                               | Harper VanSteenhouse, Yumi Kasai, David Gray, Carol Clugston, Anna Dominiczak and Alex Alderton, Roberto Amato, Sonia Goncalves, Ewan Harrison, David K. Jackson, Ian Johnston, Dominic Kwiatkowski, Cordelia Langford, John Sillitoe on behalf of the Wellcome Sanger Institute COVID-19 Surveillance Team                                                                                                                              |
| EPI_ISL_646944                                                                                                                                                                                                                                                                                                                                                                                                                                                                                                                                                                                                                                                                                                                                                                                                                                                                                                                                                                                                                                                                                                                                                                                                                                                                                                                                                                                                                                                                                                                                                                                                                                                                                                                                                                                                                                                                                                                                                                                                                                                                                                                                                                                                                                                                                                                                                                                                                                                                                                                                                                                                                                                                                                                                                                                                                                                                 | Lighthouse Lab in Alderley Park                                                                                                                                     | Wellcome Sanger Institute for the COVID-19 Genomics UK (COG-UK) Consortium                                                                                                                                                                                                                                                                                               | Jacquelyn Wynn, Mairead Hyland, The Lighthouse Lab in Alderley Park and Alex Alderton, Roberto Amato, Sonia Goncalves, Ewan Harrison, David K. Jackson, Ian Johnston, Dominic Kwiatkowski, Cordelia Langford, John Sillitoe on behalf of the Wellcome Sanger Institute COVID-19 Surveillance Team                                                                                                                                        |
| EPI_ISL_646960, EPI_ISL_646974                                                                                                                                                                                                                                                                                                                                                                                                                                                                                                                                                                                                                                                                                                                                                                                                                                                                                                                                                                                                                                                                                                                                                                                                                                                                                                                                                                                                                                                                                                                                                                                                                                                                                                                                                                                                                                                                                                                                                                                                                                                                                                                                                                                                                                                                                                                                                                                                                                                                                                                                                                                                                                                                                                                                                                                                                                                 | Lighthouse Lab in Glasgow                                                                                                                                           | Wellcome Sanger Institute for the COVID-19 Genomics UK (COG-UK) Consortium                                                                                                                                                                                                                                                                                               | Harper VanSteenhouse, Yumi Kasai, David Gray, Carol Clugston, Anna Dominiczak and Alex Alderton, Roberto Amato, Sonia Goncalves, Ewan Harrison, David K. Jackson, Ian Johnston, Dominic Kwiatkowski, Cordelia Langford, John Sillitoe on behalf of the Wellcome Sanger Institute COVID-19 Surveillance Team                                                                                                                              |
| EPI_ISL_647012, EPI_ISL_647021, EPI_ISL_647022, EPI_ISL_647027, EPI_ISL_647043                                                                                                                                                                                                                                                                                                                                                                                                                                                                                                                                                                                                                                                                                                                                                                                                                                                                                                                                                                                                                                                                                                                                                                                                                                                                                                                                                                                                                                                                                                                                                                                                                                                                                                                                                                                                                                                                                                                                                                                                                                                                                                                                                                                                                                                                                                                                                                                                                                                                                                                                                                                                                                                                                                                                                                                                 | Lighthouse Lab in Alderley Park                                                                                                                                     | Wellcome Sanger Institute for the COVID-19 Genomics UK (COG-UK) Consortium                                                                                                                                                                                                                                                                                               | Jacquelyn Wynn, Mairead Hyland, The Lighthouse Lab in Alderley Park and Alex Alderton, Roberto Amato, Sonia Goncalves, Ewan Harrison, David K. Jackson, Ian Johnston, Dominic Kwiatkowski, Cordelia Langford, John Sillitoe on behalf of the Wellcome Sanger Institute COVID-19 Surveillance Team                                                                                                                                        |
| EPI_ISL_647053                                                                                                                                                                                                                                                                                                                                                                                                                                                                                                                                                                                                                                                                                                                                                                                                                                                                                                                                                                                                                                                                                                                                                                                                                                                                                                                                                                                                                                                                                                                                                                                                                                                                                                                                                                                                                                                                                                                                                                                                                                                                                                                                                                                                                                                                                                                                                                                                                                                                                                                                                                                                                                                                                                                                                                                                                                                                 | Lighthouse Lab in Glasgow                                                                                                                                           | Wellcome Sanger Institute for the COVID-19 Genomics UK (COG-UK) Consortium                                                                                                                                                                                                                                                                                               | Harper VanSteenhouse, Yumi Kasai, David Gray, Carol Clugston, Anna Dominiczak and Alex Alderton, Roberto Amato, Sonia Goncalves, Ewan Harrison, David K. Jackson, Ian Johnston, Dominic Kwiatkowski, Cordelia Langford, John Sillitoe on behalf of the Wellcome Sanger Institute COVID-19 Surveillance Team                                                                                                                              |
| EPI_ISL_647064, EPI_ISL_647070, EPI_ISL_647072, EPI_ISL_647079, EPI_ISL_647085, EPI_ISL_647089, EPI_ISL_647091, EPI_ISL_647101                                                                                                                                                                                                                                                                                                                                                                                                                                                                                                                                                                                                                                                                                                                                                                                                                                                                                                                                                                                                                                                                                                                                                                                                                                                                                                                                                                                                                                                                                                                                                                                                                                                                                                                                                                                                                                                                                                                                                                                                                                                                                                                                                                                                                                                                                                                                                                                                                                                                                                                                                                                                                                                                                                                                                 | Lighthouse Lab in Alderley Park                                                                                                                                     | Wellcome Sanger Institute for the COVID-19 Genomics UK (COG-UK) Consortium                                                                                                                                                                                                                                                                                               | Jacquelyn Wynn, Mairead Hyland, The Lighthouse Lab in Alderley Park and Alex Alderton, Roberto Amato, Sonia Goncalves, Ewan Harrison, David K. Jackson, Ian Johnston, Dominic Kwiatkowski, Cordelia Langford, John Sillitoe on behalf of the Wellcome Sanger Institute COVID-19 Surveillance Team                                                                                                                                        |
| EPI_ISL_647102, EPI_ISL_647110, EPI_ISL_647114                                                                                                                                                                                                                                                                                                                                                                                                                                                                                                                                                                                                                                                                                                                                                                                                                                                                                                                                                                                                                                                                                                                                                                                                                                                                                                                                                                                                                                                                                                                                                                                                                                                                                                                                                                                                                                                                                                                                                                                                                                                                                                                                                                                                                                                                                                                                                                                                                                                                                                                                                                                                                                                                                                                                                                                                                                 | Lighthouse Lab in Glasgow                                                                                                                                           | Wellcome Sanger Institute for the COVID-19 Genomics UK (COG-UK) Consortium                                                                                                                                                                                                                                                                                               | Harper VanSteenhouse, Yumi Kasai, David Gray, Carol Clugston, Anna Dominiczak and Alex Alderton, Roberto Amato, Sonia Goncalves, Ewan Harrison, David K. Jackson, Ian Johnston, Dominic Kwiatkowski, Cordelia Langford, John Sillitoe on behalf of the Wellcome Sanger Institute COVID-19 Surveillance Team                                                                                                                              |
| EPI_ISL_647580, EPI_ISL_647726                                                                                                                                                                                                                                                                                                                                                                                                                                                                                                                                                                                                                                                                                                                                                                                                                                                                                                                                                                                                                                                                                                                                                                                                                                                                                                                                                                                                                                                                                                                                                                                                                                                                                                                                                                                                                                                                                                                                                                                                                                                                                                                                                                                                                                                                                                                                                                                                                                                                                                                                                                                                                                                                                                                                                                                                                                                 | Lighthouse Lab in Alderley Park                                                                                                                                     | Wellcome Sanger Institute for the COVID-19 Genomics UK (COG-UK) Consortium                                                                                                                                                                                                                                                                                               | Jacquelyn Wynn, Mairead Hyland, The Lighthouse Lab in Alderley Park and Alex Alderton, Roberto Amato, Sonia Goncalves, Ewan Harrison, David K. Jackson, Ian Johnston, Dominic Kwiatkowski, Cordelia Langford, John Sillitoe on behalf of the Wellcome Sanger Institute COVID-19 Surveillance Team                                                                                                                                        |
| EPI_ISL_647800, EPI_ISL_647805, EPI_ISL_647861, EPI_ISL_647875, EPI_ISL_647876, EPI_ISL_647897, EPI_ISL_647914, EPI_ISL_647924, EPI_ISL_647926, EPI_ISL_647941, EPI_ISL_647949, EPI_ISL_647955                                                                                                                                                                                                                                                                                                                                                                                                                                                                                                                                                                                                                                                                                                                                                                                                                                                                                                                                                                                                                                                                                                                                                                                                                                                                                                                                                                                                                                                                                                                                                                                                                                                                                                                                                                                                                                                                                                                                                                                                                                                                                                                                                                                                                                                                                                                                                                                                                                                                                                                                                                                                                                                                                 | Lighthouse Lab in Glasgow                                                                                                                                           | Wellcome Sanger Institute for the COVID-19 Genomics UK (COG-UK) Consortium                                                                                                                                                                                                                                                                                               | Harper VanSteenhouse, Yumi Kasai, David Gray, Carol Clugston, Anna Dominiczak and Alex Alderton, Roberto Amato, Sonia Goncalves, Ewan Harrison, David K. Jackson, Ian Johnston, Dominic Kwiatkowski, Cordelia Langford, John Sillitoe on behalf of the Wellcome Sanger Institute COVID-19 Surveillance Team                                                                                                                              |
| see above                                                                                                                                                                                                                                                                                                                                                                                                                                                                                                                                                                                                                                                                                                                                                                                                                                                                                                                                                                                                                                                                                                                                                                                                                                                                                                                                                                                                                                                                                                                                                                                                                                                                                                                                                                                                                                                                                                                                                                                                                                                                                                                                                                                                                                                                                                                                                                                                                                                                                                                                                                                                                                                                                                                                                                                                                                                                      | Lighthouse Lab in Glasgow                                                                                                                                           | Wellcome Sanger Institute for the COVID-19 Genomics UK (COG-UK) Consortium                                                                                                                                                                                                                                                                                               | Harper VanSteenhouse, Yumi Kasai, David Gray, Carol Clugston, Anna Dominiczak and Alex Alderton, Roberto Amato, Sonia Goncalves, Ewan Harrison, David K. Jackson, Ian Johnston, Dominic Kwiatkowski, Cordelia Langford, John Sillitoe on behalf of the Wellcome Sanger Institute COVID-19 Surveillance Team                                                                                                                              |
| EPI_ISL_649197, EPI_ISL_649218, EPI_ISL_649232, EPI_ISL_649237, EPI_ISL_649250, EPI_ISL_649252, EPI_ISL_649254, EPI_ISL_649274, EPI_ISL_649278, EPI_ISL_649279, EPI_ISL_649284, EPI_ISL_649287, EPI_ISL_649288, EPI_ISL_649289, EPI_ISL_649301, EPI_ISL_649312, EPI_ISL_649313, EPI_ISL_649314, EPI_ISL_649340, EPI_ISL_649343, EPI_ISL_649358, EPI_ISL_649374, EPI_ISL_649381, EPI_ISL_649393, EPI_ISL_649395, EPI_ISL_649397, EPI_ISL_649409, EPI_ISL_649415, EPI_ISL_649421, EPI_ISL_649427, EPI_ISL_649432, EPI_ISL_649457, EPI_ISL_649459, EPI_ISL_649477, EPI_ISL_649491                                                                                                                                                                                                                                                                                                                                                                                                                                                                                                                                                                                                                                                                                                                                                                                                                                                                                                                                                                                                                                                                                                                                                                                                                                                                                                                                                                                                                                                                                                                                                                                                                                                                                                                                                                                                                                                                                                                                                                                                                                                                                                                                                                                                                                                                                                 | Lighthouse Lab in Alderley Park                                                                                                                                     | Wellcome Sanger Institute for the COVID-19 Genomics UK (COG-UK) Consortium                                                                                                                                                                                                                                                                                               | Jacquelyn Wynn, Mairead Hyland, The Lighthouse Lab in Alderley Park and Alex Alderton, Roberto Amato, Sonia Goncalves, Ewan Harrison, David K. Jackson, Ian Johnston, Dominic Kwiatkowski, Cordelia Langford, John Sillitoe on behalf of the Wellcome Sanger Institute COVID-19 Surveillance Team ( <a href="http://www.sanger.ac.uk/covid-team">http://www.sanger.ac.uk/covid-team</a> )                                                |
| see above                                                                                                                                                                                                                                                                                                                                                                                                                                                                                                                                                                                                                                                                                                                                                                                                                                                                                                                                                                                                                                                                                                                                                                                                                                                                                                                                                                                                                                                                                                                                                                                                                                                                                                                                                                                                                                                                                                                                                                                                                                                                                                                                                                                                                                                                                                                                                                                                                                                                                                                                                                                                                                                                                                                                                                                                                                                                      | Lighthouse Lab in Alderley Park                                                                                                                                     | Wellcome Sanger Institute for the COVID-19 Genomics UK (COG-UK) Consortium                                                                                                                                                                                                                                                                                               | Jacquelyn Wynn, Mairead Hyland, The Lighthouse Lab in Alderley Park and Alex Alderton, Roberto Amato, Sonia Goncalves, Ewan Harrison, David K. Jackson, Ian Johnston, Dominic Kwiatkowski, Cordelia Langford, John Sillitoe on behalf of the Wellcome Sanger Institute COVID-19 Surveillance Team ( <a href="http://www.sanger.ac.uk/covid-team">http://www.sanger.ac.uk/covid-team</a> )                                                |
| EPI_ISL_649496, EPI_ISL_649502, EPI_ISL_649504, EPI_ISL_649508, EPI_ISL_649509, EPI_ISL_649520, EPI_ISL_649524, EPI_ISL_649536, EPI_ISL_649537, EPI_ISL_649540, EPI_ISL_649566, EPI_ISL_649584, EPI_ISL_649589, EPI_ISL_649590, EPI_ISL_649594, EPI_ISL_649618, EPI_ISL_649638, EPI_ISL_649647, EPI_ISL_649649, EPI_ISL_649657, EPI_ISL_649661, EPI_ISL_649669, EPI_ISL_649674, EPI_ISL_649693, EPI_ISL_649704, EPI_ISL_649723, EPI_ISL_649730, EPI_ISL_649733, EPI_ISL_649742                                                                                                                                                                                                                                                                                                                                                                                                                                                                                                                                                                                                                                                                                                                                                                                                                                                                                                                                                                                                                                                                                                                                                                                                                                                                                                                                                                                                                                                                                                                                                                                                                                                                                                                                                                                                                                                                                                                                                                                                                                                                                                                                                                                                                                                                                                                                                                                                 | Lighthouse Lab in Glasgow                                                                                                                                           | Wellcome Sanger Institute for the COVID-19 Genomics UK (COG-UK) Consortium                                                                                                                                                                                                                                                                                               | Harper VanSteenhouse, Yumi Kasai, David Gray, Carol Clugston, Anna Dominiczak and Alex Alderton, Roberto Amato, Sonia Goncalves, Ewan Harrison, David K. Jackson, Ian Johnston, Dominic Kwiatkowski, Cordelia Langford, John Sillitoe on behalf of the Wellcome Sanger Institute COVID-19 Surveillance Team ( <a href="http://www.sanger.ac.uk/covid-team">http://www.sanger.ac.uk/covid-team</a> )                                      |
| see above                                                                                                                                                                                                                                                                                                                                                                                                                                                                                                                                                                                                                                                                                                                                                                                                                                                                                                                                                                                                                                                                                                                                                                                                                                                                                                                                                                                                                                                                                                                                                                                                                                                                                                                                                                                                                                                                                                                                                                                                                                                                                                                                                                                                                                                                                                                                                                                                                                                                                                                                                                                                                                                                                                                                                                                                                                                                      | Lighthouse Lab in Glasgow                                                                                                                                           | Wellcome Sanger Institute for the COVID-19 Genomics UK (COG-UK) Consortium                                                                                                                                                                                                                                                                                               | Harper VanSteenhouse, Yumi Kasai, David Gray, Carol Clugston, Anna Dominiczak and Alex Alderton, Roberto Amato, Sonia Goncalves, Ewan Harrison, David K. Jackson, Ian Johnston, Dominic Kwiatkowski, Cordelia Langford, John Sillitoe on behalf of the Wellcome Sanger Institute COVID-19 Surveillance Team ( <a href="http://www.sanger.ac.uk/covid-team">http://www.sanger.ac.uk/covid-team</a> )                                      |
| EPI_ISL_650119, EPI_ISL_650126, EPI_ISL_650137, EPI_ISL_650144, EPI_ISL_650153, EPI_ISL_650155, EPI_ISL_650158, EPI_ISL_650171, EPI_ISL_650172, EPI_ISL_650176, EPI_ISL_650212, EPI_ISL_650216, EPI_ISL_650233, EPI_ISL_650234, EPI_ISL_650235, EPI_ISL_650245, EPI_ISL_650250, EPI_ISL_650251, EPI_ISL_650252, EPI_ISL_650253, EPI_ISL_650254, EPI_ISL_650271, EPI_ISL_650274, EPI_ISL_650281, EPI_ISL_650350, EPI_ISL_650354, EPI_ISL_650373, EPI_ISL_650380, EPI_ISL_650405, EPI_ISL_650410, EPI_ISL_650411, EPI_ISL_650416, EPI_ISL_650418, EPI_ISL_650432, EPI_ISL_650436, EPI_ISL_650437, EPI_ISL_650463, EPI_ISL_650582, EPI_ISL_650613, EPI_ISL_650647, EPI_ISL_650648, EPI_ISL_650665, EPI_ISL_650668, EPI_ISL_650692, EPI_ISL_650717, EPI_ISL_650724, EPI_ISL_650729, EPI_ISL_650740, EPI_ISL_650742, EPI_ISL_650743, EPI_ISL_650744, EPI_ISL_650760, EPI_ISL_650769, EPI_ISL_650770, EPI_ISL_650771, EPI_ISL_650772, EPI_ISL_650773, EPI_ISL_650790, EPI_ISL_650791, EPI_ISL_650792, EPI_ISL_650822, EPI_ISL_650823, EPI_ISL_650824, EPI_ISL_650825, EPI_ISL_650827, EPI_ISL_650849, EPI_ISL_650942, EPI_ISL_650948, EPI_ISL_650995, EPI_ISL_650996, EPI_ISL_650997, EPI_ISL_650998, EPI_ISL_651000, EPI_ISL_651098, EPI_ISL_651127, EPI_ISL_651137, EPI_ISL_651140, EPI_ISL_651144, EPI_ISL_651174, EPI_ISL_651190, EPI_ISL_651193, EPI_ISL_651195, EPI_ISL_651200, EPI_ISL_651227, EPI_ISL_651256, EPI_ISL_651266, EPI_ISL_651275, EPI_ISL_651282, EPI_ISL_651287, EPI_ISL_651304, EPI_ISL_651305, EPI_ISL_651321, EPI_ISL_651342, EPI_ISL_651353, EPI_ISL_651378, EPI_ISL_651379, EPI_ISL_651381, EPI_ISL_651390, EPI_ISL_651393, EPI_ISL_651405, EPI_ISL_651413, EPI_ISL_651422, EPI_ISL_651486, EPI_ISL_651519, EPI_ISL_651590, EPI_ISL_651591, EPI_ISL_651592, EPI_ISL_651593, EPI_ISL_651594, EPI_ISL_651595, EPI_ISL_651596, EPI_ISL_651597, EPI_ISL_651598, EPI_ISL_651599, EPI_ISL_651600, EPI_ISL_651601, EPI_ISL_651602, EPI_ISL_651603, EPI_ISL_651604, EPI_ISL_651605, EPI_ISL_651606, EPI_ISL_651607, EPI_ISL_651608, EPI_ISL_651609, EPI_ISL_651610, EPI_ISL_651611, EPI_ISL_651612, EPI_ISL_651613, EPI_ISL_651614, EPI_ISL_651615, EPI_ISL_651616, EPI_ISL_651617, EPI_ISL_651618, EPI_ISL_651619, EPI_ISL_651620, EPI_ISL_651621, EPI_ISL_651622, EPI_ISL_651623, EPI_ISL_651624, EPI_ISL_651625, EPI_ISL_651626, EPI_ISL_651627, EPI_ISL_651628, EPI_ISL_651629, EPI_ISL_651630, EPI_ISL_651631, EPI_ISL_651632, EPI_ISL_651633, EPI_ISL_651634, EPI_ISL_651635, EPI_ISL_651636, EPI_ISL_651637, EPI_ISL_651638, EPI_ISL_651639, EPI_ISL_651640, EPI_ISL_651641, EPI_ISL_651642, EPI_ISL_651643, EPI_ISL_651644, EPI_ISL_651645, EPI_ISL_651646, EPI_ISL_651647, EPI_ISL_651648, EPI_ISL_651649, EPI_ISL_651650, EPI_ISL_651651, EPI_ISL_651652, EPI_ISL_652067, EPI_ISL_652068, EPI_ISL_652069, EPI_ISL_652070, EPI_ISL_652071, EPI_ISL_652072 | University of Birmingham                                                                                                                                            | COVID-19 Genomics UK (COG-UK) Consortium                                                                                                                                                                                                                                                                                                                                 | Institute of Microbiology, University of Birmingham: Claire McMurray, Joanne Stockton, Samuel Nicholls, Radoslaw Poplowski, Will Rowe, Josh Quicke, Nicholas Loman. University of Birmingham Testing Laboratory: Celina M Whalley, Andrew Bosworth, Charlotte Poxon, Kasun Wanigasooriya, Oliver Pickles, Mike Kidd, Alex Richter, Andrew D Beggs PHE Heartlands Lab: Husam Osman, Andrew Bosworth. Queen Elizabeth Hospital: Anna Casey |
| EPI_ISL_654016, EPI_ISL_654017, EPI_ISL_654018, EPI_ISL_654019, EPI_ISL_654020                                                                                                                                                                                                                                                                                                                                                                                                                                                                                                                                                                                                                                                                                                                                                                                                                                                                                                                                                                                                                                                                                                                                                                                                                                                                                                                                                                                                                                                                                                                                                                                                                                                                                                                                                                                                                                                                                                                                                                                                                                                                                                                                                                                                                                                                                                                                                                                                                                                                                                                                                                                                                                                                                                                                                                                                 | Laboratory of Microbiology, National Reference Lab, Charles Nicolle Hospital; 2-University of Tunis ElManar, Faculty of Medicine of Tunis, LR99E509, Tunis, Tunisia | 1-Clinical and Experimental Pharmacology Lab, LR16SP02, National Center of Pharmacovigilance, University of Tunis El Manar, Tunis, Tunisia. 2-Neurodegenerative diseases and psychiatric troubles, LR18SP03, Razi Hospital, University of Tunis El Manar, Tunis, Tunisia. 3- Ministry of Health, National Observatory of New and Emerging Diseases, 1006, Tunis, Tunisia | Ilhem Boutiba-Ben Boubaker, Sameh Trabelsi, Nissaf Ben Alaya, Maher Kharrat, Alia Ben Kahla, Jalila Ben Khellil, Salma Abid, Sana Ferjani, Mouna Ben Sassi, Mouna Safer, Imen Mkada, Imen Kacem, Gaies Emna, Soumaya Rammeh, Riadh Daghfous, Riadh Gouider                                                                                                                                                                               |
| EPI_ISL_654867                                                                                                                                                                                                                                                                                                                                                                                                                                                                                                                                                                                                                                                                                                                                                                                                                                                                                                                                                                                                                                                                                                                                                                                                                                                                                                                                                                                                                                                                                                                                                                                                                                                                                                                                                                                                                                                                                                                                                                                                                                                                                                                                                                                                                                                                                                                                                                                                                                                                                                                                                                                                                                                                                                                                                                                                                                                                 | Pasteur Institute in Ho Chi Minh city                                                                                                                               | Department of Microbiology and Immunology - Pasteur Institute in Ho Chi Minh city                                                                                                                                                                                                                                                                                        | Hoàng Minh, Cao Minh Thng, Phm Th Thu Hng, V Phm Hng Nhung, ào Huy Mn, Hnh Th Kim Loan, Nguyn Hoàng Quân, Hnh Phng Tho, Hoàng Nh ào, Nguyn Trung Hiu, Nguyn Hoàng Anh, Nguyn Th Ngc, Phm Th Nhung, La Hoàng Huy, ng Thanh Giang, Nguyn Th Thanh Thng, Trn Th Hng Kim, Nguyn Thanh Long, Phm Duy Quang, Lng Chn Quang, Hoàng Quc Cng, Phan Trng Lân, Nguyn V Thng                                                                         |
| EPI_ISL_654889                                                                                                                                                                                                                                                                                                                                                                                                                                                                                                                                                                                                                                                                                                                                                                                                                                                                                                                                                                                                                                                                                                                                                                                                                                                                                                                                                                                                                                                                                                                                                                                                                                                                                                                                                                                                                                                                                                                                                                                                                                                                                                                                                                                                                                                                                                                                                                                                                                                                                                                                                                                                                                                                                                                                                                                                                                                                 | Pasteur Institute in Ho Chi Minh city                                                                                                                               | Department of Microbiology and Immunology - Pasteur Institute in Ho Chi Minh city                                                                                                                                                                                                                                                                                        | Hoàng Quc Cng, Cao Minh Thng, Phm Th Thu Hng, V Phm Hng Nhung, ào Huy Mn, Hnh Th Kim Loan, Nguyn Hoàng Quân, Hnh Phng Tho, Hoàng Nh ào, Nguyn Trung Hiu, Nguyn Hoàng Anh, Nguyn Th Ngc, Phm Th Nhung, Nguyn Th Ngc Tho, ng Thanh Giang, Nguyn Th Thanh Thng, Hoàng Minh, Trn Th Hng Kim, Nguyn Thanh Long, Phm Duy Quang, Lng Chn Quang, Nguyn V Thng, Phan Trng Lân                                                                     |
| EPI_ISL_654959, EPI_ISL_654968, EPI_ISL_654975, EPI_ISL_654977, EPI_ISL_654981, EPI_ISL_654983, EPI_ISL_654987, EPI_ISL_655020, EPI_ISL_655025, EPI_ISL_655032, EPI_ISL_655042, EPI_ISL_655064, EPI_ISL_655077, EPI_ISL_655083, EPI_ISL_655132, EPI_ISL_655153, EPI_ISL_655210, EPI_ISL_655215, EPI_ISL_655219, EPI_ISL_655230, EPI_ISL_655235, EPI_ISL_655250                                                                                                                                                                                                                                                                                                                                                                                                                                                                                                                                                                                                                                                                                                                                                                                                                                                                                                                                                                                                                                                                                                                                                                                                                                                                                                                                                                                                                                                                                                                                                                                                                                                                                                                                                                                                                                                                                                                                                                                                                                                                                                                                                                                                                                                                                                                                                                                                                                                                                                                 | Lighthouse Lab in Glasgow                                                                                                                                           | Wellcome Sanger Institute for the COVID-19 Genomics UK (COG-UK) Consortium                                                                                                                                                                                                                                                                                               | Harper VanSteenhouse, Yumi Kasai, David Gray, Carol Clugston, Anna Dominiczak and Alex Alderton, Roberto Amato, Sonia Goncalves, Ewan Harrison, David K. Jackson, Ian Johnston, Dominic Kwiatkowski, Cordelia Langford, John Sillitoe on behalf of the Wellcome Sanger Institute COVID-19 Surveillance Team                                                                                                                              |
| see above                                                                                                                                                                                                                                                                                                                                                                                                                                                                                                                                                                                                                                                                                                                                                                                                                                                                                                                                                                                                                                                                                                                                                                                                                                                                                                                                                                                                                                                                                                                                                                                                                                                                                                                                                                                                                                                                                                                                                                                                                                                                                                                                                                                                                                                                                                                                                                                                                                                                                                                                                                                                                                                                                                                                                                                                                                                                      | Lighthouse Lab in Glasgow                                                                                                                                           | Wellcome Sanger Institute for the COVID-19 Genomics UK (COG-UK) Consortium                                                                                                                                                                                                                                                                                               | Harper VanSteenhouse, Yumi Kasai, David Gray, Carol Clugston, Anna Dominiczak and Alex Alderton, Roberto Amato, Sonia Goncalves, Ewan Harrison, David K. Jackson, Ian Johnston, Dominic Kwiatkowski, Cordelia Langford, John Sillitoe on behalf of the Wellcome Sanger Institute COVID-19 Surveillance Team                                                                                                                              |
| EPI_ISL_655288, EPI_ISL_655303, EPI_ISL_655329, EPI_ISL_655353, EPI_ISL_655362, EPI_ISL_655397, EPI_ISL_655403, EPI_ISL_655417, EPI_ISL_655425, EPI_ISL_655426, EPI_ISL_655430, EPI_ISL_655434, EPI_ISL_655435, EPI_ISL_655439, EPI_ISL_655443, EPI_ISL_655448, EPI_ISL_655498, EPI_ISL_655499, EPI_ISL_655513, EPI_ISL_655521, EPI_ISL_655526, EPI_ISL_655530, EPI_ISL_655552, EPI_ISL_655555, EPI_ISL_655563, EPI_ISL_655570, EPI_ISL_655579, EPI_ISL_655581, EPI_ISL_655594, EPI_ISL_655597, EPI_ISL_655609, EPI_ISL_655643, EPI_ISL_655654, EPI_ISL_655656, EPI_ISL_655675, EPI_ISL_655696, EPI_ISL_655703, EPI_ISL_655716, EPI_ISL_655724, EPI_ISL_655729                                                                                                                                                                                                                                                                                                                                                                                                                                                                                                                                                                                                                                                                                                                                                                                                                                                                                                                                                                                                                                                                                                                                                                                                                                                                                                                                                                                                                                                                                                                                                                                                                                                                                                                                                                                                                                                                                                                                                                                                                                                                                                                                                                                                                 | Lighthouse Lab in Glasgow                                                                                                                                           | Wellcome Sanger Institute for the COVID-19 Genomics UK (COG-UK) Consortium                                                                                                                                                                                                                                                                                               | Harper VanSteenhouse, Yumi Kasai, David Gray, Carol Clugston, Anna Dominiczak and Alex Alderton, Roberto Amato, Sonia Goncalves, Ewan Harrison, David K. Jackson, Ian Johnston, Dominic Kwiatkowski, Cordelia Langford, John Sillitoe on behalf of the Wellcome Sanger Institute COVID-19 Surveillance Team                                                                                                                              |





Team

|                                                                                                                                                                                                                                                                                                                                                                                                                                                                                                                                                                                                                                                                                                                                                                                                                                                                                                                                                                                                                                                                                                                                                                                                                                                                                                                                                                                                                                                                                                                                                                                                                                                                                                                                                                                                                                                                                                                                                                                                                                                                                                                                                                                                                                                                                                                                                                                                                                                                                                                                                                                                                                                                                                                                                                                                                                                                                                                                                                                                                                                                                                                                                                                                                                                                                                                                                                                                                                                                                                                                                                                                                                                                                                                                                                                                                                                                                                                                                                                                                                                                                                                                                                                                                                                                                                                                                                                                                                                                                                                                                                                                                                                                                                                                                                                                                                                                                                                                                                                                                                                                                                                                                                                                                                                                                                                                                                                                                                                                                                                                                                                                                                                                                                                                                                                                                                                                                                                                                                                                                                                                                                                                                                                                                                                                                                                                                                                                                                                                                                                                                                                                                                                                                                                                                                                                                                                                                                 |           |                                                                                                                                                                       |                                                                                                                                                                                                                                                                                                                                                                          |                                                                                                                                                                                                                                                                                                                                                                                                                                         |
|-------------------------------------------------------------------------------------------------------------------------------------------------------------------------------------------------------------------------------------------------------------------------------------------------------------------------------------------------------------------------------------------------------------------------------------------------------------------------------------------------------------------------------------------------------------------------------------------------------------------------------------------------------------------------------------------------------------------------------------------------------------------------------------------------------------------------------------------------------------------------------------------------------------------------------------------------------------------------------------------------------------------------------------------------------------------------------------------------------------------------------------------------------------------------------------------------------------------------------------------------------------------------------------------------------------------------------------------------------------------------------------------------------------------------------------------------------------------------------------------------------------------------------------------------------------------------------------------------------------------------------------------------------------------------------------------------------------------------------------------------------------------------------------------------------------------------------------------------------------------------------------------------------------------------------------------------------------------------------------------------------------------------------------------------------------------------------------------------------------------------------------------------------------------------------------------------------------------------------------------------------------------------------------------------------------------------------------------------------------------------------------------------------------------------------------------------------------------------------------------------------------------------------------------------------------------------------------------------------------------------------------------------------------------------------------------------------------------------------------------------------------------------------------------------------------------------------------------------------------------------------------------------------------------------------------------------------------------------------------------------------------------------------------------------------------------------------------------------------------------------------------------------------------------------------------------------------------------------------------------------------------------------------------------------------------------------------------------------------------------------------------------------------------------------------------------------------------------------------------------------------------------------------------------------------------------------------------------------------------------------------------------------------------------------------------------------------------------------------------------------------------------------------------------------------------------------------------------------------------------------------------------------------------------------------------------------------------------------------------------------------------------------------------------------------------------------------------------------------------------------------------------------------------------------------------------------------------------------------------------------------------------------------------------------------------------------------------------------------------------------------------------------------------------------------------------------------------------------------------------------------------------------------------------------------------------------------------------------------------------------------------------------------------------------------------------------------------------------------------------------------------------------------------------------------------------------------------------------------------------------------------------------------------------------------------------------------------------------------------------------------------------------------------------------------------------------------------------------------------------------------------------------------------------------------------------------------------------------------------------------------------------------------------------------------------------------------------------------------------------------------------------------------------------------------------------------------------------------------------------------------------------------------------------------------------------------------------------------------------------------------------------------------------------------------------------------------------------------------------------------------------------------------------------------------------------------------------------------------------------------------------------------------------------------------------------------------------------------------------------------------------------------------------------------------------------------------------------------------------------------------------------------------------------------------------------------------------------------------------------------------------------------------------------------------------------------------------------------------------------------------------------------------------------------------------------------------------------------------------------------------------------------------------------------------------------------------------------------------------------------------------------------------------------------------------------------------------------------------------------------------------------------------------------------------------------------------------------------------------------------------------------------|-----------|-----------------------------------------------------------------------------------------------------------------------------------------------------------------------|--------------------------------------------------------------------------------------------------------------------------------------------------------------------------------------------------------------------------------------------------------------------------------------------------------------------------------------------------------------------------|-----------------------------------------------------------------------------------------------------------------------------------------------------------------------------------------------------------------------------------------------------------------------------------------------------------------------------------------------------------------------------------------------------------------------------------------|
| EPI_ISL_679008, EPI_ISL_679009, EPI_ISL_679010, EPI_ISL_679011, EPI_ISL_679012, EPI_ISL_679013, EPI_ISL_679014, EPI_ISL_679015, EPI_ISL_679016, EPI_ISL_679017, EPI_ISL_679018, EPI_ISL_679019, EPI_ISL_679020, EPI_ISL_679021, EPI_ISL_679022, EPI_ISL_679023, EPI_ISL_679024, EPI_ISL_679025, EPI_ISL_679026, EPI_ISL_679027, EPI_ISL_679028, EPI_ISL_679029, EPI_ISL_679030, EPI_ISL_679031, EPI_ISL_679032, EPI_ISL_679033, EPI_ISL_679034, EPI_ISL_679035, EPI_ISL_679036, EPI_ISL_679037, EPI_ISL_679038, EPI_ISL_679039, EPI_ISL_679040, EPI_ISL_679041, EPI_ISL_679042, EPI_ISL_679043, EPI_ISL_679044, EPI_ISL_679045, EPI_ISL_679046, EPI_ISL_679047, EPI_ISL_679048, EPI_ISL_679049, EPI_ISL_679050, EPI_ISL_679051, EPI_ISL_679052, EPI_ISL_679053, EPI_ISL_679054, EPI_ISL_679055, EPI_ISL_679056, EPI_ISL_679057, EPI_ISL_679058, EPI_ISL_679059, EPI_ISL_679060, EPI_ISL_679061, EPI_ISL_679062, EPI_ISL_679063, EPI_ISL_679064, EPI_ISL_679065, EPI_ISL_679066, EPI_ISL_679067, EPI_ISL_679068, EPI_ISL_679069, EPI_ISL_679070, EPI_ISL_679071, EPI_ISL_679072, EPI_ISL_679073, EPI_ISL_679074, EPI_ISL_679075, EPI_ISL_679076, EPI_ISL_679077, EPI_ISL_679078, EPI_ISL_679079, EPI_ISL_679080, EPI_ISL_679081, EPI_ISL_679082, EPI_ISL_679083, EPI_ISL_679084, EPI_ISL_679085, EPI_ISL_679086, EPI_ISL_679087, EPI_ISL_679088, EPI_ISL_679089, EPI_ISL_679090, EPI_ISL_679091, EPI_ISL_679092, EPI_ISL_679093, EPI_ISL_679094, EPI_ISL_679095, EPI_ISL_679096, EPI_ISL_679097, EPI_ISL_679098, EPI_ISL_679099, EPI_ISL_679100, EPI_ISL_679101, EPI_ISL_679102, EPI_ISL_679103, EPI_ISL_679104, EPI_ISL_679105, EPI_ISL_679106, EPI_ISL_679107, EPI_ISL_679108, EPI_ISL_679109, EPI_ISL_679110, EPI_ISL_679111, EPI_ISL_679112, EPI_ISL_679113, EPI_ISL_679114, EPI_ISL_679115, EPI_ISL_679116, EPI_ISL_679117, EPI_ISL_679118, EPI_ISL_679119, EPI_ISL_679120, EPI_ISL_679121, EPI_ISL_679122, EPI_ISL_679123, EPI_ISL_679124, EPI_ISL_679125, EPI_ISL_679126, EPI_ISL_679127, EPI_ISL_679128, EPI_ISL_679129, EPI_ISL_679130, EPI_ISL_679131, EPI_ISL_679132, EPI_ISL_679133                                                                                                                                                                                                                                                                                                                                                                                                                                                                                                                                                                                                                                                                                                                                                                                                                                                                                                                                                                                                                                                                                                                                                                                                                                                                                                                                                                                                                                                                                                                                                                                                                                                                                                                                                                                                                                                                                                                                                                                                                                                                                                                                                                                                                                                                                                                                                                                                                                                                                                                                                                                                                                                                                                                                                                                                                                                                                                                                                                                                                                                                                                                                                                                                                                                                                                                                                                                                                                                                                                                                                                                                                                                                                                                                                                                                                                                                                                                                                                                                                                                                                                                                                                                                                                                                                                                                                                                                                                                                                                                                                                                                                                                                                                                                                                                                  | see above | University of Birmingham                                                                                                                                              | COVID-19 Genomics UK (COG-UK) Consortium                                                                                                                                                                                                                                                                                                                                 | Institute of Microbiology, University of Birmingham: Claire McMurray, Joanne Stockton, Samuel Nicholls, Radoslaw Poplawski, Will Rowe, Josh Quick, Nicholas Loman. University of Birmingham Testing Laboratory: Celina M Whalley, Andrew Bosworth, Charlotte Poxon, Kasun Wanigasooriya, Oliver Pickles, Mike Kidd, Alex Richter, Andrew D Beggs PHE Heartlands Lab: Husam Osman, Andrew Bosworth. Queen Elizabeth Hospital: Anna Casey |
| EPI_ISL_683329                                                                                                                                                                                                                                                                                                                                                                                                                                                                                                                                                                                                                                                                                                                                                                                                                                                                                                                                                                                                                                                                                                                                                                                                                                                                                                                                                                                                                                                                                                                                                                                                                                                                                                                                                                                                                                                                                                                                                                                                                                                                                                                                                                                                                                                                                                                                                                                                                                                                                                                                                                                                                                                                                                                                                                                                                                                                                                                                                                                                                                                                                                                                                                                                                                                                                                                                                                                                                                                                                                                                                                                                                                                                                                                                                                                                                                                                                                                                                                                                                                                                                                                                                                                                                                                                                                                                                                                                                                                                                                                                                                                                                                                                                                                                                                                                                                                                                                                                                                                                                                                                                                                                                                                                                                                                                                                                                                                                                                                                                                                                                                                                                                                                                                                                                                                                                                                                                                                                                                                                                                                                                                                                                                                                                                                                                                                                                                                                                                                                                                                                                                                                                                                                                                                                                                                                                                                                                  |           | 1-Laboratory of Microbiology, National Reference Lab, Charles Nicolle Hospital; 2-University of Tunis ElManar, Faculty of Medicine of Tunis, LR99E509, Tunis, Tunisia | 1-Clinical and Experimental Pharmacology Lab, LR16SP02, National Center of Pharmacovigilance, University of Tunis El Manar, Tunis, Tunisia. 2-Neurodegenerative diseases and psychiatric troubles, LR18SP03, Razi Hospital, University of Tunis El Manar, Tunis, Tunisia. 3- Ministry of Health, National Observatory of New and Emerging Diseases, 1006, Tunis, Tunisia | Ilhem Boutiba-Ben Boubaker, Sameh Trabelsi, Nissaf Ben Alaya, Maher Kharrat, Alia Ben Kahla, Jaïlia Ben Khelil, Salma Abid, Sana Ferjani, Asma Ferjani, Mouna Ben Sassi, Mouna Safer, Guedi Berrabeh, Salwa Mrabet, Hanen ElJebari, Gaies Emna, Riadh Daghfous, Riadh Gouider.                                                                                                                                                          |
| EPI_ISL_691681                                                                                                                                                                                                                                                                                                                                                                                                                                                                                                                                                                                                                                                                                                                                                                                                                                                                                                                                                                                                                                                                                                                                                                                                                                                                                                                                                                                                                                                                                                                                                                                                                                                                                                                                                                                                                                                                                                                                                                                                                                                                                                                                                                                                                                                                                                                                                                                                                                                                                                                                                                                                                                                                                                                                                                                                                                                                                                                                                                                                                                                                                                                                                                                                                                                                                                                                                                                                                                                                                                                                                                                                                                                                                                                                                                                                                                                                                                                                                                                                                                                                                                                                                                                                                                                                                                                                                                                                                                                                                                                                                                                                                                                                                                                                                                                                                                                                                                                                                                                                                                                                                                                                                                                                                                                                                                                                                                                                                                                                                                                                                                                                                                                                                                                                                                                                                                                                                                                                                                                                                                                                                                                                                                                                                                                                                                                                                                                                                                                                                                                                                                                                                                                                                                                                                                                                                                                                                  |           | Consejería de Sanidad y Asuntos Sociales                                                                                                                              | Instituto de Salud Carlos III                                                                                                                                                                                                                                                                                                                                            | Iglesias-Caballero, M. Camarero, S. Molinero Calamita, M. González-Esguevillas, M. Pozo, F. Casas, I. Jiménez, P. Jiménez, M. Zaballos, A. Monzón, S. Varona, S. Juliá, M. Cuesta, I. Gutiérrez, G.                                                                                                                                                                                                                                     |
| EPI_ISL_691682                                                                                                                                                                                                                                                                                                                                                                                                                                                                                                                                                                                                                                                                                                                                                                                                                                                                                                                                                                                                                                                                                                                                                                                                                                                                                                                                                                                                                                                                                                                                                                                                                                                                                                                                                                                                                                                                                                                                                                                                                                                                                                                                                                                                                                                                                                                                                                                                                                                                                                                                                                                                                                                                                                                                                                                                                                                                                                                                                                                                                                                                                                                                                                                                                                                                                                                                                                                                                                                                                                                                                                                                                                                                                                                                                                                                                                                                                                                                                                                                                                                                                                                                                                                                                                                                                                                                                                                                                                                                                                                                                                                                                                                                                                                                                                                                                                                                                                                                                                                                                                                                                                                                                                                                                                                                                                                                                                                                                                                                                                                                                                                                                                                                                                                                                                                                                                                                                                                                                                                                                                                                                                                                                                                                                                                                                                                                                                                                                                                                                                                                                                                                                                                                                                                                                                                                                                                                                  |           | Hospital General Universitario de Ciudad Real                                                                                                                         | Instituto de Salud Carlos III                                                                                                                                                                                                                                                                                                                                            | Iglesias-Caballero, M. Camarero, S. Molinero Calamita, M. González-Esguevillas, M. Pozo, F. Casas, I. Jiménez, P. Jiménez, M. Zaballos, A. Monzón, S. Varona, S. Juliá, M. Cuesta, I. Jarilla, M.                                                                                                                                                                                                                                       |
| EPI_ISL_691683                                                                                                                                                                                                                                                                                                                                                                                                                                                                                                                                                                                                                                                                                                                                                                                                                                                                                                                                                                                                                                                                                                                                                                                                                                                                                                                                                                                                                                                                                                                                                                                                                                                                                                                                                                                                                                                                                                                                                                                                                                                                                                                                                                                                                                                                                                                                                                                                                                                                                                                                                                                                                                                                                                                                                                                                                                                                                                                                                                                                                                                                                                                                                                                                                                                                                                                                                                                                                                                                                                                                                                                                                                                                                                                                                                                                                                                                                                                                                                                                                                                                                                                                                                                                                                                                                                                                                                                                                                                                                                                                                                                                                                                                                                                                                                                                                                                                                                                                                                                                                                                                                                                                                                                                                                                                                                                                                                                                                                                                                                                                                                                                                                                                                                                                                                                                                                                                                                                                                                                                                                                                                                                                                                                                                                                                                                                                                                                                                                                                                                                                                                                                                                                                                                                                                                                                                                                                                  |           | Hospital General Universitario de Ciudad Real                                                                                                                         | Instituto de Salud Carlos III                                                                                                                                                                                                                                                                                                                                            | Iglesias-Caballero, M. Camarero, S. Molinero Calamita, M. González-Esguevillas, M. Pozo, F. Casas, I. Jiménez, P. Jiménez, M. Zaballos, A. Monzón, S. Varona, S. Juliá, M. Cuesta, I. Madrigal, M.                                                                                                                                                                                                                                      |
| EPI_ISL_691684                                                                                                                                                                                                                                                                                                                                                                                                                                                                                                                                                                                                                                                                                                                                                                                                                                                                                                                                                                                                                                                                                                                                                                                                                                                                                                                                                                                                                                                                                                                                                                                                                                                                                                                                                                                                                                                                                                                                                                                                                                                                                                                                                                                                                                                                                                                                                                                                                                                                                                                                                                                                                                                                                                                                                                                                                                                                                                                                                                                                                                                                                                                                                                                                                                                                                                                                                                                                                                                                                                                                                                                                                                                                                                                                                                                                                                                                                                                                                                                                                                                                                                                                                                                                                                                                                                                                                                                                                                                                                                                                                                                                                                                                                                                                                                                                                                                                                                                                                                                                                                                                                                                                                                                                                                                                                                                                                                                                                                                                                                                                                                                                                                                                                                                                                                                                                                                                                                                                                                                                                                                                                                                                                                                                                                                                                                                                                                                                                                                                                                                                                                                                                                                                                                                                                                                                                                                                                  |           | Complejo Hospitalario Universitario de Albacete                                                                                                                       | Instituto de Salud Carlos III                                                                                                                                                                                                                                                                                                                                            | Iglesias-Caballero, M. Camarero, S. Molinero Calamita, M. González-Esguevillas, M. Pozo, F. Casas, I. Jiménez, P. Jiménez, M. Zaballos, A. Monzón, S. Varona, S. Juliá, M. Cuesta, I. Martínez, E.                                                                                                                                                                                                                                      |
| EPI_ISL_691685                                                                                                                                                                                                                                                                                                                                                                                                                                                                                                                                                                                                                                                                                                                                                                                                                                                                                                                                                                                                                                                                                                                                                                                                                                                                                                                                                                                                                                                                                                                                                                                                                                                                                                                                                                                                                                                                                                                                                                                                                                                                                                                                                                                                                                                                                                                                                                                                                                                                                                                                                                                                                                                                                                                                                                                                                                                                                                                                                                                                                                                                                                                                                                                                                                                                                                                                                                                                                                                                                                                                                                                                                                                                                                                                                                                                                                                                                                                                                                                                                                                                                                                                                                                                                                                                                                                                                                                                                                                                                                                                                                                                                                                                                                                                                                                                                                                                                                                                                                                                                                                                                                                                                                                                                                                                                                                                                                                                                                                                                                                                                                                                                                                                                                                                                                                                                                                                                                                                                                                                                                                                                                                                                                                                                                                                                                                                                                                                                                                                                                                                                                                                                                                                                                                                                                                                                                                                                  |           | Hospital de Leon                                                                                                                                                      | Instituto de Salud Carlos III                                                                                                                                                                                                                                                                                                                                            | Iglesias-Caballero, M. Camarero, S. Molinero Calamita, M. González-Esguevillas, M. Pozo, F. Casas, I. Jiménez, P. Jiménez, M. Zaballos, A. Monzón, S. Varona, S. Juliá, M. Cuesta, I. Vidan, J.                                                                                                                                                                                                                                         |
| EPI_ISL_691686, EPI_ISL_691687, EPI_ISL_691688, EPI_ISL_691689, EPI_ISL_691690, EPI_ISL_691691, EPI_ISL_691692, EPI_ISL_691693, EPI_ISL_691694, EPI_ISL_691695, EPI_ISL_691696, EPI_ISL_691697, EPI_ISL_691698, EPI_ISL_691699                                                                                                                                                                                                                                                                                                                                                                                                                                                                                                                                                                                                                                                                                                                                                                                                                                                                                                                                                                                                                                                                                                                                                                                                                                                                                                                                                                                                                                                                                                                                                                                                                                                                                                                                                                                                                                                                                                                                                                                                                                                                                                                                                                                                                                                                                                                                                                                                                                                                                                                                                                                                                                                                                                                                                                                                                                                                                                                                                                                                                                                                                                                                                                                                                                                                                                                                                                                                                                                                                                                                                                                                                                                                                                                                                                                                                                                                                                                                                                                                                                                                                                                                                                                                                                                                                                                                                                                                                                                                                                                                                                                                                                                                                                                                                                                                                                                                                                                                                                                                                                                                                                                                                                                                                                                                                                                                                                                                                                                                                                                                                                                                                                                                                                                                                                                                                                                                                                                                                                                                                                                                                                                                                                                                                                                                                                                                                                                                                                                                                                                                                                                                                                                                  | see above | Hospital Universitario de Ceuta                                                                                                                                       | Instituto de Salud Carlos III                                                                                                                                                                                                                                                                                                                                            | Iglesias-Caballero, M. Camarero, S. Molinero Calamita, M. González-Esguevillas, M. Pozo, F. Casas, I. Jiménez, P. Jiménez, M. Zaballos, A. Monzón, S. Varona, S. Juliá, M. Cuesta, I. Hijano, S.                                                                                                                                                                                                                                        |
| EPI_ISL_691700, EPI_ISL_691701, EPI_ISL_691702, EPI_ISL_691703, EPI_ISL_691704, EPI_ISL_691705, EPI_ISL_691706, EPI_ISL_691707, EPI_ISL_691708, EPI_ISL_691709, EPI_ISL_691710, EPI_ISL_691711, EPI_ISL_691712, EPI_ISL_691713, EPI_ISL_691714, EPI_ISL_691715, EPI_ISL_691716, EPI_ISL_691717, EPI_ISL_691718, EPI_ISL_691719, EPI_ISL_691720, EPI_ISL_691721, EPI_ISL_691722, EPI_ISL_691723, EPI_ISL_691724, EPI_ISL_691725, EPI_ISL_691726, EPI_ISL_691727, EPI_ISL_691728                                                                                                                                                                                                                                                                                                                                                                                                                                                                                                                                                                                                                                                                                                                                                                                                                                                                                                                                                                                                                                                                                                                                                                                                                                                                                                                                                                                                                                                                                                                                                                                                                                                                                                                                                                                                                                                                                                                                                                                                                                                                                                                                                                                                                                                                                                                                                                                                                                                                                                                                                                                                                                                                                                                                                                                                                                                                                                                                                                                                                                                                                                                                                                                                                                                                                                                                                                                                                                                                                                                                                                                                                                                                                                                                                                                                                                                                                                                                                                                                                                                                                                                                                                                                                                                                                                                                                                                                                                                                                                                                                                                                                                                                                                                                                                                                                                                                                                                                                                                                                                                                                                                                                                                                                                                                                                                                                                                                                                                                                                                                                                                                                                                                                                                                                                                                                                                                                                                                                                                                                                                                                                                                                                                                                                                                                                                                                                                                                  | see above | Hospital Clínico San Carlos                                                                                                                                           | Instituto de Salud Carlos III                                                                                                                                                                                                                                                                                                                                            | Iglesias-Caballero, M. Camarero, S. Molinero Calamita, M. González-Esguevillas, M. Pozo, F. Casas, I. Jiménez, P. Jiménez, M. Zaballos, A. Monzón, S. Varona, S. Juliá, M. Cuesta, I. Rodríguez, I.                                                                                                                                                                                                                                     |
| EPI_ISL_691729, EPI_ISL_691730                                                                                                                                                                                                                                                                                                                                                                                                                                                                                                                                                                                                                                                                                                                                                                                                                                                                                                                                                                                                                                                                                                                                                                                                                                                                                                                                                                                                                                                                                                                                                                                                                                                                                                                                                                                                                                                                                                                                                                                                                                                                                                                                                                                                                                                                                                                                                                                                                                                                                                                                                                                                                                                                                                                                                                                                                                                                                                                                                                                                                                                                                                                                                                                                                                                                                                                                                                                                                                                                                                                                                                                                                                                                                                                                                                                                                                                                                                                                                                                                                                                                                                                                                                                                                                                                                                                                                                                                                                                                                                                                                                                                                                                                                                                                                                                                                                                                                                                                                                                                                                                                                                                                                                                                                                                                                                                                                                                                                                                                                                                                                                                                                                                                                                                                                                                                                                                                                                                                                                                                                                                                                                                                                                                                                                                                                                                                                                                                                                                                                                                                                                                                                                                                                                                                                                                                                                                                  |           | Hospital Universitario Severo Ochoa                                                                                                                                   | Instituto de Salud Carlos III                                                                                                                                                                                                                                                                                                                                            | Iglesias-Caballero, M. Camarero, S. Molinero Calamita, M. González-Esguevillas, M. Pozo, F. Casas, I. Jiménez, P. Jiménez, M. Zaballos, A. Monzón, S. Varona, S. Juliá, M. Cuesta, I. García, M.                                                                                                                                                                                                                                        |
| EPI_ISL_691731                                                                                                                                                                                                                                                                                                                                                                                                                                                                                                                                                                                                                                                                                                                                                                                                                                                                                                                                                                                                                                                                                                                                                                                                                                                                                                                                                                                                                                                                                                                                                                                                                                                                                                                                                                                                                                                                                                                                                                                                                                                                                                                                                                                                                                                                                                                                                                                                                                                                                                                                                                                                                                                                                                                                                                                                                                                                                                                                                                                                                                                                                                                                                                                                                                                                                                                                                                                                                                                                                                                                                                                                                                                                                                                                                                                                                                                                                                                                                                                                                                                                                                                                                                                                                                                                                                                                                                                                                                                                                                                                                                                                                                                                                                                                                                                                                                                                                                                                                                                                                                                                                                                                                                                                                                                                                                                                                                                                                                                                                                                                                                                                                                                                                                                                                                                                                                                                                                                                                                                                                                                                                                                                                                                                                                                                                                                                                                                                                                                                                                                                                                                                                                                                                                                                                                                                                                                                                  |           | Hospital Universitario Puerta de Hierro                                                                                                                               | Instituto de Salud Carlos III                                                                                                                                                                                                                                                                                                                                            | Iglesias-Caballero, M. Camarero, S. Molinero Calamita, M. González-Esguevillas, M. Pozo, F. Casas, I. Jiménez, P. Jiménez, M. Zaballos, A. Monzón, S. Varona, S. Juliá, M. Cuesta, I. Velasco, A.                                                                                                                                                                                                                                       |
| EPI_ISL_691732                                                                                                                                                                                                                                                                                                                                                                                                                                                                                                                                                                                                                                                                                                                                                                                                                                                                                                                                                                                                                                                                                                                                                                                                                                                                                                                                                                                                                                                                                                                                                                                                                                                                                                                                                                                                                                                                                                                                                                                                                                                                                                                                                                                                                                                                                                                                                                                                                                                                                                                                                                                                                                                                                                                                                                                                                                                                                                                                                                                                                                                                                                                                                                                                                                                                                                                                                                                                                                                                                                                                                                                                                                                                                                                                                                                                                                                                                                                                                                                                                                                                                                                                                                                                                                                                                                                                                                                                                                                                                                                                                                                                                                                                                                                                                                                                                                                                                                                                                                                                                                                                                                                                                                                                                                                                                                                                                                                                                                                                                                                                                                                                                                                                                                                                                                                                                                                                                                                                                                                                                                                                                                                                                                                                                                                                                                                                                                                                                                                                                                                                                                                                                                                                                                                                                                                                                                                                                  |           | Hospital de Madrid                                                                                                                                                    | Instituto de Salud Carlos III                                                                                                                                                                                                                                                                                                                                            | Iglesias-Caballero, M. Camarero, S. Molinero Calamita, M. González-Esguevillas, M. Pozo, F. Casas, I. Jiménez, P. Jiménez, M. Zaballos, A. Monzón, S. Varona, S. Juliá, M. Cuesta, I. Alhambra, A.                                                                                                                                                                                                                                      |
| EPI_ISL_693333                                                                                                                                                                                                                                                                                                                                                                                                                                                                                                                                                                                                                                                                                                                                                                                                                                                                                                                                                                                                                                                                                                                                                                                                                                                                                                                                                                                                                                                                                                                                                                                                                                                                                                                                                                                                                                                                                                                                                                                                                                                                                                                                                                                                                                                                                                                                                                                                                                                                                                                                                                                                                                                                                                                                                                                                                                                                                                                                                                                                                                                                                                                                                                                                                                                                                                                                                                                                                                                                                                                                                                                                                                                                                                                                                                                                                                                                                                                                                                                                                                                                                                                                                                                                                                                                                                                                                                                                                                                                                                                                                                                                                                                                                                                                                                                                                                                                                                                                                                                                                                                                                                                                                                                                                                                                                                                                                                                                                                                                                                                                                                                                                                                                                                                                                                                                                                                                                                                                                                                                                                                                                                                                                                                                                                                                                                                                                                                                                                                                                                                                                                                                                                                                                                                                                                                                                                                                                  |           | Lighthouse Lab in Alderley Park                                                                                                                                       | Wellcome Sanger Institute for the COVID-19 Genomics UK (COG-UK) Consortium                                                                                                                                                                                                                                                                                               | Jacquelyn Wynn, Mairead Hyland, The Lighthouse Lab in Alderley Park and Alex Alderton, Roberto Amato, Sonia Goncalves, Ewan Harrison, David K. Jackson, Ian Johnston, Dominic Kwiatkowski, Cordelia Langford, John Sillitoe on behalf of the Wellcome Sanger Institute COVID-19 Surveillance Team                                                                                                                                       |
| EPI_ISL_694009, EPI_ISL_694010, EPI_ISL_694011, EPI_ISL_694012, EPI_ISL_694013, EPI_ISL_694014, EPI_ISL_694015, EPI_ISL_694016, EPI_ISL_694017, EPI_ISL_694018, EPI_ISL_694019, EPI_ISL_694020, EPI_ISL_694021, EPI_ISL_694022, EPI_ISL_694023, EPI_ISL_694024, EPI_ISL_694025, EPI_ISL_694026, EPI_ISL_694027, EPI_ISL_694028, EPI_ISL_694029, EPI_ISL_694030, EPI_ISL_694031, EPI_ISL_694032, EPI_ISL_694033, EPI_ISL_694034, EPI_ISL_694035, EPI_ISL_694036, EPI_ISL_694037, EPI_ISL_694038, EPI_ISL_694039, EPI_ISL_694040                                                                                                                                                                                                                                                                                                                                                                                                                                                                                                                                                                                                                                                                                                                                                                                                                                                                                                                                                                                                                                                                                                                                                                                                                                                                                                                                                                                                                                                                                                                                                                                                                                                                                                                                                                                                                                                                                                                                                                                                                                                                                                                                                                                                                                                                                                                                                                                                                                                                                                                                                                                                                                                                                                                                                                                                                                                                                                                                                                                                                                                                                                                                                                                                                                                                                                                                                                                                                                                                                                                                                                                                                                                                                                                                                                                                                                                                                                                                                                                                                                                                                                                                                                                                                                                                                                                                                                                                                                                                                                                                                                                                                                                                                                                                                                                                                                                                                                                                                                                                                                                                                                                                                                                                                                                                                                                                                                                                                                                                                                                                                                                                                                                                                                                                                                                                                                                                                                                                                                                                                                                                                                                                                                                                                                                                                                                                                                  | see above | TGen North                                                                                                                                                            | TGen North                                                                                                                                                                                                                                                                                                                                                               | Hayley D Yaglom, Marette Gebhardt, Ashlyn Pfeiffer, Mary Ellen Ormsby, Daniel Jasso-Selles, Darrin Lemmer, Megan Folkerts, Chris French, Matthew Maurer, Jolene R Bowers, David M Engethaler                                                                                                                                                                                                                                            |
| EPI_ISL_699655, EPI_ISL_699656, EPI_ISL_699657                                                                                                                                                                                                                                                                                                                                                                                                                                                                                                                                                                                                                                                                                                                                                                                                                                                                                                                                                                                                                                                                                                                                                                                                                                                                                                                                                                                                                                                                                                                                                                                                                                                                                                                                                                                                                                                                                                                                                                                                                                                                                                                                                                                                                                                                                                                                                                                                                                                                                                                                                                                                                                                                                                                                                                                                                                                                                                                                                                                                                                                                                                                                                                                                                                                                                                                                                                                                                                                                                                                                                                                                                                                                                                                                                                                                                                                                                                                                                                                                                                                                                                                                                                                                                                                                                                                                                                                                                                                                                                                                                                                                                                                                                                                                                                                                                                                                                                                                                                                                                                                                                                                                                                                                                                                                                                                                                                                                                                                                                                                                                                                                                                                                                                                                                                                                                                                                                                                                                                                                                                                                                                                                                                                                                                                                                                                                                                                                                                                                                                                                                                                                                                                                                                                                                                                                                                                  |           | 1-Laboratory of Microbiology, National Reference Lab, Charles Nicolle Hospital; 2-University of Tunis ElManar, Faculty of Medicine of Tunis, LR99E509, Tunis, Tunisia | 1-Clinical and Experimental Pharmacology Lab, LR16SP02, National Center of Pharmacovigilance, University of Tunis El Manar, Tunis, Tunisia. 2-Neurodegenerative diseases and psychiatric troubles, LR18SP03, Razi Hospital, University of Tunis El Manar, Tunis, Tunisia. 3- Ministry of Health, National Observatory of New and Emerging Diseases, 1006, Tunis, Tunisia | Ilhem Boutiba-Ben Boubaker, Sameh Trabelsi, Nissaf Ben Alaya, Maher Kharrat, Alia Ben Kahla, Jaïlia Ben Khelil, Salma Abid, Sana Ferjani, Asma Ferjani, Mouna Ben Sassi, Mouna Safer, Guedi Berrabeh, Salwa Mrabet, Hanen ElJebari, Gaies Emna, Riadh Daghfous, Riadh Gouider.                                                                                                                                                          |
| EPI_ISL_699658, EPI_ISL_699659, EPI_ISL_699660, EPI_ISL_699661, EPI_ISL_699662, EPI_ISL_699663, EPI_ISL_699664, EPI_ISL_699665, EPI_ISL_699666, EPI_ISL_699667, EPI_ISL_699668, EPI_ISL_699669, EPI_ISL_699670, EPI_ISL_699671, EPI_ISL_699672, EPI_ISL_699673, EPI_ISL_699674, EPI_ISL_699675, EPI_ISL_699676, EPI_ISL_699677, EPI_ISL_699678, EPI_ISL_699679, EPI_ISL_699680, EPI_ISL_699681, EPI_ISL_699682, EPI_ISL_699683, EPI_ISL_699684, EPI_ISL_699685, EPI_ISL_699686, EPI_ISL_699687, EPI_ISL_699688, EPI_ISL_699689, EPI_ISL_699690, EPI_ISL_699691, EPI_ISL_699692, EPI_ISL_699693, EPI_ISL_699694, EPI_ISL_699695, EPI_ISL_699696, EPI_ISL_699697, EPI_ISL_699698, EPI_ISL_699699, EPI_ISL_699700, EPI_ISL_699701, EPI_ISL_699702, EPI_ISL_699703, EPI_ISL_699704, EPI_ISL_699705, EPI_ISL_699706, EPI_ISL_699707, EPI_ISL_699708, EPI_ISL_699709, EPI_ISL_699710, EPI_ISL_699711, EPI_ISL_699712, EPI_ISL_699713, EPI_ISL_699714, EPI_ISL_699715, EPI_ISL_699716, EPI_ISL_699717, EPI_ISL_699718, EPI_ISL_699719, EPI_ISL_699720, EPI_ISL_699721, EPI_ISL_699722, EPI_ISL_699723, EPI_ISL_699724, EPI_ISL_699725, EPI_ISL_699726, EPI_ISL_699727, EPI_ISL_699728, EPI_ISL_699729, EPI_ISL_699730, EPI_ISL_699731, EPI_ISL_699732, EPI_ISL_699733, EPI_ISL_699734, EPI_ISL_699735, EPI_ISL_699736, EPI_ISL_699737, EPI_ISL_699738, EPI_ISL_699739, EPI_ISL_699740, EPI_ISL_699741, EPI_ISL_699742, EPI_ISL_699743, EPI_ISL_699744, EPI_ISL_699745, EPI_ISL_699746, EPI_ISL_699747, EPI_ISL_699748, EPI_ISL_699749, EPI_ISL_699750, EPI_ISL_699751, EPI_ISL_699752, EPI_ISL_699753, EPI_ISL_699754, EPI_ISL_699755, EPI_ISL_699756, EPI_ISL_699757, EPI_ISL_699758, EPI_ISL_699759, EPI_ISL_699760, EPI_ISL_699761, EPI_ISL_699762, EPI_ISL_699763, EPI_ISL_699764, EPI_ISL_699765, EPI_ISL_699766, EPI_ISL_699767, EPI_ISL_699768, EPI_ISL_699769, EPI_ISL_699770, EPI_ISL_699771, EPI_ISL_699772, EPI_ISL_699773, EPI_ISL_699774, EPI_ISL_699775, EPI_ISL_699776, EPI_ISL_699777, EPI_ISL_699778, EPI_ISL_699779, EPI_ISL_699780, EPI_ISL_699781, EPI_ISL_699782, EPI_ISL_699783, EPI_ISL_699784, EPI_ISL_699785, EPI_ISL_699786, EPI_ISL_699787, EPI_ISL_699788, EPI_ISL_699789, EPI_ISL_699790, EPI_ISL_699791, EPI_ISL_699792, EPI_ISL_699793, EPI_ISL_699794, EPI_ISL_699795, EPI_ISL_699796, EPI_ISL_699797, EPI_ISL_699798, EPI_ISL_699799, EPI_ISL_699800, EPI_ISL_699801, EPI_ISL_699802, EPI_ISL_699803, EPI_ISL_699804, EPI_ISL_699805, EPI_ISL_699806, EPI_ISL_699807, EPI_ISL_699808, EPI_ISL_699809, EPI_ISL_699810, EPI_ISL_699811, EPI_ISL_699812, EPI_ISL_699813, EPI_ISL_699814, EPI_ISL_699815, EPI_ISL_699816, EPI_ISL_699817, EPI_ISL_699818, EPI_ISL_699819, EPI_ISL_699820, EPI_ISL_699821, EPI_ISL_699822, EPI_ISL_699823, EPI_ISL_699824, EPI_ISL_699825, EPI_ISL_699826, EPI_ISL_699827, EPI_ISL_699828, EPI_ISL_699829, EPI_ISL_699830, EPI_ISL_699831, EPI_ISL_699832, EPI_ISL_699833, EPI_ISL_699834, EPI_ISL_699835, EPI_ISL_699836, EPI_ISL_699837, EPI_ISL_699838, EPI_ISL_699839, EPI_ISL_699840, EPI_ISL_699841, EPI_ISL_699842, EPI_ISL_699843, EPI_ISL_699844, EPI_ISL_699845, EPI_ISL_699846, EPI_ISL_699847, EPI_ISL_699848, EPI_ISL_699849, EPI_ISL_699850, EPI_ISL_699851, EPI_ISL_699852, EPI_ISL_699853, EPI_ISL_699854, EPI_ISL_699855, EPI_ISL_699856, EPI_ISL_699857, EPI_ISL_699858, EPI_ISL_699859, EPI_ISL_699860, EPI_ISL_699861, EPI_ISL_699862, EPI_ISL_699863, EPI_ISL_699864, EPI_ISL_699865, EPI_ISL_699866, EPI_ISL_699867, EPI_ISL_699868, EPI_ISL_699869, EPI_ISL_699870, EPI_ISL_699871, EPI_ISL_699872, EPI_ISL_699873, EPI_ISL_699874, EPI_ISL_699875, EPI_ISL_699876, EPI_ISL_699877, EPI_ISL_699878, EPI_ISL_699879, EPI_ISL_699880, EPI_ISL_699881, EPI_ISL_699882, EPI_ISL_699883, EPI_ISL_699884, EPI_ISL_699885, EPI_ISL_699886, EPI_ISL_699887, EPI_ISL_699888, EPI_ISL_699889, EPI_ISL_699890, EPI_ISL_699891, EPI_ISL_699892, EPI_ISL_699893, EPI_ISL_699894, EPI_ISL_699895, EPI_ISL_699896, EPI_ISL_699897, EPI_ISL_699898, EPI_ISL_699899, EPI_ISL_699900, EPI_ISL_699901, EPI_ISL_699902, EPI_ISL_699903, EPI_ISL_699904, EPI_ISL_699905, EPI_ISL_699906, EPI_ISL_699907, EPI_ISL_699908, EPI_ISL_699909, EPI_ISL_699910, EPI_ISL_699911, EPI_ISL_699912, EPI_ISL_699913, EPI_ISL_699914, EPI_ISL_699915, EPI_ISL_699916, EPI_ISL_699917, EPI_ISL_699918, EPI_ISL_699919, EPI_ISL_699920, EPI_ISL_699921, EPI_ISL_699922, EPI_ISL_699923, EPI_ISL_699924, EPI_ISL_699925, EPI_ISL_699926, EPI_ISL_699927, EPI_ISL_699928, EPI_ISL_699929, EPI_ISL_699930, EPI_ISL_699931, EPI_ISL_699932, EPI_ISL_699933, EPI_ISL_699934, EPI_ISL_699935, EPI_ISL_699936, EPI_ISL_699937, EPI_ISL_699938, EPI_ISL_699939, EPI_ISL_699940, EPI_ISL_699941, EPI_ISL_699942, EPI_ISL_699943, EPI_ISL_699944, EPI_ISL_699945, EPI_ISL_699946, EPI_ISL_699947, EPI_ISL_699948, EPI_ISL_699949, EPI_ISL_699950, EPI_ISL_699951, EPI_ISL_699952, EPI_ISL_699953, EPI_ISL_699954, EPI_ISL_699955, EPI_ISL_699956, EPI_ISL_699957, EPI_ISL_699958, EPI_ISL_699959, EPI_ISL_699960, EPI_ISL_699961, EPI_ISL_699962, EPI_ISL_699963, EPI_ISL_699964, EPI_ISL_699965, EPI_ISL_699966, EPI_ISL_699967, EPI_ISL_699968, EPI_ISL_699969, EPI_ISL_699970, EPI_ISL_699971, EPI_ISL_699972, EPI_ISL_699973, EPI_ISL_699974, EPI_ISL_699975, EPI_ISL_699976, EPI_ISL_699977, EPI_ISL_699978, EPI_ISL_699979, EPI_ISL_699980, EPI_ISL_699981, EPI_ISL_699982, EPI_ISL_699983, EPI_ISL_699984, EPI_ISL_699985, EPI_ISL_699986, EPI_ISL_699987, EPI_ISL_699988, EPI_ISL_699989, EPI_ISL_699990, EPI_ISL_699991, EPI_ISL_699992, EPI_ISL_699993, EPI_ISL_699994, EPI_ISL_699995, EPI_ISL_699996, EPI_ISL_699997, EPI_ISL_699998, EPI_ISL_699999, EPI_ISL_700000, EPI_ISL_700001, EPI_ISL_700002, EPI_ISL_700003, EPI_ISL_700004, EPI_ISL_700005, EPI_ISL_700006, EPI_ISL_700007, EPI_ISL_700008, EPI_ISL_700009, EPI_ISL_700010, EPI_ISL_700011, EPI_ISL_700012, EPI_ISL_700013, EPI_ISL_700014, EPI_ISL_700015, EPI_ISL_700016, EPI_ISL_700017, EPI_ISL_700018, EPI_ISL_700019, EPI_ISL_700020, EPI_ISL_700021, EPI_ISL_700022, EPI_ISL_700023, EPI_ISL_700024, EPI_ISL_700025, EPI_ISL_700026, EPI_ISL_700027, EPI_ISL_700028, EPI_ISL_700029, EPI_ISL_700030, EPI_ISL_700031, EPI_ISL_700032, EPI_ISL_700033, EPI_ISL_700034, EPI_ISL_700035, EPI_ISL_700036, EPI_ISL_700037, EPI_ISL_700038, EPI_ISL_700039, EPI_ISL_700040, EPI_ISL_700041, EPI_ISL_700042, EPI_ISL_700043, EPI_ISL_700044, EPI_ISL_700045, EPI_ISL_700046, EPI_ISL_700047, EPI_ISL_700048, EPI_ISL_700049, EPI_ISL_700050, EPI_ISL_700051, EPI_ISL_700052, EPI_ISL_700053, EPI_ISL_700054, EPI_ISL_700055, EPI_ISL_700056, EPI_ISL_700057, EPI_ISL_700058, EPI_ISL_700059, EPI_ISL_700060, EPI_ISL_700061, EPI_ISL_700062, EPI_ISL_700063, EPI_ISL_700064, EPI_ISL_700065, EPI_ISL_700066, EPI_ISL_700067, EPI_ISL_700068, EPI_ISL_700069, EPI_ISL_700070, EPI_ISL_700071, |           |                                                                                                                                                                       |                                                                                                                                                                                                                                                                                                                                                                          |                                                                                                                                                                                                                                                                                                                                                                                                                                         |







|                                                                                                                                                                                                                                                                                                                                                                                                                                                                                                                                                                                                                                                                                                                                                                                                                |           |                                                                                                                                                                       |                                                                                                                                                                                                                                                                                                                                                                          |                                                                                                                                                                                                                                                                                                                          |
|----------------------------------------------------------------------------------------------------------------------------------------------------------------------------------------------------------------------------------------------------------------------------------------------------------------------------------------------------------------------------------------------------------------------------------------------------------------------------------------------------------------------------------------------------------------------------------------------------------------------------------------------------------------------------------------------------------------------------------------------------------------------------------------------------------------|-----------|-----------------------------------------------------------------------------------------------------------------------------------------------------------------------|--------------------------------------------------------------------------------------------------------------------------------------------------------------------------------------------------------------------------------------------------------------------------------------------------------------------------------------------------------------------------|--------------------------------------------------------------------------------------------------------------------------------------------------------------------------------------------------------------------------------------------------------------------------------------------------------------------------|
| EPI_ISL_701985, EPI_ISL_701991, EPI_ISL_701999, EPI_ISL_702005, EPI_ISL_702013, EPI_ISL_702384, EPI_ISL_702388, EPI_ISL_702402, EPI_ISL_702407, EPI_ISL_702409, EPI_ISL_702425, EPI_ISL_702427, EPI_ISL_702477, EPI_ISL_702483, EPI_ISL_702486, EPI_ISL_702511, EPI_ISL_702514, EPI_ISL_702563, EPI_ISL_702621, EPI_ISL_702645, EPI_ISL_702650, EPI_ISL_702666, EPI_ISL_702678, EPI_ISL_702696, EPI_ISL_702724, EPI_ISL_702732, EPI_ISL_702740, EPI_ISL_702780, EPI_ISL_702785, EPI_ISL_702904, EPI_ISL_702906, EPI_ISL_702916, EPI_ISL_702918, EPI_ISL_702951, EPI_ISL_702962, EPI_ISL_702991, EPI_ISL_702993, EPI_ISL_703017, EPI_ISL_703042, EPI_ISL_703068, EPI_ISL_703075, EPI_ISL_703116, EPI_ISL_703159, EPI_ISL_703166, EPI_ISL_703168, EPI_ISL_703226, EPI_ISL_703236, EPI_ISL_703244, EPI_ISL_703248 | see above | Lighthouse Lab in Alderley Park                                                                                                                                       | Wellcome Sanger Institute for the COVID-19 Genomics UK (COG-UK) Consortium                                                                                                                                                                                                                                                                                               | Jacquelyn Wynn, Mairead Hyland, The Lighthouse Lab in Alderley Park and Alex Alderton, Roberto Amato, Sonia Goncalves, Ewan Harrison, David K. Jackson, Ian Johnston, Dominic Kwiatkowski, Cordelia Langford, John Sillitoe on behalf of the Wellcome Sanger Institute COVID-19 Surveillance Team                        |
| EPI_ISL_703262, EPI_ISL_703290, EPI_ISL_703291                                                                                                                                                                                                                                                                                                                                                                                                                                                                                                                                                                                                                                                                                                                                                                 |           | Lighthouse Lab in Glasgow                                                                                                                                             | Wellcome Sanger Institute for the COVID-19 Genomics UK (COG-UK) Consortium                                                                                                                                                                                                                                                                                               | Harper VanSteenhouse, Yumi Kasai, David Gray, Carol Clugston, Anna Dominiczak and Alex Alderton, Roberto Amato, Sonia Goncalves, Ewan Harrison, David K. Jackson, Ian Johnston, Dominic Kwiatkowski, Cordelia Langford, John Sillitoe on behalf of the Wellcome Sanger Institute COVID-19 Surveillance Team              |
| EPI_ISL_703301                                                                                                                                                                                                                                                                                                                                                                                                                                                                                                                                                                                                                                                                                                                                                                                                 |           | Lighthouse Lab in Alderley Park                                                                                                                                       | Wellcome Sanger Institute for the COVID-19 Genomics UK (COG-UK) Consortium                                                                                                                                                                                                                                                                                               | Jacquelyn Wynn, Mairead Hyland, The Lighthouse Lab in Alderley Park and Alex Alderton, Roberto Amato, Sonia Goncalves, Ewan Harrison, David K. Jackson, Ian Johnston, Dominic Kwiatkowski, Cordelia Langford, John Sillitoe on behalf of the Wellcome Sanger Institute COVID-19 Surveillance Team                        |
| EPI_ISL_703334                                                                                                                                                                                                                                                                                                                                                                                                                                                                                                                                                                                                                                                                                                                                                                                                 |           | Lighthouse Lab in Glasgow                                                                                                                                             | Wellcome Sanger Institute for the COVID-19 Genomics UK (COG-UK) Consortium                                                                                                                                                                                                                                                                                               | Harper VanSteenhouse, Yumi Kasai, David Gray, Carol Clugston, Anna Dominiczak and Alex Alderton, Roberto Amato, Sonia Goncalves, Ewan Harrison, David K. Jackson, Ian Johnston, Dominic Kwiatkowski, Cordelia Langford, John Sillitoe on behalf of the Wellcome Sanger Institute COVID-19 Surveillance Team              |
| EPI_ISL_703339, EPI_ISL_703342, EPI_ISL_703368, EPI_ISL_703373, EPI_ISL_703386, EPI_ISL_703441                                                                                                                                                                                                                                                                                                                                                                                                                                                                                                                                                                                                                                                                                                                 |           | Lighthouse Lab in Alderley Park                                                                                                                                       | Wellcome Sanger Institute for the COVID-19 Genomics UK (COG-UK) Consortium                                                                                                                                                                                                                                                                                               | Jacquelyn Wynn, Mairead Hyland, The Lighthouse Lab in Alderley Park and Alex Alderton, Roberto Amato, Sonia Goncalves, Ewan Harrison, David K. Jackson, Ian Johnston, Dominic Kwiatkowski, Cordelia Langford, John Sillitoe on behalf of the Wellcome Sanger Institute COVID-19 Surveillance Team                        |
| EPI_ISL_703442, EPI_ISL_703444                                                                                                                                                                                                                                                                                                                                                                                                                                                                                                                                                                                                                                                                                                                                                                                 |           | Lighthouse Lab in Glasgow                                                                                                                                             | Wellcome Sanger Institute for the COVID-19 Genomics UK (COG-UK) Consortium                                                                                                                                                                                                                                                                                               | Harper VanSteenhouse, Yumi Kasai, David Gray, Carol Clugston, Anna Dominiczak and Alex Alderton, Roberto Amato, Sonia Goncalves, Ewan Harrison, David K. Jackson, Ian Johnston, Dominic Kwiatkowski, Cordelia Langford, John Sillitoe on behalf of the Wellcome Sanger Institute COVID-19 Surveillance Team              |
| EPI_ISL_703470, EPI_ISL_703478                                                                                                                                                                                                                                                                                                                                                                                                                                                                                                                                                                                                                                                                                                                                                                                 |           | Lighthouse Lab in Alderley Park                                                                                                                                       | Wellcome Sanger Institute for the COVID-19 Genomics UK (COG-UK) Consortium                                                                                                                                                                                                                                                                                               | Jacquelyn Wynn, Mairead Hyland, The Lighthouse Lab in Alderley Park and Alex Alderton, Roberto Amato, Sonia Goncalves, Ewan Harrison, David K. Jackson, Ian Johnston, Dominic Kwiatkowski, Cordelia Langford, John Sillitoe on behalf of the Wellcome Sanger Institute COVID-19 Surveillance Team                        |
| EPI_ISL_703514, EPI_ISL_703522                                                                                                                                                                                                                                                                                                                                                                                                                                                                                                                                                                                                                                                                                                                                                                                 |           | Lighthouse Lab in Glasgow                                                                                                                                             | Wellcome Sanger Institute for the COVID-19 Genomics UK (COG-UK) Consortium                                                                                                                                                                                                                                                                                               | Harper VanSteenhouse, Yumi Kasai, David Gray, Carol Clugston, Anna Dominiczak and Alex Alderton, Roberto Amato, Sonia Goncalves, Ewan Harrison, David K. Jackson, Ian Johnston, Dominic Kwiatkowski, Cordelia Langford, John Sillitoe on behalf of the Wellcome Sanger Institute COVID-19 Surveillance Team              |
| EPI_ISL_703523, EPI_ISL_703547                                                                                                                                                                                                                                                                                                                                                                                                                                                                                                                                                                                                                                                                                                                                                                                 |           | Lighthouse Lab in Alderley Park                                                                                                                                       | Wellcome Sanger Institute for the COVID-19 Genomics UK (COG-UK) Consortium                                                                                                                                                                                                                                                                                               | Jacquelyn Wynn, Mairead Hyland, The Lighthouse Lab in Alderley Park and Alex Alderton, Roberto Amato, Sonia Goncalves, Ewan Harrison, David K. Jackson, Ian Johnston, Dominic Kwiatkowski, Cordelia Langford, John Sillitoe on behalf of the Wellcome Sanger Institute COVID-19 Surveillance Team                        |
| EPI_ISL_703578, EPI_ISL_703612, EPI_ISL_703645, EPI_ISL_703673                                                                                                                                                                                                                                                                                                                                                                                                                                                                                                                                                                                                                                                                                                                                                 |           | Lighthouse Lab in Glasgow                                                                                                                                             | Wellcome Sanger Institute for the COVID-19 Genomics UK (COG-UK) Consortium                                                                                                                                                                                                                                                                                               | Harper VanSteenhouse, Yumi Kasai, David Gray, Carol Clugston, Anna Dominiczak and Alex Alderton, Roberto Amato, Sonia Goncalves, Ewan Harrison, David K. Jackson, Ian Johnston, Dominic Kwiatkowski, Cordelia Langford, John Sillitoe on behalf of the Wellcome Sanger Institute COVID-19 Surveillance Team              |
| EPI_ISL_703675, EPI_ISL_703803                                                                                                                                                                                                                                                                                                                                                                                                                                                                                                                                                                                                                                                                                                                                                                                 |           | Lighthouse Lab in Alderley Park                                                                                                                                       | Wellcome Sanger Institute for the COVID-19 Genomics UK (COG-UK) Consortium                                                                                                                                                                                                                                                                                               | Jacquelyn Wynn, Mairead Hyland, The Lighthouse Lab in Alderley Park and Alex Alderton, Roberto Amato, Sonia Goncalves, Ewan Harrison, David K. Jackson, Ian Johnston, Dominic Kwiatkowski, Cordelia Langford, John Sillitoe on behalf of the Wellcome Sanger Institute COVID-19 Surveillance Team                        |
| EPI_ISL_703819, EPI_ISL_703824, EPI_ISL_703828, EPI_ISL_703830, EPI_ISL_703864, EPI_ISL_703867, EPI_ISL_703877, EPI_ISL_703892, EPI_ISL_703907, EPI_ISL_703954, EPI_ISL_703965, EPI_ISL_703976, EPI_ISL_703978, EPI_ISL_703988, EPI_ISL_703989, EPI_ISL_703991, EPI_ISL_703994, EPI_ISL_703996, EPI_ISL_704059, EPI_ISL_704088, EPI_ISL_704109, EPI_ISL_704113, EPI_ISL_704116, EPI_ISL_704146, EPI_ISL_704180, EPI_ISL_704186, EPI_ISL_704237, EPI_ISL_704248, EPI_ISL_704275, EPI_ISL_704278, EPI_ISL_704290, EPI_ISL_704306, EPI_ISL_704324, EPI_ISL_704338, EPI_ISL_704405, EPI_ISL_704412, EPI_ISL_704417, EPI_ISL_704429, EPI_ISL_704451, EPI_ISL_704534, EPI_ISL_704541, EPI_ISL_704571, EPI_ISL_704649                                                                                                 | see above | Lighthouse Lab in Glasgow                                                                                                                                             | Wellcome Sanger Institute for the COVID-19 Genomics UK (COG-UK) Consortium                                                                                                                                                                                                                                                                                               | Harper VanSteenhouse, Yumi Kasai, David Gray, Carol Clugston, Anna Dominiczak and Alex Alderton, Roberto Amato, Sonia Goncalves, Ewan Harrison, David K. Jackson, Ian Johnston, Dominic Kwiatkowski, Cordelia Langford, John Sillitoe on behalf of the Wellcome Sanger Institute COVID-19 Surveillance Team              |
| EPI_ISL_707697, EPI_ISL_707698, EPI_ISL_707699, EPI_ISL_707700                                                                                                                                                                                                                                                                                                                                                                                                                                                                                                                                                                                                                                                                                                                                                 |           | 1-Laboratory of Microbiology, National Reference Lab, Charles Nicolle Hospital; 2-University of Tunis ElManar, Faculty of Medicine of Tunis, LR99ES09, Tunis, Tunisia | 1-Clinical and Experimental Pharmacology Lab, LR16SP02, National Center of Pharmacovigilance, University of Tunis El Manar, Tunis, Tunisia. 2-Neurodegenerative diseases and psychiatric troubles, LR18SP03, Razi Hospital, University of Tunis El Manar, Tunis, Tunisia. 3- Ministry of Health, National Observatory of New and Emerging Diseases, 1006, Tunis, Tunisia | Ilhem Boutiba-Ben Boubaker, Sameh Trabelsi, Nissaf Ben Alaya, Maher Kharrat, Alia Ben Kahla, Jalila Ben Khelil, Salma Abid, Sana Ferjani, Mouna Ben Sassi, Mouna Safer, Zaineb Hamzaoui, Habiba Ben Romdhane, Souissi Amira, Rouaa Ben Othman, Hanen El Jebari, Asma Ferjani, Gaies Emma, Riadh Daghfous, Riadh Gouider. |
| EPI_ISL_707791, EPI_ISL_707792, EPI_ISL_707793                                                                                                                                                                                                                                                                                                                                                                                                                                                                                                                                                                                                                                                                                                                                                                 |           | 1-Laboratory of Microbiology, National Reference Lab, Charles Nicolle Hospital; 2-University of Tunis ElManar, Faculty of Medicine of Tunis, LR99ES09, Tunis, Tunisia | 1-Clinical and Experimental Pharmacology Lab, LR16SP02, National Center of Pharmacovigilance, University of Tunis El Manar, Tunis, Tunisia. 2-Neurodegenerative diseases and psychiatric troubles, LR18SP03, Razi Hospital, University of Tunis El Manar, Tunis, Tunisia. 3- Ministry of Health, National Observatory of New and Emerging Diseases, 1006, Tunis, Tunisia | Ilhem Boutiba-Ben Boubaker, Sameh Trabelsi, Nissaf Ben Alaya, Maher Kharrat, Alia Ben Kahla, Jalila Ben Khelil, Salma Abid, Sana Ferjani, Mouna Ben Sassi, Mouna Safer, Awatef El MOussi, Habiba Ben Romdhane, Souissi Amira, Ines Mdini, Hanen El Jebari, Asma Ferjani, Gaies Emma, Riadh Daghfous, Riadh Gouider.      |
| EPI_ISL_708892, EPI_ISL_708903, EPI_ISL_708924, EPI_ISL_708929, EPI_ISL_708934, EPI_ISL_708939, EPI_ISL_708949                                                                                                                                                                                                                                                                                                                                                                                                                                                                                                                                                                                                                                                                                                 |           | Lighthouse Lab in Alderley Park                                                                                                                                       | Wellcome Sanger Institute for the COVID-19 Genomics UK (COG-UK) Consortium                                                                                                                                                                                                                                                                                               | Jacquelyn Wynn, Mairead Hyland, The Lighthouse Lab in Alderley Park and Alex Alderton, Roberto Amato, Sonia Goncalves, Ewan Harrison, David K. Jackson, Ian Johnston, Dominic Kwiatkowski, Cordelia Langford, John Sillitoe on behalf of the Wellcome Sanger Institute COVID-19 Surveillance Team                        |
| EPI_ISL_708953                                                                                                                                                                                                                                                                                                                                                                                                                                                                                                                                                                                                                                                                                                                                                                                                 |           | Lighthouse Lab in Glasgow                                                                                                                                             | Wellcome Sanger Institute for the COVID-19 Genomics UK (COG-UK) Consortium                                                                                                                                                                                                                                                                                               | Harper VanSteenhouse, Yumi Kasai, David Gray, Carol Clugston, Anna Dominiczak and Alex Alderton, Roberto Amato, Sonia Goncalves, Ewan Harrison, David K. Jackson, Ian Johnston, Dominic Kwiatkowski, Cordelia Langford, John Sillitoe on behalf of the Wellcome Sanger Institute COVID-19 Surveillance Team              |
| EPI_ISL_708959, EPI_ISL_708962, EPI_ISL_708965                                                                                                                                                                                                                                                                                                                                                                                                                                                                                                                                                                                                                                                                                                                                                                 |           | Lighthouse Lab in Alderley Park                                                                                                                                       | Wellcome Sanger Institute for the COVID-19 Genomics UK (COG-UK) Consortium                                                                                                                                                                                                                                                                                               | Jacquelyn Wynn, Mairead Hyland, The Lighthouse Lab in Alderley Park and Alex Alderton, Roberto Amato, Sonia Goncalves, Ewan Harrison, David K. Jackson, Ian Johnston, Dominic Kwiatkowski, Cordelia Langford, John Sillitoe on behalf of the Wellcome Sanger Institute COVID-19 Surveillance Team                        |
| EPI_ISL_709004, EPI_ISL_709009, EPI_ISL_709058, EPI_ISL_709065, EPI_ISL_709078, EPI_ISL_709107, EPI_ISL_709191, EPI_ISL_709264                                                                                                                                                                                                                                                                                                                                                                                                                                                                                                                                                                                                                                                                                 |           | Lighthouse Lab in Glasgow                                                                                                                                             | Wellcome Sanger Institute for the COVID-19 Genomics UK (COG-UK) Consortium                                                                                                                                                                                                                                                                                               | Harper VanSteenhouse, Yumi Kasai, David Gray, Carol Clugston, Anna Dominiczak and Alex Alderton, Roberto Amato, Sonia Goncalves, Ewan Harrison, David K. Jackson, Ian Johnston, Dominic Kwiatkowski, Cordelia Langford, John Sillitoe on behalf of the Wellcome Sanger Institute COVID-19 Surveillance Team              |
| EPI_ISL_709305, EPI_ISL_709308                                                                                                                                                                                                                                                                                                                                                                                                                                                                                                                                                                                                                                                                                                                                                                                 |           | Lighthouse Lab in Alderley Park                                                                                                                                       | Wellcome Sanger Institute for the COVID-19 Genomics UK (COG-UK) Consortium                                                                                                                                                                                                                                                                                               | Jacquelyn Wynn, Mairead Hyland, The Lighthouse Lab in Alderley Park and Alex Alderton, Roberto Amato, Sonia Goncalves, Ewan Harrison, David K. Jackson, Ian Johnston, Dominic Kwiatkowski, Cordelia Langford, John Sillitoe on behalf of the Wellcome Sanger Institute COVID-19 Surveillance Team                        |
| EPI_ISL_709332                                                                                                                                                                                                                                                                                                                                                                                                                                                                                                                                                                                                                                                                                                                                                                                                 |           | Lighthouse Lab in Glasgow                                                                                                                                             | Wellcome Sanger Institute for the COVID-19 Genomics UK (COG-UK) Consortium                                                                                                                                                                                                                                                                                               | Harper VanSteenhouse, Yumi Kasai, David Gray, Carol Clugston, Anna Dominiczak and Alex Alderton, Roberto Amato, Sonia Goncalves, Ewan Harrison, David K. Jackson, Ian Johnston, Dominic Kwiatkowski, Cordelia Langford, John Sillitoe on behalf of the Wellcome Sanger Institute COVID-19 Surveillance Team              |
| EPI_ISL_709340, EPI_ISL_709349                                                                                                                                                                                                                                                                                                                                                                                                                                                                                                                                                                                                                                                                                                                                                                                 |           | Lighthouse Lab in Alderley Park                                                                                                                                       | Wellcome Sanger Institute for the COVID-19 Genomics UK (COG-UK) Consortium                                                                                                                                                                                                                                                                                               | Jacquelyn Wynn, Mairead Hyland, The Lighthouse Lab in Alderley Park and Alex Alderton, Roberto Amato, Sonia Goncalves, Ewan Harrison, David K. Jackson, Ian Johnston, Dominic Kwiatkowski, Cordelia Langford, John Sillitoe on behalf of the Wellcome Sanger Institute COVID-19 Surveillance Team                        |
| EPI_ISL_709378, EPI_ISL_709392                                                                                                                                                                                                                                                                                                                                                                                                                                                                                                                                                                                                                                                                                                                                                                                 |           | Lighthouse Lab in Glasgow                                                                                                                                             | Wellcome Sanger Institute for the COVID-19 Genomics UK (COG-UK) Consortium                                                                                                                                                                                                                                                                                               | Harper VanSteenhouse, Yumi Kasai, David Gray, Carol Clugston, Anna Dominiczak and Alex Alderton, Roberto Amato, Sonia Goncalves, Ewan Harrison, David K. Jackson, Ian Johnston, Dominic Kwiatkowski, Cordelia Langford, John Sillitoe on behalf of the Wellcome Sanger Institute COVID-19 Surveillance Team              |
| EPI_ISL_709416, EPI_ISL_709418                                                                                                                                                                                                                                                                                                                                                                                                                                                                                                                                                                                                                                                                                                                                                                                 |           | Lighthouse Lab in Alderley Park                                                                                                                                       | Wellcome Sanger Institute for the COVID-19 Genomics UK                                                                                                                                                                                                                                                                                                                   | Jacquelyn Wynn, Mairead Hyland, The Lighthouse Lab in Alderley Park and Alex Alderton, Roberto Amato, Sonia Goncalves, Ewan Harrison, David K.                                                                                                                                                                           |





|                                                                                                                                                                                                                                                                                                                                                                                                                                                                                                                                                                                                                                                                                                                                                                                                                                                                                                                                                                                                                                                                                                                                                                                                                                                                                                                                                                                                                                                                                                                                                                                                                                                                                                                                                                                                                                                                                                                                                |                                                                                                                                                                       |                                                                                                                                                                                                                                                                                                                                                                          |                                                                                                                                                                                                                                                                                                                          |
|------------------------------------------------------------------------------------------------------------------------------------------------------------------------------------------------------------------------------------------------------------------------------------------------------------------------------------------------------------------------------------------------------------------------------------------------------------------------------------------------------------------------------------------------------------------------------------------------------------------------------------------------------------------------------------------------------------------------------------------------------------------------------------------------------------------------------------------------------------------------------------------------------------------------------------------------------------------------------------------------------------------------------------------------------------------------------------------------------------------------------------------------------------------------------------------------------------------------------------------------------------------------------------------------------------------------------------------------------------------------------------------------------------------------------------------------------------------------------------------------------------------------------------------------------------------------------------------------------------------------------------------------------------------------------------------------------------------------------------------------------------------------------------------------------------------------------------------------------------------------------------------------------------------------------------------------|-----------------------------------------------------------------------------------------------------------------------------------------------------------------------|--------------------------------------------------------------------------------------------------------------------------------------------------------------------------------------------------------------------------------------------------------------------------------------------------------------------------------------------------------------------------|--------------------------------------------------------------------------------------------------------------------------------------------------------------------------------------------------------------------------------------------------------------------------------------------------------------------------|
|                                                                                                                                                                                                                                                                                                                                                                                                                                                                                                                                                                                                                                                                                                                                                                                                                                                                                                                                                                                                                                                                                                                                                                                                                                                                                                                                                                                                                                                                                                                                                                                                                                                                                                                                                                                                                                                                                                                                                |                                                                                                                                                                       | (COG-UK) Consortium                                                                                                                                                                                                                                                                                                                                                      | David K. Jackson, Ian Johnston, Dominic Kwiatkowski, Cordelia Langford, John Sillitoe on behalf of the Wellcome Sanger Institute COVID-19 Surveillance Team                                                                                                                                                              |
| EPI_ISL_731474, EPI_ISL_731502                                                                                                                                                                                                                                                                                                                                                                                                                                                                                                                                                                                                                                                                                                                                                                                                                                                                                                                                                                                                                                                                                                                                                                                                                                                                                                                                                                                                                                                                                                                                                                                                                                                                                                                                                                                                                                                                                                                 | Lighthouse Lab in Alderley Park                                                                                                                                       | Wellcome Sanger Institute for the COVID-19 Genomics UK (COG-UK) Consortium                                                                                                                                                                                                                                                                                               | Jacquelyn Wynn, Mairead Hyland, The Lighthouse Lab in Alderley Park and Alex Alderton, Roberto Amato, Sonia Goncalves, Ewan Harrison, David K. Jackson, Ian Johnston, Dominic Kwiatkowski, Cordelia Langford, John Sillitoe on behalf of the Wellcome Sanger Institute COVID-19 Surveillance Team                        |
| EPI_ISL_731519                                                                                                                                                                                                                                                                                                                                                                                                                                                                                                                                                                                                                                                                                                                                                                                                                                                                                                                                                                                                                                                                                                                                                                                                                                                                                                                                                                                                                                                                                                                                                                                                                                                                                                                                                                                                                                                                                                                                 | Lighthouse Lab in Glasgow                                                                                                                                             | Wellcome Sanger Institute for the COVID-19 Genomics UK (COG-UK) Consortium                                                                                                                                                                                                                                                                                               | Harper VanSteenhouse, Yumi Kasai, David Gray, Carol Clugston, Anna Dominiczak and Alex Alderton, Roberto Amato, Sonia Goncalves, Ewan Harrison, David K. Jackson, Ian Johnston, Dominic Kwiatkowski, Cordelia Langford, John Sillitoe on behalf of the Wellcome Sanger Institute COVID-19 Surveillance Team              |
| EPI_ISL_731534, EPI_ISL_731547                                                                                                                                                                                                                                                                                                                                                                                                                                                                                                                                                                                                                                                                                                                                                                                                                                                                                                                                                                                                                                                                                                                                                                                                                                                                                                                                                                                                                                                                                                                                                                                                                                                                                                                                                                                                                                                                                                                 | Lighthouse Lab in Alderley Park                                                                                                                                       | Wellcome Sanger Institute for the COVID-19 Genomics UK (COG-UK) Consortium                                                                                                                                                                                                                                                                                               | Jacquelyn Wynn, Mairead Hyland, The Lighthouse Lab in Alderley Park and Alex Alderton, Roberto Amato, Sonia Goncalves, Ewan Harrison, David K. Jackson, Ian Johnston, Dominic Kwiatkowski, Cordelia Langford, John Sillitoe on behalf of the Wellcome Sanger Institute COVID-19 Surveillance Team                        |
| EPI_ISL_731548                                                                                                                                                                                                                                                                                                                                                                                                                                                                                                                                                                                                                                                                                                                                                                                                                                                                                                                                                                                                                                                                                                                                                                                                                                                                                                                                                                                                                                                                                                                                                                                                                                                                                                                                                                                                                                                                                                                                 | Lighthouse Lab in Glasgow                                                                                                                                             | Wellcome Sanger Institute for the COVID-19 Genomics UK (COG-UK) Consortium                                                                                                                                                                                                                                                                                               | Harper VanSteenhouse, Yumi Kasai, David Gray, Carol Clugston, Anna Dominiczak and Alex Alderton, Roberto Amato, Sonia Goncalves, Ewan Harrison, David K. Jackson, Ian Johnston, Dominic Kwiatkowski, Cordelia Langford, John Sillitoe on behalf of the Wellcome Sanger Institute COVID-19 Surveillance Team              |
| EPI_ISL_731555, EPI_ISL_731557, EPI_ISL_731567, EPI_ISL_731611, EPI_ISL_731680, EPI_ISL_731685, EPI_ISL_731712, EPI_ISL_731721, EPI_ISL_731724, EPI_ISL_731727, EPI_ISL_731732, EPI_ISL_731738, EPI_ISL_731740, EPI_ISL_731752, EPI_ISL_731755, EPI_ISL_731758, EPI_ISL_731770, EPI_ISL_731778, EPI_ISL_731800, EPI_ISL_731816, EPI_ISL_731818, EPI_ISL_731820, EPI_ISL_731828, EPI_ISL_731841, EPI_ISL_731853, EPI_ISL_731859, EPI_ISL_731864, EPI_ISL_731879, EPI_ISL_731880                                                                                                                                                                                                                                                                                                                                                                                                                                                                                                                                                                                                                                                                                                                                                                                                                                                                                                                                                                                                                                                                                                                                                                                                                                                                                                                                                                                                                                                                 |                                                                                                                                                                       |                                                                                                                                                                                                                                                                                                                                                                          |                                                                                                                                                                                                                                                                                                                          |
| see above                                                                                                                                                                                                                                                                                                                                                                                                                                                                                                                                                                                                                                                                                                                                                                                                                                                                                                                                                                                                                                                                                                                                                                                                                                                                                                                                                                                                                                                                                                                                                                                                                                                                                                                                                                                                                                                                                                                                      | Lighthouse Lab in Alderley Park                                                                                                                                       | Wellcome Sanger Institute for the COVID-19 Genomics UK (COG-UK) Consortium                                                                                                                                                                                                                                                                                               | Jacquelyn Wynn, Mairead Hyland, The Lighthouse Lab in Alderley Park and Alex Alderton, Roberto Amato, Sonia Goncalves, Ewan Harrison, David K. Jackson, Ian Johnston, Dominic Kwiatkowski, Cordelia Langford, John Sillitoe on behalf of the Wellcome Sanger Institute COVID-19 Surveillance Team                        |
| EPI_ISL_733499, EPI_ISL_733500                                                                                                                                                                                                                                                                                                                                                                                                                                                                                                                                                                                                                                                                                                                                                                                                                                                                                                                                                                                                                                                                                                                                                                                                                                                                                                                                                                                                                                                                                                                                                                                                                                                                                                                                                                                                                                                                                                                 | 1-Laboratory of Microbiology, National Reference Lab, Charles Nicolle Hospital; 2-University of Tunis ElManar, Faculty of Medicine of Tunis, LR99E509, Tunis, Tunisia | 1-Clinical and Experimental Pharmacology Lab, LR16SP02, National Center of Pharmacovigilance, University of Tunis El Manar, Tunis, Tunisia. 2-Neurodegenerative diseases and psychiatric troubles, LR18SP03, Razi Hospital, University of Tunis El Manar, Tunis, Tunisia. 3- Ministry of Health, National Observatory of New and Emerging Diseases, 1006, Tunis, Tunisia | Ilhem Boutiba-Ben Boubaker, Sameh Trabelsi, Nissaf Ben Alaya, Maher Kharrat, Alia Ben Kahla, Jalila Ben Khellil, Salma Abid, Sana Ferjani, Mouna Ben Sassi, Mouna Safer, Guedi Ali Barreh, Habiba Ben Romdhane, Souissi Amira, Sarra Chamman, Hanen El Jebari, Asma Ferjani, Gaies Emna, Riadh Daghighou, Riadh Gouider. |
| EPI_ISL_733623, EPI_ISL_733685, EPI_ISL_733731, EPI_ISL_733742, EPI_ISL_733819, EPI_ISL_733885                                                                                                                                                                                                                                                                                                                                                                                                                                                                                                                                                                                                                                                                                                                                                                                                                                                                                                                                                                                                                                                                                                                                                                                                                                                                                                                                                                                                                                                                                                                                                                                                                                                                                                                                                                                                                                                 | Lighthouse Lab in Alderley Park                                                                                                                                       | Wellcome Sanger Institute for the COVID-19 Genomics UK (COG-UK) Consortium                                                                                                                                                                                                                                                                                               | Jacquelyn Wynn, Mairead Hyland, The Lighthouse Lab in Alderley Park and Alex Alderton, Roberto Amato, Sonia Goncalves, Ewan Harrison, David K. Jackson, Ian Johnston, Dominic Kwiatkowski, Cordelia Langford, John Sillitoe on behalf of the Wellcome Sanger Institute COVID-19 Surveillance Team                        |
| EPI_ISL_733919, EPI_ISL_733934, EPI_ISL_733939, EPI_ISL_733942, EPI_ISL_733953, EPI_ISL_733963, EPI_ISL_733964, EPI_ISL_733975, EPI_ISL_733985, EPI_ISL_733988, EPI_ISL_734011, EPI_ISL_734013, EPI_ISL_734028, EPI_ISL_734038, EPI_ISL_734043, EPI_ISL_734065, EPI_ISL_734072, EPI_ISL_734076, EPI_ISL_734084, EPI_ISL_734085, EPI_ISL_734117, EPI_ISL_734133, EPI_ISL_734136, EPI_ISL_734162, EPI_ISL_734164, EPI_ISL_734165                                                                                                                                                                                                                                                                                                                                                                                                                                                                                                                                                                                                                                                                                                                                                                                                                                                                                                                                                                                                                                                                                                                                                                                                                                                                                                                                                                                                                                                                                                                 |                                                                                                                                                                       |                                                                                                                                                                                                                                                                                                                                                                          |                                                                                                                                                                                                                                                                                                                          |
| see above                                                                                                                                                                                                                                                                                                                                                                                                                                                                                                                                                                                                                                                                                                                                                                                                                                                                                                                                                                                                                                                                                                                                                                                                                                                                                                                                                                                                                                                                                                                                                                                                                                                                                                                                                                                                                                                                                                                                      | Lighthouse Lab in Glasgow                                                                                                                                             | Wellcome Sanger Institute for the COVID-19 Genomics UK (COG-UK) Consortium                                                                                                                                                                                                                                                                                               | Harper VanSteenhouse, Yumi Kasai, David Gray, Carol Clugston, Anna Dominiczak and Alex Alderton, Roberto Amato, Sonia Goncalves, Ewan Harrison, David K. Jackson, Ian Johnston, Dominic Kwiatkowski, Cordelia Langford, John Sillitoe on behalf of the Wellcome Sanger Institute COVID-19 Surveillance Team              |
| EPI_ISL_735259, EPI_ISL_735260, EPI_ISL_735261, EPI_ISL_735262, EPI_ISL_735263, EPI_ISL_735264, EPI_ISL_735265, EPI_ISL_735266, EPI_ISL_735267, EPI_ISL_735268, EPI_ISL_735269, EPI_ISL_735270, EPI_ISL_735271, EPI_ISL_735272, EPI_ISL_735273, EPI_ISL_735274, EPI_ISL_735275, EPI_ISL_735276, EPI_ISL_735277, EPI_ISL_735278, EPI_ISL_735279, EPI_ISL_735280, EPI_ISL_735281, EPI_ISL_735282, EPI_ISL_735283, EPI_ISL_735284, EPI_ISL_735285, EPI_ISL_735286, EPI_ISL_735287, EPI_ISL_735288, EPI_ISL_735289, EPI_ISL_735290, EPI_ISL_735291, EPI_ISL_735292, EPI_ISL_735293, EPI_ISL_735294, EPI_ISL_735295, EPI_ISL_735296, EPI_ISL_735297, EPI_ISL_735298, EPI_ISL_735299, EPI_ISL_735300, EPI_ISL_735301, EPI_ISL_735302, EPI_ISL_735303, EPI_ISL_735304, EPI_ISL_735305, EPI_ISL_735306, EPI_ISL_735307, EPI_ISL_735308, EPI_ISL_735309, EPI_ISL_735310, EPI_ISL_735311, EPI_ISL_735312, EPI_ISL_735313, EPI_ISL_735314, EPI_ISL_735315, EPI_ISL_735316, EPI_ISL_735317, EPI_ISL_735318, EPI_ISL_735319, EPI_ISL_735320, EPI_ISL_735321, EPI_ISL_735322, EPI_ISL_735323, EPI_ISL_735324, EPI_ISL_735325, EPI_ISL_735326, EPI_ISL_735327, EPI_ISL_735328, EPI_ISL_735329, EPI_ISL_735330, EPI_ISL_735331, EPI_ISL_735332, EPI_ISL_735333, EPI_ISL_735334, EPI_ISL_735335, EPI_ISL_735336, EPI_ISL_735337, EPI_ISL_735338, EPI_ISL_735339, EPI_ISL_735340, EPI_ISL_735341, EPI_ISL_735342, EPI_ISL_735343, EPI_ISL_735344, EPI_ISL_735345, EPI_ISL_735346, EPI_ISL_735347, EPI_ISL_735348, EPI_ISL_735349, EPI_ISL_735350, EPI_ISL_735351, EPI_ISL_735352, EPI_ISL_735353, EPI_ISL_735354, EPI_ISL_735355, EPI_ISL_735356, EPI_ISL_735357, EPI_ISL_735358, EPI_ISL_735359, EPI_ISL_735360, EPI_ISL_735361, EPI_ISL_735362, EPI_ISL_735363, EPI_ISL_735364, EPI_ISL_735365, EPI_ISL_735366, EPI_ISL_735367, EPI_ISL_735368, EPI_ISL_735369, EPI_ISL_735370, EPI_ISL_735371, EPI_ISL_735372, EPI_ISL_735373, EPI_ISL_735434, EPI_ISL_735435 |                                                                                                                                                                       |                                                                                                                                                                                                                                                                                                                                                                          |                                                                                                                                                                                                                                                                                                                          |
| see above                                                                                                                                                                                                                                                                                                                                                                                                                                                                                                                                                                                                                                                                                                                                                                                                                                                                                                                                                                                                                                                                                                                                                                                                                                                                                                                                                                                                                                                                                                                                                                                                                                                                                                                                                                                                                                                                                                                                      | Genomic Laboratory (GLAB) (Conjoint lab of Health Directorate of Istanbul and Istanbul Technical University)                                                          | Genomic Laboratory (GLAB), Istanbul Technical University                                                                                                                                                                                                                                                                                                                 | Ilker Karacan, Tugba Kizilboga Akgun, Nihat Bugra Agaoglu, Payam Zolfagharian, Mehtap Aydin, Gizem Alkurt, Jale Yildiz, Betsi Kose, Nisan Denizce Can, Ayse Serra Ozel, Nilsun Altunai, Arzu Irvem, Yasemin Kendir Demirkol, Ozlem Akgun Dogan, Levent Doganay, Gizem Dinler Doganay                                     |
| EPI_ISL_735880                                                                                                                                                                                                                                                                                                                                                                                                                                                                                                                                                                                                                                                                                                                                                                                                                                                                                                                                                                                                                                                                                                                                                                                                                                                                                                                                                                                                                                                                                                                                                                                                                                                                                                                                                                                                                                                                                                                                 | Lighthouse Lab in Glasgow                                                                                                                                             | Wellcome Sanger Institute for the COVID-19 Genomics UK (COG-UK) Consortium                                                                                                                                                                                                                                                                                               | Harper VanSteenhouse, Yumi Kasai, David Gray, Carol Clugston, Anna Dominiczak and Alex Alderton, Roberto Amato, Sonia Goncalves, Ewan Harrison, David K. Jackson, Ian Johnston, Dominic Kwiatkowski, Cordelia Langford, John Sillitoe on behalf of the Wellcome Sanger Institute COVID-19 Surveillance Team              |
| EPI_ISL_735881, EPI_ISL_735908, EPI_ISL_735943                                                                                                                                                                                                                                                                                                                                                                                                                                                                                                                                                                                                                                                                                                                                                                                                                                                                                                                                                                                                                                                                                                                                                                                                                                                                                                                                                                                                                                                                                                                                                                                                                                                                                                                                                                                                                                                                                                 | Lighthouse Lab in Alderley Park                                                                                                                                       | Wellcome Sanger Institute for the COVID-19 Genomics UK (COG-UK) Consortium                                                                                                                                                                                                                                                                                               | Jacquelyn Wynn, Mairead Hyland, The Lighthouse Lab in Alderley Park and Alex Alderton, Roberto Amato, Sonia Goncalves, Ewan Harrison, David K. Jackson, Ian Johnston, Dominic Kwiatkowski, Cordelia Langford, John Sillitoe on behalf of the Wellcome Sanger Institute COVID-19 Surveillance Team                        |
| EPI_ISL_735945, EPI_ISL_735956                                                                                                                                                                                                                                                                                                                                                                                                                                                                                                                                                                                                                                                                                                                                                                                                                                                                                                                                                                                                                                                                                                                                                                                                                                                                                                                                                                                                                                                                                                                                                                                                                                                                                                                                                                                                                                                                                                                 | Lighthouse Lab in Glasgow                                                                                                                                             | Wellcome Sanger Institute for the COVID-19 Genomics UK (COG-UK) Consortium                                                                                                                                                                                                                                                                                               | Harper VanSteenhouse, Yumi Kasai, David Gray, Carol Clugston, Anna Dominiczak and Alex Alderton, Roberto Amato, Sonia Goncalves, Ewan Harrison, David K. Jackson, Ian Johnston, Dominic Kwiatkowski, Cordelia Langford, John Sillitoe on behalf of the Wellcome Sanger Institute COVID-19 Surveillance Team              |
| EPI_ISL_735979, EPI_ISL_735990                                                                                                                                                                                                                                                                                                                                                                                                                                                                                                                                                                                                                                                                                                                                                                                                                                                                                                                                                                                                                                                                                                                                                                                                                                                                                                                                                                                                                                                                                                                                                                                                                                                                                                                                                                                                                                                                                                                 | Lighthouse Lab in Alderley Park                                                                                                                                       | Wellcome Sanger Institute for the COVID-19 Genomics UK (COG-UK) Consortium                                                                                                                                                                                                                                                                                               | Jacquelyn Wynn, Mairead Hyland, The Lighthouse Lab in Alderley Park and Alex Alderton, Roberto Amato, Sonia Goncalves, Ewan Harrison, David K. Jackson, Ian Johnston, Dominic Kwiatkowski, Cordelia Langford, John Sillitoe on behalf of the Wellcome Sanger Institute COVID-19 Surveillance Team                        |
| EPI_ISL_736019, EPI_ISL_736027                                                                                                                                                                                                                                                                                                                                                                                                                                                                                                                                                                                                                                                                                                                                                                                                                                                                                                                                                                                                                                                                                                                                                                                                                                                                                                                                                                                                                                                                                                                                                                                                                                                                                                                                                                                                                                                                                                                 | Lighthouse Lab in Glasgow                                                                                                                                             | Wellcome Sanger Institute for the COVID-19 Genomics UK (COG-UK) Consortium                                                                                                                                                                                                                                                                                               | Harper VanSteenhouse, Yumi Kasai, David Gray, Carol Clugston, Anna Dominiczak and Alex Alderton, Roberto Amato, Sonia Goncalves, Ewan Harrison, David K. Jackson, Ian Johnston, Dominic Kwiatkowski, Cordelia Langford, John Sillitoe on behalf of the Wellcome Sanger Institute COVID-19 Surveillance Team              |
| EPI_ISL_736035, EPI_ISL_736042, EPI_ISL_736045, EPI_ISL_736061, EPI_ISL_736071, EPI_ISL_736073, EPI_ISL_736085, EPI_ISL_736088                                                                                                                                                                                                                                                                                                                                                                                                                                                                                                                                                                                                                                                                                                                                                                                                                                                                                                                                                                                                                                                                                                                                                                                                                                                                                                                                                                                                                                                                                                                                                                                                                                                                                                                                                                                                                 | Lighthouse Lab in Alderley Park                                                                                                                                       | Wellcome Sanger Institute for the COVID-19 Genomics UK (COG-UK) Consortium                                                                                                                                                                                                                                                                                               | Jacquelyn Wynn, Mairead Hyland, The Lighthouse Lab in Alderley Park and Alex Alderton, Roberto Amato, Sonia Goncalves, Ewan Harrison, David K. Jackson, Ian Johnston, Dominic Kwiatkowski, Cordelia Langford, John Sillitoe on behalf of the Wellcome Sanger Institute COVID-19 Surveillance Team                        |
| EPI_ISL_736096, EPI_ISL_736099                                                                                                                                                                                                                                                                                                                                                                                                                                                                                                                                                                                                                                                                                                                                                                                                                                                                                                                                                                                                                                                                                                                                                                                                                                                                                                                                                                                                                                                                                                                                                                                                                                                                                                                                                                                                                                                                                                                 | Lighthouse Lab in Glasgow                                                                                                                                             | Wellcome Sanger Institute for the COVID-19 Genomics UK (COG-UK) Consortium                                                                                                                                                                                                                                                                                               | Harper VanSteenhouse, Yumi Kasai, David Gray, Carol Clugston, Anna Dominiczak and Alex Alderton, Roberto Amato, Sonia Goncalves, Ewan Harrison, David K. Jackson, Ian Johnston, Dominic Kwiatkowski, Cordelia Langford, John Sillitoe on behalf of the Wellcome Sanger Institute COVID-19 Surveillance Team              |
| EPI_ISL_736128, EPI_ISL_736145                                                                                                                                                                                                                                                                                                                                                                                                                                                                                                                                                                                                                                                                                                                                                                                                                                                                                                                                                                                                                                                                                                                                                                                                                                                                                                                                                                                                                                                                                                                                                                                                                                                                                                                                                                                                                                                                                                                 | Lighthouse Lab in Alderley Park                                                                                                                                       | Wellcome Sanger Institute for the COVID-19 Genomics UK (COG-UK) Consortium                                                                                                                                                                                                                                                                                               | Jacquelyn Wynn, Mairead Hyland, The Lighthouse Lab in Alderley Park and Alex Alderton, Roberto Amato, Sonia Goncalves, Ewan Harrison, David K. Jackson, Ian Johnston, Dominic Kwiatkowski, Cordelia Langford, John Sillitoe on behalf of the Wellcome Sanger Institute COVID-19 Surveillance Team                        |
| EPI_ISL_736149                                                                                                                                                                                                                                                                                                                                                                                                                                                                                                                                                                                                                                                                                                                                                                                                                                                                                                                                                                                                                                                                                                                                                                                                                                                                                                                                                                                                                                                                                                                                                                                                                                                                                                                                                                                                                                                                                                                                 | Lighthouse Lab in Glasgow                                                                                                                                             | Wellcome Sanger Institute for the COVID-19 Genomics UK (COG-UK) Consortium                                                                                                                                                                                                                                                                                               | Harper VanSteenhouse, Yumi Kasai, David Gray, Carol Clugston, Anna Dominiczak and Alex Alderton, Roberto Amato, Sonia Goncalves, Ewan Harrison, David K. Jackson, Ian Johnston, Dominic Kwiatkowski, Cordelia Langford, John Sillitoe on behalf of the Wellcome Sanger Institute COVID-19 Surveillance Team              |
| EPI_ISL_736157, EPI_ISL_736158, EPI_ISL_736171, EPI_ISL_736179, EPI_ISL_736189                                                                                                                                                                                                                                                                                                                                                                                                                                                                                                                                                                                                                                                                                                                                                                                                                                                                                                                                                                                                                                                                                                                                                                                                                                                                                                                                                                                                                                                                                                                                                                                                                                                                                                                                                                                                                                                                 | Lighthouse Lab in Alderley Park                                                                                                                                       | Wellcome Sanger Institute for the COVID-19 Genomics UK (COG-UK) Consortium                                                                                                                                                                                                                                                                                               | Jacquelyn Wynn, Mairead Hyland, The Lighthouse Lab in Alderley Park and Alex Alderton, Roberto Amato, Sonia Goncalves, Ewan Harrison, David K. Jackson, Ian Johnston, Dominic Kwiatkowski, Cordelia Langford, John Sillitoe on behalf of the Wellcome Sanger Institute COVID-19 Surveillance Team                        |
| EPI_ISL_736327, EPI_ISL_736332, EPI_ISL_736355, EPI_ISL_736370, EPI_ISL_736389, EPI_ISL_736391, EPI_ISL_736458, EPI_ISL_736460, EPI_ISL_736468, EPI_ISL_736479, EPI_ISL_736488                                                                                                                                                                                                                                                                                                                                                                                                                                                                                                                                                                                                                                                                                                                                                                                                                                                                                                                                                                                                                                                                                                                                                                                                                                                                                                                                                                                                                                                                                                                                                                                                                                                                                                                                                                 |                                                                                                                                                                       |                                                                                                                                                                                                                                                                                                                                                                          |                                                                                                                                                                                                                                                                                                                          |
| see above                                                                                                                                                                                                                                                                                                                                                                                                                                                                                                                                                                                                                                                                                                                                                                                                                                                                                                                                                                                                                                                                                                                                                                                                                                                                                                                                                                                                                                                                                                                                                                                                                                                                                                                                                                                                                                                                                                                                      | Lighthouse Lab in Glasgow                                                                                                                                             | Wellcome Sanger Institute for the COVID-19 Genomics UK (COG-UK) Consortium                                                                                                                                                                                                                                                                                               | Harper VanSteenhouse, Yumi Kasai, David Gray, Carol Clugston, Anna Dominiczak and Alex Alderton, Roberto Amato, Sonia Goncalves, Ewan Harrison, David K. Jackson, Ian Johnston, Dominic Kwiatkowski, Cordelia Langford, John Sillitoe on behalf of the Wellcome Sanger Institute COVID-19 Surveillance Team              |
| EPI_ISL_736507, EPI_ISL_736509, EPI_ISL_736517                                                                                                                                                                                                                                                                                                                                                                                                                                                                                                                                                                                                                                                                                                                                                                                                                                                                                                                                                                                                                                                                                                                                                                                                                                                                                                                                                                                                                                                                                                                                                                                                                                                                                                                                                                                                                                                                                                 | Lighthouse Lab in Alderley Park                                                                                                                                       | Wellcome Sanger Institute for the COVID-19 Genomics UK (COG-UK) Consortium                                                                                                                                                                                                                                                                                               | Jacquelyn Wynn, Mairead Hyland, The Lighthouse Lab in Alderley Park and Alex Alderton, Roberto Amato, Sonia Goncalves, Ewan Harrison, David K. Jackson, Ian Johnston, Dominic Kwiatkowski, Cordelia Langford, John Sillitoe on behalf of the Wellcome Sanger Institute COVID-19 Surveillance Team                        |

|                                                                                                                                                                                                                                                                                                                                                                                                                                                                                                                                                                                                                                                                                                                                                                                                                                                                                                                                                                                |                                                            |                                                                                                                                                                                                                 |                                                                                                                                                                                                                                                                                                                                                                     |
|--------------------------------------------------------------------------------------------------------------------------------------------------------------------------------------------------------------------------------------------------------------------------------------------------------------------------------------------------------------------------------------------------------------------------------------------------------------------------------------------------------------------------------------------------------------------------------------------------------------------------------------------------------------------------------------------------------------------------------------------------------------------------------------------------------------------------------------------------------------------------------------------------------------------------------------------------------------------------------|------------------------------------------------------------|-----------------------------------------------------------------------------------------------------------------------------------------------------------------------------------------------------------------|---------------------------------------------------------------------------------------------------------------------------------------------------------------------------------------------------------------------------------------------------------------------------------------------------------------------------------------------------------------------|
| EPI_ISL_736519                                                                                                                                                                                                                                                                                                                                                                                                                                                                                                                                                                                                                                                                                                                                                                                                                                                                                                                                                                 | Lighthouse Lab in Glasgow                                  | Wellcome Sanger Institute for the COVID-19 Genomics UK (COG-UK) Consortium                                                                                                                                      | Harper VanSteenhouse, Yumi Kasai, David Gray, Carol Clugston, Anna Dominicczak and Alex Alderton, Roberto Amato, Sonia Goncalves, Ewan Harrison, David K. Jackson, Ian Johnston, Dominic Kwiatkowski, Cordelia Langford, John Sillitoe on behalf of the Wellcome Sanger Institute COVID-19 Surveillance Team                                                        |
| EPI_ISL_736537, EPI_ISL_736541, EPI_ISL_736587, EPI_ISL_736589, EPI_ISL_736591, EPI_ISL_736613, EPI_ISL_736632, EPI_ISL_736667, EPI_ISL_736676                                                                                                                                                                                                                                                                                                                                                                                                                                                                                                                                                                                                                                                                                                                                                                                                                                 | Lighthouse Lab in Alderley Park                            | Wellcome Sanger Institute for the COVID-19 Genomics UK (COG-UK) Consortium                                                                                                                                      | Jacquelyn Wynn, Mairead Hyland, The Lighthouse Lab in Alderley Park and Alex Alderton, Roberto Amato, Sonia Goncalves, Ewan Harrison, David K. Jackson, Ian Johnston, Dominic Kwiatkowski, Cordelia Langford, John Sillitoe on behalf of the Wellcome Sanger Institute COVID-19 Surveillance Team                                                                   |
| EPI_ISL_736689                                                                                                                                                                                                                                                                                                                                                                                                                                                                                                                                                                                                                                                                                                                                                                                                                                                                                                                                                                 | Lighthouse Lab in Glasgow                                  | Wellcome Sanger Institute for the COVID-19 Genomics UK (COG-UK) Consortium                                                                                                                                      | Harper VanSteenhouse, Yumi Kasai, David Gray, Carol Clugston, Anna Dominicczak and Alex Alderton, Roberto Amato, Sonia Goncalves, Ewan Harrison, David K. Jackson, Ian Johnston, Dominic Kwiatkowski, Cordelia Langford, John Sillitoe on behalf of the Wellcome Sanger Institute COVID-19 Surveillance Team                                                        |
| EPI_ISL_736706, EPI_ISL_736710, EPI_ISL_736717, EPI_ISL_736770                                                                                                                                                                                                                                                                                                                                                                                                                                                                                                                                                                                                                                                                                                                                                                                                                                                                                                                 | Lighthouse Lab in Alderley Park                            | Wellcome Sanger Institute for the COVID-19 Genomics UK (COG-UK) Consortium                                                                                                                                      | Jacquelyn Wynn, Mairead Hyland, The Lighthouse Lab in Alderley Park and Alex Alderton, Roberto Amato, Sonia Goncalves, Ewan Harrison, David K. Jackson, Ian Johnston, Dominic Kwiatkowski, Cordelia Langford, John Sillitoe on behalf of the Wellcome Sanger Institute COVID-19 Surveillance Team                                                                   |
| EPI_ISL_738086                                                                                                                                                                                                                                                                                                                                                                                                                                                                                                                                                                                                                                                                                                                                                                                                                                                                                                                                                                 | National Public Health Laboratory                          | Department of Medical Microbiology, Hospital Pengajar Universiti Putra Malaysia                                                                                                                                 | Hui-Yee Chee, Syafinaz Amin-Nordin, Narcisse Joseph, Muhammad MI, Nor Zahrin Hasran, Yien-Ping Wong, Jia-Yong Lam                                                                                                                                                                                                                                                   |
| EPI_ISL_746318                                                                                                                                                                                                                                                                                                                                                                                                                                                                                                                                                                                                                                                                                                                                                                                                                                                                                                                                                                 | Genome Center                                              | Genome Center                                                                                                                                                                                                   | Hassan M. Al-Emran, Ovinu Kibria Islam, Md. Shazid Hasan, A. S. M. Rubayet- Ul- Alam, Selina Akter, Md. Tanvir Islam, Pravas Chandra Roy, Shovon Lal Sarkar, Najmuj Sakib, Nigar Sutana Megha, S. M. Tanjil Shah, Shireen Nigar, Md. Iqbal Kabir Jahid, Md. Anwar Hossain                                                                                           |
| EPI_ISL_754241                                                                                                                                                                                                                                                                                                                                                                                                                                                                                                                                                                                                                                                                                                                                                                                                                                                                                                                                                                 | Dinkes Tasikmalaya                                         | "School of Life Sciences and Technology & School of Pharmacy-Institut Teknologi Bandung; Molecular Genetics Laboratory-Faculty of Medicine-Universitas Padjadjaran; Laboratorium Kesehatan Provinsi Jawa Barat" | Husna Nugrahapraja, Marselina Irasonia Tan, Yunia Sribudiani, Catur Riani, Azzania Fibriani, Tarwadi, Ema Rahmawati, Savira Ekawardhani, Hesti Lina Wiraswati, Ryan Bayusantika Ristandi, Rifky Waluyajati Rachman, Cut Nur Cinthia Alamanda, Lia Faridah, Miftahul Faridi, Karimatu Khoirunnisa, Hammam Riza, Soni Solistia Wirawan, Agung Eru Wibowo, Ivan Faizal |
| EPI_ISL_755118, EPI_ISL_755120, EPI_ISL_755121, EPI_ISL_755122, EPI_ISL_755123, EPI_ISL_755124, EPI_ISL_755125, EPI_ISL_755126, EPI_ISL_755127, EPI_ISL_755128, EPI_ISL_755129, EPI_ISL_755131, EPI_ISL_755141, EPI_ISL_755142, EPI_ISL_755143, EPI_ISL_755144, EPI_ISL_755145, EPI_ISL_755210, EPI_ISL_755211, EPI_ISL_755212, EPI_ISL_755213, EPI_ISL_755214, EPI_ISL_755232, EPI_ISL_755233, EPI_ISL_755234, EPI_ISL_755235, EPI_ISL_755236, EPI_ISL_755237, EPI_ISL_755238, EPI_ISL_755239, EPI_ISL_755240, EPI_ISL_755241, EPI_ISL_755242, EPI_ISL_755243, EPI_ISL_755244, EPI_ISL_755245, EPI_ISL_755246, EPI_ISL_755247, EPI_ISL_755248, EPI_ISL_755249, EPI_ISL_755250, EPI_ISL_755251, EPI_ISL_755252, EPI_ISL_755253, EPI_ISL_755254, EPI_ISL_755255, EPI_ISL_755256, EPI_ISL_755257, EPI_ISL_755258, EPI_ISL_755259, EPI_ISL_755260, EPI_ISL_755261, EPI_ISL_755262, EPI_ISL_755263, EPI_ISL_755264, EPI_ISL_755265, EPI_ISL_755266, EPI_ISL_755267, EPI_ISL_755268 | Andersen lab at Scripps Research                           | Issa Abu-Dayyeh, Ahmad Tibi, Lama Hussein, Lina Mohammad, Zein Naber, Amid Abdelnour with SEARCH Alliance San Diego                                                                                             |                                                                                                                                                                                                                                                                                                                                                                     |
| see above                                                                                                                                                                                                                                                                                                                                                                                                                                                                                                                                                                                                                                                                                                                                                                                                                                                                                                                                                                      | Biolab Diagnostic Laboratories                             |                                                                                                                                                                                                                 |                                                                                                                                                                                                                                                                                                                                                                     |
| EPI_ISL_756390, EPI_ISL_756391, EPI_ISL_756407, EPI_ISL_756421, EPI_ISL_756439, EPI_ISL_756510, EPI_ISL_756598, EPI_ISL_756602, EPI_ISL_756619, EPI_ISL_756652, EPI_ISL_756686, EPI_ISL_756687                                                                                                                                                                                                                                                                                                                                                                                                                                                                                                                                                                                                                                                                                                                                                                                 | Lighthouse Lab in Alderley Park                            | Wellcome Sanger Institute for the COVID-19 Genomics UK (COG-UK) Consortium                                                                                                                                      | Jacquelyn Wynn, Mairead Hyland, The Lighthouse Lab in Alderley Park and Alex Alderton, Roberto Amato, Sonia Goncalves, Ewan Harrison, David K. Jackson, Ian Johnston, Dominic Kwiatkowski, Cordelia Langford, John Sillitoe on behalf of the Wellcome Sanger Institute COVID-19 Surveillance Team                                                                   |
| see above                                                                                                                                                                                                                                                                                                                                                                                                                                                                                                                                                                                                                                                                                                                                                                                                                                                                                                                                                                      |                                                            |                                                                                                                                                                                                                 |                                                                                                                                                                                                                                                                                                                                                                     |
| EPI_ISL_756789, EPI_ISL_756867, EPI_ISL_756881, EPI_ISL_756897, EPI_ISL_756918, EPI_ISL_756928, EPI_ISL_756952, EPI_ISL_756959, EPI_ISL_757007, EPI_ISL_757008, EPI_ISL_757011, EPI_ISL_757039, EPI_ISL_757042, EPI_ISL_757056, EPI_ISL_757072, EPI_ISL_757075, EPI_ISL_757105, EPI_ISL_757115, EPI_ISL_757145, EPI_ISL_757146, EPI_ISL_757149, EPI_ISL_757154, EPI_ISL_757163, EPI_ISL_757179, EPI_ISL_757197, EPI_ISL_757207, EPI_ISL_757227, EPI_ISL_757232, EPI_ISL_757256, EPI_ISL_757260, EPI_ISL_757263, EPI_ISL_757268                                                                                                                                                                                                                                                                                                                                                                                                                                                 | Lighthouse Lab in Glasgow                                  | Wellcome Sanger Institute for the COVID-19 Genomics UK (COG-UK) Consortium                                                                                                                                      | Harper VanSteenhouse, Yumi Kasai, David Gray, Carol Clugston, Anna Dominicczak and Alex Alderton, Roberto Amato, Sonia Goncalves, Ewan Harrison, David K. Jackson, Ian Johnston, Dominic Kwiatkowski, Cordelia Langford, John Sillitoe on behalf of the Wellcome Sanger Institute COVID-19 Surveillance Team                                                        |
| see above                                                                                                                                                                                                                                                                                                                                                                                                                                                                                                                                                                                                                                                                                                                                                                                                                                                                                                                                                                      |                                                            |                                                                                                                                                                                                                 |                                                                                                                                                                                                                                                                                                                                                                     |
| EPI_ISL_759866, EPI_ISL_759867                                                                                                                                                                                                                                                                                                                                                                                                                                                                                                                                                                                                                                                                                                                                                                                                                                                                                                                                                 | Bioinformatics, National institute of traditional medicine | Bioinformatics, National institute of traditional medicine                                                                                                                                                      | Ishwar,S., Harish,D.R., Chattopadhyay,D., Umashankar,V.                                                                                                                                                                                                                                                                                                             |
| EPI_ISL_760261                                                                                                                                                                                                                                                                                                                                                                                                                                                                                                                                                                                                                                                                                                                                                                                                                                                                                                                                                                 | Lighthouse Lab in Alderley Park                            | Wellcome Sanger Institute for the COVID-19 Genomics UK (COG-UK) Consortium                                                                                                                                      | Jacquelyn Wynn, Mairead Hyland, The Lighthouse Lab in Alderley Park and Alex Alderton, Roberto Amato, Sonia Goncalves, Ewan Harrison, David K. Jackson, Ian Johnston, Dominic Kwiatkowski, Cordelia Langford, John Sillitoe on behalf of the Wellcome Sanger Institute COVID-19 Surveillance Team                                                                   |
| EPI_ISL_760272                                                                                                                                                                                                                                                                                                                                                                                                                                                                                                                                                                                                                                                                                                                                                                                                                                                                                                                                                                 | Lighthouse Lab in Glasgow                                  | Wellcome Sanger Institute for the COVID-19 Genomics UK (COG-UK) Consortium                                                                                                                                      | Harper VanSteenhouse, Yumi Kasai, David Gray, Carol Clugston, Anna Dominicczak and Alex Alderton, Roberto Amato, Sonia Goncalves, Ewan Harrison, David K. Jackson, Ian Johnston, Dominic Kwiatkowski, Cordelia Langford, John Sillitoe on behalf of the Wellcome Sanger Institute COVID-19 Surveillance Team                                                        |
| EPI_ISL_760284, EPI_ISL_760285                                                                                                                                                                                                                                                                                                                                                                                                                                                                                                                                                                                                                                                                                                                                                                                                                                                                                                                                                 | Lighthouse Lab in Alderley Park                            | Wellcome Sanger Institute for the COVID-19 Genomics UK (COG-UK) Consortium                                                                                                                                      | Jacquelyn Wynn, Mairead Hyland, The Lighthouse Lab in Alderley Park and Alex Alderton, Roberto Amato, Sonia Goncalves, Ewan Harrison, David K. Jackson, Ian Johnston, Dominic Kwiatkowski, Cordelia Langford, John Sillitoe on behalf of the Wellcome Sanger Institute COVID-19 Surveillance Team                                                                   |
| EPI_ISL_760290, EPI_ISL_760292                                                                                                                                                                                                                                                                                                                                                                                                                                                                                                                                                                                                                                                                                                                                                                                                                                                                                                                                                 | Lighthouse Lab in Glasgow                                  | Wellcome Sanger Institute for the COVID-19 Genomics UK (COG-UK) Consortium                                                                                                                                      | Harper VanSteenhouse, Yumi Kasai, David Gray, Carol Clugston, Anna Dominicczak and Alex Alderton, Roberto Amato, Sonia Goncalves, Ewan Harrison, David K. Jackson, Ian Johnston, Dominic Kwiatkowski, Cordelia Langford, John Sillitoe on behalf of the Wellcome Sanger Institute COVID-19 Surveillance Team                                                        |
| EPI_ISL_760296                                                                                                                                                                                                                                                                                                                                                                                                                                                                                                                                                                                                                                                                                                                                                                                                                                                                                                                                                                 | Lighthouse Lab in Alderley Park                            | Wellcome Sanger Institute for the COVID-19 Genomics UK (COG-UK) Consortium                                                                                                                                      | Jacquelyn Wynn, Mairead Hyland, The Lighthouse Lab in Alderley Park and Alex Alderton, Roberto Amato, Sonia Goncalves, Ewan Harrison, David K. Jackson, Ian Johnston, Dominic Kwiatkowski, Cordelia Langford, John Sillitoe on behalf of the Wellcome Sanger Institute COVID-19 Surveillance Team                                                                   |
| EPI_ISL_760297, EPI_ISL_760310, EPI_ISL_760315, EPI_ISL_760318, EPI_ISL_760321, EPI_ISL_760325, EPI_ISL_760328                                                                                                                                                                                                                                                                                                                                                                                                                                                                                                                                                                                                                                                                                                                                                                                                                                                                 | Lighthouse Lab in Glasgow                                  | Wellcome Sanger Institute for the COVID-19 Genomics UK (COG-UK) Consortium                                                                                                                                      | Harper VanSteenhouse, Yumi Kasai, David Gray, Carol Clugston, Anna Dominicczak and Alex Alderton, Roberto Amato, Sonia Goncalves, Ewan Harrison, David K. Jackson, Ian Johnston, Dominic Kwiatkowski, Cordelia Langford, John Sillitoe on behalf of the Wellcome Sanger Institute COVID-19 Surveillance Team                                                        |
| EPI_ISL_760333                                                                                                                                                                                                                                                                                                                                                                                                                                                                                                                                                                                                                                                                                                                                                                                                                                                                                                                                                                 | Lighthouse Lab in Alderley Park                            | Wellcome Sanger Institute for the COVID-19 Genomics UK (COG-UK) Consortium                                                                                                                                      | Jacquelyn Wynn, Mairead Hyland, The Lighthouse Lab in Alderley Park and Alex Alderton, Roberto Amato, Sonia Goncalves, Ewan Harrison, David K. Jackson, Ian Johnston, Dominic Kwiatkowski, Cordelia Langford, John Sillitoe on behalf of the Wellcome Sanger Institute COVID-19 Surveillance Team                                                                   |
| EPI_ISL_760334, EPI_ISL_760348                                                                                                                                                                                                                                                                                                                                                                                                                                                                                                                                                                                                                                                                                                                                                                                                                                                                                                                                                 | Lighthouse Lab in Glasgow                                  | Wellcome Sanger Institute for the COVID-19 Genomics UK (COG-UK) Consortium                                                                                                                                      | Harper VanSteenhouse, Yumi Kasai, David Gray, Carol Clugston, Anna Dominicczak and Alex Alderton, Roberto Amato, Sonia Goncalves, Ewan Harrison, David K. Jackson, Ian Johnston, Dominic Kwiatkowski, Cordelia Langford, John Sillitoe on behalf of the Wellcome Sanger Institute COVID-19 Surveillance Team                                                        |
| EPI_ISL_760350                                                                                                                                                                                                                                                                                                                                                                                                                                                                                                                                                                                                                                                                                                                                                                                                                                                                                                                                                                 | Lighthouse Lab in Alderley Park                            | Wellcome Sanger Institute for the COVID-19 Genomics UK (COG-UK) Consortium                                                                                                                                      | Jacquelyn Wynn, Mairead Hyland, The Lighthouse Lab in Alderley Park and Alex Alderton, Roberto Amato, Sonia Goncalves, Ewan Harrison, David K. Jackson, Ian Johnston, Dominic Kwiatkowski, Cordelia Langford, John Sillitoe on behalf of the Wellcome Sanger Institute COVID-19 Surveillance Team                                                                   |
| EPI_ISL_760355, EPI_ISL_760362, EPI_ISL_760363, EPI_ISL_760367, EPI_ISL_760374, EPI_ISL_760376, EPI_ISL_760383, EPI_ISL_760385, EPI_ISL_760388, EPI_ISL_760391, EPI_ISL_760398, EPI_ISL_760399, EPI_ISL_760412, EPI_ISL_760413, EPI_ISL_760423, EPI_ISL_760431                                                                                                                                                                                                                                                                                                                                                                                                                                                                                                                                                                                                                                                                                                                 | Lighthouse Lab in Glasgow                                  | Wellcome Sanger Institute for the COVID-19 Genomics UK (COG-UK) Consortium                                                                                                                                      | Harper VanSteenhouse, Yumi Kasai, David Gray, Carol Clugston, Anna Dominicczak and Alex Alderton, Roberto Amato, Sonia Goncalves, Ewan Harrison, David K. Jackson, Ian Johnston, Dominic Kwiatkowski, Cordelia Langford, John Sillitoe on behalf of the Wellcome Sanger Institute COVID-19 Surveillance Team                                                        |
| see above                                                                                                                                                                                                                                                                                                                                                                                                                                                                                                                                                                                                                                                                                                                                                                                                                                                                                                                                                                      |                                                            |                                                                                                                                                                                                                 |                                                                                                                                                                                                                                                                                                                                                                     |
| EPI_ISL_760434                                                                                                                                                                                                                                                                                                                                                                                                                                                                                                                                                                                                                                                                                                                                                                                                                                                                                                                                                                 | Lighthouse Lab in Alderley Park                            | Wellcome Sanger Institute for the COVID-19 Genomics UK (COG-UK) Consortium                                                                                                                                      | Jacquelyn Wynn, Mairead Hyland, The Lighthouse Lab in Alderley Park and Alex Alderton, Roberto Amato, Sonia Goncalves, Ewan Harrison, David K. Jackson, Ian Johnston, Dominic Kwiatkowski, Cordelia Langford, John Sillitoe on behalf of the Wellcome Sanger Institute COVID-19 Surveillance Team                                                                   |
| EPI_ISL_760437, EPI_ISL_760451, EPI_ISL_760457, EPI_ISL_760459, EPI_ISL_760468, EPI_ISL_760488, EPI_ISL_760504, EPI_ISL_760511, EPI_ISL_760540, EPI_ISL_760556                                                                                                                                                                                                                                                                                                                                                                                                                                                                                                                                                                                                                                                                                                                                                                                                                 | Lighthouse Lab in Glasgow                                  | Wellcome Sanger Institute for the COVID-19 Genomics UK (COG-UK) Consortium                                                                                                                                      | Harper VanSteenhouse, Yumi Kasai, David Gray, Carol Clugston, Anna Dominicczak and Alex Alderton, Roberto Amato, Sonia Goncalves, Ewan Harrison, David K. Jackson, Ian Johnston, Dominic Kwiatkowski, Cordelia Langford, John Sillitoe on behalf of the Wellcome Sanger Institute COVID-19 Surveillance Team                                                        |
| EPI_ISL_760557                                                                                                                                                                                                                                                                                                                                                                                                                                                                                                                                                                                                                                                                                                                                                                                                                                                                                                                                                                 | Lighthouse Lab in Alderley Park                            | Wellcome Sanger Institute for the COVID-19 Genomics UK (COG-UK) Consortium                                                                                                                                      | Jacquelyn Wynn, Mairead Hyland, The Lighthouse Lab in Alderley Park and Alex Alderton, Roberto Amato, Sonia Goncalves, Ewan Harrison, David K. Jackson, Ian Johnston, Dominic Kwiatkowski, Cordelia Langford, John Sillitoe on behalf of the Wellcome Sanger Institute COVID-19 Surveillance Team                                                                   |
| EPI_ISL_760571, EPI_ISL_760573                                                                                                                                                                                                                                                                                                                                                                                                                                                                                                                                                                                                                                                                                                                                                                                                                                                                                                                                                 | Lighthouse Lab in Glasgow                                  | Wellcome Sanger Institute for the COVID-19 Genomics UK (COG-UK) Consortium                                                                                                                                      | Harper VanSteenhouse, Yumi Kasai, David Gray, Carol Clugston, Anna Dominicczak and Alex Alderton, Roberto Amato, Sonia Goncalves, Ewan Harrison, David K. Jackson, Ian Johnston, Dominic Kwiatkowski, Cordelia Langford, John Sillitoe on behalf of the Wellcome Sanger Institute COVID-19 Surveillance Team                                                        |







|                                                                                                                                                                                                                                                                                                                                |                                                                                                                                                                       |                                                                                                                                                                                                                                                                                                                                                                          |                                                                                                                                                                                                                                                                                                                        |                                                                                                                                                                                                                                                                                                             |
|--------------------------------------------------------------------------------------------------------------------------------------------------------------------------------------------------------------------------------------------------------------------------------------------------------------------------------|-----------------------------------------------------------------------------------------------------------------------------------------------------------------------|--------------------------------------------------------------------------------------------------------------------------------------------------------------------------------------------------------------------------------------------------------------------------------------------------------------------------------------------------------------------------|------------------------------------------------------------------------------------------------------------------------------------------------------------------------------------------------------------------------------------------------------------------------------------------------------------------------|-------------------------------------------------------------------------------------------------------------------------------------------------------------------------------------------------------------------------------------------------------------------------------------------------------------|
| EPI_ISL_763067                                                                                                                                                                                                                                                                                                                 | 1-Laboratory of Microbiology, National Reference Lab, Charles Nicolle Hospital; 2-University of Tunis ElManar, Faculty of Medicine of Tunis, LR99ES09, Tunis, Tunisia | 1-Clinical and Experimental Pharmacology Lab, LR16SP02, National Center of Pharmacovigilance, University of Tunis El Manar, Tunis, Tunisia. 2-Neurodegenerative diseases and psychiatric troubles, LR18SP03, Razi Hospital, University of Tunis El Manar, Tunis, Tunisia. 3- Ministry of Health, National Observatory of New and Emerging Diseases, 1006, Tunis, Tunisia | Ilhem Boutiba-Ben Boubaker, Sarneh Trabelsi, Nissaf Ben Alaya, Maher Kharrat, Alia Ben Kahla, Jalila Ben Kheilil, Salma Abid, Sana Ferjani, Mouna Ben Sassi, Mouna Safer, Awatef El MOussi, Habiba Ben Romdhane, Souissi Amira, Ines Mdingi, Hanen El Jebari, Asma Ferjani, Gaies Emna, Riadh Daghfous, Riadh Gouider. |                                                                                                                                                                                                                                                                                                             |
| EPI_ISL_765209                                                                                                                                                                                                                                                                                                                 | Ohio Department of Health Laboratory                                                                                                                                  | Ohio Department of Health Laboratory                                                                                                                                                                                                                                                                                                                                     | Holmes, Jennifer; Eric Brandt, Glen McGillivray, Keoni Omura, Caitlin McDonnell, Heather Blankenship, Kelsey Florek, Kirtana Ramadugu, Erica Leasure, Quanta Brown and Tammy Bannerman                                                                                                                                 |                                                                                                                                                                                                                                                                                                             |
| EPI_ISL_765222                                                                                                                                                                                                                                                                                                                 | Ohio Department of Health Laboratory                                                                                                                                  | Ohio Department of Health Laboratory                                                                                                                                                                                                                                                                                                                                     | Holmes, Jennifer; Eric Brandt, Keoni Omura, Glen McGillivray, Caitlin McDonnell, Kirtana Ramadugu, Erica Leasure, Kelsey Florek, Heather Blankenship, Quanta Brown, and Tammy Bannerman                                                                                                                                |                                                                                                                                                                                                                                                                                                             |
| EPI_ISL_767103                                                                                                                                                                                                                                                                                                                 | Lighthouse Lab in Alderley Park                                                                                                                                       | Wellcome Sanger Institute for the COVID-19 Genomics UK (COG-UK) Consortium                                                                                                                                                                                                                                                                                               | Jacquelyn Wynn, Mairead Hyland, The Lighthouse Lab in Alderley Park and Alex Alderton, Roberto Amato, Sonia Goncalves, Ewan Harrison, David K. Jackson, Ian Johnston, Dominic Kwiatkowski, Cordelia Langford, John Sillitoe on behalf of the Wellcome Sanger Institute COVID-19 Surveillance Team                      |                                                                                                                                                                                                                                                                                                             |
| EPI_ISL_767117                                                                                                                                                                                                                                                                                                                 | Lighthouse Lab in Glasgow                                                                                                                                             | Wellcome Sanger Institute for the COVID-19 Genomics UK (COG-UK) Consortium                                                                                                                                                                                                                                                                                               | Harper VanSteenhouse, Yumi Kasai, David Gray, Carol Clugston, Anna Dominiczak and Alex Alderton, Roberto Amato, Sonia Goncalves, Ewan Harrison, David K. Jackson, Ian Johnston, Dominic Kwiatkowski, Cordelia Langford, John Sillitoe on behalf of the Wellcome Sanger Institute COVID-19 Surveillance Team            |                                                                                                                                                                                                                                                                                                             |
| EPI_ISL_767130, EPI_ISL_767165, EPI_ISL_767168, EPI_ISL_767198, EPI_ISL_767199, EPI_ISL_767202, EPI_ISL_767206, EPI_ISL_767207, EPI_ISL_767218, EPI_ISL_767222, EPI_ISL_767251, EPI_ISL_767253, EPI_ISL_767277, EPI_ISL_767308, EPI_ISL_767317, EPI_ISL_768841                                                                 | see above                                                                                                                                                             | Lighthouse Lab in Alderley Park                                                                                                                                                                                                                                                                                                                                          | Wellcome Sanger Institute for the COVID-19 Genomics UK (COG-UK) Consortium                                                                                                                                                                                                                                             | Jacquelyn Wynn, Mairead Hyland, The Lighthouse Lab in Alderley Park and Alex Alderton, Roberto Amato, Sonia Goncalves, Ewan Harrison, David K. Jackson, Ian Johnston, Dominic Kwiatkowski, Cordelia Langford, John Sillitoe on behalf of the Wellcome Sanger Institute COVID-19 Surveillance Team           |
| EPI_ISL_769249, EPI_ISL_769260, EPI_ISL_769290, EPI_ISL_769320, EPI_ISL_769348, EPI_ISL_769387, EPI_ISL_769388, EPI_ISL_769396, EPI_ISL_769430, EPI_ISL_769431, EPI_ISL_769441, EPI_ISL_769468, EPI_ISL_769512, EPI_ISL_769542, EPI_ISL_769652, EPI_ISL_769655, EPI_ISL_769768, EPI_ISL_769794, EPI_ISL_769850, EPI_ISL_769861 | see above                                                                                                                                                             | Lighthouse Lab in Glasgow                                                                                                                                                                                                                                                                                                                                                | Wellcome Sanger Institute for the COVID-19 Genomics UK (COG-UK) Consortium                                                                                                                                                                                                                                             | Harper VanSteenhouse, Yumi Kasai, David Gray, Carol Clugston, Anna Dominiczak and Alex Alderton, Roberto Amato, Sonia Goncalves, Ewan Harrison, David K. Jackson, Ian Johnston, Dominic Kwiatkowski, Cordelia Langford, John Sillitoe on behalf of the Wellcome Sanger Institute COVID-19 Surveillance Team |
| EPI_ISL_770033, EPI_ISL_770034, EPI_ISL_770035, EPI_ISL_770036, EPI_ISL_770037                                                                                                                                                                                                                                                 | E. Gulbja Laboratorija                                                                                                                                                | Latvian Biomedical Research and Study Centre                                                                                                                                                                                                                                                                                                                             | Ivars Silamielis, Kaspars Megnis, Monta Ustinova, Jnis Pjalkovskis, ikitā Zrelovs, Vita Rovte, Mikus Gavars, Dmitrijs Perminovs, Uga Dumpis, Jnis Kloviš                                                                                                                                                               |                                                                                                                                                                                                                                                                                                             |
| EPI_ISL_770038, EPI_ISL_770039                                                                                                                                                                                                                                                                                                 | Centrl Laboratorija                                                                                                                                                   | Latvian Biomedical Research and Study Centre                                                                                                                                                                                                                                                                                                                             | Ivars Silamielis, Kaspars Megnis, Monta Ustinova, Jnis Pjalkovskis, ikitā Zrelovs, Vita Rovte, Stella Lapia, Jana Oste, Marta Priedte, Uga Dumpis, Jnis Kloviš                                                                                                                                                         |                                                                                                                                                                                                                                                                                                             |
| EPI_ISL_770040, EPI_ISL_770041                                                                                                                                                                                                                                                                                                 | E. Gulbja Laboratorija                                                                                                                                                | Latvian Biomedical Research and Study Centre                                                                                                                                                                                                                                                                                                                             | Ivars Silamielis, Kaspars Megnis, Monta Ustinova, Jnis Pjalkovskis, ikitā Zrelovs, Vita Rovte, Mikus Gavars, Dmitrijs Perminovs, Uga Dumpis, Jnis Kloviš                                                                                                                                                               |                                                                                                                                                                                                                                                                                                             |
| EPI_ISL_770042                                                                                                                                                                                                                                                                                                                 | Centrl Laboratorija                                                                                                                                                   | Latvian Biomedical Research and Study Centre                                                                                                                                                                                                                                                                                                                             | Ivars Silamielis, Kaspars Megnis, Monta Ustinova, Jnis Pjalkovskis, ikitā Zrelovs, Vita Rovte, Stella Lapia, Jana Oste, Marta Priedte, Uga Dumpis, Jnis Kloviš                                                                                                                                                         |                                                                                                                                                                                                                                                                                                             |
| EPI_ISL_770043, EPI_ISL_770044                                                                                                                                                                                                                                                                                                 | E. Gulbja Laboratorija                                                                                                                                                | Latvian Biomedical Research and Study Centre                                                                                                                                                                                                                                                                                                                             | Ivars Silamielis, Kaspars Megnis, Monta Ustinova, Jnis Pjalkovskis, ikitā Zrelovs, Vita Rovte, Mikus Gavars, Dmitrijs Perminovs, Uga Dumpis, Jnis Kloviš                                                                                                                                                               |                                                                                                                                                                                                                                                                                                             |
| EPI_ISL_770045                                                                                                                                                                                                                                                                                                                 | Centrl Laboratorija                                                                                                                                                   | Latvian Biomedical Research and Study Centre                                                                                                                                                                                                                                                                                                                             | Ivars Silamielis, Kaspars Megnis, Monta Ustinova, Jnis Pjalkovskis, ikitā Zrelovs, Vita Rovte, Stella Lapia, Jana Oste, Marta Priedte, Uga Dumpis, Jnis Kloviš                                                                                                                                                         |                                                                                                                                                                                                                                                                                                             |
| EPI_ISL_770046                                                                                                                                                                                                                                                                                                                 | E. Gulbja Laboratorija                                                                                                                                                | Latvian Biomedical Research and Study Centre                                                                                                                                                                                                                                                                                                                             | Ivars Silamielis, Kaspars Megnis, Monta Ustinova, Jnis Pjalkovskis, ikitā Zrelovs, Vita Rovte, Mikus Gavars, Dmitrijs Perminovs, Uga Dumpis, Jnis Kloviš                                                                                                                                                               |                                                                                                                                                                                                                                                                                                             |
| EPI_ISL_770047                                                                                                                                                                                                                                                                                                                 | Latvijas Infektoloijas centrs                                                                                                                                         | Latvian Biomedical Research and Study Centre                                                                                                                                                                                                                                                                                                                             | Ivars Silamielis, Kaspars Megnis, Monta Ustinova, Jnis Pjalkovskis, ikitā Zrelovs, Vita Rovte, Jeena Storoženko, Tatjana Kolupajeva, Oksana Savicka, Uga Dumpis, Jnis Kloviš                                                                                                                                           |                                                                                                                                                                                                                                                                                                             |
| EPI_ISL_770048, EPI_ISL_770049                                                                                                                                                                                                                                                                                                 | Centrl Laboratorija                                                                                                                                                   | Latvian Biomedical Research and Study Centre                                                                                                                                                                                                                                                                                                                             | Ivars Silamielis, Kaspars Megnis, Monta Ustinova, Jnis Pjalkovskis, ikitā Zrelovs, Vita Rovte, Stella Lapia, Jana Oste, Marta Priedte, Uga Dumpis, Jnis Kloviš                                                                                                                                                         |                                                                                                                                                                                                                                                                                                             |
| EPI_ISL_770050, EPI_ISL_770051                                                                                                                                                                                                                                                                                                 | E. Gulbja Laboratorija                                                                                                                                                | Latvian Biomedical Research and Study Centre                                                                                                                                                                                                                                                                                                                             | Ivars Silamielis, Kaspars Megnis, Monta Ustinova, Jnis Pjalkovskis, ikitā Zrelovs, Vita Rovte, Mikus Gavars, Dmitrijs Perminovs, Uga Dumpis, Jnis Kloviš                                                                                                                                                               |                                                                                                                                                                                                                                                                                                             |
| EPI_ISL_770052                                                                                                                                                                                                                                                                                                                 | Centrl Laboratorija                                                                                                                                                   | Latvian Biomedical Research and Study Centre                                                                                                                                                                                                                                                                                                                             | Ivars Silamielis, Kaspars Megnis, Monta Ustinova, Jnis Pjalkovskis, ikitā Zrelovs, Vita Rovte, Stella Lapia, Jana Oste, Marta Priedte, Uga Dumpis, Jnis Kloviš                                                                                                                                                         |                                                                                                                                                                                                                                                                                                             |
| EPI_ISL_770053                                                                                                                                                                                                                                                                                                                 | E. Gulbja Laboratorija                                                                                                                                                | Latvian Biomedical Research and Study Centre                                                                                                                                                                                                                                                                                                                             | Ivars Silamielis, Kaspars Megnis, Monta Ustinova, Jnis Pjalkovskis, ikitā Zrelovs, Vita Rovte, Mikus Gavars, Dmitrijs Perminovs, Uga Dumpis, Jnis Kloviš                                                                                                                                                               |                                                                                                                                                                                                                                                                                                             |
| EPI_ISL_770054                                                                                                                                                                                                                                                                                                                 | Centrl Laboratorija                                                                                                                                                   | Latvian Biomedical Research and Study Centre                                                                                                                                                                                                                                                                                                                             | Ivars Silamielis, Kaspars Megnis, Monta Ustinova, Jnis Pjalkovskis, ikitā Zrelovs, Vita Rovte, Stella Lapia, Jana Oste, Marta Priedte, Uga Dumpis, Jnis Kloviš                                                                                                                                                         |                                                                                                                                                                                                                                                                                                             |
| EPI_ISL_770055                                                                                                                                                                                                                                                                                                                 | E. Gulbja Laboratorija                                                                                                                                                | Latvian Biomedical Research and Study Centre                                                                                                                                                                                                                                                                                                                             | Ivars Silamielis, Kaspars Megnis, Monta Ustinova, Jnis Pjalkovskis, ikitā Zrelovs, Vita Rovte, Mikus Gavars, Dmitrijs Perminovs, Uga Dumpis, Jnis Kloviš                                                                                                                                                               |                                                                                                                                                                                                                                                                                                             |
| EPI_ISL_770056                                                                                                                                                                                                                                                                                                                 | Centrl Laboratorija                                                                                                                                                   | Latvian Biomedical Research and Study Centre                                                                                                                                                                                                                                                                                                                             | Ivars Silamielis, Kaspars Megnis, Monta Ustinova, Jnis Pjalkovskis, ikitā Zrelovs, Vita Rovte, Stella Lapia, Jana Oste, Marta Priedte, Uga Dumpis, Jnis Kloviš                                                                                                                                                         |                                                                                                                                                                                                                                                                                                             |
| EPI_ISL_770057                                                                                                                                                                                                                                                                                                                 | E. Gulbja Laboratorija                                                                                                                                                | Latvian Biomedical Research and Study Centre                                                                                                                                                                                                                                                                                                                             | Ivars Silamielis, Kaspars Megnis, Monta Ustinova, Jnis Pjalkovskis, ikitā Zrelovs, Vita Rovte, Mikus Gavars, Dmitrijs Perminovs, Uga Dumpis, Jnis Kloviš                                                                                                                                                               |                                                                                                                                                                                                                                                                                                             |
| EPI_ISL_770058, EPI_ISL_770059                                                                                                                                                                                                                                                                                                 | Centrl Laboratorija                                                                                                                                                   | Latvian Biomedical Research and Study Centre                                                                                                                                                                                                                                                                                                                             | Ivars Silamielis, Kaspars Megnis, Monta Ustinova, Jnis Pjalkovskis, ikitā Zrelovs, Vita Rovte, Stella Lapia, Jana Oste, Marta Priedte, Uga Dumpis, Jnis Kloviš                                                                                                                                                         |                                                                                                                                                                                                                                                                                                             |
| EPI_ISL_770060                                                                                                                                                                                                                                                                                                                 | Latvijas Infektoloijas centrs                                                                                                                                         | Latvian Biomedical Research and Study Centre                                                                                                                                                                                                                                                                                                                             | Ivars Silamielis, Kaspars Megnis, Monta Ustinova, Jnis Pjalkovskis, ikitā Zrelovs, Vita Rovte, Jeena Storoženko, Tatjana Kolupajeva, Oksana Savicka, Uga Dumpis, Jnis Kloviš                                                                                                                                           |                                                                                                                                                                                                                                                                                                             |
| EPI_ISL_770061                                                                                                                                                                                                                                                                                                                 | Centrl Laboratorija                                                                                                                                                   | Latvian Biomedical Research and Study Centre                                                                                                                                                                                                                                                                                                                             | Ivars Silamielis, Kaspars Megnis, Monta Ustinova, Jnis Pjalkovskis, ikitā Zrelovs, Vita Rovte, Stella Lapia, Jana Oste, Marta Priedte, Uga Dumpis, Jnis Kloviš                                                                                                                                                         |                                                                                                                                                                                                                                                                                                             |
| EPI_ISL_770062                                                                                                                                                                                                                                                                                                                 | E. Gulbja Laboratorija                                                                                                                                                | Latvian Biomedical Research and Study Centre                                                                                                                                                                                                                                                                                                                             | Ivars Silamielis, Kaspars Megnis, Monta Ustinova, Jnis Pjalkovskis, ikitā Zrelovs, Vita Rovte, Mikus Gavars, Dmitrijs Perminovs, Uga Dumpis, Jnis Kloviš                                                                                                                                                               |                                                                                                                                                                                                                                                                                                             |
| EPI_ISL_770632, EPI_ISL_770775, EPI_ISL_770776, EPI_ISL_770777                                                                                                                                                                                                                                                                 | Ohio Department of Health Laboratory                                                                                                                                  | Ohio Department of Health Laboratory                                                                                                                                                                                                                                                                                                                                     | Holmes, Jennifer; Eric Brandt, Keoni Omura, Glen McGillivray, Caitlin McDonnell, Kirtana Ramadugu, Erica Leasure, Kelsey Florek, Heather Blankenship, Quanta Brown, and Tammy Bannerman                                                                                                                                |                                                                                                                                                                                                                                                                                                             |
| EPI_ISL_775239, EPI_ISL_775240, EPI_ISL_775243, EPI_ISL_775246, EPI_ISL_775257, EPI_ISL_775259, EPI_ISL_775261                                                                                                                                                                                                                 | INT Fondazione Pascale                                                                                                                                                | INT Fondazione Pascale                                                                                                                                                                                                                                                                                                                                                   | INT Fondazione Pascale                                                                                                                                                                                                                                                                                                 |                                                                                                                                                                                                                                                                                                             |
| EPI_ISL_775596                                                                                                                                                                                                                                                                                                                 | Lab. Biologi Molekular FKIK Unwar, Bali                                                                                                                               | National Institute of Health Research and Development                                                                                                                                                                                                                                                                                                                    | Ikawati,HD;Subangkit;Pawestri,HA;Nugraha,AA;Puspa,KD;Dewi,SR;Pangesti,KNA;Soekarso,T;Puspandari,N;Setiawaty,V                                                                                                                                                                                                          |                                                                                                                                                                                                                                                                                                             |
| EPI_ISL_775600, EPI_ISL_775601, EPI_ISL_775602                                                                                                                                                                                                                                                                                 | Ohio Department of Health Laboratory                                                                                                                                  | Ohio Department of Health Laboratory                                                                                                                                                                                                                                                                                                                                     | Holmes, Jennifer; Eric Brandt, Keoni Omura, Glen McGillivray, Caitlin McDonnell, Kirtana Ramadugu, Erica Leasure, Kelsey Florek, Heather Blankenship, Quanta Brown, and Tammy Bannerman                                                                                                                                |                                                                                                                                                                                                                                                                                                             |
| EPI_ISL_775603, EPI_ISL_775605, EPI_ISL_775606, EPI_ISL_775667, EPI_ISL_775668, EPI_ISL_776773, EPI_ISL_776774, EPI_ISL_776869, EPI_ISL_776872, EPI_ISL_776874, EPI_ISL_776876, EPI_ISL_776994                                                                                                                                 | see above                                                                                                                                                             | Ohio Department of Health Laboratory                                                                                                                                                                                                                                                                                                                                     | Ohio Department of Health Laboratory                                                                                                                                                                                                                                                                                   | Holmes, Jennifer; Eric Brandt, Keoni Omura, Glen McGillivray, Caitlin McDonnell, Kirtana Ramadugu, Erica Leasure, Kelsey Florek, Heather Blankenship, Quanta Brown, and Tammy Bannerman                                                                                                                     |
| EPI_ISL_777017, EPI_ISL_777028, EPI_ISL_777036                                                                                                                                                                                                                                                                                 | Lighthouse Lab in Alderley Park                                                                                                                                       | Wellcome Sanger Institute for the COVID-19 Genomics UK (COG-UK) Consortium                                                                                                                                                                                                                                                                                               | Jacquelyn Wynn, Mairead Hyland, The Lighthouse Lab in Alderley Park and Alex Alderton, Roberto Amato, Sonia Goncalves, Ewan Harrison, David K. Jackson, Ian Johnston, Dominic Kwiatkowski, Cordelia Langford, John Sillitoe on behalf of the Wellcome Sanger Institute COVID-19 Surveillance Team                      |                                                                                                                                                                                                                                                                                                             |
| EPI_ISL_777081                                                                                                                                                                                                                                                                                                                 | Lighthouse Lab in Glasgow                                                                                                                                             | Wellcome Sanger Institute for the COVID-19 Genomics UK (COG-UK) Consortium                                                                                                                                                                                                                                                                                               | Harper VanSteenhouse, Yumi Kasai, David Gray, Carol Clugston, Anna Dominiczak and Alex Alderton, Roberto Amato, Sonia Goncalves, Ewan Harrison, David K. Jackson, Ian Johnston, Dominic Kwiatkowski, Cordelia Langford, John Sillitoe on behalf of the Wellcome Sanger Institute COVID-19 Surveillance Team            |                                                                                                                                                                                                                                                                                                             |
| EPI_ISL_777086                                                                                                                                                                                                                                                                                                                 | Lighthouse Lab in Alderley Park                                                                                                                                       | Wellcome Sanger Institute for the COVID-19 Genomics UK (COG-UK) Consortium                                                                                                                                                                                                                                                                                               | Jacquelyn Wynn, Mairead Hyland, The Lighthouse Lab in Alderley Park and Alex Alderton, Roberto Amato, Sonia Goncalves, Ewan Harrison, David K. Jackson, Ian Johnston, Dominic Kwiatkowski, Cordelia Langford, John Sillitoe on behalf of the Wellcome Sanger Institute COVID-19 Surveillance Team                      |                                                                                                                                                                                                                                                                                                             |
| EPI_ISL_777089, EPI_ISL_777099, EPI_ISL_777124                                                                                                                                                                                                                                                                                 | Lighthouse Lab in Glasgow                                                                                                                                             | Wellcome Sanger Institute for the COVID-19 Genomics UK (COG-UK) Consortium                                                                                                                                                                                                                                                                                               | Harper VanSteenhouse, Yumi Kasai, David Gray, Carol Clugston, Anna Dominiczak and Alex Alderton, Roberto Amato, Sonia Goncalves, Ewan Harrison, David K. Jackson, Ian Johnston, Dominic Kwiatkowski, Cordelia Langford, John Sillitoe on behalf of the Wellcome Sanger Institute COVID-19 Surveillance Team            |                                                                                                                                                                                                                                                                                                             |



|                                                                                                                                                                                                                                                                                                                                                                                                                                                                                                                                                                                                |           |                                                                                                                                                                       |                                                                                                                                                                                                                                                                                                                                                                          |                                                                                                                                                                                                                                                                                                                                           |
|------------------------------------------------------------------------------------------------------------------------------------------------------------------------------------------------------------------------------------------------------------------------------------------------------------------------------------------------------------------------------------------------------------------------------------------------------------------------------------------------------------------------------------------------------------------------------------------------|-----------|-----------------------------------------------------------------------------------------------------------------------------------------------------------------------|--------------------------------------------------------------------------------------------------------------------------------------------------------------------------------------------------------------------------------------------------------------------------------------------------------------------------------------------------------------------------|-------------------------------------------------------------------------------------------------------------------------------------------------------------------------------------------------------------------------------------------------------------------------------------------------------------------------------------------|
| EPI_ISL_781195, EPI_ISL_781207, EPI_ISL_781291, EPI_ISL_781337, EPI_ISL_781366, EPI_ISL_781408, EPI_ISL_781451, EPI_ISL_781463, EPI_ISL_781508, EPI_ISL_781510, EPI_ISL_781884, EPI_ISL_781887                                                                                                                                                                                                                                                                                                                                                                                                 | see above | Lighthouse Lab in Alderley Park                                                                                                                                       | Wellcome Sanger Institute for the COVID-19 Genomics UK (COG-UK) Consortium                                                                                                                                                                                                                                                                                               | Jacquelyn Wynn, Mairead Hyland, The Lighthouse Lab in Alderley Park and Alex Alderton, Roberto Amato, Sonia Goncalves, Ewan Harrison, David K. Jackson, Ian Johnston, Dominic Kwiatkowski, Cordelia Langford, John Sillitoe on behalf of the Wellcome Sanger Institute COVID-19 Surveillance Team                                         |
| EPI_ISL_781922                                                                                                                                                                                                                                                                                                                                                                                                                                                                                                                                                                                 |           | Lighthouse Lab in Glasgow                                                                                                                                             | Wellcome Sanger Institute for the COVID-19 Genomics UK (COG-UK) Consortium                                                                                                                                                                                                                                                                                               | Harper VanSteenhouse, Yumi Kasai, David Gray, Carol Clugston, Anna Dominiczak and Alex Alderton, Roberto Amato, Sonia Goncalves, Ewan Harrison, David K. Jackson, Ian Johnston, Dominic Kwiatkowski, Cordelia Langford, John Sillitoe on behalf of the Wellcome Sanger Institute COVID-19 Surveillance Team                               |
| EPI_ISL_781923, EPI_ISL_781937, EPI_ISL_781943, EPI_ISL_781962, EPI_ISL_781975                                                                                                                                                                                                                                                                                                                                                                                                                                                                                                                 |           | Lighthouse Lab in Alderley Park                                                                                                                                       | Wellcome Sanger Institute for the COVID-19 Genomics UK (COG-UK) Consortium                                                                                                                                                                                                                                                                                               | Jacquelyn Wynn, Mairead Hyland, The Lighthouse Lab in Alderley Park and Alex Alderton, Roberto Amato, Sonia Goncalves, Ewan Harrison, David K. Jackson, Ian Johnston, Dominic Kwiatkowski, Cordelia Langford, John Sillitoe on behalf of the Wellcome Sanger Institute COVID-19 Surveillance Team                                         |
| EPI_ISL_782066                                                                                                                                                                                                                                                                                                                                                                                                                                                                                                                                                                                 |           | Lighthouse Lab in Glasgow                                                                                                                                             | Wellcome Sanger Institute for the COVID-19 Genomics UK (COG-UK) Consortium                                                                                                                                                                                                                                                                                               | Harper VanSteenhouse, Yumi Kasai, David Gray, Carol Clugston, Anna Dominiczak and Alex Alderton, Roberto Amato, Sonia Goncalves, Ewan Harrison, David K. Jackson, Ian Johnston, Dominic Kwiatkowski, Cordelia Langford, John Sillitoe on behalf of the Wellcome Sanger Institute COVID-19 Surveillance Team                               |
| EPI_ISL_782082, EPI_ISL_782085, EPI_ISL_782096, EPI_ISL_782117, EPI_ISL_782120                                                                                                                                                                                                                                                                                                                                                                                                                                                                                                                 |           | Lighthouse Lab in Alderley Park                                                                                                                                       | Wellcome Sanger Institute for the COVID-19 Genomics UK (COG-UK) Consortium                                                                                                                                                                                                                                                                                               | Jacquelyn Wynn, Mairead Hyland, The Lighthouse Lab in Alderley Park and Alex Alderton, Roberto Amato, Sonia Goncalves, Ewan Harrison, David K. Jackson, Ian Johnston, Dominic Kwiatkowski, Cordelia Langford, John Sillitoe on behalf of the Wellcome Sanger Institute COVID-19 Surveillance Team                                         |
| EPI_ISL_782128, EPI_ISL_782133, EPI_ISL_782164, EPI_ISL_782168, EPI_ISL_782173, EPI_ISL_782175, EPI_ISL_782189, EPI_ISL_782191, EPI_ISL_782199                                                                                                                                                                                                                                                                                                                                                                                                                                                 |           | Lighthouse Lab in Glasgow                                                                                                                                             | Wellcome Sanger Institute for the COVID-19 Genomics UK (COG-UK) Consortium                                                                                                                                                                                                                                                                                               | Harper VanSteenhouse, Yumi Kasai, David Gray, Carol Clugston, Anna Dominiczak and Alex Alderton, Roberto Amato, Sonia Goncalves, Ewan Harrison, David K. Jackson, Ian Johnston, Dominic Kwiatkowski, Cordelia Langford, John Sillitoe on behalf of the Wellcome Sanger Institute COVID-19 Surveillance Team                               |
| EPI_ISL_782202, EPI_ISL_782207                                                                                                                                                                                                                                                                                                                                                                                                                                                                                                                                                                 |           | Lighthouse Lab in Alderley Park                                                                                                                                       | Wellcome Sanger Institute for the COVID-19 Genomics UK (COG-UK) Consortium                                                                                                                                                                                                                                                                                               | Jacquelyn Wynn, Mairead Hyland, The Lighthouse Lab in Alderley Park and Alex Alderton, Roberto Amato, Sonia Goncalves, Ewan Harrison, David K. Jackson, Ian Johnston, Dominic Kwiatkowski, Cordelia Langford, John Sillitoe on behalf of the Wellcome Sanger Institute COVID-19 Surveillance Team                                         |
| EPI_ISL_782213, EPI_ISL_782215, EPI_ISL_782228, EPI_ISL_782238, EPI_ISL_782246, EPI_ISL_782248, EPI_ISL_782253                                                                                                                                                                                                                                                                                                                                                                                                                                                                                 |           | Lighthouse Lab in Glasgow                                                                                                                                             | Wellcome Sanger Institute for the COVID-19 Genomics UK (COG-UK) Consortium                                                                                                                                                                                                                                                                                               | Harper VanSteenhouse, Yumi Kasai, David Gray, Carol Clugston, Anna Dominiczak and Alex Alderton, Roberto Amato, Sonia Goncalves, Ewan Harrison, David K. Jackson, Ian Johnston, Dominic Kwiatkowski, Cordelia Langford, John Sillitoe on behalf of the Wellcome Sanger Institute COVID-19 Surveillance Team                               |
| EPI_ISL_782259, EPI_ISL_782313                                                                                                                                                                                                                                                                                                                                                                                                                                                                                                                                                                 |           | Lighthouse Lab in Alderley Park                                                                                                                                       | Wellcome Sanger Institute for the COVID-19 Genomics UK (COG-UK) Consortium                                                                                                                                                                                                                                                                                               | Jacquelyn Wynn, Mairead Hyland, The Lighthouse Lab in Alderley Park and Alex Alderton, Roberto Amato, Sonia Goncalves, Ewan Harrison, David K. Jackson, Ian Johnston, Dominic Kwiatkowski, Cordelia Langford, John Sillitoe on behalf of the Wellcome Sanger Institute COVID-19 Surveillance Team                                         |
| EPI_ISL_782340                                                                                                                                                                                                                                                                                                                                                                                                                                                                                                                                                                                 |           | Lighthouse Lab in Glasgow                                                                                                                                             | Wellcome Sanger Institute for the COVID-19 Genomics UK (COG-UK) Consortium                                                                                                                                                                                                                                                                                               | Harper VanSteenhouse, Yumi Kasai, David Gray, Carol Clugston, Anna Dominiczak and Alex Alderton, Roberto Amato, Sonia Goncalves, Ewan Harrison, David K. Jackson, Ian Johnston, Dominic Kwiatkowski, Cordelia Langford, John Sillitoe on behalf of the Wellcome Sanger Institute COVID-19 Surveillance Team                               |
| EPI_ISL_782345                                                                                                                                                                                                                                                                                                                                                                                                                                                                                                                                                                                 |           | Lighthouse Lab in Alderley Park                                                                                                                                       | Wellcome Sanger Institute for the COVID-19 Genomics UK (COG-UK) Consortium                                                                                                                                                                                                                                                                                               | Jacquelyn Wynn, Mairead Hyland, The Lighthouse Lab in Alderley Park and Alex Alderton, Roberto Amato, Sonia Goncalves, Ewan Harrison, David K. Jackson, Ian Johnston, Dominic Kwiatkowski, Cordelia Langford, John Sillitoe on behalf of the Wellcome Sanger Institute COVID-19 Surveillance Team                                         |
| EPI_ISL_782350, EPI_ISL_782356, EPI_ISL_782374, EPI_ISL_782389                                                                                                                                                                                                                                                                                                                                                                                                                                                                                                                                 |           | Lighthouse Lab in Glasgow                                                                                                                                             | Wellcome Sanger Institute for the COVID-19 Genomics UK (COG-UK) Consortium                                                                                                                                                                                                                                                                                               | Harper VanSteenhouse, Yumi Kasai, David Gray, Carol Clugston, Anna Dominiczak and Alex Alderton, Roberto Amato, Sonia Goncalves, Ewan Harrison, David K. Jackson, Ian Johnston, Dominic Kwiatkowski, Cordelia Langford, John Sillitoe on behalf of the Wellcome Sanger Institute COVID-19 Surveillance Team                               |
| EPI_ISL_782393, EPI_ISL_782409                                                                                                                                                                                                                                                                                                                                                                                                                                                                                                                                                                 |           | Lighthouse Lab in Alderley Park                                                                                                                                       | Wellcome Sanger Institute for the COVID-19 Genomics UK (COG-UK) Consortium                                                                                                                                                                                                                                                                                               | Jacquelyn Wynn, Mairead Hyland, The Lighthouse Lab in Alderley Park and Alex Alderton, Roberto Amato, Sonia Goncalves, Ewan Harrison, David K. Jackson, Ian Johnston, Dominic Kwiatkowski, Cordelia Langford, John Sillitoe on behalf of the Wellcome Sanger Institute COVID-19 Surveillance Team                                         |
| EPI_ISL_782414, EPI_ISL_782416, EPI_ISL_782463, EPI_ISL_782472                                                                                                                                                                                                                                                                                                                                                                                                                                                                                                                                 |           | Lighthouse Lab in Glasgow                                                                                                                                             | Wellcome Sanger Institute for the COVID-19 Genomics UK (COG-UK) Consortium                                                                                                                                                                                                                                                                                               | Harper VanSteenhouse, Yumi Kasai, David Gray, Carol Clugston, Anna Dominiczak and Alex Alderton, Roberto Amato, Sonia Goncalves, Ewan Harrison, David K. Jackson, Ian Johnston, Dominic Kwiatkowski, Cordelia Langford, John Sillitoe on behalf of the Wellcome Sanger Institute COVID-19 Surveillance Team                               |
| EPI_ISL_782478                                                                                                                                                                                                                                                                                                                                                                                                                                                                                                                                                                                 |           | Lighthouse Lab in Alderley Park                                                                                                                                       | Wellcome Sanger Institute for the COVID-19 Genomics UK (COG-UK) Consortium                                                                                                                                                                                                                                                                                               | Jacquelyn Wynn, Mairead Hyland, The Lighthouse Lab in Alderley Park and Alex Alderton, Roberto Amato, Sonia Goncalves, Ewan Harrison, David K. Jackson, Ian Johnston, Dominic Kwiatkowski, Cordelia Langford, John Sillitoe on behalf of the Wellcome Sanger Institute COVID-19 Surveillance Team                                         |
| EPI_ISL_782481, EPI_ISL_782483, EPI_ISL_782511, EPI_ISL_782544, EPI_ISL_782548, EPI_ISL_782590, EPI_ISL_782603, EPI_ISL_782618, EPI_ISL_782628, EPI_ISL_782658, EPI_ISL_782661, EPI_ISL_782686, EPI_ISL_782688, EPI_ISL_782693, EPI_ISL_782700, EPI_ISL_782707, EPI_ISL_782730                                                                                                                                                                                                                                                                                                                 | see above | Lighthouse Lab in Glasgow                                                                                                                                             | Wellcome Sanger Institute for the COVID-19 Genomics UK (COG-UK) Consortium                                                                                                                                                                                                                                                                                               | Harper VanSteenhouse, Yumi Kasai, David Gray, Carol Clugston, Anna Dominiczak and Alex Alderton, Roberto Amato, Sonia Goncalves, Ewan Harrison, David K. Jackson, Ian Johnston, Dominic Kwiatkowski, Cordelia Langford, John Sillitoe on behalf of the Wellcome Sanger Institute COVID-19 Surveillance Team                               |
| EPI_ISL_782745, EPI_ISL_782791, EPI_ISL_782808, EPI_ISL_782946, EPI_ISL_782964, EPI_ISL_783026, EPI_ISL_783047                                                                                                                                                                                                                                                                                                                                                                                                                                                                                 |           | Lighthouse Lab in Alderley Park                                                                                                                                       | Wellcome Sanger Institute for the COVID-19 Genomics UK (COG-UK) Consortium                                                                                                                                                                                                                                                                                               | Jacquelyn Wynn, Mairead Hyland, The Lighthouse Lab in Alderley Park and Alex Alderton, Roberto Amato, Sonia Goncalves, Ewan Harrison, David K. Jackson, Ian Johnston, Dominic Kwiatkowski, Cordelia Langford, John Sillitoe on behalf of the Wellcome Sanger Institute COVID-19 Surveillance Team                                         |
| EPI_ISL_788943, EPI_ISL_788944, EPI_ISL_788945, EPI_ISL_788946, EPI_ISL_788947, EPI_ISL_788948, EPI_ISL_788949, EPI_ISL_788950, EPI_ISL_788951, EPI_ISL_788952, EPI_ISL_788953, EPI_ISL_788954, EPI_ISL_788955, EPI_ISL_788956, EPI_ISL_788957, EPI_ISL_788958, EPI_ISL_788959, EPI_ISL_788960, EPI_ISL_788961, EPI_ISL_788962, EPI_ISL_788963, EPI_ISL_788964, EPI_ISL_788965, EPI_ISL_788966, EPI_ISL_788967, EPI_ISL_788968, EPI_ISL_788969, EPI_ISL_788970, EPI_ISL_788971, EPI_ISL_788972, EPI_ISL_788973, EPI_ISL_788974, EPI_ISL_788975, EPI_ISL_788976, EPI_ISL_788977, EPI_ISL_788978 | see above | Ospedale "Di Venere"                                                                                                                                                  | Beaconlab (Bioinformatics, Evolution and Comparative Genomics lab), Dept of Biosciences, University on Milan                                                                                                                                                                                                                                                             | Iacobellis M, d'Avenia M, Piluscio R, Parisi A, Chiara M, Manzari C, Pesole G                                                                                                                                                                                                                                                             |
| EPI_ISL_789102, EPI_ISL_789103, EPI_ISL_789104                                                                                                                                                                                                                                                                                                                                                                                                                                                                                                                                                 |           | Ohio Department of Health Laboratory                                                                                                                                  | Ohio Department of Health Laboratory                                                                                                                                                                                                                                                                                                                                     | Holmes, Jennifer; Eric Brandt, Keoni Omura, Glen McGillivray, Caitlin McDonnell, Kirtana Ramadugu, Erica Leasure, Kelsey Florek, Heather Blankenship, Quanta Brown, and Tammy Bannerman                                                                                                                                                   |
| EPI_ISL_791980                                                                                                                                                                                                                                                                                                                                                                                                                                                                                                                                                                                 |           | RSUD Blambangan Banyuwangi                                                                                                                                            | National Institute of Health Research and Development                                                                                                                                                                                                                                                                                                                    | Ikawati,HD;Subangkit;Pawestri,HA;Nugraha,AA;Puspa,KD;Noor,RI;Pangesti,KNA;Soekarso,T;Puspandari,N;Setiawaty,V                                                                                                                                                                                                                             |
| EPI_ISL_791981                                                                                                                                                                                                                                                                                                                                                                                                                                                                                                                                                                                 |           | Balai Litbang Aceh                                                                                                                                                    | National Institute of Health Research and Development                                                                                                                                                                                                                                                                                                                    | Ikawati,HD;Subangkit;Pawestri,HA;Nugraha,AA;Puspa,KD;Ichwansyah,F;Fitria,E;Pangesti,KNA;Soekarso,T;Puspandari,N;Setiawaty,V                                                                                                                                                                                                               |
| EPI_ISL_791982                                                                                                                                                                                                                                                                                                                                                                                                                                                                                                                                                                                 |           | RSUP DR KARIADI Semarang                                                                                                                                              | National Institute of Health Research and Development                                                                                                                                                                                                                                                                                                                    | Ikawati,HD;Subangkit;Pawestri,HA;Nugraha,AA;Puspa,KD;Puspitasari,I;Pangesti,KNA;Soekarso,T;Puspandari,N;Setiawaty,V                                                                                                                                                                                                                       |
| EPI_ISL_794735, EPI_ISL_794736, EPI_ISL_794737, EPI_ISL_794738                                                                                                                                                                                                                                                                                                                                                                                                                                                                                                                                 |           | 1-Laboratory of Microbiology, National Reference Lab, Charles Nicolle Hospital; 2-University of Tunis ElManar, Faculty of Medicine of Tunis, LR99ES09, Tunis, Tunisia | 1-Clinical and Experimental Pharmacology Lab, LR16SP02, National Center of Pharmacovigilance, University of Tunis El Manar, Tunis, Tunisia. 2-Neurodegenerative diseases and psychiatric troubles, LR18SP03, Razi Hospital, University of Tunis El Manar, Tunis, Tunisia. 3- Ministry of Health, National Observatory of New and Emerging Diseases, 1006, Tunis, Tunisia | Ilhem Boutiba-Ben Boubaker, Sameh Trabelsi, Nissaf Ben Alaya, Maher Kharrat, Alia BenKahla, Jalila Ben Kheilil, Salma Abid, Sana Ferjani, Mouna Ben Sassi, Mouna Safer, Zaineb Hamzaoui, Guedi Ali Barreh, Habiba Ben Romdhane, Souissi Amira, Sarra Chamman, Hanen El Jebari, Asma Ferjani, Gaies Emna, Riadh Daghfous, Riadh Gouider.   |
| EPI_ISL_796782                                                                                                                                                                                                                                                                                                                                                                                                                                                                                                                                                                                 |           | Laboratory of Microbiology, National Reference Lab, Charles Nicolle Hospital; 2-University of Tunis ElManar, Faculty of Medicine of Tunis, LR99ES09, Tunis, Tunisia   | Clinical and Experimental Pharmacology Lab, LR16SP02, National Center of Pharmacovigilance, University of Tunis El Manar, Tunis, Tunisia. 2-Neurodegenerative diseases and psychiatric troubles, LR18SP03, Razi Hospital, University of                                                                                                                                  | Ilhem Boutiba-Ben Boubaker, Sameh Trabelsi, Nissaf Ben Alaya, Maher Kharrat, Alia BenKahla, Jalila Ben Kheilil, Salma Abid, Sana Ferjani, Mouna Ben Sassi, Mouna Safer, Zaineb Hamzaoui, Guedi Ali Barreh, Habiba Ben Romdhane, Souissi Amira, Sarra Chamman, Hanen El Jebari, Ahmed Fakhfakh, Gaies Emna, Riadh Daghfous, Riadh Gouider. |



|                                                                                                                                                                                                                                                                                                                                                                                                                                                                                |                                                                                                                                                                     |                                                                                                                                                                                                                                                                                                                                                                        |                                                                                                                                                                                                                                                                                                                                                           |
|--------------------------------------------------------------------------------------------------------------------------------------------------------------------------------------------------------------------------------------------------------------------------------------------------------------------------------------------------------------------------------------------------------------------------------------------------------------------------------|---------------------------------------------------------------------------------------------------------------------------------------------------------------------|------------------------------------------------------------------------------------------------------------------------------------------------------------------------------------------------------------------------------------------------------------------------------------------------------------------------------------------------------------------------|-----------------------------------------------------------------------------------------------------------------------------------------------------------------------------------------------------------------------------------------------------------------------------------------------------------------------------------------------------------|
|                                                                                                                                                                                                                                                                                                                                                                                                                                                                                |                                                                                                                                                                     | (COG-UK) Consortium                                                                                                                                                                                                                                                                                                                                                    | David K. Jackson, Ian Johnston, Dominic Kwiatkowski, Cordelia Langford, John Sillitoe on behalf of the Wellcome Sanger Institute COVID-19 Surveillance Team                                                                                                                                                                                               |
| EPI_ISL_800009                                                                                                                                                                                                                                                                                                                                                                                                                                                                 | Lighthouse Lab in Alderley Park                                                                                                                                     | Wellcome Sanger Institute for the COVID-19 Genomics UK (COG-UK) Consortium                                                                                                                                                                                                                                                                                             | Jacquelyn Wynn, Mairead Hyland, The Lighthouse Lab in Alderley Park and Alex Alderton, Roberto Amato, Sonia Goncalves, Ewan Harrison, David K. Jackson, Ian Johnston, Dominic Kwiatkowski, Cordelia Langford, John Sillitoe on behalf of the Wellcome Sanger Institute COVID-19 Surveillance Team                                                         |
| EPI_ISL_800015                                                                                                                                                                                                                                                                                                                                                                                                                                                                 | Lighthouse Lab in Glasgow                                                                                                                                           | Wellcome Sanger Institute for the COVID-19 Genomics UK (COG-UK) Consortium                                                                                                                                                                                                                                                                                             | Harper VanSteenhouse, Yumi Kasai, David Gray, Carol Clugston, Anna Dominiczak and Alex Alderton, Roberto Amato, Sonia Goncalves, Ewan Harrison, David K. Jackson, Ian Johnston, Dominic Kwiatkowski, Cordelia Langford, John Sillitoe on behalf of the Wellcome Sanger Institute COVID-19 Surveillance Team                                               |
| EPI_ISL_800033, EPI_ISL_800039, EPI_ISL_800040, EPI_ISL_800043, EPI_ISL_800059, EPI_ISL_800067                                                                                                                                                                                                                                                                                                                                                                                 | Lighthouse Lab in Alderley Park                                                                                                                                     | Wellcome Sanger Institute for the COVID-19 Genomics UK (COG-UK) Consortium                                                                                                                                                                                                                                                                                             | Jacquelyn Wynn, Mairead Hyland, The Lighthouse Lab in Alderley Park and Alex Alderton, Roberto Amato, Sonia Goncalves, Ewan Harrison, David K. Jackson, Ian Johnston, Dominic Kwiatkowski, Cordelia Langford, John Sillitoe on behalf of the Wellcome Sanger Institute COVID-19 Surveillance Team                                                         |
| EPI_ISL_800078                                                                                                                                                                                                                                                                                                                                                                                                                                                                 | Lighthouse Lab in Glasgow                                                                                                                                           | Wellcome Sanger Institute for the COVID-19 Genomics UK (COG-UK) Consortium                                                                                                                                                                                                                                                                                             | Harper VanSteenhouse, Yumi Kasai, David Gray, Carol Clugston, Anna Dominiczak and Alex Alderton, Roberto Amato, Sonia Goncalves, Ewan Harrison, David K. Jackson, Ian Johnston, Dominic Kwiatkowski, Cordelia Langford, John Sillitoe on behalf of the Wellcome Sanger Institute COVID-19 Surveillance Team                                               |
| EPI_ISL_800104                                                                                                                                                                                                                                                                                                                                                                                                                                                                 | Lighthouse Lab in Alderley Park                                                                                                                                     | Wellcome Sanger Institute for the COVID-19 Genomics UK (COG-UK) Consortium                                                                                                                                                                                                                                                                                             | Jacquelyn Wynn, Mairead Hyland, The Lighthouse Lab in Alderley Park and Alex Alderton, Roberto Amato, Sonia Goncalves, Ewan Harrison, David K. Jackson, Ian Johnston, Dominic Kwiatkowski, Cordelia Langford, John Sillitoe on behalf of the Wellcome Sanger Institute COVID-19 Surveillance Team                                                         |
| EPI_ISL_800151                                                                                                                                                                                                                                                                                                                                                                                                                                                                 | Lighthouse Lab in Glasgow                                                                                                                                           | Wellcome Sanger Institute for the COVID-19 Genomics UK (COG-UK) Consortium                                                                                                                                                                                                                                                                                             | Harper VanSteenhouse, Yumi Kasai, David Gray, Carol Clugston, Anna Dominiczak and Alex Alderton, Roberto Amato, Sonia Goncalves, Ewan Harrison, David K. Jackson, Ian Johnston, Dominic Kwiatkowski, Cordelia Langford, John Sillitoe on behalf of the Wellcome Sanger Institute COVID-19 Surveillance Team                                               |
| EPI_ISL_800163, EPI_ISL_800171                                                                                                                                                                                                                                                                                                                                                                                                                                                 | Lighthouse Lab in Alderley Park                                                                                                                                     | Wellcome Sanger Institute for the COVID-19 Genomics UK (COG-UK) Consortium                                                                                                                                                                                                                                                                                             | Jacquelyn Wynn, Mairead Hyland, The Lighthouse Lab in Alderley Park and Alex Alderton, Roberto Amato, Sonia Goncalves, Ewan Harrison, David K. Jackson, Ian Johnston, Dominic Kwiatkowski, Cordelia Langford, John Sillitoe on behalf of the Wellcome Sanger Institute COVID-19 Surveillance Team                                                         |
| EPI_ISL_800174                                                                                                                                                                                                                                                                                                                                                                                                                                                                 | Lighthouse Lab in Glasgow                                                                                                                                           | Wellcome Sanger Institute for the COVID-19 Genomics UK (COG-UK) Consortium                                                                                                                                                                                                                                                                                             | Harper VanSteenhouse, Yumi Kasai, David Gray, Carol Clugston, Anna Dominiczak and Alex Alderton, Roberto Amato, Sonia Goncalves, Ewan Harrison, David K. Jackson, Ian Johnston, Dominic Kwiatkowski, Cordelia Langford, John Sillitoe on behalf of the Wellcome Sanger Institute COVID-19 Surveillance Team                                               |
| EPI_ISL_800194                                                                                                                                                                                                                                                                                                                                                                                                                                                                 | Lighthouse Lab in Alderley Park                                                                                                                                     | Wellcome Sanger Institute for the COVID-19 Genomics UK (COG-UK) Consortium                                                                                                                                                                                                                                                                                             | Jacquelyn Wynn, Mairead Hyland, The Lighthouse Lab in Alderley Park and Alex Alderton, Roberto Amato, Sonia Goncalves, Ewan Harrison, David K. Jackson, Ian Johnston, Dominic Kwiatkowski, Cordelia Langford, John Sillitoe on behalf of the Wellcome Sanger Institute COVID-19 Surveillance Team                                                         |
| EPI_ISL_800204                                                                                                                                                                                                                                                                                                                                                                                                                                                                 | Lighthouse Lab in Glasgow                                                                                                                                           | Wellcome Sanger Institute for the COVID-19 Genomics UK (COG-UK) Consortium                                                                                                                                                                                                                                                                                             | Harper VanSteenhouse, Yumi Kasai, David Gray, Carol Clugston, Anna Dominiczak and Alex Alderton, Roberto Amato, Sonia Goncalves, Ewan Harrison, David K. Jackson, Ian Johnston, Dominic Kwiatkowski, Cordelia Langford, John Sillitoe on behalf of the Wellcome Sanger Institute COVID-19 Surveillance Team                                               |
| EPI_ISL_800215, EPI_ISL_800216, EPI_ISL_800224, EPI_ISL_800240, EPI_ISL_800247, EPI_ISL_800317, EPI_ISL_800376, EPI_ISL_800468, EPI_ISL_800516, EPI_ISL_800578                                                                                                                                                                                                                                                                                                                 | Lighthouse Lab in Alderley Park                                                                                                                                     | Wellcome Sanger Institute for the COVID-19 Genomics UK (COG-UK) Consortium                                                                                                                                                                                                                                                                                             | Jacquelyn Wynn, Mairead Hyland, The Lighthouse Lab in Alderley Park and Alex Alderton, Roberto Amato, Sonia Goncalves, Ewan Harrison, David K. Jackson, Ian Johnston, Dominic Kwiatkowski, Cordelia Langford, John Sillitoe on behalf of the Wellcome Sanger Institute COVID-19 Surveillance Team                                                         |
| EPI_ISL_800629, EPI_ISL_800653, EPI_ISL_800655, EPI_ISL_800696, EPI_ISL_800705, EPI_ISL_800715, EPI_ISL_800726, EPI_ISL_800766, EPI_ISL_800862, EPI_ISL_801231, EPI_ISL_801242, EPI_ISL_801270, EPI_ISL_801282, EPI_ISL_801286, EPI_ISL_801290, EPI_ISL_801302, EPI_ISL_801357, EPI_ISL_801365, EPI_ISL_801376, EPI_ISL_801377, EPI_ISL_801379                                                                                                                                 |                                                                                                                                                                     |                                                                                                                                                                                                                                                                                                                                                                        |                                                                                                                                                                                                                                                                                                                                                           |
| see above                                                                                                                                                                                                                                                                                                                                                                                                                                                                      | Lighthouse Lab in Glasgow                                                                                                                                           | Wellcome Sanger Institute for the COVID-19 Genomics UK (COG-UK) Consortium                                                                                                                                                                                                                                                                                             | Harper VanSteenhouse, Yumi Kasai, David Gray, Carol Clugston, Anna Dominiczak and Alex Alderton, Roberto Amato, Sonia Goncalves, Ewan Harrison, David K. Jackson, Ian Johnston, Dominic Kwiatkowski, Cordelia Langford, John Sillitoe on behalf of the Wellcome Sanger Institute COVID-19 Surveillance Team                                               |
| EPI_ISL_802501                                                                                                                                                                                                                                                                                                                                                                                                                                                                 | Ohio Department of Health Laboratory                                                                                                                                | Ohio Department of Health Laboratory                                                                                                                                                                                                                                                                                                                                   | Holmes, Jennifer; Eric Brandt, Keoni Omura, Glen McGillivray, Caitlin McDonnell, Kirtana Ramadugu, Erica Leasure, Kelsey Florek, Heather Blankenship, Quanta Brown, and Tammy Bannerman                                                                                                                                                                   |
| EPI_ISL_802726, EPI_ISL_802727, EPI_ISL_802728, EPI_ISL_802729, EPI_ISL_802730, EPI_ISL_802731, EPI_ISL_802732, EPI_ISL_802733, EPI_ISL_802734, EPI_ISL_802735, EPI_ISL_802736, EPI_ISL_802737, EPI_ISL_802738, EPI_ISL_802739, EPI_ISL_802740, EPI_ISL_802741, EPI_ISL_802742, EPI_ISL_802743, EPI_ISL_802744, EPI_ISL_802745, EPI_ISL_802746, EPI_ISL_802747, EPI_ISL_802748, EPI_ISL_802749                                                                                 |                                                                                                                                                                     |                                                                                                                                                                                                                                                                                                                                                                        |                                                                                                                                                                                                                                                                                                                                                           |
| see above                                                                                                                                                                                                                                                                                                                                                                                                                                                                      | Hospital Clínic de Barcelona                                                                                                                                        | Instituto de Salud Carlos III                                                                                                                                                                                                                                                                                                                                          | Iglesias-Caballero, M. Molinero Calamita, M. González-Esguevillas, M. Camarero, S. Pozo, F. Casas, I. Jiménez, P. Jiménez, M. Zaballos, A. Monzón, S. Varona, S. Juliá, M. Cuesta, I, M.A Marcos.                                                                                                                                                         |
| EPI_ISL_802750, EPI_ISL_802751, EPI_ISL_802752, EPI_ISL_802753, EPI_ISL_802754, EPI_ISL_802755, EPI_ISL_802756, EPI_ISL_802757, EPI_ISL_802758, EPI_ISL_802759, EPI_ISL_802760, EPI_ISL_802761, EPI_ISL_802762, EPI_ISL_802763, EPI_ISL_802764, EPI_ISL_802765, EPI_ISL_802766, EPI_ISL_802767, EPI_ISL_802768, EPI_ISL_802769, EPI_ISL_802770, EPI_ISL_802771, EPI_ISL_802772, EPI_ISL_802773, EPI_ISL_802774, EPI_ISL_802775, EPI_ISL_802776                                 |                                                                                                                                                                     |                                                                                                                                                                                                                                                                                                                                                                        |                                                                                                                                                                                                                                                                                                                                                           |
| see above                                                                                                                                                                                                                                                                                                                                                                                                                                                                      | Hospital Santa Maria Nai                                                                                                                                            | Instituto de Salud Carlos III                                                                                                                                                                                                                                                                                                                                          | Iglesias-Caballero, M. Molinero Calamita, M. González-Esguevillas, M. Camarero, S. Pozo, F. Casas, I. Jiménez, P. Jiménez, M. Zaballos, A. Monzón, S. Varona, S. Juliá, M. Cuesta, I, J. Garcia.                                                                                                                                                          |
| EPI_ISL_803119, EPI_ISL_803120, EPI_ISL_803430, EPI_ISL_803817, EPI_ISL_803851                                                                                                                                                                                                                                                                                                                                                                                                 | Laboratory of Microbiology, National Reference Lab, Charles Nicolle Hospital; 2-University of Tunis ElManar, Faculty of Medicine of Tunis, LR99ES09, Tunis, Tunisia | Clinical and Experimental Pharmacology Lab, LR16SP02, National Center of Pharmacovigilance, University of Tunis El Manar, Tunis, Tunisia. 2-Neurodegenerative diseases and psychiatric troubles, LR18SP03, Razi Hospital, University of Tunis El Manar, Tunis, Tunisia. 3- Ministry of Health, National Observatory of New and Emerging Diseases, 1006, Tunis, Tunisia | Ilhem Boutiba-Ben Boubaker, Sameh Trabelsi, Nissaf Ben Alaya, Maher Kharrat, Alia Ben Kahla, Jalila Ben Kheilil, Salma Abid, Sana Ferjani, Mouna Ben Sassi, Mouna Safer, Zaineb Hamzaoui, Habiba Ben Romdhane, Souissi Amira, Sarra Chamman, Hanen El Jebari, Ahmed Fakhfakh, Gaies Emna, Riadh Daghfous, Riadh Gouider.                                  |
| EPI_ISL_803852                                                                                                                                                                                                                                                                                                                                                                                                                                                                 | National Institute of Laboratory Medicine and Referral Center                                                                                                       | Genomic Research Lab, BCSIR                                                                                                                                                                                                                                                                                                                                            | Iffat Jahan, Mohammad Samir Uzzaman, Eshrar Osman, Md. Ahasan Habib, Shahina Akter, Tanjina Akhter Banu, Abu Sayeed Mohammad Mahmud, Md. Murshed Hasan Sarkar, Barna Goswami, Md. Saddam Hossain, Tasnim Nafisa, Md. Maruf Ahmed Molla, Mahmuda Yeasmin, Asish Kumar Ghosh, A. K. M. Shamsuzzaman, Monira Parveen, Md. Masum Hossain Arif, Md. Salim Khan |
| EPI_ISL_803880, EPI_ISL_803881, EPI_ISL_803882, EPI_ISL_803883, EPI_ISL_803884, EPI_ISL_803885, EPI_ISL_803886, EPI_ISL_803887, EPI_ISL_803888, EPI_ISL_803891, EPI_ISL_803892, EPI_ISL_803893, EPI_ISL_803895                                                                                                                                                                                                                                                                 |                                                                                                                                                                     |                                                                                                                                                                                                                                                                                                                                                                        |                                                                                                                                                                                                                                                                                                                                                           |
| see above                                                                                                                                                                                                                                                                                                                                                                                                                                                                      | Department of Medical Biotechnologies, University of Siena                                                                                                          | Laboratory of Infectious Diseases, Department of Biomedical and Clinical Sciences L. Sacco, University of Milan                                                                                                                                                                                                                                                        | Ilaria Vicenti, Filippo Dragoni, Maurizio Zazzi, Maria Grazia Cusi, Alessia Lai, Annalisa Bergna, Carla Della Ventura, Claudia Balotta, Massimo Galli, Gianguglielmo Zehender on behalf of SARS-CoV-2 ITALIAN RESEARCH ENTERPRISE-(SCIRE) Collaborative Group                                                                                             |
| EPI_ISL_804949, EPI_ISL_804952, EPI_ISL_804953, EPI_ISL_804954, EPI_ISL_804955, EPI_ISL_804956, EPI_ISL_804957, EPI_ISL_804958, EPI_ISL_804959, EPI_ISL_804960, EPI_ISL_804961, EPI_ISL_804962, EPI_ISL_804963, EPI_ISL_804964, EPI_ISL_804965, EPI_ISL_804966, EPI_ISL_804967, EPI_ISL_804968, EPI_ISL_804969, EPI_ISL_804970, EPI_ISL_804971, EPI_ISL_804972, EPI_ISL_804973, EPI_ISL_804974, EPI_ISL_804975, EPI_ISL_804976, EPI_ISL_804977, EPI_ISL_804978, EPI_ISL_804979 |                                                                                                                                                                     |                                                                                                                                                                                                                                                                                                                                                                        |                                                                                                                                                                                                                                                                                                                                                           |
| see above                                                                                                                                                                                                                                                                                                                                                                                                                                                                      | Hospital Comarcal de Melilla                                                                                                                                        | Instituto de Salud Carlos III                                                                                                                                                                                                                                                                                                                                          | Iglesias-Caballero, M. Molinero Calamita, M. González-Esguevillas, M. Camarero, S. Pozo, F. Casas, I. Jiménez, P. Jiménez, M. Zaballos, A. Monzón, S. Varona, S. Juliá, M. Cuesta, I, J. López                                                                                                                                                            |
| EPI_ISL_811145                                                                                                                                                                                                                                                                                                                                                                                                                                                                 | Laboratory of Microbiology, National Reference Lab, Charles Nicolle Hospital; 2-University of Tunis ElManar, Faculty of Medicine of Tunis, LR99ES09, Tunis, Tunisia | Clinical and Experimental Pharmacology Lab, LR16SP02, National Center of Pharmacovigilance, University of Tunis El Manar, Tunis, Tunisia. 2-Neurodegenerative diseases and psychiatric troubles, LR18SP03, Razi Hospital, University of Tunis El Manar, Tunis, Tunisia. 3- Ministry of Health, National Observatory of New and Emerging Diseases, 1006, Tunis, Tunisia | Ilhem Boutiba-Ben Boubaker, Sameh Trabelsi, Nissaf Ben Alaya, Maher Kharrat, Alia Ben Kahla, Jalila Ben Kheilil, Salma Abid, Sana Ferjani, Mouna Ben Sassi, Mouna Safer, Awatfel El Moussi, Habiba Ben Romdhane, Souissi Amira, Ines Mdiini, Hanen El Jebari, Asma Ferjani, Gaies Emna, Riadh Daghfous, Riadh Gouider.                                    |
| EPI_ISL_811200, EPI_ISL_811237, EPI_ISL_811243, EPI_ISL_811316, EPI_ISL_811317, EPI_ISL_811330, EPI_ISL_811337, EPI_ISL_811346, EPI_ISL_811351, EPI_ISL_811364, EPI_ISL_811438                                                                                                                                                                                                                                                                                                 |                                                                                                                                                                     |                                                                                                                                                                                                                                                                                                                                                                        |                                                                                                                                                                                                                                                                                                                                                           |
| see above                                                                                                                                                                                                                                                                                                                                                                                                                                                                      | Lighthouse Lab in Glasgow                                                                                                                                           | Wellcome Sanger Institute for the COVID-19 Genomics UK                                                                                                                                                                                                                                                                                                                 | Harper VanSteenhouse, Yumi Kasai, David Gray, Carol Clugston, Anna Dominiczak and Alex Alderton, Roberto Amato, Sonia Goncalves, Ewan Harrison,                                                                                                                                                                                                           |

|                                                                                                                                                                                                                                                                                                                                                                                                                                                                                                                                                                                                                                                                                                                                                                                                                                                                                                                                                                                                                                                                                                                                                                                                                                                                                                                                                                                                                                                                                                                                                                                                                                                                                                                                                                                                                                                                                                                                                                                                                                                                                                                                                                                                                                                                                                                                                                                                                                                                                                                                                                                                                                                                                                                                                                                                                                                                                                                                                                                                |           |                                            |                                                                            |                                                                                                                                                                                                                                                                                                                                                                                                                                         |
|------------------------------------------------------------------------------------------------------------------------------------------------------------------------------------------------------------------------------------------------------------------------------------------------------------------------------------------------------------------------------------------------------------------------------------------------------------------------------------------------------------------------------------------------------------------------------------------------------------------------------------------------------------------------------------------------------------------------------------------------------------------------------------------------------------------------------------------------------------------------------------------------------------------------------------------------------------------------------------------------------------------------------------------------------------------------------------------------------------------------------------------------------------------------------------------------------------------------------------------------------------------------------------------------------------------------------------------------------------------------------------------------------------------------------------------------------------------------------------------------------------------------------------------------------------------------------------------------------------------------------------------------------------------------------------------------------------------------------------------------------------------------------------------------------------------------------------------------------------------------------------------------------------------------------------------------------------------------------------------------------------------------------------------------------------------------------------------------------------------------------------------------------------------------------------------------------------------------------------------------------------------------------------------------------------------------------------------------------------------------------------------------------------------------------------------------------------------------------------------------------------------------------------------------------------------------------------------------------------------------------------------------------------------------------------------------------------------------------------------------------------------------------------------------------------------------------------------------------------------------------------------------------------------------------------------------------------------------------------------------|-----------|--------------------------------------------|----------------------------------------------------------------------------|-----------------------------------------------------------------------------------------------------------------------------------------------------------------------------------------------------------------------------------------------------------------------------------------------------------------------------------------------------------------------------------------------------------------------------------------|
| EPI_ISL_812783, EPI_ISL_812784, EPI_ISL_812785, EPI_ISL_812786, EPI_ISL_812787, EPI_ISL_812788, EPI_ISL_812789, EPI_ISL_812790, EPI_ISL_812791, EPI_ISL_812792, EPI_ISL_812793, EPI_ISL_812794, EPI_ISL_812795, EPI_ISL_812796, EPI_ISL_812797, EPI_ISL_812798, EPI_ISL_812799, EPI_ISL_812800, EPI_ISL_812801, EPI_ISL_812802, EPI_ISL_812803, EPI_ISL_812804, EPI_ISL_812805, EPI_ISL_812806, EPI_ISL_812807, EPI_ISL_812808, EPI_ISL_812809, EPI_ISL_812810, EPI_ISL_812811, EPI_ISL_812812, EPI_ISL_812813, EPI_ISL_812814, EPI_ISL_812815, EPI_ISL_812816, EPI_ISL_812817, EPI_ISL_812818, EPI_ISL_812819, EPI_ISL_812820, EPI_ISL_812821, EPI_ISL_812822, EPI_ISL_812823, EPI_ISL_812824, EPI_ISL_812825, EPI_ISL_812826, EPI_ISL_812827, EPI_ISL_812828, EPI_ISL_812829, EPI_ISL_812830, EPI_ISL_812831, EPI_ISL_812832, EPI_ISL_812833, EPI_ISL_812834, EPI_ISL_812835, EPI_ISL_812836, EPI_ISL_812837, EPI_ISL_812838, EPI_ISL_812839, EPI_ISL_812840, EPI_ISL_812841, EPI_ISL_812842, EPI_ISL_812843, EPI_ISL_812844, EPI_ISL_812845, EPI_ISL_812846, EPI_ISL_812847, EPI_ISL_812848, EPI_ISL_812849, EPI_ISL_812850, EPI_ISL_812851, EPI_ISL_812852, EPI_ISL_812853, EPI_ISL_812854, EPI_ISL_812855, EPI_ISL_812856, EPI_ISL_812857, EPI_ISL_812858, EPI_ISL_812859, EPI_ISL_812860, EPI_ISL_812861, EPI_ISL_812862, EPI_ISL_812863, EPI_ISL_812864, EPI_ISL_812865, EPI_ISL_812866, EPI_ISL_812867, EPI_ISL_812868, EPI_ISL_812869, EPI_ISL_812870, EPI_ISL_812871, EPI_ISL_812872                                                                                                                                                                                                                                                                                                                                                                                                                                                                                                                                                                                                                                                                                                                                                                                                                                                                                                                                                                                                                                                                                                                                                                                                                                                                                                                                                                                                                                                                                                 | see above | Genomics Program, Children Cancer Hospital | Genomics Program, Children Cancer Hospital                                 | Hatem,A., Hadad,A., Abouelnaga,S., Amer,K., Salah,H., Farawyla,H., Halafawy,A., Mansour,T., shalaby,L., Hassan,W., Soliman,M., Gomaa,C., Hassan,R., Soliman,S., Monuir,G., Hammad,M., Hussein,S., Abdo,I., Jalal,D., El-Zayat,M., El-Shaqnqery,H., Diab,A., Bakry,U., Samir,O., Magdeldin,S., Sayed,A.,                                                                                                                                 |
| EPI_ISL_812971, EPI_ISL_812972, EPI_ISL_812973, EPI_ISL_812974, EPI_ISL_812975, EPI_ISL_812976, EPI_ISL_812977, EPI_ISL_812978, EPI_ISL_812979, EPI_ISL_812980, EPI_ISL_812981, EPI_ISL_812982, EPI_ISL_812983, EPI_ISL_812984, EPI_ISL_812985, EPI_ISL_812986, EPI_ISL_812987, EPI_ISL_812988, EPI_ISL_812989, EPI_ISL_812990, EPI_ISL_812991, EPI_ISL_812992, EPI_ISL_812993, EPI_ISL_812994, EPI_ISL_812995, EPI_ISL_812996, EPI_ISL_812997, EPI_ISL_812998, EPI_ISL_812999, EPI_ISL_813000, EPI_ISL_813001, EPI_ISL_813002, EPI_ISL_813003, EPI_ISL_813004, EPI_ISL_813005, EPI_ISL_813006, EPI_ISL_813007, EPI_ISL_813008, EPI_ISL_813009, EPI_ISL_813010, EPI_ISL_813011, EPI_ISL_813012, EPI_ISL_813013, EPI_ISL_813014, EPI_ISL_813015, EPI_ISL_813016, EPI_ISL_813017, EPI_ISL_813018, EPI_ISL_813019, EPI_ISL_813020, EPI_ISL_813021, EPI_ISL_813022, EPI_ISL_813023, EPI_ISL_813024, EPI_ISL_813025, EPI_ISL_813026, EPI_ISL_813027, EPI_ISL_813028, EPI_ISL_813029, EPI_ISL_813030, EPI_ISL_813031, EPI_ISL_813032, EPI_ISL_813033, EPI_ISL_813034, EPI_ISL_813035, EPI_ISL_813036, EPI_ISL_813037, EPI_ISL_813038, EPI_ISL_813039, EPI_ISL_813040, EPI_ISL_813041, EPI_ISL_813042, EPI_ISL_813043, EPI_ISL_813044, EPI_ISL_813045, EPI_ISL_813046, EPI_ISL_813047, EPI_ISL_813048, EPI_ISL_813049, EPI_ISL_813050, EPI_ISL_813051, EPI_ISL_813052, EPI_ISL_813053, EPI_ISL_813054, EPI_ISL_813055, EPI_ISL_813056, EPI_ISL_813057, EPI_ISL_813058, EPI_ISL_813059, EPI_ISL_813060, EPI_ISL_813061, EPI_ISL_813062, EPI_ISL_813063, EPI_ISL_813064, EPI_ISL_813065, EPI_ISL_813066, EPI_ISL_813067, EPI_ISL_813068, EPI_ISL_813069, EPI_ISL_813070, EPI_ISL_813071, EPI_ISL_813072, EPI_ISL_813073, EPI_ISL_813074, EPI_ISL_813075, EPI_ISL_813076, EPI_ISL_813077, EPI_ISL_813078, EPI_ISL_813079, EPI_ISL_813080, EPI_ISL_813081, EPI_ISL_813082, EPI_ISL_813083, EPI_ISL_813084, EPI_ISL_813085, EPI_ISL_813086, EPI_ISL_813087, EPI_ISL_813088, EPI_ISL_813089, EPI_ISL_813090, EPI_ISL_813091, EPI_ISL_813092, EPI_ISL_813093, EPI_ISL_813094, EPI_ISL_813095, EPI_ISL_813096, EPI_ISL_813097, EPI_ISL_813098, EPI_ISL_813099, EPI_ISL_813100, EPI_ISL_813101, EPI_ISL_813102, EPI_ISL_813103, EPI_ISL_813104, EPI_ISL_813105, EPI_ISL_813106, EPI_ISL_813107, EPI_ISL_813108, EPI_ISL_813109, EPI_ISL_813110, EPI_ISL_813111, EPI_ISL_813112, EPI_ISL_813113, EPI_ISL_813114, EPI_ISL_813115, EPI_ISL_813116, EPI_ISL_813117, EPI_ISL_813118, EPI_ISL_813119, EPI_ISL_813120, EPI_ISL_813121, EPI_ISL_813122, EPI_ISL_813123, EPI_ISL_813124, EPI_ISL_813125, EPI_ISL_813126, EPI_ISL_813127, EPI_ISL_813128, EPI_ISL_813129, EPI_ISL_813130, EPI_ISL_813131, EPI_ISL_813132, EPI_ISL_813133, EPI_ISL_813134, EPI_ISL_813135, EPI_ISL_813136, EPI_ISL_813137, EPI_ISL_813138, EPI_ISL_813139, EPI_ISL_813140, EPI_ISL_813141, EPI_ISL_813142, EPI_ISL_813143, EPI_ISL_813144, EPI_ISL_813145, EPI_ISL_813146, EPI_ISL_813147, EPI_ISL_813148, EPI_ISL_813149, EPI_ISL_813150 | see above | University of Birmingham                   | COVID-19 Genomics UK (COG-UK) Consortium                                   | Institute of Microbiology, University of Birmingham: Claire McMurray, Joanne Stockton, Samuel Nicholls, Radoslaw Poplawski, Will Rowe, Josh Quick, Nicholas Loman. University of Birmingham Testing Laboratory: Celina M Whalley, Andrew Bosworth, Charlotte Poxon, Kasun Wanigasooriya, Oliver Pickles, Mike Kidd, Alex Richter, Andrew D Beggs PHE Heartlands Lab: Husam Osman, Andrew Bosworth. Queen Elizabeth Hospital: Anna Casey |
| EPI_ISL_816135, EPI_ISL_816136, EPI_ISL_816432, EPI_ISL_819127                                                                                                                                                                                                                                                                                                                                                                                                                                                                                                                                                                                                                                                                                                                                                                                                                                                                                                                                                                                                                                                                                                                                                                                                                                                                                                                                                                                                                                                                                                                                                                                                                                                                                                                                                                                                                                                                                                                                                                                                                                                                                                                                                                                                                                                                                                                                                                                                                                                                                                                                                                                                                                                                                                                                                                                                                                                                                                                                 |           | Ohio Department of Health Laboratory       | Ohio Department of Health Laboratory                                       | Holmes, Jennifer; Eric Brandt, Keoni Omura, Glen McGillivray, Caitlin McDonnell, Kirtana Ramadugu, Erica Leasure, Kelsey Florek, Heather Blankenship, Quanta Brown, and Tammy Bannerman                                                                                                                                                                                                                                                 |
| EPI_ISL_820130, EPI_ISL_820160, EPI_ISL_820181, EPI_ISL_820219                                                                                                                                                                                                                                                                                                                                                                                                                                                                                                                                                                                                                                                                                                                                                                                                                                                                                                                                                                                                                                                                                                                                                                                                                                                                                                                                                                                                                                                                                                                                                                                                                                                                                                                                                                                                                                                                                                                                                                                                                                                                                                                                                                                                                                                                                                                                                                                                                                                                                                                                                                                                                                                                                                                                                                                                                                                                                                                                 |           | Lighthouse Lab in Alderley Park            | Wellcome Sanger Institute for the COVID-19 Genomics UK (COG-UK) Consortium | Jacquelyn Wynn, Mairead Hyland, The Lighthouse Lab in Alderley Park and Alex Alderton, Roberto Amato, Sonia Goncalves, Ewan Harrison, David K. Jackson, Ian Johnston, Dominic Kwiatkowski, Cordelia Langford, John Sillitoe on behalf of the Wellcome Sanger Institute COVID-19 Surveillance Team                                                                                                                                       |
| EPI_ISL_820220                                                                                                                                                                                                                                                                                                                                                                                                                                                                                                                                                                                                                                                                                                                                                                                                                                                                                                                                                                                                                                                                                                                                                                                                                                                                                                                                                                                                                                                                                                                                                                                                                                                                                                                                                                                                                                                                                                                                                                                                                                                                                                                                                                                                                                                                                                                                                                                                                                                                                                                                                                                                                                                                                                                                                                                                                                                                                                                                                                                 |           | Lighthouse Lab in Glasgow                  | Wellcome Sanger Institute for the COVID-19 Genomics UK (COG-UK) Consortium | Harper VanSteenhouse, Yumi Kasai, David Gray, Carol Clugston, Anna Dominiczak and Alex Alderton, Roberto Amato, Sonia Goncalves, Ewan Harrison, David K. Jackson, Ian Johnston, Dominic Kwiatkowski, Cordelia Langford, John Sillitoe on behalf of the Wellcome Sanger Institute COVID-19 Surveillance Team                                                                                                                             |
| EPI_ISL_820230, EPI_ISL_820254, EPI_ISL_820263, EPI_ISL_820275, EPI_ISL_820281, EPI_ISL_820315, EPI_ISL_820317                                                                                                                                                                                                                                                                                                                                                                                                                                                                                                                                                                                                                                                                                                                                                                                                                                                                                                                                                                                                                                                                                                                                                                                                                                                                                                                                                                                                                                                                                                                                                                                                                                                                                                                                                                                                                                                                                                                                                                                                                                                                                                                                                                                                                                                                                                                                                                                                                                                                                                                                                                                                                                                                                                                                                                                                                                                                                 |           | Lighthouse Lab in Alderley Park            | Wellcome Sanger Institute for the COVID-19 Genomics UK (COG-UK) Consortium | Jacquelyn Wynn, Mairead Hyland, The Lighthouse Lab in Alderley Park and Alex Alderton, Roberto Amato, Sonia Goncalves, Ewan Harrison, David K. Jackson, Ian Johnston, Dominic Kwiatkowski, Cordelia Langford, John Sillitoe on behalf of the Wellcome Sanger Institute COVID-19 Surveillance Team                                                                                                                                       |
| EPI_ISL_820319                                                                                                                                                                                                                                                                                                                                                                                                                                                                                                                                                                                                                                                                                                                                                                                                                                                                                                                                                                                                                                                                                                                                                                                                                                                                                                                                                                                                                                                                                                                                                                                                                                                                                                                                                                                                                                                                                                                                                                                                                                                                                                                                                                                                                                                                                                                                                                                                                                                                                                                                                                                                                                                                                                                                                                                                                                                                                                                                                                                 |           | Lighthouse Lab in Glasgow                  | Wellcome Sanger Institute for the COVID-19 Genomics UK (COG-UK) Consortium | Harper VanSteenhouse, Yumi Kasai, David Gray, Carol Clugston, Anna Dominiczak and Alex Alderton, Roberto Amato, Sonia Goncalves, Ewan Harrison, David K. Jackson, Ian Johnston, Dominic Kwiatkowski, Cordelia Langford, John Sillitoe on behalf of the Wellcome Sanger Institute COVID-19 Surveillance Team                                                                                                                             |
| EPI_ISL_820325, EPI_ISL_820329, EPI_ISL_820379, EPI_ISL_820398, EPI_ISL_820474                                                                                                                                                                                                                                                                                                                                                                                                                                                                                                                                                                                                                                                                                                                                                                                                                                                                                                                                                                                                                                                                                                                                                                                                                                                                                                                                                                                                                                                                                                                                                                                                                                                                                                                                                                                                                                                                                                                                                                                                                                                                                                                                                                                                                                                                                                                                                                                                                                                                                                                                                                                                                                                                                                                                                                                                                                                                                                                 |           | Lighthouse Lab in Alderley Park            | Wellcome Sanger Institute for the COVID-19 Genomics UK (COG-UK) Consortium | Jacquelyn Wynn, Mairead Hyland, The Lighthouse Lab in Alderley Park and Alex Alderton, Roberto Amato, Sonia Goncalves, Ewan Harrison, David K. Jackson, Ian Johnston, Dominic Kwiatkowski, Cordelia Langford, John Sillitoe on behalf of the Wellcome Sanger Institute COVID-19 Surveillance Team                                                                                                                                       |
| EPI_ISL_820484                                                                                                                                                                                                                                                                                                                                                                                                                                                                                                                                                                                                                                                                                                                                                                                                                                                                                                                                                                                                                                                                                                                                                                                                                                                                                                                                                                                                                                                                                                                                                                                                                                                                                                                                                                                                                                                                                                                                                                                                                                                                                                                                                                                                                                                                                                                                                                                                                                                                                                                                                                                                                                                                                                                                                                                                                                                                                                                                                                                 |           | Lighthouse Lab in Glasgow                  | Wellcome Sanger Institute for the COVID-19 Genomics UK (COG-UK) Consortium | Harper VanSteenhouse, Yumi Kasai, David Gray, Carol Clugston, Anna Dominiczak and Alex Alderton, Roberto Amato, Sonia Goncalves, Ewan Harrison, David K. Jackson, Ian Johnston, Dominic Kwiatkowski, Cordelia Langford, John Sillitoe on behalf of the Wellcome Sanger Institute COVID-19 Surveillance Team                                                                                                                             |
| EPI_ISL_820494, EPI_ISL_820522, EPI_ISL_820525, EPI_ISL_820532, EPI_ISL_820538, EPI_ISL_820566, EPI_ISL_820572, EPI_ISL_820587, EPI_ISL_820592, EPI_ISL_820594, EPI_ISL_820623, EPI_ISL_820629, EPI_ISL_820638, EPI_ISL_821026, EPI_ISL_821030, EPI_ISL_821035, EPI_ISL_821036, EPI_ISL_821041, EPI_ISL_821052, EPI_ISL_821060, EPI_ISL_821076                                                                                                                                                                                                                                                                                                                                                                                                                                                                                                                                                                                                                                                                                                                                                                                                                                                                                                                                                                                                                                                                                                                                                                                                                                                                                                                                                                                                                                                                                                                                                                                                                                                                                                                                                                                                                                                                                                                                                                                                                                                                                                                                                                                                                                                                                                                                                                                                                                                                                                                                                                                                                                                 |           | Lighthouse Lab in Alderley Park            | Wellcome Sanger Institute for the COVID-19 Genomics UK (COG-UK) Consortium | Jacquelyn Wynn, Mairead Hyland, The Lighthouse Lab in Alderley Park and Alex Alderton, Roberto Amato, Sonia Goncalves, Ewan Harrison, David K. Jackson, Ian Johnston, Dominic Kwiatkowski, Cordelia Langford, John Sillitoe on behalf of the Wellcome Sanger Institute COVID-19 Surveillance Team                                                                                                                                       |
| see above                                                                                                                                                                                                                                                                                                                                                                                                                                                                                                                                                                                                                                                                                                                                                                                                                                                                                                                                                                                                                                                                                                                                                                                                                                                                                                                                                                                                                                                                                                                                                                                                                                                                                                                                                                                                                                                                                                                                                                                                                                                                                                                                                                                                                                                                                                                                                                                                                                                                                                                                                                                                                                                                                                                                                                                                                                                                                                                                                                                      |           | Lighthouse Lab in Alderley Park            | Wellcome Sanger Institute for the COVID-19 Genomics UK (COG-UK) Consortium | Jacquelyn Wynn, Mairead Hyland, The Lighthouse Lab in Alderley Park and Alex Alderton, Roberto Amato, Sonia Goncalves, Ewan Harrison, David K. Jackson, Ian Johnston, Dominic Kwiatkowski, Cordelia Langford, John Sillitoe on behalf of the Wellcome Sanger Institute COVID-19 Surveillance Team                                                                                                                                       |
| EPI_ISL_821077                                                                                                                                                                                                                                                                                                                                                                                                                                                                                                                                                                                                                                                                                                                                                                                                                                                                                                                                                                                                                                                                                                                                                                                                                                                                                                                                                                                                                                                                                                                                                                                                                                                                                                                                                                                                                                                                                                                                                                                                                                                                                                                                                                                                                                                                                                                                                                                                                                                                                                                                                                                                                                                                                                                                                                                                                                                                                                                                                                                 |           | Lighthouse Lab in Glasgow                  | Wellcome Sanger Institute for the COVID-19 Genomics UK (COG-UK) Consortium | Harper VanSteenhouse, Yumi Kasai, David Gray, Carol Clugston, Anna Dominiczak and Alex Alderton, Roberto Amato, Sonia Goncalves, Ewan Harrison, David K. Jackson, Ian Johnston, Dominic Kwiatkowski, Cordelia Langford, John Sillitoe on behalf of the Wellcome Sanger Institute COVID-19 Surveillance Team                                                                                                                             |
| EPI_ISL_821091, EPI_ISL_821103, EPI_ISL_821114, EPI_ISL_821137, EPI_ISL_821155, EPI_ISL_821162, EPI_ISL_821163, EPI_ISL_821166, EPI_ISL_821170, EPI_ISL_821189, EPI_ISL_821212, EPI_ISL_821230, EPI_ISL_821238, EPI_ISL_821242, EPI_ISL_821260, EPI_ISL_821262, EPI_ISL_821285, EPI_ISL_821292, EPI_ISL_821371, EPI_ISL_821372, EPI_ISL_821483, EPI_ISL_821490, EPI_ISL_821500, EPI_ISL_821558, EPI_ISL_821606, EPI_ISL_822008, EPI_ISL_822010, EPI_ISL_822027                                                                                                                                                                                                                                                                                                                                                                                                                                                                                                                                                                                                                                                                                                                                                                                                                                                                                                                                                                                                                                                                                                                                                                                                                                                                                                                                                                                                                                                                                                                                                                                                                                                                                                                                                                                                                                                                                                                                                                                                                                                                                                                                                                                                                                                                                                                                                                                                                                                                                                                                 |           | Lighthouse Lab in Alderley Park            | Wellcome Sanger Institute for the COVID-19 Genomics UK (COG-UK) Consortium | Jacquelyn Wynn, Mairead Hyland, The Lighthouse Lab in Alderley Park and Alex Alderton, Roberto Amato, Sonia Goncalves, Ewan Harrison, David K. Jackson, Ian Johnston, Dominic Kwiatkowski, Cordelia Langford, John Sillitoe on behalf of the Wellcome Sanger Institute COVID-19 Surveillance Team                                                                                                                                       |
| see above                                                                                                                                                                                                                                                                                                                                                                                                                                                                                                                                                                                                                                                                                                                                                                                                                                                                                                                                                                                                                                                                                                                                                                                                                                                                                                                                                                                                                                                                                                                                                                                                                                                                                                                                                                                                                                                                                                                                                                                                                                                                                                                                                                                                                                                                                                                                                                                                                                                                                                                                                                                                                                                                                                                                                                                                                                                                                                                                                                                      |           | Lighthouse Lab in Alderley Park            | Wellcome Sanger Institute for the COVID-19 Genomics UK (COG-UK) Consortium | Jacquelyn Wynn, Mairead Hyland, The Lighthouse Lab in Alderley Park and Alex Alderton, Roberto Amato, Sonia Goncalves, Ewan Harrison, David K. Jackson, Ian Johnston, Dominic Kwiatkowski, Cordelia Langford, John Sillitoe on behalf of the Wellcome Sanger Institute COVID-19 Surveillance Team                                                                                                                                       |
| EPI_ISL_822033                                                                                                                                                                                                                                                                                                                                                                                                                                                                                                                                                                                                                                                                                                                                                                                                                                                                                                                                                                                                                                                                                                                                                                                                                                                                                                                                                                                                                                                                                                                                                                                                                                                                                                                                                                                                                                                                                                                                                                                                                                                                                                                                                                                                                                                                                                                                                                                                                                                                                                                                                                                                                                                                                                                                                                                                                                                                                                                                                                                 |           | Lighthouse Lab in Glasgow                  | Wellcome Sanger Institute for the COVID-19 Genomics UK (COG-UK) Consortium | Harper VanSteenhouse, Yumi Kasai, David Gray, Carol Clugston, Anna Dominiczak and Alex Alderton, Roberto Amato, Sonia Goncalves, Ewan Harrison, David K. Jackson, Ian Johnston, Dominic Kwiatkowski, Cordelia Langford, John Sillitoe on behalf of the Wellcome Sanger Institute COVID-19 Surveillance Team                                                                                                                             |
| EPI_ISL_822034                                                                                                                                                                                                                                                                                                                                                                                                                                                                                                                                                                                                                                                                                                                                                                                                                                                                                                                                                                                                                                                                                                                                                                                                                                                                                                                                                                                                                                                                                                                                                                                                                                                                                                                                                                                                                                                                                                                                                                                                                                                                                                                                                                                                                                                                                                                                                                                                                                                                                                                                                                                                                                                                                                                                                                                                                                                                                                                                                                                 |           | Lighthouse Lab in Alderley Park            | Wellcome Sanger Institute for the COVID-19 Genomics UK (COG-UK) Consortium | Jacquelyn Wynn, Mairead Hyland, The Lighthouse Lab in Alderley Park and Alex Alderton, Roberto Amato, Sonia Goncalves, Ewan Harrison, David K. Jackson, Ian Johnston, Dominic Kwiatkowski, Cordelia Langford, John Sillitoe on behalf of the Wellcome Sanger Institute COVID-19 Surveillance Team                                                                                                                                       |
| EPI_ISL_822067                                                                                                                                                                                                                                                                                                                                                                                                                                                                                                                                                                                                                                                                                                                                                                                                                                                                                                                                                                                                                                                                                                                                                                                                                                                                                                                                                                                                                                                                                                                                                                                                                                                                                                                                                                                                                                                                                                                                                                                                                                                                                                                                                                                                                                                                                                                                                                                                                                                                                                                                                                                                                                                                                                                                                                                                                                                                                                                                                                                 |           | Lighthouse Lab in Glasgow                  | Wellcome Sanger Institute for the COVID-19 Genomics UK (COG-UK) Consortium | Harper VanSteenhouse, Yumi Kasai, David Gray, Carol Clugston, Anna Dominiczak and Alex Alderton, Roberto Amato, Sonia Goncalves, Ewan Harrison, David K. Jackson, Ian Johnston, Dominic Kwiatkowski, Cordelia Langford, John Sillitoe on behalf of the Wellcome Sanger Institute COVID-19 Surveillance Team                                                                                                                             |
| EPI_ISL_822106, EPI_ISL_822123, EPI_ISL_822134                                                                                                                                                                                                                                                                                                                                                                                                                                                                                                                                                                                                                                                                                                                                                                                                                                                                                                                                                                                                                                                                                                                                                                                                                                                                                                                                                                                                                                                                                                                                                                                                                                                                                                                                                                                                                                                                                                                                                                                                                                                                                                                                                                                                                                                                                                                                                                                                                                                                                                                                                                                                                                                                                                                                                                                                                                                                                                                                                 |           | Lighthouse Lab in Alderley Park            | Wellcome Sanger Institute for the COVID-19 Genomics UK (COG-UK) Consortium | Jacquelyn Wynn, Mairead Hyland, The Lighthouse Lab in Alderley Park and Alex Alderton, Roberto Amato, Sonia Goncalves, Ewan Harrison, David K. Jackson, Ian Johnston, Dominic Kwiatkowski, Cordelia Langford, John Sillitoe on behalf of the Wellcome Sanger Institute COVID-19 Surveillance Team                                                                                                                                       |
| EPI_ISL_822148                                                                                                                                                                                                                                                                                                                                                                                                                                                                                                                                                                                                                                                                                                                                                                                                                                                                                                                                                                                                                                                                                                                                                                                                                                                                                                                                                                                                                                                                                                                                                                                                                                                                                                                                                                                                                                                                                                                                                                                                                                                                                                                                                                                                                                                                                                                                                                                                                                                                                                                                                                                                                                                                                                                                                                                                                                                                                                                                                                                 |           | Lighthouse Lab in Glasgow                  | Wellcome Sanger Institute for the COVID-19 Genomics UK (COG-UK) Consortium | Harper VanSteenhouse, Yumi Kasai, David Gray, Carol Clugston, Anna Dominiczak and Alex Alderton, Roberto Amato, Sonia Goncalves, Ewan Harrison, David K. Jackson, Ian Johnston, Dominic Kwiatkowski, Cordelia Langford, John Sillitoe on behalf of the Wellcome Sanger Institute COVID-19 Surveillance Team                                                                                                                             |
| EPI_ISL_822149, EPI_ISL_822166, EPI_ISL_822184, EPI_ISL_822186, EPI_ISL_822199, EPI_ISL_822204, EPI_ISL_822208, EPI_ISL_822211, EPI_ISL_822226, EPI_ISL_822227                                                                                                                                                                                                                                                                                                                                                                                                                                                                                                                                                                                                                                                                                                                                                                                                                                                                                                                                                                                                                                                                                                                                                                                                                                                                                                                                                                                                                                                                                                                                                                                                                                                                                                                                                                                                                                                                                                                                                                                                                                                                                                                                                                                                                                                                                                                                                                                                                                                                                                                                                                                                                                                                                                                                                                                                                                 |           | Lighthouse Lab in Alderley Park            | Wellcome Sanger Institute for the COVID-19 Genomics UK (COG-UK) Consortium | Jacquelyn Wynn, Mairead Hyland, The Lighthouse Lab in Alderley Park and Alex Alderton, Roberto Amato, Sonia Goncalves, Ewan Harrison, David K. Jackson, Ian Johnston, Dominic Kwiatkowski, Cordelia Langford, John Sillitoe on behalf of the Wellcome Sanger Institute COVID-19 Surveillance Team                                                                                                                                       |
| EPI_ISL_822237, EPI_ISL_822260                                                                                                                                                                                                                                                                                                                                                                                                                                                                                                                                                                                                                                                                                                                                                                                                                                                                                                                                                                                                                                                                                                                                                                                                                                                                                                                                                                                                                                                                                                                                                                                                                                                                                                                                                                                                                                                                                                                                                                                                                                                                                                                                                                                                                                                                                                                                                                                                                                                                                                                                                                                                                                                                                                                                                                                                                                                                                                                                                                 |           | Lighthouse Lab in Glasgow                  | Wellcome Sanger Institute for the COVID-19 Genomics UK (COG-UK) Consortium | Harper VanSteenhouse, Yumi Kasai, David Gray, Carol Clugston, Anna Dominiczak and Alex Alderton, Roberto Amato, Sonia Goncalves, Ewan Harrison, David K. Jackson, Ian Johnston, Dominic Kwiatkowski, Cordelia Langford, John Sillitoe on behalf of the Wellcome Sanger Institute COVID-19 Surveillance Team                                                                                                                             |

|                                                                                                                                                                                                                                                                                                                                                                                                                                                                                                                                                                                                                                                                                                                                                                                                                                                                                                                                                                                                                                                                                                                                                                                                                                                                                                                                                                                                                                                                                                                                                |                                                                                                              |                                                                            |                                                                                                                                                                                                                                                                                                                                                            |                                                                                                                                                                                                                                                                                                                                                                                                                                |
|------------------------------------------------------------------------------------------------------------------------------------------------------------------------------------------------------------------------------------------------------------------------------------------------------------------------------------------------------------------------------------------------------------------------------------------------------------------------------------------------------------------------------------------------------------------------------------------------------------------------------------------------------------------------------------------------------------------------------------------------------------------------------------------------------------------------------------------------------------------------------------------------------------------------------------------------------------------------------------------------------------------------------------------------------------------------------------------------------------------------------------------------------------------------------------------------------------------------------------------------------------------------------------------------------------------------------------------------------------------------------------------------------------------------------------------------------------------------------------------------------------------------------------------------|--------------------------------------------------------------------------------------------------------------|----------------------------------------------------------------------------|------------------------------------------------------------------------------------------------------------------------------------------------------------------------------------------------------------------------------------------------------------------------------------------------------------------------------------------------------------|--------------------------------------------------------------------------------------------------------------------------------------------------------------------------------------------------------------------------------------------------------------------------------------------------------------------------------------------------------------------------------------------------------------------------------|
| EPI_ISL_822285, EPI_ISL_822298                                                                                                                                                                                                                                                                                                                                                                                                                                                                                                                                                                                                                                                                                                                                                                                                                                                                                                                                                                                                                                                                                                                                                                                                                                                                                                                                                                                                                                                                                                                 | Lighthouse Lab in Alderley Park                                                                              | Wellcome Sanger Institute for the COVID-19 Genomics UK (COG-UK) Consortium | Jacquelyn Wynn, Mairead Hyland, The Lighthouse Lab in Alderley Park and Alex Alderton, Roberto Amato, Sonia Goncalves, Ewan Harrison, David K. Jackson, Ian Johnston, Dominic Kwiatkowski, Cordelia Langford, John Sillitoe on behalf of the Wellcome Sanger Institute COVID-19 Surveillance Team                                                          |                                                                                                                                                                                                                                                                                                                                                                                                                                |
| EPI_ISL_822330                                                                                                                                                                                                                                                                                                                                                                                                                                                                                                                                                                                                                                                                                                                                                                                                                                                                                                                                                                                                                                                                                                                                                                                                                                                                                                                                                                                                                                                                                                                                 | Lighthouse Lab in Glasgow                                                                                    | Wellcome Sanger Institute for the COVID-19 Genomics UK (COG-UK) Consortium | Harper VanSteenhouse, Yumi Kasai, David Gray, Carol Clugston, Anna Dominiczak and Alex Alderton, Roberto Amato, Sonia Goncalves, Ewan Harrison, David K. Jackson, Ian Johnston, Dominic Kwiatkowski, Cordelia Langford, John Sillitoe on behalf of the Wellcome Sanger Institute COVID-19 Surveillance Team                                                |                                                                                                                                                                                                                                                                                                                                                                                                                                |
| EPI_ISL_824332, EPI_ISL_824333, EPI_ISL_824384, EPI_ISL_824385, EPI_ISL_824386, EPI_ISL_824387, EPI_ISL_824389                                                                                                                                                                                                                                                                                                                                                                                                                                                                                                                                                                                                                                                                                                                                                                                                                                                                                                                                                                                                                                                                                                                                                                                                                                                                                                                                                                                                                                 | Ohio Department of Health Laboratory                                                                         | Ohio Department of Health Laboratory                                       | Holmes, Jennifer; Eric Brandt, Keoni Omura, Glen McGillivray, Caitlin McDonnell, Kirtana Ramadugu, Erica Leasure, Kelsey Florek, Heather Blankenship, Quanta Brown, and Tammy Bannerman                                                                                                                                                                    |                                                                                                                                                                                                                                                                                                                                                                                                                                |
| EPI_ISL_826463                                                                                                                                                                                                                                                                                                                                                                                                                                                                                                                                                                                                                                                                                                                                                                                                                                                                                                                                                                                                                                                                                                                                                                                                                                                                                                                                                                                                                                                                                                                                 | The Ohio State University                                                                                    | OSU Polaris Molecular Laboratory                                           | Huolin Tu, Matthew R Avenarius, Laura Kubatko, Matthew Hunt, Xiaokang Pan, Peng Ru, Jason Garee, Keele Thomas, Peter Mohler, Preeti Panchoi, Dan Jones                                                                                                                                                                                                     |                                                                                                                                                                                                                                                                                                                                                                                                                                |
| EPI_ISL_826477                                                                                                                                                                                                                                                                                                                                                                                                                                                                                                                                                                                                                                                                                                                                                                                                                                                                                                                                                                                                                                                                                                                                                                                                                                                                                                                                                                                                                                                                                                                                 | Lighthouse Lab in Glasgow                                                                                    | Wellcome Sanger Institute for the COVID-19 Genomics UK (COG-UK) Consortium | Harper VanSteenhouse, Yumi Kasai, David Gray, Carol Clugston, Anna Dominiczak and Alex Alderton, Roberto Amato, Sonia Goncalves, Ewan Harrison, David K. Jackson, Ian Johnston, Dominic Kwiatkowski, Cordelia Langford, John Sillitoe on behalf of the Wellcome Sanger Institute COVID-19 Surveillance Team                                                |                                                                                                                                                                                                                                                                                                                                                                                                                                |
| EPI_ISL_826485, EPI_ISL_826487, EPI_ISL_826499, EPI_ISL_826511                                                                                                                                                                                                                                                                                                                                                                                                                                                                                                                                                                                                                                                                                                                                                                                                                                                                                                                                                                                                                                                                                                                                                                                                                                                                                                                                                                                                                                                                                 | Lighthouse Lab in Alderley Park                                                                              | Wellcome Sanger Institute for the COVID-19 Genomics UK (COG-UK) Consortium | Jacquelyn Wynn, Mairead Hyland, The Lighthouse Lab in Alderley Park and Alex Alderton, Roberto Amato, Sonia Goncalves, Ewan Harrison, David K. Jackson, Ian Johnston, Dominic Kwiatkowski, Cordelia Langford, John Sillitoe on behalf of the Wellcome Sanger Institute COVID-19 Surveillance Team                                                          |                                                                                                                                                                                                                                                                                                                                                                                                                                |
| EPI_ISL_826521                                                                                                                                                                                                                                                                                                                                                                                                                                                                                                                                                                                                                                                                                                                                                                                                                                                                                                                                                                                                                                                                                                                                                                                                                                                                                                                                                                                                                                                                                                                                 | The Ohio State University                                                                                    | James Molecular Laboratory                                                 | Huolin Tu, Matthew R Avenarius, Laura Kubatko, Matthew Hunt, Xiaokang Pan, Peng Ru, Jason Garee, Keele Thomas, Peter Mohler, Preeti Panchoi, Dan Jones                                                                                                                                                                                                     |                                                                                                                                                                                                                                                                                                                                                                                                                                |
| EPI_ISL_826578, EPI_ISL_826579, EPI_ISL_826580, EPI_ISL_826581, EPI_ISL_826582, EPI_ISL_826583, EPI_ISL_826584, EPI_ISL_826585, EPI_ISL_826586, EPI_ISL_826587, EPI_ISL_826588, EPI_ISL_826589, EPI_ISL_826590, EPI_ISL_826591, EPI_ISL_826592, EPI_ISL_826593, EPI_ISL_826594, EPI_ISL_826595, EPI_ISL_826596, EPI_ISL_826597, EPI_ISL_826598, EPI_ISL_826599, EPI_ISL_826600, EPI_ISL_826601, EPI_ISL_826602, EPI_ISL_826603, EPI_ISL_826604, EPI_ISL_826605, EPI_ISL_826606, EPI_ISL_826607, EPI_ISL_826608, EPI_ISL_826609, EPI_ISL_826610, EPI_ISL_826611, EPI_ISL_826612, EPI_ISL_826613, EPI_ISL_826614, EPI_ISL_826615, EPI_ISL_826616, EPI_ISL_826617, EPI_ISL_826618, EPI_ISL_826619, EPI_ISL_826620, EPI_ISL_826621, EPI_ISL_826622, EPI_ISL_826623, EPI_ISL_826624, EPI_ISL_826625, EPI_ISL_826626, EPI_ISL_826627, EPI_ISL_826628, EPI_ISL_826629, EPI_ISL_826630, EPI_ISL_826631, EPI_ISL_826632, EPI_ISL_826633, EPI_ISL_826634, EPI_ISL_826635, EPI_ISL_826636, EPI_ISL_826637, EPI_ISL_826638, EPI_ISL_826639, EPI_ISL_826640, EPI_ISL_826641, EPI_ISL_826642, EPI_ISL_826643, EPI_ISL_826644, EPI_ISL_826645, EPI_ISL_826646, EPI_ISL_826647, EPI_ISL_826648, EPI_ISL_826649, EPI_ISL_826650, EPI_ISL_826651, EPI_ISL_826652, EPI_ISL_826653, EPI_ISL_826654, EPI_ISL_826655, EPI_ISL_826656, EPI_ISL_826657, EPI_ISL_826658, EPI_ISL_826659, EPI_ISL_826660, EPI_ISL_826661, EPI_ISL_826662, EPI_ISL_826663, EPI_ISL_826664, EPI_ISL_826665, EPI_ISL_826666, EPI_ISL_826667, EPI_ISL_826668, EPI_ISL_826669, EPI_ISL_826670 | see above                                                                                                    | Montefiore Medical Center                                                  | Albert Einstein College of Medicine, Dept. of Microbiology & Immunology, Chandran lab                                                                                                                                                                                                                                                                      | J. Maximilian Fels, Saad Khan, Ryan Forster, Karin A. Skalina, Surksha Sirichand, Amy S. Fox, Aviv Bergman, William B. Mitchell, Lucia R. Wolgast, Wendy Szymczak, Robert H. Bortz III, M. Eugenia Dieterle, Catalina Florez, Denise Haslwanter, Rohit K. Jangra, Ethan Lauderlich, Ariel S. Wirchanski, Jason Barnhill, David L. Goldman, Hnin Khine, D. Yitzchak Goldstein, Johanna P. Daily, Kartik Chandran, Libusha Kelly |
| EPI_ISL_832378                                                                                                                                                                                                                                                                                                                                                                                                                                                                                                                                                                                                                                                                                                                                                                                                                                                                                                                                                                                                                                                                                                                                                                                                                                                                                                                                                                                                                                                                                                                                 | Ohio State                                                                                                   | James Molecular Lab                                                        | Huolin Tu, Matthew R Avenarius, Laura Kubatko, Matthew Hunt, Xiaokang Pan, Peng Ru, Jason Garee, Keele Thomas, Peter Mohler, Preeti Panchoi, Dan Jones                                                                                                                                                                                                     |                                                                                                                                                                                                                                                                                                                                                                                                                                |
| EPI_ISL_833141, EPI_ISL_833142, EPI_ISL_833143, EPI_ISL_833144, EPI_ISL_833145, EPI_ISL_833146, EPI_ISL_833147, EPI_ISL_833148                                                                                                                                                                                                                                                                                                                                                                                                                                                                                                                                                                                                                                                                                                                                                                                                                                                                                                                                                                                                                                                                                                                                                                                                                                                                                                                                                                                                                 | Genomic Laboratory (GLAB) (Conjoint lab of Health Directorate of Istanbul and Istanbul Technical University) | Genomic Laboratory (GLAB), Istanbul Technical University                   | Ilker Karacan, Tugba Kizilboga Akgun, Payam Zolfagharian, Nisan Denizce Can, Pari Sharifi, Levent Doganay, Gizem Dinler Doganay                                                                                                                                                                                                                            |                                                                                                                                                                                                                                                                                                                                                                                                                                |
| EPI_ISL_833179                                                                                                                                                                                                                                                                                                                                                                                                                                                                                                                                                                                                                                                                                                                                                                                                                                                                                                                                                                                                                                                                                                                                                                                                                                                                                                                                                                                                                                                                                                                                 | National Institute of Laboratory Medicine and Referral Center                                                | Genomic Research Lab, BCSIR                                                | Iffat Jahan, Mohammad Samir Uzzaman, Eshrar Osman, Md. Ahashan Habib, Shahina Akter, Tanjina Akhtar Banu, Abu Sayeed Mohammad Mahmud, Md. Murshed Hasan Sarkar, Barna Goswami, Md. Saddam Hossain, Tasnim Nafisa, Md. Maruf Ahmed Molla, Mahmuda Yeasmin, Asish Kumar Ghosh, A. K. M. Shamsuzzaman, Monira Parveen, Md. Masum Hossain Arif, Md. Salim Khan |                                                                                                                                                                                                                                                                                                                                                                                                                                |
| EPI_ISL_833492                                                                                                                                                                                                                                                                                                                                                                                                                                                                                                                                                                                                                                                                                                                                                                                                                                                                                                                                                                                                                                                                                                                                                                                                                                                                                                                                                                                                                                                                                                                                 | RS MMC Jakarta, Indonesia                                                                                    | Biosafety Level-3 Laboratory, Indonesian Institute of Sciences (LIPI)      | Isa Nuryana, Ade Andriani, Anik Budhi Dharmayanthi, Syam Budi Iryanto, Andri Wardiana, Anggia Prasetyoputri, Ahmad Fathoni, Nova Dilla Yanthi, Yuliawati, Rath Asmana Ningrum                                                                                                                                                                              |                                                                                                                                                                                                                                                                                                                                                                                                                                |
| EPI_ISL_833493                                                                                                                                                                                                                                                                                                                                                                                                                                                                                                                                                                                                                                                                                                                                                                                                                                                                                                                                                                                                                                                                                                                                                                                                                                                                                                                                                                                                                                                                                                                                 | RS PMI Bogor, Indonesia                                                                                      | Biosafety Level-3 Laboratory, Indonesian Institute of Sciences (LIPI)      | Isa Nuryana, Ade Andriani, Anik Budhi Dharmayanthi, Syam Budi Iryanto, Andri Wardiana, Anggia Prasetyoputri, Ahmad Fathoni, Indriawati, Nurulliaty, Rath Asmana Ningrum                                                                                                                                                                                    |                                                                                                                                                                                                                                                                                                                                                                                                                                |
| EPI_ISL_833499                                                                                                                                                                                                                                                                                                                                                                                                                                                                                                                                                                                                                                                                                                                                                                                                                                                                                                                                                                                                                                                                                                                                                                                                                                                                                                                                                                                                                                                                                                                                 | RS Qadr, Tangerang, Indonesia                                                                                | Biosafety Level-3 Laboratory, Indonesian Institute of Sciences (LIPI)      | Isa Nuryana, Ade Andriani, Ahmad Fathoni, Anik Budhi Dharmayanthi, Syam Budi Iryanto, Andri Wardiana, Anggia Prasetyoputri, Ratna Dwi Ramadan, Sugiyono Saputra, Rath Asmana Ningrum                                                                                                                                                                       |                                                                                                                                                                                                                                                                                                                                                                                                                                |
| EPI_ISL_833504                                                                                                                                                                                                                                                                                                                                                                                                                                                                                                                                                                                                                                                                                                                                                                                                                                                                                                                                                                                                                                                                                                                                                                                                                                                                                                                                                                                                                                                                                                                                 | RS MMC, Jakarta, Indonesia                                                                                   | Biosafety Level-3 Laboratory, Indonesian Institute of Sciences (LIPI)      | Isa Nuryana, Anik Budhi Dharmayanthi, Syam Budi Iryanto, Andri Wardiana, Anggia Prasetyoputri, Ade Andriani, Ahmad Fathoni, Ahmad Randy, Listiana Oktavia, Rath Asmana Ningrum                                                                                                                                                                             |                                                                                                                                                                                                                                                                                                                                                                                                                                |
| EPI_ISL_833506                                                                                                                                                                                                                                                                                                                                                                                                                                                                                                                                                                                                                                                                                                                                                                                                                                                                                                                                                                                                                                                                                                                                                                                                                                                                                                                                                                                                                                                                                                                                 | RS PMI, Bogor, Indonesia                                                                                     | Biosafety Level-3 Laboratory, Indonesian Institute of Sciences (LIPI)      | Isa Nuryana, Ade Andriani, Ahmad Fathoni, Anik Budhi Dharmayanthi, Syam Budi Iryanto, Andri Wardiana, Anggia Prasetyoputri, Satrio Haryo Benowo, Gilang Akbariani, Rath Asmana Ningrum                                                                                                                                                                     |                                                                                                                                                                                                                                                                                                                                                                                                                                |
| EPI_ISL_833936, EPI_ISL_833954, EPI_ISL_833958, EPI_ISL_833967, EPI_ISL_833968, EPI_ISL_833984, EPI_ISL_833986, EPI_ISL_833988, EPI_ISL_833993, EPI_ISL_833996, EPI_ISL_834006, EPI_ISL_834014, EPI_ISL_834036, EPI_ISL_834044, EPI_ISL_834046, EPI_ISL_834064, EPI_ISL_834093, EPI_ISL_834110, EPI_ISL_834113, EPI_ISL_834114, EPI_ISL_834123, EPI_ISL_834135, EPI_ISL_834145, EPI_ISL_834169, EPI_ISL_834175, EPI_ISL_834177, EPI_ISL_834185, EPI_ISL_834195, EPI_ISL_834196, EPI_ISL_834216, EPI_ISL_834221, EPI_ISL_834231, EPI_ISL_834239, EPI_ISL_834241, EPI_ISL_834246, EPI_ISL_834252, EPI_ISL_834268, EPI_ISL_834274, EPI_ISL_834293, EPI_ISL_834301, EPI_ISL_834306, EPI_ISL_834321, EPI_ISL_834326, EPI_ISL_834328, EPI_ISL_834367, EPI_ISL_834372, EPI_ISL_834396, EPI_ISL_834427, EPI_ISL_834432, EPI_ISL_834433, EPI_ISL_834435, EPI_ISL_834441, EPI_ISL_834449, EPI_ISL_834452, EPI_ISL_834453, EPI_ISL_834465, EPI_ISL_834467, EPI_ISL_834470, EPI_ISL_834472, EPI_ISL_834477, EPI_ISL_834491, EPI_ISL_834492, EPI_ISL_834497, EPI_ISL_834508, EPI_ISL_834509, EPI_ISL_834514, EPI_ISL_834519, EPI_ISL_834523, EPI_ISL_834534, EPI_ISL_834541, EPI_ISL_834543, EPI_ISL_834546, EPI_ISL_834548                                                                                                                                                                                                                                                                                                                                 | see above                                                                                                    | Lighthouse Lab in Alderley Park                                            | Wellcome Sanger Institute for the COVID-19 Genomics UK (COG-UK) Consortium                                                                                                                                                                                                                                                                                 | Jacquelyn Wynn, Mairead Hyland, The Lighthouse Lab in Alderley Park and Alex Alderton, Roberto Amato, Sonia Goncalves, Ewan Harrison, David K. Jackson, Ian Johnston, Dominic Kwiatkowski, Cordelia Langford, John Sillitoe on behalf of the Wellcome Sanger Institute COVID-19 Surveillance Team                                                                                                                              |
| EPI_ISL_834560, EPI_ISL_834570, EPI_ISL_834578, EPI_ISL_834582, EPI_ISL_834583, EPI_ISL_834594, EPI_ISL_834607, EPI_ISL_834612, EPI_ISL_834615, EPI_ISL_834617, EPI_ISL_834622, EPI_ISL_834634, EPI_ISL_834637, EPI_ISL_834652, EPI_ISL_834653, EPI_ISL_834658, EPI_ISL_834663, EPI_ISL_834667, EPI_ISL_834669, EPI_ISL_834681, EPI_ISL_834684, EPI_ISL_834696, EPI_ISL_834703, EPI_ISL_834714, EPI_ISL_834720, EPI_ISL_834729, EPI_ISL_834740, EPI_ISL_834744, EPI_ISL_834745, EPI_ISL_834749, EPI_ISL_834761, EPI_ISL_834772, EPI_ISL_834774, EPI_ISL_834779, EPI_ISL_834788, EPI_ISL_834792, EPI_ISL_834797                                                                                                                                                                                                                                                                                                                                                                                                                                                                                                                                                                                                                                                                                                                                                                                                                                                                                                                                 | see above                                                                                                    | Lighthouse Lab in Glasgow                                                  | Wellcome Sanger Institute for the COVID-19 Genomics UK (COG-UK) Consortium                                                                                                                                                                                                                                                                                 | Harper VanSteenhouse, Yumi Kasai, David Gray, Carol Clugston, Anna Dominiczak and Alex Alderton, Roberto Amato, Sonia Goncalves, Ewan Harrison, David K. Jackson, Ian Johnston, Dominic Kwiatkowski, Cordelia Langford, John Sillitoe on behalf of the Wellcome Sanger Institute COVID-19 Surveillance Team                                                                                                                    |
| EPI_ISL_834809, EPI_ISL_834813, EPI_ISL_834818, EPI_ISL_834847, EPI_ISL_834850, EPI_ISL_834881, EPI_ISL_834882, EPI_ISL_834894, EPI_ISL_834897, EPI_ISL_834899, EPI_ISL_834904, EPI_ISL_834907, EPI_ISL_834913, EPI_ISL_834914, EPI_ISL_834939, EPI_ISL_834940, EPI_ISL_834942, EPI_ISL_834944, EPI_ISL_834948, EPI_ISL_834966, EPI_ISL_834971, EPI_ISL_834980, EPI_ISL_834983, EPI_ISL_834984, EPI_ISL_834986, EPI_ISL_834990, EPI_ISL_835030, EPI_ISL_835032, EPI_ISL_835039, EPI_ISL_835042, EPI_ISL_835057, EPI_ISL_835067, EPI_ISL_835077, EPI_ISL_835079, EPI_ISL_835098, EPI_ISL_835101, EPI_ISL_835115, EPI_ISL_835136                                                                                                                                                                                                                                                                                                                                                                                                                                                                                                                                                                                                                                                                                                                                                                                                                                                                                                                 | see above                                                                                                    | Lighthouse Lab in Alderley Park                                            | Wellcome Sanger Institute for the COVID-19 Genomics UK (COG-UK) Consortium                                                                                                                                                                                                                                                                                 | Jacquelyn Wynn, Mairead Hyland, The Lighthouse Lab in Alderley Park and Alex Alderton, Roberto Amato, Sonia Goncalves, Ewan Harrison, David K. Jackson, Ian Johnston, Dominic Kwiatkowski, Cordelia Langford, John Sillitoe on behalf of the Wellcome Sanger Institute COVID-19 Surveillance Team                                                                                                                              |
| EPI_ISL_835145, EPI_ISL_835157, EPI_ISL_835176, EPI_ISL_835185, EPI_ISL_835199, EPI_ISL_835207, EPI_ISL_835218, EPI_ISL_835241, EPI_ISL_835246, EPI_ISL_835270, EPI_ISL_835280, EPI_ISL_835317, EPI_ISL_835324, EPI_ISL_835340, EPI_ISL_835350, EPI_ISL_835363, EPI_ISL_835374, EPI_ISL_835385, EPI_ISL_835417                                                                                                                                                                                                                                                                                                                                                                                                                                                                                                                                                                                                                                                                                                                                                                                                                                                                                                                                                                                                                                                                                                                                                                                                                                 | see above                                                                                                    | Lighthouse Lab in Glasgow                                                  | Wellcome Sanger Institute for the COVID-19 Genomics UK (COG-UK) Consortium                                                                                                                                                                                                                                                                                 | Harper VanSteenhouse, Yumi Kasai, David Gray, Carol Clugston, Anna Dominiczak and Alex Alderton, Roberto Amato, Sonia Goncalves, Ewan Harrison, David K. Jackson, Ian Johnston, Dominic Kwiatkowski, Cordelia Langford, John Sillitoe on behalf of the Wellcome Sanger Institute COVID-19 Surveillance Team                                                                                                                    |
| EPI_ISL_835431, EPI_ISL_835458                                                                                                                                                                                                                                                                                                                                                                                                                                                                                                                                                                                                                                                                                                                                                                                                                                                                                                                                                                                                                                                                                                                                                                                                                                                                                                                                                                                                                                                                                                                 | Lighthouse Lab in Alderley Park                                                                              | Wellcome Sanger Institute for the COVID-19 Genomics UK (COG-UK) Consortium | Jacquelyn Wynn, Mairead Hyland, The Lighthouse Lab in Alderley Park and Alex Alderton, Roberto Amato, Sonia Goncalves, Ewan Harrison, David K. Jackson, Ian Johnston, Dominic Kwiatkowski, Cordelia Langford, John Sillitoe on behalf of the Wellcome Sanger Institute COVID-19 Surveillance Team                                                          |                                                                                                                                                                                                                                                                                                                                                                                                                                |
| EPI_ISL_835470, EPI_ISL_835475                                                                                                                                                                                                                                                                                                                                                                                                                                                                                                                                                                                                                                                                                                                                                                                                                                                                                                                                                                                                                                                                                                                                                                                                                                                                                                                                                                                                                                                                                                                 | Lighthouse Lab in Glasgow                                                                                    | Wellcome Sanger Institute for the COVID-19 Genomics UK (COG-UK) Consortium | Harper VanSteenhouse, Yumi Kasai, David Gray, Carol Clugston, Anna Dominiczak and Alex Alderton, Roberto Amato, Sonia Goncalves, Ewan Harrison, David K. Jackson, Ian Johnston, Dominic Kwiatkowski, Cordelia Langford, John Sillitoe on behalf of the Wellcome Sanger Institute COVID-19 Surveillance Team                                                |                                                                                                                                                                                                                                                                                                                                                                                                                                |









|                                                                                                                                                                                                                                                                                                                                                                                                                                                                                                                                                                                                                                |                                                                  |                                                                                                                                                              |                                                                                                                                                                                                                                                                                                                                                                                                                                                                                                                                                                                                                      |
|--------------------------------------------------------------------------------------------------------------------------------------------------------------------------------------------------------------------------------------------------------------------------------------------------------------------------------------------------------------------------------------------------------------------------------------------------------------------------------------------------------------------------------------------------------------------------------------------------------------------------------|------------------------------------------------------------------|--------------------------------------------------------------------------------------------------------------------------------------------------------------|----------------------------------------------------------------------------------------------------------------------------------------------------------------------------------------------------------------------------------------------------------------------------------------------------------------------------------------------------------------------------------------------------------------------------------------------------------------------------------------------------------------------------------------------------------------------------------------------------------------------|
| see above                                                                                                                                                                                                                                                                                                                                                                                                                                                                                                                                                                                                                      | Lighthouse Lab in Alderley Park                                  | Wellcome Sanger Institute for the COVID-19 Genomics UK (COG-UK) Consortium                                                                                   | Jacquelyn Wynn, Mairead Hyland, The Lighthouse Lab in Alderley Park and Alex Alderton, Roberto Amato, Sonia Goncalves, Ewan Harrison, David K. Jackson, Ian Johnston, Dominic Kwiatkowski, Cordelia Langford, John Sillitoe on behalf of the Wellcome Sanger Institute COVID-19 Surveillance Team                                                                                                                                                                                                                                                                                                                    |
| EPI_ISL_859458, EPI_ISL_859470, EPI_ISL_859478, EPI_ISL_859494, EPI_ISL_859501, EPI_ISL_859503, EPI_ISL_859509, EPI_ISL_859513, EPI_ISL_859517, EPI_ISL_859518, EPI_ISL_859538, EPI_ISL_859539                                                                                                                                                                                                                                                                                                                                                                                                                                 | Lighthouse Lab in Glasgow<br><br>Lighthouse Lab in Alderley Park | Wellcome Sanger Institute for the COVID-19 Genomics UK (COG-UK) Consortium<br><br>Wellcome Sanger Institute for the COVID-19 Genomics UK (COG-UK) Consortium | Harper VanSteenhouse, Yumi Kasai, David Gray, Carol Clugston, Anna Dominiczak and Alex Alderton, Roberto Amato, Sonia Goncalves, Ewan Harrison, David K. Jackson, Ian Johnston, Dominic Kwiatkowski, Cordelia Langford, John Sillitoe on behalf of the Wellcome Sanger Institute COVID-19 Surveillance Team<br><br>Jacquelyn Wynn, Mairead Hyland, The Lighthouse Lab in Alderley Park and Alex Alderton, Roberto Amato, Sonia Goncalves, Ewan Harrison, David K. Jackson, Ian Johnston, Dominic Kwiatkowski, Cordelia Langford, John Sillitoe on behalf of the Wellcome Sanger Institute COVID-19 Surveillance Team |
| EPI_ISL_860256, EPI_ISL_860258, EPI_ISL_860296, EPI_ISL_860549, EPI_ISL_860552, EPI_ISL_860710, EPI_ISL_860711, EPI_ISL_860714, EPI_ISL_860717, EPI_ISL_860718, EPI_ISL_860729, EPI_ISL_860791, EPI_ISL_860792, EPI_ISL_860793, EPI_ISL_860795, EPI_ISL_860796, EPI_ISL_860819, EPI_ISL_861105, EPI_ISL_861233, EPI_ISL_861240, EPI_ISL_861241, EPI_ISL_861243                                                                                                                                                                                                                                                                 | Ohio Department of Health Laboratory                             | Ohio Department of Health Laboratory                                                                                                                         | Holmes, Jennifer, Eric Brandt, Keoni Omura, Glen McGillivray, Caitlin McDonnell, Kirtana Ramadugu, Erica Leasure, Kelsey Florek, Heather Blankenship, Quanta Brown, and Tammy Bannerman                                                                                                                                                                                                                                                                                                                                                                                                                              |
| see above                                                                                                                                                                                                                                                                                                                                                                                                                                                                                                                                                                                                                      | Ohio State University                                            | James Molecular Laboratory                                                                                                                                   | Huolin Tu, Matthew R Avenarius, Laura Kubatko, Matthew Hunt, Xiaokang Pan, Peng Ru, Jason Garee, Keelie Thomas, Peter Mohler, Preeti Pancholi, Dan Jones                                                                                                                                                                                                                                                                                                                                                                                                                                                             |
| EPI_ISL_861433, EPI_ISL_861434, EPI_ISL_861435                                                                                                                                                                                                                                                                                                                                                                                                                                                                                                                                                                                 | Ohio State University                                            | James Molecular Laboratory                                                                                                                                   | Huolin Tu, Matthew R Avenarius, Laura Kubatko, Matthew Hunt, Xiaokang Pan, Peng Ru, Jason Garee, Keelie Thomas, Peter Mohler, Preeti Pancholi, Dan Jones                                                                                                                                                                                                                                                                                                                                                                                                                                                             |
| EPI_ISL_861439, EPI_ISL_861440, EPI_ISL_861441, EPI_ISL_861442                                                                                                                                                                                                                                                                                                                                                                                                                                                                                                                                                                 | The Ohio State University                                        | James Molecular Laboratory                                                                                                                                   | Huolin Tu, Matthew R Avenarius, Laura Kubatko, Matthew Hunt, Xiaokang Pan, Peng Ru, Jason Garee, Keelie Thomas, Peter Mohler, Preeti Pancholi, Dan Jones                                                                                                                                                                                                                                                                                                                                                                                                                                                             |
| EPI_ISL_862077                                                                                                                                                                                                                                                                                                                                                                                                                                                                                                                                                                                                                 | National Influenza Center, Virology Department                   | National Influenza Center                                                                                                                                    | J Yavarian, K Sadeghi, NZ Shafiei Jandaghi, V Salimi, A Nejati, N Ghavvami, F Ajaminejad and T Mokhtari Azad                                                                                                                                                                                                                                                                                                                                                                                                                                                                                                         |
| EPI_ISL_862080                                                                                                                                                                                                                                                                                                                                                                                                                                                                                                                                                                                                                 | National Influenza Center, Virology Department                   | National Influenza Center                                                                                                                                    | J Yavarian, NZ Shafiei Jandaghi, V Salimi, A Nejati, K Sadeghi, F Ajaminejad, N Ghavvami and T Mokhtari Azad                                                                                                                                                                                                                                                                                                                                                                                                                                                                                                         |
| EPI_ISL_862544                                                                                                                                                                                                                                                                                                                                                                                                                                                                                                                                                                                                                 | Compejo Hospitalario Xeral-Calde                                 | Instituto de Salud Carlos III                                                                                                                                | Iglesias-Caballero, M. Camarero, S. Molinero Calamita, M. González-Esguevillas, M. Pozo, F. Casas, I. Jiménez, P. Jiménez, M. Zaballos, A. Monzón, S. Varona, S. Juliá, M. Cuesta, I. Alonso, P.                                                                                                                                                                                                                                                                                                                                                                                                                     |
| EPI_ISL_862545                                                                                                                                                                                                                                                                                                                                                                                                                                                                                                                                                                                                                 | Hospital Universitario Virgen de la Arrixaca                     | Instituto de Salud Carlos III                                                                                                                                | Iglesias-Caballero, M. Camarero, S. Molinero Calamita, M. González-Esguevillas, M. Pozo, F. Casas, I. Jiménez, P. Jiménez, M. Zaballos, A. Monzón, S. Varona, S. Juliá, M. Cuesta, I. Moreno, A.                                                                                                                                                                                                                                                                                                                                                                                                                     |
| EPI_ISL_862546, EPI_ISL_862547                                                                                                                                                                                                                                                                                                                                                                                                                                                                                                                                                                                                 | Consejería de Sanidad y Asuntos Sociales                         | Instituto de Salud Carlos III                                                                                                                                | Iglesias-Caballero, M. Camarero, S. Molinero Calamita, M. González-Esguevillas, M. Pozo, F. Casas, I. Jiménez, P. Jiménez, M. Zaballos, A. Monzón, S. Varona, S. Juliá, M. Cuesta, I. Gutiérrez, G.                                                                                                                                                                                                                                                                                                                                                                                                                  |
| EPI_ISL_862548                                                                                                                                                                                                                                                                                                                                                                                                                                                                                                                                                                                                                 | Hospital Clínico San Carlos                                      | Instituto de Salud Carlos III                                                                                                                                | Iglesias-Caballero, M. Camarero, S. Molinero Calamita, M. González-Esguevillas, M. Pozo, F. Casas, I. Jiménez, P. Jiménez, M. Zaballos, A. Monzón, S. Varona, S. Juliá, M. Cuesta, I. Rodríguez, I.                                                                                                                                                                                                                                                                                                                                                                                                                  |
| EPI_ISL_862549                                                                                                                                                                                                                                                                                                                                                                                                                                                                                                                                                                                                                 | Hospital Universitario Virgen de la Arrixaca                     | Instituto de Salud Carlos III                                                                                                                                | Iglesias-Caballero, M. Camarero, S. Molinero Calamita, M. González-Esguevillas, M. Pozo, F. Casas, I. Jiménez, P. Jiménez, M. Zaballos, A. Monzón, S. Varona, S. Juliá, M. Cuesta, I. Moreno, A.                                                                                                                                                                                                                                                                                                                                                                                                                     |
| EPI_ISL_862550                                                                                                                                                                                                                                                                                                                                                                                                                                                                                                                                                                                                                 | Complejo Hospitalario de Navarra                                 | Instituto de Salud Carlos III                                                                                                                                | Iglesias-Caballero, M. Camarero, S. Molinero Calamita, M. González-Esguevillas, M. Pozo, F. Casas, I. Jiménez, P. Jiménez, M. Zaballos, A. Monzón, S. Varona, S. Juliá, M. Cuesta, I. Ezpeleta, C.                                                                                                                                                                                                                                                                                                                                                                                                                   |
| EPI_ISL_862551                                                                                                                                                                                                                                                                                                                                                                                                                                                                                                                                                                                                                 | Hospital J.M. Morales Meseguer                                   | Instituto de Salud Carlos III                                                                                                                                | Iglesias-Caballero, M. Camarero, S. Molinero Calamita, M. González-Esguevillas, M. Pozo, F. Casas, I. Jiménez, P. Jiménez, M. Zaballos, A. Monzón, S. Varona, S. Juliá, M. Cuesta, I. Guerrero, C.                                                                                                                                                                                                                                                                                                                                                                                                                   |
| EPI_ISL_862552                                                                                                                                                                                                                                                                                                                                                                                                                                                                                                                                                                                                                 | Complejo Hospitalario de Navarra                                 | Instituto de Salud Carlos III                                                                                                                                | Iglesias-Caballero, M. Camarero, S. Molinero Calamita, M. González-Esguevillas, M. Pozo, F. Casas, I. Jiménez, P. Jiménez, M. Zaballos, A. Monzón, S. Varona, S. Juliá, M. Cuesta, I. Ezpeleta, C.                                                                                                                                                                                                                                                                                                                                                                                                                   |
| EPI_ISL_862553, EPI_ISL_862554, EPI_ISL_862555                                                                                                                                                                                                                                                                                                                                                                                                                                                                                                                                                                                 | Compejo Hospitalario Xeral-Calde                                 | Instituto de Salud Carlos III                                                                                                                                | Iglesias-Caballero, M. Camarero, S. Molinero Calamita, M. González-Esguevillas, M. Pozo, F. Casas, I. Jiménez, P. Jiménez, M. Zaballos, A. Monzón, S. Varona, S. Juliá, M. Cuesta, I. Alonso, P.                                                                                                                                                                                                                                                                                                                                                                                                                     |
| EPI_ISL_862556                                                                                                                                                                                                                                                                                                                                                                                                                                                                                                                                                                                                                 | Gerencia de Asistencia Sanitaria de Soria                        | Instituto de Salud Carlos III                                                                                                                                | Iglesias-Caballero, M. Camarero, S. Molinero Calamita, M. González-Esguevillas, M. Pozo, F. Casas, I. Jiménez, P. Jiménez, M. Zaballos, A. Monzón, S. Varona, S. Juliá, M. Cuesta, I. Aldea, C.                                                                                                                                                                                                                                                                                                                                                                                                                      |
| EPI_ISL_862557, EPI_ISL_862558, EPI_ISL_862559, EPI_ISL_862560, EPI_ISL_862561, EPI_ISL_862562, EPI_ISL_862563                                                                                                                                                                                                                                                                                                                                                                                                                                                                                                                 | Consejería de Sanidad y Asuntos Sociales                         | Instituto de Salud Carlos III                                                                                                                                | Iglesias-Caballero, M. Camarero, S. Molinero Calamita, M. González-Esguevillas, M. Pozo, F. Casas, I. Jiménez, P. Jiménez, M. Zaballos, A. Monzón, S. Varona, S. Juliá, M. Cuesta, I. Gutiérrez, G.                                                                                                                                                                                                                                                                                                                                                                                                                  |
| EPI_ISL_862564, EPI_ISL_862565                                                                                                                                                                                                                                                                                                                                                                                                                                                                                                                                                                                                 | Gerencia de Asistencia Sanitaria de Soria                        | Instituto de Salud Carlos III                                                                                                                                | Iglesias-Caballero, M. Camarero, S. Molinero Calamita, M. González-Esguevillas, M. Pozo, F. Casas, I. Jiménez, P. Jiménez, M. Zaballos, A. Monzón, S. Varona, S. Juliá, M. Cuesta, I. Aldea, C.                                                                                                                                                                                                                                                                                                                                                                                                                      |
| EPI_ISL_862566                                                                                                                                                                                                                                                                                                                                                                                                                                                                                                                                                                                                                 | Consejería de Sanidad y Asuntos Sociales                         | Instituto de Salud Carlos III                                                                                                                                | Iglesias-Caballero, M. Camarero, S. Molinero Calamita, M. González-Esguevillas, M. Pozo, F. Casas, I. Jiménez, P. Jiménez, M. Zaballos, A. Monzón, S. Varona, S. Juliá, M. Cuesta, I. Gutiérrez, G.                                                                                                                                                                                                                                                                                                                                                                                                                  |
| EPI_ISL_862567                                                                                                                                                                                                                                                                                                                                                                                                                                                                                                                                                                                                                 | Gerencia de Asistencia Sanitaria de Soria                        | Instituto de Salud Carlos III                                                                                                                                | Iglesias-Caballero, M. Molinero Calamita, M. González-Esguevillas, M. Camarero, S. Pozo, F. Casas, I. Jiménez, P. Jiménez, M. Zaballos, A. Monzón, S. Varona, S. Juliá, M. Cuesta, I. C. Aldea                                                                                                                                                                                                                                                                                                                                                                                                                       |
| EPI_ISL_862568                                                                                                                                                                                                                                                                                                                                                                                                                                                                                                                                                                                                                 | Hospital Universitario Virgen de la Arrixaca                     | Instituto de Salud Carlos III                                                                                                                                | Iglesias-Caballero, M. Camarero, S. Molinero Calamita, M. González-Esguevillas, M. Pozo, F. Casas, I. Jiménez, P. Jiménez, M. Zaballos, A. Monzón, S. Varona, S. Juliá, M. Cuesta, I. Moreno, A.                                                                                                                                                                                                                                                                                                                                                                                                                     |
| EPI_ISL_862569                                                                                                                                                                                                                                                                                                                                                                                                                                                                                                                                                                                                                 | Hospital Clínico San Carlos                                      | Instituto de Salud Carlos III                                                                                                                                | Iglesias-Caballero, M. Camarero, S. Molinero Calamita, M. González-Esguevillas, M. Pozo, F. Casas, I. Jiménez, P. Jiménez, M. Zaballos, A. Monzón, S. Varona, S. Juliá, M. Cuesta, I. Rodríguez, I.                                                                                                                                                                                                                                                                                                                                                                                                                  |
| EPI_ISL_862570, EPI_ISL_862571, EPI_ISL_862572                                                                                                                                                                                                                                                                                                                                                                                                                                                                                                                                                                                 | Complejo Hospitalario de Navarra                                 | Instituto de Salud Carlos III                                                                                                                                | Iglesias-Caballero, M. Camarero, S. Molinero Calamita, M. González-Esguevillas, M. Pozo, F. Casas, I. Jiménez, P. Jiménez, M. Zaballos, A. Monzón, S. Varona, S. Juliá, M. Cuesta, I. Ezpeleta, C.                                                                                                                                                                                                                                                                                                                                                                                                                   |
| EPI_ISL_862573, EPI_ISL_862574, EPI_ISL_862575, EPI_ISL_862576, EPI_ISL_862577, EPI_ISL_862578, EPI_ISL_862579, EPI_ISL_862580, EPI_ISL_862581, EPI_ISL_862582, EPI_ISL_862583, EPI_ISL_862584, EPI_ISL_862585, EPI_ISL_862586, EPI_ISL_862587, EPI_ISL_862588                                                                                                                                                                                                                                                                                                                                                                 | Hospital Clínico                                                 | Instituto de Salud Carlos III                                                                                                                                | Iglesias-Caballero, M. Camarero, S. Molinero Calamita, M. González-Esguevillas, M. Pozo, F. Casas, I. Jiménez, P. Jiménez, M. Zaballos, A. Monzón, S. Varona, S. Juliá, M. Cuesta, I. Marcos, M.A.                                                                                                                                                                                                                                                                                                                                                                                                                   |
| see above                                                                                                                                                                                                                                                                                                                                                                                                                                                                                                                                                                                                                      | Hospital Comarcal de Melilla                                     | Instituto de Salud Carlos III                                                                                                                                | Iglesias-Caballero, M. Camarero, S. Molinero Calamita, M. González-Esguevillas, M. Pozo, F. Casas, I. Jiménez, P. Jiménez, M. Zaballos, A. Monzón, S. Varona, S. Juliá, M. Cuesta, I. López, J.                                                                                                                                                                                                                                                                                                                                                                                                                      |
| EPI_ISL_862589, EPI_ISL_862590, EPI_ISL_862591, EPI_ISL_862592, EPI_ISL_862593, EPI_ISL_862594, EPI_ISL_862595, EPI_ISL_862596, EPI_ISL_862597, EPI_ISL_862598, EPI_ISL_862599, EPI_ISL_862600, EPI_ISL_862601, EPI_ISL_862602, EPI_ISL_862603, EPI_ISL_862604, EPI_ISL_862605, EPI_ISL_862606, EPI_ISL_862607, EPI_ISL_862608, EPI_ISL_862609, EPI_ISL_862610, EPI_ISL_862611, EPI_ISL_862612, EPI_ISL_862613, EPI_ISL_862614, EPI_ISL_862615, EPI_ISL_862616, EPI_ISL_862617, EPI_ISL_862618, EPI_ISL_862619, EPI_ISL_862620, EPI_ISL_862621, EPI_ISL_862622, EPI_ISL_862623, EPI_ISL_862624, EPI_ISL_862625, EPI_ISL_862626 | Hospital Clínico                                                 | Instituto de Salud Carlos III                                                                                                                                | Iglesias-Caballero, M. Camarero, S. Molinero Calamita, M. González-Esguevillas, M. Pozo, F. Casas, I. Jiménez, P. Jiménez, M. Zaballos, A. Monzón, S. Varona, S. Juliá, M. Cuesta, I. Marcos, M.A.                                                                                                                                                                                                                                                                                                                                                                                                                   |
| see above                                                                                                                                                                                                                                                                                                                                                                                                                                                                                                                                                                                                                      | Hospital Nuestra Señora de Sonsoles                              | Instituto de Salud Carlos III                                                                                                                                | Iglesias-Caballero, M. Molinero Calamita, M. González-Esguevillas, M. Camarero, S. Pozo, F. Casas, I. Jiménez, P. Jiménez, M. Zaballos, A. Monzón, S. Varona, S. Juliá, M. Cuesta, I. A. San Pedro                                                                                                                                                                                                                                                                                                                                                                                                                   |
| EPI_ISL_862627, EPI_ISL_862628, EPI_ISL_862629, EPI_ISL_862630, EPI_ISL_862631, EPI_ISL_862632, EPI_ISL_862633, EPI_ISL_862634, EPI_ISL_862635, EPI_ISL_862636                                                                                                                                                                                                                                                                                                                                                                                                                                                                 | Hospital Clínico                                                 | Instituto de Salud Carlos III                                                                                                                                | Iglesias-Caballero, M. Camarero, S. Molinero Calamita, M. González-Esguevillas, M. Pozo, F. Casas, I. Jiménez, P. Jiménez, M. Zaballos, A. Monzón, S. Varona, S. Juliá, M. Cuesta, I. Marcos, M.A.                                                                                                                                                                                                                                                                                                                                                                                                                   |
| EPI_ISL_862637, EPI_ISL_862638, EPI_ISL_862639                                                                                                                                                                                                                                                                                                                                                                                                                                                                                                                                                                                 | Hospital Nuestra Señora de Sonsoles                              | Instituto de Salud Carlos III                                                                                                                                | Iglesias-Caballero, M. Molinero Calamita, M. González-Esguevillas, M. Camarero, S. Pozo, F. Casas, I. Jiménez, P. Jiménez, M. Zaballos, A. Monzón, S. Varona, S. Juliá, M. Cuesta, I. A. San Pedro                                                                                                                                                                                                                                                                                                                                                                                                                   |
| EPI_ISL_862640                                                                                                                                                                                                                                                                                                                                                                                                                                                                                                                                                                                                                 | Gerencia de Asistencia Sanitaria de Soria                        | Instituto de Salud Carlos III                                                                                                                                | Iglesias-Caballero, M. Molinero Calamita, M. González-Esguevillas, M. Camarero, S. Pozo, F. Casas, I. Jiménez, P. Jiménez, M. Zaballos, A. Monzón, S. Varona, S. Juliá, M. Cuesta, I. C. Aldea                                                                                                                                                                                                                                                                                                                                                                                                                       |

|                                                                                                                                                                                                                                                                                                                                                                                                                                                                                                                                                |                                          |                                                                            |                                                                                                                                                                                                                                                                                                             |                                                                                                                                                                                                                                                                                                   |
|------------------------------------------------------------------------------------------------------------------------------------------------------------------------------------------------------------------------------------------------------------------------------------------------------------------------------------------------------------------------------------------------------------------------------------------------------------------------------------------------------------------------------------------------|------------------------------------------|----------------------------------------------------------------------------|-------------------------------------------------------------------------------------------------------------------------------------------------------------------------------------------------------------------------------------------------------------------------------------------------------------|---------------------------------------------------------------------------------------------------------------------------------------------------------------------------------------------------------------------------------------------------------------------------------------------------|
| EPI_ISL_862641, EPI_ISL_862642, EPI_ISL_862643, EPI_ISL_862644                                                                                                                                                                                                                                                                                                                                                                                                                                                                                 | Consejería de Sanidad y Asuntos Sociales | Instituto de Salud Carlos III                                              | Iglesias-Caballero, M. Camarero, S. Molinero Calamita, M. González-Esguevillas, M. Pozo, F. Casas, I. Jiménez, P. Jiménez, M. Zaballos, A. Monzón, S. Varona, S. Juliá, M. Cuesta, I. Gutiérrez, G.                                                                                                         |                                                                                                                                                                                                                                                                                                   |
| EPI_ISL_862645, EPI_ISL_862646, EPI_ISL_862647, EPI_ISL_862648, EPI_ISL_862649, EPI_ISL_862650, EPI_ISL_862651                                                                                                                                                                                                                                                                                                                                                                                                                                 | Complejo Hospitalario de Navarra         | Instituto de Salud Carlos III                                              | Iglesias-Caballero, M. Camarero, S. Molinero Calamita, M. González-Esguevillas, M. Pozo, F. Casas, I. Jiménez, P. Jiménez, M. Zaballos, A. Monzón, S. Varona, S. Juliá, M. Cuesta, I. Ezpeleta, C.                                                                                                          |                                                                                                                                                                                                                                                                                                   |
| EPI_ISL_862652, EPI_ISL_862653                                                                                                                                                                                                                                                                                                                                                                                                                                                                                                                 | Clínica Universidad de Navarra           | Instituto de Salud Carlos III                                              | Iglesias-Caballero, M. Camarero, S. Molinero Calamita, M. González-Esguevillas, M. Pozo, F. Casas, I. Jiménez, P. Jiménez, M. Zaballos, A. Monzón, S. Varona, S. Juliá, M. Cuesta, I. Fernández, M.                                                                                                         |                                                                                                                                                                                                                                                                                                   |
| EPI_ISL_862654                                                                                                                                                                                                                                                                                                                                                                                                                                                                                                                                 | Hospital San Pedro de Alcántara          | Instituto de Salud Carlos III                                              | Iglesias-Caballero, M. Camarero, S. Molinero Calamita, M. González-Esguevillas, M. Pozo, F. Casas, I. Jiménez, P. Jiménez, M. Zaballos, A. Monzón, S. Varona, S. Juliá, M. Cuesta, I. Rodríguez, G.                                                                                                         |                                                                                                                                                                                                                                                                                                   |
| EPI_ISL_862655, EPI_ISL_862656, EPI_ISL_862657, EPI_ISL_862658                                                                                                                                                                                                                                                                                                                                                                                                                                                                                 | Hospital Universitario de Ceuta          | Instituto de Salud Carlos III                                              | Iglesias-Caballero, M. Camarero, S. Molinero Calamita, M. González-Esguevillas, M. Pozo, F. Casas, I. Jiménez, P. Jiménez, M. Zaballos, A. Monzón, S. Varona, S. Juliá, M. Cuesta, I. Hijano, S.                                                                                                            |                                                                                                                                                                                                                                                                                                   |
| EPI_ISL_862954, EPI_ISL_863005, EPI_ISL_863022, EPI_ISL_863023, EPI_ISL_863024, EPI_ISL_863025, EPI_ISL_863037, EPI_ISL_863062, EPI_ISL_863073, EPI_ISL_863093, EPI_ISL_863097, EPI_ISL_863107, EPI_ISL_863120, EPI_ISL_863121, EPI_ISL_863142, EPI_ISL_863151, EPI_ISL_863155, EPI_ISL_863160, EPI_ISL_863163, EPI_ISL_863166, EPI_ISL_863168, EPI_ISL_863170, EPI_ISL_863171, EPI_ISL_863180, EPI_ISL_863187, EPI_ISL_863199, EPI_ISL_863204, EPI_ISL_863209, EPI_ISL_863212, EPI_ISL_863219, EPI_ISL_863221, EPI_ISL_863244, EPI_ISL_863275 | see above                                | Lighthouse Lab in Alderley Park                                            | Wellcome Sanger Institute for the COVID-19 Genomics UK (COG-UK) Consortium                                                                                                                                                                                                                                  | Jacquelyn Wynn, Mairead Hyland, The Lighthouse Lab in Alderley Park and Alex Alderton, Roberto Amato, Sonia Goncalves, Ewan Harrison, David K. Jackson, Ian Johnston, Dominic Kwiatkowski, Cordelia Langford, John Sillitoe on behalf of the Wellcome Sanger Institute COVID-19 Surveillance Team |
| EPI_ISL_863277, EPI_ISL_863301, EPI_ISL_863312, EPI_ISL_863314, EPI_ISL_863324, EPI_ISL_863345                                                                                                                                                                                                                                                                                                                                                                                                                                                 | Lighthouse Lab in Glasgow                | Wellcome Sanger Institute for the COVID-19 Genomics UK (COG-UK) Consortium | Harper VanSteenhouse, Yumi Kasai, David Gray, Carol Clugston, Anna Dominiczak and Alex Alderton, Roberto Amato, Sonia Goncalves, Ewan Harrison, David K. Jackson, Ian Johnston, Dominic Kwiatkowski, Cordelia Langford, John Sillitoe on behalf of the Wellcome Sanger Institute COVID-19 Surveillance Team |                                                                                                                                                                                                                                                                                                   |
| EPI_ISL_863357                                                                                                                                                                                                                                                                                                                                                                                                                                                                                                                                 | Lighthouse Lab in Alderley Park          | Wellcome Sanger Institute for the COVID-19 Genomics UK (COG-UK) Consortium | Jacquelyn Wynn, Mairead Hyland, The Lighthouse Lab in Alderley Park and Alex Alderton, Roberto Amato, Sonia Goncalves, Ewan Harrison, David K. Jackson, Ian Johnston, Dominic Kwiatkowski, Cordelia Langford, John Sillitoe on behalf of the Wellcome Sanger Institute COVID-19 Surveillance Team           |                                                                                                                                                                                                                                                                                                   |
| EPI_ISL_863368, EPI_ISL_863370, EPI_ISL_863382                                                                                                                                                                                                                                                                                                                                                                                                                                                                                                 | Lighthouse Lab in Glasgow                | Wellcome Sanger Institute for the COVID-19 Genomics UK (COG-UK) Consortium | Harper VanSteenhouse, Yumi Kasai, David Gray, Carol Clugston, Anna Dominiczak and Alex Alderton, Roberto Amato, Sonia Goncalves, Ewan Harrison, David K. Jackson, Ian Johnston, Dominic Kwiatkowski, Cordelia Langford, John Sillitoe on behalf of the Wellcome Sanger Institute COVID-19 Surveillance Team |                                                                                                                                                                                                                                                                                                   |
| EPI_ISL_863408, EPI_ISL_863416                                                                                                                                                                                                                                                                                                                                                                                                                                                                                                                 | Lighthouse Lab in Alderley Park          | Wellcome Sanger Institute for the COVID-19 Genomics UK (COG-UK) Consortium | Jacquelyn Wynn, Mairead Hyland, The Lighthouse Lab in Alderley Park and Alex Alderton, Roberto Amato, Sonia Goncalves, Ewan Harrison, David K. Jackson, Ian Johnston, Dominic Kwiatkowski, Cordelia Langford, John Sillitoe on behalf of the Wellcome Sanger Institute COVID-19 Surveillance Team           |                                                                                                                                                                                                                                                                                                   |
| EPI_ISL_863418, EPI_ISL_863430, EPI_ISL_863438, EPI_ISL_863439, EPI_ISL_863486, EPI_ISL_863488, EPI_ISL_863498                                                                                                                                                                                                                                                                                                                                                                                                                                 | Lighthouse Lab in Glasgow                | Wellcome Sanger Institute for the COVID-19 Genomics UK (COG-UK) Consortium | Harper VanSteenhouse, Yumi Kasai, David Gray, Carol Clugston, Anna Dominiczak and Alex Alderton, Roberto Amato, Sonia Goncalves, Ewan Harrison, David K. Jackson, Ian Johnston, Dominic Kwiatkowski, Cordelia Langford, John Sillitoe on behalf of the Wellcome Sanger Institute COVID-19 Surveillance Team |                                                                                                                                                                                                                                                                                                   |
| EPI_ISL_863503                                                                                                                                                                                                                                                                                                                                                                                                                                                                                                                                 | Lighthouse Lab in Alderley Park          | Wellcome Sanger Institute for the COVID-19 Genomics UK (COG-UK) Consortium | Jacquelyn Wynn, Mairead Hyland, The Lighthouse Lab in Alderley Park and Alex Alderton, Roberto Amato, Sonia Goncalves, Ewan Harrison, David K. Jackson, Ian Johnston, Dominic Kwiatkowski, Cordelia Langford, John Sillitoe on behalf of the Wellcome Sanger Institute COVID-19 Surveillance Team           |                                                                                                                                                                                                                                                                                                   |
| EPI_ISL_863512, EPI_ISL_863517, EPI_ISL_863651, EPI_ISL_863746                                                                                                                                                                                                                                                                                                                                                                                                                                                                                 | Lighthouse Lab in Glasgow                | Wellcome Sanger Institute for the COVID-19 Genomics UK (COG-UK) Consortium | Harper VanSteenhouse, Yumi Kasai, David Gray, Carol Clugston, Anna Dominiczak and Alex Alderton, Roberto Amato, Sonia Goncalves, Ewan Harrison, David K. Jackson, Ian Johnston, Dominic Kwiatkowski, Cordelia Langford, John Sillitoe on behalf of the Wellcome Sanger Institute COVID-19 Surveillance Team |                                                                                                                                                                                                                                                                                                   |
| EPI_ISL_863879, EPI_ISL_863911, EPI_ISL_863919, EPI_ISL_863943, EPI_ISL_863947, EPI_ISL_863954, EPI_ISL_863958, EPI_ISL_863964, EPI_ISL_863999, EPI_ISL_864010, EPI_ISL_864048, EPI_ISL_864049, EPI_ISL_864051, EPI_ISL_864053, EPI_ISL_864056, EPI_ISL_864060, EPI_ISL_864067, EPI_ISL_864081, EPI_ISL_864089, EPI_ISL_864101, EPI_ISL_864115, EPI_ISL_864123, EPI_ISL_864139, EPI_ISL_864180, EPI_ISL_864195                                                                                                                                 | see above                                | Lighthouse Lab in Alderley Park                                            | Wellcome Sanger Institute for the COVID-19 Genomics UK (COG-UK) Consortium                                                                                                                                                                                                                                  | Jacquelyn Wynn, Mairead Hyland, The Lighthouse Lab in Alderley Park and Alex Alderton, Roberto Amato, Sonia Goncalves, Ewan Harrison, David K. Jackson, Ian Johnston, Dominic Kwiatkowski, Cordelia Langford, John Sillitoe on behalf of the Wellcome Sanger Institute COVID-19 Surveillance Team |
| EPI_ISL_869079, EPI_ISL_869080, EPI_ISL_869081, EPI_ISL_870065, EPI_ISL_871325, EPI_ISL_871788, EPI_ISL_871791, EPI_ISL_871816, EPI_ISL_871818, EPI_ISL_871819, EPI_ISL_871965, EPI_ISL_871966, EPI_ISL_871967, EPI_ISL_871968, EPI_ISL_871969                                                                                                                                                                                                                                                                                                 | see above                                | Ohio Department of Health Laboratory                                       | Ohio Department of Health Laboratory                                                                                                                                                                                                                                                                        | Holmes, Jennifer; Eric Brandt, Keoni Omura, Glen McGillivray, Caitlin McDonnell, Kirtana Ramadugu, Erica Leasure, Kelsey Florek, Heather Blankenship, Quanta Brown, and Tammy Bannerman                                                                                                           |
| EPI_ISL_871972                                                                                                                                                                                                                                                                                                                                                                                                                                                                                                                                 | Instituto de Salud Carlos III            | Instituto de Salud Carlos III                                              | Iglesias-Caballero, M. Camarero, S. Molinero Calamita, M. González-Esguevillas, M. Pozo, F. Casas, I. Jiménez, P. Jiménez, M. Zaballos, A. Monzón, S. Varona, S. Juliá, M. Cuesta, I.                                                                                                                       |                                                                                                                                                                                                                                                                                                   |
| EPI_ISL_871973                                                                                                                                                                                                                                                                                                                                                                                                                                                                                                                                 | Hospital Universitario Severo Ochoa      | Instituto de Salud Carlos III                                              | Iglesias-Caballero, M. Camarero, S. Molinero Calamita, M. González-Esguevillas, M. Pozo, F. Casas, I. Jiménez, P. Jiménez, M. Zaballos, A. Monzón, S. Varona, S. Juliá, M. Cuesta, I. García, M.L.                                                                                                          |                                                                                                                                                                                                                                                                                                   |
| EPI_ISL_871974, EPI_ISL_871975                                                                                                                                                                                                                                                                                                                                                                                                                                                                                                                 | Hospital Infanta Cristina                | Instituto de Salud Carlos III                                              | Iglesias-Caballero, M. Camarero, S. Molinero Calamita, M. González-Esguevillas, M. Pozo, F. Casas, I. Jiménez, P. Jiménez, M. Zaballos, A. Monzón, S. Varona, S. Juliá, M. Cuesta, I. García, P.                                                                                                            |                                                                                                                                                                                                                                                                                                   |
| EPI_ISL_871976, EPI_ISL_871977                                                                                                                                                                                                                                                                                                                                                                                                                                                                                                                 | Hospital Universitario Lozano Belsa      | Instituto de Salud Carlos III                                              | Iglesias-Caballero, M. Camarero, S. Molinero Calamita, M. González-Esguevillas, M. Pozo, F. Casas, I. Jiménez, P. Jiménez, M. Zaballos, A. Monzón, S. Varona, S. Juliá, M. Cuesta, I. Benito, R.                                                                                                            |                                                                                                                                                                                                                                                                                                   |
| EPI_ISL_871978                                                                                                                                                                                                                                                                                                                                                                                                                                                                                                                                 | Hospital Universitario Miguel Servet     | Instituto de Salud Carlos III                                              | Iglesias-Caballero, M. Camarero, S. Molinero Calamita, M. González-Esguevillas, M. Pozo, F. Casas, I. Jiménez, P. Jiménez, M. Zaballos, A. Monzón, S. Varona, S. Juliá, M. Cuesta, I. Rezusta, A.                                                                                                           |                                                                                                                                                                                                                                                                                                   |
| EPI_ISL_871979                                                                                                                                                                                                                                                                                                                                                                                                                                                                                                                                 | Hospital Infanta Cristina                | Instituto de Salud Carlos III                                              | Iglesias-Caballero, M. Camarero, S. Molinero Calamita, M. González-Esguevillas, M. Pozo, F. Casas, I. Jiménez, P. Jiménez, M. Zaballos, A. Monzón, S. Varona, S. Juliá, M. Cuesta, I. García, P.                                                                                                            |                                                                                                                                                                                                                                                                                                   |
| EPI_ISL_871980, EPI_ISL_871981, EPI_ISL_871982, EPI_ISL_871983                                                                                                                                                                                                                                                                                                                                                                                                                                                                                 | Hospital Universitario Miguel Servet     | Instituto de Salud Carlos III                                              | Iglesias-Caballero, M. Camarero, S. Molinero Calamita, M. González-Esguevillas, M. Pozo, F. Casas, I. Jiménez, P. Jiménez, M. Zaballos, A. Monzón, S. Varona, S. Juliá, M. Cuesta, I. Rezusta, A.                                                                                                           |                                                                                                                                                                                                                                                                                                   |
| EPI_ISL_871984                                                                                                                                                                                                                                                                                                                                                                                                                                                                                                                                 | Hospital Universitario Severo Ochoa      | Instituto de Salud Carlos III                                              | Iglesias-Caballero, M. Camarero, S. Molinero Calamita, M. González-Esguevillas, M. Pozo, F. Casas, I. Jiménez, P. Jiménez, M. Zaballos, A. Monzón, S. Varona, S. Juliá, M. Cuesta, I. García, M.L.                                                                                                          |                                                                                                                                                                                                                                                                                                   |
| EPI_ISL_871985, EPI_ISL_871986, EPI_ISL_871987, EPI_ISL_871988, EPI_ISL_871989, EPI_ISL_871990                                                                                                                                                                                                                                                                                                                                                                                                                                                 | Hospital Clínico San Carlos              | Instituto de Salud Carlos III                                              | Iglesias-Caballero, M. Camarero, S. Molinero Calamita, M. González-Esguevillas, M. Pozo, F. Casas, I. Jiménez, P. Jiménez, M. Zaballos, A. Monzón, S. Varona, S. Juliá, M. Cuesta, I. Rodríguez, I.                                                                                                         |                                                                                                                                                                                                                                                                                                   |
| EPI_ISL_871991                                                                                                                                                                                                                                                                                                                                                                                                                                                                                                                                 | Hospital Universitario Severo Ochoa      | Instituto de Salud Carlos III                                              | Iglesias-Caballero, M. Camarero, S. Molinero Calamita, M. González-Esguevillas, M. Pozo, F. Casas, I. Jiménez, P. Jiménez, M. Zaballos, A. Monzón, S. Varona, S. Juliá, M. Cuesta, I. García, M.L.                                                                                                          |                                                                                                                                                                                                                                                                                                   |
| EPI_ISL_871992, EPI_ISL_871993                                                                                                                                                                                                                                                                                                                                                                                                                                                                                                                 | Hospital Clínico San Carlos              | Instituto de Salud Carlos III                                              | Iglesias-Caballero, M. Camarero, S. Molinero Calamita, M. González-Esguevillas, M. Pozo, F. Casas, I. Jiménez, P. Jiménez, M. Zaballos, A. Monzón, S. Varona, S. Juliá, M. Cuesta, I. Rodríguez, I.                                                                                                         |                                                                                                                                                                                                                                                                                                   |
| EPI_ISL_871994                                                                                                                                                                                                                                                                                                                                                                                                                                                                                                                                 | Hospital de Madrid                       | Instituto de Salud Carlos III                                              | Iglesias-Caballero, M. Camarero, S. Molinero Calamita, M. González-Esguevillas, M. Pozo, F. Casas, I. Jiménez, P. Jiménez, M. Zaballos, A. Monzón, S. Varona, S. Juliá, M. Cuesta, I. Alhambra, A.                                                                                                          |                                                                                                                                                                                                                                                                                                   |
| EPI_ISL_871995                                                                                                                                                                                                                                                                                                                                                                                                                                                                                                                                 | Hospital Universitario de Ceuta          | Instituto de Salud Carlos III                                              | Iglesias-Caballero, M. Camarero, S. Molinero Calamita, M. González-Esguevillas, M. Pozo, F. Casas, I. Jiménez, P. Jiménez, M. Zaballos, A. Monzón, S. Varona, S. Juliá, M. Cuesta, I. Hijano, S.                                                                                                            |                                                                                                                                                                                                                                                                                                   |
| EPI_ISL_871996, EPI_ISL_871997, EPI_ISL_871998                                                                                                                                                                                                                                                                                                                                                                                                                                                                                                 | Instituto de Salud Carlos III            | Instituto de Salud Carlos III                                              | Iglesias-Caballero, M. Camarero, S. Molinero Calamita, M. González-Esguevillas, M. Pozo, F. Casas, I. Jiménez, P. Jiménez, M. Zaballos, A. Monzón, S. Varona, S. Juliá, M. Cuesta, I.                                                                                                                       |                                                                                                                                                                                                                                                                                                   |

|                                                                                                                                                                                                                                                                                                                                                                                                                                                                                                                                                                                                                                                                                                                                                                                                                                                                                                                                                                                                                                                                                                                                                                                                                                                                                                                                                                                                                                                                                                                                                                                                                                                                                                                                                                                                                                                                                                                                                                                                                                                                                                                                                                                                                                                                                                                                                                                                                                                                                                                                                                                                                                                                                                                                                                                                                                                                                                                                                                                                                                                                                                                                                                                                                                                                                                                                                                                                                                                                                                                                                                |                                                        |                                                                                       |                                                                                                                                                                                                                                                                                                                                                                                                                                   |                                                                                                                                                                                                                                                                                                   |
|----------------------------------------------------------------------------------------------------------------------------------------------------------------------------------------------------------------------------------------------------------------------------------------------------------------------------------------------------------------------------------------------------------------------------------------------------------------------------------------------------------------------------------------------------------------------------------------------------------------------------------------------------------------------------------------------------------------------------------------------------------------------------------------------------------------------------------------------------------------------------------------------------------------------------------------------------------------------------------------------------------------------------------------------------------------------------------------------------------------------------------------------------------------------------------------------------------------------------------------------------------------------------------------------------------------------------------------------------------------------------------------------------------------------------------------------------------------------------------------------------------------------------------------------------------------------------------------------------------------------------------------------------------------------------------------------------------------------------------------------------------------------------------------------------------------------------------------------------------------------------------------------------------------------------------------------------------------------------------------------------------------------------------------------------------------------------------------------------------------------------------------------------------------------------------------------------------------------------------------------------------------------------------------------------------------------------------------------------------------------------------------------------------------------------------------------------------------------------------------------------------------------------------------------------------------------------------------------------------------------------------------------------------------------------------------------------------------------------------------------------------------------------------------------------------------------------------------------------------------------------------------------------------------------------------------------------------------------------------------------------------------------------------------------------------------------------------------------------------------------------------------------------------------------------------------------------------------------------------------------------------------------------------------------------------------------------------------------------------------------------------------------------------------------------------------------------------------------------------------------------------------------------------------------------------------|--------------------------------------------------------|---------------------------------------------------------------------------------------|-----------------------------------------------------------------------------------------------------------------------------------------------------------------------------------------------------------------------------------------------------------------------------------------------------------------------------------------------------------------------------------------------------------------------------------|---------------------------------------------------------------------------------------------------------------------------------------------------------------------------------------------------------------------------------------------------------------------------------------------------|
| EPI_ISL_872002                                                                                                                                                                                                                                                                                                                                                                                                                                                                                                                                                                                                                                                                                                                                                                                                                                                                                                                                                                                                                                                                                                                                                                                                                                                                                                                                                                                                                                                                                                                                                                                                                                                                                                                                                                                                                                                                                                                                                                                                                                                                                                                                                                                                                                                                                                                                                                                                                                                                                                                                                                                                                                                                                                                                                                                                                                                                                                                                                                                                                                                                                                                                                                                                                                                                                                                                                                                                                                                                                                                                                 | Ohio Department of Health Laboratory                   | Ohio Department of Health Laboratory                                                  | Holmes, Jennifer; Eric Brandt, Keoni Omura, Glen McGillivray, Caitlin McDonnell, Kirtana Ramadugu, Erica Leasure, Kelsey Florek, Heather Blankenship, Quanta Brown, and Tammy Bannerman                                                                                                                                                                                                                                           |                                                                                                                                                                                                                                                                                                   |
| EPI_ISL_872003, EPI_ISL_872004, EPI_ISL_872005, EPI_ISL_872006, EPI_ISL_872007, EPI_ISL_872008, EPI_ISL_872009, EPI_ISL_872010, EPI_ISL_872011, EPI_ISL_872012, EPI_ISL_872013, EPI_ISL_872014, EPI_ISL_872015, EPI_ISL_872016, EPI_ISL_872017, EPI_ISL_872018, EPI_ISL_872019, EPI_ISL_872020, EPI_ISL_872021, EPI_ISL_872022, EPI_ISL_872023, EPI_ISL_872024, EPI_ISL_872025, EPI_ISL_872026, EPI_ISL_872027, EPI_ISL_872028, EPI_ISL_872029, EPI_ISL_872030, EPI_ISL_872031, EPI_ISL_872032, EPI_ISL_872033, EPI_ISL_872034, EPI_ISL_872035, EPI_ISL_872036                                                                                                                                                                                                                                                                                                                                                                                                                                                                                                                                                                                                                                                                                                                                                                                                                                                                                                                                                                                                                                                                                                                                                                                                                                                                                                                                                                                                                                                                                                                                                                                                                                                                                                                                                                                                                                                                                                                                                                                                                                                                                                                                                                                                                                                                                                                                                                                                                                                                                                                                                                                                                                                                                                                                                                                                                                                                                                                                                                                                 | see above                                              | Ospedale "Di Venere"                                                                  | Beaconlab (Bioinformatics, Evolution and Comparative Genomics lab), Dept of Biosciences, University on Milan                                                                                                                                                                                                                                                                                                                      |                                                                                                                                                                                                                                                                                                   |
| EPI_ISL_872037                                                                                                                                                                                                                                                                                                                                                                                                                                                                                                                                                                                                                                                                                                                                                                                                                                                                                                                                                                                                                                                                                                                                                                                                                                                                                                                                                                                                                                                                                                                                                                                                                                                                                                                                                                                                                                                                                                                                                                                                                                                                                                                                                                                                                                                                                                                                                                                                                                                                                                                                                                                                                                                                                                                                                                                                                                                                                                                                                                                                                                                                                                                                                                                                                                                                                                                                                                                                                                                                                                                                                 | see above                                              | Ospedale "Di Venere"                                                                  | Iacobellis M, d'Avenia M, Piluscio R, Parisi A, Chiara M, Manzari C, Pesole G                                                                                                                                                                                                                                                                                                                                                     |                                                                                                                                                                                                                                                                                                   |
| EPI_ISL_873277                                                                                                                                                                                                                                                                                                                                                                                                                                                                                                                                                                                                                                                                                                                                                                                                                                                                                                                                                                                                                                                                                                                                                                                                                                                                                                                                                                                                                                                                                                                                                                                                                                                                                                                                                                                                                                                                                                                                                                                                                                                                                                                                                                                                                                                                                                                                                                                                                                                                                                                                                                                                                                                                                                                                                                                                                                                                                                                                                                                                                                                                                                                                                                                                                                                                                                                                                                                                                                                                                                                                                 | Environmental and Global Health, University of Florida | Environmental and Global Health, University of Florida                                | Iovine,N.M., Waltzek,T.B., Subramaniam,K., Loeb,J.C.,Stephenson,C.J., Lessard,K., Reeves,M., Wilkerson,G., Morris,J.G. and Lednický,J.A.                                                                                                                                                                                                                                                                                          |                                                                                                                                                                                                                                                                                                   |
| EPI_ISL_873970, EPI_ISL_873982, EPI_ISL_873983, EPI_ISL_873998, EPI_ISL_874007, EPI_ISL_874046, EPI_ISL_874050, EPI_ISL_874056, EPI_ISL_874066, EPI_ISL_874084, EPI_ISL_874086, EPI_ISL_874087, EPI_ISL_874092, EPI_ISL_874098, EPI_ISL_874107, EPI_ISL_874108, EPI_ISL_874133, EPI_ISL_874139, EPI_ISL_874144, EPI_ISL_874156, EPI_ISL_874161, EPI_ISL_874169, EPI_ISL_874171, EPI_ISL_874188, EPI_ISL_874194, EPI_ISL_874203, EPI_ISL_874205, EPI_ISL_874206, EPI_ISL_874210, EPI_ISL_874214, EPI_ISL_874220, EPI_ISL_874225, EPI_ISL_874227, EPI_ISL_874305, EPI_ISL_874322, EPI_ISL_874331, EPI_ISL_874332, EPI_ISL_874339, EPI_ISL_874351, EPI_ISL_874355, EPI_ISL_874366, EPI_ISL_874376, EPI_ISL_874378, EPI_ISL_874386, EPI_ISL_874397, EPI_ISL_874407, EPI_ISL_874415, EPI_ISL_874437, EPI_ISL_874444, EPI_ISL_874449, EPI_ISL_874486, EPI_ISL_874494, EPI_ISL_874520, EPI_ISL_874525, EPI_ISL_874534, EPI_ISL_874539, EPI_ISL_874540, EPI_ISL_874546, EPI_ISL_874549, EPI_ISL_874561, EPI_ISL_874569, EPI_ISL_874585, EPI_ISL_874589, EPI_ISL_874616, EPI_ISL_874623, EPI_ISL_874639, EPI_ISL_874666, EPI_ISL_874686, EPI_ISL_874702, EPI_ISL_874710, EPI_ISL_874717                                                                                                                                                                                                                                                                                                                                                                                                                                                                                                                                                                                                                                                                                                                                                                                                                                                                                                                                                                                                                                                                                                                                                                                                                                                                                                                                                                                                                                                                                                                                                                                                                                                                                                                                                                                                                                                                                                                                                                                                                                                                                                                                                                                                                                                                                                                                                                                 | see above                                              | Lighthouse Lab in Alderley Park                                                       | Wellcome Sanger Institute for the COVID-19 Genomics UK (COG-UK) Consortium                                                                                                                                                                                                                                                                                                                                                        | Jacquelyn Wynn, Mairead Hyland, The Lighthouse Lab in Alderley Park and Alex Alderton, Roberto Amato, Sonia Goncalves, Ewan Harrison, David K. Jackson, Ian Johnston, Dominic Kwiatkowski, Cordelia Langford, John Sillitoe on behalf of the Wellcome Sanger Institute COVID-19 Surveillance Team |
| EPI_ISL_874733, EPI_ISL_874739                                                                                                                                                                                                                                                                                                                                                                                                                                                                                                                                                                                                                                                                                                                                                                                                                                                                                                                                                                                                                                                                                                                                                                                                                                                                                                                                                                                                                                                                                                                                                                                                                                                                                                                                                                                                                                                                                                                                                                                                                                                                                                                                                                                                                                                                                                                                                                                                                                                                                                                                                                                                                                                                                                                                                                                                                                                                                                                                                                                                                                                                                                                                                                                                                                                                                                                                                                                                                                                                                                                                 | Lighthouse Lab in Glasgow                              | Wellcome Sanger Institute for the COVID-19 Genomics UK (COG-UK) Consortium            | Harper VanSteenhouse, Yumi Kasai, David Gray, Carol Clugston, Anna Dominiczak and Alex Alderton, Roberto Amato, Sonia Goncalves, Ewan Harrison, David K. Jackson, Ian Johnston, Dominic Kwiatkowski, Cordelia Langford, John Sillitoe on behalf of the Wellcome Sanger Institute COVID-19 Surveillance Team                                                                                                                       |                                                                                                                                                                                                                                                                                                   |
| EPI_ISL_874750, EPI_ISL_874768, EPI_ISL_874773, EPI_ISL_874797, EPI_ISL_874801, EPI_ISL_874818, EPI_ISL_874855, EPI_ISL_874860, EPI_ISL_874862, EPI_ISL_874880, EPI_ISL_874883, EPI_ISL_874900, EPI_ISL_874919, EPI_ISL_874939, EPI_ISL_874946, EPI_ISL_874977                                                                                                                                                                                                                                                                                                                                                                                                                                                                                                                                                                                                                                                                                                                                                                                                                                                                                                                                                                                                                                                                                                                                                                                                                                                                                                                                                                                                                                                                                                                                                                                                                                                                                                                                                                                                                                                                                                                                                                                                                                                                                                                                                                                                                                                                                                                                                                                                                                                                                                                                                                                                                                                                                                                                                                                                                                                                                                                                                                                                                                                                                                                                                                                                                                                                                                 | see above                                              | Lighthouse Lab in Alderley Park                                                       | Wellcome Sanger Institute for the COVID-19 Genomics UK (COG-UK) Consortium                                                                                                                                                                                                                                                                                                                                                        | Jacquelyn Wynn, Mairead Hyland, The Lighthouse Lab in Alderley Park and Alex Alderton, Roberto Amato, Sonia Goncalves, Ewan Harrison, David K. Jackson, Ian Johnston, Dominic Kwiatkowski, Cordelia Langford, John Sillitoe on behalf of the Wellcome Sanger Institute COVID-19 Surveillance Team |
| EPI_ISL_875347, EPI_ISL_875348, EPI_ISL_875561, EPI_ISL_875562, EPI_ISL_875563, EPI_ISL_875565, EPI_ISL_875871, EPI_ISL_875872                                                                                                                                                                                                                                                                                                                                                                                                                                                                                                                                                                                                                                                                                                                                                                                                                                                                                                                                                                                                                                                                                                                                                                                                                                                                                                                                                                                                                                                                                                                                                                                                                                                                                                                                                                                                                                                                                                                                                                                                                                                                                                                                                                                                                                                                                                                                                                                                                                                                                                                                                                                                                                                                                                                                                                                                                                                                                                                                                                                                                                                                                                                                                                                                                                                                                                                                                                                                                                 | Ohio Department of Health Laboratory                   | Ohio Department of Health Laboratory                                                  | Holmes, Jennifer; Eric Brandt, Keoni Omura, Glen McGillivray, Caitlin McDonnell, Kirtana Ramadugu, Erica Leasure, Kelsey Florek, Heather Blankenship, Quanta Brown, and Tammy Bannerman                                                                                                                                                                                                                                           |                                                                                                                                                                                                                                                                                                   |
| EPI_ISL_876032, EPI_ISL_876033, EPI_ISL_876034, EPI_ISL_876035, EPI_ISL_876036, EPI_ISL_876037, EPI_ISL_876038, EPI_ISL_876039, EPI_ISL_876040, EPI_ISL_876041                                                                                                                                                                                                                                                                                                                                                                                                                                                                                                                                                                                                                                                                                                                                                                                                                                                                                                                                                                                                                                                                                                                                                                                                                                                                                                                                                                                                                                                                                                                                                                                                                                                                                                                                                                                                                                                                                                                                                                                                                                                                                                                                                                                                                                                                                                                                                                                                                                                                                                                                                                                                                                                                                                                                                                                                                                                                                                                                                                                                                                                                                                                                                                                                                                                                                                                                                                                                 | Montefiore Medical Center                              | Albert Einstein College of Medicine, Dept. of Microbiology & Immunology, Chandran lab | J. Maximilian Fels, Saad Khan, Ryan Forster, Karin A. Skalina, Surksha Sirichand, Amy S. Fox, Aviv Bergman, William B. Mitchell, Lucia R. Wolgast, Wendy Szymczak, Robert H. Bortz III, M. Eugenia Dieterle, Catalina Florez, Denise Haslwanter, Rohit K. Jangra, Ethan Laudermilch, Ariel S. Wirchnianski, Jason Barnhill, David L. Goldman, Hnin Khine, D. Yitzchak Goldstein, Johanna P. Daily, Kartik Chandran, Lubusha Kelly |                                                                                                                                                                                                                                                                                                   |
| EPI_ISL_876427, EPI_ISL_876518                                                                                                                                                                                                                                                                                                                                                                                                                                                                                                                                                                                                                                                                                                                                                                                                                                                                                                                                                                                                                                                                                                                                                                                                                                                                                                                                                                                                                                                                                                                                                                                                                                                                                                                                                                                                                                                                                                                                                                                                                                                                                                                                                                                                                                                                                                                                                                                                                                                                                                                                                                                                                                                                                                                                                                                                                                                                                                                                                                                                                                                                                                                                                                                                                                                                                                                                                                                                                                                                                                                                 | Ohio Department of Health Laboratory                   | Ohio Department of Health Laboratory                                                  | Holmes, Jennifer; Eric Brandt, Keoni Omura, Glen McGillivray, Caitlin McDonnell, Kirtana Ramadugu, Erica Leasure, Kelsey Florek, Heather Blankenship, Quanta Brown, and Tammy Bannerman                                                                                                                                                                                                                                           |                                                                                                                                                                                                                                                                                                   |
| EPI_ISL_877132                                                                                                                                                                                                                                                                                                                                                                                                                                                                                                                                                                                                                                                                                                                                                                                                                                                                                                                                                                                                                                                                                                                                                                                                                                                                                                                                                                                                                                                                                                                                                                                                                                                                                                                                                                                                                                                                                                                                                                                                                                                                                                                                                                                                                                                                                                                                                                                                                                                                                                                                                                                                                                                                                                                                                                                                                                                                                                                                                                                                                                                                                                                                                                                                                                                                                                                                                                                                                                                                                                                                                 | The Ohio State University Wexner Medical Center        | James Molecular Lab                                                                   | Huolin Tu, Matthew R Avenarius, Laura Kubatko, Matthew Hunt, Xiaokang Pan, Peng Ru, Jason Garee, Keele Thomas, Peter Mohler, Preeti Pancholi, Dan Jones                                                                                                                                                                                                                                                                           |                                                                                                                                                                                                                                                                                                   |
| EPI_ISL_877770, EPI_ISL_877773, EPI_ISL_877803, EPI_ISL_877806, EPI_ISL_877821, EPI_ISL_877827, EPI_ISL_877897, EPI_ISL_877900, EPI_ISL_877913, EPI_ISL_877930, EPI_ISL_877932, EPI_ISL_877933, EPI_ISL_877934, EPI_ISL_877972, EPI_ISL_877983, EPI_ISL_877998, EPI_ISL_878007, EPI_ISL_878013, EPI_ISL_878015, EPI_ISL_878022, EPI_ISL_878025, EPI_ISL_878030, EPI_ISL_878031, EPI_ISL_878077, EPI_ISL_878096, EPI_ISL_878098, EPI_ISL_878111, EPI_ISL_878124, EPI_ISL_878134, EPI_ISL_878153, EPI_ISL_878156, EPI_ISL_878160, EPI_ISL_878166, EPI_ISL_878179, EPI_ISL_878200, EPI_ISL_878224, EPI_ISL_878230, EPI_ISL_878236, EPI_ISL_878269, EPI_ISL_878270, EPI_ISL_878275, EPI_ISL_878285, EPI_ISL_878289, EPI_ISL_878301, EPI_ISL_878309                                                                                                                                                                                                                                                                                                                                                                                                                                                                                                                                                                                                                                                                                                                                                                                                                                                                                                                                                                                                                                                                                                                                                                                                                                                                                                                                                                                                                                                                                                                                                                                                                                                                                                                                                                                                                                                                                                                                                                                                                                                                                                                                                                                                                                                                                                                                                                                                                                                                                                                                                                                                                                                                                                                                                                                                                 | see above                                              | Lighthouse Lab in Alderley Park                                                       | Wellcome Sanger Institute for the COVID-19 Genomics UK (COG-UK) Consortium                                                                                                                                                                                                                                                                                                                                                        | Jacquelyn Wynn, Mairead Hyland, The Lighthouse Lab in Alderley Park and Alex Alderton, Roberto Amato, Sonia Goncalves, Ewan Harrison, David K. Jackson, Ian Johnston, Dominic Kwiatkowski, Cordelia Langford, John Sillitoe on behalf of the Wellcome Sanger Institute COVID-19 Surveillance Team |
| EPI_ISL_878440, EPI_ISL_878443, EPI_ISL_878445, EPI_ISL_878448, EPI_ISL_878450, EPI_ISL_878452, EPI_ISL_878455, EPI_ISL_878457, EPI_ISL_878460, EPI_ISL_878463, EPI_ISL_878465                                                                                                                                                                                                                                                                                                                                                                                                                                                                                                                                                                                                                                                                                                                                                                                                                                                                                                                                                                                                                                                                                                                                                                                                                                                                                                                                                                                                                                                                                                                                                                                                                                                                                                                                                                                                                                                                                                                                                                                                                                                                                                                                                                                                                                                                                                                                                                                                                                                                                                                                                                                                                                                                                                                                                                                                                                                                                                                                                                                                                                                                                                                                                                                                                                                                                                                                                                                 | see above                                              | Biolab Diagnostic Laboratories                                                        | Andersen lab at Scripps Research                                                                                                                                                                                                                                                                                                                                                                                                  | Issa Abu-Dayyeh, Ahmad Tibi, Lama Hussein, Lina Mohammad, Zein Naber, Amid Abdelnour with SEARCH Alliance San Diego                                                                                                                                                                               |
| EPI_ISL_878466                                                                                                                                                                                                                                                                                                                                                                                                                                                                                                                                                                                                                                                                                                                                                                                                                                                                                                                                                                                                                                                                                                                                                                                                                                                                                                                                                                                                                                                                                                                                                                                                                                                                                                                                                                                                                                                                                                                                                                                                                                                                                                                                                                                                                                                                                                                                                                                                                                                                                                                                                                                                                                                                                                                                                                                                                                                                                                                                                                                                                                                                                                                                                                                                                                                                                                                                                                                                                                                                                                                                                 | Lighthouse Lab in Alderley Park                        | Wellcome Sanger Institute for the COVID-19 Genomics UK (COG-UK) Consortium            | Jacquelyn Wynn, Mairead Hyland, The Lighthouse Lab in Alderley Park and Alex Alderton, Roberto Amato, Sonia Goncalves, Ewan Harrison, David K. Jackson, Ian Johnston, Dominic Kwiatkowski, Cordelia Langford, John Sillitoe on behalf of the Wellcome Sanger Institute COVID-19 Surveillance Team                                                                                                                                 |                                                                                                                                                                                                                                                                                                   |
| EPI_ISL_878468, EPI_ISL_878470, EPI_ISL_878472, EPI_ISL_878474                                                                                                                                                                                                                                                                                                                                                                                                                                                                                                                                                                                                                                                                                                                                                                                                                                                                                                                                                                                                                                                                                                                                                                                                                                                                                                                                                                                                                                                                                                                                                                                                                                                                                                                                                                                                                                                                                                                                                                                                                                                                                                                                                                                                                                                                                                                                                                                                                                                                                                                                                                                                                                                                                                                                                                                                                                                                                                                                                                                                                                                                                                                                                                                                                                                                                                                                                                                                                                                                                                 | Biolab Diagnostic Laboratories                         | Andersen lab at Scripps Research                                                      | Issa Abu-Dayyeh, Ahmad Tibi, Lama Hussein, Lina Mohammad, Zein Naber, Amid Abdelnour with SEARCH Alliance San Diego                                                                                                                                                                                                                                                                                                               |                                                                                                                                                                                                                                                                                                   |
| EPI_ISL_878476                                                                                                                                                                                                                                                                                                                                                                                                                                                                                                                                                                                                                                                                                                                                                                                                                                                                                                                                                                                                                                                                                                                                                                                                                                                                                                                                                                                                                                                                                                                                                                                                                                                                                                                                                                                                                                                                                                                                                                                                                                                                                                                                                                                                                                                                                                                                                                                                                                                                                                                                                                                                                                                                                                                                                                                                                                                                                                                                                                                                                                                                                                                                                                                                                                                                                                                                                                                                                                                                                                                                                 | Lighthouse Lab in Alderley Park                        | Wellcome Sanger Institute for the COVID-19 Genomics UK (COG-UK) Consortium            | Jacquelyn Wynn, Mairead Hyland, The Lighthouse Lab in Alderley Park and Alex Alderton, Roberto Amato, Sonia Goncalves, Ewan Harrison, David K. Jackson, Ian Johnston, Dominic Kwiatkowski, Cordelia Langford, John Sillitoe on behalf of the Wellcome Sanger Institute COVID-19 Surveillance Team                                                                                                                                 |                                                                                                                                                                                                                                                                                                   |
| EPI_ISL_878477, EPI_ISL_878480, EPI_ISL_878483, EPI_ISL_878485, EPI_ISL_878488, EPI_ISL_878491, EPI_ISL_878492, EPI_ISL_878495, EPI_ISL_878498, EPI_ISL_878500, EPI_ISL_878503                                                                                                                                                                                                                                                                                                                                                                                                                                                                                                                                                                                                                                                                                                                                                                                                                                                                                                                                                                                                                                                                                                                                                                                                                                                                                                                                                                                                                                                                                                                                                                                                                                                                                                                                                                                                                                                                                                                                                                                                                                                                                                                                                                                                                                                                                                                                                                                                                                                                                                                                                                                                                                                                                                                                                                                                                                                                                                                                                                                                                                                                                                                                                                                                                                                                                                                                                                                 | see above                                              | Biolab Diagnostic Laboratories                                                        | Andersen lab at Scripps Research                                                                                                                                                                                                                                                                                                                                                                                                  | Issa Abu-Dayyeh, Ahmad Tibi, Lama Hussein, Lina Mohammad, Zein Naber, Amid Abdelnour with SEARCH Alliance San Diego                                                                                                                                                                               |
| EPI_ISL_878504                                                                                                                                                                                                                                                                                                                                                                                                                                                                                                                                                                                                                                                                                                                                                                                                                                                                                                                                                                                                                                                                                                                                                                                                                                                                                                                                                                                                                                                                                                                                                                                                                                                                                                                                                                                                                                                                                                                                                                                                                                                                                                                                                                                                                                                                                                                                                                                                                                                                                                                                                                                                                                                                                                                                                                                                                                                                                                                                                                                                                                                                                                                                                                                                                                                                                                                                                                                                                                                                                                                                                 | Lighthouse Lab in Alderley Park                        | Wellcome Sanger Institute for the COVID-19 Genomics UK (COG-UK) Consortium            | Jacquelyn Wynn, Mairead Hyland, The Lighthouse Lab in Alderley Park and Alex Alderton, Roberto Amato, Sonia Goncalves, Ewan Harrison, David K. Jackson, Ian Johnston, Dominic Kwiatkowski, Cordelia Langford, John Sillitoe on behalf of the Wellcome Sanger Institute COVID-19 Surveillance Team                                                                                                                                 |                                                                                                                                                                                                                                                                                                   |
| EPI_ISL_878506, EPI_ISL_878509, EPI_ISL_878511, EPI_ISL_878514, EPI_ISL_878516                                                                                                                                                                                                                                                                                                                                                                                                                                                                                                                                                                                                                                                                                                                                                                                                                                                                                                                                                                                                                                                                                                                                                                                                                                                                                                                                                                                                                                                                                                                                                                                                                                                                                                                                                                                                                                                                                                                                                                                                                                                                                                                                                                                                                                                                                                                                                                                                                                                                                                                                                                                                                                                                                                                                                                                                                                                                                                                                                                                                                                                                                                                                                                                                                                                                                                                                                                                                                                                                                 | Biolab Diagnostic Laboratories                         | Andersen lab at Scripps Research                                                      | Issa Abu-Dayyeh, Ahmad Tibi, Lama Hussein, Lina Mohammad, Zein Naber, Amid Abdelnour with SEARCH Alliance San Diego                                                                                                                                                                                                                                                                                                               |                                                                                                                                                                                                                                                                                                   |
| EPI_ISL_878518                                                                                                                                                                                                                                                                                                                                                                                                                                                                                                                                                                                                                                                                                                                                                                                                                                                                                                                                                                                                                                                                                                                                                                                                                                                                                                                                                                                                                                                                                                                                                                                                                                                                                                                                                                                                                                                                                                                                                                                                                                                                                                                                                                                                                                                                                                                                                                                                                                                                                                                                                                                                                                                                                                                                                                                                                                                                                                                                                                                                                                                                                                                                                                                                                                                                                                                                                                                                                                                                                                                                                 | Lighthouse Lab in Alderley Park                        | Wellcome Sanger Institute for the COVID-19 Genomics UK (COG-UK) Consortium            | Jacquelyn Wynn, Mairead Hyland, The Lighthouse Lab in Alderley Park and Alex Alderton, Roberto Amato, Sonia Goncalves, Ewan Harrison, David K. Jackson, Ian Johnston, Dominic Kwiatkowski, Cordelia Langford, John Sillitoe on behalf of the Wellcome Sanger Institute COVID-19 Surveillance Team                                                                                                                                 |                                                                                                                                                                                                                                                                                                   |
| EPI_ISL_878519, EPI_ISL_878522, EPI_ISL_878524, EPI_ISL_878526                                                                                                                                                                                                                                                                                                                                                                                                                                                                                                                                                                                                                                                                                                                                                                                                                                                                                                                                                                                                                                                                                                                                                                                                                                                                                                                                                                                                                                                                                                                                                                                                                                                                                                                                                                                                                                                                                                                                                                                                                                                                                                                                                                                                                                                                                                                                                                                                                                                                                                                                                                                                                                                                                                                                                                                                                                                                                                                                                                                                                                                                                                                                                                                                                                                                                                                                                                                                                                                                                                 | Biolab Diagnostic Laboratories                         | Andersen lab at Scripps Research                                                      | Issa Abu-Dayyeh, Ahmad Tibi, Lama Hussein, Lina Mohammad, Zein Naber, Amid Abdelnour with SEARCH Alliance San Diego                                                                                                                                                                                                                                                                                                               |                                                                                                                                                                                                                                                                                                   |
| EPI_ISL_878548, EPI_ISL_878550                                                                                                                                                                                                                                                                                                                                                                                                                                                                                                                                                                                                                                                                                                                                                                                                                                                                                                                                                                                                                                                                                                                                                                                                                                                                                                                                                                                                                                                                                                                                                                                                                                                                                                                                                                                                                                                                                                                                                                                                                                                                                                                                                                                                                                                                                                                                                                                                                                                                                                                                                                                                                                                                                                                                                                                                                                                                                                                                                                                                                                                                                                                                                                                                                                                                                                                                                                                                                                                                                                                                 | Lighthouse Lab in Alderley Park                        | Wellcome Sanger Institute for the COVID-19 Genomics UK (COG-UK) Consortium            | Jacquelyn Wynn, Mairead Hyland, The Lighthouse Lab in Alderley Park and Alex Alderton, Roberto Amato, Sonia Goncalves, Ewan Harrison, David K. Jackson, Ian Johnston, Dominic Kwiatkowski, Cordelia Langford, John Sillitoe on behalf of the Wellcome Sanger Institute COVID-19 Surveillance Team                                                                                                                                 |                                                                                                                                                                                                                                                                                                   |
| EPI_ISL_878571, EPI_ISL_878574, EPI_ISL_878576, EPI_ISL_878579, EPI_ISL_878581                                                                                                                                                                                                                                                                                                                                                                                                                                                                                                                                                                                                                                                                                                                                                                                                                                                                                                                                                                                                                                                                                                                                                                                                                                                                                                                                                                                                                                                                                                                                                                                                                                                                                                                                                                                                                                                                                                                                                                                                                                                                                                                                                                                                                                                                                                                                                                                                                                                                                                                                                                                                                                                                                                                                                                                                                                                                                                                                                                                                                                                                                                                                                                                                                                                                                                                                                                                                                                                                                 | Biolab Diagnostic Laboratories                         | Andersen lab at Scripps Research                                                      | Issa Abu-Dayyeh, Ahmad Tibi, Lama Hussein, Lina Mohammad, Zein Naber, Amid Abdelnour with SEARCH Alliance San Diego                                                                                                                                                                                                                                                                                                               |                                                                                                                                                                                                                                                                                                   |
| EPI_ISL_878621, EPI_ISL_878639, EPI_ISL_878660, EPI_ISL_878678, EPI_ISL_878696, EPI_ISL_878722, EPI_ISL_878741, EPI_ISL_878946, EPI_ISL_878959, EPI_ISL_878985, EPI_ISL_878992, EPI_ISL_878993, EPI_ISL_879061, EPI_ISL_879066, EPI_ISL_879110, EPI_ISL_879124, EPI_ISL_879129, EPI_ISL_879159, EPI_ISL_879212, EPI_ISL_879219, EPI_ISL_879239, EPI_ISL_879239, EPI_ISL_879273, EPI_ISL_879298, EPI_ISL_879303, EPI_ISL_879314, EPI_ISL_879322, EPI_ISL_879460, EPI_ISL_879475, EPI_ISL_879475, EPI_ISL_879519, EPI_ISL_879534, EPI_ISL_879578, EPI_ISL_879602, EPI_ISL_879761, EPI_ISL_879783, EPI_ISL_879865, EPI_ISL_879887, EPI_ISL_879915, EPI_ISL_879925, EPI_ISL_879974, EPI_ISL_880010, EPI_ISL_880016, EPI_ISL_880023, EPI_ISL_880028, EPI_ISL_880041, EPI_ISL_880104, EPI_ISL_880113, EPI_ISL_880136, EPI_ISL_880217, EPI_ISL_880240, EPI_ISL_880247, EPI_ISL_880264, EPI_ISL_880272, EPI_ISL_880281, EPI_ISL_880301, EPI_ISL_880314, EPI_ISL_880318, EPI_ISL_880322, EPI_ISL_880331, EPI_ISL_880342, EPI_ISL_880344, EPI_ISL_880354, EPI_ISL_880361, EPI_ISL_880368, EPI_ISL_880398, EPI_ISL_880400, EPI_ISL_880417, EPI_ISL_880424, EPI_ISL_880456, EPI_ISL_880468, EPI_ISL_880472, EPI_ISL_880481, EPI_ISL_880483, EPI_ISL_880489, EPI_ISL_880510, EPI_ISL_880510, EPI_ISL_880568, EPI_ISL_880579, EPI_ISL_880581, EPI_ISL_880943, EPI_ISL_880956, EPI_ISL_880968, EPI_ISL_880998, EPI_ISL_881020, EPI_ISL_881036, EPI_ISL_881042, EPI_ISL_881045, EPI_ISL_881067, EPI_ISL_881087, EPI_ISL_881090, EPI_ISL_881091, EPI_ISL_881099, EPI_ISL_881109, EPI_ISL_881138, EPI_ISL_881140, EPI_ISL_881151, EPI_ISL_881177, EPI_ISL_881189, EPI_ISL_881201, EPI_ISL_881218, EPI_ISL_881229, EPI_ISL_881261, EPI_ISL_881310, EPI_ISL_881311, EPI_ISL_881315, EPI_ISL_881320, EPI_ISL_881366, EPI_ISL_881370, EPI_ISL_881382, EPI_ISL_881383, EPI_ISL_881387, EPI_ISL_881405, EPI_ISL_881421, EPI_ISL_881423, EPI_ISL_881449, EPI_ISL_881450, EPI_ISL_881456, EPI_ISL_881459, EPI_ISL_881461, EPI_ISL_881468, EPI_ISL_881498, EPI_ISL_881504, EPI_ISL_881514, EPI_ISL_881542, EPI_ISL_881545, EPI_ISL_881549, EPI_ISL_881569, EPI_ISL_881576, EPI_ISL_881582, EPI_ISL_881590, EPI_ISL_881602, EPI_ISL_881610, EPI_ISL_881636, EPI_ISL_881638, EPI_ISL_881645, EPI_ISL_881653, EPI_ISL_881705, EPI_ISL_881706, EPI_ISL_881707, EPI_ISL_881712, EPI_ISL_881737, EPI_ISL_881741, EPI_ISL_881781, EPI_ISL_881799, EPI_ISL_881802, EPI_ISL_881807, EPI_ISL_881813, EPI_ISL_881815, EPI_ISL_881819, EPI_ISL_881854, EPI_ISL_881878, EPI_ISL_881882, EPI_ISL_881887, EPI_ISL_881890, EPI_ISL_881928, EPI_ISL_881930, EPI_ISL_881939, EPI_ISL_881942, EPI_ISL_881956, EPI_ISL_881977, EPI_ISL_881986, EPI_ISL_881987, EPI_ISL_881997, EPI_ISL_882005, EPI_ISL_882007, EPI_ISL_882023, EPI_ISL_882064, EPI_ISL_882064, EPI_ISL_882068, EPI_ISL_882097, EPI_ISL_882114, EPI_ISL_882114, EPI_ISL_882121, EPI_ISL_882121, EPI_ISL_882129, EPI_ISL_882142, EPI_ISL_882144, EPI_ISL_882144, EPI_ISL_882153, EPI_ISL_882172, EPI_ISL_882173, EPI_ISL_882175, EPI_ISL_882178, EPI_ISL_882192, EPI_ISL_882194, EPI_ISL_882209, EPI_ISL_882209, EPI_ISL_882223, EPI_ISL_882224, EPI_ISL_882230, EPI_ISL_882267, EPI_ISL_882272, EPI_ISL_882290, EPI_ISL_882292, EPI_ISL_882318, EPI_ISL_882366, EPI_ISL_882376, EPI_ISL_882377, EPI_ISL_882381, EPI_ISL_882390, EPI_ISL_882400, EPI_ISL_882411, EPI_ISL_882413, EPI_ISL_882435, EPI_ISL_882444, EPI_ISL_882457, EPI_ISL_882465, EPI_ISL_882488, EPI_ISL_882491, EPI_ISL_882523, EPI_ISL_882576, EPI_ISL_882577, EPI_ISL_882583 | see above                                              | Biolab Diagnostic Laboratories                                                        | Andersen lab at Scripps Research                                                                                                                                                                                                                                                                                                                                                                                                  | Issa Abu-Dayyeh, Ahmad Tibi, Lama Hussein, Lina Mohammad, Zein Naber, Amid Abdelnour with SEARCH Alliance San Diego                                                                                                                                                                               |

|                                                                                                                                                                                                                                                                                                                                                                                                                                                                                                                                                                                                                                                                                                                                                                                                                                                                                                                                                                                                                                                                                                                |                                                                                                              |                                                                                                                          |                                                                                                                                                                                                                                                                                                   |
|----------------------------------------------------------------------------------------------------------------------------------------------------------------------------------------------------------------------------------------------------------------------------------------------------------------------------------------------------------------------------------------------------------------------------------------------------------------------------------------------------------------------------------------------------------------------------------------------------------------------------------------------------------------------------------------------------------------------------------------------------------------------------------------------------------------------------------------------------------------------------------------------------------------------------------------------------------------------------------------------------------------------------------------------------------------------------------------------------------------|--------------------------------------------------------------------------------------------------------------|--------------------------------------------------------------------------------------------------------------------------|---------------------------------------------------------------------------------------------------------------------------------------------------------------------------------------------------------------------------------------------------------------------------------------------------|
| see above                                                                                                                                                                                                                                                                                                                                                                                                                                                                                                                                                                                                                                                                                                                                                                                                                                                                                                                                                                                                                                                                                                      | Lighthouse Lab in Alderley Park                                                                              | Wellcome Sanger Institute for the COVID-19 Genomics UK (COG-UK) Consortium                                               | Jacquelyn Wynn, Mairead Hyland, The Lighthouse Lab in Alderley Park and Alex Alderton, Roberto Amato, Sonia Goncalves, Ewan Harrison, David K. Jackson, Ian Johnston, Dominic Kwiatkowski, Cordelia Langford, John Sillitoe on behalf of the Wellcome Sanger Institute COVID-19 Surveillance Team |
| EPI_ISL_882647, EPI_ISL_882650                                                                                                                                                                                                                                                                                                                                                                                                                                                                                                                                                                                                                                                                                                                                                                                                                                                                                                                                                                                                                                                                                 | Ohio Department of Health Laboratory                                                                         | Ohio Department of Health Laboratory                                                                                     | Holmes, Jennifer; Eric Brandt, Keoni Omura, Glen McGillivray, Caitlin McDonnell, Kirtana Ramadugu, Erica Leasure, Kelsey Florek, Heather Blankenship, Quanta Brown, and Tammy Bannerman                                                                                                           |
| EPI_ISL_885146                                                                                                                                                                                                                                                                                                                                                                                                                                                                                                                                                                                                                                                                                                                                                                                                                                                                                                                                                                                                                                                                                                 | Genomic Laboratory (GLAB) (Conjoint lab of Health Directorate of Istanbul and Istanbul Technical University) | Genomic Laboratory (GLAB), Istanbul Technical University                                                                 | Ilker Karacan, Tugba Kizilboga Akgun, Payam Zolfagharian, Nisan Denizce Can, Pari Sharifi, Levent Doganay, Gizem Dinler Doganay                                                                                                                                                                   |
| EPI_ISL_885156, EPI_ISL_885160, EPI_ISL_885175, EPI_ISL_885180, EPI_ISL_885195, EPI_ISL_885196, EPI_ISL_885210, EPI_ISL_885211, EPI_ISL_885219, EPI_ISL_885269, EPI_ISL_885299, EPI_ISL_885324, EPI_ISL_885331, EPI_ISL_885344, EPI_ISL_885355, EPI_ISL_885372, EPI_ISL_885392, EPI_ISL_885421, EPI_ISL_885425, EPI_ISL_885444, EPI_ISL_885455, EPI_ISL_885456, EPI_ISL_885484, EPI_ISL_885495, EPI_ISL_885503, EPI_ISL_885504, EPI_ISL_885512, EPI_ISL_885529, EPI_ISL_885532, EPI_ISL_885536, EPI_ISL_885606, EPI_ISL_885613, EPI_ISL_885650, EPI_ISL_885651, EPI_ISL_885653, EPI_ISL_885691, EPI_ISL_885704, EPI_ISL_885708, EPI_ISL_885734, EPI_ISL_885766, EPI_ISL_885769, EPI_ISL_885787, EPI_ISL_885817, EPI_ISL_885824, EPI_ISL_885828, EPI_ISL_885843, EPI_ISL_885860, EPI_ISL_885861, EPI_ISL_885881, EPI_ISL_885890, EPI_ISL_885897, EPI_ISL_885941, EPI_ISL_885946, EPI_ISL_885947, EPI_ISL_885953, EPI_ISL_885988, EPI_ISL_886000, EPI_ISL_886021, EPI_ISL_886030, EPI_ISL_886048, EPI_ISL_886050, EPI_ISL_886067, EPI_ISL_886082, EPI_ISL_886094, EPI_ISL_886124, EPI_ISL_886125, EPI_ISL_886128 |                                                                                                              |                                                                                                                          |                                                                                                                                                                                                                                                                                                   |
| see above                                                                                                                                                                                                                                                                                                                                                                                                                                                                                                                                                                                                                                                                                                                                                                                                                                                                                                                                                                                                                                                                                                      | Lighthouse Lab in Alderley Park                                                                              | Wellcome Sanger Institute for the COVID-19 Genomics UK (COG-UK) Consortium                                               | Jacquelyn Wynn, Mairead Hyland, The Lighthouse Lab in Alderley Park and Alex Alderton, Roberto Amato, Sonia Goncalves, Ewan Harrison, David K. Jackson, Ian Johnston, Dominic Kwiatkowski, Cordelia Langford, John Sillitoe on behalf of the Wellcome Sanger Institute COVID-19 Surveillance Team |
| EPI_ISL_888980                                                                                                                                                                                                                                                                                                                                                                                                                                                                                                                                                                                                                                                                                                                                                                                                                                                                                                                                                                                                                                                                                                 | RS Anna                                                                                                      | Eijkman Institute for Molecular Biology, Ministry of Research and Technology/National Agency for Research and Innovation | Hidayat Trimarsanto, Iskandar Adnan, Lydia V. Panggalo, Sukma Oktavianthi, Willy Agustine, Edison Johar, Frilasita A Yudhaputri, Safarina G Malik, Khin Saw Myint, Amin Soebandrio                                                                                                                |
| EPI_ISL_888981                                                                                                                                                                                                                                                                                                                                                                                                                                                                                                                                                                                                                                                                                                                                                                                                                                                                                                                                                                                                                                                                                                 | RS Omni Pulomas                                                                                              | Eijkman Institute for Molecular Biology, Ministry of Research and Technology/National Agency for Research and Innovation | Iskandar Adnan, Lydia V. Panggalo, Sukma Oktavianthi, Willy Agustine, Edison Johar, Hidayat Trimarsanto, Frilasita A Yudhaputri, Safarina G Malik, Khin Saw Myint, Amin Soebandrio                                                                                                                |
| EPI_ISL_888992                                                                                                                                                                                                                                                                                                                                                                                                                                                                                                                                                                                                                                                                                                                                                                                                                                                                                                                                                                                                                                                                                                 | RS Mitra Keluarga Gading Serpong                                                                             | Eijkman Institute for Molecular Biology, Ministry of Research and Technology/National Agency for Research and Innovation | Hidayat Trimarsanto, Iskandar Adnan, Lydia V. Panggalo, Sukma Oktavianthi, Willy Agustine, Edison Johar, Frilasita A Yudhaputri, Safarina G Malik, Khin Saw Myint, Amin Soebandrio                                                                                                                |
| EPI_ISL_888993                                                                                                                                                                                                                                                                                                                                                                                                                                                                                                                                                                                                                                                                                                                                                                                                                                                                                                                                                                                                                                                                                                 | RSU Mediorossa                                                                                               | Eijkman Institute for Molecular Biology, Ministry of Research and Technology/National Agency for Research and Innovation | Iskandar Adnan, Lydia V. Panggalo, Sukma Oktavianthi, Willy Agustine, Edison Johar, Hidayat Trimarsanto, Frilasita A Yudhaputri, Safarina G Malik, Khin Saw Myint, Amin Soebandrio                                                                                                                |
| EPI_ISL_889011                                                                                                                                                                                                                                                                                                                                                                                                                                                                                                                                                                                                                                                                                                                                                                                                                                                                                                                                                                                                                                                                                                 | RSU Permata Cibubur                                                                                          | Eijkman Institute for Molecular Biology, Ministry of Research and Technology/National Agency for Research and Innovation | Hidayat Trimarsanto, Iskandar Adnan, Lydia V. Panggalo, Sukma Oktavianthi, Willy Agustine, Edison Johar, Frilasita A Yudhaputri, Safarina G Malik, Khin Saw Myint, Amin Soebandrio                                                                                                                |
| EPI_ISL_889012                                                                                                                                                                                                                                                                                                                                                                                                                                                                                                                                                                                                                                                                                                                                                                                                                                                                                                                                                                                                                                                                                                 | RS Mitra Keluarga Pratama Jatiasih                                                                           | Eijkman Institute for Molecular Biology, Ministry of Research and Technology/National Agency for Research and Innovation | Hidayat Trimarsanto, Iskandar Adnan, Lydia V. Panggalo, Sukma Oktavianthi, Willy Agustine, Edison Johar, Frilasita A Yudhaputri, Safarina G Malik, Khin Saw Myint, Amin Soebandrio                                                                                                                |
| EPI_ISL_889013                                                                                                                                                                                                                                                                                                                                                                                                                                                                                                                                                                                                                                                                                                                                                                                                                                                                                                                                                                                                                                                                                                 | RS Rawa Lumbu                                                                                                | Eijkman Institute for Molecular Biology, Ministry of Research and Technology/National Agency for Research and Innovation | Iskandar Adnan, Lydia V. Panggalo, Sukma Oktavianthi, Willy Agustine, Edison Johar, Hidayat Trimarsanto, Frilasita A Yudhaputri, Safarina G Malik, Khin Saw Myint, Amin Soebandrio                                                                                                                |
| EPI_ISL_889014                                                                                                                                                                                                                                                                                                                                                                                                                                                                                                                                                                                                                                                                                                                                                                                                                                                                                                                                                                                                                                                                                                 | RSU Medika Dramaga                                                                                           | Eijkman Institute for Molecular Biology, Ministry of Research and Technology/National Agency for Research and Innovation | Iskandar Adnan, Lydia V. Panggalo, Sukma Oktavianthi, Willy Agustine, Edison Johar, Hidayat Trimarsanto, Frilasita A Yudhaputri, Safarina G Malik, Khin Saw Myint, Amin Soebandrio                                                                                                                |
| EPI_ISL_889015                                                                                                                                                                                                                                                                                                                                                                                                                                                                                                                                                                                                                                                                                                                                                                                                                                                                                                                                                                                                                                                                                                 | RS Anna                                                                                                      | Eijkman Institute for Molecular Biology, Ministry of Research and Technology/National Agency for Research and Innovation | Iskandar Adnan, Lydia V. Panggalo, Sukma Oktavianthi, Willy Agustine, Edison Johar, Hidayat Trimarsanto, Frilasita A Yudhaputri, Safarina G Malik, Khin Saw Myint, Amin Soebandrio                                                                                                                |
| EPI_ISL_889016                                                                                                                                                                                                                                                                                                                                                                                                                                                                                                                                                                                                                                                                                                                                                                                                                                                                                                                                                                                                                                                                                                 | RS Mitra Husada                                                                                              | Eijkman Institute for Molecular Biology, Ministry of Research and Technology/National Agency for Research and Innovation | Iskandar Adnan, Lydia V. Panggalo, Sukma Oktavianthi, Willy Agustine, Edison Johar, Hidayat Trimarsanto, Frilasita A Yudhaputri, Safarina G Malik, Khin Saw Myint, Amin Soebandrio                                                                                                                |
| EPI_ISL_889021                                                                                                                                                                                                                                                                                                                                                                                                                                                                                                                                                                                                                                                                                                                                                                                                                                                                                                                                                                                                                                                                                                 | RSIA Kenari Graha Medika                                                                                     | Eijkman Institute for Molecular Biology, Ministry of Research and Technology/National Agency for Research and Innovation | Hidayat Trimarsanto, Iskandar Adnan, Lydia V. Panggalo, Sukma Oktavianthi, Willy Agustine, Edison Johar, Frilasita A Yudhaputri, Safarina G Malik, Khin Saw Myint, Amin Soebandrio                                                                                                                |
| EPI_ISL_889022                                                                                                                                                                                                                                                                                                                                                                                                                                                                                                                                                                                                                                                                                                                                                                                                                                                                                                                                                                                                                                                                                                 | RS Anna                                                                                                      | Eijkman Institute for Molecular Biology, Ministry of Research and Technology/National Agency for Research and Innovation | Hidayat Trimarsanto, Iskandar Adnan, Lydia V. Panggalo, Sukma Oktavianthi, Willy Agustine, Edison Johar, Frilasita A Yudhaputri, Safarina G Malik, Khin Saw Myint, Amin Soebandrio                                                                                                                |
| EPI_ISL_889443, EPI_ISL_889542, EPI_ISL_890174, EPI_ISL_890175, EPI_ISL_890176, EPI_ISL_890178, EPI_ISL_890179, EPI_ISL_890180, EPI_ISL_890181, EPI_ISL_890182                                                                                                                                                                                                                                                                                                                                                                                                                                                                                                                                                                                                                                                                                                                                                                                                                                                                                                                                                 | Ohio Department of Health Laboratory                                                                         | Ohio Department of Health Laboratory                                                                                     | Holmes, Jennifer; Eric Brandt, Keoni Omura, Glen McGillivray, Caitlin McDonnell, Jade Mowery, Stephanie Mccracken, Tyler Payne, Kirtana Ramadugu, Erica Leasure, Brent Lee, Kelsey Florek, Heather Blankenship, Quanta Brown, and Tammy Bannerman                                                 |
| EPI_ISL_891141, EPI_ISL_891142, EPI_ISL_891143, EPI_ISL_891144                                                                                                                                                                                                                                                                                                                                                                                                                                                                                                                                                                                                                                                                                                                                                                                                                                                                                                                                                                                                                                                 | Indiana Animal Disease Diagnostic Laboratory                                                                 | Carpi Laboratory - Purdue University                                                                                     | Jack Dorman, Ilinca I Ciubotariu, Lev Gorenstein, Abebe A Fola, G Kenitra Hendrix, Rebecca P Wilkes, Giovanna Carpi                                                                                                                                                                               |



















EPI\_ISL\_886042, EPI\_ISL\_886046, EPI\_ISL\_886049, EPI\_ISL\_886057, EPI\_ISL\_886060, EPI\_ISL\_886063, EPI\_ISL\_886064, EPI\_ISL\_886066, EPI\_ISL\_886069, EPI\_ISL\_886070, EPI\_ISL\_886074, EPI\_ISL\_886076, EPI\_ISL\_886081, EPI\_ISL\_886084, EPI\_ISL\_886088, EPI\_ISL\_886089, EPI\_ISL\_886092, EPI\_ISL\_886096, EPI\_ISL\_886097, EPI\_ISL\_886101, EPI\_ISL\_886105, EPI\_ISL\_886106, EPI\_ISL\_886108, EPI\_ISL\_886109, EPI\_ISL\_886123, EPI\_ISL\_886126, EPI\_ISL\_886129, EPI\_ISL\_886132, EPI\_ISL\_886133, EPI\_ISL\_886135, EPI\_ISL\_886136, EPI\_ISL\_886137, EPI\_ISL\_886138, EPI\_ISL\_886139, EPI\_ISL\_886142, EPI\_ISL\_886145, EPI\_ISL\_886146, EPI\_ISL\_886150, EPI\_ISL\_886151, EPI\_ISL\_886152, EPI\_ISL\_886153, EPI\_ISL\_886154

see above

Lighthouse Lab in Alderley Park

Wellcome Sanger Institute for the COVID-19 Genomics UK  
(COG-UK) Consortium

Jacquelyn Wynn, Mairead Hyland, The Lighthouse Lab in Alderley Park and Alex Alderton, Roberto Amato, Sonia Goncalves, Ewan Harrison, David K. Jackson, Ian Johnston, Dominic Kwiatkowski, Cordelia Langford, John Sillitoe on behalf of the Wellcome Sanger Institute COVID-19 Surveillance Team























We gratefully acknowledge the following Authors from the Originating laboratories responsible for obtaining the specimens, as well as the Submitting laboratories where the genome data were generated and shared via GISAID, on which this research is based.

All Submitters of data may be contacted directly via [www.gisaid.org](http://www.gisaid.org)

Authors are sorted alphabetically.

| Accession ID                                                                                                                                                                                                                                                                                                   | Originating Laboratory                                                                        | Submitting Laboratory                                                                          | Authors                                                                                                                                                                                                                                                                                                                                                                                                                                                                                                      |
|----------------------------------------------------------------------------------------------------------------------------------------------------------------------------------------------------------------------------------------------------------------------------------------------------------------|-----------------------------------------------------------------------------------------------|------------------------------------------------------------------------------------------------|--------------------------------------------------------------------------------------------------------------------------------------------------------------------------------------------------------------------------------------------------------------------------------------------------------------------------------------------------------------------------------------------------------------------------------------------------------------------------------------------------------------|
| EPI_ISL_412964                                                                                                                                                                                                                                                                                                 | Hospital Israelita Albert Einstein                                                            | Instituto Adolfo Lutz Interdisciplinary Procedures Center Strategic Laboratory                 | Jaqueline Goes de Jesus, Claudio Tavares Sacchi, Daniela Bernardes Borges da Silva, Ingra Moraes Claro, Flávia Cristina da Silva Sales, Claudia Regina Gonçalves, Joshua Quick, Maria do Carmo, Sampaio Tavares Timenetsky, Nicholas James Loman, Andrew Rambaut, Ester Cerdeira Sabino, Nuno Rodrigues Faria                                                                                                                                                                                                |
| EPI_ISL_413016                                                                                                                                                                                                                                                                                                 | Hospital Israelita Albert Einstein                                                            | Instituto Adolfo Lutz, Interdisciplinary Procedures Center, Strategic Laboratory               | Jaqueline Goes de Jesus, Claudio Tavares Sacchi, Fabiana Cristina Pereira dos Santos, Ingra Moraes Claro, Flávia Cristina da Silva Sales, Claudia Regina Gonçalves, Joshua Quick, Maria do Carmo Sampaio Tavares Timenetsky, Nicholas James Loman, Andrew Rambaut, Ester Cerdeira Sabino, Nuno Rodrigues Faria                                                                                                                                                                                               |
| EPI_ISL_417444                                                                                                                                                                                                                                                                                                 | Department of Healthcare Biotechnology, National University of Sciences and Technology (NUST) | Department of Healthcare Biotechnology, National University of Sciences and Technology (NUST)  | Javed,A., Niazi,S.K., Ghani,E., Saqib,M., Janjua,H.A., Corman,V.M. and Zohaib,A.                                                                                                                                                                                                                                                                                                                                                                                                                             |
| EPI_ISL_435053                                                                                                                                                                                                                                                                                                 | B.J. Medical College and Civil hospital                                                       | Gujarat Biotechnology Research Centre                                                          | Janvi Raval, Monika Gandhi, Pinal Trivedi, Maharshi Pandya, Amit Kanani, Akanksha Verma, Nitin Savaliya, Raghawendra Kumar, Dinesh Kumar, Zuber Saiyed, Dipa Kinariwala, Disha Patel, Binita Aring, Geeta Vaghela, Sonia Barve, Bhavesh Modi, Kairavi Joshi, Gaurishankar Shrimali, Nidhi Sood, Pranay Shah, R D Dixit, Snehal Bagatharia, Kamlesh J Upadhyay, Ramesh Pandit, Tejas Shah, Ankit Hinsu, Pritesh Sabara, Apurvasinh Puvar, Nidhi Patel, Chaitanya Joshi, Madhvi Joshi                          |
| EPI_ISL_444464                                                                                                                                                                                                                                                                                                 | B.J. Medical College and Civil hospital                                                       | Gujarat Biotechnology Research Centre                                                          | Janvi Raval, Monika Gandhi, Pinal Trivedi, Maharshi Pandya, Amit Kanani, Akanksha Verma, Nitin Savaliya, Raghawendra Kumar, Dinesh Kumar, Zuber Saiyed, Dipa Kinariwala, Disha Patel, Binita Aring, Neeta Khandelwal, Geeta Vaghela, Sonia Barve, Bhavesh Modi, Kairavi Joshi, Gaurishankar Shrimali, Nidhi Sood, Pranay Shah, R D Dixit, Snehal Bagatharia, Kamlesh J Upadhyay, Ramesh Pandit, Tejas Shah, Ankit Hinsu, Pritesh Sabara, Apurvasinh Puvar, Dipeshwari Shewale, Chaitanya Joshi, Madhvi Joshi |
| EPI_ISL_447036                                                                                                                                                                                                                                                                                                 | B.J. Medical College and Civil hospital                                                       | Gujarat Biotechnology Research Centre                                                          | Janvi Raval, Monika Gandhi, Pinal Trivedi, Maharshi Pandya, Amit Kanani, Akanksha Verma, Nitin Savaliya, Raghawendra Kumar, Dinesh Kumar, Zuber Saiyed, Dipa Kinariwala, Disha Patel, Binita Aring, Neeta Khandelwal, Geeta Vaghela, Sonia Barve, Bhavesh Modi, Kairavi Joshi, Gaurishankar Shrimali, Nidhi Sood, Pranay Shah, R D Dixit, Snehal Bagatharia, Kamlesh J Upadhyay, Ramesh Pandit, Tejas Shah, Ankit Hinsu, Pritesh Sabara, Apurvasinh Puvar, Afzal Ansari, Chaitanya Joshi, Madhvi Joshi       |
| EPI_ISL_447545                                                                                                                                                                                                                                                                                                 | Gujarat Biotechnology Research Centre                                                         | Gujarat Biotechnology Research Centre                                                          | Janvi Raval, Monika Gandhi, Pinal Trivedi, Maharshi Pandya, Amit Kanani, Akanksha Verma, Nitin Savaliya, Raghawendra Kumar, Dinesh Kumar, Zuber Saiyed, Dipa Kinariwala, Disha Patel, Binita Aring, Neeta Khandelwal, Geeta Vaghela, Sonia Barve, Bhavesh Modi, Kairavi Joshi, Gaurishankar Shrimali, Nidhi Sood, Pranay Shah, R D Dixit, Snehal Bagatharia, Kamlesh J Upadhyay, Ramesh Pandit, Tejas Shah, Ankit Hinsu, Pritesh Sabara, Apurvasinh Puvar, Nidhi Patel, Chaitanya Joshi, Madhvi Joshi        |
| EPI_ISL_450747                                                                                                                                                                                                                                                                                                 | Sunnybrook Health Sciences Centre                                                             | Department of Laboratory Medicine and Molecular Diagnostics, Sunnybrook Health Sciences Centre | Jalees A. Nasir, Robert A. Kozak, Patryk Aftanas, Amogelang R. Raphenya, Kendrick M. Smith, Finlay Maguire, Hassaan Maan, Muhannad Alruwaili, Arinjay Banerjee, Hamza Mbareche, Brian P. Alcock, Natalie C. Knox, Karen Mossman, Bo Wang, Julian A. Hiscox, Andrew G. McArthur, Samira Mubareka                                                                                                                                                                                                              |
| EPI_ISL_451149                                                                                                                                                                                                                                                                                                 | M.P Shah Government Medocal college Jamnagar                                                  | Gujarat Biotechnology Research Centre                                                          | Janvi Raval, Zarna Patel, Monika Gandhi, Pinal Trivedi, Maharshi Pandya, Amit Kanani, Nidhi Patel, Nitin Savaliya, Raghawendra Kumar, Dinesh Kumar, Zuber Saiyed, Komal Patel, Labdhi Pandya, Snehal Bagatharia, Ramesh Pandit, Tejas Shah, Ankit Hinsu, Pritesh Sabara, Apurvasinh Puvar, Binita Aring, Bhavesh Modi, Gaurishankar Shrimali, R D Dixit, A M Kadri, Priti Pandita, Chaitanya Joshi, Madhvi Joshi,                                                                                            |
| EPI_ISL_455024                                                                                                                                                                                                                                                                                                 | Government Medical College, Vadodara                                                          | Gujarat Biotechnology Research Centre                                                          | Janvi Raval, Zarna Patel, Monika Gandhi, Pinal Trivedi, Maharshi Pandya, Amit Kanani, Nidhi Patel, Nitin Savaliya, Raghawendra Kumar, Dinesh Kumar, Zuber Saiyed, Komal Patel, Labdhi Pandya, Snehal Bagatharia, Tanuja Javadekar , R N Daveshwar, Ramesh Pandit, Tejas Shah, Ankit Hinsu, Pritesh Sabara, Apurvasinh Puvar, Pooja P Doshi, Bhavesh Modi, Gaurishankar Shrimali, R D Dixit, A M Kadri, Umang Mishra, Chaitanya Joshi, Madhvi Joshi,                                                          |
| EPI_ISL_458108                                                                                                                                                                                                                                                                                                 | Gujarat Biotechnology Research Centre                                                         | Gujarat Biotechnology Research Centre                                                          | Janvi Raval, Zarna Patel, Monika Gandhi, Pinal Trivedi, Maharshi Pandya, Amit Kanani, Nidhi Patel, Nitin Savaliya, Raghawendra Kumar, Dinesh Kumar, Zuber Saiyed, Komal Patel, Labdhi Pandya, Snehal Bagatharia, Ramesh Pandit, Tejas Shah, Ankit Hinsu, Pritesh Sabara, Apurvasinh Puvar, Pooja P Doshi, Bhavesh Modi, Gaurishankar Shrimali, R D Dixit, A M Kadri, Umang Mishra, Chaitanya Joshi, Madhvi Joshi, , , ,                                                                                      |
| EPI_ISL_463741, EPI_ISL_463742, EPI_ISL_463743, EPI_ISL_463744, EPI_ISL_463745, EPI_ISL_463746, EPI_ISL_463747, EPI_ISL_463748                                                                                                                                                                                 | Department of Molecular Virology, Cyprus Institute of Neurology and Genetics                  | Department of Molecular Virology, Cyprus Institute of Neurology and Genetics                   | Jan Richter, George Krasias, Christina Tryfonos, Stavros Bashiardes, Dana Koptides, Christina Christodoulou                                                                                                                                                                                                                                                                                                                                                                                                  |
| EPI_ISL_467037                                                                                                                                                                                                                                                                                                 | GMERS Medical College and Hospital, Gandhinagar                                               | Gujarat Biotechnology Research Centre                                                          | Janvi Raval, Zarna Patel, Monika Gandhi, Pinal Trivedi, Maharshi Pandya, Nidhi Patel, Nitin Savaliya, Raghawendra Kumar, Dinesh Kumar, Zuber Saiyed, Komal Patel, Labdhi Pandya, Snehal Bagatharia, Seema Bhatt, Gaurishankar Shrimali, Bhavesh Modi, Bharti Rajani, Tejas Shah, Ankit Hinsu, Pritesh Sabara, Apurvasinh Puvar, Fenil Patel, R D Dixit, A M Kadri, Harsh Bakshi, Chaitanya Joshi, Madhvi Joshi                                                                                               |
| EPI_ISL_469028                                                                                                                                                                                                                                                                                                 | B.J. Medical College and Civil hospital                                                       | Gujarat Biotechnology Research Centre                                                          | Janvi Raval, Zarna Patel, Monika Gandhi, Pinal Trivedi, Maharshi Pandya, Nidhi Patel, Nitin Savaliya, Raghawendra Kumar, Dinesh Kumar, Zuber Saiyed, Komal Patel, Labdhi Pandya, Snehal Bagatharia, Pranay Shah, Kamlesh J Upadhyay, Nirav Mungalpara, Tejas Shah, Ankit Hinsu, Pritesh Sabara, Apurvasinh Puvar, Fenil Patel, R D Dixit, A M Kadri, Harsh Bakshi, Chaitanya Joshi, Madhvi Joshi                                                                                                             |
| EPI_ISL_475030                                                                                                                                                                                                                                                                                                 | Department of MicroBiology, Government Medical College, Surat                                 | Gujarat Biotechnology Research Centre                                                          | Janvi Raval, Zarna Patel, Monika Gandhi, Pinal Trivedi, Maharshi Pandya, Nidhi Patel, Nitin Savaliya, Raghawendra Kumar, Dinesh Kumar, Zuber Saiyed, Komal Patel, Labdhi Pandya, Snehal Bagatharia, Naresh Chauhan, Summaiya Mullan, Amit gamit, Pritesh Sabara, Apurvasinh Puvar, Armi Chaudhari, R D Dixit, A M Kadri, Harsh Bakshi, Chaitanya Joshi, Madhvi Joshi                                                                                                                                         |
| EPI_ISL_475048                                                                                                                                                                                                                                                                                                 | GMERS Medical College & Hospital                                                              | Gujarat Biotechnology Research Centre                                                          | Janvi Raval, Zarna Patel, Monika Gandhi, Pinal Trivedi, Maharshi Pandya, Nidhi Patel, Nitin Savaliya, Raghawendra Kumar, Dinesh Kumar, Zuber Saiyed, Komal Patel, Labdhi Pandya, Snehal Bagatharia, Meenakshi Shah, Neena Doshi, Varsha Godbole, Pritesh Sabara, Apurvasinh Puvar, Neha Rajpara, R D Dixit, A M Kadri, Harsh Bakshi, Chaitanya Joshi, Madhvi Joshi                                                                                                                                           |
| EPI_ISL_476856                                                                                                                                                                                                                                                                                                 | GMERS Medical College & Hospital, Gotri, Vadodara                                             | Gujarat Biotechnology Research Centre                                                          | Janvi Raval, Zarna Patel, Monika Gandhi, Pinal Trivedi, Maharshi Pandya, Nidhi Patel, Nitin Savaliya, Raghawendra Kumar, Dinesh Kumar, Zuber Saiyed, Komal Patel, Labdhi Pandya, Afzal Ansari, Nikha Trivedi, Meenakshi Shah, Neena Doshi, Varsha Godbole, Apurvasinh Puvar, R D Dixit, A M Kadri, Harsh Bakshi, Chaitanya Joshi, Madhvi Joshi                                                                                                                                                               |
| EPI_ISL_476874                                                                                                                                                                                                                                                                                                 | Department of MicroBiology, Government Medical College, Surat                                 | Gujarat Biotechnology Research Centre                                                          | Janvi Raval, Zarna Patel, Monika Gandhi, Pinal Trivedi, Maharshi Pandya, Nidhi Patel, Nitin Savaliya, Raghawendra Kumar, Dinesh Kumar, Zuber Saiyed, Komal Patel, Labdhi Pandya, Afzal Ansari, Nikha Trivedi, Naresh Chauhan, Summaiya Mullan, Amit gamit, Apurvasinh Puvar, R D Dixit, A M Kadri, Harsh Bakshi, Chaitanya Joshi, Madhvi Joshi                                                                                                                                                               |
| EPI_ISL_483139, EPI_ISL_483140, EPI_ISL_483141, EPI_ISL_483142, EPI_ISL_483143, EPI_ISL_483144, EPI_ISL_483145, EPI_ISL_483146, EPI_ISL_483147, EPI_ISL_483148, EPI_ISL_483149, EPI_ISL_483150, EPI_ISL_483151, EPI_ISL_483152, EPI_ISL_483153, EPI_ISL_483154, EPI_ISL_483155, EPI_ISL_483156, EPI_ISL_483157 | see above                                                                                     | Robert Koch Institute, ZBS1 Highly Pathogenic Viruses, Berlin, Germany                         | Janine Michel, Andrea Thuermer, Oliver Drechsel, Rene Kmiecinski, Stephan Fuchs, Max v. Kleist, Andreas Nitsche                                                                                                                                                                                                                                                                                                                                                                                              |
| EPI_ISL_483827                                                                                                                                                                                                                                                                                                 | GMERS Medical College Himmatnagar                                                             | Gujarat Biotechnology Research Centre                                                          | Janvi Raval, Zarna Patel, Monika Gandhi, Pinal Trivedi, Maharshi Pandya, Nidhi Patel, Nitin Savaliya, Raghawendra Kumar, Dinesh Kumar, Zuber Saiyed, Komal Patel, Labdhi Pandya, Afzal Ansari, Nikha Trivedi, Himanshu Khatri, Mayur Gandhi, Apurvasinh Puvar, R D Dixit, A M Kadri, Harsh Bakshi, Chaitanya Joshi, Madhvi Joshi                                                                                                                                                                             |







|                                                                                                                                                                                                                                                                                                                                                                                                                                                                                                                                                                                                                                                                                                                                                                                                                                                                                                                                                                                                                                                                                                                                                                                                                                                                                                                                                                                                                                                                                                                                                                                                                                                                                                                                                                                                                                                                                                                                                                                                                                                                                                                                                                                |                                                          |                                 |                                                                            |                                                                                                                                                                                                                                                                                                                                                                                           |
|--------------------------------------------------------------------------------------------------------------------------------------------------------------------------------------------------------------------------------------------------------------------------------------------------------------------------------------------------------------------------------------------------------------------------------------------------------------------------------------------------------------------------------------------------------------------------------------------------------------------------------------------------------------------------------------------------------------------------------------------------------------------------------------------------------------------------------------------------------------------------------------------------------------------------------------------------------------------------------------------------------------------------------------------------------------------------------------------------------------------------------------------------------------------------------------------------------------------------------------------------------------------------------------------------------------------------------------------------------------------------------------------------------------------------------------------------------------------------------------------------------------------------------------------------------------------------------------------------------------------------------------------------------------------------------------------------------------------------------------------------------------------------------------------------------------------------------------------------------------------------------------------------------------------------------------------------------------------------------------------------------------------------------------------------------------------------------------------------------------------------------------------------------------------------------|----------------------------------------------------------|---------------------------------|----------------------------------------------------------------------------|-------------------------------------------------------------------------------------------------------------------------------------------------------------------------------------------------------------------------------------------------------------------------------------------------------------------------------------------------------------------------------------------|
| EPI_ISL_624292, EPI_ISL_624302, EPI_ISL_624303, EPI_ISL_624309, EPI_ISL_624316, EPI_ISL_624321, EPI_ISL_624332, EPI_ISL_624333, EPI_ISL_624335, EPI_ISL_624337, EPI_ISL_624342, EPI_ISL_624343, EPI_ISL_624347, EPI_ISL_624349, EPI_ISL_624360, EPI_ISL_624364, EPI_ISL_624366, EPI_ISL_624388, EPI_ISL_624392, EPI_ISL_624396, EPI_ISL_624397, EPI_ISL_624403, EPI_ISL_624407, EPI_ISL_624412, EPI_ISL_624413, EPI_ISL_624415, EPI_ISL_624425, EPI_ISL_624432, EPI_ISL_624436, EPI_ISL_624443, EPI_ISL_624453, EPI_ISL_624465, EPI_ISL_624470, EPI_ISL_624471, EPI_ISL_624474, EPI_ISL_624475, EPI_ISL_624476, EPI_ISL_624483, EPI_ISL_624488, EPI_ISL_624492, EPI_ISL_624494, EPI_ISL_624499, EPI_ISL_624507, EPI_ISL_624514, EPI_ISL_624517, EPI_ISL_624518, EPI_ISL_624525, EPI_ISL_624526, EPI_ISL_624528, EPI_ISL_624535, EPI_ISL_624536, EPI_ISL_624543, EPI_ISL_624547, EPI_ISL_624549, EPI_ISL_624551, EPI_ISL_624564, EPI_ISL_624580, EPI_ISL_624585, EPI_ISL_624595, EPI_ISL_624597, EPI_ISL_624598, EPI_ISL_624603, EPI_ISL_624610, EPI_ISL_624614, EPI_ISL_624623, EPI_ISL_624624, EPI_ISL_624627, EPI_ISL_624629, EPI_ISL_624633, EPI_ISL_624645, EPI_ISL_624656, EPI_ISL_624661, EPI_ISL_624664, EPI_ISL_624666, EPI_ISL_624674, EPI_ISL_624675, EPI_ISL_624677, EPI_ISL_624680, EPI_ISL_624681, EPI_ISL_624682, EPI_ISL_624683, EPI_ISL_624684, EPI_ISL_624687, EPI_ISL_624688, EPI_ISL_624696, EPI_ISL_624700, EPI_ISL_624702, EPI_ISL_624705, EPI_ISL_624709, EPI_ISL_624716, EPI_ISL_624721, EPI_ISL_624732, EPI_ISL_624735, EPI_ISL_624742, EPI_ISL_624746, EPI_ISL_624753, EPI_ISL_624760, EPI_ISL_624764, EPI_ISL_624766, EPI_ISL_624769, EPI_ISL_624773, EPI_ISL_624775, EPI_ISL_624781, EPI_ISL_624788, EPI_ISL_624800, EPI_ISL_624804, EPI_ISL_624807, EPI_ISL_624813, EPI_ISL_624814, EPI_ISL_624817, EPI_ISL_624820, EPI_ISL_624824, EPI_ISL_624829, EPI_ISL_624832, EPI_ISL_624835, EPI_ISL_624841, EPI_ISL_624842, EPI_ISL_624843, EPI_ISL_624855, EPI_ISL_624857, EPI_ISL_624859, EPI_ISL_624860, EPI_ISL_624863, EPI_ISL_624869, EPI_ISL_624874, EPI_ISL_624881, EPI_ISL_624888, EPI_ISL_624893, EPI_ISL_624898, EPI_ISL_624900, EPI_ISL_624903 | see above                                                | Lighthouse Lab in Alderley Park | Wellcome Sanger Institute for the COVID-19 Genomics UK (COG-UK) consortium | Jacquelyn Wynn, Mairead Hyland, The Lighthouse Lab in Alderley Park and Alex Alderton, Roberto Amato, Sonia Goncalves, Ewan Harrison, David K. Jackson, Ian Johnston, Dominic Kwiatkowski, Cordelia Langford, John Sillitoe on behalf of the Wellcome Sanger Institute COVID-19 Surveillance Team ( <a href="http://www.sanger.ac.uk/covid-team">http://www.sanger.ac.uk/covid-team</a> ) |
| EPI_ISL_624909                                                                                                                                                                                                                                                                                                                                                                                                                                                                                                                                                                                                                                                                                                                                                                                                                                                                                                                                                                                                                                                                                                                                                                                                                                                                                                                                                                                                                                                                                                                                                                                                                                                                                                                                                                                                                                                                                                                                                                                                                                                                                                                                                                 |                                                          | Lighthouse Lab in Alderley Park | Wellcome Sanger Institute for the COVID-19 Genomics UK (COG-UK) Consortium | Jacquelyn Wynn, Mairead Hyland, The Lighthouse Lab in Alderley Park and Alex Alderton, Roberto Amato, Sonia Goncalves, Ewan Harrison, David K. Jackson, Ian Johnston, Dominic Kwiatkowski, Cordelia Langford, John Sillitoe on behalf of the Wellcome Sanger Institute COVID-19 Surveillance Team ( <a href="http://www.sanger.ac.uk/covid-team">http://www.sanger.ac.uk/covid-team</a> ) |
| EPI_ISL_624914, EPI_ISL_624921, EPI_ISL_624927, EPI_ISL_624930, EPI_ISL_624939, EPI_ISL_624943, EPI_ISL_624947, EPI_ISL_624952, EPI_ISL_624963, EPI_ISL_624966, EPI_ISL_624981, EPI_ISL_624985, EPI_ISL_624993, EPI_ISL_624994, EPI_ISL_625006, EPI_ISL_625014, EPI_ISL_625015, EPI_ISL_625016, EPI_ISL_625023, EPI_ISL_625024, EPI_ISL_625027, EPI_ISL_625033, EPI_ISL_625048, EPI_ISL_625051, EPI_ISL_625059, EPI_ISL_625069, EPI_ISL_625072, EPI_ISL_625077, EPI_ISL_625078, EPI_ISL_625080, EPI_ISL_625086, EPI_ISL_625088, EPI_ISL_625094, EPI_ISL_625095, EPI_ISL_625111, EPI_ISL_625112, EPI_ISL_625113, EPI_ISL_625116, EPI_ISL_625128, EPI_ISL_625130, EPI_ISL_625131, EPI_ISL_625139, EPI_ISL_625144, EPI_ISL_625147, EPI_ISL_625156, EPI_ISL_625161, EPI_ISL_625163, EPI_ISL_625166, EPI_ISL_625184, EPI_ISL_625189, EPI_ISL_625195, EPI_ISL_625196, EPI_ISL_625204, EPI_ISL_625209, EPI_ISL_625214, EPI_ISL_625216, EPI_ISL_625220, EPI_ISL_625223, EPI_ISL_625231, EPI_ISL_625239, EPI_ISL_625243, EPI_ISL_625245, EPI_ISL_625266, EPI_ISL_625269, EPI_ISL_625271, EPI_ISL_625272, EPI_ISL_625275, EPI_ISL_625278, EPI_ISL_625296, EPI_ISL_625299, EPI_ISL_625427                                                                                                                                                                                                                                                                                                                                                                                                                                                                                                                                                                                                                                                                                                                                                                                                                                                                                                                                                                                                 | see above                                                | Lighthouse Lab in Alderley Park | Wellcome Sanger Institute for the COVID-19 Genomics UK (COG-UK) consortium | Jacquelyn Wynn, Mairead Hyland, The Lighthouse Lab in Alderley Park and Alex Alderton, Roberto Amato, Sonia Goncalves, Ewan Harrison, David K. Jackson, Ian Johnston, Dominic Kwiatkowski, Cordelia Langford, John Sillitoe on behalf of the Wellcome Sanger Institute COVID-19 Surveillance Team ( <a href="http://www.sanger.ac.uk/covid-team">http://www.sanger.ac.uk/covid-team</a> ) |
| EPI_ISL_630352, EPI_ISL_630356, EPI_ISL_630358, EPI_ISL_630361, EPI_ISL_630365, EPI_ISL_630366, EPI_ISL_630368, EPI_ISL_630383, EPI_ISL_630389, EPI_ISL_630390, EPI_ISL_630393, EPI_ISL_630403, EPI_ISL_630405, EPI_ISL_630406, EPI_ISL_630407, EPI_ISL_630411, EPI_ISL_630412, EPI_ISL_630418, EPI_ISL_630420, EPI_ISL_630432, EPI_ISL_630433, EPI_ISL_630437, EPI_ISL_630444, EPI_ISL_630446, EPI_ISL_630448, EPI_ISL_630457, EPI_ISL_630460, EPI_ISL_630461, EPI_ISL_630462, EPI_ISL_630463, EPI_ISL_630464, EPI_ISL_630466, EPI_ISL_630468, EPI_ISL_630479, EPI_ISL_630484, EPI_ISL_630488, EPI_ISL_630491, EPI_ISL_630498, EPI_ISL_630499, EPI_ISL_630501, EPI_ISL_630507, EPI_ISL_630511, EPI_ISL_630515, EPI_ISL_630522                                                                                                                                                                                                                                                                                                                                                                                                                                                                                                                                                                                                                                                                                                                                                                                                                                                                                                                                                                                                                                                                                                                                                                                                                                                                                                                                                                                                                                                 | see above                                                | Lighthouse Lab in Alderley Park | Wellcome Sanger Institute for the COVID-19 Genomics UK (COG-UK) consortium | Jacquelyn Wynn, Mairead Hyland, The Lighthouse Lab in Alderley Park and Alex Alderton, Roberto Amato, Sonia Goncalves, Ewan Harrison, David K. Jackson, Ian Johnston, Dominic Kwiatkowski, Cordelia Langford, John Sillitoe on behalf of the Wellcome Sanger Institute COVID-19 Surveillance Team                                                                                         |
| EPI_ISL_630533                                                                                                                                                                                                                                                                                                                                                                                                                                                                                                                                                                                                                                                                                                                                                                                                                                                                                                                                                                                                                                                                                                                                                                                                                                                                                                                                                                                                                                                                                                                                                                                                                                                                                                                                                                                                                                                                                                                                                                                                                                                                                                                                                                 |                                                          | Lighthouse Lab in Alderley Park | Wellcome Sanger Institute for the COVID-19 Genomics UK (COG-UK) Consortium | Jacquelyn Wynn, Mairead Hyland, The Lighthouse Lab in Alderley Park and Alex Alderton, Roberto Amato, Sonia Goncalves, Ewan Harrison, David K. Jackson, Ian Johnston, Dominic Kwiatkowski, Cordelia Langford, John Sillitoe on behalf of the Wellcome Sanger Institute COVID-19 Surveillance Team                                                                                         |
| EPI_ISL_630535, EPI_ISL_630539, EPI_ISL_630546, EPI_ISL_630556, EPI_ISL_630569, EPI_ISL_630573, EPI_ISL_630577, EPI_ISL_630585, EPI_ISL_630589, EPI_ISL_630594, EPI_ISL_630596, EPI_ISL_630598, EPI_ISL_630606, EPI_ISL_630607, EPI_ISL_630610, EPI_ISL_630616, EPI_ISL_630622, EPI_ISL_630623, EPI_ISL_630627, EPI_ISL_630630, EPI_ISL_630634, EPI_ISL_630644, EPI_ISL_630656, EPI_ISL_630667, EPI_ISL_630671, EPI_ISL_630675, EPI_ISL_630688, EPI_ISL_630708, EPI_ISL_630713, EPI_ISL_630714, EPI_ISL_630721, EPI_ISL_630724, EPI_ISL_630726, EPI_ISL_630728, EPI_ISL_630737, EPI_ISL_630738, EPI_ISL_630739, EPI_ISL_630748, EPI_ISL_630752, EPI_ISL_630758, EPI_ISL_630768, EPI_ISL_630777, EPI_ISL_630795, EPI_ISL_630809, EPI_ISL_630819, EPI_ISL_630820, EPI_ISL_630832, EPI_ISL_630842, EPI_ISL_630847, EPI_ISL_630858, EPI_ISL_630865, EPI_ISL_630868, EPI_ISL_630884, EPI_ISL_630898, EPI_ISL_630899, EPI_ISL_630908, EPI_ISL_630917, EPI_ISL_630918, EPI_ISL_630936, EPI_ISL_630950, EPI_ISL_630960, EPI_ISL_630968, EPI_ISL_630971, EPI_ISL_630994, EPI_ISL_631012, EPI_ISL_631033, EPI_ISL_631096, EPI_ISL_631099, EPI_ISL_631107, EPI_ISL_631111, EPI_ISL_631190, EPI_ISL_631222, EPI_ISL_631269                                                                                                                                                                                                                                                                                                                                                                                                                                                                                                                                                                                                                                                                                                                                                                                                                                                                                                                                                                 | see above                                                | Lighthouse Lab in Alderley Park | Wellcome Sanger Institute for the COVID-19 Genomics UK (COG-UK) consortium | Jacquelyn Wynn, Mairead Hyland, The Lighthouse Lab in Alderley Park and Alex Alderton, Roberto Amato, Sonia Goncalves, Ewan Harrison, David K. Jackson, Ian Johnston, Dominic Kwiatkowski, Cordelia Langford, John Sillitoe on behalf of the Wellcome Sanger Institute COVID-19 Surveillance Team                                                                                         |
| EPI_ISL_631502, EPI_ISL_631503                                                                                                                                                                                                                                                                                                                                                                                                                                                                                                                                                                                                                                                                                                                                                                                                                                                                                                                                                                                                                                                                                                                                                                                                                                                                                                                                                                                                                                                                                                                                                                                                                                                                                                                                                                                                                                                                                                                                                                                                                                                                                                                                                 | New York-Presbyterian-Columbia University Medical Center |                                 | New York City Public Health Laboratory                                     | Jade Wang, et al.                                                                                                                                                                                                                                                                                                                                                                         |
| EPI_ISL_631504                                                                                                                                                                                                                                                                                                                                                                                                                                                                                                                                                                                                                                                                                                                                                                                                                                                                                                                                                                                                                                                                                                                                                                                                                                                                                                                                                                                                                                                                                                                                                                                                                                                                                                                                                                                                                                                                                                                                                                                                                                                                                                                                                                 | Wyckoff Heights Medical Center                           |                                 | New York City Public Health Laboratory                                     | Jade Wang, et al.                                                                                                                                                                                                                                                                                                                                                                         |
| EPI_ISL_631505                                                                                                                                                                                                                                                                                                                                                                                                                                                                                                                                                                                                                                                                                                                                                                                                                                                                                                                                                                                                                                                                                                                                                                                                                                                                                                                                                                                                                                                                                                                                                                                                                                                                                                                                                                                                                                                                                                                                                                                                                                                                                                                                                                 | Northwell Health-GoHealth Urgent Care 10025              |                                 | New York City Public Health Laboratory                                     | Jade Wang, et al.                                                                                                                                                                                                                                                                                                                                                                         |
| EPI_ISL_631506                                                                                                                                                                                                                                                                                                                                                                                                                                                                                                                                                                                                                                                                                                                                                                                                                                                                                                                                                                                                                                                                                                                                                                                                                                                                                                                                                                                                                                                                                                                                                                                                                                                                                                                                                                                                                                                                                                                                                                                                                                                                                                                                                                 | NYC Department Of Health And Mental Hygiene              |                                 | New York City Public Health Laboratory                                     | Jade Wang, et al.                                                                                                                                                                                                                                                                                                                                                                         |
| EPI_ISL_631507                                                                                                                                                                                                                                                                                                                                                                                                                                                                                                                                                                                                                                                                                                                                                                                                                                                                                                                                                                                                                                                                                                                                                                                                                                                                                                                                                                                                                                                                                                                                                                                                                                                                                                                                                                                                                                                                                                                                                                                                                                                                                                                                                                 | Mount Sinai West                                         |                                 | New York City Public Health Laboratory                                     | Jade Wang, et al.                                                                                                                                                                                                                                                                                                                                                                         |
| EPI_ISL_631508                                                                                                                                                                                                                                                                                                                                                                                                                                                                                                                                                                                                                                                                                                                                                                                                                                                                                                                                                                                                                                                                                                                                                                                                                                                                                                                                                                                                                                                                                                                                                                                                                                                                                                                                                                                                                                                                                                                                                                                                                                                                                                                                                                 | Brooklyn Hospital Center                                 |                                 | New York City Public Health Laboratory                                     | Jade Wang, et al.                                                                                                                                                                                                                                                                                                                                                                         |
| EPI_ISL_631509                                                                                                                                                                                                                                                                                                                                                                                                                                                                                                                                                                                                                                                                                                                                                                                                                                                                                                                                                                                                                                                                                                                                                                                                                                                                                                                                                                                                                                                                                                                                                                                                                                                                                                                                                                                                                                                                                                                                                                                                                                                                                                                                                                 | New York Presbyterian Lower Manhattan                    |                                 | New York City Public Health Laboratory                                     | Jade Wang, et al.                                                                                                                                                                                                                                                                                                                                                                         |
| EPI_ISL_631510, EPI_ISL_631511                                                                                                                                                                                                                                                                                                                                                                                                                                                                                                                                                                                                                                                                                                                                                                                                                                                                                                                                                                                                                                                                                                                                                                                                                                                                                                                                                                                                                                                                                                                                                                                                                                                                                                                                                                                                                                                                                                                                                                                                                                                                                                                                                 | New York Presbyterian/ Weill Cornell Medical Center      |                                 | New York City Public Health Laboratory                                     | Jade Wang, et al.                                                                                                                                                                                                                                                                                                                                                                         |
| EPI_ISL_631512                                                                                                                                                                                                                                                                                                                                                                                                                                                                                                                                                                                                                                                                                                                                                                                                                                                                                                                                                                                                                                                                                                                                                                                                                                                                                                                                                                                                                                                                                                                                                                                                                                                                                                                                                                                                                                                                                                                                                                                                                                                                                                                                                                 | Mount Sinai Hospital                                     |                                 | New York City Public Health Laboratory                                     | Jade Wang, et al.                                                                                                                                                                                                                                                                                                                                                                         |
| EPI_ISL_631513                                                                                                                                                                                                                                                                                                                                                                                                                                                                                                                                                                                                                                                                                                                                                                                                                                                                                                                                                                                                                                                                                                                                                                                                                                                                                                                                                                                                                                                                                                                                                                                                                                                                                                                                                                                                                                                                                                                                                                                                                                                                                                                                                                 | Montefiore Medical Center                                |                                 | New York City Public Health Laboratory                                     | Jade Wang, et al.                                                                                                                                                                                                                                                                                                                                                                         |
| EPI_ISL_631514                                                                                                                                                                                                                                                                                                                                                                                                                                                                                                                                                                                                                                                                                                                                                                                                                                                                                                                                                                                                                                                                                                                                                                                                                                                                                                                                                                                                                                                                                                                                                                                                                                                                                                                                                                                                                                                                                                                                                                                                                                                                                                                                                                 | New York Community Hospital                              |                                 | New York City Public Health Laboratory                                     | Jade Wang, et al.                                                                                                                                                                                                                                                                                                                                                                         |
| EPI_ISL_631515                                                                                                                                                                                                                                                                                                                                                                                                                                                                                                                                                                                                                                                                                                                                                                                                                                                                                                                                                                                                                                                                                                                                                                                                                                                                                                                                                                                                                                                                                                                                                                                                                                                                                                                                                                                                                                                                                                                                                                                                                                                                                                                                                                 | NYU Langone Health                                       |                                 | New York City Public Health Laboratory                                     | Jade Wang, et al.                                                                                                                                                                                                                                                                                                                                                                         |
| EPI_ISL_631516                                                                                                                                                                                                                                                                                                                                                                                                                                                                                                                                                                                                                                                                                                                                                                                                                                                                                                                                                                                                                                                                                                                                                                                                                                                                                                                                                                                                                                                                                                                                                                                                                                                                                                                                                                                                                                                                                                                                                                                                                                                                                                                                                                 | Jamaica Hospital Medical Center                          |                                 | New York City Public Health Laboratory                                     | Jade Wang, et al.                                                                                                                                                                                                                                                                                                                                                                         |
| EPI_ISL_631517, EPI_ISL_631518, EPI_ISL_631519                                                                                                                                                                                                                                                                                                                                                                                                                                                                                                                                                                                                                                                                                                                                                                                                                                                                                                                                                                                                                                                                                                                                                                                                                                                                                                                                                                                                                                                                                                                                                                                                                                                                                                                                                                                                                                                                                                                                                                                                                                                                                                                                 | New York Presbyterian-Brooklyn Methodist Hospital        |                                 | New York City Public Health Laboratory                                     | Jade Wang, et al.                                                                                                                                                                                                                                                                                                                                                                         |
| EPI_ISL_631520                                                                                                                                                                                                                                                                                                                                                                                                                                                                                                                                                                                                                                                                                                                                                                                                                                                                                                                                                                                                                                                                                                                                                                                                                                                                                                                                                                                                                                                                                                                                                                                                                                                                                                                                                                                                                                                                                                                                                                                                                                                                                                                                                                 | NYC HH Lincoln Medical And Mental Health Center          |                                 | New York City Public Health Laboratory                                     | Jade Wang, et al.                                                                                                                                                                                                                                                                                                                                                                         |
| EPI_ISL_631521                                                                                                                                                                                                                                                                                                                                                                                                                                                                                                                                                                                                                                                                                                                                                                                                                                                                                                                                                                                                                                                                                                                                                                                                                                                                                                                                                                                                                                                                                                                                                                                                                                                                                                                                                                                                                                                                                                                                                                                                                                                                                                                                                                 | Mount Sinai Hospital                                     |                                 | New York City Public Health Laboratory                                     | Jade Wang, et al.                                                                                                                                                                                                                                                                                                                                                                         |
| EPI_ISL_631522                                                                                                                                                                                                                                                                                                                                                                                                                                                                                                                                                                                                                                                                                                                                                                                                                                                                                                                                                                                                                                                                                                                                                                                                                                                                                                                                                                                                                                                                                                                                                                                                                                                                                                                                                                                                                                                                                                                                                                                                                                                                                                                                                                 | Robert Kutnick                                           |                                 | New York City Public Health Laboratory                                     | Jade Wang, et al.                                                                                                                                                                                                                                                                                                                                                                         |
| EPI_ISL_631523                                                                                                                                                                                                                                                                                                                                                                                                                                                                                                                                                                                                                                                                                                                                                                                                                                                                                                                                                                                                                                                                                                                                                                                                                                                                                                                                                                                                                                                                                                                                                                                                                                                                                                                                                                                                                                                                                                                                                                                                                                                                                                                                                                 | NYU Langone Health                                       |                                 | New York City Public Health Laboratory                                     | Jade Wang, et al.                                                                                                                                                                                                                                                                                                                                                                         |
| EPI_ISL_631524                                                                                                                                                                                                                                                                                                                                                                                                                                                                                                                                                                                                                                                                                                                                                                                                                                                                                                                                                                                                                                                                                                                                                                                                                                                                                                                                                                                                                                                                                                                                                                                                                                                                                                                                                                                                                                                                                                                                                                                                                                                                                                                                                                 | Jamaica Hospital Medical Center                          |                                 | New York City Public Health Laboratory                                     | Jade Wang, et al.                                                                                                                                                                                                                                                                                                                                                                         |
| EPI_ISL_631525                                                                                                                                                                                                                                                                                                                                                                                                                                                                                                                                                                                                                                                                                                                                                                                                                                                                                                                                                                                                                                                                                                                                                                                                                                                                                                                                                                                                                                                                                                                                                                                                                                                                                                                                                                                                                                                                                                                                                                                                                                                                                                                                                                 | Mount Sinai Hospital                                     |                                 | New York City Public Health Laboratory                                     | Jade Wang, et al.                                                                                                                                                                                                                                                                                                                                                                         |
| EPI_ISL_631526, EPI_ISL_631527                                                                                                                                                                                                                                                                                                                                                                                                                                                                                                                                                                                                                                                                                                                                                                                                                                                                                                                                                                                                                                                                                                                                                                                                                                                                                                                                                                                                                                                                                                                                                                                                                                                                                                                                                                                                                                                                                                                                                                                                                                                                                                                                                 | NYU Langone Health                                       |                                 | New York City Public Health Laboratory                                     | Jade Wang, et al.                                                                                                                                                                                                                                                                                                                                                                         |
| EPI_ISL_631528                                                                                                                                                                                                                                                                                                                                                                                                                                                                                                                                                                                                                                                                                                                                                                                                                                                                                                                                                                                                                                                                                                                                                                                                                                                                                                                                                                                                                                                                                                                                                                                                                                                                                                                                                                                                                                                                                                                                                                                                                                                                                                                                                                 | Maimonides Medical Center                                |                                 | New York City Public Health Laboratory                                     | Jade Wang, et al.                                                                                                                                                                                                                                                                                                                                                                         |
| EPI_ISL_631529                                                                                                                                                                                                                                                                                                                                                                                                                                                                                                                                                                                                                                                                                                                                                                                                                                                                                                                                                                                                                                                                                                                                                                                                                                                                                                                                                                                                                                                                                                                                                                                                                                                                                                                                                                                                                                                                                                                                                                                                                                                                                                                                                                 | St. Johns Episcopal Hospital                             |                                 | New York City Public Health Laboratory                                     | Jade Wang, et al.                                                                                                                                                                                                                                                                                                                                                                         |
| EPI_ISL_631530                                                                                                                                                                                                                                                                                                                                                                                                                                                                                                                                                                                                                                                                                                                                                                                                                                                                                                                                                                                                                                                                                                                                                                                                                                                                                                                                                                                                                                                                                                                                                                                                                                                                                                                                                                                                                                                                                                                                                                                                                                                                                                                                                                 | New York Presbyterian Queens                             |                                 | New York City Public Health Laboratory                                     | Jade Wang, et al.                                                                                                                                                                                                                                                                                                                                                                         |
| EPI_ISL_631531                                                                                                                                                                                                                                                                                                                                                                                                                                                                                                                                                                                                                                                                                                                                                                                                                                                                                                                                                                                                                                                                                                                                                                                                                                                                                                                                                                                                                                                                                                                                                                                                                                                                                                                                                                                                                                                                                                                                                                                                                                                                                                                                                                 | NYU Langone Health                                       |                                 | New York City Public Health Laboratory                                     | Jade Wang, et al.                                                                                                                                                                                                                                                                                                                                                                         |
| EPI_ISL_631532                                                                                                                                                                                                                                                                                                                                                                                                                                                                                                                                                                                                                                                                                                                                                                                                                                                                                                                                                                                                                                                                                                                                                                                                                                                                                                                                                                                                                                                                                                                                                                                                                                                                                                                                                                                                                                                                                                                                                                                                                                                                                                                                                                 | Mount Sinai Hospital                                     |                                 | New York City Public Health Laboratory                                     | Jade Wang, et al.                                                                                                                                                                                                                                                                                                                                                                         |
| EPI_ISL_631533                                                                                                                                                                                                                                                                                                                                                                                                                                                                                                                                                                                                                                                                                                                                                                                                                                                                                                                                                                                                                                                                                                                                                                                                                                                                                                                                                                                                                                                                                                                                                                                                                                                                                                                                                                                                                                                                                                                                                                                                                                                                                                                                                                 | New York Presbyterian Lower Manhattan                    |                                 | New York City Public Health Laboratory                                     | Jade Wang, et al.                                                                                                                                                                                                                                                                                                                                                                         |
| EPI_ISL_631534                                                                                                                                                                                                                                                                                                                                                                                                                                                                                                                                                                                                                                                                                                                                                                                                                                                                                                                                                                                                                                                                                                                                                                                                                                                                                                                                                                                                                                                                                                                                                                                                                                                                                                                                                                                                                                                                                                                                                                                                                                                                                                                                                                 | Mount Sinai Hospital                                     |                                 | New York City Public Health Laboratory                                     | Jade Wang, et al.                                                                                                                                                                                                                                                                                                                                                                         |
| EPI_ISL_631535                                                                                                                                                                                                                                                                                                                                                                                                                                                                                                                                                                                                                                                                                                                                                                                                                                                                                                                                                                                                                                                                                                                                                                                                                                                                                                                                                                                                                                                                                                                                                                                                                                                                                                                                                                                                                                                                                                                                                                                                                                                                                                                                                                 | NYC Department Of Health And Mental Hygiene              |                                 | New York City Public Health Laboratory                                     | Jade Wang, et al.                                                                                                                                                                                                                                                                                                                                                                         |

|                                |                                                   |                                        |                   |
|--------------------------------|---------------------------------------------------|----------------------------------------|-------------------|
| EPI_ISL_631536                 | New York Presbyterian Lower Manhattan             | New York City Public Health Laboratory | Jade Wang, et al. |
| EPI_ISL_631537                 | Mount Sinai Hospital                              | New York City Public Health Laboratory | Jade Wang, et al. |
| EPI_ISL_631538                 | Maimonides Medical Center                         | New York City Public Health Laboratory | Jade Wang, et al. |
| EPI_ISL_631539, EPI_ISL_631540 | New York Presbyterian Lower Manhattan             | New York City Public Health Laboratory | Jade Wang, et al. |
| EPI_ISL_631541                 | NYC Department Of Health And Mental Hygiene       | New York City Public Health Laboratory | Jade Wang, et al. |
| EPI_ISL_631542                 | New York Presbyterian Lower Manhattan             | New York City Public Health Laboratory | Jade Wang, et al. |
| EPI_ISL_631543                 | Robert Kutnick                                    | New York City Public Health Laboratory | Jade Wang, et al. |
| EPI_ISL_631544, EPI_ISL_631545 | New York Presbyterian-Brooklyn Methodist Hospital | New York City Public Health Laboratory | Jade Wang, et al. |
| EPI_ISL_631546                 | Maimonides Medical Center                         | New York City Public Health Laboratory | Jade Wang, et al. |
| EPI_ISL_631547                 | New York Presbyterian Queens                      | New York City Public Health Laboratory | Jade Wang, et al. |
| EPI_ISL_631548                 | New York Presbyterian-Brooklyn Methodist Hospital | New York City Public Health Laboratory | Jade Wang, et al. |
| EPI_ISL_631549                 | Mount Sinai Hospital                              | New York City Public Health Laboratory | Jade Wang, et al. |
| EPI_ISL_631550, EPI_ISL_631551 | Jamaica Hospital Medical Center                   | New York City Public Health Laboratory | Jade Wang, et al. |
| EPI_ISL_631552, EPI_ISL_631553 | Brookdale University Hospital Medical Center      | New York City Public Health Laboratory | Jade Wang, et al. |
| EPI_ISL_631554                 | Jamaica Hospital Medical Center                   | New York City Public Health Laboratory | Jade Wang, et al. |
| EPI_ISL_631555                 | Richmond University Medical Center                | New York City Public Health Laboratory | Jade Wang, et al. |
| EPI_ISL_631556                 | NYC HH Jacobi Medical Center                      | New York City Public Health Laboratory | Jade Wang, et al. |
| EPI_ISL_631557                 | NYC HH Lincoln Medical And Mental Health Center   | New York City Public Health Laboratory | Jade Wang, et al. |
| EPI_ISL_631558, EPI_ISL_631559 | NYU Langone Health                                | New York City Public Health Laboratory | Jade Wang, et al. |
| EPI_ISL_631560, EPI_ISL_631561 | Montefiore Medical Center                         | New York City Public Health Laboratory | Jade Wang, et al. |
| EPI_ISL_631562                 | Brookdale University Hospital Medical Center      | New York City Public Health Laboratory | Jade Wang, et al. |
| EPI_ISL_631563                 | Flushing Hospital Medical Center                  | New York City Public Health Laboratory | Jade Wang, et al. |
| EPI_ISL_631564                 | NYC HH Elmhurst Hospital Medical Center           | New York City Public Health Laboratory | Jade Wang, et al. |
| EPI_ISL_631565                 | Brookdale University Hospital Medical Center      | New York City Public Health Laboratory | Jade Wang, et al. |
| EPI_ISL_631566, EPI_ISL_631567 | New York Presbyterian-Brooklyn Methodist Hospital | New York City Public Health Laboratory | Jade Wang, et al. |
| EPI_ISL_631568, EPI_ISL_631569 | New York Presbyterian Queens                      | New York City Public Health Laboratory | Jade Wang, et al. |
| EPI_ISL_631570                 | OCME Office Of Chief Medical Examiner             | New York City Public Health Laboratory | Jade Wang, et al. |
| EPI_ISL_631571                 | Jamaica Hospital Medical Center                   | New York City Public Health Laboratory | Jade Wang, et al. |
| EPI_ISL_631572                 | NYC Department Of Health And Mental Hygiene       | New York City Public Health Laboratory | Jade Wang, et al. |
| EPI_ISL_631573                 | Brookdale University Hospital Medical Center      | New York City Public Health Laboratory | Jade Wang, et al. |
| EPI_ISL_631574, EPI_ISL_631575 | Jamaica Hospital Medical Center                   | New York City Public Health Laboratory | Jade Wang, et al. |
| EPI_ISL_631576                 | Richmond University Medical Center                | New York City Public Health Laboratory | Jade Wang, et al. |
| EPI_ISL_631577                 | NYC HH Lincoln Medical And Mental Health Center   | New York City Public Health Laboratory | Jade Wang, et al. |
| EPI_ISL_631578                 | Jamaica Hospital Medical Center                   | New York City Public Health Laboratory | Jade Wang, et al. |
| EPI_ISL_631579                 | Flushing Hospital Medical Center                  | New York City Public Health Laboratory | Jade Wang, et al. |
| EPI_ISL_631580                 | Bellevue Hospital Center                          | New York City Public Health Laboratory | Jade Wang, et al. |
| EPI_ISL_631581                 | SUNY Downstate Medical Center                     | New York City Public Health Laboratory | Jade Wang, et al. |
| EPI_ISL_631582                 | Jamaica Hospital Medical Center                   | New York City Public Health Laboratory | Jade Wang, et al. |
| EPI_ISL_631583                 | Richmond University Medical Center                | New York City Public Health Laboratory | Jade Wang, et al. |
| EPI_ISL_631584                 | NYC HH Lincoln Medical And Mental Health Center   | New York City Public Health Laboratory | Jade Wang, et al. |
| EPI_ISL_631585                 | Jamaica Hospital Medical Center                   | New York City Public Health Laboratory | Jade Wang, et al. |
| EPI_ISL_631586                 | Flushing Hospital Medical Center                  | New York City Public Health Laboratory | Jade Wang, et al. |
| EPI_ISL_631587                 | NYC HH Lincoln Medical And Mental Health Center   | New York City Public Health Laboratory | Jade Wang, et al. |
| EPI_ISL_631588                 | SUNY Downstate Medical Center                     | New York City Public Health Laboratory | Jade Wang, et al. |
| EPI_ISL_631589                 | Flushing Hospital Medical Center                  | New York City Public Health Laboratory | Jade Wang, et al. |
| EPI_ISL_631590                 | Jamaica Hospital Medical Center                   | New York City Public Health Laboratory | Jade Wang, et al. |
| EPI_ISL_631591                 | OCME Office Of Chief Medical Examiner             | New York City Public Health Laboratory | Jade Wang, et al. |
| EPI_ISL_631592, EPI_ISL_631593 | Jamaica Hospital Medical Center                   | New York City Public Health Laboratory | Jade Wang, et al. |
| EPI_ISL_631594                 | OCME Office Of Chief Medical Examiner             | New York City Public Health Laboratory | Jade Wang, et al. |
| EPI_ISL_631595                 | Jamaica Hospital Medical Center                   | New York City Public Health Laboratory | Jade Wang, et al. |
| EPI_ISL_631596                 | James J. Peters VA Medical Center                 | New York City Public Health Laboratory | Jade Wang, et al. |
| EPI_ISL_631597                 | Jamaica Hospital Medical Center                   | New York City Public Health Laboratory | Jade Wang, et al. |
| EPI_ISL_631598                 | OCME Office Of Chief Medical Examiner             | New York City Public Health Laboratory | Jade Wang, et al. |
| EPI_ISL_631599                 | Jamaica Hospital Medical Center                   | New York City Public Health Laboratory | Jade Wang, et al. |
| EPI_ISL_631600                 | James J. Peters VA Medical Center                 | New York City Public Health Laboratory | Jade Wang, et al. |
| EPI_ISL_631601                 | Jamaica Hospital Medical Center                   | New York City Public Health Laboratory | Jade Wang, et al. |
| EPI_ISL_631602                 | Flushing Hospital Medical Center                  | New York City Public Health Laboratory | Jade Wang, et al. |
| EPI_ISL_631603                 | NYC HH Lincoln Medical And Mental Health Center   | New York City Public Health Laboratory | Jade Wang, et al. |
| EPI_ISL_631604                 | Jamaica Hospital Medical Center                   | New York City Public Health Laboratory | Jade Wang, et al. |



|                                                                                                                |                                                 |                                        |                   |
|----------------------------------------------------------------------------------------------------------------|-------------------------------------------------|----------------------------------------|-------------------|
| EPI_ISL_631762, EPI_ISL_631763                                                                                 |                                                 |                                        |                   |
| EPI_ISL_631764                                                                                                 | Mount Sinai Hospital                            | New York City Public Health Laboratory | Jade Wang, et al. |
| EPI_ISL_631765                                                                                                 | Bellevue Hospital Center                        | New York City Public Health Laboratory | Jade Wang, et al. |
| EPI_ISL_631766                                                                                                 | Flushing Hospital Medical Center                | New York City Public Health Laboratory | Jade Wang, et al. |
| EPI_ISL_631767, EPI_ISL_631768                                                                                 | Jamaica Hospital Medical Center                 | New York City Public Health Laboratory | Jade Wang, et al. |
| EPI_ISL_631769, EPI_ISL_631770, EPI_ISL_631771                                                                 | Flushing Hospital Medical Center                | New York City Public Health Laboratory | Jade Wang, et al. |
| EPI_ISL_631772                                                                                                 | Jamaica Hospital Medical Center                 | New York City Public Health Laboratory | Jade Wang, et al. |
| EPI_ISL_631773, EPI_ISL_631774                                                                                 | Flushing Hospital Medical Center                | New York City Public Health Laboratory | Jade Wang, et al. |
| EPI_ISL_631775, EPI_ISL_631776, EPI_ISL_631777                                                                 | Jamaica Hospital Medical Center                 | New York City Public Health Laboratory | Jade Wang, et al. |
| EPI_ISL_631778, EPI_ISL_631779, EPI_ISL_631780, EPI_ISL_631781, EPI_ISL_631782, EPI_ISL_631783, EPI_ISL_631784 | St Barnabas Hospital                            | New York City Public Health Laboratory | Jade Wang, et al. |
| EPI_ISL_631785, EPI_ISL_631786                                                                                 | Mount Sinai Hospital                            | New York City Public Health Laboratory | Jade Wang, et al. |
| EPI_ISL_631787                                                                                                 | Flushing Hospital Medical Center                | New York City Public Health Laboratory | Jade Wang, et al. |
| EPI_ISL_631788, EPI_ISL_631789, EPI_ISL_631790, EPI_ISL_631791                                                 | Jamaica Hospital Medical Center                 | New York City Public Health Laboratory | Jade Wang, et al. |
| EPI_ISL_631792                                                                                                 | Richmond University Medical Center              | New York City Public Health Laboratory | Jade Wang, et al. |
| EPI_ISL_631793, EPI_ISL_631794                                                                                 | SUNY Downstate Medical Center                   | New York City Public Health Laboratory | Jade Wang, et al. |
| EPI_ISL_631795                                                                                                 | Jamaica Hospital Medical Center                 | New York City Public Health Laboratory | Jade Wang, et al. |
| EPI_ISL_631796                                                                                                 | Maimonides Medical Center                       | New York City Public Health Laboratory | Jade Wang, et al. |
| EPI_ISL_631797                                                                                                 | OCME Office Of Chief Medical Examiner           | New York City Public Health Laboratory | Jade Wang, et al. |
| EPI_ISL_631798                                                                                                 | Jamaica Hospital Medical Center                 | New York City Public Health Laboratory | Jade Wang, et al. |
| EPI_ISL_631799                                                                                                 | NYC HH Lincoln Medical And Mental Health Center | New York City Public Health Laboratory | Jade Wang, et al. |
| EPI_ISL_631800                                                                                                 | Brookdale University Hospital Medical Center    | New York City Public Health Laboratory | Jade Wang, et al. |
| EPI_ISL_631801                                                                                                 | Richmond University Medical Center              | New York City Public Health Laboratory | Jade Wang, et al. |
| EPI_ISL_631802                                                                                                 | SUNY Downstate Medical Center                   | New York City Public Health Laboratory | Jade Wang, et al. |
| EPI_ISL_631803                                                                                                 | Brookdale University Hospital Medical Center    | New York City Public Health Laboratory | Jade Wang, et al. |
| EPI_ISL_631804                                                                                                 | Bellevue Hospital Center                        | New York City Public Health Laboratory | Jade Wang, et al. |
| EPI_ISL_631805, EPI_ISL_631806, EPI_ISL_631807                                                                 | Brookdale University Hospital Medical Center    | New York City Public Health Laboratory | Jade Wang, et al. |
| EPI_ISL_631808                                                                                                 | Wyckoff Heights Medical Center                  | New York City Public Health Laboratory | Jade Wang, et al. |
| EPI_ISL_631809, EPI_ISL_631810                                                                                 | Jamaica Hospital Medical Center                 | New York City Public Health Laboratory | Jade Wang, et al. |
| EPI_ISL_631811                                                                                                 | Wyckoff Heights Medical Center                  | New York City Public Health Laboratory | Jade Wang, et al. |
| EPI_ISL_631812, EPI_ISL_631813                                                                                 | Jamaica Hospital Medical Center                 | New York City Public Health Laboratory | Jade Wang, et al. |
| EPI_ISL_631814, EPI_ISL_631815, EPI_ISL_631816, EPI_ISL_631817, EPI_ISL_631818                                 | Richmond University Medical Center              | New York City Public Health Laboratory | Jade Wang, et al. |
| EPI_ISL_631819                                                                                                 | Brookdale University Hospital Medical Center    | New York City Public Health Laboratory | Jade Wang, et al. |
| EPI_ISL_631820                                                                                                 | Jamaica Hospital Medical Center                 | New York City Public Health Laboratory | Jade Wang, et al. |
| EPI_ISL_631821                                                                                                 | Richmond University Medical Center              | New York City Public Health Laboratory | Jade Wang, et al. |
| EPI_ISL_631822, EPI_ISL_631823, EPI_ISL_631825                                                                 | Jamaica Hospital Medical Center                 | New York City Public Health Laboratory | Jade Wang, et al. |
| EPI_ISL_631826                                                                                                 | Flushing Hospital Medical Center                | New York City Public Health Laboratory | Jade Wang, et al. |
| EPI_ISL_631827                                                                                                 | NYC HH Lincoln Medical And Mental Health Center | New York City Public Health Laboratory | Jade Wang, et al. |
| EPI_ISL_631828                                                                                                 | Richmond University Medical Center              | New York City Public Health Laboratory | Jade Wang, et al. |
| EPI_ISL_631829                                                                                                 | Brookdale University Hospital Medical Center    | New York City Public Health Laboratory | Jade Wang, et al. |
| EPI_ISL_631830                                                                                                 | Mount Sinai Hospital                            | New York City Public Health Laboratory | Jade Wang, et al. |
| EPI_ISL_631831                                                                                                 | VA NY Harbor Healthcare System                  | New York City Public Health Laboratory | Jade Wang, et al. |
| EPI_ISL_631832                                                                                                 | Metro Urgicare                                  | New York City Public Health Laboratory | Jade Wang, et al. |
| EPI_ISL_631833                                                                                                 | Jamaica Hospital Medical Center                 | New York City Public Health Laboratory | Jade Wang, et al. |
| EPI_ISL_631834                                                                                                 | Mount Sinai Hospital                            | New York City Public Health Laboratory | Jade Wang, et al. |
| EPI_ISL_631835, EPI_ISL_631836                                                                                 | Jamaica Hospital Medical Center                 | New York City Public Health Laboratory | Jade Wang, et al. |
| EPI_ISL_631837                                                                                                 | Richmond University Medical Center              | New York City Public Health Laboratory | Jade Wang, et al. |
| EPI_ISL_631838                                                                                                 | Bellevue Hospital Center                        | New York City Public Health Laboratory | Jade Wang, et al. |
| EPI_ISL_631839                                                                                                 | Mount Sinai Hospital                            | New York City Public Health Laboratory | Jade Wang, et al. |
| EPI_ISL_631840, EPI_ISL_631841, EPI_ISL_631842, EPI_ISL_631843, EPI_ISL_631844, EPI_ISL_631845, EPI_ISL_631846 | OCME Office Of Chief Medical Examiner           | New York City Public Health Laboratory | Jade Wang, et al. |
| EPI_ISL_631847                                                                                                 | Jamaica Hospital Medical Center                 | New York City Public Health Laboratory | Jade Wang, et al. |



|                                                                |                                                     |                                        |                   |
|----------------------------------------------------------------|-----------------------------------------------------|----------------------------------------|-------------------|
| EPI_ISL_631848                                                 | Flushing Hospital Medical Center                    | New York City Public Health Laboratory | Jade Wang, et al. |
| EPI_ISL_631849, EPI_ISL_631850                                 | Jamaica Hospital Medical Center                     | New York City Public Health Laboratory | Jade Wang, et al. |
| EPI_ISL_631851                                                 | Flushing Hospital Medical Center                    | New York City Public Health Laboratory | Jade Wang, et al. |
| EPI_ISL_631852, EPI_ISL_631853, EPI_ISL_631854                 | Jamaica Hospital Medical Center                     | New York City Public Health Laboratory | Jade Wang, et al. |
| EPI_ISL_631855                                                 | Flushing Hospital Medical Center                    | New York City Public Health Laboratory | Jade Wang, et al. |
| EPI_ISL_631856, EPI_ISL_631857, EPI_ISL_631858, EPI_ISL_631859 | St Barnabas Hospital                                | New York City Public Health Laboratory | Jade Wang, et al. |
| EPI_ISL_631860                                                 | New York Presbyterian/ Weill Cornell Medical Center | New York City Public Health Laboratory | Jade Wang, et al. |
| EPI_ISL_631861                                                 | New York Presbyterian Queens                        | New York City Public Health Laboratory | Jade Wang, et al. |
| EPI_ISL_631862                                                 | NYC Department Of Health And Mental Hygiene         | New York City Public Health Laboratory | Jade Wang, et al. |
| EPI_ISL_631863                                                 | Maimonides Medical Center                           | New York City Public Health Laboratory | Jade Wang, et al. |
| EPI_ISL_631864                                                 | Brookdale University Hospital Medical Center        | New York City Public Health Laboratory | Jade Wang, et al. |
| EPI_ISL_631865                                                 | NYC HH Elmhurst Hospital Medical Center             | New York City Public Health Laboratory | Jade Wang, et al. |
| EPI_ISL_631866, EPI_ISL_631867                                 | Jamaica Hospital Medical Center                     | New York City Public Health Laboratory | Jade Wang, et al. |
| EPI_ISL_631868, EPI_ISL_631869                                 | Richmond University Medical Center                  | New York City Public Health Laboratory | Jade Wang, et al. |
| EPI_ISL_631870, EPI_ISL_631871, EPI_ISL_631872                 | Jamaica Hospital Medical Center                     | New York City Public Health Laboratory | Jade Wang, et al. |
| EPI_ISL_631873                                                 | Richmond University Medical Center                  | New York City Public Health Laboratory | Jade Wang, et al. |
| EPI_ISL_631874                                                 | James J. Peters VA Medical Center                   | New York City Public Health Laboratory | Jade Wang, et al. |
| EPI_ISL_631875                                                 | Richmond University Medical Center                  | New York City Public Health Laboratory | Jade Wang, et al. |
| EPI_ISL_631876, EPI_ISL_631877, EPI_ISL_631878, EPI_ISL_631879 | Jamaica Hospital Medical Center                     | New York City Public Health Laboratory | Jade Wang, et al. |
| EPI_ISL_631880                                                 | Mount Sinai West                                    | New York City Public Health Laboratory | Jade Wang, et al. |
| EPI_ISL_631881                                                 | Maimonides Medical Center                           | New York City Public Health Laboratory | Jade Wang, et al. |
| EPI_ISL_631882, EPI_ISL_631883                                 | Jamaica Hospital Medical Center                     | New York City Public Health Laboratory | Jade Wang, et al. |
| EPI_ISL_631884                                                 | Brookdale University Hospital Medical Center        | New York City Public Health Laboratory | Jade Wang, et al. |
| EPI_ISL_631885                                                 | Flushing Hospital Medical Center                    | New York City Public Health Laboratory | Jade Wang, et al. |
| EPI_ISL_631886                                                 | NYC HH Lincoln Medical And Mental Health Center     | New York City Public Health Laboratory | Jade Wang, et al. |
| EPI_ISL_631887                                                 | Jamaica Hospital Medical Center                     | New York City Public Health Laboratory | Jade Wang, et al. |
| EPI_ISL_631888                                                 | St Barnabas Hospital                                | New York City Public Health Laboratory | Jade Wang, et al. |
| EPI_ISL_631889, EPI_ISL_631890                                 | Jamaica Hospital Medical Center                     | New York City Public Health Laboratory | Jade Wang, et al. |
| EPI_ISL_631891                                                 | Flushing Hospital Medical Center                    | New York City Public Health Laboratory | Jade Wang, et al. |
| EPI_ISL_631892                                                 | Richmond University Medical Center                  | New York City Public Health Laboratory | Jade Wang, et al. |
| EPI_ISL_631893, EPI_ISL_631894                                 | Flushing Hospital Medical Center                    | New York City Public Health Laboratory | Jade Wang, et al. |
| EPI_ISL_631895, EPI_ISL_631896                                 | Jamaica Hospital Medical Center                     | New York City Public Health Laboratory | Jade Wang, et al. |
| EPI_ISL_631897                                                 | Richmond University Medical Center                  | New York City Public Health Laboratory | Jade Wang, et al. |
| EPI_ISL_631898                                                 | OCME Office Of Chief Medical Examiner               | New York City Public Health Laboratory | Jade Wang, et al. |
| EPI_ISL_631899                                                 | Richmond University Medical Center                  | New York City Public Health Laboratory | Jade Wang, et al. |
| EPI_ISL_631900                                                 | St Barnabas Hospital                                | New York City Public Health Laboratory | Jade Wang, et al. |
| EPI_ISL_631901, EPI_ISL_631902                                 | Jamaica Hospital Medical Center                     | New York City Public Health Laboratory | Jade Wang, et al. |
| EPI_ISL_631903                                                 | Richmond University Medical Center                  | New York City Public Health Laboratory | Jade Wang, et al. |
| EPI_ISL_631904                                                 | Jamaica Hospital Medical Center                     | New York City Public Health Laboratory | Jade Wang, et al. |
| EPI_ISL_631905                                                 | Richmond University Medical Center                  | New York City Public Health Laboratory | Jade Wang, et al. |
| EPI_ISL_631906, EPI_ISL_631907, EPI_ISL_631908                 | Flushing Hospital Medical Center                    | New York City Public Health Laboratory | Jade Wang, et al. |
| EPI_ISL_631909, EPI_ISL_631910                                 | Jamaica Hospital Medical Center                     | New York City Public Health Laboratory | Jade Wang, et al. |
| EPI_ISL_631911, EPI_ISL_631912                                 | St Barnabas Hospital                                | New York City Public Health Laboratory | Jade Wang, et al. |
| EPI_ISL_631913, EPI_ISL_631914                                 | Mount Sinai Hospital                                | New York City Public Health Laboratory | Jade Wang, et al. |
| EPI_ISL_631915                                                 | Maimonides Medical Center                           | New York City Public Health Laboratory | Jade Wang, et al. |
| EPI_ISL_631916                                                 | Flushing Hospital Medical Center                    | New York City Public Health Laboratory | Jade Wang, et al. |
| EPI_ISL_631917                                                 | St Barnabas Hospital                                | New York City Public Health Laboratory | Jade Wang, et al. |
| EPI_ISL_631918                                                 | Flushing Hospital Medical Center                    | New York City Public Health Laboratory | Jade Wang, et al. |
| EPI_ISL_631919, EPI_ISL_631920                                 | Richmond University Medical Center                  | New York City Public Health Laboratory | Jade Wang, et al. |
| EPI_ISL_631921, EPI_ISL_631922                                 | Jamaica Hospital Medical Center                     | New York City Public Health Laboratory | Jade Wang, et al. |
| EPI_ISL_631923                                                 | Flushing Hospital Medical Center                    | New York City Public Health Laboratory | Jade Wang, et al. |
| EPI_ISL_631924                                                 | St Barnabas Hospital                                | New York City Public Health Laboratory | Jade Wang, et al. |
| EPI_ISL_631925, EPI_ISL_631926, EPI_ISL_631927, EPI_ISL_631928 | Jamaica Hospital Medical Center                     | New York City Public Health Laboratory | Jade Wang, et al. |
| EPI_ISL_631929                                                 | Flushing Hospital Medical Center                    | New York City Public Health Laboratory | Jade Wang, et al. |
| EPI_ISL_631930                                                 | Jamaica Hospital Medical Center                     | New York City Public Health Laboratory | Jade Wang, et al. |



|                                                                |                                                          |                                        |                   |
|----------------------------------------------------------------|----------------------------------------------------------|----------------------------------------|-------------------|
| EPI_ISL_632011, EPI_ISL_632012                                 | Jamaica Hospital Medical Center                          | New York City Public Health Laboratory | Jade Wang, et al. |
| EPI_ISL_632013, EPI_ISL_632014, EPI_ISL_632015, EPI_ISL_632016 | Richmond University Medical Center                       | New York City Public Health Laboratory | Jade Wang, et al. |
| EPI_ISL_632017                                                 | Jamaica Hospital Medical Center                          | New York City Public Health Laboratory | Jade Wang, et al. |
| EPI_ISL_632018, EPI_ISL_632019, EPI_ISL_632020                 | Flushing Hospital Medical Center                         | New York City Public Health Laboratory | Jade Wang, et al. |
| EPI_ISL_632021                                                 | Jamaica Hospital Medical Center                          | New York City Public Health Laboratory | Jade Wang, et al. |
| EPI_ISL_632022                                                 | Flushing Hospital Medical Center                         | New York City Public Health Laboratory | Jade Wang, et al. |
| EPI_ISL_632023                                                 | Jamaica Hospital Medical Center                          | New York City Public Health Laboratory | Jade Wang, et al. |
| EPI_ISL_632024                                                 | Flushing Hospital Medical Center                         | New York City Public Health Laboratory | Jade Wang, et al. |
| EPI_ISL_632025                                                 | Jamaica Hospital Medical Center                          | New York City Public Health Laboratory | Jade Wang, et al. |
| EPI_ISL_632026                                                 | NYC HH Lincoln Medical And Mental Health Center          | New York City Public Health Laboratory | Jade Wang, et al. |
| EPI_ISL_632027                                                 | Flushing Hospital Medical Center                         | New York City Public Health Laboratory | Jade Wang, et al. |
| EPI_ISL_632028, EPI_ISL_632029                                 | Jamaica Hospital Medical Center                          | New York City Public Health Laboratory | Jade Wang, et al. |
| EPI_ISL_632030, EPI_ISL_632031, EPI_ISL_632032                 | Richmond University Medical Center                       | New York City Public Health Laboratory | Jade Wang, et al. |
| EPI_ISL_632034                                                 | Flushing Hospital Medical Center                         | New York City Public Health Laboratory | Jade Wang, et al. |
| EPI_ISL_632035                                                 | Jamaica Hospital Medical Center                          | New York City Public Health Laboratory | Jade Wang, et al. |
| EPI_ISL_632036                                                 | Richmond University Medical Center                       | New York City Public Health Laboratory | Jade Wang, et al. |
| EPI_ISL_632037                                                 | Jamaica Hospital Medical Center                          | New York City Public Health Laboratory | Jade Wang, et al. |
| EPI_ISL_632038                                                 | New York Presbyterian Lower Manhattan                    | New York City Public Health Laboratory | Jade Wang, et al. |
| EPI_ISL_632039                                                 | NYC Department Of Health And Mental Hygiene              | New York City Public Health Laboratory | Jade Wang, et al. |
| EPI_ISL_632040                                                 | New York Presbyterian Queens                             | New York City Public Health Laboratory | Jade Wang, et al. |
| EPI_ISL_632041, EPI_ISL_632042                                 | New York Presbyterian Lower Manhattan                    | New York City Public Health Laboratory | Jade Wang, et al. |
| EPI_ISL_632043, EPI_ISL_632044                                 | NYU Langone Health                                       | New York City Public Health Laboratory | Jade Wang, et al. |
| EPI_ISL_632045                                                 | New York Presbyterian Lower Manhattan                    | New York City Public Health Laboratory | Jade Wang, et al. |
| EPI_ISL_632046                                                 | New York Presbyterian-Brooklyn Methodist Hospital        | New York City Public Health Laboratory | Jade Wang, et al. |
| EPI_ISL_632047                                                 | New York Presbyterian Lower Manhattan                    | New York City Public Health Laboratory | Jade Wang, et al. |
| EPI_ISL_632048                                                 | New York Presbyterian-Brooklyn Methodist Hospital        | New York City Public Health Laboratory | Jade Wang, et al. |
| EPI_ISL_632049                                                 | New York Presbyterian Queens                             | New York City Public Health Laboratory | Jade Wang, et al. |
| EPI_ISL_632050                                                 | Long Island Jewish Medical Center                        | New York City Public Health Laboratory | Jade Wang, et al. |
| EPI_ISL_632051                                                 | Jamaica Hospital Medical Center                          | New York City Public Health Laboratory | Jade Wang, et al. |
| EPI_ISL_632052, EPI_ISL_632053                                 | New York Presbyterian Queens                             | New York City Public Health Laboratory | Jade Wang, et al. |
| EPI_ISL_632054                                                 | New York Presbyterian-Brooklyn Methodist Hospital        | New York City Public Health Laboratory | Jade Wang, et al. |
| EPI_ISL_632055, EPI_ISL_632056                                 | New York Community Hospital                              | New York City Public Health Laboratory | Jade Wang, et al. |
| EPI_ISL_632057                                                 | New York-Presbyterian-Columbia University Medical Center | New York City Public Health Laboratory | Jade Wang, et al. |
| EPI_ISL_632058, EPI_ISL_632059                                 | Proximedical Urgent Care                                 | New York City Public Health Laboratory | Jade Wang, et al. |
| EPI_ISL_632060                                                 | NYC HH Queens Hospital Center                            | New York City Public Health Laboratory | Jade Wang, et al. |
| EPI_ISL_632061                                                 | Jamaica Hospital Medical Center                          | New York City Public Health Laboratory | Jade Wang, et al. |
| EPI_ISL_632062                                                 | NYC Department Of Health And Mental Hygiene              | New York City Public Health Laboratory | Jade Wang, et al. |
| EPI_ISL_632063, EPI_ISL_632064                                 | New York Presbyterian Queens                             | New York City Public Health Laboratory | Jade Wang, et al. |
| EPI_ISL_632065, EPI_ISL_632066                                 | Jamaica Hospital Medical Center                          | New York City Public Health Laboratory | Jade Wang, et al. |
| EPI_ISL_632067                                                 | NYU Langone Health                                       | New York City Public Health Laboratory | Jade Wang, et al. |
| EPI_ISL_632068, EPI_ISL_632069                                 | Bellevue Hospital Center                                 | New York City Public Health Laboratory | Jade Wang, et al. |
| EPI_ISL_632070, EPI_ISL_632071                                 | New York Presbyterian Queens                             | New York City Public Health Laboratory | Jade Wang, et al. |
| EPI_ISL_632072                                                 | NYC HH Lincoln Medical And Mental Health Center          | New York City Public Health Laboratory | Jade Wang, et al. |
| EPI_ISL_632073                                                 | OCME Office Of Chief Medical Examiner                    | New York City Public Health Laboratory | Jade Wang, et al. |
| EPI_ISL_632074                                                 | NYC Department Of Health And Mental Hygiene              | New York City Public Health Laboratory | Jade Wang, et al. |
| EPI_ISL_632075                                                 | Jamaica Hospital Medical Center                          | New York City Public Health Laboratory | Jade Wang, et al. |
| EPI_ISL_632076                                                 | NYU Langone Health                                       | New York City Public Health Laboratory | Jade Wang, et al. |
| EPI_ISL_632077, EPI_ISL_632078                                 | Brookdale University Hospital Medical Center             | New York City Public Health Laboratory | Jade Wang, et al. |
| EPI_ISL_632079                                                 | NYU Langone Health                                       | New York City Public Health Laboratory | Jade Wang, et al. |
| EPI_ISL_632080                                                 | SUNY Downstate Medical Center                            | New York City Public Health Laboratory | Jade Wang, et al. |
| EPI_ISL_632081                                                 | New York Presbyterian-Brooklyn Methodist Hospital        | New York City Public Health Laboratory | Jade Wang, et al. |
| EPI_ISL_632082                                                 | New York Presbyterian/ Weill Cornell Medical Center      | New York City Public Health Laboratory | Jade Wang, et al. |
| EPI_ISL_632083, EPI_ISL_632084                                 | NYC Department Of Health And Mental Hygiene              | New York City Public Health Laboratory | Jade Wang, et al. |
| EPI_ISL_632085                                                 | Richmond University Medical Center                       | New York City Public Health Laboratory | Jade Wang, et al. |
| EPI_ISL_632086                                                 | Jamaica Hospital Medical Center                          | New York City Public Health Laboratory | Jade Wang, et al. |
| EPI_ISL_632087                                                 | Flushing Hospital Medical Center                         | New York City Public Health Laboratory | Jade Wang, et al. |
| EPI_ISL_632088                                                 | Jamaica Hospital Medical Center                          | New York City Public Health Laboratory | Jade Wang, et al. |





|                                                                                                                                                                                                                                |                                             |                                        |                   |
|--------------------------------------------------------------------------------------------------------------------------------------------------------------------------------------------------------------------------------|---------------------------------------------|----------------------------------------|-------------------|
| EPI_ISL_632959                                                                                                                                                                                                                 | Richmond University Medical Center          | New York City Public Health Laboratory | Jade Wang, et al. |
| EPI_ISL_632960                                                                                                                                                                                                                 | Flushing Hospital Medical Center            | New York City Public Health Laboratory | Jade Wang, et al. |
| EPI_ISL_632961                                                                                                                                                                                                                 | Jamaica Hospital Medical Center             | New York City Public Health Laboratory | Jade Wang, et al. |
| EPI_ISL_632962                                                                                                                                                                                                                 | Richmond University Medical Center          | New York City Public Health Laboratory | Jade Wang, et al. |
| EPI_ISL_632963                                                                                                                                                                                                                 | NYC Department Of Health And Mental Hygiene | New York City Public Health Laboratory | Jade Wang, et al. |
| EPI_ISL_632964                                                                                                                                                                                                                 | Department of Homeless Services             | New York City Public Health Laboratory | Jade Wang, et al. |
| EPI_ISL_632965                                                                                                                                                                                                                 | Richmond University Medical Center          | New York City Public Health Laboratory | Jade Wang, et al. |
| EPI_ISL_632966, EPI_ISL_632967, EPI_ISL_632968                                                                                                                                                                                 | Flushing Hospital Medical Center            | New York City Public Health Laboratory | Jade Wang, et al. |
| EPI_ISL_632969, EPI_ISL_632970, EPI_ISL_632971, EPI_ISL_632972                                                                                                                                                                 | Jamaica Hospital Medical Center             | New York City Public Health Laboratory | Jade Wang, et al. |
| EPI_ISL_632973                                                                                                                                                                                                                 | Flushing Hospital Medical Center            | New York City Public Health Laboratory | Jade Wang, et al. |
| EPI_ISL_632974                                                                                                                                                                                                                 | Jamaica Hospital Medical Center             | New York City Public Health Laboratory | Jade Wang, et al. |
| EPI_ISL_632975                                                                                                                                                                                                                 | Richmond University Medical Center          | New York City Public Health Laboratory | Jade Wang, et al. |
| EPI_ISL_632976, EPI_ISL_632977, EPI_ISL_632978, EPI_ISL_632979                                                                                                                                                                 | Empire City Laboratories                    | New York City Public Health Laboratory | Jade Wang, et al. |
| EPI_ISL_632980, EPI_ISL_632981, EPI_ISL_632982, EPI_ISL_632983, EPI_ISL_632984, EPI_ISL_632985, EPI_ISL_632986, EPI_ISL_632987, EPI_ISL_632988, EPI_ISL_632989, EPI_ISL_632990, EPI_ISL_632991, EPI_ISL_632992, EPI_ISL_632993 |                                             |                                        |                   |
| see above                                                                                                                                                                                                                      | DOHMH Corona                                | New York City Public Health Laboratory | Jade Wang, et al. |
| EPI_ISL_632994, EPI_ISL_632995, EPI_ISL_632996, EPI_ISL_632997, EPI_ISL_632998                                                                                                                                                 | DOHMH Crown Heights                         | New York City Public Health Laboratory | Jade Wang, et al. |
| EPI_ISL_632999, EPI_ISL_633000, EPI_ISL_633001, EPI_ISL_633002, EPI_ISL_633003, EPI_ISL_633004, EPI_ISL_633005, EPI_ISL_633006, EPI_ISL_633007, EPI_ISL_633008                                                                 | DOHMH Jamaica                               | New York City Public Health Laboratory | Jade Wang, et al. |
| EPI_ISL_633009, EPI_ISL_633010                                                                                                                                                                                                 | DOHMH Central Harlem                        | New York City Public Health Laboratory | Jade Wang, et al. |
| EPI_ISL_633011                                                                                                                                                                                                                 | DOHMH PHL                                   | New York City Public Health Laboratory | Jade Wang, et al. |
| EPI_ISL_633012                                                                                                                                                                                                                 | DOHMH Riverside                             | New York City Public Health Laboratory | Jade Wang, et al. |
| EPI_ISL_633013                                                                                                                                                                                                                 | DOHMH PHL                                   | New York City Public Health Laboratory | Jade Wang, et al. |
| EPI_ISL_633014                                                                                                                                                                                                                 | DOHMH Chelsea                               | New York City Public Health Laboratory | Jade Wang, et al. |
| EPI_ISL_633015                                                                                                                                                                                                                 | DOHMH Morrisania                            | New York City Public Health Laboratory | Jade Wang, et al. |
| EPI_ISL_633016, EPI_ISL_633017                                                                                                                                                                                                 | DOHMH Chelsea                               | New York City Public Health Laboratory | Jade Wang, et al. |
| EPI_ISL_633018                                                                                                                                                                                                                 | DOHMH Central Harlem                        | New York City Public Health Laboratory | Jade Wang, et al. |
| EPI_ISL_633019, EPI_ISL_633020, EPI_ISL_633021, EPI_ISL_633022                                                                                                                                                                 | DOHMH Morrisania                            | New York City Public Health Laboratory | Jade Wang, et al. |
| EPI_ISL_633023                                                                                                                                                                                                                 | DOHMH Chelsea                               | New York City Public Health Laboratory | Jade Wang, et al. |
| EPI_ISL_633024                                                                                                                                                                                                                 | DOHMH Morrisania                            | New York City Public Health Laboratory | Jade Wang, et al. |
| EPI_ISL_633025                                                                                                                                                                                                                 | DOHMH Chelsea                               | New York City Public Health Laboratory | Jade Wang, et al. |
| EPI_ISL_633026                                                                                                                                                                                                                 | DOHMH PHL                                   | New York City Public Health Laboratory | Jade Wang, et al. |
| EPI_ISL_633027, EPI_ISL_633028, EPI_ISL_633029, EPI_ISL_633030                                                                                                                                                                 | DOHMH Morrisania                            | New York City Public Health Laboratory | Jade Wang, et al. |
| EPI_ISL_633031                                                                                                                                                                                                                 | DOHMH Chelsea                               | New York City Public Health Laboratory | Jade Wang, et al. |
| EPI_ISL_633032                                                                                                                                                                                                                 | DOHMH Morrisania                            | New York City Public Health Laboratory | Jade Wang, et al. |
| EPI_ISL_633033                                                                                                                                                                                                                 | DOHMH Chelsea                               | New York City Public Health Laboratory | Jade Wang, et al. |
| EPI_ISL_633034                                                                                                                                                                                                                 | DOHMH Riverside                             | New York City Public Health Laboratory | Jade Wang, et al. |
| EPI_ISL_633035                                                                                                                                                                                                                 | DOHMH PHL                                   | New York City Public Health Laboratory | Jade Wang, et al. |
| EPI_ISL_633036                                                                                                                                                                                                                 | DOHMH Morrisania                            | New York City Public Health Laboratory | Jade Wang, et al. |
| EPI_ISL_633037                                                                                                                                                                                                                 | DOHMH Central Harlem                        | New York City Public Health Laboratory | Jade Wang, et al. |
| EPI_ISL_633038                                                                                                                                                                                                                 | DOHMH PHL                                   | New York City Public Health Laboratory | Jade Wang, et al. |
| EPI_ISL_633039, EPI_ISL_633040                                                                                                                                                                                                 | DOHMH Chelsea                               | New York City Public Health Laboratory | Jade Wang, et al. |
| EPI_ISL_633041, EPI_ISL_633042, EPI_ISL_633043                                                                                                                                                                                 | DOHMH Riverside                             | New York City Public Health Laboratory | Jade Wang, et al. |
| EPI_ISL_633044                                                                                                                                                                                                                 | DOHMH Morrisania                            | New York City Public Health Laboratory | Jade Wang, et al. |
| EPI_ISL_633045                                                                                                                                                                                                                 | DOHMH PHL                                   | New York City Public Health Laboratory | Jade Wang, et al. |
| EPI_ISL_633046, EPI_ISL_633047                                                                                                                                                                                                 | DOHMH Chelsea                               | New York City Public Health Laboratory | Jade Wang, et al. |
| EPI_ISL_633048, EPI_ISL_633049                                                                                                                                                                                                 | DOHMH Morrisania                            | New York City Public Health Laboratory | Jade Wang, et al. |
| EPI_ISL_633050, EPI_ISL_633051                                                                                                                                                                                                 | DOHMH PHL                                   | New York City Public Health Laboratory | Jade Wang, et al. |
| EPI_ISL_633052                                                                                                                                                                                                                 | DOHMH Chelsea                               | New York City Public Health Laboratory | Jade Wang, et al. |
| EPI_ISL_633053                                                                                                                                                                                                                 | DOHMH Morrisania                            | New York City Public Health Laboratory | Jade Wang, et al. |
| EPI_ISL_633054, EPI_ISL_633055                                                                                                                                                                                                 | DOHMH PHL                                   | New York City Public Health Laboratory | Jade Wang, et al. |
| EPI_ISL_633056                                                                                                                                                                                                                 | DOHMH Central Harlem                        | New York City Public Health Laboratory | Jade Wang, et al. |
| EPI_ISL_633057, EPI_ISL_633058                                                                                                                                                                                                 | DOHMH Morrisania                            | New York City Public Health Laboratory | Jade Wang, et al. |







|                                                                                                                                                                                                                                                                                                                                                                                                                                                                                                                                                                                                                                                                                                                                                                                                                                                                                                                                                                                                                                                                                                                                                                                                                                                                                                                                                                                                                                                                                                                                                                                                                                                                                                                                                                                                                                                                                                                                                                                                                                                                                                                                                                                                                                                                                                                                                                                                                                                                                                                                                                                                                                                                                                                                                                                |                                 |                                                                            |                                                                                                                                                                                                                                                                                                  |
|--------------------------------------------------------------------------------------------------------------------------------------------------------------------------------------------------------------------------------------------------------------------------------------------------------------------------------------------------------------------------------------------------------------------------------------------------------------------------------------------------------------------------------------------------------------------------------------------------------------------------------------------------------------------------------------------------------------------------------------------------------------------------------------------------------------------------------------------------------------------------------------------------------------------------------------------------------------------------------------------------------------------------------------------------------------------------------------------------------------------------------------------------------------------------------------------------------------------------------------------------------------------------------------------------------------------------------------------------------------------------------------------------------------------------------------------------------------------------------------------------------------------------------------------------------------------------------------------------------------------------------------------------------------------------------------------------------------------------------------------------------------------------------------------------------------------------------------------------------------------------------------------------------------------------------------------------------------------------------------------------------------------------------------------------------------------------------------------------------------------------------------------------------------------------------------------------------------------------------------------------------------------------------------------------------------------------------------------------------------------------------------------------------------------------------------------------------------------------------------------------------------------------------------------------------------------------------------------------------------------------------------------------------------------------------------------------------------------------------------------------------------------------------|---------------------------------|----------------------------------------------------------------------------|--------------------------------------------------------------------------------------------------------------------------------------------------------------------------------------------------------------------------------------------------------------------------------------------------|
| EPI_ISL_671762                                                                                                                                                                                                                                                                                                                                                                                                                                                                                                                                                                                                                                                                                                                                                                                                                                                                                                                                                                                                                                                                                                                                                                                                                                                                                                                                                                                                                                                                                                                                                                                                                                                                                                                                                                                                                                                                                                                                                                                                                                                                                                                                                                                                                                                                                                                                                                                                                                                                                                                                                                                                                                                                                                                                                                 | DOHMH Riverside                 | New York City Public Health Laboratory                                     | Jade Wang, et al.                                                                                                                                                                                                                                                                                |
| EPI_ISL_671763                                                                                                                                                                                                                                                                                                                                                                                                                                                                                                                                                                                                                                                                                                                                                                                                                                                                                                                                                                                                                                                                                                                                                                                                                                                                                                                                                                                                                                                                                                                                                                                                                                                                                                                                                                                                                                                                                                                                                                                                                                                                                                                                                                                                                                                                                                                                                                                                                                                                                                                                                                                                                                                                                                                                                                 | DOHMH Chelsea                   | New York City Public Health Laboratory                                     | Jade Wang, et al.                                                                                                                                                                                                                                                                                |
| EPI_ISL_674160, EPI_ISL_674161, EPI_ISL_674168, EPI_ISL_674179, EPI_ISL_674186, EPI_ISL_674188, EPI_ISL_674192, EPI_ISL_674194, EPI_ISL_674195, EPI_ISL_674199, EPI_ISL_674224, EPI_ISL_674243, EPI_ISL_674254, EPI_ISL_674260, EPI_ISL_674261, EPI_ISL_674283, EPI_ISL_674286, EPI_ISL_674297, EPI_ISL_674305, EPI_ISL_674313, EPI_ISL_674317, EPI_ISL_674318, EPI_ISL_674328, EPI_ISL_674339, EPI_ISL_674347, EPI_ISL_674352, EPI_ISL_674362, EPI_ISL_674366, EPI_ISL_674368, EPI_ISL_674375, EPI_ISL_674383, EPI_ISL_674402, EPI_ISL_674409, EPI_ISL_674420, EPI_ISL_674424, EPI_ISL_674434, EPI_ISL_674442, EPI_ISL_674445, EPI_ISL_674446, EPI_ISL_674469, EPI_ISL_674472, EPI_ISL_674476, EPI_ISL_674478, EPI_ISL_675135, EPI_ISL_675137, EPI_ISL_675140, EPI_ISL_675144, EPI_ISL_675149, EPI_ISL_675152, EPI_ISL_675154, EPI_ISL_675155, EPI_ISL_675172, EPI_ISL_675186, EPI_ISL_675196, EPI_ISL_675200, EPI_ISL_675202, EPI_ISL_675206, EPI_ISL_675207, EPI_ISL_675213, EPI_ISL_675222, EPI_ISL_675234, EPI_ISL_675242, EPI_ISL_675245, EPI_ISL_675249, EPI_ISL_675253, EPI_ISL_675254, EPI_ISL_675255, EPI_ISL_675258, EPI_ISL_675273, EPI_ISL_675283, EPI_ISL_675294, EPI_ISL_675297, EPI_ISL_675298, EPI_ISL_675312, EPI_ISL_675322, EPI_ISL_675323, EPI_ISL_675344, EPI_ISL_675347, EPI_ISL_675349, EPI_ISL_675362, EPI_ISL_675372, EPI_ISL_675380, EPI_ISL_675390, EPI_ISL_675392, EPI_ISL_675398, EPI_ISL_675401, EPI_ISL_675407, EPI_ISL_675410, EPI_ISL_675422, EPI_ISL_675425, EPI_ISL_675428, EPI_ISL_675433, EPI_ISL_675437, EPI_ISL_675438, EPI_ISL_675441, EPI_ISL_675444, EPI_ISL_675454, EPI_ISL_675457, EPI_ISL_675461, EPI_ISL_675464, EPI_ISL_675466, EPI_ISL_675471, EPI_ISL_675481, EPI_ISL_675491, EPI_ISL_675498, EPI_ISL_675509, EPI_ISL_675511, EPI_ISL_675520, EPI_ISL_675525, EPI_ISL_675546, EPI_ISL_675551, EPI_ISL_675552, EPI_ISL_675557, EPI_ISL_675559, EPI_ISL_675568, EPI_ISL_675570, EPI_ISL_675573, EPI_ISL_675591, EPI_ISL_675594, EPI_ISL_675599, EPI_ISL_675605, EPI_ISL_675619, EPI_ISL_675626, EPI_ISL_675632, EPI_ISL_675633, EPI_ISL_675635, EPI_ISL_675643, EPI_ISL_675649, EPI_ISL_675656, EPI_ISL_675669, EPI_ISL_675684, EPI_ISL_675691, EPI_ISL_675699, EPI_ISL_675674, EPI_ISL_675677, EPI_ISL_675684, EPI_ISL_675677, EPI_ISL_675685, EPI_ISL_675689, EPI_ISL_675699, EPI_ISL_675703, EPI_ISL_675715, EPI_ISL_675716, EPI_ISL_675735, EPI_ISL_675750, EPI_ISL_675759, EPI_ISL_675770, EPI_ISL_675774, EPI_ISL_675776, EPI_ISL_675779, EPI_ISL_675803, EPI_ISL_675812, EPI_ISL_675813, EPI_ISL_675817, EPI_ISL_675839, EPI_ISL_675848, EPI_ISL_675852, EPI_ISL_675868, EPI_ISL_675894, EPI_ISL_675897, EPI_ISL_675901, EPI_ISL_675908, EPI_ISL_675934, EPI_ISL_675939, EPI_ISL_675954, EPI_ISL_675988, EPI_ISL_676002 |                                 |                                                                            |                                                                                                                                                                                                                                                                                                  |
| see above                                                                                                                                                                                                                                                                                                                                                                                                                                                                                                                                                                                                                                                                                                                                                                                                                                                                                                                                                                                                                                                                                                                                                                                                                                                                                                                                                                                                                                                                                                                                                                                                                                                                                                                                                                                                                                                                                                                                                                                                                                                                                                                                                                                                                                                                                                                                                                                                                                                                                                                                                                                                                                                                                                                                                                      | Lighthouse Lab in Alderley Park | Wellcome Sanger Institute for the COVID-19 Genomics UK (COG-UK) Consortium | Jacquelyn Wynn, Mairead Hyland, The Lighthouse Lab in Alderley Park and Alex Alderton, Roberto Amato, Sonia Goncalves, Ewan Harrison, David K. Jackson, Ian Johnston, Dominic Kwiatkowski, Cordeia Langford, John Sillitoe on behalf of the Wellcome Sanger Institute COVID-19 Surveillance Team |
| EPI_ISL_683753                                                                                                                                                                                                                                                                                                                                                                                                                                                                                                                                                                                                                                                                                                                                                                                                                                                                                                                                                                                                                                                                                                                                                                                                                                                                                                                                                                                                                                                                                                                                                                                                                                                                                                                                                                                                                                                                                                                                                                                                                                                                                                                                                                                                                                                                                                                                                                                                                                                                                                                                                                                                                                                                                                                                                                 | DOHMH Corona                    | New York City Public Health Laboratory                                     | Jade Wang, et al.                                                                                                                                                                                                                                                                                |
| EPI_ISL_683754                                                                                                                                                                                                                                                                                                                                                                                                                                                                                                                                                                                                                                                                                                                                                                                                                                                                                                                                                                                                                                                                                                                                                                                                                                                                                                                                                                                                                                                                                                                                                                                                                                                                                                                                                                                                                                                                                                                                                                                                                                                                                                                                                                                                                                                                                                                                                                                                                                                                                                                                                                                                                                                                                                                                                                 | DOHMH Morrisania                | New York City Public Health Laboratory                                     | Jade Wang, et al.                                                                                                                                                                                                                                                                                |
| EPI_ISL_683755                                                                                                                                                                                                                                                                                                                                                                                                                                                                                                                                                                                                                                                                                                                                                                                                                                                                                                                                                                                                                                                                                                                                                                                                                                                                                                                                                                                                                                                                                                                                                                                                                                                                                                                                                                                                                                                                                                                                                                                                                                                                                                                                                                                                                                                                                                                                                                                                                                                                                                                                                                                                                                                                                                                                                                 | DOHMH PHL                       | New York City Public Health Laboratory                                     | Jade Wang, et al.                                                                                                                                                                                                                                                                                |
| EPI_ISL_683756                                                                                                                                                                                                                                                                                                                                                                                                                                                                                                                                                                                                                                                                                                                                                                                                                                                                                                                                                                                                                                                                                                                                                                                                                                                                                                                                                                                                                                                                                                                                                                                                                                                                                                                                                                                                                                                                                                                                                                                                                                                                                                                                                                                                                                                                                                                                                                                                                                                                                                                                                                                                                                                                                                                                                                 | DOHMH Central Harlem            | New York City Public Health Laboratory                                     | Jade Wang, et al.                                                                                                                                                                                                                                                                                |
| EPI_ISL_683757, EPI_ISL_683758                                                                                                                                                                                                                                                                                                                                                                                                                                                                                                                                                                                                                                                                                                                                                                                                                                                                                                                                                                                                                                                                                                                                                                                                                                                                                                                                                                                                                                                                                                                                                                                                                                                                                                                                                                                                                                                                                                                                                                                                                                                                                                                                                                                                                                                                                                                                                                                                                                                                                                                                                                                                                                                                                                                                                 | DOHMH Corona                    | New York City Public Health Laboratory                                     | Jade Wang, et al.                                                                                                                                                                                                                                                                                |
| EPI_ISL_683759                                                                                                                                                                                                                                                                                                                                                                                                                                                                                                                                                                                                                                                                                                                                                                                                                                                                                                                                                                                                                                                                                                                                                                                                                                                                                                                                                                                                                                                                                                                                                                                                                                                                                                                                                                                                                                                                                                                                                                                                                                                                                                                                                                                                                                                                                                                                                                                                                                                                                                                                                                                                                                                                                                                                                                 | DOHMH PHL                       | New York City Public Health Laboratory                                     | Jade Wang, et al.                                                                                                                                                                                                                                                                                |
| EPI_ISL_683760                                                                                                                                                                                                                                                                                                                                                                                                                                                                                                                                                                                                                                                                                                                                                                                                                                                                                                                                                                                                                                                                                                                                                                                                                                                                                                                                                                                                                                                                                                                                                                                                                                                                                                                                                                                                                                                                                                                                                                                                                                                                                                                                                                                                                                                                                                                                                                                                                                                                                                                                                                                                                                                                                                                                                                 | DOHMH Morrisania                | New York City Public Health Laboratory                                     | Jade Wang, et al.                                                                                                                                                                                                                                                                                |
| EPI_ISL_683761                                                                                                                                                                                                                                                                                                                                                                                                                                                                                                                                                                                                                                                                                                                                                                                                                                                                                                                                                                                                                                                                                                                                                                                                                                                                                                                                                                                                                                                                                                                                                                                                                                                                                                                                                                                                                                                                                                                                                                                                                                                                                                                                                                                                                                                                                                                                                                                                                                                                                                                                                                                                                                                                                                                                                                 | DOHMH Corona                    | New York City Public Health Laboratory                                     | Jade Wang, et al.                                                                                                                                                                                                                                                                                |
| EPI_ISL_683762, EPI_ISL_683763                                                                                                                                                                                                                                                                                                                                                                                                                                                                                                                                                                                                                                                                                                                                                                                                                                                                                                                                                                                                                                                                                                                                                                                                                                                                                                                                                                                                                                                                                                                                                                                                                                                                                                                                                                                                                                                                                                                                                                                                                                                                                                                                                                                                                                                                                                                                                                                                                                                                                                                                                                                                                                                                                                                                                 | DOHMH Morrisania                | New York City Public Health Laboratory                                     | Jade Wang, et al.                                                                                                                                                                                                                                                                                |
| EPI_ISL_683764                                                                                                                                                                                                                                                                                                                                                                                                                                                                                                                                                                                                                                                                                                                                                                                                                                                                                                                                                                                                                                                                                                                                                                                                                                                                                                                                                                                                                                                                                                                                                                                                                                                                                                                                                                                                                                                                                                                                                                                                                                                                                                                                                                                                                                                                                                                                                                                                                                                                                                                                                                                                                                                                                                                                                                 | DOHMH Corona                    | New York City Public Health Laboratory                                     | Jade Wang, et al.                                                                                                                                                                                                                                                                                |
| EPI_ISL_683765                                                                                                                                                                                                                                                                                                                                                                                                                                                                                                                                                                                                                                                                                                                                                                                                                                                                                                                                                                                                                                                                                                                                                                                                                                                                                                                                                                                                                                                                                                                                                                                                                                                                                                                                                                                                                                                                                                                                                                                                                                                                                                                                                                                                                                                                                                                                                                                                                                                                                                                                                                                                                                                                                                                                                                 | DOHMH Chelsea                   | New York City Public Health Laboratory                                     | Jade Wang, et al.                                                                                                                                                                                                                                                                                |
| EPI_ISL_683766                                                                                                                                                                                                                                                                                                                                                                                                                                                                                                                                                                                                                                                                                                                                                                                                                                                                                                                                                                                                                                                                                                                                                                                                                                                                                                                                                                                                                                                                                                                                                                                                                                                                                                                                                                                                                                                                                                                                                                                                                                                                                                                                                                                                                                                                                                                                                                                                                                                                                                                                                                                                                                                                                                                                                                 | DOHMH Corona                    | New York City Public Health Laboratory                                     | Jade Wang, et al.                                                                                                                                                                                                                                                                                |
| EPI_ISL_683767, EPI_ISL_683768, EPI_ISL_683769                                                                                                                                                                                                                                                                                                                                                                                                                                                                                                                                                                                                                                                                                                                                                                                                                                                                                                                                                                                                                                                                                                                                                                                                                                                                                                                                                                                                                                                                                                                                                                                                                                                                                                                                                                                                                                                                                                                                                                                                                                                                                                                                                                                                                                                                                                                                                                                                                                                                                                                                                                                                                                                                                                                                 | DOHMH Riverside                 | New York City Public Health Laboratory                                     | Jade Wang, et al.                                                                                                                                                                                                                                                                                |
| EPI_ISL_683770                                                                                                                                                                                                                                                                                                                                                                                                                                                                                                                                                                                                                                                                                                                                                                                                                                                                                                                                                                                                                                                                                                                                                                                                                                                                                                                                                                                                                                                                                                                                                                                                                                                                                                                                                                                                                                                                                                                                                                                                                                                                                                                                                                                                                                                                                                                                                                                                                                                                                                                                                                                                                                                                                                                                                                 | DOHMH Corona                    | New York City Public Health Laboratory                                     | Jade Wang, et al.                                                                                                                                                                                                                                                                                |
| EPI_ISL_683771                                                                                                                                                                                                                                                                                                                                                                                                                                                                                                                                                                                                                                                                                                                                                                                                                                                                                                                                                                                                                                                                                                                                                                                                                                                                                                                                                                                                                                                                                                                                                                                                                                                                                                                                                                                                                                                                                                                                                                                                                                                                                                                                                                                                                                                                                                                                                                                                                                                                                                                                                                                                                                                                                                                                                                 | DOHMH Fort Greene               | New York City Public Health Laboratory                                     | Jade Wang, et al.                                                                                                                                                                                                                                                                                |
| EPI_ISL_683772                                                                                                                                                                                                                                                                                                                                                                                                                                                                                                                                                                                                                                                                                                                                                                                                                                                                                                                                                                                                                                                                                                                                                                                                                                                                                                                                                                                                                                                                                                                                                                                                                                                                                                                                                                                                                                                                                                                                                                                                                                                                                                                                                                                                                                                                                                                                                                                                                                                                                                                                                                                                                                                                                                                                                                 | DOHMH Morrisania                | New York City Public Health Laboratory                                     | Jade Wang, et al.                                                                                                                                                                                                                                                                                |
| EPI_ISL_683773                                                                                                                                                                                                                                                                                                                                                                                                                                                                                                                                                                                                                                                                                                                                                                                                                                                                                                                                                                                                                                                                                                                                                                                                                                                                                                                                                                                                                                                                                                                                                                                                                                                                                                                                                                                                                                                                                                                                                                                                                                                                                                                                                                                                                                                                                                                                                                                                                                                                                                                                                                                                                                                                                                                                                                 | DOHMH Corona                    | New York City Public Health Laboratory                                     | Jade Wang, et al.                                                                                                                                                                                                                                                                                |
| EPI_ISL_683774                                                                                                                                                                                                                                                                                                                                                                                                                                                                                                                                                                                                                                                                                                                                                                                                                                                                                                                                                                                                                                                                                                                                                                                                                                                                                                                                                                                                                                                                                                                                                                                                                                                                                                                                                                                                                                                                                                                                                                                                                                                                                                                                                                                                                                                                                                                                                                                                                                                                                                                                                                                                                                                                                                                                                                 | DOHMH PHL                       | New York City Public Health Laboratory                                     | Jade Wang, et al.                                                                                                                                                                                                                                                                                |
| EPI_ISL_683775, EPI_ISL_683776                                                                                                                                                                                                                                                                                                                                                                                                                                                                                                                                                                                                                                                                                                                                                                                                                                                                                                                                                                                                                                                                                                                                                                                                                                                                                                                                                                                                                                                                                                                                                                                                                                                                                                                                                                                                                                                                                                                                                                                                                                                                                                                                                                                                                                                                                                                                                                                                                                                                                                                                                                                                                                                                                                                                                 | DOHMH Jamaica                   | New York City Public Health Laboratory                                     | Jade Wang, et al.                                                                                                                                                                                                                                                                                |
| EPI_ISL_683777                                                                                                                                                                                                                                                                                                                                                                                                                                                                                                                                                                                                                                                                                                                                                                                                                                                                                                                                                                                                                                                                                                                                                                                                                                                                                                                                                                                                                                                                                                                                                                                                                                                                                                                                                                                                                                                                                                                                                                                                                                                                                                                                                                                                                                                                                                                                                                                                                                                                                                                                                                                                                                                                                                                                                                 | DOHMH Corona                    | New York City Public Health Laboratory                                     | Jade Wang, et al.                                                                                                                                                                                                                                                                                |
| EPI_ISL_683778                                                                                                                                                                                                                                                                                                                                                                                                                                                                                                                                                                                                                                                                                                                                                                                                                                                                                                                                                                                                                                                                                                                                                                                                                                                                                                                                                                                                                                                                                                                                                                                                                                                                                                                                                                                                                                                                                                                                                                                                                                                                                                                                                                                                                                                                                                                                                                                                                                                                                                                                                                                                                                                                                                                                                                 | DOHMH Morrisania                | New York City Public Health Laboratory                                     | Jade Wang, et al.                                                                                                                                                                                                                                                                                |
| EPI_ISL_683779                                                                                                                                                                                                                                                                                                                                                                                                                                                                                                                                                                                                                                                                                                                                                                                                                                                                                                                                                                                                                                                                                                                                                                                                                                                                                                                                                                                                                                                                                                                                                                                                                                                                                                                                                                                                                                                                                                                                                                                                                                                                                                                                                                                                                                                                                                                                                                                                                                                                                                                                                                                                                                                                                                                                                                 | DOHMH Corona                    | New York City Public Health Laboratory                                     | Jade Wang, et al.                                                                                                                                                                                                                                                                                |
| EPI_ISL_683780                                                                                                                                                                                                                                                                                                                                                                                                                                                                                                                                                                                                                                                                                                                                                                                                                                                                                                                                                                                                                                                                                                                                                                                                                                                                                                                                                                                                                                                                                                                                                                                                                                                                                                                                                                                                                                                                                                                                                                                                                                                                                                                                                                                                                                                                                                                                                                                                                                                                                                                                                                                                                                                                                                                                                                 | DOHMH Chelsea                   | New York City Public Health Laboratory                                     | Jade Wang, et al.                                                                                                                                                                                                                                                                                |
| EPI_ISL_683781, EPI_ISL_683782                                                                                                                                                                                                                                                                                                                                                                                                                                                                                                                                                                                                                                                                                                                                                                                                                                                                                                                                                                                                                                                                                                                                                                                                                                                                                                                                                                                                                                                                                                                                                                                                                                                                                                                                                                                                                                                                                                                                                                                                                                                                                                                                                                                                                                                                                                                                                                                                                                                                                                                                                                                                                                                                                                                                                 | DOHMH Jamaica                   | New York City Public Health Laboratory                                     | Jade Wang, et al.                                                                                                                                                                                                                                                                                |
| EPI_ISL_683783                                                                                                                                                                                                                                                                                                                                                                                                                                                                                                                                                                                                                                                                                                                                                                                                                                                                                                                                                                                                                                                                                                                                                                                                                                                                                                                                                                                                                                                                                                                                                                                                                                                                                                                                                                                                                                                                                                                                                                                                                                                                                                                                                                                                                                                                                                                                                                                                                                                                                                                                                                                                                                                                                                                                                                 | DOHMH PHL                       | New York City Public Health Laboratory                                     | Jade Wang, et al.                                                                                                                                                                                                                                                                                |
| EPI_ISL_683784                                                                                                                                                                                                                                                                                                                                                                                                                                                                                                                                                                                                                                                                                                                                                                                                                                                                                                                                                                                                                                                                                                                                                                                                                                                                                                                                                                                                                                                                                                                                                                                                                                                                                                                                                                                                                                                                                                                                                                                                                                                                                                                                                                                                                                                                                                                                                                                                                                                                                                                                                                                                                                                                                                                                                                 | DOHMH Riverside                 | New York City Public Health Laboratory                                     | Jade Wang, et al.                                                                                                                                                                                                                                                                                |
| EPI_ISL_683785                                                                                                                                                                                                                                                                                                                                                                                                                                                                                                                                                                                                                                                                                                                                                                                                                                                                                                                                                                                                                                                                                                                                                                                                                                                                                                                                                                                                                                                                                                                                                                                                                                                                                                                                                                                                                                                                                                                                                                                                                                                                                                                                                                                                                                                                                                                                                                                                                                                                                                                                                                                                                                                                                                                                                                 | DOHMH Corona                    | New York City Public Health Laboratory                                     | Jade Wang, et al.                                                                                                                                                                                                                                                                                |
| EPI_ISL_683786                                                                                                                                                                                                                                                                                                                                                                                                                                                                                                                                                                                                                                                                                                                                                                                                                                                                                                                                                                                                                                                                                                                                                                                                                                                                                                                                                                                                                                                                                                                                                                                                                                                                                                                                                                                                                                                                                                                                                                                                                                                                                                                                                                                                                                                                                                                                                                                                                                                                                                                                                                                                                                                                                                                                                                 | DOHMH Jamaica                   | New York City Public Health Laboratory                                     | Jade Wang, et al.                                                                                                                                                                                                                                                                                |
| EPI_ISL_683787                                                                                                                                                                                                                                                                                                                                                                                                                                                                                                                                                                                                                                                                                                                                                                                                                                                                                                                                                                                                                                                                                                                                                                                                                                                                                                                                                                                                                                                                                                                                                                                                                                                                                                                                                                                                                                                                                                                                                                                                                                                                                                                                                                                                                                                                                                                                                                                                                                                                                                                                                                                                                                                                                                                                                                 | DOHMH PHL                       | New York City Public Health Laboratory                                     | Jade Wang, et al.                                                                                                                                                                                                                                                                                |
| EPI_ISL_683788                                                                                                                                                                                                                                                                                                                                                                                                                                                                                                                                                                                                                                                                                                                                                                                                                                                                                                                                                                                                                                                                                                                                                                                                                                                                                                                                                                                                                                                                                                                                                                                                                                                                                                                                                                                                                                                                                                                                                                                                                                                                                                                                                                                                                                                                                                                                                                                                                                                                                                                                                                                                                                                                                                                                                                 | DOHMH Chelsea                   | New York City Public Health Laboratory                                     | Jade Wang, et al.                                                                                                                                                                                                                                                                                |
| EPI_ISL_683789                                                                                                                                                                                                                                                                                                                                                                                                                                                                                                                                                                                                                                                                                                                                                                                                                                                                                                                                                                                                                                                                                                                                                                                                                                                                                                                                                                                                                                                                                                                                                                                                                                                                                                                                                                                                                                                                                                                                                                                                                                                                                                                                                                                                                                                                                                                                                                                                                                                                                                                                                                                                                                                                                                                                                                 | DOHMH PHL                       | New York City Public Health Laboratory                                     | Jade Wang, et al.                                                                                                                                                                                                                                                                                |
| EPI_ISL_683790                                                                                                                                                                                                                                                                                                                                                                                                                                                                                                                                                                                                                                                                                                                                                                                                                                                                                                                                                                                                                                                                                                                                                                                                                                                                                                                                                                                                                                                                                                                                                                                                                                                                                                                                                                                                                                                                                                                                                                                                                                                                                                                                                                                                                                                                                                                                                                                                                                                                                                                                                                                                                                                                                                                                                                 | DOHMH Morrisania                | New York City Public Health Laboratory                                     | Jade Wang, et al.                                                                                                                                                                                                                                                                                |
| EPI_ISL_683791                                                                                                                                                                                                                                                                                                                                                                                                                                                                                                                                                                                                                                                                                                                                                                                                                                                                                                                                                                                                                                                                                                                                                                                                                                                                                                                                                                                                                                                                                                                                                                                                                                                                                                                                                                                                                                                                                                                                                                                                                                                                                                                                                                                                                                                                                                                                                                                                                                                                                                                                                                                                                                                                                                                                                                 | DOHMH Jamaica                   | New York City Public Health Laboratory                                     | Jade Wang, et al.                                                                                                                                                                                                                                                                                |
| EPI_ISL_683792                                                                                                                                                                                                                                                                                                                                                                                                                                                                                                                                                                                                                                                                                                                                                                                                                                                                                                                                                                                                                                                                                                                                                                                                                                                                                                                                                                                                                                                                                                                                                                                                                                                                                                                                                                                                                                                                                                                                                                                                                                                                                                                                                                                                                                                                                                                                                                                                                                                                                                                                                                                                                                                                                                                                                                 | DOHMH Chelsea                   | New York City Public Health Laboratory                                     | Jade Wang, et al.                                                                                                                                                                                                                                                                                |
| EPI_ISL_683793, EPI_ISL_683794                                                                                                                                                                                                                                                                                                                                                                                                                                                                                                                                                                                                                                                                                                                                                                                                                                                                                                                                                                                                                                                                                                                                                                                                                                                                                                                                                                                                                                                                                                                                                                                                                                                                                                                                                                                                                                                                                                                                                                                                                                                                                                                                                                                                                                                                                                                                                                                                                                                                                                                                                                                                                                                                                                                                                 | DOHMH Corona                    | New York City Public Health Laboratory                                     | Jade Wang, et al.                                                                                                                                                                                                                                                                                |
| EPI_ISL_683795                                                                                                                                                                                                                                                                                                                                                                                                                                                                                                                                                                                                                                                                                                                                                                                                                                                                                                                                                                                                                                                                                                                                                                                                                                                                                                                                                                                                                                                                                                                                                                                                                                                                                                                                                                                                                                                                                                                                                                                                                                                                                                                                                                                                                                                                                                                                                                                                                                                                                                                                                                                                                                                                                                                                                                 | DOHMH Central Harlem            | New York City Public Health Laboratory                                     | Jade Wang, et al.                                                                                                                                                                                                                                                                                |
| EPI_ISL_683796                                                                                                                                                                                                                                                                                                                                                                                                                                                                                                                                                                                                                                                                                                                                                                                                                                                                                                                                                                                                                                                                                                                                                                                                                                                                                                                                                                                                                                                                                                                                                                                                                                                                                                                                                                                                                                                                                                                                                                                                                                                                                                                                                                                                                                                                                                                                                                                                                                                                                                                                                                                                                                                                                                                                                                 | DOHMH Corona                    | New York City Public Health Laboratory                                     | Jade Wang, et al.                                                                                                                                                                                                                                                                                |
| EPI_ISL_683797                                                                                                                                                                                                                                                                                                                                                                                                                                                                                                                                                                                                                                                                                                                                                                                                                                                                                                                                                                                                                                                                                                                                                                                                                                                                                                                                                                                                                                                                                                                                                                                                                                                                                                                                                                                                                                                                                                                                                                                                                                                                                                                                                                                                                                                                                                                                                                                                                                                                                                                                                                                                                                                                                                                                                                 | DOHMH PHL                       | New York City Public Health Laboratory                                     | Jade Wang, et al.                                                                                                                                                                                                                                                                                |
| EPI_ISL_683798, EPI_ISL_683799, EPI_ISL_683800                                                                                                                                                                                                                                                                                                                                                                                                                                                                                                                                                                                                                                                                                                                                                                                                                                                                                                                                                                                                                                                                                                                                                                                                                                                                                                                                                                                                                                                                                                                                                                                                                                                                                                                                                                                                                                                                                                                                                                                                                                                                                                                                                                                                                                                                                                                                                                                                                                                                                                                                                                                                                                                                                                                                 | DOHMH Corona                    | New York City Public Health Laboratory                                     | Jade Wang, et al.                                                                                                                                                                                                                                                                                |
| EPI_ISL_683801                                                                                                                                                                                                                                                                                                                                                                                                                                                                                                                                                                                                                                                                                                                                                                                                                                                                                                                                                                                                                                                                                                                                                                                                                                                                                                                                                                                                                                                                                                                                                                                                                                                                                                                                                                                                                                                                                                                                                                                                                                                                                                                                                                                                                                                                                                                                                                                                                                                                                                                                                                                                                                                                                                                                                                 | DOHMH Morrisania                | New York City Public Health Laboratory                                     | Jade Wang, et al.                                                                                                                                                                                                                                                                                |
| EPI_ISL_683802                                                                                                                                                                                                                                                                                                                                                                                                                                                                                                                                                                                                                                                                                                                                                                                                                                                                                                                                                                                                                                                                                                                                                                                                                                                                                                                                                                                                                                                                                                                                                                                                                                                                                                                                                                                                                                                                                                                                                                                                                                                                                                                                                                                                                                                                                                                                                                                                                                                                                                                                                                                                                                                                                                                                                                 | DOHMH Corona                    | New York City Public Health Laboratory                                     | Jade Wang, et al.                                                                                                                                                                                                                                                                                |
| EPI_ISL_683803, EPI_ISL_683804, EPI_ISL_683805, EPI_ISL_683806                                                                                                                                                                                                                                                                                                                                                                                                                                                                                                                                                                                                                                                                                                                                                                                                                                                                                                                                                                                                                                                                                                                                                                                                                                                                                                                                                                                                                                                                                                                                                                                                                                                                                                                                                                                                                                                                                                                                                                                                                                                                                                                                                                                                                                                                                                                                                                                                                                                                                                                                                                                                                                                                                                                 | DOHMH Morrisania                | New York City Public Health Laboratory                                     | Jade Wang, et al.                                                                                                                                                                                                                                                                                |
| EPI_ISL_683807, EPI_ISL_683808                                                                                                                                                                                                                                                                                                                                                                                                                                                                                                                                                                                                                                                                                                                                                                                                                                                                                                                                                                                                                                                                                                                                                                                                                                                                                                                                                                                                                                                                                                                                                                                                                                                                                                                                                                                                                                                                                                                                                                                                                                                                                                                                                                                                                                                                                                                                                                                                                                                                                                                                                                                                                                                                                                                                                 | DOHMH Chelsea                   | New York City Public Health Laboratory                                     | Jade Wang, et al.                                                                                                                                                                                                                                                                                |
| EPI_ISL_683809                                                                                                                                                                                                                                                                                                                                                                                                                                                                                                                                                                                                                                                                                                                                                                                                                                                                                                                                                                                                                                                                                                                                                                                                                                                                                                                                                                                                                                                                                                                                                                                                                                                                                                                                                                                                                                                                                                                                                                                                                                                                                                                                                                                                                                                                                                                                                                                                                                                                                                                                                                                                                                                                                                                                                                 | DOHMH Corona                    | New York City Public Health Laboratory                                     | Jade Wang, et al.                                                                                                                                                                                                                                                                                |
| EPI_ISL_683810                                                                                                                                                                                                                                                                                                                                                                                                                                                                                                                                                                                                                                                                                                                                                                                                                                                                                                                                                                                                                                                                                                                                                                                                                                                                                                                                                                                                                                                                                                                                                                                                                                                                                                                                                                                                                                                                                                                                                                                                                                                                                                                                                                                                                                                                                                                                                                                                                                                                                                                                                                                                                                                                                                                                                                 | DOHMH PHL                       | New York City Public Health Laboratory                                     | Jade Wang, et al.                                                                                                                                                                                                                                                                                |
| EPI_ISL_683811, EPI_ISL_683812                                                                                                                                                                                                                                                                                                                                                                                                                                                                                                                                                                                                                                                                                                                                                                                                                                                                                                                                                                                                                                                                                                                                                                                                                                                                                                                                                                                                                                                                                                                                                                                                                                                                                                                                                                                                                                                                                                                                                                                                                                                                                                                                                                                                                                                                                                                                                                                                                                                                                                                                                                                                                                                                                                                                                 | DOHMH Corona                    | New York City Public Health Laboratory                                     | Jade Wang, et al.                                                                                                                                                                                                                                                                                |







| see above                                                                                                                                                                                                                                                                                                                                                                                                                                                                                                                                                                                                                                                                                                                                                                                                                                                                                                                                                                                                                                                                                                                                                                                                       | Lighthouse Lab in Alderley Park | Wellcome Sanger Institute for the COVID-19 Genomics UK (COG-UK) Consortium | Jacquelyn Wynn, Mairead Hyland, The Lighthouse Lab in Alderley Park and Alex Alderton, Roberto Amato, Sonia Goncalves, Ewan Harrison, David K. Jackson, Ian Johnston, Dominic Kwiatkowski, Cordelia Langford, John Sillitoe on behalf of the Wellcome Sanger Institute COVID-19 Surveillance Team |
|-----------------------------------------------------------------------------------------------------------------------------------------------------------------------------------------------------------------------------------------------------------------------------------------------------------------------------------------------------------------------------------------------------------------------------------------------------------------------------------------------------------------------------------------------------------------------------------------------------------------------------------------------------------------------------------------------------------------------------------------------------------------------------------------------------------------------------------------------------------------------------------------------------------------------------------------------------------------------------------------------------------------------------------------------------------------------------------------------------------------------------------------------------------------------------------------------------------------|---------------------------------|----------------------------------------------------------------------------|---------------------------------------------------------------------------------------------------------------------------------------------------------------------------------------------------------------------------------------------------------------------------------------------------|
| EPI_ISL_745398                                                                                                                                                                                                                                                                                                                                                                                                                                                                                                                                                                                                                                                                                                                                                                                                                                                                                                                                                                                                                                                                                                                                                                                                  | DOHMH Jamaica                   | New York City Public Health Laboratory                                     | Jade Wang, et al.                                                                                                                                                                                                                                                                                 |
| EPI_ISL_745399                                                                                                                                                                                                                                                                                                                                                                                                                                                                                                                                                                                                                                                                                                                                                                                                                                                                                                                                                                                                                                                                                                                                                                                                  | DOHMH Morrisania                | New York City Public Health Laboratory                                     | Jade Wang, et al.                                                                                                                                                                                                                                                                                 |
| EPI_ISL_745400                                                                                                                                                                                                                                                                                                                                                                                                                                                                                                                                                                                                                                                                                                                                                                                                                                                                                                                                                                                                                                                                                                                                                                                                  | DOHMH Central Harlem            | New York City Public Health Laboratory                                     | Jade Wang, et al.                                                                                                                                                                                                                                                                                 |
| EPI_ISL_745401                                                                                                                                                                                                                                                                                                                                                                                                                                                                                                                                                                                                                                                                                                                                                                                                                                                                                                                                                                                                                                                                                                                                                                                                  | DOHMH Corona                    | New York City Public Health Laboratory                                     | Jade Wang, et al.                                                                                                                                                                                                                                                                                 |
| EPI_ISL_745402                                                                                                                                                                                                                                                                                                                                                                                                                                                                                                                                                                                                                                                                                                                                                                                                                                                                                                                                                                                                                                                                                                                                                                                                  | DOHMH Jamaica                   | New York City Public Health Laboratory                                     | Jade Wang, et al.                                                                                                                                                                                                                                                                                 |
| EPI_ISL_745403                                                                                                                                                                                                                                                                                                                                                                                                                                                                                                                                                                                                                                                                                                                                                                                                                                                                                                                                                                                                                                                                                                                                                                                                  | DOHMH Corona                    | New York City Public Health Laboratory                                     | Jade Wang, et al.                                                                                                                                                                                                                                                                                 |
| EPI_ISL_745404                                                                                                                                                                                                                                                                                                                                                                                                                                                                                                                                                                                                                                                                                                                                                                                                                                                                                                                                                                                                                                                                                                                                                                                                  | DOHMH Central Harlem            | New York City Public Health Laboratory                                     | Jade Wang, et al.                                                                                                                                                                                                                                                                                 |
| EPI_ISL_745405                                                                                                                                                                                                                                                                                                                                                                                                                                                                                                                                                                                                                                                                                                                                                                                                                                                                                                                                                                                                                                                                                                                                                                                                  | DOHMH Jamaica                   | New York City Public Health Laboratory                                     | Jade Wang, et al.                                                                                                                                                                                                                                                                                 |
| EPI_ISL_745406                                                                                                                                                                                                                                                                                                                                                                                                                                                                                                                                                                                                                                                                                                                                                                                                                                                                                                                                                                                                                                                                                                                                                                                                  | DOHMH Morrisania                | New York City Public Health Laboratory                                     | Jade Wang, et al.                                                                                                                                                                                                                                                                                 |
| EPI_ISL_745407                                                                                                                                                                                                                                                                                                                                                                                                                                                                                                                                                                                                                                                                                                                                                                                                                                                                                                                                                                                                                                                                                                                                                                                                  | DOHMH Jamaica                   | New York City Public Health Laboratory                                     | Jade Wang, et al.                                                                                                                                                                                                                                                                                 |
| EPI_ISL_745408                                                                                                                                                                                                                                                                                                                                                                                                                                                                                                                                                                                                                                                                                                                                                                                                                                                                                                                                                                                                                                                                                                                                                                                                  | DOHMH Riverside                 | New York City Public Health Laboratory                                     | Jade Wang, et al.                                                                                                                                                                                                                                                                                 |
| EPI_ISL_745409                                                                                                                                                                                                                                                                                                                                                                                                                                                                                                                                                                                                                                                                                                                                                                                                                                                                                                                                                                                                                                                                                                                                                                                                  | DOHMH Corona                    | New York City Public Health Laboratory                                     | Jade Wang, et al.                                                                                                                                                                                                                                                                                 |
| EPI_ISL_745410                                                                                                                                                                                                                                                                                                                                                                                                                                                                                                                                                                                                                                                                                                                                                                                                                                                                                                                                                                                                                                                                                                                                                                                                  | DOHMH Chelsea                   | New York City Public Health Laboratory                                     | Jade Wang, et al.                                                                                                                                                                                                                                                                                 |
| EPI_ISL_745411                                                                                                                                                                                                                                                                                                                                                                                                                                                                                                                                                                                                                                                                                                                                                                                                                                                                                                                                                                                                                                                                                                                                                                                                  | DOHMH Corona                    | New York City Public Health Laboratory                                     | Jade Wang, et al.                                                                                                                                                                                                                                                                                 |
| EPI_ISL_745412                                                                                                                                                                                                                                                                                                                                                                                                                                                                                                                                                                                                                                                                                                                                                                                                                                                                                                                                                                                                                                                                                                                                                                                                  | DOHMH Morrisania                | New York City Public Health Laboratory                                     | Jade Wang, et al.                                                                                                                                                                                                                                                                                 |
| EPI_ISL_745413                                                                                                                                                                                                                                                                                                                                                                                                                                                                                                                                                                                                                                                                                                                                                                                                                                                                                                                                                                                                                                                                                                                                                                                                  | DOHMH Central Harlem            | New York City Public Health Laboratory                                     | Jade Wang, et al.                                                                                                                                                                                                                                                                                 |
| EPI_ISL_745414, EPI_ISL_745415, EPI_ISL_745416, EPI_ISL_745417, EPI_ISL_745418                                                                                                                                                                                                                                                                                                                                                                                                                                                                                                                                                                                                                                                                                                                                                                                                                                                                                                                                                                                                                                                                                                                                  | DOHMH Jamaica                   | New York City Public Health Laboratory                                     | Jade Wang, et al.                                                                                                                                                                                                                                                                                 |
| EPI_ISL_745419, EPI_ISL_745420                                                                                                                                                                                                                                                                                                                                                                                                                                                                                                                                                                                                                                                                                                                                                                                                                                                                                                                                                                                                                                                                                                                                                                                  | DOHMH Crown Heights             | New York City Public Health Laboratory                                     | Jade Wang, et al.                                                                                                                                                                                                                                                                                 |
| EPI_ISL_745421, EPI_ISL_745422                                                                                                                                                                                                                                                                                                                                                                                                                                                                                                                                                                                                                                                                                                                                                                                                                                                                                                                                                                                                                                                                                                                                                                                  | DOHMH Chelsea                   | New York City Public Health Laboratory                                     | Jade Wang, et al.                                                                                                                                                                                                                                                                                 |
| EPI_ISL_745423, EPI_ISL_745424                                                                                                                                                                                                                                                                                                                                                                                                                                                                                                                                                                                                                                                                                                                                                                                                                                                                                                                                                                                                                                                                                                                                                                                  | DOHMH Corona                    | New York City Public Health Laboratory                                     | Jade Wang, et al.                                                                                                                                                                                                                                                                                 |
| EPI_ISL_745425                                                                                                                                                                                                                                                                                                                                                                                                                                                                                                                                                                                                                                                                                                                                                                                                                                                                                                                                                                                                                                                                                                                                                                                                  | DOHMH Central Harlem            | New York City Public Health Laboratory                                     | Jade Wang, et al.                                                                                                                                                                                                                                                                                 |
| EPI_ISL_745426, EPI_ISL_745427                                                                                                                                                                                                                                                                                                                                                                                                                                                                                                                                                                                                                                                                                                                                                                                                                                                                                                                                                                                                                                                                                                                                                                                  | DOHMH Corona                    | New York City Public Health Laboratory                                     | Jade Wang, et al.                                                                                                                                                                                                                                                                                 |
| EPI_ISL_745428, EPI_ISL_745429                                                                                                                                                                                                                                                                                                                                                                                                                                                                                                                                                                                                                                                                                                                                                                                                                                                                                                                                                                                                                                                                                                                                                                                  | DOHMH Riverside                 | New York City Public Health Laboratory                                     | Jade Wang, et al.                                                                                                                                                                                                                                                                                 |
| EPI_ISL_745430, EPI_ISL_745431, EPI_ISL_745432, EPI_ISL_745433                                                                                                                                                                                                                                                                                                                                                                                                                                                                                                                                                                                                                                                                                                                                                                                                                                                                                                                                                                                                                                                                                                                                                  | DOHMH Morrisania                | New York City Public Health Laboratory                                     | Jade Wang, et al.                                                                                                                                                                                                                                                                                 |
| EPI_ISL_745434, EPI_ISL_745435                                                                                                                                                                                                                                                                                                                                                                                                                                                                                                                                                                                                                                                                                                                                                                                                                                                                                                                                                                                                                                                                                                                                                                                  | DOHMH Corona                    | New York City Public Health Laboratory                                     | Jade Wang, et al.                                                                                                                                                                                                                                                                                 |
| EPI_ISL_745436                                                                                                                                                                                                                                                                                                                                                                                                                                                                                                                                                                                                                                                                                                                                                                                                                                                                                                                                                                                                                                                                                                                                                                                                  | DOHMH Chelsea                   | New York City Public Health Laboratory                                     | Jade Wang, et al.                                                                                                                                                                                                                                                                                 |
| EPI_ISL_745437, EPI_ISL_745438                                                                                                                                                                                                                                                                                                                                                                                                                                                                                                                                                                                                                                                                                                                                                                                                                                                                                                                                                                                                                                                                                                                                                                                  | DOHMH PHL                       | New York City Public Health Laboratory                                     | Jade Wang, et al.                                                                                                                                                                                                                                                                                 |
| EPI_ISL_745439                                                                                                                                                                                                                                                                                                                                                                                                                                                                                                                                                                                                                                                                                                                                                                                                                                                                                                                                                                                                                                                                                                                                                                                                  | DOHMH Riverside                 | New York City Public Health Laboratory                                     | Jade Wang, et al.                                                                                                                                                                                                                                                                                 |
| EPI_ISL_745440                                                                                                                                                                                                                                                                                                                                                                                                                                                                                                                                                                                                                                                                                                                                                                                                                                                                                                                                                                                                                                                                                                                                                                                                  | DOHMH Jamaica                   | New York City Public Health Laboratory                                     | Jade Wang, et al.                                                                                                                                                                                                                                                                                 |
| EPI_ISL_745441, EPI_ISL_745442, EPI_ISL_745443                                                                                                                                                                                                                                                                                                                                                                                                                                                                                                                                                                                                                                                                                                                                                                                                                                                                                                                                                                                                                                                                                                                                                                  | DOHMH Morrisania                | New York City Public Health Laboratory                                     | Jade Wang, et al.                                                                                                                                                                                                                                                                                 |
| EPI_ISL_745444                                                                                                                                                                                                                                                                                                                                                                                                                                                                                                                                                                                                                                                                                                                                                                                                                                                                                                                                                                                                                                                                                                                                                                                                  | DOHMH Jamaica                   | New York City Public Health Laboratory                                     | Jade Wang, et al.                                                                                                                                                                                                                                                                                 |
| EPI_ISL_745445                                                                                                                                                                                                                                                                                                                                                                                                                                                                                                                                                                                                                                                                                                                                                                                                                                                                                                                                                                                                                                                                                                                                                                                                  | DOHMH Crown Heights             | New York City Public Health Laboratory                                     | Jade Wang, et al.                                                                                                                                                                                                                                                                                 |
| EPI_ISL_745446, EPI_ISL_745447                                                                                                                                                                                                                                                                                                                                                                                                                                                                                                                                                                                                                                                                                                                                                                                                                                                                                                                                                                                                                                                                                                                                                                                  | DOHMH Corona                    | New York City Public Health Laboratory                                     | Jade Wang, et al.                                                                                                                                                                                                                                                                                 |
| EPI_ISL_745448                                                                                                                                                                                                                                                                                                                                                                                                                                                                                                                                                                                                                                                                                                                                                                                                                                                                                                                                                                                                                                                                                                                                                                                                  | DOHMH Crown Heights             | New York City Public Health Laboratory                                     | Jade Wang, et al.                                                                                                                                                                                                                                                                                 |
| EPI_ISL_745449, EPI_ISL_745450                                                                                                                                                                                                                                                                                                                                                                                                                                                                                                                                                                                                                                                                                                                                                                                                                                                                                                                                                                                                                                                                                                                                                                                  | DOHMH Morrisania                | New York City Public Health Laboratory                                     | Jade Wang, et al.                                                                                                                                                                                                                                                                                 |
| EPI_ISL_745451                                                                                                                                                                                                                                                                                                                                                                                                                                                                                                                                                                                                                                                                                                                                                                                                                                                                                                                                                                                                                                                                                                                                                                                                  | DOHMH Central Harlem            | New York City Public Health Laboratory                                     | Jade Wang, et al.                                                                                                                                                                                                                                                                                 |
| EPI_ISL_745452                                                                                                                                                                                                                                                                                                                                                                                                                                                                                                                                                                                                                                                                                                                                                                                                                                                                                                                                                                                                                                                                                                                                                                                                  | DOHMH Crown Heights             | New York City Public Health Laboratory                                     | Jade Wang, et al.                                                                                                                                                                                                                                                                                 |
| EPI_ISL_745453                                                                                                                                                                                                                                                                                                                                                                                                                                                                                                                                                                                                                                                                                                                                                                                                                                                                                                                                                                                                                                                                                                                                                                                                  | DOHMH Chelsea                   | New York City Public Health Laboratory                                     | Jade Wang, et al.                                                                                                                                                                                                                                                                                 |
| EPI_ISL_745454                                                                                                                                                                                                                                                                                                                                                                                                                                                                                                                                                                                                                                                                                                                                                                                                                                                                                                                                                                                                                                                                                                                                                                                                  | DOHMH Crown Heights             | New York City Public Health Laboratory                                     | Jade Wang, et al.                                                                                                                                                                                                                                                                                 |
| EPI_ISL_745455                                                                                                                                                                                                                                                                                                                                                                                                                                                                                                                                                                                                                                                                                                                                                                                                                                                                                                                                                                                                                                                                                                                                                                                                  | DOHMH Corona                    | New York City Public Health Laboratory                                     | Jade Wang, et al.                                                                                                                                                                                                                                                                                 |
| EPI_ISL_745456                                                                                                                                                                                                                                                                                                                                                                                                                                                                                                                                                                                                                                                                                                                                                                                                                                                                                                                                                                                                                                                                                                                                                                                                  | DOHMH PHL                       | New York City Public Health Laboratory                                     | Jade Wang, et al.                                                                                                                                                                                                                                                                                 |
| EPI_ISL_745457                                                                                                                                                                                                                                                                                                                                                                                                                                                                                                                                                                                                                                                                                                                                                                                                                                                                                                                                                                                                                                                                                                                                                                                                  | DOHMH Chelsea                   | New York City Public Health Laboratory                                     | Jade Wang, et al.                                                                                                                                                                                                                                                                                 |
| EPI_ISL_745458, EPI_ISL_745459, EPI_ISL_745460, EPI_ISL_745461, EPI_ISL_745462                                                                                                                                                                                                                                                                                                                                                                                                                                                                                                                                                                                                                                                                                                                                                                                                                                                                                                                                                                                                                                                                                                                                  | DOHMH Corona                    | New York City Public Health Laboratory                                     | Jade Wang, et al.                                                                                                                                                                                                                                                                                 |
| EPI_ISL_745463                                                                                                                                                                                                                                                                                                                                                                                                                                                                                                                                                                                                                                                                                                                                                                                                                                                                                                                                                                                                                                                                                                                                                                                                  | DOHMH Fort Greene               | New York City Public Health Laboratory                                     | Jade Wang, et al.                                                                                                                                                                                                                                                                                 |
| EPI_ISL_745464                                                                                                                                                                                                                                                                                                                                                                                                                                                                                                                                                                                                                                                                                                                                                                                                                                                                                                                                                                                                                                                                                                                                                                                                  | DOHMH Corona                    | New York City Public Health Laboratory                                     | Jade Wang, et al.                                                                                                                                                                                                                                                                                 |
| EPI_ISL_745465                                                                                                                                                                                                                                                                                                                                                                                                                                                                                                                                                                                                                                                                                                                                                                                                                                                                                                                                                                                                                                                                                                                                                                                                  | DOHMH PHL                       | New York City Public Health Laboratory                                     | Jade Wang, et al.                                                                                                                                                                                                                                                                                 |
| EPI_ISL_745466, EPI_ISL_745467                                                                                                                                                                                                                                                                                                                                                                                                                                                                                                                                                                                                                                                                                                                                                                                                                                                                                                                                                                                                                                                                                                                                                                                  | DOHMH Corona                    | New York City Public Health Laboratory                                     | Jade Wang, et al.                                                                                                                                                                                                                                                                                 |
| EPI_ISL_745468                                                                                                                                                                                                                                                                                                                                                                                                                                                                                                                                                                                                                                                                                                                                                                                                                                                                                                                                                                                                                                                                                                                                                                                                  | DOHMH Riverside                 | New York City Public Health Laboratory                                     | Jade Wang, et al.                                                                                                                                                                                                                                                                                 |
| EPI_ISL_745469                                                                                                                                                                                                                                                                                                                                                                                                                                                                                                                                                                                                                                                                                                                                                                                                                                                                                                                                                                                                                                                                                                                                                                                                  | DOHMH Central Harlem            | New York City Public Health Laboratory                                     | Jade Wang, et al.                                                                                                                                                                                                                                                                                 |
| EPI_ISL_745470                                                                                                                                                                                                                                                                                                                                                                                                                                                                                                                                                                                                                                                                                                                                                                                                                                                                                                                                                                                                                                                                                                                                                                                                  | DOHMH Morrisania                | New York City Public Health Laboratory                                     | Jade Wang, et al.                                                                                                                                                                                                                                                                                 |
| EPI_ISL_746479, EPI_ISL_746480, EPI_ISL_746481, EPI_ISL_746482, EPI_ISL_746483, EPI_ISL_746484, EPI_ISL_746485, EPI_ISL_746486, EPI_ISL_746487, EPI_ISL_746488, EPI_ISL_746489, EPI_ISL_746492, EPI_ISL_746494, EPI_ISL_746495, EPI_ISL_746497, EPI_ISL_746498, EPI_ISL_746500, EPI_ISL_746501, EPI_ISL_746502, EPI_ISL_746503, EPI_ISL_746504, EPI_ISL_746507, EPI_ISL_746510, EPI_ISL_746511, EPI_ISL_746512, EPI_ISL_746514, EPI_ISL_746516, EPI_ISL_746517, EPI_ISL_746518, EPI_ISL_746519, EPI_ISL_746521, EPI_ISL_746522, EPI_ISL_746523, EPI_ISL_746524, EPI_ISL_746525, EPI_ISL_746530, EPI_ISL_746532, EPI_ISL_746534, EPI_ISL_746535, EPI_ISL_746536, EPI_ISL_746537, EPI_ISL_746538, EPI_ISL_746540, EPI_ISL_746541, EPI_ISL_746545, EPI_ISL_746546, EPI_ISL_746548, EPI_ISL_746549, EPI_ISL_746550, EPI_ISL_746551, EPI_ISL_746552, EPI_ISL_746553, EPI_ISL_746555, EPI_ISL_746556, EPI_ISL_746558, EPI_ISL_746559, EPI_ISL_746560, EPI_ISL_746561, EPI_ISL_746562, EPI_ISL_746563, EPI_ISL_746564, EPI_ISL_746566, EPI_ISL_746567, EPI_ISL_746568, EPI_ISL_746569, EPI_ISL_746571, EPI_ISL_746573, EPI_ISL_746574, EPI_ISL_746575, EPI_ISL_746577, EPI_ISL_746578, EPI_ISL_746579, EPI_ISL_746580, |                                 |                                                                            |                                                                                                                                                                                                                                                                                                   |



|                                                                                                                                                                                                                                                                                                                                                                                                                                                                                                                                                                                                                                                                                                                                                                                                                                                                                                                                                                                                                                                                                                                                                                                                                                                                                                                                                                                                                                                                                                                                                                                                                                                                                                                                                                                                                                                                                                                                                                                                                                                                                                                                                                                                                                                                                                                                                                                                                                                                                                                                                                                                                                                                                                                                                                                                                                                                                                                                                                                                                |                                 |                                                                            |                                                                                                                                                                                                                                                                                                   |
|----------------------------------------------------------------------------------------------------------------------------------------------------------------------------------------------------------------------------------------------------------------------------------------------------------------------------------------------------------------------------------------------------------------------------------------------------------------------------------------------------------------------------------------------------------------------------------------------------------------------------------------------------------------------------------------------------------------------------------------------------------------------------------------------------------------------------------------------------------------------------------------------------------------------------------------------------------------------------------------------------------------------------------------------------------------------------------------------------------------------------------------------------------------------------------------------------------------------------------------------------------------------------------------------------------------------------------------------------------------------------------------------------------------------------------------------------------------------------------------------------------------------------------------------------------------------------------------------------------------------------------------------------------------------------------------------------------------------------------------------------------------------------------------------------------------------------------------------------------------------------------------------------------------------------------------------------------------------------------------------------------------------------------------------------------------------------------------------------------------------------------------------------------------------------------------------------------------------------------------------------------------------------------------------------------------------------------------------------------------------------------------------------------------------------------------------------------------------------------------------------------------------------------------------------------------------------------------------------------------------------------------------------------------------------------------------------------------------------------------------------------------------------------------------------------------------------------------------------------------------------------------------------------------------------------------------------------------------------------------------------------------|---------------------------------|----------------------------------------------------------------------------|---------------------------------------------------------------------------------------------------------------------------------------------------------------------------------------------------------------------------------------------------------------------------------------------------|
| EPI_ISL_812749                                                                                                                                                                                                                                                                                                                                                                                                                                                                                                                                                                                                                                                                                                                                                                                                                                                                                                                                                                                                                                                                                                                                                                                                                                                                                                                                                                                                                                                                                                                                                                                                                                                                                                                                                                                                                                                                                                                                                                                                                                                                                                                                                                                                                                                                                                                                                                                                                                                                                                                                                                                                                                                                                                                                                                                                                                                                                                                                                                                                 | DOHMH Central Harlem            | New York City Public Health Laboratory                                     | Jade Wang, et al.                                                                                                                                                                                                                                                                                 |
| EPI_ISL_812750, EPI_ISL_812751                                                                                                                                                                                                                                                                                                                                                                                                                                                                                                                                                                                                                                                                                                                                                                                                                                                                                                                                                                                                                                                                                                                                                                                                                                                                                                                                                                                                                                                                                                                                                                                                                                                                                                                                                                                                                                                                                                                                                                                                                                                                                                                                                                                                                                                                                                                                                                                                                                                                                                                                                                                                                                                                                                                                                                                                                                                                                                                                                                                 | DOHMH Corona                    | New York City Public Health Laboratory                                     | Jade Wang, et al.                                                                                                                                                                                                                                                                                 |
| EPI_ISL_812752                                                                                                                                                                                                                                                                                                                                                                                                                                                                                                                                                                                                                                                                                                                                                                                                                                                                                                                                                                                                                                                                                                                                                                                                                                                                                                                                                                                                                                                                                                                                                                                                                                                                                                                                                                                                                                                                                                                                                                                                                                                                                                                                                                                                                                                                                                                                                                                                                                                                                                                                                                                                                                                                                                                                                                                                                                                                                                                                                                                                 | DOHMH Crown Heights             | New York City Public Health Laboratory                                     | Jade Wang, et al.                                                                                                                                                                                                                                                                                 |
| EPI_ISL_812753, EPI_ISL_812754,<br>EPI_ISL_812755, EPI_ISL_812756,<br>EPI_ISL_812757                                                                                                                                                                                                                                                                                                                                                                                                                                                                                                                                                                                                                                                                                                                                                                                                                                                                                                                                                                                                                                                                                                                                                                                                                                                                                                                                                                                                                                                                                                                                                                                                                                                                                                                                                                                                                                                                                                                                                                                                                                                                                                                                                                                                                                                                                                                                                                                                                                                                                                                                                                                                                                                                                                                                                                                                                                                                                                                           | DOHMH Morrisania                | New York City Public Health Laboratory                                     | Jade Wang, et al.                                                                                                                                                                                                                                                                                 |
| EPI_ISL_812758                                                                                                                                                                                                                                                                                                                                                                                                                                                                                                                                                                                                                                                                                                                                                                                                                                                                                                                                                                                                                                                                                                                                                                                                                                                                                                                                                                                                                                                                                                                                                                                                                                                                                                                                                                                                                                                                                                                                                                                                                                                                                                                                                                                                                                                                                                                                                                                                                                                                                                                                                                                                                                                                                                                                                                                                                                                                                                                                                                                                 | DOHMH Crown Heights             | New York City Public Health Laboratory                                     | Jade Wang, et al.                                                                                                                                                                                                                                                                                 |
| EPI_ISL_812759                                                                                                                                                                                                                                                                                                                                                                                                                                                                                                                                                                                                                                                                                                                                                                                                                                                                                                                                                                                                                                                                                                                                                                                                                                                                                                                                                                                                                                                                                                                                                                                                                                                                                                                                                                                                                                                                                                                                                                                                                                                                                                                                                                                                                                                                                                                                                                                                                                                                                                                                                                                                                                                                                                                                                                                                                                                                                                                                                                                                 | DOHMH Riverside                 | New York City Public Health Laboratory                                     | Jade Wang, et al.                                                                                                                                                                                                                                                                                 |
| EPI_ISL_812760                                                                                                                                                                                                                                                                                                                                                                                                                                                                                                                                                                                                                                                                                                                                                                                                                                                                                                                                                                                                                                                                                                                                                                                                                                                                                                                                                                                                                                                                                                                                                                                                                                                                                                                                                                                                                                                                                                                                                                                                                                                                                                                                                                                                                                                                                                                                                                                                                                                                                                                                                                                                                                                                                                                                                                                                                                                                                                                                                                                                 | DOHMH Corona                    | New York City Public Health Laboratory                                     | Jade Wang, et al.                                                                                                                                                                                                                                                                                 |
| EPI_ISL_820132, EPI_ISL_820133, EPI_ISL_820137, EPI_ISL_820140, EPI_ISL_820145, EPI_ISL_820153, EPI_ISL_820157, EPI_ISL_820162, EPI_ISL_820179, EPI_ISL_820187, EPI_ISL_820198, EPI_ISL_820237, EPI_ISL_820242, EPI_ISL_820250, EPI_ISL_820255, EPI_ISL_820293, EPI_ISL_820301, EPI_ISL_820307, EPI_ISL_820338, EPI_ISL_820344, EPI_ISL_820359, EPI_ISL_820367, EPI_ISL_820369, EPI_ISL_820377, EPI_ISL_820408, EPI_ISL_820430, EPI_ISL_820432, EPI_ISL_820438, EPI_ISL_820443, EPI_ISL_820460, EPI_ISL_820482, EPI_ISL_820491, EPI_ISL_820495, EPI_ISL_820500, EPI_ISL_820520, EPI_ISL_820523, EPI_ISL_820527, EPI_ISL_820534, EPI_ISL_820537, EPI_ISL_820544, EPI_ISL_820551, EPI_ISL_820559, EPI_ISL_820584, EPI_ISL_820589, EPI_ISL_820602, EPI_ISL_820612, EPI_ISL_820614, EPI_ISL_820619, EPI_ISL_820621, EPI_ISL_820624, EPI_ISL_820625, EPI_ISL_820627, EPI_ISL_820637, EPI_ISL_820644, EPI_ISL_820646, EPI_ISL_821003, EPI_ISL_821004, EPI_ISL_821008, EPI_ISL_821009, EPI_ISL_821010, EPI_ISL_821013, EPI_ISL_821015, EPI_ISL_821016, EPI_ISL_821019, EPI_ISL_821028, EPI_ISL_821031, EPI_ISL_821040, EPI_ISL_821048, EPI_ISL_821053, EPI_ISL_821057, EPI_ISL_821065, EPI_ISL_821081, EPI_ISL_821084, EPI_ISL_821086, EPI_ISL_821095, EPI_ISL_821096, EPI_ISL_821108, EPI_ISL_821109, EPI_ISL_821121, EPI_ISL_821126, EPI_ISL_821136, EPI_ISL_821139, EPI_ISL_821141, EPI_ISL_821146, EPI_ISL_821151, EPI_ISL_821168, EPI_ISL_821176, EPI_ISL_821178, EPI_ISL_821182, EPI_ISL_821187, EPI_ISL_821194, EPI_ISL_821199, EPI_ISL_821201, EPI_ISL_821215, EPI_ISL_821216, EPI_ISL_821220, EPI_ISL_821221, EPI_ISL_821223, EPI_ISL_821226, EPI_ISL_821229, EPI_ISL_821232, EPI_ISL_821235, EPI_ISL_821237, EPI_ISL_821239, EPI_ISL_821298, EPI_ISL_821303, EPI_ISL_821329, EPI_ISL_821351, EPI_ISL_821384, EPI_ISL_821389, EPI_ISL_821390, EPI_ISL_821436, EPI_ISL_821453, EPI_ISL_821456, EPI_ISL_821482, EPI_ISL_821502, EPI_ISL_821533, EPI_ISL_821550, EPI_ISL_821552, EPI_ISL_821556, EPI_ISL_821586, EPI_ISL_821614, EPI_ISL_821972, EPI_ISL_821973, EPI_ISL_821977, EPI_ISL_821978, EPI_ISL_821980, EPI_ISL_821997, EPI_ISL_822002, EPI_ISL_822013, EPI_ISL_822020, EPI_ISL_822021, EPI_ISL_822024, EPI_ISL_822028, EPI_ISL_822036, EPI_ISL_822043, EPI_ISL_822052, EPI_ISL_822055, EPI_ISL_822057, EPI_ISL_822068, EPI_ISL_822096, EPI_ISL_822104, EPI_ISL_822118, EPI_ISL_822121, EPI_ISL_822124, EPI_ISL_822138, EPI_ISL_822143, EPI_ISL_822147, EPI_ISL_822151, EPI_ISL_822157, EPI_ISL_822163, EPI_ISL_822164, EPI_ISL_822179, EPI_ISL_822180, EPI_ISL_822188, EPI_ISL_822190, EPI_ISL_822192, EPI_ISL_822195, EPI_ISL_822196, EPI_ISL_822202, EPI_ISL_822205, EPI_ISL_822206, EPI_ISL_822215, EPI_ISL_822217, EPI_ISL_822219, EPI_ISL_822220, EPI_ISL_822225, EPI_ISL_822228, EPI_ISL_822232, EPI_ISL_822234, EPI_ISL_822238, EPI_ISL_822239, EPI_ISL_822262, EPI_ISL_822266, EPI_ISL_822273, EPI_ISL_822277, EPI_ISL_822280, EPI_ISL_822287, EPI_ISL_822289, EPI_ISL_822297, EPI_ISL_822300 | DOHMH Corona                    | New York City Public Health Laboratory                                     | Jade Wang, et al.                                                                                                                                                                                                                                                                                 |
| see above                                                                                                                                                                                                                                                                                                                                                                                                                                                                                                                                                                                                                                                                                                                                                                                                                                                                                                                                                                                                                                                                                                                                                                                                                                                                                                                                                                                                                                                                                                                                                                                                                                                                                                                                                                                                                                                                                                                                                                                                                                                                                                                                                                                                                                                                                                                                                                                                                                                                                                                                                                                                                                                                                                                                                                                                                                                                                                                                                                                                      | Lighthouse Lab in Alderley Park | Wellcome Sanger Institute for the COVID-19 Genomics UK (COG-UK) Consortium | Jacquelyn Wynn, Mairead Hyland, The Lighthouse Lab in Alderley Park and Alex Alderton, Roberto Amato, Sonia Goncalves, Ewan Harrison, David K. Jackson, Ian Johnston, Dominic Kwiatkowski, Cordelia Langford, John Sillitoe on behalf of the Wellcome Sanger Institute COVID-19 Surveillance Team |
| EPI_ISL_823813                                                                                                                                                                                                                                                                                                                                                                                                                                                                                                                                                                                                                                                                                                                                                                                                                                                                                                                                                                                                                                                                                                                                                                                                                                                                                                                                                                                                                                                                                                                                                                                                                                                                                                                                                                                                                                                                                                                                                                                                                                                                                                                                                                                                                                                                                                                                                                                                                                                                                                                                                                                                                                                                                                                                                                                                                                                                                                                                                                                                 | DOHMH Jamaica                   | New York City Public Health Laboratory                                     | Jade Wang, et al.                                                                                                                                                                                                                                                                                 |
| EPI_ISL_823814                                                                                                                                                                                                                                                                                                                                                                                                                                                                                                                                                                                                                                                                                                                                                                                                                                                                                                                                                                                                                                                                                                                                                                                                                                                                                                                                                                                                                                                                                                                                                                                                                                                                                                                                                                                                                                                                                                                                                                                                                                                                                                                                                                                                                                                                                                                                                                                                                                                                                                                                                                                                                                                                                                                                                                                                                                                                                                                                                                                                 | DOHMH Riverside                 | New York City Public Health Laboratory                                     | Jade Wang, et al.                                                                                                                                                                                                                                                                                 |
| EPI_ISL_823815, EPI_ISL_823816                                                                                                                                                                                                                                                                                                                                                                                                                                                                                                                                                                                                                                                                                                                                                                                                                                                                                                                                                                                                                                                                                                                                                                                                                                                                                                                                                                                                                                                                                                                                                                                                                                                                                                                                                                                                                                                                                                                                                                                                                                                                                                                                                                                                                                                                                                                                                                                                                                                                                                                                                                                                                                                                                                                                                                                                                                                                                                                                                                                 | DOHMH Chelsea                   | New York City Public Health Laboratory                                     | Jade Wang, et al.                                                                                                                                                                                                                                                                                 |
| EPI_ISL_823817, EPI_ISL_823818,<br>EPI_ISL_823819                                                                                                                                                                                                                                                                                                                                                                                                                                                                                                                                                                                                                                                                                                                                                                                                                                                                                                                                                                                                                                                                                                                                                                                                                                                                                                                                                                                                                                                                                                                                                                                                                                                                                                                                                                                                                                                                                                                                                                                                                                                                                                                                                                                                                                                                                                                                                                                                                                                                                                                                                                                                                                                                                                                                                                                                                                                                                                                                                              | DOHMH Corona                    | New York City Public Health Laboratory                                     | Jade Wang, et al.                                                                                                                                                                                                                                                                                 |
| EPI_ISL_823820                                                                                                                                                                                                                                                                                                                                                                                                                                                                                                                                                                                                                                                                                                                                                                                                                                                                                                                                                                                                                                                                                                                                                                                                                                                                                                                                                                                                                                                                                                                                                                                                                                                                                                                                                                                                                                                                                                                                                                                                                                                                                                                                                                                                                                                                                                                                                                                                                                                                                                                                                                                                                                                                                                                                                                                                                                                                                                                                                                                                 | DOHMH PHL                       | New York City Public Health Laboratory                                     | Jade Wang, et al.                                                                                                                                                                                                                                                                                 |
| EPI_ISL_823821, EPI_ISL_823822                                                                                                                                                                                                                                                                                                                                                                                                                                                                                                                                                                                                                                                                                                                                                                                                                                                                                                                                                                                                                                                                                                                                                                                                                                                                                                                                                                                                                                                                                                                                                                                                                                                                                                                                                                                                                                                                                                                                                                                                                                                                                                                                                                                                                                                                                                                                                                                                                                                                                                                                                                                                                                                                                                                                                                                                                                                                                                                                                                                 | DOHMH Jamaica                   | New York City Public Health Laboratory                                     | Jade Wang, et al.                                                                                                                                                                                                                                                                                 |
| EPI_ISL_823823, EPI_ISL_823824,<br>EPI_ISL_823825                                                                                                                                                                                                                                                                                                                                                                                                                                                                                                                                                                                                                                                                                                                                                                                                                                                                                                                                                                                                                                                                                                                                                                                                                                                                                                                                                                                                                                                                                                                                                                                                                                                                                                                                                                                                                                                                                                                                                                                                                                                                                                                                                                                                                                                                                                                                                                                                                                                                                                                                                                                                                                                                                                                                                                                                                                                                                                                                                              | DOHMH Riverside                 | New York City Public Health Laboratory                                     | Jade Wang, et al.                                                                                                                                                                                                                                                                                 |
| EPI_ISL_823826, EPI_ISL_823827,<br>EPI_ISL_823828                                                                                                                                                                                                                                                                                                                                                                                                                                                                                                                                                                                                                                                                                                                                                                                                                                                                                                                                                                                                                                                                                                                                                                                                                                                                                                                                                                                                                                                                                                                                                                                                                                                                                                                                                                                                                                                                                                                                                                                                                                                                                                                                                                                                                                                                                                                                                                                                                                                                                                                                                                                                                                                                                                                                                                                                                                                                                                                                                              | DOHMH Corona                    | New York City Public Health Laboratory                                     | Jade Wang, et al.                                                                                                                                                                                                                                                                                 |
| EPI_ISL_823829, EPI_ISL_823830,<br>EPI_ISL_823831                                                                                                                                                                                                                                                                                                                                                                                                                                                                                                                                                                                                                                                                                                                                                                                                                                                                                                                                                                                                                                                                                                                                                                                                                                                                                                                                                                                                                                                                                                                                                                                                                                                                                                                                                                                                                                                                                                                                                                                                                                                                                                                                                                                                                                                                                                                                                                                                                                                                                                                                                                                                                                                                                                                                                                                                                                                                                                                                                              | DOHMH Morrisania                | New York City Public Health Laboratory                                     | Jade Wang, et al.                                                                                                                                                                                                                                                                                 |
| EPI_ISL_823832, EPI_ISL_823833,<br>EPI_ISL_823834                                                                                                                                                                                                                                                                                                                                                                                                                                                                                                                                                                                                                                                                                                                                                                                                                                                                                                                                                                                                                                                                                                                                                                                                                                                                                                                                                                                                                                                                                                                                                                                                                                                                                                                                                                                                                                                                                                                                                                                                                                                                                                                                                                                                                                                                                                                                                                                                                                                                                                                                                                                                                                                                                                                                                                                                                                                                                                                                                              | DOHMH Central Harlem            | New York City Public Health Laboratory                                     | Jade Wang, et al.                                                                                                                                                                                                                                                                                 |
| EPI_ISL_823835, EPI_ISL_823836,<br>EPI_ISL_823837                                                                                                                                                                                                                                                                                                                                                                                                                                                                                                                                                                                                                                                                                                                                                                                                                                                                                                                                                                                                                                                                                                                                                                                                                                                                                                                                                                                                                                                                                                                                                                                                                                                                                                                                                                                                                                                                                                                                                                                                                                                                                                                                                                                                                                                                                                                                                                                                                                                                                                                                                                                                                                                                                                                                                                                                                                                                                                                                                              | DOHMH Corona                    | New York City Public Health Laboratory                                     | Jade Wang, et al.                                                                                                                                                                                                                                                                                 |
| EPI_ISL_823838, EPI_ISL_823839,<br>EPI_ISL_823840                                                                                                                                                                                                                                                                                                                                                                                                                                                                                                                                                                                                                                                                                                                                                                                                                                                                                                                                                                                                                                                                                                                                                                                                                                                                                                                                                                                                                                                                                                                                                                                                                                                                                                                                                                                                                                                                                                                                                                                                                                                                                                                                                                                                                                                                                                                                                                                                                                                                                                                                                                                                                                                                                                                                                                                                                                                                                                                                                              | DOHMH Central Harlem            | New York City Public Health Laboratory                                     | Jade Wang, et al.                                                                                                                                                                                                                                                                                 |
| EPI_ISL_823841                                                                                                                                                                                                                                                                                                                                                                                                                                                                                                                                                                                                                                                                                                                                                                                                                                                                                                                                                                                                                                                                                                                                                                                                                                                                                                                                                                                                                                                                                                                                                                                                                                                                                                                                                                                                                                                                                                                                                                                                                                                                                                                                                                                                                                                                                                                                                                                                                                                                                                                                                                                                                                                                                                                                                                                                                                                                                                                                                                                                 | DOHMH Riverside                 | New York City Public Health Laboratory                                     | Jade Wang, et al.                                                                                                                                                                                                                                                                                 |
| EPI_ISL_823842                                                                                                                                                                                                                                                                                                                                                                                                                                                                                                                                                                                                                                                                                                                                                                                                                                                                                                                                                                                                                                                                                                                                                                                                                                                                                                                                                                                                                                                                                                                                                                                                                                                                                                                                                                                                                                                                                                                                                                                                                                                                                                                                                                                                                                                                                                                                                                                                                                                                                                                                                                                                                                                                                                                                                                                                                                                                                                                                                                                                 | DOHMH PHL                       | New York City Public Health Laboratory                                     | Jade Wang, et al.                                                                                                                                                                                                                                                                                 |
| EPI_ISL_823843, EPI_ISL_823844                                                                                                                                                                                                                                                                                                                                                                                                                                                                                                                                                                                                                                                                                                                                                                                                                                                                                                                                                                                                                                                                                                                                                                                                                                                                                                                                                                                                                                                                                                                                                                                                                                                                                                                                                                                                                                                                                                                                                                                                                                                                                                                                                                                                                                                                                                                                                                                                                                                                                                                                                                                                                                                                                                                                                                                                                                                                                                                                                                                 | DOHMH Central Harlem            | New York City Public Health Laboratory                                     | Jade Wang, et al.                                                                                                                                                                                                                                                                                 |
| EPI_ISL_823845                                                                                                                                                                                                                                                                                                                                                                                                                                                                                                                                                                                                                                                                                                                                                                                                                                                                                                                                                                                                                                                                                                                                                                                                                                                                                                                                                                                                                                                                                                                                                                                                                                                                                                                                                                                                                                                                                                                                                                                                                                                                                                                                                                                                                                                                                                                                                                                                                                                                                                                                                                                                                                                                                                                                                                                                                                                                                                                                                                                                 | DOHMH Morrisania                | New York City Public Health Laboratory                                     | Jade Wang, et al.                                                                                                                                                                                                                                                                                 |
| EPI_ISL_823846, EPI_ISL_823847,<br>EPI_ISL_823848                                                                                                                                                                                                                                                                                                                                                                                                                                                                                                                                                                                                                                                                                                                                                                                                                                                                                                                                                                                                                                                                                                                                                                                                                                                                                                                                                                                                                                                                                                                                                                                                                                                                                                                                                                                                                                                                                                                                                                                                                                                                                                                                                                                                                                                                                                                                                                                                                                                                                                                                                                                                                                                                                                                                                                                                                                                                                                                                                              | DOHMH Jamaica                   | New York City Public Health Laboratory                                     | Jade Wang, et al.                                                                                                                                                                                                                                                                                 |
| EPI_ISL_823849                                                                                                                                                                                                                                                                                                                                                                                                                                                                                                                                                                                                                                                                                                                                                                                                                                                                                                                                                                                                                                                                                                                                                                                                                                                                                                                                                                                                                                                                                                                                                                                                                                                                                                                                                                                                                                                                                                                                                                                                                                                                                                                                                                                                                                                                                                                                                                                                                                                                                                                                                                                                                                                                                                                                                                                                                                                                                                                                                                                                 | DOHMH Fort Greene               | New York City Public Health Laboratory                                     | Jade Wang, et al.                                                                                                                                                                                                                                                                                 |
| EPI_ISL_823850                                                                                                                                                                                                                                                                                                                                                                                                                                                                                                                                                                                                                                                                                                                                                                                                                                                                                                                                                                                                                                                                                                                                                                                                                                                                                                                                                                                                                                                                                                                                                                                                                                                                                                                                                                                                                                                                                                                                                                                                                                                                                                                                                                                                                                                                                                                                                                                                                                                                                                                                                                                                                                                                                                                                                                                                                                                                                                                                                                                                 | DOHMH Corona                    | New York City Public Health Laboratory                                     | Jade Wang, et al.                                                                                                                                                                                                                                                                                 |
| EPI_ISL_823851                                                                                                                                                                                                                                                                                                                                                                                                                                                                                                                                                                                                                                                                                                                                                                                                                                                                                                                                                                                                                                                                                                                                                                                                                                                                                                                                                                                                                                                                                                                                                                                                                                                                                                                                                                                                                                                                                                                                                                                                                                                                                                                                                                                                                                                                                                                                                                                                                                                                                                                                                                                                                                                                                                                                                                                                                                                                                                                                                                                                 | DOHMH Fort Greene               | New York City Public Health Laboratory                                     | Jade Wang, et al.                                                                                                                                                                                                                                                                                 |
| EPI_ISL_823852, EPI_ISL_823853                                                                                                                                                                                                                                                                                                                                                                                                                                                                                                                                                                                                                                                                                                                                                                                                                                                                                                                                                                                                                                                                                                                                                                                                                                                                                                                                                                                                                                                                                                                                                                                                                                                                                                                                                                                                                                                                                                                                                                                                                                                                                                                                                                                                                                                                                                                                                                                                                                                                                                                                                                                                                                                                                                                                                                                                                                                                                                                                                                                 | DOHMH Crown Heights             | New York City Public Health Laboratory                                     | Jade Wang, et al.                                                                                                                                                                                                                                                                                 |
| EPI_ISL_823854, EPI_ISL_823855,<br>EPI_ISL_823856, EPI_ISL_823857,<br>EPI_ISL_823858, EPI_ISL_823859,<br>EPI_ISL_823860                                                                                                                                                                                                                                                                                                                                                                                                                                                                                                                                                                                                                                                                                                                                                                                                                                                                                                                                                                                                                                                                                                                                                                                                                                                                                                                                                                                                                                                                                                                                                                                                                                                                                                                                                                                                                                                                                                                                                                                                                                                                                                                                                                                                                                                                                                                                                                                                                                                                                                                                                                                                                                                                                                                                                                                                                                                                                        | DOHMH Morrisania                | New York City Public Health Laboratory                                     | Jade Wang, et al.                                                                                                                                                                                                                                                                                 |
| EPI_ISL_823861, EPI_ISL_823862,<br>EPI_ISL_823863                                                                                                                                                                                                                                                                                                                                                                                                                                                                                                                                                                                                                                                                                                                                                                                                                                                                                                                                                                                                                                                                                                                                                                                                                                                                                                                                                                                                                                                                                                                                                                                                                                                                                                                                                                                                                                                                                                                                                                                                                                                                                                                                                                                                                                                                                                                                                                                                                                                                                                                                                                                                                                                                                                                                                                                                                                                                                                                                                              | DOHMH Corona                    | New York City Public Health Laboratory                                     | Jade Wang, et al.                                                                                                                                                                                                                                                                                 |
| EPI_ISL_823864                                                                                                                                                                                                                                                                                                                                                                                                                                                                                                                                                                                                                                                                                                                                                                                                                                                                                                                                                                                                                                                                                                                                                                                                                                                                                                                                                                                                                                                                                                                                                                                                                                                                                                                                                                                                                                                                                                                                                                                                                                                                                                                                                                                                                                                                                                                                                                                                                                                                                                                                                                                                                                                                                                                                                                                                                                                                                                                                                                                                 | DOHMH Chelsea                   | New York City Public Health Laboratory                                     | Jade Wang, et al.                                                                                                                                                                                                                                                                                 |
| EPI_ISL_823865                                                                                                                                                                                                                                                                                                                                                                                                                                                                                                                                                                                                                                                                                                                                                                                                                                                                                                                                                                                                                                                                                                                                                                                                                                                                                                                                                                                                                                                                                                                                                                                                                                                                                                                                                                                                                                                                                                                                                                                                                                                                                                                                                                                                                                                                                                                                                                                                                                                                                                                                                                                                                                                                                                                                                                                                                                                                                                                                                                                                 | DOHMH Central Harlem            | New York City Public Health Laboratory                                     | Jade Wang, et al.                                                                                                                                                                                                                                                                                 |
| EPI_ISL_823866, EPI_ISL_823867                                                                                                                                                                                                                                                                                                                                                                                                                                                                                                                                                                                                                                                                                                                                                                                                                                                                                                                                                                                                                                                                                                                                                                                                                                                                                                                                                                                                                                                                                                                                                                                                                                                                                                                                                                                                                                                                                                                                                                                                                                                                                                                                                                                                                                                                                                                                                                                                                                                                                                                                                                                                                                                                                                                                                                                                                                                                                                                                                                                 | DOHMH Fort Greene               | New York City Public Health Laboratory                                     | Jade Wang, et al.                                                                                                                                                                                                                                                                                 |
| EPI_ISL_823868                                                                                                                                                                                                                                                                                                                                                                                                                                                                                                                                                                                                                                                                                                                                                                                                                                                                                                                                                                                                                                                                                                                                                                                                                                                                                                                                                                                                                                                                                                                                                                                                                                                                                                                                                                                                                                                                                                                                                                                                                                                                                                                                                                                                                                                                                                                                                                                                                                                                                                                                                                                                                                                                                                                                                                                                                                                                                                                                                                                                 | DOHMH Corona                    | New York City Public Health Laboratory                                     | Jade Wang, et al.                                                                                                                                                                                                                                                                                 |
| EPI_ISL_823869                                                                                                                                                                                                                                                                                                                                                                                                                                                                                                                                                                                                                                                                                                                                                                                                                                                                                                                                                                                                                                                                                                                                                                                                                                                                                                                                                                                                                                                                                                                                                                                                                                                                                                                                                                                                                                                                                                                                                                                                                                                                                                                                                                                                                                                                                                                                                                                                                                                                                                                                                                                                                                                                                                                                                                                                                                                                                                                                                                                                 | DOHMH Central Harlem            | New York City Public Health Laboratory                                     | Jade Wang, et al.                                                                                                                                                                                                                                                                                 |
| EPI_ISL_823870, EPI_ISL_823871                                                                                                                                                                                                                                                                                                                                                                                                                                                                                                                                                                                                                                                                                                                                                                                                                                                                                                                                                                                                                                                                                                                                                                                                                                                                                                                                                                                                                                                                                                                                                                                                                                                                                                                                                                                                                                                                                                                                                                                                                                                                                                                                                                                                                                                                                                                                                                                                                                                                                                                                                                                                                                                                                                                                                                                                                                                                                                                                                                                 | DOHMH Jamaica                   | New York City Public Health Laboratory                                     | Jade Wang, et al.                                                                                                                                                                                                                                                                                 |
| EPI_ISL_823872, EPI_ISL_823873,<br>EPI_ISL_823874                                                                                                                                                                                                                                                                                                                                                                                                                                                                                                                                                                                                                                                                                                                                                                                                                                                                                                                                                                                                                                                                                                                                                                                                                                                                                                                                                                                                                                                                                                                                                                                                                                                                                                                                                                                                                                                                                                                                                                                                                                                                                                                                                                                                                                                                                                                                                                                                                                                                                                                                                                                                                                                                                                                                                                                                                                                                                                                                                              | DOHMH Morrisania                | New York City Public Health Laboratory                                     | Jade Wang, et al.                                                                                                                                                                                                                                                                                 |
| EPI_ISL_823875                                                                                                                                                                                                                                                                                                                                                                                                                                                                                                                                                                                                                                                                                                                                                                                                                                                                                                                                                                                                                                                                                                                                                                                                                                                                                                                                                                                                                                                                                                                                                                                                                                                                                                                                                                                                                                                                                                                                                                                                                                                                                                                                                                                                                                                                                                                                                                                                                                                                                                                                                                                                                                                                                                                                                                                                                                                                                                                                                                                                 | DOHMH PHL                       | New York City Public Health Laboratory                                     | Jade Wang, et al.                                                                                                                                                                                                                                                                                 |
| EPI_ISL_823876, EPI_ISL_823877                                                                                                                                                                                                                                                                                                                                                                                                                                                                                                                                                                                                                                                                                                                                                                                                                                                                                                                                                                                                                                                                                                                                                                                                                                                                                                                                                                                                                                                                                                                                                                                                                                                                                                                                                                                                                                                                                                                                                                                                                                                                                                                                                                                                                                                                                                                                                                                                                                                                                                                                                                                                                                                                                                                                                                                                                                                                                                                                                                                 | DOHMH Jamaica                   | New York City Public Health Laboratory                                     | Jade Wang, et al.                                                                                                                                                                                                                                                                                 |





|                                                                                                                                                                                                                |                                                    |                                                                            |                                                                                                                                                                                                                                                                                                   |
|----------------------------------------------------------------------------------------------------------------------------------------------------------------------------------------------------------------|----------------------------------------------------|----------------------------------------------------------------------------|---------------------------------------------------------------------------------------------------------------------------------------------------------------------------------------------------------------------------------------------------------------------------------------------------|
| EPI_ISL_823962                                                                                                                                                                                                 | DOHMH Chelsea                                      | New York City Public Health Laboratory                                     | Jade Wang, et al.                                                                                                                                                                                                                                                                                 |
| EPI_ISL_823963, EPI_ISL_823964, EPI_ISL_823965, EPI_ISL_823966, EPI_ISL_823967                                                                                                                                 | DOHMH Corona                                       | New York City Public Health Laboratory                                     | Jade Wang, et al.                                                                                                                                                                                                                                                                                 |
| EPI_ISL_823968, EPI_ISL_823969                                                                                                                                                                                 | DOHMH Jamaica                                      | New York City Public Health Laboratory                                     | Jade Wang, et al.                                                                                                                                                                                                                                                                                 |
| EPI_ISL_823970                                                                                                                                                                                                 | Department of Homeless Services                    | New York City Public Health Laboratory                                     | Jade Wang, et al.                                                                                                                                                                                                                                                                                 |
| EPI_ISL_823971, EPI_ISL_823972                                                                                                                                                                                 | OCME Office Of Chief Medical Examiner              | New York City Public Health Laboratory                                     | Jade Wang, et al.                                                                                                                                                                                                                                                                                 |
| EPI_ISL_823973                                                                                                                                                                                                 | Department of Homeless Services                    | New York City Public Health Laboratory                                     | Jade Wang, et al.                                                                                                                                                                                                                                                                                 |
| EPI_ISL_823974                                                                                                                                                                                                 | OCME Office Of Chief Medical Examiner              | New York City Public Health Laboratory                                     | Jade Wang, et al.                                                                                                                                                                                                                                                                                 |
| EPI_ISL_823975                                                                                                                                                                                                 | Department of Homeless Services                    | New York City Public Health Laboratory                                     | Jade Wang, et al.                                                                                                                                                                                                                                                                                 |
| EPI_ISL_824295                                                                                                                                                                                                 | DOHMH Morrisania                                   | New York City Public Health Laboratory                                     | Jade Wang, et al.                                                                                                                                                                                                                                                                                 |
| EPI_ISL_824296, EPI_ISL_824297                                                                                                                                                                                 | DOHMH Jamaica                                      | New York City Public Health Laboratory                                     | Jade Wang, et al.                                                                                                                                                                                                                                                                                 |
| EPI_ISL_824298                                                                                                                                                                                                 | DOHMH Central Harlem                               | New York City Public Health Laboratory                                     | Jade Wang, et al.                                                                                                                                                                                                                                                                                 |
| EPI_ISL_824299                                                                                                                                                                                                 | DOHMH Morrisania                                   | New York City Public Health Laboratory                                     | Jade Wang, et al.                                                                                                                                                                                                                                                                                 |
| EPI_ISL_824300                                                                                                                                                                                                 | DOHMH Chelsea                                      | New York City Public Health Laboratory                                     | Jade Wang, et al.                                                                                                                                                                                                                                                                                 |
| EPI_ISL_824301                                                                                                                                                                                                 | DOHMH Crown Heights                                | New York City Public Health Laboratory                                     | Jade Wang, et al.                                                                                                                                                                                                                                                                                 |
| EPI_ISL_824302                                                                                                                                                                                                 | DOHMH Jamaica                                      | New York City Public Health Laboratory                                     | Jade Wang, et al.                                                                                                                                                                                                                                                                                 |
| EPI_ISL_824303                                                                                                                                                                                                 | DOHMH Morrisania                                   | New York City Public Health Laboratory                                     | Jade Wang, et al.                                                                                                                                                                                                                                                                                 |
| EPI_ISL_824304, EPI_ISL_824305                                                                                                                                                                                 | DOHMH Jamaica                                      | New York City Public Health Laboratory                                     | Jade Wang, et al.                                                                                                                                                                                                                                                                                 |
| EPI_ISL_824306, EPI_ISL_824307                                                                                                                                                                                 | DOHMH PHL                                          | New York City Public Health Laboratory                                     | Jade Wang, et al.                                                                                                                                                                                                                                                                                 |
| EPI_ISL_824308, EPI_ISL_824309                                                                                                                                                                                 | DOHMH Jamaica                                      | New York City Public Health Laboratory                                     | Jade Wang, et al.                                                                                                                                                                                                                                                                                 |
| EPI_ISL_824310                                                                                                                                                                                                 | DOHMH Crown Heights                                | New York City Public Health Laboratory                                     | Jade Wang, et al.                                                                                                                                                                                                                                                                                 |
| EPI_ISL_824311, EPI_ISL_824312                                                                                                                                                                                 | DOHMH Fort Greene                                  | New York City Public Health Laboratory                                     | Jade Wang, et al.                                                                                                                                                                                                                                                                                 |
| EPI_ISL_824313                                                                                                                                                                                                 | DOHMH Jamaica                                      | New York City Public Health Laboratory                                     | Jade Wang, et al.                                                                                                                                                                                                                                                                                 |
| EPI_ISL_824314, EPI_ISL_824315                                                                                                                                                                                 | DOHMH Corona                                       | New York City Public Health Laboratory                                     | Jade Wang, et al.                                                                                                                                                                                                                                                                                 |
| EPI_ISL_824316                                                                                                                                                                                                 | DOHMH Crown Heights                                | New York City Public Health Laboratory                                     | Jade Wang, et al.                                                                                                                                                                                                                                                                                 |
| EPI_ISL_824317, EPI_ISL_824318                                                                                                                                                                                 | DOHMH Central Harlem                               | New York City Public Health Laboratory                                     | Jade Wang, et al.                                                                                                                                                                                                                                                                                 |
| EPI_ISL_824319                                                                                                                                                                                                 | DOHMH Chelsea                                      | New York City Public Health Laboratory                                     | Jade Wang, et al.                                                                                                                                                                                                                                                                                 |
| EPI_ISL_824320                                                                                                                                                                                                 | DOHMH Corona                                       | New York City Public Health Laboratory                                     | Jade Wang, et al.                                                                                                                                                                                                                                                                                 |
| EPI_ISL_824321, EPI_ISL_824322                                                                                                                                                                                 | DOHMH Fort Greene                                  | New York City Public Health Laboratory                                     | Jade Wang, et al.                                                                                                                                                                                                                                                                                 |
| EPI_ISL_824323, EPI_ISL_824324, EPI_ISL_824325, EPI_ISL_824326, EPI_ISL_824327                                                                                                                                 | DOHMH Morrisania                                   | New York City Public Health Laboratory                                     | Jade Wang, et al.                                                                                                                                                                                                                                                                                 |
| EPI_ISL_824328                                                                                                                                                                                                 | DOHMH Corona                                       | New York City Public Health Laboratory                                     | Jade Wang, et al.                                                                                                                                                                                                                                                                                 |
| EPI_ISL_824329, EPI_ISL_824330                                                                                                                                                                                 | DOHMH Jamaica                                      | New York City Public Health Laboratory                                     | Jade Wang, et al.                                                                                                                                                                                                                                                                                 |
| EPI_ISL_824331                                                                                                                                                                                                 | DOHMH Corona                                       | New York City Public Health Laboratory                                     | Jade Wang, et al.                                                                                                                                                                                                                                                                                 |
| EPI_ISL_825063                                                                                                                                                                                                 | NHL Municipal Medical College, Ahmedbad            | Gujarat Biotechnology Research Centre                                      | Janvi Raval, Zarna Patel, Nitin Savaliya, Dinesh Kumar, Zuber Saiyed, Afzal Ansari, Nikha Trivedi, Apurvasinh Puvar, Ramesh Pandit, Jayshri Pethani, Monila Patel, Atit Shah, NM Shaikh, Bimal Chauhan, Tanmay Mehta, Bhavin Prajapati, Chaitanya Joshi, Madhvi Joshi                             |
| EPI_ISL_826471, EPI_ISL_826476, EPI_ISL_826480, EPI_ISL_826483, EPI_ISL_826488, EPI_ISL_826491, EPI_ISL_826501, EPI_ISL_826504                                                                                 | Lighthouse Lab in Alderley Park                    | Wellcome Sanger Institute for the COVID-19 Genomics UK (COG-UK) Consortium | Jacquelyn Wynn, Mairead Hyland, The Lighthouse Lab in Alderley Park and Alex Alderton, Roberto Amato, Sonia Goncalves, Ewan Harrison, David K. Jackson, Ian Johnston, Dominic Kwiatkowski, Cordelia Langford, John Sillitoe on behalf of the Wellcome Sanger Institute COVID-19 Surveillance Team |
| EPI_ISL_826798, EPI_ISL_826804, EPI_ISL_826807, EPI_ISL_826809, EPI_ISL_826812, EPI_ISL_826814, EPI_ISL_826822, EPI_ISL_826827, EPI_ISL_826830, EPI_ISL_826832, EPI_ISL_826834, EPI_ISL_826836, EPI_ISL_831020 | INSPI-CRN DE INFLUENZA Y OTROS VIRUS RESPIRATORIOS | Instituto de Salud Publica de Chile                                        | Javier Tognarelli, Barbara Parra, Loredana Arata, Jaime Lagos, Gisselle Barra, Alfredo Bruno, Domenica de Mora, Solon Narvaez, Jimmy Garcez, Michelle Paez, Martiza Olmedo, Manuel Gonzalez, Patricia Bustos, Rodrigo Fasce, Andres Castillo, Jorge Fernandez                                     |
| see above                                                                                                                                                                                                      |                                                    |                                                                            |                                                                                                                                                                                                                                                                                                   |
| EPI_ISL_832243                                                                                                                                                                                                 | DOHMH Corona                                       | New York City Public Health Laboratory                                     | Jade Wang, et al.                                                                                                                                                                                                                                                                                 |
| EPI_ISL_832244                                                                                                                                                                                                 | DOHMH Crown Heights                                | New York City Public Health Laboratory                                     | Jade Wang, et al.                                                                                                                                                                                                                                                                                 |
| EPI_ISL_832245                                                                                                                                                                                                 | DOHMH Corona                                       | New York City Public Health Laboratory                                     | Jade Wang, et al.                                                                                                                                                                                                                                                                                 |
| EPI_ISL_832246                                                                                                                                                                                                 | DOHMH Jamaica                                      | New York City Public Health Laboratory                                     | Jade Wang, et al.                                                                                                                                                                                                                                                                                 |
| EPI_ISL_832247, EPI_ISL_832248                                                                                                                                                                                 | DOHMH Morrisania                                   | New York City Public Health Laboratory                                     | Jade Wang, et al.                                                                                                                                                                                                                                                                                 |
| EPI_ISL_832249                                                                                                                                                                                                 | DOHMH PHL                                          | New York City Public Health Laboratory                                     | Jade Wang, et al.                                                                                                                                                                                                                                                                                 |
| EPI_ISL_832250                                                                                                                                                                                                 | DOHMH Jamaica                                      | New York City Public Health Laboratory                                     | Jade Wang, et al.                                                                                                                                                                                                                                                                                 |
| EPI_ISL_832251, EPI_ISL_832252, EPI_ISL_832253, EPI_ISL_832254                                                                                                                                                 | DOHMH Corona                                       | New York City Public Health Laboratory                                     | Jade Wang, et al.                                                                                                                                                                                                                                                                                 |
| EPI_ISL_832255                                                                                                                                                                                                 | DOHMH Morrisania                                   | New York City Public Health Laboratory                                     | Jade Wang, et al.                                                                                                                                                                                                                                                                                 |
| EPI_ISL_832256                                                                                                                                                                                                 | DOHMH Central Harlem                               | New York City Public Health Laboratory                                     | Jade Wang, et al.                                                                                                                                                                                                                                                                                 |
| EPI_ISL_832257                                                                                                                                                                                                 | DOHMH Morrisania                                   | New York City Public Health Laboratory                                     | Jade Wang, et al.                                                                                                                                                                                                                                                                                 |
| EPI_ISL_832258, EPI_ISL_832259                                                                                                                                                                                 | DOHMH PHL                                          | New York City Public Health Laboratory                                     | Jade Wang, et al.                                                                                                                                                                                                                                                                                 |
| EPI_ISL_832260, EPI_ISL_832261, EPI_ISL_832262                                                                                                                                                                 | DOHMH Corona                                       | New York City Public Health Laboratory                                     | Jade Wang, et al.                                                                                                                                                                                                                                                                                 |
| EPI_ISL_832263                                                                                                                                                                                                 | DOHMH Jamaica                                      | New York City Public Health Laboratory                                     | Jade Wang, et al.                                                                                                                                                                                                                                                                                 |
| EPI_ISL_832264                                                                                                                                                                                                 | DOHMH Morrisania                                   | New York City Public Health Laboratory                                     | Jade Wang, et al.                                                                                                                                                                                                                                                                                 |





|                                                                |                                       |                                        |                   |
|----------------------------------------------------------------|---------------------------------------|----------------------------------------|-------------------|
| EPI_ISL_857111                                                 | DOHMH Riverside                       | New York City Public Health Laboratory | Jade Wang, et al. |
| EPI_ISL_857112, EPI_ISL_857113, EPI_ISL_857114, EPI_ISL_857115 | DOHMH Fort Greene                     | New York City Public Health Laboratory | Jade Wang, et al. |
| EPI_ISL_857116                                                 | DOHMH Central Harlem                  | New York City Public Health Laboratory | Jade Wang, et al. |
| EPI_ISL_857117                                                 | DOHMH Chelsea                         | New York City Public Health Laboratory | Jade Wang, et al. |
| EPI_ISL_857118                                                 | DOHMH Central Harlem                  | New York City Public Health Laboratory | Jade Wang, et al. |
| EPI_ISL_857119                                                 | DOHMH Morrisania                      | New York City Public Health Laboratory | Jade Wang, et al. |
| EPI_ISL_857120                                                 | DOHMH Central Harlem                  | New York City Public Health Laboratory | Jade Wang, et al. |
| EPI_ISL_857121                                                 | DOHMH PHL                             | New York City Public Health Laboratory | Jade Wang, et al. |
| EPI_ISL_857122, EPI_ISL_857123, EPI_ISL_857124, EPI_ISL_857125 | DOHMH Morrisania                      | New York City Public Health Laboratory | Jade Wang, et al. |
| EPI_ISL_857126                                                 | DOHMH Central Harlem                  | New York City Public Health Laboratory | Jade Wang, et al. |
| EPI_ISL_857127, EPI_ISL_857128, EPI_ISL_857129                 | DOHMH PHL                             | New York City Public Health Laboratory | Jade Wang, et al. |
| EPI_ISL_857130, EPI_ISL_857131                                 | DOHMH Chelsea                         | New York City Public Health Laboratory | Jade Wang, et al. |
| EPI_ISL_857132, EPI_ISL_857133                                 | DOHMH Central Harlem                  | New York City Public Health Laboratory | Jade Wang, et al. |
| EPI_ISL_857134                                                 | DOHMH PHL                             | New York City Public Health Laboratory | Jade Wang, et al. |
| EPI_ISL_857135                                                 | DOHMH Corona                          | New York City Public Health Laboratory | Jade Wang, et al. |
| EPI_ISL_857136, EPI_ISL_857137, EPI_ISL_857138, EPI_ISL_857139 | DOHMH Chelsea                         | New York City Public Health Laboratory | Jade Wang, et al. |
| EPI_ISL_857140, EPI_ISL_857141                                 | DOHMH Morrisania                      | New York City Public Health Laboratory | Jade Wang, et al. |
| EPI_ISL_857142                                                 | DOHMH Central Harlem                  | New York City Public Health Laboratory | Jade Wang, et al. |
| EPI_ISL_857143, EPI_ISL_857144                                 | DOHMH Riverside                       | New York City Public Health Laboratory | Jade Wang, et al. |
| EPI_ISL_857145, EPI_ISL_857146, EPI_ISL_857147                 | DOHMH Corona                          | New York City Public Health Laboratory | Jade Wang, et al. |
| EPI_ISL_857148                                                 | DOHMH Fort Greene                     | New York City Public Health Laboratory | Jade Wang, et al. |
| EPI_ISL_857149, EPI_ISL_857150, EPI_ISL_857151, EPI_ISL_857152 | DOHMH Jamaica                         | New York City Public Health Laboratory | Jade Wang, et al. |
| EPI_ISL_857153                                                 | DOHMH Corona                          | New York City Public Health Laboratory | Jade Wang, et al. |
| EPI_ISL_857154, EPI_ISL_857155                                 | DOHMH Jamaica                         | New York City Public Health Laboratory | Jade Wang, et al. |
| EPI_ISL_857156                                                 | DOHMH Corona                          | New York City Public Health Laboratory | Jade Wang, et al. |
| EPI_ISL_857157                                                 | DOHMH PHL                             | New York City Public Health Laboratory | Jade Wang, et al. |
| EPI_ISL_857158                                                 | DOHMH Corona                          | New York City Public Health Laboratory | Jade Wang, et al. |
| EPI_ISL_857159, EPI_ISL_857160                                 | DOHMH Morrisania                      | New York City Public Health Laboratory | Jade Wang, et al. |
| EPI_ISL_857161, EPI_ISL_857162                                 | DOHMH PHL                             | New York City Public Health Laboratory | Jade Wang, et al. |
| EPI_ISL_857163                                                 | DOHMH Central Harlem                  | New York City Public Health Laboratory | Jade Wang, et al. |
| EPI_ISL_857164                                                 | DOHMH Morrisania                      | New York City Public Health Laboratory | Jade Wang, et al. |
| EPI_ISL_857165                                                 | DOHMH Corona                          | New York City Public Health Laboratory | Jade Wang, et al. |
| EPI_ISL_857166, EPI_ISL_857167                                 | DOHMH Fort Greene                     | New York City Public Health Laboratory | Jade Wang, et al. |
| EPI_ISL_857168                                                 | DOHMH Corona                          | New York City Public Health Laboratory | Jade Wang, et al. |
| EPI_ISL_857169, EPI_ISL_857170, EPI_ISL_857171                 | DOHMH Morrisania                      | New York City Public Health Laboratory | Jade Wang, et al. |
| EPI_ISL_857172, EPI_ISL_857173                                 | DOHMH Crown Heights                   | New York City Public Health Laboratory | Jade Wang, et al. |
| EPI_ISL_857174, EPI_ISL_857175, EPI_ISL_857176, EPI_ISL_857177 | DOHMH Jamaica                         | New York City Public Health Laboratory | Jade Wang, et al. |
| EPI_ISL_857178                                                 | DOHMH Riverside                       | New York City Public Health Laboratory | Jade Wang, et al. |
| EPI_ISL_857179                                                 | DOHMH Jamaica                         | New York City Public Health Laboratory | Jade Wang, et al. |
| EPI_ISL_857180, EPI_ISL_857181, EPI_ISL_857182, EPI_ISL_857183 | DOHMH Central Harlem                  | New York City Public Health Laboratory | Jade Wang, et al. |
| EPI_ISL_857184                                                 | DOHMH Riverside                       | New York City Public Health Laboratory | Jade Wang, et al. |
| EPI_ISL_857185                                                 | DOHMH PHL                             | New York City Public Health Laboratory | Jade Wang, et al. |
| EPI_ISL_857186                                                 | OCME Office Of Chief Medical Examiner | New York City Public Health Laboratory | Jade Wang, et al. |
| EPI_ISL_857187                                                 | DOHMH PHL                             | New York City Public Health Laboratory | Jade Wang, et al. |
| EPI_ISL_857188                                                 | Department of Homeless Services       | New York City Public Health Laboratory | Jade Wang, et al. |
| EPI_ISL_857189                                                 | DOHMH Corona                          | New York City Public Health Laboratory | Jade Wang, et al. |
| EPI_ISL_857190                                                 | DOHMH PHL                             | New York City Public Health Laboratory | Jade Wang, et al. |
| EPI_ISL_857191                                                 | DOHMH Morrisania                      | New York City Public Health Laboratory | Jade Wang, et al. |
| EPI_ISL_857192                                                 | DOHMH PHL                             | New York City Public Health Laboratory | Jade Wang, et al. |
| EPI_ISL_857193                                                 | OCME Office Of Chief Medical Examiner | New York City Public Health Laboratory | Jade Wang, et al. |
| EPI_ISL_857194                                                 | DOHMH Central Harlem                  | New York City Public Health Laboratory | Jade Wang, et al. |
| EPI_ISL_857195                                                 | DOHMH Riverside                       | New York City Public Health Laboratory | Jade Wang, et al. |

|                                                                                                                                                                            |                                       |                                        |                   |
|----------------------------------------------------------------------------------------------------------------------------------------------------------------------------|---------------------------------------|----------------------------------------|-------------------|
| EPI_ISL_857196                                                                                                                                                             | DOHMH Crown Heights                   | New York City Public Health Laboratory | Jade Wang, et al. |
| EPI_ISL_857197                                                                                                                                                             | DOHMH Jamaica                         | New York City Public Health Laboratory | Jade Wang, et al. |
| EPI_ISL_857198                                                                                                                                                             | Department of Homeless Services       | New York City Public Health Laboratory | Jade Wang, et al. |
| EPI_ISL_857199                                                                                                                                                             | OCME Office Of Chief Medical Examiner | New York City Public Health Laboratory | Jade Wang, et al. |
| EPI_ISL_857200                                                                                                                                                             | DOHMH Central Harlem                  | New York City Public Health Laboratory | Jade Wang, et al. |
| EPI_ISL_857201                                                                                                                                                             | DOHMH Jamaica                         | New York City Public Health Laboratory | Jade Wang, et al. |
| EPI_ISL_857202                                                                                                                                                             | DOHMH PHL                             | New York City Public Health Laboratory | Jade Wang, et al. |
| EPI_ISL_857203                                                                                                                                                             | DOHMH Riverside                       | New York City Public Health Laboratory | Jade Wang, et al. |
| EPI_ISL_857204, EPI_ISL_857205                                                                                                                                             | DOHMH Central Harlem                  | New York City Public Health Laboratory | Jade Wang, et al. |
| EPI_ISL_857206                                                                                                                                                             | DOHMH PHL                             | New York City Public Health Laboratory | Jade Wang, et al. |
| EPI_ISL_857207, EPI_ISL_857208                                                                                                                                             | DOHMH Morrisania                      | New York City Public Health Laboratory | Jade Wang, et al. |
| EPI_ISL_857209                                                                                                                                                             | DOHMH Central Harlem                  | New York City Public Health Laboratory | Jade Wang, et al. |
| EPI_ISL_857210, EPI_ISL_857211,<br>EPI_ISL_857212, EPI_ISL_857213,<br>EPI_ISL_857214, EPI_ISL_857215,<br>EPI_ISL_857216, EPI_ISL_857217                                    | DOHMH Jamaica                         | New York City Public Health Laboratory | Jade Wang, et al. |
| EPI_ISL_857218, EPI_ISL_857219,<br>EPI_ISL_857220                                                                                                                          | DOHMH Corona                          | New York City Public Health Laboratory | Jade Wang, et al. |
| EPI_ISL_857221                                                                                                                                                             | DOHMH Fort Greene                     | New York City Public Health Laboratory | Jade Wang, et al. |
| EPI_ISL_857222, EPI_ISL_857223,<br>EPI_ISL_857224                                                                                                                          | DOHMH Jamaica                         | New York City Public Health Laboratory | Jade Wang, et al. |
| EPI_ISL_857225                                                                                                                                                             | DOHMH Corona                          | New York City Public Health Laboratory | Jade Wang, et al. |
| EPI_ISL_857226                                                                                                                                                             | DOHMH Jamaica                         | New York City Public Health Laboratory | Jade Wang, et al. |
| EPI_ISL_857227, EPI_ISL_857228                                                                                                                                             | DOHMH Riverside                       | New York City Public Health Laboratory | Jade Wang, et al. |
| EPI_ISL_857229                                                                                                                                                             | DOHMH Morrisania                      | New York City Public Health Laboratory | Jade Wang, et al. |
| EPI_ISL_857230                                                                                                                                                             | DOHMH Chelsea                         | New York City Public Health Laboratory | Jade Wang, et al. |
| EPI_ISL_857231, EPI_ISL_857232,<br>EPI_ISL_857233                                                                                                                          | DOHMH Central Harlem                  | New York City Public Health Laboratory | Jade Wang, et al. |
| EPI_ISL_857234, EPI_ISL_857235,<br>EPI_ISL_857236, EPI_ISL_857237                                                                                                          | DOHMH Jamaica                         | New York City Public Health Laboratory | Jade Wang, et al. |
| EPI_ISL_857238, EPI_ISL_857239,<br>EPI_ISL_857240                                                                                                                          | DOHMH Corona                          | New York City Public Health Laboratory | Jade Wang, et al. |
| EPI_ISL_857241, EPI_ISL_857242,<br>EPI_ISL_857243, EPI_ISL_857244,<br>EPI_ISL_857245, EPI_ISL_857246,<br>EPI_ISL_857247, EPI_ISL_857248,<br>EPI_ISL_857249, EPI_ISL_857250 | DOHMH Jamaica                         | New York City Public Health Laboratory | Jade Wang, et al. |
| EPI_ISL_857251, EPI_ISL_857252                                                                                                                                             | DOHMH Morrisania                      | New York City Public Health Laboratory | Jade Wang, et al. |
| EPI_ISL_857253, EPI_ISL_857254                                                                                                                                             | DOHMH Chelsea                         | New York City Public Health Laboratory | Jade Wang, et al. |
| EPI_ISL_857255                                                                                                                                                             | DOHMH Central Harlem                  | New York City Public Health Laboratory | Jade Wang, et al. |
| EPI_ISL_857256                                                                                                                                                             | DOHMH Fort Greene                     | New York City Public Health Laboratory | Jade Wang, et al. |
| EPI_ISL_857257                                                                                                                                                             | DOHMH PHL                             | New York City Public Health Laboratory | Jade Wang, et al. |
| EPI_ISL_857258, EPI_ISL_857259                                                                                                                                             | DOHMH Central Harlem                  | New York City Public Health Laboratory | Jade Wang, et al. |
| EPI_ISL_857260, EPI_ISL_857261,<br>EPI_ISL_857262                                                                                                                          | DOHMH Chelsea                         | New York City Public Health Laboratory | Jade Wang, et al. |
| EPI_ISL_857263, EPI_ISL_857264                                                                                                                                             | DOHMH Corona                          | New York City Public Health Laboratory | Jade Wang, et al. |
| EPI_ISL_857265                                                                                                                                                             | DOHMH Fort Greene                     | New York City Public Health Laboratory | Jade Wang, et al. |
| EPI_ISL_857266                                                                                                                                                             | DOHMH PHL                             | New York City Public Health Laboratory | Jade Wang, et al. |
| EPI_ISL_857267, EPI_ISL_857268,<br>EPI_ISL_857269, EPI_ISL_857270                                                                                                          | DOHMH Jamaica                         | New York City Public Health Laboratory | Jade Wang, et al. |
| EPI_ISL_857271, EPI_ISL_857272,<br>EPI_ISL_857273                                                                                                                          | DOHMH Morrisania                      | New York City Public Health Laboratory | Jade Wang, et al. |
| EPI_ISL_857274, EPI_ISL_857275,<br>EPI_ISL_857276                                                                                                                          | DOHMH Jamaica                         | New York City Public Health Laboratory | Jade Wang, et al. |
| EPI_ISL_857277                                                                                                                                                             | DOHMH Corona                          | New York City Public Health Laboratory | Jade Wang, et al. |
| EPI_ISL_857278                                                                                                                                                             | DOHMH PHL                             | New York City Public Health Laboratory | Jade Wang, et al. |
| EPI_ISL_857279, EPI_ISL_857280                                                                                                                                             | DOHMH Fort Greene                     | New York City Public Health Laboratory | Jade Wang, et al. |
| EPI_ISL_857281                                                                                                                                                             | DOHMH Riverside                       | New York City Public Health Laboratory | Jade Wang, et al. |
| EPI_ISL_857282, EPI_ISL_857283                                                                                                                                             | DOHMH Morrisania                      | New York City Public Health Laboratory | Jade Wang, et al. |
| EPI_ISL_857284                                                                                                                                                             | DOHMH PHL                             | New York City Public Health Laboratory | Jade Wang, et al. |
| EPI_ISL_857285, EPI_ISL_857286                                                                                                                                             | DOHMH Central Harlem                  | New York City Public Health Laboratory | Jade Wang, et al. |
| EPI_ISL_857287, EPI_ISL_857288                                                                                                                                             | Department of Homeless Services       | New York City Public Health Laboratory | Jade Wang, et al. |
| EPI_ISL_857289                                                                                                                                                             | OCME Office Of Chief Medical Examiner | New York City Public Health Laboratory | Jade Wang, et al. |
| EPI_ISL_857290                                                                                                                                                             | Department of Homeless Services       | New York City Public Health Laboratory | Jade Wang, et al. |





|                                                                                                                |                                       |                                        |                                                                                                                                                                                             |
|----------------------------------------------------------------------------------------------------------------|---------------------------------------|----------------------------------------|---------------------------------------------------------------------------------------------------------------------------------------------------------------------------------------------|
| see above                                                                                                      | Eurofins Diatherix                    | Hudsonalpha Genome Sequencing Center   | Jane Grimwood, Melissa Williams, Lori H. Handley, Joshua Stough, Leslie Malone, Stefan Brzezinski, Ada Stewart, Teresa Jones, Jenell Webber, John Lovell, Jennifer Cart, and Jeremy Schmutz |
| EPI_ISL_883307, EPI_ISL_883308                                                                                 | Pandemic Response Laboratory          | New York City Public Health Laboratory | Jade Wang, et al.                                                                                                                                                                           |
| EPI_ISL_883309                                                                                                 | DOHMH Central Harlem                  | New York City Public Health Laboratory | Jade Wang, et al.                                                                                                                                                                           |
| EPI_ISL_883310                                                                                                 | DOHMH Jamaica                         | New York City Public Health Laboratory | Jade Wang, et al.                                                                                                                                                                           |
| EPI_ISL_883311                                                                                                 | Pandemic Response Laboratory          | New York City Public Health Laboratory | Jade Wang, et al.                                                                                                                                                                           |
| EPI_ISL_883312, EPI_ISL_883313                                                                                 | DOHMH Corona                          | New York City Public Health Laboratory | Jade Wang, et al.                                                                                                                                                                           |
| EPI_ISL_883314                                                                                                 | DOHMH Jamaica                         | New York City Public Health Laboratory | Jade Wang, et al.                                                                                                                                                                           |
| EPI_ISL_883315, EPI_ISL_883316                                                                                 | OCME Office Of Chief Medical Examiner | New York City Public Health Laboratory | Jade Wang, et al.                                                                                                                                                                           |
| EPI_ISL_883317                                                                                                 | Pandemic Response Laboratory          | New York City Public Health Laboratory | Jade Wang, et al.                                                                                                                                                                           |
| EPI_ISL_883318, EPI_ISL_883319, EPI_ISL_883320, EPI_ISL_883321, EPI_ISL_883322, EPI_ISL_883323                 | DOHMH Jamaica                         | New York City Public Health Laboratory | Jade Wang, et al.                                                                                                                                                                           |
| EPI_ISL_883325                                                                                                 | OCME Office Of Chief Medical Examiner | New York City Public Health Laboratory | Jade Wang, et al.                                                                                                                                                                           |
| EPI_ISL_883326                                                                                                 | Department of Homeless Services       | New York City Public Health Laboratory | Jade Wang, et al.                                                                                                                                                                           |
| EPI_ISL_883327                                                                                                 | DOHMH Central Harlem                  | New York City Public Health Laboratory | Jade Wang, et al.                                                                                                                                                                           |
| EPI_ISL_883328                                                                                                 | OCME Office Of Chief Medical Examiner | New York City Public Health Laboratory | Jade Wang, et al.                                                                                                                                                                           |
| EPI_ISL_883329                                                                                                 | DOHMH Central Harlem                  | New York City Public Health Laboratory | Jade Wang, et al.                                                                                                                                                                           |
| EPI_ISL_883330                                                                                                 | OCME Office Of Chief Medical Examiner | New York City Public Health Laboratory | Jade Wang, et al.                                                                                                                                                                           |
| EPI_ISL_883331                                                                                                 | DOHMH Morrisania                      | New York City Public Health Laboratory | Jade Wang, et al.                                                                                                                                                                           |
| EPI_ISL_883332                                                                                                 | Department of Homeless Services       | New York City Public Health Laboratory | Jade Wang, et al.                                                                                                                                                                           |
| EPI_ISL_883333, EPI_ISL_883334                                                                                 | DOHMH Riverside                       | New York City Public Health Laboratory | Jade Wang, et al.                                                                                                                                                                           |
| EPI_ISL_883335                                                                                                 | DOHMH Chelsea                         | New York City Public Health Laboratory | Jade Wang, et al.                                                                                                                                                                           |
| EPI_ISL_883336                                                                                                 | OCME Office Of Chief Medical Examiner | New York City Public Health Laboratory | Jade Wang, et al.                                                                                                                                                                           |
| EPI_ISL_883337                                                                                                 | DOHMH Crown Heights                   | New York City Public Health Laboratory | Jade Wang, et al.                                                                                                                                                                           |
| EPI_ISL_883338                                                                                                 | DOHMH Morrisania                      | New York City Public Health Laboratory | Jade Wang, et al.                                                                                                                                                                           |
| EPI_ISL_883339                                                                                                 | DOHMH Chelsea                         | New York City Public Health Laboratory | Jade Wang, et al.                                                                                                                                                                           |
| EPI_ISL_883340, EPI_ISL_883341, EPI_ISL_883342, EPI_ISL_883343                                                 | DOHMH PHL                             | New York City Public Health Laboratory | Jade Wang, et al.                                                                                                                                                                           |
| EPI_ISL_883344, EPI_ISL_883345                                                                                 | OCME Office Of Chief Medical Examiner | New York City Public Health Laboratory | Jade Wang, et al.                                                                                                                                                                           |
| EPI_ISL_883346                                                                                                 | DOHMH PHL                             | New York City Public Health Laboratory | Jade Wang, et al.                                                                                                                                                                           |
| EPI_ISL_883347                                                                                                 | DOHMH Morrisania                      | New York City Public Health Laboratory | Jade Wang, et al.                                                                                                                                                                           |
| EPI_ISL_883348                                                                                                 | DOHMH Corona                          | New York City Public Health Laboratory | Jade Wang, et al.                                                                                                                                                                           |
| EPI_ISL_883349                                                                                                 | DOHMH Jamaica                         | New York City Public Health Laboratory | Jade Wang, et al.                                                                                                                                                                           |
| EPI_ISL_883350, EPI_ISL_883351, EPI_ISL_883352, EPI_ISL_883353                                                 | OCME Office Of Chief Medical Examiner | New York City Public Health Laboratory | Jade Wang, et al.                                                                                                                                                                           |
| EPI_ISL_883354, EPI_ISL_883355, EPI_ISL_883356                                                                 | DOHMH Corona                          | New York City Public Health Laboratory | Jade Wang, et al.                                                                                                                                                                           |
| EPI_ISL_883357, EPI_ISL_883358, EPI_ISL_883359, EPI_ISL_883360                                                 | DOHMH Crown Heights                   | New York City Public Health Laboratory | Jade Wang, et al.                                                                                                                                                                           |
| EPI_ISL_883361, EPI_ISL_883362, EPI_ISL_883363                                                                 | DOHMH PHL                             | New York City Public Health Laboratory | Jade Wang, et al.                                                                                                                                                                           |
| EPI_ISL_883364                                                                                                 | DOHMH Crown Heights                   | New York City Public Health Laboratory | Jade Wang, et al.                                                                                                                                                                           |
| EPI_ISL_883365, EPI_ISL_883366, EPI_ISL_883367                                                                 | DOHMH Morrisania                      | New York City Public Health Laboratory | Jade Wang, et al.                                                                                                                                                                           |
| EPI_ISL_883368, EPI_ISL_883369                                                                                 | DOHMH Chelsea                         | New York City Public Health Laboratory | Jade Wang, et al.                                                                                                                                                                           |
| EPI_ISL_883370                                                                                                 | DOHMH Crown Heights                   | New York City Public Health Laboratory | Jade Wang, et al.                                                                                                                                                                           |
| EPI_ISL_883371, EPI_ISL_883372                                                                                 | DOHMH Central Harlem                  | New York City Public Health Laboratory | Jade Wang, et al.                                                                                                                                                                           |
| EPI_ISL_883373, EPI_ISL_883374, EPI_ISL_883375                                                                 | DOHMH Jamaica                         | New York City Public Health Laboratory | Jade Wang, et al.                                                                                                                                                                           |
| EPI_ISL_883376, EPI_ISL_883377, EPI_ISL_883378, EPI_ISL_883379                                                 | DOHMH Central Harlem                  | New York City Public Health Laboratory | Jade Wang, et al.                                                                                                                                                                           |
| EPI_ISL_883380, EPI_ISL_883381, EPI_ISL_883382                                                                 | DOHMH PHL                             | New York City Public Health Laboratory | Jade Wang, et al.                                                                                                                                                                           |
| EPI_ISL_883383, EPI_ISL_883384, EPI_ISL_883385, EPI_ISL_883386, EPI_ISL_883387, EPI_ISL_883388, EPI_ISL_883389 | Pandemic Response Laboratory          | New York City Public Health Laboratory | Jade Wang, et al.                                                                                                                                                                           |
| EPI_ISL_883390, EPI_ISL_883391, EPI_ISL_883392, EPI_ISL_883393, EPI_ISL_883394                                 | OCME Office Of Chief Medical Examiner | New York City Public Health Laboratory | Jade Wang, et al.                                                                                                                                                                           |
| EPI_ISL_883395, EPI_ISL_883396                                                                                 | Department of Homeless Services       | New York City Public Health Laboratory | Jade Wang, et al.                                                                                                                                                                           |
| EPI_ISL_883397, EPI_ISL_883398, EPI_ISL_883399, EPI_ISL_883400, EPI_ISL_883401, EPI_ISL_883402                 | OCME Office Of Chief Medical Examiner | New York City Public Health Laboratory | Jade Wang, et al.                                                                                                                                                                           |





We gratefully acknowledge the following Authors from the Originating laboratories responsible for obtaining the specimens, as well as the Submitting laboratories where the genome data were generated and shared via GISAID, on which this research is based.

All Submitters of data may be contacted directly via [www.gisaid.org](http://www.gisaid.org)

Authors are sorted alphabetically.

| Accession ID                                                                                                                                                                                                                                                                                                                                                                                                                                                                                                                                                                                                                                                                                                                                                                                                                                                   | Originating Laboratory                                                                                                                   | Submitting Laboratory                                                                                                                                                                                                                                                                                                                                                                                                                          | Authors                                                                                                                                                                                                                                                                                                                                                                                                                                        |
|----------------------------------------------------------------------------------------------------------------------------------------------------------------------------------------------------------------------------------------------------------------------------------------------------------------------------------------------------------------------------------------------------------------------------------------------------------------------------------------------------------------------------------------------------------------------------------------------------------------------------------------------------------------------------------------------------------------------------------------------------------------------------------------------------------------------------------------------------------------|------------------------------------------------------------------------------------------------------------------------------------------|------------------------------------------------------------------------------------------------------------------------------------------------------------------------------------------------------------------------------------------------------------------------------------------------------------------------------------------------------------------------------------------------------------------------------------------------|------------------------------------------------------------------------------------------------------------------------------------------------------------------------------------------------------------------------------------------------------------------------------------------------------------------------------------------------------------------------------------------------------------------------------------------------|
| EPI_ISL_406031                                                                                                                                                                                                                                                                                                                                                                                                                                                                                                                                                                                                                                                                                                                                                                                                                                                 | Centers for Disease Control, R.O.C. (Taiwan)                                                                                             | Centers for Disease Control, R.O.C. (Taiwan)                                                                                                                                                                                                                                                                                                                                                                                                   | Ji-Rong Yang, Yu-Chi Lin, Jung-Jung Mu, Ming-Tsan Liu, Shu-Ying Li                                                                                                                                                                                                                                                                                                                                                                             |
| EPI_ISL_407193                                                                                                                                                                                                                                                                                                                                                                                                                                                                                                                                                                                                                                                                                                                                                                                                                                                 | Korea Centers for Disease Control & Prevention (KCDC)<br>Center for Laboratory Control of Infectious Diseases Division of Viral Diseases | Korea Centers for Disease Control & Prevention (KCDC)<br>Center for Laboratory Control of Infectious Diseases Division of Viral Diseases                                                                                                                                                                                                                                                                                                       | Jeong-Min Kim, Yoon-Seok Chung, Namjoo Lee, Mi-Seon Kim, SangHee Woo, Hye-Joon Jo, Sehee Park, Heui Man Kim, Myung Guk Han                                                                                                                                                                                                                                                                                                                     |
| EPI_ISL_407313                                                                                                                                                                                                                                                                                                                                                                                                                                                                                                                                                                                                                                                                                                                                                                                                                                                 | Hangzhou Center for Disease Control and Prevention                                                                                       | Hangzhou Center for Disease Control and Prevention                                                                                                                                                                                                                                                                                                                                                                                             | Jun Li, Haoqiu Wang, Hua Yu, Lingfeng Mao, Xifen Yu, Zhou Sun, Qingxin Kong, Xin Qian, Shuchang Chen, Xuchu Wang                                                                                                                                                                                                                                                                                                                               |
| EPI_ISL_408670                                                                                                                                                                                                                                                                                                                                                                                                                                                                                                                                                                                                                                                                                                                                                                                                                                                 | Wisconsin Department of Health Services                                                                                                  | Pathogen Discovery, Respiratory Viruses Branch, Division of Viral Diseases, Centers for Diseases Control and Prevention                                                                                                                                                                                                                                                                                                                        | Jing Zhang, Anna Uehara, Krista Queen, Yan Li, Ying Tao, Clinton R. Paden, Xiaoyan Lu, Brian Lynch, Senthil Kumar K. Sakthivel, Brett L. Whitaker, Shifaq Kamili, Lijuan Wang, Janna' R. Murray, Susan I. Gerber, Stephen Lindstrom, Suxiang Tong                                                                                                                                                                                              |
| EPI_ISL_410044                                                                                                                                                                                                                                                                                                                                                                                                                                                                                                                                                                                                                                                                                                                                                                                                                                                 | California Department of Public Health                                                                                                   | Pathogen Discovery, Respiratory Viruses Branch, Division of Viral Diseases, Centers for Diseases Control and Prevention                                                                                                                                                                                                                                                                                                                        | Jing Zhang, Krista Queen, Yan Li, Ying Tao, Anna Uehara, Clinton R. Paden, Xiaoyan Lu, Brian Lynch, Senthil Kumar K. Sakthivel, Brett L. Whitaker, Shifaq Kamili, Lijuan Wang, Janna' R. Murray, Susan I. Gerber, Stephen Lindstrom, Suxiang Tong                                                                                                                                                                                              |
| EPI_ISL_411926, EPI_ISL_411927                                                                                                                                                                                                                                                                                                                                                                                                                                                                                                                                                                                                                                                                                                                                                                                                                                 | Taiwan Centers for Disease Control                                                                                                       | Taiwan Centers for Disease Control                                                                                                                                                                                                                                                                                                                                                                                                             | Ji-Rong Yang, Yu-Chi-Lin, Jung-Jung Mu, Ming-Tsan-Liu                                                                                                                                                                                                                                                                                                                                                                                          |
| EPI_ISL_411952, EPI_ISL_411953                                                                                                                                                                                                                                                                                                                                                                                                                                                                                                                                                                                                                                                                                                                                                                                                                                 | NHC Key laboratory of Enteric Pathogenic Microbiology, Institute of Pathogenic Microbiology                                              | Jiangsu Provincial Center for Disease Control & Prevention                                                                                                                                                                                                                                                                                                                                                                                     | Kangchen Zhao, Xiaojuan Zhu, Lunbiao Cui, Tao Wu, Yiyue Ge, Bin Wu, Yin Chen, Fengcai Zhu, Baoli Zhu, Ming Wu                                                                                                                                                                                                                                                                                                                                  |
| EPI_ISL_412869, EPI_ISL_412870, EPI_ISL_412871, EPI_ISL_412872, EPI_ISL_412873                                                                                                                                                                                                                                                                                                                                                                                                                                                                                                                                                                                                                                                                                                                                                                                 | Division of Viral Diseases, Center for Laboratory Control of Infectious Diseases, Korea Centers for Diseases Control and Prevention      | Division of Viral Diseases, Center for Laboratory Control of Infectious Diseases, Korea Centers for Diseases Control and Prevention                                                                                                                                                                                                                                                                                                            | Jeong-Min Kim, Yoon-Seok Chung, Namjoo Lee, Mi-Seon Kim, Sang Hee Woo, Hye-Jun Jo, Sehee Park, Heui Man Kim, Myung Guk Han                                                                                                                                                                                                                                                                                                                     |
| EPI_ISL_413850, EPI_ISL_413851, EPI_ISL_413852, EPI_ISL_413853, EPI_ISL_413854, EPI_ISL_413855, EPI_ISL_413856, EPI_ISL_413857, EPI_ISL_413858, EPI_ISL_413859, EPI_ISL_413860, EPI_ISL_413861, EPI_ISL_413862, EPI_ISL_413863, EPI_ISL_413864, EPI_ISL_413865, EPI_ISL_413866, EPI_ISL_413867, EPI_ISL_413868, EPI_ISL_413870, EPI_ISL_413871, EPI_ISL_413872, EPI_ISL_413873, EPI_ISL_413874, EPI_ISL_413875, EPI_ISL_413876, EPI_ISL_413877, EPI_ISL_413878, EPI_ISL_413879, EPI_ISL_413880, EPI_ISL_413881, EPI_ISL_413882, EPI_ISL_413883, EPI_ISL_413884, EPI_ISL_413885, EPI_ISL_413886, EPI_ISL_413887, EPI_ISL_413888, EPI_ISL_413889, EPI_ISL_413890, EPI_ISL_413891, EPI_ISL_413892, EPI_ISL_413893, EPI_ISL_413894, EPI_ISL_413895, EPI_ISL_413896, EPI_ISL_413897, EPI_ISL_413898, EPI_ISL_413899, EPI_ISL_413900, EPI_ISL_413901, EPI_ISL_413902 | Guangdong Provincial Institution of Public Health, Guangdong Provincial Center for Disease Control and Prevention                        | Jing Lu, Louis du Plessis, Liu Zhe, Jiufeng Sun, Sarah François, Huifang Lin, Moritz Kraemer, Jingju Peng, Qianlin Xiong, Runyu Yuan, Lilian Zeng, Pingping Zhou, Chuming Liang, Tao Liu, Wei Li, Juan Su, Huanying Zheng, Kang Min, Song Tie, Bo Peng, Shisong Fang, Wenzhe Su, Kuibiao Li, Ruilin Sun, Ru bai, Xi Tang, Minfeng Liang, Nuno Faria, Josh Quick, Andrew Rambaut, Verity Hill, Wenjun Ma, Nick Loman, Oliver Pybus, Changwen Ke |                                                                                                                                                                                                                                                                                                                                                                                                                                                |
| see above                                                                                                                                                                                                                                                                                                                                                                                                                                                                                                                                                                                                                                                                                                                                                                                                                                                      | Guangdong Provincial Institution of Public Health, Guangdong Provincial Center for Disease Control and Prevention                        | Guangdong Provincial Institution of Public Health                                                                                                                                                                                                                                                                                                                                                                                              | Jing Lu, Louis du Plessis, Liu Zhe, Jiufeng Sun, Sarah François, Huifang Lin, Moritz Kraemer, Jingju Peng, Qianlin Xiong, Runyu Yuan, Lilian Zeng, Pingping Zhou, Chuming Liang, Tao Liu, Wei Li, Juan Su, Huanying Zheng, Kang Min, Song Tie, Bo Peng, Shisong Fang, Wenzhe Su, Kuibiao Li, Ruilin Sun, Ru bai, Xi Tang, Minfeng Liang, Nuno Faria, Josh Quick, Andrew Rambaut, Verity Hill, Wenjun Ma, Nick Loman, Oliver Pybus, Changwen Ke |
| EPI_ISL_414639                                                                                                                                                                                                                                                                                                                                                                                                                                                                                                                                                                                                                                                                                                                                                                                                                                                 | NYU Langone Health                                                                                                                       | Departments of Pathology and Medicine, New York University School of Medicine                                                                                                                                                                                                                                                                                                                                                                  | John Chen, Dacia Dimartino, Xiaojun Feng, Adriana Heguy, Megan Hogan, Emily Huang, George Jour, Christian Marier, Matthew T. Maurano, Mark J. Mulligan, Peter Meyn, Marie Samanovic-Golden, Amy Rapkiewicz, Guomiao Shen, Matija Snuderl, Gael Westby, Paul Zappile                                                                                                                                                                            |
| EPI_ISL_415628, EPI_ISL_415630, EPI_ISL_415631                                                                                                                                                                                                                                                                                                                                                                                                                                                                                                                                                                                                                                                                                                                                                                                                                 | West of Scotland Specialist Virology Centre, NHSGCC                                                                                      | MRC-University of Glasgow Centre for Virus Research                                                                                                                                                                                                                                                                                                                                                                                            | Kathy Smollett, Daniel Mair, Stephen Carmichael, Ana da Silva Filipe; Richard Orton, David L Robertson; Alasdair MacLean, Rory Gunson; Natasha Jesudason, Kathy Li, Antonia Ho; Emma Thomson                                                                                                                                                                                                                                                   |
| EPI_ISL_416416, EPI_ISL_416417, EPI_ISL_416418, EPI_ISL_416419                                                                                                                                                                                                                                                                                                                                                                                                                                                                                                                                                                                                                                                                                                                                                                                                 | Connecticut State Department of Public Health                                                                                            | Grubaugh Lab - Yale School of Public Health                                                                                                                                                                                                                                                                                                                                                                                                    | Joseph Fauver, Chantal Vogels, Anderson Brito, Tara Alpert, Nagarjuna Cheemarla, Ellen Foxman, Anthony Muyombwe, Jafar Razeq, Richard Martinello, Albert Ko, Marie-Louise Landry, Nathan Grubaugh                                                                                                                                                                                                                                              |
| EPI_ISL_416420, EPI_ISL_416421, EPI_ISL_416422, EPI_ISL_416423, EPI_ISL_416424                                                                                                                                                                                                                                                                                                                                                                                                                                                                                                                                                                                                                                                                                                                                                                                 | Yale Clinical Virology Laboratory                                                                                                        | Grubaugh Lab - Yale School of Public Health                                                                                                                                                                                                                                                                                                                                                                                                    | Joseph Fauver, Chantal Vogels, Anderson Brito, Tara Alpert, Nagarjuna Cheemarla, Ellen Foxman, Anthony Muyombwe, Jafar Razeq, Richard Martinello, Albert Ko, Marie-Louise Landry, Nathan Grubaugh                                                                                                                                                                                                                                              |
| EPI_ISL_416524                                                                                                                                                                                                                                                                                                                                                                                                                                                                                                                                                                                                                                                                                                                                                                                                                                                 | Saitama Medical University Hospital                                                                                                      | Saitama Medical University                                                                                                                                                                                                                                                                                                                                                                                                                     | Kazuo Imai                                                                                                                                                                                                                                                                                                                                                                                                                                     |
| EPI_ISL_416525                                                                                                                                                                                                                                                                                                                                                                                                                                                                                                                                                                                                                                                                                                                                                                                                                                                 | Saitama Medical University                                                                                                               | Saitama Medical University                                                                                                                                                                                                                                                                                                                                                                                                                     | Kazuo Imai                                                                                                                                                                                                                                                                                                                                                                                                                                     |
| EPI_ISL_416830, EPI_ISL_416831, EPI_ISL_416832                                                                                                                                                                                                                                                                                                                                                                                                                                                                                                                                                                                                                                                                                                                                                                                                                 | NYU Langone Health                                                                                                                       | Department of Pathology and Medicine, New York University School of Medicine                                                                                                                                                                                                                                                                                                                                                                   | John Chen, Dacia Dimartino, Xiaojun Feng, Adriana Heguy, Megan Hogan, Emily Huang, George Jour, Christian Marier, Matt Maurano, Mark Mulligan, Peter Meyn, Marie Samanovic-Golden, Amy Rapkiewicz, Guomiao Shen, Matija Snuderl, Gael Westby, Paul Zappile                                                                                                                                                                                     |
| EPI_ISL_417422, EPI_ISL_417424, EPI_ISL_417425, EPI_ISL_417426, EPI_ISL_417427, EPI_ISL_417428, EPI_ISL_417429, EPI_ISL_417430                                                                                                                                                                                                                                                                                                                                                                                                                                                                                                                                                                                                                                                                                                                                 | KU Leuven, Clinical and Epidemiological Virology                                                                                         | KU Leuven, Clinical and Epidemiological Virology                                                                                                                                                                                                                                                                                                                                                                                               | Joan Marti-Carerras, Tony Wawina, Bert Vanmechelen, Piet Maes                                                                                                                                                                                                                                                                                                                                                                                  |
| EPI_ISL_417483                                                                                                                                                                                                                                                                                                                                                                                                                                                                                                                                                                                                                                                                                                                                                                                                                                                 | Oslo University Hospital, Department of Medical Microbiology                                                                             | Norwegian Institute of Public Health                                                                                                                                                                                                                                                                                                                                                                                                           | Kathrine Stene-Johansen, Kamilla Heddeland Instefjord, Hilde Elshaug, Karoline Bragstad, Olav Hungnes                                                                                                                                                                                                                                                                                                                                          |
| EPI_ISL_417484                                                                                                                                                                                                                                                                                                                                                                                                                                                                                                                                                                                                                                                                                                                                                                                                                                                 | Oslo University Hospital, Department of Medical Microbiology                                                                             | Norwegian Institute of Public Health, Department of Virology                                                                                                                                                                                                                                                                                                                                                                                   | Kathrine Stene-Johansen, Kamilla Heddeland Instefjord, Hilde Elshaug, Karoline Bragstad, Olav Hungnes                                                                                                                                                                                                                                                                                                                                          |
| EPI_ISL_417485                                                                                                                                                                                                                                                                                                                                                                                                                                                                                                                                                                                                                                                                                                                                                                                                                                                 | University Hospital of Northern Norway, Department for Microbiology and Infectious Disease Control                                       | Norwegian Institute of Public Health, Department of Virology                                                                                                                                                                                                                                                                                                                                                                                   | Kathrine Stene-Johansen, Kamilla Heddeland Instefjord, Hilde Elshaug, Karoline Bragstad, Olav Hungnes                                                                                                                                                                                                                                                                                                                                          |
| EPI_ISL_417486, EPI_ISL_417487                                                                                                                                                                                                                                                                                                                                                                                                                                                                                                                                                                                                                                                                                                                                                                                                                                 | Hospital of Southern Norway - Kristiansand, Department of Medical Microbiology                                                           | Norwegian Institute of Public Health, Department of Virology                                                                                                                                                                                                                                                                                                                                                                                   | Kathrine Stene-Johansen, Kamilla Heddeland Instefjord, Hilde Elshaug, Karoline Bragstad, Olav Hungnes                                                                                                                                                                                                                                                                                                                                          |
| EPI_ISL_417488, EPI_ISL_417489, EPI_ISL_417490                                                                                                                                                                                                                                                                                                                                                                                                                                                                                                                                                                                                                                                                                                                                                                                                                 | Oslo University Hospital, Department of Medical Microbiology                                                                             | Norwegian Institute of Public Health, Department of Virology                                                                                                                                                                                                                                                                                                                                                                                   | Kathrine Stene-Johansen, Kamilla Heddeland Instefjord, Hilde Elshaug, Karoline Bragstad, Olav Hungnes                                                                                                                                                                                                                                                                                                                                          |
| EPI_ISL_418623, EPI_ISL_418624, EPI_ISL_418639, EPI_ISL_418646, EPI_ISL_418649, EPI_ISL_418653, EPI_ISL_418654, EPI_ISL_418658, EPI_ISL_418666                                                                                                                                                                                                                                                                                                                                                                                                                                                                                                                                                                                                                                                                                                                 | Department of Clinical Microbiology                                                                                                      | GIGA Medical Genomics                                                                                                                                                                                                                                                                                                                                                                                                                          | Keith Durkin, Maria Artesi, Sébastien Bontems, Raphaël Boreux, Cécile Meex, Pierrette Melin, Marie-Pierre Hayette, Vincent Bours.                                                                                                                                                                                                                                                                                                              |
| EPI_ISL_418771, EPI_ISL_418772, EPI_ISL_418773, EPI_ISL_418774, EPI_ISL_418775, EPI_ISL_418776, EPI_ISL_418777                                                                                                                                                                                                                                                                                                                                                                                                                                                                                                                                                                                                                                                                                                                                                 | WA State Department of Health                                                                                                            | Pathogen Discovery, Respiratory Viruses Branch, Division of Viral Diseases, Centers for Disease Control and Prevention                                                                                                                                                                                                                                                                                                                         | Jing Zhang, Ying Tao, Clinton R. Paden, Krista Queen, Anna Uehara, Yan Li, Haibin Wang, Jessica Jacobs, Denny Russell, Brian Hiatt, Jessica Gant, Suxiang Tong                                                                                                                                                                                                                                                                                 |
| EPI_ISL_418809                                                                                                                                                                                                                                                                                                                                                                                                                                                                                                                                                                                                                                                                                                                                                                                                                                                 | University of Wisconsin - Madison: Influenza Research Institute                                                                          | University of Wisconsin Madison, AIDS Vaccine Research Laboratories                                                                                                                                                                                                                                                                                                                                                                            | Katarina Braun, Gage Moreno, Peter Halfmann, et al.                                                                                                                                                                                                                                                                                                                                                                                            |
| EPI_ISL_419386, EPI_ISL_419387                                                                                                                                                                                                                                                                                                                                                                                                                                                                                                                                                                                                                                                                                                                                                                                                                                 | Hospital Prof. Doutor Fernando Fonseca, EPE                                                                                              | Instituto Gulbenkian de Ciência                                                                                                                                                                                                                                                                                                                                                                                                                | João Costa, Cathy Paulino, Joao Sobral, Susana Ladeiro, Ricardo Leite                                                                                                                                                                                                                                                                                                                                                                          |
| EPI_ISL_419512, EPI_ISL_419513, EPI_ISL_419514, EPI_ISL_419515, EPI_ISL_419516                                                                                                                                                                                                                                                                                                                                                                                                                                                                                                                                                                                                                                                                                                                                                                                 | Yale COVID-19 Biorepository                                                                                                              | Grubaugh Lab - Yale School of Public Health                                                                                                                                                                                                                                                                                                                                                                                                    | Joseph Fauver, Tara Alpert, Anderson Brito, Anne Wylie, Chantal Vogels, Mary Petrone, Chaney Kalinich, Isabel Ott, Arnau Casanovas, Catherine Muenker, Adam Moore, Alice Lu, Maria Tokuyama, Patrick Wong, Peiwen Lu, Saad Omer, Richard Martinello, Allison Nelson, Shelli Farhadian, Akiko Iwasaki, Charlese Dela Cruz, Albert Ko, Nathan Grubaugh                                                                                           |

|                                                                                                                                                                                                                                                                                                                                                                                                                                                                                                                                                                                                                                                                                                                                                                                                                                                                                                                                                                                                                                                                                                                                                                                                                                                                                                                                                                                                                                                                                                                                                                                                                                                                                                                                                                                                                                                                                                                                                                                                                                                                                                                                                                                                                                                                                                                                                |           |                                                                                                                  |                                                              |                                                                                                                                                                                                                                                                                                                                                                                                                                                                                                                                                                                                                                                                                                                                                                                                               |
|------------------------------------------------------------------------------------------------------------------------------------------------------------------------------------------------------------------------------------------------------------------------------------------------------------------------------------------------------------------------------------------------------------------------------------------------------------------------------------------------------------------------------------------------------------------------------------------------------------------------------------------------------------------------------------------------------------------------------------------------------------------------------------------------------------------------------------------------------------------------------------------------------------------------------------------------------------------------------------------------------------------------------------------------------------------------------------------------------------------------------------------------------------------------------------------------------------------------------------------------------------------------------------------------------------------------------------------------------------------------------------------------------------------------------------------------------------------------------------------------------------------------------------------------------------------------------------------------------------------------------------------------------------------------------------------------------------------------------------------------------------------------------------------------------------------------------------------------------------------------------------------------------------------------------------------------------------------------------------------------------------------------------------------------------------------------------------------------------------------------------------------------------------------------------------------------------------------------------------------------------------------------------------------------------------------------------------------------|-----------|------------------------------------------------------------------------------------------------------------------|--------------------------------------------------------------|---------------------------------------------------------------------------------------------------------------------------------------------------------------------------------------------------------------------------------------------------------------------------------------------------------------------------------------------------------------------------------------------------------------------------------------------------------------------------------------------------------------------------------------------------------------------------------------------------------------------------------------------------------------------------------------------------------------------------------------------------------------------------------------------------------------|
| EPI_ISL_419517, EPI_ISL_419518, EPI_ISL_419519, EPI_ISL_419520, EPI_ISL_419521, EPI_ISL_419522, EPI_ISL_419523, EPI_ISL_419524, EPI_ISL_419525, EPI_ISL_419526, EPI_ISL_419527, EPI_ISL_419528                                                                                                                                                                                                                                                                                                                                                                                                                                                                                                                                                                                                                                                                                                                                                                                                                                                                                                                                                                                                                                                                                                                                                                                                                                                                                                                                                                                                                                                                                                                                                                                                                                                                                                                                                                                                                                                                                                                                                                                                                                                                                                                                                 | see above | Yale Clinical Virology Laboratory                                                                                | Grubaugh Lab - Yale School of Public Health                  | Joseph Fauver, Anderson Brito, Tara Alpert, Chantal Vogels, Ellen Foxman, Albert Ko, Marie Landry, Nathan Grubaugh                                                                                                                                                                                                                                                                                                                                                                                                                                                                                                                                                                                                                                                                                            |
| EPI_ISL_420082                                                                                                                                                                                                                                                                                                                                                                                                                                                                                                                                                                                                                                                                                                                                                                                                                                                                                                                                                                                                                                                                                                                                                                                                                                                                                                                                                                                                                                                                                                                                                                                                                                                                                                                                                                                                                                                                                                                                                                                                                                                                                                                                                                                                                                                                                                                                 |           | Centers for Disease Control, R.O.C. (Taiwan)                                                                     | Centers for Disease Control, R.O.C. (Taiwan)                 | Ji-Rong Yang, Yu-Chi-Lin, Jung-Jung Mu, Ming-Tsan Liu                                                                                                                                                                                                                                                                                                                                                                                                                                                                                                                                                                                                                                                                                                                                                         |
| EPI_ISL_420083, EPI_ISL_420084, EPI_ISL_420085                                                                                                                                                                                                                                                                                                                                                                                                                                                                                                                                                                                                                                                                                                                                                                                                                                                                                                                                                                                                                                                                                                                                                                                                                                                                                                                                                                                                                                                                                                                                                                                                                                                                                                                                                                                                                                                                                                                                                                                                                                                                                                                                                                                                                                                                                                 |           | Centers for Disease Control, R.O.C. (Taiwan)                                                                     | Centers for Disease Control, R.O.C. (Taiwan)                 | Ji-Rong Yang, Yu-Chi Lin, Jung-Jung Mu, Ming-Tsan Liu                                                                                                                                                                                                                                                                                                                                                                                                                                                                                                                                                                                                                                                                                                                                                         |
| EPI_ISL_420086, EPI_ISL_420087, EPI_ISL_420088, EPI_ISL_420089, EPI_ISL_420090, EPI_ISL_420091, EPI_ISL_420092, EPI_ISL_420093, EPI_ISL_420094, EPI_ISL_420095, EPI_ISL_420096, EPI_ISL_420097, EPI_ISL_420098                                                                                                                                                                                                                                                                                                                                                                                                                                                                                                                                                                                                                                                                                                                                                                                                                                                                                                                                                                                                                                                                                                                                                                                                                                                                                                                                                                                                                                                                                                                                                                                                                                                                                                                                                                                                                                                                                                                                                                                                                                                                                                                                 | see above | Yale Clinical Virology Laboratory                                                                                | Grubaugh Lab - Yale School of Public Health                  | Joseph Fauver, Anderson Brito, Tara Alpert, Chantal Vogels, Ellen Foxman, Albert Ko, Marie Landry, Nathan Grubaugh                                                                                                                                                                                                                                                                                                                                                                                                                                                                                                                                                                                                                                                                                            |
| EPI_ISL_420134                                                                                                                                                                                                                                                                                                                                                                                                                                                                                                                                                                                                                                                                                                                                                                                                                                                                                                                                                                                                                                                                                                                                                                                                                                                                                                                                                                                                                                                                                                                                                                                                                                                                                                                                                                                                                                                                                                                                                                                                                                                                                                                                                                                                                                                                                                                                 |           | Akershus University Hospital, Department for Microbiology and Infectious Disease Control                         | Norwegian Institute of Public Health, Department of Virology | Kathrine Stene-Johansen, Kamilla Heddeland Instefjord, Hilde Elshaug, Karoline Bragstad, Olav Hungnes                                                                                                                                                                                                                                                                                                                                                                                                                                                                                                                                                                                                                                                                                                         |
| EPI_ISL_420135                                                                                                                                                                                                                                                                                                                                                                                                                                                                                                                                                                                                                                                                                                                                                                                                                                                                                                                                                                                                                                                                                                                                                                                                                                                                                                                                                                                                                                                                                                                                                                                                                                                                                                                                                                                                                                                                                                                                                                                                                                                                                                                                                                                                                                                                                                                                 |           | Oslo University Hospital, Department of Medical Microbiology                                                     | Norwegian Institute of Public Health, Department of Virology | Kathrine Stene-Johansen, Kamilla Heddeland Instefjord, Hilde Elshaug, Karoline Bragstad, Olav Hungnes                                                                                                                                                                                                                                                                                                                                                                                                                                                                                                                                                                                                                                                                                                         |
| EPI_ISL_420136                                                                                                                                                                                                                                                                                                                                                                                                                                                                                                                                                                                                                                                                                                                                                                                                                                                                                                                                                                                                                                                                                                                                                                                                                                                                                                                                                                                                                                                                                                                                                                                                                                                                                                                                                                                                                                                                                                                                                                                                                                                                                                                                                                                                                                                                                                                                 |           | Akershus University Hospital, Department for Microbiology and Infectious Disease Control                         | Norwegian Institute of Public Health, Department of Virology | Kathrine Stene-Johansen, Kamilla Heddeland Instefjord, Hilde Elshaug, Karoline Bragstad, Olav Hungnes                                                                                                                                                                                                                                                                                                                                                                                                                                                                                                                                                                                                                                                                                                         |
| EPI_ISL_420137                                                                                                                                                                                                                                                                                                                                                                                                                                                                                                                                                                                                                                                                                                                                                                                                                                                                                                                                                                                                                                                                                                                                                                                                                                                                                                                                                                                                                                                                                                                                                                                                                                                                                                                                                                                                                                                                                                                                                                                                                                                                                                                                                                                                                                                                                                                                 |           | Vestfold Hospital, Tonsberg Department of Microbiology                                                           | Norwegian Institute of Public Health, Department of Virology | Kathrine Stene-Johansen, Kamilla Heddeland Instefjord, Hilde Elshaug, Karoline Bragstad, Olav Hungnes                                                                                                                                                                                                                                                                                                                                                                                                                                                                                                                                                                                                                                                                                                         |
| EPI_ISL_420138                                                                                                                                                                                                                                                                                                                                                                                                                                                                                                                                                                                                                                                                                                                                                                                                                                                                                                                                                                                                                                                                                                                                                                                                                                                                                                                                                                                                                                                                                                                                                                                                                                                                                                                                                                                                                                                                                                                                                                                                                                                                                                                                                                                                                                                                                                                                 |           | University Hospital of Northern Norway, Department for Microbiology and Infectious Disease Control               | Norwegian Institute of Public Health, Department of Virology | Kathrine Stene-Johansen, Kamilla Heddeland Instefjord, Hilde Elshaug, Karoline Bragstad, Olav Hungnes                                                                                                                                                                                                                                                                                                                                                                                                                                                                                                                                                                                                                                                                                                         |
| EPI_ISL_420139                                                                                                                                                                                                                                                                                                                                                                                                                                                                                                                                                                                                                                                                                                                                                                                                                                                                                                                                                                                                                                                                                                                                                                                                                                                                                                                                                                                                                                                                                                                                                                                                                                                                                                                                                                                                                                                                                                                                                                                                                                                                                                                                                                                                                                                                                                                                 |           | Akershus University Hospital, Department for Microbiology and Infectious Disease Control                         | Norwegian Institute of Public Health, Department of Virology | Kathrine Stene-Johansen, Kamilla Heddeland Instefjord, Hilde Elshaug, Karoline Bragstad, Olav Hungnes                                                                                                                                                                                                                                                                                                                                                                                                                                                                                                                                                                                                                                                                                                         |
| EPI_ISL_420141                                                                                                                                                                                                                                                                                                                                                                                                                                                                                                                                                                                                                                                                                                                                                                                                                                                                                                                                                                                                                                                                                                                                                                                                                                                                                                                                                                                                                                                                                                                                                                                                                                                                                                                                                                                                                                                                                                                                                                                                                                                                                                                                                                                                                                                                                                                                 |           | Furst Medical Laboratory                                                                                         | Norwegian Institute of Public Health, Department of Virology | Kathrine Stene-Johansen, Kamilla Heddeland Instefjord, Hilde Elshaug, Karoline Bragstad, Olav Hungnes                                                                                                                                                                                                                                                                                                                                                                                                                                                                                                                                                                                                                                                                                                         |
| EPI_ISL_420143                                                                                                                                                                                                                                                                                                                                                                                                                                                                                                                                                                                                                                                                                                                                                                                                                                                                                                                                                                                                                                                                                                                                                                                                                                                                                                                                                                                                                                                                                                                                                                                                                                                                                                                                                                                                                                                                                                                                                                                                                                                                                                                                                                                                                                                                                                                                 |           | Unilabs Laboratory Medicine                                                                                      | Norwegian Institute of Public Health, Department of Virology | Kathrine Stene-Johansen, Kamilla Heddeland Instefjord, Hilde Elshaug, Karoline Bragstad, Olav Hungnes                                                                                                                                                                                                                                                                                                                                                                                                                                                                                                                                                                                                                                                                                                         |
| EPI_ISL_420145                                                                                                                                                                                                                                                                                                                                                                                                                                                                                                                                                                                                                                                                                                                                                                                                                                                                                                                                                                                                                                                                                                                                                                                                                                                                                                                                                                                                                                                                                                                                                                                                                                                                                                                                                                                                                                                                                                                                                                                                                                                                                                                                                                                                                                                                                                                                 |           | Forde Hospital Department of Microbiology                                                                        | Norwegian Institute of Public Health, Department of Virology | Kathrine Stene-Johansen, Kamilla Heddeland Instefjord, Hilde Elshaug, Karoline Bragstad, Olav Hungnes                                                                                                                                                                                                                                                                                                                                                                                                                                                                                                                                                                                                                                                                                                         |
| EPI_ISL_420146                                                                                                                                                                                                                                                                                                                                                                                                                                                                                                                                                                                                                                                                                                                                                                                                                                                                                                                                                                                                                                                                                                                                                                                                                                                                                                                                                                                                                                                                                                                                                                                                                                                                                                                                                                                                                                                                                                                                                                                                                                                                                                                                                                                                                                                                                                                                 |           | Furst Medical Laboratory                                                                                         | Norwegian Institute of Public Health, Department of Virology | Kathrine Stene-Johansen, Kamilla Heddeland Instefjord, Hilde Elshaug, Karoline Bragstad, Olav Hungnes                                                                                                                                                                                                                                                                                                                                                                                                                                                                                                                                                                                                                                                                                                         |
| EPI_ISL_420147                                                                                                                                                                                                                                                                                                                                                                                                                                                                                                                                                                                                                                                                                                                                                                                                                                                                                                                                                                                                                                                                                                                                                                                                                                                                                                                                                                                                                                                                                                                                                                                                                                                                                                                                                                                                                                                                                                                                                                                                                                                                                                                                                                                                                                                                                                                                 |           | Hospital of Southern Norway - Kristiansand, Department of Medical Microbiology                                   | Norwegian Institute of Public Health, Department of Virology | Kathrine Stene-Johansen, Kamilla Heddeland Instefjord, Hilde Elshaug, Karoline Bragstad, Olav Hungnes                                                                                                                                                                                                                                                                                                                                                                                                                                                                                                                                                                                                                                                                                                         |
| EPI_ISL_420148                                                                                                                                                                                                                                                                                                                                                                                                                                                                                                                                                                                                                                                                                                                                                                                                                                                                                                                                                                                                                                                                                                                                                                                                                                                                                                                                                                                                                                                                                                                                                                                                                                                                                                                                                                                                                                                                                                                                                                                                                                                                                                                                                                                                                                                                                                                                 |           | Ostfold Hospital Trust -Kalmes Centre for Laboratory Medicine Section for gene technology and infection serology | Norwegian Institute of Public Health, Department of Virology | Kathrine Stene-Johansen, Kamilla Heddeland Instefjord, Hilde Elshaug, Karoline Bragstad, Olav Hungnes                                                                                                                                                                                                                                                                                                                                                                                                                                                                                                                                                                                                                                                                                                         |
| EPI_ISL_420149                                                                                                                                                                                                                                                                                                                                                                                                                                                                                                                                                                                                                                                                                                                                                                                                                                                                                                                                                                                                                                                                                                                                                                                                                                                                                                                                                                                                                                                                                                                                                                                                                                                                                                                                                                                                                                                                                                                                                                                                                                                                                                                                                                                                                                                                                                                                 |           | Stavanger University Hospital, Department of Medical Microbiology                                                | Norwegian Institute of Public Health, Department of Virology | Kathrine Stene-Johansen, Kamilla Heddeland Instefjord, Hilde Elshaug, Karoline Bragstad, Olav Hungnes                                                                                                                                                                                                                                                                                                                                                                                                                                                                                                                                                                                                                                                                                                         |
| EPI_ISL_420150                                                                                                                                                                                                                                                                                                                                                                                                                                                                                                                                                                                                                                                                                                                                                                                                                                                                                                                                                                                                                                                                                                                                                                                                                                                                                                                                                                                                                                                                                                                                                                                                                                                                                                                                                                                                                                                                                                                                                                                                                                                                                                                                                                                                                                                                                                                                 |           | Oslo University Hospital, Department of Medical Microbiology                                                     | Norwegian Institute of Public Health, Department of Virology | Kathrine Stene-Johansen, Kamilla Heddeland Instefjord, Hilde Elshaug, Karoline Bragstad, Olav Hungnes                                                                                                                                                                                                                                                                                                                                                                                                                                                                                                                                                                                                                                                                                                         |
| EPI_ISL_420151                                                                                                                                                                                                                                                                                                                                                                                                                                                                                                                                                                                                                                                                                                                                                                                                                                                                                                                                                                                                                                                                                                                                                                                                                                                                                                                                                                                                                                                                                                                                                                                                                                                                                                                                                                                                                                                                                                                                                                                                                                                                                                                                                                                                                                                                                                                                 |           | Nordland Hospital - Bodo, Laboratory Department, Molecular Biology Unit                                          | Norwegian Institute of Public Health, Department of Virology | Kathrine Stene-Johansen, Kamilla Heddeland Instefjord, Hilde Elshaug, Karoline Bragstad, Olav Hungnes                                                                                                                                                                                                                                                                                                                                                                                                                                                                                                                                                                                                                                                                                                         |
| EPI_ISL_420152, EPI_ISL_420153, EPI_ISL_420310                                                                                                                                                                                                                                                                                                                                                                                                                                                                                                                                                                                                                                                                                                                                                                                                                                                                                                                                                                                                                                                                                                                                                                                                                                                                                                                                                                                                                                                                                                                                                                                                                                                                                                                                                                                                                                                                                                                                                                                                                                                                                                                                                                                                                                                                                                 |           | University Hospital of Northern Norway, Department for Microbiology and Infectious Disease Control               | Norwegian Institute of Public Health, Department of Virology | Kathrine Stene-Johansen, Kamilla Heddeland Instefjord, Hilde Elshaug, Karoline Bragstad, Olav Hungnes                                                                                                                                                                                                                                                                                                                                                                                                                                                                                                                                                                                                                                                                                                         |
| EPI_ISL_420311, EPI_ISL_420312                                                                                                                                                                                                                                                                                                                                                                                                                                                                                                                                                                                                                                                                                                                                                                                                                                                                                                                                                                                                                                                                                                                                                                                                                                                                                                                                                                                                                                                                                                                                                                                                                                                                                                                                                                                                                                                                                                                                                                                                                                                                                                                                                                                                                                                                                                                 |           | Akershus University Hospital, Department for Microbiology and Infectious Disease Control                         | Norwegian Institute of Public Health, Department of Virology | Kathrine Stene-Johansen, Kamilla Heddeland Instefjord, Hilde Elshaug, Karoline Bragstad, Olav Hungnes                                                                                                                                                                                                                                                                                                                                                                                                                                                                                                                                                                                                                                                                                                         |
| EPI_ISL_420313                                                                                                                                                                                                                                                                                                                                                                                                                                                                                                                                                                                                                                                                                                                                                                                                                                                                                                                                                                                                                                                                                                                                                                                                                                                                                                                                                                                                                                                                                                                                                                                                                                                                                                                                                                                                                                                                                                                                                                                                                                                                                                                                                                                                                                                                                                                                 |           | Furst Medical Laboratory                                                                                         | Norwegian Institute of Public Health, Department of Virology | Kathrine Stene-Johansen, Kamilla Heddeland Instefjord, Hilde Elshaug, Karoline Bragstad, Olav Hungnes                                                                                                                                                                                                                                                                                                                                                                                                                                                                                                                                                                                                                                                                                                         |
| EPI_ISL_420314, EPI_ISL_420315, EPI_ISL_420316, EPI_ISL_420317, EPI_ISL_420318, EPI_ISL_420319, EPI_ISL_420320, EPI_ISL_420321, EPI_ISL_420322, EPI_ISL_420323, EPI_ISL_420324, EPI_ISL_420325, EPI_ISL_420326, EPI_ISL_420327, EPI_ISL_420328, EPI_ISL_420329, EPI_ISL_420330, EPI_ISL_420331, EPI_ISL_420332, EPI_ISL_420333, EPI_ISL_420334, EPI_ISL_420335, EPI_ISL_420336, EPI_ISL_420337, EPI_ISL_420338, EPI_ISL_420339, EPI_ISL_420340, EPI_ISL_420341, EPI_ISL_420342, EPI_ISL_420343, EPI_ISL_420344, EPI_ISL_420345, EPI_ISL_420346, EPI_ISL_420347, EPI_ISL_420348, EPI_ISL_420349, EPI_ISL_420350, EPI_ISL_420351, EPI_ISL_420352, EPI_ISL_420353, EPI_ISL_420354, EPI_ISL_420355, EPI_ISL_420356, EPI_ISL_420357, EPI_ISL_420358, EPI_ISL_420359, EPI_ISL_420360, EPI_ISL_420361, EPI_ISL_420362, EPI_ISL_420363, EPI_ISL_420364, EPI_ISL_420365, EPI_ISL_420366, EPI_ISL_420367, EPI_ISL_420368, EPI_ISL_420369, EPI_ISL_420370, EPI_ISL_420371, EPI_ISL_420372, EPI_ISL_420373, EPI_ISL_420374, EPI_ISL_420375, EPI_ISL_420376, EPI_ISL_420377, EPI_ISL_420378, EPI_ISL_420379, EPI_ISL_420380, EPI_ISL_420381, EPI_ISL_420382, EPI_ISL_420383, EPI_ISL_420384, EPI_ISL_420385, EPI_ISL_420386, EPI_ISL_420387, EPI_ISL_420388, EPI_ISL_420389, EPI_ISL_420390, EPI_ISL_420391, EPI_ISL_420392, EPI_ISL_420393, EPI_ISL_420394, EPI_ISL_420395, EPI_ISL_420396, EPI_ISL_420397, EPI_ISL_420398, EPI_ISL_420399, EPI_ISL_420400, EPI_ISL_420401, EPI_ISL_420402, EPI_ISL_420403, EPI_ISL_420404, EPI_ISL_420405, EPI_ISL_420406, EPI_ISL_420407, EPI_ISL_420408, EPI_ISL_420409, EPI_ISL_420410, EPI_ISL_420411, EPI_ISL_420412, EPI_ISL_420413, EPI_ISL_420414, EPI_ISL_420415, EPI_ISL_420416, EPI_ISL_420417, EPI_ISL_420418, EPI_ISL_420419, EPI_ISL_420420, EPI_ISL_420421, EPI_ISL_420422, EPI_ISL_420423, EPI_ISL_420424, EPI_ISL_420425, EPI_ISL_420426, EPI_ISL_420427, EPI_ISL_420428, EPI_ISL_420429, EPI_ISL_420430, EPI_ISL_420431, EPI_ISL_420432, EPI_ISL_420433, EPI_ISL_420434, EPI_ISL_420435, EPI_ISL_420436, EPI_ISL_420437, EPI_ISL_420438, EPI_ISL_420439, EPI_ISL_420440, EPI_ISL_420441, EPI_ISL_420442, EPI_ISL_420443, EPI_ISL_420444, EPI_ISL_420445, EPI_ISL_420446, EPI_ISL_420447, EPI_ISL_420448, EPI_ISL_420449, EPI_ISL_420450, EPI_ISL_420451, EPI_ISL_420452, EPI_ISL_420453, EPI_ISL_420454 | see above | KU Leuven, Clinical and Epidemiological Virology                                                                 | KU Leuven, Clinical and Epidemiological Virology             | Joan Marti-Carreras, Bert Vanmechelen, Tony Wawina, Piet Maes                                                                                                                                                                                                                                                                                                                                                                                                                                                                                                                                                                                                                                                                                                                                                 |
| EPI_ISL_421184, EPI_ISL_421188, EPI_ISL_421189, EPI_ISL_421191, EPI_ISL_421192, EPI_ISL_421195, EPI_ISL_421196, EPI_ISL_421199, EPI_ISL_421212                                                                                                                                                                                                                                                                                                                                                                                                                                                                                                                                                                                                                                                                                                                                                                                                                                                                                                                                                                                                                                                                                                                                                                                                                                                                                                                                                                                                                                                                                                                                                                                                                                                                                                                                                                                                                                                                                                                                                                                                                                                                                                                                                                                                 |           | Department of Clinical Microbiology                                                                              | GIGA Medical Genomics                                        | Keith Durkin, Maria Artesi, Sébastien Bontems, Raphaël Boreux, Cécile Meex, Pierrette Melin, Marie-Pierre Hayette, Vincent Bours.                                                                                                                                                                                                                                                                                                                                                                                                                                                                                                                                                                                                                                                                             |
| EPI_ISL_421221, EPI_ISL_421222, EPI_ISL_421223, EPI_ISL_421224, EPI_ISL_421225, EPI_ISL_421226, EPI_ISL_421227, EPI_ISL_421228, EPI_ISL_421229, EPI_ISL_421230, EPI_ISL_421231, EPI_ISL_421232, EPI_ISL_421233, EPI_ISL_421234, EPI_ISL_421235, EPI_ISL_421236                                                                                                                                                                                                                                                                                                                                                                                                                                                                                                                                                                                                                                                                                                                                                                                                                                                                                                                                                                                                                                                                                                                                                                                                                                                                                                                                                                                                                                                                                                                                                                                                                                                                                                                                                                                                                                                                                                                                                                                                                                                                                 | see above | Hangzhou Center for Diseases Control and Prevention                                                              | Hangzhou Center for Diseases Control and Prevention          | Jun Li, Haoqiu Wang, Lingfeng Mao, Hua Yu, Xinfen Yu, Zhou Sun, Xin Qian, Shuchang Chen, Junfang Chen, Xuchu Wang                                                                                                                                                                                                                                                                                                                                                                                                                                                                                                                                                                                                                                                                                             |
| EPI_ISL_421237, EPI_ISL_421238, EPI_ISL_421239, EPI_ISL_421240, EPI_ISL_421241, EPI_ISL_421242, EPI_ISL_421243, EPI_ISL_421244, EPI_ISL_421245, EPI_ISL_421246, EPI_ISL_421247, EPI_ISL_421248, EPI_ISL_421249, EPI_ISL_421250, EPI_ISL_421251, EPI_ISL_421252, EPI_ISL_421253, EPI_ISL_421254, EPI_ISL_421256, EPI_ISL_421257, EPI_ISL_421258, EPI_ISL_421259, EPI_ISL_421260, EPI_ISL_421261, EPI_ISL_421262                                                                                                                                                                                                                                                                                                                                                                                                                                                                                                                                                                                                                                                                                                                                                                                                                                                                                                                                                                                                                                                                                                                                                                                                                                                                                                                                                                                                                                                                                                                                                                                                                                                                                                                                                                                                                                                                                                                                 | see above | Jiangxi Province Center for Disease Control and Prevention                                                       | Jiangxi Province Center for Disease Control and Prevention   | JianXiong Li, Ying Xiong, Tian Gong, Yong Shi, Jun Zhou, Fang Xiao, ShiWen Liu, XiaoQing Liu, Gang Xu, DaJin Xiao, Xin Ran, YanNi Zhang                                                                                                                                                                                                                                                                                                                                                                                                                                                                                                                                                                                                                                                                       |
| EPI_ISL_421641, EPI_ISL_421651                                                                                                                                                                                                                                                                                                                                                                                                                                                                                                                                                                                                                                                                                                                                                                                                                                                                                                                                                                                                                                                                                                                                                                                                                                                                                                                                                                                                                                                                                                                                                                                                                                                                                                                                                                                                                                                                                                                                                                                                                                                                                                                                                                                                                                                                                                                 |           | Centers for Disease Control, R.O.C. (Taiwan)                                                                     | Centers for Disease Control, R.O.C. (Taiwan)                 | Ji-Rong Yang, Yu-Chi Lin, Jung-Jung Mu, Ming-Tsan Liu                                                                                                                                                                                                                                                                                                                                                                                                                                                                                                                                                                                                                                                                                                                                                         |
| EPI_ISL_422382                                                                                                                                                                                                                                                                                                                                                                                                                                                                                                                                                                                                                                                                                                                                                                                                                                                                                                                                                                                                                                                                                                                                                                                                                                                                                                                                                                                                                                                                                                                                                                                                                                                                                                                                                                                                                                                                                                                                                                                                                                                                                                                                                                                                                                                                                                                                 |           | NMIMR, Department of Virology                                                                                    | WACCBIP, University of Ghana                                 | Joyce M. Ngoi, Bright Adu, Collins M. Misita, Selassie Kumordjie, Miriam Eshun, Linda Boatemaa, Vanessa Magnussen, Erasmus Kotey, Fred Tei-Maya, Dominic S. Y. Amuzu, Peter Quashie, Augustina Arjaquah, Ivy Asante, Evelyn Bonney, George B. Kyei, Kofi Bonney, Gordon A. Awandare, William Ampofo                                                                                                                                                                                                                                                                                                                                                                                                                                                                                                           |
| EPI_ISL_422384, EPI_ISL_422387, EPI_ISL_422390, EPI_ISL_422394, EPI_ISL_422397, EPI_ISL_422398, EPI_ISL_422399, EPI_ISL_422400, EPI_ISL_422401, EPI_ISL_422402, EPI_ISL_422403, EPI_ISL_422404, EPI_ISL_422405, EPI_ISL_422406                                                                                                                                                                                                                                                                                                                                                                                                                                                                                                                                                                                                                                                                                                                                                                                                                                                                                                                                                                                                                                                                                                                                                                                                                                                                                                                                                                                                                                                                                                                                                                                                                                                                                                                                                                                                                                                                                                                                                                                                                                                                                                                 | see above | NMIMR, Department of Virology                                                                                    | WACCBIP, University of Ghana                                 | Joyce M. Ngoi, Bright Adu, Collins M. Morang'a, Selassie Kumordjie, Miriam Eshun, Linda Boatemaa, Vanessa Magnussen, Erasmus Kotey, Fred Tei-Maya, Dominic S. Y. Amuzu, Peter Quashie, Augustina Arjaquah, Ivy Asante, Evelyn Bonney, George B. Kyei, Kofi Bonney, Abraham Kwabena Anang, Gordon A. Awandare, William Ampofo                                                                                                                                                                                                                                                                                                                                                                                                                                                                                  |
| EPI_ISL_422564                                                                                                                                                                                                                                                                                                                                                                                                                                                                                                                                                                                                                                                                                                                                                                                                                                                                                                                                                                                                                                                                                                                                                                                                                                                                                                                                                                                                                                                                                                                                                                                                                                                                                                                                                                                                                                                                                                                                                                                                                                                                                                                                                                                                                                                                                                                                 |           | Institute of Microbiology Universidad San Francisco de Quito                                                     | Institute of Microbiology Universidad San Francisco de Quito | Juan Jose Guadalupe, Belen Prado-Vivar, Sully Marquez, Bernardo Gutierrez, Francisco Mora, Juan Gaviria, Alejandra Ramones, Franklin Espinoza, Edison Ligna, Jorge Reyes, Patricio Rojas-Silva, Veronica Barragan, Gabriel Trueba, Michelle Grunauer, Paul Cardenas                                                                                                                                                                                                                                                                                                                                                                                                                                                                                                                                           |
| EPI_ISL_424345, EPI_ISL_424348, EPI_ISL_424625, EPI_ISL_424626, EPI_ISL_424627                                                                                                                                                                                                                                                                                                                                                                                                                                                                                                                                                                                                                                                                                                                                                                                                                                                                                                                                                                                                                                                                                                                                                                                                                                                                                                                                                                                                                                                                                                                                                                                                                                                                                                                                                                                                                                                                                                                                                                                                                                                                                                                                                                                                                                                                 |           | Instituto Nacional de Enfermedades Respiratorias                                                                 | Instituto Nacional de Enfermedades Respiratorias             | Joel Armando Vázquez Pérez, Celia Boukadida, Santiago Avila Rios, Mario Mújica Sánchez, José Arturo Martínez Orozco, Eduardo Becerril Vargas, Jorge Salas Hernández, Irma López Martínez, Lucia Hernández Rivas, Gisela Barrera Badillo, Edgar Mendieta Cordero, Fabiola Garcés Ayala, Adnan Araiza Rodríguez, José Ernesto Ramírez González, Victor Hugo Borja Aburto, Concepción Grajales Muñoz, Cesar Raúl González Bonilla, Carolina González Torres, Francisco Javier Gaytán Cervantes, José Esteban Muñoz Medina, Guillermo M. Ruiz-Palacios, Pilar Ramos Cervantes, Violeta Ibarra González, Fernando Ledesma Barrientos, Luis Alberto García Andrade, Alfredo Ponce de León Garduño, Blanca Taboada, Alejandro Sánchez, Pavel Isa, Ricardo Grande, Gloria Vázquez, Francisco Pulido, Carlos F. Arias. |

|                                                                                                                                                                                                                                                                                                                |                                                                                                                                     |                                                                                                                                     |                                                                                                                                                                                                                                                                                                                                                                                                                                                                                                                                                                                                                                                                                                                                                                                        |
|----------------------------------------------------------------------------------------------------------------------------------------------------------------------------------------------------------------------------------------------------------------------------------------------------------------|-------------------------------------------------------------------------------------------------------------------------------------|-------------------------------------------------------------------------------------------------------------------------------------|----------------------------------------------------------------------------------------------------------------------------------------------------------------------------------------------------------------------------------------------------------------------------------------------------------------------------------------------------------------------------------------------------------------------------------------------------------------------------------------------------------------------------------------------------------------------------------------------------------------------------------------------------------------------------------------------------------------------------------------------------------------------------------------|
| EPI_ISL_424635, EPI_ISL_424636, EPI_ISL_424639, EPI_ISL_424644, EPI_ISL_424647, EPI_ISL_424659, EPI_ISL_424663, EPI_ISL_424665                                                                                                                                                                                 | Department of Clinical Microbiology                                                                                                 | GIGA Medical Genomics                                                                                                               | Keith Durkin, Maria Artesi, Sébastien Bontems, Raphaël Boreux, Cécile Meex, Pierrette Melin, Marie-Pierre Hayette, Vincent Bours.                                                                                                                                                                                                                                                                                                                                                                                                                                                                                                                                                                                                                                                      |
| EPI_ISL_424666                                                                                                                                                                                                                                                                                                 | Instituto de Diagnóstico y Referencia Epidemiológicos                                                                               | Instituto de Diagnóstico y Referencia Epidemiológicos                                                                               | José Ernesto Ramírez González, Irma López Martínez, Lucia Hernández Rivas, Gisela Barrera Badillo, Edgar Mendieta Condado, Fabiola Garcés Ayala, Adnan Araiza Rodríguez, Celia Boukadida, Santiago Avila Ríos, Mario Mújica Sánchez, José Arturo Martínez Orozco, Eduardo Becerril Vargas, Joel Armando Vázquez Pérez, Víctor Hugo Borja Aburto, Concepción Grajales Muñiz, Cesar Raúl González Bonilla, Carolina González Torres, Francisco Javier Gaytán Cervantes, José Esteban Muñoz Medina, Guillermo M. Ruiz-Palacios, Pilar Ramos Cervantes, Violeta Ibarra Gonzalez, Fernando Ledesma Barrientos, Luis Alberto García Andrade, Alfredo Ponce de León Garduño, Blanca Taboada, Alejandro Sánchez, Pavel Isa, Ricardo Grande, Gloria Vázquez, Francisco Pulido, Carlos F. Arias. |
| EPI_ISL_425117, EPI_ISL_425118                                                                                                                                                                                                                                                                                 | Division of Viral Diseases, Center for Laboratory Control of Infectious Diseases, Korea Centers for Diseases Control and Prevention | Division of Viral Diseases, Center for Laboratory Control of Infectious Diseases, Korea Centers for Diseases Control and Prevention | Jeong-Min Kim, Yoon-Seok Chung, Namjoo Lee, Mi-Seon Kim, Sang Hee Woo, Hye-Jun Jo, Sehee Park, Heui Man Kim, Jun-Sub Kim, Junhyeong Jang, Dong Hyun Song, Daesang Lee, Seong Tae Jeong, Myung Guk Han                                                                                                                                                                                                                                                                                                                                                                                                                                                                                                                                                                                  |
| EPI_ISL_426163                                                                                                                                                                                                                                                                                                 | Division of Viral Diseases, Center for Laboratory Control of Infectious Diseases, Korea Centers for Diseases Control and Prevention | Division of Viral Diseases, Center for Laboratory Control of Infectious Diseases, Korea Centers for Diseases Control and Prevention | Jeong-Min Kim, Yoon-Seok Chung, Namjoo Lee, Mi-Seon Kim, Sang Hee Woo, Hye-Jun Jo, Sehee Park, Heui Man Kim, Jun-Sub Kim, Junhyeong Jang, Myung Guk Han                                                                                                                                                                                                                                                                                                                                                                                                                                                                                                                                                                                                                                |
| EPI_ISL_426164                                                                                                                                                                                                                                                                                                 | Division of Viral Diseases, Center for Laboratory Control of Infectious Diseases, Korea Centers for Diseases Control and Prevention | Division of Viral Diseases, Center for Laboratory Control of Infectious Diseases, Korea Centers for Diseases Control and Prevention | Jeong-Min Kim, Yoon-Seok Chung, Namjoo Lee, Mi-Seon Kim, Sang Hee Woo, Hye-Jun Jo, Sehee Park, Heui Man Kim, Jun-Sub Kim, Junhyeong Jang, Dong Hyun Song, Daesang Lee, Seong Tae Jeong, Myung Guk Han                                                                                                                                                                                                                                                                                                                                                                                                                                                                                                                                                                                  |
| EPI_ISL_426166, EPI_ISL_426168                                                                                                                                                                                                                                                                                 | Division of Viral Diseases, Center for Laboratory Control of Infectious Diseases, Korea Centers for Diseases Control and Prevention | Division of Viral Diseases, Center for Laboratory Control of Infectious Diseases, Korea Centers for Diseases Control and Prevention | Jeong-Min Kim, Yoon-Seok Chung, Namjoo Lee, Mi-Seon Kim, Sang Hee Woo, Hye-Jun Jo, Sehee Park, Heui Man Kim, Jun-Sub Kim, Junhyeong Jang, Myung Guk Han                                                                                                                                                                                                                                                                                                                                                                                                                                                                                                                                                                                                                                |
| EPI_ISL_426169, EPI_ISL_426171                                                                                                                                                                                                                                                                                 | Division of Viral Diseases, Center for Laboratory Control of Infectious Diseases, Korea Centers for Diseases Control and Prevention | Division of Viral Diseases, Center for Laboratory Control of Infectious Diseases, Korea Centers for Diseases Control and Prevention | Jeong-Min Kim, Yoon-Seok Chung, Namjoo Lee, Mi-Seon Kim, Sang Hee Woo, Hye-Jun Jo, Sehee Park, Heui Man Kim, Jun-Sub Kim, Junhyeong Jang, Dong Hyun Song, Daesang Lee, Seong Tae Jeong, Myung Guk Han                                                                                                                                                                                                                                                                                                                                                                                                                                                                                                                                                                                  |
| EPI_ISL_426173, EPI_ISL_426180, EPI_ISL_426181, EPI_ISL_426182, EPI_ISL_426183, EPI_ISL_426187                                                                                                                                                                                                                 | Division of Viral Diseases, Center for Laboratory Control of Infectious Diseases, Korea Centers for Diseases Control and Prevention | Division of Viral Diseases, Center for Laboratory Control of Infectious Diseases, Korea Centers for Diseases Control and Prevention | Jeong-Min Kim, Yoon-Seok Chung, Namjoo Lee, Mi-Seon Kim, Sang Hee Woo, Hye-Jun Jo, Sehee Park, Heui Man Kim, Jun-Sub Kim, Junhyeong Jang, Myung Guk Han                                                                                                                                                                                                                                                                                                                                                                                                                                                                                                                                                                                                                                |
| EPI_ISL_426436, EPI_ISL_426438, EPI_ISL_426439, EPI_ISL_426442, EPI_ISL_426445, EPI_ISL_426450                                                                                                                                                                                                                 | WA State Department of Health                                                                                                       | Pathogen Discovery, Respiratory Viruses Branch, Division of Viral Diseases, Centers for Disease Control and Prevention              | Jing Zhang, Ying Tao, Clinton R. Paden, Krista Queen, Anna Uehara, Yan Li, Haibin Wang, Jessica Jacobs, Denny Russell, Brian Hiatt, Jessica Gant, Suxiang Tong                                                                                                                                                                                                                                                                                                                                                                                                                                                                                                                                                                                                                         |
| EPI_ISL_426483, EPI_ISL_426485                                                                                                                                                                                                                                                                                 | AZ SPHL, Arizona Department of Health Services                                                                                      | TGen North                                                                                                                          | Jolene Bowers, Megan Folkerts, Darrin Lemmer, Dave Engelthaler                                                                                                                                                                                                                                                                                                                                                                                                                                                                                                                                                                                                                                                                                                                         |
| EPI_ISL_426499, EPI_ISL_426500, EPI_ISL_426501, EPI_ISL_426502, EPI_ISL_426503, EPI_ISL_426504, EPI_ISL_426505, EPI_ISL_426506, EPI_ISL_426507, EPI_ISL_426508, EPI_ISL_426509, EPI_ISL_426510, EPI_ISL_426511                                                                                                 | see above                                                                                                                           | TGen North                                                                                                                          | Jolene Bowers, Megan Folkerts, Darrin Lemmer, Dave Engelthaler                                                                                                                                                                                                                                                                                                                                                                                                                                                                                                                                                                                                                                                                                                                         |
| EPI_ISL_426512, EPI_ISL_426513, EPI_ISL_426514, EPI_ISL_426515, EPI_ISL_426516, EPI_ISL_426517, EPI_ISL_426518, EPI_ISL_426519                                                                                                                                                                                 | AZ SPHL, Arizona Department of Health Services                                                                                      | TGen North                                                                                                                          | Jolene Bowers, Megan Folkerts, Darrin Lemmer, Dave Engelthaler                                                                                                                                                                                                                                                                                                                                                                                                                                                                                                                                                                                                                                                                                                                         |
| EPI_ISL_426520, EPI_ISL_426521, EPI_ISL_426522, EPI_ISL_426523, EPI_ISL_426524, EPI_ISL_426525, EPI_ISL_426526                                                                                                                                                                                                 | TGen North                                                                                                                          | TGen North                                                                                                                          | Jolene Bowers, Megan Folkerts, Darrin Lemmer, Dave Engelthaler                                                                                                                                                                                                                                                                                                                                                                                                                                                                                                                                                                                                                                                                                                                         |
| EPI_ISL_426527, EPI_ISL_426528, EPI_ISL_426529, EPI_ISL_426530, EPI_ISL_426531                                                                                                                                                                                                                                 | AZ SPHL, Arizona Department of Health Services                                                                                      | TGen North                                                                                                                          | Jolene Bowers, Megan Folkerts, Darrin Lemmer, Dave Engelthaler                                                                                                                                                                                                                                                                                                                                                                                                                                                                                                                                                                                                                                                                                                                         |
| EPI_ISL_426532, EPI_ISL_426533, EPI_ISL_426534, EPI_ISL_426535, EPI_ISL_426536                                                                                                                                                                                                                                 | TGen North                                                                                                                          | TGen North                                                                                                                          | Jolene Bowers, Megan Folkerts, Darrin Lemmer, Dave Engelthaler                                                                                                                                                                                                                                                                                                                                                                                                                                                                                                                                                                                                                                                                                                                         |
| EPI_ISL_426537, EPI_ISL_426538, EPI_ISL_426539, EPI_ISL_426540, EPI_ISL_426541, EPI_ISL_426542, EPI_ISL_426543, EPI_ISL_426544, EPI_ISL_426545, EPI_ISL_426546, EPI_ISL_426547, EPI_ISL_426548, EPI_ISL_426549, EPI_ISL_426550, EPI_ISL_426551, EPI_ISL_426552, EPI_ISL_426553, EPI_ISL_426554, EPI_ISL_426555 | see above                                                                                                                           | TGen North                                                                                                                          | Jolene Bowers, Megan Folkerts, Darrin Lemmer, Dave Engelthaler                                                                                                                                                                                                                                                                                                                                                                                                                                                                                                                                                                                                                                                                                                                         |
| EPI_ISL_426556, EPI_ISL_426557                                                                                                                                                                                                                                                                                 | AZ SPHL, Arizona Department of Health Services                                                                                      | TGen North                                                                                                                          | Jolene Bowers, Megan Folkerts, Darrin Lemmer, Dave Engelthaler                                                                                                                                                                                                                                                                                                                                                                                                                                                                                                                                                                                                                                                                                                                         |
| EPI_ISL_426558, EPI_ISL_426559, EPI_ISL_426560, EPI_ISL_426561, EPI_ISL_426562, EPI_ISL_426563, EPI_ISL_426564, EPI_ISL_426565, EPI_ISL_426566, EPI_ISL_426567, EPI_ISL_426568, EPI_ISL_426569, EPI_ISL_427271, EPI_ISL_427272                                                                                 | see above                                                                                                                           | TGen North                                                                                                                          | Jolene Bowers, Megan Folkerts, Darrin Lemmer, Dave Engelthaler                                                                                                                                                                                                                                                                                                                                                                                                                                                                                                                                                                                                                                                                                                                         |
| EPI_ISL_427341, EPI_ISL_427350, EPI_ISL_427352, EPI_ISL_427365, EPI_ISL_427368, EPI_ISL_427373, EPI_ISL_427378, EPI_ISL_427386, EPI_ISL_427388                                                                                                                                                                 | Department of Clinical Microbiology                                                                                                 | GIGA Medical Genomics                                                                                                               | Keith Durkin, Maria Artesi, Sébastien Bontems, Raphaël Boreux, Cécile Meex, Pierrette Melin, Marie-Pierre Hayette, Vincent Bours.                                                                                                                                                                                                                                                                                                                                                                                                                                                                                                                                                                                                                                                      |
| EPI_ISL_427809                                                                                                                                                                                                                                                                                                 | Division of Viral Diseases, Center for Laboratory Control of Infectious Diseases, Korea Centers for Diseases Control and Prevention | Division of Viral Diseases, Center for Laboratory Control of Infectious Diseases, Korea Centers for Diseases Control and Prevention | Jeong-Min Kim, Yoon-Seok Chung, Namjoo Lee, Mi-Seon Kim, Sang Hee Woo, Hye-Jun Jo, Sehee Park, Heui Man Kim, Jun-Sub Kim, Junhyeong Jang, Myung Guk Han                                                                                                                                                                                                                                                                                                                                                                                                                                                                                                                                                                                                                                |
| EPI_ISL_427810, EPI_ISL_427811, EPI_ISL_427812, EPI_ISL_427813                                                                                                                                                                                                                                                 | Division of Viral Diseases, Center for Laboratory Control of Infectious Diseases, Korea Centers for Diseases Control and Prevention | Division of Viral Diseases, Center for Laboratory Control of Infectious Diseases, Korea Centers for Diseases Control and Prevention | Jeong-Min Kim, Yoon-Seok Chung, Namjoo Lee, Mi-Seon Kim, Sang Hee Woo, Hye-Jun Jo, Sehee Park, Heui Man Kim, Jun-Sub Kim, Junhyeong Jang, Dong Hyun Song, Daesang Lee, Seong Tae Jeong, Myung Guk Han                                                                                                                                                                                                                                                                                                                                                                                                                                                                                                                                                                                  |
| EPI_ISL_428250, EPI_ISL_428370, EPI_ISL_428371, EPI_ISL_428372                                                                                                                                                                                                                                                 | Yale Clinical Virology Laboratory                                                                                                   | Grubaugh Lab - Yale School of Public Health                                                                                         | Joseph Fauver, Anderson Brito, Tara Alpert, Chantal Vogels, Ellen Foxman, Albert Ko, Marie Landry, Nathan Grubaugh                                                                                                                                                                                                                                                                                                                                                                                                                                                                                                                                                                                                                                                                     |
| EPI_ISL_428373, EPI_ISL_428374, EPI_ISL_428375, EPI_ISL_428376, EPI_ISL_428377, EPI_ISL_428378, EPI_ISL_428379, EPI_ISL_428380                                                                                                                                                                                 | Yale COVID-19 Biorepository                                                                                                         | Grubaugh Lab - Yale School of Public Health                                                                                         | Joseph Fauver, Tara Alpert, Anderson Brito, Anne Wyllie, Chantal Vogels, Mary Petrone, Chaney Kalinich, Isabel Ott, Arnau Casanovas, Catherine Muenker, Adam Moore, Alice Lu, Maria Tokuyama, Patrick Wong, Peiwen Lu, Saad Omer, Richard Martinello, Allison Nelson, Shelli Farhadian, Akiko Iwasaki, Charlese Dela Cruz, Albert Ko, Nathan Grubaugh                                                                                                                                                                                                                                                                                                                                                                                                                                  |
| EPI_ISL_428381, EPI_ISL_428382                                                                                                                                                                                                                                                                                 | Yale Clinical Virology Laboratory                                                                                                   | Grubaugh Lab - Yale School of Public Health                                                                                         | Joseph Fauver, Anderson Brito, Tara Alpert, Chantal Vogels, Ellen Foxman, Albert Ko, Marie Landry, Nathan Grubaugh                                                                                                                                                                                                                                                                                                                                                                                                                                                                                                                                                                                                                                                                     |
| EPI_ISL_428384, EPI_ISL_428385, EPI_ISL_428386, EPI_ISL_428387, EPI_ISL_428388, EPI_ISL_428389, EPI_ISL_428390, EPI_ISL_428391, EPI_ISL_428392, EPI_ISL_428393, EPI_ISL_428394, EPI_ISL_428395, EPI_ISL_428396, EPI_ISL_428397, EPI_ISL_428398                                                                 | see above                                                                                                                           | TGen North                                                                                                                          | Jolene Bowers, Megan Folkerts, Darrin Lemmer, Dave Engelthaler                                                                                                                                                                                                                                                                                                                                                                                                                                                                                                                                                                                                                                                                                                                         |

|                                                                                                                                                                                                                                                                                                                                                                                                                                                                                                                                                                                                                                                                                                                                                                |                                                                   |                                                                                            |                                                                                                                                                                                                                                                                                                                                                                                              |                                                                                                                                                                                                                                                                                                                                                                                                                                   |
|----------------------------------------------------------------------------------------------------------------------------------------------------------------------------------------------------------------------------------------------------------------------------------------------------------------------------------------------------------------------------------------------------------------------------------------------------------------------------------------------------------------------------------------------------------------------------------------------------------------------------------------------------------------------------------------------------------------------------------------------------------------|-------------------------------------------------------------------|--------------------------------------------------------------------------------------------|----------------------------------------------------------------------------------------------------------------------------------------------------------------------------------------------------------------------------------------------------------------------------------------------------------------------------------------------------------------------------------------------|-----------------------------------------------------------------------------------------------------------------------------------------------------------------------------------------------------------------------------------------------------------------------------------------------------------------------------------------------------------------------------------------------------------------------------------|
| see above                                                                                                                                                                                                                                                                                                                                                                                                                                                                                                                                                                                                                                                                                                                                                      | Yale COVID-19 Biorepository                                       | Grubaugh Lab - Yale School of Public Health                                                | Joseph Fauver, Tara Alpert, Anderson Brito, Anne Wylie, Chantal Vogels, Mary Petrone, Chaney Kalinich, Isabel Ott, Arnau Casanovas, Catherine Muenker, Adam Moore, Alice Lu, Maria Tokuyama, Patrick Wong, Peiwen Lu, Saad Omer, Richard Martinello, Allison Nelson, Shelli Farhadian, Akiko Iwasaki, Charlese Dela Cruz, Albert Ko, Nathan Grubaugh                                         |                                                                                                                                                                                                                                                                                                                                                                                                                                   |
| EPI_ISL_428399, EPI_ISL_428400, EPI_ISL_428401, EPI_ISL_428402, EPI_ISL_428403, EPI_ISL_428404, EPI_ISL_428405                                                                                                                                                                                                                                                                                                                                                                                                                                                                                                                                                                                                                                                 | Yale COVID-19 Biorepository                                       | Grubaugh Lab - Yale School of Public Health                                                | Joseph Fauver, Tara Alpert, Anderson Brito, Anne Wylie, Chantal Vogels, Mary Petrone, Cole Jensen, Chaney Kalinich, Isabel Ott, Arnau Casanovas, Catherine Muenker, Adam Moore, Alice Lu, Maria Tokuyama, Patrick Wong, Peiwen Lu, Saad Omer, Richard Martinello, Allison Nelson, Shelli Farhadian, Akiko Iwasaki, Charlese Dela Cruz, Albert Ko, Nathan Grubaugh                            |                                                                                                                                                                                                                                                                                                                                                                                                                                   |
| EPI_ISL_428488, EPI_ISL_428489, EPI_ISL_428490, EPI_ISL_428491                                                                                                                                                                                                                                                                                                                                                                                                                                                                                                                                                                                                                                                                                                 | Centers for Disease Control, R.O.C. (Taiwan)                      | Centers for Disease Control, R.O.C. (Taiwan)                                               | Ji-Rong Yang, Yu-Chi Lin, Jung-Jung Mu, Ming-Tsan Liu                                                                                                                                                                                                                                                                                                                                        |                                                                                                                                                                                                                                                                                                                                                                                                                                   |
| EPI_ISL_428740                                                                                                                                                                                                                                                                                                                                                                                                                                                                                                                                                                                                                                                                                                                                                 | Yale Clinical Virology Laboratory                                 | Grubaugh Lab - Yale School of Public Health                                                | Joseph Fauver, Anderson Brito, Tara Alpert, Chantal Vogels, Ellen Foxman, Albert Ko, Marie Landry, Nathan Grubaugh                                                                                                                                                                                                                                                                           |                                                                                                                                                                                                                                                                                                                                                                                                                                   |
| EPI_ISL_428745, EPI_ISL_428746, EPI_ISL_428747, EPI_ISL_428748, EPI_ISL_428749, EPI_ISL_428750, EPI_ISL_428751, EPI_ISL_428752                                                                                                                                                                                                                                                                                                                                                                                                                                                                                                                                                                                                                                 | Yale COVID-19 Biorepository                                       | Grubaugh Lab - Yale School of Public Health                                                | Joseph Fauver, Tara Alpert, Anderson Brito, Anne Wylie, Chantal Vogels, Mary Petrone, Cole Jensen, Chaney Kalinich, Isabel Ott, Arnau Casanovas, Catherine Muenker, Adam Moore, Alice Lu, Maria Tokuyama, Patrick Wong, Peiwen Lu, Saad Omer, Richard Martinello, Allison Nelson, Shelli Farhadian, Akiko Iwasaki, Charlese Dela Cruz, Albert Ko, Nathan Grubaugh                            |                                                                                                                                                                                                                                                                                                                                                                                                                                   |
| EPI_ISL_429256                                                                                                                                                                                                                                                                                                                                                                                                                                                                                                                                                                                                                                                                                                                                                 | Health Sciences Technology Park, Avicena, 8, 18016 Granada, Spain | Sequencing and Bioinformatics Service FISABIO-Public Health                                | Joaquín Mendoza, Almudena Rojas, Pablo Mendoza                                                                                                                                                                                                                                                                                                                                               |                                                                                                                                                                                                                                                                                                                                                                                                                                   |
| EPI_ISL_429882                                                                                                                                                                                                                                                                                                                                                                                                                                                                                                                                                                                                                                                                                                                                                 | Centers for Disease Control, R.O.C. (Taiwan)                      | Centers for Disease Control, R.O.C. (Taiwan)                                               | Ji-Rong Yang, Yu-Chi Lin, Jung-Jung Mu, Ming-Tsan Liu                                                                                                                                                                                                                                                                                                                                        |                                                                                                                                                                                                                                                                                                                                                                                                                                   |
| EPI_ISL_429883                                                                                                                                                                                                                                                                                                                                                                                                                                                                                                                                                                                                                                                                                                                                                 | Centers for Disease Control, R.O.C. (Taiwan)                      | Centers for Disease Control, R.O.C. (Taiwan)                                               | Ji-Rong Yang, Yu-Chi Lin, Jung-Jung Mu, Ming-Tsan-Liu                                                                                                                                                                                                                                                                                                                                        |                                                                                                                                                                                                                                                                                                                                                                                                                                   |
| EPI_ISL_429884                                                                                                                                                                                                                                                                                                                                                                                                                                                                                                                                                                                                                                                                                                                                                 | Centers for Disease Control, R.O.C. (Taiwan)                      | Centers for Disease Control, R.O.C. (Taiwan)                                               | Ji-Rong Yang, Yu-Chi Lin, Jung-Jung Mu, Ming-Tsan Liu                                                                                                                                                                                                                                                                                                                                        |                                                                                                                                                                                                                                                                                                                                                                                                                                   |
| EPI_ISL_431080, EPI_ISL_431081, EPI_ISL_431082, EPI_ISL_431083, EPI_ISL_431084, EPI_ISL_431085, EPI_ISL_431086, EPI_ISL_431087, EPI_ISL_431088, EPI_ISL_431089, EPI_ISL_431090, EPI_ISL_431091, EPI_ISL_431092, EPI_ISL_431093, EPI_ISL_431094, EPI_ISL_431095, EPI_ISL_431096                                                                                                                                                                                                                                                                                                                                                                                                                                                                                 | see above                                                         | Yale COVID-19 Biorepository                                                                | Grubaugh Lab - Yale School of Public Health                                                                                                                                                                                                                                                                                                                                                  |                                                                                                                                                                                                                                                                                                                                                                                                                                   |
| see above                                                                                                                                                                                                                                                                                                                                                                                                                                                                                                                                                                                                                                                                                                                                                      | Yale COVID-19 Biorepository                                       | Grubaugh Lab - Yale School of Public Health                                                | Joseph Fauver, Tara Alpert, Anderson Brito, Anne Wylie, Chantal Vogels, Mary Petrone, Cole Jensen, Chaney Kalinich, Isabel Ott, Arnau Casanovas, Catherine Muenker, Adam Moore, Alice Lu, Maria Tokuyama, Patrick Wong, Peiwen Lu, Saad Omer, Richard Martinello, Allison Nelson, Shelli Farhadian, Akiko Iwasaki, Charlese Dela Cruz, Albert Ko, Nathan Grubaugh                            |                                                                                                                                                                                                                                                                                                                                                                                                                                   |
| EPI_ISL_434455, EPI_ISL_434456, EPI_ISL_434457, EPI_ISL_434458, EPI_ISL_434459, EPI_ISL_434460, EPI_ISL_434461, EPI_ISL_434462, EPI_ISL_434463, EPI_ISL_434464, EPI_ISL_434465, EPI_ISL_434466, EPI_ISL_434467, EPI_ISL_434468, EPI_ISL_434469, EPI_ISL_434470, EPI_ISL_434471, EPI_ISL_434472, EPI_ISL_434473, EPI_ISL_434474, EPI_ISL_434475, EPI_ISL_434476, EPI_ISL_434477, EPI_ISL_434478, EPI_ISL_434479, EPI_ISL_434480, EPI_ISL_434481, EPI_ISL_434482, EPI_ISL_434483, EPI_ISL_434484, EPI_ISL_434485, EPI_ISL_434486                                                                                                                                                                                                                                 | see above                                                         | Laboratory of Microbiology, Medical School, National and Kapodistrian University of Athens | Laboratory of Biology, Department of Medicine, Democritus University of Thrace                                                                                                                                                                                                                                                                                                               | Kassela K., Bampali,M., Dvornis,N., Gatzidou,E., Froukala,E., Stavropoulou,A., Veletza,S., Tsakris,A., Spanakis.N. and Karakasiotitis,I.                                                                                                                                                                                                                                                                                          |
| EPI_ISL_434654                                                                                                                                                                                                                                                                                                                                                                                                                                                                                                                                                                                                                                                                                                                                                 | Sarolედens Familjelakare                                          | The Public Health Agency of Sweden                                                         | Katarina Jarbur, Oskar Karlsson Lindsjo, Maria Lind Karlberg, Anna-Malin Linde, Olov Svartstrom, Anna Risberg, Theresa Enkirch, Mia Brytting, Karin Tegmark-Wisell                                                                                                                                                                                                                           |                                                                                                                                                                                                                                                                                                                                                                                                                                   |
| EPI_ISL_434659                                                                                                                                                                                                                                                                                                                                                                                                                                                                                                                                                                                                                                                                                                                                                 | Knivsta VC                                                        | The Public Health Agency of Sweden                                                         | Johanna Carlson, Oskar Karlsson Lindsjo, Maria Lind Karlberg, Anna-Malin Linde, Olov Svartstrom, Anna Risberg, Theresa Enkirch, Mia Brytting, Karin Tegmark-Wisell                                                                                                                                                                                                                           |                                                                                                                                                                                                                                                                                                                                                                                                                                   |
| EPI_ISL_434668                                                                                                                                                                                                                                                                                                                                                                                                                                                                                                                                                                                                                                                                                                                                                 | Kungsors VC                                                       | The Public Health Agency of Sweden                                                         | Jessica Karlsson, Oskar Karlsson Lindsjo, Maria Lind Karlberg, Anna-Malin Linde, Olov Svartstrom, Anna Risberg, Theresa Enkirch, Mia Brytting, Karin Tegmark-Wisell                                                                                                                                                                                                                          |                                                                                                                                                                                                                                                                                                                                                                                                                                   |
| EPI_ISL_435034                                                                                                                                                                                                                                                                                                                                                                                                                                                                                                                                                                                                                                                                                                                                                 | LSUHS Emerging Viral Threat Laboratory                            | Microbial Genome Sequencing Center                                                         | Jeremy P. Kamil, John A. Vanchiere, Rona S. Scott, Camille F. Abshire, Abida Siddiq, Byeong-Jae Lee, Chan-ki Min, Md Maksudul Alam, Monica Gestal-Carteale, Edna Ondari, Adam Greer, Malgorzata Bienkowska-Haba, Katarzyna Zwolinska, Michelle M. Arnold, Jason M. Bodily, Andrew D. Yurochko, Paul M. Weinberger, Christopher G. Kevill, Martin J. Sapp, Daniel J. Snyder, Vaughn S. Cooper |                                                                                                                                                                                                                                                                                                                                                                                                                                   |
| EPI_ISL_435035, EPI_ISL_435036, EPI_ISL_435037, EPI_ISL_435038, EPI_ISL_435039, EPI_ISL_435040, EPI_ISL_435041, EPI_ISL_435042, EPI_ISL_435043, EPI_ISL_435044                                                                                                                                                                                                                                                                                                                                                                                                                                                                                                                                                                                                 | LSUHS Emerging Viral Threat Laboratory                            | Microbial Genome Sequencing Center                                                         | Jeremy P. Kamil, John A. Vanchiere, Rona S. Scott, Camille F. Abshire, Abida Siddiq, Byeong-Jae Lee, Chan-ki Min, Md Maksudul Alam, Monica Gestal-Carteale, Edna Ondari, Adam Greer, Malgorzata Bienkowska-Haba, Katarzyna Zwolinska, Jason M. Bodily, Andrew D. Yurochko, Paul M. Weinberger, Christopher G. Kevill, Martin J. Sapp, Daniel J. Snyder, Vaughn S. Cooper                     |                                                                                                                                                                                                                                                                                                                                                                                                                                   |
| EPI_ISL_435555, EPI_ISL_435556, EPI_ISL_435557, EPI_ISL_435558, EPI_ISL_435559, EPI_ISL_435560, EPI_ISL_435561, EPI_ISL_435562, EPI_ISL_435563, EPI_ISL_435564, EPI_ISL_435565, EPI_ISL_435566, EPI_ISL_435567, EPI_ISL_435568                                                                                                                                                                                                                                                                                                                                                                                                                                                                                                                                 | see above                                                         | LSUHS Emerging Viral Threat Laboratory                                                     | Microbial Genome Sequencing Center                                                                                                                                                                                                                                                                                                                                                           | John A. Vanchiere, Jeremy P. Kamil, Rona S. Scott, Camille F. Abshire, Abida Siddiq, Byeong-Jae Lee, Chan-ki Min, Md Maksudul Alam, Monica Gestal-Carteale, Edna Ondari, Adam Greer, Malgorzata Bienkowska-Haba, Katarzyna Zwolinska, Jason M. Bodily, Andrew D. Yurochko, Paul M. Weinberger, Christopher G. Kevill, Martin J. Sapp, Daniel J. Snyder, Vaughn S. Cooper                                                          |
| EPI_ISL_435569, EPI_ISL_435570, EPI_ISL_435571, EPI_ISL_435572, EPI_ISL_435573, EPI_ISL_435574, EPI_ISL_435575, EPI_ISL_435576, EPI_ISL_435577, EPI_ISL_435578, EPI_ISL_435579                                                                                                                                                                                                                                                                                                                                                                                                                                                                                                                                                                                 | see above                                                         | LSUHS Emerging Viral Threat Laboratory                                                     | Microbial Genome Sequencing Center                                                                                                                                                                                                                                                                                                                                                           | Jeremy P. Kamil, John A. Vanchiere, Rona S. Scott, Camille F. Abshire, Abida Siddiq, Byeong-Jae Lee, Chan-ki Min, Md Maksudul Alam, Monica Gestal-Carteale, Edna Ondari, Adam Greer, Malgorzata Bienkowska-Haba, Katarzyna Zwolinska, Jason M. Bodily, Andrew D. Yurochko, Paul M. Weinberger, Christopher G. Kevill, Martin J. Sapp, Daniel J. Snyder, Vaughn S. Cooper                                                          |
| EPI_ISL_435702, EPI_ISL_435703, EPI_ISL_435704, EPI_ISL_435705, EPI_ISL_435706, EPI_ISL_435707, EPI_ISL_435708, EPI_ISL_435709                                                                                                                                                                                                                                                                                                                                                                                                                                                                                                                                                                                                                                 | Yale COVID-19 Biorepository                                       | Grubaugh Lab - Yale School of Public Health                                                | Joseph Fauver, Tara Alpert, Anderson Brito, Anne Wylie, Chantal Vogels, Mary Petrone, Cole Jensen, Chaney Kalinich, Isabel Ott, Arnau Casanovas, Catherine Muenker, Adam Moore, Alice Lu, Maria Tokuyama, Patrick Wong, Peiwen Lu, Saad Omer, Richard Martinello, Allison Nelson, Shelli Farhadian, Akiko Iwasaki, Charlese Dela Cruz, Albert Ko, Nathan Grubaugh                            |                                                                                                                                                                                                                                                                                                                                                                                                                                   |
| EPI_ISL_435710, EPI_ISL_435711, EPI_ISL_435712, EPI_ISL_435713, EPI_ISL_435714, EPI_ISL_435715, EPI_ISL_435716, EPI_ISL_435717, EPI_ISL_435718, EPI_ISL_435719                                                                                                                                                                                                                                                                                                                                                                                                                                                                                                                                                                                                 | Connecticut State Department of Public Health                     | Grubaugh Lab - Yale School of Public Health                                                | Joseph Fauver, Tara Alpert, Anderson Brito, Anne Wylie, Chantal Vogels, Mary Petrone, Cole Jensen, Chaney Kalinich, Isabel Ott, Arnau Casanovas, Catherine Muenker, Adam Moore, Alice Lu, Maria Tokuyama, Patrick Wong, Peiwen Lu, Saad Omer, Richard Martinello, Allison Nelson, Shelli Farhadian, Akiko Iwasaki, Charlese Dela Cruz, Albert Ko, Nathan Grubaugh                            |                                                                                                                                                                                                                                                                                                                                                                                                                                   |
| EPI_ISL_435720                                                                                                                                                                                                                                                                                                                                                                                                                                                                                                                                                                                                                                                                                                                                                 | Yale Clinical Virology Laboratory                                 | Grubaugh Lab - Yale School of Public Health                                                | Joseph Fauver, Tara Alpert, Anderson Brito, Anne Wylie, Chantal Vogels, Mary Petrone, Cole Jensen, Chaney Kalinich, Isabel Ott, Arnau Casanovas, Catherine Muenker, Adam Moore, Alice Lu, Maria Tokuyama, Patrick Wong, Peiwen Lu, Saad Omer, Richard Martinello, Allison Nelson, Shelli Farhadian, Akiko Iwasaki, Charlese Dela Cruz, Albert Ko, Nathan Grubaugh                            |                                                                                                                                                                                                                                                                                                                                                                                                                                   |
| EPI_ISL_436235, EPI_ISL_436236, EPI_ISL_436237, EPI_ISL_436238, EPI_ISL_436239, EPI_ISL_436240, EPI_ISL_436241, EPI_ISL_436242, EPI_ISL_436243, EPI_ISL_436244, EPI_ISL_436245, EPI_ISL_436246, EPI_ISL_436247, EPI_ISL_436248, EPI_ISL_436249, EPI_ISL_436250, EPI_ISL_436251, EPI_ISL_436252, EPI_ISL_436253, EPI_ISL_436254, EPI_ISL_436255, EPI_ISL_436256, EPI_ISL_436257, EPI_ISL_436258, EPI_ISL_436259, EPI_ISL_436260, EPI_ISL_436261, EPI_ISL_436262, EPI_ISL_436263, EPI_ISL_436264, EPI_ISL_436265, EPI_ISL_436266, EPI_ISL_436267, EPI_ISL_436268, EPI_ISL_436269, EPI_ISL_436270, EPI_ISL_436372, EPI_ISL_436373, EPI_ISL_436374, EPI_ISL_436375, EPI_ISL_436376, EPI_ISL_436377, EPI_ISL_436378, EPI_ISL_436379, EPI_ISL_436380, EPI_ISL_436381 | see above                                                         | Servicio de Microbiologia. Hospital Universitario Doctor Peset                             | Sequencing and Bioinformatics Service and Molecular Epidemiology Research Group. FISABIO-Public Health                                                                                                                                                                                                                                                                                       | Juan Alberola Enguidanos, Juan Jose Camarena Miñana, Rosa González Pellicer, Neris Garcia-Gonzalez, Inma Galán Vendrell, Sandra Carbo, Loreto Ferrús Abad, Paula Ruiz-Hueso, Mariana Reyes-Prieto, Vicente Soriano Chirona, Ivan Ansari, Maria Alna Bracho, Griselda De Marco, Beatriz Beamud, Lidia Ruiz Roldan, Marta Pla Diaz, Lúcia Martínez-Priego, Giuseppe D'Auria, Jose Miguel Nogueira Coito, Fernando Gonzalez-Candelas |
| EPI_ISL_437187                                                                                                                                                                                                                                                                                                                                                                                                                                                                                                                                                                                                                                                                                                                                                 | Siloam Hospitals                                                  | Institute of Tropical Disease, Universitas Airlangga                                       | Kazufumi Shimizu, Krisnoadi Rahardjo, Aldise M Nasri, Jezzy R Dewantari, Rima R Prasetya, Maria M Padmidewi, Gatot Soegiarto, Laksmi Wulandari, Retno A Setyoningrum, Resti Y Meliana, Yohko K Shimizu, Mitsuhiro Nishimura, Yasuko Mori, Soetjipto, Maria I Lusida                                                                                                                          |                                                                                                                                                                                                                                                                                                                                                                                                                                   |
| EPI_ISL_437197, EPI_ISL_437198, EPI_ISL_437199, EPI_ISL_437200, EPI_ISL_437201, EPI_ISL_437202, EPI_ISL_437203, EPI_ISL_437298, EPI_ISL_437299, EPI_ISL_437300, EPI_ISL_437301, EPI_ISL_437302, EPI_ISL_437303                                                                                                                                                                                                                                                                                                                                                                                                                                                                                                                                                 | see above                                                         | Diagnostic- and Research Institute of Pathology, Medical University of Graz                | Diagnostic- and Research Institute of Pathology, Medical University of Graz                                                                                                                                                                                                                                                                                                                  | Karl Kaschofer, Peter Regitnig, Martin Zacharias, Gregor Gorkiewicz                                                                                                                                                                                                                                                                                                                                                               |
| EPI_ISL_437451                                                                                                                                                                                                                                                                                                                                                                                                                                                                                                                                                                                                                                                                                                                                                 | B.J. Medical College and Civil hospital                           | Gujarat Biotechnology Research Centre                                                      | Kairavi Joshi, Gaurishankar Shrimaili, Nidhi Sood, Pranay Shah, R D Dixit, Snehal Bagatharia, Kamlesh J Upadhyay, Ramesh Pandit, Tejas Shah, Ankit                                                                                                                                                                                                                                           |                                                                                                                                                                                                                                                                                                                                                                                                                                   |

|                                                                                                                                                                                                                                                                                                                                                                                                                                                                                                                                                                                                                                                                                                                                                                                                                                                                                                                                                                                                                |                                                                                                                                                          |                                                                                                                                                                                                                                                               |                                                                                                                                                                                                                                                                                                                                                                                                                                                                                                         |
|----------------------------------------------------------------------------------------------------------------------------------------------------------------------------------------------------------------------------------------------------------------------------------------------------------------------------------------------------------------------------------------------------------------------------------------------------------------------------------------------------------------------------------------------------------------------------------------------------------------------------------------------------------------------------------------------------------------------------------------------------------------------------------------------------------------------------------------------------------------------------------------------------------------------------------------------------------------------------------------------------------------|----------------------------------------------------------------------------------------------------------------------------------------------------------|---------------------------------------------------------------------------------------------------------------------------------------------------------------------------------------------------------------------------------------------------------------|---------------------------------------------------------------------------------------------------------------------------------------------------------------------------------------------------------------------------------------------------------------------------------------------------------------------------------------------------------------------------------------------------------------------------------------------------------------------------------------------------------|
|                                                                                                                                                                                                                                                                                                                                                                                                                                                                                                                                                                                                                                                                                                                                                                                                                                                                                                                                                                                                                |                                                                                                                                                          |                                                                                                                                                                                                                                                               | Hinsu, Pritesh Sabara, Apurvasinh Puvar, Janvi Raval, Monika Gandhi, Pinal Trivedi, Maharshi Pandya, Amit Kanani, Akanksha Verma, Nitin Savaliya, Raghawendra Kumar, Dinesh Kumar, Zuber Saiyed, Dipa Kinariwala, Disha Patel, Binita Aring, Neeta Khandelwal, Geeta Vaghela, Sonia Barve, Bhavesh Modi, Bhavya Jindal, Chaitanya Joshi, Madhvi Joshi                                                                                                                                                   |
| EPI_ISL_437626                                                                                                                                                                                                                                                                                                                                                                                                                                                                                                                                                                                                                                                                                                                                                                                                                                                                                                                                                                                                 | Department of Microbiology, Gandhi Medical College and Hospital                                                                                          | Department of Veterinary Biotechnology, College of Veterinary Science, Rajendranagar, PV Narsimha Rao Telengana Veterinary University                                                                                                                         | Kalyani Putty, Muttineni Radhakrishna, Nagamani K, Thrilok Chander B, Raja Rao M, Ravikumar P, Sunitha P, Pankaj Singh D, Anand Kumar K, Amit A. Upadhyay, Steven Bosinger, Rama Amara                                                                                                                                                                                                                                                                                                                  |
| EPI_ISL_437874, EPI_ISL_437875, EPI_ISL_437876, EPI_ISL_437877, EPI_ISL_437878, EPI_ISL_437879, EPI_ISL_437880, EPI_ISL_437881, EPI_ISL_437882, EPI_ISL_437883, EPI_ISL_437884, EPI_ISL_437885, EPI_ISL_437886, EPI_ISL_437887, EPI_ISL_437888, EPI_ISL_437889, EPI_ISL_437890, EPI_ISL_437891, EPI_ISL_437892, EPI_ISL_437893, EPI_ISL_437894, EPI_ISL_437895, EPI_ISL_437896, EPI_ISL_437897, EPI_ISL_437898, EPI_ISL_437899, EPI_ISL_437900, EPI_ISL_437901, EPI_ISL_437902, EPI_ISL_437903, EPI_ISL_437904, EPI_ISL_437905, EPI_ISL_437906, EPI_ISL_437907, EPI_ISL_437908, EPI_ISL_437909, EPI_ISL_437910, EPI_ISL_437911                                                                                                                                                                                                                                                                                                                                                                                 |                                                                                                                                                          |                                                                                                                                                                                                                                                               |                                                                                                                                                                                                                                                                                                                                                                                                                                                                                                         |
| see above                                                                                                                                                                                                                                                                                                                                                                                                                                                                                                                                                                                                                                                                                                                                                                                                                                                                                                                                                                                                      | Laboratory of Microbiology, Medical School, National and Kapodistrian University of Athens                                                               | Laboratory of Biology, Department of Medicine, Democritus University of Thrace                                                                                                                                                                                | Kassela K., Dovrolis, N., Bampali, M., Gatzidou, E., Froukala, E., Stavropoulou, A., Veletza, S., Tsakris, A., Spanakis, N. and Karakasiliotis, I.                                                                                                                                                                                                                                                                                                                                                      |
| EPI_ISL_444458                                                                                                                                                                                                                                                                                                                                                                                                                                                                                                                                                                                                                                                                                                                                                                                                                                                                                                                                                                                                 | B.J. Medical College and Civil hospital                                                                                                                  | Gujarat Biotechnology Research Centre                                                                                                                                                                                                                         | Kamlesh J Upadhyay, Ramesh Pandit, Tejas Shah, Ankit Hinsu, Pritesh Sabara, Apurvasinh Puvar, Janvi Raval, Monika Gandhi, Pinal Trivedi, Maharshi Pandya, Amit Kanani, Akanksha Verma, Nitin Savaliya, Raghawendra Kumar, Dinesh Kumar, Zuber Saiyed, Dipa Kinariwala, Disha Patel, Binita Aring, Neeta Khandelwal, Geeta Vaghela, Sonia Barve, Bhavesh Modi, Kairavi Joshi, Gaurishankar Shrimali, Nidhi Sood, Pranay Shah, R D Dixit, Snehal Bagatharia, Priti Pandita, Chaitanya Joshi, Madhvi Joshi |
| EPI_ISL_444481                                                                                                                                                                                                                                                                                                                                                                                                                                                                                                                                                                                                                                                                                                                                                                                                                                                                                                                                                                                                 | B.J. Medical College and Civil hospital                                                                                                                  | Gujarat Biotechnology Research Centre                                                                                                                                                                                                                         | Kairavi Joshi, Gaurishankar Shrimali, Nidhi Sood, Pranay Shah, R D Dixit, Snehal Bagatharia, Kamlesh J Upadhyay, Ramesh Pandit, Tejas Shah, Ankit Hinsu, Pritesh Sabara, Apurvasinh Puvar, Janvi Raval, Monika Gandhi, Pinal Trivedi, Maharshi Pandya, Amit Kanani, Akanksha Verma, Nitin Savaliya, Raghawendra Kumar, Dinesh Kumar, Zuber Saiyed, Dipa Kinariwala, Disha Patel, Binita Aring, Neeta Khandelwal, Geeta Vaghela, Sonia Barve, Bhavesh Modi, Neha Rajpara, Chaitanya Joshi, Madhvi Joshi  |
| EPI_ISL_444969                                                                                                                                                                                                                                                                                                                                                                                                                                                                                                                                                                                                                                                                                                                                                                                                                                                                                                                                                                                                 | Guangzhou Eighth People's Hospital (Jiahe Sector)                                                                                                        | Institute of Human Virology, Zhongshan School of Medicine, Sun Yat-sen University                                                                                                                                                                             | Junsong Zhang, Fei Yu, Jun Liu, Huimin Fan, Ruosu Ying, Feng Huang, Ting Pan, Bingfeng Liu, Yiwen Zhang, Xu Zhang, Mang Shi, Fengyu Hu, Fang Li, Kai Deng, Hui Zhang                                                                                                                                                                                                                                                                                                                                    |
| EPI_ISL_445222, EPI_ISL_445226                                                                                                                                                                                                                                                                                                                                                                                                                                                                                                                                                                                                                                                                                                                                                                                                                                                                                                                                                                                 | Sarolendens Familjelakare                                                                                                                                | The Public Health Agency of Sweden                                                                                                                                                                                                                            | Katarina Jarbur, Oskar Karlsson Lindsjo, Maria Lind Karlberg, Anna-Malin Linde, Olov Svartstrom, Anna Risberg, Theresa Enkirch, Mia Brytting, Karin Tegmark-Wisell                                                                                                                                                                                                                                                                                                                                      |
| EPI_ISL_445232                                                                                                                                                                                                                                                                                                                                                                                                                                                                                                                                                                                                                                                                                                                                                                                                                                                                                                                                                                                                 | Kungsors VC                                                                                                                                              | The Public Health Agency of Sweden                                                                                                                                                                                                                            | Jessica Karlsson, Oskar Karlsson Lindsjo, Maria Lind Karlberg, Anna-Malin Linde, Olov Svartstrom, Anna Risberg, Theresa Enkirch, Mia Brytting, Karin Tegmark-Wisell                                                                                                                                                                                                                                                                                                                                     |
| EPI_ISL_447030                                                                                                                                                                                                                                                                                                                                                                                                                                                                                                                                                                                                                                                                                                                                                                                                                                                                                                                                                                                                 | B.J. Medical College and Civil hospital                                                                                                                  | Gujarat Biotechnology Research Centre                                                                                                                                                                                                                         | Kamlesh J Upadhyay, Ramesh Pandit, Tejas Shah, Ankit Hinsu, Pritesh Sabara, Apurvasinh Puvar, Janvi Raval, Monika Gandhi, Pinal Trivedi, Maharshi Pandya, Amit Kanani, Akanksha Verma, Nitin Savaliya, Raghawendra Kumar, Dinesh Kumar, Zuber Saiyed, Dipa Kinariwala, Disha Patel, Binita Aring, Neeta Khandelwal, Geeta Vaghela, Sonia Barve, Bhavesh Modi, Kairavi Joshi, Gaurishankar Shrimali, Nidhi Sood, Pranay Shah, R D Dixit, Snehal Bagatharia, Anjali Rajwar, Chaitanya Joshi, Madhvi Joshi |
| EPI_ISL_447053                                                                                                                                                                                                                                                                                                                                                                                                                                                                                                                                                                                                                                                                                                                                                                                                                                                                                                                                                                                                 | GMERS Medical College and Hospital, Gandhinagar                                                                                                          | Gujarat Biotechnology Research Centre                                                                                                                                                                                                                         | Kairavi Joshi, Gaurishankar Shrimali, Nidhi Sood, Pranay Shah, R D Dixit, Snehal Bagatharia, Kamlesh J Upadhyay, Ramesh Pandit, Tejas Shah, Ankit Hinsu, Pritesh Sabara, Apurvasinh Puvar, Janvi Raval, Monika Gandhi, Pinal Trivedi, Maharshi Pandya, Amit Kanani, Akanksha Verma, Nitin Savaliya, Raghawendra Kumar, Dinesh Kumar, Zuber Saiyed, Dipa Kinariwala, Disha Patel, Binita Aring, Neeta Khandelwal, Geeta Vaghela, Sonia Barve, Bhavesh Modi, Pooja P Doshi, Chaitanya Joshi, Madhvi Joshi |
| EPI_ISL_447120, EPI_ISL_447130, EPI_ISL_447131, EPI_ISL_447142, EPI_ISL_447143, EPI_ISL_447144, EPI_ISL_447149, EPI_ISL_447156, EPI_ISL_447159, EPI_ISL_447160                                                                                                                                                                                                                                                                                                                                                                                                                                                                                                                                                                                                                                                                                                                                                                                                                                                 | Department of Clinical Microbiology                                                                                                                      | GIGA Medical Genomics                                                                                                                                                                                                                                         | Keith Durkin, Maria Artesi, Sébastien Bontems, Raphaël Boreux, Cécile Meex, Pierrette Melin, Marie-Pierre Hayette, Vincent Bours.                                                                                                                                                                                                                                                                                                                                                                       |
| EPI_ISL_447539                                                                                                                                                                                                                                                                                                                                                                                                                                                                                                                                                                                                                                                                                                                                                                                                                                                                                                                                                                                                 | Gujarat Biotechnology Research Centre                                                                                                                    | Gujarat Biotechnology Research Centre                                                                                                                                                                                                                         | Kamlesh J Upadhyay, Ramesh Pandit, Tejas Shah, Ankit Hinsu, Pritesh Sabara, Apurvasinh Puvar, Janvi Raval, Monika Gandhi, Pinal Trivedi, Maharshi Pandya, Amit Kanani, Akanksha Verma, Nitin Savaliya, Raghawendra Kumar, Dinesh Kumar, Zuber Saiyed, Dipa Kinariwala, Disha Patel, Binita Aring, Neeta Khandelwal, Geeta Vaghela, Sonia Barve, Bhavesh Modi, Pooja P Doshi, Chaitanya Joshi, Madhvi Joshi                                                                                              |
| EPI_ISL_447584, EPI_ISL_447585, EPI_ISL_447586, EPI_ISL_447587                                                                                                                                                                                                                                                                                                                                                                                                                                                                                                                                                                                                                                                                                                                                                                                                                                                                                                                                                 | Tamil Nadu Veterinary and Animal Sciences University                                                                                                     | CSIR-Centre for Cellular and Molecular Biology                                                                                                                                                                                                                | K Kaveri, S Sivasubramanian, S Vennila, P Padmapriya, R Kiruba, S Magesh, G Dhinakar Raj, G Ravi Kumar, Payel Mukherjee, Tulasi Nagabandi, Namami Gaur, Sakshi Shambhavi, Lamuk Zaveri, Shaguftha Khan, Purushotham Vodnala, Sofia Banu, Priya Singh, Dhivyaa Vedagiri, Divya Gupta, Vishal Sah, Santosh Kumar Kuncha, Krishnan Harinivas Harshan, Archana Bharadwaj Siva, Karthik Bharadwaj Tallapaka, Kumarasamy Thangaraj, Rakesh K Mishra, Divya Tej Sowpati                                        |
| EPI_ISL_447635, EPI_ISL_447636, EPI_ISL_447637, EPI_ISL_447638, EPI_ISL_447639, EPI_ISL_447640, EPI_ISL_447641, EPI_ISL_447642, EPI_ISL_447643, EPI_ISL_447644, EPI_ISL_447645, EPI_ISL_447651, EPI_ISL_447652, EPI_ISL_447653                                                                                                                                                                                                                                                                                                                                                                                                                                                                                                                                                                                                                                                                                                                                                                                 |                                                                                                                                                          |                                                                                                                                                                                                                                                               |                                                                                                                                                                                                                                                                                                                                                                                                                                                                                                         |
| see above                                                                                                                                                                                                                                                                                                                                                                                                                                                                                                                                                                                                                                                                                                                                                                                                                                                                                                                                                                                                      | unknown                                                                                                                                                  | Department of Medicine                                                                                                                                                                                                                                        | Kassela, K., Dovrolis, N., Bampali, M., Gatzidou, E., Froukala, E., Stavropoulou, A., Veletza, S., Tsakris, A., Spanakis, N. and Karakasiliotis, I.                                                                                                                                                                                                                                                                                                                                                     |
| EPI_ISL_447734, EPI_ISL_447735, EPI_ISL_447736, EPI_ISL_447737, EPI_ISL_447738, EPI_ISL_447739, EPI_ISL_447740, EPI_ISL_447741, EPI_ISL_447742, EPI_ISL_447743, EPI_ISL_447744, EPI_ISL_447745, EPI_ISL_447746, EPI_ISL_447747, EPI_ISL_447748, EPI_ISL_447749, EPI_ISL_447750, EPI_ISL_447751, EPI_ISL_447752, EPI_ISL_447753, EPI_ISL_447754                                                                                                                                                                                                                                                                                                                                                                                                                                                                                                                                                                                                                                                                 |                                                                                                                                                          |                                                                                                                                                                                                                                                               |                                                                                                                                                                                                                                                                                                                                                                                                                                                                                                         |
| see above                                                                                                                                                                                                                                                                                                                                                                                                                                                                                                                                                                                                                                                                                                                                                                                                                                                                                                                                                                                                      | Grupo de Investigaciones Microbiológicas-UR (GIMUR), Departamento de Biología, Facultad de Ciencias Naturales, Universidad del Rosario, Bogotá, Colombia | Grupo de Investigaciones Microbiológicas-UR (GIMUR), Departamento de Biología, Facultad de Ciencias Naturales, Universidad del Rosario, Bogotá, Colombia Instituto Nacional de Salud, Bogotá, Colombia Icahn School of Medicine at Mount Sinai, New York, USA | Juan David Ramirez, Carolina Florez, Marina Muñoz, Carolina Hernandez, Adriana Castillo, Sergio Castañeda, Nathalia Ballesteros, David Martínez, Laura Vega, Jesús E. Jaimes, Sergio Gomez, Angelica Rico, Lisseth Pardo, Esther C. Barros, Martha L. Ospina, Anibal A. Teherán, Ana S. Gonzalez-Reiche, Matthew M. Hernandez, Emilia Mia Sordillo, Viviana Simon, Harm van Bakel, Alberto Paniz-Mondolfi                                                                                               |
| EPI_ISL_447755, EPI_ISL_447756, EPI_ISL_447757, EPI_ISL_447758, EPI_ISL_447759, EPI_ISL_447760, EPI_ISL_447761, EPI_ISL_447762, EPI_ISL_447763, EPI_ISL_447764, EPI_ISL_447765, EPI_ISL_447766, EPI_ISL_447767, EPI_ISL_447768, EPI_ISL_447769, EPI_ISL_447771, EPI_ISL_447772, EPI_ISL_447774, EPI_ISL_447775, EPI_ISL_447776, EPI_ISL_447777, EPI_ISL_447778, EPI_ISL_447779, EPI_ISL_447780, EPI_ISL_447781, EPI_ISL_447782, EPI_ISL_447783, EPI_ISL_447784, EPI_ISL_447785, EPI_ISL_447786, EPI_ISL_447787, EPI_ISL_447788, EPI_ISL_447789, EPI_ISL_447790, EPI_ISL_447791, EPI_ISL_447792, EPI_ISL_447793, EPI_ISL_447794, EPI_ISL_447795, EPI_ISL_447796, EPI_ISL_447797, EPI_ISL_447798, EPI_ISL_447799, EPI_ISL_447800, EPI_ISL_447801, EPI_ISL_447802, EPI_ISL_447803, EPI_ISL_447804, EPI_ISL_447805, EPI_ISL_447806, EPI_ISL_447807, EPI_ISL_447808, EPI_ISL_447809, EPI_ISL_447810, EPI_ISL_447811, EPI_ISL_447812, EPI_ISL_447813, EPI_ISL_447814, EPI_ISL_447815, EPI_ISL_447816, EPI_ISL_447817 |                                                                                                                                                          |                                                                                                                                                                                                                                                               |                                                                                                                                                                                                                                                                                                                                                                                                                                                                                                         |
| see above                                                                                                                                                                                                                                                                                                                                                                                                                                                                                                                                                                                                                                                                                                                                                                                                                                                                                                                                                                                                      | Instituto Nacional de Salud, Bogotá, Colombia                                                                                                            | Grupo de Investigaciones Microbiológicas-UR (GIMUR), Departamento de Biología, Facultad de Ciencias Naturales, Universidad del Rosario, Bogotá, Colombia Instituto Nacional de Salud, Bogotá, Colombia Icahn School of Medicine at Mount Sinai, New York, USA | Juan David Ramirez, Carolina Florez, Marina Muñoz, Carolina Hernandez, Adriana Castillo, Sergio Castañeda, Nathalia Ballesteros, David Martínez, Laura Vega, Jesús E. Jaimes, Sergio Gomez, Angelica Rico, Lisseth Pardo, Esther C. Barros, Martha L. Ospina, Anibal A. Teherán, Ana S. Gonzalez-Reiche, Matthew M. Hernandez, Emilia Mia Sordillo, Viviana Simon, Harm van Bakel, Alberto Paniz-Mondolfi                                                                                               |
| EPI_ISL_447832, EPI_ISL_447833, EPI_ISL_447834, EPI_ISL_447835, EPI_ISL_447836                                                                                                                                                                                                                                                                                                                                                                                                                                                                                                                                                                                                                                                                                                                                                                                                                                                                                                                                 | unknown                                                                                                                                                  | Department of Medicine                                                                                                                                                                                                                                        | Kassela, K., Dovrolis, N., Bampali, M., Gatzidou, E., Froukala, E., Stavropoulou, A., Veletza, S., Tsakris, A., Spanakis, N. and Karakasiliotis, I.                                                                                                                                                                                                                                                                                                                                                     |
| EPI_ISL_447837                                                                                                                                                                                                                                                                                                                                                                                                                                                                                                                                                                                                                                                                                                                                                                                                                                                                                                                                                                                                 | Dept. of Medical Microbiology, Stavanger University Hospital, Helse Stavanger HF,                                                                        | Norwegian Institute of Public Health, Department of Virology                                                                                                                                                                                                  | Kathrine Stene-Johansen, Kamilla Heddeland Instefjord, Hilde Elshaug, Rasmus Riis Kopperud, Karoline Bragstad, Olav Hungnes                                                                                                                                                                                                                                                                                                                                                                             |
| EPI_ISL_447838, EPI_ISL_447839                                                                                                                                                                                                                                                                                                                                                                                                                                                                                                                                                                                                                                                                                                                                                                                                                                                                                                                                                                                 | Medical Microbiology Unit, Department for Laboratory Medicine, Drammen Hospital, Vestre Viken Health Trust,                                              | Norwegian Institute of Public Health, Department of Virology                                                                                                                                                                                                  | Kathrine Stene-Johansen, Kamilla Heddeland Instefjord, Hilde Elshaug, Rasmus Riis Kopperud, Karoline Bragstad, Olav Hungnes                                                                                                                                                                                                                                                                                                                                                                             |
| EPI_ISL_449786                                                                                                                                                                                                                                                                                                                                                                                                                                                                                                                                                                                                                                                                                                                                                                                                                                                                                                                                                                                                 | Ostfold Hospital Trust - Kalnes, Centre for Laboratory Medicine, Section for gene technology and infection serology                                      | Norwegian Institute of Public Health, Department of Virology                                                                                                                                                                                                  | Kathrine Stene-Johansen, Kamilla Heddeland Instefjord, Hilde Elshaug, Rasmus Riis Kopperud, Karoline Bragstad, Olav Hungnes                                                                                                                                                                                                                                                                                                                                                                             |
| EPI_ISL_449787, EPI_ISL_449788                                                                                                                                                                                                                                                                                                                                                                                                                                                                                                                                                                                                                                                                                                                                                                                                                                                                                                                                                                                 | Furst Medical Laboratory                                                                                                                                 | Norwegian Institute of Public Health, Department of Virology                                                                                                                                                                                                  | Kathrine Stene-Johansen, Kamilla Heddeland Instefjord, Hilde Elshaug, Rasmus Riis Kopperud, Karoline Bragstad, Olav Hungnes                                                                                                                                                                                                                                                                                                                                                                             |

|                                                                                                                                                                                                                                                                                                                                                                                                                                                                                                                                                                                                                                                                                                                                                                                                                                |                                                                                  |                                                                                                                                                                                                                                                                                              |                                                                                                                                                                                                                                                                                                                                                                                                                                                                                                                                                                                   |
|--------------------------------------------------------------------------------------------------------------------------------------------------------------------------------------------------------------------------------------------------------------------------------------------------------------------------------------------------------------------------------------------------------------------------------------------------------------------------------------------------------------------------------------------------------------------------------------------------------------------------------------------------------------------------------------------------------------------------------------------------------------------------------------------------------------------------------|----------------------------------------------------------------------------------|----------------------------------------------------------------------------------------------------------------------------------------------------------------------------------------------------------------------------------------------------------------------------------------------|-----------------------------------------------------------------------------------------------------------------------------------------------------------------------------------------------------------------------------------------------------------------------------------------------------------------------------------------------------------------------------------------------------------------------------------------------------------------------------------------------------------------------------------------------------------------------------------|
| EPI_ISL_449789, EPI_ISL_449790, EPI_ISL_449791, EPI_ISL_449792, EPI_ISL_449793, EPI_ISL_449794                                                                                                                                                                                                                                                                                                                                                                                                                                                                                                                                                                                                                                                                                                                                 | Dept. of Medical Microbiology, Stavanger University Hospital, Helse Stavanger HF | Norwegian Institute of Public Health, Department of Virology                                                                                                                                                                                                                                 | Kathrine Stene-Johansen, Kamilla Heddeland Instefjord, Hilde Elshaug, Rasmus Riis Kopperud, Karoline Bragstad, Olav Hungnes                                                                                                                                                                                                                                                                                                                                                                                                                                                       |
| EPI_ISL_450171, EPI_ISL_450172<br>EPI_ISL_450781                                                                                                                                                                                                                                                                                                                                                                                                                                                                                                                                                                                                                                                                                                                                                                               | National Influenza centre, Sri Lanka<br>Government Medical College-Bhavnagar     | The University of Hong Kong<br>Gujarat Biotechnology Research Centre                                                                                                                                                                                                                         | Jude Jayamaha, Daniel KW Chu, Malik Peiris<br>Kairavi Desai, Saklain Malek, Shirish Patel, Ramesh Pandit, Tejas Shah, Ankit Hinsu, Pritesh Sabara, Apurvasinh Puvar, Janvi Raval, Zarna Patel, Monika Gandhi, Pinal Trivedi, Maharshi Pandya, Amit Kanani, Nidhi Patel, Nitin Savaliya, Raghavendra Kumar, Dinesh Kumar, Zuber Saiyed, Komal Patel, Labdhi Pandya, Snehal Bagatharia, Bhavesh Modi, Gaurishankar Shrimali, R D Dixit, A M Kadri, Akanksha Verma, Chaitanya Joshi, Madhvi Joshi                                                                                    |
| EPI_ISL_450808, EPI_ISL_450810                                                                                                                                                                                                                                                                                                                                                                                                                                                                                                                                                                                                                                                                                                                                                                                                 | Sarolodens Familjelakare                                                         | The Public Health Agency of Sweden                                                                                                                                                                                                                                                           | Katarina Jarbur, Anna-Malin Linde, Maria Lind Karlberg, Oskar Karlsson Lindsjo, Olov Svartstrom, Anna Risberg, Theresa Enkirch, Mia Brytting, Karin Tegmark-Wisell                                                                                                                                                                                                                                                                                                                                                                                                                |
| EPI_ISL_450811                                                                                                                                                                                                                                                                                                                                                                                                                                                                                                                                                                                                                                                                                                                                                                                                                 | Knivsta VC                                                                       | The Public Health Agency of Sweden                                                                                                                                                                                                                                                           | Johanna Carlson, Anna-Malin Linde, Maria Lind Karlberg, Oskar Karlsson Lindsjo, Olov Svartstrom, Anna Risberg, Theresa Enkirch, Mia Brytting, Karin Tegmark-Wisell                                                                                                                                                                                                                                                                                                                                                                                                                |
| EPI_ISL_450814                                                                                                                                                                                                                                                                                                                                                                                                                                                                                                                                                                                                                                                                                                                                                                                                                 | Huslakarna Varmbadhuset Varberg                                                  | The Public Health Agency of Sweden                                                                                                                                                                                                                                                           | Johanna Hilmersson, Anna-Malin Linde, Maria Lind Karlberg, Oskar Karlsson Lindsjo, Olov Svartstrom, Anna Risberg, Theresa Enkirch, Mia Brytting, Karin Tegmark-Wisell                                                                                                                                                                                                                                                                                                                                                                                                             |
| EPI_ISL_451203, EPI_ISL_451204, EPI_ISL_451205, EPI_ISL_451206, EPI_ISL_451207, EPI_ISL_451208, EPI_ISL_451209, EPI_ISL_451210, EPI_ISL_451211, EPI_ISL_451212, EPI_ISL_451213, EPI_ISL_451214, EPI_ISL_451215, EPI_ISL_451216, EPI_ISL_451217, EPI_ISL_451218                                                                                                                                                                                                                                                                                                                                                                                                                                                                                                                                                                 | see above                                                                        | LSUHS Emerging Viral Threat Laboratory                                                                                                                                                                                                                                                       | Microbial Genome Sequencing Center<br>Jeremy P. Kamil, John A. Vanchiere, Rona S. Scott, Camille F. Abshire, Abida Siddiqi, Byeong-Jae Lee, Chan-ki Min, Md Maksudul Alam, Monica Gestal-Cartele, Edna Ondari, Adam Greer, Malgorzata Bienkowska-Haba, Katarzyna Zwolinska, Jason M. Bodily, Andrew D. Yurochko, Paul M. Weinberger, Christopher G. Kevill, Martin J. Sapp, Daniel J. Snyder, Vaughn S. Cooper                                                                                                                                                                    |
| EPI_ISL_451230, EPI_ISL_451231, EPI_ISL_451232, EPI_ISL_451233, EPI_ISL_451234, EPI_ISL_451235, EPI_ISL_451236, EPI_ISL_451237, EPI_ISL_451238, EPI_ISL_451239, EPI_ISL_451240, EPI_ISL_451241, EPI_ISL_451242, EPI_ISL_451243, EPI_ISL_451244, EPI_ISL_451245, EPI_ISL_451246, EPI_ISL_451247                                                                                                                                                                                                                                                                                                                                                                                                                                                                                                                                 | see above                                                                        | LSUHS Emerging Viral Threat Laboratory                                                                                                                                                                                                                                                       | Microbial Genome Sequencing Center<br>John A. Vanchiere, Jeremy P. Kamil, Rona S. Scott, Camille F. Abshire, Abida Siddiqi, Byeong-Jae Lee, Chan-ki Min, Md Maksudul Alam, Monica Gestal-Cartele, Edna Ondari, Adam Greer, Malgorzata Bienkowska-Haba, Katarzyna Zwolinska, Jason M. Bodily, Andrew D. Yurochko, Paul M. Weinberger, Christopher G. Kevill, Martin J. Sapp, Daniel J. Snyder, Vaughn S. Cooper                                                                                                                                                                    |
| EPI_ISL_451248, EPI_ISL_451249, EPI_ISL_451250, EPI_ISL_451251, EPI_ISL_451252, EPI_ISL_451253, EPI_ISL_451254, EPI_ISL_451255, EPI_ISL_451256, EPI_ISL_451257, EPI_ISL_451258, EPI_ISL_451259, EPI_ISL_451260, EPI_ISL_451261, EPI_ISL_451262, EPI_ISL_451263, EPI_ISL_451264, EPI_ISL_451265, EPI_ISL_451266, EPI_ISL_451267, EPI_ISL_451268, EPI_ISL_451269, EPI_ISL_451270, EPI_ISL_451271, EPI_ISL_451272, EPI_ISL_451273, EPI_ISL_451274, EPI_ISL_451275, EPI_ISL_451276, EPI_ISL_451277, EPI_ISL_451278, EPI_ISL_451279, EPI_ISL_451280, EPI_ISL_451281, EPI_ISL_451282, EPI_ISL_451283, EPI_ISL_451284, EPI_ISL_451285, EPI_ISL_451286, EPI_ISL_451287, EPI_ISL_451288, EPI_ISL_451289, EPI_ISL_451290, EPI_ISL_451291, EPI_ISL_451292, EPI_ISL_451293, EPI_ISL_451294, EPI_ISL_451295, EPI_ISL_451296, EPI_ISL_451297 | see above                                                                        | LSUHS Emerging Viral Threat Laboratory                                                                                                                                                                                                                                                       | Microbial Genome Sequencing Center<br>Jeremy P. Kamil, John A. Vanchiere, Rona S. Scott, Camille F. Abshire, Abida Siddiqi, Byeong-Jae Lee, Chan-ki Min, Md Maksudul Alam, Monica Gestal-Cartele, Edna Ondari, Adam Greer, Malgorzata Bienkowska-Haba, Katarzyna Zwolinska, Jason M. Bodily, Andrew D. Yurochko, Paul M. Weinberger, Christopher G. Kevill, Martin J. Sapp, Daniel J. Snyder, Vaughn S. Cooper                                                                                                                                                                    |
| EPI_ISL_452120                                                                                                                                                                                                                                                                                                                                                                                                                                                                                                                                                                                                                                                                                                                                                                                                                 | Georgia Department of Health                                                     | Pathogen Discovery, Respiratory Viruses Branch, Division of Viral Diseases, Centers for Disease Control and Prevention                                                                                                                                                                       | Jing Zhang, Anna Montmayeur, Yan Li, Ying Tao, Krista Queen, Anna Uehara, Clinton R. Paden, Rachel Marine, Mary S. Keckler, Alison S. Laufer Halpin, Haibin Wang, Christopher A. Elkins, Zachary Weiner, Suxiang Tong                                                                                                                                                                                                                                                                                                                                                             |
| EPI_ISL_452121, EPI_ISL_452122, EPI_ISL_452123                                                                                                                                                                                                                                                                                                                                                                                                                                                                                                                                                                                                                                                                                                                                                                                 | VI-US Virgin Islands Department of Health                                        | Pathogen Discovery, Respiratory Viruses Branch, Division of Viral Diseases, Centers for Disease Control and Prevention                                                                                                                                                                       | Jing Zhang, Anna Montmayeur, Yan Li, Ying Tao, Krista Queen, Anna Uehara, Clinton R. Paden, Rachel Marine, Mary S. Keckler, Alison S. Laufer Halpin, Haibin Wang, Christopher A. Elkins, Zachary Weiner, Suxiang Tong                                                                                                                                                                                                                                                                                                                                                             |
| EPI_ISL_452124                                                                                                                                                                                                                                                                                                                                                                                                                                                                                                                                                                                                                                                                                                                                                                                                                 | NC State Laboratory of Public Health                                             | Pathogen Discovery, Respiratory Viruses Branch, Division of Viral Diseases, Centers for Disease Control and Prevention                                                                                                                                                                       | Jing Zhang, Anna Montmayeur, Yan Li, Ying Tao, Krista Queen, Anna Uehara, Clinton R. Paden, Rachel Marine, Mary S. Keckler, Alison S. Laufer Halpin, Haibin Wang, Christopher A. Elkins, Zachary Weiner, Suxiang Tong                                                                                                                                                                                                                                                                                                                                                             |
| EPI_ISL_452125                                                                                                                                                                                                                                                                                                                                                                                                                                                                                                                                                                                                                                                                                                                                                                                                                 | Georgia Department of Health                                                     | Pathogen Discovery, Respiratory Viruses Branch, Division of Viral Diseases, Centers for Disease Control and Prevention                                                                                                                                                                       | Jing Zhang, Anna Montmayeur, Yan Li, Ying Tao, Krista Queen, Anna Uehara, Clinton R. Paden, Rachel Marine, Mary S. Keckler, Alison S. Laufer Halpin, Haibin Wang, Christopher A. Elkins, Zachary Weiner, Suxiang Tong                                                                                                                                                                                                                                                                                                                                                             |
| EPI_ISL_452126                                                                                                                                                                                                                                                                                                                                                                                                                                                                                                                                                                                                                                                                                                                                                                                                                 | NC State Laboratory of Public Health                                             | Pathogen Discovery, Respiratory Viruses Branch, Division of Viral Diseases, Centers for Disease Control and Prevention                                                                                                                                                                       | Jing Zhang, Anna Montmayeur, Yan Li, Ying Tao, Krista Queen, Anna Uehara, Clinton R. Paden, Rachel Marine, Mary S. Keckler, Alison S. Laufer Halpin, Haibin Wang, Christopher A. Elkins, Zachary Weiner, Suxiang Tong                                                                                                                                                                                                                                                                                                                                                             |
| EPI_ISL_452127, EPI_ISL_452128, EPI_ISL_452129, EPI_ISL_452130                                                                                                                                                                                                                                                                                                                                                                                                                                                                                                                                                                                                                                                                                                                                                                 | CO Department of Public Health and Environment                                   | Pathogen Discovery, Respiratory Viruses Branch, Division of Viral Diseases, Centers for Disease Control and Prevention                                                                                                                                                                       | Jing Zhang, Anna Montmayeur, Yan Li, Ying Tao, Krista Queen, Anna Uehara, Clinton R. Paden, Rachel Marine, Mary S. Keckler, Alison S. Laufer Halpin, Haibin Wang, Christopher A. Elkins, Zachary Weiner, Suxiang Tong                                                                                                                                                                                                                                                                                                                                                             |
| EPI_ISL_452131                                                                                                                                                                                                                                                                                                                                                                                                                                                                                                                                                                                                                                                                                                                                                                                                                 | IN State Department of Health Laboratory Services                                | Pathogen Discovery, Respiratory Viruses Branch, Division of Viral Diseases, Centers for Disease Control and Prevention                                                                                                                                                                       | Jing Zhang, Anna Montmayeur, Yan Li, Ying Tao, Krista Queen, Anna Uehara, Clinton R. Paden, Rachel Marine, Mary S. Keckler, Alison S. Laufer Halpin, Haibin Wang, Christopher A. Elkins, Zachary Weiner, Suxiang Tong                                                                                                                                                                                                                                                                                                                                                             |
| EPI_ISL_452143, EPI_ISL_452144, EPI_ISL_452145, EPI_ISL_452146, EPI_ISL_452147                                                                                                                                                                                                                                                                                                                                                                                                                                                                                                                                                                                                                                                                                                                                                 | Yale COVID-19 Biorepository                                                      | Grubaugh Lab - Yale School of Public Health                                                                                                                                                                                                                                                  | Joseph Fauver, Tara Alpert, Anderson Brito, Anne Wylie, Chantal Vogels, Mary Petrone, Cole Jensen, Chaney Kalinich, Isabel Ott, Arnau Casanovas, Catherine Muenker, Adam Moore, Alice Lu, Maria Tokuyama, Patrick Wong, Peiwen Lu, Saad Omer, Richard Martinello, Allison Nelson, Shelli Farhadian, Akiko Iwasaki, Charlese Dela Cruz, Albert Ko, Nathan Grubaugh                                                                                                                                                                                                                 |
| EPI_ISL_452231, EPI_ISL_452232                                                                                                                                                                                                                                                                                                                                                                                                                                                                                                                                                                                                                                                                                                                                                                                                 | Sarolodens Familjelakare                                                         | The Public Health Agency of Sweden                                                                                                                                                                                                                                                           | Katarina Jarbur, Anna-Malin Linde, Maria Lind Karlberg, Oskar Karlsson Lindsjo, Olov Svartstrom, Anna Risberg, Theresa Enkirch, Mia Brytting, Karin Tegmark-Wisell                                                                                                                                                                                                                                                                                                                                                                                                                |
| EPI_ISL_452241                                                                                                                                                                                                                                                                                                                                                                                                                                                                                                                                                                                                                                                                                                                                                                                                                 | Huslakarna Varmbadhuset Varberg                                                  | The Public Health Agency of Sweden                                                                                                                                                                                                                                                           | Johanna Hilmersson, Anna-Malin Linde, Maria Lind Karlberg, Oskar Karlsson Lindsjo, Olov Svartstrom, Anna Risberg, Theresa Enkirch, Mia Brytting, Karin Tegmark-Wisell                                                                                                                                                                                                                                                                                                                                                                                                             |
| EPI_ISL_454642                                                                                                                                                                                                                                                                                                                                                                                                                                                                                                                                                                                                                                                                                                                                                                                                                 | CT-Dr. Katherine A. Kelley State Public Health Lab                               | Pathogen Discovery, Respiratory Viruses Branch, Division of Viral Diseases, Centers for Disease Control and Prevention                                                                                                                                                                       | Jing Zhang, Ying Tao, Clinton R. Paden, Anna Uehara, Krista Queen, Yan Li, Haibin Wang, Zachary Weiner, Bettina Bankamp, Suxiang Tong                                                                                                                                                                                                                                                                                                                                                                                                                                             |
| EPI_ISL_454643, EPI_ISL_454644                                                                                                                                                                                                                                                                                                                                                                                                                                                                                                                                                                                                                                                                                                                                                                                                 | VI-US Virgin Islands Department of Health                                        | Pathogen Discovery, Respiratory Viruses Branch, Division of Viral Diseases, Centers for Disease Control and Prevention                                                                                                                                                                       | Jing Zhang, Ying Tao, Clinton R. Paden, Anna Uehara, Krista Queen, Yan Li, Haibin Wang, Zachary Weiner, Bettina Bankamp, Suxiang Tong                                                                                                                                                                                                                                                                                                                                                                                                                                             |
| EPI_ISL_454645                                                                                                                                                                                                                                                                                                                                                                                                                                                                                                                                                                                                                                                                                                                                                                                                                 | CT-Dr. Katherine A. Kelley State Public Health Lab                               | Pathogen Discovery, Respiratory Viruses Branch, Division of Viral Diseases, Centers for Disease Control and Prevention                                                                                                                                                                       | Jing Zhang, Ying Tao, Clinton R. Paden, Anna Uehara, Krista Queen, Yan Li, Haibin Wang, Zachary Weiner, Bettina Bankamp, Suxiang Tong                                                                                                                                                                                                                                                                                                                                                                                                                                             |
| EPI_ISL_455102                                                                                                                                                                                                                                                                                                                                                                                                                                                                                                                                                                                                                                                                                                                                                                                                                 | Kungsors VC                                                                      | The Public Health Agency of Sweden                                                                                                                                                                                                                                                           | Jessica Karlsson, Anna-Malin Linde, Maria Lind Karlberg, Oskar Karlsson Lindsjo, Olov Svartstrom, Anna Risberg, Theresa Enkirch, Mia Brytting, Karin Tegmark-Wisell                                                                                                                                                                                                                                                                                                                                                                                                               |
| EPI_ISL_455103                                                                                                                                                                                                                                                                                                                                                                                                                                                                                                                                                                                                                                                                                                                                                                                                                 | Huslakarna Varmbadhuset Varberg                                                  | The Public Health Agency of Sweden                                                                                                                                                                                                                                                           | Johanna Hilmersson, Anna-Malin Linde, Maria Lind Karlberg, Oskar Karlsson Lindsjo, Olov Svartstrom, Anna Risberg, Theresa Enkirch, Mia Brytting, Karin Tegmark-Wisell                                                                                                                                                                                                                                                                                                                                                                                                             |
| EPI_ISL_455440, EPI_ISL_455441, EPI_ISL_455442, EPI_ISL_455443, EPI_ISL_455444, EPI_ISL_455445, EPI_ISL_455446, EPI_ISL_455447, EPI_ISL_455448, EPI_ISL_455449, EPI_ISL_455450, EPI_ISL_455451, EPI_ISL_455452, EPI_ISL_455453                                                                                                                                                                                                                                                                                                                                                                                                                                                                                                                                                                                                 | see above                                                                        | 1. ViroGenetics - BSL3 Laboratory of Virology, Maopolska Centre of Biotechnology, Jagiellonian University; 2. II Department of Internal Medicine, Faculty of Medicine, Jagiellonian University Medical College; 3. Narodowy Instytut Zdrowia Publicznego - Pastwowy Zakad Higieny (NIZP-PZH) | 1. ViroGenetics - BSL3 Laboratory of Virology, Maopolska Centre of Biotechnology, Jagiellonian University; 2. II Department of Internal Medicine, Faculty of Medicine, Jagiellonian University Medical College; 3. Narodowy Instytut Zdrowia Publicznego - Pastwowy Zakad Higieny (NIZP-PZH).<br>Katarzyna Pancer, Marek Sanak, Aleksandra A. Zasada, Magdalena Rzeczowska, Tomasz Wokowicz, Katarzyna Zacharczuk, Agnieszka Koakowska-Kulesza, Katarzyna Owczarek, Aleksandra Milewska, Natalia Wolanik, Ewelina Hallman-Szeliska, Pawe P abaj, Wojciech Branicki, Krzysztof Pyr |
| EPI_ISL_455460, EPI_ISL_455461, EPI_ISL_455462, EPI_ISL_455463, EPI_ISL_455464, EPI_ISL_455465, EPI_ISL_455466, EPI_ISL_455467                                                                                                                                                                                                                                                                                                                                                                                                                                                                                                                                                                                                                                                                                                 | Jiangxi Province Center for Disease Control and Prevention                       | Jiangxi Province Center for Disease Control and Prevention                                                                                                                                                                                                                                   | JianXiong Li, Ying Xiong, Tian Gong, Yong Shi, Jun Zhou, Fang Xiao, ShiWen Liu, XiaoQing Liu, Gang Xu, DaJin Xiao, Xin Ran, YanNi Zhang                                                                                                                                                                                                                                                                                                                                                                                                                                           |
| EPI_ISL_455958, EPI_ISL_455966, EPI_ISL_455970, EPI_ISL_455977, EPI_ISL_455978                                                                                                                                                                                                                                                                                                                                                                                                                                                                                                                                                                                                                                                                                                                                                 | Department of Clinical Microbiology                                              | GIGA Medical Genomics                                                                                                                                                                                                                                                                        | Keith Durkin, Maria Artesi, Sébastien Bontems, Raphaël Boreux, Cécile Meex, Pierrette Melin, Marie-Pierre Hayette, Vincent Bours.                                                                                                                                                                                                                                                                                                                                                                                                                                                 |
| EPI_ISL_455980, EPI_ISL_455981,                                                                                                                                                                                                                                                                                                                                                                                                                                                                                                                                                                                                                                                                                                                                                                                                | LSUHS Emerging Viral Threat Laboratory                                           | Microbial Genome Sequencing Center                                                                                                                                                                                                                                                           | Jeremy P. Kamil, John A. Vanchiere, Rona S. Scott, Camille F. Abshire, Abida Siddiqi, Byeong-Jae Lee, Chan-ki Min, Md Maksudul Alam, Monica                                                                                                                                                                                                                                                                                                                                                                                                                                       |

|                                                                                                                                                                                                                                                                                                                                                                                                                                                                                                                                                                                                                                                                                |                                                                           |                                                                                                                                                                           |                                                                                                                                                                                                                                                                                                                                                                                                                                                                        |
|--------------------------------------------------------------------------------------------------------------------------------------------------------------------------------------------------------------------------------------------------------------------------------------------------------------------------------------------------------------------------------------------------------------------------------------------------------------------------------------------------------------------------------------------------------------------------------------------------------------------------------------------------------------------------------|---------------------------------------------------------------------------|---------------------------------------------------------------------------------------------------------------------------------------------------------------------------|------------------------------------------------------------------------------------------------------------------------------------------------------------------------------------------------------------------------------------------------------------------------------------------------------------------------------------------------------------------------------------------------------------------------------------------------------------------------|
| EPI_ISL_455982, EPI_ISL_455983, EPI_ISL_455984, EPI_ISL_455985, EPI_ISL_455986, EPI_ISL_455987, EPI_ISL_455988, EPI_ISL_455989                                                                                                                                                                                                                                                                                                                                                                                                                                                                                                                                                 |                                                                           |                                                                                                                                                                           | Gestal-Cartele, Edna Ondari, Adam Greer, Malgorzata Bienkowska-Haba, Katarzyna Zwolinska, Michelle M. Arnold, Jason M. Bodily, Andrew D. Yurochko, Paul M. Weinberger, Christopher G. Kevill, Martin J. Sapp, Daniel J. Snyder, Vaughn S. Cooper                                                                                                                                                                                                                       |
| EPI_ISL_455990, EPI_ISL_455991, EPI_ISL_455992, EPI_ISL_455993, EPI_ISL_455994, EPI_ISL_455995, EPI_ISL_455996, EPI_ISL_455997, EPI_ISL_455998, EPI_ISL_455999                                                                                                                                                                                                                                                                                                                                                                                                                                                                                                                 | LSUHS Emerging Viral Threat Laboratory                                    | Microbial Genome Sequencing Center                                                                                                                                        | John A. Vanchiere, Jeremy P. Kamil, Rona S. Scott, Camille F. Abshire, Abida Siddiqi, Byeong-Jae Lee, Chan-ki Min, Md Maksudul Alam, Monica Gestal-Cartele, Edna Ondari, Adam Greer, Malgorzata Bienkowska-Haba, Katarzyna Zwolinska, Michelle M. Arnold, Jason M. Bodily, Andrew D. Yurochko, Paul M. Weinberger, Christopher G. Kevill, Martin J. Sapp, Daniel J. Snyder, Vaughn S. Cooper                                                                           |
| EPI_ISL_456116, EPI_ISL_456117, EPI_ISL_456118, EPI_ISL_456119, EPI_ISL_456120, EPI_ISL_456121, EPI_ISL_456122, EPI_ISL_456123, EPI_ISL_456124, EPI_ISL_456125, EPI_ISL_456126, EPI_ISL_456127, EPI_ISL_456128, EPI_ISL_456129, EPI_ISL_456130, EPI_ISL_456131, EPI_ISL_456132, EPI_ISL_456133, EPI_ISL_456134, EPI_ISL_456135, EPI_ISL_456136, EPI_ISL_456137, EPI_ISL_456138, EPI_ISL_456139, EPI_ISL_456140, EPI_ISL_456141, EPI_ISL_456142, EPI_ISL_456143, EPI_ISL_456144, EPI_ISL_456145, EPI_ISL_456146, EPI_ISL_456147, EPI_ISL_456148, EPI_ISL_456149, EPI_ISL_456150, EPI_ISL_456151, EPI_ISL_456152, EPI_ISL_456153, EPI_ISL_456154, EPI_ISL_456155, EPI_ISL_456156 |                                                                           |                                                                                                                                                                           |                                                                                                                                                                                                                                                                                                                                                                                                                                                                        |
| see above                                                                                                                                                                                                                                                                                                                                                                                                                                                                                                                                                                                                                                                                      | Instituto Nacional de Salud - Unidad de Secuenciación y Análisis Genómico | Instituto Nacional de Salud, Universidad Cooperativa de Colombia, Instituto Alexander von Humboldt, Imperial College-London, London School of Hygiene & Tropical Medicine | Katherine Laiton-Donato, Diego A. Álvarez-Díaz, Carlos Franco-Muñoz, Jose A. Usme-Ciro, Gloria Puerto, Nicolas D. Franco-Sierra, Mailyn A. Gonzalez, Zulma M. Cucunubá, Christian Julian Villabona-Arenas, Liz Villabona-Arenas, Sussy Echeverria, Astrid C. Flórez, Sergio Gomez-Rangel, Luz Dary Rodriguez, Juliana Barbosa, Erika Ospitia, Diana Marcela Walteros-Acero, Martha Lucia Ospina Martinez, Marcela Mercado-Reyes.                                       |
| EPI_ISL_458030                                                                                                                                                                                                                                                                                                                                                                                                                                                                                                                                                                                                                                                                 | King Institute of Preventive Medicine & Research                          | CSIR-Centre for Cellular and Molecular Biology                                                                                                                            | K.Kaveri,S.Sivasubramanian,S.Vennila,P.Padmapriya,R.Kiruba,S.Magesh,G. Dhinakar Raj, G. Ravikumar, P. Azhahianambi,K.Thangaraj,Payel Mukherjee, Sofia Banu, Priya Singh, Dhiviya Vedagiri, Divya Gupta, Vishal Sah, Santosh Kumar Kuncha, Krishnan Harinivas Harshan, Archana Bharadwaj Siva, Karthik Bharadwaj Tallapaka, Shagufta Khan, Lamuk Zaveri, Namami Gaur, Sakshi Shambhavi, Tulasi Nagabandi, Purushotham Vodnala, Rakesh K Mishra, Divya Tej Sowpati       |
| EPI_ISL_458031                                                                                                                                                                                                                                                                                                                                                                                                                                                                                                                                                                                                                                                                 | King Institute of Preventive Medicine & Research                          | CSIR-Centre for Cellular and Molecular Biology                                                                                                                            | K.Kaveri,S.Sivasubramanian,S.Vennila,P.Padmapriya,R.Kiruba,S.Magesh,G. Dhinakar Raj, G. Ravikumar, P. Azhahianambi, K.Thangaraj,Sofia Banu, Payel Mukherjee, Priya Singh, Dhiviya Vedagiri, Divya Gupta, Vishal Sah, Santosh Kumar Kuncha, Krishnan Harinivas Harshan, Archana Bharadwaj Siva, Karthik Bharadwaj Tallapaka, Shagufta Khan, Lamuk Zaveri, Namami Gaur, Sakshi Shambhavi, Tulasi Nagabandi, Purushotham Vodnala, Rakesh K Mishra, Divya Tej Sowpati      |
| EPI_ISL_458032                                                                                                                                                                                                                                                                                                                                                                                                                                                                                                                                                                                                                                                                 | King Institute of Preventive Medicine & Research                          | CSIR-Centre for Cellular and Molecular Biology                                                                                                                            | K.Kaveri,S.Sivasubramanian,S.Vennila,P.Padmapriya,R.Kiruba,S.Magesh,G. Dhinakar Raj, G. Ravikumar, P. Azhahianambi, K.Thangaraj,Shagufta Khan, Lamuk Zaveri, Namami Gaur, Sakshi Shambhavi, Tulasi Nagabandi, Purushotham Vodnala, Payel Mukherjee, Sofia Banu, Priya Singh, Dhiviya Vedagiri, Divya Gupta, Vishal Sah, Santosh Kumar Kuncha, Krishnan Harinivas Harshan, Archana Bharadwaj Siva, Karthik Bharadwaj Tallapaka, Rakesh K Mishra, Divya Tej Sowpati      |
| EPI_ISL_458033                                                                                                                                                                                                                                                                                                                                                                                                                                                                                                                                                                                                                                                                 | King Institute of Preventive Medicine & Research                          | CSIR-Centre for Cellular and Molecular Biology                                                                                                                            | K.Kaveri,S.Sivasubramanian,S.Vennila,P.Padmapriya,R.Kiruba,S.Magesh,G. Dhinakar Raj, G. Ravikumar, P. Azhahianambi, K.Thangaraj,Lamuk Zaveri, Shagufta Khan, Namami Gaur, Sakshi Shambhavi, Tulasi Nagabandi, Purushotham Vodnala, Payel Mukherjee, Sofia Banu, Priya Singh, Dhiviya Vedagiri, Divya Gupta, Vishal Sah, Santosh Kumar Kuncha, Krishnan Harinivas Harshan, Archana Bharadwaj Siva, Karthik Bharadwaj Tallapaka, Rakesh K Mishra, Divya Tej Sowpati      |
| EPI_ISL_458034                                                                                                                                                                                                                                                                                                                                                                                                                                                                                                                                                                                                                                                                 | King Institute of Preventive Medicine & Research                          | CSIR-Centre for Cellular and Molecular Biology                                                                                                                            | K.Kaveri,S.Sivasubramanian,S.Vennila,P.Padmapriya,R.Kiruba,S.Magesh,G. Dhinakar Raj, G. Ravikumar, P. Azhahianambi, K.Thangaraj, Namami Gaur, Sakshi Shambhavi, Lamuk Zaveri, Shagufta Khan, Tulasi Nagabandi, Purushotham Vodnala, Payel Mukherjee, Sofia Banu, Priya Singh, Dhiviya Vedagiri, Divya Gupta, Vishal Sah, Santosh Kumar Kuncha, Krishnan Harinivas Harshan, Archana Bharadwaj Siva, Karthik Bharadwaj Tallapaka, Rakesh K Mishra, Divya Tej Sowpati     |
| EPI_ISL_458035                                                                                                                                                                                                                                                                                                                                                                                                                                                                                                                                                                                                                                                                 | King Institute of Preventive Medicine & Research                          | CSIR-Centre for Cellular and Molecular Biology                                                                                                                            | K.Kaveri,S.Sivasubramanian,S.Vennila,P.Padmapriya,R.Kiruba,S.Magesh,G. Dhinakar Raj, G. Ravikumar, P. Azhahianambi, K.Thangaraj, Tulasi Nagabandi, Namami Gaur, Sakshi Shambhavi, Lamuk Zaveri, Shagufta Khan, Purushotham Vodnala, Payel Mukherjee, Sofia Banu, Priya Singh, Dhiviya Vedagiri, Divya Gupta, Vishal Sah, Santosh Kumar Kuncha, Krishnan Harinivas Harshan, Archana Bharadwaj Siva, Karthik Bharadwaj Tallapaka, Rakesh K Mishra, Divya Tej Sowpati     |
| EPI_ISL_458036                                                                                                                                                                                                                                                                                                                                                                                                                                                                                                                                                                                                                                                                 | King Institute of Preventive Medicine & Research                          | CSIR-Centre for Cellular and Molecular Biology                                                                                                                            | K.Kaveri,S.Sivasubramanian,S.Vennila,P.Padmapriya,R.Kiruba,S.Magesh,G. Dhinakar Raj, G. Ravikumar, R. P. Aravindh Babu, K.Thangaraj, Payel Mukherjee, Sofia Banu, Priya Singh, Dhiviya Vedagiri, Divya Gupta, Vishal Sah, Santosh Kumar Kuncha, Krishnan Harinivas Harshan, Archana Bharadwaj Siva, Karthik Bharadwaj Tallapaka, Shagufta Khan, Lamuk Zaveri, Namami Gaur, Sakshi Shambhavi, Tulasi Nagabandi, Purushotham Vodnala, Rakesh K Mishra, Divya Tej Sowpati |
| EPI_ISL_458037                                                                                                                                                                                                                                                                                                                                                                                                                                                                                                                                                                                                                                                                 | King Institute of Preventive Medicine & Research                          | CSIR-Centre for Cellular and Molecular Biology                                                                                                                            | K.Kaveri,S.Sivasubramanian,S.Vennila,P.Padmapriya,R.Kiruba,S.Magesh,G. Dhinakar Raj, G. Ravikumar, R. P. Aravindh Babu, K.Thangaraj, Sofia Banu, Payel Mukherjee, Priya Singh, Dhiviya Vedagiri, Divya Gupta, Vishal Sah, Santosh Kumar Kuncha, Krishnan Harinivas Harshan, Archana Bharadwaj Siva, Karthik Bharadwaj Tallapaka, Shagufta Khan, Lamuk Zaveri, Namami Gaur, Sakshi Shambhavi, Tulasi Nagabandi, Purushotham Vodnala, Rakesh K Mishra, Divya Tej Sowpati |
| EPI_ISL_458038                                                                                                                                                                                                                                                                                                                                                                                                                                                                                                                                                                                                                                                                 | King Institute of Preventive Medicine & Research                          | CSIR-Centre for Cellular and Molecular Biology                                                                                                                            | K.Kaveri,S.Sivasubramanian,S.Vennila,P.Padmapriya,R.Kiruba,S.Magesh,G. Dhinakar Raj, G. Ravikumar, R. P. Aravindh Babu, K.Thangaraj, Shagufta Khan, Lamuk Zaveri, Namami Gaur, Sakshi Shambhavi, Tulasi Nagabandi, Purushotham Vodnala, Payel Mukherjee, Sofia Banu, Priya Singh, Dhiviya Vedagiri, Divya Gupta, Vishal Sah, Santosh Kumar Kuncha, Krishnan Harinivas Harshan, Archana Bharadwaj Siva, Karthik Bharadwaj Tallapaka, Rakesh K Mishra, Divya Tej Sowpati |
| EPI_ISL_458039                                                                                                                                                                                                                                                                                                                                                                                                                                                                                                                                                                                                                                                                 | King Institute of Preventive Medicine & Research                          | CSIR-Centre for Cellular and Molecular Biology                                                                                                                            | K.Kaveri,S.Sivasubramanian,S.Vennila,P.Padmapriya,R.Kiruba,S.Magesh,G. Dhinakar Raj, G. Ravikumar, R. P. Aravindh Babu, K.Thangaraj, Lamuk Zaveri, Shagufta Khan, Namami Gaur, Sakshi Shambhavi, Tulasi Nagabandi, Purushotham Vodnala, Payel Mukherjee, Sofia Banu, Priya Singh, Dhiviya Vedagiri, Divya Gupta, Vishal Sah, Santosh Kumar Kuncha, Krishnan Harinivas Harshan, Archana Bharadwaj Siva, Karthik Bharadwaj Tallapaka, Rakesh K Mishra, Divya Tej Sowpati |
| EPI_ISL_458040                                                                                                                                                                                                                                                                                                                                                                                                                                                                                                                                                                                                                                                                 | King Institute of Preventive Medicine & Research                          | CSIR-Centre for Cellular and Molecular Biology                                                                                                                            | K.Kaveri,S.Sivasubramanian,S.Vennila,P.Padmapriya,R.Kiruba,S.Magesh,G. Dhinakar Raj, G. Ravikumar, R. P. Aravindh Babu, K.Thangaraj, Namami Gaur, Sakshi Shambhavi, Lamuk Zaveri, Shagufta Khan, Tulasi Nagabandi, Purushotham Vodnala, Payel Mukherjee, Sofia Banu, Priya Singh, Dhiviya Vedagiri, Divya Gupta, Vishal Sah, Santosh Kumar Kuncha, Krishnan Harinivas Harshan, Archana Bharadwaj Siva, Karthik Bharadwaj Tallapaka, Rakesh K Mishra, Divya Tej Sowpati |
| EPI_ISL_458041                                                                                                                                                                                                                                                                                                                                                                                                                                                                                                                                                                                                                                                                 | King Institute of Preventive Medicine & Research                          | CSIR-Centre for Cellular and Molecular Biology                                                                                                                            | K.Kaveri,S.Sivasubramanian,S.Vennila,P.Padmapriya,R.Kiruba,S.Magesh,G. Dhinakar Raj, G. Ravikumar, R. P. Aravindh Babu, K.Thangaraj, Tulasi Nagabandi, Namami Gaur, Sakshi Shambhavi, Lamuk Zaveri, Shagufta Khan, Purushotham Vodnala, Payel Mukherjee, Sofia Banu, Priya Singh, Dhiviya Vedagiri, Divya Gupta, Vishal Sah, Santosh Kumar Kuncha, Krishnan Harinivas Harshan, Archana Bharadwaj Siva, Karthik Bharadwaj Tallapaka, Rakesh K Mishra, Divya Tej Sowpati |
| EPI_ISL_458042                                                                                                                                                                                                                                                                                                                                                                                                                                                                                                                                                                                                                                                                 | King Institute of Preventive Medicine & Research                          | CSIR-Centre for Cellular and Molecular Biology                                                                                                                            | K.Kaveri,S.Sivasubramanian,S.Vennila,P.Padmapriya,R.Kiruba,S.Magesh,G. Dhinakar Raj, G. Ravikumar, M. Sekar, K.Thangaraj, Payel Mukherjee, Sofia Banu, Priya Singh, Dhiviya Vedagiri, Divya Gupta, Vishal Sah, Santosh Kumar Kuncha, Krishnan Harinivas Harshan, Archana Bharadwaj Siva, Karthik Bharadwaj Tallapaka, Shagufta Khan, Lamuk Zaveri, Namami Gaur, Sakshi Shambhavi, Tulasi Nagabandi, Purushotham Vodnala, Rakesh K Mishra, Divya Tej Sowpati            |
| EPI_ISL_458043                                                                                                                                                                                                                                                                                                                                                                                                                                                                                                                                                                                                                                                                 | King Institute of Preventive Medicine & Research                          | CSIR-Centre for Cellular and Molecular Biology                                                                                                                            | K.Kaveri,S.Sivasubramanian,S.Vennila,P.Padmapriya,R.Kiruba,S.Magesh,G. Dhinakar Raj, G. Ravikumar, M. Sekar, K.Thangaraj,Sofia Banu, Payel Mukherjee, Priya Singh, Dhiviya Vedagiri, Divya Gupta, Vishal Sah, Santosh Kumar Kuncha, Krishnan Harinivas Harshan, Archana Bharadwaj Siva, Karthik Bharadwaj Tallapaka, Shagufta Khan, Lamuk Zaveri, Namami Gaur, Sakshi Shambhavi, Tulasi Nagabandi, Purushotham Vodnala, Rakesh K Mishra, Divya Tej Sowpati             |
| EPI_ISL_458044                                                                                                                                                                                                                                                                                                                                                                                                                                                                                                                                                                                                                                                                 | King Institute of Preventive Medicine & Research                          | CSIR-Centre for Cellular and Molecular Biology                                                                                                                            | K.Kaveri,S.Sivasubramanian,S.Vennila,P.Padmapriya,R.Kiruba,S.Magesh,G. Dhinakar Raj, G. Ravikumar, M. Sekar, K.Thangaraj,Shagufta Khan, Lamuk Zaveri, Namami Gaur, Sakshi Shambhavi, Tulasi Nagabandi, Purushotham Vodnala, Payel Mukherjee, Sofia Banu, Priya Singh, Dhiviya Vedagiri, Divya Gupta, Vishal Sah, Santosh Kumar Kuncha, Krishnan Harinivas Harshan, Archana Bharadwaj Siva, Karthik Bharadwaj Tallapaka, Rakesh K Mishra, Divya Tej Sowpati             |
| EPI_ISL_458081                                                                                                                                                                                                                                                                                                                                                                                                                                                                                                                                                                                                                                                                 | RSUD Bangil Pasuruan                                                      | Institute of Tropical Disease, Universitas Airlangga                                                                                                                      | Jezy R Dewantari, Rima R Prasetya, Krisnoadi Rahardjo, Aldise M Nastri, Arma Roosalina, Gatot Soegiarto, Laksmi Wulandari, Retno A Setyoningrum, Resti Yudhawati, Yohko K Shimizu, Mitsuhiro Nishimura, Yasuko Mori, Soetjipto, Kazufumi Shimizu, Maria I Lusida                                                                                                                                                                                                       |



|                                                                                                                                                                                                                                                                                                                                                                                                                                                                                                                                                                                                                                |                                                                                                                                     |                                                                                                                                     |                                                                                                                                                                                                                                                                                                                                                                                                                                                                                  |
|--------------------------------------------------------------------------------------------------------------------------------------------------------------------------------------------------------------------------------------------------------------------------------------------------------------------------------------------------------------------------------------------------------------------------------------------------------------------------------------------------------------------------------------------------------------------------------------------------------------------------------|-------------------------------------------------------------------------------------------------------------------------------------|-------------------------------------------------------------------------------------------------------------------------------------|----------------------------------------------------------------------------------------------------------------------------------------------------------------------------------------------------------------------------------------------------------------------------------------------------------------------------------------------------------------------------------------------------------------------------------------------------------------------------------|
| EPI_ISL_458082                                                                                                                                                                                                                                                                                                                                                                                                                                                                                                                                                                                                                 | Universitas Airlangga Hospital                                                                                                      | Institute of Tropical Disease, Universitas Airlangga                                                                                | Kazufumi Shimizu, Krisnoadi Rahardjo, Aldise M Nastro, Jezzy R Dewantari, Rima R Prasetya, Nasonudin, Gatot Soegiarto, Laksmi Wulandari, Retno A Setyoningrum, Resti Yudhawati, Yohko K Shimizu, Mitsuhiro Nishimura, Yasuko Mori, Soetjpto, Maria I Lusida                                                                                                                                                                                                                      |
| EPI_ISL_458090                                                                                                                                                                                                                                                                                                                                                                                                                                                                                                                                                                                                                 | B.J. Medical College and Civil hospital                                                                                             | Gujarat Biotechnology Research Centre                                                                                               | Kamlesh J Upadhyay, Ramesh Pandit, Tejas Shah, Ankit Hinsu, Pritesh Sabara, Apurvasinh Puvar, Janvi Raval, Zarna Patel, Monika Gandhi, Pinal Trivedi, Maharshi Pandya, Amit Kanani, Nidhi Patel, Nitin Savaliya, Raghawendra Kumar, Dinesh Kumar, Zuber Saiyed, Komal Patel, Labdhi Pandya, Snehal Bagatharia, Dhaval Vaghela, Ramesh Patel, Pranay Shah, Armi Chaudhari, Bhavesh Modi, Gaurishankar Shrimali, R D Dixit, A M Kadri, Umang Mishra, Chaitanya Joshi, Madhvi Joshi |
| EPI_ISL_458150                                                                                                                                                                                                                                                                                                                                                                                                                                                                                                                                                                                                                 | ANOUAL                                                                                                                              | ANOUAL                                                                                                                              | Jouali Farah, El Ansari Fatima Zahra, Marchoudi Nabila, Kasmi Yassine, Chenaoui Mohamed, El Aliani Aissam, Benhida Rachid, Azami Nawfel, Kitane Driss Lahlou, Loukman Salma, Fekkak Jamal                                                                                                                                                                                                                                                                                        |
| EPI_ISL_459910                                                                                                                                                                                                                                                                                                                                                                                                                                                                                                                                                                                                                 | Zoonotic and Exotic infection Diseases Division, Harbin Veterinary Research Institute, CAAS                                         | Zoonotic and Exotic infection Diseases Division, Harbin Veterinary Resarch Institute, CAAS                                          | Jinliang Wang, Lei Shuai, Chong Wang, Renqiang Liu, Xijun He, Xianfeng Zhang, Ziruo Sun, Dan Shan, Jinying Ge, Xijun Wang, Gongxun Zhong, Zhiyuan Wen, Zhigao Bu                                                                                                                                                                                                                                                                                                                 |
| EPI_ISL_461506                                                                                                                                                                                                                                                                                                                                                                                                                                                                                                                                                                                                                 | B.J. Medical College and Civil hospital                                                                                             | Gujarat Biotechnology Research Centre                                                                                               | Kamlesh J Upadhyay, Tejas Shah, Ankit Hinsu, Pritesh Sabara, Apurvasinh Puvar, Janvi Raval, Zarna Patel, Monika Gandhi, Pinal Trivedi, Maharshi Pandya, Nidhi Patel, Nitin Savaliya, Raghawendra Kumar, Dinesh Kumar, Zuber Saiyed, Komal Patel, Labdhi Pandya, Snehal Bagatharia, Pranay Shah, Armi Chaudhari, R D Dixit, A M Kadri, Harsh Bakshi, Chaitanya Joshi, Madhvi Joshi,                                                                                               |
| EPI_ISL_463138, EPI_ISL_463139, EPI_ISL_463140, EPI_ISL_463141, EPI_ISL_463142, EPI_ISL_463143, EPI_ISL_463144, EPI_ISL_463145, EPI_ISL_463146, EPI_ISL_463147, EPI_ISL_463148, EPI_ISL_463149, EPI_ISL_463150, EPI_ISL_463151, EPI_ISL_463152, EPI_ISL_463153, EPI_ISL_463154, EPI_ISL_463155, EPI_ISL_463156, EPI_ISL_463157, EPI_ISL_463158, EPI_ISL_463159, EPI_ISL_463160, EPI_ISL_463161, EPI_ISL_463162, EPI_ISL_463163, EPI_ISL_463164, EPI_ISL_463165, EPI_ISL_463166, EPI_ISL_463167, EPI_ISL_463168, EPI_ISL_463169, EPI_ISL_463170, EPI_ISL_463171, EPI_ISL_463172, EPI_ISL_463173, EPI_ISL_463174                 | Yale Clinical Virology Laboratory                                                                                                   | Grubaugh Lab - Yale School of Public Health                                                                                         |                                                                                                                                                                                                                                                                                                                                                                                                                                                                                  |
| see above                                                                                                                                                                                                                                                                                                                                                                                                                                                                                                                                                                                                                      |                                                                                                                                     |                                                                                                                                     | Joseph Fauver, Tara Alpert, Anderson Brito, Anne Wylie, Chantal Vogels, Mary Petrone, Cole Jensen, Chaney Kalinich, Isabel Ott, Arnau Casanovas, Catherine Muenker, Adam Moore, Alice Lu, Maria Tokuyama, Patrick Wong, Peiwen Lu, Saad Omer, Richard Martinello, Allison Nelson, Shelli Farhadian, Akiko Iwasaki, Charlese Dela Cruz, Albert Ko, Nathan Grubaugh                                                                                                                |
| EPI_ISL_463889, EPI_ISL_463894, EPI_ISL_463895, EPI_ISL_463896, EPI_ISL_463897, EPI_ISL_463898, EPI_ISL_463899, EPI_ISL_463900, EPI_ISL_463901, EPI_ISL_463902                                                                                                                                                                                                                                                                                                                                                                                                                                                                 | Shaoxing Center for Disease Control and Prevention                                                                                  | Department of Pathology and Laboratory Medicine, University of California Los Angeles                                               | Jinkun Chen, Evann E. Hilt, Huan Wu, Zhuojing Jiang, QinChao Zhang, JiLiang Wang, Yifang Wang, Fan Li, Ziqin Li, Jialiang Tang, Shangxin Yang                                                                                                                                                                                                                                                                                                                                    |
| EPI_ISL_467053                                                                                                                                                                                                                                                                                                                                                                                                                                                                                                                                                                                                                 | B.J. Medical College and Civil hospital                                                                                             | Gujarat Biotechnology Research Centre                                                                                               | Kamlesh J Upadhyay, Nirav Mungalpara, Tejas Shah, Ankit Hinsu, Pritesh Sabara, Apurvasinh Puvar, Janvi Raval, Zarna Patel, Monika Gandhi, Pinal Trivedi, Maharshi Pandya, Nidhi Patel, Nitin Savaliya, Raghawendra Kumar, Dinesh Kumar, Zuber Saiyed, Komal Patel, Labdhi Pandya, Snehal Bagatharia, Pranay Shah, Pooja P Doshi, R D Dixit, A M Kadri, Harsh Bakshi, Chaitanya Joshi, Madhvi Joshi,                                                                              |
| EPI_ISL_467262, EPI_ISL_467263, EPI_ISL_467264, EPI_ISL_467265, EPI_ISL_467266, EPI_ISL_467267, EPI_ISL_467268, EPI_ISL_467269, EPI_ISL_467270, EPI_ISL_467271, EPI_ISL_467272, EPI_ISL_467273, EPI_ISL_467274, EPI_ISL_467275, EPI_ISL_467276, EPI_ISL_467277, EPI_ISL_467278, EPI_ISL_467279, EPI_ISL_467280, EPI_ISL_467281, EPI_ISL_467282, EPI_ISL_467283, EPI_ISL_467284, EPI_ISL_467285, EPI_ISL_467286, EPI_ISL_467287, EPI_ISL_467288, EPI_ISL_467289, EPI_ISL_467290, EPI_ISL_467291, EPI_ISL_467292, EPI_ISL_467293, EPI_ISL_467294, EPI_ISL_467295, EPI_ISL_467296, EPI_ISL_467297                                 | Hospital Clínico Universitario de Santiago de Compostela                                                                            | SeqCOVID-SPAIN consortium/IBV(CSIC)                                                                                                 |                                                                                                                                                                                                                                                                                                                                                                                                                                                                                  |
| see above                                                                                                                                                                                                                                                                                                                                                                                                                                                                                                                                                                                                                      |                                                                                                                                     |                                                                                                                                     | José Javier Costa Alcalde, Antonio Aguilera Guirao, M <sup>a</sup> Luisa Pérez del Molino Bernal, Amparo Coira Nieto, Gema Barbeito Castiñeiras, Rocio Trestoy Pena and SeqCOVID-SPAIN consortium                                                                                                                                                                                                                                                                                |
| EPI_ISL_467430                                                                                                                                                                                                                                                                                                                                                                                                                                                                                                                                                                                                                 | Zoonotic and Exotic infection Diseases Division                                                                                     | Zoonotic and Exotic infection Diseases Division                                                                                     | Jinliang Wang, Zhigao Bu                                                                                                                                                                                                                                                                                                                                                                                                                                                         |
| EPI_ISL_469044                                                                                                                                                                                                                                                                                                                                                                                                                                                                                                                                                                                                                 | Dr. N. D. Desai Medical College & Hospital                                                                                          | Gujarat Biotechnology Research Centre                                                                                               | Jigar Gusani, Supreet Prabhu, Tejas Shah, Ankit Hinsu, Pritesh Sabara, Apurvasinh Puvar, Janvi Raval, Zarna Patel, Monika Gandhi, Pinal Trivedi, Maharshi Pandya, Nidhi Patel, Nitin Savaliya, Raghawendra Kumar, Dinesh Kumar, Zuber Saiyed, Komal Patel, Labdhi Pandya, Snehal Bagatharia, J G Buch, Neha Rajpara, R D Dixit, A M Kadri, Harsh Bakshi, Chaitanya Joshi, Madhvi Joshi                                                                                           |
| EPI_ISL_469171, EPI_ISL_469172, EPI_ISL_469173, EPI_ISL_469174, EPI_ISL_469175, EPI_ISL_469176, EPI_ISL_469177, EPI_ISL_469178, EPI_ISL_469179, EPI_ISL_469180, EPI_ISL_469181, EPI_ISL_469182, EPI_ISL_469183, EPI_ISL_469184, EPI_ISL_469185, EPI_ISL_469186, EPI_ISL_469187, EPI_ISL_469188, EPI_ISL_469189, EPI_ISL_469190, EPI_ISL_469191, EPI_ISL_469192, EPI_ISL_469193, EPI_ISL_469194, EPI_ISL_469195, EPI_ISL_469196, EPI_ISL_469197, EPI_ISL_469198, EPI_ISL_469199, EPI_ISL_469200, EPI_ISL_469201, EPI_ISL_469202, EPI_ISL_469203, EPI_ISL_469204, EPI_ISL_469205, EPI_ISL_469206, EPI_ISL_469207, EPI_ISL_469208 | Yale Clinical Virology Laboratory                                                                                                   | Grubaugh Lab - Yale School of Public Health                                                                                         |                                                                                                                                                                                                                                                                                                                                                                                                                                                                                  |
| see above                                                                                                                                                                                                                                                                                                                                                                                                                                                                                                                                                                                                                      |                                                                                                                                     |                                                                                                                                     | Joseph Fauver, Tara Alpert, Anderson Brito, Anne Wylie, Chantal Vogels, Mary Petrone, Cole Jensen, Chaney Kalinich, Isabel Ott, Arnau Casanovas, Catherine Muenker, Adam Moore, Alice Lu, Maria Tokuyama, Patrick Wong, Peiwen Lu, Saad Omer, Richard Martinello, Allison Nelson, Shelli Farhadian, Akiko Iwasaki, Charlese Dela Cruz, Albert Ko, Nathan Grubaugh                                                                                                                |
| EPI_ISL_470882                                                                                                                                                                                                                                                                                                                                                                                                                                                                                                                                                                                                                 | Foerde Hospital, Department of Microbiology                                                                                         | Norwegian Institute of Public Health, Department of Virology                                                                        | Kathrine Stene-Johansen, Kamilla Heddeland Instefjord, Hilde Elshaug, Rasmus Riis Kopperud, Karoline Bragstad, Olav Hungnes                                                                                                                                                                                                                                                                                                                                                      |
| EPI_ISL_471172                                                                                                                                                                                                                                                                                                                                                                                                                                                                                                                                                                                                                 | Unilabs Laboratory Medicine                                                                                                         | Norwegian Institute of Public Health, Department of Virology                                                                        | Kathrine Stene-Johansen, Kamilla Heddeland Instefjord, Hilde Elshaug, Rasmus Riis Kopperud, Karoline Bragstad, Olav Hungnes                                                                                                                                                                                                                                                                                                                                                      |
| EPI_ISL_471173                                                                                                                                                                                                                                                                                                                                                                                                                                                                                                                                                                                                                 | Hospital of Southern Norway - Kristiansand, Department of Medical Microbiology                                                      | Norwegian Institute of Public Health, Department of Virology                                                                        | Kathrine Stene-Johansen, Kamilla Heddeland Instefjord, Hilde Elshaug, Rasmus Riis Kopperud, Karoline Bragstad, Olav Hungnes                                                                                                                                                                                                                                                                                                                                                      |
| EPI_ISL_471174                                                                                                                                                                                                                                                                                                                                                                                                                                                                                                                                                                                                                 | Ostfold Hospital Trust - Kalnes, Centre for Laboratory Medicine, Section for gene technology and infection serology                 | Norwegian Institute of Public Health, Department of Virology                                                                        | Kathrine Stene-Johansen, Kamilla Heddeland Instefjord, Hilde Elshaug, Rasmus Riis Kopperud, Karoline Bragstad, Olav Hungnes                                                                                                                                                                                                                                                                                                                                                      |
| EPI_ISL_471175                                                                                                                                                                                                                                                                                                                                                                                                                                                                                                                                                                                                                 | Oslo University Hospital, Department of Medical Microbiology                                                                        | Norwegian Institute of Public Health, Department of Virology                                                                        | Kathrine Stene-Johansen, Kamilla Heddeland Instefjord, Hilde Elshaug, Rasmus Riis Kopperud, Karoline Bragstad, Olav Hungnes                                                                                                                                                                                                                                                                                                                                                      |
| EPI_ISL_471176                                                                                                                                                                                                                                                                                                                                                                                                                                                                                                                                                                                                                 | Hospital of Southern Norway - Kristiansand, Department of Medical Microbiology                                                      | Norwegian Institute of Public Health, Department of Virology                                                                        | Kathrine Stene-Johansen, Kamilla Heddeland Instefjord, Hilde Elshaug, Rasmus Riis Kopperud, Karoline Bragstad, Olav Hungnes                                                                                                                                                                                                                                                                                                                                                      |
| EPI_ISL_471177                                                                                                                                                                                                                                                                                                                                                                                                                                                                                                                                                                                                                 | Oslo University Hospital, Department of Medical Microbiology                                                                        | Norwegian Institute of Public Health, Department of Virology                                                                        | Kathrine Stene-Johansen, Kamilla Heddeland Instefjord, Hilde Elshaug, Rasmus Riis Kopperud, Karoline Bragstad, Olav Hungnes                                                                                                                                                                                                                                                                                                                                                      |
| EPI_ISL_471425, EPI_ISL_471426                                                                                                                                                                                                                                                                                                                                                                                                                                                                                                                                                                                                 | Division of Viral Diseases, Center for Laboratory Control of Infectious Diseases, Korea Centers for Diseases Control and Prevention | Division of Viral Diseases, Center for Laboratory Control of Infectious Diseases, Korea Centers for Diseases Control and Prevention | Jeong-Min Kim, Yoon-Seok Chung, Namjoo Lee, Mi-Seon Kim, Sang Hee Woo, Hye-Jun Jo, Sehee Park, Heui Man Kim, Jun-Sub Kim, Junhyeong Jang, Dong Hyun Song, Daesang Lee, Seong Tae Jeong, Myung Guk Han                                                                                                                                                                                                                                                                            |
| EPI_ISL_471438, EPI_ISL_471439, EPI_ISL_471440, EPI_ISL_471441, EPI_ISL_471442, EPI_ISL_471443, EPI_ISL_471444                                                                                                                                                                                                                                                                                                                                                                                                                                                                                                                 | Division of Viral Diseases, Center for Laboratory Control of Infectious Diseases, Korea Centers for Diseases Control and Prevention | Division of Viral Diseases, Center for Laboratory Control of Infectious Diseases, Korea Centers for Diseases Control and Prevention | Jeong-Min Kim, Yoon-Seok Chung, Namjoo Lee, Sang Hee Woo, Hye-Jun Jo, Heui Man Kim, Jun-Sub Kim, Dong Hyun Song, Daesang Lee, Seong Tae Jeong, Myung Guk Han                                                                                                                                                                                                                                                                                                                     |
| EPI_ISL_471445                                                                                                                                                                                                                                                                                                                                                                                                                                                                                                                                                                                                                 | Division of Viral Diseases, Center for Laboratory Control of Infectious Diseases, Korea Centers for Diseases Control and Prevention | Division of Viral Diseases, Center for Laboratory Control of Infectious Diseases, Korea Centers for Diseases Control and Prevention | Jeong-Min Kim, Yoon-Seok Chung, Namjoo Lee, Sang Hee Woo, Hye-Jun Jo, Heui Man Kim, Jun-Sub Kim, Myung Guk Han                                                                                                                                                                                                                                                                                                                                                                   |
| EPI_ISL_471446, EPI_ISL_471447, EPI_ISL_471448, EPI_ISL_471449, EPI_ISL_471450, EPI_ISL_471451, EPI_ISL_471452                                                                                                                                                                                                                                                                                                                                                                                                                                                                                                                 | Division of Viral Diseases, Center for Laboratory Control of Infectious Diseases, Korea Centers for Diseases Control and Prevention | Division of Viral Diseases, Center for Laboratory Control of Infectious Diseases, Korea Centers for Diseases Control and Prevention | Jeong-Min Kim, Yoon-Seok Chung, Namjoo Lee, Sang Hee Woo, Hye-Jun Jo, Heui Man Kim, Jun-Sub Kim, Dong Hyun Song, Daesang Lee, Seong Tae Jeong, Myung Guk Han                                                                                                                                                                                                                                                                                                                     |
| EPI_ISL_471453                                                                                                                                                                                                                                                                                                                                                                                                                                                                                                                                                                                                                 | Division of Viral Diseases, Center for Laboratory Control of Infectious Diseases, Korea Centers for Diseases Control and Prevention | Division of Viral Diseases, Center for Laboratory Control of Infectious Diseases, Korea Centers for Diseases Control and Prevention | Jeong-Min Kim, Yoon-Seok Chung, Namjoo Lee, Sang Hee Woo, Hye-Jun Jo, Heui Man Kim, Jun-Sub Kim, Myung Guk Han                                                                                                                                                                                                                                                                                                                                                                   |
| EPI_ISL_471454, EPI_ISL_471455                                                                                                                                                                                                                                                                                                                                                                                                                                                                                                                                                                                                 | Division of Viral Diseases, Center for Laboratory Control of Infectious Diseases, Korea Centers for Diseases Control and Prevention | Division of Viral Diseases, Center for Laboratory Control of Infectious Diseases, Korea Centers for Diseases Control and Prevention | Jeong-Min Kim, Yoon-Seok Chung, Namjoo Lee, Sang Hee Woo, Hye-Jun Jo, Heui Man Kim, Jun-Sub Kim, Dong Hyun Song, Daesang Lee, Seong Tae Jeong, Myung Guk Han                                                                                                                                                                                                                                                                                                                     |
| EPI_ISL_471583, EPI_ISL_471584                                                                                                                                                                                                                                                                                                                                                                                                                                                                                                                                                                                                 | King Institute of Preventive Medicine & Research                                                                                    | CSIR-Centre for Cellular and Molecular Biology                                                                                      | K.Kaveri,S.Sivasubramanian,S.Vennila,P.Padmapiya,R.Kiruba.S.Magesh,G. Dhinakar Raj, G. Ravikumar, P. Azhahianambi,K Thangaraj,Payel Mukherjee, Sofia Banu, Priya Singh, Dhiviya Vedagiri, Divya Gupta, Vishal Sah, Santosh Kumar Kuncha, Krishnan Harinivas Harshan, Archana Bharadwaj Siva, Karthik                                                                                                                                                                             |

|                                                                                                                                                                                                                                                                                                                                                                                                                                                                                                                                                                                                                                                                                                                                                                                                                                                                                                                                                                                                                                                                                                |                                                                                                                                                                                                                                                                                              |                                                                                                                                                                                                                                                                                               |                                                                                                                                                                                                                                                                                                                                                                    |
|------------------------------------------------------------------------------------------------------------------------------------------------------------------------------------------------------------------------------------------------------------------------------------------------------------------------------------------------------------------------------------------------------------------------------------------------------------------------------------------------------------------------------------------------------------------------------------------------------------------------------------------------------------------------------------------------------------------------------------------------------------------------------------------------------------------------------------------------------------------------------------------------------------------------------------------------------------------------------------------------------------------------------------------------------------------------------------------------|----------------------------------------------------------------------------------------------------------------------------------------------------------------------------------------------------------------------------------------------------------------------------------------------|-----------------------------------------------------------------------------------------------------------------------------------------------------------------------------------------------------------------------------------------------------------------------------------------------|--------------------------------------------------------------------------------------------------------------------------------------------------------------------------------------------------------------------------------------------------------------------------------------------------------------------------------------------------------------------|
| EPI_ISL_475572                                                                                                                                                                                                                                                                                                                                                                                                                                                                                                                                                                                                                                                                                                                                                                                                                                                                                                                                                                                                                                                                                 | Imperial College London                                                                                                                                                                                                                                                                      | Imperial College London                                                                                                                                                                                                                                                                       | Jie Zhou, Wendy Barclay                                                                                                                                                                                                                                                                                                                                            |
| EPI_ISL_476152, EPI_ISL_476153, EPI_ISL_476154, EPI_ISL_476155, EPI_ISL_476156, EPI_ISL_476157, EPI_ISL_476158, EPI_ISL_476159, EPI_ISL_476160, EPI_ISL_476161, EPI_ISL_476162, EPI_ISL_476163, EPI_ISL_476164, EPI_ISL_476165, EPI_ISL_476166, EPI_ISL_476167, EPI_ISL_476168, EPI_ISL_476169, EPI_ISL_476170, EPI_ISL_476337, EPI_ISL_476338, EPI_ISL_476339, EPI_ISL_476340, EPI_ISL_476341, EPI_ISL_476342, EPI_ISL_476343, EPI_ISL_476344, EPI_ISL_476345, EPI_ISL_476346, EPI_ISL_476347, EPI_ISL_476348, EPI_ISL_476349, EPI_ISL_476387, EPI_ISL_476388, EPI_ISL_476389, EPI_ISL_476390, EPI_ISL_476391, EPI_ISL_476392, EPI_ISL_476393, EPI_ISL_476394, EPI_ISL_476395, EPI_ISL_476396, EPI_ISL_476397, EPI_ISL_476398, EPI_ISL_476399, EPI_ISL_476400, EPI_ISL_476401, EPI_ISL_476402, EPI_ISL_476408, EPI_ISL_476409, EPI_ISL_476410, EPI_ISL_476411, EPI_ISL_476412, EPI_ISL_476413, EPI_ISL_476414, EPI_ISL_476415, EPI_ISL_476416, EPI_ISL_476417, EPI_ISL_476418, EPI_ISL_476419, EPI_ISL_476420, EPI_ISL_476421, EPI_ISL_476422, EPI_ISL_476423, EPI_ISL_476424, EPI_ISL_476425 |                                                                                                                                                                                                                                                                                              |                                                                                                                                                                                                                                                                                               |                                                                                                                                                                                                                                                                                                                                                                    |
| see above                                                                                                                                                                                                                                                                                                                                                                                                                                                                                                                                                                                                                                                                                                                                                                                                                                                                                                                                                                                                                                                                                      | Laboratório de Patologia Clínica - UNICAMP                                                                                                                                                                                                                                                   | Laboratório de Estudos de Vírus Emergentes - UNICAMP                                                                                                                                                                                                                                          | José Luiz Proença-Modena, Magnun Nueldo Nunes dos Santos, Angelica Schreiber, Julia Forato, Camila Simeoni, Marcilio Jorge Fumagalli, Mariene Ribeiro Amorim, Darlan da Silva Candido, Nuno Rodrigues Faria, Julien Theze, Luiz Gonzaga, Jaqueline Goes Jesus e William Marciel de Souza                                                                           |
| EPI_ISL_476517, EPI_ISL_476518, EPI_ISL_476519, EPI_ISL_476520, EPI_ISL_476521, EPI_ISL_476522, EPI_ISL_476523, EPI_ISL_476524, EPI_ISL_476525, EPI_ISL_476526, EPI_ISL_476527, EPI_ISL_476528, EPI_ISL_476529, EPI_ISL_476530, EPI_ISL_476531, EPI_ISL_476532, EPI_ISL_476533, EPI_ISL_476534, EPI_ISL_476535, EPI_ISL_476536, EPI_ISL_476537, EPI_ISL_476538, EPI_ISL_476539, EPI_ISL_476540, EPI_ISL_476541, EPI_ISL_476542, EPI_ISL_476543, EPI_ISL_476544, EPI_ISL_476545, EPI_ISL_476546, EPI_ISL_476547, EPI_ISL_476548, EPI_ISL_476549, EPI_ISL_476550, EPI_ISL_476551, EPI_ISL_476552, EPI_ISL_476553, EPI_ISL_476554, EPI_ISL_476555, EPI_ISL_476556, EPI_ISL_476557                                                                                                                                                                                                                                                                                                                                                                                                                 |                                                                                                                                                                                                                                                                                              |                                                                                                                                                                                                                                                                                               |                                                                                                                                                                                                                                                                                                                                                                    |
| see above                                                                                                                                                                                                                                                                                                                                                                                                                                                                                                                                                                                                                                                                                                                                                                                                                                                                                                                                                                                                                                                                                      | Yale Clinical Virology Laboratory                                                                                                                                                                                                                                                            | Grubaug Lab - Yale School of Public Health                                                                                                                                                                                                                                                    | Joseph Fauver, Tara Alpert, Anderson Brito, Anne Wyllie, Chantal Vogels, Mary Petrone, Cole Jensen, Chaney Kalinich, Isabel Ott, Arnau Casanovas, Catherine Muenker, Adam Moore, Alice Lu, Maria Tokuyama, Patrick Wong, Peiwen Lu, Saad Omer, Richard Martinello, Allison Nelson, Shelli Farhadian, Akiko Iwasaki, Charlese Deia Cruz, Albert Ko, Nathan Grubaugh |
| EPI_ISL_477016                                                                                                                                                                                                                                                                                                                                                                                                                                                                                                                                                                                                                                                                                                                                                                                                                                                                                                                                                                                                                                                                                 | Institute of Microbiology, Universidad San Francisco de Quito                                                                                                                                                                                                                                | Institute of Microbiology, Universidad San Francisco de Quito                                                                                                                                                                                                                                 | Juan José Guadalupe, Sully Márquez, Belén Prado-Vivar, Monica Becerra-Wong, Carla Torres, Bernardo Gutiérrez, Jorge Luis Velez, Verónica Barragán, Patricio Rojas-Silva, Gabriel Trueba, Michelle Grunauer, Paul Cárdenas                                                                                                                                          |
| EPI_ISL_477160                                                                                                                                                                                                                                                                                                                                                                                                                                                                                                                                                                                                                                                                                                                                                                                                                                                                                                                                                                                                                                                                                 | Laboratory of Dr. John Lednický                                                                                                                                                                                                                                                              | University of Florida                                                                                                                                                                                                                                                                         | John A. Lednický, Chang-Yu Wu, and John Glenn Morris, Jr.                                                                                                                                                                                                                                                                                                          |
| EPI_ISL_477163                                                                                                                                                                                                                                                                                                                                                                                                                                                                                                                                                                                                                                                                                                                                                                                                                                                                                                                                                                                                                                                                                 | Laboratory of Dr. John Lednický                                                                                                                                                                                                                                                              | University of Florida                                                                                                                                                                                                                                                                         | John A. Lednický, Maha A. Elbadry, Kuttichantran Subramaniam, Thomas B. Waltzek, John Glenn Morris, Jr.                                                                                                                                                                                                                                                            |
| EPI_ISL_481206                                                                                                                                                                                                                                                                                                                                                                                                                                                                                                                                                                                                                                                                                                                                                                                                                                                                                                                                                                                                                                                                                 | Hospital of Southern Norway - Kristiansand, Department of Medical Microbiology                                                                                                                                                                                                               | Norwegian Institute of Public Health, Department of Virology                                                                                                                                                                                                                                  | Kathrine Stene-Johansen, Kamilla Heddeland Instefjord, Hilde Elshaug, Rasmus Riis Kopperud, Karoline Bragstad, Olav Hungnes                                                                                                                                                                                                                                        |
| EPI_ISL_481207                                                                                                                                                                                                                                                                                                                                                                                                                                                                                                                                                                                                                                                                                                                                                                                                                                                                                                                                                                                                                                                                                 | Ostfold Hospital Trust - Kalnes, Centre for Laboratory Medicine, Section for gene technology and infection serology                                                                                                                                                                          | Norwegian Institute of Public Health, Department of Virology                                                                                                                                                                                                                                  | Kathrine Stene-Johansen, Kamilla Heddeland Instefjord, Hilde Elshaug, Rasmus Riis Kopperud, Karoline Bragstad, Olav Hungnes                                                                                                                                                                                                                                        |
| EPI_ISL_481208                                                                                                                                                                                                                                                                                                                                                                                                                                                                                                                                                                                                                                                                                                                                                                                                                                                                                                                                                                                                                                                                                 | Furst Medical Laboratory                                                                                                                                                                                                                                                                     | Norwegian Institute of Public Health, Department of Virology                                                                                                                                                                                                                                  | Kathrine Stene-Johansen, Kamilla Heddeland Instefjord, Hilde Elshaug, Rasmus Riis Kopperud, Karoline Bragstad, Olav Hungnes                                                                                                                                                                                                                                        |
| EPI_ISL_481209, EPI_ISL_481210, EPI_ISL_481211, EPI_ISL_481212, EPI_ISL_481213                                                                                                                                                                                                                                                                                                                                                                                                                                                                                                                                                                                                                                                                                                                                                                                                                                                                                                                                                                                                                 | Ostfold Hospital Trust - Kalnes, Centre for Laboratory Medicine, Section for gene technology and infection serology                                                                                                                                                                          | Norwegian Institute of Public Health, Department of Virology                                                                                                                                                                                                                                  | Kathrine Stene-Johansen, Kamilla Heddeland Instefjord, Hilde Elshaug, Rasmus Riis Kopperud, Karoline Bragstad, Olav Hungnes                                                                                                                                                                                                                                        |
| EPI_ISL_481214, EPI_ISL_481215                                                                                                                                                                                                                                                                                                                                                                                                                                                                                                                                                                                                                                                                                                                                                                                                                                                                                                                                                                                                                                                                 | Oslo University Hospital, Department of Medical Microbiology                                                                                                                                                                                                                                 | Norwegian Institute of Public Health, Department of Virology                                                                                                                                                                                                                                  | Kathrine Stene-Johansen, Kamilla Heddeland Instefjord, Hilde Elshaug, Rasmus Riis Kopperud, Karoline Bragstad, Olav Hungnes                                                                                                                                                                                                                                        |
| EPI_ISL_481216                                                                                                                                                                                                                                                                                                                                                                                                                                                                                                                                                                                                                                                                                                                                                                                                                                                                                                                                                                                                                                                                                 | Medical Microbiology Unit, Department for Laboratory Medicine, Drammen Hospital, Vestre Viken Health Trust,                                                                                                                                                                                  | Norwegian Institute of Public Health, Department of Virology                                                                                                                                                                                                                                  | Kathrine Stene-Johansen, Kamilla Heddeland Instefjord, Hilde Elshaug, Rasmus Riis Kopperud, Karoline Bragstad, Olav Hungnes                                                                                                                                                                                                                                        |
| EPI_ISL_481217, EPI_ISL_481218                                                                                                                                                                                                                                                                                                                                                                                                                                                                                                                                                                                                                                                                                                                                                                                                                                                                                                                                                                                                                                                                 | Oslo University Hospital, Department of Medical Microbiology                                                                                                                                                                                                                                 | Norwegian Institute of Public Health, Department of Virology                                                                                                                                                                                                                                  | Kathrine Stene-Johansen, Kamilla Heddeland Instefjord, Hilde Elshaug, Rasmus Riis Kopperud, Karoline Bragstad, Olav Hungnes                                                                                                                                                                                                                                        |
| EPI_ISL_481251, EPI_ISL_481252, EPI_ISL_481254, EPI_ISL_481255, EPI_ISL_481257, EPI_ISL_481258, EPI_ISL_481259, EPI_ISL_481260, EPI_ISL_481261, EPI_ISL_481263                                                                                                                                                                                                                                                                                                                                                                                                                                                                                                                                                                                                                                                                                                                                                                                                                                                                                                                                 | Department of Emerging Infectious Diseases, Institute of Tropical Medicine, Nagasaki University                                                                                                                                                                                              | Department of Emerging Infectious Diseases, Institute of Tropical Medicine, Nagasaki University                                                                                                                                                                                               | Jiro Yasuda, Rokusuke Yoshikawa, Yuichiro Furusato, Haruka Abe                                                                                                                                                                                                                                                                                                     |
| EPI_ISL_481370                                                                                                                                                                                                                                                                                                                                                                                                                                                                                                                                                                                                                                                                                                                                                                                                                                                                                                                                                                                                                                                                                 | Division of Viral Diseases, Center for Laboratory Control of Infectious Diseases, Korea Centers for Diseases Control and Prevention                                                                                                                                                          | Division of Viral Diseases, Center for Laboratory Control of Infectious Diseases, Korea Centers for Diseases Control and Prevention                                                                                                                                                           | Jeong-Min Kim, Yoon-Seok Chung, Namjoo Lee, Sang Hee Woo, Hye-Jun Jo, Heui Man Kim, Jun-Sub Kim, Myung Guk Han                                                                                                                                                                                                                                                     |
| EPI_ISL_481371, EPI_ISL_481372, EPI_ISL_481373, EPI_ISL_481374, EPI_ISL_481375, EPI_ISL_481376, EPI_ISL_481377, EPI_ISL_481378, EPI_ISL_481379                                                                                                                                                                                                                                                                                                                                                                                                                                                                                                                                                                                                                                                                                                                                                                                                                                                                                                                                                 | Division of Viral Diseases, Center for Laboratory Control of Infectious Diseases, Korea Centers for Diseases Control and Prevention                                                                                                                                                          | Division of Viral Diseases, Center for Laboratory Control of Infectious Diseases, Korea Centers for Diseases Control and Prevention                                                                                                                                                           | Jeong-Min Kim, Yoon-Seok Chung, Namjoo Lee, Sang Hee Woo, Hye-Jun Jo, Heui Man Kim, Jun-Sub Kim, Dong Hyun Song, Daesang Lee, Seong Tae Jeong, Myung Guk Han                                                                                                                                                                                                       |
| EPI_ISL_482575, EPI_ISL_482576, EPI_ISL_482577, EPI_ISL_482578, EPI_ISL_482579, EPI_ISL_482580, EPI_ISL_482581, EPI_ISL_482582, EPI_ISL_482583, EPI_ISL_482584, EPI_ISL_482585, EPI_ISL_482586                                                                                                                                                                                                                                                                                                                                                                                                                                                                                                                                                                                                                                                                                                                                                                                                                                                                                                 |                                                                                                                                                                                                                                                                                              |                                                                                                                                                                                                                                                                                               |                                                                                                                                                                                                                                                                                                                                                                    |
| see above                                                                                                                                                                                                                                                                                                                                                                                                                                                                                                                                                                                                                                                                                                                                                                                                                                                                                                                                                                                                                                                                                      | Hangzhou Center for Diseases Control and Prevention                                                                                                                                                                                                                                          | Hangzhou Center for Diseases Control and Prevention                                                                                                                                                                                                                                           | Jun Li, Haoqiu Wang, Lingfeng Mao, Hua Yu, Xinfen Yu, Zhou Sun, Xin Qian, Shuchang Chen, Junfang Chen, Xuchu Wang                                                                                                                                                                                                                                                  |
| EPI_ISL_484700, EPI_ISL_484702, EPI_ISL_484704, EPI_ISL_484705                                                                                                                                                                                                                                                                                                                                                                                                                                                                                                                                                                                                                                                                                                                                                                                                                                                                                                                                                                                                                                 | Department of Clinical Microbiology                                                                                                                                                                                                                                                          | GIGA Medical Genomics                                                                                                                                                                                                                                                                         | Keith Durkin, Maria Artesi, Sébastien Bontems, Raphaël Boreux, Cécile Meex, Axelle Chaslain, Céline Fombellida-Lopez, Pierrette Melin, Marie-Pierre Hayette, Vincent Bours.                                                                                                                                                                                        |
| EPI_ISL_490421, EPI_ISL_490422, EPI_ISL_490423, EPI_ISL_490424, EPI_ISL_490425, EPI_ISL_490426, EPI_ISL_490427, EPI_ISL_490428, EPI_ISL_490429, EPI_ISL_490430, EPI_ISL_490431, EPI_ISL_490432, EPI_ISL_490433, EPI_ISL_490434, EPI_ISL_490435, EPI_ISL_490436, EPI_ISL_490437, EPI_ISL_490438, EPI_ISL_490439                                                                                                                                                                                                                                                                                                                                                                                                                                                                                                                                                                                                                                                                                                                                                                                 |                                                                                                                                                                                                                                                                                              |                                                                                                                                                                                                                                                                                               |                                                                                                                                                                                                                                                                                                                                                                    |
| see above                                                                                                                                                                                                                                                                                                                                                                                                                                                                                                                                                                                                                                                                                                                                                                                                                                                                                                                                                                                                                                                                                      | University College London Hospital                                                                                                                                                                                                                                                           | COVID-19 Genomics UK (COG-UK) Consortium                                                                                                                                                                                                                                                      | Judith Heaney, Matthew Byott, Dan Frampton, Moira Spyer and Eleni Nastouli                                                                                                                                                                                                                                                                                         |
| EPI_ISL_491174, EPI_ISL_491175, EPI_ISL_491176, EPI_ISL_491177, EPI_ISL_491178, EPI_ISL_491179, EPI_ISL_491180, EPI_ISL_491181, EPI_ISL_491182, EPI_ISL_491183, EPI_ISL_491184, EPI_ISL_491185, EPI_ISL_491186, EPI_ISL_491187, EPI_ISL_491188, EPI_ISL_491189, EPI_ISL_491190, EPI_ISL_491191, EPI_ISL_491192, EPI_ISL_491193, EPI_ISL_491194, EPI_ISL_491195, EPI_ISL_491196, EPI_ISL_491197, EPI_ISL_491198, EPI_ISL_491199, EPI_ISL_491200, EPI_ISL_491201                                                                                                                                                                                                                                                                                                                                                                                                                                                                                                                                                                                                                                 |                                                                                                                                                                                                                                                                                              |                                                                                                                                                                                                                                                                                               |                                                                                                                                                                                                                                                                                                                                                                    |
| see above                                                                                                                                                                                                                                                                                                                                                                                                                                                                                                                                                                                                                                                                                                                                                                                                                                                                                                                                                                                                                                                                                      | Instituto Gulbenkian de Ciência                                                                                                                                                                                                                                                              | Instituto Gulbenkian de Ciência                                                                                                                                                                                                                                                               | João Costa, Cathy Paulino, Joao Sobral, Susana Ladeiro, Ricardo Leite                                                                                                                                                                                                                                                                                              |
| EPI_ISL_491231, EPI_ISL_491232, EPI_ISL_491233, EPI_ISL_491234, EPI_ISL_491235, EPI_ISL_491236, EPI_ISL_491237, EPI_ISL_491238, EPI_ISL_491239, EPI_ISL_491240, EPI_ISL_491241, EPI_ISL_491242, EPI_ISL_491243, EPI_ISL_491244, EPI_ISL_491245, EPI_ISL_491246, EPI_ISL_491247, EPI_ISL_491248, EPI_ISL_491249, EPI_ISL_491250, EPI_ISL_491251, EPI_ISL_491252, EPI_ISL_491253, EPI_ISL_491254, EPI_ISL_491255, EPI_ISL_491256, EPI_ISL_491257, EPI_ISL_491258, EPI_ISL_491259, EPI_ISL_491260, EPI_ISL_491261, EPI_ISL_491262, EPI_ISL_491263, EPI_ISL_491264                                                                                                                                                                                                                                                                                                                                                                                                                                                                                                                                 |                                                                                                                                                                                                                                                                                              |                                                                                                                                                                                                                                                                                               |                                                                                                                                                                                                                                                                                                                                                                    |
| see above                                                                                                                                                                                                                                                                                                                                                                                                                                                                                                                                                                                                                                                                                                                                                                                                                                                                                                                                                                                                                                                                                      | Instituto Gulbenkian de Ciência                                                                                                                                                                                                                                                              | Instituto Gulbenkian de Ciência                                                                                                                                                                                                                                                               | Joao Sobral, Susana Ladeiro, João Costa, Cathy Paulino, Ricardo Leite                                                                                                                                                                                                                                                                                              |
| EPI_ISL_492066, EPI_ISL_492067, EPI_ISL_492068, EPI_ISL_492069, EPI_ISL_492070, EPI_ISL_492071, EPI_ISL_492072, EPI_ISL_492073                                                                                                                                                                                                                                                                                                                                                                                                                                                                                                                                                                                                                                                                                                                                                                                                                                                                                                                                                                 | 1. ViroGenetics - BSL3 Laboratory of Virology, Maopolska Centre of Biotechnology, Jagiellonian University; 2. II Department of Internal Medicine, Faculty of Medicine, Jagiellonian University Medical College; 3. Narodowy Instytut Zdrowia Publicznego - Pastwowy Zakad Higieny (NIZP-PZH) | 1. ViroGenetics - BSL3 Laboratory of Virology, Maopolska Centre of Biotechnology, Jagiellonian University; 2. II Department of Internal Medicine, Faculty of Medicine, Jagiellonian University Medical College; 3. Narodowy Instytut Zdrowia Publicznego - Pastwowy Zakad Higieny (NIZP-PZH). | Katarzyna Pancer, Marek Sanak, Aleksandra A. Zasada, Magdalena Rzeczowska, Tomasz Wokowicz, Katarzyna Zacharczuk, Agnieszka Koakowska-Kulesza, Katarzyna Owczarek, Aleksandra Milewska, Natalia Wolaniuk, Ewelina Hallman-Szeliska, Pawe P abaj, Wojciech Branicki, Krzysztof Pyr                                                                                  |
| EPI_ISL_493137, EPI_ISL_493139                                                                                                                                                                                                                                                                                                                                                                                                                                                                                                                                                                                                                                                                                                                                                                                                                                                                                                                                                                                                                                                                 | Center for Research and Innovation, Faculty of Medical Technology, Mahidol University                                                                                                                                                                                                        | Center for Research and Innovation, Faculty of Medical Technology, Mahidol University                                                                                                                                                                                                         | Kantima Sangsriwut; Hatairait Lerdsamran; Jarunee Prasertsopon; Tipsuda Chanmanee; Anek Mungaomklang; Kamolthip Atsawawanunt; Prabda Praphasiri; Somrak Sirikhetkon; Nattakan Thinpan; Pilaipan Puthavathana                                                                                                                                                       |
| EPI_ISL_493149, EPI_ISL_493150, EPI_ISL_493151, EPI_ISL_493152, EPI_ISL_493153, EPI_ISL_493154, EPI_ISL_493155, EPI_ISL_493156, EPI_ISL_493157, EPI_ISL_493158, EPI_ISL_493159, EPI_ISL_493160, EPI_ISL_493161, EPI_ISL_493162, EPI_ISL_493163, EPI_ISL_493164, EPI_ISL_493165, EPI_ISL_493166, EPI_ISL_493167, EPI_ISL_493168, EPI_ISL_493169, EPI_ISL_493170, EPI_ISL_493171, EPI_ISL_493172, EPI_ISL_493173, EPI_ISL_493174, EPI_ISL_493175, EPI_ISL_493176, EPI_ISL_493177, EPI_ISL_493178, EPI_ISL_493179, EPI_ISL_493180, EPI_ISL_493181, EPI_ISL_493182, EPI_ISL_493183, EPI_ISL_493184, EPI_ISL_493185, EPI_ISL_493186, EPI_ISL_493187, EPI_ISL_493188, EPI_ISL_493189, EPI_ISL_493190                                                                                                                                                                                                                                                                                                                                                                                                 |                                                                                                                                                                                                                                                                                              |                                                                                                                                                                                                                                                                                               |                                                                                                                                                                                                                                                                                                                                                                    |
| see above                                                                                                                                                                                                                                                                                                                                                                                                                                                                                                                                                                                                                                                                                                                                                                                                                                                                                                                                                                                                                                                                                      | National Virus Resource Center, Chinese Academy of Sciences, Wuhan 430071, China                                                                                                                                                                                                             | Computational Virology Group, Center for Bacteria and Viruses Resources and Bioinformation, Wuhan Institute of Virology, Chinese Academy of Sciences Wuhan 430071, China                                                                                                                      | Jianjun Chen, Yi Yan, Yi Huang, Jin Xiong, Hongping Wei, Di Liu                                                                                                                                                                                                                                                                                                    |
| EPI_ISL_493350                                                                                                                                                                                                                                                                                                                                                                                                                                                                                                                                                                                                                                                                                                                                                                                                                                                                                                                                                                                                                                                                                 | Ostfold Hospital Trust - Kalnes, Centre for Laboratory                                                                                                                                                                                                                                       | Norwegian Institute of Public Health, Department of Virology                                                                                                                                                                                                                                  | Kathrine Stene-Johansen, Kamilla Heddeland Instefjord, Hilde Elshaug, Rasmus Riis Kopperud, Karoline Bragstad, Olav Hungnes                                                                                                                                                                                                                                        |

|                                                                                                                                                                                                                                                                                                                                                                                                                |                                                                                                                                     |                                                                                                                                     |                                                                                                                                                                                               |                                                                                                                                                                                                                                                                                                                                                                                                                |
|----------------------------------------------------------------------------------------------------------------------------------------------------------------------------------------------------------------------------------------------------------------------------------------------------------------------------------------------------------------------------------------------------------------|-------------------------------------------------------------------------------------------------------------------------------------|-------------------------------------------------------------------------------------------------------------------------------------|-----------------------------------------------------------------------------------------------------------------------------------------------------------------------------------------------|----------------------------------------------------------------------------------------------------------------------------------------------------------------------------------------------------------------------------------------------------------------------------------------------------------------------------------------------------------------------------------------------------------------|
|                                                                                                                                                                                                                                                                                                                                                                                                                | Medicine, Section for gene technology and infection serology                                                                        |                                                                                                                                     |                                                                                                                                                                                               |                                                                                                                                                                                                                                                                                                                                                                                                                |
| EPI_ISL_493351, EPI_ISL_493352, EPI_ISL_493353, EPI_ISL_493354, EPI_ISL_493355                                                                                                                                                                                                                                                                                                                                 | Oslo University Hospital, Department of Medical Microbiology                                                                        | Norwegian Institute of Public Health, Department of Virology                                                                        |                                                                                                                                                                                               | Kathrine Stene-Johansen, Kamilla Heddeland Instefjord, Hilde Elshaug, Rasmus Riis Kopperud, Karoline Bragstad, Olav Hungnes                                                                                                                                                                                                                                                                                    |
| EPI_ISL_493356, EPI_ISL_493357, EPI_ISL_493358, EPI_ISL_493359, EPI_ISL_493360, EPI_ISL_493361, EPI_ISL_493362, EPI_ISL_493363, EPI_ISL_493364, EPI_ISL_493365, EPI_ISL_493366, EPI_ISL_493367, EPI_ISL_493368, EPI_ISL_493369, EPI_ISL_493370, EPI_ISL_493371, EPI_ISL_493372, EPI_ISL_493373, EPI_ISL_493374, EPI_ISL_493375, EPI_ISL_493376, EPI_ISL_493377, EPI_ISL_493378, EPI_ISL_493379, EPI_ISL_493380 |                                                                                                                                     |                                                                                                                                     |                                                                                                                                                                                               |                                                                                                                                                                                                                                                                                                                                                                                                                |
| see above                                                                                                                                                                                                                                                                                                                                                                                                      | Furst Medical Laboratory                                                                                                            | Norwegian Institute of Public Health, Department of Virology                                                                        |                                                                                                                                                                                               | Kathrine Stene-Johansen, Kamilla Heddeland Instefjord, Hilde Elshaug, Rasmus Riis Kopperud, Karoline Bragstad, Olav Hungnes                                                                                                                                                                                                                                                                                    |
| EPI_ISL_493381, EPI_ISL_493382, EPI_ISL_493383                                                                                                                                                                                                                                                                                                                                                                 | Medical Microbiology Unit, Department for Laboratory Medicine, Drammen Hospital, Vestre Viken Health Trust,                         | Norwegian Institute of Public Health, Department of Virology                                                                        |                                                                                                                                                                                               | Kathrine Stene-Johansen, Kamilla Heddeland Instefjord, Hilde Elshaug, Rasmus Riis Kopperud, Karoline Bragstad, Olav Hungnes                                                                                                                                                                                                                                                                                    |
| EPI_ISL_493384                                                                                                                                                                                                                                                                                                                                                                                                 | Hospital of Southern Norway - Kristiansand, Department of Medical Microbiology                                                      | Norwegian Institute of Public Health, Department of Virology                                                                        |                                                                                                                                                                                               | Kathrine Stene-Johansen, Kamilla Heddeland Instefjord, Hilde Elshaug, Rasmus Riis Kopperud, Karoline Bragstad, Olav Hungnes                                                                                                                                                                                                                                                                                    |
| EPI_ISL_493385, EPI_ISL_493386, EPI_ISL_493387, EPI_ISL_493388, EPI_ISL_493389                                                                                                                                                                                                                                                                                                                                 | Oslo University Hospital, Department of Medical Microbiology                                                                        | Norwegian Institute of Public Health, Department of Virology                                                                        |                                                                                                                                                                                               | Kathrine Stene-Johansen, Kamilla Heddeland Instefjord, Hilde Elshaug, Rasmus Riis Kopperud, Karoline Bragstad, Olav Hungnes                                                                                                                                                                                                                                                                                    |
| EPI_ISL_494970                                                                                                                                                                                                                                                                                                                                                                                                 | Dr. Tony Mazzulli Microbiologist-in-Chief                                                                                           | Dr. Jeff Wrana, Senior Investigator                                                                                                 | Jeff Wrana, Jess Shen, Seda Barutcu, Kin Chan, Dan Trcka, Marie-Ming Aynaud, Javier Hernandez, Jessica Bourke, Christine Bruce, Bryn Hazlett, Laurence Pelletier, Sue Poutanen, Tony Mazzulli |                                                                                                                                                                                                                                                                                                                                                                                                                |
| EPI_ISL_495012                                                                                                                                                                                                                                                                                                                                                                                                 | Dr. Tony Mazzulli Microbiologist-in-Chief                                                                                           | Dr. Jeff Wrana, Senior Investigator                                                                                                 | Jeff Wrana, Jess Shen, Seda Barutcu, Kin Chan, Dan Trcka, Marie-Ming Aynaud, Javier Hernandez, Jessica Bourke, Christine Bruce, Bryn Hazlett, Laurence Pelletier, Sue Poutanen, Tony Mazzulli |                                                                                                                                                                                                                                                                                                                                                                                                                |
| EPI_ISL_495013                                                                                                                                                                                                                                                                                                                                                                                                 | Dr. Tony Mazzulli Microbiologist-in-Chief                                                                                           | Dr. Jeff Wrana, Senior Investigator                                                                                                 | Jeff Wrana, Jess Shen, Seda Barutcu, Kin Chan, Dan Trcka, Marie-Ming Aynaud, Javier Hernandez, Jessica Bourke, Christine Bruce, Bryn Hazlett, Laurence Pelletier, Sue Poutanen, Tony Mazzulli |                                                                                                                                                                                                                                                                                                                                                                                                                |
| EPI_ISL_495020                                                                                                                                                                                                                                                                                                                                                                                                 | Government Medical College, Bhavnagar                                                                                               | Gujarat Biotechnology Research Centre                                                                                               |                                                                                                                                                                                               | Kairavi Desai, Saklin Malek, Shirish Patel, Nitin Savaliya, Raghawendra Kumar, Dinesh Kumar, Zuber Saiyed, Komal Patel, Labdhi Pandya, Afzal Ansari, Nikha Trivedi, Apurvasinh Puvar, Janvi Raval, Zarna Patel, Monika Gandhi, Pinal Trivedi, Maharshi Pandya, Nidhi Patel, R D Dixit, A M Kadri, Harsh Bakshi, Chaitanya Joshi, Madhvi Joshi                                                                  |
| EPI_ISL_495068                                                                                                                                                                                                                                                                                                                                                                                                 | Dr. N. D. Desai Medical College & Hospital                                                                                          | Gujarat Biotechnology Research Centre                                                                                               |                                                                                                                                                                                               | Jigar Gusani, Supreet Prabhu, Apurvasinh Puvar, Janvi Raval, Zarna Patel, Monika Gandhi, Pinal Trivedi, Maharshi Pandya, Nidhi Patel, Nitin Savaliya, Raghawendra Kumar, Dinesh Kumar, Zuber Saiyed, Komal Patel, Labdhi Pandya, Afzal Ansari, Nikha Trivedi, J G Buch, R D Dixit, A M Kadri, Harsh Bakshi, Chaitanya Joshi, Madhvi Joshi                                                                      |
| EPI_ISL_497736, EPI_ISL_497738, EPI_ISL_497744, EPI_ISL_497745                                                                                                                                                                                                                                                                                                                                                 | Instituto Nacional de Salud, Bogotá, Colombia                                                                                       | Instituto Nacional de Salud, Bogotá, Colombia                                                                                       |                                                                                                                                                                                               | Katherine Laiton-Donato, Diego A. Álvarez-Díaz, Carlos Franco-Muñoz, Jonathan Reales, Diego Andrés Prada, Jose A. Usme-Ciro, Nicolas D. Franco-Sierra, Zulma M. Cucunubá, Christian Julian Villabona-Arenas, Liz Villabona-Arenas, Sussy Echeverría, Astrid C. Flórez, Carolina Ferro, Diana Marcela Walteros-Acero, Franklin Prieto, Carlos Andrés Durán, Martha Lucia Ospina Martínez, Marcela Mercado-Reyes |
| EPI_ISL_497951                                                                                                                                                                                                                                                                                                                                                                                                 | Division of Viral Diseases, Center for Laboratory Control of Infectious Diseases, Korea Centers for Diseases Control and Prevention | Division of Viral Diseases, Center for Laboratory Control of Infectious Diseases, Korea Centers for Diseases Control and Prevention |                                                                                                                                                                                               | Jeong-Min Kim, Yoon-Seok Chung, Namjoo Lee, Sang Hee Woo, Hye-Jun Jo, Heui Man Kim, Jun-Sub Kim, Myung Guk Han                                                                                                                                                                                                                                                                                                 |
| EPI_ISL_497953, EPI_ISL_497954, EPI_ISL_497955, EPI_ISL_497956, EPI_ISL_497957, EPI_ISL_497958, EPI_ISL_497959, EPI_ISL_497960                                                                                                                                                                                                                                                                                 | Division of Viral Diseases, Center for Laboratory Control of Infectious Diseases, Korea Centers for Diseases Control and Prevention | Division of Viral Diseases, Center for Laboratory Control of Infectious Diseases, Korea Centers for Diseases Control and Prevention |                                                                                                                                                                                               | Jeong-Min Kim, Yoon-Seok Chung, Namjoo Lee, Sang Hee Woo, Hye-Jun Jo, Heui Man Kim, Jun-Sub Kim, Dong Hyun Song, Daesang Lee, Seong Tae Jeong, Myung Guk Han                                                                                                                                                                                                                                                   |
| EPI_ISL_497961, EPI_ISL_497962, EPI_ISL_497963, EPI_ISL_497964, EPI_ISL_497965, EPI_ISL_497966, EPI_ISL_497967                                                                                                                                                                                                                                                                                                 | Division of Viral Diseases, Center for Laboratory Control of Infectious Diseases, Korea Centers for Diseases Control and Prevention | Division of Viral Diseases, Center for Laboratory Control of Infectious Diseases, Korea Centers for Diseases Control and Prevention |                                                                                                                                                                                               | Jeong-Min Kim, Yoon-Seok Chung, Namjoo Lee, Sang Hee Woo, Hye-Jun Jo, Heui Man Kim, Jun-Sub Kim, Myung Guk Han                                                                                                                                                                                                                                                                                                 |
| EPI_ISL_497968, EPI_ISL_497969, EPI_ISL_497970, EPI_ISL_497971                                                                                                                                                                                                                                                                                                                                                 | Division of Viral Diseases, Center for Laboratory Control of Infectious Diseases, Korea Centers for Diseases Control and Prevention | Division of Viral Diseases, Center for Laboratory Control of Infectious Diseases, Korea Centers for Diseases Control and Prevention |                                                                                                                                                                                               | Jeong-Min Kim, Yoon-Seok Chung, Namjoo Lee, Sang Hee Woo, Hye-Jun Jo, Heui Man Kim, Jun-Sub Kim, Dong Hyun Song, Daesang Lee, Seong Tae Jeong, Myung Guk Han                                                                                                                                                                                                                                                   |
| EPI_ISL_497972, EPI_ISL_497973                                                                                                                                                                                                                                                                                                                                                                                 | Division of Viral Diseases, Center for Laboratory Control of Infectious Diseases, Korea Centers for Diseases Control and Prevention | Division of Viral Diseases, Center for Laboratory Control of Infectious Diseases, Korea Centers for Diseases Control and Prevention |                                                                                                                                                                                               | Jeong-Min Kim, Yoon-Seok Chung, Namjoo Lee, Sang Hee Woo, Hye-Jun Jo, Heui Man Kim, Jun-Sub Kim, Myung Guk Han                                                                                                                                                                                                                                                                                                 |
| EPI_ISL_497974                                                                                                                                                                                                                                                                                                                                                                                                 | Division of Viral Diseases, Center for Laboratory Control of Infectious Diseases, Korea Centers for Diseases Control and Prevention | Division of Viral Diseases, Center for Laboratory Control of Infectious Diseases, Korea Centers for Diseases Control and Prevention |                                                                                                                                                                                               | Jeong-Min Kim, Yoon-Seok Chung, Namjoo Lee, Sang Hee Woo, Hye-Jun Jo, Heui Man Kim, Jun-Sub Kim, Dong Hyun Song, Daesang Lee, Seong Tae Jeong, Myung Guk Han                                                                                                                                                                                                                                                   |
| EPI_ISL_497975, EPI_ISL_497976, EPI_ISL_497977, EPI_ISL_497978, EPI_ISL_497979, EPI_ISL_497980, EPI_ISL_497981, EPI_ISL_497982, EPI_ISL_497983, EPI_ISL_497984                                                                                                                                                                                                                                                 | Division of Viral Diseases, Center for Laboratory Control of Infectious Diseases, Korea Centers for Diseases Control and Prevention | Division of Viral Diseases, Center for Laboratory Control of Infectious Diseases, Korea Centers for Diseases Control and Prevention |                                                                                                                                                                                               | Jeong-Min Kim, Yoon-Seok Chung, Namjoo Lee, Sang Hee Woo, Hye-Jun Jo, Heui Man Kim, Jun-Sub Kim, Myung Guk Han                                                                                                                                                                                                                                                                                                 |
| EPI_ISL_497985                                                                                                                                                                                                                                                                                                                                                                                                 | Division of Viral Diseases, Center for Laboratory Control of Infectious Diseases, Korea Centers for Diseases Control and Prevention | Division of Viral Diseases, Center for Laboratory Control of Infectious Diseases, Korea Centers for Diseases Control and Prevention |                                                                                                                                                                                               | Jeong-Min Kim, Yoon-Seok Chung, Namjoo Lee, Sang Hee Woo, Hye-Jun Jo, Heui Man Kim, Jun-Sub Kim, Dong Hyun Song, Daesang Lee, Seong Tae Jeong, Myung Guk Han                                                                                                                                                                                                                                                   |
| EPI_ISL_497986                                                                                                                                                                                                                                                                                                                                                                                                 | Division of Viral Diseases, Center for Laboratory Control of Infectious Diseases, Korea Centers for Diseases Control and Prevention | Division of Viral Diseases, Center for Laboratory Control of Infectious Diseases, Korea Centers for Diseases Control and Prevention |                                                                                                                                                                                               | Jeong-Min Kim, Yoon-Seok Chung, Namjoo Lee, Sang Hee Woo, Hye-Jun Jo, Heui Man Kim, Jun-Sub Kim, Myung Guk Han                                                                                                                                                                                                                                                                                                 |
| EPI_ISL_497987, EPI_ISL_497988, EPI_ISL_497989, EPI_ISL_497990                                                                                                                                                                                                                                                                                                                                                 | Division of Viral Diseases, Center for Laboratory Control of Infectious Diseases, Korea Centers for Diseases Control and Prevention | Division of Viral Diseases, Center for Laboratory Control of Infectious Diseases, Korea Centers for Diseases Control and Prevention |                                                                                                                                                                                               | Jeong-Min Kim, Yoon-Seok Chung, Namjoo Lee, Sang Hee Woo, Hye-Jun Jo, Heui Man Kim, Jun-Sub Kim, Dong Hyun Song, Daesang Lee, Seong Tae Jeong, Myung Guk Han                                                                                                                                                                                                                                                   |
| EPI_ISL_497991, EPI_ISL_497992, EPI_ISL_497993                                                                                                                                                                                                                                                                                                                                                                 | Division of Viral Diseases, Center for Laboratory Control of Infectious Diseases, Korea Centers for Diseases Control and Prevention | Division of Viral Diseases, Center for Laboratory Control of Infectious Diseases, Korea Centers for Diseases Control and Prevention |                                                                                                                                                                                               | Jeong-Min Kim, Yoon-Seok Chung, Namjoo Lee, Sang Hee Woo, Hye-Jun Jo, Heui Man Kim, Jun-Sub Kim, Myung Guk Han                                                                                                                                                                                                                                                                                                 |
| EPI_ISL_497994, EPI_ISL_497995                                                                                                                                                                                                                                                                                                                                                                                 | Division of Viral Diseases, Center for Laboratory Control of Infectious Diseases, Korea Centers for Diseases Control and Prevention | Division of Viral Diseases, Center for Laboratory Control of Infectious Diseases, Korea Centers for Diseases Control and Prevention |                                                                                                                                                                                               | Jeong-Min Kim, Yoon-Seok Chung, Namjoo Lee, Sang Hee Woo, Hye-Jun Jo, Heui Man Kim, Jun-Sub Kim, Dong Hyun Song, Daesang Lee, Seong Tae Jeong, Myung Guk Han                                                                                                                                                                                                                                                   |
| EPI_ISL_497996                                                                                                                                                                                                                                                                                                                                                                                                 | Division of Viral Diseases, Center for Laboratory Control of Infectious Diseases, Korea Centers for Diseases Control and Prevention | Division of Viral Diseases, Center for Laboratory Control of Infectious Diseases, Korea Centers for Diseases Control and Prevention |                                                                                                                                                                                               | Jeong-Min Kim, Yoon-Seok Chung, Namjoo Lee, Sang Hee Woo, Hye-Jun Jo, Heui Man Kim, Jun-Sub Kim, Myung Guk Han                                                                                                                                                                                                                                                                                                 |
| EPI_ISL_497997                                                                                                                                                                                                                                                                                                                                                                                                 | Division of Viral Diseases, Center for Laboratory Control of Infectious Diseases, Korea Centers for Diseases Control and Prevention | Division of Viral Diseases, Center for Laboratory Control of Infectious Diseases, Korea Centers for Diseases Control and Prevention |                                                                                                                                                                                               | Jeong-Min Kim, Yoon-Seok Chung, Namjoo Lee, Sang Hee Woo, Hye-Jun Jo, Heui Man Kim, Jun-Sub Kim, Dong Hyun Song, Daesang Lee, Seong Tae Jeong, Myung Guk Han                                                                                                                                                                                                                                                   |

|                                                                                                                                                                                                                                                                                                                | Prevention                                                                                                                          | Prevention                                                                                                                          |                                                                                                                                                                                                                                                                                                                                                                                          |
|----------------------------------------------------------------------------------------------------------------------------------------------------------------------------------------------------------------------------------------------------------------------------------------------------------------|-------------------------------------------------------------------------------------------------------------------------------------|-------------------------------------------------------------------------------------------------------------------------------------|------------------------------------------------------------------------------------------------------------------------------------------------------------------------------------------------------------------------------------------------------------------------------------------------------------------------------------------------------------------------------------------|
| EPI_ISL_497998, EPI_ISL_497999, EPI_ISL_498000, EPI_ISL_498001, EPI_ISL_498002, EPI_ISL_498003                                                                                                                                                                                                                 | Division of Viral Diseases, Center for Laboratory Control of Infectious Diseases, Korea Centers for Diseases Control and Prevention | Division of Viral Diseases, Center for Laboratory Control of Infectious Diseases, Korea Centers for Diseases Control and Prevention | Jeong-Min Kim, Yoon-Seok Chung, Namjoo Lee, Sang Hee Woo, Hye-Jun Jo, Heui Man Kim, Jun-Sub Kim, Myung Guk Han                                                                                                                                                                                                                                                                           |
| EPI_ISL_498004                                                                                                                                                                                                                                                                                                 | Division of Viral Diseases, Center for Laboratory Control of Infectious Diseases, Korea Centers for Diseases Control and Prevention | Division of Viral Diseases, Center for Laboratory Control of Infectious Diseases, Korea Centers for Diseases Control and Prevention | Jeong-Min Kim, Yoon-Seok Chung, Namjoo Lee, Sang Hee Woo, Hye-Jun Jo, Heui Man Kim, Jun-Sub Kim, Dong Hyun Song, Daesang Lee, Seong Tae Jeong, Myung Guk Han                                                                                                                                                                                                                             |
| EPI_ISL_498005                                                                                                                                                                                                                                                                                                 | Division of Viral Diseases, Center for Laboratory Control of Infectious Diseases, Korea Centers for Diseases Control and Prevention | Division of Viral Diseases, Center for Laboratory Control of Infectious Diseases, Korea Centers for Diseases Control and Prevention | Jeong-Min Kim, Yoon-Seok Chung, Namjoo Lee, Sang Hee Woo, Hye-Jun Jo, Heui Man Kim, Jun-Sub Kim, Myung Guk Han                                                                                                                                                                                                                                                                           |
| EPI_ISL_498006, EPI_ISL_498007, EPI_ISL_498008, EPI_ISL_498009, EPI_ISL_498010, EPI_ISL_498011, EPI_ISL_498012, EPI_ISL_498013, EPI_ISL_498014, EPI_ISL_498015, EPI_ISL_498016                                                                                                                                 |                                                                                                                                     |                                                                                                                                     |                                                                                                                                                                                                                                                                                                                                                                                          |
| see above                                                                                                                                                                                                                                                                                                      | Division of Viral Diseases, Center for Laboratory Control of Infectious Diseases, Korea Centers for Diseases Control and Prevention | Division of Viral Diseases, Center for Laboratory Control of Infectious Diseases, Korea Centers for Diseases Control and Prevention | Jeong-Min Kim, Yoon-Seok Chung, Namjoo Lee, Sang Hee Woo, Hye-Jun Jo, Heui Man Kim, Jun-Sub Kim, Dong Hyun Song, Daesang Lee, Seong Tae Jeong, Myung Guk Han                                                                                                                                                                                                                             |
| EPI_ISL_498017                                                                                                                                                                                                                                                                                                 | Division of Viral Diseases, Center for Laboratory Control of Infectious Diseases, Korea Centers for Diseases Control and Prevention | Division of Viral Diseases, Center for Laboratory Control of Infectious Diseases, Korea Centers for Diseases Control and Prevention | Jeong-Min Kim, Yoon-Seok Chung, Namjoo Lee, Sang Hee Woo, Hye-Jun Jo, Heui Man Kim, Jun-Sub Kim, Myung Guk Han                                                                                                                                                                                                                                                                           |
| EPI_ISL_498018, EPI_ISL_498019, EPI_ISL_498020, EPI_ISL_498021, EPI_ISL_498022, EPI_ISL_498023, EPI_ISL_498024, EPI_ISL_498025, EPI_ISL_498026, EPI_ISL_498027, EPI_ISL_498028, EPI_ISL_498029, EPI_ISL_498030, EPI_ISL_498031, EPI_ISL_498032, EPI_ISL_498033, EPI_ISL_498034, EPI_ISL_498035                 |                                                                                                                                     |                                                                                                                                     |                                                                                                                                                                                                                                                                                                                                                                                          |
| see above                                                                                                                                                                                                                                                                                                      | Division of Viral Diseases, Center for Laboratory Control of Infectious Diseases, Korea Centers for Diseases Control and Prevention | Division of Viral Diseases, Center for Laboratory Control of Infectious Diseases, Korea Centers for Diseases Control and Prevention | Jeong-Min Kim, Yoon-Seok Chung, Namjoo Lee, Sang Hee Woo, Hye-Jun Jo, Heui Man Kim, Jun-Sub Kim, Dong Hyun Song, Daesang Lee, Seong Tae Jeong, Myung Guk Han                                                                                                                                                                                                                             |
| EPI_ISL_498036                                                                                                                                                                                                                                                                                                 | Division of Viral Diseases, Center for Laboratory Control of Infectious Diseases, Korea Centers for Diseases Control and Prevention | Division of Viral Diseases, Center for Laboratory Control of Infectious Diseases, Korea Centers for Diseases Control and Prevention | Jeong-Min Kim, Yoon-Seok Chung, Namjoo Lee, Sang Hee Woo, Hye-Jun Jo, Heui Man Kim, Jun-Sub Kim, Myung Guk Han                                                                                                                                                                                                                                                                           |
| EPI_ISL_498037, EPI_ISL_498038, EPI_ISL_498039, EPI_ISL_498040, EPI_ISL_498041, EPI_ISL_498042, EPI_ISL_498043, EPI_ISL_498044, EPI_ISL_498045, EPI_ISL_498046, EPI_ISL_498047, EPI_ISL_498048, EPI_ISL_498049, EPI_ISL_498050, EPI_ISL_498051, EPI_ISL_498052, EPI_ISL_498053                                 |                                                                                                                                     |                                                                                                                                     |                                                                                                                                                                                                                                                                                                                                                                                          |
| see above                                                                                                                                                                                                                                                                                                      | Division of Viral Diseases, Center for Laboratory Control of Infectious Diseases, Korea Centers for Diseases Control and Prevention | Division of Viral Diseases, Center for Laboratory Control of Infectious Diseases, Korea Centers for Diseases Control and Prevention | Jeong-Min Kim, Yoon-Seok Chung, Namjoo Lee, Sang Hee Woo, Hye-Jun Jo, Heui Man Kim, Jun-Sub Kim, Dong Hyun Song, Daesang Lee, Seong Tae Jeong, Myung Guk Han                                                                                                                                                                                                                             |
| EPI_ISL_498127, EPI_ISL_498131, EPI_ISL_498133, EPI_ISL_498135, EPI_ISL_498137, EPI_ISL_498140, EPI_ISL_498148, EPI_ISL_498150                                                                                                                                                                                 | Department of Clinical Microbiology                                                                                                 | GIGA Medical Genomics                                                                                                               | Keith Durkin, Maria Artesi, Sébastien Bontems, Raphaël Boreux, Cécile Meex, Axelle Chaslain, Céline Fombellida-Lopez, Pierrette Melin, Marie-Pierre Hayette, Vincent Bours.                                                                                                                                                                                                              |
| EPI_ISL_498152, EPI_ISL_498153, EPI_ISL_498154, EPI_ISL_498155, EPI_ISL_498156, EPI_ISL_498157, EPI_ISL_498158, EPI_ISL_498159, EPI_ISL_498160, EPI_ISL_498161, EPI_ISL_498162, EPI_ISL_498163, EPI_ISL_498164, EPI_ISL_498165, EPI_ISL_498166, EPI_ISL_498167, EPI_ISL_498168, EPI_ISL_498169, EPI_ISL_498170 |                                                                                                                                     |                                                                                                                                     |                                                                                                                                                                                                                                                                                                                                                                                          |
| see above                                                                                                                                                                                                                                                                                                      | Instituto Nacional de Salud, Bogotá, Colombia                                                                                       | Instituto Nacional de Salud, Bogotá, Colombia                                                                                       | Katherine Laiton-Donato, Diego A. Álvarez-Díaz, Carlos Franco-Muñoz, Jonathan Reales, Diego Andrés Prada, Jose A. Usme-Ciro, Nicolas D. Franco-Sierra, Zulma M. Cucunubá, Christian Julian Villabona-Arenas, Sussy Echeverría, Astrid C. Flórez, Carolina Ferro, Diana Marcela Walteros-Acero, Franklin Prieto, Carlos Andrés Durán, Martha Lucia Ospina Martínez, Marcela Mercado-Reyes |
| EPI_ISL_498629                                                                                                                                                                                                                                                                                                 | Department of Clinical Microbiology                                                                                                 | GIGA Medical Genomics                                                                                                               | Keith Durkin, Maria Artesi, Sébastien Bontems, Raphaël Boreux, Cécile Meex, Axelle Chaslain, Céline Fombellida-Lopez, Pierrette Melin, Marie-Pierre Hayette, Vincent Bours.                                                                                                                                                                                                              |
| EPI_ISL_500162, EPI_ISL_500167, EPI_ISL_500209, EPI_ISL_500219, EPI_ISL_500221                                                                                                                                                                                                                                 | Hospital Clínico Universitario de Santiago de Compostela                                                                            | SeqCOVID-SPAIN consortium/IBV(CSIC)                                                                                                 | José Javier Costa Alcalde, Antonio Aguilera Guirao, M <sup>a</sup> Luisa Pérez del Molino Bernal, Amparo Coira Nieto, Gema Barbeito Castiñeiras, Rocio Trastoy Pena and SeqCOVID-SPAIN consortium                                                                                                                                                                                        |
| EPI_ISL_500768, EPI_ISL_500769, EPI_ISL_500770, EPI_ISL_500771, EPI_ISL_500772, EPI_ISL_500773, EPI_ISL_500774                                                                                                                                                                                                 | Furst Medical Laboratory                                                                                                            | Norwegian Institute of Public Health, Department of Virology                                                                        | Kathrine Stene-Johansen, Kamilla Heddeland Instefjord, Hilde Elshaug, Rasmus Riis Kopperud, Karoline Bragstad, Olav Hungnes                                                                                                                                                                                                                                                              |
| EPI_ISL_500775                                                                                                                                                                                                                                                                                                 | Hospital of Southern Norway - Kristiansand, Department of Medical Microbiology                                                      | Norwegian Institute of Public Health, Department of Virology                                                                        | Kathrine Stene-Johansen, Kamilla Heddeland Instefjord, Hilde Elshaug, Rasmus Riis Kopperud, Karoline Bragstad, Olav Hungnes                                                                                                                                                                                                                                                              |
| EPI_ISL_500776, EPI_ISL_500777, EPI_ISL_500778                                                                                                                                                                                                                                                                 | Foerde Hospital, Department of Microbiology                                                                                         | Norwegian Institute of Public Health, Department of Virology                                                                        | Kathrine Stene-Johansen, Kamilla Heddeland Instefjord, Hilde Elshaug, Rasmus Riis Kopperud, Karoline Bragstad, Olav Hungnes                                                                                                                                                                                                                                                              |
| EPI_ISL_500779, EPI_ISL_500780, EPI_ISL_500781, EPI_ISL_500782, EPI_ISL_500783                                                                                                                                                                                                                                 | Akershus University Hospital, Department for Microbiology and Infectious Disease Control                                            | Norwegian Institute of Public Health, Department of Virology                                                                        | Kathrine Stene-Johansen, Kamilla Heddeland Instefjord, Hilde Elshaug, Rasmus Riis Kopperud, Karoline Bragstad, Olav Hungnes                                                                                                                                                                                                                                                              |
| EPI_ISL_500784, EPI_ISL_500785, EPI_ISL_500786, EPI_ISL_500787, EPI_ISL_500788, EPI_ISL_500789, EPI_ISL_500790                                                                                                                                                                                                 | Furst Medical Laboratory                                                                                                            | Norwegian Institute of Public Health, Department of Virology                                                                        | Kathrine Stene-Johansen, Kamilla Heddeland Instefjord, Hilde Elshaug, Rasmus Riis Kopperud, Karoline Bragstad, Olav Hungnes                                                                                                                                                                                                                                                              |
| EPI_ISL_500791, EPI_ISL_500792                                                                                                                                                                                                                                                                                 | Hospital of Southern Norway - Kristiansand, Department of Medical Microbiology                                                      | Norwegian Institute of Public Health, Department of Virology                                                                        | Kathrine Stene-Johansen, Kamilla Heddeland Instefjord, Hilde Elshaug, Rasmus Riis Kopperud, Karoline Bragstad, Olav Hungnes                                                                                                                                                                                                                                                              |
| EPI_ISL_500793, EPI_ISL_500794, EPI_ISL_500795, EPI_ISL_500796                                                                                                                                                                                                                                                 | Akershus University Hospital, Department for Microbiology and Infectious Disease Control                                            | Norwegian Institute of Public Health, Department of Virology                                                                        | Kathrine Stene-Johansen, Kamilla Heddeland Instefjord, Hilde Elshaug, Rasmus Riis Kopperud, Karoline Bragstad, Olav Hungnes                                                                                                                                                                                                                                                              |
| EPI_ISL_500797, EPI_ISL_500798, EPI_ISL_500799                                                                                                                                                                                                                                                                 | Hospital of Southern Norway - Kristiansand, Department of Medical Microbiology                                                      | Norwegian Institute of Public Health, Department of Virology                                                                        | Kathrine Stene-Johansen, Kamilla Heddeland Instefjord, Hilde Elshaug, Rasmus Riis Kopperud, Karoline Bragstad, Olav Hungnes                                                                                                                                                                                                                                                              |
| EPI_ISL_500800                                                                                                                                                                                                                                                                                                 | Oslo University Hospital, Department of Medical Microbiology                                                                        | Norwegian Institute of Public Health, Department of Virology                                                                        | Kathrine Stene-Johansen, Kamilla Heddeland Instefjord, Hilde Elshaug, Rasmus Riis Kopperud, Karoline Bragstad, Olav Hungnes                                                                                                                                                                                                                                                              |
| EPI_ISL_506947, EPI_ISL_506948, EPI_ISL_506949, EPI_ISL_506950, EPI_ISL_506951, EPI_ISL_506952, EPI_ISL_506953, EPI_ISL_506954, EPI_ISL_506955, EPI_ISL_506956                                                                                                                                                 | Division of Viral Diseases, Center for Laboratory Control of Infectious Diseases, Korea Centers for Diseases Control and Prevention | Division of Viral Diseases, Center for Laboratory Control of Infectious Diseases, Korea Centers for Diseases Control and Prevention | Jeong-Min Kim, Yoon-Seok Chung, Namjoo Lee, Sang Hee Woo, Hye-Jun Jo, Heui Man Kim, Jun-Sub Kim, Dong Hyun Song, Daesang Lee, Seong Tae Jeong, Myung Guk Han                                                                                                                                                                                                                             |
| EPI_ISL_506957, EPI_ISL_506958, EPI_ISL_506959, EPI_ISL_506960, EPI_ISL_506961, EPI_ISL_506962, EPI_ISL_506963, EPI_ISL_506964                                                                                                                                                                                 | Division of Viral Diseases, Center for Laboratory Control of Infectious Diseases, Korea Centers for Diseases Control and Prevention | Division of Viral Diseases, Center for Laboratory Control of Infectious Diseases, Korea Centers for Diseases Control and Prevention | Jeong-Min Kim, Yoon-Seok Chung, Namjoo Lee, Sang Hee Woo, Hye-Jun Jo, Heui Man Kim, Jun-Sub Kim, Myung Guk Han                                                                                                                                                                                                                                                                           |

|                                                                                                                                                                                                                                                                                                                                                                                                                                                                                                                                                                                                                                                                                                                                                                                                                                                                                                                                                                                                                                                                                                                                                                                                                                                                                                                                                                                                                                                                                                                                                                                                                                                                                                                                                                                                                                                                                                                                                                                                                                                                                                                                                                                                                                                                                                                                                                                                                                                                                                                                                                                                                                                                                                                                                                                                                                                                                                                                                                                                                                                                                                                                                                                                                                                                                                                                                                                                                                                                                                                                                                                                                                                                                                                                                                                                                                                                                                                                                                                                                                                                                                                                                                                                                                                                                                                                                                                                                                                                                                                                                                                                                                                                                                                                                                                                                                                                                                                                                                                |                                                                                                                                     |                                                                                                                                     |                                                                                                                                                                                                                                                                                                                                                    |
|--------------------------------------------------------------------------------------------------------------------------------------------------------------------------------------------------------------------------------------------------------------------------------------------------------------------------------------------------------------------------------------------------------------------------------------------------------------------------------------------------------------------------------------------------------------------------------------------------------------------------------------------------------------------------------------------------------------------------------------------------------------------------------------------------------------------------------------------------------------------------------------------------------------------------------------------------------------------------------------------------------------------------------------------------------------------------------------------------------------------------------------------------------------------------------------------------------------------------------------------------------------------------------------------------------------------------------------------------------------------------------------------------------------------------------------------------------------------------------------------------------------------------------------------------------------------------------------------------------------------------------------------------------------------------------------------------------------------------------------------------------------------------------------------------------------------------------------------------------------------------------------------------------------------------------------------------------------------------------------------------------------------------------------------------------------------------------------------------------------------------------------------------------------------------------------------------------------------------------------------------------------------------------------------------------------------------------------------------------------------------------------------------------------------------------------------------------------------------------------------------------------------------------------------------------------------------------------------------------------------------------------------------------------------------------------------------------------------------------------------------------------------------------------------------------------------------------------------------------------------------------------------------------------------------------------------------------------------------------------------------------------------------------------------------------------------------------------------------------------------------------------------------------------------------------------------------------------------------------------------------------------------------------------------------------------------------------------------------------------------------------------------------------------------------------------------------------------------------------------------------------------------------------------------------------------------------------------------------------------------------------------------------------------------------------------------------------------------------------------------------------------------------------------------------------------------------------------------------------------------------------------------------------------------------------------------------------------------------------------------------------------------------------------------------------------------------------------------------------------------------------------------------------------------------------------------------------------------------------------------------------------------------------------------------------------------------------------------------------------------------------------------------------------------------------------------------------------------------------------------------------------------------------------------------------------------------------------------------------------------------------------------------------------------------------------------------------------------------------------------------------------------------------------------------------------------------------------------------------------------------------------------------------------------------------------------------------------------------------|-------------------------------------------------------------------------------------------------------------------------------------|-------------------------------------------------------------------------------------------------------------------------------------|----------------------------------------------------------------------------------------------------------------------------------------------------------------------------------------------------------------------------------------------------------------------------------------------------------------------------------------------------|
| EPI_ISL_506965, EPI_ISL_506966, EPI_ISL_506967, EPI_ISL_506968, EPI_ISL_506969, EPI_ISL_506970, EPI_ISL_506971, EPI_ISL_506972, EPI_ISL_506973, EPI_ISL_506974                                                                                                                                                                                                                                                                                                                                                                                                                                                                                                                                                                                                                                                                                                                                                                                                                                                                                                                                                                                                                                                                                                                                                                                                                                                                                                                                                                                                                                                                                                                                                                                                                                                                                                                                                                                                                                                                                                                                                                                                                                                                                                                                                                                                                                                                                                                                                                                                                                                                                                                                                                                                                                                                                                                                                                                                                                                                                                                                                                                                                                                                                                                                                                                                                                                                                                                                                                                                                                                                                                                                                                                                                                                                                                                                                                                                                                                                                                                                                                                                                                                                                                                                                                                                                                                                                                                                                                                                                                                                                                                                                                                                                                                                                                                                                                                                                 | Division of Viral Diseases, Center for Laboratory Control of Infectious Diseases, Korea Centers for Diseases Control and Prevention | Division of Viral Diseases, Center for Laboratory Control of Infectious Diseases, Korea Centers for Diseases Control and Prevention | Jeong-Min Kim, Yoon-Seok Chung, Namjoo Lee, Sang Hee Woo, Hye-Jun Jo, Heui Man Kim, Jun-Sub Kim, Dong Hyun Song, Daesang Lee, Seong Tae Jeong, Myung Guk Han                                                                                                                                                                                       |
| EPI_ISL_506975                                                                                                                                                                                                                                                                                                                                                                                                                                                                                                                                                                                                                                                                                                                                                                                                                                                                                                                                                                                                                                                                                                                                                                                                                                                                                                                                                                                                                                                                                                                                                                                                                                                                                                                                                                                                                                                                                                                                                                                                                                                                                                                                                                                                                                                                                                                                                                                                                                                                                                                                                                                                                                                                                                                                                                                                                                                                                                                                                                                                                                                                                                                                                                                                                                                                                                                                                                                                                                                                                                                                                                                                                                                                                                                                                                                                                                                                                                                                                                                                                                                                                                                                                                                                                                                                                                                                                                                                                                                                                                                                                                                                                                                                                                                                                                                                                                                                                                                                                                 | Division of Viral Diseases, Center for Laboratory Control of Infectious Diseases, Korea Centers for Diseases Control and Prevention | Division of Viral Diseases, Center for Laboratory Control of Infectious Diseases, Korea Centers for Diseases Control and Prevention | Jeong-Min Kim, Yoon-Seok Chung, Namjoo Lee, Sang Hee Woo, Hye-Jun Jo, Heui Man Kim, Jun-Sub Kim, Myung Guk Han                                                                                                                                                                                                                                     |
| EPI_ISL_506976, EPI_ISL_506977, EPI_ISL_506978, EPI_ISL_506979, EPI_ISL_506980, EPI_ISL_506981, EPI_ISL_506982, EPI_ISL_506983, EPI_ISL_506984, EPI_ISL_506985, EPI_ISL_506986, EPI_ISL_506987, EPI_ISL_506988, EPI_ISL_506989, EPI_ISL_506990, EPI_ISL_506991, EPI_ISL_506992, EPI_ISL_506993                                                                                                                                                                                                                                                                                                                                                                                                                                                                                                                                                                                                                                                                                                                                                                                                                                                                                                                                                                                                                                                                                                                                                                                                                                                                                                                                                                                                                                                                                                                                                                                                                                                                                                                                                                                                                                                                                                                                                                                                                                                                                                                                                                                                                                                                                                                                                                                                                                                                                                                                                                                                                                                                                                                                                                                                                                                                                                                                                                                                                                                                                                                                                                                                                                                                                                                                                                                                                                                                                                                                                                                                                                                                                                                                                                                                                                                                                                                                                                                                                                                                                                                                                                                                                                                                                                                                                                                                                                                                                                                                                                                                                                                                                 | Division of Viral Diseases, Center for Laboratory Control of Infectious Diseases, Korea Centers for Diseases Control and Prevention | Division of Viral Diseases, Center for Laboratory Control of Infectious Diseases, Korea Centers for Diseases Control and Prevention | Jeong-Min Kim, Yoon-Seok Chung, Namjoo Lee, Sang Hee Woo, Hye-Jun Jo, Heui Man Kim, Jun-Sub Kim, Dong Hyun Song, Daesang Lee, Seong Tae Jeong, Myung Guk Han                                                                                                                                                                                       |
| see above                                                                                                                                                                                                                                                                                                                                                                                                                                                                                                                                                                                                                                                                                                                                                                                                                                                                                                                                                                                                                                                                                                                                                                                                                                                                                                                                                                                                                                                                                                                                                                                                                                                                                                                                                                                                                                                                                                                                                                                                                                                                                                                                                                                                                                                                                                                                                                                                                                                                                                                                                                                                                                                                                                                                                                                                                                                                                                                                                                                                                                                                                                                                                                                                                                                                                                                                                                                                                                                                                                                                                                                                                                                                                                                                                                                                                                                                                                                                                                                                                                                                                                                                                                                                                                                                                                                                                                                                                                                                                                                                                                                                                                                                                                                                                                                                                                                                                                                                                                      | Division of Viral Diseases, Center for Laboratory Control of Infectious Diseases, Korea Centers for Diseases Control and Prevention | Division of Viral Diseases, Center for Laboratory Control of Infectious Diseases, Korea Centers for Diseases Control and Prevention | Jeong-Min Kim, Yoon-Seok Chung, Namjoo Lee, Sang Hee Woo, Hye-Jun Jo, Heui Man Kim, Jun-Sub Kim, Dong Hyun Song, Daesang Lee, Seong Tae Jeong, Myung Guk Han                                                                                                                                                                                       |
| EPI_ISL_506994, EPI_ISL_506995                                                                                                                                                                                                                                                                                                                                                                                                                                                                                                                                                                                                                                                                                                                                                                                                                                                                                                                                                                                                                                                                                                                                                                                                                                                                                                                                                                                                                                                                                                                                                                                                                                                                                                                                                                                                                                                                                                                                                                                                                                                                                                                                                                                                                                                                                                                                                                                                                                                                                                                                                                                                                                                                                                                                                                                                                                                                                                                                                                                                                                                                                                                                                                                                                                                                                                                                                                                                                                                                                                                                                                                                                                                                                                                                                                                                                                                                                                                                                                                                                                                                                                                                                                                                                                                                                                                                                                                                                                                                                                                                                                                                                                                                                                                                                                                                                                                                                                                                                 | Division of Viral Diseases, Center for Laboratory Control of Infectious Diseases, Korea Centers for Diseases Control and Prevention | Division of Viral Diseases, Center for Laboratory Control of Infectious Diseases, Korea Centers for Diseases Control and Prevention | Jeong-Min Kim, Yoon-Seok Chung, Namjoo Lee, Sang Hee Woo, Hye-Jun Jo, Heui Man Kim, Jun-Sub Kim, Myung Guk Han                                                                                                                                                                                                                                     |
| EPI_ISL_507040, EPI_ISL_507041, EPI_ISL_507042, EPI_ISL_507043, EPI_ISL_507044, EPI_ISL_507045, EPI_ISL_507046, EPI_ISL_507047, EPI_ISL_507048, EPI_ISL_507049, EPI_ISL_507050, EPI_ISL_507051, EPI_ISL_507052, EPI_ISL_507053, EPI_ISL_507054, EPI_ISL_507055, EPI_ISL_507056, EPI_ISL_507057, EPI_ISL_507058, EPI_ISL_507059, EPI_ISL_507060, EPI_ISL_507061, EPI_ISL_507062, EPI_ISL_507063, EPI_ISL_507064, EPI_ISL_507065, EPI_ISL_507066, EPI_ISL_507067, EPI_ISL_507068, EPI_ISL_507069, EPI_ISL_507070, EPI_ISL_507071, EPI_ISL_507072, EPI_ISL_507073, EPI_ISL_507074, EPI_ISL_507075, EPI_ISL_507076, EPI_ISL_507077, EPI_ISL_507078, EPI_ISL_507079, EPI_ISL_507080, EPI_ISL_507081, EPI_ISL_507082, EPI_ISL_507083, EPI_ISL_507084, EPI_ISL_507085, EPI_ISL_507086, EPI_ISL_507087, EPI_ISL_507088, EPI_ISL_507089, EPI_ISL_507090, EPI_ISL_507091, EPI_ISL_507092, EPI_ISL_507093, EPI_ISL_507094, EPI_ISL_507095, EPI_ISL_507096, EPI_ISL_507097, EPI_ISL_507098, EPI_ISL_507099, EPI_ISL_507100, EPI_ISL_507101, EPI_ISL_507102, EPI_ISL_507103, EPI_ISL_507104, EPI_ISL_507105, EPI_ISL_507106, EPI_ISL_507107, EPI_ISL_507108, EPI_ISL_507109                                                                                                                                                                                                                                                                                                                                                                                                                                                                                                                                                                                                                                                                                                                                                                                                                                                                                                                                                                                                                                                                                                                                                                                                                                                                                                                                                                                                                                                                                                                                                                                                                                                                                                                                                                                                                                                                                                                                                                                                                                                                                                                                                                                                                                                                                                                                                                                                                                                                                                                                                                                                                                                                                                                                                                                                                                                                                                                                                                                                                                                                                                                                                                                                                                                                                                                                                                                                                                                                                                                                                                                                                                                                                                                                                                                                                 | University College London Hospital<br>COVID-19 Genomics UK (COG-UK) Consortium                                                      | Judith Heaney, Matthew Byott, Catherine Houlihan, Dan Frampton, Stuart Kirk, Moira Spyer and Eleni Nastouli                         |                                                                                                                                                                                                                                                                                                                                                    |
| see above                                                                                                                                                                                                                                                                                                                                                                                                                                                                                                                                                                                                                                                                                                                                                                                                                                                                                                                                                                                                                                                                                                                                                                                                                                                                                                                                                                                                                                                                                                                                                                                                                                                                                                                                                                                                                                                                                                                                                                                                                                                                                                                                                                                                                                                                                                                                                                                                                                                                                                                                                                                                                                                                                                                                                                                                                                                                                                                                                                                                                                                                                                                                                                                                                                                                                                                                                                                                                                                                                                                                                                                                                                                                                                                                                                                                                                                                                                                                                                                                                                                                                                                                                                                                                                                                                                                                                                                                                                                                                                                                                                                                                                                                                                                                                                                                                                                                                                                                                                      | AR Dept. of Health-Public Health Lab                                                                                                | Pathogen Discovery, Respiratory Viruses Branch, Division of Viral Diseases, Centers for Disease Control and Prevention              | Jing Zhang, Yan Li, Anna Montmayeur, Krista Queen, Anna Uehara, Ying Tao, Rachel Marine, Clinton R. Paden, Haibin Wang, Suxiang Tong                                                                                                                                                                                                               |
| EPI_ISL_509683, EPI_ISL_509684, EPI_ISL_509685                                                                                                                                                                                                                                                                                                                                                                                                                                                                                                                                                                                                                                                                                                                                                                                                                                                                                                                                                                                                                                                                                                                                                                                                                                                                                                                                                                                                                                                                                                                                                                                                                                                                                                                                                                                                                                                                                                                                                                                                                                                                                                                                                                                                                                                                                                                                                                                                                                                                                                                                                                                                                                                                                                                                                                                                                                                                                                                                                                                                                                                                                                                                                                                                                                                                                                                                                                                                                                                                                                                                                                                                                                                                                                                                                                                                                                                                                                                                                                                                                                                                                                                                                                                                                                                                                                                                                                                                                                                                                                                                                                                                                                                                                                                                                                                                                                                                                                                                 | Utah Public Health Laboratory                                                                                                       | Pathogen Discovery, Respiratory Viruses Branch, Division of Viral Diseases, Centers for Disease Control and Prevention              | Jing Zhang, Ying Tao, Krista Queen, Anna Uehara, Yan Li, Clinton Paden, Haibin Wang, Suxiang Tong                                                                                                                                                                                                                                                  |
| EPI_ISL_509707, EPI_ISL_509708, EPI_ISL_509709                                                                                                                                                                                                                                                                                                                                                                                                                                                                                                                                                                                                                                                                                                                                                                                                                                                                                                                                                                                                                                                                                                                                                                                                                                                                                                                                                                                                                                                                                                                                                                                                                                                                                                                                                                                                                                                                                                                                                                                                                                                                                                                                                                                                                                                                                                                                                                                                                                                                                                                                                                                                                                                                                                                                                                                                                                                                                                                                                                                                                                                                                                                                                                                                                                                                                                                                                                                                                                                                                                                                                                                                                                                                                                                                                                                                                                                                                                                                                                                                                                                                                                                                                                                                                                                                                                                                                                                                                                                                                                                                                                                                                                                                                                                                                                                                                                                                                                                                 | Guatemala Ministry of Public Health                                                                                                 | Pathogen Discovery, Respiratory Viruses Branch, Division of Viral Diseases, Centers for Disease Control and Prevention              | Jing Zhang, Ying Tao, Krista Queen, Anna Uehara, Yan Li, Clinton Paden, Haibin Wang, Suxiang Tong                                                                                                                                                                                                                                                  |
| EPI_ISL_509710                                                                                                                                                                                                                                                                                                                                                                                                                                                                                                                                                                                                                                                                                                                                                                                                                                                                                                                                                                                                                                                                                                                                                                                                                                                                                                                                                                                                                                                                                                                                                                                                                                                                                                                                                                                                                                                                                                                                                                                                                                                                                                                                                                                                                                                                                                                                                                                                                                                                                                                                                                                                                                                                                                                                                                                                                                                                                                                                                                                                                                                                                                                                                                                                                                                                                                                                                                                                                                                                                                                                                                                                                                                                                                                                                                                                                                                                                                                                                                                                                                                                                                                                                                                                                                                                                                                                                                                                                                                                                                                                                                                                                                                                                                                                                                                                                                                                                                                                                                 | Belize Ministry of Health                                                                                                           | Pathogen Discovery, Respiratory Viruses Branch, Division of Viral Diseases, Centers for Disease Control and Prevention              | Jing Zhang, Ying Tao, Krista Queen, Anna Uehara, Yan Li, Clinton Paden, Haibin Wang, Suxiang Tong                                                                                                                                                                                                                                                  |
| EPI_ISL_509711, EPI_ISL_509712, EPI_ISL_509713, EPI_ISL_509714                                                                                                                                                                                                                                                                                                                                                                                                                                                                                                                                                                                                                                                                                                                                                                                                                                                                                                                                                                                                                                                                                                                                                                                                                                                                                                                                                                                                                                                                                                                                                                                                                                                                                                                                                                                                                                                                                                                                                                                                                                                                                                                                                                                                                                                                                                                                                                                                                                                                                                                                                                                                                                                                                                                                                                                                                                                                                                                                                                                                                                                                                                                                                                                                                                                                                                                                                                                                                                                                                                                                                                                                                                                                                                                                                                                                                                                                                                                                                                                                                                                                                                                                                                                                                                                                                                                                                                                                                                                                                                                                                                                                                                                                                                                                                                                                                                                                                                                 | Wisconsin Department of Health Services                                                                                             | Pathogen Discovery, Respiratory Viruses Branch, Division of Viral Diseases, Centers for Disease Control and Prevention              | Jing Zhang, Ying Tao, Krista Queen, Anna Uehara, Yan Li, Clinton Paden, Haibin Wang, Suxiang Tong                                                                                                                                                                                                                                                  |
| EPI_ISL_509715                                                                                                                                                                                                                                                                                                                                                                                                                                                                                                                                                                                                                                                                                                                                                                                                                                                                                                                                                                                                                                                                                                                                                                                                                                                                                                                                                                                                                                                                                                                                                                                                                                                                                                                                                                                                                                                                                                                                                                                                                                                                                                                                                                                                                                                                                                                                                                                                                                                                                                                                                                                                                                                                                                                                                                                                                                                                                                                                                                                                                                                                                                                                                                                                                                                                                                                                                                                                                                                                                                                                                                                                                                                                                                                                                                                                                                                                                                                                                                                                                                                                                                                                                                                                                                                                                                                                                                                                                                                                                                                                                                                                                                                                                                                                                                                                                                                                                                                                                                 |                                                                                                                                     |                                                                                                                                     |                                                                                                                                                                                                                                                                                                                                                    |
| EPI_ISL_510268, EPI_ISL_510269, EPI_ISL_510270, EPI_ISL_510271, EPI_ISL_510272, EPI_ISL_510273, EPI_ISL_510274, EPI_ISL_510275, EPI_ISL_510276, EPI_ISL_510277, EPI_ISL_510278, EPI_ISL_510279, EPI_ISL_510280, EPI_ISL_510281, EPI_ISL_510282, EPI_ISL_510283, EPI_ISL_510284, EPI_ISL_510285, EPI_ISL_510286, EPI_ISL_510287, EPI_ISL_510288, EPI_ISL_510289, EPI_ISL_510290, EPI_ISL_510291, EPI_ISL_510292, EPI_ISL_510293, EPI_ISL_510294, EPI_ISL_510295, EPI_ISL_510296, EPI_ISL_510297, EPI_ISL_510298, EPI_ISL_510299, EPI_ISL_510300, EPI_ISL_510301, EPI_ISL_510302, EPI_ISL_510303, EPI_ISL_510304                                                                                                                                                                                                                                                                                                                                                                                                                                                                                                                                                                                                                                                                                                                                                                                                                                                                                                                                                                                                                                                                                                                                                                                                                                                                                                                                                                                                                                                                                                                                                                                                                                                                                                                                                                                                                                                                                                                                                                                                                                                                                                                                                                                                                                                                                                                                                                                                                                                                                                                                                                                                                                                                                                                                                                                                                                                                                                                                                                                                                                                                                                                                                                                                                                                                                                                                                                                                                                                                                                                                                                                                                                                                                                                                                                                                                                                                                                                                                                                                                                                                                                                                                                                                                                                                                                                                                                 | Hospital Clínico Universitario de Santiago de Compostela                                                                            | SeqCOVID-SPAIN consortium/IBV(CSIC)                                                                                                 | José Javier Costa Alcalde, Antonio Aguilera Guirao, M <sup>a</sup> Luisa Pérez del Molino Bernal, Amparo Coira Nieto, Gema Barbeito Castiñeiras, Rocío Trastoy Pena and SeqCOVID-SPAIN consortium                                                                                                                                                  |
| see above                                                                                                                                                                                                                                                                                                                                                                                                                                                                                                                                                                                                                                                                                                                                                                                                                                                                                                                                                                                                                                                                                                                                                                                                                                                                                                                                                                                                                                                                                                                                                                                                                                                                                                                                                                                                                                                                                                                                                                                                                                                                                                                                                                                                                                                                                                                                                                                                                                                                                                                                                                                                                                                                                                                                                                                                                                                                                                                                                                                                                                                                                                                                                                                                                                                                                                                                                                                                                                                                                                                                                                                                                                                                                                                                                                                                                                                                                                                                                                                                                                                                                                                                                                                                                                                                                                                                                                                                                                                                                                                                                                                                                                                                                                                                                                                                                                                                                                                                                                      |                                                                                                                                     |                                                                                                                                     |                                                                                                                                                                                                                                                                                                                                                    |
| EPI_ISL_510547, EPI_ISL_510548, EPI_ISL_510549, EPI_ISL_510550, EPI_ISL_510551, EPI_ISL_510552, EPI_ISL_510553, EPI_ISL_510554, EPI_ISL_510555, EPI_ISL_510556, EPI_ISL_510557, EPI_ISL_510558, EPI_ISL_510559, EPI_ISL_510560, EPI_ISL_510561, EPI_ISL_510562, EPI_ISL_510563, EPI_ISL_510564, EPI_ISL_510565, EPI_ISL_510566, EPI_ISL_510567, EPI_ISL_510568, EPI_ISL_510569, EPI_ISL_510570, EPI_ISL_510571, EPI_ISL_510572, EPI_ISL_510573, EPI_ISL_510574, EPI_ISL_510575, EPI_ISL_510576, EPI_ISL_510577, EPI_ISL_510578, EPI_ISL_510579, EPI_ISL_510580, EPI_ISL_510581, EPI_ISL_510582, EPI_ISL_510583, EPI_ISL_510584, EPI_ISL_510585, EPI_ISL_510586, EPI_ISL_510587, EPI_ISL_510588, EPI_ISL_510589, EPI_ISL_510590, EPI_ISL_510591, EPI_ISL_510592, EPI_ISL_510593, EPI_ISL_510594, EPI_ISL_510595, EPI_ISL_510596, EPI_ISL_510597, EPI_ISL_510598, EPI_ISL_510599, EPI_ISL_510600, EPI_ISL_510601, EPI_ISL_510602, EPI_ISL_510603, EPI_ISL_510604, EPI_ISL_510605, EPI_ISL_510606, EPI_ISL_510607, EPI_ISL_510608, EPI_ISL_510609, EPI_ISL_510610, EPI_ISL_510611, EPI_ISL_510612, EPI_ISL_510613, EPI_ISL_510614, EPI_ISL_510615, EPI_ISL_510616, EPI_ISL_510617, EPI_ISL_510618, EPI_ISL_510619, EPI_ISL_510620, EPI_ISL_510621, EPI_ISL_510622, EPI_ISL_510623, EPI_ISL_510624, EPI_ISL_510625, EPI_ISL_510626, EPI_ISL_510627, EPI_ISL_510628, EPI_ISL_510629, EPI_ISL_510630, EPI_ISL_510631, EPI_ISL_510632, EPI_ISL_510633, EPI_ISL_510634, EPI_ISL_510635, EPI_ISL_510636, EPI_ISL_510637, EPI_ISL_510638, EPI_ISL_510639, EPI_ISL_510640, EPI_ISL_510641, EPI_ISL_510642, EPI_ISL_510643, EPI_ISL_510644, EPI_ISL_510645, EPI_ISL_510646, EPI_ISL_510647, EPI_ISL_510648, EPI_ISL_510649, EPI_ISL_510650, EPI_ISL_510651, EPI_ISL_510652, EPI_ISL_510653, EPI_ISL_510654, EPI_ISL_510655, EPI_ISL_510656, EPI_ISL_510657, EPI_ISL_510658, EPI_ISL_510659, EPI_ISL_510660, EPI_ISL_510661, EPI_ISL_510662, EPI_ISL_510663, EPI_ISL_510664, EPI_ISL_510665, EPI_ISL_510666, EPI_ISL_510667, EPI_ISL_510668, EPI_ISL_510669, EPI_ISL_510670, EPI_ISL_510671, EPI_ISL_510672, EPI_ISL_510673, EPI_ISL_510674, EPI_ISL_510675, EPI_ISL_510676, EPI_ISL_510677, EPI_ISL_510678, EPI_ISL_510679, EPI_ISL_510680, EPI_ISL_510681, EPI_ISL_510682, EPI_ISL_510683, EPI_ISL_510684, EPI_ISL_510685, EPI_ISL_510686, EPI_ISL_510687, EPI_ISL_510688                                                                                                                                                                                                                                                                                                                                                                                                                                                                                                                                                                                                                                                                                                                                                                                                                                                                                                                                                                                                                                                                                                                                                                                                                                                                                                                                                                                                                                                                                                                                                                                                                                                                                                                                                                                                                                                                                                                                                                                                                                                                                                                                                                                                                                                                                                                                                                                                                                                                                                                                                                                                                 | Division of Viral Diseases, Center for Laboratory Control of Infectious Diseases, Korea Centers for Diseases Control and Prevention | Division of Viral Diseases, Center for Laboratory Control of Infectious Diseases, Korea Centers for Diseases Control and Prevention | Jeong-Min Kim, Yoon-Seok Chung, Namjoo Lee, Sang Hee Woo, Hye-Jun Jo, Heui Man Kim, Jun-Sub Kim, Myung Guk Han                                                                                                                                                                                                                                     |
| see above                                                                                                                                                                                                                                                                                                                                                                                                                                                                                                                                                                                                                                                                                                                                                                                                                                                                                                                                                                                                                                                                                                                                                                                                                                                                                                                                                                                                                                                                                                                                                                                                                                                                                                                                                                                                                                                                                                                                                                                                                                                                                                                                                                                                                                                                                                                                                                                                                                                                                                                                                                                                                                                                                                                                                                                                                                                                                                                                                                                                                                                                                                                                                                                                                                                                                                                                                                                                                                                                                                                                                                                                                                                                                                                                                                                                                                                                                                                                                                                                                                                                                                                                                                                                                                                                                                                                                                                                                                                                                                                                                                                                                                                                                                                                                                                                                                                                                                                                                                      | Division of Viral Diseases, Center for Laboratory Control of Infectious Diseases, Korea Centers for Diseases Control and Prevention | Division of Viral Diseases, Center for Laboratory Control of Infectious Diseases, Korea Centers for Diseases Control and Prevention | Jeong-Min Kim, Yoon-Seok Chung, Namjoo Lee, Sang Hee Woo, Hye-Jun Jo, Heui Man Kim, Jun-Sub Kim, Myung Guk Han                                                                                                                                                                                                                                     |
| EPI_ISL_513513, EPI_ISL_513514, EPI_ISL_513515, EPI_ISL_513516, EPI_ISL_513517, EPI_ISL_513518, EPI_ISL_513519, EPI_ISL_513520, EPI_ISL_513521, EPI_ISL_513522, EPI_ISL_513523, EPI_ISL_513524, EPI_ISL_513525, EPI_ISL_513526, EPI_ISL_513527, EPI_ISL_513528, EPI_ISL_513529, EPI_ISL_513530, EPI_ISL_513531, EPI_ISL_513532, EPI_ISL_513533, EPI_ISL_513534, EPI_ISL_513535, EPI_ISL_513536, EPI_ISL_513537, EPI_ISL_513538, EPI_ISL_513539, EPI_ISL_513540, EPI_ISL_513541, EPI_ISL_513542, EPI_ISL_513543, EPI_ISL_513544, EPI_ISL_513545, EPI_ISL_513546, EPI_ISL_513547, EPI_ISL_513548, EPI_ISL_513549, EPI_ISL_513550, EPI_ISL_513551, EPI_ISL_513552, EPI_ISL_513553, EPI_ISL_513554, EPI_ISL_513555, EPI_ISL_513556, EPI_ISL_513557, EPI_ISL_513558, EPI_ISL_513559, EPI_ISL_513560, EPI_ISL_513561, EPI_ISL_513562, EPI_ISL_513563, EPI_ISL_513564, EPI_ISL_513565, EPI_ISL_513566, EPI_ISL_513567, EPI_ISL_513568, EPI_ISL_513569, EPI_ISL_513570, EPI_ISL_513571, EPI_ISL_513572, EPI_ISL_513573, EPI_ISL_513574, EPI_ISL_513575, EPI_ISL_513576, EPI_ISL_513577, EPI_ISL_513578, EPI_ISL_513579, EPI_ISL_513580, EPI_ISL_513581, EPI_ISL_513582, EPI_ISL_513583                                                                                                                                                                                                                                                                                                                                                                                                                                                                                                                                                                                                                                                                                                                                                                                                                                                                                                                                                                                                                                                                                                                                                                                                                                                                                                                                                                                                                                                                                                                                                                                                                                                                                                                                                                                                                                                                                                                                                                                                                                                                                                                                                                                                                                                                                                                                                                                                                                                                                                                                                                                                                                                                                                                                                                                                                                                                                                                                                                                                                                                                                                                                                                                                                                                                                                                                                                                                                                                                                                                                                                                                                                                                                                                                                                                                 | Programa de Oncovirologia, Instituto Nacional de Câncer                                                                             | Programa de Oncovirologia, Instituto Nacional de Câncer                                                                             | Juliana D. Siqueira, Livia R. Goes, Brunna M. Alves, Claudia Cicala, James Arthos, João P.B. Viola, Andreia C. de Melo, Marcelo A. Soares                                                                                                                                                                                                          |
| see above                                                                                                                                                                                                                                                                                                                                                                                                                                                                                                                                                                                                                                                                                                                                                                                                                                                                                                                                                                                                                                                                                                                                                                                                                                                                                                                                                                                                                                                                                                                                                                                                                                                                                                                                                                                                                                                                                                                                                                                                                                                                                                                                                                                                                                                                                                                                                                                                                                                                                                                                                                                                                                                                                                                                                                                                                                                                                                                                                                                                                                                                                                                                                                                                                                                                                                                                                                                                                                                                                                                                                                                                                                                                                                                                                                                                                                                                                                                                                                                                                                                                                                                                                                                                                                                                                                                                                                                                                                                                                                                                                                                                                                                                                                                                                                                                                                                                                                                                                                      | Programa de Oncovirologia, Instituto Nacional de Câncer                                                                             | Programa de Oncovirologia, Instituto Nacional de Câncer                                                                             | Juliana D. Siqueira, Livia R. Goes, Brunna M. Alves, Claudia Cicala, James Arthos, João P.B. Viola, Andreia C. de Melo, Marcelo A. Soares                                                                                                                                                                                                          |
| EPI_ISL_514590, EPI_ISL_514608                                                                                                                                                                                                                                                                                                                                                                                                                                                                                                                                                                                                                                                                                                                                                                                                                                                                                                                                                                                                                                                                                                                                                                                                                                                                                                                                                                                                                                                                                                                                                                                                                                                                                                                                                                                                                                                                                                                                                                                                                                                                                                                                                                                                                                                                                                                                                                                                                                                                                                                                                                                                                                                                                                                                                                                                                                                                                                                                                                                                                                                                                                                                                                                                                                                                                                                                                                                                                                                                                                                                                                                                                                                                                                                                                                                                                                                                                                                                                                                                                                                                                                                                                                                                                                                                                                                                                                                                                                                                                                                                                                                                                                                                                                                                                                                                                                                                                                                                                 | B.J. Medical College and Civil hospital, Ahmedabad                                                                                  | Gujarat Biotechnology Research Centre                                                                                               | Kamlesh J Upadhyay, Sanjay Kapadia, Apurvasinh Puvar, Janvi Raval, Zarna Patel, Monika Gandhi, Pinal Trivedi, Maharshi Pandya, Nidhi Patel, Nitin Savaliya, Raghavendra Kumar, Dinesh Kumar, Zuber Saiyed, Komal Patel, Labdhi Pandya, Afzal Ansari, Nikha Trivedi, Pranay Shah, R D Dixit, A M Kadri, Harsh Bakshi, Chaitanya Joshi, Madhvi Joshi |
| EPI_ISL_514756, EPI_ISL_514757, EPI_ISL_514758, EPI_ISL_514759, EPI_ISL_514760, EPI_ISL_514761, EPI_ISL_514762, EPI_ISL_514763, EPI_ISL_514764, EPI_ISL_514765, EPI_ISL_514766, EPI_ISL_514767, EPI_ISL_514768, EPI_ISL_514769, EPI_ISL_514770, EPI_ISL_514771, EPI_ISL_514772, EPI_ISL_514773, EPI_ISL_514774, EPI_ISL_514775, EPI_ISL_514776, EPI_ISL_514777, EPI_ISL_514778, EPI_ISL_514779, EPI_ISL_514780, EPI_ISL_514781, EPI_ISL_514782, EPI_ISL_514783, EPI_ISL_514784, EPI_ISL_514785, EPI_ISL_514786, EPI_ISL_514787, EPI_ISL_514788, EPI_ISL_514789, EPI_ISL_514790, EPI_ISL_514791, EPI_ISL_514792, EPI_ISL_514793, EPI_ISL_514794, EPI_ISL_514795, EPI_ISL_514796, EPI_ISL_514797, EPI_ISL_514798, EPI_ISL_514799, EPI_ISL_514800, EPI_ISL_514801, EPI_ISL_514802, EPI_ISL_514803, EPI_ISL_514804, EPI_ISL_514805, EPI_ISL_514806, EPI_ISL_514807, EPI_ISL_514808, EPI_ISL_514809, EPI_ISL_514810, EPI_ISL_514811, EPI_ISL_514812, EPI_ISL_514813, EPI_ISL_514814, EPI_ISL_514815, EPI_ISL_514816, EPI_ISL_514817, EPI_ISL_514818, EPI_ISL_514819, EPI_ISL_514820, EPI_ISL_514821, EPI_ISL_514822, EPI_ISL_514823, EPI_ISL_514824, EPI_ISL_514825, EPI_ISL_514826, EPI_ISL_514827, EPI_ISL_514828, EPI_ISL_514829, EPI_ISL_514830, EPI_ISL_514831, EPI_ISL_514832, EPI_ISL_514833, EPI_ISL_514834, EPI_ISL_514835, EPI_ISL_514836, EPI_ISL_514837, EPI_ISL_514838, EPI_ISL_514839, EPI_ISL_514840, EPI_ISL_514841, EPI_ISL_514842, EPI_ISL_514843, EPI_ISL_514844, EPI_ISL_514845, EPI_ISL_514846, EPI_ISL_514847, EPI_ISL_514848, EPI_ISL_514849, EPI_ISL_514850, EPI_ISL_514851, EPI_ISL_514852, EPI_ISL_514853, EPI_ISL_514854, EPI_ISL_514855, EPI_ISL_514856, EPI_ISL_514857, EPI_ISL_514858, EPI_ISL_514859, EPI_ISL_514860, EPI_ISL_514861, EPI_ISL_514862, EPI_ISL_514863, EPI_ISL_514864, EPI_ISL_514865, EPI_ISL_514866, EPI_ISL_514867, EPI_ISL_514868, EPI_ISL_514869, EPI_ISL_514870, EPI_ISL_514871, EPI_ISL_514872, EPI_ISL_514873, EPI_ISL_514874, EPI_ISL_514875, EPI_ISL_514876, EPI_ISL_514877, EPI_ISL_514878, EPI_ISL_514879, EPI_ISL_514880, EPI_ISL_514881, EPI_ISL_514882, EPI_ISL_514883, EPI_ISL_514884, EPI_ISL_514885, EPI_ISL_514886, EPI_ISL_514887, EPI_ISL_514888, EPI_ISL_514889, EPI_ISL_514890, EPI_ISL_514891, EPI_ISL_514892, EPI_ISL_514893, EPI_ISL_514894, EPI_ISL_514895, EPI_ISL_514896, EPI_ISL_514897, EPI_ISL_514898, EPI_ISL_514899, EPI_ISL_514900, EPI_ISL_514901, EPI_ISL_514902, EPI_ISL_514903, EPI_ISL_514904, EPI_ISL_514905, EPI_ISL_514906, EPI_ISL_514907, EPI_ISL_514908, EPI_ISL_514909, EPI_ISL_514910, EPI_ISL_514911, EPI_ISL_514912, EPI_ISL_514913, EPI_ISL_514914, EPI_ISL_514915, EPI_ISL_514916, EPI_ISL_514917, EPI_ISL_514918, EPI_ISL_514919, EPI_ISL_514920, EPI_ISL_514921, EPI_ISL_514922, EPI_ISL_514923, EPI_ISL_514924, EPI_ISL_514925, EPI_ISL_514926, EPI_ISL_514927, EPI_ISL_514928, EPI_ISL_514929, EPI_ISL_514930, EPI_ISL_514931, EPI_ISL_514932, EPI_ISL_514933, EPI_ISL_514934, EPI_ISL_514935, EPI_ISL_514936, EPI_ISL_514937, EPI_ISL_514938, EPI_ISL_514939, EPI_ISL_514940, EPI_ISL_514941, EPI_ISL_514942, EPI_ISL_514943, EPI_ISL_514944, EPI_ISL_514945, EPI_ISL_514946, EPI_ISL_514947, EPI_ISL_514948, EPI_ISL_514949, EPI_ISL_514950, EPI_ISL_514951, EPI_ISL_514952, EPI_ISL_514953, EPI_ISL_514954, EPI_ISL_514955, EPI_ISL_514956, EPI_ISL_514957, EPI_ISL_514958, EPI_ISL_514959, EPI_ISL_514960, EPI_ISL_514961, EPI_ISL_514962, EPI_ISL_514963, EPI_ISL_514964, EPI_ISL_514965, EPI_ISL_514966, EPI_ISL_514967, EPI_ISL_514968, EPI_ISL_514969, EPI_ISL_514970, EPI_ISL_514971, EPI_ISL_514972, EPI_ISL_514973, EPI_ISL_514974, EPI_ISL_514975, EPI_ISL_514976, EPI_ISL_514977, EPI_ISL_514978, EPI_ISL_514979, EPI_ISL_514980, EPI_ISL_514981, EPI_ISL_514982, EPI_ISL_514983, EPI_ISL_514984, EPI_ISL_514985, EPI_ISL_514986, EPI_ISL_514987, EPI_ISL_514988, EPI_ISL_514989, EPI_ISL_514990, EPI_ISL_514991, EPI_ISL_514992, EPI_ISL_514993, EPI_ISL_514994, EPI_ISL_514995, EPI_ISL_514996, EPI_ISL_514997, EPI_ISL_514998, EPI_ISL_514999, EPI_ISL_515000, EPI_ISL_515001, EPI_ISL_515002, EPI_ISL_515003, EPI_ISL_515004, EPI_ISL_515005, EPI_ISL_515006, EPI_ISL_515007, EPI_ISL_515008, EPI_ISL_515009, EPI_ISL_515010, EPI_ISL_515011, EPI_ISL_515012, EPI_ISL_515013, EPI_ISL_515014, EPI_ISL_515015, EPI_ISL_515016, EPI_ISL_515017, EPI_ISL_515018, EPI_ISL_515019, EPI_ISL_515020, EPI_ISL_515021, EPI_ISL_515022, EPI_ISL_515023, EPI_ISL_515024, EPI_ISL_515025, EPI_ISL_515026, EPI_ISL_515027, EPI_ISL_515028, EPI_ISL_515029, EPI_ISL_515030, EPI_ISL_515031, EPI_ISL_515032, EPI_ISL_515033, EPI_ISL_515034, EPI_ISL_515035, EPI_ISL_515036, EPI_ISL_515037, EPI_ISL_515038, EPI_ISL_515039, EPI_ISL_515040, EPI_ISL_515041, EPI_ISL_515042, EPI_ISL_515043, EPI_ISL_515044, EPI_ISL_515045, EPI_ISL_515046, EPI_ISL_515047, EPI_ISL_515048, EPI_ISL_515049, EPI_ISL_515050, EPI_ISL_515051, EPI_ISL_515052, EPI_ISL_515053, EPI_ISL_515054 | Division of Viral Diseases, Center for Laboratory Control of Infectious Diseases, Korea Centers for Diseases Control and Prevention | Division of Viral Diseases, Center for Laboratory Control of Infectious Diseases, Korea Centers for Diseases Control and Prevention | Jeong-Min Kim, Yoon-Seok Chung, Namjoo Lee, Sang Hee Woo, Hye-Jun Jo, Heui Man Kim, Jun-Sub Kim, Myung Guk Han                                                                                                                                                                                                                                     |
| see above                                                                                                                                                                                                                                                                                                                                                                                                                                                                                                                                                                                                                                                                                                                                                                                                                                                                                                                                                                                                                                                                                                                                                                                                                                                                                                                                                                                                                                                                                                                                                                                                                                                                                                                                                                                                                                                                                                                                                                                                                                                                                                                                                                                                                                                                                                                                                                                                                                                                                                                                                                                                                                                                                                                                                                                                                                                                                                                                                                                                                                                                                                                                                                                                                                                                                                                                                                                                                                                                                                                                                                                                                                                                                                                                                                                                                                                                                                                                                                                                                                                                                                                                                                                                                                                                                                                                                                                                                                                                                                                                                                                                                                                                                                                                                                                                                                                                                                                                                                      | Division of Viral Diseases, Center for Laboratory Control of Infectious Diseases, Korea Centers for Diseases Control and Prevention | Division of Viral Diseases, Center for Laboratory Control of Infectious Diseases, Korea Centers for Diseases Control and Prevention | Jeong-Min Kim, Yoon-Seok Chung, Namjoo Lee, Sang Hee Woo, Hye-Jun Jo, Heui Man Kim, Jun-Sub Kim, Myung Guk Han                                                                                                                                                                                                                                     |
| EPI_ISL_515055, EPI_ISL_515059, EPI_ISL_515071, EPI_ISL_515072, EPI_ISL_515074                                                                                                                                                                                                                                                                                                                                                                                                                                                                                                                                                                                                                                                                                                                                                                                                                                                                                                                                                                                                                                                                                                                                                                                                                                                                                                                                                                                                                                                                                                                                                                                                                                                                                                                                                                                                                                                                                                                                                                                                                                                                                                                                                                                                                                                                                                                                                                                                                                                                                                                                                                                                                                                                                                                                                                                                                                                                                                                                                                                                                                                                                                                                                                                                                                                                                                                                                                                                                                                                                                                                                                                                                                                                                                                                                                                                                                                                                                                                                                                                                                                                                                                                                                                                                                                                                                                                                                                                                                                                                                                                                                                                                                                                                                                                                                                                                                                                                                 | Department of Clinical Microbiology                                                                                                 | GIGA Medical Genomics                                                                                                               | Keith Durkin, Maria Artesi, Sebastien Bontems, Raphael Boreux, Cecile Meex, Axelle Chaslain, Celine Fombellida-Lopez, Pierrette Melin, Marie-Pierre Hayette, Vincent Bours.                                                                                                                                                                        |



| Centers for Diseases Control and Prevention                                                                                                                                                                                                                                                                                                                                                                                                                                                    |                                                                                                                                     | Centers for Diseases Control and Prevention                                                                                         |  |                                                                                                                                                                                                                                                                                                                                                                                                                   |
|------------------------------------------------------------------------------------------------------------------------------------------------------------------------------------------------------------------------------------------------------------------------------------------------------------------------------------------------------------------------------------------------------------------------------------------------------------------------------------------------|-------------------------------------------------------------------------------------------------------------------------------------|-------------------------------------------------------------------------------------------------------------------------------------|--|-------------------------------------------------------------------------------------------------------------------------------------------------------------------------------------------------------------------------------------------------------------------------------------------------------------------------------------------------------------------------------------------------------------------|
| EPI_ISL_522519, EPI_ISL_522520, EPI_ISL_522521, EPI_ISL_522522, EPI_ISL_522523, EPI_ISL_522524, EPI_ISL_522525, EPI_ISL_522526, EPI_ISL_522527, EPI_ISL_522528, EPI_ISL_522529, EPI_ISL_522530, EPI_ISL_522531, EPI_ISL_522532, EPI_ISL_522533, EPI_ISL_522534, EPI_ISL_522535, EPI_ISL_522536, EPI_ISL_522537, EPI_ISL_522538, EPI_ISL_522539, EPI_ISL_522540, EPI_ISL_522541, EPI_ISL_522542, EPI_ISL_522543, EPI_ISL_522544                                                                 |                                                                                                                                     |                                                                                                                                     |  | Jeong-Min Kim, Yoon-Seok Chung, Namjoo Lee, Sang Hee Woo, Hye-Jun Jo, Heui Man Kim, Jun-Sub Kim, Myung Guk Han                                                                                                                                                                                                                                                                                                    |
| see above                                                                                                                                                                                                                                                                                                                                                                                                                                                                                      | Division of Viral Diseases, Center for Laboratory Control of Infectious Diseases, Korea Centers for Diseases Control and Prevention | Division of Viral Diseases, Center for Laboratory Control of Infectious Diseases, Korea Centers for Diseases Control and Prevention |  |                                                                                                                                                                                                                                                                                                                                                                                                                   |
| EPI_ISL_524729                                                                                                                                                                                                                                                                                                                                                                                                                                                                                 | B.J. Medical College and Civil hospital, Ahmedabad                                                                                  | Gujarat Biotechnology Research Centre                                                                                               |  | Kamlesh J Upadhyay, Sanjay Kapadia, Apurvasinh Puvar, Janvi Raval, Zarna Patel, Monika Gandhi, Pinal Trivedi, Maharshi Pandya, Nidhi Patel, Nitin Savaliya, Raghavendra Kumar, Dinesh Kumar, Zuber Saiyed, Komal Patel, Labdhi Pandya, Afzal Ansari, Nikha Trivedi, Pranay Shah, R D Dixit, A M Kadri, Harsh Bakshi, Chaitanya Joshi, Madhvi Joshi                                                                |
| EPI_ISL_525430                                                                                                                                                                                                                                                                                                                                                                                                                                                                                 | Institute of Microbiology, Universidad San Francisco de Quito                                                                       | Institute of Microbiology, Universidad San Francisco de Quito                                                                       |  | Juan José Guadalupe, Monica Becerra-Wong, Belén Prado-Vivar, Sully Márquez, Bernardo Gutiérrez, Verónica Barragán, Patricio Rojas-Silva, Gabriel Trueba, Michelle Grunauer, Paúl Cárdenas                                                                                                                                                                                                                         |
| EPI_ISL_525431, EPI_ISL_525432                                                                                                                                                                                                                                                                                                                                                                                                                                                                 | Institute of Microbiology, Universidad San Francisco de Quito                                                                       | Institute of Microbiology, Universidad San Francisco de Quito                                                                       |  | Juan José Guadalupe, Monica Becerra-Wong, Belén Prado-Vivar, Sully Márquez, Ligia Briceño, Carlos Mena, Nabih Dahik, Bernardo Gutiérrez, Verónica Barragán, Patricio Rojas-Silva, Gabriel Trueba, Michelle Grunauer, Paúl Cárdenas                                                                                                                                                                                |
| EPI_ISL_525433, EPI_ISL_525434                                                                                                                                                                                                                                                                                                                                                                                                                                                                 | Institute of Microbiology, Universidad San Francisco de Quito                                                                       | Institute of Microbiology, Universidad San Francisco de Quito                                                                       |  | Juan José Guadalupe, Monica Becerra-Wong, Belén Prado-Vivar, Sully Márquez, Bernardo Gutiérrez, Eulalia Pazmiño, Carolina Pacheco, Damaris Zandoya, Carlos Mena, Nabih Dahik, Verónica Barragán, Patricio Rojas-Silva, Gabriel Trueba, Michelle Grunauer, Paúl Cárdenas                                                                                                                                           |
| EPI_ISL_525435                                                                                                                                                                                                                                                                                                                                                                                                                                                                                 | Institute of Microbiology, Universidad San Francisco de Quito                                                                       | Institute of Microbiology, Universidad San Francisco de Quito                                                                       |  | Juan José Guadalupe, Monica Becerra-Wong, Belén Prado-Vivar, Sully Márquez, Bernardo Gutiérrez, Yomara Napa, Edy Quizhpe, Carlos Mena, Nabih Dahik, Verónica Barragán, Patricio Rojas-Silva, Gabriel Trueba, Michelle Grunauer, Paúl Cárdenas                                                                                                                                                                     |
| EPI_ISL_525436, EPI_ISL_525437                                                                                                                                                                                                                                                                                                                                                                                                                                                                 | Institute of Microbiology, Universidad San Francisco de Quito                                                                       | Institute of Microbiology, Universidad San Francisco de Quito                                                                       |  | Juan José Guadalupe, Monica Becerra-Wong, Belén Prado-Vivar, Sully Márquez, Bernardo Gutiérrez, Dayron Brossard, Carlos Mena, Nabih Dahik, Verónica Barragán, Patricio Rojas-Silva, Gabriel Trueba, Michelle Grunauer, Paúl Cárdenas                                                                                                                                                                              |
| EPI_ISL_525763, EPI_ISL_525764, EPI_ISL_525765, EPI_ISL_525766, EPI_ISL_525767, EPI_ISL_525768, EPI_ISL_525769, EPI_ISL_525770, EPI_ISL_525771, EPI_ISL_525772, EPI_ISL_525773, EPI_ISL_525774, EPI_ISL_525775, EPI_ISL_525776, EPI_ISL_525777, EPI_ISL_525778, EPI_ISL_525779, EPI_ISL_525780, EPI_ISL_525781, EPI_ISL_525782, EPI_ISL_525783, EPI_ISL_525784, EPI_ISL_525785, EPI_ISL_525786, EPI_ISL_525787, EPI_ISL_525788, EPI_ISL_525789                                                 |                                                                                                                                     |                                                                                                                                     |  | Jenny Zhang, Rashmi Tuladhar, Bonnie Oh, Maliha Rahman, Anita Pokharel, Myong Koag, Chun Wang, Rachel Lee, Grace Kubin                                                                                                                                                                                                                                                                                            |
| see above                                                                                                                                                                                                                                                                                                                                                                                                                                                                                      | Texas Department of State Health Services                                                                                           | Texas Department of State Health Services                                                                                           |  |                                                                                                                                                                                                                                                                                                                                                                                                                   |
| EPI_ISL_526700, EPI_ISL_526701, EPI_ISL_526702, EPI_ISL_526703, EPI_ISL_526704, EPI_ISL_526705, EPI_ISL_526706, EPI_ISL_526707, EPI_ISL_526708, EPI_ISL_526709, EPI_ISL_526710, EPI_ISL_526711, EPI_ISL_526712, EPI_ISL_526713, EPI_ISL_526714, EPI_ISL_526715, EPI_ISL_526716, EPI_ISL_526717, EPI_ISL_526718, EPI_ISL_526719, EPI_ISL_526720, EPI_ISL_526721, EPI_ISL_526722, EPI_ISL_526723, EPI_ISL_526724, EPI_ISL_526725, EPI_ISL_526726, EPI_ISL_526727, EPI_ISL_526728, EPI_ISL_526729 |                                                                                                                                     |                                                                                                                                     |  | Jeong-Min Kim, Yoon-Seok Chung, Namjoo Lee, Sang Hee Woo, Hye-Jun Jo, Heui Man Kim, Jun-Sub Kim, Myung Guk Han                                                                                                                                                                                                                                                                                                    |
| see above                                                                                                                                                                                                                                                                                                                                                                                                                                                                                      | Division of Viral Diseases, Center for Laboratory Control of Infectious Diseases, Korea Centers for Diseases Control and Prevention | Division of Viral Diseases, Center for Laboratory Control of Infectious Diseases, Korea Centers for Diseases Control and Prevention |  |                                                                                                                                                                                                                                                                                                                                                                                                                   |
| EPI_ISL_526730, EPI_ISL_526731                                                                                                                                                                                                                                                                                                                                                                                                                                                                 | Center for Laboratory Control of Infectious Diseases, Korea Centers for Diseases Control and Prevention                             | Center for Laboratory Control of Infectious Diseases, Korea Centers for Diseases Control and Prevention                             |  | Junyoung Kim, Ae Kyung Park, Eunhyung Shin, Jin Sun No, Jeong-Min Kim, Yoon-Seok Chung, Heui Man Kim, Myung Guk Han                                                                                                                                                                                                                                                                                               |
| EPI_ISL_526732, EPI_ISL_526733                                                                                                                                                                                                                                                                                                                                                                                                                                                                 | Division of Viral Diseases, Center for Laboratory Control of Infectious Diseases, Korea Centers for Diseases Control and Prevention | Division of Viral Diseases, Center for Laboratory Control of Infectious Diseases, Korea Centers for Diseases Control and Prevention |  | Jeong-Min Kim, Yoon-Seok Chung, Namjoo Lee, Sang Hee Woo, Hye-Jun Jo, Heui Man Kim, Jun-Sub Kim, Myung Guk Han                                                                                                                                                                                                                                                                                                    |
| EPI_ISL_526734, EPI_ISL_526735, EPI_ISL_526736, EPI_ISL_526737, EPI_ISL_526738, EPI_ISL_526739, EPI_ISL_526740, EPI_ISL_526741, EPI_ISL_526742, EPI_ISL_526743, EPI_ISL_526744, EPI_ISL_526745, EPI_ISL_526746                                                                                                                                                                                                                                                                                 |                                                                                                                                     |                                                                                                                                     |  | Junyoung Kim, Ae Kyung Park, Eunhyung Shin, Jin Sun No, Jeong-Min Kim, Yoon-Seok Chung, Heui Man Kim, Myung Guk Han                                                                                                                                                                                                                                                                                               |
| see above                                                                                                                                                                                                                                                                                                                                                                                                                                                                                      | Center for Laboratory Control of Infectious Diseases, Korea Centers for Diseases Control and Prevention                             | Center for Laboratory Control of Infectious Diseases, Korea Centers for Diseases Control and Prevention                             |  |                                                                                                                                                                                                                                                                                                                                                                                                                   |
| EPI_ISL_526932, EPI_ISL_526933, EPI_ISL_526934, EPI_ISL_526949, EPI_ISL_526950, EPI_ISL_526951, EPI_ISL_526953, EPI_ISL_526954, EPI_ISL_526955, EPI_ISL_526956, EPI_ISL_526957, EPI_ISL_526958, EPI_ISL_526959, EPI_ISL_526960, EPI_ISL_526961                                                                                                                                                                                                                                                 |                                                                                                                                     |                                                                                                                                     |  |                                                                                                                                                                                                                                                                                                                                                                                                                   |
| see above                                                                                                                                                                                                                                                                                                                                                                                                                                                                                      | Instituto Nacional de Salud, Bogotá, Colombia                                                                                       | Instituto Nacional de Salud, Bogotá, Colombia                                                                                       |  | Katherine Laiton-Donato, Diego A. Álvarez-Díaz, Carlos Franco-Muñoz, Mauricio Pacheco-Montealegre, Jonathan Reales, Diego Andrés Prada, Jose A. Usme-Ciro, Zulma M. Cucunubá, Christian Julian VillabonaArenas, Liz Villabona-Arenas, Sussy Echeverría, Astrid C. Flórez, Carolina Ferro, Diana Marcela Walteros-Acero, Franklin Prieto, Carlos Andrés Durán, Martha Lucia Ospina Martínez, Marcela Mercado-Reyes |
| EPI_ISL_526962, EPI_ISL_526963, EPI_ISL_526964, EPI_ISL_526965                                                                                                                                                                                                                                                                                                                                                                                                                                 | Instituto Nacional de Salud, Bogotá, Colombia                                                                                       | Instituto Nacional de Salud, Bogotá, Colombia                                                                                       |  | Katherine Laiton-Donato, Diego A. Álvarez-Díaz, Carlos Franco-Muñoz, Jonathan Reales, Diego Andrés Prada, Jeandran Malagón-Rojas, Felix Betzler, Wendy K. Jo, Edmison F. de Oliveira-Filho, Carolina Ferro, Diana Marcela Walteros-Acero, Franklin Prieto, Carlos Andrés Durán, Martha Lucia Ospina Martínez, Marcela Mercado-Reyes                                                                               |
| EPI_ISL_526967, EPI_ISL_526968, EPI_ISL_526969, EPI_ISL_526970, EPI_ISL_526971, EPI_ISL_526973, EPI_ISL_526974                                                                                                                                                                                                                                                                                                                                                                                 | Instituto Nacional de Salud, Bogotá, Colombia                                                                                       | Instituto Nacional de Salud, Bogotá, Colombia                                                                                       |  | Katherine Laiton-Donato, Diego A. Álvarez-Díaz, Carlos Franco-Muñoz, Mauricio Pacheco-Montealegre, Jonathan Reales, Diego Andrés Prada, Jose A. Usme-Ciro, Zulma M. Cucunubá, Christian Julian VillabonaArenas, Liz Villabona-Arenas, Sussy Echeverría, Astrid C. Flórez, Carolina Ferro, Diana Marcela Walteros-Acero, Franklin Prieto, Carlos Andrés Durán, Martha Lucia Ospina Martínez, Marcela Mercado-Reyes |
| EPI_ISL_527738                                                                                                                                                                                                                                                                                                                                                                                                                                                                                 | Connecticut State Department of Public Health                                                                                       | Grubaugh Lab - Yale School of Public Health                                                                                         |  | Joseph Fauver, Mary Petrone, Anderson Brito, Tara Alpert, Nathan Grubaugh                                                                                                                                                                                                                                                                                                                                         |
| EPI_ISL_527761, EPI_ISL_527762, EPI_ISL_527763, EPI_ISL_527764, EPI_ISL_527765, EPI_ISL_527766, EPI_ISL_527767, EPI_ISL_527768, EPI_ISL_527769, EPI_ISL_527770, EPI_ISL_527771, EPI_ISL_527772, EPI_ISL_527773, EPI_ISL_527774, EPI_ISL_527775, EPI_ISL_527776, EPI_ISL_527777, EPI_ISL_527778, EPI_ISL_527779, EPI_ISL_527780, EPI_ISL_527781, EPI_ISL_527782, EPI_ISL_527783, EPI_ISL_527784, EPI_ISL_527785                                                                                 |                                                                                                                                     |                                                                                                                                     |  | Joseph Fauver, Mary Petrone, Chantal Vogels, Anderson Brito, Tara Alpert, Anthony Muyombwe, Jafar Razeq, Albert Ko, Nathan Grubaugh                                                                                                                                                                                                                                                                               |
| see above                                                                                                                                                                                                                                                                                                                                                                                                                                                                                      | Connecticut State Department of Public Health                                                                                       | Grubaugh Lab - Yale School of Public Health                                                                                         |  |                                                                                                                                                                                                                                                                                                                                                                                                                   |
| EPI_ISL_529138                                                                                                                                                                                                                                                                                                                                                                                                                                                                                 | RSAL Dr. Ramelan Surabaya                                                                                                           | Institute of Tropical Disease, Universitas Airlangga                                                                                |  | Jezy R Dewantari, Rima R Prasetya, Krisnoadi Rahardjo, Aldise M Nastri, Radito Soesanto, Gatot Soegiarto, Laksmi Wulandari, Retno A Setyoningrum, Resti Yudhawati, Yohko K Shimizu, Mitsuhiro Nishimura, Yasuko Mori, Soetjipto, Kazufumi Shimizu, Maria I Lusida                                                                                                                                                 |
| EPI_ISL_529147, EPI_ISL_529148                                                                                                                                                                                                                                                                                                                                                                                                                                                                 | Democritus University of Thrace, Department of Medicine                                                                             | Democritus University of Thrace, Department of Medicine                                                                             |  | Kassela, K., Dovrolis, N., Bampali, M., Gatzidou, E., Froukala, E., Stavropoulou, A., Veletza, S., Tsakris, A., Spanakis, N., Karakasiotis, I.                                                                                                                                                                                                                                                                    |
| EPI_ISL_529962                                                                                                                                                                                                                                                                                                                                                                                                                                                                                 | Universitas Airlangga Hospital                                                                                                      | Institute of Tropical Disease, Universitas Airlangga                                                                                |  | Jezy R Dewantari, Rima R Prasetya, Krisnoadi Rahardjo, Aldise M Nastri, Nasronudin, Gatot Soegiarto, Laksmi Wulandari, Retno A Setyoningrum, Resti Yudhawati, Yohko K Shimizu, Mitsuhiro Nishimura, Yasuko Mori, Soetjipto, Kazufumi Shimizu, Maria I Lusida                                                                                                                                                      |
| EPI_ISL_529966                                                                                                                                                                                                                                                                                                                                                                                                                                                                                 | RSUD Sidoarjo                                                                                                                       | Institute of Tropical Disease, Universitas Airlangga                                                                                |  | Kazufumi Shimizu, Krisnoadi Rahardjo, Aldise M Nastri, Jezy R Dewantari, Rima R Prasetya, Atok Irawan, Gatot Soegiarto, Laksmi Wulandari, Retno A Setyoningrum, Resti Yudhawati, Yohko K Shimizu, Mitsuhiro Nishimura, Yasuko Mori, Soetjipto, Maria I Lusida                                                                                                                                                     |
| EPI_ISL_535341, EPI_ISL_535342, EPI_ISL_535344, EPI_ISL_535345, EPI_ISL_535346, EPI_ISL_535348, EPI_ISL_535351, EPI_ISL_535357                                                                                                                                                                                                                                                                                                                                                                 | LA Office of Public Health Laboratories                                                                                             | Pathogen Discovery, Respiratory Viruses Branch, Division of Viral Diseases, Centers for Disease Control and Prevention              |  | Jing Zhang, Ying Tao, Yan Li, Krista Queen, Anna Uehara, Clinton Paden, Haibin Wang, Suxiang Tong                                                                                                                                                                                                                                                                                                                 |
| EPI_ISL_535359, EPI_ISL_535360                                                                                                                                                                                                                                                                                                                                                                                                                                                                 | RI State Health Laboratories                                                                                                        | Pathogen Discovery, Respiratory Viruses Branch, Division of Viral Diseases, Centers for Disease Control and Prevention              |  | Jing Zhang, Ying Tao, Yan Li, Krista Queen, Anna Uehara, Clinton Paden, Haibin Wang, Suxiang Tong                                                                                                                                                                                                                                                                                                                 |
| EPI_ISL_539483, EPI_ISL_539484, EPI_ISL_539485, EPI_ISL_539486, EPI_ISL_539487, EPI_ISL_539488, EPI_ISL_539489, EPI_ISL_539490                                                                                                                                                                                                                                                                                                                                                                 | Civil Hospital, Rupnagar                                                                                                            | CSIR-Institute of Microbial Technology                                                                                              |  | Kanika Bansal, Sanjeet Kumar, Anu Singh, Debarghya Ghose, Amandeep Kaur, Rajesh Kumar Mishra, Poushali Chakraborty, Harsh Goar, Navin Baid, Ashwani Kumar, Dipak Dutta, Sanjeev Khosla, Prabhu B. Patil                                                                                                                                                                                                           |
| EPI_ISL_539491                                                                                                                                                                                                                                                                                                                                                                                                                                                                                 | IDSP unit, Dehradun                                                                                                                 | CSIR-Institute of Microbial Technology                                                                                              |  | Kanika Bansal, Sanjeet Kumar, Anu Singh, Debarghya Ghose, Amandeep Kaur, Rajesh Kumar Mishra, Poushali Chakraborty, Harsh Goar, Navin Baid, Ashwani Kumar, Dipak Dutta, Sanjeev Khosla, Prabhu B. Patil                                                                                                                                                                                                           |
| EPI_ISL_539492                                                                                                                                                                                                                                                                                                                                                                                                                                                                                 | CMS, Roorkee                                                                                                                        | CSIR-Institute of Microbial Technology                                                                                              |  | Kanika Bansal, Sanjeet Kumar, Anu Singh, Debarghya Ghose, Amandeep Kaur, Rajesh Kumar Mishra, Poushali Chakraborty, Harsh Goar, Navin Baid, Ashwani Kumar, Dipak Dutta, Sanjeev Khosla, Prabhu B. Patil                                                                                                                                                                                                           |

|                                                                                                                                                                                                                                                                                                                                                                                                                                                                                                |                                                                                                                     |                                                                                                                |                                                                                                                                                                                                   |
|------------------------------------------------------------------------------------------------------------------------------------------------------------------------------------------------------------------------------------------------------------------------------------------------------------------------------------------------------------------------------------------------------------------------------------------------------------------------------------------------|---------------------------------------------------------------------------------------------------------------------|----------------------------------------------------------------------------------------------------------------|---------------------------------------------------------------------------------------------------------------------------------------------------------------------------------------------------|
| EPI_ISL_540442, EPI_ISL_540444, EPI_ISL_540446, EPI_ISL_540447, EPI_ISL_540451, EPI_ISL_540453, EPI_ISL_540461, EPI_ISL_540464                                                                                                                                                                                                                                                                                                                                                                 | University of Liège COVID-19 testing center                                                                         | GIGA Medical Genomics                                                                                          | Keith Durkin, Maria Artesi, Emmanuel André, Marc Van Ranst, Fabrice Bureau, Laurent Gillet, Wouter Coppieters, Vincent Bours                                                                      |
| EPI_ISL_540472, EPI_ISL_540473, EPI_ISL_540474, EPI_ISL_540478, EPI_ISL_540483, EPI_ISL_540485, EPI_ISL_540488, EPI_ISL_540493, EPI_ISL_540502, EPI_ISL_540506, EPI_ISL_540507, EPI_ISL_540509, EPI_ISL_540515, EPI_ISL_540519, EPI_ISL_540526, EPI_ISL_540529, EPI_ISL_540534, EPI_ISL_540535, EPI_ISL_540550, EPI_ISL_540551, EPI_ISL_540559, EPI_ISL_540562, EPI_ISL_540566, EPI_ISL_540567, EPI_ISL_540568, EPI_ISL_540571, EPI_ISL_540572, EPI_ISL_540574, EPI_ISL_540576                 | Department of Clinical Microbiology                                                                                 | GIGA Medical Genomics                                                                                          | Keith Durkin, Maria Artesi, Sébastien Bontems, Raphaël Boreux, Bouchra Boujemla, Cécile Meex, Axelle Chaslain, Céline Fombellida-Lopez, Pierrette Melin, Marie-Pierre Hayette, Vincent Bours      |
| see above                                                                                                                                                                                                                                                                                                                                                                                                                                                                                      | Department of Clinical Microbiology                                                                                 | GIGA Medical Genomics                                                                                          | Keith Durkin, Maria Artesi, Sébastien Bontems, Raphaël Boreux, Bouchra Boujemla, Cécile Meex, Axelle Chaslain, Céline Fombellida-Lopez, Pierrette Melin, Marie-Pierre Hayette, Vincent Bours      |
| EPI_ISL_541037, EPI_ISL_541038, EPI_ISL_541039, EPI_ISL_541040, EPI_ISL_541041, EPI_ISL_541042, EPI_ISL_541043, EPI_ISL_541044, EPI_ISL_541045, EPI_ISL_541046, EPI_ISL_541047, EPI_ISL_541048, EPI_ISL_541049, EPI_ISL_541050, EPI_ISL_541051, EPI_ISL_541052, EPI_ISL_541053, EPI_ISL_541054, EPI_ISL_541055, EPI_ISL_541056, EPI_ISL_541057, EPI_ISL_541058, EPI_ISL_541059, EPI_ISL_541060, EPI_ISL_541061, EPI_ISL_541062, EPI_ISL_541063, EPI_ISL_541064, EPI_ISL_541065, EPI_ISL_541066 | Hospital Clínico Universitario de Santiago de Compostela                                                            | SeqCOVID-SPAIN consortium/Institute of Biomedicine of Valencia, IBV-CSIC                                       | José Javier Costa Alcalde, Antonio Aguilera Guirao, M <sup>a</sup> Luisa Pérez del Molino Bernal, Amparo Coira Nieto, Gema Barbeito Castañeiras, Rocio Trastoy Pena and SeqCOVID-SPAIN consortium |
| see above                                                                                                                                                                                                                                                                                                                                                                                                                                                                                      | Hospital Clínico Universitario de Santiago de Compostela                                                            | SeqCOVID-SPAIN consortium/Institute of Biomedicine of Valencia, IBV-CSIC                                       | José Javier Costa Alcalde, Antonio Aguilera Guirao, M <sup>a</sup> Luisa Pérez del Molino Bernal, Amparo Coira Nieto, Gema Barbeito Castañeiras, Rocio Trastoy Pena and SeqCOVID-SPAIN consortium |
| EPI_ISL_545955                                                                                                                                                                                                                                                                                                                                                                                                                                                                                 | Laboratorio de Infecciones Respiratorias Agudas. Centro Nacional de Salud Pública, Instituto Nacional de Salud      | Laboratorio de Infecciones Respiratorias Agudas. Centro Nacional de Salud Pública, Instituto Nacional de Salud | Juscamayta, E.                                                                                                                                                                                    |
| EPI_ISL_547584                                                                                                                                                                                                                                                                                                                                                                                                                                                                                 | CMS, Roorkee                                                                                                        | CSIR-Institute of Microbial Technology                                                                         | Kanika Bansal, Sanjeet Kumar, Anu Singh, Debarghya Ghose, Rajesh Kumar Mishra, Dipak Dutta, Sanjeev Khosla, Prabhu B. Patil                                                                       |
| EPI_ISL_547585, EPI_ISL_547586, EPI_ISL_547587, EPI_ISL_547588, EPI_ISL_547589, EPI_ISL_547590, EPI_ISL_547591, EPI_ISL_547592, EPI_ISL_547593                                                                                                                                                                                                                                                                                                                                                 | Civil Hospital, Panchkula                                                                                           | CSIR-Institute of Microbial Technology                                                                         | Kanika Bansal, Sanjeet Kumar, Anu Singh, Debarghya Ghose, Rajesh Kumar Mishra, Dipak Dutta, Sanjeev Khosla, Prabhu B. Patil                                                                       |
| EPI_ISL_549027, EPI_ISL_549028                                                                                                                                                                                                                                                                                                                                                                                                                                                                 | Furst Medical Laboratory                                                                                            | Norwegian Institute of Public Health, Department of Virology                                                   | Kathrine Stene-Johansen, Kamilla Heddeland Instefjord, Hilde Elshaug, Rasmus Riis Kopperud, Hilde Synnøve Vollan, Karoline Bragstad, Olav Hungnes                                                 |
| EPI_ISL_549029, EPI_ISL_549030, EPI_ISL_549031, EPI_ISL_549032, EPI_ISL_549033, EPI_ISL_549034, EPI_ISL_549035                                                                                                                                                                                                                                                                                                                                                                                 | Oslo University Hospital, Department of Medical Microbiology                                                        | Norwegian Institute of Public Health, Department of Virology                                                   | Kathrine Stene-Johansen, Kamilla Heddeland Instefjord, Hilde Elshaug, Rasmus Riis Kopperud, Hilde Synnøve Vollan, Karoline Bragstad, Olav Hungnes                                                 |
| EPI_ISL_549036, EPI_ISL_549037                                                                                                                                                                                                                                                                                                                                                                                                                                                                 | Hospital of Southern Norway - Kristiansand, Department of Medical Microbiology                                      | Norwegian Institute of Public Health, Department of Virology                                                   | Kathrine Stene-Johansen, Kamilla Heddeland Instefjord, Hilde Elshaug, Rasmus Riis Kopperud, Hilde Synnøve Vollan, Karoline Bragstad, Olav Hungnes                                                 |
| EPI_ISL_549038                                                                                                                                                                                                                                                                                                                                                                                                                                                                                 | Furst Medical Laboratory                                                                                            | Norwegian Institute of Public Health, Department of Virology                                                   | Kathrine Stene-Johansen, Kamilla Heddeland Instefjord, Hilde Elshaug, Rasmus Riis Kopperud, Hilde Synnøve Vollan, Karoline Bragstad, Olav Hungnes                                                 |
| EPI_ISL_549039, EPI_ISL_549040, EPI_ISL_549041                                                                                                                                                                                                                                                                                                                                                                                                                                                 | Medical Microbiology Unit, Department for Laboratory Medicine, Drammen Hospital, Vestre Viken Health Trust,         | Norwegian Institute of Public Health, Department of Virology                                                   | Kathrine Stene-Johansen, Kamilla Heddeland Instefjord, Hilde Elshaug, Rasmus Riis Kopperud, Hilde Synnøve Vollan, Karoline Bragstad, Olav Hungnes                                                 |
| EPI_ISL_549042, EPI_ISL_549043, EPI_ISL_549044, EPI_ISL_549045, EPI_ISL_549046, EPI_ISL_549047                                                                                                                                                                                                                                                                                                                                                                                                 | Ostfold Hospital Trust - Kalnes, Centre for Laboratory Medicine, Section for gene technology and infection serology | Norwegian Institute of Public Health, Department of Virology                                                   | Kathrine Stene-Johansen, Kamilla Heddeland Instefjord, Hilde Elshaug, Rasmus Riis Kopperud, Hilde Synnøve Vollan, Karoline Bragstad, Olav Hungnes                                                 |
| EPI_ISL_549048, EPI_ISL_549049                                                                                                                                                                                                                                                                                                                                                                                                                                                                 | Furst Medical Laboratory                                                                                            | Norwegian Institute of Public Health, Department of Virology                                                   | Kathrine Stene-Johansen, Kamilla Heddeland Instefjord, Hilde Elshaug, Rasmus Riis Kopperud, Hilde Synnøve Vollan, Karoline Bragstad, Olav Hungnes                                                 |
| EPI_ISL_549050                                                                                                                                                                                                                                                                                                                                                                                                                                                                                 | Unilabs Laboratory Medicine                                                                                         | Norwegian Institute of Public Health, Department of Virology                                                   | Kathrine Stene-Johansen, Kamilla Heddeland Instefjord, Hilde Elshaug, Rasmus Riis Kopperud, Hilde Synnøve Vollan, Karoline Bragstad, Olav Hungnes                                                 |
| EPI_ISL_549051                                                                                                                                                                                                                                                                                                                                                                                                                                                                                 | Vestfold Hospital, Toensberg Department of Microbiology                                                             | Norwegian Institute of Public Health, Department of Virology                                                   | Kathrine Stene-Johansen, Kamilla Heddeland Instefjord, Hilde Elshaug, Rasmus Riis Kopperud, Hilde Synnøve Vollan, Karoline Bragstad, Olav Hungnes                                                 |
| EPI_ISL_549052                                                                                                                                                                                                                                                                                                                                                                                                                                                                                 | Hospital of Southern Norway - Kristiansand, Department of Medical Microbiology                                      | Norwegian Institute of Public Health, Department of Virology                                                   | Kathrine Stene-Johansen, Kamilla Heddeland Instefjord, Hilde Elshaug, Rasmus Riis Kopperud, Hilde Synnøve Vollan, Karoline Bragstad, Olav Hungnes                                                 |
| EPI_ISL_549053, EPI_ISL_549054, EPI_ISL_549055, EPI_ISL_549056, EPI_ISL_549057, EPI_ISL_549058                                                                                                                                                                                                                                                                                                                                                                                                 | Furst Medical Laboratory                                                                                            | Norwegian Institute of Public Health, Department of Virology                                                   | Kathrine Stene-Johansen, Kamilla Heddeland Instefjord, Hilde Elshaug, Rasmus Riis Kopperud, Hilde Synnøve Vollan, Karoline Bragstad, Olav Hungnes                                                 |
| EPI_ISL_549059                                                                                                                                                                                                                                                                                                                                                                                                                                                                                 | Medical Microbiology Unit, Department for Laboratory Medicine, Drammen Hospital, Vestre Viken Health Trust,         | Norwegian Institute of Public Health, Department of Virology                                                   | Kathrine Stene-Johansen, Kamilla Heddeland Instefjord, Hilde Elshaug, Rasmus Riis Kopperud, Hilde Synnøve Vollan, Karoline Bragstad, Olav Hungnes                                                 |
| EPI_ISL_549060, EPI_ISL_549061, EPI_ISL_549062, EPI_ISL_549063, EPI_ISL_549064, EPI_ISL_549065, EPI_ISL_549066, EPI_ISL_549067, EPI_ISL_549068, EPI_ISL_549069                                                                                                                                                                                                                                                                                                                                 | Furst Medical Laboratory                                                                                            | Norwegian Institute of Public Health, Department of Virology                                                   | Kathrine Stene-Johansen, Kamilla Heddeland Instefjord, Hilde Elshaug, Rasmus Riis Kopperud, Hilde Synnøve Vollan, Karoline Bragstad, Olav Hungnes                                                 |
| EPI_ISL_549070                                                                                                                                                                                                                                                                                                                                                                                                                                                                                 | Medical Microbiology Unit, Department for Laboratory Medicine, Drammen Hospital, Vestre Viken Health Trust,         | Norwegian Institute of Public Health, Department of Virology                                                   | Kathrine Stene-Johansen, Kamilla Heddeland Instefjord, Hilde Elshaug, Rasmus Riis Kopperud, Hilde Synnøve Vollan, Karoline Bragstad, Olav Hungnes                                                 |
| EPI_ISL_549071, EPI_ISL_549072, EPI_ISL_549073, EPI_ISL_549074, EPI_ISL_549075, EPI_ISL_549076, EPI_ISL_549077, EPI_ISL_549078, EPI_ISL_549079, EPI_ISL_549080                                                                                                                                                                                                                                                                                                                                 | Furst Medical Laboratory                                                                                            | Norwegian Institute of Public Health, Department of Virology                                                   | Kathrine Stene-Johansen, Kamilla Heddeland Instefjord, Hilde Elshaug, Rasmus Riis Kopperud, Hilde Synnøve Vollan, Karoline Bragstad, Olav Hungnes                                                 |
| EPI_ISL_549081                                                                                                                                                                                                                                                                                                                                                                                                                                                                                 | Medical Microbiology Unit, Department for Laboratory Medicine, Drammen Hospital, Vestre Viken Health Trust,         | Norwegian Institute of Public Health, Department of Virology                                                   | Kathrine Stene-Johansen, Kamilla Heddeland Instefjord, Hilde Elshaug, Rasmus Riis Kopperud, Hilde Synnøve Vollan, Karoline Bragstad, Olav Hungnes                                                 |
| EPI_ISL_549082                                                                                                                                                                                                                                                                                                                                                                                                                                                                                 | Furst Medical Laboratory                                                                                            | Norwegian Institute of Public Health, Department of Virology                                                   | Kathrine Stene-Johansen, Kamilla Heddeland Instefjord, Hilde Elshaug, Rasmus Riis Kopperud, Hilde Synnøve Vollan, Karoline Bragstad, Olav Hungnes                                                 |
| EPI_ISL_549083, EPI_ISL_549084                                                                                                                                                                                                                                                                                                                                                                                                                                                                 | Akershus University Hospital, Department for Microbiology and Infectious Disease Control                            | Norwegian Institute of Public Health, Department of Virology                                                   | Kathrine Stene-Johansen, Kamilla Heddeland Instefjord, Hilde Elshaug, Rasmus Riis Kopperud, Hilde Synnøve Vollan, Karoline Bragstad, Olav Hungnes                                                 |
| EPI_ISL_549085, EPI_ISL_549086                                                                                                                                                                                                                                                                                                                                                                                                                                                                 | Medical Microbiology Unit, Department for Laboratory Medicine, Drammen Hospital, Vestre Viken Health Trust,         | Norwegian Institute of Public Health, Department of Virology                                                   | Kathrine Stene-Johansen, Kamilla Heddeland Instefjord, Hilde Elshaug, Rasmus Riis Kopperud, Hilde Synnøve Vollan, Karoline Bragstad, Olav Hungnes                                                 |
| EPI_ISL_549087                                                                                                                                                                                                                                                                                                                                                                                                                                                                                 | Vestfold Hospital, Toensberg Department of Microbiology                                                             | Norwegian Institute of Public Health, Department of Virology                                                   | Kathrine Stene-Johansen, Kamilla Heddeland Instefjord, Hilde Elshaug, Rasmus Riis Kopperud, Hilde Synnøve Vollan, Karoline Bragstad, Olav Hungnes                                                 |
| EPI_ISL_549088                                                                                                                                                                                                                                                                                                                                                                                                                                                                                 | Furst Medical Laboratory                                                                                            | Norwegian Institute of Public Health, Department of Virology                                                   | Kathrine Stene-Johansen, Kamilla Heddeland Instefjord, Hilde Elshaug, Rasmus Riis Kopperud, Hilde Synnøve Vollan, Karoline Bragstad, Olav Hungnes                                                 |
| EPI_ISL_549089, EPI_ISL_549090, EPI_ISL_549091                                                                                                                                                                                                                                                                                                                                                                                                                                                 | Akershus University Hospital, Department for Microbiology and Infectious Disease Control                            | Norwegian Institute of Public Health, Department of Virology                                                   | Kathrine Stene-Johansen, Kamilla Heddeland Instefjord, Hilde Elshaug, Rasmus Riis Kopperud, Hilde Synnøve Vollan, Karoline Bragstad, Olav Hungnes                                                 |
| EPI_ISL_549092, EPI_ISL_549093, EPI_ISL_549094, EPI_ISL_549095, EPI_ISL_549096, EPI_ISL_549097, EPI_ISL_549098, EPI_ISL_549099, EPI_ISL_549100, EPI_ISL_549101, EPI_ISL_549102, EPI_ISL_549103, EPI_ISL_549104, EPI_ISL_549105, EPI_ISL_549106, EPI_ISL_549107, EPI_ISL_549108, EPI_ISL_549109, EPI_ISL_549110, EPI_ISL_549111                                                                                                                                                                 | Ostfold Hospital Trust - Kalnes, Centre for Laboratory Medicine, Section for gene technology and infection serology | Norwegian Institute of Public Health, Department of Virology                                                   | Kathrine Stene-Johansen, Kamilla Heddeland Instefjord, Hilde Elshaug, Rasmus Riis Kopperud, Hilde Synnøve Vollan, Karoline Bragstad, Olav Hungnes                                                 |
| see above                                                                                                                                                                                                                                                                                                                                                                                                                                                                                      | Ostfold Hospital Trust - Kalnes, Centre for Laboratory Medicine, Section for gene technology and infection serology | Norwegian Institute of Public Health, Department of Virology                                                   | Kathrine Stene-Johansen, Kamilla Heddeland Instefjord, Hilde Elshaug, Rasmus Riis Kopperud, Hilde Synnøve Vollan, Karoline Bragstad, Olav Hungnes                                                 |
| EPI_ISL_549112                                                                                                                                                                                                                                                                                                                                                                                                                                                                                 | Furst Medical Laboratory                                                                                            | Norwegian Institute of Public Health, Department of Virology                                                   | Kathrine Stene-Johansen, Kamilla Heddeland Instefjord, Hilde Elshaug, Rasmus Riis Kopperud, Hilde Synnøve Vollan, Karoline Bragstad, Olav Hungnes                                                 |



|                                                                                                                                                                                                                                                                                                                                                                                                                                                                                                                                                                                                                                                                                                                                                                                                                                                                                                                                                                                                                                                                                                                                                                                                 |                                                                                                                     |                                                                                                                        |                                                                                                                                                                                                         |
|-------------------------------------------------------------------------------------------------------------------------------------------------------------------------------------------------------------------------------------------------------------------------------------------------------------------------------------------------------------------------------------------------------------------------------------------------------------------------------------------------------------------------------------------------------------------------------------------------------------------------------------------------------------------------------------------------------------------------------------------------------------------------------------------------------------------------------------------------------------------------------------------------------------------------------------------------------------------------------------------------------------------------------------------------------------------------------------------------------------------------------------------------------------------------------------------------|---------------------------------------------------------------------------------------------------------------------|------------------------------------------------------------------------------------------------------------------------|---------------------------------------------------------------------------------------------------------------------------------------------------------------------------------------------------------|
| EPI_ISL_549113, EPI_ISL_549114, EPI_ISL_549115, EPI_ISL_549116, EPI_ISL_549117, EPI_ISL_549118                                                                                                                                                                                                                                                                                                                                                                                                                                                                                                                                                                                                                                                                                                                                                                                                                                                                                                                                                                                                                                                                                                  | Ostfold Hospital Trust - Kalnes, Centre for Laboratory Medicine, Section for gene technology and infection serology | Norwegian Institute of Public Health, Department of Virology                                                           | Kathrine Stene-Johansen, Kamilla Heddeland Instefjord, Hilde Elshaug, Rasmus Riis Kopperud, Hilde Synnøve Vollan, Karoline Bragstad, Olav Hungnes                                                       |
| EPI_ISL_549119, EPI_ISL_549120, EPI_ISL_549121, EPI_ISL_549122                                                                                                                                                                                                                                                                                                                                                                                                                                                                                                                                                                                                                                                                                                                                                                                                                                                                                                                                                                                                                                                                                                                                  | Furst Medical Laboratory                                                                                            | Norwegian Institute of Public Health, Department of Virology                                                           | Kathrine Stene-Johansen, Kamilla Heddeland Instefjord, Hilde Elshaug, Rasmus Riis Kopperud, Hilde Synnøve Vollan, Karoline Bragstad, Olav Hungnes                                                       |
| EPI_ISL_549123                                                                                                                                                                                                                                                                                                                                                                                                                                                                                                                                                                                                                                                                                                                                                                                                                                                                                                                                                                                                                                                                                                                                                                                  | Unilabs Laboratory Medicine                                                                                         | Norwegian Institute of Public Health, Department of Virology                                                           | Kathrine Stene-Johansen, Kamilla Heddeland Instefjord, Hilde Elshaug, Rasmus Riis Kopperud, Hilde Synnøve Vollan, Karoline Bragstad, Olav Hungnes                                                       |
| EPI_ISL_549124                                                                                                                                                                                                                                                                                                                                                                                                                                                                                                                                                                                                                                                                                                                                                                                                                                                                                                                                                                                                                                                                                                                                                                                  | Furst Medical Laboratory                                                                                            | Norwegian Institute of Public Health, Department of Virology                                                           | Kathrine Stene-Johansen, Kamilla Heddeland Instefjord, Hilde Elshaug, Rasmus Riis Kopperud, Hilde Synnøve Vollan, Karoline Bragstad, Olav Hungnes                                                       |
| EPI_ISL_549125                                                                                                                                                                                                                                                                                                                                                                                                                                                                                                                                                                                                                                                                                                                                                                                                                                                                                                                                                                                                                                                                                                                                                                                  | Unilabs Laboratory Medicine                                                                                         | Norwegian Institute of Public Health, Department of Virology                                                           | Kathrine Stene-Johansen, Kamilla Heddeland Instefjord, Hilde Elshaug, Rasmus Riis Kopperud, Hilde Synnøve Vollan, Karoline Bragstad, Olav Hungnes                                                       |
| EPI_ISL_549126, EPI_ISL_549127, EPI_ISL_549128, EPI_ISL_549129, EPI_ISL_549130, EPI_ISL_549131                                                                                                                                                                                                                                                                                                                                                                                                                                                                                                                                                                                                                                                                                                                                                                                                                                                                                                                                                                                                                                                                                                  | Ostfold Hospital Trust - Kalnes, Centre for Laboratory Medicine, Section for gene technology and infection serology | Norwegian Institute of Public Health, Department of Virology                                                           | Kathrine Stene-Johansen, Kamilla Heddeland Instefjord, Hilde Elshaug, Rasmus Riis Kopperud, Hilde Synnøve Vollan, Karoline Bragstad, Olav Hungnes                                                       |
| EPI_ISL_549132                                                                                                                                                                                                                                                                                                                                                                                                                                                                                                                                                                                                                                                                                                                                                                                                                                                                                                                                                                                                                                                                                                                                                                                  | Furst Medical Laboratory                                                                                            | Norwegian Institute of Public Health, Department of Virology                                                           | Kathrine Stene-Johansen, Kamilla Heddeland Instefjord, Hilde Elshaug, Rasmus Riis Kopperud, Hilde Synnøve Vollan, Karoline Bragstad, Olav Hungnes                                                       |
| EPI_ISL_549133, EPI_ISL_549134, EPI_ISL_549135, EPI_ISL_549136, EPI_ISL_549137, EPI_ISL_549138, EPI_ISL_549139, EPI_ISL_549140, EPI_ISL_549141, EPI_ISL_549142                                                                                                                                                                                                                                                                                                                                                                                                                                                                                                                                                                                                                                                                                                                                                                                                                                                                                                                                                                                                                                  | Ostfold Hospital Trust - Kalnes, Centre for Laboratory Medicine, Section for gene technology and infection serology | Norwegian Institute of Public Health, Department of Virology                                                           | Kathrine Stene-Johansen, Kamilla Heddeland Instefjord, Hilde Elshaug, Rasmus Riis Kopperud, Hilde Synnøve Vollan, Karoline Bragstad, Olav Hungnes                                                       |
| EPI_ISL_549143                                                                                                                                                                                                                                                                                                                                                                                                                                                                                                                                                                                                                                                                                                                                                                                                                                                                                                                                                                                                                                                                                                                                                                                  | Furst Medical Laboratory                                                                                            | Norwegian Institute of Public Health, Department of Virology                                                           | Kathrine Stene-Johansen, Kamilla Heddeland Instefjord, Hilde Elshaug, Rasmus Riis Kopperud, Hilde Synnøve Vollan, Karoline Bragstad, Olav Hungnes                                                       |
| EPI_ISL_549144, EPI_ISL_549145, EPI_ISL_549146, EPI_ISL_549147, EPI_ISL_549148, EPI_ISL_549149, EPI_ISL_549150, EPI_ISL_549151, EPI_ISL_549152, EPI_ISL_549153                                                                                                                                                                                                                                                                                                                                                                                                                                                                                                                                                                                                                                                                                                                                                                                                                                                                                                                                                                                                                                  | Ostfold Hospital Trust - Kalnes, Centre for Laboratory Medicine, Section for gene technology and infection serology | Norwegian Institute of Public Health, Department of Virology                                                           | Kathrine Stene-Johansen, Kamilla Heddeland Instefjord, Hilde Elshaug, Rasmus Riis Kopperud, Hilde Synnøve Vollan, Karoline Bragstad, Olav Hungnes                                                       |
| EPI_ISL_549154                                                                                                                                                                                                                                                                                                                                                                                                                                                                                                                                                                                                                                                                                                                                                                                                                                                                                                                                                                                                                                                                                                                                                                                  | Furst Medical Laboratory                                                                                            | Norwegian Institute of Public Health, Department of Virology                                                           | Kathrine Stene-Johansen, Kamilla Heddeland Instefjord, Hilde Elshaug, Rasmus Riis Kopperud, Hilde Synnøve Vollan, Karoline Bragstad, Olav Hungnes                                                       |
| EPI_ISL_549155, EPI_ISL_549156, EPI_ISL_549157, EPI_ISL_549158, EPI_ISL_549159, EPI_ISL_549160, EPI_ISL_549161, EPI_ISL_549162, EPI_ISL_549163                                                                                                                                                                                                                                                                                                                                                                                                                                                                                                                                                                                                                                                                                                                                                                                                                                                                                                                                                                                                                                                  | Ostfold Hospital Trust - Kalnes, Centre for Laboratory Medicine, Section for gene technology and infection serology | Norwegian Institute of Public Health, Department of Virology                                                           | Kathrine Stene-Johansen, Kamilla Heddeland Instefjord, Hilde Elshaug, Rasmus Riis Kopperud, Hilde Synnøve Vollan, Karoline Bragstad, Olav Hungnes                                                       |
| EPI_ISL_549164                                                                                                                                                                                                                                                                                                                                                                                                                                                                                                                                                                                                                                                                                                                                                                                                                                                                                                                                                                                                                                                                                                                                                                                  | Medical Microbiology Unit, Department for Laboratory Medicine, Drammen Hospital, Vestre Viken Health Trust,         | Norwegian Institute of Public Health, Department of Virology                                                           | Kathrine Stene-Johansen, Kamilla Heddeland Instefjord, Hilde Elshaug, Rasmus Riis Kopperud, Hilde Synnøve Vollan, Karoline Bragstad, Olav Hungnes                                                       |
| EPI_ISL_549165                                                                                                                                                                                                                                                                                                                                                                                                                                                                                                                                                                                                                                                                                                                                                                                                                                                                                                                                                                                                                                                                                                                                                                                  | Furst Medical Laboratory                                                                                            | Norwegian Institute of Public Health, Department of Virology                                                           | Kathrine Stene-Johansen, Kamilla Heddeland Instefjord, Hilde Elshaug, Rasmus Riis Kopperud, Hilde Synnøve Vollan, Karoline Bragstad, Olav Hungnes                                                       |
| EPI_ISL_549166                                                                                                                                                                                                                                                                                                                                                                                                                                                                                                                                                                                                                                                                                                                                                                                                                                                                                                                                                                                                                                                                                                                                                                                  | Medical Microbiology Unit, Department for Laboratory Medicine, Drammen Hospital, Vestre Viken Health Trust,         | Norwegian Institute of Public Health, Department of Virology                                                           | Kathrine Stene-Johansen, Kamilla Heddeland Instefjord, Hilde Elshaug, Rasmus Riis Kopperud, Hilde Synnøve Vollan, Karoline Bragstad, Olav Hungnes                                                       |
| EPI_ISL_549167                                                                                                                                                                                                                                                                                                                                                                                                                                                                                                                                                                                                                                                                                                                                                                                                                                                                                                                                                                                                                                                                                                                                                                                  | Hospital of Southern Norway - Kristiansand, Department of Medical Microbiology                                      | Norwegian Institute of Public Health, Department of Virology                                                           | Kathrine Stene-Johansen, Kamilla Heddeland Instefjord, Hilde Elshaug, Rasmus Riis Kopperud, Hilde Synnøve Vollan, Karoline Bragstad, Olav Hungnes                                                       |
| EPI_ISL_549168                                                                                                                                                                                                                                                                                                                                                                                                                                                                                                                                                                                                                                                                                                                                                                                                                                                                                                                                                                                                                                                                                                                                                                                  | Furst Medical Laboratory                                                                                            | Norwegian Institute of Public Health, Department of Virology                                                           | Kathrine Stene-Johansen, Kamilla Heddeland Instefjord, Hilde Elshaug, Rasmus Riis Kopperud, Hilde Synnøve Vollan, Karoline Bragstad, Olav Hungnes                                                       |
| EPI_ISL_549169, EPI_ISL_549170, EPI_ISL_549171                                                                                                                                                                                                                                                                                                                                                                                                                                                                                                                                                                                                                                                                                                                                                                                                                                                                                                                                                                                                                                                                                                                                                  | Akershus University Hospital, Department for Microbiology and Infectious Disease Control                            | Norwegian Institute of Public Health, Department of Virology                                                           | Kathrine Stene-Johansen, Kamilla Heddeland Instefjord, Hilde Elshaug, Rasmus Riis Kopperud, Hilde Synnøve Vollan, Karoline Bragstad, Olav Hungnes                                                       |
| EPI_ISL_549172                                                                                                                                                                                                                                                                                                                                                                                                                                                                                                                                                                                                                                                                                                                                                                                                                                                                                                                                                                                                                                                                                                                                                                                  | Unilabs Laboratory Medicine                                                                                         | Norwegian Institute of Public Health, Department of Virology                                                           | Kathrine Stene-Johansen, Kamilla Heddeland Instefjord, Hilde Elshaug, Rasmus Riis Kopperud, Hilde Synnøve Vollan, Karoline Bragstad, Olav Hungnes                                                       |
| EPI_ISL_549173, EPI_ISL_549174                                                                                                                                                                                                                                                                                                                                                                                                                                                                                                                                                                                                                                                                                                                                                                                                                                                                                                                                                                                                                                                                                                                                                                  | Vestfold Hospital, Toensberg Department of Microbiology                                                             | Norwegian Institute of Public Health, Department of Virology                                                           | Kathrine Stene-Johansen, Kamilla Heddeland Instefjord, Hilde Elshaug, Rasmus Riis Kopperud, Hilde Synnøve Vollan, Karoline Bragstad, Olav Hungnes                                                       |
| EPI_ISL_549175                                                                                                                                                                                                                                                                                                                                                                                                                                                                                                                                                                                                                                                                                                                                                                                                                                                                                                                                                                                                                                                                                                                                                                                  | Unilabs Laboratory Medicine                                                                                         | Norwegian Institute of Public Health, Department of Virology                                                           | Kathrine Stene-Johansen, Kamilla Heddeland Instefjord, Hilde Elshaug, Rasmus Riis Kopperud, Hilde Synnøve Vollan, Karoline Bragstad, Olav Hungnes                                                       |
| EPI_ISL_560318                                                                                                                                                                                                                                                                                                                                                                                                                                                                                                                                                                                                                                                                                                                                                                                                                                                                                                                                                                                                                                                                                                                                                                                  | Civil Hospital, Panchkula                                                                                           | CSIR-Institute of Microbial Technology                                                                                 | Kanika Bansal, Sanjeet Kumar, Anu Singh, Debarghya Ghose, Amandeep Kaur, Rajesh Kumar Mishra, Poushali Chakraborty, Harsh Goar, Navin Baid, Ashwani Kumar, Dipak Dutta, Sanjeev Khosla, Prabhu B. Patil |
| EPI_ISL_560319                                                                                                                                                                                                                                                                                                                                                                                                                                                                                                                                                                                                                                                                                                                                                                                                                                                                                                                                                                                                                                                                                                                                                                                  | IDSP unit, Dehradun                                                                                                 | CSIR-Institute of Microbial Technology                                                                                 | Kanika Bansal, Sanjeet Kumar, Anu Singh, Debarghya Ghose, Amandeep Kaur, Rajesh Kumar Mishra, Poushali Chakraborty, Harsh Goar, Navin Baid, Ashwani Kumar, Dipak Dutta, Sanjeev Khosla, Prabhu B. Patil |
| EPI_ISL_560320, EPI_ISL_560321                                                                                                                                                                                                                                                                                                                                                                                                                                                                                                                                                                                                                                                                                                                                                                                                                                                                                                                                                                                                                                                                                                                                                                  | CMS, Roorkee                                                                                                        | CSIR-Institute of Microbial Technology                                                                                 | Kanika Bansal, Sanjeet Kumar, Anu Singh, Debarghya Ghose, Amandeep Kaur, Rajesh Kumar Mishra, Poushali Chakraborty, Harsh Goar, Navin Baid, Ashwani Kumar, Dipak Dutta, Sanjeev Khosla, Prabhu B. Patil |
| EPI_ISL_560322, EPI_ISL_560323, EPI_ISL_560324                                                                                                                                                                                                                                                                                                                                                                                                                                                                                                                                                                                                                                                                                                                                                                                                                                                                                                                                                                                                                                                                                                                                                  | Civil Hospital, Panchkula                                                                                           | CSIR-Institute of Microbial Technology                                                                                 | Kanika Bansal, Sanjeet Kumar, Anu Singh, Debarghya Ghose, Rajesh Kumar Mishra, Dipak Dutta, Sanjeev Khosla, Prabhu B. Patil                                                                             |
| EPI_ISL_560385                                                                                                                                                                                                                                                                                                                                                                                                                                                                                                                                                                                                                                                                                                                                                                                                                                                                                                                                                                                                                                                                                                                                                                                  | National Health Laboratory                                                                                          | Botswana Institute for Technology Research and Innovation                                                              | Kefentse Arnold Tumed, Madisa Mine, Dineo Emang Tshiamo, Gape Nyepetsi, Thongbotho Mphoyakgosi, Maitshwarelo Ignatius Matsheka                                                                          |
| EPI_ISL_560386                                                                                                                                                                                                                                                                                                                                                                                                                                                                                                                                                                                                                                                                                                                                                                                                                                                                                                                                                                                                                                                                                                                                                                                  | National Health Laboratory                                                                                          | Botswana Institute for Technology Research and innovation                                                              | Kefentse Arnold Tumed, Madisa Mine, Dineo Emang Tshiamo. Gape Nyepetsi, Thongbotho Mphoyakgosi, Maitshwarelo Ignatius Matsheka                                                                          |
| EPI_ISL_560387, EPI_ISL_560388, EPI_ISL_560389, EPI_ISL_560390                                                                                                                                                                                                                                                                                                                                                                                                                                                                                                                                                                                                                                                                                                                                                                                                                                                                                                                                                                                                                                                                                                                                  | National Health Laboratory                                                                                          | Botswana Institute for Technology Research and Innovation                                                              | Kefentse Arnold Tumed, Madisa Mine, Dineo Emang Tshiamo. Gape Nyepetsi, Thongbotho Mphoyakgosi, Maitshwarelo Ignatius Matsheka                                                                          |
| EPI_ISL_560391, EPI_ISL_560392, EPI_ISL_560393, EPI_ISL_560394, EPI_ISL_560395, EPI_ISL_560396, EPI_ISL_560397, EPI_ISL_560398, EPI_ISL_560399, EPI_ISL_560400, EPI_ISL_560401, EPI_ISL_560402, EPI_ISL_560403, EPI_ISL_560404, EPI_ISL_560405                                                                                                                                                                                                                                                                                                                                                                                                                                                                                                                                                                                                                                                                                                                                                                                                                                                                                                                                                  | Vilnius University Hospital Santaros Klinikos, Vilnius University                                                   | Institute of Biotechnology, Life Sciences Center, Vilnius University and Thermo Fisher Scientific                      | Justinas Slikas, Albertas Timinskas, Alma Gedvilaite, Aurelija Zvirbliene, Daniel Naumovas, Lairmonas Griskevicius, Ligita Jancioriene, Mindaugas Paulauskas                                            |
| see above                                                                                                                                                                                                                                                                                                                                                                                                                                                                                                                                                                                                                                                                                                                                                                                                                                                                                                                                                                                                                                                                                                                                                                                       |                                                                                                                     |                                                                                                                        |                                                                                                                                                                                                         |
| EPI_ISL_561337, EPI_ISL_561338, EPI_ISL_561339, EPI_ISL_561340, EPI_ISL_561341, EPI_ISL_561342, EPI_ISL_561343                                                                                                                                                                                                                                                                                                                                                                                                                                                                                                                                                                                                                                                                                                                                                                                                                                                                                                                                                                                                                                                                                  | Civil Hospital, Panchkula                                                                                           | CSIR-Institute of Microbial Technology                                                                                 | Kanika Bansal, Sanjeet Kumar, Anu Singh, Debarghya Ghose, Rajesh Kumar Mishra, Dipak Dutta, Sanjeev Khosla, Prabhu B. Patil                                                                             |
| EPI_ISL_561344                                                                                                                                                                                                                                                                                                                                                                                                                                                                                                                                                                                                                                                                                                                                                                                                                                                                                                                                                                                                                                                                                                                                                                                  | Civil Hospital, Rupnagar                                                                                            | CSIR-Institute of Microbial Technology                                                                                 | Kanika Bansal, Sanjeet Kumar, Anu Singh, Debarghya Ghose, Amandeep Kaur, Rajesh Kumar Mishra, Poushali Chakraborty, Harsh Goar, Navin Baid, Ashwani Kumar, Dipak Dutta, Sanjeev Khosla, Prabhu B. Patil |
| EPI_ISL_566085, EPI_ISL_566086, EPI_ISL_566087, EPI_ISL_566088, EPI_ISL_566089, EPI_ISL_566090, EPI_ISL_566091, EPI_ISL_566092, EPI_ISL_566093, EPI_ISL_566094, EPI_ISL_566095, EPI_ISL_566096, EPI_ISL_566097, EPI_ISL_566098, EPI_ISL_566099, EPI_ISL_566100, EPI_ISL_566101, EPI_ISL_566102, EPI_ISL_566103, EPI_ISL_566104, EPI_ISL_566105, EPI_ISL_566106, EPI_ISL_566107                                                                                                                                                                                                                                                                                                                                                                                                                                                                                                                                                                                                                                                                                                                                                                                                                  | GA Department of Public Health Laboratory                                                                           | Pathogen Discovery, Respiratory Viruses Branch, Division of Viral Diseases, Centers for Disease Control and Prevention | Jing Zhang, Brian Lynch, Yan Li, Anna Montmayeur, Krista Queen, Ying Tao, Anna Uehara, Clinton R. Paden, Rachel Marine, Haibin Wang, Suxiang Tong                                                       |
| see above                                                                                                                                                                                                                                                                                                                                                                                                                                                                                                                                                                                                                                                                                                                                                                                                                                                                                                                                                                                                                                                                                                                                                                                       |                                                                                                                     |                                                                                                                        |                                                                                                                                                                                                         |
| EPI_ISL_574295, EPI_ISL_574296, EPI_ISL_574297, EPI_ISL_574298, EPI_ISL_574299, EPI_ISL_574300, EPI_ISL_574320, EPI_ISL_574321, EPI_ISL_574322, EPI_ISL_574323, EPI_ISL_574324, EPI_ISL_574325, EPI_ISL_574326, EPI_ISL_574327, EPI_ISL_574328, EPI_ISL_574329, EPI_ISL_574330, EPI_ISL_574331, EPI_ISL_574332, EPI_ISL_574333, EPI_ISL_574334, EPI_ISL_574335, EPI_ISL_574336, EPI_ISL_574337, EPI_ISL_574338, EPI_ISL_574339, EPI_ISL_574340, EPI_ISL_574341, EPI_ISL_574342, EPI_ISL_574343, EPI_ISL_574344, EPI_ISL_574345, EPI_ISL_574346, EPI_ISL_574347, EPI_ISL_574348, EPI_ISL_574349, EPI_ISL_574350, EPI_ISL_574351, EPI_ISL_574352, EPI_ISL_574353, EPI_ISL_574354, EPI_ISL_574355, EPI_ISL_574356, EPI_ISL_574357, EPI_ISL_574358, EPI_ISL_574359, EPI_ISL_574360, EPI_ISL_574361, EPI_ISL_574362, EPI_ISL_574363, EPI_ISL_574364, EPI_ISL_574365, EPI_ISL_574366, EPI_ISL_574367, EPI_ISL_574368, EPI_ISL_574369, EPI_ISL_574370, EPI_ISL_574371, EPI_ISL_574372, EPI_ISL_574373, EPI_ISL_574374, EPI_ISL_574375, EPI_ISL_574376, EPI_ISL_574377, EPI_ISL_574378, EPI_ISL_574379, EPI_ISL_574380, EPI_ISL_574381, EPI_ISL_574382, EPI_ISL_574383, EPI_ISL_574384, EPI_ISL_574385, |                                                                                                                     |                                                                                                                        |                                                                                                                                                                                                         |





|                                                                                                                                                                                                                                                                                                                                                                                |                                                                                                                     |                                                                                                                    |                                             |                                                                                                                                                                                                                                                                                                                                                      |
|--------------------------------------------------------------------------------------------------------------------------------------------------------------------------------------------------------------------------------------------------------------------------------------------------------------------------------------------------------------------------------|---------------------------------------------------------------------------------------------------------------------|--------------------------------------------------------------------------------------------------------------------|---------------------------------------------|------------------------------------------------------------------------------------------------------------------------------------------------------------------------------------------------------------------------------------------------------------------------------------------------------------------------------------------------------|
| EPI_ISL_594119, EPI_ISL_594120, EPI_ISL_594121, EPI_ISL_594122, EPI_ISL_594123, EPI_ISL_594124, EPI_ISL_594125, EPI_ISL_594126, EPI_ISL_594127, EPI_ISL_594128, EPI_ISL_594129, EPI_ISL_594130, EPI_ISL_594131, EPI_ISL_594132, EPI_ISL_594133                                                                                                                                 | see above                                                                                                           | Yale COVID-19 Biorepository                                                                                        | Grubaugh Lab - Yale School of Public Health | Joseph Fauver, Tara Alpert, Anderson Brito, Anne Wylie, Chantal Vogels, Mary Petrone, Chaney Kalinich, Isabel Ott, Arnau Casanovas, Catherine Muenker, Adam Moore, Alice Lu, Maria Tokuyama, Patrick Wong, Peiwen Lu, Saad Omer, Richard Martinello, Allison Nelson, Shelli Farhadian, Akiko Iwasaki, Charlese Dela Cruz, Albert Ko, Nathan Grubaugh |
| EPI_ISL_610156                                                                                                                                                                                                                                                                                                                                                                 | State Key Laboratory of Genetic Resources and Evolution, Kunming Institute of Zoology, Chinese Academy of Sciences  | State Key Laboratory of Genetic Resources and Evolution, Kunming Institute of Zoology, Chinese Academy of Sciences |                                             | Jian-Bo Li, Hang Liu, Ting-Ting Yin, Min-Sheng Peng, Ya-Ping Zhang                                                                                                                                                                                                                                                                                   |
| EPI_ISL_625673, EPI_ISL_625674, EPI_ISL_625675, EPI_ISL_625676, EPI_ISL_625677, EPI_ISL_625678, EPI_ISL_625679, EPI_ISL_625680, EPI_ISL_625681, EPI_ISL_625682                                                                                                                                                                                                                 | Laboratory of Molecular Medicine, University of Magallanes                                                          | Centro Asistencial Docente y de Investigacion, Universidad de Magallanes                                           |                                             | Jorge Gonzalez, Jacqueline Aldridge, Diego Alvarez, Marcelo Navarrete                                                                                                                                                                                                                                                                                |
| EPI_ISL_626231, EPI_ISL_626232, EPI_ISL_626236, EPI_ISL_626238, EPI_ISL_626250, EPI_ISL_626253, EPI_ISL_626254, EPI_ISL_626256, EPI_ISL_626258, EPI_ISL_626259, EPI_ISL_626261, EPI_ISL_626267, EPI_ISL_626272, EPI_ISL_626274, EPI_ISL_626276, EPI_ISL_626277, EPI_ISL_626283, EPI_ISL_626291, EPI_ISL_626295, EPI_ISL_626305, EPI_ISL_626312, EPI_ISL_626326, EPI_ISL_626328 | see above                                                                                                           | Department of Clinical Microbiology                                                                                | GIGA Medical Genomics                       | Keith Durkin, Maria Artesi, Sébastien Bontems, Raphaël Boreux, Bouchra Boujemla, Cécile Meex, Pierrette Melin, Marie-Pierre Hayette, Vincent Bours                                                                                                                                                                                                   |
| EPI_ISL_632312                                                                                                                                                                                                                                                                                                                                                                 | NU-sjukvården                                                                                                       | Clinical microbiology, Sahlgrenska University Hospital                                                             |                                             | Johan Ringlander, Josefin Olausson, Hedvig Engström Jakobsson, Magnus Lindh                                                                                                                                                                                                                                                                          |
| EPI_ISL_632313                                                                                                                                                                                                                                                                                                                                                                 | NU-sjukvården                                                                                                       | Clinical Microbiology, Sahlgrenska University Hospital,                                                            |                                             | Johan Ringlander, Josefin Olausson, Hedvig Engström Jakobsson, Magnus Lindh                                                                                                                                                                                                                                                                          |
| EPI_ISL_635063, EPI_ISL_635064, EPI_ISL_635065                                                                                                                                                                                                                                                                                                                                 | Foerde Hospital, Department of Microbiology                                                                         | Norwegian Institute of Public Health, Department of Virology                                                       |                                             | Kathrine Stene-Johansen, Kamilla Heddeland Instefjord, Hilde Elshaug, Marie Paulsen Madsen, Rasmus Riis Kopperud, Hilde Vollan, Karoline Bragstad, Olav Hungnes                                                                                                                                                                                      |
| EPI_ISL_635066, EPI_ISL_635067                                                                                                                                                                                                                                                                                                                                                 | Norwegian Institute of Public Health, Department of Virology                                                        | Norwegian Institute of Public Health, Department of Virology                                                       |                                             | Kathrine Stene-Johansen, Kamilla Heddeland Instefjord, Hilde Elshaug, Marie Paulsen Madsen, Rasmus Riis Kopperud, Hilde Vollan, Karoline Bragstad, Olav Hungnes                                                                                                                                                                                      |
| EPI_ISL_635068, EPI_ISL_635069, EPI_ISL_635070, EPI_ISL_635071, EPI_ISL_635072, EPI_ISL_635073                                                                                                                                                                                                                                                                                 | University Hospital of Northern Norway, Department for Microbiology and Infectious Disease Control                  | Norwegian Institute of Public Health, Department of Virology                                                       |                                             | Kathrine Stene-Johansen, Kamilla Heddeland Instefjord, Hilde Elshaug, Marie Paulsen Madsen, Rasmus Riis Kopperud, Hilde Vollan, Karoline Bragstad, Olav Hungnes                                                                                                                                                                                      |
| EPI_ISL_635074, EPI_ISL_635075, EPI_ISL_635076, EPI_ISL_635077, EPI_ISL_635078, EPI_ISL_635079                                                                                                                                                                                                                                                                                 | Norwegian Institute of Public Health, Department of Virology                                                        | Norwegian Institute of Public Health, Department of Virology                                                       |                                             | Kathrine Stene-Johansen, Kamilla Heddeland Instefjord, Hilde Elshaug, Marie Paulsen Madsen, Rasmus Riis Kopperud, Hilde Vollan, Karoline Bragstad, Olav Hungnes                                                                                                                                                                                      |
| EPI_ISL_635080, EPI_ISL_635081, EPI_ISL_635082, EPI_ISL_635083, EPI_ISL_635084                                                                                                                                                                                                                                                                                                 | Haukeland University Hospital, Department of Medical Microbiology                                                   | Norwegian Institute of Public Health, Department of Virology                                                       |                                             | Kathrine Stene-Johansen, Kamilla Heddeland Instefjord, Hilde Elshaug, Marie Paulsen Madsen, Rasmus Riis Kopperud, Hilde Vollan, Karoline Bragstad, Olav Hungnes                                                                                                                                                                                      |
| EPI_ISL_635085                                                                                                                                                                                                                                                                                                                                                                 | Oslo University Hospital, Department of Medical Microbiology                                                        | Norwegian Institute of Public Health, Department of Virology                                                       |                                             | Kathrine Stene-Johansen, Kamilla Heddeland Instefjord, Hilde Elshaug, Marie Paulsen Madsen, Rasmus Riis Kopperud, Hilde Vollan, Karoline Bragstad, Olav Hungnes                                                                                                                                                                                      |
| EPI_ISL_635086, EPI_ISL_635087                                                                                                                                                                                                                                                                                                                                                 | Furst Medical Laboratory                                                                                            | Norwegian Institute of Public Health, Department of Virology                                                       |                                             | Kathrine Stene-Johansen, Kamilla Heddeland Instefjord, Hilde Elshaug, Marie Paulsen Madsen, Rasmus Riis Kopperud, Hilde Vollan, Karoline Bragstad, Olav Hungnes                                                                                                                                                                                      |
| EPI_ISL_635088                                                                                                                                                                                                                                                                                                                                                                 | Medical Microbiology Unit, Department for Laboratory Medicine, Drammen Hospital, Vestre Viken Health Trust,         | Norwegian Institute of Public Health, Department of Virology                                                       |                                             | Kathrine Stene-Johansen, Kamilla Heddeland Instefjord, Hilde Elshaug, Marie Paulsen Madsen, Rasmus Riis Kopperud, Hilde Vollan, Karoline Bragstad, Olav Hungnes                                                                                                                                                                                      |
| EPI_ISL_635089, EPI_ISL_635090, EPI_ISL_635091                                                                                                                                                                                                                                                                                                                                 | Haukeland University Hospital, Department of Medical Microbiology                                                   | Norwegian Institute of Public Health, Department of Virology                                                       |                                             | Kathrine Stene-Johansen, Kamilla Heddeland Instefjord, Hilde Elshaug, Marie Paulsen Madsen, Rasmus Riis Kopperud, Hilde Vollan, Karoline Bragstad, Olav Hungnes                                                                                                                                                                                      |
| EPI_ISL_635092                                                                                                                                                                                                                                                                                                                                                                 | Medical Microbiology Unit, Department for Laboratory Medicine, Drammen Hospital, Vestre Viken Health Trust,         | Norwegian Institute of Public Health, Department of Virology                                                       |                                             | Kathrine Stene-Johansen, Kamilla Heddeland Instefjord, Hilde Elshaug, Marie Paulsen Madsen, Rasmus Riis Kopperud, Hilde Vollan, Karoline Bragstad, Olav Hungnes                                                                                                                                                                                      |
| EPI_ISL_635093, EPI_ISL_635094, EPI_ISL_635095                                                                                                                                                                                                                                                                                                                                 | Oslo University Hospital, Department of Medical Microbiology                                                        | Norwegian Institute of Public Health, Department of Virology                                                       |                                             | Kathrine Stene-Johansen, Kamilla Heddeland Instefjord, Hilde Elshaug, Marie Paulsen Madsen, Rasmus Riis Kopperud, Hilde Vollan, Karoline Bragstad, Olav Hungnes                                                                                                                                                                                      |
| EPI_ISL_635096                                                                                                                                                                                                                                                                                                                                                                 | Department of Medical Microbiology, St. Olavs hospital                                                              | Norwegian Institute of Public Health, Department of Virology                                                       |                                             | Kathrine Stene-Johansen, Kamilla Heddeland Instefjord, Hilde Elshaug, Marie Paulsen Madsen, Rasmus Riis Kopperud, Hilde Vollan, Karoline Bragstad, Olav Hungnes                                                                                                                                                                                      |
| EPI_ISL_635097                                                                                                                                                                                                                                                                                                                                                                 | Hospital of Southern Norway - Kristiansand, Department of Medical Microbiology                                      | Norwegian Institute of Public Health, Department of Virology                                                       |                                             | Kathrine Stene-Johansen, Kamilla Heddeland Instefjord, Hilde Elshaug, Marie Paulsen Madsen, Rasmus Riis Kopperud, Hilde Vollan, Karoline Bragstad, Olav Hungnes                                                                                                                                                                                      |
| EPI_ISL_635098                                                                                                                                                                                                                                                                                                                                                                 | Foerde Hospital, Department of Microbiology                                                                         | Norwegian Institute of Public Health, Department of Virology                                                       |                                             | Kathrine Stene-Johansen, Kamilla Heddeland Instefjord, Hilde Elshaug, Marie Paulsen Madsen, Rasmus Riis Kopperud, Hilde Vollan, Karoline Bragstad, Olav Hungnes                                                                                                                                                                                      |
| EPI_ISL_635099                                                                                                                                                                                                                                                                                                                                                                 | Medical Microbiology Unit, Department for Laboratory Medicine, Drammen Hospital, Vestre Viken Health Trust,         | Norwegian Institute of Public Health, Department of Virology                                                       |                                             | Kathrine Stene-Johansen, Kamilla Heddeland Instefjord, Hilde Elshaug, Marie Paulsen Madsen, Rasmus Riis Kopperud, Hilde Vollan, Karoline Bragstad, Olav Hungnes                                                                                                                                                                                      |
| EPI_ISL_635100                                                                                                                                                                                                                                                                                                                                                                 | Department of Medical Microbiology, St. Olavs hospital                                                              | Norwegian Institute of Public Health, Department of Virology                                                       |                                             | Kathrine Stene-Johansen, Kamilla Heddeland Instefjord, Hilde Elshaug, Marie Paulsen Madsen, Rasmus Riis Kopperud, Hilde Vollan, Karoline Bragstad, Olav Hungnes                                                                                                                                                                                      |
| EPI_ISL_635101                                                                                                                                                                                                                                                                                                                                                                 | Medical Microbiology Unit, Department for Laboratory Medicine, Drammen Hospital, Vestre Viken Health Trust,         | Norwegian Institute of Public Health, Department of Virology                                                       |                                             | Kathrine Stene-Johansen, Kamilla Heddeland Instefjord, Hilde Elshaug, Marie Paulsen Madsen, Rasmus Riis Kopperud, Hilde Vollan, Karoline Bragstad, Olav Hungnes                                                                                                                                                                                      |
| EPI_ISL_635102                                                                                                                                                                                                                                                                                                                                                                 | Akershus University Hospital, Department for Microbiology and Infectious Disease Control                            | Norwegian Institute of Public Health, Department of Virology                                                       |                                             | Kathrine Stene-Johansen, Kamilla Heddeland Instefjord, Hilde Elshaug, Marie Paulsen Madsen, Rasmus Riis Kopperud, Hilde Vollan, Karoline Bragstad, Olav Hungnes                                                                                                                                                                                      |
| EPI_ISL_635103                                                                                                                                                                                                                                                                                                                                                                 | Vestfold Hospital, Toensberg Department of Microbiology                                                             | Norwegian Institute of Public Health, Department of Virology                                                       |                                             | Kathrine Stene-Johansen, Kamilla Heddeland Instefjord, Hilde Elshaug, Marie Paulsen Madsen, Rasmus Riis Kopperud, Hilde Vollan, Karoline Bragstad, Olav Hungnes                                                                                                                                                                                      |
| EPI_ISL_635104                                                                                                                                                                                                                                                                                                                                                                 | Unilabs Laboratory Medicine                                                                                         | Norwegian Institute of Public Health, Department of Virology                                                       |                                             | Kathrine Stene-Johansen, Kamilla Heddeland Instefjord, Hilde Elshaug, Marie Paulsen Madsen, Rasmus Riis Kopperud, Hilde Vollan, Karoline Bragstad, Olav Hungnes                                                                                                                                                                                      |
| EPI_ISL_635105, EPI_ISL_635106                                                                                                                                                                                                                                                                                                                                                 | Vestfold Hospital, Toensberg Department of Microbiology                                                             | Norwegian Institute of Public Health, Department of Virology                                                       |                                             | Kathrine Stene-Johansen, Kamilla Heddeland Instefjord, Hilde Elshaug, Marie Paulsen Madsen, Rasmus Riis Kopperud, Hilde Vollan, Karoline Bragstad, Olav Hungnes                                                                                                                                                                                      |
| EPI_ISL_635107, EPI_ISL_635108, EPI_ISL_635109                                                                                                                                                                                                                                                                                                                                 | Ostfold Hospital Trust - Kalnes, Centre for Laboratory Medicine, Section for gene technology and infection serology | Norwegian Institute of Public Health, Department of Virology                                                       |                                             | Kathrine Stene-Johansen, Kamilla Heddeland Instefjord, Hilde Elshaug, Marie Paulsen Madsen, Rasmus Riis Kopperud, Hilde Vollan, Karoline Bragstad, Olav Hungnes                                                                                                                                                                                      |
| EPI_ISL_635110, EPI_ISL_635111                                                                                                                                                                                                                                                                                                                                                 | Department of Medical Microbiology, St. Olavs hospital                                                              | Norwegian Institute of Public Health, Department of Virology                                                       |                                             | Kathrine Stene-Johansen, Kamilla Heddeland Instefjord, Hilde Elshaug, Marie Paulsen Madsen, Rasmus Riis Kopperud, Hilde Vollan, Karoline Bragstad, Olav Hungnes                                                                                                                                                                                      |
| EPI_ISL_635112                                                                                                                                                                                                                                                                                                                                                                 | Vestfold Hospital, Toensberg Department of Microbiology                                                             | Norwegian Institute of Public Health, Department of Virology                                                       |                                             | Kathrine Stene-Johansen, Kamilla Heddeland Instefjord, Hilde Elshaug, Marie Paulsen Madsen, Rasmus Riis Kopperud, Hilde Vollan, Karoline Bragstad, Olav Hungnes                                                                                                                                                                                      |
| EPI_ISL_635113, EPI_ISL_635114, EPI_ISL_635115                                                                                                                                                                                                                                                                                                                                 | University Hospital of Northern Norway, Department for Microbiology and Infectious Disease Control                  | Norwegian Institute of Public Health, Department of Virology                                                       |                                             | Kathrine Stene-Johansen, Kamilla Heddeland Instefjord, Hilde Elshaug, Marie Paulsen Madsen, Rasmus Riis Kopperud, Hilde Vollan, Karoline Bragstad, Olav Hungnes                                                                                                                                                                                      |
| EPI_ISL_635116                                                                                                                                                                                                                                                                                                                                                                 | Ostfold Hospital Trust - Kalnes, Centre for Laboratory Medicine, Section for gene technology and infection serology | Norwegian Institute of Public Health, Department of Virology                                                       |                                             | Kathrine Stene-Johansen, Kamilla Heddeland Instefjord, Hilde Elshaug, Marie Paulsen Madsen, Rasmus Riis Kopperud, Hilde Vollan, Karoline Bragstad, Olav Hungnes                                                                                                                                                                                      |



|                                                                                                                                                                                                                                                                                                                                                                                                                                                                                                                                                                                                                                                                                                                                                                                                                                                                                                |                                                                                                                     |                                                                                       |                                                                                                                                                                                                                                                                                                                   |
|------------------------------------------------------------------------------------------------------------------------------------------------------------------------------------------------------------------------------------------------------------------------------------------------------------------------------------------------------------------------------------------------------------------------------------------------------------------------------------------------------------------------------------------------------------------------------------------------------------------------------------------------------------------------------------------------------------------------------------------------------------------------------------------------------------------------------------------------------------------------------------------------|---------------------------------------------------------------------------------------------------------------------|---------------------------------------------------------------------------------------|-------------------------------------------------------------------------------------------------------------------------------------------------------------------------------------------------------------------------------------------------------------------------------------------------------------------|
| EPI_ISL_635165                                                                                                                                                                                                                                                                                                                                                                                                                                                                                                                                                                                                                                                                                                                                                                                                                                                                                 | Department of Medical Microbiology, St. Olavs hospital                                                              | Norwegian Institute of Public Health, Department of Virology                          | Kathrine Stene-Johansen, Kamilla Heddeland Instefjord, Hilde Elshaug, Marie Paulsen Madsen, Rasmus Riis Kopperud, Hilde Vollan, Karoline Bragstad, Olav Hungnes                                                                                                                                                   |
| EPI_ISL_635166                                                                                                                                                                                                                                                                                                                                                                                                                                                                                                                                                                                                                                                                                                                                                                                                                                                                                 | Dept. of Medical Microbiology, Stavanger University Hospital, Helse Stavanger HF                                    | Norwegian Institute of Public Health, Department of Virology                          | Kathrine Stene-Johansen, Kamilla Heddeland Instefjord, Hilde Elshaug, Marie Paulsen Madsen, Rasmus Riis Kopperud, Hilde Vollan, Karoline Bragstad, Olav Hungnes                                                                                                                                                   |
| EPI_ISL_635167                                                                                                                                                                                                                                                                                                                                                                                                                                                                                                                                                                                                                                                                                                                                                                                                                                                                                 | Foerde Hospital, Department of Microbiology                                                                         | Norwegian Institute of Public Health, Department of Virology                          | Kathrine Stene-Johansen, Kamilla Heddeland Instefjord, Hilde Elshaug, Marie Paulsen Madsen, Rasmus Riis Kopperud, Hilde Vollan, Karoline Bragstad, Olav Hungnes                                                                                                                                                   |
| EPI_ISL_635168                                                                                                                                                                                                                                                                                                                                                                                                                                                                                                                                                                                                                                                                                                                                                                                                                                                                                 | Vestfold Hospital, Toensberg Department of Microbiology                                                             | Norwegian Institute of Public Health, Department of Virology                          | Kathrine Stene-Johansen, Kamilla Heddeland Instefjord, Hilde Elshaug, Marie Paulsen Madsen, Rasmus Riis Kopperud, Hilde Vollan, Karoline Bragstad, Olav Hungnes                                                                                                                                                   |
| EPI_ISL_635169                                                                                                                                                                                                                                                                                                                                                                                                                                                                                                                                                                                                                                                                                                                                                                                                                                                                                 | Medical Microbiology Unit, Department for Laboratory Medicine, Drammen Hospital, Vestre Viken Health Trust,         | Norwegian Institute of Public Health, Department of Virology                          | Kathrine Stene-Johansen, Kamilla Heddeland Instefjord, Hilde Elshaug, Marie Paulsen Madsen, Rasmus Riis Kopperud, Hilde Vollan, Karoline Bragstad, Olav Hungnes                                                                                                                                                   |
| EPI_ISL_635170                                                                                                                                                                                                                                                                                                                                                                                                                                                                                                                                                                                                                                                                                                                                                                                                                                                                                 | Foerde Hospital, Department of Microbiology                                                                         | Norwegian Institute of Public Health, Department of Virology                          | Kathrine Stene-Johansen, Kamilla Heddeland Instefjord, Hilde Elshaug, Marie Paulsen Madsen, Rasmus Riis Kopperud, Hilde Vollan, Karoline Bragstad, Olav Hungnes                                                                                                                                                   |
| EPI_ISL_635171                                                                                                                                                                                                                                                                                                                                                                                                                                                                                                                                                                                                                                                                                                                                                                                                                                                                                 | Vestfold Hospital, Toensberg Department of Microbiology                                                             | Norwegian Institute of Public Health, Department of Virology                          | Kathrine Stene-Johansen, Kamilla Heddeland Instefjord, Hilde Elshaug, Marie Paulsen Madsen, Rasmus Riis Kopperud, Hilde Vollan, Karoline Bragstad, Olav Hungnes                                                                                                                                                   |
| EPI_ISL_635172                                                                                                                                                                                                                                                                                                                                                                                                                                                                                                                                                                                                                                                                                                                                                                                                                                                                                 | Oslo University Hospital, Department of Medical Microbiology                                                        | Norwegian Institute of Public Health, Department of Virology                          | Kathrine Stene-Johansen, Kamilla Heddeland Instefjord, Hilde Elshaug, Marie Paulsen Madsen, Rasmus Riis Kopperud, Hilde Vollan, Karoline Bragstad, Olav Hungnes                                                                                                                                                   |
| EPI_ISL_635173                                                                                                                                                                                                                                                                                                                                                                                                                                                                                                                                                                                                                                                                                                                                                                                                                                                                                 | Foerde Hospital, Department of Microbiology                                                                         | Norwegian Institute of Public Health, Department of Virology                          | Kathrine Stene-Johansen, Kamilla Heddeland Instefjord, Hilde Elshaug, Marie Paulsen Madsen, Rasmus Riis Kopperud, Hilde Vollan, Karoline Bragstad, Olav Hungnes                                                                                                                                                   |
| EPI_ISL_635174, EPI_ISL_635175                                                                                                                                                                                                                                                                                                                                                                                                                                                                                                                                                                                                                                                                                                                                                                                                                                                                 | Ostfold Hospital Trust - Kalnes, Centre for Laboratory Medicine, Section for gene technology and infection serology | Norwegian Institute of Public Health, Department of Virology                          | Kathrine Stene-Johansen, Kamilla Heddeland Instefjord, Hilde Elshaug, Marie Paulsen Madsen, Rasmus Riis Kopperud, Hilde Vollan, Karoline Bragstad, Olav Hungnes                                                                                                                                                   |
| EPI_ISL_635176, EPI_ISL_635177                                                                                                                                                                                                                                                                                                                                                                                                                                                                                                                                                                                                                                                                                                                                                                                                                                                                 | Foerde Hospital, Department of Microbiology                                                                         | Norwegian Institute of Public Health, Department of Virology                          | Kathrine Stene-Johansen, Kamilla Heddeland Instefjord, Hilde Elshaug, Marie Paulsen Madsen, Rasmus Riis Kopperud, Hilde Vollan, Karoline Bragstad, Olav Hungnes                                                                                                                                                   |
| EPI_ISL_635178                                                                                                                                                                                                                                                                                                                                                                                                                                                                                                                                                                                                                                                                                                                                                                                                                                                                                 | Norwegian Institute of Public Health, Department of Virology                                                        | Norwegian Institute of Public Health, Department of Virology                          | Kathrine Stene-Johansen, Kamilla Heddeland Instefjord, Hilde Elshaug, Marie Paulsen Madsen, Rasmus Riis Kopperud, Hilde Vollan, Karoline Bragstad, Olav Hungnes                                                                                                                                                   |
| EPI_ISL_635179, EPI_ISL_635180, EPI_ISL_635181                                                                                                                                                                                                                                                                                                                                                                                                                                                                                                                                                                                                                                                                                                                                                                                                                                                 | University Hospital of Northern Norway, Department for Microbiology and Infectious Disease Control                  | Norwegian Institute of Public Health, Department of Virology                          | Kathrine Stene-Johansen, Kamilla Heddeland Instefjord, Hilde Elshaug, Marie Paulsen Madsen, Rasmus Riis Kopperud, Hilde Vollan, Karoline Bragstad, Olav Hungnes                                                                                                                                                   |
| EPI_ISL_635182                                                                                                                                                                                                                                                                                                                                                                                                                                                                                                                                                                                                                                                                                                                                                                                                                                                                                 | Nordland Hospital - Bodo, Laboratory Department, Molecular Biology Unit                                             | Norwegian Institute of Public Health, Department of Virology                          | Kathrine Stene-Johansen, Kamilla Heddeland Instefjord, Hilde Elshaug, Marie Paulsen Madsen, Rasmus Riis Kopperud, Hilde Vollan, Karoline Bragstad, Olav Hungnes                                                                                                                                                   |
| EPI_ISL_635183                                                                                                                                                                                                                                                                                                                                                                                                                                                                                                                                                                                                                                                                                                                                                                                                                                                                                 | Innlandet Hospital Trust, Division Lillehammer, Department for Medical Microbiology                                 | Norwegian Institute of Public Health, Department of Virology                          | Kathrine Stene-Johansen, Kamilla Heddeland Instefjord, Hilde Elshaug, Marie Paulsen Madsen, Rasmus Riis Kopperud, Hilde Vollan, Karoline Bragstad, Olav Hungnes                                                                                                                                                   |
| EPI_ISL_635184                                                                                                                                                                                                                                                                                                                                                                                                                                                                                                                                                                                                                                                                                                                                                                                                                                                                                 | Haukeland University Hospital, Department of Medical Microbiology                                                   | Norwegian Institute of Public Health, Department of Virology                          | Kathrine Stene-Johansen, Kamilla Heddeland Instefjord, Hilde Elshaug, Marie Paulsen Madsen, Rasmus Riis Kopperud, Hilde Vollan, Karoline Bragstad, Olav Hungnes                                                                                                                                                   |
| EPI_ISL_635185                                                                                                                                                                                                                                                                                                                                                                                                                                                                                                                                                                                                                                                                                                                                                                                                                                                                                 | Ostfold Hospital Trust - Kalnes, Centre for Laboratory Medicine, Section for gene technology and infection serology | Norwegian Institute of Public Health, Department of Virology                          | Kathrine Stene-Johansen, Kamilla Heddeland Instefjord, Hilde Elshaug, Marie Paulsen Madsen, Rasmus Riis Kopperud, Hilde Vollan, Karoline Bragstad, Olav Hungnes                                                                                                                                                   |
| EPI_ISL_635186                                                                                                                                                                                                                                                                                                                                                                                                                                                                                                                                                                                                                                                                                                                                                                                                                                                                                 | University Hospital of Northern Norway, Department for Microbiology and Infectious Disease Control                  | Norwegian Institute of Public Health, Department of Virology                          | Kathrine Stene-Johansen, Kamilla Heddeland Instefjord, Hilde Elshaug, Marie Paulsen Madsen, Rasmus Riis Kopperud, Hilde Vollan, Karoline Bragstad, Olav Hungnes                                                                                                                                                   |
| EPI_ISL_635187, EPI_ISL_635188                                                                                                                                                                                                                                                                                                                                                                                                                                                                                                                                                                                                                                                                                                                                                                                                                                                                 | Norwegian Institute of Public Health, Department of Virology                                                        | Norwegian Institute of Public Health, Department of Virology                          | Kathrine Stene-Johansen, Kamilla Heddeland Instefjord, Hilde Elshaug, Marie Paulsen Madsen, Rasmus Riis Kopperud, Hilde Vollan, Karoline Bragstad, Olav Hungnes                                                                                                                                                   |
| EPI_ISL_635189                                                                                                                                                                                                                                                                                                                                                                                                                                                                                                                                                                                                                                                                                                                                                                                                                                                                                 | Hospital of Southern Norway - Kristiansand, Department of Medical Microbiology                                      | Norwegian Institute of Public Health, Department of Virology                          | Kathrine Stene-Johansen, Kamilla Heddeland Instefjord, Hilde Elshaug, Marie Paulsen Madsen, Rasmus Riis Kopperud, Hilde Vollan, Karoline Bragstad, Olav Hungnes                                                                                                                                                   |
| EPI_ISL_635190                                                                                                                                                                                                                                                                                                                                                                                                                                                                                                                                                                                                                                                                                                                                                                                                                                                                                 | University Hospital of Northern Norway, Department for Microbiology and Infectious Disease Control                  | Norwegian Institute of Public Health, Department of Virology                          | Kathrine Stene-Johansen, Kamilla Heddeland Instefjord, Hilde Elshaug, Marie Paulsen Madsen, Rasmus Riis Kopperud, Hilde Vollan, Karoline Bragstad, Olav Hungnes                                                                                                                                                   |
| EPI_ISL_635191                                                                                                                                                                                                                                                                                                                                                                                                                                                                                                                                                                                                                                                                                                                                                                                                                                                                                 | Unilabs Laboratory Medicine                                                                                         | Norwegian Institute of Public Health, Department of Virology                          | Kathrine Stene-Johansen, Kamilla Heddeland Instefjord, Hilde Elshaug, Marie Paulsen Madsen, Rasmus Riis Kopperud, Hilde Vollan, Karoline Bragstad, Olav Hungnes                                                                                                                                                   |
| EPI_ISL_635192, EPI_ISL_635193                                                                                                                                                                                                                                                                                                                                                                                                                                                                                                                                                                                                                                                                                                                                                                                                                                                                 | Medical Microbiology Unit, Department for Laboratory Medicine, Drammen Hospital, Vestre Viken Health Trust,         | Norwegian Institute of Public Health, Department of Virology                          | Kathrine Stene-Johansen, Kamilla Heddeland Instefjord, Hilde Elshaug, Marie Paulsen Madsen, Rasmus Riis Kopperud, Hilde Vollan, Karoline Bragstad, Olav Hungnes                                                                                                                                                   |
| EPI_ISL_635194                                                                                                                                                                                                                                                                                                                                                                                                                                                                                                                                                                                                                                                                                                                                                                                                                                                                                 | Akershus University Hospital, Department for Microbiology and Infectious Disease Control                            | Norwegian Institute of Public Health, Department of Virology                          | Kathrine Stene-Johansen, Kamilla Heddeland Instefjord, Hilde Elshaug, Marie Paulsen Madsen, Rasmus Riis Kopperud, Hilde Vollan, Karoline Bragstad, Olav Hungnes                                                                                                                                                   |
| EPI_ISL_635195                                                                                                                                                                                                                                                                                                                                                                                                                                                                                                                                                                                                                                                                                                                                                                                                                                                                                 | Vestfold Hospital, Toensberg Department of Microbiology                                                             | Norwegian Institute of Public Health, Department of Virology                          | Kathrine Stene-Johansen, Kamilla Heddeland Instefjord, Hilde Elshaug, Marie Paulsen Madsen, Rasmus Riis Kopperud, Hilde Vollan, Karoline Bragstad, Olav Hungnes                                                                                                                                                   |
| EPI_ISL_635196                                                                                                                                                                                                                                                                                                                                                                                                                                                                                                                                                                                                                                                                                                                                                                                                                                                                                 | Dept. of Medical Microbiology, Stavanger University Hospital, Helse Stavanger HF                                    | Norwegian Institute of Public Health, Department of Virology                          | Kathrine Stene-Johansen, Kamilla Heddeland Instefjord, Hilde Elshaug, Marie Paulsen Madsen, Rasmus Riis Kopperud, Hilde Vollan, Karoline Bragstad, Olav Hungnes                                                                                                                                                   |
| EPI_ISL_635197                                                                                                                                                                                                                                                                                                                                                                                                                                                                                                                                                                                                                                                                                                                                                                                                                                                                                 | Oslo University Hospital, Department of Medical Microbiology                                                        | Norwegian Institute of Public Health, Department of Virology                          | Kathrine Stene-Johansen, Kamilla Heddeland Instefjord, Hilde Elshaug, Marie Paulsen Madsen, Rasmus Riis Kopperud, Hilde Vollan, Karoline Bragstad, Olav Hungnes                                                                                                                                                   |
| EPI_ISL_635198                                                                                                                                                                                                                                                                                                                                                                                                                                                                                                                                                                                                                                                                                                                                                                                                                                                                                 | University Hospital of Northern Norway, Department for Microbiology and Infectious Disease Control                  | Norwegian Institute of Public Health, Department of Virology                          | Kathrine Stene-Johansen, Kamilla Heddeland Instefjord, Hilde Elshaug, Marie Paulsen Madsen, Rasmus Riis Kopperud, Hilde Vollan, Karoline Bragstad, Olav Hungnes                                                                                                                                                   |
| EPI_ISL_636605, EPI_ISL_636606, EPI_ISL_636614, EPI_ISL_636619, EPI_ISL_636620, EPI_ISL_636632, EPI_ISL_636643, EPI_ISL_636647, EPI_ISL_636651, EPI_ISL_636652, EPI_ISL_636653, EPI_ISL_636660, EPI_ISL_636662, EPI_ISL_636666, EPI_ISL_636668, EPI_ISL_636669, EPI_ISL_636680                                                                                                                                                                                                                                                                                                                                                                                                                                                                                                                                                                                                                 | Department of Clinical Microbiology                                                                                 | GIGA Medical Genomics                                                                 | Keith Durkin, Maria Artesi, Sébastien Bontems, Raphaël Boreux, Bouchra Boujemla, Cécile Meex, Pierrette Melin, Marie-Pierre Hayette, Vincent Bours                                                                                                                                                                |
| see above                                                                                                                                                                                                                                                                                                                                                                                                                                                                                                                                                                                                                                                                                                                                                                                                                                                                                      | Department of Clinical Microbiology                                                                                 | GIGA Medical Genomics                                                                 | Keith Durkin, Maria Artesi, Sébastien Bontems, Raphaël Boreux, Bouchra Boujemla, Cécile Meex, Pierrette Melin, Marie-Pierre Hayette, Vincent Bours                                                                                                                                                                |
| EPI_ISL_636982, EPI_ISL_636983, EPI_ISL_636984, EPI_ISL_636985, EPI_ISL_636986, EPI_ISL_636987, EPI_ISL_636988                                                                                                                                                                                                                                                                                                                                                                                                                                                                                                                                                                                                                                                                                                                                                                                 | Virology Lab, National Institute for Biomedical Research (INRB)                                                     | Project group Epidemiology of Highly Pathogenic Microorganisms, Robert Koch-Institute | Jean-Jacques Muyembe Tshumbe, Steve Ahuka-Mundeke, Eddy Kinganda-Lusamaki, Gabriel Mbunso, Sheila Makiala, Essia Belarbi, Jasmin Schlotterbeck, Grit Schubert, Fabian Leendertz                                                                                                                                   |
| EPI_ISL_640219, EPI_ISL_640220, EPI_ISL_640221, EPI_ISL_640222, EPI_ISL_640223, EPI_ISL_640224, EPI_ISL_640225, EPI_ISL_640226, EPI_ISL_640227, EPI_ISL_640228, EPI_ISL_640229, EPI_ISL_640230, EPI_ISL_640231, EPI_ISL_640232, EPI_ISL_640233, EPI_ISL_640234, EPI_ISL_640235, EPI_ISL_640236, EPI_ISL_640237, EPI_ISL_640238, EPI_ISL_640239, EPI_ISL_640240, EPI_ISL_640241, EPI_ISL_640242, EPI_ISL_640243, EPI_ISL_640244, EPI_ISL_640245, EPI_ISL_640246, EPI_ISL_640247, EPI_ISL_640248, EPI_ISL_640249, EPI_ISL_640250, EPI_ISL_640251, EPI_ISL_640252, EPI_ISL_640253, EPI_ISL_640254, EPI_ISL_640255, EPI_ISL_640256, EPI_ISL_640257, EPI_ISL_640258, EPI_ISL_640259, EPI_ISL_640260, EPI_ISL_640261, EPI_ISL_640262, EPI_ISL_640263, EPI_ISL_640264, EPI_ISL_640265, EPI_ISL_640266, EPI_ISL_640267, EPI_ISL_640268, EPI_ISL_640269, EPI_ISL_640270, EPI_ISL_640271, EPI_ISL_640272 | MVZ Laborärzte Singen                                                                                               | MVZ Laborärzte Singen                                                                 | Jonas Schmidt, Frithjof Blessing, Sandro Berghaus, Folker Wenzel                                                                                                                                                                                                                                                  |
| see above                                                                                                                                                                                                                                                                                                                                                                                                                                                                                                                                                                                                                                                                                                                                                                                                                                                                                      | MVZ Laborärzte Singen                                                                                               | MVZ Laborärzte Singen                                                                 | Jonas Schmidt, Frithjof Blessing, Sandro Berghaus, Folker Wenzel                                                                                                                                                                                                                                                  |
| EPI_ISL_641559, EPI_ISL_641563, EPI_ISL_641565, EPI_ISL_641570, EPI_ISL_641573, EPI_ISL_641574, EPI_ISL_641587, EPI_ISL_641590, EPI_ISL_641598, EPI_ISL_641600, EPI_ISL_641601, EPI_ISL_641603, EPI_ISL_644623, EPI_ISL_644624                                                                                                                                                                                                                                                                                                                                                                                                                                                                                                                                                                                                                                                                 | Department of Clinical Microbiology                                                                                 | GIGA Medical Genomics                                                                 | Keith Durkin, Maria Artesi, Sébastien Bontems, Raphaël Boreux, Bouchra Boujemla, Cécile Meex, Pierrette Melin, Marie-Pierre Hayette, Vincent Bours                                                                                                                                                                |
| see above                                                                                                                                                                                                                                                                                                                                                                                                                                                                                                                                                                                                                                                                                                                                                                                                                                                                                      | Department of Clinical Microbiology                                                                                 | GIGA Medical Genomics                                                                 | Keith Durkin, Maria Artesi, Sébastien Bontems, Raphaël Boreux, Bouchra Boujemla, Cécile Meex, Pierrette Melin, Marie-Pierre Hayette, Vincent Bours                                                                                                                                                                |
| EPI_ISL_648209, EPI_ISL_648210, EPI_ISL_648211, EPI_ISL_648212,                                                                                                                                                                                                                                                                                                                                                                                                                                                                                                                                                                                                                                                                                                                                                                                                                                | INBIRS-UBA                                                                                                          | Laboratorio Mixto de Biotecnología Acuática (LMBA)                                    | Joaquín Ezpeleta, Ignacia García Labari, Victoria Posner, Vanina Villanova, Pablo Casal, Sofia Lavista Llanos, Federico Remes Lenicov, Ana Paletta, Flavio Spetale, Agustina Cerrí, Silvana Spinelli, Elisa Bolatti, Diego Chouhy, María Re, Gastón Viarengo, Ana Cavatorta, Julian Acosta, Javier Murillo, Laura |

|                                                                                                                                                                                                                                                                                                                                                                                                                                                                                                                                                                                                                                                                                                                                                                                                                                                                                                                                                                                                                                                                                                                                                                                                                                                                                                                                                                                                                                                                                                                                                                                                                                                                                                                                                                                                                                                                                                                                                                                                                                                                                                                                                                                                                                                                                                                                                                                                                                                                                                                                                                                                                                                                                                                                                                                                                                                                                                                                                                                                                                                                                                                                                                                                                                                                                                                                                                                                                                                                                                                                                                                                                                                                                                                                                                                                                                                                                                                                                                                                                                                                                                                                                                                                                                                                                                                                                                                                                                                                                                                                                                                                                                                                                                                                                                                                                                                                                                                                                                                                                                                                                                                                                                                                                                                                                                                                                                                                                                                                                                                                                                                                                                                                                                                                                                                                                                                                                                                                                                                                                                                                                                                                                                                                                                                                                                                                                                                                                                                                                                                                                                                                                                                                                                                                |                                                                                                                                                |                                                                                                                                                   |                                                                                                                                                                                                                                                                                                                                                                                                                    |                                                                                                                                                                                                                                                                                                                                                                                                                    |
|--------------------------------------------------------------------------------------------------------------------------------------------------------------------------------------------------------------------------------------------------------------------------------------------------------------------------------------------------------------------------------------------------------------------------------------------------------------------------------------------------------------------------------------------------------------------------------------------------------------------------------------------------------------------------------------------------------------------------------------------------------------------------------------------------------------------------------------------------------------------------------------------------------------------------------------------------------------------------------------------------------------------------------------------------------------------------------------------------------------------------------------------------------------------------------------------------------------------------------------------------------------------------------------------------------------------------------------------------------------------------------------------------------------------------------------------------------------------------------------------------------------------------------------------------------------------------------------------------------------------------------------------------------------------------------------------------------------------------------------------------------------------------------------------------------------------------------------------------------------------------------------------------------------------------------------------------------------------------------------------------------------------------------------------------------------------------------------------------------------------------------------------------------------------------------------------------------------------------------------------------------------------------------------------------------------------------------------------------------------------------------------------------------------------------------------------------------------------------------------------------------------------------------------------------------------------------------------------------------------------------------------------------------------------------------------------------------------------------------------------------------------------------------------------------------------------------------------------------------------------------------------------------------------------------------------------------------------------------------------------------------------------------------------------------------------------------------------------------------------------------------------------------------------------------------------------------------------------------------------------------------------------------------------------------------------------------------------------------------------------------------------------------------------------------------------------------------------------------------------------------------------------------------------------------------------------------------------------------------------------------------------------------------------------------------------------------------------------------------------------------------------------------------------------------------------------------------------------------------------------------------------------------------------------------------------------------------------------------------------------------------------------------------------------------------------------------------------------------------------------------------------------------------------------------------------------------------------------------------------------------------------------------------------------------------------------------------------------------------------------------------------------------------------------------------------------------------------------------------------------------------------------------------------------------------------------------------------------------------------------------------------------------------------------------------------------------------------------------------------------------------------------------------------------------------------------------------------------------------------------------------------------------------------------------------------------------------------------------------------------------------------------------------------------------------------------------------------------------------------------------------------------------------------------------------------------------------------------------------------------------------------------------------------------------------------------------------------------------------------------------------------------------------------------------------------------------------------------------------------------------------------------------------------------------------------------------------------------------------------------------------------------------------------------------------------------------------------------------------------------------------------------------------------------------------------------------------------------------------------------------------------------------------------------------------------------------------------------------------------------------------------------------------------------------------------------------------------------------------------------------------------------------------------------------------------------------------------------------------------------------------------------------------------------------------------------------------------------------------------------------------------------------------------------------------------------------------------------------------------------------------------------------------------------------------------------------------------------------------------------------------------------------------------------------------------------------------------------------------|------------------------------------------------------------------------------------------------------------------------------------------------|---------------------------------------------------------------------------------------------------------------------------------------------------|--------------------------------------------------------------------------------------------------------------------------------------------------------------------------------------------------------------------------------------------------------------------------------------------------------------------------------------------------------------------------------------------------------------------|--------------------------------------------------------------------------------------------------------------------------------------------------------------------------------------------------------------------------------------------------------------------------------------------------------------------------------------------------------------------------------------------------------------------|
| EPI_ISL_648213, EPI_ISL_648214, EPI_ISL_648215, EPI_ISL_648216                                                                                                                                                                                                                                                                                                                                                                                                                                                                                                                                                                                                                                                                                                                                                                                                                                                                                                                                                                                                                                                                                                                                                                                                                                                                                                                                                                                                                                                                                                                                                                                                                                                                                                                                                                                                                                                                                                                                                                                                                                                                                                                                                                                                                                                                                                                                                                                                                                                                                                                                                                                                                                                                                                                                                                                                                                                                                                                                                                                                                                                                                                                                                                                                                                                                                                                                                                                                                                                                                                                                                                                                                                                                                                                                                                                                                                                                                                                                                                                                                                                                                                                                                                                                                                                                                                                                                                                                                                                                                                                                                                                                                                                                                                                                                                                                                                                                                                                                                                                                                                                                                                                                                                                                                                                                                                                                                                                                                                                                                                                                                                                                                                                                                                                                                                                                                                                                                                                                                                                                                                                                                                                                                                                                                                                                                                                                                                                                                                                                                                                                                                                                                                                                 |                                                                                                                                                |                                                                                                                                                   | Angelone, Leandro Ciappina, Pilar Bulacio, Adriana Giri, Silvia Arranz, Elizabeth Tapia                                                                                                                                                                                                                                                                                                                            |                                                                                                                                                                                                                                                                                                                                                                                                                    |
| EPI_ISL_648217                                                                                                                                                                                                                                                                                                                                                                                                                                                                                                                                                                                                                                                                                                                                                                                                                                                                                                                                                                                                                                                                                                                                                                                                                                                                                                                                                                                                                                                                                                                                                                                                                                                                                                                                                                                                                                                                                                                                                                                                                                                                                                                                                                                                                                                                                                                                                                                                                                                                                                                                                                                                                                                                                                                                                                                                                                                                                                                                                                                                                                                                                                                                                                                                                                                                                                                                                                                                                                                                                                                                                                                                                                                                                                                                                                                                                                                                                                                                                                                                                                                                                                                                                                                                                                                                                                                                                                                                                                                                                                                                                                                                                                                                                                                                                                                                                                                                                                                                                                                                                                                                                                                                                                                                                                                                                                                                                                                                                                                                                                                                                                                                                                                                                                                                                                                                                                                                                                                                                                                                                                                                                                                                                                                                                                                                                                                                                                                                                                                                                                                                                                                                                                                                                                                 | SILAB                                                                                                                                          | Laboratorio Mixto de Biotecnología Acuática (LMBA)                                                                                                | Joaquín Ezpeleta, Ignacio García Labari, Victoria Posner, Vanina Villanova, Pablo Casal, Sofía Lavista Llanos, Federico Remes Lenicov, Ana Paletta, Flavio Spetale, Agustina Cerri, Silvana Spinelli, Elisa Bolatti, Diego Chouhy, María Re, Gastón Viarengo, Ana Cavatorta, Julian Acosta, Javier Murillo, Laura Angelone, Leandro Ciappina, Pilar Bulacio, Adriana Giri, Silvia Arranz, Elizabeth Tapia          |                                                                                                                                                                                                                                                                                                                                                                                                                    |
| EPI_ISL_648218                                                                                                                                                                                                                                                                                                                                                                                                                                                                                                                                                                                                                                                                                                                                                                                                                                                                                                                                                                                                                                                                                                                                                                                                                                                                                                                                                                                                                                                                                                                                                                                                                                                                                                                                                                                                                                                                                                                                                                                                                                                                                                                                                                                                                                                                                                                                                                                                                                                                                                                                                                                                                                                                                                                                                                                                                                                                                                                                                                                                                                                                                                                                                                                                                                                                                                                                                                                                                                                                                                                                                                                                                                                                                                                                                                                                                                                                                                                                                                                                                                                                                                                                                                                                                                                                                                                                                                                                                                                                                                                                                                                                                                                                                                                                                                                                                                                                                                                                                                                                                                                                                                                                                                                                                                                                                                                                                                                                                                                                                                                                                                                                                                                                                                                                                                                                                                                                                                                                                                                                                                                                                                                                                                                                                                                                                                                                                                                                                                                                                                                                                                                                                                                                                                                 | INBIRS-UBA                                                                                                                                     | Laboratorio Mixto de Biotecnología Acuática (LMBA)                                                                                                | Joaquín Ezpeleta, Ignacio García Labari, Victoria Posner, Vanina Villanova, Pablo Casal, Sofía Lavista Llanos, Federico Remes Lenicov, Ana Paletta, Flavio Spetale, Agustina Cerri, Silvana Spinelli, Elisa Bolatti, Diego Chouhy, María Re, Gastón Viarengo, Ana Cavatorta, Julian Acosta, Javier Murillo, Laura Angelone, Leandro Ciappina, Pilar Bulacio, Adriana Giri, Silvia Arranz, Elizabeth Tapia          |                                                                                                                                                                                                                                                                                                                                                                                                                    |
| EPI_ISL_648265, EPI_ISL_648266, EPI_ISL_648267, EPI_ISL_648268, EPI_ISL_648269, EPI_ISL_648270                                                                                                                                                                                                                                                                                                                                                                                                                                                                                                                                                                                                                                                                                                                                                                                                                                                                                                                                                                                                                                                                                                                                                                                                                                                                                                                                                                                                                                                                                                                                                                                                                                                                                                                                                                                                                                                                                                                                                                                                                                                                                                                                                                                                                                                                                                                                                                                                                                                                                                                                                                                                                                                                                                                                                                                                                                                                                                                                                                                                                                                                                                                                                                                                                                                                                                                                                                                                                                                                                                                                                                                                                                                                                                                                                                                                                                                                                                                                                                                                                                                                                                                                                                                                                                                                                                                                                                                                                                                                                                                                                                                                                                                                                                                                                                                                                                                                                                                                                                                                                                                                                                                                                                                                                                                                                                                                                                                                                                                                                                                                                                                                                                                                                                                                                                                                                                                                                                                                                                                                                                                                                                                                                                                                                                                                                                                                                                                                                                                                                                                                                                                                                                 | Brigham and Women's Hospital                                                                                                                   | Jonathan Li laboratory                                                                                                                            | Jonathan Z. Li, Manish C. Choudhary, Upasana D. Adhikari, George Eng, Douglas S Kwon                                                                                                                                                                                                                                                                                                                               |                                                                                                                                                                                                                                                                                                                                                                                                                    |
| EPI_ISL_648380, EPI_ISL_648595, EPI_ISL_648597, EPI_ISL_648598, EPI_ISL_648600, EPI_ISL_648602, EPI_ISL_648603, EPI_ISL_648606                                                                                                                                                                                                                                                                                                                                                                                                                                                                                                                                                                                                                                                                                                                                                                                                                                                                                                                                                                                                                                                                                                                                                                                                                                                                                                                                                                                                                                                                                                                                                                                                                                                                                                                                                                                                                                                                                                                                                                                                                                                                                                                                                                                                                                                                                                                                                                                                                                                                                                                                                                                                                                                                                                                                                                                                                                                                                                                                                                                                                                                                                                                                                                                                                                                                                                                                                                                                                                                                                                                                                                                                                                                                                                                                                                                                                                                                                                                                                                                                                                                                                                                                                                                                                                                                                                                                                                                                                                                                                                                                                                                                                                                                                                                                                                                                                                                                                                                                                                                                                                                                                                                                                                                                                                                                                                                                                                                                                                                                                                                                                                                                                                                                                                                                                                                                                                                                                                                                                                                                                                                                                                                                                                                                                                                                                                                                                                                                                                                                                                                                                                                                 | Laboratorio de Infectología Servicio de Infectología Hospital Universitario Dr. José Eleuterio González - Universidad Autónoma de Nuevo León   | Laboratorio de Infectología Molecular Departamento de Bioquímica y Medicina Molecular Facultad de Medicina - Universidad Autónoma de Nuevo León   | Kame A. Galán-Huerta, María F. Herrera-Saldivar, Natalia Martínez-Acuña, Sonia A. Lozano-Sepúlveda, Daniel Arellanos-Soto, Ana M. Rivas-Estilla, Paola Bocanegra-Ibarias, Samantha M. Flores-Treviño, Elvira Garza-González, Eduardo Perez-Alba, Laura Nuzzolo-Shihadeh, Adrian Camacho-Ortiz, Roberto Montes-de-Oca, Consuelo Treviño-Garza, Manuel E. de-la-O-Cavazos                                            |                                                                                                                                                                                                                                                                                                                                                                                                                    |
| EPI_ISL_648607, EPI_ISL_648608, EPI_ISL_648609                                                                                                                                                                                                                                                                                                                                                                                                                                                                                                                                                                                                                                                                                                                                                                                                                                                                                                                                                                                                                                                                                                                                                                                                                                                                                                                                                                                                                                                                                                                                                                                                                                                                                                                                                                                                                                                                                                                                                                                                                                                                                                                                                                                                                                                                                                                                                                                                                                                                                                                                                                                                                                                                                                                                                                                                                                                                                                                                                                                                                                                                                                                                                                                                                                                                                                                                                                                                                                                                                                                                                                                                                                                                                                                                                                                                                                                                                                                                                                                                                                                                                                                                                                                                                                                                                                                                                                                                                                                                                                                                                                                                                                                                                                                                                                                                                                                                                                                                                                                                                                                                                                                                                                                                                                                                                                                                                                                                                                                                                                                                                                                                                                                                                                                                                                                                                                                                                                                                                                                                                                                                                                                                                                                                                                                                                                                                                                                                                                                                                                                                                                                                                                                                                 | Laboratorio de Infectología, Servicio de Infectología, Hospital Universitario Dr. José Eleuterio González - Universidad Autónoma de Nuevo León | Laboratorio de Infectología Molecular, Departamento de Bioquímica y Medicina Molecular, Facultad de Medicina - Universidad Autónoma de Nuevo León | Kame A. Galán-Huerta, María F. Herrera-Saldivar, Natalia Martínez-Acuña, Sonia A. Lozano-Sepúlveda, Daniel Arellanos-Soto, Ana M. Rivas-Estilla, Paola Bocanegra-Ibarias, Samantha M. Flores-Treviño, Elvira Garza-González, Eduardo Perez-Alba, Laura Nuzzolo-Shihadeh, Adrian Camacho-Ortiz, Roberto Montes-de-Oca, Consuelo Treviño-Garza, Manuel E. de-la-O-Cavazos                                            |                                                                                                                                                                                                                                                                                                                                                                                                                    |
| EPI_ISL_648677                                                                                                                                                                                                                                                                                                                                                                                                                                                                                                                                                                                                                                                                                                                                                                                                                                                                                                                                                                                                                                                                                                                                                                                                                                                                                                                                                                                                                                                                                                                                                                                                                                                                                                                                                                                                                                                                                                                                                                                                                                                                                                                                                                                                                                                                                                                                                                                                                                                                                                                                                                                                                                                                                                                                                                                                                                                                                                                                                                                                                                                                                                                                                                                                                                                                                                                                                                                                                                                                                                                                                                                                                                                                                                                                                                                                                                                                                                                                                                                                                                                                                                                                                                                                                                                                                                                                                                                                                                                                                                                                                                                                                                                                                                                                                                                                                                                                                                                                                                                                                                                                                                                                                                                                                                                                                                                                                                                                                                                                                                                                                                                                                                                                                                                                                                                                                                                                                                                                                                                                                                                                                                                                                                                                                                                                                                                                                                                                                                                                                                                                                                                                                                                                                                                 | INBIRS-UBA                                                                                                                                     | Laboratorio Mixto de Biotecnología Acuática (LMBA)                                                                                                | Joaquín Ezpeleta, Ignacio García Labari, Victoria Posner, Vanina Villanova, Pablo Casal, Sofía Lavista Llanos, Federico Remes Lenicov, Ana Paletta, Flavio Spetale, Agustina Cerri, Silvana Spinelli, Elisa Bolatti, Diego Chouhy, María Re, Gastón Viarengo, Ana Cavatorta, Julian Acosta, Javier Murillo, Laura Angelone, Leandro Ciappina, Pilar Bulacio, Adriana Giri, Silvia Arranz, Elizabeth Tapia          |                                                                                                                                                                                                                                                                                                                                                                                                                    |
| EPI_ISL_653395, EPI_ISL_653396, EPI_ISL_653397, EPI_ISL_653398, EPI_ISL_653399, EPI_ISL_653400, EPI_ISL_653401, EPI_ISL_653402, EPI_ISL_653403, EPI_ISL_653404, EPI_ISL_653405, EPI_ISL_653406, EPI_ISL_653407, EPI_ISL_653408, EPI_ISL_653410, EPI_ISL_653411, EPI_ISL_653412, EPI_ISL_653413, EPI_ISL_653414, EPI_ISL_653415, EPI_ISL_653416, EPI_ISL_653417, EPI_ISL_653418, EPI_ISL_653419, EPI_ISL_653420, EPI_ISL_653421, EPI_ISL_653422, EPI_ISL_653423, EPI_ISL_653424, EPI_ISL_653425, EPI_ISL_653426, EPI_ISL_653427, EPI_ISL_653428, EPI_ISL_653429, EPI_ISL_653430, EPI_ISL_653431, EPI_ISL_653432, EPI_ISL_653433, EPI_ISL_653434, EPI_ISL_653435, EPI_ISL_653436, EPI_ISL_653437, EPI_ISL_653438, EPI_ISL_653439, EPI_ISL_653440, EPI_ISL_653441, EPI_ISL_653442, EPI_ISL_653443, EPI_ISL_653444, EPI_ISL_653445, EPI_ISL_653446, EPI_ISL_653447, EPI_ISL_653448, EPI_ISL_653449, EPI_ISL_653450, EPI_ISL_653451, EPI_ISL_653452, EPI_ISL_653453, EPI_ISL_653454, EPI_ISL_653455, EPI_ISL_653456, EPI_ISL_653457, EPI_ISL_653458, EPI_ISL_653459, EPI_ISL_653460, EPI_ISL_653461, EPI_ISL_653462, EPI_ISL_653463, EPI_ISL_653464, EPI_ISL_653465, EPI_ISL_653466, EPI_ISL_653467, EPI_ISL_653468, EPI_ISL_653469, EPI_ISL_653470, EPI_ISL_653471, EPI_ISL_653472, EPI_ISL_653473, EPI_ISL_653474, EPI_ISL_653475, EPI_ISL_653476, EPI_ISL_653477, EPI_ISL_653478, EPI_ISL_653479, EPI_ISL_653480, EPI_ISL_653481, EPI_ISL_653482, EPI_ISL_653483, EPI_ISL_653484, EPI_ISL_653485, EPI_ISL_653486, EPI_ISL_653487, EPI_ISL_653488, EPI_ISL_653489, EPI_ISL_653490, EPI_ISL_653491, EPI_ISL_653492, EPI_ISL_653493, EPI_ISL_653494, EPI_ISL_653495, EPI_ISL_653496, EPI_ISL_653497, EPI_ISL_653498, EPI_ISL_653499, EPI_ISL_653500, EPI_ISL_653501, EPI_ISL_653502, EPI_ISL_653503, EPI_ISL_653504, EPI_ISL_653505, EPI_ISL_653506, EPI_ISL_653507, EPI_ISL_653508, EPI_ISL_653509, EPI_ISL_653510, EPI_ISL_653511, EPI_ISL_653512, EPI_ISL_653513, EPI_ISL_653514, EPI_ISL_653515, EPI_ISL_653516, EPI_ISL_653517, EPI_ISL_653518, EPI_ISL_653519, EPI_ISL_653520, EPI_ISL_653521, EPI_ISL_653522, EPI_ISL_653523, EPI_ISL_653524, EPI_ISL_653525, EPI_ISL_653526, EPI_ISL_653527, EPI_ISL_653528, EPI_ISL_653529, EPI_ISL_653530, EPI_ISL_653531, EPI_ISL_653532, EPI_ISL_653533, EPI_ISL_653534, EPI_ISL_653535, EPI_ISL_653536, EPI_ISL_653537, EPI_ISL_653538, EPI_ISL_653539, EPI_ISL_653540, EPI_ISL_653541, EPI_ISL_653542, EPI_ISL_653543, EPI_ISL_653544, EPI_ISL_653545, EPI_ISL_653546, EPI_ISL_653547, EPI_ISL_653548, EPI_ISL_653549, EPI_ISL_653550, EPI_ISL_653551, EPI_ISL_653552, EPI_ISL_653553, EPI_ISL_653554, EPI_ISL_653555, EPI_ISL_653556, EPI_ISL_653557, EPI_ISL_653558, EPI_ISL_653559, EPI_ISL_653560, EPI_ISL_653561, EPI_ISL_653562, EPI_ISL_653563, EPI_ISL_653564, EPI_ISL_653565, EPI_ISL_653566, EPI_ISL_653567, EPI_ISL_653568, EPI_ISL_653569, EPI_ISL_653570, EPI_ISL_653571, EPI_ISL_653572, EPI_ISL_653573, EPI_ISL_653574, EPI_ISL_653575, EPI_ISL_653576, EPI_ISL_653577, EPI_ISL_653578, EPI_ISL_653579, EPI_ISL_653580, EPI_ISL_653581, EPI_ISL_653582, EPI_ISL_653583, EPI_ISL_653584, EPI_ISL_653585, EPI_ISL_653586, EPI_ISL_653587, EPI_ISL_653588, EPI_ISL_653589, EPI_ISL_653590, EPI_ISL_653591, EPI_ISL_653592, EPI_ISL_653593, EPI_ISL_653594, EPI_ISL_653595, EPI_ISL_653596, EPI_ISL_653597, EPI_ISL_653598, EPI_ISL_653599, EPI_ISL_653600, EPI_ISL_653601, EPI_ISL_653602, EPI_ISL_653603, EPI_ISL_653604, EPI_ISL_653605, EPI_ISL_653606, EPI_ISL_653607, EPI_ISL_653608, EPI_ISL_653609, EPI_ISL_653610, EPI_ISL_653611, EPI_ISL_653612, EPI_ISL_653613, EPI_ISL_653614, EPI_ISL_653615, EPI_ISL_653616, EPI_ISL_653617, EPI_ISL_653618, EPI_ISL_653619, EPI_ISL_653620, EPI_ISL_653621, EPI_ISL_653622, EPI_ISL_653623, EPI_ISL_653624, EPI_ISL_653625, EPI_ISL_653626, EPI_ISL_653627, EPI_ISL_653628, EPI_ISL_653629, EPI_ISL_653630, EPI_ISL_653631, EPI_ISL_653632, EPI_ISL_653633, EPI_ISL_653634, EPI_ISL_653635, EPI_ISL_653636, EPI_ISL_653637, EPI_ISL_653638, EPI_ISL_653639, EPI_ISL_653640, EPI_ISL_653641, EPI_ISL_653642, EPI_ISL_653643, EPI_ISL_653644, EPI_ISL_653645, EPI_ISL_653646, EPI_ISL_653647, EPI_ISL_653648, EPI_ISL_653649, EPI_ISL_653650, EPI_ISL_653651, EPI_ISL_653652, EPI_ISL_653653, EPI_ISL_653654, EPI_ISL_653655, EPI_ISL_653656, EPI_ISL_653657, EPI_ISL_653658, EPI_ISL_653659, EPI_ISL_653660, EPI_ISL_653661, EPI_ISL_653662, EPI_ISL_653663, EPI_ISL_653664, EPI_ISL_653665, EPI_ISL_653666, EPI_ISL_653667, EPI_ISL_653668, EPI_ISL_653669, EPI_ISL_653670, EPI_ISL_653671, EPI_ISL_653672, EPI_ISL_653673, EPI_ISL_653674, EPI_ISL_653675, EPI_ISL_653676, EPI_ISL_653677, EPI_ISL_653678, EPI_ISL_653679, EPI_ISL_653680, EPI_ISL_653681, EPI_ISL_653682, EPI_ISL_653683, EPI_ISL_653684, EPI_ISL_653685, EPI_ISL_653686, EPI_ISL_653687, EPI_ISL_653688, EPI_ISL_653689, EPI_ISL_653690, EPI_ISL_653691, EPI_ISL_653692, EPI_ISL_653693, EPI_ISL_653694, EPI_ISL_653695, EPI_ISL_653696, EPI_ISL_653697, EPI_ISL_653698, EPI_ISL_653699, EPI_ISL_653700, EPI_ISL_653701, EPI_ISL_653702, EPI_ISL_653703, EPI_ISL_653704, EPI_ISL_653705, EPI_ISL_653706, EPI_ISL_653707, EPI_ISL_653708, EPI_ISL_653709, EPI_ISL_653710, EPI_ISL_653711, EPI_ISL_653712, EPI_ISL_653713, EPI_ISL_653714, EPI_ISL_653715, EPI_ISL_653716, EPI_ISL_653717, EPI_ISL_653718, EPI_ISL_653719, EPI_ISL_653720, EPI_ISL_653721, EPI_ISL_653722, EPI_ISL_653723, EPI_ISL_653724, EPI_ISL_653725, EPI_ISL_653726, EPI_ISL_653727, EPI_ISL_653728, EPI_ISL_653729, EPI_ISL_653730, EPI_ISL_653731, EPI_ISL_653732, EPI_ISL_653733, EPI_ISL_653734, EPI_ISL_653735, EPI_ISL_653736, EPI_ISL_653737, EPI_ISL_653738, EPI_ISL_653739, EPI_ISL_653740, EPI_ISL_653741, EPI_ISL_653742, EPI_ISL_653743, EPI_ISL_653744                                                                                                                                                                                                                                                                                                                                                                                                                                                                                                                                                                                                                                                                                                                                                                                                                                                                                                                 | see above                                                                                                                                      | LSUHS Emerging Viral Threat Laboratory                                                                                                            | Microbial Genome Sequencing Center                                                                                                                                                                                                                                                                                                                                                                                 | Jeremy P. Kamil, Rona S. Scott, Maarten Van Diest, Malgorzata Bienkowska-Haba, Katarzyna Zwolinska, Andrew D. Yurochko, Christopher G. Kevil, Martin J. Sapp, Daniel J. Snyder, Vaughn S. Cooper, John A. Vanchiere                                                                                                                                                                                                |
| EPI_ISL_653745, EPI_ISL_653746, EPI_ISL_653747, EPI_ISL_653748, EPI_ISL_653749, EPI_ISL_653750, EPI_ISL_653751, EPI_ISL_653752, EPI_ISL_653753, EPI_ISL_653754, EPI_ISL_653755, EPI_ISL_653756, EPI_ISL_653757, EPI_ISL_653758, EPI_ISL_653759, EPI_ISL_653760, EPI_ISL_653761, EPI_ISL_653762, EPI_ISL_653824, EPI_ISL_653825                                                                                                                                                                                                                                                                                                                                                                                                                                                                                                                                                                                                                                                                                                                                                                                                                                                                                                                                                                                                                                                                                                                                                                                                                                                                                                                                                                                                                                                                                                                                                                                                                                                                                                                                                                                                                                                                                                                                                                                                                                                                                                                                                                                                                                                                                                                                                                                                                                                                                                                                                                                                                                                                                                                                                                                                                                                                                                                                                                                                                                                                                                                                                                                                                                                                                                                                                                                                                                                                                                                                                                                                                                                                                                                                                                                                                                                                                                                                                                                                                                                                                                                                                                                                                                                                                                                                                                                                                                                                                                                                                                                                                                                                                                                                                                                                                                                                                                                                                                                                                                                                                                                                                                                                                                                                                                                                                                                                                                                                                                                                                                                                                                                                                                                                                                                                                                                                                                                                                                                                                                                                                                                                                                                                                                                                                                                                                                                                 | see above                                                                                                                                      | Instituto Nacional de Salud, Bogotá, Colombia                                                                                                     | Instituto Nacional de Salud, Bogotá, Colombia                                                                                                                                                                                                                                                                                                                                                                      | Katherine Laiton-Donato, Diego A. Álvarez-Díaz, Carlos Franco-Muñoz, Mauricio Pacheco-Montealegre, Jonathan Reales, Diego Andrés Prada, Jose A. Usme-Ciro, Zulma M. Cucunubá, Christian Julian Villabona-Arenas, Liz Villabona-Arenas, Sussy Echeverría, Astrid C. Flórez, Carolina Ferro, Diana Marcela Walteros-Acero, Franklin Prieto, Carlos Andrés Durán, Martha Lucia Ospina Martínez, Marcela Mercado-Reyes |
| EPI_ISL_653916                                                                                                                                                                                                                                                                                                                                                                                                                                                                                                                                                                                                                                                                                                                                                                                                                                                                                                                                                                                                                                                                                                                                                                                                                                                                                                                                                                                                                                                                                                                                                                                                                                                                                                                                                                                                                                                                                                                                                                                                                                                                                                                                                                                                                                                                                                                                                                                                                                                                                                                                                                                                                                                                                                                                                                                                                                                                                                                                                                                                                                                                                                                                                                                                                                                                                                                                                                                                                                                                                                                                                                                                                                                                                                                                                                                                                                                                                                                                                                                                                                                                                                                                                                                                                                                                                                                                                                                                                                                                                                                                                                                                                                                                                                                                                                                                                                                                                                                                                                                                                                                                                                                                                                                                                                                                                                                                                                                                                                                                                                                                                                                                                                                                                                                                                                                                                                                                                                                                                                                                                                                                                                                                                                                                                                                                                                                                                                                                                                                                                                                                                                                                                                                                                                                 | Diagnostic- and Research Institute of Pathology, Medical University of Graz                                                                    | Diagnostic- and Research Institute of Pathology, Medical University of Graz                                                                       | Karl Kashofer, Peter Regitnig, Martin Zacharias, Gregor Gorkiewicz                                                                                                                                                                                                                                                                                                                                                 |                                                                                                                                                                                                                                                                                                                                                                                                                    |
| EPI_ISL_654793                                                                                                                                                                                                                                                                                                                                                                                                                                                                                                                                                                                                                                                                                                                                                                                                                                                                                                                                                                                                                                                                                                                                                                                                                                                                                                                                                                                                                                                                                                                                                                                                                                                                                                                                                                                                                                                                                                                                                                                                                                                                                                                                                                                                                                                                                                                                                                                                                                                                                                                                                                                                                                                                                                                                                                                                                                                                                                                                                                                                                                                                                                                                                                                                                                                                                                                                                                                                                                                                                                                                                                                                                                                                                                                                                                                                                                                                                                                                                                                                                                                                                                                                                                                                                                                                                                                                                                                                                                                                                                                                                                                                                                                                                                                                                                                                                                                                                                                                                                                                                                                                                                                                                                                                                                                                                                                                                                                                                                                                                                                                                                                                                                                                                                                                                                                                                                                                                                                                                                                                                                                                                                                                                                                                                                                                                                                                                                                                                                                                                                                                                                                                                                                                                                                 | Instituto Nacional de Salud, Bogotá, Colombia                                                                                                  | Instituto Nacional de Salud, Bogotá, Colombia                                                                                                     | Katherine Laiton-Donato, Diego A. Álvarez-Díaz, Carlos Franco-Muñoz, Mauricio Pacheco-Montealegre, Jonathan Reales, Diego Andrés Prada, Jose A. Usme-Ciro, Zulma M. Cucunubá, Christian Julian Villabona-Arenas, Liz Villabona-Arenas, Sussy Echeverría, Astrid C. Flórez, Carolina Ferro, Diana Marcela Walteros-Acero, Franklin Prieto, Carlos Andrés Durán, Martha Lucia Ospina Martínez, Marcela Mercado-Reyes |                                                                                                                                                                                                                                                                                                                                                                                                                    |
| EPI_ISL_660540                                                                                                                                                                                                                                                                                                                                                                                                                                                                                                                                                                                                                                                                                                                                                                                                                                                                                                                                                                                                                                                                                                                                                                                                                                                                                                                                                                                                                                                                                                                                                                                                                                                                                                                                                                                                                                                                                                                                                                                                                                                                                                                                                                                                                                                                                                                                                                                                                                                                                                                                                                                                                                                                                                                                                                                                                                                                                                                                                                                                                                                                                                                                                                                                                                                                                                                                                                                                                                                                                                                                                                                                                                                                                                                                                                                                                                                                                                                                                                                                                                                                                                                                                                                                                                                                                                                                                                                                                                                                                                                                                                                                                                                                                                                                                                                                                                                                                                                                                                                                                                                                                                                                                                                                                                                                                                                                                                                                                                                                                                                                                                                                                                                                                                                                                                                                                                                                                                                                                                                                                                                                                                                                                                                                                                                                                                                                                                                                                                                                                                                                                                                                                                                                                                                 | MVZ Laborärzte Singen                                                                                                                          | MVZ Laborärzte Singen                                                                                                                             | Jonas Schmidt, Frithjof Blessing, Sandro Berghaus, Folker Wenzel                                                                                                                                                                                                                                                                                                                                                   |                                                                                                                                                                                                                                                                                                                                                                                                                    |
| EPI_ISL_661201, EPI_ISL_661209, EPI_ISL_661211, EPI_ISL_661222, EPI_ISL_661229, EPI_ISL_661235, EPI_ISL_661238, EPI_ISL_661244, EPI_ISL_661247, EPI_ISL_661248, EPI_ISL_661249, EPI_ISL_661251                                                                                                                                                                                                                                                                                                                                                                                                                                                                                                                                                                                                                                                                                                                                                                                                                                                                                                                                                                                                                                                                                                                                                                                                                                                                                                                                                                                                                                                                                                                                                                                                                                                                                                                                                                                                                                                                                                                                                                                                                                                                                                                                                                                                                                                                                                                                                                                                                                                                                                                                                                                                                                                                                                                                                                                                                                                                                                                                                                                                                                                                                                                                                                                                                                                                                                                                                                                                                                                                                                                                                                                                                                                                                                                                                                                                                                                                                                                                                                                                                                                                                                                                                                                                                                                                                                                                                                                                                                                                                                                                                                                                                                                                                                                                                                                                                                                                                                                                                                                                                                                                                                                                                                                                                                                                                                                                                                                                                                                                                                                                                                                                                                                                                                                                                                                                                                                                                                                                                                                                                                                                                                                                                                                                                                                                                                                                                                                                                                                                                                                                 | see above                                                                                                                                      | Department of Clinical Microbiology                                                                                                               | GIGA Medical Genomics                                                                                                                                                                                                                                                                                                                                                                                              | Keith Durkin, Maria Artesi, Sébastien Bontems, Raphaël Boreux, Bouchra Boujemla, Cécile Meex, Pierrette Melin, Marie-Pierre Hayette, Vincent Bours                                                                                                                                                                                                                                                                 |
| EPI_ISL_664125, EPI_ISL_664147, EPI_ISL_664171, EPI_ISL_664187, EPI_ISL_664188, EPI_ISL_664189, EPI_ISL_664196, EPI_ISL_664197, EPI_ISL_664225, EPI_ISL_664228, EPI_ISL_664233, EPI_ISL_664236, EPI_ISL_664281, EPI_ISL_664335, EPI_ISL_664340, EPI_ISL_664342, EPI_ISL_664352, EPI_ISL_664353, EPI_ISL_664356, EPI_ISL_664359, EPI_ISL_664361, EPI_ISL_664367, EPI_ISL_664372, EPI_ISL_664427, EPI_ISL_664438, EPI_ISL_664447, EPI_ISL_664449, EPI_ISL_664471, EPI_ISL_664493, EPI_ISL_664494, EPI_ISL_664497, EPI_ISL_664498, EPI_ISL_664499, EPI_ISL_664500, EPI_ISL_664505, EPI_ISL_664507, EPI_ISL_664510, EPI_ISL_664512, EPI_ISL_664517, EPI_ISL_664521, EPI_ISL_664525, EPI_ISL_664540, EPI_ISL_664605, EPI_ISL_664618, EPI_ISL_664651, EPI_ISL_664661, EPI_ISL_664669, EPI_ISL_664672, EPI_ISL_664673, EPI_ISL_664694, EPI_ISL_664701, EPI_ISL_664702, EPI_ISL_664703, EPI_ISL_664707, EPI_ISL_664711, EPI_ISL_664712, EPI_ISL_664723, EPI_ISL_664724, EPI_ISL_664728, EPI_ISL_664734, EPI_ISL_664742, EPI_ISL_664744, EPI_ISL_664745, EPI_ISL_664754, EPI_ISL_664755, EPI_ISL_664759, EPI_ISL_664839, EPI_ISL_665143, EPI_ISL_665146, EPI_ISL_665147, EPI_ISL_665148, EPI_ISL_665149, EPI_ISL_665150, EPI_ISL_665151, EPI_ISL_665152, EPI_ISL_665153, EPI_ISL_665154, EPI_ISL_665155, EPI_ISL_665156, EPI_ISL_665157, EPI_ISL_665158, EPI_ISL_665159, EPI_ISL_665160, EPI_ISL_665161, EPI_ISL_665162, EPI_ISL_665163, EPI_ISL_665164, EPI_ISL_665165, EPI_ISL_665166, EPI_ISL_665167, EPI_ISL_665168, EPI_ISL_665169, EPI_ISL_665170, EPI_ISL_665171, EPI_ISL_665172, EPI_ISL_665173, EPI_ISL_665174, EPI_ISL_665175, EPI_ISL_665176, EPI_ISL_665177, EPI_ISL_665178, EPI_ISL_665179, EPI_ISL_665180, EPI_ISL_665181, EPI_ISL_665182, EPI_ISL_665183, EPI_ISL_665184, EPI_ISL_665185, EPI_ISL_665186, EPI_ISL_665187, EPI_ISL_665188, EPI_ISL_665189, EPI_ISL_665190, EPI_ISL_665191, EPI_ISL_665192, EPI_ISL_665193, EPI_ISL_665194, EPI_ISL_665195, EPI_ISL_665196, EPI_ISL_665197, EPI_ISL_665198, EPI_ISL_665199, EPI_ISL_665200, EPI_ISL_665201, EPI_ISL_665202, EPI_ISL_665203, EPI_ISL_665204, EPI_ISL_665205, EPI_ISL_665206, EPI_ISL_665207, EPI_ISL_665208, EPI_ISL_665209, EPI_ISL_665210, EPI_ISL_665211, EPI_ISL_665212, EPI_ISL_665213, EPI_ISL_665214, EPI_ISL_665215, EPI_ISL_665216, EPI_ISL_665217, EPI_ISL_665218, EPI_ISL_665219, EPI_ISL_665220, EPI_ISL_665221, EPI_ISL_665222, EPI_ISL_665223, EPI_ISL_665224, EPI_ISL_665225, EPI_ISL_665226, EPI_ISL_665227, EPI_ISL_665228, EPI_ISL_665229, EPI_ISL_665230, EPI_ISL_665231, EPI_ISL_665232, EPI_ISL_665233, EPI_ISL_665234, EPI_ISL_665235, EPI_ISL_665236, EPI_ISL_665237, EPI_ISL_665238, EPI_ISL_665239, EPI_ISL_665240, EPI_ISL_665241, EPI_ISL_665242, EPI_ISL_665243, EPI_ISL_665244, EPI_ISL_665245, EPI_ISL_665246, EPI_ISL_665247, EPI_ISL_665248, EPI_ISL_665249, EPI_ISL_665250, EPI_ISL_665251, EPI_ISL_665252, EPI_ISL_665253, EPI_ISL_665287, EPI_ISL_665297, EPI_ISL_665299, EPI_ISL_665320, EPI_ISL_665334, EPI_ISL_665352, EPI_ISL_665374, EPI_ISL_665376, EPI_ISL_665382, EPI_ISL_665466, EPI_ISL_665517, EPI_ISL_665525, EPI_ISL_665529, EPI_ISL_665530, EPI_ISL_665531, EPI_ISL_665532, EPI_ISL_665533, EPI_ISL_665534, EPI_ISL_665535, EPI_ISL_665536, EPI_ISL_665537, EPI_ISL_665538, EPI_ISL_665539, EPI_ISL_665540, EPI_ISL_665541, EPI_ISL_665542, EPI_ISL_665543, EPI_ISL_665544, EPI_ISL_665545, EPI_ISL_665546, EPI_ISL_665547, EPI_ISL_665548, EPI_ISL_665549, EPI_ISL_665550, EPI_ISL_665551, EPI_ISL_665552, EPI_ISL_665553, EPI_ISL_665554, EPI_ISL_665555, EPI_ISL_665556, EPI_ISL_665557, EPI_ISL_665558, EPI_ISL_665559, EPI_ISL_665560, EPI_ISL_665561, EPI_ISL_665562, EPI_ISL_665563, EPI_ISL_665564, EPI_ISL_665565, EPI_ISL_665566, EPI_ISL_665567, EPI_ISL_665568, EPI_ISL_665569, EPI_ISL_665570, EPI_ISL_665571, EPI_ISL_665572, EPI_ISL_665573, EPI_ISL_665574, EPI_ISL_665575, EPI_ISL_665576, EPI_ISL_665577, EPI_ISL_665578, EPI_ISL_665579, EPI_ISL_665580, EPI_ISL_665581, EPI_ISL_665582, EPI_ISL_665583, EPI_ISL_665584, EPI_ISL_665585, EPI_ISL_665586, EPI_ISL_665587, EPI_ISL_665588, EPI_ISL_665589, EPI_ISL_665590, EPI_ISL_665591, EPI_ISL_665592, EPI_ISL_665593, EPI_ISL_665594, EPI_ISL_665595, EPI_ISL_665596, EPI_ISL_665597, EPI_ISL_665598, EPI_ISL_665599, EPI_ISL_665600, EPI_ISL_665601, EPI_ISL_665602, EPI_ISL_665603, EPI_ISL_665604, EPI_ISL_665605, EPI_ISL_665606, EPI_ISL_665607, EPI_ISL_665608, EPI_ISL_665609, EPI_ISL_665610, EPI_ISL_665611, EPI_ISL_665612, EPI_ISL_665613, EPI_ISL_665614, EPI_ISL_665615, EPI_ISL_665616, EPI_ISL_665617, EPI_ISL_665618, EPI_ISL_665619, EPI_ISL_665620, EPI_ISL_665621, EPI_ISL_665622, EPI_ISL_665623, EPI_ISL_665624, EPI_ISL_665625, EPI_ISL_665626, EPI_ISL_665627, EPI_ISL_665628, EPI_ISL_665629, EPI_ISL_665630, EPI_ISL_665631, EPI_ISL_665632, EPI_ISL_665633, EPI_ISL_665634, EPI_ISL_665635, EPI_ISL_665636, EPI_ISL_665637, EPI_ISL_665638, EPI_ISL_665639, EPI_ISL_665640, EPI_ISL_665641, EPI_ISL_665642, EPI_ISL_665643, EPI_ISL_665644, EPI_ISL_665645, EPI_ISL_665646, EPI_ISL_665647, EPI_ISL_665648, EPI_ISL_665649, EPI_ISL_665650, EPI_ISL_665651, EPI_ISL_665652, EPI_ISL_665653, EPI_ISL_665654, EPI_ISL_665655, EPI_ISL_665656, EPI_ISL_665657, EPI_ISL_665658, EPI_ISL_665659, EPI_ISL_665660, EPI_ISL_665661, EPI_ISL_665662, EPI_ISL_665663, EPI_ISL_665664, EPI_ISL_665665, EPI_ISL_665666, EPI_ISL_665667, EPI_ISL_665668, EPI_ISL_665669, EPI_ISL_665670, EPI_ISL_665671, EPI_ISL_665672, EPI_ISL_665673, EPI_ISL_665674, EPI_ISL_665675, EPI_ISL_665676, EPI_ISL_665677, EPI_ISL_665678, EPI_ISL_665679, EPI_ISL_665680, EPI_ISL_665681, EPI_ISL_665682, EPI_ISL_665683, EPI_ISL_665684, EPI_ISL_665685, EPI_ISL_665686, EPI_ISL_665687, EPI_ISL_665688, EPI_ISL_665689, EPI_ISL_665690, EPI_ISL_665691, EPI_ISL_665692, EPI_ISL_665693, EPI_ISL_665694, EPI_ISL_665695, EPI_ISL_665696, EPI_ISL_665697, EPI_ISL_665698, EPI_ISL_665699, EPI_ISL_665700, EPI_ISL_665701, EPI_ISL_665702, EPI_ISL_665703, EPI_ISL_665704, EPI_ISL_665705, EPI_ISL_665706, EPI_ISL_665707, EPI_ISL_665708, EPI_ISL_665709, EPI_ISL_665710, EPI_ISL_665711, EPI_ISL_665712, EPI_ISL_665713, EPI_ISL_665714, EPI_ISL_665715, EPI_ISL_665716, EPI_ISL_665717, EPI_ISL_665718, EPI_ISL_665719, EPI_ISL_665720, EPI_ISL_665721, EPI_ISL_665722, EPI_ISL_665723, EPI_ISL_665724, EPI_ISL_665725, EPI_ISL_665726, EPI_ISL_665727, EPI_ISL_665728, EPI_ISL_665729, EPI_ISL_665730, EPI_ISL_665731, EPI_ISL_665732, EPI_ISL_665733, EPI_ISL_665734, EPI_ISL_665735, EPI_ISL_665736, EPI_ISL_665737, EPI_ISL_665738, EPI_ISL_665739, EPI_ISL_665740, EPI_ISL_665741, EPI_ISL_665742, EPI_ISL_665743, EPI_ISL_665744 | see above                                                                                                                                      | University College London Hospital                                                                                                                | COVID-19 Genomics UK (COG-UK) Consortium                                                                                                                                                                                                                                                                                                                                                                           | Judith Heaney, Matthew Byott, Catherine Houlihan, Dan Frampton, Stuart Kirk, Moira Spyer and Eleni Nastouli                                                                                                                                                                                                                                                                                                        |
| EPI_ISL_666609, EPI_ISL_666613                                                                                                                                                                                                                                                                                                                                                                                                                                                                                                                                                                                                                                                                                                                                                                                                                                                                                                                                                                                                                                                                                                                                                                                                                                                                                                                                                                                                                                                                                                                                                                                                                                                                                                                                                                                                                                                                                                                                                                                                                                                                                                                                                                                                                                                                                                                                                                                                                                                                                                                                                                                                                                                                                                                                                                                                                                                                                                                                                                                                                                                                                                                                                                                                                                                                                                                                                                                                                                                                                                                                                                                                                                                                                                                                                                                                                                                                                                                                                                                                                                                                                                                                                                                                                                                                                                                                                                                                                                                                                                                                                                                                                                                                                                                                                                                                                                                                                                                                                                                                                                                                                                                                                                                                                                                                                                                                                                                                                                                                                                                                                                                                                                                                                                                                                                                                                                                                                                                                                                                                                                                                                                                                                                                                                                                                                                                                                                                                                                                                                                                                                                                                                                                                                                 | LSUHS Emerging Viral Threat Laboratory                                                                                                         | Microbial Genome Sequencing Center                                                                                                                | Jeremy P. Kamil, Rona S. Scott, Maarten Van Diest, Malgorzata Bienkowska-Haba, Katarzyna Zwolinska, Andrew D. Yurochko, Christopher G. Kevil, Martin J. Sapp, Daniel J. Snyder, Vaughn S. Cooper, John A. Vanchiere                                                                                                                                                                                                |                                                                                                                                                                                                                                                                                                                                                                                                                    |
| EPI_ISL_666875, EPI_ISL_666880, EPI_ISL_666883, EPI_ISL_666884, EPI_ISL_666885, EPI_ISL_666886                                                                                                                                                                                                                                                                                                                                                                                                                                                                                                                                                                                                                                                                                                                                                                                                                                                                                                                                                                                                                                                                                                                                                                                                                                                                                                                                                                                                                                                                                                                                                                                                                                                                                                                                                                                                                                                                                                                                                                                                                                                                                                                                                                                                                                                                                                                                                                                                                                                                                                                                                                                                                                                                                                                                                                                                                                                                                                                                                                                                                                                                                                                                                                                                                                                                                                                                                                                                                                                                                                                                                                                                                                                                                                                                                                                                                                                                                                                                                                                                                                                                                                                                                                                                                                                                                                                                                                                                                                                                                                                                                                                                                                                                                                                                                                                                                                                                                                                                                                                                                                                                                                                                                                                                                                                                                                                                                                                                                                                                                                                                                                                                                                                                                                                                                                                                                                                                                                                                                                                                                                                                                                                                                                                                                                                                                                                                                                                                                                                                                                                                                                                                                                 | Department of Clinical Microbiology                                                                                                            | GIGA Medical Genomics                                                                                                                             | Keith Durkin, Maria Artesi, Justine Defêche, Gilles Darcis, Michel Moutschen, Sébastien Bontems, Raphaël Boreux, Bouchra Boujemla, Cécile Meex, Pierrette Melin, Marie-Pierre Hayette, Vincent Bours                                                                                                                                                                                                               |                                                                                                                                                                                                                                                                                                                                                                                                                    |

|                                                                                                                                                                                                                                                                                                                                                                                                                                                                                                                                                                                                                                                                                |                                                                                                                     |                                                              |                                                                                                                                                                 |
|--------------------------------------------------------------------------------------------------------------------------------------------------------------------------------------------------------------------------------------------------------------------------------------------------------------------------------------------------------------------------------------------------------------------------------------------------------------------------------------------------------------------------------------------------------------------------------------------------------------------------------------------------------------------------------|---------------------------------------------------------------------------------------------------------------------|--------------------------------------------------------------|-----------------------------------------------------------------------------------------------------------------------------------------------------------------|
| EPI_ISL_668390                                                                                                                                                                                                                                                                                                                                                                                                                                                                                                                                                                                                                                                                 | Vestfold Hospital, Toensberg Department of Microbiology                                                             | Norwegian Institute of Public Health, Department of Virology | Kathrine Stene-Johansen, Kamilla Heddeland Instefjord, Hilde Elshaug, Marie Paulsen Madsen, Rasmus Riis Kopperud, Hilde Vollan, Karoline Bragstad, Olav Hungnes |
| EPI_ISL_668391                                                                                                                                                                                                                                                                                                                                                                                                                                                                                                                                                                                                                                                                 | Akershus University Hospital, Department for Microbiology and Infectious Disease Control                            | Norwegian Institute of Public Health, Department of Virology | Kathrine Stene-Johansen, Kamilla Heddeland Instefjord, Hilde Elshaug, Marie Paulsen Madsen, Rasmus Riis Kopperud, Hilde Vollan, Karoline Bragstad, Olav Hungnes |
| EPI_ISL_668392                                                                                                                                                                                                                                                                                                                                                                                                                                                                                                                                                                                                                                                                 | Haukeland University Hospital, Dept. of Microbiology                                                                | Norwegian Institute of Public Health, Department of Virology | Kathrine Stene-Johansen, Kamilla Heddeland Instefjord, Hilde Elshaug, Marie Paulsen Madsen, Rasmus Riis Kopperud, Hilde Vollan, Karoline Bragstad, Olav Hungnes |
| EPI_ISL_668393                                                                                                                                                                                                                                                                                                                                                                                                                                                                                                                                                                                                                                                                 | Akershus University Hospital, Department for Microbiology and Infectious Disease Control                            | Norwegian Institute of Public Health, Department of Virology | Kathrine Stene-Johansen, Kamilla Heddeland Instefjord, Hilde Elshaug, Marie Paulsen Madsen, Rasmus Riis Kopperud, Hilde Vollan, Karoline Bragstad, Olav Hungnes |
| EPI_ISL_668394, EPI_ISL_668395                                                                                                                                                                                                                                                                                                                                                                                                                                                                                                                                                                                                                                                 | Hospital of Southern Norway - Kristiansand, Department of Medical Microbiology                                      | Norwegian Institute of Public Health, Department of Virology | Kathrine Stene-Johansen, Kamilla Heddeland Instefjord, Hilde Elshaug, Marie Paulsen Madsen, Rasmus Riis Kopperud, Hilde Vollan, Karoline Bragstad, Olav Hungnes |
| EPI_ISL_668396, EPI_ISL_668397                                                                                                                                                                                                                                                                                                                                                                                                                                                                                                                                                                                                                                                 | Furst Medical Laboratory                                                                                            | Norwegian Institute of Public Health, Department of Virology | Kathrine Stene-Johansen, Kamilla Heddeland Instefjord, Hilde Elshaug, Marie Paulsen Madsen, Rasmus Riis Kopperud, Hilde Vollan, Karoline Bragstad, Olav Hungnes |
| EPI_ISL_668398, EPI_ISL_668399                                                                                                                                                                                                                                                                                                                                                                                                                                                                                                                                                                                                                                                 | Nordland Hospital - Bodo, Laboratory Department, Molecular Biology Unit                                             | Norwegian Institute of Public Health, Department of Virology | Kathrine Stene-Johansen, Kamilla Heddeland Instefjord, Hilde Elshaug, Marie Paulsen Madsen, Rasmus Riis Kopperud, Hilde Vollan, Karoline Bragstad, Olav Hungnes |
| EPI_ISL_668400                                                                                                                                                                                                                                                                                                                                                                                                                                                                                                                                                                                                                                                                 | Medical Microbiology Unit, Department for Laboratory Medicine, Drammen Hospital, Vestre Viken Health Trust,         | Norwegian Institute of Public Health, Department of Virology | Kathrine Stene-Johansen, Kamilla Heddeland Instefjord, Hilde Elshaug, Marie Paulsen Madsen, Rasmus Riis Kopperud, Hilde Vollan, Karoline Bragstad, Olav Hungnes |
| EPI_ISL_668401, EPI_ISL_668402                                                                                                                                                                                                                                                                                                                                                                                                                                                                                                                                                                                                                                                 | Oslo University Hospital, Department of Medical Microbiology                                                        | Norwegian Institute of Public Health, Department of Virology | Kathrine Stene-Johansen, Kamilla Heddeland Instefjord, Hilde Elshaug, Marie Paulsen Madsen, Rasmus Riis Kopperud, Hilde Vollan, Karoline Bragstad, Olav Hungnes |
| EPI_ISL_668403                                                                                                                                                                                                                                                                                                                                                                                                                                                                                                                                                                                                                                                                 | Furst Medical Laboratory                                                                                            | Norwegian Institute of Public Health, Department of Virology | Kathrine Stene-Johansen, Kamilla Heddeland Instefjord, Hilde Elshaug, Marie Paulsen Madsen, Rasmus Riis Kopperud, Hilde Vollan, Karoline Bragstad, Olav Hungnes |
| EPI_ISL_668404                                                                                                                                                                                                                                                                                                                                                                                                                                                                                                                                                                                                                                                                 | Department of Medical Microbiology, St. Olavs hospital                                                              | Norwegian Institute of Public Health, Department of Virology | Kathrine Stene-Johansen, Kamilla Heddeland Instefjord, Hilde Elshaug, Marie Paulsen Madsen, Rasmus Riis Kopperud, Hilde Vollan, Karoline Bragstad, Olav Hungnes |
| EPI_ISL_668405                                                                                                                                                                                                                                                                                                                                                                                                                                                                                                                                                                                                                                                                 | Haukeland University Hospital, Dept. of Microbiology                                                                | Norwegian Institute of Public Health, Department of Virology | Kathrine Stene-Johansen, Kamilla Heddeland Instefjord, Hilde Elshaug, Marie Paulsen Madsen, Rasmus Riis Kopperud, Hilde Vollan, Karoline Bragstad, Olav Hungnes |
| EPI_ISL_668406                                                                                                                                                                                                                                                                                                                                                                                                                                                                                                                                                                                                                                                                 | Vestfold Hospital, Toensberg Department of Microbiology                                                             | Norwegian Institute of Public Health, Department of Virology | Kathrine Stene-Johansen, Kamilla Heddeland Instefjord, Hilde Elshaug, Marie Paulsen Madsen, Rasmus Riis Kopperud, Hilde Vollan, Karoline Bragstad, Olav Hungnes |
| EPI_ISL_668407, EPI_ISL_668408                                                                                                                                                                                                                                                                                                                                                                                                                                                                                                                                                                                                                                                 | Dept. of Medical Microbiology, Stavanger University Hospital, Helse Stavanger HF                                    | Norwegian Institute of Public Health, Department of Virology | Kathrine Stene-Johansen, Kamilla Heddeland Instefjord, Hilde Elshaug, Marie Paulsen Madsen, Rasmus Riis Kopperud, Hilde Vollan, Karoline Bragstad, Olav Hungnes |
| EPI_ISL_668409                                                                                                                                                                                                                                                                                                                                                                                                                                                                                                                                                                                                                                                                 | Unilabs Laboratory Medicine                                                                                         | Norwegian Institute of Public Health, Department of Virology | Kathrine Stene-Johansen, Kamilla Heddeland Instefjord, Hilde Elshaug, Marie Paulsen Madsen, Rasmus Riis Kopperud, Hilde Vollan, Karoline Bragstad, Olav Hungnes |
| EPI_ISL_668410, EPI_ISL_668411                                                                                                                                                                                                                                                                                                                                                                                                                                                                                                                                                                                                                                                 | Norwegian Institute of Public Health, Department of Virology                                                        | Norwegian Institute of Public Health, Department of Virology | Kathrine Stene-Johansen, Kamilla Heddeland Instefjord, Hilde Elshaug, Marie Paulsen Madsen, Rasmus Riis Kopperud, Hilde Vollan, Karoline Bragstad, Olav Hungnes |
| EPI_ISL_668412, EPI_ISL_668413, EPI_ISL_668414, EPI_ISL_668415, EPI_ISL_668416                                                                                                                                                                                                                                                                                                                                                                                                                                                                                                                                                                                                 | Innlandet Hospital Trust, Division Lillehammer, Department for Medical Microbiology                                 | Norwegian Institute of Public Health, Department of Virology | Kathrine Stene-Johansen, Kamilla Heddeland Instefjord, Hilde Elshaug, Marie Paulsen Madsen, Rasmus Riis Kopperud, Hilde Vollan, Karoline Bragstad, Olav Hungnes |
| EPI_ISL_668417, EPI_ISL_668418                                                                                                                                                                                                                                                                                                                                                                                                                                                                                                                                                                                                                                                 | Department of Medical Microbiology, St. Olavs hospital                                                              | Norwegian Institute of Public Health, Department of Virology | Kathrine Stene-Johansen, Kamilla Heddeland Instefjord, Hilde Elshaug, Marie Paulsen Madsen, Rasmus Riis Kopperud, Hilde Vollan, Karoline Bragstad, Olav Hungnes |
| EPI_ISL_668419                                                                                                                                                                                                                                                                                                                                                                                                                                                                                                                                                                                                                                                                 | Nordland Hospital - Bodo, Laboratory Department, Molecular Biology Unit                                             | Norwegian Institute of Public Health, Department of Virology | Kathrine Stene-Johansen, Kamilla Heddeland Instefjord, Hilde Elshaug, Marie Paulsen Madsen, Rasmus Riis Kopperud, Hilde Vollan, Karoline Bragstad, Olav Hungnes |
| EPI_ISL_668420, EPI_ISL_668421                                                                                                                                                                                                                                                                                                                                                                                                                                                                                                                                                                                                                                                 | Department of Medical Microbiology, St. Olavs hospital                                                              | Norwegian Institute of Public Health, Department of Virology | Kathrine Stene-Johansen, Kamilla Heddeland Instefjord, Hilde Elshaug, Marie Paulsen Madsen, Rasmus Riis Kopperud, Hilde Vollan, Karoline Bragstad, Olav Hungnes |
| EPI_ISL_668422, EPI_ISL_668423                                                                                                                                                                                                                                                                                                                                                                                                                                                                                                                                                                                                                                                 | Nordland Hospital - Bodo, Laboratory Department, Molecular Biology Unit                                             | Norwegian Institute of Public Health, Department of Virology | Kathrine Stene-Johansen, Kamilla Heddeland Instefjord, Hilde Elshaug, Marie Paulsen Madsen, Rasmus Riis Kopperud, Hilde Vollan, Karoline Bragstad, Olav Hungnes |
| EPI_ISL_668424, EPI_ISL_668425, EPI_ISL_668426                                                                                                                                                                                                                                                                                                                                                                                                                                                                                                                                                                                                                                 | University Hospital of Northern Norway, Department for Microbiology and Infectious Disease Control                  | Norwegian Institute of Public Health, Department of Virology | Kathrine Stene-Johansen, Kamilla Heddeland Instefjord, Hilde Elshaug, Marie Paulsen Madsen, Rasmus Riis Kopperud, Hilde Vollan, Karoline Bragstad, Olav Hungnes |
| EPI_ISL_668427, EPI_ISL_668428                                                                                                                                                                                                                                                                                                                                                                                                                                                                                                                                                                                                                                                 | Hospital of Southern Norway - Kristiansand, Department of Medical Microbiology                                      | Norwegian Institute of Public Health, Department of Virology | Kathrine Stene-Johansen, Kamilla Heddeland Instefjord, Hilde Elshaug, Marie Paulsen Madsen, Rasmus Riis Kopperud, Hilde Vollan, Karoline Bragstad, Olav Hungnes |
| EPI_ISL_668429, EPI_ISL_668430, EPI_ISL_668431, EPI_ISL_668432                                                                                                                                                                                                                                                                                                                                                                                                                                                                                                                                                                                                                 | Nordland Hospital - Bodo, Laboratory Department, Molecular Biology Unit                                             | Norwegian Institute of Public Health, Department of Virology | Kathrine Stene-Johansen, Kamilla Heddeland Instefjord, Hilde Elshaug, Marie Paulsen Madsen, Rasmus Riis Kopperud, Hilde Vollan, Karoline Bragstad, Olav Hungnes |
| EPI_ISL_668433                                                                                                                                                                                                                                                                                                                                                                                                                                                                                                                                                                                                                                                                 | Ostfold Hospital Trust - Kalnes, Centre for Laboratory Medicine, Section for gene technology and infection serology | Norwegian Institute of Public Health, Department of Virology | Kathrine Stene-Johansen, Kamilla Heddeland Instefjord, Hilde Elshaug, Marie Paulsen Madsen, Rasmus Riis Kopperud, Hilde Vollan, Karoline Bragstad, Olav Hungnes |
| EPI_ISL_668434                                                                                                                                                                                                                                                                                                                                                                                                                                                                                                                                                                                                                                                                 | Nordland Hospital - Bodo, Laboratory Department, Molecular Biology Unit                                             | Norwegian Institute of Public Health, Department of Virology | Kathrine Stene-Johansen, Kamilla Heddeland Instefjord, Hilde Elshaug, Marie Paulsen Madsen, Rasmus Riis Kopperud, Hilde Vollan, Karoline Bragstad, Olav Hungnes |
| EPI_ISL_668435, EPI_ISL_668436, EPI_ISL_668437                                                                                                                                                                                                                                                                                                                                                                                                                                                                                                                                                                                                                                 | Norwegian Institute of Public Health, Department of Virology                                                        | Norwegian Institute of Public Health, Department of Virology | Kathrine Stene-Johansen, Kamilla Heddeland Instefjord, Hilde Elshaug, Marie Paulsen Madsen, Rasmus Riis Kopperud, Hilde Vollan, Karoline Bragstad, Olav Hungnes |
| EPI_ISL_668438, EPI_ISL_668439, EPI_ISL_668440                                                                                                                                                                                                                                                                                                                                                                                                                                                                                                                                                                                                                                 | Ostfold Hospital Trust - Kalnes, Centre for Laboratory Medicine, Section for gene technology and infection serology | Norwegian Institute of Public Health, Department of Virology | Kathrine Stene-Johansen, Kamilla Heddeland Instefjord, Hilde Elshaug, Marie Paulsen Madsen, Rasmus Riis Kopperud, Hilde Vollan, Karoline Bragstad, Olav Hungnes |
| EPI_ISL_668441                                                                                                                                                                                                                                                                                                                                                                                                                                                                                                                                                                                                                                                                 | Department of Medical Microbiology, St. Olavs hospital                                                              | Norwegian Institute of Public Health, Department of Virology | Kathrine Stene-Johansen, Kamilla Heddeland Instefjord, Hilde Elshaug, Marie Paulsen Madsen, Rasmus Riis Kopperud, Hilde Vollan, Karoline Bragstad, Olav Hungnes |
| EPI_ISL_678408, EPI_ISL_678416, EPI_ISL_678417, EPI_ISL_678419, EPI_ISL_678423, EPI_ISL_678425, EPI_ISL_678430, EPI_ISL_678434, EPI_ISL_678435, EPI_ISL_678440, EPI_ISL_678443, EPI_ISL_678456, EPI_ISL_678458, EPI_ISL_678460, EPI_ISL_678471, EPI_ISL_678475, EPI_ISL_678481                                                                                                                                                                                                                                                                                                                                                                                                 | see above                                                                                                           | Department of Clinical Microbiology                          | GIGA Medical Genomics                                                                                                                                           |
| EPI_ISL_679406, EPI_ISL_679407, EPI_ISL_679408, EPI_ISL_679409, EPI_ISL_679410, EPI_ISL_679411, EPI_ISL_679412, EPI_ISL_679413, EPI_ISL_679414, EPI_ISL_679415, EPI_ISL_679416, EPI_ISL_679417, EPI_ISL_679418, EPI_ISL_679419, EPI_ISL_679420, EPI_ISL_679421, EPI_ISL_679422, EPI_ISL_679423, EPI_ISL_679424, EPI_ISL_679425, EPI_ISL_679426, EPI_ISL_679427, EPI_ISL_679428, EPI_ISL_679429, EPI_ISL_679430, EPI_ISL_679431, EPI_ISL_679432, EPI_ISL_679433, EPI_ISL_679434, EPI_ISL_679435, EPI_ISL_679436, EPI_ISL_679437, EPI_ISL_679438, EPI_ISL_679439, EPI_ISL_679440, EPI_ISL_679441, EPI_ISL_679442, EPI_ISL_679443, EPI_ISL_679444, EPI_ISL_679445, EPI_ISL_679446 | see above                                                                                                           | University College London Hospital                           | COVID-19 Genomics UK (COG-UK) Consortium                                                                                                                        |
| EPI_ISL_681267                                                                                                                                                                                                                                                                                                                                                                                                                                                                                                                                                                                                                                                                 | Department of Clinical Microbiology                                                                                 | GIGA Medical Genomics                                        | Keith Durkin, Maria Artesi, Sébastien Bontems, Raphaël Boreux, Bouchra Boujemla, Cécile Meex, Pierrette Melin, Marie-Pierre Hayette, Vincent Bours              |
| EPI_ISL_681269                                                                                                                                                                                                                                                                                                                                                                                                                                                                                                                                                                                                                                                                 | Department of Clinical Microbiology                                                                                 | GIGA Medical Genomics                                        | Judith Heaney, Matthew Byott, Catherine Houlihan, Dan Frampton, Stuart Kirk, Moira Spyer and Eleni Nastouli                                                     |
| EPI_ISL_681673, EPI_ISL_681674, EPI_ISL_681675, EPI_ISL_681676, EPI_ISL_681677, EPI_ISL_681678, EPI_ISL_681679, EPI_ISL_681680, EPI_ISL_681681, EPI_ISL_681682, EPI_ISL_681683, EPI_ISL_681684, EPI_ISL_681685, EPI_ISL_681686, EPI_ISL_681687, EPI_ISL_681688, EPI_ISL_681689, EPI_ISL_681690, EPI_ISL_681691, EPI_ISL_681692, EPI_ISL_681693, EPI_ISL_681694, EPI_ISL_681695, EPI_ISL_681696, EPI_ISL_681697, EPI_ISL_681698, EPI_ISL_681699, EPI_ISL_681700, EPI_ISL_681701                                                                                                                                                                                                 | see above                                                                                                           | Department of Clinical Microbiology                          | GIGA Medical Genomics                                                                                                                                           |









|                                                                                                                                                                                                                                                                                                                                                                                                                                                                                                                                                                                                                                                                                                                                                                                                                                                                                                                                                                                                                                |                                                                                                                     |                                                              |                                                                                                                                                                                                                                                                                                                                                                                                                                                                                                    |
|--------------------------------------------------------------------------------------------------------------------------------------------------------------------------------------------------------------------------------------------------------------------------------------------------------------------------------------------------------------------------------------------------------------------------------------------------------------------------------------------------------------------------------------------------------------------------------------------------------------------------------------------------------------------------------------------------------------------------------------------------------------------------------------------------------------------------------------------------------------------------------------------------------------------------------------------------------------------------------------------------------------------------------|---------------------------------------------------------------------------------------------------------------------|--------------------------------------------------------------|----------------------------------------------------------------------------------------------------------------------------------------------------------------------------------------------------------------------------------------------------------------------------------------------------------------------------------------------------------------------------------------------------------------------------------------------------------------------------------------------------|
| EPI_ISL_704671, EPI_ISL_704674, EPI_ISL_705247, EPI_ISL_705378, EPI_ISL_705472, EPI_ISL_705942, EPI_ISL_705943, EPI_ISL_705944, EPI_ISL_705945, EPI_ISL_705946, EPI_ISL_705947, EPI_ISL_705948, EPI_ISL_705949, EPI_ISL_705950, EPI_ISL_705951, EPI_ISL_705952, EPI_ISL_705953, EPI_ISL_705954, EPI_ISL_705955, EPI_ISL_705956, EPI_ISL_705957, EPI_ISL_705958, EPI_ISL_705959, EPI_ISL_705960                                                                                                                                                                                                                                                                                                                                                                                                                                                                                                                                                                                                                                 | see above<br>University College London Hospital                                                                     | COVID-19 Genomics UK (COG-UK) Consortium                     | Judith Heaney, Matthew Byott, Catherine Houlihan, Dan Frampton, Stuart Kirk, Moira Spyer and Eleni Nastouli                                                                                                                                                                                                                                                                                                                                                                                        |
| EPI_ISL_707707, EPI_ISL_707708                                                                                                                                                                                                                                                                                                                                                                                                                                                                                                                                                                                                                                                                                                                                                                                                                                                                                                                                                                                                 | Institute for Urban Disease Control and Prevention                                                                  | COVID-19 Network Investigations (CONI) Alliance              | Kamolthip Atsawawanarunt, Elizabeth Batty, Wasun Chantratita, Thanat Chookajorn, Stefan Fernandez, Angkana Huang, Anthony R. Jones, Khajohn Joonsalak, Prayuth Kaewmalang, Amornmas Kongklieng, Chonticha Klungtong, Theerarat Kochakarn, Namfon Kotanan, Krittikorn Kumpornsiri, Wuditchai Manasatienkij, Anek Mungaomklang, Bhakbhoom Panthan, Ekawat Pasomsomb, Pukkapon Parnwijitkul, Kingkan Rakmanee, Insee Semsorn, Janjira Thaipadungpanit, Arporn Wangwiwatsin, Treewat Watthanachockchai |
| EPI_ISL_707718, EPI_ISL_707723, EPI_ISL_707726, EPI_ISL_707727, EPI_ISL_707732, EPI_ISL_707741, EPI_ISL_707742, EPI_ISL_707743, EPI_ISL_707754, EPI_ISL_707762, EPI_ISL_707764                                                                                                                                                                                                                                                                                                                                                                                                                                                                                                                                                                                                                                                                                                                                                                                                                                                 | see above<br>Department of Clinical Microbiology                                                                    | GIGA Medical Genomics                                        | Keith Durkin, Maria Artesi, Sébastien Bontems, Raphaël Boreux, Bouchra Boujemla, Cécile Meex, Pierrette Melin, Marie-Pierre Hayette, Vincent Bours                                                                                                                                                                                                                                                                                                                                                 |
| EPI_ISL_707943, EPI_ISL_707947, EPI_ISL_707948, EPI_ISL_707949, EPI_ISL_707950, EPI_ISL_707951, EPI_ISL_707953, EPI_ISL_707954, EPI_ISL_707955, EPI_ISL_707956, EPI_ISL_707957, EPI_ISL_707958, EPI_ISL_707959, EPI_ISL_707960, EPI_ISL_707961, EPI_ISL_707962, EPI_ISL_707963, EPI_ISL_707964, EPI_ISL_707965, EPI_ISL_707966, EPI_ISL_707967, EPI_ISL_707968, EPI_ISL_707970, EPI_ISL_707971, EPI_ISL_707972, EPI_ISL_707973, EPI_ISL_707974, EPI_ISL_707975, EPI_ISL_707976, EPI_ISL_707977, EPI_ISL_707978, EPI_ISL_707979, EPI_ISL_707980, EPI_ISL_707981, EPI_ISL_707982, EPI_ISL_707983, EPI_ISL_707984, EPI_ISL_707985, EPI_ISL_707986, EPI_ISL_707987, EPI_ISL_707988, EPI_ISL_707989, EPI_ISL_707990, EPI_ISL_707991, EPI_ISL_707992, EPI_ISL_707993, EPI_ISL_707994, EPI_ISL_707995, EPI_ISL_707996, EPI_ISL_707997, EPI_ISL_707998, EPI_ISL_707999, EPI_ISL_708000, EPI_ISL_708001, EPI_ISL_708002, EPI_ISL_708003, EPI_ISL_708010, EPI_ISL_708011, EPI_ISL_708012, EPI_ISL_708013, EPI_ISL_708014, EPI_ISL_708015 | see above<br>Virology, Universitätsklinikum des Saarlandes                                                          | Epigenetics, Saarland University                             | Kathrin Kattler, Markus Vogelgesang, Stefan Lohse, Sascha Tierling, Sigrun Smola, Jörn Walter                                                                                                                                                                                                                                                                                                                                                                                                      |
| EPI_ISL_708026, EPI_ISL_708027                                                                                                                                                                                                                                                                                                                                                                                                                                                                                                                                                                                                                                                                                                                                                                                                                                                                                                                                                                                                 | University Hospital of Northern Norway, Department for Microbiology and Infectious Disease Control                  | Norwegian Institute of Public Health, Department of Virology | Kathrine Stene-Johansen, Kamilla Heddeland Instefjord, Hilde Elshaug, Marie Paulsen Madsen, Rasmus Riis Kopperud, Hilde Vollan, Karoline Bragstad, Olav Hungnes                                                                                                                                                                                                                                                                                                                                    |
| EPI_ISL_708028, EPI_ISL_708029                                                                                                                                                                                                                                                                                                                                                                                                                                                                                                                                                                                                                                                                                                                                                                                                                                                                                                                                                                                                 | Norwegian Institute of Public Health, Department of Virology                                                        | Norwegian Institute of Public Health, Department of Virology | Kathrine Stene-Johansen, Kamilla Heddeland Instefjord, Hilde Elshaug, Marie Paulsen Madsen, Rasmus Riis Kopperud, Hilde Vollan, Karoline Bragstad, Olav Hungnes                                                                                                                                                                                                                                                                                                                                    |
| EPI_ISL_708030, EPI_ISL_708031                                                                                                                                                                                                                                                                                                                                                                                                                                                                                                                                                                                                                                                                                                                                                                                                                                                                                                                                                                                                 | Innlandet Hospital Trust, Division Lillehammer, Department for Medical Microbiology                                 | Norwegian Institute of Public Health, Department of Virology | Kathrine Stene-Johansen, Kamilla Heddeland Instefjord, Hilde Elshaug, Marie Paulsen Madsen, Rasmus Riis Kopperud, Hilde Vollan, Karoline Bragstad, Olav Hungnes                                                                                                                                                                                                                                                                                                                                    |
| EPI_ISL_708032                                                                                                                                                                                                                                                                                                                                                                                                                                                                                                                                                                                                                                                                                                                                                                                                                                                                                                                                                                                                                 | Ostfold Hospital Trust - Kalnes, Centre for Laboratory Medicine, Section for gene technology and infection serology | Norwegian Institute of Public Health, Department of Virology | Kathrine Stene-Johansen, Kamilla Heddeland Instefjord, Hilde Elshaug, Marie Paulsen Madsen, Rasmus Riis Kopperud, Hilde Vollan, Karoline Bragstad, Olav Hungnes                                                                                                                                                                                                                                                                                                                                    |
| EPI_ISL_708033, EPI_ISL_708034                                                                                                                                                                                                                                                                                                                                                                                                                                                                                                                                                                                                                                                                                                                                                                                                                                                                                                                                                                                                 | Oslo University Hospital, Department of Medical Microbiology                                                        | Norwegian Institute of Public Health, Department of Virology | Kathrine Stene-Johansen, Kamilla Heddeland Instefjord, Hilde Elshaug, Marie Paulsen Madsen, Rasmus Riis Kopperud, Hilde Vollan, Karoline Bragstad, Olav Hungnes                                                                                                                                                                                                                                                                                                                                    |
| EPI_ISL_708035                                                                                                                                                                                                                                                                                                                                                                                                                                                                                                                                                                                                                                                                                                                                                                                                                                                                                                                                                                                                                 | Furst Medical Laboratory                                                                                            | Norwegian Institute of Public Health, Department of Virology | Kathrine Stene-Johansen, Kamilla Heddeland Instefjord, Hilde Elshaug, Marie Paulsen Madsen, Rasmus Riis Kopperud, Hilde Vollan, Karoline Bragstad, Olav Hungnes                                                                                                                                                                                                                                                                                                                                    |
| EPI_ISL_708036, EPI_ISL_708037, EPI_ISL_708038, EPI_ISL_708039                                                                                                                                                                                                                                                                                                                                                                                                                                                                                                                                                                                                                                                                                                                                                                                                                                                                                                                                                                 | Innlandet Hospital Trust, Division Lillehammer, Department for Medical Microbiology                                 | Norwegian Institute of Public Health, Department of Virology | Kathrine Stene-Johansen, Kamilla Heddeland Instefjord, Hilde Elshaug, Marie Paulsen Madsen, Rasmus Riis Kopperud, Hilde Vollan, Karoline Bragstad, Olav Hungnes                                                                                                                                                                                                                                                                                                                                    |
| EPI_ISL_708040                                                                                                                                                                                                                                                                                                                                                                                                                                                                                                                                                                                                                                                                                                                                                                                                                                                                                                                                                                                                                 | Norwegian Institute of Public Health, Department of Virology                                                        | Norwegian Institute of Public Health, Department of Virology | Kathrine Stene-Johansen, Kamilla Heddeland Instefjord, Hilde Elshaug, Marie Paulsen Madsen, Rasmus Riis Kopperud, Hilde Vollan, Karoline Bragstad, Olav Hungnes                                                                                                                                                                                                                                                                                                                                    |
| EPI_ISL_708041                                                                                                                                                                                                                                                                                                                                                                                                                                                                                                                                                                                                                                                                                                                                                                                                                                                                                                                                                                                                                 | Medical Microbiology Unit, Department for Laboratory Medicine, Drammen Hospital, Vestre Viken Health Trust,         | Norwegian Institute of Public Health, Department of Virology | Kathrine Stene-Johansen, Kamilla Heddeland Instefjord, Hilde Elshaug, Marie Paulsen Madsen, Rasmus Riis Kopperud, Hilde Vollan, Karoline Bragstad, Olav Hungnes                                                                                                                                                                                                                                                                                                                                    |
| EPI_ISL_708042, EPI_ISL_708043                                                                                                                                                                                                                                                                                                                                                                                                                                                                                                                                                                                                                                                                                                                                                                                                                                                                                                                                                                                                 | Department of Medical Microbiology, St. Olavs hospital                                                              | Norwegian Institute of Public Health, Department of Virology | Kathrine Stene-Johansen, Kamilla Heddeland Instefjord, Hilde Elshaug, Marie Paulsen Madsen, Rasmus Riis Kopperud, Hilde Vollan, Karoline Bragstad, Olav Hungnes                                                                                                                                                                                                                                                                                                                                    |
| EPI_ISL_708044, EPI_ISL_708045                                                                                                                                                                                                                                                                                                                                                                                                                                                                                                                                                                                                                                                                                                                                                                                                                                                                                                                                                                                                 | Dept. of Medical Microbiology, Stavanger University Hospital, Helse Stavanger HF                                    | Norwegian Institute of Public Health, Department of Virology | Kathrine Stene-Johansen, Kamilla Heddeland Instefjord, Hilde Elshaug, Marie Paulsen Madsen, Rasmus Riis Kopperud, Hilde Vollan, Karoline Bragstad, Olav Hungnes                                                                                                                                                                                                                                                                                                                                    |
| EPI_ISL_708046, EPI_ISL_708047, EPI_ISL_708048                                                                                                                                                                                                                                                                                                                                                                                                                                                                                                                                                                                                                                                                                                                                                                                                                                                                                                                                                                                 | Unilabs Laboratory Medicine                                                                                         | Norwegian Institute of Public Health, Department of Virology | Kathrine Stene-Johansen, Kamilla Heddeland Instefjord, Hilde Elshaug, Marie Paulsen Madsen, Rasmus Riis Kopperud, Hilde Vollan, Karoline Bragstad, Olav Hungnes                                                                                                                                                                                                                                                                                                                                    |
| EPI_ISL_708049, EPI_ISL_708050, EPI_ISL_708051                                                                                                                                                                                                                                                                                                                                                                                                                                                                                                                                                                                                                                                                                                                                                                                                                                                                                                                                                                                 | Norwegian Institute of Public Health, Department of Virology                                                        | Norwegian Institute of Public Health, Department of Virology | Kathrine Stene-Johansen, Kamilla Heddeland Instefjord, Hilde Elshaug, Marie Paulsen Madsen, Rasmus Riis Kopperud, Hilde Vollan, Karoline Bragstad, Olav Hungnes                                                                                                                                                                                                                                                                                                                                    |
| EPI_ISL_708052, EPI_ISL_708053, EPI_ISL_708054                                                                                                                                                                                                                                                                                                                                                                                                                                                                                                                                                                                                                                                                                                                                                                                                                                                                                                                                                                                 | Oslo University Hospital, Department of Medical Microbiology                                                        | Norwegian Institute of Public Health, Department of Virology | Kathrine Stene-Johansen, Kamilla Heddeland Instefjord, Hilde Elshaug, Marie Paulsen Madsen, Rasmus Riis Kopperud, Hilde Vollan, Karoline Bragstad, Olav Hungnes                                                                                                                                                                                                                                                                                                                                    |
| EPI_ISL_708055, EPI_ISL_708056                                                                                                                                                                                                                                                                                                                                                                                                                                                                                                                                                                                                                                                                                                                                                                                                                                                                                                                                                                                                 | Hospital of Southern Norway - Kristiansand, Department of Medical Microbiology                                      | Norwegian Institute of Public Health, Department of Virology | Kathrine Stene-Johansen, Kamilla Heddeland Instefjord, Hilde Elshaug, Marie Paulsen Madsen, Rasmus Riis Kopperud, Hilde Vollan, Karoline Bragstad, Olav Hungnes                                                                                                                                                                                                                                                                                                                                    |
| EPI_ISL_708057, EPI_ISL_708058, EPI_ISL_708059                                                                                                                                                                                                                                                                                                                                                                                                                                                                                                                                                                                                                                                                                                                                                                                                                                                                                                                                                                                 | Furst Medical Laboratory                                                                                            | Norwegian Institute of Public Health, Department of Virology | Kathrine Stene-Johansen, Kamilla Heddeland Instefjord, Hilde Elshaug, Marie Paulsen Madsen, Rasmus Riis Kopperud, Hilde Vollan, Karoline Bragstad, Olav Hungnes                                                                                                                                                                                                                                                                                                                                    |
| EPI_ISL_708060, EPI_ISL_708061, EPI_ISL_708062, EPI_ISL_708063, EPI_ISL_708064                                                                                                                                                                                                                                                                                                                                                                                                                                                                                                                                                                                                                                                                                                                                                                                                                                                                                                                                                 | Unilabs Laboratory Medicine                                                                                         | Norwegian Institute of Public Health, Department of Virology | Kathrine Stene-Johansen, Kamilla Heddeland Instefjord, Hilde Elshaug, Marie Paulsen Madsen, Rasmus Riis Kopperud, Hilde Vollan, Karoline Bragstad, Olav Hungnes                                                                                                                                                                                                                                                                                                                                    |
| EPI_ISL_708065, EPI_ISL_708066, EPI_ISL_708067, EPI_ISL_708068, EPI_ISL_708069, EPI_ISL_708070, EPI_ISL_708071, EPI_ISL_708072                                                                                                                                                                                                                                                                                                                                                                                                                                                                                                                                                                                                                                                                                                                                                                                                                                                                                                 | University Hospital of Northern Norway, Department for Microbiology and Infectious Disease Control                  | Norwegian Institute of Public Health, Department of Virology | Kathrine Stene-Johansen, Kamilla Heddeland Instefjord, Hilde Elshaug, Marie Paulsen Madsen, Rasmus Riis Kopperud, Hilde Vollan, Karoline Bragstad, Olav Hungnes                                                                                                                                                                                                                                                                                                                                    |
| EPI_ISL_708073, EPI_ISL_708074, EPI_ISL_708075, EPI_ISL_708076, EPI_ISL_708077, EPI_ISL_708078                                                                                                                                                                                                                                                                                                                                                                                                                                                                                                                                                                                                                                                                                                                                                                                                                                                                                                                                 | Foerde Hospital, Department of Microbiology                                                                         | Norwegian Institute of Public Health, Department of Virology | Kathrine Stene-Johansen, Kamilla Heddeland Instefjord, Hilde Elshaug, Marie Paulsen Madsen, Rasmus Riis Kopperud, Hilde Vollan, Karoline Bragstad, Olav Hungnes                                                                                                                                                                                                                                                                                                                                    |
| EPI_ISL_708079, EPI_ISL_708080                                                                                                                                                                                                                                                                                                                                                                                                                                                                                                                                                                                                                                                                                                                                                                                                                                                                                                                                                                                                 | University Hospital of Northern Norway, Department for Microbiology and Infectious Disease Control                  | Norwegian Institute of Public Health, Department of Virology | Kathrine Stene-Johansen, Kamilla Heddeland Instefjord, Hilde Elshaug, Marie Paulsen Madsen, Rasmus Riis Kopperud, Hilde Vollan, Karoline Bragstad, Olav Hungnes                                                                                                                                                                                                                                                                                                                                    |
| EPI_ISL_708081                                                                                                                                                                                                                                                                                                                                                                                                                                                                                                                                                                                                                                                                                                                                                                                                                                                                                                                                                                                                                 | Dept. of Medical Microbiology, Stavanger University Hospital, Helse Stavanger HF                                    | Norwegian Institute of Public Health, Department of Virology | Kathrine Stene-Johansen, Kamilla Heddeland Instefjord, Hilde Elshaug, Marie Paulsen Madsen, Rasmus Riis Kopperud, Hilde Vollan, Karoline Bragstad, Olav Hungnes                                                                                                                                                                                                                                                                                                                                    |
| EPI_ISL_708082, EPI_ISL_708083, EPI_ISL_708084, EPI_ISL_708085, EPI_ISL_708086, EPI_ISL_708087, EPI_ISL_708088, EPI_ISL_708089, EPI_ISL_708090, EPI_ISL_708091, EPI_ISL_708092, EPI_ISL_708093, EPI_ISL_708094, EPI_ISL_708095                                                                                                                                                                                                                                                                                                                                                                                                                                                                                                                                                                                                                                                                                                                                                                                                 | see above<br>University Hospital of Northern Norway, Department for Microbiology and Infectious Disease Control     | Norwegian Institute of Public Health, Department of Virology | Kathrine Stene-Johansen, Kamilla Heddeland Instefjord, Hilde Elshaug, Marie Paulsen Madsen, Rasmus Riis Kopperud, Hilde Vollan, Karoline Bragstad, Olav Hungnes                                                                                                                                                                                                                                                                                                                                    |
| EPI_ISL_708096                                                                                                                                                                                                                                                                                                                                                                                                                                                                                                                                                                                                                                                                                                                                                                                                                                                                                                                                                                                                                 | Oslo University Hospital, Department of Medical Microbiology                                                        | Norwegian Institute of Public Health, Department of Virology | Kathrine Stene-Johansen, Kamilla Heddeland Instefjord, Hilde Elshaug, Marie Paulsen Madsen, Rasmus Riis Kopperud, Hilde Vollan, Karoline Bragstad, Olav Hungnes                                                                                                                                                                                                                                                                                                                                    |
| EPI_ISL_708097, EPI_ISL_708098, EPI_ISL_708099, EPI_ISL_708100, EPI_ISL_708101, EPI_ISL_708102, EPI_ISL_708103, EPI_ISL_708104, EPI_ISL_708105                                                                                                                                                                                                                                                                                                                                                                                                                                                                                                                                                                                                                                                                                                                                                                                                                                                                                 | Nordland Hospital - Bodo, Laboratory Department, Molecular Biology Unit                                             | Norwegian Institute of Public Health, Department of Virology | Kathrine Stene-Johansen, Kamilla Heddeland Instefjord, Hilde Elshaug, Marie Paulsen Madsen, Rasmus Riis Kopperud, Hilde Vollan, Karoline Bragstad, Olav Hungnes                                                                                                                                                                                                                                                                                                                                    |
| EPI_ISL_708106, EPI_ISL_708107, EPI_ISL_708108, EPI_ISL_708109                                                                                                                                                                                                                                                                                                                                                                                                                                                                                                                                                                                                                                                                                                                                                                                                                                                                                                                                                                 | Department of Medical Microbiology, St. Olavs hospital                                                              | Norwegian Institute of Public Health, Department of Virology | Kathrine Stene-Johansen, Kamilla Heddeland Instefjord, Hilde Elshaug, Marie Paulsen Madsen, Rasmus Riis Kopperud, Hilde Vollan, Karoline Bragstad, Olav Hungnes                                                                                                                                                                                                                                                                                                                                    |

|                                                                                                                                                                                                                                                |                                                                                                                     |                                                              |                                                                                                                                                                                                                                                                                                                                                                                                                                                                                                |
|------------------------------------------------------------------------------------------------------------------------------------------------------------------------------------------------------------------------------------------------|---------------------------------------------------------------------------------------------------------------------|--------------------------------------------------------------|------------------------------------------------------------------------------------------------------------------------------------------------------------------------------------------------------------------------------------------------------------------------------------------------------------------------------------------------------------------------------------------------------------------------------------------------------------------------------------------------|
| EPI_ISL_708110, EPI_ISL_708111, EPI_ISL_708112, EPI_ISL_708113, EPI_ISL_708114                                                                                                                                                                 | Ostfold Hospital Trust - Kalnes, Centre for Laboratory Medicine, Section for gene technology and infection serology | Norwegian Institute of Public Health, Department of Virology | Kathrine Stene-Johansen, Kamilla Heddeland Instefjord, Hilde Elshaug, Marie Paulsen Madsen, Rasmus Riis Kopperud, Hilde Vollan, Karoline Bragstad, Olav Hungnes                                                                                                                                                                                                                                                                                                                                |
| EPI_ISL_708115, EPI_ISL_708116, EPI_ISL_708117                                                                                                                                                                                                 | Medical Microbiology Unit, Department for Laboratory Medicine, Drammen Hospital, Vestre Viken Health Trust,         | Norwegian Institute of Public Health, Department of Virology | Kathrine Stene-Johansen, Kamilla Heddeland Instefjord, Hilde Elshaug, Marie Paulsen Madsen, Rasmus Riis Kopperud, Hilde Vollan, Karoline Bragstad, Olav Hungnes                                                                                                                                                                                                                                                                                                                                |
| EPI_ISL_708118, EPI_ISL_708119, EPI_ISL_708120, EPI_ISL_708121                                                                                                                                                                                 | Oslo University Hospital, Department of Medical Microbiology                                                        | Norwegian Institute of Public Health, Department of Virology | Kathrine Stene-Johansen, Kamilla Heddeland Instefjord, Hilde Elshaug, Marie Paulsen Madsen, Rasmus Riis Kopperud, Hilde Vollan, Karoline Bragstad, Olav Hungnes                                                                                                                                                                                                                                                                                                                                |
| EPI_ISL_708122, EPI_ISL_708123, EPI_ISL_708124, EPI_ISL_708125                                                                                                                                                                                 | Hospital of Southern Norway - Kristiansand, Department of Medical Microbiology                                      | Norwegian Institute of Public Health, Department of Virology | Kathrine Stene-Johansen, Kamilla Heddeland Instefjord, Hilde Elshaug, Marie Paulsen Madsen, Rasmus Riis Kopperud, Hilde Vollan, Karoline Bragstad, Olav Hungnes                                                                                                                                                                                                                                                                                                                                |
| EPI_ISL_708126, EPI_ISL_708127, EPI_ISL_708128, EPI_ISL_708129, EPI_ISL_708130                                                                                                                                                                 | Furst Medical Laboratory                                                                                            | Norwegian Institute of Public Health, Department of Virology | Kathrine Stene-Johansen, Kamilla Heddeland Instefjord, Hilde Elshaug, Marie Paulsen Madsen, Rasmus Riis Kopperud, Hilde Vollan, Karoline Bragstad, Olav Hungnes                                                                                                                                                                                                                                                                                                                                |
| EPI_ISL_708131, EPI_ISL_708132, EPI_ISL_708133, EPI_ISL_708134, EPI_ISL_708135                                                                                                                                                                 | Dept. of Medical Microbiology, Stavanger University Hospital, Helse Stavanger HF                                    | Norwegian Institute of Public Health, Department of Virology | Kathrine Stene-Johansen, Kamilla Heddeland Instefjord, Hilde Elshaug, Marie Paulsen Madsen, Rasmus Riis Kopperud, Hilde Vollan, Karoline Bragstad, Olav Hungnes                                                                                                                                                                                                                                                                                                                                |
| EPI_ISL_708136, EPI_ISL_708137, EPI_ISL_708138, EPI_ISL_708139                                                                                                                                                                                 | Medical Microbiology Unit, Department for Laboratory Medicine, Drammen Hospital, Vestre Viken Health Trust,         | Norwegian Institute of Public Health, Department of Virology | Kathrine Stene-Johansen, Kamilla Heddeland Instefjord, Hilde Elshaug, Marie Paulsen Madsen, Rasmus Riis Kopperud, Hilde Vollan, Karoline Bragstad, Olav Hungnes                                                                                                                                                                                                                                                                                                                                |
| EPI_ISL_708140, EPI_ISL_708141                                                                                                                                                                                                                 | Norwegian Institute of Public Health, Department of Virology                                                        | Norwegian Institute of Public Health, Department of Virology | Kathrine Stene-Johansen, Kamilla Heddeland Instefjord, Hilde Elshaug, Marie Paulsen Madsen, Rasmus Riis Kopperud, Hilde Vollan, Karoline Bragstad, Olav Hungnes                                                                                                                                                                                                                                                                                                                                |
| EPI_ISL_708142, EPI_ISL_708143, EPI_ISL_708144, EPI_ISL_708145, EPI_ISL_708146                                                                                                                                                                 | Department of Medical Microbiology, St. Olavs hospital                                                              | Norwegian Institute of Public Health, Department of Virology | Kathrine Stene-Johansen, Kamilla Heddeland Instefjord, Hilde Elshaug, Marie Paulsen Madsen, Rasmus Riis Kopperud, Hilde Vollan, Karoline Bragstad, Olav Hungnes                                                                                                                                                                                                                                                                                                                                |
| EPI_ISL_708147, EPI_ISL_708148, EPI_ISL_708149, EPI_ISL_708150                                                                                                                                                                                 | Unilabs Laboratory Medicine                                                                                         | Norwegian Institute of Public Health, Department of Virology | Kathrine Stene-Johansen, Kamilla Heddeland Instefjord, Hilde Elshaug, Marie Paulsen Madsen, Rasmus Riis Kopperud, Hilde Vollan, Karoline Bragstad, Olav Hungnes                                                                                                                                                                                                                                                                                                                                |
| EPI_ISL_708151, EPI_ISL_708152, EPI_ISL_708153                                                                                                                                                                                                 | Innlandet Hospital Trust, Division Lillehammer, Department for Medical Microbiology                                 | Norwegian Institute of Public Health, Department of Virology | Kathrine Stene-Johansen, Kamilla Heddeland Instefjord, Hilde Elshaug, Marie Paulsen Madsen, Rasmus Riis Kopperud, Hilde Vollan, Karoline Bragstad, Olav Hungnes                                                                                                                                                                                                                                                                                                                                |
| EPI_ISL_708154, EPI_ISL_708155, EPI_ISL_708156, EPI_ISL_708157, EPI_ISL_708158, EPI_ISL_708159, EPI_ISL_708160, EPI_ISL_708161, EPI_ISL_708162, EPI_ISL_708163, EPI_ISL_708164, EPI_ISL_708165, EPI_ISL_708166, EPI_ISL_708167, EPI_ISL_708168 | see above                                                                                                           | Vestfold Hospital, Toensberg Department of Microbiology      | Norwegian Institute of Public Health, Department of Virology                                                                                                                                                                                                                                                                                                                                                                                                                                   |
| EPI_ISL_708169, EPI_ISL_708170                                                                                                                                                                                                                 | Norwegian Institute of Public Health, Department of Virology                                                        | Norwegian Institute of Public Health, Department of Virology | Kathrine Stene-Johansen, Kamilla Heddeland Instefjord, Hilde Elshaug, Marie Paulsen Madsen, Rasmus Riis Kopperud, Hilde Vollan, Karoline Bragstad, Olav Hungnes                                                                                                                                                                                                                                                                                                                                |
| EPI_ISL_708171, EPI_ISL_708172, EPI_ISL_708173, EPI_ISL_708174, EPI_ISL_708175                                                                                                                                                                 | Oslo University Hospital, Department of Medical Microbiology                                                        | Norwegian Institute of Public Health, Department of Virology | Kathrine Stene-Johansen, Kamilla Heddeland Instefjord, Hilde Elshaug, Marie Paulsen Madsen, Rasmus Riis Kopperud, Hilde Vollan, Karoline Bragstad, Olav Hungnes                                                                                                                                                                                                                                                                                                                                |
| EPI_ISL_708176, EPI_ISL_708177, EPI_ISL_708178, EPI_ISL_708179                                                                                                                                                                                 | Foerde Hospital, Department of Microbiology                                                                         | Norwegian Institute of Public Health, Department of Virology | Kathrine Stene-Johansen, Kamilla Heddeland Instefjord, Hilde Elshaug, Marie Paulsen Madsen, Rasmus Riis Kopperud, Hilde Vollan, Karoline Bragstad, Olav Hungnes                                                                                                                                                                                                                                                                                                                                |
| EPI_ISL_708180, EPI_ISL_708181                                                                                                                                                                                                                 | Norwegian Institute of Public Health, Department of Virology                                                        | Norwegian Institute of Public Health, Department of Virology | Kathrine Stene-Johansen, Kamilla Heddeland Instefjord, Hilde Elshaug, Marie Paulsen Madsen, Rasmus Riis Kopperud, Hilde Vollan, Karoline Bragstad, Olav Hungnes                                                                                                                                                                                                                                                                                                                                |
| EPI_ISL_708196                                                                                                                                                                                                                                 | Medical Microbiology Unit, Department for Laboratory Medicine, Drammen Hospital, Vestre Viken Health Trust,         | Norwegian Institute of Public Health, Department of Virology | Kathrine Stene-Johansen, Kamilla Heddeland Instefjord, Hilde Elshaug, Marie Paulsen Madsen, Rasmus Riis Kopperud, Hilde Vollan, Karoline Bragstad, Olav Hungnes                                                                                                                                                                                                                                                                                                                                |
| EPI_ISL_708197, EPI_ISL_708198                                                                                                                                                                                                                 | University Hospital of Northern Norway, Department for Microbiology and Infectious Disease Control                  | Norwegian Institute of Public Health, Department of Virology | Kathrine Stene-Johansen, Kamilla Heddeland Instefjord, Hilde Elshaug, Marie Paulsen Madsen, Rasmus Riis Kopperud, Hilde Vollan, Karoline Bragstad, Olav Hungnes                                                                                                                                                                                                                                                                                                                                |
| EPI_ISL_708199                                                                                                                                                                                                                                 | Medical Microbiology Unit, Department for Laboratory Medicine, Drammen Hospital, Vestre Viken Health Trust,         | Norwegian Institute of Public Health, Department of Virology | Kathrine Stene-Johansen, Kamilla Heddeland Instefjord, Hilde Elshaug, Marie Paulsen Madsen, Rasmus Riis Kopperud, Hilde Vollan, Karoline Bragstad, Olav Hungnes                                                                                                                                                                                                                                                                                                                                |
| EPI_ISL_708456, EPI_ISL_708457, EPI_ISL_708459                                                                                                                                                                                                 | Department of Clinical Microbiology                                                                                 | GIGA Medical Genomics                                        | Keith Durkin, Maria Artesi, Justine Deféche, Gilles Darcis, Michel Moutschen, Sébastien Bontems, Raphaël Boreux, Bouchra Boujemla, Cécile Meex, Pierrette Melin, Marie-Pierre Hayette, Vincent Bours                                                                                                                                                                                                                                                                                           |
| EPI_ISL_722931, EPI_ISL_722935, EPI_ISL_722937, EPI_ISL_722938, EPI_ISL_722947, EPI_ISL_722949, EPI_ISL_722950, EPI_ISL_722955, EPI_ISL_722965                                                                                                 | Department of Clinical Microbiology                                                                                 | GIGA Medical Genomics                                        | Keith Durkin, Maria Artesi, Sébastien Bontems, Raphaël Boreux, Bouchra Boujemla, Cécile Meex, Pierrette Melin, Marie-Pierre Hayette, Vincent Bours                                                                                                                                                                                                                                                                                                                                             |
| EPI_ISL_728557, EPI_ISL_728558, EPI_ISL_728559, EPI_ISL_728560, EPI_ISL_728561, EPI_ISL_728562, EPI_ISL_728563                                                                                                                                 | Institute for Urban Disease Control and Prevention                                                                  | COVID-19 Network Investigations (CONI) Alliance              | Kamolthip Atsawaranunt, Elizabeth Batty, Wasun Chantratita, Thanat Chookajorn, Stefan Fernandez, Angkana Huang, Anthony R. Jones, Khajohn Joonsalak, Chonticha Klungtong, Theerarat Kochakarn, Prayuth Kaewmalang, Amornmas Kongkieng, Namfon Kotanan, Krittikorn Kumpornsin, Wuditchai Manasatienkij, Anek Mungaomklang, Bhakbhoom Panthan, Pukkakorn Parnwijitkul, Ekawat Pasomsub, Kingkan Rakmanee, Insee Sarnsom, Janjira Thaipadungpanit, Arporn Wangwiwatsin, Treewat Watthanachockchai |
| EPI_ISL_729735, EPI_ISL_729736                                                                                                                                                                                                                 | Connecticut Department of Health                                                                                    | Grubaugh Lab - Yale School of Public Health                  | Joseph Fauver, Tara Alpert, Anderson Brito, Annie Watkins, Anne Wyllie, Chantal Vogels, Mary Petrone, Chaney Kalinich, Isabel Ott, Arnau Casanovas, Catherine Muenker, Adam Moore, Alice Lu, Maria Tokuyama, Patrick Wong, Peiwen Lu, Saad Omer, Richard Martinello, Allison Nelson, Shelli Farhadian, Akiko Iwasaki, Charlese Dela Cruz, Albert Ko, Nathan Grubaugh                                                                                                                           |
| EPI_ISL_729737                                                                                                                                                                                                                                 | Grubaugh Lab - Yale School of Public Health                                                                         | Grubaugh Lab - Yale School of Public Health                  | Joseph Fauver, Tara Alpert, Anderson Brito, Annie Watkins, Anne Wyllie, Chantal Vogels, Mary Petrone, Chaney Kalinich, Isabel Ott, Arnau Casanovas, Catherine Muenker, Adam Moore, Alice Lu, Maria Tokuyama, Patrick Wong, Peiwen Lu, Saad Omer, Richard Martinello, Allison Nelson, Shelli Farhadian, Akiko Iwasaki, Charlese Dela Cruz, Albert Ko, Nathan Grubaugh                                                                                                                           |
| EPI_ISL_729738                                                                                                                                                                                                                                 | Yale Pathology Lab                                                                                                  | Grubaugh Lab - Yale School of Public Health                  | Joseph Fauver, Tara Alpert, Anderson Brito, Annie Watkins, Anne Wyllie, Chantal Vogels, Mary Petrone, Chaney Kalinich, Isabel Ott, Arnau Casanovas, Catherine Muenker, Adam Moore, Alice Lu, Maria Tokuyama, Patrick Wong, Peiwen Lu, Saad Omer, Richard Martinello, Allison Nelson, Shelli Farhadian, Akiko Iwasaki, Charlese Dela Cruz, Albert Ko, Nathan Grubaugh                                                                                                                           |
| EPI_ISL_729739, EPI_ISL_729740                                                                                                                                                                                                                 | Grubaugh Lab - Yale School of Public Health                                                                         | Grubaugh Lab - Yale School of Public Health                  | Joseph Fauver, Tara Alpert, Anderson Brito, Annie Watkins, Anne Wyllie, Chantal Vogels, Mary Petrone, Chaney Kalinich, Isabel Ott, Arnau Casanovas, Catherine Muenker, Adam Moore, Alice Lu, Maria Tokuyama, Patrick Wong, Peiwen Lu, Saad Omer, Richard Martinello, Allison Nelson, Shelli Farhadian, Akiko Iwasaki, Charlese Dela Cruz, Albert Ko, Nathan Grubaugh                                                                                                                           |
| EPI_ISL_729741                                                                                                                                                                                                                                 | Connecticut Department of Health                                                                                    | Grubaugh Lab - Yale School of Public Health                  | Joseph Fauver, Tara Alpert, Anderson Brito, Annie Watkins, Anne Wyllie, Chantal Vogels, Mary Petrone, Chaney Kalinich, Isabel Ott, Arnau Casanovas, Catherine Muenker, Adam Moore, Alice Lu, Maria Tokuyama, Patrick Wong, Peiwen Lu, Saad Omer, Richard Martinello, Allison Nelson, Shelli Farhadian, Akiko Iwasaki, Charlese Dela Cruz, Albert Ko, Nathan Grubaugh                                                                                                                           |
| EPI_ISL_729742                                                                                                                                                                                                                                 | Yale Pathology Lab                                                                                                  | Grubaugh Lab - Yale School of Public Health                  | Joseph Fauver, Tara Alpert, Anderson Brito, Annie Watkins, Anne Wyllie, Chantal Vogels, Mary Petrone, Chaney Kalinich, Isabel Ott, Arnau Casanovas, Catherine Muenker, Adam Moore, Alice Lu, Maria Tokuyama, Patrick Wong, Peiwen Lu, Saad Omer, Richard Martinello, Allison Nelson, Shelli Farhadian, Akiko Iwasaki, Charlese Dela Cruz, Albert Ko, Nathan Grubaugh                                                                                                                           |





|                                                                                                                                                                                                                                                                                                                                                                                                                                                                                                                                                                                                                                                                                                                                                                                                                                                                                                                                                                                                                                                                                                                                                                                                                                                                                                                                                                                                                                                                                                                                                                                                                                                                                                                                                                                                                                                                                                                                                                                                                                                                                                                                                                                                                                                                                                                                                                                                                                                                                                                                                                                                                                                                                                                                                                                                                                                                |                                                                                          |                                                              |                                                                                                                                                                                                             |
|----------------------------------------------------------------------------------------------------------------------------------------------------------------------------------------------------------------------------------------------------------------------------------------------------------------------------------------------------------------------------------------------------------------------------------------------------------------------------------------------------------------------------------------------------------------------------------------------------------------------------------------------------------------------------------------------------------------------------------------------------------------------------------------------------------------------------------------------------------------------------------------------------------------------------------------------------------------------------------------------------------------------------------------------------------------------------------------------------------------------------------------------------------------------------------------------------------------------------------------------------------------------------------------------------------------------------------------------------------------------------------------------------------------------------------------------------------------------------------------------------------------------------------------------------------------------------------------------------------------------------------------------------------------------------------------------------------------------------------------------------------------------------------------------------------------------------------------------------------------------------------------------------------------------------------------------------------------------------------------------------------------------------------------------------------------------------------------------------------------------------------------------------------------------------------------------------------------------------------------------------------------------------------------------------------------------------------------------------------------------------------------------------------------------------------------------------------------------------------------------------------------------------------------------------------------------------------------------------------------------------------------------------------------------------------------------------------------------------------------------------------------------------------------------------------------------------------------------------------------|------------------------------------------------------------------------------------------|--------------------------------------------------------------|-------------------------------------------------------------------------------------------------------------------------------------------------------------------------------------------------------------|
|                                                                                                                                                                                                                                                                                                                                                                                                                                                                                                                                                                                                                                                                                                                                                                                                                                                                                                                                                                                                                                                                                                                                                                                                                                                                                                                                                                                                                                                                                                                                                                                                                                                                                                                                                                                                                                                                                                                                                                                                                                                                                                                                                                                                                                                                                                                                                                                                                                                                                                                                                                                                                                                                                                                                                                                                                                                                |                                                                                          |                                                              | and Tammy Bannerman                                                                                                                                                                                         |
| EPI_ISL_763319                                                                                                                                                                                                                                                                                                                                                                                                                                                                                                                                                                                                                                                                                                                                                                                                                                                                                                                                                                                                                                                                                                                                                                                                                                                                                                                                                                                                                                                                                                                                                                                                                                                                                                                                                                                                                                                                                                                                                                                                                                                                                                                                                                                                                                                                                                                                                                                                                                                                                                                                                                                                                                                                                                                                                                                                                                                 | Ohio Department of Health Laboratory                                                     | Ohio Department of Health laboratory                         | Jennifer Holmes, Eric Brandt, Keoni Omura, Glen McGillivray, Caitlin McDonnell, Kirtana Ramadugu, Kelsey Florek, Heather Blankenship, Quanta Brown, and Tammy Bannerman                                     |
| EPI_ISL_763321                                                                                                                                                                                                                                                                                                                                                                                                                                                                                                                                                                                                                                                                                                                                                                                                                                                                                                                                                                                                                                                                                                                                                                                                                                                                                                                                                                                                                                                                                                                                                                                                                                                                                                                                                                                                                                                                                                                                                                                                                                                                                                                                                                                                                                                                                                                                                                                                                                                                                                                                                                                                                                                                                                                                                                                                                                                 | Ohio Department of Health Laboratory                                                     | Ohio Depart of Health Laboratory                             | Jennifer Holmes, Eric Brandt, Keoni Omura, Glen McGillivray, Caitlin McDonnell, Kirtana Ramadugu, Kelsey Florek, Heather Blankenship, Quanta Brown, and Tammy Bannerman                                     |
| EPI_ISL_768325, EPI_ISL_768326, EPI_ISL_768327, EPI_ISL_768328, EPI_ISL_768329, EPI_ISL_768330, EPI_ISL_768331, EPI_ISL_768332, EPI_ISL_768333, EPI_ISL_768334, EPI_ISL_768335, EPI_ISL_768336, EPI_ISL_768337, EPI_ISL_768338, EPI_ISL_768339, EPI_ISL_768340, EPI_ISL_768341, EPI_ISL_768342, EPI_ISL_768343, EPI_ISL_768344, EPI_ISL_768345, EPI_ISL_768346, EPI_ISL_768347, EPI_ISL_768348, EPI_ISL_768349, EPI_ISL_768350, EPI_ISL_768351, EPI_ISL_768352, EPI_ISL_768353, EPI_ISL_768354, EPI_ISL_768355, EPI_ISL_768356, EPI_ISL_768357, EPI_ISL_768358, EPI_ISL_768359, EPI_ISL_768360, EPI_ISL_768361, EPI_ISL_768362, EPI_ISL_768363, EPI_ISL_768364, EPI_ISL_768365, EPI_ISL_768366, EPI_ISL_768367, EPI_ISL_768368, EPI_ISL_768369, EPI_ISL_768370, EPI_ISL_768371, EPI_ISL_768372, EPI_ISL_768373, EPI_ISL_768374, EPI_ISL_768375, EPI_ISL_768376, EPI_ISL_768377, EPI_ISL_768378, EPI_ISL_768379, EPI_ISL_768380, EPI_ISL_768381, EPI_ISL_768382, EPI_ISL_768383, EPI_ISL_768384, EPI_ISL_768385, EPI_ISL_768386, EPI_ISL_768387, EPI_ISL_768388, EPI_ISL_768389, EPI_ISL_768390, EPI_ISL_768391, EPI_ISL_768392, EPI_ISL_768393, EPI_ISL_768394, EPI_ISL_768395, EPI_ISL_768396, EPI_ISL_768397, EPI_ISL_768398, EPI_ISL_768399, EPI_ISL_768400, EPI_ISL_768401, EPI_ISL_768402, EPI_ISL_768403, EPI_ISL_768404, EPI_ISL_768405, EPI_ISL_768406, EPI_ISL_768407, EPI_ISL_768408, EPI_ISL_768409, EPI_ISL_768410, EPI_ISL_768411, EPI_ISL_768412, EPI_ISL_768413, EPI_ISL_768414, EPI_ISL_768415, EPI_ISL_768416, EPI_ISL_768417, EPI_ISL_768418, EPI_ISL_768419, EPI_ISL_768420, EPI_ISL_768421, EPI_ISL_768422, EPI_ISL_768423, EPI_ISL_768424, EPI_ISL_768425, EPI_ISL_768426, EPI_ISL_768427, EPI_ISL_768428, EPI_ISL_768429, EPI_ISL_768430, EPI_ISL_768431, EPI_ISL_768432, EPI_ISL_768433, EPI_ISL_768434, EPI_ISL_768435, EPI_ISL_768436, EPI_ISL_768437, EPI_ISL_768438, EPI_ISL_768439, EPI_ISL_768440, EPI_ISL_768441, EPI_ISL_768442, EPI_ISL_768443, EPI_ISL_768444, EPI_ISL_768445, EPI_ISL_768446, EPI_ISL_768447, EPI_ISL_768448, EPI_ISL_768449, EPI_ISL_768450, EPI_ISL_768451, EPI_ISL_768452, EPI_ISL_768453, EPI_ISL_768454, EPI_ISL_768455, EPI_ISL_768456, EPI_ISL_768457, EPI_ISL_768458, EPI_ISL_768459, EPI_ISL_768460, EPI_ISL_768461, EPI_ISL_768462, EPI_ISL_768463, EPI_ISL_768464, EPI_ISL_768465, EPI_ISL_768466, EPI_ISL_768467, EPI_ISL_768468, EPI_ISL_768469, EPI_ISL_768470, EPI_ISL_768471, EPI_ISL_768472, EPI_ISL_768473, EPI_ISL_768474, EPI_ISL_768475, EPI_ISL_768476, EPI_ISL_768477, EPI_ISL_768478, EPI_ISL_768479, EPI_ISL_768480, EPI_ISL_768481, EPI_ISL_768482, EPI_ISL_768483, EPI_ISL_768484, EPI_ISL_768485, EPI_ISL_768486, EPI_ISL_768487, EPI_ISL_768488, EPI_ISL_768489, EPI_ISL_768490, EPI_ISL_768491, EPI_ISL_768492, EPI_ISL_768493, EPI_ISL_768494, EPI_ISL_768495, EPI_ISL_768496 |                                                                                          |                                                              |                                                                                                                                                                                                             |
| see above                                                                                                                                                                                                                                                                                                                                                                                                                                                                                                                                                                                                                                                                                                                                                                                                                                                                                                                                                                                                                                                                                                                                                                                                                                                                                                                                                                                                                                                                                                                                                                                                                                                                                                                                                                                                                                                                                                                                                                                                                                                                                                                                                                                                                                                                                                                                                                                                                                                                                                                                                                                                                                                                                                                                                                                                                                                      | LSUHS Emerging Viral Threat Laboratory                                                   | Microbial Genome Sequencing Center                           | Jeremy P. Kamil, Jennifer L. Carroll, Camille F. Abshire, Maarten Van Diest, Andrew D. Yurochko, Martin J. Sapp, Rona S. Scott, Christopher G. Kevil, Daniel J. Snyder, Vaughn S. Cooper, John A. Vanchiere |
| EPI_ISL_768497, EPI_ISL_768498, EPI_ISL_768499, EPI_ISL_768500, EPI_ISL_768501, EPI_ISL_768502, EPI_ISL_768503, EPI_ISL_768504, EPI_ISL_768505, EPI_ISL_768506, EPI_ISL_768507, EPI_ISL_768508                                                                                                                                                                                                                                                                                                                                                                                                                                                                                                                                                                                                                                                                                                                                                                                                                                                                                                                                                                                                                                                                                                                                                                                                                                                                                                                                                                                                                                                                                                                                                                                                                                                                                                                                                                                                                                                                                                                                                                                                                                                                                                                                                                                                                                                                                                                                                                                                                                                                                                                                                                                                                                                                 |                                                                                          |                                                              |                                                                                                                                                                                                             |
| see above                                                                                                                                                                                                                                                                                                                                                                                                                                                                                                                                                                                                                                                                                                                                                                                                                                                                                                                                                                                                                                                                                                                                                                                                                                                                                                                                                                                                                                                                                                                                                                                                                                                                                                                                                                                                                                                                                                                                                                                                                                                                                                                                                                                                                                                                                                                                                                                                                                                                                                                                                                                                                                                                                                                                                                                                                                                      | LSUHS Emerging Viral Threat Laboratory                                                   | Microbial Genome Sequencing Center                           | Jennifer L. Carroll, Jeremy P. Kamil, Camille F. Abshire, Maarten Van Diest, Andrew D. Yurochko, Martin J. Sapp, Rona S. Scott, Christopher G. Kevil, Daniel J. Snyder, Vaughn S. Cooper, John A. Vanchiere |
| EPI_ISL_768525                                                                                                                                                                                                                                                                                                                                                                                                                                                                                                                                                                                                                                                                                                                                                                                                                                                                                                                                                                                                                                                                                                                                                                                                                                                                                                                                                                                                                                                                                                                                                                                                                                                                                                                                                                                                                                                                                                                                                                                                                                                                                                                                                                                                                                                                                                                                                                                                                                                                                                                                                                                                                                                                                                                                                                                                                                                 | LSUHS Emerging Viral Threat Laboratory                                                   | Microbial Genome Sequencing Center                           | Jeremy P. Kamil, Jennifer L. Carroll, Camille F. Abshire, Maarten Van Diest, Andrew D. Yurochko, Martin J. Sapp, Rona S. Scott, Christopher G. Kevil, Daniel J. Snyder, Vaughn S. Cooper, John A. Vanchiere |
| EPI_ISL_770470, EPI_ISL_770471, EPI_ISL_770472, EPI_ISL_770473, EPI_ISL_770474                                                                                                                                                                                                                                                                                                                                                                                                                                                                                                                                                                                                                                                                                                                                                                                                                                                                                                                                                                                                                                                                                                                                                                                                                                                                                                                                                                                                                                                                                                                                                                                                                                                                                                                                                                                                                                                                                                                                                                                                                                                                                                                                                                                                                                                                                                                                                                                                                                                                                                                                                                                                                                                                                                                                                                                 | National Health laboratory                                                               | Botswana Institute for Technology Research and Innovation    | Kefentse Arnold Tumedi, Madisa Mine, Dineo Emang Tshiamo. Gape Nyepetsi, Thongbotho Mphoyakgosi, Malebogo Kebabonye, Maitshwarelo Ignatius Matsheka                                                         |
| EPI_ISL_770475                                                                                                                                                                                                                                                                                                                                                                                                                                                                                                                                                                                                                                                                                                                                                                                                                                                                                                                                                                                                                                                                                                                                                                                                                                                                                                                                                                                                                                                                                                                                                                                                                                                                                                                                                                                                                                                                                                                                                                                                                                                                                                                                                                                                                                                                                                                                                                                                                                                                                                                                                                                                                                                                                                                                                                                                                                                 | National health Laboratory                                                               | Botswana Institute for Technology Research and Innovation    | Kefentse Arnold Tumedi, Madisa Mine, Dineo Emang Tshiamo. Gape Nyepetsi, Thongbotho Mphoyakgosi, Malebogo Kebabonye, Maitshwarelo Ignatius Matsheka                                                         |
| EPI_ISL_775269, EPI_ISL_775270                                                                                                                                                                                                                                                                                                                                                                                                                                                                                                                                                                                                                                                                                                                                                                                                                                                                                                                                                                                                                                                                                                                                                                                                                                                                                                                                                                                                                                                                                                                                                                                                                                                                                                                                                                                                                                                                                                                                                                                                                                                                                                                                                                                                                                                                                                                                                                                                                                                                                                                                                                                                                                                                                                                                                                                                                                 | Akershus University Hospital, Department for Microbiology and Infectious Disease Control | Norwegian Institute of Public Health, Department of Virology | Kathrine Stene-Johansen, Kamilla Heddeland Instefjord, Hilde Elshaug, Atiya R Ali, Marie Paulsen Madsen, Rasmus Riis Kopperud, Hilde Vollan, Karoline Bragstad, Olav Hungnes                                |
| EPI_ISL_775271                                                                                                                                                                                                                                                                                                                                                                                                                                                                                                                                                                                                                                                                                                                                                                                                                                                                                                                                                                                                                                                                                                                                                                                                                                                                                                                                                                                                                                                                                                                                                                                                                                                                                                                                                                                                                                                                                                                                                                                                                                                                                                                                                                                                                                                                                                                                                                                                                                                                                                                                                                                                                                                                                                                                                                                                                                                 | Furst Medical Laboratory                                                                 | Norwegian Institute of Public Health, Department of Virology | Kathrine Stene-Johansen, Kamilla Heddeland Instefjord, Hilde Elshaug, Atiya R Ali, Marie Paulsen Madsen, Rasmus Riis Kopperud, Hilde Vollan, Karoline Bragstad, Olav Hungnes                                |
| EPI_ISL_775272                                                                                                                                                                                                                                                                                                                                                                                                                                                                                                                                                                                                                                                                                                                                                                                                                                                                                                                                                                                                                                                                                                                                                                                                                                                                                                                                                                                                                                                                                                                                                                                                                                                                                                                                                                                                                                                                                                                                                                                                                                                                                                                                                                                                                                                                                                                                                                                                                                                                                                                                                                                                                                                                                                                                                                                                                                                 | Dept. of Medical Microbiology, Stavanger University Hospital, Helse Stavanger HF         | Norwegian Institute of Public Health, Department of Virology | Kathrine Stene-Johansen, Kamilla Heddeland Instefjord, Hilde Elshaug, Atiya R Ali, Marie Paulsen Madsen, Rasmus Riis Kopperud, Hilde Vollan, Karoline Bragstad, Olav Hungnes                                |
| EPI_ISL_775273, EPI_ISL_775274                                                                                                                                                                                                                                                                                                                                                                                                                                                                                                                                                                                                                                                                                                                                                                                                                                                                                                                                                                                                                                                                                                                                                                                                                                                                                                                                                                                                                                                                                                                                                                                                                                                                                                                                                                                                                                                                                                                                                                                                                                                                                                                                                                                                                                                                                                                                                                                                                                                                                                                                                                                                                                                                                                                                                                                                                                 | Furst Medical Laboratory                                                                 | Norwegian Institute of Public Health, Department of Virology | Kathrine Stene-Johansen, Kamilla Heddeland Instefjord, Hilde Elshaug, Atiya R Ali, Marie Paulsen Madsen, Rasmus Riis Kopperud, Hilde Vollan, Karoline Bragstad, Olav Hungnes                                |
| EPI_ISL_775275                                                                                                                                                                                                                                                                                                                                                                                                                                                                                                                                                                                                                                                                                                                                                                                                                                                                                                                                                                                                                                                                                                                                                                                                                                                                                                                                                                                                                                                                                                                                                                                                                                                                                                                                                                                                                                                                                                                                                                                                                                                                                                                                                                                                                                                                                                                                                                                                                                                                                                                                                                                                                                                                                                                                                                                                                                                 | Akershus University Hospital, Department for Microbiology and Infectious Disease Control | Norwegian Institute of Public Health, Department of Virology | Kathrine Stene-Johansen, Kamilla Heddeland Instefjord, Hilde Elshaug, Atiya R Ali, Marie Paulsen Madsen, Rasmus Riis Kopperud, Hilde Vollan, Karoline Bragstad, Olav Hungnes                                |
| EPI_ISL_775276                                                                                                                                                                                                                                                                                                                                                                                                                                                                                                                                                                                                                                                                                                                                                                                                                                                                                                                                                                                                                                                                                                                                                                                                                                                                                                                                                                                                                                                                                                                                                                                                                                                                                                                                                                                                                                                                                                                                                                                                                                                                                                                                                                                                                                                                                                                                                                                                                                                                                                                                                                                                                                                                                                                                                                                                                                                 | Haukeland University Hospital, Dept. of Microbiology                                     | Norwegian Institute of Public Health, Department of Virology | Kathrine Stene-Johansen, Kamilla Heddeland Instefjord, Hilde Elshaug, Atiya R Ali, Marie Paulsen Madsen, Rasmus Riis Kopperud, Hilde Vollan, Karoline Bragstad, Olav Hungnes                                |
| EPI_ISL_775277                                                                                                                                                                                                                                                                                                                                                                                                                                                                                                                                                                                                                                                                                                                                                                                                                                                                                                                                                                                                                                                                                                                                                                                                                                                                                                                                                                                                                                                                                                                                                                                                                                                                                                                                                                                                                                                                                                                                                                                                                                                                                                                                                                                                                                                                                                                                                                                                                                                                                                                                                                                                                                                                                                                                                                                                                                                 | Nordland Hospital - Bodo, Laboratory Department, Molecular Biology Unit                  | Norwegian Institute of Public Health, Department of Virology | Kathrine Stene-Johansen, Kamilla Heddeland Instefjord, Hilde Elshaug, Atiya R Ali, Marie Paulsen Madsen, Rasmus Riis Kopperud, Hilde Vollan, Karoline Bragstad, Olav Hungnes                                |
| EPI_ISL_775278                                                                                                                                                                                                                                                                                                                                                                                                                                                                                                                                                                                                                                                                                                                                                                                                                                                                                                                                                                                                                                                                                                                                                                                                                                                                                                                                                                                                                                                                                                                                                                                                                                                                                                                                                                                                                                                                                                                                                                                                                                                                                                                                                                                                                                                                                                                                                                                                                                                                                                                                                                                                                                                                                                                                                                                                                                                 | Oslo University Hospital, Department of Medical Microbiology                             | Norwegian Institute of Public Health, Department of Virology | Kathrine Stene-Johansen, Kamilla Heddeland Instefjord, Hilde Elshaug, Atiya R Ali, Marie Paulsen Madsen, Rasmus Riis Kopperud, Hilde Vollan, Karoline Bragstad, Olav Hungnes                                |
| EPI_ISL_775279                                                                                                                                                                                                                                                                                                                                                                                                                                                                                                                                                                                                                                                                                                                                                                                                                                                                                                                                                                                                                                                                                                                                                                                                                                                                                                                                                                                                                                                                                                                                                                                                                                                                                                                                                                                                                                                                                                                                                                                                                                                                                                                                                                                                                                                                                                                                                                                                                                                                                                                                                                                                                                                                                                                                                                                                                                                 | Furst Medical Laboratory                                                                 | Norwegian Institute of Public Health, Department of Virology | Kathrine Stene-Johansen, Kamilla Heddeland Instefjord, Hilde Elshaug, Atiya R Ali, Marie Paulsen Madsen, Rasmus Riis Kopperud, Hilde Vollan, Karoline Bragstad, Olav Hungnes                                |
| EPI_ISL_775280                                                                                                                                                                                                                                                                                                                                                                                                                                                                                                                                                                                                                                                                                                                                                                                                                                                                                                                                                                                                                                                                                                                                                                                                                                                                                                                                                                                                                                                                                                                                                                                                                                                                                                                                                                                                                                                                                                                                                                                                                                                                                                                                                                                                                                                                                                                                                                                                                                                                                                                                                                                                                                                                                                                                                                                                                                                 | Dept. of Medical Microbiology, Stavanger University Hospital, Helse Stavanger HF         | Norwegian Institute of Public Health, Department of Virology | Kathrine Stene-Johansen, Kamilla Heddeland Instefjord, Hilde Elshaug, Atiya R Ali, Marie Paulsen Madsen, Rasmus Riis Kopperud, Hilde Vollan, Karoline Bragstad, Olav Hungnes                                |
| EPI_ISL_775281, EPI_ISL_775282, EPI_ISL_775283                                                                                                                                                                                                                                                                                                                                                                                                                                                                                                                                                                                                                                                                                                                                                                                                                                                                                                                                                                                                                                                                                                                                                                                                                                                                                                                                                                                                                                                                                                                                                                                                                                                                                                                                                                                                                                                                                                                                                                                                                                                                                                                                                                                                                                                                                                                                                                                                                                                                                                                                                                                                                                                                                                                                                                                                                 | Nordland Hospital - Bodo, Laboratory Department, Molecular Biology Unit                  | Norwegian Institute of Public Health, Department of Virology | Kathrine Stene-Johansen, Kamilla Heddeland Instefjord, Hilde Elshaug, Atiya R Ali, Marie Paulsen Madsen, Rasmus Riis Kopperud, Hilde Vollan, Karoline Bragstad, Olav Hungnes                                |
| EPI_ISL_775284                                                                                                                                                                                                                                                                                                                                                                                                                                                                                                                                                                                                                                                                                                                                                                                                                                                                                                                                                                                                                                                                                                                                                                                                                                                                                                                                                                                                                                                                                                                                                                                                                                                                                                                                                                                                                                                                                                                                                                                                                                                                                                                                                                                                                                                                                                                                                                                                                                                                                                                                                                                                                                                                                                                                                                                                                                                 | Oslo University Hospital, Department of Medical Microbiology                             | Norwegian Institute of Public Health, Department of Virology | Kathrine Stene-Johansen, Kamilla Heddeland Instefjord, Hilde Elshaug, Atiya R Ali, Marie Paulsen Madsen, Rasmus Riis Kopperud, Hilde Vollan, Karoline Bragstad, Olav Hungnes                                |
| EPI_ISL_775285                                                                                                                                                                                                                                                                                                                                                                                                                                                                                                                                                                                                                                                                                                                                                                                                                                                                                                                                                                                                                                                                                                                                                                                                                                                                                                                                                                                                                                                                                                                                                                                                                                                                                                                                                                                                                                                                                                                                                                                                                                                                                                                                                                                                                                                                                                                                                                                                                                                                                                                                                                                                                                                                                                                                                                                                                                                 | Hospital of Southern Norway - Kristiansand, Department of Medical Microbiology           | Norwegian Institute of Public Health, Department of Virology | Kathrine Stene-Johansen, Kamilla Heddeland Instefjord, Hilde Elshaug, Atiya R Ali, Marie Paulsen Madsen, Rasmus Riis Kopperud, Hilde Vollan, Karoline Bragstad, Olav Hungnes                                |
| EPI_ISL_775286, EPI_ISL_775287, EPI_ISL_775288, EPI_ISL_775289, EPI_ISL_775290, EPI_ISL_775291, EPI_ISL_775292                                                                                                                                                                                                                                                                                                                                                                                                                                                                                                                                                                                                                                                                                                                                                                                                                                                                                                                                                                                                                                                                                                                                                                                                                                                                                                                                                                                                                                                                                                                                                                                                                                                                                                                                                                                                                                                                                                                                                                                                                                                                                                                                                                                                                                                                                                                                                                                                                                                                                                                                                                                                                                                                                                                                                 | Nordland Hospital - Bodo, Laboratory Department, Molecular Biology Unit                  | Norwegian Institute of Public Health, Department of Virology | Kathrine Stene-Johansen, Kamilla Heddeland Instefjord, Hilde Elshaug, Atiya R Ali, Marie Paulsen Madsen, Rasmus Riis Kopperud, Hilde Vollan, Karoline Bragstad, Olav Hungnes                                |
| EPI_ISL_775293                                                                                                                                                                                                                                                                                                                                                                                                                                                                                                                                                                                                                                                                                                                                                                                                                                                                                                                                                                                                                                                                                                                                                                                                                                                                                                                                                                                                                                                                                                                                                                                                                                                                                                                                                                                                                                                                                                                                                                                                                                                                                                                                                                                                                                                                                                                                                                                                                                                                                                                                                                                                                                                                                                                                                                                                                                                 | Oslo University Hospital, Department of Medical Microbiology                             | Norwegian Institute of Public Health, Department of Virology | Kathrine Stene-Johansen, Kamilla Heddeland Instefjord, Hilde Elshaug, Atiya R Ali, Marie Paulsen Madsen, Rasmus Riis Kopperud, Hilde Vollan, Karoline Bragstad, Olav Hungnes                                |
| EPI_ISL_775294                                                                                                                                                                                                                                                                                                                                                                                                                                                                                                                                                                                                                                                                                                                                                                                                                                                                                                                                                                                                                                                                                                                                                                                                                                                                                                                                                                                                                                                                                                                                                                                                                                                                                                                                                                                                                                                                                                                                                                                                                                                                                                                                                                                                                                                                                                                                                                                                                                                                                                                                                                                                                                                                                                                                                                                                                                                 | Furst Medical Laboratory                                                                 | Norwegian Institute of Public Health, Department of Virology | Kathrine Stene-Johansen, Kamilla Heddeland Instefjord, Hilde Elshaug, Atiya R Ali, Marie Paulsen Madsen, Rasmus Riis Kopperud, Hilde Vollan, Karoline Bragstad, Olav Hungnes                                |
| EPI_ISL_775295, EPI_ISL_775296, EPI_ISL_775297, EPI_ISL_775298                                                                                                                                                                                                                                                                                                                                                                                                                                                                                                                                                                                                                                                                                                                                                                                                                                                                                                                                                                                                                                                                                                                                                                                                                                                                                                                                                                                                                                                                                                                                                                                                                                                                                                                                                                                                                                                                                                                                                                                                                                                                                                                                                                                                                                                                                                                                                                                                                                                                                                                                                                                                                                                                                                                                                                                                 | Nordland Hospital - Bodo, Laboratory Department, Molecular Biology Unit                  | Norwegian Institute of Public Health, Department of Virology | Kathrine Stene-Johansen, Kamilla Heddeland Instefjord, Hilde Elshaug, Atiya R Ali, Marie Paulsen Madsen, Rasmus Riis Kopperud, Hilde Vollan, Karoline Bragstad, Olav Hungnes                                |
| EPI_ISL_775299, EPI_ISL_775300                                                                                                                                                                                                                                                                                                                                                                                                                                                                                                                                                                                                                                                                                                                                                                                                                                                                                                                                                                                                                                                                                                                                                                                                                                                                                                                                                                                                                                                                                                                                                                                                                                                                                                                                                                                                                                                                                                                                                                                                                                                                                                                                                                                                                                                                                                                                                                                                                                                                                                                                                                                                                                                                                                                                                                                                                                 | Furst Medical Laboratory                                                                 | Norwegian Institute of Public Health, Department of Virology | Kathrine Stene-Johansen, Kamilla Heddeland Instefjord, Hilde Elshaug, Atiya R Ali, Marie Paulsen Madsen, Rasmus Riis Kopperud, Hilde Vollan, Karoline Bragstad, Olav Hungnes                                |
| EPI_ISL_775301, EPI_ISL_775302                                                                                                                                                                                                                                                                                                                                                                                                                                                                                                                                                                                                                                                                                                                                                                                                                                                                                                                                                                                                                                                                                                                                                                                                                                                                                                                                                                                                                                                                                                                                                                                                                                                                                                                                                                                                                                                                                                                                                                                                                                                                                                                                                                                                                                                                                                                                                                                                                                                                                                                                                                                                                                                                                                                                                                                                                                 | Nordland Hospital - Bodo, Laboratory Department, Molecular Biology Unit                  | Norwegian Institute of Public Health, Department of Virology | Kathrine Stene-Johansen, Kamilla Heddeland Instefjord, Hilde Elshaug, Atiya R Ali, Marie Paulsen Madsen, Rasmus Riis Kopperud, Hilde Vollan, Karoline Bragstad, Olav Hungnes                                |
| EPI_ISL_775303, EPI_ISL_775304                                                                                                                                                                                                                                                                                                                                                                                                                                                                                                                                                                                                                                                                                                                                                                                                                                                                                                                                                                                                                                                                                                                                                                                                                                                                                                                                                                                                                                                                                                                                                                                                                                                                                                                                                                                                                                                                                                                                                                                                                                                                                                                                                                                                                                                                                                                                                                                                                                                                                                                                                                                                                                                                                                                                                                                                                                 | Furst Medical Laboratory                                                                 | Norwegian Institute of Public Health, Department of Virology | Kathrine Stene-Johansen, Kamilla Heddeland Instefjord, Hilde Elshaug, Atiya R Ali, Marie Paulsen Madsen, Rasmus Riis Kopperud, Hilde Vollan, Karoline Bragstad, Olav Hungnes                                |
| EPI_ISL_775305                                                                                                                                                                                                                                                                                                                                                                                                                                                                                                                                                                                                                                                                                                                                                                                                                                                                                                                                                                                                                                                                                                                                                                                                                                                                                                                                                                                                                                                                                                                                                                                                                                                                                                                                                                                                                                                                                                                                                                                                                                                                                                                                                                                                                                                                                                                                                                                                                                                                                                                                                                                                                                                                                                                                                                                                                                                 | Unilabs Laboratory Medicine                                                              | Norwegian Institute of Public Health, Department of Virology | Kathrine Stene-Johansen, Kamilla Heddeland Instefjord, Hilde Elshaug, Atiya R Ali, Marie Paulsen Madsen, Rasmus Riis Kopperud, Hilde Vollan, Karoline Bragstad, Olav Hungnes                                |
| EPI_ISL_775306                                                                                                                                                                                                                                                                                                                                                                                                                                                                                                                                                                                                                                                                                                                                                                                                                                                                                                                                                                                                                                                                                                                                                                                                                                                                                                                                                                                                                                                                                                                                                                                                                                                                                                                                                                                                                                                                                                                                                                                                                                                                                                                                                                                                                                                                                                                                                                                                                                                                                                                                                                                                                                                                                                                                                                                                                                                 | Department of Medical Microbiology, St. Olavs hospital                                   | Norwegian Institute of Public Health, Department of Virology | Kathrine Stene-Johansen, Kamilla Heddeland Instefjord, Hilde Elshaug, Atiya R Ali, Marie Paulsen Madsen, Rasmus Riis Kopperud, Hilde Vollan, Karoline                                                       |







|                                                                                                                                                                                                                                                                                                                                                                                                                                                                                                                                                                                                                                                                                                                                                                                                                                                                                                                                                                                                                                                                                                                                                                                                                                                                                                                                                                                                                                                                                                                                                                                                                                                                                                                                                                                                                                                                                                                                                                                                                                                                                                                                                                                                                                                                                                                                                                                                                                                                                                                                                                                                                                                                                                                                                                                                                                                                                                                                                                                                                                                                                                                |                                                                                          |                                                                                                                                                |                                                                                                                                                                                                                                                                                                             |                                                                                                                                                                                                                                                                                                             |
|----------------------------------------------------------------------------------------------------------------------------------------------------------------------------------------------------------------------------------------------------------------------------------------------------------------------------------------------------------------------------------------------------------------------------------------------------------------------------------------------------------------------------------------------------------------------------------------------------------------------------------------------------------------------------------------------------------------------------------------------------------------------------------------------------------------------------------------------------------------------------------------------------------------------------------------------------------------------------------------------------------------------------------------------------------------------------------------------------------------------------------------------------------------------------------------------------------------------------------------------------------------------------------------------------------------------------------------------------------------------------------------------------------------------------------------------------------------------------------------------------------------------------------------------------------------------------------------------------------------------------------------------------------------------------------------------------------------------------------------------------------------------------------------------------------------------------------------------------------------------------------------------------------------------------------------------------------------------------------------------------------------------------------------------------------------------------------------------------------------------------------------------------------------------------------------------------------------------------------------------------------------------------------------------------------------------------------------------------------------------------------------------------------------------------------------------------------------------------------------------------------------------------------------------------------------------------------------------------------------------------------------------------------------------------------------------------------------------------------------------------------------------------------------------------------------------------------------------------------------------------------------------------------------------------------------------------------------------------------------------------------------------------------------------------------------------------------------------------------------|------------------------------------------------------------------------------------------|------------------------------------------------------------------------------------------------------------------------------------------------|-------------------------------------------------------------------------------------------------------------------------------------------------------------------------------------------------------------------------------------------------------------------------------------------------------------|-------------------------------------------------------------------------------------------------------------------------------------------------------------------------------------------------------------------------------------------------------------------------------------------------------------|
| EPI_ISL_775485, EPI_ISL_775486, EPI_ISL_775487                                                                                                                                                                                                                                                                                                                                                                                                                                                                                                                                                                                                                                                                                                                                                                                                                                                                                                                                                                                                                                                                                                                                                                                                                                                                                                                                                                                                                                                                                                                                                                                                                                                                                                                                                                                                                                                                                                                                                                                                                                                                                                                                                                                                                                                                                                                                                                                                                                                                                                                                                                                                                                                                                                                                                                                                                                                                                                                                                                                                                                                                 | Nordland Hospital - Bodo, Laboratory Department, Molecular Biology Unit                  | Norwegian Institute of Public Health, Department of Virology                                                                                   | Kathrine Stene-Johansen, Kamilla Heddeland Instefjord, Hilde Elshaug, Atiya R Ali, Marie Paulsen Madsen, Rasmus Riis Kopperud, Hilde Vollan, Karoline Bragstad, Olav Hungnes                                                                                                                                |                                                                                                                                                                                                                                                                                                             |
| EPI_ISL_775488, EPI_ISL_775489, EPI_ISL_775490                                                                                                                                                                                                                                                                                                                                                                                                                                                                                                                                                                                                                                                                                                                                                                                                                                                                                                                                                                                                                                                                                                                                                                                                                                                                                                                                                                                                                                                                                                                                                                                                                                                                                                                                                                                                                                                                                                                                                                                                                                                                                                                                                                                                                                                                                                                                                                                                                                                                                                                                                                                                                                                                                                                                                                                                                                                                                                                                                                                                                                                                 | Furst Medical Laboratory                                                                 | Norwegian Institute of Public Health, Department of Virology                                                                                   | Kathrine Stene-Johansen, Kamilla Heddeland Instefjord, Hilde Elshaug, Atiya R Ali, Marie Paulsen Madsen, Rasmus Riis Kopperud, Hilde Vollan, Karoline Bragstad, Olav Hungnes                                                                                                                                |                                                                                                                                                                                                                                                                                                             |
| EPI_ISL_775491, EPI_ISL_775492, EPI_ISL_775493, EPI_ISL_775494                                                                                                                                                                                                                                                                                                                                                                                                                                                                                                                                                                                                                                                                                                                                                                                                                                                                                                                                                                                                                                                                                                                                                                                                                                                                                                                                                                                                                                                                                                                                                                                                                                                                                                                                                                                                                                                                                                                                                                                                                                                                                                                                                                                                                                                                                                                                                                                                                                                                                                                                                                                                                                                                                                                                                                                                                                                                                                                                                                                                                                                 | Department of Medical Microbiology, St. Olavs hospital                                   | Norwegian Institute of Public Health, Department of Virology                                                                                   | Kathrine Stene-Johansen, Kamilla Heddeland Instefjord, Hilde Elshaug, Atiya R Ali, Marie Paulsen Madsen, Rasmus Riis Kopperud, Hilde Vollan, Karoline Bragstad, Olav Hungnes                                                                                                                                |                                                                                                                                                                                                                                                                                                             |
| EPI_ISL_775495                                                                                                                                                                                                                                                                                                                                                                                                                                                                                                                                                                                                                                                                                                                                                                                                                                                                                                                                                                                                                                                                                                                                                                                                                                                                                                                                                                                                                                                                                                                                                                                                                                                                                                                                                                                                                                                                                                                                                                                                                                                                                                                                                                                                                                                                                                                                                                                                                                                                                                                                                                                                                                                                                                                                                                                                                                                                                                                                                                                                                                                                                                 | Unilabs Laboratory Medicine                                                              | Norwegian Institute of Public Health, Department of Virology                                                                                   | Kathrine Stene-Johansen, Kamilla Heddeland Instefjord, Hilde Elshaug, Atiya R Ali, Marie Paulsen Madsen, Rasmus Riis Kopperud, Hilde Vollan, Karoline Bragstad, Olav Hungnes                                                                                                                                |                                                                                                                                                                                                                                                                                                             |
| EPI_ISL_775496, EPI_ISL_775497                                                                                                                                                                                                                                                                                                                                                                                                                                                                                                                                                                                                                                                                                                                                                                                                                                                                                                                                                                                                                                                                                                                                                                                                                                                                                                                                                                                                                                                                                                                                                                                                                                                                                                                                                                                                                                                                                                                                                                                                                                                                                                                                                                                                                                                                                                                                                                                                                                                                                                                                                                                                                                                                                                                                                                                                                                                                                                                                                                                                                                                                                 | Furst Medical Laboratory                                                                 | Norwegian Institute of Public Health, Department of Virology                                                                                   | Kathrine Stene-Johansen, Kamilla Heddeland Instefjord, Hilde Elshaug, Atiya R Ali, Marie Paulsen Madsen, Rasmus Riis Kopperud, Hilde Vollan, Karoline Bragstad, Olav Hungnes                                                                                                                                |                                                                                                                                                                                                                                                                                                             |
| EPI_ISL_775498, EPI_ISL_775499, EPI_ISL_775500, EPI_ISL_775501, EPI_ISL_775502, EPI_ISL_775503, EPI_ISL_775504                                                                                                                                                                                                                                                                                                                                                                                                                                                                                                                                                                                                                                                                                                                                                                                                                                                                                                                                                                                                                                                                                                                                                                                                                                                                                                                                                                                                                                                                                                                                                                                                                                                                                                                                                                                                                                                                                                                                                                                                                                                                                                                                                                                                                                                                                                                                                                                                                                                                                                                                                                                                                                                                                                                                                                                                                                                                                                                                                                                                 | Vestfold Hospital, Toensberg Department of Microbiology                                  | Norwegian Institute of Public Health, Department of Virology                                                                                   | Kathrine Stene-Johansen, Kamilla Heddeland Instefjord, Hilde Elshaug, Atiya R Ali, Marie Paulsen Madsen, Rasmus Riis Kopperud, Hilde Vollan, Karoline Bragstad, Olav Hungnes                                                                                                                                |                                                                                                                                                                                                                                                                                                             |
| EPI_ISL_775505, EPI_ISL_775506, EPI_ISL_775507, EPI_ISL_775508                                                                                                                                                                                                                                                                                                                                                                                                                                                                                                                                                                                                                                                                                                                                                                                                                                                                                                                                                                                                                                                                                                                                                                                                                                                                                                                                                                                                                                                                                                                                                                                                                                                                                                                                                                                                                                                                                                                                                                                                                                                                                                                                                                                                                                                                                                                                                                                                                                                                                                                                                                                                                                                                                                                                                                                                                                                                                                                                                                                                                                                 | Department of Medical Microbiology, St. Olavs hospital                                   | Norwegian Institute of Public Health, Department of Virology                                                                                   | Kathrine Stene-Johansen, Kamilla Heddeland Instefjord, Hilde Elshaug, Atiya R Ali, Marie Paulsen Madsen, Rasmus Riis Kopperud, Hilde Vollan, Karoline Bragstad, Olav Hungnes                                                                                                                                |                                                                                                                                                                                                                                                                                                             |
| EPI_ISL_775509, EPI_ISL_775510, EPI_ISL_775511, EPI_ISL_775512, EPI_ISL_775513, EPI_ISL_775514, EPI_ISL_775515                                                                                                                                                                                                                                                                                                                                                                                                                                                                                                                                                                                                                                                                                                                                                                                                                                                                                                                                                                                                                                                                                                                                                                                                                                                                                                                                                                                                                                                                                                                                                                                                                                                                                                                                                                                                                                                                                                                                                                                                                                                                                                                                                                                                                                                                                                                                                                                                                                                                                                                                                                                                                                                                                                                                                                                                                                                                                                                                                                                                 | Norwegian Institute of Public Health, Department of Virology                             | Norwegian Institute of Public Health, Department of Virology                                                                                   | Kathrine Stene-Johansen, Kamilla Heddeland Instefjord, Hilde Elshaug, Atiya R Ali, Marie Paulsen Madsen, Rasmus Riis Kopperud, Hilde Vollan, Karoline Bragstad, Olav Hungnes                                                                                                                                |                                                                                                                                                                                                                                                                                                             |
| EPI_ISL_775516, EPI_ISL_775517                                                                                                                                                                                                                                                                                                                                                                                                                                                                                                                                                                                                                                                                                                                                                                                                                                                                                                                                                                                                                                                                                                                                                                                                                                                                                                                                                                                                                                                                                                                                                                                                                                                                                                                                                                                                                                                                                                                                                                                                                                                                                                                                                                                                                                                                                                                                                                                                                                                                                                                                                                                                                                                                                                                                                                                                                                                                                                                                                                                                                                                                                 | Unilabs Laboratory Medicine                                                              | Norwegian Institute of Public Health, Department of Virology                                                                                   | Kathrine Stene-Johansen, Kamilla Heddeland Instefjord, Hilde Elshaug, Atiya R Ali, Marie Paulsen Madsen, Rasmus Riis Kopperud, Hilde Vollan, Karoline Bragstad, Olav Hungnes                                                                                                                                |                                                                                                                                                                                                                                                                                                             |
| EPI_ISL_775518, EPI_ISL_775519, EPI_ISL_775520, EPI_ISL_775521, EPI_ISL_775522                                                                                                                                                                                                                                                                                                                                                                                                                                                                                                                                                                                                                                                                                                                                                                                                                                                                                                                                                                                                                                                                                                                                                                                                                                                                                                                                                                                                                                                                                                                                                                                                                                                                                                                                                                                                                                                                                                                                                                                                                                                                                                                                                                                                                                                                                                                                                                                                                                                                                                                                                                                                                                                                                                                                                                                                                                                                                                                                                                                                                                 | Hospital of Southern Norway - Kristiansand, Department of Medical Microbiology           | Norwegian Institute of Public Health, Department of Virology                                                                                   | Kathrine Stene-Johansen, Kamilla Heddeland Instefjord, Hilde Elshaug, Atiya R Ali, Marie Paulsen Madsen, Rasmus Riis Kopperud, Hilde Vollan, Karoline Bragstad, Olav Hungnes                                                                                                                                |                                                                                                                                                                                                                                                                                                             |
| EPI_ISL_775523                                                                                                                                                                                                                                                                                                                                                                                                                                                                                                                                                                                                                                                                                                                                                                                                                                                                                                                                                                                                                                                                                                                                                                                                                                                                                                                                                                                                                                                                                                                                                                                                                                                                                                                                                                                                                                                                                                                                                                                                                                                                                                                                                                                                                                                                                                                                                                                                                                                                                                                                                                                                                                                                                                                                                                                                                                                                                                                                                                                                                                                                                                 | Department of Medical Microbiology - section Molde, Molde Hospital                       | Norwegian Institute of Public Health, Department of Virology                                                                                   | Kathrine Stene-Johansen, Kamilla Heddeland Instefjord, Hilde Elshaug, Atiya R Ali, Marie Paulsen Madsen, Rasmus Riis Kopperud, Hilde Vollan, Karoline Bragstad, Olav Hungnes                                                                                                                                |                                                                                                                                                                                                                                                                                                             |
| EPI_ISL_775524, EPI_ISL_775525, EPI_ISL_775526, EPI_ISL_775527                                                                                                                                                                                                                                                                                                                                                                                                                                                                                                                                                                                                                                                                                                                                                                                                                                                                                                                                                                                                                                                                                                                                                                                                                                                                                                                                                                                                                                                                                                                                                                                                                                                                                                                                                                                                                                                                                                                                                                                                                                                                                                                                                                                                                                                                                                                                                                                                                                                                                                                                                                                                                                                                                                                                                                                                                                                                                                                                                                                                                                                 | Furst Medical Laboratory                                                                 | Norwegian Institute of Public Health, Department of Virology                                                                                   | Kathrine Stene-Johansen, Kamilla Heddeland Instefjord, Hilde Elshaug, Atiya R Ali, Marie Paulsen Madsen, Rasmus Riis Kopperud, Hilde Vollan, Karoline Bragstad, Olav Hungnes                                                                                                                                |                                                                                                                                                                                                                                                                                                             |
| EPI_ISL_775528, EPI_ISL_775529, EPI_ISL_775530                                                                                                                                                                                                                                                                                                                                                                                                                                                                                                                                                                                                                                                                                                                                                                                                                                                                                                                                                                                                                                                                                                                                                                                                                                                                                                                                                                                                                                                                                                                                                                                                                                                                                                                                                                                                                                                                                                                                                                                                                                                                                                                                                                                                                                                                                                                                                                                                                                                                                                                                                                                                                                                                                                                                                                                                                                                                                                                                                                                                                                                                 | Akershus University Hospital, Department for Microbiology and Infectious Disease Control | Norwegian Institute of Public Health, Department of Virology                                                                                   | Kathrine Stene-Johansen, Kamilla Heddeland Instefjord, Hilde Elshaug, Atiya R Ali, Marie Paulsen Madsen, Rasmus Riis Kopperud, Hilde Vollan, Karoline Bragstad, Olav Hungnes                                                                                                                                |                                                                                                                                                                                                                                                                                                             |
| EPI_ISL_778918, EPI_ISL_778919, EPI_ISL_778920, EPI_ISL_778921, EPI_ISL_778922, EPI_ISL_778923, EPI_ISL_778924, EPI_ISL_778925, EPI_ISL_778926, EPI_ISL_778927, EPI_ISL_778928, EPI_ISL_778929, EPI_ISL_778930, EPI_ISL_778931, EPI_ISL_778932, EPI_ISL_778933, EPI_ISL_778934, EPI_ISL_778935, EPI_ISL_778936, EPI_ISL_778937, EPI_ISL_778938, EPI_ISL_778939, EPI_ISL_778940, EPI_ISL_778941, EPI_ISL_778942, EPI_ISL_778943, EPI_ISL_778944, EPI_ISL_778945, EPI_ISL_778946, EPI_ISL_778947, EPI_ISL_778948, EPI_ISL_778949, EPI_ISL_778950, EPI_ISL_778951, EPI_ISL_778952, EPI_ISL_778953, EPI_ISL_778954, EPI_ISL_778955, EPI_ISL_778956, EPI_ISL_778957, EPI_ISL_778958, EPI_ISL_778959, EPI_ISL_778960, EPI_ISL_778961, EPI_ISL_778962, EPI_ISL_778963, EPI_ISL_778964, EPI_ISL_778965, EPI_ISL_778966, EPI_ISL_778967, EPI_ISL_778968, EPI_ISL_778969, EPI_ISL_778970, EPI_ISL_778971, EPI_ISL_778972, EPI_ISL_778973, EPI_ISL_778974, EPI_ISL_778975, EPI_ISL_778976, EPI_ISL_778977, EPI_ISL_778978, EPI_ISL_778979, EPI_ISL_778980, EPI_ISL_778981, EPI_ISL_778982, EPI_ISL_778983, EPI_ISL_778984, EPI_ISL_778985, EPI_ISL_778986, EPI_ISL_778987, EPI_ISL_778988, EPI_ISL_778989, EPI_ISL_778990, EPI_ISL_778991, EPI_ISL_778992, EPI_ISL_778993, EPI_ISL_778994, EPI_ISL_778995, EPI_ISL_778996, EPI_ISL_778997, EPI_ISL_778998, EPI_ISL_778999, EPI_ISL_779000, EPI_ISL_779001, EPI_ISL_779002, EPI_ISL_779003, EPI_ISL_779004, EPI_ISL_779005, EPI_ISL_779006, EPI_ISL_779007, EPI_ISL_779008, EPI_ISL_779009, EPI_ISL_779010, EPI_ISL_779011, EPI_ISL_779012, EPI_ISL_779013, EPI_ISL_779014, EPI_ISL_779015, EPI_ISL_779016, EPI_ISL_779017, EPI_ISL_779018, EPI_ISL_779019, EPI_ISL_779020, EPI_ISL_779021, EPI_ISL_779022, EPI_ISL_779023, EPI_ISL_779024, EPI_ISL_779025, EPI_ISL_779026, EPI_ISL_779027, EPI_ISL_779028, EPI_ISL_779029, EPI_ISL_779030, EPI_ISL_779031, EPI_ISL_779032, EPI_ISL_779033, EPI_ISL_779034, EPI_ISL_779035, EPI_ISL_779036, EPI_ISL_779037, EPI_ISL_779038, EPI_ISL_779039, EPI_ISL_779040, EPI_ISL_779041, EPI_ISL_779042, EPI_ISL_779043, EPI_ISL_779044, EPI_ISL_779045, EPI_ISL_779046, EPI_ISL_779047, EPI_ISL_779048, EPI_ISL_779049, EPI_ISL_779050, EPI_ISL_779051, EPI_ISL_779052, EPI_ISL_779053, EPI_ISL_779054, EPI_ISL_779055, EPI_ISL_779056, EPI_ISL_779057, EPI_ISL_779058, EPI_ISL_779059, EPI_ISL_779060, EPI_ISL_779061, EPI_ISL_779062, EPI_ISL_779063, EPI_ISL_779064, EPI_ISL_779065, EPI_ISL_779066, EPI_ISL_779067, EPI_ISL_779068, EPI_ISL_779069, EPI_ISL_779070, EPI_ISL_779071, EPI_ISL_779072, EPI_ISL_779073, EPI_ISL_779074, EPI_ISL_779075, EPI_ISL_779076, EPI_ISL_779077, EPI_ISL_779078, EPI_ISL_779079, EPI_ISL_779080, EPI_ISL_779081, EPI_ISL_779082, EPI_ISL_779083, EPI_ISL_779084, EPI_ISL_779085, EPI_ISL_779086, EPI_ISL_779087, EPI_ISL_779088, EPI_ISL_779089, EPI_ISL_779090, EPI_ISL_779091, EPI_ISL_779092, EPI_ISL_779093, EPI_ISL_779094, EPI_ISL_779095, EPI_ISL_779096, EPI_ISL_779097, EPI_ISL_779098, EPI_ISL_779099, EPI_ISL_779100, EPI_ISL_779101, EPI_ISL_779102, EPI_ISL_779103, EPI_ISL_779104 | see above                                                                                | LSUHS Emerging Viral Threat Laboratory                                                                                                         | Microbial Genome Sequencing Center                                                                                                                                                                                                                                                                          | Jeremy P. Kamil, Jennifer L. Carroll, Camille F. Abshire, Maarten Van Diest, Andrew D. Yurochko, Martin J. Sapp, Rona S. Scott, Christopher G. Kevill, Daniel J. Snyder, Vaughn S. Cooper, John A. Vanchiere                                                                                                |
| EPI_ISL_779105, EPI_ISL_779106, EPI_ISL_779107, EPI_ISL_779108, EPI_ISL_779109, EPI_ISL_779110, EPI_ISL_779111, EPI_ISL_779112, EPI_ISL_779113, EPI_ISL_779114, EPI_ISL_779115, EPI_ISL_779116                                                                                                                                                                                                                                                                                                                                                                                                                                                                                                                                                                                                                                                                                                                                                                                                                                                                                                                                                                                                                                                                                                                                                                                                                                                                                                                                                                                                                                                                                                                                                                                                                                                                                                                                                                                                                                                                                                                                                                                                                                                                                                                                                                                                                                                                                                                                                                                                                                                                                                                                                                                                                                                                                                                                                                                                                                                                                                                 | see above                                                                                | LSUHS Emerging Viral Threat Laboratory                                                                                                         | Microbial Genome Sequencing Center                                                                                                                                                                                                                                                                          | Jennifer L. Carroll, Jeremy P. Kamil, Camille F. Abshire, Maarten Van Diest, Andrew D. Yurochko, Martin J. Sapp, Rona S. Scott, Christopher G. Kevill, Daniel J. Snyder, Vaughn S. Cooper, John A. Vanchiere                                                                                                |
| EPI_ISL_779169, EPI_ISL_779170, EPI_ISL_779171, EPI_ISL_779172, EPI_ISL_779173, EPI_ISL_779174, EPI_ISL_779175, EPI_ISL_779176, EPI_ISL_779177, EPI_ISL_779178, EPI_ISL_779179, EPI_ISL_779180, EPI_ISL_779181, EPI_ISL_779182, EPI_ISL_779183, EPI_ISL_779184                                                                                                                                                                                                                                                                                                                                                                                                                                                                                                                                                                                                                                                                                                                                                                                                                                                                                                                                                                                                                                                                                                                                                                                                                                                                                                                                                                                                                                                                                                                                                                                                                                                                                                                                                                                                                                                                                                                                                                                                                                                                                                                                                                                                                                                                                                                                                                                                                                                                                                                                                                                                                                                                                                                                                                                                                                                 | see above                                                                                | Laboratorio de Infectología, Servicio de Infectología, Hospital Universitario Dr. José Eleuterio González - Universidad Autónoma de Nuevo León | Laboratorio de Infectología Molecular, Departamento de Bioquímica y Medicina Molecular, Facultad de Medicina - Universidad Autónoma de Nuevo León                                                                                                                                                           | Kame A. Galán-Huerta, María F. Herrera-Saldivar, Natalia Martínez-Acuña, Sonia A. Lozano-Sepúlveda, Daniel Arellanos-Soto, Ana M. Rivas-Estilla, Paola Bocanegra-Ibarias, Samantha M. Flores-Treviño, Elvira Garza-González, Eduardo Perez-Alba, Laura Nuzzolo-Shihadeh, Adrian Camacho-Ortiz               |
| EPI_ISL_779185, EPI_ISL_779186, EPI_ISL_779187, EPI_ISL_779188, EPI_ISL_779189, EPI_ISL_779190, EPI_ISL_779191, EPI_ISL_779192, EPI_ISL_779193, EPI_ISL_779194, EPI_ISL_779195, EPI_ISL_779196, EPI_ISL_779197, EPI_ISL_779198                                                                                                                                                                                                                                                                                                                                                                                                                                                                                                                                                                                                                                                                                                                                                                                                                                                                                                                                                                                                                                                                                                                                                                                                                                                                                                                                                                                                                                                                                                                                                                                                                                                                                                                                                                                                                                                                                                                                                                                                                                                                                                                                                                                                                                                                                                                                                                                                                                                                                                                                                                                                                                                                                                                                                                                                                                                                                 | see above                                                                                | Laboratorio Estatal de Salud Pública de Nuevo León                                                                                             | Laboratorio de Infectología Molecular, Departamento de Bioquímica y Medicina Molecular, Facultad de Medicina - Universidad Autónoma de Nuevo León                                                                                                                                                           | Kame A. Galán-Huerta, María F. Herrera-Saldivar, Natalia Martínez-Acuña, Sonia A. Lozano-Sepúlveda, Daniel Arellanos-Soto, Ana M. Rivas-Estilla, Samuel Buentello-Wong, Else del Carmen García-García, Gloria A. Jasso-de-la-Peña, Roberto Montes-de-Oca, Consuelo Treviño-Garza, Manuel E. de-la-O-Cavazos |
| EPI_ISL_791084                                                                                                                                                                                                                                                                                                                                                                                                                                                                                                                                                                                                                                                                                                                                                                                                                                                                                                                                                                                                                                                                                                                                                                                                                                                                                                                                                                                                                                                                                                                                                                                                                                                                                                                                                                                                                                                                                                                                                                                                                                                                                                                                                                                                                                                                                                                                                                                                                                                                                                                                                                                                                                                                                                                                                                                                                                                                                                                                                                                                                                                                                                 | Instituto Nacional de Salud - Unidad de Secuenciación y Análisis Genómico                | Instituto Nacional de Salud - Dirección de Investigación en Salud Pública                                                                      | Katherine Laiton-Donato, Diego A. Álvarez-Díaz, Carlos Franco-Muñoz, Mauricio Pacheco-Montealegre, Jonathan Reales, Sheryl Corchuelo, María T. Herrera, Julian Naizaque, Gerardo Santamaría, Paola Muñoz-Laiton, Diego Andrés Prada, Magdalena Wiesner, Martha Lucia Ospina Martínez, Marcela Mercado-Reyes |                                                                                                                                                                                                                                                                                                             |
| EPI_ISL_791085                                                                                                                                                                                                                                                                                                                                                                                                                                                                                                                                                                                                                                                                                                                                                                                                                                                                                                                                                                                                                                                                                                                                                                                                                                                                                                                                                                                                                                                                                                                                                                                                                                                                                                                                                                                                                                                                                                                                                                                                                                                                                                                                                                                                                                                                                                                                                                                                                                                                                                                                                                                                                                                                                                                                                                                                                                                                                                                                                                                                                                                                                                 | Instituto Nacional de Salud - Unidad de Secuenciación y Análisis Genómico                | Instituto Nacional de Salud - Dirección de Investigación en Salud Pública                                                                      | Katherine Laiton-Donato, Diego A. Álvarez-Díaz, Carlos Franco-Muñoz, Mauricio Pacheco-Montealegre, Jeadran Malagon-Rojas, Jesith Toloza, Julia Almentero, Ronald Lopez, Jonathan Reales, Diego Andrés Prada, Magdalena Wiesner, Martha Lucia Ospina Martínez, Marcela Mercado-Reyes                         |                                                                                                                                                                                                                                                                                                             |
| EPI_ISL_791086, EPI_ISL_791087, EPI_ISL_791088, EPI_ISL_791089, EPI_ISL_791090, EPI_ISL_791091, EPI_ISL_791092, EPI_ISL_791093, EPI_ISL_791094, EPI_ISL_791095, EPI_ISL_791096                                                                                                                                                                                                                                                                                                                                                                                                                                                                                                                                                                                                                                                                                                                                                                                                                                                                                                                                                                                                                                                                                                                                                                                                                                                                                                                                                                                                                                                                                                                                                                                                                                                                                                                                                                                                                                                                                                                                                                                                                                                                                                                                                                                                                                                                                                                                                                                                                                                                                                                                                                                                                                                                                                                                                                                                                                                                                                                                 | see above                                                                                | Instituto Nacional de Salud - Unidad de Secuenciación y Análisis Genómico                                                                      | Instituto Nacional de Salud - Dirección de Investigación en Salud Pública                                                                                                                                                                                                                                   | Katherine Laiton-Donato, Diego A. Álvarez-Díaz, Carlos Franco-Muñoz, Mauricio Pacheco-Montealegre, Jonathan Reales, Sheryl Corchuelo, María T. Herrera, Julian Naizaque, Gerardo Santamaría, Paola Muñoz-Laiton, Diego Andrés Prada, Magdalena Wiesner, Martha Lucia Ospina Martínez, Marcela Mercado-Reyes |
| EPI_ISL_792557                                                                                                                                                                                                                                                                                                                                                                                                                                                                                                                                                                                                                                                                                                                                                                                                                                                                                                                                                                                                                                                                                                                                                                                                                                                                                                                                                                                                                                                                                                                                                                                                                                                                                                                                                                                                                                                                                                                                                                                                                                                                                                                                                                                                                                                                                                                                                                                                                                                                                                                                                                                                                                                                                                                                                                                                                                                                                                                                                                                                                                                                                                 | Connecticut State Department of Public Health                                            | Grubaugh Lab - Yale School of Public Health                                                                                                    | Joseph Fauver, Tara Alpert, Chantal Vogels, Anderson Brito, Nagarjuna Cheemarla, Ellen Foxman, Anthony Muyombwe, Jafar Razeq, Nathan Grubaugh                                                                                                                                                               |                                                                                                                                                                                                                                                                                                             |
| EPI_ISL_792558, EPI_ISL_792559                                                                                                                                                                                                                                                                                                                                                                                                                                                                                                                                                                                                                                                                                                                                                                                                                                                                                                                                                                                                                                                                                                                                                                                                                                                                                                                                                                                                                                                                                                                                                                                                                                                                                                                                                                                                                                                                                                                                                                                                                                                                                                                                                                                                                                                                                                                                                                                                                                                                                                                                                                                                                                                                                                                                                                                                                                                                                                                                                                                                                                                                                 | Grubaugh Lab - Yale School of Public Health                                              | Grubaugh Lab - Yale School of Public Health                                                                                                    | Joseph Fauver, Tara Alpert, Anderson Brito, Nathan Grubaugh                                                                                                                                                                                                                                                 |                                                                                                                                                                                                                                                                                                             |
| EPI_ISL_794600, EPI_ISL_794601, EPI_ISL_794602, EPI_ISL_794603, EPI_ISL_794604                                                                                                                                                                                                                                                                                                                                                                                                                                                                                                                                                                                                                                                                                                                                                                                                                                                                                                                                                                                                                                                                                                                                                                                                                                                                                                                                                                                                                                                                                                                                                                                                                                                                                                                                                                                                                                                                                                                                                                                                                                                                                                                                                                                                                                                                                                                                                                                                                                                                                                                                                                                                                                                                                                                                                                                                                                                                                                                                                                                                                                 | Central Laboratories, Egyptian Ministry of Health and Population                         | Central Laboratories, Egyptian Ministry of Health and Population                                                                               | Kayed, A.E., Roshdy, W.H., El-Shesheny, R., Mostafa, A., Khalifa, M.K., Shehata, M., Shawky, S., Saleh, M., Gomaa, M., El Taweel, A., Mahmoud, S.H., Moatasim, Y., Kutkat, O., Kamel, M.N., Mahrous, N., El Sayes, M.A., El Guindy, N.M., Naguib, A., Kandeil, A., Kayali, G., Ali, M.A.                    |                                                                                                                                                                                                                                                                                                             |
| EPI_ISL_794649, EPI_ISL_794650, EPI_ISL_794651                                                                                                                                                                                                                                                                                                                                                                                                                                                                                                                                                                                                                                                                                                                                                                                                                                                                                                                                                                                                                                                                                                                                                                                                                                                                                                                                                                                                                                                                                                                                                                                                                                                                                                                                                                                                                                                                                                                                                                                                                                                                                                                                                                                                                                                                                                                                                                                                                                                                                                                                                                                                                                                                                                                                                                                                                                                                                                                                                                                                                                                                 | Fundación Cardio Infantil                                                                | Instituto Nacional de Salud - Dirección de Investigación en Salud Pública                                                                      | Katherine Laiton-Donato, Diego A. Álvarez-Díaz, Carlos Franco-Muñoz, Mauricio Pacheco-Montealegre, Jonathan Reales, Sheryl Corchuelo, María T. Herrera, Julian Naizaque, Gerardo Santamaría, Paola Muñoz-Laiton, Diego Andrés Prada, Magdalena Wiesner, Martha Lucia Ospina Martínez, Marcela Mercado-Reyes |                                                                                                                                                                                                                                                                                                             |
| EPI_ISL_794652, EPI_ISL_794653                                                                                                                                                                                                                                                                                                                                                                                                                                                                                                                                                                                                                                                                                                                                                                                                                                                                                                                                                                                                                                                                                                                                                                                                                                                                                                                                                                                                                                                                                                                                                                                                                                                                                                                                                                                                                                                                                                                                                                                                                                                                                                                                                                                                                                                                                                                                                                                                                                                                                                                                                                                                                                                                                                                                                                                                                                                                                                                                                                                                                                                                                 | LSP DEL TOLIMA                                                                           | Instituto Nacional de Salud - Dirección de Investigación en                                                                                    | Katherine Laiton-Donato, Diego A. Álvarez-Díaz, Carlos Franco-Muñoz, Mauricio Pacheco-Montealegre, Jonathan Reales, Sheryl Corchuelo, María T.                                                                                                                                                              |                                                                                                                                                                                                                                                                                                             |

|                                                                |                                                                                                                     |                                                                           |                                                                                                                                                                                                                                                                                                             |
|----------------------------------------------------------------|---------------------------------------------------------------------------------------------------------------------|---------------------------------------------------------------------------|-------------------------------------------------------------------------------------------------------------------------------------------------------------------------------------------------------------------------------------------------------------------------------------------------------------|
|                                                                |                                                                                                                     | Salud Pública                                                             | Herrera, Julian Naizaque, Gerardo Santamaría, Paola Muñoz-Laiton, Diego Andrés Prada, Magdalena Wiesner, Martha Lucia Ospina Martinez, Marcela Mercado-Reyes                                                                                                                                                |
| EPI_ISL_794654, EPI_ISL_794655                                 | Fundación Valle del Lili                                                                                            | Instituto Nacional de Salud - Dirección de Investigación en Salud Pública | Katherine Laiton-Donato, Diego A. Álvarez-Díaz, Carlos Franco-Muñoz, Mauricio Pacheco-Montealegre, Jonathan Reales, Sheryl Corchuelo, María T. Herrera, Julian Naizaque, Gerardo Santamaría, Paola Muñoz-Laiton, Diego Andrés Prada, Magdalena Wiesner, Martha Lucia Ospina Martinez, Marcela Mercado-Reyes |
| EPI_ISL_794656, EPI_ISL_794657                                 | UNIDAD HEMATOLOGICA ESPECIALIZADA                                                                                   | Instituto Nacional de Salud - Dirección de Investigación en Salud Pública | Katherine Laiton-Donato, Diego A. Álvarez-Díaz, Carlos Franco-Muñoz, Mauricio Pacheco-Montealegre, Jonathan Reales, Sheryl Corchuelo, María T. Herrera, Julian Naizaque, Gerardo Santamaría, Paola Muñoz-Laiton, Diego Andrés Prada, Magdalena Wiesner, Martha Lucia Ospina Martinez, Marcela Mercado-Reyes |
| EPI_ISL_794658                                                 | DIRECCION DE SANIDAD POLICIA NACIONAL                                                                               | Instituto Nacional de Salud - Dirección de Investigación en Salud Pública | Katherine Laiton-Donato, Diego A. Álvarez-Díaz, Carlos Franco-Muñoz, Mauricio Pacheco-Montealegre, Jonathan Reales, Sheryl Corchuelo, María T. Herrera, Julian Naizaque, Gerardo Santamaría, Paola Muñoz-Laiton, Diego Andrés Prada, Magdalena Wiesner, Martha Lucia Ospina Martinez, Marcela Mercado-Reyes |
| EPI_ISL_794659, EPI_ISL_794660                                 | HOSPITAL UNIVERSITARIO SAN IGNACIO                                                                                  | Instituto Nacional de Salud - Dirección de Investigación en Salud Pública | Katherine Laiton-Donato, Diego A. Álvarez-Díaz, Carlos Franco-Muñoz, Mauricio Pacheco-Montealegre, Jonathan Reales, Sheryl Corchuelo, María T. Herrera, Julian Naizaque, Gerardo Santamaría, Paola Muñoz-Laiton, Diego Andrés Prada, Magdalena Wiesner, Martha Lucia Ospina Martinez, Marcela Mercado-Reyes |
| EPI_ISL_794661                                                 | DRECCION DE SANIDAD POLICIA NACIONAL                                                                                | Instituto Nacional de Salud - Dirección de Investigación en Salud Pública | Katherine Laiton-Donato, Diego A. Álvarez-Díaz, Carlos Franco-Muñoz, Mauricio Pacheco-Montealegre, Jonathan Reales, Sheryl Corchuelo, María T. Herrera, Julian Naizaque, Gerardo Santamaría, Paola Muñoz-Laiton, Diego Andrés Prada, Magdalena Wiesner, Martha Lucia Ospina Martinez, Marcela Mercado-Reyes |
| EPI_ISL_794662                                                 | Fundación Cardio Infantil                                                                                           | Instituto Nacional de Salud - Dirección de Investigación en Salud Pública | Katherine Laiton-Donato, Diego A. Álvarez-Díaz, Carlos Franco-Muñoz, Mauricio Pacheco-Montealegre, Jonathan Reales, Sheryl Corchuelo, María T. Herrera, Julian Naizaque, Gerardo Santamaría, Paola Muñoz-Laiton, Diego Andrés Prada, Magdalena Wiesner, Martha Lucia Ospina Martinez, Marcela Mercado-Reyes |
| EPI_ISL_794663                                                 | Carvajal Laboratorios                                                                                               | Instituto Nacional de Salud - Dirección de Investigación en Salud Pública | Katherine Laiton-Donato, Diego A. Álvarez-Díaz, Carlos Franco-Muñoz, Mauricio Pacheco-Montealegre, Jonathan Reales, Sheryl Corchuelo, María T. Herrera, Julian Naizaque, Gerardo Santamaría, Paola Muñoz-Laiton, Diego Andrés Prada, Magdalena Wiesner, Martha Lucia Ospina Martinez, Marcela Mercado-Reyes |
| EPI_ISL_794664, EPI_ISL_794665                                 | Fundación Valle del Lili                                                                                            | Instituto Nacional de Salud - Dirección de Investigación en Salud Pública | Katherine Laiton-Donato, Diego A. Álvarez-Díaz, Carlos Franco-Muñoz, Mauricio Pacheco-Montealegre, Jonathan Reales, Sheryl Corchuelo, María T. Herrera, Julian Naizaque, Gerardo Santamaría, Paola Muñoz-Laiton, Diego Andrés Prada, Magdalena Wiesner, Martha Lucia Ospina Martinez, Marcela Mercado-Reyes |
| EPI_ISL_794666, EPI_ISL_794667                                 | SYNLAB REGIONAL NOROCCIDENTE                                                                                        | Instituto Nacional de Salud - Dirección de Investigación en Salud Pública | Katherine Laiton-Donato, Diego A. Álvarez-Díaz, Carlos Franco-Muñoz, Mauricio Pacheco-Montealegre, Jonathan Reales, Sheryl Corchuelo, María T. Herrera, Julian Naizaque, Gerardo Santamaría, Paola Muñoz-Laiton, Diego Andrés Prada, Magdalena Wiesner, Martha Lucia Ospina Martinez, Marcela Mercado-Reyes |
| EPI_ISL_796649                                                 | Akershus University Hospital, Department for Microbiology and Infectious Disease Control                            | Norwegian Institute of Public Health, Department of Virology              | Kathrine Stene-Johansen, Kamilla Heddeland Instefjord, Hilde Elshaug, Atiya R Ali, Marie Paulsen Madsen, Rasmus Riis Kopperud, Hilde Vollan, Karoline Bragstad, Olav Hungnes                                                                                                                                |
| EPI_ISL_796650                                                 | Nordland Hospital - Bodo, Laboratory Department, Molecular Biology Unit                                             | Norwegian Institute of Public Health, Department of Virology              | Kathrine Stene-Johansen, Kamilla Heddeland Instefjord, Hilde Elshaug, Atiya R Ali, Marie Paulsen Madsen, Rasmus Riis Kopperud, Hilde Vollan, Karoline Bragstad, Olav Hungnes                                                                                                                                |
| EPI_ISL_796651                                                 | Medical Microbiology Unit, Department for Laboratory Medicine, Drammen Hospital, Vestre Viken Health Trust,         | Norwegian Institute of Public Health, Department of Virology              | Kathrine Stene-Johansen, Kamilla Heddeland Instefjord, Hilde Elshaug, Atiya R Ali, Marie Paulsen Madsen, Rasmus Riis Kopperud, Hilde Vollan, Karoline Bragstad, Olav Hungnes                                                                                                                                |
| EPI_ISL_796652                                                 | Haukeland University Hospital, Dept. of Microbiology                                                                | Norwegian Institute of Public Health, Department of Virology              | Kathrine Stene-Johansen, Kamilla Heddeland Instefjord, Hilde Elshaug, Atiya R Ali, Marie Paulsen Madsen, Rasmus Riis Kopperud, Hilde Vollan, Karoline Bragstad, Olav Hungnes                                                                                                                                |
| EPI_ISL_796653                                                 | Department of Medical Microbiology - section Molde, Molde Hospital                                                  | Norwegian Institute of Public Health, Department of Virology              | Kathrine Stene-Johansen, Kamilla Heddeland Instefjord, Hilde Elshaug, Atiya R Ali, Marie Paulsen Madsen, Rasmus Riis Kopperud, Hilde Vollan, Karoline Bragstad, Olav Hungnes                                                                                                                                |
| EPI_ISL_796654, EPI_ISL_796655, EPI_ISL_796656, EPI_ISL_796657 | Norwegian Institute of Public Health, Department of Virology                                                        | Norwegian Institute of Public Health, Department of Virology              | Kathrine Stene-Johansen, Kamilla Heddeland Instefjord, Hilde Elshaug, Atiya R Ali, Marie Paulsen Madsen, Rasmus Riis Kopperud, Hilde Vollan, Karoline Bragstad, Olav Hungnes                                                                                                                                |
| EPI_ISL_796658                                                 | Dept. of Medical Microbiology, Stavanger University Hospital, Helse Stavanger HF                                    | Norwegian Institute of Public Health, Department of Virology              | Kathrine Stene-Johansen, Kamilla Heddeland Instefjord, Hilde Elshaug, Atiya R Ali, Marie Paulsen Madsen, Rasmus Riis Kopperud, Hilde Vollan, Karoline Bragstad, Olav Hungnes                                                                                                                                |
| EPI_ISL_796659, EPI_ISL_796660, EPI_ISL_796661, EPI_ISL_796662 | Norwegian Institute of Public Health, Department of Virology                                                        | Norwegian Institute of Public Health, Department of Virology              | Kathrine Stene-Johansen, Kamilla Heddeland Instefjord, Hilde Elshaug, Atiya R Ali, Marie Paulsen Madsen, Rasmus Riis Kopperud, Hilde Vollan, Karoline Bragstad, Olav Hungnes                                                                                                                                |
| EPI_ISL_796663                                                 | Dept. of Medical Microbiology, Stavanger University Hospital, Helse Stavanger HF                                    | Norwegian Institute of Public Health, Department of Virology              | Kathrine Stene-Johansen, Kamilla Heddeland Instefjord, Hilde Elshaug, Atiya R Ali, Marie Paulsen Madsen, Rasmus Riis Kopperud, Hilde Vollan, Karoline Bragstad, Olav Hungnes                                                                                                                                |
| EPI_ISL_796664                                                 | Hospital of Southern Norway - Kristiansand, Department of Medical Microbiology                                      | Norwegian Institute of Public Health, Department of Virology              | Kathrine Stene-Johansen, Kamilla Heddeland Instefjord, Hilde Elshaug, Atiya R Ali, Marie Paulsen Madsen, Rasmus Riis Kopperud, Hilde Vollan, Karoline Bragstad, Olav Hungnes                                                                                                                                |
| EPI_ISL_796665, EPI_ISL_796666                                 | Akershus University Hospital, Department for Microbiology and Infectious Disease Control                            | Norwegian Institute of Public Health, Department of Virology              | Kathrine Stene-Johansen, Kamilla Heddeland Instefjord, Hilde Elshaug, Atiya R Ali, Marie Paulsen Madsen, Rasmus Riis Kopperud, Hilde Vollan, Karoline Bragstad, Olav Hungnes                                                                                                                                |
| EPI_ISL_796667, EPI_ISL_796668, EPI_ISL_796669                 | Nordland Hospital - Bodo, Laboratory Department, Molecular Biology Unit                                             | Norwegian Institute of Public Health, Department of Virology              | Kathrine Stene-Johansen, Kamilla Heddeland Instefjord, Hilde Elshaug, Atiya R Ali, Marie Paulsen Madsen, Rasmus Riis Kopperud, Hilde Vollan, Karoline Bragstad, Olav Hungnes                                                                                                                                |
| EPI_ISL_796670                                                 | University Hospital of Northern Norway, Department for Microbiology and Infectious Disease Control                  | Norwegian Institute of Public Health, Department of Virology              | Kathrine Stene-Johansen, Kamilla Heddeland Instefjord, Hilde Elshaug, Atiya R Ali, Marie Paulsen Madsen, Rasmus Riis Kopperud, Hilde Vollan, Karoline Bragstad, Olav Hungnes                                                                                                                                |
| EPI_ISL_796671                                                 | Furst Medical Laboratory                                                                                            | Norwegian Institute of Public Health, Department of Virology              | Kathrine Stene-Johansen, Kamilla Heddeland Instefjord, Hilde Elshaug, Atiya R Ali, Marie Paulsen Madsen, Rasmus Riis Kopperud, Hilde Vollan, Karoline Bragstad, Olav Hungnes                                                                                                                                |
| EPI_ISL_796672                                                 | Nordland Hospital - Bodo, Laboratory Department, Molecular Biology Unit                                             | Norwegian Institute of Public Health, Department of Virology              | Kathrine Stene-Johansen, Kamilla Heddeland Instefjord, Hilde Elshaug, Atiya R Ali, Marie Paulsen Madsen, Rasmus Riis Kopperud, Hilde Vollan, Karoline Bragstad, Olav Hungnes                                                                                                                                |
| EPI_ISL_796673                                                 | Unilabs Laboratory Medicine                                                                                         | Norwegian Institute of Public Health, Department of Virology              | Kathrine Stene-Johansen, Kamilla Heddeland Instefjord, Hilde Elshaug, Atiya R Ali, Marie Paulsen Madsen, Rasmus Riis Kopperud, Hilde Vollan, Karoline Bragstad, Olav Hungnes                                                                                                                                |
| EPI_ISL_796674                                                 | Ostfold Hospital Trust - Kalnes, Centre for Laboratory Medicine, Section for gene technology and infection serology | Norwegian Institute of Public Health, Department of Virology              | Kathrine Stene-Johansen, Kamilla Heddeland Instefjord, Hilde Elshaug, Atiya R Ali, Marie Paulsen Madsen, Rasmus Riis Kopperud, Hilde Vollan, Karoline Bragstad, Olav Hungnes                                                                                                                                |
| EPI_ISL_796675, EPI_ISL_796676                                 | Norwegian Institute of Public Health, Department of Virology                                                        | Norwegian Institute of Public Health, Department of Virology              | Kathrine Stene-Johansen, Kamilla Heddeland Instefjord, Hilde Elshaug, Atiya R Ali, Marie Paulsen Madsen, Rasmus Riis Kopperud, Hilde Vollan, Karoline Bragstad, Olav Hungnes                                                                                                                                |
| EPI_ISL_796677                                                 | Dept. of Medical Microbiology, Stavanger University Hospital, Helse Stavanger HF                                    | Norwegian Institute of Public Health, Department of Virology              | Kathrine Stene-Johansen, Kamilla Heddeland Instefjord, Hilde Elshaug, Atiya R Ali, Marie Paulsen Madsen, Rasmus Riis Kopperud, Hilde Vollan, Karoline Bragstad, Olav Hungnes                                                                                                                                |
| EPI_ISL_796678                                                 | Nordland Hospital - Bodo, Laboratory Department, Molecular Biology Unit                                             | Norwegian Institute of Public Health, Department of Virology              | Kathrine Stene-Johansen, Kamilla Heddeland Instefjord, Hilde Elshaug, Atiya R Ali, Marie Paulsen Madsen, Rasmus Riis Kopperud, Hilde Vollan, Karoline Bragstad, Olav Hungnes                                                                                                                                |
| EPI_ISL_796679, EPI_ISL_796680                                 | Unilabs Laboratory Medicine                                                                                         | Norwegian Institute of Public Health, Department of Virology              | Kathrine Stene-Johansen, Kamilla Heddeland Instefjord, Hilde Elshaug, Atiya R Ali, Marie Paulsen Madsen, Rasmus Riis Kopperud, Hilde Vollan, Karoline Bragstad, Olav Hungnes                                                                                                                                |
| EPI_ISL_796681, EPI_ISL_796682,                                | Department of Medical Microbiology - section Molde, Molde                                                           | Norwegian Institute of Public Health, Department of Virology              | Kathrine Stene-Johansen, Kamilla Heddeland Instefjord, Hilde Elshaug, Atiya R Ali, Marie Paulsen Madsen, Rasmus Riis Kopperud, Hilde Vollan, Karoline                                                                                                                                                       |

|                                                                                                                                                                                                                                                                                                                                                                                                                                                |                                                                                                                     |                                                              |                                                                                                                                                                              |                                                                                                                                                                                                                                                                                                                                                                                                                                                                                                                           |
|------------------------------------------------------------------------------------------------------------------------------------------------------------------------------------------------------------------------------------------------------------------------------------------------------------------------------------------------------------------------------------------------------------------------------------------------|---------------------------------------------------------------------------------------------------------------------|--------------------------------------------------------------|------------------------------------------------------------------------------------------------------------------------------------------------------------------------------|---------------------------------------------------------------------------------------------------------------------------------------------------------------------------------------------------------------------------------------------------------------------------------------------------------------------------------------------------------------------------------------------------------------------------------------------------------------------------------------------------------------------------|
| EPI_ISL_796683                                                                                                                                                                                                                                                                                                                                                                                                                                 | Hospital                                                                                                            |                                                              |                                                                                                                                                                              | Bragstad, Olav Hungnes                                                                                                                                                                                                                                                                                                                                                                                                                                                                                                    |
| EPI_ISL_796684, EPI_ISL_796685                                                                                                                                                                                                                                                                                                                                                                                                                 | Norwegian Institute of Public Health, Department of Virology                                                        | Norwegian Institute of Public Health, Department of Virology | Kathrine Stene-Johansen, Kamilla Heddeland Instefjord, Hilde Elshaug, Atiya R Ali, Marie Paulsen Madsen, Rasmus Riis Kopperud, Hilde Vollan, Karoline Bragstad, Olav Hungnes |                                                                                                                                                                                                                                                                                                                                                                                                                                                                                                                           |
| EPI_ISL_796686                                                                                                                                                                                                                                                                                                                                                                                                                                 | Unilabs Laboratory Medicine                                                                                         | Norwegian Institute of Public Health, Department of Virology | Kathrine Stene-Johansen, Kamilla Heddeland Instefjord, Hilde Elshaug, Atiya R Ali, Marie Paulsen Madsen, Rasmus Riis Kopperud, Hilde Vollan, Karoline Bragstad, Olav Hungnes |                                                                                                                                                                                                                                                                                                                                                                                                                                                                                                                           |
| EPI_ISL_796687                                                                                                                                                                                                                                                                                                                                                                                                                                 | Department of Medical Microbiology, St. Olavs hospital                                                              | Norwegian Institute of Public Health, Department of Virology | Kathrine Stene-Johansen, Kamilla Heddeland Instefjord, Hilde Elshaug, Atiya R Ali, Marie Paulsen Madsen, Rasmus Riis Kopperud, Hilde Vollan, Karoline Bragstad, Olav Hungnes |                                                                                                                                                                                                                                                                                                                                                                                                                                                                                                                           |
| EPI_ISL_796688                                                                                                                                                                                                                                                                                                                                                                                                                                 | Hospital of Southern Norway - Kristiansand, Department of Medical Microbiology                                      | Norwegian Institute of Public Health, Department of Virology | Kathrine Stene-Johansen, Kamilla Heddeland Instefjord, Hilde Elshaug, Atiya R Ali, Marie Paulsen Madsen, Rasmus Riis Kopperud, Hilde Vollan, Karoline Bragstad, Olav Hungnes |                                                                                                                                                                                                                                                                                                                                                                                                                                                                                                                           |
| EPI_ISL_796689, EPI_ISL_796690, EPI_ISL_796691, EPI_ISL_796692, EPI_ISL_796693, EPI_ISL_796694                                                                                                                                                                                                                                                                                                                                                 | Nordland Hospital - Bodo, Laboratory Department, Molecular Biology Unit                                             | Norwegian Institute of Public Health, Department of Virology | Kathrine Stene-Johansen, Kamilla Heddeland Instefjord, Hilde Elshaug, Atiya R Ali, Marie Paulsen Madsen, Rasmus Riis Kopperud, Hilde Vollan, Karoline Bragstad, Olav Hungnes |                                                                                                                                                                                                                                                                                                                                                                                                                                                                                                                           |
| EPI_ISL_796695, EPI_ISL_796696, EPI_ISL_796697                                                                                                                                                                                                                                                                                                                                                                                                 | Ostfold Hospital Trust - Kalnes, Centre for Laboratory Medicine, Section for gene technology and infection serology | Norwegian Institute of Public Health, Department of Virology | Kathrine Stene-Johansen, Kamilla Heddeland Instefjord, Hilde Elshaug, Atiya R Ali, Marie Paulsen Madsen, Rasmus Riis Kopperud, Hilde Vollan, Karoline Bragstad, Olav Hungnes |                                                                                                                                                                                                                                                                                                                                                                                                                                                                                                                           |
| EPI_ISL_796698                                                                                                                                                                                                                                                                                                                                                                                                                                 | Dept. of Medical Microbiology, Stavanger University Hospital, Helse Stavanger HF                                    | Norwegian Institute of Public Health, Department of Virology | Kathrine Stene-Johansen, Kamilla Heddeland Instefjord, Hilde Elshaug, Atiya R Ali, Marie Paulsen Madsen, Rasmus Riis Kopperud, Hilde Vollan, Karoline Bragstad, Olav Hungnes |                                                                                                                                                                                                                                                                                                                                                                                                                                                                                                                           |
| EPI_ISL_796699                                                                                                                                                                                                                                                                                                                                                                                                                                 | Akershus University Hospital, Department for Microbiology and Infectious Disease Control                            | Norwegian Institute of Public Health, Department of Virology | Kathrine Stene-Johansen, Kamilla Heddeland Instefjord, Hilde Elshaug, Atiya R Ali, Marie Paulsen Madsen, Rasmus Riis Kopperud, Hilde Vollan, Karoline Bragstad, Olav Hungnes |                                                                                                                                                                                                                                                                                                                                                                                                                                                                                                                           |
| EPI_ISL_796700, EPI_ISL_796701, EPI_ISL_796702                                                                                                                                                                                                                                                                                                                                                                                                 | Unilabs Laboratory Medicine                                                                                         | Norwegian Institute of Public Health, Department of Virology | Kathrine Stene-Johansen, Kamilla Heddeland Instefjord, Hilde Elshaug, Atiya R Ali, Marie Paulsen Madsen, Rasmus Riis Kopperud, Hilde Vollan, Karoline Bragstad, Olav Hungnes |                                                                                                                                                                                                                                                                                                                                                                                                                                                                                                                           |
| EPI_ISL_796703                                                                                                                                                                                                                                                                                                                                                                                                                                 | Oslo University Hospital, Department of Medical Microbiology                                                        | Norwegian Institute of Public Health, Department of Virology | Kathrine Stene-Johansen, Kamilla Heddeland Instefjord, Hilde Elshaug, Atiya R Ali, Marie Paulsen Madsen, Rasmus Riis Kopperud, Hilde Vollan, Karoline Bragstad, Olav Hungnes |                                                                                                                                                                                                                                                                                                                                                                                                                                                                                                                           |
| EPI_ISL_796704                                                                                                                                                                                                                                                                                                                                                                                                                                 | University Hospital of Northern Norway, Department for Microbiology and Infectious Disease Control                  | Norwegian Institute of Public Health, Department of Virology | Kathrine Stene-Johansen, Kamilla Heddeland Instefjord, Hilde Elshaug, Atiya R Ali, Marie Paulsen Madsen, Rasmus Riis Kopperud, Hilde Vollan, Karoline Bragstad, Olav Hungnes |                                                                                                                                                                                                                                                                                                                                                                                                                                                                                                                           |
| EPI_ISL_796705                                                                                                                                                                                                                                                                                                                                                                                                                                 | Unilabs Laboratory Medicine                                                                                         | Norwegian Institute of Public Health, Department of Virology | Kathrine Stene-Johansen, Kamilla Heddeland Instefjord, Hilde Elshaug, Atiya R Ali, Marie Paulsen Madsen, Rasmus Riis Kopperud, Hilde Vollan, Karoline Bragstad, Olav Hungnes |                                                                                                                                                                                                                                                                                                                                                                                                                                                                                                                           |
| EPI_ISL_796706                                                                                                                                                                                                                                                                                                                                                                                                                                 | Department of Medical Microbiology, St. Olavs hospital                                                              | Norwegian Institute of Public Health, Department of Virology | Kathrine Stene-Johansen, Kamilla Heddeland Instefjord, Hilde Elshaug, Atiya R Ali, Marie Paulsen Madsen, Rasmus Riis Kopperud, Hilde Vollan, Karoline Bragstad, Olav Hungnes |                                                                                                                                                                                                                                                                                                                                                                                                                                                                                                                           |
| EPI_ISL_796707, EPI_ISL_796708, EPI_ISL_796709                                                                                                                                                                                                                                                                                                                                                                                                 | University Hospital of Northern Norway, Department for Microbiology and Infectious Disease Control                  | Norwegian Institute of Public Health, Department of Virology | Kathrine Stene-Johansen, Kamilla Heddeland Instefjord, Hilde Elshaug, Atiya R Ali, Marie Paulsen Madsen, Rasmus Riis Kopperud, Hilde Vollan, Karoline Bragstad, Olav Hungnes |                                                                                                                                                                                                                                                                                                                                                                                                                                                                                                                           |
| EPI_ISL_796710                                                                                                                                                                                                                                                                                                                                                                                                                                 | Norwegian Institute of Public Health, Department of Virology                                                        | Norwegian Institute of Public Health, Department of Virology | Kathrine Stene-Johansen, Kamilla Heddeland Instefjord, Hilde Elshaug, Atiya R Ali, Marie Paulsen Madsen, Rasmus Riis Kopperud, Hilde Vollan, Karoline Bragstad, Olav Hungnes |                                                                                                                                                                                                                                                                                                                                                                                                                                                                                                                           |
| EPI_ISL_796711                                                                                                                                                                                                                                                                                                                                                                                                                                 | Department of Medical Microbiology, St. Olavs hospital                                                              | Norwegian Institute of Public Health, Department of Virology | Kathrine Stene-Johansen, Kamilla Heddeland Instefjord, Hilde Elshaug, Atiya R Ali, Marie Paulsen Madsen, Rasmus Riis Kopperud, Hilde Vollan, Karoline Bragstad, Olav Hungnes |                                                                                                                                                                                                                                                                                                                                                                                                                                                                                                                           |
| EPI_ISL_796712, EPI_ISL_796713                                                                                                                                                                                                                                                                                                                                                                                                                 | Akershus University Hospital, Department for Microbiology and Infectious Disease Control                            | Norwegian Institute of Public Health, Department of Virology | Kathrine Stene-Johansen, Kamilla Heddeland Instefjord, Hilde Elshaug, Atiya R Ali, Marie Paulsen Madsen, Rasmus Riis Kopperud, Hilde Vollan, Karoline Bragstad, Olav Hungnes |                                                                                                                                                                                                                                                                                                                                                                                                                                                                                                                           |
| EPI_ISL_796714, EPI_ISL_796715, EPI_ISL_796716                                                                                                                                                                                                                                                                                                                                                                                                 | Hospital of Southern Norway - Kristiansand, Department of Medical Microbiology                                      | Norwegian Institute of Public Health, Department of Virology | Kathrine Stene-Johansen, Kamilla Heddeland Instefjord, Hilde Elshaug, Atiya R Ali, Marie Paulsen Madsen, Rasmus Riis Kopperud, Hilde Vollan, Karoline Bragstad, Olav Hungnes |                                                                                                                                                                                                                                                                                                                                                                                                                                                                                                                           |
| EPI_ISL_796717, EPI_ISL_796718, EPI_ISL_796719, EPI_ISL_796720, EPI_ISL_796721                                                                                                                                                                                                                                                                                                                                                                 | Department of Medical Microbiology, St. Olavs hospital                                                              | Norwegian Institute of Public Health, Department of Virology | Kathrine Stene-Johansen, Kamilla Heddeland Instefjord, Hilde Elshaug, Atiya R Ali, Marie Paulsen Madsen, Rasmus Riis Kopperud, Hilde Vollan, Karoline Bragstad, Olav Hungnes |                                                                                                                                                                                                                                                                                                                                                                                                                                                                                                                           |
| EPI_ISL_796722, EPI_ISL_796723, EPI_ISL_796724                                                                                                                                                                                                                                                                                                                                                                                                 | Furst Medical Laboratory                                                                                            | Norwegian Institute of Public Health, Department of Virology | Kathrine Stene-Johansen, Kamilla Heddeland Instefjord, Hilde Elshaug, Atiya R Ali, Marie Paulsen Madsen, Rasmus Riis Kopperud, Hilde Vollan, Karoline Bragstad, Olav Hungnes |                                                                                                                                                                                                                                                                                                                                                                                                                                                                                                                           |
| EPI_ISL_796725                                                                                                                                                                                                                                                                                                                                                                                                                                 | Department of Medical Microbiology, St. Olavs hospital                                                              | Norwegian Institute of Public Health, Department of Virology | Kathrine Stene-Johansen, Kamilla Heddeland Instefjord, Hilde Elshaug, Atiya R Ali, Marie Paulsen Madsen, Rasmus Riis Kopperud, Hilde Vollan, Karoline Bragstad, Olav Hungnes |                                                                                                                                                                                                                                                                                                                                                                                                                                                                                                                           |
| EPI_ISL_796726                                                                                                                                                                                                                                                                                                                                                                                                                                 | Furst Medical Laboratory                                                                                            | Norwegian Institute of Public Health, Department of Virology | Kathrine Stene-Johansen, Kamilla Heddeland Instefjord, Hilde Elshaug, Atiya R Ali, Marie Paulsen Madsen, Rasmus Riis Kopperud, Hilde Vollan, Karoline Bragstad, Olav Hungnes |                                                                                                                                                                                                                                                                                                                                                                                                                                                                                                                           |
| EPI_ISL_796727, EPI_ISL_796728                                                                                                                                                                                                                                                                                                                                                                                                                 | Department of Medical Microbiology, St. Olavs hospital                                                              | Norwegian Institute of Public Health, Department of Virology | Kathrine Stene-Johansen, Kamilla Heddeland Instefjord, Hilde Elshaug, Atiya R Ali, Marie Paulsen Madsen, Rasmus Riis Kopperud, Hilde Vollan, Karoline Bragstad, Olav Hungnes |                                                                                                                                                                                                                                                                                                                                                                                                                                                                                                                           |
| EPI_ISL_796729                                                                                                                                                                                                                                                                                                                                                                                                                                 | Hospital of Southern Norway - Kristiansand, Department of Medical Microbiology                                      | Norwegian Institute of Public Health, Department of Virology | Kathrine Stene-Johansen, Kamilla Heddeland Instefjord, Hilde Elshaug, Atiya R Ali, Marie Paulsen Madsen, Rasmus Riis Kopperud, Hilde Vollan, Karoline Bragstad, Olav Hungnes |                                                                                                                                                                                                                                                                                                                                                                                                                                                                                                                           |
| EPI_ISL_796730, EPI_ISL_796731, EPI_ISL_796732                                                                                                                                                                                                                                                                                                                                                                                                 | Furst Medical Laboratory                                                                                            | Norwegian Institute of Public Health, Department of Virology | Kathrine Stene-Johansen, Kamilla Heddeland Instefjord, Hilde Elshaug, Atiya R Ali, Marie Paulsen Madsen, Rasmus Riis Kopperud, Hilde Vollan, Karoline Bragstad, Olav Hungnes |                                                                                                                                                                                                                                                                                                                                                                                                                                                                                                                           |
| EPI_ISL_812122                                                                                                                                                                                                                                                                                                                                                                                                                                 | Department of Clinical Microbiology                                                                                 | GIGA Medical Genomics                                        | Keith Durkin, Maria Artesi, Sébastien Bontems, Raphaël Boreux, Bouchra Boujemla, Cécile Meex, Pierrette Melin, Marie-Pierre Hayette, Vincent Bours                           |                                                                                                                                                                                                                                                                                                                                                                                                                                                                                                                           |
| EPI_ISL_812929, EPI_ISL_812930, EPI_ISL_812931, EPI_ISL_812932, EPI_ISL_812933, EPI_ISL_812934, EPI_ISL_812935, EPI_ISL_812936, EPI_ISL_812937, EPI_ISL_812938, EPI_ISL_812939, EPI_ISL_812940, EPI_ISL_812941, EPI_ISL_812942, EPI_ISL_812943, EPI_ISL_812944, EPI_ISL_812945, EPI_ISL_812946, EPI_ISL_812947, EPI_ISL_812948, EPI_ISL_812949, EPI_ISL_812950, EPI_ISL_812951, EPI_ISL_812952, EPI_ISL_812953, EPI_ISL_812954, EPI_ISL_812955 | see above                                                                                                           | Institute for Urban Disease Control and Prevention           | COVID-19 Network Investigations (CONI) Alliance                                                                                                                              | Kamolthip Atsawawaranunt, Elizabeth Batty, Wasun Chantraita, Thanat Chookajorn, Stefan Fernandez, Angkana Huang, Anthony R. Jones, Khajohn Joonsalak, Chonticha Klungtong, Theerarat Kochakarn, Prayuth Kaewmalang, Amornmas Kongklieng, Namfon Kotanan, Krittikorn Kumpornsin, Duangkamon Loesbanluechai, Wudtichai Manasatienkij, Anek Mungaomklang, Bhakbhoom Panthan, Pukkapor Parnwijitkul, Ekawat Pasomsab, Kingkan Rakmanee, Insee Sensor, Janjira Thaipadungpanit, Arporn Wangwiwatsin, Treewat Watthanachockchai |
| EPI_ISL_813975                                                                                                                                                                                                                                                                                                                                                                                                                                 | Akershus University Hospital, Department for Microbiology and Infectious Disease Control                            | Norwegian Institute of Public Health, Department of Virology | Kathrine Stene-Johansen, Kamilla Heddeland Instefjord, Hilde Elshaug, Atiya R Ali, Marie Paulsen Madsen, Rasmus Riis Kopperud, Hilde Vollan, Karoline Bragstad, Olav Hungnes |                                                                                                                                                                                                                                                                                                                                                                                                                                                                                                                           |
| EPI_ISL_813976                                                                                                                                                                                                                                                                                                                                                                                                                                 | Norwegian Institute of Public Health, Department of Virology                                                        | Norwegian Institute of Public Health, Department of Virology | Kathrine Stene-Johansen, Kamilla Heddeland Instefjord, Hilde Elshaug, Atiya R Ali, Marie Paulsen Madsen, Rasmus Riis Kopperud, Hilde Vollan, Karoline Bragstad, Olav Hungnes |                                                                                                                                                                                                                                                                                                                                                                                                                                                                                                                           |
| EPI_ISL_813977                                                                                                                                                                                                                                                                                                                                                                                                                                 | Hospital of Southern Norway - Kristiansand, Department of Medical Microbiology                                      | Norwegian Institute of Public Health, Department of Virology | Kathrine Stene-Johansen, Kamilla Heddeland Instefjord, Hilde Elshaug, Atiya R Ali, Marie Paulsen Madsen, Rasmus Riis Kopperud, Hilde Vollan, Karoline Bragstad, Olav Hungnes |                                                                                                                                                                                                                                                                                                                                                                                                                                                                                                                           |
| EPI_ISL_813978                                                                                                                                                                                                                                                                                                                                                                                                                                 | University Hospital of Northern Norway, Department for Microbiology and Infectious Disease Control                  | Norwegian Institute of Public Health, Department of Virology | Kathrine Stene-Johansen, Kamilla Heddeland Instefjord, Hilde Elshaug, Atiya R Ali, Marie Paulsen Madsen, Rasmus Riis Kopperud, Hilde Vollan, Karoline Bragstad, Olav Hungnes |                                                                                                                                                                                                                                                                                                                                                                                                                                                                                                                           |
| EPI_ISL_824794, EPI_ISL_824802, EPI_ISL_824804, EPI_ISL_824808, EPI_ISL_824814, EPI_ISL_824819, EPI_ISL_824821, EPI_ISL_824823, EPI_ISL_824824, EPI_ISL_824828, EPI_ISL_824841, EPI_ISL_824844, EPI_ISL_824849, EPI_ISL_824851, EPI_ISL_824853, EPI_ISL_824856, EPI_ISL_824858, EPI_ISL_824862                                                                                                                                                 | see above                                                                                                           | Department of Clinical Microbiology                          | GIGA Medical Genomics                                                                                                                                                        | Keith Durkin, Maria Artesi, Sébastien Bontems, Raphaël Boreux, Bouchra Boujemla, Cécile Meex, Pierrette Melin, Marie-Pierre Hayette, Vincent Bours                                                                                                                                                                                                                                                                                                                                                                        |

|                                                                                                                                                                                                                                                                                                                                                                                                                                                                                                                                                                                                                                                                                                                                                                                                                                                                                                                                                                                                                                                                                                                                                                                                                                                                                                                                                                                                                                                                                                                                                                                                                                                                                                                                                                                                                                                                                                                                                                                                                                                                                                                                                                                                                                                                |                                                                                                                                                                                                                |                                                                           |                                                                                                                                                                                                                                                                                                                        |                                                                                                             |
|----------------------------------------------------------------------------------------------------------------------------------------------------------------------------------------------------------------------------------------------------------------------------------------------------------------------------------------------------------------------------------------------------------------------------------------------------------------------------------------------------------------------------------------------------------------------------------------------------------------------------------------------------------------------------------------------------------------------------------------------------------------------------------------------------------------------------------------------------------------------------------------------------------------------------------------------------------------------------------------------------------------------------------------------------------------------------------------------------------------------------------------------------------------------------------------------------------------------------------------------------------------------------------------------------------------------------------------------------------------------------------------------------------------------------------------------------------------------------------------------------------------------------------------------------------------------------------------------------------------------------------------------------------------------------------------------------------------------------------------------------------------------------------------------------------------------------------------------------------------------------------------------------------------------------------------------------------------------------------------------------------------------------------------------------------------------------------------------------------------------------------------------------------------------------------------------------------------------------------------------------------------|----------------------------------------------------------------------------------------------------------------------------------------------------------------------------------------------------------------|---------------------------------------------------------------------------|------------------------------------------------------------------------------------------------------------------------------------------------------------------------------------------------------------------------------------------------------------------------------------------------------------------------|-------------------------------------------------------------------------------------------------------------|
| EPI_ISL_825034                                                                                                                                                                                                                                                                                                                                                                                                                                                                                                                                                                                                                                                                                                                                                                                                                                                                                                                                                                                                                                                                                                                                                                                                                                                                                                                                                                                                                                                                                                                                                                                                                                                                                                                                                                                                                                                                                                                                                                                                                                                                                                                                                                                                                                                 | B.J. Medical College and Civil hospital, Ahmedabad                                                                                                                                                             | Gujarat Biotechnology Research Centre                                     | Kamlesh J Upadhyay, Zarna Patel, Nitin Savaliya, Dinesh Kumar, Zuber Saiyed, Labdhi Pandya, Afzal Ansari, Nikha Trivedi, Apurvashin Puvar, Ramesh Pandit, Janvi Raval, Pranay Shah, Nilima Shah, Sanjay Kapadia, Dipa Kinariwala, Chaitanya Joshi, Madhvi Joshi                                                        |                                                                                                             |
| EPI_ISL_825043                                                                                                                                                                                                                                                                                                                                                                                                                                                                                                                                                                                                                                                                                                                                                                                                                                                                                                                                                                                                                                                                                                                                                                                                                                                                                                                                                                                                                                                                                                                                                                                                                                                                                                                                                                                                                                                                                                                                                                                                                                                                                                                                                                                                                                                 | NHL Municipal Medical College, Ahmedbad                                                                                                                                                                        | Gujarat Biotechnology Research Centre                                     | Jayshri Pethani, Ramesh Pandit, Janvi Raval, Zarna Patel, Nitin Savaliya, Dinesh Kumar, Zuber Saiyed, Labdhi Pandya, Afzal Ansari, Nikha Trivedi, Apurvashin Puvar, Monila Patel, Atit Shah, NM Shaikh, Bimal Chauhan, Tanmay Mehta, Bhavin Prajapati, Chaitanya Joshi, Madhvi Joshi                                   |                                                                                                             |
| EPI_ISL_825054                                                                                                                                                                                                                                                                                                                                                                                                                                                                                                                                                                                                                                                                                                                                                                                                                                                                                                                                                                                                                                                                                                                                                                                                                                                                                                                                                                                                                                                                                                                                                                                                                                                                                                                                                                                                                                                                                                                                                                                                                                                                                                                                                                                                                                                 | GMERS Medical College and Hospital, Gotri, Vadodara                                                                                                                                                            | Gujarat Biotechnology Research Centre                                     | Kalpesh Mistry, Janvi Raval, Zarna Patel, Nitin Savaliya, Dinesh Kumar, Zuber Saiyed, Afzal Ansari, Nikha Trivedi, Apurvashin Puvar, Ramesh Pandit, Mitesh Kamothi, Bithika Duttaroy, Chaitanya Joshi, Madhvi Joshi                                                                                                    |                                                                                                             |
| EPI_ISL_826800, EPI_ISL_826802, EPI_ISL_826805, EPI_ISL_826811, EPI_ISL_826816, EPI_ISL_826818, EPI_ISL_826820, EPI_ISL_826823, EPI_ISL_826825, EPI_ISL_826829                                                                                                                                                                                                                                                                                                                                                                                                                                                                                                                                                                                                                                                                                                                                                                                                                                                                                                                                                                                                                                                                                                                                                                                                                                                                                                                                                                                                                                                                                                                                                                                                                                                                                                                                                                                                                                                                                                                                                                                                                                                                                                 | INSPI-CRN DE INFLUENZA Y OTROS VIRUS RESPIRATORIOS                                                                                                                                                             | Instituto de Salud Publica de Chile                                       | Javier Tognarelli, Barbara Parra, Loredana Arata, Jaime Lagos, Gisselle Barra, Alfredo Bruno, Domenica de Mora, Solon Narvaez, Jimmy Garcez, Michelle Paez, Martiza Olmedo, Manuel Gonzalez, Patricia Bustos, Rodrigo Fasce, Andres Castillo, Jorge Fernandez                                                          |                                                                                                             |
| EPI_ISL_831334, EPI_ISL_831335, EPI_ISL_831336, EPI_ISL_831337, EPI_ISL_831338, EPI_ISL_831339, EPI_ISL_831340, EPI_ISL_831341, EPI_ISL_831342, EPI_ISL_831343, EPI_ISL_831344, EPI_ISL_831345, EPI_ISL_831346, EPI_ISL_831347, EPI_ISL_831348, EPI_ISL_831349, EPI_ISL_831350, EPI_ISL_831351, EPI_ISL_831352, EPI_ISL_831353, EPI_ISL_831354, EPI_ISL_831355, EPI_ISL_831356, EPI_ISL_831357, EPI_ISL_831358, EPI_ISL_831359, EPI_ISL_831360                                                                                                                                                                                                                                                                                                                                                                                                                                                                                                                                                                                                                                                                                                                                                                                                                                                                                                                                                                                                                                                                                                                                                                                                                                                                                                                                                                                                                                                                                                                                                                                                                                                                                                                                                                                                                 | see above                                                                                                                                                                                                      | Clinical Molecular Microbiology Laboratory, UNC Hospitals                 | Jeremy Wang                                                                                                                                                                                                                                                                                                            |                                                                                                             |
| EPI_ISL_831361, EPI_ISL_831362, EPI_ISL_831363, EPI_ISL_831364, EPI_ISL_831365, EPI_ISL_831366, EPI_ISL_831367, EPI_ISL_831368, EPI_ISL_831369                                                                                                                                                                                                                                                                                                                                                                                                                                                                                                                                                                                                                                                                                                                                                                                                                                                                                                                                                                                                                                                                                                                                                                                                                                                                                                                                                                                                                                                                                                                                                                                                                                                                                                                                                                                                                                                                                                                                                                                                                                                                                                                 | see above                                                                                                                                                                                                      | Clinical Molecular Microbiology Laboratory, UNC Hospitals                 | Jeremy Wang                                                                                                                                                                                                                                                                                                            |                                                                                                             |
| EPI_ISL_832082, EPI_ISL_832083, EPI_ISL_832084, EPI_ISL_832085, EPI_ISL_832086, EPI_ISL_832087, EPI_ISL_832088, EPI_ISL_832089, EPI_ISL_832091, EPI_ISL_832092, EPI_ISL_832093, EPI_ISL_832094                                                                                                                                                                                                                                                                                                                                                                                                                                                                                                                                                                                                                                                                                                                                                                                                                                                                                                                                                                                                                                                                                                                                                                                                                                                                                                                                                                                                                                                                                                                                                                                                                                                                                                                                                                                                                                                                                                                                                                                                                                                                 | see above                                                                                                                                                                                                      | Clinical Molecular Microbiology Laboratory, UNC Hospitals                 | Jeremy Wang                                                                                                                                                                                                                                                                                                            |                                                                                                             |
| EPI_ISL_832121, EPI_ISL_832122, EPI_ISL_832123, EPI_ISL_832124, EPI_ISL_832125, EPI_ISL_832126                                                                                                                                                                                                                                                                                                                                                                                                                                                                                                                                                                                                                                                                                                                                                                                                                                                                                                                                                                                                                                                                                                                                                                                                                                                                                                                                                                                                                                                                                                                                                                                                                                                                                                                                                                                                                                                                                                                                                                                                                                                                                                                                                                 | see above                                                                                                                                                                                                      | Clinical Molecular Microbiology Laboratory, UNC Hospitals                 | Jeremy Wang                                                                                                                                                                                                                                                                                                            |                                                                                                             |
| EPI_ISL_832208, EPI_ISL_832210, EPI_ISL_832212, EPI_ISL_832214, EPI_ISL_832215, EPI_ISL_832224, EPI_ISL_832229, EPI_ISL_832231, EPI_ISL_832235, EPI_ISL_833186                                                                                                                                                                                                                                                                                                                                                                                                                                                                                                                                                                                                                                                                                                                                                                                                                                                                                                                                                                                                                                                                                                                                                                                                                                                                                                                                                                                                                                                                                                                                                                                                                                                                                                                                                                                                                                                                                                                                                                                                                                                                                                 | Department of Clinical Microbiology                                                                                                                                                                            | GIGA Medical Genomics                                                     | Keith Durkin, Maria Artesi, Sébastien Bontems, Raphaël Boreux, Bouchra Boujemla, Cécile Meex, Pierrette Melin, Marie-Pierre Hayette, Vincent Bours                                                                                                                                                                     |                                                                                                             |
| EPI_ISL_842633                                                                                                                                                                                                                                                                                                                                                                                                                                                                                                                                                                                                                                                                                                                                                                                                                                                                                                                                                                                                                                                                                                                                                                                                                                                                                                                                                                                                                                                                                                                                                                                                                                                                                                                                                                                                                                                                                                                                                                                                                                                                                                                                                                                                                                                 | Norwegian Institute of Public Health, Department of Virology                                                                                                                                                   | Norwegian Institute of Public Health, Department of Virology              | Kathrine Stene-Johansen, Kamilla Heddeland Instefjord, Hilde Elshaug, Atiya R Ali, Marie Paulsen Madsen, Rasmus Riis Kopperud, Hilde Vollan, Karoline Bragstad, Olav Hungnes                                                                                                                                           |                                                                                                             |
| EPI_ISL_842634, EPI_ISL_842635, EPI_ISL_842636, EPI_ISL_842637                                                                                                                                                                                                                                                                                                                                                                                                                                                                                                                                                                                                                                                                                                                                                                                                                                                                                                                                                                                                                                                                                                                                                                                                                                                                                                                                                                                                                                                                                                                                                                                                                                                                                                                                                                                                                                                                                                                                                                                                                                                                                                                                                                                                 | Medical Microbiology Unit, Department for Laboratory Medicine, Drammen Hospital, Vestre Viken Health Trust, University Hospital of Northern Norway, Department for Microbiology and Infectious Disease Control | Norwegian Institute of Public Health, Department of Virology              | Kathrine Stene-Johansen, Kamilla Heddeland Instefjord, Hilde Elshaug, Atiya R Ali, Marie Paulsen Madsen, Rasmus Riis Kopperud, Hilde Vollan, Karoline Bragstad, Olav Hungnes                                                                                                                                           |                                                                                                             |
| EPI_ISL_842638                                                                                                                                                                                                                                                                                                                                                                                                                                                                                                                                                                                                                                                                                                                                                                                                                                                                                                                                                                                                                                                                                                                                                                                                                                                                                                                                                                                                                                                                                                                                                                                                                                                                                                                                                                                                                                                                                                                                                                                                                                                                                                                                                                                                                                                 | University Hospital of Northern Norway, Department for Microbiology and Infectious Disease Control                                                                                                             | Norwegian Institute of Public Health, Department of Virology              | Kathrine Stene-Johansen, Kamilla Heddeland Instefjord, Hilde Elshaug, Atiya R Ali, Marie Paulsen Madsen, Rasmus Riis Kopperud, Hilde Vollan, Karoline Bragstad, Olav Hungnes                                                                                                                                           |                                                                                                             |
| EPI_ISL_842639                                                                                                                                                                                                                                                                                                                                                                                                                                                                                                                                                                                                                                                                                                                                                                                                                                                                                                                                                                                                                                                                                                                                                                                                                                                                                                                                                                                                                                                                                                                                                                                                                                                                                                                                                                                                                                                                                                                                                                                                                                                                                                                                                                                                                                                 | Oslo University Hospital, Department of Medical Microbiology                                                                                                                                                   | Norwegian Institute of Public Health, Department of Virology              | Kathrine Stene-Johansen, Kamilla Heddeland Instefjord, Hilde Elshaug, Atiya R Ali, Marie Paulsen Madsen, Rasmus Riis Kopperud, Hilde Vollan, Karoline Bragstad, Olav Hungnes                                                                                                                                           |                                                                                                             |
| EPI_ISL_842640                                                                                                                                                                                                                                                                                                                                                                                                                                                                                                                                                                                                                                                                                                                                                                                                                                                                                                                                                                                                                                                                                                                                                                                                                                                                                                                                                                                                                                                                                                                                                                                                                                                                                                                                                                                                                                                                                                                                                                                                                                                                                                                                                                                                                                                 | University Hospital of Northern Norway, Department for Microbiology and Infectious Disease Control                                                                                                             | Norwegian Institute of Public Health, Department of Virology              | Kathrine Stene-Johansen, Kamilla Heddeland Instefjord, Hilde Elshaug, Atiya R Ali, Marie Paulsen Madsen, Rasmus Riis Kopperud, Hilde Vollan, Karoline Bragstad, Olav Hungnes                                                                                                                                           |                                                                                                             |
| EPI_ISL_842641                                                                                                                                                                                                                                                                                                                                                                                                                                                                                                                                                                                                                                                                                                                                                                                                                                                                                                                                                                                                                                                                                                                                                                                                                                                                                                                                                                                                                                                                                                                                                                                                                                                                                                                                                                                                                                                                                                                                                                                                                                                                                                                                                                                                                                                 | Unilabs Laboratory Medicine                                                                                                                                                                                    | Norwegian Institute of Public Health, Department of Virology              | Kathrine Stene-Johansen, Kamilla Heddeland Instefjord, Hilde Elshaug, Atiya R Ali, Marie Paulsen Madsen, Rasmus Riis Kopperud, Hilde Vollan, Karoline Bragstad, Olav Hungnes                                                                                                                                           |                                                                                                             |
| EPI_ISL_842642                                                                                                                                                                                                                                                                                                                                                                                                                                                                                                                                                                                                                                                                                                                                                                                                                                                                                                                                                                                                                                                                                                                                                                                                                                                                                                                                                                                                                                                                                                                                                                                                                                                                                                                                                                                                                                                                                                                                                                                                                                                                                                                                                                                                                                                 | Norwegian Institute of Public Health, Department of Virology                                                                                                                                                   | Norwegian Institute of Public Health, Department of Virology              | Kathrine Stene-Johansen, Kamilla Heddeland Instefjord, Hilde Elshaug, Atiya R Ali, Marie Paulsen Madsen, Rasmus Riis Kopperud, Hilde Vollan, Karoline Bragstad, Olav Hungnes                                                                                                                                           |                                                                                                             |
| EPI_ISL_842643                                                                                                                                                                                                                                                                                                                                                                                                                                                                                                                                                                                                                                                                                                                                                                                                                                                                                                                                                                                                                                                                                                                                                                                                                                                                                                                                                                                                                                                                                                                                                                                                                                                                                                                                                                                                                                                                                                                                                                                                                                                                                                                                                                                                                                                 | Department of Medical Microbiology, St. Olavs hospital                                                                                                                                                         | Norwegian Institute of Public Health, Department of Virology              | Kathrine Stene-Johansen, Kamilla Heddeland Instefjord, Hilde Elshaug, Atiya R Ali, Marie Paulsen Madsen, Rasmus Riis Kopperud, Hilde Vollan, Karoline Bragstad, Olav Hungnes                                                                                                                                           |                                                                                                             |
| EPI_ISL_842644                                                                                                                                                                                                                                                                                                                                                                                                                                                                                                                                                                                                                                                                                                                                                                                                                                                                                                                                                                                                                                                                                                                                                                                                                                                                                                                                                                                                                                                                                                                                                                                                                                                                                                                                                                                                                                                                                                                                                                                                                                                                                                                                                                                                                                                 | Furst Medical Laboratory                                                                                                                                                                                       | Norwegian Institute of Public Health, Department of Virology              | Kathrine Stene-Johansen, Kamilla Heddeland Instefjord, Hilde Elshaug, Atiya R Ali, Marie Paulsen Madsen, Rasmus Riis Kopperud, Hilde Vollan, Karoline Bragstad, Olav Hungnes                                                                                                                                           |                                                                                                             |
| EPI_ISL_842645                                                                                                                                                                                                                                                                                                                                                                                                                                                                                                                                                                                                                                                                                                                                                                                                                                                                                                                                                                                                                                                                                                                                                                                                                                                                                                                                                                                                                                                                                                                                                                                                                                                                                                                                                                                                                                                                                                                                                                                                                                                                                                                                                                                                                                                 | Hospital of Southern Norway - Kristiansand, Department of Medical Microbiology                                                                                                                                 | Norwegian Institute of Public Health, Department of Virology              | Kathrine Stene-Johansen, Kamilla Heddeland Instefjord, Hilde Elshaug, Atiya R Ali, Marie Paulsen Madsen, Rasmus Riis Kopperud, Hilde Vollan, Karoline Bragstad, Olav Hungnes                                                                                                                                           |                                                                                                             |
| EPI_ISL_842653, EPI_ISL_842654, EPI_ISL_842655, EPI_ISL_842656, EPI_ISL_842657, EPI_ISL_842658, EPI_ISL_842659, EPI_ISL_842660, EPI_ISL_842661, EPI_ISL_842662, EPI_ISL_842663, EPI_ISL_842664, EPI_ISL_842665, EPI_ISL_842666, EPI_ISL_842667, EPI_ISL_842668, EPI_ISL_842669, EPI_ISL_842670, EPI_ISL_842671, EPI_ISL_842672, EPI_ISL_842673, EPI_ISL_842674, EPI_ISL_842675, EPI_ISL_842676, EPI_ISL_842677, EPI_ISL_842678, EPI_ISL_842679, EPI_ISL_842680, EPI_ISL_842681, EPI_ISL_842682, EPI_ISL_842683, EPI_ISL_842684, EPI_ISL_842685, EPI_ISL_842686, EPI_ISL_842687, EPI_ISL_842688, EPI_ISL_842689, EPI_ISL_842690, EPI_ISL_842691, EPI_ISL_842692, EPI_ISL_842693, EPI_ISL_842694, EPI_ISL_842695, EPI_ISL_842696, EPI_ISL_842697, EPI_ISL_842698, EPI_ISL_842699, EPI_ISL_842700, EPI_ISL_842701, EPI_ISL_842702, EPI_ISL_842703, EPI_ISL_842704, EPI_ISL_842705, EPI_ISL_842706, EPI_ISL_842707, EPI_ISL_842708, EPI_ISL_842710, EPI_ISL_842711, EPI_ISL_842712, EPI_ISL_842713, EPI_ISL_842714, EPI_ISL_842715, EPI_ISL_842716, EPI_ISL_842717, EPI_ISL_842718, EPI_ISL_842719, EPI_ISL_842720, EPI_ISL_842721, EPI_ISL_842722, EPI_ISL_842723, EPI_ISL_842724, EPI_ISL_842725, EPI_ISL_842726, EPI_ISL_842727, EPI_ISL_842728, EPI_ISL_842729, EPI_ISL_842730, EPI_ISL_842731, EPI_ISL_842732, EPI_ISL_842733, EPI_ISL_842734, EPI_ISL_842735, EPI_ISL_842736, EPI_ISL_842737, EPI_ISL_842738, EPI_ISL_842739, EPI_ISL_842740, EPI_ISL_842741, EPI_ISL_842742, EPI_ISL_842743, EPI_ISL_842744, EPI_ISL_842745, EPI_ISL_842746, EPI_ISL_842747, EPI_ISL_842749, EPI_ISL_842750, EPI_ISL_842751, EPI_ISL_842752, EPI_ISL_842753, EPI_ISL_842754, EPI_ISL_842755, EPI_ISL_842756, EPI_ISL_842757, EPI_ISL_842758, EPI_ISL_842759, EPI_ISL_842760, EPI_ISL_842761, EPI_ISL_842762, EPI_ISL_842763, EPI_ISL_842764, EPI_ISL_842765, EPI_ISL_842766, EPI_ISL_842767, EPI_ISL_842769, EPI_ISL_842770, EPI_ISL_842771, EPI_ISL_842772, EPI_ISL_842773, EPI_ISL_842774, EPI_ISL_842775, EPI_ISL_842776, EPI_ISL_842778, EPI_ISL_842779, EPI_ISL_842780, EPI_ISL_842781, EPI_ISL_842782, EPI_ISL_842783, EPI_ISL_842784, EPI_ISL_842785, EPI_ISL_842786, EPI_ISL_842787, EPI_ISL_842788, EPI_ISL_842789, EPI_ISL_842790, EPI_ISL_842791, EPI_ISL_842792 | see above                                                                                                                                                                                                      | University College London Hospital                                        | COVID-19 Genomics UK (COG-UK) Consortium                                                                                                                                                                                                                                                                               | Judith Heaney, Matthew Byott, Catherine Houlihan, Dan Frampton, Stuart Kirk, Moira Spyer and Eleni Nastouli |
| EPI_ISL_845618, EPI_ISL_845619                                                                                                                                                                                                                                                                                                                                                                                                                                                                                                                                                                                                                                                                                                                                                                                                                                                                                                                                                                                                                                                                                                                                                                                                                                                                                                                                                                                                                                                                                                                                                                                                                                                                                                                                                                                                                                                                                                                                                                                                                                                                                                                                                                                                                                 | Ayudas diagnósticas SURA                                                                                                                                                                                       | Instituto Nacional de Salud - Dirección de Investigación en Salud Pública | Katherine Laiton-Donato, Diego A. Álvarez-Díaz, Carlos Franco-Muñoz, Mauricio Pacheco-Montealegre, María T. Herrera-Sepúlveda, Jonathan Reales, Sheryll Corchuelo, Julian Naizaque, Gerardo Santamaría, Paola Muñoz-Laiton, Diego Andrés Prada, Magdalena Wiesner, Martha Lucia Ospina Martínez, Marcela Mercado-Reyes |                                                                                                             |
| EPI_ISL_845620                                                                                                                                                                                                                                                                                                                                                                                                                                                                                                                                                                                                                                                                                                                                                                                                                                                                                                                                                                                                                                                                                                                                                                                                                                                                                                                                                                                                                                                                                                                                                                                                                                                                                                                                                                                                                                                                                                                                                                                                                                                                                                                                                                                                                                                 | compensar calle 63                                                                                                                                                                                             | Instituto Nacional de Salud - Dirección de Investigación en Salud Pública | Katherine Laiton-Donato, Diego A. Álvarez-Díaz, Carlos Franco-Muñoz, Mauricio Pacheco-Montealegre, María T. Herrera-Sepúlveda, Jonathan Reales, Sheryll Corchuelo, Julian Naizaque, Gerardo Santamaría, Paola Muñoz-Laiton, Diego Andrés Prada, Magdalena Wiesner, Martha Lucia Ospina Martínez, Marcela Mercado-Reyes |                                                                                                             |
| EPI_ISL_845621, EPI_ISL_845622, EPI_ISL_845623, EPI_ISL_845624, EPI_ISL_845625                                                                                                                                                                                                                                                                                                                                                                                                                                                                                                                                                                                                                                                                                                                                                                                                                                                                                                                                                                                                                                                                                                                                                                                                                                                                                                                                                                                                                                                                                                                                                                                                                                                                                                                                                                                                                                                                                                                                                                                                                                                                                                                                                                                 | Dirección de Sanidad Ejército                                                                                                                                                                                  | Instituto Nacional de Salud - Dirección de Investigación en Salud Pública | Katherine Laiton-Donato, Diego A. Álvarez-Díaz, Carlos Franco-Muñoz, Mauricio Pacheco-Montealegre, María T. Herrera-Sepúlveda, Jonathan Reales, Sheryll Corchuelo, Julian Naizaque, Gerardo Santamaría, Paola Muñoz-Laiton, Diego Andrés Prada, Magdalena Wiesner, Martha Lucia Ospina Martínez, Marcela Mercado-Reyes |                                                                                                             |
| EPI_ISL_845626                                                                                                                                                                                                                                                                                                                                                                                                                                                                                                                                                                                                                                                                                                                                                                                                                                                                                                                                                                                                                                                                                                                                                                                                                                                                                                                                                                                                                                                                                                                                                                                                                                                                                                                                                                                                                                                                                                                                                                                                                                                                                                                                                                                                                                                 | FUNDACION CARDIOINFANTIL                                                                                                                                                                                       | Instituto Nacional de Salud - Dirección de Investigación en Salud Pública | Katherine Laiton-Donato, Diego A. Álvarez-Díaz, Carlos Franco-Muñoz, Mauricio Pacheco-Montealegre, María T. Herrera-Sepúlveda, Jonathan Reales, Sheryll Corchuelo, Julian Naizaque, Gerardo Santamaría, Paola Muñoz-Laiton, Diego Andrés Prada, Magdalena Wiesner, Martha Lucia Ospina Martínez, Marcela Mercado-Reyes |                                                                                                             |
| EPI_ISL_845627                                                                                                                                                                                                                                                                                                                                                                                                                                                                                                                                                                                                                                                                                                                                                                                                                                                                                                                                                                                                                                                                                                                                                                                                                                                                                                                                                                                                                                                                                                                                                                                                                                                                                                                                                                                                                                                                                                                                                                                                                                                                                                                                                                                                                                                 | SYNLAB COLOMBIA S.A.S                                                                                                                                                                                          | Instituto Nacional de Salud - Dirección de Investigación en Salud Pública | Katherine Laiton-Donato, Diego A. Álvarez-Díaz, Carlos Franco-Muñoz, Mauricio Pacheco-Montealegre, María T. Herrera-Sepúlveda, Jonathan Reales, Sheryll Corchuelo, Julian Naizaque, Gerardo Santamaría, Paola Muñoz-Laiton, Diego Andrés Prada, Magdalena Wiesner, Martha Lucia Ospina Martínez, Marcela Mercado-Reyes |                                                                                                             |

|                                                                                                                                                                                                                                                                                                                                                                                                                                                                                                                                                                                                                                                                                                                                                                                                                                                                                                                                                                                                                                                                                                                                                                                                                                                                                                                                                                                                                                                                                                                                                                                                                                                                                                                                                                                                                                                                                                                                                                                                                                                                                                                                                                                                                                                                                                                                                                                                                                                                                                                                                                                                                                                                                                                                                                                                                                                                                                                                                                                                                                                                                                                                                                                                |                                                                                                                     |                                                                                                    |                                                                                                                                                                                                                                                                                                                        |                                                                                                                                                                                                                                                                                                                        |
|------------------------------------------------------------------------------------------------------------------------------------------------------------------------------------------------------------------------------------------------------------------------------------------------------------------------------------------------------------------------------------------------------------------------------------------------------------------------------------------------------------------------------------------------------------------------------------------------------------------------------------------------------------------------------------------------------------------------------------------------------------------------------------------------------------------------------------------------------------------------------------------------------------------------------------------------------------------------------------------------------------------------------------------------------------------------------------------------------------------------------------------------------------------------------------------------------------------------------------------------------------------------------------------------------------------------------------------------------------------------------------------------------------------------------------------------------------------------------------------------------------------------------------------------------------------------------------------------------------------------------------------------------------------------------------------------------------------------------------------------------------------------------------------------------------------------------------------------------------------------------------------------------------------------------------------------------------------------------------------------------------------------------------------------------------------------------------------------------------------------------------------------------------------------------------------------------------------------------------------------------------------------------------------------------------------------------------------------------------------------------------------------------------------------------------------------------------------------------------------------------------------------------------------------------------------------------------------------------------------------------------------------------------------------------------------------------------------------------------------------------------------------------------------------------------------------------------------------------------------------------------------------------------------------------------------------------------------------------------------------------------------------------------------------------------------------------------------------------------------------------------------------------------------------------------------------|---------------------------------------------------------------------------------------------------------------------|----------------------------------------------------------------------------------------------------|------------------------------------------------------------------------------------------------------------------------------------------------------------------------------------------------------------------------------------------------------------------------------------------------------------------------|------------------------------------------------------------------------------------------------------------------------------------------------------------------------------------------------------------------------------------------------------------------------------------------------------------------------|
| EPI_ISL_845628, EPI_ISL_845629                                                                                                                                                                                                                                                                                                                                                                                                                                                                                                                                                                                                                                                                                                                                                                                                                                                                                                                                                                                                                                                                                                                                                                                                                                                                                                                                                                                                                                                                                                                                                                                                                                                                                                                                                                                                                                                                                                                                                                                                                                                                                                                                                                                                                                                                                                                                                                                                                                                                                                                                                                                                                                                                                                                                                                                                                                                                                                                                                                                                                                                                                                                                                                 | Laboratorio Médico Echavarría                                                                                       | Instituto Nacional de Salud - Dirección de Investigación en Salud Pública                          | Katherine Laiton-Donato, Diego A. Álvarez-Díaz, Carlos Franco-Muñoz, Mauricio Pacheco-Montealegre, María T. Herrera-Sepúlveda, Jonathan Reales, Sheryll Corchuelo, Julian Naizaque, Gerardo Santamaría, Paola Muñoz-Laiton, Diego Andrés Prada, Magdalena Wiesner, Martha Lucia Ospina Martínez, Marcela Mercado-Reyes |                                                                                                                                                                                                                                                                                                                        |
| EPI_ISL_845630, EPI_ISL_845631, EPI_ISL_845632, EPI_ISL_845633                                                                                                                                                                                                                                                                                                                                                                                                                                                                                                                                                                                                                                                                                                                                                                                                                                                                                                                                                                                                                                                                                                                                                                                                                                                                                                                                                                                                                                                                                                                                                                                                                                                                                                                                                                                                                                                                                                                                                                                                                                                                                                                                                                                                                                                                                                                                                                                                                                                                                                                                                                                                                                                                                                                                                                                                                                                                                                                                                                                                                                                                                                                                 | IDIME S.A                                                                                                           | Instituto Nacional de Salud - Dirección de Investigación en Salud Pública                          | Katherine Laiton-Donato, Diego A. Álvarez-Díaz, Carlos Franco-Muñoz, Mauricio Pacheco-Montealegre, María T. Herrera-Sepúlveda, Jonathan Reales, Sheryll Corchuelo, Julian Naizaque, Gerardo Santamaría, Paola Muñoz-Laiton, Diego Andrés Prada, Magdalena Wiesner, Martha Lucia Ospina Martínez, Marcela Mercado-Reyes |                                                                                                                                                                                                                                                                                                                        |
| EPI_ISL_845634                                                                                                                                                                                                                                                                                                                                                                                                                                                                                                                                                                                                                                                                                                                                                                                                                                                                                                                                                                                                                                                                                                                                                                                                                                                                                                                                                                                                                                                                                                                                                                                                                                                                                                                                                                                                                                                                                                                                                                                                                                                                                                                                                                                                                                                                                                                                                                                                                                                                                                                                                                                                                                                                                                                                                                                                                                                                                                                                                                                                                                                                                                                                                                                 | Instituto Nacional de Cancerología                                                                                  | Instituto Nacional de Salud - Dirección de Investigación en Salud Pública                          | Katherine Laiton-Donato, Diego A. Álvarez-Díaz, Carlos Franco-Muñoz, Mauricio Pacheco-Montealegre, María T. Herrera-Sepúlveda, Jonathan Reales, Sheryll Corchuelo, Julian Naizaque, Gerardo Santamaría, Paola Muñoz-Laiton, Diego Andrés Prada, Magdalena Wiesner, Martha Lucia Ospina Martínez, Marcela Mercado-Reyes |                                                                                                                                                                                                                                                                                                                        |
| EPI_ISL_845635, EPI_ISL_845636, EPI_ISL_845637, EPI_ISL_845638, EPI_ISL_845639, EPI_ISL_845640, EPI_ISL_845641, EPI_ISL_845642, EPI_ISL_845643, EPI_ISL_845644, EPI_ISL_845645, EPI_ISL_845646, EPI_ISL_845647, EPI_ISL_845648, EPI_ISL_845649, EPI_ISL_845650, EPI_ISL_845651, EPI_ISL_845652, EPI_ISL_845653, EPI_ISL_845654, EPI_ISL_845655                                                                                                                                                                                                                                                                                                                                                                                                                                                                                                                                                                                                                                                                                                                                                                                                                                                                                                                                                                                                                                                                                                                                                                                                                                                                                                                                                                                                                                                                                                                                                                                                                                                                                                                                                                                                                                                                                                                                                                                                                                                                                                                                                                                                                                                                                                                                                                                                                                                                                                                                                                                                                                                                                                                                                                                                                                                 | see above                                                                                                           | Laboratorio de Salud Pública - Secretaría Distrital de Salud                                       | Instituto Nacional de Salud - Dirección de Investigación en Salud Pública                                                                                                                                                                                                                                              | Katherine Laiton-Donato, Diego A. Álvarez-Díaz, Carlos Franco-Muñoz, Mauricio Pacheco-Montealegre, María T. Herrera-Sepúlveda, Jonathan Reales, Sheryll Corchuelo, Julian Naizaque, Gerardo Santamaría, Paola Muñoz-Laiton, Diego Andrés Prada, Magdalena Wiesner, Martha Lucia Ospina Martínez, Marcela Mercado-Reyes |
| EPI_ISL_845656                                                                                                                                                                                                                                                                                                                                                                                                                                                                                                                                                                                                                                                                                                                                                                                                                                                                                                                                                                                                                                                                                                                                                                                                                                                                                                                                                                                                                                                                                                                                                                                                                                                                                                                                                                                                                                                                                                                                                                                                                                                                                                                                                                                                                                                                                                                                                                                                                                                                                                                                                                                                                                                                                                                                                                                                                                                                                                                                                                                                                                                                                                                                                                                 | UNIDAD HEMATOLÓGICA ESPECIALIZADA                                                                                   | Instituto Nacional de Salud - Dirección de Investigación en Salud Pública                          | Katherine Laiton-Donato, Diego A. Álvarez-Díaz, Carlos Franco-Muñoz, Mauricio Pacheco-Montealegre, María T. Herrera-Sepúlveda, Jonathan Reales, Sheryll Corchuelo, Julian Naizaque, Gerardo Santamaría, Paola Muñoz-Laiton, Diego Andrés Prada, Magdalena Wiesner, Martha Lucia Ospina Martínez, Marcela Mercado-Reyes |                                                                                                                                                                                                                                                                                                                        |
| EPI_ISL_845809, EPI_ISL_845810, EPI_ISL_845811, EPI_ISL_845812, EPI_ISL_845813, EPI_ISL_845814, EPI_ISL_845815, EPI_ISL_845816, EPI_ISL_845817, EPI_ISL_845818, EPI_ISL_845819, EPI_ISL_845820, EPI_ISL_845821, EPI_ISL_845822, EPI_ISL_845823, EPI_ISL_845824, EPI_ISL_845825, EPI_ISL_845826, EPI_ISL_845827, EPI_ISL_845828, EPI_ISL_845829, EPI_ISL_845830, EPI_ISL_845831, EPI_ISL_845832, EPI_ISL_845833, EPI_ISL_845834, EPI_ISL_845835, EPI_ISL_845836, EPI_ISL_845837, EPI_ISL_845838, EPI_ISL_845839, EPI_ISL_845840, EPI_ISL_845841, EPI_ISL_845842, EPI_ISL_845843, EPI_ISL_845844, EPI_ISL_845845, EPI_ISL_845846, EPI_ISL_845847, EPI_ISL_845848, EPI_ISL_845849, EPI_ISL_845850, EPI_ISL_845851, EPI_ISL_845852, EPI_ISL_845853, EPI_ISL_845854, EPI_ISL_845855, EPI_ISL_845856, EPI_ISL_845857, EPI_ISL_845858, EPI_ISL_845859, EPI_ISL_845860, EPI_ISL_845861, EPI_ISL_845862, EPI_ISL_845863, EPI_ISL_845864, EPI_ISL_845865, EPI_ISL_845866, EPI_ISL_845867, EPI_ISL_845868, EPI_ISL_845869, EPI_ISL_845870, EPI_ISL_845871, EPI_ISL_845872, EPI_ISL_845873, EPI_ISL_845874, EPI_ISL_845875, EPI_ISL_845876, EPI_ISL_845877, EPI_ISL_845878, EPI_ISL_845879, EPI_ISL_845880, EPI_ISL_845881, EPI_ISL_845882, EPI_ISL_845883, EPI_ISL_845884, EPI_ISL_845885, EPI_ISL_845886, EPI_ISL_845887, EPI_ISL_845888, EPI_ISL_845889, EPI_ISL_845890, EPI_ISL_845891, EPI_ISL_845892, EPI_ISL_845893, EPI_ISL_845894, EPI_ISL_845895, EPI_ISL_845896, EPI_ISL_845897, EPI_ISL_845898, EPI_ISL_845899, EPI_ISL_845900, EPI_ISL_845901, EPI_ISL_845902, EPI_ISL_845903, EPI_ISL_845904, EPI_ISL_845905, EPI_ISL_845906, EPI_ISL_845907, EPI_ISL_845908, EPI_ISL_845909, EPI_ISL_845910, EPI_ISL_845911, EPI_ISL_845912, EPI_ISL_845913, EPI_ISL_845914, EPI_ISL_845915, EPI_ISL_845916, EPI_ISL_845917, EPI_ISL_845918, EPI_ISL_845919, EPI_ISL_845920, EPI_ISL_845921, EPI_ISL_845922, EPI_ISL_845923, EPI_ISL_845924, EPI_ISL_845925, EPI_ISL_845926, EPI_ISL_845927, EPI_ISL_845928, EPI_ISL_845929, EPI_ISL_845930, EPI_ISL_845931, EPI_ISL_845932, EPI_ISL_845933, EPI_ISL_845934, EPI_ISL_845935, EPI_ISL_845936, EPI_ISL_845937, EPI_ISL_845938, EPI_ISL_845939, EPI_ISL_845940, EPI_ISL_845941, EPI_ISL_845942, EPI_ISL_845943, EPI_ISL_845944, EPI_ISL_845945, EPI_ISL_845946, EPI_ISL_845947, EPI_ISL_845948, EPI_ISL_845949, EPI_ISL_845950, EPI_ISL_845951, EPI_ISL_845952, EPI_ISL_845953, EPI_ISL_845954, EPI_ISL_845955, EPI_ISL_845956, EPI_ISL_845957, EPI_ISL_845958, EPI_ISL_845959, EPI_ISL_845960, EPI_ISL_845961, EPI_ISL_845962, EPI_ISL_845963, EPI_ISL_845964, EPI_ISL_845965, EPI_ISL_845966, EPI_ISL_845967, EPI_ISL_845968, EPI_ISL_845969, EPI_ISL_845970, EPI_ISL_845971, EPI_ISL_845972, EPI_ISL_845973, EPI_ISL_845974, EPI_ISL_845975, EPI_ISL_845976, EPI_ISL_845977, EPI_ISL_845978, EPI_ISL_845979, EPI_ISL_845980, EPI_ISL_845981, EPI_ISL_845982, EPI_ISL_845983, EPI_ISL_845984, EPI_ISL_845985, EPI_ISL_845986, EPI_ISL_845987, EPI_ISL_845988, EPI_ISL_845989, EPI_ISL_845990, EPI_ISL_845991, EPI_ISL_845992, EPI_ISL_845993, EPI_ISL_845994, EPI_ISL_845995, EPI_ISL_845996, EPI_ISL_845997, EPI_ISL_845998, EPI_ISL_845999, EPI_ISL_846000 | see above                                                                                                           | TGen North                                                                                         | TGen North                                                                                                                                                                                                                                                                                                             | Jolene Bowers, Megan Folkerts, Chris French, Hayley Yaglom, Ashlyn Pfeiffer, Darrin Lemmer, Dave Engelthaler, The Arizona COVID Genomics Union (ACGU)                                                                                                                                                                  |
| EPI_ISL_848084, EPI_ISL_848085, EPI_ISL_848086, EPI_ISL_848087, EPI_ISL_848088, EPI_ISL_848089, EPI_ISL_848090, EPI_ISL_848091, EPI_ISL_848092, EPI_ISL_848093, EPI_ISL_848094, EPI_ISL_848095, EPI_ISL_848096, EPI_ISL_848097, EPI_ISL_848098, EPI_ISL_848099, EPI_ISL_848100, EPI_ISL_848101, EPI_ISL_848102, EPI_ISL_848103, EPI_ISL_848104, EPI_ISL_848105, EPI_ISL_848106, EPI_ISL_848107, EPI_ISL_848108, EPI_ISL_848109, EPI_ISL_848110, EPI_ISL_848111, EPI_ISL_848112, EPI_ISL_848113, EPI_ISL_848114, EPI_ISL_848115, EPI_ISL_848116, EPI_ISL_848117, EPI_ISL_848118, EPI_ISL_848119, EPI_ISL_848120, EPI_ISL_848121, EPI_ISL_848122, EPI_ISL_848123, EPI_ISL_848124, EPI_ISL_848125, EPI_ISL_848126, EPI_ISL_848127, EPI_ISL_848128, EPI_ISL_848129, EPI_ISL_848130, EPI_ISL_848131, EPI_ISL_848132, EPI_ISL_848133, EPI_ISL_848134, EPI_ISL_848135, EPI_ISL_848136, EPI_ISL_848137, EPI_ISL_848138, EPI_ISL_848139, EPI_ISL_848140, EPI_ISL_848141, EPI_ISL_848142, EPI_ISL_848143, EPI_ISL_848144, EPI_ISL_848145, EPI_ISL_848146, EPI_ISL_848147, EPI_ISL_848148, EPI_ISL_848149, EPI_ISL_848150, EPI_ISL_848151, EPI_ISL_848152, EPI_ISL_848153, EPI_ISL_848154, EPI_ISL_848155, EPI_ISL_848156, EPI_ISL_848157, EPI_ISL_848158, EPI_ISL_848159, EPI_ISL_848160, EPI_ISL_848161, EPI_ISL_848162, EPI_ISL_848163, EPI_ISL_848164, EPI_ISL_848165, EPI_ISL_848166, EPI_ISL_848167, EPI_ISL_848168, EPI_ISL_848169, EPI_ISL_848170, EPI_ISL_848171                                                                                                                                                                                                                                                                                                                                                                                                                                                                                                                                                                                                                                                                                                                                                                                                                                                                                                                                                                                                                                                                                                                                                                                                                                                                                                                                                                                                                                                                                                                                                                                                                                                                                                                                 | see above                                                                                                           | National Virus Reference Laboratory                                                                | Irish Coronavirus Sequencing Consortium - National University of Ireland Galway                                                                                                                                                                                                                                        | Kate Reddington, Grainne Mc Andrew, Simone Coughlan                                                                                                                                                                                                                                                                    |
| EPI_ISL_852633, EPI_ISL_852634, EPI_ISL_852635, EPI_ISL_852636, EPI_ISL_852637, EPI_ISL_852638, EPI_ISL_852639, EPI_ISL_852640, EPI_ISL_852641, EPI_ISL_852642, EPI_ISL_852643, EPI_ISL_852644, EPI_ISL_852645, EPI_ISL_852646, EPI_ISL_852647, EPI_ISL_852648, EPI_ISL_852649, EPI_ISL_852650, EPI_ISL_852651, EPI_ISL_852652, EPI_ISL_852653, EPI_ISL_852654, EPI_ISL_852655, EPI_ISL_852656, EPI_ISL_852657, EPI_ISL_852658, EPI_ISL_852659, EPI_ISL_852660, EPI_ISL_852661, EPI_ISL_852662, EPI_ISL_852663, EPI_ISL_852664, EPI_ISL_852665, EPI_ISL_852666, EPI_ISL_852667, EPI_ISL_852668, EPI_ISL_852669, EPI_ISL_852670, EPI_ISL_852671, EPI_ISL_852672, EPI_ISL_852673, EPI_ISL_852674, EPI_ISL_852675, EPI_ISL_852676, EPI_ISL_852677, EPI_ISL_852678, EPI_ISL_852679, EPI_ISL_852680, EPI_ISL_852681, EPI_ISL_852682, EPI_ISL_852683, EPI_ISL_852684, EPI_ISL_852685, EPI_ISL_852686, EPI_ISL_852687, EPI_ISL_852688, EPI_ISL_852689, EPI_ISL_852690, EPI_ISL_852691, EPI_ISL_852692, EPI_ISL_852693, EPI_ISL_852694, EPI_ISL_852695, EPI_ISL_852696, EPI_ISL_852697, EPI_ISL_852698, EPI_ISL_852699, EPI_ISL_852700, EPI_ISL_852701, EPI_ISL_852702, EPI_ISL_852703, EPI_ISL_852704, EPI_ISL_852705, EPI_ISL_852706, EPI_ISL_852707, EPI_ISL_852708, EPI_ISL_852709, EPI_ISL_852710, EPI_ISL_852711, EPI_ISL_852712, EPI_ISL_852713, EPI_ISL_852714, EPI_ISL_852715, EPI_ISL_852716, EPI_ISL_852717, EPI_ISL_852718, EPI_ISL_852719, EPI_ISL_852720, EPI_ISL_852721, EPI_ISL_852722, EPI_ISL_852723, EPI_ISL_852724, EPI_ISL_852725, EPI_ISL_852726, EPI_ISL_852727, EPI_ISL_852728, EPI_ISL_852729, EPI_ISL_852730, EPI_ISL_852731, EPI_ISL_852732, EPI_ISL_852733, EPI_ISL_852734, EPI_ISL_852735, EPI_ISL_852736, EPI_ISL_852737, EPI_ISL_852738, EPI_ISL_852739, EPI_ISL_852740, EPI_ISL_852741, EPI_ISL_852742, EPI_ISL_852743, EPI_ISL_852744, EPI_ISL_852745, EPI_ISL_852746, EPI_ISL_852747, EPI_ISL_852748, EPI_ISL_852749, EPI_ISL_852750, EPI_ISL_852751, EPI_ISL_852752, EPI_ISL_852753, EPI_ISL_852754, EPI_ISL_852755, EPI_ISL_852756, EPI_ISL_852757, EPI_ISL_852758, EPI_ISL_852759, EPI_ISL_852760, EPI_ISL_852761, EPI_ISL_852762, EPI_ISL_852763, EPI_ISL_852764, EPI_ISL_852765, EPI_ISL_852766, EPI_ISL_852767, EPI_ISL_852768, EPI_ISL_852769, EPI_ISL_852770, EPI_ISL_852771, EPI_ISL_852772, EPI_ISL_852773, EPI_ISL_852774, EPI_ISL_852775, EPI_ISL_852776, EPI_ISL_852777, EPI_ISL_852778, EPI_ISL_852779, EPI_ISL_852780, EPI_ISL_852781, EPI_ISL_852782, EPI_ISL_852783, EPI_ISL_852784, EPI_ISL_852785, EPI_ISL_852786, EPI_ISL_852787, EPI_ISL_852788, EPI_ISL_852789, EPI_ISL_852790, EPI_ISL_852791, EPI_ISL_852792, EPI_ISL_852793, EPI_ISL_852794, EPI_ISL_852795, EPI_ISL_852796, EPI_ISL_852797, EPI_ISL_852798, EPI_ISL_852799, EPI_ISL_852800, EPI_ISL_852801, EPI_ISL_852802, EPI_ISL_852803, EPI_ISL_852804, EPI_ISL_852805, EPI_ISL_852806, EPI_ISL_852807, EPI_ISL_852808, EPI_ISL_852809, EPI_ISL_852810, EPI_ISL_852811, EPI_ISL_852812                                                                                                                                                                                                 | see above                                                                                                           | Institute of Virology, Medical Center, University of Freiburg, Freiburg, Germany                   | Institute of Virology, Clinical Virus Genomics, Medical Center, University of Freiburg, Freiburg, Germany                                                                                                                                                                                                              | Jonas Fuchs, Lisa Kern, Sandra Reuter, Hajo Grundmann, Marcus Panning                                                                                                                                                                                                                                                  |
| EPI_ISL_855345, EPI_ISL_855346, EPI_ISL_855347, EPI_ISL_855348, EPI_ISL_855349, EPI_ISL_855350, EPI_ISL_855351, EPI_ISL_855352                                                                                                                                                                                                                                                                                                                                                                                                                                                                                                                                                                                                                                                                                                                                                                                                                                                                                                                                                                                                                                                                                                                                                                                                                                                                                                                                                                                                                                                                                                                                                                                                                                                                                                                                                                                                                                                                                                                                                                                                                                                                                                                                                                                                                                                                                                                                                                                                                                                                                                                                                                                                                                                                                                                                                                                                                                                                                                                                                                                                                                                                 | Department of Epidemiology, Infectious Disease Control and Prevention, Hiroshima University, Japan                  | Department of Epidemiology, Infectious Disease Control and Prevention, Hiroshima University, Japan | Junko Tanaka, Kazuki Takahashi, Masao Kuwabara, Eisaku Kishita, Shintaro Nagashima, Ko Ko                                                                                                                                                                                                                              |                                                                                                                                                                                                                                                                                                                        |
| EPI_ISL_856723, EPI_ISL_856724, EPI_ISL_856725, EPI_ISL_856728, EPI_ISL_856734, EPI_ISL_856737, EPI_ISL_856739, EPI_ISL_856740, EPI_ISL_856744, EPI_ISL_856746, EPI_ISL_856752                                                                                                                                                                                                                                                                                                                                                                                                                                                                                                                                                                                                                                                                                                                                                                                                                                                                                                                                                                                                                                                                                                                                                                                                                                                                                                                                                                                                                                                                                                                                                                                                                                                                                                                                                                                                                                                                                                                                                                                                                                                                                                                                                                                                                                                                                                                                                                                                                                                                                                                                                                                                                                                                                                                                                                                                                                                                                                                                                                                                                 | see above                                                                                                           | Department of Clinical Microbiology                                                                | GIGA Medical Genomics                                                                                                                                                                                                                                                                                                  | Keith Durkin, Maria Artesi, Sébastien Bontems, Raphaël Boreux, Bouchra Boujemla, Cécile Meex, Pierrette Melin, Marie-Pierre Hayette, Vincent Bours                                                                                                                                                                     |
| EPI_ISL_857314                                                                                                                                                                                                                                                                                                                                                                                                                                                                                                                                                                                                                                                                                                                                                                                                                                                                                                                                                                                                                                                                                                                                                                                                                                                                                                                                                                                                                                                                                                                                                                                                                                                                                                                                                                                                                                                                                                                                                                                                                                                                                                                                                                                                                                                                                                                                                                                                                                                                                                                                                                                                                                                                                                                                                                                                                                                                                                                                                                                                                                                                                                                                                                                 | Centers for Disease Control, R.O.C. (Taiwan)                                                                        | Centers for Disease Control, R.O.C. (Taiwan)                                                       | Ji-Rong Yang, Yu-Chi Lin, Jung-Jung-Mu, Ming-Tsan Liu                                                                                                                                                                                                                                                                  |                                                                                                                                                                                                                                                                                                                        |
| EPI_ISL_860114, EPI_ISL_860115, EPI_ISL_860116                                                                                                                                                                                                                                                                                                                                                                                                                                                                                                                                                                                                                                                                                                                                                                                                                                                                                                                                                                                                                                                                                                                                                                                                                                                                                                                                                                                                                                                                                                                                                                                                                                                                                                                                                                                                                                                                                                                                                                                                                                                                                                                                                                                                                                                                                                                                                                                                                                                                                                                                                                                                                                                                                                                                                                                                                                                                                                                                                                                                                                                                                                                                                 | Medical Microbiology Unit, Department for Laboratory Medicine, Drammen Hospital, Vestre Viken Health Trust,         | Norwegian Institute of Public Health, Department of Virology                                       | Kathrine Stene-Johansen, Kamilla Heddeland Instefjord, Hilde Elshaug, Atiya R Ali, Marie Paulsen Madsen, Rasmus Riis Kopperud, Hilde Vollan, Karoline Bragstad, Olav Hungnes                                                                                                                                           |                                                                                                                                                                                                                                                                                                                        |
| EPI_ISL_860206, EPI_ISL_860207                                                                                                                                                                                                                                                                                                                                                                                                                                                                                                                                                                                                                                                                                                                                                                                                                                                                                                                                                                                                                                                                                                                                                                                                                                                                                                                                                                                                                                                                                                                                                                                                                                                                                                                                                                                                                                                                                                                                                                                                                                                                                                                                                                                                                                                                                                                                                                                                                                                                                                                                                                                                                                                                                                                                                                                                                                                                                                                                                                                                                                                                                                                                                                 | Ostfold Hospital Trust - Kalnes, Centre for Laboratory Medicine, Section for gene technology and infection serology | Norwegian Institute of Public Health, Department of Virology                                       | Kathrine Stene-Johansen, Kamilla Heddeland Instefjord, Hilde Elshaug, Atiya R Ali, Marie Paulsen Madsen, Rasmus Riis Kopperud, Hilde Vollan, Karoline Bragstad, Olav Hungnes                                                                                                                                           |                                                                                                                                                                                                                                                                                                                        |
| EPI_ISL_860208                                                                                                                                                                                                                                                                                                                                                                                                                                                                                                                                                                                                                                                                                                                                                                                                                                                                                                                                                                                                                                                                                                                                                                                                                                                                                                                                                                                                                                                                                                                                                                                                                                                                                                                                                                                                                                                                                                                                                                                                                                                                                                                                                                                                                                                                                                                                                                                                                                                                                                                                                                                                                                                                                                                                                                                                                                                                                                                                                                                                                                                                                                                                                                                 | Haukeland University Hospital, Dept. of Microbiology                                                                | Norwegian Institute of Public Health, Department of Virology                                       | Kathrine Stene-Johansen, Kamilla Heddeland Instefjord, Hilde Elshaug, Atiya R Ali, Marie Paulsen Madsen, Rasmus Riis Kopperud, Hilde Vollan, Karoline Bragstad, Olav Hungnes                                                                                                                                           |                                                                                                                                                                                                                                                                                                                        |
| EPI_ISL_860209                                                                                                                                                                                                                                                                                                                                                                                                                                                                                                                                                                                                                                                                                                                                                                                                                                                                                                                                                                                                                                                                                                                                                                                                                                                                                                                                                                                                                                                                                                                                                                                                                                                                                                                                                                                                                                                                                                                                                                                                                                                                                                                                                                                                                                                                                                                                                                                                                                                                                                                                                                                                                                                                                                                                                                                                                                                                                                                                                                                                                                                                                                                                                                                 | Norwegian Institute of Public Health, Department of Virology                                                        | Norwegian Institute of Public Health, Department of Virology                                       | Kathrine Stene-Johansen, Kamilla Heddeland Instefjord, Hilde Elshaug, Atiya R Ali, Marie Paulsen Madsen, Rasmus Riis Kopperud, Hilde Vollan, Karoline Bragstad, Olav Hungnes                                                                                                                                           |                                                                                                                                                                                                                                                                                                                        |
| EPI_ISL_860210                                                                                                                                                                                                                                                                                                                                                                                                                                                                                                                                                                                                                                                                                                                                                                                                                                                                                                                                                                                                                                                                                                                                                                                                                                                                                                                                                                                                                                                                                                                                                                                                                                                                                                                                                                                                                                                                                                                                                                                                                                                                                                                                                                                                                                                                                                                                                                                                                                                                                                                                                                                                                                                                                                                                                                                                                                                                                                                                                                                                                                                                                                                                                                                 | Akershus University Hospital, Department for Microbiology and Infectious Disease Control                            | Norwegian Institute of Public Health, Department of Virology                                       | Kathrine Stene-Johansen, Kamilla Heddeland Instefjord, Hilde Elshaug, Atiya R Ali, Marie Paulsen Madsen, Rasmus Riis Kopperud, Hilde Vollan, Karoline Bragstad, Olav Hungnes                                                                                                                                           |                                                                                                                                                                                                                                                                                                                        |
| EPI_ISL_860211                                                                                                                                                                                                                                                                                                                                                                                                                                                                                                                                                                                                                                                                                                                                                                                                                                                                                                                                                                                                                                                                                                                                                                                                                                                                                                                                                                                                                                                                                                                                                                                                                                                                                                                                                                                                                                                                                                                                                                                                                                                                                                                                                                                                                                                                                                                                                                                                                                                                                                                                                                                                                                                                                                                                                                                                                                                                                                                                                                                                                                                                                                                                                                                 | Haukeland University Hospital, Dept. of Microbiology                                                                | Norwegian Institute of Public Health, Department of Virology                                       | Kathrine Stene-Johansen, Kamilla Heddeland Instefjord, Hilde Elshaug, Atiya R Ali, Marie Paulsen Madsen, Rasmus Riis Kopperud, Hilde Vollan, Karoline Bragstad, Olav Hungnes                                                                                                                                           |                                                                                                                                                                                                                                                                                                                        |
| EPI_ISL_860212                                                                                                                                                                                                                                                                                                                                                                                                                                                                                                                                                                                                                                                                                                                                                                                                                                                                                                                                                                                                                                                                                                                                                                                                                                                                                                                                                                                                                                                                                                                                                                                                                                                                                                                                                                                                                                                                                                                                                                                                                                                                                                                                                                                                                                                                                                                                                                                                                                                                                                                                                                                                                                                                                                                                                                                                                                                                                                                                                                                                                                                                                                                                                                                 | Akershus University Hospital, Department for Microbiology and Infectious Disease Control                            | Norwegian Institute of Public Health, Department of Virology                                       | Kathrine Stene-Johansen, Kamilla Heddeland Instefjord, Hilde Elshaug, Atiya R Ali, Marie Paulsen Madsen, Rasmus Riis Kopperud, Hilde Vollan, Karoline Bragstad, Olav Hungnes                                                                                                                                           |                                                                                                                                                                                                                                                                                                                        |
| EPI_ISL_860213                                                                                                                                                                                                                                                                                                                                                                                                                                                                                                                                                                                                                                                                                                                                                                                                                                                                                                                                                                                                                                                                                                                                                                                                                                                                                                                                                                                                                                                                                                                                                                                                                                                                                                                                                                                                                                                                                                                                                                                                                                                                                                                                                                                                                                                                                                                                                                                                                                                                                                                                                                                                                                                                                                                                                                                                                                                                                                                                                                                                                                                                                                                                                                                 | Furst Medical Laboratory                                                                                            | Norwegian Institute of Public Health, Department of Virology                                       | Kathrine Stene-Johansen, Kamilla Heddeland Instefjord, Hilde Elshaug, Atiya R Ali, Marie Paulsen Madsen, Rasmus Riis Kopperud, Hilde Vollan, Karoline Bragstad, Olav Hungnes                                                                                                                                           |                                                                                                                                                                                                                                                                                                                        |
| EPI_ISL_860214                                                                                                                                                                                                                                                                                                                                                                                                                                                                                                                                                                                                                                                                                                                                                                                                                                                                                                                                                                                                                                                                                                                                                                                                                                                                                                                                                                                                                                                                                                                                                                                                                                                                                                                                                                                                                                                                                                                                                                                                                                                                                                                                                                                                                                                                                                                                                                                                                                                                                                                                                                                                                                                                                                                                                                                                                                                                                                                                                                                                                                                                                                                                                                                 | Hospital of Southern Norway - Kristiansand, Department of Medical Microbiology                                      | Norwegian Institute of Public Health, Department of Virology                                       | Kathrine Stene-Johansen, Kamilla Heddeland Instefjord, Hilde Elshaug, Atiya R Ali, Marie Paulsen Madsen, Rasmus Riis Kopperud, Hilde Vollan, Karoline Bragstad, Olav Hungnes                                                                                                                                           |                                                                                                                                                                                                                                                                                                                        |
| EPI_ISL_860215                                                                                                                                                                                                                                                                                                                                                                                                                                                                                                                                                                                                                                                                                                                                                                                                                                                                                                                                                                                                                                                                                                                                                                                                                                                                                                                                                                                                                                                                                                                                                                                                                                                                                                                                                                                                                                                                                                                                                                                                                                                                                                                                                                                                                                                                                                                                                                                                                                                                                                                                                                                                                                                                                                                                                                                                                                                                                                                                                                                                                                                                                                                                                                                 | Norwegian Institute of Public Health, Department of Virology                                                        | Norwegian Institute of Public Health, Department of Virology                                       | Kathrine Stene-Johansen, Kamilla Heddeland Instefjord, Hilde Elshaug, Atiya R Ali, Marie Paulsen Madsen, Rasmus Riis Kopperud, Hilde Vollan, Karoline Bragstad, Olav Hungnes                                                                                                                                           |                                                                                                                                                                                                                                                                                                                        |
| EPI_ISL_860216, EPI_ISL_860217                                                                                                                                                                                                                                                                                                                                                                                                                                                                                                                                                                                                                                                                                                                                                                                                                                                                                                                                                                                                                                                                                                                                                                                                                                                                                                                                                                                                                                                                                                                                                                                                                                                                                                                                                                                                                                                                                                                                                                                                                                                                                                                                                                                                                                                                                                                                                                                                                                                                                                                                                                                                                                                                                                                                                                                                                                                                                                                                                                                                                                                                                                                                                                 | Medical Microbiology Unit, Department for Laboratory Medicine, Drammen Hospital, Vestre Viken Health Trust,         | Norwegian Institute of Public Health, Department of Virology                                       | Kathrine Stene-Johansen, Kamilla Heddeland Instefjord, Hilde Elshaug, Atiya R Ali, Marie Paulsen Madsen, Rasmus Riis Kopperud, Hilde Vollan, Karoline Bragstad, Olav Hungnes                                                                                                                                           |                                                                                                                                                                                                                                                                                                                        |
| EPI_ISL_860218                                                                                                                                                                                                                                                                                                                                                                                                                                                                                                                                                                                                                                                                                                                                                                                                                                                                                                                                                                                                                                                                                                                                                                                                                                                                                                                                                                                                                                                                                                                                                                                                                                                                                                                                                                                                                                                                                                                                                                                                                                                                                                                                                                                                                                                                                                                                                                                                                                                                                                                                                                                                                                                                                                                                                                                                                                                                                                                                                                                                                                                                                                                                                                                 | Ostfold Hospital Trust - Kalnes, Centre for Laboratory                                                              | Norwegian Institute of Public Health, Department of Virology                                       | Kathrine Stene-Johansen, Kamilla Heddeland Instefjord, Hilde Elshaug, Atiya R Ali, Marie Paulsen Madsen, Rasmus Riis Kopperud, Hilde Vollan, Karoline                                                                                                                                                                  |                                                                                                                                                                                                                                                                                                                        |





|                                                                                                                                                                                                                                                                                                                                                                                                                                                                                                                                                                                                                                                                                                                                                                                                                                                                                                                                                                                                                                                                                                                                                                                                                                                                                                                                                                                                                                                                                                                                                                                                                                                                                                                                                                                                                                                                                                                                                                                                                                                                                                                                                                                                                                                                                                                                                                                                                                                                                                                                                                                                                                                                                                                                                                                                                                                                                                                                                                                                                                                                                                                                                                                                                                                                                                                                                                                                                                                                                                                                                                                                                                                                                                                                                                                                                                                                                                                                                                                                                                                                                                                                                                                                                                                                                                                                                                                                                                                                                                                |                                                             |                                                      |                                                                                                                                                                                                                                                                                                                                                                                                                                                                                                                                          |
|----------------------------------------------------------------------------------------------------------------------------------------------------------------------------------------------------------------------------------------------------------------------------------------------------------------------------------------------------------------------------------------------------------------------------------------------------------------------------------------------------------------------------------------------------------------------------------------------------------------------------------------------------------------------------------------------------------------------------------------------------------------------------------------------------------------------------------------------------------------------------------------------------------------------------------------------------------------------------------------------------------------------------------------------------------------------------------------------------------------------------------------------------------------------------------------------------------------------------------------------------------------------------------------------------------------------------------------------------------------------------------------------------------------------------------------------------------------------------------------------------------------------------------------------------------------------------------------------------------------------------------------------------------------------------------------------------------------------------------------------------------------------------------------------------------------------------------------------------------------------------------------------------------------------------------------------------------------------------------------------------------------------------------------------------------------------------------------------------------------------------------------------------------------------------------------------------------------------------------------------------------------------------------------------------------------------------------------------------------------------------------------------------------------------------------------------------------------------------------------------------------------------------------------------------------------------------------------------------------------------------------------------------------------------------------------------------------------------------------------------------------------------------------------------------------------------------------------------------------------------------------------------------------------------------------------------------------------------------------------------------------------------------------------------------------------------------------------------------------------------------------------------------------------------------------------------------------------------------------------------------------------------------------------------------------------------------------------------------------------------------------------------------------------------------------------------------------------------------------------------------------------------------------------------------------------------------------------------------------------------------------------------------------------------------------------------------------------------------------------------------------------------------------------------------------------------------------------------------------------------------------------------------------------------------------------------------------------------------------------------------------------------------------------------------------------------------------------------------------------------------------------------------------------------------------------------------------------------------------------------------------------------------------------------------------------------------------------------------------------------------------------------------------------------------------------------------------------------------------------------------------------|-------------------------------------------------------------|------------------------------------------------------|------------------------------------------------------------------------------------------------------------------------------------------------------------------------------------------------------------------------------------------------------------------------------------------------------------------------------------------------------------------------------------------------------------------------------------------------------------------------------------------------------------------------------------------|
| EPI_ISL_861443, EPI_ISL_861444, EPI_ISL_861445, EPI_ISL_861446, EPI_ISL_861447, EPI_ISL_861448, EPI_ISL_861449, EPI_ISL_861450, EPI_ISL_861451, EPI_ISL_861452, EPI_ISL_861453, EPI_ISL_861454, EPI_ISL_861455                                                                                                                                                                                                                                                                                                                                                                                                                                                                                                                                                                                                                                                                                                                                                                                                                                                                                                                                                                                                                                                                                                                                                                                                                                                                                                                                                                                                                                                                                                                                                                                                                                                                                                                                                                                                                                                                                                                                                                                                                                                                                                                                                                                                                                                                                                                                                                                                                                                                                                                                                                                                                                                                                                                                                                                                                                                                                                                                                                                                                                                                                                                                                                                                                                                                                                                                                                                                                                                                                                                                                                                                                                                                                                                                                                                                                                                                                                                                                                                                                                                                                                                                                                                                                                                                                                 |                                                             |                                                      |                                                                                                                                                                                                                                                                                                                                                                                                                                                                                                                                          |
| see above                                                                                                                                                                                                                                                                                                                                                                                                                                                                                                                                                                                                                                                                                                                                                                                                                                                                                                                                                                                                                                                                                                                                                                                                                                                                                                                                                                                                                                                                                                                                                                                                                                                                                                                                                                                                                                                                                                                                                                                                                                                                                                                                                                                                                                                                                                                                                                                                                                                                                                                                                                                                                                                                                                                                                                                                                                                                                                                                                                                                                                                                                                                                                                                                                                                                                                                                                                                                                                                                                                                                                                                                                                                                                                                                                                                                                                                                                                                                                                                                                                                                                                                                                                                                                                                                                                                                                                                                                                                                                                      | Clinical Molecular Microbiology Laboratory, UNC Hospitals   | Jeremy Wang                                          | Jeremy Wang, Alexander Rubinsteyn, Colleen Rice, Jason Smedberg, Melissa Miller, Corbin Jones, Robert Hagan                                                                                                                                                                                                                                                                                                                                                                                                                              |
| EPI_ISL_862079                                                                                                                                                                                                                                                                                                                                                                                                                                                                                                                                                                                                                                                                                                                                                                                                                                                                                                                                                                                                                                                                                                                                                                                                                                                                                                                                                                                                                                                                                                                                                                                                                                                                                                                                                                                                                                                                                                                                                                                                                                                                                                                                                                                                                                                                                                                                                                                                                                                                                                                                                                                                                                                                                                                                                                                                                                                                                                                                                                                                                                                                                                                                                                                                                                                                                                                                                                                                                                                                                                                                                                                                                                                                                                                                                                                                                                                                                                                                                                                                                                                                                                                                                                                                                                                                                                                                                                                                                                                                                                 | National Influenza Center, Virology Department              | National Influenza Center                            | K Sadeghi, A Nejadi, J Yavarian, NZ Shafiei Jandaghi, V Salimi, F Ajaminejad, N Ghavami and T Mokhtari Azad                                                                                                                                                                                                                                                                                                                                                                                                                              |
| EPI_ISL_866048, EPI_ISL_866049, EPI_ISL_866050, EPI_ISL_866051, EPI_ISL_866052, EPI_ISL_866053, EPI_ISL_866054, EPI_ISL_866055, EPI_ISL_866056, EPI_ISL_866057, EPI_ISL_866058, EPI_ISL_866059, EPI_ISL_866060, EPI_ISL_866061, EPI_ISL_866062, EPI_ISL_866063, EPI_ISL_866064, EPI_ISL_866065, EPI_ISL_866066, EPI_ISL_866067, EPI_ISL_866068, EPI_ISL_866069, EPI_ISL_866070, EPI_ISL_866071, EPI_ISL_866072, EPI_ISL_866073, EPI_ISL_866074, EPI_ISL_866076, EPI_ISL_866077, EPI_ISL_866078, EPI_ISL_866079, EPI_ISL_866080, EPI_ISL_866082, EPI_ISL_866083, EPI_ISL_866085, EPI_ISL_866086, EPI_ISL_866087, EPI_ISL_866088, EPI_ISL_866089, EPI_ISL_866090, EPI_ISL_866091, EPI_ISL_866092, EPI_ISL_866093, EPI_ISL_866094, EPI_ISL_866095, EPI_ISL_866096, EPI_ISL_866097, EPI_ISL_866098, EPI_ISL_866099, EPI_ISL_866100, EPI_ISL_866101, EPI_ISL_866102, EPI_ISL_866103, EPI_ISL_866104, EPI_ISL_866105, EPI_ISL_866106, EPI_ISL_866107, EPI_ISL_866109, EPI_ISL_866110, EPI_ISL_866111, EPI_ISL_866112, EPI_ISL_866113, EPI_ISL_866114, EPI_ISL_866115, EPI_ISL_866116, EPI_ISL_866117, EPI_ISL_866118, EPI_ISL_866119, EPI_ISL_866120, EPI_ISL_866121, EPI_ISL_866122, EPI_ISL_866123, EPI_ISL_866124, EPI_ISL_866125, EPI_ISL_866126, EPI_ISL_866127, EPI_ISL_866128, EPI_ISL_866129, EPI_ISL_866130, EPI_ISL_866131, EPI_ISL_866132, EPI_ISL_866133, EPI_ISL_866134, EPI_ISL_866135, EPI_ISL_866136, EPI_ISL_866137, EPI_ISL_866138, EPI_ISL_866139, EPI_ISL_866140, EPI_ISL_866141, EPI_ISL_866142, EPI_ISL_866143, EPI_ISL_866145, EPI_ISL_866146, EPI_ISL_866147, EPI_ISL_866148, EPI_ISL_866149, EPI_ISL_866150, EPI_ISL_866151, EPI_ISL_866152, EPI_ISL_866153, EPI_ISL_866154, EPI_ISL_866155, EPI_ISL_866156, EPI_ISL_866158, EPI_ISL_866159, EPI_ISL_866160, EPI_ISL_866161, EPI_ISL_866162, EPI_ISL_866163, EPI_ISL_866164, EPI_ISL_866165, EPI_ISL_866166, EPI_ISL_866167, EPI_ISL_866168, EPI_ISL_866169, EPI_ISL_866170, EPI_ISL_866171, EPI_ISL_866172, EPI_ISL_866173, EPI_ISL_866174, EPI_ISL_866175, EPI_ISL_866176, EPI_ISL_866177, EPI_ISL_866178, EPI_ISL_866179, EPI_ISL_866181, EPI_ISL_866182, EPI_ISL_866183, EPI_ISL_866184, EPI_ISL_866185, EPI_ISL_866186                                                                                                                                                                                                                                                                                                                                                                                                                                                                                                                                                                                                                                                                                                                                                                                                                                                                                                                                                                                                                                                                                                                                                                                                                                                                                                                                                                                                                                                                                                                                                                                                                                                                                                                                                                                                                                                                                                                                                                                                                                                                                                                                                                                                                                                                                                                 |                                                             |                                                      |                                                                                                                                                                                                                                                                                                                                                                                                                                                                                                                                          |
| see above                                                                                                                                                                                                                                                                                                                                                                                                                                                                                                                                                                                                                                                                                                                                                                                                                                                                                                                                                                                                                                                                                                                                                                                                                                                                                                                                                                                                                                                                                                                                                                                                                                                                                                                                                                                                                                                                                                                                                                                                                                                                                                                                                                                                                                                                                                                                                                                                                                                                                                                                                                                                                                                                                                                                                                                                                                                                                                                                                                                                                                                                                                                                                                                                                                                                                                                                                                                                                                                                                                                                                                                                                                                                                                                                                                                                                                                                                                                                                                                                                                                                                                                                                                                                                                                                                                                                                                                                                                                                                                      | University College London Hospital                          | COVID-19 Genomics UK (COG-UK) Consortium             | Judith Heaney, Matthew Byott, Catherine Houlihan, Dan Frampton, Stuart Kirk, Moira Spyer and Eleni Nastouli                                                                                                                                                                                                                                                                                                                                                                                                                              |
| EPI_ISL_872038                                                                                                                                                                                                                                                                                                                                                                                                                                                                                                                                                                                                                                                                                                                                                                                                                                                                                                                                                                                                                                                                                                                                                                                                                                                                                                                                                                                                                                                                                                                                                                                                                                                                                                                                                                                                                                                                                                                                                                                                                                                                                                                                                                                                                                                                                                                                                                                                                                                                                                                                                                                                                                                                                                                                                                                                                                                                                                                                                                                                                                                                                                                                                                                                                                                                                                                                                                                                                                                                                                                                                                                                                                                                                                                                                                                                                                                                                                                                                                                                                                                                                                                                                                                                                                                                                                                                                                                                                                                                                                 | Department of Clinical Microbiology                         | GIGA Medical Genomics                                | Keith Durkin, Maria Artesi, Sébastien Bontems, Raphaël Boreux, Bouchra Boujemla, Cécile Meex, Pierrette Melin, Marie-Pierre Hayette, Vincent Bours                                                                                                                                                                                                                                                                                                                                                                                       |
| EPI_ISL_872055                                                                                                                                                                                                                                                                                                                                                                                                                                                                                                                                                                                                                                                                                                                                                                                                                                                                                                                                                                                                                                                                                                                                                                                                                                                                                                                                                                                                                                                                                                                                                                                                                                                                                                                                                                                                                                                                                                                                                                                                                                                                                                                                                                                                                                                                                                                                                                                                                                                                                                                                                                                                                                                                                                                                                                                                                                                                                                                                                                                                                                                                                                                                                                                                                                                                                                                                                                                                                                                                                                                                                                                                                                                                                                                                                                                                                                                                                                                                                                                                                                                                                                                                                                                                                                                                                                                                                                                                                                                                                                 | CHR Citadelle                                               | GIGA Medical Genomics                                | Keith Durkin, Maria Artesi, Sébastien Bontems, Raphaël Boreux, Bouchra Boujemla, Cécile Meex, Pierrette Melin, Marie-Pierre Hayette, Vincent Bours                                                                                                                                                                                                                                                                                                                                                                                       |
| EPI_ISL_872063, EPI_ISL_872064                                                                                                                                                                                                                                                                                                                                                                                                                                                                                                                                                                                                                                                                                                                                                                                                                                                                                                                                                                                                                                                                                                                                                                                                                                                                                                                                                                                                                                                                                                                                                                                                                                                                                                                                                                                                                                                                                                                                                                                                                                                                                                                                                                                                                                                                                                                                                                                                                                                                                                                                                                                                                                                                                                                                                                                                                                                                                                                                                                                                                                                                                                                                                                                                                                                                                                                                                                                                                                                                                                                                                                                                                                                                                                                                                                                                                                                                                                                                                                                                                                                                                                                                                                                                                                                                                                                                                                                                                                                                                 | Department of Clinical Microbiology                         | GIGA Medical Genomics                                | Keith Durkin, Maria Artesi, Sébastien Bontems, Raphaël Boreux, Bouchra Boujemla, Cécile Meex, Pierrette Melin, Marie-Pierre Hayette, Vincent Bours                                                                                                                                                                                                                                                                                                                                                                                       |
| EPI_ISL_872068                                                                                                                                                                                                                                                                                                                                                                                                                                                                                                                                                                                                                                                                                                                                                                                                                                                                                                                                                                                                                                                                                                                                                                                                                                                                                                                                                                                                                                                                                                                                                                                                                                                                                                                                                                                                                                                                                                                                                                                                                                                                                                                                                                                                                                                                                                                                                                                                                                                                                                                                                                                                                                                                                                                                                                                                                                                                                                                                                                                                                                                                                                                                                                                                                                                                                                                                                                                                                                                                                                                                                                                                                                                                                                                                                                                                                                                                                                                                                                                                                                                                                                                                                                                                                                                                                                                                                                                                                                                                                                 | AZ Vesale (Tongres)                                         | GIGA Medical Genomics                                | Keith Durkin, Maria Artesi, Sébastien Bontems, Raphaël Boreux, Bouchra Boujemla, Cécile Meex, Pierrette Melin, Marie-Pierre Hayette, Vincent Bours                                                                                                                                                                                                                                                                                                                                                                                       |
| EPI_ISL_872073, EPI_ISL_872074, EPI_ISL_872076, EPI_ISL_872077, EPI_ISL_872081, EPI_ISL_872082, EPI_ISL_872086                                                                                                                                                                                                                                                                                                                                                                                                                                                                                                                                                                                                                                                                                                                                                                                                                                                                                                                                                                                                                                                                                                                                                                                                                                                                                                                                                                                                                                                                                                                                                                                                                                                                                                                                                                                                                                                                                                                                                                                                                                                                                                                                                                                                                                                                                                                                                                                                                                                                                                                                                                                                                                                                                                                                                                                                                                                                                                                                                                                                                                                                                                                                                                                                                                                                                                                                                                                                                                                                                                                                                                                                                                                                                                                                                                                                                                                                                                                                                                                                                                                                                                                                                                                                                                                                                                                                                                                                 | Department of Clinical Microbiology                         | GIGA Medical Genomics                                | Keith Durkin, Maria Artesi, Sébastien Bontems, Raphaël Boreux, Bouchra Boujemla, Cécile Meex, Pierrette Melin, Marie-Pierre Hayette, Vincent Bours                                                                                                                                                                                                                                                                                                                                                                                       |
| EPI_ISL_872102, EPI_ISL_872104                                                                                                                                                                                                                                                                                                                                                                                                                                                                                                                                                                                                                                                                                                                                                                                                                                                                                                                                                                                                                                                                                                                                                                                                                                                                                                                                                                                                                                                                                                                                                                                                                                                                                                                                                                                                                                                                                                                                                                                                                                                                                                                                                                                                                                                                                                                                                                                                                                                                                                                                                                                                                                                                                                                                                                                                                                                                                                                                                                                                                                                                                                                                                                                                                                                                                                                                                                                                                                                                                                                                                                                                                                                                                                                                                                                                                                                                                                                                                                                                                                                                                                                                                                                                                                                                                                                                                                                                                                                                                 | Chu Tivoli                                                  | GIGA Medical Genomics                                | Keith Durkin, Maria Artesi, Sébastien Bontems, Raphaël Boreux, Bouchra Boujemla, Cécile Meex, Pierrette Melin, Marie-Pierre Hayette, Vincent Bours                                                                                                                                                                                                                                                                                                                                                                                       |
| EPI_ISL_872106                                                                                                                                                                                                                                                                                                                                                                                                                                                                                                                                                                                                                                                                                                                                                                                                                                                                                                                                                                                                                                                                                                                                                                                                                                                                                                                                                                                                                                                                                                                                                                                                                                                                                                                                                                                                                                                                                                                                                                                                                                                                                                                                                                                                                                                                                                                                                                                                                                                                                                                                                                                                                                                                                                                                                                                                                                                                                                                                                                                                                                                                                                                                                                                                                                                                                                                                                                                                                                                                                                                                                                                                                                                                                                                                                                                                                                                                                                                                                                                                                                                                                                                                                                                                                                                                                                                                                                                                                                                                                                 | Department of Clinical Microbiology                         | GIGA Medical Genomics                                | Keith Durkin, Maria Artesi, Sébastien Bontems, Raphaël Boreux, Bouchra Boujemla, Cécile Meex, Pierrette Melin, Marie-Pierre Hayette, Vincent Bours                                                                                                                                                                                                                                                                                                                                                                                       |
| EPI_ISL_872111                                                                                                                                                                                                                                                                                                                                                                                                                                                                                                                                                                                                                                                                                                                                                                                                                                                                                                                                                                                                                                                                                                                                                                                                                                                                                                                                                                                                                                                                                                                                                                                                                                                                                                                                                                                                                                                                                                                                                                                                                                                                                                                                                                                                                                                                                                                                                                                                                                                                                                                                                                                                                                                                                                                                                                                                                                                                                                                                                                                                                                                                                                                                                                                                                                                                                                                                                                                                                                                                                                                                                                                                                                                                                                                                                                                                                                                                                                                                                                                                                                                                                                                                                                                                                                                                                                                                                                                                                                                                                                 | CHC                                                         | GIGA Medical Genomics                                | Keith Durkin, Maria Artesi, Sébastien Bontems, Raphaël Boreux, Bouchra Boujemla, Cécile Meex, Pierrette Melin, Marie-Pierre Hayette, Vincent Bours                                                                                                                                                                                                                                                                                                                                                                                       |
| EPI_ISL_872119, EPI_ISL_872120, EPI_ISL_872121, EPI_ISL_872125, EPI_ISL_872126                                                                                                                                                                                                                                                                                                                                                                                                                                                                                                                                                                                                                                                                                                                                                                                                                                                                                                                                                                                                                                                                                                                                                                                                                                                                                                                                                                                                                                                                                                                                                                                                                                                                                                                                                                                                                                                                                                                                                                                                                                                                                                                                                                                                                                                                                                                                                                                                                                                                                                                                                                                                                                                                                                                                                                                                                                                                                                                                                                                                                                                                                                                                                                                                                                                                                                                                                                                                                                                                                                                                                                                                                                                                                                                                                                                                                                                                                                                                                                                                                                                                                                                                                                                                                                                                                                                                                                                                                                 | CHR Citadelle                                               | GIGA Medical Genomics                                | Keith Durkin, Maria Artesi, Sébastien Bontems, Raphaël Boreux, Bouchra Boujemla, Cécile Meex, Pierrette Melin, Marie-Pierre Hayette, Vincent Bours                                                                                                                                                                                                                                                                                                                                                                                       |
| EPI_ISL_872128, EPI_ISL_872130, EPI_ISL_872135, EPI_ISL_872140, EPI_ISL_872143, EPI_ISL_872148, EPI_ISL_872149                                                                                                                                                                                                                                                                                                                                                                                                                                                                                                                                                                                                                                                                                                                                                                                                                                                                                                                                                                                                                                                                                                                                                                                                                                                                                                                                                                                                                                                                                                                                                                                                                                                                                                                                                                                                                                                                                                                                                                                                                                                                                                                                                                                                                                                                                                                                                                                                                                                                                                                                                                                                                                                                                                                                                                                                                                                                                                                                                                                                                                                                                                                                                                                                                                                                                                                                                                                                                                                                                                                                                                                                                                                                                                                                                                                                                                                                                                                                                                                                                                                                                                                                                                                                                                                                                                                                                                                                 | Department of Clinical Microbiology                         | GIGA Medical Genomics                                | Keith Durkin, Maria Artesi, Sébastien Bontems, Raphaël Boreux, Bouchra Boujemla, Cécile Meex, Pierrette Melin, Marie-Pierre Hayette, Vincent Bours                                                                                                                                                                                                                                                                                                                                                                                       |
| EPI_ISL_872151                                                                                                                                                                                                                                                                                                                                                                                                                                                                                                                                                                                                                                                                                                                                                                                                                                                                                                                                                                                                                                                                                                                                                                                                                                                                                                                                                                                                                                                                                                                                                                                                                                                                                                                                                                                                                                                                                                                                                                                                                                                                                                                                                                                                                                                                                                                                                                                                                                                                                                                                                                                                                                                                                                                                                                                                                                                                                                                                                                                                                                                                                                                                                                                                                                                                                                                                                                                                                                                                                                                                                                                                                                                                                                                                                                                                                                                                                                                                                                                                                                                                                                                                                                                                                                                                                                                                                                                                                                                                                                 | CHR Citadelle                                               | GIGA Medical Genomics                                | Keith Durkin, Maria Artesi, Sébastien Bontems, Raphaël Boreux, Bouchra Boujemla, Cécile Meex, Pierrette Melin, Marie-Pierre Hayette, Vincent Bours                                                                                                                                                                                                                                                                                                                                                                                       |
| EPI_ISL_877421                                                                                                                                                                                                                                                                                                                                                                                                                                                                                                                                                                                                                                                                                                                                                                                                                                                                                                                                                                                                                                                                                                                                                                                                                                                                                                                                                                                                                                                                                                                                                                                                                                                                                                                                                                                                                                                                                                                                                                                                                                                                                                                                                                                                                                                                                                                                                                                                                                                                                                                                                                                                                                                                                                                                                                                                                                                                                                                                                                                                                                                                                                                                                                                                                                                                                                                                                                                                                                                                                                                                                                                                                                                                                                                                                                                                                                                                                                                                                                                                                                                                                                                                                                                                                                                                                                                                                                                                                                                                                                 | Institute of Tropical Disease                               | Institute of Tropical Disease, Universitas Airlangga | Jezy R Dewantari, Rima R Prasetya, Krisnoadi Rahardjo, Aldise M Nastri, Gatot Soegiarto, Laksmi Wulandari, Resti Yudhawati, Soetjipto, Yasuko Mori, Maria I Lusida, Kazufumi Shimizu                                                                                                                                                                                                                                                                                                                                                     |
| EPI_ISL_877458                                                                                                                                                                                                                                                                                                                                                                                                                                                                                                                                                                                                                                                                                                                                                                                                                                                                                                                                                                                                                                                                                                                                                                                                                                                                                                                                                                                                                                                                                                                                                                                                                                                                                                                                                                                                                                                                                                                                                                                                                                                                                                                                                                                                                                                                                                                                                                                                                                                                                                                                                                                                                                                                                                                                                                                                                                                                                                                                                                                                                                                                                                                                                                                                                                                                                                                                                                                                                                                                                                                                                                                                                                                                                                                                                                                                                                                                                                                                                                                                                                                                                                                                                                                                                                                                                                                                                                                                                                                                                                 | Anwar Medika General Hospital                               | Institute of Tropical Disease, Universitas Airlangga | Jezy R Dewantari, Rima R Prasetya, Krisnoadi Rahardjo, Aldise M Nastri, Nungky Taniasari, Gatot Soegiarto, Laksmi Wulandari, Resti Yudhawati, Soetjipto, Yasuko Mori, Maria I Lusida, Kazufumi Shimizu                                                                                                                                                                                                                                                                                                                                   |
| EPI_ISL_882612, EPI_ISL_882613, EPI_ISL_882615, EPI_ISL_882616, EPI_ISL_882617, EPI_ISL_882618, EPI_ISL_882620, EPI_ISL_882621, EPI_ISL_882623, EPI_ISL_882624, EPI_ISL_882625, EPI_ISL_882627, EPI_ISL_882628, EPI_ISL_882629, EPI_ISL_882631, EPI_ISL_882632                                                                                                                                                                                                                                                                                                                                                                                                                                                                                                                                                                                                                                                                                                                                                                                                                                                                                                                                                                                                                                                                                                                                                                                                                                                                                                                                                                                                                                                                                                                                                                                                                                                                                                                                                                                                                                                                                                                                                                                                                                                                                                                                                                                                                                                                                                                                                                                                                                                                                                                                                                                                                                                                                                                                                                                                                                                                                                                                                                                                                                                                                                                                                                                                                                                                                                                                                                                                                                                                                                                                                                                                                                                                                                                                                                                                                                                                                                                                                                                                                                                                                                                                                                                                                                                 |                                                             |                                                      |                                                                                                                                                                                                                                                                                                                                                                                                                                                                                                                                          |
| see above                                                                                                                                                                                                                                                                                                                                                                                                                                                                                                                                                                                                                                                                                                                                                                                                                                                                                                                                                                                                                                                                                                                                                                                                                                                                                                                                                                                                                                                                                                                                                                                                                                                                                                                                                                                                                                                                                                                                                                                                                                                                                                                                                                                                                                                                                                                                                                                                                                                                                                                                                                                                                                                                                                                                                                                                                                                                                                                                                                                                                                                                                                                                                                                                                                                                                                                                                                                                                                                                                                                                                                                                                                                                                                                                                                                                                                                                                                                                                                                                                                                                                                                                                                                                                                                                                                                                                                                                                                                                                                      | Hospital Ramón y Cajal                                      | Hospital Ramón y Cajal                               | José M Gonzalez-Alba, Concepción Rodríguez, Melanie Abreu, Laura Martínez, Val F Lanza, Luz Leticia Olavarrieta, Rafael Cantón, JC Galán                                                                                                                                                                                                                                                                                                                                                                                                 |
| EPI_ISL_882769                                                                                                                                                                                                                                                                                                                                                                                                                                                                                                                                                                                                                                                                                                                                                                                                                                                                                                                                                                                                                                                                                                                                                                                                                                                                                                                                                                                                                                                                                                                                                                                                                                                                                                                                                                                                                                                                                                                                                                                                                                                                                                                                                                                                                                                                                                                                                                                                                                                                                                                                                                                                                                                                                                                                                                                                                                                                                                                                                                                                                                                                                                                                                                                                                                                                                                                                                                                                                                                                                                                                                                                                                                                                                                                                                                                                                                                                                                                                                                                                                                                                                                                                                                                                                                                                                                                                                                                                                                                                                                 | Institute of Tropical Disease                               | Institute of Tropical Disease, Universitas Airlangga | Kazufumi Shimizu, Krisnoadi Rahardjo, Aldise M Nastri, Jezy R Dewantari, Rima R Prasetya, Gatot Soegiarto, Laksmi Wulandari, Resti Yudhawati, Yasuko Mori, Soetjipto, Maria I Lusida                                                                                                                                                                                                                                                                                                                                                     |
| EPI_ISL_882771                                                                                                                                                                                                                                                                                                                                                                                                                                                                                                                                                                                                                                                                                                                                                                                                                                                                                                                                                                                                                                                                                                                                                                                                                                                                                                                                                                                                                                                                                                                                                                                                                                                                                                                                                                                                                                                                                                                                                                                                                                                                                                                                                                                                                                                                                                                                                                                                                                                                                                                                                                                                                                                                                                                                                                                                                                                                                                                                                                                                                                                                                                                                                                                                                                                                                                                                                                                                                                                                                                                                                                                                                                                                                                                                                                                                                                                                                                                                                                                                                                                                                                                                                                                                                                                                                                                                                                                                                                                                                                 | Siti Khodijah Hospital                                      | Institute of Tropical Disease, Universitas Airlangga | Kazufumi Shimizu, Krisnoadi Rahardjo, Aldise M Nastri, Jezy R Dewantari, Rima R Prasetya, Muhammad Hamdan, Gatot Soegiarto, Laksmi Wulandari, Resti Yudhawati, Yasuko Mori, Soetjipto, Maria I Lusida                                                                                                                                                                                                                                                                                                                                    |
| EPI_ISL_882772                                                                                                                                                                                                                                                                                                                                                                                                                                                                                                                                                                                                                                                                                                                                                                                                                                                                                                                                                                                                                                                                                                                                                                                                                                                                                                                                                                                                                                                                                                                                                                                                                                                                                                                                                                                                                                                                                                                                                                                                                                                                                                                                                                                                                                                                                                                                                                                                                                                                                                                                                                                                                                                                                                                                                                                                                                                                                                                                                                                                                                                                                                                                                                                                                                                                                                                                                                                                                                                                                                                                                                                                                                                                                                                                                                                                                                                                                                                                                                                                                                                                                                                                                                                                                                                                                                                                                                                                                                                                                                 | Office of Diseases Prevention and Control Region 4 Saraburi | COVID-19 Network Investigations (CONI) Alliance      | Kamolthip Atsawawanun, Elizabeth Batty, Wasun Chantratita, Thanat Chookajorn, Stefan Fernandez, Angkana Huang, Anthony R. Jones, Khajohn Joonsalak, Chonticha Klungtong, Theerarat Kochakarn, Prayuth Kaewmalang, Amornmas Kongklieang, Namfon Kotanan, Krittikorn Kumpornsin, Duangkamon Loesbanluechai, Wudtichai Manasatienkij, Anek Mungaomklang, Bhakbhoom Panthan, Pukkaporn Parmwijitkul, Ekawat Pasomsub, Vichan Pawun, Kingkan Rakmanee, Insee Sensorn, Janjira Thaipadungpanit, Arporn Wangwiwatsin, Treewat Watthanachockchai |
| EPI_ISL_882773, EPI_ISL_882774, EPI_ISL_882775, EPI_ISL_882776, EPI_ISL_882777, EPI_ISL_882778, EPI_ISL_882779, EPI_ISL_882781, EPI_ISL_882782, EPI_ISL_882783, EPI_ISL_882784, EPI_ISL_882785, EPI_ISL_882786, EPI_ISL_882787, EPI_ISL_882788, EPI_ISL_882789, EPI_ISL_882790, EPI_ISL_882791, EPI_ISL_882792, EPI_ISL_882793, EPI_ISL_882794                                                                                                                                                                                                                                                                                                                                                                                                                                                                                                                                                                                                                                                                                                                                                                                                                                                                                                                                                                                                                                                                                                                                                                                                                                                                                                                                                                                                                                                                                                                                                                                                                                                                                                                                                                                                                                                                                                                                                                                                                                                                                                                                                                                                                                                                                                                                                                                                                                                                                                                                                                                                                                                                                                                                                                                                                                                                                                                                                                                                                                                                                                                                                                                                                                                                                                                                                                                                                                                                                                                                                                                                                                                                                                                                                                                                                                                                                                                                                                                                                                                                                                                                                                 |                                                             |                                                      |                                                                                                                                                                                                                                                                                                                                                                                                                                                                                                                                          |
| see above                                                                                                                                                                                                                                                                                                                                                                                                                                                                                                                                                                                                                                                                                                                                                                                                                                                                                                                                                                                                                                                                                                                                                                                                                                                                                                                                                                                                                                                                                                                                                                                                                                                                                                                                                                                                                                                                                                                                                                                                                                                                                                                                                                                                                                                                                                                                                                                                                                                                                                                                                                                                                                                                                                                                                                                                                                                                                                                                                                                                                                                                                                                                                                                                                                                                                                                                                                                                                                                                                                                                                                                                                                                                                                                                                                                                                                                                                                                                                                                                                                                                                                                                                                                                                                                                                                                                                                                                                                                                                                      | Institute for Urban Disease Control and Prevention          | COVID-19 Network Investigations (CONI) Alliance      | Kamolthip Atsawawanun, Elizabeth Batty, Wasun Chantratita, Thanat Chookajorn, Stefan Fernandez, Angkana Huang, Anthony R. Jones, Khajohn Joonsalak, Chonticha Klungtong, Theerarat Kochakarn, Prayuth Kaewmalang, Amornmas Kongklieang, Namfon Kotanan, Krittikorn Kumpornsin, Duangkamon Loesbanluechai, Wudtichai Manasatienkij, Anek Mungaomklang, Bhakbhoom Panthan, Pukkaporn Parmwijitkul, Ekawat Pasomsub, Vichan Pawun, Kingkan Rakmanee, Insee Sensorn, Janjira Thaipadungpanit, Arporn Wangwiwatsin, Treewat Watthanachockchai |
| EPI_ISL_882795, EPI_ISL_882796, EPI_ISL_882797, EPI_ISL_882798, EPI_ISL_882799                                                                                                                                                                                                                                                                                                                                                                                                                                                                                                                                                                                                                                                                                                                                                                                                                                                                                                                                                                                                                                                                                                                                                                                                                                                                                                                                                                                                                                                                                                                                                                                                                                                                                                                                                                                                                                                                                                                                                                                                                                                                                                                                                                                                                                                                                                                                                                                                                                                                                                                                                                                                                                                                                                                                                                                                                                                                                                                                                                                                                                                                                                                                                                                                                                                                                                                                                                                                                                                                                                                                                                                                                                                                                                                                                                                                                                                                                                                                                                                                                                                                                                                                                                                                                                                                                                                                                                                                                                 | Office of Diseases Prevention and Control Region 4 Saraburi | COVID-19 Network Investigations (CONI) Alliance      | Kamolthip Atsawawanun, Elizabeth Batty, Wasun Chantratita, Thanat Chookajorn, Stefan Fernandez, Angkana Huang, Anthony R. Jones, Khajohn Joonsalak, Chonticha Klungtong, Theerarat Kochakarn, Prayuth Kaewmalang, Amornmas Kongklieang, Namfon Kotanan, Krittikorn Kumpornsin, Duangkamon Loesbanluechai, Wudtichai Manasatienkij, Anek Mungaomklang, Bhakbhoom Panthan, Pukkaporn Parmwijitkul, Ekawat Pasomsub, Vichan Pawun, Kingkan Rakmanee, Insee Sensorn, Janjira Thaipadungpanit, Arporn Wangwiwatsin, Treewat Watthanachockchai |
| EPI_ISL_882800, EPI_ISL_882801, EPI_ISL_882802, EPI_ISL_882803, EPI_ISL_882804, EPI_ISL_887105                                                                                                                                                                                                                                                                                                                                                                                                                                                                                                                                                                                                                                                                                                                                                                                                                                                                                                                                                                                                                                                                                                                                                                                                                                                                                                                                                                                                                                                                                                                                                                                                                                                                                                                                                                                                                                                                                                                                                                                                                                                                                                                                                                                                                                                                                                                                                                                                                                                                                                                                                                                                                                                                                                                                                                                                                                                                                                                                                                                                                                                                                                                                                                                                                                                                                                                                                                                                                                                                                                                                                                                                                                                                                                                                                                                                                                                                                                                                                                                                                                                                                                                                                                                                                                                                                                                                                                                                                 | Institute for Urban Disease Control and Prevention          | COVID-19 Network Investigations (CONI) Alliance      | Kamolthip Atsawawanun, Elizabeth Batty, Wasun Chantratita, Thanat Chookajorn, Stefan Fernandez, Angkana Huang, Anthony R. Jones, Khajohn Joonsalak, Chonticha Klungtong, Theerarat Kochakarn, Prayuth Kaewmalang, Amornmas Kongklieang, Namfon Kotanan, Krittikorn Kumpornsin, Duangkamon Loesbanluechai, Wudtichai Manasatienkij, Anek Mungaomklang, Bhakbhoom Panthan, Pukkaporn Parmwijitkul, Ekawat Pasomsub, Vichan Pawun, Kingkan Rakmanee, Insee Sensorn, Janjira Thaipadungpanit, Arporn Wangwiwatsin, Treewat Watthanachockchai |
| EPI_ISL_889444, EPI_ISL_889445, EPI_ISL_889446, EPI_ISL_889447, EPI_ISL_889448, EPI_ISL_889449, EPI_ISL_889450, EPI_ISL_889451, EPI_ISL_889452, EPI_ISL_889453, EPI_ISL_889454, EPI_ISL_889455, EPI_ISL_889456, EPI_ISL_889457, EPI_ISL_889458, EPI_ISL_889459, EPI_ISL_889460, EPI_ISL_889461, EPI_ISL_889462, EPI_ISL_889463, EPI_ISL_889464, EPI_ISL_889465, EPI_ISL_889466, EPI_ISL_889467, EPI_ISL_889468, EPI_ISL_889469, EPI_ISL_889470, EPI_ISL_889471, EPI_ISL_889472, EPI_ISL_889473, EPI_ISL_889474, EPI_ISL_889475, EPI_ISL_889476, EPI_ISL_889477, EPI_ISL_889478, EPI_ISL_889479, EPI_ISL_889480, EPI_ISL_889481, EPI_ISL_889482, EPI_ISL_889483, EPI_ISL_889484, EPI_ISL_889485, EPI_ISL_889486, EPI_ISL_889487, EPI_ISL_889488, EPI_ISL_889489, EPI_ISL_889490, EPI_ISL_889491, EPI_ISL_889492, EPI_ISL_889493, EPI_ISL_889494, EPI_ISL_889495, EPI_ISL_889496, EPI_ISL_889497, EPI_ISL_889498, EPI_ISL_889499, EPI_ISL_889500, EPI_ISL_889501, EPI_ISL_889502, EPI_ISL_889503, EPI_ISL_889504, EPI_ISL_889505, EPI_ISL_889506, EPI_ISL_889507, EPI_ISL_889508, EPI_ISL_889509, EPI_ISL_889510, EPI_ISL_889511, EPI_ISL_889512, EPI_ISL_889513, EPI_ISL_889514, EPI_ISL_889515, EPI_ISL_889516, EPI_ISL_889517, EPI_ISL_889518, EPI_ISL_889519, EPI_ISL_889520, EPI_ISL_889521, EPI_ISL_889522, EPI_ISL_889523, EPI_ISL_889524, EPI_ISL_889525, EPI_ISL_889526, EPI_ISL_889527, EPI_ISL_889528, EPI_ISL_889529, EPI_ISL_889530, EPI_ISL_889531, EPI_ISL_889532, EPI_ISL_889533, EPI_ISL_889534, EPI_ISL_889535, EPI_ISL_889536, EPI_ISL_889537, EPI_ISL_889538, EPI_ISL_889539, EPI_ISL_889540, EPI_ISL_889541, EPI_ISL_889542, EPI_ISL_889543, EPI_ISL_889544, EPI_ISL_889545, EPI_ISL_889546, EPI_ISL_889547, EPI_ISL_889548, EPI_ISL_889549, EPI_ISL_889550, EPI_ISL_889551, EPI_ISL_889552, EPI_ISL_889553, EPI_ISL_889554, EPI_ISL_889555, EPI_ISL_889556, EPI_ISL_889557, EPI_ISL_889558, EPI_ISL_889559, EPI_ISL_889560, EPI_ISL_889561, EPI_ISL_889562, EPI_ISL_889563, EPI_ISL_889564, EPI_ISL_889565, EPI_ISL_889566, EPI_ISL_889567, EPI_ISL_889568, EPI_ISL_889569, EPI_ISL_889570, EPI_ISL_889571, EPI_ISL_889572, EPI_ISL_889573, EPI_ISL_889574, EPI_ISL_889575, EPI_ISL_889576, EPI_ISL_889577, EPI_ISL_889578, EPI_ISL_889579, EPI_ISL_889580, EPI_ISL_889581, EPI_ISL_889582, EPI_ISL_889583, EPI_ISL_889584, EPI_ISL_889585, EPI_ISL_889586, EPI_ISL_889587, EPI_ISL_889588, EPI_ISL_889589, EPI_ISL_889590, EPI_ISL_889591, EPI_ISL_889592, EPI_ISL_889593, EPI_ISL_889594, EPI_ISL_889595, EPI_ISL_889596, EPI_ISL_889597, EPI_ISL_889598, EPI_ISL_889599, EPI_ISL_889600, EPI_ISL_889601, EPI_ISL_889602, EPI_ISL_889603, EPI_ISL_889604, EPI_ISL_889605, EPI_ISL_889606, EPI_ISL_889607, EPI_ISL_889608, EPI_ISL_889609, EPI_ISL_889610, EPI_ISL_889611, EPI_ISL_889612, EPI_ISL_889613, EPI_ISL_889614, EPI_ISL_889615, EPI_ISL_889616, EPI_ISL_889617, EPI_ISL_889618, EPI_ISL_889619, EPI_ISL_889620, EPI_ISL_889621, EPI_ISL_889622, EPI_ISL_889623, EPI_ISL_889624, EPI_ISL_889625, EPI_ISL_889626, EPI_ISL_889627, EPI_ISL_889628, EPI_ISL_889629, EPI_ISL_889630, EPI_ISL_889631, EPI_ISL_889632, EPI_ISL_889633, EPI_ISL_889634, EPI_ISL_889635, EPI_ISL_889636, EPI_ISL_889637, EPI_ISL_889638, EPI_ISL_889639, EPI_ISL_889640, EPI_ISL_889641, EPI_ISL_889642, EPI_ISL_889643, EPI_ISL_889644, EPI_ISL_889645, EPI_ISL_889646, EPI_ISL_889647, EPI_ISL_889648, EPI_ISL_889649, EPI_ISL_889650, EPI_ISL_889651, EPI_ISL_889652, EPI_ISL_889653, EPI_ISL_889654, EPI_ISL_889655, EPI_ISL_889656, EPI_ISL_889657, EPI_ISL_889658, EPI_ISL_889659, EPI_ISL_889660, EPI_ISL_889661, EPI_ISL_889662, EPI_ISL_889663, EPI_ISL_889664, EPI_ISL_889665, EPI_ISL_889666, EPI_ISL_889667, EPI_ISL_889668, EPI_ISL_889669, EPI_ISL_889670, EPI_ISL_889671, EPI_ISL_889672, EPI_ISL_889673, EPI_ISL_889674, EPI_ISL_889675, EPI_ISL_889676, EPI_ISL_889677, EPI_ISL_889678, EPI_ISL_889679, EPI_ISL_889680, EPI_ISL_889681, EPI_ISL_889682, EPI_ISL_889683, EPI_ISL_889684, EPI_ISL_889685, EPI_ISL_889686, EPI_ISL_889687, EPI_ISL_889688, EPI_ISL_889689, EPI_ISL_889690, EPI_ISL_889691, EPI_ISL_889692, EPI_ISL_889693, EPI_ISL_889694, EPI_ISL_889695, EPI_ISL_889696, EPI_ISL_889697, EPI_ISL_889698, EPI_ISL_889699, EPI_ISL_889700, EPI_ISL_889701, EPI_ISL_889702, EPI_ISL_889703, EPI_ISL_889704, EPI_ISL_889705, EPI_ISL_889706, EPI_ISL_889707, EPI_ISL_889708, EPI_ISL_889709, EPI_ISL_889710, EPI_ISL_889711, EPI_ISL_889712, EPI_ISL_889713, EPI_ISL_889714 |                                                             |                                                      |                                                                                                                                                                                                                                                                                                                                                                                                                                                                                                                                          |

|                                                                                                                                                                                                                                                                                                                                                                                                                                                                                                                                                                                                                                                                                                                                                                                                                                                                                                                                                                |           |                                        |                                    |                                                                                                                                                                                                                                       |
|----------------------------------------------------------------------------------------------------------------------------------------------------------------------------------------------------------------------------------------------------------------------------------------------------------------------------------------------------------------------------------------------------------------------------------------------------------------------------------------------------------------------------------------------------------------------------------------------------------------------------------------------------------------------------------------------------------------------------------------------------------------------------------------------------------------------------------------------------------------------------------------------------------------------------------------------------------------|-----------|----------------------------------------|------------------------------------|---------------------------------------------------------------------------------------------------------------------------------------------------------------------------------------------------------------------------------------|
| EPI_ISL_889715, EPI_ISL_889716, EPI_ISL_889717, EPI_ISL_889718, EPI_ISL_889719, EPI_ISL_889720, EPI_ISL_889721, EPI_ISL_889722, EPI_ISL_889723, EPI_ISL_889724, EPI_ISL_889725, EPI_ISL_889726, EPI_ISL_889727, EPI_ISL_889728, EPI_ISL_889729, EPI_ISL_889730, EPI_ISL_889731, EPI_ISL_889732, EPI_ISL_889733, EPI_ISL_889734, EPI_ISL_889735, EPI_ISL_889736, EPI_ISL_889737, EPI_ISL_889738, EPI_ISL_889739, EPI_ISL_889740, EPI_ISL_889741, EPI_ISL_889742, EPI_ISL_889743, EPI_ISL_889744, EPI_ISL_889745, EPI_ISL_889746, EPI_ISL_889747, EPI_ISL_889748, EPI_ISL_889749, EPI_ISL_889750, EPI_ISL_889751, EPI_ISL_889752, EPI_ISL_889753, EPI_ISL_889754, EPI_ISL_889755, EPI_ISL_889756, EPI_ISL_889757, EPI_ISL_889758, EPI_ISL_889759, EPI_ISL_889760, EPI_ISL_889761, EPI_ISL_889762, EPI_ISL_889763, EPI_ISL_889764, EPI_ISL_889765, EPI_ISL_889766, EPI_ISL_889767, EPI_ISL_889768, EPI_ISL_889769, EPI_ISL_889770, EPI_ISL_889771, EPI_ISL_889772 | see above | LSUHS Emerging Viral Threat Laboratory | Microbial Genome Sequencing Center | Jeremy P. Kamil, Jennifer L. Carroll, Camille F. Abshire, Maarten Van Diest, Mohammed N.A. Siddiquey, Andrew D. Yurochko, Martin J. Sapp, Rona S. Scott, Christopher G. Kevil, Daniel J. Snyder, Vaughn S. Cooper, John A. Vanchiere  |
| EPI_ISL_889786, EPI_ISL_889787, EPI_ISL_889788, EPI_ISL_889789, EPI_ISL_889790, EPI_ISL_889791                                                                                                                                                                                                                                                                                                                                                                                                                                                                                                                                                                                                                                                                                                                                                                                                                                                                 |           | LSUHS Emerging Viral Threat Laboratory | Microbial Genome Sequencing Center | Jennifer L. Carroll, Rona S. Scott, Camille F. Abshire, Maarten Van Diest, Mohammed N.A. Siddiquey, Andrew D. Yurochko, Martin J. Sapp, Christopher G. Kevil, Daniel J. Snyder, Vaughn S. Cooper, John A. Vanchiere, Jeremy P. Kamil, |
| EPI_ISL_890361, EPI_ISL_890362, EPI_ISL_890363, EPI_ISL_890364, EPI_ISL_890365, EPI_ISL_890366                                                                                                                                                                                                                                                                                                                                                                                                                                                                                                                                                                                                                                                                                                                                                                                                                                                                 |           | LSUHS Emerging Viral Threat Laboratory | Microbial Genome Sequencing Center | Jeremy P. Kamil, Jennifer L. Carroll, Camille F. Abshire, Maarten Van Diest, Mohammed N.A. Siddiquey, Andrew D. Yurochko, Martin J. Sapp, Rona S. Scott, Christopher G. Kevil, Daniel J. Snyder, Vaughn S. Cooper, John A. Vanchiere  |
| EPI_ISL_890367, EPI_ISL_890368, EPI_ISL_890369, EPI_ISL_890370                                                                                                                                                                                                                                                                                                                                                                                                                                                                                                                                                                                                                                                                                                                                                                                                                                                                                                 |           | LSUHS Emerging Viral Threat Laboratory | Microbial Genome Sequencing Center | Jennifer L. Carroll, Rona S. Scott, Camille F. Abshire, Maarten Van Diest, Mohammed N.A. Siddiquey, Andrew D. Yurochko, Martin J. Sapp, Christopher G. Kevil, Daniel J. Snyder, Vaughn S. Cooper, John A. Vanchiere, Jeremy P. Kamil, |

We gratefully acknowledge the following Authors from the Originating laboratories responsible for obtaining the specimens, as well as the Submitting laboratories where the genome data were generated and shared via GISAID, on which this research is based.

All Submitters of data may be contacted directly via [www.gisaid.org](http://www.gisaid.org)

Authors are sorted alphabetically.

| Accession ID                                                                                                                                                                                                                                                                                                                                                                                                                                                                                                                                                                   | Originating Laboratory                                                                  | Submitting Laboratory                                                                                                       | Authors                                                                                                                                                                                                                                                                                                                                                                                                                                                                       |
|--------------------------------------------------------------------------------------------------------------------------------------------------------------------------------------------------------------------------------------------------------------------------------------------------------------------------------------------------------------------------------------------------------------------------------------------------------------------------------------------------------------------------------------------------------------------------------|-----------------------------------------------------------------------------------------|-----------------------------------------------------------------------------------------------------------------------------|-------------------------------------------------------------------------------------------------------------------------------------------------------------------------------------------------------------------------------------------------------------------------------------------------------------------------------------------------------------------------------------------------------------------------------------------------------------------------------|
| EPI_ISL_407214, EPI_ISL_407215                                                                                                                                                                                                                                                                                                                                                                                                                                                                                                                                                 | Washington State Department of Health                                                   | Pathogen Discovery, Respiratory Viruses Branch, Division of Viral Diseases, Centers for Diseases Control and Prevention     | Krista Queen, Azaibi Tamin, Jennifer Harcourt, Ying Tao, Clinton R. Paden, Jing Zhang, Yan Li, Anna Uehara, Xiaoyan Lu, Shifaq Kamili, Rashi Gautam, Haibin Wang, Janna' R. Murray, Susan I. Gerber, Stephen Lindstrom, Natalie Thornburg, Suxiang Tong                                                                                                                                                                                                                       |
| EPI_ISL_408008                                                                                                                                                                                                                                                                                                                                                                                                                                                                                                                                                                 | California Department of Health                                                         | Pathogen Discovery, Respiratory Viruses Branch, Division of Viral Diseases, Centers for Disease Control and Prevention      | Krista Queen, Jing Zhang, Yan Li, Ying Tao, Anna Uehara, Clinton Paden, Xiaoyan Lu, Brian Lynch, Senthil Kumar K. Sakhivel, Brett L. Whitaker, Shifaq Kamili, Lijuan Wang, Janna' R. Murray, Susan I. Gerber, Stephen Lindstrom, Suxiang Tong                                                                                                                                                                                                                                 |
| EPI_ISL_408009                                                                                                                                                                                                                                                                                                                                                                                                                                                                                                                                                                 | California Department of Health                                                         | Pathogen Discovery, Respiratory Viruses Branch, Division of Viral Diseases, Centers for Diseases Control and Prevention     | Krista Queen, Jing Zhang, Yan Li, Ying Tao, Anna Uehara, Clinton Paden, Xiaoyan Lu, Brian Lynch, Senthil Kumar K. Sakhivel, Brett L. Whitaker, Shifaq Kamili, Lijuan Wang, Janna' R. Murray, Susan I. Gerber, Stephen Lindstrom, Suxiang Tong                                                                                                                                                                                                                                 |
| EPI_ISL_411915                                                                                                                                                                                                                                                                                                                                                                                                                                                                                                                                                                 | Laboratory Medicine                                                                     | Department of Laboratory Medicine, Lin-Kou Chang Gung Memorial Hospital, Taoyuan, Taiwan.                                   | Kuo-Chien Tsao, Yu-Nong Gong, Shu-Li Yang, Yi-Chun Li, Chung-Guei Huang, Yhu-Chering Huang, Shin-Ru Shih                                                                                                                                                                                                                                                                                                                                                                      |
| EPI_ISL_411954, EPI_ISL_411955                                                                                                                                                                                                                                                                                                                                                                                                                                                                                                                                                 | California Department of Public Health                                                  | Pathogen Discovery, Respiratory Viruses Branch, Division of Viral Diseases, Centers for Diseases Control and Prevention     | Krista Queen, Anna Uehara, Jing Zhang, Yan Li, Ying Tao, Clinton R. Paden, Haibin Wang, Shifaq Kamili, Xiaoyan Lu, Brian Lynch, Senthil Kumar K. Sakhivel, Brett L. Whitaker, Lijuan Wang, Janna' R. Murray, Susan I. Gerber, Stephen Lindstrom, Suxiang Tong                                                                                                                                                                                                                 |
| EPI_ISL_411956                                                                                                                                                                                                                                                                                                                                                                                                                                                                                                                                                                 | Texas Department of State Health Services                                               | Pathogen Discovery, Respiratory Viruses Branch, Division of Viral Diseases, Centers for Diseases Control and Prevention     | Krista Queen, Anna Uehara, Jing Zhang, Yan Li, Ying Tao, Clinton R. Paden, Haibin Wang, Shifaq Kamili, Xiaoyan Lu, Brian Lynch, Senthil Kumar K. Sakhivel, Brett L. Whitaker, Lijuan Wang, Janna' R. Murray, Susan I. Gerber, Stephen Lindstrom, Suxiang Tong                                                                                                                                                                                                                 |
| EPI_ISL_412862                                                                                                                                                                                                                                                                                                                                                                                                                                                                                                                                                                 | California Department of Public Health                                                  | Pathogen Discovery, Respiratory Viruses Branch, Division of Viral Diseases, Centers for Disease Control and Prevention      | Krista Queen, Anna Uehara, Jing Zhang, Yan Li, Ying Tao, Clinton R. Paden, Haibin Wang, Shifaq Kamili, Xiaoyan Lu, Brian Lynch, Senthil Kumar K. Sakhivel, Brett L. Whitaker, Lijuan Wang, Janna' R. Murray, Jasmine Padilla, Justin Lee, Susan I. Gerber, Stephen Lindstrom, Suxiang Tong                                                                                                                                                                                    |
| EPI_ISL_413597                                                                                                                                                                                                                                                                                                                                                                                                                                                                                                                                                                 | Centre for Infectious Diseases and Microbiology- Public Health                          | NSW Health Pathology - Institute of Clinical Pathology and Medical Research; Westmead Hospital; University of Sydney        | Lam C, Eden J-S, Rockett R, Gray K, Timms, V, Gall M, Carter I, Rahman H, Holmes EC, O'Sullivan MV, Sintchenko V, Chen SC, Maddocks S, Kok J and Dwyer DE for the 2019-nCoV Study Group*                                                                                                                                                                                                                                                                                      |
| EPI_ISL_413996, EPI_ISL_413997, EPI_ISL_413999, EPI_ISL_414019, EPI_ISL_414020, EPI_ISL_414021, EPI_ISL_414022, EPI_ISL_414023                                                                                                                                                                                                                                                                                                                                                                                                                                                 | Laboratoire de Virologie, HUG                                                           | Swiss National Reference Centre for Influenza                                                                               | LAUBSCHER Florian et al.                                                                                                                                                                                                                                                                                                                                                                                                                                                      |
| EPI_ISL_414482, EPI_ISL_414483, EPI_ISL_414484, EPI_ISL_414485                                                                                                                                                                                                                                                                                                                                                                                                                                                                                                                 | unknown                                                                                 | Pathogen Discovery, Respiratory Viruses Branch, Division of Viral Diseases, Centers for Disease Control and Prevention      | Krista Queen, Anna Uehara, Ying Tao, Clinton R. Paden, Jing Zhang, Yan Li, Haibin Wang, Shifaq Kamili, Xiaoyan Lu, Brian Lynch, Senthil Kumar K. Sakhivel, Brett L. Whitaker, Lijuan Wang, Janna' R. Murray, Jasmine Padilla, Justin Lee, Susan I. Gerber, Stephen Lindstrom, Suxiang Tong                                                                                                                                                                                    |
| EPI_ISL_414511                                                                                                                                                                                                                                                                                                                                                                                                                                                                                                                                                                 | Department of Microbiology; Ryota Kumagai Tokyo Metropolitan Institute of Public Health | Tokyo Metropolitan Institute of Public Health                                                                               | Kumagai,R., Yoshida,I., Nagashima,M., Chiba,T. and Sadamasu,K.                                                                                                                                                                                                                                                                                                                                                                                                                |
| EPI_ISL_415454, EPI_ISL_415455, EPI_ISL_415456, EPI_ISL_415457, EPI_ISL_415458, EPI_ISL_415459, EPI_ISL_415698, EPI_ISL_415699, EPI_ISL_415700, EPI_ISL_415701, EPI_ISL_415702, EPI_ISL_415703, EPI_ISL_415704, EPI_ISL_415705, EPI_ISL_415706, EPI_ISL_415707, EPI_ISL_415708                                                                                                                                                                                                                                                                                                 | see above                                                                               | University Hospitals of Geneva Laboratory of Virology                                                                       | University Hospitals of Geneva Laboratory of Virology<br>Laubscher F.                                                                                                                                                                                                                                                                                                                                                                                                         |
| EPI_ISL_415741, EPI_ISL_415742, EPI_ISL_415743                                                                                                                                                                                                                                                                                                                                                                                                                                                                                                                                 | Laboratory Medicine                                                                     | Department of Laboratory Medicine, Lin-Kou Chang Gung Memorial Hospital, Taoyuan, Taiwan                                    | Kuo-Chien Tsao, Yu-Nong Gong, Shu-Li Yang, Yi-Chun Liu, Chung-Guei Huang, Po-Wei Huang, Mei-Jen Hsiao, Cheng-Ta Yang, Cheng-Hsun Chiu, Chi-Hsien Huang, Kuang-Tso Le, Shu-Min Lin, Peng-Nien Huang, Kuo-Ming Lee, Guang-Wu Chen, Shin-Ru Shih                                                                                                                                                                                                                                 |
| EPI_ISL_416427, EPI_ISL_416428, EPI_ISL_416429, EPI_ISL_416430, EPI_ISL_416431                                                                                                                                                                                                                                                                                                                                                                                                                                                                                                 | National Influenza Center, National Institute of Hygiene and Epidemiology (NIHE)        | National Influenza Center, National Institute of Hygiene and Epidemiology (NIHE)                                            | Le Quynh Mai, Taichiro Takemura, Meng Ling Moi, Takeshi Nabeshima, Nguyen Le Khanh Hang, Hoang Vu Mai Phuong, Ung Thi Hong Trang, Le Thi Thanh, Nguyen Vu Son, Vuong Duc Cuong, Pham Thi Hien, Tran Thu Huong, Nguyen Phuong Anh, Pham Hong Quynh Anh, Kouichi Morita, Futoshi Hasebe, Dang Duc Anh                                                                                                                                                                           |
| EPI_ISL_417176, EPI_ISL_417177, EPI_ISL_417178, EPI_ISL_417179                                                                                                                                                                                                                                                                                                                                                                                                                                                                                                                 | Department of Pathology, Princess Margaret Hospital                                     | Department of Health Technology and Informatics, Faculty of Health and Social Science, The Hong Kong Polytechnic University | Kenneth Siu-Sing LEUNG, Timothy Ting-Leung NG, Alan Ka-Lun WU, Miranda Chong-Yee YAU, Hiu-Yin LAO, Ming-Pan CHOI, Kingsley King-Gee TAM, Lam-Kwong LEE, Barry Kin-Chung WONG, Alex Yat-Man HO, Kam-Tong Yip, Kwok-Cheung LUNG, Raymond Wai-To LIU, Eugene Yuk-Keung TSO, Wai-Shing LEUNG, Man-Chun CHAN, Yuk-Yung NG, Kit-Man SIN, Kitty Sau-Chun FUNG, Sandy Ka-Yee CHAU, Wing-Kin TO, Tak-Lun Que, David Ho-Keung SHUM, Shea Ping YIP, Wing Cheong YAM, Gilman Kit-Hang SIU |
| EPI_ISL_417180, EPI_ISL_417181, EPI_ISL_417182                                                                                                                                                                                                                                                                                                                                                                                                                                                                                                                                 | Department of Pathology, United Christian Hospital                                      | Department of Health Technology and Informatics, Faculty of Health and Social Science, The Hong Kong Polytechnic University | Kenneth Siu-Sing LEUNG, Timothy Ting-Leung NG, Alan Ka-Lun WU, Miranda Chong-Yee YAU, Hiu-Yin LAO, Ming-Pan CHOI, Kingsley King-Gee TAM, Lam-Kwong LEE, Barry Kin-Chung WONG, Alex Yat-Man HO, Kam-Tong Yip, Kwok-Cheung LUNG, Raymond Wai-To LIU, Eugene Yuk-Keung TSO, Wai-Shing LEUNG, Man-Chun CHAN, Yuk-Yung NG, Kit-Man SIN, Kitty Sau-Chun FUNG, Sandy Ka-Yee CHAU, Wing-Kin TO, Tak-Lun Que, David Ho-Keung SHUM, Shea Ping YIP, Wing Cheong YAM, Gilman Kit-Hang SIU |
| EPI_ISL_417183, EPI_ISL_417184                                                                                                                                                                                                                                                                                                                                                                                                                                                                                                                                                 | Department of Clinical Pathology, Pamela Youde Nethersole Eastern Hospital              | Department of Health Technology and Informatics, Faculty of Health and Social Science, The Hong Kong Polytechnic University | Kenneth Siu-Sing LEUNG, Timothy Ting-Leung NG, Alan Ka-Lun WU, Miranda Chong-Yee YAU, Hiu-Yin LAO, Ming-Pan CHOI, Kingsley King-Gee TAM, Lam-Kwong LEE, Barry Kin-Chung WONG, Alex Yat-Man HO, Kam-Tong Yip, Kwok-Cheung LUNG, Raymond Wai-To LIU, Eugene Yuk-Keung TSO, Wai-Shing LEUNG, Man-Chun CHAN, Yuk-Yung NG, Kit-Man SIN, Kitty Sau-Chun FUNG, Sandy Ka-Yee CHAU, Wing-Kin TO, Tak-Lun Que, David Ho-Keung SHUM, Shea Ping YIP, Wing Cheong YAM, Gilman Kit-Hang SIU |
| EPI_ISL_417185                                                                                                                                                                                                                                                                                                                                                                                                                                                                                                                                                                 | Department of Pathology, United Christian Hospital                                      | Department of Health Technology and Informatics, Faculty of Health and Social Science, The Hong Kong Polytechnic University | Kenneth Siu-Sing LEUNG, Timothy Ting-Leung NG, Alan Ka-Lun WU, Miranda Chong-Yee YAU, Hiu-Yin LAO, Ming-Pan CHOI, Kingsley King-Gee TAM, Lam-Kwong LEE, Barry Kin-Chung WONG, Alex Yat-Man HO, Kam-Tong Yip, Kwok-Cheung LUNG, Raymond Wai-To LIU, Eugene Yuk-Keung TSO, Wai-Shing LEUNG, Man-Chun CHAN, Yuk-Yung NG, Kit-Man SIN, Kitty Sau-Chun FUNG, Sandy Ka-Yee CHAU, Wing-Kin TO, Tak-Lun Que, David Ho-Keung SHUM, Shea Ping YIP, Wing Cheong YAM, Gilman Kit-Hang SIU |
| EPI_ISL_417187, EPI_ISL_417188, EPI_ISL_417190, EPI_ISL_417193, EPI_ISL_417195, EPI_ISL_417197                                                                                                                                                                                                                                                                                                                                                                                                                                                                                 | Department of Clinical Pathology, Pamela Youde Nethersole Eastern Hospital              | Department of Health Technology and Informatics, Faculty of Health and Social Science, The Hong Kong Polytechnic University | Kenneth Siu-Sing LEUNG, Timothy Ting-Leung NG, Alan Ka-Lun WU, Miranda Chong-Yee YAU, Hiu-Yin LAO, Ming-Pan CHOI, Kingsley King-Gee TAM, Lam-Kwong LEE, Barry Kin-Chung WONG, Alex Yat-Man HO, Kam-Tong Yip, Kwok-Cheung LUNG, Raymond Wai-To LIU, Eugene Yuk-Keung TSO, Wai-Shing LEUNG, Man-Chun CHAN, Yuk-Yung NG, Kit-Man SIN, Kitty Sau-Chun FUNG, Sandy Ka-Yee CHAU, Wing-Kin TO, Tak-Lun Que, David Ho-Keung SHUM, Shea Ping YIP, Wing Cheong YAM, Gilman Kit-Hang SIU |
| EPI_ISL_417385                                                                                                                                                                                                                                                                                                                                                                                                                                                                                                                                                                 | Centre for Infectious Diseases and Microbiology Public Health                           | NSW Health Pathology - Institute of Clinical Pathology and Medical Research; Westmead Hospital; University of Sydney        | Lam C, Gray K, Timms V, Gall M, Arnott A, Sadsad R, Carter I, Rahman H, Holmes EC, O'Sullivan MV, Sintchenko V, Chen SC, Maddocks S, Kok J, Dwyer DE, Rockett R and Eden J-S for the 2019-nCoV Study Group                                                                                                                                                                                                                                                                    |
| EPI_ISL_417398                                                                                                                                                                                                                                                                                                                                                                                                                                                                                                                                                                 | Centre for Infectious Diseases and Microbiology Public Health                           | NSW Health Pathology - Institute of Clinical Pathology and Medical Research; Westmead Hospital; University of Sydney        | Kok J, Dwyer DE, Rockett R, Eden J-S, Lam C, Gray K, Timms V, Gall M, Arnott A, Sadsad R, Carter I, Rahman H, Holmes EC, O'Sullivan MV, Sintchenko V, Chen SC and Maddocks S for the 2019-nCoV Study Group                                                                                                                                                                                                                                                                    |
| EPI_ISL_417402                                                                                                                                                                                                                                                                                                                                                                                                                                                                                                                                                                 | Centre for Infectious Diseases and Microbiology Public Health                           | NSW Health Pathology - Institute of Clinical Pathology and Medical Research; Westmead Hospital; University of Sydney        | Lam C, Gray K, Timms V, Gall M, Arnott A, Sadsad R, Carter I, Rahman H, Holmes EC, O'Sullivan MV, Sintchenko V, Chen SC, Maddocks S, Kok J, Dwyer DE, Rockett R and Eden J-S for the 2019-nCoV Study Group                                                                                                                                                                                                                                                                    |
| EPI_ISL_417518, EPI_ISL_417519, EPI_ISL_417520, EPI_ISL_417521, EPI_ISL_417522, EPI_ISL_417523, EPI_ISL_417524, EPI_ISL_417525                                                                                                                                                                                                                                                                                                                                                                                                                                                 | Laboratory Medicine                                                                     | Department of Laboratory Medicine, Lin-Kou Chang Gung Memorial Hospital, Taoyuan, Taiwan                                    | Kuo-Chien Tsao, Yu-Nong Gong, Shu-Li Yang, Yi-Chun Liu, Chung-Guei Huang, Po-Wei Huang, Mei-Jen Hsiao, Cheng-Ta Yang, Cheng-Hsun Chiu, Peng-Nien Huang, Kuo-Ming Lee, Guang-Wu Chen, Shin-Ru Shih                                                                                                                                                                                                                                                                             |
| EPI_ISL_418625, EPI_ISL_418626, EPI_ISL_418627, EPI_ISL_418628, EPI_ISL_418629, EPI_ISL_418630, EPI_ISL_418631, EPI_ISL_418632, EPI_ISL_418633, EPI_ISL_418634, EPI_ISL_418635, EPI_ISL_418636, EPI_ISL_418637, EPI_ISL_418638, EPI_ISL_418640, EPI_ISL_418641, EPI_ISL_418642, EPI_ISL_418643, EPI_ISL_418644, EPI_ISL_418645, EPI_ISL_418647, EPI_ISL_418648, EPI_ISL_418650, EPI_ISL_418651, EPI_ISL_418652, EPI_ISL_418655, EPI_ISL_418656, EPI_ISL_418657, EPI_ISL_418659, EPI_ISL_418660, EPI_ISL_418661, EPI_ISL_418662, EPI_ISL_418663, EPI_ISL_418664, EPI_ISL_418665 |                                                                                         |                                                                                                                             |                                                                                                                                                                                                                                                                                                                                                                                                                                                                               |

|                                                                                                                                                                                                                                                                                                                                                                                                                                                                                                                                                                                                                                                                                                                                                                                                                                                                                                |                                                                                               |                                                                                                                                   |                                                                                                                                                                                                                                                                                                                                                                                                                                                                               |
|------------------------------------------------------------------------------------------------------------------------------------------------------------------------------------------------------------------------------------------------------------------------------------------------------------------------------------------------------------------------------------------------------------------------------------------------------------------------------------------------------------------------------------------------------------------------------------------------------------------------------------------------------------------------------------------------------------------------------------------------------------------------------------------------------------------------------------------------------------------------------------------------|-----------------------------------------------------------------------------------------------|-----------------------------------------------------------------------------------------------------------------------------------|-------------------------------------------------------------------------------------------------------------------------------------------------------------------------------------------------------------------------------------------------------------------------------------------------------------------------------------------------------------------------------------------------------------------------------------------------------------------------------|
| see above                                                                                                                                                                                                                                                                                                                                                                                                                                                                                                                                                                                                                                                                                                                                                                                                                                                                                      | Department of Clinical Microbiology                                                           | GIGA Medical Genomics                                                                                                             | Keith Durkin, Maria Artesi, Sébastien Bontems, Raphaël Boreux, Cécile Meex, Pierrette Melin, Marie-Pierre Hayette, Vincent Bours.                                                                                                                                                                                                                                                                                                                                             |
| EPI_ISL_418815, EPI_ISL_419213, EPI_ISL_419214, EPI_ISL_419215, EPI_ISL_419216                                                                                                                                                                                                                                                                                                                                                                                                                                                                                                                                                                                                                                                                                                                                                                                                                 | Department of Clinical Pathology, Pamela Youde Nethersole Eastern Hospital                    | Department of Health Technology and Informatics, Faculty of Health and Social Science, The Hong Kong Polytechnic University       | Kenneth Siu-Sing LEUNG, Timothy Ting-Leung NG, Alan Ka-Lun WU, Miranda Chong-Yee YAU, Hiu-Yin LAO, Ming-Pan CHOI, Kingsley King-Gee TAM, Lam-Kwong LEE, Barry Kin-Chung WONG, Alex Yat-Man HO, Kam-Tong YIP, Kwok-Cheung LUNG, Raymond Wai-To LIU, Eugene Yuk-Keung TSO, Wai-Shing LEUNG, Man-Chun CHAN, Yuk-Yung NG, Kit-Man SIN, Kitty Sau-Chun FUNG, Sandy Ka-Yee CHAU, Wing-Kin TO, Tak-Lun QUE, David Ho-Keung SHUM, Shea Ping YIP, Wing Cheong YAM, Gilman Kit-Hang SIU |
| EPI_ISL_419217                                                                                                                                                                                                                                                                                                                                                                                                                                                                                                                                                                                                                                                                                                                                                                                                                                                                                 | Department of Pathology, Princess Margaret Hospital                                           | Department of Health Technology and Informatics, Faculty of Health and Social Science, The Hong Kong Polytechnic University       | Kenneth Siu-Sing LEUNG, Timothy Ting-Leung NG, Alan Ka-Lun WU, Miranda Chong-Yee YAU, Hiu-Yin LAO, Ming-Pan CHOI, Kingsley King-Gee TAM, Lam-Kwong LEE, Barry Kin-Chung WONG, Alex Yat-Man HO, Kam-Tong YIP, Kwok-Cheung LUNG, Raymond Wai-To LIU, Eugene Yuk-Keung TSO, Wai-Shing LEUNG, Man-Chun CHAN, Yuk-Yung NG, Kit-Man SIN, Kitty Sau-Chun FUNG, Sandy Ka-Yee CHAU, Wing-Kin TO, Tak-Lun QUE, David Ho-Keung SHUM, Shea Ping YIP, Wing Cheong YAM, Gilman Kit-Hang SIU |
| EPI_ISL_419218, EPI_ISL_419219                                                                                                                                                                                                                                                                                                                                                                                                                                                                                                                                                                                                                                                                                                                                                                                                                                                                 | Department of Clinical Pathology, Pamela Youde Nethersole Eastern Hospital                    | Department of Health Technology and Informatics, Faculty of Health and Social Science, The Hong Kong Polytechnic University       | Kenneth Siu-Sing LEUNG, Timothy Ting-Leung NG, Alan Ka-Lun WU, Miranda Chong-Yee YAU, Hiu-Yin LAO, Ming-Pan CHOI, Kingsley King-Gee TAM, Lam-Kwong LEE, Barry Kin-Chung WONG, Alex Yat-Man HO, Kam-Tong YIP, Kwok-Cheung LUNG, Raymond Wai-To LIU, Eugene Yuk-Keung TSO, Wai-Shing LEUNG, Man-Chun CHAN, Yuk-Yung NG, Kit-Man SIN, Kitty Sau-Chun FUNG, Sandy Ka-Yee CHAU, Wing-Kin TO, Tak-Lun QUE, David Ho-Keung SHUM, Shea Ping YIP, Wing Cheong YAM, Gilman Kit-Hang SIU |
| EPI_ISL_419221                                                                                                                                                                                                                                                                                                                                                                                                                                                                                                                                                                                                                                                                                                                                                                                                                                                                                 | Department of Pathology, United Christian Hospital                                            | Department of Health Technology and Informatics, Faculty of Health and Social Science, The Hong Kong Polytechnic University       | Kenneth Siu-Sing LEUNG, Timothy Ting-Leung NG, Alan Ka-Lun WU, Miranda Chong-Yee YAU, Hiu-Yin LAO, Ming-Pan CHOI, Kingsley King-Gee TAM, Lam-Kwong LEE, Barry Kin-Chung WONG, Alex Yat-Man HO, Kam-Tong YIP, Kwok-Cheung LUNG, Raymond Wai-To LIU, Eugene Yuk-Keung TSO, Wai-Shing LEUNG, Man-Chun CHAN, Yuk-Yung NG, Kit-Man SIN, Kitty Sau-Chun FUNG, Sandy Ka-Yee CHAU, Wing-Kin TO, Tak-Lun QUE, David Ho-Keung SHUM, Shea Ping YIP, Wing Cheong YAM, Gilman Kit-Hang SIU |
| EPI_ISL_419222, EPI_ISL_419223                                                                                                                                                                                                                                                                                                                                                                                                                                                                                                                                                                                                                                                                                                                                                                                                                                                                 | Department of Pathology, Princess Margaret Hospital                                           | Department of Health Technology and Informatics, Faculty of Health and Social Science, The Hong Kong Polytechnic University       | Kenneth Siu-Sing LEUNG, Timothy Ting-Leung NG, Alan Ka-Lun WU, Miranda Chong-Yee YAU, Hiu-Yin LAO, Ming-Pan CHOI, Kingsley King-Gee TAM, Lam-Kwong LEE, Barry Kin-Chung WONG, Alex Yat-Man HO, Kam-Tong YIP, Kwok-Cheung LUNG, Raymond Wai-To LIU, Eugene Yuk-Keung TSO, Wai-Shing LEUNG, Man-Chun CHAN, Yuk-Yung NG, Kit-Man SIN, Kitty Sau-Chun FUNG, Sandy Ka-Yee CHAU, Wing-Kin TO, Tak-Lun QUE, David Ho-Keung SHUM, Shea Ping YIP, Wing Cheong YAM, Gilman Kit-Hang SIU |
| EPI_ISL_419224, EPI_ISL_419225, EPI_ISL_419226, EPI_ISL_419227, EPI_ISL_419228, EPI_ISL_419229                                                                                                                                                                                                                                                                                                                                                                                                                                                                                                                                                                                                                                                                                                                                                                                                 | Department of Clinical Pathology, Pamela Youde Nethersole Eastern Hospital                    | Department of Health Technology and Informatics, Faculty of Health and Social Science, The Hong Kong Polytechnic University       | Kenneth Siu-Sing LEUNG, Timothy Ting-Leung NG, Alan Ka-Lun WU, Miranda Chong-Yee YAU, Hiu-Yin LAO, Ming-Pan CHOI, Kingsley King-Gee TAM, Lam-Kwong LEE, Barry Kin-Chung WONG, Alex Yat-Man HO, Kam-Tong YIP, Kwok-Cheung LUNG, Raymond Wai-To LIU, Eugene Yuk-Keung TSO, Wai-Shing LEUNG, Man-Chun CHAN, Yuk-Yung NG, Kit-Man SIN, Kitty Sau-Chun FUNG, Sandy Ka-Yee CHAU, Wing-Kin TO, Tak-Lun QUE, David Ho-Keung SHUM, Shea Ping YIP, Wing Cheong YAM, Gilman Kit-Hang SIU |
| EPI_ISL_419231                                                                                                                                                                                                                                                                                                                                                                                                                                                                                                                                                                                                                                                                                                                                                                                                                                                                                 | Department of Clinical Pathology, Tuen Mun Hospital, 23 Tsing Chung Koon Road, Tuen Mun, N.T. | Department of Health Technology and Informatics, Faculty of Health and Social Science, The Hong Kong Polytechnic University       | Kenneth Siu-Sing LEUNG, Timothy Ting-Leung NG, Alan Ka-Lun WU, Miranda Chong-Yee YAU, Hiu-Yin LAO, Ming-Pan CHOI, Kingsley King-Gee TAM, Lam-Kwong LEE, Barry Kin-Chung WONG, Alex Yat-Man HO, Kam-Tong YIP, Kwok-Cheung LUNG, Raymond Wai-To LIU, Eugene Yuk-Keung TSO, Wai-Shing LEUNG, Man-Chun CHAN, Yuk-Yung NG, Kit-Man SIN, Kitty Sau-Chun FUNG, Sandy Ka-Yee CHAU, Wing-Kin TO, Tak-Lun QUE, David Ho-Keung SHUM, Shea Ping YIP, Wing Cheong YAM, Gilman Kit-Hang SIU |
| EPI_ISL_419232, EPI_ISL_419241                                                                                                                                                                                                                                                                                                                                                                                                                                                                                                                                                                                                                                                                                                                                                                                                                                                                 | Department of Clinical Pathology, Pamela Youde Nethersole Eastern Hospital                    | Department of Health Technology and Informatics, Faculty of Health and Social Science, The Hong Kong Polytechnic University       | Kenneth Siu-Sing LEUNG, Timothy Ting-Leung NG, Alan Ka-Lun WU, Miranda Chong-Yee YAU, Hiu-Yin LAO, Ming-Pan CHOI, Kingsley King-Gee TAM, Lam-Kwong LEE, Barry Kin-Chung WONG, Alex Yat-Man HO, Kam-Tong YIP, Kwok-Cheung LUNG, Raymond Wai-To LIU, Eugene Yuk-Keung TSO, Wai-Shing LEUNG, Man-Chun CHAN, Yuk-Yung NG, Kit-Man SIN, Kitty Sau-Chun FUNG, Sandy Ka-Yee CHAU, Wing-Kin TO, Tak-Lun QUE, David Ho-Keung SHUM, Shea Ping YIP, Wing Cheong YAM, Gilman Kit-Hang SIU |
| EPI_ISL_419242                                                                                                                                                                                                                                                                                                                                                                                                                                                                                                                                                                                                                                                                                                                                                                                                                                                                                 | Department of Clinical Pathology, Tuen Mun Hospital                                           | Department of Health Technology and Informatics, Faculty of Health and Social Science, The Hong Kong Polytechnic University       | Kenneth Siu-Sing LEUNG, Timothy Ting-Leung NG, Alan Ka-Lun WU, Miranda Chong-Yee YAU, Hiu-Yin LAO, Ming-Pan CHOI, Kingsley King-Gee TAM, Lam-Kwong LEE, Barry Kin-Chung WONG, Alex Yat-Man HO, Kam-Tong YIP, Kwok-Cheung LUNG, Raymond Wai-To LIU, Eugene Yuk-Keung TSO, Wai-Shing LEUNG, Man-Chun CHAN, Yuk-Yung NG, Kit-Man SIN, Kitty Sau-Chun FUNG, Sandy Ka-Yee CHAU, Wing-Kin TO, Tak-Lun QUE, David Ho-Keung SHUM, Shea Ping YIP, Wing Cheong YAM, Gilman Kit-Hang SIU |
| EPI_ISL_419243, EPI_ISL_419244, EPI_ISL_419245, EPI_ISL_419246, EPI_ISL_419247, EPI_ISL_419248, EPI_ISL_419249, EPI_ISL_419250, EPI_ISL_419251, EPI_ISL_419252                                                                                                                                                                                                                                                                                                                                                                                                                                                                                                                                                                                                                                                                                                                                 | Department of Clinical Pathology, Pamela Youde Nethersole Eastern Hospital                    | Department of Health Technology and Informatics, Faculty of Health and Social Science, The Hong Kong Polytechnic University       | Kenneth Siu-Sing LEUNG, Timothy Ting-Leung NG, Alan Ka-Lun WU, Miranda Chong-Yee YAU, Hiu-Yin LAO, Ming-Pan CHOI, Kingsley King-Gee TAM, Lam-Kwong LEE, Barry Kin-Chung WONG, Alex Yat-Man HO, Kam-Tong YIP, Kwok-Cheung LUNG, Raymond Wai-To LIU, Eugene Yuk-Keung TSO, Wai-Shing LEUNG, Man-Chun CHAN, Yuk-Yung NG, Kit-Man SIN, Kitty Sau-Chun FUNG, Sandy Ka-Yee CHAU, Wing-Kin TO, Tak-Lun QUE, David Ho-Keung SHUM, Shea Ping YIP, Wing Cheong YAM, Gilman Kit-Hang SIU |
| EPI_ISL_419253                                                                                                                                                                                                                                                                                                                                                                                                                                                                                                                                                                                                                                                                                                                                                                                                                                                                                 | Department of Pathology, United Christian Hospital                                            | Department of Health Technology and Informatics, Faculty of Health and Social Science, The Hong Kong Polytechnic University       | Kenneth Siu-Sing LEUNG, Timothy Ting-Leung NG, Alan Ka-Lun WU, Miranda Chong-Yee YAU, Hiu-Yin LAO, Ming-Pan CHOI, Kingsley King-Gee TAM, Lam-Kwong LEE, Barry Kin-Chung WONG, Alex Yat-Man HO, Kam-Tong YIP, Kwok-Cheung LUNG, Raymond Wai-To LIU, Eugene Yuk-Keung TSO, Wai-Shing LEUNG, Man-Chun CHAN, Yuk-Yung NG, Kit-Man SIN, Kitty Sau-Chun FUNG, Sandy Ka-Yee CHAU, Wing-Kin TO, Tak-Lun QUE, David Ho-Keung SHUM, Shea Ping YIP, Wing Cheong YAM, Gilman Kit-Hang SIU |
| EPI_ISL_419259, EPI_ISL_419265                                                                                                                                                                                                                                                                                                                                                                                                                                                                                                                                                                                                                                                                                                                                                                                                                                                                 | Lab voor klinische biologie                                                                   | Onderzoeksgroep Virologie                                                                                                         | Laurens Lambrechts, Nick Vereecke, Marthe Pauwels, Basiel Cole, Bruno Verhasselt, Linos Vandekerckhove, Hans Nauwynck, Sebastiaan Theuns                                                                                                                                                                                                                                                                                                                                      |
| EPI_ISL_420455                                                                                                                                                                                                                                                                                                                                                                                                                                                                                                                                                                                                                                                                                                                                                                                                                                                                                 | Department of Clinical Pathology, Pamela Youde Nethersole Eastern Hospital                    | Department of Health Technology and Informatics, Faculty of Health and Social Science, The Hong Kong Polytechnic University       | Kenneth Siu-Sing LEUNG, Timothy Ting-Leung NG, Alan Ka-Lun WU, Miranda Chong-Yee YAU, Hiu-Yin LAO, Ming-Pan CHOI, Kingsley King-Gee TAM, Lam-Kwong LEE, Barry Kin-Chung WONG, Alex Yat-Man HO, Kam-Tong YIP, Kwok-Cheung LUNG, Raymond Wai-To LIU, Eugene Yuk-Keung TSO, Wai-Shing LEUNG, Man-Chun CHAN, Yuk-Yung NG, Kit-Man SIN, Kitty Sau-Chun FUNG, Sandy Ka-Yee CHAU, Wing-Kin TO, Tak-Lun QUE, David Ho-Keung SHUM, Shea Ping YIP, Wing Cheong YAM, Gilman Kit-Hang SIU |
| EPI_ISL_420784                                                                                                                                                                                                                                                                                                                                                                                                                                                                                                                                                                                                                                                                                                                                                                                                                                                                                 | AZ Department of Health Services                                                              | Pathogen Discovery, Respiratory Viruses Branch, Division of Viral Diseases, Centers for Disease Control and Prevention            | Krista Queen, Yan Li, Ying Tao, Jing Zhang, Anne Uehara, Clinton R. Paden, Haibin Wang, Rachel Marine, Mary S. Keckler, Alison S. Laufer Halpin, Jasmine Padilla, Justin Lee, Christopher A. Elkins, Suxiang Tong                                                                                                                                                                                                                                                             |
| EPI_ISL_420785                                                                                                                                                                                                                                                                                                                                                                                                                                                                                                                                                                                                                                                                                                                                                                                                                                                                                 | FL Bureau of Health Laboratories Tampa                                                        | Pathogen Discovery, Respiratory Viruses Branch, Division of Viral Diseases, Centers for Disease Control and Prevention            | Krista Queen, Yan Li, Ying Tao, Jing Zhang, Anne Uehara, Clinton R. Paden, Haibin Wang, Rachel Marine, Mary S. Keckler, Alison S. Laufer Halpin, Jasmine Padilla, Justin Lee, Christopher A. Elkins, Suxiang Tong                                                                                                                                                                                                                                                             |
| EPI_ISL_420786, EPI_ISL_420787, EPI_ISL_420788                                                                                                                                                                                                                                                                                                                                                                                                                                                                                                                                                                                                                                                                                                                                                                                                                                                 | GA Department of Public Health                                                                | Pathogen Discovery, Respiratory Viruses Branch, Division of Viral Diseases, Centers for Disease Control and Prevention            | Krista Queen, Yan Li, Ying Tao, Jing Zhang, Anne Uehara, Clinton R. Paden, Haibin Wang, Rachel Marine, Mary S. Keckler, Alison S. Laufer Halpin, Jasmine Padilla, Justin Lee, Christopher A. Elkins, Suxiang Tong                                                                                                                                                                                                                                                             |
| EPI_ISL_420789, EPI_ISL_420790                                                                                                                                                                                                                                                                                                                                                                                                                                                                                                                                                                                                                                                                                                                                                                                                                                                                 | Illinois Department of Public Health Chicago Laboratory                                       | Pathogen Discovery, Respiratory Viruses Branch, Division of Viral Diseases, Centers for Disease Control and Prevention            | Krista Queen, Yan Li, Ying Tao, Jing Zhang, Anne Uehara, Clinton R. Paden, Haibin Wang, Rachel Marine, Mary S. Keckler, Alison S. Laufer Halpin, Jasmine Padilla, Justin Lee, Christopher A. Elkins, Suxiang Tong                                                                                                                                                                                                                                                             |
| EPI_ISL_420791, EPI_ISL_420792                                                                                                                                                                                                                                                                                                                                                                                                                                                                                                                                                                                                                                                                                                                                                                                                                                                                 | NH Department of Health and Human Services Public Health Labs                                 | Pathogen Discovery, Respiratory Viruses Branch, Division of Viral Diseases, Centers for Disease Control and Prevention            | Krista Queen, Yan Li, Ying Tao, Jing Zhang, Anne Uehara, Clinton R. Paden, Haibin Wang, Rachel Marine, Mary S. Keckler, Alison S. Laufer Halpin, Jasmine Padilla, Justin Lee, Christopher A. Elkins, Suxiang Tong                                                                                                                                                                                                                                                             |
| EPI_ISL_420793                                                                                                                                                                                                                                                                                                                                                                                                                                                                                                                                                                                                                                                                                                                                                                                                                                                                                 | NYC Department of Health and Mental Hygiene                                                   | Pathogen Discovery, Respiratory Viruses Branch, Division of Viral Diseases, Centers for Disease Control and Prevention            | Krista Queen, Yan Li, Ying Tao, Jing Zhang, Anne Uehara, Clinton R. Paden, Haibin Wang, Rachel Marine, Mary S. Keckler, Alison S. Laufer Halpin, Jasmine Padilla, Justin Lee, Christopher A. Elkins, Suxiang Tong                                                                                                                                                                                                                                                             |
| EPI_ISL_420794                                                                                                                                                                                                                                                                                                                                                                                                                                                                                                                                                                                                                                                                                                                                                                                                                                                                                 | Oregon State Public Health- Virology section                                                  | Pathogen Discovery, Respiratory Viruses Branch, Division of Viral Diseases, Centers for Disease Control and Prevention            | Krista Queen, Yan Li, Ying Tao, Jing Zhang, Anne Uehara, Clinton R. Paden, Haibin Wang, Rachel Marine, Mary S. Keckler, Alison S. Laufer Halpin, Jasmine Padilla, Justin Lee, Christopher A. Elkins, Suxiang Tong                                                                                                                                                                                                                                                             |
| EPI_ISL_420795                                                                                                                                                                                                                                                                                                                                                                                                                                                                                                                                                                                                                                                                                                                                                                                                                                                                                 | RI State Health Laboratory                                                                    | Pathogen Discovery, Respiratory Viruses Branch, Division of Viral Diseases, Centers for Disease Control and Prevention            | Krista Queen, Yan Li, Ying Tao, Jing Zhang, Anne Uehara, Clinton R. Paden, Haibin Wang, Rachel Marine, Mary S. Keckler, Alison S. Laufer Halpin, Jasmine Padilla, Justin Lee, Christopher A. Elkins, Suxiang Tong                                                                                                                                                                                                                                                             |
| EPI_ISL_420796, EPI_ISL_420797, EPI_ISL_420798                                                                                                                                                                                                                                                                                                                                                                                                                                                                                                                                                                                                                                                                                                                                                                                                                                                 | Texas DSHS Lab Services                                                                       | Pathogen Discovery, Respiratory Viruses Branch, Division of Viral Diseases, Centers for Disease Control and Prevention            | Krista Queen, Yan Li, Ying Tao, Jing Zhang, Anne Uehara, Clinton R. Paden, Haibin Wang, Rachel Marine, Mary S. Keckler, Alison S. Laufer Halpin, Jasmine Padilla, Justin Lee, Christopher A. Elkins, Suxiang Tong                                                                                                                                                                                                                                                             |
| EPI_ISL_420799, EPI_ISL_420800, EPI_ISL_420801                                                                                                                                                                                                                                                                                                                                                                                                                                                                                                                                                                                                                                                                                                                                                                                                                                                 | Brian D. Allgood Army Community Hospital                                                      | Pathogen Discovery, Respiratory Viruses Branch, Division of Viral Diseases, Centers for Disease Control and Prevention            | Krista Queen, Yan Li, Ying Tao, Jing Zhang, Anne Uehara, Clinton R. Paden, Haibin Wang, Rachel Marine, Mary S. Keckler, Alison S. Laufer Halpin, Jasmine Padilla, Justin Lee, Christopher A. Elkins, Suxiang Tong                                                                                                                                                                                                                                                             |
| EPI_ISL_421182, EPI_ISL_421183, EPI_ISL_421185, EPI_ISL_421186, EPI_ISL_421187, EPI_ISL_421190, EPI_ISL_421193, EPI_ISL_421194, EPI_ISL_421197, EPI_ISL_421198, EPI_ISL_421200, EPI_ISL_421201, EPI_ISL_421202, EPI_ISL_421203, EPI_ISL_421204, EPI_ISL_421205, EPI_ISL_421206, EPI_ISL_421207, EPI_ISL_421208, EPI_ISL_421209, EPI_ISL_421210, EPI_ISL_421211, EPI_ISL_421213, EPI_ISL_421214, EPI_ISL_424628, EPI_ISL_424629, EPI_ISL_424630, EPI_ISL_424631, EPI_ISL_424632, EPI_ISL_424633, EPI_ISL_424634, EPI_ISL_424637, EPI_ISL_424638, EPI_ISL_424640, EPI_ISL_424641, EPI_ISL_424642, EPI_ISL_424643, EPI_ISL_424645, EPI_ISL_424646, EPI_ISL_424648, EPI_ISL_424649, EPI_ISL_424650, EPI_ISL_424651, EPI_ISL_424652, EPI_ISL_424653, EPI_ISL_424654, EPI_ISL_424655, EPI_ISL_424656, EPI_ISL_424657, EPI_ISL_424658, EPI_ISL_424660, EPI_ISL_424661, EPI_ISL_424662, EPI_ISL_424664 | GIGA Medical Genomics                                                                         | Keith Durkin, Maria Artesi, Sébastien Bontems, Raphaël Boreux, Cécile Meex, Pierrette Melin, Marie-Pierre Hayette, Vincent Bours. |                                                                                                                                                                                                                                                                                                                                                                                                                                                                               |
| see above                                                                                                                                                                                                                                                                                                                                                                                                                                                                                                                                                                                                                                                                                                                                                                                                                                                                                      | Department of Clinical Microbiology                                                           | GIGA Medical Genomics                                                                                                             | Keith Durkin, Maria Artesi, Sébastien Bontems, Raphaël Boreux, Cécile Meex, Pierrette Melin, Marie-Pierre Hayette, Vincent Bours.                                                                                                                                                                                                                                                                                                                                             |

|                                                                                                                                                                                                                                                                                                                                                                                                                                                                                                                                                                                                                                                                                                |                                                                                                                 |                                                                                                                                   |                                                                                                                                                                                                                                                                              |
|------------------------------------------------------------------------------------------------------------------------------------------------------------------------------------------------------------------------------------------------------------------------------------------------------------------------------------------------------------------------------------------------------------------------------------------------------------------------------------------------------------------------------------------------------------------------------------------------------------------------------------------------------------------------------------------------|-----------------------------------------------------------------------------------------------------------------|-----------------------------------------------------------------------------------------------------------------------------------|------------------------------------------------------------------------------------------------------------------------------------------------------------------------------------------------------------------------------------------------------------------------------|
| EPI_ISL_424969, EPI_ISL_424970, EPI_ISL_424971, EPI_ISL_424972, EPI_ISL_424973, EPI_ISL_424974, EPI_ISL_424975, EPI_ISL_424978                                                                                                                                                                                                                                                                                                                                                                                                                                                                                                                                                                 | Laboratory Medicine                                                                                             | Department of Laboratory Medicine, Lin-Kou Chang Gung Memorial Hospital, Taoyuan, Taiwan                                          | Kuo-Chien Tsao, Yu-Nong Gong, Shu-Li Yang, Yi-Chun Liu, Chung-Guei Huang, Mei-Jen Hsiao, Po-Wei Huang, Cheng-Ta Yang, Cheng-Hsun Chiu, Peng-Nien Huang, Kuo-Ming Lee, Guang-Wu Chen, Shin-Ru Shih                                                                            |
| EPI_ISL_425048, EPI_ISL_425050, EPI_ISL_425056, EPI_ISL_425057, EPI_ISL_425058                                                                                                                                                                                                                                                                                                                                                                                                                                                                                                                                                                                                                 | Lab voor klinische biologie                                                                                     | Onderzoeksgroep Virologie                                                                                                         | Laurens Lambrechts, Nick Vereecke, Marthe Pauwels, Basiel Cole, Bruno Verhasselt, Linos Vandekerckhove, Hans Nauwynck, Sebastiaan Theuns                                                                                                                                     |
| EPI_ISL_425062, EPI_ISL_425063, EPI_ISL_425064                                                                                                                                                                                                                                                                                                                                                                                                                                                                                                                                                                                                                                                 | Lab voor klinische biologie                                                                                     | Onderzoeksgroep Virologie                                                                                                         | Laurens Lambrechts, Nick Vereecke, Marthe Pauwels, Jozefien De Clercq, Bruno Verhasselt, Linos Vandekerckhove, Hans Nauwynck, Sebastiaan Theuns                                                                                                                              |
| EPI_ISL_425224                                                                                                                                                                                                                                                                                                                                                                                                                                                                                                                                                                                                                                                                                 | Wadsworth Center, New York State Department of Health                                                           | Wadsworth Center, New York State Department of Health                                                                             | Kirsten St. George, Daryl M. Lamson, Sara Griesemer, Jonathan Plitnick, Navjot Singh, Matthew D. Shudt, Erica Lasek-Nesselquist                                                                                                                                              |
| EPI_ISL_425228, EPI_ISL_425229                                                                                                                                                                                                                                                                                                                                                                                                                                                                                                                                                                                                                                                                 | Laboratory of Molecular Genetics, 2nd Faculty of Medicine, Charles University in Prague, Prague, Czech Republic | Laboratory of Molecular Genetics, 2nd Faculty of Medicine, Charles University in Prague, Prague, Czech Republic                   | Lenka Kramná, Kateina Poláková, Ondej Cinek                                                                                                                                                                                                                                  |
| EPI_ISL_426025, EPI_ISL_426026, EPI_ISL_426027, EPI_ISL_426028, EPI_ISL_426029, EPI_ISL_426030, EPI_ISL_426031, EPI_ISL_426032, EPI_ISL_426033, EPI_ISL_426034, EPI_ISL_426035, EPI_ISL_426036, EPI_ISL_426037, EPI_ISL_426038, EPI_ISL_426039, EPI_ISL_426040, EPI_ISL_426041, EPI_ISL_426042, EPI_ISL_426043, EPI_ISL_426044, EPI_ISL_426045, EPI_ISL_426046, EPI_ISL_426047, EPI_ISL_426048, EPI_ISL_426049, EPI_ISL_426050                                                                                                                                                                                                                                                                 | Wadsworth Center, New York State Department of Health                                                           | Wadsworth Center, New York State Department of Health                                                                             | Kirsten St. George, Daryl M. Lamson, Sara Griesemer, Jonathan Plitnick, Navjot Singh, Matthew D. Shudt, Erica Lasek-Nesselquist                                                                                                                                              |
| see above                                                                                                                                                                                                                                                                                                                                                                                                                                                                                                                                                                                                                                                                                      | Wadsworth Center, New York State Department of Health                                                           | Wadsworth Center, New York State Department of Health                                                                             | Kirsten St. George, Daryl M. Lamson, Sara Griesemer, Jonathan Plitnick, Navjot Singh, Matthew D. Shudt, Erica Lasek-Nesselquist                                                                                                                                              |
| EPI_ISL_426051                                                                                                                                                                                                                                                                                                                                                                                                                                                                                                                                                                                                                                                                                 | Laboratory of Molecular Genetics, 2nd Faculty of Medicine, Charles University in Prague, Prague, Czech Republic | Laboratory of Molecular Genetics, 2nd Faculty of Medicine, Charles University in Prague, Prague, Czech Republic                   | Lenka Kramná, Kateina Poláková, Ondej Cinek                                                                                                                                                                                                                                  |
| EPI_ISL_426290                                                                                                                                                                                                                                                                                                                                                                                                                                                                                                                                                                                                                                                                                 | Wadsworth Center, New York State Department of Health                                                           | Wadsworth Center, New York State Department of Health                                                                             | Kirsten St. George, Daryl M. Lamson, Sara Griesemer, Jonathan Plitnick, Navjot Singh, Matthew D. Shudt, Erica Lasek-Nesselquist                                                                                                                                              |
| EPI_ISL_426291, EPI_ISL_426292, EPI_ISL_426293, EPI_ISL_426294, EPI_ISL_426295, EPI_ISL_426296, EPI_ISL_426297, EPI_ISL_426298, EPI_ISL_426299, EPI_ISL_426300, EPI_ISL_426301, EPI_ISL_426302, EPI_ISL_426303, EPI_ISL_426304, EPI_ISL_426305, EPI_ISL_426306, EPI_ISL_426307, EPI_ISL_426308, EPI_ISL_426309, EPI_ISL_426310, EPI_ISL_426311, EPI_ISL_426312, EPI_ISL_426313, EPI_ISL_426314, EPI_ISL_426315, EPI_ISL_426316, EPI_ISL_426317, EPI_ISL_426318, EPI_ISL_426319, EPI_ISL_426320, EPI_ISL_426321, EPI_ISL_426322, EPI_ISL_426323, EPI_ISL_426324, EPI_ISL_426325, EPI_ISL_426326, EPI_ISL_426327, EPI_ISL_426328                                                                 | Wadsworth Center, New York State Department of Health                                                           | Wadsworth Center, New York State Department of Health                                                                             | Kirsten St. George, Daryl M. Lamson, Sara Griesemer, Jonathan Plitnick, Navjot Singh, Matthew D. Shudt, Erica Lasek-Nesselquist                                                                                                                                              |
| see above                                                                                                                                                                                                                                                                                                                                                                                                                                                                                                                                                                                                                                                                                      | Wadsworth Center, New York State Department of Health                                                           | Wadsworth Center, New York State Department of Health                                                                             | Kirsten St. George, Daryl M. Lamson, Sara Griesemer, Jonathan Plitnick, Navjot Singh, Matthew D. Shudt, Erica Lasek-Nesselquist                                                                                                                                              |
| EPI_ISL_426356, EPI_ISL_426357, EPI_ISL_426358, EPI_ISL_426359, EPI_ISL_426360                                                                                                                                                                                                                                                                                                                                                                                                                                                                                                                                                                                                                 | Laboratory of Molecular Genetics, 2nd Faculty of Medicine, Charles University in Prague, Prague, Czech Republic | Laboratory of Molecular Genetics, 2nd Faculty of Medicine, Charles University in Prague, Prague, Czech Republic                   | Lenka Kramna, Katerina Polackova, Ondrej Cinek                                                                                                                                                                                                                               |
| EPI_ISL_426422, EPI_ISL_426423, EPI_ISL_426424                                                                                                                                                                                                                                                                                                                                                                                                                                                                                                                                                                                                                                                 | IN State Department of Health Laboratory Services                                                               | Pathogen Discovery, Respiratory Viruses Branch, Division of Viral Diseases, Centers for Disease Control and Prevention            | Krista Queen, Yan Li, Anna Uehara, Clinton R. Paden, Rachel Marine, Ying Tao, Jing Zhang, Haibin Wang, Mary S. Keckler, Alison S. Laufer Halpin, Christopher A. Elkins, Suxiang Tong                                                                                         |
| EPI_ISL_426425                                                                                                                                                                                                                                                                                                                                                                                                                                                                                                                                                                                                                                                                                 | MD DOH Laboratories Administration                                                                              | Pathogen Discovery, Respiratory Viruses Branch, Division of Viral Diseases, Centers for Disease Control and Prevention            | Krista Queen, Yan Li, Anna Uehara, Clinton R. Paden, Rachel Marine, Ying Tao, Jing Zhang, Haibin Wang, Mary S. Keckler, Alison S. Laufer Halpin, Christopher A. Elkins, Suxiang Tong                                                                                         |
| EPI_ISL_426426, EPI_ISL_426427                                                                                                                                                                                                                                                                                                                                                                                                                                                                                                                                                                                                                                                                 | MN PHL Division, Minnesota Department of Health                                                                 | Pathogen Discovery, Respiratory Viruses Branch, Division of Viral Diseases, Centers for Disease Control and Prevention            | Krista Queen, Yan Li, Anna Uehara, Clinton R. Paden, Rachel Marine, Ying Tao, Jing Zhang, Haibin Wang, Mary S. Keckler, Alison S. Laufer Halpin, Christopher A. Elkins, Suxiang Tong                                                                                         |
| EPI_ISL_426428                                                                                                                                                                                                                                                                                                                                                                                                                                                                                                                                                                                                                                                                                 | NC State Laboratory of Public Health                                                                            | Pathogen Discovery, Respiratory Viruses Branch, Division of Viral Diseases, Centers for Disease Control and Prevention            | Krista Queen, Yan Li, Anna Uehara, Clinton R. Paden, Rachel Marine, Ying Tao, Jing Zhang, Haibin Wang, Mary S. Keckler, Alison S. Laufer Halpin, Christopher A. Elkins, Suxiang Tong                                                                                         |
| EPI_ISL_426429                                                                                                                                                                                                                                                                                                                                                                                                                                                                                                                                                                                                                                                                                 | NV State Public Health Laboratory                                                                               | Pathogen Discovery, Respiratory Viruses Branch, Division of Viral Diseases, Centers for Disease Control and Prevention            | Krista Queen, Yan Li, Anna Uehara, Clinton R. Paden, Rachel Marine, Ying Tao, Jing Zhang, Haibin Wang, Mary S. Keckler, Alison S. Laufer Halpin, Christopher A. Elkins, Suxiang Tong                                                                                         |
| EPI_ISL_426430, EPI_ISL_426431                                                                                                                                                                                                                                                                                                                                                                                                                                                                                                                                                                                                                                                                 | OH Department of Health Laboratory                                                                              | Pathogen Discovery, Respiratory Viruses Branch, Division of Viral Diseases, Centers for Disease Control and Prevention            | Krista Queen, Yan Li, Anna Uehara, Clinton R. Paden, Rachel Marine, Ying Tao, Jing Zhang, Haibin Wang, Mary S. Keckler, Alison S. Laufer Halpin, Christopher A. Elkins, Suxiang Tong                                                                                         |
| EPI_ISL_426432, EPI_ISL_426433, EPI_ISL_426434                                                                                                                                                                                                                                                                                                                                                                                                                                                                                                                                                                                                                                                 | PA Department of Health, Bureau of Laboratories                                                                 | Pathogen Discovery, Respiratory Viruses Branch, Division of Viral Diseases, Centers for Disease Control and Prevention            | Krista Queen, Yan Li, Anna Uehara, Clinton R. Paden, Rachel Marine, Ying Tao, Jing Zhang, Haibin Wang, Mary S. Keckler, Alison S. Laufer Halpin, Christopher A. Elkins, Suxiang Tong                                                                                         |
| EPI_ISL_426435                                                                                                                                                                                                                                                                                                                                                                                                                                                                                                                                                                                                                                                                                 | RI State Health Laboratories                                                                                    | Pathogen Discovery, Respiratory Viruses Branch, Division of Viral Diseases, Centers for Disease Control and Prevention            | Krista Queen, Yan Li, Anna Uehara, Clinton R. Paden, Rachel Marine, Ying Tao, Jing Zhang, Haibin Wang, Mary S. Keckler, Alison S. Laufer Halpin, Christopher A. Elkins, Suxiang Tong                                                                                         |
| EPI_ISL_427340, EPI_ISL_427342, EPI_ISL_427343, EPI_ISL_427344, EPI_ISL_427345, EPI_ISL_427346, EPI_ISL_427347, EPI_ISL_427348, EPI_ISL_427349, EPI_ISL_427351, EPI_ISL_427353, EPI_ISL_427354, EPI_ISL_427355, EPI_ISL_427356, EPI_ISL_427357, EPI_ISL_427358, EPI_ISL_427359, EPI_ISL_427360, EPI_ISL_427361, EPI_ISL_427362, EPI_ISL_427363, EPI_ISL_427364, EPI_ISL_427366, EPI_ISL_427367, EPI_ISL_427369, EPI_ISL_427370, EPI_ISL_427371, EPI_ISL_427372, EPI_ISL_427374, EPI_ISL_427375, EPI_ISL_427376, EPI_ISL_427377, EPI_ISL_427379, EPI_ISL_427380, EPI_ISL_427381, EPI_ISL_427382, EPI_ISL_427383, EPI_ISL_427384, EPI_ISL_427385, EPI_ISL_427387, EPI_ISL_427389, EPI_ISL_427390 | GIGA Medical Genomics                                                                                           | Keith Durkin, Maria Artesi, Sébastien Bontems, Raphaël Boreux, Cécile Meex, Pierrette Melin, Marie-Pierre Hayette, Vincent Bours. |                                                                                                                                                                                                                                                                              |
| see above                                                                                                                                                                                                                                                                                                                                                                                                                                                                                                                                                                                                                                                                                      | Department of Clinical Microbiology                                                                             | GIGA Medical Genomics                                                                                                             | Keith Durkin, Maria Artesi, Sébastien Bontems, Raphaël Boreux, Cécile Meex, Pierrette Melin, Marie-Pierre Hayette, Vincent Bours.                                                                                                                                            |
| EPI_ISL_427652, EPI_ISL_427662, EPI_ISL_427668, EPI_ISL_427677, EPI_ISL_427706, EPI_ISL_427715, EPI_ISL_427716, EPI_ISL_427723, EPI_ISL_427724, EPI_ISL_427727, EPI_ISL_427738, EPI_ISL_427742, EPI_ISL_427752, EPI_ISL_427763, EPI_ISL_427773, EPI_ISL_427782, EPI_ISL_427792                                                                                                                                                                                                                                                                                                                                                                                                                 | Centre for Infectious Diseases and Microbiology Public Health                                                   | NSW Health Pathology - Institute of Clinical Pathology and Medical Research; Westmead Hospital; University of Sydney              | Lam C, Gray K, Timms, V, Gall M, Arnott A, Sadsad R, Draper J, Sim E, Bachmann N, Rockett R, Carter I, Holmes EC, O'Sullivan MV, Byun R, Sintchenko V, Chen SC, Eden JS, Maddocks S, Kok J, Propenko M, Sorrell T, Chang S, Basile K, Dwyer DE for the 2019-nCoV Study Group |
| EPI_ISL_429196, EPI_ISL_429197, EPI_ISL_429199, EPI_ISL_429200, EPI_ISL_429201, EPI_ISL_429203, EPI_ISL_429204, EPI_ISL_429206, EPI_ISL_429207, EPI_ISL_429208, EPI_ISL_429209, EPI_ISL_429210, EPI_ISL_429211, EPI_ISL_429212, EPI_ISL_429213, EPI_ISL_429214, EPI_ISL_429215, EPI_ISL_429217                                                                                                                                                                                                                                                                                                                                                                                                 | University Hospitals of Geneva Laboratory of Virology                                                           | University Hospitals of Geneva Laboratory of Virology                                                                             | Laubscher F.                                                                                                                                                                                                                                                                 |
| EPI_ISL_434347, EPI_ISL_434348, EPI_ISL_434349, EPI_ISL_434350, EPI_ISL_434351, EPI_ISL_434352, EPI_ISL_434353, EPI_ISL_434354, EPI_ISL_434355                                                                                                                                                                                                                                                                                                                                                                                                                                                                                                                                                 | Lab voor klinische biologie                                                                                     | Onderzoeksgroep Virologie                                                                                                         | Laurens Lambrechts, Nick Vereecke, Marthe Pauwels, Jozefien De Clercq, Bruno Verhasselt, Linos Vandekerckhove, Hans Nauwynck, Sebastiaan Theuns                                                                                                                              |
| EPI_ISL_434560                                                                                                                                                                                                                                                                                                                                                                                                                                                                                                                                                                                                                                                                                 | Department of Microbiology, The University of Hong Kong                                                         | Department of Microbiology, The University of Hong Kong                                                                           | Lau,S.K.P., Luk,H.K.H., Wong,A.C.P., Li,K.S.M., Zhu,L., He,Z., Fung,J., Chan,T.T.Y., Fung,K.S.C. and Woo,P.C.Y.                                                                                                                                                              |
| EPI_ISL_434561, EPI_ISL_434562                                                                                                                                                                                                                                                                                                                                                                                                                                                                                                                                                                                                                                                                 | Department of Microbiology; Ryota Kumagai Tokyo Metropolitan Institute of Public Health                         | Department of Microbiology; Ryota Kumagai Tokyo Metropolitan Institute of Public Health                                           | Kumagai,R., Yoshida,I., Asakura,H., Nagashima,M., Chiba,T. and Sadamasu,K.                                                                                                                                                                                                   |
| EPI_ISL_434650                                                                                                                                                                                                                                                                                                                                                                                                                                                                                                                                                                                                                                                                                 | Follinge Halsocentral                                                                                           | The Public Health Agency of Sweden                                                                                                | Kerstin Persson Moberg, Oskar Karlsson Lindsjo, Maria Lind Karlberg, Anna-Malin Linde, Olov Svartstrom, Anna Risberg, Theresa Enkirch, Mia Brytting, Karin Tegmark-Wisell                                                                                                    |
| EPI_ISL_437188                                                                                                                                                                                                                                                                                                                                                                                                                                                                                                                                                                                                                                                                                 | RSUD Dr. Soetomo                                                                                                | Institute of Tropical Disease, Universitas Airlangga                                                                              | Krisnoadi Rahardjo, Aldise M Nastri, Jezzy R Dewantari, Rima R Prasetya, Joni Wahyuhadi, Gatot Soegiarto, Laksmi Wulandari, Retno A Setyoningrum, Resti Y Meliana, Yokho K Shimizu, Mitsuhiro Nishimura, Yasuko Mori, Soetjpto, Kazufumi Shimizu, Maria I Lusida             |
| EPI_ISL_437512                                                                                                                                                                                                                                                                                                                                                                                                                                                                                                                                                                                                                                                                                 | Human Genetic Research Center, Kawsar Biotech Company                                                           | Human Genetic Research Center, Kawsar Biotech Company                                                                             | Khosravi,M.A., Abbasalipour,M., Zeinali,S., Sabeghi,S., Kehsvar,Y., Hosseini,F. and Haghdoost,Y.                                                                                                                                                                             |
| EPI_ISL_437601                                                                                                                                                                                                                                                                                                                                                                                                                                                                                                                                                                                                                                                                                 | Keio University School of Medicine                                                                              | Keio University School of Medicine                                                                                                | Kenjiro Kosaki, Yuka Iwasaki, Toshiki Takenouchi, Haruhiko Siomi,                                                                                                                                                                                                            |
| EPI_ISL_438947, EPI_ISL_438948, EPI_ISL_438949, EPI_ISL_438951, EPI_ISL_438952, EPI_ISL_438953, EPI_ISL_438954, EPI_ISL_438955, EPI_ISL_438956, EPI_ISL_438958, EPI_ISL_438959, EPI_ISL_438961, EPI_ISL_438962, EPI_ISL_438963, EPI_ISL_438964, EPI_ISL_438965, EPI_ISL_438966, EPI_ISL_438967, EPI_ISL_438968, EPI_ISL_438969, EPI_ISL_438970, EPI_ISL_438971, EPI_ISL_438972                                                                                                                                                                                                                                                                                                                 | Keio University School of Medicine                                                                              | Keio University School of Medicine                                                                                                | Kenjiro Kosaki                                                                                                                                                                                                                                                               |
| see above                                                                                                                                                                                                                                                                                                                                                                                                                                                                                                                                                                                                                                                                                      | Keio University School of Medicine                                                                              | Keio University School of Medicine                                                                                                | Kenjiro Kosaki                                                                                                                                                                                                                                                               |
| EPI_ISL_444274, EPI_ISL_444275, EPI_ISL_444276, EPI_ISL_444277                                                                                                                                                                                                                                                                                                                                                                                                                                                                                                                                                                                                                                 | Laboratory Medicine                                                                                             | Department of Laboratory Medicine, Lin-Kou Chang Gung Memorial Hospital, Taoyuan, Taiwan                                          | Kuo-Chien Tsao, Yu-Nong Gong, Shu-Li Yang, Yi-Chun Liu, Chung-Guei Huang, Mei-Jen Hsiao, Po-Wei Huang, Cheng-Ta Yang, Cheng-Hsun Chiu, Peng-Nien Huang, Kuo-Ming Lee, Guang-Wu Chen, Shin-Ru Shih                                                                            |

|                                                                                                                                                                                                                                                                                                                                                                                                                                                                                                                                                |                                                                                                |                                                                                                                        |                                                                                                                                                                                                                                                                                                                                                                                                                                                    |
|------------------------------------------------------------------------------------------------------------------------------------------------------------------------------------------------------------------------------------------------------------------------------------------------------------------------------------------------------------------------------------------------------------------------------------------------------------------------------------------------------------------------------------------------|------------------------------------------------------------------------------------------------|------------------------------------------------------------------------------------------------------------------------|----------------------------------------------------------------------------------------------------------------------------------------------------------------------------------------------------------------------------------------------------------------------------------------------------------------------------------------------------------------------------------------------------------------------------------------------------|
| EPI_ISL_444278                                                                                                                                                                                                                                                                                                                                                                                                                                                                                                                                 |                                                                                                |                                                                                                                        |                                                                                                                                                                                                                                                                                                                                                                                                                                                    |
| EPI_ISL_447121, EPI_ISL_447122, EPI_ISL_447123, EPI_ISL_447124, EPI_ISL_447125, EPI_ISL_447126, EPI_ISL_447127, EPI_ISL_447128, EPI_ISL_447129, EPI_ISL_447132, EPI_ISL_447133, EPI_ISL_447134, EPI_ISL_447135, EPI_ISL_447136, EPI_ISL_447137, EPI_ISL_447138, EPI_ISL_447139, EPI_ISL_447140, EPI_ISL_447141, EPI_ISL_447145, EPI_ISL_447146, EPI_ISL_447147, EPI_ISL_447148, EPI_ISL_447150, EPI_ISL_447151, EPI_ISL_447152, EPI_ISL_447153, EPI_ISL_447154, EPI_ISL_447155, EPI_ISL_447157, EPI_ISL_447158, EPI_ISL_447161, EPI_ISL_447162 |                                                                                                |                                                                                                                        |                                                                                                                                                                                                                                                                                                                                                                                                                                                    |
| see above                                                                                                                                                                                                                                                                                                                                                                                                                                                                                                                                      | Department of Clinical Microbiology                                                            | GIGA Medical Genomics                                                                                                  | Keith Durkin, Maria Artesi, Sébastien Bontems, Raphaël Boreux, Cécile Meex, Pierrette Melin, Marie-Pierre Hayette, Vincent Bours.                                                                                                                                                                                                                                                                                                                  |
| EPI_ISL_447570, EPI_ISL_447571, EPI_ISL_447572                                                                                                                                                                                                                                                                                                                                                                                                                                                                                                 | CSIR-Centre for Cellular and Molecular Biology                                                 | CSIR-Centre for Cellular and Molecular Biology                                                                         | Lamuk Zaveri, Shagufta Khan, Namami Gaur, Sakshi Shambhavi, Tulasi Nagabandi, Purushotham Vodnala, Payel Mukherjee, Sofia Banu, Priya Singh, Dhiviya Vedagiri, Divya Gupta, Vishal Sah, Santosh Kumar Kuncha, Krishnan Harinivas Harshan, Archana Bharadwaj Siva, Karthik Bharadwaj Tallapaka, Rakesh K Mishra, Divya Tej Sowpati                                                                                                                  |
| EPI_ISL_447840                                                                                                                                                                                                                                                                                                                                                                                                                                                                                                                                 | DC Public Health Lab/ Dept. of Forensic Sciences                                               | Pathogen Discovery, Respiratory Viruses Branch, Division of Viral Diseases, Centers for Disease Control and Prevention | Krista Queen, Yan Li, Anna Uehara, Jing Zhang, Ying Tao, Clinton R. Paden, Haibin Wang, Jasmine Padilla, Mary S. Keckler, Alison S. Laufer Halpin, Justin Lee, Christopher A. Elkins, Suxiang Tong                                                                                                                                                                                                                                                 |
| EPI_ISL_447841                                                                                                                                                                                                                                                                                                                                                                                                                                                                                                                                 | FL Bureau of Public Health Laboratories-Tampa                                                  | Pathogen Discovery, Respiratory Viruses Branch, Division of Viral Diseases, Centers for Disease Control and Prevention | Krista Queen, Yan Li, Anna Uehara, Jing Zhang, Ying Tao, Clinton R. Paden, Haibin Wang, Jasmine Padilla, Mary S. Keckler, Alison S. Laufer Halpin, Justin Lee, Christopher A. Elkins, Suxiang Tong                                                                                                                                                                                                                                                 |
| EPI_ISL_447842                                                                                                                                                                                                                                                                                                                                                                                                                                                                                                                                 | IA State Hygienic Laboratory                                                                   | Pathogen Discovery, Respiratory Viruses Branch, Division of Viral Diseases, Centers for Disease Control and Prevention | Krista Queen, Yan Li, Anna Uehara, Jing Zhang, Ying Tao, Clinton R. Paden, Haibin Wang, Jasmine Padilla, Mary S. Keckler, Alison S. Laufer Halpin, Justin Lee, Christopher A. Elkins, Suxiang Tong                                                                                                                                                                                                                                                 |
| EPI_ISL_447843                                                                                                                                                                                                                                                                                                                                                                                                                                                                                                                                 | MD DOH Laboratories Administration                                                             | Pathogen Discovery, Respiratory Viruses Branch, Division of Viral Diseases, Centers for Disease Control and Prevention | Krista Queen, Yan Li, Anna Uehara, Jing Zhang, Ying Tao, Clinton R. Paden, Haibin Wang, Jasmine Padilla, Mary S. Keckler, Alison S. Laufer Halpin, Justin Lee, Christopher A. Elkins, Suxiang Tong                                                                                                                                                                                                                                                 |
| EPI_ISL_447844                                                                                                                                                                                                                                                                                                                                                                                                                                                                                                                                 | PA Department of Health, Bureau of Laboratories                                                | Pathogen Discovery, Respiratory Viruses Branch, Division of Viral Diseases, Centers for Disease Control and Prevention | Krista Queen, Yan Li, Anna Uehara, Jing Zhang, Ying Tao, Clinton R. Paden, Haibin Wang, Jasmine Padilla, Mary S. Keckler, Alison S. Laufer Halpin, Justin Lee, Christopher A. Elkins, Suxiang Tong                                                                                                                                                                                                                                                 |
| EPI_ISL_447845                                                                                                                                                                                                                                                                                                                                                                                                                                                                                                                                 | PR - Biological and Chemical Emergencies Lab Office of Public Health Preparedness and Response | Pathogen Discovery, Respiratory Viruses Branch, Division of Viral Diseases, Centers for Disease Control and Prevention | Krista Queen, Yan Li, Anna Uehara, Jing Zhang, Ying Tao, Clinton R. Paden, Haibin Wang, Jasmine Padilla, Mary S. Keckler, Alison S. Laufer Halpin, Justin Lee, Christopher A. Elkins, Suxiang Tong                                                                                                                                                                                                                                                 |
| EPI_ISL_447846                                                                                                                                                                                                                                                                                                                                                                                                                                                                                                                                 | VT Dept. of Health Laboratory                                                                  | Pathogen Discovery, Respiratory Viruses Branch, Division of Viral Diseases, Centers for Disease Control and Prevention | Krista Queen, Yan Li, Anna Uehara, Jing Zhang, Ying Tao, Clinton R. Paden, Haibin Wang, Jasmine Padilla, Mary S. Keckler, Alison S. Laufer Halpin, Justin Lee, Christopher A. Elkins, Suxiang Tong                                                                                                                                                                                                                                                 |
| EPI_ISL_447851, EPI_ISL_447852, EPI_ISL_447855                                                                                                                                                                                                                                                                                                                                                                                                                                                                                                 | CSIR-Centre for Cellular and Molecular Biology                                                 | CSIR-Centre for Cellular and Molecular Biology                                                                         | Lamuk Zaveri, Shagufta Khan, Namami Gaur, Sakshi Shambhavi, Tulasi Nagabandi, Purushotham Vodnala, Payel Mukherjee, Sofia Banu, Priya Singh, Dhiviya Vedagiri, Divya Gupta, Vishal Sah, Santosh Kumar Kuncha, Krishnan Harinivas Harshan, Archana Bharadwaj Siva, Karthik Bharadwaj Tallapaka, Rakesh K Mishra, Divya Tej Sowpati                                                                                                                  |
| EPI_ISL_447900                                                                                                                                                                                                                                                                                                                                                                                                                                                                                                                                 | Lednický Laboratory at Emerging Pathogens Institute                                            | University of Florida                                                                                                  | Lednický,J.A., Gibson,J.C., Alam,M.M., Stephenson,C.J., Elbadry,M.A. and Morris,J.G.                                                                                                                                                                                                                                                                                                                                                               |
| EPI_ISL_448222                                                                                                                                                                                                                                                                                                                                                                                                                                                                                                                                 | Pasteur Insitute Ho Chi Minh City                                                              | National Key Laboratory of Gene Technology, Institute of Biotechnology, Vietnam Academy of Science and Technology      | Le Tung Lam, Nguyen Trung Hieu, Nguyen Hong Trang, Ho Thi Thuong, Nguyen Thi Ngoc Thao, Huynh Thi Kim Loan, Luu Thuy Tien, Tran Huy Linh, Pham Duy Quang, Luong Chan Quang, Cao Minh Thang, Nguyen Vu Thuong, Hoang Ha, Chu Hoang Ha, Phan Trong Lan, Truong Nam Hai                                                                                                                                                                               |
| EPI_ISL_450792, EPI_ISL_450798                                                                                                                                                                                                                                                                                                                                                                                                                                                                                                                 | Jamaica Ministry of Health and Wellness                                                        | Pathogen Discovery, Respiratory Viruses Branch, Division of Viral Diseases, Centers for Disease Control and Prevention | Krista Queen, Yan Li, Anna Montmayeur, Ying Tao, Jing Zhang, Anna Uehara, Clinton R. Paden, Rachel Marine, Haibin Wang, Jasmine Padilla, Justin Lee, Zachary Weiner, Bettina Bankamp, Suxiang Tong                                                                                                                                                                                                                                                 |
| EPI_ISL_450805                                                                                                                                                                                                                                                                                                                                                                                                                                                                                                                                 | VI-US Virgin Islands Department of Health                                                      | Pathogen Discovery, Respiratory Viruses Branch, Division of Viral Diseases, Centers for Disease Control and Prevention | Krista Queen, Yan Li, Anna Montmayeur, Ying Tao, Jing Zhang, Anna Uehara, Clinton R. Paden, Rachel Marine, Haibin Wang, Jasmine Padilla, Justin Lee, Zachary Weiner, Bettina Bankamp, Suxiang Tong                                                                                                                                                                                                                                                 |
| EPI_ISL_450818                                                                                                                                                                                                                                                                                                                                                                                                                                                                                                                                 | Aneby VC                                                                                       | The Public Health Agency of Sweden                                                                                     | Ken Granath, Anna-Malin Linde, Maria Lind Karlberg, Oskar Karlsson Lindsjo, Olov Svartstrom, Anna Risberg, Theresa Enkirch, Mia Brytting, Karin Tegmark-Wisell                                                                                                                                                                                                                                                                                     |
| EPI_ISL_451162                                                                                                                                                                                                                                                                                                                                                                                                                                                                                                                                 | Government Medical College, Vadodara                                                           | Gujarat Biotechnology Research Centre                                                                                  | Komal Patel, Labdhi Pandya, Snehal Bagatharia, Ramesh Pandit, Tejas Shah, Ankit Hinsu, Pritesh Sabara, Apurvasinh Puvar, Janvi Ravai, Zarna Patel, Monika Gandhi, Pinal Trivedi, Maharshi Pandya, Manish Pattani, Tanuja Javadekar , Amit Kanani, Nidhi Patel, Nitiin Savaliya, Raghawendra Kumar, Dinesh Kumar, Zuber Saiyed, Bhavesh Modi, Gaurishankar Shrimali, R D Dixit, A M Kadri, Priti Pandita, Chaitanya Joshi, Madhvi Joshi             |
| EPI_ISL_451163                                                                                                                                                                                                                                                                                                                                                                                                                                                                                                                                 | Government Medical College, Vadodara                                                           | Gujarat Biotechnology Research Centre                                                                                  | Labdhi Pandya, Snehal Bagatharia, Ramesh Pandit, Tejas Shah, Ankit Hinsu, Pritesh Sabara, Apurvasinh Puvar, Janvi Ravai, Zarna Patel, Monika Gandhi, Pinal Trivedi, Maharshi Pandya, Manish Pattani, Tanuja Javadekar , Amit Kanani, Nidhi Patel, Nitiin Savaliya, Raghawendra Kumar, Dinesh Kumar, Zuber Saiyed, Komal Patel, Bhavesh Modi, Gaurishankar Shrimali, R D Dixit, A M Kadri, Pragma Sharma, Chaitanya Joshi, Madhvi Joshi             |
| EPI_ISL_451164, EPI_ISL_451165, EPI_ISL_451166, EPI_ISL_451167, EPI_ISL_451168, EPI_ISL_451169, EPI_ISL_451170, EPI_ISL_451171, EPI_ISL_451172, EPI_ISL_451173                                                                                                                                                                                                                                                                                                                                                                                 | Lab voor klinische biologie                                                                    | Onderzoeksgroep Virologie                                                                                              | Laurens Lambrechts, Nick Vereecke, Marthe Pauwels, Jozefien De Clercq, Bruno Verhasselt, Linos Vandekerckhove, Hans Nauwynck, Sebastiaan Theuns                                                                                                                                                                                                                                                                                                    |
| EPI_ISL_452132                                                                                                                                                                                                                                                                                                                                                                                                                                                                                                                                 | FL Bureau of Public Health Laboratories                                                        | Pathogen Discovery, Respiratory Viruses Branch, Division of Viral Diseases, Centers for Disease Control and Prevention | Krista Queen, Yan Li, Anna Montmayeur, Ying Tao, Jing Zhang, Anna Uehara, Clinton R. Paden, Rachel Marine, Mary S. Keckler, Alison S. Laufer Halpin, Haibin Wang, Christopher A. Elkins, Zachary Weiner, Suxiang Tong                                                                                                                                                                                                                              |
| EPI_ISL_452133                                                                                                                                                                                                                                                                                                                                                                                                                                                                                                                                 | MN Department of Health                                                                        | Pathogen Discovery, Respiratory Viruses Branch, Division of Viral Diseases, Centers for Disease Control and Prevention | Krista Queen, Yan Li, Anna Montmayeur, Ying Tao, Jing Zhang, Anna Uehara, Clinton R. Paden, Rachel Marine, Mary S. Keckler, Alison S. Laufer Halpin, Haibin Wang, Christopher A. Elkins, Zachary Weiner, Suxiang Tong                                                                                                                                                                                                                              |
| EPI_ISL_452134                                                                                                                                                                                                                                                                                                                                                                                                                                                                                                                                 | IL Department of Public Health Chicago Laboratory                                              | Pathogen Discovery, Respiratory Viruses Branch, Division of Viral Diseases, Centers for Disease Control and Prevention | Krista Queen, Yan Li, Anna Montmayeur, Ying Tao, Jing Zhang, Anna Uehara, Clinton R. Paden, Rachel Marine, Mary S. Keckler, Alison S. Laufer Halpin, Haibin Wang, Christopher A. Elkins, Zachary Weiner, Suxiang Tong                                                                                                                                                                                                                              |
| EPI_ISL_452135, EPI_ISL_452136                                                                                                                                                                                                                                                                                                                                                                                                                                                                                                                 | IN State Department of Health Laboratory Services                                              | Pathogen Discovery, Respiratory Viruses Branch, Division of Viral Diseases, Centers for Disease Control and Prevention | Krista Queen, Yan Li, Anna Montmayeur, Ying Tao, Jing Zhang, Anna Uehara, Clinton R. Paden, Rachel Marine, Mary S. Keckler, Alison S. Laufer Halpin, Haibin Wang, Christopher A. Elkins, Zachary Weiner, Suxiang Tong                                                                                                                                                                                                                              |
| EPI_ISL_452178, EPI_ISL_452179                                                                                                                                                                                                                                                                                                                                                                                                                                                                                                                 | Laboratory Medicine                                                                            | Department of Laboratory Medicine, Lin-Kou Chang Gung Memorial Hospital, Taoyuan, Taiwan                               | Kuo-Chien Tsao, Yu-Nong Gong, Shu-Li Yang, Yi-Chun Liu, Chung-Guei Huang, Mei-Jen Hsiao, Po-Wei Huang, Cheng-Ta Yang, Cheng-Hsun Chiu, Peng-Nien Huang, Kuo-Ming Lee, Guang-Wu Chen, Shin-Ru Shih                                                                                                                                                                                                                                                  |
| EPI_ISL_455682                                                                                                                                                                                                                                                                                                                                                                                                                                                                                                                                 | University of Florida                                                                          | University of Florida                                                                                                  | Lednický,J.A., Wu,C.-Y., Lauzardo,M. and Morris,J.G.                                                                                                                                                                                                                                                                                                                                                                                               |
| EPI_ISL_455959, EPI_ISL_455960, EPI_ISL_455961, EPI_ISL_455962, EPI_ISL_455963, EPI_ISL_455964, EPI_ISL_455965, EPI_ISL_455967, EPI_ISL_455968, EPI_ISL_455969, EPI_ISL_455971, EPI_ISL_455972, EPI_ISL_455973, EPI_ISL_455974, EPI_ISL_455975, EPI_ISL_455976, EPI_ISL_455979                                                                                                                                                                                                                                                                 |                                                                                                |                                                                                                                        |                                                                                                                                                                                                                                                                                                                                                                                                                                                    |
| see above                                                                                                                                                                                                                                                                                                                                                                                                                                                                                                                                      | Department of Clinical Microbiology                                                            | GIGA Medical Genomics                                                                                                  | Keith Durkin, Maria Artesi, Sébastien Bontems, Raphaël Boreux, Cécile Meex, Pierrette Melin, Marie-Pierre Hayette, Vincent Bours.                                                                                                                                                                                                                                                                                                                  |
| EPI_ISL_458048                                                                                                                                                                                                                                                                                                                                                                                                                                                                                                                                 | CSIR-Centre for Cellular and Molecular Biology                                                 | CSIR-Centre for Cellular and Molecular Biology                                                                         | Lamuk Zaveri, Shagufta Khan, Namami Gaur, Sakshi Shambhavi, Tulasi Nagabandi, Purushotham Vodnala, Payel Mukherjee, Sofia Banu, Priya Singh, Dhiviya Vedagiri, Divya Gupta, Vishal Sah, Santosh Kumar Kuncha, Krishnan Harinivas Harshan, Archana Bharadwaj Siva, Karthik Bharadwaj Tallapaka, Renu Sudhakar, Somesh Gorde, Gangumala Srinivas Reddy, Sujoy Deb, Swati Bayyana, Rakesh K Mishra, Divya Tej Sowpati                                 |
| EPI_ISL_458054                                                                                                                                                                                                                                                                                                                                                                                                                                                                                                                                 | CSIR-Centre for Cellular and Molecular Biology                                                 | CSIR-Centre for Cellular and Molecular Biology                                                                         | Lamuk Zaveri, Shagufta Khan, Namami Gaur, Sakshi Shambhavi, Tulasi Nagabandi, Purushotham Vodnala, Payel Mukherjee, Sofia Banu, Priya Singh, Dhiviya Vedagiri, Divya Gupta, Vishal Sah, Santosh Kumar Kuncha, Krishnan Harinivas Harshan, Archana Bharadwaj Siva, Karthik Bharadwaj Tallapaka, Umesh Kumar, Unis Ahmad Bhat, Ajay Sarawagi, Priyanka Pant, Rajkanwar Nathawat, Rakesh K Mishra, Divya Tej Sowpati                                  |
| EPI_ISL_458060                                                                                                                                                                                                                                                                                                                                                                                                                                                                                                                                 | CSIR-Centre for Cellular and Molecular Biology                                                 | CSIR-Centre for Cellular and Molecular Biology                                                                         | Lamuk Zaveri, Shagufta Khan, Namami Gaur, Sakshi Shambhavi, Tulasi Nagabandi, Purushotham Vodnala, Payel Mukherjee, Sofia Banu, Priya Singh, Dhiviya Vedagiri, Divya Gupta, Vishal Sah, Santosh Kumar Kuncha, Krishnan Harinivas Harshan, Archana Bharadwaj Siva, Karthik Bharadwaj Tallapaka, Zeba Rizvi, Zuberwasim Sayyad, Kakade Aishwarya Arun, Amrutha H C, Ananga Ghosh, Rakesh K Mishra, Divya Tej Sowpati                                 |
| EPI_ISL_458065                                                                                                                                                                                                                                                                                                                                                                                                                                                                                                                                 | CSIR-Centre for Cellular and Molecular Biology                                                 | CSIR-Centre for Cellular and Molecular Biology                                                                         | Lamuk Zaveri, Shagufta Khan, Namami Gaur, Sakshi Shambhavi, Tulasi Nagabandi, Purushotham Vodnala, Payel Mukherjee, Sofia Banu, Priya Singh, Dhiviya Vedagiri, Divya Gupta, Vishal Sah, Santosh Kumar Kuncha, Krishnan Harinivas Harshan, Archana Bharadwaj Siva, Karthik Bharadwaj Tallapaka, Umesh Kumar, Unis Ahmad Bhat, Ajay Sarawagi, Priyanka Pant, Rajkanwar Nathawat, Rakesh K Mishra, Divya Tej Sowpati                                  |
| EPI_ISL_458098                                                                                                                                                                                                                                                                                                                                                                                                                                                                                                                                 | B.J. Medical College and Civil hospital                                                        | Gujarat Biotechnology Research Centre                                                                                  | Komal Patel, Labdhi Pandya, Snehal Bagatharia, Dhaval Vaghela, Ramesh Patel, Pranay Shah, Kamlesh J Upadhyay, Ramesh Pandit, Tejas Shah, Ankit Hinsu, Pritesh Sabara, Apurvasinh Puvar, Janvi Ravai, Zarna Patel, Monika Gandhi, Pinal Trivedi, Maharshi Pandya, Amit Kanani, Nidhi Patel, Nitiin Savaliya, Raghawendra Kumar, Dinesh Kumar, Zuber Saiyed, Pragma Sharma, Bhavesh Modi, Gaurishankar Shrimali, R D Dixit, A M Kadri, Umang Mishra, |

|                                                                                                                                                                                                                                                                                                                                                                                                                                                                                                                                                                                                                                                                                                                                                                                                                                                                                                                                                                                                                                                                                                                                                                                                                                                                                                                                                                                                                                                                                                                                                                                                                                                                                                                                                                                                                                                                                                                                                                                                                                                                                                                                                                                                                                                                                                                                                                                                                                                                                                                                                                                                                                                                                                                                                                                                                                                                                                                                                                                                                                                                                                                                                                                                                                                                                                                                                                                                                                                                                                                                                                                                                                                                                                                                                                                                                                                                                                                                                                                                                                                                                                                                                                                                                                                                                                                                                                                                                                                                                                                                                                                                                                                                                                                                                                                                                                                                                                                                                                                                                                                                                                                                                                                                                                                                                                                                                                                                                                                                                                                                                                                                                                                                                                                                                                                                                                                                                                                                                                                                                                                                                                                                                                                                                                                                |                                                                     | Chaitanya Joshi, Madhvi Joshi                                                                                          |                                                                                                                                                                                                                                                                                                                                                                                                                                                                               |                                                                                                                                                                                                               |  |
|----------------------------------------------------------------------------------------------------------------------------------------------------------------------------------------------------------------------------------------------------------------------------------------------------------------------------------------------------------------------------------------------------------------------------------------------------------------------------------------------------------------------------------------------------------------------------------------------------------------------------------------------------------------------------------------------------------------------------------------------------------------------------------------------------------------------------------------------------------------------------------------------------------------------------------------------------------------------------------------------------------------------------------------------------------------------------------------------------------------------------------------------------------------------------------------------------------------------------------------------------------------------------------------------------------------------------------------------------------------------------------------------------------------------------------------------------------------------------------------------------------------------------------------------------------------------------------------------------------------------------------------------------------------------------------------------------------------------------------------------------------------------------------------------------------------------------------------------------------------------------------------------------------------------------------------------------------------------------------------------------------------------------------------------------------------------------------------------------------------------------------------------------------------------------------------------------------------------------------------------------------------------------------------------------------------------------------------------------------------------------------------------------------------------------------------------------------------------------------------------------------------------------------------------------------------------------------------------------------------------------------------------------------------------------------------------------------------------------------------------------------------------------------------------------------------------------------------------------------------------------------------------------------------------------------------------------------------------------------------------------------------------------------------------------------------------------------------------------------------------------------------------------------------------------------------------------------------------------------------------------------------------------------------------------------------------------------------------------------------------------------------------------------------------------------------------------------------------------------------------------------------------------------------------------------------------------------------------------------------------------------------------------------------------------------------------------------------------------------------------------------------------------------------------------------------------------------------------------------------------------------------------------------------------------------------------------------------------------------------------------------------------------------------------------------------------------------------------------------------------------------------------------------------------------------------------------------------------------------------------------------------------------------------------------------------------------------------------------------------------------------------------------------------------------------------------------------------------------------------------------------------------------------------------------------------------------------------------------------------------------------------------------------------------------------------------------------------------------------------------------------------------------------------------------------------------------------------------------------------------------------------------------------------------------------------------------------------------------------------------------------------------------------------------------------------------------------------------------------------------------------------------------------------------------------------------------------------------------------------------------------------------------------------------------------------------------------------------------------------------------------------------------------------------------------------------------------------------------------------------------------------------------------------------------------------------------------------------------------------------------------------------------------------------------------------------------------------------------------------------------------------------------------------------------------------------------------------------------------------------------------------------------------------------------------------------------------------------------------------------------------------------------------------------------------------------------------------------------------------------------------------------------------------------------------------------------------------------------------------------------------------|---------------------------------------------------------------------|------------------------------------------------------------------------------------------------------------------------|-------------------------------------------------------------------------------------------------------------------------------------------------------------------------------------------------------------------------------------------------------------------------------------------------------------------------------------------------------------------------------------------------------------------------------------------------------------------------------|---------------------------------------------------------------------------------------------------------------------------------------------------------------------------------------------------------------|--|
| EPI_ISL_458099                                                                                                                                                                                                                                                                                                                                                                                                                                                                                                                                                                                                                                                                                                                                                                                                                                                                                                                                                                                                                                                                                                                                                                                                                                                                                                                                                                                                                                                                                                                                                                                                                                                                                                                                                                                                                                                                                                                                                                                                                                                                                                                                                                                                                                                                                                                                                                                                                                                                                                                                                                                                                                                                                                                                                                                                                                                                                                                                                                                                                                                                                                                                                                                                                                                                                                                                                                                                                                                                                                                                                                                                                                                                                                                                                                                                                                                                                                                                                                                                                                                                                                                                                                                                                                                                                                                                                                                                                                                                                                                                                                                                                                                                                                                                                                                                                                                                                                                                                                                                                                                                                                                                                                                                                                                                                                                                                                                                                                                                                                                                                                                                                                                                                                                                                                                                                                                                                                                                                                                                                                                                                                                                                                                                                                                 | B.J. Medical College and Civil hospital                             | Gujarat Biotechnology Research Centre                                                                                  | Labdhi Pandya, Snehal Bagatharia, Dhaval Vaghela, Ramesh Patel, Pranay Shah, Kamlsh J Upadhyay, Ramesh Pandit, Tejas Shah, Ankit Hinsu, Pritesh Sabara, Apurvashih Puvar, Janvi Raval, Zarna Patel, Monika Gandhi, Pinal Trivedi, Maharshi Pandya, Amit Kanani, Nidhi Patel, Nitin Savaliya, Raghavendra Kumar, Dinesh Kumar, Zuber Saiyed, Komal Patel, Neha Rajpara, Bhavesh Modi, Gaurishankar Shirmali, R D Dixit, A M Kadri, Umang Mishra, Chaitanya Joshi, Madhvi Joshi |                                                                                                                                                                                                               |  |
| EPI_ISL_458287                                                                                                                                                                                                                                                                                                                                                                                                                                                                                                                                                                                                                                                                                                                                                                                                                                                                                                                                                                                                                                                                                                                                                                                                                                                                                                                                                                                                                                                                                                                                                                                                                                                                                                                                                                                                                                                                                                                                                                                                                                                                                                                                                                                                                                                                                                                                                                                                                                                                                                                                                                                                                                                                                                                                                                                                                                                                                                                                                                                                                                                                                                                                                                                                                                                                                                                                                                                                                                                                                                                                                                                                                                                                                                                                                                                                                                                                                                                                                                                                                                                                                                                                                                                                                                                                                                                                                                                                                                                                                                                                                                                                                                                                                                                                                                                                                                                                                                                                                                                                                                                                                                                                                                                                                                                                                                                                                                                                                                                                                                                                                                                                                                                                                                                                                                                                                                                                                                                                                                                                                                                                                                                                                                                                                                                 | Biosafety Department PCL3                                           | Biosafety Department PCL3                                                                                              | Lemriss,S., Souiri,A. and El Kabbaj,S.                                                                                                                                                                                                                                                                                                                                                                                                                                        |                                                                                                                                                                                                               |  |
| EPI_ISL_460097, EPI_ISL_460098, EPI_ISL_460099, EPI_ISL_460100, EPI_ISL_460101, EPI_ISL_460102, EPI_ISL_460103, EPI_ISL_460104, EPI_ISL_460105, EPI_ISL_460106, EPI_ISL_460107, EPI_ISL_460108, EPI_ISL_460109, EPI_ISL_460110, EPI_ISL_460111, EPI_ISL_460112, EPI_ISL_460113, EPI_ISL_460114, EPI_ISL_460115, EPI_ISL_460116, EPI_ISL_460117, EPI_ISL_460118, EPI_ISL_460119, EPI_ISL_460120, EPI_ISL_460121, EPI_ISL_460122, EPI_ISL_460123, EPI_ISL_460124, EPI_ISL_460125, EPI_ISL_460126, EPI_ISL_460127, EPI_ISL_460128, EPI_ISL_460129, EPI_ISL_460130, EPI_ISL_460131, EPI_ISL_460132, EPI_ISL_460133, EPI_ISL_460134, EPI_ISL_460135, EPI_ISL_460136, EPI_ISL_460137, EPI_ISL_460138, EPI_ISL_460139, EPI_ISL_460140, EPI_ISL_460141, EPI_ISL_460142, EPI_ISL_460143, EPI_ISL_460144, EPI_ISL_460145, EPI_ISL_460146, EPI_ISL_460147, EPI_ISL_460148, EPI_ISL_460149, EPI_ISL_460150, EPI_ISL_460151, EPI_ISL_460152, EPI_ISL_460153, EPI_ISL_460154, EPI_ISL_460155, EPI_ISL_460156, EPI_ISL_460157, EPI_ISL_460158, EPI_ISL_460159, EPI_ISL_460160, EPI_ISL_460161, EPI_ISL_460162, EPI_ISL_460163, EPI_ISL_460164, EPI_ISL_460165, EPI_ISL_460166, EPI_ISL_460167, EPI_ISL_460168, EPI_ISL_460169, EPI_ISL_460170, EPI_ISL_460171, EPI_ISL_460172, EPI_ISL_460173, EPI_ISL_460174, EPI_ISL_460175, EPI_ISL_460176, EPI_ISL_460177, EPI_ISL_460178, EPI_ISL_460179, EPI_ISL_460180, EPI_ISL_460181, EPI_ISL_460182, EPI_ISL_460183, EPI_ISL_460184, EPI_ISL_460185, EPI_ISL_460186, EPI_ISL_460187, EPI_ISL_460188, EPI_ISL_460189, EPI_ISL_460190, EPI_ISL_460191, EPI_ISL_460192, EPI_ISL_460193, EPI_ISL_460194, EPI_ISL_460195, EPI_ISL_460196, EPI_ISL_460197, EPI_ISL_460198, EPI_ISL_460199, EPI_ISL_460200, EPI_ISL_460201, EPI_ISL_460202, EPI_ISL_460203, EPI_ISL_460204, EPI_ISL_460205, EPI_ISL_460206, EPI_ISL_460207, EPI_ISL_460208, EPI_ISL_460209, EPI_ISL_460210, EPI_ISL_460211, EPI_ISL_460212, EPI_ISL_460213, EPI_ISL_460214, EPI_ISL_460215, EPI_ISL_460216, EPI_ISL_460217, EPI_ISL_460218, EPI_ISL_460219, EPI_ISL_460220, EPI_ISL_460221, EPI_ISL_460222, EPI_ISL_460223, EPI_ISL_460224, EPI_ISL_460225, EPI_ISL_460226, EPI_ISL_460227, EPI_ISL_460228, EPI_ISL_460229, EPI_ISL_460230, EPI_ISL_460231, EPI_ISL_460232, EPI_ISL_460233, EPI_ISL_460234, EPI_ISL_460235, EPI_ISL_460236, EPI_ISL_460237, EPI_ISL_460238, EPI_ISL_460239, EPI_ISL_460240, EPI_ISL_460241, EPI_ISL_460242, EPI_ISL_460243, EPI_ISL_460244, EPI_ISL_460245, EPI_ISL_460246, EPI_ISL_460247, EPI_ISL_460248, EPI_ISL_460249, EPI_ISL_460250, EPI_ISL_460251, EPI_ISL_460252, EPI_ISL_460253, EPI_ISL_460254, EPI_ISL_460255, EPI_ISL_460256, EPI_ISL_460257, EPI_ISL_460258, EPI_ISL_460259, EPI_ISL_460260, EPI_ISL_460261, EPI_ISL_460262, EPI_ISL_460263, EPI_ISL_460264, EPI_ISL_460265, EPI_ISL_460266, EPI_ISL_460267, EPI_ISL_460268, EPI_ISL_460269, EPI_ISL_460270, EPI_ISL_460271, EPI_ISL_460272, EPI_ISL_460273, EPI_ISL_460274, EPI_ISL_460275, EPI_ISL_460276, EPI_ISL_460277, EPI_ISL_460278, EPI_ISL_460279, EPI_ISL_460280, EPI_ISL_460281, EPI_ISL_460282, EPI_ISL_460283, EPI_ISL_460284, EPI_ISL_460285, EPI_ISL_460286, EPI_ISL_460287, EPI_ISL_460288, EPI_ISL_460289, EPI_ISL_460290, EPI_ISL_460291, EPI_ISL_460292, EPI_ISL_460293, EPI_ISL_460294, EPI_ISL_460295, EPI_ISL_460296, EPI_ISL_460297, EPI_ISL_460298, EPI_ISL_460299, EPI_ISL_460300, EPI_ISL_460301, EPI_ISL_460302, EPI_ISL_460303, EPI_ISL_460304, EPI_ISL_460305, EPI_ISL_460306, EPI_ISL_460307, EPI_ISL_460308, EPI_ISL_460309, EPI_ISL_460310, EPI_ISL_460311, EPI_ISL_460312, EPI_ISL_460313, EPI_ISL_460314, EPI_ISL_460315, EPI_ISL_460316, EPI_ISL_460317, EPI_ISL_460318, EPI_ISL_460319, EPI_ISL_460320, EPI_ISL_460321, EPI_ISL_460322, EPI_ISL_460323, EPI_ISL_460324, EPI_ISL_460325, EPI_ISL_460326, EPI_ISL_460327, EPI_ISL_460328, EPI_ISL_460329, EPI_ISL_460330, EPI_ISL_460331, EPI_ISL_460332, EPI_ISL_460333, EPI_ISL_460334, EPI_ISL_460335, EPI_ISL_460336, EPI_ISL_460337, EPI_ISL_460338, EPI_ISL_460339, EPI_ISL_460340, EPI_ISL_460341, EPI_ISL_460342, EPI_ISL_460343, EPI_ISL_460344, EPI_ISL_460345, EPI_ISL_460346, EPI_ISL_460347, EPI_ISL_460348, EPI_ISL_460349, EPI_ISL_460350, EPI_ISL_460351, EPI_ISL_460352, EPI_ISL_460353, EPI_ISL_460354, EPI_ISL_460355, EPI_ISL_460356, EPI_ISL_460357, EPI_ISL_460358, EPI_ISL_460359, EPI_ISL_460360, EPI_ISL_460361, EPI_ISL_460362, EPI_ISL_460363, EPI_ISL_460364, EPI_ISL_460365, EPI_ISL_460366, EPI_ISL_460367, EPI_ISL_460368, EPI_ISL_460369, EPI_ISL_460370, EPI_ISL_460371, EPI_ISL_460372, EPI_ISL_460373, EPI_ISL_460374, EPI_ISL_460375, EPI_ISL_460376, EPI_ISL_460377, EPI_ISL_460378, EPI_ISL_460379, EPI_ISL_460380, EPI_ISL_460381, EPI_ISL_460382, EPI_ISL_460383, EPI_ISL_460384, EPI_ISL_460385, EPI_ISL_460386, EPI_ISL_460387, EPI_ISL_460388, EPI_ISL_460389, EPI_ISL_460390, EPI_ISL_460391, EPI_ISL_460392, EPI_ISL_460393, EPI_ISL_460394, EPI_ISL_460395, EPI_ISL_460396, EPI_ISL_460397, EPI_ISL_460398, EPI_ISL_460399, EPI_ISL_460400, EPI_ISL_460401, EPI_ISL_460402, EPI_ISL_460403, EPI_ISL_460404, EPI_ISL_460405, EPI_ISL_460406, EPI_ISL_460407, EPI_ISL_460408, EPI_ISL_460409, EPI_ISL_460410, EPI_ISL_460411, EPI_ISL_460412, EPI_ISL_460413, EPI_ISL_460414, EPI_ISL_460415, EPI_ISL_460416, EPI_ISL_460417, EPI_ISL_460418, EPI_ISL_460419, EPI_ISL_460420, EPI_ISL_460421, EPI_ISL_460422, EPI_ISL_460423, EPI_ISL_460424, EPI_ISL_460425, EPI_ISL_460426, EPI_ISL_460427, EPI_ISL_460428, EPI_ISL_460429, EPI_ISL_460430, EPI_ISL_460431, EPI_ISL_460432, EPI_ISL_460433, EPI_ISL_460434, EPI_ISL_460435, EPI_ISL_460436, EPI_ISL_460437, EPI_ISL_460438, EPI_ISL_460439, EPI_ISL_460440, EPI_ISL_460441, EPI_ISL_460442, EPI_ISL_460443, EPI_ISL_460444, EPI_ISL_460445, EPI_ISL_460446, EPI_ISL_460447, EPI_ISL_460448, EPI_ISL_460449, EPI_ISL_460450, EPI_ISL_460451, EPI_ISL_460452, EPI_ISL_460453, EPI_ISL_460454, EPI_ISL_460455, EPI_ISL_460456, EPI_ISL_460457, EPI_ISL_460458, EPI_ISL_460459, EPI_ISL_460460, EPI_ISL_460461, EPI_ISL_460462, EPI_ISL_460463, EPI_ISL_460464, EPI_ISL_460465, EPI_ISL_460466, EPI_ISL_460467, EPI_ISL_460468, EPI_ISL_460469, EPI_ISL_460470, EPI_ISL_460471, EPI_ISL_460472 |                                                                     |                                                                                                                        |                                                                                                                                                                                                                                                                                                                                                                                                                                                                               |                                                                                                                                                                                                               |  |
| see above                                                                                                                                                                                                                                                                                                                                                                                                                                                                                                                                                                                                                                                                                                                                                                                                                                                                                                                                                                                                                                                                                                                                                                                                                                                                                                                                                                                                                                                                                                                                                                                                                                                                                                                                                                                                                                                                                                                                                                                                                                                                                                                                                                                                                                                                                                                                                                                                                                                                                                                                                                                                                                                                                                                                                                                                                                                                                                                                                                                                                                                                                                                                                                                                                                                                                                                                                                                                                                                                                                                                                                                                                                                                                                                                                                                                                                                                                                                                                                                                                                                                                                                                                                                                                                                                                                                                                                                                                                                                                                                                                                                                                                                                                                                                                                                                                                                                                                                                                                                                                                                                                                                                                                                                                                                                                                                                                                                                                                                                                                                                                                                                                                                                                                                                                                                                                                                                                                                                                                                                                                                                                                                                                                                                                                                      | Massachusetts General Hospital                                      | Infectious Disease Program, Broad Institute of Harvard and MIT                                                         | Lemieux,J.E., Siddle,K.J., Shaw,B., Adams,G., Pierce,V., Turbett,S., Anahtar,M., Branda,J., Slater,D., Harris,J., Lin,A.E., Gladden-Young,A., Lagerborg,K., Rudy,M., DeRuff,K., Carter,A., Normandin,E., Bauer,M., Reilly,S., Tomkins-Tinch,C., Loreth,C., Chaluvadi,S., Neumann,A., Cusick,C., Chapman,S.B., Gnrke,A., Flowers,K., Cerrato,F., Birren,B.W., Gallagher,G., Smole,S., Park,D.J., MacInnis,B.L., Ryan,E., LaRocque,R., Rosenberg,E., Sabeti,P.C.                |                                                                                                                                                                                                               |  |
| EPI_ISL_462446                                                                                                                                                                                                                                                                                                                                                                                                                                                                                                                                                                                                                                                                                                                                                                                                                                                                                                                                                                                                                                                                                                                                                                                                                                                                                                                                                                                                                                                                                                                                                                                                                                                                                                                                                                                                                                                                                                                                                                                                                                                                                                                                                                                                                                                                                                                                                                                                                                                                                                                                                                                                                                                                                                                                                                                                                                                                                                                                                                                                                                                                                                                                                                                                                                                                                                                                                                                                                                                                                                                                                                                                                                                                                                                                                                                                                                                                                                                                                                                                                                                                                                                                                                                                                                                                                                                                                                                                                                                                                                                                                                                                                                                                                                                                                                                                                                                                                                                                                                                                                                                                                                                                                                                                                                                                                                                                                                                                                                                                                                                                                                                                                                                                                                                                                                                                                                                                                                                                                                                                                                                                                                                                                                                                                                                 | unknown                                                             | Ryota Kumagai Tokyo Metropolitan Institute of Public Health                                                            | Kumagai,R., Yoshida,I., Asakura,H., Nagashima,M., Chiba,T., Sadamasu,K.                                                                                                                                                                                                                                                                                                                                                                                                       |                                                                                                                                                                                                               |  |
| EPI_ISL_463893                                                                                                                                                                                                                                                                                                                                                                                                                                                                                                                                                                                                                                                                                                                                                                                                                                                                                                                                                                                                                                                                                                                                                                                                                                                                                                                                                                                                                                                                                                                                                                                                                                                                                                                                                                                                                                                                                                                                                                                                                                                                                                                                                                                                                                                                                                                                                                                                                                                                                                                                                                                                                                                                                                                                                                                                                                                                                                                                                                                                                                                                                                                                                                                                                                                                                                                                                                                                                                                                                                                                                                                                                                                                                                                                                                                                                                                                                                                                                                                                                                                                                                                                                                                                                                                                                                                                                                                                                                                                                                                                                                                                                                                                                                                                                                                                                                                                                                                                                                                                                                                                                                                                                                                                                                                                                                                                                                                                                                                                                                                                                                                                                                                                                                                                                                                                                                                                                                                                                                                                                                                                                                                                                                                                                                                 | University Clinical Center Tuzla                                    | Alea Genetiki Centar                                                                                                   | Konjhodži,R;Salihefendi,L;Goleti,T;Pear,D;Tih,N;Marjanovi,D;Huki,M.                                                                                                                                                                                                                                                                                                                                                                                                           |                                                                                                                                                                                                               |  |
| EPI_ISL_464092, EPI_ISL_464093, EPI_ISL_464094                                                                                                                                                                                                                                                                                                                                                                                                                                                                                                                                                                                                                                                                                                                                                                                                                                                                                                                                                                                                                                                                                                                                                                                                                                                                                                                                                                                                                                                                                                                                                                                                                                                                                                                                                                                                                                                                                                                                                                                                                                                                                                                                                                                                                                                                                                                                                                                                                                                                                                                                                                                                                                                                                                                                                                                                                                                                                                                                                                                                                                                                                                                                                                                                                                                                                                                                                                                                                                                                                                                                                                                                                                                                                                                                                                                                                                                                                                                                                                                                                                                                                                                                                                                                                                                                                                                                                                                                                                                                                                                                                                                                                                                                                                                                                                                                                                                                                                                                                                                                                                                                                                                                                                                                                                                                                                                                                                                                                                                                                                                                                                                                                                                                                                                                                                                                                                                                                                                                                                                                                                                                                                                                                                                                                 | Laboratory Medicine                                                 | Department of Laboratory Medicine, Lin-Kou Chang Gung Memorial Hospital, Taoyuan, Taiwan                               | Kuo-Chien Tsao, Yu-Nong Gong, Shu-Li Yang, Yi-Chun Liu, Chung-Guei Huang, Mei-Jen Hsiao, Po-Wei Huang, Cheng-Ta Yang, Cheng-Hsun Chiu, Peng-Nien Huang, Kuo-Ming Lee, Guang-Wu Chen, Shin-Ru Shih                                                                                                                                                                                                                                                                             |                                                                                                                                                                                                               |  |
| EPI_ISL_464167                                                                                                                                                                                                                                                                                                                                                                                                                                                                                                                                                                                                                                                                                                                                                                                                                                                                                                                                                                                                                                                                                                                                                                                                                                                                                                                                                                                                                                                                                                                                                                                                                                                                                                                                                                                                                                                                                                                                                                                                                                                                                                                                                                                                                                                                                                                                                                                                                                                                                                                                                                                                                                                                                                                                                                                                                                                                                                                                                                                                                                                                                                                                                                                                                                                                                                                                                                                                                                                                                                                                                                                                                                                                                                                                                                                                                                                                                                                                                                                                                                                                                                                                                                                                                                                                                                                                                                                                                                                                                                                                                                                                                                                                                                                                                                                                                                                                                                                                                                                                                                                                                                                                                                                                                                                                                                                                                                                                                                                                                                                                                                                                                                                                                                                                                                                                                                                                                                                                                                                                                                                                                                                                                                                                                                                 | VI-US Virgin Islands Department of Health                           | Pathogen Discovery, Respiratory Viruses Branch, Division of Viral Diseases, Centers for Disease Control and Prevention | Krista Queen, Ying Tao, Jing Zhang, Yan Li, Anna Uehara, Clinton R. Paden, Mary S. Keckler, Alison S. Laufer Halpin, Haibin Wang, Jasmine Padilla, Justin Lee, Christopher A. Elkins, Suxiang Tong                                                                                                                                                                                                                                                                            |                                                                                                                                                                                                               |  |
| EPI_ISL_467049                                                                                                                                                                                                                                                                                                                                                                                                                                                                                                                                                                                                                                                                                                                                                                                                                                                                                                                                                                                                                                                                                                                                                                                                                                                                                                                                                                                                                                                                                                                                                                                                                                                                                                                                                                                                                                                                                                                                                                                                                                                                                                                                                                                                                                                                                                                                                                                                                                                                                                                                                                                                                                                                                                                                                                                                                                                                                                                                                                                                                                                                                                                                                                                                                                                                                                                                                                                                                                                                                                                                                                                                                                                                                                                                                                                                                                                                                                                                                                                                                                                                                                                                                                                                                                                                                                                                                                                                                                                                                                                                                                                                                                                                                                                                                                                                                                                                                                                                                                                                                                                                                                                                                                                                                                                                                                                                                                                                                                                                                                                                                                                                                                                                                                                                                                                                                                                                                                                                                                                                                                                                                                                                                                                                                                                 | B.J. Medical College and Civil hospital                             | Gujarat Biotechnology Research Centre                                                                                  | Komal Patel, Labdhi Pandya, Snehal Bagatharia, Pranay Shah, Kamlsh J Upadhyay, Nirav Mungalpara, Tejas Shah, Ankit Hinsu, Pritesh Sabara, Apurvashih Puvar, Janvi Raval, Zarna Patel, Monika Gandhi, Pinal Trivedi, Maharshi Pandya, Nidhi Patel, Nitin Savaliya, Raghavendra Kumar, Dinesh Kumar, Zuber Saiyed, Neelam Nathani, R D Dixit, A M Kadri, Harsh Bakshi, Chaitanya Joshi, Madhvi Joshi,                                                                           |                                                                                                                                                                                                               |  |
| EPI_ISL_467050                                                                                                                                                                                                                                                                                                                                                                                                                                                                                                                                                                                                                                                                                                                                                                                                                                                                                                                                                                                                                                                                                                                                                                                                                                                                                                                                                                                                                                                                                                                                                                                                                                                                                                                                                                                                                                                                                                                                                                                                                                                                                                                                                                                                                                                                                                                                                                                                                                                                                                                                                                                                                                                                                                                                                                                                                                                                                                                                                                                                                                                                                                                                                                                                                                                                                                                                                                                                                                                                                                                                                                                                                                                                                                                                                                                                                                                                                                                                                                                                                                                                                                                                                                                                                                                                                                                                                                                                                                                                                                                                                                                                                                                                                                                                                                                                                                                                                                                                                                                                                                                                                                                                                                                                                                                                                                                                                                                                                                                                                                                                                                                                                                                                                                                                                                                                                                                                                                                                                                                                                                                                                                                                                                                                                                                 | B.J. Medical College and Civil hospital                             | Gujarat Biotechnology Research Centre                                                                                  | Labdhi Pandya, Snehal Bagatharia, Pranay Shah, Kamlsh J Upadhyay, Tejas Shah, Ankit Hinsu, Pritesh Sabara, Apurvashih Puvar, Janvi Raval, Zarna Patel, Monika Gandhi, Pinal Trivedi, Maharshi Pandya, Nidhi Patel, Nitin Savaliya, Raghavendra Kumar, Dinesh Kumar, Zuber Saiyed, Komal Patel, Armi Chaudhari, R D Dixit, A M Kadri, Harsh Bakshi, Chaitanya Joshi, Madhvi Joshi,                                                                                             |                                                                                                                                                                                                               |  |
| EPI_ISL_467184, EPI_ISL_467185, EPI_ISL_467186, EPI_ISL_467187, EPI_ISL_467188, EPI_ISL_467189, EPI_ISL_467190, EPI_ISL_467191, EPI_ISL_467192, EPI_ISL_467193, EPI_ISL_467194, EPI_ISL_467195, EPI_ISL_467196, EPI_ISL_467197, EPI_ISL_467198, EPI_ISL_467199, EPI_ISL_467200, EPI_ISL_467201, EPI_ISL_467202, EPI_ISL_467203, EPI_ISL_467204, EPI_ISL_467205, EPI_ISL_467206, EPI_ISL_467207, EPI_ISL_467208, EPI_ISL_467209, EPI_ISL_467210, EPI_ISL_467211, EPI_ISL_467212, EPI_ISL_467213, EPI_ISL_467214, EPI_ISL_467215, EPI_ISL_467216, EPI_ISL_467217, EPI_ISL_467218, EPI_ISL_467219, EPI_ISL_467220, EPI_ISL_467221, EPI_ISL_467222, EPI_ISL_467223, EPI_ISL_467224, EPI_ISL_467225, EPI_ISL_467226, EPI_ISL_467227, EPI_ISL_467228, EPI_ISL_467229, EPI_ISL_467230, EPI_ISL_467231, EPI_ISL_467232, EPI_ISL_467233, EPI_ISL_467234, EPI_ISL_467235, EPI_ISL_467236, EPI_ISL_467237, EPI_ISL_467238, EPI_ISL_467239, EPI_ISL_467240, EPI_ISL_467241, EPI_ISL_467242, EPI_ISL_467243, EPI_ISL_467244, EPI_ISL_467245, EPI_ISL_467246, EPI_ISL_467247, EPI_ISL_467248, EPI_ISL_467249, EPI_ISL_467250, EPI_ISL_467251, EPI_ISL_467252, EPI_ISL_467253, EPI_ISL_467254, EPI_ISL_467255, EPI_ISL_467256, EPI_ISL_467257, EPI_ISL_467258, EPI_ISL_467259, EPI_ISL_467260, EPI_ISL_467261                                                                                                                                                                                                                                                                                                                                                                                                                                                                                                                                                                                                                                                                                                                                                                                                                                                                                                                                                                                                                                                                                                                                                                                                                                                                                                                                                                                                                                                                                                                                                                                                                                                                                                                                                                                                                                                                                                                                                                                                                                                                                                                                                                                                                                                                                                                                                                                                                                                                                                                                                                                                                                                                                                                                                                                                                                                                                                                                                                                                                                                                                                                                                                                                                                                                                                                                                                                                                                                                                                                                                                                                                                                                                                                                                                                                                                                                                                                                                                                                                                                                                                                                                                                                                                                                                                                                                                                                                                                                                                                                                                                                                                                                                                                                                                                                                                                                                                                                                                 |                                                                     |                                                                                                                        |                                                                                                                                                                                                                                                                                                                                                                                                                                                                               |                                                                                                                                                                                                               |  |
| see above                                                                                                                                                                                                                                                                                                                                                                                                                                                                                                                                                                                                                                                                                                                                                                                                                                                                                                                                                                                                                                                                                                                                                                                                                                                                                                                                                                                                                                                                                                                                                                                                                                                                                                                                                                                                                                                                                                                                                                                                                                                                                                                                                                                                                                                                                                                                                                                                                                                                                                                                                                                                                                                                                                                                                                                                                                                                                                                                                                                                                                                                                                                                                                                                                                                                                                                                                                                                                                                                                                                                                                                                                                                                                                                                                                                                                                                                                                                                                                                                                                                                                                                                                                                                                                                                                                                                                                                                                                                                                                                                                                                                                                                                                                                                                                                                                                                                                                                                                                                                                                                                                                                                                                                                                                                                                                                                                                                                                                                                                                                                                                                                                                                                                                                                                                                                                                                                                                                                                                                                                                                                                                                                                                                                                                                      | Hospital General Universitario Gregorio Marañón                     | SeqCOVID-SPAIN consortium/IBV(CSIC)                                                                                    | Laura Pérez-Lago, Marta Herranz, Jon Sicilia, Julia Suárez, Pilar Catalán, Patricia Muñoz, Darío García de Viedma and SeqCOVID-SPAIN consortium                                                                                                                                                                                                                                                                                                                               |                                                                                                                                                                                                               |  |
| EPI_ISL_468331, EPI_ISL_468332, EPI_ISL_468333, EPI_ISL_468334, EPI_ISL_468335, EPI_ISL_468336, EPI_ISL_468337, EPI_ISL_468338, EPI_ISL_468339, EPI_ISL_468340, EPI_ISL_468341, EPI_ISL_468342, EPI_ISL_468343, EPI_ISL_468344                                                                                                                                                                                                                                                                                                                                                                                                                                                                                                                                                                                                                                                                                                                                                                                                                                                                                                                                                                                                                                                                                                                                                                                                                                                                                                                                                                                                                                                                                                                                                                                                                                                                                                                                                                                                                                                                                                                                                                                                                                                                                                                                                                                                                                                                                                                                                                                                                                                                                                                                                                                                                                                                                                                                                                                                                                                                                                                                                                                                                                                                                                                                                                                                                                                                                                                                                                                                                                                                                                                                                                                                                                                                                                                                                                                                                                                                                                                                                                                                                                                                                                                                                                                                                                                                                                                                                                                                                                                                                                                                                                                                                                                                                                                                                                                                                                                                                                                                                                                                                                                                                                                                                                                                                                                                                                                                                                                                                                                                                                                                                                                                                                                                                                                                                                                                                                                                                                                                                                                                                                 | see above                                                           | Microbiology Service, University Hospital of A Coruna-Biomedical Research Institute                                    | Genomes & Disease, Center for Research in Molecular Medicine and Chronic Diseases, University of Santiago de Compostela                                                                                                                                                                                                                                                                                                                                                       | Kelly Conde, Jorge Arca, Soraya Rumbo, Juan A. Vallejo, M Poza, G Bou, Ana Pequeno-Valtierra, Jorge Rodríguez-Castro, Javier Temes, Daniel García-Souto, Martin Santamarina, Cristina Gomez, Jose M. C. Tubio |  |
| EPI_ISL_468724, EPI_ISL_468725                                                                                                                                                                                                                                                                                                                                                                                                                                                                                                                                                                                                                                                                                                                                                                                                                                                                                                                                                                                                                                                                                                                                                                                                                                                                                                                                                                                                                                                                                                                                                                                                                                                                                                                                                                                                                                                                                                                                                                                                                                                                                                                                                                                                                                                                                                                                                                                                                                                                                                                                                                                                                                                                                                                                                                                                                                                                                                                                                                                                                                                                                                                                                                                                                                                                                                                                                                                                                                                                                                                                                                                                                                                                                                                                                                                                                                                                                                                                                                                                                                                                                                                                                                                                                                                                                                                                                                                                                                                                                                                                                                                                                                                                                                                                                                                                                                                                                                                                                                                                                                                                                                                                                                                                                                                                                                                                                                                                                                                                                                                                                                                                                                                                                                                                                                                                                                                                                                                                                                                                                                                                                                                                                                                                                                 | unknown                                                             | Contact:Ryota Kumagai Tokyo Metropolitan Institute of Public Health                                                    | Kumagai,R., Yoshida,I., Asakura,H., Nagashima,M., Chiba,T., Sadamasu,K.                                                                                                                                                                                                                                                                                                                                                                                                       |                                                                                                                                                                                                               |  |
| EPI_ISL_468727, EPI_ISL_468728, EPI_ISL_468729, EPI_ISL_468730, EPI_ISL_468731, EPI_ISL_468732, EPI_ISL_468733, EPI_ISL_468734, EPI_ISL_468735                                                                                                                                                                                                                                                                                                                                                                                                                                                                                                                                                                                                                                                                                                                                                                                                                                                                                                                                                                                                                                                                                                                                                                                                                                                                                                                                                                                                                                                                                                                                                                                                                                                                                                                                                                                                                                                                                                                                                                                                                                                                                                                                                                                                                                                                                                                                                                                                                                                                                                                                                                                                                                                                                                                                                                                                                                                                                                                                                                                                                                                                                                                                                                                                                                                                                                                                                                                                                                                                                                                                                                                                                                                                                                                                                                                                                                                                                                                                                                                                                                                                                                                                                                                                                                                                                                                                                                                                                                                                                                                                                                                                                                                                                                                                                                                                                                                                                                                                                                                                                                                                                                                                                                                                                                                                                                                                                                                                                                                                                                                                                                                                                                                                                                                                                                                                                                                                                                                                                                                                                                                                                                                 | Lab voor klinische biologie                                         | Onderzoeksgroep Virologie                                                                                              | Laurens Lambrechts, Nick Vereecke, Marthe Pauwels, Bruno Verhassel, Linos Vandekerckhove, Hans Neumannck, Sebastiaan Thomsen                                                                                                                                                                                                                                                                                                                                                  |                                                                                                                                                                                                               |  |
| EPI_ISL_469038                                                                                                                                                                                                                                                                                                                                                                                                                                                                                                                                                                                                                                                                                                                                                                                                                                                                                                                                                                                                                                                                                                                                                                                                                                                                                                                                                                                                                                                                                                                                                                                                                                                                                                                                                                                                                                                                                                                                                                                                                                                                                                                                                                                                                                                                                                                                                                                                                                                                                                                                                                                                                                                                                                                                                                                                                                                                                                                                                                                                                                                                                                                                                                                                                                                                                                                                                                                                                                                                                                                                                                                                                                                                                                                                                                                                                                                                                                                                                                                                                                                                                                                                                                                                                                                                                                                                                                                                                                                                                                                                                                                                                                                                                                                                                                                                                                                                                                                                                                                                                                                                                                                                                                                                                                                                                                                                                                                                                                                                                                                                                                                                                                                                                                                                                                                                                                                                                                                                                                                                                                                                                                                                                                                                                                                 | GMERS Medical College & Hospital                                    | Gujarat Biotechnology Research Centre                                                                                  | Komal Patel, Labdhi Pandya, Snehal Bagatharia, Meenakshi Shah, Neena Doshi, Varsha Godbole, Tejas Shah, Ankit Hinsu, Pritesh Sabara, Apurvashih Puvar, Janvi Raval, Zarna Patel, Monika Gandhi, Pinal Trivedi, Maharshi Pandya, Nidhi Patel, Nitin Savaliya, Raghavendra Kumar, Dinesh Kumar, Zuber Saiyed, Neha Rajpara, R D Dixit, A M Kadri, Harsh Bakshi, Chaitanya Joshi, Madhvi Joshi                                                                                   |                                                                                                                                                                                                               |  |
| EPI_ISL_469039                                                                                                                                                                                                                                                                                                                                                                                                                                                                                                                                                                                                                                                                                                                                                                                                                                                                                                                                                                                                                                                                                                                                                                                                                                                                                                                                                                                                                                                                                                                                                                                                                                                                                                                                                                                                                                                                                                                                                                                                                                                                                                                                                                                                                                                                                                                                                                                                                                                                                                                                                                                                                                                                                                                                                                                                                                                                                                                                                                                                                                                                                                                                                                                                                                                                                                                                                                                                                                                                                                                                                                                                                                                                                                                                                                                                                                                                                                                                                                                                                                                                                                                                                                                                                                                                                                                                                                                                                                                                                                                                                                                                                                                                                                                                                                                                                                                                                                                                                                                                                                                                                                                                                                                                                                                                                                                                                                                                                                                                                                                                                                                                                                                                                                                                                                                                                                                                                                                                                                                                                                                                                                                                                                                                                                                 | GMERS Medical College & Hospital                                    | Gujarat Biotechnology Research Centre                                                                                  | Labdhi Pandya, Snehal Bagatharia, Meenakshi Shah, Neena Doshi, Varsha Godbole, Tejas Shah, Ankit Hinsu, Pritesh Sabara, Apurvashih Puvar, Janvi Raval, Zarna Patel, Monika Gandhi, Pinal Trivedi, Maharshi Pandya, Nidhi Patel, Nitin Savaliya, Raghavendra Kumar, Dinesh Kumar, Zuber Saiyed, Komal Patel, Afzal Ansari, R D Dixit, A M Kadri, Harsh Bakshi, Chaitanya Joshi, Madhvi Joshi                                                                                   |                                                                                                                                                                                                               |  |
| EPI_ISL_469282                                                                                                                                                                                                                                                                                                                                                                                                                                                                                                                                                                                                                                                                                                                                                                                                                                                                                                                                                                                                                                                                                                                                                                                                                                                                                                                                                                                                                                                                                                                                                                                                                                                                                                                                                                                                                                                                                                                                                                                                                                                                                                                                                                                                                                                                                                                                                                                                                                                                                                                                                                                                                                                                                                                                                                                                                                                                                                                                                                                                                                                                                                                                                                                                                                                                                                                                                                                                                                                                                                                                                                                                                                                                                                                                                                                                                                                                                                                                                                                                                                                                                                                                                                                                                                                                                                                                                                                                                                                                                                                                                                                                                                                                                                                                                                                                                                                                                                                                                                                                                                                                                                                                                                                                                                                                                                                                                                                                                                                                                                                                                                                                                                                                                                                                                                                                                                                                                                                                                                                                                                                                                                                                                                                                                                                 | Service de Virologie Hôpital Saint-Louis                            | Laboratory of Cell Biology of viral infection, Unit INSERM-U944                                                        | Laurent Meertens, Lucie Bonnet-Madin, Constance Delaugerre, Ali Amara                                                                                                                                                                                                                                                                                                                                                                                                         |                                                                                                                                                                                                               |  |
| EPI_ISL_469283, EPI_ISL_469284                                                                                                                                                                                                                                                                                                                                                                                                                                                                                                                                                                                                                                                                                                                                                                                                                                                                                                                                                                                                                                                                                                                                                                                                                                                                                                                                                                                                                                                                                                                                                                                                                                                                                                                                                                                                                                                                                                                                                                                                                                                                                                                                                                                                                                                                                                                                                                                                                                                                                                                                                                                                                                                                                                                                                                                                                                                                                                                                                                                                                                                                                                                                                                                                                                                                                                                                                                                                                                                                                                                                                                                                                                                                                                                                                                                                                                                                                                                                                                                                                                                                                                                                                                                                                                                                                                                                                                                                                                                                                                                                                                                                                                                                                                                                                                                                                                                                                                                                                                                                                                                                                                                                                                                                                                                                                                                                                                                                                                                                                                                                                                                                                                                                                                                                                                                                                                                                                                                                                                                                                                                                                                                                                                                                                                 | Service de Virologie Hôpital Saint-Louis                            | Laboratory Cell Biology of Viral Infection-INSERM unit 944                                                             | Laurent Meertens, Lucie Bonnet-Madin, Séverine Mercier-Delarue, Maud SALMONA, Constance Delaugerre, Ali Amara                                                                                                                                                                                                                                                                                                                                                                 |                                                                                                                                                                                                               |  |
| EPI_ISL_469287, EPI_ISL_469288, EPI_ISL_469289, EPI_ISL_469290, EPI_ISL_469291, EPI_ISL_469292, EPI_ISL_469293, EPI_ISL_469294, EPI_ISL_469295, EPI_ISL_469296                                                                                                                                                                                                                                                                                                                                                                                                                                                                                                                                                                                                                                                                                                                                                                                                                                                                                                                                                                                                                                                                                                                                                                                                                                                                                                                                                                                                                                                                                                                                                                                                                                                                                                                                                                                                                                                                                                                                                                                                                                                                                                                                                                                                                                                                                                                                                                                                                                                                                                                                                                                                                                                                                                                                                                                                                                                                                                                                                                                                                                                                                                                                                                                                                                                                                                                                                                                                                                                                                                                                                                                                                                                                                                                                                                                                                                                                                                                                                                                                                                                                                                                                                                                                                                                                                                                                                                                                                                                                                                                                                                                                                                                                                                                                                                                                                                                                                                                                                                                                                                                                                                                                                                                                                                                                                                                                                                                                                                                                                                                                                                                                                                                                                                                                                                                                                                                                                                                                                                                                                                                                                                 | Keio University Hospital                                            | Keio University Hospital                                                                                               | Kenjro Kosaki                                                                                                                                                                                                                                                                                                                                                                                                                                                                 |                                                                                                                                                                                                               |  |
| EPI_ISL_470540                                                                                                                                                                                                                                                                                                                                                                                                                                                                                                                                                                                                                                                                                                                                                                                                                                                                                                                                                                                                                                                                                                                                                                                                                                                                                                                                                                                                                                                                                                                                                                                                                                                                                                                                                                                                                                                                                                                                                                                                                                                                                                                                                                                                                                                                                                                                                                                                                                                                                                                                                                                                                                                                                                                                                                                                                                                                                                                                                                                                                                                                                                                                                                                                                                                                                                                                                                                                                                                                                                                                                                                                                                                                                                                                                                                                                                                                                                                                                                                                                                                                                                                                                                                                                                                                                                                                                                                                                                                                                                                                                                                                                                                                                                                                                                                                                                                                                                                                                                                                                                                                                                                                                                                                                                                                                                                                                                                                                                                                                                                                                                                                                                                                                                                                                                                                                                                                                                                                                                                                                                                                                                                                                                                                                                                 | Wisconsin State Laboratory of Hygiene Communicable Disease Division | Wisconsin State Laboratory of Hygiene Communicable Disease Division                                                    | Kelsey R Florek                                                                                                                                                                                                                                                                                                                                                                                                                                                               |                                                                                                                                                                                                               |  |
| EPI_ISL_471178, EPI_ISL_471179, EPI_ISL_471180, EPI_ISL_471181, EPI_ISL_471182, EPI_ISL_471183, EPI_ISL_471184, EPI_ISL_471185, EPI_ISL_471186, EPI_ISL_471187, EPI_ISL_471188, EPI_ISL_471189, EPI_ISL_471190, EPI_ISL_471191, EPI_ISL_471192, EPI_ISL_471193, EPI_ISL_471194, EPI_ISL_471195,                                                                                                                                                                                                                                                                                                                                                                                                                                                                                                                                                                                                                                                                                                                                                                                                                                                                                                                                                                                                                                                                                                                                                                                                                                                                                                                                                                                                                                                                                                                                                                                                                                                                                                                                                                                                                                                                                                                                                                                                                                                                                                                                                                                                                                                                                                                                                                                                                                                                                                                                                                                                                                                                                                                                                                                                                                                                                                                                                                                                                                                                                                                                                                                                                                                                                                                                                                                                                                                                                                                                                                                                                                                                                                                                                                                                                                                                                                                                                                                                                                                                                                                                                                                                                                                                                                                                                                                                                                                                                                                                                                                                                                                                                                                                                                                                                                                                                                                                                                                                                                                                                                                                                                                                                                                                                                                                                                                                                                                                                                                                                                                                                                                                                                                                                                                                                                                                                                                                                                |                                                                     |                                                                                                                        |                                                                                                                                                                                                                                                                                                                                                                                                                                                                               |                                                                                                                                                                                                               |  |

|                                                                                                                                                                                                                                                                                                                                                                                                                                                                                                                                                                                                                                                                                                                                                                                                                                                                                                                                                                                                                                                                                                                                                                                |           |                                                                     |                                                                                                                        |                                                                                                                                                                                                                                                                                                                                                                                                                     |
|--------------------------------------------------------------------------------------------------------------------------------------------------------------------------------------------------------------------------------------------------------------------------------------------------------------------------------------------------------------------------------------------------------------------------------------------------------------------------------------------------------------------------------------------------------------------------------------------------------------------------------------------------------------------------------------------------------------------------------------------------------------------------------------------------------------------------------------------------------------------------------------------------------------------------------------------------------------------------------------------------------------------------------------------------------------------------------------------------------------------------------------------------------------------------------|-----------|---------------------------------------------------------------------|------------------------------------------------------------------------------------------------------------------------|---------------------------------------------------------------------------------------------------------------------------------------------------------------------------------------------------------------------------------------------------------------------------------------------------------------------------------------------------------------------------------------------------------------------|
| EPI_ISL_471196, EPI_ISL_471197, EPI_ISL_471198, EPI_ISL_471199, EPI_ISL_471200, EPI_ISL_471201, EPI_ISL_471202, EPI_ISL_471203, EPI_ISL_471204, EPI_ISL_471205, EPI_ISL_471206, EPI_ISL_471207, EPI_ISL_471208, EPI_ISL_471209, EPI_ISL_471210, EPI_ISL_471211, EPI_ISL_471212, EPI_ISL_471213, EPI_ISL_471214, EPI_ISL_471215, EPI_ISL_471216, EPI_ISL_471217, EPI_ISL_471218, EPI_ISL_471219, EPI_ISL_471220, EPI_ISL_471221, EPI_ISL_471222, EPI_ISL_471223, EPI_ISL_471224, EPI_ISL_471225, EPI_ISL_471226, EPI_ISL_471227, EPI_ISL_471228, EPI_ISL_471229, EPI_ISL_471230, EPI_ISL_471231, EPI_ISL_471232, EPI_ISL_471233, EPI_ISL_471234, EPI_ISL_471235, EPI_ISL_471236, EPI_ISL_471237, EPI_ISL_471238, EPI_ISL_471239, EPI_ISL_471240, EPI_ISL_471241, EPI_ISL_471242, EPI_ISL_471243, EPI_ISL_471244, EPI_ISL_471245, EPI_ISL_471246, EPI_ISL_471247, EPI_ISL_471248, EPI_ISL_471249, EPI_ISL_471250, EPI_ISL_471251, EPI_ISL_471252, EPI_ISL_471253, EPI_ISL_471254, EPI_ISL_471255, EPI_ISL_471256, EPI_ISL_471257, EPI_ISL_471258, EPI_ISL_471259, EPI_ISL_471260, EPI_ISL_471261, EPI_ISL_471262, EPI_ISL_471263, EPI_ISL_471264, EPI_ISL_471265, EPI_ISL_471266 | see above | Wisconsin State Laboratory of Hygiene Communicable Disease Division | Wisconsin State Laboratory of Hygiene Communicable Disease Division                                                    | Kelsey R. Florek, Abigail C. Shockey                                                                                                                                                                                                                                                                                                                                                                                |
| EPI_ISL_471427, EPI_ISL_471428, EPI_ISL_471429, EPI_ISL_471430, EPI_ISL_471431, EPI_ISL_471432, EPI_ISL_471433, EPI_ISL_471434, EPI_ISL_471435, EPI_ISL_471436, EPI_ISL_471437                                                                                                                                                                                                                                                                                                                                                                                                                                                                                                                                                                                                                                                                                                                                                                                                                                                                                                                                                                                                 | see above | Department of Clinical Microbiology                                 | GIGA Medical Genomics                                                                                                  | Keith Durkin, Maria Artesi, Sébastien Bontems, Raphaël Boreux, Cécile Meex, Axelle Chaslain, Céline Fombellida-Lopez, Pierrette Melin, Marie-Pierre Hayette, Vincent Bours.                                                                                                                                                                                                                                         |
| EPI_ISL_471586                                                                                                                                                                                                                                                                                                                                                                                                                                                                                                                                                                                                                                                                                                                                                                                                                                                                                                                                                                                                                                                                                                                                                                 |           | CSIR-Centre for Cellular and Molecular Biology                      | CSIR-Centre for Cellular and Molecular Biology                                                                         | Lamuk Zaveri, Shagufta Khan, Namami Gaur, Sakshi Shambhavi, Tulasi Nagabandi, Purushotham Vodnala, Payel Mukherjee, Sofia Banu, Priya Singh, Dhiviya Vedagiri, Divya Gupta, Vishal Sah, Santosh Kumar Kuncha, Krishnan Harinivas Harshan, Archana Bharadwaj Siva, Karthik Bharadwaj Tallapaka,Zeba Rizvi, Zuberwasim Sayyad, Kakade Aishwarya Arun, Amrutha H C, Ananga Ghosh, Rakesh K Mishra, Divya Tej Sowpati   |
| EPI_ISL_471588                                                                                                                                                                                                                                                                                                                                                                                                                                                                                                                                                                                                                                                                                                                                                                                                                                                                                                                                                                                                                                                                                                                                                                 |           | CSIR-Centre for Cellular and Molecular Biology                      | CSIR-Centre for Cellular and Molecular Biology                                                                         | Lamuk Zaveri, Shagufta Khan, Namami Gaur, Sakshi Shambhavi, Tulasi Nagabandi, Purushotham Vodnala, Payel Mukherjee, Sofia Banu, Priya Singh, Dhiviya Vedagiri, Divya Gupta, Vishal Sah, Santosh Kumar Kuncha, Krishnan Harinivas Harshan, Archana Bharadwaj Siva, Karthik Bharadwaj Tallapaka, Renu Sudhakar, Somesh Gorde, Gangumala Srinivas Reddy, Sujoy Deb, Swati Baiyyana, Rakesh K Mishra, Divya Tej Sowpati |
| EPI_ISL_471589                                                                                                                                                                                                                                                                                                                                                                                                                                                                                                                                                                                                                                                                                                                                                                                                                                                                                                                                                                                                                                                                                                                                                                 |           | CSIR-Centre for Cellular and Molecular Biology                      | CSIR-Centre for Cellular and Molecular Biology                                                                         | Lamuk Zaveri, Shagufta Khan, Namami Gaur, Sakshi Shambhavi, Tulasi Nagabandi, Purushotham Vodnala, Payel Mukherjee, Sofia Banu, Priya Singh, Dhiviya Vedagiri, Divya Gupta, Vishal Sah, Santosh Kumar Kuncha, Krishnan Harinivas Harshan, Archana Bharadwaj Siva, Karthik Bharadwaj Tallapaka,Umesh Kumar, Unis Ahmad Bhat, Ajay Sarawagi, Priyanka Pant, Rajkanwar Nathawat, Rakesh K Mishra, Divya Tej Sowpati    |
| EPI_ISL_471590, EPI_ISL_471615                                                                                                                                                                                                                                                                                                                                                                                                                                                                                                                                                                                                                                                                                                                                                                                                                                                                                                                                                                                                                                                                                                                                                 |           | CSIR-Centre for Cellular and Molecular Biology                      | CSIR-Centre for Cellular and Molecular Biology                                                                         | Lamuk Zaveri, Shagufta Khan, Namami Gaur, Sakshi Shambhavi, Tulasi Nagabandi, Purushotham Vodnala, Payel Mukherjee, Sofia Banu, Priya Singh, Dhiviya Vedagiri, Divya Gupta, Vishal Sah, Santosh Kumar Kuncha, Krishnan Harinivas Harshan, Archana Bharadwaj Siva, Karthik Bharadwaj Tallapaka,Zeba Rizvi, Zuberwasim Sayyad, Kakade Aishwarya Arun, Amrutha H C, Ananga Ghosh, Rakesh K Mishra, Divya Tej Sowpati   |
| EPI_ISL_471616                                                                                                                                                                                                                                                                                                                                                                                                                                                                                                                                                                                                                                                                                                                                                                                                                                                                                                                                                                                                                                                                                                                                                                 |           | CSIR-Centre for Cellular and Molecular Biology                      | CSIR-Centre for Cellular and Molecular Biology                                                                         | Lamuk Zaveri, Shagufta Khan, Namami Gaur, Sakshi Shambhavi, Tulasi Nagabandi, Purushotham Vodnala, Payel Mukherjee, Sofia Banu, Priya Singh, Dhiviya Vedagiri, Divya Gupta, Vishal Sah, Santosh Kumar Kuncha, Krishnan Harinivas Harshan, Archana Bharadwaj Siva, Karthik Bharadwaj Tallapaka, Renu Sudhakar, Somesh Gorde, Gangumala Srinivas Reddy, Sujoy Deb, Swati Baiyyana, Rakesh K Mishra, Divya Tej Sowpati |
| EPI_ISL_471617                                                                                                                                                                                                                                                                                                                                                                                                                                                                                                                                                                                                                                                                                                                                                                                                                                                                                                                                                                                                                                                                                                                                                                 |           | CSIR-Centre for Cellular and Molecular Biology                      | CSIR-Centre for Cellular and Molecular Biology                                                                         | Lamuk Zaveri, Shagufta Khan, Namami Gaur, Sakshi Shambhavi, Tulasi Nagabandi, Purushotham Vodnala, Payel Mukherjee, Sofia Banu, Priya Singh, Dhiviya Vedagiri, Divya Gupta, Vishal Sah, Santosh Kumar Kuncha, Krishnan Harinivas Harshan, Archana Bharadwaj Siva, Karthik Bharadwaj Tallapaka,Umesh Kumar, Unis Ahmad Bhat, Ajay Sarawagi, Priyanka Pant, Rajkanwar Nathawat, Rakesh K Mishra, Divya Tej Sowpati    |
| EPI_ISL_471618                                                                                                                                                                                                                                                                                                                                                                                                                                                                                                                                                                                                                                                                                                                                                                                                                                                                                                                                                                                                                                                                                                                                                                 |           | CSIR-Centre for Cellular and Molecular Biology                      | CSIR-Centre for Cellular and Molecular Biology                                                                         | Lamuk Zaveri, Shagufta Khan, Namami Gaur, Sakshi Shambhavi, Tulasi Nagabandi, Purushotham Vodnala, Payel Mukherjee, Sofia Banu, Priya Singh, Dhiviya Vedagiri, Divya Gupta, Vishal Sah, Santosh Kumar Kuncha, Krishnan Harinivas Harshan, Archana Bharadwaj Siva, Karthik Bharadwaj Tallapaka,Zeba Rizvi, Zuberwasim Sayyad, Kakade Aishwarya Arun, Amrutha H C, Ananga Ghosh, Rakesh K Mishra, Divya Tej Sowpati   |
| EPI_ISL_475040                                                                                                                                                                                                                                                                                                                                                                                                                                                                                                                                                                                                                                                                                                                                                                                                                                                                                                                                                                                                                                                                                                                                                                 |           | Department of MicroBiology, Government Medical College, Surat       | Gujarat Biotechnology Research Centre                                                                                  | Komal Patel, Labdhi Pandya, Snehal Bagatharia, Naresh Chauhan, Summaiya Mullan, Amit gamit, Pritesh Sabara, Apurvasinh Puvar, Janvi Raval, Zarna Patel, Monika Gandhi, Pinal Trivedi, Maharshi Pandya, Nidhi Patel, Nitin Savaliya, Raghawendra Kumar, Dinesh Kumar, Zuber Saiyed, Neelam Nathani, R D Dixit, A M Kadri, Harsh Bakshi, Chaitanya Joshi, Madhvi Joshi                                                |
| EPI_ISL_475041                                                                                                                                                                                                                                                                                                                                                                                                                                                                                                                                                                                                                                                                                                                                                                                                                                                                                                                                                                                                                                                                                                                                                                 |           | Department of MicroBiology, Government Medical College, Surat       | Gujarat Biotechnology Research Centre                                                                                  | Labdhi Pandya, Snehal Bagatharia, Naresh Chauhan, Summaiya Mullan, Amit gamit, Pritesh Sabara, Apurvasinh Puvar, Janvi Raval, Zarna Patel, Monika Gandhi, Pinal Trivedi, Maharshi Pandya, Nidhi Patel, Nitin Savaliya, Raghawendra Kumar, Dinesh Kumar, Zuber Saiyed, Komal Patel, Armi Chaudhari, R D Dixit, A M Kadri, Harsh Bakshi, Chaitanya Joshi, Madhvi Joshi                                                |
| EPI_ISL_475060, EPI_ISL_475061, EPI_ISL_475062, EPI_ISL_475063, EPI_ISL_475064, EPI_ISL_475065, EPI_ISL_475066, EPI_ISL_475067, EPI_ISL_475068, EPI_ISL_475069, EPI_ISL_475070                                                                                                                                                                                                                                                                                                                                                                                                                                                                                                                                                                                                                                                                                                                                                                                                                                                                                                                                                                                                 | see above | Lab voor klinische biologie                                         | Onderzoeksgroep Virologie                                                                                              | Laurens Lambrechts, Nick Vereecke, Marthe Pauwels, Bruno Verhasselt, Linos Vandekerckhove, Hans Nauwynck, Sebastiaan Theuns                                                                                                                                                                                                                                                                                         |
| EPI_ISL_476866                                                                                                                                                                                                                                                                                                                                                                                                                                                                                                                                                                                                                                                                                                                                                                                                                                                                                                                                                                                                                                                                                                                                                                 |           | GMERS Medical College and Hospital, Gandhinagar                     | Gujarat Biotechnology Research Centre                                                                                  | Komal Patel, Labdhi Pandya, Afzal Ansari, Nikha Trivedi, Seema Bhatt, Gaurishankar Shrimali, Bhavesh Modi, Bharti Rajani, Apurvasinh Puvar, Janvi Raval, Zarna Patel, Monika Gandhi, Pinal Trivedi, Maharshi Pandya, Nidhi Patel, Nitin Savaliya, Raghawendra Kumar, Dinesh Kumar, Zuber Saiyed, R D Dixit, A M Kadri, Harsh Bakshi, Chaitanya Joshi, Madhvi Joshi                                                  |
| EPI_ISL_476867                                                                                                                                                                                                                                                                                                                                                                                                                                                                                                                                                                                                                                                                                                                                                                                                                                                                                                                                                                                                                                                                                                                                                                 |           | Banas Medical College and Research Institute                        | Gujarat Biotechnology Research Centre                                                                                  | Labdhi Pandya, Afzal Ansari, Nikha Trivedi, Radhika Khara, Sunil R Joshi, Viren s Doshi, Apurvasinh Puvar, Janvi Raval, Zarna Patel, Monika Gandhi, Pinal Trivedi, Maharshi Pandya, Nidhi Patel, Nitin Savaliya, Raghawendra Kumar, Dinesh Kumar, Zuber Saiyed, Komal Patel, R D Dixit, A M Kadri, Harsh Bakshi, Chaitanya Joshi, Madhvi Joshi                                                                      |
| EPI_ISL_479756, EPI_ISL_479757, EPI_ISL_479758                                                                                                                                                                                                                                                                                                                                                                                                                                                                                                                                                                                                                                                                                                                                                                                                                                                                                                                                                                                                                                                                                                                                 |           | National Institute of Hygiene and Epidemiology (NIHE)               | National Key Laboratory of Gene Technology, Institute of Biotechnology (IBT)                                           | Le Tung Lam, Nguyen Hong Trang, Ho Thi Thuong, Tran Huyen Linh, Ung Thi Hong Trang, Le Thi Thanh, Nguyen Vu Son, Vuong Duc Cuong, Tran Thu Huong, Pham Thi Hien, Nguyen Phuong Anh, Nguyen Le Khanh Hung, Hoang Vu Mai Phuong, Hoang Ha, Taichiro Takemura, Futoshi Hasebe, Chu Hoang Ha, Le Quynh Mai, Dang Duc Anh, Truong Nam Hai                                                                                |
| EPI_ISL_480784, EPI_ISL_480785                                                                                                                                                                                                                                                                                                                                                                                                                                                                                                                                                                                                                                                                                                                                                                                                                                                                                                                                                                                                                                                                                                                                                 |           | NYC Department of Health and Mental Hygiene                         | Pathogen Discovery, Respiratory Viruses Branch, Division of Viral Diseases, Centers for Disease Control and Prevention | Krista Queen, Christine Mahl, Jennifer Rakeman, Anna Uehara, Ying Tao, Jing Zhang, Yan Li, Clinton R. Paden, Haibin Wang, Jasmine Padilla, Justin Lee, Sally Slavinski, Suxiang Tong                                                                                                                                                                                                                                |
| EPI_ISL_481041, EPI_ISL_481042, EPI_ISL_481043, EPI_ISL_481044, EPI_ISL_481045, EPI_ISL_481046, EPI_ISL_481047, EPI_ISL_481048, EPI_ISL_481049, EPI_ISL_481050, EPI_ISL_481051, EPI_ISL_481052, EPI_ISL_481053, EPI_ISL_481054, EPI_ISL_481055, EPI_ISL_481056, EPI_ISL_481057, EPI_ISL_481058, EPI_ISL_481059, EPI_ISL_481060, EPI_ISL_481061, EPI_ISL_481062, EPI_ISL_481063, EPI_ISL_481064, EPI_ISL_481065, EPI_ISL_481066, EPI_ISL_481067, EPI_ISL_481068, EPI_ISL_481069, EPI_ISL_481070, EPI_ISL_481071, EPI_ISL_481072, EPI_ISL_481073, EPI_ISL_481074, EPI_ISL_481075, EPI_ISL_481076, EPI_ISL_481077, EPI_ISL_481078, EPI_ISL_481079, EPI_ISL_481080, EPI_ISL_481081, EPI_ISL_481082, EPI_ISL_481083, EPI_ISL_481084, EPI_ISL_481085, EPI_ISL_481086, EPI_ISL_481087, EPI_ISL_481088, EPI_ISL_481089, EPI_ISL_481090, EPI_ISL_481091, EPI_ISL_481092, EPI_ISL_481093, EPI_ISL_481094, EPI_ISL_481095, EPI_ISL_481096, EPI_ISL_481097, EPI_ISL_481098, EPI_ISL_481099, EPI_ISL_481100, EPI_ISL_481101, EPI_ISL_481102, EPI_ISL_481103, EPI_ISL_481104, EPI_ISL_481105, EPI_ISL_481106, EPI_ISL_481107, EPI_ISL_481108, EPI_ISL_481109                                 | see above | Hospital General Universitario Gregorio Marañón                     | SeqCOVID-SPAIN consortium/IBV(CSIC)                                                                                    | Laura Pérez-Lago, Marta Herranz, Jon Sicilia, Julia Suárez, Pilar Catalán, Patricia Muñoz, Darío Garcia de Viedma and SeqCOVID-SPAIN consortium                                                                                                                                                                                                                                                                     |
| EPI_ISL_481221, EPI_ISL_481222, EPI_ISL_481223, EPI_ISL_481224, EPI_ISL_481225, EPI_ISL_481226                                                                                                                                                                                                                                                                                                                                                                                                                                                                                                                                                                                                                                                                                                                                                                                                                                                                                                                                                                                                                                                                                 |           | Lab voor klinische biologie                                         | Onderzoeksgroep Virologie                                                                                              | Laurens Lambrechts, Nick Vereecke, Marthe Pauwels, Bruno Verhasselt, Linos Vandekerckhove, Hans Nauwynck, Sebastiaan Theuns                                                                                                                                                                                                                                                                                         |
| EPI_ISL_481265, EPI_ISL_481266, EPI_ISL_481267, EPI_ISL_481268, EPI_ISL_481269, EPI_ISL_481270, EPI_ISL_481271, EPI_ISL_481272, EPI_ISL_481273, EPI_ISL_481274, EPI_ISL_481275, EPI_ISL_481276, EPI_ISL_481277, EPI_ISL_481278, EPI_ISL_481279, EPI_ISL_481280, EPI_ISL_481281, EPI_ISL_481282                                                                                                                                                                                                                                                                                                                                                                                                                                                                                                                                                                                                                                                                                                                                                                                                                                                                                 | see above | Maryland Department of Health                                       | Maryland Department of Health                                                                                          | Keller,E.                                                                                                                                                                                                                                                                                                                                                                                                           |
| EPI_ISL_483820                                                                                                                                                                                                                                                                                                                                                                                                                                                                                                                                                                                                                                                                                                                                                                                                                                                                                                                                                                                                                                                                                                                                                                 |           | GMERS Medical College and Hospital, Gandhinagar                     | Gujarat Biotechnology Research Centre                                                                                  | Komal Patel, Labdhi Pandya, Afzal Ansari, Nikha Trivedi, Seema Bhatt, Gaurishankar Shrimali, Bhavesh Modi, Bharti Rajani, Apurvasinh Puvar, Janvi Raval, Zarna Patel, Monika Gandhi, Pinal Trivedi, Maharshi Pandya, Nidhi Patel, Nitin Savaliya, Raghawendra Kumar, Dinesh Kumar, Zuber Saiyed, Komal Patel, R D Dixit, A M Kadri, Harsh Bakshi, Chaitanya Joshi, Madhvi Joshi                                     |
| EPI_ISL_483821                                                                                                                                                                                                                                                                                                                                                                                                                                                                                                                                                                                                                                                                                                                                                                                                                                                                                                                                                                                                                                                                                                                                                                 |           | Government Medical College, Vadodara                                | Gujarat Biotechnology Research Centre                                                                                  | Labdhi Pandya, Afzal Ansari, Nikha Trivedi, Meenakshi Shah, Neena Doshi, Varsha Godbole, Apurvasinh Puvar, Janvi Raval, Zarna Patel, Monika Gandhi, Pinal Trivedi, Maharshi Pandya, Nidhi Patel, Nitin Savaliya, Raghawendra Kumar, Dinesh Kumar, Zuber Saiyed, Komal Patel, R D Dixit, A M Kadri, Harsh Bakshi, Chaitanya Joshi, Madhvi Joshi                                                                      |
| EPI_ISL_483837                                                                                                                                                                                                                                                                                                                                                                                                                                                                                                                                                                                                                                                                                                                                                                                                                                                                                                                                                                                                                                                                                                                                                                 |           | Pandit Deendayal Upadhyay Government Medical College, Rajkot        | Gujarat Biotechnology Research Centre                                                                                  | Komal Patel, Labdhi Pandya, Afzal Ansari, Nikha Trivedi, Gauravi Dhruv, Arti Trivedi, Apurvasinh Puvar, Janvi Raval, Zarna Patel, Monika Gandhi, Pinal Trivedi, Maharshi Pandya, Nidhi Patel, Nitin Savaliya, Raghawendra Kumar, Dinesh Kumar, Zuber Saiyed, Komal Patel, R D Dixit, A M Kadri, Harsh Bakshi, Chaitanya Joshi, Madhvi Joshi                                                                         |
| EPI_ISL_483838                                                                                                                                                                                                                                                                                                                                                                                                                                                                                                                                                                                                                                                                                                                                                                                                                                                                                                                                                                                                                                                                                                                                                                 |           | Pandit Deendayal Upadhyay Government Medical College, Rajkot        | Gujarat Biotechnology Research Centre                                                                                  | Labdhi Pandya, Afzal Ansari, Nikha Trivedi, Gauravi Dhruv, Arti Trivedi, Apurvasinh Puvar, Janvi Raval, Zarna Patel, Monika Gandhi, Pinal Trivedi, Maharshi Pandya, Nidhi Patel, Nitin Savaliya, Raghawendra Kumar, Dinesh Kumar, Zuber Saiyed, Komal Patel, R D Dixit, A M Kadri, Harsh Bakshi, Chaitanya Joshi, Madhvi Joshi                                                                                      |
| EPI_ISL_483854                                                                                                                                                                                                                                                                                                                                                                                                                                                                                                                                                                                                                                                                                                                                                                                                                                                                                                                                                                                                                                                                                                                                                                 |           | Department of Microbiology, Government Medical College, Surat       | Gujarat Biotechnology Research Centre                                                                                  | Komal Patel, Labdhi Pandya, Afzal Ansari, Nikha Trivedi, Naresh Chauhan, Summaiya Mullan, Amit gamit, Apurvasinh Puvar, Janvi Raval, Zarna Patel, Monika Gandhi, Pinal Trivedi, Maharshi Pandya, Nidhi Patel, Nitin Savaliya, Raghawendra Kumar, Dinesh Kumar, Zuber Saiyed, R D Dixit, A M Kadri,                                                                                                                  |



|                                                                                                                                                                                                                                                                                                                                                                                                                                                                                                                                                                                                                                                                                                                                                                                                                                                                                                 |                                                                         |                                                                         |                                                                                                                                                                                                                                                                                                                                                                                                                                                                                         |                                             |
|-------------------------------------------------------------------------------------------------------------------------------------------------------------------------------------------------------------------------------------------------------------------------------------------------------------------------------------------------------------------------------------------------------------------------------------------------------------------------------------------------------------------------------------------------------------------------------------------------------------------------------------------------------------------------------------------------------------------------------------------------------------------------------------------------------------------------------------------------------------------------------------------------|-------------------------------------------------------------------------|-------------------------------------------------------------------------|-----------------------------------------------------------------------------------------------------------------------------------------------------------------------------------------------------------------------------------------------------------------------------------------------------------------------------------------------------------------------------------------------------------------------------------------------------------------------------------------|---------------------------------------------|
|                                                                                                                                                                                                                                                                                                                                                                                                                                                                                                                                                                                                                                                                                                                                                                                                                                                                                                 |                                                                         |                                                                         |                                                                                                                                                                                                                                                                                                                                                                                                                                                                                         | Harsh Bakshi, Chaitanya Joshi, Madhvi Joshi |
| EPI_ISL_483855                                                                                                                                                                                                                                                                                                                                                                                                                                                                                                                                                                                                                                                                                                                                                                                                                                                                                  | Department of Microbiology, Government Medical College, Surat           | Gujarat Biotechnology Research Centre                                   | Labdhi Pandya, Afzal Ansari, Nikha Trivedi, Naresh Chauhan, Summaiya Mullan, Amit gamit, Apurvasinh Puvar, Janvi Raval, Zarna Patel, Monika Gandhi, Pinal Trivedi, Maharshi Pandya, Nidhi Patel, Nitin Savaliya, Raghawendra Kumar, Dinesh Kumar, Zuber Saiyed, Komal Patel, R D Dixit, A M Kadri, Harsh Bakshi, Chaitanya Joshi, Madhvi Joshi                                                                                                                                          |                                             |
| EPI_ISL_483872                                                                                                                                                                                                                                                                                                                                                                                                                                                                                                                                                                                                                                                                                                                                                                                                                                                                                  | Department of Microbiology, Government Medical College, Surat           | Gujarat Biotechnology Research Centre                                   | Komal Patel, Labdhi Pandya, Afzal Ansari, Nikha Trivedi, Naresh Chauhan, Summaiya Mullan, Amit gamit, Apurvasinh Puvar, Janvi Raval, Zarna Patel, Monika Gandhi, Pinal Trivedi, Maharshi Pandya, Nidhi Patel, Nitin Savaliya, Raghawendra Kumar, Dinesh Kumar, Zuber Saiyed, R D Dixit, A M Kadri, Harsh Bakshi, Chaitanya Joshi, Madhvi Joshi                                                                                                                                          |                                             |
| EPI_ISL_483873                                                                                                                                                                                                                                                                                                                                                                                                                                                                                                                                                                                                                                                                                                                                                                                                                                                                                  | Department of Microbiology, Government Medical College, Surat           | Gujarat Biotechnology Research Centre                                   | Labdhi Pandya, Afzal Ansari, Nikha Trivedi, Naresh Chauhan, Summaiya Mullan, Amit gamit, Apurvasinh Puvar, Janvi Raval, Zarna Patel, Monika Gandhi, Pinal Trivedi, Maharshi Pandya, Nidhi Patel, Nitin Savaliya, Raghawendra Kumar, Dinesh Kumar, Zuber Saiyed, Komal Patel, R D Dixit, A M Kadri, Harsh Bakshi, Chaitanya Joshi, Madhvi Joshi                                                                                                                                          |                                             |
| EPI_ISL_484693, EPI_ISL_484694, EPI_ISL_484695, EPI_ISL_484696, EPI_ISL_484697, EPI_ISL_484698, EPI_ISL_484699, EPI_ISL_484701, EPI_ISL_484703, EPI_ISL_484706, EPI_ISL_484707, EPI_ISL_484708                                                                                                                                                                                                                                                                                                                                                                                                                                                                                                                                                                                                                                                                                                  |                                                                         |                                                                         |                                                                                                                                                                                                                                                                                                                                                                                                                                                                                         |                                             |
| see above                                                                                                                                                                                                                                                                                                                                                                                                                                                                                                                                                                                                                                                                                                                                                                                                                                                                                       | Department of Clinical Microbiology                                     | GIGA Medical Genomics                                                   | Keith Durkin, Maria Artesi, Sébastien Bontems, Raphaël Boreux, Cécile Meex, Axelle Chaslain, Céline Fombellida-Lopez, Pierrette Melin, Marie-Pierre Hayette, Vincent Bours.                                                                                                                                                                                                                                                                                                             |                                             |
| EPI_ISL_485001, EPI_ISL_485002, EPI_ISL_485388, EPI_ISL_485389, EPI_ISL_485390, EPI_ISL_485391, EPI_ISL_485392, EPI_ISL_485393, EPI_ISL_485394, EPI_ISL_485395, EPI_ISL_485396                                                                                                                                                                                                                                                                                                                                                                                                                                                                                                                                                                                                                                                                                                                  |                                                                         |                                                                         |                                                                                                                                                                                                                                                                                                                                                                                                                                                                                         |                                             |
| see above                                                                                                                                                                                                                                                                                                                                                                                                                                                                                                                                                                                                                                                                                                                                                                                                                                                                                       | University of Ulsan College of Medicine and Asan Medical Center         | University of Ulsan College of Medicine and Asan Medical Center         | Kuenyool Park, Jaewoong Lee, Kihyun Lee, Jiwon Jung, Sung-Han Kim, Jina Lee, Mauricio Chalita, Seok-Hwan Yoon, Jongsik Chun, Kyu-Hwa Hur, Heungsup Sung, Mi-Na Kim, and Hae Kyung Lee                                                                                                                                                                                                                                                                                                   |                                             |
| EPI_ISL_485398                                                                                                                                                                                                                                                                                                                                                                                                                                                                                                                                                                                                                                                                                                                                                                                                                                                                                  | Department of Internal Medicine, College of Medicine, Chosun University | Department of Internal Medicine, College of Medicine, Chosun University | Kim,D.-M.                                                                                                                                                                                                                                                                                                                                                                                                                                                                               |                                             |
| EPI_ISL_486912, EPI_ISL_486913, EPI_ISL_486914, EPI_ISL_486915, EPI_ISL_486916, EPI_ISL_486917                                                                                                                                                                                                                                                                                                                                                                                                                                                                                                                                                                                                                                                                                                                                                                                                  | Maryland Department of Health                                           | Maryland Department of Health                                           | Keller,E.                                                                                                                                                                                                                                                                                                                                                                                                                                                                               |                                             |
| EPI_ISL_487446, EPI_ISL_487447, EPI_ISL_487448, EPI_ISL_487449, EPI_ISL_487450, EPI_ISL_487451, EPI_ISL_487452, EPI_ISL_487453, EPI_ISL_487454, EPI_ISL_487455, EPI_ISL_487456, EPI_ISL_487457, EPI_ISL_487458, EPI_ISL_487459, EPI_ISL_487460, EPI_ISL_487461, EPI_ISL_487462, EPI_ISL_487463, EPI_ISL_487464, EPI_ISL_487465, EPI_ISL_487466                                                                                                                                                                                                                                                                                                                                                                                                                                                                                                                                                  |                                                                         |                                                                         |                                                                                                                                                                                                                                                                                                                                                                                                                                                                                         |                                             |
| see above                                                                                                                                                                                                                                                                                                                                                                                                                                                                                                                                                                                                                                                                                                                                                                                                                                                                                       | CICM-Mail                                                               | Bundeswehr Institut of Microbiology                                     | Kouriba, Dürr, Sangaré, Rehn, Traoré, Bestehorn-Willmann, Walter, Quedraogo, Zimmermann, Maiga, Heitzer, Sogodogo, Antwerpen, Wölfel                                                                                                                                                                                                                                                                                                                                                    |                                             |
| EPI_ISL_495026                                                                                                                                                                                                                                                                                                                                                                                                                                                                                                                                                                                                                                                                                                                                                                                                                                                                                  | GMERS Medical College & Hospital, Gotri, Vadodara                       | Gujarat Biotechnology Research Centre                                   | Komal Patel, Labdhi Pandya, Afzal Ansari, Nikha Trivedi, Meenakshi Shah, Neena Doshi, Varsha Godbole, Apurvasinh Puvar, Janvi Raval, Zarna Patel, Monika Gandhi, Pinal Trivedi, Maharshi Pandya, Nidhi Patel, Nitin Savaliya, Raghawendra Kumar, Dinesh Kumar, Zuber Saiyed, R D Dixit, A M Kadri, Harsh Bakshi, Chaitanya Joshi, Madhvi Joshi                                                                                                                                          |                                             |
| EPI_ISL_495027                                                                                                                                                                                                                                                                                                                                                                                                                                                                                                                                                                                                                                                                                                                                                                                                                                                                                  | GMERS Medical College & Hospital, Gotri, Vadodara                       | Gujarat Biotechnology Research Centre                                   | Labdhi Pandya, Afzal Ansari, Nikha Trivedi, Meenakshi Shah, Neena Doshi, Varsha Godbole, Apurvasinh Puvar, Janvi Raval, Zarna Patel, Monika Gandhi, Pinal Trivedi, Maharshi Pandya, Nidhi Patel, Nitin Savaliya, Raghawendra Kumar, Dinesh Kumar, Zuber Saiyed, Komal Patel, R D Dixit, A M Kadri, Harsh Bakshi, Chaitanya Joshi, Madhvi Joshi                                                                                                                                          |                                             |
| EPI_ISL_495044                                                                                                                                                                                                                                                                                                                                                                                                                                                                                                                                                                                                                                                                                                                                                                                                                                                                                  | GMERS Medical College & Hospital, Gotri, Vadodara                       | Gujarat Biotechnology Research Centre                                   | Komal Patel, Labdhi Pandya, Afzal Ansari, Nikha Trivedi, Meenakshi Shah, Neena Doshi, Varsha Godbole, Apurvasinh Puvar, Janvi Raval, Zarna Patel, Monika Gandhi, Pinal Trivedi, Maharshi Pandya, Nidhi Patel, Nitin Savaliya, Raghawendra Kumar, Dinesh Kumar, Zuber Saiyed, R D Dixit, A M Kadri, Harsh Bakshi, Chaitanya Joshi, Madhvi Joshi                                                                                                                                          |                                             |
| EPI_ISL_495045                                                                                                                                                                                                                                                                                                                                                                                                                                                                                                                                                                                                                                                                                                                                                                                                                                                                                  | GMERS Medical College & Hospital, Gotri, Vadodara                       | Gujarat Biotechnology Research Centre                                   | Labdhi Pandya, Afzal Ansari, Nikha Trivedi, Meenakshi Shah, Neena Doshi, Varsha Godbole, Apurvasinh Puvar, Janvi Raval, Zarna Patel, Monika Gandhi, Pinal Trivedi, Maharshi Pandya, Nidhi Patel, Nitin Savaliya, Raghawendra Kumar, Dinesh Kumar, Zuber Saiyed, Komal Patel, R D Dixit, A M Kadri, Harsh Bakshi, Chaitanya Joshi, Madhvi Joshi                                                                                                                                          |                                             |
| EPI_ISL_495062                                                                                                                                                                                                                                                                                                                                                                                                                                                                                                                                                                                                                                                                                                                                                                                                                                                                                  | GMERS Medical College & Hospital, Gotri, Vadodara                       | Gujarat Biotechnology Research Centre                                   | Komal Patel, Labdhi Pandya, Afzal Ansari, Nikha Trivedi, Meenakshi Shah, Neena Doshi, Varsha Godbole, Apurvasinh Puvar, Janvi Raval, Zarna Patel, Monika Gandhi, Pinal Trivedi, Maharshi Pandya, Nidhi Patel, Nitin Savaliya, Raghawendra Kumar, Dinesh Kumar, Zuber Saiyed, R D Dixit, A M Kadri, Harsh Bakshi, Chaitanya Joshi, Madhvi Joshi                                                                                                                                          |                                             |
| EPI_ISL_495063                                                                                                                                                                                                                                                                                                                                                                                                                                                                                                                                                                                                                                                                                                                                                                                                                                                                                  | GMERS Medical College & Hospital, Himmatnagar                           | Gujarat Biotechnology Research Centre                                   | Labdhi Pandya, Afzal Ansari, Nikha Trivedi, Himanshu Khatri, Mayur Gandhi, Apurvasinh Puvar, Janvi Raval, Zarna Patel, Monika Gandhi, Pinal Trivedi, Maharshi Pandya, Nidhi Patel, Nitin Savaliya, Raghawendra Kumar, Dinesh Kumar, Zuber Saiyed, Komal Patel, R D Dixit, A M Kadri, Harsh Bakshi, Chaitanya Joshi, Madhvi Joshi                                                                                                                                                        |                                             |
| EPI_ISL_495200                                                                                                                                                                                                                                                                                                                                                                                                                                                                                                                                                                                                                                                                                                                                                                                                                                                                                  | CSIR-Centre for Cellular and Molecular Biology                          | CSIR-Centre for Cellular and Molecular Biology                          | Lamuk Zaveri, Shagufta Khan, Namami Gaur, Sakshi Shambhavi, Nikhil Hajirnis, M Soujanya Reddy, Pratheusa Maccha, Tulasi Nagabandi, Purushotham Vodnala, Payel Mukherjee, Sofia Banu, Priya Singh, Onkar Kulkarni, Dhiviya Vedagiri, Divya Gupta, Vishal Sah, Santosh Kumar Kuncha, Krishnan Harinivas Harshan, Archana Bharadwaj Siva, Karthik Bharadwaj Tallapaka, Renu Sudhakar, Somesh Gorde, Gangumala Srinivas Reddy, Sujoy Deb, Swati Bayyana, Rakesh K Mishra, Divya Tej Sowpati |                                             |
| EPI_ISL_495215, EPI_ISL_495233                                                                                                                                                                                                                                                                                                                                                                                                                                                                                                                                                                                                                                                                                                                                                                                                                                                                  | CSIR-Centre for Cellular and Molecular Biology                          | CSIR-Centre for Cellular and Molecular Biology                          | Lamuk Zaveri, Shagufta Khan, Nikhil Hajirnis, M Soujanya Reddy, Pratheusa Maccha, Namami Gaur, Sakshi Shambhavi, Tulasi Nagabandi, Purushotham Vodnala, Payel Mukherjee, Sofia Banu, Priya Singh, Onkar Kulkarni, Dhiviya Vedagiri, Divya Gupta, Vishal Sah, Santosh Kumar Kuncha, Krishnan Harinivas Harshan, Archana Bharadwaj Siva, Karthik Bharadwaj Tallapaka, Umesh Kumar, Unis Ahmad Bhat, Ajay Sarawagi, Priyanka Pant, Rajkanwar Nathawat, Rakesh K Mishra, Divya Tej Sowpati  |                                             |
| EPI_ISL_495234, EPI_ISL_495243                                                                                                                                                                                                                                                                                                                                                                                                                                                                                                                                                                                                                                                                                                                                                                                                                                                                  | CSIR-Centre for Cellular and Molecular Biology                          | CSIR-Centre for Cellular and Molecular Biology                          | Lamuk Zaveri, Shagufta Khan, Nikhil Hajirnis, M Soujanya Reddy, Pratheusa Maccha, Namami Gaur, Sakshi Shambhavi, Tulasi Nagabandi, Purushotham Vodnala, Payel Mukherjee, Sofia Banu, Priya Singh, Onkar Kulkarni, Dhiviya Vedagiri, Divya Gupta, Vishal Sah, Santosh Kumar Kuncha, Krishnan Harinivas Harshan, Archana Bharadwaj Siva, Karthik Bharadwaj Tallapaka, Zeba Rizvi, Zuberwasim Sayyad, Kakade Aishwarya Arun, Amrutha H C, Ananga Ghosh, Rakesh K Mishra, Divya Tej Sowpati |                                             |
| EPI_ISL_495246                                                                                                                                                                                                                                                                                                                                                                                                                                                                                                                                                                                                                                                                                                                                                                                                                                                                                  | CSIR-Centre for Cellular and Molecular Biology                          | CSIR-Centre for Cellular and Molecular Biology                          | Lamuk Zaveri, Shagufta Khan, Namami Gaur, Sakshi Shambhavi, Nikhil Hajirnis, M Soujanya Reddy, Pratheusa Maccha, Tulasi Nagabandi, Purushotham Vodnala, Payel Mukherjee, Sofia Banu, Priya Singh, Onkar Kulkarni, Dhiviya Vedagiri, Divya Gupta, Vishal Sah, Santosh Kumar Kuncha, Krishnan Harinivas Harshan, Archana Bharadwaj Siva, Karthik Bharadwaj Tallapaka, Renu Sudhakar, Somesh Gorde, Gangumala Srinivas Reddy, Sujoy Deb, Swati Bayyana, Rakesh K Mishra, Divya Tej Sowpati |                                             |
| EPI_ISL_495247                                                                                                                                                                                                                                                                                                                                                                                                                                                                                                                                                                                                                                                                                                                                                                                                                                                                                  | CSIR-Centre for Cellular and Molecular Biology                          | CSIR-Centre for Cellular and Molecular Biology                          | Lamuk Zaveri, Shagufta Khan, Nikhil Hajirnis, M Soujanya Reddy, Pratheusa Maccha, Namami Gaur, Sakshi Shambhavi, Tulasi Nagabandi, Purushotham Vodnala, Payel Mukherjee, Sofia Banu, Priya Singh, Onkar Kulkarni, Dhiviya Vedagiri, Divya Gupta, Vishal Sah, Santosh Kumar Kuncha, Krishnan Harinivas Harshan, Archana Bharadwaj Siva, Karthik Bharadwaj Tallapaka, Zeba Rizvi, Zuberwasim Sayyad, Kakade Aishwarya Arun, Amrutha H C, Ananga Ghosh, Rakesh K Mishra, Divya Tej Sowpati |                                             |
| EPI_ISL_495250                                                                                                                                                                                                                                                                                                                                                                                                                                                                                                                                                                                                                                                                                                                                                                                                                                                                                  | CSIR-Centre for Cellular and Molecular Biology                          | CSIR-Centre for Cellular and Molecular Biology                          | Lamuk Zaveri, Shagufta Khan, Nikhil Hajirnis, M Soujanya Reddy, Pratheusa Maccha, Namami Gaur, Sakshi Shambhavi, Tulasi Nagabandi, Purushotham Vodnala, Payel Mukherjee, Sofia Banu, Priya Singh, Onkar Kulkarni, Dhiviya Vedagiri, Divya Gupta, Vishal Sah, Santosh Kumar Kuncha, Krishnan Harinivas Harshan, Archana Bharadwaj Siva, Karthik Bharadwaj Tallapaka, Renu Sudhakar, Somesh Gorde, Gangumala Srinivas Reddy, Sujoy Deb, Swati Bayyana, Rakesh K Mishra, Divya Tej Sowpati |                                             |
| EPI_ISL_495258, EPI_ISL_495265                                                                                                                                                                                                                                                                                                                                                                                                                                                                                                                                                                                                                                                                                                                                                                                                                                                                  | CSIR-Centre for Cellular and Molecular Biology                          | CSIR-Centre for Cellular and Molecular Biology                          | Lamuk Zaveri, Shagufta Khan, Namami Gaur, Sakshi Shambhavi, Nikhil Hajirnis, M Soujanya Reddy, Pratheusa Maccha, Tulasi Nagabandi, Purushotham Vodnala, Payel Mukherjee, Sofia Banu, Priya Singh, Onkar Kulkarni, Dhiviya Vedagiri, Divya Gupta, Vishal Sah, Santosh Kumar Kuncha, Krishnan Harinivas Harshan, Archana Bharadwaj Siva, Karthik Bharadwaj Tallapaka, Renu Sudhakar, Somesh Gorde, Gangumala Srinivas Reddy, Sujoy Deb, Swati Bayyana, Rakesh K Mishra, Divya Tej Sowpati |                                             |
| EPI_ISL_497768, EPI_ISL_497769, EPI_ISL_497770, EPI_ISL_497771, EPI_ISL_497772, EPI_ISL_497773, EPI_ISL_497774, EPI_ISL_497775, EPI_ISL_497776, EPI_ISL_497777, EPI_ISL_497778, EPI_ISL_497779, EPI_ISL_497780, EPI_ISL_497781, EPI_ISL_497782, EPI_ISL_497783, EPI_ISL_497784, EPI_ISL_497785, EPI_ISL_497786, EPI_ISL_497787, EPI_ISL_497788, EPI_ISL_497789, EPI_ISL_497790, EPI_ISL_497791, EPI_ISL_497792, EPI_ISL_497793, EPI_ISL_497794, EPI_ISL_497795, EPI_ISL_497796, EPI_ISL_497797, EPI_ISL_497798, EPI_ISL_497799, EPI_ISL_497800, EPI_ISL_497801, EPI_ISL_497802, EPI_ISL_497803, EPI_ISL_497804, EPI_ISL_497805, EPI_ISL_497806, EPI_ISL_497807, EPI_ISL_497808, EPI_ISL_497809, EPI_ISL_497810, EPI_ISL_497811, EPI_ISL_497812, EPI_ISL_497813, EPI_ISL_497814, EPI_ISL_497815, EPI_ISL_497816, EPI_ISL_497817, EPI_ISL_497818, EPI_ISL_497819, EPI_ISL_497820, EPI_ISL_497821, |                                                                         |                                                                         |                                                                                                                                                                                                                                                                                                                                                                                                                                                                                         |                                             |

|                                                                                                                                                                                                                                                                                                                                                                                                                                                                                                                                                                                                                                                                                                                                                                                                                                                                                                                                                                                                                                                                                                                                                                                                                                                                                                                                                                                                                                                                                                                                                                                                                                                                                                                                                                                                                                                                                                                                                                                                                                                                                                                                                                                                                                                                                                                                                                                |           |                                                                                                                                                |                                                                                                                                                |                                                                                                                                                                                                                                                                                                                                                                    |
|--------------------------------------------------------------------------------------------------------------------------------------------------------------------------------------------------------------------------------------------------------------------------------------------------------------------------------------------------------------------------------------------------------------------------------------------------------------------------------------------------------------------------------------------------------------------------------------------------------------------------------------------------------------------------------------------------------------------------------------------------------------------------------------------------------------------------------------------------------------------------------------------------------------------------------------------------------------------------------------------------------------------------------------------------------------------------------------------------------------------------------------------------------------------------------------------------------------------------------------------------------------------------------------------------------------------------------------------------------------------------------------------------------------------------------------------------------------------------------------------------------------------------------------------------------------------------------------------------------------------------------------------------------------------------------------------------------------------------------------------------------------------------------------------------------------------------------------------------------------------------------------------------------------------------------------------------------------------------------------------------------------------------------------------------------------------------------------------------------------------------------------------------------------------------------------------------------------------------------------------------------------------------------------------------------------------------------------------------------------------------------|-----------|------------------------------------------------------------------------------------------------------------------------------------------------|------------------------------------------------------------------------------------------------------------------------------------------------|--------------------------------------------------------------------------------------------------------------------------------------------------------------------------------------------------------------------------------------------------------------------------------------------------------------------------------------------------------------------|
| EPI_ISL_497822, EPI_ISL_497823, EPI_ISL_497824, EPI_ISL_497825, EPI_ISL_497826, EPI_ISL_497827, EPI_ISL_497828, EPI_ISL_497829, EPI_ISL_497830, EPI_ISL_497831, EPI_ISL_497832, EPI_ISL_497833, EPI_ISL_497834, EPI_ISL_497835, EPI_ISL_497836, EPI_ISL_497837, EPI_ISL_497838, EPI_ISL_497839, EPI_ISL_497840, EPI_ISL_497841, EPI_ISL_497842, EPI_ISL_497843, EPI_ISL_497844, EPI_ISL_497845, EPI_ISL_497846, EPI_ISL_497847, EPI_ISL_497848, EPI_ISL_497849, EPI_ISL_497850, EPI_ISL_497851, EPI_ISL_497852, EPI_ISL_497853, EPI_ISL_497854, EPI_ISL_497855, EPI_ISL_497856, EPI_ISL_497857, EPI_ISL_497858, EPI_ISL_497859, EPI_ISL_497860, EPI_ISL_497861, EPI_ISL_497862, EPI_ISL_497863, EPI_ISL_497864, EPI_ISL_497865, EPI_ISL_497866, EPI_ISL_497867, EPI_ISL_497868, EPI_ISL_497869, EPI_ISL_497870                                                                                                                                                                                                                                                                                                                                                                                                                                                                                                                                                                                                                                                                                                                                                                                                                                                                                                                                                                                                                                                                                                                                                                                                                                                                                                                                                                                                                                                                                                                                                                 | see above | Department of Microbiology, The University of Hong Kong                                                                                        | Department of Microbiology, The University of Hong Kong                                                                                        | Kevin K.W. To, Kwok-Yung Yuen                                                                                                                                                                                                                                                                                                                                      |
| EPI_ISL_498128, EPI_ISL_498129, EPI_ISL_498130, EPI_ISL_498132, EPI_ISL_498134, EPI_ISL_498136, EPI_ISL_498138, EPI_ISL_498139, EPI_ISL_498141, EPI_ISL_498142, EPI_ISL_498143, EPI_ISL_498144, EPI_ISL_498145, EPI_ISL_498146, EPI_ISL_498149, EPI_ISL_498151                                                                                                                                                                                                                                                                                                                                                                                                                                                                                                                                                                                                                                                                                                                                                                                                                                                                                                                                                                                                                                                                                                                                                                                                                                                                                                                                                                                                                                                                                                                                                                                                                                                                                                                                                                                                                                                                                                                                                                                                                                                                                                                 | see above | Department of Clinical Microbiology                                                                                                            | GIGA Medical Genomics                                                                                                                          | Keith Durkin, Maria Artesi, Sébastien Bontems, Raphaël Boreux, Cécile Meex, Axelle Chaslain, Céline Fombellida-Lopez, Pierrette Melin, Marie-Pierre Hayette, Vincent Bours.                                                                                                                                                                                        |
| EPI_ISL_498226                                                                                                                                                                                                                                                                                                                                                                                                                                                                                                                                                                                                                                                                                                                                                                                                                                                                                                                                                                                                                                                                                                                                                                                                                                                                                                                                                                                                                                                                                                                                                                                                                                                                                                                                                                                                                                                                                                                                                                                                                                                                                                                                                                                                                                                                                                                                                                 |           | LIC                                                                                                                                            | LIC                                                                                                                                            | LIC                                                                                                                                                                                                                                                                                                                                                                |
| EPI_ISL_498269, EPI_ISL_498270, EPI_ISL_498271                                                                                                                                                                                                                                                                                                                                                                                                                                                                                                                                                                                                                                                                                                                                                                                                                                                                                                                                                                                                                                                                                                                                                                                                                                                                                                                                                                                                                                                                                                                                                                                                                                                                                                                                                                                                                                                                                                                                                                                                                                                                                                                                                                                                                                                                                                                                 |           | Department of Microbiology, The University of Hong Kong                                                                                        | Department of Microbiology, The University of Hong Kong                                                                                        | Kevin K.W. To, Kwok-Yung Yuen                                                                                                                                                                                                                                                                                                                                      |
| EPI_ISL_498628                                                                                                                                                                                                                                                                                                                                                                                                                                                                                                                                                                                                                                                                                                                                                                                                                                                                                                                                                                                                                                                                                                                                                                                                                                                                                                                                                                                                                                                                                                                                                                                                                                                                                                                                                                                                                                                                                                                                                                                                                                                                                                                                                                                                                                                                                                                                                                 |           | Department of Clinical Microbiology                                                                                                            | GIGA Medical Genomics                                                                                                                          | Keith Durkin, Maria Artesi, Sébastien Bontems, Raphaël Boreux, Cécile Meex, Axelle Chaslain, Céline Fombellida-Lopez, Pierrette Melin, Marie-Pierre Hayette, Vincent Bours.                                                                                                                                                                                        |
| EPI_ISL_500949                                                                                                                                                                                                                                                                                                                                                                                                                                                                                                                                                                                                                                                                                                                                                                                                                                                                                                                                                                                                                                                                                                                                                                                                                                                                                                                                                                                                                                                                                                                                                                                                                                                                                                                                                                                                                                                                                                                                                                                                                                                                                                                                                                                                                                                                                                                                                                 |           | Department of MicroBiology, Government Medical College, Surat                                                                                  | Gujarat Biotechnology Research Centre                                                                                                          | Komal Patel, Labdhi Pandya, Afzal Ansari, Nikha Trivedi, Naresh Chauhan, Summaiya Mullan, Amit gamit, Apurvasinh Puvar, Janvi Raval, Zarna Patel, Monika Gandhi, Pinal Trivedi, Maharshi Pandya, Nidhi Patel, Nitin Savaliya, Raghawendra Kumar, Dinesh Kumar, Zuber Saiyed, R D Dixit, A M Kadri, Harsh Bakshi, Chaitanya Joshi, Madhvi Joshi                     |
| EPI_ISL_500950                                                                                                                                                                                                                                                                                                                                                                                                                                                                                                                                                                                                                                                                                                                                                                                                                                                                                                                                                                                                                                                                                                                                                                                                                                                                                                                                                                                                                                                                                                                                                                                                                                                                                                                                                                                                                                                                                                                                                                                                                                                                                                                                                                                                                                                                                                                                                                 |           | Department of MicroBiology, Government Medical College, Surat                                                                                  | Gujarat Biotechnology Research Centre                                                                                                          | Labdhi Pandya, Afzal Ansari, Nikha Trivedi, Naresh Chauhan, Summaiya Mullan, Amit gamit, Apurvasinh Puvar, Janvi Raval, Zarna Patel, Monika Gandhi, Pinal Trivedi, Maharshi Pandya, Nidhi Patel, Nitin Savaliya, Raghawendra Kumar, Dinesh Kumar, Zuber Saiyed, Komal Patel, R D Dixit, A M Kadri, Harsh Bakshi, Chaitanya Joshi, Madhvi Joshi                     |
| EPI_ISL_509444, EPI_ISL_509445, EPI_ISL_509446, EPI_ISL_509447, EPI_ISL_509448, EPI_ISL_509449, EPI_ISL_509450, EPI_ISL_509451, EPI_ISL_509452, EPI_ISL_509453, EPI_ISL_509454, EPI_ISL_509455, EPI_ISL_509456, EPI_ISL_509457, EPI_ISL_509458, EPI_ISL_509459, EPI_ISL_509460, EPI_ISL_509461, EPI_ISL_509462, EPI_ISL_509463, EPI_ISL_509464, EPI_ISL_509465, EPI_ISL_509466, EPI_ISL_509467, EPI_ISL_509468, EPI_ISL_509469, EPI_ISL_509470, EPI_ISL_509471, EPI_ISL_509472, EPI_ISL_509473, EPI_ISL_509474, EPI_ISL_509475, EPI_ISL_509476, EPI_ISL_509477, EPI_ISL_509478, EPI_ISL_509479, EPI_ISL_509480, EPI_ISL_509481, EPI_ISL_509482, EPI_ISL_509483, EPI_ISL_509484, EPI_ISL_509485, EPI_ISL_509486, EPI_ISL_509487, EPI_ISL_509488, EPI_ISL_509489, EPI_ISL_509490, EPI_ISL_509491                                                                                                                                                                                                                                                                                                                                                                                                                                                                                                                                                                                                                                                                                                                                                                                                                                                                                                                                                                                                                                                                                                                                                                                                                                                                                                                                                                                                                                                                                                                                                                                 | see above | Maryland Department of Health                                                                                                                  | Maryland Department of Health                                                                                                                  | Keller,E.                                                                                                                                                                                                                                                                                                                                                          |
| EPI_ISL_510103, EPI_ISL_510104, EPI_ISL_510105, EPI_ISL_510106, EPI_ISL_510107, EPI_ISL_510108, EPI_ISL_510109, EPI_ISL_510110, EPI_ISL_510111, EPI_ISL_510112, EPI_ISL_510113, EPI_ISL_510114, EPI_ISL_510115, EPI_ISL_510116, EPI_ISL_510117, EPI_ISL_510118, EPI_ISL_510119, EPI_ISL_510120, EPI_ISL_510121, EPI_ISL_510122, EPI_ISL_510123, EPI_ISL_510124, EPI_ISL_510125, EPI_ISL_510126, EPI_ISL_510127, EPI_ISL_510128, EPI_ISL_510129, EPI_ISL_510130, EPI_ISL_510131, EPI_ISL_510132, EPI_ISL_510133, EPI_ISL_510134, EPI_ISL_510135, EPI_ISL_510136, EPI_ISL_510137, EPI_ISL_510138, EPI_ISL_510139, EPI_ISL_510140, EPI_ISL_510141, EPI_ISL_510142, EPI_ISL_510143, EPI_ISL_510144, EPI_ISL_510145, EPI_ISL_510146, EPI_ISL_510147, EPI_ISL_510148, EPI_ISL_510149, EPI_ISL_510150, EPI_ISL_510151, EPI_ISL_510152, EPI_ISL_510153, EPI_ISL_510154, EPI_ISL_510155, EPI_ISL_510156, EPI_ISL_510157, EPI_ISL_510158, EPI_ISL_510159, EPI_ISL_510160, EPI_ISL_510161, EPI_ISL_510162, EPI_ISL_510163, EPI_ISL_510164, EPI_ISL_510165, EPI_ISL_510166, EPI_ISL_510167, EPI_ISL_510168, EPI_ISL_510169, EPI_ISL_510170, EPI_ISL_510171, EPI_ISL_510172, EPI_ISL_510173, EPI_ISL_510174, EPI_ISL_510175, EPI_ISL_510176, EPI_ISL_510177, EPI_ISL_510178, EPI_ISL_510179, EPI_ISL_510180, EPI_ISL_510181, EPI_ISL_510182, EPI_ISL_510183, EPI_ISL_510184, EPI_ISL_510185, EPI_ISL_510186, EPI_ISL_510187, EPI_ISL_510188, EPI_ISL_510189, EPI_ISL_510190, EPI_ISL_510191, EPI_ISL_510192, EPI_ISL_510193, EPI_ISL_510194, EPI_ISL_510195, EPI_ISL_510196, EPI_ISL_510197, EPI_ISL_510198, EPI_ISL_510199, EPI_ISL_510200, EPI_ISL_510201, EPI_ISL_510202, EPI_ISL_510203, EPI_ISL_510204, EPI_ISL_510205, EPI_ISL_510206, EPI_ISL_510207, EPI_ISL_510208, EPI_ISL_510209, EPI_ISL_510210, EPI_ISL_510211, EPI_ISL_510212, EPI_ISL_510213, EPI_ISL_510214, EPI_ISL_510215, EPI_ISL_510216, EPI_ISL_510217, EPI_ISL_510218, EPI_ISL_510219, EPI_ISL_510220, EPI_ISL_510221, EPI_ISL_510222, EPI_ISL_510223, EPI_ISL_510224, EPI_ISL_510225, EPI_ISL_510226, EPI_ISL_510227, EPI_ISL_510228, EPI_ISL_510229, EPI_ISL_510230, EPI_ISL_510231, EPI_ISL_510232, EPI_ISL_510233, EPI_ISL_510234, EPI_ISL_510235, EPI_ISL_510236, EPI_ISL_510237, EPI_ISL_510238, EPI_ISL_510239, EPI_ISL_510240, EPI_ISL_510241, EPI_ISL_510242, EPI_ISL_510243, EPI_ISL_510244, EPI_ISL_510245 | see above | Hospital General Universitario Gregorio Marañón                                                                                                | SeqCOVID-SPAIN consortium/IBV(CSIC)                                                                                                            | Laura Pérez-Lago, Marta Herranz, Jon Sicilia, Julia Suárez, Pilar Catalán, Patricia Muñoz, Darío Garcia de Viedma and SeqCOVID-SPAIN consortium                                                                                                                                                                                                                    |
| EPI_ISL_510538, EPI_ISL_510539, EPI_ISL_510540                                                                                                                                                                                                                                                                                                                                                                                                                                                                                                                                                                                                                                                                                                                                                                                                                                                                                                                                                                                                                                                                                                                                                                                                                                                                                                                                                                                                                                                                                                                                                                                                                                                                                                                                                                                                                                                                                                                                                                                                                                                                                                                                                                                                                                                                                                                                 |           | Department of Microbiology, The University of Hong Kong                                                                                        | Department of Microbiology, The University of Hong Kong                                                                                        | Kevin K.W. To, Kwok-Yung Yuen                                                                                                                                                                                                                                                                                                                                      |
| EPI_ISL_512066                                                                                                                                                                                                                                                                                                                                                                                                                                                                                                                                                                                                                                                                                                                                                                                                                                                                                                                                                                                                                                                                                                                                                                                                                                                                                                                                                                                                                                                                                                                                                                                                                                                                                                                                                                                                                                                                                                                                                                                                                                                                                                                                                                                                                                                                                                                                                                 |           | Sardar Vallabhbhai Patel Institute of Medical Sciences & Research                                                                              | Gujarat Biotechnology Research Centre                                                                                                          | Komal Patel, Labdhi Pandya, Afzal Ansari, Nikha Trivedi, Pranay Shah, Kamesh J Upadhyay, Sanjay Kapadia, Apurvasinh Puvar, Janvi Raval, Zarna Patel, Monika Gandhi, Pinal Trivedi, Maharshi Pandya, Nidhi Patel, Nitin Savaliya, Raghawendra Kumar, Dinesh Kumar, Zuber Saiyed, R D Dixit, A M Kadri, Harsh Bakshi, Chaitanya Joshi, Madhvi Joshi                  |
| EPI_ISL_512067                                                                                                                                                                                                                                                                                                                                                                                                                                                                                                                                                                                                                                                                                                                                                                                                                                                                                                                                                                                                                                                                                                                                                                                                                                                                                                                                                                                                                                                                                                                                                                                                                                                                                                                                                                                                                                                                                                                                                                                                                                                                                                                                                                                                                                                                                                                                                                 |           | Sardar Vallabhbhai Patel Institute of Medical Sciences & Research                                                                              | Gujarat Biotechnology Research Centre                                                                                                          | Labdhi Pandya, Afzal Ansari, Nikha Trivedi, Pranay Shah, Kamesh J Upadhyay, Sanjay Kapadia, Apurvasinh Puvar, Janvi Raval, Zarna Patel, Monika Gandhi, Pinal Trivedi, Maharshi Pandya, Nidhi Patel, Nitin Savaliya, Raghawendra Kumar, Dinesh Kumar, Zuber Saiyed, Komal Patel, R D Dixit, A M Kadri, Harsh Bakshi, Chaitanya Joshi, Madhvi Joshi                  |
| EPI_ISL_513925                                                                                                                                                                                                                                                                                                                                                                                                                                                                                                                                                                                                                                                                                                                                                                                                                                                                                                                                                                                                                                                                                                                                                                                                                                                                                                                                                                                                                                                                                                                                                                                                                                                                                                                                                                                                                                                                                                                                                                                                                                                                                                                                                                                                                                                                                                                                                                 |           | Microbiology & Bioinformatics and Biostatistics, Kohat University of Science and Technology (Pakistan) & Shanghai Jiao Tong University (China) | Microbiology & Bioinformatics and Biostatistics, Kohat University of Science and Technology (Pakistan) & Shanghai Jiao Tong University (China) | Khan,M.T., Khan,T.A., Ali,S., Khan,A.S., Muhammad,N. and Wei,D.Q.                                                                                                                                                                                                                                                                                                  |
| EPI_ISL_514065, EPI_ISL_514067, EPI_ISL_514068, EPI_ISL_514071, EPI_ISL_514072, EPI_ISL_514075, EPI_ISL_514076, EPI_ISL_514080, EPI_ISL_514081, EPI_ISL_514082, EPI_ISL_514083, EPI_ISL_514085, EPI_ISL_514086, EPI_ISL_514087, EPI_ISL_514089                                                                                                                                                                                                                                                                                                                                                                                                                                                                                                                                                                                                                                                                                                                                                                                                                                                                                                                                                                                                                                                                                                                                                                                                                                                                                                                                                                                                                                                                                                                                                                                                                                                                                                                                                                                                                                                                                                                                                                                                                                                                                                                                 | see above | Navy and Marine Corps Public Health Center                                                                                                     | Pathogen Discovery, Respiratory Viruses Branch, Division of Viral Diseases, Centers for Disease Control and Prevention                         | Krista Queen, Yan Li, Anna Montmayeur, Jing Zhang, Ying Tao, Anna Uehara, Rachel Marine, Clinton R. Paden, Haibin Wang, Suxiang Tong                                                                                                                                                                                                                               |
| EPI_ISL_514128                                                                                                                                                                                                                                                                                                                                                                                                                                                                                                                                                                                                                                                                                                                                                                                                                                                                                                                                                                                                                                                                                                                                                                                                                                                                                                                                                                                                                                                                                                                                                                                                                                                                                                                                                                                                                                                                                                                                                                                                                                                                                                                                                                                                                                                                                                                                                                 |           | Navy and Marine Corps Public Health Center                                                                                                     | Centers for Disease Control and Prevention                                                                                                     | Krista Queen, Yan Li, Anna Montmayeur, Jing Zhang, Ying Tao, Anna Uehara, Rachel Marine, Clinton R. Paden, Haibin Wang, Suxiang Tong                                                                                                                                                                                                                               |
| EPI_ISL_514585                                                                                                                                                                                                                                                                                                                                                                                                                                                                                                                                                                                                                                                                                                                                                                                                                                                                                                                                                                                                                                                                                                                                                                                                                                                                                                                                                                                                                                                                                                                                                                                                                                                                                                                                                                                                                                                                                                                                                                                                                                                                                                                                                                                                                                                                                                                                                                 |           | B.J. Medical College and Civil hospital, Ahmedabad                                                                                             | Gujarat Biotechnology Research Centre                                                                                                          | Komal Patel, Labdhi Pandya, Afzal Ansari, Nikha Trivedi, Pranay Shah, Kamesh J Upadhyay, Sanjay Kapadia, Apurvasinh Puvar, Janvi Raval, Zarna Patel, Monika Gandhi, Pinal Trivedi, Maharshi Pandya, Nidhi Patel, Nitin Savaliya, Raghawendra Kumar, Dinesh Kumar, Zuber Saiyed, R D Dixit, A M Kadri, Harsh Bakshi, Chaitanya Joshi, Madhvi Joshi                  |
| EPI_ISL_514586                                                                                                                                                                                                                                                                                                                                                                                                                                                                                                                                                                                                                                                                                                                                                                                                                                                                                                                                                                                                                                                                                                                                                                                                                                                                                                                                                                                                                                                                                                                                                                                                                                                                                                                                                                                                                                                                                                                                                                                                                                                                                                                                                                                                                                                                                                                                                                 |           | B.J. Medical College and Civil hospital, Ahmedabad                                                                                             | Gujarat Biotechnology Research Centre                                                                                                          | Labdhi Pandya, Afzal Ansari, Nikha Trivedi, Pranay Shah, Kamesh J Upadhyay, Sanjay Kapadia, Apurvasinh Puvar, Janvi Raval, Zarna Patel, Monika Gandhi, Pinal Trivedi, Maharshi Pandya, Nidhi Patel, Nitin Savaliya, Raghawendra Kumar, Dinesh Kumar, Zuber Saiyed, Komal Patel, R D Dixit, A M Kadri, Harsh Bakshi, Chaitanya Joshi, Madhvi Joshi                  |
| EPI_ISL_514603                                                                                                                                                                                                                                                                                                                                                                                                                                                                                                                                                                                                                                                                                                                                                                                                                                                                                                                                                                                                                                                                                                                                                                                                                                                                                                                                                                                                                                                                                                                                                                                                                                                                                                                                                                                                                                                                                                                                                                                                                                                                                                                                                                                                                                                                                                                                                                 |           | B.J. Medical College and Civil hospital, Ahmedabad                                                                                             | Gujarat Biotechnology Research Centre                                                                                                          | Komal Patel, Labdhi Pandya, Afzal Ansari, Nikha Trivedi, Pranay Shah, Kamesh J Upadhyay, Sanjay Kapadia, Apurvasinh Puvar, Janvi Raval, Zarna Patel, Monika Gandhi, Pinal Trivedi, Maharshi Pandya, Nidhi Patel, Nitin Savaliya, Raghawendra Kumar, Dinesh Kumar, Zuber Saiyed, R D Dixit, A M Kadri, Harsh Bakshi, Chaitanya Joshi, Madhvi Joshi                  |
| EPI_ISL_514604                                                                                                                                                                                                                                                                                                                                                                                                                                                                                                                                                                                                                                                                                                                                                                                                                                                                                                                                                                                                                                                                                                                                                                                                                                                                                                                                                                                                                                                                                                                                                                                                                                                                                                                                                                                                                                                                                                                                                                                                                                                                                                                                                                                                                                                                                                                                                                 |           | B.J. Medical College and Civil hospital, Ahmedabad                                                                                             | Gujarat Biotechnology Research Centre                                                                                                          | Labdhi Pandya, Afzal Ansari, Nikha Trivedi, Pranay Shah, Kamesh J Upadhyay, Sanjay Kapadia, Apurvasinh Puvar, Janvi Raval, Zarna Patel, Monika Gandhi, Pinal Trivedi, Maharshi Pandya, Nidhi Patel, Nitin Savaliya, Raghawendra Kumar, Dinesh Kumar, Zuber Saiyed, Komal Patel, R D Dixit, A M Kadri, Harsh Bakshi, Chaitanya Joshi, Madhvi Joshi                  |
| EPI_ISL_515056, EPI_ISL_515057, EPI_ISL_515058, EPI_ISL_515060, EPI_ISL_515061, EPI_ISL_515062, EPI_ISL_515063, EPI_ISL_515064, EPI_ISL_515065, EPI_ISL_515066, EPI_ISL_515067, EPI_ISL_515068, EPI_ISL_515069, EPI_ISL_515070, EPI_ISL_515073, EPI_ISL_515075, EPI_ISL_515076, EPI_ISL_515077, EPI_ISL_515078, EPI_ISL_515079, EPI_ISL_515080, EPI_ISL_515081                                                                                                                                                                                                                                                                                                                                                                                                                                                                                                                                                                                                                                                                                                                                                                                                                                                                                                                                                                                                                                                                                                                                                                                                                                                                                                                                                                                                                                                                                                                                                                                                                                                                                                                                                                                                                                                                                                                                                                                                                 | see above | Department of Clinical Microbiology                                                                                                            | GIGA Medical Genomics                                                                                                                          | Keith Durkin, Maria Artesi, Sebastian Bontems, Raphael Boreux, Cecile Meex, Axelle Chaslain, Céline Fombellida-Lopez, Pierrette Melin, Marie-Pierre Hayette, Vincent Bours.                                                                                                                                                                                        |
| EPI_ISL_516798, EPI_ISL_516799                                                                                                                                                                                                                                                                                                                                                                                                                                                                                                                                                                                                                                                                                                                                                                                                                                                                                                                                                                                                                                                                                                                                                                                                                                                                                                                                                                                                                                                                                                                                                                                                                                                                                                                                                                                                                                                                                                                                                                                                                                                                                                                                                                                                                                                                                                                                                 |           | Department of Microbiology, The University of Hong Kong                                                                                        | Department of Microbiology, The University of Hong Kong                                                                                        | Kevin K.W. To, Kwok-Yung Yuen                                                                                                                                                                                                                                                                                                                                      |
| EPI_ISL_524724                                                                                                                                                                                                                                                                                                                                                                                                                                                                                                                                                                                                                                                                                                                                                                                                                                                                                                                                                                                                                                                                                                                                                                                                                                                                                                                                                                                                                                                                                                                                                                                                                                                                                                                                                                                                                                                                                                                                                                                                                                                                                                                                                                                                                                                                                                                                                                 |           | B.J. Medical College and Civil hospital, Ahmedabad                                                                                             | Gujarat Biotechnology Research Centre                                                                                                          | Komal Patel, Labdhi Pandya, Afzal Ansari, Nikha Trivedi, Pranay Shah, Kamesh J Upadhyay, Sanjay Kapadia, Apurvasinh Puvar, Janvi Raval, Zarna Patel, Monika Gandhi, Pinal Trivedi, Maharshi Pandya, Nidhi Patel, Nitin Savaliya, Raghawendra Kumar, Dinesh Kumar, Zuber Saiyed, R D Dixit, A M Kadri, Harsh Bakshi, Chaitanya Joshi, Madhvi Joshi                  |
| EPI_ISL_524725                                                                                                                                                                                                                                                                                                                                                                                                                                                                                                                                                                                                                                                                                                                                                                                                                                                                                                                                                                                                                                                                                                                                                                                                                                                                                                                                                                                                                                                                                                                                                                                                                                                                                                                                                                                                                                                                                                                                                                                                                                                                                                                                                                                                                                                                                                                                                                 |           | B.J. Medical College and Civil hospital, Ahmedabad                                                                                             | Gujarat Biotechnology Research Centre                                                                                                          | Labdhi Pandya, Afzal Ansari, Nikha Trivedi, Pranay Shah, Kamesh J Upadhyay, Sanjay Kapadia, Apurvasinh Puvar, Janvi Raval, Zarna Patel, Monika Gandhi, Pinal Trivedi, Maharshi Pandya, Nidhi Patel, Nitin Savaliya, Raghawendra Kumar, Dinesh Kumar, Zuber Saiyed, Komal Patel, R D Dixit, A M Kadri, Harsh Bakshi, Chaitanya Joshi, Madhvi Joshi                  |
| EPI_ISL_524744                                                                                                                                                                                                                                                                                                                                                                                                                                                                                                                                                                                                                                                                                                                                                                                                                                                                                                                                                                                                                                                                                                                                                                                                                                                                                                                                                                                                                                                                                                                                                                                                                                                                                                                                                                                                                                                                                                                                                                                                                                                                                                                                                                                                                                                                                                                                                                 |           | GMERS Medical College and Hospital, Gandhinagar                                                                                                | Gujarat Biotechnology Research Centre                                                                                                          | Komal Patel, Labdhi Pandya, Afzal Ansari, Nikha Trivedi, Seema Bhatt, Gaurishankar Shrimali, Bhavesh Modi, Bharti Rajani, Apurvasinh Puvar, Janvi Raval, Zarna Patel, Monika Gandhi, Pinal Trivedi, Maharshi Pandya, Nidhi Patel, Nitin Savaliya, Raghawendra Kumar, Dinesh Kumar, Zuber Saiyed, R D Dixit, A M Kadri, Harsh Bakshi, Chaitanya Joshi, Madhvi Joshi |
| EPI_ISL_524745                                                                                                                                                                                                                                                                                                                                                                                                                                                                                                                                                                                                                                                                                                                                                                                                                                                                                                                                                                                                                                                                                                                                                                                                                                                                                                                                                                                                                                                                                                                                                                                                                                                                                                                                                                                                                                                                                                                                                                                                                                                                                                                                                                                                                                                                                                                                                                 |           | GMERS Medical College and Hospital, Gandhinagar                                                                                                | Gujarat Biotechnology Research Centre                                                                                                          | Labdhi Pandya, Afzal Ansari, Nikha Trivedi, Seema Bhatt, Gaurishankar Shrimali, Bhavesh Modi, Bharti Rajani, Apurvasinh Puvar, Janvi Raval, Zarna Patel, Monika Gandhi, Pinal Trivedi, Maharshi Pandya, Nidhi Patel, Nitin Savaliya, Raghawendra Kumar, Dinesh Kumar, Zuber Saiyed, Komal Patel, R D Dixit, A M Kadri, Harsh Bakshi, Chaitanya Joshi, Madhvi Joshi |

|                                                                                                                                                                                                                                                                                                                                                                                                                                                                                                                                                                                                                                                                                                                                                                                                                                                                                                                                                                                                                                                                                                                                                                                                                                                                                                                                                                                                                                                                                                                                                                                                                                                                                                                                                                                                                                                                |                                                       |                                                                                                                        |                                                                                                                                                                                                                                                                                                                                                                                                                                                                                         |
|----------------------------------------------------------------------------------------------------------------------------------------------------------------------------------------------------------------------------------------------------------------------------------------------------------------------------------------------------------------------------------------------------------------------------------------------------------------------------------------------------------------------------------------------------------------------------------------------------------------------------------------------------------------------------------------------------------------------------------------------------------------------------------------------------------------------------------------------------------------------------------------------------------------------------------------------------------------------------------------------------------------------------------------------------------------------------------------------------------------------------------------------------------------------------------------------------------------------------------------------------------------------------------------------------------------------------------------------------------------------------------------------------------------------------------------------------------------------------------------------------------------------------------------------------------------------------------------------------------------------------------------------------------------------------------------------------------------------------------------------------------------------------------------------------------------------------------------------------------------|-------------------------------------------------------|------------------------------------------------------------------------------------------------------------------------|-----------------------------------------------------------------------------------------------------------------------------------------------------------------------------------------------------------------------------------------------------------------------------------------------------------------------------------------------------------------------------------------------------------------------------------------------------------------------------------------|
|                                                                                                                                                                                                                                                                                                                                                                                                                                                                                                                                                                                                                                                                                                                                                                                                                                                                                                                                                                                                                                                                                                                                                                                                                                                                                                                                                                                                                                                                                                                                                                                                                                                                                                                                                                                                                                                                |                                                       |                                                                                                                        | Monika Gandhi, Pinal Trivedi, Maharshi Pandya, Nidhi Patel, Nitin Savaliya, Raghawendra Kumar, Dinesh Kumar, Zuber Saiyed, Komal Patel, R D Dixit, A M Kadri, Harsh Bakshi, Chaitanya Joshi, Madhvi Joshi                                                                                                                                                                                                                                                                               |
| EPI_ISL_524760                                                                                                                                                                                                                                                                                                                                                                                                                                                                                                                                                                                                                                                                                                                                                                                                                                                                                                                                                                                                                                                                                                                                                                                                                                                                                                                                                                                                                                                                                                                                                                                                                                                                                                                                                                                                                                                 | GMERS Medical College and Hospital, Dharpur, Patan    | Gujarat Biotechnology Research Centre                                                                                  | Komal Patel, Labdhi Pandya, Afzal Ansari, Nikha Trivedi, A N Parmar, Apurvashin Puvar, Janvi Raval, Zarna Patel, Monika Gandhi, Pinal Trivedi, Maharshi Pandya, Nidhi Patel, Nitin Savaliya, Raghawendra Kumar, Dinesh Kumar, Zuber Saiyed, R D Dixit, A M Kadri, Harsh Bakshi, Chaitanya Joshi, Madhvi Joshi                                                                                                                                                                           |
| EPI_ISL_524761                                                                                                                                                                                                                                                                                                                                                                                                                                                                                                                                                                                                                                                                                                                                                                                                                                                                                                                                                                                                                                                                                                                                                                                                                                                                                                                                                                                                                                                                                                                                                                                                                                                                                                                                                                                                                                                 | GMERS Medical College and Hospital, Dharpur, Patan    | Gujarat Biotechnology Research Centre                                                                                  | Labdhi Pandya, Afzal Ansari, Nikha Trivedi, A N Parmar, Apurvashin Puvar, Janvi Raval, Zarna Patel, Monika Gandhi, Pinal Trivedi, Maharshi Pandya, Nidhi Patel, Nitin Savaliya, Raghawendra Kumar, Dinesh Kumar, Zuber Saiyed, Komal Patel, R D Dixit, A M Kadri, Harsh Bakshi, Chaitanya Joshi, Madhvi Joshi                                                                                                                                                                           |
| EPI_ISL_525575, EPI_ISL_525576, EPI_ISL_525577, EPI_ISL_525578, EPI_ISL_525579, EPI_ISL_525580, EPI_ISL_525581, EPI_ISL_525582, EPI_ISL_525583, EPI_ISL_525584, EPI_ISL_525585, EPI_ISL_525586, EPI_ISL_525587, EPI_ISL_525588, EPI_ISL_525589, EPI_ISL_525590, EPI_ISL_525591, EPI_ISL_525592, EPI_ISL_525593, EPI_ISL_525594, EPI_ISL_525595, EPI_ISL_525596, EPI_ISL_525597, EPI_ISL_525598, EPI_ISL_525599, EPI_ISL_526000, EPI_ISL_526001, EPI_ISL_526002, EPI_ISL_526003, EPI_ISL_526004, EPI_ISL_526005, EPI_ISL_526006, EPI_ISL_526007, EPI_ISL_526008, EPI_ISL_526009, EPI_ISL_526010, EPI_ISL_526011, EPI_ISL_526012, EPI_ISL_526013, EPI_ISL_526014, EPI_ISL_526015, EPI_ISL_526016, EPI_ISL_526017, EPI_ISL_526018, EPI_ISL_526019, EPI_ISL_526020, EPI_ISL_526021, EPI_ISL_526022, EPI_ISL_526023, EPI_ISL_526024, EPI_ISL_526025, EPI_ISL_526026, EPI_ISL_526027, EPI_ISL_526028, EPI_ISL_526029, EPI_ISL_526030, EPI_ISL_526031, EPI_ISL_526032, EPI_ISL_526033, EPI_ISL_526034, EPI_ISL_526035, EPI_ISL_526036, EPI_ISL_526037, EPI_ISL_526038, EPI_ISL_526039, EPI_ISL_526040, EPI_ISL_526041, EPI_ISL_526042, EPI_ISL_526043, EPI_ISL_526044, EPI_ISL_526045, EPI_ISL_526046, EPI_ISL_526047, EPI_ISL_526048, EPI_ISL_526049, EPI_ISL_526050, EPI_ISL_526051, EPI_ISL_526052, EPI_ISL_526053, EPI_ISL_526054, EPI_ISL_526055, EPI_ISL_526056, EPI_ISL_526057, EPI_ISL_526058, EPI_ISL_526059, EPI_ISL_526060, EPI_ISL_526061, EPI_ISL_526062, EPI_ISL_526063, EPI_ISL_526064, EPI_ISL_526065, EPI_ISL_526066, EPI_ISL_526067, EPI_ISL_526068, EPI_ISL_526069, EPI_ISL_526070, EPI_ISL_526071, EPI_ISL_526072, EPI_ISL_526073, EPI_ISL_526074, EPI_ISL_526075, EPI_ISL_526076, EPI_ISL_526077, EPI_ISL_526078, EPI_ISL_526079, EPI_ISL_526080, EPI_ISL_526081, EPI_ISL_526082, EPI_ISL_526083, EPI_ISL_526084, EPI_ISL_526085, EPI_ISL_526086 | Wadsworth Center, New York State Department of Health | Wadsworth Center, New York State Department of Health                                                                  | Kirsten St. George, Daryl M. Lamson, Sara Griesemer, Jonathan Plitnick, Navjot Singh, Matthew D. Shudt, Erica Lasek-Nesselquist                                                                                                                                                                                                                                                                                                                                                         |
| see above                                                                                                                                                                                                                                                                                                                                                                                                                                                                                                                                                                                                                                                                                                                                                                                                                                                                                                                                                                                                                                                                                                                                                                                                                                                                                                                                                                                                                                                                                                                                                                                                                                                                                                                                                                                                                                                      | Wadsworth Center, New York State Department of Health | Wadsworth Center, New York State Department of Health                                                                  | Kirsten St. George, Daryl M. Lamson, Sara Griesemer, Jonathan Plitnick, Navjot Singh, Matthew D. Shudt, Erica Lasek-Nesselquist                                                                                                                                                                                                                                                                                                                                                         |
| EPI_ISL_527666                                                                                                                                                                                                                                                                                                                                                                                                                                                                                                                                                                                                                                                                                                                                                                                                                                                                                                                                                                                                                                                                                                                                                                                                                                                                                                                                                                                                                                                                                                                                                                                                                                                                                                                                                                                                                                                 | IN State Department of Health Laboratory Services     | Pathogen Discovery, Respiratory Viruses Branch, Division of Viral Diseases, Centers for Disease Control and Prevention | Krista Queen, Brian Lynch, Yan Li, Anna Montmayeur, Jing Zhang, Ying Tao, Anna Uehara, Rachel Marine, Clinton R. Paden, Haibin Wang, Suxiang Tong                                                                                                                                                                                                                                                                                                                                       |
| EPI_ISL_527692, EPI_ISL_527699, EPI_ISL_527701, EPI_ISL_527714, EPI_ISL_527716, EPI_ISL_527717, EPI_ISL_527720, EPI_ISL_527724, EPI_ISL_527731, EPI_ISL_527734, EPI_ISL_527735                                                                                                                                                                                                                                                                                                                                                                                                                                                                                                                                                                                                                                                                                                                                                                                                                                                                                                                                                                                                                                                                                                                                                                                                                                                                                                                                                                                                                                                                                                                                                                                                                                                                                 |                                                       |                                                                                                                        |                                                                                                                                                                                                                                                                                                                                                                                                                                                                                         |
| see above                                                                                                                                                                                                                                                                                                                                                                                                                                                                                                                                                                                                                                                                                                                                                                                                                                                                                                                                                                                                                                                                                                                                                                                                                                                                                                                                                                                                                                                                                                                                                                                                                                                                                                                                                                                                                                                      | MN PHL Division, Minnesota Department of Health       | Pathogen Discovery, Respiratory Viruses Branch, Division of Viral Diseases, Centers for Disease Control and Prevention | Krista Queen, Brian Lynch, Yan Li, Anna Montmayeur, Jing Zhang, Ying Tao, Anna Uehara, Rachel Marine, Clinton R. Paden, Haibin Wang, Suxiang Tong                                                                                                                                                                                                                                                                                                                                       |
| EPI_ISL_528831, EPI_ISL_528833, EPI_ISL_528850, EPI_ISL_528862                                                                                                                                                                                                                                                                                                                                                                                                                                                                                                                                                                                                                                                                                                                                                                                                                                                                                                                                                                                                                                                                                                                                                                                                                                                                                                                                                                                                                                                                                                                                                                                                                                                                                                                                                                                                 | CSIR-Centre for Cellular and Molecular Biology        | CSIR-Centre for Cellular and Molecular Biology                                                                         | Lamuk Zaveri, Shagufta Khan, Namami Gaur, Sakshi Shambhavi, Nikhil Hajirnis, M Soujanya Reddy, Pratheusa Maccha, Tulasi Nagabandi, Purushotham Vodnala, Payel Mukherjee, Sofia Banu, Priya Singh, Onkar Kulkarni, Dhiviya Vedagiri, Divya Gupta, Vishal Sah, Santosh Kumar Kuncha, Krishnan Harinivas Harshan, Archana Bharadwaj Siva, Karthik Bharadwaj Tallapaka, Renu Sudhakar, Samesh Gorde, Gangumala Srinivas Reddy, Sujoy Deb, Swati Bayyana, Rakesh K Mishra, Divya Tej Sowpati |
| EPI_ISL_529033, EPI_ISL_529034, EPI_ISL_529035, EPI_ISL_529036                                                                                                                                                                                                                                                                                                                                                                                                                                                                                                                                                                                                                                                                                                                                                                                                                                                                                                                                                                                                                                                                                                                                                                                                                                                                                                                                                                                                                                                                                                                                                                                                                                                                                                                                                                                                 | Wadsworth Center, New York State Department of Health | Wadsworth Center, New York State Department of Health                                                                  | Kirsten St. George, Daryl M. Lamson, Sara Griesemer, Jonathan Plitnick, Navjot Singh, Matthew D. Shudt, Erica Lasek-Nesselquist                                                                                                                                                                                                                                                                                                                                                         |
| EPI_ISL_529961                                                                                                                                                                                                                                                                                                                                                                                                                                                                                                                                                                                                                                                                                                                                                                                                                                                                                                                                                                                                                                                                                                                                                                                                                                                                                                                                                                                                                                                                                                                                                                                                                                                                                                                                                                                                                                                 | Husada Utama Hospital                                 | Institute of Tropical Disease, Universitas Airlangga                                                                   | Krisnoadi Rahardjo, Aldise M Nastri, Jezy R Dewantari, Rima R Prasetya, Didi Dewanto, Gatot Soegiarto, Laksmi Wulandari, Retno A Setyoningrum, Resti Yudhawati, Yohko K Shimizu, Mitsuhiro Nishimura, Yasuko Mori, Soetjipto, Kazufumi Shimizu, Maria I Lusida                                                                                                                                                                                                                          |
| EPI_ISL_529965                                                                                                                                                                                                                                                                                                                                                                                                                                                                                                                                                                                                                                                                                                                                                                                                                                                                                                                                                                                                                                                                                                                                                                                                                                                                                                                                                                                                                                                                                                                                                                                                                                                                                                                                                                                                                                                 | RSUD Dr. Soetomo                                      | Institute of Tropical Disease, Universitas Airlangga                                                                   | Krisnoadi Rahardjo, Aldise M Nastri, Jezy R Dewantari, Rima R Prasetya, Joni Wahyuhadi, Gatot Soegiarto, Laksmi Wulandari, Retno A Setyoningrum, Resti Yudhawati, Yohko K Shimizu, Mitsuhiro Nishimura, Yasuko Mori, Soetjipto, Kazufumi Shimizu, Maria I Lusida                                                                                                                                                                                                                        |
| EPI_ISL_534731                                                                                                                                                                                                                                                                                                                                                                                                                                                                                                                                                                                                                                                                                                                                                                                                                                                                                                                                                                                                                                                                                                                                                                                                                                                                                                                                                                                                                                                                                                                                                                                                                                                                                                                                                                                                                                                 | Wadsworth Center, New York State Department of Health | Wadsworth Center, New York State Department of Health                                                                  | Kirsten St. George, Daryl M. Lamson, Sara Griesemer, Jonathan Plitnick, Navjot Singh, Matthew D. Shudt, Erica Lasek-Nesselquist                                                                                                                                                                                                                                                                                                                                                         |
| EPI_ISL_539616                                                                                                                                                                                                                                                                                                                                                                                                                                                                                                                                                                                                                                                                                                                                                                                                                                                                                                                                                                                                                                                                                                                                                                                                                                                                                                                                                                                                                                                                                                                                                                                                                                                                                                                                                                                                                                                 | CSIR-Centre for Cellular and Molecular Biology        | CSIR-Centre for Cellular and Molecular Biology                                                                         | Lamuk Zaveri, Shagufta Khan, Namami Gaur, Sakshi Shambhavi, Nikhil Hajirnis, M Soujanya Reddy, Pratheusa Maccha, Tulasi Nagabandi, Purushotham Vodnala, Payel Mukherjee, Sofia Banu, Priya Singh, Onkar Kulkarni, Dhiviya Vedagiri, Divya Gupta, Vishal Sah, Santosh Kumar Kuncha, Krishnan Harinivas Harshan, Archana Bharadwaj Siva, Karthik Bharadwaj Tallapaka, Renu Sudhakar, Samesh Gorde, Gangumala Srinivas Reddy, Sujoy Deb, Swati Bayyana, Rakesh K Mishra, Divya Tej Sowpati |
| EPI_ISL_539617                                                                                                                                                                                                                                                                                                                                                                                                                                                                                                                                                                                                                                                                                                                                                                                                                                                                                                                                                                                                                                                                                                                                                                                                                                                                                                                                                                                                                                                                                                                                                                                                                                                                                                                                                                                                                                                 | CSIR-Centre for Cellular and Molecular Biology        | CSIR-Centre for Cellular and Molecular Biology                                                                         | Lamuk Zaveri, Shagufta Khan, Nikhil Hajirnis, M Soujanya Reddy, Pratheusa Maccha, Namami Gaur, Sakshi Shambhavi, Tulasi Nagabandi, Purushotham Vodnala, Payel Mukherjee, Sofia Banu, Priya Singh, Onkar Kulkarni, Dhiviya Vedagiri, Divya Gupta, Vishal Sah, Santosh Kumar Kuncha, Krishnan Harinivas Harshan, Archana Bharadwaj Siva, Karthik Bharadwaj Tallapaka, Umesh Kumar, Unis Ahmad Bhat, Ajay Sarawagi, Priyanka Pant, Rajkanwar Nathawat, Rakesh K Mishra, Divya Tej Sowpati  |
| EPI_ISL_539618                                                                                                                                                                                                                                                                                                                                                                                                                                                                                                                                                                                                                                                                                                                                                                                                                                                                                                                                                                                                                                                                                                                                                                                                                                                                                                                                                                                                                                                                                                                                                                                                                                                                                                                                                                                                                                                 | CSIR-Centre for Cellular and Molecular Biology        | CSIR-Centre for Cellular and Molecular Biology                                                                         | Lamuk Zaveri, Shagufta Khan, Nikhil Hajirnis, M Soujanya Reddy, Pratheusa Maccha, Namami Gaur, Sakshi Shambhavi, Tulasi Nagabandi, Purushotham Vodnala, Payel Mukherjee, Sofia Banu, Priya Singh, Onkar Kulkarni, Dhiviya Vedagiri, Divya Gupta, Vishal Sah, Santosh Kumar Kuncha, Krishnan Harinivas Harshan, Archana Bharadwaj Siva, Karthik Bharadwaj Tallapaka, Zeba Rizvi, Zuberwasim Sayyad, Kakade Aishwarya Arun, Amrutha H C, Ananga Ghosh, Rakesh K Mishra, Divya Tej Sowpati |
| EPI_ISL_539646                                                                                                                                                                                                                                                                                                                                                                                                                                                                                                                                                                                                                                                                                                                                                                                                                                                                                                                                                                                                                                                                                                                                                                                                                                                                                                                                                                                                                                                                                                                                                                                                                                                                                                                                                                                                                                                 | CSIR-Centre for Cellular and Molecular Biology        | CSIR-Centre for Cellular and Molecular Biology                                                                         | Lamuk Zaveri, Shagufta Khan, Namami Gaur, Sakshi Shambhavi, Nikhil Hajirnis, M Soujanya Reddy, Pratheusa Maccha, Tulasi Nagabandi, Purushotham Vodnala, Payel Mukherjee, Sofia Banu, Priya Singh, Onkar Kulkarni, Dhiviya Vedagiri, Divya Gupta, Vishal Sah, Santosh Kumar Kuncha, Krishnan Harinivas Harshan, Archana Bharadwaj Siva, Karthik Bharadwaj Tallapaka, Renu Sudhakar, Samesh Gorde, Gangumala Srinivas Reddy, Sujoy Deb, Swati Bayyana, Rakesh K Mishra, Divya Tej Sowpati |
| EPI_ISL_539647                                                                                                                                                                                                                                                                                                                                                                                                                                                                                                                                                                                                                                                                                                                                                                                                                                                                                                                                                                                                                                                                                                                                                                                                                                                                                                                                                                                                                                                                                                                                                                                                                                                                                                                                                                                                                                                 | CSIR-Centre for Cellular and Molecular Biology        | CSIR-Centre for Cellular and Molecular Biology                                                                         | Lamuk Zaveri, Shagufta Khan, Nikhil Hajirnis, M Soujanya Reddy, Pratheusa Maccha, Namami Gaur, Sakshi Shambhavi, Tulasi Nagabandi, Purushotham Vodnala, Payel Mukherjee, Sofia Banu, Priya Singh, Onkar Kulkarni, Dhiviya Vedagiri, Divya Gupta, Vishal Sah, Santosh Kumar Kuncha, Krishnan Harinivas Harshan, Archana Bharadwaj Siva, Karthik Bharadwaj Tallapaka, Umesh Kumar, Unis Ahmad Bhat, Ajay Sarawagi, Priyanka Pant, Rajkanwar Nathawat, Rakesh K Mishra, Divya Tej Sowpati  |
| EPI_ISL_539648                                                                                                                                                                                                                                                                                                                                                                                                                                                                                                                                                                                                                                                                                                                                                                                                                                                                                                                                                                                                                                                                                                                                                                                                                                                                                                                                                                                                                                                                                                                                                                                                                                                                                                                                                                                                                                                 | CSIR-Centre for Cellular and Molecular Biology        | CSIR-Centre for Cellular and Molecular Biology                                                                         | Lamuk Zaveri, Shagufta Khan, Nikhil Hajirnis, M Soujanya Reddy, Pratheusa Maccha, Namami Gaur, Sakshi Shambhavi, Tulasi Nagabandi, Purushotham Vodnala, Payel Mukherjee, Sofia Banu, Priya Singh, Onkar Kulkarni, Dhiviya Vedagiri, Divya Gupta, Vishal Sah, Santosh Kumar Kuncha, Krishnan Harinivas Harshan, Archana Bharadwaj Siva, Karthik Bharadwaj Tallapaka, Zeba Rizvi, Zuberwasim Sayyad, Kakade Aishwarya Arun, Amrutha H C, Ananga Ghosh, Rakesh K Mishra, Divya Tej Sowpati |
| EPI_ISL_539676                                                                                                                                                                                                                                                                                                                                                                                                                                                                                                                                                                                                                                                                                                                                                                                                                                                                                                                                                                                                                                                                                                                                                                                                                                                                                                                                                                                                                                                                                                                                                                                                                                                                                                                                                                                                                                                 | CSIR-Centre for Cellular and Molecular Biology        | CSIR-Centre for Cellular and Molecular Biology                                                                         | Lamuk Zaveri, Shagufta Khan, Namami Gaur, Sakshi Shambhavi, Nikhil Hajirnis, M Soujanya Reddy, Pratheusa Maccha, Tulasi Nagabandi, Purushotham Vodnala, Payel Mukherjee, Sofia Banu, Priya Singh, Onkar Kulkarni, Dhiviya Vedagiri, Divya Gupta, Vishal Sah, Santosh Kumar Kuncha, Krishnan Harinivas Harshan, Archana Bharadwaj Siva, Karthik Bharadwaj Tallapaka, Renu Sudhakar, Samesh Gorde, Gangumala Srinivas Reddy, Sujoy Deb, Swati Bayyana, Rakesh K Mishra, Divya Tej Sowpati |
| EPI_ISL_539677                                                                                                                                                                                                                                                                                                                                                                                                                                                                                                                                                                                                                                                                                                                                                                                                                                                                                                                                                                                                                                                                                                                                                                                                                                                                                                                                                                                                                                                                                                                                                                                                                                                                                                                                                                                                                                                 | CSIR-Centre for Cellular and Molecular Biology        | CSIR-Centre for Cellular and Molecular Biology                                                                         | Lamuk Zaveri, Shagufta Khan, Nikhil Hajirnis, M Soujanya Reddy, Pratheusa Maccha, Namami Gaur, Sakshi Shambhavi, Tulasi Nagabandi, Purushotham Vodnala, Payel Mukherjee, Sofia Banu, Priya Singh, Onkar Kulkarni, Dhiviya Vedagiri, Divya Gupta, Vishal Sah, Santosh Kumar Kuncha, Krishnan Harinivas Harshan, Archana Bharadwaj Siva, Karthik Bharadwaj Tallapaka, Umesh Kumar, Unis Ahmad Bhat, Ajay Sarawagi, Priyanka Pant, Rajkanwar Nathawat, Rakesh K Mishra, Divya Tej Sowpati  |
| EPI_ISL_539678                                                                                                                                                                                                                                                                                                                                                                                                                                                                                                                                                                                                                                                                                                                                                                                                                                                                                                                                                                                                                                                                                                                                                                                                                                                                                                                                                                                                                                                                                                                                                                                                                                                                                                                                                                                                                                                 | CSIR-Centre for Cellular and Molecular Biology        | CSIR-Centre for Cellular and Molecular Biology                                                                         | Lamuk Zaveri, Shagufta Khan, Nikhil Hajirnis, M Soujanya Reddy, Pratheusa Maccha, Namami Gaur, Sakshi Shambhavi, Tulasi Nagabandi, Purushotham Vodnala, Payel Mukherjee, Sofia Banu, Priya Singh, Onkar Kulkarni, Dhiviya Vedagiri, Divya Gupta, Vishal Sah, Santosh Kumar Kuncha, Krishnan Harinivas Harshan, Archana Bharadwaj Siva, Karthik Bharadwaj Tallapaka, Zeba Rizvi, Zuberwasim Sayyad, Kakade Aishwarya Arun, Amrutha H C, Ananga Ghosh, Rakesh K Mishra, Divya Tej Sowpati |
| EPI_ISL_539706                                                                                                                                                                                                                                                                                                                                                                                                                                                                                                                                                                                                                                                                                                                                                                                                                                                                                                                                                                                                                                                                                                                                                                                                                                                                                                                                                                                                                                                                                                                                                                                                                                                                                                                                                                                                                                                 | CSIR-Centre for Cellular and Molecular Biology        | CSIR-Centre for Cellular and Molecular Biology                                                                         | Lamuk Zaveri, Shagufta Khan, Namami Gaur, Sakshi Shambhavi, Nikhil Hajirnis, M Soujanya Reddy, Pratheusa Maccha, Tulasi Nagabandi, Purushotham Vodnala, Payel Mukherjee, Sofia Banu, Priya Singh, Onkar Kulkarni, Dhiviya Vedagiri, Divya Gupta, Vishal Sah, Santosh Kumar Kuncha, Krishnan Harinivas Harshan, Archana Bharadwaj Siva, Karthik Bharadwaj Tallapaka, Renu Sudhakar, Samesh Gorde, Gangumala Srinivas Reddy, Sujoy Deb, Swati Bayyana, Rakesh K Mishra, Divya Tej Sowpati |
| EPI_ISL_539707                                                                                                                                                                                                                                                                                                                                                                                                                                                                                                                                                                                                                                                                                                                                                                                                                                                                                                                                                                                                                                                                                                                                                                                                                                                                                                                                                                                                                                                                                                                                                                                                                                                                                                                                                                                                                                                 | CSIR-Centre for Cellular and Molecular Biology        | CSIR-Centre for Cellular and Molecular Biology                                                                         | Lamuk Zaveri, Shagufta Khan, Nikhil Hajirnis, M Soujanya Reddy, Pratheusa Maccha, Namami Gaur, Sakshi Shambhavi, Tulasi Nagabandi, Purushotham Vodnala, Payel Mukherjee, Sofia Banu, Priya Singh, Onkar Kulkarni, Dhiviya Vedagiri, Divya Gupta, Vishal Sah, Santosh Kumar Kuncha, Krishnan Harinivas Harshan, Archana Bharadwaj Siva, Karthik Bharadwaj Tallapaka, Umesh Kumar, Unis Ahmad Bhat, Ajay Sarawagi, Priyanka Pant, Rajkanwar Nathawat, Rakesh K Mishra, Divya Tej Sowpati  |
| EPI_ISL_539708                                                                                                                                                                                                                                                                                                                                                                                                                                                                                                                                                                                                                                                                                                                                                                                                                                                                                                                                                                                                                                                                                                                                                                                                                                                                                                                                                                                                                                                                                                                                                                                                                                                                                                                                                                                                                                                 | CSIR-Centre for Cellular and Molecular Biology        | CSIR-Centre for Cellular and Molecular Biology                                                                         | Lamuk Zaveri, Shagufta Khan, Nikhil Hajirnis, M Soujanya Reddy, Pratheusa Maccha, Namami Gaur, Sakshi Shambhavi, Tulasi Nagabandi, Purushotham                                                                                                                                                                                                                                                                                                                                          |

|                                                                                                                                                                                                                                                                                                                                                                                                                                                                                                                                                                                                                                                                                                                                                                                                                                                                                                                                                                                                                                                                                                                                                                                                                                                                                                                                                                                                                                                                                                                                                                                                                                                                                                                                                                                                                                                                                                                                                                                                                                                                                                                                                                                                                                                                                                                                                                                                                                                                                                                                                                                                                                                                                                                                                                                                                                                                                                                                                                                                                                                                                                                                                                                                                                                                                                                                                                                                                                                                                                                                                                                                                                                                                                                                                                                                                                                                                                                                                                                                                                                                                                                                                                                                                                                                                                                                                                                                                                                                                                                                                                                                                                                                                                                                                                                                                                                                                                                                                                                                                                                                                                                                                                                                                                                                                                                                                                                                                                                                                                                                                                                                                                                                                                                                                                                                                                                                                                                                                                                                                |                                                                                                 |                                                                                                                        |                                                                                                                                                                                                                                                                                                                                                                                                                                                                                         |
|----------------------------------------------------------------------------------------------------------------------------------------------------------------------------------------------------------------------------------------------------------------------------------------------------------------------------------------------------------------------------------------------------------------------------------------------------------------------------------------------------------------------------------------------------------------------------------------------------------------------------------------------------------------------------------------------------------------------------------------------------------------------------------------------------------------------------------------------------------------------------------------------------------------------------------------------------------------------------------------------------------------------------------------------------------------------------------------------------------------------------------------------------------------------------------------------------------------------------------------------------------------------------------------------------------------------------------------------------------------------------------------------------------------------------------------------------------------------------------------------------------------------------------------------------------------------------------------------------------------------------------------------------------------------------------------------------------------------------------------------------------------------------------------------------------------------------------------------------------------------------------------------------------------------------------------------------------------------------------------------------------------------------------------------------------------------------------------------------------------------------------------------------------------------------------------------------------------------------------------------------------------------------------------------------------------------------------------------------------------------------------------------------------------------------------------------------------------------------------------------------------------------------------------------------------------------------------------------------------------------------------------------------------------------------------------------------------------------------------------------------------------------------------------------------------------------------------------------------------------------------------------------------------------------------------------------------------------------------------------------------------------------------------------------------------------------------------------------------------------------------------------------------------------------------------------------------------------------------------------------------------------------------------------------------------------------------------------------------------------------------------------------------------------------------------------------------------------------------------------------------------------------------------------------------------------------------------------------------------------------------------------------------------------------------------------------------------------------------------------------------------------------------------------------------------------------------------------------------------------------------------------------------------------------------------------------------------------------------------------------------------------------------------------------------------------------------------------------------------------------------------------------------------------------------------------------------------------------------------------------------------------------------------------------------------------------------------------------------------------------------------------------------------------------------------------------------------------------------------------------------------------------------------------------------------------------------------------------------------------------------------------------------------------------------------------------------------------------------------------------------------------------------------------------------------------------------------------------------------------------------------------------------------------------------------------------------------------------------------------------------------------------------------------------------------------------------------------------------------------------------------------------------------------------------------------------------------------------------------------------------------------------------------------------------------------------------------------------------------------------------------------------------------------------------------------------------------------------------------------------------------------------------------------------------------------------------------------------------------------------------------------------------------------------------------------------------------------------------------------------------------------------------------------------------------------------------------------------------------------------------------------------------------------------------------------------------------------------------------------------------------------|-------------------------------------------------------------------------------------------------|------------------------------------------------------------------------------------------------------------------------|-----------------------------------------------------------------------------------------------------------------------------------------------------------------------------------------------------------------------------------------------------------------------------------------------------------------------------------------------------------------------------------------------------------------------------------------------------------------------------------------|
|                                                                                                                                                                                                                                                                                                                                                                                                                                                                                                                                                                                                                                                                                                                                                                                                                                                                                                                                                                                                                                                                                                                                                                                                                                                                                                                                                                                                                                                                                                                                                                                                                                                                                                                                                                                                                                                                                                                                                                                                                                                                                                                                                                                                                                                                                                                                                                                                                                                                                                                                                                                                                                                                                                                                                                                                                                                                                                                                                                                                                                                                                                                                                                                                                                                                                                                                                                                                                                                                                                                                                                                                                                                                                                                                                                                                                                                                                                                                                                                                                                                                                                                                                                                                                                                                                                                                                                                                                                                                                                                                                                                                                                                                                                                                                                                                                                                                                                                                                                                                                                                                                                                                                                                                                                                                                                                                                                                                                                                                                                                                                                                                                                                                                                                                                                                                                                                                                                                                                                                                                |                                                                                                 |                                                                                                                        | Vodnala, Payel Mukherjee, Sofia Banu, Priya Singh, Onkar Kulkarni, Dhiviya Vedagiri, Divya Gupta, Vishal Sah, Santosh Kumar Kuncha, Krishnan Harinivas Harshan, Archana Bharadwaj Siva, Karthik Bharadwaj Tallapaka,Zeba Rizvi, Zuberwasim Sayyad, Kakade Aishwarya Arun, Amrutha H C, Ananga Ghosh, Rakesh K Mishra, Divya Tej Sowpati                                                                                                                                                 |
| EPI_ISL_539736                                                                                                                                                                                                                                                                                                                                                                                                                                                                                                                                                                                                                                                                                                                                                                                                                                                                                                                                                                                                                                                                                                                                                                                                                                                                                                                                                                                                                                                                                                                                                                                                                                                                                                                                                                                                                                                                                                                                                                                                                                                                                                                                                                                                                                                                                                                                                                                                                                                                                                                                                                                                                                                                                                                                                                                                                                                                                                                                                                                                                                                                                                                                                                                                                                                                                                                                                                                                                                                                                                                                                                                                                                                                                                                                                                                                                                                                                                                                                                                                                                                                                                                                                                                                                                                                                                                                                                                                                                                                                                                                                                                                                                                                                                                                                                                                                                                                                                                                                                                                                                                                                                                                                                                                                                                                                                                                                                                                                                                                                                                                                                                                                                                                                                                                                                                                                                                                                                                                                                                                 | CSIR-Centre for Cellular and Molecular Biology                                                  | CSIR-Centre for Cellular and Molecular Biology                                                                         | Lamuk Zaveri, Shagufta Khan, Namami Gaur, Sakshi Shambhavi, Nikhil Hajirnis, M Soujanya Reddy, Pratheusa Maccha, Tulasi Nagabandi, Purushotham Vodnala, Payel Mukherjee, Sofia Banu, Priya Singh, Onkar Kulkarni, Dhiviya Vedagiri, Divya Gupta, Vishal Sah, Santosh Kumar Kuncha, Krishnan Harinivas Harshan, Archana Bharadwaj Siva, Karthik Bharadwaj Tallapaka, Renu Sudhakar, Somesh Gorde, Gangumala Srinivas Reddy, Sujoy Deb, Swati Bayyana, Rakesh K Mishra, Divya Tej Sowpati |
| EPI_ISL_539737                                                                                                                                                                                                                                                                                                                                                                                                                                                                                                                                                                                                                                                                                                                                                                                                                                                                                                                                                                                                                                                                                                                                                                                                                                                                                                                                                                                                                                                                                                                                                                                                                                                                                                                                                                                                                                                                                                                                                                                                                                                                                                                                                                                                                                                                                                                                                                                                                                                                                                                                                                                                                                                                                                                                                                                                                                                                                                                                                                                                                                                                                                                                                                                                                                                                                                                                                                                                                                                                                                                                                                                                                                                                                                                                                                                                                                                                                                                                                                                                                                                                                                                                                                                                                                                                                                                                                                                                                                                                                                                                                                                                                                                                                                                                                                                                                                                                                                                                                                                                                                                                                                                                                                                                                                                                                                                                                                                                                                                                                                                                                                                                                                                                                                                                                                                                                                                                                                                                                                                                 | CSIR-Centre for Cellular and Molecular Biology                                                  | CSIR-Centre for Cellular and Molecular Biology                                                                         | Lamuk Zaveri, Shagufta Khan,Nikhil Hajirnis, M Soujanya Reddy, Pratheusa Maccha, Namami Gaur, Sakshi Shambhavi, Tulasi Nagabandi, Purushotham Vodnala, Payel Mukherjee, Sofia Banu, Priya Singh, Onkar Kulkarni, Dhiviya Vedagiri, Divya Gupta, Vishal Sah, Santosh Kumar Kuncha, Krishnan Harinivas Harshan, Archana Bharadwaj Siva, Karthik Bharadwaj Tallapaka,Umesh Kumar, Unis Ahmad Bhat, Ajay Sarawagi, Priyanka Pant, Rajkanwar Nathawat, Rakesh K Mishra, Divya Tej Sowpati    |
| EPI_ISL_539738                                                                                                                                                                                                                                                                                                                                                                                                                                                                                                                                                                                                                                                                                                                                                                                                                                                                                                                                                                                                                                                                                                                                                                                                                                                                                                                                                                                                                                                                                                                                                                                                                                                                                                                                                                                                                                                                                                                                                                                                                                                                                                                                                                                                                                                                                                                                                                                                                                                                                                                                                                                                                                                                                                                                                                                                                                                                                                                                                                                                                                                                                                                                                                                                                                                                                                                                                                                                                                                                                                                                                                                                                                                                                                                                                                                                                                                                                                                                                                                                                                                                                                                                                                                                                                                                                                                                                                                                                                                                                                                                                                                                                                                                                                                                                                                                                                                                                                                                                                                                                                                                                                                                                                                                                                                                                                                                                                                                                                                                                                                                                                                                                                                                                                                                                                                                                                                                                                                                                                                                 | CSIR-Centre for Cellular and Molecular Biology                                                  | CSIR-Centre for Cellular and Molecular Biology                                                                         | Lamuk Zaveri, Shagufta Khan,Nikhil Hajirnis, M Soujanya Reddy, Pratheusa Maccha, Namami Gaur, Sakshi Shambhavi, Tulasi Nagabandi, Purushotham Vodnala, Payel Mukherjee, Sofia Banu, Priya Singh, Onkar Kulkarni, Dhiviya Vedagiri, Divya Gupta, Vishal Sah, Santosh Kumar Kuncha, Krishnan Harinivas Harshan, Archana Bharadwaj Siva, Karthik Bharadwaj Tallapaka,Zeba Rizvi, Zuberwasim Sayyad, Kakade Aishwarya Arun, Amrutha H C, Ananga Ghosh, Rakesh K Mishra, Divya Tej Sowpati   |
| EPI_ISL_539769                                                                                                                                                                                                                                                                                                                                                                                                                                                                                                                                                                                                                                                                                                                                                                                                                                                                                                                                                                                                                                                                                                                                                                                                                                                                                                                                                                                                                                                                                                                                                                                                                                                                                                                                                                                                                                                                                                                                                                                                                                                                                                                                                                                                                                                                                                                                                                                                                                                                                                                                                                                                                                                                                                                                                                                                                                                                                                                                                                                                                                                                                                                                                                                                                                                                                                                                                                                                                                                                                                                                                                                                                                                                                                                                                                                                                                                                                                                                                                                                                                                                                                                                                                                                                                                                                                                                                                                                                                                                                                                                                                                                                                                                                                                                                                                                                                                                                                                                                                                                                                                                                                                                                                                                                                                                                                                                                                                                                                                                                                                                                                                                                                                                                                                                                                                                                                                                                                                                                                                                 | CSIR-Centre for Cellular and Molecular Biology                                                  | CSIR-Centre for Cellular and Molecular Biology                                                                         | Lamuk Zaveri, Shagufta Khan,Nikhil Hajirnis, M Soujanya Reddy, Pratheusa Maccha, Namami Gaur, Sakshi Shambhavi, Tulasi Nagabandi, Purushotham Vodnala, Payel Mukherjee, Sofia Banu, Priya Singh, Onkar Kulkarni, Dhiviya Vedagiri, Divya Gupta, Vishal Sah, Santosh Kumar Kuncha, Krishnan Harinivas Harshan, Archana Bharadwaj Siva, Karthik Bharadwaj Tallapaka,Umesh Kumar, Unis Ahmad Bhat, Ajay Sarawagi, Priyanka Pant, Rajkanwar Nathawat, Rakesh K Mishra, Divya Tej Sowpati    |
| EPI_ISL_539770                                                                                                                                                                                                                                                                                                                                                                                                                                                                                                                                                                                                                                                                                                                                                                                                                                                                                                                                                                                                                                                                                                                                                                                                                                                                                                                                                                                                                                                                                                                                                                                                                                                                                                                                                                                                                                                                                                                                                                                                                                                                                                                                                                                                                                                                                                                                                                                                                                                                                                                                                                                                                                                                                                                                                                                                                                                                                                                                                                                                                                                                                                                                                                                                                                                                                                                                                                                                                                                                                                                                                                                                                                                                                                                                                                                                                                                                                                                                                                                                                                                                                                                                                                                                                                                                                                                                                                                                                                                                                                                                                                                                                                                                                                                                                                                                                                                                                                                                                                                                                                                                                                                                                                                                                                                                                                                                                                                                                                                                                                                                                                                                                                                                                                                                                                                                                                                                                                                                                                                                 | CSIR-Centre for Cellular and Molecular Biology                                                  | CSIR-Centre for Cellular and Molecular Biology                                                                         | Lamuk Zaveri, Shagufta Khan,Nikhil Hajirnis, M Soujanya Reddy, Pratheusa Maccha, Namami Gaur, Sakshi Shambhavi, Tulasi Nagabandi, Purushotham Vodnala, Payel Mukherjee, Sofia Banu, Priya Singh, Onkar Kulkarni, Dhiviya Vedagiri, Divya Gupta, Vishal Sah, Santosh Kumar Kuncha, Krishnan Harinivas Harshan, Archana Bharadwaj Siva, Karthik Bharadwaj Tallapaka,Zeba Rizvi, Zuberwasim Sayyad, Kakade Aishwarya Arun, Amrutha H C, Ananga Ghosh, Rakesh K Mishra, Divya Tej Sowpati   |
| EPI_ISL_540435                                                                                                                                                                                                                                                                                                                                                                                                                                                                                                                                                                                                                                                                                                                                                                                                                                                                                                                                                                                                                                                                                                                                                                                                                                                                                                                                                                                                                                                                                                                                                                                                                                                                                                                                                                                                                                                                                                                                                                                                                                                                                                                                                                                                                                                                                                                                                                                                                                                                                                                                                                                                                                                                                                                                                                                                                                                                                                                                                                                                                                                                                                                                                                                                                                                                                                                                                                                                                                                                                                                                                                                                                                                                                                                                                                                                                                                                                                                                                                                                                                                                                                                                                                                                                                                                                                                                                                                                                                                                                                                                                                                                                                                                                                                                                                                                                                                                                                                                                                                                                                                                                                                                                                                                                                                                                                                                                                                                                                                                                                                                                                                                                                                                                                                                                                                                                                                                                                                                                                                                 | VA-Division of Consolidated Laboratory Services                                                 | Pathogen Discovery, Respiratory Viruses Branch, Division of Viral Diseases, Centers for Disease Control and Prevention | Krista Queen, Yan Li, Jing Zhang, Anna Montmayeur, Krista Queen,Ying Tao, Anna Uehara, Clinton R. Paden, Rachel Marine, Haibin Wang, Suxiang Tong                                                                                                                                                                                                                                                                                                                                       |
| EPI_ISL_540443, EPI_ISL_540445, EPI_ISL_540448, EPI_ISL_540449, EPI_ISL_540450, EPI_ISL_540451, EPI_ISL_540452, EPI_ISL_540454, EPI_ISL_540455, EPI_ISL_540456, EPI_ISL_540457, EPI_ISL_540458, EPI_ISL_540459, EPI_ISL_540460, EPI_ISL_540462, EPI_ISL_540463, EPI_ISL_540465, EPI_ISL_540466, EPI_ISL_540467, EPI_ISL_540468                                                                                                                                                                                                                                                                                                                                                                                                                                                                                                                                                                                                                                                                                                                                                                                                                                                                                                                                                                                                                                                                                                                                                                                                                                                                                                                                                                                                                                                                                                                                                                                                                                                                                                                                                                                                                                                                                                                                                                                                                                                                                                                                                                                                                                                                                                                                                                                                                                                                                                                                                                                                                                                                                                                                                                                                                                                                                                                                                                                                                                                                                                                                                                                                                                                                                                                                                                                                                                                                                                                                                                                                                                                                                                                                                                                                                                                                                                                                                                                                                                                                                                                                                                                                                                                                                                                                                                                                                                                                                                                                                                                                                                                                                                                                                                                                                                                                                                                                                                                                                                                                                                                                                                                                                                                                                                                                                                                                                                                                                                                                                                                                                                                                                 | University of Liège COVID-19 testing center                                                     | GIGA Medical Genomics                                                                                                  | Keith Durkin, Maria Artesi, Emmanuel André, Marc Van Ranst, Fabrice Bureau, Laurent Gillet, Wouter Coppieters, Vincent Bours                                                                                                                                                                                                                                                                                                                                                            |
| EPI_ISL_540469, EPI_ISL_540470, EPI_ISL_540471, EPI_ISL_540475, EPI_ISL_540476, EPI_ISL_540477, EPI_ISL_540479, EPI_ISL_540480, EPI_ISL_540481, EPI_ISL_540482, EPI_ISL_540484, EPI_ISL_540486, EPI_ISL_540487, EPI_ISL_540489, EPI_ISL_540490, EPI_ISL_540491, EPI_ISL_540492, EPI_ISL_540494, EPI_ISL_540495, EPI_ISL_540496, EPI_ISL_540497, EPI_ISL_540498, EPI_ISL_540499, EPI_ISL_540500, EPI_ISL_540501, EPI_ISL_540503, EPI_ISL_540504, EPI_ISL_540505, EPI_ISL_540508, EPI_ISL_540510, EPI_ISL_540511, EPI_ISL_540512, EPI_ISL_540513, EPI_ISL_540514, EPI_ISL_540515, EPI_ISL_540516, EPI_ISL_540517, EPI_ISL_540518, EPI_ISL_540519, EPI_ISL_540520, EPI_ISL_540521, EPI_ISL_540522, EPI_ISL_540523, EPI_ISL_540524, EPI_ISL_540525, EPI_ISL_540527, EPI_ISL_540528, EPI_ISL_540530, EPI_ISL_540531, EPI_ISL_540532, EPI_ISL_540533, EPI_ISL_540534, EPI_ISL_540535, EPI_ISL_540536, EPI_ISL_540537, EPI_ISL_540538, EPI_ISL_540539, EPI_ISL_540540, EPI_ISL_540541, EPI_ISL_540542, EPI_ISL_540543, EPI_ISL_540544, EPI_ISL_540545, EPI_ISL_540546, EPI_ISL_540547, EPI_ISL_540548, EPI_ISL_540549, EPI_ISL_540550, EPI_ISL_540552, EPI_ISL_540553, EPI_ISL_540554, EPI_ISL_540555, EPI_ISL_540556, EPI_ISL_540557, EPI_ISL_540558, EPI_ISL_540559, EPI_ISL_540560, EPI_ISL_540561, EPI_ISL_540563, EPI_ISL_540564, EPI_ISL_540565, EPI_ISL_540566, EPI_ISL_540567, EPI_ISL_540568, EPI_ISL_540569, EPI_ISL_540570, EPI_ISL_540571, EPI_ISL_540572, EPI_ISL_540573, EPI_ISL_540575, EPI_ISL_540577, EPI_ISL_540578                                                                                                                                                                                                                                                                                                                                                                                                                                                                                                                                                                                                                                                                                                                                                                                                                                                                                                                                                                                                                                                                                                                                                                                                                                                                                                                                                                                                                                                                                                                                                                                                                                                                                                                                                                                                                                                                                                                                                                                                                                                                                                                                                                                                                                                                                                                                                                                                                                                                                                                                                                                                                                                                                                                                                                                                                                                                                                                                                                                                                                                                                                                                                                                                                                                                                                                                                                                                                                                                                                                                                                                                                                                                                                                                                                                                                                                                                                                                                                                                                                                                                                                                                                                                                                                                                                                                                                                                                                                                                 | Department of Clinical Microbiology                                                             | GIGA Medical Genomics                                                                                                  | Keith Durkin, Maria Artesi, Sébastien Bontems, Raphaël Boreux, Bouchra Boujemla, Cécile Meex, Axelle Chaslain, Céline Fombellida-Lopez, Pierrette Melin, Marie-Pierre Hayette, Vincent Bours                                                                                                                                                                                                                                                                                            |
| EPI_ISL_541878, EPI_ISL_541879, EPI_ISL_541880, EPI_ISL_541881, EPI_ISL_541882, EPI_ISL_541883, EPI_ISL_541884, EPI_ISL_541885, EPI_ISL_541886, EPI_ISL_541887, EPI_ISL_541888, EPI_ISL_541889, EPI_ISL_541890, EPI_ISL_541891, EPI_ISL_541892, EPI_ISL_541893, EPI_ISL_541894, EPI_ISL_541895, EPI_ISL_541896, EPI_ISL_541897, EPI_ISL_541898, EPI_ISL_541899, EPI_ISL_541900, EPI_ISL_541901, EPI_ISL_541902, EPI_ISL_541903, EPI_ISL_541904, EPI_ISL_541905, EPI_ISL_541906, EPI_ISL_541907, EPI_ISL_541908, EPI_ISL_541909, EPI_ISL_541910, EPI_ISL_541911, EPI_ISL_541912, EPI_ISL_541913, EPI_ISL_541914, EPI_ISL_541915, EPI_ISL_541916, EPI_ISL_541917, EPI_ISL_541918, EPI_ISL_541919, EPI_ISL_541920, EPI_ISL_541921, EPI_ISL_541922, EPI_ISL_541923, EPI_ISL_541924, EPI_ISL_541925, EPI_ISL_541926, EPI_ISL_541927, EPI_ISL_541928, EPI_ISL_541929, EPI_ISL_541930, EPI_ISL_541931, EPI_ISL_541932, EPI_ISL_541933, EPI_ISL_541934, EPI_ISL_541935, EPI_ISL_541936, EPI_ISL_541937, EPI_ISL_541938, EPI_ISL_541939, EPI_ISL_541940, EPI_ISL_541941                                                                                                                                                                                                                                                                                                                                                                                                                                                                                                                                                                                                                                                                                                                                                                                                                                                                                                                                                                                                                                                                                                                                                                                                                                                                                                                                                                                                                                                                                                                                                                                                                                                                                                                                                                                                                                                                                                                                                                                                                                                                                                                                                                                                                                                                                                                                                                                                                                                                                                                                                                                                                                                                                                                                                                                                                                                                                                                                                                                                                                                                                                                                                                                                                                                                                                                                                                                                                                                                                                                                                                                                                                                                                                                                                                                                                                                                                                                                                                                                                                                                                                                                                                                                                                                                                                                                                                                                                                                                                                                                                                                                                                                                                                                                                                                                                                                                                                                                                 | Hospital General Universitario Gregorio Marañón                                                 | SeqCOVID-SPAIN consortium/IBV(CSIC)                                                                                    | Laura Pérez-Lago, Marta Herranz, Jon Sicilia, Julia Suárez, Pilar Catalán, Patricia Muñoz, Darío García de Viedma and SeqCOVID-SPAIN consortium                                                                                                                                                                                                                                                                                                                                         |
| EPI_ISL_548147, EPI_ISL_548148, EPI_ISL_548149, EPI_ISL_548150, EPI_ISL_548151, EPI_ISL_548152, EPI_ISL_548153, EPI_ISL_548154, EPI_ISL_548155, EPI_ISL_548156, EPI_ISL_548157, EPI_ISL_548158, EPI_ISL_548159, EPI_ISL_548160, EPI_ISL_548161, EPI_ISL_548162, EPI_ISL_548163, EPI_ISL_548164, EPI_ISL_548165, EPI_ISL_548166, EPI_ISL_548167, EPI_ISL_548168, EPI_ISL_548169, EPI_ISL_548170, EPI_ISL_548171, EPI_ISL_548172, EPI_ISL_548173, EPI_ISL_548174, EPI_ISL_548175, EPI_ISL_548176, EPI_ISL_548177, EPI_ISL_548178, EPI_ISL_548179, EPI_ISL_548180, EPI_ISL_548181, EPI_ISL_548182, EPI_ISL_548183, EPI_ISL_548184, EPI_ISL_548185, EPI_ISL_548186, EPI_ISL_548187, EPI_ISL_548188, EPI_ISL_548189, EPI_ISL_548190, EPI_ISL_548191, EPI_ISL_548192, EPI_ISL_548193, EPI_ISL_548194, EPI_ISL_548195, EPI_ISL_548196, EPI_ISL_548197, EPI_ISL_548198, EPI_ISL_548199, EPI_ISL_548200, EPI_ISL_548201, EPI_ISL_548202, EPI_ISL_548203, EPI_ISL_548204, EPI_ISL_548205, EPI_ISL_548206, EPI_ISL_548207, EPI_ISL_548208, EPI_ISL_548209, EPI_ISL_548210, EPI_ISL_548211, EPI_ISL_548212, EPI_ISL_548213, EPI_ISL_548214, EPI_ISL_548215, EPI_ISL_548216, EPI_ISL_548217, EPI_ISL_548218, EPI_ISL_548219, EPI_ISL_548220, EPI_ISL_548221, EPI_ISL_548222, EPI_ISL_548223, EPI_ISL_548224, EPI_ISL_548225, EPI_ISL_548226, EPI_ISL_548227, EPI_ISL_548228, EPI_ISL_548229, EPI_ISL_548230, EPI_ISL_548231, EPI_ISL_548232, EPI_ISL_548233, EPI_ISL_548234, EPI_ISL_548235, EPI_ISL_548236, EPI_ISL_548237, EPI_ISL_548238, EPI_ISL_548239, EPI_ISL_548240, EPI_ISL_548241, EPI_ISL_548242                                                                                                                                                                                                                                                                                                                                                                                                                                                                                                                                                                                                                                                                                                                                                                                                                                                                                                                                                                                                                                                                                                                                                                                                                                                                                                                                                                                                                                                                                                                                                                                                                                                                                                                                                                                                                                                                                                                                                                                                                                                                                                                                                                                                                                                                                                                                                                                                                                                                                                                                                                                                                                                                                                                                                                                                                                                                                                                                                                                                                                                                                                                                                                                                                                                                                                                                                                                                                                                                                                                                                                                                                                                                                                                                                                                                                                                                                                                                                                                                                                                                                                                                                                                                                                                                                                                                                                                                                 | Laboratoire de Virologie, HUG                                                                   | Swiss National Reference Centre for Influenza                                                                          | LAUBSCHER F.                                                                                                                                                                                                                                                                                                                                                                                                                                                                            |
| EPI_ISL_574292                                                                                                                                                                                                                                                                                                                                                                                                                                                                                                                                                                                                                                                                                                                                                                                                                                                                                                                                                                                                                                                                                                                                                                                                                                                                                                                                                                                                                                                                                                                                                                                                                                                                                                                                                                                                                                                                                                                                                                                                                                                                                                                                                                                                                                                                                                                                                                                                                                                                                                                                                                                                                                                                                                                                                                                                                                                                                                                                                                                                                                                                                                                                                                                                                                                                                                                                                                                                                                                                                                                                                                                                                                                                                                                                                                                                                                                                                                                                                                                                                                                                                                                                                                                                                                                                                                                                                                                                                                                                                                                                                                                                                                                                                                                                                                                                                                                                                                                                                                                                                                                                                                                                                                                                                                                                                                                                                                                                                                                                                                                                                                                                                                                                                                                                                                                                                                                                                                                                                                                                 | Instituto Nacional de Investigación en Salud Pública                                            | Instituto Nacional de Investigación en Salud Pública                                                                   | Leandro Patino Patino, Domenica de Mora Coloma, Denisse Portugal, Alfredo Bruno Caicedo, Andrés Carrasco, Orson Mestanza, Manuel Gonzalez, Alberto Orlando Narvaez.                                                                                                                                                                                                                                                                                                                     |
| EPI_ISL_574293                                                                                                                                                                                                                                                                                                                                                                                                                                                                                                                                                                                                                                                                                                                                                                                                                                                                                                                                                                                                                                                                                                                                                                                                                                                                                                                                                                                                                                                                                                                                                                                                                                                                                                                                                                                                                                                                                                                                                                                                                                                                                                                                                                                                                                                                                                                                                                                                                                                                                                                                                                                                                                                                                                                                                                                                                                                                                                                                                                                                                                                                                                                                                                                                                                                                                                                                                                                                                                                                                                                                                                                                                                                                                                                                                                                                                                                                                                                                                                                                                                                                                                                                                                                                                                                                                                                                                                                                                                                                                                                                                                                                                                                                                                                                                                                                                                                                                                                                                                                                                                                                                                                                                                                                                                                                                                                                                                                                                                                                                                                                                                                                                                                                                                                                                                                                                                                                                                                                                                                                 | Instituto Nacional de Investigación en Salud Pública                                            | Instituto Nacional de Investigación en Salud Pública                                                                   | Leandro Patino Patino, Doménica de Mora Coloma, Denisse Portugal, Alfredo Bruno Caicedo,Andrés Carrasco, Orson Mestanza, Manuel Gonzalez, Alberto Orlando Narvaez.                                                                                                                                                                                                                                                                                                                      |
| EPI_ISL_574294                                                                                                                                                                                                                                                                                                                                                                                                                                                                                                                                                                                                                                                                                                                                                                                                                                                                                                                                                                                                                                                                                                                                                                                                                                                                                                                                                                                                                                                                                                                                                                                                                                                                                                                                                                                                                                                                                                                                                                                                                                                                                                                                                                                                                                                                                                                                                                                                                                                                                                                                                                                                                                                                                                                                                                                                                                                                                                                                                                                                                                                                                                                                                                                                                                                                                                                                                                                                                                                                                                                                                                                                                                                                                                                                                                                                                                                                                                                                                                                                                                                                                                                                                                                                                                                                                                                                                                                                                                                                                                                                                                                                                                                                                                                                                                                                                                                                                                                                                                                                                                                                                                                                                                                                                                                                                                                                                                                                                                                                                                                                                                                                                                                                                                                                                                                                                                                                                                                                                                                                 | Instituto Nacional de Investigación en Salud Pública                                            | Instituto Nacional de Investigación en Salud Pública                                                                   | Leandro Patino Patino, Doménica de Mora Coloma, Denisse Portugal, Alfredo Bruno,Andrés Carrasco , Orson Mestanza , Manuel Gonzalez, Alberto Orlando Narvaez                                                                                                                                                                                                                                                                                                                             |
| EPI_ISL_577735, EPI_ISL_577737, EPI_ISL_577739                                                                                                                                                                                                                                                                                                                                                                                                                                                                                                                                                                                                                                                                                                                                                                                                                                                                                                                                                                                                                                                                                                                                                                                                                                                                                                                                                                                                                                                                                                                                                                                                                                                                                                                                                                                                                                                                                                                                                                                                                                                                                                                                                                                                                                                                                                                                                                                                                                                                                                                                                                                                                                                                                                                                                                                                                                                                                                                                                                                                                                                                                                                                                                                                                                                                                                                                                                                                                                                                                                                                                                                                                                                                                                                                                                                                                                                                                                                                                                                                                                                                                                                                                                                                                                                                                                                                                                                                                                                                                                                                                                                                                                                                                                                                                                                                                                                                                                                                                                                                                                                                                                                                                                                                                                                                                                                                                                                                                                                                                                                                                                                                                                                                                                                                                                                                                                                                                                                                                                 | Institute of Virology, Biomedical Research Center of the Slovak Academy of Sciences, Bratislava | Faculty of Natural Sciences, Comenius University, Bratislava                                                           | Kristína Bořšová, Viktória Hodorová, Broa Brejová, Viktória abanová, Dominika Friová, Sabina Fumaová Havlíková, Juraj Kopáek, Martina Liková, ubomíra Lukáiková, Martina Neboháová, Monika Sláviková, Edit Staroová, Elena Tichá, Tomáš Vina, Boris Klempa, Jozef Nosek                                                                                                                                                                                                                 |
| EPI_ISL_578335, EPI_ISL_578336, EPI_ISL_578337, EPI_ISL_578338, EPI_ISL_578339, EPI_ISL_578340, EPI_ISL_578341, EPI_ISL_578342, EPI_ISL_578343, EPI_ISL_578344, EPI_ISL_578345, EPI_ISL_578346, EPI_ISL_578347, EPI_ISL_578348, EPI_ISL_578349, EPI_ISL_578350, EPI_ISL_578351, EPI_ISL_578352, EPI_ISL_578353, EPI_ISL_578354, EPI_ISL_578355, EPI_ISL_578356, EPI_ISL_578357, EPI_ISL_578358, EPI_ISL_578359, EPI_ISL_578360, EPI_ISL_578361, EPI_ISL_578362, EPI_ISL_578363, EPI_ISL_578364, EPI_ISL_578365, EPI_ISL_578366, EPI_ISL_578367, EPI_ISL_578368, EPI_ISL_578369, EPI_ISL_578370, EPI_ISL_578371, EPI_ISL_578372, EPI_ISL_578373, EPI_ISL_578374, EPI_ISL_578375, EPI_ISL_578376, EPI_ISL_578377, EPI_ISL_578378, EPI_ISL_578379, EPI_ISL_578380, EPI_ISL_578381, EPI_ISL_578382, EPI_ISL_578383, EPI_ISL_578384, EPI_ISL_578385, EPI_ISL_578386, EPI_ISL_578387, EPI_ISL_578388, EPI_ISL_578389, EPI_ISL_578390, EPI_ISL_578391, EPI_ISL_578392, EPI_ISL_578393, EPI_ISL_578394, EPI_ISL_578395, EPI_ISL_578396, EPI_ISL_578397, EPI_ISL_578398, EPI_ISL_578399, EPI_ISL_578400, EPI_ISL_578401, EPI_ISL_578402, EPI_ISL_578403, EPI_ISL_578404, EPI_ISL_578405, EPI_ISL_578406, EPI_ISL_578407, EPI_ISL_578408, EPI_ISL_578409, EPI_ISL_578410, EPI_ISL_578411, EPI_ISL_578412, EPI_ISL_578413, EPI_ISL_578414, EPI_ISL_578415, EPI_ISL_578416, EPI_ISL_578417, EPI_ISL_578418, EPI_ISL_578419, EPI_ISL_578420, EPI_ISL_578421, EPI_ISL_578422, EPI_ISL_578423, EPI_ISL_578424, EPI_ISL_578425, EPI_ISL_578426, EPI_ISL_578427, EPI_ISL_578428, EPI_ISL_578429, EPI_ISL_578430, EPI_ISL_578431, EPI_ISL_578432, EPI_ISL_578433, EPI_ISL_578434, EPI_ISL_578435, EPI_ISL_578436, EPI_ISL_578437, EPI_ISL_578438, EPI_ISL_578439, EPI_ISL_578440, EPI_ISL_578441, EPI_ISL_578442, EPI_ISL_578443, EPI_ISL_578444, EPI_ISL_578445, EPI_ISL_578446, EPI_ISL_578447, EPI_ISL_578448, EPI_ISL_578449, EPI_ISL_578450, EPI_ISL_578451, EPI_ISL_578452, EPI_ISL_578453, EPI_ISL_578454, EPI_ISL_578455, EPI_ISL_578456, EPI_ISL_578457, EPI_ISL_578458, EPI_ISL_578459, EPI_ISL_578460, EPI_ISL_578461, EPI_ISL_578462, EPI_ISL_578463, EPI_ISL_578464, EPI_ISL_578465, EPI_ISL_578466, EPI_ISL_578467, EPI_ISL_578468, EPI_ISL_578469, EPI_ISL_578470, EPI_ISL_578471, EPI_ISL_578472, EPI_ISL_578473, EPI_ISL_578474, EPI_ISL_578475, EPI_ISL_578476, EPI_ISL_578477, EPI_ISL_578478, EPI_ISL_578479, EPI_ISL_578480, EPI_ISL_578481, EPI_ISL_578482, EPI_ISL_578483, EPI_ISL_578484, EPI_ISL_578485, EPI_ISL_578486, EPI_ISL_578487, EPI_ISL_578488, EPI_ISL_578489, EPI_ISL_578490, EPI_ISL_578491, EPI_ISL_578492, EPI_ISL_578493, EPI_ISL_578494, EPI_ISL_578495, EPI_ISL_578496, EPI_ISL_578497, EPI_ISL_578498, EPI_ISL_578499, EPI_ISL_578500, EPI_ISL_578501, EPI_ISL_578502, EPI_ISL_578503, EPI_ISL_578504, EPI_ISL_578505, EPI_ISL_578506, EPI_ISL_578507, EPI_ISL_578508, EPI_ISL_578509, EPI_ISL_578510, EPI_ISL_578511, EPI_ISL_578512, EPI_ISL_578513, EPI_ISL_578514, EPI_ISL_578515, EPI_ISL_578516, EPI_ISL_578517, EPI_ISL_578518, EPI_ISL_578519, EPI_ISL_578520, EPI_ISL_578521, EPI_ISL_578522, EPI_ISL_578523, EPI_ISL_578524, EPI_ISL_578525, EPI_ISL_578526, EPI_ISL_578527, EPI_ISL_578528, EPI_ISL_578529, EPI_ISL_578530, EPI_ISL_578531, EPI_ISL_578532, EPI_ISL_578533, EPI_ISL_578534, EPI_ISL_578535, EPI_ISL_578536, EPI_ISL_578537, EPI_ISL_578538, EPI_ISL_578539, EPI_ISL_578540, EPI_ISL_578541, EPI_ISL_578542, EPI_ISL_578543, EPI_ISL_578544, EPI_ISL_578545, EPI_ISL_578546, EPI_ISL_578547, EPI_ISL_578548, EPI_ISL_578549, EPI_ISL_578550, EPI_ISL_578551, EPI_ISL_578552, EPI_ISL_578553, EPI_ISL_578554, EPI_ISL_578555, EPI_ISL_578556, EPI_ISL_578557, EPI_ISL_578558, EPI_ISL_578559, EPI_ISL_578560, EPI_ISL_578561, EPI_ISL_578562, EPI_ISL_578563, EPI_ISL_578564, EPI_ISL_578565, EPI_ISL_578566, EPI_ISL_578567, EPI_ISL_578568, EPI_ISL_578569, EPI_ISL_578570, EPI_ISL_578571, EPI_ISL_578572, EPI_ISL_578573, EPI_ISL_578574, EPI_ISL_578575, EPI_ISL_578576, EPI_ISL_578577, EPI_ISL_578578, EPI_ISL_578579, EPI_ISL_578580, EPI_ISL_578581, EPI_ISL_578582, EPI_ISL_578583, EPI_ISL_578584, EPI_ISL_578585, EPI_ISL_578586, EPI_ISL_578587, EPI_ISL_578588, EPI_ISL_578589, EPI_ISL_578590, EPI_ISL_578591, EPI_ISL_578592, EPI_ISL_578593, EPI_ISL_578594, EPI_ISL_578595, EPI_ISL_578596, EPI_ISL_578597, EPI_ISL_578598, EPI_ISL_578599, EPI_ISL_578600, EPI_ISL_578601, EPI_ISL_578602, EPI_ISL_578603, EPI_ISL_578604, EPI_ISL_578605, EPI_ISL_578606, EPI_ISL_578607, EPI_ISL_578608, EPI_ISL_578609, EPI_ISL_578610, EPI_ISL_578611, EPI_ISL_578612, EPI_ISL_578613, EPI_ISL_578614, EPI_ISL_578615, EPI_ISL_578616, EPI_ISL_578617, EPI_ISL_578618, EPI_ISL_578619, EPI_ISL_578620, EPI_ISL_578621, EPI_ISL_578622, EPI_ISL_578623, EPI_ISL_578624, EPI_ISL_578625, EPI_ISL_578626, EPI_ISL_578627, EPI_ISL_578628, EPI_ISL_578629, EPI_ISL_578630, EPI_ISL_578631, EPI_ISL_578632, EPI_ISL_578633, EPI_ISL_578634, EPI_ISL_578635, EPI_ISL_578636, EPI_ISL_578637, EPI_ISL_578638, EPI_ISL_578639, EPI_ISL_578640, EPI_ISL_578641, EPI_ISL_578642, EPI_ISL_578643, EPI_ISL_578644, EPI_ISL_578645, EPI_ISL_578646, EPI_ISL_578647, EPI_ISL_578648, EPI_ISL_578649, EPI_ISL_578650, EPI_ISL_578651, EPI_ISL_578652, EPI_ISL_578653, EPI_ISL_578654, EPI_ISL_578655, EPI_ISL_578656, EPI_ISL_578657, EPI_ISL_578658, EPI_ISL_578659, EPI_ISL_578660, EPI_ISL_578661, EPI_ISL_578662, EPI_ISL_578663, EPI_ISL_578664, EPI_ISL_578665, EPI_ISL_578666, EPI_ISL_578667, EPI_ISL_578668, EPI_ISL_578669, EPI_ISL_578670, EPI_ISL_578671, EPI_ISL_578672, EPI_ISL_578673, EPI_ISL_578674, EPI_ISL_578675, EPI_ISL_578676, EPI_ISL_578677, EPI_ISL_578678, EPI_ISL_578679, EPI_ISL_578680, EPI_ISL_578681, EPI_ISL_578682, EPI_ISL_578683, EPI_ISL_578684, EPI_ISL_578685, EPI_ISL_578686, EPI_ISL_578687, EPI_ISL_578688, EPI_ISL_578689, EPI_ISL_578690, EPI_ISL_578691, EPI_ISL_578692, EPI_ISL_578693, EPI_ISL_578694, EPI_ISL_578695 | Wisconsin State Laboratory of Hygiene Communicable                                              | Wisconsin State Laboratory of Hygiene Communicable                                                                     | Kelsey R. Florek, Abigail C. Shockey                                                                                                                                                                                                                                                                                                                                                                                                                                                    |
| see above                                                                                                                                                                                                                                                                                                                                                                                                                                                                                                                                                                                                                                                                                                                                                                                                                                                                                                                                                                                                                                                                                                                                                                                                                                                                                                                                                                                                                                                                                                                                                                                                                                                                                                                                                                                                                                                                                                                                                                                                                                                                                                                                                                                                                                                                                                                                                                                                                                                                                                                                                                                                                                                                                                                                                                                                                                                                                                                                                                                                                                                                                                                                                                                                                                                                                                                                                                                                                                                                                                                                                                                                                                                                                                                                                                                                                                                                                                                                                                                                                                                                                                                                                                                                                                                                                                                                                                                                                                                                                                                                                                                                                                                                                                                                                                                                                                                                                                                                                                                                                                                                                                                                                                                                                                                                                                                                                                                                                                                                                                                                                                                                                                                                                                                                                                                                                                                                                                                                                                                                      | Wisconsin State Laboratory of Hygiene Communicable                                              | Wisconsin State Laboratory of Hygiene Communicable                                                                     | Kelsey R. Florek, Abigail C. Shockey                                                                                                                                                                                                                                                                                                                                                                                                                                                    |

| Disease Division                                                                                                                                                                                                                                                                                                                                                                                                                                                                                                                                                                                                                                                                                                                                                                                                                                                                                                                                                                                                                                                                                                                                                                                                                                                                                                                                                                                                               |                                                                                                                                                            | Disease Division                                                                                                                                           |                                                                                                                                                                                                                                                                                                                                                    | Disease Division                                                                                                                                   |  |
|--------------------------------------------------------------------------------------------------------------------------------------------------------------------------------------------------------------------------------------------------------------------------------------------------------------------------------------------------------------------------------------------------------------------------------------------------------------------------------------------------------------------------------------------------------------------------------------------------------------------------------------------------------------------------------------------------------------------------------------------------------------------------------------------------------------------------------------------------------------------------------------------------------------------------------------------------------------------------------------------------------------------------------------------------------------------------------------------------------------------------------------------------------------------------------------------------------------------------------------------------------------------------------------------------------------------------------------------------------------------------------------------------------------------------------|------------------------------------------------------------------------------------------------------------------------------------------------------------|------------------------------------------------------------------------------------------------------------------------------------------------------------|----------------------------------------------------------------------------------------------------------------------------------------------------------------------------------------------------------------------------------------------------------------------------------------------------------------------------------------------------|----------------------------------------------------------------------------------------------------------------------------------------------------|--|
| EPI_ISL_581575, EPI_ISL_581576, EPI_ISL_581578, EPI_ISL_581579, EPI_ISL_581580, EPI_ISL_581581, EPI_ISL_581583, EPI_ISL_581584, EPI_ISL_581585, EPI_ISL_581587, EPI_ISL_581588, EPI_ISL_581589, EPI_ISL_581590, EPI_ISL_581591, EPI_ISL_581592, EPI_ISL_581596, EPI_ISL_581597, EPI_ISL_581598, EPI_ISL_581599, EPI_ISL_581600, EPI_ISL_581601, EPI_ISL_581603, EPI_ISL_581604, EPI_ISL_581606, EPI_ISL_581607, EPI_ISL_581608, EPI_ISL_581609, EPI_ISL_581611, EPI_ISL_581612, EPI_ISL_581613, EPI_ISL_581614, EPI_ISL_581615, EPI_ISL_581616, EPI_ISL_581617, EPI_ISL_581618, EPI_ISL_581620, EPI_ISL_581622, EPI_ISL_581623, EPI_ISL_581625, EPI_ISL_581626, EPI_ISL_581627, EPI_ISL_581628, EPI_ISL_581629, EPI_ISL_581631, EPI_ISL_581632, EPI_ISL_581636, EPI_ISL_581637, EPI_ISL_581638, EPI_ISL_581640, EPI_ISL_581641, EPI_ISL_581642, EPI_ISL_581643, EPI_ISL_581644, EPI_ISL_581645, EPI_ISL_581646, EPI_ISL_581647, EPI_ISL_581649, EPI_ISL_581650, EPI_ISL_581651, EPI_ISL_581652, EPI_ISL_581654, EPI_ISL_581656, EPI_ISL_581657, EPI_ISL_581659, EPI_ISL_581660, EPI_ISL_581661, EPI_ISL_581662, EPI_ISL_581664, EPI_ISL_581665, EPI_ISL_581666, EPI_ISL_581667, EPI_ISL_582027                                                                                                                                                                                                                                 | see above                                                                                                                                                  | Department of Clinical Microbiology                                                                                                                        | GIGA Medical Genomics                                                                                                                                                                                                                                                                                                                              | Keith Durkin, Maria Artesi, Sébastien Bontems, Raphaël Boreux, Bouchra Boujemla, Cécile Meex, Pierrette Melin, Marie-Pierre Hayette, Vincent Bours |  |
| EPI_ISL_583482, EPI_ISL_583484, EPI_ISL_583486                                                                                                                                                                                                                                                                                                                                                                                                                                                                                                                                                                                                                                                                                                                                                                                                                                                                                                                                                                                                                                                                                                                                                                                                                                                                                                                                                                                 | Institute of Virology, Biomedical Research Center of the Slovak Academy of Sciences, Bratislava                                                            | Faculty of Natural Sciences, Comenius University, Bratislava                                                                                               | Kristína Bořová, Viktória Hodorová, Broa Břejová, Viktória abanová, Dominika Friová, Sabina Fumaová Havlíková, Juraj Kopáček, Martina Liková, umomíra Lukáiková, Martina Neboháová, Monika Sláviková, Editá Staroová, Elena Tichá, Tomáš Vina, Boris Klempa, Jozef Nosek                                                                           |                                                                                                                                                    |  |
| EPI_ISL_586520                                                                                                                                                                                                                                                                                                                                                                                                                                                                                                                                                                                                                                                                                                                                                                                                                                                                                                                                                                                                                                                                                                                                                                                                                                                                                                                                                                                                                 | B.J. Medical College and Civil hospital, Ahmedabad                                                                                                         | Gujarat Biotechnology Research Centre                                                                                                                      | Komal Patel, Labdhi Pandya, Afzal Ansari, Nikha Trivedi, Pranay Shah, Kamlesh J Upadhyay, Sanjay Kapadia, Apurvasinh Puvar, Janvi Raval, Zarna Patel, Monika Gandhi, Pinal Trivedi, Maharshi Pandya, Nidhi Patel, Nitin Savaliya, Raghawendra Kumar, Dinesh Kumar, Zuber Saiyed, R D Dixit, A M Kadri, Harsh Bakshi, Chaitanya Joshi, Madhvi Joshi |                                                                                                                                                    |  |
| EPI_ISL_586521                                                                                                                                                                                                                                                                                                                                                                                                                                                                                                                                                                                                                                                                                                                                                                                                                                                                                                                                                                                                                                                                                                                                                                                                                                                                                                                                                                                                                 | B.J. Medical College and Civil hospital, Ahmedabad                                                                                                         | Gujarat Biotechnology Research Centre                                                                                                                      | Labdhi Pandya, Afzal Ansari, Nikha Trivedi, Pranay Shah, Kamlesh J Upadhyay, Sanjay Kapadia, Apurvasinh Puvar, Janvi Raval, Zarna Patel, Monika Gandhi, Pinal Trivedi, Maharshi Pandya, Nidhi Patel, Nitin Savaliya, Raghawendra Kumar, Dinesh Kumar, Zuber Saiyed, Komal Patel, R D Dixit, A M Kadri, Harsh Bakshi, Chaitanya Joshi, Madhvi Joshi |                                                                                                                                                    |  |
| EPI_ISL_586542                                                                                                                                                                                                                                                                                                                                                                                                                                                                                                                                                                                                                                                                                                                                                                                                                                                                                                                                                                                                                                                                                                                                                                                                                                                                                                                                                                                                                 | Government General Hospital, Jam Khambhaliya, Devbhoomi Dwarka                                                                                             | Gujarat Biotechnology Research Centre                                                                                                                      | Komal Patel, Labdhi Pandya, Afzal Ansari, Nikha Trivedi, Harish Matani, Apurvasinh Puvar, Janvi Raval, Zarna Patel, Monika Gandhi, Pinal Trivedi, Maharshi Pandya, Nidhi Patel, Nitin Savaliya, Raghawendra Kumar, Dinesh Kumar, Zuber Saiyed, R D Dixit, A M Kadri, Harsh Bakshi, Chaitanya Joshi, Madhvi Joshi                                   |                                                                                                                                                    |  |
| EPI_ISL_586543                                                                                                                                                                                                                                                                                                                                                                                                                                                                                                                                                                                                                                                                                                                                                                                                                                                                                                                                                                                                                                                                                                                                                                                                                                                                                                                                                                                                                 | Government General Hospital, Jam Khambhaliya, Devbhoomi Dwarka                                                                                             | Gujarat Biotechnology Research Centre                                                                                                                      | Labdhi Pandya, Afzal Ansari, Nikha Trivedi, Harish Matani, Apurvasinh Puvar, Janvi Raval, Zarna Patel, Monika Gandhi, Pinal Trivedi, Maharshi Pandya, Nidhi Patel, Nitin Savaliya, Raghawendra Kumar, Dinesh Kumar, Zuber Saiyed, Komal Patel, R D Dixit, A M Kadri, Harsh Bakshi, Chaitanya Joshi, Madhvi Joshi                                   |                                                                                                                                                    |  |
| EPI_ISL_586559                                                                                                                                                                                                                                                                                                                                                                                                                                                                                                                                                                                                                                                                                                                                                                                                                                                                                                                                                                                                                                                                                                                                                                                                                                                                                                                                                                                                                 | CCC, Veraval                                                                                                                                               | Gujarat Biotechnology Research Centre                                                                                                                      | Komal Patel, Labdhi Pandya, Afzal Ansari, Nikha Trivedi, Jignesh Parmar, Jitendra Bamrotia, Apurvasinh Puvar, Janvi Raval, Zarna Patel, Monika Gandhi, Pinal Trivedi, Maharshi Pandya, Nidhi Patel, Nitin Savaliya, Raghawendra Kumar, Dinesh Kumar, Zuber Saiyed, R D Dixit, A M Kadri, Harsh Bakshi, Chaitanya Joshi, Madhvi Joshi               |                                                                                                                                                    |  |
| EPI_ISL_586560                                                                                                                                                                                                                                                                                                                                                                                                                                                                                                                                                                                                                                                                                                                                                                                                                                                                                                                                                                                                                                                                                                                                                                                                                                                                                                                                                                                                                 | CCC, Veraval                                                                                                                                               | Gujarat Biotechnology Research Centre                                                                                                                      | Labdhi Pandya, Afzal Ansari, Nikha Trivedi, Jignesh Parmar, Jitendra Bamrotia, Apurvasinh Puvar, Janvi Raval, Zarna Patel, Monika Gandhi, Pinal Trivedi, Maharshi Pandya, Nidhi Patel, Nitin Savaliya, Raghawendra Kumar, Dinesh Kumar, Zuber Saiyed, Komal Patel, R D Dixit, A M Kadri, Harsh Bakshi, Chaitanya Joshi, Madhvi Joshi               |                                                                                                                                                    |  |
| EPI_ISL_591099, EPI_ISL_591541, EPI_ISL_591542, EPI_ISL_591543, EPI_ISL_591544, EPI_ISL_591545, EPI_ISL_591546, EPI_ISL_591547                                                                                                                                                                                                                                                                                                                                                                                                                                                                                                                                                                                                                                                                                                                                                                                                                                                                                                                                                                                                                                                                                                                                                                                                                                                                                                 | CHU Purpan - Laboratoire de Virologie - Institut Fédératif de Biologie                                                                                     | CHU Purpan - Laboratoire de Virologie - Institut Fédératif de Biologie                                                                                     | Latour J., Ranger N., Dubois M., Carcenac R., Harter A., Boyer P., Tremeaux P., Izopet J.                                                                                                                                                                                                                                                          |                                                                                                                                                    |  |
| EPI_ISL_593481, EPI_ISL_593483, EPI_ISL_593486, EPI_ISL_593487, EPI_ISL_593489, EPI_ISL_593490, EPI_ISL_593491, EPI_ISL_593492, EPI_ISL_593493, EPI_ISL_593494, EPI_ISL_593495, EPI_ISL_593496, EPI_ISL_593497, EPI_ISL_593498, EPI_ISL_593499, EPI_ISL_593501, EPI_ISL_593502, EPI_ISL_593503, EPI_ISL_593504, EPI_ISL_593506, EPI_ISL_593507, EPI_ISL_593508, EPI_ISL_593509, EPI_ISL_593511, EPI_ISL_593512, EPI_ISL_593513, EPI_ISL_593514, EPI_ISL_593515, EPI_ISL_593517, EPI_ISL_593518, EPI_ISL_593519, EPI_ISL_593523, EPI_ISL_593524, EPI_ISL_593525, EPI_ISL_593526, EPI_ISL_593527, EPI_ISL_593528, EPI_ISL_593529, EPI_ISL_593531, EPI_ISL_593532, EPI_ISL_593533, EPI_ISL_593534, EPI_ISL_593536, EPI_ISL_593537, EPI_ISL_593538, EPI_ISL_593539, EPI_ISL_593540, EPI_ISL_593541, EPI_ISL_593543, EPI_ISL_593544, EPI_ISL_593545, EPI_ISL_593546, EPI_ISL_593547, EPI_ISL_593548, EPI_ISL_593549, EPI_ISL_593550, EPI_ISL_593551                                                                                                                                                                                                                                                                                                                                                                                                                                                                                 | see above                                                                                                                                                  | Eastern Ontario Regional Laboratory Association                                                                                                            | McMaster University                                                                                                                                                                                                                                                                                                                                | Leanne Mortimer, Hooman Derakhshani, Emily Panousis, Ahmed Draia, Jalees Nasir, Robert Slinger, Andrew G. McArthur                                 |  |
| EPI_ISL_593855, EPI_ISL_593856, EPI_ISL_593857, EPI_ISL_593858, EPI_ISL_593859, EPI_ISL_593860, EPI_ISL_593861, EPI_ISL_593862, EPI_ISL_593863, EPI_ISL_593864, EPI_ISL_593865, EPI_ISL_593866, EPI_ISL_593867, EPI_ISL_593868, EPI_ISL_593869, EPI_ISL_593870, EPI_ISL_593871, EPI_ISL_593872, EPI_ISL_593873, EPI_ISL_593874, EPI_ISL_593875, EPI_ISL_593876, EPI_ISL_593877, EPI_ISL_593878, EPI_ISL_593879, EPI_ISL_593880, EPI_ISL_593881, EPI_ISL_593882, EPI_ISL_593883, EPI_ISL_593884, EPI_ISL_593885, EPI_ISL_593886, EPI_ISL_593887, EPI_ISL_593888, EPI_ISL_593889, EPI_ISL_593891, EPI_ISL_593892, EPI_ISL_593893, EPI_ISL_593894, EPI_ISL_593895, EPI_ISL_593896, EPI_ISL_593897, EPI_ISL_593898, EPI_ISL_593899, EPI_ISL_593900, EPI_ISL_593901                                                                                                                                                                                                                                                                                                                                                                                                                                                                                                                                                                                                                                                                 | see above                                                                                                                                                  | CHU Purpan - Laboratoire de Virologie - Institut Fédératif de Biologie                                                                                     | CHU Purpan - Laboratoire de Virologie - Institut Fédératif de Biologie                                                                                                                                                                                                                                                                             | Latour J., Ranger N., Dubois M., Carcenac R., Harter A., Boyer P., Tremeaux P., Izopet J.                                                          |  |
| EPI_ISL_596386                                                                                                                                                                                                                                                                                                                                                                                                                                                                                                                                                                                                                                                                                                                                                                                                                                                                                                                                                                                                                                                                                                                                                                                                                                                                                                                                                                                                                 | National Institute for Allergy and Infectious Diseases Integrated Research Facility - Frederick (NIAID IRF-Frederick), National Institutes of Health (NIH) | National Institute for Allergy and Infectious Diseases Integrated Research Facility - Frederick (NIAID IRF-Frederick), National Institutes of Health (NIH) | Kocher,G., Kugelman,J.R., Beitzel,B. and Palacios,G.                                                                                                                                                                                                                                                                                               |                                                                                                                                                    |  |
| EPI_ISL_600428, EPI_ISL_600429, EPI_ISL_600430, EPI_ISL_600431, EPI_ISL_600432, EPI_ISL_600433, EPI_ISL_600434, EPI_ISL_600435, EPI_ISL_600436, EPI_ISL_600437, EPI_ISL_600438, EPI_ISL_600439, EPI_ISL_600440, EPI_ISL_600441, EPI_ISL_600442, EPI_ISL_600443, EPI_ISL_600444, EPI_ISL_600445, EPI_ISL_600446, EPI_ISL_600449, EPI_ISL_600451, EPI_ISL_600454, EPI_ISL_600456, EPI_ISL_600459, EPI_ISL_600461, EPI_ISL_600463, EPI_ISL_600466, EPI_ISL_600468, EPI_ISL_600471, EPI_ISL_600473, EPI_ISL_600476, EPI_ISL_600478, EPI_ISL_600480, EPI_ISL_600484, EPI_ISL_600487, EPI_ISL_600489, EPI_ISL_600492, EPI_ISL_600495, EPI_ISL_600498, EPI_ISL_600500, EPI_ISL_600502, EPI_ISL_600505, EPI_ISL_600507, EPI_ISL_600510, EPI_ISL_600512, EPI_ISL_600515, EPI_ISL_600517, EPI_ISL_600519, EPI_ISL_600522, EPI_ISL_600524, EPI_ISL_600527, EPI_ISL_600530, EPI_ISL_600533, EPI_ISL_600535, EPI_ISL_600538, EPI_ISL_600541, EPI_ISL_600543, EPI_ISL_600546, EPI_ISL_600549, EPI_ISL_600552, EPI_ISL_600554, EPI_ISL_600557, EPI_ISL_600559, EPI_ISL_600562, EPI_ISL_600564, EPI_ISL_600567, EPI_ISL_600570                                                                                                                                                                                                                                                                                                                 | see above                                                                                                                                                  | Institute of Epidemiology Disease Control And Research                                                                                                     | Institute for Developing Science and Health Initiatives                                                                                                                                                                                                                                                                                            | Lauren Cowley, Mokubil Hassan Afrad, Sadia Isfat Ara Rahman, Md. Mahfuz-Al-mamun, Firadausi Qadri, Tahmina Shirin                                  |  |
| EPI_ISL_603216, EPI_ISL_603217, EPI_ISL_603218, EPI_ISL_603219, EPI_ISL_603220                                                                                                                                                                                                                                                                                                                                                                                                                                                                                                                                                                                                                                                                                                                                                                                                                                                                                                                                                                                                                                                                                                                                                                                                                                                                                                                                                 | CHU Purpan - Laboratoire de Virologie - Institut Fédératif de Biologie                                                                                     | CHU Purpan - Laboratoire de Virologie - Institut Fédératif de Biologie                                                                                     | Latour J., Ranger N., Dubois M., Carcenac R., Harter A., Boyer P., Tremeaux P., Izopet J.                                                                                                                                                                                                                                                          |                                                                                                                                                    |  |
| EPI_ISL_605882, EPI_ISL_605883, EPI_ISL_605884, EPI_ISL_605885, EPI_ISL_605886, EPI_ISL_605887, EPI_ISL_605888, EPI_ISL_605889, EPI_ISL_605890, EPI_ISL_605891, EPI_ISL_605892, EPI_ISL_605893, EPI_ISL_605894, EPI_ISL_605895, EPI_ISL_605896, EPI_ISL_605900, EPI_ISL_605901, EPI_ISL_605902, EPI_ISL_605903, EPI_ISL_605904, EPI_ISL_605905, EPI_ISL_605906, EPI_ISL_605907, EPI_ISL_605908                                                                                                                                                                                                                                                                                                                                                                                                                                                                                                                                                                                                                                                                                                                                                                                                                                                                                                                                                                                                                                 | see above                                                                                                                                                  | NGS Lab, DNA SOLUTION LTD.                                                                                                                                 | NGS Lab, DNA SOLUTION LTD.                                                                                                                                                                                                                                                                                                                         | Khan,M.I., Hasan,K.N., Sufian,A., Polol,M.N.I., Khaleque,A., Rahman,M., Chowdhury,M., Haider,H.U., Razu,M.H., Khan,M., Rabbi,M.F.A.                |  |
| EPI_ISL_605909, EPI_ISL_605910, EPI_ISL_605911, EPI_ISL_605912, EPI_ISL_605913                                                                                                                                                                                                                                                                                                                                                                                                                                                                                                                                                                                                                                                                                                                                                                                                                                                                                                                                                                                                                                                                                                                                                                                                                                                                                                                                                 | see above                                                                                                                                                  | NGS Lab, DNA SOLUTION LTD.                                                                                                                                 | NGS Lab, DNA SOLUTION LTD.                                                                                                                                                                                                                                                                                                                         | Khan,M.I., Hasan,K.N., Sufian,A., Hosen,M.B., Polol,M.N.I., Khaleque,A., Rahman,M., Chowdhury,M., Haider,H.U., Razu,M.H., Khan,M., Rabbi,M.F.A.    |  |
| EPI_ISL_605914, EPI_ISL_605915, EPI_ISL_605916, EPI_ISL_605917, EPI_ISL_605918, EPI_ISL_605919, EPI_ISL_605920, EPI_ISL_605921, EPI_ISL_605922, EPI_ISL_605923                                                                                                                                                                                                                                                                                                                                                                                                                                                                                                                                                                                                                                                                                                                                                                                                                                                                                                                                                                                                                                                                                                                                                                                                                                                                 | see above                                                                                                                                                  | NGS Lab, DNA SOLUTION LTD.                                                                                                                                 | NGS Lab, DNA SOLUTION LTD.                                                                                                                                                                                                                                                                                                                         | Khan,M.I., Hasan,K.N., Sufian,A., Hosen,M.B., Khaleque,A., Rahman,M., Chowdhury,M., Haider,H.U., Razu,M.H., Khan,M., Rabbi,M.F.A.                  |  |
| EPI_ISL_626233, EPI_ISL_626234, EPI_ISL_626235, EPI_ISL_626237, EPI_ISL_626239, EPI_ISL_626240, EPI_ISL_626241, EPI_ISL_626242, EPI_ISL_626243, EPI_ISL_626244, EPI_ISL_626245, EPI_ISL_626246, EPI_ISL_626247, EPI_ISL_626248, EPI_ISL_626249, EPI_ISL_626251, EPI_ISL_626252, EPI_ISL_626255, EPI_ISL_626257, EPI_ISL_626260, EPI_ISL_626262, EPI_ISL_626263, EPI_ISL_626264, EPI_ISL_626265, EPI_ISL_626266, EPI_ISL_626268, EPI_ISL_626269, EPI_ISL_626270, EPI_ISL_626271, EPI_ISL_626273, EPI_ISL_626275, EPI_ISL_626278, EPI_ISL_626279, EPI_ISL_626280, EPI_ISL_626281, EPI_ISL_626282, EPI_ISL_626284, EPI_ISL_626285, EPI_ISL_626286, EPI_ISL_626287, EPI_ISL_626288, EPI_ISL_626289, EPI_ISL_626290, EPI_ISL_626292, EPI_ISL_626293, EPI_ISL_626294, EPI_ISL_626296, EPI_ISL_626297, EPI_ISL_626298, EPI_ISL_626299, EPI_ISL_626300, EPI_ISL_626301, EPI_ISL_626302, EPI_ISL_626303, EPI_ISL_626304, EPI_ISL_626306, EPI_ISL_626307, EPI_ISL_626308, EPI_ISL_626309, EPI_ISL_626310, EPI_ISL_626311, EPI_ISL_626313, EPI_ISL_626314, EPI_ISL_626315, EPI_ISL_626316, EPI_ISL_626317, EPI_ISL_626318, EPI_ISL_626319, EPI_ISL_626320, EPI_ISL_626321, EPI_ISL_626322, EPI_ISL_626323, EPI_ISL_626324, EPI_ISL_626325, EPI_ISL_626327, EPI_ISL_626329, EPI_ISL_626330, EPI_ISL_626331, EPI_ISL_626332, EPI_ISL_626333, EPI_ISL_626334, EPI_ISL_626335, EPI_ISL_626336, EPI_ISL_626337, EPI_ISL_626338, EPI_ISL_626339 | see above                                                                                                                                                  | Department of Clinical Microbiology                                                                                                                        | GIGA Medical Genomics                                                                                                                                                                                                                                                                                                                              | Keith Durkin, Maria Artesi, Sébastien Bontems, Raphaël Boreux, Bouchra Boujemla, Cécile Meex, Pierrette Melin, Marie-Pierre Hayette, Vincent Bours |  |
| EPI_ISL_628750, EPI_ISL_628751, EPI_ISL_628752, EPI_ISL_628753, EPI_ISL_628754, EPI_ISL_628755, EPI_ISL_628756, EPI_ISL_628757, EPI_ISL_628758, EPI_ISL_628759, EPI_ISL_628760, EPI_ISL_628761                                                                                                                                                                                                                                                                                                                                                                                                                                                                                                                                                                                                                                                                                                                                                                                                                                                                                                                                                                                                                                                                                                                                                                                                                                 | see above                                                                                                                                                  | UHAS COVID-19 Lab                                                                                                                                          | UHAS COVID-19 Lab                                                                                                                                                                                                                                                                                                                                  | Kwabena O. Duedu, Jones Gyamfi, Reuben Ayivor-Djanie, John O. Gyapong and the UHAS COVID-19 Lab Team                                               |  |
| EPI_ISL_631389, EPI_ISL_631390, EPI_ISL_631391, EPI_ISL_631392, EPI_ISL_631393, EPI_ISL_631394, EPI_ISL_631395, EPI_ISL_631396, EPI_ISL_631397, EPI_ISL_631398, EPI_ISL_631399, EPI_ISL_631400, EPI_ISL_631401, EPI_ISL_631402, EPI_ISL_631403, EPI_ISL_631404, EPI_ISL_631405, EPI_ISL_631406, EPI_ISL_631407, EPI_ISL_631408, EPI_ISL_631409, EPI_ISL_631410, EPI_ISL_631411, EPI_ISL_631412, EPI_ISL_631413, EPI_ISL_631414, EPI_ISL_631415, EPI_ISL_631416, EPI_ISL_631417, EPI_ISL_631418, EPI_ISL_631419, EPI_ISL_631420, EPI_ISL_631421, EPI_ISL_631422, EPI_ISL_631423, EPI_ISL_631424, EPI_ISL_631425, EPI_ISL_631426, EPI_ISL_631427, EPI_ISL_631428, EPI_ISL_631429, EPI_ISL_631430, EPI_ISL_631431, EPI_ISL_631432, EPI_ISL_631433, EPI_ISL_631434, EPI_ISL_631435, EPI_ISL_631436, EPI_ISL_631437, EPI_ISL_631438, EPI_ISL_631439, EPI_ISL_631440, EPI_ISL_631441, EPI_ISL_631442                                                                                                                                                                                                                                                                                                                                                                                                                                                                                                                                 | see above                                                                                                                                                  | UHAS COVID-19 Lab                                                                                                                                          | UHAS COVID-19 Lab                                                                                                                                                                                                                                                                                                                                  | Kwabena O. Duedu, Jones Gyamfi, Reuben Ayivor-Djanie, John O. Gyapong and the UHAS COVID-19 Lab Team                                               |  |

|                                                                                                                                                                                                                                                                                                                                                                                                                                                                                                                                                                                                                                                                                                                                                                                                                                                                                                                                                                                                                                                                                                                                                                                                                                                                                                                                                                                                                                                                                                                                                                                                                                                                                                                                                                                                                                                                                                                                                                                                                                                                                                                                                                                                                                                                                                                                                                                                                                                                                                                                                                                                                                                                                                                                                                                                                                                                                                                                                                                                                                                                                                                                                                                                                                                                                                                                                                                                                                                                                                                                                                                                                                                                                                                                                                                                                                                                                                                                                                                                                                                                                                                                                                                                                                                                                                                                                                                                                                                                                                                                                                                                                                                                                                                                                                                                                                                                                                                                                                                                                                                                                                                                                                                                                                                                                                                                                                                                                                                                                                                                                                                                                                                                                                                                                                                                |                                                                                                                                                                                                                                                                                                                                                                                                                                                                                                                                                                                                                                                                                                                                                                                                                                                                                                                                                                                                                                                                                                                                                                                                                                                                                                                                                                                                                                                                                                                                                                                                                                                                                                                                                                                                                                                                                                                                                                                                                                                                                                                                                                                                                                                                                                                                                                                                                                                                                                                                                                                                                                                                                                                                                                                                                                                                                                                                                                                                                                                                                                                                                                                                                                                                                                                                                                                                                                                                                                                                                                                                                                                                                                                                                                                                                            |                                                                                                |                                                                                                |                                                                                                                                                                                                                                                                                                                            |
|------------------------------------------------------------------------------------------------------------------------------------------------------------------------------------------------------------------------------------------------------------------------------------------------------------------------------------------------------------------------------------------------------------------------------------------------------------------------------------------------------------------------------------------------------------------------------------------------------------------------------------------------------------------------------------------------------------------------------------------------------------------------------------------------------------------------------------------------------------------------------------------------------------------------------------------------------------------------------------------------------------------------------------------------------------------------------------------------------------------------------------------------------------------------------------------------------------------------------------------------------------------------------------------------------------------------------------------------------------------------------------------------------------------------------------------------------------------------------------------------------------------------------------------------------------------------------------------------------------------------------------------------------------------------------------------------------------------------------------------------------------------------------------------------------------------------------------------------------------------------------------------------------------------------------------------------------------------------------------------------------------------------------------------------------------------------------------------------------------------------------------------------------------------------------------------------------------------------------------------------------------------------------------------------------------------------------------------------------------------------------------------------------------------------------------------------------------------------------------------------------------------------------------------------------------------------------------------------------------------------------------------------------------------------------------------------------------------------------------------------------------------------------------------------------------------------------------------------------------------------------------------------------------------------------------------------------------------------------------------------------------------------------------------------------------------------------------------------------------------------------------------------------------------------------------------------------------------------------------------------------------------------------------------------------------------------------------------------------------------------------------------------------------------------------------------------------------------------------------------------------------------------------------------------------------------------------------------------------------------------------------------------------------------------------------------------------------------------------------------------------------------------------------------------------------------------------------------------------------------------------------------------------------------------------------------------------------------------------------------------------------------------------------------------------------------------------------------------------------------------------------------------------------------------------------------------------------------------------------------------------------------------------------------------------------------------------------------------------------------------------------------------------------------------------------------------------------------------------------------------------------------------------------------------------------------------------------------------------------------------------------------------------------------------------------------------------------------------------------------------------------------------------------------------------------------------------------------------------------------------------------------------------------------------------------------------------------------------------------------------------------------------------------------------------------------------------------------------------------------------------------------------------------------------------------------------------------------------------------------------------------------------------------------------------------------------------------------------------------------------------------------------------------------------------------------------------------------------------------------------------------------------------------------------------------------------------------------------------------------------------------------------------------------------------------------------------------------------------------------------------------------------------------------------|----------------------------------------------------------------------------------------------------------------------------------------------------------------------------------------------------------------------------------------------------------------------------------------------------------------------------------------------------------------------------------------------------------------------------------------------------------------------------------------------------------------------------------------------------------------------------------------------------------------------------------------------------------------------------------------------------------------------------------------------------------------------------------------------------------------------------------------------------------------------------------------------------------------------------------------------------------------------------------------------------------------------------------------------------------------------------------------------------------------------------------------------------------------------------------------------------------------------------------------------------------------------------------------------------------------------------------------------------------------------------------------------------------------------------------------------------------------------------------------------------------------------------------------------------------------------------------------------------------------------------------------------------------------------------------------------------------------------------------------------------------------------------------------------------------------------------------------------------------------------------------------------------------------------------------------------------------------------------------------------------------------------------------------------------------------------------------------------------------------------------------------------------------------------------------------------------------------------------------------------------------------------------------------------------------------------------------------------------------------------------------------------------------------------------------------------------------------------------------------------------------------------------------------------------------------------------------------------------------------------------------------------------------------------------------------------------------------------------------------------------------------------------------------------------------------------------------------------------------------------------------------------------------------------------------------------------------------------------------------------------------------------------------------------------------------------------------------------------------------------------------------------------------------------------------------------------------------------------------------------------------------------------------------------------------------------------------------------------------------------------------------------------------------------------------------------------------------------------------------------------------------------------------------------------------------------------------------------------------------------------------------------------------------------------------------------------------------------------------------------------------------------------------------------------------------------------|------------------------------------------------------------------------------------------------|------------------------------------------------------------------------------------------------|----------------------------------------------------------------------------------------------------------------------------------------------------------------------------------------------------------------------------------------------------------------------------------------------------------------------------|
| EPI_ISL_631443, EPI_ISL_631444, EPI_ISL_631445, EPI_ISL_631446, EPI_ISL_631447, EPI_ISL_631448, EPI_ISL_631449, EPI_ISL_631450, EPI_ISL_631451, EPI_ISL_631452, EPI_ISL_631453, EPI_ISL_631454, EPI_ISL_631455, EPI_ISL_631456, EPI_ISL_631457, EPI_ISL_631458, EPI_ISL_631459, EPI_ISL_631460, EPI_ISL_631461, EPI_ISL_631462, EPI_ISL_631463, EPI_ISL_631464, EPI_ISL_631465, EPI_ISL_631466, EPI_ISL_631467, EPI_ISL_631468, EPI_ISL_631469, EPI_ISL_631470, EPI_ISL_631471, EPI_ISL_631472, EPI_ISL_631473, EPI_ISL_631474, EPI_ISL_631475, EPI_ISL_631476, EPI_ISL_631477, EPI_ISL_631478, EPI_ISL_631479, EPI_ISL_631480, EPI_ISL_631481, EPI_ISL_631482, EPI_ISL_631483, EPI_ISL_631484, EPI_ISL_631485, EPI_ISL_631486, EPI_ISL_631487, EPI_ISL_631488, EPI_ISL_631489, EPI_ISL_631490, EPI_ISL_631491, EPI_ISL_631492, EPI_ISL_631493, EPI_ISL_631494, EPI_ISL_631495, EPI_ISL_631496, EPI_ISL_631497, EPI_ISL_631498, EPI_ISL_631499, EPI_ISL_631500, EPI_ISL_631501                                                                                                                                                                                                                                                                                                                                                                                                                                                                                                                                                                                                                                                                                                                                                                                                                                                                                                                                                                                                                                                                                                                                                                                                                                                                                                                                                                                                                                                                                                                                                                                                                                                                                                                                                                                                                                                                                                                                                                                                                                                                                                                                                                                                                                                                                                                                                                                                                                                                                                                                                                                                                                                                                                                                                                                                                                                                                                                                                                                                                                                                                                                                                                                                                                                                                                                                                                                                                                                                                                                                                                                                                                                                                                                                                                                                                                                                                                                                                                                                                                                                                                                                                                                                                                                                                                                                                                                                                                                                                                                                                                                                                                                                                                                                                                                                                 | see above                                                                                                                                                                                                                                                                                                                                                                                                                                                                                                                                                                                                                                                                                                                                                                                                                                                                                                                                                                                                                                                                                                                                                                                                                                                                                                                                                                                                                                                                                                                                                                                                                                                                                                                                                                                                                                                                                                                                                                                                                                                                                                                                                                                                                                                                                                                                                                                                                                                                                                                                                                                                                                                                                                                                                                                                                                                                                                                                                                                                                                                                                                                                                                                                                                                                                                                                                                                                                                                                                                                                                                                                                                                                                                                                                                                                                  | Wisconsin State Laboratory of Hygiene Communicable Disease Division                            | Wisconsin State Laboratory of Hygiene Communicable Disease Division                            | Kelsey R. Florek, Abigail C. Shockey                                                                                                                                                                                                                                                                                       |
| EPI_ISL_634876, EPI_ISL_634877, EPI_ISL_634878, EPI_ISL_634879, EPI_ISL_634880, EPI_ISL_634881, EPI_ISL_634882, EPI_ISL_634883, EPI_ISL_634884, EPI_ISL_634885                                                                                                                                                                                                                                                                                                                                                                                                                                                                                                                                                                                                                                                                                                                                                                                                                                                                                                                                                                                                                                                                                                                                                                                                                                                                                                                                                                                                                                                                                                                                                                                                                                                                                                                                                                                                                                                                                                                                                                                                                                                                                                                                                                                                                                                                                                                                                                                                                                                                                                                                                                                                                                                                                                                                                                                                                                                                                                                                                                                                                                                                                                                                                                                                                                                                                                                                                                                                                                                                                                                                                                                                                                                                                                                                                                                                                                                                                                                                                                                                                                                                                                                                                                                                                                                                                                                                                                                                                                                                                                                                                                                                                                                                                                                                                                                                                                                                                                                                                                                                                                                                                                                                                                                                                                                                                                                                                                                                                                                                                                                                                                                                                                 | see above                                                                                                                                                                                                                                                                                                                                                                                                                                                                                                                                                                                                                                                                                                                                                                                                                                                                                                                                                                                                                                                                                                                                                                                                                                                                                                                                                                                                                                                                                                                                                                                                                                                                                                                                                                                                                                                                                                                                                                                                                                                                                                                                                                                                                                                                                                                                                                                                                                                                                                                                                                                                                                                                                                                                                                                                                                                                                                                                                                                                                                                                                                                                                                                                                                                                                                                                                                                                                                                                                                                                                                                                                                                                                                                                                                                                                  | Lab voor klinische biologie                                                                    | Onderzoeksgroep Virologie                                                                      | Laurens Lambrechts, Nick Vereecke, Marthe Pauwels, Bruno Verhasselt, Linos Vandekerckhove, Hans Nauwynck, Sebastiaan Theuns                                                                                                                                                                                                |
| EPI_ISL_636607, EPI_ISL_636608, EPI_ISL_636609, EPI_ISL_636610, EPI_ISL_636611, EPI_ISL_636612, EPI_ISL_636613, EPI_ISL_636615, EPI_ISL_636616, EPI_ISL_636617, EPI_ISL_636618, EPI_ISL_636621, EPI_ISL_636622, EPI_ISL_636623, EPI_ISL_636624, EPI_ISL_636625, EPI_ISL_636626, EPI_ISL_636627, EPI_ISL_636628, EPI_ISL_636629, EPI_ISL_636630, EPI_ISL_636631, EPI_ISL_636633, EPI_ISL_636634, EPI_ISL_636635, EPI_ISL_636636, EPI_ISL_636637, EPI_ISL_636638, EPI_ISL_636639, EPI_ISL_636640, EPI_ISL_636641, EPI_ISL_636642, EPI_ISL_636643, EPI_ISL_636644, EPI_ISL_636645, EPI_ISL_636646, EPI_ISL_636647, EPI_ISL_636648, EPI_ISL_636649, EPI_ISL_636650, EPI_ISL_636651, EPI_ISL_636655, EPI_ISL_636656, EPI_ISL_636657, EPI_ISL_636658, EPI_ISL_636659, EPI_ISL_636661, EPI_ISL_636663, EPI_ISL_636664, EPI_ISL_636665, EPI_ISL_636667, EPI_ISL_636668, EPI_ISL_636669, EPI_ISL_636670, EPI_ISL_636671, EPI_ISL_636672, EPI_ISL_636673, EPI_ISL_636674, EPI_ISL_636675, EPI_ISL_636676, EPI_ISL_636677, EPI_ISL_636678, EPI_ISL_636679, EPI_ISL_636683, EPI_ISL_636684, EPI_ISL_636685, EPI_ISL_636686, EPI_ISL_636687, EPI_ISL_636688, EPI_ISL_636689, EPI_ISL_636690, EPI_ISL_636691, EPI_ISL_636692, EPI_ISL_636693, EPI_ISL_636694, EPI_ISL_636695, EPI_ISL_636696, EPI_ISL_636697, EPI_ISL_636698, EPI_ISL_636699, EPI_ISL_636700, EPI_ISL_636701, EPI_ISL_636702, EPI_ISL_636703, EPI_ISL_636704, EPI_ISL_636705, EPI_ISL_636706, EPI_ISL_636707, EPI_ISL_636708, EPI_ISL_636709, EPI_ISL_636710, EPI_ISL_636711, EPI_ISL_636712, EPI_ISL_636713, EPI_ISL_636714, EPI_ISL_636715, EPI_ISL_636716, EPI_ISL_636717, EPI_ISL_636718, EPI_ISL_636719, EPI_ISL_636720, EPI_ISL_636721, EPI_ISL_636722, EPI_ISL_636723, EPI_ISL_636724, EPI_ISL_636725, EPI_ISL_636726, EPI_ISL_636727, EPI_ISL_636728, EPI_ISL_636729, EPI_ISL_636730, EPI_ISL_636731, EPI_ISL_636732, EPI_ISL_636733, EPI_ISL_636734, EPI_ISL_636735, EPI_ISL_636736, EPI_ISL_636737, EPI_ISL_636738, EPI_ISL_636739, EPI_ISL_636740, EPI_ISL_636741, EPI_ISL_636742, EPI_ISL_636743, EPI_ISL_636744, EPI_ISL_636745, EPI_ISL_636746, EPI_ISL_636747, EPI_ISL_636748, EPI_ISL_636749, EPI_ISL_636750, EPI_ISL_636751, EPI_ISL_636752, EPI_ISL_636753, EPI_ISL_636754, EPI_ISL_636755, EPI_ISL_636756, EPI_ISL_636757, EPI_ISL_636758, EPI_ISL_636759, EPI_ISL_636760, EPI_ISL_636761, EPI_ISL_636762, EPI_ISL_636763, EPI_ISL_636764, EPI_ISL_636765, EPI_ISL_636766, EPI_ISL_636767, EPI_ISL_636768, EPI_ISL_636769, EPI_ISL_636770, EPI_ISL_636771, EPI_ISL_636772, EPI_ISL_636773, EPI_ISL_636774, EPI_ISL_636775, EPI_ISL_636776, EPI_ISL_636777, EPI_ISL_636778, EPI_ISL_636779, EPI_ISL_636780, EPI_ISL_636781, EPI_ISL_636782, EPI_ISL_636783, EPI_ISL_636784, EPI_ISL_636785, EPI_ISL_636786, EPI_ISL_636787, EPI_ISL_636788, EPI_ISL_636789, EPI_ISL_636790, EPI_ISL_636791, EPI_ISL_636792, EPI_ISL_636793, EPI_ISL_636794, EPI_ISL_636795, EPI_ISL_636796, EPI_ISL_636797, EPI_ISL_636798, EPI_ISL_636799, EPI_ISL_636800, EPI_ISL_636801, EPI_ISL_636802, EPI_ISL_636803, EPI_ISL_636804, EPI_ISL_636805, EPI_ISL_636806, EPI_ISL_636807, EPI_ISL_636808, EPI_ISL_636809, EPI_ISL_636810, EPI_ISL_636811, EPI_ISL_636812, EPI_ISL_636813, EPI_ISL_636814, EPI_ISL_636815, EPI_ISL_636816, EPI_ISL_636817, EPI_ISL_636818, EPI_ISL_636819, EPI_ISL_636820, EPI_ISL_636821, EPI_ISL_636822, EPI_ISL_636823, EPI_ISL_636824, EPI_ISL_636825, EPI_ISL_636826, EPI_ISL_636827, EPI_ISL_636828, EPI_ISL_636829, EPI_ISL_636830, EPI_ISL_636831, EPI_ISL_636832, EPI_ISL_636833, EPI_ISL_636834, EPI_ISL_636835, EPI_ISL_636836, EPI_ISL_636837, EPI_ISL_636838, EPI_ISL_636839, EPI_ISL_636840, EPI_ISL_636841, EPI_ISL_636842, EPI_ISL_636843, EPI_ISL_636844, EPI_ISL_636845, EPI_ISL_636846, EPI_ISL_636847, EPI_ISL_636848, EPI_ISL_636849, EPI_ISL_636850, EPI_ISL_636851, EPI_ISL_636852, EPI_ISL_636853, EPI_ISL_636854, EPI_ISL_636855, EPI_ISL_636856, EPI_ISL_636857, EPI_ISL_636858, EPI_ISL_636859, EPI_ISL_636860, EPI_ISL_636861, EPI_ISL_636862, EPI_ISL_636863, EPI_ISL_636864, EPI_ISL_636865, EPI_ISL_636866, EPI_ISL_636867, EPI_ISL_636868, EPI_ISL_636869, EPI_ISL_636870, EPI_ISL_636871, EPI_ISL_636872, EPI_ISL_636873, EPI_ISL_636874, EPI_ISL_636875, EPI_ISL_636876, EPI_ISL_636877, EPI_ISL_636878, EPI_ISL_636879, EPI_ISL_636880, EPI_ISL_636881, EPI_ISL_636882, EPI_ISL_636883, EPI_ISL_636884, EPI_ISL_636885, EPI_ISL_636886, EPI_ISL_636887, EPI_ISL_636888, EPI_ISL_636889, EPI_ISL_636890, EPI_ISL_636891, EPI_ISL_636892, EPI_ISL_636893, EPI_ISL_636894, EPI_ISL_636895, EPI_ISL_636896, EPI_ISL_636897, EPI_ISL_636898, EPI_ISL_636899, EPI_ISL_636900, EPI_ISL_636901, EPI_ISL_636902, EPI_ISL_636903, EPI_ISL_636904, EPI_ISL_636905, EPI_ISL_636906, EPI_ISL_636907, EPI_ISL_636908, EPI_ISL_636909, EPI_ISL_636910, EPI_ISL_636911, EPI_ISL_636912, EPI_ISL_636913, EPI_ISL_636914, EPI_ISL_636915, EPI_ISL_636916, EPI_ISL_636917, EPI_ISL_636918, EPI_ISL_636919, EPI_ISL_636920, EPI_ISL_636921, EPI_ISL_636922, EPI_ISL_636923, EPI_ISL_636924, EPI_ISL_636925, EPI_ISL_636926, EPI_ISL_636927, EPI_ISL_636928, EPI_ISL_636929, EPI_ISL_636930, EPI_ISL_636931, EPI_ISL_636932, EPI_ISL_636933, EPI_ISL_636934, EPI_ISL_636935, EPI_ISL_636936, EPI_ISL_636937, EPI_ISL_636938, EPI_ISL_636939, EPI_ISL_636940, EPI_ISL_636941, EPI_ISL_636942, EPI_ISL_636943, EPI_ISL_636944, EPI_ISL_636945, EPI_ISL_636946, EPI_ISL_636947, EPI_ISL_636948, EPI_ISL_636949, EPI_ISL_636950, EPI_ISL_636951, EPI_ISL_636952, EPI_ISL_636953, EPI_ISL_636954, EPI_ISL_636955, EPI_ISL_636956, EPI_ISL_636957, EPI_ISL_636958, EPI_ISL_636959, EPI_ISL_636960, EPI_ISL_636961, EPI_ISL_636962, EPI_ISL_636963, EPI_ISL_636964, EPI_ISL_636965, EPI_ISL_636966, EPI_ISL_636967 | see above                                                                                                                                                                                                                                                                                                                                                                                                                                                                                                                                                                                                                                                                                                                                                                                                                                                                                                                                                                                                                                                                                                                                                                                                                                                                                                                                                                                                                                                                                                                                                                                                                                                                                                                                                                                                                                                                                                                                                                                                                                                                                                                                                                                                                                                                                                                                                                                                                                                                                                                                                                                                                                                                                                                                                                                                                                                                                                                                                                                                                                                                                                                                                                                                                                                                                                                                                                                                                                                                                                                                                                                                                                                                                                                                                                                                                  | Department of Clinical Microbiology                                                            | GIGA Medical Genomics                                                                          | Keith Durkin, Maria Artesi, Sébastien Bontems, Raphaël Boreux, Bouchra Boujemla, Cécile Meex, Pierrette Melin, Marie-Pierre Hayette, Vincent Bours                                                                                                                                                                         |
| EPI_ISL_644945, EPI_ISL_644946, EPI_ISL_644947, EPI_ISL_644948, EPI_ISL_644949, EPI_ISL_644950, EPI_ISL_644951, EPI_ISL_644952, EPI_ISL_644953, EPI_ISL_644954, EPI_ISL_644955, EPI_ISL_644956, EPI_ISL_644957, EPI_ISL_644958, EPI_ISL_644959, EPI_ISL_644960, EPI_ISL_644961, EPI_ISL_644962, EPI_ISL_644963, EPI_ISL_644964, EPI_ISL_644965, EPI_ISL_644966, EPI_ISL_644967, EPI_ISL_644968, EPI_ISL_644969, EPI_ISL_644970, EPI_ISL_644971, EPI_ISL_644972, EPI_ISL_644973, EPI_ISL_644974, EPI_ISL_644975, EPI_ISL_644976, EPI_ISL_644977, EPI_ISL_644978, EPI_ISL_644979, EPI_ISL_644980, EPI_ISL_644981, EPI_ISL_644982, EPI_ISL_644983, EPI_ISL_644984, EPI_ISL_644985, EPI_ISL_644986, EPI_ISL_644987, EPI_ISL_644988, EPI_ISL_644989, EPI_ISL_644990, EPI_ISL_644991, EPI_ISL_644992, EPI_ISL_644993, EPI_ISL_644994, EPI_ISL_644995, EPI_ISL_644996, EPI_ISL_644997, EPI_ISL_644998, EPI_ISL_644999                                                                                                                                                                                                                                                                                                                                                                                                                                                                                                                                                                                                                                                                                                                                                                                                                                                                                                                                                                                                                                                                                                                                                                                                                                                                                                                                                                                                                                                                                                                                                                                                                                                                                                                                                                                                                                                                                                                                                                                                                                                                                                                                                                                                                                                                                                                                                                                                                                                                                                                                                                                                                                                                                                                                                                                                                                                                                                                                                                                                                                                                                                                                                                                                                                                                                                                                                                                                                                                                                                                                                                                                                                                                                                                                                                                                                                                                                                                                                                                                                                                                                                                                                                                                                                                                                                                                                                                                                                                                                                                                                                                                                                                                                                                                                                                                                                                                                 | see above                                                                                                                                                                                                                                                                                                                                                                                                                                                                                                                                                                                                                                                                                                                                                                                                                                                                                                                                                                                                                                                                                                                                                                                                                                                                                                                                                                                                                                                                                                                                                                                                                                                                                                                                                                                                                                                                                                                                                                                                                                                                                                                                                                                                                                                                                                                                                                                                                                                                                                                                                                                                                                                                                                                                                                                                                                                                                                                                                                                                                                                                                                                                                                                                                                                                                                                                                                                                                                                                                                                                                                                                                                                                                                                                                                                                                  | Department of Infectious Diseases, Keio University School of Medicine, Tokyo, Japan            | Center for Medical Genetics, Keio University School of Medicine, Tokyo, Japan                  | Kenjiro Kosaki, Yuka Iwasaki, Hirotosugu Ishizu, Haruhiko Siomi, Kodai Abe                                                                                                                                                                                                                                                 |
| EPI_ISL_645000, EPI_ISL_645001, EPI_ISL_645002, EPI_ISL_645003, EPI_ISL_645004, EPI_ISL_645005, EPI_ISL_645006, EPI_ISL_645007, EPI_ISL_645008, EPI_ISL_645009, EPI_ISL_645010, EPI_ISL_645011, EPI_ISL_645012, EPI_ISL_645013, EPI_ISL_645014, EPI_ISL_645015, EPI_ISL_645016, EPI_ISL_645017, EPI_ISL_645018, EPI_ISL_645019, EPI_ISL_645020, EPI_ISL_645021, EPI_ISL_645022, EPI_ISL_645023, EPI_ISL_645024, EPI_ISL_645025, EPI_ISL_645026, EPI_ISL_645027, EPI_ISL_645028, EPI_ISL_645029, EPI_ISL_645030, EPI_ISL_645031, EPI_ISL_645032, EPI_ISL_645033, EPI_ISL_645034, EPI_ISL_645035, EPI_ISL_645036, EPI_ISL_645037, EPI_ISL_645038, EPI_ISL_645039, EPI_ISL_645040, EPI_ISL_645041, EPI_ISL_645042, EPI_ISL_645043, EPI_ISL_645044, EPI_ISL_645045, EPI_ISL_645046, EPI_ISL_645047, EPI_ISL_645048, EPI_ISL_645049, EPI_ISL_645050, EPI_ISL_645051, EPI_ISL_645052, EPI_ISL_645053, EPI_ISL_645054, EPI_ISL_645055, EPI_ISL_645056, EPI_ISL_645057, EPI_ISL_645058, EPI_ISL_645059, EPI_ISL_645060, EPI_ISL_645061, EPI_ISL_645062, EPI_ISL_645063, EPI_ISL_645064, EPI_ISL_645065, EPI_ISL_645066, EPI_ISL_645067, EPI_ISL_645068, EPI_ISL_645069, EPI_ISL_645070, EPI_ISL_645071, EPI_ISL_645072, EPI_ISL_645073, EPI_ISL_645074, EPI_ISL_645075, EPI_ISL_645076, EPI_ISL_645077, EPI_ISL_645078, EPI_ISL_645079, EPI_ISL_645080, EPI_ISL_645081, EPI_ISL_645082, EPI_ISL_645083, EPI_ISL_645084, EPI_ISL_645085, EPI_ISL_645086, EPI_ISL_645087, EPI_ISL_645088, EPI_ISL_645089, EPI_ISL_645090, EPI_ISL_645091, EPI_ISL_645092, EPI_ISL_645093, EPI_ISL_645094, EPI_ISL_645095, EPI_ISL_645096, EPI_ISL_645097, EPI_ISL_645098, EPI_ISL_645099, EPI_ISL_645100, EPI_ISL_645101, EPI_ISL_645102, EPI_ISL_645103, EPI_ISL_645104, EPI_ISL_645105, EPI_ISL_645106, EPI_ISL_645107, EPI_ISL_645108, EPI_ISL_645109                                                                                                                                                                                                                                                                                                                                                                                                                                                                                                                                                                                                                                                                                                                                                                                                                                                                                                                                                                                                                                                                                                                                                                                                                                                                                                                                                                                                                                                                                                                                                                                                                                                                                                                                                                                                                                                                                                                                                                                                                                                                                                                                                                                                                                                                                                                                                                                                                                                                                                                                                                                                                                                                                                                                                                                                                                                                                                                                                                                                                                                                                                                                                                                                                                                                                                                                                                                                                                                                                                                                                                                                                                                                                                                                                                                                                                                                                                                                                                 | see above                                                                                                                                                                                                                                                                                                                                                                                                                                                                                                                                                                                                                                                                                                                                                                                                                                                                                                                                                                                                                                                                                                                                                                                                                                                                                                                                                                                                                                                                                                                                                                                                                                                                                                                                                                                                                                                                                                                                                                                                                                                                                                                                                                                                                                                                                                                                                                                                                                                                                                                                                                                                                                                                                                                                                                                                                                                                                                                                                                                                                                                                                                                                                                                                                                                                                                                                                                                                                                                                                                                                                                                                                                                                                                                                                                                                                  | Human Genome Variation Research Group, Malopolska Centre of Biotechnology<br>UHAS COVID-19 Lab | Human Genome Variation Research Group, Malopolska Centre of Biotechnology<br>UHAS COVID-19 Lab | Kowalski,M., Pospiech,E., Klajmon,A., Gromowski,T., Pisarek,A., Marszalek,K., Kopera,K., Foremny,J., Swadzba,J., Sanak,M., Owczarek,K., Dabrowska,A., Szczepanski,A., Botwina,P., Labaj,P.P., Pyrc,K., Branicki,W.<br>Kwabena O. Duedu, Jones Gyamfi, Reuben Ayivor-Djanie, John O. Gyapong and the UHAS COVID-19 Lab Team |
| EPI_ISL_648124, EPI_ISL_648125, EPI_ISL_648126, EPI_ISL_648127, EPI_ISL_648128                                                                                                                                                                                                                                                                                                                                                                                                                                                                                                                                                                                                                                                                                                                                                                                                                                                                                                                                                                                                                                                                                                                                                                                                                                                                                                                                                                                                                                                                                                                                                                                                                                                                                                                                                                                                                                                                                                                                                                                                                                                                                                                                                                                                                                                                                                                                                                                                                                                                                                                                                                                                                                                                                                                                                                                                                                                                                                                                                                                                                                                                                                                                                                                                                                                                                                                                                                                                                                                                                                                                                                                                                                                                                                                                                                                                                                                                                                                                                                                                                                                                                                                                                                                                                                                                                                                                                                                                                                                                                                                                                                                                                                                                                                                                                                                                                                                                                                                                                                                                                                                                                                                                                                                                                                                                                                                                                                                                                                                                                                                                                                                                                                                                                                                 | EPI_ISL_660541                                                                                                                                                                                                                                                                                                                                                                                                                                                                                                                                                                                                                                                                                                                                                                                                                                                                                                                                                                                                                                                                                                                                                                                                                                                                                                                                                                                                                                                                                                                                                                                                                                                                                                                                                                                                                                                                                                                                                                                                                                                                                                                                                                                                                                                                                                                                                                                                                                                                                                                                                                                                                                                                                                                                                                                                                                                                                                                                                                                                                                                                                                                                                                                                                                                                                                                                                                                                                                                                                                                                                                                                                                                                                                                                                                                                             | National Influenza Center, National Institute of Hygiene and Epidemiology (NIHE)               | National Influenza Center, National Institute of Hygiene and Epidemiology (NIHE)               | Le Quynh Mai, Taichiro Takemura, Meng Ling Moi, Takeshi Nabeshima, Nguyen Le Khanh Hang, Hoang Vu Mai Phuong, Ung Thi Hong Trang, Le Thi Thanh, Nguyen Vu Son, Vuong Duc Cuong, Pham Thi Hien, Tran Thu Huong, Nguyen Phuong Anh, Pham Hong Quynh Anh, Kouichi Morita, Futoshi Hasebe, Dang Duc Anh                        |
| EPI_ISL_660542                                                                                                                                                                                                                                                                                                                                                                                                                                                                                                                                                                                                                                                                                                                                                                                                                                                                                                                                                                                                                                                                                                                                                                                                                                                                                                                                                                                                                                                                                                                                                                                                                                                                                                                                                                                                                                                                                                                                                                                                                                                                                                                                                                                                                                                                                                                                                                                                                                                                                                                                                                                                                                                                                                                                                                                                                                                                                                                                                                                                                                                                                                                                                                                                                                                                                                                                                                                                                                                                                                                                                                                                                                                                                                                                                                                                                                                                                                                                                                                                                                                                                                                                                                                                                                                                                                                                                                                                                                                                                                                                                                                                                                                                                                                                                                                                                                                                                                                                                                                                                                                                                                                                                                                                                                                                                                                                                                                                                                                                                                                                                                                                                                                                                                                                                                                 | EPI_ISL_660543, EPI_ISL_660544, EPI_ISL_660545                                                                                                                                                                                                                                                                                                                                                                                                                                                                                                                                                                                                                                                                                                                                                                                                                                                                                                                                                                                                                                                                                                                                                                                                                                                                                                                                                                                                                                                                                                                                                                                                                                                                                                                                                                                                                                                                                                                                                                                                                                                                                                                                                                                                                                                                                                                                                                                                                                                                                                                                                                                                                                                                                                                                                                                                                                                                                                                                                                                                                                                                                                                                                                                                                                                                                                                                                                                                                                                                                                                                                                                                                                                                                                                                                                             | National Influenza Center, National Institute of Hygiene and Epidemiology (NIHE)               | National Institute of Hygiene and Epidemiology (NIHE)                                          | Le Quynh Mai, Taichiro Takemura, Meng Ling Moi, Takeshi Nabeshima, Nguyen Le Khanh Hang, Hoang Vu Mai Phuong, Ung Thi Hong Trang, Le Thi Thanh, Nguyen Vu Son, Vuong Duc Cuong, Pham Thi Hien, Tran Thu Huong, Nguyen Phuong Anh, Pham Hong Quynh Anh, Kouichi Morita, Futoshi Hasebe, Dang Duc Anh                        |
| EPI_ISL_661202, EPI_ISL_661203, EPI_ISL_661204, EPI_ISL_661205, EPI_ISL_661206, EPI_ISL_661207, EPI_ISL_661208, EPI_ISL_661210, EPI_ISL_661212, EPI_ISL_661213, EPI_ISL_661214, EPI_ISL_661215, EPI_ISL_661216, EPI_ISL_661217, EPI_ISL_661218, EPI_ISL_661219, EPI_ISL_661220, EPI_ISL_661221, EPI_ISL_661223, EPI_ISL_661224, EPI_ISL_661225, EPI_ISL_661226, EPI_ISL_661227, EPI_ISL_661228, EPI_ISL_661230, EPI_ISL_661231, EPI_ISL_661232, EPI_ISL_661233, EPI_ISL_661234, EPI_ISL_661236, EPI_ISL_661237, EPI_ISL_661239, EPI_ISL_661240, EPI_ISL_661241, EPI_ISL_661242, EPI_ISL_661243, EPI_ISL_661245, EPI_ISL_661246, EPI_ISL_661250                                                                                                                                                                                                                                                                                                                                                                                                                                                                                                                                                                                                                                                                                                                                                                                                                                                                                                                                                                                                                                                                                                                                                                                                                                                                                                                                                                                                                                                                                                                                                                                                                                                                                                                                                                                                                                                                                                                                                                                                                                                                                                                                                                                                                                                                                                                                                                                                                                                                                                                                                                                                                                                                                                                                                                                                                                                                                                                                                                                                                                                                                                                                                                                                                                                                                                                                                                                                                                                                                                                                                                                                                                                                                                                                                                                                                                                                                                                                                                                                                                                                                                                                                                                                                                                                                                                                                                                                                                                                                                                                                                                                                                                                                                                                                                                                                                                                                                                                                                                                                                                                                                                                                 | see above                                                                                                                                                                                                                                                                                                                                                                                                                                                                                                                                                                                                                                                                                                                                                                                                                                                                                                                                                                                                                                                                                                                                                                                                                                                                                                                                                                                                                                                                                                                                                                                                                                                                                                                                                                                                                                                                                                                                                                                                                                                                                                                                                                                                                                                                                                                                                                                                                                                                                                                                                                                                                                                                                                                                                                                                                                                                                                                                                                                                                                                                                                                                                                                                                                                                                                                                                                                                                                                                                                                                                                                                                                                                                                                                                                                                                  | Laboratory Medicine                                                                            | Department of Laboratory Medicine, Lin-Kuo Chang Gung Memorial Hospital, Taoyuan, Taiwan       | Kuo-Chien Tsao, Yu-Nong Gong, Shu-Li Yang, Yi-Chun Liu, Chung-Guei Huang, Mei-Jen Hsiao, Po-Wei Huang, Cheng-Ta Yang, Cheng-Hsun Chiu, Peng-Nien Huang, Kuo-Ming Lee, Guang-Wu Chen, Shin-Ru Shih                                                                                                                          |
| EPI_ISL_666871, EPI_ISL_666872, EPI_ISL_666873, EPI_ISL_666874, EPI_ISL_666876, EPI_ISL_666877, EPI_ISL_666878, EPI_ISL_666879, EPI_ISL_666881, EPI_ISL_666882, EPI_ISL_666887, EPI_ISL_666888, EPI_ISL_666889                                                                                                                                                                                                                                                                                                                                                                                                                                                                                                                                                                                                                                                                                                                                                                                                                                                                                                                                                                                                                                                                                                                                                                                                                                                                                                                                                                                                                                                                                                                                                                                                                                                                                                                                                                                                                                                                                                                                                                                                                                                                                                                                                                                                                                                                                                                                                                                                                                                                                                                                                                                                                                                                                                                                                                                                                                                                                                                                                                                                                                                                                                                                                                                                                                                                                                                                                                                                                                                                                                                                                                                                                                                                                                                                                                                                                                                                                                                                                                                                                                                                                                                                                                                                                                                                                                                                                                                                                                                                                                                                                                                                                                                                                                                                                                                                                                                                                                                                                                                                                                                                                                                                                                                                                                                                                                                                                                                                                                                                                                                                                                                 | see above                                                                                                                                                                                                                                                                                                                                                                                                                                                                                                                                                                                                                                                                                                                                                                                                                                                                                                                                                                                                                                                                                                                                                                                                                                                                                                                                                                                                                                                                                                                                                                                                                                                                                                                                                                                                                                                                                                                                                                                                                                                                                                                                                                                                                                                                                                                                                                                                                                                                                                                                                                                                                                                                                                                                                                                                                                                                                                                                                                                                                                                                                                                                                                                                                                                                                                                                                                                                                                                                                                                                                                                                                                                                                                                                                                                                                  | Department of Clinical Microbiology                                                            | GIGA Medical Genomics                                                                          | Keith Durkin, Maria Artesi, Sébastien Bontems, Raphaël Boreux, Bouchra Boujemla, Cécile Meex, Pierrette Melin, Marie-Pierre Hayette, Vincent Bours                                                                                                                                                                         |
| EPI_ISL_667807, EPI_ISL_667808, EPI_ISL_667809                                                                                                                                                                                                                                                                                                                                                                                                                                                                                                                                                                                                                                                                                                                                                                                                                                                                                                                                                                                                                                                                                                                                                                                                                                                                                                                                                                                                                                                                                                                                                                                                                                                                                                                                                                                                                                                                                                                                                                                                                                                                                                                                                                                                                                                                                                                                                                                                                                                                                                                                                                                                                                                                                                                                                                                                                                                                                                                                                                                                                                                                                                                                                                                                                                                                                                                                                                                                                                                                                                                                                                                                                                                                                                                                                                                                                                                                                                                                                                                                                                                                                                                                                                                                                                                                                                                                                                                                                                                                                                                                                                                                                                                                                                                                                                                                                                                                                                                                                                                                                                                                                                                                                                                                                                                                                                                                                                                                                                                                                                                                                                                                                                                                                                                                                 | see above                                                                                                                                                                                                                                                                                                                                                                                                                                                                                                                                                                                                                                                                                                                                                                                                                                                                                                                                                                                                                                                                                                                                                                                                                                                                                                                                                                                                                                                                                                                                                                                                                                                                                                                                                                                                                                                                                                                                                                                                                                                                                                                                                                                                                                                                                                                                                                                                                                                                                                                                                                                                                                                                                                                                                                                                                                                                                                                                                                                                                                                                                                                                                                                                                                                                                                                                                                                                                                                                                                                                                                                                                                                                                                                                                                                                                  | Laboratory Medicine                                                                            | Department of Laboratory Medicine, Lin-Kuo Chang Gung Memorial Hospital, Taoyuan, Taiwan       | Kuo-Chien Tsao, Yu-Nong Gong, Shu-Li Yang, Yi-Chun Liu, Chung-Guei Huang, Mei-Jen Hsiao, Po-Wei Huang, Cheng-Ta Yang, Cheng-Hsun Chiu, Peng-Nien Huang, Kuo-Ming Lee, Guang-Wu Chen, Shin-Ru Shih                                                                                                                          |
| EPI_ISL_671941, EPI_ISL_671942, EPI_ISL_671943, EPI_ISL_671944, EPI_ISL_671945, EPI_ISL_671946, EPI_ISL_671947, EPI_ISL_671948, EPI_ISL_671949, EPI_ISL_671950, EPI_ISL_671951, EPI_ISL_671952, EPI_ISL_671953, EPI_ISL_671954, EPI_ISL_671955, EPI_ISL_671956, EPI_ISL_671957, EPI_ISL_671958, EPI_ISL_671959, EPI_ISL_671960, EPI_ISL_671961, EPI_ISL_671962, EPI_ISL_671963, EPI_ISL_671964, EPI_ISL_671965, EPI_ISL_671966, EPI_ISL_671967, EPI_ISL_671968, EPI_ISL_671969, EPI_ISL_671970, EPI_ISL_671971, EPI_ISL_671972, EPI_ISL_671973, EPI_ISL_671974, EPI_ISL_671975, EPI_ISL_671976, EPI_ISL_671977                                                                                                                                                                                                                                                                                                                                                                                                                                                                                                                                                                                                                                                                                                                                                                                                                                                                                                                                                                                                                                                                                                                                                                                                                                                                                                                                                                                                                                                                                                                                                                                                                                                                                                                                                                                                                                                                                                                                                                                                                                                                                                                                                                                                                                                                                                                                                                                                                                                                                                                                                                                                                                                                                                                                                                                                                                                                                                                                                                                                                                                                                                                                                                                                                                                                                                                                                                                                                                                                                                                                                                                                                                                                                                                                                                                                                                                                                                                                                                                                                                                                                                                                                                                                                                                                                                                                                                                                                                                                                                                                                                                                                                                                                                                                                                                                                                                                                                                                                                                                                                                                                                                                                                                 | see above                                                                                                                                                                                                                                                                                                                                                                                                                                                                                                                                                                                                                                                                                                                                                                                                                                                                                                                                                                                                                                                                                                                                                                                                                                                                                                                                                                                                                                                                                                                                                                                                                                                                                                                                                                                                                                                                                                                                                                                                                                                                                                                                                                                                                                                                                                                                                                                                                                                                                                                                                                                                                                                                                                                                                                                                                                                                                                                                                                                                                                                                                                                                                                                                                                                                                                                                                                                                                                                                                                                                                                                                                                                                                                                                                                                                                  | CHU Purpan - Laboratoire de Virologie - Institut Fédératif de Biologie                         | CHU Purpan - Laboratoire de Virologie - Institut Fédératif de Biologie                         | Latour J., Ranger N., Dubois M., Carcenac R., Harter A., Boyer P., Tremeaux P., Izopet J.                                                                                                                                                                                                                                  |
| EPI_ISL_676648, EPI_ISL_676649, EPI_ISL_676650                                                                                                                                                                                                                                                                                                                                                                                                                                                                                                                                                                                                                                                                                                                                                                                                                                                                                                                                                                                                                                                                                                                                                                                                                                                                                                                                                                                                                                                                                                                                                                                                                                                                                                                                                                                                                                                                                                                                                                                                                                                                                                                                                                                                                                                                                                                                                                                                                                                                                                                                                                                                                                                                                                                                                                                                                                                                                                                                                                                                                                                                                                                                                                                                                                                                                                                                                                                                                                                                                                                                                                                                                                                                                                                                                                                                                                                                                                                                                                                                                                                                                                                                                                                                                                                                                                                                                                                                                                                                                                                                                                                                                                                                                                                                                                                                                                                                                                                                                                                                                                                                                                                                                                                                                                                                                                                                                                                                                                                                                                                                                                                                                                                                                                                                                 | EPI_ISL_676651, EPI_ISL_676653, EPI_ISL_676654, EPI_ISL_676655, EPI_ISL_676656, EPI_ISL_676657, EPI_ISL_676658, EPI_ISL_676660, EPI_ISL_676662, EPI_ISL_676664, EPI_ISL_676666, EPI_ISL_676667, EPI_ISL_676669, EPI_ISL_676670, EPI_ISL_676671, EPI_ISL_676672, EPI_ISL_676673, EPI_ISL_676674, EPI_ISL_676675, EPI_ISL_676676, EPI_ISL_676677, EPI_ISL_676678, EPI_ISL_676679, EPI_ISL_676681, EPI_ISL_676682, EPI_ISL_676683, EPI_ISL_676684, EPI_ISL_676685, EPI_ISL_676686, EPI_ISL_676687, EPI_ISL_676688, EPI_ISL_676689, EPI_ISL_676690, EPI_ISL_676691, EPI_ISL_676692, EPI_ISL_676693, EPI_ISL_676694, EPI_ISL_676695, EPI_ISL_676696, EPI_ISL_676697, EPI_ISL_676698, EPI_ISL_676699, EPI_ISL_676700, EPI_ISL_676701, EPI_ISL_676702, EPI_ISL_676703, EPI_ISL_676704, EPI_ISL_676705, EPI_ISL_676706, EPI_ISL_676707, EPI_ISL_676708, EPI_ISL_676709, EPI_ISL_676710, EPI_ISL_676711, EPI_ISL_676712, EPI_ISL_676713, EPI_ISL_676714, EPI_ISL_676715, EPI_ISL_676716, EPI_ISL_676717, EPI_ISL_676718, EPI_ISL_676719, EPI_ISL_676720, EPI_ISL_676721, EPI_ISL_676722, EPI_ISL_676723, EPI_ISL_676724, EPI_ISL_676725, EPI_ISL_676726, EPI_ISL_676727, EPI_ISL_676728, EPI_ISL_676729, EPI_ISL_676730, EPI_ISL_676731, EPI_ISL_676732, EPI_ISL_676733, EPI_ISL_676734, EPI_ISL_676735, EPI_ISL_676736, EPI_ISL_676737, EPI_ISL_676738, EPI_ISL_676739, EPI_ISL_676740, EPI_ISL_676741, EPI_ISL_676742, EPI_ISL_676743, EPI_ISL_676744, EPI_ISL_676745, EPI_ISL_676746, EPI_ISL_676747, EPI_ISL_676748, EPI_ISL_676749, EPI_ISL_676750, EPI_ISL_676751, EPI_ISL_676752, EPI_ISL_676753, EPI_ISL_676754, EPI_ISL_676755, EPI_ISL_676756, EPI_ISL_676757, EPI_ISL_676758, EPI_ISL_676759, EPI_ISL_676760, EPI_ISL_676761, EPI_ISL_676762, EPI_ISL_676763, EPI_ISL_676764, EPI_ISL_676765, EPI_ISL_676766, EPI_ISL_676767, EPI_ISL_676768, EPI_ISL_676769, EPI_ISL_676770, EPI_ISL_676771, EPI_ISL_676772, EPI_ISL_676773, EPI_ISL_676774, EPI_ISL_676775, EPI_ISL_676776, EPI_ISL_676777, EPI_ISL_676778, EPI_ISL_676779, EPI_ISL_676780, EPI_ISL_676781, EPI_ISL_676782, EPI_ISL_676783, EPI_ISL_676784, EPI_ISL_676785, EPI_ISL_676786, EPI_ISL_676787, EPI_ISL_676788, EPI_ISL_676789, EPI_ISL_676790, EPI_ISL_676791, EPI_ISL_676792, EPI_ISL_676793, EPI_ISL_676794, EPI_ISL_676795, EPI_ISL_676796, EPI_ISL_676797, EPI_ISL_676798, EPI_ISL_676799, EPI_ISL_676800, EPI_ISL_676801, EPI_ISL_676802, EPI_ISL_676803, EPI_ISL_676804, EPI_ISL_676805, EPI_ISL_676806, EPI_ISL_676807, EPI_ISL_676808, EPI_ISL_676809, EPI_ISL_676810, EPI_ISL_676811, EPI_ISL_676812, EPI_ISL_676813, EPI_ISL_676814, EPI_ISL_676815, EPI_ISL_676816, EPI_ISL_676817, EPI_ISL_676818, EPI_ISL_676819, EPI_ISL_676820, EPI_ISL_676821, EPI_ISL_676822, EPI_ISL_676823, EPI_ISL_676824, EPI_ISL_676825, EPI_ISL_676826, EPI_ISL_676827, EPI_ISL_676828, EPI_ISL_676829, EPI_ISL_676830, EPI_ISL_676831, EPI_ISL_676832, EPI_ISL_676833, EPI_ISL_676834, EPI_ISL_676835, EPI_ISL_676836, EPI_ISL_676837, EPI_ISL_676838, EPI_ISL_676839, EPI_ISL_676840, EPI_ISL_676841, EPI_ISL_676842, EPI_ISL_676843, EPI_ISL_676844, EPI_ISL_676845, EPI_ISL_676846, EPI_ISL_676847, EPI_ISL_676848, EPI_ISL_676849, EPI_ISL_676850, EPI_ISL_676851, EPI_ISL_676852, EPI_ISL_676853, EPI_ISL_676854, EPI_ISL_676855, EPI_ISL_676856, EPI_ISL_676857, EPI_ISL_676858, EPI_ISL_676859, EPI_ISL_676860, EPI_ISL_676861, EPI_ISL_676862, EPI_ISL_676863, EPI_ISL_676864, EPI_ISL_676865, EPI_ISL_676866, EPI_ISL_676867, EPI_ISL_676868, EPI_ISL_676869, EPI_ISL_676870, EPI_ISL_676871, EPI_ISL_676872, EPI_ISL_676873, EPI_ISL_676874, EPI_ISL_676875, EPI_ISL_676876, EPI_ISL_676877, EPI_ISL_676878, EPI_ISL_676879, EPI_ISL_676880, EPI_ISL_676881, EPI_ISL_676882, EPI_ISL_676883, EPI_ISL_676884, EPI_ISL_676885, EPI_ISL_676886, EPI_ISL_67 |                                                                                                |                                                                                                |                                                                                                                                                                                                                                                                                                                            |



|                                                                                                                                                                                                                                                                                                                                                                                                                                                                                                                                                                                                                                                                                                                                                                                                                                                                                                                                                                                                |           |                                                                        |                                                                                                                            |                                                                                                                                                                                             |
|------------------------------------------------------------------------------------------------------------------------------------------------------------------------------------------------------------------------------------------------------------------------------------------------------------------------------------------------------------------------------------------------------------------------------------------------------------------------------------------------------------------------------------------------------------------------------------------------------------------------------------------------------------------------------------------------------------------------------------------------------------------------------------------------------------------------------------------------------------------------------------------------------------------------------------------------------------------------------------------------|-----------|------------------------------------------------------------------------|----------------------------------------------------------------------------------------------------------------------------|---------------------------------------------------------------------------------------------------------------------------------------------------------------------------------------------|
| EPI_ISL_734465, EPI_ISL_734466, EPI_ISL_734467, EPI_ISL_734468, EPI_ISL_734469, EPI_ISL_734470, EPI_ISL_734471, EPI_ISL_734472, EPI_ISL_734473, EPI_ISL_734474, EPI_ISL_734475, EPI_ISL_734476, EPI_ISL_734477, EPI_ISL_734478, EPI_ISL_734479, EPI_ISL_734480, EPI_ISL_734481                                                                                                                                                                                                                                                                                                                                                                                                                                                                                                                                                                                                                                                                                                                 | see above | Masonic Medical Research Institute                                     | Wadsworth Center, New York State Department of Health                                                                      | Kirsten St. George, Nathan Tucker, Ryan D. Pfeiffer, Daryl M. Lamson, Alexis Russel, Jonathan Pitnick, Navjot Singh, John Kelly, Sara Griesemer, Erasmus Schneider, Erica Lasek-Nesselquist |
| EPI_ISL_735392, EPI_ISL_735393, EPI_ISL_735394                                                                                                                                                                                                                                                                                                                                                                                                                                                                                                                                                                                                                                                                                                                                                                                                                                                                                                                                                 |           | Laboratory of Genetics and Personalized Medicine, Zan Mitrev Clinic    | Laboratory of Genetics and Personalized Medicine, Zan Mitrev Clinic                                                        | Kungulovski et al., 2020                                                                                                                                                                    |
| EPI_ISL_735395                                                                                                                                                                                                                                                                                                                                                                                                                                                                                                                                                                                                                                                                                                                                                                                                                                                                                                                                                                                 |           | Laboratory of Genetics and Personalized Medicine, Zan Mitrev Clinic    | Laboratory of Genetics and Personalized Medicine, Zan Mitrev Clinic                                                        | Kungulovski et al. 2020                                                                                                                                                                     |
| EPI_ISL_737310, EPI_ISL_737311, EPI_ISL_737312, EPI_ISL_737313, EPI_ISL_737314, EPI_ISL_737315, EPI_ISL_737317, EPI_ISL_737322, EPI_ISL_737323, EPI_ISL_737324, EPI_ISL_737325, EPI_ISL_737326, EPI_ISL_737327, EPI_ISL_737328, EPI_ISL_737329, EPI_ISL_737330, EPI_ISL_737331, EPI_ISL_737333, EPI_ISL_737334, EPI_ISL_737336, EPI_ISL_737337, EPI_ISL_737339, EPI_ISL_737340, EPI_ISL_737341, EPI_ISL_737342, EPI_ISL_737344, EPI_ISL_737347, EPI_ISL_737348, EPI_ISL_737349, EPI_ISL_737350, EPI_ISL_737352, EPI_ISL_737355, EPI_ISL_737356, EPI_ISL_737358, EPI_ISL_737359, EPI_ISL_737360, EPI_ISL_737361, EPI_ISL_737362, EPI_ISL_737363, EPI_ISL_737365, EPI_ISL_737367, EPI_ISL_737369, EPI_ISL_737371, EPI_ISL_737372, EPI_ISL_737373, EPI_ISL_737374, EPI_ISL_737379, EPI_ISL_737380, EPI_ISL_737382, EPI_ISL_737383, EPI_ISL_737384, EPI_ISL_737385, EPI_ISL_737386, EPI_ISL_737387, EPI_ISL_737388, EPI_ISL_737389, EPI_ISL_737390, EPI_ISL_737391, EPI_ISL_737393, EPI_ISL_737394 | see above | Department of Clinical Microbiology                                    | GIGA Medical Genomics                                                                                                      | Keith Durkin, Maria Arnesi, Sébastien Bontems, Raphaël Boreux, Bouchra Boujemla, Cécile Meex, Pierrette Melin, Marie-Pierre Hayette, Vincent Bours                                          |
| EPI_ISL_745202, EPI_ISL_745203, EPI_ISL_745204, EPI_ISL_745205, EPI_ISL_745206, EPI_ISL_745207, EPI_ISL_745208, EPI_ISL_745209, EPI_ISL_745210, EPI_ISL_745211                                                                                                                                                                                                                                                                                                                                                                                                                                                                                                                                                                                                                                                                                                                                                                                                                                 |           | Lab voor klinische biologie                                            | Onderzoeksgroep Virologie                                                                                                  | Laurens Lambrechts, Nick Vereecke, Marthe Pauwels, Bruno Verhasselt, Linos Vandekerckhove, Hans Nauwynck, Sebastiaan Theuns                                                                 |
| EPI_ISL_751448, EPI_ISL_751449, EPI_ISL_751450, EPI_ISL_751451, EPI_ISL_751452, EPI_ISL_751453, EPI_ISL_751454, EPI_ISL_751455, EPI_ISL_751456, EPI_ISL_751457, EPI_ISL_751458, EPI_ISL_751459, EPI_ISL_751460, EPI_ISL_751461, EPI_ISL_751462, EPI_ISL_751463, EPI_ISL_751464, EPI_ISL_751465, EPI_ISL_751466, EPI_ISL_751467, EPI_ISL_751468, EPI_ISL_751469, EPI_ISL_751470, EPI_ISL_751471, EPI_ISL_751472, EPI_ISL_751473, EPI_ISL_751474, EPI_ISL_751475, EPI_ISL_751476, EPI_ISL_751477, EPI_ISL_751478, EPI_ISL_751479, EPI_ISL_751480, EPI_ISL_751481, EPI_ISL_751482, EPI_ISL_751483, EPI_ISL_751484, EPI_ISL_751485, EPI_ISL_751486, EPI_ISL_751487, EPI_ISL_751488, EPI_ISL_751489, EPI_ISL_751490, EPI_ISL_751491, EPI_ISL_751492, EPI_ISL_751493, EPI_ISL_751494, EPI_ISL_751495, EPI_ISL_751496, EPI_ISL_751497, EPI_ISL_751498, EPI_ISL_751499                                                                                                                                 | see above | CHU Purpan - Laboratoire de Virologie - Institut Fédératif de Biologie | CHU Purpan - Laboratoire de Virologie - Institut Fédératif de Biologie                                                     | Latour J., Ranger N., Dubois M., Carcenac R., Harter A., Boyer P., Tremeaux P., Izopet J.                                                                                                   |
| EPI_ISL_751542                                                                                                                                                                                                                                                                                                                                                                                                                                                                                                                                                                                                                                                                                                                                                                                                                                                                                                                                                                                 |           | SC Dept of Health and Env. Control-Bureau of Laboratories              | Genomics and Discovery, Respiratory Viruses Branch, Division of Viral Diseases, Centers for Disease Control and Prevention | Krista Queen, Yan Li, Ying Tao, Jing Zhang, Anna Uehara, Anna Montmayeur, Clinton R. Paden, Peter W. Cook, Rachel Marine, Mili Sheth, Haibin Wang, Justin Lee, Suxiang Tong                 |
| EPI_ISL_751543                                                                                                                                                                                                                                                                                                                                                                                                                                                                                                                                                                                                                                                                                                                                                                                                                                                                                                                                                                                 |           | DE Public Health Laboratory                                            | Genomics and Discovery, Respiratory Viruses Branch, Division of Viral Diseases, Centers for Disease Control and Prevention | Krista Queen, Yan Li, Ying Tao, Jing Zhang, Anna Uehara, Anna Montmayeur, Clinton R. Paden, Peter W. Cook, Rachel Marine, Mili Sheth, Haibin Wang, Justin Lee, Suxiang Tong                 |
| EPI_ISL_751544                                                                                                                                                                                                                                                                                                                                                                                                                                                                                                                                                                                                                                                                                                                                                                                                                                                                                                                                                                                 |           | NH Dept. of Health and Human Services Public Health Labs               | Genomics and Discovery, Respiratory Viruses Branch, Division of Viral Diseases, Centers for Disease Control and Prevention | Krista Queen, Yan Li, Ying Tao, Jing Zhang, Anna Uehara, Anna Montmayeur, Clinton R. Paden, Peter W. Cook, Rachel Marine, Mili Sheth, Haibin Wang, Justin Lee, Suxiang Tong                 |
| EPI_ISL_751545                                                                                                                                                                                                                                                                                                                                                                                                                                                                                                                                                                                                                                                                                                                                                                                                                                                                                                                                                                                 |           | NYSDOH Wadsworth Center, Virology Lab                                  | Genomics and Discovery, Respiratory Viruses Branch, Division of Viral Diseases, Centers for Disease Control and Prevention | Krista Queen, Yan Li, Ying Tao, Jing Zhang, Anna Uehara, Anna Montmayeur, Clinton R. Paden, Peter W. Cook, Rachel Marine, Mili Sheth, Haibin Wang, Justin Lee, Suxiang Tong                 |
| EPI_ISL_751546                                                                                                                                                                                                                                                                                                                                                                                                                                                                                                                                                                                                                                                                                                                                                                                                                                                                                                                                                                                 |           | VA-Division of Consolidated Laboratory Services                        | Genomics and Discovery, Respiratory Viruses Branch, Division of Viral Diseases, Centers for Disease Control and Prevention | Krista Queen, Yan Li, Ying Tao, Jing Zhang, Anna Uehara, Anna Montmayeur, Clinton R. Paden, Peter W. Cook, Rachel Marine, Mili Sheth, Haibin Wang, Justin Lee, Suxiang Tong                 |
| EPI_ISL_751547                                                                                                                                                                                                                                                                                                                                                                                                                                                                                                                                                                                                                                                                                                                                                                                                                                                                                                                                                                                 |           | DE Public Health Laboratory                                            | Genomics and Discovery, Respiratory Viruses Branch, Division of Viral Diseases, Centers for Disease Control and Prevention | Krista Queen, Yan Li, Ying Tao, Jing Zhang, Anna Uehara, Anna Montmayeur, Clinton R. Paden, Peter W. Cook, Rachel Marine, Mili Sheth, Haibin Wang, Justin Lee, Suxiang Tong                 |
| EPI_ISL_751548                                                                                                                                                                                                                                                                                                                                                                                                                                                                                                                                                                                                                                                                                                                                                                                                                                                                                                                                                                                 |           | NYSDOH Wadsworth Center, Virology Lab                                  | Genomics and Discovery, Respiratory Viruses Branch, Division of Viral Diseases, Centers for Disease Control and Prevention | Krista Queen, Yan Li, Ying Tao, Jing Zhang, Anna Uehara, Anna Montmayeur, Clinton R. Paden, Peter W. Cook, Rachel Marine, Mili Sheth, Haibin Wang, Justin Lee, Suxiang Tong                 |
| EPI_ISL_751549                                                                                                                                                                                                                                                                                                                                                                                                                                                                                                                                                                                                                                                                                                                                                                                                                                                                                                                                                                                 |           | MS Public Health Laboratory                                            | Genomics and Discovery, Respiratory Viruses Branch, Division of Viral Diseases, Centers for Disease Control and Prevention | Krista Queen, Yan Li, Ying Tao, Jing Zhang, Anna Uehara, Anna Montmayeur, Clinton R. Paden, Peter W. Cook, Rachel Marine, Mili Sheth, Haibin Wang, Justin Lee, Suxiang Tong                 |
| EPI_ISL_751550                                                                                                                                                                                                                                                                                                                                                                                                                                                                                                                                                                                                                                                                                                                                                                                                                                                                                                                                                                                 |           | SC Dept of Health and Env. Control-Bureau of Laboratories              | Genomics and Discovery, Respiratory Viruses Branch, Division of Viral Diseases, Centers for Disease Control and Prevention | Krista Queen, Yan Li, Ying Tao, Jing Zhang, Anna Uehara, Anna Montmayeur, Clinton R. Paden, Peter W. Cook, Rachel Marine, Mili Sheth, Haibin Wang, Justin Lee, Suxiang Tong                 |
| EPI_ISL_751551                                                                                                                                                                                                                                                                                                                                                                                                                                                                                                                                                                                                                                                                                                                                                                                                                                                                                                                                                                                 |           | MS Public Health Laboratory                                            | Genomics and Discovery, Respiratory Viruses Branch, Division of Viral Diseases, Centers for Disease Control and Prevention | Krista Queen, Yan Li, Ying Tao, Jing Zhang, Anna Uehara, Anna Montmayeur, Clinton R. Paden, Peter W. Cook, Rachel Marine, Mili Sheth, Haibin Wang, Justin Lee, Suxiang Tong                 |
| EPI_ISL_751552                                                                                                                                                                                                                                                                                                                                                                                                                                                                                                                                                                                                                                                                                                                                                                                                                                                                                                                                                                                 |           | SD Public Health Laboratory                                            | Genomics and Discovery, Respiratory Viruses Branch, Division of Viral Diseases, Centers for Disease Control and Prevention | Krista Queen, Yan Li, Ying Tao, Jing Zhang, Anna Uehara, Anna Montmayeur, Clinton R. Paden, Peter W. Cook, Rachel Marine, Mili Sheth, Haibin Wang, Justin Lee, Suxiang Tong                 |
| EPI_ISL_751553                                                                                                                                                                                                                                                                                                                                                                                                                                                                                                                                                                                                                                                                                                                                                                                                                                                                                                                                                                                 |           | IA State Hygienic Laboratory                                           | Genomics and Discovery, Respiratory Viruses Branch, Division of Viral Diseases, Centers for Disease Control and Prevention | Krista Queen, Yan Li, Ying Tao, Jing Zhang, Anna Uehara, Anna Montmayeur, Clinton R. Paden, Peter W. Cook, Rachel Marine, Mili Sheth, Haibin Wang, Justin Lee, Suxiang Tong                 |
| EPI_ISL_751554                                                                                                                                                                                                                                                                                                                                                                                                                                                                                                                                                                                                                                                                                                                                                                                                                                                                                                                                                                                 |           | CT-Dr. Katherine A. Kelley State Public Health Lab                     | Genomics and Discovery, Respiratory Viruses Branch, Division of Viral Diseases, Centers for Disease Control and Prevention | Krista Queen, Yan Li, Ying Tao, Jing Zhang, Anna Uehara, Anna Montmayeur, Clinton R. Paden, Peter W. Cook, Rachel Marine, Mili Sheth, Haibin Wang, Justin Lee, Suxiang Tong                 |
| EPI_ISL_751555                                                                                                                                                                                                                                                                                                                                                                                                                                                                                                                                                                                                                                                                                                                                                                                                                                                                                                                                                                                 |           | WY Public Health Laboratory                                            | Genomics and Discovery, Respiratory Viruses Branch, Division of Viral Diseases, Centers for Disease Control and Prevention | Krista Queen, Yan Li, Ying Tao, Jing Zhang, Anna Uehara, Anna Montmayeur, Clinton R. Paden, Peter W. Cook, Rachel Marine, Mili Sheth, Haibin Wang, Justin Lee, Suxiang Tong                 |
| EPI_ISL_751556, EPI_ISL_751557                                                                                                                                                                                                                                                                                                                                                                                                                                                                                                                                                                                                                                                                                                                                                                                                                                                                                                                                                                 |           | NV State Public Health Laboratory                                      | Genomics and Discovery, Respiratory Viruses Branch, Division of Viral Diseases, Centers for Disease Control and Prevention | Krista Queen, Yan Li, Ying Tao, Jing Zhang, Anna Uehara, Anna Montmayeur, Clinton R. Paden, Peter W. Cook, Rachel Marine, Mili Sheth, Haibin Wang, Justin Lee, Suxiang Tong                 |
| EPI_ISL_751558                                                                                                                                                                                                                                                                                                                                                                                                                                                                                                                                                                                                                                                                                                                                                                                                                                                                                                                                                                                 |           | NH Dept. of Health and Human Services Public Health Labs               | Genomics and Discovery, Respiratory Viruses Branch, Division of Viral Diseases, Centers for Disease Control and Prevention | Krista Queen, Yan Li, Ying Tao, Jing Zhang, Anna Uehara, Anna Montmayeur, Clinton R. Paden, Peter W. Cook, Rachel Marine, Mili Sheth, Haibin Wang, Justin Lee, Suxiang Tong                 |
| EPI_ISL_751559                                                                                                                                                                                                                                                                                                                                                                                                                                                                                                                                                                                                                                                                                                                                                                                                                                                                                                                                                                                 |           | MD DOH Laboratories Administration                                     | Genomics and Discovery, Respiratory Viruses Branch, Division of Viral Diseases, Centers for Disease Control and Prevention | Krista Queen, Yan Li, Ying Tao, Jing Zhang, Anna Uehara, Anna Montmayeur, Clinton R. Paden, Peter W. Cook, Rachel Marine, Mili Sheth, Haibin Wang, Justin Lee, Suxiang Tong                 |
| EPI_ISL_751560                                                                                                                                                                                                                                                                                                                                                                                                                                                                                                                                                                                                                                                                                                                                                                                                                                                                                                                                                                                 |           | NYSDOH Wadsworth Center, Virology Lab                                  | Genomics and Discovery, Respiratory Viruses Branch,                                                                        | Krista Queen, Yan Li, Ying Tao, Jing Zhang, Anna Uehara, Anna Montmayeur, Clinton R. Paden, Peter W. Cook, Rachel Marine, Mili Sheth, Haibin Wang,                                          |





















|                                                                                                                                                                                                                                                                                                                                                                                                                                                                                                                                                                                                                                                                                                                                                                                                                                                                                                                                                                                                                                                                                                                                                                                                                                                                                                                                                                                                                                                                                                                                                                                                                                                                                                                                                                                                                                                                                                                                                                                                                                                                                                                                                                                                                                                                                                                                                                                                                                                                                                                                                                                                                                                                                                                                                                                                                                                                                                                                                                                                                                                                                                                                                                                                                                                                                                                                                                                                                                                                                                                                                                                                                                                                                                                                                                                                                                                                                                                                                                                                                                                                                                                                                                                                                                                                                                                                                                                                                                                                                                                                                                                                                                                                                                                                                                                                                                                                                                                                                                                                                                                                                                                                                                                                                                                                                                                                                                                                                                                                                                                                                                                                                                                                                                                                                                                                                                                                                                                                                                                                                                                                                                                                                                                                                                                                                                                                                                                                                                                                                                                                                                                                                                                                                                                                                                                                                                                                                                                                                                                                                                                                                                                                                                                                                                                                                                                                                                                                                                                                |                                                                                  |                                                                                                                                                                                              |                                                                                                                                                                                                                                                                                                     |
|----------------------------------------------------------------------------------------------------------------------------------------------------------------------------------------------------------------------------------------------------------------------------------------------------------------------------------------------------------------------------------------------------------------------------------------------------------------------------------------------------------------------------------------------------------------------------------------------------------------------------------------------------------------------------------------------------------------------------------------------------------------------------------------------------------------------------------------------------------------------------------------------------------------------------------------------------------------------------------------------------------------------------------------------------------------------------------------------------------------------------------------------------------------------------------------------------------------------------------------------------------------------------------------------------------------------------------------------------------------------------------------------------------------------------------------------------------------------------------------------------------------------------------------------------------------------------------------------------------------------------------------------------------------------------------------------------------------------------------------------------------------------------------------------------------------------------------------------------------------------------------------------------------------------------------------------------------------------------------------------------------------------------------------------------------------------------------------------------------------------------------------------------------------------------------------------------------------------------------------------------------------------------------------------------------------------------------------------------------------------------------------------------------------------------------------------------------------------------------------------------------------------------------------------------------------------------------------------------------------------------------------------------------------------------------------------------------------------------------------------------------------------------------------------------------------------------------------------------------------------------------------------------------------------------------------------------------------------------------------------------------------------------------------------------------------------------------------------------------------------------------------------------------------------------------------------------------------------------------------------------------------------------------------------------------------------------------------------------------------------------------------------------------------------------------------------------------------------------------------------------------------------------------------------------------------------------------------------------------------------------------------------------------------------------------------------------------------------------------------------------------------------------------------------------------------------------------------------------------------------------------------------------------------------------------------------------------------------------------------------------------------------------------------------------------------------------------------------------------------------------------------------------------------------------------------------------------------------------------------------------------------------------------------------------------------------------------------------------------------------------------------------------------------------------------------------------------------------------------------------------------------------------------------------------------------------------------------------------------------------------------------------------------------------------------------------------------------------------------------------------------------------------------------------------------------------------------------------------------------------------------------------------------------------------------------------------------------------------------------------------------------------------------------------------------------------------------------------------------------------------------------------------------------------------------------------------------------------------------------------------------------------------------------------------------------------------------------------------------------------------------------------------------------------------------------------------------------------------------------------------------------------------------------------------------------------------------------------------------------------------------------------------------------------------------------------------------------------------------------------------------------------------------------------------------------------------------------------------------------------------------------------------------------------------------------------------------------------------------------------------------------------------------------------------------------------------------------------------------------------------------------------------------------------------------------------------------------------------------------------------------------------------------------------------------------------------------------------------------------------------------------------------------------------------------------------------------------------------------------------------------------------------------------------------------------------------------------------------------------------------------------------------------------------------------------------------------------------------------------------------------------------------------------------------------------------------------------------------------------------------------------------------------------------------------------------------------------------------------------------------------------------------------------------------------------------------------------------------------------------------------------------------------------------------------------------------------------------------------------------------------------------------------------------------------------------------------------------------------------------------------------------------------------------------------------------------------------|----------------------------------------------------------------------------------|----------------------------------------------------------------------------------------------------------------------------------------------------------------------------------------------|-----------------------------------------------------------------------------------------------------------------------------------------------------------------------------------------------------------------------------------------------------------------------------------------------------|
|                                                                                                                                                                                                                                                                                                                                                                                                                                                                                                                                                                                                                                                                                                                                                                                                                                                                                                                                                                                                                                                                                                                                                                                                                                                                                                                                                                                                                                                                                                                                                                                                                                                                                                                                                                                                                                                                                                                                                                                                                                                                                                                                                                                                                                                                                                                                                                                                                                                                                                                                                                                                                                                                                                                                                                                                                                                                                                                                                                                                                                                                                                                                                                                                                                                                                                                                                                                                                                                                                                                                                                                                                                                                                                                                                                                                                                                                                                                                                                                                                                                                                                                                                                                                                                                                                                                                                                                                                                                                                                                                                                                                                                                                                                                                                                                                                                                                                                                                                                                                                                                                                                                                                                                                                                                                                                                                                                                                                                                                                                                                                                                                                                                                                                                                                                                                                                                                                                                                                                                                                                                                                                                                                                                                                                                                                                                                                                                                                                                                                                                                                                                                                                                                                                                                                                                                                                                                                                                                                                                                                                                                                                                                                                                                                                                                                                                                                                                                                                                                |                                                                                  | Division of Viral Diseases, Centers for Disease Control and Prevention                                                                                                                       | Justin Lee, Suxiang Tong                                                                                                                                                                                                                                                                            |
| EPI_ISL_751788                                                                                                                                                                                                                                                                                                                                                                                                                                                                                                                                                                                                                                                                                                                                                                                                                                                                                                                                                                                                                                                                                                                                                                                                                                                                                                                                                                                                                                                                                                                                                                                                                                                                                                                                                                                                                                                                                                                                                                                                                                                                                                                                                                                                                                                                                                                                                                                                                                                                                                                                                                                                                                                                                                                                                                                                                                                                                                                                                                                                                                                                                                                                                                                                                                                                                                                                                                                                                                                                                                                                                                                                                                                                                                                                                                                                                                                                                                                                                                                                                                                                                                                                                                                                                                                                                                                                                                                                                                                                                                                                                                                                                                                                                                                                                                                                                                                                                                                                                                                                                                                                                                                                                                                                                                                                                                                                                                                                                                                                                                                                                                                                                                                                                                                                                                                                                                                                                                                                                                                                                                                                                                                                                                                                                                                                                                                                                                                                                                                                                                                                                                                                                                                                                                                                                                                                                                                                                                                                                                                                                                                                                                                                                                                                                                                                                                                                                                                                                                                 | OH Department of Health Laboratory                                               | Genomics and Discovery, Respiratory Viruses Branch, Division of Viral Diseases, Centers for Disease Control and Prevention                                                                   | Krista Queen, Yan Li, Ying Tao, Jing Zhang, Anna Uehara, Anna Montmayeur, Clinton R. Paden, Peter W. Cook, Rachel Marine, Mili Sheth, Haibin Wang, Justin Lee, Suxiang Tong                                                                                                                         |
| EPI_ISL_751789                                                                                                                                                                                                                                                                                                                                                                                                                                                                                                                                                                                                                                                                                                                                                                                                                                                                                                                                                                                                                                                                                                                                                                                                                                                                                                                                                                                                                                                                                                                                                                                                                                                                                                                                                                                                                                                                                                                                                                                                                                                                                                                                                                                                                                                                                                                                                                                                                                                                                                                                                                                                                                                                                                                                                                                                                                                                                                                                                                                                                                                                                                                                                                                                                                                                                                                                                                                                                                                                                                                                                                                                                                                                                                                                                                                                                                                                                                                                                                                                                                                                                                                                                                                                                                                                                                                                                                                                                                                                                                                                                                                                                                                                                                                                                                                                                                                                                                                                                                                                                                                                                                                                                                                                                                                                                                                                                                                                                                                                                                                                                                                                                                                                                                                                                                                                                                                                                                                                                                                                                                                                                                                                                                                                                                                                                                                                                                                                                                                                                                                                                                                                                                                                                                                                                                                                                                                                                                                                                                                                                                                                                                                                                                                                                                                                                                                                                                                                                                                 | ID Bureau of Laboratories                                                        | Genomics and Discovery, Respiratory Viruses Branch, Division of Viral Diseases, Centers for Disease Control and Prevention                                                                   | Krista Queen, Yan Li, Ying Tao, Jing Zhang, Anna Uehara, Anna Montmayeur, Clinton R. Paden, Peter W. Cook, Rachel Marine, Mili Sheth, Haibin Wang, Justin Lee, Suxiang Tong                                                                                                                         |
| EPI_ISL_751790                                                                                                                                                                                                                                                                                                                                                                                                                                                                                                                                                                                                                                                                                                                                                                                                                                                                                                                                                                                                                                                                                                                                                                                                                                                                                                                                                                                                                                                                                                                                                                                                                                                                                                                                                                                                                                                                                                                                                                                                                                                                                                                                                                                                                                                                                                                                                                                                                                                                                                                                                                                                                                                                                                                                                                                                                                                                                                                                                                                                                                                                                                                                                                                                                                                                                                                                                                                                                                                                                                                                                                                                                                                                                                                                                                                                                                                                                                                                                                                                                                                                                                                                                                                                                                                                                                                                                                                                                                                                                                                                                                                                                                                                                                                                                                                                                                                                                                                                                                                                                                                                                                                                                                                                                                                                                                                                                                                                                                                                                                                                                                                                                                                                                                                                                                                                                                                                                                                                                                                                                                                                                                                                                                                                                                                                                                                                                                                                                                                                                                                                                                                                                                                                                                                                                                                                                                                                                                                                                                                                                                                                                                                                                                                                                                                                                                                                                                                                                                                 | RI State Health Laboratories                                                     | Genomics and Discovery, Respiratory Viruses Branch, Division of Viral Diseases, Centers for Disease Control and Prevention                                                                   | Krista Queen, Yan Li, Ying Tao, Jing Zhang, Anna Uehara, Anna Montmayeur, Clinton R. Paden, Peter W. Cook, Rachel Marine, Mili Sheth, Haibin Wang, Justin Lee, Suxiang Tong                                                                                                                         |
| EPI_ISL_751791, EPI_ISL_751792                                                                                                                                                                                                                                                                                                                                                                                                                                                                                                                                                                                                                                                                                                                                                                                                                                                                                                                                                                                                                                                                                                                                                                                                                                                                                                                                                                                                                                                                                                                                                                                                                                                                                                                                                                                                                                                                                                                                                                                                                                                                                                                                                                                                                                                                                                                                                                                                                                                                                                                                                                                                                                                                                                                                                                                                                                                                                                                                                                                                                                                                                                                                                                                                                                                                                                                                                                                                                                                                                                                                                                                                                                                                                                                                                                                                                                                                                                                                                                                                                                                                                                                                                                                                                                                                                                                                                                                                                                                                                                                                                                                                                                                                                                                                                                                                                                                                                                                                                                                                                                                                                                                                                                                                                                                                                                                                                                                                                                                                                                                                                                                                                                                                                                                                                                                                                                                                                                                                                                                                                                                                                                                                                                                                                                                                                                                                                                                                                                                                                                                                                                                                                                                                                                                                                                                                                                                                                                                                                                                                                                                                                                                                                                                                                                                                                                                                                                                                                                 | AL Dept. of Public Health Bureau of Clinical Laboratories                        | Genomics and Discovery, Respiratory Viruses Branch, Division of Viral Diseases, Centers for Disease Control and Prevention                                                                   | Krista Queen, Yan Li, Ying Tao, Jing Zhang, Anna Uehara, Anna Montmayeur, Clinton R. Paden, Peter W. Cook, Rachel Marine, Mili Sheth, Haibin Wang, Justin Lee, Suxiang Tong                                                                                                                         |
| EPI_ISL_751793                                                                                                                                                                                                                                                                                                                                                                                                                                                                                                                                                                                                                                                                                                                                                                                                                                                                                                                                                                                                                                                                                                                                                                                                                                                                                                                                                                                                                                                                                                                                                                                                                                                                                                                                                                                                                                                                                                                                                                                                                                                                                                                                                                                                                                                                                                                                                                                                                                                                                                                                                                                                                                                                                                                                                                                                                                                                                                                                                                                                                                                                                                                                                                                                                                                                                                                                                                                                                                                                                                                                                                                                                                                                                                                                                                                                                                                                                                                                                                                                                                                                                                                                                                                                                                                                                                                                                                                                                                                                                                                                                                                                                                                                                                                                                                                                                                                                                                                                                                                                                                                                                                                                                                                                                                                                                                                                                                                                                                                                                                                                                                                                                                                                                                                                                                                                                                                                                                                                                                                                                                                                                                                                                                                                                                                                                                                                                                                                                                                                                                                                                                                                                                                                                                                                                                                                                                                                                                                                                                                                                                                                                                                                                                                                                                                                                                                                                                                                                                                 | AK State Public Health Lab, State Health Department                              | Genomics and Discovery, Respiratory Viruses Branch, Division of Viral Diseases, Centers for Disease Control and Prevention                                                                   | Krista Queen, Yan Li, Ying Tao, Jing Zhang, Anna Uehara, Anna Montmayeur, Clinton R. Paden, Peter W. Cook, Rachel Marine, Mili Sheth, Haibin Wang, Justin Lee, Suxiang Tong                                                                                                                         |
| EPI_ISL_751794                                                                                                                                                                                                                                                                                                                                                                                                                                                                                                                                                                                                                                                                                                                                                                                                                                                                                                                                                                                                                                                                                                                                                                                                                                                                                                                                                                                                                                                                                                                                                                                                                                                                                                                                                                                                                                                                                                                                                                                                                                                                                                                                                                                                                                                                                                                                                                                                                                                                                                                                                                                                                                                                                                                                                                                                                                                                                                                                                                                                                                                                                                                                                                                                                                                                                                                                                                                                                                                                                                                                                                                                                                                                                                                                                                                                                                                                                                                                                                                                                                                                                                                                                                                                                                                                                                                                                                                                                                                                                                                                                                                                                                                                                                                                                                                                                                                                                                                                                                                                                                                                                                                                                                                                                                                                                                                                                                                                                                                                                                                                                                                                                                                                                                                                                                                                                                                                                                                                                                                                                                                                                                                                                                                                                                                                                                                                                                                                                                                                                                                                                                                                                                                                                                                                                                                                                                                                                                                                                                                                                                                                                                                                                                                                                                                                                                                                                                                                                                                 | KY State Public Health Lab                                                       | Genomics and Discovery, Respiratory Viruses Branch, Division of Viral Diseases, Centers for Disease Control and Prevention                                                                   | Krista Queen, Yan Li, Ying Tao, Jing Zhang, Anna Uehara, Anna Montmayeur, Clinton R. Paden, Peter W. Cook, Rachel Marine, Mili Sheth, Haibin Wang, Justin Lee, Suxiang Tong                                                                                                                         |
| EPI_ISL_751795                                                                                                                                                                                                                                                                                                                                                                                                                                                                                                                                                                                                                                                                                                                                                                                                                                                                                                                                                                                                                                                                                                                                                                                                                                                                                                                                                                                                                                                                                                                                                                                                                                                                                                                                                                                                                                                                                                                                                                                                                                                                                                                                                                                                                                                                                                                                                                                                                                                                                                                                                                                                                                                                                                                                                                                                                                                                                                                                                                                                                                                                                                                                                                                                                                                                                                                                                                                                                                                                                                                                                                                                                                                                                                                                                                                                                                                                                                                                                                                                                                                                                                                                                                                                                                                                                                                                                                                                                                                                                                                                                                                                                                                                                                                                                                                                                                                                                                                                                                                                                                                                                                                                                                                                                                                                                                                                                                                                                                                                                                                                                                                                                                                                                                                                                                                                                                                                                                                                                                                                                                                                                                                                                                                                                                                                                                                                                                                                                                                                                                                                                                                                                                                                                                                                                                                                                                                                                                                                                                                                                                                                                                                                                                                                                                                                                                                                                                                                                                                 | RI State Health Laboratories                                                     | Genomics and Discovery, Respiratory Viruses Branch, Division of Viral Diseases, Centers for Disease Control and Prevention                                                                   | Krista Queen, Yan Li, Ying Tao, Jing Zhang, Anna Uehara, Anna Montmayeur, Clinton R. Paden, Peter W. Cook, Rachel Marine, Mili Sheth, Haibin Wang, Justin Lee, Suxiang Tong                                                                                                                         |
| EPI_ISL_751800                                                                                                                                                                                                                                                                                                                                                                                                                                                                                                                                                                                                                                                                                                                                                                                                                                                                                                                                                                                                                                                                                                                                                                                                                                                                                                                                                                                                                                                                                                                                                                                                                                                                                                                                                                                                                                                                                                                                                                                                                                                                                                                                                                                                                                                                                                                                                                                                                                                                                                                                                                                                                                                                                                                                                                                                                                                                                                                                                                                                                                                                                                                                                                                                                                                                                                                                                                                                                                                                                                                                                                                                                                                                                                                                                                                                                                                                                                                                                                                                                                                                                                                                                                                                                                                                                                                                                                                                                                                                                                                                                                                                                                                                                                                                                                                                                                                                                                                                                                                                                                                                                                                                                                                                                                                                                                                                                                                                                                                                                                                                                                                                                                                                                                                                                                                                                                                                                                                                                                                                                                                                                                                                                                                                                                                                                                                                                                                                                                                                                                                                                                                                                                                                                                                                                                                                                                                                                                                                                                                                                                                                                                                                                                                                                                                                                                                                                                                                                                                 | Colorado Department of Public Health and Environment                             | Colorado Department of Public Health & Environment                                                                                                                                           | Laura Bankers, Molly C. Hetherington-Rauth, Diana Ir, Shannon Ely, Shannon R. Matzinger, Sarah Elizabeth Totten, Emily A. Travanty                                                                                                                                                                  |
| EPI_ISL_754136, EPI_ISL_754137, EPI_ISL_754138, EPI_ISL_754139                                                                                                                                                                                                                                                                                                                                                                                                                                                                                                                                                                                                                                                                                                                                                                                                                                                                                                                                                                                                                                                                                                                                                                                                                                                                                                                                                                                                                                                                                                                                                                                                                                                                                                                                                                                                                                                                                                                                                                                                                                                                                                                                                                                                                                                                                                                                                                                                                                                                                                                                                                                                                                                                                                                                                                                                                                                                                                                                                                                                                                                                                                                                                                                                                                                                                                                                                                                                                                                                                                                                                                                                                                                                                                                                                                                                                                                                                                                                                                                                                                                                                                                                                                                                                                                                                                                                                                                                                                                                                                                                                                                                                                                                                                                                                                                                                                                                                                                                                                                                                                                                                                                                                                                                                                                                                                                                                                                                                                                                                                                                                                                                                                                                                                                                                                                                                                                                                                                                                                                                                                                                                                                                                                                                                                                                                                                                                                                                                                                                                                                                                                                                                                                                                                                                                                                                                                                                                                                                                                                                                                                                                                                                                                                                                                                                                                                                                                                                 | CHU Purpan - Laboratoire de Virologie - Institut Fédératif de Biologie           | CHU Purpan - Laboratoire de Virologie - Institut Fédératif de Biologie                                                                                                                       | Latour J., Ranger N., Dubois M., Carcenac R., Harter A., Boyer P., Tremeaux P., Izopet J.                                                                                                                                                                                                           |
| EPI_ISL_754394, EPI_ISL_754395, EPI_ISL_754396, EPI_ISL_754397, EPI_ISL_754398, EPI_ISL_754399, EPI_ISL_754400, EPI_ISL_754401, EPI_ISL_754402, EPI_ISL_754403, EPI_ISL_754404, EPI_ISL_754405, EPI_ISL_754406, EPI_ISL_754407, EPI_ISL_754408, EPI_ISL_754409, EPI_ISL_754410, EPI_ISL_754411, EPI_ISL_754412, EPI_ISL_754413, EPI_ISL_754414, EPI_ISL_754415, EPI_ISL_754416, EPI_ISL_754417, EPI_ISL_754418, EPI_ISL_754419, EPI_ISL_754420, EPI_ISL_754421, EPI_ISL_754422, EPI_ISL_754423, EPI_ISL_754424, EPI_ISL_754425, EPI_ISL_754426, EPI_ISL_754427, EPI_ISL_754428, EPI_ISL_754429, EPI_ISL_754430, EPI_ISL_754431, EPI_ISL_754432, EPI_ISL_754433, EPI_ISL_754434, EPI_ISL_754435, EPI_ISL_754436, EPI_ISL_754437, EPI_ISL_754438, EPI_ISL_754439, EPI_ISL_754440, EPI_ISL_754441, EPI_ISL_754442, EPI_ISL_754443, EPI_ISL_754444, EPI_ISL_754445, EPI_ISL_754446, EPI_ISL_754447, EPI_ISL_754448, EPI_ISL_754449, EPI_ISL_754450, EPI_ISL_754451, EPI_ISL_754452, EPI_ISL_754453, EPI_ISL_754454, EPI_ISL_754455, EPI_ISL_754456, EPI_ISL_754457, EPI_ISL_754458, EPI_ISL_754459, EPI_ISL_754460, EPI_ISL_754461, EPI_ISL_754462, EPI_ISL_754463, EPI_ISL_754464, EPI_ISL_754465, EPI_ISL_754466, EPI_ISL_754467, EPI_ISL_754468, EPI_ISL_754469, EPI_ISL_754470, EPI_ISL_754471, EPI_ISL_754472, EPI_ISL_754473, EPI_ISL_754474, EPI_ISL_754475, EPI_ISL_754476, EPI_ISL_754477, EPI_ISL_754478, EPI_ISL_754479, EPI_ISL_754480, EPI_ISL_754481, EPI_ISL_754482, EPI_ISL_754483, EPI_ISL_754484, EPI_ISL_754485, EPI_ISL_754486, EPI_ISL_754487, EPI_ISL_754488, EPI_ISL_754489, EPI_ISL_754490, EPI_ISL_754491, EPI_ISL_754492, EPI_ISL_754493, EPI_ISL_754494, EPI_ISL_754495, EPI_ISL_754496, EPI_ISL_754497, EPI_ISL_754498, EPI_ISL_754499, EPI_ISL_754500, EPI_ISL_754501, EPI_ISL_754502, EPI_ISL_754503, EPI_ISL_754504, EPI_ISL_754505, EPI_ISL_754506, EPI_ISL_754507, EPI_ISL_754508, EPI_ISL_754509, EPI_ISL_754510, EPI_ISL_754511, EPI_ISL_754512, EPI_ISL_754513, EPI_ISL_754514, EPI_ISL_754515, EPI_ISL_754516, EPI_ISL_754517, EPI_ISL_754518, EPI_ISL_754519, EPI_ISL_754520, EPI_ISL_754521, EPI_ISL_754522, EPI_ISL_754523, EPI_ISL_754524, EPI_ISL_754525, EPI_ISL_754526, EPI_ISL_754527, EPI_ISL_754528, EPI_ISL_754529, EPI_ISL_754530, EPI_ISL_754531, EPI_ISL_754532, EPI_ISL_754533, EPI_ISL_754534, EPI_ISL_754535, EPI_ISL_754536, EPI_ISL_754537, EPI_ISL_754538, EPI_ISL_754539, EPI_ISL_754540, EPI_ISL_754541, EPI_ISL_754542, EPI_ISL_754543, EPI_ISL_754544, EPI_ISL_754545, EPI_ISL_754546, EPI_ISL_754547, EPI_ISL_754548, EPI_ISL_754549, EPI_ISL_754550, EPI_ISL_754551, EPI_ISL_754552, EPI_ISL_754553, EPI_ISL_754554, EPI_ISL_754555, EPI_ISL_754556, EPI_ISL_754557, EPI_ISL_754558, EPI_ISL_754559, EPI_ISL_754560, EPI_ISL_754561, EPI_ISL_754562, EPI_ISL_754563, EPI_ISL_754564, EPI_ISL_754565, EPI_ISL_754566, EPI_ISL_754567, EPI_ISL_754568, EPI_ISL_754569, EPI_ISL_754570, EPI_ISL_754571, EPI_ISL_754572, EPI_ISL_754573, EPI_ISL_754574, EPI_ISL_754575, EPI_ISL_754576, EPI_ISL_754577, EPI_ISL_754578, EPI_ISL_754579, EPI_ISL_754580, EPI_ISL_754581, EPI_ISL_754582, EPI_ISL_754583, EPI_ISL_754584, EPI_ISL_754585, EPI_ISL_754586, EPI_ISL_754587, EPI_ISL_754588, EPI_ISL_754589, EPI_ISL_754590, EPI_ISL_754591, EPI_ISL_754592, EPI_ISL_754593, EPI_ISL_754594, EPI_ISL_754595, EPI_ISL_754596, EPI_ISL_754597, EPI_ISL_754598, EPI_ISL_754599, EPI_ISL_754600, EPI_ISL_754601, EPI_ISL_754602, EPI_ISL_754603, EPI_ISL_754604, EPI_ISL_754605, EPI_ISL_754606, EPI_ISL_754607, EPI_ISL_754608, EPI_ISL_754609, EPI_ISL_754610, EPI_ISL_754611, EPI_ISL_754612, EPI_ISL_754613, EPI_ISL_754614, EPI_ISL_754615, EPI_ISL_754616, EPI_ISL_754617, EPI_ISL_754618, EPI_ISL_754619, EPI_ISL_754620, EPI_ISL_754621, EPI_ISL_754622, EPI_ISL_754623, EPI_ISL_754624, EPI_ISL_754625, EPI_ISL_754626, EPI_ISL_754627, EPI_ISL_754628, EPI_ISL_754629, EPI_ISL_754630, EPI_ISL_754631, EPI_ISL_754632, EPI_ISL_754633, EPI_ISL_754634, EPI_ISL_754635, EPI_ISL_754636, EPI_ISL_754637, EPI_ISL_754638, EPI_ISL_754639, EPI_ISL_754640, EPI_ISL_754641, EPI_ISL_754642, EPI_ISL_754643, EPI_ISL_754644, EPI_ISL_754645, EPI_ISL_754646, EPI_ISL_754647, EPI_ISL_754648, EPI_ISL_754649, EPI_ISL_754650, EPI_ISL_754651, EPI_ISL_754652, EPI_ISL_754653, EPI_ISL_754654, EPI_ISL_754655, EPI_ISL_754656, EPI_ISL_754657, EPI_ISL_754658, EPI_ISL_754659, EPI_ISL_754660, EPI_ISL_754661, EPI_ISL_754662, EPI_ISL_754663, EPI_ISL_754664, EPI_ISL_754665, EPI_ISL_754666, EPI_ISL_754667, EPI_ISL_754668, EPI_ISL_754669, EPI_ISL_754670, EPI_ISL_754671, EPI_ISL_754672, EPI_ISL_754673, EPI_ISL_754674, EPI_ISL_754675, EPI_ISL_754676, EPI_ISL_754677, EPI_ISL_754678, EPI_ISL_754679, EPI_ISL_754680, EPI_ISL_754681, EPI_ISL_754682, EPI_ISL_754683, EPI_ISL_754684, EPI_ISL_754685, EPI_ISL_754686, EPI_ISL_754687, EPI_ISL_754688, EPI_ISL_754689, EPI_ISL_754690, EPI_ISL_754691, EPI_ISL_754692, EPI_ISL_754693, EPI_ISL_754694, EPI_ISL_754695, EPI_ISL_754696, EPI_ISL_754697, EPI_ISL_754698, EPI_ISL_754699, EPI_ISL_754700, EPI_ISL_754701, EPI_ISL_754702, EPI_ISL_754703, EPI_ISL_754704, EPI_ISL_754705, EPI_ISL_754706, EPI_ISL_754707, EPI_ISL_754708, EPI_ISL_754709, EPI_ISL_754710, EPI_ISL_754711, EPI_ISL_754712, EPI_ISL_754713, EPI_ISL_754714, EPI_ISL_754715, EPI_ISL_754716, EPI_ISL_754717, EPI_ISL_754718, EPI_ISL_754719, EPI_ISL_754720, EPI_ISL_754721, EPI_ISL_754722, EPI_ISL_754723, EPI_ISL_754724, EPI_ISL_754725, EPI_ISL_754726, EPI_ISL_754727, EPI_ISL_754728, EPI_ISL_754729, EPI_ISL_754730, EPI_ISL_754731, EPI_ISL_754732, EPI_ISL_754733, EPI_ISL_754734, EPI_ISL_754735, EPI_ISL_754736, EPI_ISL_754737, EPI_ISL_754738, EPI_ISL_754739, EPI_ISL_754740, EPI_ISL_754741, EPI_ISL_754742, EPI_ISL_754743, EPI_ISL_754744, EPI_ISL_754745, EPI_ISL_754746, EPI_ISL_754747, EPI_ISL_754748, EPI_ISL_754749, EPI_ISL_754750, EPI_ISL_754751, EPI_ISL_754752, EPI_ISL_754753, EPI_ISL_754754, EPI_ISL_754755, EPI_ISL_754756, EPI_ISL_754757, EPI_ISL_754758, EPI_ISL_754759, EPI_ISL_754760, EPI_ISL_754761, EPI_ISL_754762, EPI_ISL_754763, EPI_ISL_754764, EPI_ISL_754765, EPI_ISL_754766, EPI_ISL_754767, EPI_ISL_754768, EPI_ISL_754769, EPI_ISL_754770, EPI_ISL_754771, EPI_ISL_754772, EPI_ISL_754773, EPI_ISL_754774, EPI_ISL_754775, EPI_ISL_754776, EPI_ISL_754777, EPI_ISL_754778, EPI_ISL_754779, EPI_ISL_754780, EPI_ISL_754781, EPI_ISL_754782, EPI_ISL_754783, EPI_ISL_754784, EPI_ISL_754785, EPI_ISL_754786, EPI_ISL_754787, EPI_ISL_754788, EPI_ISL_754789, EPI_ISL_754790, EPI_ISL_754791, EPI_ISL_754792, EPI_ISL_754793, EPI_ISL_754794, EPI_ISL_754795, EPI_ISL_754796, EPI_ISL_754797, EPI_ISL_754798, EPI_ISL_754799, EPI_ISL_754800, EPI_ISL_754801, EPI_ISL_754802, EPI_ISL_754803, EPI_ISL_754804, EPI_ISL_754805, EPI_ISL_754806, EPI_ISL_754807, EPI_ISL_754808, EPI_ISL_754809, EPI_ISL_754810, EPI_ISL_754811, EPI_ISL_754812, EPI_ISL_754813, EPI_ISL_754814, EPI_ISL_754815, EPI_ISL_754816, EPI_ISL_754817, EPI_ISL_754818, EPI_ISL_754819, EPI_ISL_754820, EPI_ISL_754821, EPI_ISL_754822, EPI_ISL_754823, EPI_ISL_754824, EPI_ISL_754825, EPI_ISL_754826, EPI_ISL_754827, EPI_ISL_754828, EPI_ISL_754829, EPI_ISL_754830, EPI_ISL_754831, EPI_ISL_754832, EPI_ISL_754833, EPI_ISL_754834, EPI_ISL_754835, EPI_ISL_754836, EPI_ISL_754837, EPI_ISL_754838, EPI_ISL_754839, EPI_ISL_754840, EPI_ISL_754841 | Wadsworth Center, New York State Department of Health                            | Kirsten St. George, Daryl M. Lamson, Alexis Russel, Matthew Shudt, Melissa A Leisner, Jonathan Pitnick, Navjot Singh, John Kelly, Sara Griesemer, Erasmus Schneider, Erica Lasek-Nesselquist |                                                                                                                                                                                                                                                                                                     |
| see above                                                                                                                                                                                                                                                                                                                                                                                                                                                                                                                                                                                                                                                                                                                                                                                                                                                                                                                                                                                                                                                                                                                                                                                                                                                                                                                                                                                                                                                                                                                                                                                                                                                                                                                                                                                                                                                                                                                                                                                                                                                                                                                                                                                                                                                                                                                                                                                                                                                                                                                                                                                                                                                                                                                                                                                                                                                                                                                                                                                                                                                                                                                                                                                                                                                                                                                                                                                                                                                                                                                                                                                                                                                                                                                                                                                                                                                                                                                                                                                                                                                                                                                                                                                                                                                                                                                                                                                                                                                                                                                                                                                                                                                                                                                                                                                                                                                                                                                                                                                                                                                                                                                                                                                                                                                                                                                                                                                                                                                                                                                                                                                                                                                                                                                                                                                                                                                                                                                                                                                                                                                                                                                                                                                                                                                                                                                                                                                                                                                                                                                                                                                                                                                                                                                                                                                                                                                                                                                                                                                                                                                                                                                                                                                                                                                                                                                                                                                                                                                      | Wadsworth Center, New York State Department of Health                            | Wadsworth Center, New York State Department of Health                                                                                                                                        | Kirsten St. George, Daryl M. Lamson, Alexis Russel, Matthew Shudt, Melissa A Leisner, Jonathan Pitnick, Navjot Singh, John Kelly, Sara Griesemer, Erasmus Schneider, Erica Lasek-Nesselquist                                                                                                        |
| EPI_ISL_755587                                                                                                                                                                                                                                                                                                                                                                                                                                                                                                                                                                                                                                                                                                                                                                                                                                                                                                                                                                                                                                                                                                                                                                                                                                                                                                                                                                                                                                                                                                                                                                                                                                                                                                                                                                                                                                                                                                                                                                                                                                                                                                                                                                                                                                                                                                                                                                                                                                                                                                                                                                                                                                                                                                                                                                                                                                                                                                                                                                                                                                                                                                                                                                                                                                                                                                                                                                                                                                                                                                                                                                                                                                                                                                                                                                                                                                                                                                                                                                                                                                                                                                                                                                                                                                                                                                                                                                                                                                                                                                                                                                                                                                                                                                                                                                                                                                                                                                                                                                                                                                                                                                                                                                                                                                                                                                                                                                                                                                                                                                                                                                                                                                                                                                                                                                                                                                                                                                                                                                                                                                                                                                                                                                                                                                                                                                                                                                                                                                                                                                                                                                                                                                                                                                                                                                                                                                                                                                                                                                                                                                                                                                                                                                                                                                                                                                                                                                                                                                                 | Infection and Immunology, Translational Health Science and Technology Institute  | Infection and Immunology, Translational Health Science and Technology Institute                                                                                                              | Kumar, S., Wangchuk, J., Pandey, A.K., Das, A. and Medigeshi, G.R.                                                                                                                                                                                                                                  |
| EPI_ISL_759869, EPI_ISL_759870, EPI_ISL_759871, EPI_ISL_759872, EPI_ISL_759873, EPI_ISL_759874, EPI_ISL_759875, EPI_ISL_759876, EPI_ISL_759877, EPI_ISL_759878, EPI_ISL_759879, EPI_ISL_759880, EPI_ISL_759881, EPI_ISL_759882, EPI_ISL_759883, EPI_ISL_759884, EPI_ISL_759885, EPI_ISL_759886, EPI_ISL_759887, EPI_ISL_759888, EPI_ISL_759889, EPI_ISL_759890, EPI_ISL_759891                                                                                                                                                                                                                                                                                                                                                                                                                                                                                                                                                                                                                                                                                                                                                                                                                                                                                                                                                                                                                                                                                                                                                                                                                                                                                                                                                                                                                                                                                                                                                                                                                                                                                                                                                                                                                                                                                                                                                                                                                                                                                                                                                                                                                                                                                                                                                                                                                                                                                                                                                                                                                                                                                                                                                                                                                                                                                                                                                                                                                                                                                                                                                                                                                                                                                                                                                                                                                                                                                                                                                                                                                                                                                                                                                                                                                                                                                                                                                                                                                                                                                                                                                                                                                                                                                                                                                                                                                                                                                                                                                                                                                                                                                                                                                                                                                                                                                                                                                                                                                                                                                                                                                                                                                                                                                                                                                                                                                                                                                                                                                                                                                                                                                                                                                                                                                                                                                                                                                                                                                                                                                                                                                                                                                                                                                                                                                                                                                                                                                                                                                                                                                                                                                                                                                                                                                                                                                                                                                                                                                                                                                 | National Influenza Center, National Institute of Hygiene and Epidemiology (NIHE) | National Influenza Center, National Institute of Hygiene and Epidemiology (NIHE)                                                                                                             | Le Quynh Mai, Taichiro Takemura, Meng Ling Moi, Takeshi Nabeshima, Nguyen Le Khanh Hang, Hoang Vu Mai Phuong, Ung Thi Hong Trang, Le Thi Thanh, Nguyen Vu Son, Vuong Duc Cuong, Pham Thi Hien, Tran Thu Huong, Nguyen Phuong Anh, Pham Hong Quynh Anh, Kouichi Morita, Futoshi Hasebe, Dang Duc Anh |
| see above                                                                                                                                                                                                                                                                                                                                                                                                                                                                                                                                                                                                                                                                                                                                                                                                                                                                                                                                                                                                                                                                                                                                                                                                                                                                                                                                                                                                                                                                                                                                                                                                                                                                                                                                                                                                                                                                                                                                                                                                                                                                                                                                                                                                                                                                                                                                                                                                                                                                                                                                                                                                                                                                                                                                                                                                                                                                                                                                                                                                                                                                                                                                                                                                                                                                                                                                                                                                                                                                                                                                                                                                                                                                                                                                                                                                                                                                                                                                                                                                                                                                                                                                                                                                                                                                                                                                                                                                                                                                                                                                                                                                                                                                                                                                                                                                                                                                                                                                                                                                                                                                                                                                                                                                                                                                                                                                                                                                                                                                                                                                                                                                                                                                                                                                                                                                                                                                                                                                                                                                                                                                                                                                                                                                                                                                                                                                                                                                                                                                                                                                                                                                                                                                                                                                                                                                                                                                                                                                                                                                                                                                                                                                                                                                                                                                                                                                                                                                                                                      | National Influenza Center, National Institute of Hygiene and Epidemiology (NIHE) | National Influenza Center, National Institute of Hygiene and Epidemiology (NIHE)                                                                                                             | Le Quynh Mai, Taichiro Takemura, Meng Ling Moi, Takeshi Nabeshima, Nguyen Le Khanh Hang, Hoang Vu Mai Phuong, Ung Thi Hong Trang, Le Thi Thanh, Nguyen Vu Son, Vuong Duc Cuong, Pham Thi Hien, Tran Thu Huong, Nguyen Phuong Anh, Pham Hong Quynh Anh, Kouichi Morita, Futoshi Hasebe, Dang Duc Anh |
| EPI_ISL_759959                                                                                                                                                                                                                                                                                                                                                                                                                                                                                                                                                                                                                                                                                                                                                                                                                                                                                                                                                                                                                                                                                                                                                                                                                                                                                                                                                                                                                                                                                                                                                                                                                                                                                                                                                                                                                                                                                                                                                                                                                                                                                                                                                                                                                                                                                                                                                                                                                                                                                                                                                                                                                                                                                                                                                                                                                                                                                                                                                                                                                                                                                                                                                                                                                                                                                                                                                                                                                                                                                                                                                                                                                                                                                                                                                                                                                                                                                                                                                                                                                                                                                                                                                                                                                                                                                                                                                                                                                                                                                                                                                                                                                                                                                                                                                                                                                                                                                                                                                                                                                                                                                                                                                                                                                                                                                                                                                                                                                                                                                                                                                                                                                                                                                                                                                                                                                                                                                                                                                                                                                                                                                                                                                                                                                                                                                                                                                                                                                                                                                                                                                                                                                                                                                                                                                                                                                                                                                                                                                                                                                                                                                                                                                                                                                                                                                                                                                                                                                                                 | Premier Hospital Surabaya                                                        | Institute of Tropical Disease, Universitas Airlangga                                                                                                                                         | Krisnoadi Rahardjo, Aldise M Nastro, Jezzy R Dewantari, Rima R Prasetya, Hartono Tanto, Gatot Soegiarto, Laksmi Wulandari, Resti Yudhawati, Soetjipto, Yasuko Mori, Maria I Lusida, Kazufumi Shimizu                                                                                                |
| EPI_ISL_759962                                                                                                                                                                                                                                                                                                                                                                                                                                                                                                                                                                                                                                                                                                                                                                                                                                                                                                                                                                                                                                                                                                                                                                                                                                                                                                                                                                                                                                                                                                                                                                                                                                                                                                                                                                                                                                                                                                                                                                                                                                                                                                                                                                                                                                                                                                                                                                                                                                                                                                                                                                                                                                                                                                                                                                                                                                                                                                                                                                                                                                                                                                                                                                                                                                                                                                                                                                                                                                                                                                                                                                                                                                                                                                                                                                                                                                                                                                                                                                                                                                                                                                                                                                                                                                                                                                                                                                                                                                                                                                                                                                                                                                                                                                                                                                                                                                                                                                                                                                                                                                                                                                                                                                                                                                                                                                                                                                                                                                                                                                                                                                                                                                                                                                                                                                                                                                                                                                                                                                                                                                                                                                                                                                                                                                                                                                                                                                                                                                                                                                                                                                                                                                                                                                                                                                                                                                                                                                                                                                                                                                                                                                                                                                                                                                                                                                                                                                                                                                                 | RSUD Dr. Soetomo                                                                 | Institute of Tropical Disease, Universitas Airlangga                                                                                                                                         | Krisnoadi Rahardjo, Aldise M Nastro, Jezzy R Dewantari, Rima R Prasetya, Joni Wahyuhadi, Gatot Soegiarto, Laksmi Wulandari, Resti Yudhawati, Yasuko Mori, Soetjipto, Kazufumi Shimizu, Maria I Lusida                                                                                               |
| EPI_ISL_759966                                                                                                                                                                                                                                                                                                                                                                                                                                                                                                                                                                                                                                                                                                                                                                                                                                                                                                                                                                                                                                                                                                                                                                                                                                                                                                                                                                                                                                                                                                                                                                                                                                                                                                                                                                                                                                                                                                                                                                                                                                                                                                                                                                                                                                                                                                                                                                                                                                                                                                                                                                                                                                                                                                                                                                                                                                                                                                                                                                                                                                                                                                                                                                                                                                                                                                                                                                                                                                                                                                                                                                                                                                                                                                                                                                                                                                                                                                                                                                                                                                                                                                                                                                                                                                                                                                                                                                                                                                                                                                                                                                                                                                                                                                                                                                                                                                                                                                                                                                                                                                                                                                                                                                                                                                                                                                                                                                                                                                                                                                                                                                                                                                                                                                                                                                                                                                                                                                                                                                                                                                                                                                                                                                                                                                                                                                                                                                                                                                                                                                                                                                                                                                                                                                                                                                                                                                                                                                                                                                                                                                                                                                                                                                                                                                                                                                                                                                                                                                                 | RSUD Sidoarjo                                                                    | Institute of Tropical Disease, Universitas Airlangga                                                                                                                                         | Krisnoadi Rahardjo, Aldise M Nastro, Jezzy R Dewantari, Rima R Prasetya, Atok Irawan, Gatot Soegiarto, Laksmi Wulandari, Resti Yudhawati, Yasuko Mori, Soetjipto, Kazufumi Shimizu, Maria I Lusida                                                                                                  |
| EPI_ISL_760059, EPI_ISL_760246                                                                                                                                                                                                                                                                                                                                                                                                                                                                                                                                                                                                                                                                                                                                                                                                                                                                                                                                                                                                                                                                                                                                                                                                                                                                                                                                                                                                                                                                                                                                                                                                                                                                                                                                                                                                                                                                                                                                                                                                                                                                                                                                                                                                                                                                                                                                                                                                                                                                                                                                                                                                                                                                                                                                                                                                                                                                                                                                                                                                                                                                                                                                                                                                                                                                                                                                                                                                                                                                                                                                                                                                                                                                                                                                                                                                                                                                                                                                                                                                                                                                                                                                                                                                                                                                                                                                                                                                                                                                                                                                                                                                                                                                                                                                                                                                                                                                                                                                                                                                                                                                                                                                                                                                                                                                                                                                                                                                                                                                                                                                                                                                                                                                                                                                                                                                                                                                                                                                                                                                                                                                                                                                                                                                                                                                                                                                                                                                                                                                                                                                                                                                                                                                                                                                                                                                                                                                                                                                                                                                                                                                                                                                                                                                                                                                                                                                                                                                                                 | Laboratory of Genetics and Personalized Medicine, Zan Mitrev Clinic              | Laboratory of Genetics and Personalized Medicine, Zan Mitrev Clinic                                                                                                                          | Kungulovski et al., 2020                                                                                                                                                                                                                                                                            |
| EPI_ISL_760247                                                                                                                                                                                                                                                                                                                                                                                                                                                                                                                                                                                                                                                                                                                                                                                                                                                                                                                                                                                                                                                                                                                                                                                                                                                                                                                                                                                                                                                                                                                                                                                                                                                                                                                                                                                                                                                                                                                                                                                                                                                                                                                                                                                                                                                                                                                                                                                                                                                                                                                                                                                                                                                                                                                                                                                                                                                                                                                                                                                                                                                                                                                                                                                                                                                                                                                                                                                                                                                                                                                                                                                                                                                                                                                                                                                                                                                                                                                                                                                                                                                                                                                                                                                                                                                                                                                                                                                                                                                                                                                                                                                                                                                                                                                                                                                                                                                                                                                                                                                                                                                                                                                                                                                                                                                                                                                                                                                                                                                                                                                                                                                                                                                                                                                                                                                                                                                                                                                                                                                                                                                                                                                                                                                                                                                                                                                                                                                                                                                                                                                                                                                                                                                                                                                                                                                                                                                                                                                                                                                                                                                                                                                                                                                                                                                                                                                                                                                                                                                 | Pasteur Institute in Ho Chi Minh city                                            | Department of Microbiology and Immunology - Pasteur Institute in Ho Chi Minh city                                                                                                            | Lan Trong Phan, Manh Huy Dao, Hang Thi Thu Pham, Nhung Pham Hong Vu, Hieu Minh Le, Thang Minh Cao, Loan Thi Kim Huynh, Long Thanh Nguyen, Anh Hoang Nguyen, Hieu Trung Nguyen, Thao Thi Ngoc Nguyen, Quang Duy Pham, Quang Chan Luong, Thuong Vu Nguyen                                             |
| EPI_ISL_765480                                                                                                                                                                                                                                                                                                                                                                                                                                                                                                                                                                                                                                                                                                                                                                                                                                                                                                                                                                                                                                                                                                                                                                                                                                                                                                                                                                                                                                                                                                                                                                                                                                                                                                                                                                                                                                                                                                                                                                                                                                                                                                                                                                                                                                                                                                                                                                                                                                                                                                                                                                                                                                                                                                                                                                                                                                                                                                                                                                                                                                                                                                                                                                                                                                                                                                                                                                                                                                                                                                                                                                                                                                                                                                                                                                                                                                                                                                                                                                                                                                                                                                                                                                                                                                                                                                                                                                                                                                                                                                                                                                                                                                                                                                                                                                                                                                                                                                                                                                                                                                                                                                                                                                                                                                                                                                                                                                                                                                                                                                                                                                                                                                                                                                                                                                                                                                                                                                                                                                                                                                                                                                                                                                                                                                                                                                                                                                                                                                                                                                                                                                                                                                                                                                                                                                                                                                                                                                                                                                                                                                                                                                                                                                                                                                                                                                                                                                                                                                                 | Wadsworth Center, New York State Department of Health                            | Wadsworth Center, New York State Department of Health                                                                                                                                        | Kirsten St. George, Daryl M. Lamson, Alexis Russel, Matthew Shudt, Melissa A Leisner, Jonathan Pitnick, Navjot Singh, John Kelly, Sara Griesemer, Erasmus Schneider, Erica Lasek-Nesselquist                                                                                                        |
| EPI_ISL_765481                                                                                                                                                                                                                                                                                                                                                                                                                                                                                                                                                                                                                                                                                                                                                                                                                                                                                                                                                                                                                                                                                                                                                                                                                                                                                                                                                                                                                                                                                                                                                                                                                                                                                                                                                                                                                                                                                                                                                                                                                                                                                                                                                                                                                                                                                                                                                                                                                                                                                                                                                                                                                                                                                                                                                                                                                                                                                                                                                                                                                                                                                                                                                                                                                                                                                                                                                                                                                                                                                                                                                                                                                                                                                                                                                                                                                                                                                                                                                                                                                                                                                                                                                                                                                                                                                                                                                                                                                                                                                                                                                                                                                                                                                                                                                                                                                                                                                                                                                                                                                                                                                                                                                                                                                                                                                                                                                                                                                                                                                                                                                                                                                                                                                                                                                                                                                                                                                                                                                                                                                                                                                                                                                                                                                                                                                                                                                                                                                                                                                                                                                                                                                                                                                                                                                                                                                                                                                                                                                                                                                                                                                                                                                                                                                                                                                                                                                                                                                                                 | SARATOGA HOSPITAL LABORATORY                                                     | Wadsworth Center, New York State Department of Health                                                                                                                                        | Kirsten St. George, Daryl M. Lamson, Alexis Russel, Matthew Shudt, Melissa A Leisner, Jonathan Pitnick, Navjot Singh, John Kelly, Sara Griesemer, Erasmus Schneider, Erica Lasek-Nesselquist                                                                                                        |
| EPI_ISL_765482                                                                                                                                                                                                                                                                                                                                                                                                                                                                                                                                                                                                                                                                                                                                                                                                                                                                                                                                                                                                                                                                                                                                                                                                                                                                                                                                                                                                                                                                                                                                                                                                                                                                                                                                                                                                                                                                                                                                                                                                                                                                                                                                                                                                                                                                                                                                                                                                                                                                                                                                                                                                                                                                                                                                                                                                                                                                                                                                                                                                                                                                                                                                                                                                                                                                                                                                                                                                                                                                                                                                                                                                                                                                                                                                                                                                                                                                                                                                                                                                                                                                                                                                                                                                                                                                                                                                                                                                                                                                                                                                                                                                                                                                                                                                                                                                                                                                                                                                                                                                                                                                                                                                                                                                                                                                                                                                                                                                                                                                                                                                                                                                                                                                                                                                                                                                                                                                                                                                                                                                                                                                                                                                                                                                                                                                                                                                                                                                                                                                                                                                                                                                                                                                                                                                                                                                                                                                                                                                                                                                                                                                                                                                                                                                                                                                                                                                                                                                                                                 | Wadsworth Center, New York State Department of Health                            | Wadsworth Center, New York State Department of Health                                                                                                                                        | Kirsten St. George, Daryl M. Lamson, Alexis Russel, Matthew Shudt, Melissa A Leisner, Jonathan Pitnick, Navjot Singh, John Kelly, Sara Griesemer, Erasmus Schneider, Erica Lasek-Nesselquist                                                                                                        |
| EPI_ISL_765483                                                                                                                                                                                                                                                                                                                                                                                                                                                                                                                                                                                                                                                                                                                                                                                                                                                                                                                                                                                                                                                                                                                                                                                                                                                                                                                                                                                                                                                                                                                                                                                                                                                                                                                                                                                                                                                                                                                                                                                                                                                                                                                                                                                                                                                                                                                                                                                                                                                                                                                                                                                                                                                                                                                                                                                                                                                                                                                                                                                                                                                                                                                                                                                                                                                                                                                                                                                                                                                                                                                                                                                                                                                                                                                                                                                                                                                                                                                                                                                                                                                                                                                                                                                                                                                                                                                                                                                                                                                                                                                                                                                                                                                                                                                                                                                                                                                                                                                                                                                                                                                                                                                                                                                                                                                                                                                                                                                                                                                                                                                                                                                                                                                                                                                                                                                                                                                                                                                                                                                                                                                                                                                                                                                                                                                                                                                                                                                                                                                                                                                                                                                                                                                                                                                                                                                                                                                                                                                                                                                                                                                                                                                                                                                                                                                                                                                                                                                                                                                 | SARATOGA HOSPITAL LABORATORY                                                     | Wadsworth Center, New York State Department of Health                                                                                                                                        | Kirsten St. George, Daryl M. Lamson, Alexis Russel, Matthew Shudt, Melissa A Leisner, Jonathan Pitnick, Navjot Singh, John Kelly, Sara Griesemer, Erasmus Schneider, Erica Lasek-Nesselquist                                                                                                        |
| EPI_ISL_765484, EPI_ISL_765485, EPI_ISL_765486, EPI_ISL_765487,                                                                                                                                                                                                                                                                                                                                                                                                                                                                                                                                                                                                                                                                                                                                                                                                                                                                                                                                                                                                                                                                                                                                                                                                                                                                                                                                                                                                                                                                                                                                                                                                                                                                                                                                                                                                                                                                                                                                                                                                                                                                                                                                                                                                                                                                                                                                                                                                                                                                                                                                                                                                                                                                                                                                                                                                                                                                                                                                                                                                                                                                                                                                                                                                                                                                                                                                                                                                                                                                                                                                                                                                                                                                                                                                                                                                                                                                                                                                                                                                                                                                                                                                                                                                                                                                                                                                                                                                                                                                                                                                                                                                                                                                                                                                                                                                                                                                                                                                                                                                                                                                                                                                                                                                                                                                                                                                                                                                                                                                                                                                                                                                                                                                                                                                                                                                                                                                                                                                                                                                                                                                                                                                                                                                                                                                                                                                                                                                                                                                                                                                                                                                                                                                                                                                                                                                                                                                                                                                                                                                                                                                                                                                                                                                                                                                                                                                                                                                | Wadsworth Center, New York State Department of Health                            | Wadsworth Center, New York State Department of Health                                                                                                                                        | Kirsten St. George, Daryl M. Lamson, Alexis Russel, Matthew Shudt, Melissa A Leisner, Jonathan Pitnick, Navjot Singh, John Kelly, Sara Griesemer, Erasmus Schneider, Erica Lasek-Nesselquist                                                                                                        |





|                                                                                                                                                                                                                                                                                                                                                                                                                                                                                                                                                                                                                                                                                                                                                                                                                                                                                                                                                                                                                                                                                                                                                                                                                                                                                                                                                                                                                                                                                                                                                                                                                                                                                                                                                                                                                                                                                                                                                                                                                                                                                                                                                                                                                                                                                                                                                                                                                                                                                                                                                                                                                                                                                                                                                                                                                                                                                                                                                                                                                                                                                                                                                                                                                                                                                                                                                                                                                                                                                                                                                                                                                                                                                                                                                                                                                                                                                                                                                                                                                                                                                                                                |                                |                                                                                              |                                                                                                                                                                                                                                             |                                                                                                                                                                                                                                                                                                                                                                                                                                                                                                                                                                                                                                                                                                                                                                                                                                                                                                                                                                                                                                                                                                                                                                                                                                                                                                                                                                                                                                                                                                                                                                                                                                                                                                                                                                                                                                                                                                                                                                                                                                                                                                                                                                                                                                                                                                                                                                                                                                                                                                                                                                                                                                                                                                                                                                                                                                                                                                                                                                                                                                                                                                                                                                                                                                                                                                                                                                                                                                                                                                                                                                                |           |                                              |                                                                |                                                                                                                                                                                                                                                                                                                                                                                                                                                                    |
|--------------------------------------------------------------------------------------------------------------------------------------------------------------------------------------------------------------------------------------------------------------------------------------------------------------------------------------------------------------------------------------------------------------------------------------------------------------------------------------------------------------------------------------------------------------------------------------------------------------------------------------------------------------------------------------------------------------------------------------------------------------------------------------------------------------------------------------------------------------------------------------------------------------------------------------------------------------------------------------------------------------------------------------------------------------------------------------------------------------------------------------------------------------------------------------------------------------------------------------------------------------------------------------------------------------------------------------------------------------------------------------------------------------------------------------------------------------------------------------------------------------------------------------------------------------------------------------------------------------------------------------------------------------------------------------------------------------------------------------------------------------------------------------------------------------------------------------------------------------------------------------------------------------------------------------------------------------------------------------------------------------------------------------------------------------------------------------------------------------------------------------------------------------------------------------------------------------------------------------------------------------------------------------------------------------------------------------------------------------------------------------------------------------------------------------------------------------------------------------------------------------------------------------------------------------------------------------------------------------------------------------------------------------------------------------------------------------------------------------------------------------------------------------------------------------------------------------------------------------------------------------------------------------------------------------------------------------------------------------------------------------------------------------------------------------------------------------------------------------------------------------------------------------------------------------------------------------------------------------------------------------------------------------------------------------------------------------------------------------------------------------------------------------------------------------------------------------------------------------------------------------------------------------------------------------------------------------------------------------------------------------------------------------------------------------------------------------------------------------------------------------------------------------------------------------------------------------------------------------------------------------------------------------------------------------------------------------------------------------------------------------------------------------------------------------------------------------------------------------------------------|--------------------------------|----------------------------------------------------------------------------------------------|---------------------------------------------------------------------------------------------------------------------------------------------------------------------------------------------------------------------------------------------|--------------------------------------------------------------------------------------------------------------------------------------------------------------------------------------------------------------------------------------------------------------------------------------------------------------------------------------------------------------------------------------------------------------------------------------------------------------------------------------------------------------------------------------------------------------------------------------------------------------------------------------------------------------------------------------------------------------------------------------------------------------------------------------------------------------------------------------------------------------------------------------------------------------------------------------------------------------------------------------------------------------------------------------------------------------------------------------------------------------------------------------------------------------------------------------------------------------------------------------------------------------------------------------------------------------------------------------------------------------------------------------------------------------------------------------------------------------------------------------------------------------------------------------------------------------------------------------------------------------------------------------------------------------------------------------------------------------------------------------------------------------------------------------------------------------------------------------------------------------------------------------------------------------------------------------------------------------------------------------------------------------------------------------------------------------------------------------------------------------------------------------------------------------------------------------------------------------------------------------------------------------------------------------------------------------------------------------------------------------------------------------------------------------------------------------------------------------------------------------------------------------------------------------------------------------------------------------------------------------------------------------------------------------------------------------------------------------------------------------------------------------------------------------------------------------------------------------------------------------------------------------------------------------------------------------------------------------------------------------------------------------------------------------------------------------------------------------------------------------------------------------------------------------------------------------------------------------------------------------------------------------------------------------------------------------------------------------------------------------------------------------------------------------------------------------------------------------------------------------------------------------------------------------------------------------------------------|-----------|----------------------------------------------|----------------------------------------------------------------|--------------------------------------------------------------------------------------------------------------------------------------------------------------------------------------------------------------------------------------------------------------------------------------------------------------------------------------------------------------------------------------------------------------------------------------------------------------------|
| EPI_ISL_771257, EPI_ISL_771258, EPI_ISL_771259, EPI_ISL_771260, EPI_ISL_771261, EPI_ISL_771262, EPI_ISL_771263, EPI_ISL_771264, EPI_ISL_771265, EPI_ISL_771266, EPI_ISL_771267, EPI_ISL_771268, EPI_ISL_771269, EPI_ISL_771270, EPI_ISL_771271, EPI_ISL_771272, EPI_ISL_771273, EPI_ISL_771274, EPI_ISL_771275, EPI_ISL_771276, EPI_ISL_771277, EPI_ISL_771278, EPI_ISL_771279, EPI_ISL_771280, EPI_ISL_771281, EPI_ISL_771282, EPI_ISL_771283, EPI_ISL_771284, EPI_ISL_771285, EPI_ISL_771286, EPI_ISL_771287, EPI_ISL_771288, EPI_ISL_771289, EPI_ISL_771290, EPI_ISL_771291, EPI_ISL_771292, EPI_ISL_771293, EPI_ISL_771294, EPI_ISL_771295, EPI_ISL_771296, EPI_ISL_771297, EPI_ISL_771298, EPI_ISL_771299, EPI_ISL_771300, EPI_ISL_771301, EPI_ISL_771302, EPI_ISL_771303, EPI_ISL_771304, EPI_ISL_771305, EPI_ISL_771306, EPI_ISL_771307, EPI_ISL_771308, EPI_ISL_771309, EPI_ISL_771310, EPI_ISL_771311, EPI_ISL_771312, EPI_ISL_771313, EPI_ISL_771314, EPI_ISL_771315, EPI_ISL_771316, EPI_ISL_771317, EPI_ISL_771318, EPI_ISL_771319, EPI_ISL_771320, EPI_ISL_771321, EPI_ISL_771322, EPI_ISL_771323, EPI_ISL_771324, EPI_ISL_771325, EPI_ISL_771326, EPI_ISL_771327, EPI_ISL_771328, EPI_ISL_771329, EPI_ISL_771330, EPI_ISL_771331, EPI_ISL_771332, EPI_ISL_771333, EPI_ISL_771334, EPI_ISL_771335, EPI_ISL_771336, EPI_ISL_771337, EPI_ISL_771338, EPI_ISL_771339, EPI_ISL_771340, EPI_ISL_771341, EPI_ISL_771342, EPI_ISL_771343, EPI_ISL_771344, EPI_ISL_771345, EPI_ISL_771346, EPI_ISL_771347, EPI_ISL_771348, EPI_ISL_771349, EPI_ISL_771350, EPI_ISL_771351, EPI_ISL_771352, EPI_ISL_771353, EPI_ISL_771354, EPI_ISL_771355, EPI_ISL_771356, EPI_ISL_771357, EPI_ISL_771358, EPI_ISL_771359, EPI_ISL_771360                                                                                                                                                                                                                                                                                                                                                                                                                                                                                                                                                                                                                                                                                                                                                                                                                                                                                                                                                                                                                                                                                                                                                                                                                                                                                                                                                                                                                                                                                                                                                                                                                                                                                                                                                                                                                                                                                                                                                                                                                                                                                                                                                                                                                                                                                                                                                                                                 | see above                      | Colorado Department of Public Health and Environment                                         | Colorado Department of Public Health and Environment                                                                                                                                                                                        | Laura Bankers, Molly C. Hetherington-Rauth, Diana Ir, Shannon Ely, Shannon R. Matzinger, Sarah Elizabeth Totten, Emily A. Travanty                                                                                                                                                                                                                                                                                                                                                                                                                                                                                                                                                                                                                                                                                                                                                                                                                                                                                                                                                                                                                                                                                                                                                                                                                                                                                                                                                                                                                                                                                                                                                                                                                                                                                                                                                                                                                                                                                                                                                                                                                                                                                                                                                                                                                                                                                                                                                                                                                                                                                                                                                                                                                                                                                                                                                                                                                                                                                                                                                                                                                                                                                                                                                                                                                                                                                                                                                                                                                                             |           |                                              |                                                                |                                                                                                                                                                                                                                                                                                                                                                                                                                                                    |
| EPI_ISL_779652, EPI_ISL_779654, EPI_ISL_779656                                                                                                                                                                                                                                                                                                                                                                                                                                                                                                                                                                                                                                                                                                                                                                                                                                                                                                                                                                                                                                                                                                                                                                                                                                                                                                                                                                                                                                                                                                                                                                                                                                                                                                                                                                                                                                                                                                                                                                                                                                                                                                                                                                                                                                                                                                                                                                                                                                                                                                                                                                                                                                                                                                                                                                                                                                                                                                                                                                                                                                                                                                                                                                                                                                                                                                                                                                                                                                                                                                                                                                                                                                                                                                                                                                                                                                                                                                                                                                                                                                                                                 | EPI_ISL_788980, EPI_ISL_788982 | EPI_ISL_788983                                                                               | EPI_ISL_788988                                                                                                                                                                                                                              | EPI_ISL_791514, EPI_ISL_791515, EPI_ISL_791516, EPI_ISL_791517, EPI_ISL_791518, EPI_ISL_791519, EPI_ISL_791520, EPI_ISL_791521, EPI_ISL_791522, EPI_ISL_791523, EPI_ISL_791524, EPI_ISL_791525, EPI_ISL_791526, EPI_ISL_791527, EPI_ISL_791528, EPI_ISL_791529, EPI_ISL_791530, EPI_ISL_791531, EPI_ISL_791532, EPI_ISL_791533, EPI_ISL_791534, EPI_ISL_791535, EPI_ISL_791536, EPI_ISL_791537, EPI_ISL_791538, EPI_ISL_791539, EPI_ISL_791540, EPI_ISL_791541, EPI_ISL_791542, EPI_ISL_791543, EPI_ISL_791544, EPI_ISL_791545, EPI_ISL_791546, EPI_ISL_791547, EPI_ISL_791548, EPI_ISL_791549, EPI_ISL_791550, EPI_ISL_791551, EPI_ISL_791552, EPI_ISL_791553, EPI_ISL_791554, EPI_ISL_791555, EPI_ISL_791556, EPI_ISL_791557, EPI_ISL_791558, EPI_ISL_791559, EPI_ISL_791560, EPI_ISL_791561, EPI_ISL_791562, EPI_ISL_791563, EPI_ISL_791564, EPI_ISL_791565, EPI_ISL_791566, EPI_ISL_791567, EPI_ISL_791568, EPI_ISL_791569, EPI_ISL_791570, EPI_ISL_791571, EPI_ISL_791572, EPI_ISL_791573, EPI_ISL_791574, EPI_ISL_791575, EPI_ISL_791576, EPI_ISL_791577, EPI_ISL_791578, EPI_ISL_791579, EPI_ISL_791580, EPI_ISL_791581, EPI_ISL_791582, EPI_ISL_791583, EPI_ISL_791584, EPI_ISL_791585, EPI_ISL_791586, EPI_ISL_791587, EPI_ISL_791588, EPI_ISL_791589, EPI_ISL_791590, EPI_ISL_791591, EPI_ISL_791592, EPI_ISL_791593, EPI_ISL_791594, EPI_ISL_791595, EPI_ISL_791596, EPI_ISL_791597, EPI_ISL_791598, EPI_ISL_791599, EPI_ISL_791600, EPI_ISL_791601, EPI_ISL_791602, EPI_ISL_791603, EPI_ISL_791604, EPI_ISL_791605, EPI_ISL_791606, EPI_ISL_791607, EPI_ISL_791608, EPI_ISL_791609, EPI_ISL_791610, EPI_ISL_791611, EPI_ISL_791612, EPI_ISL_791613, EPI_ISL_791614, EPI_ISL_791615, EPI_ISL_791616, EPI_ISL_791617, EPI_ISL_791618, EPI_ISL_791619, EPI_ISL_791620, EPI_ISL_791621, EPI_ISL_791622, EPI_ISL_791623, EPI_ISL_791624, EPI_ISL_791625, EPI_ISL_791626, EPI_ISL_791627, EPI_ISL_791628, EPI_ISL_791629, EPI_ISL_791630, EPI_ISL_791631, EPI_ISL_791632, EPI_ISL_791633, EPI_ISL_791634, EPI_ISL_791635, EPI_ISL_791636, EPI_ISL_791637, EPI_ISL_791638, EPI_ISL_791639, EPI_ISL_791640, EPI_ISL_791641, EPI_ISL_791642, EPI_ISL_791643, EPI_ISL_791644, EPI_ISL_791645, EPI_ISL_791646, EPI_ISL_791647, EPI_ISL_791648, EPI_ISL_791649, EPI_ISL_791650, EPI_ISL_791651, EPI_ISL_791652, EPI_ISL_791653, EPI_ISL_791654, EPI_ISL_791655, EPI_ISL_791656, EPI_ISL_791657, EPI_ISL_791658, EPI_ISL_791659, EPI_ISL_791660, EPI_ISL_791661, EPI_ISL_791662, EPI_ISL_791663, EPI_ISL_791664, EPI_ISL_791665, EPI_ISL_791666, EPI_ISL_791667, EPI_ISL_791668, EPI_ISL_791669, EPI_ISL_791670, EPI_ISL_791671, EPI_ISL_791672, EPI_ISL_791673, EPI_ISL_791674, EPI_ISL_791675, EPI_ISL_791676, EPI_ISL_791677, EPI_ISL_791678, EPI_ISL_791679, EPI_ISL_791680, EPI_ISL_791681, EPI_ISL_791682, EPI_ISL_791683, EPI_ISL_791684, EPI_ISL_791685, EPI_ISL_791686, EPI_ISL_791687, EPI_ISL_791688, EPI_ISL_791689, EPI_ISL_791690, EPI_ISL_791691, EPI_ISL_791692, EPI_ISL_791693, EPI_ISL_791694, EPI_ISL_791695, EPI_ISL_791696, EPI_ISL_791697, EPI_ISL_791698, EPI_ISL_791699, EPI_ISL_791700, EPI_ISL_791701, EPI_ISL_791702, EPI_ISL_791703, EPI_ISL_791704, EPI_ISL_791705, EPI_ISL_791706, EPI_ISL_791707, EPI_ISL_791708, EPI_ISL_791709, EPI_ISL_791710, EPI_ISL_791711, EPI_ISL_791712, EPI_ISL_791713, EPI_ISL_791714, EPI_ISL_791715, EPI_ISL_791716, EPI_ISL_791717, EPI_ISL_791718, EPI_ISL_791719, EPI_ISL_791720, EPI_ISL_791721, EPI_ISL_791722, EPI_ISL_791723, EPI_ISL_791724, EPI_ISL_791725, EPI_ISL_791726, EPI_ISL_791727, EPI_ISL_791728 | see above | Massachusetts State Public Health Laboratory | Infectious Disease Program, Broad Institute of Harvard and MIT | Lemieux,J.E., Siddle,K.J., Shaw,B., Adams,G., Pierce,V., Turbett,S., Anahtar,M., Branda,J., Slater,D., Harris,J., Lin,A.E., Gladden-Young,A., Lagerborg,K., Rudy,M., DeRuff,K., Carter,A., Normandin,E., Bauer,M., Reilly,S., Tomkins-Tinch,C., Loreth,C., Chaluvadi,S., Neumann,A., Cusick,C., Chapman,S.B., Gnirke,A., Flowers,K., Cerrato,F., Birren,B.W., Gallagher,G., Smole,S., Park,D.J., MacInnis,B.L., Ryan,E., LaRocque,R., Rosenberg,E. and Sabeti,P.C. |
| EPI_ISL_791729, EPI_ISL_791730, EPI_ISL_791731, EPI_ISL_791732, EPI_ISL_791733, EPI_ISL_791734, EPI_ISL_791735, EPI_ISL_791736, EPI_ISL_791737, EPI_ISL_791738, EPI_ISL_791739, EPI_ISL_791740, EPI_ISL_791741, EPI_ISL_791742, EPI_ISL_791743, EPI_ISL_791744, EPI_ISL_791745, EPI_ISL_791746, EPI_ISL_791747, EPI_ISL_791748, EPI_ISL_791749, EPI_ISL_791750, EPI_ISL_791751, EPI_ISL_791752, EPI_ISL_791753, EPI_ISL_791754, EPI_ISL_791755, EPI_ISL_791756, EPI_ISL_791757, EPI_ISL_791758, EPI_ISL_791759, EPI_ISL_791760, EPI_ISL_791761, EPI_ISL_791762, EPI_ISL_791763, EPI_ISL_791764, EPI_ISL_791765, EPI_ISL_791766, EPI_ISL_791767, EPI_ISL_791768, EPI_ISL_791769, EPI_ISL_791770, EPI_ISL_791771, EPI_ISL_791772, EPI_ISL_791773, EPI_ISL_791774, EPI_ISL_791775, EPI_ISL_791776, EPI_ISL_791777, EPI_ISL_791778, EPI_ISL_791779, EPI_ISL_791780, EPI_ISL_791781, EPI_ISL_791782, EPI_ISL_791783, EPI_ISL_791784, EPI_ISL_791785, EPI_ISL_791786, EPI_ISL_791787, EPI_ISL_791788, EPI_ISL_791789, EPI_ISL_791790, EPI_ISL_791791, EPI_ISL_791792, EPI_ISL_791793, EPI_ISL_791794, EPI_ISL_791795, EPI_ISL_791796, EPI_ISL_791797, EPI_ISL_791798, EPI_ISL_791799, EPI_ISL_791800, EPI_ISL_791801, EPI_ISL_791802, EPI_ISL_791803, EPI_ISL_791804, EPI_ISL_791805, EPI_ISL_791806, EPI_ISL_791807, EPI_ISL_791808, EPI_ISL_791809, EPI_ISL_791810, EPI_ISL_791811, EPI_ISL_791812, EPI_ISL_791813, EPI_ISL_791814, EPI_ISL_791815, EPI_ISL_791816, EPI_ISL_791817, EPI_ISL_791818, EPI_ISL_791819, EPI_ISL_791820, EPI_ISL_791821, EPI_ISL_791822, EPI_ISL_791823, EPI_ISL_791824, EPI_ISL_791825, EPI_ISL_791826, EPI_ISL_791827, EPI_ISL_791828, EPI_ISL_791829, EPI_ISL_791830, EPI_ISL_791831, EPI_ISL_791832, EPI_ISL_791833, EPI_ISL_791834, EPI_ISL_791835, EPI_ISL_791836, EPI_ISL_791837, EPI_ISL_791838, EPI_ISL_791839, EPI_ISL_791840, EPI_ISL_791841, EPI_ISL_791842, EPI_ISL_791843, EPI_ISL_791844, EPI_ISL_791845, EPI_ISL_791846, EPI_ISL_791847, EPI_ISL_791848, EPI_ISL_791849, EPI_ISL_791850, EPI_ISL_791851, EPI_ISL_791852, EPI_ISL_791853, EPI_ISL_791854, EPI_ISL_791855, EPI_ISL_791856, EPI_ISL_791857, EPI_ISL_791858, EPI_ISL_791859, EPI_ISL_791860, EPI_ISL_791861, EPI_ISL_791862, EPI_ISL_791863, EPI_ISL_791864, EPI_ISL_791865, EPI_ISL_791866, EPI_ISL_791867, EPI_ISL_791868, EPI_ISL_791869, EPI_ISL_791870, EPI_ISL_791871, EPI_ISL_791872, EPI_ISL_791873, EPI_ISL_791874, EPI_ISL_791875, EPI_ISL_791876, EPI_ISL_791877, EPI_ISL_791878, EPI_ISL_791879, EPI_ISL_791880, EPI_ISL_791881, EPI_ISL_791882, EPI_ISL_791883, EPI_ISL_791884, EPI_ISL_791885, EPI_ISL_791886, EPI_ISL_791887, EPI_ISL_791888, EPI_ISL_791889, EPI_ISL_791890, EPI_ISL_791891, EPI_ISL_791892, EPI_ISL_791893, EPI_ISL_791894, EPI_ISL_791895, EPI_ISL_791896, EPI_ISL_791897, EPI_ISL_791898, EPI_ISL_791899, EPI_ISL_791900, EPI_ISL_791901, EPI_ISL_791902, EPI_ISL_791903, EPI_ISL_791904, EPI_ISL_791905, EPI_ISL_791906, EPI_ISL_791907, EPI_ISL_791908, EPI_ISL_791909, EPI_ISL_791910, EPI_ISL_791911, EPI_ISL_791912, EPI_ISL_791913, EPI_ISL_791914, EPI_ISL_791915, EPI_ISL_791916, EPI_ISL_791917, EPI_ISL_791918, EPI_ISL_791919, EPI_ISL_791920, EPI_ISL_791921, EPI_ISL_791922, EPI_ISL_791923, EPI_ISL_791924, EPI_ISL_791925, EPI_ISL_791926, EPI_ISL_791927, EPI_ISL_791928, EPI_ISL_791929, EPI_ISL_791930, EPI_ISL_791931, EPI_ISL_791932, EPI_ISL_791933, EPI_ISL_791934, EPI_ISL_791935, EPI_ISL_791936, EPI_ISL_791937, EPI_ISL_791938, EPI_ISL_791939, EPI_ISL_791940, EPI_ISL_791941, EPI_ISL_791942, EPI_ISL_791943, EPI_ISL_791944, EPI_ISL_791945, EPI_ISL_791946, EPI_ISL_791947, EPI_ISL_791948, EPI_ISL_791949, EPI_ISL_791950, EPI_ISL_791951, EPI_ISL_791952, EPI_ISL_791953, EPI_ISL_791954, EPI_ISL_791955, EPI_ISL_791956, EPI_ISL_791957, EPI_ISL_791958, EPI_ISL_791959, EPI_ISL_791960, EPI_ISL_791961, EPI_ISL_791962, EPI_ISL_791963, EPI_ISL_791964, EPI_ISL_791965, EPI_ISL_791966, EPI_ISL_791967, EPI_ISL_791968, EPI_ISL_791969, EPI_ISL_791970, EPI_ISL_791971, EPI_ISL_791972, EPI_ISL_791973, EPI_ISL_791974, EPI_ISL_791975, EPI_ISL_791976 | see above                      | Massachusetts General Hospital                                                               | Infectious Disease Program, Broad Institute of Harvard and MIT                                                                                                                                                                              | Lemieux,J.E., Siddle,K.J., Shaw,B., Adams,G., Pierce,V., Turbett,S., Anahtar,M., Branda,J., Slater,D., Harris,J., Lin,A.E., Gladden-Young,A., Lagerborg,K., Rudy,M., DeRuff,K., Carter,A., Normandin,E., Bauer,M., Reilly,S., Tomkins-Tinch,C., Loreth,C., Chaluvadi,S., Neumann,A., Cusick,C., Chapman,S.B., Gnirke,A., Flowers,K., Cerrato,F., Birren,B.W., Gallagher,G., Smole,S., Park,D.J., MacInnis,B.L., Ryan,E., LaRocque,R., Rosenberg,E. and Sabeti,P.C.                                                                                                                                                                                                                                                                                                                                                                                                                                                                                                                                                                                                                                                                                                                                                                                                                                                                                                                                                                                                                                                                                                                                                                                                                                                                                                                                                                                                                                                                                                                                                                                                                                                                                                                                                                                                                                                                                                                                                                                                                                                                                                                                                                                                                                                                                                                                                                                                                                                                                                                                                                                                                                                                                                                                                                                                                                                                                                                                                                                                                                                                                                             |           |                                              |                                                                |                                                                                                                                                                                                                                                                                                                                                                                                                                                                    |
| EPI_ISL_792402, EPI_ISL_792403, EPI_ISL_792404, EPI_ISL_792405, EPI_ISL_792406, EPI_ISL_792407, EPI_ISL_792408, EPI_ISL_792409, EPI_ISL_792410, EPI_ISL_792411, EPI_ISL_792412, EPI_ISL_792413, EPI_ISL_792414, EPI_ISL_792415, EPI_ISL_792416, EPI_ISL_792417, EPI_ISL_792418, EPI_ISL_792419, EPI_ISL_792420, EPI_ISL_792421, EPI_ISL_792422, EPI_ISL_792423                                                                                                                                                                                                                                                                                                                                                                                                                                                                                                                                                                                                                                                                                                                                                                                                                                                                                                                                                                                                                                                                                                                                                                                                                                                                                                                                                                                                                                                                                                                                                                                                                                                                                                                                                                                                                                                                                                                                                                                                                                                                                                                                                                                                                                                                                                                                                                                                                                                                                                                                                                                                                                                                                                                                                                                                                                                                                                                                                                                                                                                                                                                                                                                                                                                                                                                                                                                                                                                                                                                                                                                                                                                                                                                                                                 | see above                      | LABORATORIO DE CAMPAÑA COVID 19 INTA                                                         | Instituto de Biotecnología, IABIMO (CONICET), Instituto de Virología, IVIT(CONICET), Instituto de Patobiología, IPVET(CONICET), CICVyA, INTA on behalf of Proyecto Argentino Interinstitucional de genómica de SARS-CoV-2 (PAIS Consortium) | König, GA; Peralta, AV; Distéfano, AJ; Zavallo, D; Muñoz Hidalgo, MG; Vera, PA; Fass, M; Farber, MD; Cacciabué, MPD; Pedroarias, VC; Lozano Calderón, LC; Bengoa Luoni, S; Asurmendi, S; Giofré, A; Fernández PC; Zúrrraga, M; Delgado, F; Diaz Carraco, J; Garbaccio, S; Alvarez, I; Diagiacomo, S; Franco, L; Schammas, J; Rimondi, A; Soria, J;Craigo, M; Chimento, S; Gómez, E; Klepp, L; Lucero, MS; Sioya, B; Del Médico, P; Rodríguez, A; Dus Santos, MJ; Olivera, V; Trono, K; Rosende, J; Fusco, M; Huertas, P; Vissani, A; Perea, A; Pereda, A; Paniego, NB; Rivarola, M; Puebla, AF; Viegas, M.                                                                                                                                                                                                                                                                                                                                                                                                                                                                                                                                                                                                                                                                                                                                                                                                                                                                                                                                                                                                                                                                                                                                                                                                                                                                                                                                                                                                                                                                                                                                                                                                                                                                                                                                                                                                                                                                                                                                                                                                                                                                                                                                                                                                                                                                                                                                                                                                                                                                                                                                                                                                                                                                                                                                                                                                                                                                                                                                                                     |           |                                              |                                                                |                                                                                                                                                                                                                                                                                                                                                                                                                                                                    |
| EPI_ISL_792424, EPI_ISL_792425, EPI_ISL_792426, EPI_ISL_792427, EPI_ISL_792428, EPI_ISL_792429, EPI_ISL_792430, EPI_ISL_792431, EPI_ISL_792432, EPI_ISL_792433, EPI_ISL_792434, EPI_ISL_792435, EPI_ISL_792436, EPI_ISL_792437, EPI_ISL_792438, EPI_ISL_792439, EPI_ISL_792440, EPI_ISL_792441, EPI_ISL_792442                                                                                                                                                                                                                                                                                                                                                                                                                                                                                                                                                                                                                                                                                                                                                                                                                                                                                                                                                                                                                                                                                                                                                                                                                                                                                                                                                                                                                                                                                                                                                                                                                                                                                                                                                                                                                                                                                                                                                                                                                                                                                                                                                                                                                                                                                                                                                                                                                                                                                                                                                                                                                                                                                                                                                                                                                                                                                                                                                                                                                                                                                                                                                                                                                                                                                                                                                                                                                                                                                                                                                                                                                                                                                                                                                                                                                 | see above                      | Laboratorio de Inmunología del Hospital Perrando e Instituto de Medicina Regional de la UNNE | Instituto de Biotecnología, IABIMO (CONICET), Instituto de Virología, IVIT(CONICET), Instituto de Patobiología, IPVET(CONICET), CICVyA, INTA on behalf of Proyecto Argentino Interinstitucional de genómica de SARS-CoV-2 (PAIS Consortium) | König, GA; Peralta, AV; Distéfano, AJ; Zavallo, D; Muñoz Hidalgo, MG; Vera, PA; Fass, M; Farber, MD; Cacciabué, MPD; Pedroarias, VC; Lozano Calderón, LC; Bengoa Luoni, S; Asurmendi, S; Foussal, MD; Deluca, G; Ayala, NA; Gómez, MV; Giusiano, G; Lucero, H; Marín, M; Lescano, L; Cayré, A; Paniego, NB; Rivarola, M; Puebla, AF; Viegas, M.                                                                                                                                                                                                                                                                                                                                                                                                                                                                                                                                                                                                                                                                                                                                                                                                                                                                                                                                                                                                                                                                                                                                                                                                                                                                                                                                                                                                                                                                                                                                                                                                                                                                                                                                                                                                                                                                                                                                                                                                                                                                                                                                                                                                                                                                                                                                                                                                                                                                                                                                                                                                                                                                                                                                                                                                                                                                                                                                                                                                                                                                                                                                                                                                                                |           |                                              |                                                                |                                                                                                                                                                                                                                                                                                                                                                                                                                                                    |
| EPI_ISL_794014, EPI_ISL_794015, EPI_ISL_794016, EPI_ISL_794017, EPI_ISL_794018, EPI_ISL_794019, EPI_ISL_794020, EPI_ISL_794021, EPI_ISL_794022, EPI_ISL_794023, EPI_ISL_794024, EPI_ISL_794025, EPI_ISL_794026, EPI_ISL_794027, EPI_ISL_794028, EPI_ISL_794029, EPI_ISL_794030, EPI_ISL_794031, EPI_ISL_794032, EPI_ISL_794033, EPI_ISL_794034, EPI_ISL_794035, EPI_ISL_794036, EPI_ISL_794037, EPI_ISL_794038, EPI_ISL_794039, EPI_ISL_794040, EPI_ISL_794041, EPI_ISL_794042, EPI_ISL_794043, EPI_ISL_794044, EPI_ISL_794045, EPI_ISL_794046, EPI_ISL_794047, EPI_ISL_794048, EPI_ISL_794049, EPI_ISL_794050, EPI_ISL_794051, EPI_ISL_794052, EPI_ISL_794053, EPI_ISL_794054, EPI_ISL_794055, EPI_ISL_794056, EPI_ISL_794057, EPI_ISL_794058, EPI_ISL_794059, EPI_ISL_794060, EPI_ISL_794061, EPI_ISL_794062, EPI_ISL_794063, EPI_ISL_794064, EPI_ISL_794065, EPI_ISL_794066, EPI_ISL_794067, EPI_ISL_794068, EPI_ISL_794069, EPI_ISL_794070, EPI_ISL_794071, EPI_ISL_794072, EPI_ISL_794073, EPI_ISL_794074, EPI_ISL_794075, EPI_ISL_794076, EPI_ISL_794077, EPI_ISL_794078, EPI_ISL_794079, EPI_ISL_794080, EPI_ISL_794081, EPI_ISL_794082                                                                                                                                                                                                                                                                                                                                                                                                                                                                                                                                                                                                                                                                                                                                                                                                                                                                                                                                                                                                                                                                                                                                                                                                                                                                                                                                                                                                                                                                                                                                                                                                                                                                                                                                                                                                                                                                                                                                                                                                                                                                                                                                                                                                                                                                                                                                                                                                                                                                                                                                                                                                                                                                                                                                                                                                                                                                                                                                                                                 | see above                      | Wadsworth Center, New York State Department.of Health                                        | Wadsworth Center, New York State Department.of Health                                                                                                                                                                                       | Kirsten St. George, Daryl M. Lamson, Alexis Russel, Matthew Shudt, Melissa A Leisner, Jonathan Pitlnick, Navjot Singh, John Kelly, Sara Griesemer, Erasmus Schneider, Erica Lasek-Nesselquist                                                                                                                                                                                                                                                                                                                                                                                                                                                                                                                                                                                                                                                                                                                                                                                                                                                                                                                                                                                                                                                                                                                                                                                                                                                                                                                                                                                                                                                                                                                                                                                                                                                                                                                                                                                                                                                                                                                                                                                                                                                                                                                                                                                                                                                                                                                                                                                                                                                                                                                                                                                                                                                                                                                                                                                                                                                                                                                                                                                                                                                                                                                                                                                                                                                                                                                                                                                  |           |                                              |                                                                |                                                                                                                                                                                                                                                                                                                                                                                                                                                                    |
| EPI_ISL_794083, EPI_ISL_794084, EPI_ISL_794085, EPI_ISL_794086, EPI_ISL_794087, EPI_ISL_794088, EPI_ISL_794089, EPI_ISL_794090, EPI_ISL_794091, EPI_ISL_794092, EPI_ISL_794093, EPI_ISL_794094, EPI_ISL_794095, EPI_ISL_794096, EPI_ISL_794097, EPI_ISL_794098, EPI_ISL_794099, EPI_ISL_794100, EPI_ISL_794101, EPI_ISL_794102, EPI_ISL_794103, EPI_ISL_794104, EPI_ISL_794105, EPI_ISL_794106                                                                                                                                                                                                                                                                                                                                                                                                                                                                                                                                                                                                                                                                                                                                                                                                                                                                                                                                                                                                                                                                                                                                                                                                                                                                                                                                                                                                                                                                                                                                                                                                                                                                                                                                                                                                                                                                                                                                                                                                                                                                                                                                                                                                                                                                                                                                                                                                                                                                                                                                                                                                                                                                                                                                                                                                                                                                                                                                                                                                                                                                                                                                                                                                                                                                                                                                                                                                                                                                                                                                                                                                                                                                                                                                 | see above                      | URMC LABS                                                                                    | Wadsworth Center, New York State Department.of Health                                                                                                                                                                                       | Kirsten St. George, Daryl M. Lamson, Alexis Russel, Matthew Shudt, Melissa A Leisner, Jonathan Pitlnick, Navjot Singh, John Kelly, Sara Griesemer, Erasmus Schneider, Erica Lasek-Nesselquist                                                                                                                                                                                                                                                                                                                                                                                                                                                                                                                                                                                                                                                                                                                                                                                                                                                                                                                                                                                                                                                                                                                                                                                                                                                                                                                                                                                                                                                                                                                                                                                                                                                                                                                                                                                                                                                                                                                                                                                                                                                                                                                                                                                                                                                                                                                                                                                                                                                                                                                                                                                                                                                                                                                                                                                                                                                                                                                                                                                                                                                                                                                                                                                                                                                                                                                                                                                  |           |                                              |                                                                |                                                                                                                                                                                                                                                                                                                                                                                                                                                                    |
| EPI_ISL_794107, EPI_ISL_794108, EPI_ISL_794109, EPI_ISL_794110, EPI_ISL_794111, EPI_ISL_794112, EPI_ISL_794113, EPI_ISL_794114, EPI_ISL_794115, EPI_ISL_794116, EPI_ISL_794117, EPI_ISL_794118                                                                                                                                                                                                                                                                                                                                                                                                                                                                                                                                                                                                                                                                                                                                                                                                                                                                                                                                                                                                                                                                                                                                                                                                                                                                                                                                                                                                                                                                                                                                                                                                                                                                                                                                                                                                                                                                                                                                                                                                                                                                                                                                                                                                                                                                                                                                                                                                                                                                                                                                                                                                                                                                                                                                                                                                                                                                                                                                                                                                                                                                                                                                                                                                                                                                                                                                                                                                                                                                                                                                                                                                                                                                                                                                                                                                                                                                                                                                 | see above                      | GLENS FALLS HOSPITAL LABORATORY                                                              | Wadsworth Center, New York State Department.of Health                                                                                                                                                                                       | Kirsten St. George, Daryl M. Lamson, Alexis Russel, Matthew Shudt, Melissa A Leisner, Jonathan Pitlnick, Navjot Singh, John Kelly, Sara Griesemer, Erasmus Schneider, Erica Lasek-Nesselquist                                                                                                                                                                                                                                                                                                                                                                                                                                                                                                                                                                                                                                                                                                                                                                                                                                                                                                                                                                                                                                                                                                                                                                                                                                                                                                                                                                                                                                                                                                                                                                                                                                                                                                                                                                                                                                                                                                                                                                                                                                                                                                                                                                                                                                                                                                                                                                                                                                                                                                                                                                                                                                                                                                                                                                                                                                                                                                                                                                                                                                                                                                                                                                                                                                                                                                                                                                                  |           |                                              |                                                                |                                                                                                                                                                                                                                                                                                                                                                                                                                                                    |
| EPI_ISL_794119, EPI_ISL_794120, EPI_ISL_794121, EPI_ISL_794122, EPI_ISL_794123, EPI_ISL_794124, EPI_ISL_794125, EPI_ISL_794126, EPI_ISL_794127, EPI_ISL_794128, EPI_ISL_794129, EPI_ISL_794130, EPI_ISL_794131, EPI_ISL_794132, EPI_ISL_794133, EPI_ISL_794134, EPI_ISL_794135, EPI_ISL_794136, EPI_ISL_794137, EPI_ISL_794138, EPI_ISL_794139, EPI_ISL_794140, EPI_ISL_794141, EPI_ISL_794142, EPI_ISL_794143, EPI_ISL_794144, EPI_ISL_794145, EPI_ISL_794146, EPI_ISL_794147, EPI_ISL_794148, EPI_ISL_794149, EPI_ISL_794150, EPI_ISL_794151, EPI_ISL_794152, EPI_ISL_794153, EPI_ISL_794154, EPI_ISL_794155, EPI_ISL_794156, EPI_ISL_794157, EPI_ISL_794158                                                                                                                                                                                                                                                                                                                                                                                                                                                                                                                                                                                                                                                                                                                                                                                                                                                                                                                                                                                                                                                                                                                                                                                                                                                                                                                                                                                                                                                                                                                                                                                                                                                                                                                                                                                                                                                                                                                                                                                                                                                                                                                                                                                                                                                                                                                                                                                                                                                                                                                                                                                                                                                                                                                                                                                                                                                                                                                                                                                                                                                                                                                                                                                                                                                                                                                                                                                                                                                                 |                                |                                                                                              |                                                                                                                                                                                                                                             |                                                                                                                                                                                                                                                                                                                                                                                                                                                                                                                                                                                                                                                                                                                                                                                                                                                                                                                                                                                                                                                                                                                                                                                                                                                                                                                                                                                                                                                                                                                                                                                                                                                                                                                                                                                                                                                                                                                                                                                                                                                                                                                                                                                                                                                                                                                                                                                                                                                                                                                                                                                                                                                                                                                                                                                                                                                                                                                                                                                                                                                                                                                                                                                                                                                                                                                                                                                                                                                                                                                                                                                |           |                                              |                                                                |                                                                                                                                                                                                                                                                                                                                                                                                                                                                    |

|                                                                                                                                                                                                                                                                                                                                                                                                                                                                                                                                                                                                                                                                                                                                                                                                                                                                                                                                                                                                                                                                                                                                                                                                                                                                                                                                                                                                                                                                                                                                                                                                                                                                                                                                                                                                                                                                                                                                                |                                                                            |                                                       |                                                                                                                                                                                                                                                                                                                                                                                                                                                                                                          |
|------------------------------------------------------------------------------------------------------------------------------------------------------------------------------------------------------------------------------------------------------------------------------------------------------------------------------------------------------------------------------------------------------------------------------------------------------------------------------------------------------------------------------------------------------------------------------------------------------------------------------------------------------------------------------------------------------------------------------------------------------------------------------------------------------------------------------------------------------------------------------------------------------------------------------------------------------------------------------------------------------------------------------------------------------------------------------------------------------------------------------------------------------------------------------------------------------------------------------------------------------------------------------------------------------------------------------------------------------------------------------------------------------------------------------------------------------------------------------------------------------------------------------------------------------------------------------------------------------------------------------------------------------------------------------------------------------------------------------------------------------------------------------------------------------------------------------------------------------------------------------------------------------------------------------------------------|----------------------------------------------------------------------------|-------------------------------------------------------|----------------------------------------------------------------------------------------------------------------------------------------------------------------------------------------------------------------------------------------------------------------------------------------------------------------------------------------------------------------------------------------------------------------------------------------------------------------------------------------------------------|
| see above                                                                                                                                                                                                                                                                                                                                                                                                                                                                                                                                                                                                                                                                                                                                                                                                                                                                                                                                                                                                                                                                                                                                                                                                                                                                                                                                                                                                                                                                                                                                                                                                                                                                                                                                                                                                                                                                                                                                      | NORTHWELL HEALTH LABORATORIES                                              | Wadsworth Center, New York State Department of Health | Kirsten St. George, Daryl M. Lamson, Alexis Russel, Matthew Shudt, Melissa A Leisner, Jonathan Plitnick, Navjot Singh, John Kelly, Sara Griesemer, Erasmus Schneider, Erica Lasek-Nesselquist                                                                                                                                                                                                                                                                                                            |
| EPI_ISL_794159, EPI_ISL_794160, EPI_ISL_794161, EPI_ISL_794162, EPI_ISL_794163, EPI_ISL_794164, EPI_ISL_794165, EPI_ISL_794166, EPI_ISL_794167, EPI_ISL_794168, EPI_ISL_794169, EPI_ISL_794170, EPI_ISL_794171, EPI_ISL_794172, EPI_ISL_794173, EPI_ISL_794174, EPI_ISL_794175, EPI_ISL_794176, EPI_ISL_794177, EPI_ISL_794178, EPI_ISL_794179, EPI_ISL_794180, EPI_ISL_794181                                                                                                                                                                                                                                                                                                                                                                                                                                                                                                                                                                                                                                                                                                                                                                                                                                                                                                                                                                                                                                                                                                                                                                                                                                                                                                                                                                                                                                                                                                                                                                 |                                                                            |                                                       |                                                                                                                                                                                                                                                                                                                                                                                                                                                                                                          |
| see above                                                                                                                                                                                                                                                                                                                                                                                                                                                                                                                                                                                                                                                                                                                                                                                                                                                                                                                                                                                                                                                                                                                                                                                                                                                                                                                                                                                                                                                                                                                                                                                                                                                                                                                                                                                                                                                                                                                                      | Wadsworth Center, New York State Department of Health                      | Wadsworth Center, New York State Department of Health | Kirsten St. George, Daryl M. Lamson, Alexis Russel, Matthew Shudt, Melissa A Leisner, Jonathan Plitnick, Navjot Singh, John Kelly, Sara Griesemer, Erasmus Schneider, Erica Lasek-Nesselquist                                                                                                                                                                                                                                                                                                            |
| EPI_ISL_794182, EPI_ISL_794183, EPI_ISL_794184, EPI_ISL_794185, EPI_ISL_794186, EPI_ISL_794187, EPI_ISL_794188, EPI_ISL_794189, EPI_ISL_794190, EPI_ISL_794191, EPI_ISL_794192, EPI_ISL_794193, EPI_ISL_794194, EPI_ISL_794195, EPI_ISL_794196, EPI_ISL_794197, EPI_ISL_794198, EPI_ISL_794199, EPI_ISL_794200, EPI_ISL_794201, EPI_ISL_794202, EPI_ISL_794203, EPI_ISL_794204, EPI_ISL_794205                                                                                                                                                                                                                                                                                                                                                                                                                                                                                                                                                                                                                                                                                                                                                                                                                                                                                                                                                                                                                                                                                                                                                                                                                                                                                                                                                                                                                                                                                                                                                 |                                                                            |                                                       |                                                                                                                                                                                                                                                                                                                                                                                                                                                                                                          |
| see above                                                                                                                                                                                                                                                                                                                                                                                                                                                                                                                                                                                                                                                                                                                                                                                                                                                                                                                                                                                                                                                                                                                                                                                                                                                                                                                                                                                                                                                                                                                                                                                                                                                                                                                                                                                                                                                                                                                                      | URMC LABS                                                                  | Wadsworth Center, New York State Department of Health | Kirsten St. George, Daryl M. Lamson, Alexis Russel, Matthew Shudt, Melissa A Leisner, Jonathan Plitnick, Navjot Singh, John Kelly, Sara Griesemer, Erasmus Schneider, Erica Lasek-Nesselquist                                                                                                                                                                                                                                                                                                            |
| EPI_ISL_794206, EPI_ISL_794207                                                                                                                                                                                                                                                                                                                                                                                                                                                                                                                                                                                                                                                                                                                                                                                                                                                                                                                                                                                                                                                                                                                                                                                                                                                                                                                                                                                                                                                                                                                                                                                                                                                                                                                                                                                                                                                                                                                 | Wadsworth Center, New York State Department of Health                      | Wadsworth Center, New York State Department of Health | Kirsten St. George, Daryl M. Lamson, Alexis Russel, Matthew Shudt, Melissa A Leisner, Jonathan Plitnick, Navjot Singh, John Kelly, Sara Griesemer, Erasmus Schneider, Erica Lasek-Nesselquist                                                                                                                                                                                                                                                                                                            |
| EPI_ISL_794208, EPI_ISL_794209, EPI_ISL_794210, EPI_ISL_794211, EPI_ISL_794212, EPI_ISL_794213, EPI_ISL_794214, EPI_ISL_794215, EPI_ISL_794216, EPI_ISL_794217, EPI_ISL_794218, EPI_ISL_794219, EPI_ISL_794220, EPI_ISL_794221, EPI_ISL_794222, EPI_ISL_794223, EPI_ISL_794224, EPI_ISL_794225, EPI_ISL_794226, EPI_ISL_794227, EPI_ISL_794228, EPI_ISL_794229, EPI_ISL_794230, EPI_ISL_794231, EPI_ISL_794232, EPI_ISL_794233, EPI_ISL_794234, EPI_ISL_794235, EPI_ISL_794236, EPI_ISL_794237, EPI_ISL_794238, EPI_ISL_794239, EPI_ISL_794240, EPI_ISL_794241, EPI_ISL_794242, EPI_ISL_794243, EPI_ISL_794244, EPI_ISL_794245, EPI_ISL_794246, EPI_ISL_794247, EPI_ISL_794248, EPI_ISL_794249, EPI_ISL_794250, EPI_ISL_794251, EPI_ISL_794252, EPI_ISL_794253, EPI_ISL_794254, EPI_ISL_794255, EPI_ISL_794256, EPI_ISL_794257, EPI_ISL_794258, EPI_ISL_794259, EPI_ISL_794260, EPI_ISL_794261, EPI_ISL_794262, EPI_ISL_794263, EPI_ISL_794264, EPI_ISL_794265, EPI_ISL_794266, EPI_ISL_794267, EPI_ISL_794268, EPI_ISL_794269, EPI_ISL_794270, EPI_ISL_794271, EPI_ISL_794272, EPI_ISL_794273, EPI_ISL_794274, EPI_ISL_794275, EPI_ISL_794276, EPI_ISL_794277, EPI_ISL_794278, EPI_ISL_794279, EPI_ISL_794280, EPI_ISL_794281, EPI_ISL_794282                                                                                                                                                                                                                                                                                                                                                                                                                                                                                                                                                                                                                                                                                                 |                                                                            |                                                       |                                                                                                                                                                                                                                                                                                                                                                                                                                                                                                          |
| see above                                                                                                                                                                                                                                                                                                                                                                                                                                                                                                                                                                                                                                                                                                                                                                                                                                                                                                                                                                                                                                                                                                                                                                                                                                                                                                                                                                                                                                                                                                                                                                                                                                                                                                                                                                                                                                                                                                                                      | WESTCHESTER MEDICAL CENTER                                                 | Wadsworth Center, New York State Department of Health | Kirsten St. George, Daryl M. Lamson, Alexis Russel, Matthew Shudt, Melissa A Leisner, Jonathan Plitnick, Navjot Singh, John Kelly, Sara Griesemer, Erasmus Schneider, Erica Lasek-Nesselquist                                                                                                                                                                                                                                                                                                            |
| EPI_ISL_794283, EPI_ISL_794284, EPI_ISL_794285, EPI_ISL_794286, EPI_ISL_794287, EPI_ISL_794288, EPI_ISL_794289, EPI_ISL_794290, EPI_ISL_794291, EPI_ISL_794292, EPI_ISL_794293, EPI_ISL_794294, EPI_ISL_794295, EPI_ISL_794296, EPI_ISL_794297, EPI_ISL_794298, EPI_ISL_794299, EPI_ISL_794300, EPI_ISL_794301, EPI_ISL_794302, EPI_ISL_794303, EPI_ISL_794304, EPI_ISL_794305, EPI_ISL_794306, EPI_ISL_794307                                                                                                                                                                                                                                                                                                                                                                                                                                                                                                                                                                                                                                                                                                                                                                                                                                                                                                                                                                                                                                                                                                                                                                                                                                                                                                                                                                                                                                                                                                                                 |                                                                            |                                                       |                                                                                                                                                                                                                                                                                                                                                                                                                                                                                                          |
| see above                                                                                                                                                                                                                                                                                                                                                                                                                                                                                                                                                                                                                                                                                                                                                                                                                                                                                                                                                                                                                                                                                                                                                                                                                                                                                                                                                                                                                                                                                                                                                                                                                                                                                                                                                                                                                                                                                                                                      | Columbia University Irving Medical Center                                  | Wadsworth Center, New York State Department of Health | Kirsten St. George, Daryl M. Lamson, Alexis Russel, Matthew Shudt, Melissa A Leisner, Jonathan Plitnick, Navjot Singh, John Kelly, Sara Griesemer, Erasmus Schneider, Erica Lasek-Nesselquist                                                                                                                                                                                                                                                                                                            |
| EPI_ISL_794308, EPI_ISL_794309, EPI_ISL_794310, EPI_ISL_794311, EPI_ISL_794312, EPI_ISL_794313, EPI_ISL_794314, EPI_ISL_794315, EPI_ISL_794316, EPI_ISL_794317, EPI_ISL_794318, EPI_ISL_794319, EPI_ISL_794320                                                                                                                                                                                                                                                                                                                                                                                                                                                                                                                                                                                                                                                                                                                                                                                                                                                                                                                                                                                                                                                                                                                                                                                                                                                                                                                                                                                                                                                                                                                                                                                                                                                                                                                                 |                                                                            |                                                       |                                                                                                                                                                                                                                                                                                                                                                                                                                                                                                          |
| see above                                                                                                                                                                                                                                                                                                                                                                                                                                                                                                                                                                                                                                                                                                                                                                                                                                                                                                                                                                                                                                                                                                                                                                                                                                                                                                                                                                                                                                                                                                                                                                                                                                                                                                                                                                                                                                                                                                                                      | Wadsworth Center, New York State Department of Health                      | Wadsworth Center, New York State Department of Health | Kirsten St. George, Daryl M. Lamson, Alexis Russel, Matthew Shudt, Melissa A Leisner, Jonathan Plitnick, Navjot Singh, John Kelly, Sara Griesemer, Erasmus Schneider, Erica Lasek-Nesselquist                                                                                                                                                                                                                                                                                                            |
| EPI_ISL_794825                                                                                                                                                                                                                                                                                                                                                                                                                                                                                                                                                                                                                                                                                                                                                                                                                                                                                                                                                                                                                                                                                                                                                                                                                                                                                                                                                                                                                                                                                                                                                                                                                                                                                                                                                                                                                                                                                                                                 | Lab voor klinische biologie                                                | Onderzoeksgroep Virologie                             | Laurens Lambrechts, Nick Vereecke, Marthe Pauwels, Bruno Verhasselt, Linos Vandekerckhove, Hans Nauwynck, Sebastiaan Theuns                                                                                                                                                                                                                                                                                                                                                                              |
| EPI_ISL_801539, EPI_ISL_801544, EPI_ISL_801545, EPI_ISL_801546, EPI_ISL_801548, EPI_ISL_801549, EPI_ISL_801550, EPI_ISL_801551, EPI_ISL_801554                                                                                                                                                                                                                                                                                                                                                                                                                                                                                                                                                                                                                                                                                                                                                                                                                                                                                                                                                                                                                                                                                                                                                                                                                                                                                                                                                                                                                                                                                                                                                                                                                                                                                                                                                                                                 | Laboratory of Molecular Virology, Pontificia Universidad Católica de Chile | MSHS Pathogen Surveillance Program                    | Leonardo I. Almonacid, Ana S. Gonzalez-Reiche, Matthew M. Hernandez, Jorge Levican, Ana Maria Contreras, Carlos Palma, Tamara Garcia-Salum, Zenab Khan, Adriana van De Guchte, Ajay Obla, Jayeeta Dutta, Bremy Albuquerque, Eileen Serrano, Constanza Maldonado, M. Belen Leyton, Erick Salinas, Hala Alshammary, Juan Soto, Shwetha Hara Sridhar, Ying-Chih Wang, Melissa Smith, Robert Sebra, Marcela Ferres, Adolfo Garcia-Sastre, Edward C. Holmes, Viviana Simon, Harm van Bakel, Rafael A. Medina. |
| EPI_ISL_801556, EPI_ISL_801557, EPI_ISL_801562, EPI_ISL_801563, EPI_ISL_801565, EPI_ISL_801571, EPI_ISL_801572, EPI_ISL_801573, EPI_ISL_801576, EPI_ISL_801580                                                                                                                                                                                                                                                                                                                                                                                                                                                                                                                                                                                                                                                                                                                                                                                                                                                                                                                                                                                                                                                                                                                                                                                                                                                                                                                                                                                                                                                                                                                                                                                                                                                                                                                                                                                 | Laboratory of Molecular Virology, Pontificia Universidad Católica de Chile | MSHS Pathogen Surveillance Program                    | Leonardo I. Almonacid, Ana S. Gonzalez-Reiche, Matthew M. Hernandez, Jorge Levican, Tamara Garcia-Salum, Zenab Khan, Adriana van De Guchte, Ajay Obla, Jayeeta Dutta, Bremy Albuquerque, Eileen Serrano, Erick Salinas, Manuel Ampuero, Hala Alshammary, Juan Soto, Shwetha Hara Sridhar, Ying-Chih Wang, Melissa Smith, Robert Sebra, Fernando Valiente, Aldo Gaggero, Adolfo Garcia-Sastre, Edward C. Holmes, Viviana Simon, Harm van Bakel, Rafael A. Medina.                                         |
| EPI_ISL_801582, EPI_ISL_801583, EPI_ISL_801584, EPI_ISL_801588, EPI_ISL_801589, EPI_ISL_801590, EPI_ISL_801593, EPI_ISL_801596                                                                                                                                                                                                                                                                                                                                                                                                                                                                                                                                                                                                                                                                                                                                                                                                                                                                                                                                                                                                                                                                                                                                                                                                                                                                                                                                                                                                                                                                                                                                                                                                                                                                                                                                                                                                                 | Laboratory of Molecular Virology, Pontificia Universidad Católica de Chile | MSHS Pathogen Surveillance Program                    | Leonardo I. Almonacid, Ana S. Gonzalez-Reiche, Matthew M. Hernandez, Jorge Levican, Tamara Garcia-Salum, Zenab Khan, Adriana van De Guchte, Ajay Obla, Jayeeta Dutta, Bremy Albuquerque, Eileen Serrano, Erick Salinas, Hala Alshammary, Juan Soto, Shwetha Hara Sridhar, Ying-Chih Wang, Melissa Smith, Robert Sebra, Adolfo Garcia-Sastre, Edward C. Holmes, Viviana Simon, Harm van Bakel, Rafael A. Medina                                                                                           |
| EPI_ISL_801601, EPI_ISL_801602, EPI_ISL_801603, EPI_ISL_801604, EPI_ISL_801607, EPI_ISL_801609, EPI_ISL_801612, EPI_ISL_801613, EPI_ISL_801615, EPI_ISL_801618, EPI_ISL_801622, EPI_ISL_801629, EPI_ISL_801630, EPI_ISL_801632, EPI_ISL_801634, EPI_ISL_801636, EPI_ISL_801638, EPI_ISL_801641, EPI_ISL_801642, EPI_ISL_801644, EPI_ISL_801646, EPI_ISL_801649, EPI_ISL_801650, EPI_ISL_801652, EPI_ISL_801653, EPI_ISL_801654, EPI_ISL_801656, EPI_ISL_801658, EPI_ISL_801659, EPI_ISL_801662, EPI_ISL_801663, EPI_ISL_801664, EPI_ISL_801665, EPI_ISL_801667, EPI_ISL_801668, EPI_ISL_801670, EPI_ISL_801673, EPI_ISL_801675, EPI_ISL_801676, EPI_ISL_801678, EPI_ISL_801679, EPI_ISL_801681, EPI_ISL_801683, EPI_ISL_801686, EPI_ISL_801687, EPI_ISL_801688, EPI_ISL_801689, EPI_ISL_801691, EPI_ISL_801692, EPI_ISL_801697, EPI_ISL_801700, EPI_ISL_801701, EPI_ISL_801704, EPI_ISL_801705, EPI_ISL_801706, EPI_ISL_801707, EPI_ISL_801710, EPI_ISL_801712, EPI_ISL_801713, EPI_ISL_801715, EPI_ISL_801716, EPI_ISL_801717, EPI_ISL_801719, EPI_ISL_801720, EPI_ISL_801721, EPI_ISL_801722, EPI_ISL_801723, EPI_ISL_801724, EPI_ISL_801728, EPI_ISL_801729, EPI_ISL_801730, EPI_ISL_801733, EPI_ISL_801734, EPI_ISL_801735, EPI_ISL_801736, EPI_ISL_801737, EPI_ISL_801740, EPI_ISL_801742, EPI_ISL_801743, EPI_ISL_801744, EPI_ISL_801745, EPI_ISL_801757, EPI_ISL_801759, EPI_ISL_801762, EPI_ISL_801764, EPI_ISL_801770, EPI_ISL_801772, EPI_ISL_801774, EPI_ISL_801775, EPI_ISL_801777, EPI_ISL_801779, EPI_ISL_801781, EPI_ISL_801784, EPI_ISL_801786, EPI_ISL_801790, EPI_ISL_801791, EPI_ISL_801794, EPI_ISL_801798, EPI_ISL_801799, EPI_ISL_801800, EPI_ISL_801803, EPI_ISL_801809, EPI_ISL_801810, EPI_ISL_801811, EPI_ISL_801812, EPI_ISL_801821, EPI_ISL_801822, EPI_ISL_801823, EPI_ISL_801825, EPI_ISL_801830, EPI_ISL_801835, EPI_ISL_801842, EPI_ISL_801844, EPI_ISL_801848, EPI_ISL_801849, EPI_ISL_801850, EPI_ISL_801851 |                                                                            |                                                       |                                                                                                                                                                                                                                                                                                                                                                                                                                                                                                          |
| see above                                                                                                                                                                                                                                                                                                                                                                                                                                                                                                                                                                                                                                                                                                                                                                                                                                                                                                                                                                                                                                                                                                                                                                                                                                                                                                                                                                                                                                                                                                                                                                                                                                                                                                                                                                                                                                                                                                                                      | Laboratory of Molecular Virology, Pontificia Universidad Católica de Chile | MSHS Pathogen Surveillance Program                    | Leonardo I. Almonacid, Ana S. Gonzalez-Reiche, Matthew M. Hernandez, Jorge Levican, Ana Maria Contreras, Carlos Palma, Tamara Garcia-Salum, Zenab Khan, Adriana van De Guchte, Ajay Obla, Jayeeta Dutta, Bremy Albuquerque, Eileen Serrano, Constanza Maldonado, M. Belen Leyton, Erick Salinas, Hala Alshammary, Juan Soto, Shwetha Hara Sridhar, Ying-Chih Wang, Melissa Smith, Robert Sebra, Marcela Ferres, Adolfo Garcia-Sastre, Edward C. Holmes, Viviana Simon, Harm van Bakel, Rafael A. Medina. |
| EPI_ISL_802428                                                                                                                                                                                                                                                                                                                                                                                                                                                                                                                                                                                                                                                                                                                                                                                                                                                                                                                                                                                                                                                                                                                                                                                                                                                                                                                                                                                                                                                                                                                                                                                                                                                                                                                                                                                                                                                                                                                                 | SARATOGA HOSPITAL LABORATORY                                               | Wadsworth Center, New York State Department of Health | Kirsten St. George, Daryl M. Lamson, Alexis Russel, Matthew Shudt, Melissa A Leisner, Jonathan Plitnick, Navjot Singh, John Kelly, Sara Griesemer, Erasmus Schneider, Erica Lasek-Nesselquist                                                                                                                                                                                                                                                                                                            |
| EPI_ISL_802429                                                                                                                                                                                                                                                                                                                                                                                                                                                                                                                                                                                                                                                                                                                                                                                                                                                                                                                                                                                                                                                                                                                                                                                                                                                                                                                                                                                                                                                                                                                                                                                                                                                                                                                                                                                                                                                                                                                                 | Wadsworth Center, New York State Department of Health                      | Wadsworth Center, New York State Department of Health | Kirsten St. George, Daryl M. Lamson, Alexis Russel, Matthew Shudt, Melissa A Leisner, Jonathan Plitnick, Navjot Singh, John Kelly, Sara Griesemer, Erasmus Schneider, Erica Lasek-Nesselquist                                                                                                                                                                                                                                                                                                            |
| EPI_ISL_802430                                                                                                                                                                                                                                                                                                                                                                                                                                                                                                                                                                                                                                                                                                                                                                                                                                                                                                                                                                                                                                                                                                                                                                                                                                                                                                                                                                                                                                                                                                                                                                                                                                                                                                                                                                                                                                                                                                                                 | BIO-REFERENCE LABORATORIES                                                 | Wadsworth Center, New York State Department of Health | Kirsten St. George, Daryl M. Lamson, Alexis Russel, Matthew Shudt, Melissa A Leisner, Jonathan Plitnick, Navjot Singh, John Kelly, Sara Griesemer, Erasmus Schneider, Erica Lasek-Nesselquist                                                                                                                                                                                                                                                                                                            |
| EPI_ISL_802431                                                                                                                                                                                                                                                                                                                                                                                                                                                                                                                                                                                                                                                                                                                                                                                                                                                                                                                                                                                                                                                                                                                                                                                                                                                                                                                                                                                                                                                                                                                                                                                                                                                                                                                                                                                                                                                                                                                                 | Wadsworth Center, New York State Department of Health                      | Wadsworth Center, New York State Department of Health | Kirsten St. George, Daryl M. Lamson, Alexis Russel, Matthew Shudt, Melissa A Leisner, Jonathan Plitnick, Navjot Singh, John Kelly, Sara Griesemer, Erasmus Schneider, Erica Lasek-Nesselquist                                                                                                                                                                                                                                                                                                            |
| EPI_ISL_802432                                                                                                                                                                                                                                                                                                                                                                                                                                                                                                                                                                                                                                                                                                                                                                                                                                                                                                                                                                                                                                                                                                                                                                                                                                                                                                                                                                                                                                                                                                                                                                                                                                                                                                                                                                                                                                                                                                                                 | SARATOGA HOSPITAL LABORATORY                                               | Wadsworth Center, New York State Department of Health | Kirsten St. George, Daryl M. Lamson, Alexis Russel, Matthew Shudt, Melissa A Leisner, Jonathan Plitnick, Navjot Singh, John Kelly, Sara Griesemer, Erasmus Schneider, Erica Lasek-Nesselquist                                                                                                                                                                                                                                                                                                            |
| EPI_ISL_802433                                                                                                                                                                                                                                                                                                                                                                                                                                                                                                                                                                                                                                                                                                                                                                                                                                                                                                                                                                                                                                                                                                                                                                                                                                                                                                                                                                                                                                                                                                                                                                                                                                                                                                                                                                                                                                                                                                                                 | Wadsworth Center, New York State Department of Health                      | Wadsworth Center, New York State Department of Health | Kirsten St. George, Daryl M. Lamson, Alexis Russel, Matthew Shudt, Melissa A Leisner, Jonathan Plitnick, Navjot Singh, John Kelly, Sara Griesemer, Erasmus Schneider, Erica Lasek-Nesselquist                                                                                                                                                                                                                                                                                                            |
| EPI_ISL_802434, EPI_ISL_802435                                                                                                                                                                                                                                                                                                                                                                                                                                                                                                                                                                                                                                                                                                                                                                                                                                                                                                                                                                                                                                                                                                                                                                                                                                                                                                                                                                                                                                                                                                                                                                                                                                                                                                                                                                                                                                                                                                                 | WESTCHESTER MEDICAL CENTER                                                 | Wadsworth Center, New York State Department of Health | Kirsten St. George, Daryl M. Lamson, Alexis Russel, Matthew Shudt, Melissa A Leisner, Jonathan Plitnick, Navjot Singh, John Kelly, Sara Griesemer, Erasmus Schneider, Erica Lasek-Nesselquist                                                                                                                                                                                                                                                                                                            |
| EPI_ISL_802436                                                                                                                                                                                                                                                                                                                                                                                                                                                                                                                                                                                                                                                                                                                                                                                                                                                                                                                                                                                                                                                                                                                                                                                                                                                                                                                                                                                                                                                                                                                                                                                                                                                                                                                                                                                                                                                                                                                                 | TEMPUS LABS INC                                                            | Wadsworth Center, New York State Department of Health | Kirsten St. George, Daryl M. Lamson, Alexis Russel, Matthew Shudt, Melissa A Leisner, Jonathan Plitnick, Navjot Singh, John Kelly, Sara Griesemer, Erasmus Schneider, Erica Lasek-Nesselquist                                                                                                                                                                                                                                                                                                            |
| EPI_ISL_802437                                                                                                                                                                                                                                                                                                                                                                                                                                                                                                                                                                                                                                                                                                                                                                                                                                                                                                                                                                                                                                                                                                                                                                                                                                                                                                                                                                                                                                                                                                                                                                                                                                                                                                                                                                                                                                                                                                                                 | SARATOGA HOSPITAL LABORATORY                                               | Wadsworth Center, New York State Department of Health | Kirsten St. George, Daryl M. Lamson, Alexis Russel, Matthew Shudt, Melissa A Leisner, Jonathan Plitnick, Navjot Singh, John Kelly, Sara Griesemer, Erasmus Schneider, Erica Lasek-Nesselquist                                                                                                                                                                                                                                                                                                            |
| EPI_ISL_802438                                                                                                                                                                                                                                                                                                                                                                                                                                                                                                                                                                                                                                                                                                                                                                                                                                                                                                                                                                                                                                                                                                                                                                                                                                                                                                                                                                                                                                                                                                                                                                                                                                                                                                                                                                                                                                                                                                                                 | Wadsworth Center, New York State Department of Health                      | Wadsworth Center, New York State Department of Health | Kirsten St. George, Daryl M. Lamson, Alexis Russel, Matthew Shudt, Melissa A Leisner, Jonathan Plitnick, Navjot Singh, John Kelly, Sara Griesemer, Erasmus Schneider, Erica Lasek-Nesselquist                                                                                                                                                                                                                                                                                                            |
| EPI_ISL_802439                                                                                                                                                                                                                                                                                                                                                                                                                                                                                                                                                                                                                                                                                                                                                                                                                                                                                                                                                                                                                                                                                                                                                                                                                                                                                                                                                                                                                                                                                                                                                                                                                                                                                                                                                                                                                                                                                                                                 | SARATOGA HOSPITAL LABORATORY                                               | Wadsworth Center, New York State Department of Health | Kirsten St. George, Daryl M. Lamson, Alexis Russel, Matthew Shudt, Melissa A Leisner, Jonathan Plitnick, Navjot Singh, John Kelly, Sara Griesemer, Erasmus Schneider, Erica Lasek-Nesselquist                                                                                                                                                                                                                                                                                                            |



|                                                                                                                                                                                                                                                                                                                                                                                                                                                                                                                                                                                                                                                                                                                                                                                                                                                                                                                                                                |                                                                                                                           |                                                                                                                                                                               |                                                                                                                                                                                                                                                              |
|----------------------------------------------------------------------------------------------------------------------------------------------------------------------------------------------------------------------------------------------------------------------------------------------------------------------------------------------------------------------------------------------------------------------------------------------------------------------------------------------------------------------------------------------------------------------------------------------------------------------------------------------------------------------------------------------------------------------------------------------------------------------------------------------------------------------------------------------------------------------------------------------------------------------------------------------------------------|---------------------------------------------------------------------------------------------------------------------------|-------------------------------------------------------------------------------------------------------------------------------------------------------------------------------|--------------------------------------------------------------------------------------------------------------------------------------------------------------------------------------------------------------------------------------------------------------|
| EPI_ISL_804370, EPI_ISL_804371, EPI_ISL_804372, EPI_ISL_804373, EPI_ISL_804374, EPI_ISL_804375, EPI_ISL_804376, EPI_ISL_804377, EPI_ISL_804378                                                                                                                                                                                                                                                                                                                                                                                                                                                                                                                                                                                                                                                                                                                                                                                                                 | CHU Purpan - Laboratoire de Virologie - Institut Fédératif de Biologie                                                    | CHU Purpan - Laboratoire de Virologie - Institut Fédératif de Biologie                                                                                                        | Latour J., Ranger N., Dubois M., Carcenac R., Harter A., Boyer P., Tremeaux P., Izopet J.                                                                                                                                                                    |
| EPI_ISL_804945                                                                                                                                                                                                                                                                                                                                                                                                                                                                                                                                                                                                                                                                                                                                                                                                                                                                                                                                                 | Wadsworth Center, New York State Department.of Health                                                                     | Wadsworth Center, New York State Department.of Health                                                                                                                         | Kirsten St. George, Daryl M. Lamson, Alexis Russel, Matthew Shudt, Melissa A Leisner, Jonathan Plitnick, Navjot Singh, John Kelly, Sara Griesemer, Erasmus Schneider, Erica Lasek-Nesselquist                                                                |
| EPI_ISL_804946                                                                                                                                                                                                                                                                                                                                                                                                                                                                                                                                                                                                                                                                                                                                                                                                                                                                                                                                                 | BIO-REFERENCE LABORATORIES                                                                                                | Wadsworth Center, New York State Department.of Health                                                                                                                         | Kirsten St. George, Daryl M. Lamson, Alexis Russel, Matthew Shudt, Melissa A Leisner, Jonathan Plitnick, Navjot Singh, John Kelly, Sara Griesemer, Erasmus Schneider, Erica Lasek-Nesselquist                                                                |
| EPI_ISL_804947, EPI_ISL_804948                                                                                                                                                                                                                                                                                                                                                                                                                                                                                                                                                                                                                                                                                                                                                                                                                                                                                                                                 | Wadsworth Center, New York State Department.of Health                                                                     | Wadsworth Center, New York State Department.of Health                                                                                                                         | Kirsten St. George, Daryl M. Lamson, Alexis Russel, Matthew Shudt, Melissa A Leisner, Jonathan Plitnick, Navjot Singh, John Kelly, Sara Griesemer, Erasmus Schneider, Erica Lasek-Nesselquist                                                                |
| EPI_ISL_804980                                                                                                                                                                                                                                                                                                                                                                                                                                                                                                                                                                                                                                                                                                                                                                                                                                                                                                                                                 | Columbia University Irving Medical Center                                                                                 | Wadsworth Center, New York State Department of Health                                                                                                                         | Kirsten St. George, Daryl M. Lamson, Alexis Russel, Matthew Shudt, Melissa A Leisner, Jonathan Plitnick, Navjot Singh, John Kelly, Erasmus Schneider, Erica Lasek-Nesselquist                                                                                |
| EPI_ISL_804981, EPI_ISL_804982, EPI_ISL_804983, EPI_ISL_804984                                                                                                                                                                                                                                                                                                                                                                                                                                                                                                                                                                                                                                                                                                                                                                                                                                                                                                 | BIO-REFERENCE LABORATORIES                                                                                                | Wadsworth Center, New York State Department of Health                                                                                                                         | Kirsten St. George, Daryl M. Lamson, Alexis Russel, Matthew Shudt, Melissa A Leisner, Jonathan Plitnick, Navjot Singh, John Kelly, Erasmus Schneider, Erica Lasek-Nesselquist                                                                                |
| EPI_ISL_806544                                                                                                                                                                                                                                                                                                                                                                                                                                                                                                                                                                                                                                                                                                                                                                                                                                                                                                                                                 | INSPI Instituto Nacional de Investigación en Salud Pública                                                                | Av. Julián Coronel 905 entre Esmeraldas y José Mascote Av. Juan Tanca Marengo No. 100 y Av. de las Américas                                                                   | Leandro Patiño, Doménica de Mora, Maritza Olmedo, Andrés Carrasco, Orson Mestanza, Mary Regato, Melissa Zambrano, Manuel González, Alfredo Bruno, Alberto Orlando.                                                                                           |
| EPI_ISL_812114                                                                                                                                                                                                                                                                                                                                                                                                                                                                                                                                                                                                                                                                                                                                                                                                                                                                                                                                                 | Arizona State University                                                                                                  | Arizona State University                                                                                                                                                      | LaRinda A. Holland, Peter T. Skidmore, Emily A. Kaelin, Nicholas J. Mellor, Kristina Buss, Joy M. Blain, Valerie Harris, Joshua LaBaer, Vel Murugan, Eftem S. Lim                                                                                            |
| EPI_ISL_812956, EPI_ISL_812957, EPI_ISL_812958, EPI_ISL_812959, EPI_ISL_812960, EPI_ISL_812961, EPI_ISL_812962, EPI_ISL_812963, EPI_ISL_812964, EPI_ISL_812965                                                                                                                                                                                                                                                                                                                                                                                                                                                                                                                                                                                                                                                                                                                                                                                                 | Division of Pathogen Resource Management, Korea National Institute of Health, Korea Disease Control and Prevention Agency | Division of Pathogen Resource Management, Korea National Institute of Health, Korea Disease Control and Prevention Agency                                                     | Kim,S.T., Kim,S.Y., Choi,Y.S., Kim,E.-J., Kim,J.-M., Yun,M.-r., Choi,C.                                                                                                                                                                                      |
| EPI_ISL_812968                                                                                                                                                                                                                                                                                                                                                                                                                                                                                                                                                                                                                                                                                                                                                                                                                                                                                                                                                 | Department of Molecular Medicine, University of Padova                                                                    | Department of Molecular Medicine, University of Padova                                                                                                                        | Lavezzo,E., Franchin,E., Barzon,L., Del Vecchio,C., Rossi,L.,Manganelli,R., Loregian,A., Abate,D., Sciro,M., De Canale,E.,Vanuzzo,M.C., Besutti,V., Saluzzo,F., Onelia,F., Pacenti,M.,Manuto,L., Parisi,S.G., Masi,G., Trevisan,M., Toppo,S. and Crisanti,A. |
| EPI_ISL_824790, EPI_ISL_824791, EPI_ISL_824792, EPI_ISL_824793, EPI_ISL_824795, EPI_ISL_824796, EPI_ISL_824797, EPI_ISL_824798, EPI_ISL_824799, EPI_ISL_824800, EPI_ISL_824801, EPI_ISL_824803, EPI_ISL_824805, EPI_ISL_824806, EPI_ISL_824807, EPI_ISL_824809, EPI_ISL_824810, EPI_ISL_824811, EPI_ISL_824812, EPI_ISL_824813, EPI_ISL_824815, EPI_ISL_824816, EPI_ISL_824817, EPI_ISL_824818, EPI_ISL_824820, EPI_ISL_824822, EPI_ISL_824825, EPI_ISL_824826, EPI_ISL_824827, EPI_ISL_824829, EPI_ISL_824830, EPI_ISL_824831, EPI_ISL_824832, EPI_ISL_824833, EPI_ISL_824834, EPI_ISL_824835, EPI_ISL_824836, EPI_ISL_824837, EPI_ISL_824838, EPI_ISL_824839, EPI_ISL_824840, EPI_ISL_824842, EPI_ISL_824843, EPI_ISL_824845, EPI_ISL_824846, EPI_ISL_824847, EPI_ISL_824848, EPI_ISL_824850, EPI_ISL_824852, EPI_ISL_824854, EPI_ISL_824855, EPI_ISL_824857, EPI_ISL_824859, EPI_ISL_824860, EPI_ISL_824861, EPI_ISL_824863                                 | Department of Clinical Microbiology                                                                                       | GIGA Medical Genomics                                                                                                                                                         | Keith Durkin, Maria Artesi, Sébastien Bontems, Raphaël Boreux, Bouchra Boujemla, Cécile Meex, Pierrette Melin, Marie-Pierre Hayette, Vincent Bours                                                                                                           |
| see above                                                                                                                                                                                                                                                                                                                                                                                                                                                                                                                                                                                                                                                                                                                                                                                                                                                                                                                                                      | Department of Clinical Microbiology                                                                                       | GIGA Medical Genomics                                                                                                                                                         | Keith Durkin, Maria Artesi, Sébastien Bontems, Raphaël Boreux, Bouchra Boujemla, Cécile Meex, Pierrette Melin, Marie-Pierre Hayette, Vincent Bours                                                                                                           |
| EPI_ISL_825033                                                                                                                                                                                                                                                                                                                                                                                                                                                                                                                                                                                                                                                                                                                                                                                                                                                                                                                                                 | Center for Genome Sciences, US Army Medical Research Institute of Infectious Disease (USAMRIID)                           | Center for Genome Sciences, US Army Medical Research Institute of Infectious Disease (USAMRIID)                                                                               | Kugelman,J. and Beitzel,B.                                                                                                                                                                                                                                   |
| EPI_ISL_825039                                                                                                                                                                                                                                                                                                                                                                                                                                                                                                                                                                                                                                                                                                                                                                                                                                                                                                                                                 | B.J. Medical College and Civil hospital, Ahmedabad                                                                        | Gujarat Biotechnology Research Centre                                                                                                                                         | Labdhi Pandya, Afzal Ansari, Nikha Trivedi, Apurvasinh Puvur, Ramesh Pandit, Janvi Raval, Zarna Patel, Nitin Savaliya, Dinesh Kumar, Zuber Saiyed, Pranay Shah, Kamlesh J Upadhyay, Sanjay Kapadia, Dipa Kinariwala, Chaitanya Joshi, Madhvi Joshi           |
| EPI_ISL_830208, EPI_ISL_830210, EPI_ISL_830212                                                                                                                                                                                                                                                                                                                                                                                                                                                                                                                                                                                                                                                                                                                                                                                                                                                                                                                 | KALEIDA CENTER FOR LABORATORY MEDICINE                                                                                    | Wadsworth Center, New York State Department of Health                                                                                                                         | Kirsten St. George, Daryl M. Lamson, Alexis Russel, Matthew Shudt, Melissa A Leisner, Jonathan Plitnick, Navjot Singh, John Kelly, Erasmus Schneider, Erica Lasek-Nesselquist                                                                                |
| EPI_ISL_830214                                                                                                                                                                                                                                                                                                                                                                                                                                                                                                                                                                                                                                                                                                                                                                                                                                                                                                                                                 | BOSTON HEART DIAGNOSTICS CORP                                                                                             | Wadsworth Center, New York State Department of Health                                                                                                                         | Kirsten St. George, Daryl M. Lamson, Alexis Russel, Matthew Shudt, Melissa A Leisner, Jonathan Plitnick, Navjot Singh, John Kelly, Erasmus Schneider, Erica Lasek-Nesselquist                                                                                |
| EPI_ISL_830216, EPI_ISL_830218, EPI_ISL_830220, EPI_ISL_830221                                                                                                                                                                                                                                                                                                                                                                                                                                                                                                                                                                                                                                                                                                                                                                                                                                                                                                 | Wadsworth Center, New York State Department of Health                                                                     | Wadsworth Center, New York State Department of Health                                                                                                                         | Kirsten St. George, Daryl M. Lamson, Alexis Russel, Matthew Shudt, Melissa A Leisner, Jonathan Plitnick, Navjot Singh, John Kelly, Erasmus Schneider, Erica Lasek-Nesselquist                                                                                |
| EPI_ISL_830223, EPI_ISL_830225, EPI_ISL_830227, EPI_ISL_830229, EPI_ISL_830230, EPI_ISL_830232, EPI_ISL_830234, EPI_ISL_830236, EPI_ISL_830238, EPI_ISL_830239, EPI_ISL_830241, EPI_ISL_830243                                                                                                                                                                                                                                                                                                                                                                                                                                                                                                                                                                                                                                                                                                                                                                 | Wadsworth Center, New York State Department of Health                                                                     | Wadsworth Center, New York State Department of Health                                                                                                                         | Kirsten St. George, Daryl M. Lamson, Alexis Russel, Matthew Shudt, Melissa A Leisner, Jonathan Plitnick, Navjot Singh, John Kelly, Erasmus Schneider, Erica Lasek-Nesselquist                                                                                |
| see above                                                                                                                                                                                                                                                                                                                                                                                                                                                                                                                                                                                                                                                                                                                                                                                                                                                                                                                                                      | KALEIDA CENTER FOR LABORATORY MEDICINE                                                                                    | Wadsworth Center, New York State Department of Health                                                                                                                         | Kirsten St. George, Daryl M. Lamson, Alexis Russel, Matthew Shudt, Melissa A Leisner, Jonathan Plitnick, Navjot Singh, John Kelly, Erasmus Schneider, Erica Lasek-Nesselquist                                                                                |
| EPI_ISL_830244, EPI_ISL_830246, EPI_ISL_830248, EPI_ISL_830250, EPI_ISL_830252, EPI_ISL_830253, EPI_ISL_830255, EPI_ISL_830257, EPI_ISL_830259, EPI_ISL_830261, EPI_ISL_830263, EPI_ISL_830265, EPI_ISL_830267, EPI_ISL_830269, EPI_ISL_830270, EPI_ISL_830272, EPI_ISL_830274, EPI_ISL_830276, EPI_ISL_830278, EPI_ISL_830280, EPI_ISL_830282, EPI_ISL_830284, EPI_ISL_830286, EPI_ISL_830288, EPI_ISL_830289, EPI_ISL_830291, EPI_ISL_830293, EPI_ISL_830294, EPI_ISL_830296, EPI_ISL_830298, EPI_ISL_830300, EPI_ISL_830302, EPI_ISL_830304, EPI_ISL_830306, EPI_ISL_830308, EPI_ISL_830310, EPI_ISL_830312, EPI_ISL_830313, EPI_ISL_830315, EPI_ISL_830317, EPI_ISL_830319, EPI_ISL_830321, EPI_ISL_830323, EPI_ISL_830325, EPI_ISL_830326, EPI_ISL_830329, EPI_ISL_830331, EPI_ISL_830333, EPI_ISL_830334, EPI_ISL_830335, EPI_ISL_830337, EPI_ISL_830338, EPI_ISL_830340, EPI_ISL_830342, EPI_ISL_830344, EPI_ISL_830346, EPI_ISL_830348, EPI_ISL_830349 | Wadsworth Center, New York State Department of Health                                                                     | Kirsten St. George, Daryl M. Lamson, Alexis Russel, Matthew Shudt, Melissa A Leisner, Jonathan Plitnick, Navjot Singh, John Kelly, Erasmus Schneider, Erica Lasek-Nesselquist |                                                                                                                                                                                                                                                              |
| see above                                                                                                                                                                                                                                                                                                                                                                                                                                                                                                                                                                                                                                                                                                                                                                                                                                                                                                                                                      | Wadsworth Center, New York State Department of Health                                                                     | Wadsworth Center, New York State Department of Health                                                                                                                         | Kirsten St. George, Daryl M. Lamson, Alexis Russel, Matthew Shudt, Melissa A Leisner, Jonathan Plitnick, Navjot Singh, John Kelly, Erasmus Schneider, Erica Lasek-Nesselquist                                                                                |
| EPI_ISL_830571                                                                                                                                                                                                                                                                                                                                                                                                                                                                                                                                                                                                                                                                                                                                                                                                                                                                                                                                                 | KALEIDA CENTER FOR LABORATORY MEDICINE                                                                                    | Wadsworth Center, New York State Department of Health                                                                                                                         | Kirsten St. George, Daryl M. Lamson, Alexis Russel, Matthew Shudt, Melissa A Leisner, Jonathan Plitnick, Navjot Singh, John Kelly, Erasmus Schneider, Erica Lasek-Nesselquist                                                                                |
| EPI_ISL_830572                                                                                                                                                                                                                                                                                                                                                                                                                                                                                                                                                                                                                                                                                                                                                                                                                                                                                                                                                 | NORTHWELL HEALTH LABORATORIES                                                                                             | Wadsworth Center, New York State Department of Health                                                                                                                         | Kirsten St. George, Daryl M. Lamson, Alexis Russel, Matthew Shudt, Melissa A Leisner, Jonathan Plitnick, Navjot Singh, John Kelly, Erasmus Schneider, Erica Lasek-Nesselquist                                                                                |
| EPI_ISL_830573                                                                                                                                                                                                                                                                                                                                                                                                                                                                                                                                                                                                                                                                                                                                                                                                                                                                                                                                                 | KALEIDA CENTER FOR LABORATORY MEDICINE                                                                                    | Wadsworth Center, New York State Department of Health                                                                                                                         | Kirsten St. George, Daryl M. Lamson, Alexis Russel, Matthew Shudt, Melissa A Leisner, Jonathan Plitnick, Navjot Singh, John Kelly, Erasmus Schneider, Erica Lasek-Nesselquist                                                                                |
| EPI_ISL_830574                                                                                                                                                                                                                                                                                                                                                                                                                                                                                                                                                                                                                                                                                                                                                                                                                                                                                                                                                 | NORTHWELL HEALTH LABORATORIES                                                                                             | Wadsworth Center, New York State Department of Health                                                                                                                         | Kirsten St. George, Daryl M. Lamson, Alexis Russel, Matthew Shudt, Melissa A Leisner, Jonathan Plitnick, Navjot Singh, John Kelly, Erasmus Schneider, Erica Lasek-Nesselquist                                                                                |
| EPI_ISL_830575                                                                                                                                                                                                                                                                                                                                                                                                                                                                                                                                                                                                                                                                                                                                                                                                                                                                                                                                                 | KALEIDA CENTER FOR LABORATORY MEDICINE                                                                                    | Wadsworth Center, New York State Department of Health                                                                                                                         | Kirsten St. George, Daryl M. Lamson, Alexis Russel, Matthew Shudt, Melissa A Leisner, Jonathan Plitnick, Navjot Singh, John Kelly, Erasmus Schneider, Erica Lasek-Nesselquist                                                                                |
| EPI_ISL_830576, EPI_ISL_830577, EPI_ISL_830578                                                                                                                                                                                                                                                                                                                                                                                                                                                                                                                                                                                                                                                                                                                                                                                                                                                                                                                 | NORTHWELL HEALTH LABORATORIES                                                                                             | Wadsworth Center, New York State Department of Health                                                                                                                         | Kirsten St. George, Daryl M. Lamson, Alexis Russel, Matthew Shudt, Melissa A Leisner, Jonathan Plitnick, Navjot Singh, John Kelly, Erasmus Schneider, Erica Lasek-Nesselquist                                                                                |
| EPI_ISL_830579, EPI_ISL_830580, EPI_ISL_830581, EPI_ISL_830582, EPI_ISL_830583, EPI_ISL_830584, EPI_ISL_830585, EPI_ISL_830586, EPI_ISL_830587, EPI_ISL_830588, EPI_ISL_830589, EPI_ISL_830590, EPI_ISL_830591, EPI_ISL_830592, EPI_ISL_830593, EPI_ISL_830594, EPI_ISL_830595, EPI_ISL_830596, EPI_ISL_830597, EPI_ISL_830598, EPI_ISL_830599, EPI_ISL_830600, EPI_ISL_830601, EPI_ISL_830602, EPI_ISL_830603, EPI_ISL_830604, EPI_ISL_830605, EPI_ISL_830606, EPI_ISL_830607, EPI_ISL_830608, EPI_ISL_830609, EPI_ISL_830610, EPI_ISL_830611, EPI_ISL_830612, EPI_ISL_830613, EPI_ISL_830614, EPI_ISL_830615, EPI_ISL_830616, EPI_ISL_830617, EPI_ISL_830618, EPI_ISL_830619, EPI_ISL_830620, EPI_ISL_830621, EPI_ISL_830622, EPI_ISL_830623, EPI_ISL_830624, EPI_ISL_830625, EPI_ISL_830626, EPI_ISL_830627                                                                                                                                                 | Wadsworth Center, New York State Department of Health                                                                     | Kirsten St. George, Daryl M. Lamson, Alexis Russel, Matthew Shudt, Melissa A Leisner, Jonathan Plitnick, Navjot Singh, John Kelly, Erasmus Schneider, Erica Lasek-Nesselquist |                                                                                                                                                                                                                                                              |
| see above                                                                                                                                                                                                                                                                                                                                                                                                                                                                                                                                                                                                                                                                                                                                                                                                                                                                                                                                                      | KALEIDA CENTER FOR LABORATORY MEDICINE                                                                                    | Wadsworth Center, New York State Department of Health                                                                                                                         | Kirsten St. George, Daryl M. Lamson, Alexis Russel, Matthew Shudt, Melissa A Leisner, Jonathan Plitnick, Navjot Singh, John Kelly, Erasmus Schneider, Erica Lasek-Nesselquist                                                                                |
| EPI_ISL_830628, EPI_ISL_830629, EPI_ISL_830630, EPI_ISL_830631, EPI_ISL_830632, EPI_ISL_830633                                                                                                                                                                                                                                                                                                                                                                                                                                                                                                                                                                                                                                                                                                                                                                                                                                                                 | NORTHWELL HEALTH LABORATORIES                                                                                             | Wadsworth Center, New York State Department of Health                                                                                                                         | Kirsten St. George, Daryl M. Lamson, Alexis Russel, Matthew Shudt, Melissa A Leisner, Jonathan Plitnick, Navjot Singh, John Kelly, Erasmus Schneider, Erica Lasek-Nesselquist                                                                                |
| EPI_ISL_830634                                                                                                                                                                                                                                                                                                                                                                                                                                                                                                                                                                                                                                                                                                                                                                                                                                                                                                                                                 | MARY IMOGENE BASSETT HOSPITAL                                                                                             | Wadsworth Center, New York State Department of Health                                                                                                                         | Kirsten St. George, Daryl M. Lamson, Alexis Russel, Matthew Shudt, Melissa A Leisner, Jonathan Plitnick, Navjot Singh, John Kelly, Erasmus Schneider, Erica Lasek-Nesselquist                                                                                |

|                                                                                                                                                                                                                                                                                                                                                                                                                                                                                                                                                                                                                                                                                                                                                                                                                                                                                                                                                                                                                                                                                                                                                                                                                                                                                                                                                                                                                                                                                                                                                                                                                                                                                                                                                                                                                                                                                                                                                                                                                                                                                                                                                                                                                                                                                                                                                                                                                                                                                                                                                                                                                                                                                                                                                                                                                                                                                                                                                                                                                                                                                                                                                                                                                                                                                                                                                                                                                                                                                                                                                                                                                                                                                                                                                                                                                                                                                                                                                                                                                                                                                                                                                                                                                                                                                                                                                                                                                                                                                                                                                                                                                                                                                                                                                                                                                                                                                                                                                                                                                                                                                                                                                                                                                                                                                                                                                                                                                                                                                                                                                                                                                                                                                                                |                                                                                                 |                                                                          |                                                                                                                                                                                                                            |                                                                                                                                                                               |
|----------------------------------------------------------------------------------------------------------------------------------------------------------------------------------------------------------------------------------------------------------------------------------------------------------------------------------------------------------------------------------------------------------------------------------------------------------------------------------------------------------------------------------------------------------------------------------------------------------------------------------------------------------------------------------------------------------------------------------------------------------------------------------------------------------------------------------------------------------------------------------------------------------------------------------------------------------------------------------------------------------------------------------------------------------------------------------------------------------------------------------------------------------------------------------------------------------------------------------------------------------------------------------------------------------------------------------------------------------------------------------------------------------------------------------------------------------------------------------------------------------------------------------------------------------------------------------------------------------------------------------------------------------------------------------------------------------------------------------------------------------------------------------------------------------------------------------------------------------------------------------------------------------------------------------------------------------------------------------------------------------------------------------------------------------------------------------------------------------------------------------------------------------------------------------------------------------------------------------------------------------------------------------------------------------------------------------------------------------------------------------------------------------------------------------------------------------------------------------------------------------------------------------------------------------------------------------------------------------------------------------------------------------------------------------------------------------------------------------------------------------------------------------------------------------------------------------------------------------------------------------------------------------------------------------------------------------------------------------------------------------------------------------------------------------------------------------------------------------------------------------------------------------------------------------------------------------------------------------------------------------------------------------------------------------------------------------------------------------------------------------------------------------------------------------------------------------------------------------------------------------------------------------------------------------------------------------------------------------------------------------------------------------------------------------------------------------------------------------------------------------------------------------------------------------------------------------------------------------------------------------------------------------------------------------------------------------------------------------------------------------------------------------------------------------------------------------------------------------------------------------------------------------------------------------------------------------------------------------------------------------------------------------------------------------------------------------------------------------------------------------------------------------------------------------------------------------------------------------------------------------------------------------------------------------------------------------------------------------------------------------------------------------------------------------------------------------------------------------------------------------------------------------------------------------------------------------------------------------------------------------------------------------------------------------------------------------------------------------------------------------------------------------------------------------------------------------------------------------------------------------------------------------------------------------------------------------------------------------------------------------------------------------------------------------------------------------------------------------------------------------------------------------------------------------------------------------------------------------------------------------------------------------------------------------------------------------------------------------------------------------------------------------------------------------------------------------------|-------------------------------------------------------------------------------------------------|--------------------------------------------------------------------------|----------------------------------------------------------------------------------------------------------------------------------------------------------------------------------------------------------------------------|-------------------------------------------------------------------------------------------------------------------------------------------------------------------------------|
| EPI_ISL_830635, EPI_ISL_830636, EPI_ISL_830637, EPI_ISL_830638, EPI_ISL_830639, EPI_ISL_830640, EPI_ISL_830641, EPI_ISL_830642                                                                                                                                                                                                                                                                                                                                                                                                                                                                                                                                                                                                                                                                                                                                                                                                                                                                                                                                                                                                                                                                                                                                                                                                                                                                                                                                                                                                                                                                                                                                                                                                                                                                                                                                                                                                                                                                                                                                                                                                                                                                                                                                                                                                                                                                                                                                                                                                                                                                                                                                                                                                                                                                                                                                                                                                                                                                                                                                                                                                                                                                                                                                                                                                                                                                                                                                                                                                                                                                                                                                                                                                                                                                                                                                                                                                                                                                                                                                                                                                                                                                                                                                                                                                                                                                                                                                                                                                                                                                                                                                                                                                                                                                                                                                                                                                                                                                                                                                                                                                                                                                                                                                                                                                                                                                                                                                                                                                                                                                                                                                                                                 | NORTHWELL HEALTH LABORATORIES                                                                   | Wadsworth Center, New York State Department of Health                    | Kirsten St. George, Daryl M. Lamson, Alexis Russel, Matthew Shudt, Melissa A Leisner, Jonathan Plitnick, Navjot Singh, John Kelly, Erasmus Schneider, Erica Lasek-Nesselquist                                              |                                                                                                                                                                               |
| EPI_ISL_830643, EPI_ISL_830644, EPI_ISL_830645, EPI_ISL_830646, EPI_ISL_830647                                                                                                                                                                                                                                                                                                                                                                                                                                                                                                                                                                                                                                                                                                                                                                                                                                                                                                                                                                                                                                                                                                                                                                                                                                                                                                                                                                                                                                                                                                                                                                                                                                                                                                                                                                                                                                                                                                                                                                                                                                                                                                                                                                                                                                                                                                                                                                                                                                                                                                                                                                                                                                                                                                                                                                                                                                                                                                                                                                                                                                                                                                                                                                                                                                                                                                                                                                                                                                                                                                                                                                                                                                                                                                                                                                                                                                                                                                                                                                                                                                                                                                                                                                                                                                                                                                                                                                                                                                                                                                                                                                                                                                                                                                                                                                                                                                                                                                                                                                                                                                                                                                                                                                                                                                                                                                                                                                                                                                                                                                                                                                                                                                 | Wadsworth Center, New York State Department of Health                                           | Wadsworth Center, New York State Department of Health                    | Kirsten St. George, Daryl M. Lamson, Alexis Russel, Matthew Shudt, Melissa A Leisner, Jonathan Plitnick, Navjot Singh, John Kelly, Erasmus Schneider, Erica Lasek-Nesselquist                                              |                                                                                                                                                                               |
| EPI_ISL_830650, EPI_ISL_830651, EPI_ISL_830652, EPI_ISL_830653, EPI_ISL_830654, EPI_ISL_830655, EPI_ISL_830656, EPI_ISL_830657, EPI_ISL_830658, EPI_ISL_830659, EPI_ISL_830660, EPI_ISL_830661, EPI_ISL_830662, EPI_ISL_830663, EPI_ISL_830664, EPI_ISL_830665, EPI_ISL_830666, EPI_ISL_830667, EPI_ISL_830668, EPI_ISL_830669, EPI_ISL_830670, EPI_ISL_830671, EPI_ISL_830672, EPI_ISL_830673, EPI_ISL_830674, EPI_ISL_830675, EPI_ISL_830676, EPI_ISL_830677, EPI_ISL_830678, EPI_ISL_830679, EPI_ISL_830680, EPI_ISL_830681, EPI_ISL_830682                                                                                                                                                                                                                                                                                                                                                                                                                                                                                                                                                                                                                                                                                                                                                                                                                                                                                                                                                                                                                                                                                                                                                                                                                                                                                                                                                                                                                                                                                                                                                                                                                                                                                                                                                                                                                                                                                                                                                                                                                                                                                                                                                                                                                                                                                                                                                                                                                                                                                                                                                                                                                                                                                                                                                                                                                                                                                                                                                                                                                                                                                                                                                                                                                                                                                                                                                                                                                                                                                                                                                                                                                                                                                                                                                                                                                                                                                                                                                                                                                                                                                                                                                                                                                                                                                                                                                                                                                                                                                                                                                                                                                                                                                                                                                                                                                                                                                                                                                                                                                                                                                                                                                                 | see above                                                                                       | SUNY UPSTATE MEDICAL UNIVERSITY                                          | Wadsworth Center, New York State Department of Health                                                                                                                                                                      | Kirsten St. George, Daryl M. Lamson, Alexis Russel, Matthew Shudt, Melissa A Leisner, Jonathan Plitnick, Navjot Singh, John Kelly, Erasmus Schneider, Erica Lasek-Nesselquist |
| EPI_ISL_830683, EPI_ISL_830684, EPI_ISL_830685, EPI_ISL_830686, EPI_ISL_830687, EPI_ISL_830688, EPI_ISL_830689, EPI_ISL_830690, EPI_ISL_830691, EPI_ISL_830692, EPI_ISL_830693, EPI_ISL_830694, EPI_ISL_830695, EPI_ISL_830696, EPI_ISL_830697, EPI_ISL_830698, EPI_ISL_830699, EPI_ISL_830700, EPI_ISL_830701, EPI_ISL_830702, EPI_ISL_830703, EPI_ISL_830704, EPI_ISL_830705, EPI_ISL_830706, EPI_ISL_830707, EPI_ISL_830708, EPI_ISL_830709, EPI_ISL_830710, EPI_ISL_830711, EPI_ISL_830712, EPI_ISL_830713, EPI_ISL_830714, EPI_ISL_830715, EPI_ISL_830716, EPI_ISL_830717, EPI_ISL_830718, EPI_ISL_830719                                                                                                                                                                                                                                                                                                                                                                                                                                                                                                                                                                                                                                                                                                                                                                                                                                                                                                                                                                                                                                                                                                                                                                                                                                                                                                                                                                                                                                                                                                                                                                                                                                                                                                                                                                                                                                                                                                                                                                                                                                                                                                                                                                                                                                                                                                                                                                                                                                                                                                                                                                                                                                                                                                                                                                                                                                                                                                                                                                                                                                                                                                                                                                                                                                                                                                                                                                                                                                                                                                                                                                                                                                                                                                                                                                                                                                                                                                                                                                                                                                                                                                                                                                                                                                                                                                                                                                                                                                                                                                                                                                                                                                                                                                                                                                                                                                                                                                                                                                                                                                                                                                 | see above                                                                                       | ALBANY MEDICAL CENTER HOSPITAL CLINICAL LABORATORIES                     | Wadsworth Center, New York State Department of Health                                                                                                                                                                      | Kirsten St. George, Daryl M. Lamson, Alexis Russel, Matthew Shudt, Melissa A Leisner, Jonathan Plitnick, Navjot Singh, John Kelly, Erasmus Schneider, Erica Lasek-Nesselquist |
| EPI_ISL_830720, EPI_ISL_830721, EPI_ISL_830722, EPI_ISL_830723                                                                                                                                                                                                                                                                                                                                                                                                                                                                                                                                                                                                                                                                                                                                                                                                                                                                                                                                                                                                                                                                                                                                                                                                                                                                                                                                                                                                                                                                                                                                                                                                                                                                                                                                                                                                                                                                                                                                                                                                                                                                                                                                                                                                                                                                                                                                                                                                                                                                                                                                                                                                                                                                                                                                                                                                                                                                                                                                                                                                                                                                                                                                                                                                                                                                                                                                                                                                                                                                                                                                                                                                                                                                                                                                                                                                                                                                                                                                                                                                                                                                                                                                                                                                                                                                                                                                                                                                                                                                                                                                                                                                                                                                                                                                                                                                                                                                                                                                                                                                                                                                                                                                                                                                                                                                                                                                                                                                                                                                                                                                                                                                                                                 | BIO-REFERENCE LABORATORIES                                                                      | Wadsworth Center, New York State Department of Health                    | Kirsten St. George, Daryl M. Lamson, Alexis Russel, Matthew Shudt, Melissa A Leisner, Jonathan Plitnick, Navjot Singh, John Kelly, Erasmus Schneider, Erica Lasek-Nesselquist                                              |                                                                                                                                                                               |
| EPI_ISL_830724, EPI_ISL_830725                                                                                                                                                                                                                                                                                                                                                                                                                                                                                                                                                                                                                                                                                                                                                                                                                                                                                                                                                                                                                                                                                                                                                                                                                                                                                                                                                                                                                                                                                                                                                                                                                                                                                                                                                                                                                                                                                                                                                                                                                                                                                                                                                                                                                                                                                                                                                                                                                                                                                                                                                                                                                                                                                                                                                                                                                                                                                                                                                                                                                                                                                                                                                                                                                                                                                                                                                                                                                                                                                                                                                                                                                                                                                                                                                                                                                                                                                                                                                                                                                                                                                                                                                                                                                                                                                                                                                                                                                                                                                                                                                                                                                                                                                                                                                                                                                                                                                                                                                                                                                                                                                                                                                                                                                                                                                                                                                                                                                                                                                                                                                                                                                                                                                 | ACUTIS DIAGNOSTICS                                                                              | Wadsworth Center, New York State Department of Health                    | Kirsten St. George, Daryl M. Lamson, Alexis Russel, Matthew Shudt, Melissa A Leisner, Jonathan Plitnick, Navjot Singh, John Kelly, Erasmus Schneider, Erica Lasek-Nesselquist                                              |                                                                                                                                                                               |
| EPI_ISL_830726                                                                                                                                                                                                                                                                                                                                                                                                                                                                                                                                                                                                                                                                                                                                                                                                                                                                                                                                                                                                                                                                                                                                                                                                                                                                                                                                                                                                                                                                                                                                                                                                                                                                                                                                                                                                                                                                                                                                                                                                                                                                                                                                                                                                                                                                                                                                                                                                                                                                                                                                                                                                                                                                                                                                                                                                                                                                                                                                                                                                                                                                                                                                                                                                                                                                                                                                                                                                                                                                                                                                                                                                                                                                                                                                                                                                                                                                                                                                                                                                                                                                                                                                                                                                                                                                                                                                                                                                                                                                                                                                                                                                                                                                                                                                                                                                                                                                                                                                                                                                                                                                                                                                                                                                                                                                                                                                                                                                                                                                                                                                                                                                                                                                                                 | Wadsworth Center, New York State Department of Health                                           | Wadsworth Center, New York State Department of Health                    | Kirsten St. George, Daryl M. Lamson, Alexis Russel, Matthew Shudt, Melissa A Leisner, Jonathan Plitnick, Navjot Singh, John Kelly, Erasmus Schneider, Erica Lasek-Nesselquist                                              |                                                                                                                                                                               |
| EPI_ISL_831663, EPI_ISL_831668, EPI_ISL_831669, EPI_ISL_831673, EPI_ISL_831674                                                                                                                                                                                                                                                                                                                                                                                                                                                                                                                                                                                                                                                                                                                                                                                                                                                                                                                                                                                                                                                                                                                                                                                                                                                                                                                                                                                                                                                                                                                                                                                                                                                                                                                                                                                                                                                                                                                                                                                                                                                                                                                                                                                                                                                                                                                                                                                                                                                                                                                                                                                                                                                                                                                                                                                                                                                                                                                                                                                                                                                                                                                                                                                                                                                                                                                                                                                                                                                                                                                                                                                                                                                                                                                                                                                                                                                                                                                                                                                                                                                                                                                                                                                                                                                                                                                                                                                                                                                                                                                                                                                                                                                                                                                                                                                                                                                                                                                                                                                                                                                                                                                                                                                                                                                                                                                                                                                                                                                                                                                                                                                                                                 | Institute of Virology, Biomedical Research Center of the Slovak Academy of Sciences, Bratislava | Faculty of Natural Sciences, Comenius University, Bratislava             | Kristína Boršová, Viktória abanová, Broa Brejová, Viktória Hodorová, Sabina Fumaová Havlíková, Juraj Kopáek, Martina Liková, ubomira Lukáiková, Martina Neboháová, Monika Sláviková, Tomáš Vina, Boris Klempa, Jozef Nosek |                                                                                                                                                                               |
| EPI_ISL_832207, EPI_ISL_832209, EPI_ISL_832211, EPI_ISL_832213, EPI_ISL_832216, EPI_ISL_832217, EPI_ISL_832218, EPI_ISL_832219, EPI_ISL_832220, EPI_ISL_832221, EPI_ISL_832222, EPI_ISL_832223, EPI_ISL_832224, EPI_ISL_832241, EPI_ISL_832242                                                                                                                                                                                                                                                                                                                                                                                                                                                                                                                                                                                                                                                                                                                                                                                                                                                                                                                                                                                                                                                                                                                                                                                                                                                                                                                                                                                                                                                                                                                                                                                                                                                                                                                                                                                                                                                                                                                                                                                                                                                                                                                                                                                                                                                                                                                                                                                                                                                                                                                                                                                                                                                                                                                                                                                                                                                                                                                                                                                                                                                                                                                                                                                                                                                                                                                                                                                                                                                                                                                                                                                                                                                                                                                                                                                                                                                                                                                                                                                                                                                                                                                                                                                                                                                                                                                                                                                                                                                                                                                                                                                                                                                                                                                                                                                                                                                                                                                                                                                                                                                                                                                                                                                                                                                                                                                                                                                                                                                                 | see above                                                                                       | Department of Clinical Microbiology                                      | GIGA Medical Genomics                                                                                                                                                                                                      | Keith Durkin, Maria Artesi, Sébastien Bontems, Raphaël Boreux, Bouchra Boujemla, Cécile Meex, Pierrette Melin, Marie-Pierre Hayette, Vincent Bours                            |
| EPI_ISL_833041                                                                                                                                                                                                                                                                                                                                                                                                                                                                                                                                                                                                                                                                                                                                                                                                                                                                                                                                                                                                                                                                                                                                                                                                                                                                                                                                                                                                                                                                                                                                                                                                                                                                                                                                                                                                                                                                                                                                                                                                                                                                                                                                                                                                                                                                                                                                                                                                                                                                                                                                                                                                                                                                                                                                                                                                                                                                                                                                                                                                                                                                                                                                                                                                                                                                                                                                                                                                                                                                                                                                                                                                                                                                                                                                                                                                                                                                                                                                                                                                                                                                                                                                                                                                                                                                                                                                                                                                                                                                                                                                                                                                                                                                                                                                                                                                                                                                                                                                                                                                                                                                                                                                                                                                                                                                                                                                                                                                                                                                                                                                                                                                                                                                                                 | Defence Services Medical Research Center, Biological Research Laboratory                        | Defence Services Medical Research Center, Biological Research Laboratory | Khine Zaw Oo, Nay Myo Aung, Ko Ko Win, Phyo Kyaw Aung, Zaw Win Htun, Sat Paing Htoo, Kyaw Wanna, Thein Zaw, Kye Myint, Ko Ko Lwin                                                                                          |                                                                                                                                                                               |
| EPI_ISL_833185, EPI_ISL_833187, EPI_ISL_833188, EPI_ISL_833189, EPI_ISL_833190                                                                                                                                                                                                                                                                                                                                                                                                                                                                                                                                                                                                                                                                                                                                                                                                                                                                                                                                                                                                                                                                                                                                                                                                                                                                                                                                                                                                                                                                                                                                                                                                                                                                                                                                                                                                                                                                                                                                                                                                                                                                                                                                                                                                                                                                                                                                                                                                                                                                                                                                                                                                                                                                                                                                                                                                                                                                                                                                                                                                                                                                                                                                                                                                                                                                                                                                                                                                                                                                                                                                                                                                                                                                                                                                                                                                                                                                                                                                                                                                                                                                                                                                                                                                                                                                                                                                                                                                                                                                                                                                                                                                                                                                                                                                                                                                                                                                                                                                                                                                                                                                                                                                                                                                                                                                                                                                                                                                                                                                                                                                                                                                                                 | Department of Clinical Microbiology                                                             | GIGA Medical Genomics                                                    | Keith Durkin, Maria Artesi, Sébastien Bontems, Raphaël Boreux, Bouchra Boujemla, Cécile Meex, Pierrette Melin, Marie-Pierre Hayette, Vincent Bours                                                                         |                                                                                                                                                                               |
| EPI_ISL_833457, EPI_ISL_833458, EPI_ISL_833459, EPI_ISL_833460, EPI_ISL_833461, EPI_ISL_833462, EPI_ISL_833463, EPI_ISL_833464, EPI_ISL_833465, EPI_ISL_833466, EPI_ISL_833467, EPI_ISL_833468, EPI_ISL_833469, EPI_ISL_833470, EPI_ISL_833471, EPI_ISL_833472, EPI_ISL_833473, EPI_ISL_833474, EPI_ISL_833475, EPI_ISL_833476, EPI_ISL_833477, EPI_ISL_833478, EPI_ISL_833479, EPI_ISL_833480, EPI_ISL_848063, EPI_ISL_848064, EPI_ISL_848065, EPI_ISL_848066, EPI_ISL_848067, EPI_ISL_848068                                                                                                                                                                                                                                                                                                                                                                                                                                                                                                                                                                                                                                                                                                                                                                                                                                                                                                                                                                                                                                                                                                                                                                                                                                                                                                                                                                                                                                                                                                                                                                                                                                                                                                                                                                                                                                                                                                                                                                                                                                                                                                                                                                                                                                                                                                                                                                                                                                                                                                                                                                                                                                                                                                                                                                                                                                                                                                                                                                                                                                                                                                                                                                                                                                                                                                                                                                                                                                                                                                                                                                                                                                                                                                                                                                                                                                                                                                                                                                                                                                                                                                                                                                                                                                                                                                                                                                                                                                                                                                                                                                                                                                                                                                                                                                                                                                                                                                                                                                                                                                                                                                                                                                                                                 | see above                                                                                       | CHU Purpan - Laboratoire de Virologie - Institut Fédératif de Biologie   | CHU Purpan - Laboratoire de Virologie - Institut Fédératif de Biologie                                                                                                                                                     | Latour J., Ranger N., Dubois M., Carcenac R., Harter A., Boyer P., Tremeaux P., Izopet J.                                                                                     |
| EPI_ISL_848203, EPI_ISL_848204, EPI_ISL_848205, EPI_ISL_848206, EPI_ISL_848207, EPI_ISL_848208, EPI_ISL_848209, EPI_ISL_848210, EPI_ISL_848211, EPI_ISL_848212, EPI_ISL_848213, EPI_ISL_848214, EPI_ISL_848215, EPI_ISL_848216, EPI_ISL_848217, EPI_ISL_848218, EPI_ISL_848219, EPI_ISL_848220, EPI_ISL_848221, EPI_ISL_848222, EPI_ISL_848223, EPI_ISL_848224, EPI_ISL_848225, EPI_ISL_848226, EPI_ISL_848227, EPI_ISL_848228, EPI_ISL_848229, EPI_ISL_848230, EPI_ISL_848231, EPI_ISL_848232, EPI_ISL_848233, EPI_ISL_848234, EPI_ISL_848235, EPI_ISL_848236, EPI_ISL_848237, EPI_ISL_848238, EPI_ISL_848239, EPI_ISL_848240, EPI_ISL_848241, EPI_ISL_848242, EPI_ISL_848243, EPI_ISL_848244, EPI_ISL_848245, EPI_ISL_848246, EPI_ISL_848247, EPI_ISL_848248, EPI_ISL_848249, EPI_ISL_848250, EPI_ISL_848251, EPI_ISL_848252, EPI_ISL_848253, EPI_ISL_848254, EPI_ISL_848255, EPI_ISL_848256, EPI_ISL_848257, EPI_ISL_848258, EPI_ISL_848259, EPI_ISL_848260, EPI_ISL_848261, EPI_ISL_848262, EPI_ISL_848263, EPI_ISL_848264, EPI_ISL_848265, EPI_ISL_848266, EPI_ISL_848267, EPI_ISL_848268, EPI_ISL_848269, EPI_ISL_848270, EPI_ISL_848271, EPI_ISL_848272, EPI_ISL_848273, EPI_ISL_848274, EPI_ISL_848275, EPI_ISL_848276, EPI_ISL_848277, EPI_ISL_848278, EPI_ISL_848279, EPI_ISL_848280, EPI_ISL_848281, EPI_ISL_848282, EPI_ISL_848283, EPI_ISL_848284, EPI_ISL_848285, EPI_ISL_848286, EPI_ISL_848287, EPI_ISL_848288, EPI_ISL_848289, EPI_ISL_848290, EPI_ISL_848291, EPI_ISL_848292, EPI_ISL_848293, EPI_ISL_848294, EPI_ISL_848295, EPI_ISL_848296, EPI_ISL_848297, EPI_ISL_848298, EPI_ISL_848299, EPI_ISL_848300, EPI_ISL_848301, EPI_ISL_848302, EPI_ISL_848303, EPI_ISL_848304, EPI_ISL_848305, EPI_ISL_848306, EPI_ISL_848307, EPI_ISL_848308, EPI_ISL_848309, EPI_ISL_848310, EPI_ISL_848311, EPI_ISL_848312, EPI_ISL_848313, EPI_ISL_848314, EPI_ISL_848315, EPI_ISL_848316, EPI_ISL_848317, EPI_ISL_848318, EPI_ISL_848319, EPI_ISL_848320, EPI_ISL_848321, EPI_ISL_848322, EPI_ISL_848323, EPI_ISL_848324, EPI_ISL_848325, EPI_ISL_848326, EPI_ISL_848327, EPI_ISL_848328, EPI_ISL_848329, EPI_ISL_848330, EPI_ISL_848331, EPI_ISL_848332, EPI_ISL_848333, EPI_ISL_848334, EPI_ISL_848335, EPI_ISL_848336, EPI_ISL_848337, EPI_ISL_848338, EPI_ISL_848339, EPI_ISL_848340, EPI_ISL_848341, EPI_ISL_848342, EPI_ISL_848343, EPI_ISL_848344, EPI_ISL_848345, EPI_ISL_848346, EPI_ISL_848347, EPI_ISL_848348, EPI_ISL_848349, EPI_ISL_848350, EPI_ISL_848351, EPI_ISL_848352, EPI_ISL_848353, EPI_ISL_848354, EPI_ISL_848355, EPI_ISL_848356, EPI_ISL_848357, EPI_ISL_848358, EPI_ISL_848359, EPI_ISL_848360, EPI_ISL_848361, EPI_ISL_848362, EPI_ISL_848363, EPI_ISL_848364, EPI_ISL_848365, EPI_ISL_848366, EPI_ISL_848367, EPI_ISL_848368, EPI_ISL_848369, EPI_ISL_848370, EPI_ISL_848371, EPI_ISL_848372, EPI_ISL_848373, EPI_ISL_848374, EPI_ISL_848375, EPI_ISL_848376, EPI_ISL_848377, EPI_ISL_848378, EPI_ISL_848379, EPI_ISL_848380, EPI_ISL_848381, EPI_ISL_848382, EPI_ISL_848383, EPI_ISL_848384, EPI_ISL_848385, EPI_ISL_848386, EPI_ISL_848387, EPI_ISL_848388, EPI_ISL_848389, EPI_ISL_848390, EPI_ISL_848391, EPI_ISL_848392, EPI_ISL_848393, EPI_ISL_848394, EPI_ISL_848395, EPI_ISL_848396, EPI_ISL_848397, EPI_ISL_848398, EPI_ISL_848399, EPI_ISL_848400, EPI_ISL_848401, EPI_ISL_848402, EPI_ISL_848403, EPI_ISL_848404, EPI_ISL_848405, EPI_ISL_848406, EPI_ISL_848407, EPI_ISL_848408, EPI_ISL_848409, EPI_ISL_848410, EPI_ISL_848411, EPI_ISL_848412, EPI_ISL_848413, EPI_ISL_848414, EPI_ISL_848415, EPI_ISL_848416, EPI_ISL_848417, EPI_ISL_848418, EPI_ISL_848419, EPI_ISL_848420, EPI_ISL_848421, EPI_ISL_848422, EPI_ISL_848423, EPI_ISL_848424, EPI_ISL_848425, EPI_ISL_848426, EPI_ISL_848427, EPI_ISL_848428, EPI_ISL_848429, EPI_ISL_848430, EPI_ISL_848431, EPI_ISL_848432, EPI_ISL_848433, EPI_ISL_848434, EPI_ISL_848435, EPI_ISL_848436, EPI_ISL_848437, EPI_ISL_848438, EPI_ISL_848439, EPI_ISL_848440, EPI_ISL_848441, EPI_ISL_848442, EPI_ISL_848443, EPI_ISL_848444, EPI_ISL_848445, EPI_ISL_848446, EPI_ISL_848447, EPI_ISL_848448, EPI_ISL_848449, EPI_ISL_848450, EPI_ISL_848451, EPI_ISL_848452, EPI_ISL_848453, EPI_ISL_848454, EPI_ISL_848455, EPI_ISL_848456, EPI_ISL_848457, EPI_ISL_848458, EPI_ISL_848459, EPI_ISL_848460, EPI_ISL_848461, EPI_ISL_848462, EPI_ISL_848463, EPI_ISL_848464, EPI_ISL_848465, EPI_ISL_848466, EPI_ISL_848467, EPI_ISL_848468, EPI_ISL_848469, EPI_ISL_848470, EPI_ISL_848471, EPI_ISL_848472, EPI_ISL_848473, EPI_ISL_848474, EPI_ISL_848475, EPI_ISL_848476, EPI_ISL_848477, EPI_ISL_848478, EPI_ISL_848479, EPI_ISL_848480, EPI_ISL_848481, EPI_ISL_848482, EPI_ISL_848483, EPI_ISL_848484, EPI_ISL_848485, EPI_ISL_848486, EPI_ISL_848487, EPI_ISL_848488, EPI_ISL_848489, EPI_ISL_848490, EPI_ISL_848491, EPI_ISL_848492, EPI_ISL_848493, EPI_ISL_848494, EPI_ISL_848495, EPI_ISL_848496, EPI_ISL_848497, EPI_ISL_848498, EPI_ISL_848499, EPI_ISL_848500, EPI_ISL_848501, EPI_ISL_848502, EPI_ISL_848503, EPI_ISL_848504, EPI_ISL_848505, EPI_ISL_848506, EPI_ISL_848507, EPI_ISL_848508, EPI_ISL_848509, EPI_ISL_848510, EPI_ISL_848511, EPI_ISL_848512, EPI_ISL_848513, EPI_ISL_848514, EPI_ISL_848515, EPI_ISL_848516, EPI_ISL_848517, EPI_ISL_848518, EPI_ISL_848519, EPI_ISL_848520, EPI_ISL_848521, EPI_ISL_848522, EPI_ISL_848523, EPI_ISL_848524, EPI_ISL_848525, EPI_ISL_848526, EPI_ISL_848527, EPI_ISL_848528, EPI_ISL_848529, EPI_ISL_848530, EPI_ISL_848531, EPI_ISL_848532, EPI_ISL_848533, EPI_ISL_848534, EPI_ISL_848535, EPI_ISL_848536, EPI_ISL_848537, EPI_ISL_848538, EPI_ISL_848539, EPI_ISL_848540, EPI_ISL_848541, EPI_ISL_848542, EPI_ISL_848543, EPI_ISL_848544, EPI_ISL_848545 | see above                                                                                       | Illinois Department of Public Health                                     | Gagnon Lab, Southern Illinois University                                                                                                                                                                                   | Keith Gagnon                                                                                                                                                                  |
| EPI_ISL_852814, EPI_ISL_852815, EPI_ISL_852816, EPI_ISL_852817, EPI_ISL_852818                                                                                                                                                                                                                                                                                                                                                                                                                                                                                                                                                                                                                                                                                                                                                                                                                                                                                                                                                                                                                                                                                                                                                                                                                                                                                                                                                                                                                                                                                                                                                                                                                                                                                                                                                                                                                                                                                                                                                                                                                                                                                                                                                                                                                                                                                                                                                                                                                                                                                                                                                                                                                                                                                                                                                                                                                                                                                                                                                                                                                                                                                                                                                                                                                                                                                                                                                                                                                                                                                                                                                                                                                                                                                                                                                                                                                                                                                                                                                                                                                                                                                                                                                                                                                                                                                                                                                                                                                                                                                                                                                                                                                                                                                                                                                                                                                                                                                                                                                                                                                                                                                                                                                                                                                                                                                                                                                                                                                                                                                                                                                                                                                                 | CHU Purpan - Laboratoire de Virologie - Institut Fédératif de Biologie                          | CHU Purpan - Laboratoire de Virologie - Institut Fédératif de Biologie   | Latour J., Ranger N., Dubois M., Carcenac R., Harter A., Boyer P., Tremeaux P., Izopet J.                                                                                                                                  |                                                                                                                                                                               |
| EPI_ISL_853648, EPI_ISL_853649                                                                                                                                                                                                                                                                                                                                                                                                                                                                                                                                                                                                                                                                                                                                                                                                                                                                                                                                                                                                                                                                                                                                                                                                                                                                                                                                                                                                                                                                                                                                                                                                                                                                                                                                                                                                                                                                                                                                                                                                                                                                                                                                                                                                                                                                                                                                                                                                                                                                                                                                                                                                                                                                                                                                                                                                                                                                                                                                                                                                                                                                                                                                                                                                                                                                                                                                                                                                                                                                                                                                                                                                                                                                                                                                                                                                                                                                                                                                                                                                                                                                                                                                                                                                                                                                                                                                                                                                                                                                                                                                                                                                                                                                                                                                                                                                                                                                                                                                                                                                                                                                                                                                                                                                                                                                                                                                                                                                                                                                                                                                                                                                                                                                                 | THE MARY IMOGENE BASSETT HOSPITAL                                                               | Wadsworth Center, New York State Department of Health                    | Kirsten St. George, Daryl M. Lamson, Alexis Russel, Matthew Shudt, Melissa A Leisner, Jonathan Plitnick, Navjot Singh, John Kelly, Erasmus Schneider, Erica Lasek-Nesselquist                                              |                                                                                                                                                                               |
| EPI_ISL_853650, EPI_ISL_853651                                                                                                                                                                                                                                                                                                                                                                                                                                                                                                                                                                                                                                                                                                                                                                                                                                                                                                                                                                                                                                                                                                                                                                                                                                                                                                                                                                                                                                                                                                                                                                                                                                                                                                                                                                                                                                                                                                                                                                                                                                                                                                                                                                                                                                                                                                                                                                                                                                                                                                                                                                                                                                                                                                                                                                                                                                                                                                                                                                                                                                                                                                                                                                                                                                                                                                                                                                                                                                                                                                                                                                                                                                                                                                                                                                                                                                                                                                                                                                                                                                                                                                                                                                                                                                                                                                                                                                                                                                                                                                                                                                                                                                                                                                                                                                                                                                                                                                                                                                                                                                                                                                                                                                                                                                                                                                                                                                                                                                                                                                                                                                                                                                                                                 | NORTHWELL HEALTH LABORATORIES                                                                   | Wadsworth Center, New York State Department of Health                    | Kirsten St. George, Daryl M. Lamson, Alexis Russel, Matthew Shudt, Melissa A Leisner, Jonathan Plitnick, Navjot Singh, John Kelly, Erasmus Schneider, Erica Lasek-Nesselquist                                              |                                                                                                                                                                               |
| EPI_ISL_853652                                                                                                                                                                                                                                                                                                                                                                                                                                                                                                                                                                                                                                                                                                                                                                                                                                                                                                                                                                                                                                                                                                                                                                                                                                                                                                                                                                                                                                                                                                                                                                                                                                                                                                                                                                                                                                                                                                                                                                                                                                                                                                                                                                                                                                                                                                                                                                                                                                                                                                                                                                                                                                                                                                                                                                                                                                                                                                                                                                                                                                                                                                                                                                                                                                                                                                                                                                                                                                                                                                                                                                                                                                                                                                                                                                                                                                                                                                                                                                                                                                                                                                                                                                                                                                                                                                                                                                                                                                                                                                                                                                                                                                                                                                                                                                                                                                                                                                                                                                                                                                                                                                                                                                                                                                                                                                                                                                                                                                                                                                                                                                                                                                                                                                 | THE MARY IMOGENE BASSETT HOSPITAL                                                               | Wadsworth Center, New York State Department of Health                    | Kirsten St. George, Daryl M. Lamson, Alexis Russel, Matthew Shudt, Melissa A Leisner, Jonathan Plitnick, Navjot Singh, John Kelly, Erasmus Schneider, Erica Lasek-Nesselquist                                              |                                                                                                                                                                               |
| EPI_ISL_853653, EPI_ISL_853654, EPI_ISL_853655, EPI_ISL_853656, EPI_ISL_853657, EPI_ISL_853658, EPI_ISL_853659, EPI_ISL_853660, EPI_ISL_853661, EPI_ISL_853662, EPI_ISL_853663, EPI_ISL_853664, EPI_ISL_853665, EPI_ISL_853666                                                                                                                                                                                                                                                                                                                                                                                                                                                                                                                                                                                                                                                                                                                                                                                                                                                                                                                                                                                                                                                                                                                                                                                                                                                                                                                                                                                                                                                                                                                                                                                                                                                                                                                                                                                                                                                                                                                                                                                                                                                                                                                                                                                                                                                                                                                                                                                                                                                                                                                                                                                                                                                                                                                                                                                                                                                                                                                                                                                                                                                                                                                                                                                                                                                                                                                                                                                                                                                                                                                                                                                                                                                                                                                                                                                                                                                                                                                                                                                                                                                                                                                                                                                                                                                                                                                                                                                                                                                                                                                                                                                                                                                                                                                                                                                                                                                                                                                                                                                                                                                                                                                                                                                                                                                                                                                                                                                                                                                                                 | see above                                                                                       | NORTHWELL HEALTH LABORATORIES                                            | Wadsworth Center, New York State Department of Health                                                                                                                                                                      | Kirsten St. George, Daryl M. Lamson, Alexis Russel, Matthew Shudt, Melissa A Leisner, Jonathan Plitnick, Navjot Singh, John Kelly, Erasmus Schneider, Erica Lasek-Nesselquist |
| EPI_ISL_853667, EPI_ISL_853668, EPI_ISL_853669                                                                                                                                                                                                                                                                                                                                                                                                                                                                                                                                                                                                                                                                                                                                                                                                                                                                                                                                                                                                                                                                                                                                                                                                                                                                                                                                                                                                                                                                                                                                                                                                                                                                                                                                                                                                                                                                                                                                                                                                                                                                                                                                                                                                                                                                                                                                                                                                                                                                                                                                                                                                                                                                                                                                                                                                                                                                                                                                                                                                                                                                                                                                                                                                                                                                                                                                                                                                                                                                                                                                                                                                                                                                                                                                                                                                                                                                                                                                                                                                                                                                                                                                                                                                                                                                                                                                                                                                                                                                                                                                                                                                                                                                                                                                                                                                                                                                                                                                                                                                                                                                                                                                                                                                                                                                                                                                                                                                                                                                                                                                                                                                                                                                 | THE MARY IMOGENE BASSETT HOSPITAL                                                               | Wadsworth Center, New York State Department of Health                    | Kirsten St. George, Daryl M. Lamson, Alexis Russel, Matthew Shudt, Melissa A Leisner, Jonathan Plitnick, Navjot Singh, John Kelly, Erasmus Schneider, Erica Lasek-Nesselquist                                              |                                                                                                                                                                               |
| EPI_ISL_853670, EPI_ISL_853671, EPI_ISL_853672, EPI_ISL_853673, EPI_ISL_853674, EPI_ISL_853675                                                                                                                                                                                                                                                                                                                                                                                                                                                                                                                                                                                                                                                                                                                                                                                                                                                                                                                                                                                                                                                                                                                                                                                                                                                                                                                                                                                                                                                                                                                                                                                                                                                                                                                                                                                                                                                                                                                                                                                                                                                                                                                                                                                                                                                                                                                                                                                                                                                                                                                                                                                                                                                                                                                                                                                                                                                                                                                                                                                                                                                                                                                                                                                                                                                                                                                                                                                                                                                                                                                                                                                                                                                                                                                                                                                                                                                                                                                                                                                                                                                                                                                                                                                                                                                                                                                                                                                                                                                                                                                                                                                                                                                                                                                                                                                                                                                                                                                                                                                                                                                                                                                                                                                                                                                                                                                                                                                                                                                                                                                                                                                                                 | NORTHWELL HEALTH LABORATORIES                                                                   | Wadsworth Center, New York State Department of Health                    | Kirsten St. George, Daryl M. Lamson, Alexis Russel, Matthew Shudt, Melissa A Leisner, Jonathan Plitnick, Navjot Singh, John Kelly, Erasmus Schneider, Erica Lasek-Nesselquist                                              |                                                                                                                                                                               |





|                                                                                                                                                                                                                                                                                                                                                                                                                                                                                                                                                                                                                                                                                                                                                                                                                                                                                                                                                                                                                                                                                |                                                       |                                                       |                                                                                                                                                                               |                                                                                                                                                                               |
|--------------------------------------------------------------------------------------------------------------------------------------------------------------------------------------------------------------------------------------------------------------------------------------------------------------------------------------------------------------------------------------------------------------------------------------------------------------------------------------------------------------------------------------------------------------------------------------------------------------------------------------------------------------------------------------------------------------------------------------------------------------------------------------------------------------------------------------------------------------------------------------------------------------------------------------------------------------------------------------------------------------------------------------------------------------------------------|-------------------------------------------------------|-------------------------------------------------------|-------------------------------------------------------------------------------------------------------------------------------------------------------------------------------|-------------------------------------------------------------------------------------------------------------------------------------------------------------------------------|
| EPI_ISL_854447, EPI_ISL_854448                                                                                                                                                                                                                                                                                                                                                                                                                                                                                                                                                                                                                                                                                                                                                                                                                                                                                                                                                                                                                                                 | TEMPUS LABS INC                                       | Wadsworth Center, New York State Department of Health | Kirsten St. George, Daryl M. Lamson, Alexis Russel, Matthew Shudt, Melissa A Leisner, Jonathan Plitnick, Navjot Singh, John Kelly, Erasmus Schneider, Erica Lasek-Nesselquist |                                                                                                                                                                               |
| EPI_ISL_854449                                                                                                                                                                                                                                                                                                                                                                                                                                                                                                                                                                                                                                                                                                                                                                                                                                                                                                                                                                                                                                                                 | WESTCHESTER MEDICAL CENTER                            | Wadsworth Center, New York State Department of Health | Kirsten St. George, Daryl M. Lamson, Alexis Russel, Matthew Shudt, Melissa A Leisner, Jonathan Plitnick, Navjot Singh, John Kelly, Erasmus Schneider, Erica Lasek-Nesselquist |                                                                                                                                                                               |
| EPI_ISL_854450                                                                                                                                                                                                                                                                                                                                                                                                                                                                                                                                                                                                                                                                                                                                                                                                                                                                                                                                                                                                                                                                 | MONTEFIORE MEDICAL CENTER LABORATORIES                | Wadsworth Center, New York State Department of Health | Kirsten St. George, Daryl M. Lamson, Alexis Russel, Matthew Shudt, Melissa A Leisner, Jonathan Plitnick, Navjot Singh, John Kelly, Erasmus Schneider, Erica Lasek-Nesselquist |                                                                                                                                                                               |
| EPI_ISL_854451                                                                                                                                                                                                                                                                                                                                                                                                                                                                                                                                                                                                                                                                                                                                                                                                                                                                                                                                                                                                                                                                 | WESTCHESTER MEDICAL CENTER                            | Wadsworth Center, New York State Department of Health | Kirsten St. George, Daryl M. Lamson, Alexis Russel, Matthew Shudt, Melissa A Leisner, Jonathan Plitnick, Navjot Singh, John Kelly, Erasmus Schneider, Erica Lasek-Nesselquist |                                                                                                                                                                               |
| EPI_ISL_854452, EPI_ISL_854453, EPI_ISL_854454, EPI_ISL_854455, EPI_ISL_854456, EPI_ISL_854457, EPI_ISL_854458, EPI_ISL_854459                                                                                                                                                                                                                                                                                                                                                                                                                                                                                                                                                                                                                                                                                                                                                                                                                                                                                                                                                 | MONTEFIORE MEDICAL CENTER LABORATORIES                | Wadsworth Center, New York State Department of Health | Kirsten St. George, Daryl M. Lamson, Alexis Russel, Matthew Shudt, Melissa A Leisner, Jonathan Plitnick, Navjot Singh, John Kelly, Erasmus Schneider, Erica Lasek-Nesselquist |                                                                                                                                                                               |
| EPI_ISL_854977, EPI_ISL_854978, EPI_ISL_854979, EPI_ISL_854980, EPI_ISL_854981, EPI_ISL_854982, EPI_ISL_854983, EPI_ISL_854984, EPI_ISL_854985, EPI_ISL_854986, EPI_ISL_854987, EPI_ISL_854988, EPI_ISL_854989, EPI_ISL_854990, EPI_ISL_854991, EPI_ISL_854992, EPI_ISL_854993, EPI_ISL_854994, EPI_ISL_854995, EPI_ISL_854996, EPI_ISL_854997, EPI_ISL_854998, EPI_ISL_854999, EPI_ISL_855000, EPI_ISL_855001, EPI_ISL_855002, EPI_ISL_855003, EPI_ISL_855004, EPI_ISL_855005, EPI_ISL_855006, EPI_ISL_855007, EPI_ISL_855008, EPI_ISL_855009, EPI_ISL_855010, EPI_ISL_855011, EPI_ISL_855012, EPI_ISL_855013                                                                                                                                                                                                                                                                                                                                                                                                                                                                 | NGS Lab, DNA SOLUTION LTD.                            | NGS Lab, DNA SOLUTION LTD.                            | Khan,M.I., Hasan,K.N., Sufian,A., Hosen,M.B., Khaleque,A., Rahman,M., Chowdhury,M., Haider,H.U., Razu,M.H., Khan,M., Rabbi,M.F.A.                                             |                                                                                                                                                                               |
| EPI_ISL_855902, EPI_ISL_855904, EPI_ISL_855906, EPI_ISL_855910, EPI_ISL_855912, EPI_ISL_855914, EPI_ISL_855916, EPI_ISL_855917, EPI_ISL_855919, EPI_ISL_855921, EPI_ISL_855923, EPI_ISL_855925, EPI_ISL_855927, EPI_ISL_855928, EPI_ISL_855930, EPI_ISL_855932, EPI_ISL_855934                                                                                                                                                                                                                                                                                                                                                                                                                                                                                                                                                                                                                                                                                                                                                                                                 | see above                                             | Lab voor klinische biologie                           | Onderzoeksgroep Virologie                                                                                                                                                     | Laurens Lambrechts, Nick Vereecke, Marthe Pauwels, Bruno Verhasselt, Linos Vandekerckhove, Hans Nauwynck, Sebastiaan Theuns                                                   |
| EPI_ISL_856722, EPI_ISL_856726, EPI_ISL_856727, EPI_ISL_856729, EPI_ISL_856730, EPI_ISL_856731, EPI_ISL_856732, EPI_ISL_856733, EPI_ISL_856735, EPI_ISL_856736, EPI_ISL_856738, EPI_ISL_856741, EPI_ISL_856742, EPI_ISL_856743, EPI_ISL_856745, EPI_ISL_856747, EPI_ISL_856748, EPI_ISL_856749, EPI_ISL_856750, EPI_ISL_856751, EPI_ISL_856753, EPI_ISL_856754                                                                                                                                                                                                                                                                                                                                                                                                                                                                                                                                                                                                                                                                                                                 | see above                                             | Department of Clinical Microbiology                   | GIGA Medical Genomics                                                                                                                                                         | Keith Durkin, Maria Arnesi, Sébastien Bontems, Raphaël Boreux, Bouchra Boujemla, Cécile Meex, Pierrette Melin, Marie-Pierre Hayette, Vincent Bours                            |
| EPI_ISL_857043, EPI_ISL_857044, EPI_ISL_857045, EPI_ISL_857046, EPI_ISL_857047, EPI_ISL_857048, EPI_ISL_857049, EPI_ISL_857050                                                                                                                                                                                                                                                                                                                                                                                                                                                                                                                                                                                                                                                                                                                                                                                                                                                                                                                                                 | Colorado Department of Public Health and Environment  | Colorado Department of Public Health and Environment  | Laura Bankers, Molly C. Hetherington-Rauth, Diana Ir, Shannon Ely, Shannon R. Matzinger, Sarah Elizabeth Totten, Emily A. Travanty                                            |                                                                                                                                                                               |
| EPI_ISL_860117, EPI_ISL_860118, EPI_ISL_860119, EPI_ISL_860120, EPI_ISL_860121, EPI_ISL_860122, EPI_ISL_860123, EPI_ISL_860124, EPI_ISL_860125, EPI_ISL_860126, EPI_ISL_860127, EPI_ISL_860128, EPI_ISL_860129, EPI_ISL_860130, EPI_ISL_860131, EPI_ISL_860132, EPI_ISL_860133, EPI_ISL_860134, EPI_ISL_860135, EPI_ISL_860136, EPI_ISL_860137, EPI_ISL_860138, EPI_ISL_860139, EPI_ISL_860140, EPI_ISL_860141, EPI_ISL_860142, EPI_ISL_860143, EPI_ISL_860144, EPI_ISL_860145, EPI_ISL_860146, EPI_ISL_860147, EPI_ISL_860148, EPI_ISL_860149, EPI_ISL_860150, EPI_ISL_860151, EPI_ISL_860152, EPI_ISL_860153, EPI_ISL_860154, EPI_ISL_860155, EPI_ISL_860156, EPI_ISL_860157, EPI_ISL_860158, EPI_ISL_860159, EPI_ISL_860160, EPI_ISL_860161, EPI_ISL_860162, EPI_ISL_860163, EPI_ISL_860164, EPI_ISL_860165, EPI_ISL_860166, EPI_ISL_860167, EPI_ISL_860168, EPI_ISL_860169, EPI_ISL_860170, EPI_ISL_860171, EPI_ISL_860172, EPI_ISL_860173, EPI_ISL_860174, EPI_ISL_860175, EPI_ISL_860176, EPI_ISL_860177, EPI_ISL_860178, EPI_ISL_860179, EPI_ISL_860180, EPI_ISL_860181 | see above                                             | Keio University School of Medicine                    | Keio University School of Medicine                                                                                                                                            | Kenjiro Kosaki, Yuka Iwasaki, Hirotsugu Ishizu, Haruhiko Siomi, Kodai Abe                                                                                                     |
| EPI_ISL_861106, EPI_ISL_861107, EPI_ISL_861108                                                                                                                                                                                                                                                                                                                                                                                                                                                                                                                                                                                                                                                                                                                                                                                                                                                                                                                                                                                                                                 | KALEIDA CENTER FOR LABORATORY MEDICINE                | Wadsworth Center, New York State Department of Health | Kirsten St. George, Daryl M. Lamson, Alexis Russel, Matthew Shudt, Melissa A Leisner, Jonathan Plitnick, Navjot Singh, John Kelly, Erasmus Schneider, Erica Lasek-Nesselquist |                                                                                                                                                                               |
| EPI_ISL_861109, EPI_ISL_861110, EPI_ISL_861111, EPI_ISL_861112, EPI_ISL_861113, EPI_ISL_861114                                                                                                                                                                                                                                                                                                                                                                                                                                                                                                                                                                                                                                                                                                                                                                                                                                                                                                                                                                                 | New York Presbyterian Hospital                        | Wadsworth Center, New York State Department of Health | Kirsten St. George, Daryl M. Lamson, Alexis Russel, Matthew Shudt, Melissa A Leisner, Jonathan Plitnick, Navjot Singh, John Kelly, Erasmus Schneider, Erica Lasek-Nesselquist |                                                                                                                                                                               |
| EPI_ISL_861115, EPI_ISL_861116, EPI_ISL_861117                                                                                                                                                                                                                                                                                                                                                                                                                                                                                                                                                                                                                                                                                                                                                                                                                                                                                                                                                                                                                                 | Wadsworth Center, New York State Department of Health | Wadsworth Center, New York State Department of Health | Kirsten St. George, Daryl M. Lamson, Alexis Russel, Matthew Shudt, Melissa A Leisner, Jonathan Plitnick, Navjot Singh, John Kelly, Erasmus Schneider, Erica Lasek-Nesselquist |                                                                                                                                                                               |
| EPI_ISL_861118, EPI_ISL_861119, EPI_ISL_861120, EPI_ISL_861121, EPI_ISL_861122, EPI_ISL_861123, EPI_ISL_861124, EPI_ISL_861125, EPI_ISL_861126, EPI_ISL_861127, EPI_ISL_861128, EPI_ISL_861129, EPI_ISL_861130, EPI_ISL_861131, EPI_ISL_861132, EPI_ISL_861133                                                                                                                                                                                                                                                                                                                                                                                                                                                                                                                                                                                                                                                                                                                                                                                                                 | see above                                             | New York Presbyterian Hospital                        | Wadsworth Center, New York State Department of Health                                                                                                                         | Kirsten St. George, Daryl M. Lamson, Alexis Russel, Matthew Shudt, Melissa A Leisner, Jonathan Plitnick, Navjot Singh, John Kelly, Erasmus Schneider, Erica Lasek-Nesselquist |
| EPI_ISL_861134                                                                                                                                                                                                                                                                                                                                                                                                                                                                                                                                                                                                                                                                                                                                                                                                                                                                                                                                                                                                                                                                 | KALEIDA CENTER FOR LABORATORY MEDICINE                | Wadsworth Center, New York State Department of Health | Kirsten St. George, Daryl M. Lamson, Alexis Russel, Matthew Shudt, Melissa A Leisner, Jonathan Plitnick, Navjot Singh, John Kelly, Erasmus Schneider, Erica Lasek-Nesselquist |                                                                                                                                                                               |
| EPI_ISL_861135, EPI_ISL_861136, EPI_ISL_861137, EPI_ISL_861138, EPI_ISL_861139, EPI_ISL_861140, EPI_ISL_861141, EPI_ISL_861142, EPI_ISL_861143                                                                                                                                                                                                                                                                                                                                                                                                                                                                                                                                                                                                                                                                                                                                                                                                                                                                                                                                 | ADIRONDACK MEDICAL CENTER                             | Wadsworth Center, New York State Department of Health | Kirsten St. George, Daryl M. Lamson, Alexis Russel, Matthew Shudt, Melissa A Leisner, Jonathan Plitnick, Navjot Singh, John Kelly, Erasmus Schneider, Erica Lasek-Nesselquist |                                                                                                                                                                               |
| EPI_ISL_861144, EPI_ISL_861145, EPI_ISL_861146, EPI_ISL_861147, EPI_ISL_861148, EPI_ISL_861149, EPI_ISL_861150, EPI_ISL_861151, EPI_ISL_861152, EPI_ISL_861153, EPI_ISL_861154, EPI_ISL_861155, EPI_ISL_861156, EPI_ISL_861157, EPI_ISL_861158, EPI_ISL_861159, EPI_ISL_861160, EPI_ISL_861161, EPI_ISL_861162, EPI_ISL_861163, EPI_ISL_861164, EPI_ISL_861165, EPI_ISL_861166, EPI_ISL_861167, EPI_ISL_861168, EPI_ISL_861169, EPI_ISL_861170, EPI_ISL_861171, EPI_ISL_861172, EPI_ISL_861173, EPI_ISL_861174                                                                                                                                                                                                                                                                                                                                                                                                                                                                                                                                                                 | see above                                             | KALEIDA CENTER FOR LABORATORY MEDICINE                | Wadsworth Center, New York State Department of Health                                                                                                                         | Kirsten St. George, Daryl M. Lamson, Alexis Russel, Matthew Shudt, Melissa A Leisner, Jonathan Plitnick, Navjot Singh, John Kelly, Erasmus Schneider, Erica Lasek-Nesselquist |
| EPI_ISL_861175, EPI_ISL_861176, EPI_ISL_861177, EPI_ISL_861178, EPI_ISL_861179, EPI_ISL_861180, EPI_ISL_861181, EPI_ISL_861182                                                                                                                                                                                                                                                                                                                                                                                                                                                                                                                                                                                                                                                                                                                                                                                                                                                                                                                                                 | BIO-REFERENCE LABORATORIES                            | Wadsworth Center, New York State Department of Health | Kirsten St. George, Daryl M. Lamson, Alexis Russel, Matthew Shudt, Melissa A Leisner, Jonathan Plitnick, Navjot Singh, John Kelly, Erasmus Schneider, Erica Lasek-Nesselquist |                                                                                                                                                                               |
| EPI_ISL_861183, EPI_ISL_861184                                                                                                                                                                                                                                                                                                                                                                                                                                                                                                                                                                                                                                                                                                                                                                                                                                                                                                                                                                                                                                                 | URMC LABS                                             | Wadsworth Center, New York State Department of Health | Kirsten St. George, Daryl M. Lamson, Alexis Russel, Matthew Shudt, Melissa A Leisner, Jonathan Plitnick, Navjot Singh, John Kelly, Erasmus Schneider, Erica Lasek-Nesselquist |                                                                                                                                                                               |
| EPI_ISL_861185                                                                                                                                                                                                                                                                                                                                                                                                                                                                                                                                                                                                                                                                                                                                                                                                                                                                                                                                                                                                                                                                 | BIO-REFERENCE LABORATORIES                            | Wadsworth Center, New York State Department of Health | Kirsten St. George, Daryl M. Lamson, Alexis Russel, Matthew Shudt, Melissa A Leisner, Jonathan Plitnick, Navjot Singh, John Kelly, Erasmus Schneider, Erica Lasek-Nesselquist |                                                                                                                                                                               |
| EPI_ISL_861186                                                                                                                                                                                                                                                                                                                                                                                                                                                                                                                                                                                                                                                                                                                                                                                                                                                                                                                                                                                                                                                                 | NORTH SHORE UNIVERSITY HOSPITAL                       | Wadsworth Center, New York State Department of Health | Kirsten St. George, Daryl M. Lamson, Alexis Russel, Matthew Shudt, Melissa A Leisner, Jonathan Plitnick, Navjot Singh, John Kelly, Erasmus Schneider, Erica Lasek-Nesselquist |                                                                                                                                                                               |
| EPI_ISL_861187                                                                                                                                                                                                                                                                                                                                                                                                                                                                                                                                                                                                                                                                                                                                                                                                                                                                                                                                                                                                                                                                 | BIO-REFERENCE LABORATORIES                            | Wadsworth Center, New York State Department of Health | Kirsten St. George, Daryl M. Lamson, Alexis Russel, Matthew Shudt, Melissa A Leisner, Jonathan Plitnick, Navjot Singh, John Kelly, Erasmus Schneider, Erica Lasek-Nesselquist |                                                                                                                                                                               |
| EPI_ISL_861188, EPI_ISL_861189, EPI_ISL_861190, EPI_ISL_861191, EPI_ISL_861192, EPI_ISL_861193, EPI_ISL_861194, EPI_ISL_861195, EPI_ISL_861196, EPI_ISL_861197, EPI_ISL_861198                                                                                                                                                                                                                                                                                                                                                                                                                                                                                                                                                                                                                                                                                                                                                                                                                                                                                                 | see above                                             | NORTH SHORE UNIVERSITY HOSPITAL                       | Wadsworth Center, New York State Department of Health                                                                                                                         | Kirsten St. George, Daryl M. Lamson, Alexis Russel, Matthew Shudt, Melissa A Leisner, Jonathan Plitnick, Navjot Singh, John Kelly, Erasmus Schneider, Erica Lasek-Nesselquist |
| EPI_ISL_861199, EPI_ISL_861200, EPI_ISL_861201, EPI_ISL_861202, EPI_ISL_861203, EPI_ISL_861204, EPI_ISL_861205, EPI_ISL_861206, EPI_ISL_861207, EPI_ISL_861208, EPI_ISL_861209                                                                                                                                                                                                                                                                                                                                                                                                                                                                                                                                                                                                                                                                                                                                                                                                                                                                                                 | see above                                             | URMC LABS                                             | Wadsworth Center, New York State Department of Health                                                                                                                         | Kirsten St. George, Daryl M. Lamson, Alexis Russel, Matthew Shudt, Melissa A Leisner, Jonathan Plitnick, Navjot Singh, John Kelly, Erasmus Schneider, Erica Lasek-Nesselquist |
| EPI_ISL_861210, EPI_ISL_861211, EPI_ISL_861212, EPI_ISL_861213, EPI_ISL_861214, EPI_ISL_861215, EPI_ISL_861216, EPI_ISL_861217, EPI_ISL_861218, EPI_ISL_861219, EPI_ISL_861220, EPI_ISL_861221, EPI_ISL_861222, EPI_ISL_861223, EPI_ISL_861224, EPI_ISL_861225, EPI_ISL_861226, EPI_ISL_861227,                                                                                                                                                                                                                                                                                                                                                                                                                                                                                                                                                                                                                                                                                                                                                                                |                                                       |                                                       |                                                                                                                                                                               |                                                                                                                                                                               |

|                                                                                                                                                                                                                                                                                                                                                                                                                                                                                                                                                                                                                                                                                                                                                                                                                                                                                                                                                                                                                                                                                                                                                                                                                                                                                                                                                                                                                                                                |           |                                                                        |                                                                        |                                                                                                                                                                                                                                                                                       |
|----------------------------------------------------------------------------------------------------------------------------------------------------------------------------------------------------------------------------------------------------------------------------------------------------------------------------------------------------------------------------------------------------------------------------------------------------------------------------------------------------------------------------------------------------------------------------------------------------------------------------------------------------------------------------------------------------------------------------------------------------------------------------------------------------------------------------------------------------------------------------------------------------------------------------------------------------------------------------------------------------------------------------------------------------------------------------------------------------------------------------------------------------------------------------------------------------------------------------------------------------------------------------------------------------------------------------------------------------------------------------------------------------------------------------------------------------------------|-----------|------------------------------------------------------------------------|------------------------------------------------------------------------|---------------------------------------------------------------------------------------------------------------------------------------------------------------------------------------------------------------------------------------------------------------------------------------|
| EPI_ISL_861228, EPI_ISL_861229, EPI_ISL_861230, EPI_ISL_861231, EPI_ISL_861232                                                                                                                                                                                                                                                                                                                                                                                                                                                                                                                                                                                                                                                                                                                                                                                                                                                                                                                                                                                                                                                                                                                                                                                                                                                                                                                                                                                 | see above | BIO-REFERENCE LABORATORIES                                             | Wadsworth Center, New York State Department of Health                  | Kirsten St. George, Daryl M. Lamson, Alexis Russel, Matthew Shudt, Melissa A Leisner, Jonathan Plitnick, Navjot Singh, John Kelly, Erasmus Schneider, Erica Lasek-Nesselquist                                                                                                         |
| EPI_ISL_861244, EPI_ISL_861245, EPI_ISL_861246, EPI_ISL_861247, EPI_ISL_861248, EPI_ISL_861249, EPI_ISL_861250, EPI_ISL_861251, EPI_ISL_861252, EPI_ISL_861253, EPI_ISL_861254, EPI_ISL_861255, EPI_ISL_861256, EPI_ISL_861257, EPI_ISL_861258, EPI_ISL_861259, EPI_ISL_861260, EPI_ISL_861261, EPI_ISL_861262, EPI_ISL_861263, EPI_ISL_861264, EPI_ISL_861265, EPI_ISL_861266, EPI_ISL_861267, EPI_ISL_861268, EPI_ISL_861269, EPI_ISL_861270, EPI_ISL_861271, EPI_ISL_861272, EPI_ISL_861273, EPI_ISL_861274, EPI_ISL_861275, EPI_ISL_861276, EPI_ISL_861277, EPI_ISL_861278, EPI_ISL_861279, EPI_ISL_861280, EPI_ISL_861281, EPI_ISL_861282, EPI_ISL_861283, EPI_ISL_861284, EPI_ISL_861285, EPI_ISL_861286, EPI_ISL_861287, EPI_ISL_861288, EPI_ISL_861289, EPI_ISL_861290, EPI_ISL_861291, EPI_ISL_861292, EPI_ISL_861293, EPI_ISL_861294, EPI_ISL_861295, EPI_ISL_861296, EPI_ISL_861297, EPI_ISL_861298, EPI_ISL_861299, EPI_ISL_861300, EPI_ISL_861301, EPI_ISL_861302, EPI_ISL_861303, EPI_ISL_861304, EPI_ISL_861305, EPI_ISL_861306, EPI_ISL_861307, EPI_ISL_861308, EPI_ISL_861309, EPI_ISL_861310, EPI_ISL_861311, EPI_ISL_861312, EPI_ISL_861313, EPI_ISL_861314, EPI_ISL_861315, EPI_ISL_861316, EPI_ISL_861317, EPI_ISL_861318, EPI_ISL_861319, EPI_ISL_861320, EPI_ISL_861321, EPI_ISL_861322, EPI_ISL_861323, EPI_ISL_861324, EPI_ISL_861325, EPI_ISL_861326, EPI_ISL_861327, EPI_ISL_861328, EPI_ISL_861329, EPI_ISL_861330, EPI_ISL_861331 | see above | MONTEFIORE MEDICAL CENTER LABORATORIES                                 | Wadsworth Center, New York State Department of Health                  | Kirsten St. George, Daryl M. Lamson, Alexis Russel, Matthew Shudt, Melissa A Leisner, Jonathan Plitnick, Navjot Singh, John Kelly, Erasmus Schneider, Erica Lasek-Nesselquist                                                                                                         |
| EPI_ISL_861333, EPI_ISL_861334, EPI_ISL_861335, EPI_ISL_861336, EPI_ISL_861337, EPI_ISL_861338, EPI_ISL_861339, EPI_ISL_861340, EPI_ISL_861341, EPI_ISL_861342, EPI_ISL_861343, EPI_ISL_861344, EPI_ISL_861345, EPI_ISL_861346, EPI_ISL_861347, EPI_ISL_861348, EPI_ISL_861349, EPI_ISL_861350, EPI_ISL_861351, EPI_ISL_861352, EPI_ISL_861353, EPI_ISL_861354, EPI_ISL_861355, EPI_ISL_861356, EPI_ISL_861357, EPI_ISL_861358, EPI_ISL_861359, EPI_ISL_861360, EPI_ISL_861361, EPI_ISL_861362, EPI_ISL_861363, EPI_ISL_861364, EPI_ISL_861365, EPI_ISL_861366, EPI_ISL_861367, EPI_ISL_861368, EPI_ISL_861369, EPI_ISL_861370, EPI_ISL_861371, EPI_ISL_861372, EPI_ISL_861373, EPI_ISL_861374, EPI_ISL_861375, EPI_ISL_861376, EPI_ISL_861377, EPI_ISL_861378, EPI_ISL_861379, EPI_ISL_861380, EPI_ISL_861381, EPI_ISL_861382, EPI_ISL_861383, EPI_ISL_861384, EPI_ISL_861385, EPI_ISL_861386, EPI_ISL_861387, EPI_ISL_861388, EPI_ISL_861389, EPI_ISL_861390, EPI_ISL_861391, EPI_ISL_861392, EPI_ISL_861393, EPI_ISL_861394, EPI_ISL_861395, EPI_ISL_861396, EPI_ISL_861397, EPI_ISL_861398, EPI_ISL_861399, EPI_ISL_861400, EPI_ISL_861401, EPI_ISL_861402, EPI_ISL_861403, EPI_ISL_861404, EPI_ISL_861405, EPI_ISL_861406, EPI_ISL_861407, EPI_ISL_861408, EPI_ISL_861409, EPI_ISL_861410, EPI_ISL_861411, EPI_ISL_861412                                                                                                                                 | see above | WESTCHESTER MEDICAL CENTER                                             | Wadsworth Center, New York State Department of Health                  | Kirsten St. George, Daryl M. Lamson, Alexis Russel, Matthew Shudt, Melissa A Leisner, Jonathan Plitnick, Navjot Singh, John Kelly, Erasmus Schneider, Erica Lasek-Nesselquist                                                                                                         |
| EPI_ISL_861413, EPI_ISL_861414, EPI_ISL_861415, EPI_ISL_861416, EPI_ISL_861417, EPI_ISL_861418                                                                                                                                                                                                                                                                                                                                                                                                                                                                                                                                                                                                                                                                                                                                                                                                                                                                                                                                                                                                                                                                                                                                                                                                                                                                                                                                                                 |           | NORTH SHORE UNIVERSITY HOSPITAL                                        | Wadsworth Center, New York State Department of Health                  | Kirsten St. George, Daryl M. Lamson, Alexis Russel, Matthew Shudt, Melissa A Leisner, Jonathan Plitnick, Navjot Singh, John Kelly, Erasmus Schneider, Erica Lasek-Nesselquist                                                                                                         |
| EPI_ISL_861459, EPI_ISL_861460, EPI_ISL_861461, EPI_ISL_861462, EPI_ISL_861463, EPI_ISL_861464, EPI_ISL_861465, EPI_ISL_861466, EPI_ISL_861467, EPI_ISL_861468, EPI_ISL_861469, EPI_ISL_861470, EPI_ISL_861471                                                                                                                                                                                                                                                                                                                                                                                                                                                                                                                                                                                                                                                                                                                                                                                                                                                                                                                                                                                                                                                                                                                                                                                                                                                 | see above | UHAS COVID-19 Lab                                                      | UHAS COVID-19 Lab                                                      | Kwabena O. Duedu, Jones Gyamfi, Reuben Ayivor-Djanie, John O. Gyapong and the UHAS COVID-19 Lab Team                                                                                                                                                                                  |
| EPI_ISL_864581, EPI_ISL_864582, EPI_ISL_864583, EPI_ISL_864584, EPI_ISL_864585, EPI_ISL_864586, EPI_ISL_864587, EPI_ISL_864588, EPI_ISL_864589, EPI_ISL_864590, EPI_ISL_864591, EPI_ISL_864592, EPI_ISL_864593                                                                                                                                                                                                                                                                                                                                                                                                                                                                                                                                                                                                                                                                                                                                                                                                                                                                                                                                                                                                                                                                                                                                                                                                                                                 | see above | CHU Purpan - Laboratoire de Virologie - Institut Fédératif de Biologie | CHU Purpan - Laboratoire de Virologie - Institut Fédératif de Biologie | Latour J., Ranger N., Dubois M., Carcenac R., Harter A., Boyer P., Tremeaux P., Izopet J.                                                                                                                                                                                             |
| EPI_ISL_871789, EPI_ISL_871792                                                                                                                                                                                                                                                                                                                                                                                                                                                                                                                                                                                                                                                                                                                                                                                                                                                                                                                                                                                                                                                                                                                                                                                                                                                                                                                                                                                                                                 |           | Cerballiance Normandie                                                 | CERBA LAB                                                              | LAFOREST D, BRIAND G, LEPIGEON, technicien V; COUDRAY J, MARTINS-AMARAL F; COULON C, THOMAS Johan, VITEL R, HAMEL A.                                                                                                                                                                  |
| EPI_ISL_872039, EPI_ISL_872040, EPI_ISL_872041, EPI_ISL_872042, EPI_ISL_872043, EPI_ISL_872044, EPI_ISL_872045, EPI_ISL_872046, EPI_ISL_872047, EPI_ISL_872048, EPI_ISL_872049, EPI_ISL_872050                                                                                                                                                                                                                                                                                                                                                                                                                                                                                                                                                                                                                                                                                                                                                                                                                                                                                                                                                                                                                                                                                                                                                                                                                                                                 | see above | Department of Clinical Microbiology                                    | GIGA Medical Genomics                                                  | Keith Durkin, Maria Artesi, Sébastien Bontems, Raphaël Boreux, Bouchra Boujemla, Cécile Meex, Pierrette Melin, Marie-Pierre Hayette, Vincent Bours                                                                                                                                    |
| EPI_ISL_872051                                                                                                                                                                                                                                                                                                                                                                                                                                                                                                                                                                                                                                                                                                                                                                                                                                                                                                                                                                                                                                                                                                                                                                                                                                                                                                                                                                                                                                                 |           | CHC                                                                    | GIGA Medical Genomics                                                  | Keith Durkin, Maria Artesi, Sébastien Bontems, Raphaël Boreux, Bouchra Boujemla, Cécile Meex, Pierrette Melin, Marie-Pierre Hayette, Vincent Bours                                                                                                                                    |
| EPI_ISL_872052, EPI_ISL_872053, EPI_ISL_872054, EPI_ISL_872056                                                                                                                                                                                                                                                                                                                                                                                                                                                                                                                                                                                                                                                                                                                                                                                                                                                                                                                                                                                                                                                                                                                                                                                                                                                                                                                                                                                                 |           | CHR Citadelle                                                          | GIGA Medical Genomics                                                  | Keith Durkin, Maria Artesi, Sébastien Bontems, Raphaël Boreux, Bouchra Boujemla, Cécile Meex, Pierrette Melin, Marie-Pierre Hayette, Vincent Bours                                                                                                                                    |
| EPI_ISL_872057, EPI_ISL_872058, EPI_ISL_872059, EPI_ISL_872060, EPI_ISL_872061, EPI_ISL_872062                                                                                                                                                                                                                                                                                                                                                                                                                                                                                                                                                                                                                                                                                                                                                                                                                                                                                                                                                                                                                                                                                                                                                                                                                                                                                                                                                                 |           | Department of Clinical Microbiology                                    | GIGA Medical Genomics                                                  | Keith Durkin, Maria Artesi, Sébastien Bontems, Raphaël Boreux, Bouchra Boujemla, Cécile Meex, Pierrette Melin, Marie-Pierre Hayette, Vincent Bours                                                                                                                                    |
| EPI_ISL_872065, EPI_ISL_872066, EPI_ISL_872067                                                                                                                                                                                                                                                                                                                                                                                                                                                                                                                                                                                                                                                                                                                                                                                                                                                                                                                                                                                                                                                                                                                                                                                                                                                                                                                                                                                                                 |           | AZ Vesale (Tongres)                                                    | GIGA Medical Genomics                                                  | Keith Durkin, Maria Artesi, Sébastien Bontems, Raphaël Boreux, Bouchra Boujemla, Cécile Meex, Pierrette Melin, Marie-Pierre Hayette, Vincent Bours                                                                                                                                    |
| EPI_ISL_872069, EPI_ISL_872070, EPI_ISL_872071, EPI_ISL_872072, EPI_ISL_872075, EPI_ISL_872078, EPI_ISL_872079, EPI_ISL_872080, EPI_ISL_872083, EPI_ISL_872084, EPI_ISL_872085, EPI_ISL_872087                                                                                                                                                                                                                                                                                                                                                                                                                                                                                                                                                                                                                                                                                                                                                                                                                                                                                                                                                                                                                                                                                                                                                                                                                                                                 | see above | Department of Clinical Microbiology                                    | GIGA Medical Genomics                                                  | Keith Durkin, Maria Artesi, Sébastien Bontems, Raphaël Boreux, Bouchra Boujemla, Cécile Meex, Pierrette Melin, Marie-Pierre Hayette, Vincent Bours                                                                                                                                    |
| EPI_ISL_872100, EPI_ISL_872101, EPI_ISL_872103                                                                                                                                                                                                                                                                                                                                                                                                                                                                                                                                                                                                                                                                                                                                                                                                                                                                                                                                                                                                                                                                                                                                                                                                                                                                                                                                                                                                                 |           | Chu Tivoli                                                             | GIGA Medical Genomics                                                  | Keith Durkin, Maria Artesi, Sébastien Bontems, Raphaël Boreux, Bouchra Boujemla, Cécile Meex, Pierrette Melin, Marie-Pierre Hayette, Vincent Bours                                                                                                                                    |
| EPI_ISL_872105, EPI_ISL_872107, EPI_ISL_872108, EPI_ISL_872109                                                                                                                                                                                                                                                                                                                                                                                                                                                                                                                                                                                                                                                                                                                                                                                                                                                                                                                                                                                                                                                                                                                                                                                                                                                                                                                                                                                                 |           | Department of Clinical Microbiology                                    | GIGA Medical Genomics                                                  | Keith Durkin, Maria Artesi, Sébastien Bontems, Raphaël Boreux, Bouchra Boujemla, Cécile Meex, Pierrette Melin, Marie-Pierre Hayette, Vincent Bours                                                                                                                                    |
| EPI_ISL_872110                                                                                                                                                                                                                                                                                                                                                                                                                                                                                                                                                                                                                                                                                                                                                                                                                                                                                                                                                                                                                                                                                                                                                                                                                                                                                                                                                                                                                                                 |           | CHC                                                                    | GIGA Medical Genomics                                                  | Keith Durkin, Maria Artesi, Sébastien Bontems, Raphaël Boreux, Bouchra Boujemla, Cécile Meex, Pierrette Melin, Marie-Pierre Hayette, Vincent Bours                                                                                                                                    |
| EPI_ISL_872112, EPI_ISL_872113, EPI_ISL_872114, EPI_ISL_872115, EPI_ISL_872116                                                                                                                                                                                                                                                                                                                                                                                                                                                                                                                                                                                                                                                                                                                                                                                                                                                                                                                                                                                                                                                                                                                                                                                                                                                                                                                                                                                 |           | Department of Clinical Microbiology                                    | GIGA Medical Genomics                                                  | Keith Durkin, Maria Artesi, Sébastien Bontems, Raphaël Boreux, Bouchra Boujemla, Cécile Meex, Pierrette Melin, Marie-Pierre Hayette, Vincent Bours                                                                                                                                    |
| EPI_ISL_872117, EPI_ISL_872118                                                                                                                                                                                                                                                                                                                                                                                                                                                                                                                                                                                                                                                                                                                                                                                                                                                                                                                                                                                                                                                                                                                                                                                                                                                                                                                                                                                                                                 |           | CHR Citadelle                                                          | GIGA Medical Genomics                                                  | Keith Durkin, Maria Artesi, Sébastien Bontems, Raphaël Boreux, Bouchra Boujemla, Cécile Meex, Pierrette Melin, Marie-Pierre Hayette, Vincent Bours                                                                                                                                    |
| EPI_ISL_872122                                                                                                                                                                                                                                                                                                                                                                                                                                                                                                                                                                                                                                                                                                                                                                                                                                                                                                                                                                                                                                                                                                                                                                                                                                                                                                                                                                                                                                                 |           | Department of Clinical Microbiology                                    | GIGA Medical Genomics                                                  | Keith Durkin, Maria Artesi, Sébastien Bontems, Raphaël Boreux, Bouchra Boujemla, Cécile Meex, Pierrette Melin, Marie-Pierre Hayette, Vincent Bours                                                                                                                                    |
| EPI_ISL_872123, EPI_ISL_872124                                                                                                                                                                                                                                                                                                                                                                                                                                                                                                                                                                                                                                                                                                                                                                                                                                                                                                                                                                                                                                                                                                                                                                                                                                                                                                                                                                                                                                 |           | CHR Citadelle                                                          | GIGA Medical Genomics                                                  | Keith Durkin, Maria Artesi, Sébastien Bontems, Raphaël Boreux, Bouchra Boujemla, Cécile Meex, Pierrette Melin, Marie-Pierre Hayette, Vincent Bours                                                                                                                                    |
| EPI_ISL_872127, EPI_ISL_872129, EPI_ISL_872131, EPI_ISL_872132, EPI_ISL_872133                                                                                                                                                                                                                                                                                                                                                                                                                                                                                                                                                                                                                                                                                                                                                                                                                                                                                                                                                                                                                                                                                                                                                                                                                                                                                                                                                                                 |           | Department of Clinical Microbiology                                    | GIGA Medical Genomics                                                  | Keith Durkin, Maria Artesi, Sébastien Bontems, Raphaël Boreux, Bouchra Boujemla, Cécile Meex, Pierrette Melin, Marie-Pierre Hayette, Vincent Bours                                                                                                                                    |
| EPI_ISL_872134                                                                                                                                                                                                                                                                                                                                                                                                                                                                                                                                                                                                                                                                                                                                                                                                                                                                                                                                                                                                                                                                                                                                                                                                                                                                                                                                                                                                                                                 |           | CHR Citadelle                                                          | GIGA Medical Genomics                                                  | Keith Durkin, Maria Artesi, Sébastien Bontems, Raphaël Boreux, Bouchra Boujemla, Cécile Meex, Pierrette Melin, Marie-Pierre Hayette, Vincent Bours                                                                                                                                    |
| EPI_ISL_872136, EPI_ISL_872137, EPI_ISL_872138, EPI_ISL_872139, EPI_ISL_872141, EPI_ISL_872142, EPI_ISL_872144, EPI_ISL_872145                                                                                                                                                                                                                                                                                                                                                                                                                                                                                                                                                                                                                                                                                                                                                                                                                                                                                                                                                                                                                                                                                                                                                                                                                                                                                                                                 |           | Department of Clinical Microbiology                                    | GIGA Medical Genomics                                                  | Keith Durkin, Maria Artesi, Sébastien Bontems, Raphaël Boreux, Bouchra Boujemla, Cécile Meex, Pierrette Melin, Marie-Pierre Hayette, Vincent Bours                                                                                                                                    |
| EPI_ISL_872146, EPI_ISL_872147                                                                                                                                                                                                                                                                                                                                                                                                                                                                                                                                                                                                                                                                                                                                                                                                                                                                                                                                                                                                                                                                                                                                                                                                                                                                                                                                                                                                                                 |           | CHC                                                                    | GIGA Medical Genomics                                                  | Keith Durkin, Maria Artesi, Sébastien Bontems, Raphaël Boreux, Bouchra Boujemla, Cécile Meex, Pierrette Melin, Marie-Pierre Hayette, Vincent Bours                                                                                                                                    |
| EPI_ISL_872150, EPI_ISL_872152                                                                                                                                                                                                                                                                                                                                                                                                                                                                                                                                                                                                                                                                                                                                                                                                                                                                                                                                                                                                                                                                                                                                                                                                                                                                                                                                                                                                                                 |           | CHR Citadelle                                                          | GIGA Medical Genomics                                                  | Keith Durkin, Maria Artesi, Sébastien Bontems, Raphaël Boreux, Bouchra Boujemla, Cécile Meex, Pierrette Melin, Marie-Pierre Hayette, Vincent Bours                                                                                                                                    |
| EPI_ISL_872153, EPI_ISL_872154, EPI_ISL_872155                                                                                                                                                                                                                                                                                                                                                                                                                                                                                                                                                                                                                                                                                                                                                                                                                                                                                                                                                                                                                                                                                                                                                                                                                                                                                                                                                                                                                 |           | Department of Clinical Microbiology                                    | GIGA Medical Genomics                                                  | Keith Durkin, Maria Artesi, Sébastien Bontems, Raphaël Boreux, Bouchra Boujemla, Cécile Meex, Pierrette Melin, Marie-Pierre Hayette, Vincent Bours                                                                                                                                    |
| EPI_ISL_872644, EPI_ISL_872645, EPI_ISL_872646, EPI_ISL_872647, EPI_ISL_872648, EPI_ISL_872649, EPI_ISL_872650, EPI_ISL_872651, EPI_ISL_872652, EPI_ISL_872653, EPI_ISL_872654, EPI_ISL_872655, EPI_ISL_872656, EPI_ISL_872657, EPI_ISL_872658, EPI_ISL_872659, EPI_ISL_872660, EPI_ISL_872661, EPI_ISL_872662, EPI_ISL_872663, EPI_ISL_872664, EPI_ISL_872665, EPI_ISL_872666, EPI_ISL_872667, EPI_ISL_872668, EPI_ISL_872669, EPI_ISL_872670, EPI_ISL_872671, EPI_ISL_872672, EPI_ISL_872673, EPI_ISL_872674, EPI_ISL_872675, EPI_ISL_872676, EPI_ISL_872677, EPI_ISL_872678, EPI_ISL_872679                                                                                                                                                                                                                                                                                                                                                                                                                                                                                                                                                                                                                                                                                                                                                                                                                                                                 | see above | University of Massachusetts Medical School                             | Infectious Disease Program, Broad Institute of Harvard and MIT         | Lemieux,J.E., Siddle,K.J., Ward,D., Ellison,R., Adams,G., Gladden-Young,A., Lagerborg,K., Rudy,M., DeRuff,K., Carter,A., Normandin,E., Bauer,M., Reilly,S., Tomkins-Tinch,C., Loreth,C., Chaluvadi,S., Birren,B.W., Gallagher,G., Smole,S., Park,D.J., MacInnis,B.L., and Sabeti,P.C. |
| EPI_ISL_872680, EPI_ISL_872681, EPI_ISL_872682, EPI_ISL_872683, EPI_ISL_872684, EPI_ISL_872685, EPI_ISL_872686, EPI_ISL_872687, EPI_ISL_872688, EPI_ISL_872689, EPI_ISL_872690, EPI_ISL_872691, EPI_ISL_872692, EPI_ISL_872693, EPI_ISL_872694, EPI_ISL_872695, EPI_ISL_872696, EPI_ISL_872697, EPI_ISL_872698, EPI_ISL_872699, EPI_ISL_872700, EPI_ISL_872701, EPI_ISL_872702, EPI_ISL_872703, EPI_ISL_872704, EPI_ISL_872705, EPI_ISL_872706, EPI_ISL_872707, EPI_ISL_872708, EPI_ISL_872709, EPI_ISL_872710, EPI_ISL_872711, EPI_ISL_872712, EPI_ISL_872713, EPI_ISL_872714, EPI_ISL_872715, EPI_ISL_872716, EPI_ISL_872717, EPI_ISL_872718, EPI_ISL_872719, EPI_ISL_872720, EPI_ISL_872721, EPI_ISL_872722, EPI_ISL_872723, EPI_ISL_872724, EPI_ISL_872725, EPI_ISL_872726, EPI_ISL_872727, EPI_ISL_872728, EPI_ISL_872729, EPI_ISL_872730, EPI_ISL_872731, EPI_ISL_872732, EPI_ISL_872733, EPI_ISL_872734, EPI_ISL_872735, EPI_ISL_872736, EPI_ISL_872737, EPI_ISL_872738, EPI_ISL_872739, EPI_ISL_872740, EPI_ISL_872741, EPI_ISL_872742, EPI_ISL_872743, EPI_ISL_872744                                                                                                                                                                                                                                                                                                                                                                                 | see above | Rhode Island Department of Health                                      | Infectious Disease Program, Broad Institute of Harvard and             | Lemieux,J.E., Siddle,K.J., Huard,R., King,E., Azevedo,K., Miller,A., Adams,G., Gladden-Young,A., Lagerborg,K., Rudy,M., DeRuff,K., Carter,A.,                                                                                                                                         |

|                                                                                                                                                                                                                                                                                                                                                                                                                                                                                                                                                |                                                                                                                                          |                                                                                                                                                              |
|------------------------------------------------------------------------------------------------------------------------------------------------------------------------------------------------------------------------------------------------------------------------------------------------------------------------------------------------------------------------------------------------------------------------------------------------------------------------------------------------------------------------------------------------|------------------------------------------------------------------------------------------------------------------------------------------|--------------------------------------------------------------------------------------------------------------------------------------------------------------|
|                                                                                                                                                                                                                                                                                                                                                                                                                                                                                                                                                | MIT                                                                                                                                      | Normandin,E., Bauer,M., Reilly,S., Tomkins-Tinch,C., Loreth,C., Chaluvadi,S., Birren,B.W., Gallagher,G., Smole,S., Park,D.J., MacInnis,B.L., and Sabeti,P.C. |
| EPI_ISL_872745, EPI_ISL_872746, EPI_ISL_872747, EPI_ISL_872748, EPI_ISL_872749, EPI_ISL_872750, EPI_ISL_872751, EPI_ISL_872752, EPI_ISL_872753, EPI_ISL_872754, EPI_ISL_872755, EPI_ISL_872756, EPI_ISL_872757, EPI_ISL_872758, EPI_ISL_872759, EPI_ISL_872760, EPI_ISL_872761, EPI_ISL_872762, EPI_ISL_872763, EPI_ISL_872764, EPI_ISL_872765, EPI_ISL_872766, EPI_ISL_872767, EPI_ISL_872768, EPI_ISL_872769, EPI_ISL_872770, EPI_ISL_872771, EPI_ISL_872772, EPI_ISL_872773, EPI_ISL_872774, EPI_ISL_872775, EPI_ISL_872776, EPI_ISL_872777 |                                                                                                                                          |                                                                                                                                                              |
| see above                                                                                                                                                                                                                                                                                                                                                                                                                                                                                                                                      | Colorado Mesa University                                                                                                                 | Infectious Disease Program, Broad Institute of Harvard and MIT                                                                                               |
| EPI_ISL_875516, EPI_ISL_875520, EPI_ISL_875523, EPI_ISL_875525, EPI_ISL_875528, EPI_ISL_875529, EPI_ISL_875534, EPI_ISL_875537, EPI_ISL_875539                                                                                                                                                                                                                                                                                                                                                                                                 | Institute of Virology, Biomedical Research Center of the Slovak Academy of Sciences, Bratislava                                          | Faculty of Natural Sciences, Comenius University, Bratislava                                                                                                 |
| EPI_ISL_875540, EPI_ISL_875541, EPI_ISL_875542, EPI_ISL_875543, EPI_ISL_875544, EPI_ISL_875545, EPI_ISL_875546, EPI_ISL_875547, EPI_ISL_875548, EPI_ISL_875549, EPI_ISL_875550                                                                                                                                                                                                                                                                                                                                                                 |                                                                                                                                          |                                                                                                                                                              |
| see above                                                                                                                                                                                                                                                                                                                                                                                                                                                                                                                                      | Instituto de Biotecnologia - UNESP-Botucatu-SP                                                                                           | Instituto de Biotecnologia - UNESP-Botucatu-SP                                                                                                               |
| EPI_ISL_875666, EPI_ISL_875667, EPI_ISL_875668, EPI_ISL_875669, EPI_ISL_875670, EPI_ISL_875671, EPI_ISL_875672, EPI_ISL_875673                                                                                                                                                                                                                                                                                                                                                                                                                 | CHU Purpan - Laboratoire de Virologie - Institut Fédératif de Biologie                                                                   | CHU Purpan - Laboratoire de Virologie - Institut Fédératif de Biologie                                                                                       |
| EPI_ISL_877227                                                                                                                                                                                                                                                                                                                                                                                                                                                                                                                                 | Thai Red Cross Emerging Infectious Diseases Health Science Centre, Chulalongkorn Hospital, Faculty of Medicine, Chulalongkorn University | Thai Red Cross Emerging Infectious Diseases Center and Faculty of Medicine, Chulalongkorn University                                                         |
| EPI_ISL_877419                                                                                                                                                                                                                                                                                                                                                                                                                                                                                                                                 | Siti Khodijah Hospital                                                                                                                   | Institute of Tropical Disease, Universitas Airlangga                                                                                                         |
| EPI_ISL_877456                                                                                                                                                                                                                                                                                                                                                                                                                                                                                                                                 | Primasatya Husada Citra Hospital                                                                                                         | Institute of Tropical Disease, Universitas Airlangga                                                                                                         |
| EPI_ISL_877538                                                                                                                                                                                                                                                                                                                                                                                                                                                                                                                                 | Siti Khodijah Hospital                                                                                                                   | Institute of Tropical Disease, Universitas Airlangga                                                                                                         |
| EPI_ISL_883156                                                                                                                                                                                                                                                                                                                                                                                                                                                                                                                                 | UK Tübingen, Medical Microbiology                                                                                                        | Hannover Medical School, Institute of Virology                                                                                                               |
| EPI_ISL_883157, EPI_ISL_883158, EPI_ISL_883159, EPI_ISL_883160, EPI_ISL_883161, EPI_ISL_883162, EPI_ISL_883163, EPI_ISL_883164, EPI_ISL_883165, EPI_ISL_883166, EPI_ISL_883167, EPI_ISL_883168, EPI_ISL_883169, EPI_ISL_883170, EPI_ISL_883171, EPI_ISL_883172, EPI_ISL_883173, EPI_ISL_883174, EPI_ISL_883175                                                                                                                                                                                                                                 |                                                                                                                                          |                                                                                                                                                              |
| see above                                                                                                                                                                                                                                                                                                                                                                                                                                                                                                                                      | Hannover Medical School, Institute of Virology                                                                                           | Hannover Medical School, Institute of Virology                                                                                                               |
| EPI_ISL_883176, EPI_ISL_883177, EPI_ISL_883178, EPI_ISL_883179, EPI_ISL_883180, EPI_ISL_883181, EPI_ISL_883182, EPI_ISL_883183, EPI_ISL_883184, EPI_ISL_883185, EPI_ISL_883186, EPI_ISL_883187, EPI_ISL_883188, EPI_ISL_883189, EPI_ISL_883190, EPI_ISL_883191, EPI_ISL_883192                                                                                                                                                                                                                                                                 |                                                                                                                                          |                                                                                                                                                              |
| see above                                                                                                                                                                                                                                                                                                                                                                                                                                                                                                                                      | UK Tübingen, Medical Microbiology                                                                                                        | Hannover Medical School, Institute of Virology                                                                                                               |
| EPI_ISL_883425                                                                                                                                                                                                                                                                                                                                                                                                                                                                                                                                 | BOSTON HEART DIAGNOSTICS CORP                                                                                                            | Wadsworth Center, New York State Department of Health                                                                                                        |
| EPI_ISL_883426, EPI_ISL_883427, EPI_ISL_883428                                                                                                                                                                                                                                                                                                                                                                                                                                                                                                 | NORTHWELL HEALTH LABORATORIES                                                                                                            | Wadsworth Center, New York State Department of Health                                                                                                        |
| EPI_ISL_883429, EPI_ISL_883430                                                                                                                                                                                                                                                                                                                                                                                                                                                                                                                 | BOSTON HEART DIAGNOSTICS CORP                                                                                                            | Wadsworth Center, New York State Department of Health                                                                                                        |
| EPI_ISL_883431, EPI_ISL_883432, EPI_ISL_883433, EPI_ISL_883434, EPI_ISL_883435                                                                                                                                                                                                                                                                                                                                                                                                                                                                 | NORTHWELL HEALTH LABORATORIES                                                                                                            | Wadsworth Center, New York State Department of Health                                                                                                        |
| EPI_ISL_883436, EPI_ISL_883437, EPI_ISL_883438, EPI_ISL_883439, EPI_ISL_883440, EPI_ISL_883441, EPI_ISL_883442, EPI_ISL_883443, EPI_ISL_883444                                                                                                                                                                                                                                                                                                                                                                                                 | ADIRONDACK MEDICAL CENTER                                                                                                                | Wadsworth Center, New York State Department of Health                                                                                                        |
| EPI_ISL_883445, EPI_ISL_883446, EPI_ISL_883447, EPI_ISL_883448, EPI_ISL_883449, EPI_ISL_883450, EPI_ISL_883451, EPI_ISL_883452, EPI_ISL_883453, EPI_ISL_883454, EPI_ISL_883455, EPI_ISL_883456, EPI_ISL_883457, EPI_ISL_883458, EPI_ISL_883459, EPI_ISL_883460, EPI_ISL_883461, EPI_ISL_883462, EPI_ISL_883463, EPI_ISL_883464, EPI_ISL_883465, EPI_ISL_883466, EPI_ISL_883467, EPI_ISL_883468, EPI_ISL_883469, EPI_ISL_883470, EPI_ISL_883471, EPI_ISL_883472                                                                                 |                                                                                                                                          |                                                                                                                                                              |
| see above                                                                                                                                                                                                                                                                                                                                                                                                                                                                                                                                      | NORTHWELL HEALTH LABORATORIES                                                                                                            | Wadsworth Center, New York State Department of Health                                                                                                        |
| EPI_ISL_883473                                                                                                                                                                                                                                                                                                                                                                                                                                                                                                                                 | ADIRONDACK MEDICAL CENTER                                                                                                                | Wadsworth Center, New York State Department of Health                                                                                                        |
| EPI_ISL_883474, EPI_ISL_883475, EPI_ISL_883476, EPI_ISL_883477, EPI_ISL_883478, EPI_ISL_883479, EPI_ISL_883480, EPI_ISL_883481, EPI_ISL_883482, EPI_ISL_883483, EPI_ISL_883484, EPI_ISL_883485, EPI_ISL_883486, EPI_ISL_883487, EPI_ISL_883488, EPI_ISL_883489, EPI_ISL_883490, EPI_ISL_883491, EPI_ISL_883492, EPI_ISL_883493, EPI_ISL_883494, EPI_ISL_883495, EPI_ISL_883496, EPI_ISL_883497, EPI_ISL_883498                                                                                                                                 |                                                                                                                                          |                                                                                                                                                              |
| see above                                                                                                                                                                                                                                                                                                                                                                                                                                                                                                                                      | NORTHWELL HEALTH LABORATORIES                                                                                                            | Wadsworth Center, New York State Department of Health                                                                                                        |
| EPI_ISL_884008, EPI_ISL_884009, EPI_ISL_884010, EPI_ISL_884011, EPI_ISL_884012                                                                                                                                                                                                                                                                                                                                                                                                                                                                 | ALBANY MEDICAL CENTER HOSPITAL CLINICAL LABORATORIES                                                                                     | Wadsworth Center, New York State Department of Health                                                                                                        |
| EPI_ISL_884013, EPI_ISL_884014, EPI_ISL_884015, EPI_ISL_884016                                                                                                                                                                                                                                                                                                                                                                                                                                                                                 | Wadsworth Center, New York State Department of Health                                                                                    | Wadsworth Center, New York State Department of Health                                                                                                        |
| EPI_ISL_884017, EPI_ISL_884018, EPI_ISL_884019, EPI_ISL_884020, EPI_ISL_884021, EPI_ISL_884022, EPI_ISL_884023, EPI_ISL_884024, EPI_ISL_884025, EPI_ISL_884026, EPI_ISL_884027, EPI_ISL_884028, EPI_ISL_884029, EPI_ISL_884030, EPI_ISL_884031                                                                                                                                                                                                                                                                                                 |                                                                                                                                          |                                                                                                                                                              |
| see above                                                                                                                                                                                                                                                                                                                                                                                                                                                                                                                                      | ALBANY MEDICAL CENTER HOSPITAL CLINICAL LABORATORIES                                                                                     | Wadsworth Center, New York State Department of Health                                                                                                        |
| EPI_ISL_884032, EPI_ISL_884033, EPI_ISL_884034, EPI_ISL_884035, EPI_ISL_884036, EPI_ISL_884037, EPI_ISL_884038, EPI_ISL_884039, EPI_ISL_884040, EPI_ISL_884041                                                                                                                                                                                                                                                                                                                                                                                 | Wadsworth Center, New York State Department of Health                                                                                    | Wadsworth Center, New York State Department of Health                                                                                                        |
| EPI_ISL_884042, EPI_ISL_884043, EPI_ISL_884044, EPI_ISL_884045, EPI_ISL_884046                                                                                                                                                                                                                                                                                                                                                                                                                                                                 | ALBANY MEDICAL CENTER HOSPITAL CLINICAL LABORATORIES                                                                                     | Wadsworth Center, New York State Department of Health                                                                                                        |

|                                                                                                                                                                                                                                                                                                                                                |                                                       |                                                                |                                                                                                                                                                                                                                                                                                                                                                                                                                                                    |
|------------------------------------------------------------------------------------------------------------------------------------------------------------------------------------------------------------------------------------------------------------------------------------------------------------------------------------------------|-------------------------------------------------------|----------------------------------------------------------------|--------------------------------------------------------------------------------------------------------------------------------------------------------------------------------------------------------------------------------------------------------------------------------------------------------------------------------------------------------------------------------------------------------------------------------------------------------------------|
| EPI_ISL_884047                                                                                                                                                                                                                                                                                                                                 | Wadsworth Center, New York State Department of Health | Wadsworth Center, New York State Department of Health          | Kirsten St. George, Daryl M. Lamson, Alexis Russel, Matthew Shudt, Melissa A Leisner, Jonathan Plitnick, Navjot Singh, John Kelly, Erasmus Schneider, Erica Lasek-Nesselquist                                                                                                                                                                                                                                                                                      |
| EPI_ISL_884048, EPI_ISL_884049, EPI_ISL_884050, EPI_ISL_884051, EPI_ISL_884052, EPI_ISL_884053                                                                                                                                                                                                                                                 | ALBANY MEDICAL CENTER HOSPITAL CLINICAL LABORATORIES  | Wadsworth Center, New York State Department of Health          | Kirsten St. George, Daryl M. Lamson, Alexis Russel, Matthew Shudt, Melissa A Leisner, Jonathan Plitnick, Navjot Singh, John Kelly, Erasmus Schneider, Erica Lasek-Nesselquist                                                                                                                                                                                                                                                                                      |
| EPI_ISL_884054                                                                                                                                                                                                                                                                                                                                 | TEMPUS LABS INC                                       | Wadsworth Center, New York State Department of Health          | Kirsten St. George, Daryl M. Lamson, Alexis Russel, Matthew Shudt, Melissa A Leisner, Jonathan Plitnick, Navjot Singh, John Kelly, Erasmus Schneider, Erica Lasek-Nesselquist                                                                                                                                                                                                                                                                                      |
| EPI_ISL_884055, EPI_ISL_884056, EPI_ISL_884057, EPI_ISL_884058                                                                                                                                                                                                                                                                                 | Wadsworth Center, New York State Department of Health | Wadsworth Center, New York State Department of Health          | Kirsten St. George, Daryl M. Lamson, Alexis Russel, Matthew Shudt, Melissa A Leisner, Jonathan Plitnick, Navjot Singh, John Kelly, Erasmus Schneider, Erica Lasek-Nesselquist                                                                                                                                                                                                                                                                                      |
| EPI_ISL_884059, EPI_ISL_884060, EPI_ISL_884061, EPI_ISL_884062, EPI_ISL_884063, EPI_ISL_884064, EPI_ISL_884065, EPI_ISL_884066, EPI_ISL_884067, EPI_ISL_884068, EPI_ISL_884069, EPI_ISL_884070, EPI_ISL_884071, EPI_ISL_884072, EPI_ISL_884073, EPI_ISL_884074, EPI_ISL_884075, EPI_ISL_884076, EPI_ISL_884077, EPI_ISL_884078, EPI_ISL_884079 | ALBANY MEDICAL CENTER HOSPITAL CLINICAL LABORATORIES  | Wadsworth Center, New York State Department of Health          | Kirsten St. George, Daryl M. Lamson, Alexis Russel, Matthew Shudt, Melissa A Leisner, Jonathan Plitnick, Navjot Singh, John Kelly, Erasmus Schneider, Erica Lasek-Nesselquist                                                                                                                                                                                                                                                                                      |
| see above                                                                                                                                                                                                                                                                                                                                      | ALBANY MEDICAL CENTER HOSPITAL CLINICAL LABORATORIES  | Wadsworth Center, New York State Department of Health          | Kirsten St. George, Daryl M. Lamson, Alexis Russel, Matthew Shudt, Melissa A Leisner, Jonathan Plitnick, Navjot Singh, John Kelly, Erasmus Schneider, Erica Lasek-Nesselquist                                                                                                                                                                                                                                                                                      |
| EPI_ISL_884080                                                                                                                                                                                                                                                                                                                                 | Wadsworth Center, New York State Department of Health | Wadsworth Center, New York State Department of Health          | Kirsten St. George, Daryl M. Lamson, Alexis Russel, Matthew Shudt, Melissa A Leisner, Jonathan Plitnick, Navjot Singh, John Kelly, Erasmus Schneider, Erica Lasek-Nesselquist                                                                                                                                                                                                                                                                                      |
| EPI_ISL_884081, EPI_ISL_884082, EPI_ISL_884083, EPI_ISL_884084, EPI_ISL_884085                                                                                                                                                                                                                                                                 | ALBANY MEDICAL CENTER HOSPITAL CLINICAL LABORATORIES  | Wadsworth Center, New York State Department of Health          | Kirsten St. George, Daryl M. Lamson, Alexis Russel, Matthew Shudt, Melissa A Leisner, Jonathan Plitnick, Navjot Singh, John Kelly, Erasmus Schneider, Erica Lasek-Nesselquist                                                                                                                                                                                                                                                                                      |
| EPI_ISL_884086                                                                                                                                                                                                                                                                                                                                 | Wadsworth Center, New York State Department of Health | Wadsworth Center, New York State Department of Health          | Kirsten St. George, Daryl M. Lamson, Alexis Russel, Matthew Shudt, Melissa A Leisner, Jonathan Plitnick, Navjot Singh, John Kelly, Erasmus Schneider, Erica Lasek-Nesselquist                                                                                                                                                                                                                                                                                      |
| EPI_ISL_887145, EPI_ISL_887146, EPI_ISL_887147, EPI_ISL_887148, EPI_ISL_887149, EPI_ISL_887150, EPI_ISL_887151, EPI_ISL_887152, EPI_ISL_887153, EPI_ISL_887154, EPI_ISL_887155, EPI_ISL_887156, EPI_ISL_887157, EPI_ISL_887158, EPI_ISL_887159, EPI_ISL_887160, EPI_ISL_887161, EPI_ISL_887162, EPI_ISL_887163, EPI_ISL_887164, EPI_ISL_887165 | Massachusetts General Hospital                        | Infectious Disease Program, Broad Institute of Harvard and MIT | Lemieux,J.E., Siddle,K.J., Shaw,B., Adams,G., Pierce,V., Turbett,S., Anahtar,M., Branda,J., Slater,D., Harris,J., Lin,A.E., Gladden-Young,A., Lagerborg,K., Rudy,M., DeRuff,K., Carter,A., Normandin,E., Bauer,M., Reilly,S., Tomkins-Tinch,C., Loreth,C., Chaluvadi,S., Neumann,A., Cusick,C., Chapman,S.B., Gnirke,A., Flowers,K., Cerrato,F., Birren,B.W., Gallagher,G., Smole,S., Park,D.J., MacInnis,B.L., Ryan,E., LaRocque,R., Rosenberg,E. and Sabeti,P.C. |
| EPI_ISL_888591                                                                                                                                                                                                                                                                                                                                 | Siti Khodijah Hospital                                | Institute of Tropical Disease, Universitas Airlangga           | Krisnoadi Rahardjo, Aldise M Nastro, Jezzy R Dewantari, Rima R Prasetya, Muhammad Hamdan, Gatot Soegiarto, Laksmi Wulandari, Resti Yudhawati, Yasuko Mori, Soetijpto, Kazufumi Shimizu, Maria I Lusida                                                                                                                                                                                                                                                             |
| EPI_ISL_888671, EPI_ISL_888672                                                                                                                                                                                                                                                                                                                 | Instituto de Biotecnologia - UNESP-Botucatu-SP        | Instituto de Biotecnologia - UNESP-Botucatu-SP                 | Leila Sabrina Ullmann; Fábio Sossai Possebon, Camila Dantas Malossi, Paula Rahal, Paulo Inacio da Costa, João Pessoa Araújo Jr.                                                                                                                                                                                                                                                                                                                                    |

We gratefully acknowledge the following Authors from the Originating laboratories responsible for obtaining the specimens, as well as the Submitting laboratories where the genome data were generated and shared via GISAID, on which this research is based.

All Submitters of data may be contacted directly via [www.gisaid.org](http://www.gisaid.org)

Authors are sorted alphabetically.

| Accession ID                                                                   | Originating Laboratory                                                                                  | Submitting Laboratory                                                                                                | Authors                                                                                                                                                                                                                                                                                                                                 |
|--------------------------------------------------------------------------------|---------------------------------------------------------------------------------------------------------|----------------------------------------------------------------------------------------------------------------------|-----------------------------------------------------------------------------------------------------------------------------------------------------------------------------------------------------------------------------------------------------------------------------------------------------------------------------------------|
| EPI_ISL_402123, EPI_ISL_403928, EPI_ISL_403929, EPI_ISL_403930, EPI_ISL_403931 | Institute of Pathogen Biology, Chinese Academy of Medical Sciences & Peking Union Medical College       | Institute of Pathogen Biology, Chinese Academy of Medical Sciences & Peking Union Medical College                    | Lili Ren, Jianwei Wang, Qi Jin, Zichun Xiang, Zhiqiang Wu, Chao Wu, Yiwei Liu                                                                                                                                                                                                                                                           |
| EPI_ISL_411950                                                                 | NHC Key laboratory of Enteric Pathogenic Microbiology, Institute of Pathogenic Microbiology             | Jiangsu Provincial Center for Disease Control & Prevention                                                           | Lunbiao Cui, Kangchen Zhao, Xiaojuan Zhu, Yiyue Ge, Tao Wu, Bin Wu, Yin Chen, Fengcai Zhu, Baoli Zhu, Ming Wu                                                                                                                                                                                                                           |
| EPI_ISL_411957                                                                 | Key Laboratory of Human Diseases, Comparative Medicine, Institute of Laboratory Animal Science          | Key Laboratory of Human Diseases, Comparative Medicine, Institute of Laboratory Animal Science                       | Linlin B., Lili R., Shuran G., Jiangning L., Feifei Q., Qi L., Fengdi L., Jing X., Wei D., Pin Y., Yanfeng X., Yajin Q., Hong G., Qiang W., Mingya L., Guanpeng W., Shunyi W., Zhiqi S., Li G., Lan C., Conghui W., Ying W., Xinming W., Yan X., Qi J. and Chuan Q.                                                                     |
| EPI_ISL_413518, EPI_ISL_413519, EPI_ISL_413520, EPI_ISL_413521                 | Infectious Disease Control Center, Center for Disease Control and Prevention of PLA                     | Infectious Disease Control Center, Center for Disease Control and Prevention of PLA                                  | Li J., Li L., Li Z., Qiu S., Song H., Li P. and Li P.                                                                                                                                                                                                                                                                                   |
| EPI_ISL_416432                                                                 | Clinical Microbiology Lab                                                                               | Infectious Disease Research Department, King Abdullah International Medical Research Center (KAIMRC)                 | Majed Algoribi, Sadeem Alhayli, Abdulrahman Alswaji, Liliane Okdah, Sameera Al Johani, Michel Doumith                                                                                                                                                                                                                                   |
| EPI_ISL_417211, EPI_ISL_417212                                                 | Dunedin Hospital                                                                                        | University of Otago                                                                                                  | M.E. Quiñones-Mateu, B. Lawley, J. Grant, R. Harfoot, J. Ussher                                                                                                                                                                                                                                                                         |
| EPI_ISL_417397                                                                 | Centre for Infectious Diseases and Microbiology Public Health                                           | NSW Health Pathology - Institute of Clinical Pathology and Medical Research; Westmead Hospital; University of Sydney | Maddocks S, Kok J, Dwyer DE, Rockett R, Eden J-S, Lam C, Gray K, Timms V, Gall M, Arnott A, Sadsad R, Carter I, Rahman H, Holmes EC, O'Sullivan MV, Sintchenko V and Chen SC for the 2019-nCoV Study Group                                                                                                                              |
| EPI_ISL_417418                                                                 | Laboratory of Molecular Virology International Center for Genetic Engineering and Biotechnology (ICGEB) | ARGO Open Lab Platform for Genome sequencing                                                                         | Licastro D, Rajasekharan S, Dal Monego S, Segat L, D'Agaro P, Marcello A                                                                                                                                                                                                                                                                |
| EPI_ISL_417419                                                                 | Laboratory of Molecular Virology International Center for Genetic Engineering and Biotechnology (ICGEB) | ARGO Open Lab Platform for Genome sequencing                                                                         | Licastro D, Rajasekharan S, Dal Monego S, Segat L, D'Agaro P, Marcello A                                                                                                                                                                                                                                                                |
| EPI_ISL_417420                                                                 | Jiangxi province Center for Disease Control and Prevention                                              | Jiangxi province Center for Disease Control and Prevention                                                           | Li jian Xiong                                                                                                                                                                                                                                                                                                                           |
| EPI_ISL_417421                                                                 | Laboratory of Molecular Virology International Center for Genetic Engineering and Biotechnology (ICGEB) | ARGO Open Lab Platform for Genome sequencing                                                                         | Licastro D, Rajasekharan S, Dal Monego S, Segat L, D'Agaro P, Marcello A                                                                                                                                                                                                                                                                |
| EPI_ISL_417423                                                                 | Laboratory of Molecular Virology International Center for Genetic Engineering and Biotechnology (ICGEB) | ARGO Open Lab Platform for Genome sequencing                                                                         | Licastro D, Rajasekharan, Dal Monego S, Segat L, D'Agaro P, Marcello A                                                                                                                                                                                                                                                                  |
| EPI_ISL_418255                                                                 | Presidio Ospedaliero "S. Spirito" - PESCARA                                                             | Istituto Zooprofilattico Sperimentale dell'Abruzzo e Molise "G. Caporale"                                            | Lorusso A, Marcacci M, Cammà C, Monaco F, Puglia I, Di Pasquale A, Rinaldi A, Mangone I, Savini G                                                                                                                                                                                                                                       |
| EPI_ISL_418256                                                                 | Ospedale "San Liberatore" di Atri                                                                       | Istituto Zooprofilattico Sperimentale dell'Abruzzo e Molise "G. Caporale"                                            | Lorusso A, Marcacci M, Di Domenico M, Puglia I, Curini V, Ancora M, Di Pasquale A, Rinaldi A, Mangone I, Cammà C, Savini G.                                                                                                                                                                                                             |
| EPI_ISL_418257                                                                 | Ospedale Civile Giuseppe Mazzini, Teramo                                                                | Istituto Zooprofilattico Sperimentale dell'Abruzzo e Molise "G. Caporale"                                            | Lorusso A, Marcacci M, Di Domenico M, Puglia I, Curini V, Ancora M, Di Pasquale A, Rinaldi A, Mangone I, Cammà C, Savini G.                                                                                                                                                                                                             |
| EPI_ISL_418258, EPI_ISL_418259                                                 | Presidio ospedaliero "Santo Spirito"                                                                    | Istituto Zooprofilattico Sperimentale dell'Abruzzo e Molise "G. Caporale"                                            | Lorusso A, Marcacci M, Di Domenico M, Puglia I, Curini V, Ancora M, Di Pasquale A, Rinaldi A, Mangone I, Cammà C, Savini G.                                                                                                                                                                                                             |
| EPI_ISL_418260, EPI_ISL_418261                                                 | Ospedale Civile Giuseppe Mazzini                                                                        | Istituto Zooprofilattico Sperimentale dell'Abruzzo e Molise "G. Caporale"                                            | Lorusso A, Marcacci M, Di Domenico M, Puglia I, Curini V, Ancora M, Di Pasquale A, Rinaldi A, Mangone I, Cammà C, Savini G.                                                                                                                                                                                                             |
| EPI_ISL_420112                                                                 | Servicio de Microbiología. Consorcio Hospital General Universitario de Valencia                         | Sequencing and Bioinformatics Service and Molecular Epidemiology Research Group. FISABIO-Public Health               | Lidia Ruiz Roldan, Marta Pla Diaz, Neris Garcia-Gonzalez, Loreto Ferrús Abad, Inma Galán Vendrell, Paula Ruiz-Hueso, Mariana Reyes-Prieto, Vicente Soriano Chirona, María Alma Bracho, Griselda De Marco, Beatriz Beamud, María Dolores Ocete, Lúcia Martínez-Priego, Concepcion Gimeno, Giuseppe D'Auria, Fernando Gonzalez-Candelas   |
| EPI_ISL_420117                                                                 | Servicio de Microbiología. Consorcio Hospital General Universitario de Valencia                         | Sequencing and Bioinformatics Service and Molecular Epidemiology Research Group. FISABIO-Public Health               | Loreto Ferrús Abad, Inma Galán Vendrell, Paula Ruiz-Hueso, Mariana Reyes-Prieto, Vicente Soriano Chirona, María Alma Bracho, Griselda De Marco, Beatriz Beamud, Lidia Ruiz Roldan, Marta Pla Diaz, Neris Garcia-Gonzalez, María Dolores Ocete, Lúcia Martínez-Priego, Concepcion Gimeno, Giuseppe D'Auria, Fernando Gonzalez-Candelas   |
| EPI_ISL_420126                                                                 | Servicio de Microbiología. Hospital Clínico Universitario de Valencia                                   | Sequencing and Bioinformatics Service and Molecular Epidemiology Research Group. FISABIO-Public Health               | Lúcia Martínez-Priego, María Alma Bracho, Griselda De Marco, Beatriz Beamud, Lidia Ruiz Roldan, Marta Pla Diaz, Neris Garcia-Gonzalez, Loreto Ferrús Abad, Inma Galán Vendrell, Paula Ruiz-Hueso, Mariana Reyes-Prieto, Vicente Soriano Chirona, David Navarro, Giuseppe D'Auria, Fernando Gonzalez-Candelas                            |
| EPI_ISL_420563                                                                 | Ospedale Civile Giuseppe Mazzini                                                                        | Istituto Zooprofilattico Sperimentale dell'Abruzzo e Molise "G. Caporale"                                            | Lorusso A, Marcacci M, Di Domenico M, Ancora M, Curini V, Mangone I, Rinaldi A, Di Pasquale A, Cammà C, Puglia I, Savini G                                                                                                                                                                                                              |
| EPI_ISL_420564                                                                 | Ospedale Civile Castel Di Sangro                                                                        | Istituto Zooprofilattico Sperimentale dell'Abruzzo e Molise "G. Caporale"                                            | Lorusso A, Marcacci M, Di Domenico M, Ancora M, Curini V, Mangone I, Rinaldi A, Di Pasquale A, Cammà C, Puglia I, Savini G                                                                                                                                                                                                              |
| EPI_ISL_420565                                                                 | Ospedale Civile Giuseppe Mazzini                                                                        | Istituto Zooprofilattico Sperimentale dell'Abruzzo e Molise "G. Caporale"                                            | Lorusso A, Marcacci M, Di Domenico M, Ancora M, Curini V, Mangone I, Rinaldi A, Di Pasquale A, Cammà C, Puglia I, Savini G                                                                                                                                                                                                              |
| EPI_ISL_420566, EPI_ISL_420567                                                 | Ospedale Regionale San Salvatore                                                                        | Istituto Zooprofilattico Sperimentale dell'Abruzzo e Molise "G. Caporale"                                            | Lorusso A, Marcacci M, Di Domenico M, Ancora M, Curini V, Mangone I, Rinaldi A, Di Pasquale A, Cammà C, Puglia I, Savini G                                                                                                                                                                                                              |
| EPI_ISL_420568, EPI_ISL_420569, EPI_ISL_420583, EPI_ISL_420592                 | Ospedale Civile Giuseppe Mazzini                                                                        | Istituto Zooprofilattico Sperimentale dell'Abruzzo e Molise "G. Caporale"                                            | Lorusso A, Marcacci M, Di Domenico M, Ancora M, Curini V, Mangone I, Rinaldi A, Di Pasquale A, Cammà C, Puglia I, Savini G                                                                                                                                                                                                              |
| EPI_ISL_421516                                                                 | Servicio de Microbiología. Hospital Clínico Universitario de Valencia                                   | Sequencing and Bioinformatics Service and Molecular Epidemiology Research Group. FISABIO-Public Health               | Loreto Ferrús Abad, María Alma Bracho, Griselda De Marco, Beatriz Beamud, Lidia Ruiz Roldan, Marta Pla Diaz, Neris Garcia-Gonzalez, Inma Galán Vendrell, Paula Ruiz-Hueso, Mariana Reyes-Prieto, Vicente Soriano Chirona, David Navarro, Lúcia Martínez-Priego, Giuseppe D'Auria, Fernando Gonzalez-Candelas                            |
| EPI_ISL_421520                                                                 | Servicio de Microbiología. Hospital Clínico Universitario de Valencia                                   | Sequencing and Bioinformatics Service and Molecular Epidemiology Research Group. FISABIO-Public Health               | Loreto Ferrús Abad, María Alma Bracho, Griselda De Marco, Sandra Carbo, Beatriz Beamud, Lidia Ruiz Roldan, Marta Pla Diaz, Neris Garcia-Gonzalez, Inma Galán Vendrell, Paula Ruiz-Hueso, Mariana Reyes-Prieto, Vicente Soriano Chirona, Ivan Ansari, David Navarro, Lúcia Martínez-Priego, Giuseppe D'Auria, Fernando Gonzalez-Candelas |
| EPI_ISL_422432                                                                 | National Public Health Laboratory, National Centre for Infectious Diseases                              | National Public Health Laboratory, National Centre for Infectious Diseases                                           | Mak TM, Octavia S, Cui L, Lin RTP                                                                                                                                                                                                                                                                                                       |
| EPI_ISL_425182                                                                 | Servicio de Microbiología. Consorcio Hospital General                                                   | Sequencing and Bioinformatics Service and Molecular                                                                  | Lidia Ruiz Roldan, Marta Pla Diaz, Neris Garcia-Gonzalez, Inma Galán Vendrell, Sandra Carbo, Loreto Ferrús Abad, Paula Ruiz-Hueso, Mariana                                                                                                                                                                                              |

|                                                                                                                                                                                                                                                                                                                                                                                                                                                                                                                                                                                                                                                                                                                                                                                                                                                                                                                                                                                                                                                                                                                                                                                                                                                                                                                                                                                                                                                                                                                                                                                                                                                                                                                                                                                                                                                                                                                                                                                                                                                                                                                                                                                                                                                                                                                                                                                                                                                                                                                                                                                                                                                                                                                                                                                                                                                                                                                                                                                                                                                                                                                                                                                                                                                                                                                                                                                                                                                                                                                                                                                                                                                                                                                                                                                                                                                                                                                                                                                                                                                                                                                                                                                                                                                                                                                                                                                                                                                                                                                                                                                                                                                                                                                                                                                                                                                                                                                                                                                                                                                                                                                                                                                                                                                                                                                                                                                                                                                                                                                                                                                                                                                                                                                                                                                                                                                                                                                                                                                                                                                                                                                                                                                                                                                                                                                                                                                                                                                                                                                                                                                                                                                                                                                                                                                                                                                                                                                                                                                                                                                                                                                                                                                                                                                                                                 |                                                                                                                                          |                                                                                                                                                                      |                                                                                                                                                                                                                                                                                                                                                                                                 |
|-------------------------------------------------------------------------------------------------------------------------------------------------------------------------------------------------------------------------------------------------------------------------------------------------------------------------------------------------------------------------------------------------------------------------------------------------------------------------------------------------------------------------------------------------------------------------------------------------------------------------------------------------------------------------------------------------------------------------------------------------------------------------------------------------------------------------------------------------------------------------------------------------------------------------------------------------------------------------------------------------------------------------------------------------------------------------------------------------------------------------------------------------------------------------------------------------------------------------------------------------------------------------------------------------------------------------------------------------------------------------------------------------------------------------------------------------------------------------------------------------------------------------------------------------------------------------------------------------------------------------------------------------------------------------------------------------------------------------------------------------------------------------------------------------------------------------------------------------------------------------------------------------------------------------------------------------------------------------------------------------------------------------------------------------------------------------------------------------------------------------------------------------------------------------------------------------------------------------------------------------------------------------------------------------------------------------------------------------------------------------------------------------------------------------------------------------------------------------------------------------------------------------------------------------------------------------------------------------------------------------------------------------------------------------------------------------------------------------------------------------------------------------------------------------------------------------------------------------------------------------------------------------------------------------------------------------------------------------------------------------------------------------------------------------------------------------------------------------------------------------------------------------------------------------------------------------------------------------------------------------------------------------------------------------------------------------------------------------------------------------------------------------------------------------------------------------------------------------------------------------------------------------------------------------------------------------------------------------------------------------------------------------------------------------------------------------------------------------------------------------------------------------------------------------------------------------------------------------------------------------------------------------------------------------------------------------------------------------------------------------------------------------------------------------------------------------------------------------------------------------------------------------------------------------------------------------------------------------------------------------------------------------------------------------------------------------------------------------------------------------------------------------------------------------------------------------------------------------------------------------------------------------------------------------------------------------------------------------------------------------------------------------------------------------------------------------------------------------------------------------------------------------------------------------------------------------------------------------------------------------------------------------------------------------------------------------------------------------------------------------------------------------------------------------------------------------------------------------------------------------------------------------------------------------------------------------------------------------------------------------------------------------------------------------------------------------------------------------------------------------------------------------------------------------------------------------------------------------------------------------------------------------------------------------------------------------------------------------------------------------------------------------------------------------------------------------------------------------------------------------------------------------------------------------------------------------------------------------------------------------------------------------------------------------------------------------------------------------------------------------------------------------------------------------------------------------------------------------------------------------------------------------------------------------------------------------------------------------------------------------------------------------------------------------------------------------------------------------------------------------------------------------------------------------------------------------------------------------------------------------------------------------------------------------------------------------------------------------------------------------------------------------------------------------------------------------------------------------------------------------------------------------------------------------------------------------------------------------------------------------------------------------------------------------------------------------------------------------------------------------------------------------------------------------------------------------------------------------------------------------------------------------------------------------------------------------------------------------------------------------------------------------------------------------|------------------------------------------------------------------------------------------------------------------------------------------|----------------------------------------------------------------------------------------------------------------------------------------------------------------------|-------------------------------------------------------------------------------------------------------------------------------------------------------------------------------------------------------------------------------------------------------------------------------------------------------------------------------------------------------------------------------------------------|
|                                                                                                                                                                                                                                                                                                                                                                                                                                                                                                                                                                                                                                                                                                                                                                                                                                                                                                                                                                                                                                                                                                                                                                                                                                                                                                                                                                                                                                                                                                                                                                                                                                                                                                                                                                                                                                                                                                                                                                                                                                                                                                                                                                                                                                                                                                                                                                                                                                                                                                                                                                                                                                                                                                                                                                                                                                                                                                                                                                                                                                                                                                                                                                                                                                                                                                                                                                                                                                                                                                                                                                                                                                                                                                                                                                                                                                                                                                                                                                                                                                                                                                                                                                                                                                                                                                                                                                                                                                                                                                                                                                                                                                                                                                                                                                                                                                                                                                                                                                                                                                                                                                                                                                                                                                                                                                                                                                                                                                                                                                                                                                                                                                                                                                                                                                                                                                                                                                                                                                                                                                                                                                                                                                                                                                                                                                                                                                                                                                                                                                                                                                                                                                                                                                                                                                                                                                                                                                                                                                                                                                                                                                                                                                                                                                                                                                 | Universitario de Valencia                                                                                                                | Epidemiology Research Group. FISABIO-Public Health                                                                                                                   | Reyes-Prieto, Vicente Soriano Chirona, Ivan Ansari, David Navarro, Maria Alma Bracho, Griselda De Marco, Beatriz Beamud, Lúcia Martínez-Priego, Giuseppe D'Auria, Fernando Gonzalez-Candelas                                                                                                                                                                                                    |
| EPI_ISL_425187                                                                                                                                                                                                                                                                                                                                                                                                                                                                                                                                                                                                                                                                                                                                                                                                                                                                                                                                                                                                                                                                                                                                                                                                                                                                                                                                                                                                                                                                                                                                                                                                                                                                                                                                                                                                                                                                                                                                                                                                                                                                                                                                                                                                                                                                                                                                                                                                                                                                                                                                                                                                                                                                                                                                                                                                                                                                                                                                                                                                                                                                                                                                                                                                                                                                                                                                                                                                                                                                                                                                                                                                                                                                                                                                                                                                                                                                                                                                                                                                                                                                                                                                                                                                                                                                                                                                                                                                                                                                                                                                                                                                                                                                                                                                                                                                                                                                                                                                                                                                                                                                                                                                                                                                                                                                                                                                                                                                                                                                                                                                                                                                                                                                                                                                                                                                                                                                                                                                                                                                                                                                                                                                                                                                                                                                                                                                                                                                                                                                                                                                                                                                                                                                                                                                                                                                                                                                                                                                                                                                                                                                                                                                                                                                                                                                                  | Servicio de Microbiología. Consorcio Hospital General Universitario de Valencia                                                          | Sequencing and Bioinformatics Service and Molecular Epidemiology Research Group. FISABIO-Public Health                                                               | Loreto Ferrús Abad, Paula Ruiz-Hueso, Mariana Reyes-Prieto, Vicente Soriano Chirona, Ivan Ansari, David Navarro, Maria Alma Bracho, Griselda De Marco, Beatriz Beamud, Lidia Ruiz Roldan, Marta Pla Diaz, Neris Garcia-Gonzalez, Inma Galán Vendrell, Sandra Carbo, Lúcia Martínez-Priego, Giuseppe D'Auria, Fernando Gonzalez-Candelas                                                         |
| EPI_ISL_425196                                                                                                                                                                                                                                                                                                                                                                                                                                                                                                                                                                                                                                                                                                                                                                                                                                                                                                                                                                                                                                                                                                                                                                                                                                                                                                                                                                                                                                                                                                                                                                                                                                                                                                                                                                                                                                                                                                                                                                                                                                                                                                                                                                                                                                                                                                                                                                                                                                                                                                                                                                                                                                                                                                                                                                                                                                                                                                                                                                                                                                                                                                                                                                                                                                                                                                                                                                                                                                                                                                                                                                                                                                                                                                                                                                                                                                                                                                                                                                                                                                                                                                                                                                                                                                                                                                                                                                                                                                                                                                                                                                                                                                                                                                                                                                                                                                                                                                                                                                                                                                                                                                                                                                                                                                                                                                                                                                                                                                                                                                                                                                                                                                                                                                                                                                                                                                                                                                                                                                                                                                                                                                                                                                                                                                                                                                                                                                                                                                                                                                                                                                                                                                                                                                                                                                                                                                                                                                                                                                                                                                                                                                                                                                                                                                                                                  | Servicio de Microbiología. Consorcio Hospital General Universitario de Valencia                                                          | Sequencing and Bioinformatics Service and Molecular Epidemiology Research Group. FISABIO-Public Health                                                               | Lidia Ruiz Roldan, Marta Pla Diaz, Neris Garcia-Gonzalez, Inma Galán Vendrell, Sandra Carbo, Loreto Ferrús Abad, Paula Ruiz-Hueso, Mariana Reyes-Prieto, Vicente Soriano Chirona, Ivan Ansari, David Navarro, Maria Alma Bracho, Griselda De Marco, Beatriz Beamud, Lúcia Martínez-Priego, Giuseppe D'Auria, Fernando Gonzalez-Candelas                                                         |
| EPI_ISL_425207                                                                                                                                                                                                                                                                                                                                                                                                                                                                                                                                                                                                                                                                                                                                                                                                                                                                                                                                                                                                                                                                                                                                                                                                                                                                                                                                                                                                                                                                                                                                                                                                                                                                                                                                                                                                                                                                                                                                                                                                                                                                                                                                                                                                                                                                                                                                                                                                                                                                                                                                                                                                                                                                                                                                                                                                                                                                                                                                                                                                                                                                                                                                                                                                                                                                                                                                                                                                                                                                                                                                                                                                                                                                                                                                                                                                                                                                                                                                                                                                                                                                                                                                                                                                                                                                                                                                                                                                                                                                                                                                                                                                                                                                                                                                                                                                                                                                                                                                                                                                                                                                                                                                                                                                                                                                                                                                                                                                                                                                                                                                                                                                                                                                                                                                                                                                                                                                                                                                                                                                                                                                                                                                                                                                                                                                                                                                                                                                                                                                                                                                                                                                                                                                                                                                                                                                                                                                                                                                                                                                                                                                                                                                                                                                                                                                                  | Servicio de Microbiología. Hospital Clínico Universitario de Valencia                                                                    | Sequencing and Bioinformatics Service and Molecular Epidemiology Research Group. FISABIO-Public Health                                                               | Lidia Ruiz Roldan, Marta Pla Diaz, Neris Garcia-Gonzalez, Loreto Ferrús Abad, Maria Dolores Ocete, Inma Galán Vendrell, Paula Ruiz-Hueso, Mariana Reyes-Prieto, Vicente Soriano Chirona, Maria Alma Bracho, Griselda De Marco, Beatriz Beamud, Lidia Ruiz Roldan, Marta Pla Diaz, Neris Garcia-Gonzalez, Lúcia Martínez-Priego, Concepcion Gimeno, Giuseppe D'Auria, Fernando Gonzalez-Candelas |
| EPI_ISL_425210                                                                                                                                                                                                                                                                                                                                                                                                                                                                                                                                                                                                                                                                                                                                                                                                                                                                                                                                                                                                                                                                                                                                                                                                                                                                                                                                                                                                                                                                                                                                                                                                                                                                                                                                                                                                                                                                                                                                                                                                                                                                                                                                                                                                                                                                                                                                                                                                                                                                                                                                                                                                                                                                                                                                                                                                                                                                                                                                                                                                                                                                                                                                                                                                                                                                                                                                                                                                                                                                                                                                                                                                                                                                                                                                                                                                                                                                                                                                                                                                                                                                                                                                                                                                                                                                                                                                                                                                                                                                                                                                                                                                                                                                                                                                                                                                                                                                                                                                                                                                                                                                                                                                                                                                                                                                                                                                                                                                                                                                                                                                                                                                                                                                                                                                                                                                                                                                                                                                                                                                                                                                                                                                                                                                                                                                                                                                                                                                                                                                                                                                                                                                                                                                                                                                                                                                                                                                                                                                                                                                                                                                                                                                                                                                                                                                                  | Servicio de Microbiología. Hospital Clínico Universitario de Valencia                                                                    | Sequencing and Bioinformatics Service and Molecular Epidemiology Research Group. FISABIO-Public Health                                                               | Loreto Ferrús Abad, Maria Dolores Ocete, Inma Galán Vendrell, Paula Ruiz-Hueso, Mariana Reyes-Prieto, Vicente Soriano Chirona, Maria Alma Bracho, Griselda De Marco, Beatriz Beamud, Lidia Ruiz Roldan, Marta Pla Diaz, Neris Garcia-Gonzalez, Lúcia Martínez-Priego, Concepcion Gimeno, Giuseppe D'Auria, Fernando Gonzalez-Candelas                                                           |
| EPI_ISL_425211                                                                                                                                                                                                                                                                                                                                                                                                                                                                                                                                                                                                                                                                                                                                                                                                                                                                                                                                                                                                                                                                                                                                                                                                                                                                                                                                                                                                                                                                                                                                                                                                                                                                                                                                                                                                                                                                                                                                                                                                                                                                                                                                                                                                                                                                                                                                                                                                                                                                                                                                                                                                                                                                                                                                                                                                                                                                                                                                                                                                                                                                                                                                                                                                                                                                                                                                                                                                                                                                                                                                                                                                                                                                                                                                                                                                                                                                                                                                                                                                                                                                                                                                                                                                                                                                                                                                                                                                                                                                                                                                                                                                                                                                                                                                                                                                                                                                                                                                                                                                                                                                                                                                                                                                                                                                                                                                                                                                                                                                                                                                                                                                                                                                                                                                                                                                                                                                                                                                                                                                                                                                                                                                                                                                                                                                                                                                                                                                                                                                                                                                                                                                                                                                                                                                                                                                                                                                                                                                                                                                                                                                                                                                                                                                                                                                                  | Servicio de Microbiología. Hospital Clínico Universitario de Valencia                                                                    | Sequencing and Bioinformatics Service and Molecular Epidemiology Research Group. FISABIO-Public Health                                                               | Loreto Ferrús Abad, Maria Dolores Ocete, Inma Galán Vendrell, Paula Ruiz-Hueso, Mariana Reyes-Prieto, Vicente Soriano Chirona, Maria Alma Bracho, Griselda De Marco, Beatriz Beamud, Lidia Ruiz Roldan, Marta Pla Diaz, Neris Garcia-Gonzalez, Lúcia Martínez-Priego, Concepcion Gimeno, Giuseppe D'Auria, Fernando Gonzalez-Candelas                                                           |
| EPI_ISL_425216                                                                                                                                                                                                                                                                                                                                                                                                                                                                                                                                                                                                                                                                                                                                                                                                                                                                                                                                                                                                                                                                                                                                                                                                                                                                                                                                                                                                                                                                                                                                                                                                                                                                                                                                                                                                                                                                                                                                                                                                                                                                                                                                                                                                                                                                                                                                                                                                                                                                                                                                                                                                                                                                                                                                                                                                                                                                                                                                                                                                                                                                                                                                                                                                                                                                                                                                                                                                                                                                                                                                                                                                                                                                                                                                                                                                                                                                                                                                                                                                                                                                                                                                                                                                                                                                                                                                                                                                                                                                                                                                                                                                                                                                                                                                                                                                                                                                                                                                                                                                                                                                                                                                                                                                                                                                                                                                                                                                                                                                                                                                                                                                                                                                                                                                                                                                                                                                                                                                                                                                                                                                                                                                                                                                                                                                                                                                                                                                                                                                                                                                                                                                                                                                                                                                                                                                                                                                                                                                                                                                                                                                                                                                                                                                                                                                                  | Servicio de Microbiología. Consorcio Hospital General Universitario de Valencia                                                          | Sequencing and Bioinformatics Service and Molecular Epidemiology Research Group. FISABIO-Public Health                                                               | Lidia Ruiz Roldan, Marta Pla Diaz, Neris Garcia-Gonzalez, Inma Galán Vendrell, Sandra Carbo, Loreto Ferrús Abad, Paula Ruiz-Hueso, Mariana Reyes-Prieto, Vicente Soriano Chirona, Ivan Ansari, David Navarro, Maria Alma Bracho, Griselda De Marco, Beatriz Beamud, Lúcia Martínez-Priego, Giuseppe D'Auria, Fernando Gonzalez-Candelas                                                         |
| EPI_ISL_425222                                                                                                                                                                                                                                                                                                                                                                                                                                                                                                                                                                                                                                                                                                                                                                                                                                                                                                                                                                                                                                                                                                                                                                                                                                                                                                                                                                                                                                                                                                                                                                                                                                                                                                                                                                                                                                                                                                                                                                                                                                                                                                                                                                                                                                                                                                                                                                                                                                                                                                                                                                                                                                                                                                                                                                                                                                                                                                                                                                                                                                                                                                                                                                                                                                                                                                                                                                                                                                                                                                                                                                                                                                                                                                                                                                                                                                                                                                                                                                                                                                                                                                                                                                                                                                                                                                                                                                                                                                                                                                                                                                                                                                                                                                                                                                                                                                                                                                                                                                                                                                                                                                                                                                                                                                                                                                                                                                                                                                                                                                                                                                                                                                                                                                                                                                                                                                                                                                                                                                                                                                                                                                                                                                                                                                                                                                                                                                                                                                                                                                                                                                                                                                                                                                                                                                                                                                                                                                                                                                                                                                                                                                                                                                                                                                                                                  | Servicio de Microbiología. Consorcio Hospital General Universitario de Valencia                                                          | Sequencing and Bioinformatics Service and Molecular Epidemiology Research Group. FISABIO-Public Health                                                               | Loreto Ferrús Abad, Paula Ruiz-Hueso, Mariana Reyes-Prieto, Vicente Soriano Chirona, Ivan Ansari, David Navarro, Maria Alma Bracho, Griselda De Marco, Beatriz Beamud, Lidia Ruiz Roldan, Marta Pla Diaz, Neris Garcia-Gonzalez, Inma Galán Vendrell, Sandra Carbo, Lúcia Martínez-Priego, Giuseppe D'Auria, Fernando Gonzalez-Candelas                                                         |
| EPI_ISL_425231, EPI_ISL_425232, EPI_ISL_425233, EPI_ISL_425234, EPI_ISL_425235, EPI_ISL_425236, EPI_ISL_425237, EPI_ISL_425238, EPI_ISL_425239, EPI_ISL_425240, EPI_ISL_425241, EPI_ISL_425242, EPI_ISL_425243, EPI_ISL_425244, EPI_ISL_425245, EPI_ISL_425246, EPI_ISL_425247, EPI_ISL_425248, EPI_ISL_425249, EPI_ISL_425250, EPI_ISL_425251, EPI_ISL_425252, EPI_ISL_425253, EPI_ISL_425254, EPI_ISL_425255, EPI_ISL_425256, EPI_ISL_425257, EPI_ISL_425258, EPI_ISL_425259, EPI_ISL_425260, EPI_ISL_425261, EPI_ISL_425262, EPI_ISL_425263, EPI_ISL_425264, EPI_ISL_425265, EPI_ISL_425266, EPI_ISL_425267, EPI_ISL_425268, EPI_ISL_425269, EPI_ISL_425270, EPI_ISL_425271, EPI_ISL_425272, EPI_ISL_425273, EPI_ISL_425274, EPI_ISL_425275, EPI_ISL_425276, EPI_ISL_425277, EPI_ISL_425278, EPI_ISL_425279, EPI_ISL_425280, EPI_ISL_425281, EPI_ISL_425282, EPI_ISL_425283, EPI_ISL_425284, EPI_ISL_425285, EPI_ISL_425286, EPI_ISL_425287, EPI_ISL_425288, EPI_ISL_425289, EPI_ISL_425290, EPI_ISL_425291, EPI_ISL_425292, EPI_ISL_425293, EPI_ISL_425294, EPI_ISL_425295, EPI_ISL_425296, EPI_ISL_425297, EPI_ISL_425298, EPI_ISL_425299, EPI_ISL_425300, EPI_ISL_425301, EPI_ISL_425302, EPI_ISL_425303, EPI_ISL_425304, EPI_ISL_425305, EPI_ISL_425306, EPI_ISL_425307, EPI_ISL_425308, EPI_ISL_425309, EPI_ISL_425310, EPI_ISL_425311, EPI_ISL_425312, EPI_ISL_425313, EPI_ISL_425314, EPI_ISL_425315, EPI_ISL_425316, EPI_ISL_425317, EPI_ISL_425318, EPI_ISL_425319, EPI_ISL_425320, EPI_ISL_425321, EPI_ISL_425322, EPI_ISL_425323, EPI_ISL_425324, EPI_ISL_425325, EPI_ISL_425326, EPI_ISL_425327, EPI_ISL_425328, EPI_ISL_425329, EPI_ISL_425330, EPI_ISL_425331, EPI_ISL_425332, EPI_ISL_425333, EPI_ISL_425334, EPI_ISL_425335, EPI_ISL_425336, EPI_ISL_425337, EPI_ISL_425338, EPI_ISL_425339, EPI_ISL_425340, EPI_ISL_425341, EPI_ISL_425342, EPI_ISL_425343, EPI_ISL_425344, EPI_ISL_425345, EPI_ISL_425346, EPI_ISL_425347, EPI_ISL_425348, EPI_ISL_425349, EPI_ISL_425350, EPI_ISL_425351, EPI_ISL_425352, EPI_ISL_425353, EPI_ISL_425354, EPI_ISL_425355, EPI_ISL_425356, EPI_ISL_425357, EPI_ISL_425358, EPI_ISL_425359, EPI_ISL_425360, EPI_ISL_425361, EPI_ISL_425362, EPI_ISL_425363, EPI_ISL_425364, EPI_ISL_425365, EPI_ISL_425366, EPI_ISL_425367, EPI_ISL_425368, EPI_ISL_425369, EPI_ISL_425370, EPI_ISL_425371, EPI_ISL_425372, EPI_ISL_425373, EPI_ISL_425374, EPI_ISL_425375, EPI_ISL_425376, EPI_ISL_425377, EPI_ISL_425378, EPI_ISL_425379, EPI_ISL_425380, EPI_ISL_425381, EPI_ISL_425382, EPI_ISL_425383, EPI_ISL_425384, EPI_ISL_425385, EPI_ISL_425386, EPI_ISL_425387, EPI_ISL_425388, EPI_ISL_425389, EPI_ISL_425390, EPI_ISL_425391, EPI_ISL_425392, EPI_ISL_425393, EPI_ISL_425394, EPI_ISL_425395, EPI_ISL_425396, EPI_ISL_425397, EPI_ISL_425398, EPI_ISL_425399, EPI_ISL_425400, EPI_ISL_425401, EPI_ISL_425402, EPI_ISL_425403, EPI_ISL_425404, EPI_ISL_425405, EPI_ISL_425406, EPI_ISL_425407, EPI_ISL_425408, EPI_ISL_425409, EPI_ISL_425410, EPI_ISL_425411, EPI_ISL_425412, EPI_ISL_425413, EPI_ISL_425414, EPI_ISL_425415, EPI_ISL_425416, EPI_ISL_425417, EPI_ISL_425418, EPI_ISL_425419, EPI_ISL_425420, EPI_ISL_425421, EPI_ISL_425422, EPI_ISL_425423, EPI_ISL_425424, EPI_ISL_425425, EPI_ISL_425426, EPI_ISL_425427, EPI_ISL_425428, EPI_ISL_425429, EPI_ISL_425430, EPI_ISL_425431, EPI_ISL_425432, EPI_ISL_425433, EPI_ISL_425434, EPI_ISL_425435, EPI_ISL_425436, EPI_ISL_425437, EPI_ISL_425438, EPI_ISL_425439, EPI_ISL_425440, EPI_ISL_425441, EPI_ISL_425442, EPI_ISL_425443, EPI_ISL_425444, EPI_ISL_425445, EPI_ISL_425446, EPI_ISL_425447, EPI_ISL_425448, EPI_ISL_425449, EPI_ISL_425450, EPI_ISL_425451, EPI_ISL_425452, EPI_ISL_425453, EPI_ISL_425454, EPI_ISL_425455, EPI_ISL_425456, EPI_ISL_425457, EPI_ISL_425458, EPI_ISL_425459, EPI_ISL_425460, EPI_ISL_425461                                                                                                                                                                                                                                                                                                                                                                                                                                                                                                                                                                                                                                                                                                                                                                                                                                                                                                                                                                                                                                                                                                                                                                                                                                                                                                                                                                                                                                                                                                                                                                                                                                                                                                                                                                                                                                                                                                                                                                                                                                                                                                                                                                                                                                                                                                                                                                                                                                                                                                                                                                                                                                                                                                                                                                                                                                                                                                                                                                                                                                                                                                                                                                                                                                                                                                                                                                                                                                                  |                                                                                                                                          |                                                                                                                                                                      |                                                                                                                                                                                                                                                                                                                                                                                                 |
| see above                                                                                                                                                                                                                                                                                                                                                                                                                                                                                                                                                                                                                                                                                                                                                                                                                                                                                                                                                                                                                                                                                                                                                                                                                                                                                                                                                                                                                                                                                                                                                                                                                                                                                                                                                                                                                                                                                                                                                                                                                                                                                                                                                                                                                                                                                                                                                                                                                                                                                                                                                                                                                                                                                                                                                                                                                                                                                                                                                                                                                                                                                                                                                                                                                                                                                                                                                                                                                                                                                                                                                                                                                                                                                                                                                                                                                                                                                                                                                                                                                                                                                                                                                                                                                                                                                                                                                                                                                                                                                                                                                                                                                                                                                                                                                                                                                                                                                                                                                                                                                                                                                                                                                                                                                                                                                                                                                                                                                                                                                                                                                                                                                                                                                                                                                                                                                                                                                                                                                                                                                                                                                                                                                                                                                                                                                                                                                                                                                                                                                                                                                                                                                                                                                                                                                                                                                                                                                                                                                                                                                                                                                                                                                                                                                                                                                       | Department of Pathology, University of Cambridge                                                                                         | COVID-19 Genomics UK (COG-UK) Consortium                                                                                                                             | Luke W Meredith, M. Estee Torok , Myra Hosmillo, William L. Hamilton, Martin D. Curran, Theresa Feltwell, Anna Yakovleva, Charlotte J. Houldcroft, Aminu S. Jahun, Sarah L. Caddy, Ian Goodfellow                                                                                                                                                                                               |
| EPI_ISL_426379                                                                                                                                                                                                                                                                                                                                                                                                                                                                                                                                                                                                                                                                                                                                                                                                                                                                                                                                                                                                                                                                                                                                                                                                                                                                                                                                                                                                                                                                                                                                                                                                                                                                                                                                                                                                                                                                                                                                                                                                                                                                                                                                                                                                                                                                                                                                                                                                                                                                                                                                                                                                                                                                                                                                                                                                                                                                                                                                                                                                                                                                                                                                                                                                                                                                                                                                                                                                                                                                                                                                                                                                                                                                                                                                                                                                                                                                                                                                                                                                                                                                                                                                                                                                                                                                                                                                                                                                                                                                                                                                                                                                                                                                                                                                                                                                                                                                                                                                                                                                                                                                                                                                                                                                                                                                                                                                                                                                                                                                                                                                                                                                                                                                                                                                                                                                                                                                                                                                                                                                                                                                                                                                                                                                                                                                                                                                                                                                                                                                                                                                                                                                                                                                                                                                                                                                                                                                                                                                                                                                                                                                                                                                                                                                                                                                                  | The National Laboratory of Health, Environment and Food, Maribor, Slovenia                                                               | The National Laboratory of Health, Environment and Food, Maribor, Slovenia                                                                                           | Mahnic A., Hedzet S., Janezic S., Duh D., Završnik J., Blazun Vosner H., Rupnik M.                                                                                                                                                                                                                                                                                                              |
| EPI_ISL_428209                                                                                                                                                                                                                                                                                                                                                                                                                                                                                                                                                                                                                                                                                                                                                                                                                                                                                                                                                                                                                                                                                                                                                                                                                                                                                                                                                                                                                                                                                                                                                                                                                                                                                                                                                                                                                                                                                                                                                                                                                                                                                                                                                                                                                                                                                                                                                                                                                                                                                                                                                                                                                                                                                                                                                                                                                                                                                                                                                                                                                                                                                                                                                                                                                                                                                                                                                                                                                                                                                                                                                                                                                                                                                                                                                                                                                                                                                                                                                                                                                                                                                                                                                                                                                                                                                                                                                                                                                                                                                                                                                                                                                                                                                                                                                                                                                                                                                                                                                                                                                                                                                                                                                                                                                                                                                                                                                                                                                                                                                                                                                                                                                                                                                                                                                                                                                                                                                                                                                                                                                                                                                                                                                                                                                                                                                                                                                                                                                                                                                                                                                                                                                                                                                                                                                                                                                                                                                                                                                                                                                                                                                                                                                                                                                                                                                  | Laboratory of Molecular Biology, Diagnostyka sp. z o.o.                                                                                  | Laboratory of Recombinant Vaccines                                                                                                                                   | Lukasz Rabalski, Anna Piotrowska-Mietelska, Boguslaw Szewczyk, Krystyna Bienkowska-Szewczyk                                                                                                                                                                                                                                                                                                     |
| EPI_ISL_428851, EPI_ISL_428852                                                                                                                                                                                                                                                                                                                                                                                                                                                                                                                                                                                                                                                                                                                                                                                                                                                                                                                                                                                                                                                                                                                                                                                                                                                                                                                                                                                                                                                                                                                                                                                                                                                                                                                                                                                                                                                                                                                                                                                                                                                                                                                                                                                                                                                                                                                                                                                                                                                                                                                                                                                                                                                                                                                                                                                                                                                                                                                                                                                                                                                                                                                                                                                                                                                                                                                                                                                                                                                                                                                                                                                                                                                                                                                                                                                                                                                                                                                                                                                                                                                                                                                                                                                                                                                                                                                                                                                                                                                                                                                                                                                                                                                                                                                                                                                                                                                                                                                                                                                                                                                                                                                                                                                                                                                                                                                                                                                                                                                                                                                                                                                                                                                                                                                                                                                                                                                                                                                                                                                                                                                                                                                                                                                                                                                                                                                                                                                                                                                                                                                                                                                                                                                                                                                                                                                                                                                                                                                                                                                                                                                                                                                                                                                                                                                                  | FSBSI "Chumakov Federal Scientific Center for Research and Development of Immune-and-Biological Products of Russian Academy of Sciences" | FSBSI "Chumakov Federal Scientific Center for Research and Development of Immune-and-Biological Products of Russian Academy of Sciences" & NRC "Kurchatov institute" | Liubov Kozlovskaya, Anastasia Pinaeva, Georgy Ignatyev, Anna Shishova, Aydar Ishmukhametov, Mikhail Rychev, Egor Prokhorchuk, Denis Protsenko, Anastasia Berestovskaya                                                                                                                                                                                                                          |
| EPI_ISL_428853                                                                                                                                                                                                                                                                                                                                                                                                                                                                                                                                                                                                                                                                                                                                                                                                                                                                                                                                                                                                                                                                                                                                                                                                                                                                                                                                                                                                                                                                                                                                                                                                                                                                                                                                                                                                                                                                                                                                                                                                                                                                                                                                                                                                                                                                                                                                                                                                                                                                                                                                                                                                                                                                                                                                                                                                                                                                                                                                                                                                                                                                                                                                                                                                                                                                                                                                                                                                                                                                                                                                                                                                                                                                                                                                                                                                                                                                                                                                                                                                                                                                                                                                                                                                                                                                                                                                                                                                                                                                                                                                                                                                                                                                                                                                                                                                                                                                                                                                                                                                                                                                                                                                                                                                                                                                                                                                                                                                                                                                                                                                                                                                                                                                                                                                                                                                                                                                                                                                                                                                                                                                                                                                                                                                                                                                                                                                                                                                                                                                                                                                                                                                                                                                                                                                                                                                                                                                                                                                                                                                                                                                                                                                                                                                                                                                                  | Laboratory of Molecular Virology International Center for Genetic Engineering and Biotechnology (ICGEB)                                  | ARGO Open Lab Platform for Genome Sequencing                                                                                                                         | Licastro D, Rajasekharan S, Dal Monego S, Segat L, D'Agaro P, Marcello A                                                                                                                                                                                                                                                                                                                        |
| EPI_ISL_428854                                                                                                                                                                                                                                                                                                                                                                                                                                                                                                                                                                                                                                                                                                                                                                                                                                                                                                                                                                                                                                                                                                                                                                                                                                                                                                                                                                                                                                                                                                                                                                                                                                                                                                                                                                                                                                                                                                                                                                                                                                                                                                                                                                                                                                                                                                                                                                                                                                                                                                                                                                                                                                                                                                                                                                                                                                                                                                                                                                                                                                                                                                                                                                                                                                                                                                                                                                                                                                                                                                                                                                                                                                                                                                                                                                                                                                                                                                                                                                                                                                                                                                                                                                                                                                                                                                                                                                                                                                                                                                                                                                                                                                                                                                                                                                                                                                                                                                                                                                                                                                                                                                                                                                                                                                                                                                                                                                                                                                                                                                                                                                                                                                                                                                                                                                                                                                                                                                                                                                                                                                                                                                                                                                                                                                                                                                                                                                                                                                                                                                                                                                                                                                                                                                                                                                                                                                                                                                                                                                                                                                                                                                                                                                                                                                                                                  | Laboratory of Molecular Virology International Center for Genetic Engineering and Biotechnology (ICGEB)                                  | ARGO Open Lab Platform for Genome sequencing                                                                                                                         | Licastro D, Rajasekharan S, Dal Monego S, Segat L, D'Agaro P, Marcello A                                                                                                                                                                                                                                                                                                                        |
| EPI_ISL_429226, EPI_ISL_429227                                                                                                                                                                                                                                                                                                                                                                                                                                                                                                                                                                                                                                                                                                                                                                                                                                                                                                                                                                                                                                                                                                                                                                                                                                                                                                                                                                                                                                                                                                                                                                                                                                                                                                                                                                                                                                                                                                                                                                                                                                                                                                                                                                                                                                                                                                                                                                                                                                                                                                                                                                                                                                                                                                                                                                                                                                                                                                                                                                                                                                                                                                                                                                                                                                                                                                                                                                                                                                                                                                                                                                                                                                                                                                                                                                                                                                                                                                                                                                                                                                                                                                                                                                                                                                                                                                                                                                                                                                                                                                                                                                                                                                                                                                                                                                                                                                                                                                                                                                                                                                                                                                                                                                                                                                                                                                                                                                                                                                                                                                                                                                                                                                                                                                                                                                                                                                                                                                                                                                                                                                                                                                                                                                                                                                                                                                                                                                                                                                                                                                                                                                                                                                                                                                                                                                                                                                                                                                                                                                                                                                                                                                                                                                                                                                                                  | Presidio Ospedaliero Santo Spirito                                                                                                       | Istituto Zooprofilattico Sperimentale dell'Abruzzo e Molise "G. Caporale"                                                                                            | Lorusso A, Maraccci M, Di Domenico M, Ancora M, Curini V, Mangone I, Rinaldi A, Di Pasquale A, Camma C, Puglia I, Savini G                                                                                                                                                                                                                                                                      |
| EPI_ISL_429228                                                                                                                                                                                                                                                                                                                                                                                                                                                                                                                                                                                                                                                                                                                                                                                                                                                                                                                                                                                                                                                                                                                                                                                                                                                                                                                                                                                                                                                                                                                                                                                                                                                                                                                                                                                                                                                                                                                                                                                                                                                                                                                                                                                                                                                                                                                                                                                                                                                                                                                                                                                                                                                                                                                                                                                                                                                                                                                                                                                                                                                                                                                                                                                                                                                                                                                                                                                                                                                                                                                                                                                                                                                                                                                                                                                                                                                                                                                                                                                                                                                                                                                                                                                                                                                                                                                                                                                                                                                                                                                                                                                                                                                                                                                                                                                                                                                                                                                                                                                                                                                                                                                                                                                                                                                                                                                                                                                                                                                                                                                                                                                                                                                                                                                                                                                                                                                                                                                                                                                                                                                                                                                                                                                                                                                                                                                                                                                                                                                                                                                                                                                                                                                                                                                                                                                                                                                                                                                                                                                                                                                                                                                                                                                                                                                                                  | Ospedale Civile Giuseppe Mazzini                                                                                                         | Istituto Zooprofilattico Sperimentale dell'Abruzzo e Molise "G. Caporale"                                                                                            | Lorusso A, Maraccci M, Di Domenico M, Ancora M, Curini V, Mangone I, Rinaldi A, Di Pasquale A, Camma C, Puglia I, Savini G                                                                                                                                                                                                                                                                      |
| EPI_ISL_429229                                                                                                                                                                                                                                                                                                                                                                                                                                                                                                                                                                                                                                                                                                                                                                                                                                                                                                                                                                                                                                                                                                                                                                                                                                                                                                                                                                                                                                                                                                                                                                                                                                                                                                                                                                                                                                                                                                                                                                                                                                                                                                                                                                                                                                                                                                                                                                                                                                                                                                                                                                                                                                                                                                                                                                                                                                                                                                                                                                                                                                                                                                                                                                                                                                                                                                                                                                                                                                                                                                                                                                                                                                                                                                                                                                                                                                                                                                                                                                                                                                                                                                                                                                                                                                                                                                                                                                                                                                                                                                                                                                                                                                                                                                                                                                                                                                                                                                                                                                                                                                                                                                                                                                                                                                                                                                                                                                                                                                                                                                                                                                                                                                                                                                                                                                                                                                                                                                                                                                                                                                                                                                                                                                                                                                                                                                                                                                                                                                                                                                                                                                                                                                                                                                                                                                                                                                                                                                                                                                                                                                                                                                                                                                                                                                                                                  | Ospedale Regionale San Salvatore                                                                                                         | Istituto Zooprofilattico Sperimentale dell'Abruzzo e Molise "G. Caporale"                                                                                            | Lorusso A, Maraccci M, Di Domenico M, Ancora M, Curini V, Mangone I, Rinaldi A, Di Pasquale A, Camma C, Puglia I, Savini G                                                                                                                                                                                                                                                                      |
| EPI_ISL_429230, EPI_ISL_429231, EPI_ISL_429232, EPI_ISL_429233, EPI_ISL_429234, EPI_ISL_429235                                                                                                                                                                                                                                                                                                                                                                                                                                                                                                                                                                                                                                                                                                                                                                                                                                                                                                                                                                                                                                                                                                                                                                                                                                                                                                                                                                                                                                                                                                                                                                                                                                                                                                                                                                                                                                                                                                                                                                                                                                                                                                                                                                                                                                                                                                                                                                                                                                                                                                                                                                                                                                                                                                                                                                                                                                                                                                                                                                                                                                                                                                                                                                                                                                                                                                                                                                                                                                                                                                                                                                                                                                                                                                                                                                                                                                                                                                                                                                                                                                                                                                                                                                                                                                                                                                                                                                                                                                                                                                                                                                                                                                                                                                                                                                                                                                                                                                                                                                                                                                                                                                                                                                                                                                                                                                                                                                                                                                                                                                                                                                                                                                                                                                                                                                                                                                                                                                                                                                                                                                                                                                                                                                                                                                                                                                                                                                                                                                                                                                                                                                                                                                                                                                                                                                                                                                                                                                                                                                                                                                                                                                                                                                                                  | Ospedale Civile Giuseppe Mazzini                                                                                                         | Istituto Zooprofilattico Sperimentale dell'Abruzzo e Molise "G. Caporale"                                                                                            | Lorusso A, Maraccci M, Di Domenico M, Ancora M, Curini V, Mangone I, Rinaldi A, Di Pasquale A, Camma C, Puglia I, Savini G                                                                                                                                                                                                                                                                      |
| EPI_ISL_429236                                                                                                                                                                                                                                                                                                                                                                                                                                                                                                                                                                                                                                                                                                                                                                                                                                                                                                                                                                                                                                                                                                                                                                                                                                                                                                                                                                                                                                                                                                                                                                                                                                                                                                                                                                                                                                                                                                                                                                                                                                                                                                                                                                                                                                                                                                                                                                                                                                                                                                                                                                                                                                                                                                                                                                                                                                                                                                                                                                                                                                                                                                                                                                                                                                                                                                                                                                                                                                                                                                                                                                                                                                                                                                                                                                                                                                                                                                                                                                                                                                                                                                                                                                                                                                                                                                                                                                                                                                                                                                                                                                                                                                                                                                                                                                                                                                                                                                                                                                                                                                                                                                                                                                                                                                                                                                                                                                                                                                                                                                                                                                                                                                                                                                                                                                                                                                                                                                                                                                                                                                                                                                                                                                                                                                                                                                                                                                                                                                                                                                                                                                                                                                                                                                                                                                                                                                                                                                                                                                                                                                                                                                                                                                                                                                                                                  | Ospedale Civile S. Liberatore di Atri                                                                                                    | Istituto Zooprofilattico Sperimentale dell'Abruzzo e Molise "G. Caporale"                                                                                            | Lorusso A, Maraccci M, Di Domenico M, Ancora M, Curini V, Mangone I, Rinaldi A, Di Pasquale A, Camma C, Puglia I, Savini G                                                                                                                                                                                                                                                                      |
| EPI_ISL_431118, EPI_ISL_431180, EPI_ISL_431240, EPI_ISL_431292, EPI_ISL_431779, EPI_ISL_431780, EPI_ISL_431781, EPI_ISL_431782, EPI_ISL_431783, EPI_ISL_431784, EPI_ISL_431785                                                                                                                                                                                                                                                                                                                                                                                                                                                                                                                                                                                                                                                                                                                                                                                                                                                                                                                                                                                                                                                                                                                                                                                                                                                                                                                                                                                                                                                                                                                                                                                                                                                                                                                                                                                                                                                                                                                                                                                                                                                                                                                                                                                                                                                                                                                                                                                                                                                                                                                                                                                                                                                                                                                                                                                                                                                                                                                                                                                                                                                                                                                                                                                                                                                                                                                                                                                                                                                                                                                                                                                                                                                                                                                                                                                                                                                                                                                                                                                                                                                                                                                                                                                                                                                                                                                                                                                                                                                                                                                                                                                                                                                                                                                                                                                                                                                                                                                                                                                                                                                                                                                                                                                                                                                                                                                                                                                                                                                                                                                                                                                                                                                                                                                                                                                                                                                                                                                                                                                                                                                                                                                                                                                                                                                                                                                                                                                                                                                                                                                                                                                                                                                                                                                                                                                                                                                                                                                                                                                                                                                                                                                  |                                                                                                                                          |                                                                                                                                                                      |                                                                                                                                                                                                                                                                                                                                                                                                 |
| see above                                                                                                                                                                                                                                                                                                                                                                                                                                                                                                                                                                                                                                                                                                                                                                                                                                                                                                                                                                                                                                                                                                                                                                                                                                                                                                                                                                                                                                                                                                                                                                                                                                                                                                                                                                                                                                                                                                                                                                                                                                                                                                                                                                                                                                                                                                                                                                                                                                                                                                                                                                                                                                                                                                                                                                                                                                                                                                                                                                                                                                                                                                                                                                                                                                                                                                                                                                                                                                                                                                                                                                                                                                                                                                                                                                                                                                                                                                                                                                                                                                                                                                                                                                                                                                                                                                                                                                                                                                                                                                                                                                                                                                                                                                                                                                                                                                                                                                                                                                                                                                                                                                                                                                                                                                                                                                                                                                                                                                                                                                                                                                                                                                                                                                                                                                                                                                                                                                                                                                                                                                                                                                                                                                                                                                                                                                                                                                                                                                                                                                                                                                                                                                                                                                                                                                                                                                                                                                                                                                                                                                                                                                                                                                                                                                                                                       | Fujian Center for Disease Control and Prevention                                                                                         | Fujian Center for Disease Control and Prevention                                                                                                                     | Lin Qi, Huang Zhimiao, Zhang Yanhua, Weng Yuwei                                                                                                                                                                                                                                                                                                                                                 |
| EPI_ISL_433466, EPI_ISL_433467, EPI_ISL_433468, EPI_ISL_433469, EPI_ISL_433470, EPI_ISL_433471, EPI_ISL_433472, EPI_ISL_433473, EPI_ISL_433474, EPI_ISL_433475, EPI_ISL_433476, EPI_ISL_433477, EPI_ISL_433478, EPI_ISL_433479, EPI_ISL_433480, EPI_ISL_433481, EPI_ISL_433482, EPI_ISL_433483, EPI_ISL_433484, EPI_ISL_433485, EPI_ISL_433486, EPI_ISL_433487, EPI_ISL_433488, EPI_ISL_433489, EPI_ISL_433490, EPI_ISL_433491, EPI_ISL_433492, EPI_ISL_433493, EPI_ISL_433494, EPI_ISL_433495, EPI_ISL_433496, EPI_ISL_433497, EPI_ISL_433498, EPI_ISL_433499, EPI_ISL_433500, EPI_ISL_433501, EPI_ISL_433502, EPI_ISL_433503, EPI_ISL_433504, EPI_ISL_433505, EPI_ISL_433506, EPI_ISL_433507, EPI_ISL_433508, EPI_ISL_433509, EPI_ISL_433510, EPI_ISL_433511, EPI_ISL_433512, EPI_ISL_433513, EPI_ISL_433514, EPI_ISL_433515, EPI_ISL_433516, EPI_ISL_433517, EPI_ISL_433518, EPI_ISL_433519, EPI_ISL_433520, EPI_ISL_433521, EPI_ISL_433522, EPI_ISL_433523, EPI_ISL_433524, EPI_ISL_433525, EPI_ISL_433526, EPI_ISL_433527, EPI_ISL_433528, EPI_ISL_433529, EPI_ISL_433530, EPI_ISL_433531, EPI_ISL_433532, EPI_ISL_433533, EPI_ISL_433534, EPI_ISL_433535, EPI_ISL_433536, EPI_ISL_433537, EPI_ISL_433538, EPI_ISL_433539, EPI_ISL_433540, EPI_ISL_433541, EPI_ISL_433542, EPI_ISL_433543, EPI_ISL_433544, EPI_ISL_433545, EPI_ISL_433546, EPI_ISL_433547, EPI_ISL_433548, EPI_ISL_433549, EPI_ISL_433550, EPI_ISL_433551, EPI_ISL_433552, EPI_ISL_433553, EPI_ISL_433554, EPI_ISL_433555, EPI_ISL_433556, EPI_ISL_433557, EPI_ISL_433558, EPI_ISL_433559, EPI_ISL_433560, EPI_ISL_433561, EPI_ISL_433562, EPI_ISL_433563, EPI_ISL_433564, EPI_ISL_433565, EPI_ISL_433566, EPI_ISL_433567, EPI_ISL_433568, EPI_ISL_433569, EPI_ISL_433570, EPI_ISL_433571, EPI_ISL_433572, EPI_ISL_433573, EPI_ISL_433574, EPI_ISL_433575, EPI_ISL_433576, EPI_ISL_433577, EPI_ISL_433578, EPI_ISL_433579, EPI_ISL_433580, EPI_ISL_433581, EPI_ISL_433582, EPI_ISL_433583, EPI_ISL_433584, EPI_ISL_433585, EPI_ISL_433586, EPI_ISL_433587, EPI_ISL_433588, EPI_ISL_433589, EPI_ISL_433590, EPI_ISL_433591, EPI_ISL_433592, EPI_ISL_433593, EPI_ISL_433594, EPI_ISL_433595, EPI_ISL_433596, EPI_ISL_433597, EPI_ISL_433598, EPI_ISL_433599, EPI_ISL_433600, EPI_ISL_433601, EPI_ISL_433602, EPI_ISL_433603, EPI_ISL_433604, EPI_ISL_433605, EPI_ISL_433606, EPI_ISL_433607, EPI_ISL_433608, EPI_ISL_433609, EPI_ISL_433610, EPI_ISL_433611, EPI_ISL_433612, EPI_ISL_433613, EPI_ISL_433614, EPI_ISL_433615, EPI_ISL_433616, EPI_ISL_433617, EPI_ISL_433618, EPI_ISL_433619, EPI_ISL_433620, EPI_ISL_433621, EPI_ISL_433622, EPI_ISL_433623, EPI_ISL_433624, EPI_ISL_433625, EPI_ISL_433626, EPI_ISL_433627, EPI_ISL_433628, EPI_ISL_433629, EPI_ISL_433630, EPI_ISL_433631, EPI_ISL_433632, EPI_ISL_433633, EPI_ISL_433634, EPI_ISL_433635, EPI_ISL_433636, EPI_ISL_433637, EPI_ISL_433638, EPI_ISL_433639, EPI_ISL_433640, EPI_ISL_433641, EPI_ISL_433642, EPI_ISL_433643, EPI_ISL_433644, EPI_ISL_433645, EPI_ISL_433646, EPI_ISL_433647, EPI_ISL_433648, EPI_ISL_433649, EPI_ISL_433650, EPI_ISL_433651, EPI_ISL_433652, EPI_ISL_433653, EPI_ISL_433654, EPI_ISL_433655, EPI_ISL_433656, EPI_ISL_433657, EPI_ISL_433658, EPI_ISL_433659, EPI_ISL_433660, EPI_ISL_433661, EPI_ISL_433662, EPI_ISL_433663, EPI_ISL_433664, EPI_ISL_433665, EPI_ISL_433666, EPI_ISL_433667, EPI_ISL_433668, EPI_ISL_433669, EPI_ISL_433670, EPI_ISL_433671, EPI_ISL_433672, EPI_ISL_433673, EPI_ISL_433674, EPI_ISL_433675, EPI_ISL_433676, EPI_ISL_433677, EPI_ISL_433678, EPI_ISL_433679, EPI_ISL_433680, EPI_ISL_433681, EPI_ISL_433682, EPI_ISL_433683, EPI_ISL_433684, EPI_ISL_433685, EPI_ISL_433686, EPI_ISL_433687, EPI_ISL_433688, EPI_ISL_433689, EPI_ISL_433690, EPI_ISL_433691, EPI_ISL_433692, EPI_ISL_433693, EPI_ISL_433694, EPI_ISL_433695, EPI_ISL_433696, EPI_ISL_433697, EPI_ISL_433698, EPI_ISL_433699, EPI_ISL_433700, EPI_ISL_433701, EPI_ISL_433702, EPI_ISL_433703, EPI_ISL_433704, EPI_ISL_433705, EPI_ISL_433706, EPI_ISL_433707, EPI_ISL_433708, EPI_ISL_433709, EPI_ISL_433710, EPI_ISL_433711, EPI_ISL_433712, EPI_ISL_433713, EPI_ISL_433714, EPI_ISL_433715, EPI_ISL_433716, EPI_ISL_433717, EPI_ISL_433718, EPI_ISL_433719, EPI_ISL_433720, EPI_ISL_433721, EPI_ISL_433722, EPI_ISL_433723, EPI_ISL_433724, EPI_ISL_433725, EPI_ISL_433726, EPI_ISL_433727, EPI_ISL_433728, EPI_ISL_433729, EPI_ISL_433730, EPI_ISL_433731, EPI_ISL_433732, EPI_ISL_433733, EPI_ISL_433734, EPI_ISL_433735, EPI_ISL_433736, EPI_ISL_433737, EPI_ISL_433738, EPI_ISL_433739, EPI_ISL_433740, EPI_ISL_433741, EPI_ISL_433742, EPI_ISL_433743, EPI_ISL_433744, EPI_ISL_433745, EPI_ISL_433746, EPI_ISL_433747, EPI_ISL_433748, EPI_ISL_433749, EPI_ISL_433750, EPI_ISL_433751, EPI_ISL_433752, EPI_ISL_433753, EPI_ISL_433754, EPI_ISL_433755, EPI_ISL_433756, EPI_ISL_433757, EPI_ISL_433758, EPI_ISL_433759, EPI_ISL_433760, EPI_ISL_433761, EPI_ISL_433762, EPI_ISL_433763, EPI_ISL_433764, EPI_ISL_433765, EPI_ISL_433766, EPI_ISL_433767, EPI_ISL_433768, EPI_ISL_433769, EPI_ISL_433770, EPI_ISL_433771, EPI_ISL_433772, EPI_ISL_433773, EPI_ISL_433774, EPI_ISL_433775, EPI_ISL_433776, EPI_ISL_433777, EPI_ISL_433778, EPI_ISL_433779, EPI_ISL_433780, EPI_ISL_433781, EPI_ISL_433782, EPI_ISL_433783, EPI_ISL_433784, EPI_ISL_433785, EPI_ISL_433786, EPI_ISL_433787, EPI_ISL_433788, EPI_ISL_433789, EPI_ISL_433790, EPI_ISL_433791, EPI_ISL_433792, EPI_ISL_433793, EPI_ISL_433794, EPI_ISL_433795, EPI_ISL_433796, EPI_ISL_433797, EPI_ISL_433798, EPI_ISL_433799, EPI_ISL_433800, EPI_ISL_433801, EPI_ISL_433802, EPI_ISL_433803, EPI_ISL_433804, EPI_ISL_433805, EPI_ISL_433806, EPI_ISL_433807, EPI_ISL_433808, EPI_ISL_433809, EPI_ISL_433810, EPI_ISL_433811, EPI_ISL_433812, EPI_ISL_433813, EPI_ISL_433814, EPI_ISL_433815, EPI_ISL_433816, EPI_ISL_433817, EPI_ISL_433818, EPI_ISL_433819, EPI_ISL_433820, EPI_ISL_433821, EPI_ISL_433822, EPI_ISL_433823, EPI_ISL_433824, EPI_ISL_433825, EPI_ISL_433826, EPI_ISL_433827, EPI_ISL_433828, EPI_ISL_433829, EPI_ISL_433830, EPI_ISL_433831, EPI_ISL_433832, EPI_ISL_433833, EPI_ISL_433834, EPI_ISL_433835, EPI_ISL_433836, EPI_ISL_433837, EPI_ISL_433838, EPI_ISL_433839, EPI_ISL_433840, EPI_ISL_433841, EPI_ISL_433842, EPI_ISL_433843, EPI_ISL_433844, EPI_ISL_433845, EPI_ISL_433846, EPI_ISL_433847, EPI_ISL_433848, EPI_ISL_433849, EPI_ISL_433850, EPI_ISL_433851, EPI_ISL_433852, EPI_ISL_433853, EPI_ISL_433854, EPI_ISL_433855, EPI_ISL_433856, EPI_ISL_433857, EPI_ISL_433858, EPI_ISL_433859, EPI_ISL_433860, EPI_ISL_433861, EPI_ISL_433862, EPI_ISL_433863, EPI_ISL_433864, EPI_ISL_433865, EPI_ISL_433866, EPI_ISL_433867, EPI_ISL_433868, EPI_ISL_433869, EPI_ISL_433870, EPI_ISL_433871, EPI_ISL_433872, EPI_ISL_433873, EPI_ISL_433874, EPI_ISL_433875, EPI_ISL_433876, EPI_ISL_433877, EPI_ISL_433878, EPI_ISL_433879, EPI_ISL_433880, EPI_ISL_433881, EPI_ISL_433882, EPI_ISL_433883, EPI_ISL_433884, EPI_ISL_433885, EPI_ISL_433886, EPI_ISL_433887, EPI_ISL_433888, EPI_ISL_433889, EPI_ISL_433890, EPI_ISL_433891, EPI_ISL_433892, EPI_ISL_433893, EPI_ISL_433894, EPI_ISL_433895, EPI_ISL_433896, EPI_ISL_433897, EPI_ISL_433898, EPI_ISL_433899, EPI_ISL_433900, EPI_ISL_433901, EPI_ISL_433902, EPI_ISL_433903, |                                                                                                                                          |                                                                                                                                                                      |                                                                                                                                                                                                                                                                                                                                                                                                 |

|                                                                                                                                                                                                                                                                                                                                                                                                                                                                                                                                                                                                                                                                                                                                                                                                                                                                                                                                                                                                                                                                                                                                                                                                                                                                                                                                                                                                                                                                                                                                                                                                                                                                                                                                                                                                                                                                                                                                                                                                                                                                                                                                                                                                                                                                                                                                                                                                                                                                                                                                                                                                                                                |           |                                                                                 |                                                                                                        |                                                                                                                                                                                                                                                                                                                                                                                                                                                                                      |
|------------------------------------------------------------------------------------------------------------------------------------------------------------------------------------------------------------------------------------------------------------------------------------------------------------------------------------------------------------------------------------------------------------------------------------------------------------------------------------------------------------------------------------------------------------------------------------------------------------------------------------------------------------------------------------------------------------------------------------------------------------------------------------------------------------------------------------------------------------------------------------------------------------------------------------------------------------------------------------------------------------------------------------------------------------------------------------------------------------------------------------------------------------------------------------------------------------------------------------------------------------------------------------------------------------------------------------------------------------------------------------------------------------------------------------------------------------------------------------------------------------------------------------------------------------------------------------------------------------------------------------------------------------------------------------------------------------------------------------------------------------------------------------------------------------------------------------------------------------------------------------------------------------------------------------------------------------------------------------------------------------------------------------------------------------------------------------------------------------------------------------------------------------------------------------------------------------------------------------------------------------------------------------------------------------------------------------------------------------------------------------------------------------------------------------------------------------------------------------------------------------------------------------------------------------------------------------------------------------------------------------------------|-----------|---------------------------------------------------------------------------------|--------------------------------------------------------------------------------------------------------|--------------------------------------------------------------------------------------------------------------------------------------------------------------------------------------------------------------------------------------------------------------------------------------------------------------------------------------------------------------------------------------------------------------------------------------------------------------------------------------|
| EPI_ISL_433904, EPI_ISL_433905, EPI_ISL_433906, EPI_ISL_433907, EPI_ISL_433908, EPI_ISL_433909, EPI_ISL_433910, EPI_ISL_433911, EPI_ISL_433912, EPI_ISL_433913, EPI_ISL_433914, EPI_ISL_433915, EPI_ISL_433916, EPI_ISL_433917, EPI_ISL_433918, EPI_ISL_433919, EPI_ISL_433920, EPI_ISL_433921, EPI_ISL_433922, EPI_ISL_433923, EPI_ISL_433924, EPI_ISL_433925, EPI_ISL_433926, EPI_ISL_433927, EPI_ISL_433928, EPI_ISL_433929, EPI_ISL_433930, EPI_ISL_433931, EPI_ISL_433932, EPI_ISL_433933, EPI_ISL_433934, EPI_ISL_433935, EPI_ISL_433936, EPI_ISL_433937, EPI_ISL_433938, EPI_ISL_433939, EPI_ISL_433940, EPI_ISL_433941, EPI_ISL_433942, EPI_ISL_433943, EPI_ISL_433944, EPI_ISL_433945, EPI_ISL_433946, EPI_ISL_433947, EPI_ISL_433948, EPI_ISL_433949, EPI_ISL_433950, EPI_ISL_433951, EPI_ISL_433952, EPI_ISL_433953, EPI_ISL_433954, EPI_ISL_433955, EPI_ISL_433956, EPI_ISL_433957, EPI_ISL_433958, EPI_ISL_433959, EPI_ISL_433960, EPI_ISL_433961, EPI_ISL_433962, EPI_ISL_433963, EPI_ISL_433964, EPI_ISL_433965, EPI_ISL_433966, EPI_ISL_433967, EPI_ISL_433968, EPI_ISL_433969, EPI_ISL_433970, EPI_ISL_433971, EPI_ISL_433972, EPI_ISL_433973, EPI_ISL_433974, EPI_ISL_433975, EPI_ISL_433976, EPI_ISL_433977, EPI_ISL_433978, EPI_ISL_433979, EPI_ISL_433980, EPI_ISL_433981, EPI_ISL_433982, EPI_ISL_433983, EPI_ISL_433984, EPI_ISL_433985, EPI_ISL_433986, EPI_ISL_433987, EPI_ISL_433988, EPI_ISL_433989, EPI_ISL_433990, EPI_ISL_433991, EPI_ISL_433992, EPI_ISL_433993, EPI_ISL_433994, EPI_ISL_433995, EPI_ISL_433996, EPI_ISL_433997, EPI_ISL_433998, EPI_ISL_433999, EPI_ISL_434000, EPI_ISL_434001, EPI_ISL_434002, EPI_ISL_434003, EPI_ISL_434004, EPI_ISL_434005, EPI_ISL_434006, EPI_ISL_434007, EPI_ISL_434008, EPI_ISL_434009, EPI_ISL_434010, EPI_ISL_434011, EPI_ISL_434012, EPI_ISL_434013, EPI_ISL_434014, EPI_ISL_434015, EPI_ISL_434016, EPI_ISL_434017, EPI_ISL_434018, EPI_ISL_434019, EPI_ISL_434020, EPI_ISL_434021, EPI_ISL_434022, EPI_ISL_434023, EPI_ISL_434024, EPI_ISL_434025, EPI_ISL_434026, EPI_ISL_434027, EPI_ISL_434028, EPI_ISL_434029, EPI_ISL_434030, EPI_ISL_434031, EPI_ISL_434032, EPI_ISL_434033, EPI_ISL_434034, EPI_ISL_434035, EPI_ISL_434036, EPI_ISL_434037, EPI_ISL_434038, EPI_ISL_434039, EPI_ISL_434040, EPI_ISL_434041, EPI_ISL_434042, EPI_ISL_434043, EPI_ISL_434044, EPI_ISL_434045, EPI_ISL_434046, EPI_ISL_434047, EPI_ISL_434048, EPI_ISL_434049, EPI_ISL_434050, EPI_ISL_434051, EPI_ISL_434052, EPI_ISL_434053, EPI_ISL_434054, EPI_ISL_434055, EPI_ISL_434056, EPI_ISL_434057, EPI_ISL_434058, EPI_ISL_434059, EPI_ISL_434060, EPI_ISL_434061, EPI_ISL_434062 | see above | Department of Pathology, University of Cambridge                                | COVID-19 Genomics UK (COG-UK) Consortium                                                               | Luke W Meredith, M. Estee Torok , Myra Hosmlil, William L. Hamilton, Martin D. Curran, Theresa Felthwell, Grant Hall, Anna Yakovleva, Fahad A Khokhar, Charlotte J. Houldcroft, Laura G Caller, Aminu S. Jahun, Sarah L. Caddy, Ian Goodfellow                                                                                                                                                                                                                                       |
| EPI_ISL_434644                                                                                                                                                                                                                                                                                                                                                                                                                                                                                                                                                                                                                                                                                                                                                                                                                                                                                                                                                                                                                                                                                                                                                                                                                                                                                                                                                                                                                                                                                                                                                                                                                                                                                                                                                                                                                                                                                                                                                                                                                                                                                                                                                                                                                                                                                                                                                                                                                                                                                                                                                                                                                                 |           | Kungsholmsdoktorn                                                               | The Public Health Agency of Sweden                                                                     | Linus Hammar, Oskar Karlsson Lindsjo, Maria Lind Karlberg, Anna-Malin Linde, Olov Svartstrom, Anna Risberg, Theresa Enkirch, Mia Brytting, Karin Tegmark-Wisell                                                                                                                                                                                                                                                                                                                      |
| EPI_ISL_434671                                                                                                                                                                                                                                                                                                                                                                                                                                                                                                                                                                                                                                                                                                                                                                                                                                                                                                                                                                                                                                                                                                                                                                                                                                                                                                                                                                                                                                                                                                                                                                                                                                                                                                                                                                                                                                                                                                                                                                                                                                                                                                                                                                                                                                                                                                                                                                                                                                                                                                                                                                                                                                 |           | Narhalsan Sjobo vardcentral                                                     | The Public Health Agency of Sweden                                                                     | Lovisa Hjerten, Oskar Karlsson Lindsjo, Maria Lind Karlberg, Anna-Malin Linde, Olov Svartstrom, Anna Risberg, Theresa Enkirch, Mia Brytting, Karin Tegmark-Wisell                                                                                                                                                                                                                                                                                                                    |
| EPI_ISL_435056                                                                                                                                                                                                                                                                                                                                                                                                                                                                                                                                                                                                                                                                                                                                                                                                                                                                                                                                                                                                                                                                                                                                                                                                                                                                                                                                                                                                                                                                                                                                                                                                                                                                                                                                                                                                                                                                                                                                                                                                                                                                                                                                                                                                                                                                                                                                                                                                                                                                                                                                                                                                                                 |           | Gujarat Biotechnology Research Centre                                           | Gujarat Biotechnology Research Centre                                                                  | Maharshi Pandya, Amit Kanani, Akanksha Verma, Nitin Savaliya, Raghawendra Kumar, Dinesh Kumar, Zuber Saiyed, Dipa Kinariwala, Disha Patel, Binita Aring, Geeta Vaghela, Sonia Barve, Bhavesh Modi, Kairavi Joshi, Gaurishankar Shrimali, Nidhi Sood, Pranay Shah, R D Dixit, Snehal Bagatharia, Kamlesh J Upadhyay, Ramesh Pandit, Tejas Shah, Ankit Hinsu, Pritesh Sabara, Apurvasinh Puvar, Janvi Raval, Monika Gandhi, Pinal Trivedi, Afzal Ansari, Chaitanya Joshi, Madhvi Joshi |
| EPI_ISL_435145                                                                                                                                                                                                                                                                                                                                                                                                                                                                                                                                                                                                                                                                                                                                                                                                                                                                                                                                                                                                                                                                                                                                                                                                                                                                                                                                                                                                                                                                                                                                                                                                                                                                                                                                                                                                                                                                                                                                                                                                                                                                                                                                                                                                                                                                                                                                                                                                                                                                                                                                                                                                                                 |           | Ospedale Civile Giuseppe Mazzini                                                | Istituto Zooprofilattico Sperimentale dell'Abruzzo e Molise "G.Caporale"                               | Lorusso A, Marcacci M, Di Domenico M, Ancora M, Curini V, Mangone I, Rinaldi A, Di Pasquale A, Cammà C, Puglia I, Savini G                                                                                                                                                                                                                                                                                                                                                           |
| EPI_ISL_435146, EPI_ISL_435147                                                                                                                                                                                                                                                                                                                                                                                                                                                                                                                                                                                                                                                                                                                                                                                                                                                                                                                                                                                                                                                                                                                                                                                                                                                                                                                                                                                                                                                                                                                                                                                                                                                                                                                                                                                                                                                                                                                                                                                                                                                                                                                                                                                                                                                                                                                                                                                                                                                                                                                                                                                                                 |           | Villa Serena del Dr. Leonardo Petruzzi                                          | Istituto Zooprofilattico Sperimentale dell'Abruzzo e Molise "G.Caporale"                               | Lorusso A, Marcacci M, Di Domenico M, Ancora M, Curini V, Mangone I, Rinaldi A, Di Pasquale A, Cammà C, Puglia I, Savini G                                                                                                                                                                                                                                                                                                                                                           |
| EPI_ISL_435148                                                                                                                                                                                                                                                                                                                                                                                                                                                                                                                                                                                                                                                                                                                                                                                                                                                                                                                                                                                                                                                                                                                                                                                                                                                                                                                                                                                                                                                                                                                                                                                                                                                                                                                                                                                                                                                                                                                                                                                                                                                                                                                                                                                                                                                                                                                                                                                                                                                                                                                                                                                                                                 |           | Ospedale SS Annunziata                                                          | Istituto Zooprofilattico Sperimentale dell'Abruzzo e Molise "G.Caporale"                               | Lorusso A, Marcacci M, Di Domenico M, Ancora M, Curini V, Mangone I, Rinaldi A, Di Pasquale A, Cammà C, Puglia I, Savini G                                                                                                                                                                                                                                                                                                                                                           |
| EPI_ISL_435149                                                                                                                                                                                                                                                                                                                                                                                                                                                                                                                                                                                                                                                                                                                                                                                                                                                                                                                                                                                                                                                                                                                                                                                                                                                                                                                                                                                                                                                                                                                                                                                                                                                                                                                                                                                                                                                                                                                                                                                                                                                                                                                                                                                                                                                                                                                                                                                                                                                                                                                                                                                                                                 |           | SERVIZIO DI IGIENE E SANITÀ PUBBLICA ASL Teramo                                 | Istituto Zooprofilattico Sperimentale dell'Abruzzo e Molise "G.Caporale"                               | Lorusso A, Marcacci M, Di Domenico M, Ancora M, Curini V, Mangone I, Rinaldi A, Di Pasquale A, Cammà C, Puglia I, Savini G                                                                                                                                                                                                                                                                                                                                                           |
| EPI_ISL_435150, EPI_ISL_435151                                                                                                                                                                                                                                                                                                                                                                                                                                                                                                                                                                                                                                                                                                                                                                                                                                                                                                                                                                                                                                                                                                                                                                                                                                                                                                                                                                                                                                                                                                                                                                                                                                                                                                                                                                                                                                                                                                                                                                                                                                                                                                                                                                                                                                                                                                                                                                                                                                                                                                                                                                                                                 |           | Ospedale SS Annunziata                                                          | Istituto Zooprofilattico Sperimentale dell'Abruzzo e Molise "G.Caporale"                               | Lorusso A, Marcacci M, Di Domenico M, Ancora M, Curini V, Mangone I, Rinaldi A, Di Pasquale A, Cammà C, Puglia I, Savini G                                                                                                                                                                                                                                                                                                                                                           |
| EPI_ISL_435152                                                                                                                                                                                                                                                                                                                                                                                                                                                                                                                                                                                                                                                                                                                                                                                                                                                                                                                                                                                                                                                                                                                                                                                                                                                                                                                                                                                                                                                                                                                                                                                                                                                                                                                                                                                                                                                                                                                                                                                                                                                                                                                                                                                                                                                                                                                                                                                                                                                                                                                                                                                                                                 |           | Servizio di Igiene, Epidemiologia e Sanità Pubblica (SIESP) Avezzano            | Istituto Zooprofilattico Sperimentale dell'Abruzzo e Molise "G.Caporale"                               | Lorusso A, Marcacci M, Di Domenico M, Ancora M, Curini V, Mangone I, Rinaldi A, Di Pasquale A, Cammà C, Puglia I, Savini G                                                                                                                                                                                                                                                                                                                                                           |
| EPI_ISL_435153, EPI_ISL_435154, EPI_ISL_435155                                                                                                                                                                                                                                                                                                                                                                                                                                                                                                                                                                                                                                                                                                                                                                                                                                                                                                                                                                                                                                                                                                                                                                                                                                                                                                                                                                                                                                                                                                                                                                                                                                                                                                                                                                                                                                                                                                                                                                                                                                                                                                                                                                                                                                                                                                                                                                                                                                                                                                                                                                                                 |           | SERVIZIO DI IGIENE E SANITÀ PUBBLICA ASL Teramo                                 | Istituto Zooprofilattico Sperimentale dell'Abruzzo e Molise "G.Caporale"                               | Lorusso A, Marcacci M, Di Domenico M, Ancora M, Curini V, Mangone I, Rinaldi A, Di Pasquale A, Cammà C, Puglia I, Savini G                                                                                                                                                                                                                                                                                                                                                           |
| EPI_ISL_436198                                                                                                                                                                                                                                                                                                                                                                                                                                                                                                                                                                                                                                                                                                                                                                                                                                                                                                                                                                                                                                                                                                                                                                                                                                                                                                                                                                                                                                                                                                                                                                                                                                                                                                                                                                                                                                                                                                                                                                                                                                                                                                                                                                                                                                                                                                                                                                                                                                                                                                                                                                                                                                 |           | Servicio de Microbiología. Consorcio Hospital General Universitario de Valencia | Sequencing and Bioinformatics Service and Molecular Epidemiology Research Group. FISABIO-Public Health | Lidia Ruiz Roldan, Marta Pla Diaz,Neris Garcia-Gonzalez, Loreto Ferrús Abad, Maria Dolores Ocete, Inma Galán Vendrell, Paula Ruiz-Hueso, Mariana Reyes-Prieto, Vicente Soriano Chirona, Maria Alma Bracho, Griselda De Marco, Beatriz Beamud, Lidia Ruiz Roldan, Marta Pla Diaz,Neris Garcia-Gonzalez, Lúcia Martínez-Priego, Concepcion Gimeno, Giuseppe D'Auria, Fernando Gonzalez-Candelas                                                                                        |
| EPI_ISL_436201                                                                                                                                                                                                                                                                                                                                                                                                                                                                                                                                                                                                                                                                                                                                                                                                                                                                                                                                                                                                                                                                                                                                                                                                                                                                                                                                                                                                                                                                                                                                                                                                                                                                                                                                                                                                                                                                                                                                                                                                                                                                                                                                                                                                                                                                                                                                                                                                                                                                                                                                                                                                                                 |           | Servicio de Microbiología. Consorcio Hospital General Universitario de Valencia | Sequencing and Bioinformatics Service and Molecular Epidemiology Research Group. FISABIO-Public Health | Loreto Ferrús Abad, Maria Dolores Ocete, Inma Galán Vendrell, Paula Ruiz-Hueso, Mariana Reyes-Prieto, Vicente Soriano Chirona, Maria Alma Bracho, Griselda De Marco, Beatriz Beamud, Lidia Ruiz Roldan, Marta Pla Diaz,Neris Garcia-Gonzalez, Lúcia Martínez-Priego, Concepcion Gimeno, Giuseppe D'Auria, Fernando Gonzalez-Candelas                                                                                                                                                 |
| EPI_ISL_436202                                                                                                                                                                                                                                                                                                                                                                                                                                                                                                                                                                                                                                                                                                                                                                                                                                                                                                                                                                                                                                                                                                                                                                                                                                                                                                                                                                                                                                                                                                                                                                                                                                                                                                                                                                                                                                                                                                                                                                                                                                                                                                                                                                                                                                                                                                                                                                                                                                                                                                                                                                                                                                 |           | Servicio de Microbiología. Consorcio Hospital General Universitario de Valencia | Sequencing and Bioinformatics Service and Molecular Epidemiology Research Group. FISABIO-Public Health | Loreto Ferrús Abad, Maria Dolores Ocete, Inma Galán Vendrell, Paula Ruiz-Hueso, Mariana Reyes-Prieto, Vicente Soriano Chirona, Maria Alma Bracho, Griselda De Marco, Beatriz Beamud, Lidia Ruiz Roldan, Marta Pla Diaz,Neris Garcia-Gonzalez, Lúcia Martínez-Priego, Concepcion Gimeno, Giuseppe D'Auria, Fernando Gonzalez-Candelas                                                                                                                                                 |
| EPI_ISL_436206                                                                                                                                                                                                                                                                                                                                                                                                                                                                                                                                                                                                                                                                                                                                                                                                                                                                                                                                                                                                                                                                                                                                                                                                                                                                                                                                                                                                                                                                                                                                                                                                                                                                                                                                                                                                                                                                                                                                                                                                                                                                                                                                                                                                                                                                                                                                                                                                                                                                                                                                                                                                                                 |           | Servicio de Microbiología. Consorcio Hospital General Universitario de Valencia | Sequencing and Bioinformatics Service and Molecular Epidemiology Research Group. FISABIO-Public Health | Lidia Ruiz Roldan, Marta Pla Diaz,Neris Garcia-Gonzalez, Loreto Ferrús Abad, Maria Dolores Ocete, Inma Galán Vendrell, Paula Ruiz-Hueso, Mariana Reyes-Prieto, Vicente Soriano Chirona, Maria Alma Bracho, Griselda De Marco, Beatriz Beamud, Lidia Ruiz Roldan, Marta Pla Diaz,Neris Garcia-Gonzalez, Lúcia Martínez-Priego, Concepcion Gimeno, Giuseppe D'Auria, Fernando Gonzalez-Candelas                                                                                        |
| EPI_ISL_436209                                                                                                                                                                                                                                                                                                                                                                                                                                                                                                                                                                                                                                                                                                                                                                                                                                                                                                                                                                                                                                                                                                                                                                                                                                                                                                                                                                                                                                                                                                                                                                                                                                                                                                                                                                                                                                                                                                                                                                                                                                                                                                                                                                                                                                                                                                                                                                                                                                                                                                                                                                                                                                 |           | Servicio de Microbiología. Consorcio Hospital General Universitario de Valencia | Sequencing and Bioinformatics Service and Molecular Epidemiology Research Group. FISABIO-Public Health | Loreto Ferrús Abad, Maria Dolores Ocete, Inma Galán Vendrell, Paula Ruiz-Hueso, Mariana Reyes-Prieto, Vicente Soriano Chirona, Maria Alma Bracho, Griselda De Marco, Beatriz Beamud, Lidia Ruiz Roldan, Marta Pla Diaz,Neris Garcia-Gonzalez, Lúcia Martínez-Priego, Concepcion Gimeno, Giuseppe D'Auria, Fernando Gonzalez-Candelas                                                                                                                                                 |
| EPI_ISL_436210                                                                                                                                                                                                                                                                                                                                                                                                                                                                                                                                                                                                                                                                                                                                                                                                                                                                                                                                                                                                                                                                                                                                                                                                                                                                                                                                                                                                                                                                                                                                                                                                                                                                                                                                                                                                                                                                                                                                                                                                                                                                                                                                                                                                                                                                                                                                                                                                                                                                                                                                                                                                                                 |           | Servicio de Microbiología. Consorcio Hospital General Universitario de Valencia | Sequencing and Bioinformatics Service and Molecular Epidemiology Research Group. FISABIO-Public Health | Loreto Ferrús Abad, Maria Dolores Ocete, Inma Galán Vendrell, Paula Ruiz-Hueso, Mariana Reyes-Prieto, Vicente Soriano Chirona, Maria Alma Bracho, Griselda De Marco, Beatriz Beamud, Lidia Ruiz Roldan, Marta Pla Diaz,Neris Garcia-Gonzalez, Lúcia Martínez-Priego, Concepcion Gimeno, Giuseppe D'Auria, Fernando Gonzalez-Candelas                                                                                                                                                 |
| EPI_ISL_436214                                                                                                                                                                                                                                                                                                                                                                                                                                                                                                                                                                                                                                                                                                                                                                                                                                                                                                                                                                                                                                                                                                                                                                                                                                                                                                                                                                                                                                                                                                                                                                                                                                                                                                                                                                                                                                                                                                                                                                                                                                                                                                                                                                                                                                                                                                                                                                                                                                                                                                                                                                                                                                 |           | Servicio de Microbiología. Consorcio Hospital General Universitario de Valencia | Sequencing and Bioinformatics Service and Molecular Epidemiology Research Group. FISABIO-Public Health | Lidia Ruiz Roldan, Marta Pla Diaz,Neris Garcia-Gonzalez, Loreto Ferrús Abad, Maria Dolores Ocete, Inma Galán Vendrell, Paula Ruiz-Hueso, Mariana Reyes-Prieto, Vicente Soriano Chirona, Maria Alma Bracho, Griselda De Marco, Beatriz Beamud, Lidia Ruiz Roldan, Marta Pla Diaz,Neris Garcia-Gonzalez, Lúcia Martínez-Priego, Concepcion Gimeno, Giuseppe D'Auria, Fernando Gonzalez-Candelas                                                                                        |
| EPI_ISL_436217                                                                                                                                                                                                                                                                                                                                                                                                                                                                                                                                                                                                                                                                                                                                                                                                                                                                                                                                                                                                                                                                                                                                                                                                                                                                                                                                                                                                                                                                                                                                                                                                                                                                                                                                                                                                                                                                                                                                                                                                                                                                                                                                                                                                                                                                                                                                                                                                                                                                                                                                                                                                                                 |           | Servicio de Microbiología. Consorcio Hospital General Universitario de Valencia | Sequencing and Bioinformatics Service and Molecular Epidemiology Research Group. FISABIO-Public Health | Loreto Ferrús Abad, Maria Dolores Ocete, Inma Galán Vendrell, Paula Ruiz-Hueso, Mariana Reyes-Prieto, Vicente Soriano Chirona, Maria Alma Bracho, Griselda De Marco, Beatriz Beamud, Lidia Ruiz Roldan, Marta Pla Diaz,Neris Garcia-Gonzalez, Lúcia Martínez-Priego, Concepcion Gimeno, Giuseppe D'Auria, Fernando Gonzalez-Candelas                                                                                                                                                 |
| EPI_ISL_436218                                                                                                                                                                                                                                                                                                                                                                                                                                                                                                                                                                                                                                                                                                                                                                                                                                                                                                                                                                                                                                                                                                                                                                                                                                                                                                                                                                                                                                                                                                                                                                                                                                                                                                                                                                                                                                                                                                                                                                                                                                                                                                                                                                                                                                                                                                                                                                                                                                                                                                                                                                                                                                 |           | Servicio de Microbiología. Consorcio Hospital General Universitario de Valencia | Sequencing and Bioinformatics Service and Molecular Epidemiology Research Group. FISABIO-Public Health | Loreto Ferrús Abad, Maria Dolores Ocete, Inma Galán Vendrell, Paula Ruiz-Hueso, Mariana Reyes-Prieto, Vicente Soriano Chirona, Maria Alma Bracho, Griselda De Marco, Beatriz Beamud, Lidia Ruiz Roldan, Marta Pla Diaz,Neris Garcia-Gonzalez, Lúcia Martínez-Priego, Concepcion Gimeno, Giuseppe D'Auria, Fernando Gonzalez-Candelas                                                                                                                                                 |
| EPI_ISL_436222                                                                                                                                                                                                                                                                                                                                                                                                                                                                                                                                                                                                                                                                                                                                                                                                                                                                                                                                                                                                                                                                                                                                                                                                                                                                                                                                                                                                                                                                                                                                                                                                                                                                                                                                                                                                                                                                                                                                                                                                                                                                                                                                                                                                                                                                                                                                                                                                                                                                                                                                                                                                                                 |           | Servicio de Microbiología. Consorcio Hospital General Universitario de Valencia | Sequencing and Bioinformatics Service and Molecular Epidemiology Research Group. FISABIO-Public Health | Lidia Ruiz Roldan, Marta Pla Diaz,Neris Garcia-Gonzalez, Loreto Ferrús Abad, Maria Dolores Ocete, Inma Galán Vendrell, Paula Ruiz-Hueso, Mariana Reyes-Prieto, Vicente Soriano Chirona, Maria Alma Bracho, Griselda De Marco, Beatriz Beamud, Lidia Ruiz Roldan, Marta Pla Diaz,Neris Garcia-Gonzalez, Lúcia Martínez-Priego, Concepcion Gimeno, Giuseppe D'Auria, Fernando Gonzalez-Candelas                                                                                        |
| EPI_ISL_436225                                                                                                                                                                                                                                                                                                                                                                                                                                                                                                                                                                                                                                                                                                                                                                                                                                                                                                                                                                                                                                                                                                                                                                                                                                                                                                                                                                                                                                                                                                                                                                                                                                                                                                                                                                                                                                                                                                                                                                                                                                                                                                                                                                                                                                                                                                                                                                                                                                                                                                                                                                                                                                 |           | Servicio de Microbiología. Consorcio Hospital General Universitario de Valencia | Sequencing and Bioinformatics Service and Molecular Epidemiology Research Group. FISABIO-Public Health | Loreto Ferrús Abad, Maria Dolores Ocete, Inma Galán Vendrell, Paula Ruiz-Hueso, Mariana Reyes-Prieto, Vicente Soriano Chirona, Maria Alma Bracho, Griselda De Marco, Beatriz Beamud, Lidia Ruiz Roldan, Marta Pla Diaz,Neris Garcia-Gonzalez, Lúcia Martínez-Priego, Concepcion Gimeno, Giuseppe D'Auria, Fernando Gonzalez-Candelas                                                                                                                                                 |
| EPI_ISL_436229                                                                                                                                                                                                                                                                                                                                                                                                                                                                                                                                                                                                                                                                                                                                                                                                                                                                                                                                                                                                                                                                                                                                                                                                                                                                                                                                                                                                                                                                                                                                                                                                                                                                                                                                                                                                                                                                                                                                                                                                                                                                                                                                                                                                                                                                                                                                                                                                                                                                                                                                                                                                                                 |           | Servicio de Microbiología. Consorcio Hospital General Universitario de Valencia | Sequencing and Bioinformatics Service and Molecular Epidemiology Research Group. FISABIO-Public Health | Lidia Ruiz Roldan, Marta Pla Diaz,Neris Garcia-Gonzalez, Loreto Ferrús Abad, Maria Dolores Ocete, Inma Galán Vendrell, Paula Ruiz-Hueso, Mariana Reyes-Prieto, Vicente Soriano Chirona, Maria Alma Bracho, Griselda De Marco, Beatriz Beamud, Lidia Ruiz Roldan, Marta Pla Diaz,Neris Garcia-Gonzalez, Lúcia Martínez-Priego, Concepcion Gimeno, Giuseppe D'Auria, Fernando Gonzalez-Candelas                                                                                        |
| EPI_ISL_436232                                                                                                                                                                                                                                                                                                                                                                                                                                                                                                                                                                                                                                                                                                                                                                                                                                                                                                                                                                                                                                                                                                                                                                                                                                                                                                                                                                                                                                                                                                                                                                                                                                                                                                                                                                                                                                                                                                                                                                                                                                                                                                                                                                                                                                                                                                                                                                                                                                                                                                                                                                                                                                 |           | Servicio de Microbiología. Consorcio Hospital General Universitario de Valencia | Sequencing and Bioinformatics Service and Molecular Epidemiology Research Group. FISABIO-Public Health | Loreto Ferrús Abad, Maria Dolores Ocete, Inma Galán Vendrell, Paula Ruiz-Hueso, Mariana Reyes-Prieto, Vicente Soriano Chirona, Maria Alma Bracho, Griselda De Marco, Beatriz Beamud, Lidia Ruiz Roldan, Marta Pla Diaz,Neris Garcia-Gonzalez, Lúcia Martínez-Priego, Concepcion Gimeno, Giuseppe D'Auria, Fernando Gonzalez-Candelas                                                                                                                                                 |
| EPI_ISL_436233                                                                                                                                                                                                                                                                                                                                                                                                                                                                                                                                                                                                                                                                                                                                                                                                                                                                                                                                                                                                                                                                                                                                                                                                                                                                                                                                                                                                                                                                                                                                                                                                                                                                                                                                                                                                                                                                                                                                                                                                                                                                                                                                                                                                                                                                                                                                                                                                                                                                                                                                                                                                                                 |           | Servicio de Microbiología. Consorcio Hospital General Universitario de Valencia | Sequencing and Bioinformatics Service and Molecular Epidemiology Research Group. FISABIO-Public Health | Loreto Ferrús Abad, Maria Dolores Ocete, Inma Galán Vendrell, Paula Ruiz-Hueso, Mariana Reyes-Prieto, Vicente Soriano Chirona, Maria Alma Bracho, Griselda De Marco, Beatriz Beamud, Lidia Ruiz Roldan, Marta Pla Diaz,Neris Garcia-Gonzalez, Lúcia Martínez-Priego, Concepcion Gimeno, Giuseppe D'Auria, Fernando Gonzalez-Candelas                                                                                                                                                 |









|                                                                                                                                                                                                                                                                                                                                                                                                                                                                                                                                                                                                                                                                                                                                                                                                                                                                                                                                                                                                                                                                                                                                                                                                                                                                                                                                                                                                                                                                                                                                                                                                                                                                                                                                                                                                                                                                                                                                                                                                                                                                                                                                                                                                                                                                                                                                                                 |           |                                                                                                                     |                                                                                                                 |                                                                                                                                                                                                                                                                                                                                                                                                                                                                                                                                                                       |
|-----------------------------------------------------------------------------------------------------------------------------------------------------------------------------------------------------------------------------------------------------------------------------------------------------------------------------------------------------------------------------------------------------------------------------------------------------------------------------------------------------------------------------------------------------------------------------------------------------------------------------------------------------------------------------------------------------------------------------------------------------------------------------------------------------------------------------------------------------------------------------------------------------------------------------------------------------------------------------------------------------------------------------------------------------------------------------------------------------------------------------------------------------------------------------------------------------------------------------------------------------------------------------------------------------------------------------------------------------------------------------------------------------------------------------------------------------------------------------------------------------------------------------------------------------------------------------------------------------------------------------------------------------------------------------------------------------------------------------------------------------------------------------------------------------------------------------------------------------------------------------------------------------------------------------------------------------------------------------------------------------------------------------------------------------------------------------------------------------------------------------------------------------------------------------------------------------------------------------------------------------------------------------------------------------------------------------------------------------------------|-----------|---------------------------------------------------------------------------------------------------------------------|-----------------------------------------------------------------------------------------------------------------|-----------------------------------------------------------------------------------------------------------------------------------------------------------------------------------------------------------------------------------------------------------------------------------------------------------------------------------------------------------------------------------------------------------------------------------------------------------------------------------------------------------------------------------------------------------------------|
| EPI_ISL_443570, EPI_ISL_443571, EPI_ISL_443572, EPI_ISL_443573, EPI_ISL_443574, EPI_ISL_443575, EPI_ISL_443576, EPI_ISL_443577, EPI_ISL_443578, EPI_ISL_443579, EPI_ISL_443580, EPI_ISL_443581, EPI_ISL_443582, EPI_ISL_443583, EPI_ISL_443584, EPI_ISL_443585, EPI_ISL_443586, EPI_ISL_443587, EPI_ISL_443588, EPI_ISL_443589, EPI_ISL_443590, EPI_ISL_443591, EPI_ISL_443592, EPI_ISL_443593, EPI_ISL_443594, EPI_ISL_443595, EPI_ISL_443596, EPI_ISL_443597, EPI_ISL_443598, EPI_ISL_443599, EPI_ISL_443600, EPI_ISL_443601, EPI_ISL_443602, EPI_ISL_443603, EPI_ISL_443604, EPI_ISL_443605, EPI_ISL_443606, EPI_ISL_443607, EPI_ISL_443608, EPI_ISL_443609, EPI_ISL_443610, EPI_ISL_443611, EPI_ISL_443612, EPI_ISL_443613, EPI_ISL_443614, EPI_ISL_443615, EPI_ISL_443616, EPI_ISL_443617, EPI_ISL_443618, EPI_ISL_443619, EPI_ISL_443620, EPI_ISL_443621, EPI_ISL_443622, EPI_ISL_443623, EPI_ISL_443624, EPI_ISL_443625, EPI_ISL_443626, EPI_ISL_443627, EPI_ISL_443628, EPI_ISL_443629, EPI_ISL_443630, EPI_ISL_443631, EPI_ISL_443632, EPI_ISL_443633, EPI_ISL_443634, EPI_ISL_443635, EPI_ISL_443636, EPI_ISL_443637, EPI_ISL_443638, EPI_ISL_443639, EPI_ISL_443640, EPI_ISL_443641, EPI_ISL_443642, EPI_ISL_443643, EPI_ISL_443644, EPI_ISL_443645, EPI_ISL_443646, EPI_ISL_443647, EPI_ISL_443648, EPI_ISL_443649, EPI_ISL_443650, EPI_ISL_443651, EPI_ISL_443652, EPI_ISL_443653, EPI_ISL_443654, EPI_ISL_443655, EPI_ISL_443656, EPI_ISL_443657, EPI_ISL_443658, EPI_ISL_443659, EPI_ISL_443660, EPI_ISL_443661, EPI_ISL_443662, EPI_ISL_443663, EPI_ISL_443664, EPI_ISL_443665, EPI_ISL_443666, EPI_ISL_443667, EPI_ISL_443668, EPI_ISL_443669, EPI_ISL_443670, EPI_ISL_443671, EPI_ISL_443672, EPI_ISL_443673, EPI_ISL_443674, EPI_ISL_443675, EPI_ISL_443676, EPI_ISL_443677,                                                                                                                                                                                                                                                                                                                                                                                                                                                                                                                                                                 | see above | Department of Pathology, University of Cambridge                                                                    | Wellcome Sanger Institute for the COVID-19 Genomics UK (COG-UK) consortium                                      | Luke W Meredith, M. Estée Török , Myra Hosmillo, William L. Hamilton, Martin D. Curran, Theresa Feltwell, Grant Hall, Anna Yakovleva, Fahad A Khokhar, Charlotte J. Houldcroft, Laura G Caller, Aminu S. Jahun, Sarah L. Caddy, Ian Goodfellow; and Alex Alderton, Roberto Amato, Sonia Goncalves, Ewan Harrison, David K. Jackson, Ian Johnston, Dominic Kwiatkowski, Cordelia Langford, John Sillitoe on behalf of the Wellcome Sanger Institute COVID-19 Surveillance Team ( <a href="http://www.sanger.ac.uk/covid-team">http://www.sanger.ac.uk/covid-team</a> ) |
| EPI_ISL_444279, EPI_ISL_444280, EPI_ISL_444281, EPI_ISL_444282, EPI_ISL_444283, EPI_ISL_444284, EPI_ISL_444285, EPI_ISL_444286, EPI_ISL_444287, EPI_ISL_444288, EPI_ISL_444289, EPI_ISL_444290, EPI_ISL_444291, EPI_ISL_444292, EPI_ISL_444293, EPI_ISL_444294, EPI_ISL_444295, EPI_ISL_444296, EPI_ISL_444297, EPI_ISL_444298, EPI_ISL_444299, EPI_ISL_444300, EPI_ISL_444301, EPI_ISL_444302, EPI_ISL_444303, EPI_ISL_444304, EPI_ISL_444305, EPI_ISL_444306, EPI_ISL_444307, EPI_ISL_444308, EPI_ISL_444309, EPI_ISL_444310, EPI_ISL_444311, EPI_ISL_444312                                                                                                                                                                                                                                                                                                                                                                                                                                                                                                                                                                                                                                                                                                                                                                                                                                                                                                                                                                                                                                                                                                                                                                                                                                                                                                                                                                                                                                                                                                                                                                                                                                                                                                                                                                                                  | see above | University of Birmingham                                                                                            | COVID-19 Genomics UK (COG-UK) Consortium                                                                        | Loman Lab: Claire McCormurray, Joanne Stockton, Samuel Nicholls, Radoslaw Poplawski, Will Rowe, Josh Quirk, Nicholas Loman // UHB Lab: Celina M Whalley, Andrew Bosworth, Charlotte Poxon, Kasun Wanigasooriya, Oliver Pickles, Mike Kidd, Alex Richter, Andrew D Beggs // PHE Heartlands Lab: Husam Osman, Andrew Bosworth                                                                                                                                                                                                                                           |
| EPI_ISL_444313, EPI_ISL_444314, EPI_ISL_444315, EPI_ISL_444316, EPI_ISL_444317, EPI_ISL_444318, EPI_ISL_444319, EPI_ISL_444320, EPI_ISL_444321, EPI_ISL_444322, EPI_ISL_444323, EPI_ISL_444324, EPI_ISL_444325, EPI_ISL_444326, EPI_ISL_444327, EPI_ISL_444328, EPI_ISL_444329, EPI_ISL_444330, EPI_ISL_444331, EPI_ISL_444332, EPI_ISL_444333, EPI_ISL_444334, EPI_ISL_444335, EPI_ISL_444336, EPI_ISL_444337, EPI_ISL_444338, EPI_ISL_444339, EPI_ISL_444340, EPI_ISL_444341, EPI_ISL_444342, EPI_ISL_444343, EPI_ISL_444344, EPI_ISL_444345, EPI_ISL_444346, EPI_ISL_444347, EPI_ISL_444348, EPI_ISL_444349, EPI_ISL_444350, EPI_ISL_444351, EPI_ISL_444352, EPI_ISL_444353, EPI_ISL_444354, EPI_ISL_444355, EPI_ISL_444356, EPI_ISL_444357, EPI_ISL_444358, EPI_ISL_444359, EPI_ISL_444360, EPI_ISL_444361, EPI_ISL_444362, EPI_ISL_444363, EPI_ISL_444364, EPI_ISL_444365, EPI_ISL_444366, EPI_ISL_444367, EPI_ISL_444368, EPI_ISL_444369, EPI_ISL_444370, EPI_ISL_444371, EPI_ISL_444372, EPI_ISL_444373, EPI_ISL_444374, EPI_ISL_444375, EPI_ISL_444376, EPI_ISL_444377, EPI_ISL_444378, EPI_ISL_444379, EPI_ISL_444380, EPI_ISL_444381, EPI_ISL_444382, EPI_ISL_444383, EPI_ISL_444384, EPI_ISL_444385, EPI_ISL_444386, EPI_ISL_444387, EPI_ISL_444388, EPI_ISL_444389, EPI_ISL_444390, EPI_ISL_444391, EPI_ISL_444392, EPI_ISL_444393, EPI_ISL_444394, EPI_ISL_444395, EPI_ISL_444396, EPI_ISL_444397, EPI_ISL_444398, EPI_ISL_444399, EPI_ISL_444400, EPI_ISL_444401, EPI_ISL_444402, EPI_ISL_444403, EPI_ISL_444404, EPI_ISL_444405, EPI_ISL_444406, EPI_ISL_444407, EPI_ISL_444408, EPI_ISL_444409, EPI_ISL_444410, EPI_ISL_444411, EPI_ISL_444412, EPI_ISL_444413, EPI_ISL_444414, EPI_ISL_444415, EPI_ISL_444416, EPI_ISL_444417, EPI_ISL_444418, EPI_ISL_444419, EPI_ISL_444420, EPI_ISL_444421, EPI_ISL_444422, EPI_ISL_444423, EPI_ISL_444424, EPI_ISL_444425, EPI_ISL_444426, EPI_ISL_444427, EPI_ISL_444428, EPI_ISL_444429, EPI_ISL_444430, EPI_ISL_444431, EPI_ISL_444432, EPI_ISL_444433, EPI_ISL_444434, EPI_ISL_444435, EPI_ISL_444436, EPI_ISL_444437, EPI_ISL_444438, EPI_ISL_444439, EPI_ISL_444440, EPI_ISL_444441, EPI_ISL_444442, EPI_ISL_444443, EPI_ISL_444444, EPI_ISL_444445, EPI_ISL_444446, EPI_ISL_444447, EPI_ISL_444448, EPI_ISL_444449, EPI_ISL_444450, EPI_ISL_444451, EPI_ISL_444452, EPI_ISL_444453, EPI_ISL_444454, | see above | Department of Pathology, University of Cambridge                                                                    | COVID-19 Genomics UK (COG-UK) Consortium                                                                        | Luke W Meredith, M. Estée Török , Myra Hosmillo, William L. Hamilton, Martin D. Curran, Theresa Feltwell, Grant Hall, Anna Yakovleva, Fahad A Khokhar, Charlotte J. Houldcroft, Laura G Caller, Aminu S. Jahun, Sarah L. Caddy, Ian Goodfellow                                                                                                                                                                                                                                                                                                                        |
| EPI_ISL_444467                                                                                                                                                                                                                                                                                                                                                                                                                                                                                                                                                                                                                                                                                                                                                                                                                                                                                                                                                                                                                                                                                                                                                                                                                                                                                                                                                                                                                                                                                                                                                                                                                                                                                                                                                                                                                                                                                                                                                                                                                                                                                                                                                                                                                                                                                                                                                  |           | B.J. Medical College and Civil hospital                                                                             | Gujarat Biotechnology Research Centre                                                                           | Maharshi Pandya, Amit Kanani, Akanksha Verma, Nitin Savaliya, Raghawendra Kumar, Dinesh Kumar, Zuber Saiyed, Dipa Kinariwala, Disha Patel, Binita Aring, Neeta Khandelwal, Geeta Vaghela, Sonia Barve, Bhavesh Modi, Kairavi Joshi, Gaurishankar Shrimali, Nidhi Sood, Pranay Shah, R D Dixit, Snehal Bagatharia, Kamlesh J Upadhyay, Ramesh Pandit, Tejas Shah, Ankit Hinsu, Pritesh Sabara, Apurvasinh Puvar, Janvi Raval, Monika Gandhi, Pinal Trivedi, Pooja P Doshi, Chaitanya Joshi, Madhvi Joshi                                                               |
| EPI_ISL_444994, EPI_ISL_444995, EPI_ISL_444996, EPI_ISL_444997, EPI_ISL_444998, EPI_ISL_444999, EPI_ISL_445000                                                                                                                                                                                                                                                                                                                                                                                                                                                                                                                                                                                                                                                                                                                                                                                                                                                                                                                                                                                                                                                                                                                                                                                                                                                                                                                                                                                                                                                                                                                                                                                                                                                                                                                                                                                                                                                                                                                                                                                                                                                                                                                                                                                                                                                  |           | Naval Health Research Center                                                                                        | Naval Medical Research Center Biological Defense Research Directorate                                           | Logan Voegtly, Regina Cer, Dessiree Pena-Gomez, Adrian Paskey, Kyle Long, Roger Pan, Melinda Balansay-Ames, Chris Myers, Ewell Hollis, Nathaniel Christy, Kimberly Bishop-Lilly                                                                                                                                                                                                                                                                                                                                                                                       |
| EPI_ISL_445085                                                                                                                                                                                                                                                                                                                                                                                                                                                                                                                                                                                                                                                                                                                                                                                                                                                                                                                                                                                                                                                                                                                                                                                                                                                                                                                                                                                                                                                                                                                                                                                                                                                                                                                                                                                                                                                                                                                                                                                                                                                                                                                                                                                                                                                                                                                                                  |           | Virology Unit, Agrobiodiversity and Biotechnology Project, CIAT - International Center for Tropical Agriculture     | Virology Unit, Agrobiodiversity and Biotechnology Project, CIAT - International Center for Tropical Agriculture | Lopez,D., Parra,B. and Cuellar,W.J.                                                                                                                                                                                                                                                                                                                                                                                                                                                                                                                                   |
| EPI_ISL_445220                                                                                                                                                                                                                                                                                                                                                                                                                                                                                                                                                                                                                                                                                                                                                                                                                                                                                                                                                                                                                                                                                                                                                                                                                                                                                                                                                                                                                                                                                                                                                                                                                                                                                                                                                                                                                                                                                                                                                                                                                                                                                                                                                                                                                                                                                                                                                  |           | Laboratory for Respiratory Viruses, "Cantacuzino" National Military-Medical Institute for Resararch and Development | Cantacuzino Institute                                                                                           | M.Lazar, L.Ustea, A.Cretu                                                                                                                                                                                                                                                                                                                                                                                                                                                                                                                                             |
| EPI_ISL_445224                                                                                                                                                                                                                                                                                                                                                                                                                                                                                                                                                                                                                                                                                                                                                                                                                                                                                                                                                                                                                                                                                                                                                                                                                                                                                                                                                                                                                                                                                                                                                                                                                                                                                                                                                                                                                                                                                                                                                                                                                                                                                                                                                                                                                                                                                                                                                  |           | Narhalsan Olskroken VC                                                                                              | The Public Health Agency of Sweden                                                                              | Mahin Ghorogh, Oskar Karlsson Lindsjo, Maria Lind Karlberg, Anna-Malin Linde, Olov Svartstrom, Anna Risberg, Theresa Enkirch, Mia Brytting, Karin Tegmark-Wisell                                                                                                                                                                                                                                                                                                                                                                                                      |
| EPI_ISL_445241                                                                                                                                                                                                                                                                                                                                                                                                                                                                                                                                                                                                                                                                                                                                                                                                                                                                                                                                                                                                                                                                                                                                                                                                                                                                                                                                                                                                                                                                                                                                                                                                                                                                                                                                                                                                                                                                                                                                                                                                                                                                                                                                                                                                                                                                                                                                                  |           | Å-restadsklinikens VC                                                                                               | The Public Health Agency of Sweden                                                                              | Lisa Kjellberg / Laura Plavitu, Oskar Karlsson Lindsjo, Maria Lind Karlberg, Anna-Malin Linde, Olov Svartstrom, Anna Risberg, Theresa Enkirch, Mia Brytting, Karin Tegmark-Wisell                                                                                                                                                                                                                                                                                                                                                                                     |
| EPI_ISL_445243                                                                                                                                                                                                                                                                                                                                                                                                                                                                                                                                                                                                                                                                                                                                                                                                                                                                                                                                                                                                                                                                                                                                                                                                                                                                                                                                                                                                                                                                                                                                                                                                                                                                                                                                                                                                                                                                                                                                                                                                                                                                                                                                                                                                                                                                                                                                                  |           | Laboratory for Respiratory Viruses, Cantacuzino National Military-Medical Institute for Research and Development    | Cantacuzino Institute                                                                                           | M.Lazar, L.Ustea, A.Cretu                                                                                                                                                                                                                                                                                                                                                                                                                                                                                                                                             |
| EPI_ISL_447039                                                                                                                                                                                                                                                                                                                                                                                                                                                                                                                                                                                                                                                                                                                                                                                                                                                                                                                                                                                                                                                                                                                                                                                                                                                                                                                                                                                                                                                                                                                                                                                                                                                                                                                                                                                                                                                                                                                                                                                                                                                                                                                                                                                                                                                                                                                                                  |           | B.J. Medical College and Civil hospital                                                                             | Gujarat Biotechnology Research Centre                                                                           | Maharshi Pandya, Amit Kanani, Akanksha Verma, Nitin Savaliya, Raghawendra Kumar, Dinesh Kumar, Zuber Saiyed, Dipa Kinariwala, Disha Patel, Binita Aring, Neeta Khandelwal, Geeta Vaghela, Sonia Barve, Bhavesh Modi, Kairavi Joshi, Gaurishankar Shrimali, Nidhi Sood, Pranay Shah, R D Dixit, Snehal Bagatharia, Kamlesh J Upadhyay, Ramesh Pandit, Tejas Shah, Ankit Hinsu, Pritesh Sabara, Apurvasinh Puvar, Janvi Raval, Monika Gandhi, Pinal Trivedi, Bhavya Jindal, Chaitanya Joshi, Madhvi Joshi                                                               |
| EPI_ISL_447054                                                                                                                                                                                                                                                                                                                                                                                                                                                                                                                                                                                                                                                                                                                                                                                                                                                                                                                                                                                                                                                                                                                                                                                                                                                                                                                                                                                                                                                                                                                                                                                                                                                                                                                                                                                                                                                                                                                                                                                                                                                                                                                                                                                                                                                                                                                                                  |           | Cantacuzino National Military-Medical Institute for Research and Development                                        | Cantacuzino Institute                                                                                           | M.Lazar, L.Ustea, A.Cretu                                                                                                                                                                                                                                                                                                                                                                                                                                                                                                                                             |
| EPI_ISL_447474                                                                                                                                                                                                                                                                                                                                                                                                                                                                                                                                                                                                                                                                                                                                                                                                                                                                                                                                                                                                                                                                                                                                                                                                                                                                                                                                                                                                                                                                                                                                                                                                                                                                                                                                                                                                                                                                                                                                                                                                                                                                                                                                                                                                                                                                                                                                                  |           | Servicio de Microbiologia. Hospital Clinico Universitario de Valencia                                               | Sequencing and Bioinformatics Service and Molecular Epidemiology Research Group. FISABIO-Public Health          | Lidia Ruiz Roldan, Neris Garcia-Gonzalez, Inma Galán Vendrell, Sandra Carbo, Loreto Ferrús Abad, Paula Ruiz-Hueso, Mariana Reyes-Prieto, Vicente Soriano Chirona, Ivan Ansari, Lúcia Martínez-Priego, Giuseppe 'Auria, David Navarro, Eliseo Albert, Maria Alma Bracho, Fernando Gonzalez-Candelas                                                                                                                                                                                                                                                                    |
| EPI_ISL_447478                                                                                                                                                                                                                                                                                                                                                                                                                                                                                                                                                                                                                                                                                                                                                                                                                                                                                                                                                                                                                                                                                                                                                                                                                                                                                                                                                                                                                                                                                                                                                                                                                                                                                                                                                                                                                                                                                                                                                                                                                                                                                                                                                                                                                                                                                                                                                  |           | Servicio de Microbiologia. Hospital Clinico Universitario de Valencia                                               | Sequencing and Bioinformatics Service and Molecular Epidemiology Research Group. FISABIO-Public Health          | Loreto Ferrús Abad, Paula Ruiz-Hueso, Mariana Reyes-Prieto, Vicente Soriano Chirona, Ivan Ansari, Lúcia Martínez-Priego, Giuseppe 'Auria, David Navarro, Eliseo Albert, Maria Alma Bracho, Lidia Ruiz Roldan, Neris Garcia-Gonzalez, Inma Galán Vendrell, Sandra Carbo, Loreto Ferrús Abad, Paula Ruiz-Hueso, Mariana Reyes-Prieto, Vicente Soriano Chirona, Ivan Ansari, Fernando Gonzalez-Candelas                                                                                                                                                                  |
| EPI_ISL_447483                                                                                                                                                                                                                                                                                                                                                                                                                                                                                                                                                                                                                                                                                                                                                                                                                                                                                                                                                                                                                                                                                                                                                                                                                                                                                                                                                                                                                                                                                                                                                                                                                                                                                                                                                                                                                                                                                                                                                                                                                                                                                                                                                                                                                                                                                                                                                  |           | Servicio de Microbiologia. Hospital Clinico Universitario de Valencia                                               | Sequencing and Bioinformatics Service and Molecular Epidemiology Research Group. FISABIO-Public Health          | Lúcia Martínez-Priego, Giuseppe 'Auria, David Navarro, Eliseo Albert, Maria Alma Bracho, Lidia Ruiz Roldan, Neris Garcia-Gonzalez, Inma Galán Vendrell, Sandra Carbo, Loreto Ferrús Abad, Paula Ruiz-Hueso, Mariana Reyes-Prieto, Vicente Soriano Chirona, Ivan Ansari, Fernando Gonzalez-Candelas                                                                                                                                                                                                                                                                    |
| EPI_ISL_447488                                                                                                                                                                                                                                                                                                                                                                                                                                                                                                                                                                                                                                                                                                                                                                                                                                                                                                                                                                                                                                                                                                                                                                                                                                                                                                                                                                                                                                                                                                                                                                                                                                                                                                                                                                                                                                                                                                                                                                                                                                                                                                                                                                                                                                                                                                                                                  |           | Servicio de Microbiologia. Hospital Clinico Universitario de Valencia                                               | Sequencing and Bioinformatics Service and Molecular Epidemiology Research Group. FISABIO-Public Health          | Lidia Ruiz Roldan, Neris Garcia-Gonzalez, Inma Galán Vendrell, Sandra Carbo, Loreto Ferrús Abad, Paula Ruiz-Hueso, Mariana Reyes-Prieto, Vicente Soriano Chirona, Ivan Ansari, Lúcia Martínez-Priego, Giuseppe 'Auria, David Navarro, Eliseo Albert, Maria Alma Bracho, Fernando Gonzalez-Candelas                                                                                                                                                                                                                                                                    |
| EPI_ISL_447492                                                                                                                                                                                                                                                                                                                                                                                                                                                                                                                                                                                                                                                                                                                                                                                                                                                                                                                                                                                                                                                                                                                                                                                                                                                                                                                                                                                                                                                                                                                                                                                                                                                                                                                                                                                                                                                                                                                                                                                                                                                                                                                                                                                                                                                                                                                                                  |           | Servicio de Microbiologia. Hospital Clinico Universitario de Valencia                                               | Sequencing and Bioinformatics Service and Molecular Epidemiology Research Group. FISABIO-Public Health          | Loreto Ferrús Abad, Paula Ruiz-Hueso, Mariana Reyes-Prieto, Vicente Soriano Chirona, Ivan Ansari, Lúcia Martínez-Priego, Giuseppe 'Auria, David Navarro, Eliseo Albert, Maria Alma Bracho, Lidia Ruiz Roldan, Neris Garcia-Gonzalez, Inma Galán Vendrell, Sandra Carbo, Loreto Ferrús Abad, Paula Ruiz-Hueso, Mariana Reyes-Prieto, Vicente Soriano Chirona, Ivan Ansari, Fernando Gonzalez-Candelas                                                                                                                                                                  |
| EPI_ISL_447497                                                                                                                                                                                                                                                                                                                                                                                                                                                                                                                                                                                                                                                                                                                                                                                                                                                                                                                                                                                                                                                                                                                                                                                                                                                                                                                                                                                                                                                                                                                                                                                                                                                                                                                                                                                                                                                                                                                                                                                                                                                                                                                                                                                                                                                                                                                                                  |           | Servicio de Microbiologia. Hospital Clinico Universitario de Valencia                                               | Sequencing and Bioinformatics Service and Molecular Epidemiology Research Group. FISABIO-Public Health          | Lúcia Martínez-Priego, Giuseppe 'Auria, David Navarro, Eliseo Albert, Maria Alma Bracho, Lidia Ruiz Roldan, Neris Garcia-Gonzalez, Inma Galán Vendrell, Sandra Carbo, Loreto Ferrús Abad, Paula Ruiz-Hueso, Mariana Reyes-Prieto, Vicente Soriano Chirona, Ivan Ansari, Fernando Gonzalez-Candelas                                                                                                                                                                                                                                                                    |
| EPI_ISL_447502                                                                                                                                                                                                                                                                                                                                                                                                                                                                                                                                                                                                                                                                                                                                                                                                                                                                                                                                                                                                                                                                                                                                                                                                                                                                                                                                                                                                                                                                                                                                                                                                                                                                                                                                                                                                                                                                                                                                                                                                                                                                                                                                                                                                                                                                                                                                                  |           | Servicio de Microbiologia. Hospital Clinico Universitario de Valencia                                               | Sequencing and Bioinformatics Service and Molecular Epidemiology Research Group. FISABIO-Public Health          | Lidia Ruiz Roldan, Neris Garcia-Gonzalez, Inma Galán Vendrell, Sandra Carbo, Loreto Ferrús Abad, Paula Ruiz-Hueso, Mariana Reyes-Prieto, Vicente Soriano Chirona, Ivan Ansari, Lúcia Martínez-Priego, Giuseppe 'Auria, David Navarro, Eliseo Albert, Maria Alma Bracho, Fernando Gonzalez-Candelas                                                                                                                                                                                                                                                                    |
| EPI_ISL_447506                                                                                                                                                                                                                                                                                                                                                                                                                                                                                                                                                                                                                                                                                                                                                                                                                                                                                                                                                                                                                                                                                                                                                                                                                                                                                                                                                                                                                                                                                                                                                                                                                                                                                                                                                                                                                                                                                                                                                                                                                                                                                                                                                                                                                                                                                                                                                  |           | Servicio de Microbiologia. Hospital Clinico Universitario de Valencia                                               | Sequencing and Bioinformatics Service and Molecular Epidemiology Research Group. FISABIO-Public Health          | Loreto Ferrús Abad, Paula Ruiz-Hueso, Mariana Reyes-Prieto, Vicente Soriano Chirona, Ivan Ansari, Lúcia Martínez-Priego, Giuseppe 'Auria, David Navarro, Eliseo Albert, Maria Alma Bracho, Lidia Ruiz Roldan, Neris Garcia-Gonzalez, Inma Galán Vendrell, Sandra Carbo, Fernando Gonzalez-Candelas                                                                                                                                                                                                                                                                    |
| EPI_ISL_447511                                                                                                                                                                                                                                                                                                                                                                                                                                                                                                                                                                                                                                                                                                                                                                                                                                                                                                                                                                                                                                                                                                                                                                                                                                                                                                                                                                                                                                                                                                                                                                                                                                                                                                                                                                                                                                                                                                                                                                                                                                                                                                                                                                                                                                                                                                                                                  |           | Servicio de Microbiologia. Hospital Clinico Universitario de Valencia                                               | Sequencing and Bioinformatics Service and Molecular Epidemiology Research Group. FISABIO-Public Health          | Lúcia Martínez-Priego, Giuseppe 'Auria, David Navarro, Eliseo Albert, Maria Alma Bracho, Lidia Ruiz Roldan, Neris Garcia-Gonzalez, Inma Galán Vendrell, Sandra Carbo, Loreto Ferrús Abad, Paula Ruiz-Hueso, Mariana Reyes-Prieto, Vicente Soriano Chirona, Ivan Ansari, Fernando Gonzalez-Candelas                                                                                                                                                                                                                                                                    |
| EPI_ISL_447516                                                                                                                                                                                                                                                                                                                                                                                                                                                                                                                                                                                                                                                                                                                                                                                                                                                                                                                                                                                                                                                                                                                                                                                                                                                                                                                                                                                                                                                                                                                                                                                                                                                                                                                                                                                                                                                                                                                                                                                                                                                                                                                                                                                                                                                                                                                                                  |           | Servicio de Microbiologia. Hospital Clinico Universitario de Valencia                                               | Sequencing and Bioinformatics Service and Molecular Epidemiology Research Group. FISABIO-Public Health          | Lidia Ruiz Roldan, Neris Garcia-Gonzalez, Inma Galán Vendrell, Sandra Carbo, Loreto Ferrús Abad, Paula Ruiz-Hueso, Mariana Reyes-Prieto, Vicente Soriano Chirona, Ivan Ansari, Lúcia Martínez-Priego, Giuseppe 'Auria, David Navarro, Eliseo Albert, Maria Alma Bracho, Fernando Gonzalez-Candelas                                                                                                                                                                                                                                                                    |
| EPI_ISL_447520                                                                                                                                                                                                                                                                                                                                                                                                                                                                                                                                                                                                                                                                                                                                                                                                                                                                                                                                                                                                                                                                                                                                                                                                                                                                                                                                                                                                                                                                                                                                                                                                                                                                                                                                                                                                                                                                                                                                                                                                                                                                                                                                                                                                                                                                                                                                                  |           | Servicio de Microbiologia. Hospital Clinico Universitario de Valencia                                               | Sequencing and Bioinformatics Service and Molecular Epidemiology Research Group. FISABIO-Public Health          | Loreto Ferrús Abad, Paula Ruiz-Hueso, Mariana Reyes-Prieto, Vicente Soriano Chirona, Ivan Ansari, Lúcia Martínez-Priego, Giuseppe 'Auria, David Navarro, Eliseo Albert, Maria Alma Bracho, Lidia Ruiz Roldan, Neris Garcia-Gonzalez, Inma Galán Vendrell, Sandra Carbo, Fernando Gonzalez-Candelas                                                                                                                                                                                                                                                                    |
| EPI_ISL_447524                                                                                                                                                                                                                                                                                                                                                                                                                                                                                                                                                                                                                                                                                                                                                                                                                                                                                                                                                                                                                                                                                                                                                                                                                                                                                                                                                                                                                                                                                                                                                                                                                                                                                                                                                                                                                                                                                                                                                                                                                                                                                                                                                                                                                                                                                                                                                  |           | Servicio de Microbiologia. Hospital Clinico Universitario de Valencia                                               | Sequencing and Bioinformatics Service and Molecular Epidemiology Research Group. FISABIO-Public Health          | Lúcia Martínez-Priego, Giuseppe 'Auria, David Navarro, Eliseo Albert, Maria Alma Bracho, Lidia Ruiz Roldan, Neris Garcia-Gonzalez, Inma Galán Vendrell, Sandra Carbo, Loreto Ferrús Abad, Paula Ruiz-Hueso, Mariana Reyes-Prieto, Vicente Soriano Chirona, Ivan Ansari, Fernando Gonzalez-Candelas                                                                                                                                                                                                                                                                    |

|                                                                                                                                                                                                                                                                                                                                                                                                                                                                                                                                                                                                                                                                                                                                                                                                                                                                                                                                                                                                                                                                                                                                                                                                                                                                                                                                                                                                                                                                                                                                                                                                                                                                                                                                                                                                                                                                                                                                                                                                                                                                                                                                                                                                                                                                                                                                                                                                                                                                                                                                                                                                                                                                                                                                                                                |                                                                                                                                                                               |                                                                                                                                                                                                                                                |                                                                                                                                                                                                                                                                                                                                                                                                                                                                                                        |
|--------------------------------------------------------------------------------------------------------------------------------------------------------------------------------------------------------------------------------------------------------------------------------------------------------------------------------------------------------------------------------------------------------------------------------------------------------------------------------------------------------------------------------------------------------------------------------------------------------------------------------------------------------------------------------------------------------------------------------------------------------------------------------------------------------------------------------------------------------------------------------------------------------------------------------------------------------------------------------------------------------------------------------------------------------------------------------------------------------------------------------------------------------------------------------------------------------------------------------------------------------------------------------------------------------------------------------------------------------------------------------------------------------------------------------------------------------------------------------------------------------------------------------------------------------------------------------------------------------------------------------------------------------------------------------------------------------------------------------------------------------------------------------------------------------------------------------------------------------------------------------------------------------------------------------------------------------------------------------------------------------------------------------------------------------------------------------------------------------------------------------------------------------------------------------------------------------------------------------------------------------------------------------------------------------------------------------------------------------------------------------------------------------------------------------------------------------------------------------------------------------------------------------------------------------------------------------------------------------------------------------------------------------------------------------------------------------------------------------------------------------------------------------|-------------------------------------------------------------------------------------------------------------------------------------------------------------------------------|------------------------------------------------------------------------------------------------------------------------------------------------------------------------------------------------------------------------------------------------|--------------------------------------------------------------------------------------------------------------------------------------------------------------------------------------------------------------------------------------------------------------------------------------------------------------------------------------------------------------------------------------------------------------------------------------------------------------------------------------------------------|
| EPI_ISL_447529                                                                                                                                                                                                                                                                                                                                                                                                                                                                                                                                                                                                                                                                                                                                                                                                                                                                                                                                                                                                                                                                                                                                                                                                                                                                                                                                                                                                                                                                                                                                                                                                                                                                                                                                                                                                                                                                                                                                                                                                                                                                                                                                                                                                                                                                                                                                                                                                                                                                                                                                                                                                                                                                                                                                                                 | Servicio de Microbiología. Hospital Clínico Universitario de Valencia                                                                                                         | Sequencing and Bioinformatics Service and Molecular Epidemiology Research Group. FISABIO-Public Health                                                                                                                                         | Lidia Ruiz Roldan, Neris Garcia-Gonzalez, Inma Galán Vendrell, Sandra Carbo, Loreto Ferrús Abad, Paula Ruiz-Hueso, Mariana Reyes-Prieto, Vicente Soriano Chirona, Ivan Ansari, Lúcia Martínez-Priego, Giuseppe Auria, David Navarro, Eliseo Albar, María Alma Bracho, Fernando Gonzalez-Candelas                                                                                                                                                                                                       |
| EPI_ISL_447548                                                                                                                                                                                                                                                                                                                                                                                                                                                                                                                                                                                                                                                                                                                                                                                                                                                                                                                                                                                                                                                                                                                                                                                                                                                                                                                                                                                                                                                                                                                                                                                                                                                                                                                                                                                                                                                                                                                                                                                                                                                                                                                                                                                                                                                                                                                                                                                                                                                                                                                                                                                                                                                                                                                                                                 | GMERS Medical College and Hospital, Gandhinagar                                                                                                                               | Gujarat Biotechnology Research Centre                                                                                                                                                                                                          | Maharshi Pandya, Amit Kanani, Akanksha Verma, Nitin Savaliya, Raghawendra Kumar, Dinesh Kumar, Zuber Saiyed, Dipa Kinariwala, Disha Patel, Binita Aring, Neeta Khandelwal, Geeta Vaghela, Sonia Barve, Bhavesh Modi, Kairavi Joshi, Gaurishankar Shrimali, Nidhi Sood, Pranay Shah, R D Dixit, Snehal Bagatharia, Kamlesh J Upadhyay, Ramesh Pandit, Tejas Shah, Ankit Hinsu, Pritesh Sabara, Apurvasinh Puvar, Janvi Raval, Monika Gandhi, Pinal Trivedi, Fzsal Ansari, Chaitanya Joshi, Madhvi Joshi |
| EPI_ISL_447945, EPI_ISL_447946, EPI_ISL_447947, EPI_ISL_447948, EPI_ISL_447949, EPI_ISL_447950, EPI_ISL_447951, EPI_ISL_447952, EPI_ISL_447953, EPI_ISL_447954, EPI_ISL_447955, EPI_ISL_447956, EPI_ISL_447961, EPI_ISL_447962, EPI_ISL_447963, EPI_ISL_447964, EPI_ISL_447965, EPI_ISL_447966, EPI_ISL_447967, EPI_ISL_447968, EPI_ISL_447969, EPI_ISL_447970, EPI_ISL_447971, EPI_ISL_447972, EPI_ISL_447973, EPI_ISL_447974, EPI_ISL_447975, EPI_ISL_447976, EPI_ISL_447977, EPI_ISL_447978, EPI_ISL_447979, EPI_ISL_447980, EPI_ISL_447981, EPI_ISL_447982, EPI_ISL_447983, EPI_ISL_447984, EPI_ISL_447985, EPI_ISL_447986, EPI_ISL_447987, EPI_ISL_447988, EPI_ISL_447989, EPI_ISL_447990, EPI_ISL_447991, EPI_ISL_447992, EPI_ISL_447993, EPI_ISL_447994, EPI_ISL_447995, EPI_ISL_447996, EPI_ISL_447997, EPI_ISL_447998, EPI_ISL_447999, EPI_ISL_448000, EPI_ISL_448001, EPI_ISL_448002, EPI_ISL_448003, EPI_ISL_448004, EPI_ISL_448005, EPI_ISL_448006, EPI_ISL_448007, EPI_ISL_448008, EPI_ISL_448009, EPI_ISL_448010, EPI_ISL_448011, EPI_ISL_448012, EPI_ISL_448013, EPI_ISL_448014, EPI_ISL_448015, EPI_ISL_448016, EPI_ISL_448017, EPI_ISL_448018, EPI_ISL_448019, EPI_ISL_448020, EPI_ISL_448021, EPI_ISL_448022, EPI_ISL_448023, EPI_ISL_448024, EPI_ISL_448025, EPI_ISL_448026, EPI_ISL_448027, EPI_ISL_448028, EPI_ISL_448029, EPI_ISL_448030, EPI_ISL_448031, EPI_ISL_448032, EPI_ISL_448033, EPI_ISL_448034, EPI_ISL_448035, EPI_ISL_448036, EPI_ISL_448037, EPI_ISL_448038, EPI_ISL_448039, EPI_ISL_448040, EPI_ISL_448041, EPI_ISL_448042, EPI_ISL_448043, EPI_ISL_448044, EPI_ISL_448045, EPI_ISL_448046, EPI_ISL_448047, EPI_ISL_448048, EPI_ISL_448049, EPI_ISL_448050, EPI_ISL_448051, EPI_ISL_448052, EPI_ISL_448053, EPI_ISL_448054, EPI_ISL_448055, EPI_ISL_448056, EPI_ISL_448057, EPI_ISL_448058, EPI_ISL_448059, EPI_ISL_448060, EPI_ISL_448061, EPI_ISL_448062, EPI_ISL_448063, EPI_ISL_448064, EPI_ISL_448065, EPI_ISL_448066, EPI_ISL_448067, EPI_ISL_448068, EPI_ISL_448069, EPI_ISL_448070, EPI_ISL_448071, EPI_ISL_448072, EPI_ISL_448073, EPI_ISL_448074, EPI_ISL_448075, EPI_ISL_448076, EPI_ISL_448077, EPI_ISL_448078, EPI_ISL_448079, EPI_ISL_448080, EPI_ISL_448081, EPI_ISL_448082, EPI_ISL_448083, EPI_ISL_448084, EPI_ISL_448085, EPI_ISL_448086, EPI_ISL_448087, EPI_ISL_448088, EPI_ISL_448089, EPI_ISL_448090, EPI_ISL_448091, EPI_ISL_448092, EPI_ISL_448093, EPI_ISL_448094, EPI_ISL_448095, EPI_ISL_448096, EPI_ISL_448097, EPI_ISL_448098, EPI_ISL_448099, EPI_ISL_448100, EPI_ISL_448101, EPI_ISL_448102, EPI_ISL_448103, EPI_ISL_448104, EPI_ISL_448105, EPI_ISL_448106, EPI_ISL_448107, EPI_ISL_448108, EPI_ISL_448109, EPI_ISL_448110, EPI_ISL_448111, EPI_ISL_448112, EPI_ISL_448113, EPI_ISL_448114, EPI_ISL_448115 | COVID-19 Genomics UK (COG-UK) Consortium                                                                                                                                      | Luke W Meredith, M. Estée Török , Myra Hosmillo, William L. Hamilton, Martin D. Curran, Theresa Feltwell, Grant Hall, Anna Yakovleva, Fahad A Khokhar, Charlotte J. Houldcroft, Laura G Caller, Aminu S. Jahun, Sarah L. Caddy, Ian Goodfellow |                                                                                                                                                                                                                                                                                                                                                                                                                                                                                                        |
| see above                                                                                                                                                                                                                                                                                                                                                                                                                                                                                                                                                                                                                                                                                                                                                                                                                                                                                                                                                                                                                                                                                                                                                                                                                                                                                                                                                                                                                                                                                                                                                                                                                                                                                                                                                                                                                                                                                                                                                                                                                                                                                                                                                                                                                                                                                                                                                                                                                                                                                                                                                                                                                                                                                                                                                                      | Department of Pathology, University of Cambridge                                                                                                                              | COVID-19 Genomics UK (COG-UK) Consortium                                                                                                                                                                                                       | Luke W Meredith, M. Estée Török , Myra Hosmillo, William L. Hamilton, Martin D. Curran, Theresa Feltwell, Grant Hall, Anna Yakovleva, Fahad A Khokhar, Charlotte J. Houldcroft, Laura G Caller, Aminu S. Jahun, Sarah L. Caddy, Ian Goodfellow                                                                                                                                                                                                                                                         |
| EPI_ISL_449799                                                                                                                                                                                                                                                                                                                                                                                                                                                                                                                                                                                                                                                                                                                                                                                                                                                                                                                                                                                                                                                                                                                                                                                                                                                                                                                                                                                                                                                                                                                                                                                                                                                                                                                                                                                                                                                                                                                                                                                                                                                                                                                                                                                                                                                                                                                                                                                                                                                                                                                                                                                                                                                                                                                                                                 | National Laboratory for Health, Environment and Food                                                                                                                          | National Laboratory for Health, Environment and Food                                                                                                                                                                                           | Mahnic A., Hedzet S., Janeczic S., Duh D., Završnik J., Blazun Vosner H., Rupnik M.                                                                                                                                                                                                                                                                                                                                                                                                                    |
| EPI_ISL_450193, EPI_ISL_450194, EPI_ISL_450195                                                                                                                                                                                                                                                                                                                                                                                                                                                                                                                                                                                                                                                                                                                                                                                                                                                                                                                                                                                                                                                                                                                                                                                                                                                                                                                                                                                                                                                                                                                                                                                                                                                                                                                                                                                                                                                                                                                                                                                                                                                                                                                                                                                                                                                                                                                                                                                                                                                                                                                                                                                                                                                                                                                                 | SA Pathology                                                                                                                                                                  | SA Pathology                                                                                                                                                                                                                                   | Lex Leong                                                                                                                                                                                                                                                                                                                                                                                                                                                                                              |
| EPI_ISL_450442                                                                                                                                                                                                                                                                                                                                                                                                                                                                                                                                                                                                                                                                                                                                                                                                                                                                                                                                                                                                                                                                                                                                                                                                                                                                                                                                                                                                                                                                                                                                                                                                                                                                                                                                                                                                                                                                                                                                                                                                                                                                                                                                                                                                                                                                                                                                                                                                                                                                                                                                                                                                                                                                                                                                                                 | The Department of Infectious Disease Prevention and Control, Henan Provincial Center for Disease Control and Prevention                                                       | The Department of Infectious Disease Prevention and Control, Henan Provincial Center for Disease Control and Prevention                                                                                                                        | Li.X., Lu.S., Wu.B., Hu.X., Li.D., Huang.X. and Guo.W.                                                                                                                                                                                                                                                                                                                                                                                                                                                 |
| EPI_ISL_450525, EPI_ISL_450526, EPI_ISL_450527, EPI_ISL_450528, EPI_ISL_450529, EPI_ISL_450530                                                                                                                                                                                                                                                                                                                                                                                                                                                                                                                                                                                                                                                                                                                                                                                                                                                                                                                                                                                                                                                                                                                                                                                                                                                                                                                                                                                                                                                                                                                                                                                                                                                                                                                                                                                                                                                                                                                                                                                                                                                                                                                                                                                                                                                                                                                                                                                                                                                                                                                                                                                                                                                                                 | Hematology Laboratory, Section of Molecular Diagnostics, University Clinical Centre, Medical University of Gdansk                                                             | Department of Virology, Faculty of Medicine, University of Helsinki, Helsinki, Finland                                                                                                                                                         | Maciej Grzybek, Marlena Robakowska, Aneta Szulc, Olli Vapalahti, Teemu Smura                                                                                                                                                                                                                                                                                                                                                                                                                           |
| EPI_ISL_450746                                                                                                                                                                                                                                                                                                                                                                                                                                                                                                                                                                                                                                                                                                                                                                                                                                                                                                                                                                                                                                                                                                                                                                                                                                                                                                                                                                                                                                                                                                                                                                                                                                                                                                                                                                                                                                                                                                                                                                                                                                                                                                                                                                                                                                                                                                                                                                                                                                                                                                                                                                                                                                                                                                                                                                 | Laboratory of Molecular Biology, Diagnostyka sp. z o.o.                                                                                                                       | Laboratory of Recombinant Vaccines                                                                                                                                                                                                             | Lukasz Rabalski, Anna Piotrowska-Mietelska, Maciej Kosinski, Boguslaw Szewczyk, Krystyna Bienkowska-Szewczyk                                                                                                                                                                                                                                                                                                                                                                                           |
| EPI_ISL_450809                                                                                                                                                                                                                                                                                                                                                                                                                                                                                                                                                                                                                                                                                                                                                                                                                                                                                                                                                                                                                                                                                                                                                                                                                                                                                                                                                                                                                                                                                                                                                                                                                                                                                                                                                                                                                                                                                                                                                                                                                                                                                                                                                                                                                                                                                                                                                                                                                                                                                                                                                                                                                                                                                                                                                                 | Kungsholmsdoktorn                                                                                                                                                             | The Public Health Agency of Sweden                                                                                                                                                                                                             | Linus Hammar, Anna-Malin Linde, Maria Lind Karlberg, Oskar Karlsson Lindsjo, Olov Svartstrom, Anna Risberg, Theresa Enkirch, Mia Brytting, Karin Tegmark-Wisell                                                                                                                                                                                                                                                                                                                                        |
| EPI_ISL_450816                                                                                                                                                                                                                                                                                                                                                                                                                                                                                                                                                                                                                                                                                                                                                                                                                                                                                                                                                                                                                                                                                                                                                                                                                                                                                                                                                                                                                                                                                                                                                                                                                                                                                                                                                                                                                                                                                                                                                                                                                                                                                                                                                                                                                                                                                                                                                                                                                                                                                                                                                                                                                                                                                                                                                                 | orestadsklinikens VC                                                                                                                                                          | The Public Health Agency of Sweden                                                                                                                                                                                                             | Lisa Kjellberg / Laura Plavitu, Anna-Malin Linde, Maria Lind Karlberg, Oskar Karlsson Lindsjo, Olov Svartstrom, Anna Risberg, Theresa Enkirch, Mia Brytting, Karin Tegmark-Wisell                                                                                                                                                                                                                                                                                                                      |
| EPI_ISL_450829                                                                                                                                                                                                                                                                                                                                                                                                                                                                                                                                                                                                                                                                                                                                                                                                                                                                                                                                                                                                                                                                                                                                                                                                                                                                                                                                                                                                                                                                                                                                                                                                                                                                                                                                                                                                                                                                                                                                                                                                                                                                                                                                                                                                                                                                                                                                                                                                                                                                                                                                                                                                                                                                                                                                                                 | Narhalsan Sjobo vardcentral                                                                                                                                                   | The Public Health Agency of Sweden                                                                                                                                                                                                             | Lovisa Hjerten, Anna-Malin Linde, Maria Lind Karlberg, Oskar Karlsson Lindsjo, Olov Svartstrom, Anna Risberg, Theresa Enkirch, Mia Brytting, Karin Tegmark-Wisell                                                                                                                                                                                                                                                                                                                                      |
| EPI_ISL_450830                                                                                                                                                                                                                                                                                                                                                                                                                                                                                                                                                                                                                                                                                                                                                                                                                                                                                                                                                                                                                                                                                                                                                                                                                                                                                                                                                                                                                                                                                                                                                                                                                                                                                                                                                                                                                                                                                                                                                                                                                                                                                                                                                                                                                                                                                                                                                                                                                                                                                                                                                                                                                                                                                                                                                                 | Narhalsan Olskroken VC                                                                                                                                                        | The Public Health Agency of Sweden                                                                                                                                                                                                             | Mahin Ghoroghi, Anna-Malin Linde, Maria Lind Karlberg, Oskar Karlsson Lindsjo, Olov Svartstrom, Anna Risberg, Theresa Enkirch, Mia Brytting, Karin Tegmark-Wisell                                                                                                                                                                                                                                                                                                                                      |
| EPI_ISL_451077, EPI_ISL_451078, EPI_ISL_451079, EPI_ISL_451080, EPI_ISL_451081, EPI_ISL_451082, EPI_ISL_451083, EPI_ISL_451084, EPI_ISL_451085, EPI_ISL_451086, EPI_ISL_451087, EPI_ISL_451088, EPI_ISL_451089, EPI_ISL_451090, EPI_ISL_451091, EPI_ISL_451092, EPI_ISL_451093, EPI_ISL_451094, EPI_ISL_451095, EPI_ISL_451096, EPI_ISL_451097, EPI_ISL_451098, EPI_ISL_451099, EPI_ISL_451100, EPI_ISL_451101, EPI_ISL_451102, EPI_ISL_451103, EPI_ISL_451104, EPI_ISL_451105, EPI_ISL_451106, EPI_ISL_451107, EPI_ISL_451108, EPI_ISL_451109, EPI_ISL_451110, EPI_ISL_451111, EPI_ISL_451112, EPI_ISL_451113, EPI_ISL_451114, EPI_ISL_451115, EPI_ISL_451116, EPI_ISL_451117, EPI_ISL_451118, EPI_ISL_451119, EPI_ISL_451120, EPI_ISL_451121, EPI_ISL_451122, EPI_ISL_451123, EPI_ISL_451124, EPI_ISL_451125, EPI_ISL_451126, EPI_ISL_451127, EPI_ISL_451128, EPI_ISL_451129, EPI_ISL_451130, EPI_ISL_451131, EPI_ISL_451132, EPI_ISL_451133, EPI_ISL_451134, EPI_ISL_451135, EPI_ISL_451136, EPI_ISL_451137, EPI_ISL_451138, EPI_ISL_451139, EPI_ISL_451140, EPI_ISL_451141, EPI_ISL_451142, EPI_ISL_451143, EPI_ISL_451144, EPI_ISL_451145, EPI_ISL_451146, EPI_ISL_451147, EPI_ISL_451148                                                                                                                                                                                                                                                                                                                                                                                                                                                                                                                                                                                                                                                                                                                                                                                                                                                                                                                                                                                                                                                                                                                                                                                                                                                                                                                                                                                                                                                                                                                                                                                 | SA Pathology                                                                                                                                                                  | Lex Leong, Chuan Kok Lim, Mark Turra, Ivan Bastian, Geoff Higgins                                                                                                                                                                              |                                                                                                                                                                                                                                                                                                                                                                                                                                                                                                        |
| EPI_ISL_451153                                                                                                                                                                                                                                                                                                                                                                                                                                                                                                                                                                                                                                                                                                                                                                                                                                                                                                                                                                                                                                                                                                                                                                                                                                                                                                                                                                                                                                                                                                                                                                                                                                                                                                                                                                                                                                                                                                                                                                                                                                                                                                                                                                                                                                                                                                                                                                                                                                                                                                                                                                                                                                                                                                                                                                 | M.P Shah Government Medocal college Jamnagar                                                                                                                                  | Gujarat Biotechnology Research Centre                                                                                                                                                                                                          | Maharshi Pandya, Amit Kanani, Nidhi Patel, Nitin Savaliya, Raghawendra Kumar, Dinesh Kumar, Zuber Saiyed, Komal Patel, Labdhi Pandya, Snehal Bagatharia, Ramesh Pandit, Tejas Shah, Ankit Hinsu, Pritesh Sabara, Apurvasinh Puvar, Binita Aring, Janvi Raval, Zarna Patel, Monika Gandhi, Pinal Trivedi, Bhavesh Modi, Gaurishankar Shrimali, R D Dixit, A M Kadri, Fenil Patel, Chaitanya Joshi, Madhvi Joshi,                                                                                        |
| EPI_ISL_451644, EPI_ISL_451645, EPI_ISL_451646, EPI_ISL_451647                                                                                                                                                                                                                                                                                                                                                                                                                                                                                                                                                                                                                                                                                                                                                                                                                                                                                                                                                                                                                                                                                                                                                                                                                                                                                                                                                                                                                                                                                                                                                                                                                                                                                                                                                                                                                                                                                                                                                                                                                                                                                                                                                                                                                                                                                                                                                                                                                                                                                                                                                                                                                                                                                                                 | Laboratory of Molecular Biology, Diagnostyka sp. z o.o.                                                                                                                       | Laboratory of Recombinant Vaccines                                                                                                                                                                                                             | Lukasz Rabalski, Anna Piotrowska-Mietelska, Maciej Kosinski, Boguslaw Szewczyk, Krystyna Bienkowska-Szewczyk                                                                                                                                                                                                                                                                                                                                                                                           |
| EPI_ISL_451648, EPI_ISL_451649, EPI_ISL_451650, EPI_ISL_451651, EPI_ISL_451652, EPI_ISL_451653, EPI_ISL_451654                                                                                                                                                                                                                                                                                                                                                                                                                                                                                                                                                                                                                                                                                                                                                                                                                                                                                                                                                                                                                                                                                                                                                                                                                                                                                                                                                                                                                                                                                                                                                                                                                                                                                                                                                                                                                                                                                                                                                                                                                                                                                                                                                                                                                                                                                                                                                                                                                                                                                                                                                                                                                                                                 | Hematology Laboratory, Section of Molecular Diagnostics, University Clinical Centre, Medical University of Gdansk                                                             | Laboratory of Recombinant Vaccines                                                                                                                                                                                                             | Lukasz Rabalski, Adam Sodal, Aneta Szulc, Krzysztof Lewandowski, Ewa Milosz, Marlena Robakowska, Boguslaw Szewczyk, Krystyna Bienkowska-Szewczyk                                                                                                                                                                                                                                                                                                                                                       |
| EPI_ISL_451655, EPI_ISL_451656, EPI_ISL_451657, EPI_ISL_451658, EPI_ISL_451659, EPI_ISL_451660, EPI_ISL_451661, EPI_ISL_451662, EPI_ISL_451663, EPI_ISL_451664                                                                                                                                                                                                                                                                                                                                                                                                                                                                                                                                                                                                                                                                                                                                                                                                                                                                                                                                                                                                                                                                                                                                                                                                                                                                                                                                                                                                                                                                                                                                                                                                                                                                                                                                                                                                                                                                                                                                                                                                                                                                                                                                                                                                                                                                                                                                                                                                                                                                                                                                                                                                                 | State Sanitary Inspectorate                                                                                                                                                   | Laboratory of Recombinant Vaccines                                                                                                                                                                                                             | Lukasz Rabalski, Boguslaw Szewczyk, Krystyna Bienkowska-Szewczyk, Jaroslaw Pinkas                                                                                                                                                                                                                                                                                                                                                                                                                      |
| EPI_ISL_452236                                                                                                                                                                                                                                                                                                                                                                                                                                                                                                                                                                                                                                                                                                                                                                                                                                                                                                                                                                                                                                                                                                                                                                                                                                                                                                                                                                                                                                                                                                                                                                                                                                                                                                                                                                                                                                                                                                                                                                                                                                                                                                                                                                                                                                                                                                                                                                                                                                                                                                                                                                                                                                                                                                                                                                 | VC Sorgenfrimottagningen                                                                                                                                                      | The Public Health Agency of Sweden                                                                                                                                                                                                             | Lisa Esbjornsson Klemenz, Anna-Malin Linde, Maria Lind Karlberg, Oskar Karlsson Lindsjo, Olov Svartstrom, Anna Risberg, Theresa Enkirch, Mia Brytting, Karin Tegmark-Wisell                                                                                                                                                                                                                                                                                                                            |
| EPI_ISL_452238                                                                                                                                                                                                                                                                                                                                                                                                                                                                                                                                                                                                                                                                                                                                                                                                                                                                                                                                                                                                                                                                                                                                                                                                                                                                                                                                                                                                                                                                                                                                                                                                                                                                                                                                                                                                                                                                                                                                                                                                                                                                                                                                                                                                                                                                                                                                                                                                                                                                                                                                                                                                                                                                                                                                                                 | Narhalsan Sjobo vardcentral                                                                                                                                                   | The Public Health Agency of Sweden                                                                                                                                                                                                             | Lovisa Hjerten, Anna-Malin Linde, Maria Lind Karlberg, Oskar Karlsson Lindsjo, Olov Svartstrom, Anna Risberg, Theresa Enkirch, Mia Brytting, Karin Tegmark-Wisell                                                                                                                                                                                                                                                                                                                                      |
| EPI_ISL_452857, EPI_ISL_452858, EPI_ISL_452859, EPI_ISL_452860, EPI_ISL_452861, EPI_ISL_452862, EPI_ISL_452863, EPI_ISL_452864, EPI_ISL_452865, EPI_ISL_452866, EPI_ISL_452867, EPI_ISL_452868, EPI_ISL_452869, EPI_ISL_452870, EPI_ISL_452871, EPI_ISL_452872, EPI_ISL_452873, EPI_ISL_452874, EPI_ISL_452875, EPI_ISL_452876, EPI_ISL_452877, EPI_ISL_452878, EPI_ISL_452879, EPI_ISL_452880, EPI_ISL_452881, EPI_ISL_452882, EPI_ISL_452883, EPI_ISL_452884, EPI_ISL_452885, EPI_ISL_452886, EPI_ISL_452887, EPI_ISL_452888, EPI_ISL_452889, EPI_ISL_452890, EPI_ISL_452891, EPI_ISL_452892, EPI_ISL_452893, EPI_ISL_452894, EPI_ISL_452895, EPI_ISL_452896, EPI_ISL_452897, EPI_ISL_452898, EPI_ISL_452899, EPI_ISL_452900, EPI_ISL_452901, EPI_ISL_452902, EPI_ISL_452903, EPI_ISL_452904, EPI_ISL_452905, EPI_ISL_452906, EPI_ISL_452907, EPI_ISL_452908, EPI_ISL_452909, EPI_ISL_452910, EPI_ISL_452911, EPI_ISL_452912, EPI_ISL_452913, EPI_ISL_452914, EPI_ISL_452915, EPI_ISL_452916, EPI_ISL_452917, EPI_ISL_452918, EPI_ISL_452919, EPI_ISL_452920, EPI_ISL_452921, EPI_ISL_452922, EPI_ISL_452923, EPI_ISL_452924, EPI_ISL_452925, EPI_ISL_452926, EPI_ISL_452927, EPI_ISL_452928, EPI_ISL_452929, EPI_ISL_452930, EPI_ISL_452931, EPI_ISL_452932, EPI_ISL_452933, EPI_ISL_452934, EPI_ISL_452935, EPI_ISL_452936, EPI_ISL_452937, EPI_ISL_452938, EPI_ISL_452939, EPI_ISL_452940, EPI_ISL_452941, EPI_ISL_452942, EPI_ISL_452943, EPI_ISL_452944, EPI_ISL_452945, EPI_ISL_452946, EPI_ISL_452947, EPI_ISL_452948, EPI_ISL_452949, EPI_ISL_452950, EPI_ISL_452951, EPI_ISL_452952, EPI_ISL_452953, EPI_ISL_452954, EPI_ISL_452955, EPI_ISL_452956, EPI_ISL_452957, EPI_ISL_452958, EPI_ISL_452959, EPI_ISL_452960, EPI_ISL_452961, EPI_ISL_452962, EPI_ISL_452963, EPI_ISL_452964, EPI_ISL_452965, EPI_ISL_452966, EPI_ISL_452967, EPI_ISL_452968, EPI_ISL_452969, EPI_ISL_452970, EPI_ISL_452971, EPI_ISL_452972, EPI_ISL_452973, EPI_ISL_452974, EPI_ISL_452975, EPI_ISL_452976, EPI_ISL_452977, EPI_ISL_452978, EPI_ISL_452979, EPI_ISL_452980, EPI_ISL_452981, EPI_ISL_452982, EPI_ISL_452983, EPI_ISL_452984, EPI_ISL_452985, EPI_ISL_452986, EPI_ISL_452987, EPI_ISL_452988, EPI_ISL_452989, EPI_ISL_452990, EPI_ISL_452991, EPI_ISL_452992, EPI_ISL_452993, EPI_ISL_452994, EPI_ISL_452995, EPI_ISL_452996, EPI_ISL_452997, EPI_ISL_452998, EPI_ISL_452999, EPI_ISL_453000, EPI_ISL_453001, EPI_ISL_453002, EPI_ISL_453003, EPI_ISL_453004, EPI_ISL_453005                                                                                                                                                                                                                                                                                                 | COVID-19 Genomics UK (COG-UK) Consortium                                                                                                                                      | Luke W Meredith, M. Estée Török , Myra Hosmillo, William L. Hamilton, Martin D. Curran, Theresa Feltwell, Grant Hall, Anna Yakovleva, Fahad A Khokhar, Charlotte J. Houldcroft, Laura G Caller, Aminu S. Jahun, Sarah L. Caddy, Ian Goodfellow |                                                                                                                                                                                                                                                                                                                                                                                                                                                                                                        |
| see above                                                                                                                                                                                                                                                                                                                                                                                                                                                                                                                                                                                                                                                                                                                                                                                                                                                                                                                                                                                                                                                                                                                                                                                                                                                                                                                                                                                                                                                                                                                                                                                                                                                                                                                                                                                                                                                                                                                                                                                                                                                                                                                                                                                                                                                                                                                                                                                                                                                                                                                                                                                                                                                                                                                                                                      | Department of Pathology, University of Cambridge                                                                                                                              | COVID-19 Genomics UK (COG-UK) Consortium                                                                                                                                                                                                       | Luke W Meredith, M. Estée Török , Myra Hosmillo, William L. Hamilton, Martin D. Curran, Theresa Feltwell, Grant Hall, Anna Yakovleva, Fahad A Khokhar, Charlotte J. Houldcroft, Laura G Caller, Aminu S. Jahun, Sarah L. Caddy, Ian Goodfellow                                                                                                                                                                                                                                                         |
| EPI_ISL_454421, EPI_ISL_454422, EPI_ISL_454423, EPI_ISL_454424, EPI_ISL_454425, EPI_ISL_454426, EPI_ISL_454427, EPI_ISL_454428, EPI_ISL_454429, EPI_ISL_454430, EPI_ISL_454431, EPI_ISL_454432, EPI_ISL_454433, EPI_ISL_454434, EPI_ISL_454435                                                                                                                                                                                                                                                                                                                                                                                                                                                                                                                                                                                                                                                                                                                                                                                                                                                                                                                                                                                                                                                                                                                                                                                                                                                                                                                                                                                                                                                                                                                                                                                                                                                                                                                                                                                                                                                                                                                                                                                                                                                                                                                                                                                                                                                                                                                                                                                                                                                                                                                                 | see above                                                                                                                                                                     | see above                                                                                                                                                                                                                                      | MDH Laboratories Administration                                                                                                                                                                                                                                                                                                                                                                                                                                                                        |
| EPI_ISL_455468, EPI_ISL_455469, EPI_ISL_455470, EPI_ISL_455471, EPI_ISL_455472, EPI_ISL_455473, EPI_ISL_455474                                                                                                                                                                                                                                                                                                                                                                                                                                                                                                                                                                                                                                                                                                                                                                                                                                                                                                                                                                                                                                                                                                                                                                                                                                                                                                                                                                                                                                                                                                                                                                                                                                                                                                                                                                                                                                                                                                                                                                                                                                                                                                                                                                                                                                                                                                                                                                                                                                                                                                                                                                                                                                                                 | Maryland Department of Health Laboratories Administration<br>Laboratory for Respiratory Viruses, Cantacuzino National Military-Medical Institute for Research and Development | Maryland Department of Health Laboratories Administration<br>Cantacuzino Institute                                                                                                                                                             | M.Lazar, L.Ustea, A.Cretu, Tim Durfee                                                                                                                                                                                                                                                                                                                                                                                                                                                                  |

|                                                                                                                                                                                                                                                                                                                                                                                                                                                                                                                                                                                                                                                                                                                                                                                                                                                                                                                                                                                                                                                                                                                                                                                                                                                                                                                |                                                                                                                  |                                                                                                                                       |                                                                                                                                                                                                                                                                                                                                                                                                                                                                                                                                                                       |
|----------------------------------------------------------------------------------------------------------------------------------------------------------------------------------------------------------------------------------------------------------------------------------------------------------------------------------------------------------------------------------------------------------------------------------------------------------------------------------------------------------------------------------------------------------------------------------------------------------------------------------------------------------------------------------------------------------------------------------------------------------------------------------------------------------------------------------------------------------------------------------------------------------------------------------------------------------------------------------------------------------------------------------------------------------------------------------------------------------------------------------------------------------------------------------------------------------------------------------------------------------------------------------------------------------------|------------------------------------------------------------------------------------------------------------------|---------------------------------------------------------------------------------------------------------------------------------------|-----------------------------------------------------------------------------------------------------------------------------------------------------------------------------------------------------------------------------------------------------------------------------------------------------------------------------------------------------------------------------------------------------------------------------------------------------------------------------------------------------------------------------------------------------------------------|
| EPI_ISL_455475, EPI_ISL_455476, EPI_ISL_455477, EPI_ISL_455479                                                                                                                                                                                                                                                                                                                                                                                                                                                                                                                                                                                                                                                                                                                                                                                                                                                                                                                                                                                                                                                                                                                                                                                                                                                 | Laboratory for Respiratory Viruses, Cantacuzino National Military-Medical Institute for Research and Development | Cantacuzino Institute                                                                                                                 | M.Lazar, L.Ustea, A.Cretu, T.Durfee                                                                                                                                                                                                                                                                                                                                                                                                                                                                                                                                   |
| EPI_ISL_455724                                                                                                                                                                                                                                                                                                                                                                                                                                                                                                                                                                                                                                                                                                                                                                                                                                                                                                                                                                                                                                                                                                                                                                                                                                                                                                 | Servicio de Microbiología. Hospital Clínico Universitario de Valencia                                            | Sequencing and Bioinformatics Service and Molecular Epidemiology Research Group. FISABIO-Public Health, and SeqCOVID-Spain Consortium | Loreto Ferrús Abad, Paula Ruiz-Hueso, Mariana Reyes-Prieto, Vicente Soriano Chirona, Ivan Ansari, Lúcia Martínez-Priego, Giuseppe 'Auria, David Navarro, Eliseo Albert, María Alma Bracho, Lidia Ruiz Roldan, Neris Garcia-Gonzalez, Inma Galán Vendrell, Sandra Carbo, Fernando Gonzalez-Candelas                                                                                                                                                                                                                                                                    |
| EPI_ISL_455732                                                                                                                                                                                                                                                                                                                                                                                                                                                                                                                                                                                                                                                                                                                                                                                                                                                                                                                                                                                                                                                                                                                                                                                                                                                                                                 | Servicio de Microbiología. Hospital Clínico Universitario de Valencia                                            | Sequencing and Bioinformatics Service and Molecular Epidemiology Research Group. FISABIO-Public Health, and SeqCOVID-Spain Consortium | Lidia Ruiz Roldan, Neris Garcia-Gonzalez, Inma Galán Vendrell, Sandra Carbo, Loreto Ferrús Abad, Paula Ruiz-Hueso, Mariana Reyes-Prieto, Vicente Soriano Chirona, Ivan Ansari, Lúcia Martínez-Priego, Giuseppe 'Auria, David Navarro, Eliseo Albert, María Alma Bracho, Fernando Gonzalez-Candelas                                                                                                                                                                                                                                                                    |
| EPI_ISL_455733                                                                                                                                                                                                                                                                                                                                                                                                                                                                                                                                                                                                                                                                                                                                                                                                                                                                                                                                                                                                                                                                                                                                                                                                                                                                                                 | Servicio de Microbiología. Hospital Clínico Universitario de Valencia                                            | Sequencing and Bioinformatics Service and Molecular Epidemiology Research Group. FISABIO-Public Health, and SeqCOVID-Spain Consortium | Loreto Ferrús Abad, Paula Ruiz-Hueso, Mariana Reyes-Prieto, Vicente Soriano Chirona, Ivan Ansari, Lúcia Martínez-Priego, Giuseppe 'Auria, David Navarro, Eliseo Albert, María Alma Bracho, Lidia Ruiz Roldan, Neris Garcia-Gonzalez, Inma Galán Vendrell, Sandra Carbo, Fernando Gonzalez-Candelas                                                                                                                                                                                                                                                                    |
| EPI_ISL_455739                                                                                                                                                                                                                                                                                                                                                                                                                                                                                                                                                                                                                                                                                                                                                                                                                                                                                                                                                                                                                                                                                                                                                                                                                                                                                                 | Servicio de Microbiología. Hospital Clínico Universitario de Valencia                                            | Sequencing and Bioinformatics Service and Molecular Epidemiology Research Group. FISABIO-Public Health, and SeqCOVID-Spain Consortium | Lidia Ruiz Roldan, Neris Garcia-Gonzalez, Inma Galán Vendrell, Sandra Carbo, Loreto Ferrús Abad, Paula Ruiz-Hueso, Mariana Reyes-Prieto, Vicente Soriano Chirona, Ivan Ansari, Lúcia Martínez-Priego, Giuseppe 'Auria, David Navarro, Eliseo Albert, María Alma Bracho, Fernando Gonzalez-Candelas                                                                                                                                                                                                                                                                    |
| EPI_ISL_455744                                                                                                                                                                                                                                                                                                                                                                                                                                                                                                                                                                                                                                                                                                                                                                                                                                                                                                                                                                                                                                                                                                                                                                                                                                                                                                 | Servicio de Microbiología. Hospital Clínico Universitario de Valencia                                            | Sequencing and Bioinformatics Service and Molecular Epidemiology Research Group. FISABIO-Public Health, and SeqCOVID-Spain Consortium | Lúcia Martínez-Priego, Giuseppe 'Auria, David Navarro, Eliseo Albert, María Alma Bracho, Lidia Ruiz Roldan, Neris Garcia-Gonzalez, Inma Galán Vendrell, Sandra Carbo, Loreto Ferrús Abad, Paula Ruiz-Hueso, Mariana Reyes-Prieto, Vicente Soriano Chirona, Ivan Ansari, Fernando Gonzalez-Candelas                                                                                                                                                                                                                                                                    |
| EPI_ISL_456657, EPI_ISL_456658, EPI_ISL_456659, EPI_ISL_456660, EPI_ISL_456661, EPI_ISL_456662, EPI_ISL_456663, EPI_ISL_456664, EPI_ISL_456665, EPI_ISL_456666, EPI_ISL_456667, EPI_ISL_456668, EPI_ISL_456669, EPI_ISL_456670, EPI_ISL_456671, EPI_ISL_456672, EPI_ISL_456673, EPI_ISL_456674, EPI_ISL_456675, EPI_ISL_456676                                                                                                                                                                                                                                                                                                                                                                                                                                                                                                                                                                                                                                                                                                                                                                                                                                                                                                                                                                                 | University of Birmingham                                                                                         | COVID-19 Genomics UK (COG-UK) Consortium                                                                                              | Loman Lab: Claire McMurray, Joanne Stockton, Samuel Nicholls, Radoslaw Poplawski, Will Rowe, Josh Quick, Nicholas Loman // UHB Lab: Celina M Whalley, Andrew Bosworth, Charlotte Poxon, Kasun Wanigasooriya, Oliver Pickles, Mike Kidd, Alex Richter, Andrew D Beggs // PHE Heartlands Lab: Husam Osman, Andrew Bosworth                                                                                                                                                                                                                                              |
| EPI_ISL_456677, EPI_ISL_456678, EPI_ISL_456679, EPI_ISL_456680, EPI_ISL_456681, EPI_ISL_456682, EPI_ISL_456683, EPI_ISL_456684, EPI_ISL_456685, EPI_ISL_456686, EPI_ISL_456687, EPI_ISL_456688, EPI_ISL_456689, EPI_ISL_456690, EPI_ISL_456691, EPI_ISL_456692, EPI_ISL_456693, EPI_ISL_456694, EPI_ISL_456695, EPI_ISL_456696, EPI_ISL_456697, EPI_ISL_456698, EPI_ISL_456699, EPI_ISL_456700, EPI_ISL_456701, EPI_ISL_456702, EPI_ISL_456703, EPI_ISL_456704, EPI_ISL_456705, EPI_ISL_456706, EPI_ISL_456707, EPI_ISL_456708, EPI_ISL_456709, EPI_ISL_456710, EPI_ISL_456711, EPI_ISL_456712, EPI_ISL_456713, EPI_ISL_456714, EPI_ISL_456715, EPI_ISL_456716, EPI_ISL_456717, EPI_ISL_456718, EPI_ISL_456719, EPI_ISL_456720, EPI_ISL_456721, EPI_ISL_456722, EPI_ISL_456723, EPI_ISL_456724, EPI_ISL_456725, EPI_ISL_456726, EPI_ISL_456727, EPI_ISL_456728, EPI_ISL_456729, EPI_ISL_456730, EPI_ISL_456731, EPI_ISL_456732, EPI_ISL_456733, EPI_ISL_456734, EPI_ISL_456735, EPI_ISL_456736, EPI_ISL_456737, EPI_ISL_456738, EPI_ISL_456739, EPI_ISL_456740, EPI_ISL_456741, EPI_ISL_456742, EPI_ISL_456743, EPI_ISL_456744, EPI_ISL_456745, EPI_ISL_456746, EPI_ISL_456747, EPI_ISL_456748, EPI_ISL_456749, EPI_ISL_456750, EPI_ISL_456751, EPI_ISL_456752, EPI_ISL_456753, EPI_ISL_456754, EPI_ISL_456755 | Department of Pathology, University of Cambridge                                                                 | COVID-19 Genomics UK (COG-UK) Consortium                                                                                              | Luke W Meredith, M. Estée Török, Myra Hosmillo, William L. Hamilton, Martin D. Curran, Theresa Feltwell, Grant Hall, Anna Yakovleva, Fahad A Khokhar, Charlotte J. Houldcroft, Laura G Caller, Aminu S. Jahun, Sarah L. Caddy, Ian Goodfellow                                                                                                                                                                                                                                                                                                                         |
| EPI_ISL_458091                                                                                                                                                                                                                                                                                                                                                                                                                                                                                                                                                                                                                                                                                                                                                                                                                                                                                                                                                                                                                                                                                                                                                                                                                                                                                                 | B.J. Medical College and Civil hospital                                                                          | Gujarat Biotechnology Research Centre                                                                                                 | Maharshi Pandya, Amit Kanani, Nidhi Patel, Nitin Savaliya, Raghawendra Kumar, Dinesh Kumar, Zuber Saiyed, Komal Patel, Labdhi Pandya, Snehal Bagatharia, Dhaval Vaghela, Ramesh Patel, Pranay Shah, Kamlesh J Upadhyay, Ramesh Pandit, Tejas Shah, Ankit Hinsu, Pritesh Sabara, Apurvasinh Puvar, Janvi Raval, Zarna Patel, Monika Gandhi, Pinal Trivedi, Bhavya Jindal, Bhavesh Modi, Gaurishankar Shrimali, R D Dixit, A M Kadri, Umang Mishra, Chaitanya Joshi, Madhvi Joshi                                                                                       |
| EPI_ISL_458112                                                                                                                                                                                                                                                                                                                                                                                                                                                                                                                                                                                                                                                                                                                                                                                                                                                                                                                                                                                                                                                                                                                                                                                                                                                                                                 | Gujarat Biotechnology Research Centre                                                                            | Gujarat Biotechnology Research Centre                                                                                                 | Maharshi Pandya, Amit Kanani, Nidhi Patel, Nitin Savaliya, Raghawendra Kumar, Dinesh Kumar, Zuber Saiyed, Komal Patel, Labdhi Pandya, Snehal Bagatharia, Ramesh Pandit, Tejas Shah, Ankit Hinsu, Pritesh Sabara, Apurvasinh Puvar, Janvi Raval, Zarna Patel, Monika Gandhi, Pinal Trivedi, Neha Rajpara, Bhavesh Modi, Gaurishankar Shrimali, R D Dixit, A M Kadri, Umang Mishra, Chaitanya Joshi, Madhvi Joshi, , , ,                                                                                                                                                |
| EPI_ISL_458516, EPI_ISL_458517, EPI_ISL_458518, EPI_ISL_458519, EPI_ISL_458520, EPI_ISL_458521, EPI_ISL_458522, EPI_ISL_458523, EPI_ISL_458524, EPI_ISL_458525, EPI_ISL_458526, EPI_ISL_458527, EPI_ISL_458528, EPI_ISL_458529, EPI_ISL_458530, EPI_ISL_458531, EPI_ISL_458532, EPI_ISL_458533, EPI_ISL_458534, EPI_ISL_458535, EPI_ISL_458536, EPI_ISL_458537, EPI_ISL_458538, EPI_ISL_458539, EPI_ISL_458540, EPI_ISL_458541, EPI_ISL_458542, EPI_ISL_458543, EPI_ISL_458544, EPI_ISL_458545, EPI_ISL_458546, EPI_ISL_458547, EPI_ISL_458548, EPI_ISL_458549, EPI_ISL_458550, EPI_ISL_458551, EPI_ISL_458552, EPI_ISL_458553, EPI_ISL_458554, EPI_ISL_458555, EPI_ISL_458556, EPI_ISL_458557, EPI_ISL_458558, EPI_ISL_458559, EPI_ISL_458560, EPI_ISL_458561, EPI_ISL_458562, EPI_ISL_458563, EPI_ISL_458564, EPI_ISL_458565, EPI_ISL_458566, EPI_ISL_458567, EPI_ISL_458568, EPI_ISL_458569, EPI_ISL_458570                                                                                                                                                                                                                                                                                                                                                                                                 | Department of Pathology, University of Cambridge                                                                 | Wellcome Sanger Institute for the COVID-19 Genomics UK (COG-UK) consortium                                                            | Luke W Meredith, M. Estée Török , Myra Hosmillo, William L. Hamilton, Martin D. Curran, Theresa Feltwell, Grant Hall, Anna Yakovleva, Fahad A Khokhar, Charlotte J. Houldcroft, Laura G Caller, Aminu S. Jahun, Sarah L. Caddy, Ian Goodfellow; and Alex Alderton, Roberto Amato, Sonia Goncalves, Ewan Harrison, David K. Jackson, Ian Johnston, Dominic Kwiatkowski, Cordelia Langford, John Sillitoe on behalf of the Wellcome Sanger Institute COVID-19 Surveillance Team ( <a href="http://www.sanger.ac.uk/covid-team">http://www.sanger.ac.uk/covid-team</a> ) |
| EPI_ISL_458571                                                                                                                                                                                                                                                                                                                                                                                                                                                                                                                                                                                                                                                                                                                                                                                                                                                                                                                                                                                                                                                                                                                                                                                                                                                                                                 | Department of Pathology, University of Cambridge                                                                 | Wellcome Sanger Institute for the COVID-19 Genomics UK (COG-UK) Consortium                                                            | Luke W Meredith, M. Estée Török , Myra Hosmillo, William L. Hamilton, Martin D. Curran, Theresa Feltwell, Grant Hall, Anna Yakovleva, Fahad A Khokhar, Charlotte J. Houldcroft, Laura G Caller, Aminu S. Jahun, Sarah L. Caddy, Ian Goodfellow; and Alex Alderton, Roberto Amato, Sonia Goncalves, Ewan Harrison, David K. Jackson, Ian Johnston, Dominic Kwiatkowski, Cordelia Langford, John Sillitoe on behalf of the Wellcome Sanger Institute COVID-19 Surveillance Team ( <a href="http://www.sanger.ac.uk/covid-team">http://www.sanger.ac.uk/covid-team</a> ) |
| EPI_ISL_458572, EPI_ISL_458573, EPI_ISL_458574, EPI_ISL_458575, EPI_ISL_458576, EPI_ISL_458577, EPI_ISL_459166, EPI_ISL_459167, EPI_ISL_459168, EPI_ISL_459169, EPI_ISL_459170, EPI_ISL_459171, EPI_ISL_459172                                                                                                                                                                                                                                                                                                                                                                                                                                                                                                                                                                                                                                                                                                                                                                                                                                                                                                                                                                                                                                                                                                 | Department of Pathology, University of Cambridge                                                                 | Wellcome Sanger Institute for the COVID-19 Genomics UK (COG-UK) consortium                                                            | Luke W Meredith, M. Estée Török , Myra Hosmillo, William L. Hamilton, Martin D. Curran, Theresa Feltwell, Grant Hall, Anna Yakovleva, Fahad A Khokhar, Charlotte J. Houldcroft, Laura G Caller, Aminu S. Jahun, Sarah L. Caddy, Ian Goodfellow; and Alex Alderton, Roberto Amato, Sonia Goncalves, Ewan Harrison, David K. Jackson, Ian Johnston, Dominic Kwiatkowski, Cordelia Langford, John Sillitoe on behalf of the Wellcome Sanger Institute COVID-19 Surveillance Team ( <a href="http://www.sanger.ac.uk/covid-team">http://www.sanger.ac.uk/covid-team</a> ) |
| EPI_ISL_459173                                                                                                                                                                                                                                                                                                                                                                                                                                                                                                                                                                                                                                                                                                                                                                                                                                                                                                                                                                                                                                                                                                                                                                                                                                                                                                 | Department of Pathology, University of Cambridge                                                                 | Wellcome Sanger Institute for the COVID-19 Genomics UK (COG-UK) Consortium                                                            | Luke W Meredith, M. Estée Török , Myra Hosmillo, William L. Hamilton, Martin D. Curran, Theresa Feltwell, Grant Hall, Anna Yakovleva, Fahad A Khokhar, Charlotte J. Houldcroft, Laura G Caller, Aminu S. Jahun, Sarah L. Caddy, Ian Goodfellow; and Alex Alderton, Roberto Amato, Sonia Goncalves, Ewan Harrison, David K. Jackson, Ian Johnston, Dominic Kwiatkowski, Cordelia Langford, John Sillitoe on behalf of the Wellcome Sanger Institute COVID-19 Surveillance Team ( <a href="http://www.sanger.ac.uk/covid-team">http://www.sanger.ac.uk/covid-team</a> ) |
| EPI_ISL_459174, EPI_ISL_459175, EPI_ISL_459176, EPI_ISL_459177, EPI_ISL_459178, EPI_ISL_459179, EPI_ISL_459180, EPI_ISL_459181, EPI_ISL_459182, EPI_ISL_459183, EPI_ISL_459184, EPI_ISL_459185, EPI_ISL_459186, EPI_ISL_459187, EPI_ISL_459188, EPI_ISL_459189, EPI_ISL_459190, EPI_ISL_459191, EPI_ISL_459192, EPI_ISL_459193, EPI_ISL_459194, EPI_ISL_459195, EPI_ISL_459196, EPI_ISL_459197, EPI_ISL_459198, EPI_ISL_459199, EPI_ISL_459200, EPI_ISL_459201, EPI_ISL_459202, EPI_ISL_459203, EPI_ISL_459204, EPI_ISL_459205, EPI_ISL_459206, EPI_ISL_459207, EPI_ISL_459208, EPI_ISL_459209, EPI_ISL_459210, EPI_ISL_459211, EPI_ISL_459212, EPI_ISL_459213, EPI_ISL_459214, EPI_ISL_459215, EPI_ISL_459216, EPI_ISL_459217, EPI_ISL_459218, EPI_ISL_459219, EPI_ISL_459220, EPI_ISL_459221, EPI_ISL_459222, EPI_ISL_459223, EPI_ISL_459224, EPI_ISL_459225, EPI_ISL_459226, EPI_ISL_459227, EPI_ISL_459228, EPI_ISL_459229, EPI_ISL_459230, EPI_ISL_459231, EPI_ISL_459232, EPI_ISL_459233, EPI_ISL_459234, EPI_ISL_459235, EPI_ISL_459236, EPI_ISL_459237, EPI_ISL_459238, EPI_ISL_459239, EPI_ISL_459240                                                                                                                                                                                                 | Department of Pathology, University of Cambridge                                                                 | Wellcome Sanger Institute for the COVID-19 Genomics UK (COG-UK) consortium                                                            | Luke W Meredith, M. Estée Török , Myra Hosmillo, William L. Hamilton, Martin D. Curran, Theresa Feltwell, Grant Hall, Anna Yakovleva, Fahad A Khokhar, Charlotte J. Houldcroft, Laura G Caller, Aminu S. Jahun, Sarah L. Caddy, Ian Goodfellow; and Alex Alderton, Roberto Amato, Sonia Goncalves, Ewan Harrison, David K. Jackson, Ian Johnston, Dominic Kwiatkowski, Cordelia Langford, John Sillitoe on behalf of the Wellcome Sanger Institute COVID-19 Surveillance Team ( <a href="http://www.sanger.ac.uk/covid-team">http://www.sanger.ac.uk/covid-team</a> ) |
| EPI_ISL_459241                                                                                                                                                                                                                                                                                                                                                                                                                                                                                                                                                                                                                                                                                                                                                                                                                                                                                                                                                                                                                                                                                                                                                                                                                                                                                                 | Department of Pathology, University of Cambridge                                                                 | Wellcome Sanger Institute for the COVID-19 Genomics UK (COG-UK) Consortium                                                            | Luke W Meredith, M. Estée Török , Myra Hosmillo, William L. Hamilton, Martin D. Curran, Theresa Feltwell, Grant Hall, Anna Yakovleva, Fahad A Khokhar, Charlotte J. Houldcroft, Laura G Caller, Aminu S. Jahun, Sarah L. Caddy, Ian Goodfellow; and Alex Alderton, Roberto Amato, Sonia Goncalves, Ewan Harrison, David K. Jackson, Ian Johnston, Dominic Kwiatkowski, Cordelia Langford, John Sillitoe on behalf of the Wellcome Sanger Institute COVID-19 Surveillance Team ( <a href="http://www.sanger.ac.uk/covid-team">http://www.sanger.ac.uk/covid-team</a> ) |
| EPI_ISL_459242                                                                                                                                                                                                                                                                                                                                                                                                                                                                                                                                                                                                                                                                                                                                                                                                                                                                                                                                                                                                                                                                                                                                                                                                                                                                                                 | Department of Pathology, University of Cambridge                                                                 | Wellcome Sanger Institute for the COVID-19 Genomics UK (COG-UK) consortium                                                            | Luke W Meredith, M. Estée Török , Myra Hosmillo, William L. Hamilton, Martin D. Curran, Theresa Feltwell, Grant Hall, Anna Yakovleva, Fahad A Khokhar, Charlotte J. Houldcroft, Laura G Caller, Aminu S. Jahun, Sarah L. Caddy, Ian Goodfellow; and Alex Alderton, Roberto Amato, Sonia Goncalves, Ewan Harrison, David K. Jackson, Ian Johnston, Dominic Kwiatkowski, Cordelia Langford, John Sillitoe on behalf of the Wellcome Sanger Institute COVID-19 Surveillance Team ( <a href="http://www.sanger.ac.uk/covid-team">http://www.sanger.ac.uk/covid-team</a> ) |
| EPI_ISL_459243                                                                                                                                                                                                                                                                                                                                                                                                                                                                                                                                                                                                                                                                                                                                                                                                                                                                                                                                                                                                                                                                                                                                                                                                                                                                                                 | Department of Pathology, University of Cambridge                                                                 | Wellcome Sanger Institute for the COVID-19 Genomics UK (COG-UK) Consortium                                                            | Luke W Meredith, M. Estée Török , Myra Hosmillo, William L. Hamilton, Martin D. Curran, Theresa Feltwell, Grant Hall, Anna Yakovleva, Fahad A Khokhar, Charlotte J. Houldcroft, Laura G Caller, Aminu S. Jahun, Sarah L. Caddy, Ian Goodfellow; and Alex Alderton, Roberto Amato, Sonia Goncalves, Ewan Harrison, David K. Jackson, Ian Johnston, Dominic Kwiatkowski, Cordelia Langford, John Sillitoe on behalf of the Wellcome Sanger Institute COVID-19 Surveillance Team ( <a href="http://www.sanger.ac.uk/covid-team">http://www.sanger.ac.uk/covid-team</a> ) |

| Surveillance Team                                                                                                                                                                                                                                                                                                                                                                                                                                                                                                                                                                                                                                                                                                                                                                                                                                                                                                                                                                                                                                                                                                                                                                                                                                                                                                                                                                                                                                                                                                                                                                                                                                                                                                                                                                                                                                                                                                                                                                                                                                                                                                                                                                                                                                                                                                                                                                                                                                                                                                                                                                                                                                                                                                                                                                                                                                                                                                                                                                              |                                                                            |                                                                                       |                                                                                                                                                                                                                                                                                                                                                                                                                                                                                                                                                                                                                                                                                                                                                                                                                                                                                                                                               |                                                                                                                                                                                                                                                                                                                                                                                                                                                                                                                                                                       |
|------------------------------------------------------------------------------------------------------------------------------------------------------------------------------------------------------------------------------------------------------------------------------------------------------------------------------------------------------------------------------------------------------------------------------------------------------------------------------------------------------------------------------------------------------------------------------------------------------------------------------------------------------------------------------------------------------------------------------------------------------------------------------------------------------------------------------------------------------------------------------------------------------------------------------------------------------------------------------------------------------------------------------------------------------------------------------------------------------------------------------------------------------------------------------------------------------------------------------------------------------------------------------------------------------------------------------------------------------------------------------------------------------------------------------------------------------------------------------------------------------------------------------------------------------------------------------------------------------------------------------------------------------------------------------------------------------------------------------------------------------------------------------------------------------------------------------------------------------------------------------------------------------------------------------------------------------------------------------------------------------------------------------------------------------------------------------------------------------------------------------------------------------------------------------------------------------------------------------------------------------------------------------------------------------------------------------------------------------------------------------------------------------------------------------------------------------------------------------------------------------------------------------------------------------------------------------------------------------------------------------------------------------------------------------------------------------------------------------------------------------------------------------------------------------------------------------------------------------------------------------------------------------------------------------------------------------------------------------------------------|----------------------------------------------------------------------------|---------------------------------------------------------------------------------------|-----------------------------------------------------------------------------------------------------------------------------------------------------------------------------------------------------------------------------------------------------------------------------------------------------------------------------------------------------------------------------------------------------------------------------------------------------------------------------------------------------------------------------------------------------------------------------------------------------------------------------------------------------------------------------------------------------------------------------------------------------------------------------------------------------------------------------------------------------------------------------------------------------------------------------------------------|-----------------------------------------------------------------------------------------------------------------------------------------------------------------------------------------------------------------------------------------------------------------------------------------------------------------------------------------------------------------------------------------------------------------------------------------------------------------------------------------------------------------------------------------------------------------------|
| EPI_ISL_459244, EPI_ISL_459245, EPI_ISL_459246, EPI_ISL_459247, EPI_ISL_459248, EPI_ISL_459249, EPI_ISL_459250, EPI_ISL_459251, EPI_ISL_459252, EPI_ISL_459253, EPI_ISL_459254, EPI_ISL_459255, EPI_ISL_459256, EPI_ISL_459257                                                                                                                                                                                                                                                                                                                                                                                                                                                                                                                                                                                                                                                                                                                                                                                                                                                                                                                                                                                                                                                                                                                                                                                                                                                                                                                                                                                                                                                                                                                                                                                                                                                                                                                                                                                                                                                                                                                                                                                                                                                                                                                                                                                                                                                                                                                                                                                                                                                                                                                                                                                                                                                                                                                                                                 | see above                                                                  | Department of Pathology, University of Cambridge                                      | Wellcome Sanger Institute for the COVID-19 Genomics UK (COG-UK) consortium                                                                                                                                                                                                                                                                                                                                                                                                                                                                                                                                                                                                                                                                                                                                                                                                                                                                    | Luke W Meredith, M. Estée Török , Myra Hosmillo, William L. Hamilton, Martin D. Curran, Theresa Feltwell, Grant Hall, Anna Yakovleva, Fahad A Khokhar, Charlotte J. Houldcroft, Laura G Caller, Aminu S. Jahun, Sarah L. Caddy, Ian Goodfellow; and Alex Alderton, Roberto Amato, Sonia Goncalves, Ewan Harrison, David K. Jackson, Ian Johnston, Dominic Kwiatkowski, Cordelia Langford, John Sillitoe on behalf of the Wellcome Sanger Institute COVID-19 Surveillance Team ( <a href="http://www.sanger.ac.uk/covid-team">http://www.sanger.ac.uk/covid-team</a> ) |
| EPI_ISL_459258                                                                                                                                                                                                                                                                                                                                                                                                                                                                                                                                                                                                                                                                                                                                                                                                                                                                                                                                                                                                                                                                                                                                                                                                                                                                                                                                                                                                                                                                                                                                                                                                                                                                                                                                                                                                                                                                                                                                                                                                                                                                                                                                                                                                                                                                                                                                                                                                                                                                                                                                                                                                                                                                                                                                                                                                                                                                                                                                                                                 | Department of Pathology, University of Cambridge                           | Wellcome Sanger Institute for the COVID-19 Genomics UK (COG-UK) Consortium            | Luke W Meredith, M. Estée Török , Myra Hosmillo, William L. Hamilton, Martin D. Curran, Theresa Feltwell, Grant Hall, Anna Yakovleva, Fahad A Khokhar, Charlotte J. Houldcroft, Laura G Caller, Aminu S. Jahun, Sarah L. Caddy, Ian Goodfellow; and Alex Alderton, Roberto Amato, Sonia Goncalves, Ewan Harrison, David K. Jackson, Ian Johnston, Dominic Kwiatkowski, Cordelia Langford, John Sillitoe on behalf of the Wellcome Sanger Institute COVID-19 Surveillance Team                                                                                                                                                                                                                                                                                                                                                                                                                                                                 |                                                                                                                                                                                                                                                                                                                                                                                                                                                                                                                                                                       |
| EPI_ISL_459259, EPI_ISL_459260, EPI_ISL_459261, EPI_ISL_459262, EPI_ISL_459263, EPI_ISL_459264, EPI_ISL_459265, EPI_ISL_459266, EPI_ISL_459267, EPI_ISL_459268, EPI_ISL_459269, EPI_ISL_459270, EPI_ISL_459271, EPI_ISL_459272, EPI_ISL_459273, EPI_ISL_459274, EPI_ISL_459275, EPI_ISL_459276, EPI_ISL_459277, EPI_ISL_459278, EPI_ISL_459279, EPI_ISL_459280, EPI_ISL_459281, EPI_ISL_459282, EPI_ISL_459283, EPI_ISL_459284, EPI_ISL_459285, EPI_ISL_459286, EPI_ISL_459287, EPI_ISL_459288, EPI_ISL_459289, EPI_ISL_459290, EPI_ISL_459291, EPI_ISL_459292, EPI_ISL_459293, EPI_ISL_459294, EPI_ISL_459295, EPI_ISL_459296, EPI_ISL_459297, EPI_ISL_459304, EPI_ISL_459305, EPI_ISL_459306, EPI_ISL_459307, EPI_ISL_459308, EPI_ISL_459309, EPI_ISL_459310, EPI_ISL_459311, EPI_ISL_459312, EPI_ISL_459313, EPI_ISL_459314, EPI_ISL_459315, EPI_ISL_459316, EPI_ISL_459317, EPI_ISL_459318, EPI_ISL_459319, EPI_ISL_459320, EPI_ISL_459321, EPI_ISL_459322, EPI_ISL_459323, EPI_ISL_459410, EPI_ISL_459411, EPI_ISL_459412, EPI_ISL_459413, EPI_ISL_459414, EPI_ISL_459415, EPI_ISL_459416, EPI_ISL_459417, EPI_ISL_459418, EPI_ISL_459419, EPI_ISL_459420, EPI_ISL_459421, EPI_ISL_459422, EPI_ISL_459423, EPI_ISL_459424, EPI_ISL_459425, EPI_ISL_459426, EPI_ISL_459427, EPI_ISL_459428, EPI_ISL_459429, EPI_ISL_459430, EPI_ISL_459431, EPI_ISL_459432, EPI_ISL_459433, EPI_ISL_459434, EPI_ISL_459435, EPI_ISL_459436, EPI_ISL_459437, EPI_ISL_459438, EPI_ISL_459439, EPI_ISL_459440, EPI_ISL_459441, EPI_ISL_459442, EPI_ISL_459443, EPI_ISL_459444, EPI_ISL_459445, EPI_ISL_459446, EPI_ISL_459447, EPI_ISL_459448, EPI_ISL_459449, EPI_ISL_459450, EPI_ISL_459451, EPI_ISL_459452, EPI_ISL_459453, EPI_ISL_459454, EPI_ISL_459455, EPI_ISL_459456, EPI_ISL_459457, EPI_ISL_459458, EPI_ISL_459459, EPI_ISL_459460, EPI_ISL_459461, EPI_ISL_459462, EPI_ISL_459463, EPI_ISL_459464, EPI_ISL_459465, EPI_ISL_459466, EPI_ISL_459467, EPI_ISL_459468, EPI_ISL_459469, EPI_ISL_459470, EPI_ISL_459471, EPI_ISL_459472, EPI_ISL_459473, EPI_ISL_459474, EPI_ISL_459475, EPI_ISL_459476, EPI_ISL_459477, EPI_ISL_459478, EPI_ISL_459479, EPI_ISL_459480, EPI_ISL_459481, EPI_ISL_459482, EPI_ISL_459483, EPI_ISL_459484, EPI_ISL_459485, EPI_ISL_459486, EPI_ISL_459487, EPI_ISL_459488, EPI_ISL_459489, EPI_ISL_459490, EPI_ISL_459491, EPI_ISL_459492, EPI_ISL_459493, EPI_ISL_459494, EPI_ISL_459495, EPI_ISL_459496, EPI_ISL_459497, EPI_ISL_459498, EPI_ISL_459499, EPI_ISL_459500, EPI_ISL_459501, EPI_ISL_459502, EPI_ISL_459503, EPI_ISL_459504                                                                                                                                                                                                                                                                                                                                                                                                                                 | see above                                                                  | Department of Pathology, University of Cambridge                                      | Wellcome Sanger Institute for the COVID-19 Genomics UK (COG-UK) consortium                                                                                                                                                                                                                                                                                                                                                                                                                                                                                                                                                                                                                                                                                                                                                                                                                                                                    | Luke W Meredith, M. Estée Török , Myra Hosmillo, William L. Hamilton, Martin D. Curran, Theresa Feltwell, Grant Hall, Anna Yakovleva, Fahad A Khokhar, Charlotte J. Houldcroft, Laura G Caller, Aminu S. Jahun, Sarah L. Caddy, Ian Goodfellow; and Alex Alderton, Roberto Amato, Sonia Goncalves, Ewan Harrison, David K. Jackson, Ian Johnston, Dominic Kwiatkowski, Cordelia Langford, John Sillitoe on behalf of the Wellcome Sanger Institute COVID-19 Surveillance Team ( <a href="http://www.sanger.ac.uk/covid-team">http://www.sanger.ac.uk/covid-team</a> ) |
| EPI_ISL_461507, EPI_ISL_461508, EPI_ISL_461509, EPI_ISL_461510, EPI_ISL_461511, EPI_ISL_461512, EPI_ISL_461513, EPI_ISL_461514, EPI_ISL_461515, EPI_ISL_461516, EPI_ISL_461517, EPI_ISL_461518, EPI_ISL_461519, EPI_ISL_461520, EPI_ISL_461521, EPI_ISL_461522, EPI_ISL_461523, EPI_ISL_461524, EPI_ISL_461525, EPI_ISL_461526, EPI_ISL_461527, EPI_ISL_461528, EPI_ISL_461529, EPI_ISL_461530, EPI_ISL_461531, EPI_ISL_461532, EPI_ISL_461533, EPI_ISL_461534, EPI_ISL_461535, EPI_ISL_461536, EPI_ISL_461537, EPI_ISL_461538, EPI_ISL_461539, EPI_ISL_461540, EPI_ISL_461541, EPI_ISL_461542, EPI_ISL_461543, EPI_ISL_461544, EPI_ISL_461545                                                                                                                                                                                                                                                                                                                                                                                                                                                                                                                                                                                                                                                                                                                                                                                                                                                                                                                                                                                                                                                                                                                                                                                                                                                                                                                                                                                                                                                                                                                                                                                                                                                                                                                                                                                                                                                                                                                                                                                                                                                                                                                                                                                                                                                                                                                                                 | see above                                                                  | University of Birmingham                                                              | COVID-19 Genomics UK (COG-UK) Consortium                                                                                                                                                                                                                                                                                                                                                                                                                                                                                                                                                                                                                                                                                                                                                                                                                                                                                                      | Loman Lab: Claire McMurray, Joanne Stockton, Samuel Nicholls, Radoslaw Poplawski, Will Rowe, Josh Quick, Nicholas Loman // UHB Lab: Celina M Whalley, Andrew Bosworth, Charlotte Poxon, Kasun Wanigasooriya, Oliver Pickles, Mike Kidd, Alex Richter, Andrew D Beggs // PHE Heartlands Lab: Husam Osman, Andrew Bosworth                                                                                                                                                                                                                                              |
| EPI_ISL_461546, EPI_ISL_461547, EPI_ISL_461548, EPI_ISL_461549, EPI_ISL_461550, EPI_ISL_461551, EPI_ISL_461552, EPI_ISL_461553, EPI_ISL_461554, EPI_ISL_461555, EPI_ISL_461556, EPI_ISL_461557, EPI_ISL_461558, EPI_ISL_461559, EPI_ISL_461570, EPI_ISL_461571, EPI_ISL_461572, EPI_ISL_461573, EPI_ISL_461574, EPI_ISL_461575, EPI_ISL_461576, EPI_ISL_461577, EPI_ISL_461578, EPI_ISL_461579, EPI_ISL_461580, EPI_ISL_461581, EPI_ISL_461582, EPI_ISL_461583, EPI_ISL_461584, EPI_ISL_461585, EPI_ISL_461586, EPI_ISL_461587, EPI_ISL_461588                                                                                                                                                                                                                                                                                                                                                                                                                                                                                                                                                                                                                                                                                                                                                                                                                                                                                                                                                                                                                                                                                                                                                                                                                                                                                                                                                                                                                                                                                                                                                                                                                                                                                                                                                                                                                                                                                                                                                                                                                                                                                                                                                                                                                                                                                                                                                                                                                                                 | see above                                                                  | Department of Pathology, University of Cambridge                                      | COVID-19 Genomics UK (COG-UK) Consortium                                                                                                                                                                                                                                                                                                                                                                                                                                                                                                                                                                                                                                                                                                                                                                                                                                                                                                      | Luke W Meredith, M. Estée Török, Myra Hosmillo, William L. Hamilton, Martin D. Curran, Theresa Feltwell, Grant Hall, Anna Yakovleva, Fahad A Khokhar, Charlotte J. Houldcroft, Laura G Caller, Aminu S. Jahun, Sarah L. Caddy, Ian Goodfellow                                                                                                                                                                                                                                                                                                                         |
| EPI_ISL_462321, EPI_ISL_462324                                                                                                                                                                                                                                                                                                                                                                                                                                                                                                                                                                                                                                                                                                                                                                                                                                                                                                                                                                                                                                                                                                                                                                                                                                                                                                                                                                                                                                                                                                                                                                                                                                                                                                                                                                                                                                                                                                                                                                                                                                                                                                                                                                                                                                                                                                                                                                                                                                                                                                                                                                                                                                                                                                                                                                                                                                                                                                                                                                 | National Public Health Laboratory, National Centre for Infectious Diseases | National Public Health Laboratory, National Centre for Infectious Diseases            | Mak TM, Octavia S, Chavatte JM, Cui L, Lin RTP                                                                                                                                                                                                                                                                                                                                                                                                                                                                                                                                                                                                                                                                                                                                                                                                                                                                                                |                                                                                                                                                                                                                                                                                                                                                                                                                                                                                                                                                                       |
| EPI_ISL_463749                                                                                                                                                                                                                                                                                                                                                                                                                                                                                                                                                                                                                                                                                                                                                                                                                                                                                                                                                                                                                                                                                                                                                                                                                                                                                                                                                                                                                                                                                                                                                                                                                                                                                                                                                                                                                                                                                                                                                                                                                                                                                                                                                                                                                                                                                                                                                                                                                                                                                                                                                                                                                                                                                                                                                                                                                                                                                                                                                                                 | Pasteur Institute of Iran                                                  | Rapid Response Team                                                                   | Mahboobeh Rafiqh, Kayhan Azadmanesh, Tahmineh Jalali, Fatemeh Fotouhi-Chahooki, Mohammad Hassan Pouriayevaei, Arash Arashkia, Zahra Ahmadi, Mohammad Sadegh Shams Nosrati, Ali Maleki, Zabihollah Shoja, Sanam Azad-Mazjiri, Mehdi Rohani, Saber Esmaeli, Ahmad Ghaseini, Amir Hesam Nemati, Ahmad Mahmoudi, Zahra Fereydooni, Mahsa Tavakolirad, Tahereh Mohammadi, Sahar Khakifirooz, Mehdi Fazlialpour, Hesam Karimi, Kazem Baesi, Seyed Dawood Mousavi Nasab, Mahmood Barati, Mohammad Reza Asadi Karam, Mehri Habibi, Neda Afzali, Ali Torabi, Azita Eshratkhan mohammadnejad, Seyedeh Sahar Bathaiein, Mohamad Mahdi Mortazavipour, Seyedeh Atefe Hosseini, Farideh niknam oskouei, Zahra Nejatipour, Parastoo Yekta Sanati, Hadiseh Shokouhi Targhi, Mahsa Ghalejoogh, Azam Amirian, Afsaneh Zokaei, Hajarrossadat Ghaderi, Elmira Vadaye kheiri, Mina Agharezaei, Akram Abouie Mehrizi, Seyedeh Zahra Moraveji, Mostafa Salehi-Vaziri |                                                                                                                                                                                                                                                                                                                                                                                                                                                                                                                                                                       |
| EPI_ISL_467043                                                                                                                                                                                                                                                                                                                                                                                                                                                                                                                                                                                                                                                                                                                                                                                                                                                                                                                                                                                                                                                                                                                                                                                                                                                                                                                                                                                                                                                                                                                                                                                                                                                                                                                                                                                                                                                                                                                                                                                                                                                                                                                                                                                                                                                                                                                                                                                                                                                                                                                                                                                                                                                                                                                                                                                                                                                                                                                                                                                 | B.J. Medical College and Civil hospital                                    | Gujarat Biotechnology Research Centre                                                 | Maharshi Pandya, Nidhi Patel, Nitin Savaliya, Raghawendra Kumar, Dinesh Kumar, Zuber Saiyed, Komal Patel, Labdhi Pandya, Snehal Bagatharia, Pranay Shah, Kamesh J Upadhyay, Nirav Mungalpara, Tejas Shah, Ankit Hinsu, Pritesh Sabara, Apurvasinh Puvar, Janvi Raval, Zarina Patel, Monika Gandhi, Pinal Trivedi, Akanksha Verma, R D Dixit, A M Kadri, Harsh Bakshi, Chaitanya Joshi, Madhvi Joshi,                                                                                                                                                                                                                                                                                                                                                                                                                                                                                                                                          |                                                                                                                                                                                                                                                                                                                                                                                                                                                                                                                                                                       |
| EPI_ISL_467086, EPI_ISL_467087, EPI_ISL_467088, EPI_ISL_467089, EPI_ISL_467090, EPI_ISL_467091                                                                                                                                                                                                                                                                                                                                                                                                                                                                                                                                                                                                                                                                                                                                                                                                                                                                                                                                                                                                                                                                                                                                                                                                                                                                                                                                                                                                                                                                                                                                                                                                                                                                                                                                                                                                                                                                                                                                                                                                                                                                                                                                                                                                                                                                                                                                                                                                                                                                                                                                                                                                                                                                                                                                                                                                                                                                                                 | Hospital Universitario de Gran Canaria Dr. Negrín                          | SeqCOVID-SPAIN consortium/IBV(CSIC)                                                   | M. Carmen Pérez González, Francisco J. Chamizo López, Ana Bordes Benitez and SeqCOVID-SPAIN consortium                                                                                                                                                                                                                                                                                                                                                                                                                                                                                                                                                                                                                                                                                                                                                                                                                                        |                                                                                                                                                                                                                                                                                                                                                                                                                                                                                                                                                                       |
| EPI_ISL_467985, EPI_ISL_467986, EPI_ISL_467987, EPI_ISL_467988, EPI_ISL_467989                                                                                                                                                                                                                                                                                                                                                                                                                                                                                                                                                                                                                                                                                                                                                                                                                                                                                                                                                                                                                                                                                                                                                                                                                                                                                                                                                                                                                                                                                                                                                                                                                                                                                                                                                                                                                                                                                                                                                                                                                                                                                                                                                                                                                                                                                                                                                                                                                                                                                                                                                                                                                                                                                                                                                                                                                                                                                                                 | SA Pathology                                                               | SA Pathology                                                                          | Lex Leong, Chuan Kok Lim, Mark Turra, Ivan Bastian, Geoff Higgins                                                                                                                                                                                                                                                                                                                                                                                                                                                                                                                                                                                                                                                                                                                                                                                                                                                                             |                                                                                                                                                                                                                                                                                                                                                                                                                                                                                                                                                                       |
| EPI_ISL_467990                                                                                                                                                                                                                                                                                                                                                                                                                                                                                                                                                                                                                                                                                                                                                                                                                                                                                                                                                                                                                                                                                                                                                                                                                                                                                                                                                                                                                                                                                                                                                                                                                                                                                                                                                                                                                                                                                                                                                                                                                                                                                                                                                                                                                                                                                                                                                                                                                                                                                                                                                                                                                                                                                                                                                                                                                                                                                                                                                                                 | SA Pathology                                                               | SA Pathology                                                                          | Leong, LEX, Lim, CK, Turra, M, Bastian, I, Higgins, G                                                                                                                                                                                                                                                                                                                                                                                                                                                                                                                                                                                                                                                                                                                                                                                                                                                                                         |                                                                                                                                                                                                                                                                                                                                                                                                                                                                                                                                                                       |
| EPI_ISL_467991, EPI_ISL_467992, EPI_ISL_467993, EPI_ISL_467994, EPI_ISL_467995, EPI_ISL_467996, EPI_ISL_467997, EPI_ISL_467998, EPI_ISL_467999, EPI_ISL_468000, EPI_ISL_468001, EPI_ISL_468002, EPI_ISL_468003, EPI_ISL_468004, EPI_ISL_468005, EPI_ISL_468006, EPI_ISL_468007, EPI_ISL_468008, EPI_ISL_468009, EPI_ISL_468010, EPI_ISL_468011, EPI_ISL_468012, EPI_ISL_468013, EPI_ISL_468014, EPI_ISL_468015, EPI_ISL_468016, EPI_ISL_468017, EPI_ISL_468018, EPI_ISL_468019, EPI_ISL_468020, EPI_ISL_468021, EPI_ISL_468022, EPI_ISL_468023, EPI_ISL_468024, EPI_ISL_468025, EPI_ISL_468026, EPI_ISL_468027, EPI_ISL_468028, EPI_ISL_468029, EPI_ISL_468030, EPI_ISL_468031, EPI_ISL_468032, EPI_ISL_468033, EPI_ISL_468034, EPI_ISL_468035, EPI_ISL_468036, EPI_ISL_468037, EPI_ISL_468038, EPI_ISL_468039, EPI_ISL_468040, EPI_ISL_468041, EPI_ISL_468042, EPI_ISL_468043                                                                                                                                                                                                                                                                                                                                                                                                                                                                                                                                                                                                                                                                                                                                                                                                                                                                                                                                                                                                                                                                                                                                                                                                                                                                                                                                                                                                                                                                                                                                                                                                                                                                                                                                                                                                                                                                                                                                                                                                                                                                                                                 | see above                                                                  | SA Pathology                                                                          | SA Pathology                                                                                                                                                                                                                                                                                                                                                                                                                                                                                                                                                                                                                                                                                                                                                                                                                                                                                                                                  | Lex Leong, Chuan Kok Lim, Mark Turra, Ivan Bastian, Geoff Higgins                                                                                                                                                                                                                                                                                                                                                                                                                                                                                                     |
| EPI_ISL_468134, EPI_ISL_468135, EPI_ISL_468136, EPI_ISL_468137, EPI_ISL_468138, EPI_ISL_468139, EPI_ISL_468140, EPI_ISL_468141, EPI_ISL_468142, EPI_ISL_468143, EPI_ISL_468144, EPI_ISL_468145, EPI_ISL_468146, EPI_ISL_468147, EPI_ISL_468148, EPI_ISL_468149, EPI_ISL_468150, EPI_ISL_468151, EPI_ISL_468152, EPI_ISL_468153, EPI_ISL_468154, EPI_ISL_468155, EPI_ISL_468156, EPI_ISL_468157, EPI_ISL_468158                                                                                                                                                                                                                                                                                                                                                                                                                                                                                                                                                                                                                                                                                                                                                                                                                                                                                                                                                                                                                                                                                                                                                                                                                                                                                                                                                                                                                                                                                                                                                                                                                                                                                                                                                                                                                                                                                                                                                                                                                                                                                                                                                                                                                                                                                                                                                                                                                                                                                                                                                                                 | see above                                                                  | [Romania, Bucharest] National Institute for Infectious Diseases "Prof. Dr. Matei Bal" | [Romania, Bucharest] National Institute for Infectious Diseases "Prof. Dr. Matei Bal"                                                                                                                                                                                                                                                                                                                                                                                                                                                                                                                                                                                                                                                                                                                                                                                                                                                         | Leontina Banica, Marius Cotic, Corina Casangu, Marius Surleac, Simona Paraschiv                                                                                                                                                                                                                                                                                                                                                                                                                                                                                       |
| EPI_ISL_469032                                                                                                                                                                                                                                                                                                                                                                                                                                                                                                                                                                                                                                                                                                                                                                                                                                                                                                                                                                                                                                                                                                                                                                                                                                                                                                                                                                                                                                                                                                                                                                                                                                                                                                                                                                                                                                                                                                                                                                                                                                                                                                                                                                                                                                                                                                                                                                                                                                                                                                                                                                                                                                                                                                                                                                                                                                                                                                                                                                                 | Government Medical College, Vadodara                                       | Gujarat Biotechnology Research Centre                                                 | Maharshi Pandya, Nidhi Patel, Nitin Savaliya, Raghawendra Kumar, Dinesh Kumar, Zuber Saiyed, Komal Patel, Labdhi Pandya, Snehal Bagatharia, Meenakshi Shah, Neena Doshi, Varsha Godbole, Tejas Shah, Ankit Hinsu, Pritesh Sabara, Apurvasinh Puvar, Janvi Raval, Zarina Patel, Monika Gandhi, Pinal Trivedi, Pragma Sharma, R D Dixit, A M Kadri, Harsh Bakshi, Chaitanya Joshi, Madhvi Joshi                                                                                                                                                                                                                                                                                                                                                                                                                                                                                                                                                 |                                                                                                                                                                                                                                                                                                                                                                                                                                                                                                                                                                       |
| EPI_ISL_469126                                                                                                                                                                                                                                                                                                                                                                                                                                                                                                                                                                                                                                                                                                                                                                                                                                                                                                                                                                                                                                                                                                                                                                                                                                                                                                                                                                                                                                                                                                                                                                                                                                                                                                                                                                                                                                                                                                                                                                                                                                                                                                                                                                                                                                                                                                                                                                                                                                                                                                                                                                                                                                                                                                                                                                                                                                                                                                                                                                                 | National Public Health Laboratory, National Centre for Infectious Diseases | National Public Health Laboratory, National Centre for Infectious Diseases            | Mak TM, Octavia S, Chavatte JM, Cui L, Lin RTP                                                                                                                                                                                                                                                                                                                                                                                                                                                                                                                                                                                                                                                                                                                                                                                                                                                                                                |                                                                                                                                                                                                                                                                                                                                                                                                                                                                                                                                                                       |
| EPI_ISL_469891, EPI_ISL_469892, EPI_ISL_469893, EPI_ISL_469894, EPI_ISL_469895, EPI_ISL_469896, EPI_ISL_469897, EPI_ISL_469898, EPI_ISL_469899, EPI_ISL_469900, EPI_ISL_469901, EPI_ISL_469902, EPI_ISL_469903, EPI_ISL_469904, EPI_ISL_469905, EPI_ISL_469906, EPI_ISL_469907, EPI_ISL_469908, EPI_ISL_469909, EPI_ISL_469910, EPI_ISL_469911, EPI_ISL_469912, EPI_ISL_469913, EPI_ISL_470090, EPI_ISL_470091, EPI_ISL_470092, EPI_ISL_470093, EPI_ISL_470094, EPI_ISL_470095, EPI_ISL_470096, EPI_ISL_470097, EPI_ISL_470098, EPI_ISL_470099, EPI_ISL_470100, EPI_ISL_470101, EPI_ISL_470102, EPI_ISL_470103, EPI_ISL_470104, EPI_ISL_470105, EPI_ISL_470106, EPI_ISL_470107, EPI_ISL_470108, EPI_ISL_470109, EPI_ISL_470110, EPI_ISL_470111, EPI_ISL_470112, EPI_ISL_470113, EPI_ISL_470114, EPI_ISL_470115, EPI_ISL_470116, EPI_ISL_470117, EPI_ISL_470118, EPI_ISL_470119, EPI_ISL_470120, EPI_ISL_470121, EPI_ISL_470122, EPI_ISL_470123, EPI_ISL_470124, EPI_ISL_470125, EPI_ISL_470126, EPI_ISL_470127, EPI_ISL_470128, EPI_ISL_470129, EPI_ISL_470130, EPI_ISL_470131, EPI_ISL_470132, EPI_ISL_470133, EPI_ISL_470134, EPI_ISL_470135, EPI_ISL_470136, EPI_ISL_470137, EPI_ISL_470138, EPI_ISL_470139, EPI_ISL_470140, EPI_ISL_470141, EPI_ISL_470142, EPI_ISL_470143, EPI_ISL_470144, EPI_ISL_470145, EPI_ISL_470146, EPI_ISL_470147, EPI_ISL_470148, EPI_ISL_470149, EPI_ISL_470150, EPI_ISL_470151, EPI_ISL_470152, EPI_ISL_470153, EPI_ISL_470154, EPI_ISL_470155, EPI_ISL_470156, EPI_ISL_470157, EPI_ISL_470158, EPI_ISL_470159, EPI_ISL_470160, EPI_ISL_470161, EPI_ISL_470162, EPI_ISL_470163, EPI_ISL_470164, EPI_ISL_470165, EPI_ISL_470166, EPI_ISL_470167, EPI_ISL_470168, EPI_ISL_470169, EPI_ISL_470170, EPI_ISL_470171, EPI_ISL_470172, EPI_ISL_470173, EPI_ISL_470174, EPI_ISL_470175, EPI_ISL_470176, EPI_ISL_470177, EPI_ISL_470178, EPI_ISL_470179, EPI_ISL_470180, EPI_ISL_470181, EPI_ISL_470182, EPI_ISL_470183, EPI_ISL_470184, EPI_ISL_470185, EPI_ISL_470186, EPI_ISL_470187, EPI_ISL_470188, EPI_ISL_470189, EPI_ISL_470190, EPI_ISL_470191, EPI_ISL_470192, EPI_ISL_470193, EPI_ISL_470194, EPI_ISL_470195, EPI_ISL_470196, EPI_ISL_470197, EPI_ISL_470198, EPI_ISL_470199, EPI_ISL_470200, EPI_ISL_470201, EPI_ISL_470202, EPI_ISL_470203, EPI_ISL_470204, EPI_ISL_470205, EPI_ISL_470206, EPI_ISL_470207, EPI_ISL_470208, EPI_ISL_470209, EPI_ISL_470210, EPI_ISL_470211, EPI_ISL_470212, EPI_ISL_470213, EPI_ISL_470214, EPI_ISL_470215, EPI_ISL_470216, EPI_ISL_470217, EPI_ISL_470218, EPI_ISL_470219, EPI_ISL_470220, EPI_ISL_470221, EPI_ISL_470222, EPI_ISL_470223, EPI_ISL_470224, EPI_ISL_470225, EPI_ISL_470226, EPI_ISL_470227, EPI_ISL_470228, EPI_ISL_470229, EPI_ISL_470230, EPI_ISL_470231, EPI_ISL_470232, EPI_ISL_470233, EPI_ISL_470234, EPI_ISL_470235, EPI_ISL_470236, EPI_ISL_470237, EPI_ISL_470238, EPI_ISL_470239, EPI_ISL_470240, EPI_ISL_470241, EPI_ISL_470242, EPI_ISL_470243, EPI_ISL_470244, EPI_ISL_470245, EPI_ISL_470246 |                                                                            |                                                                                       |                                                                                                                                                                                                                                                                                                                                                                                                                                                                                                                                                                                                                                                                                                                                                                                                                                                                                                                                               |                                                                                                                                                                                                                                                                                                                                                                                                                                                                                                                                                                       |

|                                                                                                                                                                                                                                                                                                                                                                                                                                                                                                                                                                                                                                                                                                                                                                                                                                                                                                                                                                                                                                                                                                                                                                                                                                                                                                                                                                                                                                                                                                                                                                                                                                                                                                                                                                                                                                                                                                                                                                                                                                                                                                                                                                                                                                                                                                                                                                                                                                                                                                                                                                                                                                                                                                                                                                                                                                                                                                                                                                                                                                                                                                                                                                                                                                                                                                                                                                                                                                                                                                                                                                                                                                                                                                                                                                                                                                                                                                                                                                                                                                                                                                                                                                                                                                                                                                                                                                                                                                                                                                                                                                                                                                                                                                                                                                                                                                |           |                                                                                                                                             |                                                                            |                                                                                                                                                                                                                                                                                                                                                                                                                                                                                                                                                                      |
|--------------------------------------------------------------------------------------------------------------------------------------------------------------------------------------------------------------------------------------------------------------------------------------------------------------------------------------------------------------------------------------------------------------------------------------------------------------------------------------------------------------------------------------------------------------------------------------------------------------------------------------------------------------------------------------------------------------------------------------------------------------------------------------------------------------------------------------------------------------------------------------------------------------------------------------------------------------------------------------------------------------------------------------------------------------------------------------------------------------------------------------------------------------------------------------------------------------------------------------------------------------------------------------------------------------------------------------------------------------------------------------------------------------------------------------------------------------------------------------------------------------------------------------------------------------------------------------------------------------------------------------------------------------------------------------------------------------------------------------------------------------------------------------------------------------------------------------------------------------------------------------------------------------------------------------------------------------------------------------------------------------------------------------------------------------------------------------------------------------------------------------------------------------------------------------------------------------------------------------------------------------------------------------------------------------------------------------------------------------------------------------------------------------------------------------------------------------------------------------------------------------------------------------------------------------------------------------------------------------------------------------------------------------------------------------------------------------------------------------------------------------------------------------------------------------------------------------------------------------------------------------------------------------------------------------------------------------------------------------------------------------------------------------------------------------------------------------------------------------------------------------------------------------------------------------------------------------------------------------------------------------------------------------------------------------------------------------------------------------------------------------------------------------------------------------------------------------------------------------------------------------------------------------------------------------------------------------------------------------------------------------------------------------------------------------------------------------------------------------------------------------------------------------------------------------------------------------------------------------------------------------------------------------------------------------------------------------------------------------------------------------------------------------------------------------------------------------------------------------------------------------------------------------------------------------------------------------------------------------------------------------------------------------------------------------------------------------------------------------------------------------------------------------------------------------------------------------------------------------------------------------------------------------------------------------------------------------------------------------------------------------------------------------------------------------------------------------------------------------------------------------------------------------------------------------------------------|-----------|---------------------------------------------------------------------------------------------------------------------------------------------|----------------------------------------------------------------------------|----------------------------------------------------------------------------------------------------------------------------------------------------------------------------------------------------------------------------------------------------------------------------------------------------------------------------------------------------------------------------------------------------------------------------------------------------------------------------------------------------------------------------------------------------------------------|
| EPI_ISL_470247, EPI_ISL_470248, EPI_ISL_470249, EPI_ISL_470250, EPI_ISL_470251, EPI_ISL_470252, EPI_ISL_470253, EPI_ISL_470254, EPI_ISL_470255, EPI_ISL_470256, EPI_ISL_470257, EPI_ISL_470258, EPI_ISL_470259, EPI_ISL_470260, EPI_ISL_470261, EPI_ISL_470262, EPI_ISL_470263, EPI_ISL_470264, EPI_ISL_470265, EPI_ISL_470266, EPI_ISL_470267, EPI_ISL_470268, EPI_ISL_470269, EPI_ISL_470270, EPI_ISL_470271, EPI_ISL_470272, EPI_ISL_470273, EPI_ISL_470274, EPI_ISL_470275, EPI_ISL_470276, EPI_ISL_470277, EPI_ISL_470278, EPI_ISL_470279, EPI_ISL_470280, EPI_ISL_470281, EPI_ISL_470282, EPI_ISL_470283, EPI_ISL_470284, EPI_ISL_470285, EPI_ISL_470286, EPI_ISL_470287, EPI_ISL_470288, EPI_ISL_470289, EPI_ISL_470290, EPI_ISL_470291, EPI_ISL_470292, EPI_ISL_470293, EPI_ISL_470294, EPI_ISL_470295, EPI_ISL_470296, EPI_ISL_470297, EPI_ISL_470298, EPI_ISL_470299, EPI_ISL_470300, EPI_ISL_470301, EPI_ISL_470302, EPI_ISL_470303, EPI_ISL_470304, EPI_ISL_470305, EPI_ISL_470306, EPI_ISL_470307, EPI_ISL_470308, EPI_ISL_470309, EPI_ISL_470310, EPI_ISL_470311, EPI_ISL_470312, EPI_ISL_470313, EPI_ISL_470314, EPI_ISL_470315, EPI_ISL_470316, EPI_ISL_470317, EPI_ISL_470318, EPI_ISL_470319, EPI_ISL_470320, EPI_ISL_470321, EPI_ISL_470322, EPI_ISL_470323, EPI_ISL_470324, EPI_ISL_470325, EPI_ISL_470326, EPI_ISL_470327, EPI_ISL_470328, EPI_ISL_470329, EPI_ISL_470330, EPI_ISL_470331, EPI_ISL_470332, EPI_ISL_470333, EPI_ISL_470334, EPI_ISL_470335, EPI_ISL_470336, EPI_ISL_470337, EPI_ISL_470338, EPI_ISL_470339, EPI_ISL_470340, EPI_ISL_470341, EPI_ISL_470342, EPI_ISL_470343, EPI_ISL_470344, EPI_ISL_470345, EPI_ISL_470346, EPI_ISL_470347, EPI_ISL_470348, EPI_ISL_470349, EPI_ISL_470350, EPI_ISL_470351, EPI_ISL_470352, EPI_ISL_470353, EPI_ISL_470354, EPI_ISL_470355, EPI_ISL_470356, EPI_ISL_470359, EPI_ISL_470360, EPI_ISL_470361, EPI_ISL_470362, EPI_ISL_470363, EPI_ISL_470364, EPI_ISL_470365, EPI_ISL_470366, EPI_ISL_470367, EPI_ISL_470368, EPI_ISL_470369, EPI_ISL_470370, EPI_ISL_470371, EPI_ISL_470372, EPI_ISL_470373, EPI_ISL_470374, EPI_ISL_470375, EPI_ISL_470376, EPI_ISL_470377, EPI_ISL_470378, EPI_ISL_470379, EPI_ISL_470380, EPI_ISL_470381, EPI_ISL_470382, EPI_ISL_470383, EPI_ISL_470384, EPI_ISL_470385, EPI_ISL_470386, EPI_ISL_470387, EPI_ISL_470388, EPI_ISL_470389, EPI_ISL_470390, EPI_ISL_470391, EPI_ISL_470392, EPI_ISL_470393, EPI_ISL_470394, EPI_ISL_470395, EPI_ISL_470396, EPI_ISL_470397, EPI_ISL_470398, EPI_ISL_470399, EPI_ISL_470400, EPI_ISL_470401, EPI_ISL_470402, EPI_ISL_470403, EPI_ISL_470404, EPI_ISL_470405, EPI_ISL_470406, EPI_ISL_470407, EPI_ISL_470408, EPI_ISL_470409, EPI_ISL_470410, EPI_ISL_470411, EPI_ISL_470412, EPI_ISL_470413, EPI_ISL_470414, EPI_ISL_470415, EPI_ISL_470416, EPI_ISL_470417, EPI_ISL_470418, EPI_ISL_470419, EPI_ISL_470420, EPI_ISL_470421, EPI_ISL_470422, EPI_ISL_470423, EPI_ISL_470424, EPI_ISL_470425, EPI_ISL_470426, EPI_ISL_470427, EPI_ISL_470428, EPI_ISL_470429, EPI_ISL_470430, EPI_ISL_470431, EPI_ISL_470432, EPI_ISL_470433, EPI_ISL_470434, EPI_ISL_470435, EPI_ISL_470436, EPI_ISL_470437, EPI_ISL_470438, EPI_ISL_470439, EPI_ISL_470440, EPI_ISL_470441, EPI_ISL_470442, EPI_ISL_470443, EPI_ISL_470444, EPI_ISL_470445, EPI_ISL_470446, EPI_ISL_470447, EPI_ISL_470448, EPI_ISL_470449, EPI_ISL_470450, EPI_ISL_470451, EPI_ISL_470452, EPI_ISL_470453, EPI_ISL_470454, EPI_ISL_470455, EPI_ISL_470456, EPI_ISL_470457, EPI_ISL_470458, EPI_ISL_470459, EPI_ISL_470460, EPI_ISL_470461, EPI_ISL_470462, EPI_ISL_470463, EPI_ISL_470464, EPI_ISL_470465, EPI_ISL_470466, EPI_ISL_470467, EPI_ISL_470468, EPI_ISL_470469, EPI_ISL_470470, EPI_ISL_470471, EPI_ISL_470472, EPI_ISL_470473, EPI_ISL_470474, EPI_ISL_470475, EPI_ISL_470476, EPI_ISL_470477, EPI_ISL_470478, EPI_ISL_470479, EPI_ISL_470480, EPI_ISL_470481, EPI_ISL_470482, EPI_ISL_470483, EPI_ISL_470484, EPI_ISL_470485, EPI_ISL_470486, EPI_ISL_470487, EPI_ISL_470488, EPI_ISL_470489, EPI_ISL_470490, EPI_ISL_470491, EPI_ISL_470492, EPI_ISL_470493, EPI_ISL_470494, EPI_ISL_470495, EPI_ISL_470496, EPI_ISL_470497, EPI_ISL_470498, EPI_ISL_470499, EPI_ISL_470500, EPI_ISL_470501, EPI_ISL_470502, EPI_ISL_470503, EPI_ISL_470504, EPI_ISL_470505, EPI_ISL_470506, EPI_ISL_470507, EPI_ISL_470508, EPI_ISL_470509, EPI_ISL_470510, EPI_ISL_470511, EPI_ISL_470512, EPI_ISL_470513, EPI_ISL_470514, EPI_ISL_470515, EPI_ISL_470516, EPI_ISL_470517, EPI_ISL_470518, EPI_ISL_470519, EPI_ISL_470520, EPI_ISL_470521, EPI_ISL_470522, EPI_ISL_470523, EPI_ISL_470524, EPI_ISL_470525, EPI_ISL_470526, EPI_ISL_470527, EPI_ISL_470528, EPI_ISL_470529, EPI_ISL_470530, EPI_ISL_470531, EPI_ISL_470532, EPI_ISL_470533, EPI_ISL_470534, EPI_ISL_470535, EPI_ISL_470536, EPI_ISL_470537, EPI_ISL_470538 | see above | Department of Pathology, University of Cambridge                                                                                            | Wellcome Sanger Institute for the COVID-19 Genomics UK (COG-UK) consortium | Luke W Meredith, M. Estée Török, Myra Hosmillo, William L. Hamilton, Martin D. Curran, Theresa Feltwell, Grant Hall, Anna Yakovleva, Fahad A Khokhar, Charlotte J. Houldcroft, Laura G Caller, Aminu S. Jahun, Sarah L. Caddy, Ian Goodfellow, and Alex Alderton, Roberto Amato, Sonia Goncalves, Ewan Harrison, David K. Jackson, Ian Johnston, Dominic Kwiatkowski, Cordelia Langford, John Sillitoe on behalf of the Wellcome Sanger Institute COVID-19 Surveillance Team ( <a href="http://www.sanger.ac.uk/covid-team">http://www.sanger.ac.uk/covid-team</a> ) |
| EPI_ISL_471416, EPI_ISL_471417, EPI_ISL_471418, EPI_ISL_471419, EPI_ISL_471420, EPI_ISL_471421, EPI_ISL_471422, EPI_ISL_471423, EPI_ISL_471424                                                                                                                                                                                                                                                                                                                                                                                                                                                                                                                                                                                                                                                                                                                                                                                                                                                                                                                                                                                                                                                                                                                                                                                                                                                                                                                                                                                                                                                                                                                                                                                                                                                                                                                                                                                                                                                                                                                                                                                                                                                                                                                                                                                                                                                                                                                                                                                                                                                                                                                                                                                                                                                                                                                                                                                                                                                                                                                                                                                                                                                                                                                                                                                                                                                                                                                                                                                                                                                                                                                                                                                                                                                                                                                                                                                                                                                                                                                                                                                                                                                                                                                                                                                                                                                                                                                                                                                                                                                                                                                                                                                                                                                                                 |           | Laboratory for Respiratory Viruses, National Influenza Centre, Cantacuzino National Military-Medical Institute for Research and Development | Cantacuzino Institute                                                      | Luiza Ustea, Nicoleta Paraschiv, Tim Durfee, Mihaela Lazar                                                                                                                                                                                                                                                                                                                                                                                                                                                                                                           |
| EPI_ISL_473451, EPI_ISL_473452, EPI_ISL_473453, EPI_ISL_473454, EPI_ISL_473455, EPI_ISL_473456, EPI_ISL_473457, EPI_ISL_473458, EPI_ISL_473459, EPI_ISL_473460, EPI_ISL_473461, EPI_ISL_473462, EPI_ISL_473463, EPI_ISL_473464, EPI_ISL_473465, EPI_ISL_473466, EPI_ISL_473467, EPI_ISL_473468, EPI_ISL_473469, EPI_ISL_473470, EPI_ISL_473471, EPI_ISL_473472, EPI_ISL_473473, EPI_ISL_473474, EPI_ISL_473475, EPI_ISL_473476, EPI_ISL_473477, EPI_ISL_473478, EPI_ISL_473479, EPI_ISL_473480, EPI_ISL_473481, EPI_ISL_473482, EPI_ISL_473483, EPI_ISL_473484, EPI_ISL_473485, EPI_ISL_473486, EPI_ISL_473487, EPI_ISL_473488, EPI_ISL_473489, EPI_ISL_473490, EPI_ISL_473491, EPI_ISL_473492, EPI_ISL_473493, EPI_ISL_473494, EPI_ISL_473495, EPI_ISL_473496, EPI_ISL_473497, EPI_ISL_473498, EPI_ISL_473499, EPI_ISL_473500, EPI_ISL_473501, EPI_ISL_473502, EPI_ISL_473503, EPI_ISL_473504, EPI_ISL_473505, EPI_ISL_473506, EPI_ISL_473507                                                                                                                                                                                                                                                                                                                                                                                                                                                                                                                                                                                                                                                                                                                                                                                                                                                                                                                                                                                                                                                                                                                                                                                                                                                                                                                                                                                                                                                                                                                                                                                                                                                                                                                                                                                                                                                                                                                                                                                                                                                                                                                                                                                                                                                                                                                                                                                                                                                                                                                                                                                                                                                                                                                                                                                                                                                                                                                                                                                                                                                                                                                                                                                                                                                                                                                                                                                                                                                                                                                                                                                                                                                                                                                                                                                                                                                                                 | see above | Department of Pathology, University of Cambridge                                                                                            | COVID-19 Genomics UK (COG-UK) Consortium                                   | Luke W Meredith, M. Estée Török, Myra Hosmillo, William L. Hamilton, Martin D. Curran, Theresa Feltwell, Grant Hall, Anna Yakovleva, Fahad A Khokhar, Charlotte J. Houldcroft, Laura G Caller, Aminu S. Jahun, Sarah L. Caddy, Yasmin Chaudhry, Malte Pinckert, Ian Goodfellow                                                                                                                                                                                                                                                                                       |
| EPI_ISL_474910, EPI_ISL_474911, EPI_ISL_474912, EPI_ISL_474913, EPI_ISL_474914, EPI_ISL_474915, EPI_ISL_474916, EPI_ISL_474917, EPI_ISL_474918                                                                                                                                                                                                                                                                                                                                                                                                                                                                                                                                                                                                                                                                                                                                                                                                                                                                                                                                                                                                                                                                                                                                                                                                                                                                                                                                                                                                                                                                                                                                                                                                                                                                                                                                                                                                                                                                                                                                                                                                                                                                                                                                                                                                                                                                                                                                                                                                                                                                                                                                                                                                                                                                                                                                                                                                                                                                                                                                                                                                                                                                                                                                                                                                                                                                                                                                                                                                                                                                                                                                                                                                                                                                                                                                                                                                                                                                                                                                                                                                                                                                                                                                                                                                                                                                                                                                                                                                                                                                                                                                                                                                                                                                                 |           | Hospital Universitario de Gran Canaria Dr. Negrín                                                                                           | SeqCOVID-SPAIN consortium/IBV(CSIC)                                        | M. Carmen Pérez González, Francisco J. Chamizo López, Ana Bordes Benitez and SeqCOVID-SPAIN consortium                                                                                                                                                                                                                                                                                                                                                                                                                                                               |
| EPI_ISL_475034                                                                                                                                                                                                                                                                                                                                                                                                                                                                                                                                                                                                                                                                                                                                                                                                                                                                                                                                                                                                                                                                                                                                                                                                                                                                                                                                                                                                                                                                                                                                                                                                                                                                                                                                                                                                                                                                                                                                                                                                                                                                                                                                                                                                                                                                                                                                                                                                                                                                                                                                                                                                                                                                                                                                                                                                                                                                                                                                                                                                                                                                                                                                                                                                                                                                                                                                                                                                                                                                                                                                                                                                                                                                                                                                                                                                                                                                                                                                                                                                                                                                                                                                                                                                                                                                                                                                                                                                                                                                                                                                                                                                                                                                                                                                                                                                                 |           | Department of MicroBiology, Government Medical College, Surat                                                                               | Gujarat Biotechnology Research Centre                                      | Maharshi Pandya, Nidhi Patel, Nitin Savaliya, Raghawendra Kumar, Dinesh Kumar, Zuber Saiyed, Komal Patel, Labdhi Pandya, Snehal Bagatharia, Naresh Chauhan, Summैया Mullan, Amit gamit, Pritesh Sabara, Apurvasinh Puvar, Janvi Raval, Zarna Patel, Monika Gandhi, Pinal Trivedi, Akanksha Verma, R D Dixit, A M Kadri, Harsh Bakshi, Chaitanya Joshi, Madhvi Joshi                                                                                                                                                                                                  |
| EPI_ISL_475052                                                                                                                                                                                                                                                                                                                                                                                                                                                                                                                                                                                                                                                                                                                                                                                                                                                                                                                                                                                                                                                                                                                                                                                                                                                                                                                                                                                                                                                                                                                                                                                                                                                                                                                                                                                                                                                                                                                                                                                                                                                                                                                                                                                                                                                                                                                                                                                                                                                                                                                                                                                                                                                                                                                                                                                                                                                                                                                                                                                                                                                                                                                                                                                                                                                                                                                                                                                                                                                                                                                                                                                                                                                                                                                                                                                                                                                                                                                                                                                                                                                                                                                                                                                                                                                                                                                                                                                                                                                                                                                                                                                                                                                                                                                                                                                                                 |           | GMERS Medical College & Hospital                                                                                                            | Gujarat Biotechnology Research Centre                                      | Maharshi Pandya, Nidhi Patel, Nitin Savaliya, Raghawendra Kumar, Dinesh Kumar, Zuber Saiyed, Komal Patel, Labdhi Pandya, Snehal Bagatharia, Meenakshi Shah, Neena Doshi, Varsha Godbole, Pritesh Sabara, Apurvasinh Puvar, Janvi Raval, Zarna Patel, Monika Gandhi, Pinal Trivedi, Armi Chaudhari, R D Dixit, A M Kadri, Harsh Bakshi, Chaitanya Joshi, Madhvi Joshi                                                                                                                                                                                                 |
| EPI_ISL_476860                                                                                                                                                                                                                                                                                                                                                                                                                                                                                                                                                                                                                                                                                                                                                                                                                                                                                                                                                                                                                                                                                                                                                                                                                                                                                                                                                                                                                                                                                                                                                                                                                                                                                                                                                                                                                                                                                                                                                                                                                                                                                                                                                                                                                                                                                                                                                                                                                                                                                                                                                                                                                                                                                                                                                                                                                                                                                                                                                                                                                                                                                                                                                                                                                                                                                                                                                                                                                                                                                                                                                                                                                                                                                                                                                                                                                                                                                                                                                                                                                                                                                                                                                                                                                                                                                                                                                                                                                                                                                                                                                                                                                                                                                                                                                                                                                 |           | GMERS Medical College & Hospital, Gotri, Vadodara                                                                                           | Gujarat Biotechnology Research Centre                                      | Maharshi Pandya, Nidhi Patel, Nitin Savaliya, Raghawendra Kumar, Dinesh Kumar, Zuber Saiyed, Komal Patel, Labdhi Pandya, Afzal Ansari, Nikha Trivedi, Meenakshi Shah, Neena Doshi, Varsha Godbole, Apurvasinh Puvar, Janvi Raval, Zarna Patel, Monika Gandhi, Pinal Trivedi, R D Dixit, A M Kadri, Harsh Bakshi, Chaitanya Joshi, Madhvi Joshi                                                                                                                                                                                                                       |
| EPI_ISL_476877                                                                                                                                                                                                                                                                                                                                                                                                                                                                                                                                                                                                                                                                                                                                                                                                                                                                                                                                                                                                                                                                                                                                                                                                                                                                                                                                                                                                                                                                                                                                                                                                                                                                                                                                                                                                                                                                                                                                                                                                                                                                                                                                                                                                                                                                                                                                                                                                                                                                                                                                                                                                                                                                                                                                                                                                                                                                                                                                                                                                                                                                                                                                                                                                                                                                                                                                                                                                                                                                                                                                                                                                                                                                                                                                                                                                                                                                                                                                                                                                                                                                                                                                                                                                                                                                                                                                                                                                                                                                                                                                                                                                                                                                                                                                                                                                                 |           | Department of MicroBiology, Government Medical College, Surat                                                                               | Gujarat Biotechnology Research Centre                                      | Maharshi Pandya, Nidhi Patel, Nitin Savaliya, Raghawendra Kumar, Dinesh Kumar, Zuber Saiyed, Komal Patel, Labdhi Pandya, Afzal Ansari, Nikha Trivedi, Naresh Chauhan, Summैया Mullan, Amit gamit, Apurvasinh Puvar, Janvi Raval, Zarna Patel, Monika Gandhi, Pinal Trivedi, R D Dixit, A M Kadri, Harsh Bakshi, Chaitanya Joshi, Madhvi Joshi                                                                                                                                                                                                                        |
| EPI_ISL_477783, EPI_ISL_477784, EPI_ISL_477785, EPI_ISL_477786, EPI_ISL_477787, EPI_ISL_477788, EPI_ISL_477789, EPI_ISL_477790, EPI_ISL_477791, EPI_ISL_477792, EPI_ISL_477793, EPI_ISL_477794, EPI_ISL_477795, EPI_ISL_477796, EPI_ISL_477797, EPI_ISL_477798, EPI_ISL_477799, EPI_ISL_477800, EPI_ISL_477801, EPI_ISL_477802, EPI_ISL_477803, EPI_ISL_477804, EPI_ISL_477805, EPI_ISL_477806, EPI_ISL_477807, EPI_ISL_477808, EPI_ISL_477809, EPI_ISL_477810, EPI_ISL_477811, EPI_ISL_477812, EPI_ISL_477813, EPI_ISL_477814, EPI_ISL_477815, EPI_ISL_477816, EPI_ISL_477817, EPI_ISL_477818, EPI_ISL_477819                                                                                                                                                                                                                                                                                                                                                                                                                                                                                                                                                                                                                                                                                                                                                                                                                                                                                                                                                                                                                                                                                                                                                                                                                                                                                                                                                                                                                                                                                                                                                                                                                                                                                                                                                                                                                                                                                                                                                                                                                                                                                                                                                                                                                                                                                                                                                                                                                                                                                                                                                                                                                                                                                                                                                                                                                                                                                                                                                                                                                                                                                                                                                                                                                                                                                                                                                                                                                                                                                                                                                                                                                                                                                                                                                                                                                                                                                                                                                                                                                                                                                                                                                                                                                 | see above | Department of Pathology, University of Cambridge                                                                                            | COVID-19 Genomics UK (COG-UK) Consortium                                   | Luke W Meredith, M. Estée Török, Myra Hosmillo, William L. Hamilton, Martin D. Curran, Theresa Feltwell, Grant Hall, Anna Yakovleva, Fahad A Khokhar, Charlotte J. Houldcroft, Laura G Caller, Aminu S. Jahun, Sarah L. Caddy, Yasmin Chaudhry, Malte Pinckert, Ian Goodfellow                                                                                                                                                                                                                                                                                       |
| EPI_ISL_479616, EPI_ISL_479617                                                                                                                                                                                                                                                                                                                                                                                                                                                                                                                                                                                                                                                                                                                                                                                                                                                                                                                                                                                                                                                                                                                                                                                                                                                                                                                                                                                                                                                                                                                                                                                                                                                                                                                                                                                                                                                                                                                                                                                                                                                                                                                                                                                                                                                                                                                                                                                                                                                                                                                                                                                                                                                                                                                                                                                                                                                                                                                                                                                                                                                                                                                                                                                                                                                                                                                                                                                                                                                                                                                                                                                                                                                                                                                                                                                                                                                                                                                                                                                                                                                                                                                                                                                                                                                                                                                                                                                                                                                                                                                                                                                                                                                                                                                                                                                                 |           | Laboratory of Molecular Virology of the International Centre for Genetic Engineering and Biotechnology (ICGEB)                              | ARGO Open Lab Platform for Genome Sequencing                               | Licastro, D, Rajasekharan S, Dal Monego S, Segat L, D'Agaro P, Salton F, Confalonieri P, Confalonieri M Marcello A                                                                                                                                                                                                                                                                                                                                                                                                                                                   |
| EPI_ISL_479618, EPI_ISL_479619, EPI_ISL_479790, EPI_ISL_479791                                                                                                                                                                                                                                                                                                                                                                                                                                                                                                                                                                                                                                                                                                                                                                                                                                                                                                                                                                                                                                                                                                                                                                                                                                                                                                                                                                                                                                                                                                                                                                                                                                                                                                                                                                                                                                                                                                                                                                                                                                                                                                                                                                                                                                                                                                                                                                                                                                                                                                                                                                                                                                                                                                                                                                                                                                                                                                                                                                                                                                                                                                                                                                                                                                                                                                                                                                                                                                                                                                                                                                                                                                                                                                                                                                                                                                                                                                                                                                                                                                                                                                                                                                                                                                                                                                                                                                                                                                                                                                                                                                                                                                                                                                                                                                 |           | Laboratory of Molecular Virology of the International Centre for Genetic Engineering and Biotechnology (ICGEB)                              | ARGO Open Lab Platform for Genome Sequencing                               | Licastro, D, Rajasekharan S, Dal Monego S, Segat L, D'Agaro P, Salton F, Confalonieri P, Confalonieri M, Marcello A                                                                                                                                                                                                                                                                                                                                                                                                                                                  |
| EPI_ISL_482124, EPI_ISL_482131                                                                                                                                                                                                                                                                                                                                                                                                                                                                                                                                                                                                                                                                                                                                                                                                                                                                                                                                                                                                                                                                                                                                                                                                                                                                                                                                                                                                                                                                                                                                                                                                                                                                                                                                                                                                                                                                                                                                                                                                                                                                                                                                                                                                                                                                                                                                                                                                                                                                                                                                                                                                                                                                                                                                                                                                                                                                                                                                                                                                                                                                                                                                                                                                                                                                                                                                                                                                                                                                                                                                                                                                                                                                                                                                                                                                                                                                                                                                                                                                                                                                                                                                                                                                                                                                                                                                                                                                                                                                                                                                                                                                                                                                                                                                                                                                 |           | North West London Pathology, Imperial College Healthcare NHS Trust                                                                          | Wellcome Sanger Institute for the COVID-19 Genomics UK (COG-UK) consortium | Ling Li, Paul Randell, David Muir, Frankie Bolt, Alison Holmes, James Price, Aileen Rowan, Graham Taylor, Anjna Badhan, Carolina Herrera and Alex Alderton, Roberto Amato, Sonia Goncalves, Ewan Harrison, David K. Jackson, Ian Johnston, Dominic Kwiatkowski, Cordelia Langford, John Sillitoe on behalf of the Wellcome Sanger Institute COVID-19 Surveillance Team ( <a href="http://www.sanger.ac.uk/covid-team">http://www.sanger.ac.uk/covid-team</a> )                                                                                                       |
| EPI_ISL_482138                                                                                                                                                                                                                                                                                                                                                                                                                                                                                                                                                                                                                                                                                                                                                                                                                                                                                                                                                                                                                                                                                                                                                                                                                                                                                                                                                                                                                                                                                                                                                                                                                                                                                                                                                                                                                                                                                                                                                                                                                                                                                                                                                                                                                                                                                                                                                                                                                                                                                                                                                                                                                                                                                                                                                                                                                                                                                                                                                                                                                                                                                                                                                                                                                                                                                                                                                                                                                                                                                                                                                                                                                                                                                                                                                                                                                                                                                                                                                                                                                                                                                                                                                                                                                                                                                                                                                                                                                                                                                                                                                                                                                                                                                                                                                                                                                 |           | North West London Pathology, Imperial College Healthcare NHS Trust                                                                          | Wellcome Sanger Institute for the COVID-19 Genomics UK (COG-UK) Consortium | Ling Li, Paul Randell, David Muir, Frankie Bolt, Alison Holmes, James Price, Aileen Rowan, Graham Taylor, Anjna Badhan, Carolina Herrera and Alex Alderton, Roberto Amato, Sonia Goncalves, Ewan Harrison, David K. Jackson, Ian Johnston, Dominic Kwiatkowski, Cordelia Langford, John Sillitoe on behalf of the Wellcome Sanger Institute COVID-19 Surveillance Team                                                                                                                                                                                               |
| EPI_ISL_483066, EPI_ISL_483067, EPI_ISL_483068, EPI_ISL_483069, EPI_ISL_483070, EPI_ISL_483071, EPI_ISL_483072, EPI_ISL_483073, EPI_ISL_483074, EPI_ISL_483075, EPI_ISL_483076, EPI_ISL_483077, EPI_ISL_483078, EPI_ISL_483079, EPI_ISL_483080, EPI_ISL_483081, EPI_ISL_483082, EPI_ISL_483083, EPI_ISL_483084, EPI_ISL_483085, EPI_ISL_483086, EPI_ISL_483087, EPI_ISL_483088, EPI_ISL_483089, EPI_ISL_483090, EPI_ISL_483091, EPI_ISL_483092, EPI_ISL_483093, EPI_ISL_483094, EPI_ISL_483095, EPI_ISL_483096, EPI_ISL_483097, EPI_ISL_483098, EPI_ISL_483099, EPI_ISL_483100, EPI_ISL_483101, EPI_ISL_483102, EPI_ISL_483103, EPI_ISL_483104, EPI_ISL_483105, EPI_ISL_483107, EPI_ISL_483108, EPI_ISL_483109, EPI_ISL_483110, EPI_ISL_483111, EPI_ISL_483112, EPI_ISL_483113, EPI_ISL_483114, EPI_ISL_483115, EPI_ISL_483116, EPI_ISL_483117, EPI_ISL_483118, EPI_ISL_483119, EPI_ISL_483120, EPI_ISL_483121, EPI_ISL_483122, EPI_ISL_483123, EPI_ISL_483124, EPI_ISL_483125, EPI_ISL_483126, EPI_ISL_483127, EPI_ISL_483128, EPI_ISL_483129, EPI_ISL_483130, EPI_ISL_483131, EPI_ISL_483132, EPI_ISL_483133, EPI_ISL_483134, EPI_ISL_483135, EPI_ISL_483136, EPI_ISL_483137, EPI_ISL_483138                                                                                                                                                                                                                                                                                                                                                                                                                                                                                                                                                                                                                                                                                                                                                                                                                                                                                                                                                                                                                                                                                                                                                                                                                                                                                                                                                                                                                                                                                                                                                                                                                                                                                                                                                                                                                                                                                                                                                                                                                                                                                                                                                                                                                                                                                                                                                                                                                                                                                                                                                                                                                                                                                                                                                                                                                                                                                                                                                                                                                                                                                                                                                                                                                                                                                                                                                                                                                                                                                                                                                                                                                                 | see above | SA Pathology                                                                                                                                | SA Pathology                                                               | Lex Leong, Chuan Kok Lim, Mark Turra, Ivan Bastian, Geoff Higgins                                                                                                                                                                                                                                                                                                                                                                                                                                                                                                    |
| EPI_ISL_483627, EPI_ISL_483628                                                                                                                                                                                                                                                                                                                                                                                                                                                                                                                                                                                                                                                                                                                                                                                                                                                                                                                                                                                                                                                                                                                                                                                                                                                                                                                                                                                                                                                                                                                                                                                                                                                                                                                                                                                                                                                                                                                                                                                                                                                                                                                                                                                                                                                                                                                                                                                                                                                                                                                                                                                                                                                                                                                                                                                                                                                                                                                                                                                                                                                                                                                                                                                                                                                                                                                                                                                                                                                                                                                                                                                                                                                                                                                                                                                                                                                                                                                                                                                                                                                                                                                                                                                                                                                                                                                                                                                                                                                                                                                                                                                                                                                                                                                                                                                                 |           | National Institute of Laboratory Medicine and Referral Center                                                                               | Genomic Research Lab, BCSIR                                                | Mahmuda Yeasmin, Abu Sayeed Mohammad Mahmud, Mohammad Samir Uzzaman, Eshrar Osman, Md. Ahasan Habib, Shahina Akter, Tanjina Akhter Banu, Md. Murshed Hasan Sarkar, Borna Goswami, Iffat Jahan, Md. Saddam Hossain, Tashim Nafisa, Md. Maruf Ahmed Molla, Asish Kumar Ghosh, A. K. M. Shamsuzzaman, Sheikh Md. Selim Al Din, Utpal Chandra Ray, Salek Ahmed Sajib, Md. Salim Khan                                                                                                                                                                                     |
| EPI_ISL_483831, EPI_ISL_483848                                                                                                                                                                                                                                                                                                                                                                                                                                                                                                                                                                                                                                                                                                                                                                                                                                                                                                                                                                                                                                                                                                                                                                                                                                                                                                                                                                                                                                                                                                                                                                                                                                                                                                                                                                                                                                                                                                                                                                                                                                                                                                                                                                                                                                                                                                                                                                                                                                                                                                                                                                                                                                                                                                                                                                                                                                                                                                                                                                                                                                                                                                                                                                                                                                                                                                                                                                                                                                                                                                                                                                                                                                                                                                                                                                                                                                                                                                                                                                                                                                                                                                                                                                                                                                                                                                                                                                                                                                                                                                                                                                                                                                                                                                                                                                                                 |           | Pandit Deendayal Upadhyay Government Medical College, Rajkot                                                                                | Gujarat Biotechnology Research Centre                                      | Maharshi Pandya, Nidhi Patel, Nitin Savaliya, Raghawendra Kumar, Dinesh Kumar, Zuber Saiyed, Komal Patel, Labdhi Pandya, Afzal Ansari, Nikha Trivedi, Gauravi Dhruv, Arti Trivedi, Apurvasinh Puvar, Janvi Raval, Zarna Patel, Monika Gandhi, Pinal Trivedi, R D Dixit, A M Kadri, Harsh Bakshi, Chaitanya Joshi, Madhvi Joshi                                                                                                                                                                                                                                       |
| EPI_ISL_483866                                                                                                                                                                                                                                                                                                                                                                                                                                                                                                                                                                                                                                                                                                                                                                                                                                                                                                                                                                                                                                                                                                                                                                                                                                                                                                                                                                                                                                                                                                                                                                                                                                                                                                                                                                                                                                                                                                                                                                                                                                                                                                                                                                                                                                                                                                                                                                                                                                                                                                                                                                                                                                                                                                                                                                                                                                                                                                                                                                                                                                                                                                                                                                                                                                                                                                                                                                                                                                                                                                                                                                                                                                                                                                                                                                                                                                                                                                                                                                                                                                                                                                                                                                                                                                                                                                                                                                                                                                                                                                                                                                                                                                                                                                                                                                                                                 |           | Department of Microbiology, Government Medical College, Surat                                                                               | Gujarat Biotechnology Research Centre                                      | Maharshi Pandya, Nidhi Patel, Nitin Savaliya, Raghawendra Kumar, Dinesh Kumar, Zuber Saiyed, Komal Patel, Labdhi Pandya, Afzal Ansari, Nikha Trivedi, Naresh Chauhan, Summैया Mullan, Amit gamit, Apurvasinh Puvar, Janvi Raval, Zarna Patel, Monika Gandhi, Pinal Trivedi, R D Dixit, A M Kadri, Harsh Bakshi, Chaitanya Joshi, Madhvi Joshi                                                                                                                                                                                                                        |



|                                                                                                                                                                                                                                                                                                                                                                                                                                                                                                                                                                                                                                                                                                                                                                                                                                                                                                                                                                                                                                                                                                                                                                                                                                                                                                                                                                                                                                                                                                                                                                                                                                                                                                                                                                                                                                                                                                                                                                                                                                                                                                                                                                                                                                                                                                                                                                                                                                                                                                                                                                                                                                                                                                                                                                                                                                                                                                |                                                                            |                                                                                                                                                                                                                                                                                                                                                                                                                                                                                                                                                                      |                                                                                                                                                                                                                                                                                                                                                                                                                                                                                                                                                                      |
|------------------------------------------------------------------------------------------------------------------------------------------------------------------------------------------------------------------------------------------------------------------------------------------------------------------------------------------------------------------------------------------------------------------------------------------------------------------------------------------------------------------------------------------------------------------------------------------------------------------------------------------------------------------------------------------------------------------------------------------------------------------------------------------------------------------------------------------------------------------------------------------------------------------------------------------------------------------------------------------------------------------------------------------------------------------------------------------------------------------------------------------------------------------------------------------------------------------------------------------------------------------------------------------------------------------------------------------------------------------------------------------------------------------------------------------------------------------------------------------------------------------------------------------------------------------------------------------------------------------------------------------------------------------------------------------------------------------------------------------------------------------------------------------------------------------------------------------------------------------------------------------------------------------------------------------------------------------------------------------------------------------------------------------------------------------------------------------------------------------------------------------------------------------------------------------------------------------------------------------------------------------------------------------------------------------------------------------------------------------------------------------------------------------------------------------------------------------------------------------------------------------------------------------------------------------------------------------------------------------------------------------------------------------------------------------------------------------------------------------------------------------------------------------------------------------------------------------------------------------------------------------------|----------------------------------------------------------------------------|----------------------------------------------------------------------------------------------------------------------------------------------------------------------------------------------------------------------------------------------------------------------------------------------------------------------------------------------------------------------------------------------------------------------------------------------------------------------------------------------------------------------------------------------------------------------|----------------------------------------------------------------------------------------------------------------------------------------------------------------------------------------------------------------------------------------------------------------------------------------------------------------------------------------------------------------------------------------------------------------------------------------------------------------------------------------------------------------------------------------------------------------------|
| EPI_ISL_483913, EPI_ISL_483914, EPI_ISL_483915                                                                                                                                                                                                                                                                                                                                                                                                                                                                                                                                                                                                                                                                                                                                                                                                                                                                                                                                                                                                                                                                                                                                                                                                                                                                                                                                                                                                                                                                                                                                                                                                                                                                                                                                                                                                                                                                                                                                                                                                                                                                                                                                                                                                                                                                                                                                                                                                                                                                                                                                                                                                                                                                                                                                                                                                                                                 | Department of Pathology, University of Cambridge                           | COVID-19 Genomics UK (COG-UK) Consortium                                                                                                                                                                                                                                                                                                                                                                                                                                                                                                                             | Luke W Meredith, M. Estée Török, Myra Hosmillo, William L. Hamilton, Martin D. Curran, Theresa Feltwell, Grant Hall, Anna Yakovleva, Fahad A Khokhar, Charlotte J. Houldcroft, Laura G Caller, Aminu S. Jahun, Sarah L. Caddy, Yasmin Chaudhry, Malte Pinckert, Ian Goodfellow                                                                                                                                                                                                                                                                                       |
| EPI_ISL_486834                                                                                                                                                                                                                                                                                                                                                                                                                                                                                                                                                                                                                                                                                                                                                                                                                                                                                                                                                                                                                                                                                                                                                                                                                                                                                                                                                                                                                                                                                                                                                                                                                                                                                                                                                                                                                                                                                                                                                                                                                                                                                                                                                                                                                                                                                                                                                                                                                                                                                                                                                                                                                                                                                                                                                                                                                                                                                 | Suceava County Emergency Hospital "Sf. Ioan cel Nou"                       | SMU Metagenomics lab                                                                                                                                                                                                                                                                                                                                                                                                                                                                                                                                                 | Lobiuc Andrei, Antoniadis Panagiotis                                                                                                                                                                                                                                                                                                                                                                                                                                                                                                                                 |
| EPI_ISL_486854                                                                                                                                                                                                                                                                                                                                                                                                                                                                                                                                                                                                                                                                                                                                                                                                                                                                                                                                                                                                                                                                                                                                                                                                                                                                                                                                                                                                                                                                                                                                                                                                                                                                                                                                                                                                                                                                                                                                                                                                                                                                                                                                                                                                                                                                                                                                                                                                                                                                                                                                                                                                                                                                                                                                                                                                                                                                                 | Emergency County Hospital Suceava                                          | Stefan cel Mare, University Metagenomics lab                                                                                                                                                                                                                                                                                                                                                                                                                                                                                                                         | Lobiuc Andrei et al.                                                                                                                                                                                                                                                                                                                                                                                                                                                                                                                                                 |
| EPI_ISL_486855                                                                                                                                                                                                                                                                                                                                                                                                                                                                                                                                                                                                                                                                                                                                                                                                                                                                                                                                                                                                                                                                                                                                                                                                                                                                                                                                                                                                                                                                                                                                                                                                                                                                                                                                                                                                                                                                                                                                                                                                                                                                                                                                                                                                                                                                                                                                                                                                                                                                                                                                                                                                                                                                                                                                                                                                                                                                                 | Emergency county Hospital Suceava                                          | "Stefan cel Mare" University Metagenomics Lab                                                                                                                                                                                                                                                                                                                                                                                                                                                                                                                        | Lobiuc Andrei et al.                                                                                                                                                                                                                                                                                                                                                                                                                                                                                                                                                 |
| EPI_ISL_486856                                                                                                                                                                                                                                                                                                                                                                                                                                                                                                                                                                                                                                                                                                                                                                                                                                                                                                                                                                                                                                                                                                                                                                                                                                                                                                                                                                                                                                                                                                                                                                                                                                                                                                                                                                                                                                                                                                                                                                                                                                                                                                                                                                                                                                                                                                                                                                                                                                                                                                                                                                                                                                                                                                                                                                                                                                                                                 | Emergency County Hospital                                                  | Stefan cel Mare, University Metagenomics lab                                                                                                                                                                                                                                                                                                                                                                                                                                                                                                                         | Lobiuc Andrei et al.                                                                                                                                                                                                                                                                                                                                                                                                                                                                                                                                                 |
| EPI_ISL_489381, EPI_ISL_489382, EPI_ISL_489383, EPI_ISL_489384, EPI_ISL_489385, EPI_ISL_489386, EPI_ISL_489387, EPI_ISL_489388, EPI_ISL_489389, EPI_ISL_489390, EPI_ISL_489391, EPI_ISL_489395, EPI_ISL_489397, EPI_ISL_489398, EPI_ISL_489399, EPI_ISL_489400, EPI_ISL_489402, EPI_ISL_489403, EPI_ISL_489404, EPI_ISL_489405, EPI_ISL_489406, EPI_ISL_489409, EPI_ISL_489410, EPI_ISL_489411, EPI_ISL_489412, EPI_ISL_489414, EPI_ISL_489415, EPI_ISL_489416, EPI_ISL_489417, EPI_ISL_489419, EPI_ISL_489420, EPI_ISL_489421, EPI_ISL_489422, EPI_ISL_489423, EPI_ISL_489424, EPI_ISL_489425, EPI_ISL_489426, EPI_ISL_489427, EPI_ISL_489428, EPI_ISL_489430, EPI_ISL_489431, EPI_ISL_489432, EPI_ISL_489433, EPI_ISL_489434, EPI_ISL_489435, EPI_ISL_489436, EPI_ISL_489437, EPI_ISL_489438, EPI_ISL_489439, EPI_ISL_489440, EPI_ISL_489441, EPI_ISL_489443, EPI_ISL_489444, EPI_ISL_489445, EPI_ISL_489446, EPI_ISL_489447, EPI_ISL_489448, EPI_ISL_489450, EPI_ISL_489451, EPI_ISL_489452, EPI_ISL_489453, EPI_ISL_489454, EPI_ISL_489456, EPI_ISL_489457, EPI_ISL_489458, EPI_ISL_489459, EPI_ISL_489460, EPI_ISL_489461, EPI_ISL_489462, EPI_ISL_489463, EPI_ISL_489464, EPI_ISL_489465, EPI_ISL_489466, EPI_ISL_489467, EPI_ISL_489468, EPI_ISL_489469, EPI_ISL_489471, EPI_ISL_489472, EPI_ISL_489473, EPI_ISL_489474, EPI_ISL_489475, EPI_ISL_489476, EPI_ISL_489477, EPI_ISL_489478, EPI_ISL_489479, EPI_ISL_489481, EPI_ISL_489482, EPI_ISL_489483, EPI_ISL_489484, EPI_ISL_489485, EPI_ISL_489486, EPI_ISL_489487, EPI_ISL_489488, EPI_ISL_489490, EPI_ISL_489491, EPI_ISL_489492, EPI_ISL_489493, EPI_ISL_489494, EPI_ISL_489495, EPI_ISL_489496, EPI_ISL_489497, EPI_ISL_489498, EPI_ISL_489499, EPI_ISL_489500, EPI_ISL_489501, EPI_ISL_489502, EPI_ISL_489503, EPI_ISL_489504, EPI_ISL_489505, EPI_ISL_489506, EPI_ISL_489507, EPI_ISL_489508, EPI_ISL_489509, EPI_ISL_489510, EPI_ISL_489511, EPI_ISL_489512, EPI_ISL_489513, EPI_ISL_489514, EPI_ISL_489515, EPI_ISL_489516, EPI_ISL_489517, EPI_ISL_489518, EPI_ISL_489519, EPI_ISL_489520, EPI_ISL_489521, EPI_ISL_489522, EPI_ISL_489524, EPI_ISL_489525, EPI_ISL_489526, EPI_ISL_489527, EPI_ISL_489528, EPI_ISL_489529, EPI_ISL_489531, EPI_ISL_489532, EPI_ISL_489533, EPI_ISL_489534, EPI_ISL_489535, EPI_ISL_489538, EPI_ISL_489539, EPI_ISL_489540, EPI_ISL_489541, EPI_ISL_489542, EPI_ISL_489544, EPI_ISL_489545, EPI_ISL_489546, EPI_ISL_489548, EPI_ISL_489549, EPI_ISL_489550, EPI_ISL_489551, EPI_ISL_489552, EPI_ISL_489553, EPI_ISL_489554, EPI_ISL_489555, EPI_ISL_489556, EPI_ISL_489557, EPI_ISL_489558, EPI_ISL_489559, EPI_ISL_489560, EPI_ISL_489561, EPI_ISL_489562, EPI_ISL_489563, EPI_ISL_489564, EPI_ISL_489565, EPI_ISL_489566, EPI_ISL_489568, EPI_ISL_489569, EPI_ISL_489570, EPI_ISL_489571, EPI_ISL_489572, EPI_ISL_489573, EPI_ISL_489574, EPI_ISL_489575, EPI_ISL_489576, EPI_ISL_489577 | Wellcome Sanger Institute for the COVID-19 Genomics UK (COG-UK) consortium | Luke W Meredith, M. Estée Török, Myra Hosmillo, William L. Hamilton, Martin D. Curran, Theresa Feltwell, Grant Hall, Anna Yakovleva, Fahad A Khokhar, Charlotte J. Houldcroft, Laura G Caller, Aminu S. Jahun, Sarah L. Caddy, Ian Goodfellow, and Alex Alderton, Roberto Amato, Sonia Goncalves, Ewan Harrison, David K. Jackson, Ian Johnston, Dominic Kwiatkowski, Cordelia Langford, John Sillitoe on behalf of the Wellcome Sanger Institute COVID-19 Surveillance Team ( <a href="http://www.sanger.ac.uk/covid-team">http://www.sanger.ac.uk/covid-team</a> ) |                                                                                                                                                                                                                                                                                                                                                                                                                                                                                                                                                                      |
| see above                                                                                                                                                                                                                                                                                                                                                                                                                                                                                                                                                                                                                                                                                                                                                                                                                                                                                                                                                                                                                                                                                                                                                                                                                                                                                                                                                                                                                                                                                                                                                                                                                                                                                                                                                                                                                                                                                                                                                                                                                                                                                                                                                                                                                                                                                                                                                                                                                                                                                                                                                                                                                                                                                                                                                                                                                                                                                      | Department of Pathology, University of Cambridge                           | Wellcome Sanger Institute for the COVID-19 Genomics UK (COG-UK) consortium                                                                                                                                                                                                                                                                                                                                                                                                                                                                                           | Luke W Meredith, M. Estée Török, Myra Hosmillo, William L. Hamilton, Martin D. Curran, Theresa Feltwell, Grant Hall, Anna Yakovleva, Fahad A Khokhar, Charlotte J. Houldcroft, Laura G Caller, Aminu S. Jahun, Sarah L. Caddy, Ian Goodfellow, and Alex Alderton, Roberto Amato, Sonia Goncalves, Ewan Harrison, David K. Jackson, Ian Johnston, Dominic Kwiatkowski, Cordelia Langford, John Sillitoe on behalf of the Wellcome Sanger Institute COVID-19 Surveillance Team ( <a href="http://www.sanger.ac.uk/covid-team">http://www.sanger.ac.uk/covid-team</a> ) |
| EPI_ISL_490317, EPI_ISL_490318, EPI_ISL_490319, EPI_ISL_490320, EPI_ISL_490321, EPI_ISL_490322, EPI_ISL_490323, EPI_ISL_490324, EPI_ISL_490325, EPI_ISL_490326, EPI_ISL_490327, EPI_ISL_490328, EPI_ISL_490329                                                                                                                                                                                                                                                                                                                                                                                                                                                                                                                                                                                                                                                                                                                                                                                                                                                                                                                                                                                                                                                                                                                                                                                                                                                                                                                                                                                                                                                                                                                                                                                                                                                                                                                                                                                                                                                                                                                                                                                                                                                                                                                                                                                                                                                                                                                                                                                                                                                                                                                                                                                                                                                                                 | Department of Pathology, University of Cambridge                           | COVID-19 Genomics UK (COG-UK) Consortium                                                                                                                                                                                                                                                                                                                                                                                                                                                                                                                             | Luke W Meredith, M. Estée Török, Myra Hosmillo, William L. Hamilton, Martin D. Curran, Theresa Feltwell, Grant Hall, Anna Yakovleva, Fahad A Khokhar, Charlotte J. Houldcroft, Laura G Caller, Aminu S. Jahun, Sarah L. Caddy, Yasmin Chaudhry, Malte Pinckert, Ian Goodfellow                                                                                                                                                                                                                                                                                       |
| see above                                                                                                                                                                                                                                                                                                                                                                                                                                                                                                                                                                                                                                                                                                                                                                                                                                                                                                                                                                                                                                                                                                                                                                                                                                                                                                                                                                                                                                                                                                                                                                                                                                                                                                                                                                                                                                                                                                                                                                                                                                                                                                                                                                                                                                                                                                                                                                                                                                                                                                                                                                                                                                                                                                                                                                                                                                                                                      | Department of Pathology, University of Cambridge                           | COVID-19 Genomics UK (COG-UK) Consortium                                                                                                                                                                                                                                                                                                                                                                                                                                                                                                                             | Luke W Meredith, M. Estée Török, Myra Hosmillo, William L. Hamilton, Martin D. Curran, Theresa Feltwell, Grant Hall, Anna Yakovleva, Fahad A Khokhar, Charlotte J. Houldcroft, Laura G Caller, Aminu S. Jahun, Sarah L. Caddy, Yasmin Chaudhry, Malte Pinckert, Ian Goodfellow                                                                                                                                                                                                                                                                                       |
| EPI_ISL_491036, EPI_ISL_491037, EPI_ISL_491038                                                                                                                                                                                                                                                                                                                                                                                                                                                                                                                                                                                                                                                                                                                                                                                                                                                                                                                                                                                                                                                                                                                                                                                                                                                                                                                                                                                                                                                                                                                                                                                                                                                                                                                                                                                                                                                                                                                                                                                                                                                                                                                                                                                                                                                                                                                                                                                                                                                                                                                                                                                                                                                                                                                                                                                                                                                 | Suceava County Emergency Hospital                                          | "Stefan cel Mare" University Metagenomics Lab                                                                                                                                                                                                                                                                                                                                                                                                                                                                                                                        | Lobiuc Andrei, Antoniadis Panagiotis et al.                                                                                                                                                                                                                                                                                                                                                                                                                                                                                                                          |
| EPI_ISL_491039, EPI_ISL_491040, EPI_ISL_491041                                                                                                                                                                                                                                                                                                                                                                                                                                                                                                                                                                                                                                                                                                                                                                                                                                                                                                                                                                                                                                                                                                                                                                                                                                                                                                                                                                                                                                                                                                                                                                                                                                                                                                                                                                                                                                                                                                                                                                                                                                                                                                                                                                                                                                                                                                                                                                                                                                                                                                                                                                                                                                                                                                                                                                                                                                                 | Suceava County Emergency Hospital                                          | "Stefan cel Mare" University Metagenomics Lab                                                                                                                                                                                                                                                                                                                                                                                                                                                                                                                        | Lobiuc Andrei et al.                                                                                                                                                                                                                                                                                                                                                                                                                                                                                                                                                 |
| EPI_ISL_491042, EPI_ISL_491043                                                                                                                                                                                                                                                                                                                                                                                                                                                                                                                                                                                                                                                                                                                                                                                                                                                                                                                                                                                                                                                                                                                                                                                                                                                                                                                                                                                                                                                                                                                                                                                                                                                                                                                                                                                                                                                                                                                                                                                                                                                                                                                                                                                                                                                                                                                                                                                                                                                                                                                                                                                                                                                                                                                                                                                                                                                                 | Suceava County Emergency Hospital                                          | "Stefan cel Mare" University Metagenomics Lab                                                                                                                                                                                                                                                                                                                                                                                                                                                                                                                        | Lobiuc Andrei, Antoniadis Panagiotis et al.                                                                                                                                                                                                                                                                                                                                                                                                                                                                                                                          |
| EPI_ISL_491044                                                                                                                                                                                                                                                                                                                                                                                                                                                                                                                                                                                                                                                                                                                                                                                                                                                                                                                                                                                                                                                                                                                                                                                                                                                                                                                                                                                                                                                                                                                                                                                                                                                                                                                                                                                                                                                                                                                                                                                                                                                                                                                                                                                                                                                                                                                                                                                                                                                                                                                                                                                                                                                                                                                                                                                                                                                                                 | Suceava County Emergency Hospital                                          | "Stefan cel Mare" University Metagenomics Lab                                                                                                                                                                                                                                                                                                                                                                                                                                                                                                                        | Lobiuc Andrei et al.                                                                                                                                                                                                                                                                                                                                                                                                                                                                                                                                                 |
| EPI_ISL_491045, EPI_ISL_491046, EPI_ISL_491047                                                                                                                                                                                                                                                                                                                                                                                                                                                                                                                                                                                                                                                                                                                                                                                                                                                                                                                                                                                                                                                                                                                                                                                                                                                                                                                                                                                                                                                                                                                                                                                                                                                                                                                                                                                                                                                                                                                                                                                                                                                                                                                                                                                                                                                                                                                                                                                                                                                                                                                                                                                                                                                                                                                                                                                                                                                 | Suceava County Emergency Hospital                                          | "Stefan cel Mare" University Metagenomics Lab                                                                                                                                                                                                                                                                                                                                                                                                                                                                                                                        | Lobiuc Andrei, Antoniadis Panagiotis et al.                                                                                                                                                                                                                                                                                                                                                                                                                                                                                                                          |
| EPI_ISL_491048                                                                                                                                                                                                                                                                                                                                                                                                                                                                                                                                                                                                                                                                                                                                                                                                                                                                                                                                                                                                                                                                                                                                                                                                                                                                                                                                                                                                                                                                                                                                                                                                                                                                                                                                                                                                                                                                                                                                                                                                                                                                                                                                                                                                                                                                                                                                                                                                                                                                                                                                                                                                                                                                                                                                                                                                                                                                                 | Suceava County Emergency Hospital                                          | "Stefan cel Mare" University Metagenomics Lab                                                                                                                                                                                                                                                                                                                                                                                                                                                                                                                        | Lobiuc Andrei et al.                                                                                                                                                                                                                                                                                                                                                                                                                                                                                                                                                 |
| EPI_ISL_491049                                                                                                                                                                                                                                                                                                                                                                                                                                                                                                                                                                                                                                                                                                                                                                                                                                                                                                                                                                                                                                                                                                                                                                                                                                                                                                                                                                                                                                                                                                                                                                                                                                                                                                                                                                                                                                                                                                                                                                                                                                                                                                                                                                                                                                                                                                                                                                                                                                                                                                                                                                                                                                                                                                                                                                                                                                                                                 | Suceava County Emergency Hospital                                          | "Stefan cel Mare" University Metagenomics Lab                                                                                                                                                                                                                                                                                                                                                                                                                                                                                                                        | Lobiuc Andrei, Antoniadis Panagiotis et al.                                                                                                                                                                                                                                                                                                                                                                                                                                                                                                                          |
| EPI_ISL_491050, EPI_ISL_491051, EPI_ISL_491052, EPI_ISL_491053, EPI_ISL_491054, EPI_ISL_491055, EPI_ISL_491056, EPI_ISL_491057                                                                                                                                                                                                                                                                                                                                                                                                                                                                                                                                                                                                                                                                                                                                                                                                                                                                                                                                                                                                                                                                                                                                                                                                                                                                                                                                                                                                                                                                                                                                                                                                                                                                                                                                                                                                                                                                                                                                                                                                                                                                                                                                                                                                                                                                                                                                                                                                                                                                                                                                                                                                                                                                                                                                                                 | Suceava County Emergency Hospital                                          | "Stefan cel Mare" University Metagenomics Lab                                                                                                                                                                                                                                                                                                                                                                                                                                                                                                                        | Lobiuc Andrei et al.                                                                                                                                                                                                                                                                                                                                                                                                                                                                                                                                                 |
| EPI_ISL_491058, EPI_ISL_491059                                                                                                                                                                                                                                                                                                                                                                                                                                                                                                                                                                                                                                                                                                                                                                                                                                                                                                                                                                                                                                                                                                                                                                                                                                                                                                                                                                                                                                                                                                                                                                                                                                                                                                                                                                                                                                                                                                                                                                                                                                                                                                                                                                                                                                                                                                                                                                                                                                                                                                                                                                                                                                                                                                                                                                                                                                                                 | Suceava County Emergency Hospital                                          | "Stefan cel Mare" University Metagenomics Lab                                                                                                                                                                                                                                                                                                                                                                                                                                                                                                                        | Lobiuc Andrei, Antoniadis Panagiotis et al.                                                                                                                                                                                                                                                                                                                                                                                                                                                                                                                          |
| EPI_ISL_491060, EPI_ISL_491061                                                                                                                                                                                                                                                                                                                                                                                                                                                                                                                                                                                                                                                                                                                                                                                                                                                                                                                                                                                                                                                                                                                                                                                                                                                                                                                                                                                                                                                                                                                                                                                                                                                                                                                                                                                                                                                                                                                                                                                                                                                                                                                                                                                                                                                                                                                                                                                                                                                                                                                                                                                                                                                                                                                                                                                                                                                                 | Suceava County Emergency Hospital                                          | "Stefan cel Mare" University Metagenomics Lab                                                                                                                                                                                                                                                                                                                                                                                                                                                                                                                        | Lobiuc Andrei et al.                                                                                                                                                                                                                                                                                                                                                                                                                                                                                                                                                 |
| EPI_ISL_491062, EPI_ISL_491063, EPI_ISL_491064, EPI_ISL_491065                                                                                                                                                                                                                                                                                                                                                                                                                                                                                                                                                                                                                                                                                                                                                                                                                                                                                                                                                                                                                                                                                                                                                                                                                                                                                                                                                                                                                                                                                                                                                                                                                                                                                                                                                                                                                                                                                                                                                                                                                                                                                                                                                                                                                                                                                                                                                                                                                                                                                                                                                                                                                                                                                                                                                                                                                                 | Suceava County Emergency Hospital                                          | "Stefan cel Mare" University Metagenomics Lab                                                                                                                                                                                                                                                                                                                                                                                                                                                                                                                        | Lobiuc Andrei, Antoniadis Panagiotis et al.                                                                                                                                                                                                                                                                                                                                                                                                                                                                                                                          |
| EPI_ISL_491066, EPI_ISL_491067, EPI_ISL_491068, EPI_ISL_491069, EPI_ISL_491070, EPI_ISL_491071, EPI_ISL_491072                                                                                                                                                                                                                                                                                                                                                                                                                                                                                                                                                                                                                                                                                                                                                                                                                                                                                                                                                                                                                                                                                                                                                                                                                                                                                                                                                                                                                                                                                                                                                                                                                                                                                                                                                                                                                                                                                                                                                                                                                                                                                                                                                                                                                                                                                                                                                                                                                                                                                                                                                                                                                                                                                                                                                                                 | Suceava County Emergency Hospital                                          | "Stefan cel Mare" University Metagenomics Lab                                                                                                                                                                                                                                                                                                                                                                                                                                                                                                                        | Lobiuc Andrei et al.                                                                                                                                                                                                                                                                                                                                                                                                                                                                                                                                                 |
| EPI_ISL_491073                                                                                                                                                                                                                                                                                                                                                                                                                                                                                                                                                                                                                                                                                                                                                                                                                                                                                                                                                                                                                                                                                                                                                                                                                                                                                                                                                                                                                                                                                                                                                                                                                                                                                                                                                                                                                                                                                                                                                                                                                                                                                                                                                                                                                                                                                                                                                                                                                                                                                                                                                                                                                                                                                                                                                                                                                                                                                 | Suceava County Emergency Hospital                                          | "Stefan cel Mare" University Metagenomics Lab                                                                                                                                                                                                                                                                                                                                                                                                                                                                                                                        | Lobiuc Andrei, Antoniadis Panagiotis et al.                                                                                                                                                                                                                                                                                                                                                                                                                                                                                                                          |
| EPI_ISL_491074                                                                                                                                                                                                                                                                                                                                                                                                                                                                                                                                                                                                                                                                                                                                                                                                                                                                                                                                                                                                                                                                                                                                                                                                                                                                                                                                                                                                                                                                                                                                                                                                                                                                                                                                                                                                                                                                                                                                                                                                                                                                                                                                                                                                                                                                                                                                                                                                                                                                                                                                                                                                                                                                                                                                                                                                                                                                                 | Suceava County Emergency Hospital                                          | "Stefan cel Mare" University Metagenomics Lab                                                                                                                                                                                                                                                                                                                                                                                                                                                                                                                        | Lobiuc Andrei et al.                                                                                                                                                                                                                                                                                                                                                                                                                                                                                                                                                 |
| EPI_ISL_491075                                                                                                                                                                                                                                                                                                                                                                                                                                                                                                                                                                                                                                                                                                                                                                                                                                                                                                                                                                                                                                                                                                                                                                                                                                                                                                                                                                                                                                                                                                                                                                                                                                                                                                                                                                                                                                                                                                                                                                                                                                                                                                                                                                                                                                                                                                                                                                                                                                                                                                                                                                                                                                                                                                                                                                                                                                                                                 | Suceava County Emergency Hospital                                          | "Stefan cel Mare" University Metagenomics Lab                                                                                                                                                                                                                                                                                                                                                                                                                                                                                                                        | Lobiuc Andrei, Antoniadis Panagiotis et al.                                                                                                                                                                                                                                                                                                                                                                                                                                                                                                                          |
| EPI_ISL_491076                                                                                                                                                                                                                                                                                                                                                                                                                                                                                                                                                                                                                                                                                                                                                                                                                                                                                                                                                                                                                                                                                                                                                                                                                                                                                                                                                                                                                                                                                                                                                                                                                                                                                                                                                                                                                                                                                                                                                                                                                                                                                                                                                                                                                                                                                                                                                                                                                                                                                                                                                                                                                                                                                                                                                                                                                                                                                 | Suceava County Emergency Hospital                                          | "Stefan cel Mare" University Metagenomics Lab                                                                                                                                                                                                                                                                                                                                                                                                                                                                                                                        | Lobiuc Andrei et al.                                                                                                                                                                                                                                                                                                                                                                                                                                                                                                                                                 |
| EPI_ISL_491077                                                                                                                                                                                                                                                                                                                                                                                                                                                                                                                                                                                                                                                                                                                                                                                                                                                                                                                                                                                                                                                                                                                                                                                                                                                                                                                                                                                                                                                                                                                                                                                                                                                                                                                                                                                                                                                                                                                                                                                                                                                                                                                                                                                                                                                                                                                                                                                                                                                                                                                                                                                                                                                                                                                                                                                                                                                                                 | Suceava County Emergency Hospital                                          | "Stefan cel Mare" University Metagenomics Lab                                                                                                                                                                                                                                                                                                                                                                                                                                                                                                                        | Lobiuc Andrei, Antoniadis Panagiotis et al.                                                                                                                                                                                                                                                                                                                                                                                                                                                                                                                          |
| EPI_ISL_491078                                                                                                                                                                                                                                                                                                                                                                                                                                                                                                                                                                                                                                                                                                                                                                                                                                                                                                                                                                                                                                                                                                                                                                                                                                                                                                                                                                                                                                                                                                                                                                                                                                                                                                                                                                                                                                                                                                                                                                                                                                                                                                                                                                                                                                                                                                                                                                                                                                                                                                                                                                                                                                                                                                                                                                                                                                                                                 | Suceava County Emergency Hospital                                          | "Stefan cel Mare" University Metagenomics Lab                                                                                                                                                                                                                                                                                                                                                                                                                                                                                                                        | Lobiuc Andrei et al.                                                                                                                                                                                                                                                                                                                                                                                                                                                                                                                                                 |
| EPI_ISL_491079, EPI_ISL_491080                                                                                                                                                                                                                                                                                                                                                                                                                                                                                                                                                                                                                                                                                                                                                                                                                                                                                                                                                                                                                                                                                                                                                                                                                                                                                                                                                                                                                                                                                                                                                                                                                                                                                                                                                                                                                                                                                                                                                                                                                                                                                                                                                                                                                                                                                                                                                                                                                                                                                                                                                                                                                                                                                                                                                                                                                                                                 | Suceava County Emergency Hospital                                          | "Stefan cel Mare" University Metagenomics Lab                                                                                                                                                                                                                                                                                                                                                                                                                                                                                                                        | Lobiuc Andrei, Antoniadis Panagiotis et al.                                                                                                                                                                                                                                                                                                                                                                                                                                                                                                                          |
| EPI_ISL_491081                                                                                                                                                                                                                                                                                                                                                                                                                                                                                                                                                                                                                                                                                                                                                                                                                                                                                                                                                                                                                                                                                                                                                                                                                                                                                                                                                                                                                                                                                                                                                                                                                                                                                                                                                                                                                                                                                                                                                                                                                                                                                                                                                                                                                                                                                                                                                                                                                                                                                                                                                                                                                                                                                                                                                                                                                                                                                 | Suceava County Emergency Hospital                                          | "Stefan cel Mare" University Metagenomics Lab                                                                                                                                                                                                                                                                                                                                                                                                                                                                                                                        | Lobiuc Andrei et al.                                                                                                                                                                                                                                                                                                                                                                                                                                                                                                                                                 |
| EPI_ISL_491082                                                                                                                                                                                                                                                                                                                                                                                                                                                                                                                                                                                                                                                                                                                                                                                                                                                                                                                                                                                                                                                                                                                                                                                                                                                                                                                                                                                                                                                                                                                                                                                                                                                                                                                                                                                                                                                                                                                                                                                                                                                                                                                                                                                                                                                                                                                                                                                                                                                                                                                                                                                                                                                                                                                                                                                                                                                                                 | Suceava County Emergency Hospital                                          | "Stefan cel Mare" University Metagenomics Lab                                                                                                                                                                                                                                                                                                                                                                                                                                                                                                                        | Lobiuc Andrei, Antoniadis Panagiotis et al.                                                                                                                                                                                                                                                                                                                                                                                                                                                                                                                          |
| EPI_ISL_491083, EPI_ISL_491084                                                                                                                                                                                                                                                                                                                                                                                                                                                                                                                                                                                                                                                                                                                                                                                                                                                                                                                                                                                                                                                                                                                                                                                                                                                                                                                                                                                                                                                                                                                                                                                                                                                                                                                                                                                                                                                                                                                                                                                                                                                                                                                                                                                                                                                                                                                                                                                                                                                                                                                                                                                                                                                                                                                                                                                                                                                                 | Suceava County Emergency Hospital                                          | "Stefan cel Mare" University Metagenomics Lab                                                                                                                                                                                                                                                                                                                                                                                                                                                                                                                        | Lobiuc Andrei et al.                                                                                                                                                                                                                                                                                                                                                                                                                                                                                                                                                 |
| EPI_ISL_491085                                                                                                                                                                                                                                                                                                                                                                                                                                                                                                                                                                                                                                                                                                                                                                                                                                                                                                                                                                                                                                                                                                                                                                                                                                                                                                                                                                                                                                                                                                                                                                                                                                                                                                                                                                                                                                                                                                                                                                                                                                                                                                                                                                                                                                                                                                                                                                                                                                                                                                                                                                                                                                                                                                                                                                                                                                                                                 | Suceava County Emergency Hospital                                          | "Stefan cel Mare" University Metagenomics Lab                                                                                                                                                                                                                                                                                                                                                                                                                                                                                                                        | Lobiuc Andrei, Antoniadis Panagiotis et al.                                                                                                                                                                                                                                                                                                                                                                                                                                                                                                                          |
| EPI_ISL_491086                                                                                                                                                                                                                                                                                                                                                                                                                                                                                                                                                                                                                                                                                                                                                                                                                                                                                                                                                                                                                                                                                                                                                                                                                                                                                                                                                                                                                                                                                                                                                                                                                                                                                                                                                                                                                                                                                                                                                                                                                                                                                                                                                                                                                                                                                                                                                                                                                                                                                                                                                                                                                                                                                                                                                                                                                                                                                 | Suceava County Emergency Hospital                                          | "Stefan cel Mare" University Metagenomics Lab                                                                                                                                                                                                                                                                                                                                                                                                                                                                                                                        | Lobiuc Andrei et al.                                                                                                                                                                                                                                                                                                                                                                                                                                                                                                                                                 |
| EPI_ISL_491087, EPI_ISL_491088                                                                                                                                                                                                                                                                                                                                                                                                                                                                                                                                                                                                                                                                                                                                                                                                                                                                                                                                                                                                                                                                                                                                                                                                                                                                                                                                                                                                                                                                                                                                                                                                                                                                                                                                                                                                                                                                                                                                                                                                                                                                                                                                                                                                                                                                                                                                                                                                                                                                                                                                                                                                                                                                                                                                                                                                                                                                 | Suceava County Emergency Hospital                                          | "Stefan cel Mare" University Metagenomics Lab                                                                                                                                                                                                                                                                                                                                                                                                                                                                                                                        | Lobiuc Andrei, Antoniadis Panagiotis et al.                                                                                                                                                                                                                                                                                                                                                                                                                                                                                                                          |
| EPI_ISL_491089                                                                                                                                                                                                                                                                                                                                                                                                                                                                                                                                                                                                                                                                                                                                                                                                                                                                                                                                                                                                                                                                                                                                                                                                                                                                                                                                                                                                                                                                                                                                                                                                                                                                                                                                                                                                                                                                                                                                                                                                                                                                                                                                                                                                                                                                                                                                                                                                                                                                                                                                                                                                                                                                                                                                                                                                                                                                                 | Suceava County Emergency Hospital                                          | "Stefan cel Mare" University Metagenomics Lab                                                                                                                                                                                                                                                                                                                                                                                                                                                                                                                        | Lobiuc Andrei et al.                                                                                                                                                                                                                                                                                                                                                                                                                                                                                                                                                 |
| EPI_ISL_491090                                                                                                                                                                                                                                                                                                                                                                                                                                                                                                                                                                                                                                                                                                                                                                                                                                                                                                                                                                                                                                                                                                                                                                                                                                                                                                                                                                                                                                                                                                                                                                                                                                                                                                                                                                                                                                                                                                                                                                                                                                                                                                                                                                                                                                                                                                                                                                                                                                                                                                                                                                                                                                                                                                                                                                                                                                                                                 | Suceava County Emergency Hospital                                          | "Stefan cel Mare" University Metagenomics Lab                                                                                                                                                                                                                                                                                                                                                                                                                                                                                                                        | Lobiuc Andrei, Antoniadis Panagiotis et al.                                                                                                                                                                                                                                                                                                                                                                                                                                                                                                                          |
| EPI_ISL_491091                                                                                                                                                                                                                                                                                                                                                                                                                                                                                                                                                                                                                                                                                                                                                                                                                                                                                                                                                                                                                                                                                                                                                                                                                                                                                                                                                                                                                                                                                                                                                                                                                                                                                                                                                                                                                                                                                                                                                                                                                                                                                                                                                                                                                                                                                                                                                                                                                                                                                                                                                                                                                                                                                                                                                                                                                                                                                 | Suceava County Emergency Hospital                                          | "Stefan cel Mare" University Metagenomics Lab                                                                                                                                                                                                                                                                                                                                                                                                                                                                                                                        | Lobiuc Andrei et al.                                                                                                                                                                                                                                                                                                                                                                                                                                                                                                                                                 |
| EPI_ISL_491115                                                                                                                                                                                                                                                                                                                                                                                                                                                                                                                                                                                                                                                                                                                                                                                                                                                                                                                                                                                                                                                                                                                                                                                                                                                                                                                                                                                                                                                                                                                                                                                                                                                                                                                                                                                                                                                                                                                                                                                                                                                                                                                                                                                                                                                                                                                                                                                                                                                                                                                                                                                                                                                                                                                                                                                                                                                                                 | Cicin-Sain Lab                                                             | Cicin-Sain Lab                                                                                                                                                                                                                                                                                                                                                                                                                                                                                                                                                       | M. Zeeshan Chaudhry, Kathrin Eschke, Yeonsu Kim, Luka Cicin-Sain                                                                                                                                                                                                                                                                                                                                                                                                                                                                                                     |
| EPI_ISL_491465, EPI_ISL_491466                                                                                                                                                                                                                                                                                                                                                                                                                                                                                                                                                                                                                                                                                                                                                                                                                                                                                                                                                                                                                                                                                                                                                                                                                                                                                                                                                                                                                                                                                                                                                                                                                                                                                                                                                                                                                                                                                                                                                                                                                                                                                                                                                                                                                                                                                                                                                                                                                                                                                                                                                                                                                                                                                                                                                                                                                                                                 | San Lazaro Hospital                                                        | Research Institute for Tropical Medicine                                                                                                                                                                                                                                                                                                                                                                                                                                                                                                                             | Ma. Angelica Tujan, Othoniel Jan Onza, Francisco Gerardo Polotan, Inez Andrea Medado, Criselda Bautista, Kirstyn Brunker, Edelwisa Mercado, Daria Manalo, Catalino Demetria                                                                                                                                                                                                                                                                                                                                                                                          |
| EPI_ISL_491467, EPI_ISL_491468                                                                                                                                                                                                                                                                                                                                                                                                                                                                                                                                                                                                                                                                                                                                                                                                                                                                                                                                                                                                                                                                                                                                                                                                                                                                                                                                                                                                                                                                                                                                                                                                                                                                                                                                                                                                                                                                                                                                                                                                                                                                                                                                                                                                                                                                                                                                                                                                                                                                                                                                                                                                                                                                                                                                                                                                                                                                 | Research Institute for Tropical Medicine                                   | Research Institute for Tropical Medicine                                                                                                                                                                                                                                                                                                                                                                                                                                                                                                                             | Ma. Angelica Tujan, Othoniel Jan Onza, Francisco Gerardo Polotan, Inez Andrea Medado, Criselda Bautista, Kirstyn Brunker, Edelwisa Mercado, Daria Manalo, Catalino Demetria                                                                                                                                                                                                                                                                                                                                                                                          |
| EPI_ISL_491471                                                                                                                                                                                                                                                                                                                                                                                                                                                                                                                                                                                                                                                                                                                                                                                                                                                                                                                                                                                                                                                                                                                                                                                                                                                                                                                                                                                                                                                                                                                                                                                                                                                                                                                                                                                                                                                                                                                                                                                                                                                                                                                                                                                                                                                                                                                                                                                                                                                                                                                                                                                                                                                                                                                                                                                                                                                                                 | San Lazaro Hospital                                                        | Research Institute for Tropical Medicine                                                                                                                                                                                                                                                                                                                                                                                                                                                                                                                             | Ma. Angelica Tujan, Othoniel Jan Onza, Francisco Gerardo Polotan, Inez Andrea Medado, Criselda Bautista, Kirstyn Brunker, Edelwisa Mercado, Daria Manalo, Catalino Demetria                                                                                                                                                                                                                                                                                                                                                                                          |

|                                                                                                                                                                                                                                                                                                                                                                                                                                                                                                                                                                                                                                                                                                                                                                                                                                                                                                                                                                                                                                                                                                                                                                                                |                                                                                                         |                                                                            |                                                                                                                                                                                                                                                                                                                                                                                                                                                                                                         |                                                                                                                                                                                                                                                                                                                                                                                                                                                                                                                                                                      |
|------------------------------------------------------------------------------------------------------------------------------------------------------------------------------------------------------------------------------------------------------------------------------------------------------------------------------------------------------------------------------------------------------------------------------------------------------------------------------------------------------------------------------------------------------------------------------------------------------------------------------------------------------------------------------------------------------------------------------------------------------------------------------------------------------------------------------------------------------------------------------------------------------------------------------------------------------------------------------------------------------------------------------------------------------------------------------------------------------------------------------------------------------------------------------------------------|---------------------------------------------------------------------------------------------------------|----------------------------------------------------------------------------|---------------------------------------------------------------------------------------------------------------------------------------------------------------------------------------------------------------------------------------------------------------------------------------------------------------------------------------------------------------------------------------------------------------------------------------------------------------------------------------------------------|----------------------------------------------------------------------------------------------------------------------------------------------------------------------------------------------------------------------------------------------------------------------------------------------------------------------------------------------------------------------------------------------------------------------------------------------------------------------------------------------------------------------------------------------------------------------|
| EPI_ISL_491472                                                                                                                                                                                                                                                                                                                                                                                                                                                                                                                                                                                                                                                                                                                                                                                                                                                                                                                                                                                                                                                                                                                                                                                 | Cardinal Santos Medical Center                                                                          | Research Institute for Tropical Medicine                                   | Ma. Angelica Tujan, Othoniel Jan Onza, Francisco Gerardo Polotan, Inez Andrea Medado, Criselda Bautista, Kirstyn Brunker, Edelwisa Mercado, Daria Manalo, Catalino Demetria                                                                                                                                                                                                                                                                                                                             |                                                                                                                                                                                                                                                                                                                                                                                                                                                                                                                                                                      |
| EPI_ISL_491473                                                                                                                                                                                                                                                                                                                                                                                                                                                                                                                                                                                                                                                                                                                                                                                                                                                                                                                                                                                                                                                                                                                                                                                 | The Medical City                                                                                        | Research Institute for Tropical Medicine                                   | Ma. Angelica Tujan, Othoniel Jan Onza, Francisco Gerardo Polotan, Inez Andrea Medado, Criselda Bautista, Kirstyn Brunker, Edelwisa Mercado, Daria Manalo, Catalino Demetria                                                                                                                                                                                                                                                                                                                             |                                                                                                                                                                                                                                                                                                                                                                                                                                                                                                                                                                      |
| EPI_ISL_491474                                                                                                                                                                                                                                                                                                                                                                                                                                                                                                                                                                                                                                                                                                                                                                                                                                                                                                                                                                                                                                                                                                                                                                                 | Research Institute for Tropical Medicine                                                                | Research Institute for Tropical Medicine                                   | Ma. Angelica Tujan, Othoniel Jan Onza, Francisco Gerardo Polotan, Inez Andrea Medado, Criselda Bautista, Kirstyn Brunker, Edelwisa Mercado, Daria Manalo, Catalino Demetria                                                                                                                                                                                                                                                                                                                             |                                                                                                                                                                                                                                                                                                                                                                                                                                                                                                                                                                      |
| EPI_ISL_491475                                                                                                                                                                                                                                                                                                                                                                                                                                                                                                                                                                                                                                                                                                                                                                                                                                                                                                                                                                                                                                                                                                                                                                                 | Protacio Hospital                                                                                       | Research Institute for Tropical Medicine                                   | Ma. Angelica Tujan, Othoniel Jan Onza, Francisco Gerardo Polotan, Inez Andrea Medado, Criselda Bautista, Kirstyn Brunker, Edelwisa Mercado, Daria Manalo, Catalino Demetria                                                                                                                                                                                                                                                                                                                             |                                                                                                                                                                                                                                                                                                                                                                                                                                                                                                                                                                      |
| EPI_ISL_491907, EPI_ISL_491908, EPI_ISL_491909, EPI_ISL_491910, EPI_ISL_491911, EPI_ISL_491912, EPI_ISL_491913, EPI_ISL_491914, EPI_ISL_491915, EPI_ISL_491916, EPI_ISL_491917, EPI_ISL_491918, EPI_ISL_491919, EPI_ISL_491920, EPI_ISL_491921, EPI_ISL_491922, EPI_ISL_491923, EPI_ISL_491924, EPI_ISL_491925, EPI_ISL_491926, EPI_ISL_491927, EPI_ISL_491928, EPI_ISL_491929, EPI_ISL_491930, EPI_ISL_491931, EPI_ISL_491942, EPI_ISL_491943                                                                                                                                                                                                                                                                                                                                                                                                                                                                                                                                                                                                                                                                                                                                                 | see above                                                                                               | Naval Infectious Diseases Diagnostic Laboratory                            | Naval Medical Research Center Biological Defense Research Directorate                                                                                                                                                                                                                                                                                                                                                                                                                                   |                                                                                                                                                                                                                                                                                                                                                                                                                                                                                                                                                                      |
| EPI_ISL_492109, EPI_ISL_492110, EPI_ISL_492111, EPI_ISL_492112, EPI_ISL_492113, EPI_ISL_492114, EPI_ISL_492115, EPI_ISL_492116, EPI_ISL_492117, EPI_ISL_492118, EPI_ISL_492119, EPI_ISL_492120, EPI_ISL_492121, EPI_ISL_492122, EPI_ISL_492123, EPI_ISL_492124, EPI_ISL_492125, EPI_ISL_492126, EPI_ISL_492127, EPI_ISL_492128, EPI_ISL_492129, EPI_ISL_492130, EPI_ISL_492131, EPI_ISL_492132, EPI_ISL_492133, EPI_ISL_492134, EPI_ISL_492135, EPI_ISL_492136, EPI_ISL_492137, EPI_ISL_492138, EPI_ISL_492139, EPI_ISL_492140, EPI_ISL_492141, EPI_ISL_492142, EPI_ISL_492143, EPI_ISL_492144, EPI_ISL_492145, EPI_ISL_492146, EPI_ISL_492147, EPI_ISL_492148, EPI_ISL_492149, EPI_ISL_492150, EPI_ISL_492151, EPI_ISL_492152, EPI_ISL_492153, EPI_ISL_492154, EPI_ISL_492155, EPI_ISL_492156, EPI_ISL_492157, EPI_ISL_492158, EPI_ISL_492159, EPI_ISL_492160, EPI_ISL_492161, EPI_ISL_492162, EPI_ISL_492163, EPI_ISL_492164, EPI_ISL_492165, EPI_ISL_492166, EPI_ISL_492167, EPI_ISL_492168, EPI_ISL_492169, EPI_ISL_492170, EPI_ISL_492171, EPI_ISL_492172, EPI_ISL_492173, EPI_ISL_492174, EPI_ISL_492175, EPI_ISL_492176, EPI_ISL_492177, EPI_ISL_492178, EPI_ISL_492179, EPI_ISL_492180 | see above                                                                                               | SA Pathology                                                               | SA Pathology                                                                                                                                                                                                                                                                                                                                                                                                                                                                                            | Lex Leong, Chuan Kok Lim, Mark Turra, Ivan Bastian, Geoff Higgins                                                                                                                                                                                                                                                                                                                                                                                                                                                                                                    |
| EPI_ISL_492189, EPI_ISL_492190, EPI_ISL_492191, EPI_ISL_492192, EPI_ISL_492193, EPI_ISL_492194, EPI_ISL_492196, EPI_ISL_492198, EPI_ISL_492199, EPI_ISL_492200, EPI_ISL_492201, EPI_ISL_492204, EPI_ISL_492205, EPI_ISL_492206                                                                                                                                                                                                                                                                                                                                                                                                                                                                                                                                                                                                                                                                                                                                                                                                                                                                                                                                                                 | see above                                                                                               | Department of Pathology, University of Cambridge                           | Wellcome Sanger Institute for the COVID-19 Genomics UK (COG-UK) consortium                                                                                                                                                                                                                                                                                                                                                                                                                              | Luke W Meredith, M. Estée Török, Myra Hosmillo, William L. Hamilton, Martin D. Curran, Theresa Feltwell, Grant Hall, Anna Yakovleva, Fahad A Khokhar, Charlotte J. Houldcroft, Laura G Caller, Aminu S. Jahun, Sarah L. Caddy, Jan Goodfellow, and Alex Alderton, Roberto Amato, Sonia Goncalves, Ewan Harrison, David K. Jackson, Ian Johnston, Dominic Kwiatkowski, Cordelia Langford, John Sillitoe on behalf of the Wellcome Sanger Institute COVID-19 Surveillance Team ( <a href="http://www.sanger.ac.uk/covid-team">http://www.sanger.ac.uk/covid-team</a> ) |
| EPI_ISL_493401                                                                                                                                                                                                                                                                                                                                                                                                                                                                                                                                                                                                                                                                                                                                                                                                                                                                                                                                                                                                                                                                                                                                                                                 | National Public Health Laboratory, National Centre for Infectious Diseases                              | National Public Health Laboratory, National Centre for Infectious Diseases | Mak TM, Octavia S. Zhou Z, Chavatte JM, Cui L, Lin RTP                                                                                                                                                                                                                                                                                                                                                                                                                                                  |                                                                                                                                                                                                                                                                                                                                                                                                                                                                                                                                                                      |
| EPI_ISL_495018                                                                                                                                                                                                                                                                                                                                                                                                                                                                                                                                                                                                                                                                                                                                                                                                                                                                                                                                                                                                                                                                                                                                                                                 | B.J. Medical College and Civil hospital                                                                 | Gujarat Biotechnology Research Centre                                      | Maharshi Pandya, Nidhi Patel, Nitin Savaliya, Raghawendra Kumar, Dinesh Kumar, Zuber Saiyed, Komal Patel, Labdhi Pandya, Afzal Ansari, Nikha Trivedi, Pranay Shah, Kamlesh J Upadhyay, Sanjay Kapadia, Apurvasinh Puvar, Janvi Raval, Zarna Patel, Monika Gandhi, Pinal Trivedi, R D Dixit, A M Kadri, Harsh Bakshi, Chaitanya Joshi, Madhvi Joshi                                                                                                                                                      |                                                                                                                                                                                                                                                                                                                                                                                                                                                                                                                                                                      |
| EPI_ISL_495038, EPI_ISL_495056                                                                                                                                                                                                                                                                                                                                                                                                                                                                                                                                                                                                                                                                                                                                                                                                                                                                                                                                                                                                                                                                                                                                                                 | GMERS Medical College & Hospital, Gotri, Vadodara                                                       | Gujarat Biotechnology Research Centre                                      | Maharshi Pandya, Nidhi Patel, Nitin Savaliya, Raghawendra Kumar, Dinesh Kumar, Zuber Saiyed, Komal Patel, Labdhi Pandya, Afzal Ansari, Nikha Trivedi, Meenakshi Shah, Neena Doshi, Varsha Godbole, Apurvasinh Puvar, Janvi Raval, Zarna Patel, Monika Gandhi, Pinal Trivedi, R D Dixit, A M Kadri, Harsh Bakshi, Chaitanya Joshi, Madhvi Joshi                                                                                                                                                          |                                                                                                                                                                                                                                                                                                                                                                                                                                                                                                                                                                      |
| EPI_ISL_495171                                                                                                                                                                                                                                                                                                                                                                                                                                                                                                                                                                                                                                                                                                                                                                                                                                                                                                                                                                                                                                                                                                                                                                                 | CSIR-Centre for Cellular and Molecular Biology                                                          | CSIR-Centre for Cellular and Molecular Biology                             | M Soujanya Reddy, Nikhil Hajirnis, Pratheusa Maccha, Namami Gaur, Sakshi Shambhavi, Lamuk Zaveri, Shagufta Khan, Tulasi Nagabandi, Purushotham Vodnala, Payel Mukherjee, Sofia Banu, Priya Singh, Onkar Kulkarni, Dhiviya Vedagiri, Divya Gupta, Vishal Sah, Santosh Kumar Kuncha, Krishnan Harinivas Harshan, Archana Bharadwaj Siva, Karthik Bharadwaj Tallapaka, Zeba Rizvi, Zuberwasim Sayyad, Kakade Aishwarya Arun, Amrutha H C, Ananga Ghosh, Rakesh K Mishra, Divya Tej Sowpati                 |                                                                                                                                                                                                                                                                                                                                                                                                                                                                                                                                                                      |
| EPI_ISL_495174                                                                                                                                                                                                                                                                                                                                                                                                                                                                                                                                                                                                                                                                                                                                                                                                                                                                                                                                                                                                                                                                                                                                                                                 | CSIR-Centre for Cellular and Molecular Biology                                                          | CSIR-Centre for Cellular and Molecular Biology                             | M Soujanya Reddy, Nikhil Hajirnis, Pratheusa Maccha, Payel Mukherjee, Sofia Banu, Priya Singh, Onkar Kulkarni, Dhiviya Vedagiri, Divya Gupta, Vishal Sah, Santosh Kumar Kuncha, Krishnan Harinivas Harshan, Archana Bharadwaj Siva, Karthik Bharadwaj Tallapaka, G. Aditya Kumar, Koushick Sivakumar, Pooja Ramesh Gupta, Rajan Kumar Jha, Shraddha Vijay Lahoti, Rakesh K Mishra, Divya Tej Sowpati                                                                                                    |                                                                                                                                                                                                                                                                                                                                                                                                                                                                                                                                                                      |
| EPI_ISL_495180, EPI_ISL_495212                                                                                                                                                                                                                                                                                                                                                                                                                                                                                                                                                                                                                                                                                                                                                                                                                                                                                                                                                                                                                                                                                                                                                                 | CSIR-Centre for Cellular and Molecular Biology                                                          | CSIR-Centre for Cellular and Molecular Biology                             | M Soujanya Reddy, Nikhil Hajirnis, Pratheusa Maccha, Sakshi Shambhavi, Lamuk Zaveri, Shagufta Khan, Namami Gaur, Tulasi Nagabandi, Purushotham Vodnala, Payel Mukherjee, Sofia Banu, Priya Singh, Onkar Kulkarni, Dhiviya Vedagiri, Divya Gupta, Vishal Sah, Santosh Kumar Kuncha, Krishnan Harinivas Harshan, Archana Bharadwaj Siva, Karthik Bharadwaj Tallapaka, G. Aditya Kumar, Koushick Sivakumar, Pooja Ramesh Gupta, Rajan Kumar Jha, Shraddha Vijay Lahoti, Rakesh K Mishra, Divya Tej Sowpati |                                                                                                                                                                                                                                                                                                                                                                                                                                                                                                                                                                      |
| EPI_ISL_495226                                                                                                                                                                                                                                                                                                                                                                                                                                                                                                                                                                                                                                                                                                                                                                                                                                                                                                                                                                                                                                                                                                                                                                                 | CSIR-Centre for Cellular and Molecular Biology                                                          | CSIR-Centre for Cellular and Molecular Biology                             | M Soujanya Reddy, Nikhil Hajirnis, Pratheusa Maccha, Namami Gaur, Sakshi Shambhavi, Lamuk Zaveri, Shagufta Khan, Tulasi Nagabandi, Purushotham Vodnala, Payel Mukherjee, Sofia Banu, Priya Singh, Onkar Kulkarni, Dhiviya Vedagiri, Divya Gupta, Vishal Sah, Santosh Kumar Kuncha, Krishnan Harinivas Harshan, Archana Bharadwaj Siva, Karthik Bharadwaj Tallapaka, Zeba Rizvi, Zuberwasim Sayyad, Kakade Aishwarya Arun, Amrutha H C, Ananga Ghosh, Rakesh K Mishra, Divya Tej Sowpati                 |                                                                                                                                                                                                                                                                                                                                                                                                                                                                                                                                                                      |
| EPI_ISL_495240                                                                                                                                                                                                                                                                                                                                                                                                                                                                                                                                                                                                                                                                                                                                                                                                                                                                                                                                                                                                                                                                                                                                                                                 | CSIR-Centre for Cellular and Molecular Biology                                                          | CSIR-Centre for Cellular and Molecular Biology                             | M Soujanya Reddy, Nikhil Hajirnis, Pratheusa Maccha, Payel Mukherjee, Sofia Banu, Priya Singh, Onkar Kulkarni, Dhiviya Vedagiri, Divya Gupta, Vishal Sah, Santosh Kumar Kuncha, Krishnan Harinivas Harshan, Archana Bharadwaj Siva, Karthik Bharadwaj Tallapaka, Kezia J Ann, Radhika Khandelwal, Roshan Maku Venkata, Shemin Mansuri, Sonu Uday, Rakesh K Mishra, Divya Tej Sowpati                                                                                                                    |                                                                                                                                                                                                                                                                                                                                                                                                                                                                                                                                                                      |
| EPI_ISL_495253                                                                                                                                                                                                                                                                                                                                                                                                                                                                                                                                                                                                                                                                                                                                                                                                                                                                                                                                                                                                                                                                                                                                                                                 | CSIR-Centre for Cellular and Molecular Biology                                                          | CSIR-Centre for Cellular and Molecular Biology                             | M Soujanya Reddy, Nikhil Hajirnis, Pratheusa Maccha, Namami Gaur, Sakshi Shambhavi, Lamuk Zaveri, Shagufta Khan, Tulasi Nagabandi, Purushotham Vodnala, Payel Mukherjee, Sofia Banu, Priya Singh, Onkar Kulkarni, Dhiviya Vedagiri, Divya Gupta, Vishal Sah, Santosh Kumar Kuncha, Krishnan Harinivas Harshan, Archana Bharadwaj Siva, Karthik Bharadwaj Tallapaka, Zeba Rizvi, Zuberwasim Sayyad, Kakade Aishwarya Arun, Amrutha H C, Ananga Ghosh, Rakesh K Mishra, Divya Tej Sowpati                 |                                                                                                                                                                                                                                                                                                                                                                                                                                                                                                                                                                      |
| EPI_ISL_495257                                                                                                                                                                                                                                                                                                                                                                                                                                                                                                                                                                                                                                                                                                                                                                                                                                                                                                                                                                                                                                                                                                                                                                                 | CSIR-Centre for Cellular and Molecular Biology                                                          | CSIR-Centre for Cellular and Molecular Biology                             | M Soujanya Reddy, Nikhil Hajirnis, Pratheusa Maccha, Payel Mukherjee, Sofia Banu, Priya Singh, Onkar Kulkarni, Dhiviya Vedagiri, Divya Gupta, Vishal Sah, Santosh Kumar Kuncha, Krishnan Harinivas Harshan, Archana Bharadwaj Siva, Karthik Bharadwaj Tallapaka, Kezia J Ann, Radhika Khandelwal, Roshan Maku Venkata, Shemin Mansuri, Sonu Uday, Rakesh K Mishra, Divya Tej Sowpati                                                                                                                    |                                                                                                                                                                                                                                                                                                                                                                                                                                                                                                                                                                      |
| EPI_ISL_495271                                                                                                                                                                                                                                                                                                                                                                                                                                                                                                                                                                                                                                                                                                                                                                                                                                                                                                                                                                                                                                                                                                                                                                                 | CSIR-Centre for Cellular and Molecular Biology                                                          | CSIR-Centre for Cellular and Molecular Biology                             | M Soujanya Reddy, Nikhil Hajirnis, Pratheusa Maccha, Sakshi Shambhavi, Lamuk Zaveri, Shagufta Khan, Namami Gaur, Tulasi Nagabandi, Purushotham Vodnala, Payel Mukherjee, Sofia Banu, Priya Singh, Onkar Kulkarni, Dhiviya Vedagiri, Divya Gupta, Vishal Sah, Santosh Kumar Kuncha, Krishnan Harinivas Harshan, Archana Bharadwaj Siva, Karthik Bharadwaj Tallapaka, G. Aditya Kumar, Koushick Sivakumar, Pooja Ramesh Gupta, Rajan Kumar Jha, Shraddha Vijay Lahoti, Rakesh K Mishra, Divya Tej Sowpati |                                                                                                                                                                                                                                                                                                                                                                                                                                                                                                                                                                      |
| EPI_ISL_495272                                                                                                                                                                                                                                                                                                                                                                                                                                                                                                                                                                                                                                                                                                                                                                                                                                                                                                                                                                                                                                                                                                                                                                                 | CSIR-Centre for Cellular and Molecular Biology                                                          | CSIR-Centre for Cellular and Molecular Biology                             | M Soujanya Reddy, Nikhil Hajirnis, Pratheusa Maccha, Namami Gaur, Sakshi Shambhavi, Lamuk Zaveri, Shagufta Khan, Tulasi Nagabandi, Purushotham Vodnala, Payel Mukherjee, Sofia Banu, Priya Singh, Onkar Kulkarni, Dhiviya Vedagiri, Divya Gupta, Vishal Sah, Santosh Kumar Kuncha, Krishnan Harinivas Harshan, Archana Bharadwaj Siva, Karthik Bharadwaj Tallapaka, Zeba Rizvi, Zuberwasim Sayyad, Kakade Aishwarya Arun, Amrutha H C, Ananga Ghosh, Rakesh K Mishra, Divya Tej Sowpati                 |                                                                                                                                                                                                                                                                                                                                                                                                                                                                                                                                                                      |
| EPI_ISL_498466, EPI_ISL_498467                                                                                                                                                                                                                                                                                                                                                                                                                                                                                                                                                                                                                                                                                                                                                                                                                                                                                                                                                                                                                                                                                                                                                                 | National Institute of Laboratory Medicine and Referral Center                                           | Genomic Research Lab, BCSIR                                                | Mahmuda Yeasmin, Abu Sayeed Mohammad Mahmud, Mohammad Samir Uzzaman, Eshrar Osman, Md. Ahasan Habib, Shahina Akter, Tanjina Akhter Banu, Md. Murshed Hasan Sarkar, Barna Goswami, Ilfat Jahan, Md. Saddam Hossain, Tasnim Nafisa, Md. Maruf Ahmed Molla, Asish Kumar Ghosh, A. K. M. Shamsuzzaman, Sheikh Md. Selim Al Din, Utpal Chandra Ray, Salek Ahmed Sajib, Md. Salim Khan                                                                                                                        |                                                                                                                                                                                                                                                                                                                                                                                                                                                                                                                                                                      |
| EPI_ISL_498558, EPI_ISL_498559, EPI_ISL_498560, EPI_ISL_498561, EPI_ISL_498562, EPI_ISL_498563                                                                                                                                                                                                                                                                                                                                                                                                                                                                                                                                                                                                                                                                                                                                                                                                                                                                                                                                                                                                                                                                                                 | Laboratory of Molecular Virology International Center for Genetic Engineering and Biotechnology (ICGEB) | ARGO Open Lab Platform for Genome Sequencing                               | Licastro D, Rajasekharan S, Dal Monego S, Segat L, D'Agaro P, Marcello A                                                                                                                                                                                                                                                                                                                                                                                                                                |                                                                                                                                                                                                                                                                                                                                                                                                                                                                                                                                                                      |
| EPI_ISL_499853, EPI_ISL_499855, EPI_ISL_499905, EPI_ISL_499908, EPI_ISL_499966, EPI_ISL_499968, EPI_ISL_499969, EPI_ISL_499970, EPI_ISL_499971, EPI_ISL_499972, EPI_ISL_499973                                                                                                                                                                                                                                                                                                                                                                                                                                                                                                                                                                                                                                                                                                                                                                                                                                                                                                                                                                                                                 | see above                                                                                               | Department of Pathology, University of Cambridge                           | COVID-19 Genomics UK (COG-UK) Consortium                                                                                                                                                                                                                                                                                                                                                                                                                                                                | Luke W Meredith, M. Estée Török, Myra Hosmillo, William L. Hamilton, Martin D. Curran, Theresa Feltwell, Grant Hall, Anna Yakovleva, Fahad A Khokhar, Charlotte J. Houldcroft, Laura G Caller, Aminu S. Jahun, Sarah L. Caddy, Yasmin Chaudhry, Malte Pinckert, Ian Goodfellow                                                                                                                                                                                                                                                                                       |

|                                                                                                                                                                                                                                                                                                                                                                                                                                                                                                                                                                                                                                                                                                                                                                                                                                                                |                                                                                                                     |                                                                                        |                                                                                                                                                                                                                                                                                                                                                                                                                                                                                                                                                                      |                                                                                                                                                                                                                                                                                                                                                                                                                                                                                                                                                                      |
|----------------------------------------------------------------------------------------------------------------------------------------------------------------------------------------------------------------------------------------------------------------------------------------------------------------------------------------------------------------------------------------------------------------------------------------------------------------------------------------------------------------------------------------------------------------------------------------------------------------------------------------------------------------------------------------------------------------------------------------------------------------------------------------------------------------------------------------------------------------|---------------------------------------------------------------------------------------------------------------------|----------------------------------------------------------------------------------------|----------------------------------------------------------------------------------------------------------------------------------------------------------------------------------------------------------------------------------------------------------------------------------------------------------------------------------------------------------------------------------------------------------------------------------------------------------------------------------------------------------------------------------------------------------------------|----------------------------------------------------------------------------------------------------------------------------------------------------------------------------------------------------------------------------------------------------------------------------------------------------------------------------------------------------------------------------------------------------------------------------------------------------------------------------------------------------------------------------------------------------------------------|
| EPI_ISL_500947                                                                                                                                                                                                                                                                                                                                                                                                                                                                                                                                                                                                                                                                                                                                                                                                                                                 | Department of MicroBiology, Government Medical College, Surat                                                       | Gujarat Biotechnology Research Centre                                                  | Maharshi Pandya, Nidhi Patel, Nitin Savaliya, Raghawendra Kumar, Dinesh Kumar, Zuber Saiyed, Komal Patel, Labdhi Pandya, Afzal Ansari, Nikha Trivedi, Naresh Chauhan, Summiya Mullan, Amit gamit, Apurvasinh Puvar, Janvi Raval, Zarna Patel, Monika Gandhi, Pinal Trivedi, R D Dixit, A M Kadri, Harsh Bakshi, Chaitanya Joshi, Madhvi Joshi                                                                                                                                                                                                                        |                                                                                                                                                                                                                                                                                                                                                                                                                                                                                                                                                                      |
| EPI_ISL_508122, EPI_ISL_508123, EPI_ISL_508124, EPI_ISL_508125, EPI_ISL_508126, EPI_ISL_508127, EPI_ISL_508128, EPI_ISL_508129, EPI_ISL_508130, EPI_ISL_508131, EPI_ISL_508132, EPI_ISL_508133, EPI_ISL_508134, EPI_ISL_508135, EPI_ISL_508136, EPI_ISL_508137, EPI_ISL_508138, EPI_ISL_508139, EPI_ISL_508140, EPI_ISL_508141, EPI_ISL_508142, EPI_ISL_508143, EPI_ISL_508144, EPI_ISL_508145, EPI_ISL_508605, EPI_ISL_508606, EPI_ISL_508607                                                                                                                                                                                                                                                                                                                                                                                                                 | see above                                                                                                           | SA Pathology                                                                           | SA Pathology                                                                                                                                                                                                                                                                                                                                                                                                                                                                                                                                                         | Lex Leong, Chuan Kok Lim, Mark Turra, Ivan Bastian, Geoff Higgins                                                                                                                                                                                                                                                                                                                                                                                                                                                                                                    |
| EPI_ISL_509017, EPI_ISL_509018, EPI_ISL_509019, EPI_ISL_509020, EPI_ISL_509021, EPI_ISL_509022, EPI_ISL_509023, EPI_ISL_509024, EPI_ISL_509026, EPI_ISL_509028, EPI_ISL_509029, EPI_ISL_509031, EPI_ISL_509033, EPI_ISL_509035, EPI_ISL_509037, EPI_ISL_509038, EPI_ISL_509051                                                                                                                                                                                                                                                                                                                                                                                                                                                                                                                                                                                 | see above                                                                                                           | genXone SA, Molecular Diagnostics Laboratory / NZOZ                                    | genXone SA, Research & Development Laboratory                                                                                                                                                                                                                                                                                                                                                                                                                                                                                                                        | Maciej Sykulski, Grzegorz Nowicki, Monika Makowska-Woniak, Jakub Grabowski, Natalia Drwska-Matelska, ukasz Krych, Micha Kaszuba                                                                                                                                                                                                                                                                                                                                                                                                                                      |
| EPI_ISL_510542, EPI_ISL_510543, EPI_ISL_510544                                                                                                                                                                                                                                                                                                                                                                                                                                                                                                                                                                                                                                                                                                                                                                                                                 | see above                                                                                                           | SA Pathology                                                                           | SA Pathology                                                                                                                                                                                                                                                                                                                                                                                                                                                                                                                                                         | Lex Leong, Chuan Kok Lim, Mark Turra, Ivan Bastian, Geoff Higgins                                                                                                                                                                                                                                                                                                                                                                                                                                                                                                    |
| EPI_ISL_511959, EPI_ISL_511970, EPI_ISL_511982                                                                                                                                                                                                                                                                                                                                                                                                                                                                                                                                                                                                                                                                                                                                                                                                                 | Department of Pathology, University of Cambridge                                                                    | Wellcome Sanger Institute for the COVID-19 Genomics UK (COG-UK) consortium             | Luke W Meredith, M. Estée Török, Myra Hosmillo, William L. Hamilton, Martin D. Curran, Theresa Feltwell, Grant Hall, Anna Yakovleva, Fahad A Khokhar, Charlotte J. Houldcroft, Laura G Caller, Aminu S. Jahun, Sarah L. Caddy, Ian Goodfellow; and Alex Alderton, Roberto Amato, Sonia Goncalves, Ewan Harrison, David K. Jackson, Ian Johnston, Dominic Kwiatkowski, Cordelia Langford, John Sillitoe on behalf of the Wellcome Sanger Institute COVID-19 Surveillance Team ( <a href="http://www.sanger.ac.uk/covid-team">http://www.sanger.ac.uk/covid-team</a> ) |                                                                                                                                                                                                                                                                                                                                                                                                                                                                                                                                                                      |
| EPI_ISL_512060                                                                                                                                                                                                                                                                                                                                                                                                                                                                                                                                                                                                                                                                                                                                                                                                                                                 | B.J. Medical College and Civil hospital, Ahmedabad                                                                  | Gujarat Biotechnology Research Centre                                                  | Maharshi Pandya, Nidhi Patel, Nitin Savaliya, Raghawendra Kumar, Dinesh Kumar, Zuber Saiyed, Komal Patel, Labdhi Pandya, Afzal Ansari, Nikha Trivedi, Pranay Shah, Kamlesh J Upadhyay, Sanjay Kapadia, Apurvasinh Puvar, Janvi Raval, Zarna Patel, Monika Gandhi, Pinal Trivedi, R D Dixit, A M Kadri, Harsh Bakshi, Chaitanya Joshi, Madhvi Joshi                                                                                                                                                                                                                   |                                                                                                                                                                                                                                                                                                                                                                                                                                                                                                                                                                      |
| EPI_ISL_512077                                                                                                                                                                                                                                                                                                                                                                                                                                                                                                                                                                                                                                                                                                                                                                                                                                                 | Dr. RSS Hospital, Modasa                                                                                            | Gujarat Biotechnology Research Centre                                                  | Maharshi Pandya, Nidhi Patel, Nitin Savaliya, Raghawendra Kumar, Dinesh Kumar, Zuber Saiyed, Komal Patel, Labdhi Pandya, Afzal Ansari, Nikha Trivedi, Harsh Chaudhari, Apurvasinh Puvar, Janvi Raval, Zarna Patel, Monika Gandhi, Pinal Trivedi, R D Dixit, A M Kadri, Harsh Bakshi, Chaitanya Joshi, Madhvi Joshi                                                                                                                                                                                                                                                   |                                                                                                                                                                                                                                                                                                                                                                                                                                                                                                                                                                      |
| EPI_ISL_512296, EPI_ISL_512297, EPI_ISL_512298, EPI_ISL_512299, EPI_ISL_512300, EPI_ISL_512301, EPI_ISL_512302, EPI_ISL_512303                                                                                                                                                                                                                                                                                                                                                                                                                                                                                                                                                                                                                                                                                                                                 | Hematology Laboratory, Section of Molecular Diagnostics, University Clinical Centre, Medical University of Gdansk   | Department of Virology, Faculty of Medicine, University of Helsinki, Helsinki, Finland | Maciej Grzybek, Marlena Robakowska, Aneta Szulc, Ewa Miosz, Olli Vapalahti, Teemu Smura                                                                                                                                                                                                                                                                                                                                                                                                                                                                              |                                                                                                                                                                                                                                                                                                                                                                                                                                                                                                                                                                      |
| EPI_ISL_512330, EPI_ISL_512331, EPI_ISL_512332, EPI_ISL_512333, EPI_ISL_512334, EPI_ISL_512335                                                                                                                                                                                                                                                                                                                                                                                                                                                                                                                                                                                                                                                                                                                                                                 | Department of Pathology, University of Cambridge                                                                    | COVID-19 Genomics UK (COG-UK) Consortium                                               | Luke W Meredith, M. Estée Török, Myra Hosmillo, William L. Hamilton, Martin D. Curran, Theresa Feltwell, Grant Hall, Anna Yakovleva, Fahad A Khokhar, Charlotte J. Houldcroft, Laura G Caller, Aminu S. Jahun, Sarah L. Caddy, Yasmin Chaudhry, Malte Pinckert, Ian Goodfellow                                                                                                                                                                                                                                                                                       |                                                                                                                                                                                                                                                                                                                                                                                                                                                                                                                                                                      |
| EPI_ISL_513911, EPI_ISL_513912, EPI_ISL_513913                                                                                                                                                                                                                                                                                                                                                                                                                                                                                                                                                                                                                                                                                                                                                                                                                 | SA Pathology                                                                                                        | SA Pathology                                                                           | Lex Leong, Chuan Kok Lim, Mark Turra, Ivan Bastian, Geoff Higgins                                                                                                                                                                                                                                                                                                                                                                                                                                                                                                    |                                                                                                                                                                                                                                                                                                                                                                                                                                                                                                                                                                      |
| EPI_ISL_514131                                                                                                                                                                                                                                                                                                                                                                                                                                                                                                                                                                                                                                                                                                                                                                                                                                                 | Rondônia Central Public Health Laboratory (LACEN/RO), vinculated to State Health Secretariat of Rondônia (SESAU/RO) | Molecular Virology Laboratory of Oswaldo Cruz Foundation of Rondônia                   | Luan Felipe Botelho-Souza, Felipe Souza Nogueira-Lima, Tárzio Peixoto Roca, Alcione de Oliveira dos Santos, Felipe Gomes Naveca, Adriana Cristina Salvador Maia, Cicileia Correia da Silva, Aline Linhares Ferreira de Melo Mendonça, Celina Aparecida Bertoni Lugtenburg, Camila Flávia Gomes Azzi, Juliana Loca Furtado, Suelen Cavalcante, Rita de Cássia Pontello Rampazzo, Caio Henrique Nemeth Santos, Alice Paula Di Sabatino Guimarães, Jansen Fernandes de Medeiros, Fernando Rodrigues Máximo, Juan Miguel Vilalobos-Salcedo and Deusilene Souza Vieira1   |                                                                                                                                                                                                                                                                                                                                                                                                                                                                                                                                                                      |
| EPI_ISL_514132                                                                                                                                                                                                                                                                                                                                                                                                                                                                                                                                                                                                                                                                                                                                                                                                                                                 | Rondônia Central Public Health Laboratory (LACEN/RO), vinculated to State Health Secretariat of Rondônia (SESAU/RO) | Molecular Virology Laboratory of Oswaldo Cruz Foundation of Rondônia                   | Luan Felipe Botelho-Souza, Felipe Souza Nogueira-Lima, Tárzio Peixoto Roca, Alcione de Oliveira dos Santos, Felipe Gomes Naveca, Adriana Cristina Salvador Maia, Cicileia Correia da Silva, Aline Linhares Ferreira de Melo Mendonça, Celina Aparecida Bertoni Lugtenburg, Camila Flávia Gomes Azzi, Juliana Loca Furtado, Suelen Cavalcante, Rita de Cássia Pontello Rampazzo, Caio Henrique Nemeth Santos, Alice Paula Di Sabatino Guimarães, Jansen Fernandes de Medeiros, Fernando Rodrigues Máximo, Juan Miguel Vilalobos-Salcedo and Deusilene Souza Vieira    |                                                                                                                                                                                                                                                                                                                                                                                                                                                                                                                                                                      |
| EPI_ISL_514133, EPI_ISL_514134, EPI_ISL_514135, EPI_ISL_514136, EPI_ISL_514137, EPI_ISL_514138                                                                                                                                                                                                                                                                                                                                                                                                                                                                                                                                                                                                                                                                                                                                                                 | Rondônia Central Public Health Laboratory (LACEN/RO), vinculated to State Health Secretariat of Rondônia (SESAU/RO) | Molecular Virology Laboratory of Oswaldo Cruz Foundation of Rondônia                   | Luan Felipe Botelho-Souza, Felipe Souza Nogueira-Lima, Tárzio Peixoto Roca, Alcione de Oliveira dos Santos, Felipe Gomes Naveca, Adriana Cristina Salvador Maia, Cicileia Correia da Silva, Aline Linhares Ferreira de Melo Mendonça, Celina Aparecida Bertoni Lugtenburg, Camila Flávia Gomes Azzi, Juliana Loca Furtado, Suelen Cavalcante, Rita de Cássia Pontello Rampazzo, Caio Henrique Nemeth Santos, Alice Paula Di Sabatino Guimarães, Jansen Fernandes de Medeiros, Fernando Rodrigues Máximo, Juan Miguel Vilalobos-Salcedo and Deusilene Souza Vieira    |                                                                                                                                                                                                                                                                                                                                                                                                                                                                                                                                                                      |
| EPI_ISL_514443, EPI_ISL_514444, EPI_ISL_514445, EPI_ISL_514446, EPI_ISL_514447, EPI_ISL_514448, EPI_ISL_514449, EPI_ISL_514450, EPI_ISL_514451                                                                                                                                                                                                                                                                                                                                                                                                                                                                                                                                                                                                                                                                                                                 | Department of Pathology, University of Cambridge                                                                    | COVID-19 Genomics UK (COG-UK) Consortium                                               | Luke W Meredith, M. Estée Török, Myra Hosmillo, William L. Hamilton, Martin D. Curran, Theresa Feltwell, Grant Hall, Anna Yakovleva, Fahad A Khokhar, Charlotte J. Houldcroft, Laura G Caller, Aminu S. Jahun, Sarah L. Caddy, Yasmin Chaudhry, Malte Pinckert, Ian Goodfellow                                                                                                                                                                                                                                                                                       |                                                                                                                                                                                                                                                                                                                                                                                                                                                                                                                                                                      |
| EPI_ISL_514597                                                                                                                                                                                                                                                                                                                                                                                                                                                                                                                                                                                                                                                                                                                                                                                                                                                 | B.J. Medical College and Civil hospital, Ahmedabad                                                                  | Gujarat Biotechnology Research Centre                                                  | Maharshi Pandya, Nidhi Patel, Nitin Savaliya, Raghawendra Kumar, Dinesh Kumar, Zuber Saiyed, Komal Patel, Labdhi Pandya, Afzal Ansari, Nikha Trivedi, Pranay Shah, Kamlesh J Upadhyay, Sanjay Kapadia, Apurvasinh Puvar, Janvi Raval, Zarna Patel, Monika Gandhi, Pinal Trivedi, R D Dixit, A M Kadri, Harsh Bakshi, Chaitanya Joshi, Madhvi Joshi                                                                                                                                                                                                                   |                                                                                                                                                                                                                                                                                                                                                                                                                                                                                                                                                                      |
| EPI_ISL_514752                                                                                                                                                                                                                                                                                                                                                                                                                                                                                                                                                                                                                                                                                                                                                                                                                                                 | Infectious Disease Control Center, Center for Disease Control and Prevention of PLA                                 | Infectious Disease Control Center, Center for Disease Control and Prevention of PLA    | Li, P.                                                                                                                                                                                                                                                                                                                                                                                                                                                                                                                                                               |                                                                                                                                                                                                                                                                                                                                                                                                                                                                                                                                                                      |
| EPI_ISL_516550, EPI_ISL_516551                                                                                                                                                                                                                                                                                                                                                                                                                                                                                                                                                                                                                                                                                                                                                                                                                                 | SA Pathology                                                                                                        | SA Pathology                                                                           | Lex Leong, Julien Soubrier, Luke Walters, Chuan Kok Lim, Song Gao, Mark Turra, Karin Kassahn, Ivan Bastian, Geoff Higgins                                                                                                                                                                                                                                                                                                                                                                                                                                            |                                                                                                                                                                                                                                                                                                                                                                                                                                                                                                                                                                      |
| EPI_ISL_516831, EPI_ISL_516832, EPI_ISL_516833, EPI_ISL_516834, EPI_ISL_516835, EPI_ISL_516836, EPI_ISL_516837, EPI_ISL_516838, EPI_ISL_516839, EPI_ISL_516840, EPI_ISL_516841, EPI_ISL_516842, EPI_ISL_516843, EPI_ISL_516844, EPI_ISL_516845, EPI_ISL_516846, EPI_ISL_516847, EPI_ISL_516848, EPI_ISL_516849, EPI_ISL_516850, EPI_ISL_516851, EPI_ISL_516852, EPI_ISL_516853, EPI_ISL_516854, EPI_ISL_516855, EPI_ISL_516856, EPI_ISL_516857, EPI_ISL_516858, EPI_ISL_516859, EPI_ISL_516860, EPI_ISL_516861, EPI_ISL_516862, EPI_ISL_516863, EPI_ISL_516864, EPI_ISL_516865, EPI_ISL_516866, EPI_ISL_516867, EPI_ISL_516868, EPI_ISL_516869, EPI_ISL_516870, EPI_ISL_516871, EPI_ISL_516872, EPI_ISL_516873, EPI_ISL_516874, EPI_ISL_516875, EPI_ISL_516876, EPI_ISL_516877, EPI_ISL_516878, EPI_ISL_516879, EPI_ISL_516881, EPI_ISL_516882, EPI_ISL_516883 | see above                                                                                                           | North West London Pathology, Imperial College Healthcare NHS Trust                     | Wellcome Sanger Institute for the COVID-19 Genomics UK (COG-UK) consortium                                                                                                                                                                                                                                                                                                                                                                                                                                                                                           | Ling Li, Paul Randell, David Muir, Frankie Bolt, Alison Holmes, James Price, Aileen Rowan, Graham Taylor, Anjna Badhan, Carolina Herrera and Alex Alderton, Roberto Amato, Sonia Goncalves, Ewan Harrison, David K. Jackson, Ian Johnston, Dominic Kwiatkowski, Cordelia Langford, John Sillitoe on behalf of the Wellcome Sanger Institute COVID-19 Surveillance Team ( <a href="http://www.sanger.ac.uk/covid-team">http://www.sanger.ac.uk/covid-team</a> )                                                                                                       |
| EPI_ISL_516990, EPI_ISL_516991, EPI_ISL_516992, EPI_ISL_516993, EPI_ISL_516994, EPI_ISL_516995, EPI_ISL_516996, EPI_ISL_516997, EPI_ISL_516998, EPI_ISL_516999, EPI_ISL_517000                                                                                                                                                                                                                                                                                                                                                                                                                                                                                                                                                                                                                                                                                 | see above                                                                                                           | Department of Pathology, University of Cambridge                                       | COVID-19 Genomics UK (COG-UK) Consortium                                                                                                                                                                                                                                                                                                                                                                                                                                                                                                                             | Luke W Meredith, M. Estée Török, Myra Hosmillo, William L. Hamilton, Martin D. Curran, Theresa Feltwell, Grant Hall, Anna Yakovleva, Fahad A Khokhar, Charlotte J. Houldcroft, Laura G Caller, Aminu S. Jahun, Sarah L. Caddy, Yasmin Chaudhry, Malte Pinckert, Ian Goodfellow                                                                                                                                                                                                                                                                                       |
| EPI_ISL_524493, EPI_ISL_524495, EPI_ISL_524497, EPI_ISL_524498, EPI_ISL_524501, EPI_ISL_524502, EPI_ISL_524503, EPI_ISL_524505, EPI_ISL_524506, EPI_ISL_524508, EPI_ISL_524509, EPI_ISL_524515, EPI_ISL_524521, EPI_ISL_524522, EPI_ISL_524525, EPI_ISL_524528, EPI_ISL_524529, EPI_ISL_524530, EPI_ISL_524531, EPI_ISL_524537, EPI_ISL_524538, EPI_ISL_524541, EPI_ISL_524544, EPI_ISL_524546, EPI_ISL_524548, EPI_ISL_524551, EPI_ISL_524553, EPI_ISL_524558, EPI_ISL_524560, EPI_ISL_524564, EPI_ISL_524568, EPI_ISL_524570, EPI_ISL_524573, EPI_ISL_524574, EPI_ISL_524575, EPI_ISL_524576, EPI_ISL_524577, EPI_ISL_524578, EPI_ISL_524579, EPI_ISL_524580, EPI_ISL_524581, EPI_ISL_524582, EPI_ISL_524583, EPI_ISL_524584, EPI_ISL_524585, EPI_ISL_524586, EPI_ISL_524587, EPI_ISL_524588, EPI_ISL_524589                                                 | see above                                                                                                           | Department of Pathology, University of Cambridge                                       | Wellcome Sanger Institute for the COVID-19 Genomics UK (COG-UK) consortium                                                                                                                                                                                                                                                                                                                                                                                                                                                                                           | Luke W Meredith, M. Estée Török, Myra Hosmillo, William L. Hamilton, Martin D. Curran, Theresa Feltwell, Grant Hall, Anna Yakovleva, Fahad A Khokhar, Charlotte J. Houldcroft, Laura G Caller, Aminu S. Jahun, Sarah L. Caddy, Ian Goodfellow; and Alex Alderton, Roberto Amato, Sonia Goncalves, Ewan Harrison, David K. Jackson, Ian Johnston, Dominic Kwiatkowski, Cordelia Langford, John Sillitoe on behalf of the Wellcome Sanger Institute COVID-19 Surveillance Team ( <a href="http://www.sanger.ac.uk/covid-team">http://www.sanger.ac.uk/covid-team</a> ) |
| EPI_ISL_524590                                                                                                                                                                                                                                                                                                                                                                                                                                                                                                                                                                                                                                                                                                                                                                                                                                                 | Department of Pathology, University of Cambridge                                                                    | Wellcome Sanger Institute for the COVID-19 Genomics UK (COG-UK) Consortium             | Luke W Meredith, M. Estée Török, Myra Hosmillo, William L. Hamilton, Martin D. Curran, Theresa Feltwell, Grant Hall, Anna Yakovleva, Fahad A Khokhar, Charlotte J. Houldcroft, Laura G Caller, Aminu S. Jahun, Sarah L. Caddy, Ian Goodfellow; and Alex Alderton, Roberto Amato, Sonia Goncalves, Ewan Harrison, David K. Jackson, Ian Johnston, Dominic Kwiatkowski, Cordelia Langford, John Sillitoe on behalf of the Wellcome Sanger Institute COVID-19 Surveillance Team                                                                                         |                                                                                                                                                                                                                                                                                                                                                                                                                                                                                                                                                                      |
| EPI_ISL_524591, EPI_ISL_524592, EPI_ISL_524593, EPI_ISL_524594                                                                                                                                                                                                                                                                                                                                                                                                                                                                                                                                                                                                                                                                                                                                                                                                 | Department of Pathology, University of Cambridge                                                                    | Wellcome Sanger Institute for the COVID-19 Genomics UK (COG-UK) consortium             | Luke W Meredith, M. Estée Török, Myra Hosmillo, William L. Hamilton, Martin D. Curran, Theresa Feltwell, Grant Hall, Anna Yakovleva, Fahad A Khokhar, Charlotte J. Houldcroft, Laura G Caller, Aminu S. Jahun, Sarah L. Caddy, Ian Goodfellow; and Alex Alderton, Roberto Amato, Sonia Goncalves, Ewan                                                                                                                                                                                                                                                               |                                                                                                                                                                                                                                                                                                                                                                                                                                                                                                                                                                      |

|                                                                                                                                                                                                                                                                                                                                                                                                                                                                                                                                                                                                                                                                                                                                                                                                                                                                                                                                                                                                                                                                                                                                                                                                                                                                                                                                                                                                                                                                                                                                                                                                                                                                                                                                                                                                                                                                                                                                                                                                                                                                                                                                                                                                                                                                                                                                                                                                                                                                                                                                                                                                                                                                                                                                                                                                                                                                                                                                                                                                                                                                                                                                                                                                                                                                                                                                                                                                                                                                                                                                                                                                                                                                                                                                                                                                                                                                                                                                                                                                                                                                                                                                                                                                                                                                                                                                                                                                                                                                                                                                                                                                                                                                                                                                                                                                                                                                                                                                                                                                                                                                                                                                                                                                                                                                                                                                                                                                                                                                                                                                                                                                                                                                                                                                                                                                                                                                                                                                                                                                                                                                                                                                                                                                                                                                                                                                                                                                                                                                                                                                                                                                                                                                                                                                                                                                                                                                                                                                                                                                                                                                                                                                                                                                                                                                                                                                                                                                                                                                                                                                                                                                                                                                                                                                                                |                                                                                                                |                                                                            |                                                                                                                                                                                                                                                                                                                                                                                                                                                                                                                                                                       |
|----------------------------------------------------------------------------------------------------------------------------------------------------------------------------------------------------------------------------------------------------------------------------------------------------------------------------------------------------------------------------------------------------------------------------------------------------------------------------------------------------------------------------------------------------------------------------------------------------------------------------------------------------------------------------------------------------------------------------------------------------------------------------------------------------------------------------------------------------------------------------------------------------------------------------------------------------------------------------------------------------------------------------------------------------------------------------------------------------------------------------------------------------------------------------------------------------------------------------------------------------------------------------------------------------------------------------------------------------------------------------------------------------------------------------------------------------------------------------------------------------------------------------------------------------------------------------------------------------------------------------------------------------------------------------------------------------------------------------------------------------------------------------------------------------------------------------------------------------------------------------------------------------------------------------------------------------------------------------------------------------------------------------------------------------------------------------------------------------------------------------------------------------------------------------------------------------------------------------------------------------------------------------------------------------------------------------------------------------------------------------------------------------------------------------------------------------------------------------------------------------------------------------------------------------------------------------------------------------------------------------------------------------------------------------------------------------------------------------------------------------------------------------------------------------------------------------------------------------------------------------------------------------------------------------------------------------------------------------------------------------------------------------------------------------------------------------------------------------------------------------------------------------------------------------------------------------------------------------------------------------------------------------------------------------------------------------------------------------------------------------------------------------------------------------------------------------------------------------------------------------------------------------------------------------------------------------------------------------------------------------------------------------------------------------------------------------------------------------------------------------------------------------------------------------------------------------------------------------------------------------------------------------------------------------------------------------------------------------------------------------------------------------------------------------------------------------------------------------------------------------------------------------------------------------------------------------------------------------------------------------------------------------------------------------------------------------------------------------------------------------------------------------------------------------------------------------------------------------------------------------------------------------------------------------------------------------------------------------------------------------------------------------------------------------------------------------------------------------------------------------------------------------------------------------------------------------------------------------------------------------------------------------------------------------------------------------------------------------------------------------------------------------------------------------------------------------------------------------------------------------------------------------------------------------------------------------------------------------------------------------------------------------------------------------------------------------------------------------------------------------------------------------------------------------------------------------------------------------------------------------------------------------------------------------------------------------------------------------------------------------------------------------------------------------------------------------------------------------------------------------------------------------------------------------------------------------------------------------------------------------------------------------------------------------------------------------------------------------------------------------------------------------------------------------------------------------------------------------------------------------------------------------------------------------------------------------------------------------------------------------------------------------------------------------------------------------------------------------------------------------------------------------------------------------------------------------------------------------------------------------------------------------------------------------------------------------------------------------------------------------------------------------------------------------------------------------------------------------------------------------------------------------------------------------------------------------------------------------------------------------------------------------------------------------------------------------------------------------------------------------------------------------------------------------------------------------------------------------------------------------------------------------------------------------------------------------------------------------------------------------------------------------------------------------------------------------------------------------------------------------------------------------------------------------------------------------------------------------------------------------------------------------------------------------------------------------------------------------------------------------------------------------------------------------------------------------------------------------------------------------------------|----------------------------------------------------------------------------------------------------------------|----------------------------------------------------------------------------|-----------------------------------------------------------------------------------------------------------------------------------------------------------------------------------------------------------------------------------------------------------------------------------------------------------------------------------------------------------------------------------------------------------------------------------------------------------------------------------------------------------------------------------------------------------------------|
|                                                                                                                                                                                                                                                                                                                                                                                                                                                                                                                                                                                                                                                                                                                                                                                                                                                                                                                                                                                                                                                                                                                                                                                                                                                                                                                                                                                                                                                                                                                                                                                                                                                                                                                                                                                                                                                                                                                                                                                                                                                                                                                                                                                                                                                                                                                                                                                                                                                                                                                                                                                                                                                                                                                                                                                                                                                                                                                                                                                                                                                                                                                                                                                                                                                                                                                                                                                                                                                                                                                                                                                                                                                                                                                                                                                                                                                                                                                                                                                                                                                                                                                                                                                                                                                                                                                                                                                                                                                                                                                                                                                                                                                                                                                                                                                                                                                                                                                                                                                                                                                                                                                                                                                                                                                                                                                                                                                                                                                                                                                                                                                                                                                                                                                                                                                                                                                                                                                                                                                                                                                                                                                                                                                                                                                                                                                                                                                                                                                                                                                                                                                                                                                                                                                                                                                                                                                                                                                                                                                                                                                                                                                                                                                                                                                                                                                                                                                                                                                                                                                                                                                                                                                                                                                                                                |                                                                                                                |                                                                            | Harrison, David K. Jackson, Ian Johnston, Dominic Kwiatkowski, Cordelia Langford, John Sillitoe on behalf of the Wellcome Sanger Institute COVID-19 Surveillance Team ( <a href="http://www.sanger.ac.uk/covid-team">http://www.sanger.ac.uk/covid-team</a> )                                                                                                                                                                                                                                                                                                         |
| EPI_ISL_524595                                                                                                                                                                                                                                                                                                                                                                                                                                                                                                                                                                                                                                                                                                                                                                                                                                                                                                                                                                                                                                                                                                                                                                                                                                                                                                                                                                                                                                                                                                                                                                                                                                                                                                                                                                                                                                                                                                                                                                                                                                                                                                                                                                                                                                                                                                                                                                                                                                                                                                                                                                                                                                                                                                                                                                                                                                                                                                                                                                                                                                                                                                                                                                                                                                                                                                                                                                                                                                                                                                                                                                                                                                                                                                                                                                                                                                                                                                                                                                                                                                                                                                                                                                                                                                                                                                                                                                                                                                                                                                                                                                                                                                                                                                                                                                                                                                                                                                                                                                                                                                                                                                                                                                                                                                                                                                                                                                                                                                                                                                                                                                                                                                                                                                                                                                                                                                                                                                                                                                                                                                                                                                                                                                                                                                                                                                                                                                                                                                                                                                                                                                                                                                                                                                                                                                                                                                                                                                                                                                                                                                                                                                                                                                                                                                                                                                                                                                                                                                                                                                                                                                                                                                                                                                                                                 | Department of Pathology, University of Cambridge                                                               | Wellcome Sanger Institute for the COVID-19 Genomics UK (COG-UK) Consortium | Luke W Meredith, M. Estée Török , Myra Hosmillo, William L. Hamilton, Martin D. Curran, Theresa Feltwell, Grant Hall, Anna Yakovleva, Fahad A Khokhar, Charlotte J. Houldcroft, Laura G Caller, Aminu S. Jahun, Sarah L. Caddy, Ian Goodfellow; and Alex Alderton, Roberto Amato, Sonia Goncalves, Ewan Harrison, David K. Jackson, Ian Johnston, Dominic Kwiatkowski, Cordelia Langford, John Sillitoe on behalf of the Wellcome Sanger Institute COVID-19 Surveillance Team                                                                                         |
| EPI_ISL_524596, EPI_ISL_524597, EPI_ISL_524598, EPI_ISL_524599, EPI_ISL_524600, EPI_ISL_524601, EPI_ISL_524602, EPI_ISL_524603, EPI_ISL_524604, EPI_ISL_524605, EPI_ISL_524606, EPI_ISL_524607, EPI_ISL_524608, EPI_ISL_524609, EPI_ISL_524610, EPI_ISL_524611, EPI_ISL_524612, EPI_ISL_524613, EPI_ISL_524614, EPI_ISL_524615, EPI_ISL_524616, EPI_ISL_524617, EPI_ISL_524618                                                                                                                                                                                                                                                                                                                                                                                                                                                                                                                                                                                                                                                                                                                                                                                                                                                                                                                                                                                                                                                                                                                                                                                                                                                                                                                                                                                                                                                                                                                                                                                                                                                                                                                                                                                                                                                                                                                                                                                                                                                                                                                                                                                                                                                                                                                                                                                                                                                                                                                                                                                                                                                                                                                                                                                                                                                                                                                                                                                                                                                                                                                                                                                                                                                                                                                                                                                                                                                                                                                                                                                                                                                                                                                                                                                                                                                                                                                                                                                                                                                                                                                                                                                                                                                                                                                                                                                                                                                                                                                                                                                                                                                                                                                                                                                                                                                                                                                                                                                                                                                                                                                                                                                                                                                                                                                                                                                                                                                                                                                                                                                                                                                                                                                                                                                                                                                                                                                                                                                                                                                                                                                                                                                                                                                                                                                                                                                                                                                                                                                                                                                                                                                                                                                                                                                                                                                                                                                                                                                                                                                                                                                                                                                                                                                                                                                                                                                 |                                                                                                                |                                                                            |                                                                                                                                                                                                                                                                                                                                                                                                                                                                                                                                                                       |
| see above                                                                                                                                                                                                                                                                                                                                                                                                                                                                                                                                                                                                                                                                                                                                                                                                                                                                                                                                                                                                                                                                                                                                                                                                                                                                                                                                                                                                                                                                                                                                                                                                                                                                                                                                                                                                                                                                                                                                                                                                                                                                                                                                                                                                                                                                                                                                                                                                                                                                                                                                                                                                                                                                                                                                                                                                                                                                                                                                                                                                                                                                                                                                                                                                                                                                                                                                                                                                                                                                                                                                                                                                                                                                                                                                                                                                                                                                                                                                                                                                                                                                                                                                                                                                                                                                                                                                                                                                                                                                                                                                                                                                                                                                                                                                                                                                                                                                                                                                                                                                                                                                                                                                                                                                                                                                                                                                                                                                                                                                                                                                                                                                                                                                                                                                                                                                                                                                                                                                                                                                                                                                                                                                                                                                                                                                                                                                                                                                                                                                                                                                                                                                                                                                                                                                                                                                                                                                                                                                                                                                                                                                                                                                                                                                                                                                                                                                                                                                                                                                                                                                                                                                                                                                                                                                                      | Department of Pathology, University of Cambridge                                                               | Wellcome Sanger Institute for the COVID-19 Genomics UK (COG-UK) consortium | Luke W Meredith, M. Estée Török , Myra Hosmillo, William L. Hamilton, Martin D. Curran, Theresa Feltwell, Grant Hall, Anna Yakovleva, Fahad A Khokhar, Charlotte J. Houldcroft, Laura G Caller, Aminu S. Jahun, Sarah L. Caddy, Ian Goodfellow; and Alex Alderton, Roberto Amato, Sonia Goncalves, Ewan Harrison, David K. Jackson, Ian Johnston, Dominic Kwiatkowski, Cordelia Langford, John Sillitoe on behalf of the Wellcome Sanger Institute COVID-19 Surveillance Team ( <a href="http://www.sanger.ac.uk/covid-team">http://www.sanger.ac.uk/covid-team</a> ) |
| EPI_ISL_524619, EPI_ISL_524620, EPI_ISL_524621, EPI_ISL_524622, EPI_ISL_524623, EPI_ISL_524624, EPI_ISL_524625, EPI_ISL_524626, EPI_ISL_524627, EPI_ISL_524628, EPI_ISL_524629, EPI_ISL_524630, EPI_ISL_524631, EPI_ISL_524632, EPI_ISL_524633, EPI_ISL_524634, EPI_ISL_524635, EPI_ISL_524636, EPI_ISL_524637, EPI_ISL_524638, EPI_ISL_524639, EPI_ISL_524640, EPI_ISL_524641, EPI_ISL_524642, EPI_ISL_524643, EPI_ISL_524644, EPI_ISL_524645, EPI_ISL_524646, EPI_ISL_524647, EPI_ISL_524648, EPI_ISL_524649, EPI_ISL_524650, EPI_ISL_524651, EPI_ISL_524652, EPI_ISL_524653, EPI_ISL_524654, EPI_ISL_524655, EPI_ISL_524656, EPI_ISL_524657, EPI_ISL_524658, EPI_ISL_524659, EPI_ISL_524660, EPI_ISL_524661, EPI_ISL_524662, EPI_ISL_524663, EPI_ISL_524664, EPI_ISL_524665, EPI_ISL_524666, EPI_ISL_524667, EPI_ISL_524668, EPI_ISL_524669, EPI_ISL_524670, EPI_ISL_524671, EPI_ISL_524672, EPI_ISL_524673, EPI_ISL_524674, EPI_ISL_524675, EPI_ISL_524676, EPI_ISL_524677, EPI_ISL_524678, EPI_ISL_524679, EPI_ISL_524680, EPI_ISL_524681, EPI_ISL_524682, EPI_ISL_524683, EPI_ISL_524684, EPI_ISL_524685, EPI_ISL_524686, EPI_ISL_524687, EPI_ISL_524688, EPI_ISL_524689, EPI_ISL_524690, EPI_ISL_524691, EPI_ISL_524692, EPI_ISL_524693, EPI_ISL_524694, EPI_ISL_524695, EPI_ISL_524696, EPI_ISL_524697, EPI_ISL_524698, EPI_ISL_524699, EPI_ISL_524700, EPI_ISL_524701, EPI_ISL_524702, EPI_ISL_524703, EPI_ISL_524704, EPI_ISL_524705, EPI_ISL_524706, EPI_ISL_524707, EPI_ISL_524708, EPI_ISL_524709, EPI_ISL_524710, EPI_ISL_524711, EPI_ISL_524712                                                                                                                                                                                                                                                                                                                                                                                                                                                                                                                                                                                                                                                                                                                                                                                                                                                                                                                                                                                                                                                                                                                                                                                                                                                                                                                                                                                                                                                                                                                                                                                                                                                                                                                                                                                                                                                                                                                                                                                                                                                                                                                                                                                                                                                                                                                                                                                                                                                                                                                                                                                                                                                                                                                                                                                                                                                                                                                                                                                                                                                                                                                                                                                                                                                                                                                                                                                                                                                                                                                                                                                                                                                                                                                                                                                                                                                                                                                                                                                                                                                                                                                                                                                                                                                                                                                                                                                                                                                                                                                                                                                                                                                                                                                                                                                                                                                                                                                                                                                                                                                                                                                                                                                                                                                                                                                                                                                                                                                                                                                                                                                                                                                                                                                                                                                                                                                                                                                                                                                                                                                                                                                                                                                                 |                                                                                                                |                                                                            |                                                                                                                                                                                                                                                                                                                                                                                                                                                                                                                                                                       |
| see above                                                                                                                                                                                                                                                                                                                                                                                                                                                                                                                                                                                                                                                                                                                                                                                                                                                                                                                                                                                                                                                                                                                                                                                                                                                                                                                                                                                                                                                                                                                                                                                                                                                                                                                                                                                                                                                                                                                                                                                                                                                                                                                                                                                                                                                                                                                                                                                                                                                                                                                                                                                                                                                                                                                                                                                                                                                                                                                                                                                                                                                                                                                                                                                                                                                                                                                                                                                                                                                                                                                                                                                                                                                                                                                                                                                                                                                                                                                                                                                                                                                                                                                                                                                                                                                                                                                                                                                                                                                                                                                                                                                                                                                                                                                                                                                                                                                                                                                                                                                                                                                                                                                                                                                                                                                                                                                                                                                                                                                                                                                                                                                                                                                                                                                                                                                                                                                                                                                                                                                                                                                                                                                                                                                                                                                                                                                                                                                                                                                                                                                                                                                                                                                                                                                                                                                                                                                                                                                                                                                                                                                                                                                                                                                                                                                                                                                                                                                                                                                                                                                                                                                                                                                                                                                                                      | North West London Pathology, Imperial College Healthcare NHS Trust                                             | Wellcome Sanger Institute for the COVID-19 Genomics UK (COG-UK) consortium | Ling Li, Paul Randell, David Muir, Frankie Bolt, Alison Holmes, James Price, Aileen Rowan, Graham Taylor, Anjna Badhan, Carolina Herrera and Alex Alderton, Roberto Amato, Sonia Goncalves, Ewan Harrison, David K. Jackson, Ian Johnston, Dominic Kwiatkowski, Cordelia Langford, John Sillitoe on behalf of the Wellcome Sanger Institute COVID-19 Surveillance Team ( <a href="http://www.sanger.ac.uk/covid-team">http://www.sanger.ac.uk/covid-team</a> )                                                                                                        |
| EPI_ISL_524718                                                                                                                                                                                                                                                                                                                                                                                                                                                                                                                                                                                                                                                                                                                                                                                                                                                                                                                                                                                                                                                                                                                                                                                                                                                                                                                                                                                                                                                                                                                                                                                                                                                                                                                                                                                                                                                                                                                                                                                                                                                                                                                                                                                                                                                                                                                                                                                                                                                                                                                                                                                                                                                                                                                                                                                                                                                                                                                                                                                                                                                                                                                                                                                                                                                                                                                                                                                                                                                                                                                                                                                                                                                                                                                                                                                                                                                                                                                                                                                                                                                                                                                                                                                                                                                                                                                                                                                                                                                                                                                                                                                                                                                                                                                                                                                                                                                                                                                                                                                                                                                                                                                                                                                                                                                                                                                                                                                                                                                                                                                                                                                                                                                                                                                                                                                                                                                                                                                                                                                                                                                                                                                                                                                                                                                                                                                                                                                                                                                                                                                                                                                                                                                                                                                                                                                                                                                                                                                                                                                                                                                                                                                                                                                                                                                                                                                                                                                                                                                                                                                                                                                                                                                                                                                                                 | B.J. Medical College and Civil hospital, Ahmedabad                                                             | Gujarat Biotechnology Research Centre                                      | Maharshi Pandya, Nidhi Patel, Nitin Savaliya, Raghawendra Kumar, Dinesh Kumar, Zuber Saiyed, Komal Patel, Labdhi Pandya, Afzal Ansari, Nikha Trivedi, Pranay Shah, Kamlesh J Upadhyay, Sanjay Kapadia, Apurvashin Puvar, Janvi Raval, Zarna Patel, Monika Gandhi, Pinal Trivedi, R D Dixit, A M Kadri, Harsh Bakshi, Chaitanya Joshi, Madhvi Joshi                                                                                                                                                                                                                    |
| EPI_ISL_524740                                                                                                                                                                                                                                                                                                                                                                                                                                                                                                                                                                                                                                                                                                                                                                                                                                                                                                                                                                                                                                                                                                                                                                                                                                                                                                                                                                                                                                                                                                                                                                                                                                                                                                                                                                                                                                                                                                                                                                                                                                                                                                                                                                                                                                                                                                                                                                                                                                                                                                                                                                                                                                                                                                                                                                                                                                                                                                                                                                                                                                                                                                                                                                                                                                                                                                                                                                                                                                                                                                                                                                                                                                                                                                                                                                                                                                                                                                                                                                                                                                                                                                                                                                                                                                                                                                                                                                                                                                                                                                                                                                                                                                                                                                                                                                                                                                                                                                                                                                                                                                                                                                                                                                                                                                                                                                                                                                                                                                                                                                                                                                                                                                                                                                                                                                                                                                                                                                                                                                                                                                                                                                                                                                                                                                                                                                                                                                                                                                                                                                                                                                                                                                                                                                                                                                                                                                                                                                                                                                                                                                                                                                                                                                                                                                                                                                                                                                                                                                                                                                                                                                                                                                                                                                                                                 | GMERS Medical College and Hospital, Gandhinagar                                                                | Gujarat Biotechnology Research Centre                                      | Maharshi Pandya, Nidhi Patel, Nitin Savaliya, Raghawendra Kumar, Dinesh Kumar, Zuber Saiyed, Komal Patel, Labdhi Pandya, Afzal Ansari, Nikha Trivedi, Seema Bhatt, Gaurishankar Shrimail, Bhavesh Modi, Bharti Rajani, Apurvashin Puvar, Janvi Raval, Zarna Patel, Monika Gandhi, Pinal Trivedi, R D Dixit, A M Kadri, Harsh Bakshi, Chaitanya Joshi, Madhvi Joshi                                                                                                                                                                                                    |
| EPI_ISL_524754                                                                                                                                                                                                                                                                                                                                                                                                                                                                                                                                                                                                                                                                                                                                                                                                                                                                                                                                                                                                                                                                                                                                                                                                                                                                                                                                                                                                                                                                                                                                                                                                                                                                                                                                                                                                                                                                                                                                                                                                                                                                                                                                                                                                                                                                                                                                                                                                                                                                                                                                                                                                                                                                                                                                                                                                                                                                                                                                                                                                                                                                                                                                                                                                                                                                                                                                                                                                                                                                                                                                                                                                                                                                                                                                                                                                                                                                                                                                                                                                                                                                                                                                                                                                                                                                                                                                                                                                                                                                                                                                                                                                                                                                                                                                                                                                                                                                                                                                                                                                                                                                                                                                                                                                                                                                                                                                                                                                                                                                                                                                                                                                                                                                                                                                                                                                                                                                                                                                                                                                                                                                                                                                                                                                                                                                                                                                                                                                                                                                                                                                                                                                                                                                                                                                                                                                                                                                                                                                                                                                                                                                                                                                                                                                                                                                                                                                                                                                                                                                                                                                                                                                                                                                                                                                                 | GMERS Medical College and Hospital, Dharpur, Patan                                                             | Gujarat Biotechnology Research Centre                                      | Maharshi Pandya, Nidhi Patel, Nitin Savaliya, Raghawendra Kumar, Dinesh Kumar, Zuber Saiyed, Komal Patel, Labdhi Pandya, Afzal Ansari, Nikha Trivedi, A N Parmar, Apurvashin Puvar, Janvi Raval, Zarna Patel, Monika Gandhi, Pinal Trivedi, R D Dixit, A M Kadri, Harsh Bakshi, Chaitanya Joshi, Madhvi Joshi                                                                                                                                                                                                                                                         |
| EPI_ISL_525495, EPI_ISL_525496                                                                                                                                                                                                                                                                                                                                                                                                                                                                                                                                                                                                                                                                                                                                                                                                                                                                                                                                                                                                                                                                                                                                                                                                                                                                                                                                                                                                                                                                                                                                                                                                                                                                                                                                                                                                                                                                                                                                                                                                                                                                                                                                                                                                                                                                                                                                                                                                                                                                                                                                                                                                                                                                                                                                                                                                                                                                                                                                                                                                                                                                                                                                                                                                                                                                                                                                                                                                                                                                                                                                                                                                                                                                                                                                                                                                                                                                                                                                                                                                                                                                                                                                                                                                                                                                                                                                                                                                                                                                                                                                                                                                                                                                                                                                                                                                                                                                                                                                                                                                                                                                                                                                                                                                                                                                                                                                                                                                                                                                                                                                                                                                                                                                                                                                                                                                                                                                                                                                                                                                                                                                                                                                                                                                                                                                                                                                                                                                                                                                                                                                                                                                                                                                                                                                                                                                                                                                                                                                                                                                                                                                                                                                                                                                                                                                                                                                                                                                                                                                                                                                                                                                                                                                                                                                 | Laboratory of Molecular Virology of the International Centre for Genetic Engineering and Biotechnology (ICGEB) | ARGO Open Lab Platform for Genome Sequencing                               | Licastro D, Rajasekharan S, Dal Monego S, Segat L, D'Agaro P, Marcello A                                                                                                                                                                                                                                                                                                                                                                                                                                                                                              |
| EPI_ISL_527916, EPI_ISL_527917, EPI_ISL_527918, EPI_ISL_527919, EPI_ISL_527920, EPI_ISL_527921, EPI_ISL_527922, EPI_ISL_527923, EPI_ISL_527924, EPI_ISL_527925, EPI_ISL_527926, EPI_ISL_527927, EPI_ISL_527928, EPI_ISL_527929, EPI_ISL_527930, EPI_ISL_527931, EPI_ISL_527932, EPI_ISL_527933, EPI_ISL_527934, EPI_ISL_527935, EPI_ISL_527936, EPI_ISL_527937, EPI_ISL_527938, EPI_ISL_527939, EPI_ISL_527940, EPI_ISL_527941, EPI_ISL_527942, EPI_ISL_527943, EPI_ISL_527944, EPI_ISL_527945, EPI_ISL_527946, EPI_ISL_527947, EPI_ISL_527948, EPI_ISL_527949, EPI_ISL_527950, EPI_ISL_527951, EPI_ISL_527952, EPI_ISL_527953, EPI_ISL_527954, EPI_ISL_527955, EPI_ISL_527956, EPI_ISL_527957, EPI_ISL_527958, EPI_ISL_527959, EPI_ISL_527960, EPI_ISL_527961, EPI_ISL_527962, EPI_ISL_527963, EPI_ISL_527964, EPI_ISL_527965, EPI_ISL_527966, EPI_ISL_527967, EPI_ISL_527968, EPI_ISL_527969, EPI_ISL_527970, EPI_ISL_527971, EPI_ISL_527972, EPI_ISL_527973, EPI_ISL_527974, EPI_ISL_527975, EPI_ISL_527976, EPI_ISL_527977, EPI_ISL_527978, EPI_ISL_527979, EPI_ISL_527980, EPI_ISL_527981, EPI_ISL_527982, EPI_ISL_527983, EPI_ISL_527984, EPI_ISL_527985, EPI_ISL_527986, EPI_ISL_527987, EPI_ISL_527988, EPI_ISL_527989, EPI_ISL_527990, EPI_ISL_527991, EPI_ISL_527992, EPI_ISL_527993, EPI_ISL_527994, EPI_ISL_527995, EPI_ISL_527996, EPI_ISL_527997, EPI_ISL_527998, EPI_ISL_527999, EPI_ISL_528000, EPI_ISL_528001, EPI_ISL_528002, EPI_ISL_528003, EPI_ISL_528004, EPI_ISL_528005, EPI_ISL_528006, EPI_ISL_528007, EPI_ISL_528008, EPI_ISL_528009, EPI_ISL_528010, EPI_ISL_528011, EPI_ISL_528012, EPI_ISL_528013, EPI_ISL_528014, EPI_ISL_528015, EPI_ISL_528016, EPI_ISL_528017, EPI_ISL_528018, EPI_ISL_528019, EPI_ISL_528020, EPI_ISL_528021, EPI_ISL_528022, EPI_ISL_528023, EPI_ISL_528024, EPI_ISL_528025, EPI_ISL_528026, EPI_ISL_528027, EPI_ISL_528028, EPI_ISL_528029, EPI_ISL_528030, EPI_ISL_528031, EPI_ISL_528032, EPI_ISL_528033, EPI_ISL_528034, EPI_ISL_528035, EPI_ISL_528036, EPI_ISL_528037, EPI_ISL_528038, EPI_ISL_528039, EPI_ISL_528040, EPI_ISL_528041, EPI_ISL_528042, EPI_ISL_528043, EPI_ISL_528044, EPI_ISL_528045, EPI_ISL_528046, EPI_ISL_528047, EPI_ISL_528048, EPI_ISL_528049, EPI_ISL_528050, EPI_ISL_528051, EPI_ISL_528052, EPI_ISL_528053, EPI_ISL_528054, EPI_ISL_528055, EPI_ISL_528056, EPI_ISL_528057, EPI_ISL_528058, EPI_ISL_528059, EPI_ISL_528060, EPI_ISL_528061, EPI_ISL_528062, EPI_ISL_528063, EPI_ISL_528064, EPI_ISL_528065, EPI_ISL_528066, EPI_ISL_528067, EPI_ISL_528068, EPI_ISL_528069, EPI_ISL_528070, EPI_ISL_528071, EPI_ISL_528072, EPI_ISL_528073, EPI_ISL_528074, EPI_ISL_528075, EPI_ISL_528076, EPI_ISL_528077, EPI_ISL_528078, EPI_ISL_528079, EPI_ISL_528080, EPI_ISL_528081, EPI_ISL_528082, EPI_ISL_528083, EPI_ISL_528084, EPI_ISL_528085, EPI_ISL_528086, EPI_ISL_528087, EPI_ISL_528088, EPI_ISL_528089, EPI_ISL_528090, EPI_ISL_528091, EPI_ISL_528092, EPI_ISL_528093, EPI_ISL_528094, EPI_ISL_528095, EPI_ISL_528096, EPI_ISL_528097, EPI_ISL_528098, EPI_ISL_528099, EPI_ISL_528100, EPI_ISL_528101, EPI_ISL_528102, EPI_ISL_528103, EPI_ISL_528104, EPI_ISL_528105, EPI_ISL_528106, EPI_ISL_528107, EPI_ISL_528108, EPI_ISL_528109, EPI_ISL_528110, EPI_ISL_528111, EPI_ISL_528112, EPI_ISL_528113, EPI_ISL_528114, EPI_ISL_528115, EPI_ISL_528116, EPI_ISL_528117, EPI_ISL_528118, EPI_ISL_528119, EPI_ISL_528120, EPI_ISL_528121, EPI_ISL_528122, EPI_ISL_528123, EPI_ISL_528124, EPI_ISL_528125, EPI_ISL_528126, EPI_ISL_528127, EPI_ISL_528128, EPI_ISL_528129, EPI_ISL_528130, EPI_ISL_528131, EPI_ISL_528132, EPI_ISL_528133, EPI_ISL_528134, EPI_ISL_528135, EPI_ISL_528136, EPI_ISL_528137, EPI_ISL_528138, EPI_ISL_528139, EPI_ISL_528140, EPI_ISL_528141, EPI_ISL_528142, EPI_ISL_528143, EPI_ISL_528144, EPI_ISL_528145, EPI_ISL_528146, EPI_ISL_528147, EPI_ISL_528148, EPI_ISL_528149, EPI_ISL_528150, EPI_ISL_528151, EPI_ISL_528152, EPI_ISL_528153, EPI_ISL_528154, EPI_ISL_528155, EPI_ISL_528156, EPI_ISL_528157, EPI_ISL_528158, EPI_ISL_528159, EPI_ISL_528160, EPI_ISL_528161, EPI_ISL_528162, EPI_ISL_528163, EPI_ISL_528164, EPI_ISL_528165, EPI_ISL_528166, EPI_ISL_528167, EPI_ISL_528168, EPI_ISL_528169, EPI_ISL_528170, EPI_ISL_528171, EPI_ISL_528172, EPI_ISL_528173, EPI_ISL_528174, EPI_ISL_528175, EPI_ISL_528176, EPI_ISL_528177, EPI_ISL_528178, EPI_ISL_528179, EPI_ISL_528180, EPI_ISL_528181, EPI_ISL_528182, EPI_ISL_528183, EPI_ISL_528184, EPI_ISL_528185, EPI_ISL_528186, EPI_ISL_528187, EPI_ISL_528188, EPI_ISL_528189, EPI_ISL_528190, EPI_ISL_528191, EPI_ISL_528192, EPI_ISL_528193, EPI_ISL_528194, EPI_ISL_528195, EPI_ISL_528196, EPI_ISL_528197, EPI_ISL_528198, EPI_ISL_528199, EPI_ISL_528200, EPI_ISL_528201, EPI_ISL_528202, EPI_ISL_528203, EPI_ISL_528204, EPI_ISL_528205, EPI_ISL_528206, EPI_ISL_528207, EPI_ISL_528208, EPI_ISL_528209, EPI_ISL_528210, EPI_ISL_528211, EPI_ISL_528212, EPI_ISL_528213, EPI_ISL_528214, EPI_ISL_528215, EPI_ISL_528216, EPI_ISL_528217, EPI_ISL_528218, EPI_ISL_528219, EPI_ISL_528220, EPI_ISL_528221, EPI_ISL_528222, EPI_ISL_528223, EPI_ISL_528224, EPI_ISL_528225, EPI_ISL_528226, EPI_ISL_528227, EPI_ISL_528228, EPI_ISL_528229, EPI_ISL_528230, EPI_ISL_528231, EPI_ISL_528232, EPI_ISL_528233, EPI_ISL_528234, EPI_ISL_528235, EPI_ISL_528236, EPI_ISL_528237, EPI_ISL_528238, EPI_ISL_528239, EPI_ISL_528240, EPI_ISL_528241, EPI_ISL_528242, EPI_ISL_528243, EPI_ISL_528244, EPI_ISL_528245, EPI_ISL_528246, EPI_ISL_528247, EPI_ISL_528248, EPI_ISL_528249, EPI_ISL_528250, EPI_ISL_528251, EPI_ISL_528252, EPI_ISL_528253, EPI_ISL_528254, EPI_ISL_528255, EPI_ISL_528256, EPI_ISL_528257, EPI_ISL_528258, EPI_ISL_528259, EPI_ISL_528260, EPI_ISL_528261, EPI_ISL_528262, EPI_ISL_528263, EPI_ISL_528264, EPI_ISL_528265, EPI_ISL_528266, EPI_ISL_528267, EPI_ISL_528268, EPI_ISL_528269, EPI_ISL_528270, EPI_ISL_528271, EPI_ISL_528272, EPI_ISL_528273, EPI_ISL_528274, EPI_ISL_528275, EPI_ISL_528276, EPI_ISL_528277, EPI_ISL_528278, EPI_ISL_528279, EPI_ISL_528280, EPI_ISL_528281, EPI_ISL_528282, EPI_ISL_528283, EPI_ISL_528284, EPI_ISL_528285, EPI_ISL_528286, EPI_ISL_528287, EPI_ISL_528288, EPI_ISL_528289, EPI_ISL_528290, EPI_ISL_528291, EPI_ISL_528292, EPI_ISL_528293, EPI_ISL_528294, EPI_ISL_528295, EPI_ISL_528296, EPI_ISL_528297, EPI_ISL_528298, EPI_ISL_528299, EPI_ISL_528300, EPI_ISL_528301, EPI_ISL_528302, EPI_ISL_528303, EPI_ISL_528304, EPI_ISL_528305, EPI_ISL_528306, EPI_ISL_528307, EPI_ISL_528308, EPI_ISL_528309, EPI_ISL_528310, EPI_ISL_528311, EPI_ISL_528312, EPI_ISL_528313, EPI_ISL_528314, EPI_ISL_528315, EPI_ISL_528316, EPI_ISL_528317, EPI_ISL_528318, EPI_ISL_528319, EPI_ISL_528320, EPI_ISL_528321, EPI_ISL_528322, EPI_ISL_528323, EPI_ISL_528324, EPI_ISL_528325, EPI_ISL_528326, EPI_ISL_528327, EPI_ISL_528328, EPI_ISL_528329, EPI_ISL_528330, EPI_ISL_528331, EPI_ISL_528332, EPI_ISL_528333, EPI_ISL_528334, EPI_ISL_528335, EPI_ISL_528336, EPI_ISL_528337, EPI_ISL_528338, EPI_ISL_528339, EPI_ISL_528340, EPI_ISL_528341, EPI_ISL_528342, EPI_ISL_528343, EPI_ISL_528344, EPI_ISL_528345, EPI_ISL_528346, EPI_ISL_528347, EPI_ISL_528348, EPI_ISL_528349, EPI_ISL_528350, EPI_ISL_528351, EPI_ISL_528352, EPI_ISL_528353, EPI_ISL_528354, EPI_ISL_528355, EPI_ISL_528356, EPI_ISL_528357, EPI_ISL_528358, EPI_ISL_528359, EPI_ISL_528360, EPI_ISL_528361, EPI_ISL_528362, EPI_ISL_528363, EPI_ISL_528364, EPI_ISL_528365, EPI_ISL_528366, EPI_ISL_528367, EPI_ISL_528368, EPI_ISL_528369, EPI_ISL_528370, EPI_ISL_528371, EPI_ISL_528372, EPI_ISL_528373, EPI_ISL_528374, EPI_ISL_528375, EPI_ISL_528376, EPI_ISL_528377, EPI_ISL_528378, EPI_ISL_528379, EPI_ISL_528380, EPI_ISL_528381 |                                                                                                                |                                                                            |                                                                                                                                                                                                                                                                                                                                                                                                                                                                                                                                                                       |
| see above                                                                                                                                                                                                                                                                                                                                                                                                                                                                                                                                                                                                                                                                                                                                                                                                                                                                                                                                                                                                                                                                                                                                                                                                                                                                                                                                                                                                                                                                                                                                                                                                                                                                                                                                                                                                                                                                                                                                                                                                                                                                                                                                                                                                                                                                                                                                                                                                                                                                                                                                                                                                                                                                                                                                                                                                                                                                                                                                                                                                                                                                                                                                                                                                                                                                                                                                                                                                                                                                                                                                                                                                                                                                                                                                                                                                                                                                                                                                                                                                                                                                                                                                                                                                                                                                                                                                                                                                                                                                                                                                                                                                                                                                                                                                                                                                                                                                                                                                                                                                                                                                                                                                                                                                                                                                                                                                                                                                                                                                                                                                                                                                                                                                                                                                                                                                                                                                                                                                                                                                                                                                                                                                                                                                                                                                                                                                                                                                                                                                                                                                                                                                                                                                                                                                                                                                                                                                                                                                                                                                                                                                                                                                                                                                                                                                                                                                                                                                                                                                                                                                                                                                                                                                                                                                                      | University Hospital Basel, Clinical Virology                                                                   | University Hospital Basel, Clinical Bacteriology                           | Madlen Stange, Alfredo Mari, Tim Roloff, Helena MB Seth-Smith, Michael Schweitzer, Myrta Brunner, Karoline Leuzinger, Kirstine K. Soegaard, Alexander Gensch, Sarah Tschudin-Sutter, Simon Fuchs, Julia Bielicki, Hans Pargger, Martin Siegemund, Christian Nickel, Roland Bingesser, Michael Osthoff, Stefano Bassetti, Rita Schneider-Sliwa, Manuel Battegay, Hans Hirsch, Adrian Egli                                                                                                                                                                              |
| EPI_ISL_528835, EPI_ISL_528867                                                                                                                                                                                                                                                                                                                                                                                                                                                                                                                                                                                                                                                                                                                                                                                                                                                                                                                                                                                                                                                                                                                                                                                                                                                                                                                                                                                                                                                                                                                                                                                                                                                                                                                                                                                                                                                                                                                                                                                                                                                                                                                                                                                                                                                                                                                                                                                                                                                                                                                                                                                                                                                                                                                                                                                                                                                                                                                                                                                                                                                                                                                                                                                                                                                                                                                                                                                                                                                                                                                                                                                                                                                                                                                                                                                                                                                                                                                                                                                                                                                                                                                                                                                                                                                                                                                                                                                                                                                                                                                                                                                                                                                                                                                                                                                                                                                                                                                                                                                                                                                                                                                                                                                                                                                                                                                                                                                                                                                                                                                                                                                                                                                                                                                                                                                                                                                                                                                                                                                                                                                                                                                                                                                                                                                                                                                                                                                                                                                                                                                                                                                                                                                                                                                                                                                                                                                                                                                                                                                                                                                                                                                                                                                                                                                                                                                                                                                                                                                                                                                                                                                                                                                                                                                                 | CSIR-Centre for Cellular and Molecular Biology                                                                 | CSIR-Centre for Cellular and Molecular Biology                             | M Soujanya Reddy, Nikhil Hajirnis, Pratheesa Maccha, Namami Gaur, Sakshi Shambhavi, Lamuk Zaveri, Shagufa Khan, Tulasi Nagabandan, Purushotham Vodnala, Payel Mukherjee, Sofia Banu, Priya Singh, Onkar Kulcar, Dhivya Vedagiri, Divya Gupta, Vishal Sah, Santes Khoskar Kuncha, Krishnan Harinivas Harshan, Archana Bharadwaj Siva, Karthik Bhadraj Tallapaka, Zeba Rizvi, Zuberwasim Sayyad, Kakade Aishwarya Arun, Amrutha H C, Ananga Ghosh, Rakshak K Mishra, Divya Tej Sowpati                                                                                  |
| EPI_ISL_528919                                                                                                                                                                                                                                                                                                                                                                                                                                                                                                                                                                                                                                                                                                                                                                                                                                                                                                                                                                                                                                                                                                                                                                                                                                                                                                                                                                                                                                                                                                                                                                                                                                                                                                                                                                                                                                                                                                                                                                                                                                                                                                                                                                                                                                                                                                                                                                                                                                                                                                                                                                                                                                                                                                                                                                                                                                                                                                                                                                                                                                                                                                                                                                                                                                                                                                                                                                                                                                                                                                                                                                                                                                                                                                                                                                                                                                                                                                                                                                                                                                                                                                                                                                                                                                                                                                                                                                                                                                                                                                                                                                                                                                                                                                                                                                                                                                                                                                                                                                                                                                                                                                                                                                                                                                                                                                                                                                                                                                                                                                                                                                                                                                                                                                                                                                                                                                                                                                                                                                                                                                                                                                                                                                                                                                                                                                                                                                                                                                                                                                                                                                                                                                                                                                                                                                                                                                                                                                                                                                                                                                                                                                                                                                                                                                                                                                                                                                                                                                                                                                                                                                                                                                                                                                                                                 | Ospedale Civile S. Liberatore-Atri                                                                             | Istituto Zooprofilattico Sperimentale dell'Abruzzo e Molise "G.Caporale"   | Lorusso A, Marcelli M, Di Domenico M, Curini V, Ancora M, Cammà C, Rinaldi A, Mangone I, Di Pasquale A, Puglia I, Savini G.                                                                                                                                                                                                                                                                                                                                                                                                                                           |
| EPI_ISL_528920, EPI_ISL_528921                                                                                                                                                                                                                                                                                                                                                                                                                                                                                                                                                                                                                                                                                                                                                                                                                                                                                                                                                                                                                                                                                                                                                                                                                                                                                                                                                                                                                                                                                                                                                                                                                                                                                                                                                                                                                                                                                                                                                                                                                                                                                                                                                                                                                                                                                                                                                                                                                                                                                                                                                                                                                                                                                                                                                                                                                                                                                                                                                                                                                                                                                                                                                                                                                                                                                                                                                                                                                                                                                                                                                                                                                                                                                                                                                                                                                                                                                                                                                                                                                                                                                                                                                                                                                                                                                                                                                                                                                                                                                                                                                                                                                                                                                                                                                                                                                                                                                                                                                                                                                                                                                                                                                                                                                                                                                                                                                                                                                                                                                                                                                                                                                                                                                                                                                                                                                                                                                                                                                                                                                                                                                                                                                                                                                                                                                                                                                                                                                                                                                                                                                                                                                                                                                                                                                                                                                                                                                                                                                                                                                                                                                                                                                                                                                                                                                                                                                                                                                                                                                                                                                                                                                                                                                                                                 | Presidio Ospedaliero "Santo Spirito"-Pescara                                                                   | Istituto Zooprofilattico Sperimentale dell'Abruzzo e Molise "G.Caporale"   | Lorusso A, Marcelli M, Di Domenico M, Curini V, Ancora M, Cammà C, Rinaldi A, Mangone I, Di Pasquale A, Puglia I, Savini G.                                                                                                                                                                                                                                                                                                                                                                                                                                           |
| EPI_ISL_528922                                                                                                                                                                                                                                                                                                                                                                                                                                                                                                                                                                                                                                                                                                                                                                                                                                                                                                                                                                                                                                                                                                                                                                                                                                                                                                                                                                                                                                                                                                                                                                                                                                                                                                                                                                                                                                                                                                                                                                                                                                                                                                                                                                                                                                                                                                                                                                                                                                                                                                                                                                                                                                                                                                                                                                                                                                                                                                                                                                                                                                                                                                                                                                                                                                                                                                                                                                                                                                                                                                                                                                                                                                                                                                                                                                                                                                                                                                                                                                                                                                                                                                                                                                                                                                                                                                                                                                                                                                                                                                                                                                                                                                                                                                                                                                                                                                                                                                                                                                                                                                                                                                                                                                                                                                                                                                                                                                                                                                                                                                                                                                                                                                                                                                                                                                                                                                                                                                                                                                                                                                                                                                                                                                                                                                                                                                                                                                                                                                                                                                                                                                                                                                                                                                                                                                                                                                                                                                                                                                                                                                                                                                                                                                                                                                                                                                                                                                                                                                                                                                                                                                                                                                                                                                                                                 | Ospedale "Giuseppe Mazzini"-Teramo                                                                             | Istituto Zooprofilattico Sperimentale dell'Abruzzo e Molise "G.Caporale"   | Lorusso A, Marcelli M, Di Domenico M, Curini V, Ancora M, Cammà C, Rinaldi A, Mangone I, Di Pasquale A, Puglia I, Savini G.                                                                                                                                                                                                                                                                                                                                                                                                                                           |
| EPI_ISL_528923                                                                                                                                                                                                                                                                                                                                                                                                                                                                                                                                                                                                                                                                                                                                                                                                                                                                                                                                                                                                                                                                                                                                                                                                                                                                                                                                                                                                                                                                                                                                                                                                                                                                                                                                                                                                                                                                                                                                                                                                                                                                                                                                                                                                                                                                                                                                                                                                                                                                                                                                                                                                                                                                                                                                                                                                                                                                                                                                                                                                                                                                                                                                                                                                                                                                                                                                                                                                                                                                                                                                                                                                                                                                                                                                                                                                                                                                                                                                                                                                                                                                                                                                                                                                                                                                                                                                                                                                                                                                                                                                                                                                                                                                                                                                                                                                                                                                                                                                                                                                                                                                                                                                                                                                                                                                                                                                                                                                                                                                                                                                                                                                                                                                                                                                                                                                                                                                                                                                                                                                                                                                                                                                                                                                                                                                                                                                                                                                                                                                                                                                                                                                                                                                                                                                                                                                                                                                                                                                                                                                                                                                                                                                                                                                                                                                                                                                                                                                                                                                                                                                                                                                                                                                                                                                                 | Ospedale Civile S. Liberatore-Atri                                                                             | Istituto Zooprofilattico Sperimentale dell'Abruzzo e Molise "G.Caporale"   | Lorusso A, Marcelli M, Di Domenico M, Curini V, Ancora M, Cammà C, Rinaldi A, Mangone I, Di Pasquale A, Puglia I, Savini G.                                                                                                                                                                                                                                                                                                                                                                                                                                           |
| EPI_ISL_528924                                                                                                                                                                                                                                                                                                                                                                                                                                                                                                                                                                                                                                                                                                                                                                                                                                                                                                                                                                                                                                                                                                                                                                                                                                                                                                                                                                                                                                                                                                                                                                                                                                                                                                                                                                                                                                                                                                                                                                                                                                                                                                                                                                                                                                                                                                                                                                                                                                                                                                                                                                                                                                                                                                                                                                                                                                                                                                                                                                                                                                                                                                                                                                                                                                                                                                                                                                                                                                                                                                                                                                                                                                                                                                                                                                                                                                                                                                                                                                                                                                                                                                                                                                                                                                                                                                                                                                                                                                                                                                                                                                                                                                                                                                                                                                                                                                                                                                                                                                                                                                                                                                                                                                                                                                                                                                                                                                                                                                                                                                                                                                                                                                                                                                                                                                                                                                                                                                                                                                                                                                                                                                                                                                                                                                                                                                                                                                                                                                                                                                                                                                                                                                                                                                                                                                                                                                                                                                                                                                                                                                                                                                                                                                                                                                                                                                                                                                                                                                                                                                                                                                                                                                                                                                                                                 | Ospedale "Giuseppe Mazzini"-Teramo                                                                             | Istituto Zooprofilattico Sperimentale dell'Abruzzo e Molise "G.Caporale"   | Lorusso A, Marcelli M, Di Domenico M, Curini V, Ancora M, Cammà C, Rinaldi A, Mangone I, Di Pasquale A, Puglia I, Savini G.                                                                                                                                                                                                                                                                                                                                                                                                                                           |
| EPI_ISL_528925                                                                                                                                                                                                                                                                                                                                                                                                                                                                                                                                                                                                                                                                                                                                                                                                                                                                                                                                                                                                                                                                                                                                                                                                                                                                                                                                                                                                                                                                                                                                                                                                                                                                                                                                                                                                                                                                                                                                                                                                                                                                                                                                                                                                                                                                                                                                                                                                                                                                                                                                                                                                                                                                                                                                                                                                                                                                                                                                                                                                                                                                                                                                                                                                                                                                                                                                                                                                                                                                                                                                                                                                                                                                                                                                                                                                                                                                                                                                                                                                                                                                                                                                                                                                                                                                                                                                                                                                                                                                                                                                                                                                                                                                                                                                                                                                                                                                                                                                                                                                                                                                                                                                                                                                                                                                                                                                                                                                                                                                                                                                                                                                                                                                                                                                                                                                                                                                                                                                                                                                                                                                                                                                                                                                                                                                                                                                                                                                                                                                                                                                                                                                                                                                                                                                                                                                                                                                                                                                                                                                                                                                                                                                                                                                                                                                                                                                                                                                                                                                                                                                                                                                                                                                                                                                                 | Ospedale Regionale San Salvatore-L'Aquila                                                                      | Istituto Zooprofilattico Sperimentale dell'Abruzzo e Molise "G.Caporale"   | Lorusso A, Marcelli M, Di Domenico M, Curini V, Ancora M, Cammà C, Rinaldi A, Mangone I, Di Pasquale A, Puglia I, Savini G.                                                                                                                                                                                                                                                                                                                                                                                                                                           |
| EPI_ISL_528926, EPI_ISL_528927,                                                                                                                                                                                                                                                                                                                                                                                                                                                                                                                                                                                                                                                                                                                                                                                                                                                                                                                                                                                                                                                                                                                                                                                                                                                                                                                                                                                                                                                                                                                                                                                                                                                                                                                                                                                                                                                                                                                                                                                                                                                                                                                                                                                                                                                                                                                                                                                                                                                                                                                                                                                                                                                                                                                                                                                                                                                                                                                                                                                                                                                                                                                                                                                                                                                                                                                                                                                                                                                                                                                                                                                                                                                                                                                                                                                                                                                                                                                                                                                                                                                                                                                                                                                                                                                                                                                                                                                                                                                                                                                                                                                                                                                                                                                                                                                                                                                                                                                                                                                                                                                                                                                                                                                                                                                                                                                                                                                                                                                                                                                                                                                                                                                                                                                                                                                                                                                                                                                                                                                                                                                                                                                                                                                                                                                                                                                                                                                                                                                                                                                                                                                                                                                                                                                                                                                                                                                                                                                                                                                                                                                                                                                                                                                                                                                                                                                                                                                                                                                                                                                                                                                                                                                                                                                                | Ospedale "Giuseppe Mazzini"-Teramo                                                                             | Istituto Zooprofilattico Sperimentale dell'Abruzzo e Molise                | Lorusso A, Marcelli M, Di Domenico M, Curini V, Ancora M, Cammà C, Rinaldi A, Mangone I, Di Pasquale A, Puglia I, Savini G.                                                                                                                                                                                                                                                                                                                                                                                                                                           |

|                                                                                                                                                                                                                                                                                                                                                                                                                                                                                                                                                                                                                                                                                                                                                                                                                                                                                                                                                                                                                                                |                                                                                                             |                                                                                                             |                                                                                                                                                                                                                                                                                                                                                                                           |                                                                                                                                                                                                                                                                                                        |
|------------------------------------------------------------------------------------------------------------------------------------------------------------------------------------------------------------------------------------------------------------------------------------------------------------------------------------------------------------------------------------------------------------------------------------------------------------------------------------------------------------------------------------------------------------------------------------------------------------------------------------------------------------------------------------------------------------------------------------------------------------------------------------------------------------------------------------------------------------------------------------------------------------------------------------------------------------------------------------------------------------------------------------------------|-------------------------------------------------------------------------------------------------------------|-------------------------------------------------------------------------------------------------------------|-------------------------------------------------------------------------------------------------------------------------------------------------------------------------------------------------------------------------------------------------------------------------------------------------------------------------------------------------------------------------------------------|--------------------------------------------------------------------------------------------------------------------------------------------------------------------------------------------------------------------------------------------------------------------------------------------------------|
| EPI_ISL_528928                                                                                                                                                                                                                                                                                                                                                                                                                                                                                                                                                                                                                                                                                                                                                                                                                                                                                                                                                                                                                                 |                                                                                                             | "G.Caporale"                                                                                                |                                                                                                                                                                                                                                                                                                                                                                                           |                                                                                                                                                                                                                                                                                                        |
| EPI_ISL_528929                                                                                                                                                                                                                                                                                                                                                                                                                                                                                                                                                                                                                                                                                                                                                                                                                                                                                                                                                                                                                                 | Ospedale Civile S. Liberatore-Atri                                                                          | Istituto Zooprofilattico Sperimentale dell'Abruzzo e Molise "G.Caporale"                                    | Lorusso A, Marcacci M, Di Domenico M, Curini V, Ancora M, Cammà C, Rinaldi A, Mangone I, Di Pasquale A, Puglia I, Savini G.                                                                                                                                                                                                                                                               |                                                                                                                                                                                                                                                                                                        |
| EPI_ISL_528934, EPI_ISL_528935, EPI_ISL_528936, EPI_ISL_528937, EPI_ISL_528938, EPI_ISL_528939, EPI_ISL_528940, EPI_ISL_528941, EPI_ISL_528942, EPI_ISL_528943, EPI_ISL_528944, EPI_ISL_528945, EPI_ISL_528946, EPI_ISL_528947, EPI_ISL_528948, EPI_ISL_528949                                                                                                                                                                                                                                                                                                                                                                                                                                                                                                                                                                                                                                                                                                                                                                                 | see above                                                                                                   | Agenzia di Tutela della Salute di Bergamo                                                                   | Istituto Zooprofilattico Sperimentale dell'Abruzzo e Molise "G.Caporale"                                                                                                                                                                                                                                                                                                                  | Lorusso A, Marcacci M, Di Domenico M, Curini V, Ancora M, Cammà C, Rinaldi A, Mangone I, Di Pasquale A, Puglia I, Savini G.                                                                                                                                                                            |
| EPI_ISL_528990                                                                                                                                                                                                                                                                                                                                                                                                                                                                                                                                                                                                                                                                                                                                                                                                                                                                                                                                                                                                                                 | Ospedale Civile Maria SS. dello Splendore                                                                   | Istituto Zooprofilattico Sperimentale dell'Abruzzo e Molise "G.Caporale"                                    | Lorusso A, Marcacci M, Di Domenico M, Curini V, Ancora M, Cammà C, Rinaldi A, Mangone I, Di Pasquale A, Puglia I, Savini G.                                                                                                                                                                                                                                                               |                                                                                                                                                                                                                                                                                                        |
| EPI_ISL_528991, EPI_ISL_528992                                                                                                                                                                                                                                                                                                                                                                                                                                                                                                                                                                                                                                                                                                                                                                                                                                                                                                                                                                                                                 | Ospedale SS Annunziata-Sulmona                                                                              | Istituto Zooprofilattico Sperimentale dell'Abruzzo e Molise "G.Caporale"                                    | Lorusso A, Marcacci M, Di Domenico M, Curini V, Ancora M, Cammà C, Rinaldi A, Mangone I, Di Pasquale A, Puglia I, Savini G.                                                                                                                                                                                                                                                               |                                                                                                                                                                                                                                                                                                        |
| EPI_ISL_528993                                                                                                                                                                                                                                                                                                                                                                                                                                                                                                                                                                                                                                                                                                                                                                                                                                                                                                                                                                                                                                 | Ospedale Civile S. Liberatore-Atri                                                                          | Istituto Zooprofilattico Sperimentale dell'Abruzzo e Molise "G.Caporale"                                    | Lorusso A, Marcacci M, Di Domenico M, Curini V, Ancora M, Cammà C, Rinaldi A, Mangone I, Di Pasquale A, Puglia I, Savini G.                                                                                                                                                                                                                                                               |                                                                                                                                                                                                                                                                                                        |
| EPI_ISL_528994, EPI_ISL_528995, EPI_ISL_528996, EPI_ISL_528997, EPI_ISL_528998, EPI_ISL_528999, EPI_ISL_529000, EPI_ISL_529001, EPI_ISL_529002, EPI_ISL_529003, EPI_ISL_529004, EPI_ISL_529005                                                                                                                                                                                                                                                                                                                                                                                                                                                                                                                                                                                                                                                                                                                                                                                                                                                 | see above                                                                                                   | Servizio di igiene epidemiologia e sanità pubblica (SIESP)-Chieti                                           | Istituto Zooprofilattico Sperimentale dell'Abruzzo e Molise "G.Caporale"                                                                                                                                                                                                                                                                                                                  | Lorusso A, Marcacci M, Di Domenico M, Curini V, Ancora M, Cammà C, Rinaldi A, Mangone I, Di Pasquale A, Puglia I, Savini G.                                                                                                                                                                            |
| EPI_ISL_529006                                                                                                                                                                                                                                                                                                                                                                                                                                                                                                                                                                                                                                                                                                                                                                                                                                                                                                                                                                                                                                 | Servizio di igiene e sanità pubblica (SIESP)-Teramo                                                         | Istituto Zooprofilattico Sperimentale dell'Abruzzo e Molise "G.Caporale"                                    | Lorusso A, Marcacci M, Di Domenico M, Curini V, Ancora M, Cammà C, Rinaldi A, Mangone I, Di Pasquale A, Puglia I, Savini G.                                                                                                                                                                                                                                                               |                                                                                                                                                                                                                                                                                                        |
| EPI_ISL_529007                                                                                                                                                                                                                                                                                                                                                                                                                                                                                                                                                                                                                                                                                                                                                                                                                                                                                                                                                                                                                                 | Ospedale Civile S. Liberatore-Atri                                                                          | Istituto Zooprofilattico Sperimentale dell'Abruzzo e Molise "G.Caporale"                                    | Lorusso A, Marcacci M, Di Domenico M, Curini V, Ancora M, Cammà C, Rinaldi A, Mangone I, Di Pasquale A, Puglia I, Savini G.                                                                                                                                                                                                                                                               |                                                                                                                                                                                                                                                                                                        |
| EPI_ISL_529008                                                                                                                                                                                                                                                                                                                                                                                                                                                                                                                                                                                                                                                                                                                                                                                                                                                                                                                                                                                                                                 | Servizio di igiene e sanità pubblica (SIESP)-Teramo                                                         | Istituto Zooprofilattico Sperimentale dell'Abruzzo e Molise "G.Caporale"                                    | Lorusso A, Marcacci M, Di Domenico M, Curini V, Ancora M, Cammà C, Rinaldi A, Mangone I, Di Pasquale A, Puglia I, Savini G.                                                                                                                                                                                                                                                               |                                                                                                                                                                                                                                                                                                        |
| EPI_ISL_529009                                                                                                                                                                                                                                                                                                                                                                                                                                                                                                                                                                                                                                                                                                                                                                                                                                                                                                                                                                                                                                 | Ospedale Civile S. Liberatore-Atri                                                                          | Istituto Zooprofilattico Sperimentale dell'Abruzzo e Molise "G.Caporale"                                    | Lorusso A, Marcacci M, Di Domenico M, Curini V, Ancora M, Cammà C, Rinaldi A, Mangone I, Di Pasquale A, Puglia I, Savini G.                                                                                                                                                                                                                                                               |                                                                                                                                                                                                                                                                                                        |
| EPI_ISL_529010, EPI_ISL_529011, EPI_ISL_529012                                                                                                                                                                                                                                                                                                                                                                                                                                                                                                                                                                                                                                                                                                                                                                                                                                                                                                                                                                                                 | Servizio Igiene Epidemiologia e Sanità Pubblica (SIESP)-L'Aquila                                            | Istituto Zooprofilattico Sperimentale dell'Abruzzo e Molise "G.Caporale"                                    | Lorusso A, Marcacci M, Di Domenico M, Curini V, Ancora M, Cammà C, Rinaldi A, Mangone I, Di Pasquale A, Puglia I, Savini G.                                                                                                                                                                                                                                                               |                                                                                                                                                                                                                                                                                                        |
| EPI_ISL_529013                                                                                                                                                                                                                                                                                                                                                                                                                                                                                                                                                                                                                                                                                                                                                                                                                                                                                                                                                                                                                                 | Presidio Ospedaliero "S.Filippo e Nicola"-Avezzano                                                          | Istituto Zooprofilattico Sperimentale dell'Abruzzo e Molise "G.Caporale"                                    | Lorusso A, Marcacci M, Di Domenico M, Curini V, Ancora M, Cammà C, Rinaldi A, Mangone I, Di Pasquale A, Puglia I, Savini G.                                                                                                                                                                                                                                                               |                                                                                                                                                                                                                                                                                                        |
| EPI_ISL_529014, EPI_ISL_529015                                                                                                                                                                                                                                                                                                                                                                                                                                                                                                                                                                                                                                                                                                                                                                                                                                                                                                                                                                                                                 | Ospedale "Ss. Annunziata"                                                                                   | Istituto Zooprofilattico Sperimentale dell'Abruzzo e Molise "G.Caporale"                                    | Lorusso A, Marcacci M, Di Domenico M, Curini V, Ancora M, Cammà C, Rinaldi A, Mangone I, Di Pasquale A, Puglia I, Savini G.                                                                                                                                                                                                                                                               |                                                                                                                                                                                                                                                                                                        |
| EPI_ISL_529016                                                                                                                                                                                                                                                                                                                                                                                                                                                                                                                                                                                                                                                                                                                                                                                                                                                                                                                                                                                                                                 | Ospedale SS Annunziata-Sulmona                                                                              | Istituto Zooprofilattico Sperimentale dell'Abruzzo e Molise "G.Caporale"                                    | Lorusso A, Marcacci M, Di Domenico M, Curini V, Ancora M, Cammà C, Rinaldi A, Mangone I, Di Pasquale A, Puglia I, Savini G.                                                                                                                                                                                                                                                               |                                                                                                                                                                                                                                                                                                        |
| EPI_ISL_529017                                                                                                                                                                                                                                                                                                                                                                                                                                                                                                                                                                                                                                                                                                                                                                                                                                                                                                                                                                                                                                 | RSA San Raffaele Sulmona                                                                                    | Istituto Zooprofilattico Sperimentale dell'Abruzzo e Molise "G.Caporale"                                    | Lorusso A, Marcacci M, Di Domenico M, Curini V, Ancora M, Cammà C, Rinaldi A, Mangone I, Di Pasquale A, Puglia I, Savini G.                                                                                                                                                                                                                                                               |                                                                                                                                                                                                                                                                                                        |
| EPI_ISL_529018                                                                                                                                                                                                                                                                                                                                                                                                                                                                                                                                                                                                                                                                                                                                                                                                                                                                                                                                                                                                                                 | Ospedale "Giuseppe Mazzini"-Teramo                                                                          | Istituto Zooprofilattico Sperimentale dell'Abruzzo e Molise "G.Caporale"                                    | Lorusso A, Marcacci M, Di Domenico M, Curini V, Ancora M, Cammà C, Rinaldi A, Mangone I, Di Pasquale A, Puglia I, Savini G.                                                                                                                                                                                                                                                               |                                                                                                                                                                                                                                                                                                        |
| EPI_ISL_529019                                                                                                                                                                                                                                                                                                                                                                                                                                                                                                                                                                                                                                                                                                                                                                                                                                                                                                                                                                                                                                 | RSA/RP Villa San Giovanni - Gruppo Edos                                                                     | Istituto Zooprofilattico Sperimentale dell'Abruzzo e Molise "G.Caporale"                                    | Lorusso A, Marcacci M, Di Domenico M, Curini V, Ancora M, Cammà C, Rinaldi A, Mangone I, Di Pasquale A, Puglia I, Savini G.                                                                                                                                                                                                                                                               |                                                                                                                                                                                                                                                                                                        |
| EPI_ISL_529020, EPI_ISL_529021                                                                                                                                                                                                                                                                                                                                                                                                                                                                                                                                                                                                                                                                                                                                                                                                                                                                                                                                                                                                                 | Ospedale Civile S. Liberatore-Atri                                                                          | Istituto Zooprofilattico Sperimentale dell'Abruzzo e Molise "G.Caporale"                                    | Lorusso A, Marcacci M, Di Domenico M, Curini V, Ancora M, Cammà C, Rinaldi A, Mangone I, Di Pasquale A, Puglia I, Savini G.                                                                                                                                                                                                                                                               |                                                                                                                                                                                                                                                                                                        |
| EPI_ISL_529022                                                                                                                                                                                                                                                                                                                                                                                                                                                                                                                                                                                                                                                                                                                                                                                                                                                                                                                                                                                                                                 | Ospedale "Ss. Annunziata"                                                                                   | Istituto Zooprofilattico Sperimentale dell'Abruzzo e Molise "G.Caporale"                                    | Lorusso A, Marcacci M, Di Domenico M, Curini V, Ancora M, Cammà C, Rinaldi A, Mangone I, Di Pasquale A, Puglia I, Savini G.                                                                                                                                                                                                                                                               |                                                                                                                                                                                                                                                                                                        |
| EPI_ISL_529023, EPI_ISL_529024, EPI_ISL_529025                                                                                                                                                                                                                                                                                                                                                                                                                                                                                                                                                                                                                                                                                                                                                                                                                                                                                                                                                                                                 | Servizio di igiene epidemiologia e sanità pubblica (SIESP)-Chieti                                           | Istituto Zooprofilattico Sperimentale dell'Abruzzo e Molise "G.Caporale"                                    | Lorusso A, Marcacci M, Di Domenico M, Curini V, Ancora M, Cammà C, Rinaldi A, Mangone I, Di Pasquale A, Puglia I, Savini G.                                                                                                                                                                                                                                                               |                                                                                                                                                                                                                                                                                                        |
| EPI_ISL_529026                                                                                                                                                                                                                                                                                                                                                                                                                                                                                                                                                                                                                                                                                                                                                                                                                                                                                                                                                                                                                                 | Ospedale "Giuseppe Mazzini"-Teramo                                                                          | Istituto Zooprofilattico Sperimentale dell'Abruzzo e Molise "G.Caporale"                                    | Lorusso A, Marcacci M, Di Domenico M, Curini V, Ancora M, Cammà C, Rinaldi A, Mangone I, Di Pasquale A, Puglia I, Savini G.                                                                                                                                                                                                                                                               |                                                                                                                                                                                                                                                                                                        |
| EPI_ISL_529224, EPI_ISL_529225, EPI_ISL_529236, EPI_ISL_529257, EPI_ISL_529261, EPI_ISL_529265, EPI_ISL_529269, EPI_ISL_529283, EPI_ISL_529299, EPI_ISL_529445, EPI_ISL_529524, EPI_ISL_529656, EPI_ISL_529657, EPI_ISL_529658, EPI_ISL_529659, EPI_ISL_529660                                                                                                                                                                                                                                                                                                                                                                                                                                                                                                                                                                                                                                                                                                                                                                                 | see above                                                                                                   | Department of Pathology, University of Cambridge                                                            | COVID-19 Genomics UK (COG-UK) Consortium                                                                                                                                                                                                                                                                                                                                                  | Luke W Meredith, M. Estée Török, Myra Hosmillo, William L. Hamilton, Martin D. Curran, Theresa Feltwell, Grant Hall, Anna Yakovleva, Fahad A Khokhar, Charlotte J. Houldcroft, Laura G Caller, Aminu S. Jahun, Sarah L. Caddy, Yasmin Chaudhry, Maite Pinckert, Ian Goodfellow                         |
| EPI_ISL_530122, EPI_ISL_530123                                                                                                                                                                                                                                                                                                                                                                                                                                                                                                                                                                                                                                                                                                                                                                                                                                                                                                                                                                                                                 | University Hospital Basel, Clinical Virology                                                                | University Hospital Basel, Clinical Bacteriology                                                            | Madlen Stange, Alfredo Mari, Tim Roloff, Helena MB Seth-Smith, Michael Schweitzer, Myrta Brunner, Karoline Leuzinger, Kirstine K. Soegaard, Alexander Gensch, Sarah Tschudin-Sutter, Simon Fuchs, Julia Bielicki, Hans Pargger, Martin Siegemund, Christian Nicking, Roland Bingisser, Michael Osthoff, Stefano Bassetti, Rita Schneider-Sliwa, Manuel Battegay, Hans Hirsch, Adrian Egli |                                                                                                                                                                                                                                                                                                        |
| EPI_ISL_536398                                                                                                                                                                                                                                                                                                                                                                                                                                                                                                                                                                                                                                                                                                                                                                                                                                                                                                                                                                                                                                 | Lithuanian University of Health Sciences Hospital, Department of Laboratory Medicine                        | Lithuanian University of Health Sciences, Molecular cardiology lab.                                         | Lukas Zemaitis, Arnoldas Pautienius, Kamiile Tamauskaite, Dovydas Gecys, Vaiva Lesauskaite, Astra Vitkauskiene                                                                                                                                                                                                                                                                            |                                                                                                                                                                                                                                                                                                        |
| EPI_ISL_537691, EPI_ISL_537692, EPI_ISL_537693, EPI_ISL_537694, EPI_ISL_537695, EPI_ISL_537696, EPI_ISL_537697, EPI_ISL_537698, EPI_ISL_537699, EPI_ISL_537700, EPI_ISL_537701, EPI_ISL_537702, EPI_ISL_537703, EPI_ISL_537704, EPI_ISL_537705, EPI_ISL_537706, EPI_ISL_537707, EPI_ISL_537708, EPI_ISL_537709, EPI_ISL_537710, EPI_ISL_537711, EPI_ISL_537712, EPI_ISL_537713, EPI_ISL_537714, EPI_ISL_537715, EPI_ISL_537716, EPI_ISL_537717, EPI_ISL_537718, EPI_ISL_537719, EPI_ISL_537720, EPI_ISL_537721, EPI_ISL_537722, EPI_ISL_537723, EPI_ISL_537724, EPI_ISL_537725, EPI_ISL_537726, EPI_ISL_537727, EPI_ISL_537728, EPI_ISL_537788, EPI_ISL_537789, EPI_ISL_537790, EPI_ISL_537791, EPI_ISL_537792, EPI_ISL_537793, EPI_ISL_537794, EPI_ISL_537795, EPI_ISL_537796, EPI_ISL_537797, EPI_ISL_537798, EPI_ISL_537799, EPI_ISL_537800, EPI_ISL_537801, EPI_ISL_537802, EPI_ISL_537803, EPI_ISL_537804, EPI_ISL_537805, EPI_ISL_537806, EPI_ISL_537807, EPI_ISL_537808                                                                 | see above                                                                                                   | Hospital Universitario de Gran Canaria Dr. Negrín                                                           | SeqCOVID-SPAIN consortium/IBV(CSIC)                                                                                                                                                                                                                                                                                                                                                       | M. Carmen Pérez González, Francisco J. Chamizo López, Ana Bordes Benitez and SeqCOVID-SPAIN consortium                                                                                                                                                                                                 |
| EPI_ISL_538748, EPI_ISL_538749, EPI_ISL_538750, EPI_ISL_538751, EPI_ISL_538752, EPI_ISL_538753, EPI_ISL_538754, EPI_ISL_538755, EPI_ISL_538756, EPI_ISL_538757, EPI_ISL_538758, EPI_ISL_538759, EPI_ISL_538760, EPI_ISL_538761, EPI_ISL_538762, EPI_ISL_538763, EPI_ISL_538764, EPI_ISL_538765, EPI_ISL_538766, EPI_ISL_538767, EPI_ISL_538768, EPI_ISL_538769, EPI_ISL_538770, EPI_ISL_538771, EPI_ISL_538772, EPI_ISL_538773, EPI_ISL_538774, EPI_ISL_538775, EPI_ISL_538776, EPI_ISL_538777, EPI_ISL_538778, EPI_ISL_538779, EPI_ISL_538780, EPI_ISL_538781, EPI_ISL_538782, EPI_ISL_538783, EPI_ISL_538784, EPI_ISL_538785, EPI_ISL_538786, EPI_ISL_538787, EPI_ISL_538788, EPI_ISL_538789, EPI_ISL_538790, EPI_ISL_538791, EPI_ISL_538792, EPI_ISL_538793, EPI_ISL_538794, EPI_ISL_538795, EPI_ISL_538796, EPI_ISL_538797, EPI_ISL_538798, EPI_ISL_538799, EPI_ISL_538800, EPI_ISL_538801, EPI_ISL_538802, EPI_ISL_538803, EPI_ISL_538804, EPI_ISL_538805, EPI_ISL_538806, EPI_ISL_538807, EPI_ISL_538808, EPI_ISL_538809, EPI_ISL_538810 | see above                                                                                                   | Leeds Teaching Hospitals NHS Trust and Public Health England, National Infection Service (Leeds laboratory) | Wellcome Sanger Institute for the COVID-19 Genomics UK (COG-UK) consortium                                                                                                                                                                                                                                                                                                                | Louissa Macfarlane-Smith, Holli Carden, Katherine L. Harper, Antony Hale and Alex Alderton, Roberto Amato, Sonia Goncalves, Ewan Harrison, David K. Jackson, Ian Johnston, Dominic Kwiatkowski, Cordelia Langford, John Sillitoe on behalf of the Wellcome Sanger Institute COVID-19 Surveillance Team |
| EPI_ISL_538811                                                                                                                                                                                                                                                                                                                                                                                                                                                                                                                                                                                                                                                                                                                                                                                                                                                                                                                                                                                                                                 | Leeds Teaching Hospitals NHS Trust and Public Health England, National Infection Service (Leeds laboratory) | Wellcome Sanger Institute for the COVID-19 Genomics UK (COG-UK) Consortium                                  | Louissa Macfarlane-Smith, Holli Carden, Katherine L. Harper, Antony Hale and Alex Alderton, Roberto Amato, Sonia Goncalves, Ewan Harrison, David K. Jackson, Ian Johnston, Dominic Kwiatkowski, Cordelia Langford, John Sillitoe on behalf of the Wellcome Sanger Institute COVID-19 Surveillance Team                                                                                    |                                                                                                                                                                                                                                                                                                        |
| EPI_ISL_538812, EPI_ISL_538813, EPI_ISL_538814, EPI_ISL_538815, EPI_ISL_538816, EPI_ISL_538817                                                                                                                                                                                                                                                                                                                                                                                                                                                                                                                                                                                                                                                                                                                                                                                                                                                                                                                                                 | Leeds Teaching Hospitals NHS Trust and Public Health England, National Infection Service (Leeds laboratory) | Wellcome Sanger Institute for the COVID-19 Genomics UK (COG-UK) consortium                                  | Louissa Macfarlane-Smith, Holli Carden, Katherine L. Harper, Antony Hale and Alex Alderton, Roberto Amato, Sonia Goncalves, Ewan Harrison, David K. Jackson, Ian Johnston, Dominic Kwiatkowski, Cordelia Langford, John Sillitoe on behalf of the Wellcome Sanger Institute COVID-19 Surveillance Team                                                                                    |                                                                                                                                                                                                                                                                                                        |
| EPI_ISL_538818                                                                                                                                                                                                                                                                                                                                                                                                                                                                                                                                                                                                                                                                                                                                                                                                                                                                                                                                                                                                                                 | Leeds Teaching Hospitals NHS Trust and Public Health England, National Infection Service (Leeds laboratory) | Wellcome Sanger Institute for the COVID-19 Genomics UK (COG-UK) Consortium                                  | Louissa Macfarlane-Smith, Holli Carden, Katherine L. Harper, Antony Hale and Alex Alderton, Roberto Amato, Sonia Goncalves, Ewan Harrison, David K. Jackson, Ian Johnston, Dominic Kwiatkowski, Cordelia Langford, John Sillitoe on behalf of the Wellcome Sanger Institute COVID-19 Surveillance Team                                                                                    |                                                                                                                                                                                                                                                                                                        |





|                                                                                                                                                                                                                                                                                                                                                                                                                                                                                                                                                                                                                                                                                                                                                                                                                                                                                                                                                                                                                                                                                                                                                                                                                                                                                                                                                                                                                                                                                                                                                                                                                                                                                                                                                                                                                                                                                                                                                                                                                                                                                                                                                                                                                                                                                                                                                                                                                                                                                                                                                                                                                                                                                                                                                                                                                                                                                                                                                                                                                                                                                                                                                                                                                                                                                                                                                                                                                                                                                                                                                                                                                                                                                                                                                                                                                                                                                                                                                                                                                                                                                                                                                                                                                                                                                                                                                                                                                                                                                                                                                                                                                                                                                                                                                                                                                                                                                                                                                                                                                                                                                                                                                                                                                                                                                                                                                                                                                                                                                                                                                                                |                                                    |                                                                                      |                                                                              |                                                                                                                                                                                                                                                                                                                                                                                                                                                                                                          |
|--------------------------------------------------------------------------------------------------------------------------------------------------------------------------------------------------------------------------------------------------------------------------------------------------------------------------------------------------------------------------------------------------------------------------------------------------------------------------------------------------------------------------------------------------------------------------------------------------------------------------------------------------------------------------------------------------------------------------------------------------------------------------------------------------------------------------------------------------------------------------------------------------------------------------------------------------------------------------------------------------------------------------------------------------------------------------------------------------------------------------------------------------------------------------------------------------------------------------------------------------------------------------------------------------------------------------------------------------------------------------------------------------------------------------------------------------------------------------------------------------------------------------------------------------------------------------------------------------------------------------------------------------------------------------------------------------------------------------------------------------------------------------------------------------------------------------------------------------------------------------------------------------------------------------------------------------------------------------------------------------------------------------------------------------------------------------------------------------------------------------------------------------------------------------------------------------------------------------------------------------------------------------------------------------------------------------------------------------------------------------------------------------------------------------------------------------------------------------------------------------------------------------------------------------------------------------------------------------------------------------------------------------------------------------------------------------------------------------------------------------------------------------------------------------------------------------------------------------------------------------------------------------------------------------------------------------------------------------------------------------------------------------------------------------------------------------------------------------------------------------------------------------------------------------------------------------------------------------------------------------------------------------------------------------------------------------------------------------------------------------------------------------------------------------------------------------------------------------------------------------------------------------------------------------------------------------------------------------------------------------------------------------------------------------------------------------------------------------------------------------------------------------------------------------------------------------------------------------------------------------------------------------------------------------------------------------------------------------------------------------------------------------------------------------------------------------------------------------------------------------------------------------------------------------------------------------------------------------------------------------------------------------------------------------------------------------------------------------------------------------------------------------------------------------------------------------------------------------------------------------------------------------------------------------------------------------------------------------------------------------------------------------------------------------------------------------------------------------------------------------------------------------------------------------------------------------------------------------------------------------------------------------------------------------------------------------------------------------------------------------------------------------------------------------------------------------------------------------------------------------------------------------------------------------------------------------------------------------------------------------------------------------------------------------------------------------------------------------------------------------------------------------------------------------------------------------------------------------------------------------------------------------------------------------------------------------------|----------------------------------------------------|--------------------------------------------------------------------------------------|------------------------------------------------------------------------------|----------------------------------------------------------------------------------------------------------------------------------------------------------------------------------------------------------------------------------------------------------------------------------------------------------------------------------------------------------------------------------------------------------------------------------------------------------------------------------------------------------|
|                                                                                                                                                                                                                                                                                                                                                                                                                                                                                                                                                                                                                                                                                                                                                                                                                                                                                                                                                                                                                                                                                                                                                                                                                                                                                                                                                                                                                                                                                                                                                                                                                                                                                                                                                                                                                                                                                                                                                                                                                                                                                                                                                                                                                                                                                                                                                                                                                                                                                                                                                                                                                                                                                                                                                                                                                                                                                                                                                                                                                                                                                                                                                                                                                                                                                                                                                                                                                                                                                                                                                                                                                                                                                                                                                                                                                                                                                                                                                                                                                                                                                                                                                                                                                                                                                                                                                                                                                                                                                                                                                                                                                                                                                                                                                                                                                                                                                                                                                                                                                                                                                                                                                                                                                                                                                                                                                                                                                                                                                                                                                                                |                                                    |                                                                                      |                                                                              | Vodnala, Payel Mukherjee, Sofia Banu, Priya Singh, Onkar Kulkarni, Dhiviya Vedagiri, Divya Gupta, Vishal Sah, Santosh Kumar Kuncha, Krishnan Harinivas Harshan, Archana Bharadwaj Siva, Karthik Bharadwaj Tallapaka, Zeba Rizvi, Zuberwasim Sayyad, Kakade Aishwarya Arun, Amrutha H C, Ananga Ghosh, Rakesh K Mishra, Divya Tej Sowpati                                                                                                                                                                 |
| EPI_ISL_539680                                                                                                                                                                                                                                                                                                                                                                                                                                                                                                                                                                                                                                                                                                                                                                                                                                                                                                                                                                                                                                                                                                                                                                                                                                                                                                                                                                                                                                                                                                                                                                                                                                                                                                                                                                                                                                                                                                                                                                                                                                                                                                                                                                                                                                                                                                                                                                                                                                                                                                                                                                                                                                                                                                                                                                                                                                                                                                                                                                                                                                                                                                                                                                                                                                                                                                                                                                                                                                                                                                                                                                                                                                                                                                                                                                                                                                                                                                                                                                                                                                                                                                                                                                                                                                                                                                                                                                                                                                                                                                                                                                                                                                                                                                                                                                                                                                                                                                                                                                                                                                                                                                                                                                                                                                                                                                                                                                                                                                                                                                                                                                 | CSIR-Centre for Cellular and Molecular Biology     | CSIR-Centre for Cellular and Molecular Biology                                       |                                                                              | M Soujanya Reddy, Nikhil Hajirnis, Pratheusa Maccha, Payel Mukherjee, Sofia Banu, Priya Singh, Onkar Kulkarni, Tulasi Nagabandi, Namami Gaur, Sakshi Shambhavi, Lamuk Zaveri, Shaguftha Khan, Purushotham Vodnala, Dhiviya Vedagiri, Divya Gupta, Vishal Sah, Santosh Kumar Kuncha, Krishnan Harinivas Harshan, Archana Bharadwaj Siva, Karthik Bharadwaj Tallapaka, Kezia J Ann, Radhika Khandelwal, Roshan Maku Venkata, Shemin Mansuri, Sonu Uday, Rakesh K Mishra, Divya Tej Sowpati                 |
| EPI_ISL_539681                                                                                                                                                                                                                                                                                                                                                                                                                                                                                                                                                                                                                                                                                                                                                                                                                                                                                                                                                                                                                                                                                                                                                                                                                                                                                                                                                                                                                                                                                                                                                                                                                                                                                                                                                                                                                                                                                                                                                                                                                                                                                                                                                                                                                                                                                                                                                                                                                                                                                                                                                                                                                                                                                                                                                                                                                                                                                                                                                                                                                                                                                                                                                                                                                                                                                                                                                                                                                                                                                                                                                                                                                                                                                                                                                                                                                                                                                                                                                                                                                                                                                                                                                                                                                                                                                                                                                                                                                                                                                                                                                                                                                                                                                                                                                                                                                                                                                                                                                                                                                                                                                                                                                                                                                                                                                                                                                                                                                                                                                                                                                                 | CSIR-Centre for Cellular and Molecular Biology     | CSIR-Centre for Cellular and Molecular Biology                                       |                                                                              | M Soujanya Reddy, Nikhil Hajirnis, Pratheusa Maccha, Sakshi Shambhavi, Lamuk Zaveri, Shaguftha Khan, Namami Gaur, Tulasi Nagabandi, Purushotham Vodnala, Payel Mukherjee, Sofia Banu, Priya Singh, Onkar Kulkarni, Dhiviya Vedagiri, Divya Gupta, Vishal Sah, Santosh Kumar Kuncha, Krishnan Harinivas Harshan, Archana Bharadwaj Siva, Karthik Bharadwaj Tallapaka, G. Aditya Kumar, Koushick Sivakumar, Pooja Ramesh Gupta, Rajan Kumar Jha, Shraddha Vijay Lahoti, Rakesh K Mishra, Divya Tej Sowpati |
| EPI_ISL_539709                                                                                                                                                                                                                                                                                                                                                                                                                                                                                                                                                                                                                                                                                                                                                                                                                                                                                                                                                                                                                                                                                                                                                                                                                                                                                                                                                                                                                                                                                                                                                                                                                                                                                                                                                                                                                                                                                                                                                                                                                                                                                                                                                                                                                                                                                                                                                                                                                                                                                                                                                                                                                                                                                                                                                                                                                                                                                                                                                                                                                                                                                                                                                                                                                                                                                                                                                                                                                                                                                                                                                                                                                                                                                                                                                                                                                                                                                                                                                                                                                                                                                                                                                                                                                                                                                                                                                                                                                                                                                                                                                                                                                                                                                                                                                                                                                                                                                                                                                                                                                                                                                                                                                                                                                                                                                                                                                                                                                                                                                                                                                                 | CSIR-Centre for Cellular and Molecular Biology     | CSIR-Centre for Cellular and Molecular Biology                                       |                                                                              | M Soujanya Reddy, Nikhil Hajirnis, Pratheusa Maccha, Namami Gaur, Sakshi Shambhavi, Lamuk Zaveri, Shaguftha Khan, Tulasi Nagabandi, Purushotham Vodnala, Payel Mukherjee, Sofia Banu, Priya Singh, Onkar Kulkarni, Dhiviya Vedagiri, Divya Gupta, Vishal Sah, Santosh Kumar Kuncha, Krishnan Harinivas Harshan, Archana Bharadwaj Siva, Karthik Bharadwaj Tallapaka, Zeba Rizvi, Zuberwasim Sayyad, Kakade Aishwarya Arun, Amrutha H C, Ananga Ghosh, Rakesh K Mishra, Divya Tej Sowpati                 |
| EPI_ISL_539710                                                                                                                                                                                                                                                                                                                                                                                                                                                                                                                                                                                                                                                                                                                                                                                                                                                                                                                                                                                                                                                                                                                                                                                                                                                                                                                                                                                                                                                                                                                                                                                                                                                                                                                                                                                                                                                                                                                                                                                                                                                                                                                                                                                                                                                                                                                                                                                                                                                                                                                                                                                                                                                                                                                                                                                                                                                                                                                                                                                                                                                                                                                                                                                                                                                                                                                                                                                                                                                                                                                                                                                                                                                                                                                                                                                                                                                                                                                                                                                                                                                                                                                                                                                                                                                                                                                                                                                                                                                                                                                                                                                                                                                                                                                                                                                                                                                                                                                                                                                                                                                                                                                                                                                                                                                                                                                                                                                                                                                                                                                                                                 | CSIR-Centre for Cellular and Molecular Biology     | CSIR-Centre for Cellular and Molecular Biology                                       |                                                                              | M Soujanya Reddy, Nikhil Hajirnis, Pratheusa Maccha, Payel Mukherjee, Sofia Banu, Priya Singh, Onkar Kulkarni, Tulasi Nagabandi, Namami Gaur, Sakshi Shambhavi, Lamuk Zaveri, Shaguftha Khan, Purushotham Vodnala, Dhiviya Vedagiri, Divya Gupta, Vishal Sah, Santosh Kumar Kuncha, Krishnan Harinivas Harshan, Archana Bharadwaj Siva, Karthik Bharadwaj Tallapaka, Kezia J Ann, Radhika Khandelwal, Roshan Maku Venkata, Shemin Mansuri, Sonu Uday, Rakesh K Mishra, Divya Tej Sowpati                 |
| EPI_ISL_539711                                                                                                                                                                                                                                                                                                                                                                                                                                                                                                                                                                                                                                                                                                                                                                                                                                                                                                                                                                                                                                                                                                                                                                                                                                                                                                                                                                                                                                                                                                                                                                                                                                                                                                                                                                                                                                                                                                                                                                                                                                                                                                                                                                                                                                                                                                                                                                                                                                                                                                                                                                                                                                                                                                                                                                                                                                                                                                                                                                                                                                                                                                                                                                                                                                                                                                                                                                                                                                                                                                                                                                                                                                                                                                                                                                                                                                                                                                                                                                                                                                                                                                                                                                                                                                                                                                                                                                                                                                                                                                                                                                                                                                                                                                                                                                                                                                                                                                                                                                                                                                                                                                                                                                                                                                                                                                                                                                                                                                                                                                                                                                 | CSIR-Centre for Cellular and Molecular Biology     | CSIR-Centre for Cellular and Molecular Biology                                       |                                                                              | M Soujanya Reddy, Nikhil Hajirnis, Pratheusa Maccha, Sakshi Shambhavi, Lamuk Zaveri, Shaguftha Khan, Namami Gaur, Tulasi Nagabandi, Purushotham Vodnala, Payel Mukherjee, Sofia Banu, Priya Singh, Onkar Kulkarni, Dhiviya Vedagiri, Divya Gupta, Vishal Sah, Santosh Kumar Kuncha, Krishnan Harinivas Harshan, Archana Bharadwaj Siva, Karthik Bharadwaj Tallapaka, G. Aditya Kumar, Koushick Sivakumar, Pooja Ramesh Gupta, Rajan Kumar Jha, Shraddha Vijay Lahoti, Rakesh K Mishra, Divya Tej Sowpati |
| EPI_ISL_539739                                                                                                                                                                                                                                                                                                                                                                                                                                                                                                                                                                                                                                                                                                                                                                                                                                                                                                                                                                                                                                                                                                                                                                                                                                                                                                                                                                                                                                                                                                                                                                                                                                                                                                                                                                                                                                                                                                                                                                                                                                                                                                                                                                                                                                                                                                                                                                                                                                                                                                                                                                                                                                                                                                                                                                                                                                                                                                                                                                                                                                                                                                                                                                                                                                                                                                                                                                                                                                                                                                                                                                                                                                                                                                                                                                                                                                                                                                                                                                                                                                                                                                                                                                                                                                                                                                                                                                                                                                                                                                                                                                                                                                                                                                                                                                                                                                                                                                                                                                                                                                                                                                                                                                                                                                                                                                                                                                                                                                                                                                                                                                 | CSIR-Centre for Cellular and Molecular Biology     | CSIR-Centre for Cellular and Molecular Biology                                       |                                                                              | M Soujanya Reddy, Nikhil Hajirnis, Pratheusa Maccha, Namami Gaur, Sakshi Shambhavi, Lamuk Zaveri, Shaguftha Khan, Tulasi Nagabandi, Purushotham Vodnala, Payel Mukherjee, Sofia Banu, Priya Singh, Onkar Kulkarni, Dhiviya Vedagiri, Divya Gupta, Vishal Sah, Santosh Kumar Kuncha, Krishnan Harinivas Harshan, Archana Bharadwaj Siva, Karthik Bharadwaj Tallapaka, Zeba Rizvi, Zuberwasim Sayyad, Kakade Aishwarya Arun, Amrutha H C, Ananga Ghosh, Rakesh K Mishra, Divya Tej Sowpati                 |
| EPI_ISL_539740                                                                                                                                                                                                                                                                                                                                                                                                                                                                                                                                                                                                                                                                                                                                                                                                                                                                                                                                                                                                                                                                                                                                                                                                                                                                                                                                                                                                                                                                                                                                                                                                                                                                                                                                                                                                                                                                                                                                                                                                                                                                                                                                                                                                                                                                                                                                                                                                                                                                                                                                                                                                                                                                                                                                                                                                                                                                                                                                                                                                                                                                                                                                                                                                                                                                                                                                                                                                                                                                                                                                                                                                                                                                                                                                                                                                                                                                                                                                                                                                                                                                                                                                                                                                                                                                                                                                                                                                                                                                                                                                                                                                                                                                                                                                                                                                                                                                                                                                                                                                                                                                                                                                                                                                                                                                                                                                                                                                                                                                                                                                                                 | CSIR-Centre for Cellular and Molecular Biology     | CSIR-Centre for Cellular and Molecular Biology                                       |                                                                              | M Soujanya Reddy, Nikhil Hajirnis, Pratheusa Maccha, Payel Mukherjee, Sofia Banu, Priya Singh, Onkar Kulkarni, Tulasi Nagabandi, Namami Gaur, Sakshi Shambhavi, Lamuk Zaveri, Shaguftha Khan, Purushotham Vodnala, Dhiviya Vedagiri, Divya Gupta, Vishal Sah, Santosh Kumar Kuncha, Krishnan Harinivas Harshan, Archana Bharadwaj Siva, Karthik Bharadwaj Tallapaka, Kezia J Ann, Radhika Khandelwal, Roshan Maku Venkata, Shemin Mansuri, Sonu Uday, Rakesh K Mishra, Divya Tej Sowpati                 |
| EPI_ISL_539741                                                                                                                                                                                                                                                                                                                                                                                                                                                                                                                                                                                                                                                                                                                                                                                                                                                                                                                                                                                                                                                                                                                                                                                                                                                                                                                                                                                                                                                                                                                                                                                                                                                                                                                                                                                                                                                                                                                                                                                                                                                                                                                                                                                                                                                                                                                                                                                                                                                                                                                                                                                                                                                                                                                                                                                                                                                                                                                                                                                                                                                                                                                                                                                                                                                                                                                                                                                                                                                                                                                                                                                                                                                                                                                                                                                                                                                                                                                                                                                                                                                                                                                                                                                                                                                                                                                                                                                                                                                                                                                                                                                                                                                                                                                                                                                                                                                                                                                                                                                                                                                                                                                                                                                                                                                                                                                                                                                                                                                                                                                                                                 | CSIR-Centre for Cellular and Molecular Biology     | CSIR-Centre for Cellular and Molecular Biology                                       |                                                                              | M Soujanya Reddy, Nikhil Hajirnis, Pratheusa Maccha, Sakshi Shambhavi, Lamuk Zaveri, Shaguftha Khan, Namami Gaur, Tulasi Nagabandi, Purushotham Vodnala, Payel Mukherjee, Sofia Banu, Priya Singh, Onkar Kulkarni, Dhiviya Vedagiri, Divya Gupta, Vishal Sah, Santosh Kumar Kuncha, Krishnan Harinivas Harshan, Archana Bharadwaj Siva, Karthik Bharadwaj Tallapaka, G. Aditya Kumar, Koushick Sivakumar, Pooja Ramesh Gupta, Rajan Kumar Jha, Shraddha Vijay Lahoti, Rakesh K Mishra, Divya Tej Sowpati |
| EPI_ISL_541847, EPI_ISL_541848, EPI_ISL_541849, EPI_ISL_541850, EPI_ISL_541851, EPI_ISL_541852, EPI_ISL_541853, EPI_ISL_541854, EPI_ISL_541855, EPI_ISL_541856, EPI_ISL_541857, EPI_ISL_541858, EPI_ISL_541859, EPI_ISL_541860, EPI_ISL_541861, EPI_ISL_541862, EPI_ISL_541863, EPI_ISL_541864, EPI_ISL_541865, EPI_ISL_541866, EPI_ISL_541867, EPI_ISL_541868, EPI_ISL_541869, EPI_ISL_541870, EPI_ISL_541871, EPI_ISL_541872, EPI_ISL_541873, EPI_ISL_541874, EPI_ISL_541875, EPI_ISL_541876, EPI_ISL_541877                                                                                                                                                                                                                                                                                                                                                                                                                                                                                                                                                                                                                                                                                                                                                                                                                                                                                                                                                                                                                                                                                                                                                                                                                                                                                                                                                                                                                                                                                                                                                                                                                                                                                                                                                                                                                                                                                                                                                                                                                                                                                                                                                                                                                                                                                                                                                                                                                                                                                                                                                                                                                                                                                                                                                                                                                                                                                                                                                                                                                                                                                                                                                                                                                                                                                                                                                                                                                                                                                                                                                                                                                                                                                                                                                                                                                                                                                                                                                                                                                                                                                                                                                                                                                                                                                                                                                                                                                                                                                                                                                                                                                                                                                                                                                                                                                                                                                                                                                                                                                                                                 | see above                                          | Lithuanian University of Health Sciences Hospital, Department of Laboratory Medicine | Lithuanian University of Health Sciences, Laboratory of Molecular Cardiology | Lukas Zemaitis, Arnoldas Pautienius, Kamile Tamauskaite, Dovydas Gecys, Laura Pareckaitė, Vaiva Lesauskaite, Astra Vitkauskienė                                                                                                                                                                                                                                                                                                                                                                          |
| EPI_ISL_542486                                                                                                                                                                                                                                                                                                                                                                                                                                                                                                                                                                                                                                                                                                                                                                                                                                                                                                                                                                                                                                                                                                                                                                                                                                                                                                                                                                                                                                                                                                                                                                                                                                                                                                                                                                                                                                                                                                                                                                                                                                                                                                                                                                                                                                                                                                                                                                                                                                                                                                                                                                                                                                                                                                                                                                                                                                                                                                                                                                                                                                                                                                                                                                                                                                                                                                                                                                                                                                                                                                                                                                                                                                                                                                                                                                                                                                                                                                                                                                                                                                                                                                                                                                                                                                                                                                                                                                                                                                                                                                                                                                                                                                                                                                                                                                                                                                                                                                                                                                                                                                                                                                                                                                                                                                                                                                                                                                                                                                                                                                                                                                 | Walter Reed National Military Medical Center       | Naval Medical Research Center Biological Defense Research Directorate                |                                                                              | Logan J. Voegtly, Regina Z. Cer, Lindsay A. Glang, Francisco J. Malagon, Kyle A. Long, Derek Larson, Sterling L. Brodriak, Kimberly A Bishop-Lilly                                                                                                                                                                                                                                                                                                                                                       |
| EPI_ISL_561370, EPI_ISL_561371, EPI_ISL_561372                                                                                                                                                                                                                                                                                                                                                                                                                                                                                                                                                                                                                                                                                                                                                                                                                                                                                                                                                                                                                                                                                                                                                                                                                                                                                                                                                                                                                                                                                                                                                                                                                                                                                                                                                                                                                                                                                                                                                                                                                                                                                                                                                                                                                                                                                                                                                                                                                                                                                                                                                                                                                                                                                                                                                                                                                                                                                                                                                                                                                                                                                                                                                                                                                                                                                                                                                                                                                                                                                                                                                                                                                                                                                                                                                                                                                                                                                                                                                                                                                                                                                                                                                                                                                                                                                                                                                                                                                                                                                                                                                                                                                                                                                                                                                                                                                                                                                                                                                                                                                                                                                                                                                                                                                                                                                                                                                                                                                                                                                                                                 | Hospital Universitario de Gran Canaria Dr. Negrin  | SeqCOVID-SPAIN consortium/IBV(CSIC)                                                  |                                                                              | M. Carmen Pérez González, Francisco J. Chamizo López, Ana Bordes Benitez and SeqCOVID-SPAIN consortium                                                                                                                                                                                                                                                                                                                                                                                                   |
| EPI_ISL_578698, EPI_ISL_578704, EPI_ISL_578705, EPI_ISL_578706, EPI_ISL_578707, EPI_ISL_578708, EPI_ISL_578709, EPI_ISL_578710, EPI_ISL_578711, EPI_ISL_578712, EPI_ISL_578713, EPI_ISL_578714, EPI_ISL_578715, EPI_ISL_578716, EPI_ISL_578717, EPI_ISL_578718, EPI_ISL_578719, EPI_ISL_578720, EPI_ISL_578721, EPI_ISL_578722, EPI_ISL_578723, EPI_ISL_578724, EPI_ISL_578725, EPI_ISL_578726, EPI_ISL_578727                                                                                                                                                                                                                                                                                                                                                                                                                                                                                                                                                                                                                                                                                                                                                                                                                                                                                                                                                                                                                                                                                                                                                                                                                                                                                                                                                                                                                                                                                                                                                                                                                                                                                                                                                                                                                                                                                                                                                                                                                                                                                                                                                                                                                                                                                                                                                                                                                                                                                                                                                                                                                                                                                                                                                                                                                                                                                                                                                                                                                                                                                                                                                                                                                                                                                                                                                                                                                                                                                                                                                                                                                                                                                                                                                                                                                                                                                                                                                                                                                                                                                                                                                                                                                                                                                                                                                                                                                                                                                                                                                                                                                                                                                                                                                                                                                                                                                                                                                                                                                                                                                                                                                                 | see above                                          | LSUHS Emerging Viral Threat Laboratory                                               | Microbial Genome Sequencing Center                                           | Maarten Van Diest, Jeremy P. Kamil, Rona S. Scott, Malgorzata Bienkowska-Haba, Katarzyna Zwolinska, Andrew D. Yurochko, Christopher G. Kevil, Martin J. Sapp, Daniel J. Snyder, Vaughn S. Cooper, John A. Vanchiere                                                                                                                                                                                                                                                                                      |
| EPI_ISL_581668, EPI_ISL_581669, EPI_ISL_581670, EPI_ISL_581671, EPI_ISL_581672, EPI_ISL_581673, EPI_ISL_581674, EPI_ISL_581675, EPI_ISL_581676, EPI_ISL_581677, EPI_ISL_581678, EPI_ISL_581679, EPI_ISL_581680, EPI_ISL_581681, EPI_ISL_581682, EPI_ISL_581683, EPI_ISL_581684, EPI_ISL_581685, EPI_ISL_581686, EPI_ISL_581687, EPI_ISL_581688, EPI_ISL_581689, EPI_ISL_581690, EPI_ISL_581691, EPI_ISL_581692, EPI_ISL_581693, EPI_ISL_581694, EPI_ISL_581695, EPI_ISL_581696, EPI_ISL_581697, EPI_ISL_581698, EPI_ISL_581699, EPI_ISL_581700, EPI_ISL_581701, EPI_ISL_581702, EPI_ISL_581703, EPI_ISL_581704, EPI_ISL_581705, EPI_ISL_581706, EPI_ISL_581707, EPI_ISL_581708, EPI_ISL_581709, EPI_ISL_581710, EPI_ISL_581711, EPI_ISL_581712, EPI_ISL_581713, EPI_ISL_581714, EPI_ISL_581715, EPI_ISL_581716, EPI_ISL_581717, EPI_ISL_581718, EPI_ISL_581719, EPI_ISL_581720, EPI_ISL_581721, EPI_ISL_581722, EPI_ISL_581723, EPI_ISL_581724, EPI_ISL_581725, EPI_ISL_581726, EPI_ISL_581727, EPI_ISL_581728, EPI_ISL_581729, EPI_ISL_581730, EPI_ISL_581731, EPI_ISL_581732, EPI_ISL_581733, EPI_ISL_581734, EPI_ISL_581735, EPI_ISL_581736, EPI_ISL_581737, EPI_ISL_581738, EPI_ISL_581739, EPI_ISL_581740, EPI_ISL_581741, EPI_ISL_581742, EPI_ISL_581743, EPI_ISL_581744, EPI_ISL_581745, EPI_ISL_581746, EPI_ISL_581747, EPI_ISL_581748, EPI_ISL_581749, EPI_ISL_581750, EPI_ISL_581751, EPI_ISL_581752, EPI_ISL_581753, EPI_ISL_581754, EPI_ISL_581755, EPI_ISL_581756, EPI_ISL_581757, EPI_ISL_581758, EPI_ISL_581759, EPI_ISL_581760, EPI_ISL_581761, EPI_ISL_581762, EPI_ISL_581763, EPI_ISL_581764, EPI_ISL_581765, EPI_ISL_581766, EPI_ISL_581767, EPI_ISL_581768, EPI_ISL_581769, EPI_ISL_581770, EPI_ISL_581771, EPI_ISL_581772, EPI_ISL_581773, EPI_ISL_581774, EPI_ISL_581775, EPI_ISL_581776, EPI_ISL_581777, EPI_ISL_581778, EPI_ISL_581779, EPI_ISL_581780, EPI_ISL_581781, EPI_ISL_581782, EPI_ISL_581783, EPI_ISL_581784, EPI_ISL_581785, EPI_ISL_581786, EPI_ISL_581787, EPI_ISL_581788, EPI_ISL_581789, EPI_ISL_581790, EPI_ISL_581791, EPI_ISL_581792, EPI_ISL_581793, EPI_ISL_581794, EPI_ISL_581795, EPI_ISL_581796, EPI_ISL_581797, EPI_ISL_581798, EPI_ISL_581799, EPI_ISL_581800, EPI_ISL_581801, EPI_ISL_581802, EPI_ISL_581803, EPI_ISL_581804, EPI_ISL_581805, EPI_ISL_581806, EPI_ISL_581807, EPI_ISL_581808, EPI_ISL_581809, EPI_ISL_581810, EPI_ISL_581811, EPI_ISL_581812, EPI_ISL_581813, EPI_ISL_581814, EPI_ISL_581815, EPI_ISL_581816, EPI_ISL_581817, EPI_ISL_581818, EPI_ISL_581819, EPI_ISL_581820, EPI_ISL_581821, EPI_ISL_581822, EPI_ISL_581823, EPI_ISL_581824, EPI_ISL_581825, EPI_ISL_581826, EPI_ISL_581827, EPI_ISL_581828, EPI_ISL_581829, EPI_ISL_581830, EPI_ISL_581831, EPI_ISL_581832, EPI_ISL_581833, EPI_ISL_581834, EPI_ISL_581835, EPI_ISL_581836, EPI_ISL_581837, EPI_ISL_581838, EPI_ISL_581839, EPI_ISL_581840, EPI_ISL_581841, EPI_ISL_581842, EPI_ISL_581843, EPI_ISL_581844, EPI_ISL_581845, EPI_ISL_581846, EPI_ISL_581847, EPI_ISL_581848, EPI_ISL_581849, EPI_ISL_581850, EPI_ISL_581851, EPI_ISL_581852, EPI_ISL_581853, EPI_ISL_581854, EPI_ISL_581855, EPI_ISL_581856, EPI_ISL_581857, EPI_ISL_581858, EPI_ISL_581859, EPI_ISL_581860, EPI_ISL_581861, EPI_ISL_581862, EPI_ISL_581863, EPI_ISL_581864, EPI_ISL_581865, EPI_ISL_581866, EPI_ISL_581867, EPI_ISL_581868, EPI_ISL_581869, EPI_ISL_581870, EPI_ISL_581871, EPI_ISL_581872, EPI_ISL_581873, EPI_ISL_581874, EPI_ISL_581875, EPI_ISL_581876, EPI_ISL_581877, EPI_ISL_581878, EPI_ISL_581879, EPI_ISL_581880, EPI_ISL_581881, EPI_ISL_581882, EPI_ISL_581883, EPI_ISL_581884, EPI_ISL_581885, EPI_ISL_581886, EPI_ISL_581887, EPI_ISL_581888, EPI_ISL_581889, EPI_ISL_581890, EPI_ISL_581891, EPI_ISL_581892, EPI_ISL_581893, EPI_ISL_581894, EPI_ISL_581895, EPI_ISL_581896, EPI_ISL_581897, EPI_ISL_581898, EPI_ISL_581899, EPI_ISL_581900, EPI_ISL_581901, EPI_ISL_581902, EPI_ISL_581903, EPI_ISL_581904, EPI_ISL_581905, EPI_ISL_581906, EPI_ISL_581907, EPI_ISL_581908, EPI_ISL_581909, EPI_ISL_581910, EPI_ISL_581911, EPI_ISL_581912, EPI_ISL_581913, EPI_ISL_581914, EPI_ISL_581915, EPI_ISL_581916, EPI_ISL_581917, EPI_ISL_581918, EPI_ISL_581919, EPI_ISL_581920, EPI_ISL_581921, EPI_ISL_581922, EPI_ISL_581923, EPI_ISL_581924, EPI_ISL_581925, EPI_ISL_581926, EPI_ISL_581927, EPI_ISL_581928, EPI_ISL_581929, EPI_ISL_581930, EPI_ISL_581931, EPI_ISL_581932, EPI_ISL_581933, EPI_ISL_581934, EPI_ISL_581935, EPI_ISL_581936, EPI_ISL_581937, EPI_ISL_581938, EPI_ISL_581939, EPI_ISL_581940, EPI_ISL_581941, EPI_ISL_581942, EPI_ISL_581943, EPI_ISL_581944, EPI_ISL_581945, EPI_ISL_581946, EPI_ISL_581947, EPI_ISL_581948, EPI_ISL_581949, EPI_ISL_581950, EPI_ISL_581951, EPI_ISL_581952, EPI_ISL_581953, EPI_ISL_581954, EPI_ISL_581955, EPI_ISL_581956, EPI_ISL_581957, EPI_ISL_581958, EPI_ISL_581959, EPI_ISL_581960, EPI_ISL_581961, EPI_ISL_581962, EPI_ISL_581963, EPI_ISL_581964, EPI_ISL_581965, EPI_ISL_581966, EPI_ISL_581967, EPI_ISL_581968, EPI_ISL_581969, EPI_ISL_581970, EPI_ISL_581971, EPI_ISL_581972, EPI_ISL_581973, EPI_ISL_581974, EPI_ISL_581975, EPI_ISL_581976, EPI_ISL_581977, EPI_ISL_581978, EPI_ISL_581979, EPI_ISL_581980, EPI_ISL_581981, EPI_ISL_581982, EPI_ISL_581983, EPI_ISL_581984, EPI_ISL_581985, EPI_ISL_581986, EPI_ISL_581987, EPI_ISL_581988, EPI_ISL_581989, EPI_ISL_581990, EPI_ISL_581991, EPI_ISL_581992, EPI_ISL_581993, EPI_ISL_581994, EPI_ISL_581995, EPI_ISL_581996, EPI_ISL_581997, EPI_ISL_581998, EPI_ISL_581999, EPI_ISL_582000, EPI_ISL_582001, EPI_ISL_582002 | see above                                          | University Hospital Basel, Clinical Virology                                         | University Hospital Basel, Clinical Bacteriology                             | Madlen Stange, Alfredo Mari, Tim Roloff, Helena MB Seth-Smith, Michael Schweitzer, Myrta Brunner, Karoline Leuzinger, Kirstine K. Soegaard, Alexander Gensch, Sarah Tschudin-Sutter, Simon Fuchs, Julia Bielicki, Hans Pargger, Martin Siegemund, Christian Nickel, Roland Bingisser, Michael Osthoff, Stefano Bassetti, Rita Schneider-Sliwa, Manuel Bategay, Hans Hristic, Adrian Egli                                                                                                                 |
| EPI_ISL_582695, EPI_ISL_582696, EPI_ISL_582697, EPI_ISL_582698, EPI_ISL_582699, EPI_ISL_582700, EPI_ISL_582701, EPI_ISL_582702, EPI_ISL_582703, EPI_ISL_582704, EPI_ISL_582705, EPI_ISL_582706, EPI_ISL_582707, EPI_ISL_582708, EPI_ISL_582709, EPI_ISL_582710, EPI_ISL_582711, EPI_ISL_582712, EPI_ISL_582713, EPI_ISL_582714, EPI_ISL_582715, EPI_ISL_582716, EPI_ISL_582717, EPI_ISL_582718, EPI_ISL_582719, EPI_ISL_582720, EPI_ISL_582721, EPI_ISL_582722, EPI_ISL_582723, EPI_ISL_582724, EPI_ISL_582725, EPI_ISL_582726, EPI_ISL_582727, EPI_ISL_582728, EPI_ISL_582729, EPI_ISL_582730, EPI_ISL_582731, EPI_ISL_582732, EPI_ISL_582733, EPI_ISL_582734, EPI_ISL_582735, EPI_ISL_582736, EPI_ISL_582737, EPI_ISL_582738, EPI_ISL_582739, EPI_ISL_582740, EPI_ISL_582741, EPI_ISL_582742, EPI_ISL_582743, EPI_ISL_582744, EPI_ISL_582745, EPI_ISL_582746, EPI_ISL_582747, EPI_ISL_582748, EPI_ISL_582749, EPI_ISL_582750, EPI_ISL_582751, EPI_ISL_582752, EPI_ISL_582753, EPI_ISL_582754, EPI_ISL_582755, EPI_ISL_582756, EPI_ISL_582757, EPI_ISL_582758, EPI_ISL_582759, EPI_ISL_582760, EPI_ISL_582761, EPI_ISL_582762, EPI_ISL_582763, EPI_ISL_582764, EPI_ISL_582765, EPI_ISL_582766                                                                                                                                                                                                                                                                                                                                                                                                                                                                                                                                                                                                                                                                                                                                                                                                                                                                                                                                                                                                                                                                                                                                                                                                                                                                                                                                                                                                                                                                                                                                                                                                                                                                                                                                                                                                                                                                                                                                                                                                                                                                                                                                                                                                                                                                                                                                                                                                                                                                                                                                                                                                                                                                                                                                                                                                                                                                                                                                                                                                                                                                                                                                                                                                                                                                                                                                                                                                                                                                                                                                                                                                                                                                                                                                                                                                                                                                                                                                                                                                                                                                                                                                                                                                                                                                                                                                                                                 | see above                                          | Servicio de Microbiología, Hospital Universitario Cruces, Bilbao                     | SeqCOVID-SPAIN consortium/IBV(CSIC)                                          | Maitane Aranzamendi Zaldumbide and SeqCOVID-SPAIN consortium                                                                                                                                                                                                                                                                                                                                                                                                                                             |
| EPI_ISL_586514                                                                                                                                                                                                                                                                                                                                                                                                                                                                                                                                                                                                                                                                                                                                                                                                                                                                                                                                                                                                                                                                                                                                                                                                                                                                                                                                                                                                                                                                                                                                                                                                                                                                                                                                                                                                                                                                                                                                                                                                                                                                                                                                                                                                                                                                                                                                                                                                                                                                                                                                                                                                                                                                                                                                                                                                                                                                                                                                                                                                                                                                                                                                                                                                                                                                                                                                                                                                                                                                                                                                                                                                                                                                                                                                                                                                                                                                                                                                                                                                                                                                                                                                                                                                                                                                                                                                                                                                                                                                                                                                                                                                                                                                                                                                                                                                                                                                                                                                                                                                                                                                                                                                                                                                                                                                                                                                                                                                                                                                                                                                                                 | B.J. Medical College and Civil hospital, Ahmedabad | Gujarat Biotechnology Research Center                                                |                                                                              | Maharshi Pandya, Nidhi Patel, Nitin Savaliya, Raghawendra Kumar, Dinesh Kumar, Zuber Saiyed, Komal Patel, Labdhi Pandya, Afzal Ansari, Nikha Trivedi, Pranay Shah, Kamlesh J Upadhyay, Sanjay Kapadia, Apurvashin Puvvar, Janvi Ravai, Zarna Patel, Monika Gandhi, Pinal Trivedi, R D Dixit, A M Kadri, Harsh Bakshi, Chaitanya Joshi, Madhvi Joshi                                                                                                                                                      |



|                                                                                                                                                                                                                                                                                                                                                                                                                                                                                                                                                                                                                                                                                                                                                                                                                                                                                                                                                                                                                                                                                                                                                                                                                                                                                                                                                                                                                                                                                                                                                                                                |                                                                                                                     |                                                                                                                     |                                                                                                                                                                                                                                                                                                                                                                                                                                                                               |
|------------------------------------------------------------------------------------------------------------------------------------------------------------------------------------------------------------------------------------------------------------------------------------------------------------------------------------------------------------------------------------------------------------------------------------------------------------------------------------------------------------------------------------------------------------------------------------------------------------------------------------------------------------------------------------------------------------------------------------------------------------------------------------------------------------------------------------------------------------------------------------------------------------------------------------------------------------------------------------------------------------------------------------------------------------------------------------------------------------------------------------------------------------------------------------------------------------------------------------------------------------------------------------------------------------------------------------------------------------------------------------------------------------------------------------------------------------------------------------------------------------------------------------------------------------------------------------------------|---------------------------------------------------------------------------------------------------------------------|---------------------------------------------------------------------------------------------------------------------|-------------------------------------------------------------------------------------------------------------------------------------------------------------------------------------------------------------------------------------------------------------------------------------------------------------------------------------------------------------------------------------------------------------------------------------------------------------------------------|
| EPI_ISL_586534                                                                                                                                                                                                                                                                                                                                                                                                                                                                                                                                                                                                                                                                                                                                                                                                                                                                                                                                                                                                                                                                                                                                                                                                                                                                                                                                                                                                                                                                                                                                                                                 | General Hospital,Chhotaudepur                                                                                       | Gujarat Biotechnology Research Centre                                                                               | Maharshi Pandya, Nidhi Patel, Nitin Savaliya, Raghawendra Kumar, Dinesh Kumar, Zuber Saiyed, Komal Patel, Labdhi Pandya, Afzal Ansari, Nikha Trivedi, Apurvasinh Puvar, Janvi Raval, Zarna Patel, Monika Gandhi, Pinal Trivedi, Yogesh Parmar, Arti Thakur, Dharak Pandya, R D Dixit, A M Kadri, Harsh Bakshi, Chaitanya Joshi, Madhvi Joshi                                                                                                                                  |
| EPI_ISL_586553                                                                                                                                                                                                                                                                                                                                                                                                                                                                                                                                                                                                                                                                                                                                                                                                                                                                                                                                                                                                                                                                                                                                                                                                                                                                                                                                                                                                                                                                                                                                                                                 | Government Hospital,Veraval                                                                                         | Gujarat Biotechnology Research Centre                                                                               | Maharshi Pandya, Nidhi Patel, Nitin Savaliya, Raghawendra Kumar, Dinesh Kumar, Zuber Saiyed, Komal Patel, Labdhi Pandya, Afzal Ansari, Nikha Trivedi, Jignesh Parmar, Jitendra Bamrotia, Apurvasinh Puvar, Janvi Raval, Zarna Patel, Monika Gandhi, Pinal Trivedi, R D Dixit, A M Kadri, Harsh Bakshi, Chaitanya Joshi, Madhvi Joshi                                                                                                                                          |
| EPI_ISL_591076, EPI_ISL_591077, EPI_ISL_591078, EPI_ISL_591079, EPI_ISL_591080, EPI_ISL_591081, EPI_ISL_591082, EPI_ISL_591091, EPI_ISL_591092, EPI_ISL_591093                                                                                                                                                                                                                                                                                                                                                                                                                                                                                                                                                                                                                                                                                                                                                                                                                                                                                                                                                                                                                                                                                                                                                                                                                                                                                                                                                                                                                                 | Department of Pathology, University of Cambridge                                                                    | Wellcome Sanger Institute for the COVID-19 Genomics UK (COG-UK) consortium                                          | Luke W Meredith, M. Estée Török , Myra Hosmillo, William L. Hamilton, Martin D. Curran, Theresa Feltwell, Grant Hall, Anna Yakovleva, Fahad A Khokhar, Charlotte J. Houldcroft, Laura G Caller, Aminu S. Jahun, Sarah L. Caddy, Ian Goodfellow, and Alex Alderton, Roberto Amato, Sonia Goncalves, Ewan Harrison, David K. Jackson, Ian Johnston, Dominic Kwiatkowski, Cordelia Langford, John Sillitoe on behalf of the Wellcome Sanger Institute COVID-19 Surveillance Team |
| EPI_ISL_602577, EPI_ISL_602578, EPI_ISL_602579, EPI_ISL_602580, EPI_ISL_602581                                                                                                                                                                                                                                                                                                                                                                                                                                                                                                                                                                                                                                                                                                                                                                                                                                                                                                                                                                                                                                                                                                                                                                                                                                                                                                                                                                                                                                                                                                                 | SA Pathology                                                                                                        | SA Pathology                                                                                                        | Lex Leong, Julien Soubrier, Chuan Kok Lim, Song Gao, Mark Turra, Karin Kassahn, Ivan Bastian, Geoff Higgins                                                                                                                                                                                                                                                                                                                                                                   |
| EPI_ISL_603082, EPI_ISL_603083, EPI_ISL_603084, EPI_ISL_603085, EPI_ISL_603086, EPI_ISL_603087, EPI_ISL_603088, EPI_ISL_603089, EPI_ISL_603090, EPI_ISL_603091, EPI_ISL_603092, EPI_ISL_603093, EPI_ISL_603094, EPI_ISL_603095, EPI_ISL_603096, EPI_ISL_603097, EPI_ISL_603098, EPI_ISL_603099, EPI_ISL_603100, EPI_ISL_603101, EPI_ISL_603102, EPI_ISL_603103, EPI_ISL_603104, EPI_ISL_603105, EPI_ISL_603106, EPI_ISL_603107, EPI_ISL_603108, EPI_ISL_603109, EPI_ISL_603110, EPI_ISL_603111, EPI_ISL_603112, EPI_ISL_603113, EPI_ISL_603114, EPI_ISL_603115, EPI_ISL_603116, EPI_ISL_603117, EPI_ISL_603118, EPI_ISL_603119, EPI_ISL_603120, EPI_ISL_603121, EPI_ISL_603122                                                                                                                                                                                                                                                                                                                                                                                                                                                                                                                                                                                                                                                                                                                                                                                                                                                                                                                 | Lithuanian University of Health Sciences Hospital, Department of Laboratory Medicine                                | Lithuanian University of Health Sciences, Molecular cardiology lab.                                                 | Lukas Zemaitis, Ingrida Olendrait, Arnoldas Pautienius, Kamile Tamauskaite, Dovydas Gecys, Laura Pareckaitė, Vaiva Lesauskaite, Astra Vitkauskiene                                                                                                                                                                                                                                                                                                                            |
| see above                                                                                                                                                                                                                                                                                                                                                                                                                                                                                                                                                                                                                                                                                                                                                                                                                                                                                                                                                                                                                                                                                                                                                                                                                                                                                                                                                                                                                                                                                                                                                                                      | Lithuanian University of Health Sciences Hospital, Department of Laboratory Medicine                                | Lithuanian University of Health Sciences, Molecular cardiology lab.                                                 | Lukas Zemaitis, Ingrida Olendrait, Arnoldas Pautienius, Kamile Tamauskaite, Dovydas Gecys, Laura Pareckaitė, Vaiva Lesauskaite, Astra Vitkauskiene                                                                                                                                                                                                                                                                                                                            |
| EPI_ISL_603123, EPI_ISL_603124, EPI_ISL_603125, EPI_ISL_603126, EPI_ISL_603127, EPI_ISL_603128                                                                                                                                                                                                                                                                                                                                                                                                                                                                                                                                                                                                                                                                                                                                                                                                                                                                                                                                                                                                                                                                                                                                                                                                                                                                                                                                                                                                                                                                                                 | SA Pathology                                                                                                        | SA Pathology                                                                                                        | Lex Leong, Julien Soubrier, Chuan Kok Lim, Song Gao, Mark Turra, Karin Kassahn, Ivan Bastian, Geoff Higgins                                                                                                                                                                                                                                                                                                                                                                   |
| EPI_ISL_605929, EPI_ISL_605930                                                                                                                                                                                                                                                                                                                                                                                                                                                                                                                                                                                                                                                                                                                                                                                                                                                                                                                                                                                                                                                                                                                                                                                                                                                                                                                                                                                                                                                                                                                                                                 | Department of Infectious Disease Prevention and Control, Henan Provincial Center for Disease Control and Prevention | Department of Infectious Disease Prevention and Control, Henan Provincial Center for Disease Control and Prevention | Li,X., Lu,S., Wu,B., Hu,X., Li,D., Ye,Y., Huang,X., Guo,W.                                                                                                                                                                                                                                                                                                                                                                                                                    |
| EPI_ISL_609991, EPI_ISL_609997                                                                                                                                                                                                                                                                                                                                                                                                                                                                                                                                                                                                                                                                                                                                                                                                                                                                                                                                                                                                                                                                                                                                                                                                                                                                                                                                                                                                                                                                                                                                                                 | INMI Lazzaro Spallanzani IRCCS                                                                                      | INMI Lazzaro Spallanzani IRCCS                                                                                      | M Rueca, B Bartolini, C.E.M Gruber, F Messina, E Giombini, A Di Caro, MR Capobianchi                                                                                                                                                                                                                                                                                                                                                                                          |
| EPI_ISL_614980                                                                                                                                                                                                                                                                                                                                                                                                                                                                                                                                                                                                                                                                                                                                                                                                                                                                                                                                                                                                                                                                                                                                                                                                                                                                                                                                                                                                                                                                                                                                                                                 | Rwanda National Reference Laboratory                                                                                | Rwanda National Reference Laboratory                                                                                | MUKantwari Enatha,Stefan Rook,Aine O'Toole,UMuringa Jeanne d'Arc                                                                                                                                                                                                                                                                                                                                                                                                              |
| EPI_ISL_615071                                                                                                                                                                                                                                                                                                                                                                                                                                                                                                                                                                                                                                                                                                                                                                                                                                                                                                                                                                                                                                                                                                                                                                                                                                                                                                                                                                                                                                                                                                                                                                                 | Rwanda National Reference Laboratory                                                                                | Rwanda National Reference Laboratory                                                                                | MUKantwari Enatha,Stefan Rook,Aine O'Toole,Umuringa Jeanne d'Arc                                                                                                                                                                                                                                                                                                                                                                                                              |
| EPI_ISL_615075                                                                                                                                                                                                                                                                                                                                                                                                                                                                                                                                                                                                                                                                                                                                                                                                                                                                                                                                                                                                                                                                                                                                                                                                                                                                                                                                                                                                                                                                                                                                                                                 | Rwanda National Reference Laboratory                                                                                | Rwanda National Reference Laboratory                                                                                | MUKantwari Enatha,Stefan Rooke,Aine O'Toole ,Umuringa Jeanne d'Arc                                                                                                                                                                                                                                                                                                                                                                                                            |
| EPI_ISL_622761, EPI_ISL_622762, EPI_ISL_622763, EPI_ISL_622764, EPI_ISL_622765, EPI_ISL_622766                                                                                                                                                                                                                                                                                                                                                                                                                                                                                                                                                                                                                                                                                                                                                                                                                                                                                                                                                                                                                                                                                                                                                                                                                                                                                                                                                                                                                                                                                                 | SA Pathology                                                                                                        | SA Pathology                                                                                                        | Lex Leong, Julien Soubrier, Chuan Kok Lim, Song Gao, Mark Turra, Karin Kassahn, Ivan Bastian, Geoff Higgins                                                                                                                                                                                                                                                                                                                                                                   |
| EPI_ISL_636604                                                                                                                                                                                                                                                                                                                                                                                                                                                                                                                                                                                                                                                                                                                                                                                                                                                                                                                                                                                                                                                                                                                                                                                                                                                                                                                                                                                                                                                                                                                                                                                 | Lithuanian University of Health Sciences Hospital, Department of Laboratory Medicine                                | Lithuanian University of Health Sciences, Molecular cardiology lab.                                                 | Lukas Zemaitis, Ingrida Olendrait, Arnoldas Pautienius, Kamile Tamauskaite, Dovydas Gecys, Laura Pareckaitė, Vaiva Lesauskaite, Astra Vitkauskiene                                                                                                                                                                                                                                                                                                                            |
| EPI_ISL_636738, EPI_ISL_636739, EPI_ISL_636740, EPI_ISL_636741, EPI_ISL_636742, EPI_ISL_636743, EPI_ISL_636744, EPI_ISL_636745, EPI_ISL_636746, EPI_ISL_636747, EPI_ISL_636748, EPI_ISL_636749, EPI_ISL_636750, EPI_ISL_636751, EPI_ISL_636752, EPI_ISL_636753, EPI_ISL_636754, EPI_ISL_636755, EPI_ISL_636756, EPI_ISL_636757, EPI_ISL_636758, EPI_ISL_636759, EPI_ISL_636760, EPI_ISL_636761, EPI_ISL_636762, EPI_ISL_636763, EPI_ISL_636764, EPI_ISL_636765, EPI_ISL_636766, EPI_ISL_636767, EPI_ISL_636768, EPI_ISL_636769, EPI_ISL_636770, EPI_ISL_636771, EPI_ISL_636772, EPI_ISL_636773, EPI_ISL_636774, EPI_ISL_636775, EPI_ISL_636776, EPI_ISL_636777, EPI_ISL_636778, EPI_ISL_636779, EPI_ISL_636780, EPI_ISL_636781, EPI_ISL_636782, EPI_ISL_636783, EPI_ISL_636784, EPI_ISL_636785, EPI_ISL_636786, EPI_ISL_636787, EPI_ISL_636788, EPI_ISL_636789, EPI_ISL_636790, EPI_ISL_636791, EPI_ISL_636792, EPI_ISL_636793, EPI_ISL_636794, EPI_ISL_636795, EPI_ISL_636796, EPI_ISL_636797, EPI_ISL_636798, EPI_ISL_636799, EPI_ISL_636800, EPI_ISL_636801, EPI_ISL_636802, EPI_ISL_636803, EPI_ISL_636804, EPI_ISL_636805, EPI_ISL_636806, EPI_ISL_636807, EPI_ISL_636808, EPI_ISL_636809, EPI_ISL_636810, EPI_ISL_636811, EPI_ISL_636812, EPI_ISL_636813, EPI_ISL_636814, EPI_ISL_636815, EPI_ISL_636816, EPI_ISL_636817, EPI_ISL_636818, EPI_ISL_636819, EPI_ISL_636820, EPI_ISL_636821, EPI_ISL_636822, EPI_ISL_636823, EPI_ISL_636824, EPI_ISL_636825, EPI_ISL_636826, EPI_ISL_636827, EPI_ISL_636828, EPI_ISL_636829, EPI_ISL_636830, EPI_ISL_636831, EPI_ISL_636832, EPI_ISL_636833 | National Centre for Disease control (NCDC)                                                                          | NCDC/CSIR-IGIB                                                                                                      | Mahesh S. Dhar1*, Bharathram Uppliz2*, Robin Marwal1*, Pooja Sharma2*, RadhaKrishnan VS, Vivekanand A, Nishu Tyagi, Shaista Khan, Simmi Tiwari, Manish Kumar, Ajit Shewale, Ishfaq Ahmed, Asangla Kamal, Aparna Swaminathan, Saruchi Wadhwa, Tushar Nale, Sandhya Kabra, Sujeet Singh, Mohammed Faruq#, Anurag Agrawal#, Partha Rakshit#                                                                                                                                      |
| EPI_ISL_636839, EPI_ISL_636840, EPI_ISL_636841, EPI_ISL_636842, EPI_ISL_636843, EPI_ISL_636844, EPI_ISL_636845, EPI_ISL_636846, EPI_ISL_636847, EPI_ISL_636848, EPI_ISL_636849, EPI_ISL_636850, EPI_ISL_636851, EPI_ISL_636852, EPI_ISL_636853, EPI_ISL_636854, EPI_ISL_636855, EPI_ISL_636856, EPI_ISL_636857, EPI_ISL_636858, EPI_ISL_636859, EPI_ISL_636860, EPI_ISL_636861, EPI_ISL_636862, EPI_ISL_636863, EPI_ISL_636864, EPI_ISL_636865, EPI_ISL_636866, EPI_ISL_636867, EPI_ISL_636868, EPI_ISL_636869, EPI_ISL_636870, EPI_ISL_636871, EPI_ISL_636872, EPI_ISL_636873, EPI_ISL_636874, EPI_ISL_636875, EPI_ISL_636876, EPI_ISL_636877, EPI_ISL_636878, EPI_ISL_636879, EPI_ISL_636880, EPI_ISL_636881, EPI_ISL_636882, EPI_ISL_636883, EPI_ISL_636884, EPI_ISL_636885, EPI_ISL_636886, EPI_ISL_636887, EPI_ISL_636888, EPI_ISL_636889, EPI_ISL_636890, EPI_ISL_636891, EPI_ISL_636892, EPI_ISL_636893, EPI_ISL_636894, EPI_ISL_636895, EPI_ISL_636896, EPI_ISL_636897, EPI_ISL_636898, EPI_ISL_636899, EPI_ISL_636900, EPI_ISL_636901, EPI_ISL_636902, EPI_ISL_636903, EPI_ISL_636904, EPI_ISL_636905, EPI_ISL_636906                                                                                                                                                                                                                                                                                                                                                                                                                                                                 | Lithuanian University of Health Sciences Hospital, Department of Laboratory Medicine                                | Lithuanian University of Health Sciences, Molecular cardiology lab.                                                 | Lukas Zemaitis, Ingrida Olendrait, Arnoldas Pautienius, Kamile Tamauskaite, Dovydas Gecys, Laura Pareckaitė, Vaiva Lesauskaite, Astra Vitkauskiene                                                                                                                                                                                                                                                                                                                            |
| EPI_ISL_639740, EPI_ISL_641311                                                                                                                                                                                                                                                                                                                                                                                                                                                                                                                                                                                                                                                                                                                                                                                                                                                                                                                                                                                                                                                                                                                                                                                                                                                                                                                                                                                                                                                                                                                                                                 | Respiratory virus Laboratory, Chinese Academy of Medical Science                                                    | Respiratory virus Laboratory, Chinese Academy of Medical Science                                                    | Li,J., Zhen,H., Chen,Y. and Liu,L                                                                                                                                                                                                                                                                                                                                                                                                                                             |
| EPI_ISL_653345, EPI_ISL_653346, EPI_ISL_653347, EPI_ISL_653348, EPI_ISL_653349, EPI_ISL_653350, EPI_ISL_653351, EPI_ISL_653352, EPI_ISL_653353, EPI_ISL_653354, EPI_ISL_653355, EPI_ISL_653356, EPI_ISL_653357, EPI_ISL_653358, EPI_ISL_653359, EPI_ISL_653360, EPI_ISL_653361, EPI_ISL_653362, EPI_ISL_653363, EPI_ISL_653364, EPI_ISL_653365, EPI_ISL_653366, EPI_ISL_653367, EPI_ISL_653368, EPI_ISL_653369                                                                                                                                                                                                                                                                                                                                                                                                                                                                                                                                                                                                                                                                                                                                                                                                                                                                                                                                                                                                                                                                                                                                                                                 | LSUHS Emerging Viral Threat Laboratory                                                                              | Microbial Genome Sequencing Center                                                                                  | Maarten Van Diest, Jeremy P. Kamil, Rona S. Scott, Malgorzata Bienkowska-Haba, Katarzyna Zwolinska, Andrew D. Yurochko, Christopher G. Kevil, Martin J. Sapp, Daniel J. Snyder, Vaughn S. Cooper, John A. Vanchiere                                                                                                                                                                                                                                                           |
| EPI_ISL_654618                                                                                                                                                                                                                                                                                                                                                                                                                                                                                                                                                                                                                                                                                                                                                                                                                                                                                                                                                                                                                                                                                                                                                                                                                                                                                                                                                                                                                                                                                                                                                                                 | Servicio de Microbiología, Hospital Universitario Cruces, Bilbao                                                    | SeqCOVID-SPAIN consortium/IBV(CSIC)                                                                                 | Maitane Aranzamendi Zaldumbide and SeqCOVID-SPAIN consortium                                                                                                                                                                                                                                                                                                                                                                                                                  |
| EPI_ISL_654795, EPI_ISL_654796, EPI_ISL_654797, EPI_ISL_654798, EPI_ISL_654799, EPI_ISL_654800, EPI_ISL_654801, EPI_ISL_654802, EPI_ISL_654803, EPI_ISL_654804, EPI_ISL_654805, EPI_ISL_654806, EPI_ISL_654807, EPI_ISL_654808, EPI_ISL_654809                                                                                                                                                                                                                                                                                                                                                                                                                                                                                                                                                                                                                                                                                                                                                                                                                                                                                                                                                                                                                                                                                                                                                                                                                                                                                                                                                 | SA Pathology                                                                                                        | SA Pathology                                                                                                        | Lex Leong, Julien Soubrier, Chuan Kok Lim, Song Gao, Mark Turra, Karin Kassahn, Ivan Bastian, Geoff Higgins                                                                                                                                                                                                                                                                                                                                                                   |
| see above                                                                                                                                                                                                                                                                                                                                                                                                                                                                                                                                                                                                                                                                                                                                                                                                                                                                                                                                                                                                                                                                                                                                                                                                                                                                                                                                                                                                                                                                                                                                                                                      | SA Pathology                                                                                                        | SA Pathology                                                                                                        | Lex Leong, Julien Soubrier, Chuan Kok Lim, Song Gao, Mark Turra, Karin Kassahn, Ivan Bastian, Geoff Higgins                                                                                                                                                                                                                                                                                                                                                                   |
| EPI_ISL_654881                                                                                                                                                                                                                                                                                                                                                                                                                                                                                                                                                                                                                                                                                                                                                                                                                                                                                                                                                                                                                                                                                                                                                                                                                                                                                                                                                                                                                                                                                                                                                                                 | Pasteur Institute in Ho Chi Minh city                                                                               | Department of Microbiology and Immunology - Pasteur Institute in Ho Chi Minh city                                   | Lng Chn Quang, ào Huy Minh, Phm Th Thu Hng, V Phm Hng Nhung, Cao Minh Thng, Hunh Th Kim Loan, Nguyen Hoàng Quân, Hunh Phng Tho, Hoàng Nh ào, Nguyen Trung Hiu, Nguyen Hoàng Anh, Nguyen Th Ngc, Phm Th Nhung, Nguyen Th Ngc Tho, ng Thanh Giang, Nguyen Th Thanh Thng, Hoàng Minh, Nguyen Th Phng Thuy, Nguyen Thanh Long, Phm Duy Quang, Hoàng Quc Cng, Nguyen V Thng, Phan Trng Lán                                                                                         |
| EPI_ISL_654882                                                                                                                                                                                                                                                                                                                                                                                                                                                                                                                                                                                                                                                                                                                                                                                                                                                                                                                                                                                                                                                                                                                                                                                                                                                                                                                                                                                                                                                                                                                                                                                 | Pasteur Institute in Ho Chi Minh city                                                                               | Department of Microbiology and Immunology - Pasteur Institute in Ho Chi Minh city                                   | Lng Chn Quang, ào Huy Mnh, Phm Th Thu Hng, V Phm Hng Nhung, Cao Minh Thng, Hunh Th Kim Loan, Nguyen Hoàng Quân, Hunh Phng Tho, Hoàng Nh ào, Nguyen Trung Hiu, Nguyen Hoàng Anh, Nguyen Ngc Anh Tun, Phm Th Nhung, Nguyen Th Ngc Tho, ng Thanh Giang, Nguyen Th Thanh Thng, Hoàng Minh, Trn Th Hng Kim, Nguyen Thanh Long, Phm Duy Quang, Hoàng Quc Cng, Phan Trng Lán, Nguyen V Thng                                                                                          |
| EPI_ISL_660600                                                                                                                                                                                                                                                                                                                                                                                                                                                                                                                                                                                                                                                                                                                                                                                                                                                                                                                                                                                                                                                                                                                                                                                                                                                                                                                                                                                                                                                                                                                                                                                 | Hospital Universitario de Gran Canaria Dr. Negrín                                                                   | SeqCOVID-SPAIN consortium/IBV(CSIC)                                                                                 | M. Carmen Pérez González, Francisco J. Chamizo López, Ana Bordes Benitez and SeqCOVID-SPAIN consortium                                                                                                                                                                                                                                                                                                                                                                        |
| EPI_ISL_666617, EPI_ISL_666618, EPI_ISL_666619, EPI_ISL_666620, EPI_ISL_666621                                                                                                                                                                                                                                                                                                                                                                                                                                                                                                                                                                                                                                                                                                                                                                                                                                                                                                                                                                                                                                                                                                                                                                                                                                                                                                                                                                                                                                                                                                                 | Environmental and Global Health, University of Florida                                                              | Environmental and Global Health, University of Florida                                                              | Loeb,J.C., Silva,L.O., Elbadry,M.A., Stephenson,C.J., Morris,J.G., Lednický,J.A.                                                                                                                                                                                                                                                                                                                                                                                              |
| EPI_ISL_678050, EPI_ISL_678057, EPI_ISL_678114, EPI_ISL_678115, EPI_ISL_678118, EPI_ISL_678119, EPI_ISL_678120, EPI_ISL_678121, EPI_ISL_678122, EPI_ISL_678123, EPI_ISL_678124, EPI_ISL_678125, EPI_ISL_678126, EPI_ISL_678128, EPI_ISL_678129, EPI_ISL_678130, EPI_ISL_678131, EPI_ISL_678132, EPI_ISL_678133, EPI_ISL_678134, EPI_ISL_678246                                                                                                                                                                                                                                                                                                                                                                                                                                                                                                                                                                                                                                                                                                                                                                                                                                                                                                                                                                                                                                                                                                                                                                                                                                                 | Pathogen Genomics Lab King Abdullah University of Science and Technology(KAUST)                                     | Pathogen Genomics Lab King Abdullah University of Science and Technology(KAUST)                                     | Luke Esau, Amanda Ooi, Sharif Hala, Raece Naeem, Sara Mfarrej, Asim Khogeer, Fadwa Alofi, Afrah Alsomali, Jumana Taha, Abdulaziz Alahmadi, Kahled Alghami, Anwar Hashem, Naif Almontashiri, Arnab Pain                                                                                                                                                                                                                                                                        |
| see above                                                                                                                                                                                                                                                                                                                                                                                                                                                                                                                                                                                                                                                                                                                                                                                                                                                                                                                                                                                                                                                                                                                                                                                                                                                                                                                                                                                                                                                                                                                                                                                      | Pathogen Genomics Lab King Abdullah University of Science and Technology(KAUST)                                     | Pathogen Genomics Lab King Abdullah University of Science and Technology(KAUST)                                     | Luke Esau, Amanda Ooi, Sharif Hala, Raece Naeem, Sara Mfarrej, Asim Khogeer, Fadwa Alofi, Afrah Alsomali, Jumana Taha, Abdulaziz Alahmadi, Kahled Alghami, Anwar Hashem, Naif Almontashiri, Arnab Pain                                                                                                                                                                                                                                                                        |

|                                                                                                                                                                                                                                                                                                                                                                                                                                                                                                                                                                                                                                                                                                                                                                                                                                                                                                                                                                                                                                                                                                                                                                                                                                                                                                                                                                                                                                                                                                                                                                                                                                |                                                                                                                  |                                                                                                                                  |                                                                                                                                                                                                                                                                                                                                                                                                                                                                                                         |
|--------------------------------------------------------------------------------------------------------------------------------------------------------------------------------------------------------------------------------------------------------------------------------------------------------------------------------------------------------------------------------------------------------------------------------------------------------------------------------------------------------------------------------------------------------------------------------------------------------------------------------------------------------------------------------------------------------------------------------------------------------------------------------------------------------------------------------------------------------------------------------------------------------------------------------------------------------------------------------------------------------------------------------------------------------------------------------------------------------------------------------------------------------------------------------------------------------------------------------------------------------------------------------------------------------------------------------------------------------------------------------------------------------------------------------------------------------------------------------------------------------------------------------------------------------------------------------------------------------------------------------|------------------------------------------------------------------------------------------------------------------|----------------------------------------------------------------------------------------------------------------------------------|---------------------------------------------------------------------------------------------------------------------------------------------------------------------------------------------------------------------------------------------------------------------------------------------------------------------------------------------------------------------------------------------------------------------------------------------------------------------------------------------------------|
| EPI_ISL_678397, EPI_ISL_678398                                                                                                                                                                                                                                                                                                                                                                                                                                                                                                                                                                                                                                                                                                                                                                                                                                                                                                                                                                                                                                                                                                                                                                                                                                                                                                                                                                                                                                                                                                                                                                                                 | Suceava County Emergency Hospital                                                                                | "Stefan cel Mare" University Metagenomics Lab                                                                                    | Lobiuc Andrei, Puscaselu Roxana                                                                                                                                                                                                                                                                                                                                                                                                                                                                         |
| EPI_ISL_681322                                                                                                                                                                                                                                                                                                                                                                                                                                                                                                                                                                                                                                                                                                                                                                                                                                                                                                                                                                                                                                                                                                                                                                                                                                                                                                                                                                                                                                                                                                                                                                                                                 | Environmental and Global Health, University of Florida                                                           | Environmental and Global Health, University of Florida                                                                           | Loeb,J.C., Stephenson,C.J., Merck,L., Morris,J.G. and Lednický,J.A.                                                                                                                                                                                                                                                                                                                                                                                                                                     |
| EPI_ISL_682298                                                                                                                                                                                                                                                                                                                                                                                                                                                                                                                                                                                                                                                                                                                                                                                                                                                                                                                                                                                                                                                                                                                                                                                                                                                                                                                                                                                                                                                                                                                                                                                                                 | Respiratory virus Laboratory, Chinese Academy of Medical Science                                                 | Respiratory virus Laboratory, Chinese Academy of Medical Science                                                                 | Li,J., Zhen,H., Chen,Y. and Liu,L.                                                                                                                                                                                                                                                                                                                                                                                                                                                                      |
| EPI_ISL_710544, EPI_ISL_721626                                                                                                                                                                                                                                                                                                                                                                                                                                                                                                                                                                                                                                                                                                                                                                                                                                                                                                                                                                                                                                                                                                                                                                                                                                                                                                                                                                                                                                                                                                                                                                                                 | National Institute for Infectious Diseases, INMI, "L. Spallanzani" IRCCS                                         | National Institute for Infectious Diseases, INMI, "L. Spallanzani" IRCCS                                                         | M Rueca, B Bartolini, C.E.M Gruber, F Messina, E Giombini, A Di Caro, MR Capobianchi                                                                                                                                                                                                                                                                                                                                                                                                                    |
| EPI_ISL_728282                                                                                                                                                                                                                                                                                                                                                                                                                                                                                                                                                                                                                                                                                                                                                                                                                                                                                                                                                                                                                                                                                                                                                                                                                                                                                                                                                                                                                                                                                                                                                                                                                 | National Institute for Infectious Diseases, INMI, "L. Spallanzani" IRCCS                                         | National Institute for Infectious Diseases, INMI, "L. Spallanzani" IRCCS                                                         | M. Rueca, C.E.M Gruber, B Bartolini, F Messina, E Giombini, A Di Caro, MR Capobianchi                                                                                                                                                                                                                                                                                                                                                                                                                   |
| EPI_ISL_728284                                                                                                                                                                                                                                                                                                                                                                                                                                                                                                                                                                                                                                                                                                                                                                                                                                                                                                                                                                                                                                                                                                                                                                                                                                                                                                                                                                                                                                                                                                                                                                                                                 | National Institute for Infectious Diseases, INMI, "L. Spallanzani" IRCCS                                         | National Institute for Infectious Diseases, INMI, "L. Spallanzani" IRCCS                                                         | M Rueca, B Bartolini, C.E.M Gruber, F Messina, E Giombini, A Di Caro, MR Capobianchi                                                                                                                                                                                                                                                                                                                                                                                                                    |
| EPI_ISL_732827, EPI_ISL_732828, EPI_ISL_732829, EPI_ISL_732830, EPI_ISL_732831, EPI_ISL_732832, EPI_ISL_732833, EPI_ISL_732834, EPI_ISL_732835, EPI_ISL_732836, EPI_ISL_732837, EPI_ISL_732838, EPI_ISL_732839, EPI_ISL_732840, EPI_ISL_732841, EPI_ISL_732842, EPI_ISL_732843, EPI_ISL_732844, EPI_ISL_732845, EPI_ISL_732846, EPI_ISL_732847, EPI_ISL_732848, EPI_ISL_732849, EPI_ISL_732850, EPI_ISL_732851, EPI_ISL_732852, EPI_ISL_732853, EPI_ISL_732854, EPI_ISL_732855, EPI_ISL_732856, EPI_ISL_732857, EPI_ISL_732858, EPI_ISL_732859, EPI_ISL_732860, EPI_ISL_732861, EPI_ISL_732862, EPI_ISL_732863, EPI_ISL_732864, EPI_ISL_732865, EPI_ISL_732866, EPI_ISL_732867, EPI_ISL_732868, EPI_ISL_732869, EPI_ISL_732870, EPI_ISL_732871, EPI_ISL_732872, EPI_ISL_732873, EPI_ISL_732874, EPI_ISL_732875, EPI_ISL_732876, EPI_ISL_732877, EPI_ISL_732878, EPI_ISL_732879, EPI_ISL_732880, EPI_ISL_732881, EPI_ISL_732883, EPI_ISL_732884, EPI_ISL_732885, EPI_ISL_732886, EPI_ISL_732887, EPI_ISL_732888, EPI_ISL_732889, EPI_ISL_732890, EPI_ISL_732891, EPI_ISL_732892, EPI_ISL_732893, EPI_ISL_732894, EPI_ISL_732895, EPI_ISL_732896, EPI_ISL_732897, EPI_ISL_732898, EPI_ISL_732899, EPI_ISL_732900, EPI_ISL_732901, EPI_ISL_732902, EPI_ISL_732903, EPI_ISL_732904, EPI_ISL_732905, EPI_ISL_732906, EPI_ISL_732907, EPI_ISL_732908, EPI_ISL_732909, EPI_ISL_732910, EPI_ISL_732911, EPI_ISL_732912, EPI_ISL_732913, EPI_ISL_732914, EPI_ISL_732915, EPI_ISL_732917, EPI_ISL_732918, EPI_ISL_732919, EPI_ISL_732920, EPI_ISL_732921, EPI_ISL_732922, EPI_ISL_732923, EPI_ISL_732924, EPI_ISL_732925, EPI_ISL_732926 | National Institute for Infectious Diseases, INMI, "L. Spallanzani" IRCCS                                         |                                                                                                                                  |                                                                                                                                                                                                                                                                                                                                                                                                                                                                                                         |
| see above                                                                                                                                                                                                                                                                                                                                                                                                                                                                                                                                                                                                                                                                                                                                                                                                                                                                                                                                                                                                                                                                                                                                                                                                                                                                                                                                                                                                                                                                                                                                                                                                                      | genXone SA, Molecular Diagnostics Laboratory / NZOZ                                                              | genXone SA, Research & Development Laboratory                                                                                    | Maciej Sykulski, Grzegorz Nowicki, Monika Makowska-Woniak, Jakub Grabowski, Natalia Drwska-Matelska, ukasz Krych, Micha Kaszuba                                                                                                                                                                                                                                                                                                                                                                         |
| EPI_ISL_732948, EPI_ISL_732949, EPI_ISL_732950, EPI_ISL_732951, EPI_ISL_732952, EPI_ISL_732953, EPI_ISL_732954, EPI_ISL_732955, EPI_ISL_732956, EPI_ISL_732957, EPI_ISL_732958, EPI_ISL_732959                                                                                                                                                                                                                                                                                                                                                                                                                                                                                                                                                                                                                                                                                                                                                                                                                                                                                                                                                                                                                                                                                                                                                                                                                                                                                                                                                                                                                                 | Department of Tropical Parasitology                                                                              | Laboratory of Recombinant Vaccines                                                                                               | Lukasz Rabalski, Maciej Kosinski, Teemu Smura, Kirsi Aaltonen, Ravi Kant, Tarja Sironen, Boguslaw Szewczyk, Maciej Grzybek                                                                                                                                                                                                                                                                                                                                                                              |
| see above                                                                                                                                                                                                                                                                                                                                                                                                                                                                                                                                                                                                                                                                                                                                                                                                                                                                                                                                                                                                                                                                                                                                                                                                                                                                                                                                                                                                                                                                                                                                                                                                                      | SA Pathology                                                                                                     | SA Pathology                                                                                                                     | Lex Leong, Julien Soubrier, Chuan Kok Lim, Song Gao, Mark Turra, Karin Kassahn, Ivan Bastian, Geoff Higgins                                                                                                                                                                                                                                                                                                                                                                                             |
| EPI_ISL_735510                                                                                                                                                                                                                                                                                                                                                                                                                                                                                                                                                                                                                                                                                                                                                                                                                                                                                                                                                                                                                                                                                                                                                                                                                                                                                                                                                                                                                                                                                                                                                                                                                 | National Institute for Infectious Diseases, INMI, "L. Spallanzani" IRCCS                                         | National Institute for Infectious Diseases, INMI, "L. Spallanzani" IRCCS                                                         | M. Rueca, C.E.M Gruber, E. Giombini, F. Messina, B. Bartolini, F. Carletti, A. Di Caro, M.R Capobianchi                                                                                                                                                                                                                                                                                                                                                                                                 |
| EPI_ISL_738044                                                                                                                                                                                                                                                                                                                                                                                                                                                                                                                                                                                                                                                                                                                                                                                                                                                                                                                                                                                                                                                                                                                                                                                                                                                                                                                                                                                                                                                                                                                                                                                                                 | SIESP CHIETI - DRIVE IN LANCIANO                                                                                 | Istituto Zooprofilattico Sperimentale dell'Abruzzo e Molise "G. Caporale"                                                        | Lorusso A, Marcacci M, Di Domenico M, Ancora M, Curini V, Mangone I, Rinaldi A, Di Pasquale A, Cammà C, Puglia I, Savini G                                                                                                                                                                                                                                                                                                                                                                              |
| EPI_ISL_738045                                                                                                                                                                                                                                                                                                                                                                                                                                                                                                                                                                                                                                                                                                                                                                                                                                                                                                                                                                                                                                                                                                                                                                                                                                                                                                                                                                                                                                                                                                                                                                                                                 | SIESP DIPARTIMENTO DI PREVENZIONE CHIETI                                                                         | Istituto Zooprofilattico Sperimentale dell'Abruzzo e Molise "G. Caporale"                                                        | Lorusso A, Marcacci M, Di Domenico M, Ancora M, Curini V, Mangone I, Rinaldi A, Di Pasquale A, Cammà C, Puglia I, Savini G                                                                                                                                                                                                                                                                                                                                                                              |
| EPI_ISL_738046, EPI_ISL_738047, EPI_ISL_738048                                                                                                                                                                                                                                                                                                                                                                                                                                                                                                                                                                                                                                                                                                                                                                                                                                                                                                                                                                                                                                                                                                                                                                                                                                                                                                                                                                                                                                                                                                                                                                                 | SIESP CHIETI - DRIVE IN ORTONA                                                                                   | Istituto Zooprofilattico Sperimentale dell'Abruzzo e Molise "G. Caporale"                                                        | Lorusso A, Marcacci M, Di Domenico M, Ancora M, Curini V, Mangone I, Rinaldi A, Di Pasquale A, Cammà C, Puglia I, Savini G                                                                                                                                                                                                                                                                                                                                                                              |
| EPI_ISL_738084                                                                                                                                                                                                                                                                                                                                                                                                                                                                                                                                                                                                                                                                                                                                                                                                                                                                                                                                                                                                                                                                                                                                                                                                                                                                                                                                                                                                                                                                                                                                                                                                                 | Department of Health Technology and Informatics, Hong Kong Polytechnic University of Hong Kong                   | Department of Health Technology and Informatics, Hong Kong Polytechnic University of Hong Kong                                   | Leung,K.S.-S., Ng,T.T.-L., Wu,A.K.-L., Yau,M.C.-Y., Lao,H.-Y.,Choi,M.-P., Tam,K.K.-G., Lee,L.-K., Wong,B.K.-C., Ho,A.Y.-M.,Yip,K.-T., Lung,K.-C., Liu,R.W.-T., Tso,E.Y.-K., Leung,W.-S.,Chan,M.-C., Fung,K.S.-C., Chau,S.K.-Y., To,W.-K., Que,T.-L.Q.,Shum,D.H.-K., Yip,S.-P., Yam,W.C. and Siu,G.K.-H.                                                                                                                                                                                                 |
| EPI_ISL_746828                                                                                                                                                                                                                                                                                                                                                                                                                                                                                                                                                                                                                                                                                                                                                                                                                                                                                                                                                                                                                                                                                                                                                                                                                                                                                                                                                                                                                                                                                                                                                                                                                 | National Institute for Infectious Diseases, INMI, "L. Spallanzani" IRCCS                                         | National Institute for Infectious Diseases, INMI, "L. Spallanzani" IRCCS                                                         | M Rueca, B Bartolini, C.E.M Gruber, F Messina, E Giombini, A Di Caro, MR Capobianchi                                                                                                                                                                                                                                                                                                                                                                                                                    |
| EPI_ISL_746835                                                                                                                                                                                                                                                                                                                                                                                                                                                                                                                                                                                                                                                                                                                                                                                                                                                                                                                                                                                                                                                                                                                                                                                                                                                                                                                                                                                                                                                                                                                                                                                                                 | National Institute for Infectious Diseases, INMI, "L. Spallanzani" IRCCS                                         | National Institute for Infectious Diseases, INMI, "L. Spallanzani" IRCCS                                                         | M Rueca, E Giombini, B Bartolini, C.E.M Gruber, F Messina, A Di Caro, MR Capobianchi                                                                                                                                                                                                                                                                                                                                                                                                                    |
| EPI_ISL_752598, EPI_ISL_752599                                                                                                                                                                                                                                                                                                                                                                                                                                                                                                                                                                                                                                                                                                                                                                                                                                                                                                                                                                                                                                                                                                                                                                                                                                                                                                                                                                                                                                                                                                                                                                                                 | SA Pathology                                                                                                     | SA Pathology                                                                                                                     | Lex Leong, Julien Soubrier, Chuan Kok Lim, Song Gao, Mark Turra, Karin Kassahn, Ivan Bastian, Geoff Higgins                                                                                                                                                                                                                                                                                                                                                                                             |
| EPI_ISL_754238                                                                                                                                                                                                                                                                                                                                                                                                                                                                                                                                                                                                                                                                                                                                                                                                                                                                                                                                                                                                                                                                                                                                                                                                                                                                                                                                                                                                                                                                                                                                                                                                                 | Laboratory for Respiratory Viruses, Cantacuzino National Military-Medical Institute for Research and Development | Cantacuzino Institute Virology                                                                                                   | Luiza Ustea, Mühlemann Barbara, Mihaela Lazar                                                                                                                                                                                                                                                                                                                                                                                                                                                           |
| EPI_ISL_754902, EPI_ISL_754903, EPI_ISL_754904, EPI_ISL_754905, EPI_ISL_754906, EPI_ISL_754907, EPI_ISL_754908, EPI_ISL_754909, EPI_ISL_754910, EPI_ISL_754911, EPI_ISL_754912, EPI_ISL_754913                                                                                                                                                                                                                                                                                                                                                                                                                                                                                                                                                                                                                                                                                                                                                                                                                                                                                                                                                                                                                                                                                                                                                                                                                                                                                                                                                                                                                                 | Laboratory Diagnostics and Clinical Immunology of Developmental Age, Medical University of Warsaw                | genXone SA, Research & Development Laboratory; The Faculty of Mathematics, Informatics and Mechanics of the University of Warsaw | Maciej Sykulski, Grzegorz Nowicki, Monika Makowska-Woniak, Jakub Grabowski, Natalia Drwska-Matelska, ukasz Krych, Micha Kaszuba, Anna Gambin, Urszula Demkow                                                                                                                                                                                                                                                                                                                                            |
| EPI_ISL_755301, EPI_ISL_755302, EPI_ISL_755303                                                                                                                                                                                                                                                                                                                                                                                                                                                                                                                                                                                                                                                                                                                                                                                                                                                                                                                                                                                                                                                                                                                                                                                                                                                                                                                                                                                                                                                                                                                                                                                 | Laboratorio de Bioingeniería, Instituto de Ciencias de la Ingeniería, Universidad de O'Higgins                   | Center for Mathematical Modeling and Center for Genome Regulation. Santiago, Chile                                               | M. Latorre, G. Galvez, J. Ortega, Bastias M, Sanhueza D, Travisany D, Allende ML, Maass A, González M, Bustos F, Arriagada G, Montecino, M, Orellana A, Castro E, Meneses C.                                                                                                                                                                                                                                                                                                                            |
| EPI_ISL_755568, EPI_ISL_755569, EPI_ISL_755570, EPI_ISL_755571                                                                                                                                                                                                                                                                                                                                                                                                                                                                                                                                                                                                                                                                                                                                                                                                                                                                                                                                                                                                                                                                                                                                                                                                                                                                                                                                                                                                                                                                                                                                                                 | SA Pathology                                                                                                     | SA Pathology                                                                                                                     | Lex Leong, Julien Soubrier, Chuan Kok Lim, Song Gao, Mark Turra, Karin Kassahn, Ivan Bastian, Geoff Higgins                                                                                                                                                                                                                                                                                                                                                                                             |
| EPI_ISL_765570                                                                                                                                                                                                                                                                                                                                                                                                                                                                                                                                                                                                                                                                                                                                                                                                                                                                                                                                                                                                                                                                                                                                                                                                                                                                                                                                                                                                                                                                                                                                                                                                                 | National Institute for Infectious Diseases, INMI, "L. Spallanzani" IRCCS                                         | National Institute for Infectious Diseases, INMI, "L. Spallanzani" IRCCS                                                         | M. Rueca, C.E.M Gruber, B Bartolini, O Butera, F Messina, E Giombini, A Di Caro, MR Capobianchi                                                                                                                                                                                                                                                                                                                                                                                                         |
| EPI_ISL_768509, EPI_ISL_768510, EPI_ISL_768511, EPI_ISL_768512, EPI_ISL_768513, EPI_ISL_768514, EPI_ISL_768515, EPI_ISL_768516, EPI_ISL_768517, EPI_ISL_768518, EPI_ISL_768519, EPI_ISL_768520                                                                                                                                                                                                                                                                                                                                                                                                                                                                                                                                                                                                                                                                                                                                                                                                                                                                                                                                                                                                                                                                                                                                                                                                                                                                                                                                                                                                                                 | LSUHS Emerging Viral Threat Laboratory                                                                           | Microbial Genome Sequencing Center                                                                                               | Maarten Van Diest, Jeremy P. Kamil, Jennifer L. Carroll, Camille F. Abshire, Andrew D. Yurochko, Martin J. Sapp, Rona S. Scott, Christopher G. Kevill, Daniel J. Snyder, Vaughn S. Cooper, John A. Vanchiere                                                                                                                                                                                                                                                                                            |
| EPI_ISL_770498, EPI_ISL_770499, EPI_ISL_770500, EPI_ISL_770501, EPI_ISL_770502, EPI_ISL_770503, EPI_ISL_770504, EPI_ISL_770505, EPI_ISL_770506, EPI_ISL_770507, EPI_ISL_770508, EPI_ISL_770509, EPI_ISL_770510, EPI_ISL_770511, EPI_ISL_770512, EPI_ISL_770513, EPI_ISL_770514, EPI_ISL_770515, EPI_ISL_770516, EPI_ISL_770517, EPI_ISL_770518, EPI_ISL_770519, EPI_ISL_770520, EPI_ISL_770521, EPI_ISL_770522, EPI_ISL_770523, EPI_ISL_770524, EPI_ISL_770525, EPI_ISL_770526, EPI_ISL_770527, EPI_ISL_770528, EPI_ISL_770529, EPI_ISL_770530, EPI_ISL_770531, EPI_ISL_770532                                                                                                                                                                                                                                                                                                                                                                                                                                                                                                                                                                                                                                                                                                                                                                                                                                                                                                                                                                                                                                                 | Lithuanian University of Health Sciences Hospital, Department of Laboratory Medicine                             | Lithuanian University of Health Sciences, Molecular cardiology lab.                                                              | Lukas Zemaitis, Ingrida Olendrait, Arnoldas Pautienius, Kamile Tamauskaite, Dovydas Gecys, Laura Pareckaitė, Vaiva Lesauskaite, Astra Vitkauskiene                                                                                                                                                                                                                                                                                                                                                      |
| EPI_ISL_770533, EPI_ISL_770534, EPI_ISL_770535, EPI_ISL_770536, EPI_ISL_770537, EPI_ISL_770538, EPI_ISL_770539, EPI_ISL_770540, EPI_ISL_770541, EPI_ISL_770542, EPI_ISL_770543, EPI_ISL_770544, EPI_ISL_770545, EPI_ISL_770546, EPI_ISL_770547, EPI_ISL_770548, EPI_ISL_770549                                                                                                                                                                                                                                                                                                                                                                                                                                                                                                                                                                                                                                                                                                                                                                                                                                                                                                                                                                                                                                                                                                                                                                                                                                                                                                                                                 | Private lab                                                                                                      | Lithuanian University of Health Sciences, Molecular cardiology lab.                                                              | Lukas Zemaitis, Ingrida Olendrait, Arnoldas Pautienius, Kamile Tamauskaite, Dovydas Gecys, Laura Pareckaitė, Vaiva Lesauskaite, Astra Vitkauskiene                                                                                                                                                                                                                                                                                                                                                      |
| EPI_ISL_770550                                                                                                                                                                                                                                                                                                                                                                                                                                                                                                                                                                                                                                                                                                                                                                                                                                                                                                                                                                                                                                                                                                                                                                                                                                                                                                                                                                                                                                                                                                                                                                                                                 | Lithuanian University of Health Sciences Hospital, Department of Laboratory Medicine                             | Lithuanian University of Health Sciences, Molecular cardiology lab.                                                              | Lukas Zemaitis, Ingrida Olendrait, Arnoldas Pautienius, Kamile Tamauskaite, Dovydas Gecys, Laura Pareckaitė, Vaiva Lesauskaite, Astra Vitkauskiene                                                                                                                                                                                                                                                                                                                                                      |
| EPI_ISL_771367, EPI_ISL_771368, EPI_ISL_771369, EPI_ISL_771370                                                                                                                                                                                                                                                                                                                                                                                                                                                                                                                                                                                                                                                                                                                                                                                                                                                                                                                                                                                                                                                                                                                                                                                                                                                                                                                                                                                                                                                                                                                                                                 | SA Pathology                                                                                                     | SA Pathology                                                                                                                     | Lex Leong, Julien Soubrier, Chuan Kok Lim, Song Gao, Mark Turra, Karin Kassahn, Ivan Bastian, Geoff Higgins                                                                                                                                                                                                                                                                                                                                                                                             |
| EPI_ISL_779117, EPI_ISL_779118, EPI_ISL_779119, EPI_ISL_779120, EPI_ISL_779121, EPI_ISL_779122, EPI_ISL_779123, EPI_ISL_779124, EPI_ISL_779125, EPI_ISL_779126, EPI_ISL_779127, EPI_ISL_779128                                                                                                                                                                                                                                                                                                                                                                                                                                                                                                                                                                                                                                                                                                                                                                                                                                                                                                                                                                                                                                                                                                                                                                                                                                                                                                                                                                                                                                 | LSUHS Emerging Viral Threat Laboratory                                                                           | Microbial Genome Sequencing Center                                                                                               | Maarten Van Diest, Jeremy P. Kamil, Jennifer L. Carroll, Camille F. Abshire, Andrew D. Yurochko, Martin J. Sapp, Rona S. Scott, Christopher G. Kevill, Daniel J. Snyder, Vaughn S. Cooper, John A. Vanchiere                                                                                                                                                                                                                                                                                            |
| EPI_ISL_794744                                                                                                                                                                                                                                                                                                                                                                                                                                                                                                                                                                                                                                                                                                                                                                                                                                                                                                                                                                                                                                                                                                                                                                                                                                                                                                                                                                                                                                                                                                                                                                                                                 | National Institute of Infectious Diseases-Prof. Dr. Matei Bals Molecular Diagnostics Laboratory                  | National Institute of Infectious Diseases-Prof. Dr. Matei Bals Molecular Diagnostics Laboratory                                  | Leontina Banica, Marius Surleac, Corina Casangiu, Petre Milu, Andreea Tudor, Simona Paraschiv, Dan Otelea                                                                                                                                                                                                                                                                                                                                                                                               |
| EPI_ISL_801540, EPI_ISL_801541, EPI_ISL_801542, EPI_ISL_801543, EPI_ISL_801547, EPI_ISL_801552, EPI_ISL_801553                                                                                                                                                                                                                                                                                                                                                                                                                                                                                                                                                                                                                                                                                                                                                                                                                                                                                                                                                                                                                                                                                                                                                                                                                                                                                                                                                                                                                                                                                                                 | Laboratory of Molecular Virology, Pontificia Universidad Católica de Chile                                       | MSHS Pathogen Surveillance Program                                                                                               | Leonardo I. Almonacid, Ana S. Gonzalez-Reiche, Matthew M. Hernandez, Jorge Levican, Ana Maria Contreras, Carlos Palma, Tamara Garcia-Salum, Zenab Khan, Adriana van De Guchte, Ajay Obla, Jayeeta Dutta, Bremy Albuquerque, Eileen Serrano, Constanza Maldonado, M. Belem Leyton, Erick Salinas, Hala Alshammry, Juan Soto, Shwetha Hara Sridhar, Ying-Chih Wang, Melissa Smith, Robert Sebra, Marcela Ferres, Adolfo Garcia-Sastre, Edward C. Holmes, Viviana Simon, Harm van Bakel, Rafael A. Medina. |

|                                                                                                                                                                                                                                                                                                                                                                                                                                                                                                                                                                                                                                                                                                                                                                                                                                                                                                                                                                                                                                                                                                                                                                                                                                                                                                                                                                                                                                                                                                                                                                                                                                                                                                                                                                                                                                                                                                                                                                                                                                                                                                                                                                                                                                                |                |                                                                                                                                                                                                          |                                                                                                                                                                |                                                                                                                                                                                                                                                                                                                                                                                                                                                                                                          |                                                                                                                                        |                                                                                                                                                |                                                                |                |                                                |                                                                                                                |                                |                                |                                                                |
|------------------------------------------------------------------------------------------------------------------------------------------------------------------------------------------------------------------------------------------------------------------------------------------------------------------------------------------------------------------------------------------------------------------------------------------------------------------------------------------------------------------------------------------------------------------------------------------------------------------------------------------------------------------------------------------------------------------------------------------------------------------------------------------------------------------------------------------------------------------------------------------------------------------------------------------------------------------------------------------------------------------------------------------------------------------------------------------------------------------------------------------------------------------------------------------------------------------------------------------------------------------------------------------------------------------------------------------------------------------------------------------------------------------------------------------------------------------------------------------------------------------------------------------------------------------------------------------------------------------------------------------------------------------------------------------------------------------------------------------------------------------------------------------------------------------------------------------------------------------------------------------------------------------------------------------------------------------------------------------------------------------------------------------------------------------------------------------------------------------------------------------------------------------------------------------------------------------------------------------------|----------------|----------------------------------------------------------------------------------------------------------------------------------------------------------------------------------------------------------|----------------------------------------------------------------------------------------------------------------------------------------------------------------|----------------------------------------------------------------------------------------------------------------------------------------------------------------------------------------------------------------------------------------------------------------------------------------------------------------------------------------------------------------------------------------------------------------------------------------------------------------------------------------------------------|----------------------------------------------------------------------------------------------------------------------------------------|------------------------------------------------------------------------------------------------------------------------------------------------|----------------------------------------------------------------|----------------|------------------------------------------------|----------------------------------------------------------------------------------------------------------------|--------------------------------|--------------------------------|----------------------------------------------------------------|
| EPI_ISL_801555, EPI_ISL_801558, EPI_ISL_801559, EPI_ISL_801560, EPI_ISL_801561, EPI_ISL_801564, EPI_ISL_801566, EPI_ISL_801567, EPI_ISL_801568, EPI_ISL_801569, EPI_ISL_801570, EPI_ISL_801574, EPI_ISL_801575, EPI_ISL_801577, EPI_ISL_801578, EPI_ISL_801579                                                                                                                                                                                                                                                                                                                                                                                                                                                                                                                                                                                                                                                                                                                                                                                                                                                                                                                                                                                                                                                                                                                                                                                                                                                                                                                                                                                                                                                                                                                                                                                                                                                                                                                                                                                                                                                                                                                                                                                 | see above      | Laboratory of Molecular Virology, Pontificia Universidad Católica de Chile                                                                                                                               | MSSH Pathogen Surveillance Program                                                                                                                             | Leonardo I. Almonacid, Ana S. Gonzalez-Reiche, Matthew M. Hernandez, Jorge Levican, Tamara García-Salum, Zenab Khan, Adriana van De Guchte, Ajay Obla, Jayeeta Dutta, Bremy Albuquerque, Eileen Serrano, Erick Salinas, Manuel Ampuero, Hala Alshammary, Juan Soto, Shwetha Hara Sridhar, Ying-Chih Wang, Melissa Smith, Robert Sebra, Fernando Valiente, Aldo Gaggero, Adolfo Garcia-Sastre, Edward C. Holmes, Viviana Simon, Harm van Bakel, Rafael A. Medina.                                         |                                                                                                                                        |                                                                                                                                                |                                                                |                |                                                |                                                                                                                |                                |                                |                                                                |
| EPI_ISL_801581, EPI_ISL_801585, EPI_ISL_801586, EPI_ISL_801587, EPI_ISL_801591, EPI_ISL_801592, EPI_ISL_801594, EPI_ISL_801595, EPI_ISL_801597                                                                                                                                                                                                                                                                                                                                                                                                                                                                                                                                                                                                                                                                                                                                                                                                                                                                                                                                                                                                                                                                                                                                                                                                                                                                                                                                                                                                                                                                                                                                                                                                                                                                                                                                                                                                                                                                                                                                                                                                                                                                                                 | EPI_ISL_801598 | Laboratory of Molecular Virology, Pontificia Universidad Católica de Chile                                                                                                                               | MSSH Pathogen Surveillance Program                                                                                                                             | Leonardo I. Almonacid, Ana S. Gonzalez-Reiche, Matthew M. Hernandez, Jorge Levican, Tamara García-Salum, Zenab Khan, Adriana van De Guchte, Ajay Obla, Jayeeta Dutta, Bremy Albuquerque, Eileen Serrano, Erick Salinas, Hala Alshammary, Juan Soto, Shwetha Hara Sridhar, Ying-Chih Wang, Melissa Smith, Robert Sebra, Adolfo Garcia-Sastre, Edward C. Holmes, Viviana Simon, Harm van Bakel, Rafael A. Medina                                                                                           |                                                                                                                                        |                                                                                                                                                |                                                                |                |                                                |                                                                                                                |                                |                                |                                                                |
| EPI_ISL_801599, EPI_ISL_801600, EPI_ISL_801605, EPI_ISL_801606, EPI_ISL_801608, EPI_ISL_801610, EPI_ISL_801611, EPI_ISL_801614, EPI_ISL_801616, EPI_ISL_801617, EPI_ISL_801619, EPI_ISL_801620, EPI_ISL_801621, EPI_ISL_801623, EPI_ISL_801624, EPI_ISL_801625, EPI_ISL_801626, EPI_ISL_801627, EPI_ISL_801628, EPI_ISL_801631, EPI_ISL_801633, EPI_ISL_801635, EPI_ISL_801637, EPI_ISL_801639, EPI_ISL_801640, EPI_ISL_801643, EPI_ISL_801645, EPI_ISL_801647, EPI_ISL_801648, EPI_ISL_801651, EPI_ISL_801655, EPI_ISL_801657, EPI_ISL_801660, EPI_ISL_801661, EPI_ISL_801666, EPI_ISL_801669, EPI_ISL_801671, EPI_ISL_801672, EPI_ISL_801674, EPI_ISL_801677, EPI_ISL_801680, EPI_ISL_801682, EPI_ISL_801684, EPI_ISL_801685, EPI_ISL_801690, EPI_ISL_801693, EPI_ISL_801694, EPI_ISL_801695, EPI_ISL_801696, EPI_ISL_801699, EPI_ISL_801702, EPI_ISL_801703, EPI_ISL_801708, EPI_ISL_801709, EPI_ISL_801711, EPI_ISL_801714, EPI_ISL_801718, EPI_ISL_801725, EPI_ISL_801726, EPI_ISL_801727, EPI_ISL_801731, EPI_ISL_801732, EPI_ISL_801738, EPI_ISL_801739, EPI_ISL_801741, EPI_ISL_801746, EPI_ISL_801747, EPI_ISL_801748, EPI_ISL_801749, EPI_ISL_801750, EPI_ISL_801751, EPI_ISL_801752, EPI_ISL_801753, EPI_ISL_801754, EPI_ISL_801755, EPI_ISL_801756, EPI_ISL_801758, EPI_ISL_801760, EPI_ISL_801761, EPI_ISL_801763, EPI_ISL_801765, EPI_ISL_801766, EPI_ISL_801767, EPI_ISL_801768, EPI_ISL_801771, EPI_ISL_801773, EPI_ISL_801776, EPI_ISL_801778, EPI_ISL_801780, EPI_ISL_801782, EPI_ISL_801783, EPI_ISL_801785, EPI_ISL_801787, EPI_ISL_801788, EPI_ISL_801789, EPI_ISL_801792, EPI_ISL_801793, EPI_ISL_801795, EPI_ISL_801796, EPI_ISL_801797, EPI_ISL_801801, EPI_ISL_801802, EPI_ISL_801804, EPI_ISL_801805, EPI_ISL_801806, EPI_ISL_801807, EPI_ISL_801808, EPI_ISL_801813, EPI_ISL_801814, EPI_ISL_801815, EPI_ISL_801816, EPI_ISL_801817, EPI_ISL_801818, EPI_ISL_801819, EPI_ISL_801820, EPI_ISL_801824, EPI_ISL_801826, EPI_ISL_801827, EPI_ISL_801828, EPI_ISL_801829, EPI_ISL_801831, EPI_ISL_801832, EPI_ISL_801833, EPI_ISL_801834, EPI_ISL_801836, EPI_ISL_801837, EPI_ISL_801838, EPI_ISL_801839, EPI_ISL_801840, EPI_ISL_801841, EPI_ISL_801843, EPI_ISL_801845, EPI_ISL_801846, EPI_ISL_801847, EPI_ISL_801852 | see above      | Laboratory of Molecular Virology, Pontificia Universidad Católica de Chile                                                                                                                               | MSSH Pathogen Surveillance Program                                                                                                                             | Leonardo I. Almonacid, Ana S. Gonzalez-Reiche, Matthew M. Hernandez, Jorge Levican, Ana Maria Contreras, Carlos Palma, Tamara García-Salum, Zenab Khan, Adriana van De Guchte, Ajay Obla, Jayeeta Dutta, Bremy Albuquerque, Eileen Serrano, Constanza Maldonado, M. Belen Leyton, Erick Salinas, Hala Alshammary, Juan Soto, Shwetha Hara Sridhar, Ying-Chih Wang, Melissa Smith, Robert Sebra, Marcela Ferres, Adolfo Garcia-Sastre, Edward C. Holmes, Viviana Simon, Harm van Bakel, Rafael A. Medina. |                                                                                                                                        |                                                                                                                                                |                                                                |                |                                                |                                                                                                                |                                |                                |                                                                |
| EPI_ISL_801853, EPI_ISL_801854, EPI_ISL_801855, EPI_ISL_801856, EPI_ISL_801857, EPI_ISL_801858, EPI_ISL_801859, EPI_ISL_801860                                                                                                                                                                                                                                                                                                                                                                                                                                                                                                                                                                                                                                                                                                                                                                                                                                                                                                                                                                                                                                                                                                                                                                                                                                                                                                                                                                                                                                                                                                                                                                                                                                                                                                                                                                                                                                                                                                                                                                                                                                                                                                                 | EPI_ISL_803896 | Laboratory of Molecular Virology, Pontificia Universidad Católica de Chile                                                                                                                               | MSSH Pathogen Surveillance Program                                                                                                                             | Leonardo I. Almonacid, Ana S. Gonzalez-Reiche, Matthew M. Hernandez, Jorge Levican, Tamara García-Salum, Zenab Khan, Adriana van De Guchte, Ajay Obla, Jayeeta Dutta, Bremy Albuquerque, Eileen Serrano, Constanza Maldonado, M. Belen Leyton, Erick Salinas, Hala Alshammary, Juan Soto, Shwetha Hara Sridhar, Ying-Chih Wang, Melissa Smith, Robert Sebra, Fernando Valiente, Aldo Gaggero, Adolfo Garcia-Sastre, Edward C. Holmes, Viviana Simon, Harm van Bakel, Rafael A. Medina.                   |                                                                                                                                        |                                                                                                                                                |                                                                |                |                                                |                                                                                                                |                                |                                |                                                                |
| EPI_ISL_804038, EPI_ISL_804040, EPI_ISL_804041, EPI_ISL_804044, EPI_ISL_804048, EPI_ISL_804050, EPI_ISL_804051, EPI_ISL_804052, EPI_ISL_804053, EPI_ISL_804054                                                                                                                                                                                                                                                                                                                                                                                                                                                                                                                                                                                                                                                                                                                                                                                                                                                                                                                                                                                                                                                                                                                                                                                                                                                                                                                                                                                                                                                                                                                                                                                                                                                                                                                                                                                                                                                                                                                                                                                                                                                                                 | EPI_ISL_806730 | SC (UCO) Igiene e Sanità Pubblica (funzione integrata con SC Microbiologia e Virologia) e Laboratory of Molecular Virology of the International Centre for Genetic Engineering and Biotechnology (ICGEB) | National Institute for Infectious Diseases, INMI, "L. Spallanzani" IRCCS                                                                                       | ARGO Laboratorio Genomica ed Epigenomica                                                                                                                                                                                                                                                                                                                                                                                                                                                                 | Licastro D, Dal Monego S, Degasperis M, Marcello A, D'Agaro P                                                                          |                                                                                                                                                |                                                                |                |                                                |                                                                                                                |                                |                                |                                                                |
| EPI_ISL_806731, EPI_ISL_806732                                                                                                                                                                                                                                                                                                                                                                                                                                                                                                                                                                                                                                                                                                                                                                                                                                                                                                                                                                                                                                                                                                                                                                                                                                                                                                                                                                                                                                                                                                                                                                                                                                                                                                                                                                                                                                                                                                                                                                                                                                                                                                                                                                                                                 | EPI_ISL_806733 | EPI_ISL_806734                                                                                                                                                                                           | EPI_ISL_806735, EPI_ISL_806736, EPI_ISL_806737, EPI_ISL_806738, EPI_ISL_806739, EPI_ISL_806740, EPI_ISL_806741, EPI_ISL_806742, EPI_ISL_806743, EPI_ISL_806744 | EPI_ISL_806745                                                                                                                                                                                                                                                                                                                                                                                                                                                                                           | EPI_ISL_806746, EPI_ISL_806747, EPI_ISL_806748                                                                                         | EPI_ISL_806749, EPI_ISL_806750, EPI_ISL_806751, EPI_ISL_806752, EPI_ISL_806753, EPI_ISL_806754, EPI_ISL_806755, EPI_ISL_806756, EPI_ISL_806757 | EPI_ISL_806758, EPI_ISL_806759, EPI_ISL_806760, EPI_ISL_806761 | EPI_ISL_806762 | EPI_ISL_806763, EPI_ISL_806764, EPI_ISL_806765 | EPI_ISL_806766, EPI_ISL_806767, EPI_ISL_806768, EPI_ISL_806769, EPI_ISL_806770, EPI_ISL_806771, EPI_ISL_806772 | EPI_ISL_806773, EPI_ISL_806774 | EPI_ISL_806775, EPI_ISL_806776 | EPI_ISL_806777, EPI_ISL_806778, EPI_ISL_806779, EPI_ISL_806780 |
|                                                                                                                                                                                                                                                                                                                                                                                                                                                                                                                                                                                                                                                                                                                                                                                                                                                                                                                                                                                                                                                                                                                                                                                                                                                                                                                                                                                                                                                                                                                                                                                                                                                                                                                                                                                                                                                                                                                                                                                                                                                                                                                                                                                                                                                |                | Presidio Ospedaliero S.Liberatore Atri                                                                                                                                                                   | Istituto Zooprofilattico Sperimentale dell'Abruzzo e Molise "G. Caporale"                                                                                      |                                                                                                                                                                                                                                                                                                                                                                                                                                                                                                          | Lorusso A, Marcacci M, Di Domenico M, Ancora M, Curini V, Mangone I, Rinaldi A, Di Pasquale A, Cammà C, Puglia I, Calistri P, Savini G |                                                                                                                                                |                                                                |                |                                                |                                                                                                                |                                |                                |                                                                |
|                                                                                                                                                                                                                                                                                                                                                                                                                                                                                                                                                                                                                                                                                                                                                                                                                                                                                                                                                                                                                                                                                                                                                                                                                                                                                                                                                                                                                                                                                                                                                                                                                                                                                                                                                                                                                                                                                                                                                                                                                                                                                                                                                                                                                                                |                | SIESP DIPARTIMENTO DI PREVENZIONE CHIETI                                                                                                                                                                 | Istituto Zooprofilattico Sperimentale dell'Abruzzo e Molise "G. Caporale"                                                                                      |                                                                                                                                                                                                                                                                                                                                                                                                                                                                                                          | Lorusso A, Marcacci M, Di Domenico M, Ancora M, Curini V, Mangone I, Rinaldi A, Di Pasquale A, Cammà C, Puglia I, Calistri P, Savini G |                                                                                                                                                |                                                                |                |                                                |                                                                                                                |                                |                                |                                                                |
|                                                                                                                                                                                                                                                                                                                                                                                                                                                                                                                                                                                                                                                                                                                                                                                                                                                                                                                                                                                                                                                                                                                                                                                                                                                                                                                                                                                                                                                                                                                                                                                                                                                                                                                                                                                                                                                                                                                                                                                                                                                                                                                                                                                                                                                |                | SIESP CHIETI - DRIVE IN CHIETI                                                                                                                                                                           | Istituto Zooprofilattico Sperimentale dell'Abruzzo e Molise "G. Caporale"                                                                                      |                                                                                                                                                                                                                                                                                                                                                                                                                                                                                                          | Lorusso A, Marcacci M, Di Domenico M, Ancora M, Curini V, Mangone I, Rinaldi A, Di Pasquale A, Cammà C, Puglia I, Calistri P, Savini G |                                                                                                                                                |                                                                |                |                                                |                                                                                                                |                                |                                |                                                                |
|                                                                                                                                                                                                                                                                                                                                                                                                                                                                                                                                                                                                                                                                                                                                                                                                                                                                                                                                                                                                                                                                                                                                                                                                                                                                                                                                                                                                                                                                                                                                                                                                                                                                                                                                                                                                                                                                                                                                                                                                                                                                                                                                                                                                                                                |                | SIESP CHIETI - DRIVE IN LANCIANO                                                                                                                                                                         | Istituto Zooprofilattico Sperimentale dell'Abruzzo e Molise "G. Caporale"                                                                                      |                                                                                                                                                                                                                                                                                                                                                                                                                                                                                                          | Lorusso A, Marcacci M, Di Domenico M, Ancora M, Curini V, Mangone I, Rinaldi A, Di Pasquale A, Cammà C, Puglia I, Calistri P, Savini G |                                                                                                                                                |                                                                |                |                                                |                                                                                                                |                                |                                |                                                                |
|                                                                                                                                                                                                                                                                                                                                                                                                                                                                                                                                                                                                                                                                                                                                                                                                                                                                                                                                                                                                                                                                                                                                                                                                                                                                                                                                                                                                                                                                                                                                                                                                                                                                                                                                                                                                                                                                                                                                                                                                                                                                                                                                                                                                                                                |                | SIESP DIPARTIMENTO DI PREVENZIONE TERAMO                                                                                                                                                                 | Istituto Zooprofilattico Sperimentale dell'Abruzzo e Molise "G. Caporale"                                                                                      |                                                                                                                                                                                                                                                                                                                                                                                                                                                                                                          | Lorusso A, Marcacci M, Di Domenico M, Ancora M, Curini V, Mangone I, Rinaldi A, Di Pasquale A, Cammà C, Puglia I, Calistri P, Savini G |                                                                                                                                                |                                                                |                |                                                |                                                                                                                |                                |                                |                                                                |
|                                                                                                                                                                                                                                                                                                                                                                                                                                                                                                                                                                                                                                                                                                                                                                                                                                                                                                                                                                                                                                                                                                                                                                                                                                                                                                                                                                                                                                                                                                                                                                                                                                                                                                                                                                                                                                                                                                                                                                                                                                                                                                                                                                                                                                                |                | RSA Giulianova                                                                                                                                                                                           | Istituto Zooprofilattico Sperimentale dell'Abruzzo e Molise "G. Caporale"                                                                                      |                                                                                                                                                                                                                                                                                                                                                                                                                                                                                                          | Lorusso A, Marcacci M, Di Domenico M, Ancora M, Curini V, Mangone I, Rinaldi A, Di Pasquale A, Cammà C, Puglia I, Calistri P, Savini G |                                                                                                                                                |                                                                |                |                                                |                                                                                                                |                                |                                |                                                                |
|                                                                                                                                                                                                                                                                                                                                                                                                                                                                                                                                                                                                                                                                                                                                                                                                                                                                                                                                                                                                                                                                                                                                                                                                                                                                                                                                                                                                                                                                                                                                                                                                                                                                                                                                                                                                                                                                                                                                                                                                                                                                                                                                                                                                                                                |                | SIESP DIPARTIMENTO DI PREVENZIONE TERAMO                                                                                                                                                                 | Istituto Zooprofilattico Sperimentale dell'Abruzzo e Molise "G. Caporale"                                                                                      |                                                                                                                                                                                                                                                                                                                                                                                                                                                                                                          | Lorusso A, Marcacci M, Di Domenico M, Ancora M, Curini V, Mangone I, Rinaldi A, Di Pasquale A, Cammà C, Puglia I, Calistri P, Savini G |                                                                                                                                                |                                                                |                |                                                |                                                                                                                |                                |                                |                                                                |
|                                                                                                                                                                                                                                                                                                                                                                                                                                                                                                                                                                                                                                                                                                                                                                                                                                                                                                                                                                                                                                                                                                                                                                                                                                                                                                                                                                                                                                                                                                                                                                                                                                                                                                                                                                                                                                                                                                                                                                                                                                                                                                                                                                                                                                                |                | SIESP DIPARTIMENTO DI PREVENZIONE SULMONA                                                                                                                                                                | Istituto Zooprofilattico Sperimentale dell'Abruzzo e Molise "G. Caporale"                                                                                      |                                                                                                                                                                                                                                                                                                                                                                                                                                                                                                          | Lorusso A, Marcacci M, Di Domenico M, Ancora M, Curini V, Mangone I, Rinaldi A, Di Pasquale A, Cammà C, Puglia I, Calistri P, Savini G |                                                                                                                                                |                                                                |                |                                                |                                                                                                                |                                |                                |                                                                |
|                                                                                                                                                                                                                                                                                                                                                                                                                                                                                                                                                                                                                                                                                                                                                                                                                                                                                                                                                                                                                                                                                                                                                                                                                                                                                                                                                                                                                                                                                                                                                                                                                                                                                                                                                                                                                                                                                                                                                                                                                                                                                                                                                                                                                                                |                | DIPARTIMENTO PREVENZIONE AVEZZANO-SERVIZIO DI IGIENE EPIDEMIOLOGIA E SANITA' PUBBLICA                                                                                                                    | Istituto Zooprofilattico Sperimentale dell'Abruzzo e Molise "G. Caporale"                                                                                      |                                                                                                                                                                                                                                                                                                                                                                                                                                                                                                          | Lorusso A, Marcacci M, Di Domenico M, Ancora M, Curini V, Mangone I, Rinaldi A, Di Pasquale A, Cammà C, Puglia I, Calistri P, Savini G |                                                                                                                                                |                                                                |                |                                                |                                                                                                                |                                |                                |                                                                |
|                                                                                                                                                                                                                                                                                                                                                                                                                                                                                                                                                                                                                                                                                                                                                                                                                                                                                                                                                                                                                                                                                                                                                                                                                                                                                                                                                                                                                                                                                                                                                                                                                                                                                                                                                                                                                                                                                                                                                                                                                                                                                                                                                                                                                                                |                | SIESP CHIETI - DRIVE IN ORTONA                                                                                                                                                                           | Istituto Zooprofilattico Sperimentale dell'Abruzzo e Molise "G. Caporale"                                                                                      |                                                                                                                                                                                                                                                                                                                                                                                                                                                                                                          | Lorusso A, Marcacci M, Di Domenico M, Ancora M, Curini V, Mangone I, Rinaldi A, Di Pasquale A, Cammà C, Puglia I, Calistri P, Savini G |                                                                                                                                                |                                                                |                |                                                |                                                                                                                |                                |                                |                                                                |
|                                                                                                                                                                                                                                                                                                                                                                                                                                                                                                                                                                                                                                                                                                                                                                                                                                                                                                                                                                                                                                                                                                                                                                                                                                                                                                                                                                                                                                                                                                                                                                                                                                                                                                                                                                                                                                                                                                                                                                                                                                                                                                                                                                                                                                                |                | DIPARTIMENTO PREVENZIONE AVEZZANO-SERVIZIO DI IGIENE EPIDEMIOLOGIA E SANITA' PUBBLICA                                                                                                                    | Istituto Zooprofilattico Sperimentale dell'Abruzzo e Molise "G. Caporale"                                                                                      |                                                                                                                                                                                                                                                                                                                                                                                                                                                                                                          | Lorusso A, Marcacci M, Di Domenico M, Ancora M, Curini V, Mangone I, Rinaldi A, Di Pasquale A, Cammà C, Puglia I, Calistri P, Savini G |                                                                                                                                                |                                                                |                |                                                |                                                                                                                |                                |                                |                                                                |
|                                                                                                                                                                                                                                                                                                                                                                                                                                                                                                                                                                                                                                                                                                                                                                                                                                                                                                                                                                                                                                                                                                                                                                                                                                                                                                                                                                                                                                                                                                                                                                                                                                                                                                                                                                                                                                                                                                                                                                                                                                                                                                                                                                                                                                                |                | SIESP DIPARTIMENTO DI PREVENZIONE TERAMO                                                                                                                                                                 | Istituto Zooprofilattico Sperimentale dell'Abruzzo e Molise "G. Caporale"                                                                                      |                                                                                                                                                                                                                                                                                                                                                                                                                                                                                                          | Lorusso A, Marcacci M, Di Domenico M, Ancora M, Curini V, Mangone I, Rinaldi A, Di Pasquale A, Cammà C, Puglia I, Calistri P, Savini G |                                                                                                                                                |                                                                |                |                                                |                                                                                                                |                                |                                |                                                                |
|                                                                                                                                                                                                                                                                                                                                                                                                                                                                                                                                                                                                                                                                                                                                                                                                                                                                                                                                                                                                                                                                                                                                                                                                                                                                                                                                                                                                                                                                                                                                                                                                                                                                                                                                                                                                                                                                                                                                                                                                                                                                                                                                                                                                                                                |                | Ospedale S.Salvatore-Medicina Interna L'Aquila                                                                                                                                                           | Istituto Zooprofilattico Sperimentale dell'Abruzzo e Molise "G. Caporale"                                                                                      |                                                                                                                                                                                                                                                                                                                                                                                                                                                                                                          | Lorusso A, Marcacci M, Di Domenico M, Ancora M, Curini V, Mangone I, Rinaldi A, Di Pasquale A, Cammà C, Puglia I, Calistri P, Savini G |                                                                                                                                                |                                                                |                |                                                |                                                                                                                |                                |                                |                                                                |
|                                                                                                                                                                                                                                                                                                                                                                                                                                                                                                                                                                                                                                                                                                                                                                                                                                                                                                                                                                                                                                                                                                                                                                                                                                                                                                                                                                                                                                                                                                                                                                                                                                                                                                                                                                                                                                                                                                                                                                                                                                                                                                                                                                                                                                                |                | SIESP CHIETI - DRIVE IN LANCIANO                                                                                                                                                                         | Istituto Zooprofilattico Sperimentale dell'Abruzzo e Molise "G. Caporale"                                                                                      |                                                                                                                                                                                                                                                                                                                                                                                                                                                                                                          | Lorusso A, Marcacci M, Di Domenico M, Ancora M, Curini V, Mangone I, Rinaldi A, Di Pasquale A, Cammà C, Puglia I, Calistri P, Savini G |                                                                                                                                                |                                                                |                |                                                |                                                                                                                |                                |                                |                                                                |
|                                                                                                                                                                                                                                                                                                                                                                                                                                                                                                                                                                                                                                                                                                                                                                                                                                                                                                                                                                                                                                                                                                                                                                                                                                                                                                                                                                                                                                                                                                                                                                                                                                                                                                                                                                                                                                                                                                                                                                                                                                                                                                                                                                                                                                                |                | SIESP DIPARTIMENTO DI PREVENZIONE TERAMO                                                                                                                                                                 | Istituto Zooprofilattico Sperimentale dell'Abruzzo e Molise "G. Caporale"                                                                                      |                                                                                                                                                                                                                                                                                                                                                                                                                                                                                                          | Lorusso A, Marcacci M, Di Domenico M, Ancora M, Curini V, Mangone I, Rinaldi A, Di Pasquale A, Cammà C, Puglia I, Calistri P, Savini G |                                                                                                                                                |                                                                |                |                                                |                                                                                                                |                                |                                |                                                                |

|                                                                                                                                                                                                                                                                |                                                                                       |                                                                                                 |                                                                                                                                                          |
|----------------------------------------------------------------------------------------------------------------------------------------------------------------------------------------------------------------------------------------------------------------|---------------------------------------------------------------------------------------|-------------------------------------------------------------------------------------------------|----------------------------------------------------------------------------------------------------------------------------------------------------------|
| EPI_ISL_806781, EPI_ISL_806782                                                                                                                                                                                                                                 | DIPARTIMENTO PREVENZIONE AVEZZANO-SERVIZIO DI IGIENE EPIDEMIOLOGIA E SANITA' PUBBLICA | Istituto Zooprofilattico Sperimentale dell'Abruzzo e Molise "G. Caporale"                       | Lorusso A, Marcacci M, Di Domenico M, Ancora M, Curini V, Mangone I, Rinaldi A, Di Pasquale A, Cammà C, Puglia I, Calistri P, Savini G                   |
| EPI_ISL_806783                                                                                                                                                                                                                                                 | Casa di cura Di Lorenzo- Avezzano                                                     | Istituto Zooprofilattico Sperimentale dell'Abruzzo e Molise "G. Caporale"                       | Lorusso A, Marcacci M, Di Domenico M, Ancora M, Curini V, Mangone I, Rinaldi A, Di Pasquale A, Cammà C, Puglia I, Calistri P, Savini G                   |
| EPI_ISL_806784, EPI_ISL_806785                                                                                                                                                                                                                                 | Ospedale Civile G.Mazzini-Teramo                                                      | Istituto Zooprofilattico Sperimentale dell'Abruzzo e Molise "G. Caporale"                       | Lorusso A, Marcacci M, Di Domenico M, Ancora M, Curini V, Mangone I, Rinaldi A, Di Pasquale A, Cammà C, Puglia I, Calistri P, Savini G                   |
| EPI_ISL_806786, EPI_ISL_806787, EPI_ISL_806788                                                                                                                                                                                                                 | SIESP DIPARTIMENTO DI PREVENZIONE TERAMO                                              | Istituto Zooprofilattico Sperimentale dell'Abruzzo e Molise "G. Caporale"                       | Lorusso A, Marcacci M, Di Domenico M, Ancora M, Curini V, Mangone I, Rinaldi A, Di Pasquale A, Cammà C, Puglia I, Calistri P, Savini G                   |
| EPI_ISL_806789                                                                                                                                                                                                                                                 | Ospedale Civile Giulianova                                                            | Istituto Zooprofilattico Sperimentale dell'Abruzzo e Molise "G. Caporale"                       | Lorusso A, Marcacci M, Di Domenico M, Ancora M, Curini V, Mangone I, Rinaldi A, Di Pasquale A, Cammà C, Puglia I, Calistri P, Savini G                   |
| EPI_ISL_806790                                                                                                                                                                                                                                                 | SIESP DIPARTIMENTO DI PREVENZIONE DELL'AQUILA                                         | Istituto Zooprofilattico Sperimentale dell'Abruzzo e Molise "G. Caporale"                       | Lorusso A, Marcacci M, Di Domenico M, Ancora M, Curini V, Mangone I, Rinaldi A, Di Pasquale A, Cammà C, Puglia I, Calistri P, Savini G                   |
| EPI_ISL_806791, EPI_ISL_806792, EPI_ISL_806793, EPI_ISL_806794, EPI_ISL_806795, EPI_ISL_806796, EPI_ISL_806797, EPI_ISL_806798                                                                                                                                 | SIESP CHIETI - DRIVE IN ORTONA                                                        | Istituto Zooprofilattico Sperimentale dell'Abruzzo e Molise "G. Caporale"                       | Lorusso A, Marcacci M, Di Domenico M, Ancora M, Curini V, Mangone I, Rinaldi A, Di Pasquale A, Cammà C, Puglia I, Calistri P, Savini G                   |
| EPI_ISL_806799                                                                                                                                                                                                                                                 | SIESP CHIETI - DRIVE IN LANCIANO                                                      | Istituto Zooprofilattico Sperimentale dell'Abruzzo e Molise "G. Caporale"                       | Lorusso A, Marcacci M, Di Domenico M, Ancora M, Curini V, Mangone I, Rinaldi A, Di Pasquale A, Cammà C, Puglia I, Calistri P, Savini G                   |
| EPI_ISL_806800, EPI_ISL_806801, EPI_ISL_806802, EPI_ISL_806803                                                                                                                                                                                                 | SIESP CHIETI - DRIVE IN GISSI                                                         | Istituto Zooprofilattico Sperimentale dell'Abruzzo e Molise "G. Caporale"                       | Lorusso A, Marcacci M, Di Domenico M, Ancora M, Curini V, Mangone I, Rinaldi A, Di Pasquale A, Cammà C, Puglia I, Calistri P, Savini G                   |
| EPI_ISL_806804, EPI_ISL_806805                                                                                                                                                                                                                                 | SIESP CHIETI - DISTRETTO SANITARIO CHIETI                                             | Istituto Zooprofilattico Sperimentale dell'Abruzzo e Molise "G. Caporale"                       | Lorusso A, Marcacci M, Di Domenico M, Ancora M, Curini V, Mangone I, Rinaldi A, Di Pasquale A, Cammà C, Puglia I, Calistri P, Savini G                   |
| EPI_ISL_806806                                                                                                                                                                                                                                                 | SIESP DIPARTIMENTO DI PREVENZIONE CHIETI                                              | Istituto Zooprofilattico Sperimentale dell'Abruzzo e Molise "G. Caporale"                       | Lorusso A, Marcacci M, Di Domenico M, Ancora M, Curini V, Mangone I, Rinaldi A, Di Pasquale A, Cammà C, Puglia I, Calistri P, Savini G                   |
| EPI_ISL_807154, EPI_ISL_807155, EPI_ISL_807156                                                                                                                                                                                                                 | Deva County Emergency Hospital                                                        | National Institute of Infectious Diseases-Prof. Dr. Matei Bals Molecular Diagnostics Laboratory | Leontina Banica, Marius Surleac, Corina Casangiu, Petre Milu, Andreea Tudor, Simona Paraschiv, Dan Otelea                                                |
| EPI_ISL_812233, EPI_ISL_812234, EPI_ISL_812235, EPI_ISL_812236, EPI_ISL_812237, EPI_ISL_812238, EPI_ISL_812239, EPI_ISL_812240, EPI_ISL_812241, EPI_ISL_812242, EPI_ISL_812243, EPI_ISL_812244, EPI_ISL_812245, EPI_ISL_812246, EPI_ISL_812247, EPI_ISL_812248 | North Dakota Department of Health, Public Health Laboratory                           | North Dakota Department of Health, Public Health Laboratory                                     | Lisa Wingerter                                                                                                                                           |
| see above                                                                                                                                                                                                                                                      | SA Pathology                                                                          | SA Pathology                                                                                    | Lex Leong, Julien Soubrier, Chuan Kok Lim, Song Gao, Mark Turra, Karin Kassahn, Ivan Bastian, Geoff Higgins                                              |
| EPI_ISL_812356, EPI_ISL_812357, EPI_ISL_812358                                                                                                                                                                                                                 | SA Pathology                                                                          | SA Pathology                                                                                    | Lex Leong, Julien Soubrier, Chuan Kok Lim, Song Gao, Mark Turra, Karin Kassahn, Ivan Bastian, Geoff Higgins                                              |
| EPI_ISL_826286, EPI_ISL_826287, EPI_ISL_826288, EPI_ISL_826289, EPI_ISL_826290, EPI_ISL_826291, EPI_ISL_826292, EPI_ISL_826293, EPI_ISL_826294, EPI_ISL_826295, EPI_ISL_826522                                                                                 | The Jackson Laboratory                                                                | The Jackson Laboratory                                                                          | Lloyd M, Maurya R, Renzette N, Omerza G, Kelly K, Li L, Wei C L, Adams M                                                                                 |
| see above                                                                                                                                                                                                                                                      | The Jackson Laboratory                                                                | The Jackson Laboratory                                                                          | Lloyd M, Maurya R, Renzette N, Omerza G, Kelly K, Li L, Wei C L, Adams M                                                                                 |
| EPI_ISL_832815, EPI_ISL_832816                                                                                                                                                                                                                                 | SIESP CHIETI - DRIVE IN LANCIANO                                                      | Istituto Zooprofilattico Sperimentale dell'Abruzzo e Molise "G. Caporale"                       | Lorusso A, Marcacci M, Di Domenico M, Curini V, Ancora M, Cammà C, Rinaldi A, Mangone I, Di Pasquale A, Puglia I, Calistri P, Savini G.                  |
| EPI_ISL_832817                                                                                                                                                                                                                                                 | SIESP DIPARTIMENTO DI PREVENZIONE TERAMO                                              | Istituto Zooprofilattico Sperimentale dell'Abruzzo e Molise "G. Caporale"                       | Lorusso A, Marcacci M, Di Domenico M, Curini V, Ancora M, Cammà C, Rinaldi A, Mangone I, Di Pasquale A, Puglia I, Calistri P, Savini G.                  |
| EPI_ISL_832818                                                                                                                                                                                                                                                 | Ospedale Civile Atri                                                                  | Istituto Zooprofilattico Sperimentale dell'Abruzzo e Molise "G. Caporale"                       | Lorusso A, Marcacci M, Di Domenico M, Curini V, Ancora M, Cammà C, Rinaldi A, Mangone I, Di Pasquale A, Puglia I, Calistri P, Savini G.                  |
| EPI_ISL_832819                                                                                                                                                                                                                                                 | SIESP DIPARTIMENTO DI PREVENZIONE SULMONA                                             | Istituto Zooprofilattico Sperimentale dell'Abruzzo e Molise "G. Caporale"                       | Lorusso A, Marcacci M, Di Domenico M, Curini V, Ancora M, Cammà C, Rinaldi A, Mangone I, Di Pasquale A, Puglia I, Calistri P, Savini G.                  |
| EPI_ISL_832820                                                                                                                                                                                                                                                 | Medico Competente P.O. L'Aquila                                                       | Istituto Zooprofilattico Sperimentale dell'Abruzzo e Molise "G. Caporale"                       | Lorusso A, Marcacci M, Di Domenico M, Curini V, Ancora M, Cammà C, Rinaldi A, Mangone I, Di Pasquale A, Puglia I, Calistri P, Savini G.                  |
| EPI_ISL_832821                                                                                                                                                                                                                                                 | SIESP CHIETI - DRIVE IN CHIETI                                                        | Istituto Zooprofilattico Sperimentale dell'Abruzzo e Molise "G. Caporale"                       | Lorusso A, Marcacci M, Di Domenico M, Curini V, Ancora M, Cammà C, Rinaldi A, Mangone I, Di Pasquale A, Puglia I, Calistri P, Savini G.                  |
| EPI_ISL_832822                                                                                                                                                                                                                                                 | SIESP CHIETI - DRIVE IN LANCIANO                                                      | Istituto Zooprofilattico Sperimentale dell'Abruzzo e Molise "G. Caporale"                       | Lorusso A, Marcacci M, Di Domenico M, Curini V, Ancora M, Cammà C, Rinaldi A, Mangone I, Di Pasquale A, Puglia I, Calistri P, Savini G.                  |
| EPI_ISL_833042                                                                                                                                                                                                                                                 | OSPEDALE SAN SALVATORE L'AQUILA UOC PNEUMOLOGIAE UTSIR                                | Istituto Zooprofilattico Sperimentale dell'Abruzzo e Molise "G. Caporale"                       | Lorusso A, Marcacci M, Di Domenico M, Ancora M, Curini V, Mangone I, Rinaldi A, Delli Compagni E, Di Pasquale A, Cammà C, Puglia I, Calistri P, Savini G |
| EPI_ISL_833043                                                                                                                                                                                                                                                 | SIESP DIPARTIMENTO DI PREVENZIONE CHIETI                                              | Istituto Zooprofilattico Sperimentale dell'Abruzzo e Molise "G. Caporale"                       | Lorusso A, Marcacci M, Di Domenico M, Ancora M, Curini V, Mangone I, Rinaldi A, Delli Compagni E, Di Pasquale A, Cammà C, Puglia I, Calistri P, Savini G |
| EPI_ISL_833044                                                                                                                                                                                                                                                 | SIESP CHIETI - DRIVE IN CHIETI                                                        | Istituto Zooprofilattico Sperimentale dell'Abruzzo e Molise "G. Caporale"                       | Lorusso A, Marcacci M, Di Domenico M, Ancora M, Curini V, Mangone I, Rinaldi A, Delli Compagni E, Di Pasquale A, Cammà C, Puglia I, Calistri P, Savini G |
| EPI_ISL_833045                                                                                                                                                                                                                                                 | SIESP CHIETI - DRIVE IN ORTONA                                                        | Istituto Zooprofilattico Sperimentale dell'Abruzzo e Molise "G. Caporale"                       | Lorusso A, Marcacci M, Di Domenico M, Ancora M, Curini V, Mangone I, Rinaldi A, Delli Compagni E, Di Pasquale A, Cammà C, Puglia I, Calistri P, Savini G |
| EPI_ISL_833046                                                                                                                                                                                                                                                 | FPAM                                                                                  | Istituto Zooprofilattico Sperimentale dell'Abruzzo e Molise "G. Caporale"                       | Lorusso A, Marcacci M, Di Domenico M, Ancora M, Curini V, Mangone I, Rinaldi A, Delli Compagni E, Di Pasquale A, Cammà C, Puglia I, Calistri P, Savini G |
| EPI_ISL_833047, EPI_ISL_833048                                                                                                                                                                                                                                 | OSPEDALE CIVILE ATRI                                                                  | Istituto Zooprofilattico Sperimentale dell'Abruzzo e Molise "G. Caporale"                       | Lorusso A, Marcacci M, Di Domenico M, Ancora M, Curini V, Mangone I, Rinaldi A, Delli Compagni E, Di Pasquale A, Cammà C, Puglia I, Calistri P, Savini G |
| EPI_ISL_833049                                                                                                                                                                                                                                                 | SIESP CHIETI - DRIVE IN LANCIANO                                                      | Istituto Zooprofilattico Sperimentale dell'Abruzzo e Molise "G. Caporale"                       | Lorusso A, Marcacci M, Di Domenico M, Ancora M, Curini V, Mangone I, Rinaldi A, Delli Compagni E, Di Pasquale A, Cammà C, Puglia I, Calistri P, Savini G |
| EPI_ISL_833050, EPI_ISL_833051                                                                                                                                                                                                                                 | DIP. PREV. AVEZZANO SERVIZIO DI IGIENE EPIDEMIOLOGIAE SANITA' PUBBLICA                | Istituto Zooprofilattico Sperimentale dell'Abruzzo e Molise "G. Caporale"                       | Lorusso A, Marcacci M, Di Domenico M, Ancora M, Curini V, Mangone I, Rinaldi A, Delli Compagni E, Di Pasquale A, Cammà C, Puglia I, Calistri P, Savini G |
| EPI_ISL_833052, EPI_ISL_833053, EPI_ISL_833054                                                                                                                                                                                                                 | "Presidio Ospedaliero "San Liberatore" Atri                                           | Istituto Zooprofilattico Sperimentale dell'Abruzzo e Molise "G. Caporale"                       | Lorusso A, Marcacci M, Di Domenico M, Ancora M, Curini V, Mangone I, Rinaldi A, Delli Compagni E, Di Pasquale A, Cammà C, Puglia I, Calistri P, Savini G |
| EPI_ISL_833055, EPI_ISL_833056                                                                                                                                                                                                                                 | "SIESP DIPARTIMENTO DI PREVENZIONE CHIETI                                             | Istituto Zooprofilattico Sperimentale dell'Abruzzo e Molise "G. Caporale"                       | Lorusso A, Marcacci M, Di Domenico M, Ancora M, Curini V, Mangone I, Rinaldi A, Delli Compagni E, Di Pasquale A, Cammà C, Puglia I, Calistri P, Savini G |
| EPI_ISL_833057, EPI_ISL_833058, EPI_ISL_833059, EPI_ISL_833060, EPI_ISL_833061, EPI_ISL_833062, EPI_ISL_833063, EPI_ISL_833064, EPI_ISL_833065, EPI_ISL_833066, EPI_ISL_833067                                                                                 | DIP. PREV. AVEZZANO SERVIZIO DI IGIENE EPIDEMIOLOGIAE SANITA' PUBBLICA                | Istituto Zooprofilattico Sperimentale dell'Abruzzo e Molise "G. Caporale"                       | Lorusso A, Marcacci M, Di Domenico M, Ancora M, Curini V, Mangone I, Rinaldi A, Delli Compagni E, Di Pasquale A, Cammà C, Puglia I, Calistri P, Savini G |
| see above                                                                                                                                                                                                                                                      | DIP. PREV. AVEZZANO SERVIZIO DI IGIENE EPIDEMIOLOGIAE SANITA' PUBBLICA                | Istituto Zooprofilattico Sperimentale dell'Abruzzo e Molise "G. Caporale"                       | Lorusso A, Marcacci M, Di Domenico M, Ancora M, Curini V, Mangone I, Rinaldi A, Delli Compagni E, Di Pasquale A, Cammà C, Puglia I, Calistri P, Savini G |
| EPI_ISL_833068, EPI_ISL_833069,                                                                                                                                                                                                                                | FPAM                                                                                  | Istituto Zooprofilattico Sperimentale dell'Abruzzo e Molise "G. Caporale"                       | Lorusso A, Marcacci M, Di Domenico M, Ancora M, Curini V, Mangone I, Rinaldi A, Delli Compagni E, Di Pasquale A, Cammà C, Puglia I, Calistri P, Savini G |





|                                                                                                                                                                                                                                                                                                                                                                                                                                                                                                                                                |                                                                                       |                                                                                                                                                                                                          |                                                                                                                                                                                                         |                                                               |
|------------------------------------------------------------------------------------------------------------------------------------------------------------------------------------------------------------------------------------------------------------------------------------------------------------------------------------------------------------------------------------------------------------------------------------------------------------------------------------------------------------------------------------------------|---------------------------------------------------------------------------------------|----------------------------------------------------------------------------------------------------------------------------------------------------------------------------------------------------------|---------------------------------------------------------------------------------------------------------------------------------------------------------------------------------------------------------|---------------------------------------------------------------|
|                                                                                                                                                                                                                                                                                                                                                                                                                                                                                                                                                |                                                                                       | Caporale"                                                                                                                                                                                                |                                                                                                                                                                                                         |                                                               |
| EPI_ISL_833322                                                                                                                                                                                                                                                                                                                                                                                                                                                                                                                                 | SIESP DIPARTIMENTO DI PREVENZIONE SULMONA                                             | Istituto Zooprofilattico Sperimentale dell'Abruzzo e Molise "G. Caporale"                                                                                                                                | Lorusso A, Marcacci M, Di Domenico M, Ancora M, Curini V, Mangone I, Rinaldi A, Di Pasquale A, Cammà C, Puglia I, Calistri P, Savini G                                                                  |                                                               |
| EPI_ISL_833323                                                                                                                                                                                                                                                                                                                                                                                                                                                                                                                                 | SIESP CHIETI - DRIVE IN CHIETI                                                        | Istituto Zooprofilattico Sperimentale dell'Abruzzo e Molise "G. Caporale"                                                                                                                                | Lorusso A, Marcacci M, Di Domenico M, Ancora M, Curini V, Mangone I, Rinaldi A, Di Pasquale A, Cammà C, Puglia I, Calistri P, Savini G                                                                  |                                                               |
| EPI_ISL_833324                                                                                                                                                                                                                                                                                                                                                                                                                                                                                                                                 | SIESP DIPARTIMENTO DI PREVENZIONE CHIETI                                              | Istituto Zooprofilattico Sperimentale dell'Abruzzo e Molise "G. Caporale"                                                                                                                                | Lorusso A, Marcacci M, Di Domenico M, Ancora M, Curini V, Mangone I, Rinaldi A, Di Pasquale A, Cammà C, Puglia I, Calistri P, Savini G                                                                  |                                                               |
| EPI_ISL_833325                                                                                                                                                                                                                                                                                                                                                                                                                                                                                                                                 | Ospedale SS Annunziata Chieti                                                         | Istituto Zooprofilattico Sperimentale dell'Abruzzo e Molise "G. Caporale"                                                                                                                                | Lorusso A, Marcacci M, Di Domenico M, Ancora M, Curini V, Mangone I, Rinaldi A, Di Pasquale A, Cammà C, Puglia I, Calistri P, Savini G                                                                  |                                                               |
| EPI_ISL_833326                                                                                                                                                                                                                                                                                                                                                                                                                                                                                                                                 | SIESP DIPARTIMENTO DI PREVENZIONE CHIETI                                              | Istituto Zooprofilattico Sperimentale dell'Abruzzo e Molise "G. Caporale"                                                                                                                                | Lorusso A, Marcacci M, Di Domenico M, Ancora M, Curini V, Mangone I, Rinaldi A, Di Pasquale A, Cammà C, Puglia I, Calistri P, Savini G                                                                  |                                                               |
| EPI_ISL_833327                                                                                                                                                                                                                                                                                                                                                                                                                                                                                                                                 | Ospedale SS Annunziata Chieti                                                         | Istituto Zooprofilattico Sperimentale dell'Abruzzo e Molise "G. Caporale"                                                                                                                                | Lorusso A, Marcacci M, Di Domenico M, Ancora M, Curini V, Mangone I, Rinaldi A, Di Pasquale A, Cammà C, Puglia I, Calistri P, Savini G                                                                  |                                                               |
| EPI_ISL_833328, EPI_ISL_833329, EPI_ISL_833330                                                                                                                                                                                                                                                                                                                                                                                                                                                                                                 | SIESP CHIETI - DRIVE IN ORTONA                                                        | Istituto Zooprofilattico Sperimentale dell'Abruzzo e Molise "G. Caporale"                                                                                                                                | Lorusso A, Marcacci M, Di Domenico M, Ancora M, Curini V, Mangone I, Rinaldi A, Di Pasquale A, Cammà C, Puglia I, Calistri P, Savini G                                                                  |                                                               |
| EPI_ISL_833331                                                                                                                                                                                                                                                                                                                                                                                                                                                                                                                                 | Ospedale Civile Atri                                                                  | Istituto Zooprofilattico Sperimentale dell'Abruzzo e Molise "G. Caporale"                                                                                                                                | Lorusso A, Marcacci M, Di Domenico M, Ancora M, Curini V, Mangone I, Rinaldi A, Di Pasquale A, Cammà C, Puglia I, Calistri P, Savini G                                                                  |                                                               |
| EPI_ISL_833435, EPI_ISL_833436, EPI_ISL_833437, EPI_ISL_833438, EPI_ISL_833439, EPI_ISL_833440, EPI_ISL_833441, EPI_ISL_833442, EPI_ISL_833443, EPI_ISL_833444, EPI_ISL_833445, EPI_ISL_833446, EPI_ISL_833447, EPI_ISL_833448, EPI_ISL_833449, EPI_ISL_833450, EPI_ISL_833451, EPI_ISL_833452, EPI_ISL_833453, EPI_ISL_833454, EPI_ISL_833455                                                                                                                                                                                                 | see above                                                                             | SC (UCO) Igiene e Sanità Pubblica (funzione integrata con SC Microbiologia e Virologia) e Laboratory of Molecular Virology of the International Centre for Genetic Engineering and Biotechnology (ICGEB) | ARGO Laboratorio Genomica ed Epigenomica                                                                                                                                                                | Licastro D, Dal Monego S, Degasperri M, Marcello A, D'Agaro P |
| EPI_ISL_847825                                                                                                                                                                                                                                                                                                                                                                                                                                                                                                                                 | Lab. Microbiologia e Virologia, Cotugno, A.O. dei Colli                               | Lab. Microbiologia e Virologia, Cotugno, A.O. dei Colli                                                                                                                                                  | Luigi Atripaldi, Claudia Tiberio, Anna Perfetti                                                                                                                                                         |                                                               |
| EPI_ISL_848172, EPI_ISL_848173, EPI_ISL_848174, EPI_ISL_848175, EPI_ISL_848176, EPI_ISL_848177, EPI_ISL_848178, EPI_ISL_848179, EPI_ISL_848180, EPI_ISL_848181, EPI_ISL_848182, EPI_ISL_848183, EPI_ISL_848184, EPI_ISL_848185, EPI_ISL_848186, EPI_ISL_848187, EPI_ISL_848546, EPI_ISL_848547, EPI_ISL_848548, EPI_ISL_848549, EPI_ISL_848550, EPI_ISL_848551, EPI_ISL_848552, EPI_ISL_848553, EPI_ISL_848554, EPI_ISL_848634, EPI_ISL_848635, EPI_ISL_848636, EPI_ISL_848637, EPI_ISL_848638, EPI_ISL_848639, EPI_ISL_848640, EPI_ISL_848641 | see above                                                                             | North Dakota Department of Health, Public Health Laboratory                                                                                                                                              | North Dakota Department of Health, Public Health Laboratory                                                                                                                                             | Lisa Wingerter                                                |
| EPI_ISL_849634                                                                                                                                                                                                                                                                                                                                                                                                                                                                                                                                 | SIESP DIPARTIMENTO DI PREVENZIONE CHIETI                                              | Istituto Zooprofilattico Sperimentale dell'Abruzzo e Molise "G. Caporale"                                                                                                                                | Lorusso A, Marcacci M, Di Domenico M, Curini V, Ancora M, Cammà C, Rinaldi A, Mangone I, Di Pasquale A, Puglia I, Savini G.                                                                             |                                                               |
| EPI_ISL_849635, EPI_ISL_849636                                                                                                                                                                                                                                                                                                                                                                                                                                                                                                                 | DIPARTIMENTO PREVENZIONE AVEZZANO-SERVIZIO DI IGIENE EPIDEMIOLOGIA E SANITA' PUBBLICA | Istituto Zooprofilattico Sperimentale dell'Abruzzo e Molise "G. Caporale"                                                                                                                                | Lorusso A, Marcacci M, Di Domenico M, Curini V, Ancora M, Cammà C, Rinaldi A, Mangone I, Di Pasquale A, Puglia I, Savini G.                                                                             |                                                               |
| EPI_ISL_849637, EPI_ISL_849638, EPI_ISL_849639, EPI_ISL_849640, EPI_ISL_849641, EPI_ISL_849642, EPI_ISL_849643, EPI_ISL_849644, EPI_ISL_849645, EPI_ISL_849646                                                                                                                                                                                                                                                                                                                                                                                 | SIESP DIPARTIMENTO DI PREVENZIONE CHIETI                                              | Istituto Zooprofilattico Sperimentale dell'Abruzzo e Molise "G. Caporale"                                                                                                                                | Lorusso A, Marcacci M, Di Domenico M, Curini V, Ancora M, Cammà C, Rinaldi A, Mangone I, Di Pasquale A, Puglia I, Savini G.                                                                             |                                                               |
| EPI_ISL_849647, EPI_ISL_849648, EPI_ISL_849649                                                                                                                                                                                                                                                                                                                                                                                                                                                                                                 | SIESP- DRIVE IN CHIETI                                                                | Istituto Zooprofilattico Sperimentale dell'Abruzzo e Molise "G. Caporale"                                                                                                                                | Lorusso A, Marcacci M, Di Domenico M, Curini V, Ancora M, Cammà C, Rinaldi A, Mangone I, Di Pasquale A, Puglia I, Savini G.                                                                             |                                                               |
| EPI_ISL_849650, EPI_ISL_849651, EPI_ISL_849652                                                                                                                                                                                                                                                                                                                                                                                                                                                                                                 | Servizio di igiene epidemiologia e sanità pubblica (SIESP)-Chieti                     | Istituto Zooprofilattico Sperimentale dell'Abruzzo e Molise "G. Caporale"                                                                                                                                | Lorusso A, Marcacci M, Di Domenico M, Curini V, Ancora M, Cammà C, Rinaldi A, Mangone I, Di Pasquale A, Puglia I, Savini G.                                                                             |                                                               |
| EPI_ISL_849653                                                                                                                                                                                                                                                                                                                                                                                                                                                                                                                                 | Servizio di igiene e sanità pubblica (SIESP)-Teramo                                   | Istituto Zooprofilattico Sperimentale dell'Abruzzo e Molise "G. Caporale"                                                                                                                                | Lorusso A, Marcacci M, Di Domenico M, Curini V, Ancora M, Cammà C, Rinaldi A, Mangone I, Di Pasquale A, Puglia I, Savini G.                                                                             |                                                               |
| EPI_ISL_849654                                                                                                                                                                                                                                                                                                                                                                                                                                                                                                                                 | Servizio Igiene Epidemiologia e Sanità Pubblica (SIESP)-L'Aquila                      | Istituto Zooprofilattico Sperimentale dell'Abruzzo e Molise "G. Caporale"                                                                                                                                | Lorusso A, Marcacci M, Di Domenico M, Curini V, Ancora M, Cammà C, Rinaldi A, Mangone I, Di Pasquale A, Puglia I, Savini G.                                                                             |                                                               |
| EPI_ISL_849655                                                                                                                                                                                                                                                                                                                                                                                                                                                                                                                                 | Servizio di igiene e sanità pubblica (SIESP)-Teramo                                   | Istituto Zooprofilattico Sperimentale dell'Abruzzo e Molise "G. Caporale"                                                                                                                                | Lorusso A, Marcacci M, Di Domenico M, Curini V, Ancora M, Cammà C, Rinaldi A, Mangone I, Di Pasquale A, Puglia I, Savini G.                                                                             |                                                               |
| EPI_ISL_849656, EPI_ISL_849657, EPI_ISL_849658, EPI_ISL_849659, EPI_ISL_849660, EPI_ISL_849661                                                                                                                                                                                                                                                                                                                                                                                                                                                 | Servizio Igiene Epidemiologia e Sanità Pubblica (SIESP)-L'Aquila                      | Istituto Zooprofilattico Sperimentale dell'Abruzzo e Molise "G. Caporale"                                                                                                                                | Lorusso A, Marcacci M, Di Domenico M, Curini V, Ancora M, Cammà C, Rinaldi A, Mangone I, Di Pasquale A, Puglia I, Savini G.                                                                             |                                                               |
| EPI_ISL_849662, EPI_ISL_849663                                                                                                                                                                                                                                                                                                                                                                                                                                                                                                                 | Servizio di igiene epidemiologia e sanità pubblica (SIESP)-Chieti                     | Istituto Zooprofilattico Sperimentale dell'Abruzzo e Molise "G. Caporale"                                                                                                                                | Lorusso A, Marcacci M, Di Domenico M, Curini V, Ancora M, Cammà C, Rinaldi A, Mangone I, Di Pasquale A, Puglia I, Savini G.                                                                             |                                                               |
| EPI_ISL_851052, EPI_ISL_851053, EPI_ISL_851054                                                                                                                                                                                                                                                                                                                                                                                                                                                                                                 | Lithuanian University of Health Sciences Hospital, Department of Laboratory Medicine  | Lithuanian University of Health Sciences, Molecular cardiology lab.                                                                                                                                      | Lukas Zemaitis, Arnoldas Pautienius, Ingrida Olendrait, Kamile Tamauskaite, Dovydas Gecys, Laura Pareckaitė, Vaiva Lesauskaite, Astra Vitkauskiene                                                      |                                                               |
| EPI_ISL_851055, EPI_ISL_851056, EPI_ISL_851057, EPI_ISL_851058, EPI_ISL_851059, EPI_ISL_851060, EPI_ISL_851061                                                                                                                                                                                                                                                                                                                                                                                                                                 | National Food and Veterinary Risk Assessment Institute                                | Lithuanian University of Health Sciences, Molecular cardiology lab.                                                                                                                                      | Lukas Zemaitis, Arnoldas Pautienius, Ingrida Olendrait, Kamile Tamauskaite, Dovydas Gecys, Laura Pareckaitė, Vaiva Lesauskaite, Astra Vitkauskiene, Arunas Stankevicius, Algirdas Malakauskas           |                                                               |
| EPI_ISL_852619, EPI_ISL_852622, EPI_ISL_852628, EPI_ISL_852629, EPI_ISL_852630, EPI_ISL_852631, EPI_ISL_852632, EPI_ISL_852813, EPI_ISL_852819, EPI_ISL_852821, EPI_ISL_852823, EPI_ISL_852825, EPI_ISL_852828                                                                                                                                                                                                                                                                                                                                 | see above                                                                             | Lab. Microbiologia e Virologia, Cotugno, A.O. dei Colli                                                                                                                                                  | Lab. Microbiologia e Virologia, Cotugno, A.O. dei Colli                                                                                                                                                 | Luigi Atripaldi, Claudia Tiberio, Anna Perfetti               |
| EPI_ISL_852842                                                                                                                                                                                                                                                                                                                                                                                                                                                                                                                                 | Laboratory of Molecular Biology, Diagnostyka sp. z o.o.                               | genXone SA, Research & Development Laboratory                                                                                                                                                            | Maciej Sykulski, Grzegorz Nowicki, Jakub Grabowski, Natalia Drwska-Matelska, ukasz Krych, Micha Kaszuba                                                                                                 |                                                               |
| EPI_ISL_853718, EPI_ISL_853719, EPI_ISL_853720                                                                                                                                                                                                                                                                                                                                                                                                                                                                                                 | Department of Microbiology, University Innsbruck                                      | Bergthaler laboratory, CeMM Research Center for Molecular Medicine of the Austrian Academy of Sciences                                                                                                   | Lukas Endler, Alexandra Popa, Benedikt Agerer, Jakob-Wendelin Genger, Alexander Lercher, Anna Schedl, Thomas Penz, Michael Schuster, Jan Laine, Martin Senekowitsch, Christoph Bock, Andreas Bergthaler |                                                               |
| EPI_ISL_853721                                                                                                                                                                                                                                                                                                                                                                                                                                                                                                                                 | Austrian Agency for Health and Food Safety (AGES)                                     | Bergthaler laboratory, CeMM Research Center for Molecular Medicine of the Austrian Academy of Sciences                                                                                                   | Lukas Endler, Alexandra Popa, Benedikt Agerer, Jakob-Wendelin Genger, Alexander Lercher, Anna Schedl, Thomas Penz, Michael Schuster, Jan Laine, Martin Senekowitsch, Christoph Bock, Andreas Bergthaler |                                                               |
| EPI_ISL_853722                                                                                                                                                                                                                                                                                                                                                                                                                                                                                                                                 | Department of Microbiology, University Innsbruck                                      | Bergthaler laboratory, CeMM Research Center for Molecular Medicine of the Austrian Academy of Sciences                                                                                                   | Lukas Endler, Alexandra Popa, Benedikt Agerer, Jakob-Wendelin Genger, Alexander Lercher, Anna Schedl, Thomas Penz, Michael Schuster, Jan Laine, Martin Senekowitsch, Christoph Bock, Andreas Bergthaler |                                                               |
| EPI_ISL_853723                                                                                                                                                                                                                                                                                                                                                                                                                                                                                                                                 | Institute for Water Quality and Resource Management, Technical University Vienna      | Bergthaler laboratory, CeMM Research Center for Molecular Medicine of the Austrian Academy of Sciences                                                                                                   | Lukas Endler, Alexandra Popa, Benedikt Agerer, Jakob-Wendelin Genger, Alexander Lercher, Anna Schedl, Thomas Penz, Michael Schuster, Jan Laine, Martin Senekowitsch, Christoph Bock, Andreas Bergthaler |                                                               |
| EPI_ISL_853724, EPI_ISL_853725, EPI_ISL_853726, EPI_ISL_853727, EPI_ISL_853728                                                                                                                                                                                                                                                                                                                                                                                                                                                                 | Department of Microbiology, University Innsbruck                                      | Bergthaler laboratory, CeMM Research Center for Molecular Medicine of the Austrian Academy of Sciences                                                                                                   | Lukas Endler, Alexandra Popa, Benedikt Agerer, Jakob-Wendelin Genger, Alexander Lercher, Anna Schedl, Thomas Penz, Michael Schuster, Jan Laine, Martin Senekowitsch, Christoph Bock, Andreas Bergthaler |                                                               |









|                                                                                                                                                                                                                                                                                                                                                                                                                                                                                                                                                                                                                                                                                                                                                                                                                                                                                                                                                                                                                                                                                                                                                                                                                |                                                                                                                                                                                                          |                                                                                                       |                                                                                                                                                                                                        |                                                                                                                                     |
|----------------------------------------------------------------------------------------------------------------------------------------------------------------------------------------------------------------------------------------------------------------------------------------------------------------------------------------------------------------------------------------------------------------------------------------------------------------------------------------------------------------------------------------------------------------------------------------------------------------------------------------------------------------------------------------------------------------------------------------------------------------------------------------------------------------------------------------------------------------------------------------------------------------------------------------------------------------------------------------------------------------------------------------------------------------------------------------------------------------------------------------------------------------------------------------------------------------|----------------------------------------------------------------------------------------------------------------------------------------------------------------------------------------------------------|-------------------------------------------------------------------------------------------------------|--------------------------------------------------------------------------------------------------------------------------------------------------------------------------------------------------------|-------------------------------------------------------------------------------------------------------------------------------------|
| EPI_ISL_854298                                                                                                                                                                                                                                                                                                                                                                                                                                                                                                                                                                                                                                                                                                                                                                                                                                                                                                                                                                                                                                                                                                                                                                                                 |                                                                                                                                                                                                          | Medicine of the Austrian Academy of Sciences                                                          |                                                                                                                                                                                                        | Martin Senekowitsch, Christoph Bock, Andreas Berghaler                                                                              |
| EPI_ISL_854299                                                                                                                                                                                                                                                                                                                                                                                                                                                                                                                                                                                                                                                                                                                                                                                                                                                                                                                                                                                                                                                                                                                                                                                                 | Center for Virology, Medical University of Vienna                                                                                                                                                        | Berghaler laboratory, CeMM Research Center for Molecular Medicine of the Austrian Academy of Sciences | Lukas Endler, Alexandra Popa, Benedikt Agerer, Jakob-Wendelin Genger, Alexander Lercher, Anna Schedl, Thomas Penz, Michael Schuster, Jan Laine, Martin Senekowitsch, Christoph Bock, Andreas Berghaler |                                                                                                                                     |
| EPI_ISL_854300                                                                                                                                                                                                                                                                                                                                                                                                                                                                                                                                                                                                                                                                                                                                                                                                                                                                                                                                                                                                                                                                                                                                                                                                 | Pharmgenetix GmbH                                                                                                                                                                                        | Berghaler laboratory, CeMM Research Center for Molecular Medicine of the Austrian Academy of Sciences | Lukas Endler, Alexandra Popa, Benedikt Agerer, Jakob-Wendelin Genger, Alexander Lercher, Anna Schedl, Thomas Penz, Michael Schuster, Jan Laine, Martin Senekowitsch, Christoph Bock, Andreas Berghaler |                                                                                                                                     |
| EPI_ISL_854301                                                                                                                                                                                                                                                                                                                                                                                                                                                                                                                                                                                                                                                                                                                                                                                                                                                                                                                                                                                                                                                                                                                                                                                                 | Austrian Agency for Health and Food Safety (AGES)                                                                                                                                                        | Berghaler laboratory, CeMM Research Center for Molecular Medicine of the Austrian Academy of Sciences | Lukas Endler, Alexandra Popa, Benedikt Agerer, Jakob-Wendelin Genger, Alexander Lercher, Anna Schedl, Thomas Penz, Michael Schuster, Jan Laine, Martin Senekowitsch, Christoph Bock, Andreas Berghaler |                                                                                                                                     |
| EPI_ISL_854302, EPI_ISL_854303                                                                                                                                                                                                                                                                                                                                                                                                                                                                                                                                                                                                                                                                                                                                                                                                                                                                                                                                                                                                                                                                                                                                                                                 | Pharmgenetix GmbH                                                                                                                                                                                        | Berghaler laboratory, CeMM Research Center for Molecular Medicine of the Austrian Academy of Sciences | Lukas Endler, Alexandra Popa, Benedikt Agerer, Jakob-Wendelin Genger, Alexander Lercher, Anna Schedl, Thomas Penz, Michael Schuster, Jan Laine, Martin Senekowitsch, Christoph Bock, Andreas Berghaler |                                                                                                                                     |
| EPI_ISL_854304                                                                                                                                                                                                                                                                                                                                                                                                                                                                                                                                                                                                                                                                                                                                                                                                                                                                                                                                                                                                                                                                                                                                                                                                 | Austrian Agency for Health and Food Safety (AGES)                                                                                                                                                        | Berghaler laboratory, CeMM Research Center for Molecular Medicine of the Austrian Academy of Sciences | Lukas Endler, Alexandra Popa, Benedikt Agerer, Jakob-Wendelin Genger, Alexander Lercher, Anna Schedl, Thomas Penz, Michael Schuster, Jan Laine, Martin Senekowitsch, Christoph Bock, Andreas Berghaler |                                                                                                                                     |
| EPI_ISL_855344                                                                                                                                                                                                                                                                                                                                                                                                                                                                                                                                                                                                                                                                                                                                                                                                                                                                                                                                                                                                                                                                                                                                                                                                 | SA Pathology                                                                                                                                                                                             | SA Pathology                                                                                          | Lex Leong, Chuan Kok Lim, Mark Turra, Karin Kassahn, Ivan Bastian, Geoff Higgins                                                                                                                       |                                                                                                                                     |
| EPI_ISL_855556, EPI_ISL_855573, EPI_ISL_855610, EPI_ISL_855611, EPI_ISL_855612, EPI_ISL_855613, EPI_ISL_855614, EPI_ISL_856679, EPI_ISL_856682, EPI_ISL_856694, EPI_ISL_856698, EPI_ISL_856700, EPI_ISL_860095, EPI_ISL_860203, EPI_ISL_860204, EPI_ISL_860205, EPI_ISL_860257, EPI_ISL_860290, EPI_ISL_860297, EPI_ISL_860794                                                                                                                                                                                                                                                                                                                                                                                                                                                                                                                                                                                                                                                                                                                                                                                                                                                                                 |                                                                                                                                                                                                          |                                                                                                       |                                                                                                                                                                                                        |                                                                                                                                     |
| see above                                                                                                                                                                                                                                                                                                                                                                                                                                                                                                                                                                                                                                                                                                                                                                                                                                                                                                                                                                                                                                                                                                                                                                                                      | Lab. Microbiologia e Virologia, Cotugno, A.O. dei Colli                                                                                                                                                  | Lab. Microbiologia e Virologia, Cotugno, A.O. dei Colli                                               |                                                                                                                                                                                                        | Luigi Atripaldi, Claudia Tiberio, Anna Perfetti                                                                                     |
| EPI_ISL_862831, EPI_ISL_862832, EPI_ISL_862833, EPI_ISL_862834, EPI_ISL_862835, EPI_ISL_862836                                                                                                                                                                                                                                                                                                                                                                                                                                                                                                                                                                                                                                                                                                                                                                                                                                                                                                                                                                                                                                                                                                                 | National Institute of Infectious Diseases-Prof. Dr. Matei Bals<br>Molecular Diagnostics Laboratory                                                                                                       | National Institute of Infectious Diseases-Prof. Dr. Matei Bals<br>Molecular Diagnostics Laboratory    |                                                                                                                                                                                                        | Leontina Banica, Marius Surleac, Corina Casanguiu, Petre Milu, Andreea Tudor, Simona Paraschiv, Dan Otelea                          |
| EPI_ISL_869241                                                                                                                                                                                                                                                                                                                                                                                                                                                                                                                                                                                                                                                                                                                                                                                                                                                                                                                                                                                                                                                                                                                                                                                                 | Suceava County Emergency Hospital                                                                                                                                                                        | "Stefan cel Mare" University Metagenomics Laboratory                                                  |                                                                                                                                                                                                        | Lobiuc Andrei, Puscaselu Roxana                                                                                                     |
| EPI_ISL_873194, EPI_ISL_873195, EPI_ISL_873196, EPI_ISL_873197, EPI_ISL_873198, EPI_ISL_873199, EPI_ISL_873200, EPI_ISL_873201, EPI_ISL_873202, EPI_ISL_873203, EPI_ISL_873204, EPI_ISL_873205, EPI_ISL_873206, EPI_ISL_873207, EPI_ISL_873208                                                                                                                                                                                                                                                                                                                                                                                                                                                                                                                                                                                                                                                                                                                                                                                                                                                                                                                                                                 |                                                                                                                                                                                                          |                                                                                                       |                                                                                                                                                                                                        |                                                                                                                                     |
| see above                                                                                                                                                                                                                                                                                                                                                                                                                                                                                                                                                                                                                                                                                                                                                                                                                                                                                                                                                                                                                                                                                                                                                                                                      | North Dakota Department of Health, Public Health Laboratory                                                                                                                                              | North Dakota Department of Health, Public Health Laboratory                                           |                                                                                                                                                                                                        | Lisa Wingerter                                                                                                                      |
| EPI_ISL_875346                                                                                                                                                                                                                                                                                                                                                                                                                                                                                                                                                                                                                                                                                                                                                                                                                                                                                                                                                                                                                                                                                                                                                                                                 | National Institute of Infectious Diseases-Prof. Dr. Matei Bals<br>Molecular Diagnostics Laboratory                                                                                                       | National Institute of Infectious Diseases-Prof. Dr. Matei Bals<br>Molecular Diagnostics Laboratory    |                                                                                                                                                                                                        | Leontina Banica, Marius Surleac, Corina Casanguiu, Petre Milu, Andreea Tudor, Simona Paraschiv, Dan Otelea                          |
| EPI_ISL_875566, EPI_ISL_875567, EPI_ISL_875568                                                                                                                                                                                                                                                                                                                                                                                                                                                                                                                                                                                                                                                                                                                                                                                                                                                                                                                                                                                                                                                                                                                                                                 | SIESP L'AQUILA                                                                                                                                                                                           | Istituto Zooprofilattico Sperimentale dell'Abruzzo e Molise "G. Caporale"                             | Lorusso A, Marcacci M, Di Domenico M, Ancora M, Curini V, Mangone I, Rinaldi A, Scialabba S, Di Pasquale A, Cammà C, Puglia I, Calistri P, Savini G                                                    |                                                                                                                                     |
| EPI_ISL_875959, EPI_ISL_875960, EPI_ISL_875961, EPI_ISL_875962, EPI_ISL_875963, EPI_ISL_875964, EPI_ISL_875965, EPI_ISL_875966, EPI_ISL_875967, EPI_ISL_875968, EPI_ISL_875969, EPI_ISL_875970, EPI_ISL_875971, EPI_ISL_875972, EPI_ISL_875973, EPI_ISL_875974, EPI_ISL_875975, EPI_ISL_875976, EPI_ISL_875977, EPI_ISL_875978, EPI_ISL_875979, EPI_ISL_875980, EPI_ISL_875981, EPI_ISL_875982, EPI_ISL_875983, EPI_ISL_875984, EPI_ISL_875985, EPI_ISL_875986, EPI_ISL_875987, EPI_ISL_875988, EPI_ISL_875989, EPI_ISL_875990, EPI_ISL_875991, EPI_ISL_875992, EPI_ISL_875993, EPI_ISL_875994, EPI_ISL_875995, EPI_ISL_875996, EPI_ISL_875997, EPI_ISL_875998, EPI_ISL_875999, EPI_ISL_876000, EPI_ISL_876001, EPI_ISL_876002, EPI_ISL_876003, EPI_ISL_876004, EPI_ISL_876005, EPI_ISL_876006, EPI_ISL_876007, EPI_ISL_876008, EPI_ISL_876009, EPI_ISL_876010, EPI_ISL_876011, EPI_ISL_876012, EPI_ISL_876013, EPI_ISL_876014, EPI_ISL_876015, EPI_ISL_876016, EPI_ISL_876017, EPI_ISL_876018, EPI_ISL_876019, EPI_ISL_876020, EPI_ISL_876021, EPI_ISL_876022, EPI_ISL_876023, EPI_ISL_876024, EPI_ISL_876025, EPI_ISL_876026, EPI_ISL_876027, EPI_ISL_876028, EPI_ISL_876029, EPI_ISL_876030, EPI_ISL_876031 |                                                                                                                                                                                                          |                                                                                                       |                                                                                                                                                                                                        |                                                                                                                                     |
| see above                                                                                                                                                                                                                                                                                                                                                                                                                                                                                                                                                                                                                                                                                                                                                                                                                                                                                                                                                                                                                                                                                                                                                                                                      | Laboratory of Molecular Biology, Diagnostyka sp. z o.o.                                                                                                                                                  | genXone SA, Research & Development Laboratory                                                         | Maciej Sykulski, Grzegorz Nowicki, Monika Makowska-Woniak, Jakub Grabowski, Natalia Drwska-Matelska, ukasz Krych, Micha Kaszuba                                                                        |                                                                                                                                     |
| EPI_ISL_882635                                                                                                                                                                                                                                                                                                                                                                                                                                                                                                                                                                                                                                                                                                                                                                                                                                                                                                                                                                                                                                                                                                                                                                                                 | SC (UCO) Igiene e Sanità Pubblica (funzione integrata con SC Microbiologia e Virologia) e Laboratory of Molecular Virology of the International Centre for Genetic Engineering and Biotechnology (ICGEB) | ARGO Laboratorio Genomica ed Epigenomica                                                              |                                                                                                                                                                                                        | Licastro D, Dal Monego S, Degasperri M, Marcello A, D'Agaro P                                                                       |
| EPI_ISL_882636                                                                                                                                                                                                                                                                                                                                                                                                                                                                                                                                                                                                                                                                                                                                                                                                                                                                                                                                                                                                                                                                                                                                                                                                 | SC (UCO) Igiene e Sanità Pubblica (funzione integrata con SC Microbiologia e Virologia) e Laboratory of Molecular Virology of the International Centre for Genetic Engineering and Biotechnology (ICGEB) | ARGO Laboratorio Genomica ed Epigenomica                                                              |                                                                                                                                                                                                        | Licastro D, Dal Monego S, Degasperri M, Marcello A, D'Agaro P                                                                       |
| EPI_ISL_882920                                                                                                                                                                                                                                                                                                                                                                                                                                                                                                                                                                                                                                                                                                                                                                                                                                                                                                                                                                                                                                                                                                                                                                                                 | INMI Lazzaro Spallanzani IRCCS                                                                                                                                                                           | INMI Lazzaro Spallanzani IRCCS                                                                        |                                                                                                                                                                                                        | M Rueca, E Giombini, C.E.M Gruber, B Bartolini, O Butera, F Messina, A Di Caro, MR Capobianchi                                      |
| EPI_ISL_882921                                                                                                                                                                                                                                                                                                                                                                                                                                                                                                                                                                                                                                                                                                                                                                                                                                                                                                                                                                                                                                                                                                                                                                                                 | Genomic Medicine Laboratory, IRCCS Santa Lucia Foundation                                                                                                                                                | INMI Lazzaro Spallanzani IRCCS                                                                        |                                                                                                                                                                                                        | M Rueca, E Giombini, C.E.M Gruber, B Bartolini, O Butera, F Messina, E Giardina, A Di Caro, MR Capobianchi                          |
| EPI_ISL_882927                                                                                                                                                                                                                                                                                                                                                                                                                                                                                                                                                                                                                                                                                                                                                                                                                                                                                                                                                                                                                                                                                                                                                                                                 | INMI Lazzaro Spallanzani IRCCS                                                                                                                                                                           | INMI Lazzaro Spallanzani IRCCS                                                                        |                                                                                                                                                                                                        | M Rueca, E Giombini, C.E.M Gruber, B Bartolini, O Butera, F Messina, A Di Caro, MR Capobianchi                                      |
| EPI_ISL_882940                                                                                                                                                                                                                                                                                                                                                                                                                                                                                                                                                                                                                                                                                                                                                                                                                                                                                                                                                                                                                                                                                                                                                                                                 | Ospedale San Camillo De Lellis Rieti                                                                                                                                                                     | INMI Lazzaro Spallanzani IRCCS                                                                        |                                                                                                                                                                                                        | M Rueca, E Giombini, C.E.M Gruber, B Bartolini, O Butera, S Venarubea, A De Luca, L Casertano, F Messina, A Di Caro, MR Capobianchi |
| EPI_ISL_882942                                                                                                                                                                                                                                                                                                                                                                                                                                                                                                                                                                                                                                                                                                                                                                                                                                                                                                                                                                                                                                                                                                                                                                                                 | Ospedale San Camillo De Lellis Rieti                                                                                                                                                                     | INMI Lazzaro Spallanzani IRCCS                                                                        |                                                                                                                                                                                                        | M Rueca, E Giombini, C.E.M Gruber, B Bartolini, O Butera, F Messina, S Venarubea, A De Luca, L Casertano, A Di Caro, MR Capobianchi |
| EPI_ISL_883286, EPI_ISL_883287                                                                                                                                                                                                                                                                                                                                                                                                                                                                                                                                                                                                                                                                                                                                                                                                                                                                                                                                                                                                                                                                                                                                                                                 | SIESP DIPARTIMENTO DI PREVENZIONE CHIE                                                                                                                                                                   | Istituto Zooprofilattico Sperimentale dell'Abruzzo e Molise "G. Caporale"                             | Lorusso A, Marcacci M, Di Domenico M, Ancora M, Curini V, Mangone I, Rinaldi A, Scialabba S, Di Pasquale A, Cammà C, Puglia I, Calistri P, Savini G                                                    |                                                                                                                                     |
| EPI_ISL_883288, EPI_ISL_883289                                                                                                                                                                                                                                                                                                                                                                                                                                                                                                                                                                                                                                                                                                                                                                                                                                                                                                                                                                                                                                                                                                                                                                                 | SIESP CHIETI-DRIVE IN ORTONA                                                                                                                                                                             | Istituto Zooprofilattico Sperimentale dell'Abruzzo e Molise "G. Caporale"                             | Lorusso A, Marcacci M, Di Domenico M, Ancora M, Curini V, Mangone I, Rinaldi A, Scialabba S, Di Pasquale A, Cammà C, Puglia I, Calistri P, Savini G                                                    |                                                                                                                                     |
| EPI_ISL_883290                                                                                                                                                                                                                                                                                                                                                                                                                                                                                                                                                                                                                                                                                                                                                                                                                                                                                                                                                                                                                                                                                                                                                                                                 | SIESP CHIETI-DRIVE IN CHIETI                                                                                                                                                                             | Istituto Zooprofilattico Sperimentale dell'Abruzzo e Molise "G. Caporale"                             | Lorusso A, Marcacci M, Di Domenico M, Ancora M, Curini V, Mangone I, Rinaldi A, Scialabba S, Di Pasquale A, Cammà C, Puglia I, Calistri P, Savini G                                                    |                                                                                                                                     |
| EPI_ISL_883291                                                                                                                                                                                                                                                                                                                                                                                                                                                                                                                                                                                                                                                                                                                                                                                                                                                                                                                                                                                                                                                                                                                                                                                                 | RP Guardiagrele-Ospedale di Comunità                                                                                                                                                                     | Istituto Zooprofilattico Sperimentale dell'Abruzzo e Molise "G. Caporale"                             | Lorusso A, Marcacci M, Di Domenico M, Ancora M, Curini V, Mangone I, Rinaldi A, Scialabba S, Di Pasquale A, Cammà C, Puglia I, Calistri P, Savini G                                                    |                                                                                                                                     |
| EPI_ISL_883292                                                                                                                                                                                                                                                                                                                                                                                                                                                                                                                                                                                                                                                                                                                                                                                                                                                                                                                                                                                                                                                                                                                                                                                                 | SIESP CHIETI-DRIVE IN ORTONA                                                                                                                                                                             | Istituto Zooprofilattico Sperimentale dell'Abruzzo e Molise "G. Caporale"                             | Lorusso A, Marcacci M, Di Domenico M, Ancora M, Curini V, Mangone I, Rinaldi A, Scialabba S, Di Pasquale A, Cammà C, Puglia I, Calistri P, Savini G                                                    |                                                                                                                                     |
| EPI_ISL_883293                                                                                                                                                                                                                                                                                                                                                                                                                                                                                                                                                                                                                                                                                                                                                                                                                                                                                                                                                                                                                                                                                                                                                                                                 | SIESP CHIETI-DRIVE IN LANCIANO                                                                                                                                                                           | Istituto Zooprofilattico Sperimentale dell'Abruzzo e Molise "G. Caporale"                             | Lorusso A, Marcacci M, Di Domenico M, Ancora M, Curini V, Mangone I, Rinaldi A, Scialabba S, Di Pasquale A, Cammà C, Puglia I, Calistri P, Savini G                                                    |                                                                                                                                     |
| EPI_ISL_883294, EPI_ISL_883295                                                                                                                                                                                                                                                                                                                                                                                                                                                                                                                                                                                                                                                                                                                                                                                                                                                                                                                                                                                                                                                                                                                                                                                 | RP Guardiagrele-Ospedale di Comunità                                                                                                                                                                     | Istituto Zooprofilattico Sperimentale dell'Abruzzo e Molise "G. Caporale"                             | Lorusso A, Marcacci M, Di Domenico M, Ancora M, Curini V, Mangone I, Rinaldi A, Scialabba S, Di Pasquale A, Cammà C, Puglia I, Calistri P, Savini G                                                    |                                                                                                                                     |
| EPI_ISL_883296                                                                                                                                                                                                                                                                                                                                                                                                                                                                                                                                                                                                                                                                                                                                                                                                                                                                                                                                                                                                                                                                                                                                                                                                 | SIESP CHIETI-DRIVE IN ORTONA                                                                                                                                                                             | Istituto Zooprofilattico Sperimentale dell'Abruzzo e Molise "G. Caporale"                             | Lorusso A, Marcacci M, Di Domenico M, Ancora M, Curini V, Mangone I, Rinaldi A, Scialabba S, Di Pasquale A, Cammà C, Puglia I, Calistri P, Savini G                                                    |                                                                                                                                     |
| EPI_ISL_883297                                                                                                                                                                                                                                                                                                                                                                                                                                                                                                                                                                                                                                                                                                                                                                                                                                                                                                                                                                                                                                                                                                                                                                                                 | RP Guardiagrele-Ospedale di Comunità                                                                                                                                                                     | Istituto Zooprofilattico Sperimentale dell'Abruzzo e Molise "G. Caporale"                             | Lorusso A, Marcacci M, Di Domenico M, Ancora M, Curini V, Mangone I, Rinaldi A, Scialabba S, Di Pasquale A, Cammà C, Puglia I, Calistri P, Savini G                                                    |                                                                                                                                     |
| EPI_ISL_883298, EPI_ISL_883299                                                                                                                                                                                                                                                                                                                                                                                                                                                                                                                                                                                                                                                                                                                                                                                                                                                                                                                                                                                                                                                                                                                                                                                 | SIESP DIPARTIMENTO DI PREVENZIONE CHIE                                                                                                                                                                   | Istituto Zooprofilattico Sperimentale dell'Abruzzo e Molise "G. Caporale"                             | Lorusso A, Marcacci M, Di Domenico M, Ancora M, Curini V, Mangone I, Rinaldi A, Scialabba S, Di Pasquale A, Cammà C, Puglia I, Calistri P, Savini G                                                    |                                                                                                                                     |
| EPI_ISL_883300                                                                                                                                                                                                                                                                                                                                                                                                                                                                                                                                                                                                                                                                                                                                                                                                                                                                                                                                                                                                                                                                                                                                                                                                 | SIESP CHIETI-DRIVE IN CHIETI                                                                                                                                                                             | Istituto Zooprofilattico Sperimentale dell'Abruzzo e Molise "G. Caporale"                             | Lorusso A, Marcacci M, Di Domenico M, Ancora M, Curini V, Mangone I, Rinaldi A, Scialabba S, Di Pasquale A, Cammà C, Puglia I, Calistri P, Savini G                                                    |                                                                                                                                     |
| EPI_ISL_883301, EPI_ISL_883302                                                                                                                                                                                                                                                                                                                                                                                                                                                                                                                                                                                                                                                                                                                                                                                                                                                                                                                                                                                                                                                                                                                                                                                 | RP Guardiagrele-Ospedale di Comunità                                                                                                                                                                     | Istituto Zooprofilattico Sperimentale dell'Abruzzo e Molise "G. Caporale"                             | Lorusso A, Marcacci M, Di Domenico M, Ancora M, Curini V, Mangone I, Rinaldi A, Scialabba S, Di Pasquale A, Cammà C, Puglia I, Calistri P, Savini G                                                    |                                                                                                                                     |
| EPI_ISL_883303, EPI_ISL_883304,                                                                                                                                                                                                                                                                                                                                                                                                                                                                                                                                                                                                                                                                                                                                                                                                                                                                                                                                                                                                                                                                                                                                                                                | SIESP DIPARTIMENTO DI PREVENZIONE CHIE                                                                                                                                                                   | Istituto Zooprofilattico Sperimentale dell'Abruzzo e Molise "G.                                       | Lorusso A, Marcacci M, Di Domenico M, Ancora M, Curini V, Mangone I, Rinaldi A, Scialabba S, Di Pasquale A, Cammà C, Puglia I, Calistri P, Savini G                                                    |                                                                                                                                     |

|                                                                                                                                                                |                                                                                                                     | Caporale*                                                                                                                   |                                                                                                                                                                                                                                      |
|----------------------------------------------------------------------------------------------------------------------------------------------------------------|---------------------------------------------------------------------------------------------------------------------|-----------------------------------------------------------------------------------------------------------------------------|--------------------------------------------------------------------------------------------------------------------------------------------------------------------------------------------------------------------------------------|
| EPI_ISL_883305                                                                                                                                                 |                                                                                                                     |                                                                                                                             |                                                                                                                                                                                                                                      |
| EPI_ISL_885152, EPI_ISL_885153, EPI_ISL_885154                                                                                                                 | National Institute of Infectious Diseases-Prof. Dr. Matei Bals<br>Molecular Diagnostics Laboratory                  | National Institute of Infectious Diseases-Prof. Dr. Matei Bals<br>Molecular Diagnostics Laboratory                          | Leontina Banica, Marius Surleac, Corina Casangiu, Petre Milu, Andreea Tudor, Simona Paraschiv, Dan Otelea                                                                                                                            |
| EPI_ISL_888678                                                                                                                                                 | Laboratory for Respiratory Viruses, Cantacuzino National<br>Military-Medical Institute for Research and Development | Cantacuzino Institute Virology                                                                                              | Luiza Ustea, Nicoleta Paraschiv, Mihaela Lazar                                                                                                                                                                                       |
| EPI_ISL_888994                                                                                                                                                 | RSU MMC                                                                                                             | Eijkman Institute for Molecular Biology, Ministry of Research<br>and Technology/National Agency for Research and Innovation | Lydia V. Panggalo, Sukma Oktavianthi, Willy Agustine, Edison Johar, Hidayat Trimarsanto, Iskandar Adnan, Frilasita A Yudhaputri, Safarina G Malik, Khin Saw Myint, Amin Soebandrio                                                   |
| EPI_ISL_888995                                                                                                                                                 | RSU Sumber Waras                                                                                                    | Eijkman Institute for Molecular Biology, Ministry of Research<br>and Technology/National Agency for Research and Innovation | Lydia V. Panggalo, Sukma Oktavianthi, Willy Agustine, Edison Johar, Hidayat Trimarsanto, Iskandar Adnan, Frilasita A Yudhaputri, Safarina G Malik, Khin Saw Myint, Amin Soebandrio                                                   |
| EPI_ISL_888996                                                                                                                                                 | RSU Graha Juanda                                                                                                    | Eijkman Institute for Molecular Biology, Ministry of Research<br>and Technology/National Agency for Research and Innovation | Lydia V. Panggalo, Sukma Oktavianthi, Willy Agustine, Edison Johar, Hidayat Trimarsanto, Iskandar Adnan, Frilasita A Yudhaputri, Safarina G Malik, Khin Saw Myint, Amin Soebandrio                                                   |
| EPI_ISL_889017                                                                                                                                                 | RS Hermina Tangerang                                                                                                | Eijkman Institute for Molecular Biology, Ministry of Research<br>and Technology/National Agency for Research and Innovation | Lydia V. Panggalo, Sukma Oktavianthi, Willy Agustine, Edison Johar, Hidayat Trimarsanto, Iskandar Adnan, Frilasita A Yudhaputri, Safarina G Malik, Khin Saw Myint, Amin Soebandrio                                                   |
| EPI_ISL_889018                                                                                                                                                 | RSU Medika Dramaga                                                                                                  | Eijkman Institute for Molecular Biology, Ministry of Research<br>and Technology/National Agency for Research and Innovation | Lydia V. Panggalo, Sukma Oktavianthi, Willy Agustine, Edison Johar, Hidayat Trimarsanto, Iskandar Adnan, Frilasita A Yudhaputri, Safarina G Malik, Khin Saw Myint, Amin Soebandrio                                                   |
| EPI_ISL_889019                                                                                                                                                 | RSIA Sayyidah                                                                                                       | Eijkman Institute for Molecular Biology, Ministry of Research<br>and Technology/National Agency for Research and Innovation | Lydia V. Panggalo, Sukma Oktavianthi, Willy Agustine, Edison Johar, Hidayat Trimarsanto, Iskandar Adnan, Frilasita A Yudhaputri, Safarina G Malik, Khin Saw Myint, Amin Soebandrio                                                   |
| EPI_ISL_889776, EPI_ISL_889777, EPI_ISL_889778, EPI_ISL_889779, EPI_ISL_889780, EPI_ISL_889781, EPI_ISL_889782, EPI_ISL_889783, EPI_ISL_889784, EPI_ISL_889785 | LSUHS Emerging Viral Threat Laboratory                                                                              | Microbial Genome Sequencing Center                                                                                          | Maarten Van Diest, Jennifer L. Carroll, Camille F. Abshire, Mohammed N.A. Siddiquey, Andrew D. Yurochko, Martin J. Sapp, Rona S. Scott, Christopher G. Kevil, Daniel J. Snyder, Vaughn S. Cooper, John A. Vanchiere, Jeremy P. Kamil |
| EPI_ISL_891136, EPI_ISL_891137, EPI_ISL_891138, EPI_ISL_891139, EPI_ISL_891140                                                                                 | The Jackson Laboratory                                                                                              | The Jackson Laboratory                                                                                                      | Lloyd M, Sanderson B, Srivastava A, Maurya R, Renzette N, Omerza G, Kelly K, Li L, Wei C L, Adams M                                                                                                                                  |

We gratefully acknowledge the following Authors from the Originating laboratories responsible for obtaining the specimens, as well as the Submitting laboratories where the genome data were generated and shared via GISAID, on which this research is based.

All Submitters of data may be contacted directly via [www.gisaid.org](http://www.gisaid.org)

Authors are sorted alphabetically.

| Accession ID                                                                                                                                                                                                                                                                                                                                                                                   | Originating Laboratory                                                                                                  | Submitting Laboratory                                                                                                                                                    | Authors                                                                                                                                                                                                                                                                                                                                                                                                                                                                                                                                                         |
|------------------------------------------------------------------------------------------------------------------------------------------------------------------------------------------------------------------------------------------------------------------------------------------------------------------------------------------------------------------------------------------------|-------------------------------------------------------------------------------------------------------------------------|--------------------------------------------------------------------------------------------------------------------------------------------------------------------------|-----------------------------------------------------------------------------------------------------------------------------------------------------------------------------------------------------------------------------------------------------------------------------------------------------------------------------------------------------------------------------------------------------------------------------------------------------------------------------------------------------------------------------------------------------------------|
| EPI_ISL_406973                                                                                                                                                                                                                                                                                                                                                                                 | Singapore General Hospital                                                                                              | National Public Health Laboratory                                                                                                                                        | Mak, TM; Octavia S; Chavatte JM; Zhou, ZY; Cui, L; Lin, RTP                                                                                                                                                                                                                                                                                                                                                                                                                                                                                                     |
| EPI_ISL_410545                                                                                                                                                                                                                                                                                                                                                                                 | INMI Lazzaro Spallanzani IRCCS                                                                                          | Laboratory of Virology, INMI Lazzaro Spallanzani IRCCS                                                                                                                   | Maria R. Capobianchi, Cesare E. M. Gruber, Martina Rueca, Barbara Bartolini, Francesco Messina, Emanuela Giombini, Francesca Colavita, Concetta Castilletti, Eleonora Lalle, Fabrizio Carletti, Emanuele Nicastrì, Giuseppe Ippolito.                                                                                                                                                                                                                                                                                                                           |
| EPI_ISL_410546                                                                                                                                                                                                                                                                                                                                                                                 | INMI Lazzaro Spallanzani IRCCS                                                                                          | Laboratory of Virology, INMI Lazzaro Spallanzani IRCCS                                                                                                                   | Maria R. Capobianchi, Cesare E. M. Gruber, Martina Rueca, Fabrizio Carletti, Barbara Bartolini, Francesco Messina, Emanuela Giombini, Francesca Colavita, Concetta Castilletti, Eleonora Lalle, Emanuele Nicastrì, Giuseppe Ippolito.                                                                                                                                                                                                                                                                                                                           |
| EPI_ISL_413490                                                                                                                                                                                                                                                                                                                                                                                 | Auckland Hospital                                                                                                       | Institute of Environmental Science and Research (ESR)                                                                                                                    | Matt Storey, Xiaoyun Ren, Gary McAuliffe, Sally Roberts, Matthew Blakiston, Erasmus Smit, Lauren Jelly, Joep de Ligt                                                                                                                                                                                                                                                                                                                                                                                                                                            |
| EPI_ISL_414520, EPI_ISL_414521                                                                                                                                                                                                                                                                                                                                                                 | Bundeswehr Institute of Microbiology                                                                                    | Bundeswehr Institute of Microbiology                                                                                                                                     | Mathias C Walter, Markus H Antwerpen and Roman Wölfel                                                                                                                                                                                                                                                                                                                                                                                                                                                                                                           |
| EPI_ISL_414588, EPI_ISL_414589, EPI_ISL_414590                                                                                                                                                                                                                                                                                                                                                 | Minnesota Department of Health, Public Health Laboratory                                                                | Minnesota Department of Health, Public Health Laboratory                                                                                                                 | Matt Plumb, Jake Garfin and Xiong Wang                                                                                                                                                                                                                                                                                                                                                                                                                                                                                                                          |
| EPI_ISL_414648                                                                                                                                                                                                                                                                                                                                                                                 | Andersen Lab, The Scripps Research Institute                                                                            | Andersen Lab, The Scripps Research Institute                                                                                                                             | Mark Zeller, Catie Anderson, Emily Spender, Sarah Topol, Raphaelle Klitting, Refugio Robles-Sikisaka, Karthik Gangavarapu, Laura Nicholson, Kristian Andersen                                                                                                                                                                                                                                                                                                                                                                                                   |
| EPI_ISL_415629, EPI_ISL_415632, EPI_ISL_415633, EPI_ISL_415637, EPI_ISL_415638, EPI_ISL_415639, EPI_ISL_415640                                                                                                                                                                                                                                                                                 | Virology Department, Royal Infirmary of Edinburgh, NHS Lothian                                                          | Virology Department, Royal Infirmary of Edinburgh, NHS Lothian                                                                                                           | McHugh M, Dewar R, O'Toole Á, Rambaut A, Williams TC, Templeton K                                                                                                                                                                                                                                                                                                                                                                                                                                                                                               |
| EPI_ISL_416457                                                                                                                                                                                                                                                                                                                                                                                 | Andersen Lab, The Scripps Research Institute                                                                            | Andersen Lab, The Scripps Research Institute                                                                                                                             | Mark Zeller, Catie Anderson, Emily Spender, Sarah Topol, Raphaelle Klitting, Refugio Robles-Sikisaka, Karthik Gangavarapu, Laura Nicholson, Kristian Andersen                                                                                                                                                                                                                                                                                                                                                                                                   |
| EPI_ISL_416477, EPI_ISL_416478, EPI_ISL_416479                                                                                                                                                                                                                                                                                                                                                 | R. G. Lugar Center for Public Health Research, National Center for Disease Control and Public Health (NCDC) of Georgia. | R. G. Lugar Center for Public Health Research, National Center for Disease Control and Public Health (NCDC) of Georgia.                                                  | Marine Murtskhvaladze, Nato Kotaria, Ann Machablashvili, Lela Sabadze, Mari Gavashelidze, Ana Papiakuri, Meri Pantsulaia, Gvantsa Brachveli, Tata Imnadze, Tamar Jashiasvili, Tea Tevdoradze, Ketevan Sidamonidze, Ekaterine Khmaladze, Ekaterine Zhghenti, Roena Sukhiasvili, Mariam Zakalashvili, Lela Urushadze, Magda Dgebuadze, Giorgi Tomashvili, Davit Tsaguria, Ekaterine Zangaladze, Nino Berishvili, Gvantsa Chanturia, Adam Kotorashvili, Maia Alkhazashvili, Irma Burjanadze, Anna Kasradze, Khatuna Zakhshvili, Paata Imnadze, Amiran Gamkrelidze. |
| EPI_ISL_416483                                                                                                                                                                                                                                                                                                                                                                                 | Servicio de Microbiología. Consorcio Hospital General Universitario de Valencia                                         | Sequencing and Bioinformatics Service and Molecular Epidemiology Research Group. FISABIO-Public Health                                                                   | Maria Alma Bracho, Maria Dolores Ocete, Concepcion Gimeno, Giuseppe D'Auria, Griselda De Marco, Neris Garcia-Gonzalez, Fernando Gonzalez-Candelas                                                                                                                                                                                                                                                                                                                                                                                                               |
| EPI_ISL_416484                                                                                                                                                                                                                                                                                                                                                                                 | Servicio de Microbiología. Consorcio Hospital General Universitario de Valencia                                         | Sequencing and Bioinformatics Service and Molecular Epidemiology Research Group. FISABIO-Public Health                                                                   | Maria Dolores Ocete, Concepcion Gimeno, Giuseppe D'Auria, Griselda De Marco, Neris Garcia-Gonzalez, Maria Alma Bracho, Fernando Gonzalez-Candelas                                                                                                                                                                                                                                                                                                                                                                                                               |
| EPI_ISL_416519, EPI_ISL_416526                                                                                                                                                                                                                                                                                                                                                                 | Auckland Hospital                                                                                                       | Institute of Environmental Science and Research (ESR)                                                                                                                    | Matt Storey, Xiaoyun Ren, Gary McAuliffe, Sally Roberts, Matthew Blakiston, Erasmus Smit, Lauren Jelly, Joep de Ligt                                                                                                                                                                                                                                                                                                                                                                                                                                            |
| EPI_ISL_416539                                                                                                                                                                                                                                                                                                                                                                                 | Wellington Hospital                                                                                                     | Institute of Environmental Science and Research (ESR)                                                                                                                    | Matt Storey, Xiaoyun Ren, Craig Thornley, Maxim Bloomfield, Erasmus Smit, Lauren Jelly, Joep de Ligt                                                                                                                                                                                                                                                                                                                                                                                                                                                            |
| EPI_ISL_417189, EPI_ISL_417191, EPI_ISL_417192, EPI_ISL_417194, EPI_ISL_417196, EPI_ISL_417198                                                                                                                                                                                                                                                                                                 | Minnesota Department of Health, Public Health Laboratory                                                                | Minnesota Department of Health, Public Health Laboratory                                                                                                                 | Matt Plumb, Jake Garfin and Xiong Wang                                                                                                                                                                                                                                                                                                                                                                                                                                                                                                                          |
| EPI_ISL_417205                                                                                                                                                                                                                                                                                                                                                                                 | Servicio de Microbiología. Consorcio Hospital General Universitario de Valencia                                         | Sequencing and Bioinformatics Service and Molecular Epidemiology Research Group. FISABIO-Public Health                                                                   | Maria Alma Bracho, Maria Dolores Ocete, Concepcion Gimeno, Giuseppe D'Auria, Griselda De Marco, Neris Garcia-Gonzalez, Fernando Gonzalez-Candelas                                                                                                                                                                                                                                                                                                                                                                                                               |
| EPI_ISL_417206                                                                                                                                                                                                                                                                                                                                                                                 | Servicio de Microbiología. Consorcio Hospital General Universitario de Valencia                                         | Sequencing and Bioinformatics Service and Molecular Epidemiology Research Group. FISABIO-Public Health                                                                   | Maria Alma Bracho, Maria Dolores Ocete, Concepcion Gimeno, Giuseppe D'Auria, Griselda De Marco, Neris Garcia-Gonzalez, Fernando Gonzalez-Candelas                                                                                                                                                                                                                                                                                                                                                                                                               |
| EPI_ISL_417469, EPI_ISL_417470, EPI_ISL_417471, EPI_ISL_417472, EPI_ISL_417473, EPI_ISL_417474, EPI_ISL_417475, EPI_ISL_417476, EPI_ISL_417477, EPI_ISL_417478, EPI_ISL_417479, EPI_ISL_417480, EPI_ISL_417492, EPI_ISL_417493, EPI_ISL_417494, EPI_ISL_417495, EPI_ISL_417496, EPI_ISL_417497, EPI_ISL_417498, EPI_ISL_417499, EPI_ISL_417500, EPI_ISL_417501, EPI_ISL_417502, EPI_ISL_417503 | Minnesota Department of Health, Public Health Laboratory                                                                | Minnesota Department of Health, Public Health Laboratory                                                                                                                 | Matt Plumb, Jake Garfin and Xiong Wang                                                                                                                                                                                                                                                                                                                                                                                                                                                                                                                          |
| see above                                                                                                                                                                                                                                                                                                                                                                                      | Minnesota Department of Health, Public Health Laboratory                                                                | Minnesota Department of Health, Public Health Laboratory                                                                                                                 | Matt Plumb, Jake Garfin and Xiong Wang                                                                                                                                                                                                                                                                                                                                                                                                                                                                                                                          |
| EPI_ISL_417921                                                                                                                                                                                                                                                                                                                                                                                 | INMI Lazzaro Spallanzani IRCCS                                                                                          | Laboratory of Virology, INMI Lazzaro Spallanzani IRCCS                                                                                                                   | Martina Rueca, Barbara Bartolini, Francesco Messina, Cesare E. M. Gruber, Emanuela Giombini, Maria R. Capobianchi, Fabrizio Carletti, Francesca Colavita, Concetta Castilletti, Eleonora Lalle, Daniele Lapa, Giuseppe Ippolito.                                                                                                                                                                                                                                                                                                                                |
| EPI_ISL_417924                                                                                                                                                                                                                                                                                                                                                                                 | Secretaría de Salud Medellín                                                                                            | Instituto Nacional de Salud, Universidad Cooperativa de Colombia Instituto Alexander von Humboldt, Imperial College-London, London School of Hygiene & Tropical Medicine | Marcela Mercado-Reyes, Katherine Laiton-Donato, Diego A. Álvarez-Díaz, Carlos Franco-Muñoz, Jose A. Usme-Ciro, Gloria Puerto, Nicolás D. Franco-Sierra, Maily A. Gonzalez, Zulma M. Cucunubá, Christian Julian VillabonaArenas, Liz Villabona-Arenas, Sussy Echeverría-Londoño, Astrid C. Flórez, Sergio Gomez Rangel, Luz Dary Rodriguez, Juliana Barbosa, Erika Ospitia, Diana Marcela Walteros-Acero, Martha Lucia Ospina Martinez                                                                                                                           |
| EPI_ISL_418190, EPI_ISL_418191, EPI_ISL_418192, EPI_ISL_418193, EPI_ISL_418194, EPI_ISL_418195, EPI_ISL_418196, EPI_ISL_418197, EPI_ISL_418198, EPI_ISL_418199, EPI_ISL_418200, EPI_ISL_418201, EPI_ISL_418202, EPI_ISL_418203, EPI_ISL_418204, EPI_ISL_418205, EPI_ISL_418254                                                                                                                 | NYU Langone Health                                                                                                      | Department of Pathology and Medicine, New York University School of Medicine                                                                                             | Margaret Black, John Cadley, Paolo Cotzia, John Chen, Dacia Dimartino, Xiaojun Feng, Adriana Heguy, Megan Hogan, Emily Huang, George Jour, Christian Marier, Matthew T. Maurano, Mark J. Mulligan, Peter Meyn, Jared Pinnell, Amy Rapkiewicz, Marie Samanovic-Golden, Antonio Serrano, Guomiao Shen, Matija Snuderl, Nick Vulpescu, Gael Westby, Paul Zappile                                                                                                                                                                                                   |
| EPI_ISL_418262                                                                                                                                                                                                                                                                                                                                                                                 | Instituto Nacional de Salud                                                                                             | Instituto Nacional de Salud Universidad Cooperativa de Colombia Instituto Alexander von Humboldt, Imperial College-London London School of Hygiene & Tropical Medicine   | Marcela Mercado-Reyes, Katherine Laiton-Donato, Diego A. Álvarez-Díaz, Carlos Franco-Muñoz, Jose A. Usme-Ciro, Gloria Puerto, Nicolas D. Franco-Sierra, Maily A. Gonzalez, Zulma M. Cucunubá, Christian Julian VillabonaArenas, Liz Villabona-Arenas, Sussy Echeverría-Londoño, Astrid C. Flórez, Sergio Gomez Rangel, Luz Dary Rodriguez, Juliana Barbosa, Erika Ospitia, Diana Marcela Walteros-Acero, Nuno Rodrigues Faria, Martha Lucia Ospina Martinez                                                                                                     |
| EPI_ISL_418263, EPI_ISL_418264, EPI_ISL_418265                                                                                                                                                                                                                                                                                                                                                 | Laboratory of Microbiology, Department of Medicine, National and Kapodistrian University of Athens, Greece              | Laboratory of Biology, Department of Medicine, Democritus University of Thrace, Greece                                                                                   | Maria Bampali, Elisavet Gatzidou, Nikolaos Dovrolis, Stavroula Veletza, Nikolaos Spanakis, Ioannis Karakasiliotis                                                                                                                                                                                                                                                                                                                                                                                                                                               |
| EPI_ISL_418968, EPI_ISL_418969, EPI_ISL_418970, EPI_ISL_418971, EPI_ISL_418972, EPI_ISL_418973, EPI_ISL_418974, EPI_ISL_418975, EPI_ISL_418976, EPI_ISL_418977, EPI_ISL_418978, EPI_ISL_418979, EPI_ISL_418980                                                                                                                                                                                 | NYU Langone Health                                                                                                      | Department of Pathology and Medicine, New York University School of Medicine                                                                                             | Maria Agüero-Rosenfeld, Margaret Black, John Cadley, Paolo Cotzia, John Chen, Dacia Dimartino, Xiaojun Feng, Adriana Heguy, Megan Hogan, Emily Huang, George Jour, Christian Marier, Matthew T. Maurano, Mark J. Mulligan, Peter Meyn, Jared Pinnell, Siiharam Ramaswami, Amy Rapkiewicz, Marie Samanovic-Golden, Antonio Serrano, Guomiao Shen, Matija Snuderl, Nick Vulpescu, Gael Westby, Paul Zappile, Yutong Zhang                                                                                                                                         |
| see above                                                                                                                                                                                                                                                                                                                                                                                      | NYU Langone Health                                                                                                      | Department of Pathology and Medicine, New York University School of Medicine                                                                                             | Maria Agüero-Rosenfeld, Margaret Black, John Cadley, Paolo Cotzia, John Chen, Dacia Dimartino, Xiaojun Feng, Adriana Heguy, Megan Hogan, Emily Huang, George Jour, Christian Marier, Matthew T. Maurano, Mark J. Mulligan, Peter Meyn, Jared Pinnell, Siiharam Ramaswami, Amy Rapkiewicz, Marie Samanovic-Golden, Antonio Serrano, Guomiao Shen, Matija Snuderl, Nick Vulpescu, Gael Westby, Paul Zappile, Yutong Zhang                                                                                                                                         |
| EPI_ISL_418992, EPI_ISL_418993, EPI_ISL_418994, EPI_ISL_418995, EPI_ISL_418996, EPI_ISL_418997, EPI_ISL_418998, EPI_ISL_418999, EPI_ISL_419000, EPI_ISL_419001                                                                                                                                                                                                                                 | National Public Health Laboratory, National Centre for Infectious Diseases                                              | National Public Health Laboratory, National Centre for Infectious Diseases                                                                                               | Mak TM, Octavia S, Cui L, Lin RTP                                                                                                                                                                                                                                                                                                                                                                                                                                                                                                                               |

|                                                                                                                                                                                                                                                                                                                                                                                                                                                                                                |                                                                                                                                                                                         |                                                                                                                                                                                         |                                                                                                                                                                                                                                                                                                                                                                                                                                                                                                                                                    |
|------------------------------------------------------------------------------------------------------------------------------------------------------------------------------------------------------------------------------------------------------------------------------------------------------------------------------------------------------------------------------------------------------------------------------------------------------------------------------------------------|-----------------------------------------------------------------------------------------------------------------------------------------------------------------------------------------|-----------------------------------------------------------------------------------------------------------------------------------------------------------------------------------------|----------------------------------------------------------------------------------------------------------------------------------------------------------------------------------------------------------------------------------------------------------------------------------------------------------------------------------------------------------------------------------------------------------------------------------------------------------------------------------------------------------------------------------------------------|
| EPI_ISL_419388, EPI_ISL_419390, EPI_ISL_419391, EPI_ISL_419392, EPI_ISL_419393, EPI_ISL_419394, EPI_ISL_419395, EPI_ISL_419396, EPI_ISL_419397                                                                                                                                                                                                                                                                                                                                                 | Minnesota Department of Health, Public Health Laboratory                                                                                                                                | Minnesota Department of Health, Public Health Laboratory                                                                                                                                | Matt Plumb, Jake Garfin and Xiong Wang                                                                                                                                                                                                                                                                                                                                                                                                                                                                                                             |
| EPI_ISL_419675                                                                                                                                                                                                                                                                                                                                                                                                                                                                                 | Servicio de Microbiología. Consorcio Hospital General Universitario de Valencia                                                                                                         | Sequencing and Bioinformatics Service and Molecular Epidemiology Research Group. FISABIO-Public Health                                                                                  | Maria Alma Bracho, Maria Dolores Ocete, Giuseppe D'Auria, Griselda De Marco, Neris Garcia-Gonzalez, Concepcion Gimeno, Fernando Gonzalez-Candelas                                                                                                                                                                                                                                                                                                                                                                                                  |
| EPI_ISL_419676                                                                                                                                                                                                                                                                                                                                                                                                                                                                                 | Servicio de Microbiología. Consorcio Hospital General Universitario de Valencia                                                                                                         | Sequencing and Bioinformatics Service and Molecular Epidemiology Research Group. FISABIO-Public Health                                                                                  | Maria Dolores Ocete, Giuseppe D'Auria, Griselda De Marco, Neris Garcia-Gonzalez, Maria Alma Bracho, Concepcion Gimeno, Fernando Gonzalez-Candelas                                                                                                                                                                                                                                                                                                                                                                                                  |
| EPI_ISL_419680                                                                                                                                                                                                                                                                                                                                                                                                                                                                                 | Servicio de Microbiología. Consorcio Hospital General Universitario de Valencia                                                                                                         | Sequencing and Bioinformatics Service and Molecular Epidemiology Research Group. FISABIO-Public Health                                                                                  | Maria Alma Bracho, Maria Dolores Ocete, Giuseppe D'Auria, Griselda De Marco, Neris Garcia-Gonzalez, Concepcion Gimeno, Fernando Gonzalez-Candelas                                                                                                                                                                                                                                                                                                                                                                                                  |
| EPI_ISL_419681                                                                                                                                                                                                                                                                                                                                                                                                                                                                                 | Servicio de Microbiología. Consorcio Hospital General Universitario de Valencia                                                                                                         | Sequencing and Bioinformatics Service and Molecular Epidemiology Research Group. FISABIO-Public Health                                                                                  | Maria Dolores Ocete, Giuseppe D'Auria, Griselda De Marco, Neris Garcia-Gonzalez, Maria Alma Bracho, Concepcion Gimeno, Fernando Gonzalez-Candelas                                                                                                                                                                                                                                                                                                                                                                                                  |
| EPI_ISL_419685                                                                                                                                                                                                                                                                                                                                                                                                                                                                                 | Servicio de Microbiología. Consorcio Hospital General Universitario de Valencia                                                                                                         | Sequencing and Bioinformatics Service and Molecular Epidemiology Research Group. FISABIO-Public Health                                                                                  | Maria Alma Bracho, Maria Dolores Ocete, Giuseppe D'Auria, Griselda De Marco, Neris Garcia-Gonzalez, Concepcion Gimeno, Fernando Gonzalez-Candelas                                                                                                                                                                                                                                                                                                                                                                                                  |
| EPI_ISL_419686                                                                                                                                                                                                                                                                                                                                                                                                                                                                                 | Servicio de Microbiología. Consorcio Hospital General Universitario de Valencia                                                                                                         | Sequencing and Bioinformatics Service and Molecular Epidemiology Research Group. FISABIO-Public Health                                                                                  | Maria Dolores Ocete, Giuseppe D'Auria, Griselda De Marco, Neris Garcia-Gonzalez, Maria Alma Bracho, Concepcion Gimeno, Fernando Gonzalez-Candelas                                                                                                                                                                                                                                                                                                                                                                                                  |
| EPI_ISL_419690                                                                                                                                                                                                                                                                                                                                                                                                                                                                                 | Servicio de Microbiología. Consorcio Hospital General Universitario de Valencia                                                                                                         | Sequencing and Bioinformatics Service and Molecular Epidemiology Research Group. FISABIO-Public Health                                                                                  | Maria Alma Bracho, Maria Dolores Ocete, Giuseppe D'Auria, Griselda De Marco, Neris Garcia-Gonzalez, Concepcion Gimeno, Fernando Gonzalez-Candelas                                                                                                                                                                                                                                                                                                                                                                                                  |
| EPI_ISL_419696, EPI_ISL_419697, EPI_ISL_419698, EPI_ISL_419699, EPI_ISL_419700, EPI_ISL_419701, EPI_ISL_419702, EPI_ISL_419703, EPI_ISL_419704, EPI_ISL_419705                                                                                                                                                                                                                                                                                                                                 | NYU Langone Health                                                                                                                                                                      | Departments of Pathology and Medicine, New York University School of Medicine                                                                                                           | Maria Agüero-Rosenfeld, Margaret Black, John Cadley, Paolo Cotzia, John Chen, Dacia Dimartino, Xiaojun Feng, Adriana Heguy, Megan Hogan, Emily Huang, George Jour, Christian Marier, Matthew T. Maurano, Mark J. Mulligan, Peter Meyn, Jared Pinnell, Sitharam Ramaswami, Amy Rapkiewicz, Marie Samanovic-Golden, Antonio Serrano, Guomiao Shen, Matija Snuderl, Nick Vulpescu, Gael Westby, Paul Zappile, Yutong Zhang                                                                                                                            |
| EPI_ISL_420115                                                                                                                                                                                                                                                                                                                                                                                                                                                                                 | Servicio de Microbiología. Consorcio Hospital General Universitario de Valencia                                                                                                         | Sequencing and Bioinformatics Service and Molecular Epidemiology Research Group. FISABIO-Public Health                                                                                  | Marta Pla Diaz, Neris Garcia-Gonzalez, Loreto Ferrús Abad, Inma Galán Vendrell, Paula Ruiz-Hueso, Mariana Reyes-Prieto, Vicente Soriano Chirona, Maria Alma Bracho, Griselda De Marco, Beatriz Beamud, Lidia Ruiz Roldan, Maria Dolores Ocete, Lúcia Martínez-Priego, Concepcion Gimeno, Giuseppe D'Auria, Fernando Gonzalez-Candelas                                                                                                                                                                                                              |
| EPI_ISL_420120                                                                                                                                                                                                                                                                                                                                                                                                                                                                                 | Servicio de Microbiología. Consorcio Hospital General Universitario de Valencia                                                                                                         | Sequencing and Bioinformatics Service and Molecular Epidemiology Research Group. FISABIO-Public Health                                                                                  | Mariana Reyes-Prieto, Vicente Soriano Chirona, Maria Alma Bracho, Griselda De Marco, Beatriz Beamud, Lidia Ruiz Roldan, Marta Pla Diaz, Neris Garcia-Gonzalez, Loreto Ferrús Abad, Inma Galán Vendrell, Paula Ruiz-Hueso, Maria Dolores Ocete, Lúcia Martínez-Priego, Concepcion Gimeno, Giuseppe D'Auria, Fernando Gonzalez-Candelas                                                                                                                                                                                                              |
| EPI_ISL_420122                                                                                                                                                                                                                                                                                                                                                                                                                                                                                 | Servicio de Microbiología. Consorcio Hospital General Universitario de Valencia                                                                                                         | Sequencing and Bioinformatics Service and Molecular Epidemiology Research Group. FISABIO-Public Health                                                                                  | Maria Alma Bracho, Griselda De Marco, Beatriz Beamud, Lidia Ruiz Roldan, Marta Pla Diaz, Neris Garcia-Gonzalez, Loreto Ferrús Abad, Inma Galán Vendrell, Paula Ruiz-Hueso, Mariana Reyes-Prieto, Vicente Soriano Chirona, Maria Dolores Ocete, Lúcia Martínez-Priego, Concepcion Gimeno, Giuseppe D'Auria, Fernando Gonzalez-Candelas                                                                                                                                                                                                              |
| EPI_ISL_420123                                                                                                                                                                                                                                                                                                                                                                                                                                                                                 | Servicio de Microbiología. Consorcio Hospital General Universitario de Valencia                                                                                                         | Sequencing and Bioinformatics Service and Molecular Epidemiology Research Group. FISABIO-Public Health                                                                                  | Maria Dolores Ocete, Maria Alma Bracho, Griselda De Marco, Beatriz Beamud, Lidia Ruiz Roldan, Marta Pla Diaz, Neris Garcia-Gonzalez, Loreto Ferrús Abad, Inma Galán Vendrell, Paula Ruiz-Hueso, Mariana Reyes-Prieto, Vicente Soriano Chirona, Lúcia Martínez-Priego, Concepcion Gimeno, Giuseppe D'Auria, Fernando Gonzalez-Candelas                                                                                                                                                                                                              |
| EPI_ISL_420127                                                                                                                                                                                                                                                                                                                                                                                                                                                                                 | Servicio de Microbiología. Hospital Clínico Universitario de Valencia                                                                                                                   | Sequencing and Bioinformatics Service and Molecular Epidemiology Research Group. FISABIO-Public Health                                                                                  | Maria Alma Bracho, Griselda De Marco, Beatriz Beamud, Lidia Ruiz Roldan, Marta Pla Diaz, Neris Garcia-Gonzalez, Loreto Ferrús Abad, Inma Galán Vendrell, Paula Ruiz-Hueso, Mariana Reyes-Prieto, Vicente Soriano Chirona, David Navarro, Lúcia Martínez-Priego, Giuseppe D'Auria, Fernando Gonzalez-Candelas                                                                                                                                                                                                                                       |
| EPI_ISL_420142                                                                                                                                                                                                                                                                                                                                                                                                                                                                                 | Department for Virology, Molecular Biology and Genome Research, R. G. Lugar Center for Public Health Research, National Center for Disease Control and Public Health (NCDC) of Georgia. | Department for Virology, Molecular Biology and Genome Research, R. G. Lugar Center for Public Health Research, National Center for Disease Control and Public Health (NCDC) of Georgia. | Marine Murtskhalvadze, Ann Machablashvili, Lela Sabadze, Mari Gavashelidze, Ana Papkiauri, Meri Pantsulaia, Gvantsa Brachveli, Tata Imnadze, Tamar Jashiasvili, Tea Tvedoradze, Ketevan Sidamonidze, Ekaterine Khmaladze, Ekaterine Zhghenti, Roena Sukhiasvili, Mariam Zakalashvili, Lela Urushadze, Magda Dgebuadze, Giorgi Tomashvili, Davit Tsaguria, Ekaterine Zangaladze, Nino Berishvili, Gvantsa Chanturia, Adam Kotorashvili, Maia Alkhashashvili, Irma Burjanadze, Anna Kasradze, Khatuna Zakhshvili, Paata Imnadze, Amiran Gamkrelidze. |
| EPI_ISL_420296, EPI_ISL_420297, EPI_ISL_420298, EPI_ISL_420299, EPI_ISL_420300, EPI_ISL_420301, EPI_ISL_420302, EPI_ISL_420307, EPI_ISL_420308, EPI_ISL_420309                                                                                                                                                                                                                                                                                                                                 | NYU Langone Health                                                                                                                                                                      | Departments of Pathology and Medicine, New York University School of Medicine                                                                                                           | Maria Agüero-Rosenfeld, Margaret Black, John Cadley, Paolo Cotzia, John Chen, Dacia Dimartino, Xiaojun Feng, Adriana Heguy, Megan Hogan, Emily Huang, George Jour, Christian Marier, Matthew T. Maurano, Mark J. Mulligan, Peter Meyn, Jared Pinnell, Sitharam Ramaswami, Amy Rapkiewicz, Marie Samanovic-Golden, Antonio Serrano, Guomiao Shen, Matija Snuderl, Nick Vulpescu, Gael Westby, Paul Zappile, Yutong Zhang                                                                                                                            |
| EPI_ISL_420570, EPI_ISL_420571, EPI_ISL_420572, EPI_ISL_420573, EPI_ISL_420574, EPI_ISL_420575, EPI_ISL_420576, EPI_ISL_420577, EPI_ISL_420578, EPI_ISL_420579, EPI_ISL_420580, EPI_ISL_420581, EPI_ISL_420582, EPI_ISL_420584, EPI_ISL_420585, EPI_ISL_420586, EPI_ISL_420587, EPI_ISL_420588, EPI_ISL_420589, EPI_ISL_420590, EPI_ISL_420591                                                                                                                                                 | NYU Langone Health                                                                                                                                                                      | Departments of Pathology and Medicine, New York University School of Medicine                                                                                                           | Maria Agüero-Rosenfeld, Brendan Belovarac, Margaret Black, Ludovic Boytard, John Cadley, Paolo Cotzia, John Chen, Dacia Dimartino, Xiaojun Feng, Tatyana Gindin, Adriana Heguy, Megan Hogan, Emily Huang, George Jour, Andrew Lytle, Christian Marier, Matthew T. Maurano, Mark J. Mulligan, Peter Meyn, Iman Osman, Jared Pinnell, Sitharam Ramaswami, Amy Rapkiewicz, Marie Samanovic-Golden, Antonio Serrano, Guomiao Shen, Matija Snuderl, Theodore Vougiouklakis, Nick Vulpescu, Gael Westby, Paul Zappile, Yutong Zhang                      |
| EPI_ISL_420898, EPI_ISL_420899, EPI_ISL_420900, EPI_ISL_420901, EPI_ISL_420902, EPI_ISL_420903, EPI_ISL_420904, EPI_ISL_420905, EPI_ISL_420906, EPI_ISL_420907, EPI_ISL_420908, EPI_ISL_420909, EPI_ISL_420911, EPI_ISL_420912                                                                                                                                                                                                                                                                 | Max von Pettenkofer Institute, Virology, National Reference Center for Retroviruses, LMU Munich                                                                                         | Laboratory for Functional Genome Analysis, Dept. Genomics, Gene Center of the LMU Munich                                                                                                | Max Muenchhoff, Stefan Krebs, Alexander Graf, Ashok Varadarajan, Oliver Keppler, Helmut Blum                                                                                                                                                                                                                                                                                                                                                                                                                                                       |
| EPI_ISL_421577, EPI_ISL_421578, EPI_ISL_421579, EPI_ISL_421580, EPI_ISL_421581, EPI_ISL_421582, EPI_ISL_421583, EPI_ISL_421584, EPI_ISL_421585, EPI_ISL_421586, EPI_ISL_421587, EPI_ISL_421588, EPI_ISL_421589, EPI_ISL_421590, EPI_ISL_421591, EPI_ISL_421592                                                                                                                                                                                                                                 | NYU Langone Health                                                                                                                                                                      | Departments of Pathology and Medicine, New York University School of Medicine                                                                                                           | Maria Agüero-Rosenfeld, Brendan Belovarac, Margaret Black, Ludovic Boytard, John Cadley, Paolo Cotzia, John Chen, Dacia Dimartino, Xiaojun Feng, Tatyana Gindin, Adriana Heguy, Megan Hogan, Emily Huang, George Jour, Andrew Lytle, Christian Marier, Matthew T. Maurano, Mark J. Mulligan, Peter Meyn, Iman Osman, Jared Pinnell, Sitharam Ramaswami, Amy Rapkiewicz, Marie Samanovic-Golden, Antonio Serrano, Guomiao Shen, Matija Snuderl, Theodore Vougiouklakis, Nick Vulpescu, Gael Westby, Paul Zappile, Yutong Zhang                      |
| EPI_ISL_421683, EPI_ISL_421684, EPI_ISL_421685, EPI_ISL_421686, EPI_ISL_421687, EPI_ISL_421688, EPI_ISL_421689, EPI_ISL_421690, EPI_ISL_421691, EPI_ISL_421692                                                                                                                                                                                                                                                                                                                                 | Minnesota Department of Health, Public Health Laboratory                                                                                                                                | Minnesota Department of Health, Public Health Laboratory                                                                                                                                | Matt Plumb, Jacob Garfin, Xiong Wang                                                                                                                                                                                                                                                                                                                                                                                                                                                                                                               |
| EPI_ISL_421704, EPI_ISL_421705, EPI_ISL_421706, EPI_ISL_421707, EPI_ISL_421708, EPI_ISL_421709, EPI_ISL_421710, EPI_ISL_421711, EPI_ISL_421712, EPI_ISL_421713, EPI_ISL_421714, EPI_ISL_421715, EPI_ISL_421716, EPI_ISL_421717, EPI_ISL_421718, EPI_ISL_421719, EPI_ISL_421720, EPI_ISL_421721, EPI_ISL_421722, EPI_ISL_421723, EPI_ISL_421724, EPI_ISL_421725, EPI_ISL_421726, EPI_ISL_421727, EPI_ISL_421728, EPI_ISL_421729, EPI_ISL_421730, EPI_ISL_421731, EPI_ISL_421732, EPI_ISL_421733 | NYU Langone Health                                                                                                                                                                      | Departments of Pathology and Medicine, New York University School of Medicine                                                                                                           | Maria Agüero-Rosenfeld, Brendan Belovarac, Margaret Black, Ludovic Boytard, John Cadley, Paolo Cotzia, John Chen, Dacia Dimartino, Xiaojun Feng, Tatyana Gindin, Adriana Heguy, Megan Hogan, Emily Huang, George Jour, Andrew Lytle, Christian Marier, Matthew T. Maurano, Mark J. Mulligan, Peter Meyn, Iman Osman, Jared Pinnell, Sitharam Ramaswami, Amy Rapkiewicz, Marie Samanovic-Golden, Antonio Serrano, Guomiao Shen, Matija Snuderl, Theodore Vougiouklakis, Nick Vulpescu, Gael Westby, Paul Zappile, Yutong Zhang                      |
| EPI_ISL_422428, EPI_ISL_422429, EPI_ISL_422430, EPI_ISL_422431,                                                                                                                                                                                                                                                                                                                                                                                                                                | National Public Health Laboratory, National Centre for Infectious Diseases                                                                                                              | National Public Health Laboratory, National Centre for Infectious Diseases                                                                                                              | Mak TM, Octavia S, Cui L, Lin RTP                                                                                                                                                                                                                                                                                                                                                                                                                                                                                                                  |

|                                                                                                                                                                                                                                                                                                                                                                                                                                                                                                                                                                                                                                                                                                                                                                                                                                                                                                                                                                                                                                                                                                                                                                                                                                                                                                                                                                                                                                                                                                                                                                                                                                                                                                                                                                                                                                                                                                                                                                                                                                                                                                                                                                                                                                                                                                                                                                                                                                                                                                                |           |                                                                                                                                                                                                 |                                                                                                        |                                                                                                                                                                                                                                                                                                                                                                                                                                                                                                                                                            |
|----------------------------------------------------------------------------------------------------------------------------------------------------------------------------------------------------------------------------------------------------------------------------------------------------------------------------------------------------------------------------------------------------------------------------------------------------------------------------------------------------------------------------------------------------------------------------------------------------------------------------------------------------------------------------------------------------------------------------------------------------------------------------------------------------------------------------------------------------------------------------------------------------------------------------------------------------------------------------------------------------------------------------------------------------------------------------------------------------------------------------------------------------------------------------------------------------------------------------------------------------------------------------------------------------------------------------------------------------------------------------------------------------------------------------------------------------------------------------------------------------------------------------------------------------------------------------------------------------------------------------------------------------------------------------------------------------------------------------------------------------------------------------------------------------------------------------------------------------------------------------------------------------------------------------------------------------------------------------------------------------------------------------------------------------------------------------------------------------------------------------------------------------------------------------------------------------------------------------------------------------------------------------------------------------------------------------------------------------------------------------------------------------------------------------------------------------------------------------------------------------------------|-----------|-------------------------------------------------------------------------------------------------------------------------------------------------------------------------------------------------|--------------------------------------------------------------------------------------------------------|------------------------------------------------------------------------------------------------------------------------------------------------------------------------------------------------------------------------------------------------------------------------------------------------------------------------------------------------------------------------------------------------------------------------------------------------------------------------------------------------------------------------------------------------------------|
| EPI_ISL_422433, EPI_ISL_422434, EPI_ISL_422435                                                                                                                                                                                                                                                                                                                                                                                                                                                                                                                                                                                                                                                                                                                                                                                                                                                                                                                                                                                                                                                                                                                                                                                                                                                                                                                                                                                                                                                                                                                                                                                                                                                                                                                                                                                                                                                                                                                                                                                                                                                                                                                                                                                                                                                                                                                                                                                                                                                                 |           |                                                                                                                                                                                                 |                                                                                                        |                                                                                                                                                                                                                                                                                                                                                                                                                                                                                                                                                            |
| EPI_ISL_424929, EPI_ISL_424930, EPI_ISL_424931, EPI_ISL_424932, EPI_ISL_424933, EPI_ISL_424934, EPI_ISL_424935, EPI_ISL_424936, EPI_ISL_424937, EPI_ISL_424938, EPI_ISL_424939, EPI_ISL_424940, EPI_ISL_424941, EPI_ISL_424942, EPI_ISL_424943, EPI_ISL_424944, EPI_ISL_424945, EPI_ISL_424946, EPI_ISL_424947, EPI_ISL_424948, EPI_ISL_424949, EPI_ISL_424950, EPI_ISL_424951, EPI_ISL_424952, EPI_ISL_424953, EPI_ISL_424954, EPI_ISL_424955, EPI_ISL_424956, EPI_ISL_424957, EPI_ISL_424958, EPI_ISL_424959, EPI_ISL_424960, EPI_ISL_424961, EPI_ISL_424962, EPI_ISL_424963, EPI_ISL_424964, EPI_ISL_424965, EPI_ISL_424966, EPI_ISL_424967, EPI_ISL_424968                                                                                                                                                                                                                                                                                                                                                                                                                                                                                                                                                                                                                                                                                                                                                                                                                                                                                                                                                                                                                                                                                                                                                                                                                                                                                                                                                                                                                                                                                                                                                                                                                                                                                                                                                                                                                                                 | see above | NYU Langone Health                                                                                                                                                                              | Departments of Pathology and Medicine, New York University School of Medicine                          | Maria Agüero-Rosenfeld, Brendan Belovarac, Margaret Black, Ludovic Boytard, John Cadley, Paolo Cotzia, John Chen, Dacia Dimartino, Xiaojun Feng, Tatyana Gindin, Adriana Heguy, Megan Hogan, Emily Huang, George Jour, Andrew Lytle, Christian Marier, Matthew T. Maurano, Mark J. Mulligan, Peter Meyn, Iman Osman, Jared Pinnell, Sitharam Ramaswami, Amy Rapkiewicz, Marie Samanovic-Golden, Antonio Serrano, Guomiao Shen, Matija Snuderl, Theodore Vougiouklakis, Nick Vulpescu, Gael Westby, Paul Zappile, Yutong Zhang                              |
| EPI_ISL_425183                                                                                                                                                                                                                                                                                                                                                                                                                                                                                                                                                                                                                                                                                                                                                                                                                                                                                                                                                                                                                                                                                                                                                                                                                                                                                                                                                                                                                                                                                                                                                                                                                                                                                                                                                                                                                                                                                                                                                                                                                                                                                                                                                                                                                                                                                                                                                                                                                                                                                                 |           | Servicio de Microbiología. Consorcio Hospital General Universitario de Valencia                                                                                                                 | Sequencing and Bioinformatics Service and Molecular Epidemiology Research Group. FISABIO-Public Health | Marta Pla Diaz, Neris Garcia-Gonzalez, Inma Galán Vendrell, Sandra Carbo, Loreto Ferrús Abad, Paula Ruiz-Hueso, Mariana Reyes-Prieto, Vicente Soriano Chirona, Ivan Ansari, David Navarro, Maria Alma Bracho, Griselda De Marco, Beatriz Beamud, Lidia Ruiz Roldan, Lúcia Martínez-Priego, Giuseppe D'Auria, Fernando Gonzalez-Candelas                                                                                                                                                                                                                    |
| EPI_ISL_425189                                                                                                                                                                                                                                                                                                                                                                                                                                                                                                                                                                                                                                                                                                                                                                                                                                                                                                                                                                                                                                                                                                                                                                                                                                                                                                                                                                                                                                                                                                                                                                                                                                                                                                                                                                                                                                                                                                                                                                                                                                                                                                                                                                                                                                                                                                                                                                                                                                                                                                 |           | Servicio de Microbiología. Consorcio Hospital General Universitario de Valencia                                                                                                                 | Sequencing and Bioinformatics Service and Molecular Epidemiology Research Group. FISABIO-Public Health | Mariana Reyes-Prieto, Vicente Soriano Chirona, Ivan Ansari, David Navarro, Maria Alma Bracho, Griselda De Marco, Beatriz Beamud, Lidia Ruiz Roldan, Marta Pla Diaz, Neris Garcia-Gonzalez, Inma Galán Vendrell, Sandra Carbo, Loreto Ferrús Abad, Paula Ruiz-Hueso, Lúcia Martínez-Priego, Giuseppe D'Auria, Fernando Gonzalez-Candelas                                                                                                                                                                                                                    |
| EPI_ISL_425193                                                                                                                                                                                                                                                                                                                                                                                                                                                                                                                                                                                                                                                                                                                                                                                                                                                                                                                                                                                                                                                                                                                                                                                                                                                                                                                                                                                                                                                                                                                                                                                                                                                                                                                                                                                                                                                                                                                                                                                                                                                                                                                                                                                                                                                                                                                                                                                                                                                                                                 |           | Servicio de Microbiología. Consorcio Hospital General Universitario de Valencia                                                                                                                 | Sequencing and Bioinformatics Service and Molecular Epidemiology Research Group. FISABIO-Public Health | Maria Alma Bracho, Griselda De Marco, Beatriz Beamud, Lidia Ruiz Roldan, Marta Pla Diaz, Neris Garcia-Gonzalez, Inma Galán Vendrell, Sandra Carbo, Loreto Ferrús Abad, Paula Ruiz-Hueso, Mariana Reyes-Prieto, Vicente Soriano Chirona, Ivan Ansari, David Navarro, Lúcia Martínez-Priego, Giuseppe D'Auria, Fernando Gonzalez-Candelas                                                                                                                                                                                                                    |
| EPI_ISL_425197                                                                                                                                                                                                                                                                                                                                                                                                                                                                                                                                                                                                                                                                                                                                                                                                                                                                                                                                                                                                                                                                                                                                                                                                                                                                                                                                                                                                                                                                                                                                                                                                                                                                                                                                                                                                                                                                                                                                                                                                                                                                                                                                                                                                                                                                                                                                                                                                                                                                                                 |           | Servicio de Microbiología. Consorcio Hospital General Universitario de Valencia                                                                                                                 | Sequencing and Bioinformatics Service and Molecular Epidemiology Research Group. FISABIO-Public Health | Marta Pla Diaz, Neris Garcia-Gonzalez, Inma Galán Vendrell, Sandra Carbo, Loreto Ferrús Abad, Paula Ruiz-Hueso, Mariana Reyes-Prieto, Vicente Soriano Chirona, Ivan Ansari, David Navarro, Maria Alma Bracho, Griselda De Marco, Beatriz Beamud, Lidia Ruiz Roldan, Lúcia Martínez-Priego, Giuseppe D'Auria, Fernando Gonzalez-Candelas                                                                                                                                                                                                                    |
| EPI_ISL_425201                                                                                                                                                                                                                                                                                                                                                                                                                                                                                                                                                                                                                                                                                                                                                                                                                                                                                                                                                                                                                                                                                                                                                                                                                                                                                                                                                                                                                                                                                                                                                                                                                                                                                                                                                                                                                                                                                                                                                                                                                                                                                                                                                                                                                                                                                                                                                                                                                                                                                                 |           | Servicio de Microbiología. Hospital Clínico Universitario de Valencia                                                                                                                           | Sequencing and Bioinformatics Service and Molecular Epidemiology Research Group. FISABIO-Public Health | Mariana Reyes-Prieto, Vicente Soriano Chirona, Maria Alma Bracho, Griselda De Marco, Beatriz Beamud, Lidia Ruiz Roldan, Marta Pla Diaz, Neris Garcia-Gonzalez, Loreto Ferrús Abad, Maria Dolores Ocete, Lúcia Martínez-Priego, Inma Galán Vendrell, Paula Ruiz-Hueso, Concepcion Gimeno, Giuseppe D'Auria, Fernando Gonzalez-Candelas                                                                                                                                                                                                                      |
| EPI_ISL_425203                                                                                                                                                                                                                                                                                                                                                                                                                                                                                                                                                                                                                                                                                                                                                                                                                                                                                                                                                                                                                                                                                                                                                                                                                                                                                                                                                                                                                                                                                                                                                                                                                                                                                                                                                                                                                                                                                                                                                                                                                                                                                                                                                                                                                                                                                                                                                                                                                                                                                                 |           | Servicio de Microbiología. Hospital Clínico Universitario de Valencia                                                                                                                           | Sequencing and Bioinformatics Service and Molecular Epidemiology Research Group. FISABIO-Public Health | Maria Alma Bracho, Griselda De Marco, Beatriz Beamud, Lidia Ruiz Roldan, Marta Pla Diaz, Neris Garcia-Gonzalez, Loreto Ferrús Abad, Maria Dolores Ocete, Inma Galán Vendrell, Paula Ruiz-Hueso, Mariana Reyes-Prieto, Vicente Soriano Chirona, Lúcia Martínez-Priego, Concepcion Gimeno, Giuseppe D'Auria, Fernando Gonzalez-Candelas                                                                                                                                                                                                                      |
| EPI_ISL_425204                                                                                                                                                                                                                                                                                                                                                                                                                                                                                                                                                                                                                                                                                                                                                                                                                                                                                                                                                                                                                                                                                                                                                                                                                                                                                                                                                                                                                                                                                                                                                                                                                                                                                                                                                                                                                                                                                                                                                                                                                                                                                                                                                                                                                                                                                                                                                                                                                                                                                                 |           | Servicio de Microbiología. Hospital Clínico Universitario de Valencia                                                                                                                           | Sequencing and Bioinformatics Service and Molecular Epidemiology Research Group. FISABIO-Public Health | Maria Dolores Ocete, Inma Galán Vendrell, Paula Ruiz-Hueso, Mariana Reyes-Prieto, Vicente Soriano Chirona, Maria Alma Bracho, Griselda De Marco, Beatriz Beamud, Lidia Ruiz Roldan, Marta Pla Diaz, Neris Garcia-Gonzalez, Loreto Ferrús Abad, Lúcia Martínez-Priego, Concepcion Gimeno, Giuseppe D'Auria, Fernando Gonzalez-Candelas                                                                                                                                                                                                                      |
| EPI_ISL_425208                                                                                                                                                                                                                                                                                                                                                                                                                                                                                                                                                                                                                                                                                                                                                                                                                                                                                                                                                                                                                                                                                                                                                                                                                                                                                                                                                                                                                                                                                                                                                                                                                                                                                                                                                                                                                                                                                                                                                                                                                                                                                                                                                                                                                                                                                                                                                                                                                                                                                                 |           | Servicio de Microbiología. Hospital Clínico Universitario de Valencia                                                                                                                           | Sequencing and Bioinformatics Service and Molecular Epidemiology Research Group. FISABIO-Public Health | Marta Pla Diaz, Neris Garcia-Gonzalez, Loreto Ferrús Abad, Maria Dolores Ocete, Inma Galán Vendrell, Paula Ruiz-Hueso, Mariana Reyes-Prieto, Vicente Soriano Chirona, Maria Alma Bracho, Griselda De Marco, Beatriz Beamud, Lidia Ruiz Roldan, Lúcia Martínez-Priego, Concepcion Gimeno, Giuseppe D'Auria, Fernando Gonzalez-Candelas                                                                                                                                                                                                                      |
| EPI_ISL_425213                                                                                                                                                                                                                                                                                                                                                                                                                                                                                                                                                                                                                                                                                                                                                                                                                                                                                                                                                                                                                                                                                                                                                                                                                                                                                                                                                                                                                                                                                                                                                                                                                                                                                                                                                                                                                                                                                                                                                                                                                                                                                                                                                                                                                                                                                                                                                                                                                                                                                                 |           | Servicio de Microbiología. Consorcio Hospital General Universitario de Valencia                                                                                                                 | Sequencing and Bioinformatics Service and Molecular Epidemiology Research Group. FISABIO-Public Health | Maria Alma Bracho, Griselda De Marco, Beatriz Beamud, Lidia Ruiz Roldan, Marta Pla Diaz, Neris Garcia-Gonzalez, Inma Galán Vendrell, Sandra Carbo, Loreto Ferrús Abad, Paula Ruiz-Hueso, Mariana Reyes-Prieto, Vicente Soriano Chirona, Ivan Ansari, David Navarro, Lúcia Martínez-Priego, Giuseppe D'Auria, Fernando Gonzalez-Candelas                                                                                                                                                                                                                    |
| EPI_ISL_425217                                                                                                                                                                                                                                                                                                                                                                                                                                                                                                                                                                                                                                                                                                                                                                                                                                                                                                                                                                                                                                                                                                                                                                                                                                                                                                                                                                                                                                                                                                                                                                                                                                                                                                                                                                                                                                                                                                                                                                                                                                                                                                                                                                                                                                                                                                                                                                                                                                                                                                 |           | Servicio de Microbiología. Consorcio Hospital General Universitario de Valencia                                                                                                                 | Sequencing and Bioinformatics Service and Molecular Epidemiology Research Group. FISABIO-Public Health | Marta Pla Diaz, Neris Garcia-Gonzalez, Inma Galán Vendrell, Sandra Carbo, Loreto Ferrús Abad, Paula Ruiz-Hueso, Mariana Reyes-Prieto, Vicente Soriano Chirona, Ivan Ansari, David Navarro, Maria Alma Bracho, Griselda De Marco, Beatriz Beamud, Lidia Ruiz Roldan, Lúcia Martínez-Priego, Giuseppe D'Auria, Fernando Gonzalez-Candelas                                                                                                                                                                                                                    |
| EPI_ISL_425819, EPI_ISL_425820, EPI_ISL_425821, EPI_ISL_425824, EPI_ISL_425825, EPI_ISL_425826, EPI_ISL_425827, EPI_ISL_425828, EPI_ISL_425829, EPI_ISL_425830, EPI_ISL_425831, EPI_ISL_425835, EPI_ISL_425836, EPI_ISL_425837, EPI_ISL_425838, EPI_ISL_425840, EPI_ISL_425841, EPI_ISL_425844, EPI_ISL_425845, EPI_ISL_425846, EPI_ISL_425848, EPI_ISL_425850, EPI_ISL_425851, EPI_ISL_425852, EPI_ISL_425856, EPI_ISL_425857, EPI_ISL_425858, EPI_ISL_425860, EPI_ISL_425861, EPI_ISL_425864, EPI_ISL_425867, EPI_ISL_425870, EPI_ISL_425871, EPI_ISL_425872, EPI_ISL_425873, EPI_ISL_425875, EPI_ISL_425876, EPI_ISL_425877, EPI_ISL_425878, EPI_ISL_425879, EPI_ISL_425880, EPI_ISL_425881, EPI_ISL_425882, EPI_ISL_425884, EPI_ISL_425885, EPI_ISL_425886, EPI_ISL_425887, EPI_ISL_425888, EPI_ISL_425889, EPI_ISL_425890, EPI_ISL_425891, EPI_ISL_425892, EPI_ISL_425893, EPI_ISL_425894, EPI_ISL_425896, EPI_ISL_425897, EPI_ISL_425898, EPI_ISL_425899, EPI_ISL_425900, EPI_ISL_425902, EPI_ISL_425904, EPI_ISL_425905, EPI_ISL_425907, EPI_ISL_425911, EPI_ISL_425912, EPI_ISL_425913, EPI_ISL_425914, EPI_ISL_425916, EPI_ISL_425917, EPI_ISL_425918, EPI_ISL_425919, EPI_ISL_425920, EPI_ISL_425921, EPI_ISL_425922, EPI_ISL_425923, EPI_ISL_425924, EPI_ISL_425925, EPI_ISL_425927, EPI_ISL_425928, EPI_ISL_425930, EPI_ISL_425933, EPI_ISL_425934, EPI_ISL_425935, EPI_ISL_425936, EPI_ISL_425938, EPI_ISL_425939, EPI_ISL_425940, EPI_ISL_425941, EPI_ISL_425942, EPI_ISL_425943, EPI_ISL_425944, EPI_ISL_425945, EPI_ISL_425946, EPI_ISL_425947, EPI_ISL_425948, EPI_ISL_425949, EPI_ISL_425951, EPI_ISL_425952, EPI_ISL_425955, EPI_ISL_425956, EPI_ISL_425957, EPI_ISL_425958, EPI_ISL_425959, EPI_ISL_425961, EPI_ISL_425962, EPI_ISL_425963, EPI_ISL_425964, EPI_ISL_425965, EPI_ISL_425966, EPI_ISL_425967, EPI_ISL_425968, EPI_ISL_425969, EPI_ISL_425970, EPI_ISL_425972, EPI_ISL_425974, EPI_ISL_425977, EPI_ISL_425978, EPI_ISL_425980, EPI_ISL_425981, EPI_ISL_425982, EPI_ISL_425983, EPI_ISL_425984, EPI_ISL_425985, EPI_ISL_425986, EPI_ISL_425987, EPI_ISL_425988, EPI_ISL_425989, EPI_ISL_425990, EPI_ISL_425991, EPI_ISL_425992, EPI_ISL_425993, EPI_ISL_425994, EPI_ISL_425995, EPI_ISL_425996, EPI_ISL_425997, EPI_ISL_425998, EPI_ISL_425999, EPI_ISL_426000, EPI_ISL_426002, EPI_ISL_426006, EPI_ISL_426007, EPI_ISL_426008, EPI_ISL_426009, EPI_ISL_426012, EPI_ISL_426014, EPI_ISL_426016, EPI_ISL_426019, EPI_ISL_426020, EPI_ISL_426022, EPI_ISL_426023, EPI_ISL_426024 | see above | Virology Department, Royal Infirmary of Edinburgh, NHS Lothian / School of Biological Sciences, University of Edinburgh / Institute of Genetics and Molecular Medicine, University of Edinburgh | COVID-19 Genomics UK (COG-UK) Consortium                                                               | McHugh M, Dewar R, Rooke S, Gallagher M, Balcaza C, O'Toole A, Hill V, McCrone JT, Colquhoun R, Yu X, Jackson B, Scher E, Rambaut A, Williams TC, Templeton K                                                                                                                                                                                                                                                                                                                                                                                              |
| EPI_ISL_426617, EPI_ISL_426618, EPI_ISL_426619, EPI_ISL_426620, EPI_ISL_426621, EPI_ISL_426622, EPI_ISL_426623, EPI_ISL_426624, EPI_ISL_426625, EPI_ISL_426626                                                                                                                                                                                                                                                                                                                                                                                                                                                                                                                                                                                                                                                                                                                                                                                                                                                                                                                                                                                                                                                                                                                                                                                                                                                                                                                                                                                                                                                                                                                                                                                                                                                                                                                                                                                                                                                                                                                                                                                                                                                                                                                                                                                                                                                                                                                                                 | see above | NYU Langone Health                                                                                                                                                                              | Departments of Pathology and Medicine, New York University School of Medicine                          | Maria Agüero-Rosenfeld, Brendan Belovarac, Margaret Black, Ludovic Boytard, John Cadley, Paolo Cotzia, John Chen, Dacia Dimartino, Xiaojun Feng, Tatyana Gindin, Emily Guzman, Adriana Heguy, Megan Hogan, Emily Huang, George Jour, Andrew Lytle, Christian Marier, Matthew T. Maurano, Mark J. Mulligan, Peter Meyn, Iman Osman, Jared Pinnell, Vanessa Raabe, Sitharam Ramaswami, Amy Rapkiewicz, Marie Samanovic-Golden, Antonio Serrano, Guomiao Shen, Matija Snuderl, Theodore Vougiouklakis, Nick Vulpescu, Gael Westby, Paul Zappile, Yutong Zhang |
| EPI_ISL_427273, EPI_ISL_427274, EPI_ISL_427275, EPI_ISL_427276, EPI_ISL_427277, EPI_ISL_427278, EPI_ISL_427279, EPI_ISL_427280, EPI_ISL_427281, EPI_ISL_427282, EPI_ISL_427283, EPI_ISL_427284, EPI_ISL_427285, EPI_ISL_427286, EPI_ISL_427287                                                                                                                                                                                                                                                                                                                                                                                                                                                                                                                                                                                                                                                                                                                                                                                                                                                                                                                                                                                                                                                                                                                                                                                                                                                                                                                                                                                                                                                                                                                                                                                                                                                                                                                                                                                                                                                                                                                                                                                                                                                                                                                                                                                                                                                                 | see above | Minnesota Department of Health, Public Health Laboratory                                                                                                                                        | Minnesota Department of Health, Public Health Laboratory                                               | Matt Plumb, Jacob Garfin and Xiong Wang                                                                                                                                                                                                                                                                                                                                                                                                                                                                                                                    |
| EPI_ISL_427469, EPI_ISL_427470, EPI_ISL_427471, EPI_ISL_427472, EPI_ISL_427473, EPI_ISL_427474, EPI_ISL_427475, EPI_ISL_427476, EPI_ISL_427477, EPI_ISL_427478, EPI_ISL_427479, EPI_ISL_427480, EPI_ISL_427481, EPI_ISL_427482, EPI_ISL_427483, EPI_ISL_427484, EPI_ISL_427485, EPI_ISL_427486, EPI_ISL_427487, EPI_ISL_427488, EPI_ISL_427489, EPI_ISL_427490, EPI_ISL_427491, EPI_ISL_427492, EPI_ISL_427493, EPI_ISL_427494, EPI_ISL_427495, EPI_ISL_427496, EPI_ISL_427497, EPI_ISL_427498, EPI_ISL_427499, EPI_ISL_427500, EPI_ISL_427501, EPI_ISL_427502, EPI_ISL_427503, EPI_ISL_427504, EPI_ISL_427505, EPI_ISL_427506, EPI_ISL_427507, EPI_ISL_427508, EPI_ISL_427509, EPI_ISL_427510, EPI_ISL_427511, EPI_ISL_427512, EPI_ISL_427513, EPI_ISL_427514, EPI_ISL_427515, EPI_ISL_427516, EPI_ISL_427517, EPI_ISL_427518, EPI_ISL_427519, EPI_ISL_427520, EPI_ISL_427521, EPI_ISL_427522, EPI_ISL_427523, EPI_ISL_427524, EPI_ISL_427525, EPI_ISL_427627, EPI_ISL_427628, EPI_ISL_427629, EPI_ISL_427630, EPI_ISL_427631, EPI_ISL_427632, EPI_ISL_427633, EPI_ISL_427634, EPI_ISL_427635, EPI_ISL_427636, EPI_ISL_427637, EPI_ISL_427638, EPI_ISL_427639, EPI_ISL_427640, EPI_ISL_427641, EPI_ISL_427642                                                                                                                                                                                                                                                                                                                                                                                                                                                                                                                                                                                                                                                                                                                                                                                                                                                                                                                                                                                                                                                                                                                                                                                                                                                                                                 | see above | NYU Langone Health                                                                                                                                                                              | Departments of Pathology and Medicine, New York University School of Medicine                          | Maria Agüero-Rosenfeld, Brendan Belovarac, Margaret Black, Ludovic Boytard, John Cadley, Paolo Cotzia, John Chen, Dacia Dimartino, Xiaojun Feng, Tatyana Gindin, Emily Guzman, Adriana Heguy, Megan Hogan, Andrew Lytle, Christian Marier, Matthew T. Maurano, Mark J. Mulligan, Peter Meyn, Iman Osman, Jared Pinnell, Vanessa Raabe, Sitharam Ramaswami, Amy Rapkiewicz, Marie Samanovic-Golden, Antonio Serrano, Guomiao Shen, Matija Snuderl, Theodore Vougiouklakis, Nick Vulpescu, Gael Westby, Paul Zappile, Yutong Zhang                           |
| EPI_ISL_428232, EPI_ISL_428233, EPI_ISL_428234, EPI_ISL_428235, EPI_ISL_428236                                                                                                                                                                                                                                                                                                                                                                                                                                                                                                                                                                                                                                                                                                                                                                                                                                                                                                                                                                                                                                                                                                                                                                                                                                                                                                                                                                                                                                                                                                                                                                                                                                                                                                                                                                                                                                                                                                                                                                                                                                                                                                                                                                                                                                                                                                                                                                                                                                 |           | Hematology Laboratory, Section of Molecular Diagnostics, University Clinical Centre, Medical University of Gdansk                                                                               | Department of Virology, Faculty of Medicine, University of Helsinki, Helsinki, Finland                 | Marlena Robakowska, Aneta Szulc, Maciej Grzybek, Olli Vapalahti, Teemu Smura                                                                                                                                                                                                                                                                                                                                                                                                                                                                               |
| EPI_ISL_428757, EPI_ISL_428758, EPI_ISL_428759, EPI_ISL_428760, EPI_ISL_428761, EPI_ISL_428762, EPI_ISL_428763, EPI_ISL_428764, EPI_ISL_428765, EPI_ISL_428766, EPI_ISL_428767, EPI_ISL_428768, EPI_ISL_428769, EPI_ISL_428770, EPI_ISL_428771, EPI_ISL_428772, EPI_ISL_428773, EPI_ISL_428774, EPI_ISL_428775, EPI_ISL_428776, EPI_ISL_428777, EPI_ISL_428778, EPI_ISL_428779, EPI_ISL_428780, EPI_ISL_428781, EPI_ISL_428782, EPI_ISL_428783, EPI_ISL_428784, EPI_ISL_428785, EPI_ISL_428786, EPI_ISL_428787, EPI_ISL_428788, EPI_ISL_428789, EPI_ISL_428790, EPI_ISL_428791, EPI_ISL_428792, EPI_ISL_428793, EPI_ISL_428794, EPI_ISL_428795, EPI_ISL_428796, EPI_ISL_428797, EPI_ISL_428798, EPI_ISL_428799, EPI_ISL_428800, EPI_ISL_428801, EPI_ISL_428802, EPI_ISL_428803, EPI_ISL_428804, EPI_ISL_428805                                                                                                                                                                                                                                                                                                                                                                                                                                                                                                                                                                                                                                                                                                                                                                                                                                                                                                                                                                                                                                                                                                                                                                                                                                                                                                                                                                                                                                                                                                                                                                                                                                                                                                 | see above | NYU Langone Health                                                                                                                                                                              | Departments of Pathology and Medicine, New York University School of Medicine                          | Maria Agüero-Rosenfeld, Brendan Belovarac, Margaret Black, Ludovic Boytard, John Cadley, Paolo Cotzia, John Chen, Dacia Dimartino, Xiaojun Feng, Tatyana Gindin, Emily Guzman, Adriana Heguy, Megan Hogan, Emily Huang, George Jour, Andrew Lytle, Christian Marier, Matthew T. Maurano, Mark J. Mulligan, Peter Meyn, Iman Osman, Jared Pinnell, Vanessa Raabe, Sitharam Ramaswami, Amy Rapkiewicz, Marie Samanovic-Golden, Antonio Serrano, Guomiao Shen, Matija Snuderl, Theodore Vougiouklakis, Nick Vulpescu, Gael Westby, Paul Zappile, Yutong Zhang |

EPI\_ISL\_428822, EPI\_ISL\_428823, EPI\_ISL\_428824, EPI\_ISL\_428825, EPI\_ISL\_428826, EPI\_ISL\_428827, EPI\_ISL\_428828, EPI\_ISL\_428829, EPI\_ISL\_428830, EPI\_ISL\_428831, EPI\_ISL\_428832, EPI\_ISL\_428833, EPI\_ISL\_428834, EPI\_ISL\_428835, EPI\_ISL\_428836, EPI\_ISL\_428837, EPI\_ISL\_428838, EPI\_ISL\_428839, EPI\_ISL\_428840, EPI\_ISL\_428841, EPI\_ISL\_428842, EPI\_ISL\_428843, EPI\_ISL\_428844, EPI\_ISL\_428845, EPI\_ISL\_428846, EPI\_ISL\_428847, EPI\_ISL\_428848, EPI\_ISL\_428849, EPI\_ISL\_428850

|                                                                                                                                                                                                                                                                                                                                                                                                                                                                                                                                                                                                                                                                                                                                                                                                                                                                                                                                                                                                                                                                                                                                                                                                                                                                                                                                                                                                                                                                                                                                                                                                                                                                                                                                                                                                                                                                                                                                                                                                                                                                                                                                                                                                                                                                                                                                                                                                                                                                                                                                                                                                                                                                                                                                                                                                                                                                                                                                                                                                                                                                                                                                                                                                                                                                                                                                                                                                                                                                                                                                                                                                                                                                                                                                                                                                                                                                                                                                                                                                                                                                                                                                                                                                                                                                                                                                                                                                                                                                                                                                                                                                                                                                                                                                                                                                                                                                                                                                                                                                                                                                                                                                                                                                                                                                                                                                                                                                                                                                                                                                                                                                                                                                                                                                                                                                                                                                                                                                                                                                                                                                                                                                                                                                                                                                                                                                                                                                                                                                                                                                                                                                                                                                                                                                                                                                                                                                                                                                                                                                                                                                                                                                                |                                                                                                                                                                                                 |                                                                               |                                                                                                                                                                                                                                                                                                                                                                                                                                                                                                                                                                                                                                               |
|------------------------------------------------------------------------------------------------------------------------------------------------------------------------------------------------------------------------------------------------------------------------------------------------------------------------------------------------------------------------------------------------------------------------------------------------------------------------------------------------------------------------------------------------------------------------------------------------------------------------------------------------------------------------------------------------------------------------------------------------------------------------------------------------------------------------------------------------------------------------------------------------------------------------------------------------------------------------------------------------------------------------------------------------------------------------------------------------------------------------------------------------------------------------------------------------------------------------------------------------------------------------------------------------------------------------------------------------------------------------------------------------------------------------------------------------------------------------------------------------------------------------------------------------------------------------------------------------------------------------------------------------------------------------------------------------------------------------------------------------------------------------------------------------------------------------------------------------------------------------------------------------------------------------------------------------------------------------------------------------------------------------------------------------------------------------------------------------------------------------------------------------------------------------------------------------------------------------------------------------------------------------------------------------------------------------------------------------------------------------------------------------------------------------------------------------------------------------------------------------------------------------------------------------------------------------------------------------------------------------------------------------------------------------------------------------------------------------------------------------------------------------------------------------------------------------------------------------------------------------------------------------------------------------------------------------------------------------------------------------------------------------------------------------------------------------------------------------------------------------------------------------------------------------------------------------------------------------------------------------------------------------------------------------------------------------------------------------------------------------------------------------------------------------------------------------------------------------------------------------------------------------------------------------------------------------------------------------------------------------------------------------------------------------------------------------------------------------------------------------------------------------------------------------------------------------------------------------------------------------------------------------------------------------------------------------------------------------------------------------------------------------------------------------------------------------------------------------------------------------------------------------------------------------------------------------------------------------------------------------------------------------------------------------------------------------------------------------------------------------------------------------------------------------------------------------------------------------------------------------------------------------------------------------------------------------------------------------------------------------------------------------------------------------------------------------------------------------------------------------------------------------------------------------------------------------------------------------------------------------------------------------------------------------------------------------------------------------------------------------------------------------------------------------------------------------------------------------------------------------------------------------------------------------------------------------------------------------------------------------------------------------------------------------------------------------------------------------------------------------------------------------------------------------------------------------------------------------------------------------------------------------------------------------------------------------------------------------------------------------------------------------------------------------------------------------------------------------------------------------------------------------------------------------------------------------------------------------------------------------------------------------------------------------------------------------------------------------------------------------------------------------------------------------------------------------------------------------------------------------------------------------------------------------------------------------------------------------------------------------------------------------------------------------------------------------------------------------------------------------------------------------------------------------------------------------------------------------------------------------------------------------------------------------------------------------------------------------------------------------------------------------------------------------------------------------------------------------------------------------------------------------------------------------------------------------------------------------------------------------------------------------------------------------------------------------------------------------------------------------------------------------------------------------------------------------------------------------------------------------------------------------|-------------------------------------------------------------------------------------------------------------------------------------------------------------------------------------------------|-------------------------------------------------------------------------------|-----------------------------------------------------------------------------------------------------------------------------------------------------------------------------------------------------------------------------------------------------------------------------------------------------------------------------------------------------------------------------------------------------------------------------------------------------------------------------------------------------------------------------------------------------------------------------------------------------------------------------------------------|
| see above                                                                                                                                                                                                                                                                                                                                                                                                                                                                                                                                                                                                                                                                                                                                                                                                                                                                                                                                                                                                                                                                                                                                                                                                                                                                                                                                                                                                                                                                                                                                                                                                                                                                                                                                                                                                                                                                                                                                                                                                                                                                                                                                                                                                                                                                                                                                                                                                                                                                                                                                                                                                                                                                                                                                                                                                                                                                                                                                                                                                                                                                                                                                                                                                                                                                                                                                                                                                                                                                                                                                                                                                                                                                                                                                                                                                                                                                                                                                                                                                                                                                                                                                                                                                                                                                                                                                                                                                                                                                                                                                                                                                                                                                                                                                                                                                                                                                                                                                                                                                                                                                                                                                                                                                                                                                                                                                                                                                                                                                                                                                                                                                                                                                                                                                                                                                                                                                                                                                                                                                                                                                                                                                                                                                                                                                                                                                                                                                                                                                                                                                                                                                                                                                                                                                                                                                                                                                                                                                                                                                                                                                                                                                      | National Public Health Laboratory, National Centre for Infectious Diseases                                                                                                                      | National Public Health Laboratory, National Centre for Infectious Diseases    | Mak TM, Octavia S, Chavatte JM, Cui L, Lin RTP                                                                                                                                                                                                                                                                                                                                                                                                                                                                                                                                                                                                |
| EPI_ISL_429136, EPI_ISL_429137, EPI_ISL_429138, EPI_ISL_429139, EPI_ISL_429140, EPI_ISL_429141, EPI_ISL_429142, EPI_ISL_429143, EPI_ISL_429144, EPI_ISL_429145, EPI_ISL_429146, EPI_ISL_429147, EPI_ISL_429148, EPI_ISL_429150, EPI_ISL_429151, EPI_ISL_429152, EPI_ISL_429153, EPI_ISL_429154, EPI_ISL_429155, EPI_ISL_429156, EPI_ISL_429157, EPI_ISL_429158, EPI_ISL_429160                                                                                                                                                                                                                                                                                                                                                                                                                                                                                                                                                                                                                                                                                                                                                                                                                                                                                                                                                                                                                                                                                                                                                                                                                                                                                                                                                                                                                                                                                                                                                                                                                                                                                                                                                                                                                                                                                                                                                                                                                                                                                                                                                                                                                                                                                                                                                                                                                                                                                                                                                                                                                                                                                                                                                                                                                                                                                                                                                                                                                                                                                                                                                                                                                                                                                                                                                                                                                                                                                                                                                                                                                                                                                                                                                                                                                                                                                                                                                                                                                                                                                                                                                                                                                                                                                                                                                                                                                                                                                                                                                                                                                                                                                                                                                                                                                                                                                                                                                                                                                                                                                                                                                                                                                                                                                                                                                                                                                                                                                                                                                                                                                                                                                                                                                                                                                                                                                                                                                                                                                                                                                                                                                                                                                                                                                                                                                                                                                                                                                                                                                                                                                                                                                                                                                                 | Klinisk mikrobiologi Orebro                                                                                                                                                                     | The Public Health Agency of Sweden                                            | Martin Sundqvist, Olov Svartstrom, Maria Lind Karlberg, Anna-Malin Linde, Oskar Karlsson Lindsjo, Anna Risberg, Shaman Muradrasoli, Karin Tegmark-Wisell                                                                                                                                                                                                                                                                                                                                                                                                                                                                                      |
| EPI_ISL_430319, EPI_ISL_430320, EPI_ISL_430321, EPI_ISL_430322, EPI_ISL_430323, EPI_ISL_430324, EPI_ISL_430325, EPI_ISL_430326, EPI_ISL_430327, EPI_ISL_430328, EPI_ISL_430329, EPI_ISL_430330, EPI_ISL_430331, EPI_ISL_430332, EPI_ISL_430333, EPI_ISL_430334, EPI_ISL_430335, EPI_ISL_430336, EPI_ISL_430337, EPI_ISL_430338, EPI_ISL_430339, EPI_ISL_430340, EPI_ISL_430341, EPI_ISL_430342, EPI_ISL_430343, EPI_ISL_430344, EPI_ISL_430345, EPI_ISL_430346, EPI_ISL_430347, EPI_ISL_430348, EPI_ISL_430349, EPI_ISL_430350, EPI_ISL_430351, EPI_ISL_430352, EPI_ISL_430353, EPI_ISL_430354, EPI_ISL_430355, EPI_ISL_430356, EPI_ISL_430357, EPI_ISL_430358, EPI_ISL_430359, EPI_ISL_430360, EPI_ISL_430361, EPI_ISL_430362, EPI_ISL_430363, EPI_ISL_430364, EPI_ISL_430365, EPI_ISL_430366, EPI_ISL_430367, EPI_ISL_430368, EPI_ISL_430369, EPI_ISL_430370, EPI_ISL_430371, EPI_ISL_430372, EPI_ISL_430373, EPI_ISL_430374, EPI_ISL_430375, EPI_ISL_430376, EPI_ISL_430377, EPI_ISL_430378, EPI_ISL_430379, EPI_ISL_430380, EPI_ISL_430381, EPI_ISL_430382, EPI_ISL_430383, EPI_ISL_430384, EPI_ISL_430385, EPI_ISL_430386, EPI_ISL_430387, EPI_ISL_430388, EPI_ISL_430389, EPI_ISL_430390, EPI_ISL_430391, EPI_ISL_430392, EPI_ISL_430393, EPI_ISL_430394, EPI_ISL_430395, EPI_ISL_430396, EPI_ISL_430397, EPI_ISL_430398, EPI_ISL_430399, EPI_ISL_430400, EPI_ISL_430401, EPI_ISL_430402, EPI_ISL_430403, EPI_ISL_430404, EPI_ISL_430405, EPI_ISL_430406, EPI_ISL_430407, EPI_ISL_430408, EPI_ISL_430409, EPI_ISL_430410, EPI_ISL_430411, EPI_ISL_430412, EPI_ISL_430413, EPI_ISL_430414, EPI_ISL_430415, EPI_ISL_430416, EPI_ISL_430417, EPI_ISL_430418, EPI_ISL_430419, EPI_ISL_430420, EPI_ISL_430421, EPI_ISL_430422, EPI_ISL_430423, EPI_ISL_430424, EPI_ISL_430425, EPI_ISL_430426, EPI_ISL_430427, EPI_ISL_430428, EPI_ISL_430429, EPI_ISL_430430, EPI_ISL_430431, EPI_ISL_430432, EPI_ISL_430433, EPI_ISL_430434                                                                                                                                                                                                                                                                                                                                                                                                                                                                                                                                                                                                                                                                                                                                                                                                                                                                                                                                                                                                                                                                                                                                                                                                                                                                                                                                                                                                                                                                                                                                                                                                                                                                                                                                                                                                                                                                                                                                                                                                                                                                                                                                                                                                                                                                                                                                                                                                                                                                                                                                                                                                                                                                                                                                                                                                                                                                                                                                                                                                                                                                                                                                                                                                                                                                                                                                                                                                                                                                                                                                                                                                                                                                                                                                                                                                                                                                                                                                                                                                                                                                                                                                                                                                                                                                                                                                                                                                                                                                                                                                                                                                                                                                                                                                                                                                                                                                                                                                                                                                                                                                                                                                                                                                                 | NYU Langone Health                                                                                                                                                                              | Departments of Pathology and Medicine, New York University School of Medicine | Maria Agüero-Rosenfeld, Brendan Belovarac, Margaret Black, Ludovic Boytard, John Cadley, Paolo Cotzia, John Chen, Dacia Dimartino, Xiaojun Feng, Tatyana Gindin, Emily Guzman, Adriana Heguy, Megan Hogan, Emily Huang, George Jour, Lawrence H. Lin, Raven Luthen, Andrew Lytle, Christian Marier, Matthew T. Maurano, Mark J. Mulligan, Peter Meyn, Raquel Ordonez Ciriza, Iman Osman, Jared Pinnell, Vanessa Raabe, Sitharam Ramaswami, Amy Rapkiewicz, Andre M. Ribeiro-dos-Santos, Marie Samanovic-Golden, Antonio Serrano, Guomiao Shen, Matija Snuderl, Theodore Vougiouklakis, Nick Vulpescu, Gael Westby, Paul Zappile, Yutong Zhang |
| EPI_ISL_430860, EPI_ISL_430861, EPI_ISL_430863                                                                                                                                                                                                                                                                                                                                                                                                                                                                                                                                                                                                                                                                                                                                                                                                                                                                                                                                                                                                                                                                                                                                                                                                                                                                                                                                                                                                                                                                                                                                                                                                                                                                                                                                                                                                                                                                                                                                                                                                                                                                                                                                                                                                                                                                                                                                                                                                                                                                                                                                                                                                                                                                                                                                                                                                                                                                                                                                                                                                                                                                                                                                                                                                                                                                                                                                                                                                                                                                                                                                                                                                                                                                                                                                                                                                                                                                                                                                                                                                                                                                                                                                                                                                                                                                                                                                                                                                                                                                                                                                                                                                                                                                                                                                                                                                                                                                                                                                                                                                                                                                                                                                                                                                                                                                                                                                                                                                                                                                                                                                                                                                                                                                                                                                                                                                                                                                                                                                                                                                                                                                                                                                                                                                                                                                                                                                                                                                                                                                                                                                                                                                                                                                                                                                                                                                                                                                                                                                                                                                                                                                                                 | Klinisk mikrobiologi Orebro                                                                                                                                                                     | The Public Health Agency of Sweden                                            | Martin Sundqvist, Oskar Karlsson Lindsjo, Maria Lind Karlberg, Anna-Malin Linde, Olov Svartstrom, Anna Risberg, Shaman Muradrasoli, Karin Tegmark-Wisell                                                                                                                                                                                                                                                                                                                                                                                                                                                                                      |
| EPI_ISL_432869, EPI_ISL_432870, EPI_ISL_432871, EPI_ISL_432872, EPI_ISL_432873, EPI_ISL_432874, EPI_ISL_432875, EPI_ISL_432876, EPI_ISL_432877, EPI_ISL_432878, EPI_ISL_432879, EPI_ISL_432880, EPI_ISL_432881, EPI_ISL_432882, EPI_ISL_432883, EPI_ISL_432884, EPI_ISL_432885, EPI_ISL_432886, EPI_ISL_432887, EPI_ISL_432888, EPI_ISL_432889, EPI_ISL_432890, EPI_ISL_432891, EPI_ISL_432892, EPI_ISL_432893, EPI_ISL_432894, EPI_ISL_432895, EPI_ISL_432896, EPI_ISL_432897, EPI_ISL_432898, EPI_ISL_432899, EPI_ISL_433068, EPI_ISL_433069, EPI_ISL_433070, EPI_ISL_433071, EPI_ISL_433072, EPI_ISL_433073, EPI_ISL_433074, EPI_ISL_433075, EPI_ISL_433076, EPI_ISL_433077, EPI_ISL_433078, EPI_ISL_433079, EPI_ISL_433080, EPI_ISL_433081, EPI_ISL_433082, EPI_ISL_433083, EPI_ISL_433084, EPI_ISL_433085, EPI_ISL_433086, EPI_ISL_433087, EPI_ISL_433088, EPI_ISL_433089, EPI_ISL_433090, EPI_ISL_433091, EPI_ISL_433092, EPI_ISL_433093, EPI_ISL_433094, EPI_ISL_433095, EPI_ISL_433096, EPI_ISL_433097, EPI_ISL_433098, EPI_ISL_433099, EPI_ISL_433100, EPI_ISL_433101, EPI_ISL_433102, EPI_ISL_433103, EPI_ISL_433104, EPI_ISL_433105, EPI_ISL_433106, EPI_ISL_433107, EPI_ISL_433108, EPI_ISL_433109, EPI_ISL_433110, EPI_ISL_433111, EPI_ISL_433112, EPI_ISL_433113, EPI_ISL_433114, EPI_ISL_433115, EPI_ISL_433116, EPI_ISL_433117, EPI_ISL_433118, EPI_ISL_433119, EPI_ISL_433120, EPI_ISL_433121, EPI_ISL_433122, EPI_ISL_433123, EPI_ISL_433124, EPI_ISL_433125, EPI_ISL_433126, EPI_ISL_433127, EPI_ISL_433128, EPI_ISL_433129, EPI_ISL_433130, EPI_ISL_433131, EPI_ISL_433132, EPI_ISL_433133, EPI_ISL_433134, EPI_ISL_433135, EPI_ISL_433136, EPI_ISL_433137, EPI_ISL_433138, EPI_ISL_433139, EPI_ISL_433140, EPI_ISL_433141, EPI_ISL_433142, EPI_ISL_433143, EPI_ISL_433144, EPI_ISL_433145, EPI_ISL_433146, EPI_ISL_433147, EPI_ISL_433148, EPI_ISL_433149, EPI_ISL_433150, EPI_ISL_433151, EPI_ISL_433152, EPI_ISL_433153, EPI_ISL_433154, EPI_ISL_433155, EPI_ISL_433156, EPI_ISL_433157, EPI_ISL_433158, EPI_ISL_433159, EPI_ISL_433160, EPI_ISL_433161, EPI_ISL_433162, EPI_ISL_433163, EPI_ISL_433164, EPI_ISL_433165, EPI_ISL_433166, EPI_ISL_433167, EPI_ISL_433168, EPI_ISL_433169, EPI_ISL_433170, EPI_ISL_433171, EPI_ISL_433172, EPI_ISL_433173, EPI_ISL_433174, EPI_ISL_433175, EPI_ISL_433176, EPI_ISL_433177, EPI_ISL_433178, EPI_ISL_433179, EPI_ISL_433180, EPI_ISL_433181, EPI_ISL_433182, EPI_ISL_433183, EPI_ISL_433184, EPI_ISL_433185, EPI_ISL_433186, EPI_ISL_433187, EPI_ISL_433188, EPI_ISL_433189, EPI_ISL_433190, EPI_ISL_433191, EPI_ISL_433192, EPI_ISL_433193, EPI_ISL_433194, EPI_ISL_433195, EPI_ISL_433196, EPI_ISL_433197, EPI_ISL_433198, EPI_ISL_433199, EPI_ISL_433200, EPI_ISL_433201, EPI_ISL_433202, EPI_ISL_433203, EPI_ISL_433204, EPI_ISL_433205, EPI_ISL_433206, EPI_ISL_433207, EPI_ISL_433208, EPI_ISL_433209, EPI_ISL_433210, EPI_ISL_433211, EPI_ISL_433212, EPI_ISL_433213, EPI_ISL_433214, EPI_ISL_433215, EPI_ISL_433216, EPI_ISL_433217, EPI_ISL_433218, EPI_ISL_433219, EPI_ISL_433220, EPI_ISL_433221, EPI_ISL_433222, EPI_ISL_433223, EPI_ISL_433224, EPI_ISL_433225, EPI_ISL_433226, EPI_ISL_433227, EPI_ISL_433228, EPI_ISL_433229, EPI_ISL_433230, EPI_ISL_433231, EPI_ISL_433232, EPI_ISL_433233, EPI_ISL_433234, EPI_ISL_433235, EPI_ISL_433236, EPI_ISL_433237, EPI_ISL_433238, EPI_ISL_433239, EPI_ISL_433240, EPI_ISL_433241, EPI_ISL_433242, EPI_ISL_433243, EPI_ISL_433244, EPI_ISL_433245, EPI_ISL_433246, EPI_ISL_433247, EPI_ISL_433248, EPI_ISL_433249, EPI_ISL_433250, EPI_ISL_433251, EPI_ISL_433252, EPI_ISL_433253, EPI_ISL_433254, EPI_ISL_433255, EPI_ISL_433256, EPI_ISL_433257, EPI_ISL_433258, EPI_ISL_433259, EPI_ISL_433260, EPI_ISL_433261, EPI_ISL_433262, EPI_ISL_433263, EPI_ISL_433264, EPI_ISL_433265, EPI_ISL_433266, EPI_ISL_433267, EPI_ISL_433268, EPI_ISL_433269, EPI_ISL_433270, EPI_ISL_433271, EPI_ISL_433272, EPI_ISL_433273, EPI_ISL_433274, EPI_ISL_433275, EPI_ISL_433276, EPI_ISL_433277, EPI_ISL_433278, EPI_ISL_433279, EPI_ISL_433280, EPI_ISL_433281, EPI_ISL_433282, EPI_ISL_433283, EPI_ISL_433284, EPI_ISL_433285, EPI_ISL_433286, EPI_ISL_433287, EPI_ISL_433288, EPI_ISL_433289, EPI_ISL_433290, EPI_ISL_433291, EPI_ISL_433292, EPI_ISL_433293, EPI_ISL_433294, EPI_ISL_433295, EPI_ISL_433296, EPI_ISL_433297, EPI_ISL_433298, EPI_ISL_433299, EPI_ISL_433300, EPI_ISL_433301, EPI_ISL_433302, EPI_ISL_433303, EPI_ISL_433304, EPI_ISL_433305, EPI_ISL_433306, EPI_ISL_433307, EPI_ISL_433308, EPI_ISL_433309, EPI_ISL_433310, EPI_ISL_433311, EPI_ISL_433312, EPI_ISL_433313, EPI_ISL_433314, EPI_ISL_433315, EPI_ISL_433316, EPI_ISL_433317, EPI_ISL_433318, EPI_ISL_433319, EPI_ISL_433320, EPI_ISL_433321, EPI_ISL_433322, EPI_ISL_433323, EPI_ISL_433324, EPI_ISL_433325, EPI_ISL_433326, EPI_ISL_433327, EPI_ISL_433328, EPI_ISL_433329, EPI_ISL_433330, EPI_ISL_433331, EPI_ISL_433332, EPI_ISL_433333, EPI_ISL_433334, EPI_ISL_433335, EPI_ISL_433336, EPI_ISL_433337, EPI_ISL_433338, EPI_ISL_433339, EPI_ISL_433340, EPI_ISL_433341, EPI_ISL_433342, EPI_ISL_433343, EPI_ISL_433344, EPI_ISL_433345, EPI_ISL_433346, EPI_ISL_433347, EPI_ISL_433348, EPI_ISL_433349, EPI_ISL_433350, EPI_ISL_433351, EPI_ISL_433352, EPI_ISL_433353, EPI_ISL_433354, EPI_ISL_433355, EPI_ISL_433356, EPI_ISL_433357, EPI_ISL_433358, EPI_ISL_433359, EPI_ISL_433360, EPI_ISL_433361, EPI_ISL_433362, EPI_ISL_433363, EPI_ISL_433364, EPI_ISL_433365, EPI_ISL_433366, EPI_ISL_433367, EPI_ISL_433368, EPI_ISL_433369, EPI_ISL_433370, EPI_ISL_433371, EPI_ISL_433372, EPI_ISL_433373, EPI_ISL_433374, EPI_ISL_433375, EPI_ISL_433376, EPI_ISL_433377, EPI_ISL_433378, EPI_ISL_433379, EPI_ISL_433380, EPI_ISL_433381, EPI_ISL_433382, EPI_ISL_433383, EPI_ISL_433384, EPI_ISL_433385, EPI_ISL_433386, EPI_ISL_433387, EPI_ISL_433388, EPI_ISL_433389, EPI_ISL_433390, EPI_ISL_433391, EPI_ISL_433392, EPI_ISL_433393, EPI_ISL_433394, EPI_ISL_433395, EPI_ISL_433396, EPI_ISL_433397, EPI_ISL_433398, EPI_ISL_433399, EPI_ISL_433400, EPI_ISL_433401, EPI_ISL_433402, EPI_ISL_433403, EPI_ISL_433404, EPI_ISL_433405, EPI_ISL_433406, EPI_ISL_433407, EPI_ISL_433408, EPI_ISL_433409, EPI_ISL_433410, EPI_ISL_433411, EPI_ISL_433412, EPI_ISL_433413, EPI_ISL_433414, EPI_ISL_433415, EPI_ISL_433416, EPI_ISL_433417, EPI_ISL_433418, EPI_ISL_433419, EPI_ISL_433420, EPI_ISL_433421, EPI_ISL_433422, EPI_ISL_433423, EPI_ISL_433424, EPI_ISL_433425, EPI_ISL_433426, EPI_ISL_433427, EPI_ISL_433428, EPI_ISL_433429, EPI_ISL_433430, EPI_ISL_433431, EPI_ISL_433432, EPI_ISL_433433, EPI_ISL_433434, EPI_ISL_433435, EPI_ISL_433436, EPI_ISL_433437, EPI_ISL_433438, EPI_ISL_433439, EPI_ISL_433440, EPI_ISL_433441, EPI_ISL_433442, EPI_ISL_433443, EPI_ISL_433444, EPI_ISL_433445, EPI_ISL_433446, EPI_ISL_433447, EPI_ISL_433448, EPI_ISL_433449, EPI_ISL_433450, EPI_ISL_433451, EPI_ISL_433452, EPI_ISL_433453, EPI_ISL_433454, EPI_ISL_433455, EPI_ISL_433456, EPI_ISL_433457, EPI_ISL_433458, EPI_ISL_433459, EPI_ISL_433460, EPI_ISL_433461, EPI_ISL_433462, EPI_ISL_433463, EPI_ISL_433464, EPI_ISL_433465 | Virology Department, Royal Infirmary of Edinburgh, NHS Lothian / School of Biological Sciences, University of Edinburgh / Institute of Genetics and Molecular Medicine, University of Edinburgh | COVID-19 Genomics UK (COG-UK) Consortium                                      | McHugh M, Dewar R, Rooke S, Gallagher M, Balcaza C, O'Toole A, Hill V, McCrone JT, Colquhoun R, Yu X, Jackson B, Rambaut A, Williams TC, Templeton K                                                                                                                                                                                                                                                                                                                                                                                                                                                                                          |
| EPI_ISL_434651                                                                                                                                                                                                                                                                                                                                                                                                                                                                                                                                                                                                                                                                                                                                                                                                                                                                                                                                                                                                                                                                                                                                                                                                                                                                                                                                                                                                                                                                                                                                                                                                                                                                                                                                                                                                                                                                                                                                                                                                                                                                                                                                                                                                                                                                                                                                                                                                                                                                                                                                                                                                                                                                                                                                                                                                                                                                                                                                                                                                                                                                                                                                                                                                                                                                                                                                                                                                                                                                                                                                                                                                                                                                                                                                                                                                                                                                                                                                                                                                                                                                                                                                                                                                                                                                                                                                                                                                                                                                                                                                                                                                                                                                                                                                                                                                                                                                                                                                                                                                                                                                                                                                                                                                                                                                                                                                                                                                                                                                                                                                                                                                                                                                                                                                                                                                                                                                                                                                                                                                                                                                                                                                                                                                                                                                                                                                                                                                                                                                                                                                                                                                                                                                                                                                                                                                                                                                                                                                                                                                                                                                                                                                 | Krokoms Halsocentral                                                                                                                                                                            | The Public Health Agency of Sweden                                            | Martin Ersson, Oskar Karlsson Lindsjo, Maria Lind Karlberg, Anna-Malin Linde, Olov Svartstrom, Anna Risberg, Theresa Enkirch, Mia Brytting, Karin Tegmark-Wisell                                                                                                                                                                                                                                                                                                                                                                                                                                                                              |
| EPI_ISL_434658                                                                                                                                                                                                                                                                                                                                                                                                                                                                                                                                                                                                                                                                                                                                                                                                                                                                                                                                                                                                                                                                                                                                                                                                                                                                                                                                                                                                                                                                                                                                                                                                                                                                                                                                                                                                                                                                                                                                                                                                                                                                                                                                                                                                                                                                                                                                                                                                                                                                                                                                                                                                                                                                                                                                                                                                                                                                                                                                                                                                                                                                                                                                                                                                                                                                                                                                                                                                                                                                                                                                                                                                                                                                                                                                                                                                                                                                                                                                                                                                                                                                                                                                                                                                                                                                                                                                                                                                                                                                                                                                                                                                                                                                                                                                                                                                                                                                                                                                                                                                                                                                                                                                                                                                                                                                                                                                                                                                                                                                                                                                                                                                                                                                                                                                                                                                                                                                                                                                                                                                                                                                                                                                                                                                                                                                                                                                                                                                                                                                                                                                                                                                                                                                                                                                                                                                                                                                                                                                                                                                                                                                                                                                 | Lundens VC                                                                                                                                                                                      | The Public Health Agency of Sweden                                            | Marita Dagner, Oskar Karlsson Lindsjo, Maria Lind Karlberg, Anna-Malin Linde, Olov Svartstrom, Anna Risberg, Theresa Enkirch, Mia Brytting, Karin Tegmark-Wisell                                                                                                                                                                                                                                                                                                                                                                                                                                                                              |
| EPI_ISL_434660                                                                                                                                                                                                                                                                                                                                                                                                                                                                                                                                                                                                                                                                                                                                                                                                                                                                                                                                                                                                                                                                                                                                                                                                                                                                                                                                                                                                                                                                                                                                                                                                                                                                                                                                                                                                                                                                                                                                                                                                                                                                                                                                                                                                                                                                                                                                                                                                                                                                                                                                                                                                                                                                                                                                                                                                                                                                                                                                                                                                                                                                                                                                                                                                                                                                                                                                                                                                                                                                                                                                                                                                                                                                                                                                                                                                                                                                                                                                                                                                                                                                                                                                                                                                                                                                                                                                                                                                                                                                                                                                                                                                                                                                                                                                                                                                                                                                                                                                                                                                                                                                                                                                                                                                                                                                                                                                                                                                                                                                                                                                                                                                                                                                                                                                                                                                                                                                                                                                                                                                                                                                                                                                                                                                                                                                                                                                                                                                                                                                                                                                                                                                                                                                                                                                                                                                                                                                                                                                                                                                                                                                                                                                 | Narhalsan Backa vardcentral                                                                                                                                                                     | The Public Health Agency of Sweden                                            | Mats Olsson, Oskar Karlsson Lindsjo, Maria Lind Karlberg, Anna-Malin Linde, Olov Svartstrom, Anna Risberg, Theresa Enkirch, Mia Brytting, Karin Tegmark-Wisell                                                                                                                                                                                                                                                                                                                                                                                                                                                                                |
| EPI_ISL_434670                                                                                                                                                                                                                                                                                                                                                                                                                                                                                                                                                                                                                                                                                                                                                                                                                                                                                                                                                                                                                                                                                                                                                                                                                                                                                                                                                                                                                                                                                                                                                                                                                                                                                                                                                                                                                                                                                                                                                                                                                                                                                                                                                                                                                                                                                                                                                                                                                                                                                                                                                                                                                                                                                                                                                                                                                                                                                                                                                                                                                                                                                                                                                                                                                                                                                                                                                                                                                                                                                                                                                                                                                                                                                                                                                                                                                                                                                                                                                                                                                                                                                                                                                                                                                                                                                                                                                                                                                                                                                                                                                                                                                                                                                                                                                                                                                                                                                                                                                                                                                                                                                                                                                                                                                                                                                                                                                                                                                                                                                                                                                                                                                                                                                                                                                                                                                                                                                                                                                                                                                                                                                                                                                                                                                                                                                                                                                                                                                                                                                                                                                                                                                                                                                                                                                                                                                                                                                                                                                                                                                                                                                                                                 | Narhalsan Molnlycke, Barn och ungdomsmedicin                                                                                                                                                    | The Public Health Agency of Sweden                                            | Mats Reimer, Oskar Karlsson Lindsjo, Maria Lind Karlberg, Anna-Malin Linde, Olov Svartstrom, Anna Risberg, Theresa Enkirch, Mia Brytting, Karin Tegmark-Wisell                                                                                                                                                                                                                                                                                                                                                                                                                                                                                |
| EPI_ISL_434674                                                                                                                                                                                                                                                                                                                                                                                                                                                                                                                                                                                                                                                                                                                                                                                                                                                                                                                                                                                                                                                                                                                                                                                                                                                                                                                                                                                                                                                                                                                                                                                                                                                                                                                                                                                                                                                                                                                                                                                                                                                                                                                                                                                                                                                                                                                                                                                                                                                                                                                                                                                                                                                                                                                                                                                                                                                                                                                                                                                                                                                                                                                                                                                                                                                                                                                                                                                                                                                                                                                                                                                                                                                                                                                                                                                                                                                                                                                                                                                                                                                                                                                                                                                                                                                                                                                                                                                                                                                                                                                                                                                                                                                                                                                                                                                                                                                                                                                                                                                                                                                                                                                                                                                                                                                                                                                                                                                                                                                                                                                                                                                                                                                                                                                                                                                                                                                                                                                                                                                                                                                                                                                                                                                                                                                                                                                                                                                                                                                                                                                                                                                                                                                                                                                                                                                                                                                                                                                                                                                                                                                                                                                                 | Narhalsan Backa vardcentral                                                                                                                                                                     | The Public Health Agency of Sweden                                            | Mats Olsson, Oskar Karlsson Lindsjo, Maria Lind Karlberg, Anna-Malin Linde, Olov Svartstrom, Anna Risberg, Theresa Enkirch, Mia Brytting, Karin Tegmark-Wisell                                                                                                                                                                                                                                                                                                                                                                                                                                                                                |
| EPI_ISL_435343, EPI_ISL_435344, EPI_ISL_435345, EPI_ISL_435346, EPI_ISL_435347                                                                                                                                                                                                                                                                                                                                                                                                                                                                                                                                                                                                                                                                                                                                                                                                                                                                                                                                                                                                                                                                                                                                                                                                                                                                                                                                                                                                                                                                                                                                                                                                                                                                                                                                                                                                                                                                                                                                                                                                                                                                                                                                                                                                                                                                                                                                                                                                                                                                                                                                                                                                                                                                                                                                                                                                                                                                                                                                                                                                                                                                                                                                                                                                                                                                                                                                                                                                                                                                                                                                                                                                                                                                                                                                                                                                                                                                                                                                                                                                                                                                                                                                                                                                                                                                                                                                                                                                                                                                                                                                                                                                                                                                                                                                                                                                                                                                                                                                                                                                                                                                                                                                                                                                                                                                                                                                                                                                                                                                                                                                                                                                                                                                                                                                                                                                                                                                                                                                                                                                                                                                                                                                                                                                                                                                                                                                                                                                                                                                                                                                                                                                                                                                                                                                                                                                                                                                                                                                                                                                                                                                 | Laboratoire de microbiologie, Hopital de Verdun                                                                                                                                                 | Smith Laboratory, Centre de Recherche CHU Sainte-Justine                      | Martin Smith, Marieke Rozendaal, Ivan Pavlov                                                                                                                                                                                                                                                                                                                                                                                                                                                                                                                                                                                                  |
| EPI_ISL_435475, EPI_ISL_435476, EPI_ISL_435477, EPI_ISL_435478, EPI_ISL_435479, EPI_ISL_435480, EPI_ISL_435481, EPI_ISL_435482, EPI_ISL_435483, EPI_ISL_435484, EPI_ISL_435485, EPI_ISL_435486, EPI_ISL_435487, EPI_ISL_435488, EPI_ISL_435489, EPI_ISL_435490, EPI_ISL_435491, EPI_ISL_435492, EPI_ISL_435493, EPI_ISL_435494, EPI_ISL_435495, EPI_ISL_435496, EPI_ISL_435497, EPI_ISL_435498, EPI_ISL_435499, EPI_ISL_435500, EPI_ISL_435501, EPI_ISL_435502, EPI_ISL_435503, EPI_ISL_435504, EPI_ISL_435505, EPI_ISL_435506, EPI_ISL_435507, EPI_ISL_435508, EPI_ISL_435509, EPI_ISL_435510, EPI_ISL_435511, EPI_ISL_435512, EPI_ISL_435513, EPI_ISL_435514, EPI_ISL_435515, EPI_ISL_435516, EPI_ISL_435517, EPI_ISL_435518, EPI_ISL_435519, EPI_ISL_435520, EPI_ISL_435521, EPI_ISL_435522, EPI_ISL_435523, EPI_ISL_435524, EPI_ISL_435525, EPI_ISL_435526, EPI_ISL_435527, EPI_ISL_435528, EPI_ISL_435529, EPI_ISL_435530, EPI_ISL_435531, EPI_ISL_435532, EPI_ISL_435533, EPI_ISL_435534, EPI_ISL_435535, EPI_ISL_435536, EPI_ISL_435537, EPI_ISL_435538, EPI_ISL_435539, EPI_ISL_435540, EPI_ISL_435541, EPI_ISL_435542, EPI_ISL_435543, EPI_ISL_435544, EPI_ISL_435545, EPI_ISL_435546, EPI_ISL_435547, EPI_ISL_435548, EPI_ISL_435549                                                                                                                                                                                                                                                                                                                                                                                                                                                                                                                                                                                                                                                                                                                                                                                                                                                                                                                                                                                                                                                                                                                                                                                                                                                                                                                                                                                                                                                                                                                                                                                                                                                                                                                                                                                                                                                                                                                                                                                                                                                                                                                                                                                                                                                                                                                                                                                                                                                                                                                                                                                                                                                                                                                                                                                                                                                                                                                                                                                                                                                                                                                                                                                                                                                                                                                                                                                                                                                                                                                                                                                                                                                                                                                                                                                                                                                                                                                                                                                                                                                                                                                                                                                                                                                                                                                                                                                                                                                                                                                                                                                                                                                                                                                                                                                                                                                                                                                                                                                                                                                                                                                                                                                                                                                                                                                                                                                                                                                                                                                                                                                                                                                                                                                                                                                                                                                                                                 | NYU Langone Health                                                                                                                                                                              | Departments of Pathology and Medicine, New York University School of Medicine | Maria Agüero-Rosenfeld, Brendan Belovarac, Margaret Black, Ludovic Boytard, John Cadley, Paolo Cotzia, John Chen, Dacia Dimartino, Xiaojun Feng, Tatyana Gindin, Emily Guzman, Adriana Heguy, Megan Hogan, Emily Huang, George Jour, Lawrence H. Lin, Raven Luthen, Andrew Lytle, Christian Marier, Matthew T. Maurano, Mark J. Mulligan, Peter Meyn, Raquel Ordonez Ciriza, Iman Osman, Jared Pinnell, Vanessa Raabe, Sitharam Ramaswami, Amy Rapkiewicz, Andre M. Ribeiro-dos-Santos, Marie Samanovic-Golden, Antonio Serrano, Guomiao Shen, Matija Snuderl, Theodore Vougiouklakis, Nick Vulpescu, Gael Westby, Paul Zappile, Yutong Zhang |
| EPI_ISL_435674, EPI_ISL_435675, EPI_ISL_435676, EPI_ISL_435677                                                                                                                                                                                                                                                                                                                                                                                                                                                                                                                                                                                                                                                                                                                                                                                                                                                                                                                                                                                                                                                                                                                                                                                                                                                                                                                                                                                                                                                                                                                                                                                                                                                                                                                                                                                                                                                                                                                                                                                                                                                                                                                                                                                                                                                                                                                                                                                                                                                                                                                                                                                                                                                                                                                                                                                                                                                                                                                                                                                                                                                                                                                                                                                                                                                                                                                                                                                                                                                                                                                                                                                                                                                                                                                                                                                                                                                                                                                                                                                                                                                                                                                                                                                                                                                                                                                                                                                                                                                                                                                                                                                                                                                                                                                                                                                                                                                                                                                                                                                                                                                                                                                                                                                                                                                                                                                                                                                                                                                                                                                                                                                                                                                                                                                                                                                                                                                                                                                                                                                                                                                                                                                                                                                                                                                                                                                                                                                                                                                                                                                                                                                                                                                                                                                                                                                                                                                                                                                                                                                                                                                                                 | National Virology Reference Laboratory                                                                                                                                                          | National Public Health Laboratory, National Centre for Infectious Diseases    | Mak Tze Minn, Octavia Sophie, Chavatte Jean-Marc, Zaini Zainun, Taib Surita, Cui Lin, Lin Raymond Tzer Pin                                                                                                                                                                                                                                                                                                                                                                                                                                                                                                                                    |
| EPI_ISL_435678, EPI_ISL_435679, EPI_ISL_435680, EPI_ISL_435681, EPI_ISL_435682, EPI_ISL_435683, EPI_ISL_435684, EPI_ISL_435685, EPI_ISL_435686, EPI_ISL_435687, EPI_ISL_435688, EPI_ISL_435689, EPI_ISL_435690, EPI_ISL_435691, EPI_ISL_435692, EPI_ISL_435693, EPI_ISL_435694, EPI_ISL_435695, EPI_ISL_435696, EPI_ISL_435697, EPI_ISL_435698, EPI_ISL_435699, EPI_ISL_435700                                                                                                                                                                                                                                                                                                                                                                                                                                                                                                                                                                                                                                                                                                                                                                                                                                                                                                                                                                                                                                                                                                                                                                                                                                                                                                                                                                                                                                                                                                                                                                                                                                                                                                                                                                                                                                                                                                                                                                                                                                                                                                                                                                                                                                                                                                                                                                                                                                                                                                                                                                                                                                                                                                                                                                                                                                                                                                                                                                                                                                                                                                                                                                                                                                                                                                                                                                                                                                                                                                                                                                                                                                                                                                                                                                                                                                                                                                                                                                                                                                                                                                                                                                                                                                                                                                                                                                                                                                                                                                                                                                                                                                                                                                                                                                                                                                                                                                                                                                                                                                                                                                                                                                                                                                                                                                                                                                                                                                                                                                                                                                                                                                                                                                                                                                                                                                                                                                                                                                                                                                                                                                                                                                                                                                                                                                                                                                                                                                                                                                                                                                                                                                                                                                                                                                 | National Public Health Laboratory, National Centre for Infectious Diseases                                                                                                                      | National Public Health Laboratory, National Centre for Infectious Diseases    | Mak Tze Minn, Octavia Sophie, Chavatte Jean-Marc, Cui Lin, Lin Raymond Tzer Pin                                                                                                                                                                                                                                                                                                                                                                                                                                                                                                                                                               |
| EPI_ISL_435721, EPI_ISL_435722                                                                                                                                                                                                                                                                                                                                                                                                                                                                                                                                                                                                                                                                                                                                                                                                                                                                                                                                                                                                                                                                                                                                                                                                                                                                                                                                                                                                                                                                                                                                                                                                                                                                                                                                                                                                                                                                                                                                                                                                                                                                                                                                                                                                                                                                                                                                                                                                                                                                                                                                                                                                                                                                                                                                                                                                                                                                                                                                                                                                                                                                                                                                                                                                                                                                                                                                                                                                                                                                                                                                                                                                                                                                                                                                                                                                                                                                                                                                                                                                                                                                                                                                                                                                                                                                                                                                                                                                                                                                                                                                                                                                                                                                                                                                                                                                                                                                                                                                                                                                                                                                                                                                                                                                                                                                                                                                                                                                                                                                                                                                                                                                                                                                                                                                                                                                                                                                                                                                                                                                                                                                                                                                                                                                                                                                                                                                                                                                                                                                                                                                                                                                                                                                                                                                                                                                                                                                                                                                                                                                                                                                                                                 | NYU Langone Health                                                                                                                                                                              | Departments of Pathology and Medicine, New York University School of Medicine | Maria Agüero-Rosenfeld, Brendan Belovarac, Margaret Black, Ludovic Boytard, John Cadley, Paolo Cotzia, John Chen, Dacia Dimartino, Xiaojun Feng, Tatyana Gindin, Emily Guzman, Adriana Heguy, Megan Hogan, Emily Huang, George Jour, Lawrence H. Lin, Raven Luthen, Andrew Lytle, Christian Marier, Matthew T. Maurano, Mark J. Mulligan, Peter Meyn, Raquel Ordonez Ciriza, Iman Osman, Jared Pinnell, Vanessa Raabe, Sitharam Ramaswami, Amy Rapkiewicz, Andre M. Ribeiro-dos-Santos, Marie Samanovic-Golden, Antonio Serrano, Guomiao Shen, Matija Snuderl, Theodore Vougiouklakis, Nick Vulpescu, Gael Westby, Paul Zappile, Yutong Zhang |
| EPI_ISL_436195                                                                                                                                                                                                                                                                                                                                                                                                                                                                                                                                                                                                                                                                                                                                                                                                                                                                                                                                                                                                                                                                                                                                                                                                                                                                                                                                                                                                                                                                                                                                                                                                                                                                                                                                                                                                                                                                                                                                                                                                                                                                                                                                                                                                                                                                                                                                                                                                                                                                                                                                                                                                                                                                                                                                                                                                                                                                                                                                                                                                                                                                                                                                                                                                                                                                                                                                                                                                                                                                                                                                                                                                                                                                                                                                                                                                                                                                                                                                                                                                                                                                                                                                                                                                                                                                                                                                                                                                                                                                                                                                                                                                                                                                                                                                                                                                                                                                                                                                                                                                                                                                                                                                                                                                                                                                                                                                                                                                                                                                                                                                                                                                                                                                                                                                                                                                                                                                                                                                                                                                                                                                                                                                                                                                                                                                                                                                                                                                                                                                                                                                                                                                                                                                                                                                                                                                                                                                                                                                                                                                                                                                                                                                 | Servicio de Microbiología. Consorcio Hospital General                                                                                                                                           | Sequencing and Bioinformatics Service and Molecular                           | Maria Dolores Ocete, Inma Galán Vendrell, Paula Ruiz-Hueso, Mariana Reyes-Prieto, Vicente Soriano Chirona, Maria Alma Bracho, Griselda De Marco,                                                                                                                                                                                                                                                                                                                                                                                                                                                                                              |





|                                                                                                                                                                                                                                                                                                                                                                                                                                                                                                                                                                                                                                                                                                                                                                                                                                                                                                                                                                                                                                                                                                                                                                                                                                                                                                                                                                                                                                                                                                                                                                                                                                                                                                                                                                                                                                                                                                                                                                                                                                                                                                                                                                                                                                                                                                                                                                                                                                                                                                                                                                                                                |                                                                                                                                                                                                 |                                                                                                        |                                                                                                                                                                                                                                                                                                                                                                                                                                                                                                                                                                                                                                                               |
|----------------------------------------------------------------------------------------------------------------------------------------------------------------------------------------------------------------------------------------------------------------------------------------------------------------------------------------------------------------------------------------------------------------------------------------------------------------------------------------------------------------------------------------------------------------------------------------------------------------------------------------------------------------------------------------------------------------------------------------------------------------------------------------------------------------------------------------------------------------------------------------------------------------------------------------------------------------------------------------------------------------------------------------------------------------------------------------------------------------------------------------------------------------------------------------------------------------------------------------------------------------------------------------------------------------------------------------------------------------------------------------------------------------------------------------------------------------------------------------------------------------------------------------------------------------------------------------------------------------------------------------------------------------------------------------------------------------------------------------------------------------------------------------------------------------------------------------------------------------------------------------------------------------------------------------------------------------------------------------------------------------------------------------------------------------------------------------------------------------------------------------------------------------------------------------------------------------------------------------------------------------------------------------------------------------------------------------------------------------------------------------------------------------------------------------------------------------------------------------------------------------------------------------------------------------------------------------------------------------|-------------------------------------------------------------------------------------------------------------------------------------------------------------------------------------------------|--------------------------------------------------------------------------------------------------------|---------------------------------------------------------------------------------------------------------------------------------------------------------------------------------------------------------------------------------------------------------------------------------------------------------------------------------------------------------------------------------------------------------------------------------------------------------------------------------------------------------------------------------------------------------------------------------------------------------------------------------------------------------------|
|                                                                                                                                                                                                                                                                                                                                                                                                                                                                                                                                                                                                                                                                                                                                                                                                                                                                                                                                                                                                                                                                                                                                                                                                                                                                                                                                                                                                                                                                                                                                                                                                                                                                                                                                                                                                                                                                                                                                                                                                                                                                                                                                                                                                                                                                                                                                                                                                                                                                                                                                                                                                                | Valencia                                                                                                                                                                                        | Epidemiology Research Group. FISABIO-Public Health                                                     | Marta Pla Diaz, Neris Garcia-Gonzalez, Inma Galán Vendrell, Sandra Carbo, Loreto Ferrús Abad, Paula Ruiz-Hueso, Lúcia Martínez-Priego, Giuseppe D'Auria, Fernando Gonzalez-Candelas                                                                                                                                                                                                                                                                                                                                                                                                                                                                           |
| EPI_ISL_436352                                                                                                                                                                                                                                                                                                                                                                                                                                                                                                                                                                                                                                                                                                                                                                                                                                                                                                                                                                                                                                                                                                                                                                                                                                                                                                                                                                                                                                                                                                                                                                                                                                                                                                                                                                                                                                                                                                                                                                                                                                                                                                                                                                                                                                                                                                                                                                                                                                                                                                                                                                                                 | Servicio de Microbiología. Hospital Clínico Universitario de Valencia                                                                                                                           | Sequencing and Bioinformatics Service and Molecular Epidemiology Research Group. FISABIO-Public Health | Maria Alma Bracho, Griselda De Marco, Beatriz Beamud, Lidia Ruiz Roldan, Marta Pla Diaz, Neris Garcia-Gonzalez, Inma Galán Vendrell, Sandra Carbo, Loreto Ferrús Abad, Paula Ruiz-Hueso, Mariana Reyes-Prieto, Vicente Soriano Chirona, Ivan Ansari, David Navarro, Lúcia Martínez-Priego, Giuseppe D'Auria, Fernando Gonzalez-Candelas                                                                                                                                                                                                                                                                                                                       |
| EPI_ISL_436356, EPI_ISL_436359                                                                                                                                                                                                                                                                                                                                                                                                                                                                                                                                                                                                                                                                                                                                                                                                                                                                                                                                                                                                                                                                                                                                                                                                                                                                                                                                                                                                                                                                                                                                                                                                                                                                                                                                                                                                                                                                                                                                                                                                                                                                                                                                                                                                                                                                                                                                                                                                                                                                                                                                                                                 | Servicio de Microbiología. Hospital Clínico Universitario de Valencia                                                                                                                           | Sequencing and Bioinformatics Service and Molecular Epidemiology Research Group. FISABIO-Public Health | Marta Pla Diaz, Neris Garcia-Gonzalez, Inma Galán Vendrell, Sandra Carbo, Loreto Ferrús Abad, Paula Ruiz-Hueso, Mariana Reyes-Prieto, Vicente Soriano Chirona, Ivan Ansari, David Navarro, Maria Alma Bracho, Griselda De Marco, Beatriz Beamud, Lidia Ruiz Roldan, Lúcia Martínez-Priego, Giuseppe D'Auria, Fernando Gonzalez-Candelas                                                                                                                                                                                                                                                                                                                       |
| EPI_ISL_436366                                                                                                                                                                                                                                                                                                                                                                                                                                                                                                                                                                                                                                                                                                                                                                                                                                                                                                                                                                                                                                                                                                                                                                                                                                                                                                                                                                                                                                                                                                                                                                                                                                                                                                                                                                                                                                                                                                                                                                                                                                                                                                                                                                                                                                                                                                                                                                                                                                                                                                                                                                                                 | Servicio de Microbiología. Hospital Clínico Universitario de Valencia                                                                                                                           | Sequencing and Bioinformatics Service and Molecular Epidemiology Research Group. FISABIO-Public Health | Marta Pla Diaz, Neris Garcia-Gonzalez, Inma Galán Vendrell, Sandra Carbo, Loreto Ferrús Abad, Paula Ruiz-Hueso, Mariana Reyes-Prieto, Vicente Soriano Chirona, Ivan Ansari, David Navarro, Maria Alma Bracho, Griselda De Marco, Beatriz Beamud, Lidia Ruiz Roldan, Lúcia Martínez-Priego, Giuseppe D'Auria, Fernando Gonzalez-Candelas                                                                                                                                                                                                                                                                                                                       |
| EPI_ISL_436383                                                                                                                                                                                                                                                                                                                                                                                                                                                                                                                                                                                                                                                                                                                                                                                                                                                                                                                                                                                                                                                                                                                                                                                                                                                                                                                                                                                                                                                                                                                                                                                                                                                                                                                                                                                                                                                                                                                                                                                                                                                                                                                                                                                                                                                                                                                                                                                                                                                                                                                                                                                                 | Servicio de Microbiología. Consorcio Hospital General Universitario de Valencia                                                                                                                 | Sequencing and Bioinformatics Service and Molecular Epidemiology Research Group. FISABIO-Public Health | Maria Dolores Ocete, Inma Galán Vendrell, Paula Ruiz-Hueso, Mariana Reyes-Prieto, Vicente Soriano Chirona, Maria Alma Bracho, Griselda De Marco, Beatriz Beamud, Lidia Ruiz Roldan, Marta Pla Diaz, Neris Garcia-Gonzalez, Loreto Ferrús Abad, Lúcia Martínez-Priego, Concepcion Gimeno, Giuseppe D'Auria, Fernando Gonzalez-Candelas                                                                                                                                                                                                                                                                                                                         |
| EPI_ISL_436387                                                                                                                                                                                                                                                                                                                                                                                                                                                                                                                                                                                                                                                                                                                                                                                                                                                                                                                                                                                                                                                                                                                                                                                                                                                                                                                                                                                                                                                                                                                                                                                                                                                                                                                                                                                                                                                                                                                                                                                                                                                                                                                                                                                                                                                                                                                                                                                                                                                                                                                                                                                                 | Servicio de Microbiología. Consorcio Hospital General Universitario de Valencia                                                                                                                 | Sequencing and Bioinformatics Service and Molecular Epidemiology Research Group. FISABIO-Public Health | Marta Pla Diaz, Neris Garcia-Gonzalez, Loreto Ferrús Abad, Maria Dolores Ocete, Inma Galán Vendrell, Paula Ruiz-Hueso, Mariana Reyes-Prieto, Vicente Soriano Chirona, Maria Alma Bracho, Griselda De Marco, Beatriz Beamud, Lidia Ruiz Roldan, Lúcia Martínez-Priego, Concepcion Gimeno, Giuseppe D'Auria, Fernando Gonzalez-Candelas                                                                                                                                                                                                                                                                                                                         |
| EPI_ISL_436390                                                                                                                                                                                                                                                                                                                                                                                                                                                                                                                                                                                                                                                                                                                                                                                                                                                                                                                                                                                                                                                                                                                                                                                                                                                                                                                                                                                                                                                                                                                                                                                                                                                                                                                                                                                                                                                                                                                                                                                                                                                                                                                                                                                                                                                                                                                                                                                                                                                                                                                                                                                                 | Servicio de Microbiología. Consorcio Hospital General Universitario de Valencia                                                                                                                 | Sequencing and Bioinformatics Service and Molecular Epidemiology Research Group. FISABIO-Public Health | Maria Dolores Ocete, Inma Galán Vendrell, Paula Ruiz-Hueso, Mariana Reyes-Prieto, Vicente Soriano Chirona, Maria Alma Bracho, Griselda De Marco, Beatriz Beamud, Lidia Ruiz Roldan, Marta Pla Diaz, Neris Garcia-Gonzalez, Loreto Ferrús Abad, Lúcia Martínez-Priego, Concepcion Gimeno, Giuseppe D'Auria, Fernando Gonzalez-Candelas                                                                                                                                                                                                                                                                                                                         |
| EPI_ISL_436394                                                                                                                                                                                                                                                                                                                                                                                                                                                                                                                                                                                                                                                                                                                                                                                                                                                                                                                                                                                                                                                                                                                                                                                                                                                                                                                                                                                                                                                                                                                                                                                                                                                                                                                                                                                                                                                                                                                                                                                                                                                                                                                                                                                                                                                                                                                                                                                                                                                                                                                                                                                                 | Servicio de Microbiología. Consorcio Hospital General Universitario de Valencia                                                                                                                 | Sequencing and Bioinformatics Service and Molecular Epidemiology Research Group. FISABIO-Public Health | Marta Pla Diaz, Neris Garcia-Gonzalez, Loreto Ferrús Abad, Maria Dolores Ocete, Inma Galán Vendrell, Paula Ruiz-Hueso, Mariana Reyes-Prieto, Vicente Soriano Chirona, Maria Alma Bracho, Griselda De Marco, Beatriz Beamud, Lidia Ruiz Roldan, Lúcia Martínez-Priego, Concepcion Gimeno, Giuseppe D'Auria, Fernando Gonzalez-Candelas                                                                                                                                                                                                                                                                                                                         |
| EPI_ISL_436399                                                                                                                                                                                                                                                                                                                                                                                                                                                                                                                                                                                                                                                                                                                                                                                                                                                                                                                                                                                                                                                                                                                                                                                                                                                                                                                                                                                                                                                                                                                                                                                                                                                                                                                                                                                                                                                                                                                                                                                                                                                                                                                                                                                                                                                                                                                                                                                                                                                                                                                                                                                                 | Servicio de Microbiología. Hospital Clínico Universitario de Valencia                                                                                                                           | Sequencing and Bioinformatics Service and Molecular Epidemiology Research Group. FISABIO-Public Health | Mariana Reyes-Prieto, Vicente Soriano Chirona, Ivan Ansari, David Navarro, Maria Alma Bracho, Griselda De Marco, Beatriz Beamud, Lidia Ruiz Roldan, Marta Pla Diaz, Neris Garcia-Gonzalez, Inma Galán Vendrell, Sandra Carbo, Loreto Ferrús Abad, Paula Ruiz-Hueso, Lúcia Martínez-Priego, Giuseppe D'Auria, Fernando Gonzalez-Candelas                                                                                                                                                                                                                                                                                                                       |
| EPI_ISL_436403                                                                                                                                                                                                                                                                                                                                                                                                                                                                                                                                                                                                                                                                                                                                                                                                                                                                                                                                                                                                                                                                                                                                                                                                                                                                                                                                                                                                                                                                                                                                                                                                                                                                                                                                                                                                                                                                                                                                                                                                                                                                                                                                                                                                                                                                                                                                                                                                                                                                                                                                                                                                 | Servicio de Microbiología. Hospital Clínico Universitario de Valencia                                                                                                                           | Sequencing and Bioinformatics Service and Molecular Epidemiology Research Group. FISABIO-Public Health | Maria Alma Bracho, Griselda De Marco, Beatriz Beamud, Lidia Ruiz Roldan, Marta Pla Diaz, Neris Garcia-Gonzalez, Inma Galán Vendrell, Sandra Carbo, Loreto Ferrús Abad, Paula Ruiz-Hueso, Mariana Reyes-Prieto, Vicente Soriano Chirona, Ivan Ansari, David Navarro, Lúcia Martínez-Priego, Giuseppe D'Auria, Fernando Gonzalez-Candelas                                                                                                                                                                                                                                                                                                                       |
| EPI_ISL_436407, EPI_ISL_436410                                                                                                                                                                                                                                                                                                                                                                                                                                                                                                                                                                                                                                                                                                                                                                                                                                                                                                                                                                                                                                                                                                                                                                                                                                                                                                                                                                                                                                                                                                                                                                                                                                                                                                                                                                                                                                                                                                                                                                                                                                                                                                                                                                                                                                                                                                                                                                                                                                                                                                                                                                                 | Servicio de Microbiología. Hospital Clínico Universitario de Valencia                                                                                                                           | Sequencing and Bioinformatics Service and Molecular Epidemiology Research Group. FISABIO-Public Health | Marta Pla Diaz, Neris Garcia-Gonzalez, Inma Galán Vendrell, Sandra Carbo, Loreto Ferrús Abad, Paula Ruiz-Hueso, Mariana Reyes-Prieto, Vicente Soriano Chirona, Ivan Ansari, David Navarro, Maria Alma Bracho, Griselda De Marco, Beatriz Beamud, Lidia Ruiz Roldan, Lúcia Martínez-Priego, Giuseppe D'Auria, Fernando Gonzalez-Candelas                                                                                                                                                                                                                                                                                                                       |
| EPI_ISL_436733, EPI_ISL_436734, EPI_ISL_436735, EPI_ISL_436736, EPI_ISL_436737, EPI_ISL_436738, EPI_ISL_436739, EPI_ISL_436740, EPI_ISL_436741, EPI_ISL_436742, EPI_ISL_436743                                                                                                                                                                                                                                                                                                                                                                                                                                                                                                                                                                                                                                                                                                                                                                                                                                                                                                                                                                                                                                                                                                                                                                                                                                                                                                                                                                                                                                                                                                                                                                                                                                                                                                                                                                                                                                                                                                                                                                                                                                                                                                                                                                                                                                                                                                                                                                                                                                 |                                                                                                                                                                                                 |                                                                                                        |                                                                                                                                                                                                                                                                                                                                                                                                                                                                                                                                                                                                                                                               |
| see above                                                                                                                                                                                                                                                                                                                                                                                                                                                                                                                                                                                                                                                                                                                                                                                                                                                                                                                                                                                                                                                                                                                                                                                                                                                                                                                                                                                                                                                                                                                                                                                                                                                                                                                                                                                                                                                                                                                                                                                                                                                                                                                                                                                                                                                                                                                                                                                                                                                                                                                                                                                                      | NYU Langone Health                                                                                                                                                                              | Departments of Pathology and Medicine, New York University School of Medicine                          | Maria Aguero-Rosenfeld, Brendan Belovarac, Margaret Black, Ludovic Boytard, John Cadley, Paolo Cotzia, John Chen, Dacia Dimartino, Xiaojun Feng, Tatyana Gindin, Emily Guzman, Adriana Heguy, Megan Hogan, George Jour, Alireza Khodadadi-Jamayran, Lawrence H. Lin, Raven Luther, Andrew Lytle, Christian Marier, Matthew T. Maurano, Mark J. Mulligan, Peter Meyn, Raquel Ordonez Ciriza, Iman Osman, Jared Pinnell, Vanessa Raabe, Sitharam Ramaswami, Amy Rapkiewicz, Andre M. Ribeiro-dos-Santos, Marie Samanovic-Golden, Antonio Serrano, Guomiao Shen, Matija Snuderl, Theodore Vougiouklakis, Nick Vulpescu, Gael Westby, Paul Zappelli, Yutong Zhang |
| EPI_ISL_437204, EPI_ISL_437205, EPI_ISL_437206, EPI_ISL_437207, EPI_ISL_437208, EPI_ISL_437209, EPI_ISL_437210, EPI_ISL_437211, EPI_ISL_437212, EPI_ISL_437213, EPI_ISL_437214, EPI_ISL_437215, EPI_ISL_437216, EPI_ISL_437217, EPI_ISL_437218, EPI_ISL_437219, EPI_ISL_437220, EPI_ISL_437221, EPI_ISL_437222, EPI_ISL_437223, EPI_ISL_437224, EPI_ISL_437225, EPI_ISL_437226, EPI_ISL_437227, EPI_ISL_437228, EPI_ISL_437229, EPI_ISL_437230, EPI_ISL_437231, EPI_ISL_437232, EPI_ISL_437233, EPI_ISL_437234, EPI_ISL_437235, EPI_ISL_437236, EPI_ISL_437237, EPI_ISL_437238, EPI_ISL_437239, EPI_ISL_437240, EPI_ISL_437241, EPI_ISL_437242, EPI_ISL_437243, EPI_ISL_437244, EPI_ISL_437245, EPI_ISL_437246, EPI_ISL_437247, EPI_ISL_437248, EPI_ISL_437249, EPI_ISL_437250, EPI_ISL_437251, EPI_ISL_437252, EPI_ISL_437253, EPI_ISL_437254, EPI_ISL_437255, EPI_ISL_437256, EPI_ISL_437257, EPI_ISL_437258, EPI_ISL_437259, EPI_ISL_437260, EPI_ISL_437261, EPI_ISL_437262, EPI_ISL_437263, EPI_ISL_437264, EPI_ISL_437265, EPI_ISL_437266, EPI_ISL_437267, EPI_ISL_437268, EPI_ISL_437269, EPI_ISL_437270, EPI_ISL_437271, EPI_ISL_437272, EPI_ISL_437273, EPI_ISL_437274, EPI_ISL_437275, EPI_ISL_437276, EPI_ISL_437277, EPI_ISL_437278, EPI_ISL_437279, EPI_ISL_437280, EPI_ISL_437281, EPI_ISL_437282, EPI_ISL_437283, EPI_ISL_437284, EPI_ISL_437285, EPI_ISL_437286, EPI_ISL_437287, EPI_ISL_437288, EPI_ISL_437289, EPI_ISL_437290, EPI_ISL_437291, EPI_ISL_437292, EPI_ISL_437293, EPI_ISL_437294, EPI_ISL_437295, EPI_ISL_437296, EPI_ISL_437297, EPI_ISL_437298, EPI_ISL_437299, EPI_ISL_437300                                                                                                                                                                                                                                                                                                                                                                                                                                                                                                                                                                                                                                                                                                                                                                                                                                                                                                                                                                                                 |                                                                                                                                                                                                 |                                                                                                        |                                                                                                                                                                                                                                                                                                                                                                                                                                                                                                                                                                                                                                                               |
| see above                                                                                                                                                                                                                                                                                                                                                                                                                                                                                                                                                                                                                                                                                                                                                                                                                                                                                                                                                                                                                                                                                                                                                                                                                                                                                                                                                                                                                                                                                                                                                                                                                                                                                                                                                                                                                                                                                                                                                                                                                                                                                                                                                                                                                                                                                                                                                                                                                                                                                                                                                                                                      | Max von Pettenkofer Institute, Virology, National Reference Center for Retroviruses, LMU München                                                                                                | Laboratory for Functional Genome Analysis, Dept. Genomics, Gene Center of the LMU Munich               | Max Muenchhoff, Stefan Krebs, Alexander Graf, Oliver Keppler, Helmut Blum                                                                                                                                                                                                                                                                                                                                                                                                                                                                                                                                                                                     |
| EPI_ISL_437360, EPI_ISL_437361, EPI_ISL_437362, EPI_ISL_437363, EPI_ISL_437364, EPI_ISL_437365, EPI_ISL_437366, EPI_ISL_437367, EPI_ISL_437368, EPI_ISL_437369, EPI_ISL_437370, EPI_ISL_437371, EPI_ISL_437372, EPI_ISL_437373, EPI_ISL_437374, EPI_ISL_437375, EPI_ISL_437376, EPI_ISL_437377, EPI_ISL_437378, EPI_ISL_437379, EPI_ISL_437380, EPI_ISL_437381, EPI_ISL_437382, EPI_ISL_437383, EPI_ISL_437384, EPI_ISL_437385, EPI_ISL_437386                                                                                                                                                                                                                                                                                                                                                                                                                                                                                                                                                                                                                                                                                                                                                                                                                                                                                                                                                                                                                                                                                                                                                                                                                                                                                                                                                                                                                                                                                                                                                                                                                                                                                                                                                                                                                                                                                                                                                                                                                                                                                                                                                                 |                                                                                                                                                                                                 |                                                                                                        |                                                                                                                                                                                                                                                                                                                                                                                                                                                                                                                                                                                                                                                               |
| see above                                                                                                                                                                                                                                                                                                                                                                                                                                                                                                                                                                                                                                                                                                                                                                                                                                                                                                                                                                                                                                                                                                                                                                                                                                                                                                                                                                                                                                                                                                                                                                                                                                                                                                                                                                                                                                                                                                                                                                                                                                                                                                                                                                                                                                                                                                                                                                                                                                                                                                                                                                                                      | Minnesota Department of Health, Public Health Laboratory                                                                                                                                        | Minnesota Department of Health, Public Health Laboratory                                               | Matt Plumb, Jacob Garfin, and Xiong Wang                                                                                                                                                                                                                                                                                                                                                                                                                                                                                                                                                                                                                      |
| EPI_ISL_439149, EPI_ISL_439152, EPI_ISL_439153, EPI_ISL_439154, EPI_ISL_439156, EPI_ISL_439158, EPI_ISL_439159, EPI_ISL_439160, EPI_ISL_439161, EPI_ISL_439163, EPI_ISL_439165, EPI_ISL_439166, EPI_ISL_439169, EPI_ISL_439172, EPI_ISL_439173, EPI_ISL_439174, EPI_ISL_439175, EPI_ISL_439178, EPI_ISL_439180, EPI_ISL_439182, EPI_ISL_439183, EPI_ISL_439184, EPI_ISL_439185, EPI_ISL_439186, EPI_ISL_439187, EPI_ISL_439190, EPI_ISL_439191, EPI_ISL_439193, EPI_ISL_439194, EPI_ISL_439195, EPI_ISL_439196, EPI_ISL_439200, EPI_ISL_439201, EPI_ISL_439202, EPI_ISL_439203, EPI_ISL_439205, EPI_ISL_439207, EPI_ISL_439208, EPI_ISL_439210, EPI_ISL_439211, EPI_ISL_439212, EPI_ISL_439213, EPI_ISL_439214, EPI_ISL_439216, EPI_ISL_439217, EPI_ISL_439218, EPI_ISL_439219, EPI_ISL_439220, EPI_ISL_439222, EPI_ISL_439223, EPI_ISL_439224, EPI_ISL_439228, EPI_ISL_439230, EPI_ISL_439231, EPI_ISL_439233, EPI_ISL_439235, EPI_ISL_439236, EPI_ISL_439239, EPI_ISL_439241, EPI_ISL_439243, EPI_ISL_439246, EPI_ISL_439247, EPI_ISL_439248, EPI_ISL_439249, EPI_ISL_439250, EPI_ISL_439252, EPI_ISL_439254, EPI_ISL_439255, EPI_ISL_439257, EPI_ISL_439258, EPI_ISL_439261, EPI_ISL_439264, EPI_ISL_439265, EPI_ISL_439268, EPI_ISL_439270, EPI_ISL_439272, EPI_ISL_439274, EPI_ISL_439275, EPI_ISL_439277, EPI_ISL_439278, EPI_ISL_439279, EPI_ISL_439280, EPI_ISL_439281, EPI_ISL_439282, EPI_ISL_439283, EPI_ISL_439284, EPI_ISL_439286, EPI_ISL_439287, EPI_ISL_439288, EPI_ISL_439289, EPI_ISL_439290, EPI_ISL_439294, EPI_ISL_439297, EPI_ISL_439299, EPI_ISL_439300, EPI_ISL_439301, EPI_ISL_439302, EPI_ISL_439303, EPI_ISL_439304, EPI_ISL_439306, EPI_ISL_439307, EPI_ISL_439308, EPI_ISL_439309, EPI_ISL_439310, EPI_ISL_439311, EPI_ISL_439312, EPI_ISL_439314, EPI_ISL_439315, EPI_ISL_439316, EPI_ISL_439318, EPI_ISL_439319, EPI_ISL_439320, EPI_ISL_439321, EPI_ISL_439323, EPI_ISL_439324, EPI_ISL_439325, EPI_ISL_439327, EPI_ISL_439328, EPI_ISL_439329, EPI_ISL_439330, EPI_ISL_439332, EPI_ISL_439333, EPI_ISL_439334, EPI_ISL_439335, EPI_ISL_439337, EPI_ISL_439338, EPI_ISL_439339, EPI_ISL_439340, EPI_ISL_439341, EPI_ISL_439343, EPI_ISL_439344, EPI_ISL_439345, EPI_ISL_439346, EPI_ISL_439347, EPI_ISL_439348, EPI_ISL_439349, EPI_ISL_439350, EPI_ISL_439351, EPI_ISL_439352, EPI_ISL_439353, EPI_ISL_439354, EPI_ISL_439355, EPI_ISL_439356, EPI_ISL_439357, EPI_ISL_439358, EPI_ISL_439359, EPI_ISL_439360, EPI_ISL_439361, EPI_ISL_439363, EPI_ISL_439365, EPI_ISL_439367, EPI_ISL_439665, EPI_ISL_439666, EPI_ISL_439667, EPI_ISL_439668, EPI_ISL_439670, EPI_ISL_439671 |                                                                                                                                                                                                 |                                                                                                        |                                                                                                                                                                                                                                                                                                                                                                                                                                                                                                                                                                                                                                                               |
| see above                                                                                                                                                                                                                                                                                                                                                                                                                                                                                                                                                                                                                                                                                                                                                                                                                                                                                                                                                                                                                                                                                                                                                                                                                                                                                                                                                                                                                                                                                                                                                                                                                                                                                                                                                                                                                                                                                                                                                                                                                                                                                                                                                                                                                                                                                                                                                                                                                                                                                                                                                                                                      | Virology Department, Royal Infirmary of Edinburgh, NHS Lothian / School of Biological Sciences, University of Edinburgh / Institute of Genetics and Molecular Medicine, University of Edinburgh | COVID-19 Genomics UK (COG-UK) Consortium                                                               | McHugh M, Dewar R, Rooke S, Gallagher M, Balcaza C, O'Átoole Á, Scher E, Hill V, McCrone JT, Colquhoun R, Yu X, Jackson B, Rambaut A, Williams TC, Templeton K                                                                                                                                                                                                                                                                                                                                                                                                                                                                                                |
| EPI_ISL_443187                                                                                                                                                                                                                                                                                                                                                                                                                                                                                                                                                                                                                                                                                                                                                                                                                                                                                                                                                                                                                                                                                                                                                                                                                                                                                                                                                                                                                                                                                                                                                                                                                                                                                                                                                                                                                                                                                                                                                                                                                                                                                                                                                                                                                                                                                                                                                                                                                                                                                                                                                                                                 | National Virology Reference Laboratory                                                                                                                                                          | National Public Health Laboratory, National Centre for Infectious Diseases                             | Mak Tze Minn, Octavia Sophie, Chavatte Jean-Marc, Zaini Zainun, Taib Surita, Cui Lin, Lin Raymond Tzer Pin                                                                                                                                                                                                                                                                                                                                                                                                                                                                                                                                                    |
| EPI_ISL_443188, EPI_ISL_443189, EPI_ISL_443190, EPI_ISL_443191, EPI_ISL_443192, EPI_ISL_443193, EPI_ISL_443194, EPI_ISL_443195, EPI_ISL_443196, EPI_ISL_443197, EPI_ISL_443198, EPI_ISL_443199, EPI_ISL_443200, EPI_ISL_443201, EPI_ISL_443202, EPI_ISL_443203, EPI_ISL_443204, EPI_ISL_443205, EPI_ISL_443206, EPI_ISL_443207, EPI_ISL_443208, EPI_ISL_443209, EPI_ISL_443210, EPI_ISL_443211, EPI_ISL_443212, EPI_ISL_443213, EPI_ISL_443214, EPI_ISL_443215, EPI_ISL_443216, EPI_ISL_443217, EPI_ISL_443218, EPI_ISL_443219, EPI_ISL_443220, EPI_ISL_443221, EPI_ISL_443222, EPI_ISL_443223, EPI_ISL_443224, EPI_ISL_443225, EPI_ISL_443226, EPI_ISL_443227, EPI_ISL_443228, EPI_ISL_443229, EPI_ISL_443230, EPI_ISL_443231, EPI_ISL_443232, EPI_ISL_443233, EPI_ISL_443234, EPI_ISL_443235, EPI_ISL_443236, EPI_ISL_443237, EPI_ISL_443238, EPI_ISL_443239, EPI_ISL_443240, EPI_ISL_443241, EPI_ISL_443242, EPI_ISL_443243, EPI_ISL_443244, EPI_ISL_443245, EPI_ISL_443246, EPI_ISL_443247, EPI_ISL_443248, EPI_ISL_443249                                                                                                                                                                                                                                                                                                                                                                                                                                                                                                                                                                                                                                                                                                                                                                                                                                                                                                                                                                                                                                                                                                                                                                                                                                                                                                                                                                                                                                                                                                                                                                                 |                                                                                                                                                                                                 |                                                                                                        |                                                                                                                                                                                                                                                                                                                                                                                                                                                                                                                                                                                                                                                               |
| see above                                                                                                                                                                                                                                                                                                                                                                                                                                                                                                                                                                                                                                                                                                                                                                                                                                                                                                                                                                                                                                                                                                                                                                                                                                                                                                                                                                                                                                                                                                                                                                                                                                                                                                                                                                                                                                                                                                                                                                                                                                                                                                                                                                                                                                                                                                                                                                                                                                                                                                                                                                                                      | National Public Health Laboratory, National Centre for Infectious Diseases                                                                                                                      | National Public Health Laboratory, National Centre for Infectious Diseases                             | Mak Tze Minn, Octavia Sophie, Chavatte Jean-Marc, Cui Lin, Lin Raymond Tzer Pin                                                                                                                                                                                                                                                                                                                                                                                                                                                                                                                                                                               |
| EPI_ISL_444494, EPI_ISL_444495, EPI_ISL_444496, EPI_ISL_444497, EPI_ISL_444498, EPI_ISL_444499, EPI_ISL_444500, EPI_ISL_444501, EPI_ISL_444502, EPI_ISL_444503, EPI_ISL_444504, EPI_ISL_444505, EPI_ISL_444506, EPI_ISL_444507, EPI_ISL_444508, EPI_ISL_444509, EPI_ISL_444510, EPI_ISL_444511, EPI_ISL_444512, EPI_ISL_444513, EPI_ISL_444514, EPI_ISL_444515, EPI_ISL_444516                                                                                                                                                                                                                                                                                                                                                                                                                                                                                                                                                                                                                                                                                                                                                                                                                                                                                                                                                                                                                                                                                                                                                                                                                                                                                                                                                                                                                                                                                                                                                                                                                                                                                                                                                                                                                                                                                                                                                                                                                                                                                                                                                                                                                                 |                                                                                                                                                                                                 |                                                                                                        |                                                                                                                                                                                                                                                                                                                                                                                                                                                                                                                                                                                                                                                               |
| see above                                                                                                                                                                                                                                                                                                                                                                                                                                                                                                                                                                                                                                                                                                                                                                                                                                                                                                                                                                                                                                                                                                                                                                                                                                                                                                                                                                                                                                                                                                                                                                                                                                                                                                                                                                                                                                                                                                                                                                                                                                                                                                                                                                                                                                                                                                                                                                                                                                                                                                                                                                                                      | Laboratoire de microbiologie, Hopital de Verdun                                                                                                                                                 | Smith Laboratory, Centre de Recherche CHU Sainte-Justine                                               | Martin Smith, Marieke Rozendaal, Ivan Pavlov                                                                                                                                                                                                                                                                                                                                                                                                                                                                                                                                                                                                                  |
| EPI_ISL_444613, EPI_ISL_444614, EPI_ISL_444615, EPI_ISL_444616, EPI_ISL_444617, EPI_ISL_444618, EPI_ISL_444619, EPI_ISL_444620, EPI_ISL_444621, EPI_ISL_444622, EPI_ISL_444623, EPI_ISL_444624, EPI_ISL_444625, EPI_ISL_444626, EPI_ISL_444627, EPI_ISL_444628, EPI_ISL_444629, EPI_ISL_444630, EPI_ISL_444631, EPI_ISL_444632, EPI_ISL_444633, EPI_ISL_444634, EPI_ISL_444635, EPI_ISL_444636, EPI_ISL_444637, EPI_ISL_444638, EPI_ISL_444639, EPI_ISL_444640, EPI_ISL_444641, EPI_ISL_444642, EPI_ISL_444643, EPI_ISL_444644, EPI_ISL_444645, EPI_ISL_444646, EPI_ISL_444647, EPI_ISL_444648                                                                                                                                                                                                                                                                                                                                                                                                                                                                                                                                                                                                                                                                                                                                                                                                                                                                                                                                                                                                                                                                                                                                                                                                                                                                                                                                                                                                                                                                                                                                                                                                                                                                                                                                                                                                                                                                                                                                                                                                                 |                                                                                                                                                                                                 |                                                                                                        |                                                                                                                                                                                                                                                                                                                                                                                                                                                                                                                                                                                                                                                               |

|                                                                                                                                                                                                                                                                                                                                                                                                                                                                                                                                                                                                                                                                                                                                                                                                                                                                                                                                                                                                                                                                                                                                                                                                                                                                                                                                                                                                                                                                                                                                                                                                                                                                                                                                                                                                                                                                                                                                                                                                                                                                                                                                                                                                                                                                                                                                                                                                |           |                                                                                                                                                                                                 |                                                                                                        |                                                                                                                                                                                                                                                                                                                                                                                                                                                                                                                                                                                                                                                                           |
|------------------------------------------------------------------------------------------------------------------------------------------------------------------------------------------------------------------------------------------------------------------------------------------------------------------------------------------------------------------------------------------------------------------------------------------------------------------------------------------------------------------------------------------------------------------------------------------------------------------------------------------------------------------------------------------------------------------------------------------------------------------------------------------------------------------------------------------------------------------------------------------------------------------------------------------------------------------------------------------------------------------------------------------------------------------------------------------------------------------------------------------------------------------------------------------------------------------------------------------------------------------------------------------------------------------------------------------------------------------------------------------------------------------------------------------------------------------------------------------------------------------------------------------------------------------------------------------------------------------------------------------------------------------------------------------------------------------------------------------------------------------------------------------------------------------------------------------------------------------------------------------------------------------------------------------------------------------------------------------------------------------------------------------------------------------------------------------------------------------------------------------------------------------------------------------------------------------------------------------------------------------------------------------------------------------------------------------------------------------------------------------------|-----------|-------------------------------------------------------------------------------------------------------------------------------------------------------------------------------------------------|--------------------------------------------------------------------------------------------------------|---------------------------------------------------------------------------------------------------------------------------------------------------------------------------------------------------------------------------------------------------------------------------------------------------------------------------------------------------------------------------------------------------------------------------------------------------------------------------------------------------------------------------------------------------------------------------------------------------------------------------------------------------------------------------|
| EPI_ISL_444649, EPI_ISL_444650, EPI_ISL_444651, EPI_ISL_444652, EPI_ISL_444653, EPI_ISL_444654, EPI_ISL_444655, EPI_ISL_444656, EPI_ISL_444657, EPI_ISL_444658, EPI_ISL_444659, EPI_ISL_444660, EPI_ISL_444661, EPI_ISL_444662, EPI_ISL_444663, EPI_ISL_444664, EPI_ISL_444665, EPI_ISL_444666, EPI_ISL_444667, EPI_ISL_444668, EPI_ISL_444669, EPI_ISL_444670, EPI_ISL_444671, EPI_ISL_444672, EPI_ISL_444673, EPI_ISL_444674, EPI_ISL_444675, EPI_ISL_444676, EPI_ISL_444677, EPI_ISL_444678, EPI_ISL_444679, EPI_ISL_444680, EPI_ISL_444681, EPI_ISL_444682, EPI_ISL_444683, EPI_ISL_444684, EPI_ISL_444685, EPI_ISL_444686, EPI_ISL_444687, EPI_ISL_444688, EPI_ISL_444689, EPI_ISL_444690, EPI_ISL_444691, EPI_ISL_444692, EPI_ISL_444693, EPI_ISL_444694, EPI_ISL_444695, EPI_ISL_444696, EPI_ISL_444697, EPI_ISL_444698, EPI_ISL_444699, EPI_ISL_444700, EPI_ISL_444701, EPI_ISL_444702, EPI_ISL_444703, EPI_ISL_444704, EPI_ISL_444705, EPI_ISL_444706, EPI_ISL_444707, EPI_ISL_444708, EPI_ISL_444709, EPI_ISL_444710, EPI_ISL_444711, EPI_ISL_444712, EPI_ISL_444713, EPI_ISL_444714, EPI_ISL_444715, EPI_ISL_444716, EPI_ISL_444717, EPI_ISL_444718, EPI_ISL_444719, EPI_ISL_444720, EPI_ISL_444721, EPI_ISL_444722, EPI_ISL_444723, EPI_ISL_444724, EPI_ISL_444725, EPI_ISL_444726, EPI_ISL_444727, EPI_ISL_444728, EPI_ISL_444729, EPI_ISL_444730, EPI_ISL_444731, EPI_ISL_444732, EPI_ISL_444733, EPI_ISL_444734, EPI_ISL_444735, EPI_ISL_444736, EPI_ISL_444737, EPI_ISL_444738, EPI_ISL_444739, EPI_ISL_444740, EPI_ISL_444741, EPI_ISL_444742, EPI_ISL_444743, EPI_ISL_444744, EPI_ISL_444745, EPI_ISL_444746, EPI_ISL_444747, EPI_ISL_444748, EPI_ISL_444749, EPI_ISL_444750, EPI_ISL_444751, EPI_ISL_444752, EPI_ISL_444753, EPI_ISL_444754, EPI_ISL_444755, EPI_ISL_444756, EPI_ISL_444757, EPI_ISL_444758, EPI_ISL_444759, EPI_ISL_444760, EPI_ISL_444761, EPI_ISL_444762, EPI_ISL_444763, EPI_ISL_444764, EPI_ISL_444765, EPI_ISL_444766, EPI_ISL_444767, EPI_ISL_444768, EPI_ISL_444769, EPI_ISL_444770, EPI_ISL_444771, EPI_ISL_444772, EPI_ISL_444773, EPI_ISL_444774, EPI_ISL_444775, EPI_ISL_444776, EPI_ISL_444777, EPI_ISL_444778, EPI_ISL_444779, EPI_ISL_444780, EPI_ISL_444781, EPI_ISL_444782, EPI_ISL_444783, EPI_ISL_444784, EPI_ISL_444785, EPI_ISL_444786, EPI_ISL_444787, EPI_ISL_444788, EPI_ISL_444789, EPI_ISL_444790, EPI_ISL_444791, EPI_ISL_444792 | see above | NYU Langone Health                                                                                                                                                                              | Departments of Pathology and Medicine, New York University School of Medicine                          | Maria Agüero-Rosenfeld, Brendan Belovarac, Margaret Black, Ludovic Boytard, John Cadley, Paolo Cotzia, John Chen, Dacia Dimartino, Xiaojun Feng, Tatyana Gindin, Emily Guzman, Adriana Heguy, Megan Hogan, Emily Huang, George Jour, Alireza Khodadadi-Jamayran, Lawrence H. Lin, Raven Luther, Andrew Lytle, Christian Marier, Matthew T. Maurano, Mark J. Mulligan, Peter Meyn, Raquel Ordonez Ciriza, Iman Osman, Jared Pinnell, Vanessa Raabe, Sitharam Ramaswami, Amy Rapkiewicz, Andre M. Ribeiro-dos-Santos, Marie Samanovic-Golden, Antonio Serrano, Guomiao Shen, Matija Snuderl, Theodore Vougiouklakis, Nick Vulpescu, Gael Westby, Paul Zappile, Yutong Zhang |
| EPI_ISL_445229, EPI_ISL_445236                                                                                                                                                                                                                                                                                                                                                                                                                                                                                                                                                                                                                                                                                                                                                                                                                                                                                                                                                                                                                                                                                                                                                                                                                                                                                                                                                                                                                                                                                                                                                                                                                                                                                                                                                                                                                                                                                                                                                                                                                                                                                                                                                                                                                                                                                                                                                                 |           | Narhalsan Backa vardcentral                                                                                                                                                                     | The Public Health Agency of Sweden                                                                     | Mats Olsson, Oskar Karlsson Lindsjo, Maria Lind Karlberg, Anna-Malin Linde, Olov Svartstrom, Anna Risberg, Theresa Enkirch, Mia Brytting, Karin Tegmark-Wisell                                                                                                                                                                                                                                                                                                                                                                                                                                                                                                            |
| EPI_ISL_445237                                                                                                                                                                                                                                                                                                                                                                                                                                                                                                                                                                                                                                                                                                                                                                                                                                                                                                                                                                                                                                                                                                                                                                                                                                                                                                                                                                                                                                                                                                                                                                                                                                                                                                                                                                                                                                                                                                                                                                                                                                                                                                                                                                                                                                                                                                                                                                                 |           | Narhalsan Molnlycke, Barn och ungdomsmedicin                                                                                                                                                    | The Public Health Agency of Sweden                                                                     | Mats Reimer, Oskar Karlsson Lindsjo, Maria Lind Karlberg, Anna-Malin Linde, Olov Svartstrom, Anna Risberg, Theresa Enkirch, Mia Brytting, Karin Tegmark-Wisell                                                                                                                                                                                                                                                                                                                                                                                                                                                                                                            |
| EPI_ISL_445242                                                                                                                                                                                                                                                                                                                                                                                                                                                                                                                                                                                                                                                                                                                                                                                                                                                                                                                                                                                                                                                                                                                                                                                                                                                                                                                                                                                                                                                                                                                                                                                                                                                                                                                                                                                                                                                                                                                                                                                                                                                                                                                                                                                                                                                                                                                                                                                 |           | Jokkmokks Halsocentral                                                                                                                                                                          | The Public Health Agency of Sweden                                                                     | Markus Beland, Oskar Karlsson Lindsjo, Maria Lind Karlberg, Anna-Malin Linde, Olov Svartstrom, Anna Risberg, Theresa Enkirch, Mia Brytting, Karin Tegmark-Wisell                                                                                                                                                                                                                                                                                                                                                                                                                                                                                                          |
| EPI_ISL_447472                                                                                                                                                                                                                                                                                                                                                                                                                                                                                                                                                                                                                                                                                                                                                                                                                                                                                                                                                                                                                                                                                                                                                                                                                                                                                                                                                                                                                                                                                                                                                                                                                                                                                                                                                                                                                                                                                                                                                                                                                                                                                                                                                                                                                                                                                                                                                                                 |           | Servicio de Microbiologia. Hospital Clinico Universitario de Valencia                                                                                                                           | Sequencing and Bioinformatics Service and Molecular Epidemiology Research Group. FISABIO-Public Health | María Alma Bracho, Griselda De Marco, Lidia Ruiz Roldan, Neris Garcia-Gonzalez, Inma Galán Vendrell, Sandra Carbo, Loreto Ferrús Abad, Paula Ruiz-Hueso, Mariana Reyes-Prieto, Vicente Soriano Chirona, Ivan Ansari, Lúcia Martínez-Priego, Giuseppe 'Auria, David Navarro, Eliseo Albert, Fernando Gonzalez-Candelas                                                                                                                                                                                                                                                                                                                                                     |
| EPI_ISL_447480                                                                                                                                                                                                                                                                                                                                                                                                                                                                                                                                                                                                                                                                                                                                                                                                                                                                                                                                                                                                                                                                                                                                                                                                                                                                                                                                                                                                                                                                                                                                                                                                                                                                                                                                                                                                                                                                                                                                                                                                                                                                                                                                                                                                                                                                                                                                                                                 |           | Servicio de Microbiologia. Hospital Clinico Universitario de Valencia                                                                                                                           | Sequencing and Bioinformatics Service and Molecular Epidemiology Research Group. FISABIO-Public Health | Mariana Reyes-Prieto, Vicente Soriano Chirona, Ivan Ansari, Lidia Martínez-Priego, Giuseppe 'Auria, David Navarro, Eliseo Albert, Maria Alma Bracho, Lidia Ruiz Roldan, Neris Garcia-Gonzalez, Inma Galán Vendrell, Sandra Carbo, Loreto Ferrús Abad, Paula Ruiz-Hueso, Fernando Gonzalez-Candelas                                                                                                                                                                                                                                                                                                                                                                        |
| EPI_ISL_447486                                                                                                                                                                                                                                                                                                                                                                                                                                                                                                                                                                                                                                                                                                                                                                                                                                                                                                                                                                                                                                                                                                                                                                                                                                                                                                                                                                                                                                                                                                                                                                                                                                                                                                                                                                                                                                                                                                                                                                                                                                                                                                                                                                                                                                                                                                                                                                                 |           | Servicio de Microbiologia. Hospital Clinico Universitario de Valencia                                                                                                                           | Sequencing and Bioinformatics Service and Molecular Epidemiology Research Group. FISABIO-Public Health | María Alma Bracho, Griselda De Marco, Lidia Ruiz Roldan, Neris Garcia-Gonzalez, Inma Galán Vendrell, Sandra Carbo, Loreto Ferrús Abad, Paula Ruiz-Hueso, Mariana Reyes-Prieto, Vicente Soriano Chirona, Ivan Ansari, Lúcia Martínez-Priego, Giuseppe 'Auria, David Navarro, Eliseo Albert, Fernando Gonzalez-Candelas                                                                                                                                                                                                                                                                                                                                                     |
| EPI_ISL_447494                                                                                                                                                                                                                                                                                                                                                                                                                                                                                                                                                                                                                                                                                                                                                                                                                                                                                                                                                                                                                                                                                                                                                                                                                                                                                                                                                                                                                                                                                                                                                                                                                                                                                                                                                                                                                                                                                                                                                                                                                                                                                                                                                                                                                                                                                                                                                                                 |           | Servicio de Microbiologia. Hospital Clinico Universitario de Valencia                                                                                                                           | Sequencing and Bioinformatics Service and Molecular Epidemiology Research Group. FISABIO-Public Health | Mariana Reyes-Prieto, Vicente Soriano Chirona, Ivan Ansari, Lidia Martínez-Priego, Giuseppe 'Auria, David Navarro, Eliseo Albert, Maria Alma Bracho, Lidia Ruiz Roldan, Neris Garcia-Gonzalez, Inma Galán Vendrell, Sandra Carbo, Loreto Ferrús Abad, Paula Ruiz-Hueso, Fernando Gonzalez-Candelas                                                                                                                                                                                                                                                                                                                                                                        |
| EPI_ISL_447500                                                                                                                                                                                                                                                                                                                                                                                                                                                                                                                                                                                                                                                                                                                                                                                                                                                                                                                                                                                                                                                                                                                                                                                                                                                                                                                                                                                                                                                                                                                                                                                                                                                                                                                                                                                                                                                                                                                                                                                                                                                                                                                                                                                                                                                                                                                                                                                 |           | Servicio de Microbiologia. Hospital Clinico Universitario de Valencia                                                                                                                           | Sequencing and Bioinformatics Service and Molecular Epidemiology Research Group. FISABIO-Public Health | María Alma Bracho, Griselda De Marco, Lidia Ruiz Roldan, Neris Garcia-Gonzalez, Inma Galán Vendrell, Sandra Carbo, Loreto Ferrús Abad, Paula Ruiz-Hueso, Mariana Reyes-Prieto, Vicente Soriano Chirona, Ivan Ansari, Lúcia Martínez-Priego, Giuseppe 'Auria, David Navarro, Eliseo Albert, Fernando Gonzalez-Candelas                                                                                                                                                                                                                                                                                                                                                     |
| EPI_ISL_447508                                                                                                                                                                                                                                                                                                                                                                                                                                                                                                                                                                                                                                                                                                                                                                                                                                                                                                                                                                                                                                                                                                                                                                                                                                                                                                                                                                                                                                                                                                                                                                                                                                                                                                                                                                                                                                                                                                                                                                                                                                                                                                                                                                                                                                                                                                                                                                                 |           | Servicio de Microbiologia. Hospital Clinico Universitario de Valencia                                                                                                                           | Sequencing and Bioinformatics Service and Molecular Epidemiology Research Group. FISABIO-Public Health | Mariana Reyes-Prieto, Vicente Soriano Chirona, Ivan Ansari, Lidia Martínez-Priego, Giuseppe 'Auria, David Navarro, Eliseo Albert, Maria Alma Bracho, Lidia Ruiz Roldan, Neris Garcia-Gonzalez, Inma Galán Vendrell, Sandra Carbo, Loreto Ferrús Abad, Paula Ruiz-Hueso, Fernando Gonzalez-Candelas                                                                                                                                                                                                                                                                                                                                                                        |
| EPI_ISL_447514, EPI_ISL_447527                                                                                                                                                                                                                                                                                                                                                                                                                                                                                                                                                                                                                                                                                                                                                                                                                                                                                                                                                                                                                                                                                                                                                                                                                                                                                                                                                                                                                                                                                                                                                                                                                                                                                                                                                                                                                                                                                                                                                                                                                                                                                                                                                                                                                                                                                                                                                                 |           | Servicio de Microbiologia. Hospital Clinico Universitario de Valencia                                                                                                                           | Sequencing and Bioinformatics Service and Molecular Epidemiology Research Group. FISABIO-Public Health | María Alma Bracho, Griselda De Marco, Lidia Ruiz Roldan, Neris Garcia-Gonzalez, Inma Galán Vendrell, Sandra Carbo, Loreto Ferrús Abad, Paula Ruiz-Hueso, Mariana Reyes-Prieto, Vicente Soriano Chirona, Ivan Ansari, Lúcia Martínez-Priego, Giuseppe 'Auria, David Navarro, Eliseo Albert, Fernando Gonzalez-Candelas                                                                                                                                                                                                                                                                                                                                                     |
| EPI_ISL_449259, EPI_ISL_449260, EPI_ISL_449262, EPI_ISL_449263, EPI_ISL_449264, EPI_ISL_449265, EPI_ISL_449266, EPI_ISL_449270, EPI_ISL_449271, EPI_ISL_449272, EPI_ISL_449273, EPI_ISL_449274, EPI_ISL_449275, EPI_ISL_449276, EPI_ISL_449277, EPI_ISL_449280, EPI_ISL_449281, EPI_ISL_449282, EPI_ISL_449285, EPI_ISL_449287, EPI_ISL_449289, EPI_ISL_449290, EPI_ISL_449291, EPI_ISL_449292, EPI_ISL_449293, EPI_ISL_449294, EPI_ISL_449297, EPI_ISL_449298, EPI_ISL_449299, EPI_ISL_449300, EPI_ISL_449301, EPI_ISL_449303, EPI_ISL_449306, EPI_ISL_449307, EPI_ISL_449308, EPI_ISL_449311, EPI_ISL_449313, EPI_ISL_449314, EPI_ISL_449315, EPI_ISL_449316, EPI_ISL_449320, EPI_ISL_449321, EPI_ISL_449322, EPI_ISL_449323, EPI_ISL_449324, EPI_ISL_449325, EPI_ISL_449326, EPI_ISL_449327, EPI_ISL_449328                                                                                                                                                                                                                                                                                                                                                                                                                                                                                                                                                                                                                                                                                                                                                                                                                                                                                                                                                                                                                                                                                                                                                                                                                                                                                                                                                                                                                                                                                                                                                                                 | see above | Virology Department, Royal Infirmary of Edinburgh, NHS Lothian / School of Biological Sciences, University of Edinburgh / Institute of Genetics and Molecular Medicine, University of Edinburgh | COVID-19 Genomics UK (COG-UK) Consortium                                                               | McHugh M, Dewar R, Rooke S, Gallagher M, Balcaza C, O'Toole Á, Scher E, Hill V, McCrone JT, Colquhoun R, Yu X, Jackson B, Rambaut A, Williams TC, Templeton K                                                                                                                                                                                                                                                                                                                                                                                                                                                                                                             |
| EPI_ISL_450393, EPI_ISL_450394, EPI_ISL_450395, EPI_ISL_450396, EPI_ISL_450397, EPI_ISL_450398, EPI_ISL_450399, EPI_ISL_450400, EPI_ISL_450401, EPI_ISL_450402                                                                                                                                                                                                                                                                                                                                                                                                                                                                                                                                                                                                                                                                                                                                                                                                                                                                                                                                                                                                                                                                                                                                                                                                                                                                                                                                                                                                                                                                                                                                                                                                                                                                                                                                                                                                                                                                                                                                                                                                                                                                                                                                                                                                                                 |           | NYU Langone Health                                                                                                                                                                              | Departments of Pathology and Medicine, New York University School of Medicine                          | Maria Agüero-Rosenfeld, Brendan Belovarac, Margaret Black, Ludovic Boytard, John Cadley, Paolo Cotzia, John Chen, Dacia Dimartino, Xiaojun Feng, Tatyana Gindin, Emily Guzman, Adriana Heguy, Megan Hogan, Emily Huang, George Jour, Alireza Khodadadi-Jamayran, Lawrence H. Lin, Raven Luther, Andrew Lytle, Christian Marier, Matthew T. Maurano, Mark J. Mulligan, Peter Meyn, Raquel Ordonez Ciriza, Iman Osman, Jared Pinnell, Vanessa Raabe, Sitharam Ramaswami, Amy Rapkiewicz, Andre M. Ribeiro-dos-Santos, Marie Samanovic-Golden, Antonio Serrano, Guomiao Shen, Matija Snuderl, Theodore Vougiouklakis, Nick Vulpescu, Gael Westby, Paul Zappile, Yutong Zhang |
| EPI_ISL_450506                                                                                                                                                                                                                                                                                                                                                                                                                                                                                                                                                                                                                                                                                                                                                                                                                                                                                                                                                                                                                                                                                                                                                                                                                                                                                                                                                                                                                                                                                                                                                                                                                                                                                                                                                                                                                                                                                                                                                                                                                                                                                                                                                                                                                                                                                                                                                                                 |           | Clinical Laboratory, Hospital Israelita Albert Einstein                                                                                                                                         | Clinical Laboratory, Hospital Israelita Albert Einstein                                                | Malta,F., Argament,D., de Oliveira,D.B.L., Araujo,D.B., Machado,R.R.G., Santana,R.A.F., Manguiera,C.L.P., Durigon,E.L. and Pinho,J.R.R.                                                                                                                                                                                                                                                                                                                                                                                                                                                                                                                                   |
| EPI_ISL_450638, EPI_ISL_450639, EPI_ISL_450640, EPI_ISL_450641, EPI_ISL_450642, EPI_ISL_450643, EPI_ISL_450644, EPI_ISL_450645, EPI_ISL_450646, EPI_ISL_450647, EPI_ISL_450648, EPI_ISL_450649, EPI_ISL_450650, EPI_ISL_450651, EPI_ISL_450652, EPI_ISL_450653                                                                                                                                                                                                                                                                                                                                                                                                                                                                                                                                                                                                                                                                                                                                                                                                                                                                                                                                                                                                                                                                                                                                                                                                                                                                                                                                                                                                                                                                                                                                                                                                                                                                                                                                                                                                                                                                                                                                                                                                                                                                                                                                 | see above | Laboratoire de microbiologie, Hopital de Verdun                                                                                                                                                 | Smith Laboratory, Centre de Recherche CHU Sainte-Justine                                               | Martin Smith, Marieke Rozendaal, Ivan Pavlov                                                                                                                                                                                                                                                                                                                                                                                                                                                                                                                                                                                                                              |
| EPI_ISL_450748, EPI_ISL_450749, EPI_ISL_450750, EPI_ISL_450751, EPI_ISL_450752, EPI_ISL_450753, EPI_ISL_450754, EPI_ISL_450755, EPI_ISL_450756, EPI_ISL_450757, EPI_ISL_450758, EPI_ISL_450759, EPI_ISL_450760, EPI_ISL_450761, EPI_ISL_450762, EPI_ISL_450763, EPI_ISL_450764, EPI_ISL_450765, EPI_ISL_450766, EPI_ISL_450767, EPI_ISL_450768, EPI_ISL_450769, EPI_ISL_450770, EPI_ISL_450771, EPI_ISL_450772, EPI_ISL_450773, EPI_ISL_450774, EPI_ISL_450775, EPI_ISL_450776, EPI_ISL_450777, EPI_ISL_450778, EPI_ISL_450779, EPI_ISL_450780                                                                                                                                                                                                                                                                                                                                                                                                                                                                                                                                                                                                                                                                                                                                                                                                                                                                                                                                                                                                                                                                                                                                                                                                                                                                                                                                                                                                                                                                                                                                                                                                                                                                                                                                                                                                                                                 | see above | Minnesota Department of Health, Public Health Laboratory                                                                                                                                        | Minnesota Department of Health, Public Health Laboratory                                               | Matt Plumb, Jacob Garfin, and Xiong Wang                                                                                                                                                                                                                                                                                                                                                                                                                                                                                                                                                                                                                                  |
| EPI_ISL_450787                                                                                                                                                                                                                                                                                                                                                                                                                                                                                                                                                                                                                                                                                                                                                                                                                                                                                                                                                                                                                                                                                                                                                                                                                                                                                                                                                                                                                                                                                                                                                                                                                                                                                                                                                                                                                                                                                                                                                                                                                                                                                                                                                                                                                                                                                                                                                                                 |           | Pandit Deendayal Upadhyay Government Medical College, Rajkot                                                                                                                                    | Gujarat Biotechnology Research Centre                                                                  | Manish Pattani, Prakash Modi, Sejal Antala, Zarna Patel, Monika Gandhi, Pinal Trivedi, Maharshi Pandya, Amit Kanani, Nidhi Patel, Nitin Savaliya, Raghawendra Kumar, Dinesh Kumar, Zuber Saiyed, Komal Patel, Labdhi Pandya, Snehal Bagatharia, Ramesh Pandit, Tejas Shah, Ankit Hinsu, Pritesh Sabara, Apurvashin Puvav, Janvi Ravat, Bhavesh Modi, Gaurishankar Shrimali, R D Dixit, A M Kadri, Bhavya Jindal, Chaitanya Joshi, Madhvi Joshi                                                                                                                                                                                                                            |
| EPI_ISL_450815                                                                                                                                                                                                                                                                                                                                                                                                                                                                                                                                                                                                                                                                                                                                                                                                                                                                                                                                                                                                                                                                                                                                                                                                                                                                                                                                                                                                                                                                                                                                                                                                                                                                                                                                                                                                                                                                                                                                                                                                                                                                                                                                                                                                                                                                                                                                                                                 |           | Narhalsan Molnlycke, Barn och ungdomsmedicin                                                                                                                                                    | The Public Health Agency of Sweden                                                                     | Mats Reimer, Anna-Malin Linde, Maria Lind Karlberg, Oskar Karlsson Lindsjo, Olov Svartstrom, Anna Risberg, Theresa Enkirch, Mia Brytting, Karin Tegmark-Wisell                                                                                                                                                                                                                                                                                                                                                                                                                                                                                                            |
| EPI_ISL_450817                                                                                                                                                                                                                                                                                                                                                                                                                                                                                                                                                                                                                                                                                                                                                                                                                                                                                                                                                                                                                                                                                                                                                                                                                                                                                                                                                                                                                                                                                                                                                                                                                                                                                                                                                                                                                                                                                                                                                                                                                                                                                                                                                                                                                                                                                                                                                                                 |           | Narhalsan Backa vardcentral                                                                                                                                                                     | The Public Health Agency of Sweden                                                                     | Mats Olsson, Anna-Malin Linde, Maria Lind Karlberg, Oskar Karlsson Lindsjo, Olov Svartstrom, Anna Risberg, Theresa Enkirch, Mia Brytting, Karin Tegmark-Wisell                                                                                                                                                                                                                                                                                                                                                                                                                                                                                                            |
| EPI_ISL_450820                                                                                                                                                                                                                                                                                                                                                                                                                                                                                                                                                                                                                                                                                                                                                                                                                                                                                                                                                                                                                                                                                                                                                                                                                                                                                                                                                                                                                                                                                                                                                                                                                                                                                                                                                                                                                                                                                                                                                                                                                                                                                                                                                                                                                                                                                                                                                                                 |           | Narhalsan Molnlycke, Barn och ungdomsmedicin                                                                                                                                                    | The Public Health Agency of Sweden                                                                     | Mats Reimer, Anna-Malin Linde, Maria Lind Karlberg, Oskar Karlsson Lindsjo, Olov Svartstrom, Anna Risberg, Theresa Enkirch, Mia Brytting, Karin Tegmark-Wisell                                                                                                                                                                                                                                                                                                                                                                                                                                                                                                            |
| EPI_ISL_450823, EPI_ISL_450825                                                                                                                                                                                                                                                                                                                                                                                                                                                                                                                                                                                                                                                                                                                                                                                                                                                                                                                                                                                                                                                                                                                                                                                                                                                                                                                                                                                                                                                                                                                                                                                                                                                                                                                                                                                                                                                                                                                                                                                                                                                                                                                                                                                                                                                                                                                                                                 |           | Narhalsan Backa vardcentral                                                                                                                                                                     | The Public Health Agency of Sweden                                                                     | Mats Olsson, Anna-Malin Linde, Maria Lind Karlberg, Oskar Karlsson Lindsjo, Olov Svartstrom, Anna Risberg, Theresa Enkirch, Mia Brytting, Karin Tegmark-Wisell                                                                                                                                                                                                                                                                                                                                                                                                                                                                                                            |
| EPI_ISL_451154                                                                                                                                                                                                                                                                                                                                                                                                                                                                                                                                                                                                                                                                                                                                                                                                                                                                                                                                                                                                                                                                                                                                                                                                                                                                                                                                                                                                                                                                                                                                                                                                                                                                                                                                                                                                                                                                                                                                                                                                                                                                                                                                                                                                                                                                                                                                                                                 |           | Government Medical College, Vadodara                                                                                                                                                            | Gujarat Biotechnology Research Centre                                                                  | Manish Pattani, Tanuja Javadekar , Maharshi Pandya, Amit Kanani, Nidhi Patel, Nitin Savaliya, Raghawendra Kumar, Dinesh Kumar, Zuber Saiyed, Komal Patel, Labdhi Pandya, Snehal Bagatharia, Ramesh Pandit, Tejas Shah, Ankit Hinsu, Pritesh Sabara, Apurvashin Puvav, Janvi Ravat, Zarna Patel, Monika Gandhi, Pinal Trivedi, Bhavesh Modi, Gaurishankar Shrimali, R D Dixit, A M Kadri, Neelam Nathani, Chaitanya Joshi, Madhvi Joshi                                                                                                                                                                                                                                    |
| EPI_ISL_451299, EPI_ISL_451301, EPI_ISL_451303, EPI_ISL_451305                                                                                                                                                                                                                                                                                                                                                                                                                                                                                                                                                                                                                                                                                                                                                                                                                                                                                                                                                                                                                                                                                                                                                                                                                                                                                                                                                                                                                                                                                                                                                                                                                                                                                                                                                                                                                                                                                                                                                                                                                                                                                                                                                                                                                                                                                                                                 |           | Laboratory of Virology, INMI Lazzaro Spallanzani IRCCS                                                                                                                                          | Laboratory of Virology, INMI Lazzaro Spallanzani IRCCS                                                 | Martina Rueca, Cesare E.M. Gruber, Barbara Bartolini, Francesco Messina, Antonino Di Caro, Maria R. Capobianchi, Giuseppe Ippolito                                                                                                                                                                                                                                                                                                                                                                                                                                                                                                                                        |
| EPI_ISL_451401, EPI_ISL_451402, EPI_ISL_451403, EPI_ISL_451404, EPI_ISL_451405, EPI_ISL_451406, EPI_ISL_451407, EPI_ISL_451408, EPI_ISL_451409, EPI_ISL_451410, EPI_ISL_451411, EPI_ISL_451412, EPI_ISL_451413, EPI_ISL_451414, EPI_ISL_451415, EPI_ISL_451416, EPI_ISL_451417, EPI_ISL_451418, EPI_ISL_451419, EPI_ISL_451420, EPI_ISL_451421, EPI_ISL_451422, EPI_ISL_451423, EPI_ISL_451424, EPI_ISL_451425, EPI_ISL_451426, EPI_ISL_451427, EPI_ISL_451428, EPI_ISL_451429, EPI_ISL_451430, EPI_ISL_451431, EPI_ISL_451432, EPI_ISL_451433, EPI_ISL_451434, EPI_ISL_451435, EPI_ISL_451436, EPI_ISL_451437, EPI_ISL_451438, EPI_ISL_451439, EPI_ISL_451440, EPI_ISL_451441, EPI_ISL_451442, EPI_ISL_451443, EPI_ISL_451444, EPI_ISL_451445, EPI_ISL_451446, EPI_ISL_451447, EPI_ISL_451448, EPI_ISL_451449, EPI_ISL_451450, EPI_ISL_451451, EPI_ISL_451452, EPI_ISL_451453, EPI_ISL_451454                                                                                                                                                                                                                                                                                                                                                                                                                                                                                                                                                                                                                                                                                                                                                                                                                                                                                                                                                                                                                                                                                                                                                                                                                                                                                                                                                                                                                                                                                                 |           |                                                                                                                                                                                                 |                                                                                                        |                                                                                                                                                                                                                                                                                                                                                                                                                                                                                                                                                                                                                                                                           |

|                                                                                                                                                                                                                                                                                                                                                                                                                                                                                                                                                                                                                                                                                                                                                                                                                                                                                                                                                                                                                                                                                                                                                                                                                                                                                |           |                                                                                                                                                                                                                                     |                                                                                                                                                                                                                 |                                                                                                                                                                                                                                                                                                                                                                                                                                                                                                                                                                                                                                                                           |
|--------------------------------------------------------------------------------------------------------------------------------------------------------------------------------------------------------------------------------------------------------------------------------------------------------------------------------------------------------------------------------------------------------------------------------------------------------------------------------------------------------------------------------------------------------------------------------------------------------------------------------------------------------------------------------------------------------------------------------------------------------------------------------------------------------------------------------------------------------------------------------------------------------------------------------------------------------------------------------------------------------------------------------------------------------------------------------------------------------------------------------------------------------------------------------------------------------------------------------------------------------------------------------|-----------|-------------------------------------------------------------------------------------------------------------------------------------------------------------------------------------------------------------------------------------|-----------------------------------------------------------------------------------------------------------------------------------------------------------------------------------------------------------------|---------------------------------------------------------------------------------------------------------------------------------------------------------------------------------------------------------------------------------------------------------------------------------------------------------------------------------------------------------------------------------------------------------------------------------------------------------------------------------------------------------------------------------------------------------------------------------------------------------------------------------------------------------------------------|
| EPI_ISL_451455, EPI_ISL_451456, EPI_ISL_451457, EPI_ISL_451458, EPI_ISL_451459, EPI_ISL_451460, EPI_ISL_451461, EPI_ISL_451462, EPI_ISL_451463, EPI_ISL_451464, EPI_ISL_451465, EPI_ISL_451466, EPI_ISL_451467, EPI_ISL_451468, EPI_ISL_451469, EPI_ISL_451470, EPI_ISL_451471, EPI_ISL_451472, EPI_ISL_451473, EPI_ISL_451474, EPI_ISL_451475, EPI_ISL_451476, EPI_ISL_451477, EPI_ISL_451478, EPI_ISL_451479, EPI_ISL_451665                                                                                                                                                                                                                                                                                                                                                                                                                                                                                                                                                                                                                                                                                                                                                                                                                                                 | see above | NYU Langone Health                                                                                                                                                                                                                  | Departments of Pathology and Medicine, New York University School of Medicine                                                                                                                                   | Maria Agüero-Rosenfeld, Brendan Belovarac, Margaret Black, Ludovic Boytard, John Cadley, Paolo Cotzia, John Chen, Dacia Dimartino, Xiaojun Feng, Tatyana Gindin, Emily Guzman, Adriana Heguy, Megan Hogan, Emily Huang, George Jour, Alireza Khodadadi-Jamayran, Lawrence H. Lin, Raven Luther, Andrew Lytle, Christian Marier, Matthew T. Maurano, Mark J. Mulligan, Peter Meyn, Raquel Ordonez Ciriza, Iman Osman, Jared Pinnell, Vanessa Raabe, Sitharam Ramaswami, Amy Rapkiewicz, Andre M. Ribeiro-dos-Santos, Marie Samanovic-Golden, Antonio Serrano, Guomiao Shen, Matija Snuderl, Theodore Vougiouklakis, Nick Vulpescu, Gael Westby, Paul Zappile, Yutong Zhang |
| EPI_ISL_451936, EPI_ISL_451937, EPI_ISL_451938, EPI_ISL_451939, EPI_ISL_451940, EPI_ISL_451941, EPI_ISL_451942, EPI_ISL_451943, EPI_ISL_451944, EPI_ISL_451945, EPI_ISL_451946, EPI_ISL_451947                                                                                                                                                                                                                                                                                                                                                                                                                                                                                                                                                                                                                                                                                                                                                                                                                                                                                                                                                                                                                                                                                 | see above | Max von Pettenkofer Institute, Virology, National Reference Center for Retroviruses, LMU München                                                                                                                                    | Laboratory for Functional Genome Analysis, Dept. Genomics, Gene Center of the LMU Munich                                                                                                                        | Max Muenchhoff, Stefan Krebs, Alexander Graf, Oliver Keppler, Helmut Blum                                                                                                                                                                                                                                                                                                                                                                                                                                                                                                                                                                                                 |
| EPI_ISL_451971, EPI_ISL_451972, EPI_ISL_451973, EPI_ISL_451974, EPI_ISL_451975, EPI_ISL_451976, EPI_ISL_451977, EPI_ISL_451978, EPI_ISL_451979, EPI_ISL_451980, EPI_ISL_451981, EPI_ISL_451982, EPI_ISL_451983, EPI_ISL_451984, EPI_ISL_451985, EPI_ISL_451986, EPI_ISL_451987                                                                                                                                                                                                                                                                                                                                                                                                                                                                                                                                                                                                                                                                                                                                                                                                                                                                                                                                                                                                 | see above | 1. ViroGenetics - BSL3 Laboratory of Virology, Maopolska Centre of Biotechnology, Jagiellonian University; 2. II Department of Internal Medicine, Faculty of Medicine, Jagiellonian University Medical College; 3. DIAGNOSTYKA Ltd. | 1. ViroGenetics - BSL3 Laboratory of Virology, Maopolska Centre of Biotechnology, Jagiellonian University; 2. II Department of Internal Medicine, Faculty of Medicine, Jagiellonian University Medical College. | Marek Sanak, Marcin Surmiak, Monika Gsecka-Czapla, Wojciech Branicki, Pawe P abaj, Marta Rogalska-Kupiec, Jakub Swadba, Krzysztof Pyr                                                                                                                                                                                                                                                                                                                                                                                                                                                                                                                                     |
| EPI_ISL_452103, EPI_ISL_452104                                                                                                                                                                                                                                                                                                                                                                                                                                                                                                                                                                                                                                                                                                                                                                                                                                                                                                                                                                                                                                                                                                                                                                                                                                                 | see above | Max von Pettenkofer Institute, Virology, National Reference Center for Retroviruses, LMU München                                                                                                                                    | Laboratory for Functional Genome Analysis, Dept. Genomics, Gene Center of the LMU Munich                                                                                                                        | Max Muenchhoff, Stefan Krebs, Alexander Graf, Oliver Keppler, Helmut Blum                                                                                                                                                                                                                                                                                                                                                                                                                                                                                                                                                                                                 |
| EPI_ISL_452229, EPI_ISL_452230, EPI_ISL_452235, EPI_ISL_452239                                                                                                                                                                                                                                                                                                                                                                                                                                                                                                                                                                                                                                                                                                                                                                                                                                                                                                                                                                                                                                                                                                                                                                                                                 | see above | Narhalsan Backa vardcentral                                                                                                                                                                                                         | The Public Health Agency of Sweden                                                                                                                                                                              | Mats Olsson, Anna-Malin Linde, Maria Lind Karlberg, Oskar Karlsson Lindsjö, Olov Svartstrom, Anna Risberg, Theresa Enkirch, Mia Brytting, Karin Tegmark-Wisell                                                                                                                                                                                                                                                                                                                                                                                                                                                                                                            |
| EPI_ISL_453100, EPI_ISL_453101, EPI_ISL_453103, EPI_ISL_453104, EPI_ISL_453105, EPI_ISL_453106, EPI_ISL_453107, EPI_ISL_453108, EPI_ISL_453110, EPI_ISL_453111, EPI_ISL_453112, EPI_ISL_453113, EPI_ISL_453114, EPI_ISL_453115, EPI_ISL_453117, EPI_ISL_453118, EPI_ISL_453119, EPI_ISL_453121, EPI_ISL_453123, EPI_ISL_453125, EPI_ISL_453126, EPI_ISL_453128, EPI_ISL_453129, EPI_ISL_453130, EPI_ISL_453131, EPI_ISL_453132, EPI_ISL_453133, EPI_ISL_453134, EPI_ISL_453135, EPI_ISL_453136, EPI_ISL_453137, EPI_ISL_453139, EPI_ISL_453141, EPI_ISL_453143, EPI_ISL_453144, EPI_ISL_453146, EPI_ISL_453147, EPI_ISL_453148, EPI_ISL_453150, EPI_ISL_453151, EPI_ISL_453152, EPI_ISL_453155, EPI_ISL_453156, EPI_ISL_453157, EPI_ISL_453158, EPI_ISL_453159, EPI_ISL_453160, EPI_ISL_453161, EPI_ISL_453162, EPI_ISL_453164, EPI_ISL_453165, EPI_ISL_453168, EPI_ISL_453169, EPI_ISL_453170, EPI_ISL_453171, EPI_ISL_453172, EPI_ISL_453173, EPI_ISL_453176, EPI_ISL_453178, EPI_ISL_453179, EPI_ISL_453181, EPI_ISL_453183, EPI_ISL_453184, EPI_ISL_453185, EPI_ISL_453186, EPI_ISL_453187, EPI_ISL_453188, EPI_ISL_453189, EPI_ISL_453190, EPI_ISL_453191, EPI_ISL_453192, EPI_ISL_453193, EPI_ISL_453194                                                                 | see above | Virology Department, Royal Infirmary of Edinburgh, NHS Lothian / School of Biological Sciences, University of Edinburgh / Institute of Genetics and Molecular Medicine, University of Edinburgh                                     | COVID-19 Genomics UK (COG-UK) Consortium                                                                                                                                                                        | McHugh M, Dewar R, Rooke S, Gallagher M, Balcaza C, O'Toole Á, Scher E, Hill V, McCrone JT, Colquhoun R, Yu X, Jackson B, Rambaut A, Williams TC, Templeton K                                                                                                                                                                                                                                                                                                                                                                                                                                                                                                             |
| EPI_ISL_455107                                                                                                                                                                                                                                                                                                                                                                                                                                                                                                                                                                                                                                                                                                                                                                                                                                                                                                                                                                                                                                                                                                                                                                                                                                                                 | see above | Narhalsan Møllerud                                                                                                                                                                                                                  | The Public Health Agency of Sweden                                                                                                                                                                              | Maria Nykvist, Anna-Malin Linde, Maria Lind Karlberg, Oskar Karlsson Lindsjö, Olov Svartstrom, Anna Risberg, Theresa Enkirch, Mia Brytting, Karin Tegmark-Wisell                                                                                                                                                                                                                                                                                                                                                                                                                                                                                                          |
| EPI_ISL_455728                                                                                                                                                                                                                                                                                                                                                                                                                                                                                                                                                                                                                                                                                                                                                                                                                                                                                                                                                                                                                                                                                                                                                                                                                                                                 | see above | Servicio de Microbiología. Hospital Clínico Universitario de Valencia                                                                                                                                                               | Sequencing and Bioinformatics Service and Molecular Epidemiology Research Group. FISABIO-Public Health, and SeqCOVID-Spain Consortium                                                                           | Maria Alma Bracho, Griselda De Marco, Lidia Ruiz Roldan, Neris Garcia-Gonzalez, Inma Galán Vendrell, Sandra Carbo, Loreto Ferrús Abad, Paula Ruiz-Hueso, Mariana Reyes-Prieto, Vicente Soriano Chirona, Ivan Ansari, Lúcia Martínez-Priego, Giuseppe Auria, David Navarro, Eliseo Albert, Fernando Gonzalez-Candelas                                                                                                                                                                                                                                                                                                                                                      |
| EPI_ISL_455730, EPI_ISL_455731                                                                                                                                                                                                                                                                                                                                                                                                                                                                                                                                                                                                                                                                                                                                                                                                                                                                                                                                                                                                                                                                                                                                                                                                                                                 | see above | Servicio de Microbiología. Hospital Clínico Universitario de Valencia                                                                                                                                                               | Sequencing and Bioinformatics Service and Molecular Epidemiology Research Group. FISABIO-Public Health, and SeqCOVID-Spain Consortium                                                                           | Mariana Reyes-Prieto, Vicente Soriano Chirona, Ivan Ansari, Lúcia Martínez-Priego, Giuseppe Auria, David Navarro, Eliseo Albert, Maria Alma Bracho, Lidia Ruiz Roldan, Neris Garcia-Gonzalez, Inma Galán Vendrell, Sandra Carbo, Loreto Ferrús Abad, Paula Ruiz-Hueso, Fernando Gonzalez-Candelas                                                                                                                                                                                                                                                                                                                                                                         |
| EPI_ISL_455738                                                                                                                                                                                                                                                                                                                                                                                                                                                                                                                                                                                                                                                                                                                                                                                                                                                                                                                                                                                                                                                                                                                                                                                                                                                                 | see above | Servicio de Microbiología. Hospital Clínico Universitario de Valencia                                                                                                                                                               | Sequencing and Bioinformatics Service and Molecular Epidemiology Research Group. FISABIO-Public Health, and SeqCOVID-Spain Consortium                                                                           | Maria Alma Bracho, Griselda De Marco, Lidia Ruiz Roldan, Neris Garcia-Gonzalez, Inma Galán Vendrell, Sandra Carbo, Loreto Ferrús Abad, Paula Ruiz-Hueso, Mariana Reyes-Prieto, Vicente Soriano Chirona, Ivan Ansari, Lúcia Martínez-Priego, Giuseppe Auria, David Navarro, Eliseo Albert, Fernando Gonzalez-Candelas                                                                                                                                                                                                                                                                                                                                                      |
| EPI_ISL_456003, EPI_ISL_456004, EPI_ISL_456005, EPI_ISL_456006, EPI_ISL_456007, EPI_ISL_456008, EPI_ISL_456009, EPI_ISL_456010, EPI_ISL_456011, EPI_ISL_456012, EPI_ISL_456013, EPI_ISL_456014, EPI_ISL_456015, EPI_ISL_456016, EPI_ISL_456017, EPI_ISL_456018, EPI_ISL_456019, EPI_ISL_456020, EPI_ISL_456021, EPI_ISL_456022, EPI_ISL_456023, EPI_ISL_456024, EPI_ISL_456025, EPI_ISL_456026, EPI_ISL_456027, EPI_ISL_456028, EPI_ISL_456029, EPI_ISL_456030, EPI_ISL_456031, EPI_ISL_456032, EPI_ISL_456033, EPI_ISL_456034, EPI_ISL_456035, EPI_ISL_456036, EPI_ISL_456037, EPI_ISL_456038, EPI_ISL_456039, EPI_ISL_456040, EPI_ISL_456041, EPI_ISL_456042, EPI_ISL_456043, EPI_ISL_456044, EPI_ISL_456045, EPI_ISL_456046, EPI_ISL_456047, EPI_ISL_456048, EPI_ISL_456049, EPI_ISL_456050, EPI_ISL_456051, EPI_ISL_456052, EPI_ISL_456053, EPI_ISL_456054, EPI_ISL_456055, EPI_ISL_456056, EPI_ISL_456057, EPI_ISL_456058, EPI_ISL_456059, EPI_ISL_456060, EPI_ISL_456061, EPI_ISL_456062, EPI_ISL_456063, EPI_ISL_456064, EPI_ISL_456065, EPI_ISL_456066, EPI_ISL_456067, EPI_ISL_456068, EPI_ISL_456069, EPI_ISL_456070, EPI_ISL_456107, EPI_ISL_456108, EPI_ISL_456109, EPI_ISL_456110, EPI_ISL_456111, EPI_ISL_456112, EPI_ISL_456113, EPI_ISL_456114, EPI_ISL_456115 | see above | NYU Langone Health                                                                                                                                                                                                                  | Departments of Pathology and Medicine, New York University School of Medicine                                                                                                                                   | Maria Agüero-Rosenfeld, Brendan Belovarac, Margaret Black, Ludovic Boytard, John Cadley, Paolo Cotzia, John Chen, Dacia Dimartino, Xiaojun Feng, Tatyana Gindin, Emily Guzman, Adriana Heguy, Megan Hogan, Emily Huang, George Jour, Alireza Khodadadi-Jamayran, Lawrence H. Lin, Raven Luther, Andrew Lytle, Christian Marier, Matthew T. Maurano, Mark J. Mulligan, Peter Meyn, Raquel Ordonez Ciriza, Iman Osman, Jared Pinnell, Vanessa Raabe, Sitharam Ramaswami, Amy Rapkiewicz, Andre M. Ribeiro-dos-Santos, Marie Samanovic-Golden, Antonio Serrano, Guomiao Shen, Matija Snuderl, Theodore Vougiouklakis, Nick Vulpescu, Gael Westby, Paul Zappile, Yutong Zhang |
| EPI_ISL_456157                                                                                                                                                                                                                                                                                                                                                                                                                                                                                                                                                                                                                                                                                                                                                                                                                                                                                                                                                                                                                                                                                                                                                                                                                                                                 | see above | LabPLUS                                                                                                                                                                                                                             | Institute of Environmental Science and Research (ESR)                                                                                                                                                           | Matt Storey, Xiaoyun Ren, Anja Werno, Antje van der Linden, Arlo Upton, Chris Mansell, David Hammer, Dragana Drinkovic, Erasmus Smit, Gary McAuliffe, Hana Sofia Andersson, James Ussher, Jill Sherwood, Josh Freeman, Julia Howard, Juliet Elvy, Mary DeAlmeida, Matt Blakiston, Matthew Rogers, Max Bloomfield, Michael Addidle, Michelle Balm, Sally Roberts, Sarah Jefferies, Sharmini Muttaiyah, Susan Morpeth, Susan Taylor, Timothy Blackmore, Vani Sathyendran, Veronica Playle, Virginia Hope, Erasmus Smit, Lauren Jelly, Joep de Lig                                                                                                                           |
| EPI_ISL_456158, EPI_ISL_456159                                                                                                                                                                                                                                                                                                                                                                                                                                                                                                                                                                                                                                                                                                                                                                                                                                                                                                                                                                                                                                                                                                                                                                                                                                                 | see above | Southern Community Labs Dunedin                                                                                                                                                                                                     | Institute of Environmental Science and Research (ESR)                                                                                                                                                           | Matt Storey, Xiaoyun Ren, Anja Werno, Antje van der Linden, Arlo Upton, Chris Mansell, David Hammer, Dragana Drinkovic, Erasmus Smit, Gary McAuliffe, Hana Sofia Andersson, James Ussher, Jill Sherwood, Josh Freeman, Julia Howard, Juliet Elvy, Mary DeAlmeida, Matt Blakiston, Matthew Rogers, Max Bloomfield, Michael Addidle, Michelle Balm, Sally Roberts, Sarah Jefferies, Sharmini Muttaiyah, Susan Morpeth, Susan Taylor, Timothy Blackmore, Vani Sathyendran, Veronica Playle, Virginia Hope, Erasmus Smit, Lauren Jelly, Joep de Lig                                                                                                                           |
| EPI_ISL_456160                                                                                                                                                                                                                                                                                                                                                                                                                                                                                                                                                                                                                                                                                                                                                                                                                                                                                                                                                                                                                                                                                                                                                                                                                                                                 | see above | Waikato Hospital                                                                                                                                                                                                                    | Institute of Environmental Science and Research (ESR)                                                                                                                                                           | Matt Storey, Xiaoyun Ren, Anja Werno, Antje van der Linden, Arlo Upton, Chris Mansell, David Hammer, Dragana Drinkovic, Erasmus Smit, Gary McAuliffe, Hana Sofia Andersson, James Ussher, Jill Sherwood, Josh Freeman, Julia Howard, Juliet Elvy, Mary DeAlmeida, Matt Blakiston, Matthew Rogers, Max Bloomfield, Michael Addidle, Michelle Balm, Sally Roberts, Sarah Jefferies, Sharmini Muttaiyah, Susan Morpeth, Susan Taylor, Timothy Blackmore, Vani Sathyendran, Veronica Playle, Virginia Hope, Erasmus Smit, Lauren Jelly, Joep de Lig                                                                                                                           |
| EPI_ISL_456161                                                                                                                                                                                                                                                                                                                                                                                                                                                                                                                                                                                                                                                                                                                                                                                                                                                                                                                                                                                                                                                                                                                                                                                                                                                                 | see above | Wellington SCL                                                                                                                                                                                                                      | Institute of Environmental Science and Research (ESR)                                                                                                                                                           | Matt Storey, Xiaoyun Ren, Anja Werno, Antje van der Linden, Arlo Upton, Chris Mansell, David Hammer, Dragana Drinkovic, Erasmus Smit, Gary McAuliffe, Hana Sofia Andersson, James Ussher, Jill Sherwood, Josh Freeman, Julia Howard, Juliet Elvy, Mary DeAlmeida, Matt Blakiston, Matthew Rogers, Max Bloomfield, Michael Addidle, Michelle Balm, Sally Roberts, Sarah Jefferies, Sharmini Muttaiyah, Susan Morpeth, Susan Taylor, Timothy Blackmore, Vani Sathyendran, Veronica Playle, Virginia Hope, Erasmus Smit, Lauren Jelly, Joep de Lig                                                                                                                           |
| EPI_ISL_456162                                                                                                                                                                                                                                                                                                                                                                                                                                                                                                                                                                                                                                                                                                                                                                                                                                                                                                                                                                                                                                                                                                                                                                                                                                                                 | see above | Southern Community Labs Dunedin                                                                                                                                                                                                     | Institute of Environmental Science and Research (ESR)                                                                                                                                                           | Matt Storey, Xiaoyun Ren, Anja Werno, Antje van der Linden, Arlo Upton, Chris Mansell, David Hammer, Dragana Drinkovic, Erasmus Smit, Gary McAuliffe, Hana Sofia Andersson, James Ussher, Jill Sherwood, Josh Freeman, Julia Howard, Juliet Elvy, Mary DeAlmeida, Matt Blakiston, Matthew Rogers, Max Bloomfield, Michael Addidle, Michelle Balm, Sally Roberts, Sarah Jefferies, Sharmini Muttaiyah, Susan Morpeth, Susan Taylor, Timothy Blackmore, Vani Sathyendran, Veronica Playle, Virginia Hope, Erasmus Smit, Lauren Jelly, Joep de Lig                                                                                                                           |
| EPI_ISL_456163                                                                                                                                                                                                                                                                                                                                                                                                                                                                                                                                                                                                                                                                                                                                                                                                                                                                                                                                                                                                                                                                                                                                                                                                                                                                 | see above | PathLab Bay of Plenty                                                                                                                                                                                                               | Institute of Environmental Science and Research (ESR)                                                                                                                                                           | Matt Storey, Xiaoyun Ren, Anja Werno, Antje van der Linden, Arlo Upton, Chris Mansell, David Hammer, Dragana Drinkovic, Erasmus Smit, Gary McAuliffe, Hana Sofia Andersson, James Ussher, Jill Sherwood, Josh Freeman, Julia Howard, Juliet Elvy, Mary DeAlmeida, Matt Blakiston, Matthew Rogers, Max Bloomfield, Michael Addidle, Michelle Balm, Sally Roberts, Sarah Jefferies, Sharmini Muttaiyah, Susan Morpeth, Susan Taylor, Timothy Blackmore, Vani Sathyendran, Veronica Playle, Virginia Hope, Erasmus Smit, Lauren Jelly, Joep de Lig                                                                                                                           |
| EPI_ISL_456164, EPI_ISL_456165, EPI_ISL_456166                                                                                                                                                                                                                                                                                                                                                                                                                                                                                                                                                                                                                                                                                                                                                                                                                                                                                                                                                                                                                                                                                                                                                                                                                                 | see above | Wellington SCL                                                                                                                                                                                                                      | Institute of Environmental Science and Research (ESR)                                                                                                                                                           | Matt Storey, Xiaoyun Ren, Anja Werno, Antje van der Linden, Arlo Upton, Chris Mansell, David Hammer, Dragana Drinkovic, Erasmus Smit, Gary McAuliffe, Hana Sofia Andersson, James Ussher, Jill Sherwood, Josh Freeman, Julia Howard, Juliet Elvy, Mary DeAlmeida, Matt Blakiston, Matthew Rogers, Max Bloomfield, Michael Addidle, Michelle Balm, Sally Roberts, Sarah Jefferies, Sharmini Muttaiyah, Susan Morpeth, Susan Taylor, Timothy Blackmore, Vani Sathyendran, Veronica Playle, Virginia Hope, Erasmus Smit, Lauren Jelly, Joep de Lig                                                                                                                           |





|                                                                                                                                                                                                                                                                                                                                                                                                                                                                                                                                                                                                                                                                                                                                                                                                                                                                                                                                                                                                                                                                                                                                                                                                                                                                                                                                                                                                                                                                                                                                                                                                                                                                                                                                                                                                                                                                                                                                                                                                                                                                                                                                                                                                                                                                                                                                                                                                                                                                                                                                                                                                |                                                                                                                                                                                                 |                                                                               |                                                                                                                                                                                                                                                                                                                                                                                                                                                                                                                                                                                                                                                                           |
|------------------------------------------------------------------------------------------------------------------------------------------------------------------------------------------------------------------------------------------------------------------------------------------------------------------------------------------------------------------------------------------------------------------------------------------------------------------------------------------------------------------------------------------------------------------------------------------------------------------------------------------------------------------------------------------------------------------------------------------------------------------------------------------------------------------------------------------------------------------------------------------------------------------------------------------------------------------------------------------------------------------------------------------------------------------------------------------------------------------------------------------------------------------------------------------------------------------------------------------------------------------------------------------------------------------------------------------------------------------------------------------------------------------------------------------------------------------------------------------------------------------------------------------------------------------------------------------------------------------------------------------------------------------------------------------------------------------------------------------------------------------------------------------------------------------------------------------------------------------------------------------------------------------------------------------------------------------------------------------------------------------------------------------------------------------------------------------------------------------------------------------------------------------------------------------------------------------------------------------------------------------------------------------------------------------------------------------------------------------------------------------------------------------------------------------------------------------------------------------------------------------------------------------------------------------------------------------------|-------------------------------------------------------------------------------------------------------------------------------------------------------------------------------------------------|-------------------------------------------------------------------------------|---------------------------------------------------------------------------------------------------------------------------------------------------------------------------------------------------------------------------------------------------------------------------------------------------------------------------------------------------------------------------------------------------------------------------------------------------------------------------------------------------------------------------------------------------------------------------------------------------------------------------------------------------------------------------|
| EPI_ISL_456388, EPI_ISL_456389, EPI_ISL_456390, EPI_ISL_456391, EPI_ISL_456392, EPI_ISL_456393, EPI_ISL_456394                                                                                                                                                                                                                                                                                                                                                                                                                                                                                                                                                                                                                                                                                                                                                                                                                                                                                                                                                                                                                                                                                                                                                                                                                                                                                                                                                                                                                                                                                                                                                                                                                                                                                                                                                                                                                                                                                                                                                                                                                                                                                                                                                                                                                                                                                                                                                                                                                                                                                 | LabPLUS                                                                                                                                                                                         | Institute of Environmental Science and Research (ESR)                         | Matt Storey, Xiaoyun Ren, Anja Werno, Antje van der Linden, Arlo Upton, Chris Mansell, David Hammer, Dragana Drinkovic, Erasmus Smit, Gary McAuliffe, Hana Sofia Andersson, James Ussher, Jill Sherwood, Josh Freeman, Julia Howard, Juliet Ely, Mary DeAlmeida, Matt Blakiston, Matthew Rogers, Max Bloomfield, Michael Addidle, Michelle Balm, Sally Roberts, Sarah Jefferies, Sharmini Muttaiyah, Susan Morpeth, Susan Taylor, Timothy Blackmore, Vani Sathyendran, Veronica Playle, Virginia Hope, Erasmus Smit, Lauren Jelly, Joep de Lig                                                                                                                            |
| EPI_ISL_456395, EPI_ISL_456396, EPI_ISL_456397                                                                                                                                                                                                                                                                                                                                                                                                                                                                                                                                                                                                                                                                                                                                                                                                                                                                                                                                                                                                                                                                                                                                                                                                                                                                                                                                                                                                                                                                                                                                                                                                                                                                                                                                                                                                                                                                                                                                                                                                                                                                                                                                                                                                                                                                                                                                                                                                                                                                                                                                                 | North Shore Hospital                                                                                                                                                                            | Institute of Environmental Science and Research (ESR)                         | Matt Storey, Xiaoyun Ren, Anja Werno, Antje van der Linden, Arlo Upton, Chris Mansell, David Hammer, Dragana Drinkovic, Erasmus Smit, Gary McAuliffe, Hana Sofia Andersson, James Ussher, Jill Sherwood, Josh Freeman, Julia Howard, Juliet Ely, Mary DeAlmeida, Matt Blakiston, Matthew Rogers, Max Bloomfield, Michael Addidle, Michelle Balm, Sally Roberts, Sarah Jefferies, Sharmini Muttaiyah, Susan Morpeth, Susan Taylor, Timothy Blackmore, Vani Sathyendran, Veronica Playle, Virginia Hope, Erasmus Smit, Lauren Jelly, Joep de Lig                                                                                                                            |
| EPI_ISL_456398, EPI_ISL_456399, EPI_ISL_456400, EPI_ISL_456401, EPI_ISL_456402                                                                                                                                                                                                                                                                                                                                                                                                                                                                                                                                                                                                                                                                                                                                                                                                                                                                                                                                                                                                                                                                                                                                                                                                                                                                                                                                                                                                                                                                                                                                                                                                                                                                                                                                                                                                                                                                                                                                                                                                                                                                                                                                                                                                                                                                                                                                                                                                                                                                                                                 | Wellington SCL                                                                                                                                                                                  | Institute of Environmental Science and Research (ESR)                         | Matt Storey, Xiaoyun Ren, Anja Werno, Antje van der Linden, Arlo Upton, Chris Mansell, David Hammer, Dragana Drinkovic, Erasmus Smit, Gary McAuliffe, Hana Sofia Andersson, James Ussher, Jill Sherwood, Josh Freeman, Julia Howard, Juliet Ely, Mary DeAlmeida, Matt Blakiston, Matthew Rogers, Max Bloomfield, Michael Addidle, Michelle Balm, Sally Roberts, Sarah Jefferies, Sharmini Muttaiyah, Susan Morpeth, Susan Taylor, Timothy Blackmore, Vani Sathyendran, Veronica Playle, Virginia Hope, Erasmus Smit, Lauren Jelly, Joep de Lig                                                                                                                            |
| EPI_ISL_456403                                                                                                                                                                                                                                                                                                                                                                                                                                                                                                                                                                                                                                                                                                                                                                                                                                                                                                                                                                                                                                                                                                                                                                                                                                                                                                                                                                                                                                                                                                                                                                                                                                                                                                                                                                                                                                                                                                                                                                                                                                                                                                                                                                                                                                                                                                                                                                                                                                                                                                                                                                                 | Middlemore Hospital                                                                                                                                                                             | Institute of Environmental Science and Research (ESR)                         | Matt Storey, Xiaoyun Ren, Anja Werno, Antje van der Linden, Arlo Upton, Chris Mansell, David Hammer, Dragana Drinkovic, Erasmus Smit, Gary McAuliffe, Hana Sofia Andersson, James Ussher, Jill Sherwood, Josh Freeman, Julia Howard, Juliet Ely, Mary DeAlmeida, Matt Blakiston, Matthew Rogers, Max Bloomfield, Michael Addidle, Michelle Balm, Sally Roberts, Sarah Jefferies, Sharmini Muttaiyah, Susan Morpeth, Susan Taylor, Timothy Blackmore, Vani Sathyendran, Veronica Playle, Virginia Hope, Erasmus Smit, Lauren Jelly, Joep de Lig                                                                                                                            |
| EPI_ISL_456890, EPI_ISL_456891, EPI_ISL_456892, EPI_ISL_456893, EPI_ISL_456894, EPI_ISL_456896, EPI_ISL_456897, EPI_ISL_456898, EPI_ISL_456900, EPI_ISL_456901, EPI_ISL_456902, EPI_ISL_456903, EPI_ISL_456904, EPI_ISL_456905, EPI_ISL_456906, EPI_ISL_456907, EPI_ISL_456908, EPI_ISL_456909, EPI_ISL_456910, EPI_ISL_456912, EPI_ISL_456913, EPI_ISL_456914, EPI_ISL_456915, EPI_ISL_456917, EPI_ISL_456918, EPI_ISL_456919, EPI_ISL_456920, EPI_ISL_456922, EPI_ISL_456923, EPI_ISL_456925, EPI_ISL_456926, EPI_ISL_456928, EPI_ISL_456930, EPI_ISL_456931, EPI_ISL_456932, EPI_ISL_456933, EPI_ISL_456934, EPI_ISL_456935, EPI_ISL_456936, EPI_ISL_456938, EPI_ISL_456939, EPI_ISL_456940, EPI_ISL_456941, EPI_ISL_456942, EPI_ISL_456943, EPI_ISL_456944, EPI_ISL_456945, EPI_ISL_456946, EPI_ISL_456947, EPI_ISL_456948, EPI_ISL_456949, EPI_ISL_456950, EPI_ISL_456951, EPI_ISL_456952, EPI_ISL_456953, EPI_ISL_456954, EPI_ISL_456955, EPI_ISL_456956, EPI_ISL_456958, EPI_ISL_456960, EPI_ISL_456961, EPI_ISL_456963, EPI_ISL_456964, EPI_ISL_456967, EPI_ISL_456969, EPI_ISL_456970, EPI_ISL_456971, EPI_ISL_456972, EPI_ISL_456973, EPI_ISL_456975, EPI_ISL_456976, EPI_ISL_456977, EPI_ISL_456979, EPI_ISL_456981, EPI_ISL_456982, EPI_ISL_456986, EPI_ISL_456987, EPI_ISL_456988, EPI_ISL_456990, EPI_ISL_456992, EPI_ISL_456994, EPI_ISL_456995, EPI_ISL_456996, EPI_ISL_456998, EPI_ISL_457000, EPI_ISL_457007, EPI_ISL_457009, EPI_ISL_457010, EPI_ISL_457011, EPI_ISL_457014, EPI_ISL_457015, EPI_ISL_457016, EPI_ISL_457017, EPI_ISL_457019, EPI_ISL_457020, EPI_ISL_457022                                                                                                                                                                                                                                                                                                                                                                                                                                                                                                                                                                                                                                                                                                                                                                                                                                                                                                                                                                                                 |                                                                                                                                                                                                 |                                                                               |                                                                                                                                                                                                                                                                                                                                                                                                                                                                                                                                                                                                                                                                           |
| see above                                                                                                                                                                                                                                                                                                                                                                                                                                                                                                                                                                                                                                                                                                                                                                                                                                                                                                                                                                                                                                                                                                                                                                                                                                                                                                                                                                                                                                                                                                                                                                                                                                                                                                                                                                                                                                                                                                                                                                                                                                                                                                                                                                                                                                                                                                                                                                                                                                                                                                                                                                                      | Virology Department, Royal Infirmary of Edinburgh, NHS Lothian / School of Biological Sciences, University of Edinburgh / Institute of Genetics and Molecular Medicine, University of Edinburgh | COVID-19 Genomics UK (COG-UK) Consortium                                      | McHugh M, Dewar R, Rooke S, Gallagher M, Balcaza C, O'Toole Á, Scher E, Hill V, McCrone JT, Colquhoun R, Yu X, Jackson B, Rambaut A, Williams TC, Templeton K                                                                                                                                                                                                                                                                                                                                                                                                                                                                                                             |
| EPI_ISL_457940, EPI_ISL_457941, EPI_ISL_457942, EPI_ISL_457943, EPI_ISL_457944, EPI_ISL_457945, EPI_ISL_457946, EPI_ISL_457947, EPI_ISL_457948, EPI_ISL_457949, EPI_ISL_457950, EPI_ISL_457951, EPI_ISL_457952, EPI_ISL_457953, EPI_ISL_457954, EPI_ISL_457955, EPI_ISL_457956, EPI_ISL_457957, EPI_ISL_457958, EPI_ISL_457959, EPI_ISL_457960, EPI_ISL_457961, EPI_ISL_457962, EPI_ISL_457963, EPI_ISL_457964, EPI_ISL_457965, EPI_ISL_457966, EPI_ISL_457967, EPI_ISL_457968, EPI_ISL_457969, EPI_ISL_457970, EPI_ISL_457971, EPI_ISL_457972, EPI_ISL_457973                                                                                                                                                                                                                                                                                                                                                                                                                                                                                                                                                                                                                                                                                                                                                                                                                                                                                                                                                                                                                                                                                                                                                                                                                                                                                                                                                                                                                                                                                                                                                                                                                                                                                                                                                                                                                                                                                                                                                                                                                                 |                                                                                                                                                                                                 |                                                                               |                                                                                                                                                                                                                                                                                                                                                                                                                                                                                                                                                                                                                                                                           |
| see above                                                                                                                                                                                                                                                                                                                                                                                                                                                                                                                                                                                                                                                                                                                                                                                                                                                                                                                                                                                                                                                                                                                                                                                                                                                                                                                                                                                                                                                                                                                                                                                                                                                                                                                                                                                                                                                                                                                                                                                                                                                                                                                                                                                                                                                                                                                                                                                                                                                                                                                                                                                      | Laboratorio de Biología Molecular Asociación Española Primera en Salud                                                                                                                          | Departments of Pathology and Medicine, New York University School of Medicine | Maria Victoria Elizondo, Maria Noel Zubillaga, Gonzalo Manrique, Paul Zappile, Gael Westby, Matthew T Maurano, Christian Marier, Adriana Heguy                                                                                                                                                                                                                                                                                                                                                                                                                                                                                                                            |
| EPI_ISL_457999                                                                                                                                                                                                                                                                                                                                                                                                                                                                                                                                                                                                                                                                                                                                                                                                                                                                                                                                                                                                                                                                                                                                                                                                                                                                                                                                                                                                                                                                                                                                                                                                                                                                                                                                                                                                                                                                                                                                                                                                                                                                                                                                                                                                                                                                                                                                                                                                                                                                                                                                                                                 | Centre For Biotechnology Research and Development                                                                                                                                               | Centre For Biotechnology Research and Development                             | Matoke-Muhia,D., Symeker,S.L., Muuo,S.N., Ochwoto,M., Zablou,J.O., Kimotho,J., Waruhiu,C.N. and Michuki,G.N.                                                                                                                                                                                                                                                                                                                                                                                                                                                                                                                                                              |
| EPI_ISL_458000                                                                                                                                                                                                                                                                                                                                                                                                                                                                                                                                                                                                                                                                                                                                                                                                                                                                                                                                                                                                                                                                                                                                                                                                                                                                                                                                                                                                                                                                                                                                                                                                                                                                                                                                                                                                                                                                                                                                                                                                                                                                                                                                                                                                                                                                                                                                                                                                                                                                                                                                                                                 | Centre For Biotechnology Research and Development                                                                                                                                               | Centre For Biotechnology Research and Development                             | Matoke-Muhia,D.K., Symeker,S.L., Muuo,S.N., Ochwoto,M., Zablou,J.O., Kimotho,J., Waruhiu,C.N. and Michuki,G.N.                                                                                                                                                                                                                                                                                                                                                                                                                                                                                                                                                            |
| EPI_ISL_458017, EPI_ISL_458018, EPI_ISL_458019, EPI_ISL_458020, EPI_ISL_458021, EPI_ISL_458022                                                                                                                                                                                                                                                                                                                                                                                                                                                                                                                                                                                                                                                                                                                                                                                                                                                                                                                                                                                                                                                                                                                                                                                                                                                                                                                                                                                                                                                                                                                                                                                                                                                                                                                                                                                                                                                                                                                                                                                                                                                                                                                                                                                                                                                                                                                                                                                                                                                                                                 | NYU Langone Health                                                                                                                                                                              | Departments of Pathology and Medicine, New York University School of Medicine | Maria Agüero-Rosenfeld, Brendan Belovarac, Margaret Black, Ludovic Boytard, John Cadley, Paolo Cotzia, John Chen, Dacia Dimartino, Xiaojun Feng, Tatyana Gindin, Emily Guzman, Adriana Heguy, Megan Hogan, Emily Huang, George Jour, Alireza Khodadadi-Jamayran, Lawrence H. Lin, Raven Luther, Andrew Lytle, Christian Marier, Matthew T. Maurano, Mark J. Mulligan, Peter Meyn, Raquel Ordonez Ciriza, Iman Osman, Jared Pinnell, Vanessa Raabe, Sitharam Ramaswami, Amy Rapkiewicz, Andre M. Ribeiro-dos-Santos, Marie Samanovic-Golden, Antonio Serrano, Guomiao Shen, Matija Snuderl, Theodore Vougiouklakis, Nick Vulpescu, Gael Westby, Paul Zappile, Yutong Zhang |
| EPI_ISL_459965, EPI_ISL_459966, EPI_ISL_459967, EPI_ISL_459968, EPI_ISL_459969, EPI_ISL_459970, EPI_ISL_459971, EPI_ISL_459972, EPI_ISL_459973, EPI_ISL_459974, EPI_ISL_459975, EPI_ISL_459976, EPI_ISL_459977, EPI_ISL_459978, EPI_ISL_459979, EPI_ISL_459980, EPI_ISL_459981, EPI_ISL_459982, EPI_ISL_459983, EPI_ISL_459984                                                                                                                                                                                                                                                                                                                                                                                                                                                                                                                                                                                                                                                                                                                                                                                                                                                                                                                                                                                                                                                                                                                                                                                                                                                                                                                                                                                                                                                                                                                                                                                                                                                                                                                                                                                                                                                                                                                                                                                                                                                                                                                                                                                                                                                                 |                                                                                                                                                                                                 |                                                                               |                                                                                                                                                                                                                                                                                                                                                                                                                                                                                                                                                                                                                                                                           |
| see above                                                                                                                                                                                                                                                                                                                                                                                                                                                                                                                                                                                                                                                                                                                                                                                                                                                                                                                                                                                                                                                                                                                                                                                                                                                                                                                                                                                                                                                                                                                                                                                                                                                                                                                                                                                                                                                                                                                                                                                                                                                                                                                                                                                                                                                                                                                                                                                                                                                                                                                                                                                      | Institut Pasteur du Maroc                                                                                                                                                                       | Institut Pasteur du Maroc                                                     | Marion Barbet, Sylvie Behillil, Méline Bizard, Angela Brisebarre, Camille Capel, Etienne Simon-Lorière, Vincent Enouf, Maud Vanpeene, Sylvie van der Werf, Latifa Anga, Abdellah Faouzi, Anass Abbad, Mjid Eloualid, Jalal Nouril, Anderrahmane Maaroufi                                                                                                                                                                                                                                                                                                                                                                                                                  |
| EPI_ISL_460045, EPI_ISL_460046, EPI_ISL_460047, EPI_ISL_460048, EPI_ISL_460049, EPI_ISL_460050, EPI_ISL_460051, EPI_ISL_460052, EPI_ISL_460053, EPI_ISL_460054, EPI_ISL_460055, EPI_ISL_460056, EPI_ISL_460057, EPI_ISL_460058, EPI_ISL_460059, EPI_ISL_460060, EPI_ISL_460061, EPI_ISL_460062, EPI_ISL_460063, EPI_ISL_460064, EPI_ISL_460065, EPI_ISL_460066, EPI_ISL_460067, EPI_ISL_460068, EPI_ISL_460069, EPI_ISL_460070, EPI_ISL_460071, EPI_ISL_460072, EPI_ISL_460073, EPI_ISL_460074, EPI_ISL_460075, EPI_ISL_460076, EPI_ISL_460077, EPI_ISL_460078                                                                                                                                                                                                                                                                                                                                                                                                                                                                                                                                                                                                                                                                                                                                                                                                                                                                                                                                                                                                                                                                                                                                                                                                                                                                                                                                                                                                                                                                                                                                                                                                                                                                                                                                                                                                                                                                                                                                                                                                                                 |                                                                                                                                                                                                 |                                                                               |                                                                                                                                                                                                                                                                                                                                                                                                                                                                                                                                                                                                                                                                           |
| see above                                                                                                                                                                                                                                                                                                                                                                                                                                                                                                                                                                                                                                                                                                                                                                                                                                                                                                                                                                                                                                                                                                                                                                                                                                                                                                                                                                                                                                                                                                                                                                                                                                                                                                                                                                                                                                                                                                                                                                                                                                                                                                                                                                                                                                                                                                                                                                                                                                                                                                                                                                                      | Minnesota Department of Health, Public Health Laboratory                                                                                                                                        | Minnesota Department of Health, Public Health Laboratory                      | Matt Plumb, Jacob Garfin, and Xiong Wang                                                                                                                                                                                                                                                                                                                                                                                                                                                                                                                                                                                                                                  |
| EPI_ISL_460082                                                                                                                                                                                                                                                                                                                                                                                                                                                                                                                                                                                                                                                                                                                                                                                                                                                                                                                                                                                                                                                                                                                                                                                                                                                                                                                                                                                                                                                                                                                                                                                                                                                                                                                                                                                                                                                                                                                                                                                                                                                                                                                                                                                                                                                                                                                                                                                                                                                                                                                                                                                 | Molecular Virology Unit, Fondazione IRCCS Policlinico San Matteo , Pavia                                                                                                                        | Laboratory of Virology, INMI Lazzaro Spallanzani IRCCS                        | Martina Rueca, Cesare E.M. Gruber, Antonio Piralla, Antonino Di Caro, Barbara Bartolini, Maria R. Capobianchi, Fausto Baldanti                                                                                                                                                                                                                                                                                                                                                                                                                                                                                                                                            |
| EPI_ISL_460083                                                                                                                                                                                                                                                                                                                                                                                                                                                                                                                                                                                                                                                                                                                                                                                                                                                                                                                                                                                                                                                                                                                                                                                                                                                                                                                                                                                                                                                                                                                                                                                                                                                                                                                                                                                                                                                                                                                                                                                                                                                                                                                                                                                                                                                                                                                                                                                                                                                                                                                                                                                 | Molecular Virology Unit, Fondazione IRCCS Policlinico San Matteo , Pavia                                                                                                                        | Laboratory of Virology, INMI Lazzaro Spallanzani IRCCS                        | Martina Rueca, Antonino Di Caro, Cesare E.M. Gruber, Barbara Bartolini, Fausto Baldanti, Antonio Piralla, Maria R. Capobianchi                                                                                                                                                                                                                                                                                                                                                                                                                                                                                                                                            |
| EPI_ISL_460086                                                                                                                                                                                                                                                                                                                                                                                                                                                                                                                                                                                                                                                                                                                                                                                                                                                                                                                                                                                                                                                                                                                                                                                                                                                                                                                                                                                                                                                                                                                                                                                                                                                                                                                                                                                                                                                                                                                                                                                                                                                                                                                                                                                                                                                                                                                                                                                                                                                                                                                                                                                 | Molecular Virology Unit, Fondazione IRCCS Policlinico San Matteo , Pavia                                                                                                                        | Laboratory of Virology, INMI Lazzaro Spallanzani IRCCS                        | Maria R. Capobianchi, Fausto Baldanti, Antonio Piralla, Antonino Di Caro, Barbara Bartolini, Cesare E.M. Gruber, Martina Rueca                                                                                                                                                                                                                                                                                                                                                                                                                                                                                                                                            |
| EPI_ISL_460088                                                                                                                                                                                                                                                                                                                                                                                                                                                                                                                                                                                                                                                                                                                                                                                                                                                                                                                                                                                                                                                                                                                                                                                                                                                                                                                                                                                                                                                                                                                                                                                                                                                                                                                                                                                                                                                                                                                                                                                                                                                                                                                                                                                                                                                                                                                                                                                                                                                                                                                                                                                 | Molecular Virology Unit, Fondazione IRCCS Policlinico San Matteo , Pavia                                                                                                                        | Laboratory of Virology, INMI Lazzaro Spallanzani IRCCS                        | Martina Rueca, Barbara Bartolini, Fausto Baldanti, Maria R. Capobianchi, Cesare E.M. Gruber, Antonino Di Caro, Antonio Piralla                                                                                                                                                                                                                                                                                                                                                                                                                                                                                                                                            |
| EPI_ISL_460093                                                                                                                                                                                                                                                                                                                                                                                                                                                                                                                                                                                                                                                                                                                                                                                                                                                                                                                                                                                                                                                                                                                                                                                                                                                                                                                                                                                                                                                                                                                                                                                                                                                                                                                                                                                                                                                                                                                                                                                                                                                                                                                                                                                                                                                                                                                                                                                                                                                                                                                                                                                 | Molecular Virology Unit, Fondazione IRCCS Policlinico San Matteo , Pavia                                                                                                                        | Laboratory of Virology, INMI Lazzaro Spallanzani IRCCS                        | Maria R. Capobianchi, Antonio Piralla, Antonino Di Caro, Fausto Baldanti, Martina Rueca, Cesare E.M. Gruber, Barbara Bartolini                                                                                                                                                                                                                                                                                                                                                                                                                                                                                                                                            |
| EPI_ISL_460603                                                                                                                                                                                                                                                                                                                                                                                                                                                                                                                                                                                                                                                                                                                                                                                                                                                                                                                                                                                                                                                                                                                                                                                                                                                                                                                                                                                                                                                                                                                                                                                                                                                                                                                                                                                                                                                                                                                                                                                                                                                                                                                                                                                                                                                                                                                                                                                                                                                                                                                                                                                 | NYU Langone Health                                                                                                                                                                              | Departments of Pathology and Medicine, New York University School of Medicine | Maria Agüero-Rosenfeld, Brendan Belovarac, Margaret Black, Ludovic Boytard, John Cadley, Paolo Cotzia, John Chen, Dacia Dimartino, Xiaojun Feng, Tatyana Gindin, Emily Guzman, Adriana Heguy, Megan Hogan, Emily Huang, George Jour, Alireza Khodadadi-Jamayran, Lawrence H. Lin, Raven Luther, Andrew Lytle, Christian Marier, Matthew T. Maurano, Mark J. Mulligan, Peter Meyn, Raquel Ordonez Ciriza, Iman Osman, Jared Pinnell, Vanessa Raabe, Sitharam Ramaswami, Amy Rapkiewicz, Andre M. Ribeiro-dos-Santos, Marie Samanovic-Golden, Antonio Serrano, Guomiao Shen, Matija Snuderl, Theodore Vougiouklakis, Nick Vulpescu, Gael Westby, Paul Zappile, Yutong Zhang |
| EPI_ISL_461707, EPI_ISL_461708, EPI_ISL_461711, EPI_ISL_461712, EPI_ISL_461713, EPI_ISL_461714, EPI_ISL_461715, EPI_ISL_461716, EPI_ISL_461717, EPI_ISL_461719, EPI_ISL_461721, EPI_ISL_461722, EPI_ISL_461723, EPI_ISL_461724, EPI_ISL_461725, EPI_ISL_461726, EPI_ISL_461727, EPI_ISL_461728, EPI_ISL_461729, EPI_ISL_461730, EPI_ISL_461731, EPI_ISL_461732, EPI_ISL_461733, EPI_ISL_461734, EPI_ISL_461735, EPI_ISL_461737, EPI_ISL_461738, EPI_ISL_461740, EPI_ISL_461741, EPI_ISL_461742, EPI_ISL_461743, EPI_ISL_461744, EPI_ISL_461745, EPI_ISL_461746, EPI_ISL_461747, EPI_ISL_461748, EPI_ISL_461750, EPI_ISL_461751, EPI_ISL_461752, EPI_ISL_461753, EPI_ISL_461754, EPI_ISL_461755, EPI_ISL_461756, EPI_ISL_461758, EPI_ISL_461759, EPI_ISL_461761                                                                                                                                                                                                                                                                                                                                                                                                                                                                                                                                                                                                                                                                                                                                                                                                                                                                                                                                                                                                                                                                                                                                                                                                                                                                                                                                                                                                                                                                                                                                                                                                                                                                                                                                                                                                                                 |                                                                                                                                                                                                 |                                                                               |                                                                                                                                                                                                                                                                                                                                                                                                                                                                                                                                                                                                                                                                           |
| see above                                                                                                                                                                                                                                                                                                                                                                                                                                                                                                                                                                                                                                                                                                                                                                                                                                                                                                                                                                                                                                                                                                                                                                                                                                                                                                                                                                                                                                                                                                                                                                                                                                                                                                                                                                                                                                                                                                                                                                                                                                                                                                                                                                                                                                                                                                                                                                                                                                                                                                                                                                                      | Virology Department, Royal Infirmary of Edinburgh, NHS Lothian / School of Biological Sciences, University of Edinburgh / Institute of Genetics and Molecular Medicine, University of Edinburgh | COVID-19 Genomics UK (COG-UK) Consortium                                      | McHugh M, Dewar R, Rooke S, Gallagher M, Balcaza C, O'Toole Á, Scher E, Hill V, McCrone JT, Colquhoun R, Yu X, Jackson B, Rambaut A, Williams TC, Templeton K                                                                                                                                                                                                                                                                                                                                                                                                                                                                                                             |
| EPI_ISL_462276, EPI_ISL_462277, EPI_ISL_462278, EPI_ISL_462279, EPI_ISL_462280, EPI_ISL_462281, EPI_ISL_462282, EPI_ISL_462283, EPI_ISL_462284, EPI_ISL_462285, EPI_ISL_462286, EPI_ISL_462287, EPI_ISL_462288, EPI_ISL_462289, EPI_ISL_462290, EPI_ISL_462291, EPI_ISL_462292, EPI_ISL_462293, EPI_ISL_462294, EPI_ISL_462295, EPI_ISL_462296, EPI_ISL_462297, EPI_ISL_462298, EPI_ISL_462299, EPI_ISL_462300, EPI_ISL_462301, EPI_ISL_462302, EPI_ISL_462303, EPI_ISL_462304, EPI_ISL_462305, EPI_ISL_462306, EPI_ISL_462307, EPI_ISL_462308, EPI_ISL_462309, EPI_ISL_462310, EPI_ISL_462311, EPI_ISL_462312, EPI_ISL_462313, EPI_ISL_462314, EPI_ISL_462315, EPI_ISL_462316, EPI_ISL_462317, EPI_ISL_462318, EPI_ISL_462319, EPI_ISL_462320, EPI_ISL_462322, EPI_ISL_462323, EPI_ISL_462324, EPI_ISL_462325, EPI_ISL_462326, EPI_ISL_462327, EPI_ISL_462328, EPI_ISL_462329, EPI_ISL_462330, EPI_ISL_462331, EPI_ISL_462332, EPI_ISL_462333, EPI_ISL_462334, EPI_ISL_462335, EPI_ISL_462336, EPI_ISL_462337, EPI_ISL_462338, EPI_ISL_462339, EPI_ISL_462340, EPI_ISL_462341, EPI_ISL_462342, EPI_ISL_462343, EPI_ISL_462344, EPI_ISL_462345, EPI_ISL_462346, EPI_ISL_462347, EPI_ISL_462348, EPI_ISL_462349, EPI_ISL_462350, EPI_ISL_462351, EPI_ISL_462352, EPI_ISL_462353, EPI_ISL_462354, EPI_ISL_462355, EPI_ISL_462356, EPI_ISL_462357, EPI_ISL_462358, EPI_ISL_462359, EPI_ISL_462360, EPI_ISL_462361, EPI_ISL_462362, EPI_ISL_462363, EPI_ISL_462364, EPI_ISL_462365, EPI_ISL_462366, EPI_ISL_462367, EPI_ISL_462368, EPI_ISL_462369, EPI_ISL_462370, EPI_ISL_462371, EPI_ISL_462372, EPI_ISL_462373, EPI_ISL_462374, EPI_ISL_462375, EPI_ISL_462376, EPI_ISL_462377, EPI_ISL_462378, EPI_ISL_462379, EPI_ISL_462380, EPI_ISL_462381, EPI_ISL_462382, EPI_ISL_462383, EPI_ISL_462384, EPI_ISL_462385, EPI_ISL_462387, EPI_ISL_462388, EPI_ISL_462389, EPI_ISL_462390, EPI_ISL_462391, EPI_ISL_462392, EPI_ISL_462393, EPI_ISL_462394, EPI_ISL_462395, EPI_ISL_462396, EPI_ISL_462397, EPI_ISL_462398, EPI_ISL_462399, EPI_ISL_462400, EPI_ISL_462401, EPI_ISL_462402, EPI_ISL_462403, EPI_ISL_462404, EPI_ISL_462405, EPI_ISL_462406, EPI_ISL_462407, EPI_ISL_462408, EPI_ISL_462409, EPI_ISL_462410, EPI_ISL_462411, EPI_ISL_462412, EPI_ISL_462413, EPI_ISL_462414, EPI_ISL_462415, EPI_ISL_462416, EPI_ISL_462417, EPI_ISL_462418, EPI_ISL_462419, EPI_ISL_462420, EPI_ISL_462421, EPI_ISL_462422, EPI_ISL_462423, EPI_ISL_462424, EPI_ISL_462425, EPI_ISL_462426, EPI_ISL_462427, EPI_ISL_462428, EPI_ISL_462429, EPI_ISL_462430, EPI_ISL_462431, EPI_ISL_462432, EPI_ISL_462433 |                                                                                                                                                                                                 |                                                                               |                                                                                                                                                                                                                                                                                                                                                                                                                                                                                                                                                                                                                                                                           |

|                                                                                                                                                                                                                                                                                                                                                                                                                                                                                                                                                                                                                                                                                                                                                                                                                                                                                                                                                                                                                                                                                                                                                                                                                                                                                                                                                                                                                                                                                                                                                                                                                                                                                                                                                                                                                                                                                                                                                                                                                                                                                                                                                                                                                                                                                                                                                                                                                                                                                                                                                                                                                                                |                                                                                                        |                                                                                                                                                                                                 |                                                                                                                                                                                                                   |                                                                                                                                                                                                                                                                                                                                                                                                                                                                                                                                                                                                                                                              |
|------------------------------------------------------------------------------------------------------------------------------------------------------------------------------------------------------------------------------------------------------------------------------------------------------------------------------------------------------------------------------------------------------------------------------------------------------------------------------------------------------------------------------------------------------------------------------------------------------------------------------------------------------------------------------------------------------------------------------------------------------------------------------------------------------------------------------------------------------------------------------------------------------------------------------------------------------------------------------------------------------------------------------------------------------------------------------------------------------------------------------------------------------------------------------------------------------------------------------------------------------------------------------------------------------------------------------------------------------------------------------------------------------------------------------------------------------------------------------------------------------------------------------------------------------------------------------------------------------------------------------------------------------------------------------------------------------------------------------------------------------------------------------------------------------------------------------------------------------------------------------------------------------------------------------------------------------------------------------------------------------------------------------------------------------------------------------------------------------------------------------------------------------------------------------------------------------------------------------------------------------------------------------------------------------------------------------------------------------------------------------------------------------------------------------------------------------------------------------------------------------------------------------------------------------------------------------------------------------------------------------------------------|--------------------------------------------------------------------------------------------------------|-------------------------------------------------------------------------------------------------------------------------------------------------------------------------------------------------|-------------------------------------------------------------------------------------------------------------------------------------------------------------------------------------------------------------------|--------------------------------------------------------------------------------------------------------------------------------------------------------------------------------------------------------------------------------------------------------------------------------------------------------------------------------------------------------------------------------------------------------------------------------------------------------------------------------------------------------------------------------------------------------------------------------------------------------------------------------------------------------------|
| see above                                                                                                                                                                                                                                                                                                                                                                                                                                                                                                                                                                                                                                                                                                                                                                                                                                                                                                                                                                                                                                                                                                                                                                                                                                                                                                                                                                                                                                                                                                                                                                                                                                                                                                                                                                                                                                                                                                                                                                                                                                                                                                                                                                                                                                                                                                                                                                                                                                                                                                                                                                                                                                      | National Public Health Laboratory, National Centre for Infectious Diseases                             | National Public Health Laboratory, National Centre for Infectious Diseases                                                                                                                      | Mak TM, Octavia S, Chavatte JM, Cui L, Lin RTP                                                                                                                                                                    |                                                                                                                                                                                                                                                                                                                                                                                                                                                                                                                                                                                                                                                              |
| EPI_ISL_462447, EPI_ISL_462448                                                                                                                                                                                                                                                                                                                                                                                                                                                                                                                                                                                                                                                                                                                                                                                                                                                                                                                                                                                                                                                                                                                                                                                                                                                                                                                                                                                                                                                                                                                                                                                                                                                                                                                                                                                                                                                                                                                                                                                                                                                                                                                                                                                                                                                                                                                                                                                                                                                                                                                                                                                                                 | Fundació Lluita contra la SIDA (FLSida)/Hospital Universitari Germans Trias i Pujol                    | IrsiCaixa AIDS Research Lab                                                                                                                                                                     | Marc Noguera-Julian, Mariona Parera, Maria Pilar Armengol, Marc Corbacho, Maria Ubals, Oriol Mitjà, Lidia Ruiz, Nuria Izquierdo, Jorge Carrillo, Roger Paredes, Julia Blanco, Joaquim Segalés, Bonaventura Clotet |                                                                                                                                                                                                                                                                                                                                                                                                                                                                                                                                                                                                                                                              |
| EPI_ISL_462449                                                                                                                                                                                                                                                                                                                                                                                                                                                                                                                                                                                                                                                                                                                                                                                                                                                                                                                                                                                                                                                                                                                                                                                                                                                                                                                                                                                                                                                                                                                                                                                                                                                                                                                                                                                                                                                                                                                                                                                                                                                                                                                                                                                                                                                                                                                                                                                                                                                                                                                                                                                                                                 | Fundació Lluita contra la SIDA (FLSida)/Hospital Universitari Germans Trias i Pujol                    | IrsiCaixa AIDS Research Lab                                                                                                                                                                     | Marc Noguera-Julian, Mariona Parera, Maria Pilar Armengol, Marc Corbacho, Maria Ubals, Oriol Mitjà, Lidia Ruiz, Nuria Izquierdo, Jorge Carrillo, Roger Paredes, Julia Blanco, Bonaventura Clotet                  |                                                                                                                                                                                                                                                                                                                                                                                                                                                                                                                                                                                                                                                              |
| EPI_ISL_462845, EPI_ISL_462846, EPI_ISL_462847, EPI_ISL_462848, EPI_ISL_462849, EPI_ISL_462850, EPI_ISL_462851, EPI_ISL_462852, EPI_ISL_462853, EPI_ISL_462854, EPI_ISL_462855, EPI_ISL_462856, EPI_ISL_462857, EPI_ISL_462858, EPI_ISL_462859, EPI_ISL_462860, EPI_ISL_462861, EPI_ISL_462862, EPI_ISL_462863, EPI_ISL_462864, EPI_ISL_462865, EPI_ISL_462866, EPI_ISL_462867, EPI_ISL_462868, EPI_ISL_462869, EPI_ISL_462870, EPI_ISL_462871, EPI_ISL_462872, EPI_ISL_462873, EPI_ISL_462874, EPI_ISL_462875, EPI_ISL_462876, EPI_ISL_462877, EPI_ISL_462878, EPI_ISL_462879, EPI_ISL_462880, EPI_ISL_462881, EPI_ISL_462882, EPI_ISL_462883, EPI_ISL_462884, EPI_ISL_462885, EPI_ISL_462886, EPI_ISL_462887, EPI_ISL_462888, EPI_ISL_462889, EPI_ISL_462890, EPI_ISL_462891, EPI_ISL_462892, EPI_ISL_462893, EPI_ISL_462894, EPI_ISL_462895, EPI_ISL_462896, EPI_ISL_462897, EPI_ISL_462898, EPI_ISL_462899, EPI_ISL_462900, EPI_ISL_462901, EPI_ISL_462902, EPI_ISL_462903, EPI_ISL_462904, EPI_ISL_462905, EPI_ISL_462906, EPI_ISL_462907, EPI_ISL_462908, EPI_ISL_462909, EPI_ISL_462910, EPI_ISL_462911                                                                                                                                                                                                                                                                                                                                                                                                                                                                                                                                                                                                                                                                                                                                                                                                                                                                                                                                                                                                                                                                                                                                                                                                                                                                                                                                                                                                                                                                                                                                 | Minnesota Department of Health, Public Health Laboratory                                               | Minnesota Department of Health, Public Health Laboratory                                                                                                                                        | Matt Plumb, Jacob Garfin, and Xiong Wang                                                                                                                                                                          |                                                                                                                                                                                                                                                                                                                                                                                                                                                                                                                                                                                                                                                              |
| EPI_ISL_463903, EPI_ISL_463904, EPI_ISL_463905, EPI_ISL_463906, EPI_ISL_463907, EPI_ISL_463908, EPI_ISL_463909, EPI_ISL_463910, EPI_ISL_463911, EPI_ISL_463912, EPI_ISL_463913, EPI_ISL_463914, EPI_ISL_463915, EPI_ISL_463916, EPI_ISL_463917, EPI_ISL_463918, EPI_ISL_463919, EPI_ISL_463920, EPI_ISL_463921, EPI_ISL_463922, EPI_ISL_463923, EPI_ISL_463924, EPI_ISL_463925, EPI_ISL_463926, EPI_ISL_463927, EPI_ISL_463928, EPI_ISL_463929, EPI_ISL_463930, EPI_ISL_463931, EPI_ISL_463932, EPI_ISL_463933, EPI_ISL_463934, EPI_ISL_463935, EPI_ISL_463936, EPI_ISL_463937, EPI_ISL_463938, EPI_ISL_463939, EPI_ISL_463940, EPI_ISL_463941, EPI_ISL_463942, EPI_ISL_463943, EPI_ISL_463944, EPI_ISL_463945, EPI_ISL_463946, EPI_ISL_463947, EPI_ISL_463948, EPI_ISL_463949, EPI_ISL_463950, EPI_ISL_463951, EPI_ISL_463952, EPI_ISL_463953, EPI_ISL_463954, EPI_ISL_463955, EPI_ISL_463956, EPI_ISL_463957, EPI_ISL_463958, EPI_ISL_463959, EPI_ISL_463960, EPI_ISL_463961, EPI_ISL_463962, EPI_ISL_463963, EPI_ISL_463964, EPI_ISL_463965, EPI_ISL_463966, EPI_ISL_463967, EPI_ISL_463968, EPI_ISL_463969                                                                                                                                                                                                                                                                                                                                                                                                                                                                                                                                                                                                                                                                                                                                                                                                                                                                                                                                                                                                                                                                                                                                                                                                                                                                                                                                                                                                                                                                                                                                 | see above                                                                                              | Laboratoire de microbiologie, Hôpital de Verdun                                                                                                                                                 | Smith Laboratory, Centre de Recherche CHU Sainte-Justine                                                                                                                                                          | Martin Smith, Marieke Rozendaal, Ivan Pavlov                                                                                                                                                                                                                                                                                                                                                                                                                                                                                                                                                                                                                 |
| EPI_ISL_466874, EPI_ISL_466875, EPI_ISL_466876, EPI_ISL_466877, EPI_ISL_466878, EPI_ISL_466879, EPI_ISL_466880, EPI_ISL_466881, EPI_ISL_466882, EPI_ISL_466883, EPI_ISL_466884, EPI_ISL_466885, EPI_ISL_466886, EPI_ISL_466887, EPI_ISL_466888, EPI_ISL_466889, EPI_ISL_466890, EPI_ISL_466891, EPI_ISL_466892, EPI_ISL_466893, EPI_ISL_466894, EPI_ISL_466895, EPI_ISL_466896, EPI_ISL_466897, EPI_ISL_466898, EPI_ISL_466899, EPI_ISL_466900, EPI_ISL_466901, EPI_ISL_466902, EPI_ISL_466903, EPI_ISL_466904, EPI_ISL_466905, EPI_ISL_466906, EPI_ISL_466907, EPI_ISL_466908, EPI_ISL_466909, EPI_ISL_466910, EPI_ISL_466911, EPI_ISL_466912, EPI_ISL_466913, EPI_ISL_466914, EPI_ISL_466915, EPI_ISL_466916, EPI_ISL_466917, EPI_ISL_466918, EPI_ISL_466919, EPI_ISL_466920, EPI_ISL_466921, EPI_ISL_466922, EPI_ISL_466923, EPI_ISL_466924, EPI_ISL_466925                                                                                                                                                                                                                                                                                                                                                                                                                                                                                                                                                                                                                                                                                                                                                                                                                                                                                                                                                                                                                                                                                                                                                                                                                                                                                                                                                                                                                                                                                                                                                                                                                                                                                                                                                                                 | see above                                                                                              | Max von Pettenkofer Institute, Virology, National Reference Center for Retroviruses, LMU München                                                                                                | Laboratory for Functional Genome Analysis, Dept. Genomics, Gene Center of the LMU Munich                                                                                                                          | Max Muenchhoff, Stefan Krebs, Alexander Graf, Oliver Keppler, Helmut Blum                                                                                                                                                                                                                                                                                                                                                                                                                                                                                                                                                                                    |
| EPI_ISL_467377, EPI_ISL_467378, EPI_ISL_467379, EPI_ISL_467380, EPI_ISL_467381, EPI_ISL_467382, EPI_ISL_467383, EPI_ISL_467384, EPI_ISL_467385, EPI_ISL_467386, EPI_ISL_467387, EPI_ISL_467388, EPI_ISL_467389, EPI_ISL_467390, EPI_ISL_467391, EPI_ISL_467392, EPI_ISL_467393, EPI_ISL_467394, EPI_ISL_467395, EPI_ISL_467396, EPI_ISL_467397, EPI_ISL_467398, EPI_ISL_467399, EPI_ISL_467400, EPI_ISL_467401, EPI_ISL_467402, EPI_ISL_467403, EPI_ISL_467404, EPI_ISL_467405, EPI_ISL_467406, EPI_ISL_467407, EPI_ISL_467408, EPI_ISL_467409, EPI_ISL_467410, EPI_ISL_467411, EPI_ISL_467412, EPI_ISL_467413, EPI_ISL_467414, EPI_ISL_467415, EPI_ISL_467416, EPI_ISL_467417, EPI_ISL_467418, EPI_ISL_467419, EPI_ISL_467420, EPI_ISL_467421, EPI_ISL_467422                                                                                                                                                                                                                                                                                                                                                                                                                                                                                                                                                                                                                                                                                                                                                                                                                                                                                                                                                                                                                                                                                                                                                                                                                                                                                                                                                                                                                                                                                                                                                                                                                                                                                                                                                                                                                                                                                 | see above                                                                                              | NYU Langone Health                                                                                                                                                                              | Departments of Pathology and Medicine, New York University School of Medicine                                                                                                                                     | Maria Agüero-Rosenfeld, Brendan Belovarac, Margaret Black, Ludovic Boytard, John Cadley, Paolo Cotzia, John Chen, Dacia Dimartino, Xiaojun Feng, Tatyana Gindin, Emily Guzman, Adriana Heguy, Megan Hogan, George Jour, Alireza Khodadadi-Jamayran, Lawrence H. Lin, Raven Luther, Andrew Lytle, Christian Marier, Matthew T. Maurano, Mark J. Mulligan, Peter Meyn, Raquel Ordonez Ciriza, Iman Osman, Jared Pinnell, Vanessa Raabe, Sitharam Ramaswami, Amy Rapkiewicz, Andre M. Ribeiro-dos-Santos, Marie Samanovic-Golden, Antonio Serrano, Guomiao Shen, Matija Snuderl, Theodore Vougiouklakis, Nick Vulpescu, Gael Westby, Paul Zappile, Yutong Zhang |
| EPI_ISL_468159, EPI_ISL_468160                                                                                                                                                                                                                                                                                                                                                                                                                                                                                                                                                                                                                                                                                                                                                                                                                                                                                                                                                                                                                                                                                                                                                                                                                                                                                                                                                                                                                                                                                                                                                                                                                                                                                                                                                                                                                                                                                                                                                                                                                                                                                                                                                                                                                                                                                                                                                                                                                                                                                                                                                                                                                 | unknown                                                                                                | Department of Virology, Public Health Laboratories Division, National Institute of Health                                                                                                       | Massab Umair, Aamer Ikram, Muhammad Salman, Adnan Khurshid, Nazish Badar, Shannon Whitmer, John Klerna                                                                                                            |                                                                                                                                                                                                                                                                                                                                                                                                                                                                                                                                                                                                                                                              |
| EPI_ISL_468161                                                                                                                                                                                                                                                                                                                                                                                                                                                                                                                                                                                                                                                                                                                                                                                                                                                                                                                                                                                                                                                                                                                                                                                                                                                                                                                                                                                                                                                                                                                                                                                                                                                                                                                                                                                                                                                                                                                                                                                                                                                                                                                                                                                                                                                                                                                                                                                                                                                                                                                                                                                                                                 | Department of Virology, Public Health Laboratories Division, National Institute of Health              | Department of Virology, Public Health Laboratories Division, National Institute of Health                                                                                                       | Massab Umair, Aamer Ikram, Muhammad Salman, Adnan Khurshid, Nazish Badar, Shannon Whitmer, John Klerna                                                                                                            |                                                                                                                                                                                                                                                                                                                                                                                                                                                                                                                                                                                                                                                              |
| EPI_ISL_468162                                                                                                                                                                                                                                                                                                                                                                                                                                                                                                                                                                                                                                                                                                                                                                                                                                                                                                                                                                                                                                                                                                                                                                                                                                                                                                                                                                                                                                                                                                                                                                                                                                                                                                                                                                                                                                                                                                                                                                                                                                                                                                                                                                                                                                                                                                                                                                                                                                                                                                                                                                                                                                 | unknown                                                                                                | Department of Virology, Public Health Laboratories Division, National Institute of Health                                                                                                       | Massab Umair, Aamer Ikram, Muhammad Salman, Adnan Khurshid, Nazish Badar, Shannon Whitmer, John Klerna                                                                                                            |                                                                                                                                                                                                                                                                                                                                                                                                                                                                                                                                                                                                                                                              |
| EPI_ISL_468163                                                                                                                                                                                                                                                                                                                                                                                                                                                                                                                                                                                                                                                                                                                                                                                                                                                                                                                                                                                                                                                                                                                                                                                                                                                                                                                                                                                                                                                                                                                                                                                                                                                                                                                                                                                                                                                                                                                                                                                                                                                                                                                                                                                                                                                                                                                                                                                                                                                                                                                                                                                                                                 | Department of Virology, Public Health Laboratories Division, National Institute of Health              | Department of Virology, Public Health Laboratories Division, National Institute of Health                                                                                                       | Massab Umair, Aamer Ikram, Muhammad Salman, Adnan Khurshid, Nazish Badar, Shannon Whitmer, John Klerna                                                                                                            |                                                                                                                                                                                                                                                                                                                                                                                                                                                                                                                                                                                                                                                              |
| EPI_ISL_468761, EPI_ISL_468762, EPI_ISL_468763, EPI_ISL_468764                                                                                                                                                                                                                                                                                                                                                                                                                                                                                                                                                                                                                                                                                                                                                                                                                                                                                                                                                                                                                                                                                                                                                                                                                                                                                                                                                                                                                                                                                                                                                                                                                                                                                                                                                                                                                                                                                                                                                                                                                                                                                                                                                                                                                                                                                                                                                                                                                                                                                                                                                                                 | Centro de Investigación Biomédica de La Rioja - Hospital San Pedro Logroño                             | SeqCOVID-SPAIN consortium/IBV(CSIC)                                                                                                                                                             | María de Toro, José Manuel Azcona Gutiérrez, María Pilar Bea Escudero, Miriam Blasco Alberdi and SeqCOVID-SPAIN consortium                                                                                        |                                                                                                                                                                                                                                                                                                                                                                                                                                                                                                                                                                                                                                                              |
| EPI_ISL_469080, EPI_ISL_469081, EPI_ISL_469082, EPI_ISL_469083, EPI_ISL_469084, EPI_ISL_469085, EPI_ISL_469086, EPI_ISL_469087, EPI_ISL_469088, EPI_ISL_469089, EPI_ISL_469090, EPI_ISL_469091, EPI_ISL_469092, EPI_ISL_469093, EPI_ISL_469094, EPI_ISL_469095, EPI_ISL_469096, EPI_ISL_469097, EPI_ISL_469098, EPI_ISL_469099, EPI_ISL_469100, EPI_ISL_469101, EPI_ISL_469102, EPI_ISL_469103, EPI_ISL_469104, EPI_ISL_469105, EPI_ISL_469106, EPI_ISL_469107, EPI_ISL_469108, EPI_ISL_469109, EPI_ISL_469110, EPI_ISL_469111, EPI_ISL_469112, EPI_ISL_469113, EPI_ISL_469114, EPI_ISL_469115, EPI_ISL_469116, EPI_ISL_469117, EPI_ISL_469118, EPI_ISL_469119, EPI_ISL_469120, EPI_ISL_469121, EPI_ISL_469122, EPI_ISL_469123, EPI_ISL_469124, EPI_ISL_469125, EPI_ISL_469126, EPI_ISL_469127, EPI_ISL_469128, EPI_ISL_469129, EPI_ISL_469130, EPI_ISL_469131, EPI_ISL_469132, EPI_ISL_469133, EPI_ISL_469134, EPI_ISL_469135, EPI_ISL_469136, EPI_ISL_469137, EPI_ISL_469138, EPI_ISL_469139, EPI_ISL_469140, EPI_ISL_469141, EPI_ISL_469142, EPI_ISL_469143, EPI_ISL_469144, EPI_ISL_469145, EPI_ISL_469146, EPI_ISL_469147, EPI_ISL_469148, EPI_ISL_469149, EPI_ISL_469150, EPI_ISL_469151, EPI_ISL_469152, EPI_ISL_469153, EPI_ISL_469154, EPI_ISL_469155, EPI_ISL_469274                                                                                                                                                                                                                                                                                                                                                                                                                                                                                                                                                                                                                                                                                                                                                                                                                                                                                                                                                                                                                                                                                                                                                                                                                                                                                                                                                                 | see above                                                                                              | National Public Health Laboratory, National Centre for Infectious Diseases                                                                                                                      | National Public Health Laboratory, National Centre for Infectious Diseases                                                                                                                                        | Mak TM, Octavia S, Chavatte JM, Cui L, Lin RTP                                                                                                                                                                                                                                                                                                                                                                                                                                                                                                                                                                                                               |
| EPI_ISL_470747, EPI_ISL_470748, EPI_ISL_470749, EPI_ISL_470750, EPI_ISL_470751, EPI_ISL_470752, EPI_ISL_470753, EPI_ISL_470754, EPI_ISL_470755, EPI_ISL_470756, EPI_ISL_470757, EPI_ISL_470758, EPI_ISL_470759, EPI_ISL_470760, EPI_ISL_470761, EPI_ISL_470762, EPI_ISL_470763, EPI_ISL_470764, EPI_ISL_470765, EPI_ISL_470766, EPI_ISL_470767, EPI_ISL_470768, EPI_ISL_470769, EPI_ISL_470770, EPI_ISL_470771, EPI_ISL_470772, EPI_ISL_470773, EPI_ISL_470774, EPI_ISL_470775, EPI_ISL_470776, EPI_ISL_470777, EPI_ISL_470778, EPI_ISL_470779, EPI_ISL_470780, EPI_ISL_470781, EPI_ISL_470782, EPI_ISL_470783, EPI_ISL_470784, EPI_ISL_470785, EPI_ISL_470786, EPI_ISL_470787, EPI_ISL_470788, EPI_ISL_470789                                                                                                                                                                                                                                                                                                                                                                                                                                                                                                                                                                                                                                                                                                                                                                                                                                                                                                                                                                                                                                                                                                                                                                                                                                                                                                                                                                                                                                                                                                                                                                                                                                                                                                                                                                                                                                                                                                                                 | see above                                                                                              | Minnesota Department of Health, Public Health Laboratory                                                                                                                                        | Minnesota Department of Health, Public Health Laboratory                                                                                                                                                          | Matt Plumb, Jacob Garfin, and Xiong Wang                                                                                                                                                                                                                                                                                                                                                                                                                                                                                                                                                                                                                     |
| EPI_ISL_470790, EPI_ISL_470791, EPI_ISL_470792, EPI_ISL_470793, EPI_ISL_470794, EPI_ISL_470795, EPI_ISL_470796, EPI_ISL_470797, EPI_ISL_470798, EPI_ISL_470799, EPI_ISL_470800                                                                                                                                                                                                                                                                                                                                                                                                                                                                                                                                                                                                                                                                                                                                                                                                                                                                                                                                                                                                                                                                                                                                                                                                                                                                                                                                                                                                                                                                                                                                                                                                                                                                                                                                                                                                                                                                                                                                                                                                                                                                                                                                                                                                                                                                                                                                                                                                                                                                 | see above                                                                                              | M Health Fairview                                                                                                                                                                               | Minnesota Department of Health, Public Health Laboratory                                                                                                                                                          | Matt Plumb, Jacob Garfin, and Xiong Wang                                                                                                                                                                                                                                                                                                                                                                                                                                                                                                                                                                                                                     |
| EPI_ISL_471472                                                                                                                                                                                                                                                                                                                                                                                                                                                                                                                                                                                                                                                                                                                                                                                                                                                                                                                                                                                                                                                                                                                                                                                                                                                                                                                                                                                                                                                                                                                                                                                                                                                                                                                                                                                                                                                                                                                                                                                                                                                                                                                                                                                                                                                                                                                                                                                                                                                                                                                                                                                                                                 | Hospital Universitari Germans Trias i Pujol(HUGTIP)/Fundació Lluita contra la SIDA (FLSida)/IRTA-CRESA | IrsiCaixa AIDS Research Lab                                                                                                                                                                     | Marc Noguera-Julian, Pilar Armengol, Jordi Rodón, Julia Vergara, Lidia Ruiz, Nuria Izquierdo, Jorge Carrillo, Roger Paredes, Albert Bensaid, Julia Blanco, Joaquim Segalés, Bonaventura Clotet                    |                                                                                                                                                                                                                                                                                                                                                                                                                                                                                                                                                                                                                                                              |
| EPI_ISL_473783, EPI_ISL_473784, EPI_ISL_473786, EPI_ISL_473788, EPI_ISL_473790, EPI_ISL_473791, EPI_ISL_473793, EPI_ISL_473795, EPI_ISL_473799, EPI_ISL_473800, EPI_ISL_473801, EPI_ISL_473802, EPI_ISL_473803, EPI_ISL_473805, EPI_ISL_473806, EPI_ISL_473807, EPI_ISL_473808, EPI_ISL_473810, EPI_ISL_473812, EPI_ISL_473813, EPI_ISL_473814, EPI_ISL_473817, EPI_ISL_473818, EPI_ISL_473819, EPI_ISL_473821, EPI_ISL_473822, EPI_ISL_473823, EPI_ISL_473827, EPI_ISL_473828, EPI_ISL_473829, EPI_ISL_473830, EPI_ISL_473833, EPI_ISL_473836, EPI_ISL_473837, EPI_ISL_473840, EPI_ISL_473841, EPI_ISL_473844, EPI_ISL_473846, EPI_ISL_473847, EPI_ISL_473849, EPI_ISL_473849, EPI_ISL_473851, EPI_ISL_473852, EPI_ISL_473853, EPI_ISL_473857, EPI_ISL_473858, EPI_ISL_473859, EPI_ISL_473860, EPI_ISL_473861, EPI_ISL_473864, EPI_ISL_473865, EPI_ISL_473866, EPI_ISL_473867, EPI_ISL_473868, EPI_ISL_473869, EPI_ISL_473870, EPI_ISL_473874, EPI_ISL_473876, EPI_ISL_473877, EPI_ISL_473878, EPI_ISL_473879, EPI_ISL_473881, EPI_ISL_473883, EPI_ISL_473884, EPI_ISL_473885, EPI_ISL_473886, EPI_ISL_473887, EPI_ISL_473888, EPI_ISL_473889, EPI_ISL_473891, EPI_ISL_473893, EPI_ISL_473895, EPI_ISL_473896, EPI_ISL_473898, EPI_ISL_473899, EPI_ISL_473901, EPI_ISL_473902, EPI_ISL_473906, EPI_ISL_473907, EPI_ISL_473909, EPI_ISL_473910, EPI_ISL_473914, EPI_ISL_473915, EPI_ISL_473916, EPI_ISL_473917, EPI_ISL_473918, EPI_ISL_473919, EPI_ISL_473921, EPI_ISL_473922, EPI_ISL_473926, EPI_ISL_473927, EPI_ISL_473928, EPI_ISL_473929, EPI_ISL_473930, EPI_ISL_473931, EPI_ISL_473934, EPI_ISL_473936, EPI_ISL_473937, EPI_ISL_473939, EPI_ISL_473940, EPI_ISL_473941, EPI_ISL_473942, EPI_ISL_473943, EPI_ISL_473944, EPI_ISL_473945, EPI_ISL_473946, EPI_ISL_473947, EPI_ISL_473948, EPI_ISL_473949, EPI_ISL_473950, EPI_ISL_473951, EPI_ISL_473952, EPI_ISL_473953, EPI_ISL_473954, EPI_ISL_473955, EPI_ISL_473956, EPI_ISL_473957, EPI_ISL_473958, EPI_ISL_473959, EPI_ISL_473960, EPI_ISL_473961, EPI_ISL_473962, EPI_ISL_473963, EPI_ISL_473964, EPI_ISL_473965, EPI_ISL_473966, EPI_ISL_473967, EPI_ISL_473968, EPI_ISL_473969, EPI_ISL_473970, EPI_ISL_473971, EPI_ISL_473972, EPI_ISL_473973, EPI_ISL_473974, EPI_ISL_473975, EPI_ISL_473976, EPI_ISL_473977, EPI_ISL_473978, EPI_ISL_473979, EPI_ISL_473980, EPI_ISL_473981, EPI_ISL_473982, EPI_ISL_473983, EPI_ISL_473984, EPI_ISL_473985, EPI_ISL_473986, EPI_ISL_473987, EPI_ISL_473988, EPI_ISL_473989, EPI_ISL_473990, EPI_ISL_473991, EPI_ISL_473992, EPI_ISL_473993, EPI_ISL_473994, EPI_ISL_473995, EPI_ISL_473996, EPI_ISL_473997, EPI_ISL_473998, EPI_ISL_473999 | see above                                                                                              | Virology Department, Royal Infirmary of Edinburgh, NHS Lothian / School of Biological Sciences, University of Edinburgh / Institute of Genetics and Molecular Medicine, University of Edinburgh | COVID-19 Genomics UK (COG-UK) Consortium                                                                                                                                                                          | McHugh M, Dewar R, Rooke S, Gallagher M, Balcaza C, O'Toole Á, Scher E, Hill V, McCrone JT, Colquhoun R, Yu X, Jackson B, Rambaut A, Williams TC, Templeton K                                                                                                                                                                                                                                                                                                                                                                                                                                                                                                |
| EPI_ISL_475937, EPI_ISL_475938, EPI_ISL_475939, EPI_ISL_475940, EPI_ISL_475941, EPI_ISL_475942, EPI_ISL_475943, EPI_ISL_475944, EPI_ISL_475945, EPI_ISL_475946, EPI_ISL_475947, EPI_ISL_475948, EPI_ISL_475949, EPI_ISL_475950, EPI_ISL_475951, EPI_ISL_475952, EPI_ISL_475953, EPI_ISL_475954, EPI_ISL_475955, EPI_ISL_475956, EPI_ISL_475957, EPI_ISL_475958, EPI_ISL_475959, EPI_ISL_475960, EPI_ISL_475961, EPI_ISL_475962, EPI_ISL_475963, EPI_ISL_475964, EPI_ISL_475965, EPI_ISL_475966, EPI_ISL_475967, EPI_ISL_475968, EPI_ISL_475969, EPI_ISL_475970, EPI_ISL_475971, EPI_ISL_475972, EPI_ISL_475973, EPI_ISL_475974, EPI_ISL_475975, EPI_ISL_475976, EPI_ISL_475977, EPI_ISL_475978, EPI_ISL_475979, EPI_ISL_475980, EPI_ISL_475981, EPI_ISL_475982, EPI_ISL_475983, EPI_ISL_475984, EPI_ISL_475985, EPI_ISL_475986, EPI_ISL_475987, EPI_ISL_475988, EPI_ISL_475989, EPI_ISL_475990, EPI_ISL_475991, EPI_ISL_475992, EPI_ISL_475993, EPI_ISL_475994, EPI_ISL_475995, EPI_ISL_475996, EPI_ISL_475997, EPI_ISL_475998, EPI_ISL_475999                                                                                                                                                                                                                                                                                                                                                                                                                                                                                                                                                                                                                                                                                                                                                                                                                                                                                                                                                                                                                                                                                                                                                                                                                                                                                                                                                                                                                                                                                                                                                                                                 | see above                                                                                              | National Public Health Laboratory, National Centre for Infectious Diseases                                                                                                                      | National Public Health Laboratory, National Centre for Infectious Diseases                                                                                                                                        | Mak TM, Octavia S, Chavatte JM, Cui L, Lin RTP                                                                                                                                                                                                                                                                                                                                                                                                                                                                                                                                                                                                               |
| EPI_ISL_476498, EPI_ISL_476499, EPI_ISL_476500, EPI_ISL_476501, EPI_ISL_476502, EPI_ISL_476503, EPI_ISL_476504, EPI_ISL_476505, EPI_ISL_476506, EPI_ISL_476507, EPI_ISL_476508, EPI_ISL_476509, EPI_ISL_476510, EPI_ISL_476511, EPI_ISL_476512, EPI_ISL_476513                                                                                                                                                                                                                                                                                                                                                                                                                                                                                                                                                                                                                                                                                                                                                                                                                                                                                                                                                                                                                                                                                                                                                                                                                                                                                                                                                                                                                                                                                                                                                                                                                                                                                                                                                                                                                                                                                                                                                                                                                                                                                                                                                                                                                                                                                                                                                                                 | see above                                                                                              | Laboratoire de microbiologie, Hôpital de Verdun                                                                                                                                                 | Smith Laboratory, Centre de Recherche CHU Sainte-Justine                                                                                                                                                          | Martin Smith, Marieke Rozendaal, Ivan Pavlov                                                                                                                                                                                                                                                                                                                                                                                                                                                                                                                                                                                                                 |



|                                                                                                                                                                                                                                                                                                                                                                                                                                                                                                                                                                                                                                                                                                                                                                                                                                                                                                                                                                                                                                                                                                                                                                                                                                                                                                                                                                                                                                                                                                                                                                                                                                                                                                                                                                                                                                                                                                                                                                                                                                                                                                                                                                                                                |                                                                                                                                                                                                |                                                                                                                                                                                                |                                                                                                                                                                                                                                                                                                                                  |                                                                                                                                                               |
|----------------------------------------------------------------------------------------------------------------------------------------------------------------------------------------------------------------------------------------------------------------------------------------------------------------------------------------------------------------------------------------------------------------------------------------------------------------------------------------------------------------------------------------------------------------------------------------------------------------------------------------------------------------------------------------------------------------------------------------------------------------------------------------------------------------------------------------------------------------------------------------------------------------------------------------------------------------------------------------------------------------------------------------------------------------------------------------------------------------------------------------------------------------------------------------------------------------------------------------------------------------------------------------------------------------------------------------------------------------------------------------------------------------------------------------------------------------------------------------------------------------------------------------------------------------------------------------------------------------------------------------------------------------------------------------------------------------------------------------------------------------------------------------------------------------------------------------------------------------------------------------------------------------------------------------------------------------------------------------------------------------------------------------------------------------------------------------------------------------------------------------------------------------------------------------------------------------|------------------------------------------------------------------------------------------------------------------------------------------------------------------------------------------------|------------------------------------------------------------------------------------------------------------------------------------------------------------------------------------------------|----------------------------------------------------------------------------------------------------------------------------------------------------------------------------------------------------------------------------------------------------------------------------------------------------------------------------------|---------------------------------------------------------------------------------------------------------------------------------------------------------------|
| EPI_ISL_476706, EPI_ISL_476707, EPI_ISL_476708, EPI_ISL_476709, EPI_ISL_476710, EPI_ISL_476711, EPI_ISL_476712, EPI_ISL_476713, EPI_ISL_476714, EPI_ISL_476715, EPI_ISL_476716, EPI_ISL_476717, EPI_ISL_476718, EPI_ISL_476719, EPI_ISL_476720, EPI_ISL_476721, EPI_ISL_476722, EPI_ISL_476723, EPI_ISL_476724, EPI_ISL_476725, EPI_ISL_476726, EPI_ISL_476727, EPI_ISL_476728, EPI_ISL_476729, EPI_ISL_476730, EPI_ISL_476731, EPI_ISL_476732, EPI_ISL_476733, EPI_ISL_476734, EPI_ISL_476735, EPI_ISL_476736, EPI_ISL_476737, EPI_ISL_476738, EPI_ISL_476739, EPI_ISL_476740, EPI_ISL_476741, EPI_ISL_476742, EPI_ISL_476743, EPI_ISL_476744, EPI_ISL_476745, EPI_ISL_476746, EPI_ISL_476747, EPI_ISL_476748, EPI_ISL_476749, EPI_ISL_476750, EPI_ISL_476751, EPI_ISL_476752, EPI_ISL_476753, EPI_ISL_476754, EPI_ISL_476755, EPI_ISL_476756, EPI_ISL_476757, EPI_ISL_476758, EPI_ISL_476759, EPI_ISL_476760, EPI_ISL_476761, EPI_ISL_476762, EPI_ISL_476763, EPI_ISL_476764, EPI_ISL_476765, EPI_ISL_476766                                                                                                                                                                                                                                                                                                                                                                                                                                                                                                                                                                                                                                                                                                                                                                                                                                                                                                                                                                                                                                                                                                                                                                                                 | Minnesota Department of Health, Public Health Laboratory                                                                                                                                       | Minnesota Department of Health, Public Health Laboratory                                                                                                                                       | Matt Plumb, Jacob Garfin, and Xiong Wang                                                                                                                                                                                                                                                                                         |                                                                                                                                                               |
| see above                                                                                                                                                                                                                                                                                                                                                                                                                                                                                                                                                                                                                                                                                                                                                                                                                                                                                                                                                                                                                                                                                                                                                                                                                                                                                                                                                                                                                                                                                                                                                                                                                                                                                                                                                                                                                                                                                                                                                                                                                                                                                                                                                                                                      |                                                                                                                                                                                                |                                                                                                                                                                                                |                                                                                                                                                                                                                                                                                                                                  |                                                                                                                                                               |
| EPI_ISL_476835                                                                                                                                                                                                                                                                                                                                                                                                                                                                                                                                                                                                                                                                                                                                                                                                                                                                                                                                                                                                                                                                                                                                                                                                                                                                                                                                                                                                                                                                                                                                                                                                                                                                                                                                                                                                                                                                                                                                                                                                                                                                                                                                                                                                 | National Influenza Centre for Northern Greece                                                                                                                                                  | National Influenza Centre for Northern Greece                                                                                                                                                  | Maria Christoforidi                                                                                                                                                                                                                                                                                                              |                                                                                                                                                               |
| EPI_ISL_476836                                                                                                                                                                                                                                                                                                                                                                                                                                                                                                                                                                                                                                                                                                                                                                                                                                                                                                                                                                                                                                                                                                                                                                                                                                                                                                                                                                                                                                                                                                                                                                                                                                                                                                                                                                                                                                                                                                                                                                                                                                                                                                                                                                                                 | National Influenza Centre for Northern Greece                                                                                                                                                  | National Influenza Centre for Northern Greece                                                                                                                                                  | Maria Christoforidi                                                                                                                                                                                                                                                                                                              |                                                                                                                                                               |
| EPI_ISL_476837, EPI_ISL_476838, EPI_ISL_476839, EPI_ISL_476841, EPI_ISL_476843, EPI_ISL_476845, EPI_ISL_476847, EPI_ISL_476851                                                                                                                                                                                                                                                                                                                                                                                                                                                                                                                                                                                                                                                                                                                                                                                                                                                                                                                                                                                                                                                                                                                                                                                                                                                                                                                                                                                                                                                                                                                                                                                                                                                                                                                                                                                                                                                                                                                                                                                                                                                                                 | National Influenza Centre for Northern Greece                                                                                                                                                  | National Influenza Centre for Northern Greece                                                                                                                                                  | Maria Christoforidi                                                                                                                                                                                                                                                                                                              |                                                                                                                                                               |
| EPI_ISL_477272, EPI_ISL_477273, EPI_ISL_477274, EPI_ISL_477275, EPI_ISL_477276                                                                                                                                                                                                                                                                                                                                                                                                                                                                                                                                                                                                                                                                                                                                                                                                                                                                                                                                                                                                                                                                                                                                                                                                                                                                                                                                                                                                                                                                                                                                                                                                                                                                                                                                                                                                                                                                                                                                                                                                                                                                                                                                 | Mayo Clinic & Mayo Clinic Laboratories                                                                                                                                                         | Minnesota Department of Health, Public Health Laboratory                                                                                                                                       | Matt Plumb, Jacob Garfin, Kelly Pung, and Xiong Wang                                                                                                                                                                                                                                                                             |                                                                                                                                                               |
| EPI_ISL_477277, EPI_ISL_477278, EPI_ISL_477279, EPI_ISL_477280, EPI_ISL_477281, EPI_ISL_477282, EPI_ISL_477283, EPI_ISL_477284, EPI_ISL_477285, EPI_ISL_477286, EPI_ISL_477287, EPI_ISL_477288, EPI_ISL_477289, EPI_ISL_477290                                                                                                                                                                                                                                                                                                                                                                                                                                                                                                                                                                                                                                                                                                                                                                                                                                                                                                                                                                                                                                                                                                                                                                                                                                                                                                                                                                                                                                                                                                                                                                                                                                                                                                                                                                                                                                                                                                                                                                                 | see above                                                                                                                                                                                      | Minnesota Department of Health, Public Health Laboratory                                                                                                                                       | Matt Plumb, Jacob Garfin, Kelly Pung, and Xiong Wang                                                                                                                                                                                                                                                                             |                                                                                                                                                               |
| EPI_ISL_477291, EPI_ISL_477292, EPI_ISL_477293, EPI_ISL_477294, EPI_ISL_477295, EPI_ISL_477296, EPI_ISL_477297, EPI_ISL_477298, EPI_ISL_477299, EPI_ISL_477300, EPI_ISL_477301, EPI_ISL_477302, EPI_ISL_477303, EPI_ISL_477304, EPI_ISL_477305, EPI_ISL_477306, EPI_ISL_477307, EPI_ISL_477308, EPI_ISL_477309, EPI_ISL_477310, EPI_ISL_477311, EPI_ISL_477312                                                                                                                                                                                                                                                                                                                                                                                                                                                                                                                                                                                                                                                                                                                                                                                                                                                                                                                                                                                                                                                                                                                                                                                                                                                                                                                                                                                                                                                                                                                                                                                                                                                                                                                                                                                                                                                 | see above                                                                                                                                                                                      | Minnesota Department of Health, Public Health Laboratory                                                                                                                                       | Matt Plumb, Jacob Garfin, Kelly Pung, and Xiong Wang                                                                                                                                                                                                                                                                             |                                                                                                                                                               |
| EPI_ISL_478163, EPI_ISL_478164, EPI_ISL_478167, EPI_ISL_478168, EPI_ISL_478169, EPI_ISL_478170, EPI_ISL_478171, EPI_ISL_478172, EPI_ISL_478177, EPI_ISL_478178, EPI_ISL_478179, EPI_ISL_478180, EPI_ISL_478181, EPI_ISL_478182, EPI_ISL_478184, EPI_ISL_478187, EPI_ISL_478188, EPI_ISL_478189, EPI_ISL_478190, EPI_ISL_478191, EPI_ISL_478192, EPI_ISL_478193, EPI_ISL_478194, EPI_ISL_478195, EPI_ISL_478196, EPI_ISL_478199, EPI_ISL_478200, EPI_ISL_478201, EPI_ISL_478202, EPI_ISL_478206, EPI_ISL_478207, EPI_ISL_478208, EPI_ISL_478209, EPI_ISL_478212, EPI_ISL_478213, EPI_ISL_478214, EPI_ISL_478216, EPI_ISL_478217, EPI_ISL_478218, EPI_ISL_478219, EPI_ISL_478220, EPI_ISL_478221, EPI_ISL_478223, EPI_ISL_478224, EPI_ISL_478225, EPI_ISL_478227, EPI_ISL_478230, EPI_ISL_478231, EPI_ISL_478233, EPI_ISL_478235, EPI_ISL_478236, EPI_ISL_478237, EPI_ISL_478239, EPI_ISL_478241, EPI_ISL_478243, EPI_ISL_478244, EPI_ISL_478245, EPI_ISL_478246, EPI_ISL_478247, EPI_ISL_478248, EPI_ISL_478249, EPI_ISL_478250, EPI_ISL_478251, EPI_ISL_478252, EPI_ISL_478253, EPI_ISL_478255, EPI_ISL_478256, EPI_ISL_478257, EPI_ISL_478258, EPI_ISL_478261, EPI_ISL_478262, EPI_ISL_478263, EPI_ISL_478264, EPI_ISL_478269, EPI_ISL_478270, EPI_ISL_478271, EPI_ISL_478272, EPI_ISL_478273                                                                                                                                                                                                                                                                                                                                                                                                                                                                                                                                                                                                                                                                                                                                                                                                                                                                                                                 | see above                                                                                                                                                                                      | Viology Department, Royal Infirmary of Edinburgh, NHS Lothian / School of Biological Sciences, University of Edinburgh / Institute of Genetics and Molecular Medicine, University of Edinburgh | COVID-19 Genomics UK (COG-UK) Consortium                                                                                                                                                                                                                                                                                         | McHugh M, Dewar R, Rooke S, Gallagher M, Balcaza C, O'Toole Á, Scher E, Hill V, McCrone JT, Colquhoun R, Yu X, Jackson B, Rambaut A, Williams TC, Templeton K |
| EPI_ISL_479574, EPI_ISL_479575, EPI_ISL_479576, EPI_ISL_479577, EPI_ISL_479578, EPI_ISL_479579, EPI_ISL_479580, EPI_ISL_479581, EPI_ISL_479582, EPI_ISL_479583, EPI_ISL_479584, EPI_ISL_479585, EPI_ISL_479586, EPI_ISL_479587, EPI_ISL_479588, EPI_ISL_479589, EPI_ISL_479590, EPI_ISL_479591, EPI_ISL_479592, EPI_ISL_479593, EPI_ISL_479594, EPI_ISL_479595, EPI_ISL_479596, EPI_ISL_479597, EPI_ISL_479598, EPI_ISL_479599, EPI_ISL_479600, EPI_ISL_479601, EPI_ISL_479602, EPI_ISL_479603                                                                                                                                                                                                                                                                                                                                                                                                                                                                                                                                                                                                                                                                                                                                                                                                                                                                                                                                                                                                                                                                                                                                                                                                                                                                                                                                                                                                                                                                                                                                                                                                                                                                                                                 | see above                                                                                                                                                                                      | National Public Health Laboratory, National Centre for Infectious Diseases                                                                                                                     | National Public Health Laboratory, National Centre for Infectious Diseases                                                                                                                                                                                                                                                       | Mak TM, Octavia S, Zhou Z, Chavatte JM, Cui L, Lin RTP                                                                                                        |
| EPI_ISL_480428, EPI_ISL_480429, EPI_ISL_480431, EPI_ISL_480432, EPI_ISL_480433, EPI_ISL_480434, EPI_ISL_480435, EPI_ISL_480436, EPI_ISL_480437, EPI_ISL_480438                                                                                                                                                                                                                                                                                                                                                                                                                                                                                                                                                                                                                                                                                                                                                                                                                                                                                                                                                                                                                                                                                                                                                                                                                                                                                                                                                                                                                                                                                                                                                                                                                                                                                                                                                                                                                                                                                                                                                                                                                                                 | Laboratorio de Biología Molecular Asociación Española Primera en Salud                                                                                                                         | Departments of Pathology and Medicine, New York University School of Medicine                                                                                                                  | Maria Victoria Elizondo, Maria Noel Zubillaga, Gonzalo Manrique, Paul Zappile, Gael Westby, Matthew T Maurano, Christian Marier, Adriana Heguy                                                                                                                                                                                   |                                                                                                                                                               |
| EPI_ISL_481241                                                                                                                                                                                                                                                                                                                                                                                                                                                                                                                                                                                                                                                                                                                                                                                                                                                                                                                                                                                                                                                                                                                                                                                                                                                                                                                                                                                                                                                                                                                                                                                                                                                                                                                                                                                                                                                                                                                                                                                                                                                                                                                                                                                                 | M Health Fairview                                                                                                                                                                              | Minnesota Department of Health, Public Health Laboratory                                                                                                                                       | Matt Plumb, Jacob Garfin, Kelly Pung, and Xiong Wang                                                                                                                                                                                                                                                                             |                                                                                                                                                               |
| EPI_ISL_481242                                                                                                                                                                                                                                                                                                                                                                                                                                                                                                                                                                                                                                                                                                                                                                                                                                                                                                                                                                                                                                                                                                                                                                                                                                                                                                                                                                                                                                                                                                                                                                                                                                                                                                                                                                                                                                                                                                                                                                                                                                                                                                                                                                                                 | Mayo Clinic & Mayo Clinic Laboratories                                                                                                                                                         | Minnesota Department of Health, Public Health Laboratory                                                                                                                                       | Matt Plumb, Jacob Garfin, Kelly Pung, and Xiong Wang                                                                                                                                                                                                                                                                             |                                                                                                                                                               |
| EPI_ISL_481253, EPI_ISL_481256, EPI_ISL_481262, EPI_ISL_481264                                                                                                                                                                                                                                                                                                                                                                                                                                                                                                                                                                                                                                                                                                                                                                                                                                                                                                                                                                                                                                                                                                                                                                                                                                                                                                                                                                                                                                                                                                                                                                                                                                                                                                                                                                                                                                                                                                                                                                                                                                                                                                                                                 | Robert Koch Institute, National Reference center for Influenza, Berlin, Germany                                                                                                                | Robert Koch Institute, Bioinformatics MF1, Berlin, Germany                                                                                                                                     | Marianne Wedde, Oliver Drechsel, Andrea Thuermer, Rene Kmiecinski, Ralf Duerwald, Thorsten Wolff, Stephan Fuchs, Max v. Kleist                                                                                                                                                                                                   |                                                                                                                                                               |
| EPI_ISL_482946, EPI_ISL_482947, EPI_ISL_482948, EPI_ISL_482949, EPI_ISL_482950, EPI_ISL_482951, EPI_ISL_482952, EPI_ISL_482953, EPI_ISL_482954, EPI_ISL_482955, EPI_ISL_482956, EPI_ISL_482957, EPI_ISL_482958, EPI_ISL_482959, EPI_ISL_482960, EPI_ISL_482961, EPI_ISL_482962, EPI_ISL_482963, EPI_ISL_482964, EPI_ISL_482965, EPI_ISL_482966                                                                                                                                                                                                                                                                                                                                                                                                                                                                                                                                                                                                                                                                                                                                                                                                                                                                                                                                                                                                                                                                                                                                                                                                                                                                                                                                                                                                                                                                                                                                                                                                                                                                                                                                                                                                                                                                 | see above                                                                                                                                                                                      | Minnesota Department of Health, Public Health Laboratory                                                                                                                                       | Minnesota Department of Health, Public Health Laboratory                                                                                                                                                                                                                                                                         | Matt Plumb, Jacob Garfin, and Xiong Wang                                                                                                                      |
| EPI_ISL_482967, EPI_ISL_482968, EPI_ISL_482969, EPI_ISL_482970, EPI_ISL_482971, EPI_ISL_482972, EPI_ISL_482973, EPI_ISL_482974, EPI_ISL_482975, EPI_ISL_482976, EPI_ISL_482977, EPI_ISL_482978, EPI_ISL_482979, EPI_ISL_482980, EPI_ISL_482981, EPI_ISL_482982, EPI_ISL_482983, EPI_ISL_482984, EPI_ISL_482985, EPI_ISL_482986, EPI_ISL_482987                                                                                                                                                                                                                                                                                                                                                                                                                                                                                                                                                                                                                                                                                                                                                                                                                                                                                                                                                                                                                                                                                                                                                                                                                                                                                                                                                                                                                                                                                                                                                                                                                                                                                                                                                                                                                                                                 | see above                                                                                                                                                                                      | Minnesota Department of Health, Public Health Laboratory                                                                                                                                       | Minnesota Department of Health, Public Health Laboratory                                                                                                                                                                                                                                                                         | Matt Plumb, Jacob Garfin, and Xiong Wang                                                                                                                      |
| EPI_ISL_482988, EPI_ISL_482989, EPI_ISL_482990, EPI_ISL_482991, EPI_ISL_482992, EPI_ISL_482993, EPI_ISL_482994, EPI_ISL_482995, EPI_ISL_482996, EPI_ISL_482997, EPI_ISL_482998, EPI_ISL_482999, EPI_ISL_483000, EPI_ISL_483001, EPI_ISL_483002, EPI_ISL_483003, EPI_ISL_483004, EPI_ISL_483005, EPI_ISL_483006, EPI_ISL_483007, EPI_ISL_483008, EPI_ISL_483009, EPI_ISL_483010, EPI_ISL_483011, EPI_ISL_483012, EPI_ISL_483013, EPI_ISL_483014, EPI_ISL_483015, EPI_ISL_483016, EPI_ISL_483017                                                                                                                                                                                                                                                                                                                                                                                                                                                                                                                                                                                                                                                                                                                                                                                                                                                                                                                                                                                                                                                                                                                                                                                                                                                                                                                                                                                                                                                                                                                                                                                                                                                                                                                 | see above                                                                                                                                                                                      | Minnesota Department of Health, Public Health Laboratory                                                                                                                                       | Minnesota Department of Health, Public Health Laboratory                                                                                                                                                                                                                                                                         | Matt Plumb, Jacob Garfin, and Xiong Wang                                                                                                                      |
| EPI_ISL_483576, EPI_ISL_483577, EPI_ISL_483578, EPI_ISL_483579, EPI_ISL_483580, EPI_ISL_483581, EPI_ISL_483582, EPI_ISL_483583, EPI_ISL_483584, EPI_ISL_483585, EPI_ISL_483586, EPI_ISL_483587, EPI_ISL_483588, EPI_ISL_483589, EPI_ISL_483590, EPI_ISL_483591, EPI_ISL_483592, EPI_ISL_483593, EPI_ISL_483594, EPI_ISL_483595, EPI_ISL_483596, EPI_ISL_483597, EPI_ISL_483598, EPI_ISL_483599, EPI_ISL_483600, EPI_ISL_483601, EPI_ISL_483602, EPI_ISL_483603, EPI_ISL_483604, EPI_ISL_483605, EPI_ISL_483606, EPI_ISL_483607, EPI_ISL_483608, EPI_ISL_483609, EPI_ISL_483610, EPI_ISL_483611, EPI_ISL_483612, EPI_ISL_483613, EPI_ISL_483614, EPI_ISL_483615, EPI_ISL_483616, EPI_ISL_483617, EPI_ISL_483618, EPI_ISL_483619, EPI_ISL_483620, EPI_ISL_483621                                                                                                                                                                                                                                                                                                                                                                                                                                                                                                                                                                                                                                                                                                                                                                                                                                                                                                                                                                                                                                                                                                                                                                                                                                                                                                                                                                                                                                                 | see above                                                                                                                                                                                      | National Public Health Laboratory, National Centre for Infectious Diseases                                                                                                                     | National Public Health Laboratory, National Centre for Infectious Diseases                                                                                                                                                                                                                                                       | Mak TM, Octavia S, Zhou Z, Chavatte JM, Cui L, Lin RTP                                                                                                        |
| EPI_ISL_483825                                                                                                                                                                                                                                                                                                                                                                                                                                                                                                                                                                                                                                                                                                                                                                                                                                                                                                                                                                                                                                                                                                                                                                                                                                                                                                                                                                                                                                                                                                                                                                                                                                                                                                                                                                                                                                                                                                                                                                                                                                                                                                                                                                                                 | GMERS Medical College Himmatnagar                                                                                                                                                              | Gujarat Biotechnology Research Centre                                                                                                                                                          | Mayur Gandhi, Apurvashin Puvar, Janvi Raval, Zarna Patel, Monika Gandhi, Pinal Trivedi, Maharshi Pandya, Nidhi Patel, Nitin Savaliya, Raghawendra Kumar, Dinesh Kumar, Zuber Saiyed, Komal Patel, Labdhi Pandya, Afzal Ansari, Nikha Trivedi, Himanshu Khatri, R D Dixit, A M Kadri, Harsh Bakshi, Chaitanya Joshi, Madhvi Joshi |                                                                                                                                                               |
| EPI_ISL_484680, EPI_ISL_484681, EPI_ISL_484682, EPI_ISL_484683, EPI_ISL_484684                                                                                                                                                                                                                                                                                                                                                                                                                                                                                                                                                                                                                                                                                                                                                                                                                                                                                                                                                                                                                                                                                                                                                                                                                                                                                                                                                                                                                                                                                                                                                                                                                                                                                                                                                                                                                                                                                                                                                                                                                                                                                                                                 | Viology Department, Royal Infirmary of Edinburgh, NHS Lothian / School of Biological Sciences, University of Edinburgh / Institute of Genetics and Molecular Medicine, University of Edinburgh | COVID-19 Genomics UK (COG-UK) Consortium                                                                                                                                                       | McHugh M, Dewar R, Rooke S, Gallagher M, Balcaza C, O'Toole Á, Scher E, Hill V, McCrone JT, Colquhoun R, Yu X, Jackson B, Rambaut A, Williams TC, Templeton K                                                                                                                                                                    |                                                                                                                                                               |
| EPI_ISL_484692                                                                                                                                                                                                                                                                                                                                                                                                                                                                                                                                                                                                                                                                                                                                                                                                                                                                                                                                                                                                                                                                                                                                                                                                                                                                                                                                                                                                                                                                                                                                                                                                                                                                                                                                                                                                                                                                                                                                                                                                                                                                                                                                                                                                 | Minnesota Department of Health, Public Health Laboratory                                                                                                                                       | Minnesota Department of Health, Public Health Laboratory                                                                                                                                       | Matt Plumb, Jacob Garfin, and Xiong Wang                                                                                                                                                                                                                                                                                         |                                                                                                                                                               |
| EPI_ISL_486429                                                                                                                                                                                                                                                                                                                                                                                                                                                                                                                                                                                                                                                                                                                                                                                                                                                                                                                                                                                                                                                                                                                                                                                                                                                                                                                                                                                                                                                                                                                                                                                                                                                                                                                                                                                                                                                                                                                                                                                                                                                                                                                                                                                                 | unknown                                                                                                                                                                                        | Clinical Laboratory, Hospital Israelita Albert Einstein                                                                                                                                        | Malta,F., Amgarten,D., Guedes,R.L., Santana,R.A., de Menezes,F.G., Manguiera,C.L. and Pinho,J.R.                                                                                                                                                                                                                                 |                                                                                                                                                               |
| EPI_ISL_486646, EPI_ISL_486647, EPI_ISL_486651, EPI_ISL_486655, EPI_ISL_486662                                                                                                                                                                                                                                                                                                                                                                                                                                                                                                                                                                                                                                                                                                                                                                                                                                                                                                                                                                                                                                                                                                                                                                                                                                                                                                                                                                                                                                                                                                                                                                                                                                                                                                                                                                                                                                                                                                                                                                                                                                                                                                                                 | Microbiology, Virology and Biemergency Laboratory-ASST FBF Sacco                                                                                                                               | Microbiology, Virology and Biemergency Laboratory-ASST FBF Sacco                                                                                                                               | Mancon A, Comandatore F, Romeri F, Micheli V, Rimoldi SG                                                                                                                                                                                                                                                                         |                                                                                                                                                               |
| EPI_ISL_487648, EPI_ISL_487649, EPI_ISL_487650, EPI_ISL_487651, EPI_ISL_487652, EPI_ISL_487653, EPI_ISL_487654, EPI_ISL_487655, EPI_ISL_487656, EPI_ISL_487657, EPI_ISL_487658, EPI_ISL_487659, EPI_ISL_487660, EPI_ISL_487661, EPI_ISL_487662, EPI_ISL_487663, EPI_ISL_487664, EPI_ISL_487665, EPI_ISL_487666, EPI_ISL_487667, EPI_ISL_487668, EPI_ISL_487669, EPI_ISL_487670, EPI_ISL_487671, EPI_ISL_487672, EPI_ISL_487673, EPI_ISL_487674, EPI_ISL_487675, EPI_ISL_487676, EPI_ISL_487677, EPI_ISL_487678, EPI_ISL_487679, EPI_ISL_487680, EPI_ISL_487681, EPI_ISL_487682, EPI_ISL_487683, EPI_ISL_487684, EPI_ISL_487685, EPI_ISL_487686, EPI_ISL_487687, EPI_ISL_487688, EPI_ISL_487689, EPI_ISL_487690, EPI_ISL_487691, EPI_ISL_487692, EPI_ISL_487693, EPI_ISL_487694, EPI_ISL_487695, EPI_ISL_487696, EPI_ISL_487697, EPI_ISL_487698, EPI_ISL_487699, EPI_ISL_487700, EPI_ISL_487701, EPI_ISL_487702, EPI_ISL_487703, EPI_ISL_487704, EPI_ISL_487705, EPI_ISL_487706, EPI_ISL_487707, EPI_ISL_487708, EPI_ISL_487709, EPI_ISL_487710, EPI_ISL_487711, EPI_ISL_487712, EPI_ISL_487713, EPI_ISL_487714, EPI_ISL_487715, EPI_ISL_487716, EPI_ISL_487717, EPI_ISL_487718, EPI_ISL_487719, EPI_ISL_487720, EPI_ISL_487721, EPI_ISL_487722, EPI_ISL_487723, EPI_ISL_487724, EPI_ISL_487725, EPI_ISL_487726, EPI_ISL_487727, EPI_ISL_487728, EPI_ISL_487729, EPI_ISL_487730, EPI_ISL_487731, EPI_ISL_487732, EPI_ISL_487733, EPI_ISL_487734, EPI_ISL_487735, EPI_ISL_487736, EPI_ISL_487737, EPI_ISL_487738, EPI_ISL_487739, EPI_ISL_487740, EPI_ISL_487741, EPI_ISL_487742, EPI_ISL_487743, EPI_ISL_487744, EPI_ISL_487745, EPI_ISL_487746, EPI_ISL_487747, EPI_ISL_487748, EPI_ISL_487749, EPI_ISL_487750, EPI_ISL_487751, EPI_ISL_487752, EPI_ISL_487753, EPI_ISL_487754, EPI_ISL_487755, EPI_ISL_487756, EPI_ISL_487757, EPI_ISL_487758, EPI_ISL_487759, EPI_ISL_487760, EPI_ISL_487761, EPI_ISL_487762, EPI_ISL_487763, EPI_ISL_487764, EPI_ISL_487765, EPI_ISL_487766, EPI_ISL_487767, EPI_ISL_487768, EPI_ISL_487769, EPI_ISL_487770, EPI_ISL_487771, EPI_ISL_487772, EPI_ISL_487773, EPI_ISL_487774, EPI_ISL_487775, EPI_ISL_487776, EPI_ISL_487777, EPI_ISL_487778, EPI_ISL_487779, EPI_ISL_487780 |                                                                                                                                                                                                |                                                                                                                                                                                                |                                                                                                                                                                                                                                                                                                                                  |                                                                                                                                                               |



|                                                                                                                                                                                                                                                                                                                                                                                                                                                                                                                                                                                                                                                                                                                                                                                                                                                                                                                                                                                                                                                                                                                                                                                                                                                                                                                                                                                                                                                                                                                                                                                                                |           |                                                                                                                                                                                                 |                                                                                                                                                                                                               |                                                                                                                                                                                                                                                                                                                                                                                                                                                                                                                                                                                                                                                                                                                                                                                                                                                                                                                             |
|----------------------------------------------------------------------------------------------------------------------------------------------------------------------------------------------------------------------------------------------------------------------------------------------------------------------------------------------------------------------------------------------------------------------------------------------------------------------------------------------------------------------------------------------------------------------------------------------------------------------------------------------------------------------------------------------------------------------------------------------------------------------------------------------------------------------------------------------------------------------------------------------------------------------------------------------------------------------------------------------------------------------------------------------------------------------------------------------------------------------------------------------------------------------------------------------------------------------------------------------------------------------------------------------------------------------------------------------------------------------------------------------------------------------------------------------------------------------------------------------------------------------------------------------------------------------------------------------------------------|-----------|-------------------------------------------------------------------------------------------------------------------------------------------------------------------------------------------------|---------------------------------------------------------------------------------------------------------------------------------------------------------------------------------------------------------------|-----------------------------------------------------------------------------------------------------------------------------------------------------------------------------------------------------------------------------------------------------------------------------------------------------------------------------------------------------------------------------------------------------------------------------------------------------------------------------------------------------------------------------------------------------------------------------------------------------------------------------------------------------------------------------------------------------------------------------------------------------------------------------------------------------------------------------------------------------------------------------------------------------------------------------|
| EPI_ISL_495628, EPI_ISL_496916, EPI_ISL_496917                                                                                                                                                                                                                                                                                                                                                                                                                                                                                                                                                                                                                                                                                                                                                                                                                                                                                                                                                                                                                                                                                                                                                                                                                                                                                                                                                                                                                                                                                                                                                                 | see above | Minnesota Department of Health, Public Health Laboratory                                                                                                                                        | Minnesota Department of Health, Public Health Laboratory                                                                                                                                                      | Matt Plumb, Jacob Garfin, and Xiong Wang                                                                                                                                                                                                                                                                                                                                                                                                                                                                                                                                                                                                                                                                                                                                                                                                                                                                                    |
| EPI_ISL_496918                                                                                                                                                                                                                                                                                                                                                                                                                                                                                                                                                                                                                                                                                                                                                                                                                                                                                                                                                                                                                                                                                                                                                                                                                                                                                                                                                                                                                                                                                                                                                                                                 |           | Mayo Clinic & Mayo Clinic Laboratories                                                                                                                                                          | Minnesota Department of Health, Public Health Laboratory                                                                                                                                                      | Matt Plumb, Jacob Garfin, and Xiong Wang                                                                                                                                                                                                                                                                                                                                                                                                                                                                                                                                                                                                                                                                                                                                                                                                                                                                                    |
| EPI_ISL_496919, EPI_ISL_496920, EPI_ISL_496921, EPI_ISL_496922, EPI_ISL_496923, EPI_ISL_496924, EPI_ISL_496925, EPI_ISL_496926, EPI_ISL_496927, EPI_ISL_496928, EPI_ISL_496929, EPI_ISL_496930                                                                                                                                                                                                                                                                                                                                                                                                                                                                                                                                                                                                                                                                                                                                                                                                                                                                                                                                                                                                                                                                                                                                                                                                                                                                                                                                                                                                                 | see above | Minnesota Department of Health, Public Health Laboratory                                                                                                                                        | Minnesota Department of Health, Public Health Laboratory                                                                                                                                                      | Matt Plumb, Jacob Garfin, and Xiong Wang                                                                                                                                                                                                                                                                                                                                                                                                                                                                                                                                                                                                                                                                                                                                                                                                                                                                                    |
| EPI_ISL_498564, EPI_ISL_498565, EPI_ISL_498566, EPI_ISL_498567, EPI_ISL_498568, EPI_ISL_498569, EPI_ISL_498570, EPI_ISL_498571, EPI_ISL_498572, EPI_ISL_498573, EPI_ISL_498574, EPI_ISL_498575, EPI_ISL_498576, EPI_ISL_498577, EPI_ISL_498578, EPI_ISL_498579, EPI_ISL_498580, EPI_ISL_498581, EPI_ISL_498582, EPI_ISL_498583, EPI_ISL_498584, EPI_ISL_498585, EPI_ISL_498586, EPI_ISL_498587, EPI_ISL_498588, EPI_ISL_498589, EPI_ISL_498590, EPI_ISL_498591, EPI_ISL_498592, EPI_ISL_498593, EPI_ISL_498594, EPI_ISL_498595, EPI_ISL_498596, EPI_ISL_498597, EPI_ISL_498598, EPI_ISL_498599, EPI_ISL_498600, EPI_ISL_498601, EPI_ISL_498602, EPI_ISL_498603, EPI_ISL_498604, EPI_ISL_498605, EPI_ISL_498606, EPI_ISL_498607, EPI_ISL_498608, EPI_ISL_498609, EPI_ISL_498610, EPI_ISL_498611, EPI_ISL_498612, EPI_ISL_498613, EPI_ISL_498614, EPI_ISL_498615, EPI_ISL_498616, EPI_ISL_498617, EPI_ISL_498618                                                                                                                                                                                                                                                                                                                                                                                                                                                                                                                                                                                                                                                                                                 | see above | National Public Health Laboratory, National Centre for Infectious Diseases                                                                                                                      | National Public Health Laboratory, National Centre for Infectious Diseases                                                                                                                                    | Mak TM, Octavia S, Zhou Z, Chavatte JM, Cui L, Lin RTP                                                                                                                                                                                                                                                                                                                                                                                                                                                                                                                                                                                                                                                                                                                                                                                                                                                                      |
| EPI_ISL_500369, EPI_ISL_500370, EPI_ISL_500371, EPI_ISL_500372, EPI_ISL_500374, EPI_ISL_500375, EPI_ISL_500376, EPI_ISL_500377, EPI_ISL_500378, EPI_ISL_500379, EPI_ISL_500380, EPI_ISL_500381, EPI_ISL_500383, EPI_ISL_500385, EPI_ISL_500386, EPI_ISL_500387, EPI_ISL_500388, EPI_ISL_500389, EPI_ISL_500390, EPI_ISL_500391, EPI_ISL_500392, EPI_ISL_500393, EPI_ISL_500394, EPI_ISL_500395, EPI_ISL_500396, EPI_ISL_500397, EPI_ISL_500398, EPI_ISL_500399, EPI_ISL_500400, EPI_ISL_500401, EPI_ISL_500402, EPI_ISL_500403, EPI_ISL_500404, EPI_ISL_500405, EPI_ISL_500406, EPI_ISL_500407, EPI_ISL_500408, EPI_ISL_500409, EPI_ISL_500410, EPI_ISL_500411, EPI_ISL_500412, EPI_ISL_500413, EPI_ISL_500414, EPI_ISL_500415, EPI_ISL_500416, EPI_ISL_500417, EPI_ISL_500418, EPI_ISL_500419, EPI_ISL_500420, EPI_ISL_500421, EPI_ISL_500422, EPI_ISL_500423, EPI_ISL_500424, EPI_ISL_500425, EPI_ISL_500426, EPI_ISL_500427, EPI_ISL_500428, EPI_ISL_500429, EPI_ISL_500430, EPI_ISL_500431, EPI_ISL_500432, EPI_ISL_500433, EPI_ISL_500434, EPI_ISL_500435, EPI_ISL_500436, EPI_ISL_500437, EPI_ISL_500438, EPI_ISL_500439, EPI_ISL_500440, EPI_ISL_500441, EPI_ISL_500442, EPI_ISL_500443, EPI_ISL_500444, EPI_ISL_500445, EPI_ISL_500446, EPI_ISL_500447, EPI_ISL_500448, EPI_ISL_500449, EPI_ISL_500450, EPI_ISL_500451, EPI_ISL_500452, EPI_ISL_500453, EPI_ISL_500454, EPI_ISL_500455, EPI_ISL_500456, EPI_ISL_500457, EPI_ISL_500458                                                                                                                                                                 | see above | Centro de Investigación Biomédica de La Rioja - Hospital San Pedro Logroño                                                                                                                      | SeqCOVID-SPAIN consortium/IBV(CSIC)                                                                                                                                                                           | María de Toro, José Manuel Azcona Gutiérrez, María Pilar Bea Escudero, Miriam Blasco Alberdi and SeqCOVID-SPAIN consortium                                                                                                                                                                                                                                                                                                                                                                                                                                                                                                                                                                                                                                                                                                                                                                                                  |
| EPI_ISL_500460, EPI_ISL_500461, EPI_ISL_500462, EPI_ISL_500463, EPI_ISL_500464, EPI_ISL_500465, EPI_ISL_500466, EPI_ISL_500467, EPI_ISL_500468, EPI_ISL_500469, EPI_ISL_500470, EPI_ISL_500471, EPI_ISL_500472, EPI_ISL_500473, EPI_ISL_500474, EPI_ISL_500475, EPI_ISL_500476, EPI_ISL_500477, EPI_ISL_500478, EPI_ISL_500479, EPI_ISL_500480, EPI_ISL_500481, EPI_ISL_500482, EPI_ISL_500483, EPI_ISL_500484, EPI_ISL_500485, EPI_ISL_500486, EPI_ISL_500865, EPI_ISL_500866, EPI_ISL_500867, EPI_ISL_500868, EPI_ISL_500869, EPI_ISL_500870, EPI_ISL_500871, EPI_ISL_500872, EPI_ISL_500873, EPI_ISL_500874, EPI_ISL_500875                                                                                                                                                                                                                                                                                                                                                                                                                                                                                                                                                                                                                                                                                                                                                                                                                                                                                                                                                                                 | see above | Laboratório Central de Saúde Pública do Estado de Pernambuco (LACEN-PE)                                                                                                                         | WallauLab, Aggeu Magalhaes Institute                                                                                                                                                                          | Marcelo Henrique Santos Paiva, Duschinka Ribeiro Duarte Guedes, Cássia Docena, Matheus Filgueira Bezerra, Filipe Zimmer Dezordi, Laís Ceschini Machado, Larissa Krokovsky, Elisama Helvecio, Alexandre Freitas da Silva, Luydson Richardson Silva Vasconcelos, Antonio Mauro Rezende, Severino Jefferson Ribeiro da Silva, Kamila Gaudêncio da Silva Sales, Bruna Santos Lima Figueiredo de Sá, Derciliano Lopes da Cruz, Claudio Eduardo Cavalcanti, Armando de Menezes Neto, Caroline Targino Alves da Silva, Renata Pessôa Germano Mendes, Maria Almerice Lopes da Silva, Tiago Gráf, Paola Cristina Resende, Gonzalo Bello, Michelle da Silva Barros, Wheverton Ricardo Correia do Nascimento, Rodrigo Moraes Loyo Arcoverde, Luciane Caroline Albuquerque Bezerra, Sinalva Pinto Brandão Filho, Consistência Flávia Junqueira Ayres, Gabriel Luz Wallau on behalf of the Fiocruz COVID-19 Genomic Surveillance Network |
| EPI_ISL_501557, EPI_ISL_501562, EPI_ISL_501602, EPI_ISL_501613                                                                                                                                                                                                                                                                                                                                                                                                                                                                                                                                                                                                                                                                                                                                                                                                                                                                                                                                                                                                                                                                                                                                                                                                                                                                                                                                                                                                                                                                                                                                                 |           | Department of Medical Microbiology, Western Sussex Hospitals NHS Foundation Trust, St Richard's Hospital                                                                                        | Wellcome Sanger Institute for the COVID-19 Genomics UK (COG-UK) consortium                                                                                                                                    | Manasa Mutingwende, Sarah Lowdon, Olga Podplomyk, Michelle Erkiert, Jonathan Lewis, Paul Randell and Alex Alderton, Roberto Amato, Sonia Goncalves, Ewan Harrison, David K. Jackson, Ian Johnston, Dominic Kwiatkowski, Cordelia Langford, John Sillitoe on behalf of the Wellcome Sanger Institute COVID-19 Surveillance Team ( <a href="http://www.sanger.ac.uk/covid-team">http://www.sanger.ac.uk/covid-team</a> )                                                                                                                                                                                                                                                                                                                                                                                                                                                                                                      |
| EPI_ISL_507181, EPI_ISL_507182, EPI_ISL_507184, EPI_ISL_507185, EPI_ISL_507187, EPI_ISL_507188, EPI_ISL_507189, EPI_ISL_507191, EPI_ISL_507192, EPI_ISL_507193, EPI_ISL_507194, EPI_ISL_507196, EPI_ISL_507197, EPI_ISL_507198, EPI_ISL_507199, EPI_ISL_507201                                                                                                                                                                                                                                                                                                                                                                                                                                                                                                                                                                                                                                                                                                                                                                                                                                                                                                                                                                                                                                                                                                                                                                                                                                                                                                                                                 | see above | Virology Department, Royal Infirmary of Edinburgh, NHS Lothian / School of Biological Sciences, University of Edinburgh / Institute of Genetics and Molecular Medicine, University of Edinburgh | COVID-19 Genomics UK (COG-UK) Consortium                                                                                                                                                                      | McHugh M, Dewar R, Rooke S, Gallagher M, Balcaza C, O'Toole Á, Scher E, Hill V, McCrone JT, Colquhoun R, Yu X, Jackson B, Rambaut A, Williams TC, Templeton K                                                                                                                                                                                                                                                                                                                                                                                                                                                                                                                                                                                                                                                                                                                                                               |
| EPI_ISL_507934, EPI_ISL_507935, EPI_ISL_507936, EPI_ISL_507937, EPI_ISL_507938, EPI_ISL_507939, EPI_ISL_507940, EPI_ISL_507941, EPI_ISL_507942, EPI_ISL_507943, EPI_ISL_507944, EPI_ISL_507945, EPI_ISL_507946, EPI_ISL_507947, EPI_ISL_507948, EPI_ISL_507949, EPI_ISL_507950, EPI_ISL_507951, EPI_ISL_507952, EPI_ISL_507953, EPI_ISL_507954, EPI_ISL_507955, EPI_ISL_507956                                                                                                                                                                                                                                                                                                                                                                                                                                                                                                                                                                                                                                                                                                                                                                                                                                                                                                                                                                                                                                                                                                                                                                                                                                 | see above | Minnesota Department of Health, Public Health Laboratory                                                                                                                                        | Minnesota Department of Health, Public Health Laboratory                                                                                                                                                      | Matt Plumb, Jacob Garfin, and Xiong Wang                                                                                                                                                                                                                                                                                                                                                                                                                                                                                                                                                                                                                                                                                                                                                                                                                                                                                    |
| EPI_ISL_507957, EPI_ISL_507958, EPI_ISL_507959, EPI_ISL_507960, EPI_ISL_507961                                                                                                                                                                                                                                                                                                                                                                                                                                                                                                                                                                                                                                                                                                                                                                                                                                                                                                                                                                                                                                                                                                                                                                                                                                                                                                                                                                                                                                                                                                                                 |           | Mayo Clinic & Mayo Clinic Laboratories                                                                                                                                                          | Minnesota Department of Health, Public Health Laboratory                                                                                                                                                      | Matt Plumb, Jacob Garfin, and Xiong Wang                                                                                                                                                                                                                                                                                                                                                                                                                                                                                                                                                                                                                                                                                                                                                                                                                                                                                    |
| EPI_ISL_507962                                                                                                                                                                                                                                                                                                                                                                                                                                                                                                                                                                                                                                                                                                                                                                                                                                                                                                                                                                                                                                                                                                                                                                                                                                                                                                                                                                                                                                                                                                                                                                                                 |           | Children's Hospitals and Clinics of Minnesota                                                                                                                                                   | Minnesota Department of Health, Public Health Laboratory                                                                                                                                                      | Matt Plumb, Jacob Garfin, and Xiong Wang                                                                                                                                                                                                                                                                                                                                                                                                                                                                                                                                                                                                                                                                                                                                                                                                                                                                                    |
| EPI_ISL_507963, EPI_ISL_507964, EPI_ISL_507965, EPI_ISL_507966, EPI_ISL_507967, EPI_ISL_507968, EPI_ISL_507969, EPI_ISL_507970, EPI_ISL_507971, EPI_ISL_507972                                                                                                                                                                                                                                                                                                                                                                                                                                                                                                                                                                                                                                                                                                                                                                                                                                                                                                                                                                                                                                                                                                                                                                                                                                                                                                                                                                                                                                                 |           | Avera McKennan Laboratory                                                                                                                                                                       | Minnesota Department of Health, Public Health Laboratory                                                                                                                                                      | Matt Plumb, Jacob Garfin, and Xiong Wang                                                                                                                                                                                                                                                                                                                                                                                                                                                                                                                                                                                                                                                                                                                                                                                                                                                                                    |
| EPI_ISL_507973, EPI_ISL_507974, EPI_ISL_507975, EPI_ISL_507976, EPI_ISL_507977, EPI_ISL_507978, EPI_ISL_507979, EPI_ISL_507980, EPI_ISL_507981, EPI_ISL_507982, EPI_ISL_507983                                                                                                                                                                                                                                                                                                                                                                                                                                                                                                                                                                                                                                                                                                                                                                                                                                                                                                                                                                                                                                                                                                                                                                                                                                                                                                                                                                                                                                 | see above | Minnesota Department of Health, Public Health Laboratory                                                                                                                                        | Minnesota Department of Health, Public Health Laboratory                                                                                                                                                      | Matt Plumb, Jacob Garfin, and Xiong Wang                                                                                                                                                                                                                                                                                                                                                                                                                                                                                                                                                                                                                                                                                                                                                                                                                                                                                    |
| EPI_ISL_508865, EPI_ISL_508867, EPI_ISL_508869, EPI_ISL_509222                                                                                                                                                                                                                                                                                                                                                                                                                                                                                                                                                                                                                                                                                                                                                                                                                                                                                                                                                                                                                                                                                                                                                                                                                                                                                                                                                                                                                                                                                                                                                 |           | Division of Infectious Diseases and Hospital Epidemiology, University Hospital Zürich                                                                                                           | Institute of Medical Virology, University of Zurich                                                                                                                                                           | Maryam Zaheri, Verena Kufner, Dana Weissberg, Jürg Böni, Silvana K. Rampini, Peter W. Schreiber, Irene A. Abela, Hugo Sax, Aline Wolfensberger, Michael Huber                                                                                                                                                                                                                                                                                                                                                                                                                                                                                                                                                                                                                                                                                                                                                               |
| EPI_ISL_509686                                                                                                                                                                                                                                                                                                                                                                                                                                                                                                                                                                                                                                                                                                                                                                                                                                                                                                                                                                                                                                                                                                                                                                                                                                                                                                                                                                                                                                                                                                                                                                                                 |           | M Health Fairview                                                                                                                                                                               | Minnesota Department of Health, Public Health Laboratory                                                                                                                                                      | Matt Plumb, Jacob Garfin, and Xiong Wang                                                                                                                                                                                                                                                                                                                                                                                                                                                                                                                                                                                                                                                                                                                                                                                                                                                                                    |
| EPI_ISL_510160                                                                                                                                                                                                                                                                                                                                                                                                                                                                                                                                                                                                                                                                                                                                                                                                                                                                                                                                                                                                                                                                                                                                                                                                                                                                                                                                                                                                                                                                                                                                                                                                 |           | Utah Public Health Laboratory                                                                                                                                                                   | Pathogen Discovery, Respiratory Viruses Branch, Division of Viral Diseases, Centers for Disease Control and Prevention                                                                                        | Mary L. Killian, Kerrie Franzen, Krista Queen, Anna Uehara, Ying Tao, Yan Li, Jing Zhang, Clinton R. Paden, Haibin Wang, Suxiang Tong                                                                                                                                                                                                                                                                                                                                                                                                                                                                                                                                                                                                                                                                                                                                                                                       |
| EPI_ISL_511879                                                                                                                                                                                                                                                                                                                                                                                                                                                                                                                                                                                                                                                                                                                                                                                                                                                                                                                                                                                                                                                                                                                                                                                                                                                                                                                                                                                                                                                                                                                                                                                                 |           | Laboratorium Kesehatan Provinsi Jawa Barat                                                                                                                                                      | Molecular Genetics Laboratory-Faculty of Medicine-Universitas Padjadjaran; School of Life Sciences and Technology & School of Pharmacy-Institut Teknologi Bandung; Laboratorium Kesehatan Provinsi Jawa Barat | Marselina Irasonia Tan, Yunia Sribudiani, Catur Riani, Azzania Fibriani, Husna Nugrahaprajaya, Tarwadi, Ema Rahmawati, Hesti Lina Wiraswati, Lia Faridah, Savira Ekawardhani, Ryan Bayusantika Ristandi, Rifky Waluyajati Rachman, Cut Nur Cinthia Alamanda, Hammam Riza, Soni Solistia Wirawan, Agung Eru Wibowo                                                                                                                                                                                                                                                                                                                                                                                                                                                                                                                                                                                                           |
| EPI_ISL_512822, EPI_ISL_512823, EPI_ISL_512824, EPI_ISL_512825, EPI_ISL_512826, EPI_ISL_512827, EPI_ISL_512828, EPI_ISL_512829, EPI_ISL_512830, EPI_ISL_512831, EPI_ISL_512832, EPI_ISL_512833, EPI_ISL_512834, EPI_ISL_512835, EPI_ISL_512836, EPI_ISL_512837, EPI_ISL_512838, EPI_ISL_512839, EPI_ISL_512840, EPI_ISL_512841, EPI_ISL_512842                                                                                                                                                                                                                                                                                                                                                                                                                                                                                                                                                                                                                                                                                                                                                                                                                                                                                                                                                                                                                                                                                                                                                                                                                                                                 | see above | National Public Health Laboratory, National Centre for Infectious Diseases                                                                                                                      | National Public Health Laboratory, National Centre for Infectious Diseases                                                                                                                                    | Mak TM, Octavia S, Zhou Z, Chavatte JM, Cui L, Lin RTP                                                                                                                                                                                                                                                                                                                                                                                                                                                                                                                                                                                                                                                                                                                                                                                                                                                                      |
| EPI_ISL_513414, EPI_ISL_513415, EPI_ISL_513416, EPI_ISL_513417, EPI_ISL_513418, EPI_ISL_513419, EPI_ISL_513420, EPI_ISL_513421, EPI_ISL_513422, EPI_ISL_513423, EPI_ISL_513424, EPI_ISL_513425, EPI_ISL_513426, EPI_ISL_513427, EPI_ISL_513428, EPI_ISL_513429, EPI_ISL_513430, EPI_ISL_513431, EPI_ISL_513432, EPI_ISL_513433, EPI_ISL_513434, EPI_ISL_513435, EPI_ISL_513436, EPI_ISL_513437, EPI_ISL_513438, EPI_ISL_513439, EPI_ISL_513440, EPI_ISL_513441, EPI_ISL_513442, EPI_ISL_513443, EPI_ISL_513444, EPI_ISL_513445, EPI_ISL_513446, EPI_ISL_513447, EPI_ISL_513448, EPI_ISL_513449, EPI_ISL_513450, EPI_ISL_513451, EPI_ISL_513452, EPI_ISL_513453, EPI_ISL_513454, EPI_ISL_513455, EPI_ISL_513456, EPI_ISL_513457, EPI_ISL_513458, EPI_ISL_513459, EPI_ISL_513460, EPI_ISL_513461, EPI_ISL_513462, EPI_ISL_513463, EPI_ISL_513464, EPI_ISL_513465, EPI_ISL_513466, EPI_ISL_513467, EPI_ISL_513468, EPI_ISL_513469, EPI_ISL_513470, EPI_ISL_513471, EPI_ISL_513472, EPI_ISL_513473, EPI_ISL_513474, EPI_ISL_513475, EPI_ISL_513476, EPI_ISL_513477, EPI_ISL_513478, EPI_ISL_513479, EPI_ISL_513480, EPI_ISL_513481, EPI_ISL_513482, EPI_ISL_513483, EPI_ISL_513484, EPI_ISL_513485, EPI_ISL_513486, EPI_ISL_513487, EPI_ISL_513488, EPI_ISL_513489, EPI_ISL_513490, EPI_ISL_513491, EPI_ISL_513492, EPI_ISL_513493, EPI_ISL_513494, EPI_ISL_513495, EPI_ISL_513496, EPI_ISL_513497, EPI_ISL_513498, EPI_ISL_513499, EPI_ISL_513500, EPI_ISL_513501, EPI_ISL_513502, EPI_ISL_513503, EPI_ISL_513504, EPI_ISL_513505, EPI_ISL_513506, EPI_ISL_513507, EPI_ISL_513508, EPI_ISL_513509, EPI_ISL_513510 | see above | Maine HETL                                                                                                                                                                                      | Tewhey Lab, The Jackson Laboratory                                                                                                                                                                            | Matluk,N., Dewey,H., Barter,M., Lynch,R., Munger,H. and Tewhey,R.                                                                                                                                                                                                                                                                                                                                                                                                                                                                                                                                                                                                                                                                                                                                                                                                                                                           |
| EPI_ISL_514438, EPI_ISL_514439                                                                                                                                                                                                                                                                                                                                                                                                                                                                                                                                                                                                                                                                                                                                                                                                                                                                                                                                                                                                                                                                                                                                                                                                                                                                                                                                                                                                                                                                                                                                                                                 |           | Tewhey Lab, The Jackson Laboratory                                                                                                                                                              | Tewhey Lab, The Jackson Laboratory                                                                                                                                                                            | Matluk,N., Dewey,H., Barter,M., Lynch,R., Munger,H., Tewhey,R.                                                                                                                                                                                                                                                                                                                                                                                                                                                                                                                                                                                                                                                                                                                                                                                                                                                              |
| EPI_ISL_514516, EPI_ISL_514517, EPI_ISL_514518, EPI_ISL_514519, EPI_ISL_514520, EPI_ISL_514521, EPI_ISL_514522, EPI_ISL_514523, EPI_ISL_514524, EPI_ISL_514525, EPI_ISL_514526, EPI_ISL_514527, EPI_ISL_514528, EPI_ISL_514529, EPI_ISL_514531, EPI_ISL_514532, EPI_ISL_514533, EPI_ISL_514534, EPI_ISL_514535, EPI_ISL_514536, EPI_ISL_514537, EPI_ISL_514538, EPI_ISL_514539, EPI_ISL_514540, EPI_ISL_514541, EPI_ISL_514542, EPI_ISL_514543, EPI_ISL_514544, EPI_ISL_514545, EPI_ISL_514546, EPI_ISL_514547, EPI_ISL_514548, EPI_ISL_514549, EPI_ISL_514550, EPI_ISL_514551, EPI_ISL_514552, EPI_ISL_514553, EPI_ISL_514554, EPI_ISL_514555, EPI_ISL_514556, EPI_ISL_514557, EPI_ISL_514558, EPI_ISL_514559, EPI_ISL_514560, EPI_ISL_514561, EPI_ISL_514562                                                                                                                                                                                                                                                                                                                                                                                                                                                                                                                                                                                                                                                                                                                                                                                                                                                 |           |                                                                                                                                                                                                 |                                                                                                                                                                                                               |                                                                                                                                                                                                                                                                                                                                                                                                                                                                                                                                                                                                                                                                                                                                                                                                                                                                                                                             |

|                                                                                                                                                                                                                                                                                                                                                                                                                                                                                                                                                                                                                                                                                                                                                                                                                                |                                                                                                                                                                                                 |                                                                                           |                                                                                                                                                                                                                   |
|--------------------------------------------------------------------------------------------------------------------------------------------------------------------------------------------------------------------------------------------------------------------------------------------------------------------------------------------------------------------------------------------------------------------------------------------------------------------------------------------------------------------------------------------------------------------------------------------------------------------------------------------------------------------------------------------------------------------------------------------------------------------------------------------------------------------------------|-------------------------------------------------------------------------------------------------------------------------------------------------------------------------------------------------|-------------------------------------------------------------------------------------------|-------------------------------------------------------------------------------------------------------------------------------------------------------------------------------------------------------------------|
| see above                                                                                                                                                                                                                                                                                                                                                                                                                                                                                                                                                                                                                                                                                                                                                                                                                      | Virology Department, Royal Infirmary of Edinburgh, NHS Lothian / School of Biological Sciences, University of Edinburgh / Institute of Genetics and Molecular Medicine, University of Edinburgh | COVID-19 Genomics UK (COG-UK) Consortium                                                  | McHugh M, Dewar R, Rooke S, Gallagher M, Balcaza C, O'Toole Á, Scher E, Hill V, McCrone JT, Colquhoun R, Yu X, Jackson B, Rambaut A, Williams TC, Templeton K                                                     |
| EPI_ISL_514616, EPI_ISL_514617, EPI_ISL_514618                                                                                                                                                                                                                                                                                                                                                                                                                                                                                                                                                                                                                                                                                                                                                                                 | Minnesota Department of Health, Public Health Laboratory                                                                                                                                        | Minnesota Department of Health, Public Health Laboratory                                  | Matt Plumb, Jacob Garfin, and Xiong Wang                                                                                                                                                                          |
| EPI_ISL_514619, EPI_ISL_514620, EPI_ISL_514621, EPI_ISL_514622, EPI_ISL_514623, EPI_ISL_514624, EPI_ISL_514625, EPI_ISL_514626, EPI_ISL_514627, EPI_ISL_514628                                                                                                                                                                                                                                                                                                                                                                                                                                                                                                                                                                                                                                                                 | Mayo Clinic & Mayo Clinic Laboratories                                                                                                                                                          | Minnesota Department of Health, Public Health Laboratory                                  | Matt Plumb, Jacob Garfin, and Xiong Wang                                                                                                                                                                          |
| EPI_ISL_514629, EPI_ISL_514630, EPI_ISL_514631, EPI_ISL_514632, EPI_ISL_514633, EPI_ISL_514634, EPI_ISL_514635                                                                                                                                                                                                                                                                                                                                                                                                                                                                                                                                                                                                                                                                                                                 | M Health Fairview                                                                                                                                                                               | Minnesota Department of Health, Public Health Laboratory                                  | Matt Plumb, Jacob Garfin, and Xiong Wang                                                                                                                                                                          |
| EPI_ISL_514636                                                                                                                                                                                                                                                                                                                                                                                                                                                                                                                                                                                                                                                                                                                                                                                                                 | Mayo Clinic & Mayo Clinic Laboratories                                                                                                                                                          | Minnesota Department of Health, Public Health Laboratory                                  | Matt Plumb, Jacob Garfin, and Xiong Wang                                                                                                                                                                          |
| EPI_ISL_514637                                                                                                                                                                                                                                                                                                                                                                                                                                                                                                                                                                                                                                                                                                                                                                                                                 | M Health Fairview St. Joseph's Hospital                                                                                                                                                         | Minnesota Department of Health, Public Health Laboratory                                  | Matt Plumb, Jacob Garfin, and Xiong Wang                                                                                                                                                                          |
| EPI_ISL_514638, EPI_ISL_514639, EPI_ISL_514640                                                                                                                                                                                                                                                                                                                                                                                                                                                                                                                                                                                                                                                                                                                                                                                 | Mayo Clinic & Mayo Clinic Laboratories                                                                                                                                                          | Minnesota Department of Health, Public Health Laboratory                                  | Matt Plumb, Jacob Garfin, and Xiong Wang                                                                                                                                                                          |
| EPI_ISL_514641                                                                                                                                                                                                                                                                                                                                                                                                                                                                                                                                                                                                                                                                                                                                                                                                                 | St. Luke's Hospital                                                                                                                                                                             | Minnesota Department of Health, Public Health Laboratory                                  | Matt Plumb, Jacob Garfin, and Xiong Wang                                                                                                                                                                          |
| EPI_ISL_514642                                                                                                                                                                                                                                                                                                                                                                                                                                                                                                                                                                                                                                                                                                                                                                                                                 | Essentia Health-St. Mary's Medical Center                                                                                                                                                       | Minnesota Department of Health, Public Health Laboratory                                  | Matt Plumb, Jacob Garfin, and Xiong Wang                                                                                                                                                                          |
| EPI_ISL_514643                                                                                                                                                                                                                                                                                                                                                                                                                                                                                                                                                                                                                                                                                                                                                                                                                 | M Health Fairview St. Joseph's Hospital                                                                                                                                                         | Minnesota Department of Health, Public Health Laboratory                                  | Matt Plumb, Jacob Garfin, and Xiong Wang                                                                                                                                                                          |
| EPI_ISL_514644                                                                                                                                                                                                                                                                                                                                                                                                                                                                                                                                                                                                                                                                                                                                                                                                                 | Mayo Clinic & Mayo Clinic Laboratories                                                                                                                                                          | Minnesota Department of Health, Public Health Laboratory                                  | Matt Plumb, Jacob Garfin, and Xiong Wang                                                                                                                                                                          |
| EPI_ISL_514645                                                                                                                                                                                                                                                                                                                                                                                                                                                                                                                                                                                                                                                                                                                                                                                                                 | Avera McKennan Laboratory                                                                                                                                                                       | Minnesota Department of Health, Public Health Laboratory                                  | Matt Plumb, Jacob Garfin, and Xiong Wang                                                                                                                                                                          |
| EPI_ISL_514646                                                                                                                                                                                                                                                                                                                                                                                                                                                                                                                                                                                                                                                                                                                                                                                                                 | St. Luke's Hospital                                                                                                                                                                             | Minnesota Department of Health, Public Health Laboratory                                  | Matt Plumb, Jacob Garfin, and Xiong Wang                                                                                                                                                                          |
| EPI_ISL_514647                                                                                                                                                                                                                                                                                                                                                                                                                                                                                                                                                                                                                                                                                                                                                                                                                 | Allina Health Laboratory                                                                                                                                                                        | Minnesota Department of Health, Public Health Laboratory                                  | Matt Plumb, Jacob Garfin, and Xiong Wang                                                                                                                                                                          |
| EPI_ISL_514648                                                                                                                                                                                                                                                                                                                                                                                                                                                                                                                                                                                                                                                                                                                                                                                                                 | Essentia Health-St. Joseph's Medical Center                                                                                                                                                     | Minnesota Department of Health, Public Health Laboratory                                  | Matt Plumb, Jacob Garfin, and Xiong Wang                                                                                                                                                                          |
| EPI_ISL_514649                                                                                                                                                                                                                                                                                                                                                                                                                                                                                                                                                                                                                                                                                                                                                                                                                 | Allina Health Laboratory                                                                                                                                                                        | Minnesota Department of Health, Public Health Laboratory                                  | Matt Plumb, Jacob Garfin, and Xiong Wang                                                                                                                                                                          |
| EPI_ISL_514650                                                                                                                                                                                                                                                                                                                                                                                                                                                                                                                                                                                                                                                                                                                                                                                                                 | M Health Fairview St. Joseph's Hospital                                                                                                                                                         | Minnesota Department of Health, Public Health Laboratory                                  | Matt Plumb, Jacob Garfin, and Xiong Wang                                                                                                                                                                          |
| EPI_ISL_514651                                                                                                                                                                                                                                                                                                                                                                                                                                                                                                                                                                                                                                                                                                                                                                                                                 | Allina Health Laboratory                                                                                                                                                                        | Minnesota Department of Health, Public Health Laboratory                                  | Matt Plumb, Jacob Garfin, and Xiong Wang                                                                                                                                                                          |
| EPI_ISL_514652                                                                                                                                                                                                                                                                                                                                                                                                                                                                                                                                                                                                                                                                                                                                                                                                                 | M Health Fairview St. Joseph's Hospital                                                                                                                                                         | Minnesota Department of Health, Public Health Laboratory                                  | Matt Plumb, Jacob Garfin, and Xiong Wang                                                                                                                                                                          |
| EPI_ISL_514653, EPI_ISL_514654, EPI_ISL_514655, EPI_ISL_514656                                                                                                                                                                                                                                                                                                                                                                                                                                                                                                                                                                                                                                                                                                                                                                 | Mayo Clinic & Mayo Clinic Laboratories                                                                                                                                                          | Minnesota Department of Health, Public Health Laboratory                                  | Matt Plumb, Jacob Garfin, and Xiong Wang                                                                                                                                                                          |
| EPI_ISL_514657                                                                                                                                                                                                                                                                                                                                                                                                                                                                                                                                                                                                                                                                                                                                                                                                                 | M Health Fairview St. Joseph's Hospital                                                                                                                                                         | Minnesota Department of Health, Public Health Laboratory                                  | Matt Plumb, Jacob Garfin, and Xiong Wang                                                                                                                                                                          |
| EPI_ISL_514658, EPI_ISL_514659, EPI_ISL_514660, EPI_ISL_514661, EPI_ISL_514662, EPI_ISL_514663, EPI_ISL_514664, EPI_ISL_514665, EPI_ISL_514666, EPI_ISL_514667, EPI_ISL_514668, EPI_ISL_514669, EPI_ISL_514670, EPI_ISL_514671, EPI_ISL_514672                                                                                                                                                                                                                                                                                                                                                                                                                                                                                                                                                                                 | Minnesota Department of Health, Public Health Laboratory                                                                                                                                        | Minnesota Department of Health, Public Health Laboratory                                  | Matt Plumb, Jacob Garfin, and Xiong Wang                                                                                                                                                                          |
| see above                                                                                                                                                                                                                                                                                                                                                                                                                                                                                                                                                                                                                                                                                                                                                                                                                      | Minnesota Department of Health, Public Health Laboratory                                                                                                                                        | Minnesota Department of Health, Public Health Laboratory                                  | Matt Plumb, Jacob Garfin, and Xiong Wang                                                                                                                                                                          |
| EPI_ISL_515197, EPI_ISL_515198, EPI_ISL_515199, EPI_ISL_515200, EPI_ISL_515201, EPI_ISL_515202, EPI_ISL_515203, EPI_ISL_515204, EPI_ISL_515205, EPI_ISL_515206, EPI_ISL_515207, EPI_ISL_515208, EPI_ISL_515209, EPI_ISL_515210, EPI_ISL_515211, EPI_ISL_515212, EPI_ISL_515213, EPI_ISL_515214, EPI_ISL_515215, EPI_ISL_515216, EPI_ISL_515217, EPI_ISL_515218, EPI_ISL_515219, EPI_ISL_515220, EPI_ISL_515221, EPI_ISL_515222, EPI_ISL_515223, EPI_ISL_515224, EPI_ISL_515225, EPI_ISL_515226, EPI_ISL_515227, EPI_ISL_515228, EPI_ISL_515229, EPI_ISL_515230, EPI_ISL_515231, EPI_ISL_515232, EPI_ISL_515233, EPI_ISL_515234, EPI_ISL_515235, EPI_ISL_515236, EPI_ISL_515237, EPI_ISL_515238, EPI_ISL_515239, EPI_ISL_515240, EPI_ISL_515241, EPI_ISL_515242, EPI_ISL_515243, EPI_ISL_515244, EPI_ISL_515245, EPI_ISL_515246 | Laboratoire de microbiologie, Hôpital de Verdun                                                                                                                                                 | Smith Laboratory, Centre de Recherche CHU Sainte-Justine                                  | Martin Smith, Marieke Rozendaal, Ivan Pavlov                                                                                                                                                                      |
| EPI_ISL_515262                                                                                                                                                                                                                                                                                                                                                                                                                                                                                                                                                                                                                                                                                                                                                                                                                 | Minnesota Department of Health, Public Health Laboratory                                                                                                                                        | Minnesota Department of Health, Public Health Laboratory                                  | Matt Plumb, Jacob Garfin, and Xiong Wang                                                                                                                                                                          |
| EPI_ISL_515263, EPI_ISL_515264, EPI_ISL_515265, EPI_ISL_515266                                                                                                                                                                                                                                                                                                                                                                                                                                                                                                                                                                                                                                                                                                                                                                 | Mayo Clinic & Mayo Clinic Laboratories                                                                                                                                                          | Minnesota Department of Health, Public Health Laboratory                                  | Matt Plumb, Jacob Garfin, and Xiong Wang                                                                                                                                                                          |
| EPI_ISL_515267, EPI_ISL_515268                                                                                                                                                                                                                                                                                                                                                                                                                                                                                                                                                                                                                                                                                                                                                                                                 | M Health Fairview                                                                                                                                                                               | Minnesota Department of Health, Public Health Laboratory                                  | Matt Plumb, Jacob Garfin, and Xiong Wang                                                                                                                                                                          |
| EPI_ISL_515269                                                                                                                                                                                                                                                                                                                                                                                                                                                                                                                                                                                                                                                                                                                                                                                                                 | Minnesota Department of Health, Public Health Laboratory                                                                                                                                        | Minnesota Department of Health, Public Health Laboratory                                  | Matt Plumb, Jacob Garfin, and Xiong Wang                                                                                                                                                                          |
| EPI_ISL_516193                                                                                                                                                                                                                                                                                                                                                                                                                                                                                                                                                                                                                                                                                                                                                                                                                 | Hospital Universitari Germans Trias i Pujol                                                                                                                                                     | IrsiCaixa AIDS Research Lab                                                               | Marc Noguera-Julian, Mariona Parera, Maria Pilar Armengol, Marta Massanella, Ester Ballana, Lidia Ruiz, Nuria Izquierdo, Jorge Carrillo, Roger Paredes, Julia Blanco, Joaquim Segalés, Bonaventura Clotet         |
| EPI_ISL_516807, EPI_ISL_516808, EPI_ISL_516809, EPI_ISL_516810, EPI_ISL_516811, EPI_ISL_516812, EPI_ISL_516813, EPI_ISL_516814, EPI_ISL_516815, EPI_ISL_516816, EPI_ISL_516817, EPI_ISL_516818, EPI_ISL_516819, EPI_ISL_516820, EPI_ISL_516821, EPI_ISL_516822, EPI_ISL_516823, EPI_ISL_516824, EPI_ISL_516825, EPI_ISL_516826, EPI_ISL_516827, EPI_ISL_516828                                                                                                                                                                                                                                                                                                                                                                                                                                                                 | National Public Health Laboratory, National Centre for Infectious Diseases                                                                                                                      | National Public Health Laboratory, National Centre for Infectious Diseases                | Mak TM, Octavia S, Zhou Z, Cui L, Lin RTP                                                                                                                                                                         |
| EPI_ISL_517585, EPI_ISL_517586, EPI_ISL_517587, EPI_ISL_517589                                                                                                                                                                                                                                                                                                                                                                                                                                                                                                                                                                                                                                                                                                                                                                 | Virology Department, Royal Infirmary of Edinburgh, NHS Lothian / School of Biological Sciences, University of Edinburgh / Institute of Genetics and Molecular Medicine, University of Edinburgh | COVID-19 Genomics UK (COG-UK) Consortium                                                  | McHugh M, Dewar R, Rooke S, Gallagher M, Balcaza C, O'Toole Á, Scher E, Hill V, McCrone JT, Colquhoun R, Yu X, Jackson B, Rambaut A, Williams TC, Templeton K                                                     |
| EPI_ISL_518855                                                                                                                                                                                                                                                                                                                                                                                                                                                                                                                                                                                                                                                                                                                                                                                                                 | Minnesota Department of Health, Public Health Laboratory                                                                                                                                        | Minnesota Department of Health, Public Health Laboratory                                  | Matt Plumb, Jacob Garfin, and Xiong Wang                                                                                                                                                                          |
| EPI_ISL_518856, EPI_ISL_518857, EPI_ISL_518858, EPI_ISL_518859, EPI_ISL_518860, EPI_ISL_518861, EPI_ISL_518862, EPI_ISL_518863, EPI_ISL_518864, EPI_ISL_518865, EPI_ISL_518866, EPI_ISL_518867, EPI_ISL_518868, EPI_ISL_518869, EPI_ISL_518870, EPI_ISL_518871, EPI_ISL_518872, EPI_ISL_518873, EPI_ISL_518874, EPI_ISL_518875, EPI_ISL_518876, EPI_ISL_518877, EPI_ISL_518878, EPI_ISL_518879, EPI_ISL_518880, EPI_ISL_518881, EPI_ISL_518882, EPI_ISL_518883, EPI_ISL_518884, EPI_ISL_518885, EPI_ISL_518886, EPI_ISL_518887, EPI_ISL_518888, EPI_ISL_518889, EPI_ISL_518890, EPI_ISL_521153                                                                                                                                                                                                                                 | Mayo Clinic & Mayo Clinic Laboratories                                                                                                                                                          | Minnesota Department of Health, Public Health Laboratory                                  | Matt Plumb, Jacob Garfin, and Xiong Wang                                                                                                                                                                          |
| EPI_ISL_522824, EPI_ISL_522825, EPI_ISL_522826, EPI_ISL_522827, EPI_ISL_522828, EPI_ISL_522829, EPI_ISL_522830, EPI_ISL_522831, EPI_ISL_522832, EPI_ISL_522833, EPI_ISL_522834, EPI_ISL_522835, EPI_ISL_522836, EPI_ISL_522837, EPI_ISL_522838, EPI_ISL_522839, EPI_ISL_522840, EPI_ISL_522841, EPI_ISL_522842, EPI_ISL_522843, EPI_ISL_522844, EPI_ISL_522845, EPI_ISL_522846, EPI_ISL_522847, EPI_ISL_522848, EPI_ISL_522849, EPI_ISL_522850, EPI_ISL_522851, EPI_ISL_522852, EPI_ISL_522853, EPI_ISL_522854, EPI_ISL_522855, EPI_ISL_522856, EPI_ISL_522857                                                                                                                                                                                                                                                                 | Maryland Department of Health                                                                                                                                                                   | Maryland Department of Health                                                             | Maryland Department of Health Laboratories Administration                                                                                                                                                         |
| EPI_ISL_523927, EPI_ISL_523928, EPI_ISL_523929                                                                                                                                                                                                                                                                                                                                                                                                                                                                                                                                                                                                                                                                                                                                                                                 | Center of Medical Microbiology, Virology, and Hospital Hygiene, University of Duesseldorf                                                                                                       | Center of Medical Microbiology, Virology, and Hospital Hygiene, University of Duesseldorf | Maximilian Damagnez, Alexander Diltthey, Torsten Houwaart, Malte Kohns Vasconcelos, Marek Korencak, Jessica Nicolai, Klaus Pfeffer, Hendrik Streeck, Daniel Strelow, Jörg Timm, Andreas Walker, Tobias Wienermann |
| EPI_ISL_523930                                                                                                                                                                                                                                                                                                                                                                                                                                                                                                                                                                                                                                                                                                                                                                                                                 | Center of Medical Microbiology, Virology, and Hospital Hygiene, University of Duesseldorf                                                                                                       | Universitätstr.1 40225 Düsseldorf Germany                                                 | Maximilian Damagnez, Alexander Diltthey, Torsten Houwaart, Malte Kohns Vasconcelos, Marek Korencak, Jessica Nicolai, Klaus Pfeffer, Hendrik Streeck, Daniel Strelow, Jörg Timm, Andreas Walker, Tobias Wienermann |

|                                                                                                                                                                                                                                                                                                                                                                                                                                                                                                                                                                                                                                                                                                                                                                                                                                                                                                                                                                                                                                                                                                |           |                                                                                                                                                                                                 |                                                                                                                                                                                                                                                                           |                                                                                                                                                                                                                                                                                                                                                                                                                                                                                       |
|------------------------------------------------------------------------------------------------------------------------------------------------------------------------------------------------------------------------------------------------------------------------------------------------------------------------------------------------------------------------------------------------------------------------------------------------------------------------------------------------------------------------------------------------------------------------------------------------------------------------------------------------------------------------------------------------------------------------------------------------------------------------------------------------------------------------------------------------------------------------------------------------------------------------------------------------------------------------------------------------------------------------------------------------------------------------------------------------|-----------|-------------------------------------------------------------------------------------------------------------------------------------------------------------------------------------------------|---------------------------------------------------------------------------------------------------------------------------------------------------------------------------------------------------------------------------------------------------------------------------|---------------------------------------------------------------------------------------------------------------------------------------------------------------------------------------------------------------------------------------------------------------------------------------------------------------------------------------------------------------------------------------------------------------------------------------------------------------------------------------|
| EPI_ISL_523931, EPI_ISL_523932, EPI_ISL_523933, EPI_ISL_523934, EPI_ISL_523935, EPI_ISL_523936, EPI_ISL_523937, EPI_ISL_523938, EPI_ISL_523939, EPI_ISL_523940, EPI_ISL_523941, EPI_ISL_523942, EPI_ISL_523943, EPI_ISL_523944, EPI_ISL_523945, EPI_ISL_523946, EPI_ISL_523947, EPI_ISL_523948, EPI_ISL_523949                                                                                                                                                                                                                                                                                                                                                                                                                                                                                                                                                                                                                                                                                                                                                                                 | see above | Center of Medical Microbiology, Virology, and Hospital Hygiene, University of Duesseldorf                                                                                                       | Center of Medical Microbiology, Virology, and Hospital Hygiene, University of Duesseldorf                                                                                                                                                                                 | Maximilian Damagnez, Alexander Dilthey, Torsten Houwaart, Malte Kohns Vasconcelos, Marek Korencak, Jessica Nicolai, Klaus Pfeffer, Hendrik Streeck, Daniel Strelow, Jörg Timm, Andreas Walker, Tobias Wienemann                                                                                                                                                                                                                                                                       |
| EPI_ISL_523950                                                                                                                                                                                                                                                                                                                                                                                                                                                                                                                                                                                                                                                                                                                                                                                                                                                                                                                                                                                                                                                                                 |           | Center of Medical Microbiology, Virology, and Hospital Hygiene, University of Duesseldorf                                                                                                       | Center of Medical Microbiology, Virology, and Hospital Hygiene, Heinrich Heine University Düsseldorf                                                                                                                                                                      | Maximilian Damagnez, Alexander Dilthey, Torsten Houwaart, Malte Kohns Vasconcelos, Marek Korencak, Jessica Nicolai, Klaus Pfeffer, Hendrik Streeck, Daniel Strelow, Jörg Timm, Andreas Walker, Tobias Wienemann                                                                                                                                                                                                                                                                       |
| EPI_ISL_524873, EPI_ISL_524874, EPI_ISL_524875, EPI_ISL_524876, EPI_ISL_524877, EPI_ISL_524878, EPI_ISL_524879, EPI_ISL_524880, EPI_ISL_524881, EPI_ISL_524882, EPI_ISL_524883, EPI_ISL_524884, EPI_ISL_524885, EPI_ISL_524886, EPI_ISL_524887, EPI_ISL_524888, EPI_ISL_524889, EPI_ISL_524890, EPI_ISL_524891, EPI_ISL_524892, EPI_ISL_524893, EPI_ISL_524894, EPI_ISL_524895, EPI_ISL_524896, EPI_ISL_524897, EPI_ISL_524898, EPI_ISL_524899, EPI_ISL_524900, EPI_ISL_524901, EPI_ISL_524902, EPI_ISL_524903                                                                                                                                                                                                                                                                                                                                                                                                                                                                                                                                                                                 | see above | MD PHL                                                                                                                                                                                          | MD PHL                                                                                                                                                                                                                                                                    | Maryland Department of Health Laboratories Administration                                                                                                                                                                                                                                                                                                                                                                                                                             |
| EPI_ISL_525118                                                                                                                                                                                                                                                                                                                                                                                                                                                                                                                                                                                                                                                                                                                                                                                                                                                                                                                                                                                                                                                                                 |           | Maryland Department of Health Laboratory                                                                                                                                                        | Maryland Department of Health Laboratory                                                                                                                                                                                                                                  | Maryland Department of Health Laboratories Administration                                                                                                                                                                                                                                                                                                                                                                                                                             |
| EPI_ISL_526459, EPI_ISL_526460, EPI_ISL_526461, EPI_ISL_526462, EPI_ISL_526463, EPI_ISL_526464, EPI_ISL_526465, EPI_ISL_526466, EPI_ISL_526467, EPI_ISL_526468, EPI_ISL_526469, EPI_ISL_526471, EPI_ISL_526472, EPI_ISL_526473, EPI_ISL_526474, EPI_ISL_526475, EPI_ISL_526476, EPI_ISL_526477, EPI_ISL_526479, EPI_ISL_526480, EPI_ISL_526481, EPI_ISL_526482, EPI_ISL_526483, EPI_ISL_526484, EPI_ISL_526485, EPI_ISL_526486, EPI_ISL_526487, EPI_ISL_526488, EPI_ISL_526489, EPI_ISL_526490, EPI_ISL_526491, EPI_ISL_526492, EPI_ISL_526493, EPI_ISL_526494, EPI_ISL_526495, EPI_ISL_526496, EPI_ISL_526497, EPI_ISL_526498, EPI_ISL_526499, EPI_ISL_526501, EPI_ISL_526502, EPI_ISL_526503, EPI_ISL_526504, EPI_ISL_526505, EPI_ISL_526506, EPI_ISL_526507, EPI_ISL_526509, EPI_ISL_526510, EPI_ISL_526511, EPI_ISL_526514, EPI_ISL_526515, EPI_ISL_526517, EPI_ISL_526519, EPI_ISL_526520, EPI_ISL_526521, EPI_ISL_526523, EPI_ISL_526525, EPI_ISL_526526, EPI_ISL_526527, EPI_ISL_526529, EPI_ISL_526530, EPI_ISL_526531, EPI_ISL_526532, EPI_ISL_526533, EPI_ISL_526535, EPI_ISL_526536 | see above | Virology Department, Royal Infirmary of Edinburgh, NHS Lothian / School of Biological Sciences, University of Edinburgh / Institute of Genetics and Molecular Medicine, University of Edinburgh | COVID-19 Genomics UK (COG-UK) Consortium                                                                                                                                                                                                                                  | McHugh M, Dewar R, Rooke S, Gallagher M, Balcaza C, O'Toole Á, Scher E, Hill V, McCrone JT, Colquhoun R, Yu X, Jackson B, Rambaut A, Williams TC, Templeton K                                                                                                                                                                                                                                                                                                                         |
| EPI_ISL_526935, EPI_ISL_526936, EPI_ISL_526937, EPI_ISL_526938, EPI_ISL_526939, EPI_ISL_526940, EPI_ISL_526941, EPI_ISL_526942, EPI_ISL_526943, EPI_ISL_526944, EPI_ISL_526945, EPI_ISL_526946, EPI_ISL_526947, EPI_ISL_526948                                                                                                                                                                                                                                                                                                                                                                                                                                                                                                                                                                                                                                                                                                                                                                                                                                                                 | see above | Faroese National Reference Laboratory for Fish and Animal Diseases                                                                                                                              | Faroese National Reference Laboratory for Fish and Animal Diseases                                                                                                                                                                                                        | Maria Marjunardóttir Dahl, Petra Elisabeth Petersen, Debes Hammershaimb Christiansen                                                                                                                                                                                                                                                                                                                                                                                                  |
| EPI_ISL_527359, EPI_ISL_527360, EPI_ISL_527361, EPI_ISL_527362, EPI_ISL_527363, EPI_ISL_527364, EPI_ISL_527365, EPI_ISL_527366, EPI_ISL_527367, EPI_ISL_527368, EPI_ISL_527369, EPI_ISL_527370, EPI_ISL_527371, EPI_ISL_527372, EPI_ISL_527373, EPI_ISL_527374, EPI_ISL_527375, EPI_ISL_527376, EPI_ISL_527377, EPI_ISL_527378, EPI_ISL_527379                                                                                                                                                                                                                                                                                                                                                                                                                                                                                                                                                                                                                                                                                                                                                 | see above | National Public Health Laboratory, National Centre for Infectious Diseases                                                                                                                      | National Public Health Laboratory, National Centre for Infectious Diseases                                                                                                                                                                                                | Mak TM, Octavia S, Zhou Z, Cui L, Lin RTP                                                                                                                                                                                                                                                                                                                                                                                                                                             |
| EPI_ISL_527573, EPI_ISL_527574, EPI_ISL_527575, EPI_ISL_527576, EPI_ISL_527577, EPI_ISL_527578, EPI_ISL_527579, EPI_ISL_527580, EPI_ISL_527581, EPI_ISL_527582, EPI_ISL_527583, EPI_ISL_527584, EPI_ISL_527585, EPI_ISL_527586, EPI_ISL_527587, EPI_ISL_527588, EPI_ISL_527589, EPI_ISL_527590, EPI_ISL_527591, EPI_ISL_527592, EPI_ISL_527593, EPI_ISL_527594, EPI_ISL_527595, EPI_ISL_527596, EPI_ISL_527597, EPI_ISL_527598, EPI_ISL_527599, EPI_ISL_527600, EPI_ISL_527601, EPI_ISL_527602, EPI_ISL_527603, EPI_ISL_527604, EPI_ISL_527605, EPI_ISL_527606, EPI_ISL_527607, EPI_ISL_527608, EPI_ISL_527609, EPI_ISL_527610, EPI_ISL_527611, EPI_ISL_527612, EPI_ISL_527613, EPI_ISL_527614, EPI_ISL_527615, EPI_ISL_527616, EPI_ISL_527617, EPI_ISL_527618, EPI_ISL_527619, EPI_ISL_527620, EPI_ISL_527621, EPI_ISL_527622, EPI_ISL_527623, EPI_ISL_527624, EPI_ISL_527625, EPI_ISL_527626, EPI_ISL_527627, EPI_ISL_527628, EPI_ISL_527629                                                                                                                                                 | see above | Minnesota Department of Health, Public Health Laboratory<br>Mayo Clinic & Mayo Clinic Laboratories                                                                                              | Minnesota Department of Health, Public Health Laboratory<br>School of Life Sciences and Technology & School of Pharmacy-Institut Teknologi Bandung; Molecular Genetics Laboratory-Faculty of Medicine-Universitas Padjadjaran; Laboratorium Kesehatan Provinsi Jawa Barat | Matt Plumb, Jacob Garfin, and Xiong Wang<br>Matt Plumb, Jacob Garfin, and Xiong Wang<br>Marselina Irasonia Tan, Yunia Sribudiani, Catur Riani, Azzania Fibriani, Husna Nugrahapraja, Tarwadi, Ema Rahmawati, Savira Ekawardhani, Hesti Lina Wiraswati, Ryan Bayusantika Ristandi, Rifky Waluyajati Rachman, Cut Nur Cinthia Alamanda, Lia Faridah, Tri Hanggono Achmad, Mas Rizky A.A. Syamsunarno, Fensi Amalina, Hammam Riza, Sony Solistia Wirawan, Agung Eru Wibowo, Irvan Faizal |
| EPI_ISL_528745                                                                                                                                                                                                                                                                                                                                                                                                                                                                                                                                                                                                                                                                                                                                                                                                                                                                                                                                                                                                                                                                                 |           | Laboratorium Kesehatan Provinsi Jawa Barat                                                                                                                                                      | School of Life Sciences and Technology & School of Pharmacy-Institut Teknologi Bandung; Molecular Genetics Laboratory-Faculty of Medicine-Universitas Padjadjaran; Laboratorium Kesehatan Provinsi Jawa Barat                                                             | Marselina Irasonia Tan, Yunia Sribudiani, Catur Riani, Azzania Fibriani, Husna Nugrahapraja, Tarwadi, Ema Rahmawati, Savira Ekawardhani, Hesti Lina Wiraswati, Ryan Bayusantika Ristandi, Rifky Waluyajati Rachman, Cut Nur Cinthia Alamanda, Lia Faridah, Miftahul Farid, Karimatu Khoirunnisa, Hammam Riza, Sony Solistia Wirawan, Agung Eru Wibowo, Irvan Faizal                                                                                                                   |
| EPI_ISL_528750                                                                                                                                                                                                                                                                                                                                                                                                                                                                                                                                                                                                                                                                                                                                                                                                                                                                                                                                                                                                                                                                                 |           | Santo Borromeus Hospital                                                                                                                                                                        | School of Life Sciences and Technology & School of Pharmacy-Institut Teknologi Bandung; Molecular Genetics Laboratory-Faculty of Medicine-Universitas Padjadjaran; Laboratorium Kesehatan Provinsi Jawa Barat                                                             | Marselina Irasonia Tan, Yunia Sribudiani, Catur Riani, Azzania Fibriani, Husna Nugrahapraja, Tarwadi, Ema Rahmawati, Savira Ekawardhani, Hesti Lina Wiraswati, Ryan Bayusantika Ristandi, Rifky Waluyajati Rachman, Cut Nur Cinthia Alamanda, Lia Faridah, Miftahul Farid, Karimatu Khoirunnisa, Hammam Riza, Sony Solistia Wirawan, Agung Eru Wibowo, Irvan Faizal                                                                                                                   |
| EPI_ISL_529031                                                                                                                                                                                                                                                                                                                                                                                                                                                                                                                                                                                                                                                                                                                                                                                                                                                                                                                                                                                                                                                                                 |           | Central Molecular Microbiology Laboratory, Clinical and Chemical Pathology Department, Faculty of Medicine, CAIRO UNIVERSITY                                                                    | Next Generation Sequencing Reference Laboratory, Faculty of Medicine, CAIRO UNIVERSITY and The Center for Genome and Microbiome Research, Faculty of Pharmacy, CAIRO UNIVERSITY                                                                                           | May Sherif Soliman, May Abdelfattah, Ramy Karam Aziz                                                                                                                                                                                                                                                                                                                                                                                                                                  |
| EPI_ISL_529032                                                                                                                                                                                                                                                                                                                                                                                                                                                                                                                                                                                                                                                                                                                                                                                                                                                                                                                                                                                                                                                                                 |           | Central Molecular Microbiology Laboratory and Next Generation Sequencing Reference Laboratory, Clinical and Chemical Pathology Department, Faculty of Medicine, CAIRO UNIVERSITY                | Next Generation Sequencing Reference Laboratory, Faculty of Medicine, CAIRO UNIVERSITY and The Center for Genome and Microbiome Research, Faculty of Pharmacy, CAIRO UNIVERSITY                                                                                           | May Sherif Soliman, May Abdelfattah, Ramy Karam Aziz                                                                                                                                                                                                                                                                                                                                                                                                                                  |
| EPI_ISL_529285, EPI_ISL_529318, EPI_ISL_529478, EPI_ISL_529689, EPI_ISL_529691, EPI_ISL_529692, EPI_ISL_529693                                                                                                                                                                                                                                                                                                                                                                                                                                                                                                                                                                                                                                                                                                                                                                                                                                                                                                                                                                                 |           | Virology Department, Royal Infirmary of Edinburgh, NHS Lothian / School of Biological Sciences, University of Edinburgh / Institute of Genetics and Molecular Medicine, University of Edinburgh | COVID-19 Genomics UK (COG-UK) Consortium                                                                                                                                                                                                                                  | McHugh M, Dewar R, Rooke S, Gallagher M, Balcaza C, O'Toole Á, Scher E, Hill V, McCrone JT, Colquhoun R, Yu X, Jackson B, Rambaut A, Williams TC, Templeton K                                                                                                                                                                                                                                                                                                                         |
| EPI_ISL_530025, EPI_ISL_530026, EPI_ISL_530027, EPI_ISL_530028, EPI_ISL_530029, EPI_ISL_530030, EPI_ISL_530031, EPI_ISL_530032, EPI_ISL_530033, EPI_ISL_530034, EPI_ISL_530035, EPI_ISL_530036, EPI_ISL_530037, EPI_ISL_530038, EPI_ISL_530039, EPI_ISL_530040, EPI_ISL_530041, EPI_ISL_530042, EPI_ISL_530043, EPI_ISL_530070, EPI_ISL_530071, EPI_ISL_530072, EPI_ISL_530073, EPI_ISL_530074, EPI_ISL_530075, EPI_ISL_530076, EPI_ISL_530077, EPI_ISL_530078, EPI_ISL_530079, EPI_ISL_530080, EPI_ISL_530081, EPI_ISL_530082, EPI_ISL_530083, EPI_ISL_530084, EPI_ISL_530085, EPI_ISL_530086, EPI_ISL_530087, EPI_ISL_530088, EPI_ISL_530089, EPI_ISL_530090, EPI_ISL_530091, EPI_ISL_530092, EPI_ISL_530093                                                                                                                                                                                                                                                                                                                                                                                 | see above | Hospital Universitario La Paz                                                                                                                                                                   | Hospital Universitario La Paz                                                                                                                                                                                                                                             | María Rodríguez, Elias Dahdouh, Sara González, Raúl Recio, Fernando Lázaro, Esther Viedma, Natalia Stella, Julio García, Juan Carlos Galán, Rafael Cantón, Mª Dolores Folgueira, Rafael Delgado, Jesús Mingorance                                                                                                                                                                                                                                                                     |
| EPI_ISL_530114, EPI_ISL_530115, EPI_ISL_530116, EPI_ISL_530117, EPI_ISL_530118, EPI_ISL_530119                                                                                                                                                                                                                                                                                                                                                                                                                                                                                                                                                                                                                                                                                                                                                                                                                                                                                                                                                                                                 |           | Hospital Universitario Ramón y Cajal                                                                                                                                                            | Hospital Universitario La Paz                                                                                                                                                                                                                                             | María Rodríguez, Elias Dahdouh, Sara González, Raúl Recio, Fernando Lázaro, Esther Viedma, Natalia Stella, Julio García, Juan Carlos Galán, Rafael Cantón, Mª Dolores Folgueira, Rafael Delgado, Jesús Mingorance                                                                                                                                                                                                                                                                     |
| EPI_ISL_530163, EPI_ISL_530164, EPI_ISL_530165, EPI_ISL_530166, EPI_ISL_530167, EPI_ISL_530168                                                                                                                                                                                                                                                                                                                                                                                                                                                                                                                                                                                                                                                                                                                                                                                                                                                                                                                                                                                                 |           | M Health Fairview                                                                                                                                                                               | Minnesota Department of Health, Public Health Laboratory                                                                                                                                                                                                                  | Matt Plumb, Jacob Garfin, and Xiong Wang                                                                                                                                                                                                                                                                                                                                                                                                                                              |
| EPI_ISL_530169, EPI_ISL_530170, EPI_ISL_530171                                                                                                                                                                                                                                                                                                                                                                                                                                                                                                                                                                                                                                                                                                                                                                                                                                                                                                                                                                                                                                                 |           | Hennepin County Medical Center                                                                                                                                                                  | Minnesota Department of Health, Public Health Laboratory                                                                                                                                                                                                                  | Matt Plumb, Jacob Garfin, and Xiong Wang                                                                                                                                                                                                                                                                                                                                                                                                                                              |
| EPI_ISL_530172, EPI_ISL_530173, EPI_ISL_530174, EPI_ISL_530175, EPI_ISL_530176, EPI_ISL_530177, EPI_ISL_530178, EPI_ISL_530179, EPI_ISL_530180, EPI_ISL_530181, EPI_ISL_530182, EPI_ISL_530183, EPI_ISL_530184, EPI_ISL_530185, EPI_ISL_530186, EPI_ISL_530187, EPI_ISL_530188, EPI_ISL_530189, EPI_ISL_530190, EPI_ISL_530191, EPI_ISL_530192, EPI_ISL_530193, EPI_ISL_530194, EPI_ISL_530195, EPI_ISL_530196, EPI_ISL_530197, EPI_ISL_530198, EPI_ISL_530199, EPI_ISL_530200, EPI_ISL_530201, EPI_ISL_530202, EPI_ISL_530203, EPI_ISL_530204, EPI_ISL_530205, EPI_ISL_530206, EPI_ISL_530207, EPI_ISL_530208, EPI_ISL_530209, EPI_ISL_530210, EPI_ISL_530211, EPI_ISL_530212, EPI_ISL_530213, EPI_ISL_530214, EPI_ISL_530215, EPI_ISL_530216, EPI_ISL_530217, EPI_ISL_530218, EPI_ISL_530219, EPI_ISL_530220, EPI_ISL_530221, EPI_ISL_530222, EPI_ISL_530223, EPI_ISL_530224                                                                                                                                                                                                                 | see above | Minnesota Department of Health, Public Health Laboratory                                                                                                                                        | Minnesota Department of Health, Public Health Laboratory                                                                                                                                                                                                                  | Matt Plumb, Jacob Garfin, and Xiong Wang                                                                                                                                                                                                                                                                                                                                                                                                                                              |
| EPI_ISL_532659, EPI_ISL_532683, EPI_ISL_532689, EPI_ISL_532705, EPI_ISL_532926, EPI_ISL_532978, EPI_ISL_532983, EPI_ISL_532990, EPI_ISL_532992, EPI_ISL_532994                                                                                                                                                                                                                                                                                                                                                                                                                                                                                                                                                                                                                                                                                                                                                                                                                                                                                                                                 | see above | Virology Department, Royal Infirmary of Edinburgh, NHS Lothian / School of Biological Sciences, University of Edinburgh                                                                         | Wellcome Sanger Institute for the COVID-19 Genomics UK (COG-UK) consortium                                                                                                                                                                                                | McHugh M, Dewar R, Rooke S, O'Toole Á, Scher E, Hill V, McCrone JT, Colquhoun R, Yu X, Jackson B, Rambaut A, Templeton K and Alex Alderton, Roberto Amato, Sonia Goncalves, Ewan Harrison, David K. Jackson, Ian Johnston, Dominic Kwiatkowski, Cordelia Langford, John Sillitoe                                                                                                                                                                                                      |

|                                                                                                                                                                                                                                                                                                                                                                                                                                                                                                                                                                                                                                                                                                                                                                                                                                                                                                                                                                                                                                                                                                                                                                                                                                                                                                                                                                                                                                                                                                                                                                                                                                                                                                                                                                                                                                                                                                                                                                                                                                                                                                                                                                                                                                                                                                                                                                                                                                                                                                                                                                                                                                                                                                                                                                                                                                                                                                                                                                                                                                                                                                                                                                                                                                                                                                                                                                                                                                                                                                                                                                                                                                                                                                                                                                                                                                                                                                                                                                                                                                                                                                                                                                                                                                                                                                                                                                                                                                                                                                                                                                                                                                                                                                                                                                                                                                                                                                                                                                                                                                                                                                                                                                                                                                                                                                                                                                                                                                                                                                                                                                                                                                                                                                                                                                                                                                                                                                                                                                                                                                                                                                                                                                                                                                                                                                                                                                                                                                                                                                                                                                                                                                                                                                                                                                                                                                                                                                                                                                                                                                                                                                                                                                                                                                                                                                                                                                                                                                                                                                                                                                                                                                                                                                                                                                                                                                                                                                                                                                                                                                                                                                                                                                                                |                                                                                             |                                                                                              |                                                                                                                                                                                                                                                                                                                                                                                                                                                                                                                                   |                                                                                                                                                                                                                                                                                                                                                                    |
|------------------------------------------------------------------------------------------------------------------------------------------------------------------------------------------------------------------------------------------------------------------------------------------------------------------------------------------------------------------------------------------------------------------------------------------------------------------------------------------------------------------------------------------------------------------------------------------------------------------------------------------------------------------------------------------------------------------------------------------------------------------------------------------------------------------------------------------------------------------------------------------------------------------------------------------------------------------------------------------------------------------------------------------------------------------------------------------------------------------------------------------------------------------------------------------------------------------------------------------------------------------------------------------------------------------------------------------------------------------------------------------------------------------------------------------------------------------------------------------------------------------------------------------------------------------------------------------------------------------------------------------------------------------------------------------------------------------------------------------------------------------------------------------------------------------------------------------------------------------------------------------------------------------------------------------------------------------------------------------------------------------------------------------------------------------------------------------------------------------------------------------------------------------------------------------------------------------------------------------------------------------------------------------------------------------------------------------------------------------------------------------------------------------------------------------------------------------------------------------------------------------------------------------------------------------------------------------------------------------------------------------------------------------------------------------------------------------------------------------------------------------------------------------------------------------------------------------------------------------------------------------------------------------------------------------------------------------------------------------------------------------------------------------------------------------------------------------------------------------------------------------------------------------------------------------------------------------------------------------------------------------------------------------------------------------------------------------------------------------------------------------------------------------------------------------------------------------------------------------------------------------------------------------------------------------------------------------------------------------------------------------------------------------------------------------------------------------------------------------------------------------------------------------------------------------------------------------------------------------------------------------------------------------------------------------------------------------------------------------------------------------------------------------------------------------------------------------------------------------------------------------------------------------------------------------------------------------------------------------------------------------------------------------------------------------------------------------------------------------------------------------------------------------------------------------------------------------------------------------------------------------------------------------------------------------------------------------------------------------------------------------------------------------------------------------------------------------------------------------------------------------------------------------------------------------------------------------------------------------------------------------------------------------------------------------------------------------------------------------------------------------------------------------------------------------------------------------------------------------------------------------------------------------------------------------------------------------------------------------------------------------------------------------------------------------------------------------------------------------------------------------------------------------------------------------------------------------------------------------------------------------------------------------------------------------------------------------------------------------------------------------------------------------------------------------------------------------------------------------------------------------------------------------------------------------------------------------------------------------------------------------------------------------------------------------------------------------------------------------------------------------------------------------------------------------------------------------------------------------------------------------------------------------------------------------------------------------------------------------------------------------------------------------------------------------------------------------------------------------------------------------------------------------------------------------------------------------------------------------------------------------------------------------------------------------------------------------------------------------------------------------------------------------------------------------------------------------------------------------------------------------------------------------------------------------------------------------------------------------------------------------------------------------------------------------------------------------------------------------------------------------------------------------------------------------------------------------------------------------------------------------------------------------------------------------------------------------------------------------------------------------------------------------------------------------------------------------------------------------------------------------------------------------------------------------------------------------------------------------------------------------------------------------------------------------------------------------------------------------------------------------------------------------------------------------------------------------------------------------------------------------------------------------------------------------------------------------------------------------------------------------------------------------------------------------------------------------------------------------------------------------------------------------------------------------------------------------------------------------------------------------------------------------------------------------------|---------------------------------------------------------------------------------------------|----------------------------------------------------------------------------------------------|-----------------------------------------------------------------------------------------------------------------------------------------------------------------------------------------------------------------------------------------------------------------------------------------------------------------------------------------------------------------------------------------------------------------------------------------------------------------------------------------------------------------------------------|--------------------------------------------------------------------------------------------------------------------------------------------------------------------------------------------------------------------------------------------------------------------------------------------------------------------------------------------------------------------|
| EPI_ISL_534217                                                                                                                                                                                                                                                                                                                                                                                                                                                                                                                                                                                                                                                                                                                                                                                                                                                                                                                                                                                                                                                                                                                                                                                                                                                                                                                                                                                                                                                                                                                                                                                                                                                                                                                                                                                                                                                                                                                                                                                                                                                                                                                                                                                                                                                                                                                                                                                                                                                                                                                                                                                                                                                                                                                                                                                                                                                                                                                                                                                                                                                                                                                                                                                                                                                                                                                                                                                                                                                                                                                                                                                                                                                                                                                                                                                                                                                                                                                                                                                                                                                                                                                                                                                                                                                                                                                                                                                                                                                                                                                                                                                                                                                                                                                                                                                                                                                                                                                                                                                                                                                                                                                                                                                                                                                                                                                                                                                                                                                                                                                                                                                                                                                                                                                                                                                                                                                                                                                                                                                                                                                                                                                                                                                                                                                                                                                                                                                                                                                                                                                                                                                                                                                                                                                                                                                                                                                                                                                                                                                                                                                                                                                                                                                                                                                                                                                                                                                                                                                                                                                                                                                                                                                                                                                                                                                                                                                                                                                                                                                                                                                                                                                                                                                 | M Health Fairview                                                                           | Minnesota Department of Health, Public Health Laboratory                                     | Matt Plumb, Jacob Garfin, and Xiong Wang                                                                                                                                                                                                                                                                                                                                                                                                                                                                                          |                                                                                                                                                                                                                                                                                                                                                                    |
| EPI_ISL_534330, EPI_ISL_534331, EPI_ISL_534332, EPI_ISL_534333                                                                                                                                                                                                                                                                                                                                                                                                                                                                                                                                                                                                                                                                                                                                                                                                                                                                                                                                                                                                                                                                                                                                                                                                                                                                                                                                                                                                                                                                                                                                                                                                                                                                                                                                                                                                                                                                                                                                                                                                                                                                                                                                                                                                                                                                                                                                                                                                                                                                                                                                                                                                                                                                                                                                                                                                                                                                                                                                                                                                                                                                                                                                                                                                                                                                                                                                                                                                                                                                                                                                                                                                                                                                                                                                                                                                                                                                                                                                                                                                                                                                                                                                                                                                                                                                                                                                                                                                                                                                                                                                                                                                                                                                                                                                                                                                                                                                                                                                                                                                                                                                                                                                                                                                                                                                                                                                                                                                                                                                                                                                                                                                                                                                                                                                                                                                                                                                                                                                                                                                                                                                                                                                                                                                                                                                                                                                                                                                                                                                                                                                                                                                                                                                                                                                                                                                                                                                                                                                                                                                                                                                                                                                                                                                                                                                                                                                                                                                                                                                                                                                                                                                                                                                                                                                                                                                                                                                                                                                                                                                                                                                                                                                 | Hospital Universitario La Paz                                                               | Hospital Universitario La Paz                                                                | María Rodríguez, Elias Dahdouh, Sara González, Raúl Recio, Fernando Lázaro, Esther Viedma, Natalia Stella, Julio García, Juan Carlos Galán, Rafael Cantón, Ma Dolores Folgueira, Rafael Delgado, Jesús Mingorance                                                                                                                                                                                                                                                                                                                 |                                                                                                                                                                                                                                                                                                                                                                    |
| EPI_ISL_534334                                                                                                                                                                                                                                                                                                                                                                                                                                                                                                                                                                                                                                                                                                                                                                                                                                                                                                                                                                                                                                                                                                                                                                                                                                                                                                                                                                                                                                                                                                                                                                                                                                                                                                                                                                                                                                                                                                                                                                                                                                                                                                                                                                                                                                                                                                                                                                                                                                                                                                                                                                                                                                                                                                                                                                                                                                                                                                                                                                                                                                                                                                                                                                                                                                                                                                                                                                                                                                                                                                                                                                                                                                                                                                                                                                                                                                                                                                                                                                                                                                                                                                                                                                                                                                                                                                                                                                                                                                                                                                                                                                                                                                                                                                                                                                                                                                                                                                                                                                                                                                                                                                                                                                                                                                                                                                                                                                                                                                                                                                                                                                                                                                                                                                                                                                                                                                                                                                                                                                                                                                                                                                                                                                                                                                                                                                                                                                                                                                                                                                                                                                                                                                                                                                                                                                                                                                                                                                                                                                                                                                                                                                                                                                                                                                                                                                                                                                                                                                                                                                                                                                                                                                                                                                                                                                                                                                                                                                                                                                                                                                                                                                                                                                                 | Hospital Universitario Ramón y Cajal                                                        | Hospital Universitario La Paz                                                                | María Rodríguez, Elias Dahdouh, Sara González, Raúl Recio, Fernando Lázaro, Esther Viedma, Natalia Stella, Julio García, Juan Carlos Galán, Rafael Cantón, Ma Dolores Folgueira, Rafael Delgado, Jesús Mingorance                                                                                                                                                                                                                                                                                                                 |                                                                                                                                                                                                                                                                                                                                                                    |
| EPI_ISL_534335                                                                                                                                                                                                                                                                                                                                                                                                                                                                                                                                                                                                                                                                                                                                                                                                                                                                                                                                                                                                                                                                                                                                                                                                                                                                                                                                                                                                                                                                                                                                                                                                                                                                                                                                                                                                                                                                                                                                                                                                                                                                                                                                                                                                                                                                                                                                                                                                                                                                                                                                                                                                                                                                                                                                                                                                                                                                                                                                                                                                                                                                                                                                                                                                                                                                                                                                                                                                                                                                                                                                                                                                                                                                                                                                                                                                                                                                                                                                                                                                                                                                                                                                                                                                                                                                                                                                                                                                                                                                                                                                                                                                                                                                                                                                                                                                                                                                                                                                                                                                                                                                                                                                                                                                                                                                                                                                                                                                                                                                                                                                                                                                                                                                                                                                                                                                                                                                                                                                                                                                                                                                                                                                                                                                                                                                                                                                                                                                                                                                                                                                                                                                                                                                                                                                                                                                                                                                                                                                                                                                                                                                                                                                                                                                                                                                                                                                                                                                                                                                                                                                                                                                                                                                                                                                                                                                                                                                                                                                                                                                                                                                                                                                                                                 | LabPLUS                                                                                     | Institute of Environmental Science and Research (ESR)                                        | Matt Storey, Xiaoyun Ren, Anja Werno, Antje van der Linden, Arlo Upton, Chris Mansell, David Hamner, Dragana Drinkovic, Gary McAuliffe, Hana Sofia Andersson, James Ussher, Jill Sherwood, Josh Freeman, Julia Howard, Juliet Elvy, Mary DeAlmeida, Matt Blakiston, Matthew Rogers, Max Bloomfield, Michael Addide, Michelle Balm, Sally Roberts, Sarah Jefferies, Sharmini Muttaiyah, Susan Morphet, Susan Taylor, Timothy Blackmore, Vani Sathyendran, Veronica Playle, Virginia Hope, Erasmus Smit, Lauren Jelly, Joep de Ligt |                                                                                                                                                                                                                                                                                                                                                                    |
| EPI_ISL_534699, EPI_ISL_534700, EPI_ISL_534701, EPI_ISL_534702, EPI_ISL_534703, EPI_ISL_534704, EPI_ISL_534705, EPI_ISL_534706, EPI_ISL_534707, EPI_ISL_534708, EPI_ISL_534709, EPI_ISL_534710, EPI_ISL_534711, EPI_ISL_534712, EPI_ISL_534713, EPI_ISL_534714, EPI_ISL_534715, EPI_ISL_534716                                                                                                                                                                                                                                                                                                                                                                                                                                                                                                                                                                                                                                                                                                                                                                                                                                                                                                                                                                                                                                                                                                                                                                                                                                                                                                                                                                                                                                                                                                                                                                                                                                                                                                                                                                                                                                                                                                                                                                                                                                                                                                                                                                                                                                                                                                                                                                                                                                                                                                                                                                                                                                                                                                                                                                                                                                                                                                                                                                                                                                                                                                                                                                                                                                                                                                                                                                                                                                                                                                                                                                                                                                                                                                                                                                                                                                                                                                                                                                                                                                                                                                                                                                                                                                                                                                                                                                                                                                                                                                                                                                                                                                                                                                                                                                                                                                                                                                                                                                                                                                                                                                                                                                                                                                                                                                                                                                                                                                                                                                                                                                                                                                                                                                                                                                                                                                                                                                                                                                                                                                                                                                                                                                                                                                                                                                                                                                                                                                                                                                                                                                                                                                                                                                                                                                                                                                                                                                                                                                                                                                                                                                                                                                                                                                                                                                                                                                                                                                                                                                                                                                                                                                                                                                                                                                                                                                                                                                 | see above                                                                                   | MD PHL                                                                                       | Maryland Department of Health Laboratories Administration                                                                                                                                                                                                                                                                                                                                                                                                                                                                         |                                                                                                                                                                                                                                                                                                                                                                    |
| EPI_ISL_535575                                                                                                                                                                                                                                                                                                                                                                                                                                                                                                                                                                                                                                                                                                                                                                                                                                                                                                                                                                                                                                                                                                                                                                                                                                                                                                                                                                                                                                                                                                                                                                                                                                                                                                                                                                                                                                                                                                                                                                                                                                                                                                                                                                                                                                                                                                                                                                                                                                                                                                                                                                                                                                                                                                                                                                                                                                                                                                                                                                                                                                                                                                                                                                                                                                                                                                                                                                                                                                                                                                                                                                                                                                                                                                                                                                                                                                                                                                                                                                                                                                                                                                                                                                                                                                                                                                                                                                                                                                                                                                                                                                                                                                                                                                                                                                                                                                                                                                                                                                                                                                                                                                                                                                                                                                                                                                                                                                                                                                                                                                                                                                                                                                                                                                                                                                                                                                                                                                                                                                                                                                                                                                                                                                                                                                                                                                                                                                                                                                                                                                                                                                                                                                                                                                                                                                                                                                                                                                                                                                                                                                                                                                                                                                                                                                                                                                                                                                                                                                                                                                                                                                                                                                                                                                                                                                                                                                                                                                                                                                                                                                                                                                                                                                                 | Hospital Universitari Germans Trias i Pujol(HUGTIP)/Fundació Lluita contra la SIDA (FLSida) | IrsiCaixa AIDS Research Lab                                                                  | Marc Noguera-Julian, Mariona Parera, Maria Pilar Armengol, Marta Massanella, Ester Ballana, Lidia Ruiz, Nuria Izquierdo, Jorge Carrillo, Roger Paredes, Julia Blanco, Joaquim Segalés, Bonaventura Clotet                                                                                                                                                                                                                                                                                                                         |                                                                                                                                                                                                                                                                                                                                                                    |
| EPI_ISL_536400                                                                                                                                                                                                                                                                                                                                                                                                                                                                                                                                                                                                                                                                                                                                                                                                                                                                                                                                                                                                                                                                                                                                                                                                                                                                                                                                                                                                                                                                                                                                                                                                                                                                                                                                                                                                                                                                                                                                                                                                                                                                                                                                                                                                                                                                                                                                                                                                                                                                                                                                                                                                                                                                                                                                                                                                                                                                                                                                                                                                                                                                                                                                                                                                                                                                                                                                                                                                                                                                                                                                                                                                                                                                                                                                                                                                                                                                                                                                                                                                                                                                                                                                                                                                                                                                                                                                                                                                                                                                                                                                                                                                                                                                                                                                                                                                                                                                                                                                                                                                                                                                                                                                                                                                                                                                                                                                                                                                                                                                                                                                                                                                                                                                                                                                                                                                                                                                                                                                                                                                                                                                                                                                                                                                                                                                                                                                                                                                                                                                                                                                                                                                                                                                                                                                                                                                                                                                                                                                                                                                                                                                                                                                                                                                                                                                                                                                                                                                                                                                                                                                                                                                                                                                                                                                                                                                                                                                                                                                                                                                                                                                                                                                                                                 | Fareham Creek Veterinary Surgery                                                            | MRC-University of Glasgow Centre for Virus Research                                          | Margaret J Hosie, Ilaria Epifano, Vanessa Herder, Richard J Orton, Andrew Stevenson, Natasha Johnson, Daniel Goldfarb, Emma MacDonald, Lynn Stevenson, Frazer Bell, Dawn Dunbar, Michael McDonald, Fiona Howie, Bryn Tennant, Darcy Herry, Ana Da Silva Filipe, Daniel G Streicker, Brian J Willett, Pablo R Murcia, Ruth F Jarrett, David L Robertson and William Weir                                                                                                                                                           |                                                                                                                                                                                                                                                                                                                                                                    |
| EPI_ISL_536412, EPI_ISL_536413, EPI_ISL_536414, EPI_ISL_536415, EPI_ISL_536416, EPI_ISL_536417, EPI_ISL_536418, EPI_ISL_536419, EPI_ISL_536420, EPI_ISL_536421, EPI_ISL_536422, EPI_ISL_536423, EPI_ISL_536424, EPI_ISL_536425, EPI_ISL_536426, EPI_ISL_536427, EPI_ISL_536428, EPI_ISL_536429, EPI_ISL_536430, EPI_ISL_536431, EPI_ISL_536432, EPI_ISL_536433, EPI_ISL_536434, EPI_ISL_536435, EPI_ISL_536436, EPI_ISL_536437, EPI_ISL_536438, EPI_ISL_536439, EPI_ISL_536440, EPI_ISL_536441, EPI_ISL_536442, EPI_ISL_536443, EPI_ISL_536444, EPI_ISL_536445, EPI_ISL_536446, EPI_ISL_536447, EPI_ISL_536448, EPI_ISL_536449, EPI_ISL_536450, EPI_ISL_536451, EPI_ISL_536452, EPI_ISL_536453, EPI_ISL_536454                                                                                                                                                                                                                                                                                                                                                                                                                                                                                                                                                                                                                                                                                                                                                                                                                                                                                                                                                                                                                                                                                                                                                                                                                                                                                                                                                                                                                                                                                                                                                                                                                                                                                                                                                                                                                                                                                                                                                                                                                                                                                                                                                                                                                                                                                                                                                                                                                                                                                                                                                                                                                                                                                                                                                                                                                                                                                                                                                                                                                                                                                                                                                                                                                                                                                                                                                                                                                                                                                                                                                                                                                                                                                                                                                                                                                                                                                                                                                                                                                                                                                                                                                                                                                                                                                                                                                                                                                                                                                                                                                                                                                                                                                                                                                                                                                                                                                                                                                                                                                                                                                                                                                                                                                                                                                                                                                                                                                                                                                                                                                                                                                                                                                                                                                                                                                                                                                                                                                                                                                                                                                                                                                                                                                                                                                                                                                                                                                                                                                                                                                                                                                                                                                                                                                                                                                                                                                                                                                                                                                                                                                                                                                                                                                                                                                                                                                                                                                                                                                 | see above                                                                                   | National Public Health Laboratory, National Centre for Infectious Diseases                   | National Public Health Laboratory, National Centre for Infectious Diseases                                                                                                                                                                                                                                                                                                                                                                                                                                                        | Mak TM, Octavia S, Zhou Z, Cui L, Lin RTP                                                                                                                                                                                                                                                                                                                          |
| EPI_ISL_537382, EPI_ISL_537383, EPI_ISL_537384, EPI_ISL_537385, EPI_ISL_537386, EPI_ISL_537387, EPI_ISL_537388, EPI_ISL_537389, EPI_ISL_537390, EPI_ISL_537391, EPI_ISL_537392, EPI_ISL_537393, EPI_ISL_537394, EPI_ISL_537395, EPI_ISL_537396, EPI_ISL_537397, EPI_ISL_537398, EPI_ISL_537399, EPI_ISL_537400, EPI_ISL_537401, EPI_ISL_537402, EPI_ISL_537403, EPI_ISL_537404, EPI_ISL_537405, EPI_ISL_537406, EPI_ISL_537407, EPI_ISL_537408, EPI_ISL_537409, EPI_ISL_537410, EPI_ISL_537411, EPI_ISL_537412, EPI_ISL_537413, EPI_ISL_537414, EPI_ISL_537415, EPI_ISL_537416, EPI_ISL_537417, EPI_ISL_537418, EPI_ISL_537419, EPI_ISL_537420, EPI_ISL_537421, EPI_ISL_537422, EPI_ISL_537423, EPI_ISL_537424, EPI_ISL_537425, EPI_ISL_537426, EPI_ISL_537427, EPI_ISL_537428, EPI_ISL_537429, EPI_ISL_537430, EPI_ISL_537431, EPI_ISL_537432, EPI_ISL_537433, EPI_ISL_537434, EPI_ISL_537435, EPI_ISL_537436, EPI_ISL_537437, EPI_ISL_537438, EPI_ISL_537439, EPI_ISL_537440, EPI_ISL_537441, EPI_ISL_537442, EPI_ISL_537443, EPI_ISL_537444, EPI_ISL_537445, EPI_ISL_537446, EPI_ISL_537447, EPI_ISL_537448, EPI_ISL_537449, EPI_ISL_537450, EPI_ISL_537451, EPI_ISL_537452, EPI_ISL_537453, EPI_ISL_537454, EPI_ISL_537455, EPI_ISL_537456, EPI_ISL_537457, EPI_ISL_537458, EPI_ISL_537459, EPI_ISL_537460, EPI_ISL_537461, EPI_ISL_537462, EPI_ISL_537463, EPI_ISL_537464, EPI_ISL_537465, EPI_ISL_537466, EPI_ISL_537467, EPI_ISL_537468, EPI_ISL_537469, EPI_ISL_537470, EPI_ISL_537471, EPI_ISL_537472, EPI_ISL_537473, EPI_ISL_537474, EPI_ISL_537475, EPI_ISL_537476, EPI_ISL_537477, EPI_ISL_537478, EPI_ISL_537479, EPI_ISL_537480, EPI_ISL_537481, EPI_ISL_537482, EPI_ISL_537483, EPI_ISL_537484, EPI_ISL_537485, EPI_ISL_537486, EPI_ISL_537487, EPI_ISL_537488, EPI_ISL_537489, EPI_ISL_537490, EPI_ISL_537491, EPI_ISL_537492, EPI_ISL_537493, EPI_ISL_537494, EPI_ISL_537495, EPI_ISL_537496, EPI_ISL_537497, EPI_ISL_537498, EPI_ISL_537499, EPI_ISL_537500, EPI_ISL_537501, EPI_ISL_537502, EPI_ISL_537503, EPI_ISL_537504, EPI_ISL_537505, EPI_ISL_537506, EPI_ISL_537507, EPI_ISL_537508, EPI_ISL_537509, EPI_ISL_537510, EPI_ISL_537511, EPI_ISL_537512, EPI_ISL_537513, EPI_ISL_537514, EPI_ISL_537515, EPI_ISL_537516, EPI_ISL_537517, EPI_ISL_537518, EPI_ISL_537519, EPI_ISL_537520, EPI_ISL_537521, EPI_ISL_537522, EPI_ISL_537523, EPI_ISL_537524, EPI_ISL_537525, EPI_ISL_537526, EPI_ISL_537527, EPI_ISL_537528, EPI_ISL_537529, EPI_ISL_537530, EPI_ISL_537531, EPI_ISL_537532, EPI_ISL_537533, EPI_ISL_537534, EPI_ISL_537535, EPI_ISL_537536, EPI_ISL_537537, EPI_ISL_537538, EPI_ISL_537539, EPI_ISL_537540, EPI_ISL_537541, EPI_ISL_537542, EPI_ISL_537543, EPI_ISL_537544, EPI_ISL_537545, EPI_ISL_537546, EPI_ISL_537547, EPI_ISL_537548, EPI_ISL_537549, EPI_ISL_537550, EPI_ISL_537551, EPI_ISL_537552, EPI_ISL_537553, EPI_ISL_537554, EPI_ISL_537555, EPI_ISL_537556, EPI_ISL_537557, EPI_ISL_537558, EPI_ISL_537559, EPI_ISL_537560, EPI_ISL_537561, EPI_ISL_537562, EPI_ISL_537563, EPI_ISL_537564, EPI_ISL_537565, EPI_ISL_537566, EPI_ISL_537567, EPI_ISL_537568, EPI_ISL_537569, EPI_ISL_537570, EPI_ISL_537571, EPI_ISL_537572, EPI_ISL_537573, EPI_ISL_537574, EPI_ISL_537575, EPI_ISL_537576, EPI_ISL_537577, EPI_ISL_537578, EPI_ISL_537579, EPI_ISL_537580, EPI_ISL_537581, EPI_ISL_537582, EPI_ISL_537583, EPI_ISL_537584, EPI_ISL_537585, EPI_ISL_537586, EPI_ISL_537587, EPI_ISL_537588, EPI_ISL_537589, EPI_ISL_537590, EPI_ISL_537591, EPI_ISL_537592, EPI_ISL_537593, EPI_ISL_537594, EPI_ISL_537595, EPI_ISL_537596, EPI_ISL_537597, EPI_ISL_537598, EPI_ISL_537599, EPI_ISL_537600, EPI_ISL_537601, EPI_ISL_537602, EPI_ISL_537603, EPI_ISL_537604, EPI_ISL_537605, EPI_ISL_537606, EPI_ISL_537607, EPI_ISL_537608, EPI_ISL_537609, EPI_ISL_537610, EPI_ISL_537611, EPI_ISL_537612, EPI_ISL_537613, EPI_ISL_537614, EPI_ISL_537615, EPI_ISL_537616, EPI_ISL_537617, EPI_ISL_537618, EPI_ISL_537619, EPI_ISL_537620, EPI_ISL_537621, EPI_ISL_537622, EPI_ISL_537623, EPI_ISL_537624, EPI_ISL_537625, EPI_ISL_537626, EPI_ISL_537627, EPI_ISL_537628, EPI_ISL_537629, EPI_ISL_537630, EPI_ISL_537631, EPI_ISL_537632, EPI_ISL_537633, EPI_ISL_537634, EPI_ISL_537635, EPI_ISL_537636, EPI_ISL_537637, EPI_ISL_537638, EPI_ISL_537639, EPI_ISL_537640, EPI_ISL_537641, EPI_ISL_537642, EPI_ISL_537643, EPI_ISL_537644, EPI_ISL_537645, EPI_ISL_537646, EPI_ISL_537647, EPI_ISL_537648, EPI_ISL_537649, EPI_ISL_537650, EPI_ISL_537651, EPI_ISL_537652, EPI_ISL_537653, EPI_ISL_537654, EPI_ISL_537655, EPI_ISL_537656, EPI_ISL_537657, EPI_ISL_537658, EPI_ISL_537659, EPI_ISL_537660, EPI_ISL_537661, EPI_ISL_537662, EPI_ISL_537663, EPI_ISL_537664, EPI_ISL_537665, EPI_ISL_537666, EPI_ISL_537667, EPI_ISL_537668, EPI_ISL_537669, EPI_ISL_537670, EPI_ISL_537671, EPI_ISL_537672, EPI_ISL_537673, EPI_ISL_537674, EPI_ISL_537675, EPI_ISL_537676, EPI_ISL_537677, EPI_ISL_537678, EPI_ISL_537679, EPI_ISL_537680, EPI_ISL_537681, EPI_ISL_537682, EPI_ISL_537683, EPI_ISL_537684, EPI_ISL_537685, EPI_ISL_537686, EPI_ISL_537687, EPI_ISL_537688, EPI_ISL_537689, EPI_ISL_537690, EPI_ISL_537691, EPI_ISL_537692, EPI_ISL_537693, EPI_ISL_537694, EPI_ISL_537695, EPI_ISL_537696, EPI_ISL_537697, EPI_ISL_537698, EPI_ISL_537699, EPI_ISL_537700, EPI_ISL_537701, EPI_ISL_537702, EPI_ISL_537703, EPI_ISL_537704, EPI_ISL_537705, EPI_ISL_537706, EPI_ISL_537707, EPI_ISL_537708, EPI_ISL_537709, EPI_ISL_537710, EPI_ISL_537711, EPI_ISL_537712, EPI_ISL_537713, EPI_ISL_537714, EPI_ISL_537715, EPI_ISL_537716, EPI_ISL_537717, EPI_ISL_537718, EPI_ISL_537719, EPI_ISL_537720, EPI_ISL_537721, EPI_ISL_537722, EPI_ISL_537723, EPI_ISL_537724, EPI_ISL_537725, EPI_ISL_537726, EPI_ISL_537727, EPI_ISL_537728, EPI_ISL_537729, EPI_ISL_537730, EPI_ISL_537731, EPI_ISL_537732, EPI_ISL_537733, EPI_ISL_537734, EPI_ISL_537735, EPI_ISL_537736, EPI_ISL_537737, EPI_ISL_537738, EPI_ISL_537739, EPI_ISL_537740, EPI_ISL_537741, EPI_ISL_537742, EPI_ISL_537743, EPI_ISL_537744, EPI_ISL_537745, EPI_ISL_537746, EPI_ISL_537747, EPI_ISL_537748, EPI_ISL_537749, EPI_ISL_537750, EPI_ISL_537751, EPI_ISL_537752, EPI_ISL_537753, EPI_ISL_537754, EPI_ISL_537755, EPI_ISL_537756, EPI_ISL_537757, EPI_ISL_537758, EPI_ISL_537759, EPI_ISL_537760, EPI_ISL_537761, EPI_ISL_537762, EPI_ISL_537763, EPI_ISL_537764, EPI_ISL_537765, EPI_ISL_537766, EPI_ISL_537767, EPI_ISL_537768, EPI_ISL_537769, EPI_ISL_537770, EPI_ISL_537771, EPI_ISL_537772, EPI_ISL_537773, EPI_ISL_537774, EPI_ISL_537775, EPI_ISL_537776, EPI_ISL_537777, EPI_ISL_537778, EPI_ISL_537779, EPI_ISL_537780, EPI_ISL_537781, EPI_ISL_537782, EPI_ISL_537783, EPI_ISL_537784, EPI_ISL_537785, EPI_ISL_537786, EPI_ISL_537787, EPI_ISL_537788, EPI_ISL_537789, EPI_ISL_537790, EPI_ISL_537791, EPI_ISL_537792, EPI_ISL_537793, EPI_ISL_537794, EPI_ISL_537795, EPI_ISL_537796, EPI_ISL_537797, EPI_ISL_537798, EPI_ISL_537799, EPI_ISL_537800, EPI_ISL_537801, EPI_ISL_537802, EPI_ISL_537803, EPI_ISL_537804, EPI_ISL_537805, EPI_ISL_537806, EPI_ISL_537807, EPI_ISL_537808, EPI_ISL_537809, EPI_ISL_537810, EPI_ISL_537811, EPI_ISL_537812, EPI_ISL_537813, EPI_ISL_537814, EPI_ISL_537815, EPI_ISL_537816, EPI_ISL_537817, EPI_ISL_537818, EPI_ISL_537819, EPI_ISL_537820, EPI_ISL_537821, EPI_ISL_537822, EPI_ISL_537823, EPI_ISL_537824, EPI_ISL_537825, EPI_ISL_537826, EPI_ISL_537827, EPI_ISL_537828, EPI_ISL_537829, EPI_ISL_537830, EPI_ISL_537831, EPI_ISL_537832, EPI_ISL_537833, EPI_ISL_537834, EPI_ISL_537835, EPI_ISL_537836, EPI_ISL_537837, EPI_ISL_537838, EPI_ISL_537839, EPI_ISL_537840, EPI_ISL_537841, EPI_ISL_537842, EPI_ISL_537843, EPI_ISL_537844, EPI_ISL_537845, EPI_ISL_537846, EPI_ISL_537847, EPI_ISL_537848, EPI_ISL_537849, EPI_ISL_537850, EPI_ISL_537851, EPI_ISL_537852, EPI_ISL_537853, EPI_ISL_537854, EPI_ISL_537855, EPI_ISL_537856, EPI_ISL_537857, EPI_ISL_537858, EPI_ISL_537859, EPI_ISL_537860, EPI_ISL_537861, EPI_ISL_537862, EPI_ISL_537863, EPI_ISL_537864, EPI_ISL_537865, EPI_ISL_537866, EPI_ISL_537867, EPI_ISL_537868, EPI_ISL_537869, EPI_ISL_537870, EPI_ISL_537871, EPI_ISL_537872, EPI_ISL_537873 | see above                                                                                   | Centro de Investigación Biomédica de La Rioja - Hospital San Pedro Logroño                   | SeqCOVID-SPAIN consortium/IBV(CSIC)                                                                                                                                                                                                                                                                                                                                                                                                                                                                                               | María de Toro, José Manuel Azcona Gutiérrez, María Pilar Bea Escudero, Miriam Blasco Alberdi and SeqCOVID-SPAIN consortium                                                                                                                                                                                                                                         |
| EPI_ISL_538003, EPI_ISL_538004, EPI_ISL_538005, EPI_ISL_538006, EPI_ISL_538007, EPI_ISL_538008, EPI_ISL_538009, EPI_ISL_538010, EPI_ISL_538011, EPI_ISL_538012, EPI_ISL_538013, EPI_ISL_538014, EPI_ISL_538015, EPI_ISL_538016, EPI_ISL_538017, EPI_ISL_538018, EPI_ISL_538019, EPI_ISL_538020, EPI_ISL_538021, EPI_ISL_538022, EPI_ISL_538023, EPI_ISL_538024, EPI_ISL_538025, EPI_ISL_538026, EPI_ISL_538027, EPI_ISL_538028, EPI_ISL_538029, EPI_ISL_538030, EPI_ISL_538031, EPI_ISL_538032, EPI_ISL_538033, EPI_ISL_538034, EPI_ISL_538035, EPI_ISL_538036, EPI_ISL_538037, EPI_ISL_538038, EPI_ISL_538039, EPI_ISL_538040, EPI_ISL_538041, EPI_ISL_538042, EPI_ISL_538043, EPI_ISL_538044, EPI_ISL_538045, EPI_ISL_538046, EPI_ISL_538047, EPI_ISL_538048, EPI_ISL_538049, EPI_ISL_538050, EPI_ISL_538051, EPI_ISL_538052, EPI_ISL_538053, EPI_ISL_538054                                                                                                                                                                                                                                                                                                                                                                                                                                                                                                                                                                                                                                                                                                                                                                                                                                                                                                                                                                                                                                                                                                                                                                                                                                                                                                                                                                                                                                                                                                                                                                                                                                                                                                                                                                                                                                                                                                                                                                                                                                                                                                                                                                                                                                                                                                                                                                                                                                                                                                                                                                                                                                                                                                                                                                                                                                                                                                                                                                                                                                                                                                                                                                                                                                                                                                                                                                                                                                                                                                                                                                                                                                                                                                                                                                                                                                                                                                                                                                                                                                                                                                                                                                                                                                                                                                                                                                                                                                                                                                                                                                                                                                                                                                                                                                                                                                                                                                                                                                                                                                                                                                                                                                                                                                                                                                                                                                                                                                                                                                                                                                                                                                                                                                                                                                                                                                                                                                                                                                                                                                                                                                                                                                                                                                                                                                                                                                                                                                                                                                                                                                                                                                                                                                                                                                                                                                                                                                                                                                                                                                                                                                                                                                                                                                                                                                                                 | see above                                                                                   | Hospital Universitari i Politècnic La Fe de València                                         | SeqCOVID-SPAIN consortium/IBV(CSIC)                                                                                                                                                                                                                                                                                                                                                                                                                                                                                               | María Dolores Gómez Ruiz, Eva González Barbera, Ana Gil Brusola, Salvador Giner Almaraz, José Luis López Hontangas and SeqCOVID-SPAIN consortium                                                                                                                                                                                                                   |
| EPI_ISL_538265, EPI_ISL_538266, EPI_ISL_538267, EPI_ISL_538268, EPI_ISL_538269, EPI_ISL_538270, EPI_ISL_538271, EPI_ISL_538272, EPI_ISL_538273, EPI_ISL_538274                                                                                                                                                                                                                                                                                                                                                                                                                                                                                                                                                                                                                                                                                                                                                                                                                                                                                                                                                                                                                                                                                                                                                                                                                                                                                                                                                                                                                                                                                                                                                                                                                                                                                                                                                                                                                                                                                                                                                                                                                                                                                                                                                                                                                                                                                                                                                                                                                                                                                                                                                                                                                                                                                                                                                                                                                                                                                                                                                                                                                                                                                                                                                                                                                                                                                                                                                                                                                                                                                                                                                                                                                                                                                                                                                                                                                                                                                                                                                                                                                                                                                                                                                                                                                                                                                                                                                                                                                                                                                                                                                                                                                                                                                                                                                                                                                                                                                                                                                                                                                                                                                                                                                                                                                                                                                                                                                                                                                                                                                                                                                                                                                                                                                                                                                                                                                                                                                                                                                                                                                                                                                                                                                                                                                                                                                                                                                                                                                                                                                                                                                                                                                                                                                                                                                                                                                                                                                                                                                                                                                                                                                                                                                                                                                                                                                                                                                                                                                                                                                                                                                                                                                                                                                                                                                                                                                                                                                                                                                                                                                                 | see above                                                                                   | Maryland Public Health Laboratory                                                            | Maryland Public Health Laboratory                                                                                                                                                                                                                                                                                                                                                                                                                                                                                                 | Maryland Department of Health Laboratories Administration                                                                                                                                                                                                                                                                                                          |
| EPI_ISL_538552                                                                                                                                                                                                                                                                                                                                                                                                                                                                                                                                                                                                                                                                                                                                                                                                                                                                                                                                                                                                                                                                                                                                                                                                                                                                                                                                                                                                                                                                                                                                                                                                                                                                                                                                                                                                                                                                                                                                                                                                                                                                                                                                                                                                                                                                                                                                                                                                                                                                                                                                                                                                                                                                                                                                                                                                                                                                                                                                                                                                                                                                                                                                                                                                                                                                                                                                                                                                                                                                                                                                                                                                                                                                                                                                                                                                                                                                                                                                                                                                                                                                                                                                                                                                                                                                                                                                                                                                                                                                                                                                                                                                                                                                                                                                                                                                                                                                                                                                                                                                                                                                                                                                                                                                                                                                                                                                                                                                                                                                                                                                                                                                                                                                                                                                                                                                                                                                                                                                                                                                                                                                                                                                                                                                                                                                                                                                                                                                                                                                                                                                                                                                                                                                                                                                                                                                                                                                                                                                                                                                                                                                                                                                                                                                                                                                                                                                                                                                                                                                                                                                                                                                                                                                                                                                                                                                                                                                                                                                                                                                                                                                                                                                                                                 | Hospital Universitari Germans Trias i Pujol(HUGTIP)/Fundació Lluita contra la SIDA (FLSida) | IrsiCaixa AIDS Research Lab                                                                  | Marc Noguera-Julian, Mariona Parera, Maria Pilar Armengol, Marta Massanella, Ester Ballana, Lidia Ruiz, Nuria Izquierdo, Jorge Carrillo, Roger Paredes, Julia Blanco, Joaquim Segalés, Bonaventura Clotet                                                                                                                                                                                                                                                                                                                         |                                                                                                                                                                                                                                                                                                                                                                    |
| EPI_ISL_538690, EPI_ISL_538691, EPI_ISL_538692, EPI_ISL_538693, EPI_ISL_538694, EPI_ISL_538695, EPI_ISL_538696, EPI_ISL_538697, EPI_ISL_538698, EPI_ISL_538699, EPI_ISL_538700, EPI_ISL_538701, EPI_ISL_538702, EPI_ISL_538703, EPI_ISL_538704, EPI_ISL_538705, EPI_ISL_538706, EPI_ISL_538707, EPI_ISL_538708, EPI_ISL_538709, EPI_ISL_538710, EPI_ISL_538711, EPI_ISL_538712, EPI_ISL_538713, EPI_ISL_538714, EPI_ISL_538715, EPI_ISL_538716, EPI_ISL_538717, EPI_ISL_538718, EPI_ISL_538719, EPI_ISL_538720, EPI_ISL_538721, EPI_ISL_538722, EPI_ISL_538723, EPI_ISL_538724, EPI_ISL_538725, EPI_ISL_538726, EPI_ISL_538727, EPI_ISL_538728, EPI_ISL_538729, EPI_ISL_538730, EPI_ISL_538731, EPI_ISL_538732, EPI_ISL_538733, EPI_ISL_538734, EPI_ISL_538735, EPI_ISL_538736, EPI_ISL_538737, EPI_ISL_538738, EPI_ISL_538739, EPI_ISL_538740, EPI_ISL_538741, EPI_ISL_538742, EPI_ISL_538743, EPI_ISL_538744, EPI_ISL_538745, EPI_ISL_538746, EPI_ISL_538747                                                                                                                                                                                                                                                                                                                                                                                                                                                                                                                                                                                                                                                                                                                                                                                                                                                                                                                                                                                                                                                                                                                                                                                                                                                                                                                                                                                                                                                                                                                                                                                                                                                                                                                                                                                                                                                                                                                                                                                                                                                                                                                                                                                                                                                                                                                                                                                                                                                                                                                                                                                                                                                                                                                                                                                                                                                                                                                                                                                                                                                                                                                                                                                                                                                                                                                                                                                                                                                                                                                                                                                                                                                                                                                                                                                                                                                                                                                                                                                                                                                                                                                                                                                                                                                                                                                                                                                                                                                                                                                                                                                                                                                                                                                                                                                                                                                                                                                                                                                                                                                                                                                                                                                                                                                                                                                                                                                                                                                                                                                                                                                                                                                                                                                                                                                                                                                                                                                                                                                                                                                                                                                                                                                                                                                                                                                                                                                                                                                                                                                                                                                                                                                                                                                                                                                                                                                                                                                                                                                                                                                                                                                                                                                                                                 | see above                                                                                   | Hospital Universitario Marqués de Valdecilla - IDIVAL (Santander, Cantabria)                 | SeqCOVID-SPAIN consortium/IBV(CSIC)                                                                                                                                                                                                                                                                                                                                                                                                                                                                                               | María Eliecer Cano García, Mónica Gozalo Margüello, Jose Manuel Méndez Legaza, Daniel Pablo Marcos, Jesús Rodríguez Rodríguez, María Siller Ruiz and SeqCOVID-SPAIN consortium                                                                                                                                                                                     |
| EPI_ISL_539221, EPI_ISL_539222, EPI_ISL_539223, EPI_ISL_539224, EPI_ISL_539225, EPI_ISL_539226, EPI_ISL_539227, EPI_ISL_539228, EPI_ISL_539229, EPI_ISL_539230, EPI_ISL_539231, EPI_ISL_539232, EPI_ISL_539233, EPI_ISL_539235, EPI_ISL_539236, EPI_ISL_539237, EPI_ISL_539238, EPI_ISL_539239, EPI_ISL_539243, EPI_ISL_539244                                                                                                                                                                                                                                                                                                                                                                                                                                                                                                                                                                                                                                                                                                                                                                                                                                                                                                                                                                                                                                                                                                                                                                                                                                                                                                                                                                                                                                                                                                                                                                                                                                                                                                                                                                                                                                                                                                                                                                                                                                                                                                                                                                                                                                                                                                                                                                                                                                                                                                                                                                                                                                                                                                                                                                                                                                                                                                                                                                                                                                                                                                                                                                                                                                                                                                                                                                                                                                                                                                                                                                                                                                                                                                                                                                                                                                                                                                                                                                                                                                                                                                                                                                                                                                                                                                                                                                                                                                                                                                                                                                                                                                                                                                                                                                                                                                                                                                                                                                                                                                                                                                                                                                                                                                                                                                                                                                                                                                                                                                                                                                                                                                                                                                                                                                                                                                                                                                                                                                                                                                                                                                                                                                                                                                                                                                                                                                                                                                                                                                                                                                                                                                                                                                                                                                                                                                                                                                                                                                                                                                                                                                                                                                                                                                                                                                                                                                                                                                                                                                                                                                                                                                                                                                                                                                                                                                                                 | see above                                                                                   | Servicio de Microbiología. Hospital Clínico Universitario de Valencia                        | SeqCOVID-SPAIN consortium/IBV(CSIC)                                                                                                                                                                                                                                                                                                                                                                                                                                                                                               | María Dolores Ocete, Inma Galán Vendrell, Paula Ruiz-Hueso, Mariana Reyes-Prieto, Vicente Soriano Chirona, María Alma Bracho, Griselda De Marco, Beatriz Beaud, Lidia Ruiz Roldan, Marta Pla Díaz, Neris García-Gonzalez, Loreto Ferrús Abad, Lúcia Martínez-Priego, Concepcion Gimeno, Giuseppe D'Auria, Fernando Gonzalez-Candelas and SeqCOVID-SPAIN consortium |
| EPI_ISL_539245                                                                                                                                                                                                                                                                                                                                                                                                                                                                                                                                                                                                                                                                                                                                                                                                                                                                                                                                                                                                                                                                                                                                                                                                                                                                                                                                                                                                                                                                                                                                                                                                                                                                                                                                                                                                                                                                                                                                                                                                                                                                                                                                                                                                                                                                                                                                                                                                                                                                                                                                                                                                                                                                                                                                                                                                                                                                                                                                                                                                                                                                                                                                                                                                                                                                                                                                                                                                                                                                                                                                                                                                                                                                                                                                                                                                                                                                                                                                                                                                                                                                                                                                                                                                                                                                                                                                                                                                                                                                                                                                                                                                                                                                                                                                                                                                                                                                                                                                                                                                                                                                                                                                                                                                                                                                                                                                                                                                                                                                                                                                                                                                                                                                                                                                                                                                                                                                                                                                                                                                                                                                                                                                                                                                                                                                                                                                                                                                                                                                                                                                                                                                                                                                                                                                                                                                                                                                                                                                                                                                                                                                                                                                                                                                                                                                                                                                                                                                                                                                                                                                                                                                                                                                                                                                                                                                                                                                                                                                                                                                                                                                                                                                                                                 | Hospital Universitari i Politècnic La Fe de València                                        | SeqCOVID-SPAIN consortium/IBV(CSIC)                                                          | María Dolores Gómez Ruiz, Eva González Barbera, Ana Gil Brusola, Salvador Giner Almaraz, José Luis López Hontangas and SeqCOVID-SPAIN consortium                                                                                                                                                                                                                                                                                                                                                                                  |                                                                                                                                                                                                                                                                                                                                                                    |
| EPI_ISL_539288                                                                                                                                                                                                                                                                                                                                                                                                                                                                                                                                                                                                                                                                                                                                                                                                                                                                                                                                                                                                                                                                                                                                                                                                                                                                                                                                                                                                                                                                                                                                                                                                                                                                                                                                                                                                                                                                                                                                                                                                                                                                                                                                                                                                                                                                                                                                                                                                                                                                                                                                                                                                                                                                                                                                                                                                                                                                                                                                                                                                                                                                                                                                                                                                                                                                                                                                                                                                                                                                                                                                                                                                                                                                                                                                                                                                                                                                                                                                                                                                                                                                                                                                                                                                                                                                                                                                                                                                                                                                                                                                                                                                                                                                                                                                                                                                                                                                                                                                                                                                                                                                                                                                                                                                                                                                                                                                                                                                                                                                                                                                                                                                                                                                                                                                                                                                                                                                                                                                                                                                                                                                                                                                                                                                                                                                                                                                                                                                                                                                                                                                                                                                                                                                                                                                                                                                                                                                                                                                                                                                                                                                                                                                                                                                                                                                                                                                                                                                                                                                                                                                                                                                                                                                                                                                                                                                                                                                                                                                                                                                                                                                                                                                                                                 | Servicio de Microbiología. Hospital Clínico Universitario de Valencia                       | SeqCOVID-SPAIN consortium/IBV(CSIC)                                                          | María Dolores Ocete, Inma Galán Vendrell, Paula Ruiz-Hueso, Mariana Reyes-Prieto, Vicente Soriano Chirona, María Alma Bracho, Griselda De Marco, Beatriz Beaud, Lidia Ruiz Roldan, Marta Pla Díaz, Neris García-Gonzalez, Loreto Ferrús Abad, Lúcia Martínez-Priego, Concepcion Gimeno, Giuseppe D'Auria, Fernando Gonzalez-Candelas and SeqCOVID-SPAIN consortium                                                                                                                                                                |                                                                                                                                                                                                                                                                                                                                                                    |
| EPI_ISL_539577, EPI_ISL_539578, EPI_ISL_539579, EPI_ISL_539580, EPI_ISL_539581, EPI_ISL_539582, EPI_ISL_539583, EPI_ISL_539584, EPI_ISL_539585, EPI_ISL_539586, EPI_ISL_539587, EPI_ISL_539588, EPI_ISL_539589, EPI_ISL_539590, EPI_ISL_539591, EPI_ISL_539592, EPI_ISL_539593, EPI_ISL_539594, EPI_ISL_539595, EPI_ISL_539596, EPI_ISL_539597, EPI_ISL_539598, EPI_ISL_539599, EPI_ISL_539600, EPI_ISL_539601, EPI_ISL_539602, EPI_ISL_539603, EPI_ISL_539604, EPI_ISL_539605, EPI_ISL_539606, EPI_ISL_539607, EPI_ISL_539608, EPI_ISL_539609, EPI_ISL_539610, EPI_ISL_539611, EPI_ISL_539612, EPI_ISL_539613, EPI_ISL_539614, EPI_ISL_539615                                                                                                                                                                                                                                                                                                                                                                                                                                                                                                                                                                                                                                                                                                                                                                                                                                                                                                                                                                                                                                                                                                                                                                                                                                                                                                                                                                                                                                                                                                                                                                                                                                                                                                                                                                                                                                                                                                                                                                                                                                                                                                                                                                                                                                                                                                                                                                                                                                                                                                                                                                                                                                                                                                                                                                                                                                                                                                                                                                                                                                                                                                                                                                                                                                                                                                                                                                                                                                                                                                                                                                                                                                                                                                                                                                                                                                                                                                                                                                                                                                                                                                                                                                                                                                                                                                                                                                                                                                                                                                                                                                                                                                                                                                                                                                                                                                                                                                                                                                                                                                                                                                                                                                                                                                                                                                                                                                                                                                                                                                                                                                                                                                                                                                                                                                                                                                                                                                                                                                                                                                                                                                                                                                                                                                                                                                                                                                                                                                                                                                                                                                                                                                                                                                                                                                                                                                                                                                                                                                                                                                                                                                                                                                                                                                                                                                                                                                                                                                                                                                                                                 | see above                                                                                   | ZOTZ KLIMAS MVZ Düsseldorf-Centrum GbR ÜBAG für Labormedizin, Genetik, Zytologie, Pathologie | Center of Medical Microbiology, Virology, and Hospital Hygiene, University of Duesseldorf                                                                                                                                                                                                                                                                                                                                                                                                                                         | Maximilian Damagnez, Alexander Dilthey, Ashley-Jane Duplessis, Patrick Finzer, Katrin Hoffmann, Torsten Houwaart, Malte Kohns Vasconcelos, Marek Korenca, Nadine Lübke, Jessica Nicolai, Klaus Pfeffer, Daniel Strelow, Jörg Timm, Andreas Walker, Tobias Wienemann, Rainer Zotz                                                                                   |
| EPI_ISL_539824, EPI_ISL_539825, EPI_ISL_539826, EPI_ISL_539827, EPI_ISL_539828, EPI_ISL_539829, EPI_ISL_539830, EPI_ISL_539831, EPI_ISL_539832, EPI_ISL_539833, EPI_ISL_539834, EPI_ISL_539835, EPI_ISL_539836, EPI_ISL_539837, EPI_ISL_539838, EPI_ISL_539839, EPI_ISL_539840, EPI_ISL_539841                                                                                                                                                                                                                                                                                                                                                                                                                                                                                                                                                                                                                                                                                                                                                                                                                                                                                                                                                                                                                                                                                                                                                                                                                                                                                                                                                                                                                                                                                                                                                                                                                                                                                                                                                                                                                                                                                                                                                                                                                                                                                                                                                                                                                                                                                                                                                                                                                                                                                                                                                                                                                                                                                                                                                                                                                                                                                                                                                                                                                                                                                                                                                                                                                                                                                                                                                                                                                                                                                                                                                                                                                                                                                                                                                                                                                                                                                                                                                                                                                                                                                                                                                                                                                                                                                                                                                                                                                                                                                                                                                                                                                                                                                                                                                                                                                                                                                                                                                                                                                                                                                                                                                                                                                                                                                                                                                                                                                                                                                                                                                                                                                                                                                                                                                                                                                                                                                                                                                                                                                                                                                                                                                                                                                                                                                                                                                                                                                                                                                                                                                                                                                                                                                                                                                                                                                                                                                                                                                                                                                                                                                                                                                                                                                                                                                                                                                                                                                                                                                                                                                                                                                                                                                                                                                                                                                                                                                                 | see above                                                                                   | Minnesota Department of Health, Public Health Laboratory                                     | Minnesota Department of Health, Public Health Laboratory                                                                                                                                                                                                                                                                                                                                                                                                                                                                          | Matt Plumb, Jacob Garfin, and Xiong Wang                                                                                                                                                                                                                                                                                                                           |
| EPI_ISL_539842, EPI_ISL_539843, EPI_ISL_539844, EPI_ISL_539845, EPI_ISL_539846, EPI_ISL_539847, EPI_ISL_539848, EPI_ISL_539849                                                                                                                                                                                                                                                                                                                                                                                                                                                                                                                                                                                                                                                                                                                                                                                                                                                                                                                                                                                                                                                                                                                                                                                                                                                                                                                                                                                                                                                                                                                                                                                                                                                                                                                                                                                                                                                                                                                                                                                                                                                                                                                                                                                                                                                                                                                                                                                                                                                                                                                                                                                                                                                                                                                                                                                                                                                                                                                                                                                                                                                                                                                                                                                                                                                                                                                                                                                                                                                                                                                                                                                                                                                                                                                                                                                                                                                                                                                                                                                                                                                                                                                                                                                                                                                                                                                                                                                                                                                                                                                                                                                                                                                                                                                                                                                                                                                                                                                                                                                                                                                                                                                                                                                                                                                                                                                                                                                                                                                                                                                                                                                                                                                                                                                                                                                                                                                                                                                                                                                                                                                                                                                                                                                                                                                                                                                                                                                                                                                                                                                                                                                                                                                                                                                                                                                                                                                                                                                                                                                                                                                                                                                                                                                                                                                                                                                                                                                                                                                                                                                                                                                                                                                                                                                                                                                                                                                                                                                                                                                                                                                                 | see above                                                                                   | Mayo Clinic & Mayo Clinic Laboratories                                                       | Minnesota Department of Health, Public Health Laboratory                                                                                                                                                                                                                                                                                                                                                                                                                                                                          | Matt Plumb, Jacob Garfin, and Xiong Wang                                                                                                                                                                                                                                                                                                                           |
| EPI_ISL_540872, EPI_ISL_540873, EPI_ISL_540874, EPI_ISL_540875, EPI_ISL_540876, EPI_ISL_540878, EPI_ISL_540881, EPI_ISL_540882, EPI_ISL_540883, EPI_ISL_540884, EPI_ISL_540885, EPI_ISL_540887, EPI_ISL_540888, EPI_ISL_540889, EPI_ISL_540890, EPI_ISL_540891, EPI_ISL_540893                                                                                                                                                                                                                                                                                                                                                                                                                                                                                                                                                                                                                                                                                                                                                                                                                                                                                                                                                                                                                                                                                                                                                                                                                                                                                                                                                                                                                                                                                                                                                                                                                                                                                                                                                                                                                                                                                                                                                                                                                                                                                                                                                                                                                                                                                                                                                                                                                                                                                                                                                                                                                                                                                                                                                                                                                                                                                                                                                                                                                                                                                                                                                                                                                                                                                                                                                                                                                                                                                                                                                                                                                                                                                                                                                                                                                                                                                                                                                                                                                                                                                                                                                                                                                                                                                                                                                                                                                                                                                                                                                                                                                                                                                                                                                                                                                                                                                                                                                                                                                                                                                                                                                                                                                                                                                                                                                                                                                                                                                                                                                                                                                                                                                                                                                                                                                                                                                                                                                                                                                                                                                                                                                                                                                                                                                                                                                                                                                                                                                                                                                                                                                                                                                                                                                                                                                                                                                                                                                                                                                                                                                                                                                                                                                                                                                                                                                                                                                                                                                                                                                                                                                                                                                                                                                                                                                                                                                                                 | see above                                                                                   | Virology Department, Royal Infirmary of Edinburgh, NHS                                       | COVID-19 Genomics UK (COG-UK) Consortium                                                                                                                                                                                                                                                                                                                                                                                                                                                                                          | McHugh M, Dewar R, Rooke S, Gallagher M, Balcaza C, O'Toole Á, Scher E, Hill V, McCrone JT, Colquhoun R, Yu X, Jackson B, Rambaut A, Williams                                                                                                                                                                                                                      |

|                                                                                                                                                                                                                                                                                                                                                                                                                                                                                                                                                                                                                                                                                                                                                                                                                                                                                                                                                                                                                                                |                                                                                                                                                                                                 |                                                                                                                                                                                     |                                                                                                                                                                                                                                                                                                                                                                                                                                                                                                                      |                                                                                                                                                                                                                                                                                                                                                                                                                                                                                                                                                                                                                                                                                                                                                                                                                                                                                                                          |
|------------------------------------------------------------------------------------------------------------------------------------------------------------------------------------------------------------------------------------------------------------------------------------------------------------------------------------------------------------------------------------------------------------------------------------------------------------------------------------------------------------------------------------------------------------------------------------------------------------------------------------------------------------------------------------------------------------------------------------------------------------------------------------------------------------------------------------------------------------------------------------------------------------------------------------------------------------------------------------------------------------------------------------------------|-------------------------------------------------------------------------------------------------------------------------------------------------------------------------------------------------|-------------------------------------------------------------------------------------------------------------------------------------------------------------------------------------|----------------------------------------------------------------------------------------------------------------------------------------------------------------------------------------------------------------------------------------------------------------------------------------------------------------------------------------------------------------------------------------------------------------------------------------------------------------------------------------------------------------------|--------------------------------------------------------------------------------------------------------------------------------------------------------------------------------------------------------------------------------------------------------------------------------------------------------------------------------------------------------------------------------------------------------------------------------------------------------------------------------------------------------------------------------------------------------------------------------------------------------------------------------------------------------------------------------------------------------------------------------------------------------------------------------------------------------------------------------------------------------------------------------------------------------------------------|
|                                                                                                                                                                                                                                                                                                                                                                                                                                                                                                                                                                                                                                                                                                                                                                                                                                                                                                                                                                                                                                                | Lothian / School of Biological Sciences, University of Edinburgh / Institute of Genetics and Molecular Medicine, University of Edinburgh                                                        |                                                                                                                                                                                     | TC, Templeton K                                                                                                                                                                                                                                                                                                                                                                                                                                                                                                      |                                                                                                                                                                                                                                                                                                                                                                                                                                                                                                                                                                                                                                                                                                                                                                                                                                                                                                                          |
| EPI_ISL_548949, EPI_ISL_548950, EPI_ISL_548951, EPI_ISL_548952, EPI_ISL_548953, EPI_ISL_548954, EPI_ISL_548955, EPI_ISL_548956, EPI_ISL_548957, EPI_ISL_548958, EPI_ISL_548959, EPI_ISL_548960, EPI_ISL_548961                                                                                                                                                                                                                                                                                                                                                                                                                                                                                                                                                                                                                                                                                                                                                                                                                                 | see above                                                                                                                                                                                       | Max von Pettenkofer Institute, Virology, National Reference Center for Retroviruses, LMU München                                                                                    | Laboratory for Functional Genome Analysis, Dept. Genomics, Gene Center of the LMU Munich                                                                                                                                                                                                                                                                                                                                                                                                                             | Max Muenchhoff, Stefan Krebs, Alexander Graf, Oliver Keppler, Helmut Blum                                                                                                                                                                                                                                                                                                                                                                                                                                                                                                                                                                                                                                                                                                                                                                                                                                                |
| EPI_ISL_548972, EPI_ISL_548973, EPI_ISL_548974, EPI_ISL_548975, EPI_ISL_548976, EPI_ISL_548977, EPI_ISL_548978, EPI_ISL_548979, EPI_ISL_548980, EPI_ISL_548981, EPI_ISL_548982, EPI_ISL_548983, EPI_ISL_548984, EPI_ISL_548985, EPI_ISL_548986, EPI_ISL_548987, EPI_ISL_548988, EPI_ISL_548989, EPI_ISL_548990, EPI_ISL_548991, EPI_ISL_548992, EPI_ISL_548993, EPI_ISL_548994, EPI_ISL_548995, EPI_ISL_548996, EPI_ISL_548997, EPI_ISL_548998, EPI_ISL_548999, EPI_ISL_549000, EPI_ISL_549001, EPI_ISL_549002, EPI_ISL_549003, EPI_ISL_549004, EPI_ISL_549005                                                                                                                                                                                                                                                                                                                                                                                                                                                                                 | see above                                                                                                                                                                                       | National Public Health Laboratory, National Centre for Infectious Diseases                                                                                                          | National Public Health Laboratory, National Centre for Infectious Diseases                                                                                                                                                                                                                                                                                                                                                                                                                                           | Mak TM, Octavia S, Zhou Z, Cui L, Lin RTP                                                                                                                                                                                                                                                                                                                                                                                                                                                                                                                                                                                                                                                                                                                                                                                                                                                                                |
| EPI_ISL_549025                                                                                                                                                                                                                                                                                                                                                                                                                                                                                                                                                                                                                                                                                                                                                                                                                                                                                                                                                                                                                                 | Max von Pettenkofer Institute, Virology, National Reference Center for Retroviruses, LMU München                                                                                                | Laboratory for Functional Genome Analysis, Dept. Genomics, Gene Center of the LMU Munich                                                                                            |                                                                                                                                                                                                                                                                                                                                                                                                                                                                                                                      | Max Muenchhoff, Stefan Krebs, Alexander Graf, Oliver Keppler, Helmut Blum                                                                                                                                                                                                                                                                                                                                                                                                                                                                                                                                                                                                                                                                                                                                                                                                                                                |
| EPI_ISL_559971, EPI_ISL_559972, EPI_ISL_559973, EPI_ISL_559974, EPI_ISL_559975, EPI_ISL_559980, EPI_ISL_559981, EPI_ISL_559982                                                                                                                                                                                                                                                                                                                                                                                                                                                                                                                                                                                                                                                                                                                                                                                                                                                                                                                 | Virology Department, Royal Infirmary of Edinburgh, NHS Lothian / School of Biological Sciences, University of Edinburgh / Institute of Genetics and Molecular Medicine, University of Edinburgh | COVID-19 Genomics UK (COG-UK) Consortium                                                                                                                                            | McHugh M, Dewar R, Rooke S, Gallagher M, Balcaza C, O'Toole Á, Scher E, Hill V, McCrone JT, Colquhoun R, Yu X, Jackson B, Rambaut A, Williams TC, Templeton K                                                                                                                                                                                                                                                                                                                                                        |                                                                                                                                                                                                                                                                                                                                                                                                                                                                                                                                                                                                                                                                                                                                                                                                                                                                                                                          |
| EPI_ISL_560743, EPI_ISL_560744, EPI_ISL_560745, EPI_ISL_560746, EPI_ISL_560747, EPI_ISL_560748, EPI_ISL_560749, EPI_ISL_560750, EPI_ISL_560751, EPI_ISL_560752, EPI_ISL_560753, EPI_ISL_560754, EPI_ISL_560755, EPI_ISL_560756, EPI_ISL_560757, EPI_ISL_560758, EPI_ISL_560759, EPI_ISL_560760, EPI_ISL_560761, EPI_ISL_560762, EPI_ISL_560763, EPI_ISL_560764, EPI_ISL_560765, EPI_ISL_560766, EPI_ISL_560767, EPI_ISL_560768, EPI_ISL_560769, EPI_ISL_560770, EPI_ISL_560771, EPI_ISL_560772, EPI_ISL_560773, EPI_ISL_560774, EPI_ISL_560775, EPI_ISL_560776, EPI_ISL_560777, EPI_ISL_560778, EPI_ISL_560779, EPI_ISL_560780, EPI_ISL_560781, EPI_ISL_560782, EPI_ISL_560783, EPI_ISL_560784, EPI_ISL_560785, EPI_ISL_560786, EPI_ISL_560787, EPI_ISL_560788, EPI_ISL_560789, EPI_ISL_560790, EPI_ISL_560791                                                                                                                                                                                                                                 | see above                                                                                                                                                                                       | Minnesota Department of Health, Public Health Laboratory                                                                                                                            | Minnesota Department of Health, Public Health Laboratory                                                                                                                                                                                                                                                                                                                                                                                                                                                             | Matt Plumb, Jacob Garfin, and Xiong Wang                                                                                                                                                                                                                                                                                                                                                                                                                                                                                                                                                                                                                                                                                                                                                                                                                                                                                 |
| EPI_ISL_560792, EPI_ISL_560793, EPI_ISL_560794, EPI_ISL_560795, EPI_ISL_560796, EPI_ISL_560797                                                                                                                                                                                                                                                                                                                                                                                                                                                                                                                                                                                                                                                                                                                                                                                                                                                                                                                                                 | Mayo Clinic & Mayo Clinic Laboratories                                                                                                                                                          | Minnesota Department of Health, Public Health Laboratory                                                                                                                            |                                                                                                                                                                                                                                                                                                                                                                                                                                                                                                                      | Matt Plumb, Jacob Garfin, and Xiong Wang                                                                                                                                                                                                                                                                                                                                                                                                                                                                                                                                                                                                                                                                                                                                                                                                                                                                                 |
| EPI_ISL_560798, EPI_ISL_560799, EPI_ISL_560800, EPI_ISL_560801, EPI_ISL_560802, EPI_ISL_560803, EPI_ISL_560804, EPI_ISL_560805                                                                                                                                                                                                                                                                                                                                                                                                                                                                                                                                                                                                                                                                                                                                                                                                                                                                                                                 | M Health Fairview                                                                                                                                                                               | Minnesota Department of Health, Public Health Laboratory                                                                                                                            |                                                                                                                                                                                                                                                                                                                                                                                                                                                                                                                      | Matt Plumb, Jacob Garfin, and Xiong Wang                                                                                                                                                                                                                                                                                                                                                                                                                                                                                                                                                                                                                                                                                                                                                                                                                                                                                 |
| EPI_ISL_560806, EPI_ISL_560807, EPI_ISL_560808, EPI_ISL_560809, EPI_ISL_560810, EPI_ISL_560811, EPI_ISL_560812, EPI_ISL_560813, EPI_ISL_560814, EPI_ISL_560815, EPI_ISL_560816, EPI_ISL_560817, EPI_ISL_560818, EPI_ISL_560819, EPI_ISL_560820, EPI_ISL_560821, EPI_ISL_560822, EPI_ISL_560823, EPI_ISL_560824, EPI_ISL_560825, EPI_ISL_560826, EPI_ISL_560827, EPI_ISL_560828, EPI_ISL_560829, EPI_ISL_560830, EPI_ISL_560831, EPI_ISL_560832                                                                                                                                                                                                                                                                                                                                                                                                                                                                                                                                                                                                 | see above                                                                                                                                                                                       | Maryland Public Health Laboratory                                                                                                                                                   | Maryland Public Health Laboratory                                                                                                                                                                                                                                                                                                                                                                                                                                                                                    | Maryland Department of Health Laboratories Administration                                                                                                                                                                                                                                                                                                                                                                                                                                                                                                                                                                                                                                                                                                                                                                                                                                                                |
| EPI_ISL_566036, EPI_ISL_566037, EPI_ISL_566038, EPI_ISL_566039, EPI_ISL_566040, EPI_ISL_566041, EPI_ISL_566042, EPI_ISL_566043                                                                                                                                                                                                                                                                                                                                                                                                                                                                                                                                                                                                                                                                                                                                                                                                                                                                                                                 | Wildlife Conservation Society, Bronx Zoo                                                                                                                                                        | Diagnostic Virology Laboratory, United States Department of Agriculture, National Veterinary Services Laboratories, Population Medicine and Diagnostic Sciences, Cornell University | McAloose,D., Laverack,M., Wang,L., Killian,M.L., Caserta,L.C., Yuan,F., Mitchell,P.K., Queen,K., Mauldin,M.R., Cronk,B.D., Bartlett,S.L., Sykes,J.M., Zec,S., Stokol,T., Ingerman,K., Delaney,M.A., Frederikson,R., Ivancic,M., Jenkins-Moore,M., Mozingo,K., Farnzen,K., Kuzmin,I., Hines Bergeson,N., Goodman,L., Wang,H., Tong,S., Fang,Y., Olmstead,C., McCann,C., Thomas,P., Goodrich,E., Elvinger,F., Smith,D.C., Slavinski,S., Calle,P.P., Terio,K., Torchetti,M.K., Diel,D.G., Cardia Caserta,L.             |                                                                                                                                                                                                                                                                                                                                                                                                                                                                                                                                                                                                                                                                                                                                                                                                                                                                                                                          |
| EPI_ISL_566044                                                                                                                                                                                                                                                                                                                                                                                                                                                                                                                                                                                                                                                                                                                                                                                                                                                                                                                                                                                                                                 | Wildlife Conservation Society, Bronx Zoo                                                                                                                                                        | Diagnostic Virology Laboratory, United States Department of Agriculture, National Veterinary Services Laboratories, Population Medicine and Diagnostic Sciences, Cornell University | McAloose,D., Laverack,M., Wang,L., Killian,M.L., Caserta,L.C., Yuan,F., Mitchell,P.K., Queen,K., Mauldin,M.R., Cronk,B.D., Bartlett,S.L., Sykes,J.M., Zec,S., Stokol,T., Ingerman,K., Delaney,M.A., Frederikson,R., Ivancic,M., Jenkins-Moore,M., Mozingo,K., Farnzen,K., Kuzmin,I., Hines Bergeson,N., Goodman,L., Wang,H., Tong,S., Fang,Y., Olmstead,C., McCann,C., Thomas,P., Goodrich,E., Elvinger,F., Smith,D.C., Slavinski,S., Calle,P.P., Terio,K., Torchetti,M.K., Diel,D.G., Cardia Caserta,L., Mauldin,M. |                                                                                                                                                                                                                                                                                                                                                                                                                                                                                                                                                                                                                                                                                                                                                                                                                                                                                                                          |
| EPI_ISL_569609                                                                                                                                                                                                                                                                                                                                                                                                                                                                                                                                                                                                                                                                                                                                                                                                                                                                                                                                                                                                                                 | Bennet County Hospital                                                                                                                                                                          | South Dakota Public Health Laboratory                                                                                                                                               |                                                                                                                                                                                                                                                                                                                                                                                                                                                                                                                      | Matt Plumb, Jacob Garfin, Xiong Wang, and Chris Carlson                                                                                                                                                                                                                                                                                                                                                                                                                                                                                                                                                                                                                                                                                                                                                                                                                                                                  |
| EPI_ISL_569610                                                                                                                                                                                                                                                                                                                                                                                                                                                                                                                                                                                                                                                                                                                                                                                                                                                                                                                                                                                                                                 | Avera McKennan Hospital                                                                                                                                                                         | South Dakota Public Health Laboratory                                                                                                                                               |                                                                                                                                                                                                                                                                                                                                                                                                                                                                                                                      | Matt Plumb, Jacob Garfin, Xiong Wang, and Chris Carlson                                                                                                                                                                                                                                                                                                                                                                                                                                                                                                                                                                                                                                                                                                                                                                                                                                                                  |
| EPI_ISL_569611                                                                                                                                                                                                                                                                                                                                                                                                                                                                                                                                                                                                                                                                                                                                                                                                                                                                                                                                                                                                                                 | Sioux Falls Urgent Care                                                                                                                                                                         | South Dakota Public Health Laboratory                                                                                                                                               |                                                                                                                                                                                                                                                                                                                                                                                                                                                                                                                      | Matt Plumb, Jacob Garfin, Xiong Wang, and Chris Carlson                                                                                                                                                                                                                                                                                                                                                                                                                                                                                                                                                                                                                                                                                                                                                                                                                                                                  |
| EPI_ISL_569612, EPI_ISL_569613                                                                                                                                                                                                                                                                                                                                                                                                                                                                                                                                                                                                                                                                                                                                                                                                                                                                                                                                                                                                                 | Cheyenne River Health Center                                                                                                                                                                    | South Dakota Public Health Laboratory                                                                                                                                               |                                                                                                                                                                                                                                                                                                                                                                                                                                                                                                                      | Matt Plumb, Jacob Garfin, Xiong Wang, and Chris Carlson                                                                                                                                                                                                                                                                                                                                                                                                                                                                                                                                                                                                                                                                                                                                                                                                                                                                  |
| EPI_ISL_569614                                                                                                                                                                                                                                                                                                                                                                                                                                                                                                                                                                                                                                                                                                                                                                                                                                                                                                                                                                                                                                 | IHS Fort Yates Hospital                                                                                                                                                                         | South Dakota Public Health Laboratory                                                                                                                                               |                                                                                                                                                                                                                                                                                                                                                                                                                                                                                                                      | Matt Plumb, Jacob Garfin, Xiong Wang, and Chris Carlson                                                                                                                                                                                                                                                                                                                                                                                                                                                                                                                                                                                                                                                                                                                                                                                                                                                                  |
| EPI_ISL_569615                                                                                                                                                                                                                                                                                                                                                                                                                                                                                                                                                                                                                                                                                                                                                                                                                                                                                                                                                                                                                                 | Quick Care Huron                                                                                                                                                                                | South Dakota Public Health Laboratory                                                                                                                                               |                                                                                                                                                                                                                                                                                                                                                                                                                                                                                                                      | Matt Plumb, Jacob Garfin, Xiong Wang, and Chris Carlson                                                                                                                                                                                                                                                                                                                                                                                                                                                                                                                                                                                                                                                                                                                                                                                                                                                                  |
| EPI_ISL_569616                                                                                                                                                                                                                                                                                                                                                                                                                                                                                                                                                                                                                                                                                                                                                                                                                                                                                                                                                                                                                                 | Aurora County Clinic                                                                                                                                                                            | South Dakota Public Health Laboratory                                                                                                                                               |                                                                                                                                                                                                                                                                                                                                                                                                                                                                                                                      | Matt Plumb, Jacob Garfin, Xiong Wang, and Chris Carlson                                                                                                                                                                                                                                                                                                                                                                                                                                                                                                                                                                                                                                                                                                                                                                                                                                                                  |
| EPI_ISL_569617                                                                                                                                                                                                                                                                                                                                                                                                                                                                                                                                                                                                                                                                                                                                                                                                                                                                                                                                                                                                                                 | SD Urban Indian Health Pierre                                                                                                                                                                   | South Dakota Public Health Laboratory                                                                                                                                               |                                                                                                                                                                                                                                                                                                                                                                                                                                                                                                                      | Matt Plumb, Jacob Garfin, Xiong Wang, and Chris Carlson                                                                                                                                                                                                                                                                                                                                                                                                                                                                                                                                                                                                                                                                                                                                                                                                                                                                  |
| EPI_ISL_569618, EPI_ISL_569619                                                                                                                                                                                                                                                                                                                                                                                                                                                                                                                                                                                                                                                                                                                                                                                                                                                                                                                                                                                                                 | Bethel Lutheran Home                                                                                                                                                                            | South Dakota Public Health Laboratory                                                                                                                                               |                                                                                                                                                                                                                                                                                                                                                                                                                                                                                                                      | Matt Plumb, Jacob Garfin, Xiong Wang, and Chris Carlson                                                                                                                                                                                                                                                                                                                                                                                                                                                                                                                                                                                                                                                                                                                                                                                                                                                                  |
| EPI_ISL_569620                                                                                                                                                                                                                                                                                                                                                                                                                                                                                                                                                                                                                                                                                                                                                                                                                                                                                                                                                                                                                                 | McCrossan Boys Ranch                                                                                                                                                                            | South Dakota Public Health Laboratory                                                                                                                                               |                                                                                                                                                                                                                                                                                                                                                                                                                                                                                                                      | Matt Plumb, Jacob Garfin, Xiong Wang, and Chris Carlson                                                                                                                                                                                                                                                                                                                                                                                                                                                                                                                                                                                                                                                                                                                                                                                                                                                                  |
| EPI_ISL_569621                                                                                                                                                                                                                                                                                                                                                                                                                                                                                                                                                                                                                                                                                                                                                                                                                                                                                                                                                                                                                                 | Quick Care Watertown                                                                                                                                                                            | South Dakota Public Health Laboratory                                                                                                                                               |                                                                                                                                                                                                                                                                                                                                                                                                                                                                                                                      | Matt Plumb, Jacob Garfin, Xiong Wang, and Chris Carlson                                                                                                                                                                                                                                                                                                                                                                                                                                                                                                                                                                                                                                                                                                                                                                                                                                                                  |
| EPI_ISL_569622                                                                                                                                                                                                                                                                                                                                                                                                                                                                                                                                                                                                                                                                                                                                                                                                                                                                                                                                                                                                                                 | Woodrow Wilson Keeble Memorial Healthcare                                                                                                                                                       | South Dakota Public Health Laboratory                                                                                                                                               |                                                                                                                                                                                                                                                                                                                                                                                                                                                                                                                      | Matt Plumb, Jacob Garfin, Xiong Wang, and Chris Carlson                                                                                                                                                                                                                                                                                                                                                                                                                                                                                                                                                                                                                                                                                                                                                                                                                                                                  |
| EPI_ISL_569623                                                                                                                                                                                                                                                                                                                                                                                                                                                                                                                                                                                                                                                                                                                                                                                                                                                                                                                                                                                                                                 | Quick Care Watertown                                                                                                                                                                            | South Dakota Public Health Laboratory                                                                                                                                               |                                                                                                                                                                                                                                                                                                                                                                                                                                                                                                                      | Matt Plumb, Jacob Garfin, Xiong Wang, and Chris Carlson                                                                                                                                                                                                                                                                                                                                                                                                                                                                                                                                                                                                                                                                                                                                                                                                                                                                  |
| EPI_ISL_569624                                                                                                                                                                                                                                                                                                                                                                                                                                                                                                                                                                                                                                                                                                                                                                                                                                                                                                                                                                                                                                 | Avera McKennan Hospital                                                                                                                                                                         | South Dakota Public Health Laboratory                                                                                                                                               |                                                                                                                                                                                                                                                                                                                                                                                                                                                                                                                      | Matt Plumb, Jacob Garfin, Xiong Wang, and Chris Carlson                                                                                                                                                                                                                                                                                                                                                                                                                                                                                                                                                                                                                                                                                                                                                                                                                                                                  |
| EPI_ISL_572320, EPI_ISL_572321, EPI_ISL_572322, EPI_ISL_572323, EPI_ISL_572324                                                                                                                                                                                                                                                                                                                                                                                                                                                                                                                                                                                                                                                                                                                                                                                                                                                                                                                                                                 | IZSM                                                                                                                                                                                            | IZSM                                                                                                                                                                                |                                                                                                                                                                                                                                                                                                                                                                                                                                                                                                                      | Maurizio Viscardi, Lorena Cardillo, Giovanna Fusco                                                                                                                                                                                                                                                                                                                                                                                                                                                                                                                                                                                                                                                                                                                                                                                                                                                                       |
| EPI_ISL_572330, EPI_ISL_572331, EPI_ISL_572333                                                                                                                                                                                                                                                                                                                                                                                                                                                                                                                                                                                                                                                                                                                                                                                                                                                                                                                                                                                                 | Institute for Virology, University Hospital Duesseldorf, Medical Faculty, Heinrich-Heine-University Duesseldorf                                                                                 | Institute for Virology, University Hospital Duesseldorf, Medical Faculty, Heinrich-Heine-University Duesseldorf                                                                     | Maximilian Damagnez, Verena Keitel, Björn Jensen, Nadine Lübke, Lisa Müller, Philipp Ostermann, Tina Senff, Ortwin Adams, Philipp Albrecht, Gerald Antoch, Johannes Bode, Edwin Bölke, Saskia Elben, Torsten Feldt, Johannes C. Fischer, , Anselm Kunststein, Caroline Klindt, Alexander Killer, Tom Lüdde, Annemarie Mohring, Jennifer Neubert, Heiner Schaal, Ansgar Schulz, Jörg Timm, Andreas Walker                                                                                                             |                                                                                                                                                                                                                                                                                                                                                                                                                                                                                                                                                                                                                                                                                                                                                                                                                                                                                                                          |
| EPI_ISL_572334, EPI_ISL_572335, EPI_ISL_572336, EPI_ISL_572337, EPI_ISL_572338, EPI_ISL_572339, EPI_ISL_572340, EPI_ISL_572341, EPI_ISL_572342, EPI_ISL_572343, EPI_ISL_572344, EPI_ISL_572345, EPI_ISL_572346, EPI_ISL_572347, EPI_ISL_572348, EPI_ISL_572349, EPI_ISL_572350, EPI_ISL_572351, EPI_ISL_572352, EPI_ISL_572353, EPI_ISL_572354, EPI_ISL_572355, EPI_ISL_572356, EPI_ISL_572357, EPI_ISL_572358, EPI_ISL_572359, EPI_ISL_572360, EPI_ISL_572361, EPI_ISL_572362, EPI_ISL_572363, EPI_ISL_572364, EPI_ISL_572365, EPI_ISL_572366, EPI_ISL_572367, EPI_ISL_572368, EPI_ISL_572369, EPI_ISL_572370, EPI_ISL_572371, EPI_ISL_572372, EPI_ISL_572373, EPI_ISL_572374, EPI_ISL_572375, EPI_ISL_572376, EPI_ISL_572377, EPI_ISL_572378, EPI_ISL_572379, EPI_ISL_572380, EPI_ISL_572381, EPI_ISL_572382, EPI_ISL_572383, EPI_ISL_572384, EPI_ISL_572385, EPI_ISL_572386, EPI_ISL_572387, EPI_ISL_572388, EPI_ISL_572389, EPI_ISL_572390, EPI_ISL_572391, EPI_ISL_572392, EPI_ISL_572393, EPI_ISL_572394, EPI_ISL_572395, EPI_ISL_572396 | see above                                                                                                                                                                                       | Laboratório Central de Saúde Pública do Estado de Pernambuco (LACEN-PE)                                                                                                             | WallauLab, Aggeu Magalhaes Institute                                                                                                                                                                                                                                                                                                                                                                                                                                                                                 | Marcelo Henrique Santos Paiva, Duschinka Ribeiro Duarte Guedes, Cássia Docena, Matheus Filgueira Bezerra, Filipe Zimmer Dezordi, Laís Ceschini Machado, Larissa Krokovsky, Elisama Helvecio, Alexandre Freitas da Silva, Luydson Richardson Silva Vasconcelos, Antonio Mauro Rezende, Severino Jefferson Ribeiro da Silva, Kamila Gaudêncio da Silva Sales, Bruna Santos Lima Figueiredo de Sá, Derciliano Lopes da Cruz, Claudio Eduardo Cavalcanti, Armando de Menezes Neto, Caroline Targino Alves da Silva, Renata Pessôa Germano Mendes, Maria Almerice Lopes da Silva, Tiago Gráf, Paola Cristina Resende, Gonzalo Bello, Michelle da Silva Barros, Wherverton Ricardo Correia do Nascimento, Rodrigo Moraes Loyo Arcoverde, Luciane Caroline Albuquerque Bezerra, Sinval Pinto Brandão Filho, Constança Flávia Junqueira Ayres, Gabriel Luz Wallau on behalf of the FioCruz COVID-19 Genomic Surveillance Network |
| EPI_ISL_572397                                                                                                                                                                                                                                                                                                                                                                                                                                                                                                                                                                                                                                                                                                                                                                                                                                                                                                                                                                                                                                 | Institute for Virology, University Hospital Duesseldorf, Medical Faculty, Heinrich-Heine-University Duesseldorf                                                                                 | Institute for Virology, University Hospital Duesseldorf, Medical Faculty, Heinrich-Heine-University Duesseldorf                                                                     | Maximilian Damagnez, Verena Keitel, Björn Jensen, Nadine Lübke, Lisa Müller, Philipp Ostermann, Tina Senff, Ortwin Adams, Philipp Albrecht, Gerald Antoch, Johannes Bode, Edwin Bölke, Saskia Elben, Torsten Feldt, Johannes C. Fischer, , Anselm Kunststein, Caroline Klindt, Alexander Killer, Tom Lüdde,                                                                                                                                                                                                          |                                                                                                                                                                                                                                                                                                                                                                                                                                                                                                                                                                                                                                                                                                                                                                                                                                                                                                                          |

| Annemarie Mohring, Jennifer Neubert, Heiner Schaal, Ansgar Schulz, Jörg Timm, Andreas Walker                                                                                                                                                                                                                                                                                                                                                                                                                                                                                                                                                                                                                                                                                                                                                                                                                                                                                                                                                                                                                                                                   |           |                                                                                                                                                                                                 |                                                                                                                 |                                                                                                                                                                                                                                                                                                                                                                                                        |
|----------------------------------------------------------------------------------------------------------------------------------------------------------------------------------------------------------------------------------------------------------------------------------------------------------------------------------------------------------------------------------------------------------------------------------------------------------------------------------------------------------------------------------------------------------------------------------------------------------------------------------------------------------------------------------------------------------------------------------------------------------------------------------------------------------------------------------------------------------------------------------------------------------------------------------------------------------------------------------------------------------------------------------------------------------------------------------------------------------------------------------------------------------------|-----------|-------------------------------------------------------------------------------------------------------------------------------------------------------------------------------------------------|-----------------------------------------------------------------------------------------------------------------|--------------------------------------------------------------------------------------------------------------------------------------------------------------------------------------------------------------------------------------------------------------------------------------------------------------------------------------------------------------------------------------------------------|
| EPI_ISL_572413, EPI_ISL_572414, EPI_ISL_572421, EPI_ISL_572425, EPI_ISL_572435, EPI_ISL_572442, EPI_ISL_572483, EPI_ISL_572490, EPI_ISL_572535, EPI_ISL_572536, EPI_ISL_572537, EPI_ISL_572538, EPI_ISL_572539, EPI_ISL_572542, EPI_ISL_572543, EPI_ISL_572544, EPI_ISL_572573, EPI_ISL_572590, EPI_ISL_572593, EPI_ISL_572599, EPI_ISL_572608, EPI_ISL_572610, EPI_ISL_572617, EPI_ISL_572689, EPI_ISL_572692, EPI_ISL_572707, EPI_ISL_572756, EPI_ISL_572762, EPI_ISL_572774, EPI_ISL_572777, EPI_ISL_572801, EPI_ISL_572803, EPI_ISL_572821, EPI_ISL_572871, EPI_ISL_572874, EPI_ISL_572955                                                                                                                                                                                                                                                                                                                                                                                                                                                                                                                                                                 | see above | Virology Department, Royal Infirmary of Edinburgh, NHS Lothian / School of Biological Sciences, University of Edinburgh / Institute of Genetics and Molecular Medicine, University of Edinburgh | COVID-19 Genomics UK (COG-UK) Consortium                                                                        | McHugh M, Dewar R, Rooke S, Gallagher M, Balcaza C, O'Toole Á, Scher E, Hill V, McCrone JT, Colquhoun R, Yu X, Jackson B, Rambaut A, Williams TC, Templeton K                                                                                                                                                                                                                                          |
| EPI_ISL_573152                                                                                                                                                                                                                                                                                                                                                                                                                                                                                                                                                                                                                                                                                                                                                                                                                                                                                                                                                                                                                                                                                                                                                 |           | Institute for Virology, University Hospital Duesseldorf, Medical Faculty, Heinrich-Heine-University Duesseldorf                                                                                 | Institute for Virology, University Hospital Duesseldorf, Medical Faculty, Heinrich-Heine-University Duesseldorf | Maximilian Damagnez, Verena Keitel, Björn Jensen, Nadine Lübke, Lisa Müller, Philipp Ostermann, Tina Senff, Ortwin Adams, Philipp Albrecht, Gerald Antoch, Johannes Bode, Edwin Bölke, Saskia Elben, Torsten Feldt, Johannes C. Fischer, , Anselm Kunstein, Caroline Klindt, Alexander Killel, Tom Lüdde, Annemarie Mohring, Jennifer Neubert, Heiner Schaal, Ansgar Schulz, Jörg Timm, Andreas Walker |
| EPI_ISL_573247, EPI_ISL_573248, EPI_ISL_573249, EPI_ISL_573250, EPI_ISL_573251, EPI_ISL_573252, EPI_ISL_573794, EPI_ISL_573795, EPI_ISL_573796                                                                                                                                                                                                                                                                                                                                                                                                                                                                                                                                                                                                                                                                                                                                                                                                                                                                                                                                                                                                                 |           | Virology Department, Royal Infirmary of Edinburgh, NHS Lothian / School of Biological Sciences, University of Edinburgh / Institute of Genetics and Molecular Medicine, University of Edinburgh | COVID-19 Genomics UK (COG-UK) Consortium                                                                        | McHugh M, Dewar R, Rooke S, Gallagher M, Balcaza C, O'Toole Á, Scher E, Hill V, McCrone JT, Colquhoun R, Yu X, Jackson B, Rambaut A, Williams TC, Templeton K                                                                                                                                                                                                                                          |
| EPI_ISL_574259                                                                                                                                                                                                                                                                                                                                                                                                                                                                                                                                                                                                                                                                                                                                                                                                                                                                                                                                                                                                                                                                                                                                                 |           | Institute for Virology, University Hospital Duesseldorf, Medical Faculty, Heinrich-Heine-University Duesseldorf                                                                                 | Institute for Virology, University Hospital Duesseldorf, Medical Faculty, Heinrich-Heine-University Duesseldorf | Maximilian Damagnez, Verena Keitel, Björn Jensen, Nadine Lübke, Lisa Müller, Philipp Ostermann, Tina Senff, Ortwin Adams, Philipp Albrecht, Gerald Antoch, Johannes Bode, Edwin Bölke, Saskia Elben, Torsten Feldt, Johannes C. Fischer, , Anselm Kunstein, Caroline Klindt, Alexander Killel, Tom Lüdde, Annemarie Mohring, Jennifer Neubert, Heiner Schaal, Ansgar Schulz, Jörg Timm, Andreas Walker |
| EPI_ISL_576228, EPI_ISL_576229, EPI_ISL_576230, EPI_ISL_576231, EPI_ISL_576232, EPI_ISL_576233, EPI_ISL_576234, EPI_ISL_576235, EPI_ISL_576236, EPI_ISL_576237, EPI_ISL_576238, EPI_ISL_576239, EPI_ISL_576240, EPI_ISL_576241, EPI_ISL_576242, EPI_ISL_576243, EPI_ISL_576244, EPI_ISL_576245, EPI_ISL_576246, EPI_ISL_576247, EPI_ISL_576248, EPI_ISL_576249, EPI_ISL_576250, EPI_ISL_576251, EPI_ISL_576252, EPI_ISL_576253, EPI_ISL_576254, EPI_ISL_576255, EPI_ISL_576256                                                                                                                                                                                                                                                                                                                                                                                                                                                                                                                                                                                                                                                                                 | see above | Minnesota Department of Health, Public Health Laboratory                                                                                                                                        | Minnesota Department of Health, Public Health Laboratory                                                        | Matt Plumb, Jacob Garfin, Alexandra Lorentz, and Xiong Wang                                                                                                                                                                                                                                                                                                                                            |
| EPI_ISL_577348, EPI_ISL_577349, EPI_ISL_577350, EPI_ISL_577351, EPI_ISL_577352, EPI_ISL_577354, EPI_ISL_577355, EPI_ISL_577356, EPI_ISL_577358                                                                                                                                                                                                                                                                                                                                                                                                                                                                                                                                                                                                                                                                                                                                                                                                                                                                                                                                                                                                                 |           | Virology Department, Royal Infirmary of Edinburgh, NHS Lothian / School of Biological Sciences, University of Edinburgh / Institute of Genetics and Molecular Medicine, University of Edinburgh | COVID-19 Genomics UK (COG-UK) Consortium                                                                        | McHugh M, Dewar R, Rooke S, Gallagher M, Balcaza C, O'Toole Á, Scher E, Hill V, McCrone JT, Colquhoun R, Yu X, Jackson B, Rambaut A, Williams TC, Templeton K                                                                                                                                                                                                                                          |
| EPI_ISL_582091, EPI_ISL_582092, EPI_ISL_582093, EPI_ISL_582094, EPI_ISL_582095, EPI_ISL_582096, EPI_ISL_582097, EPI_ISL_582098, EPI_ISL_582099, EPI_ISL_582100, EPI_ISL_582101, EPI_ISL_582102, EPI_ISL_582103, EPI_ISL_582104, EPI_ISL_582105, EPI_ISL_582106, EPI_ISL_582107, EPI_ISL_582108, EPI_ISL_582109                                                                                                                                                                                                                                                                                                                                                                                                                                                                                                                                                                                                                                                                                                                                                                                                                                                 | see above | Hospital Universitario Marqués de Valdecilla - IDIVAL (Santander, Cantabria)                                                                                                                    | SeqCOVID-SPAIN consortium/IBV(CSIC)                                                                             | Maria Eliecer Cano García, Mónica Gozalo Margüello, Jose Manuel Méndez Legaza, Daniel Pablo Marcos, Jesús Rodríguez Rodríguez, María Siller Ruiz and SeqCOVID-SPAIN consortium                                                                                                                                                                                                                         |
| EPI_ISL_582123, EPI_ISL_583953, EPI_ISL_583954, EPI_ISL_583955, EPI_ISL_583956, EPI_ISL_583957, EPI_ISL_583958, EPI_ISL_583959, EPI_ISL_583960, EPI_ISL_583961, EPI_ISL_583962, EPI_ISL_583963, EPI_ISL_583964, EPI_ISL_583965, EPI_ISL_583966, EPI_ISL_583967                                                                                                                                                                                                                                                                                                                                                                                                                                                                                                                                                                                                                                                                                                                                                                                                                                                                                                 | see above | UOC Microbiologia e Virologia, Azienda Ospedaliera Universitaria Senese, Siena, Italy                                                                                                           | Dipartimento di Biotecnologie Mediche                                                                           | Maria Grazia Cusi, David Pinzauti, Claudia Gandolfo, Gabriele Anichini, Gianni Pozzi, Francesco Santoro                                                                                                                                                                                                                                                                                                |
| EPI_ISL_584069, EPI_ISL_584071, EPI_ISL_584072                                                                                                                                                                                                                                                                                                                                                                                                                                                                                                                                                                                                                                                                                                                                                                                                                                                                                                                                                                                                                                                                                                                 |           | IZSM                                                                                                                                                                                            | IZSM                                                                                                            | Maurizio Viscardi, Lorena Cardillo, Giovanna Fusco                                                                                                                                                                                                                                                                                                                                                     |
| EPI_ISL_585426, EPI_ISL_585429, EPI_ISL_585430, EPI_ISL_585432, EPI_ISL_585433, EPI_ISL_585435, EPI_ISL_585436, EPI_ISL_585438, EPI_ISL_585439, EPI_ISL_585440, EPI_ISL_585441, EPI_ISL_585442, EPI_ISL_585443, EPI_ISL_585444, EPI_ISL_585445, EPI_ISL_585447, EPI_ISL_585448, EPI_ISL_585450, EPI_ISL_585452, EPI_ISL_585453, EPI_ISL_585455, EPI_ISL_585456, EPI_ISL_585457, EPI_ISL_585458, EPI_ISL_585459, EPI_ISL_585460, EPI_ISL_585462, EPI_ISL_585463, EPI_ISL_585464, EPI_ISL_585465, EPI_ISL_585466, EPI_ISL_585467, EPI_ISL_585468, EPI_ISL_585470, EPI_ISL_585471, EPI_ISL_585472, EPI_ISL_585473, EPI_ISL_585475, EPI_ISL_585477, EPI_ISL_585478, EPI_ISL_585481, EPI_ISL_585483, EPI_ISL_585485, EPI_ISL_585487, EPI_ISL_585489, EPI_ISL_585490, EPI_ISL_585491, EPI_ISL_585492, EPI_ISL_585493, EPI_ISL_585494, EPI_ISL_585495, EPI_ISL_585496, EPI_ISL_585497, EPI_ISL_585498, EPI_ISL_585500                                                                                                                                                                                                                                                 | see above | Virology Department, Royal Infirmary of Edinburgh, NHS Lothian / School of Biological Sciences, University of Edinburgh / Institute of Genetics and Molecular Medicine, University of Edinburgh | COVID-19 Genomics UK (COG-UK) Consortium                                                                        | McHugh M, Dewar R, Rooke S, Gallagher M, Balcaza C, O'Toole Á, Scher E, Hill V, McCrone JT, Colquhoun R, Yu X, Jackson B, Rambaut A, Williams TC, Templeton K                                                                                                                                                                                                                                          |
| EPI_ISL_590693                                                                                                                                                                                                                                                                                                                                                                                                                                                                                                                                                                                                                                                                                                                                                                                                                                                                                                                                                                                                                                                                                                                                                 |           | INMI Lazzaro Spallanzani IRCCS                                                                                                                                                                  | INMI Lazzaro Spallanzani IRCCS                                                                                  | Martina Rueca, Barbara Bartolini, Cesare E.M. Gruber, Francesco Messina, Emanuela Giombini, Beatrice Valli, Eleonora Lalle, Simone Lanini, Francesco Vairo, Maria R. Capobianchi, Antonino Di Caro                                                                                                                                                                                                     |
| EPI_ISL_590697                                                                                                                                                                                                                                                                                                                                                                                                                                                                                                                                                                                                                                                                                                                                                                                                                                                                                                                                                                                                                                                                                                                                                 |           | INMI Lazzaro Spallanzani IRCCS                                                                                                                                                                  | INMI Lazzaro Spallanzani IRCCS                                                                                  | Martina Rueca, Cesare E.M. Gruber, Barbara Bartolini, Francesco Messina, Emanuela Giombini, Beatrice Valli, Eleonora Lalle, Simone Lanini, Francesco Vairo, Antonino Di Caro, Maria R. Capobianchi                                                                                                                                                                                                     |
| EPI_ISL_590753, EPI_ISL_590754, EPI_ISL_590755, EPI_ISL_590756, EPI_ISL_590757, EPI_ISL_590758, EPI_ISL_590759, EPI_ISL_590760, EPI_ISL_590761, EPI_ISL_590762, EPI_ISL_590763, EPI_ISL_590764, EPI_ISL_590765, EPI_ISL_590766, EPI_ISL_590767, EPI_ISL_590768, EPI_ISL_590769, EPI_ISL_590770, EPI_ISL_590771, EPI_ISL_590772, EPI_ISL_590773, EPI_ISL_590774, EPI_ISL_590775, EPI_ISL_590776, EPI_ISL_590777, EPI_ISL_590778, EPI_ISL_590779, EPI_ISL_590780, EPI_ISL_590781, EPI_ISL_590782, EPI_ISL_590783, EPI_ISL_590784, EPI_ISL_590785, EPI_ISL_590786, EPI_ISL_590787, EPI_ISL_590788, EPI_ISL_590789, EPI_ISL_590790, EPI_ISL_590791, EPI_ISL_590792, EPI_ISL_590793, EPI_ISL_590794, EPI_ISL_590795, EPI_ISL_590796, EPI_ISL_590797, EPI_ISL_590798, EPI_ISL_590799, EPI_ISL_590800, EPI_ISL_590801, EPI_ISL_590802, EPI_ISL_590803, EPI_ISL_590804, EPI_ISL_590805, EPI_ISL_590806, EPI_ISL_590807, EPI_ISL_590808, EPI_ISL_590809, EPI_ISL_590810, EPI_ISL_590811, EPI_ISL_590812, EPI_ISL_590813, EPI_ISL_590814, EPI_ISL_590815, EPI_ISL_590816, EPI_ISL_590817, EPI_ISL_590818, EPI_ISL_590819, EPI_ISL_590820, EPI_ISL_590821, EPI_ISL_590822 | see above | Minnesota Department of Health, Public Health Laboratory                                                                                                                                        | Minnesota Department of Health, Public Health Laboratory                                                        | Matt Plumb, Jacob Garfin, Alexandra Lorentz, and Xiong Wang                                                                                                                                                                                                                                                                                                                                            |
| EPI_ISL_590823, EPI_ISL_590824, EPI_ISL_590825, EPI_ISL_590826, EPI_ISL_590827, EPI_ISL_590828, EPI_ISL_590829, EPI_ISL_590830, EPI_ISL_590831, EPI_ISL_590832, EPI_ISL_590833, EPI_ISL_590834, EPI_ISL_590835, EPI_ISL_590836                                                                                                                                                                                                                                                                                                                                                                                                                                                                                                                                                                                                                                                                                                                                                                                                                                                                                                                                 | see above | Institute of Medical Virology, University of Zurich                                                                                                                                             | Institute of Medical Virology, University of Zurich                                                             | Marie O. Pohl, Idoia Busnadiego, Verena Kufner, Stefan Schmutz, Maryam Zaheri, Irene Abela, Alexandra Trkoca, Michael Huber, Silke Stertz, Benjamin G. Hale                                                                                                                                                                                                                                            |
| EPI_ISL_590837                                                                                                                                                                                                                                                                                                                                                                                                                                                                                                                                                                                                                                                                                                                                                                                                                                                                                                                                                                                                                                                                                                                                                 |           | Minnesota Department of Health, Public Health Laboratory                                                                                                                                        | Minnesota Department of Health, Public Health Laboratory                                                        | Matt Plumb, Jacob Garfin, Alexandra Lorentz, and Xiong Wang                                                                                                                                                                                                                                                                                                                                            |
| EPI_ISL_591022, EPI_ISL_591023, EPI_ISL_591024, EPI_ISL_591025, EPI_ISL_591026, EPI_ISL_591027, EPI_ISL_591028, EPI_ISL_591029, EPI_ISL_591030, EPI_ISL_591031, EPI_ISL_591032, EPI_ISL_591033, EPI_ISL_591034, EPI_ISL_591035, EPI_ISL_591036                                                                                                                                                                                                                                                                                                                                                                                                                                                                                                                                                                                                                                                                                                                                                                                                                                                                                                                 | see above | MD PHL                                                                                                                                                                                          | MD PHL                                                                                                          | Maryland Department of Health Laboratories Administration                                                                                                                                                                                                                                                                                                                                              |
| EPI_ISL_593478, EPI_ISL_593479, EPI_ISL_593480, EPI_ISL_593553, EPI_ISL_593554, EPI_ISL_593555, EPI_ISL_593556, EPI_ISL_593557, EPI_ISL_593558                                                                                                                                                                                                                                                                                                                                                                                                                                                                                                                                                                                                                                                                                                                                                                                                                                                                                                                                                                                                                 |           | Brigham and Women's Hospital                                                                                                                                                                    | Jonathan Li Laboratory                                                                                          | Manish C. Choudhary, James Regan, Jonathan Z. Li                                                                                                                                                                                                                                                                                                                                                       |
| EPI_ISL_594816, EPI_ISL_594820, EPI_ISL_594822, EPI_ISL_594824, EPI_ISL_594825, EPI_ISL_594826, EPI_ISL_594827, EPI_ISL_594830, EPI_ISL_594831, EPI_ISL_594833, EPI_ISL_594834, EPI_ISL_594835, EPI_ISL_594836, EPI_ISL_594837, EPI_ISL_594838, EPI_ISL_594840, EPI_ISL_594841, EPI_ISL_594843, EPI_ISL_594844, EPI_ISL_594845, EPI_ISL_594846                                                                                                                                                                                                                                                                                                                                                                                                                                                                                                                                                                                                                                                                                                                                                                                                                 | see above | Virology Department, Royal Infirmary of Edinburgh, NHS Lothian / School of Biological Sciences, University of Edinburgh / Institute of Genetics and Molecular Medicine, University of Edinburgh | COVID-19 Genomics UK (COG-UK) Consortium                                                                        | McHugh M, Dewar R, Rooke S, Gallagher M, Balcaza C, O'Toole Á, Scher E, Hill V, McCrone JT, Colquhoun R, Yu X, Jackson B, Rambaut A, Williams TC, Templeton K                                                                                                                                                                                                                                          |
| EPI_ISL_596627, EPI_ISL_596628, EPI_ISL_596629, EPI_ISL_596630, EPI_ISL_596631, EPI_ISL_596632, EPI_ISL_596633, EPI_ISL_596634, EPI_ISL_596635, EPI_ISL_596636, EPI_ISL_596637, EPI_ISL_596638, EPI_ISL_596639, EPI_ISL_596640, EPI_ISL_596641, EPI_ISL_596642, EPI_ISL_596643, EPI_ISL_596644, EPI_ISL_596645, EPI_ISL_596646, EPI_ISL_596647, EPI_ISL_596648, EPI_ISL_596649, EPI_ISL_596650, EPI_ISL_596651, EPI_ISL_596652, EPI_ISL_596653, EPI_ISL_596654, EPI_ISL_596655, EPI_ISL_596656, EPI_ISL_596657, EPI_ISL_596658, EPI_ISL_596659, EPI_ISL_596660, EPI_ISL_596661, EPI_ISL_596662, EPI_ISL_596663, EPI_ISL_596664, EPI_ISL_596665, EPI_ISL_596666, EPI_ISL_596667, EPI_ISL_596668, EPI_ISL_596669, EPI_ISL_596670, EPI_ISL_596671, EPI_ISL_596672, EPI_ISL_596673, EPI_ISL_596674, EPI_ISL_596675, EPI_ISL_596676                                                                                                                                                                                                                                                                                                                                 |           | Virology Department, Royal Infirmary of Edinburgh, NHS Lothian / School of Biological Sciences, University of Edinburgh / Institute of Genetics and Molecular Medicine, University of Edinburgh | COVID-19 Genomics UK (COG-UK) Consortium                                                                        | McHugh M, Dewar R, Rooke S, Gallagher M, Balcaza C, O'Toole Á, Scher E, Hill V, McCrone JT, Colquhoun R, Yu X, Jackson B, Rambaut A, Williams TC, Templeton K                                                                                                                                                                                                                                          |



|                                                                                                                                                                                                                                                                                                                                                                                                                                                                                                                                                                                                                                                                                                                                                                                                                                                                                                                                                                                                |                                                                                                                                                                                                 |                                                                                           |                                                                                                                                                                                                                                                        |
|------------------------------------------------------------------------------------------------------------------------------------------------------------------------------------------------------------------------------------------------------------------------------------------------------------------------------------------------------------------------------------------------------------------------------------------------------------------------------------------------------------------------------------------------------------------------------------------------------------------------------------------------------------------------------------------------------------------------------------------------------------------------------------------------------------------------------------------------------------------------------------------------------------------------------------------------------------------------------------------------|-------------------------------------------------------------------------------------------------------------------------------------------------------------------------------------------------|-------------------------------------------------------------------------------------------|--------------------------------------------------------------------------------------------------------------------------------------------------------------------------------------------------------------------------------------------------------|
| see above                                                                                                                                                                                                                                                                                                                                                                                                                                                                                                                                                                                                                                                                                                                                                                                                                                                                                                                                                                                      | St.Vincent's University Hospital                                                                                                                                                                | St.Vincent's University Hospital                                                          | Mary Lucey, Guerrino Macori, Niamh Mullane, Una Sutton-Fitzpatrick, Gabriel Gonzalez, Suzie Coughlan, Aisling Purcell, Lynda Fenelon, Séamus Fanning, Kirsten Schaffer                                                                                 |
| EPI_ISL_602258, EPI_ISL_602259, EPI_ISL_602260, EPI_ISL_602261, EPI_ISL_602262, EPI_ISL_602263, EPI_ISL_602264, EPI_ISL_602265, EPI_ISL_602266, EPI_ISL_602267, EPI_ISL_602268, EPI_ISL_602269, EPI_ISL_602270, EPI_ISL_602271, EPI_ISL_602272, EPI_ISL_602273, EPI_ISL_602274, EPI_ISL_602275, EPI_ISL_602276, EPI_ISL_602277                                                                                                                                                                                                                                                                                                                                                                                                                                                                                                                                                                                                                                                                 |                                                                                                                                                                                                 |                                                                                           |                                                                                                                                                                                                                                                        |
| see above                                                                                                                                                                                                                                                                                                                                                                                                                                                                                                                                                                                                                                                                                                                                                                                                                                                                                                                                                                                      | MD PHL                                                                                                                                                                                          | MD PHL                                                                                    | Maryland Department of Health Laboratories Administration                                                                                                                                                                                              |
| EPI_ISL_602304                                                                                                                                                                                                                                                                                                                                                                                                                                                                                                                                                                                                                                                                                                                                                                                                                                                                                                                                                                                 | Istituto Zooprofilattico Sperimentale del Mezzogiorno                                                                                                                                           | U.O. Diagnostica Virologica Dip. Sanità Animale IZSM                                      | Maurizio Viscardi, Lorena Cardillo, e Giovanna Fusco                                                                                                                                                                                                   |
| EPI_ISL_602510, EPI_ISL_602511, EPI_ISL_602512, EPI_ISL_602513, EPI_ISL_602514, EPI_ISL_602515, EPI_ISL_602516, EPI_ISL_602517                                                                                                                                                                                                                                                                                                                                                                                                                                                                                                                                                                                                                                                                                                                                                                                                                                                                 | Center of Medical Microbiology, Virology, and Hospital Hygiene, University of Duesseldorf                                                                                                       | Center of Medical Microbiology, Virology, and Hospital Hygiene, University of Duesseldorf | Maximilian Damagnez, Alexander Dilthey, Torsten Houwaart, Lisanna Hülse, Malte Kohns Vasconcelos, Marek Korencak, Nadine Lübke, Jessica Nicolai, Klaus Pfeffer, Hendrik Streeck, Daniel Strelow, Jörg Timm, Andreas Walker, Tobias Wienemann           |
| EPI_ISL_602533, EPI_ISL_602534, EPI_ISL_602535, EPI_ISL_602536, EPI_ISL_602537, EPI_ISL_602538, EPI_ISL_602539, EPI_ISL_602540, EPI_ISL_602541, EPI_ISL_602542, EPI_ISL_602543, EPI_ISL_602544, EPI_ISL_602545, EPI_ISL_602546, EPI_ISL_602547, EPI_ISL_602548, EPI_ISL_602549, EPI_ISL_602550, EPI_ISL_602551, EPI_ISL_602552                                                                                                                                                                                                                                                                                                                                                                                                                                                                                                                                                                                                                                                                 |                                                                                                                                                                                                 |                                                                                           |                                                                                                                                                                                                                                                        |
| see above                                                                                                                                                                                                                                                                                                                                                                                                                                                                                                                                                                                                                                                                                                                                                                                                                                                                                                                                                                                      | Center of Medical Microbiology, Virology, and Hospital Hygiene, University of Duesseldorf                                                                                                       | Center of Medical Microbiology, Virology, and Hospital Hygiene, University of Duesseldorf | Maximilian Damagnez, Alexander Dilthey, Torsten Houwaart, Malte Kohns Vasconcelos, Marek Korencak, Nadine Lübke, Jessica Nicolai, Klaus Pfeffer, Hendrik Streeck, Daniel Strelow, Jörg Timm, Andreas Walker, Tobias Wienemann                          |
| EPI_ISL_602956, EPI_ISL_602957, EPI_ISL_602958, EPI_ISL_602959, EPI_ISL_602960, EPI_ISL_602961, EPI_ISL_602962, EPI_ISL_602963, EPI_ISL_602964, EPI_ISL_602965, EPI_ISL_602966, EPI_ISL_602967, EPI_ISL_602968, EPI_ISL_602969, EPI_ISL_602970, EPI_ISL_602971, EPI_ISL_602972, EPI_ISL_602973, EPI_ISL_602974, EPI_ISL_602975, EPI_ISL_602976, EPI_ISL_602977, EPI_ISL_602978, EPI_ISL_602979, EPI_ISL_602980, EPI_ISL_602981, EPI_ISL_602982, EPI_ISL_602983, EPI_ISL_602984, EPI_ISL_602985, EPI_ISL_602986, EPI_ISL_602987, EPI_ISL_602988, EPI_ISL_602989, EPI_ISL_602990, EPI_ISL_602991, EPI_ISL_602992, EPI_ISL_602993, EPI_ISL_602994, EPI_ISL_602995, EPI_ISL_602996, EPI_ISL_602997, EPI_ISL_602998, EPI_ISL_602999                                                                                                                                                                                                                                                                 |                                                                                                                                                                                                 |                                                                                           |                                                                                                                                                                                                                                                        |
| see above                                                                                                                                                                                                                                                                                                                                                                                                                                                                                                                                                                                                                                                                                                                                                                                                                                                                                                                                                                                      | Minnesota Department of Health, Public Health Laboratory                                                                                                                                        | Minnesota Department of Health, Public Health Laboratory                                  | Matt Plumb, Jacob Garfin, Alexandra Lorentz, and Xiong Wang                                                                                                                                                                                            |
| EPI_ISL_603000, EPI_ISL_603001, EPI_ISL_603002, EPI_ISL_603003                                                                                                                                                                                                                                                                                                                                                                                                                                                                                                                                                                                                                                                                                                                                                                                                                                                                                                                                 | Sanford South University Medical Center                                                                                                                                                         | Minnesota Department of Health, Public Health Laboratory                                  | Matt Plumb, Jacob Garfin, Alexandra Lorentz, and Xiong Wang                                                                                                                                                                                            |
| EPI_ISL_603004, EPI_ISL_603005                                                                                                                                                                                                                                                                                                                                                                                                                                                                                                                                                                                                                                                                                                                                                                                                                                                                                                                                                                 | Essentia Health-St. Mary's Medical Center                                                                                                                                                       | Minnesota Department of Health, Public Health Laboratory                                  | Matt Plumb, Jacob Garfin, Alexandra Lorentz, and Xiong Wang                                                                                                                                                                                            |
| EPI_ISL_603006, EPI_ISL_603007, EPI_ISL_603008, EPI_ISL_603009                                                                                                                                                                                                                                                                                                                                                                                                                                                                                                                                                                                                                                                                                                                                                                                                                                                                                                                                 | Minnesota Department of Health, Public Health Laboratory                                                                                                                                        | Minnesota Department of Health, Public Health Laboratory                                  | Matt Plumb, Jacob Garfin, Alexandra Lorentz, and Xiong Wang                                                                                                                                                                                            |
| EPI_ISL_603010, EPI_ISL_603011                                                                                                                                                                                                                                                                                                                                                                                                                                                                                                                                                                                                                                                                                                                                                                                                                                                                                                                                                                 | Mayo Clinic & Mayo Clinic Laboratories                                                                                                                                                          | Minnesota Department of Health, Public Health Laboratory                                  | Matt Plumb, Jacob Garfin, Alexandra Lorentz, and Xiong Wang                                                                                                                                                                                            |
| EPI_ISL_603012, EPI_ISL_603013, EPI_ISL_603014                                                                                                                                                                                                                                                                                                                                                                                                                                                                                                                                                                                                                                                                                                                                                                                                                                                                                                                                                 | Essentia Health-St. Mary's Medical Center                                                                                                                                                       | Minnesota Department of Health, Public Health Laboratory                                  | Matt Plumb, Jacob Garfin, Alexandra Lorentz, and Xiong Wang                                                                                                                                                                                            |
| EPI_ISL_603015                                                                                                                                                                                                                                                                                                                                                                                                                                                                                                                                                                                                                                                                                                                                                                                                                                                                                                                                                                                 | Minnesota Department of Health, Public Health Laboratory                                                                                                                                        | Minnesota Department of Health, Public Health Laboratory                                  | Matt Plumb, Jacob Garfin, Alexandra Lorentz, and Xiong Wang                                                                                                                                                                                            |
| EPI_ISL_603016, EPI_ISL_603017                                                                                                                                                                                                                                                                                                                                                                                                                                                                                                                                                                                                                                                                                                                                                                                                                                                                                                                                                                 | Essentia Health-St. Mary's Medical Center                                                                                                                                                       | Minnesota Department of Health, Public Health Laboratory                                  | Matt Plumb, Jacob Garfin, Alexandra Lorentz, and Xiong Wang                                                                                                                                                                                            |
| EPI_ISL_603018, EPI_ISL_603019, EPI_ISL_603020                                                                                                                                                                                                                                                                                                                                                                                                                                                                                                                                                                                                                                                                                                                                                                                                                                                                                                                                                 | Minnesota Department of Health, Public Health Laboratory                                                                                                                                        | Minnesota Department of Health, Public Health Laboratory                                  | Matt Plumb, Jacob Garfin, Alexandra Lorentz, and Xiong Wang                                                                                                                                                                                            |
| EPI_ISL_603138                                                                                                                                                                                                                                                                                                                                                                                                                                                                                                                                                                                                                                                                                                                                                                                                                                                                                                                                                                                 | INMI Lazzaro Spallanzani IRCCS                                                                                                                                                                  | INMI Lazzaro Spallanzani IRCCS                                                            | Martina Rueca, Francesco Messina, Barbara Bartolini, Cesare E.M. Gruber, Emanuela Giombini, Simone Lanini, Antonino Di Caro, Maria R. Capobianchi                                                                                                      |
| EPI_ISL_603139                                                                                                                                                                                                                                                                                                                                                                                                                                                                                                                                                                                                                                                                                                                                                                                                                                                                                                                                                                                 | INMI Lazzaro Spallanzani IRCCS                                                                                                                                                                  | INMI Lazzaro Spallanzani IRCCS                                                            | Martina Rueca, Cesare E.M. Gruber, Barbara Bartolini, Francesco Messina, Emanuela Giombini, Simone Lanini, Antonino Di Caro, Maria R. Capobianchi                                                                                                      |
| EPI_ISL_603140                                                                                                                                                                                                                                                                                                                                                                                                                                                                                                                                                                                                                                                                                                                                                                                                                                                                                                                                                                                 | INMI Lazzaro Spallanzani IRCCS                                                                                                                                                                  | INMI Lazzaro Spallanzani IRCCS                                                            | Martina Rueca, Cesare E.M. Gruber, Francesco Messina, Barbara Bartolini, Emanuela Giombini, Simone Lanini, Antonino Di Caro, Maria R. Capobianchi                                                                                                      |
| EPI_ISL_603143, EPI_ISL_603154                                                                                                                                                                                                                                                                                                                                                                                                                                                                                                                                                                                                                                                                                                                                                                                                                                                                                                                                                                 | INMI Lazzaro Spallanzani IRCCS                                                                                                                                                                  | INMI Lazzaro Spallanzani IRCCS                                                            | Martina Rueca, Francesco Messina, Cesare E.M. Gruber, Barbara Bartolini, Emanuela Giombini, Simone Lanini, Antonino Di Caro, Maria R. Capobianchi                                                                                                      |
| EPI_ISL_603155                                                                                                                                                                                                                                                                                                                                                                                                                                                                                                                                                                                                                                                                                                                                                                                                                                                                                                                                                                                 | INMI Lazzaro Spallanzani IRCCS                                                                                                                                                                  | INMI Lazzaro Spallanzani IRCCS                                                            | Martina Rueca, Francesco Messina, Barbara Bartolini, Cesare E.M. Gruber, Simone Lanini, Emanuela Giombini, Maria R. Capobianchi, Antonino Di Caro                                                                                                      |
| EPI_ISL_603165                                                                                                                                                                                                                                                                                                                                                                                                                                                                                                                                                                                                                                                                                                                                                                                                                                                                                                                                                                                 | INMI Lazzaro Spallanzani IRCCS                                                                                                                                                                  | INMI Lazzaro Spallanzani IRCCS                                                            | Martina Rueca, Francesco Messina, Barbara Bartolini, Cesare E.M. Gruber, Emanuela Giombini, Simone Lanini, Fulvia Pimpinelli, Maria R. Capobianchi, Antonino Di Caro                                                                                   |
| EPI_ISL_603166                                                                                                                                                                                                                                                                                                                                                                                                                                                                                                                                                                                                                                                                                                                                                                                                                                                                                                                                                                                 | INMI Lazzaro Spallanzani IRCCS                                                                                                                                                                  | INMI Lazzaro Spallanzani IRCCS                                                            | Martina Rueca, Cesare E.M. Gruber, Barbara Bartolini, Francesco Messina, Simone Lanini, Emanuela Giombini, Fulvia Pimpinelli, Maria R. Capobianchi, Antonino Di Caro                                                                                   |
| EPI_ISL_603167                                                                                                                                                                                                                                                                                                                                                                                                                                                                                                                                                                                                                                                                                                                                                                                                                                                                                                                                                                                 | INMI Lazzaro Spallanzani IRCCS                                                                                                                                                                  | INMI Lazzaro Spallanzani IRCCS                                                            | Martina Rueca, Cesare E.M. Gruber, Francesco Messina, Barbara Bartolini, Simone Lanini, Emanuela Giombini, Fulvia Pimpinelli, Maria R. Capobianchi, Antonino Di Caro                                                                                   |
| EPI_ISL_603168                                                                                                                                                                                                                                                                                                                                                                                                                                                                                                                                                                                                                                                                                                                                                                                                                                                                                                                                                                                 | INMI Lazzaro Spallanzani IRCCS                                                                                                                                                                  | INMI Lazzaro Spallanzani IRCCS                                                            | Martina Rueca, Barbara Bartolini, Cesare E.M. Gruber, Simone Lanini, Emanuela Giombini, Francesco Messina, Fulvia Pimpinelli, Antonino Di Caro, Maria R. Capobianchi                                                                                   |
| EPI_ISL_603170                                                                                                                                                                                                                                                                                                                                                                                                                                                                                                                                                                                                                                                                                                                                                                                                                                                                                                                                                                                 | INMI Lazzaro Spallanzani IRCCS                                                                                                                                                                  | INMI Lazzaro Spallanzani IRCCS                                                            | Martina Rueca, Barbara Bartolini, Cesare E.M. Gruber, Francesco Messina, Simone Lanini, Emanuela Giombini, Maria R. Capobianchi, Antonino Di Caro                                                                                                      |
| EPI_ISL_603178                                                                                                                                                                                                                                                                                                                                                                                                                                                                                                                                                                                                                                                                                                                                                                                                                                                                                                                                                                                 | INMI Lazzaro Spallanzani IRCCS                                                                                                                                                                  | INMI Lazzaro Spallanzani IRCCS                                                            | Martina Rueca, Francesco Messina, Cesare E.M. Gruber, Barbara Bartolini, Simone Lanini, Emanuela Giombini, Antonino Di Caro, Maria R. Capobianchi                                                                                                      |
| EPI_ISL_603182                                                                                                                                                                                                                                                                                                                                                                                                                                                                                                                                                                                                                                                                                                                                                                                                                                                                                                                                                                                 | INMI Lazzaro Spallanzani IRCCS                                                                                                                                                                  | INMI Lazzaro Spallanzani IRCCS                                                            | Martina Rueca, Barbara Bartolini, Cesare E.M. Gruber, Francesco Messina, Emanuela Giombini, Simone Lanini, Maria R. Capobianchi, Antonino Di Caro                                                                                                      |
| EPI_ISL_603184                                                                                                                                                                                                                                                                                                                                                                                                                                                                                                                                                                                                                                                                                                                                                                                                                                                                                                                                                                                 | INMI Lazzaro Spallanzani IRCCS                                                                                                                                                                  | INMI Lazzaro Spallanzani IRCCS                                                            | Martina Rueca, Barbara Bartolini, Francesco Messina, Cesare E.M. Gruber, Emanuela Giombini, Simone Lanini, Maria R. Capobianchi, Antonino Di Caro                                                                                                      |
| EPI_ISL_611544, EPI_ISL_611549, EPI_ISL_611707, EPI_ISL_611850, EPI_ISL_611894, EPI_ISL_611924, EPI_ISL_611989, EPI_ISL_612037, EPI_ISL_612074, EPI_ISL_612126, EPI_ISL_612128, EPI_ISL_612129, EPI_ISL_612188, EPI_ISL_612189, EPI_ISL_612314, EPI_ISL_612315, EPI_ISL_612316, EPI_ISL_612317, EPI_ISL_612319, EPI_ISL_612320, EPI_ISL_612321, EPI_ISL_612324, EPI_ISL_612326, EPI_ISL_612328, EPI_ISL_612329, EPI_ISL_612330, EPI_ISL_612333, EPI_ISL_612334, EPI_ISL_612335, EPI_ISL_612336, EPI_ISL_612338, EPI_ISL_612339, EPI_ISL_612340, EPI_ISL_612342, EPI_ISL_612343, EPI_ISL_612344, EPI_ISL_612345, EPI_ISL_612346, EPI_ISL_612347, EPI_ISL_612348, EPI_ISL_612349, EPI_ISL_612351, EPI_ISL_612352, EPI_ISL_612353, EPI_ISL_612354, EPI_ISL_612355, EPI_ISL_612356, EPI_ISL_612357, EPI_ISL_612358, EPI_ISL_612359, EPI_ISL_612360, EPI_ISL_612361, EPI_ISL_612362, EPI_ISL_612363, EPI_ISL_612365, EPI_ISL_612366, EPI_ISL_612367, EPI_ISL_612368, EPI_ISL_612370, EPI_ISL_612373 |                                                                                                                                                                                                 |                                                                                           |                                                                                                                                                                                                                                                        |
| see above                                                                                                                                                                                                                                                                                                                                                                                                                                                                                                                                                                                                                                                                                                                                                                                                                                                                                                                                                                                      | Virology Department, Royal Infirmary of Edinburgh, NHS Lothian / School of Biological Sciences, University of Edinburgh / Institute of Genetics and Molecular Medicine, University of Edinburgh | COVID-19 Genomics UK (COG-UK) Consortium                                                  | McHugh M, Dewar R, Rooke S, Gallagher M, Balcaza C, O'Toole Á, Scher E, Hill V, McCrone JT, Colquhoun R, Yu X, Jackson B, Rambaut A, Williams TC, Templeton K                                                                                          |
| EPI_ISL_613419, EPI_ISL_613420, EPI_ISL_613421, EPI_ISL_613422, EPI_ISL_613423, EPI_ISL_613424, EPI_ISL_613425, EPI_ISL_613426, EPI_ISL_613427, EPI_ISL_613428, EPI_ISL_613429, EPI_ISL_613430, EPI_ISL_613431, EPI_ISL_613432, EPI_ISL_613433, EPI_ISL_613434, EPI_ISL_613435, EPI_ISL_613436, EPI_ISL_613437, EPI_ISL_613438, EPI_ISL_613439, EPI_ISL_613440, EPI_ISL_613441, EPI_ISL_613442, EPI_ISL_613443, EPI_ISL_613444, EPI_ISL_613445, EPI_ISL_613446                                                                                                                                                                                                                                                                                                                                                                                                                                                                                                                                 |                                                                                                                                                                                                 |                                                                                           |                                                                                                                                                                                                                                                        |
| see above                                                                                                                                                                                                                                                                                                                                                                                                                                                                                                                                                                                                                                                                                                                                                                                                                                                                                                                                                                                      | Institut Pasteur de la Guadeloupe                                                                                                                                                               | Institut Pasteur de la Guadeloupe                                                         | Marion Barbet, Sylvie Behillil, Méline Bizard, Angela Brisebarre, Camille Capel, Etienne Simon-Lorière, Vincent Enouf, Maud Vanpeene, Sylvie van der Werf, Stéphanie Guymard, Sébastien Breurec, Antoine Talarmin                                      |
| EPI_ISL_613447, EPI_ISL_613448, EPI_ISL_613449, EPI_ISL_613450, EPI_ISL_613451, EPI_ISL_613452, EPI_ISL_613453, EPI_ISL_613454, EPI_ISL_613455, EPI_ISL_613456                                                                                                                                                                                                                                                                                                                                                                                                                                                                                                                                                                                                                                                                                                                                                                                                                                 | Institut Pasteur de la Guadeloupe                                                                                                                                                               | Institut Pasteur de la Guadeloupe                                                         | Marion Barbet, Sylvie Behillil, Méline Bizard, Angela Brisebarre, Camille Capel, Etienne Simon-Lorière, Vincent Enouf, Maud Vanpeene, Sylvie van der Werf, Stéphanie Guymard, Sébastien Breurec, Radjin Steingrover, Cherina Fleming, Antoine Talarmin |
| EPI_ISL_613545, EPI_ISL_613546, EPI_ISL_613547, EPI_ISL_613548, EPI_ISL_613549, EPI_ISL_613550, EPI_ISL_613551, EPI_ISL_613552, EPI_ISL_613553, EPI_ISL_613554, EPI_ISL_613555, EPI_ISL_613556, EPI_ISL_613557, EPI_ISL_613558, EPI_ISL_613559                                                                                                                                                                                                                                                                                                                                                                                                                                                                                                                                                                                                                                                                                                                                                 |                                                                                                                                                                                                 |                                                                                           |                                                                                                                                                                                                                                                        |
| see above                                                                                                                                                                                                                                                                                                                                                                                                                                                                                                                                                                                                                                                                                                                                                                                                                                                                                                                                                                                      | CHRU Pontchailou - Laboratoire de Virologie 2, rue Henri Le Guilloux                                                                                                                            | National Reference Center for Viruses of Respiratory Infections, Institut Pasteur, Paris  | Marion Barbet, Sylvie Behillil, Méline Bizard, Angela Brisebarre, Camille Capel, Etienne Simon-Lorière, Vincent Enouf, Maud Vanpeene, Sylvie van der Werf, Gisèle Lagathu                                                                              |
| EPI_ISL_614265, EPI_ISL_614266, EPI_ISL_614267, EPI_ISL_614268, EPI_ISL_614269, EPI_ISL_614270, EPI_ISL_614271, EPI_ISL_614272, EPI_ISL_614273, EPI_ISL_614274, EPI_ISL_614275, EPI_ISL_614276, EPI_ISL_614277, EPI_ISL_614278, EPI_ISL_614279, EPI_ISL_614280                                                                                                                                                                                                                                                                                                                                                                                                                                                                                                                                                                                                                                                                                                                                 |                                                                                                                                                                                                 |                                                                                           |                                                                                                                                                                                                                                                        |
| see above                                                                                                                                                                                                                                                                                                                                                                                                                                                                                                                                                                                                                                                                                                                                                                                                                                                                                                                                                                                      | Eurofins                                                                                                                                                                                        | National Reference Center for Viruses of Respiratory                                      | Marion Barbet, Sylvie Behillil, Méline Bizard, Angela Brisebarre, Camille Capel, Etienne Simon-Lorière, Vincent Enouf, Maud Vanpeene, Sylvie van der                                                                                                   |

|                                                                                                                                                                                                                                                                                                                                                                                                                                                                                                                                                                                                                                                                                                                                                                                                                                                                                                                                                                                                                                                                                                                                                                                                                                                                                                                                                                                                                                                                                                                                                                                                                                                                                                                                                                                                                                                                                                                                                                                                                                                                                                                                                                                                                                                                                                                                                                                                                                                                                                                                                |                                                                                                                                                                                                 |                                                                                           |                                                                                                                                                                                                                                                                                                           |      |
|------------------------------------------------------------------------------------------------------------------------------------------------------------------------------------------------------------------------------------------------------------------------------------------------------------------------------------------------------------------------------------------------------------------------------------------------------------------------------------------------------------------------------------------------------------------------------------------------------------------------------------------------------------------------------------------------------------------------------------------------------------------------------------------------------------------------------------------------------------------------------------------------------------------------------------------------------------------------------------------------------------------------------------------------------------------------------------------------------------------------------------------------------------------------------------------------------------------------------------------------------------------------------------------------------------------------------------------------------------------------------------------------------------------------------------------------------------------------------------------------------------------------------------------------------------------------------------------------------------------------------------------------------------------------------------------------------------------------------------------------------------------------------------------------------------------------------------------------------------------------------------------------------------------------------------------------------------------------------------------------------------------------------------------------------------------------------------------------------------------------------------------------------------------------------------------------------------------------------------------------------------------------------------------------------------------------------------------------------------------------------------------------------------------------------------------------------------------------------------------------------------------------------------------------|-------------------------------------------------------------------------------------------------------------------------------------------------------------------------------------------------|-------------------------------------------------------------------------------------------|-----------------------------------------------------------------------------------------------------------------------------------------------------------------------------------------------------------------------------------------------------------------------------------------------------------|------|
|                                                                                                                                                                                                                                                                                                                                                                                                                                                                                                                                                                                                                                                                                                                                                                                                                                                                                                                                                                                                                                                                                                                                                                                                                                                                                                                                                                                                                                                                                                                                                                                                                                                                                                                                                                                                                                                                                                                                                                                                                                                                                                                                                                                                                                                                                                                                                                                                                                                                                                                                                |                                                                                                                                                                                                 | Infektions, Institut Pasteur, Paris                                                       |                                                                                                                                                                                                                                                                                                           | Werf |
| EPI_ISL_614281                                                                                                                                                                                                                                                                                                                                                                                                                                                                                                                                                                                                                                                                                                                                                                                                                                                                                                                                                                                                                                                                                                                                                                                                                                                                                                                                                                                                                                                                                                                                                                                                                                                                                                                                                                                                                                                                                                                                                                                                                                                                                                                                                                                                                                                                                                                                                                                                                                                                                                                                 | CHRU Pontchaillou - Laboratoire de Virologie 2, rue Henri Le Guilloux                                                                                                                           | National Reference Center for Viruses of Respiratory Infections, Institut Pasteur, Paris  | Marion Barbet, Sylvie Behillil, Méline Bizard, Angela Brisebarre, Camille Capel, Etienne Simon-Lorière, Vincent Enouf, Maud Vanpeene, Sylvie van der Werf, Gisèle Lagathu                                                                                                                                 |      |
| EPI_ISL_614282, EPI_ISL_614283, EPI_ISL_614284, EPI_ISL_614285, EPI_ISL_614286, EPI_ISL_614287, EPI_ISL_614288, EPI_ISL_614289, EPI_ISL_614290, EPI_ISL_614291, EPI_ISL_614292, EPI_ISL_614293                                                                                                                                                                                                                                                                                                                                                                                                                                                                                                                                                                                                                                                                                                                                                                                                                                                                                                                                                                                                                                                                                                                                                                                                                                                                                                                                                                                                                                                                                                                                                                                                                                                                                                                                                                                                                                                                                                                                                                                                                                                                                                                                                                                                                                                                                                                                                 |                                                                                                                                                                                                 |                                                                                           |                                                                                                                                                                                                                                                                                                           |      |
| see above                                                                                                                                                                                                                                                                                                                                                                                                                                                                                                                                                                                                                                                                                                                                                                                                                                                                                                                                                                                                                                                                                                                                                                                                                                                                                                                                                                                                                                                                                                                                                                                                                                                                                                                                                                                                                                                                                                                                                                                                                                                                                                                                                                                                                                                                                                                                                                                                                                                                                                                                      | General practitioner                                                                                                                                                                            | National Reference Center for Viruses of Respiratory Infections, Institut Pasteur, Paris  | Marion Barbet, Sylvie Behillil, Méline Bizard, Angela Brisebarre, Camille Capel, Etienne Simon-Lorière, Vincent Enouf, Maud Vanpeene, Sylvie van der Werf                                                                                                                                                 |      |
| EPI_ISL_614295, EPI_ISL_614296, EPI_ISL_614297, EPI_ISL_614298, EPI_ISL_614299, EPI_ISL_614300, EPI_ISL_614301, EPI_ISL_614302, EPI_ISL_614303, EPI_ISL_614304, EPI_ISL_614305, EPI_ISL_614306, EPI_ISL_614307, EPI_ISL_614308, EPI_ISL_614309, EPI_ISL_614310, EPI_ISL_614311, EPI_ISL_614312, EPI_ISL_614313, EPI_ISL_614314, EPI_ISL_614315, EPI_ISL_614316, EPI_ISL_614317                                                                                                                                                                                                                                                                                                                                                                                                                                                                                                                                                                                                                                                                                                                                                                                                                                                                                                                                                                                                                                                                                                                                                                                                                                                                                                                                                                                                                                                                                                                                                                                                                                                                                                                                                                                                                                                                                                                                                                                                                                                                                                                                                                 |                                                                                                                                                                                                 |                                                                                           |                                                                                                                                                                                                                                                                                                           |      |
| see above                                                                                                                                                                                                                                                                                                                                                                                                                                                                                                                                                                                                                                                                                                                                                                                                                                                                                                                                                                                                                                                                                                                                                                                                                                                                                                                                                                                                                                                                                                                                                                                                                                                                                                                                                                                                                                                                                                                                                                                                                                                                                                                                                                                                                                                                                                                                                                                                                                                                                                                                      | Faroese National Reference Laboratory for Fish and Animal Diseases                                                                                                                              | Faroese National Reference Laboratory for Fish and Animal Diseases                        | Maria Marjunardóttir Dahl, Petra Elisabeth Petersen, Debes Hammershaimb Christiansen                                                                                                                                                                                                                      |      |
| EPI_ISL_623096, EPI_ISL_623097, EPI_ISL_623103                                                                                                                                                                                                                                                                                                                                                                                                                                                                                                                                                                                                                                                                                                                                                                                                                                                                                                                                                                                                                                                                                                                                                                                                                                                                                                                                                                                                                                                                                                                                                                                                                                                                                                                                                                                                                                                                                                                                                                                                                                                                                                                                                                                                                                                                                                                                                                                                                                                                                                 | General practitioner                                                                                                                                                                            | National Reference Center for Viruses of Respiratory Infections, Institut Pasteur, Paris  | Marion Barbet, Sylvie Behillil, Méline Bizard, Angela Brisebarre, Camille Capel, Etienne Simon-Lorière, Vincent Enouf, Maud Vanpeene, Sylvie van der Werf                                                                                                                                                 |      |
| EPI_ISL_629036, EPI_ISL_629037, EPI_ISL_629038, EPI_ISL_629039, EPI_ISL_629040, EPI_ISL_629041, EPI_ISL_629042, EPI_ISL_629043, EPI_ISL_629044, EPI_ISL_629045, EPI_ISL_629046, EPI_ISL_629047, EPI_ISL_629048, EPI_ISL_629049, EPI_ISL_629050, EPI_ISL_629051, EPI_ISL_629052, EPI_ISL_629053, EPI_ISL_629054, EPI_ISL_629055, EPI_ISL_629056, EPI_ISL_629057, EPI_ISL_629058, EPI_ISL_629059, EPI_ISL_629060, EPI_ISL_629061, EPI_ISL_629062, EPI_ISL_629063, EPI_ISL_629064, EPI_ISL_629065, EPI_ISL_629066, EPI_ISL_629067, EPI_ISL_629068, EPI_ISL_629069, EPI_ISL_629070, EPI_ISL_629071, EPI_ISL_629072, EPI_ISL_629073, EPI_ISL_629074, EPI_ISL_629075, EPI_ISL_629076, EPI_ISL_629077, EPI_ISL_629078, EPI_ISL_629079, EPI_ISL_629080                                                                                                                                                                                                                                                                                                                                                                                                                                                                                                                                                                                                                                                                                                                                                                                                                                                                                                                                                                                                                                                                                                                                                                                                                                                                                                                                                                                                                                                                                                                                                                                                                                                                                                                                                                                                 |                                                                                                                                                                                                 |                                                                                           |                                                                                                                                                                                                                                                                                                           |      |
| see above                                                                                                                                                                                                                                                                                                                                                                                                                                                                                                                                                                                                                                                                                                                                                                                                                                                                                                                                                                                                                                                                                                                                                                                                                                                                                                                                                                                                                                                                                                                                                                                                                                                                                                                                                                                                                                                                                                                                                                                                                                                                                                                                                                                                                                                                                                                                                                                                                                                                                                                                      | Maryland Public Health Laboratory                                                                                                                                                               | Maryland Public Health Laboratory                                                         | Maryland Department of Health Laboratories Administration                                                                                                                                                                                                                                                 |      |
| EPI_ISL_631304, EPI_ISL_631305, EPI_ISL_631306, EPI_ISL_631307, EPI_ISL_631308, EPI_ISL_631309, EPI_ISL_631310, EPI_ISL_631311, EPI_ISL_631312, EPI_ISL_631313, EPI_ISL_631314, EPI_ISL_631315, EPI_ISL_631316, EPI_ISL_631317, EPI_ISL_631318, EPI_ISL_631319, EPI_ISL_631320, EPI_ISL_631344, EPI_ISL_631345, EPI_ISL_631346, EPI_ISL_631347, EPI_ISL_631348, EPI_ISL_631349, EPI_ISL_631350, EPI_ISL_631351, EPI_ISL_631352, EPI_ISL_631353, EPI_ISL_631354, EPI_ISL_631355, EPI_ISL_631357, EPI_ISL_631358, EPI_ISL_631359, EPI_ISL_631360, EPI_ISL_631361, EPI_ISL_631362, EPI_ISL_631363, EPI_ISL_631364, EPI_ISL_631365, EPI_ISL_631366, EPI_ISL_631367, EPI_ISL_631368, EPI_ISL_631369, EPI_ISL_631370, EPI_ISL_631371, EPI_ISL_631372, EPI_ISL_631373, EPI_ISL_631374, EPI_ISL_631375, EPI_ISL_631376                                                                                                                                                                                                                                                                                                                                                                                                                                                                                                                                                                                                                                                                                                                                                                                                                                                                                                                                                                                                                                                                                                                                                                                                                                                                                                                                                                                                                                                                                                                                                                                                                                                                                                                                 |                                                                                                                                                                                                 |                                                                                           |                                                                                                                                                                                                                                                                                                           |      |
| see above                                                                                                                                                                                                                                                                                                                                                                                                                                                                                                                                                                                                                                                                                                                                                                                                                                                                                                                                                                                                                                                                                                                                                                                                                                                                                                                                                                                                                                                                                                                                                                                                                                                                                                                                                                                                                                                                                                                                                                                                                                                                                                                                                                                                                                                                                                                                                                                                                                                                                                                                      | ZOTZ KLIMAS MVZ Düsseldorf-Centrum GbR ÜBAG für Labormedizin, Genetik, Zytologie, Pathologie                                                                                                    | Center of Medical Microbiology, Virology, and Hospital Hygiene, University of Duesseldorf | Maximilian Damagnez, Alexander Dilthey, Ashley-Jane Duplessis, Patrick Finzer, Katrin Hoffmann, Torsten Houwaart, Lisanna Hülse, Malte Kohns Vasconcelos, Marek Korencak, Nadine Lübke, Jessica Nicolai, Klaus Pfeffer, Daniel Strelow, Jörg Timm, Andreas Walker, Tobias Wienemann, Rainer Zotz          |      |
| EPI_ISL_631377, EPI_ISL_631378, EPI_ISL_631379, EPI_ISL_631380, EPI_ISL_631381, EPI_ISL_631382, EPI_ISL_631383, EPI_ISL_631384, EPI_ISL_631385, EPI_ISL_631386                                                                                                                                                                                                                                                                                                                                                                                                                                                                                                                                                                                                                                                                                                                                                                                                                                                                                                                                                                                                                                                                                                                                                                                                                                                                                                                                                                                                                                                                                                                                                                                                                                                                                                                                                                                                                                                                                                                                                                                                                                                                                                                                                                                                                                                                                                                                                                                 | University Hospital Cologne                                                                                                                                                                     | Center of Medical Microbiology, Virology, and Hospital Hygiene, University of Duesseldorf | Maximilian Damagnez, Alexander Dilthey, Ashley-Jane Duplessis, Eva Heger, Torsten Houwaart, Rolf Kaiser, Florian Klein, Elena Knops, Malte Kohns Vasconcelos, Jessica Nicolai, Klaus Pfeffer, Gibran Rubio Quintanares, Saleta Sierra-Aragón, Daniel Strelow, Jörg Timm, Andreas Walker, Tobias Wienemann |      |
| EPI_ISL_631387                                                                                                                                                                                                                                                                                                                                                                                                                                                                                                                                                                                                                                                                                                                                                                                                                                                                                                                                                                                                                                                                                                                                                                                                                                                                                                                                                                                                                                                                                                                                                                                                                                                                                                                                                                                                                                                                                                                                                                                                                                                                                                                                                                                                                                                                                                                                                                                                                                                                                                                                 | ZOTZ KLIMAS MVZ Düsseldorf-Centrum GbR ÜBAG für Labormedizin, Genetik, Zytologie, Pathologie                                                                                                    | Center of Medical Microbiology, Virology, and Hospital Hygiene, University of Duesseldorf | Maximilian Damagnez, Alexander Dilthey, Ashley-Jane Duplessis, Patrick Finzer, Katrin Hoffmann, Torsten Houwaart, Lisanna Hülse, Malte Kohns Vasconcelos, Marek Korencak, Nadine Lübke, Jessica Nicolai, Klaus Pfeffer, Daniel Strelow, Jörg Timm, Andreas Walker, Tobias Wienemann, Rainer Zotz          |      |
| EPI_ISL_631388                                                                                                                                                                                                                                                                                                                                                                                                                                                                                                                                                                                                                                                                                                                                                                                                                                                                                                                                                                                                                                                                                                                                                                                                                                                                                                                                                                                                                                                                                                                                                                                                                                                                                                                                                                                                                                                                                                                                                                                                                                                                                                                                                                                                                                                                                                                                                                                                                                                                                                                                 | University Hospital Cologne                                                                                                                                                                     | Center of Medical Microbiology, Virology, and Hospital Hygiene, University of Duesseldorf | Maximilian Damagnez, Alexander Dilthey, Ashley-Jane Duplessis, Eva Heger, Torsten Houwaart, Rolf Kaiser, Florian Klein, Elena Knops, Malte Kohns Vasconcelos, Jessica Nicolai, Klaus Pfeffer, Gibran Rubio Quintanares, Saleta Sierra-Aragón, Daniel Strelow, Jörg Timm, Andreas Walker, Tobias Wienemann |      |
| EPI_ISL_633083, EPI_ISL_633084, EPI_ISL_633085, EPI_ISL_633086, EPI_ISL_633087, EPI_ISL_633088, EPI_ISL_633089, EPI_ISL_633090, EPI_ISL_633091, EPI_ISL_633092, EPI_ISL_633093, EPI_ISL_633094, EPI_ISL_633095, EPI_ISL_633096, EPI_ISL_633097, EPI_ISL_633098, EPI_ISL_633099                                                                                                                                                                                                                                                                                                                                                                                                                                                                                                                                                                                                                                                                                                                                                                                                                                                                                                                                                                                                                                                                                                                                                                                                                                                                                                                                                                                                                                                                                                                                                                                                                                                                                                                                                                                                                                                                                                                                                                                                                                                                                                                                                                                                                                                                 |                                                                                                                                                                                                 |                                                                                           |                                                                                                                                                                                                                                                                                                           |      |
| see above                                                                                                                                                                                                                                                                                                                                                                                                                                                                                                                                                                                                                                                                                                                                                                                                                                                                                                                                                                                                                                                                                                                                                                                                                                                                                                                                                                                                                                                                                                                                                                                                                                                                                                                                                                                                                                                                                                                                                                                                                                                                                                                                                                                                                                                                                                                                                                                                                                                                                                                                      | MD PHL                                                                                                                                                                                          | MD PHL                                                                                    | Maryland Department of Health Laboratories Administration                                                                                                                                                                                                                                                 |      |
| EPI_ISL_634838, EPI_ISL_634839, EPI_ISL_634840, EPI_ISL_634841, EPI_ISL_634842, EPI_ISL_634843, EPI_ISL_634844, EPI_ISL_634845, EPI_ISL_634846, EPI_ISL_634847, EPI_ISL_634848, EPI_ISL_634849, EPI_ISL_634850, EPI_ISL_634851, EPI_ISL_634852, EPI_ISL_634853, EPI_ISL_634854, EPI_ISL_634855, EPI_ISL_634856                                                                                                                                                                                                                                                                                                                                                                                                                                                                                                                                                                                                                                                                                                                                                                                                                                                                                                                                                                                                                                                                                                                                                                                                                                                                                                                                                                                                                                                                                                                                                                                                                                                                                                                                                                                                                                                                                                                                                                                                                                                                                                                                                                                                                                 |                                                                                                                                                                                                 |                                                                                           |                                                                                                                                                                                                                                                                                                           |      |
| see above                                                                                                                                                                                                                                                                                                                                                                                                                                                                                                                                                                                                                                                                                                                                                                                                                                                                                                                                                                                                                                                                                                                                                                                                                                                                                                                                                                                                                                                                                                                                                                                                                                                                                                                                                                                                                                                                                                                                                                                                                                                                                                                                                                                                                                                                                                                                                                                                                                                                                                                                      | Minnesota Department of Health, Public Health Laboratory                                                                                                                                        | Minnesota Department of Health, Public Health Laboratory                                  | Matt Plumb, Jacob Garfin, Alexandra Lorentz, and Xiong Wang                                                                                                                                                                                                                                               |      |
| EPI_ISL_634857                                                                                                                                                                                                                                                                                                                                                                                                                                                                                                                                                                                                                                                                                                                                                                                                                                                                                                                                                                                                                                                                                                                                                                                                                                                                                                                                                                                                                                                                                                                                                                                                                                                                                                                                                                                                                                                                                                                                                                                                                                                                                                                                                                                                                                                                                                                                                                                                                                                                                                                                 | Minneapolis VA Health Care System                                                                                                                                                               | Minnesota Department of Health, Public Health Laboratory                                  | Matt Plumb, Jacob Garfin, Alexandra Lorentz, and Xiong Wang                                                                                                                                                                                                                                               |      |
| EPI_ISL_634858, EPI_ISL_634859, EPI_ISL_634860, EPI_ISL_634861, EPI_ISL_634862, EPI_ISL_634863                                                                                                                                                                                                                                                                                                                                                                                                                                                                                                                                                                                                                                                                                                                                                                                                                                                                                                                                                                                                                                                                                                                                                                                                                                                                                                                                                                                                                                                                                                                                                                                                                                                                                                                                                                                                                                                                                                                                                                                                                                                                                                                                                                                                                                                                                                                                                                                                                                                 | Minnesota Department of Health, Public Health Laboratory                                                                                                                                        | Minnesota Department of Health, Public Health Laboratory                                  | Matt Plumb, Jacob Garfin, Alexandra Lorentz, and Xiong Wang                                                                                                                                                                                                                                               |      |
| EPI_ISL_634864, EPI_ISL_634865                                                                                                                                                                                                                                                                                                                                                                                                                                                                                                                                                                                                                                                                                                                                                                                                                                                                                                                                                                                                                                                                                                                                                                                                                                                                                                                                                                                                                                                                                                                                                                                                                                                                                                                                                                                                                                                                                                                                                                                                                                                                                                                                                                                                                                                                                                                                                                                                                                                                                                                 | HealthPartners Central Lab                                                                                                                                                                      | Minnesota Department of Health, Public Health Laboratory                                  | Matt Plumb, Jacob Garfin, Alexandra Lorentz, and Xiong Wang                                                                                                                                                                                                                                               |      |
| EPI_ISL_634866, EPI_ISL_634867, EPI_ISL_634868, EPI_ISL_634869, EPI_ISL_634870, EPI_ISL_634871, EPI_ISL_634872, EPI_ISL_634873, EPI_ISL_634874, EPI_ISL_634875                                                                                                                                                                                                                                                                                                                                                                                                                                                                                                                                                                                                                                                                                                                                                                                                                                                                                                                                                                                                                                                                                                                                                                                                                                                                                                                                                                                                                                                                                                                                                                                                                                                                                                                                                                                                                                                                                                                                                                                                                                                                                                                                                                                                                                                                                                                                                                                 | Minnesota Department of Health, Public Health Laboratory                                                                                                                                        | Minnesota Department of Health, Public Health Laboratory                                  | Matt Plumb, Jacob Garfin, Alexandra Lorentz, and Xiong Wang                                                                                                                                                                                                                                               |      |
| EPI_ISL_644933, EPI_ISL_644934, EPI_ISL_644935                                                                                                                                                                                                                                                                                                                                                                                                                                                                                                                                                                                                                                                                                                                                                                                                                                                                                                                                                                                                                                                                                                                                                                                                                                                                                                                                                                                                                                                                                                                                                                                                                                                                                                                                                                                                                                                                                                                                                                                                                                                                                                                                                                                                                                                                                                                                                                                                                                                                                                 | Essentia Health-St. Mary's Medical Center                                                                                                                                                       | Minnesota Department of Health, Public Health Laboratory                                  | Matt Plumb, Jacob Garfin, Alexandra Lorentz, and Xiong Wang                                                                                                                                                                                                                                               |      |
| EPI_ISL_644936, EPI_ISL_644937, EPI_ISL_644938, EPI_ISL_644939, EPI_ISL_644940                                                                                                                                                                                                                                                                                                                                                                                                                                                                                                                                                                                                                                                                                                                                                                                                                                                                                                                                                                                                                                                                                                                                                                                                                                                                                                                                                                                                                                                                                                                                                                                                                                                                                                                                                                                                                                                                                                                                                                                                                                                                                                                                                                                                                                                                                                                                                                                                                                                                 | Mayo Clinic & Mayo Clinic Laboratories                                                                                                                                                          | Minnesota Department of Health, Public Health Laboratory                                  | Matt Plumb, Jacob Garfin, Alexandra Lorentz, and Xiong Wang                                                                                                                                                                                                                                               |      |
| EPI_ISL_644941                                                                                                                                                                                                                                                                                                                                                                                                                                                                                                                                                                                                                                                                                                                                                                                                                                                                                                                                                                                                                                                                                                                                                                                                                                                                                                                                                                                                                                                                                                                                                                                                                                                                                                                                                                                                                                                                                                                                                                                                                                                                                                                                                                                                                                                                                                                                                                                                                                                                                                                                 | Allina Health Laboratory                                                                                                                                                                        | Minnesota Department of Health, Public Health Laboratory                                  | Matt Plumb, Jacob Garfin, Alexandra Lorentz, and Xiong Wang                                                                                                                                                                                                                                               |      |
| EPI_ISL_644942                                                                                                                                                                                                                                                                                                                                                                                                                                                                                                                                                                                                                                                                                                                                                                                                                                                                                                                                                                                                                                                                                                                                                                                                                                                                                                                                                                                                                                                                                                                                                                                                                                                                                                                                                                                                                                                                                                                                                                                                                                                                                                                                                                                                                                                                                                                                                                                                                                                                                                                                 | Hennepin County Medical Center                                                                                                                                                                  | Minnesota Department of Health, Public Health Laboratory                                  | Matt Plumb, Jacob Garfin, Alexandra Lorentz, and Xiong Wang                                                                                                                                                                                                                                               |      |
| EPI_ISL_644943                                                                                                                                                                                                                                                                                                                                                                                                                                                                                                                                                                                                                                                                                                                                                                                                                                                                                                                                                                                                                                                                                                                                                                                                                                                                                                                                                                                                                                                                                                                                                                                                                                                                                                                                                                                                                                                                                                                                                                                                                                                                                                                                                                                                                                                                                                                                                                                                                                                                                                                                 | Essentia Health-St. Mary's Medical Center                                                                                                                                                       | Minnesota Department of Health, Public Health Laboratory                                  | Matt Plumb, Jacob Garfin, Alexandra Lorentz, and Xiong Wang                                                                                                                                                                                                                                               |      |
| EPI_ISL_644944                                                                                                                                                                                                                                                                                                                                                                                                                                                                                                                                                                                                                                                                                                                                                                                                                                                                                                                                                                                                                                                                                                                                                                                                                                                                                                                                                                                                                                                                                                                                                                                                                                                                                                                                                                                                                                                                                                                                                                                                                                                                                                                                                                                                                                                                                                                                                                                                                                                                                                                                 | M Health Fairview                                                                                                                                                                               | Minnesota Department of Health, Public Health Laboratory                                  | Matt Plumb, Jacob Garfin, Alexandra Lorentz, and Xiong Wang                                                                                                                                                                                                                                               |      |
| EPI_ISL_648271, EPI_ISL_648272, EPI_ISL_648273, EPI_ISL_648274, EPI_ISL_648275, EPI_ISL_648276, EPI_ISL_648277, EPI_ISL_648278, EPI_ISL_648279, EPI_ISL_648280, EPI_ISL_648281, EPI_ISL_648282, EPI_ISL_648283, EPI_ISL_648284, EPI_ISL_648285, EPI_ISL_648286, EPI_ISL_648287, EPI_ISL_648288, EPI_ISL_648289, EPI_ISL_648290, EPI_ISL_648291, EPI_ISL_648292, EPI_ISL_648293, EPI_ISL_648294, EPI_ISL_648295, EPI_ISL_648296, EPI_ISL_648297, EPI_ISL_648298, EPI_ISL_648299, EPI_ISL_648300, EPI_ISL_648301, EPI_ISL_648302                                                                                                                                                                                                                                                                                                                                                                                                                                                                                                                                                                                                                                                                                                                                                                                                                                                                                                                                                                                                                                                                                                                                                                                                                                                                                                                                                                                                                                                                                                                                                                                                                                                                                                                                                                                                                                                                                                                                                                                                                 |                                                                                                                                                                                                 |                                                                                           |                                                                                                                                                                                                                                                                                                           |      |
| see above                                                                                                                                                                                                                                                                                                                                                                                                                                                                                                                                                                                                                                                                                                                                                                                                                                                                                                                                                                                                                                                                                                                                                                                                                                                                                                                                                                                                                                                                                                                                                                                                                                                                                                                                                                                                                                                                                                                                                                                                                                                                                                                                                                                                                                                                                                                                                                                                                                                                                                                                      | MD PHL                                                                                                                                                                                          | MD PHL                                                                                    | Maryland Department of Health Laboratories Administration                                                                                                                                                                                                                                                 |      |
| EPI_ISL_650135, EPI_ISL_650138, EPI_ISL_650152, EPI_ISL_650159, EPI_ISL_650165, EPI_ISL_650167, EPI_ISL_650173, EPI_ISL_650177, EPI_ISL_650180, EPI_ISL_650182, EPI_ISL_650191, EPI_ISL_650220, EPI_ISL_650255, EPI_ISL_650263, EPI_ISL_650267, EPI_ISL_650277, EPI_ISL_650286, EPI_ISL_650300, EPI_ISL_650302, EPI_ISL_650305, EPI_ISL_650306, EPI_ISL_650307, EPI_ISL_650311, EPI_ISL_650426, EPI_ISL_650427, EPI_ISL_650433, EPI_ISL_650435, EPI_ISL_650495, EPI_ISL_650499, EPI_ISL_650500, EPI_ISL_650501, EPI_ISL_650531, EPI_ISL_650690, EPI_ISL_650775, EPI_ISL_650776, EPI_ISL_650778, EPI_ISL_650793, EPI_ISL_650795, EPI_ISL_650796, EPI_ISL_650798, EPI_ISL_650799, EPI_ISL_650800, EPI_ISL_650812, EPI_ISL_650813, EPI_ISL_650814, EPI_ISL_650826, EPI_ISL_650833, EPI_ISL_650834, EPI_ISL_651012, EPI_ISL_651158, EPI_ISL_651169, EPI_ISL_651171, EPI_ISL_651188, EPI_ISL_651221, EPI_ISL_651230, EPI_ISL_651294, EPI_ISL_651299, EPI_ISL_651316, EPI_ISL_651320, EPI_ISL_651322, EPI_ISL_651343, EPI_ISL_651350, EPI_ISL_651367, EPI_ISL_651394, EPI_ISL_651425, EPI_ISL_651428, EPI_ISL_651520, EPI_ISL_651522, EPI_ISL_651523, EPI_ISL_651524, EPI_ISL_651528, EPI_ISL_651596, EPI_ISL_651962, EPI_ISL_651963, EPI_ISL_651964, EPI_ISL_651965, EPI_ISL_651966, EPI_ISL_651969, EPI_ISL_651972, EPI_ISL_651973, EPI_ISL_651974, EPI_ISL_651975, EPI_ISL_651976, EPI_ISL_651977, EPI_ISL_651978, EPI_ISL_651979, EPI_ISL_651980, EPI_ISL_651981, EPI_ISL_651982, EPI_ISL_651983, EPI_ISL_651984, EPI_ISL_651985, EPI_ISL_651986, EPI_ISL_651987, EPI_ISL_651988, EPI_ISL_651989, EPI_ISL_651990, EPI_ISL_651991, EPI_ISL_651992, EPI_ISL_651993, EPI_ISL_651994, EPI_ISL_651998, EPI_ISL_652000, EPI_ISL_652002, EPI_ISL_652003, EPI_ISL_652005, EPI_ISL_652006, EPI_ISL_652007, EPI_ISL_652008, EPI_ISL_652010, EPI_ISL_652012, EPI_ISL_652013, EPI_ISL_652014, EPI_ISL_652017, EPI_ISL_652019, EPI_ISL_652020, EPI_ISL_652021, EPI_ISL_652022, EPI_ISL_652023, EPI_ISL_652024, EPI_ISL_652025, EPI_ISL_652026, EPI_ISL_652027, EPI_ISL_652028, EPI_ISL_652029, EPI_ISL_652030, EPI_ISL_652032, EPI_ISL_652033, EPI_ISL_652034, EPI_ISL_652035, EPI_ISL_652037, EPI_ISL_652038, EPI_ISL_652039, EPI_ISL_652040, EPI_ISL_652042, EPI_ISL_652043, EPI_ISL_652044, EPI_ISL_652045, EPI_ISL_652046, EPI_ISL_652047, EPI_ISL_652048, EPI_ISL_652049, EPI_ISL_652052, EPI_ISL_652053, EPI_ISL_652055, EPI_ISL_652056, EPI_ISL_652057, EPI_ISL_652058, EPI_ISL_652059, EPI_ISL_652060, EPI_ISL_652061, EPI_ISL_652063, EPI_ISL_652064 |                                                                                                                                                                                                 |                                                                                           |                                                                                                                                                                                                                                                                                                           |      |
| see above                                                                                                                                                                                                                                                                                                                                                                                                                                                                                                                                                                                                                                                                                                                                                                                                                                                                                                                                                                                                                                                                                                                                                                                                                                                                                                                                                                                                                                                                                                                                                                                                                                                                                                                                                                                                                                                                                                                                                                                                                                                                                                                                                                                                                                                                                                                                                                                                                                                                                                                                      | Virology Department, Royal Infirmary of Edinburgh, NHS Lothian / School of Biological Sciences, University of Edinburgh / Institute of Genetics and Molecular Medicine, University of Edinburgh | COVID-19 Genomics UK (COG-UK) Consortium                                                  | McHugh M, Dewar R, Rooke S, Gallagher B, Balcaza C, O'Toole Á, Scher E, Hill V, McCrone JT, Colquhoun R, Yu X, Jackson B, Rambaut A, Williams TC, Templeton K                                                                                                                                             |      |
| EPI_ISL_654695                                                                                                                                                                                                                                                                                                                                                                                                                                                                                                                                                                                                                                                                                                                                                                                                                                                                                                                                                                                                                                                                                                                                                                                                                                                                                                                                                                                                                                                                                                                                                                                                                                                                                                                                                                                                                                                                                                                                                                                                                                                                                                                                                                                                                                                                                                                                                                                                                                                                                                                                 | Minnesota Department of Health, Public Health Laboratory                                                                                                                                        | Minnesota Department of Health, Public Health Laboratory                                  | Matt Plumb, Jacob Garfin, Alexandra Lorentz, and Xiong Wang                                                                                                                                                                                                                                               |      |

|                                                                                                                                                                                                                                                                                                                                                                                                                                                                                                                                                                                                                                                                                                                                                                                                                                                                                                                                                                                                                                                                                                                                                                                                                                                |                                                                                           |                                                                                                                                                                                                 |                                                                                                                                                                                                                                                                                                                                                                                                |
|------------------------------------------------------------------------------------------------------------------------------------------------------------------------------------------------------------------------------------------------------------------------------------------------------------------------------------------------------------------------------------------------------------------------------------------------------------------------------------------------------------------------------------------------------------------------------------------------------------------------------------------------------------------------------------------------------------------------------------------------------------------------------------------------------------------------------------------------------------------------------------------------------------------------------------------------------------------------------------------------------------------------------------------------------------------------------------------------------------------------------------------------------------------------------------------------------------------------------------------------|-------------------------------------------------------------------------------------------|-------------------------------------------------------------------------------------------------------------------------------------------------------------------------------------------------|------------------------------------------------------------------------------------------------------------------------------------------------------------------------------------------------------------------------------------------------------------------------------------------------------------------------------------------------------------------------------------------------|
| EPI_ISL_654696, EPI_ISL_654697                                                                                                                                                                                                                                                                                                                                                                                                                                                                                                                                                                                                                                                                                                                                                                                                                                                                                                                                                                                                                                                                                                                                                                                                                 | Essentia Health-St. Mary's Medical Center                                                 | Minnesota Department of Health, Public Health Laboratory                                                                                                                                        | Matt Plumb, Jacob Garfin, Alexandra Lorentz, and Xiong Wang                                                                                                                                                                                                                                                                                                                                    |
| EPI_ISL_654698                                                                                                                                                                                                                                                                                                                                                                                                                                                                                                                                                                                                                                                                                                                                                                                                                                                                                                                                                                                                                                                                                                                                                                                                                                 | Mayo Clinic & Mayo Clinic Laboratories                                                    | Minnesota Department of Health, Public Health Laboratory                                                                                                                                        | Matt Plumb, Jacob Garfin, Alexandra Lorentz, and Xiong Wang                                                                                                                                                                                                                                                                                                                                    |
| EPI_ISL_654699                                                                                                                                                                                                                                                                                                                                                                                                                                                                                                                                                                                                                                                                                                                                                                                                                                                                                                                                                                                                                                                                                                                                                                                                                                 | Essentia Health-St. Mary's Medical Center                                                 | Minnesota Department of Health, Public Health Laboratory                                                                                                                                        | Matt Plumb, Jacob Garfin, Alexandra Lorentz, and Xiong Wang                                                                                                                                                                                                                                                                                                                                    |
| EPI_ISL_654700, EPI_ISL_654701, EPI_ISL_654702, EPI_ISL_654703, EPI_ISL_654704, EPI_ISL_654705, EPI_ISL_654706, EPI_ISL_654707, EPI_ISL_654708, EPI_ISL_654709, EPI_ISL_654710, EPI_ISL_654711, EPI_ISL_654712, EPI_ISL_654713, EPI_ISL_654714, EPI_ISL_654715, EPI_ISL_654716, EPI_ISL_654717, EPI_ISL_654718, EPI_ISL_654719, EPI_ISL_654720, EPI_ISL_654721, EPI_ISL_654722, EPI_ISL_654723, EPI_ISL_654724, EPI_ISL_654725, EPI_ISL_654726, EPI_ISL_654727, EPI_ISL_654728, EPI_ISL_654729                                                                                                                                                                                                                                                                                                                                                                                                                                                                                                                                                                                                                                                                                                                                                 | Minnesota Department of Health, Public Health Laboratory                                  | Minnesota Department of Health, Public Health Laboratory                                                                                                                                        | Matt Plumb, Jacob Garfin, Alexandra Lorentz, and Xiong Wang                                                                                                                                                                                                                                                                                                                                    |
| see above                                                                                                                                                                                                                                                                                                                                                                                                                                                                                                                                                                                                                                                                                                                                                                                                                                                                                                                                                                                                                                                                                                                                                                                                                                      | Minnesota Department of Health, Public Health Laboratory                                  | Minnesota Department of Health, Public Health Laboratory                                                                                                                                        | Matt Plumb, Jacob Garfin, Alexandra Lorentz, and Xiong Wang                                                                                                                                                                                                                                                                                                                                    |
| EPI_ISL_660071, EPI_ISL_660072, EPI_ISL_660073, EPI_ISL_660074, EPI_ISL_660075, EPI_ISL_660076, EPI_ISL_660077, EPI_ISL_660078, EPI_ISL_660079, EPI_ISL_660080, EPI_ISL_660081, EPI_ISL_660082, EPI_ISL_660083, EPI_ISL_660084, EPI_ISL_660085, EPI_ISL_660086, EPI_ISL_660087, EPI_ISL_660088, EPI_ISL_660089, EPI_ISL_660090, EPI_ISL_660091, EPI_ISL_660092, EPI_ISL_660093, EPI_ISL_660094, EPI_ISL_660095, EPI_ISL_660096, EPI_ISL_660097, EPI_ISL_660098, EPI_ISL_660099, EPI_ISL_660100, EPI_ISL_660101, EPI_ISL_660102, EPI_ISL_660103, EPI_ISL_660104, EPI_ISL_660105                                                                                                                                                                                                                                                                                                                                                                                                                                                                                                                                                                                                                                                                 | MD PHL                                                                                    | MD PHL                                                                                                                                                                                          | Maryland Department of Health Laboratories Administration                                                                                                                                                                                                                                                                                                                                      |
| see above                                                                                                                                                                                                                                                                                                                                                                                                                                                                                                                                                                                                                                                                                                                                                                                                                                                                                                                                                                                                                                                                                                                                                                                                                                      | MD PHL                                                                                    | MD PHL                                                                                                                                                                                          | Maryland Department of Health Laboratories Administration                                                                                                                                                                                                                                                                                                                                      |
| EPI_ISL_660323                                                                                                                                                                                                                                                                                                                                                                                                                                                                                                                                                                                                                                                                                                                                                                                                                                                                                                                                                                                                                                                                                                                                                                                                                                 | Hospital                                                                                  | National Reference Center for Viruses of Respiratory Infections, Institut Pasteur, Paris                                                                                                        | Marion Barbet, Sylvie Behillil, Méline Bizard, Angela Brisebarre, Camille Capel, Etienne Simon-Lorière, Vincent Enouf, Maud Vanpeene, Sylvie van der Werf, Alexandra Ducancelle                                                                                                                                                                                                                |
| EPI_ISL_660324, EPI_ISL_660325                                                                                                                                                                                                                                                                                                                                                                                                                                                                                                                                                                                                                                                                                                                                                                                                                                                                                                                                                                                                                                                                                                                                                                                                                 | General practitioner                                                                      | National Reference Center for Viruses of Respiratory Infections, Institut Pasteur, Paris                                                                                                        | Marion Barbet, Sylvie Behillil, Méline Bizard, Angela Brisebarre, Camille Capel, Etienne Simon-Lorière, Vincent Enouf, Maud Vanpeene, Sylvie van der Werf                                                                                                                                                                                                                                      |
| EPI_ISL_665340, EPI_ISL_665552, EPI_ISL_665554, EPI_ISL_665555, EPI_ISL_665563, EPI_ISL_665725, EPI_ISL_665762, EPI_ISL_665790, EPI_ISL_666060, EPI_ISL_666061, EPI_ISL_666063, EPI_ISL_666064, EPI_ISL_666067, EPI_ISL_666069, EPI_ISL_666070, EPI_ISL_666071, EPI_ISL_666072, EPI_ISL_666073, EPI_ISL_666076, EPI_ISL_666078, EPI_ISL_666079, EPI_ISL_666081, EPI_ISL_666082, EPI_ISL_666083                                                                                                                                                                                                                                                                                                                                                                                                                                                                                                                                                                                                                                                                                                                                                                                                                                                 | see above                                                                                 | Virology Department, Royal Infirmary of Edinburgh, NHS Lothian / School of Biological Sciences, University of Edinburgh / Institute of Genetics and Molecular Medicine, University of Edinburgh | COVID-19 Genomics UK (COG-UK) Consortium<br>McHugh M, Dewar R, Rooke S, Gallagher M, Balcaza C, O'Toole Á, Scher E, Hill V, McCrone JT, Colquhoun R, Yu X, Jackson B, Rambaut A, Williams TC, Templeton K                                                                                                                                                                                      |
| EPI_ISL_666623, EPI_ISL_666624, EPI_ISL_666625, EPI_ISL_666626, EPI_ISL_666627, EPI_ISL_666628, EPI_ISL_666629, EPI_ISL_666630, EPI_ISL_666631, EPI_ISL_666632, EPI_ISL_666633, EPI_ISL_666634, EPI_ISL_666635, EPI_ISL_666636, EPI_ISL_666637, EPI_ISL_666638, EPI_ISL_666639, EPI_ISL_666640, EPI_ISL_666641, EPI_ISL_666642, EPI_ISL_666643, EPI_ISL_666644, EPI_ISL_666645, EPI_ISL_666646, EPI_ISL_666647, EPI_ISL_666648, EPI_ISL_666649, EPI_ISL_666650, EPI_ISL_666651, EPI_ISL_666652                                                                                                                                                                                                                                                                                                                                                                                                                                                                                                                                                                                                                                                                                                                                                 | see above                                                                                 | ZOTZ KLIMAS MVZ Düsseldorf-Centrum GbR ÜBAG für Labormedizin, Genetik, Zytologie, Pathologie                                                                                                    | Center of Medical Microbiology, Virology, and Hospital Hygiene, University of Duesseldorf<br>Maximilian Damagnez, Alexander Diltthey, Ashley-Jane Duplessis, Patrick Finzer, Katrin Hoffmann, Torsten Houwaart, Lisanna Hülse, Malte Kohns Vasconcelos, Marek Korencak, Nadine Lübke, Jessica Nicolai, Klaus Pfeffer, Daniel Strelow, Jörg Timm, Andreas Walker, Tobias Wienemann, Rainer Zotz |
| EPI_ISL_666688, EPI_ISL_666689, EPI_ISL_666690, EPI_ISL_666691, EPI_ISL_666692, EPI_ISL_666693, EPI_ISL_666694, EPI_ISL_666695, EPI_ISL_666696, EPI_ISL_666697, EPI_ISL_666698, EPI_ISL_666699, EPI_ISL_666700, EPI_ISL_666701, EPI_ISL_666702, EPI_ISL_666703, EPI_ISL_666704, EPI_ISL_666705, EPI_ISL_666706, EPI_ISL_666707, EPI_ISL_666708, EPI_ISL_666709, EPI_ISL_666710                                                                                                                                                                                                                                                                                                                                                                                                                                                                                                                                                                                                                                                                                                                                                                                                                                                                 | see above                                                                                 | National Virus Reference Lab (NVRL)                                                                                                                                                             | Irish Coronavirus Sequencing Consortium-Teagasc Grange<br>Matthew McCabe, Calum Walsh, Fiona Crispie, Paul Cotter, Michael Carr, Aijandro Abner Garcia Leon                                                                                                                                                                                                                                    |
| EPI_ISL_666771, EPI_ISL_666772, EPI_ISL_666773, EPI_ISL_666774, EPI_ISL_666775, EPI_ISL_666776, EPI_ISL_666777, EPI_ISL_666778, EPI_ISL_666779, EPI_ISL_666780, EPI_ISL_666781, EPI_ISL_666782, EPI_ISL_666783, EPI_ISL_666784, EPI_ISL_666785, EPI_ISL_666786, EPI_ISL_666787, EPI_ISL_666788, EPI_ISL_666789, EPI_ISL_666790, EPI_ISL_666791, EPI_ISL_666792, EPI_ISL_666793, EPI_ISL_666794, EPI_ISL_666795, EPI_ISL_666796, EPI_ISL_666797, EPI_ISL_666798, EPI_ISL_666799, EPI_ISL_666800, EPI_ISL_666801, EPI_ISL_666802, EPI_ISL_666803, EPI_ISL_666804, EPI_ISL_666805, EPI_ISL_666806, EPI_ISL_666807, EPI_ISL_666808, EPI_ISL_666809, EPI_ISL_666810, EPI_ISL_666811, EPI_ISL_666812, EPI_ISL_666813                                                                                                                                                                                                                                                                                                                                                                                                                                                                                                                                 | see above                                                                                 | Maryland Public Health Laboratory                                                                                                                                                               | Maryland Public Health Laboratory<br>Maryland Department of Health Laboratories Administration<br>Manuel Guerreiro, Marta Montero-Alonso, María Dolores Gómez and SeqCOVID-SPAIN consortium                                                                                                                                                                                                    |
| EPI_ISL_680462, EPI_ISL_680464, EPI_ISL_680465, EPI_ISL_680467, EPI_ISL_680469, EPI_ISL_680470, EPI_ISL_680471, EPI_ISL_680472, EPI_ISL_680473, EPI_ISL_680474, EPI_ISL_680475, EPI_ISL_680477, EPI_ISL_680479, EPI_ISL_680480, EPI_ISL_680481, EPI_ISL_680482, EPI_ISL_680483, EPI_ISL_680485, EPI_ISL_680486, EPI_ISL_680487, EPI_ISL_680489, EPI_ISL_680490, EPI_ISL_680491, EPI_ISL_680492, EPI_ISL_680493, EPI_ISL_680495, EPI_ISL_680496, EPI_ISL_680499, EPI_ISL_680500, EPI_ISL_680501, EPI_ISL_680502, EPI_ISL_680503, EPI_ISL_680504, EPI_ISL_680506, EPI_ISL_680507, EPI_ISL_680508, EPI_ISL_680509, EPI_ISL_680510, EPI_ISL_680511, EPI_ISL_680513, EPI_ISL_680514, EPI_ISL_680515, EPI_ISL_680518, EPI_ISL_680522, EPI_ISL_680527, EPI_ISL_680530, EPI_ISL_680533, EPI_ISL_680534, EPI_ISL_680535, EPI_ISL_680536, EPI_ISL_680537, EPI_ISL_680538, EPI_ISL_680540, EPI_ISL_680545, EPI_ISL_680546, EPI_ISL_680548, EPI_ISL_680549, EPI_ISL_680551, EPI_ISL_680552, EPI_ISL_680553, EPI_ISL_680554                                                                                                                                                                                                                                 | see above                                                                                 | Virology Department, Royal Infirmary of Edinburgh, NHS Lothian / School of Biological Sciences, University of Edinburgh / Institute of Genetics and Molecular Medicine, University of Edinburgh | COVID-19 Genomics UK (COG-UK) Consortium<br>McHugh M, Dewar R, Rooke S, Gallagher M, Balcaza C, O'Toole Á, Scher E, Hill V, McCrone JT, Colquhoun R, Yu X, Jackson B, Rambaut A, Williams TC, Templeton K                                                                                                                                                                                      |
| EPI_ISL_682060, EPI_ISL_682061, EPI_ISL_682062, EPI_ISL_682063, EPI_ISL_682064, EPI_ISL_682065, EPI_ISL_682066, EPI_ISL_682067, EPI_ISL_682068, EPI_ISL_682069, EPI_ISL_682070, EPI_ISL_682071, EPI_ISL_682072, EPI_ISL_682073, EPI_ISL_682074, EPI_ISL_682075, EPI_ISL_682076, EPI_ISL_682077, EPI_ISL_682078                                                                                                                                                                                                                                                                                                                                                                                                                                                                                                                                                                                                                                                                                                                                                                                                                                                                                                                                 | see above                                                                                 | Maryland Public Health Laboratory                                                                                                                                                               | Maryland Public Health Laboratory<br>Maryland Department of Health Laboratories Administration                                                                                                                                                                                                                                                                                                 |
| EPI_ISL_693758, EPI_ISL_693759, EPI_ISL_693760, EPI_ISL_693761, EPI_ISL_693762, EPI_ISL_693763, EPI_ISL_693764                                                                                                                                                                                                                                                                                                                                                                                                                                                                                                                                                                                                                                                                                                                                                                                                                                                                                                                                                                                                                                                                                                                                 | see above                                                                                 | Hospital                                                                                                                                                                                        | National Reference Center for Viruses of Respiratory Infections, Institut Pasteur, Paris<br>Marion Barbet, Sylvie Behillil, Méline Bizard, Angela Brisebarre, Camille Capel, Etienne Simon-Lorière, Vincent Enouf, Maud Vanpeene, Sylvie van der Werf, Gisèle Lagathu                                                                                                                          |
| EPI_ISL_693765                                                                                                                                                                                                                                                                                                                                                                                                                                                                                                                                                                                                                                                                                                                                                                                                                                                                                                                                                                                                                                                                                                                                                                                                                                 | hospital                                                                                  | National Reference Center for Viruses of Respiratory Infections, Institut Pasteur, Paris                                                                                                        | Marion Barbet, Sylvie Behillil, Méline Bizard, Angela Brisebarre, Camille Capel, Etienne Simon-Lorière, Vincent Enouf, Maud Vanpeene, Sylvie van der Werf, Gisèle Lagathu                                                                                                                                                                                                                      |
| EPI_ISL_693766, EPI_ISL_693767, EPI_ISL_693768, EPI_ISL_693769, EPI_ISL_693770, EPI_ISL_693771, EPI_ISL_693772, EPI_ISL_693773, EPI_ISL_693774                                                                                                                                                                                                                                                                                                                                                                                                                                                                                                                                                                                                                                                                                                                                                                                                                                                                                                                                                                                                                                                                                                 | see above                                                                                 | General practitioner                                                                                                                                                                            | National Reference Center for Viruses of Respiratory Infections, Institut Pasteur, Paris<br>Marion Barbet, Sylvie Behillil, Méline Bizard, Angela Brisebarre, Camille Capel, Etienne Simon-Lorière, Vincent Enouf, Maud Vanpeene, Sylvie van der Werf                                                                                                                                          |
| EPI_ISL_702528, EPI_ISL_702594, EPI_ISL_702620, EPI_ISL_702679, EPI_ISL_702937, EPI_ISL_703144, EPI_ISL_703297, EPI_ISL_703414, EPI_ISL_703572, EPI_ISL_703622, EPI_ISL_703779, EPI_ISL_703782, EPI_ISL_703787, EPI_ISL_703810, EPI_ISL_703813, EPI_ISL_703950, EPI_ISL_704187, EPI_ISL_705113, EPI_ISL_705118, EPI_ISL_705391, EPI_ISL_705416, EPI_ISL_705492, EPI_ISL_705735, EPI_ISL_705736, EPI_ISL_705737, EPI_ISL_705738, EPI_ISL_705739, EPI_ISL_705740, EPI_ISL_705741, EPI_ISL_705745, EPI_ISL_705746, EPI_ISL_705747, EPI_ISL_705748, EPI_ISL_705749, EPI_ISL_705751, EPI_ISL_705752, EPI_ISL_705753, EPI_ISL_705754, EPI_ISL_705756, EPI_ISL_705757, EPI_ISL_705758, EPI_ISL_705759, EPI_ISL_705760, EPI_ISL_705761, EPI_ISL_705762, EPI_ISL_705765, EPI_ISL_705766, EPI_ISL_705767, EPI_ISL_705768, EPI_ISL_705769, EPI_ISL_705770, EPI_ISL_705771, EPI_ISL_705772, EPI_ISL_705773, EPI_ISL_705774, EPI_ISL_705775, EPI_ISL_705777, EPI_ISL_705778, EPI_ISL_705779, EPI_ISL_705780, EPI_ISL_705781, EPI_ISL_705783, EPI_ISL_705785, EPI_ISL_705788, EPI_ISL_705790, EPI_ISL_705791, EPI_ISL_705792, EPI_ISL_705793, EPI_ISL_705796, EPI_ISL_705797, EPI_ISL_705798, EPI_ISL_705799, EPI_ISL_705800, EPI_ISL_705802, EPI_ISL_705803 | see above                                                                                 | Virology Department, Royal Infirmary of Edinburgh, NHS Lothian / School of Biological Sciences, University of Edinburgh / Institute of Genetics and Molecular Medicine, University of Edinburgh | COVID-19 Genomics UK (COG-UK) Consortium<br>McHugh M, Dewar R, Rooke S, Gallagher M, Balcaza C, O'Toole Á, Scher E, Hill V, McCrone JT, Colquhoun R, Yu X, Jackson B, Rambaut A, Williams TC, Templeton K                                                                                                                                                                                      |
| EPI_ISL_707928                                                                                                                                                                                                                                                                                                                                                                                                                                                                                                                                                                                                                                                                                                                                                                                                                                                                                                                                                                                                                                                                                                                                                                                                                                 | Fujita Health University Hospital                                                         | Fujita Health University School of Medicine, Department of Microbiology                                                                                                                         | Masahiro Suzuki, Aki Sakurai, Yohei Doi                                                                                                                                                                                                                                                                                                                                                        |
| EPI_ISL_710090, EPI_ISL_710091, EPI_ISL_710092, EPI_ISL_710093, EPI_ISL_710094, EPI_ISL_710095, EPI_ISL_710096, EPI_ISL_710097, EPI_ISL_710098                                                                                                                                                                                                                                                                                                                                                                                                                                                                                                                                                                                                                                                                                                                                                                                                                                                                                                                                                                                                                                                                                                 | see above                                                                                 | Maryland Public Health Laboratory                                                                                                                                                               | Maryland Public Health Laboratory<br>Maryland Department of Health Laboratories Administration                                                                                                                                                                                                                                                                                                 |
| EPI_ISL_717976                                                                                                                                                                                                                                                                                                                                                                                                                                                                                                                                                                                                                                                                                                                                                                                                                                                                                                                                                                                                                                                                                                                                                                                                                                 | Center of Medical Microbiology, Virology, and Hospital Hygiene, University of Duesseldorf | Center of Medical Microbiology, Virology, and Hospital Hygiene, University of Duesseldorf                                                                                                       | Maximilian Damagnez, Alexander Diltthey, Torsten Houwaart, Malte Kohns Vasconcelos, Marek Korencak, Nadine Lübke, Jessica Nicolai, Klaus Pfeffer, Hendrik Streeck, Daniel Strelow, Jörg Timm, Andreas Walker, Tobias Wienemann                                                                                                                                                                 |
| EPI_ISL_718027, EPI_ISL_718028, EPI_ISL_718029, EPI_ISL_718030, EPI_ISL_718031, EPI_ISL_718032, EPI_ISL_718033, EPI_ISL_718034, EPI_ISL_718035, EPI_ISL_718036, EPI_ISL_718037, EPI_ISL_718038, EPI_ISL_718039, EPI_ISL_718040, EPI_ISL_718041, EPI_ISL_718042, EPI_ISL_718043, EPI_ISL_718044,                                                                                                                                                                                                                                                                                                                                                                                                                                                                                                                                                                                                                                                                                                                                                                                                                                                                                                                                                |                                                                                           |                                                                                                                                                                                                 |                                                                                                                                                                                                                                                                                                                                                                                                |

|                                                                                                                                                                                                                                                                                                                                                                                                                                                                                                                                                                                                                                                                                                                                                                                                                                                                                                                                                                                                                                                                                                                                                                                                                                                                                                                                                                                                                                                                                                                                                                                                                                                                                                                                                                                                                                                                                |           |                                                                                                                                                                                                 |                                                                                                                                                                                                                 |                                                                                                                                                                                                                                                                                                                                                                   |
|--------------------------------------------------------------------------------------------------------------------------------------------------------------------------------------------------------------------------------------------------------------------------------------------------------------------------------------------------------------------------------------------------------------------------------------------------------------------------------------------------------------------------------------------------------------------------------------------------------------------------------------------------------------------------------------------------------------------------------------------------------------------------------------------------------------------------------------------------------------------------------------------------------------------------------------------------------------------------------------------------------------------------------------------------------------------------------------------------------------------------------------------------------------------------------------------------------------------------------------------------------------------------------------------------------------------------------------------------------------------------------------------------------------------------------------------------------------------------------------------------------------------------------------------------------------------------------------------------------------------------------------------------------------------------------------------------------------------------------------------------------------------------------------------------------------------------------------------------------------------------------|-----------|-------------------------------------------------------------------------------------------------------------------------------------------------------------------------------------------------|-----------------------------------------------------------------------------------------------------------------------------------------------------------------------------------------------------------------|-------------------------------------------------------------------------------------------------------------------------------------------------------------------------------------------------------------------------------------------------------------------------------------------------------------------------------------------------------------------|
| EPI_ISL_718045, EPI_ISL_718046, EPI_ISL_718047, EPI_ISL_718048, EPI_ISL_718049, EPI_ISL_718050, EPI_ISL_718051, EPI_ISL_718052, EPI_ISL_718053, EPI_ISL_718054, EPI_ISL_718055, EPI_ISL_718056, EPI_ISL_718057, EPI_ISL_718058, EPI_ISL_718059, EPI_ISL_718060, EPI_ISL_718061, EPI_ISL_718062, EPI_ISL_718063, EPI_ISL_718064, EPI_ISL_718065, EPI_ISL_718066, EPI_ISL_718067, EPI_ISL_718068, EPI_ISL_718069, EPI_ISL_718070, EPI_ISL_718071, EPI_ISL_718072, EPI_ISL_718073, EPI_ISL_718074, EPI_ISL_718075, EPI_ISL_718076, EPI_ISL_718077, EPI_ISL_718078, EPI_ISL_718079, EPI_ISL_718080, EPI_ISL_718081, EPI_ISL_718082, EPI_ISL_718083, EPI_ISL_718084, EPI_ISL_718085, EPI_ISL_718086, EPI_ISL_718087, EPI_ISL_718088, EPI_ISL_718089, EPI_ISL_718090, EPI_ISL_718091, EPI_ISL_718092, EPI_ISL_718093, EPI_ISL_718094, EPI_ISL_718095, EPI_ISL_718096, EPI_ISL_718097, EPI_ISL_718098, EPI_ISL_718099, EPI_ISL_718100, EPI_ISL_718101, EPI_ISL_718102, EPI_ISL_718103, EPI_ISL_718104                                                                                                                                                                                                                                                                                                                                                                                                                                                                                                                                                                                                                                                                                                                                                                                                                                                                                 | see above | ZOTZ KLIMAS MVZ Düsseldorf-Centrum GbR ÜBAG für Labormedizin, Genetik, Zytologie, Pathologie                                                                                                    | Center of Medical Microbiology, Virology, and Hospital Hygiene, University of Duesseldorf                                                                                                                       | Maximilian Damagnez, Alexander Dilthey, Ashley-Jane Duplessis, Patrick Finzer, Katrin Hoffmann, Torsten Houwaart, Lisanna Hülse, Malte Kohns Vasconcelos, Marek Korencak, Nadine Lübke, Jessica Nicolai, Klaus Pfeffer, Daniel Strelow, Jörg Timm, Andreas Walker, Tobias Wienemann, Rainer Zotz                                                                  |
| EPI_ISL_718226, EPI_ISL_718227, EPI_ISL_718228, EPI_ISL_718229, EPI_ISL_718230, EPI_ISL_718231, EPI_ISL_718232, EPI_ISL_718233, EPI_ISL_718234, EPI_ISL_718235, EPI_ISL_718236, EPI_ISL_718237, EPI_ISL_718238, EPI_ISL_718239, EPI_ISL_718240, EPI_ISL_718241, EPI_ISL_718242, EPI_ISL_718243, EPI_ISL_718244, EPI_ISL_718245, EPI_ISL_718246, EPI_ISL_718247, EPI_ISL_718248, EPI_ISL_718249                                                                                                                                                                                                                                                                                                                                                                                                                                                                                                                                                                                                                                                                                                                                                                                                                                                                                                                                                                                                                                                                                                                                                                                                                                                                                                                                                                                                                                                                                 | see above | Hospital                                                                                                                                                                                        | National Reference Center for Viruses of Respiratory Infections, Institut Pasteur, Paris                                                                                                                        | Marion Barbet, Sylvie Behillil, Méline Bizard, Angela Brisebarre, Camille Capel, Etienne Simon-Lorière, Vincent Enouf, Maud Vanpeene, Sylvie van der Werf, Gisèle Lagathu                                                                                                                                                                                         |
| EPI_ISL_724222, EPI_ISL_724223, EPI_ISL_724225, EPI_ISL_724227, EPI_ISL_724228, EPI_ISL_724230, EPI_ISL_724231, EPI_ISL_724232, EPI_ISL_724233, EPI_ISL_724234, EPI_ISL_724236, EPI_ISL_724237, EPI_ISL_724238, EPI_ISL_724239, EPI_ISL_724242, EPI_ISL_724244, EPI_ISL_724245, EPI_ISL_724246, EPI_ISL_724247, EPI_ISL_724248, EPI_ISL_724250, EPI_ISL_724252                                                                                                                                                                                                                                                                                                                                                                                                                                                                                                                                                                                                                                                                                                                                                                                                                                                                                                                                                                                                                                                                                                                                                                                                                                                                                                                                                                                                                                                                                                                 | see above | Virology Department, Royal Infirmary of Edinburgh, NHS Lothian / School of Biological Sciences, University of Edinburgh / Institute of Genetics and Molecular Medicine, University of Edinburgh | COVID-19 Genomics UK (COG-UK) Consortium                                                                                                                                                                        | McHugh M, Dewar R, Rooke S, Gallagher M, Balcaza C, O'Toole Á, Scher E, Hill V, McCrone JT, Colquhoun R, Yu X, Jackson B, Rambaut A, Williams TC, Templeton K                                                                                                                                                                                                     |
| EPI_ISL_728361, EPI_ISL_728362, EPI_ISL_728364, EPI_ISL_728365                                                                                                                                                                                                                                                                                                                                                                                                                                                                                                                                                                                                                                                                                                                                                                                                                                                                                                                                                                                                                                                                                                                                                                                                                                                                                                                                                                                                                                                                                                                                                                                                                                                                                                                                                                                                                 |           | Hospital Universitari Vall d'Hebron - Vall d'Hebron Institut de Recerca                                                                                                                         | Hospital Universitari Vall d'Hebron - Vall d'Hebron Institut de Recerca                                                                                                                                         | Maria Piñana, Josep F Abril, Cristina Andrés, Damir Garcia-Cehic, Aroa Silgado, Maria Carmen Martín, Carla Castillo, Ariadna Rando, Maria Gerna Codina, Juliana Espinalba, Elena Sulleiro, Tomás Pumarola, Josep Quer, Andrés Antón                                                                                                                               |
| EPI_ISL_732524, EPI_ISL_732525, EPI_ISL_732526, EPI_ISL_732527, EPI_ISL_732528, EPI_ISL_732529, EPI_ISL_732530, EPI_ISL_732541, EPI_ISL_732542, EPI_ISL_732543, EPI_ISL_732544, EPI_ISL_732545, EPI_ISL_732546, EPI_ISL_732547, EPI_ISL_732548, EPI_ISL_732549, EPI_ISL_732550, EPI_ISL_732551, EPI_ISL_732552, EPI_ISL_732553, EPI_ISL_732554, EPI_ISL_732555, EPI_ISL_732561, EPI_ISL_732562, EPI_ISL_732563, EPI_ISL_732564                                                                                                                                                                                                                                                                                                                                                                                                                                                                                                                                                                                                                                                                                                                                                                                                                                                                                                                                                                                                                                                                                                                                                                                                                                                                                                                                                                                                                                                 | see above | Bundeswehr Institute of Microbiology                                                                                                                                                            | Bundeswehr Institute of Microbiology                                                                                                                                                                            | Markus Antwerpen, Alexandra Rehn, Mathias Walter, Malena Bestehorn-Willmann, Sabine Zange, Enrico Georgi, Roman Wölfel                                                                                                                                                                                                                                            |
| EPI_ISL_732748, EPI_ISL_732749, EPI_ISL_732750, EPI_ISL_732751, EPI_ISL_732752, EPI_ISL_732753, EPI_ISL_732754, EPI_ISL_732755, EPI_ISL_732756, EPI_ISL_732757, EPI_ISL_732758, EPI_ISL_732759, EPI_ISL_732760, EPI_ISL_732761, EPI_ISL_732762, EPI_ISL_732763, EPI_ISL_732764, EPI_ISL_732765, EPI_ISL_732766, EPI_ISL_732767, EPI_ISL_732768, EPI_ISL_732769, EPI_ISL_732770, EPI_ISL_732771, EPI_ISL_732772, EPI_ISL_732773, EPI_ISL_732774, EPI_ISL_732775, EPI_ISL_732776, EPI_ISL_732777, EPI_ISL_732778, EPI_ISL_732779, EPI_ISL_732780, EPI_ISL_732781, EPI_ISL_732782, EPI_ISL_732783, EPI_ISL_732784, EPI_ISL_732785, EPI_ISL_732786, EPI_ISL_732787, EPI_ISL_732788, EPI_ISL_732789, EPI_ISL_732790, EPI_ISL_732791, EPI_ISL_732792, EPI_ISL_732793, EPI_ISL_732794, EPI_ISL_732795, EPI_ISL_732796, EPI_ISL_732797, EPI_ISL_732798, EPI_ISL_732799, EPI_ISL_732800, EPI_ISL_732801, EPI_ISL_732802, EPI_ISL_732803, EPI_ISL_732804, EPI_ISL_732805, EPI_ISL_732806, EPI_ISL_732807, EPI_ISL_732808, EPI_ISL_732809, EPI_ISL_732810, EPI_ISL_732811, EPI_ISL_732812, EPI_ISL_732813, EPI_ISL_732814, EPI_ISL_732815, EPI_ISL_732816, EPI_ISL_732817, EPI_ISL_732818, EPI_ISL_732819                                                                                                                                                                                                                                                                                                                                                                                                                                                                                                                                                                                                                                                                                 | see above | Centro de Investigación Biomédica de La Rioja - Hospital San Pedro Logroño                                                                                                                      | SeqCOVID-SPAIN consortium/IBV(CSIC)                                                                                                                                                                             | Maria de Toro, José Manuel Azcona Gutiérrez, María Pilar Bea Escudero, Miriam Blasco Alberdi and SeqCOVID-SPAIN consortium                                                                                                                                                                                                                                        |
| EPI_ISL_733501, EPI_ISL_733502, EPI_ISL_733503, EPI_ISL_733504, EPI_ISL_733505, EPI_ISL_733506, EPI_ISL_733507, EPI_ISL_733508, EPI_ISL_733509, EPI_ISL_733510, EPI_ISL_733511, EPI_ISL_733512, EPI_ISL_733513, EPI_ISL_733514, EPI_ISL_733515, EPI_ISL_733516, EPI_ISL_733517, EPI_ISL_733518, EPI_ISL_733519, EPI_ISL_733520, EPI_ISL_733521, EPI_ISL_733522, EPI_ISL_733523                                                                                                                                                                                                                                                                                                                                                                                                                                                                                                                                                                                                                                                                                                                                                                                                                                                                                                                                                                                                                                                                                                                                                                                                                                                                                                                                                                                                                                                                                                 | see above | ZOTZ KLIMAS MVZ Düsseldorf-Centrum GbR ÜBAG für Labormedizin, Genetik, Zytologie, Pathologie                                                                                                    | Center of Medical Microbiology, Virology, and Hospital Hygiene, University of Duesseldorf                                                                                                                       | Maximilian Damagnez, Alexander Dilthey, Ashley-Jane Duplessis, Patrick Finzer, Katrin Hoffmann, Torsten Houwaart, Lisanna Hülse, Malte Kohns Vasconcelos, Marek Korencak, Nadine Lübke, Jessica Nicolai, Klaus Pfeffer, Daniel Strelow, Jörg Timm, Andreas Walker, Tobias Wienemann, Rainer Zotz                                                                  |
| EPI_ISL_734167, EPI_ISL_734168, EPI_ISL_734169                                                                                                                                                                                                                                                                                                                                                                                                                                                                                                                                                                                                                                                                                                                                                                                                                                                                                                                                                                                                                                                                                                                                                                                                                                                                                                                                                                                                                                                                                                                                                                                                                                                                                                                                                                                                                                 |           | CHRU Pontchaillou - Laboratoire de Virologie                                                                                                                                                    | National Reference Center for Viruses of Respiratory Infections, Institut Pasteur, Paris                                                                                                                        | Marion Barbet, Sylvie Behillil, Méline Bizard, Angela Brisebarre, Camille Capel, Etienne Simon-Lorière, Vincent Enouf, Maud Vanpeene, Sylvie van der Werf, Gisèle Lagathu                                                                                                                                                                                         |
| EPI_ISL_735504                                                                                                                                                                                                                                                                                                                                                                                                                                                                                                                                                                                                                                                                                                                                                                                                                                                                                                                                                                                                                                                                                                                                                                                                                                                                                                                                                                                                                                                                                                                                                                                                                                                                                                                                                                                                                                                                 |           | University of Bari Biomedical Sciences and Human Oncology                                                                                                                                       | University of Bari Biomedical Sciences and Human Oncology                                                                                                                                                       | Maria Chironna, Anna Sallustio, Daniela Loconsole                                                                                                                                                                                                                                                                                                                 |
| EPI_ISL_735505, EPI_ISL_735506                                                                                                                                                                                                                                                                                                                                                                                                                                                                                                                                                                                                                                                                                                                                                                                                                                                                                                                                                                                                                                                                                                                                                                                                                                                                                                                                                                                                                                                                                                                                                                                                                                                                                                                                                                                                                                                 |           | University of Bari Biomedical Sciences and Human Oncology                                                                                                                                       | University of Bari Biomedical Sciences and Human Oncology                                                                                                                                                       | Maria Chironna, Anna Sallustio, Daniela Loconsole, Marisa Accogli                                                                                                                                                                                                                                                                                                 |
| EPI_ISL_737931, EPI_ISL_737932, EPI_ISL_737933, EPI_ISL_737934, EPI_ISL_737935, EPI_ISL_737936, EPI_ISL_737937, EPI_ISL_737938, EPI_ISL_737939, EPI_ISL_737940, EPI_ISL_737941, EPI_ISL_737942, EPI_ISL_737943, EPI_ISL_737944, EPI_ISL_737945, EPI_ISL_737946, EPI_ISL_737947, EPI_ISL_737948, EPI_ISL_737949, EPI_ISL_737950, EPI_ISL_737951, EPI_ISL_737952, EPI_ISL_737953, EPI_ISL_737954, EPI_ISL_737955, EPI_ISL_737956, EPI_ISL_737957, EPI_ISL_737958, EPI_ISL_737959, EPI_ISL_737960, EPI_ISL_737961, EPI_ISL_737962, EPI_ISL_737963, EPI_ISL_737964, EPI_ISL_737965, EPI_ISL_737966, EPI_ISL_737967, EPI_ISL_737968, EPI_ISL_737969, EPI_ISL_737970, EPI_ISL_737971, EPI_ISL_737972, EPI_ISL_737973, EPI_ISL_737974, EPI_ISL_737975, EPI_ISL_737976, EPI_ISL_737977, EPI_ISL_737978, EPI_ISL_737979, EPI_ISL_737980, EPI_ISL_737981, EPI_ISL_737982, EPI_ISL_737983, EPI_ISL_737984, EPI_ISL_737985, EPI_ISL_737986, EPI_ISL_737987, EPI_ISL_737988, EPI_ISL_737989, EPI_ISL_737990, EPI_ISL_737991, EPI_ISL_737992, EPI_ISL_737993, EPI_ISL_737994, EPI_ISL_737995, EPI_ISL_737996, EPI_ISL_737997, EPI_ISL_737998, EPI_ISL_737999, EPI_ISL_738000, EPI_ISL_738001, EPI_ISL_738002, EPI_ISL_738003, EPI_ISL_738004, EPI_ISL_738005, EPI_ISL_738006, EPI_ISL_738007, EPI_ISL_738008, EPI_ISL_738009, EPI_ISL_738010, EPI_ISL_738011, EPI_ISL_738012, EPI_ISL_738013, EPI_ISL_738014, EPI_ISL_738015, EPI_ISL_738016, EPI_ISL_738017, EPI_ISL_738018, EPI_ISL_738019, EPI_ISL_738020, EPI_ISL_738021, EPI_ISL_738022, EPI_ISL_738023, EPI_ISL_738024, EPI_ISL_738025, EPI_ISL_738026, EPI_ISL_738027, EPI_ISL_738028, EPI_ISL_738029, EPI_ISL_738030, EPI_ISL_738031, EPI_ISL_738032, EPI_ISL_738033, EPI_ISL_738034, EPI_ISL_738035, EPI_ISL_738036, EPI_ISL_738037, EPI_ISL_738038, EPI_ISL_738039, EPI_ISL_738040, EPI_ISL_738041, EPI_ISL_738042, EPI_ISL_738043 | see above | Uganda Central Public Health Lab and Uganda Virus Research Institute                                                                                                                            | MRC/UVRI & LSHTM Uganda Research Unit                                                                                                                                                                           | Matthew Cotten, Dan Lule Bugembe, My V.T. Phan, Pontiano Kaleebu et al.                                                                                                                                                                                                                                                                                           |
| EPI_ISL_738121, EPI_ISL_738122, EPI_ISL_738123, EPI_ISL_738124, EPI_ISL_738125, EPI_ISL_738126, EPI_ISL_738127, EPI_ISL_738128, EPI_ISL_738129, EPI_ISL_738130, EPI_ISL_738131, EPI_ISL_738132                                                                                                                                                                                                                                                                                                                                                                                                                                                                                                                                                                                                                                                                                                                                                                                                                                                                                                                                                                                                                                                                                                                                                                                                                                                                                                                                                                                                                                                                                                                                                                                                                                                                                 | see above | IZSM-U.O.C. Virologia                                                                                                                                                                           | Istituto Zooprofilattico Sperimentale del Mezzogiorno                                                                                                                                                           | Maurizio Viscardi, Lorena Cardillo, Giovanna Fusco                                                                                                                                                                                                                                                                                                                |
| EPI_ISL_738144                                                                                                                                                                                                                                                                                                                                                                                                                                                                                                                                                                                                                                                                                                                                                                                                                                                                                                                                                                                                                                                                                                                                                                                                                                                                                                                                                                                                                                                                                                                                                                                                                                                                                                                                                                                                                                                                 |           | University of Bari Biomedical Sciences and Human Oncology                                                                                                                                       | University of Bari Biomedical Sciences and Human Oncology                                                                                                                                                       | Maria Chironna, Anna Sallustio, Daniela Loconsole, Marisa Accogli                                                                                                                                                                                                                                                                                                 |
| EPI_ISL_742175, EPI_ISL_742177, EPI_ISL_742178, EPI_ISL_742179, EPI_ISL_742180, EPI_ISL_742181, EPI_ISL_742184, EPI_ISL_742185, EPI_ISL_742187, EPI_ISL_742188, EPI_ISL_742189, EPI_ISL_742190, EPI_ISL_742191, EPI_ISL_742193, EPI_ISL_742195, EPI_ISL_742196, EPI_ISL_742197, EPI_ISL_742198, EPI_ISL_742199, EPI_ISL_742200, EPI_ISL_742201, EPI_ISL_742202, EPI_ISL_742203, EPI_ISL_742206, EPI_ISL_742209, EPI_ISL_742210, EPI_ISL_742211, EPI_ISL_742212, EPI_ISL_742216, EPI_ISL_742218, EPI_ISL_742219, EPI_ISL_742221, EPI_ISL_742222, EPI_ISL_742223, EPI_ISL_742225, EPI_ISL_742226, EPI_ISL_742228, EPI_ISL_742229, EPI_ISL_742230, EPI_ISL_742232, EPI_ISL_742234, EPI_ISL_742235, EPI_ISL_742237, EPI_ISL_742238, EPI_ISL_742239, EPI_ISL_742242, EPI_ISL_742243, EPI_ISL_742244, EPI_ISL_742245, EPI_ISL_742246                                                                                                                                                                                                                                                                                                                                                                                                                                                                                                                                                                                                                                                                                                                                                                                                                                                                                                                                                                                                                                                 | see above | Virology Department, Royal Infirmary of Edinburgh, NHS Lothian / School of Biological Sciences, University of Edinburgh / Institute of Genetics and Molecular Medicine, University of Edinburgh | COVID-19 Genomics UK (COG-UK) Consortium                                                                                                                                                                        | McHugh M, Dewar R, Rooke S, Gallagher M, Balcaza C, O'Toole Á, Scher E, Hill V, McCrone JT, Colquhoun R, Yu X, Jackson B, Rambaut A, Williams TC, Templeton K                                                                                                                                                                                                     |
| EPI_ISL_747520                                                                                                                                                                                                                                                                                                                                                                                                                                                                                                                                                                                                                                                                                                                                                                                                                                                                                                                                                                                                                                                                                                                                                                                                                                                                                                                                                                                                                                                                                                                                                                                                                                                                                                                                                                                                                                                                 |           | ZOTZ KLIMAS MVZ Düsseldorf-Centrum GbR ÜBAG für Labormedizin, Genetik, Zytologie, Pathologie                                                                                                    | Center of Medical Microbiology, Virology, and Hospital Hygiene, University of Duesseldorf                                                                                                                       | Maximilian Damagnez, Alexander Dilthey, Ashley-Jane Duplessis, Patrick Finzer, Katrin Hoffmann, Torsten Houwaart, Lisanna Hülse, Malte Kohns Vasconcelos, Marek Korencak, Nadine Lübke, Jessica Nicolai, Klaus Pfeffer, Daniel Strelow, Jörg Timm, Andreas Walker, Tobias Wienemann, Rainer Zotz                                                                  |
| EPI_ISL_754141, EPI_ISL_754142, EPI_ISL_754143, EPI_ISL_754144, EPI_ISL_754145, EPI_ISL_754146, EPI_ISL_754147, EPI_ISL_754148, EPI_ISL_754149, EPI_ISL_754150, EPI_ISL_754151, EPI_ISL_754152, EPI_ISL_754153, EPI_ISL_754154, EPI_ISL_754155, EPI_ISL_754156, EPI_ISL_754157, EPI_ISL_754158, EPI_ISL_754159, EPI_ISL_754160, EPI_ISL_754161, EPI_ISL_754162, EPI_ISL_754163, EPI_ISL_754164, EPI_ISL_754165, EPI_ISL_754166, EPI_ISL_754167, EPI_ISL_754168, EPI_ISL_754169, EPI_ISL_754170, EPI_ISL_754171, EPI_ISL_754172                                                                                                                                                                                                                                                                                                                                                                                                                                                                                                                                                                                                                                                                                                                                                                                                                                                                                                                                                                                                                                                                                                                                                                                                                                                                                                                                                 | see above | Laboratoire de Microbiologie                                                                                                                                                                    | National Reference Center for Viruses of Respiratory Infections, Institut Pasteur, Paris                                                                                                                        | Marion Barbet, Sylvie Behillil, Méline Bizard, Angela Brisebarre, Camille Capel, Etienne Simon-Lorière, Vincent Enouf, Maud Vanpeene, Sylvie van der Werf, Marie-Sarah Fangous                                                                                                                                                                                    |
| EPI_ISL_754239                                                                                                                                                                                                                                                                                                                                                                                                                                                                                                                                                                                                                                                                                                                                                                                                                                                                                                                                                                                                                                                                                                                                                                                                                                                                                                                                                                                                                                                                                                                                                                                                                                                                                                                                                                                                                                                                 |           | Santosa Hospital Bandung Central                                                                                                                                                                | "School of Life Sciences and Technology & School of Pharmacy-Institut Teknologi Bandung; Molecular Genetics Laboratory-Faculty of Medicine-Universitas Padjadjaran; Laboratorium Kesehatan Provinsi Jawa Barat" | Marselina Irasonia Tan, Yunia Sribudiani, Catur Riani, Azzania Fibriani, Husna Nugrahapraja, Tarwadi, Ema Rahmawati, Savira Ekawardhani, Hesti Lina Wiraswati, Ryan Bayusantika Ristandi, Rifky Waluyajati Rachman, Cut Nur Cinthia Alamanda, Lia Faridah, Matifah Farid, Karimatu Khoirunnisa, Hammam Riza, Soni Solisia Wirawan, Agung Eru Wibowo, Irvan Faizal |
| EPI_ISL_754842                                                                                                                                                                                                                                                                                                                                                                                                                                                                                                                                                                                                                                                                                                                                                                                                                                                                                                                                                                                                                                                                                                                                                                                                                                                                                                                                                                                                                                                                                                                                                                                                                                                                                                                                                                                                                                                                 |           | CHU Amiens - Labo virologie                                                                                                                                                                     | National Reference Center for Viruses of Respiratory Infections, Institut Pasteur, Paris                                                                                                                        | Marion Barbet, Sylvie Behillil, Méline Bizard, Angela Brisebarre, Camille Capel, Etienne Simon-Lorière, Vincent Enouf, Maud Vanpeene, Sylvie van der Werf, Castelain Sandrine, François Catherine                                                                                                                                                                 |
| EPI_ISL_754843, EPI_ISL_754844, EPI_ISL_754845, EPI_ISL_754846                                                                                                                                                                                                                                                                                                                                                                                                                                                                                                                                                                                                                                                                                                                                                                                                                                                                                                                                                                                                                                                                                                                                                                                                                                                                                                                                                                                                                                                                                                                                                                                                                                                                                                                                                                                                                 |           | Laboratoire de Virologie Hôpital Robert Debré                                                                                                                                                   | National Reference Center for Viruses of Respiratory Infections, Institut Pasteur, Paris                                                                                                                        | Marion Barbet, Sylvie Behillil, Méline Bizard, Angela Brisebarre, Camille Capel, Etienne Simon-Lorière, Vincent Enouf, Maud Vanpeene, Sylvie van der Werf, Andreoletti Laurent                                                                                                                                                                                    |
| EPI_ISL_754847                                                                                                                                                                                                                                                                                                                                                                                                                                                                                                                                                                                                                                                                                                                                                                                                                                                                                                                                                                                                                                                                                                                                                                                                                                                                                                                                                                                                                                                                                                                                                                                                                                                                                                                                                                                                                                                                 |           | Korian Villa d'Azon                                                                                                                                                                             | National Reference Center for Viruses of Respiratory Infections, Institut Pasteur, Paris                                                                                                                        | Marion Barbet, Sylvie Behillil, Méline Bizard, Angela Brisebarre, Camille Capel, Etienne Simon-Lorière, Vincent Enouf, Maud Vanpeene, Sylvie van der Werf                                                                                                                                                                                                         |
| EPI_ISL_754849, EPI_ISL_754850, EPI_ISL_754851, EPI_ISL_754852                                                                                                                                                                                                                                                                                                                                                                                                                                                                                                                                                                                                                                                                                                                                                                                                                                                                                                                                                                                                                                                                                                                                                                                                                                                                                                                                                                                                                                                                                                                                                                                                                                                                                                                                                                                                                 |           | Laboratoire de Virologie Hôpital Robert Debré                                                                                                                                                   | National Reference Center for Viruses of Respiratory Infections, Institut Pasteur, Paris                                                                                                                        | Marion Barbet, Sylvie Behillil, Méline Bizard, Angela Brisebarre, Camille Capel, Etienne Simon-Lorière, Vincent Enouf, Maud Vanpeene, Sylvie van der Werf, Andreoletti Laurent                                                                                                                                                                                    |

|                                                                                                                                                                                                                                                                                                                                                                                                                                                                                                                                                                                                                                                                                                                                                                                                                                                                                                                                                                                                                                                                                                                                                                                                                                                                                                                                                                                                                                                                                                                                                                                                                                                                                                                                                                                                                                                                                                                                                                                                                                                                                                                                                                                                                                                                                                                                                                                                                                                                                                                                                                                                                                                                                                                                                                                                                                                                                                                                                                                                                                                                                                                                                                                                                                                                                                                                                                                                                                                                                                                                                                                                                                                                                                                                                                                                                                                                                                                                                                                                                                                                                                                                                                                                                                                                                                                                                |                                                                                                                                                                                                 |                                                                                                                                                                                                                                                                                                  |                                                                                                                                                                                                                                                                                                  |
|------------------------------------------------------------------------------------------------------------------------------------------------------------------------------------------------------------------------------------------------------------------------------------------------------------------------------------------------------------------------------------------------------------------------------------------------------------------------------------------------------------------------------------------------------------------------------------------------------------------------------------------------------------------------------------------------------------------------------------------------------------------------------------------------------------------------------------------------------------------------------------------------------------------------------------------------------------------------------------------------------------------------------------------------------------------------------------------------------------------------------------------------------------------------------------------------------------------------------------------------------------------------------------------------------------------------------------------------------------------------------------------------------------------------------------------------------------------------------------------------------------------------------------------------------------------------------------------------------------------------------------------------------------------------------------------------------------------------------------------------------------------------------------------------------------------------------------------------------------------------------------------------------------------------------------------------------------------------------------------------------------------------------------------------------------------------------------------------------------------------------------------------------------------------------------------------------------------------------------------------------------------------------------------------------------------------------------------------------------------------------------------------------------------------------------------------------------------------------------------------------------------------------------------------------------------------------------------------------------------------------------------------------------------------------------------------------------------------------------------------------------------------------------------------------------------------------------------------------------------------------------------------------------------------------------------------------------------------------------------------------------------------------------------------------------------------------------------------------------------------------------------------------------------------------------------------------------------------------------------------------------------------------------------------------------------------------------------------------------------------------------------------------------------------------------------------------------------------------------------------------------------------------------------------------------------------------------------------------------------------------------------------------------------------------------------------------------------------------------------------------------------------------------------------------------------------------------------------------------------------------------------------------------------------------------------------------------------------------------------------------------------------------------------------------------------------------------------------------------------------------------------------------------------------------------------------------------------------------------------------------------------------------------------------------------------------------------------------|-------------------------------------------------------------------------------------------------------------------------------------------------------------------------------------------------|--------------------------------------------------------------------------------------------------------------------------------------------------------------------------------------------------------------------------------------------------------------------------------------------------|--------------------------------------------------------------------------------------------------------------------------------------------------------------------------------------------------------------------------------------------------------------------------------------------------|
| EPI_ISL_754853, EPI_ISL_754854, EPI_ISL_754855, EPI_ISL_754856                                                                                                                                                                                                                                                                                                                                                                                                                                                                                                                                                                                                                                                                                                                                                                                                                                                                                                                                                                                                                                                                                                                                                                                                                                                                                                                                                                                                                                                                                                                                                                                                                                                                                                                                                                                                                                                                                                                                                                                                                                                                                                                                                                                                                                                                                                                                                                                                                                                                                                                                                                                                                                                                                                                                                                                                                                                                                                                                                                                                                                                                                                                                                                                                                                                                                                                                                                                                                                                                                                                                                                                                                                                                                                                                                                                                                                                                                                                                                                                                                                                                                                                                                                                                                                                                                 | CHU - Hôpital Cavale Blanche - Labo. de Virologie                                                                                                                                               | National Reference Center for Viruses of Respiratory Infections, Institut Pasteur, Paris                                                                                                                                                                                                         | Marion Barbet, Sylvie Behillil, Méline Bizard, Angela Brisebarre, Camille Capel, Etienne Simon-Lorière, Vincent Enouf, Maud Vanpeene, Sylvie van der Werf, Pïlorge Iéa                                                                                                                           |
| EPI_ISL_755306, EPI_ISL_755307, EPI_ISL_755308, EPI_ISL_755309, EPI_ISL_755310, EPI_ISL_755311, EPI_ISL_755312, EPI_ISL_755313, EPI_ISL_755314, EPI_ISL_755315, EPI_ISL_755316, EPI_ISL_755317, EPI_ISL_755318, EPI_ISL_755319, EPI_ISL_755320, EPI_ISL_755321, EPI_ISL_755322, EPI_ISL_755323, EPI_ISL_755324, EPI_ISL_755325, EPI_ISL_755326, EPI_ISL_755327, EPI_ISL_755328, EPI_ISL_755329, EPI_ISL_755330, EPI_ISL_755331, EPI_ISL_755332, EPI_ISL_755333, EPI_ISL_755334, EPI_ISL_755335, EPI_ISL_755336, EPI_ISL_755337, EPI_ISL_755338, EPI_ISL_755339, EPI_ISL_755340, EPI_ISL_755341, EPI_ISL_755342, EPI_ISL_755343, EPI_ISL_755344, EPI_ISL_755345, EPI_ISL_755346, EPI_ISL_755347, EPI_ISL_755348, EPI_ISL_755349, EPI_ISL_755350, EPI_ISL_755351, EPI_ISL_755352, EPI_ISL_755353, EPI_ISL_755354, EPI_ISL_755355, EPI_ISL_755356, EPI_ISL_755357, EPI_ISL_755358, EPI_ISL_755359, EPI_ISL_755360, EPI_ISL_755361, EPI_ISL_755362, EPI_ISL_755363, EPI_ISL_755364, EPI_ISL_755365, EPI_ISL_755366, EPI_ISL_755367, EPI_ISL_755368, EPI_ISL_755369, EPI_ISL_755370, EPI_ISL_755371, EPI_ISL_755372, EPI_ISL_755373, EPI_ISL_755374, EPI_ISL_755375, EPI_ISL_755376, EPI_ISL_755377, EPI_ISL_755378, EPI_ISL_755379, EPI_ISL_755380, EPI_ISL_755381, EPI_ISL_755382, EPI_ISL_755383, EPI_ISL_755384, EPI_ISL_755385, EPI_ISL_755386, EPI_ISL_755387, EPI_ISL_755388, EPI_ISL_755389, EPI_ISL_755390, EPI_ISL_755391, EPI_ISL_755392, EPI_ISL_755393, EPI_ISL_755394, EPI_ISL_755395, EPI_ISL_755396, EPI_ISL_755397, EPI_ISL_755398, EPI_ISL_755399, EPI_ISL_755400, EPI_ISL_755401, EPI_ISL_755402, EPI_ISL_755403, EPI_ISL_755404, EPI_ISL_755405, EPI_ISL_755406, EPI_ISL_755407, EPI_ISL_755408, EPI_ISL_755409, EPI_ISL_755410, EPI_ISL_755411, EPI_ISL_755412, EPI_ISL_755413, EPI_ISL_755414, EPI_ISL_755415, EPI_ISL_755416, EPI_ISL_755417, EPI_ISL_755418, EPI_ISL_755419, EPI_ISL_755420, EPI_ISL_755421, EPI_ISL_755422, EPI_ISL_755423, EPI_ISL_755424, EPI_ISL_755425, EPI_ISL_755426, EPI_ISL_755427, EPI_ISL_755428, EPI_ISL_755429, EPI_ISL_755430, EPI_ISL_755431, EPI_ISL_755432, EPI_ISL_755433, EPI_ISL_755434, EPI_ISL_755435, EPI_ISL_755436, EPI_ISL_755437, EPI_ISL_755438, EPI_ISL_755439, EPI_ISL_755440, EPI_ISL_755441, EPI_ISL_755442, EPI_ISL_755443, EPI_ISL_755444, EPI_ISL_755445, EPI_ISL_755446, EPI_ISL_755447, EPI_ISL_755448, EPI_ISL_755449, EPI_ISL_755450, EPI_ISL_755451, EPI_ISL_755452, EPI_ISL_755453, EPI_ISL_755454, EPI_ISL_755455, EPI_ISL_755456, EPI_ISL_755457, EPI_ISL_755458, EPI_ISL_755459, EPI_ISL_755460, EPI_ISL_755461, EPI_ISL_755462, EPI_ISL_755463, EPI_ISL_755464, EPI_ISL_755465, EPI_ISL_755466, EPI_ISL_755467, EPI_ISL_755468, EPI_ISL_755469, EPI_ISL_755470, EPI_ISL_755471, EPI_ISL_755472, EPI_ISL_755473, EPI_ISL_755474, EPI_ISL_755475, EPI_ISL_755476, EPI_ISL_755477, EPI_ISL_755478, EPI_ISL_755479, EPI_ISL_755480, EPI_ISL_755481, EPI_ISL_755482, EPI_ISL_755483, EPI_ISL_755484, EPI_ISL_755485, EPI_ISL_755486, EPI_ISL_755487, EPI_ISL_755488, EPI_ISL_755489, EPI_ISL_755490, EPI_ISL_755491, EPI_ISL_755492, EPI_ISL_755493, EPI_ISL_755494, EPI_ISL_755495, EPI_ISL_755496, EPI_ISL_755497, EPI_ISL_755498, EPI_ISL_755499, EPI_ISL_755500, EPI_ISL_755501, EPI_ISL_755502, EPI_ISL_755503, EPI_ISL_755504, EPI_ISL_755505, EPI_ISL_755506, EPI_ISL_755507, EPI_ISL_755508, EPI_ISL_755509, EPI_ISL_755510, EPI_ISL_755511, EPI_ISL_755512, EPI_ISL_755513, EPI_ISL_755514, EPI_ISL_755515, EPI_ISL_755516, EPI_ISL_755517, EPI_ISL_755518, EPI_ISL_755519, EPI_ISL_755520, EPI_ISL_755521, EPI_ISL_755522, EPI_ISL_755523, EPI_ISL_755524, EPI_ISL_755525, EPI_ISL_755526, EPI_ISL_755527, EPI_ISL_755528, EPI_ISL_755529, EPI_ISL_755530, EPI_ISL_755531, EPI_ISL_755532, EPI_ISL_755533, EPI_ISL_755534, EPI_ISL_755535, EPI_ISL_755536, EPI_ISL_755537, EPI_ISL_755538, EPI_ISL_755539, EPI_ISL_755540, EPI_ISL_755541, EPI_ISL_755542, EPI_ISL_755543, EPI_ISL_755544, EPI_ISL_755545, EPI_ISL_755546, EPI_ISL_755547, EPI_ISL_755548, EPI_ISL_755549, EPI_ISL_755550, EPI_ISL_755551, EPI_ISL_755552, EPI_ISL_755553, EPI_ISL_755554, EPI_ISL_755555, EPI_ISL_755556, EPI_ISL_755557, EPI_ISL_755558, EPI_ISL_755559, EPI_ISL_755560, EPI_ISL_755561, EPI_ISL_755562, EPI_ISL_755563, EPI_ISL_755564, EPI_ISL_755565, EPI_ISL_755566 | Maine Health and Environmental Testing Laboratory                                                                                                                                               | Tewhey Lab, The Jackson Laboratory                                                                                                                                                                                                                                                               | Matluk,N., Dewey,H., Isoue,F., Barter,M., Lynch,R., Munger,H. and Tewhey,R.                                                                                                                                                                                                                      |
| EPI_ISL_755639                                                                                                                                                                                                                                                                                                                                                                                                                                                                                                                                                                                                                                                                                                                                                                                                                                                                                                                                                                                                                                                                                                                                                                                                                                                                                                                                                                                                                                                                                                                                                                                                                                                                                                                                                                                                                                                                                                                                                                                                                                                                                                                                                                                                                                                                                                                                                                                                                                                                                                                                                                                                                                                                                                                                                                                                                                                                                                                                                                                                                                                                                                                                                                                                                                                                                                                                                                                                                                                                                                                                                                                                                                                                                                                                                                                                                                                                                                                                                                                                                                                                                                                                                                                                                                                                                                                                 | Bundeswehr Institute of Microbiology                                                                                                                                                            | Bundeswehr Institute of Microbiology                                                                                                                                                                                                                                                             | Malena Bestehorn-Willmann, Mathias Walter, Christina Bugert, Joachim Bugert, Roman Wölfel, Markus Antwerpen                                                                                                                                                                                      |
| EPI_ISL_757285, EPI_ISL_757286                                                                                                                                                                                                                                                                                                                                                                                                                                                                                                                                                                                                                                                                                                                                                                                                                                                                                                                                                                                                                                                                                                                                                                                                                                                                                                                                                                                                                                                                                                                                                                                                                                                                                                                                                                                                                                                                                                                                                                                                                                                                                                                                                                                                                                                                                                                                                                                                                                                                                                                                                                                                                                                                                                                                                                                                                                                                                                                                                                                                                                                                                                                                                                                                                                                                                                                                                                                                                                                                                                                                                                                                                                                                                                                                                                                                                                                                                                                                                                                                                                                                                                                                                                                                                                                                                                                 | Department of Virology, Public Health Laboratories Division                                                                                                                                     | Department of Virology, Public Health Laboratories Division                                                                                                                                                                                                                                      | Massab Umair, Aamer Ikram, Muhammad Salman                                                                                                                                                                                                                                                       |
| EPI_ISL_759958                                                                                                                                                                                                                                                                                                                                                                                                                                                                                                                                                                                                                                                                                                                                                                                                                                                                                                                                                                                                                                                                                                                                                                                                                                                                                                                                                                                                                                                                                                                                                                                                                                                                                                                                                                                                                                                                                                                                                                                                                                                                                                                                                                                                                                                                                                                                                                                                                                                                                                                                                                                                                                                                                                                                                                                                                                                                                                                                                                                                                                                                                                                                                                                                                                                                                                                                                                                                                                                                                                                                                                                                                                                                                                                                                                                                                                                                                                                                                                                                                                                                                                                                                                                                                                                                                                                                 | Universitas Airlangga Hospital                                                                                                                                                                  | Institute of Tropical Disease, Universitas Airlangga                                                                                                                                                                                                                                             | Maria I Lusida, Krisnoadi Rahardjo, Aldise M Nastri, Jezy R Dewantari, Rima R Prasetya, Nasronudin, Gatot Soegiarto, Laksmi Wulandari, Resti Yudhawati, Soetjipto, Yasuko Mori, Kazufumi Shimizu                                                                                                 |
| EPI_ISL_759968                                                                                                                                                                                                                                                                                                                                                                                                                                                                                                                                                                                                                                                                                                                                                                                                                                                                                                                                                                                                                                                                                                                                                                                                                                                                                                                                                                                                                                                                                                                                                                                                                                                                                                                                                                                                                                                                                                                                                                                                                                                                                                                                                                                                                                                                                                                                                                                                                                                                                                                                                                                                                                                                                                                                                                                                                                                                                                                                                                                                                                                                                                                                                                                                                                                                                                                                                                                                                                                                                                                                                                                                                                                                                                                                                                                                                                                                                                                                                                                                                                                                                                                                                                                                                                                                                                                                 | RSI Darus Syifa'                                                                                                                                                                                | Institute of Tropical Disease, Universitas Airlangga                                                                                                                                                                                                                                             | Maria I Lusida, Krisnoadi Rahardjo, Aldise M Nastri, Jezy R Dewantari, Rima R Prasetya, HM Faiz, Gatot Soegiarto, Laksmi Wulandari, Resti Yudhawati, Soetjipto, Yasuko Mori, Kazufumi Shimizu                                                                                                    |
| EPI_ISL_763068                                                                                                                                                                                                                                                                                                                                                                                                                                                                                                                                                                                                                                                                                                                                                                                                                                                                                                                                                                                                                                                                                                                                                                                                                                                                                                                                                                                                                                                                                                                                                                                                                                                                                                                                                                                                                                                                                                                                                                                                                                                                                                                                                                                                                                                                                                                                                                                                                                                                                                                                                                                                                                                                                                                                                                                                                                                                                                                                                                                                                                                                                                                                                                                                                                                                                                                                                                                                                                                                                                                                                                                                                                                                                                                                                                                                                                                                                                                                                                                                                                                                                                                                                                                                                                                                                                                                 | RSUD Kota Surakarta                                                                                                                                                                             | Universitas Sebelas Maret (UNS); Rumah Sakit UNS (RS-UNS): National Institute of Health Research and Development, Indonesian Ministry of Health.                                                                                                                                                 | Maryani, Yulia Sari, Hartono, Afif A Ghufron, Revi G H Novika, Hana A Pawestri, Kartika, Dewi Puspa, Hartanti Dian Ika, Arie A Nugraha, Vivi Setiawaty, Betty Suryawati.                                                                                                                         |
| EPI_ISL_763069, EPI_ISL_763071, EPI_ISL_763072, EPI_ISL_763073, EPI_ISL_763094, EPI_ISL_763095, EPI_ISL_763096, EPI_ISL_763097, EPI_ISL_763098, EPI_ISL_763099, EPI_ISL_763100, EPI_ISL_763101, EPI_ISL_763102, EPI_ISL_763103, EPI_ISL_763104, EPI_ISL_763105, EPI_ISL_763106, EPI_ISL_763107, EPI_ISL_763108, EPI_ISL_763109, EPI_ISL_763110, EPI_ISL_763111, EPI_ISL_763112, EPI_ISL_763113, EPI_ISL_763114, EPI_ISL_763115, EPI_ISL_763116, EPI_ISL_763117, EPI_ISL_763118, EPI_ISL_763119, EPI_ISL_763120, EPI_ISL_763121, EPI_ISL_763122, EPI_ISL_763123, EPI_ISL_763124, EPI_ISL_763125, EPI_ISL_763126, EPI_ISL_763127, EPI_ISL_763128, EPI_ISL_763129, EPI_ISL_763130                                                                                                                                                                                                                                                                                                                                                                                                                                                                                                                                                                                                                                                                                                                                                                                                                                                                                                                                                                                                                                                                                                                                                                                                                                                                                                                                                                                                                                                                                                                                                                                                                                                                                                                                                                                                                                                                                                                                                                                                                                                                                                                                                                                                                                                                                                                                                                                                                                                                                                                                                                                                                                                                                                                                                                                                                                                                                                                                                                                                                                                                                                                                                                                                                                                                                                                                                                                                                                                                                                                                                                                                                                                                 | Istituto Zooprofilattico Sperimentale dell' Umbria e delle Marche -Togo Rosati                                                                                                                  | Istituto Superiore di Sanità                                                                                                                                                                                                                                                                     | Massimo Biagetti , Monica Giammarioli, Luca De Sabato, Gabriele Vaccari, Ilaria Di Bartolo, Giovanni Ianiro                                                                                                                                                                                      |
| EPI_ISL_763447, EPI_ISL_763511, EPI_ISL_763548, EPI_ISL_763649, EPI_ISL_763694, EPI_ISL_763695, EPI_ISL_763732, EPI_ISL_763817, EPI_ISL_763892, EPI_ISL_763895, EPI_ISL_763896, EPI_ISL_763897, EPI_ISL_763898, EPI_ISL_763901, EPI_ISL_763904, EPI_ISL_763905, EPI_ISL_763906, EPI_ISL_764061, EPI_ISL_764069, EPI_ISL_764070, EPI_ISL_764072, EPI_ISL_764073, EPI_ISL_764074, EPI_ISL_764075, EPI_ISL_764083, EPI_ISL_764147, EPI_ISL_764195, EPI_ISL_764198, EPI_ISL_764278, EPI_ISL_764279, EPI_ISL_764357, EPI_ISL_764358, EPI_ISL_764359, EPI_ISL_764362, EPI_ISL_764363, EPI_ISL_764364, EPI_ISL_764365, EPI_ISL_764367, EPI_ISL_764369, EPI_ISL_764371                                                                                                                                                                                                                                                                                                                                                                                                                                                                                                                                                                                                                                                                                                                                                                                                                                                                                                                                                                                                                                                                                                                                                                                                                                                                                                                                                                                                                                                                                                                                                                                                                                                                                                                                                                                                                                                                                                                                                                                                                                                                                                                                                                                                                                                                                                                                                                                                                                                                                                                                                                                                                                                                                                                                                                                                                                                                                                                                                                                                                                                                                                                                                                                                                                                                                                                                                                                                                                                                                                                                                                                                                                                                                 | Virology Department, Royal Infirmary of Edinburgh, NHS Lothian / School of Biological Sciences, University of Edinburgh / Institute of Genetics and Molecular Medicine, University of Edinburgh | COVID-19 Genomics UK (COG-UK) Consortium                                                                                                                                                                                                                                                         | McHugh M, Dewar R, Rooke S, Gallagher M, Balcaza C, O'Toole Á, Scher E, Hill V, McCrone JT, Colquhoun R, Yu X, Jackson B, Rambaut A, Williams TC, Templeton K                                                                                                                                    |
| EPI_ISL_765479                                                                                                                                                                                                                                                                                                                                                                                                                                                                                                                                                                                                                                                                                                                                                                                                                                                                                                                                                                                                                                                                                                                                                                                                                                                                                                                                                                                                                                                                                                                                                                                                                                                                                                                                                                                                                                                                                                                                                                                                                                                                                                                                                                                                                                                                                                                                                                                                                                                                                                                                                                                                                                                                                                                                                                                                                                                                                                                                                                                                                                                                                                                                                                                                                                                                                                                                                                                                                                                                                                                                                                                                                                                                                                                                                                                                                                                                                                                                                                                                                                                                                                                                                                                                                                                                                                                                 | Laboratoire de Virologie, Hôpital Robert Debré                                                                                                                                                  | National Reference Center for Viruses of Respiratory Infections, Institut Pasteur, Paris                                                                                                                                                                                                         | Marion Barbet, Sylvie Behillil, Méline Bizard, Angela Brisebarre, Camille Capel, Etienne Simon-Lorière, Vincent Enouf, Maud Vanpeene, Sylvie van der Werf, Andreoletti Laurent                                                                                                                   |
| EPI_ISL_767013, EPI_ISL_767043                                                                                                                                                                                                                                                                                                                                                                                                                                                                                                                                                                                                                                                                                                                                                                                                                                                                                                                                                                                                                                                                                                                                                                                                                                                                                                                                                                                                                                                                                                                                                                                                                                                                                                                                                                                                                                                                                                                                                                                                                                                                                                                                                                                                                                                                                                                                                                                                                                                                                                                                                                                                                                                                                                                                                                                                                                                                                                                                                                                                                                                                                                                                                                                                                                                                                                                                                                                                                                                                                                                                                                                                                                                                                                                                                                                                                                                                                                                                                                                                                                                                                                                                                                                                                                                                                                                 | University of Bari Biomedical Sciences and Human Oncology                                                                                                                                       | University of Bari Biomedical Sciences and Human Oncology                                                                                                                                                                                                                                        | Maria Chironna, Anna Sallustio, Daniela Loconsole, Marisa Accogli                                                                                                                                                                                                                                |
| EPI_ISL_770688, EPI_ISL_770689, EPI_ISL_770690, EPI_ISL_770691, EPI_ISL_770692, EPI_ISL_770693, EPI_ISL_770694, EPI_ISL_770695, EPI_ISL_770696, EPI_ISL_770697, EPI_ISL_770698, EPI_ISL_770699, EPI_ISL_770700, EPI_ISL_770701, EPI_ISL_770702, EPI_ISL_770703, EPI_ISL_770704, EPI_ISL_770705, EPI_ISL_770706, EPI_ISL_770707, EPI_ISL_770708, EPI_ISL_770709, EPI_ISL_770710, EPI_ISL_770711, EPI_ISL_770712, EPI_ISL_770713, EPI_ISL_770714, EPI_ISL_770715, EPI_ISL_770716, EPI_ISL_770717, EPI_ISL_770718, EPI_ISL_770719, EPI_ISL_770720, EPI_ISL_770721, EPI_ISL_770722, EPI_ISL_770723, EPI_ISL_770724, EPI_ISL_770725, EPI_ISL_770726, EPI_ISL_770727, EPI_ISL_770728, EPI_ISL_770729, EPI_ISL_770730, EPI_ISL_770731, EPI_ISL_770732, EPI_ISL_770733, EPI_ISL_770734, EPI_ISL_770735, EPI_ISL_770736, EPI_ISL_770737, EPI_ISL_770738, EPI_ISL_770739, EPI_ISL_770740, EPI_ISL_770741, EPI_ISL_770742, EPI_ISL_770743, EPI_ISL_770744, EPI_ISL_770745, EPI_ISL_770746, EPI_ISL_770747, EPI_ISL_770748, EPI_ISL_770749, EPI_ISL_770750, EPI_ISL_770751, EPI_ISL_770752, EPI_ISL_770753, EPI_ISL_770754, EPI_ISL_770755, EPI_ISL_770756, EPI_ISL_770757, EPI_ISL_770758, EPI_ISL_770759, EPI_ISL_770760, EPI_ISL_770761, EPI_ISL_770762, EPI_ISL_770763, EPI_ISL_770764, EPI_ISL_770765, EPI_ISL_770766, EPI_ISL_770767, EPI_ISL_770768, EPI_ISL_770769, EPI_ISL_770770, EPI_ISL_770771, EPI_ISL_770772, EPI_ISL_770773, EPI_ISL_770774                                                                                                                                                                                                                                                                                                                                                                                                                                                                                                                                                                                                                                                                                                                                                                                                                                                                                                                                                                                                                                                                                                                                                                                                                                                                                                                                                                                                                                                                                                                                                                                                                                                                                                                                                                                                                                                                                                                                                                                                                                                                                                                                                                                                                                                                                                                                                                                                                                                                                                                                                                                                                                                                                                                                                                                                                                                                                                 | Center of Medical Microbiology, Virology, and Hospital Hygiene, University of Duesseldorf                                                                                                       | Maximilian Damagnez, Alexander Dilthey, Ashley-Jane Duplessis, Patrick Finzer, Katrin Hoffmann, Torsten Houwaart, Lisanna Hülse, Malte Kohns Vasconcelos, Marek Korencak, Nadine Lübke, Jessica Nicolai, Klaus Pfeffer, Daniel Strelow, Jörg Timm, Andreas Walker, Tobias Wienemann, Rainer Zotz |                                                                                                                                                                                                                                                                                                  |
| EPI_ISL_778819, EPI_ISL_778820, EPI_ISL_778821, EPI_ISL_778822, EPI_ISL_778823, EPI_ISL_778824, EPI_ISL_778825, EPI_ISL_778826, EPI_ISL_778827, EPI_ISL_778828, EPI_ISL_778829, EPI_ISL_778830, EPI_ISL_778831, EPI_ISL_778832, EPI_ISL_778833, EPI_ISL_778834, EPI_ISL_778835, EPI_ISL_778836, EPI_ISL_778837, EPI_ISL_778838, EPI_ISL_778839, EPI_ISL_778840, EPI_ISL_778841                                                                                                                                                                                                                                                                                                                                                                                                                                                                                                                                                                                                                                                                                                                                                                                                                                                                                                                                                                                                                                                                                                                                                                                                                                                                                                                                                                                                                                                                                                                                                                                                                                                                                                                                                                                                                                                                                                                                                                                                                                                                                                                                                                                                                                                                                                                                                                                                                                                                                                                                                                                                                                                                                                                                                                                                                                                                                                                                                                                                                                                                                                                                                                                                                                                                                                                                                                                                                                                                                                                                                                                                                                                                                                                                                                                                                                                                                                                                                                 | AIID                                                                                                                                                                                            | Irish Coronavirus Sequencing Consortium-Teagasc Grange                                                                                                                                                                                                                                           | Matthew McCabe, Aljandro Abner Garcia Leon, Fiona Crispie, Calum Walsh, Michael Carr, John Kenny, Paul Cotter, Patrick Mallon, Gabriel Gonzalez                                                                                                                                                  |
| EPI_ISL_778844                                                                                                                                                                                                                                                                                                                                                                                                                                                                                                                                                                                                                                                                                                                                                                                                                                                                                                                                                                                                                                                                                                                                                                                                                                                                                                                                                                                                                                                                                                                                                                                                                                                                                                                                                                                                                                                                                                                                                                                                                                                                                                                                                                                                                                                                                                                                                                                                                                                                                                                                                                                                                                                                                                                                                                                                                                                                                                                                                                                                                                                                                                                                                                                                                                                                                                                                                                                                                                                                                                                                                                                                                                                                                                                                                                                                                                                                                                                                                                                                                                                                                                                                                                                                                                                                                                                                 | ZOTZ KLIMAS MVZ Düsseldorf-Centrum GbR ÜBAG für Labormedizin, Genetik, Zytologie, Pathologie                                                                                                    | Center of Medical Microbiology, Virology, and Hospital Hygiene, University of Duesseldorf                                                                                                                                                                                                        | Maximilian Damagnez, Alexander Dilthey, Ashley-Jane Duplessis, Patrick Finzer, Katrin Hoffmann, Torsten Houwaart, Lisanna Hülse, Malte Kohns Vasconcelos, Marek Korencak, Nadine Lübke, Jessica Nicolai, Klaus Pfeffer, Daniel Strelow, Jörg Timm, Andreas Walker, Tobias Wienemann, Rainer Zotz |
| EPI_ISL_778871, EPI_ISL_778872, EPI_ISL_778873, EPI_ISL_778874, EPI_ISL_778875, EPI_ISL_778876, EPI_ISL_778877, EPI_ISL_778878, EPI_ISL_778879, EPI_ISL_778880, EPI_ISL_778881, EPI_ISL_778882, EPI_ISL_778883, EPI_ISL_778884, EPI_ISL_778885, EPI_ISL_778886, EPI_ISL_778887, EPI_ISL_778888, EPI_ISL_778889, EPI_ISL_778890, EPI_ISL_778891, EPI_ISL_778892, EPI_ISL_778893, EPI_ISL_778894, EPI_ISL_778895, EPI_ISL_778896, EPI_ISL_778897, EPI_ISL_778898, EPI_ISL_778899, EPI_ISL_778900, EPI_ISL_778901, EPI_ISL_778902, EPI_ISL_778903, EPI_ISL_778904, EPI_ISL_778905, EPI_ISL_778906, EPI_ISL_778907, EPI_ISL_778908, EPI_ISL_778909, EPI_ISL_778910, EPI_ISL_778911, EPI_ISL_778912, EPI_ISL_778913, EPI_ISL_778914, EPI_ISL_778915, EPI_ISL_778916, EPI_ISL_778917                                                                                                                                                                                                                                                                                                                                                                                                                                                                                                                                                                                                                                                                                                                                                                                                                                                                                                                                                                                                                                                                                                                                                                                                                                                                                                                                                                                                                                                                                                                                                                                                                                                                                                                                                                                                                                                                                                                                                                                                                                                                                                                                                                                                                                                                                                                                                                                                                                                                                                                                                                                                                                                                                                                                                                                                                                                                                                                                                                                                                                                                                                                                                                                                                                                                                                                                                                                                                                                                                                                                                                 | Maryland Public Health Laboratory                                                                                                                                                               | Maryland Public Health Laboratory                                                                                                                                                                                                                                                                |                                                                                                                                                                                                                                                                                                  |
| EPI_ISL_779254                                                                                                                                                                                                                                                                                                                                                                                                                                                                                                                                                                                                                                                                                                                                                                                                                                                                                                                                                                                                                                                                                                                                                                                                                                                                                                                                                                                                                                                                                                                                                                                                                                                                                                                                                                                                                                                                                                                                                                                                                                                                                                                                                                                                                                                                                                                                                                                                                                                                                                                                                                                                                                                                                                                                                                                                                                                                                                                                                                                                                                                                                                                                                                                                                                                                                                                                                                                                                                                                                                                                                                                                                                                                                                                                                                                                                                                                                                                                                                                                                                                                                                                                                                                                                                                                                                                                 | Virology, CHU Pitie Salpetriere Charles Foix                                                                                                                                                    | Virology, CHU Pitie Salpetriere Charles Foix                                                                                                                                                                                                                                                     | Marot,S., Malet,I., Leducq,V., Zafilaza,K., Sterin,D., Planas,D.,Gothland,A., Jary,A., Dorgham,K., Bruel,T., Burrel,S.,Boutolleau,D., Schwartz,O., Gorochov,G., Calvez,V. and Marcelin,A.-G.                                                                                                     |
| EPI_ISL_779922, EPI_ISL_779923, EPI_ISL_779924, EPI_ISL_779925, EPI_ISL_779926, EPI_ISL_779927, EPI_ISL_779928, EPI_ISL_779929, EPI_ISL_779930, EPI_ISL_779931, EPI_ISL_779932, EPI_ISL_779933, EPI_ISL_779934, EPI_ISL_779935, EPI_ISL_779936, EPI_ISL_779937, EPI_ISL_779938, EPI_ISL_779939, EPI_ISL_779940, EPI_ISL_779941, EPI_ISL_779942, EPI_ISL_779943, EPI_ISL_779944, EPI_ISL_779945, EPI_ISL_779946, EPI_ISL_779947, EPI_ISL_779948, EPI_ISL_779949, EPI_ISL_779950, EPI_ISL_779951, EPI_ISL_779952, EPI_ISL_779953                                                                                                                                                                                                                                                                                                                                                                                                                                                                                                                                                                                                                                                                                                                                                                                                                                                                                                                                                                                                                                                                                                                                                                                                                                                                                                                                                                                                                                                                                                                                                                                                                                                                                                                                                                                                                                                                                                                                                                                                                                                                                                                                                                                                                                                                                                                                                                                                                                                                                                                                                                                                                                                                                                                                                                                                                                                                                                                                                                                                                                                                                                                                                                                                                                                                                                                                                                                                                                                                                                                                                                                                                                                                                                                                                                                                                 | Center of Medical Microbiology, Virology, and Hospital Hygiene, University of Duesseldorf                                                                                                       | Center of Medical Microbiology, Virology, and Hospital Hygiene, University of Duesseldorf                                                                                                                                                                                                        | Maximilian Damagnez, Alexander Dilthey, Ashley-Jane Duplessis, Torsten Houwaart, Lisanna Hülse, Malte Kohns Vasconcelos, Nadine Lübke, Jessica Nicolai, Klaus Pfeffer, Daniel Strelow, Teresa Tamayo, Jörg Timm, Andreas Walker, Tobias Wienemann                                                |
| EPI_ISL_779954                                                                                                                                                                                                                                                                                                                                                                                                                                                                                                                                                                                                                                                                                                                                                                                                                                                                                                                                                                                                                                                                                                                                                                                                                                                                                                                                                                                                                                                                                                                                                                                                                                                                                                                                                                                                                                                                                                                                                                                                                                                                                                                                                                                                                                                                                                                                                                                                                                                                                                                                                                                                                                                                                                                                                                                                                                                                                                                                                                                                                                                                                                                                                                                                                                                                                                                                                                                                                                                                                                                                                                                                                                                                                                                                                                                                                                                                                                                                                                                                                                                                                                                                                                                                                                                                                                                                 | ZOTZ KLIMAS MVZ Düsseldorf-Centrum GbR ÜBAG für Labormedizin, Genetik, Zytologie, Pathologie                                                                                                    | Center of Medical Microbiology, Virology, and Hospital Hygiene, University of Duesseldorf                                                                                                                                                                                                        | Maximilian Damagnez, Alexander Dilthey, Ashley-Jane Duplessis, Patrick Finzer, Katrin Hoffmann, Torsten Houwaart, Lisanna Hülse, Malte Kohns Vasconcelos, Marek Korencak, Nadine Lübke, Jessica Nicolai, Klaus Pfeffer, Daniel Strelow, Jörg Timm, Andreas Walker, Tobias Wienemann, Rainer Zotz |
| EPI_ISL_791991, EPI_ISL_791992, EPI_ISL_791993, EPI_ISL_791994, EPI_ISL_791995, EPI_ISL_791996, EPI_ISL_791997, EPI_ISL_791998, EPI_ISL_791999                                                                                                                                                                                                                                                                                                                                                                                                                                                                                                                                                                                                                                                                                                                                                                                                                                                                                                                                                                                                                                                                                                                                                                                                                                                                                                                                                                                                                                                                                                                                                                                                                                                                                                                                                                                                                                                                                                                                                                                                                                                                                                                                                                                                                                                                                                                                                                                                                                                                                                                                                                                                                                                                                                                                                                                                                                                                                                                                                                                                                                                                                                                                                                                                                                                                                                                                                                                                                                                                                                                                                                                                                                                                                                                                                                                                                                                                                                                                                                                                                                                                                                                                                                                                 | CHU - Hôpital Cavale Blanche                                                                                                                                                                    | National Reference Center for Viruses of Respiratory Infections, Institut Pasteur, Paris                                                                                                                                                                                                         | Marion Barbet, Sylvie Behillil, Méline Bizard, Angela Brisebarre, Camille Capel, Etienne Simon-Lorière, Vincent Enouf, Maud Vanpeene, Sylvie van der Werf, Léa Pïlorgé                                                                                                                           |
| EPI_ISL_792000, EPI_ISL_792001, EPI_ISL_792002, EPI_ISL_792003, EPI_ISL_792004, EPI_ISL_792005, EPI_ISL_792006, EPI_ISL_792007                                                                                                                                                                                                                                                                                                                                                                                                                                                                                                                                                                                                                                                                                                                                                                                                                                                                                                                                                                                                                                                                                                                                                                                                                                                                                                                                                                                                                                                                                                                                                                                                                                                                                                                                                                                                                                                                                                                                                                                                                                                                                                                                                                                                                                                                                                                                                                                                                                                                                                                                                                                                                                                                                                                                                                                                                                                                                                                                                                                                                                                                                                                                                                                                                                                                                                                                                                                                                                                                                                                                                                                                                                                                                                                                                                                                                                                                                                                                                                                                                                                                                                                                                                                                                 | Laboratoire de Virologie Hôpital Robert Debré                                                                                                                                                   | National Reference Center for Viruses of Respiratory Infections, Institut Pasteur, Paris                                                                                                                                                                                                         | Marion Barbet, Sylvie Behillil, Méline Bizard, Angela Brisebarre, Camille Capel, Etienne Simon-Lorière, Vincent Enouf, Maud Vanpeene, Sylvie van der Werf, Andreoletti Laurent                                                                                                                   |

|                                                                                                                                                                                                                                                                                                                                                                                                                                                                                                                                                                                                                                                                                                                                                                                                                                                                                                                                                                                                                                                                                                                                                                                                                                                                                                                                                                                                                                                                                                                                                                                                                                                                                                                                                                                                                                                                                                                                                                                                                                                                                                                                                                                                                                                                                                                                                                                                                                                                                                                                                                                                                                                                                                                                                                                                                                                                                                                                                                                                                                                                                                                                                                                                                                                                                                                                                                                                                                                                                                                                                                |                                                                                                                                                                                                 |                                                                                           |                                                                                                                                                                                                                                                                                                  |
|----------------------------------------------------------------------------------------------------------------------------------------------------------------------------------------------------------------------------------------------------------------------------------------------------------------------------------------------------------------------------------------------------------------------------------------------------------------------------------------------------------------------------------------------------------------------------------------------------------------------------------------------------------------------------------------------------------------------------------------------------------------------------------------------------------------------------------------------------------------------------------------------------------------------------------------------------------------------------------------------------------------------------------------------------------------------------------------------------------------------------------------------------------------------------------------------------------------------------------------------------------------------------------------------------------------------------------------------------------------------------------------------------------------------------------------------------------------------------------------------------------------------------------------------------------------------------------------------------------------------------------------------------------------------------------------------------------------------------------------------------------------------------------------------------------------------------------------------------------------------------------------------------------------------------------------------------------------------------------------------------------------------------------------------------------------------------------------------------------------------------------------------------------------------------------------------------------------------------------------------------------------------------------------------------------------------------------------------------------------------------------------------------------------------------------------------------------------------------------------------------------------------------------------------------------------------------------------------------------------------------------------------------------------------------------------------------------------------------------------------------------------------------------------------------------------------------------------------------------------------------------------------------------------------------------------------------------------------------------------------------------------------------------------------------------------------------------------------------------------------------------------------------------------------------------------------------------------------------------------------------------------------------------------------------------------------------------------------------------------------------------------------------------------------------------------------------------------------------------------------------------------------------------------------------------------|-------------------------------------------------------------------------------------------------------------------------------------------------------------------------------------------------|-------------------------------------------------------------------------------------------|--------------------------------------------------------------------------------------------------------------------------------------------------------------------------------------------------------------------------------------------------------------------------------------------------|
| EPI_ISL_792008, EPI_ISL_792009, EPI_ISL_792010, EPI_ISL_792011, EPI_ISL_792012, EPI_ISL_792013, EPI_ISL_792014, EPI_ISL_792015                                                                                                                                                                                                                                                                                                                                                                                                                                                                                                                                                                                                                                                                                                                                                                                                                                                                                                                                                                                                                                                                                                                                                                                                                                                                                                                                                                                                                                                                                                                                                                                                                                                                                                                                                                                                                                                                                                                                                                                                                                                                                                                                                                                                                                                                                                                                                                                                                                                                                                                                                                                                                                                                                                                                                                                                                                                                                                                                                                                                                                                                                                                                                                                                                                                                                                                                                                                                                                 | CH de Bethune - Laboratoire de Biologie Médicale                                                                                                                                                | National Reference Center for Viruses of Respiratory Infections, Institut Pasteur, Paris  | Marion Barbet, Sylvie Behillil, Méline Bizard, Angela Brisebarre, Camille Capel, Etienne Simon-Lorière, Vincent Enouf, Maud Vanpeene, Sylvie van der Werf, Léa Pilorge                                                                                                                           |
| EPI_ISL_792016, EPI_ISL_792017, EPI_ISL_792018, EPI_ISL_792019, EPI_ISL_792020, EPI_ISL_792021, EPI_ISL_792022, EPI_ISL_792023                                                                                                                                                                                                                                                                                                                                                                                                                                                                                                                                                                                                                                                                                                                                                                                                                                                                                                                                                                                                                                                                                                                                                                                                                                                                                                                                                                                                                                                                                                                                                                                                                                                                                                                                                                                                                                                                                                                                                                                                                                                                                                                                                                                                                                                                                                                                                                                                                                                                                                                                                                                                                                                                                                                                                                                                                                                                                                                                                                                                                                                                                                                                                                                                                                                                                                                                                                                                                                 | Plateforme COVID IDF                                                                                                                                                                            | National Reference Center for Viruses of Respiratory Infections, Institut Pasteur, Paris  | Marion Barbet, Sylvie Behillil, Méline Bizard, Angela Brisebarre, Camille Capel, Etienne Simon-Lorière, Vincent Enouf, Maud Vanpeene, Sylvie van der Werf, Jacques Fourgeaud                                                                                                                     |
| EPI_ISL_792042                                                                                                                                                                                                                                                                                                                                                                                                                                                                                                                                                                                                                                                                                                                                                                                                                                                                                                                                                                                                                                                                                                                                                                                                                                                                                                                                                                                                                                                                                                                                                                                                                                                                                                                                                                                                                                                                                                                                                                                                                                                                                                                                                                                                                                                                                                                                                                                                                                                                                                                                                                                                                                                                                                                                                                                                                                                                                                                                                                                                                                                                                                                                                                                                                                                                                                                                                                                                                                                                                                                                                 | General practitioner                                                                                                                                                                            | National Reference Center for Viruses of Respiratory Infections, Institut Pasteur, Paris  | Marion Barbet, Sylvie Behillil, Méline Bizard, Angela Brisebarre, Camille Capel, Etienne Simon-Lorière, Vincent Enouf, Maud Vanpeene, Sylvie van der Werf,                                                                                                                                       |
| EPI_ISL_792045, EPI_ISL_792046, EPI_ISL_792047, EPI_ISL_792048, EPI_ISL_792050                                                                                                                                                                                                                                                                                                                                                                                                                                                                                                                                                                                                                                                                                                                                                                                                                                                                                                                                                                                                                                                                                                                                                                                                                                                                                                                                                                                                                                                                                                                                                                                                                                                                                                                                                                                                                                                                                                                                                                                                                                                                                                                                                                                                                                                                                                                                                                                                                                                                                                                                                                                                                                                                                                                                                                                                                                                                                                                                                                                                                                                                                                                                                                                                                                                                                                                                                                                                                                                                                 | General practitioner                                                                                                                                                                            | National Reference Center for Viruses of Respiratory Infections, Institut Pasteur, Paris  | Marion Barbet, Sylvie Behillil, Méline Bizard, Angela Brisebarre, Camille Capel, Etienne Simon-Lorière, Vincent Enouf, Maud Vanpeene, Sylvie van der Werf, Brieuc Lefauré                                                                                                                        |
| EPI_ISL_792053                                                                                                                                                                                                                                                                                                                                                                                                                                                                                                                                                                                                                                                                                                                                                                                                                                                                                                                                                                                                                                                                                                                                                                                                                                                                                                                                                                                                                                                                                                                                                                                                                                                                                                                                                                                                                                                                                                                                                                                                                                                                                                                                                                                                                                                                                                                                                                                                                                                                                                                                                                                                                                                                                                                                                                                                                                                                                                                                                                                                                                                                                                                                                                                                                                                                                                                                                                                                                                                                                                                                                 | General practitioner                                                                                                                                                                            | National Reference Center for Viruses of Respiratory Infections, Institut Pasteur, Paris  | Marion Barbet, Sylvie Behillil, Méline Bizard, Angela Brisebarre, Camille Capel, Etienne Simon-Lorière, Vincent Enouf, Maud Vanpeene, Sylvie van der Werf                                                                                                                                        |
| EPI_ISL_792055                                                                                                                                                                                                                                                                                                                                                                                                                                                                                                                                                                                                                                                                                                                                                                                                                                                                                                                                                                                                                                                                                                                                                                                                                                                                                                                                                                                                                                                                                                                                                                                                                                                                                                                                                                                                                                                                                                                                                                                                                                                                                                                                                                                                                                                                                                                                                                                                                                                                                                                                                                                                                                                                                                                                                                                                                                                                                                                                                                                                                                                                                                                                                                                                                                                                                                                                                                                                                                                                                                                                                 | hospital                                                                                                                                                                                        | National Reference Center for Viruses of Respiratory Infections, Institut Pasteur, Paris  | Marion Barbet, Sylvie Behillil, Méline Bizard, Angela Brisebarre, Camille Capel, Etienne Simon-Lorière, Vincent Enouf, Maud Vanpeene, Sylvie van der Werf, Patricia Stoessel                                                                                                                     |
| EPI_ISL_792056                                                                                                                                                                                                                                                                                                                                                                                                                                                                                                                                                                                                                                                                                                                                                                                                                                                                                                                                                                                                                                                                                                                                                                                                                                                                                                                                                                                                                                                                                                                                                                                                                                                                                                                                                                                                                                                                                                                                                                                                                                                                                                                                                                                                                                                                                                                                                                                                                                                                                                                                                                                                                                                                                                                                                                                                                                                                                                                                                                                                                                                                                                                                                                                                                                                                                                                                                                                                                                                                                                                                                 | Hopital                                                                                                                                                                                         | National Reference Center for Viruses of Respiratory Infections, Institut Pasteur, Paris  | Marion Barbet, Sylvie Behillil, Méline Bizard, Angela Brisebarre, Camille Capel, Etienne Simon-Lorière, Vincent Enouf, Maud Vanpeene, Sylvie van der Werf, Patricia Stoessel                                                                                                                     |
| EPI_ISL_804019, EPI_ISL_804020, EPI_ISL_804021, EPI_ISL_804022, EPI_ISL_804023, EPI_ISL_804024, EPI_ISL_804025, EPI_ISL_804026, EPI_ISL_804027, EPI_ISL_804028, EPI_ISL_804029, EPI_ISL_804030, EPI_ISL_804031, EPI_ISL_804032, EPI_ISL_804033, EPI_ISL_804034, EPI_ISL_804035, EPI_ISL_804036, EPI_ISL_804463, EPI_ISL_804464, EPI_ISL_804465, EPI_ISL_804592, EPI_ISL_804593, EPI_ISL_804594, EPI_ISL_804595, EPI_ISL_804596, EPI_ISL_804597, EPI_ISL_804598                                                                                                                                                                                                                                                                                                                                                                                                                                                                                                                                                                                                                                                                                                                                                                                                                                                                                                                                                                                                                                                                                                                                                                                                                                                                                                                                                                                                                                                                                                                                                                                                                                                                                                                                                                                                                                                                                                                                                                                                                                                                                                                                                                                                                                                                                                                                                                                                                                                                                                                                                                                                                                                                                                                                                                                                                                                                                                                                                                                                                                                                                                 |                                                                                                                                                                                                 |                                                                                           |                                                                                                                                                                                                                                                                                                  |
| see above                                                                                                                                                                                                                                                                                                                                                                                                                                                                                                                                                                                                                                                                                                                                                                                                                                                                                                                                                                                                                                                                                                                                                                                                                                                                                                                                                                                                                                                                                                                                                                                                                                                                                                                                                                                                                                                                                                                                                                                                                                                                                                                                                                                                                                                                                                                                                                                                                                                                                                                                                                                                                                                                                                                                                                                                                                                                                                                                                                                                                                                                                                                                                                                                                                                                                                                                                                                                                                                                                                                                                      | Maryland Public Health Laboratory                                                                                                                                                               | Maryland Public Health Laboratory                                                         | Maryland Department of Health Laboratories Administration                                                                                                                                                                                                                                        |
| EPI_ISL_812922                                                                                                                                                                                                                                                                                                                                                                                                                                                                                                                                                                                                                                                                                                                                                                                                                                                                                                                                                                                                                                                                                                                                                                                                                                                                                                                                                                                                                                                                                                                                                                                                                                                                                                                                                                                                                                                                                                                                                                                                                                                                                                                                                                                                                                                                                                                                                                                                                                                                                                                                                                                                                                                                                                                                                                                                                                                                                                                                                                                                                                                                                                                                                                                                                                                                                                                                                                                                                                                                                                                                                 | Pasteur Institute in Ho Chi Minh city                                                                                                                                                           | Department of Microbiology and Immunology - Pasteur Institute in Ho Chi Minh city         | Manh Huy Dao, Hang Thi Thu Pham, Nhung Pham Hong Vu, Hieu Minh Le, Thang Minh Cao, Loan Thi Kim Huynh, Long Thanh Nguyen, Anh Hoang Nguyen, Hieu Trung Nguyen, Thao Thi Ngoc Nguyen, Thinh Viet Nguyen, Quang Duy Pham, Quang Chan Luong, Lan Trong Phan, Thuong Vu Nguyen.                      |
| EPI_ISL_814333, EPI_ISL_814365, EPI_ISL_814460, EPI_ISL_814461, EPI_ISL_814462, EPI_ISL_814464, EPI_ISL_814533, EPI_ISL_814534, EPI_ISL_814546, EPI_ISL_814665, EPI_ISL_814666, EPI_ISL_814667, EPI_ISL_814677, EPI_ISL_814678, EPI_ISL_814680, EPI_ISL_814682, EPI_ISL_814684, EPI_ISL_814685, EPI_ISL_814686, EPI_ISL_814687                                                                                                                                                                                                                                                                                                                                                                                                                                                                                                                                                                                                                                                                                                                                                                                                                                                                                                                                                                                                                                                                                                                                                                                                                                                                                                                                                                                                                                                                                                                                                                                                                                                                                                                                                                                                                                                                                                                                                                                                                                                                                                                                                                                                                                                                                                                                                                                                                                                                                                                                                                                                                                                                                                                                                                                                                                                                                                                                                                                                                                                                                                                                                                                                                                 |                                                                                                                                                                                                 |                                                                                           |                                                                                                                                                                                                                                                                                                  |
| see above                                                                                                                                                                                                                                                                                                                                                                                                                                                                                                                                                                                                                                                                                                                                                                                                                                                                                                                                                                                                                                                                                                                                                                                                                                                                                                                                                                                                                                                                                                                                                                                                                                                                                                                                                                                                                                                                                                                                                                                                                                                                                                                                                                                                                                                                                                                                                                                                                                                                                                                                                                                                                                                                                                                                                                                                                                                                                                                                                                                                                                                                                                                                                                                                                                                                                                                                                                                                                                                                                                                                                      | Virology Department, Royal Infirmary of Edinburgh, NHS Lothian / School of Biological Sciences, University of Edinburgh / Institute of Genetics and Molecular Medicine, University of Edinburgh | COVID-19 Genomics UK (COG-UK) Consortium                                                  | McHugh M, Dewar R, Rooke S, Gallagher M, Balcaza C, O'Toole Á, Scher E, Hill V, McCrone JT, Colquhoun R, Yu X, Jackson B, Rambaut A, Williams TC, Templeton K                                                                                                                                    |
| EPI_ISL_819203                                                                                                                                                                                                                                                                                                                                                                                                                                                                                                                                                                                                                                                                                                                                                                                                                                                                                                                                                                                                                                                                                                                                                                                                                                                                                                                                                                                                                                                                                                                                                                                                                                                                                                                                                                                                                                                                                                                                                                                                                                                                                                                                                                                                                                                                                                                                                                                                                                                                                                                                                                                                                                                                                                                                                                                                                                                                                                                                                                                                                                                                                                                                                                                                                                                                                                                                                                                                                                                                                                                                                 | ZOTZ KLIMAS MVZ Düsseldorf-Centrum GbR ÜBAG für Labormedizin, Genetik, Zytologie, Pathologie                                                                                                    | Center of Medical Microbiology, Virology, and Hospital Hygiene, University of Duesseldorf | Maximilian Damagnez, Alexander Dilthey, Ashley-Jane Duplessis, Patrick Finzer, Katrin Hoffmann, Torsten Houwaart, Lisanna Hülse, Malte Kohns Vasconcelos, Marek Korencak, Nadine Lübke, Jessica Nicolai, Klaus Pfeffer, Daniel Strelow, Jörg Timm, Andreas Walker, Tobias Wienemann, Rainer Zotz |
| EPI_ISL_824945, EPI_ISL_824946, EPI_ISL_824947, EPI_ISL_824948, EPI_ISL_824949, EPI_ISL_824950, EPI_ISL_824951, EPI_ISL_824952, EPI_ISL_824953, EPI_ISL_824954, EPI_ISL_824955, EPI_ISL_824956, EPI_ISL_824957, EPI_ISL_824958, EPI_ISL_824959, EPI_ISL_824960, EPI_ISL_824961, EPI_ISL_824962, EPI_ISL_824963, EPI_ISL_824964, EPI_ISL_824965, EPI_ISL_824966, EPI_ISL_824967, EPI_ISL_824968, EPI_ISL_824969, EPI_ISL_824970, EPI_ISL_824971, EPI_ISL_824972, EPI_ISL_824973, EPI_ISL_824974, EPI_ISL_824975, EPI_ISL_824976, EPI_ISL_824977, EPI_ISL_824978, EPI_ISL_824979, EPI_ISL_824980, EPI_ISL_824981, EPI_ISL_824982, EPI_ISL_824983, EPI_ISL_824984                                                                                                                                                                                                                                                                                                                                                                                                                                                                                                                                                                                                                                                                                                                                                                                                                                                                                                                                                                                                                                                                                                                                                                                                                                                                                                                                                                                                                                                                                                                                                                                                                                                                                                                                                                                                                                                                                                                                                                                                                                                                                                                                                                                                                                                                                                                                                                                                                                                                                                                                                                                                                                                                                                                                                                                                                                                                                                 |                                                                                                                                                                                                 |                                                                                           |                                                                                                                                                                                                                                                                                                  |
| see above                                                                                                                                                                                                                                                                                                                                                                                                                                                                                                                                                                                                                                                                                                                                                                                                                                                                                                                                                                                                                                                                                                                                                                                                                                                                                                                                                                                                                                                                                                                                                                                                                                                                                                                                                                                                                                                                                                                                                                                                                                                                                                                                                                                                                                                                                                                                                                                                                                                                                                                                                                                                                                                                                                                                                                                                                                                                                                                                                                                                                                                                                                                                                                                                                                                                                                                                                                                                                                                                                                                                                      | Maryland Public Health Laboratory                                                                                                                                                               | Maryland Public Health Laboratory                                                         | Maryland Department of Health Laboratories Administration                                                                                                                                                                                                                                        |
| EPI_ISL_831029, EPI_ISL_831031, EPI_ISL_831032, EPI_ISL_831033, EPI_ISL_831034, EPI_ISL_831035, EPI_ISL_831036, EPI_ISL_831039, EPI_ISL_831040, EPI_ISL_831041, EPI_ISL_831042, EPI_ISL_831043, EPI_ISL_831044, EPI_ISL_831045, EPI_ISL_831046, EPI_ISL_831047, EPI_ISL_831048, EPI_ISL_831050, EPI_ISL_831051, EPI_ISL_831052, EPI_ISL_831053, EPI_ISL_831054, EPI_ISL_831055, EPI_ISL_831056, EPI_ISL_831057, EPI_ISL_831058, EPI_ISL_831059, EPI_ISL_831060, EPI_ISL_831061, EPI_ISL_831062, EPI_ISL_831063, EPI_ISL_831064, EPI_ISL_831065, EPI_ISL_831066, EPI_ISL_831067, EPI_ISL_831068, EPI_ISL_831069, EPI_ISL_831070, EPI_ISL_831071, EPI_ISL_831072, EPI_ISL_831073, EPI_ISL_831074, EPI_ISL_831075, EPI_ISL_831076, EPI_ISL_831077, EPI_ISL_831078, EPI_ISL_831079, EPI_ISL_831080, EPI_ISL_831081, EPI_ISL_831082, EPI_ISL_831083, EPI_ISL_831084, EPI_ISL_831085, EPI_ISL_831086, EPI_ISL_831087, EPI_ISL_831088, EPI_ISL_831089, EPI_ISL_831090, EPI_ISL_831091, EPI_ISL_831092, EPI_ISL_831093, EPI_ISL_831094, EPI_ISL_831095, EPI_ISL_831096, EPI_ISL_831097, EPI_ISL_831098, EPI_ISL_831099, EPI_ISL_831100, EPI_ISL_831101, EPI_ISL_831102, EPI_ISL_831103, EPI_ISL_831104, EPI_ISL_831105, EPI_ISL_831106, EPI_ISL_831107, EPI_ISL_831108, EPI_ISL_831109, EPI_ISL_831110, EPI_ISL_831111, EPI_ISL_831112, EPI_ISL_831113, EPI_ISL_831114, EPI_ISL_831115, EPI_ISL_831116, EPI_ISL_831117, EPI_ISL_831118, EPI_ISL_831119, EPI_ISL_831120, EPI_ISL_831121, EPI_ISL_831122, EPI_ISL_831123, EPI_ISL_831124, EPI_ISL_831125, EPI_ISL_831126, EPI_ISL_831127, EPI_ISL_831128, EPI_ISL_831129, EPI_ISL_831130, EPI_ISL_831131, EPI_ISL_831132, EPI_ISL_831133, EPI_ISL_831134, EPI_ISL_831135, EPI_ISL_831136, EPI_ISL_831137, EPI_ISL_831138, EPI_ISL_831139, EPI_ISL_831140, EPI_ISL_831141, EPI_ISL_831142, EPI_ISL_831143, EPI_ISL_831144, EPI_ISL_831145, EPI_ISL_831146, EPI_ISL_831147, EPI_ISL_831148, EPI_ISL_831149, EPI_ISL_831150, EPI_ISL_831151, EPI_ISL_831152, EPI_ISL_831153, EPI_ISL_831154, EPI_ISL_831155, EPI_ISL_831156, EPI_ISL_831157, EPI_ISL_831158, EPI_ISL_831159, EPI_ISL_831160, EPI_ISL_831161, EPI_ISL_831162, EPI_ISL_831163, EPI_ISL_831164, EPI_ISL_831165, EPI_ISL_831166, EPI_ISL_831167, EPI_ISL_831168, EPI_ISL_831169, EPI_ISL_831170, EPI_ISL_831171, EPI_ISL_831172, EPI_ISL_831173, EPI_ISL_831174, EPI_ISL_831175, EPI_ISL_831176, EPI_ISL_831177, EPI_ISL_831178, EPI_ISL_831179, EPI_ISL_831180, EPI_ISL_831181, EPI_ISL_831182, EPI_ISL_831183, EPI_ISL_831184, EPI_ISL_831185, EPI_ISL_831186, EPI_ISL_831187, EPI_ISL_831188, EPI_ISL_831189, EPI_ISL_831190, EPI_ISL_831191, EPI_ISL_831192, EPI_ISL_831193, EPI_ISL_831194, EPI_ISL_831195, EPI_ISL_831196, EPI_ISL_831197, EPI_ISL_831198, EPI_ISL_831199, EPI_ISL_831200, EPI_ISL_831201, EPI_ISL_831202, EPI_ISL_831203, EPI_ISL_831204, EPI_ISL_831205, EPI_ISL_831206, EPI_ISL_831207, EPI_ISL_831208, EPI_ISL_831209, EPI_ISL_831210, EPI_ISL_831211, EPI_ISL_831212, EPI_ISL_831213, EPI_ISL_831214, EPI_ISL_831215, EPI_ISL_831216, EPI_ISL_831217, EPI_ISL_831218, EPI_ISL_831219, EPI_ISL_831220, EPI_ISL_831221, EPI_ISL_831222, EPI_ISL_831223, EPI_ISL_831224, EPI_ISL_831225, EPI_ISL_831226, EPI_ISL_831227, EPI_ISL_831228, EPI_ISL_831229, EPI_ISL_831230, EPI_ISL_831231, EPI_ISL_831232, EPI_ISL_831233, EPI_ISL_831234, EPI_ISL_831235, EPI_ISL_831236, EPI_ISL_831237, EPI_ISL_831238, EPI_ISL_831239, EPI_ISL_831240, EPI_ISL_831241, EPI_ISL_831242, EPI_ISL_831243, EPI_ISL_831244, EPI_ISL_831245, EPI_ISL_831246 |                                                                                                                                                                                                 |                                                                                           |                                                                                                                                                                                                                                                                                                  |
| see above                                                                                                                                                                                                                                                                                                                                                                                                                                                                                                                                                                                                                                                                                                                                                                                                                                                                                                                                                                                                                                                                                                                                                                                                                                                                                                                                                                                                                                                                                                                                                                                                                                                                                                                                                                                                                                                                                                                                                                                                                                                                                                                                                                                                                                                                                                                                                                                                                                                                                                                                                                                                                                                                                                                                                                                                                                                                                                                                                                                                                                                                                                                                                                                                                                                                                                                                                                                                                                                                                                                                                      | Hospital Universitario La Paz (Madrid)                                                                                                                                                          | SeqCOVID-SPAIN consortium/IBV(CSIC)                                                       | María Rodríguez-Tejedor, Elias Dahdouh, Fernando Lázaro-Perona, Jesús Mingorance and SeqCOVID-SPAIN consortium                                                                                                                                                                                   |
| EPI_ISL_832101, EPI_ISL_832102, EPI_ISL_832103, EPI_ISL_832104                                                                                                                                                                                                                                                                                                                                                                                                                                                                                                                                                                                                                                                                                                                                                                                                                                                                                                                                                                                                                                                                                                                                                                                                                                                                                                                                                                                                                                                                                                                                                                                                                                                                                                                                                                                                                                                                                                                                                                                                                                                                                                                                                                                                                                                                                                                                                                                                                                                                                                                                                                                                                                                                                                                                                                                                                                                                                                                                                                                                                                                                                                                                                                                                                                                                                                                                                                                                                                                                                                 | Hospital Universitari Germans Trias i Pujol(HUGTIP)/Fundació Lluita contra la SIDA (FLSida)                                                                                                     | IrsiCaixa AIDS Research Lab                                                               | Marc Noguera-Julian, Mariona Parera, Maria Pilar Armengol, Marta Massanella, Ester Ballana, Lidia Ruiz, Nuria Izquierdo, Jorge Carrillo, Roger Paredes, Julia Bianco, Joaquim Segalés, Bonaventura Clotet                                                                                        |
| EPI_ISL_832128                                                                                                                                                                                                                                                                                                                                                                                                                                                                                                                                                                                                                                                                                                                                                                                                                                                                                                                                                                                                                                                                                                                                                                                                                                                                                                                                                                                                                                                                                                                                                                                                                                                                                                                                                                                                                                                                                                                                                                                                                                                                                                                                                                                                                                                                                                                                                                                                                                                                                                                                                                                                                                                                                                                                                                                                                                                                                                                                                                                                                                                                                                                                                                                                                                                                                                                                                                                                                                                                                                                                                 | Sentinelles IDF                                                                                                                                                                                 | National Reference Center for Viruses of Respiratory Infections, Institut Pasteur, Paris  | Marion Barbet, Sylvie Behillil, Méline Bizard, Angela Brisebarre, Camille Capel, Etienne Simon-Lorière, Vincent Enouf, Maud Vanpeene, Sylvie van der Werf, Patricia Lefebvre                                                                                                                     |
| EPI_ISL_832129                                                                                                                                                                                                                                                                                                                                                                                                                                                                                                                                                                                                                                                                                                                                                                                                                                                                                                                                                                                                                                                                                                                                                                                                                                                                                                                                                                                                                                                                                                                                                                                                                                                                                                                                                                                                                                                                                                                                                                                                                                                                                                                                                                                                                                                                                                                                                                                                                                                                                                                                                                                                                                                                                                                                                                                                                                                                                                                                                                                                                                                                                                                                                                                                                                                                                                                                                                                                                                                                                                                                                 | Sentinelles IDF                                                                                                                                                                                 | National Reference Center for Viruses of Respiratory Infections, Institut Pasteur, Paris  | Marion Barbet, Sylvie Behillil, Méline Bizard, Angela Brisebarre, Camille Capel, Etienne Simon-Lorière, Vincent Enouf, Maud Vanpeene, Sylvie van der Werf, Claire Watermez                                                                                                                       |
| EPI_ISL_832130, EPI_ISL_832131, EPI_ISL_832132, EPI_ISL_832133, EPI_ISL_832134, EPI_ISL_832135, EPI_ISL_832136, EPI_ISL_832137, EPI_ISL_832138, EPI_ISL_832139, EPI_ISL_832140, EPI_ISL_832141, EPI_ISL_832142, EPI_ISL_832143                                                                                                                                                                                                                                                                                                                                                                                                                                                                                                                                                                                                                                                                                                                                                                                                                                                                                                                                                                                                                                                                                                                                                                                                                                                                                                                                                                                                                                                                                                                                                                                                                                                                                                                                                                                                                                                                                                                                                                                                                                                                                                                                                                                                                                                                                                                                                                                                                                                                                                                                                                                                                                                                                                                                                                                                                                                                                                                                                                                                                                                                                                                                                                                                                                                                                                                                 |                                                                                                                                                                                                 |                                                                                           |                                                                                                                                                                                                                                                                                                  |
| see above                                                                                                                                                                                                                                                                                                                                                                                                                                                                                                                                                                                                                                                                                                                                                                                                                                                                                                                                                                                                                                                                                                                                                                                                                                                                                                                                                                                                                                                                                                                                                                                                                                                                                                                                                                                                                                                                                                                                                                                                                                                                                                                                                                                                                                                                                                                                                                                                                                                                                                                                                                                                                                                                                                                                                                                                                                                                                                                                                                                                                                                                                                                                                                                                                                                                                                                                                                                                                                                                                                                                                      | Hospital                                                                                                                                                                                        | National Reference Center for Viruses of Respiratory Infections, Institut Pasteur, Paris  | Marion Barbet, Sylvie Behillil, Méline Bizard, Angela Brisebarre, Camille Capel, Etienne Simon-Lorière, Vincent Enouf, Maud Vanpeene, Sylvie van der Werf, Laurent Andreoletti                                                                                                                   |
| EPI_ISL_832144, EPI_ISL_832145, EPI_ISL_832146, EPI_ISL_832147, EPI_ISL_832148, EPI_ISL_832149, EPI_ISL_832150, EPI_ISL_832151, EPI_ISL_832152, EPI_ISL_832153, EPI_ISL_832154, EPI_ISL_832155, EPI_ISL_832156, EPI_ISL_832157, EPI_ISL_832158, EPI_ISL_832159, EPI_ISL_832160, EPI_ISL_832161, EPI_ISL_832162, EPI_ISL_832163, EPI_ISL_832164, EPI_ISL_832165, EPI_ISL_832166                                                                                                                                                                                                                                                                                                                                                                                                                                                                                                                                                                                                                                                                                                                                                                                                                                                                                                                                                                                                                                                                                                                                                                                                                                                                                                                                                                                                                                                                                                                                                                                                                                                                                                                                                                                                                                                                                                                                                                                                                                                                                                                                                                                                                                                                                                                                                                                                                                                                                                                                                                                                                                                                                                                                                                                                                                                                                                                                                                                                                                                                                                                                                                                 |                                                                                                                                                                                                 |                                                                                           |                                                                                                                                                                                                                                                                                                  |
| see above                                                                                                                                                                                                                                                                                                                                                                                                                                                                                                                                                                                                                                                                                                                                                                                                                                                                                                                                                                                                                                                                                                                                                                                                                                                                                                                                                                                                                                                                                                                                                                                                                                                                                                                                                                                                                                                                                                                                                                                                                                                                                                                                                                                                                                                                                                                                                                                                                                                                                                                                                                                                                                                                                                                                                                                                                                                                                                                                                                                                                                                                                                                                                                                                                                                                                                                                                                                                                                                                                                                                                      | Hospital                                                                                                                                                                                        | National Reference Center for Viruses of Respiratory Infections, Institut Pasteur, Paris  | Marion Barbet, Sylvie Behillil, Méline Bizard, Angela Brisebarre, Camille Capel, Etienne Simon-Lorière, Vincent Enouf, Maud Vanpeene, Sylvie van der Werf, Léa Pilorge                                                                                                                           |
| EPI_ISL_832167                                                                                                                                                                                                                                                                                                                                                                                                                                                                                                                                                                                                                                                                                                                                                                                                                                                                                                                                                                                                                                                                                                                                                                                                                                                                                                                                                                                                                                                                                                                                                                                                                                                                                                                                                                                                                                                                                                                                                                                                                                                                                                                                                                                                                                                                                                                                                                                                                                                                                                                                                                                                                                                                                                                                                                                                                                                                                                                                                                                                                                                                                                                                                                                                                                                                                                                                                                                                                                                                                                                                                 | Sentinelles Province                                                                                                                                                                            | National Reference Center for Viruses of Respiratory Infections, Institut Pasteur, Paris  | Marion Barbet, Sylvie Behillil, Méline Bizard, Angela Brisebarre, Camille Capel, Etienne Simon-Lorière, Vincent Enouf, Maud Vanpeene, Sylvie van der Werf, Jean-Michel Monnier                                                                                                                   |
| EPI_ISL_832168                                                                                                                                                                                                                                                                                                                                                                                                                                                                                                                                                                                                                                                                                                                                                                                                                                                                                                                                                                                                                                                                                                                                                                                                                                                                                                                                                                                                                                                                                                                                                                                                                                                                                                                                                                                                                                                                                                                                                                                                                                                                                                                                                                                                                                                                                                                                                                                                                                                                                                                                                                                                                                                                                                                                                                                                                                                                                                                                                                                                                                                                                                                                                                                                                                                                                                                                                                                                                                                                                                                                                 | Sentinelles Province                                                                                                                                                                            | National Reference Center for Viruses of Respiratory Infections, Institut Pasteur, Paris  | Marion Barbet, Sylvie Behillil, Méline Bizard, Angela Brisebarre, Camille Capel, Etienne Simon-Lorière, Vincent Enouf, Maud Vanpeene, Sylvie van der Werf, Denis Calvet                                                                                                                          |
| EPI_ISL_832169, EPI_ISL_832170                                                                                                                                                                                                                                                                                                                                                                                                                                                                                                                                                                                                                                                                                                                                                                                                                                                                                                                                                                                                                                                                                                                                                                                                                                                                                                                                                                                                                                                                                                                                                                                                                                                                                                                                                                                                                                                                                                                                                                                                                                                                                                                                                                                                                                                                                                                                                                                                                                                                                                                                                                                                                                                                                                                                                                                                                                                                                                                                                                                                                                                                                                                                                                                                                                                                                                                                                                                                                                                                                                                                 | Hospital                                                                                                                                                                                        | National Reference Center for Viruses of Respiratory Infections, Institut Pasteur, Paris  | Marion Barbet, Sylvie Behillil, Méline Bizard, Angela Brisebarre, Camille Capel, Etienne Simon-Lorière, Vincent Enouf, Maud Vanpeene, Sylvie van der Werf, Clémence Guillaume                                                                                                                    |
| EPI_ISL_832171, EPI_ISL_832172, EPI_ISL_832173, EPI_ISL_832174, EPI_ISL_832175                                                                                                                                                                                                                                                                                                                                                                                                                                                                                                                                                                                                                                                                                                                                                                                                                                                                                                                                                                                                                                                                                                                                                                                                                                                                                                                                                                                                                                                                                                                                                                                                                                                                                                                                                                                                                                                                                                                                                                                                                                                                                                                                                                                                                                                                                                                                                                                                                                                                                                                                                                                                                                                                                                                                                                                                                                                                                                                                                                                                                                                                                                                                                                                                                                                                                                                                                                                                                                                                                 | Hospital                                                                                                                                                                                        | National Reference Center for Viruses of Respiratory Infections, Institut Pasteur, Paris  | Marion Barbet, Sylvie Behillil, Méline Bizard, Angela Brisebarre, Camille Capel, Etienne Simon-Lorière, Vincent Enouf, Maud Vanpeene, Sylvie van der Werf, Patricia Stoessel-Thouvenin                                                                                                           |
| EPI_ISL_832176, EPI_ISL_832177                                                                                                                                                                                                                                                                                                                                                                                                                                                                                                                                                                                                                                                                                                                                                                                                                                                                                                                                                                                                                                                                                                                                                                                                                                                                                                                                                                                                                                                                                                                                                                                                                                                                                                                                                                                                                                                                                                                                                                                                                                                                                                                                                                                                                                                                                                                                                                                                                                                                                                                                                                                                                                                                                                                                                                                                                                                                                                                                                                                                                                                                                                                                                                                                                                                                                                                                                                                                                                                                                                                                 | Hospital                                                                                                                                                                                        | National Reference Center for Viruses of Respiratory Infections, Institut Pasteur, Paris  | Marion Barbet, Sylvie Behillil, Méline Bizard, Angela Brisebarre, Camille Capel, Etienne Simon-Lorière, Vincent Enouf, Maud Vanpeene, Sylvie van der Werf, Aurélie Guigon                                                                                                                        |







|                                                                                                                                                                                                                                                                                                                                |                                                        |                                                                                              |                                                                                                                                                                                    |                                                                                                                                                                                                                                                                                                  |
|--------------------------------------------------------------------------------------------------------------------------------------------------------------------------------------------------------------------------------------------------------------------------------------------------------------------------------|--------------------------------------------------------|----------------------------------------------------------------------------------------------|------------------------------------------------------------------------------------------------------------------------------------------------------------------------------------|--------------------------------------------------------------------------------------------------------------------------------------------------------------------------------------------------------------------------------------------------------------------------------------------------|
| see above                                                                                                                                                                                                                                                                                                                      | Labo Analyses Med                                      | National Reference Center for Viruses of Respiratory Infections, Institut Pasteur, Paris     | Marion Barbet, Sylvie Behillil, Méline Bizard, Angela Brisebarre, Camille Capel, Etienne Simon-Lorière, Vincent Enouf, Maud Vanpeene, Sylvie van der Werf, Lefaire Brieuc          |                                                                                                                                                                                                                                                                                                  |
| EPI_ISL_860889                                                                                                                                                                                                                                                                                                                 | Labo Analyses Med                                      | National Reference Center for Viruses of Respiratory Infections, Institut Pasteur, Paris     | Marion Barbet, Sylvie Behillil, Méline Bizard, Angela Brisebarre, Camille Capel, Etienne Simon-Lorière, Vincent Enouf, Maud Vanpeene, Sylvie van der Werf, Amzalag Jonas           |                                                                                                                                                                                                                                                                                                  |
| EPI_ISL_860890                                                                                                                                                                                                                                                                                                                 | CHU de Nantes - Hôtel Dieu - Labo. Virologie           | National Reference Center for Viruses of Respiratory Infections, Institut Pasteur, Paris     | Marion Barbet, Sylvie Behillil, Méline Bizard, Angela Brisebarre, Camille Capel, Etienne Simon-Lorière, Vincent Enouf, Maud Vanpeene, Sylvie van der Werf, Andre-Garnier Elisabeth |                                                                                                                                                                                                                                                                                                  |
| EPI_ISL_860891, EPI_ISL_860892, EPI_ISL_860893, EPI_ISL_860894, EPI_ISL_860895, EPI_ISL_860896, EPI_ISL_860897                                                                                                                                                                                                                 | CHU Tours - Virologie                                  | National Reference Center for Viruses of Respiratory Infections, Institut Pasteur, Paris     | Marion Barbet, Sylvie Behillil, Méline Bizard, Angela Brisebarre, Camille Capel, Etienne Simon-Lorière, Vincent Enouf, Maud Vanpeene, Sylvie van der Werf, Gaudy Graffin Catherine |                                                                                                                                                                                                                                                                                                  |
| EPI_ISL_860898                                                                                                                                                                                                                                                                                                                 | Centre Hospitalier Compiègne-Noyon - Laboratoire       | National Reference Center for Viruses of Respiratory Infections, Institut Pasteur, Paris     | Marion Barbet, Sylvie Behillil, Méline Bizard, Angela Brisebarre, Camille Capel, Etienne Simon-Lorière, Vincent Enouf, Maud Vanpeene, Sylvie van der Werf, Emond Jean-Philippe     |                                                                                                                                                                                                                                                                                                  |
| EPI_ISL_860899                                                                                                                                                                                                                                                                                                                 | HOPITAL PAUL BROUSSE - Service Microbiologie           | National Reference Center for Viruses of Respiratory Infections, Institut Pasteur, Paris     | Marion Barbet, Sylvie Behillil, Méline Bizard, Angela Brisebarre, Camille Capel, Etienne Simon-Lorière, Vincent Enouf, Maud Vanpeene, Sylvie van der Werf, Roque-Afonso Anne-Marie |                                                                                                                                                                                                                                                                                                  |
| EPI_ISL_860900, EPI_ISL_860901, EPI_ISL_860902, EPI_ISL_860903, EPI_ISL_860904                                                                                                                                                                                                                                                 | CH du MANS - Lab. Bio. Moléculaire                     | National Reference Center for Viruses of Respiratory Infections, Institut Pasteur, Paris     | Marion Barbet, Sylvie Behillil, Méline Bizard, Angela Brisebarre, Camille Capel, Etienne Simon-Lorière, Vincent Enouf, Maud Vanpeene, Sylvie van der Werf, Ramanantsoa CéliLine    |                                                                                                                                                                                                                                                                                                  |
| EPI_ISL_860905, EPI_ISL_860906                                                                                                                                                                                                                                                                                                 | CHU Angers - Dpt des Agents Infectieux                 | National Reference Center for Viruses of Respiratory Infections, Institut Pasteur, Paris     | Marion Barbet, Sylvie Behillil, Méline Bizard, Angela Brisebarre, Camille Capel, Etienne Simon-Lorière, Vincent Enouf, Maud Vanpeene, Sylvie van der Werf, Ducancelle Alexandra    |                                                                                                                                                                                                                                                                                                  |
| EPI_ISL_860907, EPI_ISL_860908, EPI_ISL_860909                                                                                                                                                                                                                                                                                 | CHU Tours - Virologie                                  | National Reference Center for Viruses of Respiratory Infections, Institut Pasteur, Paris     | Marion Barbet, Sylvie Behillil, Méline Bizard, Angela Brisebarre, Camille Capel, Etienne Simon-Lorière, Vincent Enouf, Maud Vanpeene, Sylvie van der Werf, Gaudy Graffin Catherine |                                                                                                                                                                                                                                                                                                  |
| EPI_ISL_860910                                                                                                                                                                                                                                                                                                                 | CH du MANS - Lab. Bio. Moléculaire                     | National Reference Center for Viruses of Respiratory Infections, Institut Pasteur, Paris     | Marion Barbet, Sylvie Behillil, Méline Bizard, Angela Brisebarre, Camille Capel, Etienne Simon-Lorière, Vincent Enouf, Maud Vanpeene, Sylvie van der Werf, Ramanantsoa CéliLine    |                                                                                                                                                                                                                                                                                                  |
| EPI_ISL_860911, EPI_ISL_860912                                                                                                                                                                                                                                                                                                 | CHU Angers - Dpt des Agents Infectieux                 | National Reference Center for Viruses of Respiratory Infections, Institut Pasteur, Paris     | Marion Barbet, Sylvie Behillil, Méline Bizard, Angela Brisebarre, Camille Capel, Etienne Simon-Lorière, Vincent Enouf, Maud Vanpeene, Sylvie van der Werf, Ducancelle Alexandra    |                                                                                                                                                                                                                                                                                                  |
| EPI_ISL_860913, EPI_ISL_860914, EPI_ISL_860915, EPI_ISL_860916, EPI_ISL_860917, EPI_ISL_860918, EPI_ISL_860919, EPI_ISL_860920, EPI_ISL_860921, EPI_ISL_860922, EPI_ISL_860923, EPI_ISL_860924, EPI_ISL_860925, EPI_ISL_860926, EPI_ISL_860927, EPI_ISL_860928, EPI_ISL_860929, EPI_ISL_860930                                 | see above                                              | CHU de Nantes - Hôtel Dieu - Labo. Virologie                                                 | National Reference Center for Viruses of Respiratory Infections, Institut Pasteur, Paris                                                                                           | Marion Barbet, Sylvie Behillil, Méline Bizard, Angela Brisebarre, Camille Capel, Etienne Simon-Lorière, Vincent Enouf, Maud Vanpeene, Sylvie van der Werf, Andre-Garnier Elisabeth                                                                                                               |
| EPI_ISL_860931, EPI_ISL_861234                                                                                                                                                                                                                                                                                                 | Labo Analyses Med                                      | National Reference Center for Viruses of Respiratory Infections, Institut Pasteur, Paris     | Marion Barbet, Sylvie Behillil, Méline Bizard, Angela Brisebarre, Camille Capel, Etienne Simon-Lorière, Vincent Enouf, Maud Vanpeene, Sylvie van der Werf                          |                                                                                                                                                                                                                                                                                                  |
| EPI_ISL_861235                                                                                                                                                                                                                                                                                                                 | CHU Tours - Virologie                                  | National Reference Center for Viruses of Respiratory Infections, Institut Pasteur, Paris     | Marion Barbet, Sylvie Behillil, Méline Bizard, Angela Brisebarre, Camille Capel, Etienne Simon-Lorière, Vincent Enouf, Maud Vanpeene, Sylvie van der Werf, Gaudy Graffin Catherine |                                                                                                                                                                                                                                                                                                  |
| EPI_ISL_861236                                                                                                                                                                                                                                                                                                                 | CHU Angers - Dpt des Agents Infectieux                 | National Reference Center for Viruses of Respiratory Infections, Institut Pasteur, Paris     | Marion Barbet, Sylvie Behillil, Méline Bizard, Angela Brisebarre, Camille Capel, Etienne Simon-Lorière, Vincent Enouf, Maud Vanpeene, Sylvie van der Werf, Ducancelle Alexandra    |                                                                                                                                                                                                                                                                                                  |
| EPI_ISL_861237                                                                                                                                                                                                                                                                                                                 | Labo Analyses Med                                      | National Reference Center for Viruses of Respiratory Infections, Institut Pasteur, Paris     | Marion Barbet, Sylvie Behillil, Méline Bizard, Angela Brisebarre, Camille Capel, Etienne Simon-Lorière, Vincent Enouf, Maud Vanpeene, Sylvie van der Werf                          |                                                                                                                                                                                                                                                                                                  |
| EPI_ISL_861239                                                                                                                                                                                                                                                                                                                 | Labo Analyses med                                      | National Reference Center for Viruses of Respiratory Infections, Institut Pasteur, Paris     | Marion Barbet, Sylvie Behillil, Méline Bizard, Angela Brisebarre, Camille Capel, Etienne Simon-Lorière, Vincent Enouf, Maud Vanpeene, Sylvie van der Werf, Amzalag Jonas           |                                                                                                                                                                                                                                                                                                  |
| EPI_ISL_861493                                                                                                                                                                                                                                                                                                                 | Cerballiance Côte d'Azur                               | CERBA LAB                                                                                    | Marius M; Barsanti M; Maltese S; Francois J; Sinsoulieu T; Van Der Rhyn I; Morello V; Marcadal M; Gandillet A; Prots L.                                                            |                                                                                                                                                                                                                                                                                                  |
| EPI_ISL_861509, EPI_ISL_861510, EPI_ISL_861511, EPI_ISL_861512, EPI_ISL_861513, EPI_ISL_861514, EPI_ISL_861515, EPI_ISL_861516, EPI_ISL_861517, EPI_ISL_861518, EPI_ISL_861519, EPI_ISL_861520, EPI_ISL_861521, EPI_ISL_861522, EPI_ISL_861523, EPI_ISL_861524, EPI_ISL_861525, EPI_ISL_861526, EPI_ISL_861527, EPI_ISL_861528 | see above                                              | ZOTZ KLIMAS MVZ Düsseldorf-Centrum GbR ÜBAG für Labormedizin, Genetik, Zytologie, Pathologie | Center of Medical Microbiology, Virology, and Hospital Hygiene, University of Duesseldorf                                                                                          | Maximilian Damagnez, Alexander Dilthey, Ashley-Jane Duplessis, Patrick Finzer, Katrin Hoffmann, Torsten Houwaert, Lisanna Hülse, Malte Kohns Vasconcelos, Marek Korencak, Nadine Lübke, Jessica Nicolai, Klaus Pfeffer, Daniel Strelow, Jörg Timm, Andreas Walker, Tobias Wienemann, Rainer Zotz |
| EPI_ISL_862837, EPI_ISL_862838                                                                                                                                                                                                                                                                                                 | Fujita Health University Hospital                      | Fujita health University, School of Medicine, Department of Microbiology                     | Masahiro suzuki, Yohei Doi                                                                                                                                                         |                                                                                                                                                                                                                                                                                                  |
| EPI_ISL_862839                                                                                                                                                                                                                                                                                                                 | Fujita Health University Bantane Hospital              | Fujita health University, School of Medicine, Department of Microbiology                     | Masahiro suzuki, Yohei Doi                                                                                                                                                         |                                                                                                                                                                                                                                                                                                  |
| EPI_ISL_862840, EPI_ISL_862841, EPI_ISL_862842                                                                                                                                                                                                                                                                                 | Fujita Health University Hospital                      | Fujita health University, School of Medicine, Department of Microbiology                     | Masahiro suzuki, Yohei Doi                                                                                                                                                         |                                                                                                                                                                                                                                                                                                  |
| EPI_ISL_862843, EPI_ISL_862844, EPI_ISL_862845, EPI_ISL_862846, EPI_ISL_862847                                                                                                                                                                                                                                                 | Nara Medical University Hospital                       | Fujita health University, School of Medicine, Department of Microbiology                     | Masahiro suzuki, Yohei Doi                                                                                                                                                         |                                                                                                                                                                                                                                                                                                  |
| EPI_ISL_862848                                                                                                                                                                                                                                                                                                                 | Japanese Red Cross Narita Hospital                     | Fujita health University, School of Medicine, Department of Microbiology                     | Masahiro suzuki, Yohei Doi                                                                                                                                                         |                                                                                                                                                                                                                                                                                                  |
| EPI_ISL_862849, EPI_ISL_862850, EPI_ISL_862851                                                                                                                                                                                                                                                                                 | Ehime Prefectural Central Hospital                     | Fujita health University, School of Medicine, Department of Microbiology                     | Masahiro suzuki, Yohei Doi                                                                                                                                                         |                                                                                                                                                                                                                                                                                                  |
| EPI_ISL_862852, EPI_ISL_862853, EPI_ISL_862854                                                                                                                                                                                                                                                                                 | Tosei General Hospital                                 | Fujita health University, School of Medicine, Department of Microbiology                     | Masahiro suzuki, Yohei Doi                                                                                                                                                         |                                                                                                                                                                                                                                                                                                  |
| EPI_ISL_862855                                                                                                                                                                                                                                                                                                                 | National Hospital Organization Kanazawa Medical Center | Fujita health University, School of Medicine, Department of Microbiology                     | Masahiro suzuki, Yohei Doi                                                                                                                                                         |                                                                                                                                                                                                                                                                                                  |
| EPI_ISL_862856                                                                                                                                                                                                                                                                                                                 | Japanese Red Cross Narita Hospital                     | Fujita health University, School of Medicine, Department of Microbiology                     | Masahiro suzuki, Yohei Doi                                                                                                                                                         |                                                                                                                                                                                                                                                                                                  |
| EPI_ISL_862857                                                                                                                                                                                                                                                                                                                 | Fujita Health University Bantane Hospital              | Fujita health University, School of Medicine, Department of Microbiology                     | Masahiro suzuki, Yohei Doi                                                                                                                                                         |                                                                                                                                                                                                                                                                                                  |
| EPI_ISL_862858                                                                                                                                                                                                                                                                                                                 | Isehara Kyodo Hospital                                 | Fujita health University, School of Medicine, Department of Microbiology                     | Masahiro suzuki, Yohei Doi                                                                                                                                                         |                                                                                                                                                                                                                                                                                                  |
| EPI_ISL_862859, EPI_ISL_862860                                                                                                                                                                                                                                                                                                 | Nara Medical University Hospital                       | Fujita health University, School of Medicine, Department of Microbiology                     | Masahiro suzuki, Yohei Doi                                                                                                                                                         |                                                                                                                                                                                                                                                                                                  |
| EPI_ISL_862861, EPI_ISL_862862                                                                                                                                                                                                                                                                                                 | Sagamihara Kyodo Hospital                              | Fujita health University, School of Medicine, Department of Microbiology                     | Masahiro suzuki, Yohei Doi                                                                                                                                                         |                                                                                                                                                                                                                                                                                                  |

|                                                                                                                                                                                                                                                                                                                                                                                                                                                                                                                                                                                                                                                                                                                                                                                                                                                                                                                                                                                                                                                                                                                                                                |                                                                                                                                                                                                 |                                                                                          |                                                                                                                                                                               |
|----------------------------------------------------------------------------------------------------------------------------------------------------------------------------------------------------------------------------------------------------------------------------------------------------------------------------------------------------------------------------------------------------------------------------------------------------------------------------------------------------------------------------------------------------------------------------------------------------------------------------------------------------------------------------------------------------------------------------------------------------------------------------------------------------------------------------------------------------------------------------------------------------------------------------------------------------------------------------------------------------------------------------------------------------------------------------------------------------------------------------------------------------------------|-------------------------------------------------------------------------------------------------------------------------------------------------------------------------------------------------|------------------------------------------------------------------------------------------|-------------------------------------------------------------------------------------------------------------------------------------------------------------------------------|
| EPI_ISL_862863, EPI_ISL_862864, EPI_ISL_862865                                                                                                                                                                                                                                                                                                                                                                                                                                                                                                                                                                                                                                                                                                                                                                                                                                                                                                                                                                                                                                                                                                                 | University Hospital Kyoto Prefectural University of Medicine                                                                                                                                    | Fujita health University, School of Medicine, Department of Microbiology                 | Masahiro suzuki, Yohei Doi                                                                                                                                                    |
| EPI_ISL_862866                                                                                                                                                                                                                                                                                                                                                                                                                                                                                                                                                                                                                                                                                                                                                                                                                                                                                                                                                                                                                                                                                                                                                 | Nara Medical University Hospital                                                                                                                                                                | Fujita health University, School of Medicine, Department of Microbiology                 | Masahiro suzuki, Yohei Doi                                                                                                                                                    |
| EPI_ISL_862867                                                                                                                                                                                                                                                                                                                                                                                                                                                                                                                                                                                                                                                                                                                                                                                                                                                                                                                                                                                                                                                                                                                                                 | Yokohama City University Hospital                                                                                                                                                               | Fujita health University, School of Medicine, Department of Microbiology                 | Masahiro suzuki, Yohei Doi                                                                                                                                                    |
| EPI_ISL_862868                                                                                                                                                                                                                                                                                                                                                                                                                                                                                                                                                                                                                                                                                                                                                                                                                                                                                                                                                                                                                                                                                                                                                 | Fujita Health University Bantane Hospital                                                                                                                                                       | Fujita health University, School of Medicine, Department of Microbiology                 | Masahiro suzuki, Yohei Doi                                                                                                                                                    |
| EPI_ISL_862869, EPI_ISL_862870                                                                                                                                                                                                                                                                                                                                                                                                                                                                                                                                                                                                                                                                                                                                                                                                                                                                                                                                                                                                                                                                                                                                 | Saiseikai Niigata Hospital                                                                                                                                                                      | Fujita health University, School of Medicine, Department of Microbiology                 | Masahiro suzuki, Yohei Doi                                                                                                                                                    |
| EPI_ISL_862871                                                                                                                                                                                                                                                                                                                                                                                                                                                                                                                                                                                                                                                                                                                                                                                                                                                                                                                                                                                                                                                                                                                                                 | Nara Medical University Hospital                                                                                                                                                                | Fujita health University, School of Medicine, Department of Microbiology                 | Masahiro suzuki, Yohei Doi                                                                                                                                                    |
| EPI_ISL_862872, EPI_ISL_862873                                                                                                                                                                                                                                                                                                                                                                                                                                                                                                                                                                                                                                                                                                                                                                                                                                                                                                                                                                                                                                                                                                                                 | Japanese Red Cross Narita Hospital                                                                                                                                                              | Fujita health University, School of Medicine, Department of Microbiology                 | Masahiro suzuki, Yohei Doi                                                                                                                                                    |
| EPI_ISL_862874                                                                                                                                                                                                                                                                                                                                                                                                                                                                                                                                                                                                                                                                                                                                                                                                                                                                                                                                                                                                                                                                                                                                                 | Japanese Red Cross Nagoya Daiichi Hospital                                                                                                                                                      | Fujita health University, School of Medicine, Department of Microbiology                 | Masahiro suzuki, Yohei Doi                                                                                                                                                    |
| EPI_ISL_862875                                                                                                                                                                                                                                                                                                                                                                                                                                                                                                                                                                                                                                                                                                                                                                                                                                                                                                                                                                                                                                                                                                                                                 | Komatsu Municipal Hospital                                                                                                                                                                      | Fujita health University, School of Medicine, Department of Microbiology                 | Masahiro suzuki, Yohei Doi                                                                                                                                                    |
| EPI_ISL_862876                                                                                                                                                                                                                                                                                                                                                                                                                                                                                                                                                                                                                                                                                                                                                                                                                                                                                                                                                                                                                                                                                                                                                 | NTT East Sapporo Hospital                                                                                                                                                                       | Fujita health University, School of Medicine, Department of Microbiology                 | Masahiro suzuki, Yohei Doi                                                                                                                                                    |
| EPI_ISL_862877, EPI_ISL_862878                                                                                                                                                                                                                                                                                                                                                                                                                                                                                                                                                                                                                                                                                                                                                                                                                                                                                                                                                                                                                                                                                                                                 | Nara Medical University Hospital                                                                                                                                                                | Fujita health University, School of Medicine, Department of Microbiology                 | Masahiro suzuki, Yohei Doi                                                                                                                                                    |
| EPI_ISL_862879                                                                                                                                                                                                                                                                                                                                                                                                                                                                                                                                                                                                                                                                                                                                                                                                                                                                                                                                                                                                                                                                                                                                                 | Ehime Prefectural Central Hospital                                                                                                                                                              | Fujita health University, School of Medicine, Department of Microbiology                 | Masahiro suzuki, Yohei Doi                                                                                                                                                    |
| EPI_ISL_862880                                                                                                                                                                                                                                                                                                                                                                                                                                                                                                                                                                                                                                                                                                                                                                                                                                                                                                                                                                                                                                                                                                                                                 | Nara Medical University Hospital                                                                                                                                                                | Fujita health University, School of Medicine, Department of Microbiology                 | Masahiro suzuki, Yohei Doi                                                                                                                                                    |
| EPI_ISL_862881                                                                                                                                                                                                                                                                                                                                                                                                                                                                                                                                                                                                                                                                                                                                                                                                                                                                                                                                                                                                                                                                                                                                                 | Kitakyushu Municipal Medical Center                                                                                                                                                             | Fujita health University, School of Medicine, Department of Microbiology                 | Masahiro suzuki, Yohei Doi                                                                                                                                                    |
| EPI_ISL_862882, EPI_ISL_862883, EPI_ISL_862884                                                                                                                                                                                                                                                                                                                                                                                                                                                                                                                                                                                                                                                                                                                                                                                                                                                                                                                                                                                                                                                                                                                 | University Hospital Kyoto Prefectural University of Medicine                                                                                                                                    | Fujita health University, School of Medicine, Department of Microbiology                 | Masahiro suzuki, Yohei Doi                                                                                                                                                    |
| EPI_ISL_862885                                                                                                                                                                                                                                                                                                                                                                                                                                                                                                                                                                                                                                                                                                                                                                                                                                                                                                                                                                                                                                                                                                                                                 | Japanese Red Cross Narita Hospital                                                                                                                                                              | Fujita health University, School of Medicine, Department of Microbiology                 | Masahiro suzuki, Yohei Doi                                                                                                                                                    |
| EPI_ISL_864547, EPI_ISL_864548, EPI_ISL_864549, EPI_ISL_864550, EPI_ISL_864551, EPI_ISL_864552, EPI_ISL_864553, EPI_ISL_864554, EPI_ISL_864555, EPI_ISL_864556, EPI_ISL_864557, EPI_ISL_864558, EPI_ISL_864559, EPI_ISL_864560, EPI_ISL_864561, EPI_ISL_864562                                                                                                                                                                                                                                                                                                                                                                                                                                                                                                                                                                                                                                                                                                                                                                                                                                                                                                 |                                                                                                                                                                                                 |                                                                                          |                                                                                                                                                                               |
| see above                                                                                                                                                                                                                                                                                                                                                                                                                                                                                                                                                                                                                                                                                                                                                                                                                                                                                                                                                                                                                                                                                                                                                      | Knappschaftskrankenhaus Bochum                                                                                                                                                                  | Bundeswehr Institute of Microbiology                                                     | Markus Antwerpen, Mustafa Özçürümez, Antonios Katsounas, Alexandra Rehn, Mathias Walter, Malena Bestehorn-Willmann, Sabine Zange, Enrico Georgi, Roman Wölfel                 |
| EPI_ISL_865069, EPI_ISL_865070, EPI_ISL_865071, EPI_ISL_865072, EPI_ISL_865073, EPI_ISL_865074, EPI_ISL_865075, EPI_ISL_865076, EPI_ISL_865077, EPI_ISL_865079, EPI_ISL_865080, EPI_ISL_865081, EPI_ISL_865082, EPI_ISL_865083, EPI_ISL_865084, EPI_ISL_865085, EPI_ISL_865086, EPI_ISL_865087, EPI_ISL_865088, EPI_ISL_865089, EPI_ISL_865090, EPI_ISL_865091, EPI_ISL_865092, EPI_ISL_865093, EPI_ISL_865094, EPI_ISL_865095, EPI_ISL_865098, EPI_ISL_865100, EPI_ISL_865101, EPI_ISL_865102, EPI_ISL_865104, EPI_ISL_865105, EPI_ISL_865106, EPI_ISL_865107, EPI_ISL_865108, EPI_ISL_865109, EPI_ISL_865110, EPI_ISL_865112, EPI_ISL_865113, EPI_ISL_865115, EPI_ISL_865117, EPI_ISL_865119, EPI_ISL_865120, EPI_ISL_865122, EPI_ISL_865123, EPI_ISL_865126, EPI_ISL_865128, EPI_ISL_865129, EPI_ISL_865130, EPI_ISL_865135, EPI_ISL_865136, EPI_ISL_865138, EPI_ISL_865140, EPI_ISL_865141, EPI_ISL_865142, EPI_ISL_865143, EPI_ISL_865144, EPI_ISL_865146, EPI_ISL_865148, EPI_ISL_865150, EPI_ISL_865151, EPI_ISL_865153, EPI_ISL_865154, EPI_ISL_865156, EPI_ISL_865157, EPI_ISL_865158, EPI_ISL_865159, EPI_ISL_865160, EPI_ISL_865161, EPI_ISL_865162 |                                                                                                                                                                                                 |                                                                                          |                                                                                                                                                                               |
| see above                                                                                                                                                                                                                                                                                                                                                                                                                                                                                                                                                                                                                                                                                                                                                                                                                                                                                                                                                                                                                                                                                                                                                      | Virology Department, Royal Infirmary of Edinburgh, NHS Lothian / School of Biological Sciences, University of Edinburgh / Institute of Genetics and Molecular Medicine, University of Edinburgh | COVID-19 Genomics UK (COG-UK) Consortium                                                 | McHugh M, Dewar R, Rooke S, Gallagher M, Balcaza C, O'Toole A, Scher E, Hill V, McCrone JT, Colquhoun R, Yu X, Jackson B, Rambaut A, Williams TC, Templeton K                 |
| EPI_ISL_871793, EPI_ISL_871794, EPI_ISL_871795, EPI_ISL_871796, EPI_ISL_871797, EPI_ISL_871798, EPI_ISL_871799, EPI_ISL_871800, EPI_ISL_871801, EPI_ISL_871802, EPI_ISL_871803, EPI_ISL_871804, EPI_ISL_871805, EPI_ISL_871806, EPI_ISL_871807, EPI_ISL_871808, EPI_ISL_871809, EPI_ISL_871810, EPI_ISL_871811, EPI_ISL_871812, EPI_ISL_871813, EPI_ISL_871814                                                                                                                                                                                                                                                                                                                                                                                                                                                                                                                                                                                                                                                                                                                                                                                                 |                                                                                                                                                                                                 |                                                                                          |                                                                                                                                                                               |
| see above                                                                                                                                                                                                                                                                                                                                                                                                                                                                                                                                                                                                                                                                                                                                                                                                                                                                                                                                                                                                                                                                                                                                                      | AIID                                                                                                                                                                                            | Irish Coronavirus Sequencing Consortium-Teagasc Grange                                   | Matthew McCabe, Aljandro Abner Garcia Leon, Fiona Crispie, Calum Walsh, Michael Carr, John Kenny, Paul Cotter, Patrick Mallon, Gabriel Gonzalez                               |
| EPI_ISL_872197                                                                                                                                                                                                                                                                                                                                                                                                                                                                                                                                                                                                                                                                                                                                                                                                                                                                                                                                                                                                                                                                                                                                                 | hopital                                                                                                                                                                                         | National Reference Center for Viruses of Respiratory Infections, Institut Pasteur, Paris | Marion Barbet, Sylvie Behillil, Méline Bizard, Angela Brisebarre, Camille Capel, Etienne Simon-Lorière, Vincent Enouf, Maud Vanpeene, Sylvie van der Werf, Combe Patrice      |
| EPI_ISL_872198                                                                                                                                                                                                                                                                                                                                                                                                                                                                                                                                                                                                                                                                                                                                                                                                                                                                                                                                                                                                                                                                                                                                                 | Hopital                                                                                                                                                                                         | National Reference Center for Viruses of Respiratory Infections, Institut Pasteur, Paris | Marion Barbet, Sylvie Behillil, Méline Bizard, Angela Brisebarre, Camille Capel, Etienne Simon-Lorière, Vincent Enouf, Maud Vanpeene, Sylvie van der Werf                     |
| EPI_ISL_872199                                                                                                                                                                                                                                                                                                                                                                                                                                                                                                                                                                                                                                                                                                                                                                                                                                                                                                                                                                                                                                                                                                                                                 | Hopital                                                                                                                                                                                         | National Reference Center for Viruses of Respiratory Infections, Institut Pasteur, Paris | Marion Barbet, Sylvie Behillil, Méline Bizard, Angela Brisebarre, Camille Capel, Etienne Simon-Lorière, Vincent Enouf, Maud Vanpeene, Sylvie van der Werf, Ramanantsoa CéLine |
| EPI_ISL_872200                                                                                                                                                                                                                                                                                                                                                                                                                                                                                                                                                                                                                                                                                                                                                                                                                                                                                                                                                                                                                                                                                                                                                 | hopital                                                                                                                                                                                         | National Reference Center for Viruses of Respiratory Infections, Institut Pasteur, Paris | Marion Barbet, Sylvie Behillil, Méline Bizard, Angela Brisebarre, Camille Capel, Etienne Simon-Lorière, Vincent Enouf, Maud Vanpeene, Sylvie van der Werf, Combe Patrice      |
| EPI_ISL_872201                                                                                                                                                                                                                                                                                                                                                                                                                                                                                                                                                                                                                                                                                                                                                                                                                                                                                                                                                                                                                                                                                                                                                 | Labo Analyses Med                                                                                                                                                                               | National Reference Center for Viruses of Respiratory Infections, Institut Pasteur, Paris | Marion Barbet, Sylvie Behillil, Méline Bizard, Angela Brisebarre, Camille Capel, Etienne Simon-Lorière, Vincent Enouf, Maud Vanpeene, Sylvie van der Werf, Girard Sophie      |
| EPI_ISL_872202                                                                                                                                                                                                                                                                                                                                                                                                                                                                                                                                                                                                                                                                                                                                                                                                                                                                                                                                                                                                                                                                                                                                                 | hopital                                                                                                                                                                                         | National Reference Center for Viruses of Respiratory Infections, Institut Pasteur, Paris | Marion Barbet, Sylvie Behillil, Méline Bizard, Angela Brisebarre, Camille Capel, Etienne Simon-Lorière, Vincent Enouf, Maud Vanpeene, Sylvie van der Werf, Combe Patrice      |
| EPI_ISL_872203                                                                                                                                                                                                                                                                                                                                                                                                                                                                                                                                                                                                                                                                                                                                                                                                                                                                                                                                                                                                                                                                                                                                                 | Labo Analyses Med                                                                                                                                                                               | National Reference Center for Viruses of Respiratory Infections, Institut Pasteur, Paris | Marion Barbet, Sylvie Behillil, Méline Bizard, Angela Brisebarre, Camille Capel, Etienne Simon-Lorière, Vincent Enouf, Maud Vanpeene, Sylvie van der Werf                     |
| EPI_ISL_872204, EPI_ISL_872205                                                                                                                                                                                                                                                                                                                                                                                                                                                                                                                                                                                                                                                                                                                                                                                                                                                                                                                                                                                                                                                                                                                                 | Labo Analyses Med                                                                                                                                                                               | National Reference Center for Viruses of Respiratory Infections, Institut Pasteur, Paris | Marion Barbet, Sylvie Behillil, Méline Bizard, Angela Brisebarre, Camille Capel, Etienne Simon-Lorière, Vincent Enouf, Maud Vanpeene, Sylvie van der Werf, Girard Sophie      |
| EPI_ISL_872206                                                                                                                                                                                                                                                                                                                                                                                                                                                                                                                                                                                                                                                                                                                                                                                                                                                                                                                                                                                                                                                                                                                                                 | Hopital                                                                                                                                                                                         | National Reference Center for Viruses of Respiratory Infections, Institut Pasteur, Paris | Marion Barbet, Sylvie Behillil, Méline Bizard, Angela Brisebarre, Camille Capel, Etienne Simon-Lorière, Vincent Enouf, Maud Vanpeene, Sylvie van der Werf, Morvan Odile       |
| EPI_ISL_872207, EPI_ISL_872208, EPI_ISL_872209                                                                                                                                                                                                                                                                                                                                                                                                                                                                                                                                                                                                                                                                                                                                                                                                                                                                                                                                                                                                                                                                                                                 | Labo Analyses Med                                                                                                                                                                               | National Reference Center for Viruses of Respiratory Infections, Institut Pasteur, Paris | Marion Barbet, Sylvie Behillil, Méline Bizard, Angela Brisebarre, Camille Capel, Etienne Simon-Lorière, Vincent Enouf, Maud Vanpeene, Sylvie van der Werf                     |
| EPI_ISL_872210, EPI_ISL_872211                                                                                                                                                                                                                                                                                                                                                                                                                                                                                                                                                                                                                                                                                                                                                                                                                                                                                                                                                                                                                                                                                                                                 | Hopital                                                                                                                                                                                         | National Reference Center for Viruses of Respiratory Infections, Institut Pasteur, Paris | Marion Barbet, Sylvie Behillil, Méline Bizard, Angela Brisebarre, Camille Capel, Etienne Simon-Lorière, Vincent Enouf, Maud Vanpeene, Sylvie van der Werf, Guigon Aurélie     |
| EPI_ISL_872212                                                                                                                                                                                                                                                                                                                                                                                                                                                                                                                                                                                                                                                                                                                                                                                                                                                                                                                                                                                                                                                                                                                                                 | Labo analyses med                                                                                                                                                                               | National Reference Center for Viruses of Respiratory Infections, Institut Pasteur, Paris | Marion Barbet, Sylvie Behillil, Méline Bizard, Angela Brisebarre, Camille Capel, Etienne Simon-Lorière, Vincent Enouf, Maud Vanpeene, Sylvie van der Werf, Amzalag Jonas      |
| EPI_ISL_872213, EPI_ISL_872214,                                                                                                                                                                                                                                                                                                                                                                                                                                                                                                                                                                                                                                                                                                                                                                                                                                                                                                                                                                                                                                                                                                                                | Hopital                                                                                                                                                                                         | National Reference Center for Viruses of Respiratory                                     | Marion Barbet, Sylvie Behillil, Méline Bizard, Angela Brisebarre, Camille Capel, Etienne Simon-Lorière, Vincent Enouf, Maud Vanpeene, Sylvie van der                          |



|                                                                                                                                                                                                                                                                                                                                                                                                                                                                                                                                                                                                                |                                  |                                                                                          |                                                                                                                                                                                                          |
|----------------------------------------------------------------------------------------------------------------------------------------------------------------------------------------------------------------------------------------------------------------------------------------------------------------------------------------------------------------------------------------------------------------------------------------------------------------------------------------------------------------------------------------------------------------------------------------------------------------|----------------------------------|------------------------------------------------------------------------------------------|----------------------------------------------------------------------------------------------------------------------------------------------------------------------------------------------------------|
| EPI_ISL_872274                                                                                                                                                                                                                                                                                                                                                                                                                                                                                                                                                                                                 | Hopital                          | National Reference Center for Viruses of Respiratory Infections, Institut Pasteur, Paris | Marion Barbet, Sylvie Behillil, Méline Bizard, Angela Brisebarre, Camille Capel, Etienne Simon-Lorière, Vincent Enouf, Maud Vanpeene, Sylvie van der Werf, Irimia Alix                                   |
| EPI_ISL_872275, EPI_ISL_872276, EPI_ISL_872277, EPI_ISL_872278                                                                                                                                                                                                                                                                                                                                                                                                                                                                                                                                                 | Hopital                          | National Reference Center for Viruses of Respiratory Infections, Institut Pasteur, Paris | Marion Barbet, Sylvie Behillil, Méline Bizard, Angela Brisebarre, Camille Capel, Etienne Simon-Lorière, Vincent Enouf, Maud Vanpeene, Sylvie van der Werf, Ramanantsoa CéLine                            |
| EPI_ISL_872279, EPI_ISL_872280, EPI_ISL_872281                                                                                                                                                                                                                                                                                                                                                                                                                                                                                                                                                                 | Labo Analyses Med                | National Reference Center for Viruses of Respiratory Infections, Institut Pasteur, Paris | Marion Barbet, Sylvie Behillil, Méline Bizard, Angela Brisebarre, Camille Capel, Etienne Simon-Lorière, Vincent Enouf, Maud Vanpeene, Sylvie van der Werf, Bour Jean Baptiste                            |
| EPI_ISL_872282, EPI_ISL_872283                                                                                                                                                                                                                                                                                                                                                                                                                                                                                                                                                                                 | Labo Analyses Med                | National Reference Center for Viruses of Respiratory Infections, Institut Pasteur, Paris | Marion Barbet, Sylvie Behillil, Méline Bizard, Angela Brisebarre, Camille Capel, Etienne Simon-Lorière, Vincent Enouf, Maud Vanpeene, Sylvie van der Werf, Girard Sophie                                 |
| EPI_ISL_872284, EPI_ISL_872285, EPI_ISL_872286, EPI_ISL_872287, EPI_ISL_872288, EPI_ISL_872289, EPI_ISL_872290                                                                                                                                                                                                                                                                                                                                                                                                                                                                                                 | Labo Analyses Med                | National Reference Center for Viruses of Respiratory Infections, Institut Pasteur, Paris | Marion Barbet, Sylvie Behillil, Méline Bizard, Angela Brisebarre, Camille Capel, Etienne Simon-Lorière, Vincent Enouf, Maud Vanpeene, Sylvie van der Werf                                                |
| EPI_ISL_872291, EPI_ISL_872292, EPI_ISL_872293, EPI_ISL_872294, EPI_ISL_872295, EPI_ISL_872296, EPI_ISL_872297                                                                                                                                                                                                                                                                                                                                                                                                                                                                                                 | Hopital                          | National Reference Center for Viruses of Respiratory Infections, Institut Pasteur, Paris | Marion Barbet, Sylvie Behillil, Méline Bizard, Angela Brisebarre, Camille Capel, Etienne Simon-Lorière, Vincent Enouf, Maud Vanpeene, Sylvie van der Werf, Guigon AuréLie                                |
| EPI_ISL_872298, EPI_ISL_872299, EPI_ISL_872300, EPI_ISL_872301, EPI_ISL_872302, EPI_ISL_872303, EPI_ISL_872304, EPI_ISL_872305                                                                                                                                                                                                                                                                                                                                                                                                                                                                                 | Hopital                          | National Reference Center for Viruses of Respiratory Infections, Institut Pasteur, Paris | Marion Barbet, Sylvie Behillil, Méline Bizard, Angela Brisebarre, Camille Capel, Etienne Simon-Lorière, Vincent Enouf, Maud Vanpeene, Sylvie van der Werf, Florin CéCile                                 |
| EPI_ISL_872307                                                                                                                                                                                                                                                                                                                                                                                                                                                                                                                                                                                                 | Hopital                          | National Reference Center for Viruses of Respiratory Infections, Institut Pasteur, Paris | Marion Barbet, Sylvie Behillil, Méline Bizard, Angela Brisebarre, Camille Capel, Etienne Simon-Lorière, Vincent Enouf, Maud Vanpeene, Sylvie van der Werf, Castelain Sandrine                            |
| EPI_ISL_872308                                                                                                                                                                                                                                                                                                                                                                                                                                                                                                                                                                                                 | Hopital                          | National Reference Center for Viruses of Respiratory Infections, Institut Pasteur, Paris | Marion Barbet, Sylvie Behillil, Méline Bizard, Angela Brisebarre, Camille Capel, Etienne Simon-Lorière, Vincent Enouf, Maud Vanpeene, Sylvie van der Werf, Brichler Ségolène                             |
| EPI_ISL_872309, EPI_ISL_872310, EPI_ISL_872311, EPI_ISL_872312, EPI_ISL_872313, EPI_ISL_872314                                                                                                                                                                                                                                                                                                                                                                                                                                                                                                                 | Labo analyses med                | National Reference Center for Viruses of Respiratory Infections, Institut Pasteur, Paris | Marion Barbet, Sylvie Behillil, Méline Bizard, Angela Brisebarre, Camille Capel, Etienne Simon-Lorière, Vincent Enouf, Maud Vanpeene, Sylvie van der Werf, Amzalag Jonas                                 |
| EPI_ISL_872315, EPI_ISL_872316, EPI_ISL_872317, EPI_ISL_872318, EPI_ISL_872319                                                                                                                                                                                                                                                                                                                                                                                                                                                                                                                                 | Hopital                          | National Reference Center for Viruses of Respiratory Infections, Institut Pasteur, Paris | Marion Barbet, Sylvie Behillil, Méline Bizard, Angela Brisebarre, Camille Capel, Etienne Simon-Lorière, Vincent Enouf, Maud Vanpeene, Sylvie van der Werf, Fourgeaud Jacques                             |
| EPI_ISL_872320, EPI_ISL_872321, EPI_ISL_872322                                                                                                                                                                                                                                                                                                                                                                                                                                                                                                                                                                 | Labo Analyses Med                | National Reference Center for Viruses of Respiratory Infections, Institut Pasteur, Paris | Marion Barbet, Sylvie Behillil, Méline Bizard, Angela Brisebarre, Camille Capel, Etienne Simon-Lorière, Vincent Enouf, Maud Vanpeene, Sylvie van der Werf                                                |
| EPI_ISL_872323                                                                                                                                                                                                                                                                                                                                                                                                                                                                                                                                                                                                 | Labo Analyses Med                | National Reference Center for Viruses of Respiratory Infections, Institut Pasteur, Paris | Marion Barbet, Sylvie Behillil, Méline Bizard, Angela Brisebarre, Camille Capel, Etienne Simon-Lorière, Vincent Enouf, Maud Vanpeene, Sylvie van der Werf, Rouah Raquel                                  |
| EPI_ISL_872324                                                                                                                                                                                                                                                                                                                                                                                                                                                                                                                                                                                                 | Labo Analyses Med                | National Reference Center for Viruses of Respiratory Infections, Institut Pasteur, Paris | Marion Barbet, Sylvie Behillil, Méline Bizard, Angela Brisebarre, Camille Capel, Etienne Simon-Lorière, Vincent Enouf, Maud Vanpeene, Sylvie van der Werf                                                |
| EPI_ISL_872325                                                                                                                                                                                                                                                                                                                                                                                                                                                                                                                                                                                                 | Hopital                          | National Reference Center for Viruses of Respiratory Infections, Institut Pasteur, Paris | Marion Barbet, Sylvie Behillil, Méline Bizard, Angela Brisebarre, Camille Capel, Etienne Simon-Lorière, Vincent Enouf, Maud Vanpeene, Sylvie van der Werf, Brichler Ségolène                             |
| EPI_ISL_872326, EPI_ISL_872327, EPI_ISL_872328, EPI_ISL_872329, EPI_ISL_872330, EPI_ISL_872331, EPI_ISL_872332, EPI_ISL_872333, EPI_ISL_872334, EPI_ISL_872335, EPI_ISL_872336, EPI_ISL_872337, EPI_ISL_872338                                                                                                                                                                                                                                                                                                                                                                                                 | see above                        | hopital                                                                                  | National Reference Center for Viruses of Respiratory Infections, Institut Pasteur, Paris                                                                                                                 |
| EPI_ISL_872339, EPI_ISL_872340, EPI_ISL_872341, EPI_ISL_872342                                                                                                                                                                                                                                                                                                                                                                                                                                                                                                                                                 | Hopital                          | National Reference Center for Viruses of Respiratory Infections, Institut Pasteur, Paris | Marion Barbet, Sylvie Behillil, Méline Bizard, Angela Brisebarre, Camille Capel, Etienne Simon-Lorière, Vincent Enouf, Maud Vanpeene, Sylvie van der Werf, Ducancelle Alexandra                          |
| EPI_ISL_872343                                                                                                                                                                                                                                                                                                                                                                                                                                                                                                                                                                                                 | Hopital                          | National Reference Center for Viruses of Respiratory Infections, Institut Pasteur, Paris | Marion Barbet, Sylvie Behillil, Méline Bizard, Angela Brisebarre, Camille Capel, Etienne Simon-Lorière, Vincent Enouf, Maud Vanpeene, Sylvie van der Werf, Irimia Alix                                   |
| EPI_ISL_872344, EPI_ISL_872345, EPI_ISL_872346                                                                                                                                                                                                                                                                                                                                                                                                                                                                                                                                                                 | Hopital                          | National Reference Center for Viruses of Respiratory Infections, Institut Pasteur, Paris | Marion Barbet, Sylvie Behillil, Méline Bizard, Angela Brisebarre, Camille Capel, Etienne Simon-Lorière, Vincent Enouf, Maud Vanpeene, Sylvie van der Werf, Ramanantsoa CéLine                            |
| EPI_ISL_872347, EPI_ISL_872348                                                                                                                                                                                                                                                                                                                                                                                                                                                                                                                                                                                 | Hopital                          | National Reference Center for Viruses of Respiratory Infections, Institut Pasteur, Paris | Marion Barbet, Sylvie Behillil, Méline Bizard, Angela Brisebarre, Camille Capel, Etienne Simon-Lorière, Vincent Enouf, Maud Vanpeene, Sylvie van der Werf, Irimia Alix                                   |
| EPI_ISL_877423                                                                                                                                                                                                                                                                                                                                                                                                                                                                                                                                                                                                 | Primasatya Husada Citra Hospital | Institute of Tropical Disease, Universitas Airlangga                                     | Maria I Lusida, Krisnoadi Rahardjo, Aldise M Nastri, Jezzy R Dewantari, Rima R Prasetya, Pudji Djanuartono, Gatot Soegiarto, Laksmi Wulandari, Resti Yudhawati, Soetjipto, Yasuko Mori, Kazufumi Shimizu |
| EPI_ISL_877460                                                                                                                                                                                                                                                                                                                                                                                                                                                                                                                                                                                                 | Siti Khodijah Hospital           | Institute of Tropical Disease, Universitas Airlangga                                     | Maria I Lusida, Krisnoadi Rahardjo, Aldise M Nastri, Jezzy R Dewantari, Rima R Prasetya, Muhammad Hamdan, Gatot Soegiarto, Laksmi Wulandari, Resti Yudhawati, Soetjipto, Yasuko Mori, Kazufumi Shimizu   |
| EPI_ISL_882999, EPI_ISL_883000, EPI_ISL_883001, EPI_ISL_883002, EPI_ISL_883003, EPI_ISL_883004, EPI_ISL_883005, EPI_ISL_883006, EPI_ISL_883007, EPI_ISL_883008, EPI_ISL_883009, EPI_ISL_883010, EPI_ISL_883011, EPI_ISL_883012, EPI_ISL_883013, EPI_ISL_883014, EPI_ISL_883015, EPI_ISL_883016, EPI_ISL_883017, EPI_ISL_883018, EPI_ISL_883019, EPI_ISL_883020, EPI_ISL_883021, EPI_ISL_883022, EPI_ISL_883023, EPI_ISL_883024, EPI_ISL_883025, EPI_ISL_883026, EPI_ISL_883027, EPI_ISL_883028, EPI_ISL_883029, EPI_ISL_883030, EPI_ISL_883031, EPI_ISL_883032, EPI_ISL_883033, EPI_ISL_883034, EPI_ISL_883035 | see above                        | Maryland Public Health Laboratory                                                        | Maryland Department of Health Laboratories Administration                                                                                                                                                |
| EPI_ISL_883958                                                                                                                                                                                                                                                                                                                                                                                                                                                                                                                                                                                                 | Hopital                          | National Reference Center for Viruses of Respiratory Infections, Institut Pasteur, Paris | Marion Barbet, Sylvie Behillil, Méline Bizard, Angela Brisebarre, Camille Capel, Etienne Simon-Lorière, Vincent Enouf, Maud Vanpeene, Sylvie van der Werf, Lagathu GisèLe                                |
| EPI_ISL_883959                                                                                                                                                                                                                                                                                                                                                                                                                                                                                                                                                                                                 | Labo Analyses Med                | National Reference Center for Viruses of Respiratory Infections, Institut Pasteur, Paris | Marion Barbet, Sylvie Behillil, Méline Bizard, Angela Brisebarre, Camille Capel, Etienne Simon-Lorière, Vincent Enouf, Maud Vanpeene, Sylvie van der Werf                                                |
| EPI_ISL_883960, EPI_ISL_883961                                                                                                                                                                                                                                                                                                                                                                                                                                                                                                                                                                                 | Labo Analyses Med                | National Reference Center for Viruses of Respiratory Infections, Institut Pasteur, Paris | Marion Barbet, Sylvie Behillil, Méline Bizard, Angela Brisebarre, Camille Capel, Etienne Simon-Lorière, Vincent Enouf, Maud Vanpeene, Sylvie van der Werf, Jacques Alexandra                             |
| EPI_ISL_883962, EPI_ISL_883963                                                                                                                                                                                                                                                                                                                                                                                                                                                                                                                                                                                 | Labo Analyses Med                | National Reference Center for Viruses of Respiratory Infections, Institut Pasteur, Paris | Marion Barbet, Sylvie Behillil, Méline Bizard, Angela Brisebarre, Camille Capel, Etienne Simon-Lorière, Vincent Enouf, Maud Vanpeene, Sylvie van der Werf, Amzalag Jonas                                 |
| EPI_ISL_883964, EPI_ISL_883965, EPI_ISL_883966, EPI_ISL_883967, EPI_ISL_883968, EPI_ISL_883969, EPI_ISL_883970, EPI_ISL_883971                                                                                                                                                                                                                                                                                                                                                                                                                                                                                 | Labo Analyses med                | National Reference Center for Viruses of Respiratory Infections, Institut Pasteur, Paris | Marion Barbet, Sylvie Behillil, Méline Bizard, Angela Brisebarre, Camille Capel, Etienne Simon-Lorière, Vincent Enouf, Maud Vanpeene, Sylvie van der Werf, Amzalag Jonas                                 |
| EPI_ISL_883972, EPI_ISL_883973, EPI_ISL_883974, EPI_ISL_883975, EPI_ISL_883976, EPI_ISL_883977, EPI_ISL_883978, EPI_ISL_883979, EPI_ISL_883980, EPI_ISL_883981, EPI_ISL_883982, EPI_ISL_883983, EPI_ISL_883984, EPI_ISL_883985                                                                                                                                                                                                                                                                                                                                                                                 | see above                        | Hopital                                                                                  | National Reference Center for Viruses of Respiratory Infections, Institut Pasteur, Paris                                                                                                                 |

|                                                                                                                                                |                                   |                                                                                          |                                                                                                                                                                                        |
|------------------------------------------------------------------------------------------------------------------------------------------------|-----------------------------------|------------------------------------------------------------------------------------------|----------------------------------------------------------------------------------------------------------------------------------------------------------------------------------------|
| EPI_ISL_883986, EPI_ISL_883987, EPI_ISL_883988, EPI_ISL_883989                                                                                 | Hopital                           | National Reference Center for Viruses of Respiratory Infections, Institut Pasteur, Paris | Marion Barbet, Sylvie Behillil, Méline Bizard, Angela Brisebarre, Camille Capel, Etienne Simon-Lorière, Vincent Enouf, Maud Vanpeene, Sylvie van der Werf                              |
| EPI_ISL_883990, EPI_ISL_883991, EPI_ISL_883992, EPI_ISL_883993, EPI_ISL_883994, EPI_ISL_883995, EPI_ISL_883996                                 | hopital                           | National Reference Center for Viruses of Respiratory Infections, Institut Pasteur, Paris | Marion Barbet, Sylvie Behillil, Méline Bizard, Angela Brisebarre, Camille Capel, Etienne Simon-Lorière, Vincent Enouf, Maud Vanpeene, Sylvie van der Werf, Andre-Garnier Elisabeth     |
| EPI_ISL_883997                                                                                                                                 | Labo Analyses Med                 | National Reference Center for Viruses of Respiratory Infections, Institut Pasteur, Paris | Marion Barbet, Sylvie Behillil, Méline Bizard, Angela Brisebarre, Camille Capel, Etienne Simon-Lorière, Vincent Enouf, Maud Vanpeene, Sylvie van der Werf, Selas Labormaine            |
| EPI_ISL_883998, EPI_ISL_883999, EPI_ISL_884000, EPI_ISL_884001, EPI_ISL_884002, EPI_ISL_884003, EPI_ISL_884004, EPI_ISL_884005                 | Labo Analyses Med                 | National Reference Center for Viruses of Respiratory Infections, Institut Pasteur, Paris | Marion Barbet, Sylvie Behillil, Méline Bizard, Angela Brisebarre, Camille Capel, Etienne Simon-Lorière, Vincent Enouf, Maud Vanpeene, Sylvie van der Werf, Rousset Dominique           |
| EPI_ISL_884006, EPI_ISL_884007                                                                                                                 | hopital                           | National Reference Center for Viruses of Respiratory Infections, Institut Pasteur, Paris | Marion Barbet, Sylvie Behillil, Méline Bizard, Angela Brisebarre, Camille Capel, Etienne Simon-Lorière, Vincent Enouf, Maud Vanpeene, Sylvie van der Werf, Combe Patrice               |
| EPI_ISL_884251, EPI_ISL_884252, EPI_ISL_884253, EPI_ISL_884254, EPI_ISL_884255, EPI_ISL_884256, EPI_ISL_884257, EPI_ISL_884258, EPI_ISL_884259 | Maryland Public Health Laboratory | Maryland Public Health Laboratory                                                        | Maryland Department of Health Laboratories Administration                                                                                                                              |
| EPI_ISL_888826                                                                                                                                 | Hospital                          | National Reference Center for Viruses of Respiratory Infections, Institut Pasteur, Paris | Marion Barbet, Sylvie Behillil, Méline Bizard, Angela Brisebarre, Camille Capel, Etienne Simon-Lorière, Vincent Enouf, Maud Vanpeene, Sylvie van der Werf, Gisèle Lagathu              |
| EPI_ISL_888827, EPI_ISL_888828, EPI_ISL_888829                                                                                                 | General practitioner office       | National Reference Center for Viruses of Respiratory Infections, Institut Pasteur, Paris | Marion Barbet, Sylvie Behillil, Méline Bizard, Angela Brisebarre, Camille Capel, Etienne Simon-Lorière, Vincent Enouf, Maud Vanpeene, Sylvie van der Werf                              |
| EPI_ISL_890352, EPI_ISL_890353                                                                                                                 | Labo Analyses Med                 | National Reference Center for Viruses of Respiratory Infections, Institut Pasteur, Paris | Marion Barbet, Sylvie Behillil, Méline Bizard, Angela Brisebarre, Camille Capel, Etienne Simon-Lorière, Vincent Enouf, Maud Vanpeene, Sylvie van der Werf, Rousset Dominique           |
| EPI_ISL_890354                                                                                                                                 | Labo Analyses Med                 | National Reference Center for Viruses of Respiratory Infections, Institut Pasteur, Paris | Marion Barbet, Sylvie Behillil, Méline Bizard, Angela Brisebarre, Camille Capel, Etienne Simon-Lorière, Vincent Enouf, Maud Vanpeene, Sylvie van der Werf, Coignard Catherine          |
| EPI_ISL_890355, EPI_ISL_890356, EPI_ISL_890357, EPI_ISL_890358                                                                                 | Hospital                          | National Reference Center for Viruses of Respiratory Infections, Institut Pasteur, Paris | Marion Barbet, Sylvie Behillil, Méline Bizard, Angela Brisebarre, Camille Capel, Etienne Simon-Lorière, Vincent Enouf, Maud Vanpeene, Sylvie van der Werf, Combe Patrice               |
| EPI_ISL_890359                                                                                                                                 | Hospital                          | National Reference Center for Viruses of Respiratory Infections, Institut Pasteur, Paris | Marion Barbet, Sylvie Behillil, Méline Bizard, Angela Brisebarre, Camille Capel, Etienne Simon-Lorière, Vincent Enouf, Maud Vanpeene, Sylvie van der Werf, Guigon AuréLie              |
| EPI_ISL_890889                                                                                                                                 | Hospital                          | National Reference Center for Viruses of Respiratory Infections, Institut Pasteur, Paris | Marion Barbet, Sylvie Behillil, Méline Bizard, Angela Brisebarre, Camille Capel, Etienne Simon-Lorière, Vincent Enouf, Maud Vanpeene, Sylvie van der Werf, Laurent Andreoletti         |
| EPI_ISL_890890, EPI_ISL_890891                                                                                                                 | Hospital                          | National Reference Center for Viruses of Respiratory Infections, Institut Pasteur, Paris | Marion Barbet, Sylvie Behillil, Méline Bizard, Angela Brisebarre, Camille Capel, Etienne Simon-Lorière, Vincent Enouf, Maud Vanpeene, Sylvie van der Werf, Patricia Stoessel-Thouvenin |
| EPI_ISL_890892                                                                                                                                 | Hospital                          | National Reference Center for Viruses of Respiratory Infections, Institut Pasteur, Paris | Marion Barbet, Sylvie Behillil, Méline Bizard, Angela Brisebarre, Camille Capel, Etienne Simon-Lorière, Vincent Enouf, Maud Vanpeene, Sylvie van der Werf, Léa Pilorge                 |
| EPI_ISL_890893, EPI_ISL_890894                                                                                                                 | Hospital                          | National Reference Center for Viruses of Respiratory Infections, Institut Pasteur, Paris | Marion Barbet, Sylvie Behillil, Méline Bizard, Angela Brisebarre, Camille Capel, Etienne Simon-Lorière, Vincent Enouf, Maud Vanpeene, Sylvie van der Werf, Patricia Stoessel-Thouvenin |
| EPI_ISL_890895                                                                                                                                 | Laboratory Analyses Med           | National Reference Center for Viruses of Respiratory Infections, Institut Pasteur, Paris | Marion Barbet, Sylvie Behillil, Méline Bizard, Angela Brisebarre, Camille Capel, Etienne Simon-Lorière, Vincent Enouf, Maud Vanpeene, Sylvie van der Werf, Céline Menaut               |

We gratefully acknowledge the following Authors from the Originating laboratories responsible for obtaining the specimens, as well as the Submitting laboratories where the genome data were generated and shared via GISAID, on which this research is based.

All Submitters of data may be contacted directly via [www.gisaid.org](http://www.gisaid.org)

Authors are sorted alphabetically.

| Accession ID                                                                                                                                                                                                                                                                                                                                                   | Originating Laboratory                                                                                           | Submitting Laboratory                                                                       | Authors                                                                                                                                                                                                                                                                                                                                                                                                 |
|----------------------------------------------------------------------------------------------------------------------------------------------------------------------------------------------------------------------------------------------------------------------------------------------------------------------------------------------------------------|------------------------------------------------------------------------------------------------------------------|---------------------------------------------------------------------------------------------|---------------------------------------------------------------------------------------------------------------------------------------------------------------------------------------------------------------------------------------------------------------------------------------------------------------------------------------------------------------------------------------------------------|
| EPI_ISL_403932, EPI_ISL_403933, EPI_ISL_403934, EPI_ISL_403935, EPI_ISL_403936, EPI_ISL_403937                                                                                                                                                                                                                                                                 | Guangdong Provincial Center for Diseases Control and Prevention; Guangdong Provincial Public Health              | Department of Microbiology, Guangdong Provincial Center for Diseases Control and Prevention | Min Kang, Jie Wu, Jing Lu, Tao Liu, Baisheng Li, Shujiang Mei, Feng Ruan, Lifeng Lin, Changwen Ke, Haojie Zhong, Yingtao Zhang, Lirong Zou, Xuguang Chen, Qi Zhu, Jianpeng Xiao, Jianxiang Geng, Zhe Liu, Jianxiang Hu, Weilin Zeng, Xing Li, Yuhuang Liao, Xiujuan Tang, Songjian Xiao, Ying Wang, Yingchao Song, Xue Zhuang, Lijun Liang, Guan hao He, Huihong Deng, Tie Song, Jianfeng He, Wenjun Ma |
| EPI_ISL_406531                                                                                                                                                                                                                                                                                                                                                 | Guangdong Provincial Center for Diseases Control and Prevention; Guangdong Provincial Public Health              | Guangdong Provincial Center for Disease Control and Prevention                              | Min Kang, Jie Wu, Jing Lu, Tao Liu, Baisheng Li, Shujiang Mei, Feng Ruan, Lifeng Lin, Changwen Ke, Haojie Zhong, Yingtao Zhang, Lirong Zou, Xuguang Chen, Qi Zhu, Jianpeng Xiao, Jianxiang Geng, Zhe Liu, Jianxiang Hu, Weilin Zeng, Xing Li, Yuhuang Liao, Xiujuan Tang, Songjian Xiao, Ying Wang, Yingchao Song, Xue Zhuang, Lijun Liang, Guan hao He, Huihong Deng, Tie Song, Jianfeng He, Wenjun Ma |
| EPI_ISL_406533                                                                                                                                                                                                                                                                                                                                                 | Guangdong Provincial Center for Diseases Control and Prevention; Guangdong Provincial Public Health              | Guangdong Provincial Center for Diseases Control and Prevention                             | Min Kang, Jie Wu, Jing Lu, Tao Liu, Baisheng Li, Shujiang Mei, Feng Ruan, Lifeng Lin, Changwen Ke, Haojie Zhong, Yingtao Zhang, Lirong Zou, Xuguang Chen, Qi Zhu, Jianpeng Xiao, Jianxiang Geng, Zhe Liu, Jianxiang Hu, Weilin Zeng, Xing Li, Yuhuang Liao, Xiujuan Tang, Songjian Xiao, Ying Wang, Yingchao Song, Xue Zhuang, Lijun Liang, Guan hao He, Huihong Deng, Tie Song, Jianfeng He, Wenjun Ma |
| EPI_ISL_406534, EPI_ISL_406535, EPI_ISL_406536                                                                                                                                                                                                                                                                                                                 | Guangdong Provincial Center for Diseases Control and Prevention; Guangdong Provincial Public Health              | Guangdong Provincial Center for Diseases Control and Prevention                             | Min Kang, Jie Wu, Jing Lu, Tao Liu, Baisheng Li, Shujiang Mei, Feng Ruan, Lifeng Lin, Changwen Ke, Haojie Zhong, Yingtao Zhang, Lirong Zou, Xuguang Chen, Qi Zhu, Jianpeng Xiao, Jianxiang Geng, Zhe Liu, Jianxiang Hu, Weilin Zeng, Xing Li, Yuhuang Liao, Xiujuan Tang, Songjian Xiao, Ying Wang, Yingchao Song, Xue Zhuang, Lijun Liang, Guan hao He, Huihong Deng, Tie Song, Jianfeng He, Wenjun Ma |
| EPI_ISL_406538                                                                                                                                                                                                                                                                                                                                                 | Guangdong Provincial Center for Diseases Control and Prevention; Guangdong Provincial Institute of Public Health | Guangdong Provincial Center for Diseases Control and Prevention                             | Min Kang, Jie Wu, Jing Lu, Tao Liu, Baisheng Li, Shujiang Mei, Feng Ruan, Lifeng Lin, Changwen Ke, Haojie Zhong, Yingtao Zhang, Lirong Zou, Xuguang Chen, Qi Zhu, Jianpeng Xiao, Jianxiang Geng, Zhe Liu, Jianxiang Hu, Weilin Zeng, Xing Li, Yuhuang Liao, Xiujuan Tang, Songjian Xiao, Ying Wang, Yingchao Song, Xue Zhuang, Lijun Liang, Guan hao He, Huihong Deng, Tie Song, Jianfeng He, Wenjun Ma |
| EPI_ISL_406596, EPI_ISL_406597                                                                                                                                                                                                                                                                                                                                 | Department of Infectious and Tropical Diseases, Bichat Claude Bernard Hospital, Paris                            | National Reference Center for Viruses of Respiratory Infections, Institut Pasteur, Paris    | Mélanie Albert, Marion Barbet, Sylvie Behillil, Méline Bizard, Angela Brisebarre, Flora Donati, Vincent Enouf, Maud Vanpeene, Sylvie van der Werf, Yazdan Yazdanpanah, Xavier Lescure.                                                                                                                                                                                                                  |
| EPI_ISL_407071                                                                                                                                                                                                                                                                                                                                                 | Respiratory Virus Unit, Microbiology Services Colindale, Public Health England                                   | Respiratory Virus Unit, Microbiology Services Colindale, Public Health England              | Monica Galiano, Shahjahan Miah, Richard Myers, Angie Lackenby, Omolola Akinbami, Tiina Talts, Leena Bhaw, Kirstin Edwards, Jonathan Hubb, Joanna Ellis, Maria Zambon                                                                                                                                                                                                                                    |
| EPI_ISL_407073                                                                                                                                                                                                                                                                                                                                                 | Respiratory Virus Unit, Microbiology Services Colindale, Public Health England                                   | Respiratory Virus Unit, Microbiology Services Colindale, Public Health England              | Monica Galiano, Shahjahan Miah, Richard Myers, Angie Lackenby, Omolola Akinbami, Tiina Talts, Leena Bhaw, Kirstin Edwards, Jonathan Hubb, Joanna Ellis, Maria Zambon.                                                                                                                                                                                                                                   |
| EPI_ISL_408430                                                                                                                                                                                                                                                                                                                                                 | Department of Infectious and Tropical Diseases, Bichat Claude Bernard Hospital, Paris                            | National Reference Center for Viruses of Respiratory Infections, Institut Pasteur, Paris    | Mélanie Albert, Marion Barbet, Sylvie Behillil, Méline Bizard, Angela Brisebarre, Flora Donati, Vincent Enouf, Maud Vanpeene, Sylvie van der Werf, Yazdan Yazdanpanah, Xavier Lescure                                                                                                                                                                                                                   |
| EPI_ISL_408431                                                                                                                                                                                                                                                                                                                                                 | Sorbonne Université, Inserm et Assistance Publique-Hôpitaux de Paris (Pitié Salpêtrière)                         | National Reference Center for Viruses of Respiratory Infections, Institut Pasteur, Paris    | Mélanie Albert, Marion Barbet, Sylvie Behillil, Méline Bizard, Angela Brisebarre, Flora Donati, Vincent Enouf, Maud Vanpeene, Sylvie van der Werf, Sonia Burrel, Anne-Geneviève Marcelin, Vincent Calvez, David Boutolleau, Elise Klément, Valérie Pourcher, Eric Caumes.                                                                                                                               |
| EPI_ISL_410720                                                                                                                                                                                                                                                                                                                                                 | Department of Infectious and Tropical Diseases, Bichat Claude Bernard Hospital, Paris                            | National Reference Center for Viruses of Respiratory Infections, Institut Pasteur, Paris    | Mélanie Albert, Marion Barbet, Sylvie Behillil, Méline Bizard, Angela Brisebarre, Flora Donati, Vincent Enouf, Maud Vanpeene, Sylvie van der Werf, Yazdan Yazdanpanah, Xavier Lescure.                                                                                                                                                                                                                  |
| EPI_ISL_410984                                                                                                                                                                                                                                                                                                                                                 | Department of Infectious and Tropical Diseases, Bichat Claude Bernard Hospital, Paris                            | National Reference Center for Viruses of Respiratory Infections, Institut Pasteur, Paris    | Mélanie Albert, Marion Barbet, Sylvie Behillil, Méline Bizard, Angela Brisebarre, Flora Donati, Vincent Enouf, Maud Vanpeene, Sylvie van der Werf, Yazdan Yazdanpanah, Xavier Lescure                                                                                                                                                                                                                   |
| EPI_ISL_412116, EPI_ISL_414005, EPI_ISL_414006, EPI_ISL_414007, EPI_ISL_414008, EPI_ISL_414009, EPI_ISL_414010, EPI_ISL_414011, EPI_ISL_414012, EPI_ISL_414013, EPI_ISL_414040, EPI_ISL_414041, EPI_ISL_414042, EPI_ISL_414043, EPI_ISL_414044                                                                                                                 | see above                                                                                                        | Respiratory Virus Unit, Microbiology Services Colindale, Public Health England              | Monica Galiano, Shahjahan Miah, Angie Lackenby, Omolola Akinbami, Tiina Talts, Leena Bhaw, Richard Myers, Steven Platt, Kirstin Edwards, Jonathan Hubb, Joanna Ellis, Maria Zambon                                                                                                                                                                                                                      |
| EPI_ISL_414487                                                                                                                                                                                                                                                                                                                                                 | UCD National Virus Reference Laboratory                                                                          | UCD National Virus Reference Laboratory                                                     | Michael Carr, Gabriel Gonzalez, Jonathan Dean, Suzie Coughlan, Alison Murphy, Kevin Byrne, Ken Wolfe, Jeff Connell, Brendan Loftus, Cillian F De Gascun                                                                                                                                                                                                                                                 |
| EPI_ISL_414522, EPI_ISL_414523, EPI_ISL_414524, EPI_ISL_414525, EPI_ISL_414526                                                                                                                                                                                                                                                                                 | Respiratory Virus Unit, Microbiology Services Colindale, Public Health England                                   | Respiratory Virus Unit, Microbiology Services Colindale, Public Health England              | Monica Galiano, Shahjahan Miah, Angie Lackenby, Omolola Akinbami, Tiina Talts, Leena Bhaw, Richard Myers, Steven Platt, Kirstin Edwards, Jonathan Hubb, Joanna Ellis, Maria Zambon                                                                                                                                                                                                                      |
| EPI_ISL_414584, EPI_ISL_414585, EPI_ISL_414586, EPI_ISL_414587                                                                                                                                                                                                                                                                                                 | UCD National Virus Reference Laboratory                                                                          | UCD National Virus Reference Laboratory                                                     | Michael Carr, Gabriel Gonzalez, Jonathan Dean, Suzie Coughlan, Alison Murphy, Kevin Byrne, Ken Wolfe, Jeff Connell, Brendan Loftus, Cillian F De Gascun                                                                                                                                                                                                                                                 |
| EPI_ISL_414600, EPI_ISL_414623                                                                                                                                                                                                                                                                                                                                 | Laboratoire de Virologie Institut de Virologie - INSERM U 1109 Hôpitaux Universitaires de Strasbourg             | National Reference Center for Viruses of Respiratory Infections, Institut Pasteur, Paris    | Mélanie Albert, Marion Barbet, Sylvie Behillil, Méline Bizard, Angela Brisebarre, Flora Donati Vincent Enouf, Maud Vanpeene, Sylvie van der Werf, Samira Fafi-Kremer                                                                                                                                                                                                                                    |
| EPI_ISL_414624                                                                                                                                                                                                                                                                                                                                                 | Centre Hospitalier Universitaire de Rouen Laboratoire de Virologie                                               | National Reference Center for Viruses of Respiratory Infections, Institut Pasteur, Paris    | Mélanie Albert, Marion Barbet, Sylvie Behillil, Méline Bizard, Angela Brisebarre, Flora Donati Vincent Enouf, Maud Vanpeene, Sylvie van der Werf, Jean-Christophe Plantier                                                                                                                                                                                                                              |
| EPI_ISL_414625                                                                                                                                                                                                                                                                                                                                                 | Centre Hospitalier Régional Universitaire de Nantes Laboratoire de Virologie                                     | National Reference Center for Viruses of Respiratory Infections, Institut Pasteur, Paris    | Mélanie Albert, Marion Barbet, Sylvie Behillil, Méline Bizard, Angela Brisebarre, Flora Donati Vincent Enouf, Maud Vanpeene, Sylvie van der Werf, Marianne Coste-Burel                                                                                                                                                                                                                                  |
| EPI_ISL_414626                                                                                                                                                                                                                                                                                                                                                 | unknown                                                                                                          | National Reference Center for Viruses of Respiratory Infections, Institut Pasteur, Paris    | Mélanie Albert, Marion Barbet, Sylvie Behillil, Méline Bizard, Angela Brisebarre, Flora Donati Vincent Enouf, Maud Vanpeene, Sylvie van der Werf                                                                                                                                                                                                                                                        |
| EPI_ISL_414627, EPI_ISL_414628, EPI_ISL_414629, EPI_ISL_414630                                                                                                                                                                                                                                                                                                 | Centre Hospitalier Compiègne Laboratoire de Biologie                                                             | National Reference Center for Viruses of Respiratory Infections, Institut Pasteur, Paris    | Mélanie Albert, Marion Barbet, Sylvie Behillil, Méline Bizard, Angela Brisebarre, Flora Donati Vincent Enouf, Maud Vanpeene, Sylvie van der Werf, Raulin Olivia                                                                                                                                                                                                                                         |
| EPI_ISL_414631, EPI_ISL_414632                                                                                                                                                                                                                                                                                                                                 | Hôpital Robert Debré Laboratoire de Virologie                                                                    | National Reference Center for Viruses of Respiratory Infections, Institut Pasteur, Paris    | Mélanie Albert, Marion Barbet, Sylvie Behillil, Méline Bizard, Angela Brisebarre, Flora Donati Vincent Enouf, Maud Vanpeene, Sylvie van der Werf, Laurent Andreoletti                                                                                                                                                                                                                                   |
| EPI_ISL_414633                                                                                                                                                                                                                                                                                                                                                 | Centre Hospitalier René Dubois Laboratoire de Microbiologie - Bât A                                              | National Reference Center for Viruses of Respiratory Infections, Institut Pasteur, Paris    | Mélanie Albert, Marion Barbet, Sylvie Behillil, Méline Bizard, Angela Brisebarre, Flora Donati Vincent Enouf, Maud Vanpeene, Sylvie van der Werf, Pascale Martres                                                                                                                                                                                                                                       |
| EPI_ISL_414634, EPI_ISL_414635, EPI_ISL_414636, EPI_ISL_414637, EPI_ISL_414638                                                                                                                                                                                                                                                                                 | Centre Hospitalier Compiègne Laboratoire de Biologie                                                             | National Reference Center for Viruses of Respiratory Infections, Institut Pasteur, Paris    | Mélanie Albert, Marion Barbet, Sylvie Behillil, Méline Bizard, Angela Brisebarre, Flora Donati Vincent Enouf, Maud Vanpeene, Sylvie van der Werf, Raulin Olivia                                                                                                                                                                                                                                         |
| EPI_ISL_415129, EPI_ISL_415130, EPI_ISL_415131, EPI_ISL_415132, EPI_ISL_415133, EPI_ISL_415134, EPI_ISL_415135, EPI_ISL_415136, EPI_ISL_415137, EPI_ISL_415138, EPI_ISL_415139, EPI_ISL_415140, EPI_ISL_415141, EPI_ISL_415142, EPI_ISL_415143, EPI_ISL_415144, EPI_ISL_415145, EPI_ISL_415146, EPI_ISL_415147, EPI_ISL_415148, EPI_ISL_415149, EPI_ISL_415150 | see above                                                                                                        | Respiratory Virus Unit, Microbiology Services Colindale, Public Health England              | Monica Galiano, Shahjahan Miah, Angie Lackenby, Omolola Akinbami, Tiina Talts, Leena Bhaw, Richard Myers, Steven Platt, Kirstin Edwards, Jonathan Hubb, Joanna Ellis, Maria Zambon                                                                                                                                                                                                                      |
| EPI_ISL_415634, EPI_ISL_415635, EPI_ISL_415636                                                                                                                                                                                                                                                                                                                 | Virology Department, Royal Infirmary of Edinburgh, NHS Lothian                                                   | Virology Department, Royal Infirmary of Edinburgh, NHS Lothian                              | McHugh M, Dewar R, O'Toole Á, Rambaut A, Williams TC, Templeton K                                                                                                                                                                                                                                                                                                                                       |

|                                                                                                                                                                                                                                                                                                                                                                                                                                                                                                                                                                                                                                                                                                                                                                                                                                                                                                                                                                                                                                                                                                                                                                                                                                                                                                                                                                                                                                                                                                                                                                                                                                                                                                                |                                                                                                                                                             |                                                                                                                                               |                                                                                                                                                                                                                                                                                                                                                                                                                                                                                                                                                                 |
|----------------------------------------------------------------------------------------------------------------------------------------------------------------------------------------------------------------------------------------------------------------------------------------------------------------------------------------------------------------------------------------------------------------------------------------------------------------------------------------------------------------------------------------------------------------------------------------------------------------------------------------------------------------------------------------------------------------------------------------------------------------------------------------------------------------------------------------------------------------------------------------------------------------------------------------------------------------------------------------------------------------------------------------------------------------------------------------------------------------------------------------------------------------------------------------------------------------------------------------------------------------------------------------------------------------------------------------------------------------------------------------------------------------------------------------------------------------------------------------------------------------------------------------------------------------------------------------------------------------------------------------------------------------------------------------------------------------|-------------------------------------------------------------------------------------------------------------------------------------------------------------|-----------------------------------------------------------------------------------------------------------------------------------------------|-----------------------------------------------------------------------------------------------------------------------------------------------------------------------------------------------------------------------------------------------------------------------------------------------------------------------------------------------------------------------------------------------------------------------------------------------------------------------------------------------------------------------------------------------------------------|
| EPI_ISL_415641, EPI_ISL_415642, EPI_ISL_415643, EPI_ISL_415644                                                                                                                                                                                                                                                                                                                                                                                                                                                                                                                                                                                                                                                                                                                                                                                                                                                                                                                                                                                                                                                                                                                                                                                                                                                                                                                                                                                                                                                                                                                                                                                                                                                 | R. G. Lugar Center for Public Health Research, National Center for Disease Control and Public Health (NCDC) of Georgia.                                     | R. G. Lugar Center for Public Health Research, National Center for Disease Control and Public Health (NCDC) of Georgia.                       | Nato Kotaria, Marine Murtskhaladze, Ann Machabliashvili, Lela Sabadze, Mari Gavashelidze, Ana Papkiauri, Meri Pantsulaia, Gvantsa Brachveli, Tata Imnadze, Tamar Jashiasvili, Tea Tvedoradze, Kétevan Sidamonidze, Ekaterine Khmaladze, Ekaterine Zghenti, Roena Sukhiasvili, Mariam Zakalashvili, Lela Urushadze, Magda Dgebuadze, Giorgi Tomashvili, Davit Tsaguria, Ekaterine Zangaladze, Nino Berishvili, Gvantsa Chanturia, Adam Kotorashvili, Maia Alkhazashvili, Irma Burjanadze, Anna Kasradze, Khatuna Zakhashvili, Paata Imnadze, Amiran Gamkrelidze. |
| EPI_ISL_415646                                                                                                                                                                                                                                                                                                                                                                                                                                                                                                                                                                                                                                                                                                                                                                                                                                                                                                                                                                                                                                                                                                                                                                                                                                                                                                                                                                                                                                                                                                                                                                                                                                                                                                 | Department of Virus and Microbiological Special diagnostics, Statens Serum Institut, Copenhagen, Denmark.                                                   | ViFU                                                                                                                                          | Morten Rasmussen, Maiken Worsoe Rosenstjerne , Anders Fomsgaard                                                                                                                                                                                                                                                                                                                                                                                                                                                                                                 |
| EPI_ISL_415647                                                                                                                                                                                                                                                                                                                                                                                                                                                                                                                                                                                                                                                                                                                                                                                                                                                                                                                                                                                                                                                                                                                                                                                                                                                                                                                                                                                                                                                                                                                                                                                                                                                                                                 | Department of Virus and Microbiological Special diagnostics, Statens Serum Institut, Copenhagen, Denmark.                                                   | Statens Serum Institute                                                                                                                       | Morten Rasmussen, Maiken Worsoe Rosenstjerne , Anders Fomsgaard                                                                                                                                                                                                                                                                                                                                                                                                                                                                                                 |
| EPI_ISL_415648                                                                                                                                                                                                                                                                                                                                                                                                                                                                                                                                                                                                                                                                                                                                                                                                                                                                                                                                                                                                                                                                                                                                                                                                                                                                                                                                                                                                                                                                                                                                                                                                                                                                                                 | Department of Virus and Microbiological Special diagnostics, Statens Serum Institut, Copenhagen, Denmark.                                                   | ViFU                                                                                                                                          | Morten Rasmussen, Maiken Worsoe Rosenstjerne , Anders Fomsgaard                                                                                                                                                                                                                                                                                                                                                                                                                                                                                                 |
| EPI_ISL_415649                                                                                                                                                                                                                                                                                                                                                                                                                                                                                                                                                                                                                                                                                                                                                                                                                                                                                                                                                                                                                                                                                                                                                                                                                                                                                                                                                                                                                                                                                                                                                                                                                                                                                                 | unknown                                                                                                                                                     | National Reference Center for Viruses of Respiratory Infections, Institut Pasteur, Paris                                                      | Mélnie Albert, Marion Barbet, Sylvie Behillil, Méline Bizard, Angela Brisebarre, Flora Donati Vincent Enouf, Maud Vanpeene, Sylvie van der Werf                                                                                                                                                                                                                                                                                                                                                                                                                 |
| EPI_ISL_415650                                                                                                                                                                                                                                                                                                                                                                                                                                                                                                                                                                                                                                                                                                                                                                                                                                                                                                                                                                                                                                                                                                                                                                                                                                                                                                                                                                                                                                                                                                                                                                                                                                                                                                 | Hôpital Instruction des Armées - BEGIN                                                                                                                      | National Reference Center for Viruses of Respiratory Infections, Institut Pasteur, Paris                                                      | Mélnie Albert, Marion Barbet, Sylvie Behillil, Méline Bizard, Angela Brisebarre, Flora Donati Vincent Enouf, Maud Vanpeene, Sylvie van der Werf, Christine Bigaillon                                                                                                                                                                                                                                                                                                                                                                                            |
| EPI_ISL_415651, EPI_ISL_415652                                                                                                                                                                                                                                                                                                                                                                                                                                                                                                                                                                                                                                                                                                                                                                                                                                                                                                                                                                                                                                                                                                                                                                                                                                                                                                                                                                                                                                                                                                                                                                                                                                                                                 | unknown                                                                                                                                                     | National Reference Center for Viruses of Respiratory Infections, Institut Pasteur, Paris                                                      | Mélnie Albert, Marion Barbet, Sylvie Behillil, Méline Bizard, Angela Brisebarre, Flora Donati Vincent Enouf, Maud Vanpeene, Sylvie van der Werf                                                                                                                                                                                                                                                                                                                                                                                                                 |
| EPI_ISL_415653, EPI_ISL_415654                                                                                                                                                                                                                                                                                                                                                                                                                                                                                                                                                                                                                                                                                                                                                                                                                                                                                                                                                                                                                                                                                                                                                                                                                                                                                                                                                                                                                                                                                                                                                                                                                                                                                 | Centre Hospitalier Compiègne Laboratoire de Biologie                                                                                                        | National Reference Center for Viruses of Respiratory Infections, Institut Pasteur, Paris                                                      | Mélnie Albert, Marion Barbet, Sylvie Behillil, Méline Bizard, Angela Brisebarre, Flora Donati Vincent Enouf, Maud Vanpeene, Sylvie van der Werf, Raulin Olivia                                                                                                                                                                                                                                                                                                                                                                                                  |
| EPI_ISL_416140, EPI_ISL_416141, EPI_ISL_416142                                                                                                                                                                                                                                                                                                                                                                                                                                                                                                                                                                                                                                                                                                                                                                                                                                                                                                                                                                                                                                                                                                                                                                                                                                                                                                                                                                                                                                                                                                                                                                                                                                                                 | Department of Virus and Microbiological Special diagnostics, Statens Serum Institut, Copenhagen, Denmark.                                                   | Statens Serum Institute                                                                                                                       | Morten Rasmussen, Maiken Worsoe Rosenstjerne , Anders Fomsgaard                                                                                                                                                                                                                                                                                                                                                                                                                                                                                                 |
| EPI_ISL_416143, EPI_ISL_416144, EPI_ISL_416153                                                                                                                                                                                                                                                                                                                                                                                                                                                                                                                                                                                                                                                                                                                                                                                                                                                                                                                                                                                                                                                                                                                                                                                                                                                                                                                                                                                                                                                                                                                                                                                                                                                                 | Department of Virus and Microbiological Special diagnostics, Statens Serum Institut, Copenhagen, Denmark.                                                   | ViFU                                                                                                                                          | Morten Rasmussen, Maiken Worsoe Rosenstjerne , Anders Fomsgaard                                                                                                                                                                                                                                                                                                                                                                                                                                                                                                 |
| EPI_ISL_416486                                                                                                                                                                                                                                                                                                                                                                                                                                                                                                                                                                                                                                                                                                                                                                                                                                                                                                                                                                                                                                                                                                                                                                                                                                                                                                                                                                                                                                                                                                                                                                                                                                                                                                 | Servicio de Microbiología. Consorcio Hospital General Universitario de Valencia                                                                             | Sequencing and Bioinformatics Service and Molecular Epidemiology Research Group. FISABIO-Public Health                                        | Neris Garcia-Gonzalez, Maria Alma Bracho, Maria Dolores Ocete, Concepcion Gimeno, Giuseppe D'Auria, Griselda De Marco, Fernando Gonzalez-Candelas                                                                                                                                                                                                                                                                                                                                                                                                               |
| EPI_ISL_416493                                                                                                                                                                                                                                                                                                                                                                                                                                                                                                                                                                                                                                                                                                                                                                                                                                                                                                                                                                                                                                                                                                                                                                                                                                                                                                                                                                                                                                                                                                                                                                                                                                                                                                 | CH Jean de Navarre Laboratoire de Biologie                                                                                                                  | National Reference Center for Viruses of Respiratory Infections, Institut Pasteur, Paris                                                      | Mélnie Albert, Marion Barbet, Sylvie Behillil, Méline Bizard, Angela Brisebarre, Flora Donati, Etienne Simon-Lorière, Vincent Enouf, Maud Vanpeene, Sylvie van der Werf                                                                                                                                                                                                                                                                                                                                                                                         |
| EPI_ISL_416494                                                                                                                                                                                                                                                                                                                                                                                                                                                                                                                                                                                                                                                                                                                                                                                                                                                                                                                                                                                                                                                                                                                                                                                                                                                                                                                                                                                                                                                                                                                                                                                                                                                                                                 | Centre Hospitalier Universitaire de Rouen Laboratoire de Virologie                                                                                          | National Reference Center for Viruses of Respiratory Infections, Institut Pasteur, Paris                                                      | Mélnie Albert, Marion Barbet, Sylvie Behillil, Méline Bizard, Angela Brisebarre, Flora Donati, Etienne Simon-Lorière, Vincent Enouf, Maud Vanpeene, Sylvie van der Werf, Jean-Christophe Plantier                                                                                                                                                                                                                                                                                                                                                               |
| EPI_ISL_416495, EPI_ISL_416496, EPI_ISL_416497                                                                                                                                                                                                                                                                                                                                                                                                                                                                                                                                                                                                                                                                                                                                                                                                                                                                                                                                                                                                                                                                                                                                                                                                                                                                                                                                                                                                                                                                                                                                                                                                                                                                 | Centre Hospitalier Compiègne Laboratoire de Biologie                                                                                                        | National Reference Center for Viruses of Respiratory Infections, Institut Pasteur, Paris                                                      | Mélnie Albert, Marion Barbet, Sylvie Behillil, Méline Bizard, Angela Brisebarre, Flora Donati, Etienne Simon-Lorière, Vincent Enouf, Maud Vanpeene, Sylvie van der Werf, Raulin Olivia                                                                                                                                                                                                                                                                                                                                                                          |
| EPI_ISL_416498                                                                                                                                                                                                                                                                                                                                                                                                                                                                                                                                                                                                                                                                                                                                                                                                                                                                                                                                                                                                                                                                                                                                                                                                                                                                                                                                                                                                                                                                                                                                                                                                                                                                                                 | Institut Médico légal- Hop R. Poincaré                                                                                                                      | National Reference Center for Viruses of Respiratory Infections, Institut Pasteur, Paris                                                      | Mélnie Albert, Marion Barbet, Sylvie Behillil, Méline Bizard, Angela Brisebarre, Flora Donati, Etienne Simon-Lorière, Vincent Enouf, Maud Vanpeene, Sylvie van der Werf                                                                                                                                                                                                                                                                                                                                                                                         |
| EPI_ISL_416499, EPI_ISL_416500                                                                                                                                                                                                                                                                                                                                                                                                                                                                                                                                                                                                                                                                                                                                                                                                                                                                                                                                                                                                                                                                                                                                                                                                                                                                                                                                                                                                                                                                                                                                                                                                                                                                                 | LABM GH nord Essonne                                                                                                                                        | National Reference Center for Viruses of Respiratory Infections, Institut Pasteur, Paris                                                      | Mélnie Albert, Marion Barbet, Sylvie Behillil, Méline Bizard, Angela Brisebarre, Flora Donati, Etienne Simon-Lorière, Vincent Enouf, Maud Vanpeene, Sylvie van der Werf                                                                                                                                                                                                                                                                                                                                                                                         |
| EPI_ISL_416501                                                                                                                                                                                                                                                                                                                                                                                                                                                                                                                                                                                                                                                                                                                                                                                                                                                                                                                                                                                                                                                                                                                                                                                                                                                                                                                                                                                                                                                                                                                                                                                                                                                                                                 | Hopital franco britannique - Service des Urgences                                                                                                           | National Reference Center for Viruses of Respiratory Infections, Institut Pasteur, Paris                                                      | Mélnie Albert, Marion Barbet, Sylvie Behillil, Méline Bizard, Angela Brisebarre, Flora Donati, Etienne Simon-Lorière, Vincent Enouf, Maud Vanpeene, Sylvie van der Werf                                                                                                                                                                                                                                                                                                                                                                                         |
| EPI_ISL_416502, EPI_ISL_416503, EPI_ISL_416504, EPI_ISL_416505, EPI_ISL_416506, EPI_ISL_416507, EPI_ISL_416508, EPI_ISL_416509, EPI_ISL_416510, EPI_ISL_416511, EPI_ISL_416512, EPI_ISL_416513                                                                                                                                                                                                                                                                                                                                                                                                                                                                                                                                                                                                                                                                                                                                                                                                                                                                                                                                                                                                                                                                                                                                                                                                                                                                                                                                                                                                                                                                                                                 | see above                                                                                                                                                   | see above                                                                                                                                     | see above                                                                                                                                                                                                                                                                                                                                                                                                                                                                                                                                                       |
| EPI_ISL_416829                                                                                                                                                                                                                                                                                                                                                                                                                                                                                                                                                                                                                                                                                                                                                                                                                                                                                                                                                                                                                                                                                                                                                                                                                                                                                                                                                                                                                                                                                                                                                                                                                                                                                                 | CHRU Pontchaillou - Laboratoire de Virologie                                                                                                                | National Reference Center for Viruses of Respiratory Infections, Institut Pasteur, Paris                                                      | Mélnie Albert, Marion Barbet, Sylvie Behillil, Méline Bizard, Angela Brisebarre, Flora Donati, Etienne Simon-Lorière, Vincent Enouf, Maud Vanpeene, Sylvie van der Werf, Gisèle Lagathu                                                                                                                                                                                                                                                                                                                                                                         |
| EPI_ISL_416829                                                                                                                                                                                                                                                                                                                                                                                                                                                                                                                                                                                                                                                                                                                                                                                                                                                                                                                                                                                                                                                                                                                                                                                                                                                                                                                                                                                                                                                                                                                                                                                                                                                                                                 | National Public Health Laboratory                                                                                                                           | Malaysia Genome Institute                                                                                                                     | Mohd Noor Mat Isa, Imi Suhayu Sopian, Yusuf Muhammad Noor, Nurhezreen Md Iqbal, Mohd Faizal Abu Bakar, Enizza Kasim, Shamsidar Sopia, Siti Noraini Othman, Azrin Ahmad, Nor Azfa Johari, Norazimah Tajudin, Noorliza Mohamad Noordin, W Afiza W Mohd Arifin, Rehan Shuhada Abu Bakar, Yu Kie Chem, Selvanesan Sengol, Hani Mat Hussin, Shahrul Hisham Zainal Ariffin                                                                                                                                                                                            |
| EPI_ISL_416866                                                                                                                                                                                                                                                                                                                                                                                                                                                                                                                                                                                                                                                                                                                                                                                                                                                                                                                                                                                                                                                                                                                                                                                                                                                                                                                                                                                                                                                                                                                                                                                                                                                                                                 | National Public Health Laboratory                                                                                                                           | Malaysia Genome Institute                                                                                                                     | Mohd Noor Mat Isa, Imi Suhayu Sopian, Yusuf Muhammad Noor, Nurhezreen Md Iqbal, Mohd Faizal Abu Bakar, Enizza Kasim, Shamsidar Sopia, Siti Noraini Othman, Azrin Ahmad, Nor Azfa Johari, Norazimah Tajudin, Noorliza Mohamad Noordin, W Afiza W Mohd Arifin, Rehan Shuhada Abu Bakar, Yu Kie Chem, Selvanesan Sengol, Hani Mat Hussin, Shahrul Hisham Zainal Ariffin                                                                                                                                                                                            |
| EPI_ISL_416885, EPI_ISL_416886, EPI_ISL_416907                                                                                                                                                                                                                                                                                                                                                                                                                                                                                                                                                                                                                                                                                                                                                                                                                                                                                                                                                                                                                                                                                                                                                                                                                                                                                                                                                                                                                                                                                                                                                                                                                                                                 | National Public Health Laboratory                                                                                                                           | Malaysia Genome Institute                                                                                                                     | Mohd Noor Mat Isa, Imi Suhayu Sopian, Yusuf Muhammad Noor, Nurhezreen Md Iqbal, Mohd Faizal Abu Bakar, Enizza Kasim, Shamsidar Sopia, Siti Noraini Othman, Azrin Ahmad, Nor Azfa Johari, Norazimah Tajudin, Noorliza Mohamad Noordin, W Afiza W Mohd Arifin, Rehan Shuhada Abu Bakar, Yu Kie Chem, Selvanesan Sengol, Hani Mat Hussin, Shahrul Hisham Zainal Ariffin                                                                                                                                                                                            |
| EPI_ISL_417213, EPI_ISL_417214, EPI_ISL_417215, EPI_ISL_417216, EPI_ISL_417217, EPI_ISL_417218, EPI_ISL_417219, EPI_ISL_417220, EPI_ISL_417221, EPI_ISL_417222, EPI_ISL_417223, EPI_ISL_417224, EPI_ISL_417225, EPI_ISL_417226, EPI_ISL_417227, EPI_ISL_417228, EPI_ISL_417229, EPI_ISL_417230, EPI_ISL_417231, EPI_ISL_417232, EPI_ISL_417233, EPI_ISL_417234, EPI_ISL_417235, EPI_ISL_417236, EPI_ISL_417237, EPI_ISL_417238, EPI_ISL_417239, EPI_ISL_417240, EPI_ISL_417241, EPI_ISL_417242, EPI_ISL_417243, EPI_ISL_417244, EPI_ISL_417245, EPI_ISL_417246, EPI_ISL_417247, EPI_ISL_417248, EPI_ISL_417249, EPI_ISL_417250, EPI_ISL_417251, EPI_ISL_417252, EPI_ISL_417253, EPI_ISL_417254, EPI_ISL_417255, EPI_ISL_417256, EPI_ISL_417257, EPI_ISL_417258, EPI_ISL_417259, EPI_ISL_417260, EPI_ISL_417261, EPI_ISL_417262, EPI_ISL_417263, EPI_ISL_417264, EPI_ISL_417265, EPI_ISL_417266, EPI_ISL_417267, EPI_ISL_417268, EPI_ISL_417269, EPI_ISL_417270, EPI_ISL_417271, EPI_ISL_417272, EPI_ISL_417273, EPI_ISL_417274, EPI_ISL_417275, EPI_ISL_417276, EPI_ISL_417277, EPI_ISL_417278, EPI_ISL_417279, EPI_ISL_417280, EPI_ISL_417281, EPI_ISL_417282, EPI_ISL_417283, EPI_ISL_417284, EPI_ISL_417285, EPI_ISL_417286, EPI_ISL_417287, EPI_ISL_417288, EPI_ISL_417289, EPI_ISL_417290, EPI_ISL_417291, EPI_ISL_417292, EPI_ISL_417293, EPI_ISL_417294, EPI_ISL_417295, EPI_ISL_417296, EPI_ISL_417297, EPI_ISL_417298, EPI_ISL_417299, EPI_ISL_417300, EPI_ISL_417301, EPI_ISL_417302, EPI_ISL_417303, EPI_ISL_417304, EPI_ISL_417305, EPI_ISL_417306, EPI_ISL_417307, EPI_ISL_417308, EPI_ISL_417309, EPI_ISL_417310, EPI_ISL_417311, EPI_ISL_417312, EPI_ISL_417313, EPI_ISL_417314, EPI_ISL_417315 | see above                                                                                                                                                   | see above                                                                                                                                     | see above                                                                                                                                                                                                                                                                                                                                                                                                                                                                                                                                                       |
| EPI_ISL_417877, EPI_ISL_417878, EPI_ISL_417879, EPI_ISL_417880                                                                                                                                                                                                                                                                                                                                                                                                                                                                                                                                                                                                                                                                                                                                                                                                                                                                                                                                                                                                                                                                                                                                                                                                                                                                                                                                                                                                                                                                                                                                                                                                                                                 | Respiratory Virus Unit, Microbiology Services Colindale, Public Health England                                                                              | Respiratory Virus Unit, Microbiology Services Colindale, Public Health England                                                                | Monica Galiano, Shahjahan Miah, Angie Lackenby, Omolola Akinbami, Tiina Talts, Leena Bhaw, Richard Myers, Steven Platt, Kirstin Edwards, Jonathan Hubb, Joanna Ellis, Maria Zambon                                                                                                                                                                                                                                                                                                                                                                              |
| EPI_ISL_418206, EPI_ISL_418207, EPI_ISL_418208, EPI_ISL_418209, EPI_ISL_418210, EPI_ISL_418211                                                                                                                                                                                                                                                                                                                                                                                                                                                                                                                                                                                                                                                                                                                                                                                                                                                                                                                                                                                                                                                                                                                                                                                                                                                                                                                                                                                                                                                                                                                                                                                                                 | Institute of Virology, Biomedical Research Center of the Slovak Academy of Sciences, Bratislava; Public Health Authority of the Slovak Republic, Bratislava | Institute of Virology, Biomedical Research Center of the Slovak Academy of Sciences, Bratislava; Comenius University Science Park, Bratislava | Monika Slávikova, Martina Liková, Sabina Fumaová Havlíková, Juraj Koi, Juraj Kopáček, Elena Tichá, Edita Staroová, Jaroslav Budiš, Werner Krampfl, Miroslav Böhmer, Diana Rusáková, Tomáš Szemeš, Boris Klempa                                                                                                                                                                                                                                                                                                                                                  |
| EPI_ISL_418212                                                                                                                                                                                                                                                                                                                                                                                                                                                                                                                                                                                                                                                                                                                                                                                                                                                                                                                                                                                                                                                                                                                                                                                                                                                                                                                                                                                                                                                                                                                                                                                                                                                                                                 | Institut Pasteur Dakar                                                                                                                                      | Institut Pasteur de Dakar                                                                                                                     | Ndongo Dia, Ousmane Faye, Amadou Alpha Sall                                                                                                                                                                                                                                                                                                                                                                                                                                                                                                                     |
| EPI_ISL_418213, EPI_ISL_418214                                                                                                                                                                                                                                                                                                                                                                                                                                                                                                                                                                                                                                                                                                                                                                                                                                                                                                                                                                                                                                                                                                                                                                                                                                                                                                                                                                                                                                                                                                                                                                                                                                                                                 | Institut Pasteur Dakar                                                                                                                                      | Institut Pasteur de Dakar                                                                                                                     | Ndongo Dia, Ousmane Faye, Amadou Alpha Sall                                                                                                                                                                                                                                                                                                                                                                                                                                                                                                                     |
| EPI_ISL_418215                                                                                                                                                                                                                                                                                                                                                                                                                                                                                                                                                                                                                                                                                                                                                                                                                                                                                                                                                                                                                                                                                                                                                                                                                                                                                                                                                                                                                                                                                                                                                                                                                                                                                                 | Institut Pasteur Dakar                                                                                                                                      | Institut Pasteur de Dakar                                                                                                                     | Ndongo Dia, Ousmane Faye, Amadou Alpha Sall                                                                                                                                                                                                                                                                                                                                                                                                                                                                                                                     |
| EPI_ISL_418216, EPI_ISL_418217                                                                                                                                                                                                                                                                                                                                                                                                                                                                                                                                                                                                                                                                                                                                                                                                                                                                                                                                                                                                                                                                                                                                                                                                                                                                                                                                                                                                                                                                                                                                                                                                                                                                                 | Institut Pasteur Dakar                                                                                                                                      | Institut Pasteur de Dakar                                                                                                                     | Ndongo Dia, Ousmane Faye, Amadou Alpha Sall                                                                                                                                                                                                                                                                                                                                                                                                                                                                                                                     |
| EPI_ISL_418218                                                                                                                                                                                                                                                                                                                                                                                                                                                                                                                                                                                                                                                                                                                                                                                                                                                                                                                                                                                                                                                                                                                                                                                                                                                                                                                                                                                                                                                                                                                                                                                                                                                                                                 | Centre Hospitalier Compiègne Laboratoire de Biologie                                                                                                        | National Reference Center for Viruses of Respiratory Infections, Institut Pasteur, Paris                                                      | Mélanie Albert, Marion Barbet, Sylvie Behillil, Méline Bizard, Angela Brisebarre, Flora Donati, Fabiana Gambaro, Etienne Simon-Lorière, Vincent Enouf, Maud Vanpeene, Sylvie van der Werf, Raulin Olivia                                                                                                                                                                                                                                                                                                                                                        |
| EPI_ISL_418219                                                                                                                                                                                                                                                                                                                                                                                                                                                                                                                                                                                                                                                                                                                                                                                                                                                                                                                                                                                                                                                                                                                                                                                                                                                                                                                                                                                                                                                                                                                                                                                                                                                                                                 | CHU - Hôpital Cavale Blanche - Labo. de Virologie                                                                                                           | National Reference Center for Viruses of Respiratory Infections, Institut Pasteur, Paris                                                      | Mélanie Albert, Marion Barbet, Sylvie Behillil, Méline Bizard, Angela Brisebarre, Flora Donati, Fabiana Gambaro, Etienne Simon-Lorière, Vincent Enouf, Maud Vanpeene, Sylvie van der Werf, Léa Pilorge                                                                                                                                                                                                                                                                                                                                                          |
| EPI_ISL_418220, EPI_ISL_418221                                                                                                                                                                                                                                                                                                                                                                                                                                                                                                                                                                                                                                                                                                                                                                                                                                                                                                                                                                                                                                                                                                                                                                                                                                                                                                                                                                                                                                                                                                                                                                                                                                                                                 | Centre Hospitalier Compiègne Laboratoire de Biologie                                                                                                        | National Reference Center for Viruses of Respiratory Infections, Institut Pasteur, Paris                                                      | Mélanie Albert, Marion Barbet, Sylvie Behillil, Méline Bizard, Angela Brisebarre, Flora Donati, Fabiana Gambaro, Etienne Simon-Lorière, Vincent Enouf, Maud Vanpeene, Sylvie van der Werf, Raulin Olivia                                                                                                                                                                                                                                                                                                                                                        |

|                                                                                                                                                                                                                                                                                                                                                                                                                                                                                                                                                                                                                                                                                                                                                                                                                                                                                                                                                                                                                                                                                                                                                                                                                                                                                                                                                                                                                                                                                                                                                                                                                                                                                                                                |                                                                                 |                                                                                                                                                                                    |                                                                                                                                                                                                                                                                                                 |
|--------------------------------------------------------------------------------------------------------------------------------------------------------------------------------------------------------------------------------------------------------------------------------------------------------------------------------------------------------------------------------------------------------------------------------------------------------------------------------------------------------------------------------------------------------------------------------------------------------------------------------------------------------------------------------------------------------------------------------------------------------------------------------------------------------------------------------------------------------------------------------------------------------------------------------------------------------------------------------------------------------------------------------------------------------------------------------------------------------------------------------------------------------------------------------------------------------------------------------------------------------------------------------------------------------------------------------------------------------------------------------------------------------------------------------------------------------------------------------------------------------------------------------------------------------------------------------------------------------------------------------------------------------------------------------------------------------------------------------|---------------------------------------------------------------------------------|------------------------------------------------------------------------------------------------------------------------------------------------------------------------------------|-------------------------------------------------------------------------------------------------------------------------------------------------------------------------------------------------------------------------------------------------------------------------------------------------|
| EPI_ISL_418222                                                                                                                                                                                                                                                                                                                                                                                                                                                                                                                                                                                                                                                                                                                                                                                                                                                                                                                                                                                                                                                                                                                                                                                                                                                                                                                                                                                                                                                                                                                                                                                                                                                                                                                 | CHRU Bretonneau - Serv. Bacterio-Virol.                                         | National Reference Center for Viruses of Respiratory Infections, Institut Pasteur, Paris                                                                                           | Mélanie Albert, Marion Barbet, Sylvie Behillil, Méline Bizard, Angela Brisebarre, Flora Donati, Fabiana Gambaro, Etienne Simon-Lorière, Vincent Enouf, Maud Vanpeene, Sylvie van der Werf, Julien Marlet                                                                                        |
| EPI_ISL_418223, EPI_ISL_418224, EPI_ISL_418225                                                                                                                                                                                                                                                                                                                                                                                                                                                                                                                                                                                                                                                                                                                                                                                                                                                                                                                                                                                                                                                                                                                                                                                                                                                                                                                                                                                                                                                                                                                                                                                                                                                                                 | Centre Hospitalier Compiègne Laboratoire de Biologie                            | National Reference Center for Viruses of Respiratory Infections, Institut Pasteur, Paris                                                                                           | Mélanie Albert, Marion Barbet, Sylvie Behillil, Méline Bizard, Angela Brisebarre, Flora Donati, Fabiana Gambaro, Etienne Simon-Lorière, Vincent Enouf, Maud Vanpeene, Sylvie van der Werf, Raulin Olivia                                                                                        |
| EPI_ISL_418226                                                                                                                                                                                                                                                                                                                                                                                                                                                                                                                                                                                                                                                                                                                                                                                                                                                                                                                                                                                                                                                                                                                                                                                                                                                                                                                                                                                                                                                                                                                                                                                                                                                                                                                 | EHPAD - Résidences les Cèdres                                                   | National Reference Center for Viruses of Respiratory Infections, Institut Pasteur, Paris                                                                                           | Mélanie Albert, Marion Barbet, Sylvie Behillil, Méline Bizard, Angela Brisebarre, Flora Donati, Etienne Simon-Lorière, Vincent Enouf, Maud Vanpeene, Sylvie van der Werf                                                                                                                        |
| EPI_ISL_418227, EPI_ISL_418228                                                                                                                                                                                                                                                                                                                                                                                                                                                                                                                                                                                                                                                                                                                                                                                                                                                                                                                                                                                                                                                                                                                                                                                                                                                                                                                                                                                                                                                                                                                                                                                                                                                                                                 | Centre Hospitalier Compiègne Laboratoire de Biologie                            | National Reference Center for Viruses of Respiratory Infections, Institut Pasteur, Paris                                                                                           | Mélanie Albert, Marion Barbet, Sylvie Behillil, Méline Bizard, Angela Brisebarre, Flora Donati, Etienne Simon-Lorière, Vincent Enouf, Maud Vanpeene, Sylvie van der Werf, Raulin Olivia                                                                                                         |
| EPI_ISL_418229                                                                                                                                                                                                                                                                                                                                                                                                                                                                                                                                                                                                                                                                                                                                                                                                                                                                                                                                                                                                                                                                                                                                                                                                                                                                                                                                                                                                                                                                                                                                                                                                                                                                                                                 | Hopital franco britannique - Laboratoire                                        | National Reference Center for Viruses of Respiratory Infections, Institut Pasteur, Paris                                                                                           | Mélanie Albert, Marion Barbet, Sylvie Behillil, Méline Bizard, Angela Brisebarre, Flora Donati, Etienne Simon-Lorière, Vincent Enouf, Maud Vanpeene, Sylvie van der Werf, Marianne Asso Bonnet                                                                                                  |
| EPI_ISL_418230                                                                                                                                                                                                                                                                                                                                                                                                                                                                                                                                                                                                                                                                                                                                                                                                                                                                                                                                                                                                                                                                                                                                                                                                                                                                                                                                                                                                                                                                                                                                                                                                                                                                                                                 | Clinique AVERAY LA BROUSTE, Med. Polyvalente                                    | National Reference Center for Viruses of Respiratory Infections, Institut Pasteur, Paris                                                                                           | Mélanie Albert, Marion Barbet, Sylvie Behillil, Méline Bizard, Angela Brisebarre, Flora Donati, Etienne Simon-Lorière, Vincent Enouf, Maud Vanpeene, Sylvie van der Werf, Elisa Ngwem                                                                                                           |
| EPI_ISL_418231                                                                                                                                                                                                                                                                                                                                                                                                                                                                                                                                                                                                                                                                                                                                                                                                                                                                                                                                                                                                                                                                                                                                                                                                                                                                                                                                                                                                                                                                                                                                                                                                                                                                                                                 | Centre Hospitalier Compiègne Laboratoire de Biologie                            | National Reference Center for Viruses of Respiratory Infections, Institut Pasteur, Paris                                                                                           | Mélanie Albert, Marion Barbet, Sylvie Behillil, Méline Bizard, Angela Brisebarre, Flora Donati, Etienne Simon-Lorière, Vincent Enouf, Maud Vanpeene, Sylvie van der Werf, Raulin Olivia                                                                                                         |
| EPI_ISL_418232, EPI_ISL_418233                                                                                                                                                                                                                                                                                                                                                                                                                                                                                                                                                                                                                                                                                                                                                                                                                                                                                                                                                                                                                                                                                                                                                                                                                                                                                                                                                                                                                                                                                                                                                                                                                                                                                                 | Service des Urgences                                                            | National Reference Center for Viruses of Respiratory Infections, Institut Pasteur, Paris                                                                                           | Mélanie Albert, Marion Barbet, Sylvie Behillil, Méline Bizard, Angela Brisebarre, Flora Donati, Etienne Simon-Lorière, Vincent Enouf, Maud Vanpeene, Sylvie van der Werf, Boukeur                                                                                                               |
| EPI_ISL_418234                                                                                                                                                                                                                                                                                                                                                                                                                                                                                                                                                                                                                                                                                                                                                                                                                                                                                                                                                                                                                                                                                                                                                                                                                                                                                                                                                                                                                                                                                                                                                                                                                                                                                                                 | LABM GH nord Essonne                                                            | National Reference Center for Viruses of Respiratory Infections, Institut Pasteur, Paris                                                                                           | Mélanie Albert, Marion Barbet, Sylvie Behillil, Méline Bizard, Angela Brisebarre, Flora Donati, Etienne Simon-Lorière, Vincent Enouf, Maud Vanpeene, Sylvie van der Werf, Christine Lambert                                                                                                     |
| EPI_ISL_418235                                                                                                                                                                                                                                                                                                                                                                                                                                                                                                                                                                                                                                                                                                                                                                                                                                                                                                                                                                                                                                                                                                                                                                                                                                                                                                                                                                                                                                                                                                                                                                                                                                                                                                                 | Cabinet médical                                                                 | National Reference Center for Viruses of Respiratory Infections, Institut Pasteur, Paris                                                                                           | Mélanie Albert, Marion Barbet, Sylvie Behillil, Méline Bizard, Angela Brisebarre, Flora Donati, Etienne Simon-Lorière, Vincent Enouf, Maud Vanpeene, Sylvie van der Werf                                                                                                                        |
| EPI_ISL_418236, EPI_ISL_418237, EPI_ISL_418238, EPI_ISL_418239                                                                                                                                                                                                                                                                                                                                                                                                                                                                                                                                                                                                                                                                                                                                                                                                                                                                                                                                                                                                                                                                                                                                                                                                                                                                                                                                                                                                                                                                                                                                                                                                                                                                 | Centre Hospitalier Compiègne Laboratoire de Biologie                            | National Reference Center for Viruses of Respiratory Infections, Institut Pasteur, Paris                                                                                           | Mélanie Albert, Marion Barbet, Sylvie Behillil, Méline Bizard, Angela Brisebarre, Flora Donati, Etienne Simon-Lorière, Vincent Enouf, Maud Vanpeene, Sylvie van der Werf, Raulin Olivia                                                                                                         |
| EPI_ISL_418240                                                                                                                                                                                                                                                                                                                                                                                                                                                                                                                                                                                                                                                                                                                                                                                                                                                                                                                                                                                                                                                                                                                                                                                                                                                                                                                                                                                                                                                                                                                                                                                                                                                                                                                 | LABM GH nord Essonne                                                            | National Reference Center for Viruses of Respiratory Infections, Institut Pasteur, Paris                                                                                           | Mélanie Albert, Marion Barbet, Sylvie Behillil, Méline Bizard, Angela Brisebarre, Flora Donati, Etienne Simon-Lorière, Vincent Enouf, Maud Vanpeene, Sylvie van der Werf, Christine Lambert                                                                                                     |
| EPI_ISL_418241, EPI_ISL_418242                                                                                                                                                                                                                                                                                                                                                                                                                                                                                                                                                                                                                                                                                                                                                                                                                                                                                                                                                                                                                                                                                                                                                                                                                                                                                                                                                                                                                                                                                                                                                                                                                                                                                                 | NIC Viral Respiratory Unit - Institut Pasteur of Algeria                        | National Reference Center for Viruses of Respiratory Infections, Institut Pasteur, Paris                                                                                           | Mélanie Albert, Marion Barbet, Sylvie Behillil, Méline Bizard, Angela Brisebarre, Flora Donati, Etienne Simon-Lorière, Vincent Enouf, Maud Vanpeene, Sylvie van der Werf, Fawzi Derrar                                                                                                          |
| EPI_ISL_418267                                                                                                                                                                                                                                                                                                                                                                                                                                                                                                                                                                                                                                                                                                                                                                                                                                                                                                                                                                                                                                                                                                                                                                                                                                                                                                                                                                                                                                                                                                                                                                                                                                                                                                                 | Microbiology and Immunology department, Pasteur institute in Ho Chi Minh city   | Microbiology and Immunology department, Pasteur institute in Ho Chi Minh city                                                                                                      | Nguyen,H.T., Cao,T.M., Pham,H.T.T., Vu,N.P.H., Dao,M.H., Huynh,L.T.K., Nguyen,L.T., Nguyen,N.T., Nguyen,T.T.N., Nguyen,A.H., Luong,Q.C., Nguyen,T.V., Tran,K.C., Pham,Q.D., Tran,T., Hoang,C.Q., Nguyen,T.T., Le,H.Q., Phung,T.M., Vo,T.N.A., Nguyen,S.N., Pham,D.T., Nguyen,T.V. and Phan,L.T. |
| EPI_ISL_418516, EPI_ISL_418548, EPI_ISL_418580, EPI_ISL_418581, EPI_ISL_418582, EPI_ISL_418583, EPI_ISL_418584                                                                                                                                                                                                                                                                                                                                                                                                                                                                                                                                                                                                                                                                                                                                                                                                                                                                                                                                                                                                                                                                                                                                                                                                                                                                                                                                                                                                                                                                                                                                                                                                                 | UCD National Virus Reference Laboratory                                         | UCD National Virus Reference Laboratory                                                                                                                                            | Michael Carr, Gabriel Gonzalez, Jonathan Dean, Suzie Coughlan, Alison Murphy, Kevin Byrne, Ken Wolfe, Jeff Connell, Brendan Loftus, Cillian F De Gascun                                                                                                                                         |
| EPI_ISL_418667, EPI_ISL_418668, EPI_ISL_418669, EPI_ISL_418670, EPI_ISL_418671, EPI_ISL_418672, EPI_ISL_418673, EPI_ISL_418674, EPI_ISL_418675, EPI_ISL_418676, EPI_ISL_418677, EPI_ISL_418678, EPI_ISL_418679, EPI_ISL_418680, EPI_ISL_418681, EPI_ISL_418682, EPI_ISL_418683, EPI_ISL_418684, EPI_ISL_418685, EPI_ISL_418686, EPI_ISL_418687, EPI_ISL_418688, EPI_ISL_418689, EPI_ISL_418690, EPI_ISL_418691, EPI_ISL_418692, EPI_ISL_418693, EPI_ISL_418694, EPI_ISL_418695, EPI_ISL_418696, EPI_ISL_418697, EPI_ISL_418698, EPI_ISL_418699, EPI_ISL_418700, EPI_ISL_418701, EPI_ISL_418702, EPI_ISL_418703, EPI_ISL_418704, EPI_ISL_418705, EPI_ISL_418706, EPI_ISL_418707, EPI_ISL_418708, EPI_ISL_418709, EPI_ISL_418710, EPI_ISL_418711, EPI_ISL_418712, EPI_ISL_418713, EPI_ISL_418714, EPI_ISL_418715, EPI_ISL_418716, EPI_ISL_418717, EPI_ISL_418718, EPI_ISL_418719, EPI_ISL_418720, EPI_ISL_418721, EPI_ISL_418722, EPI_ISL_418723, EPI_ISL_418724, EPI_ISL_418725, EPI_ISL_418726, EPI_ISL_418727, EPI_ISL_418728, EPI_ISL_418729, EPI_ISL_418730, EPI_ISL_418731, EPI_ISL_418732, EPI_ISL_418733, EPI_ISL_418734, EPI_ISL_418735, EPI_ISL_418736, EPI_ISL_418737, EPI_ISL_418738, EPI_ISL_418739, EPI_ISL_418740, EPI_ISL_418741, EPI_ISL_418742, EPI_ISL_418743, EPI_ISL_418744, EPI_ISL_418745, EPI_ISL_418746, EPI_ISL_418747, EPI_ISL_418748, EPI_ISL_418749, EPI_ISL_418750, EPI_ISL_418751, EPI_ISL_418752, EPI_ISL_418753, EPI_ISL_418754, EPI_ISL_418755, EPI_ISL_418756, EPI_ISL_418757, EPI_ISL_418758, EPI_ISL_418759, EPI_ISL_418760, EPI_ISL_418761, EPI_ISL_418762, EPI_ISL_418763, EPI_ISL_418764, EPI_ISL_418765, EPI_ISL_418766, EPI_ISL_418767, EPI_ISL_418768, EPI_ISL_418769, EPI_ISL_418770 | Respiratory Virus Unit, Microbiology Services Colindale, Public Health England  | Monica Galiano, Shahjahan Miah, Angie Lackenby, Omolola Akinbami, Tiina Talts, Leena Bhaw, Richard Myers, Steven Platt, Kirstin Edwards, Jonathan Hubb, Joanna Ellis, Maria Zambon |                                                                                                                                                                                                                                                                                                 |
| see above                                                                                                                                                                                                                                                                                                                                                                                                                                                                                                                                                                                                                                                                                                                                                                                                                                                                                                                                                                                                                                                                                                                                                                                                                                                                                                                                                                                                                                                                                                                                                                                                                                                                                                                      | Respiratory Virus Unit, Microbiology Services Colindale, Public Health England  | Respiratory Virus Unit, Microbiology Services Colindale, Public Health England                                                                                                     | Monica Galiano, Shahjahan Miah, Angie Lackenby, Omolola Akinbami, Tiina Talts, Leena Bhaw, Richard Myers, Steven Platt, Kirstin Edwards, Jonathan Hubb, Joanna Ellis, Maria Zambon                                                                                                              |
| EPI_ISL_419264, EPI_ISL_419266                                                                                                                                                                                                                                                                                                                                                                                                                                                                                                                                                                                                                                                                                                                                                                                                                                                                                                                                                                                                                                                                                                                                                                                                                                                                                                                                                                                                                                                                                                                                                                                                                                                                                                 | Lab voor klinische biologie                                                     | Onderzoeksgroep Virologie                                                                                                                                                          | Nick Vereecke, Laurens Lambrechts, Marthe Pauwels, Basiel Cole, Bruno Verhasselt, Linos Vandekerckhove, Hans Nauwynck, Sebastiaan Theuns                                                                                                                                                        |
| EPI_ISL_419679, EPI_ISL_419684, EPI_ISL_419689                                                                                                                                                                                                                                                                                                                                                                                                                                                                                                                                                                                                                                                                                                                                                                                                                                                                                                                                                                                                                                                                                                                                                                                                                                                                                                                                                                                                                                                                                                                                                                                                                                                                                 | Servicio de Microbiología. Consorcio Hospital General Universitario de Valencia | Sequencing and Bioinformatics Service and Molecular Epidemiology Research Group. FISABIO-Public Health                                                                             | Neris Garcia-Gonzalez, María Alma Bracho, María Dolores Ocete, Giuseppe D'Auria, Griselda De Marco, Concepcion Gimeno, Fernando Gonzalez-Candelas                                                                                                                                               |
| EPI_ISL_419831, EPI_ISL_419832, EPI_ISL_419833, EPI_ISL_419835                                                                                                                                                                                                                                                                                                                                                                                                                                                                                                                                                                                                                                                                                                                                                                                                                                                                                                                                                                                                                                                                                                                                                                                                                                                                                                                                                                                                                                                                                                                                                                                                                                                                 | Royal Darwin Hospital                                                           | Victorian Infectious Diseases Reference Laboratory and Microbiological Diagnostic Unit Public Health Laboratory, Doherty Institute                                                 | Meumann, E., Seemann T., Sait, M., Schultz M., Caly L., Druce J.                                                                                                                                                                                                                                |
| EPI_ISL_420037                                                                                                                                                                                                                                                                                                                                                                                                                                                                                                                                                                                                                                                                                                                                                                                                                                                                                                                                                                                                                                                                                                                                                                                                                                                                                                                                                                                                                                                                                                                                                                                                                                                                                                                 | NIC Viral Respiratory Unit - Institut Pasteur of Algeria                        | National Reference Center for Viruses of Respiratory Infections, Institut Pasteur, Paris                                                                                           | Mélanie Albert, Marion Barbet, Sylvie Behillil, Méline Bizard, Angela Brisebarre, Flora Donati, Etienne Simon-Lorière, Vincent Enouf, Maud Vanpeene, Sylvie van der Werf, Fawzi Derrar                                                                                                          |
| EPI_ISL_420038                                                                                                                                                                                                                                                                                                                                                                                                                                                                                                                                                                                                                                                                                                                                                                                                                                                                                                                                                                                                                                                                                                                                                                                                                                                                                                                                                                                                                                                                                                                                                                                                                                                                                                                 | Sentinelles network                                                             | National Reference Center for Viruses of Respiratory Infections, Institut Pasteur, Paris                                                                                           | Mélanie Albert, Marion Barbet, Sylvie Behillil, Méline Bizard, Angela Brisebarre, Flora Donati, Etienne Simon-Lorière, Vincent Enouf, Maud Vanpeene, Sylvie van der Werf                                                                                                                        |
| EPI_ISL_420039, EPI_ISL_420040                                                                                                                                                                                                                                                                                                                                                                                                                                                                                                                                                                                                                                                                                                                                                                                                                                                                                                                                                                                                                                                                                                                                                                                                                                                                                                                                                                                                                                                                                                                                                                                                                                                                                                 | L'Air du Temps                                                                  | National Reference Center for Viruses of Respiratory Infections, Institut Pasteur, Paris                                                                                           | Mélanie Albert, Marion Barbet, Sylvie Behillil, Méline Bizard, Angela Brisebarre, Flora Donati, Etienne Simon-Lorière, Vincent Enouf, Maud Vanpeene, Sylvie van der Werf                                                                                                                        |
| EPI_ISL_420041                                                                                                                                                                                                                                                                                                                                                                                                                                                                                                                                                                                                                                                                                                                                                                                                                                                                                                                                                                                                                                                                                                                                                                                                                                                                                                                                                                                                                                                                                                                                                                                                                                                                                                                 | CH Compiègne Laboratoire de Biologie                                            | National Reference Center for Viruses of Respiratory Infections, Institut Pasteur, Paris                                                                                           | Mélanie Albert, Marion Barbet, Sylvie Behillil, Méline Bizard, Angela Brisebarre, Flora Donati, Etienne Simon-Lorière, Vincent Enouf, Maud Vanpeene, Sylvie van der Werf, Raulin Olivia                                                                                                         |
| EPI_ISL_420042                                                                                                                                                                                                                                                                                                                                                                                                                                                                                                                                                                                                                                                                                                                                                                                                                                                                                                                                                                                                                                                                                                                                                                                                                                                                                                                                                                                                                                                                                                                                                                                                                                                                                                                 | Service de Biologie clinique                                                    | National Reference Center for Viruses of Respiratory Infections, Institut Pasteur, Paris                                                                                           | Mélanie Albert, Marion Barbet, Sylvie Behillil, Méline Bizard, Angela Brisebarre, Flora Donati, Etienne Simon-Lorière, Vincent Enouf, Maud Vanpeene, Sylvie van der Werf                                                                                                                        |
| EPI_ISL_420043                                                                                                                                                                                                                                                                                                                                                                                                                                                                                                                                                                                                                                                                                                                                                                                                                                                                                                                                                                                                                                                                                                                                                                                                                                                                                                                                                                                                                                                                                                                                                                                                                                                                                                                 | CMP                                                                             | National Reference Center for Viruses of Respiratory Infections, Institut Pasteur, Paris                                                                                           | Mélanie Albert, Marion Barbet, Sylvie Behillil, Méline Bizard, Angela Brisebarre, Flora Donati, Etienne Simon-Lorière, Vincent Enouf, Maud Vanpeene, Sylvie van der Werf                                                                                                                        |
| EPI_ISL_420044                                                                                                                                                                                                                                                                                                                                                                                                                                                                                                                                                                                                                                                                                                                                                                                                                                                                                                                                                                                                                                                                                                                                                                                                                                                                                                                                                                                                                                                                                                                                                                                                                                                                                                                 | CH Jean de Navarre Laboratoire de Biologie                                      | National Reference Center for Viruses of Respiratory Infections, Institut Pasteur, Paris                                                                                           | Mélanie Albert, Marion Barbet, Sylvie Behillil, Méline Bizard, Angela Brisebarre, Flora Donati, Etienne Simon-Lorière, Vincent Enouf, Maud Vanpeene, Sylvie van der Werf                                                                                                                        |
| EPI_ISL_420045                                                                                                                                                                                                                                                                                                                                                                                                                                                                                                                                                                                                                                                                                                                                                                                                                                                                                                                                                                                                                                                                                                                                                                                                                                                                                                                                                                                                                                                                                                                                                                                                                                                                                                                 | Sentinelles network                                                             | National Reference Center for Viruses of Respiratory Infections, Institut Pasteur, Paris                                                                                           | Mélanie Albert, Marion Barbet, Sylvie Behillil, Méline Bizard, Angela Brisebarre, Flora Donati, Etienne Simon-Lorière, Vincent Enouf, Maud Vanpeene, Sylvie van der Werf                                                                                                                        |
| EPI_ISL_420046, EPI_ISL_420047                                                                                                                                                                                                                                                                                                                                                                                                                                                                                                                                                                                                                                                                                                                                                                                                                                                                                                                                                                                                                                                                                                                                                                                                                                                                                                                                                                                                                                                                                                                                                                                                                                                                                                 | Résidence Villa Caroline                                                        | National Reference Center for Viruses of Respiratory Infections, Institut Pasteur, Paris                                                                                           | Mélanie Albert, Marion Barbet, Sylvie Behillil, Méline Bizard, Angela Brisebarre, Flora Donati, Etienne Simon-Lorière, Vincent Enouf, Maud Vanpeene, Sylvie van der Werf                                                                                                                        |
| EPI_ISL_420048                                                                                                                                                                                                                                                                                                                                                                                                                                                                                                                                                                                                                                                                                                                                                                                                                                                                                                                                                                                                                                                                                                                                                                                                                                                                                                                                                                                                                                                                                                                                                                                                                                                                                                                 | Service de Biologie Médicale - BP 125                                           | National Reference Center for Viruses of Respiratory Infections, Institut Pasteur, Paris                                                                                           | Mélanie Albert, Marion Barbet, Sylvie Behillil, Méline Bizard, Angela Brisebarre, Flora Donati, Etienne Simon-Lorière, Vincent Enouf, Maud Vanpeene, Sylvie van der Werf, Christine Lambert                                                                                                     |
| EPI_ISL_420049, EPI_ISL_420050                                                                                                                                                                                                                                                                                                                                                                                                                                                                                                                                                                                                                                                                                                                                                                                                                                                                                                                                                                                                                                                                                                                                                                                                                                                                                                                                                                                                                                                                                                                                                                                                                                                                                                 | CH Compiègne Laboratoire de Biologie                                            | National Reference Center for Viruses of Respiratory Infections, Institut Pasteur, Paris                                                                                           | Mélanie Albert, Marion Barbet, Sylvie Behillil, Méline Bizard, Angela Brisebarre, Flora Donati, Etienne Simon-Lorière, Vincent Enouf, Maud Vanpeene, Sylvie van der Werf, Raulin Olivia                                                                                                         |
| EPI_ISL_420051                                                                                                                                                                                                                                                                                                                                                                                                                                                                                                                                                                                                                                                                                                                                                                                                                                                                                                                                                                                                                                                                                                                                                                                                                                                                                                                                                                                                                                                                                                                                                                                                                                                                                                                 | Résidence Eleusis                                                               | National Reference Center for Viruses of Respiratory Infections, Institut Pasteur, Paris                                                                                           | Mélanie Albert, Marion Barbet, Sylvie Behillil, Méline Bizard, Angela Brisebarre, Flora Donati, Etienne Simon-Lorière, Vincent Enouf, Maud Vanpeene, Sylvie van der Werf                                                                                                                        |
| EPI_ISL_420052                                                                                                                                                                                                                                                                                                                                                                                                                                                                                                                                                                                                                                                                                                                                                                                                                                                                                                                                                                                                                                                                                                                                                                                                                                                                                                                                                                                                                                                                                                                                                                                                                                                                                                                 | Résidence les Marines                                                           | National Reference Center for Viruses of Respiratory                                                                                                                               | Mélanie Albert, Marion Barbet, Sylvie Behillil, Méline Bizard, Angela Brisebarre, Flora Donati, Etienne Simon-Lorière, Vincent Enouf, Maud Vanpeene, Sylvie van der Werf                                                                                                                        |



|                                                                                                                                                                                                                                                                                                                                                                                                                                                                                                                                                                                                                                                                                                                                                                                                                                                                                                                                                                                                                                                                                                                                                                                                                                                                                                                                                                                                                                                                                                                                                                                                                                                                                                                                                                                                                                                                                                                                                                                                                                                                                                                                                                                                                                                                                                                                                                                                                                                                                                                                                                                                                                                                                                                                                                                                                                                                                                                                                                                                                                                                                                                                                                                                                                                                                                                                                                                                                                                                                |                                                                                                                                                                                         | Infections, Institut Pasteur, Paris                                                                                                                                                     | van der Werf                                                                                                                                                                                                                                                                                                                                                                                                                                                                                                                                                   |
|--------------------------------------------------------------------------------------------------------------------------------------------------------------------------------------------------------------------------------------------------------------------------------------------------------------------------------------------------------------------------------------------------------------------------------------------------------------------------------------------------------------------------------------------------------------------------------------------------------------------------------------------------------------------------------------------------------------------------------------------------------------------------------------------------------------------------------------------------------------------------------------------------------------------------------------------------------------------------------------------------------------------------------------------------------------------------------------------------------------------------------------------------------------------------------------------------------------------------------------------------------------------------------------------------------------------------------------------------------------------------------------------------------------------------------------------------------------------------------------------------------------------------------------------------------------------------------------------------------------------------------------------------------------------------------------------------------------------------------------------------------------------------------------------------------------------------------------------------------------------------------------------------------------------------------------------------------------------------------------------------------------------------------------------------------------------------------------------------------------------------------------------------------------------------------------------------------------------------------------------------------------------------------------------------------------------------------------------------------------------------------------------------------------------------------------------------------------------------------------------------------------------------------------------------------------------------------------------------------------------------------------------------------------------------------------------------------------------------------------------------------------------------------------------------------------------------------------------------------------------------------------------------------------------------------------------------------------------------------------------------------------------------------------------------------------------------------------------------------------------------------------------------------------------------------------------------------------------------------------------------------------------------------------------------------------------------------------------------------------------------------------------------------------------------------------------------------------------------------|-----------------------------------------------------------------------------------------------------------------------------------------------------------------------------------------|-----------------------------------------------------------------------------------------------------------------------------------------------------------------------------------------|----------------------------------------------------------------------------------------------------------------------------------------------------------------------------------------------------------------------------------------------------------------------------------------------------------------------------------------------------------------------------------------------------------------------------------------------------------------------------------------------------------------------------------------------------------------|
| EPI_ISL_420053                                                                                                                                                                                                                                                                                                                                                                                                                                                                                                                                                                                                                                                                                                                                                                                                                                                                                                                                                                                                                                                                                                                                                                                                                                                                                                                                                                                                                                                                                                                                                                                                                                                                                                                                                                                                                                                                                                                                                                                                                                                                                                                                                                                                                                                                                                                                                                                                                                                                                                                                                                                                                                                                                                                                                                                                                                                                                                                                                                                                                                                                                                                                                                                                                                                                                                                                                                                                                                                                 | CH Jean de Navarre Laboratoire de Biologie                                                                                                                                              | National Reference Center for Viruses of Respiratory Infections, Institut Pasteur, Paris                                                                                                | Mélanie Albert, Marion Barbet, Sylvie Behillil, Méline Bizard, Angela Brisebarre, Flora Donati, Etienne Simon-Lorière, Vincent Enouf, Maud Vanpeene, Sylvie van der Werf                                                                                                                                                                                                                                                                                                                                                                                       |
| EPI_ISL_420054                                                                                                                                                                                                                                                                                                                                                                                                                                                                                                                                                                                                                                                                                                                                                                                                                                                                                                                                                                                                                                                                                                                                                                                                                                                                                                                                                                                                                                                                                                                                                                                                                                                                                                                                                                                                                                                                                                                                                                                                                                                                                                                                                                                                                                                                                                                                                                                                                                                                                                                                                                                                                                                                                                                                                                                                                                                                                                                                                                                                                                                                                                                                                                                                                                                                                                                                                                                                                                                                 | Résidence de maintienon                                                                                                                                                                 | National Reference Center for Viruses of Respiratory Infections, Institut Pasteur, Paris                                                                                                | Mélanie Albert, Marion Barbet, Sylvie Behillil, Méline Bizard, Angela Brisebarre, Flora Donati, Etienne Simon-Lorière, Vincent Enouf, Maud Vanpeene, Sylvie van der Werf                                                                                                                                                                                                                                                                                                                                                                                       |
| EPI_ISL_420055                                                                                                                                                                                                                                                                                                                                                                                                                                                                                                                                                                                                                                                                                                                                                                                                                                                                                                                                                                                                                                                                                                                                                                                                                                                                                                                                                                                                                                                                                                                                                                                                                                                                                                                                                                                                                                                                                                                                                                                                                                                                                                                                                                                                                                                                                                                                                                                                                                                                                                                                                                                                                                                                                                                                                                                                                                                                                                                                                                                                                                                                                                                                                                                                                                                                                                                                                                                                                                                                 | Sentinelles network                                                                                                                                                                     | National Reference Center for Viruses of Respiratory Infections, Institut Pasteur, Paris                                                                                                | Mélanie Albert, Marion Barbet, Sylvie Behillil, Méline Bizard, Angela Brisebarre, Flora Donati, Etienne Simon-Lorière, Vincent Enouf, Maud Vanpeene, Sylvie van der Werf                                                                                                                                                                                                                                                                                                                                                                                       |
| EPI_ISL_420056, EPI_ISL_420057                                                                                                                                                                                                                                                                                                                                                                                                                                                                                                                                                                                                                                                                                                                                                                                                                                                                                                                                                                                                                                                                                                                                                                                                                                                                                                                                                                                                                                                                                                                                                                                                                                                                                                                                                                                                                                                                                                                                                                                                                                                                                                                                                                                                                                                                                                                                                                                                                                                                                                                                                                                                                                                                                                                                                                                                                                                                                                                                                                                                                                                                                                                                                                                                                                                                                                                                                                                                                                                 | CH Compiègne Laboratoire de Biologie                                                                                                                                                    | National Reference Center for Viruses of Respiratory Infections, Institut Pasteur, Paris                                                                                                | Mélanie Albert, Marion Barbet, Sylvie Behillil, Méline Bizard, Angela Brisebarre, Flora Donati, Etienne Simon-Lorière, Vincent Enouf, Maud Vanpeene, Sylvie van der Werf, Raulin Olivia                                                                                                                                                                                                                                                                                                                                                                        |
| EPI_ISL_420058, EPI_ISL_420059, EPI_ISL_420060                                                                                                                                                                                                                                                                                                                                                                                                                                                                                                                                                                                                                                                                                                                                                                                                                                                                                                                                                                                                                                                                                                                                                                                                                                                                                                                                                                                                                                                                                                                                                                                                                                                                                                                                                                                                                                                                                                                                                                                                                                                                                                                                                                                                                                                                                                                                                                                                                                                                                                                                                                                                                                                                                                                                                                                                                                                                                                                                                                                                                                                                                                                                                                                                                                                                                                                                                                                                                                 | Service de Biologie Médicale - BP 125                                                                                                                                                   | National Reference Center for Viruses of Respiratory Infections, Institut Pasteur, Paris                                                                                                | Mélanie Albert, Marion Barbet, Sylvie Behillil, Méline Bizard, Angela Brisebarre, Flora Donati, Etienne Simon-Lorière, Vincent Enouf, Maud Vanpeene, Sylvie van der Werf, Christine Lambert                                                                                                                                                                                                                                                                                                                                                                    |
| EPI_ISL_420061                                                                                                                                                                                                                                                                                                                                                                                                                                                                                                                                                                                                                                                                                                                                                                                                                                                                                                                                                                                                                                                                                                                                                                                                                                                                                                                                                                                                                                                                                                                                                                                                                                                                                                                                                                                                                                                                                                                                                                                                                                                                                                                                                                                                                                                                                                                                                                                                                                                                                                                                                                                                                                                                                                                                                                                                                                                                                                                                                                                                                                                                                                                                                                                                                                                                                                                                                                                                                                                                 | CMIP                                                                                                                                                                                    | National Reference Center for Viruses of Respiratory Infections, Institut Pasteur, Paris                                                                                                | Mélanie Albert, Marion Barbet, Sylvie Behillil, Méline Bizard, Angela Brisebarre, Flora Donati, Etienne Simon-Lorière, Vincent Enouf, Maud Vanpeene, Sylvie van der Werf                                                                                                                                                                                                                                                                                                                                                                                       |
| EPI_ISL_420062                                                                                                                                                                                                                                                                                                                                                                                                                                                                                                                                                                                                                                                                                                                                                                                                                                                                                                                                                                                                                                                                                                                                                                                                                                                                                                                                                                                                                                                                                                                                                                                                                                                                                                                                                                                                                                                                                                                                                                                                                                                                                                                                                                                                                                                                                                                                                                                                                                                                                                                                                                                                                                                                                                                                                                                                                                                                                                                                                                                                                                                                                                                                                                                                                                                                                                                                                                                                                                                                 | Service de Biologie Médicale - BP 125                                                                                                                                                   | National Reference Center for Viruses of Respiratory Infections, Institut Pasteur, Paris                                                                                                | Mélanie Albert, Marion Barbet, Sylvie Behillil, Méline Bizard, Angela Brisebarre, Flora Donati, Etienne Simon-Lorière, Vincent Enouf, Maud Vanpeene, Sylvie van der Werf, Christine Lambert                                                                                                                                                                                                                                                                                                                                                                    |
| EPI_ISL_420063                                                                                                                                                                                                                                                                                                                                                                                                                                                                                                                                                                                                                                                                                                                                                                                                                                                                                                                                                                                                                                                                                                                                                                                                                                                                                                                                                                                                                                                                                                                                                                                                                                                                                                                                                                                                                                                                                                                                                                                                                                                                                                                                                                                                                                                                                                                                                                                                                                                                                                                                                                                                                                                                                                                                                                                                                                                                                                                                                                                                                                                                                                                                                                                                                                                                                                                                                                                                                                                                 | Labo BM - Site de Juvisy - Hopital Général                                                                                                                                              | National Reference Center for Viruses of Respiratory Infections, Institut Pasteur, Paris                                                                                                | Mélanie Albert, Marion Barbet, Sylvie Behillil, Méline Bizard, Angela Brisebarre, Flora Donati, Etienne Simon-Lorière, Vincent Enouf, Maud Vanpeene, Sylvie van der Werf                                                                                                                                                                                                                                                                                                                                                                                       |
| EPI_ISL_420064                                                                                                                                                                                                                                                                                                                                                                                                                                                                                                                                                                                                                                                                                                                                                                                                                                                                                                                                                                                                                                                                                                                                                                                                                                                                                                                                                                                                                                                                                                                                                                                                                                                                                                                                                                                                                                                                                                                                                                                                                                                                                                                                                                                                                                                                                                                                                                                                                                                                                                                                                                                                                                                                                                                                                                                                                                                                                                                                                                                                                                                                                                                                                                                                                                                                                                                                                                                                                                                                 | Service de Biologie Médicale - BP 125                                                                                                                                                   | National Reference Center for Viruses of Respiratory Infections, Institut Pasteur, Paris                                                                                                | Mélanie Albert, Marion Barbet, Sylvie Behillil, Méline Bizard, Angela Brisebarre, Flora Donati, Etienne Simon-Lorière, Vincent Enouf, Maud Vanpeene, Sylvie van der Werf, Christine Lambert                                                                                                                                                                                                                                                                                                                                                                    |
| EPI_ISL_420069, EPI_ISL_420070, EPI_ISL_420071                                                                                                                                                                                                                                                                                                                                                                                                                                                                                                                                                                                                                                                                                                                                                                                                                                                                                                                                                                                                                                                                                                                                                                                                                                                                                                                                                                                                                                                                                                                                                                                                                                                                                                                                                                                                                                                                                                                                                                                                                                                                                                                                                                                                                                                                                                                                                                                                                                                                                                                                                                                                                                                                                                                                                                                                                                                                                                                                                                                                                                                                                                                                                                                                                                                                                                                                                                                                                                 | Institut Pasteur Dakar                                                                                                                                                                  | Institut Pasteur de Dakar                                                                                                                                                               | Ndongo Dia, Moussa Moise Diagne, Mamadou Diop, Ousmane Faye, Amadou Alpha Sall                                                                                                                                                                                                                                                                                                                                                                                                                                                                                 |
| EPI_ISL_420072, EPI_ISL_420073, EPI_ISL_420074                                                                                                                                                                                                                                                                                                                                                                                                                                                                                                                                                                                                                                                                                                                                                                                                                                                                                                                                                                                                                                                                                                                                                                                                                                                                                                                                                                                                                                                                                                                                                                                                                                                                                                                                                                                                                                                                                                                                                                                                                                                                                                                                                                                                                                                                                                                                                                                                                                                                                                                                                                                                                                                                                                                                                                                                                                                                                                                                                                                                                                                                                                                                                                                                                                                                                                                                                                                                                                 | Institut Pasteur Dakar                                                                                                                                                                  | Institut Pasteur de Dakar                                                                                                                                                               | Ndongo Dia, Moussa Moise Diagne, Mamadou Diop, Ousmane Faye , Amadou Alpha Sall                                                                                                                                                                                                                                                                                                                                                                                                                                                                                |
| EPI_ISL_420075                                                                                                                                                                                                                                                                                                                                                                                                                                                                                                                                                                                                                                                                                                                                                                                                                                                                                                                                                                                                                                                                                                                                                                                                                                                                                                                                                                                                                                                                                                                                                                                                                                                                                                                                                                                                                                                                                                                                                                                                                                                                                                                                                                                                                                                                                                                                                                                                                                                                                                                                                                                                                                                                                                                                                                                                                                                                                                                                                                                                                                                                                                                                                                                                                                                                                                                                                                                                                                                                 | Institut pasteur Dakar                                                                                                                                                                  | Institut Pasteur de Dakar                                                                                                                                                               | Ndongo Dia, Moussa Moise Diagne, Mamadou Diop, Ousmane Faye , Amadou Alpha Sall                                                                                                                                                                                                                                                                                                                                                                                                                                                                                |
| EPI_ISL_420076                                                                                                                                                                                                                                                                                                                                                                                                                                                                                                                                                                                                                                                                                                                                                                                                                                                                                                                                                                                                                                                                                                                                                                                                                                                                                                                                                                                                                                                                                                                                                                                                                                                                                                                                                                                                                                                                                                                                                                                                                                                                                                                                                                                                                                                                                                                                                                                                                                                                                                                                                                                                                                                                                                                                                                                                                                                                                                                                                                                                                                                                                                                                                                                                                                                                                                                                                                                                                                                                 | Institut Pasteur Dakar                                                                                                                                                                  | Institut Pasteur de Dakar                                                                                                                                                               | Ndongo Dia, Moussa Moise Diagne, Mamadou Diop, Ousmane Faye , Ndongo Dia                                                                                                                                                                                                                                                                                                                                                                                                                                                                                       |
| EPI_ISL_420077, EPI_ISL_420078, EPI_ISL_420079                                                                                                                                                                                                                                                                                                                                                                                                                                                                                                                                                                                                                                                                                                                                                                                                                                                                                                                                                                                                                                                                                                                                                                                                                                                                                                                                                                                                                                                                                                                                                                                                                                                                                                                                                                                                                                                                                                                                                                                                                                                                                                                                                                                                                                                                                                                                                                                                                                                                                                                                                                                                                                                                                                                                                                                                                                                                                                                                                                                                                                                                                                                                                                                                                                                                                                                                                                                                                                 | Institut Pasteur Dakar                                                                                                                                                                  | Institut Pasteur de Dakar                                                                                                                                                               | Ndongo Dia, Moussa Moise Diagne, Mamadou Diop, Ousmane Faye , Amadou Alpha Sall                                                                                                                                                                                                                                                                                                                                                                                                                                                                                |
| EPI_ISL_420116                                                                                                                                                                                                                                                                                                                                                                                                                                                                                                                                                                                                                                                                                                                                                                                                                                                                                                                                                                                                                                                                                                                                                                                                                                                                                                                                                                                                                                                                                                                                                                                                                                                                                                                                                                                                                                                                                                                                                                                                                                                                                                                                                                                                                                                                                                                                                                                                                                                                                                                                                                                                                                                                                                                                                                                                                                                                                                                                                                                                                                                                                                                                                                                                                                                                                                                                                                                                                                                                 | Servicio de Microbiología. Consorcio Hospital General Universitario de Valencia                                                                                                         | Sequencing and Bioinformatics Service and Molecular Epidemiology Research Group. FISABIO-Public Health                                                                                  | Neris Garcia-Gonzalez, Loreto Ferrús Abad, Inma Galán Vendrell, Paula Ruiz-Hueso, Mariana Reyes-Prieto, Vicente Soriano Chirona, Maria Alma Bracho, Griselda De Marco, Beatriz Beamud, Lidia Ruiz Roldan, Marta Pla Diaz, Maria Dolores Ocete, Lúcia Martínez-Priego, Concepcion Gimeno, Giuseppe D'Auria, Fernando Gonzalez-Candelas                                                                                                                                                                                                                          |
| EPI_ISL_420140                                                                                                                                                                                                                                                                                                                                                                                                                                                                                                                                                                                                                                                                                                                                                                                                                                                                                                                                                                                                                                                                                                                                                                                                                                                                                                                                                                                                                                                                                                                                                                                                                                                                                                                                                                                                                                                                                                                                                                                                                                                                                                                                                                                                                                                                                                                                                                                                                                                                                                                                                                                                                                                                                                                                                                                                                                                                                                                                                                                                                                                                                                                                                                                                                                                                                                                                                                                                                                                                 | Department for Virology, Molecular Biology and Genome Research, R. G. Lugar Center for Public Health Research, National Center for Disease Control and Public Health (NCDC) of Georgia. | Department for Virology, Molecular Biology and Genome Research, R. G. Lugar Center for Public Health Research, National Center for Disease Control and Public Health (NCDC) of Georgia. | Nato Kotaria, Marine Murtskhaladze, Ann Machabishvili, Lela Sabadze, Mari Gavashelidze, Ana Papkiauri, Meri Pantsulaia, Gvantsa Brachveli, Tata Imnadze, Tamar Jashiasvili, Tea Tevdoradze, Ketevan Sidamonidze, Ekaterine Khmaladze, Ekaterine Zhghenti, Roena Sukhiasvili, Mariam Zakalashvili, Lela Urushadze, Magda Dgebuadze, Giorgi Tomashvili, Davit Tsaquria, Ekaterine Zangaladze, Nino Berishvili, Gvantsa Chanturia, Adam Kotorashvili, Maia Alkhaszashvili, Irma Burjanadze, Anna Kasradze, Khatuna Zakhashvili, Paata Imnadze, Amiran Gamkrelidze |
| EPI_ISL_420457, EPI_ISL_420458, EPI_ISL_420459, EPI_ISL_420460, EPI_ISL_420461, EPI_ISL_420462, EPI_ISL_420475, EPI_ISL_420476, EPI_ISL_420477, EPI_ISL_420478, EPI_ISL_420479, EPI_ISL_420480, EPI_ISL_420483, EPI_ISL_420484, EPI_ISL_420485, EPI_ISL_420486, EPI_ISL_420487, EPI_ISL_420488, EPI_ISL_420489, EPI_ISL_420490, EPI_ISL_420491, EPI_ISL_420492, EPI_ISL_420493, EPI_ISL_420494, EPI_ISL_420495, EPI_ISL_420496, EPI_ISL_420497, EPI_ISL_420498, EPI_ISL_420499, EPI_ISL_420500, EPI_ISL_420501, EPI_ISL_420502, EPI_ISL_420503, EPI_ISL_420504, EPI_ISL_420505, EPI_ISL_420506, EPI_ISL_420507, EPI_ISL_420508, EPI_ISL_420509, EPI_ISL_420510, EPI_ISL_420511, EPI_ISL_420512, EPI_ISL_420513, EPI_ISL_420514, EPI_ISL_420515, EPI_ISL_420516, EPI_ISL_420517, EPI_ISL_420518, EPI_ISL_420519, EPI_ISL_420520, EPI_ISL_420521, EPI_ISL_420522, EPI_ISL_420523, EPI_ISL_420524, EPI_ISL_420525, EPI_ISL_420526, EPI_ISL_420527, EPI_ISL_420528, EPI_ISL_420529, EPI_ISL_420530, EPI_ISL_420542, EPI_ISL_420631, EPI_ISL_420632, EPI_ISL_420633, EPI_ISL_420634, EPI_ISL_420635, EPI_ISL_420636, EPI_ISL_420637, EPI_ISL_420638, EPI_ISL_420639, EPI_ISL_420640, EPI_ISL_420641, EPI_ISL_420642, EPI_ISL_420643, EPI_ISL_420644, EPI_ISL_420645, EPI_ISL_420646, EPI_ISL_420647, EPI_ISL_420648, EPI_ISL_420649, EPI_ISL_420650, EPI_ISL_420651, EPI_ISL_420652, EPI_ISL_420653, EPI_ISL_420654, EPI_ISL_420655, EPI_ISL_420656, EPI_ISL_420657, EPI_ISL_420658, EPI_ISL_420659, EPI_ISL_420660, EPI_ISL_420661, EPI_ISL_420662, EPI_ISL_420663, EPI_ISL_420664, EPI_ISL_420665, EPI_ISL_420666, EPI_ISL_420667, EPI_ISL_420668, EPI_ISL_420669, EPI_ISL_420670, EPI_ISL_420671, EPI_ISL_420672, EPI_ISL_420673, EPI_ISL_420674, EPI_ISL_420675, EPI_ISL_420676, EPI_ISL_420677, EPI_ISL_420678, EPI_ISL_420679, EPI_ISL_420680, EPI_ISL_420681, EPI_ISL_420682, EPI_ISL_420683, EPI_ISL_420684, EPI_ISL_420685, EPI_ISL_420686, EPI_ISL_420687, EPI_ISL_420688, EPI_ISL_420689, EPI_ISL_420690, EPI_ISL_420691, EPI_ISL_420692, EPI_ISL_420693, EPI_ISL_420694, EPI_ISL_420695, EPI_ISL_420696, EPI_ISL_420697, EPI_ISL_420698, EPI_ISL_420699, EPI_ISL_420700, EPI_ISL_420701, EPI_ISL_420702, EPI_ISL_420703, EPI_ISL_420704, EPI_ISL_420705, EPI_ISL_420706, EPI_ISL_420707, EPI_ISL_420708, EPI_ISL_420709, EPI_ISL_420710, EPI_ISL_420711, EPI_ISL_420712, EPI_ISL_420713, EPI_ISL_420714, EPI_ISL_420715, EPI_ISL_420716, EPI_ISL_420717, EPI_ISL_420718, EPI_ISL_420719, EPI_ISL_420720, EPI_ISL_420721, EPI_ISL_420722, EPI_ISL_420723, EPI_ISL_420724, EPI_ISL_420725, EPI_ISL_420726, EPI_ISL_420727, EPI_ISL_420728, EPI_ISL_420729, EPI_ISL_420730, EPI_ISL_420731, EPI_ISL_420732, EPI_ISL_420733, EPI_ISL_420734, EPI_ISL_420735, EPI_ISL_420736, EPI_ISL_420737, EPI_ISL_420738, EPI_ISL_420739, EPI_ISL_420740, EPI_ISL_420741, EPI_ISL_420742, EPI_ISL_420743, EPI_ISL_420744, EPI_ISL_420745, EPI_ISL_420746, EPI_ISL_420747, EPI_ISL_420748, EPI_ISL_420749, EPI_ISL_420750, EPI_ISL_420751, EPI_ISL_420752, EPI_ISL_420753, EPI_ISL_420754, EPI_ISL_420755, EPI_ISL_420756, EPI_ISL_420757, EPI_ISL_420758, EPI_ISL_420759, EPI_ISL_420760, EPI_ISL_420761, EPI_ISL_420762, EPI_ISL_420763, EPI_ISL_420764, EPI_ISL_420765, EPI_ISL_420766, EPI_ISL_420767, EPI_ISL_420768, EPI_ISL_420769, EPI_ISL_420770, EPI_ISL_420771, EPI_ISL_420772, EPI_ISL_420773, EPI_ISL_420774, EPI_ISL_420775, EPI_ISL_420776, EPI_ISL_420777, EPI_ISL_420910 | Respiratory Virus Unit, Microbiology Services Colindale, Public Health England                                                                                                          | Respiratory Virus Unit, Microbiology Services Colindale, Public Health England                                                                                                          | Monica Galiano, Shahjahan Miah, Angie Lackenby, Omolola Akinbami, Tiina Talts, Leena Bhow, Richard Myers, Steven Platt, Kirstin Edwards, Jonathan Hubb, Joanna Ellis, Maria Zambon                                                                                                                                                                                                                                                                                                                                                                             |
| EPI_ISL_421500                                                                                                                                                                                                                                                                                                                                                                                                                                                                                                                                                                                                                                                                                                                                                                                                                                                                                                                                                                                                                                                                                                                                                                                                                                                                                                                                                                                                                                                                                                                                                                                                                                                                                                                                                                                                                                                                                                                                                                                                                                                                                                                                                                                                                                                                                                                                                                                                                                                                                                                                                                                                                                                                                                                                                                                                                                                                                                                                                                                                                                                                                                                                                                                                                                                                                                                                                                                                                                                                 | CH Compiègne Laboratoire de Biologie                                                                                                                                                    | National Reference Center for Viruses of Respiratory Infections, Institut Pasteur, Paris                                                                                                | Mélanie Albert, Marion Barbet, Sylvie Behillil, Méline Bizard, Angela Brisebarre, Flora Donati, Etienne Simon-Lorière, Vincent Enouf, Maud Vanpeene, Sylvie van der Werf, Raulin Olivia                                                                                                                                                                                                                                                                                                                                                                        |
| EPI_ISL_421501                                                                                                                                                                                                                                                                                                                                                                                                                                                                                                                                                                                                                                                                                                                                                                                                                                                                                                                                                                                                                                                                                                                                                                                                                                                                                                                                                                                                                                                                                                                                                                                                                                                                                                                                                                                                                                                                                                                                                                                                                                                                                                                                                                                                                                                                                                                                                                                                                                                                                                                                                                                                                                                                                                                                                                                                                                                                                                                                                                                                                                                                                                                                                                                                                                                                                                                                                                                                                                                                 | Service de Biologie Médicale - BP 125                                                                                                                                                   | National Reference Center for Viruses of Respiratory Infections, Institut Pasteur, Paris                                                                                                | Mélanie Albert, Marion Barbet, Sylvie Behillil, Méline Bizard, Angela Brisebarre, Flora Donati, Etienne Simon-Lorière, Vincent Enouf, Maud Vanpeene, Sylvie van der Werf, Christine Lambert                                                                                                                                                                                                                                                                                                                                                                    |
| EPI_ISL_421502, EPI_ISL_421503                                                                                                                                                                                                                                                                                                                                                                                                                                                                                                                                                                                                                                                                                                                                                                                                                                                                                                                                                                                                                                                                                                                                                                                                                                                                                                                                                                                                                                                                                                                                                                                                                                                                                                                                                                                                                                                                                                                                                                                                                                                                                                                                                                                                                                                                                                                                                                                                                                                                                                                                                                                                                                                                                                                                                                                                                                                                                                                                                                                                                                                                                                                                                                                                                                                                                                                                                                                                                                                 | Parc des Dames                                                                                                                                                                          | National Reference Center for Viruses of Respiratory Infections, Institut Pasteur, Paris                                                                                                | Mélanie Albert, Marion Barbet, Sylvie Behillil, Méline Bizard, Angela Brisebarre, Flora Donati, Etienne Simon-Lorière, Vincent Enouf, Maud Vanpeene, Sylvie van der Werf                                                                                                                                                                                                                                                                                                                                                                                       |
| EPI_ISL_421504, EPI_ISL_421505, EPI_ISL_421506                                                                                                                                                                                                                                                                                                                                                                                                                                                                                                                                                                                                                                                                                                                                                                                                                                                                                                                                                                                                                                                                                                                                                                                                                                                                                                                                                                                                                                                                                                                                                                                                                                                                                                                                                                                                                                                                                                                                                                                                                                                                                                                                                                                                                                                                                                                                                                                                                                                                                                                                                                                                                                                                                                                                                                                                                                                                                                                                                                                                                                                                                                                                                                                                                                                                                                                                                                                                                                 | Service de Biologie Médicale - BP 125                                                                                                                                                   | National Reference Center for Viruses of Respiratory Infections, Institut Pasteur, Paris                                                                                                | Mélanie Albert, Marion Barbet, Sylvie Behillil, Méline Bizard, Angela Brisebarre, Flora Donati, Etienne Simon-Lorière, Vincent Enouf, Maud Vanpeene, Sylvie van der Werf, Christine Lambert                                                                                                                                                                                                                                                                                                                                                                    |
| EPI_ISL_421507, EPI_ISL_421508                                                                                                                                                                                                                                                                                                                                                                                                                                                                                                                                                                                                                                                                                                                                                                                                                                                                                                                                                                                                                                                                                                                                                                                                                                                                                                                                                                                                                                                                                                                                                                                                                                                                                                                                                                                                                                                                                                                                                                                                                                                                                                                                                                                                                                                                                                                                                                                                                                                                                                                                                                                                                                                                                                                                                                                                                                                                                                                                                                                                                                                                                                                                                                                                                                                                                                                                                                                                                                                 | Le Château de Seine-Port                                                                                                                                                                | National Reference Center for Viruses of Respiratory Infections, Institut Pasteur, Paris                                                                                                | Mélanie Albert, Marion Barbet, Sylvie Behillil, Méline Bizard, Angela Brisebarre, Flora Donati, Etienne Simon-Lorière, Vincent Enouf, Maud Vanpeene, Sylvie van der Werf                                                                                                                                                                                                                                                                                                                                                                                       |
| EPI_ISL_421509, EPI_ISL_421510, EPI_ISL_421511                                                                                                                                                                                                                                                                                                                                                                                                                                                                                                                                                                                                                                                                                                                                                                                                                                                                                                                                                                                                                                                                                                                                                                                                                                                                                                                                                                                                                                                                                                                                                                                                                                                                                                                                                                                                                                                                                                                                                                                                                                                                                                                                                                                                                                                                                                                                                                                                                                                                                                                                                                                                                                                                                                                                                                                                                                                                                                                                                                                                                                                                                                                                                                                                                                                                                                                                                                                                                                 | CH Compiègne Laboratoire de Biologie                                                                                                                                                    | National Reference Center for Viruses of Respiratory Infections, Institut Pasteur, Paris                                                                                                | Mélanie Albert, Marion Barbet, Sylvie Behillil, Méline Bizard, Angela Brisebarre, Flora Donati, Etienne Simon-Lorière, Vincent Enouf, Maud Vanpeene, Sylvie van der Werf, Raulin Olivia                                                                                                                                                                                                                                                                                                                                                                        |
| EPI_ISL_421512                                                                                                                                                                                                                                                                                                                                                                                                                                                                                                                                                                                                                                                                                                                                                                                                                                                                                                                                                                                                                                                                                                                                                                                                                                                                                                                                                                                                                                                                                                                                                                                                                                                                                                                                                                                                                                                                                                                                                                                                                                                                                                                                                                                                                                                                                                                                                                                                                                                                                                                                                                                                                                                                                                                                                                                                                                                                                                                                                                                                                                                                                                                                                                                                                                                                                                                                                                                                                                                                 | Service de Biologie Médicale - BP 125                                                                                                                                                   | National Reference Center for Viruses of Respiratory Infections, Institut Pasteur, Paris                                                                                                | Mélanie Albert, Marion Barbet, Sylvie Behillil, Méline Bizard, Angela Brisebarre, Flora Donati, Etienne Simon-Lorière, Vincent Enouf, Maud Vanpeene, Sylvie van der Werf, Christine Lambert                                                                                                                                                                                                                                                                                                                                                                    |
| EPI_ISL_421513                                                                                                                                                                                                                                                                                                                                                                                                                                                                                                                                                                                                                                                                                                                                                                                                                                                                                                                                                                                                                                                                                                                                                                                                                                                                                                                                                                                                                                                                                                                                                                                                                                                                                                                                                                                                                                                                                                                                                                                                                                                                                                                                                                                                                                                                                                                                                                                                                                                                                                                                                                                                                                                                                                                                                                                                                                                                                                                                                                                                                                                                                                                                                                                                                                                                                                                                                                                                                                                                 | Service de Biologie clinique                                                                                                                                                            | National Reference Center for Viruses of Respiratory Infections, Institut Pasteur, Paris                                                                                                | Mélanie Albert, Marion Barbet, Sylvie Behillil, Méline Bizard, Angela Brisebarre, Flora Donati, Etienne Simon-Lorière, Vincent Enouf, Maud Vanpeene, Sylvie van der Werf, Christine Lambert                                                                                                                                                                                                                                                                                                                                                                    |
| EPI_ISL_421514                                                                                                                                                                                                                                                                                                                                                                                                                                                                                                                                                                                                                                                                                                                                                                                                                                                                                                                                                                                                                                                                                                                                                                                                                                                                                                                                                                                                                                                                                                                                                                                                                                                                                                                                                                                                                                                                                                                                                                                                                                                                                                                                                                                                                                                                                                                                                                                                                                                                                                                                                                                                                                                                                                                                                                                                                                                                                                                                                                                                                                                                                                                                                                                                                                                                                                                                                                                                                                                                 | Sentinelles network                                                                                                                                                                     | National Reference Center for Viruses of Respiratory Infections, Institut Pasteur, Paris                                                                                                | Mélanie Albert, Marion Barbet, Sylvie Behillil, Méline Bizard, Angela Brisebarre, Flora Donati, Etienne Simon-Lorière, Vincent Enouf, Maud Vanpeene, Sylvie van der Werf                                                                                                                                                                                                                                                                                                                                                                                       |
| EPI_ISL_421766, EPI_ISL_421769, EPI_ISL_421770, EPI_ISL_421771, EPI_ISL_421772, EPI_ISL_421773, EPI_ISL_421774, EPI_ISL_421775, EPI_ISL_421776, EPI_ISL_421777, EPI_ISL_421778, EPI_ISL_421779, EPI_ISL_421780, EPI_ISL_421781, EPI_ISL_421782, EPI_ISL_421783, EPI_ISL_421784, EPI_ISL_421785, EPI_ISL_421786, EPI_ISL_421787, EPI_ISL_421788, EPI_ISL_421789, EPI_ISL_421790, EPI_ISL_421791, EPI_ISL_421792, EPI_ISL_421793, EPI_ISL_421794, EPI_ISL_421795, EPI_ISL_421796, EPI_ISL_421797, EPI_ISL_421798, EPI_ISL_421799, EPI_ISL_421800, EPI_ISL_421801, EPI_ISL_421802, EPI_ISL_421803, EPI_ISL_421804, EPI_ISL_421805, EPI_ISL_421806, EPI_ISL_421807, EPI_ISL_421808, EPI_ISL_421809, EPI_ISL_421810, EPI_ISL_421811, EPI_ISL_421812, EPI_ISL_421813, EPI_ISL_421814, EPI_ISL_421815, EPI_ISL_421816, EPI_ISL_421817, EPI_ISL_421818, EPI_ISL_421819, EPI_ISL_421820, EPI_ISL_421821, EPI_ISL_421822, EPI_ISL_421823, EPI_ISL_421824, EPI_ISL_421825, EPI_ISL_421826, EPI_ISL_421827, EPI_ISL_421828, EPI_ISL_421829, EPI_ISL_421830, EPI_ISL_421831, EPI_ISL_421832, EPI_ISL_421833, EPI_ISL_421834, EPI_ISL_421835, EPI_ISL_421836, EPI_ISL_421837, EPI_ISL_421838, EPI_ISL_421839, EPI_ISL_421840, EPI_ISL_421841, EPI_ISL_421842, EPI_ISL_421843, EPI_ISL_421844, EPI_ISL_421845, EPI_ISL_421846, EPI_ISL_421847, EPI_ISL_421848, EPI_ISL_421849, EPI_ISL_421850, EPI_ISL_421851, EPI_ISL_421852, EPI_ISL_421853, EPI_ISL_421854, EPI_ISL_421855, EPI_ISL_421856, EPI_ISL_421857, EPI_ISL_421858, EPI_ISL_421859, EPI_ISL_421860, EPI_ISL_421861, EPI_ISL_421862, EPI_ISL_421863, EPI_ISL_421864, EPI_ISL_421865, EPI_ISL_421866, EPI_ISL_421867, EPI_ISL_421868, EPI_ISL_421869, EPI_ISL_421870, EPI_ISL_421871, EPI_ISL_421872, EPI_ISL_421873, EPI_ISL_421874, EPI_ISL_421875,                                                                                                                                                                                                                                                                                                                                                                                                                                                                                                                                                                                                                                                                                                                                                                                                                                                                                                                                                                                                                                                                                                                                                                                                                                                                                                                                                                                                                                                                                                                                                                                                                                                                                |                                                                                                                                                                                         |                                                                                                                                                                                         |                                                                                                                                                                                                                                                                                                                                                                                                                                                                                                                                                                |

EPI\_ISL\_421876, EPI\_ISL\_421877, EPI\_ISL\_421878, EPI\_ISL\_421879, EPI\_ISL\_421880, EPI\_ISL\_421881, EPI\_ISL\_421882, EPI\_ISL\_421883, EPI\_ISL\_421884, EPI\_ISL\_421885, EPI\_ISL\_421886, EPI\_ISL\_421887, EPI\_ISL\_421888, EPI\_ISL\_421889, EPI\_ISL\_421890, EPI\_ISL\_421891, EPI\_ISL\_421892, EPI\_ISL\_421893, EPI\_ISL\_421894, EPI\_ISL\_421895, EPI\_ISL\_421896, EPI\_ISL\_421897, EPI\_ISL\_421898, EPI\_ISL\_421899, EPI\_ISL\_421900, EPI\_ISL\_421901, EPI\_ISL\_421902, EPI\_ISL\_421903, EPI\_ISL\_421904, EPI\_ISL\_421905, EPI\_ISL\_421906, EPI\_ISL\_421907, EPI\_ISL\_421908, EPI\_ISL\_421909, EPI\_ISL\_421910, EPI\_ISL\_421911, EPI\_ISL\_421912, EPI\_ISL\_421913, EPI\_ISL\_421914, EPI\_ISL\_421915, EPI\_ISL\_421916, EPI\_ISL\_421917, EPI\_ISL\_421918, EPI\_ISL\_421919, EPI\_ISL\_421920, EPI\_ISL\_421921, EPI\_ISL\_421922, EPI\_ISL\_421923, EPI\_ISL\_421924, EPI\_ISL\_421925, EPI\_ISL\_421926, EPI\_ISL\_421927, EPI\_ISL\_421928, EPI\_ISL\_421929, EPI\_ISL\_421930, EPI\_ISL\_421931, EPI\_ISL\_421932, EPI\_ISL\_421933, EPI\_ISL\_421934, EPI\_ISL\_421935, EPI\_ISL\_421936, EPI\_ISL\_421937, EPI\_ISL\_421938, EPI\_ISL\_421939, EPI\_ISL\_421940, EPI\_ISL\_421941, EPI\_ISL\_421942, EPI\_ISL\_421943, EPI\_ISL\_421944, EPI\_ISL\_421945, EPI\_ISL\_421946, EPI\_ISL\_421947, EPI\_ISL\_421948, EPI\_ISL\_421949, EPI\_ISL\_421951, EPI\_ISL\_421952, EPI\_ISL\_421953, EPI\_ISL\_421954, EPI\_ISL\_421955, EPI\_ISL\_421956, EPI\_ISL\_421957, EPI\_ISL\_421958, EPI\_ISL\_421959, EPI\_ISL\_421960, EPI\_ISL\_421961, EPI\_ISL\_421962, EPI\_ISL\_421963, EPI\_ISL\_421964, EPI\_ISL\_421965, EPI\_ISL\_421966, EPI\_ISL\_421967, EPI\_ISL\_421968, EPI\_ISL\_421969, EPI\_ISL\_421970, EPI\_ISL\_421971, EPI\_ISL\_421972, EPI\_ISL\_421973, EPI\_ISL\_421974, EPI\_ISL\_421975, EPI\_ISL\_421976, EPI\_ISL\_421977, EPI\_ISL\_421978, EPI\_ISL\_421979, EPI\_ISL\_421980, EPI\_ISL\_421981, EPI\_ISL\_421982, EPI\_ISL\_421983, EPI\_ISL\_421984, EPI\_ISL\_421985, EPI\_ISL\_421986, EPI\_ISL\_421987, EPI\_ISL\_421988, EPI\_ISL\_421989, EPI\_ISL\_421990, EPI\_ISL\_421991, EPI\_ISL\_421992, EPI\_ISL\_421993, EPI\_ISL\_421994, EPI\_ISL\_421995, EPI\_ISL\_421996, EPI\_ISL\_421997, EPI\_ISL\_421998, EPI\_ISL\_421999, EPI\_ISL\_422000, EPI\_ISL\_422001, EPI\_ISL\_422002, EPI\_ISL\_422003, EPI\_ISL\_422004, EPI\_ISL\_422005, EPI\_ISL\_422006, EPI\_ISL\_422007, EPI\_ISL\_422008, EPI\_ISL\_422009, EPI\_ISL\_422010, EPI\_ISL\_422011, EPI\_ISL\_422012, EPI\_ISL\_422013, EPI\_ISL\_422014, EPI\_ISL\_422015, EPI\_ISL\_422016, EPI\_ISL\_422017, EPI\_ISL\_422018, EPI\_ISL\_422019, EPI\_ISL\_422020, EPI\_ISL\_422021, EPI\_ISL\_422022, EPI\_ISL\_422023, EPI\_ISL\_422024, EPI\_ISL\_422025, EPI\_ISL\_422026, EPI\_ISL\_422027, EPI\_ISL\_422028, EPI\_ISL\_422029, EPI\_ISL\_422030, EPI\_ISL\_422031, EPI\_ISL\_422032, EPI\_ISL\_422033, EPI\_ISL\_422034, EPI\_ISL\_422035, EPI\_ISL\_422036, EPI\_ISL\_422037, EPI\_ISL\_422038, EPI\_ISL\_422039, EPI\_ISL\_422040, EPI\_ISL\_422041, EPI\_ISL\_422042, EPI\_ISL\_422043, EPI\_ISL\_422044, EPI\_ISL\_422045, EPI\_ISL\_422046, EPI\_ISL\_422047, EPI\_ISL\_422048, EPI\_ISL\_422049, EPI\_ISL\_422050, EPI\_ISL\_422051, EPI\_ISL\_422052, EPI\_ISL\_422053, EPI\_ISL\_422054, EPI\_ISL\_422055, EPI\_ISL\_422056, EPI\_ISL\_422057, EPI\_ISL\_422058, EPI\_ISL\_422059, EPI\_ISL\_422060, EPI\_ISL\_422061, EPI\_ISL\_422062, EPI\_ISL\_422063, EPI\_ISL\_422064, EPI\_ISL\_422065, EPI\_ISL\_422066, EPI\_ISL\_422067, EPI\_ISL\_422068, EPI\_ISL\_422069, EPI\_ISL\_422070, EPI\_ISL\_422071, EPI\_ISL\_422072, EPI\_ISL\_422073, EPI\_ISL\_422074, EPI\_ISL\_422075, EPI\_ISL\_422076, EPI\_ISL\_422077, EPI\_ISL\_422078, EPI\_ISL\_422079, EPI\_ISL\_422080, EPI\_ISL\_422081, EPI\_ISL\_422082, EPI\_ISL\_422083, EPI\_ISL\_422084, EPI\_ISL\_422085, EPI\_ISL\_422086, EPI\_ISL\_422087, EPI\_ISL\_422088, EPI\_ISL\_422089, EPI\_ISL\_422090, EPI\_ISL\_422091, EPI\_ISL\_422092, EPI\_ISL\_422093, EPI\_ISL\_422094, EPI\_ISL\_422095, EPI\_ISL\_422096, EPI\_ISL\_422097, EPI\_ISL\_422098, EPI\_ISL\_422099, EPI\_ISL\_422100, EPI\_ISL\_422101, EPI\_ISL\_422102, EPI\_ISL\_422103, EPI\_ISL\_422104, EPI\_ISL\_422105, EPI\_ISL\_422106, EPI\_ISL\_422107, EPI\_ISL\_422108, EPI\_ISL\_422109, EPI\_ISL\_422110, EPI\_ISL\_422111, EPI\_ISL\_422112, EPI\_ISL\_422113, EPI\_ISL\_422114, EPI\_ISL\_422115, EPI\_ISL\_422116, EPI\_ISL\_422117, EPI\_ISL\_422118, EPI\_ISL\_422119, EPI\_ISL\_422120, EPI\_ISL\_422121, EPI\_ISL\_422122, EPI\_ISL\_422123, EPI\_ISL\_422124, EPI\_ISL\_422125, EPI\_ISL\_422126, EPI\_ISL\_422127, EPI\_ISL\_422128, EPI\_ISL\_422129, EPI\_ISL\_422130, EPI\_ISL\_422131, EPI\_ISL\_422132, EPI\_ISL\_422133, EPI\_ISL\_422134, EPI\_ISL\_422135, EPI\_ISL\_422136, EPI\_ISL\_422137, EPI\_ISL\_422138, EPI\_ISL\_422139, EPI\_ISL\_422140, EPI\_ISL\_422141, EPI\_ISL\_422142, EPI\_ISL\_422143, EPI\_ISL\_422144, EPI\_ISL\_422145, EPI\_ISL\_422146, EPI\_ISL\_422147, EPI\_ISL\_422148, EPI\_ISL\_422149, EPI\_ISL\_422150, EPI\_ISL\_422151, EPI\_ISL\_422152, EPI\_ISL\_422153, EPI\_ISL\_422154, EPI\_ISL\_422155, EPI\_ISL\_422156, EPI\_ISL\_422157, EPI\_ISL\_422158, EPI\_ISL\_422159, EPI\_ISL\_422160, EPI\_ISL\_422161, EPI\_ISL\_422162, EPI\_ISL\_422163, EPI\_ISL\_422164, EPI\_ISL\_422165

see above

Respiratory Virus Unit, Microbiology Services Colindale, Public Health England

Respiratory Virus Unit, Microbiology Services Colindale, Public Health England

Monica Galiano, Shahjahan Miah, Angie Lackenby, Omolola Akinmbi, Tiina Talts, Leena Bhow, Richard Myers, Steven Platt, Kirstin Edwards, Jonathan Hubb, Joanna Ellis, Maria Zambon

EPI\_ISL\_424731

Hospital General Regional No.66, Ciudad Juárez, Chihuahua.

Laboratorio Central de Epidemiología-DLVE / Laboratorio de Secuenciación-Centro de Instrumentos. Instituto Mexicano del Seguro Social

Muñoz-Medina JE, González-Torres C, Gaytán-Cervantes J, López-Ríos L, Hernández-Rivas L, Barrera-Badillo G, Mendieta-Condado E, Garcés-Ayala F, Araiza-Rodríguez A, Ramírez-González JE, Boukadia C, Ávila-Rios S, Mújica-Sánchez M, Martínez-Orozco JA, Becerril-Vargas E, Vázquez-Pérez JA, Taboada B, Sánchez A, Isa P, Grande R, Vázquez G, Pulido F, López S, Arias C, Ramos-Cervantes P, Ruiz-Palacios GM, Ibarra-González V, Ledesma-Barriontos F, Garcia-Andrade LA, de León-Garduño AP, González-Bonilla C, Grajales-Muñiz C, Borja-Aburto VH.

EPI\_ISL\_425051, EPI\_ISL\_425052, EPI\_ISL\_425053, EPI\_ISL\_425054, EPI\_ISL\_425055, EPI\_ISL\_425059, EPI\_ISL\_425060, EPI\_ISL\_425061

Lab voor klinische biologie

Onderzoeksgroep Virologie

Nick Vereecke, Laurens Lambrechts, Marthe Pauwels, Basiel Cole, Bruno Verhaselt, Linos Vandekerckhove, Hans Nauwynck, Sebastiaan Theuns

EPI\_ISL\_425184, EPI\_ISL\_425198

Servicio de Microbiología. Consorcio Hospital General Universitario de Valencia

Sequencing and Bioinformatics Service and Molecular Epidemiology Research Group. FISABIO-Public Health

Neris Garcia-Gonzalez, Inma Galán Vendrell, Sandra Carbo, Loreto Ferrús Abad, Paula Ruiz-Hueso, Mariana Reyes-Prieto, Vicente Soriano Chirona, Ivan Ansari, David Navarro, Maria Alma Bracho, Griselda De Marco, Beatriz Beamud, Lidia Ruiz Roldan, Marta Pla Diaz, Lúcia Martínez-Priego, Giuseppe D'Auria, Fernando Gonzalez-Candelas

EPI\_ISL\_425209

Servicio de Microbiología. Hospital Clínico Universitario de Valencia

Sequencing and Bioinformatics Service and Molecular Epidemiology Research Group. FISABIO-Public Health

Neris Garcia-Gonzalez, Loreto Ferrús Abad, Maria Dolores Ocete, Inma Galán Vendrell, Paula Ruiz-Hueso, Mariana Reyes-Prieto, Vicente Soriano Chirona, Maria Alma Bracho, Griselda De Marco, Beatriz Beamud, Lidia Ruiz Roldan, Marta Pla Diaz, Lúcia Martínez-Priego, Concepcion Gimeno, Giuseppe D'Auria,

|                                                                                                                                                                                                                                                                                                                                                                                                                                                                                                                                                                                                                                                                                                                                                                                                                                                                                                                                                                |                                                                                                                                                                                                 |                                                                                                                                                                                                 |                                                                                                                                                                                                                                                                                                                                         | Fernando Gonzalez-Candelas |
|----------------------------------------------------------------------------------------------------------------------------------------------------------------------------------------------------------------------------------------------------------------------------------------------------------------------------------------------------------------------------------------------------------------------------------------------------------------------------------------------------------------------------------------------------------------------------------------------------------------------------------------------------------------------------------------------------------------------------------------------------------------------------------------------------------------------------------------------------------------------------------------------------------------------------------------------------------------|-------------------------------------------------------------------------------------------------------------------------------------------------------------------------------------------------|-------------------------------------------------------------------------------------------------------------------------------------------------------------------------------------------------|-----------------------------------------------------------------------------------------------------------------------------------------------------------------------------------------------------------------------------------------------------------------------------------------------------------------------------------------|----------------------------|
| EPI_ISL_425218, EPI_ISL_425219                                                                                                                                                                                                                                                                                                                                                                                                                                                                                                                                                                                                                                                                                                                                                                                                                                                                                                                                 | Servicio de Microbiología, Consorcio Hospital General Universitario de Valencia                                                                                                                 | Sequencing and Bioinformatics Service and Molecular Epidemiology Research Group, FISABIO-Public Health                                                                                          | Neris Garcia-Gonzalez, Inma Galán Vendrell, Sandra Carbo, Loreto Ferrús Abad, Paula Ruiz-Hueso, Mariana Reyes-Prieto, Vicente Soriano Chirona, Ivan Ansari, David Navarro, Maria Alma Bracho, Griselda De Marco, Beatriz Beamud, Lidia Ruiz Roldan, Marta Pla Diaz, Lúcia Martínez-Priego, Giuseppe D'Auria, Fernando Gonzalez-Candelas |                            |
| EPI_ISL_425822, EPI_ISL_425823, EPI_ISL_425832, EPI_ISL_425833, EPI_ISL_425834, EPI_ISL_425839, EPI_ISL_425842, EPI_ISL_425843, EPI_ISL_425847, EPI_ISL_425849, EPI_ISL_425853, EPI_ISL_425854, EPI_ISL_425855, EPI_ISL_425859, EPI_ISL_425862, EPI_ISL_425863, EPI_ISL_425865, EPI_ISL_425866, EPI_ISL_425869, EPI_ISL_425874, EPI_ISL_425876, EPI_ISL_425883, EPI_ISL_425895, EPI_ISL_425901, EPI_ISL_425903, EPI_ISL_425906, EPI_ISL_425908, EPI_ISL_425909, EPI_ISL_425910, EPI_ISL_425915, EPI_ISL_425926, EPI_ISL_425931, EPI_ISL_425932, EPI_ISL_425937, EPI_ISL_425950, EPI_ISL_425953, EPI_ISL_425954, EPI_ISL_425959, EPI_ISL_425967, EPI_ISL_425971, EPI_ISL_425973, EPI_ISL_425975, EPI_ISL_425976, EPI_ISL_425979, EPI_ISL_425987, EPI_ISL_425988, EPI_ISL_425991, EPI_ISL_426001, EPI_ISL_426003, EPI_ISL_426004, EPI_ISL_426005, EPI_ISL_426010, EPI_ISL_426011, EPI_ISL_426013, EPI_ISL_426015, EPI_ISL_426017, EPI_ISL_426018, EPI_ISL_426021 | COVID-19 Genomics UK (COG-UK) Consortium                                                                                                                                                        | McHugh M, Dewar R, Rooke S, Gallagher M, Balcaza C, O'Toole A, Hill V, McCrone JT, Colquhoun R, Yu X, Jackson B, Scher E, Rambaut A, Williams TC, Templeton K                                   |                                                                                                                                                                                                                                                                                                                                         |                            |
| see above                                                                                                                                                                                                                                                                                                                                                                                                                                                                                                                                                                                                                                                                                                                                                                                                                                                                                                                                                      | Virology Department, Royal Infirmary of Edinburgh, NHS Lothian / School of Biological Sciences, University of Edinburgh / Institute of Genetics and Molecular Medicine, University of Edinburgh |                                                                                                                                                                                                 |                                                                                                                                                                                                                                                                                                                                         |                            |
| EPI_ISL_426633, EPI_ISL_426634, EPI_ISL_426635, EPI_ISL_426636, EPI_ISL_426898, EPI_ISL_426899, EPI_ISL_426900, EPI_ISL_426901, EPI_ISL_426902, EPI_ISL_426903, EPI_ISL_426904                                                                                                                                                                                                                                                                                                                                                                                                                                                                                                                                                                                                                                                                                                                                                                                 |                                                                                                                                                                                                 |                                                                                                                                                                                                 |                                                                                                                                                                                                                                                                                                                                         |                            |
| see above                                                                                                                                                                                                                                                                                                                                                                                                                                                                                                                                                                                                                                                                                                                                                                                                                                                                                                                                                      | Royal Darwin Hospital Pathology                                                                                                                                                                 | Microbiological Diagnostic Unit Public Health Laboratory and Victorian Infectious Diseases Reference Laboratory, Doherty Institute                                                              | Meumann, E., Caly L., Seemann T., Sait, M., Schultz M., Druce J., Sherry, N.                                                                                                                                                                                                                                                            |                            |
| EPI_ISL_428347                                                                                                                                                                                                                                                                                                                                                                                                                                                                                                                                                                                                                                                                                                                                                                                                                                                                                                                                                 | Service de Biologie Médicale - BP 125                                                                                                                                                           | National Reference Center for Viruses of Respiratory Infections, Institut Pasteur, Paris                                                                                                        | Mélanie Albert, Marion Barbet, Sylvie Behillil, Méline Bizard, Angela Brisebarre, Flora Donati, Etienne Simon-Lorière, Vincent Enouf, Maud Vanpeene, Sylvie van der Werf                                                                                                                                                                |                            |
| EPI_ISL_428348                                                                                                                                                                                                                                                                                                                                                                                                                                                                                                                                                                                                                                                                                                                                                                                                                                                                                                                                                 | Maison de Santé du Val d'Ormois                                                                                                                                                                 | National Reference Center for Viruses of Respiratory Infections, Institut Pasteur, Paris                                                                                                        | Mélanie Albert, Marion Barbet, Sylvie Behillil, Méline Bizard, Angela Brisebarre, Flora Donati, Etienne Simon-Lorière, Vincent Enouf, Maud Vanpeene, Sylvie van der Werf                                                                                                                                                                |                            |
| EPI_ISL_428349                                                                                                                                                                                                                                                                                                                                                                                                                                                                                                                                                                                                                                                                                                                                                                                                                                                                                                                                                 | Service de Biologie Médicale - BP 125                                                                                                                                                           | National Reference Center for Viruses of Respiratory Infections, Institut Pasteur, Paris                                                                                                        | Mélanie Albert, Marion Barbet, Sylvie Behillil, Méline Bizard, Angela Brisebarre, Flora Donati, Etienne Simon-Lorière, Vincent Enouf, Maud Vanpeene, Sylvie van der Werf                                                                                                                                                                |                            |
| EPI_ISL_428350                                                                                                                                                                                                                                                                                                                                                                                                                                                                                                                                                                                                                                                                                                                                                                                                                                                                                                                                                 | CH Jean de Navarre Laboratoire de Biologie                                                                                                                                                      | National Reference Center for Viruses of Respiratory Infections, Institut Pasteur, Paris                                                                                                        | Mélanie Albert, Marion Barbet, Sylvie Behillil, Méline Bizard, Angela Brisebarre, Flora Donati, Etienne Simon-Lorière, Vincent Enouf, Maud Vanpeene, Sylvie van der Werf                                                                                                                                                                |                            |
| EPI_ISL_428351, EPI_ISL_428352                                                                                                                                                                                                                                                                                                                                                                                                                                                                                                                                                                                                                                                                                                                                                                                                                                                                                                                                 | GH Nord Essonne Service de Biologie clinique                                                                                                                                                    | National Reference Center for Viruses of Respiratory Infections, Institut Pasteur, Paris                                                                                                        | Mélanie Albert, Marion Barbet, Sylvie Behillil, Méline Bizard, Angela Brisebarre, Flora Donati, Etienne Simon-Lorière, Vincent Enouf, Maud Vanpeene, Sylvie van der Werf                                                                                                                                                                |                            |
| EPI_ISL_428353                                                                                                                                                                                                                                                                                                                                                                                                                                                                                                                                                                                                                                                                                                                                                                                                                                                                                                                                                 | CH Compiègne Laboratoire de Biologie                                                                                                                                                            | National Reference Center for Viruses of Respiratory Infections, Institut Pasteur, Paris                                                                                                        | Mélanie Albert, Marion Barbet, Sylvie Behillil, Méline Bizard, Angela Brisebarre, Flora Donati, Etienne Simon-Lorière, Vincent Enouf, Maud Vanpeene, Sylvie van der Werf                                                                                                                                                                |                            |
| EPI_ISL_428354                                                                                                                                                                                                                                                                                                                                                                                                                                                                                                                                                                                                                                                                                                                                                                                                                                                                                                                                                 | LABM GH nord Essonne de Longjumeau - BP 125                                                                                                                                                     | National Reference Center for Viruses of Respiratory Infections, Institut Pasteur, Paris                                                                                                        | Mélanie Albert, Marion Barbet, Sylvie Behillil, Méline Bizard, Angela Brisebarre, Flora Donati, Etienne Simon-Lorière, Vincent Enouf, Maud Vanpeene, Sylvie van der Werf                                                                                                                                                                |                            |
| EPI_ISL_428355, EPI_ISL_428356, EPI_ISL_428357                                                                                                                                                                                                                                                                                                                                                                                                                                                                                                                                                                                                                                                                                                                                                                                                                                                                                                                 | Institut Médico légal- Hop R. Poincaré                                                                                                                                                          | National Reference Center for Viruses of Respiratory Infections, Institut Pasteur, Paris                                                                                                        | Mélanie Albert, Marion Barbet, Sylvie Behillil, Méline Bizard, Angela Brisebarre, Flora Donati, Etienne Simon-Lorière, Vincent Enouf, Maud Vanpeene, Sylvie van der Werf                                                                                                                                                                |                            |
| EPI_ISL_428358                                                                                                                                                                                                                                                                                                                                                                                                                                                                                                                                                                                                                                                                                                                                                                                                                                                                                                                                                 | CH Jeanne de Navarre Laboratoire de Biologie                                                                                                                                                    | National Reference Center for Viruses of Respiratory Infections, Institut Pasteur, Paris                                                                                                        | Mélanie Albert, Marion Barbet, Sylvie Behillil, Méline Bizard, Angela Brisebarre, Flora Donati, Etienne Simon-Lorière, Vincent Enouf, Maud Vanpeene, Sylvie van der Werf                                                                                                                                                                |                            |
| EPI_ISL_428359, EPI_ISL_428360                                                                                                                                                                                                                                                                                                                                                                                                                                                                                                                                                                                                                                                                                                                                                                                                                                                                                                                                 | CH Compiègne Laboratoire de Biologie                                                                                                                                                            | National Reference Center for Viruses of Respiratory Infections, Institut Pasteur, Paris                                                                                                        | Mélanie Albert, Marion Barbet, Sylvie Behillil, Méline Bizard, Angela Brisebarre, Flora Donati, Etienne Simon-Lorière, Vincent Enouf, Maud Vanpeene, Sylvie van der Werf                                                                                                                                                                |                            |
| EPI_ISL_428361, EPI_ISL_428362                                                                                                                                                                                                                                                                                                                                                                                                                                                                                                                                                                                                                                                                                                                                                                                                                                                                                                                                 | LABM GH nord Essonne de Longjumeau - BP 125                                                                                                                                                     | National Reference Center for Viruses of Respiratory Infections, Institut Pasteur, Paris                                                                                                        | Mélanie Albert, Marion Barbet, Sylvie Behillil, Méline Bizard, Angela Brisebarre, Flora Donati, Etienne Simon-Lorière, Vincent Enouf, Maud Vanpeene, Sylvie van der Werf                                                                                                                                                                |                            |
| EPI_ISL_428363                                                                                                                                                                                                                                                                                                                                                                                                                                                                                                                                                                                                                                                                                                                                                                                                                                                                                                                                                 | GH Nord Essonne Service de Biologie clinique                                                                                                                                                    | National Reference Center for Viruses of Respiratory Infections, Institut Pasteur, Paris                                                                                                        | Mélanie Albert, Marion Barbet, Sylvie Behillil, Méline Bizard, Angela Brisebarre, Flora Donati, Etienne Simon-Lorière, Vincent Enouf, Maud Vanpeene, Sylvie van der Werf                                                                                                                                                                |                            |
| EPI_ISL_428364                                                                                                                                                                                                                                                                                                                                                                                                                                                                                                                                                                                                                                                                                                                                                                                                                                                                                                                                                 | Cabinet Médical                                                                                                                                                                                 | National Reference Center for Viruses of Respiratory Infections, Institut Pasteur, Paris                                                                                                        | Mélanie Albert, Marion Barbet, Sylvie Behillil, Méline Bizard, Angela Brisebarre, Flora Donati, Etienne Simon-Lorière, Vincent Enouf, Maud Vanpeene, Sylvie van der Werf                                                                                                                                                                |                            |
| EPI_ISL_428365                                                                                                                                                                                                                                                                                                                                                                                                                                                                                                                                                                                                                                                                                                                                                                                                                                                                                                                                                 | LABM GH nord Essonne de Longjumeau - BP 125                                                                                                                                                     | National Reference Center for Viruses of Respiratory Infections, Institut Pasteur, Paris                                                                                                        | Mélanie Albert, Marion Barbet, Sylvie Behillil, Méline Bizard, Angela Brisebarre, Flora Donati, Etienne Simon-Lorière, Vincent Enouf, Maud Vanpeene, Sylvie van der Werf                                                                                                                                                                |                            |
| EPI_ISL_428366                                                                                                                                                                                                                                                                                                                                                                                                                                                                                                                                                                                                                                                                                                                                                                                                                                                                                                                                                 | CH Jeanne de Navarre Laboratoire de Biologie                                                                                                                                                    | National Reference Center for Viruses of Respiratory Infections, Institut Pasteur, Paris                                                                                                        | Mélanie Albert, Marion Barbet, Sylvie Behillil, Méline Bizard, Angela Brisebarre, Flora Donati, Etienne Simon-Lorière, Vincent Enouf, Maud Vanpeene, Sylvie van der Werf                                                                                                                                                                |                            |
| EPI_ISL_428367                                                                                                                                                                                                                                                                                                                                                                                                                                                                                                                                                                                                                                                                                                                                                                                                                                                                                                                                                 | Cabinet Médical                                                                                                                                                                                 | National Reference Center for Viruses of Respiratory Infections, Institut Pasteur, Paris                                                                                                        | Mélanie Albert, Marion Barbet, Sylvie Behillil, Méline Bizard, Angela Brisebarre, Flora Donati, Etienne Simon-Lorière, Vincent Enouf, Maud Vanpeene, Sylvie van der Werf                                                                                                                                                                |                            |
| EPI_ISL_429968                                                                                                                                                                                                                                                                                                                                                                                                                                                                                                                                                                                                                                                                                                                                                                                                                                                                                                                                                 | Centre Hospitalier Compiègne Laboratoire de Biologie                                                                                                                                            | National Reference Center for Viruses of Respiratory Infections, Institut Pasteur, Paris                                                                                                        | Mélanie Albert, Marion Barbet, Sylvie Behillil, Méline Bizard, Angela Brisebarre, Flora Donati, Fabiana Gambaro, Etienne Simon-Lorière, Vincent Enouf, Maud Vanpeene, Sylvie van der Werf, Raulin Olivia                                                                                                                                |                            |
| EPI_ISL_430456                                                                                                                                                                                                                                                                                                                                                                                                                                                                                                                                                                                                                                                                                                                                                                                                                                                                                                                                                 | Rizal Medical Center                                                                                                                                                                            | Research Institute for Tropical Medicine                                                                                                                                                        | Medado,I.A.P., Bautista,C.T., Onza,O.J.T., Polotan,F.G.M., Brunker, K., Mercado,E.S., Manalo, D.L., Demetria, C.S.                                                                                                                                                                                                                      |                            |
| EPI_ISL_430494, EPI_ISL_430495, EPI_ISL_430496, EPI_ISL_430497, EPI_ISL_430631, EPI_ISL_430632, EPI_ISL_430633, EPI_ISL_430634, EPI_ISL_430635, EPI_ISL_430636                                                                                                                                                                                                                                                                                                                                                                                                                                                                                                                                                                                                                                                                                                                                                                                                 | Royal Darwin Hospital Pathology                                                                                                                                                                 | Microbiological Diagnostic Unit Public Health Laboratory and Victorian Infectious Diseases Reference Laboratory, The Peter Doherty Institute for Infection and Immunity                         | Meumann, E., Caly L., Seemann T., Sait, M., Schultz M., Druce J., Sherry, N.                                                                                                                                                                                                                                                            |                            |
| EPI_ISL_430793, EPI_ISL_430794                                                                                                                                                                                                                                                                                                                                                                                                                                                                                                                                                                                                                                                                                                                                                                                                                                                                                                                                 | Laboratorio Análisis Clínicos, Unidad de Servicios Diagnósticos, Swiss Medical Group                                                                                                            | Área de Secuenciación del Laboratorio de Virología del Hospital de Niños Dr. Ricardo Gutierrez on behalf of 'Proyecto Argentino Interinstitucional de genómica de SARS-CoV-2' (PAIS Consortium) | Nabaes Jodar, MS; Goya, S; Natale, MI; Lusso, S; Sanchez, O; Guevara, D; Vicario, SM; Mistchenko, AS; Valinotto, LE; Viegas, M.                                                                                                                                                                                                         |                            |
| EPI_ISL_430795                                                                                                                                                                                                                                                                                                                                                                                                                                                                                                                                                                                                                                                                                                                                                                                                                                                                                                                                                 | Laboratorio de Virología del Hospital de Niños Dr. Ricardo Gutierrez                                                                                                                            | Área de Secuenciación del Laboratorio de Virología del Hospital de Niños Dr. Ricardo Gutierrez on behalf of 'Proyecto Argentino Interinstitucional de genómica de SARS-CoV-2' (PAIS Consortium) | Nabaes Jodar, MS; Goya, S; Natale, MI; Lusso, S; Gravis, E; Mistchenko, AS; Valinotto, LE; Viegas, M.                                                                                                                                                                                                                                   |                            |
| EPI_ISL_430796, EPI_ISL_430797, EPI_ISL_430798                                                                                                                                                                                                                                                                                                                                                                                                                                                                                                                                                                                                                                                                                                                                                                                                                                                                                                                 | Departamento de Biología y genética molecular, IACA Laboratorios.                                                                                                                               | Área de Secuenciación del Laboratorio de Virología del Hospital de Niños Dr. Ricardo Gutierrez on behalf of 'Proyecto Argentino Interinstitucional de genómica de SARS-CoV-2' (PAIS Consortium) | Nabaes Jodar, MS; Goya, S; Natale, MI; Lusso, S; Tittarelli, E; Suárez, A; Masciovecchio MV; Streitenberger ER; Mistchenko, AS; Valinotto, LE; Viegas, M.                                                                                                                                                                               |                            |
| EPI_ISL_430799, EPI_ISL_430800, EPI_ISL_430801                                                                                                                                                                                                                                                                                                                                                                                                                                                                                                                                                                                                                                                                                                                                                                                                                                                                                                                 | Laboratorio de Virología del Hospital de Niños Dr. Ricardo Gutierrez                                                                                                                            | Área de Secuenciación del Laboratorio de Virología del Hospital de Niños Dr. Ricardo Gutierrez on behalf of 'Proyecto Argentino Interinstitucional de genómica de SARS-CoV-2' (PAIS Consortium) | Nabaes Jodar, MS; Goya, S; Natale, MI; Lusso, S; Gravis, E; Mistchenko, AS; Valinotto, LE; Viegas, M.                                                                                                                                                                                                                                   |                            |
| EPI_ISL_430802                                                                                                                                                                                                                                                                                                                                                                                                                                                                                                                                                                                                                                                                                                                                                                                                                                                                                                                                                 | Departamento de Biología y genética molecular, IACA                                                                                                                                             | Área de Secuenciación del Laboratorio de Virología del                                                                                                                                          | Nabaes Jodar, MS; Goya, S; Natale, MI; Lusso, S; Tittarelli, E; Suárez, A; Masciovecchio MV; Streitenberger ER; Mistchenko, AS; Valinotto, LE; Viegas, M.                                                                                                                                                                               |                            |

|                                                                                                                                                                                                                                                                                                                                                                                                                                                                                                                                                                                                                                                |                                                                                                                                                                                                 |                                                                                                                                                                                                 |                                                                                                                                                                                                                                                                                                                                                                                                                                                                                        |
|------------------------------------------------------------------------------------------------------------------------------------------------------------------------------------------------------------------------------------------------------------------------------------------------------------------------------------------------------------------------------------------------------------------------------------------------------------------------------------------------------------------------------------------------------------------------------------------------------------------------------------------------|-------------------------------------------------------------------------------------------------------------------------------------------------------------------------------------------------|-------------------------------------------------------------------------------------------------------------------------------------------------------------------------------------------------|----------------------------------------------------------------------------------------------------------------------------------------------------------------------------------------------------------------------------------------------------------------------------------------------------------------------------------------------------------------------------------------------------------------------------------------------------------------------------------------|
|                                                                                                                                                                                                                                                                                                                                                                                                                                                                                                                                                                                                                                                | Laboratorios.                                                                                                                                                                                   | Hospital de Niños Dr. Ricardo Gutierrez on behalf of 'Proyecto Argentino Interinstitucional de genómica de SARS-CoV-2' (PAIS Consortium)                                                        |                                                                                                                                                                                                                                                                                                                                                                                                                                                                                        |
| EPI_ISL_430803, EPI_ISL_430804                                                                                                                                                                                                                                                                                                                                                                                                                                                                                                                                                                                                                 | Laboratorio de Virología del Hospital de Niños Dr. Ricardo Gutierrez                                                                                                                            | Área de Secuenciación del Laboratorio de Virología del Hospital de Niños Dr. Ricardo Gutierrez on behalf of 'Proyecto Argentino Interinstitucional de genómica de SARS-CoV-2' (PAIS Consortium) | Nabaes Jodar, MS; Goya, S; Natale, MI; Lusso, S; Gravis, E; Mistchenko, AS; Valinotto, LE; Viegas, M.                                                                                                                                                                                                                                                                                                                                                                                  |
| EPI_ISL_430805, EPI_ISL_430806                                                                                                                                                                                                                                                                                                                                                                                                                                                                                                                                                                                                                 | Departamento de Biología y genética molecular, IACA Laboratorios.                                                                                                                               | Área de Secuenciación del Laboratorio de Virología del Hospital de Niños Dr. Ricardo Gutierrez on behalf of 'Proyecto Argentino Interinstitucional de genómica de SARS-CoV-2' (PAIS Consortium) | Nabaes Jodar, MS; Goya, S; Natale, MI; Lusso, S; Tittarelli, E; Suárez, A; Masciovecchio MV; Streitenberger ER; Mistchenko, AS; Valinotto, LE; Viegas, M.                                                                                                                                                                                                                                                                                                                              |
| EPI_ISL_430807                                                                                                                                                                                                                                                                                                                                                                                                                                                                                                                                                                                                                                 | Laboratorio de Virología del Hospital de Niños Dr. Ricardo Gutierrez                                                                                                                            | Área de Secuenciación del Laboratorio de Virología del Hospital de Niños Dr. Ricardo Gutierrez on behalf of 'Proyecto Argentino Interinstitucional de genómica de SARS-CoV-2' (PAIS Consortium) | Nabaes Jodar, MS; Goya, S; Natale, MI; Lusso, S; Gravis, E; Mistchenko, AS; Valinotto, LE; Viegas, M.                                                                                                                                                                                                                                                                                                                                                                                  |
| EPI_ISL_430808                                                                                                                                                                                                                                                                                                                                                                                                                                                                                                                                                                                                                                 | Departamento de Biología y genética molecular, IACA Laboratorios.                                                                                                                               | Área de Secuenciación del Laboratorio de Virología del Hospital de Niños Dr. Ricardo Gutierrez on behalf of 'Proyecto Argentino Interinstitucional de genómica de SARS-CoV-2' (PAIS Consortium) | Nabaes Jodar, MS; Goya, S; Natale, MI; Lusso, S; Tittarelli, E; Suárez, A; Masciovecchio MV; Streitenberger ER; Mistchenko, AS; Valinotto, LE; Viegas, M.                                                                                                                                                                                                                                                                                                                              |
| EPI_ISL_430809, EPI_ISL_430810, EPI_ISL_430811, EPI_ISL_430812, EPI_ISL_430813, EPI_ISL_430814, EPI_ISL_430815, EPI_ISL_430816, EPI_ISL_430817, EPI_ISL_430818                                                                                                                                                                                                                                                                                                                                                                                                                                                                                 | Laboratorio de Virología del Hospital de Niños Dr. Ricardo Gutierrez                                                                                                                            | Área de Secuenciación del Laboratorio de Virología del Hospital de Niños Dr. Ricardo Gutierrez on behalf of 'Proyecto Argentino Interinstitucional de genómica de SARS-CoV-2' (PAIS Consortium) | Nabaes Jodar, MS; Goya, S; Natale, MI; Lusso, S; Gravis, E; Mistchenko, AS; Valinotto, LE; Viegas, M.                                                                                                                                                                                                                                                                                                                                                                                  |
| EPI_ISL_430819                                                                                                                                                                                                                                                                                                                                                                                                                                                                                                                                                                                                                                 | Center of Scientific Excellence for Influenza Viruses, National Research Centre (NRC), Egypt.                                                                                                   | Center of Scientific Excellence for Influenza Viruses, National Research Centre (NRC), Egypt.                                                                                                   | Mohamed Ahmed Ali, Ahmed Kandeil, Ahmed Mostafa, Rabeh El-Shesheny, Mahmoud Shehata, Wael Roshdy, Shymaa Showky Ahmed, Amal Naguib, Nancy M. El Guindy, Mokhtar Gomaa, Ahmed El-Taweel, Ahmed E Kayed, Yassmin Moatasim, Omnia Kutkat, Sara Mahmoud, Mina Kamel, Abo Shama, M Noura, Mohamed El Sayes                                                                                                                                                                                  |
| EPI_ISL_430820                                                                                                                                                                                                                                                                                                                                                                                                                                                                                                                                                                                                                                 | Center of Scientific Excellence for Influenza Viruses, National Research Centre (NRC), Egypt.                                                                                                   | Center of Scientific Excellence for Influenza Viruses, National Research Centre (NRC), Egypt.                                                                                                   | Mohamed Ahmed Ali, Ahmed Kandeil, Ahmed Mostafa, Rabeh El-Shesheny, Mahmoud Shehata, Wael Roshdy, Shymaa Showky Ahmed, Amal Naguib, Mokhtar Gomaa, Ahmed El-Taweel, Ahmed E Kayed, Yassmin Moatasim, Omnia Kutkat, Sara Mahmoud, Mina Kamel, Abo Shama, M Noura, Mohamed El Sayes, Nancy M. El Guindy                                                                                                                                                                                  |
| EPI_ISL_430838                                                                                                                                                                                                                                                                                                                                                                                                                                                                                                                                                                                                                                 | Makati Medical Center                                                                                                                                                                           | Research Institute for Tropical Medicine                                                                                                                                                        | Medado, I.A.P., Bautista, C.T., Onza, O.J.T., Polotan, F.G.M., Brunker, K., Mercado, E.S., Manalo, D.L., Demetria, C.S.                                                                                                                                                                                                                                                                                                                                                                |
| EPI_ISL_430839                                                                                                                                                                                                                                                                                                                                                                                                                                                                                                                                                                                                                                 | Research Institute for Tropical Medicine                                                                                                                                                        | Research Institute for Tropical Medicine                                                                                                                                                        | Medado, I.A.P., Bautista, C.T., Onza, O.J.T., Polotan, F.G.M., Brunker, K., Mercado, E.S., Manalo, D.L., Demetria, C.S.                                                                                                                                                                                                                                                                                                                                                                |
| EPI_ISL_430840                                                                                                                                                                                                                                                                                                                                                                                                                                                                                                                                                                                                                                 | Veterans Memorial Medical Center                                                                                                                                                                | Research Institute for Tropical Medicine                                                                                                                                                        | Medado, I.A.P., Bautista, C.T., Onza, O.J.T., Polotan, F.G.M., Brunker, K., Mercado, E.S., Manalo, D.L., Demetria, C.S.                                                                                                                                                                                                                                                                                                                                                                |
| EPI_ISL_430843                                                                                                                                                                                                                                                                                                                                                                                                                                                                                                                                                                                                                                 | Bethany Hospital                                                                                                                                                                                | Research Institute for Tropical Medicine                                                                                                                                                        | Medado, I.A.P., Bautista, C.T., Onza, O.J.T., Polotan, F.G.M., Brunker, K., Mercado, E.S., Manalo, D.L., Demetria, C.S.                                                                                                                                                                                                                                                                                                                                                                |
| EPI_ISL_430844                                                                                                                                                                                                                                                                                                                                                                                                                                                                                                                                                                                                                                 | Lung Center of the Philippines                                                                                                                                                                  | Research Institute for Tropical Medicine                                                                                                                                                        | Medado, I.A.P., Bautista, C.T., Onza, O.J.T., Polotan, F.G.M., Brunker, K., Mercado, E.S., Manalo, D.L., Demetria, C.S.                                                                                                                                                                                                                                                                                                                                                                |
| EPI_ISL_430845                                                                                                                                                                                                                                                                                                                                                                                                                                                                                                                                                                                                                                 | Pasig City General Hospital                                                                                                                                                                     | Research Institute for Tropical Medicine                                                                                                                                                        | Medado, I.A.P., Bautista, C.T., Onza, O.J.T., Polotan, F.G.M., Brunker, K., Mercado, E.S., Manalo, D.L., Demetria, C.S.                                                                                                                                                                                                                                                                                                                                                                |
| EPI_ISL_431101                                                                                                                                                                                                                                                                                                                                                                                                                                                                                                                                                                                                                                 | Department of Microbiology, Gandhi Medical College and Hospital, Secendrabad, Hyderabad, India                                                                                                  | Virus Research Laboratory, Department of Zoology, Osmania University, Hyderabad, India                                                                                                          | Muttineni Radhakrishna, Nagamani K, Thirlok Chander B, Raja Rao M, Kalyani Putty, Ravikumar P, Sunitha P, Pankaj Singh D, Anand Kumar K, Amit A. Upadhyay, Steven E. Bosinger, Rama Amara                                                                                                                                                                                                                                                                                              |
| EPI_ISL_431102                                                                                                                                                                                                                                                                                                                                                                                                                                                                                                                                                                                                                                 | Department of Microbiology, Gandhi Medical College and Hospital, Secendrabad, Hyderabad, India                                                                                                  | Department of Microbiology, Gandhi Medical College and Hospital, Secendrabad, Hyderabad                                                                                                         | Nagamani K, Muttineni Radhakrishna, Thirlok Chander B, Raja Rao M, Kalyani Putty, Ravikumar P, Sunitha P, Pankaj Singh D, Anand Kumar K, Amit A. Upadhyay, Steven E. Bosinger, Rama Amara                                                                                                                                                                                                                                                                                              |
| EPI_ISL_431103                                                                                                                                                                                                                                                                                                                                                                                                                                                                                                                                                                                                                                 | Department of Microbiology, Gandhi Medical College and Hospital, Secendrabad, Hyderabad, India                                                                                                  | Department of Microbiology, Gandhi Medical College and Hospital, Secendrabad, Hyderabad                                                                                                         | Nagamani K, Muttineni Radhakrishna, Thirlok Chander B, Raja Rao M, Kalyani Putty, Ravikumar P, Sunitha P, Pankaj Singh D, Anand Kumar K, Amit A. Upadhyay, Steven E. Bosinger, Rama Amara                                                                                                                                                                                                                                                                                              |
| EPI_ISL_432868, EPI_ISL_432871, EPI_ISL_432872, EPI_ISL_432880, EPI_ISL_432882, EPI_ISL_432884, EPI_ISL_433120, EPI_ISL_433122, EPI_ISL_433125, EPI_ISL_433126, EPI_ISL_433129, EPI_ISL_433137, EPI_ISL_433163, EPI_ISL_433186, EPI_ISL_433196, EPI_ISL_433200, EPI_ISL_433202, EPI_ISL_433206, EPI_ISL_433249, EPI_ISL_433252, EPI_ISL_433253, EPI_ISL_433256, EPI_ISL_433259, EPI_ISL_433262, EPI_ISL_433415, EPI_ISL_433419, EPI_ISL_433421, EPI_ISL_433424, EPI_ISL_433425, EPI_ISL_433430, EPI_ISL_433434, EPI_ISL_433435, EPI_ISL_433436, EPI_ISL_433437, EPI_ISL_433440, EPI_ISL_433441, EPI_ISL_433445, EPI_ISL_433459, EPI_ISL_433460 | COVID-19 Genomics UK (COG-UK) Consortium                                                                                                                                                        | McHugh M, Dewar R, Rooke S, Gallagher M, Balcaza C, O'Toole A, Hill V, McCrone JT, Colquhoun R, Yu X, Jackson B, Rambaut A, Williams TC, Templeton K                                            |                                                                                                                                                                                                                                                                                                                                                                                                                                                                                        |
| see above                                                                                                                                                                                                                                                                                                                                                                                                                                                                                                                                                                                                                                      | Virology Department, Royal Infirmary of Edinburgh, NHS Lothian / School of Biological Sciences, University of Edinburgh / Institute of Genetics and Molecular Medicine, University of Edinburgh | COVID-19 Genomics UK (COG-UK) Consortium                                                                                                                                                        | McHugh M, Dewar R, Rooke S, Gallagher M, Balcaza C, O'Toole A, Hill V, McCrone JT, Colquhoun R, Yu X, Jackson B, Rambaut A, Williams TC, Templeton K                                                                                                                                                                                                                                                                                                                                   |
| EPI_ISL_434356, EPI_ISL_434357, EPI_ISL_434358, EPI_ISL_434359, EPI_ISL_434360, EPI_ISL_434361, EPI_ISL_434362, EPI_ISL_434363, EPI_ISL_434364, EPI_ISL_434365                                                                                                                                                                                                                                                                                                                                                                                                                                                                                 | Lab voor klinische biologie                                                                                                                                                                     | Onderzoeksgroep Virologie                                                                                                                                                                       | Nick Vereecke, Laurens Lambrechts, Marthe Pauwels, Jozefien De Clercq, Bruno Verhasselt, Linos Vandekerckhove, Hans Nauwynck, Sebastiaan Theuns                                                                                                                                                                                                                                                                                                                                        |
| EPI_ISL_434657                                                                                                                                                                                                                                                                                                                                                                                                                                                                                                                                                                                                                                 | Kristianstadkliniken                                                                                                                                                                            | The Public Health Agency of Sweden                                                                                                                                                              | Mia Settergren Hammer, Oskar Karlsson Lindsjö, Maria Lind Karlberg, Anna-Malin Linde, Olov Svartstrom, Anna Risberg, Theresa Enkirch, Mia Brytting, Karin Tegmark-Wisell                                                                                                                                                                                                                                                                                                               |
| EPI_ISL_435054                                                                                                                                                                                                                                                                                                                                                                                                                                                                                                                                                                                                                                 | B.J. Medical College and Civil hospital                                                                                                                                                         | Gujarat Biotechnology Research Centre                                                                                                                                                           | Monika Gandhi, Pinal Trivedi, Maharshi Pandya, Amit Kanani, Akanksha Verma, Nitin Savaliya, Raghawendra Kumar, Dinesh Kumar, Zuber Saiyed, Dipa Kinariwala, Disha Patel, Binita Aring, Geeta Vaghela, Sonia Barve, Bhavesh Modi, Kairavi Joshi, Gaurishankar Shrimali, Nidhi Sood, Pranay Shah, R D Dixit, Snehal Bagatharia, Kamlesh J Upadhyay, Ramesh Pandit, Tejas Shah, Ankita Hinsu, Pritesh Sabara, Apurvasinh Puvar, Janvi Raval, Priti Pandita, Chaitanya Joshi, Madhvi Joshi |
| EPI_ISL_435284, EPI_ISL_435287, EPI_ISL_435289, EPI_ISL_435291                                                                                                                                                                                                                                                                                                                                                                                                                                                                                                                                                                                 | Central Virology Laboratory, Israel Ministry of Health                                                                                                                                          | Central Virology Laboratory, Israel Ministry of Health                                                                                                                                          | Neta Zuckerman, Efrat Bucris, Oran Erster, Danit Sofer, Orna Mor, Ella Mendelson, Michal Mandelboim                                                                                                                                                                                                                                                                                                                                                                                    |
| EPI_ISL_435292                                                                                                                                                                                                                                                                                                                                                                                                                                                                                                                                                                                                                                 | Central Virology Laboratory, Israel Ministry of Health                                                                                                                                          | Central Virology Laboratory, Israel Ministry of Health                                                                                                                                          | Neta Zuckerman, Efrat Bucris, Oran Erster, Danit Sofer, Ella Mendelson, Michal Mandelboim, Orna Mor                                                                                                                                                                                                                                                                                                                                                                                    |
| EPI_ISL_435303                                                                                                                                                                                                                                                                                                                                                                                                                                                                                                                                                                                                                                 | National Hospital of Tropical Diseases                                                                                                                                                          | Oxford University Clinical Research Unit, Hanoi, Vietnam                                                                                                                                        | Nguyen Thi Tam, Van Dinh Trang, Nguyen Thu Trang, Nguyen Thi Ngoc Diep, Le Nguyen Minh Hoa, Pham Ngoc Thach, H. Rogier van Doorn, on behalf of the OUCRU COVID-19 research group                                                                                                                                                                                                                                                                                                       |
| EPI_ISL_435305, EPI_ISL_435308, EPI_ISL_435310, EPI_ISL_435311, EPI_ISL_435312, EPI_ISL_435313, EPI_ISL_435314, EPI_ISL_435315, EPI_ISL_435316, EPI_ISL_435317                                                                                                                                                                                                                                                                                                                                                                                                                                                                                 | National Hospital of Tropical Diseases                                                                                                                                                          | Oxford University Clinical Research Unit, Hanoi, Vietnam                                                                                                                                        | Nguyen Thi Tam, Van Dinh Trang, Nguyen Thu Trang, Nguyen Thi Ngoc Diep, Le Nguyen Minh Hoa, Pham Ngoc Thach, H. Rogier van Doorn, on behalf of the OUCRU COVID-19 research group                                                                                                                                                                                                                                                                                                       |
| EPI_ISL_436200, EPI_ISL_436208, EPI_ISL_436216, EPI_ISL_436224,                                                                                                                                                                                                                                                                                                                                                                                                                                                                                                                                                                                | Servicio de Microbiología. Consorcio Hospital General Universitario de Valencia                                                                                                                 | Sequencing and Bioinformatics Service and Molecular Epidemiology Research Group. FISABIO-Public Health                                                                                          | Neris Garcia-Gonzalez, Loreto Ferrús Abad, María Dolores Ocete, Inma Galán Vendrell, Paula Ruiz-Hueso, Mariana Reyes-Prieto, Vicente Soriano Chirona, María Alma Bracho, Griselda De Marco, Beatriz Beamud, Lidia Ruiz Roldan, Marta Pla Diaz, Lúcia Martínez-Priego, Concepcion Gimeno, Giuseppe D'Auria,                                                                                                                                                                             |

|                                                                                                                                                                                                                                                                                                                                                                                                                                                                                                                                                                                                                                                                                                                                                                                                                                                                                                                                                                                                                                                                                                                                                                                |                                                                                                                                                                                                 |                                                                                                                                                                 |                                                                                                                                                                                                                                                                                                                                                                                                                                                                                                              |
|--------------------------------------------------------------------------------------------------------------------------------------------------------------------------------------------------------------------------------------------------------------------------------------------------------------------------------------------------------------------------------------------------------------------------------------------------------------------------------------------------------------------------------------------------------------------------------------------------------------------------------------------------------------------------------------------------------------------------------------------------------------------------------------------------------------------------------------------------------------------------------------------------------------------------------------------------------------------------------------------------------------------------------------------------------------------------------------------------------------------------------------------------------------------------------|-------------------------------------------------------------------------------------------------------------------------------------------------------------------------------------------------|-----------------------------------------------------------------------------------------------------------------------------------------------------------------|--------------------------------------------------------------------------------------------------------------------------------------------------------------------------------------------------------------------------------------------------------------------------------------------------------------------------------------------------------------------------------------------------------------------------------------------------------------------------------------------------------------|
| EPI_ISL_436231, EPI_ISL_436275, EPI_ISL_436277                                                                                                                                                                                                                                                                                                                                                                                                                                                                                                                                                                                                                                                                                                                                                                                                                                                                                                                                                                                                                                                                                                                                 |                                                                                                                                                                                                 |                                                                                                                                                                 | Fernando Gonzalez-Candelas                                                                                                                                                                                                                                                                                                                                                                                                                                                                                   |
| EPI_ISL_436283, EPI_ISL_436297, EPI_ISL_436303, EPI_ISL_436317, EPI_ISL_436323, EPI_ISL_436337, EPI_ISL_436343, EPI_ISL_436357, EPI_ISL_436360                                                                                                                                                                                                                                                                                                                                                                                                                                                                                                                                                                                                                                                                                                                                                                                                                                                                                                                                                                                                                                 | Servicio de Microbiología. Hospital Clínico Universitario de Valencia                                                                                                                           | Sequencing and Bioinformatics Service and Molecular Epidemiology Research Group. FISABIO-Public Health                                                          | Neeris Garcia-Gonzalez, Inma Galán Vendrell, Sandra Carbo, Loreto Ferrús Abad, Paula Ruiz-Hueso, Mariana Reyes-Prieto, Vicente Soriano Chirona, Ivan Ansari, David Navarro, Maria Alma Bracho, Griselda De Marco, Beatriz Beamud, Lidia Ruiz Roldan, Marta Pla Diaz, Lúcia Martínez-Priego, Giuseppe D'Auria, Fernando Gonzalez-Candelas                                                                                                                                                                     |
| EPI_ISL_436361                                                                                                                                                                                                                                                                                                                                                                                                                                                                                                                                                                                                                                                                                                                                                                                                                                                                                                                                                                                                                                                                                                                                                                 | Servicio de Microbiología. Consorcio Hospital General Universitario de Valencia                                                                                                                 | Sequencing and Bioinformatics Service and Molecular Epidemiology Research Group. FISABIO-Public Health                                                          | Neeris Garcia-Gonzalez, Loreto Ferrús Abad, Maria Dolores Ocete, Inma Galán Vendrell, Paula Ruiz-Hueso, Mariana Reyes-Prieto, Vicente Soriano Chirona, Maria Alma Bracho, Griselda De Marco, Beatriz Beamud, Lidia Ruiz Roldan, Marta Pla Diaz, Lúcia Martínez-Priego, Concepcion Gimeno, Giuseppe D'Auria, Fernando Gonzalez-Candelas                                                                                                                                                                       |
| EPI_ISL_436367                                                                                                                                                                                                                                                                                                                                                                                                                                                                                                                                                                                                                                                                                                                                                                                                                                                                                                                                                                                                                                                                                                                                                                 | Servicio de Microbiología. Hospital Clínico Universitario de Valencia                                                                                                                           | Sequencing and Bioinformatics Service and Molecular Epidemiology Research Group. FISABIO-Public Health                                                          | Neeris Garcia-Gonzalez, Inma Galán Vendrell, Sandra Carbo, Loreto Ferrús Abad, Paula Ruiz-Hueso, Mariana Reyes-Prieto, Vicente Soriano Chirona, Ivan Ansari, David Navarro, Maria Alma Bracho, Griselda De Marco, Beatriz Beamud, Lidia Ruiz Roldan, Marta Pla Diaz, Lúcia Martínez-Priego, Giuseppe D'Auria, Fernando Gonzalez-Candelas                                                                                                                                                                     |
| EPI_ISL_436388, EPI_ISL_436395                                                                                                                                                                                                                                                                                                                                                                                                                                                                                                                                                                                                                                                                                                                                                                                                                                                                                                                                                                                                                                                                                                                                                 | Servicio de Microbiología. Consorcio Hospital General Universitario de Valencia                                                                                                                 | Sequencing and Bioinformatics Service and Molecular Epidemiology Research Group. FISABIO-Public Health                                                          | Neeris Garcia-Gonzalez, Loreto Ferrús Abad, Maria Dolores Ocete, Inma Galán Vendrell, Paula Ruiz-Hueso, Mariana Reyes-Prieto, Vicente Soriano Chirona, Fernando Gonzalez-Candelas                                                                                                                                                                                                                                                                                                                            |
| EPI_ISL_436408, EPI_ISL_436411                                                                                                                                                                                                                                                                                                                                                                                                                                                                                                                                                                                                                                                                                                                                                                                                                                                                                                                                                                                                                                                                                                                                                 | Servicio de Microbiología. Hospital Clínico Universitario de Valencia                                                                                                                           | Sequencing and Bioinformatics Service and Molecular Epidemiology Research Group. FISABIO-Public Health                                                          | Neeris Garcia-Gonzalez, Inma Galán Vendrell, Sandra Carbo, Loreto Ferrús Abad, Paula Ruiz-Hueso, Mariana Reyes-Prieto, Vicente Soriano Chirona, Ivan Ansari, David Navarro, Maria Alma Bracho, Griselda De Marco, Beatriz Beamud, Lidia Ruiz Roldan, Marta Pla Diaz, Lúcia Martínez-Priego, Giuseppe D'Auria, Fernando Gonzalez-Candelas                                                                                                                                                                     |
| EPI_ISL_437440                                                                                                                                                                                                                                                                                                                                                                                                                                                                                                                                                                                                                                                                                                                                                                                                                                                                                                                                                                                                                                                                                                                                                                 | Department of MicroBiology, Government Medical College, Surat                                                                                                                                   | Gujarat Biotechnology Research Centre                                                                                                                           | Nitin Savaliya, Raghawendra Kumar, Dinesh Kumar, Zuber Saiyed, Dipa Kinariwala, Disha Patel, Binita Aring, Neeta Khandelwal, Geeta Vaghela, Sonia Barve, Bhavesh Modi, Kairavi Joshi, Gaurishankar Shrimali, Nidhi Sood, Pranay Shah, R D Dixit, Snehal Bagatharia, Kamlesh J Upadhyay, Ramesh Pandit, Tejas Shah, Ankit Hinsu, Pritesh Sabara, Apurvasinh Puvar, Janvi Raval, Monika Gandhi, Pinal Trivedi, Maharshi Pandya, Amit Kanani, Akanksha Verma, Bhavya Jindal, Chaitanya Joshi, Madhvi Joshi      |
| EPI_ISL_437447                                                                                                                                                                                                                                                                                                                                                                                                                                                                                                                                                                                                                                                                                                                                                                                                                                                                                                                                                                                                                                                                                                                                                                 | B.J. Medical College and Civil hospital                                                                                                                                                         | Gujarat Biotechnology Research Centre                                                                                                                           | Neeta Khandelwal, Geeta Vaghela, Sonia Barve, Bhavesh Modi, Kairavi Joshi, Gaurishankar Shrimali, Nidhi Sood, Pranay Shah, R D Dixit, Snehal Bagatharia, Kamlesh J Upadhyay, Ramesh Pandit, Tejas Shah, Ankit Hinsu, Pritesh Sabara, Apurvasinh Puvar, Janvi Raval, Monika Gandhi, Pinal Trivedi, Maharshi Pandya, Amit Kanani, Akanksha Verma, Nitin Savaliya, Raghawendra Kumar, Dinesh Kumar, Zuber Saiyed, Dipa Kinariwala, Disha Patel, Binita Aring, Neha Rajpara, Chaitanya Joshi, Madhvi Joshi       |
| EPI_ISL_437453                                                                                                                                                                                                                                                                                                                                                                                                                                                                                                                                                                                                                                                                                                                                                                                                                                                                                                                                                                                                                                                                                                                                                                 | B.J. Medical College and Civil hospital                                                                                                                                                         | Gujarat Biotechnology Research Centre                                                                                                                           | Nidhi Sood, Pranay Shah, R D Dixit, Snehal Bagatharia, Kamlesh J Upadhyay, Ramesh Pandit, Tejas Shah, Ankit Hinsu, Pritesh Sabara, Apurvasinh Puvar, Janvi Raval, Monika Gandhi, Pinal Trivedi, Maharshi Pandya, Amit Kanani, Akanksha Verma, Nitin Savaliya, Raghawendra Kumar, Dinesh Kumar, Zuber Saiyed, Dipa Kinariwala, Disha Patel, Binita Aring, Neeta Khandelwal, Geeta Vaghela, Sonia Barve, Bhavesh Modi, Kairavi Joshi, Gaurishankar Shrimali, Chaitanya Joshi, Dipeshwari Shewale, Madhvi Joshi |
| EPI_ISL_437684, EPI_ISL_437685, EPI_ISL_437686, EPI_ISL_437687, EPI_ISL_437688                                                                                                                                                                                                                                                                                                                                                                                                                                                                                                                                                                                                                                                                                                                                                                                                                                                                                                                                                                                                                                                                                                 | UCD National Virus Reference Laboratory                                                                                                                                                         | UCD National Virus Reference Laboratory                                                                                                                         | Michael J Carr, Gabriel Gonzalez, Brendan Crowley, Cillian F De Gascun                                                                                                                                                                                                                                                                                                                                                                                                                                       |
| EPI_ISL_438139                                                                                                                                                                                                                                                                                                                                                                                                                                                                                                                                                                                                                                                                                                                                                                                                                                                                                                                                                                                                                                                                                                                                                                 | Department of Microbiology, Gandhi Medical College and Hospital, Hyderabad                                                                                                                      | Virus Research Laboratory, Department of Zoology, Osmania University, Hyderabad, India                                                                          | Muttineni Radhakrishna, Nagamani K, Thrilok Chandar B, Raja Rao M, Kalyani Putty, Ravikumar P, Sunitha P, Pankaj Singh D, Anand Kumar K, Amit A. Upadhyay, Steven Bosingher, Rama Amara                                                                                                                                                                                                                                                                                                                      |
| EPI_ISL_439144, EPI_ISL_439145, EPI_ISL_439146, EPI_ISL_439147, EPI_ISL_439148, EPI_ISL_439150, EPI_ISL_439151, EPI_ISL_439155, EPI_ISL_439157, EPI_ISL_439162, EPI_ISL_439164, EPI_ISL_439167, EPI_ISL_439168, EPI_ISL_439170, EPI_ISL_439171, EPI_ISL_439176, EPI_ISL_439177, EPI_ISL_439179, EPI_ISL_439181, EPI_ISL_439188, EPI_ISL_439189, EPI_ISL_439192, EPI_ISL_439197, EPI_ISL_439198, EPI_ISL_439199, EPI_ISL_439204, EPI_ISL_439206, EPI_ISL_439209, EPI_ISL_439215, EPI_ISL_439221, EPI_ISL_439225, EPI_ISL_439226, EPI_ISL_439227, EPI_ISL_439229, EPI_ISL_439232, EPI_ISL_439234, EPI_ISL_439237, EPI_ISL_439238, EPI_ISL_439240, EPI_ISL_439242, EPI_ISL_439244, EPI_ISL_439245, EPI_ISL_439251, EPI_ISL_439253, EPI_ISL_439256, EPI_ISL_439262, EPI_ISL_439263, EPI_ISL_439266, EPI_ISL_439267, EPI_ISL_439271, EPI_ISL_439273, EPI_ISL_439276, EPI_ISL_439285, EPI_ISL_439291, EPI_ISL_439292, EPI_ISL_439293, EPI_ISL_439295, EPI_ISL_439296, EPI_ISL_439298, EPI_ISL_439305, EPI_ISL_439313, EPI_ISL_439317, EPI_ISL_439322, EPI_ISL_439331, EPI_ISL_439333, EPI_ISL_439336, EPI_ISL_439342, EPI_ISL_439362, EPI_ISL_439364, EPI_ISL_439366, EPI_ISL_439369 | COVID-19 Genomics UK (COG-UK) Consortium                                                                                                                                                        | McHugh M, Dewar R, Rooke S, Gallagher M, Balcaza C, O'ÁbToole Á, Scher E, Hill V, McCrone JT, Colquhoun R, Yu X, Jackson B, Rambaut A, Williams TC, Templeton K |                                                                                                                                                                                                                                                                                                                                                                                                                                                                                                              |
| see above                                                                                                                                                                                                                                                                                                                                                                                                                                                                                                                                                                                                                                                                                                                                                                                                                                                                                                                                                                                                                                                                                                                                                                      | Virology Department, Royal Infirmary of Edinburgh, NHS Lothian / School of Biological Sciences, University of Edinburgh / Institute of Genetics and Molecular Medicine, University of Edinburgh |                                                                                                                                                                 |                                                                                                                                                                                                                                                                                                                                                                                                                                                                                                              |
| EPI_ISL_442044                                                                                                                                                                                                                                                                                                                                                                                                                                                                                                                                                                                                                                                                                                                                                                                                                                                                                                                                                                                                                                                                                                                                                                 | Kawsar Human Genetic Research Center                                                                                                                                                            | Kawsar Human Genetic Research Center                                                                                                                            | Mohammad Ali Khosravi, Maryam Abbasalipour Bashash, Sirous Zeinali, Solmaz Sabeghi, Yeganeh Keshvar, Fatemeh Hosseini, Yeganeh Haghdooost                                                                                                                                                                                                                                                                                                                                                                    |
| EPI_ISL_443258, EPI_ISL_443259                                                                                                                                                                                                                                                                                                                                                                                                                                                                                                                                                                                                                                                                                                                                                                                                                                                                                                                                                                                                                                                                                                                                                 | Résidence Ormano                                                                                                                                                                                | National Reference Center for Viruses of Respiratory Infections, Institut Pasteur, Paris                                                                        | Mélanie Albert, Marion Barbet, Sylvie Behillil, Méline Bizard, Angela Brisebarre, Flora Donati, Etienne Simon-Lorière, Vincent Enouf, Maud Vanpeene, Sylvie van der Werf                                                                                                                                                                                                                                                                                                                                     |
| EPI_ISL_443260                                                                                                                                                                                                                                                                                                                                                                                                                                                                                                                                                                                                                                                                                                                                                                                                                                                                                                                                                                                                                                                                                                                                                                 | LABM GH nord Essonne de Longjumeau - BP 125                                                                                                                                                     | National Reference Center for Viruses of Respiratory Infections, Institut Pasteur, Paris                                                                        | Mélanie Albert, Marion Barbet, Sylvie Behillil, Méline Bizard, Angela Brisebarre, Flora Donati, Etienne Simon-Lorière, Vincent Enouf, Maud Vanpeene, Sylvie van der Werf                                                                                                                                                                                                                                                                                                                                     |
| EPI_ISL_443261, EPI_ISL_443262, EPI_ISL_443263, EPI_ISL_443264                                                                                                                                                                                                                                                                                                                                                                                                                                                                                                                                                                                                                                                                                                                                                                                                                                                                                                                                                                                                                                                                                                                 | CHU de Dijon - Laboratoire de Virologie                                                                                                                                                         | National Reference Center for Viruses of Respiratory Infections, Institut Pasteur, Paris                                                                        | Mélanie Albert, Marion Barbet, Sylvie Behillil, Méline Bizard, Angela Brisebarre, Flora Donati, Etienne Simon-Lorière, Vincent Enouf, Maud Vanpeene, Sylvie van der Werf, Jean-Baptiste Bour                                                                                                                                                                                                                                                                                                                 |
| EPI_ISL_443265, EPI_ISL_443266, EPI_ISL_443267, EPI_ISL_443268, EPI_ISL_443269, EPI_ISL_443270, EPI_ISL_443271, EPI_ISL_443272, EPI_ISL_443273, EPI_ISL_443274, EPI_ISL_443275, EPI_ISL_443276, EPI_ISL_443277, EPI_ISL_443278, EPI_ISL_443279, EPI_ISL_443280, EPI_ISL_443281, EPI_ISL_443282, EPI_ISL_443283                                                                                                                                                                                                                                                                                                                                                                                                                                                                                                                                                                                                                                                                                                                                                                                                                                                                 | CHU - Hôpital Cavale Blanche - Labo. de Virologie                                                                                                                                               | National Reference Center for Viruses of Respiratory Infections, Institut Pasteur, Paris                                                                        | Mélanie Albert, Marion Barbet, Sylvie Behillil, Méline Bizard, Angela Brisebarre, Flora Donati, Etienne Simon-Lorière, Vincent Enouf, Maud Vanpeene, Sylvie van der Werf, Léa Pilorge                                                                                                                                                                                                                                                                                                                        |
| EPI_ISL_443284, EPI_ISL_443285, EPI_ISL_443286, EPI_ISL_443287, EPI_ISL_443288                                                                                                                                                                                                                                                                                                                                                                                                                                                                                                                                                                                                                                                                                                                                                                                                                                                                                                                                                                                                                                                                                                 | Laboratoire de Microbiologie - Bât A - CH René Dubois                                                                                                                                           | National Reference Center for Viruses of Respiratory Infections, Institut Pasteur, Paris                                                                        | Mélanie Albert, Marion Barbet, Sylvie Behillil, Méline Bizard, Angela Brisebarre, Flora Donati, Etienne Simon-Lorière, Vincent Enouf, Maud Vanpeene, Sylvie van der Werf, Pascale Martres                                                                                                                                                                                                                                                                                                                    |
| EPI_ISL_443289, EPI_ISL_443290, EPI_ISL_443291, EPI_ISL_443292, EPI_ISL_443293, EPI_ISL_443294                                                                                                                                                                                                                                                                                                                                                                                                                                                                                                                                                                                                                                                                                                                                                                                                                                                                                                                                                                                                                                                                                 | CHRU Pontchaillou - Laboratoire de Virologie                                                                                                                                                    | National Reference Center for Viruses of Respiratory Infections, Institut Pasteur, Paris                                                                        | Mélanie Albert, Marion Barbet, Sylvie Behillil, Méline Bizard, Angela Brisebarre, Flora Donati, Etienne Simon-Lorière, Vincent Enouf, Maud Vanpeene, Sylvie van der Werf, Gisèle Lagathu                                                                                                                                                                                                                                                                                                                     |
| EPI_ISL_443295, EPI_ISL_443296, EPI_ISL_443297, EPI_ISL_443298, EPI_ISL_443299                                                                                                                                                                                                                                                                                                                                                                                                                                                                                                                                                                                                                                                                                                                                                                                                                                                                                                                                                                                                                                                                                                 | Hôpital Necker - Enfants - Malades Laboratoire de Virologie                                                                                                                                     | National Reference Center for Viruses of Respiratory Infections, Institut Pasteur, Paris                                                                        | Mélanie Albert, Marion Barbet, Sylvie Behillil, Méline Bizard, Angela Brisebarre, Flora Donati, Etienne Simon-Lorière, Vincent Enouf, Maud Vanpeene, Sylvie van der Werf, Marianne Leruez-Ville                                                                                                                                                                                                                                                                                                              |
| EPI_ISL_443300, EPI_ISL_443301, EPI_ISL_443302                                                                                                                                                                                                                                                                                                                                                                                                                                                                                                                                                                                                                                                                                                                                                                                                                                                                                                                                                                                                                                                                                                                                 | Cabinet Médical                                                                                                                                                                                 | National Reference Center for Viruses of Respiratory Infections, Institut Pasteur, Paris                                                                        | Mélanie Albert, Marion Barbet, Sylvie Behillil, Méline Bizard, Angela Brisebarre, Flora Donati, Etienne Simon-Lorière, Vincent Enouf, Maud Vanpeene, Sylvie van der Werf                                                                                                                                                                                                                                                                                                                                     |
| EPI_ISL_443303                                                                                                                                                                                                                                                                                                                                                                                                                                                                                                                                                                                                                                                                                                                                                                                                                                                                                                                                                                                                                                                                                                                                                                 | Résidence Les Marines                                                                                                                                                                           | National Reference Center for Viruses of Respiratory Infections, Institut Pasteur, Paris                                                                        | Mélanie Albert, Marion Barbet, Sylvie Behillil, Méline Bizard, Angela Brisebarre, Flora Donati, Etienne Simon-Lorière, Vincent Enouf, Maud Vanpeene, Sylvie van der Werf                                                                                                                                                                                                                                                                                                                                     |
| EPI_ISL_443304                                                                                                                                                                                                                                                                                                                                                                                                                                                                                                                                                                                                                                                                                                                                                                                                                                                                                                                                                                                                                                                                                                                                                                 | Résidence Esterel                                                                                                                                                                               | National Reference Center for Viruses of Respiratory Infections, Institut Pasteur, Paris                                                                        | Mélanie Albert, Marion Barbet, Sylvie Behillil, Méline Bizard, Angela Brisebarre, Flora Donati, Etienne Simon-Lorière, Vincent Enouf, Maud Vanpeene, Sylvie van der Werf                                                                                                                                                                                                                                                                                                                                     |
| EPI_ISL_443305                                                                                                                                                                                                                                                                                                                                                                                                                                                                                                                                                                                                                                                                                                                                                                                                                                                                                                                                                                                                                                                                                                                                                                 | LABM GH nord Essonne de Longjumeau - BP 125                                                                                                                                                     | National Reference Center for Viruses of Respiratory Infections, Institut Pasteur, Paris                                                                        | Mélanie Albert, Marion Barbet, Sylvie Behillil, Méline Bizard, Angela Brisebarre, Flora Donati, Etienne Simon-Lorière, Vincent Enouf, Maud Vanpeene, Sylvie van der Werf                                                                                                                                                                                                                                                                                                                                     |
| EPI_ISL_443306                                                                                                                                                                                                                                                                                                                                                                                                                                                                                                                                                                                                                                                                                                                                                                                                                                                                                                                                                                                                                                                                                                                                                                 | Cabinet Médical                                                                                                                                                                                 | National Reference Center for Viruses of Respiratory Infections, Institut Pasteur, Paris                                                                        | Mélanie Albert, Marion Barbet, Sylvie Behillil, Méline Bizard, Angela Brisebarre, Flora Donati, Etienne Simon-Lorière, Vincent Enouf, Maud Vanpeene, Sylvie van der Werf                                                                                                                                                                                                                                                                                                                                     |

|                                                                                |                                                                                                                                                                                         |                                                                                                                                                                                         |                                                                                                                                                                                                                                                                                                                                                                                                                                                                                                                                                           |
|--------------------------------------------------------------------------------|-----------------------------------------------------------------------------------------------------------------------------------------------------------------------------------------|-----------------------------------------------------------------------------------------------------------------------------------------------------------------------------------------|-----------------------------------------------------------------------------------------------------------------------------------------------------------------------------------------------------------------------------------------------------------------------------------------------------------------------------------------------------------------------------------------------------------------------------------------------------------------------------------------------------------------------------------------------------------|
| EPI_ISL_443307                                                                 | La Villa Papyri                                                                                                                                                                         | National Reference Center for Viruses of Respiratory Infections, Institut Pasteur, Paris                                                                                                | Mélanie Albert, Marion Barbet, Sylvie Behillil, Méline Bizard, Angela Brisebarre, Flora Donati, Etienne Simon-Lorière, Vincent Enouf, Maud Vanpeene, Sylvie van der Werf                                                                                                                                                                                                                                                                                                                                                                                  |
| EPI_ISL_443308                                                                 | Plaisance                                                                                                                                                                               | National Reference Center for Viruses of Respiratory Infections, Institut Pasteur, Paris                                                                                                | Mélanie Albert, Marion Barbet, Sylvie Behillil, Méline Bizard, Angela Brisebarre, Flora Donati, Etienne Simon-Lorière, Vincent Enouf, Maud Vanpeene, Sylvie van der Werf                                                                                                                                                                                                                                                                                                                                                                                  |
| EPI_ISL_443309                                                                 | CH Compiègne Laboratoire de Biologie                                                                                                                                                    | National Reference Center for Viruses of Respiratory Infections, Institut Pasteur, Paris                                                                                                | Mélanie Albert, Marion Barbet, Sylvie Behillil, Méline Bizard, Angela Brisebarre, Flora Donati, Etienne Simon-Lorière, Vincent Enouf, Maud Vanpeene, Sylvie van der Werf                                                                                                                                                                                                                                                                                                                                                                                  |
| EPI_ISL_443310                                                                 | Centre de santé Filieris                                                                                                                                                                | National Reference Center for Viruses of Respiratory Infections, Institut Pasteur, Paris                                                                                                | Mélanie Albert, Marion Barbet, Sylvie Behillil, Méline Bizard, Angela Brisebarre, Flora Donati, Etienne Simon-Lorière, Vincent Enouf, Maud Vanpeene, Sylvie van der Werf                                                                                                                                                                                                                                                                                                                                                                                  |
| EPI_ISL_443311, EPI_ISL_443312, EPI_ISL_443313                                 | Cabinet Médical                                                                                                                                                                         | National Reference Center for Viruses of Respiratory Infections, Institut Pasteur, Paris                                                                                                | Mélanie Albert, Marion Barbet, Sylvie Behillil, Méline Bizard, Angela Brisebarre, Flora Donati, Etienne Simon-Lorière, Vincent Enouf, Maud Vanpeene, Sylvie van der Werf                                                                                                                                                                                                                                                                                                                                                                                  |
| EPI_ISL_443314                                                                 | LABM GH nord Essonne de Longjumeau - BP 125                                                                                                                                             | National Reference Center for Viruses of Respiratory Infections, Institut Pasteur, Paris                                                                                                | Mélanie Albert, Marion Barbet, Sylvie Behillil, Méline Bizard, Angela Brisebarre, Flora Donati, Etienne Simon-Lorière, Vincent Enouf, Maud Vanpeene, Sylvie van der Werf                                                                                                                                                                                                                                                                                                                                                                                  |
| EPI_ISL_443315                                                                 | Château de la Source                                                                                                                                                                    | National Reference Center for Viruses of Respiratory Infections, Institut Pasteur, Paris                                                                                                | Mélanie Albert, Marion Barbet, Sylvie Behillil, Méline Bizard, Angela Brisebarre, Flora Donati, Etienne Simon-Lorière, Vincent Enouf, Maud Vanpeene, Sylvie van der Werf                                                                                                                                                                                                                                                                                                                                                                                  |
| EPI_ISL_443316                                                                 | CH Compiègne Laboratoire de Biologie                                                                                                                                                    | National Reference Center for Viruses of Respiratory Infections, Institut Pasteur, Paris                                                                                                | Mélanie Albert, Marion Barbet, Sylvie Behillil, Méline Bizard, Angela Brisebarre, Flora Donati, Etienne Simon-Lorière, Vincent Enouf, Maud Vanpeene, Sylvie van der Werf, Olivia Raulin                                                                                                                                                                                                                                                                                                                                                                   |
| EPI_ISL_443317                                                                 | Cabinet Médical                                                                                                                                                                         | National Reference Center for Viruses of Respiratory Infections, Institut Pasteur, Paris                                                                                                | Mélanie Albert, Marion Barbet, Sylvie Behillil, Méline Bizard, Angela Brisebarre, Flora Donati, Etienne Simon-Lorière, Vincent Enouf, Maud Vanpeene, Sylvie van der Werf                                                                                                                                                                                                                                                                                                                                                                                  |
| EPI_ISL_444465                                                                 | B.J. Medical College and Civil hospital                                                                                                                                                 | Gujarat Biotechnology Research Centre                                                                                                                                                   | Monika Gandhi, Pinal Trivedi, Maharshi Pandya, Amit Kanani, Akanksha Verma, Nitin Savaliya, Raghawendra Kumar, Dinesh Kumar, Zuber Saiyed, Dipa Kinariwala, Disha Patel, Binita Aring, Neeta Khandelwal, Geeta Vaghela, Sonia Barve, Bhavesh Modi, Kairavi Joshi, Gaurishankar Shrimali, Nidhi Sood, Pranay Shah, R D Dixit, Snehal Bagatharia, Kamlesh J Upadhyay, Ramesh Pandit, Tejas Shah, Ankit Hinsu, Pritesh Sabara, Apurvashin Puvar, Janvi Raval, Anjali Rajwar, Chaitanya Joshi, Madhvi Joshi                                                   |
| EPI_ISL_444470                                                                 | B.J. Medical College and Civil hospital                                                                                                                                                 | Gujarat Biotechnology Research Centre                                                                                                                                                   | Nitin Savaliya, Raghawendra Kumar, Dinesh Kumar, Zuber Saiyed, Dipa Kinariwala, Disha Patel, Binita Aring, Neeta Khandelwal, Geeta Vaghela, Sonia Barve, Bhavesh Modi, Kairavi Joshi, Gaurishankar Shrimali, Nidhi Sood, Pranay Shah, R D Dixit, Snehal Bagatharia, Kamlesh J Upadhyay, Ramesh Pandit, Tejas Shah, Ankit Hinsu, Pritesh Sabara, Apurvashin Puvar, Janvi Raval, Monika Gandhi, Pinal Trivedi, Maharshi Pandya, Amit Kanani, Akanksha Verma, Neha Rajpara, Chaitanya Joshi, Madhvi Joshi                                                    |
| EPI_ISL_444477                                                                 | B.J. Medical College and Civil hospital                                                                                                                                                 | Gujarat Biotechnology Research Centre                                                                                                                                                   | Neeta Khandelwal, Geeta Vaghela, Sonia Barve, Bhavesh Modi, Kairavi Joshi, Gaurishankar Shrimali, Nidhi Sood, Pranay Shah, R D Dixit, Snehal Bagatharia, Kamlesh J Upadhyay, Ramesh Pandit, Tejas Shah, Ankit Hinsu, Pritesh Sabara, Apurvashin Puvar, Janvi Raval, Monika Gandhi, Pinal Trivedi, Maharshi Pandya, Amit Kanani, Akanksha Verma, Nitin Savaliya, Raghawendra Kumar, Dinesh Kumar, Zuber Saiyed, Dipa Kinariwala, Disha Patel, Binita Aring, Sharmistha Majumdar, Chaitanya Joshi, Madhvi Joshi                                             |
| EPI_ISL_444483                                                                 | Gujarat Biotechnology Research Centre                                                                                                                                                   | Gujarat Biotechnology Research Centre                                                                                                                                                   | Nidhi Sood, Pranay Shah, R D Dixit, Snehal Bagatharia, Kamlesh J Upadhyay, Ramesh Pandit, Tejas Shah, Ankit Hinsu, Pritesh Sabara, Apurvashin Puvar, Janvi Raval, Monika Gandhi, Pinal Trivedi, Maharshi Pandya, Amit Kanani, Akanksha Verma, Nitin Savaliya, Raghawendra Kumar, Dinesh Kumar, Zuber Saiyed, Dipa Kinariwala, Disha Patel, Binita Aring, Neeta Khandelwal, Geeta Vaghela, Sonia Barve, Bhavesh Modi, Kairavi Joshi, Gaurishankar Shrimali, Neelam Nathani, Chaitanya Joshi, Madhvi Joshi                                                  |
| EPI_ISL_445213                                                                 | DNA Solution Ltd                                                                                                                                                                        | DNA Solution Ltd                                                                                                                                                                        | Md. Imran Khan, Kazi Nadim Hasan, Abu Sufian, Mohammed Nafiz Imtiaz Polol, Abdul Khaleque, Mizanur Rahman, MSM Chowdhury, Hasan UI Haider, Mamudul Hasan Razu, Mala Khan, Mohammad Fazle Alam Rabbi                                                                                                                                                                                                                                                                                                                                                       |
| EPI_ISL_445214, EPI_ISL_445215, EPI_ISL_445216, EPI_ISL_445217                 | DNA Solution Ltd.                                                                                                                                                                       | DNA Solution Ltd.                                                                                                                                                                       | Md. Imran Khan, Kazi Nadim Hasan, Abu Sufian, Mohammed Nafiz Imtiaz Polol, Abdul Khaleque, Mizanur Rahman, MSM Chowdhury, Hasan UI Haider, Mamudul Hasan Razu, Mala Khan, Mohammad Fazle Alam Rabbi                                                                                                                                                                                                                                                                                                                                                       |
| EPI_ISL_445244                                                                 | Akbiomed lab                                                                                                                                                                            | Tejgaon College bmb lab                                                                                                                                                                 | Md.Abdul kaium,Md.Easin Arafat                                                                                                                                                                                                                                                                                                                                                                                                                                                                                                                            |
| EPI_ISL_447037                                                                 | B.J. Medical College and Civil hospital                                                                                                                                                 | Gujarat Biotechnology Research Centre                                                                                                                                                   | Monika Gandhi, Pinal Trivedi, Maharshi Pandya, Amit Kanani, Akanksha Verma, Nitin Savaliya, Raghawendra Kumar, Dinesh Kumar, Zuber Saiyed, Dipa Kinariwala, Disha Patel, Binita Aring, Neeta Khandelwal, Geeta Vaghela, Sonia Barve, Bhavesh Modi, Kairavi Joshi, Gaurishankar Shrimali, Nidhi Sood, Pranay Shah, R D Dixit, Snehal Bagatharia, Kamlesh J Upadhyay, Ramesh Pandit, Tejas Shah, Ankit Hinsu, Pritesh Sabara, Apurvashin Puvar, Janvi Raval, Neelam Nathani, Chaitanya Joshi, Madhvi Joshi                                                  |
| EPI_ISL_447042                                                                 | B.J. Medical College and Civil hospital                                                                                                                                                 | Gujarat Biotechnology Research Centre                                                                                                                                                   | Nitin Savaliya, Raghawendra Kumar, Dinesh Kumar, Zuber Saiyed, Dipa Kinariwala, Disha Patel, Binita Aring, Neeta Khandelwal, Geeta Vaghela, Sonia Barve, Bhavesh Modi, Kairavi Joshi, Gaurishankar Shrimali, Nidhi Sood, Pranay Shah, R D Dixit, Snehal Bagatharia, Kamlesh J Upadhyay, Ramesh Pandit, Tejas Shah, Ankit Hinsu, Pritesh Sabara, Apurvashin Puvar, Janvi Raval, Monika Gandhi, Pinal Trivedi, Maharshi Pandya, Amit Kanani, Akanksha Verma, Pooja P Doshi, Chaitanya Joshi, Madhvi Joshi                                                   |
| EPI_ISL_447049                                                                 | GMERS Medical College and Hospital, Gandhinagar                                                                                                                                         | Gujarat Biotechnology Research Centre                                                                                                                                                   | Neeta Khandelwal, Geeta Vaghela, Sonia Barve, Bhavesh Modi, Kairavi Joshi, Gaurishankar Shrimali, Nidhi Sood, Pranay Shah, R D Dixit, Snehal Bagatharia, Kamlesh J Upadhyay, Ramesh Pandit, Tejas Shah, Ankit Hinsu, Pritesh Sabara, Apurvashin Puvar, Janvi Raval, Monika Gandhi, Pinal Trivedi, Maharshi Pandya, Amit Kanani, Akanksha Verma, Nitin Savaliya, Raghawendra Kumar, Dinesh Kumar, Zuber Saiyed, Dipa Kinariwala, Disha Patel, Binita Aring, Bhavya Jindal, Chaitanya Joshi, Madhvi Joshi                                                   |
| EPI_ISL_447055                                                                 | Department for Virology, Molecular Biology and Genome Research, R. G. Lugar Center for Public Health Research, National Center for Disease Control and Public Health (NCDC) of Georgia. | Department for Virology, Molecular Biology and Genome Research, R. G. Lugar Center for Public Health Research, National Center for Disease Control and Public Health (NCDC) of Georgia. | Meri Pantsulaia, Gvantsa Brachveli, Giorgi Tomashvili, Gvantsa Chanturia, Ann Machabishvili, Nato Kotaria, Marine Murtskhaladze, Lela Sabadze, Mari Gavashelidze, Ana Papkauri, Tata Imnadze, Tamar Jashiasvili, Tea Tevdoradze, Ketevan Sidamonidze, Ekaterine Khmaladze, Ekaterine Zhghenti, Roena Sukhiasvili, Mariam Zakalashvili, Lela Urushadze, Magda Dgebuadze, Davit Tsguria, Ekaterine Zangladze, Nino Berishvili, Adam Kotorashvili, Maia Alkhazashvili, Irma Burjanadze, Anna Kasradze, Khatuna Zakhashvili, Paata Imnadze, Amiran Karmelidze |
| EPI_ISL_447250, EPI_ISL_447251                                                 | Central Virology Laboratory                                                                                                                                                             | Central Virology Laboratory                                                                                                                                                             | Neta Zuckerman, Efrat Bucris, Oran Erseto, Danit Sofer, Orna Mor, Ella Mendelson, Michal Mandelboim                                                                                                                                                                                                                                                                                                                                                                                                                                                       |
| EPI_ISL_447475, EPI_ISL_447489, EPI_ISL_447503, EPI_ISL_447517, EPI_ISL_447530 | Servicio de Microbiología. Hospital Clínico Universitario de Valencia                                                                                                                   | Sequencing and Bioinformatics Service and Molecular Epidemiology Research Group. FISABIO-Public Health                                                                                  | Neris Garcia-Gonzalez, Irma Galán Vendrell, Sandra Carbo, Loreto Ferrús Abad, Paula Ruiz-Hueso, Mariana Reyes-Prieto, Vicente Soriano Chirona, Ivan Ansari, Lúcia Martínez-Priego, Giuseppe Auria, David Navarro, Eliseo Albert, Maria Alma Bracho, Lidia Ruiz Roldán, Fernando Gonzalez-Candelas                                                                                                                                                                                                                                                         |
| EPI_ISL_447535                                                                 | Gujarat Biotechnology Research Centre                                                                                                                                                   | Gujarat Biotechnology Research Centre                                                                                                                                                   | Nidhi Sood, Pranay Shah, R D Dixit, Snehal Bagatharia, Kamlesh J Upadhyay, Ramesh Pandit, Tejas Shah, Ankit Hinsu, Pritesh Sabara, Apurvashin Puvar, Janvi Raval, Monika Gandhi, Pinal Trivedi, Maharshi Pandya, Amit Kanani, Akanksha Verma, Nitin Savaliya, Raghawendra Kumar, Dinesh Kumar, Zuber Saiyed, Dipa Kinariwala, Disha Patel, Binita Aring, Neeta Khandelwal, Geeta Vaghela, Sonia Barve, Bhavesh Modi, Kairavi Joshi, Gaurishankar Shrimali, Priti Pandita, Chaitanya Joshi, Madhvi Joshi                                                   |
| EPI_ISL_447546                                                                 | Gujarat Biotechnology Research Centre                                                                                                                                                   | Gujarat Biotechnology Research Centre                                                                                                                                                   | Monika Gandhi, Pinal Trivedi, Maharshi Pandya, Amit Kanani, Akanksha Verma, Nitin Savaliya, Raghawendra Kumar, Dinesh Kumar, Zuber Saiyed, Dipa Kinariwala, Disha Patel, Binita Aring, Neeta Khandelwal, Geeta Vaghela, Sonia Barve, Bhavesh Modi, Kairavi Joshi, Gaurishankar Shrimali, Nidhi Sood, Pranay Shah, R D Dixit, Snehal Bagatharia, Kamlesh J Upadhyay, Ramesh Pandit, Tejas Shah, Ankit Hinsu, Pritesh Sabara, Apurvashin Puvar, Janvi Raval, Priti Pandita, Chaitanya Joshi, Madhvi Joshi                                                   |
| EPI_ISL_447551                                                                 | GMERS Medical College and Hospital, Gandhinagar                                                                                                                                         | Gujarat Biotechnology Research Centre                                                                                                                                                   | Nitin Savaliya, Raghawendra Kumar, Dinesh Kumar, Zuber Saiyed, Dipa Kinariwala, Disha Patel, Binita Aring, Neeta Khandelwal, Geeta Vaghela, Sonia Barve, Bhavesh Modi, Kairavi Joshi, Gaurishankar Shrimali, Nidhi Sood, Pranay Shah, R D Dixit, Snehal Bagatharia, Kamlesh J Upadhyay, Ramesh Pandit, Tejas Shah, Ankit Hinsu, Pritesh Sabara, Apurvashin Puvar, Janvi Raval, Monika Gandhi, Pinal Trivedi, Maharshi Pandya, Amit Kanani, Akanksha Verma, Bhavya Jindal, Chaitanya Joshi, Madhvi Joshi                                                   |
| EPI_ISL_447574, EPI_ISL_447576, EPI_ISL_447577, EPI_ISL_447578, EPI_ISL_447853 | CSIR-Centre for Cellular and Molecular Biology                                                                                                                                          | CSIR-Centre for Cellular and Molecular Biology                                                                                                                                          | Namami Gaur, Sakshi Shambhavi, Lamuk Zaveri, Shagufta Khan, Tulasi Nagabandi, Purushotham Vodnala, Payel Mukherjee, Sofia Banu, Priya Singh, Dhivya Vedagiri, Divya Gupta, Vishal Sah, Santosh Kumar Kuncha, Krishnan Harinivas Harshan, Archana Bharadwaj Siva, Karthik Bharadwaj Tallapaka, Rakesh K Mishra, Divya Tej Sowpati                                                                                                                                                                                                                          |

|                                                                                                                                                                                                                                                                                                                                                                                                                                                                                                                                                                                                                                                                                                                                                                                                                                                                                                                                                                                                                                                                                                                                                                                                |                                                                                                                                                                                                 |                                                                                                         |                                                                                                                                                                                                                                                                                                                                                                                                                                                                                                                            |
|------------------------------------------------------------------------------------------------------------------------------------------------------------------------------------------------------------------------------------------------------------------------------------------------------------------------------------------------------------------------------------------------------------------------------------------------------------------------------------------------------------------------------------------------------------------------------------------------------------------------------------------------------------------------------------------------------------------------------------------------------------------------------------------------------------------------------------------------------------------------------------------------------------------------------------------------------------------------------------------------------------------------------------------------------------------------------------------------------------------------------------------------------------------------------------------------|-------------------------------------------------------------------------------------------------------------------------------------------------------------------------------------------------|---------------------------------------------------------------------------------------------------------|----------------------------------------------------------------------------------------------------------------------------------------------------------------------------------------------------------------------------------------------------------------------------------------------------------------------------------------------------------------------------------------------------------------------------------------------------------------------------------------------------------------------------|
| EPI_ISL_447904                                                                                                                                                                                                                                                                                                                                                                                                                                                                                                                                                                                                                                                                                                                                                                                                                                                                                                                                                                                                                                                                                                                                                                                 | National Institute of Biotechnology                                                                                                                                                             | National Institute of Biotechnology                                                                     | Md. Moniruzzaman, Mohammad Uzzal Hossain, Md. Nazrul Islam, Md. Hadisur Rahman, Irfan Ahmed, Tahia Anan Rahman, Arित्रा Bhattacharjee, Md. Ruhul Amin, Asif Rashid, Chaman Ara Keya, Keshob Chandra Das, Md. Salimullah                                                                                                                                                                                                                                                                                                    |
| EPI_ISL_449261, EPI_ISL_449267, EPI_ISL_449268, EPI_ISL_449269, EPI_ISL_449278, EPI_ISL_449279, EPI_ISL_449283, EPI_ISL_449284, EPI_ISL_449286, EPI_ISL_449288, EPI_ISL_449295, EPI_ISL_449296, EPI_ISL_449302, EPI_ISL_449304, EPI_ISL_449305, EPI_ISL_449309, EPI_ISL_449310, EPI_ISL_449312, EPI_ISL_449317, EPI_ISL_449318, EPI_ISL_449319, EPI_ISL_449329                                                                                                                                                                                                                                                                                                                                                                                                                                                                                                                                                                                                                                                                                                                                                                                                                                 |                                                                                                                                                                                                 |                                                                                                         |                                                                                                                                                                                                                                                                                                                                                                                                                                                                                                                            |
| see above                                                                                                                                                                                                                                                                                                                                                                                                                                                                                                                                                                                                                                                                                                                                                                                                                                                                                                                                                                                                                                                                                                                                                                                      | Virology Department, Royal Infirmary of Edinburgh, NHS Lothian / School of Biological Sciences, University of Edinburgh / Institute of Genetics and Molecular Medicine, University of Edinburgh | COVID-19 Genomics UK (COG-UK) Consortium                                                                | McHugh M, Dewar R, Rooke S, Gallagher M, Balcaza C, O'Toole Á, Scher E, Hill V, McCrone JT, Colqhoun R, Yu X, Jackson B, Rambaut A, Williams TC, Templeton K                                                                                                                                                                                                                                                                                                                                                               |
| EPI_ISL_450329                                                                                                                                                                                                                                                                                                                                                                                                                                                                                                                                                                                                                                                                                                                                                                                                                                                                                                                                                                                                                                                                                                                                                                                 | CSIR-Centre for Cellular and Molecular Biology                                                                                                                                                  | CSIR-Centre for Cellular and Molecular Biology                                                          | Namami Gaur, Sakshi Shambhavi, Lamuk Zaveri, Shagufta Khan, Tulasi Nagabandi, Purushotham Vodnala, Payel Mukherjee, Sofia Banu, Priya Singh, Dhiviya Vedagiri, Divya Gupta, Vishal Sah, Santosh Kumar Kuncha, Krishnan Harinivas Harshan, Archana Bharadwaj Siva, Karthik Bharadwaj Tallapaka, Sonu Uday, Sudipta Mondal, Annapoorna P Karthyayani, Debabrata Jana, Debrya Saha, Gokulan C G, Gunjan Purohit, Hanuman Tulashiram Kale, Pankaj Kumar, Prachand Issarapu, Preethi Jampala Rakesh K Mishra, Divya Tej Sowpati |
| EPI_ISL_450341                                                                                                                                                                                                                                                                                                                                                                                                                                                                                                                                                                                                                                                                                                                                                                                                                                                                                                                                                                                                                                                                                                                                                                                 | Bangladesh Institute of Tropical & Infectious Diseases, COVID-19 Testing Laboratory                                                                                                             | Basic and Applied Research on Jute Project                                                              | Md. Sabbir Hossain, Rasel Ahmed, Shah Md Tamim Kabir, Emdadul Mannan Emdad, Md. Nazmul Haq Ronoy, Eaftekar Ahmed Rana, Paritous Kumar Biswas, M A Hassan Chowdhury, Md. Shakeel Ahmed, Md. Samiul Haque, Md. Monjurul Alam, Md. Sharifur Rahman, A S M Anwarul Huq, Md. Shahidul Islam, Goutam Buddha Das, AMAM Zonae Siddiki                                                                                                                                                                                              |
| EPI_ISL_450343, EPI_ISL_450345                                                                                                                                                                                                                                                                                                                                                                                                                                                                                                                                                                                                                                                                                                                                                                                                                                                                                                                                                                                                                                                                                                                                                                 | Bangladesh Institute of Tropical & Infectious Diseases, COVID-19 Testing Laboratory                                                                                                             | Basic and Applied Research on Jute Project                                                              | Md. Sabbir Hossain, Rasel Ahmed, Shah Md Tamim Kabir, Emdadul Mannan Emdad, Md. Nazmul Haq Ronoy, Eaftekar Ahmed Rana, Paritous Kumar Biswas, M A Hassan Chowdhury, Md. Shakeel Ahmed, Md. Samiul Haque, Md. Monjurul Alam, Md. Sharifur Rahman, A S M Anwarul Huq, Md. Shahidul Islam, Goutam Buddha Das, AMAM Zonae Siddiki                                                                                                                                                                                              |
| EPI_ISL_450738, EPI_ISL_450739, EPI_ISL_450740, EPI_ISL_450741, EPI_ISL_450742, EPI_ISL_450743, EPI_ISL_450744, EPI_ISL_450745                                                                                                                                                                                                                                                                                                                                                                                                                                                                                                                                                                                                                                                                                                                                                                                                                                                                                                                                                                                                                                                                 | OUCRU/HTD                                                                                                                                                                                       | OUCRU/HTD                                                                                               | Nguyen Van Vinh Chau, Nguyen Thi Thu Hong, Nguyen Thi Han Ny, Le Nguyen Truc Nhu, Nghiem My Ngoc, Vo Thanh Lam, Nguyen Thanh Dung, Lam Minh Yen, Ngo Ngoc Quang Minh, Le Manh Hung, Nguyen Tri Dung, Dinh Nguyen Huy Man, Lam Anh Nguyet, Tran Chanh Xuan, Tran Tinh Hien, Nguyen Thanh Phong, Tran Nguyen Hoang Tu, Tran Tan Thanh, Nguyen Thanh Truong, Nguyen Tan Binh, Tang Chi Thuong, Guy Thwaites, and Le Van Tan, for OUCRU COVID-19 research group*                                                               |
| EPI_ISL_451151                                                                                                                                                                                                                                                                                                                                                                                                                                                                                                                                                                                                                                                                                                                                                                                                                                                                                                                                                                                                                                                                                                                                                                                 | M.P Shah Government Medocal college Jamnagar                                                                                                                                                    | Gujarat Biotechnology Research Centre                                                                   | Monika Gandhi, Pinal Trivedi, Maharshi Pandya, Amit Kanani, Nidhi Patel, Nitin Savaliya, Raghawendra Kumar, Dinesh Kumar, Zuber Saiyed, Komal Patel, Labdhi Pandya, Snehal Bagatharia, Ramesh Pandit, Tejas Shah, Ankit Hinsu, Pritesh Sabara, Apurvasinh Puvar, Binita Aring, Janvi Raval, Zarna Patel, Bhavesh Modi, Gaurishankar Shrimali, R D Dixit, A M Kadri, Neha Rajpara, Chaitanya Joshi, Madhvi Joshi                                                                                                            |
| EPI_ISL_451157                                                                                                                                                                                                                                                                                                                                                                                                                                                                                                                                                                                                                                                                                                                                                                                                                                                                                                                                                                                                                                                                                                                                                                                 | Government Medical College, Vadodara                                                                                                                                                            | Gujarat Biotechnology Research Centre                                                                   | Nidhi Patel, Nitin Savaliya, Raghawendra Kumar, Dinesh Kumar, Zuber Saiyed, Komal Patel, Labdhi Pandya, Snehal Bagatharia, Ramesh Pandit, Tejas Shah, Ankit Hinsu, Pritesh Sabara, Apurvasinh Puvar, Janvi Raval, Zarna Patel, Monika Gandhi, Pinal Trivedi, Maharshi Pandya, Manish Pattani, Tanuja Javadekar , Amit Kanani, Bhavesh Modi, Gaurishankar Shrimali, R D Dixit, A M Kadri, Camelia Chakraborty, Chaitanya Joshi, Madhvi Joshi                                                                                |
| EPI_ISL_451158                                                                                                                                                                                                                                                                                                                                                                                                                                                                                                                                                                                                                                                                                                                                                                                                                                                                                                                                                                                                                                                                                                                                                                                 | Government Medical College, Vadodara                                                                                                                                                            | Gujarat Biotechnology Research Centre                                                                   | Nitin Savaliya, Raghawendra Kumar, Dinesh Kumar, Zuber Saiyed, Komal Patel, Labdhi Pandya, Snehal Bagatharia, Ramesh Pandit, Tejas Shah, Ankit Hinsu, Pritesh Sabara, Apurvasinh Puvar, Janvi Raval, Zarna Patel, Monika Gandhi, Pinal Trivedi, Maharshi Pandya, Manish Pattani, Tanuja Javadekar , Amit Kanani, Nidhi Patel, Bhavesh Modi, Gaurishankar Shrimali, R D Dixit, A M Kadri, Siddhant Kumar, Chaitanya Joshi, Madhvi Joshi                                                                                     |
| EPI_ISL_451174, EPI_ISL_451175, EPI_ISL_451176, EPI_ISL_451177, EPI_ISL_451178, EPI_ISL_451179, EPI_ISL_451180, EPI_ISL_451181, EPI_ISL_451182                                                                                                                                                                                                                                                                                                                                                                                                                                                                                                                                                                                                                                                                                                                                                                                                                                                                                                                                                                                                                                                 | Lab voor klinische biologie                                                                                                                                                                     | Onderzoeksgroep Virologie                                                                               | Nick Vereecke, Laurens Lambrechts, Marthe Pauwels, Jozefien De Clercq, Bruno Verhasselt, Linos Vandekerckhove, Hans Nauwynck, Sebastiaan Theuns                                                                                                                                                                                                                                                                                                                                                                            |
| EPI_ISL_452472, EPI_ISL_452473, EPI_ISL_452474, EPI_ISL_452475, EPI_ISL_452476, EPI_ISL_452477, EPI_ISL_452478, EPI_ISL_452479, EPI_ISL_452480, EPI_ISL_452481, EPI_ISL_452482, EPI_ISL_452483, EPI_ISL_452484, EPI_ISL_452485, EPI_ISL_452486, EPI_ISL_452487, EPI_ISL_452488, EPI_ISL_452489, EPI_ISL_452490, EPI_ISL_452491, EPI_ISL_452492, EPI_ISL_452493, EPI_ISL_452494, EPI_ISL_452495, EPI_ISL_452496, EPI_ISL_452497, EPI_ISL_452498, EPI_ISL_452499, EPI_ISL_452500, EPI_ISL_452501, EPI_ISL_452502, EPI_ISL_452503, EPI_ISL_452504, EPI_ISL_452505, EPI_ISL_452506, EPI_ISL_452507, EPI_ISL_452508, EPI_ISL_452509, EPI_ISL_452510, EPI_ISL_452511, EPI_ISL_452512, EPI_ISL_452513, EPI_ISL_452514, EPI_ISL_452515, EPI_ISL_452516, EPI_ISL_452517, EPI_ISL_452518, EPI_ISL_452519, EPI_ISL_452520, EPI_ISL_452521, EPI_ISL_452522, EPI_ISL_452523, EPI_ISL_452524, EPI_ISL_452525, EPI_ISL_452526, EPI_ISL_452527, EPI_ISL_452528, EPI_ISL_452529, EPI_ISL_452530, EPI_ISL_452531, EPI_ISL_452532, EPI_ISL_452533, EPI_ISL_452534, EPI_ISL_452535, EPI_ISL_452536, EPI_ISL_452537, EPI_ISL_452538, EPI_ISL_452539, EPI_ISL_452540, EPI_ISL_452541, EPI_ISL_452542, EPI_ISL_452543 |                                                                                                                                                                                                 |                                                                                                         |                                                                                                                                                                                                                                                                                                                                                                                                                                                                                                                            |
| see above                                                                                                                                                                                                                                                                                                                                                                                                                                                                                                                                                                                                                                                                                                                                                                                                                                                                                                                                                                                                                                                                                                                                                                                      | Clinica Universidad de Navarra. Servicio de Enfermedades Infecciosas y Microbiología clínica                                                                                                    | SeqCOVID-SPAIN consortium/IBV(CSIC)                                                                     | Miriam Fernández-Alonso, Jose Luis del Pozo and SeqCOVID-SPAIN consortium                                                                                                                                                                                                                                                                                                                                                                                                                                                  |
| EPI_ISL_453099, EPI_ISL_453102, EPI_ISL_453109, EPI_ISL_453116, EPI_ISL_453120, EPI_ISL_453122, EPI_ISL_453124, EPI_ISL_453127, EPI_ISL_453138, EPI_ISL_453140, EPI_ISL_453142, EPI_ISL_453145, EPI_ISL_453149, EPI_ISL_453153, EPI_ISL_453154, EPI_ISL_453163, EPI_ISL_453166, EPI_ISL_453167, EPI_ISL_453174, EPI_ISL_453175, EPI_ISL_453177, EPI_ISL_453180, EPI_ISL_453182                                                                                                                                                                                                                                                                                                                                                                                                                                                                                                                                                                                                                                                                                                                                                                                                                 |                                                                                                                                                                                                 |                                                                                                         |                                                                                                                                                                                                                                                                                                                                                                                                                                                                                                                            |
| see above                                                                                                                                                                                                                                                                                                                                                                                                                                                                                                                                                                                                                                                                                                                                                                                                                                                                                                                                                                                                                                                                                                                                                                                      | Virology Department, Royal Infirmary of Edinburgh, NHS Lothian / School of Biological Sciences, University of Edinburgh / Institute of Genetics and Molecular Medicine, University of Edinburgh | COVID-19 Genomics UK (COG-UK) Consortium                                                                | McHugh M, Dewar R, Rooke S, Gallagher M, Balcaza C, O'Toole Á, Scher E, Hill V, McCrone JT, Colqhoun R, Yu X, Jackson B, Rambaut A, Williams TC, Templeton K                                                                                                                                                                                                                                                                                                                                                               |
| EPI_ISL_454353                                                                                                                                                                                                                                                                                                                                                                                                                                                                                                                                                                                                                                                                                                                                                                                                                                                                                                                                                                                                                                                                                                                                                                                 | Microbial Genome Sequencing Center; Microbial Genomic Epidemiology Laboratory                                                                                                                   | Microbial Genomic Epidemiology Laboratory, University of Pittsburgh                                     | Mustapha M. Mustapha, Jane W. Marsh, Dan Snyder, Marissa P. Griffith, Stephanie L. Mitchell, Vatsala R. Srinivasa, Kady D. Waggle, Chinelo Ezeonwuku, Vaughn S. Cooper, Lee H. Harrison                                                                                                                                                                                                                                                                                                                                    |
| EPI_ISL_454354                                                                                                                                                                                                                                                                                                                                                                                                                                                                                                                                                                                                                                                                                                                                                                                                                                                                                                                                                                                                                                                                                                                                                                                 | UPMC Clinical Microbiology Laboratory                                                                                                                                                           | Microbial Genome Sequencing Center; Microbial Genomic Epidemiology Laboratory, University of Pittsburgh | Mustapha M. Mustapha, Jane W. Marsh, Dan Snyder, Marissa P. Griffith, Stephanie L. Mitchell, Vatsala R. Srinivasa, Kady D. Waggle, Chinelo Ezeonwuku, Vaughn S. Cooper, Lee H. Harrison                                                                                                                                                                                                                                                                                                                                    |
| EPI_ISL_454355, EPI_ISL_454356, EPI_ISL_454357, EPI_ISL_454358, EPI_ISL_454359, EPI_ISL_454360, EPI_ISL_454361, EPI_ISL_454362, EPI_ISL_454363, EPI_ISL_454364, EPI_ISL_454365, EPI_ISL_454366, EPI_ISL_454367, EPI_ISL_454368, EPI_ISL_454369, EPI_ISL_454370, EPI_ISL_454371, EPI_ISL_454372, EPI_ISL_454373, EPI_ISL_454374, EPI_ISL_454375, EPI_ISL_454376, EPI_ISL_454377, EPI_ISL_454378, EPI_ISL_454379, EPI_ISL_454380, EPI_ISL_454381, EPI_ISL_454382, EPI_ISL_454383, EPI_ISL_454384, EPI_ISL_454385, EPI_ISL_454386, EPI_ISL_454387, EPI_ISL_454388, EPI_ISL_454389, EPI_ISL_454390, EPI_ISL_454391, EPI_ISL_454392, EPI_ISL_454393, EPI_ISL_454394, EPI_ISL_454395, EPI_ISL_454396, EPI_ISL_454397, EPI_ISL_454398, EPI_ISL_454399, EPI_ISL_454400, EPI_ISL_454401, EPI_ISL_454402, EPI_ISL_454403, EPI_ISL_454404, EPI_ISL_454405, EPI_ISL_454406, EPI_ISL_454407, EPI_ISL_454408, EPI_ISL_454409, EPI_ISL_454410, EPI_ISL_454411                                                                                                                                                                                                                                                 |                                                                                                                                                                                                 |                                                                                                         |                                                                                                                                                                                                                                                                                                                                                                                                                                                                                                                            |
| see above                                                                                                                                                                                                                                                                                                                                                                                                                                                                                                                                                                                                                                                                                                                                                                                                                                                                                                                                                                                                                                                                                                                                                                                      | UPMC Clinical Microbiology Laboratory                                                                                                                                                           | Microbial Genome Sequencing Center, Microbial Epidemiological Laboratory                                | Mustapha M. Mustapha, Jane W. Marsh, Dan Snyder, Marissa P. Griffith, Stephanie L. Mitchell, Vatsala R. Srinivasa, Kady D. Waggle, Chinelo Ezeonwuku, Vaughn S. Cooper, Lee H. Harrison                                                                                                                                                                                                                                                                                                                                    |
| EPI_ISL_455026                                                                                                                                                                                                                                                                                                                                                                                                                                                                                                                                                                                                                                                                                                                                                                                                                                                                                                                                                                                                                                                                                                                                                                                 | Government Medical College, Vadodara                                                                                                                                                            | Gujarat Biotechnology Research Centre                                                                   | Monika Gandhi, Pinal Trivedi, Maharshi Pandya, Amit Kanani, Nidhi Patel, Nitin Savaliya, Raghawendra Kumar, Dinesh Kumar, Zuber Saiyed, Komal Patel, Labdhi Pandya, Snehal Bagatharia, Tanuja Javadekar , R N Daveswar, Ramesh Pandit, Tejas Shah, Ankit Hinsu, Pritesh Sabara, Apurvasinh Puvar, Janvi Raval, Zarna Patel, Priti Pandita, Bhavesh Modi, Gaurishankar Shrimali, R D Dixit, A M Kadri, Umang Mishra, Chaitanya Joshi, Madhvi Joshi                                                                          |
| EPI_ISL_455312                                                                                                                                                                                                                                                                                                                                                                                                                                                                                                                                                                                                                                                                                                                                                                                                                                                                                                                                                                                                                                                                                                                                                                                 | Microbiology Unit, Department of Pathology & Laboratory Medicine, IUM Medical Centre                                                                                                            | SEA Microbiome Unit, Faculty of Industrial Sciences & Technology, Universiti Malaysia Pahang            | Norhidayah Binti Kamarudin, Ahmad Hafiz Bin Zulkifly, Hajar Fauzan Ahmad, Muhammad Adam Lee Abdullah, Mohd Fazli Farida Asras, Ahmad Mahfuz Gazali, Mohd Nazli Bin Kamarulzaman, IIUM Medical Centre Covid19 Taskforce, UMP Covid19 Team                                                                                                                                                                                                                                                                                   |
| EPI_ISL_455439                                                                                                                                                                                                                                                                                                                                                                                                                                                                                                                                                                                                                                                                                                                                                                                                                                                                                                                                                                                                                                                                                                                                                                                 | Instituto de Diagnostico y Referencia Epidemiologicos (INDRE)                                                                                                                                   | Instituto de Diagnostico y Referencia Epidemiologicos (INDRE)                                           | Mendieta-Condado Edgar, Araiza-Rodriguez Adnan, Garces-Ayala Fabiola, Rodriguez-Maldonado Abril, Wong-Arambula Claudia, Barrera-Badillo Gisela, Hernandez-Rivas Lucia, Lopez-Martinez Irma, Taboada Ramirez Blanca, Ramirez-Gonzalez Ernesto.                                                                                                                                                                                                                                                                              |
| EPI_ISL_455454                                                                                                                                                                                                                                                                                                                                                                                                                                                                                                                                                                                                                                                                                                                                                                                                                                                                                                                                                                                                                                                                                                                                                                                 | Instituto de Diagnostico y Referencia Epidemiologicos (INDRE)                                                                                                                                   | Instituto de Diagnostico y Referencia Epidemiologicos (INDRE)                                           | Mendieta-Condado Edgar, Araiza-Rodriguez Adnan, Garces-Ayala Fabiola, Rodriguez-Maldonado Abril, Wong-Arambula Claudia, Barrera-Badillo Gisela, Taboada Ramirez Blanca, Ramirez-Gonzalez Ernesto, Hernandez-Rivas Lucia, Lopez-Martinez Irma.                                                                                                                                                                                                                                                                              |
| EPI_ISL_455694, EPI_ISL_455695, EPI_ISL_455696, EPI_ISL_455697, EPI_ISL_455698, EPI_ISL_455699, EPI_ISL_455700, EPI_ISL_455701, EPI_ISL_455702, EPI_ISL_455703, EPI_ISL_455704, EPI_ISL_455705, EPI_ISL_455706, EPI_ISL_455707, EPI_ISL_455708, EPI_ISL_455709, EPI_ISL_455710, EPI_ISL_455711, EPI_ISL_455712                                                                                                                                                                                                                                                                                                                                                                                                                                                                                                                                                                                                                                                                                                                                                                                                                                                                                 |                                                                                                                                                                                                 |                                                                                                         |                                                                                                                                                                                                                                                                                                                                                                                                                                                                                                                            |
| see above                                                                                                                                                                                                                                                                                                                                                                                                                                                                                                                                                                                                                                                                                                                                                                                                                                                                                                                                                                                                                                                                                                                                                                                      | National Hospital of Tropical Diseases                                                                                                                                                          | Oxford University Clinical Research Unit, Hanoi, Vietnam                                                | Nguyen Thi Tam, Van Dinh Trang, Nguyen Thu Trang, Nguyen Thi Ngoc Diep, Le Nguyen Minh Hoa, Pham Ngoc Thach, H. Rogier van Doorn, on behalf of the OUCRU COVID-19 research group                                                                                                                                                                                                                                                                                                                                           |
| EPI_ISL_455713, EPI_ISL_455714, EPI_ISL_455715, EPI_ISL_455716, EPI_ISL_455717, EPI_ISL_455718                                                                                                                                                                                                                                                                                                                                                                                                                                                                                                                                                                                                                                                                                                                                                                                                                                                                                                                                                                                                                                                                                                 | National Hospital of Tropical Diseases                                                                                                                                                          | Oxford University Clinical Research Unit, Hanoi, Vietnam                                                | Nguyen Thi Tam, Van Dinh Trang, Nguyen Thi Hong Thuong, Vu Thi Ngoc Bich, Nguyen Thu Trang, Nguyen Thi Ngoc Diep, Le Nguyen Minh Hoa, Pham Ngoc Thach, H. Rogier van Doorn, on behalf of the OUCRU COVID-19 research group                                                                                                                                                                                                                                                                                                 |

|                                                                                                                                                                                                                                                                                                                                                                                                                                                                                                                                                |                                                                                                                                |                                                                                                                                                                                                 |                                                                                                                                                                                                                                                                                                                                                                                                                                                                                    |                                                                                                                                                               |
|------------------------------------------------------------------------------------------------------------------------------------------------------------------------------------------------------------------------------------------------------------------------------------------------------------------------------------------------------------------------------------------------------------------------------------------------------------------------------------------------------------------------------------------------|--------------------------------------------------------------------------------------------------------------------------------|-------------------------------------------------------------------------------------------------------------------------------------------------------------------------------------------------|------------------------------------------------------------------------------------------------------------------------------------------------------------------------------------------------------------------------------------------------------------------------------------------------------------------------------------------------------------------------------------------------------------------------------------------------------------------------------------|---------------------------------------------------------------------------------------------------------------------------------------------------------------|
| EPI_ISL_455719                                                                                                                                                                                                                                                                                                                                                                                                                                                                                                                                 | T.C. Salk Bakanl Adyaman I Salk Müdürlüğü Adyaman Eitim Ve Aratırma Hastanesi                                                  | VETAL Animal Health Products Company, BSL3+ Production Laboratory /Turkey                                                                                                                       | Mehmet Turgut, Muhtittin Önderci, Fatma Nilay Tutak, Abidin Ercan Yonucu, Murat Dönen, Haluk Uluca, Fethiye Sevimli, O. Uğur Sezerman                                                                                                                                                                                                                                                                                                                                              |                                                                                                                                                               |
| EPI_ISL_455742                                                                                                                                                                                                                                                                                                                                                                                                                                                                                                                                 | Servicio de Microbiología. Hospital Clínico Universitario de Valencia                                                          | Sequencing and Bioinformatics Service and Molecular Epidemiology Research Group. FISABIO-Public Health, and SeqCOVID-Spain Consortium                                                           | Neris Garcia-Gonzalez, Inma Galán Vendrell, Sandra Carbo, Loreto Ferrús Abad, Paula Ruiz-Hueso, Mariana Reyes-Prieto, Vicente Soriano Chirona, Ivan Ansari, Lúcia Martínez-Priego, Giuseppe Auria, David Navarro, Eliseo Albert, María Alma Bracho, Lidia Ruiz Roldan, Fernando Gonzalez-Candelas                                                                                                                                                                                  |                                                                                                                                                               |
| EPI_ISL_455790, EPI_ISL_455791                                                                                                                                                                                                                                                                                                                                                                                                                                                                                                                 | Institute for Medical Research, Infectious Disease Research Centre, National Institutes of Health, Ministry of Health Malaysia | Malaysia Genome Institute                                                                                                                                                                       | Mohd Noor Mat Isa, Irni Suhayu Sapijan, Yusuf Muhammad Noor, Jeyanthi Suppiah, Nurhezreen Md Iqbal, Enizza Kasim, Zarina Mohd Zawawi, Siti Noraini Othman, Mohd Faizal Abu Bakar, Shamsidar Sopia, Azrin Ahmad, Ravindran Thayan, Norazah Ahmad, Tahir Aris, Shahrlul Hisham Zainal Ariffin                                                                                                                                                                                        |                                                                                                                                                               |
| EPI_ISL_455792, EPI_ISL_455793                                                                                                                                                                                                                                                                                                                                                                                                                                                                                                                 | Institute for Medical Research, Infectious Disease Research Centre, National Institutes of Health, Ministry of Health Malaysia | Malaysia Genome Institute                                                                                                                                                                       | Mohd Noor Mat Isa, Irni Suhayu Sapijan, Yusuf Muhammad Noor, Jeyanthi Suppiah, Nurhezreen Md Iqbal, Enizza Kasim, Zarina Mohd Zawawi, Siti Noraini Othman, Mohd Faizal Abu Bakar, Shamsidar Sopia, Azrin Ahmad, Ravindran Thayan, Norazah Ahmad, Tahir Aris, Shahrlul Hisham Zainal Ariffin                                                                                                                                                                                        |                                                                                                                                                               |
| EPI_ISL_456497, EPI_ISL_456498                                                                                                                                                                                                                                                                                                                                                                                                                                                                                                                 | Royal Darwin Hospital Pathology                                                                                                | Microbiological Diagnostic Unit Public Health Laboratory, The Peter Doherty Institute for Infection and Immunity                                                                                | Meumann, E., Cally L., Seemann T., Sait, M., Schultz M., Druce J., Sherry, N.                                                                                                                                                                                                                                                                                                                                                                                                      |                                                                                                                                                               |
| EPI_ISL_456895, EPI_ISL_456899, EPI_ISL_456911, EPI_ISL_456916, EPI_ISL_456921, EPI_ISL_456924, EPI_ISL_456927, EPI_ISL_456929, EPI_ISL_456937, EPI_ISL_456954, EPI_ISL_456957, EPI_ISL_456959, EPI_ISL_456962, EPI_ISL_456965, EPI_ISL_456966, EPI_ISL_456968, EPI_ISL_456974, EPI_ISL_456978, EPI_ISL_456980, EPI_ISL_456983, EPI_ISL_456985, EPI_ISL_456989, EPI_ISL_456991, EPI_ISL_456993, EPI_ISL_456997, EPI_ISL_457001, EPI_ISL_457004, EPI_ISL_457008, EPI_ISL_457012, EPI_ISL_457013, EPI_ISL_457018, EPI_ISL_457021, EPI_ISL_457023 | see above                                                                                                                      | Virology Department, Royal Infirmary of Edinburgh, NHS Lothian / School of Biological Sciences, University of Edinburgh / Institute of Genetics and Molecular Medicine, University of Edinburgh | COVID-19 Genomics UK (COG-UK) Consortium                                                                                                                                                                                                                                                                                                                                                                                                                                           | McHugh M, Dewar R, Rooke S, Gallagher M, Balcaza C, O'Toole Á, Scher E, Hill V, McCrone JT, Colquhoun R, Yu X, Jackson B, Rambaut A, Williams TC, Templeton K |
| EPI_ISL_457824                                                                                                                                                                                                                                                                                                                                                                                                                                                                                                                                 | Bezmalem Vakif University, Dept Microbiology, Medical School, Fatih, Istanbul, Turkey                                          | Bezmalem Vakif University, Medical School & Beykoz Institute of Life Sciences & Biotechnology                                                                                                   | Mehmet Z. Doymaz, Merve Kalkan, Nesibe Cetin, Elif Karaaslan, Bilge Sumbul, Filiz Guney                                                                                                                                                                                                                                                                                                                                                                                            |                                                                                                                                                               |
| EPI_ISL_458049                                                                                                                                                                                                                                                                                                                                                                                                                                                                                                                                 | CSIR-Centre for Cellular and Molecular Biology                                                                                 | CSIR-Centre for Cellular and Molecular Biology                                                                                                                                                  | Namami Gaur, Sakshi Shambhavi, Lamuk Zaveri, Shagufta Khan, Tulasi Nagabandi, Purushotham Vodnala, Payel Mukherjee, Sofia Banu, Priya Singh, Dhiviya Vedagiri, Divya Gupta, Vishal Sah, Santosh Kumar Kuncha, Krishnan Harinivas Harshan, Archana Bharadwaj Siva, Karthik Bharadwaj Tallapaka, Zeba Rizvi, Zuberwasim Sayyad, Kakade Aishwarya Arun, Amrutha H C, Ananga Ghosh, Rakesh K Mishra, Divya Tej Sowpati                                                                 |                                                                                                                                                               |
| EPI_ISL_458055                                                                                                                                                                                                                                                                                                                                                                                                                                                                                                                                 | CSIR-Centre for Cellular and Molecular Biology                                                                                 | CSIR-Centre for Cellular and Molecular Biology                                                                                                                                                  | Namami Gaur, Sakshi Shambhavi, Lamuk Zaveri, Shagufta Khan, Tulasi Nagabandi, Purushotham Vodnala, Payel Mukherjee, Sofia Banu, Priya Singh, Dhiviya Vedagiri, Divya Gupta, Vishal Sah, Santosh Kumar Kuncha, Krishnan Harinivas Harshan, Archana Bharadwaj Siva, Karthik Bharadwaj Tallapaka, Nikhil Hajirnis, Pratheusa Maccha, M Soujanya Reddy, G. Aditya Kumar, Koushick Sivakumar, Rakesh K Mishra, Divya Tej Sowpati                                                        |                                                                                                                                                               |
| EPI_ISL_458061                                                                                                                                                                                                                                                                                                                                                                                                                                                                                                                                 | CSIR-Centre for Cellular and Molecular Biology                                                                                 | CSIR-Centre for Cellular and Molecular Biology                                                                                                                                                  | Namami Gaur, Sakshi Shambhavi, Lamuk Zaveri, Shagufta Khan, Tulasi Nagabandi, Purushotham Vodnala, Payel Mukherjee, Sofia Banu, Priya Singh, Dhiviya Vedagiri, Divya Gupta, Vishal Sah, Santosh Kumar Kuncha, Krishnan Harinivas Harshan, Archana Bharadwaj Siva, Karthik Bharadwaj Tallapaka, Kezia J Ann, Radhika Khandelwal, Roshan Maku Venkata, Shemin Mansuri, Sonu Uday, Rakesh K Mishra, Divya Tej Sowpati                                                                 |                                                                                                                                                               |
| EPI_ISL_458093                                                                                                                                                                                                                                                                                                                                                                                                                                                                                                                                 | B.J. Medical College and Civil hospital                                                                                        | Gujarat Biotechnology Research Centre                                                                                                                                                           | Nidhi Patel, Nitin Savaliya, Raghawendra Kumar, Dinesh Kumar, Zuber Saiyed, Komal Patel, Labdhi Pandya, Snehal Bagatharia, Dhaval Vaghela, Ramesh Patel, Pranay Shah, Kamlesh J Upadhyay, Ramesh Pandit, Tejas Shah, Ankit Hinsu, Pritesh Sabara, Apurvasinh Puvar, Janvi Raval, Zarna Patel, Monika Gandhi, Pinal Trivedi, Maharshi Pandya, Amit Kanani, Siddhant Kumar, Bhavesh Modi, Gaurishankar Shrimali, R D Dixit, A M Kadri, Umang Mishra, Chaitanya Joshi, Madhvi Joshi   |                                                                                                                                                               |
| EPI_ISL_458094                                                                                                                                                                                                                                                                                                                                                                                                                                                                                                                                 | B.J. Medical College and Civil hospital                                                                                        | Gujarat Biotechnology Research Centre                                                                                                                                                           | Nitin Savaliya, Raghawendra Kumar, Dinesh Kumar, Zuber Saiyed, Komal Patel, Labdhi Pandya, Snehal Bagatharia, Dhaval Vaghela, Ramesh Patel, Pranay Shah, Kamlesh J Upadhyay, Ramesh Pandit, Tejas Shah, Ankit Hinsu, Pritesh Sabara, Apurvasinh Puvar, Janvi Raval, Zarna Patel, Monika Gandhi, Pinal Trivedi, Maharshi Pandya, Amit Kanani, Nidhi Patel, Priyanka P Vatsa, Bhavesh Modi, Gaurishankar Shrimali, R D Dixit, A M Kadri, Umang Mishra, Chaitanya Joshi, Madhvi Joshi |                                                                                                                                                               |
| EPI_ISL_458110                                                                                                                                                                                                                                                                                                                                                                                                                                                                                                                                 | Gujarat Biotechnology Research Centre                                                                                          | Gujarat Biotechnology Research Centre                                                                                                                                                           | Monika Gandhi, Pinal Trivedi, Maharshi Pandya, Amit Kanani, Nidhi Patel, Nitin Savaliya, Raghawendra Kumar, Dinesh Kumar, Zuber Saiyed, Komal Patel, Labdhi Pandya, Snehal Bagatharia, Ramesh Pandit, Tejas Shah, Ankit Hinsu, Pritesh Sabara, Apurvasinh Puvar, Janvi Raval, Zarna Patel, Priti Pandita, Bhavesh Modi, Gaurishankar Shrimali, R D Dixit, A M Kadri, Umang Mishra, Chaitanya Joshi, Madhvi Joshi, , , , ,                                                          |                                                                                                                                                               |
| EPI_ISL_458133                                                                                                                                                                                                                                                                                                                                                                                                                                                                                                                                 | National Institute of Biotechnology                                                                                            | Bioinformatics Division, National Institute of Biotechnology                                                                                                                                    | Mohammad Uzzal Hossain, Md. Moniruzzaman, Md. Salim Khan, Md. Nazrul Islam, Md. Hadisur Rahman, Aritra Bhattacharjee, Md. Ruhul Amin, Asif Rashid, Chaman Ara Keya, Keshob Chandra Das, Md. Salimullah                                                                                                                                                                                                                                                                             |                                                                                                                                                               |
| EPI_ISL_461479                                                                                                                                                                                                                                                                                                                                                                                                                                                                                                                                 | Government Medical College, Vadodara                                                                                           | Gujarat Biotechnology Research Centre                                                                                                                                                           | Neelam Nathani, Nitin Savaliya, Raghawendra Kumar, Dinesh Kumar, Zuber Saiyed, Komal Patel, Labdhi Pandya, Snehal Bagatharia, Tanuja Javadekar , R N Daveshtwar, Tejas Shah, Ankit Hinsu, Pritesh Sabara, Apurvasinh Puvar, Janvi Raval, Zarna Patel, Monika Gandhi, Pinal Trivedi, Maharshi Pandya, Nidhi Patel, R D Dixit, A M Kadri, Harsh Bakshi, Chaitanya Joshi, Madhvi Joshi,                                                                                               |                                                                                                                                                               |
| EPI_ISL_461489                                                                                                                                                                                                                                                                                                                                                                                                                                                                                                                                 | B.J. Medical College and Civil hospital                                                                                        | Gujarat Biotechnology Research Centre                                                                                                                                                           | Neha Rajpara, Ankit Hinsu, Pritesh Sabara, Apurvasinh Puvar, Janvi Raval, Zarna Patel, Monika Gandhi, Pinal Trivedi, Maharshi Pandya, Nidhi Patel, Nitin Savaliya, Raghawendra Kumar, Dinesh Kumar, Zuber Saiyed, Komal Patel, Labdhi Pandya, Snehal Bagatharia, Pranay Shah, Kamlesh J Upadhyay, Tejas Shah, R D Dixit, A M Kadri, Harsh Bakshi, Chaitanya Joshi, Madhvi Joshi,                                                                                                   |                                                                                                                                                               |
| EPI_ISL_461492                                                                                                                                                                                                                                                                                                                                                                                                                                                                                                                                 | B.J. Medical College and Civil hospital                                                                                        | Gujarat Biotechnology Research Centre                                                                                                                                                           | Neelam Nathani, Janvi Raval, Zarna Patel, Monika Gandhi, Pinal Trivedi, Maharshi Pandya, Nidhi Patel, Nitin Savaliya, Raghawendra Kumar, Dinesh Kumar, Zuber Saiyed, Komal Patel, Labdhi Pandya, Snehal Bagatharia, Pranay Shah, Kamlesh J Upadhyay, Tejas Shah, Ankit Hinsu, Pritesh Sabara, Apurvasinh Puvar, R D Dixit, A M Kadri, Harsh Bakshi, Chaitanya Joshi, Madhvi Joshi,                                                                                                 |                                                                                                                                                               |
| EPI_ISL_461502                                                                                                                                                                                                                                                                                                                                                                                                                                                                                                                                 | B.J. Medical College and Civil hospital                                                                                        | Gujarat Biotechnology Research Centre                                                                                                                                                           | Neha Rajpara, Komal Patel, Labdhi Pandya, Snehal Bagatharia, Pranay Shah, Kamlesh J Upadhyay, Tejas Shah, Ankit Hinsu, Pritesh Sabara, Apurvasinh Puvar, Janvi Raval, Zarna Patel, Monika Gandhi, Pinal Trivedi, Maharshi Pandya, Nidhi Patel, Nitin Savaliya, Raghawendra Kumar, Dinesh Kumar, Zuber Saiyed, R D Dixit, A M Kadri, Harsh Bakshi, Chaitanya Joshi, Madhvi Joshi,                                                                                                   |                                                                                                                                                               |
| EPI_ISL_461706, EPI_ISL_461709, EPI_ISL_461710, EPI_ISL_461718, EPI_ISL_461720, EPI_ISL_461736, EPI_ISL_461739, EPI_ISL_461749, EPI_ISL_461757, EPI_ISL_461760, EPI_ISL_461762                                                                                                                                                                                                                                                                                                                                                                 | see above                                                                                                                      | Virology Department, Royal Infirmary of Edinburgh, NHS Lothian / School of Biological Sciences, University of Edinburgh / Institute of Genetics and Molecular Medicine, University of Edinburgh | COVID-19 Genomics UK (COG-UK) Consortium                                                                                                                                                                                                                                                                                                                                                                                                                                           | McHugh M, Dewar R, Rooke S, Gallagher M, Balcaza C, O'Toole Á, Scher E, Hill V, McCrone JT, Colquhoun R, Yu X, Jackson B, Rambaut A, Williams TC, Templeton K |
| EPI_ISL_462085, EPI_ISL_462086, EPI_ISL_462087, EPI_ISL_462088, EPI_ISL_462089                                                                                                                                                                                                                                                                                                                                                                                                                                                                 | Singapore General Hospital                                                                                                     | Department of Microbiology                                                                                                                                                                      | Nurdyana Abdul Rahman, Kun Lee Lim, Chenhao Li, Kian Sing Chan, Lynette Oon, Kern Rei Chng, Niranjan Nagarajan, Karrie Ko                                                                                                                                                                                                                                                                                                                                                          |                                                                                                                                                               |
| EPI_ISL_464161, EPI_ISL_464162                                                                                                                                                                                                                                                                                                                                                                                                                                                                                                                 | National Institute of Laboratory Medicine and Referral Center                                                                  | Genomic Research Lab, BCSIR                                                                                                                                                                     | Md. Hasan Habib, Abu Sayeed Mohammad Mahmud, Mohammad Samir Uzzaman, Eshrar Osman, Shahina Akter, Tanjina Akhter Banu, Md. Murshed Hasan Sarker, Barna Goswami, Iffat Jahan, Md. Saddam Hossain, Tasnim Nafisa, Md. Maruf Ahmed Molla, Mahmuda Yeasmin, Asish Kumar Ghosh, Arifa Akram, A. K. M. Shamsuzzaman, Sheikh Md. Selim Al Din, Utpal Chandra Ray, Salek Ahmed Sajid, Md. Salim Khan                                                                                       |                                                                                                                                                               |
| EPI_ISL_467039                                                                                                                                                                                                                                                                                                                                                                                                                                                                                                                                 | Government Medical College, Vadodara                                                                                           | Gujarat Biotechnology Research Centre                                                                                                                                                           | Meenakshi Shah, Neena Doshi, Varsha Godbole, Tejas Shah, Ankit Hinsu, Pritesh Sabara, Apurvasinh Puvar, Janvi Raval, Zarna Patel, Monika Gandhi, Pinal Trivedi, Maharshi Pandya, Nidhi Patel, Nitin Savaliya, Raghawendra Kumar, Dinesh Kumar, Zuber Saiyed, Komal Patel, Labdhi Pandya, Snehal Bagatharia, Armi Chaudhari, R D Dixit, A M Kadri, Harsh Bakshi, Chaitanya Joshi, Madhvi Joshi,                                                                                     |                                                                                                                                                               |
| EPI_ISL_467040                                                                                                                                                                                                                                                                                                                                                                                                                                                                                                                                 | Government Medical College, Vadodara                                                                                           | Gujarat Biotechnology Research Centre                                                                                                                                                           | Neena Doshi, Varsha Godbole, Tejas Shah, Ankit Hinsu, Pritesh Sabara, Apurvasinh Puvar, Janvi Raval, Zarna Patel, Monika Gandhi, Pinal Trivedi, Maharshi Pandya, Nidhi Patel, Nitin Savaliya, Raghawendra Kumar, Dinesh Kumar, Zuber Saiyed, Komal Patel, Labdhi Pandya, Snehal Bagatharia, Meenakshi Shah, Bhavya Jindal, R D Dixit, A M Kadri, Harsh Bakshi, Chaitanya Joshi, Madhvi Joshi,                                                                                      |                                                                                                                                                               |
| EPI_ISL_467041                                                                                                                                                                                                                                                                                                                                                                                                                                                                                                                                 | B.J. Medical College and Civil hospital                                                                                        | Gujarat Biotechnology Research Centre                                                                                                                                                           | Monika Gandhi, Pinal Trivedi, Maharshi Pandya, Nidhi Patel, Nitin Savaliya, Raghawendra Kumar, Dinesh Kumar, Zuber Saiyed, Komal Patel, Labdhi Pandya, Snehal Bagatharia, Pranay Shah, Kamlesh J Upadhyay, Nirav Mungalpara, Tejas Shah, Ankit Hinsu, Pritesh Sabara, Apurvasinh Puvar, Janvi Raval, Zarna Patel, Priyanka P Vatsa, R D Dixit, A M Kadri, Harsh Bakshi, Chaitanya Joshi, Madhvi Joshi,                                                                             |                                                                                                                                                               |



|                                                                                                                                                                                |                                                                                                                                                                                         |                                                                                                                                                                                         |                                                                                                                                                                                                                                                                                                                                                                                                                                                                                                                                                                                     |
|--------------------------------------------------------------------------------------------------------------------------------------------------------------------------------|-----------------------------------------------------------------------------------------------------------------------------------------------------------------------------------------|-----------------------------------------------------------------------------------------------------------------------------------------------------------------------------------------|-------------------------------------------------------------------------------------------------------------------------------------------------------------------------------------------------------------------------------------------------------------------------------------------------------------------------------------------------------------------------------------------------------------------------------------------------------------------------------------------------------------------------------------------------------------------------------------|
| EPI_ISL_467044                                                                                                                                                                 | B.J. Medical College and Civil hospital                                                                                                                                                 | Gujarat Biotechnology Research Centre                                                                                                                                                   | Nidhi Patel, Nitin Savaliya, Raghawendra Kumar, Dinesh Kumar, Zuber Saiyed, Komal Patel, Labdhi Pandya, Snehal Bagatharia, Pranay Shah, Kamlesh J Upadhyay, Nirav Mungalpara, Tejas Shah, Ankit Hinsu, Pritesh Sabara, Apurvasinh Puvar, Janvi Raval, Zarna Patel, Monika Gandhi, Pinal Trivedi, Maharshi Pandya, Priti Pandita, R D Dixit, A M Kadri, Harsh Bakshi, Chaitanya Joshi, Madhvi Joshi,                                                                                                                                                                                 |
| EPI_ISL_467045                                                                                                                                                                 | B.J. Medical College and Civil hospital                                                                                                                                                 | Gujarat Biotechnology Research Centre                                                                                                                                                   | Nitin Savaliya, Raghawendra Kumar, Dinesh Kumar, Zuber Saiyed, Komal Patel, Labdhi Pandya, Snehal Bagatharia, Pranay Shah, Kamlesh J Upadhyay, Nirav Mungalpara, Tejas Shah, Ankit Hinsu, Pritesh Sabara, Apurvasinh Puvar, Janvi Raval, Zarna Patel, Monika Gandhi, Pinal Trivedi, Maharshi Pandya, Nidhi Patel, Pragya Sharma, R D Dixit, A M Kadri, Harsh Bakshi, Chaitanya Joshi, Madhvi Joshi,                                                                                                                                                                                 |
| EPI_ISL_467054                                                                                                                                                                 | B.J. Medical College and Civil hospital                                                                                                                                                 | Gujarat Biotechnology Research Centre                                                                                                                                                   | Nirav Mungalpara, Tejas Shah, Ankit Hinsu, Pritesh Sabara, Apurvasinh Puvar, Janvi Raval, Zarna Patel, Monika Gandhi, Pinal Trivedi, Maharshi Pandya, Nidhi Patel, Nitin Savaliya, Raghawendra Kumar, Dinesh Kumar, Zuber Saiyed, Komal Patel, Labdhi Pandya, Snehal Bagatharia, Pranay Shah, Kamlesh J Upadhyay, Akanksha Verma, R D Dixit, A M Kadri, Harsh Bakshi, Chaitanya Joshi, Madhvi Joshi,                                                                                                                                                                                |
| EPI_ISL_467059, EPI_ISL_467060, EPI_ISL_467061, EPI_ISL_467062, EPI_ISL_467063                                                                                                 | Hospital Universitario Virgen de las Nieves de Granada-SAS                                                                                                                              | SeqCOVID-SPAIN consortium/IBV(CSIC)                                                                                                                                                     | Mercedes Pérez Ruiz, Sara Sanbonmatsu Gámez, Irene Pedrosa Corral, José M. Navarro-Mari and SeqCOVID-SPAIN consortium                                                                                                                                                                                                                                                                                                                                                                                                                                                               |
| EPI_ISL_467666                                                                                                                                                                 | Virology lab, NIC, NCCD, Ulaanbaatar, Mongolia                                                                                                                                          | National Centre for Communicable Diseases (NCCD)                                                                                                                                        | Naranzul Ts.Darmaa B.Bayagsalan N.Ankhubayar S.Tsogtbaatar B, Erdene-Ochir Ts,Nymadawa P                                                                                                                                                                                                                                                                                                                                                                                                                                                                                            |
| EPI_ISL_468736, EPI_ISL_468737, EPI_ISL_468738, EPI_ISL_468739, EPI_ISL_468740, EPI_ISL_468741, EPI_ISL_468742, EPI_ISL_468743, EPI_ISL_468744, EPI_ISL_468745, EPI_ISL_468746 | see above                                                                                                                                                                               | Lab voor klinische biologie                                                                                                                                                             | Onderzoeksgroep Virologie                                                                                                                                                                                                                                                                                                                                                                                                                                                                                                                                                           |
| EPI_ISL_469017                                                                                                                                                                 | LNR National Reference Laboratory, Mohammed VI University of Health Sciences                                                                                                            | Medical Biotechnology Laboratory, Rabat Medical and Pharmacy School, Mohammed The Vth University in Rabat                                                                               | Nick Vereecke, Laurens Lambrechts, Marthe Pauwels, Bruno Verhasselt, Linos Vandekerckhove, Hans Nauwynck, Sebastian Theuns<br>Meriem LAAMARTI, Souad KARTTI, Rokaia LAAMRTI, M.W. CHEMAO-ELFIHRI, Loubna ALLAM, Mouna OUAUGHIRI, Imane SMYEJ, Jalila RAHOUI, Houda BENRAHMA, Jalil El Atar, Idrissa Diawara, Rachid EL JAOUDI, Laila SBABOU, Chakib NEJJARI, Saaid AMZAZI, Rachid MENTAG, Lahcen BELYAMANI and Azeddine IBRAHIMI                                                                                                                                                    |
| EPI_ISL_469030                                                                                                                                                                 | Government Medical College, Vadodara                                                                                                                                                    | Gujarat Biotechnology Research Centre                                                                                                                                                   | Monika Gandhi, Pinal Trivedi, Maharshi Pandya, Nidhi Patel, Nitin Savaliya, Raghawendra Kumar, Dinesh Kumar, Zuber Saiyed, Komal Patel, Labdhi Pandya, Snehal Bagatharia, Meenakshi Shah, Neena Doshi, Varsha Godbole, Tejas Shah, Ankit Hinsu, Pritesh Sabara, Apurvasinh Puvar, Janvi Raval, Zarna Patel, Armi Chaudhari, R D Dixit, A M Kadri, Harsh Bakshi, Chaitanya Joshi, Madhvi Joshi                                                                                                                                                                                       |
| EPI_ISL_469033                                                                                                                                                                 | Government Medical College, Vadodara                                                                                                                                                    | Gujarat Biotechnology Research Centre                                                                                                                                                   | Nidhi Patel, Nitin Savaliya, Raghawendra Kumar, Dinesh Kumar, Zuber Saiyed, Komal Patel, Labdhi Pandya, Snehal Bagatharia, Meenakshi Shah, Neena Doshi, Varsha Godbole, Tejas Shah, Ankit Hinsu, Pritesh Sabara, Apurvasinh Puvar, Janvi Raval, Zarna Patel, Monika Gandhi, Pinal Trivedi, Maharshi Pandya, Priyanka P Vatsa, R D Dixit, A M Kadri, Harsh Bakshi, Chaitanya Joshi, Madhvi Joshi                                                                                                                                                                                     |
| EPI_ISL_469034                                                                                                                                                                 | Government Medical College, Vadodara                                                                                                                                                    | Gujarat Biotechnology Research Centre                                                                                                                                                   | Nitin Savaliya, Raghawendra Kumar, Dinesh Kumar, Zuber Saiyed, Komal Patel, Labdhi Pandya, Snehal Bagatharia, Meenakshi Shah, Neena Doshi, Varsha Godbole, Tejas Shah, Ankit Hinsu, Pritesh Sabara, Apurvasinh Puvar, Janvi Raval, Zarna Patel, Monika Gandhi, Pinal Trivedi, Maharshi Pandya, Pooja P Doshi, R D Dixit, A M Kadri, Harsh Bakshi, Chaitanya Joshi, Madhvi Joshi                                                                                                                                                                                                     |
| EPI_ISL_469041                                                                                                                                                                 | GMERS Medical College & Hospital                                                                                                                                                        | Gujarat Biotechnology Research Centre                                                                                                                                                   | Meenakshi Shah, Neena Doshi, Varsha Godbole, Tejas Shah, Ankit Hinsu, Pritesh Sabara, Apurvasinh Puvar, Janvi Raval, Zarna Patel, Monika Gandhi, Pinal Trivedi, Maharshi Pandya, Nidhi Patel, Nitin Savaliya, Raghawendra Kumar, Dinesh Kumar, Zuber Saiyed, Komal Patel, Labdhi Pandya, Snehal Bagatharia, Neelam Nathani, R D Dixit, A M Kadri, Harsh Bakshi, Chaitanya Joshi, Madhvi Joshi                                                                                                                                                                                       |
| EPI_ISL_469042                                                                                                                                                                 | GMERS Medical College & Hospital                                                                                                                                                        | Gujarat Biotechnology Research Centre                                                                                                                                                   | Neena Doshi, Varsha Godbole, Tejas Shah, Ankit Hinsu, Pritesh Sabara, Apurvasinh Puvar, Janvi Raval, Zarna Patel, Monika Gandhi, Pinal Trivedi, Maharshi Pandya, Nidhi Patel, Nitin Savaliya, Raghawendra Kumar, Dinesh Kumar, Zuber Saiyed, Komal Patel, Labdhi Pandya, Snehal Bagatharia, Meenakshi Shah, Armi Chaudhari, R D Dixit, A M Kadri, Harsh Bakshi, Chaitanya Joshi, Madhvi Joshi                                                                                                                                                                                       |
| EPI_ISL_469049, EPI_ISL_469051, EPI_ISL_469052, EPI_ISL_469053, EPI_ISL_469054                                                                                                 | LNR National Reference Laboratory, Mohammed VI University of Health Sciences                                                                                                            | Medical Biotechnology Laboratory, Rabat Medical and Pharmacy School, Mohammed The Vth University in Rabat                                                                               | Meriem LAAMARTI, Souad KARTTI, Rokaia LAAMRTI, M.W. CHEMAO-ELFIHRI, Loubna ALLAM, Mouna OUAUGHIRI, Imane SMYEJ, Jalila RAHOUI, Houda BENRAHMA, Jalil El Atar, Idrissa Diawara, Rachid EL JAOUDI, Laila SBABOU, Chakib NEJJARI, Saaid AMZAZI, Rachid MENTAG, Lahcen BELYAMANI and Azeddine IBRAHIMI                                                                                                                                                                                                                                                                                  |
| EPI_ISL_469298                                                                                                                                                                 | National Institute of Laboratory Medicine and Referral Center                                                                                                                           | Genomic Research Lab, BCSIR                                                                                                                                                             | Md. Murshed Hasan Sarkar, Abu Sayeed Mohammad Mahmud, Mohammad Samir Uzzaman, Eshrar Osman, Md. Ahasan Habib, Shahina Akter, Tanjina Akhter Banu, Barna Goswami, Iffat Jahan, Md. Saddam Hossain, Tasnim Nafisa, Md. Maruf Ahmed Molla, Mahmuda Yeasmin, Asish Kumar Ghosh, Bayzid Bin Monir, A. K. M. Shamsuzzaman, Sheikh Md. Selim Al Din, Utpal Chandra Ray, Salek Ahmed Sajib, Md. Salim Khan                                                                                                                                                                                  |
| EPI_ISL_471528                                                                                                                                                                 | The National Institute of Public Health                                                                                                                                                 | State Veterinary Institute Prague and The National Institute of Public Health                                                                                                           | Nagy,A;Jirincova,H;Novakova,L;Trnka,D;Vecerova,J                                                                                                                                                                                                                                                                                                                                                                                                                                                                                                                                    |
| EPI_ISL_471529                                                                                                                                                                 | Department for Virology, Molecular Biology and Genome Research, R. G. Lugar Center for Public Health Research, National Center for Disease Control and Public Health (NCDC) of Georgia. | Department for Virology, Molecular Biology and Genome Research, R. G. Lugar Center for Public Health Research, National Center for Disease Control and Public Health (NCDC) of Georgia. | Meri Pantsulaia, Gvantsa Brachveli, Giorgi Tomashvili, Gvantsa Chanturia, Ann Machabishvili, Nato Kotiava, Marine Murtskhalvadze, Lela Sabadze, Mari Gavashelidze, Ana Papkiauri, Gvantsa Brachveli, Tata Imnadze, Tamar Jashiasvili, Tea Tvedoradze, Ketevan Sidamonidze, Ekaterine Kvaladze, Ekaterine Zhghenti, Roena Sukhiasvili, Mariam Zakalashvili, Lela Urushadze, Magda Dgebuadze, Davit Tsaguria, Ekaterine Zangaladze, Nino Berishvili, Adam Kotorashvili, Maia Alkhasashvili, Irma Burjanadze, Anna Kasradze, Khatuna Zakhshashvili, Paata Imnadze, Amiran Gamkrelidze. |
| EPI_ISL_471530, EPI_ISL_471540, EPI_ISL_471544, EPI_ISL_471547, EPI_ISL_471550, EPI_ISL_471553, EPI_ISL_471555                                                                 | The National Institute of Public Health                                                                                                                                                 | State Veterinary Institute Prague and The National Institute of Public Health                                                                                                           | Nagy,A;Jirincova,H;Novakova,L;Trnka,D;Vecerova,J                                                                                                                                                                                                                                                                                                                                                                                                                                                                                                                                    |
| EPI_ISL_471591                                                                                                                                                                 | CSIR-Centre for Cellular and Molecular Biology                                                                                                                                          | CSIR-Centre for Cellular and Molecular Biology                                                                                                                                          | Namami Gaur, Sakshi Shambhavi, Lamuk Zaveri, Shagufta Khan, Tulasi Nagabandi, Purushotham Vodnala, Payel Mukherjee, Sofia Banu, Priya Singh, Dhiviya Vedagiri, Divya Gupta, Vishal Sah, Santosh Kumar Kuncha, Krishnan Harinivas Harshan, Archana Bharadwaj Siva, Karthik Bharadwaj Tallapaka, Zeba Rizvi, Zuberwasim Sayyad, Kakade Aishwarya Arun, Amrutha H C, Ananga Ghosh, Rakesh K Mishra, Divya Tej Sowpati                                                                                                                                                                  |
| EPI_ISL_471592                                                                                                                                                                 | CSIR-Centre for Cellular and Molecular Biology                                                                                                                                          | CSIR-Centre for Cellular and Molecular Biology                                                                                                                                          | Namami Gaur, Sakshi Shambhavi, Lamuk Zaveri, Shagufta Khan, Tulasi Nagabandi, Purushotham Vodnala, Payel Mukherjee, Sofia Banu, Priya Singh, Dhiviya Vedagiri, Divya Gupta, Vishal Sah, Santosh Kumar Kuncha, Krishnan Harinivas Harshan, Archana Bharadwaj Siva, Karthik Bharadwaj Tallapaka, Nikhil Hajirnis, Pratheusa Maccha, M Soujanya Reddy,G. Aditya Kumar, Koushick Sivakumar, Rakesh K Mishra, Divya Tej Sowpati                                                                                                                                                          |
| EPI_ISL_471593                                                                                                                                                                 | CSIR-Centre for Cellular and Molecular Biology                                                                                                                                          | CSIR-Centre for Cellular and Molecular Biology                                                                                                                                          | Namami Gaur, Sakshi Shambhavi, Lamuk Zaveri, Shagufta Khan, Tulasi Nagabandi, Purushotham Vodnala, Payel Mukherjee, Sofia Banu, Priya Singh, Dhiviya Vedagiri, Divya Gupta, Vishal Sah, Santosh Kumar Kuncha, Krishnan Harinivas Harshan, Archana Bharadwaj Siva, Karthik Bharadwaj Tallapaka, Zeba Rizvi, Zuberwasim Sayyad, Kakade Aishwarya Arun, Amrutha H C, Ananga Ghosh, Rakesh K Mishra, Divya Tej Sowpati                                                                                                                                                                  |
| EPI_ISL_471594                                                                                                                                                                 | CSIR-Centre for Cellular and Molecular Biology                                                                                                                                          | CSIR-Centre for Cellular and Molecular Biology                                                                                                                                          | Namami Gaur, Sakshi Shambhavi, Lamuk Zaveri, Shagufta Khan, Tulasi Nagabandi, Purushotham Vodnala, Payel Mukherjee, Sofia Banu, Priya Singh, Dhiviya Vedagiri, Divya Gupta, Vishal Sah, Santosh Kumar Kuncha, Krishnan Harinivas Harshan, Archana Bharadwaj Siva, Karthik Bharadwaj Tallapaka,Kezia J Ann, Radhika Khandelwal, Roshan Maku Venkata, Shemin Mansuri, Sonu Uday, Rakesh K Mishra, Divya Tej Sowpati                                                                                                                                                                   |
| EPI_ISL_471619                                                                                                                                                                 | CSIR-Centre for Cellular and Molecular Biology                                                                                                                                          | CSIR-Centre for Cellular and Molecular Biology                                                                                                                                          | Namami Gaur, Sakshi Shambhavi, Lamuk Zaveri, Shagufta Khan, Tulasi Nagabandi, Purushotham Vodnala, Payel Mukherjee, Sofia Banu, Priya Singh, Dhiviya Vedagiri, Divya Gupta, Vishal Sah, Santosh Kumar Kuncha, Krishnan Harinivas Harshan, Archana Bharadwaj Siva, Karthik Bharadwaj Tallapaka, Zeba Rizvi, Zuberwasim Sayyad, Kakade Aishwarya Arun, Amrutha H C, Ananga Ghosh, Rakesh K Mishra, Divya Tej Sowpati                                                                                                                                                                  |
| EPI_ISL_471620                                                                                                                                                                 | CSIR-Centre for Cellular and Molecular Biology                                                                                                                                          | CSIR-Centre for Cellular and Molecular Biology                                                                                                                                          | Namami Gaur, Sakshi Shambhavi, Lamuk Zaveri, Shagufta Khan, Tulasi Nagabandi, Purushotham Vodnala, Payel Mukherjee, Sofia Banu, Priya Singh, Dhiviya Vedagiri, Divya Gupta, Vishal Sah, Santosh Kumar Kuncha, Krishnan Harinivas Harshan, Archana Bharadwaj Siva, Karthik Bharadwaj Tallapaka, Nikhil Hajirnis, Pratheusa Maccha, M Soujanya Reddy,G. Aditya Kumar, Koushick Sivakumar, Rakesh K Mishra, Divya Tej Sowpati                                                                                                                                                          |
| EPI_ISL_471621                                                                                                                                                                 | CSIR-Centre for Cellular and Molecular Biology                                                                                                                                          | CSIR-Centre for Cellular and Molecular Biology                                                                                                                                          | Namami Gaur, Sakshi Shambhavi, Lamuk Zaveri, Shagufta Khan, Tulasi Nagabandi, Purushotham Vodnala, Payel Mukherjee, Sofia Banu, Priya Singh, Dhiviya Vedagiri, Divya Gupta, Vishal Sah, Santosh Kumar Kuncha, Krishnan Harinivas Harshan, Archana Bharadwaj Siva, Karthik Bharadwaj Tallapaka, Zeba Rizvi, Zuberwasim Sayyad, Kakade Aishwarya Arun, Amrutha H C, Ananga Ghosh, Rakesh K Mishra, Divya Tej Sowpati                                                                                                                                                                  |
| EPI_ISL_471622                                                                                                                                                                 | CSIR-Centre for Cellular and Molecular Biology                                                                                                                                          | CSIR-Centre for Cellular and Molecular Biology                                                                                                                                          | Namami Gaur, Sakshi Shambhavi, Lamuk Zaveri, Shagufta Khan, Tulasi Nagabandi, Purushotham Vodnala, Payel Mukherjee, Sofia Banu, Priya Singh, Dhiviya Vedagiri, Divya Gupta, Vishal Sah, Santosh Kumar Kuncha, Krishnan Harinivas Harshan, Archana Bharadwaj Siva, Karthik Bharadwaj Tallapaka,Kezia J Ann, Radhika Khandelwal, Roshan Maku Venkata, Shemin Mansuri, Sonu Uday, Rakesh K Mishra, Divya Tej Sowpati                                                                                                                                                                   |
| EPI_ISL_472430, EPI_ISL_472431                                                                                                                                                 | Queens Medical Centre, Clinical Microbiology Department /                                                                                                                               | COVID-19 Genomics UK (COG-UK) Consortium                                                                                                                                                | Nichola Duckworth, Tim Sloan, Sarah Walsh, Jonathan Ball, Patrick McClure, Joeseeph Chappell, Nadine Holmes, Matthew Carlisle, Christopher Moore, Fei                                                                                                                                                                                                                                                                                                                                                                                                                               |

| DeepSeq Nottingham                                                                                                                                                                                                                                                                                                                                                                                                                                                                                                                                                                                                                                                                                                                                                                                                                                                                                                                                                                                                                                                                                                                                                                                                                                                                                                                                                                                                                                                                                                                                                                                                                                                                                                                                                                                                                                                                                             |           | Sang, Johnny Debebe, Victoria Wright, Matthew Loose                                                                                                                                             |                                                                               |                                                                                                                                                                                                                                                                                                                                                                                                    |
|----------------------------------------------------------------------------------------------------------------------------------------------------------------------------------------------------------------------------------------------------------------------------------------------------------------------------------------------------------------------------------------------------------------------------------------------------------------------------------------------------------------------------------------------------------------------------------------------------------------------------------------------------------------------------------------------------------------------------------------------------------------------------------------------------------------------------------------------------------------------------------------------------------------------------------------------------------------------------------------------------------------------------------------------------------------------------------------------------------------------------------------------------------------------------------------------------------------------------------------------------------------------------------------------------------------------------------------------------------------------------------------------------------------------------------------------------------------------------------------------------------------------------------------------------------------------------------------------------------------------------------------------------------------------------------------------------------------------------------------------------------------------------------------------------------------------------------------------------------------------------------------------------------------|-----------|-------------------------------------------------------------------------------------------------------------------------------------------------------------------------------------------------|-------------------------------------------------------------------------------|----------------------------------------------------------------------------------------------------------------------------------------------------------------------------------------------------------------------------------------------------------------------------------------------------------------------------------------------------------------------------------------------------|
| EPI_ISL_473785, EPI_ISL_473787, EPI_ISL_473789, EPI_ISL_473792, EPI_ISL_473794, EPI_ISL_473796, EPI_ISL_473797, EPI_ISL_473798, EPI_ISL_473804, EPI_ISL_473808, EPI_ISL_473809, EPI_ISL_473811, EPI_ISL_473815, EPI_ISL_473816, EPI_ISL_473820, EPI_ISL_473824, EPI_ISL_473825, EPI_ISL_473826, EPI_ISL_473831, EPI_ISL_473832, EPI_ISL_473834, EPI_ISL_473835, EPI_ISL_473838, EPI_ISL_473842, EPI_ISL_473843, EPI_ISL_473845, EPI_ISL_473848, EPI_ISL_473850, EPI_ISL_473855, EPI_ISL_473862, EPI_ISL_473863, EPI_ISL_473871, EPI_ISL_473872, EPI_ISL_473873, EPI_ISL_473875, EPI_ISL_473880, EPI_ISL_473882, EPI_ISL_473894, EPI_ISL_473897, EPI_ISL_473900, EPI_ISL_473903, EPI_ISL_473904, EPI_ISL_473905, EPI_ISL_473908, EPI_ISL_473911, EPI_ISL_473912, EPI_ISL_473913, EPI_ISL_473920, EPI_ISL_473921, EPI_ISL_473923, EPI_ISL_473924, EPI_ISL_473932, EPI_ISL_473933, EPI_ISL_473935, EPI_ISL_473938, EPI_ISL_473946, EPI_ISL_473947, EPI_ISL_473948, EPI_ISL_473950, EPI_ISL_473953                                                                                                                                                                                                                                                                                                                                                                                                                                                                                                                                                                                                                                                                                                                                                                                                                                                                                                                 | see above | Virology Department, Royal Infirmary of Edinburgh, NHS Lothian / School of Biological Sciences, University of Edinburgh / Institute of Genetics and Molecular Medicine, University of Edinburgh | COVID-19 Genomics UK (COG-UK) Consortium                                      | McHugh M, Dewar R, Rooke S, Gallagher M, Balcaza C, O'Toole Á, Scher E, Hill V, McCrone JT, Colqhoun R, Yu X, Jackson B, Rambaut A, Williams TC, Templeton K                                                                                                                                                                                                                                       |
| EPI_ISL_474797, EPI_ISL_474832, EPI_ISL_474833, EPI_ISL_474834, EPI_ISL_474835, EPI_ISL_474836, EPI_ISL_474841, EPI_ISL_474842, EPI_ISL_474843, EPI_ISL_474844, EPI_ISL_474845, EPI_ISL_474846, EPI_ISL_474848, EPI_ISL_474850, EPI_ISL_474851, EPI_ISL_474852, EPI_ISL_474854, EPI_ISL_474855, EPI_ISL_474856, EPI_ISL_474857, EPI_ISL_474858, EPI_ISL_474859, EPI_ISL_474860, EPI_ISL_474861, EPI_ISL_474862, EPI_ISL_474863, EPI_ISL_474864, EPI_ISL_474865, EPI_ISL_474866, EPI_ISL_474867, EPI_ISL_474868, EPI_ISL_474869, EPI_ISL_474870, EPI_ISL_474871, EPI_ISL_474872, EPI_ISL_474873, EPI_ISL_474874, EPI_ISL_474875, EPI_ISL_474876, EPI_ISL_474877, EPI_ISL_474878, EPI_ISL_474879, EPI_ISL_474880, EPI_ISL_474881, EPI_ISL_474882, EPI_ISL_474883, EPI_ISL_474884, EPI_ISL_474885, EPI_ISL_474886, EPI_ISL_474887, EPI_ISL_474888, EPI_ISL_474889, EPI_ISL_474890, EPI_ISL_474891, EPI_ISL_474892, EPI_ISL_474893, EPI_ISL_474894, EPI_ISL_474895, EPI_ISL_474896, EPI_ISL_474897, EPI_ISL_474898, EPI_ISL_474899, EPI_ISL_474900, EPI_ISL_474901, EPI_ISL_474902, EPI_ISL_474903, EPI_ISL_474904, EPI_ISL_474905, EPI_ISL_474906, EPI_ISL_474907, EPI_ISL_474908, EPI_ISL_474909, EPI_ISL_474910, EPI_ISL_474911, EPI_ISL_474912, EPI_ISL_474913, EPI_ISL_474914, EPI_ISL_474915, EPI_ISL_474916, EPI_ISL_474917, EPI_ISL_474918, EPI_ISL_474919, EPI_ISL_474920, EPI_ISL_474921, EPI_ISL_474922, EPI_ISL_474923, EPI_ISL_474924, EPI_ISL_474925, EPI_ISL_474926, EPI_ISL_474927, EPI_ISL_474928, EPI_ISL_474929, EPI_ISL_474930, EPI_ISL_474931, EPI_ISL_474932, EPI_ISL_474934, EPI_ISL_474935, EPI_ISL_474936, EPI_ISL_474937, EPI_ISL_474938, EPI_ISL_474939, EPI_ISL_474940, EPI_ISL_474941, EPI_ISL_474942, EPI_ISL_474943, EPI_ISL_474944, EPI_ISL_474945, EPI_ISL_474946, EPI_ISL_474947, EPI_ISL_474948, EPI_ISL_474949, EPI_ISL_474950, EPI_ISL_474951, EPI_ISL_474952, EPI_ISL_474953 | see above | Hospital Universitario Virgen de las Nieves de Granada-SAS                                                                                                                                      | SeqCOVID-SPAIN consortium/IBV(CSIC)                                           | Mercedes Pérez Ruiz, Sara Sanbonmatsu Gámez, Irene Pedrosa Corral, José M. Navarro-Marí and SeqCOVID-SPAIN consortium                                                                                                                                                                                                                                                                              |
| EPI_ISL_474958                                                                                                                                                                                                                                                                                                                                                                                                                                                                                                                                                                                                                                                                                                                                                                                                                                                                                                                                                                                                                                                                                                                                                                                                                                                                                                                                                                                                                                                                                                                                                                                                                                                                                                                                                                                                                                                                                                 | see above | Israeli Central Virology laboratory                                                                                                                                                             | Israeli Central Virology laboratory                                           | Neta Zuckerman, Efrat Dahan Bucris, Oran Erster, Ella Mendelson, Michal Mandelboim                                                                                                                                                                                                                                                                                                                 |
| EPI_ISL_474959, EPI_ISL_474960, EPI_ISL_474961, EPI_ISL_474962, EPI_ISL_474963, EPI_ISL_474964, EPI_ISL_474965, EPI_ISL_474966, EPI_ISL_474967, EPI_ISL_474968, EPI_ISL_474969, EPI_ISL_474970, EPI_ISL_474971, EPI_ISL_474972, EPI_ISL_474973, EPI_ISL_474974, EPI_ISL_474975, EPI_ISL_474976, EPI_ISL_474977, EPI_ISL_474978, EPI_ISL_474979, EPI_ISL_474980, EPI_ISL_474981, EPI_ISL_474982, EPI_ISL_474983, EPI_ISL_474984, EPI_ISL_474985, EPI_ISL_474986, EPI_ISL_474987, EPI_ISL_474988, EPI_ISL_474989, EPI_ISL_474990, EPI_ISL_474991, EPI_ISL_474992, EPI_ISL_474993, EPI_ISL_474994, EPI_ISL_474995, EPI_ISL_474996, EPI_ISL_474997, EPI_ISL_474998, EPI_ISL_474999, EPI_ISL_475000, EPI_ISL_475001, EPI_ISL_475002, EPI_ISL_475003, EPI_ISL_475004, EPI_ISL_475005, EPI_ISL_475006, EPI_ISL_475007, EPI_ISL_475008, EPI_ISL_475009, EPI_ISL_475010, EPI_ISL_475011, EPI_ISL_475012, EPI_ISL_475013, EPI_ISL_475014, EPI_ISL_475015, EPI_ISL_475016, EPI_ISL_475017, EPI_ISL_475018, EPI_ISL_475019, EPI_ISL_475020, EPI_ISL_475021, EPI_ISL_475022, EPI_ISL_475023, EPI_ISL_475024, EPI_ISL_475025                                                                                                                                                                                                                                                                                                                                                                                                                                                                                                                                                                                                                                                                                                                                                                                                 | see above | Israeli Central Virology laboratory                                                                                                                                                             | Israeli Central Virology laboratory                                           | Neta Zuckerman, Efrat Dahan Bucris, Oran Erster, Ella Mendelson, Michal Mandelboim                                                                                                                                                                                                                                                                                                                 |
| EPI_ISL_475032                                                                                                                                                                                                                                                                                                                                                                                                                                                                                                                                                                                                                                                                                                                                                                                                                                                                                                                                                                                                                                                                                                                                                                                                                                                                                                                                                                                                                                                                                                                                                                                                                                                                                                                                                                                                                                                                                                 | see above | Department of MicroBiology, Government Medical College, Surat                                                                                                                                   | Gujarat Biotechnology Research Centre                                         | Monika Gandhi, Pinal Trivedi, Maharshi Pandya, Nidhi Patel, Nitin Savaliya, Raghawendra Kumar, Dinesh Kumar, Zuber Saiyed, Komal Patel, Labdhi Pandya, Snehal Bagatharia, Naresh Chauhan, Summaiya Mullan, Amit gamit, Pritesh Sabara, Apurvasinh Puvar, Janvi Raval, Zarna Patel, Priyanka P Vatsa, R D Dixit, A M Kadri, Harsh Bakshi, Chaitanya Joshi, Madhvi Joshi                             |
| EPI_ISL_475035                                                                                                                                                                                                                                                                                                                                                                                                                                                                                                                                                                                                                                                                                                                                                                                                                                                                                                                                                                                                                                                                                                                                                                                                                                                                                                                                                                                                                                                                                                                                                                                                                                                                                                                                                                                                                                                                                                 | see above | Department of MicroBiology, Government Medical College, Surat                                                                                                                                   | Gujarat Biotechnology Research Centre                                         | Nidhi Patel, Nitin Savaliya, Raghawendra Kumar, Dinesh Kumar, Zuber Saiyed, Komal Patel, Labdhi Pandya, Snehal Bagatharia, Naresh Chauhan, Summaiya Mullan, Amit gamit, Pritesh Sabara, Apurvasinh Puvar, Janvi Raval, Zarna Patel, Monika Gandhi, Pinal Trivedi, Maharshi Pandya, Priti Pandita, R D Dixit, A M Kadri, Harsh Bakshi, Chaitanya Joshi, Madhvi Joshi                                |
| EPI_ISL_475036                                                                                                                                                                                                                                                                                                                                                                                                                                                                                                                                                                                                                                                                                                                                                                                                                                                                                                                                                                                                                                                                                                                                                                                                                                                                                                                                                                                                                                                                                                                                                                                                                                                                                                                                                                                                                                                                                                 | see above | Department of MicroBiology, Government Medical College, Surat                                                                                                                                   | Gujarat Biotechnology Research Centre                                         | Nitin Savaliya, Raghawendra Kumar, Dinesh Kumar, Zuber Saiyed, Komal Patel, Labdhi Pandya, Snehal Bagatharia, Naresh Chauhan, Summaiya Mullan, Amit gamit, Pritesh Sabara, Apurvasinh Puvar, Janvi Raval, Zarna Patel, Monika Gandhi, Pinal Trivedi, Maharshi Pandya, Nidhi Patel, Pragya Sharma, R D Dixit, A M Kadri, Harsh Bakshi, Chaitanya Joshi, Madhvi Joshi                                |
| EPI_ISL_475043                                                                                                                                                                                                                                                                                                                                                                                                                                                                                                                                                                                                                                                                                                                                                                                                                                                                                                                                                                                                                                                                                                                                                                                                                                                                                                                                                                                                                                                                                                                                                                                                                                                                                                                                                                                                                                                                                                 | see above | Department of MicroBiology, Government Medical College, Surat                                                                                                                                   | Gujarat Biotechnology Research Centre                                         | Naresh Chauhan, Summaiya Mullan, Amit gamit, Pritesh Sabara, Apurvasinh Puvar, Janvi Raval, Zarna Patel, Monika Gandhi, Pinal Trivedi, Maharshi Pandya, Nidhi Patel, Nitin Savaliya, Raghawendra Kumar, Dinesh Kumar, Zuber Saiyed, Komal Patel, Labdhi Pandya, Snehal Bagatharia, Priyanka P Vatsa, R D Dixit, A M Kadri, Harsh Bakshi, Chaitanya Joshi, Madhvi Joshi                             |
| EPI_ISL_475050                                                                                                                                                                                                                                                                                                                                                                                                                                                                                                                                                                                                                                                                                                                                                                                                                                                                                                                                                                                                                                                                                                                                                                                                                                                                                                                                                                                                                                                                                                                                                                                                                                                                                                                                                                                                                                                                                                 | see above | GMERS Medical College & Hospital                                                                                                                                                                | Gujarat Biotechnology Research Centre                                         | Monika Gandhi, Pinal Trivedi, Maharshi Pandya, Nidhi Patel, Nitin Savaliya, Raghawendra Kumar, Dinesh Kumar, Zuber Saiyed, Komal Patel, Labdhi Pandya, Snehal Bagatharia, Meenakshi Shah, Neena Doshi, Varsha Godbole, Pritesh Sabara, Apurvasinh Puvar, Janvi Raval, Zarna Patel, Fenil Patel, R D Dixit, A M Kadri, Harsh Bakshi, Chaitanya Joshi, Madhvi Joshi                                  |
| EPI_ISL_475053                                                                                                                                                                                                                                                                                                                                                                                                                                                                                                                                                                                                                                                                                                                                                                                                                                                                                                                                                                                                                                                                                                                                                                                                                                                                                                                                                                                                                                                                                                                                                                                                                                                                                                                                                                                                                                                                                                 | see above | GMERS Medical College & Hospital                                                                                                                                                                | Gujarat Biotechnology Research Centre                                         | Nidhi Patel, Nitin Savaliya, Raghawendra Kumar, Dinesh Kumar, Zuber Saiyed, Komal Patel, Labdhi Pandya, Snehal Bagatharia, Meenakshi Shah, Neena Doshi, Varsha Godbole, Pritesh Sabara, Apurvasinh Puvar, Janvi Raval, Zarna Patel, Monika Gandhi, Pinal Trivedi, Maharshi Pandya, Bhavya Jindal, R D Dixit, A M Kadri, Harsh Bakshi, Chaitanya Joshi, Madhvi Joshi                                |
| EPI_ISL_475054                                                                                                                                                                                                                                                                                                                                                                                                                                                                                                                                                                                                                                                                                                                                                                                                                                                                                                                                                                                                                                                                                                                                                                                                                                                                                                                                                                                                                                                                                                                                                                                                                                                                                                                                                                                                                                                                                                 | see above | GMERS Medical College & Hospital                                                                                                                                                                | Gujarat Biotechnology Research Centre                                         | Nitin Savaliya, Raghawendra Kumar, Dinesh Kumar, Zuber Saiyed, Komal Patel, Labdhi Pandya, Snehal Bagatharia, Meenakshi Shah, Neena Doshi, Varsha Godbole, Pritesh Sabara, Apurvasinh Puvar, Janvi Raval, Zarna Patel, Monika Gandhi, Pinal Trivedi, Maharshi Pandya, Nidhi Patel, Priyanka P Vatsa, R D Dixit, A M Kadri, Harsh Bakshi, Chaitanya Joshi, Madhvi Joshi                             |
| EPI_ISL_475071, EPI_ISL_475072, EPI_ISL_475073, EPI_ISL_475074, EPI_ISL_475075, EPI_ISL_475076, EPI_ISL_475077, EPI_ISL_475078, EPI_ISL_475079, EPI_ISL_475080, EPI_ISL_475081, EPI_ISL_475082                                                                                                                                                                                                                                                                                                                                                                                                                                                                                                                                                                                                                                                                                                                                                                                                                                                                                                                                                                                                                                                                                                                                                                                                                                                                                                                                                                                                                                                                                                                                                                                                                                                                                                                 | see above | Lab voor klinische biologie                                                                                                                                                                     | Onderzoeksgroep Virologie                                                     | Nick Vereecke, Laurens Lambrechts, Marthe Pauwels, Bruno Verhasselt, Linos Vandekerckhove, Hans Nauwynck, Sebastiaan Theuns                                                                                                                                                                                                                                                                        |
| EPI_ISL_475083, EPI_ISL_475084                                                                                                                                                                                                                                                                                                                                                                                                                                                                                                                                                                                                                                                                                                                                                                                                                                                                                                                                                                                                                                                                                                                                                                                                                                                                                                                                                                                                                                                                                                                                                                                                                                                                                                                                                                                                                                                                                 | see above | National Institute of Laboratory Medicine and Referral Center                                                                                                                                   | Genomic Research Lab, BCSIR                                                   | Md. Murshed Hasan Sarkar, Abu Sayeed Mohammad Mahmud, Mohammad Samir Uzzaman, Eshrar Osman, Md. Ahasan Habib, Shahina Akter, Tanjina Akhter Banu, Barna Goswami, Iffat Jahan, Md. Saddam Hossain, Tasnim Nafisa, Md. Maruf Ahmed Molla, Mahmuda Yeasmin, Asish Kumar Ghosh, Bayzid Bin Monir, A. K. M. Shamsuzzaman, Sheikh Md. Selim Al Din, Utpal Chandra Ray, Salek Ahmed Sajib, Md. Salim Khan |
| EPI_ISL_475169                                                                                                                                                                                                                                                                                                                                                                                                                                                                                                                                                                                                                                                                                                                                                                                                                                                                                                                                                                                                                                                                                                                                                                                                                                                                                                                                                                                                                                                                                                                                                                                                                                                                                                                                                                                                                                                                                                 | see above | National Institute of Laboratory Medicine and Referral Center                                                                                                                                   | Genomic Research Lab, BCSIR                                                   | Md. Saddam Hossain, Abu Sayeed Mohammad Mahmud, Mohammad Samir Uzzaman, Eshrar Osman, Md. Ahasan Habib, Shahina Akter, Tanjina Akhter Banu, Md. Murshed Hasan Sarkar, Barna Goswami, Iffat Jahan, Tasnim Nafisa, Md. Maruf Ahmed Molla, Mahmuda Yeasmin, Asish Kumar Ghosh, Bayzid Bin Monir, A. K. M. Shamsuzzaman, Sheikh Md. Selim Al Din, Utpal Chandra Ray, Salek Ahmed Sajib, Md. Salim Khan |
| EPI_ISL_475573                                                                                                                                                                                                                                                                                                                                                                                                                                                                                                                                                                                                                                                                                                                                                                                                                                                                                                                                                                                                                                                                                                                                                                                                                                                                                                                                                                                                                                                                                                                                                                                                                                                                                                                                                                                                                                                                                                 | see above | Genome Center                                                                                                                                                                                   | Genome Center                                                                 | Md. Shazid Hasan, Hassan M. Al-Emran, Ovinu Kibria Islam, A. S. M. Rubayet- Ul- Alam, Selina Akter, Shireen Nigar, Md. Tanvir Islam, Pravas Chandra Roy, Shovon Lal Sarkar, Md. Nazmul Hasan, Tanay Chakrovarty, Md. Ali Ahasan Setu, Sourav Dutta, Ruhul Amin, Md. Iqbal Kabir Jahid, Md. Anwar Hossain                                                                                           |
| EPI_ISL_475755                                                                                                                                                                                                                                                                                                                                                                                                                                                                                                                                                                                                                                                                                                                                                                                                                                                                                                                                                                                                                                                                                                                                                                                                                                                                                                                                                                                                                                                                                                                                                                                                                                                                                                                                                                                                                                                                                                 | see above | National Institute of Laboratory Medicine and Referral Center                                                                                                                                   | Genomic Research Lab, BCSIR                                                   | Md. Murshed Hasan Sarkar, Abu Sayeed Mohammad Mahmud, Mohammad Samir Uzzaman, Eshrar Osman, Md. Ahasan Habib, Shahina Akter, Tanjina Akhter Banu, Barna Goswami, Iffat Jahan, Md. Saddam Hossain, Tasnim Nafisa, Md. Maruf Ahmed Molla, Mahmuda Yeasmin, Asish Kumar Ghosh, Arifa Akram, A. K. M. Shamsuzzaman, Sheikh Md. Selim Al Din, Utpal Chandra Ray, Salek Ahmed Sajib, Md. Salim Khan      |
| EPI_ISL_475759                                                                                                                                                                                                                                                                                                                                                                                                                                                                                                                                                                                                                                                                                                                                                                                                                                                                                                                                                                                                                                                                                                                                                                                                                                                                                                                                                                                                                                                                                                                                                                                                                                                                                                                                                                                                                                                                                                 | see above | National Institute of Laboratory Medicine and Referral Center                                                                                                                                   | Genomic Research Lab, BCSIR                                                   | Md. Saddam Hossain, Abu Sayeed Mohammad Mahmud, Mohammad Samir Uzzaman, Eshrar Osman, Md. Ahasan Habib, Shahina Akter, Tanjina Akhter Banu, Md. Murshed Hasan Sarkar, Barna Goswami, Iffat Jahan, Tasnim Nafisa, Md. Maruf Ahmed Molla, Mahmuda Yeasmin, Asish Kumar Ghosh, Arifa Akram, A. K. M. Shamsuzzaman, Sheikh Md. Selim Al Din, Utpal Chandra Ray, Salek Ahmed Sajib, Md. Salim Khan      |
| EPI_ISL_476067                                                                                                                                                                                                                                                                                                                                                                                                                                                                                                                                                                                                                                                                                                                                                                                                                                                                                                                                                                                                                                                                                                                                                                                                                                                                                                                                                                                                                                                                                                                                                                                                                                                                                                                                                                                                                                                                                                 | see above | The National Institute of Public Health                                                                                                                                                         | State Veterinary Institute Prague and The National Institute of Public Health | Nagy,A.;Jirincova,H.;Novakova,L.;Trnka,D.;Vecerova,J                                                                                                                                                                                                                                                                                                                                               |
| EPI_ISL_476148, EPI_ISL_476149                                                                                                                                                                                                                                                                                                                                                                                                                                                                                                                                                                                                                                                                                                                                                                                                                                                                                                                                                                                                                                                                                                                                                                                                                                                                                                                                                                                                                                                                                                                                                                                                                                                                                                                                                                                                                                                                                 | see above | Institut Pasteur Dakar                                                                                                                                                                          | Institut Pasteur de Dakar                                                     | Ndongo Dia, Moussa Moise Diagne, Mamadou Diop, Ousmane Faye, Amadou Alpha Sall                                                                                                                                                                                                                                                                                                                     |
| EPI_ISL_476150                                                                                                                                                                                                                                                                                                                                                                                                                                                                                                                                                                                                                                                                                                                                                                                                                                                                                                                                                                                                                                                                                                                                                                                                                                                                                                                                                                                                                                                                                                                                                                                                                                                                                                                                                                                                                                                                                                 | see above | Institut Pasteur Dakar                                                                                                                                                                          | Institut Pasteur de Dakar                                                     | Ndongo Dia, Moussa Moise Diagne, Mamadou diop, Ousmane Faye, Amadou Alpha Sall                                                                                                                                                                                                                                                                                                                     |
| EPI_ISL_476151                                                                                                                                                                                                                                                                                                                                                                                                                                                                                                                                                                                                                                                                                                                                                                                                                                                                                                                                                                                                                                                                                                                                                                                                                                                                                                                                                                                                                                                                                                                                                                                                                                                                                                                                                                                                                                                                                                 | see above | Institut Pasteur Dakar                                                                                                                                                                          | Institut Pasteur de Dakar                                                     | Ndongo Dia, Moussa Moise Diagne, Mamadou Diop, Ousmane faye, Amadou Alpha Sall                                                                                                                                                                                                                                                                                                                     |
| EPI_ISL_476491, EPI_ISL_476492                                                                                                                                                                                                                                                                                                                                                                                                                                                                                                                                                                                                                                                                                                                                                                                                                                                                                                                                                                                                                                                                                                                                                                                                                                                                                                                                                                                                                                                                                                                                                                                                                                                                                                                                                                                                                                                                                 | see above | Institut Pasteur Dakar                                                                                                                                                                          | Institut Pasteur de Dakar                                                     | Ndongo Dia, Moussa Moise Diagne, Mamadou Diop, Ousmane Faye, Amadou Alpha Sall                                                                                                                                                                                                                                                                                                                     |
| EPI_ISL_476493                                                                                                                                                                                                                                                                                                                                                                                                                                                                                                                                                                                                                                                                                                                                                                                                                                                                                                                                                                                                                                                                                                                                                                                                                                                                                                                                                                                                                                                                                                                                                                                                                                                                                                                                                                                                                                                                                                 | see above | Institut Pasteur Dakar                                                                                                                                                                          | Institut Pasteur de Dakar                                                     | Ndongo Dia, Moussa Moise Diagne, Mamadou Diop, Ousmane Faye, Amadou alpha Sall                                                                                                                                                                                                                                                                                                                     |
| EPI_ISL_476494                                                                                                                                                                                                                                                                                                                                                                                                                                                                                                                                                                                                                                                                                                                                                                                                                                                                                                                                                                                                                                                                                                                                                                                                                                                                                                                                                                                                                                                                                                                                                                                                                                                                                                                                                                                                                                                                                                 | see above | Institut Pasteur Dakar                                                                                                                                                                          | Institut Pasteur de Dakar                                                     | Ndongo Dia, Moussa Moise Diagne, Mamadou Diop, Ousmane Faye, Amadou Alpha Sall                                                                                                                                                                                                                                                                                                                     |
| EPI_ISL_476495, EPI_ISL_476497                                                                                                                                                                                                                                                                                                                                                                                                                                                                                                                                                                                                                                                                                                                                                                                                                                                                                                                                                                                                                                                                                                                                                                                                                                                                                                                                                                                                                                                                                                                                                                                                                                                                                                                                                                                                                                                                                 | see above | Institut Pasteur Dakar                                                                                                                                                                          | Institut Pasteur de Dakar                                                     | Ndongo Dia, Moussa Moise Diagne, Mamadou Diop, Ousmane Faye, Amadou alpha Sall                                                                                                                                                                                                                                                                                                                     |
| EPI_ISL_476514                                                                                                                                                                                                                                                                                                                                                                                                                                                                                                                                                                                                                                                                                                                                                                                                                                                                                                                                                                                                                                                                                                                                                                                                                                                                                                                                                                                                                                                                                                                                                                                                                                                                                                                                                                                                                                                                                                 | see above | Institut Pasteur Dakar                                                                                                                                                                          | Institut Pasteur de Dakar                                                     | Ndongo Dia, Moussa Moise Diagne, Mamadou Diop, Ousmane Faye, Amadou Alpha Sall                                                                                                                                                                                                                                                                                                                     |
| EPI_ISL_476515                                                                                                                                                                                                                                                                                                                                                                                                                                                                                                                                                                                                                                                                                                                                                                                                                                                                                                                                                                                                                                                                                                                                                                                                                                                                                                                                                                                                                                                                                                                                                                                                                                                                                                                                                                                                                                                                                                 | see above | Institut Pasteur Dakar                                                                                                                                                                          | Institut Pasteur de Dakar                                                     | Ndongo Dia, Moussa Moise Diagne, Mamadou diop, Ousmane Faye, Amadou alpha Sall                                                                                                                                                                                                                                                                                                                     |
| EPI_ISL_476516                                                                                                                                                                                                                                                                                                                                                                                                                                                                                                                                                                                                                                                                                                                                                                                                                                                                                                                                                                                                                                                                                                                                                                                                                                                                                                                                                                                                                                                                                                                                                                                                                                                                                                                                                                                                                                                                                                 | see above | Institut Pasteur Dakar                                                                                                                                                                          | Institut Pasteur de Dakar                                                     | Ndongo Dia, Moussa Moise Diagne, mamadou Diop, Ousmane Faye, Amadou Alpha Sall                                                                                                                                                                                                                                                                                                                     |
| EPI_ISL_476558, EPI_ISL_476560,                                                                                                                                                                                                                                                                                                                                                                                                                                                                                                                                                                                                                                                                                                                                                                                                                                                                                                                                                                                                                                                                                                                                                                                                                                                                                                                                                                                                                                                                                                                                                                                                                                                                                                                                                                                                                                                                                | see above | Institut Pasteur Dakar                                                                                                                                                                          | Institut Pasteur de Dakar                                                     | Ndongo Dia, Moussa Moise Diagne, Mamadou Diop, Ousmane Faye, Amadou Alpha Sall                                                                                                                                                                                                                                                                                                                     |

|                                                                                                                                                                                                                                                                                                                                                                                                                                                                                                                                |                                                                                                                                                                                                 |                                                                                                                                                                                         |  |                                                                                                                                                                                                                                                                                                                                                                                                                                                                                                                                                                  |
|--------------------------------------------------------------------------------------------------------------------------------------------------------------------------------------------------------------------------------------------------------------------------------------------------------------------------------------------------------------------------------------------------------------------------------------------------------------------------------------------------------------------------------|-------------------------------------------------------------------------------------------------------------------------------------------------------------------------------------------------|-----------------------------------------------------------------------------------------------------------------------------------------------------------------------------------------|--|------------------------------------------------------------------------------------------------------------------------------------------------------------------------------------------------------------------------------------------------------------------------------------------------------------------------------------------------------------------------------------------------------------------------------------------------------------------------------------------------------------------------------------------------------------------|
| EPI_ISL_476562                                                                                                                                                                                                                                                                                                                                                                                                                                                                                                                 |                                                                                                                                                                                                 |                                                                                                                                                                                         |  |                                                                                                                                                                                                                                                                                                                                                                                                                                                                                                                                                                  |
| EPI_ISL_476564                                                                                                                                                                                                                                                                                                                                                                                                                                                                                                                 | Institut Pasteur Dakar                                                                                                                                                                          | Institut Pasteur de Dakar                                                                                                                                                               |  | Ndongo Dia, Moussa Moise Diagne, Mamadou diop, Ousmane Faye, Amadou alpha Sall                                                                                                                                                                                                                                                                                                                                                                                                                                                                                   |
| EPI_ISL_476566                                                                                                                                                                                                                                                                                                                                                                                                                                                                                                                 | Institut Pasteur Dakar                                                                                                                                                                          | Institut Pasteur de Dakar                                                                                                                                                               |  | Ndongo Dia, Moussa Moise Diagne, Mamadou Diop, Ousmane Faye, Amadou Alpha Sall                                                                                                                                                                                                                                                                                                                                                                                                                                                                                   |
| EPI_ISL_476569                                                                                                                                                                                                                                                                                                                                                                                                                                                                                                                 | Institut Pasteur Dakar                                                                                                                                                                          | Institut Pasteur de Dakar                                                                                                                                                               |  | Ndongo Dia, Moussa Moise, Mamadou Diop, Ousmane Faye, Amadou Alpha Sall                                                                                                                                                                                                                                                                                                                                                                                                                                                                                          |
| EPI_ISL_476570, EPI_ISL_476572, EPI_ISL_476574                                                                                                                                                                                                                                                                                                                                                                                                                                                                                 | Institut Pasteur Dakar                                                                                                                                                                          | Institut Pasteur de Dakar                                                                                                                                                               |  | Ndongo Dia, Moussa Moise Diagne, Mamadou Diop, Ousmane Faye, Amadou Alpha Sall                                                                                                                                                                                                                                                                                                                                                                                                                                                                                   |
| EPI_ISL_476858                                                                                                                                                                                                                                                                                                                                                                                                                                                                                                                 | GMERS Medical College & Hospital, Gotri, Vadodara                                                                                                                                               | Gujarat Biotechnology Research Centre                                                                                                                                                   |  | Monika Gandhi, Pinal Trivedi, Maharshi Pandya, Nidhi Patel, Nitin Savaliya, Raghawendra Kumar, Dinesh Kumar, Zuber Saiyed, Komal Patel, Labdhi Pandya, Afzal Ansari, Nikha Trivedi, Meenakshi Shah, Neena Doshi, Varsha Godbole, Apurvasinh Puvar, Janvi Raval, Zarna Patel, R D Dixit, A M Kadri, Harsh Bakshi, Chaitanya Joshi, Madhvi Joshi                                                                                                                                                                                                                   |
| EPI_ISL_476861                                                                                                                                                                                                                                                                                                                                                                                                                                                                                                                 | GMERS Medical College & Hospital, Gotri, Vadodara                                                                                                                                               | Gujarat Biotechnology Research Centre                                                                                                                                                   |  | Nidhi Patel, Nitin Savaliya, Raghawendra Kumar, Dinesh Kumar, Zuber Saiyed, Komal Patel, Labdhi Pandya, Afzal Ansari, Nikha Trivedi, Meenakshi Shah, Neena Doshi, Varsha Godbole, Apurvasinh Puvar, Janvi Raval, Zarna Patel, Monika Gandhi, Pinal Trivedi, Maharshi Pandya, R D Dixit, A M Kadri, Harsh Bakshi, Chaitanya Joshi, Madhvi Joshi                                                                                                                                                                                                                   |
| EPI_ISL_476862                                                                                                                                                                                                                                                                                                                                                                                                                                                                                                                 | GMERS Medical College & Hospital, Gotri, Vadodara                                                                                                                                               | Gujarat Biotechnology Research Centre                                                                                                                                                   |  | Nitin Savaliya, Raghawendra Kumar, Dinesh Kumar, Zuber Saiyed, Komal Patel, Labdhi Pandya, Afzal Ansari, Nikha Trivedi, Meenakshi Shah, Neena Doshi, Varsha Godbole, Apurvasinh Puvar, Janvi Raval, Zarna Patel, Monika Gandhi, Pinal Trivedi, Maharshi Pandya, Nidhi Patel, R D Dixit, A M Kadri, Harsh Bakshi, Chaitanya Joshi, Madhvi Joshi                                                                                                                                                                                                                   |
| EPI_ISL_476869                                                                                                                                                                                                                                                                                                                                                                                                                                                                                                                 | Department of MicroBiology, Government Medical College, Surat                                                                                                                                   | Gujarat Biotechnology Research Centre                                                                                                                                                   |  | Nikha Trivedi, Naresh Chauhan, Summaiya Mullan, Amit gamit, Apurvasinh Puvar, Janvi Raval, Zarna Patel, Monika Gandhi, Pinal Trivedi, Maharshi Pandya, Nidhi Patel, Nitin Savaliya, Raghawendra Kumar, Dinesh Kumar, Zuber Saiyed, Komal Patel, Labdhi Pandya, Afzal Ansari, R D Dixit, A M Kadri, Harsh Bakshi, Chaitanya Joshi, Madhvi Joshi                                                                                                                                                                                                                   |
| EPI_ISL_476870                                                                                                                                                                                                                                                                                                                                                                                                                                                                                                                 | Department of MicroBiology, Government Medical College, Surat                                                                                                                                   | Gujarat Biotechnology Research Centre                                                                                                                                                   |  | Naresh Chauhan, Summaiya Mullan, Amit gamit, Apurvasinh Puvar, Janvi Raval, Zarna Patel, Monika Gandhi, Pinal Trivedi, Maharshi Pandya, Nidhi Patel, Nitin Savaliya, Raghawendra Kumar, Dinesh Kumar, Zuber Saiyed, Komal Patel, Labdhi Pandya, Afzal Ansari, Nikha Trivedi, R D Dixit, A M Kadri, Harsh Bakshi, Chaitanya Joshi, Madhvi Joshi                                                                                                                                                                                                                   |
| EPI_ISL_476878                                                                                                                                                                                                                                                                                                                                                                                                                                                                                                                 | Department of MicroBiology, Government Medical College, Surat                                                                                                                                   | Gujarat Biotechnology Research Centre                                                                                                                                                   |  | Nidhi Patel, Nitin Savaliya, Raghawendra Kumar, Dinesh Kumar, Zuber Saiyed, Komal Patel, Labdhi Pandya, Afzal Ansari, Nikha Trivedi, Naresh Chauhan, Summaiya Mullan, Amit gamit, Apurvasinh Puvar, Janvi Raval, Zarna Patel, Monika Gandhi, Pinal Trivedi, Maharshi Pandya, R D Dixit, A M Kadri, Harsh Bakshi, Chaitanya Joshi, Madhvi Joshi                                                                                                                                                                                                                   |
| EPI_ISL_476879                                                                                                                                                                                                                                                                                                                                                                                                                                                                                                                 | Department of MicroBiology, Government Medical College, Surat                                                                                                                                   | Gujarat Biotechnology Research Centre                                                                                                                                                   |  | Nitin Savaliya, Raghawendra Kumar, Dinesh Kumar, Zuber Saiyed, Komal Patel, Labdhi Pandya, Afzal Ansari, Nikha Trivedi, Naresh Chauhan, Summaiya Mullan, Amit gamit, Apurvasinh Puvar, Janvi Raval, Zarna Patel, Monika Gandhi, Pinal Trivedi, Maharshi Pandya, Nidhi Patel, R D Dixit, A M Kadri, Harsh Bakshi, Chaitanya Joshi, Madhvi Joshi                                                                                                                                                                                                                   |
| EPI_ISL_476897                                                                                                                                                                                                                                                                                                                                                                                                                                                                                                                 | University of South Carolina Functional Genomics Core                                                                                                                                           | University of South Carolina Functional Genomics Core                                                                                                                                   |  | Michael Shutman                                                                                                                                                                                                                                                                                                                                                                                                                                                                                                                                                  |
| EPI_ISL_477141, EPI_ISL_477142, EPI_ISL_477143, EPI_ISL_477144, EPI_ISL_477145, EPI_ISL_477146, EPI_ISL_477147, EPI_ISL_477148, EPI_ISL_477149, EPI_ISL_477150, EPI_ISL_477151, EPI_ISL_477152, EPI_ISL_477153, EPI_ISL_477154, EPI_ISL_477155, EPI_ISL_477156, EPI_ISL_477157, EPI_ISL_477158, EPI_ISL_477159                                                                                                                                                                                                                 |                                                                                                                                                                                                 |                                                                                                                                                                                         |  |                                                                                                                                                                                                                                                                                                                                                                                                                                                                                                                                                                  |
| see above                                                                                                                                                                                                                                                                                                                                                                                                                                                                                                                      | Institut Pasteur Dakar                                                                                                                                                                          | Institut Pasteur de Dakar                                                                                                                                                               |  | Ndongo Dia, Moussa Moise Diagne, Mamadou Diop, Mamadou Malado Jallow, Marie Henriette Dior Ndione, Safietou Sankhe, Ousmane Faye, Amadou Alpha Sall.                                                                                                                                                                                                                                                                                                                                                                                                             |
| EPI_ISL_477183                                                                                                                                                                                                                                                                                                                                                                                                                                                                                                                 | Department of MicroBiology, Government Medical College, Surat                                                                                                                                   | Gujarat Biotechnology Research Centre                                                                                                                                                   |  | Monika Gandhi, Pinal Trivedi, Maharshi Pandya, Nidhi Patel, Nitin Savaliya, Raghawendra Kumar, Dinesh Kumar, Zuber Saiyed, Komal Patel, Labdhi Pandya, Afzal Ansari, Nikha Trivedi, Naresh Chauhan, Summaiya Mullan, Amit gamit, Apurvasinh Puvar, Janvi Raval, Zarna Patel, R D Dixit, A M Kadri, Harsh Bakshi, Chaitanya Joshi, Madhvi Joshi                                                                                                                                                                                                                   |
| EPI_ISL_478165, EPI_ISL_478166, EPI_ISL_478173, EPI_ISL_478174, EPI_ISL_478175, EPI_ISL_478176, EPI_ISL_478183, EPI_ISL_478185, EPI_ISL_478186, EPI_ISL_478197, EPI_ISL_478198, EPI_ISL_478203, EPI_ISL_478205, EPI_ISL_478210, EPI_ISL_478211, EPI_ISL_478215, EPI_ISL_478222, EPI_ISL_478226, EPI_ISL_478228, EPI_ISL_478229, EPI_ISL_478232, EPI_ISL_478234, EPI_ISL_478238, EPI_ISL_478240, EPI_ISL_478242, EPI_ISL_478254, EPI_ISL_478259, EPI_ISL_478260, EPI_ISL_478265, EPI_ISL_478266, EPI_ISL_478267, EPI_ISL_478268 |                                                                                                                                                                                                 |                                                                                                                                                                                         |  |                                                                                                                                                                                                                                                                                                                                                                                                                                                                                                                                                                  |
| see above                                                                                                                                                                                                                                                                                                                                                                                                                                                                                                                      | Virology Department, Royal Infirmary of Edinburgh, NHS Lothian / School of Biological Sciences, University of Edinburgh / Institute of Genetics and Molecular Medicine, University of Edinburgh | COVID-19 Genomics UK (COG-UK) Consortium                                                                                                                                                |  | McHugh M, Dewar R, Rooke S, Gallagher M, Balcaza C, O'Toole Á, Scher E, Hill V, McCrone JT, Colquhoun R, Yu X, Jackson B, Rambaut A, Williams TC, Templeton K                                                                                                                                                                                                                                                                                                                                                                                                    |
| EPI_ISL_480414, EPI_ISL_480415, EPI_ISL_480416, EPI_ISL_480417, EPI_ISL_480418                                                                                                                                                                                                                                                                                                                                                                                                                                                 | National Institute of Laboratory Medicine and Referral Center                                                                                                                                   | Bangladesh Council of Scientific and Industrial Research                                                                                                                                |  | Md. Saddam Hossain, Abu Sayeed Mohammad Mahmud, Mohammad Samir Uzzaman, Eshrar Osman, Md. Ahasan Habib, Shahina Akter, Tanjina Akhter Banu, Md. Murshed Hasan Sarkar, Barna Goswami, Iffat Jahan, Tasnim Nafisa, Md. Maruf Ahmed Molla, Mahmuda Yeasmin, Asish Kumar Ghosh, Shahjahan Siddike, A. K. M. Shamsuzzaman, Sheikh Md. Selim Al Din, Utpal Chandra Ray, Salek Ahmed Sajib, Md. Salim Khan                                                                                                                                                              |
| EPI_ISL_480419, EPI_ISL_480420, EPI_ISL_480421, EPI_ISL_480424, EPI_ISL_480425                                                                                                                                                                                                                                                                                                                                                                                                                                                 | National Institute of Laboratory Medicine and Referral Center                                                                                                                                   | Bangladesh Council of Scientific and Industrial Research                                                                                                                                |  | Md. Murshed Hasan Sarkar, Abu Sayeed Mohammad Mahmud, Mohammad Samir Uzzaman, Eshrar Osman, Md. Ahasan Habib, Shahina Akter, Tanjina Akhter Banu, Barna Goswami, Iffat Jahan, Md. Saddam Hossain, Tasnim Nafisa, Md. Maruf Ahmed Molla, Mahmuda Yeasmin, Asish Kumar Ghosh, Shahjahan Siddike, A. K. M. Shamsuzzaman, Sheikh Md. Selim Al Din, Utpal Chandra Ray, Salek Ahmed Sajib, Md. Salim Khan                                                                                                                                                              |
| EPI_ISL_480445                                                                                                                                                                                                                                                                                                                                                                                                                                                                                                                 | National Institute of Laboratory Medicine and Referral Center                                                                                                                                   | Genomic Research Lab, BCSIR                                                                                                                                                             |  | Md. Ahasan Habib, Abu Sayeed Mohammad Mahmud, Mohammad Samir Uzzaman, Eshrar Osman, , Shahina Akter, Tanjina Akhter Banu, Md. Murshed Hasan Sarkar, Barna Goswami, Iffat Jahan, Md. Saddam Hossain, Tasnim Nafisa, Md. Maruf Ahmed Molla, Mahmuda Yeasmin, Asish Kumar Ghosh, Shahjahan Siddike, A. K. M. Shamsuzzaman, Sheikh Md. Selim Al Din, Utpal Chandra Ray, Salek Ahmed Sajib, Md. Salim Khan                                                                                                                                                            |
| EPI_ISL_480554, EPI_ISL_480556                                                                                                                                                                                                                                                                                                                                                                                                                                                                                                 | Institut Pasteur Dakar                                                                                                                                                                          | Institut Pasteur de Dakar                                                                                                                                                               |  | Ndongo Dia, Moussa Moise Diagne, Mamadou Diop, Marie Henriette Dior Ndione, Mamadou Malado Jallow, Safietou Sanke, Ousmane Faye, Amadou Alpha Sall.                                                                                                                                                                                                                                                                                                                                                                                                              |
| EPI_ISL_480691, EPI_ISL_480692, EPI_ISL_480693, EPI_ISL_480694, EPI_ISL_480695, EPI_ISL_480696, EPI_ISL_480697                                                                                                                                                                                                                                                                                                                                                                                                                 | Royal Darwin Hospital Pathology                                                                                                                                                                 | MDU-PHL                                                                                                                                                                                 |  | Meumann, E., Cally L., Seemann T., Sait, M., Schultz M., Druce J., Sherry, N.                                                                                                                                                                                                                                                                                                                                                                                                                                                                                    |
| EPI_ISL_480782, EPI_ISL_480783, EPI_ISL_480786, EPI_ISL_480787, EPI_ISL_480788, EPI_ISL_480789, EPI_ISL_481220                                                                                                                                                                                                                                                                                                                                                                                                                 | Institut Pasteur Dakar                                                                                                                                                                          | Institut Pasteur de Dakar                                                                                                                                                               |  | Ndongo Dia, Moussa Moise Diagne, Mamadou Diop, Marie Henriette Dior Ndione, Mamadou Malado Jallow, Safietou Sanke, Ousmane Faye, Amadou Alpha Sall.                                                                                                                                                                                                                                                                                                                                                                                                              |
| EPI_ISL_481227, EPI_ISL_481228, EPI_ISL_481229, EPI_ISL_481230, EPI_ISL_481231, EPI_ISL_481232, EPI_ISL_481233                                                                                                                                                                                                                                                                                                                                                                                                                 | Lab voor klinische biologie                                                                                                                                                                     | Onderzoeksgroep Virologie                                                                                                                                                               |  | Nick Vereecke, Laurens Lambrechts, Marthe Pauwels, Bruno Verhasselt, Linos Vandekerckhove, Hans Nauwynck, Sebastiaan Theuns                                                                                                                                                                                                                                                                                                                                                                                                                                      |
| EPI_ISL_481234, EPI_ISL_481235, EPI_ISL_481236, EPI_ISL_481237, EPI_ISL_481238, EPI_ISL_481239, EPI_ISL_481240, EPI_ISL_481243                                                                                                                                                                                                                                                                                                                                                                                                 | Institut Pasteur Dakar                                                                                                                                                                          | Institut Pasteur de Dakar                                                                                                                                                               |  | Ndongo Dia, Moussa Moise Diagne, Mamadou Diop, Marie Henriette Dior Ndione, Mamadou Malado Jallow, Safietou Sanke, Ousmane Faye, Amadou Alpha Sall.                                                                                                                                                                                                                                                                                                                                                                                                              |
| EPI_ISL_481483                                                                                                                                                                                                                                                                                                                                                                                                                                                                                                                 | Department for Virology, Molecular Biology and Genome Research, R. G. Lugar Center for Public Health Research, National Center for Disease Control and Public Health (NCDC) of Georgia.         | Department for Virology, Molecular Biology and Genome Research, R. G. Lugar Center for Public Health Research, National Center for Disease Control and Public Health (NCDC) of Georgia. |  | Nino Berishvili, Tata Imnadze, Giorgi Tomashvili, Ana Papkauri, Meri Pantsulaia, Gvantsa Brachveli, Gvantsa Chanturia, Ann Machablishvili, Nato Kotaria, Marine Murtskhvaladze, Lela Sabadze, Mari Gavashelidze, Tamar Jashishvili, Tea Tevdoradze, Ketevan Sidamonidze, Ekaterine Khmaladze, Ekaterine Zhghenti, Roena Sukhishvili, Mariam Zakalashvili, Lela Urushadze, Magda Dgebuadze, Davit Tsaguria, Ekaterine Zangaladze, Adam Kotorashvili, Maia Alkhaszashvili, Irma Burjanadze, Anna Kasradze, Khatuna Zakhashvili, Paata Imnadze, Amiran Gamkrelidze. |
| EPI_ISL_482488                                                                                                                                                                                                                                                                                                                                                                                                                                                                                                                 | National Institute of Laboratory Medicine and Referral Center                                                                                                                                   | Genomic Research Lab, BCSIR                                                                                                                                                             |  | Md. Murshed Hasan Sarkar, Abu Sayeed Mohammad Mahmud, Mohammad Samir Uzzaman, Eshrar Osman, Md. Ahasan Habib, Shahina Akter, Tanjina Akhter Banu, Barna Goswami, Iffat Jahan, Md. Saddam Hossain, Tasnim Nafisa, Md. Maruf Ahmed Molla, Mahmuda Yeasmin, Asish Kumar Ghosh,                                                                                                                                                                                                                                                                                      |

|                                                                                                                                                                                                                                                                                                                                                                                                                                                                |                                                                              |                                                                                                           |  |                                                                                                                                                                                                                                                                                                                                                                                                     |
|----------------------------------------------------------------------------------------------------------------------------------------------------------------------------------------------------------------------------------------------------------------------------------------------------------------------------------------------------------------------------------------------------------------------------------------------------------------|------------------------------------------------------------------------------|-----------------------------------------------------------------------------------------------------------|--|-----------------------------------------------------------------------------------------------------------------------------------------------------------------------------------------------------------------------------------------------------------------------------------------------------------------------------------------------------------------------------------------------------|
|                                                                                                                                                                                                                                                                                                                                                                                                                                                                |                                                                              |                                                                                                           |  | Shahjahan Siddike, A. K. M. Shamsuzzaman, Sheikh Md. Selim Al Din, Utpal Chandra Ray, Salek Ahmed Sajib, Md. Salim Khan                                                                                                                                                                                                                                                                             |
| EPI_ISL_482489                                                                                                                                                                                                                                                                                                                                                                                                                                                 | National Institute of Laboratory Medicine and Referral Center                | Genomic Research Lab, BCSIR                                                                               |  | Md. Ahasan Habib, Abu Sayeed Mohammad Mahmud, Mohammad Samir Uzzaman, Eshrar Osman, Shahina Akter, Tanjina Akhter Banu, Md. Murshed Hasan Sarkar, Barna Goswami, Iffat Jahan, Md. Saddam Hossain, Tasnim Nafisa, Md. Maruf Ahmed Molla, Mahmuda Yeasmin, Asish Kumar Ghosh, Shahjahan Siddike, A. K. M. Shamsuzzaman, Sheikh Md. Selim Al Din, Utpal Chandra Ray, Salek Ahmed Sajib, Md. Salim Khan |
| EPI_ISL_482672, EPI_ISL_482673, EPI_ISL_482674, EPI_ISL_482675, EPI_ISL_482676, EPI_ISL_482677, EPI_ISL_482678, EPI_ISL_482679, EPI_ISL_482680, EPI_ISL_482681, EPI_ISL_482682, EPI_ISL_482683, EPI_ISL_482684, EPI_ISL_482685, EPI_ISL_482686, EPI_ISL_482687, EPI_ISL_482688, EPI_ISL_482689, EPI_ISL_482690, EPI_ISL_482691, EPI_ISL_482692, EPI_ISL_482693, EPI_ISL_482694, EPI_ISL_482695, EPI_ISL_482696, EPI_ISL_482697, EPI_ISL_482698, EPI_ISL_482699 |                                                                              |                                                                                                           |  |                                                                                                                                                                                                                                                                                                                                                                                                     |
| see above                                                                                                                                                                                                                                                                                                                                                                                                                                                      | Singapore General Hospital                                                   | Department of Microbiology                                                                                |  | Nurdyana Abdul Rahman, Kun Lee Lim, Chenhao Li, Kian Sing Chan, Lynette Oon, Kern Rei Chng, Niranjan Nagarajan, Karrie Ko                                                                                                                                                                                                                                                                           |
| EPI_ISL_482732, EPI_ISL_482733, EPI_ISL_482734, EPI_ISL_482735, EPI_ISL_482736, EPI_ISL_482737, EPI_ISL_482738, EPI_ISL_482739, EPI_ISL_482740                                                                                                                                                                                                                                                                                                                 | LNR National Reference Laboratory, Mohammed VI University of Health Sciences | Medical Biotechnology Laboratory, Rabat Medical and Pharmacy School, Mohammed The Vth University in Rabat |  | Meriem LAAMARTI, Souad KARTTI, Rokia LAAMARTI , M.W. CHEMAO-ELFIHRI, Loubna ALLAM, Mouna OUADGHIRI, Imane SMYEJ, Jailla RAHOUI, Houda BENRAHMA, Jalil EI ATAR, Idrissa DIAWARA, Rachid EL JAoudi, Laila SBABOU, Chakib NEJJARI, Saaid AMZAZI, Rachid MENTAG, Lahcen BELYAMANI and Azeddine IBRAHIMI                                                                                                 |
| EPI_ISL_482874, EPI_ISL_482875, EPI_ISL_482876, EPI_ISL_482877, EPI_ISL_482878                                                                                                                                                                                                                                                                                                                                                                                 | Institut Pasteur Dakar                                                       | Institut Pasteur de Dakar                                                                                 |  | Ndongo Dia, Moussa Moise Diagne, Mamadou Diop, Marie Henriette Dior Ndione, Mamadou malado Jallow, Safietou Sankhe, Ousmane Faye, Amadou Alpha Sall.                                                                                                                                                                                                                                                |
| EPI_ISL_483566                                                                                                                                                                                                                                                                                                                                                                                                                                                 | Clinical Microbiology Laboratory- Basurto University Hospital                | Biocruces-Bizkaia                                                                                         |  | Mikel J. Urrutikoetxea-Gutierrez, Ana Belén Belén de la Hoz, Matxalen Vidal-García, M <sup>o</sup> Carmen Nieto Toboso, Estibaliz Ugalde-Zarraga, José Luis Díaz de Tuesta del Arco                                                                                                                                                                                                                 |
| EPI_ISL_483570                                                                                                                                                                                                                                                                                                                                                                                                                                                 | Clinical Microbiology Laboratory- Basurto University Hospita                 | Biocruces-Bizkaia                                                                                         |  | Mikel J. Urrutikoetxea-Gutierrez, Ana Belén Belén de la Hoz, Matxalen Vidal-García, M <sup>o</sup> Carmen Nieto Toboso, Estibaliz Ugalde-Zarraga, José Luis Díaz de Tuesta del Arco                                                                                                                                                                                                                 |
| EPI_ISL_483571, EPI_ISL_483572, EPI_ISL_483573                                                                                                                                                                                                                                                                                                                                                                                                                 | Clinical Microbiology Laboratory- Basurto University Hospital                | Biocruces-Bizkaia                                                                                         |  | Mikel J. Urrutikoetxea-Gutierrez, Ana Belén Belén de la Hoz, Matxalen Vidal-García, M <sup>o</sup> Carmen Nieto Toboso, Estibaliz Ugalde-Zarraga, José Luis Díaz de Tuesta del Arco                                                                                                                                                                                                                 |
| EPI_ISL_483624                                                                                                                                                                                                                                                                                                                                                                                                                                                 | National Institute of Laboratory Medicine and Referral Center                | Genomic Research Lab, BCSIR                                                                               |  | Md. Maruf Ahmed Molla, Abu Sayeed Mohammad Mahmud, Mohammad Samir Uzzaman, Eshrar Osman, Md. Ahasan Habib, Shahina Akter, Tanjina Akhter Banu, Md. Murshed Hasan Sarkar, Barna Goswami, Iffat Jahan, Md. Saddam Hossain, Tasnim Nafisa, Mahmuda Yeasmin, Asish Kumar Ghosh, A. K. M. Shamsuzzaman, Sheikh Md. Selim Al Din, Utpal Chandra Ray, Salek Ahmed Sajib, Md. Salim Khan                    |
| EPI_ISL_483626                                                                                                                                                                                                                                                                                                                                                                                                                                                 | National Institute of Laboratory Medicine and Referral Center                | Genomic Research Lab, BCSIR                                                                               |  | Md. Maruf Ahmed Molla, Abu Sayeed Mohammad Mahmud, Mohammad Samir Uzzaman, Eshrar Osman, Md. Ahasan Habib, Shahina Akter, Tanjina Akhter Banu, Md. Murshed Hasan Sarkar, Barna Goswami, Iffat Jahan, Md. Saddam Hossain, Tasnim Nafisa, Mahmuda Yeasmin, Asish Kumar Ghosh, A. K. M. Shamsuzzaman, Sheikh Md. Selim Al Din, Utpal Chandra Ray, Salek Ahmed Sajib, Md. Salim Khan                    |
| EPI_ISL_483631, EPI_ISL_483632                                                                                                                                                                                                                                                                                                                                                                                                                                 | National Institute of Laboratory Medicine and Referral Center                | Genomic Research Lab, BCSIR                                                                               |  | Md. Ahasan Habib, Abu Sayeed Mohammad Mahmud, Mohammad Samir Uzzaman, Eshrar Osman, Shahina Akter, Tanjina Akhter Banu, Md. Murshed Hasan Sarkar, Barna Goswami, Iffat Jahan, Md. Saddam Hossain, Tasnim Nafisa, Md. Maruf Ahmed Molla, Mahmuda Yeasmin, Asish Kumar Ghosh, A. K. M. Shamsuzzaman, Sheikh Md. Selim Al Din, Utpal Chandra Ray, Salek Ahmed Sajib, Md. Salim Khan                    |
| EPI_ISL_483645, EPI_ISL_483646, EPI_ISL_483647                                                                                                                                                                                                                                                                                                                                                                                                                 | National Institute of Laboratory Medicine and Referral Center                | Genomic Research Lab, BCSIR                                                                               |  | Md. Saddam Hossain, Abu Sayeed Mohammad Mahmud, Mohammad Samir Uzzaman, Eshrar Osman, Md. Ahasan Habib, Shahina Akter, Tanjina Akhter Banu, Md. Murshed Hasan Sarkar, Barna Goswami, Iffat Jahan, Tasnim Nafisa, Md. Maruf Ahmed Molla, Mahmuda Yeasmin, Asish Kumar Ghosh, A. K. M. Shamsuzzaman, Sheikh Md. Selim Al Din, Utpal Chandra Ray, Salek Ahmed Sajib, Md. Salim Khan                    |
| EPI_ISL_483686, EPI_ISL_483687                                                                                                                                                                                                                                                                                                                                                                                                                                 | National Institute of Laboratory Medicine and Referral Center                | Genomic Research Lab, BCSIR                                                                               |  | Md. Murshed Hasan Sarkar, Abu Sayeed Mohammad Mahmud, Mohammad Samir Uzzaman, Eshrar Osman, Md. Ahasan Habib, Shahina Akter, Tanjina Akhter Banu, Barna Goswami, Iffat Jahan, Md. Saddam Hossain, Tasnim Nafisa, Md. Maruf Ahmed Molla, Mahmuda Yeasmin, Asish Kumar Ghosh, A. K. M. Shamsuzzaman, Sheikh Md. Selim Al Din, Utpal Chandra Ray, Salek Ahmed Sajib, Md. Salim Khan                    |
| EPI_ISL_483688                                                                                                                                                                                                                                                                                                                                                                                                                                                 | Genomic Research Lab, BCSIR                                                  | Genomic Research Lab, BCSIR                                                                               |  | Md. Murshed Hasan Sarkar, Abu Sayeed Mohammad Mahmud, Mohammad Samir Uzzaman, Eshrar Osman, Md. Ahasan Habib, Shahina Akter, Tanjina Akhter Banu, Barna Goswami, Iffat Jahan, Md. Saddam Hossain, Tasnim Nafisa, Md. Maruf Ahmed Molla, Mahmuda Yeasmin, Asish Kumar Ghosh, A. K. M. Shamsuzzaman, Sheikh Md. Selim Al Din, Utpal Chandra Ray, Salek Ahmed Sajib, Md. Salim Khan                    |
| EPI_ISL_483689, EPI_ISL_483690, EPI_ISL_483691, EPI_ISL_483692                                                                                                                                                                                                                                                                                                                                                                                                 | National Institute of Laboratory Medicine and Referral Center                | Genomic Research Lab, BCSIR                                                                               |  | Md. Murshed Hasan Sarkar, Abu Sayeed Mohammad Mahmud, Mohammad Samir Uzzaman, Eshrar Osman, Md. Ahasan Habib, Shahina Akter, Tanjina Akhter Banu, Barna Goswami, Iffat Jahan, Md. Saddam Hossain, Tasnim Nafisa, Md. Maruf Ahmed Molla, Mahmuda Yeasmin, Asish Kumar Ghosh, A. K. M. Shamsuzzaman, Sheikh Md. Selim Al Din, Utpal Chandra Ray, Salek Ahmed Sajib, Md. Salim Khan                    |
| EPI_ISL_483701, EPI_ISL_483704, EPI_ISL_483706, EPI_ISL_483708, EPI_ISL_483709, EPI_ISL_483711, EPI_ISL_483712, EPI_ISL_483713, EPI_ISL_483714, EPI_ISL_483715, EPI_ISL_483716, EPI_ISL_483717, EPI_ISL_483718, EPI_ISL_483719, EPI_ISL_483720, EPI_ISL_483721, EPI_ISL_483722, EPI_ISL_483723, EPI_ISL_483724, EPI_ISL_483725                                                                                                                                 |                                                                              |                                                                                                           |  |                                                                                                                                                                                                                                                                                                                                                                                                     |
| see above                                                                                                                                                                                                                                                                                                                                                                                                                                                      | Israel Central Virology laboratory                                           | Israel Central Virology laboratory                                                                        |  | Neta Zuckerman, Efrat Dahan Bucris, Oran Erster, Ella Mendelson, Michal Mandelboim                                                                                                                                                                                                                                                                                                                  |
| EPI_ISL_483823                                                                                                                                                                                                                                                                                                                                                                                                                                                 | GMERS Medical College Himmatnagar                                            | Gujarat Biotechnology Research Centre                                                                     |  | Nikha Trivedi, Himanshu Khatri, Apurvasinh Puvar, Janvi Raval, Zarna Patel, Monika Gandhi, Pinal Trivedi, Maharshi Pandya, Nidhi Patel, Nitin Savaliya, Raghawendra Kumar, Dinesh Kumar, Zuber Saiyed, Komal Patel, Labdhi Pandya, Afzal Ansari, R D Dixit, A M Kadri, Harsh Bakshi, Chaitanya Joshi, Madhvi Joshi                                                                                  |
| EPI_ISL_483829                                                                                                                                                                                                                                                                                                                                                                                                                                                 | Pandit Deendayal Upadhyay Government Medical College, Rajkot                 | Gujarat Biotechnology Research Centre                                                                     |  | Monika Gandhi, Pinal Trivedi, Maharshi Pandya, Nidhi Patel, Nitin Savaliya, Raghawendra Kumar, Dinesh Kumar, Zuber Saiyed, Komal Patel, Labdhi Pandya, Afzal Ansari, Nikha Trivedi, Gauravi Dhruv, Arti Trivedi, Apurvasinh Puvar, Janvi Raval, Zarna Patel, R D Dixit, A M Kadri, Harsh Bakshi, Chaitanya Joshi, Madhvi Joshi                                                                      |
| EPI_ISL_483832                                                                                                                                                                                                                                                                                                                                                                                                                                                 | Pandit Deendayal Upadhyay Government Medical College, Rajkot                 | Gujarat Biotechnology Research Centre                                                                     |  | Nidhi Patel, Nitin Savaliya, Raghawendra Kumar, Dinesh Kumar, Zuber Saiyed, Komal Patel, Labdhi Pandya, Afzal Ansari, Nikha Trivedi, Gauravi Dhruv, Arti Trivedi, Apurvasinh Puvar, Janvi Raval, Zarna Patel, Monika Gandhi, Pinal Trivedi, Maharshi Pandya, R D Dixit, A M Kadri, Harsh Bakshi, Chaitanya Joshi, Madhvi Joshi                                                                      |
| EPI_ISL_483833                                                                                                                                                                                                                                                                                                                                                                                                                                                 | Pandit Deendayal Upadhyay Government Medical College, Rajkot                 | Gujarat Biotechnology Research Centre                                                                     |  | Nitin Savaliya, Raghawendra Kumar, Dinesh Kumar, Zuber Saiyed, Komal Patel, Labdhi Pandya, Afzal Ansari, Nikha Trivedi, Gauravi Dhruv, Arti Trivedi, Apurvasinh Puvar, Janvi Raval, Zarna Patel, Monika Gandhi, Pinal Trivedi, Maharshi Pandya, Nidhi Patel, R D Dixit, A M Kadri, Harsh Bakshi, Chaitanya Joshi, Madhvi Joshi                                                                      |
| EPI_ISL_483840                                                                                                                                                                                                                                                                                                                                                                                                                                                 | Pandit Deendayal Upadhyay Government Medical College, Rajkot                 | Gujarat Biotechnology Research Centre                                                                     |  | Nikha Trivedi, Gauravi Dhruv, Arti Trivedi, Apurvasinh Puvar, Janvi Raval, Zarna Patel, Monika Gandhi, Pinal Trivedi, Maharshi Pandya, Nidhi Patel, Nitin Savaliya, Raghawendra Kumar, Dinesh Kumar, Zuber Saiyed, Komal Patel, Labdhi Pandya, Afzal Ansari, R D Dixit, A M Kadri, Harsh Bakshi, Chaitanya Joshi, Madhvi Joshi                                                                      |
| EPI_ISL_483846                                                                                                                                                                                                                                                                                                                                                                                                                                                 | Pandit Deendayal Upadhyay Government Medical College, Rajkot                 | Gujarat Biotechnology Research Centre                                                                     |  | Monika Gandhi, Pinal Trivedi, Maharshi Pandya, Nidhi Patel, Nitin Savaliya, Raghawendra Kumar, Dinesh Kumar, Zuber Saiyed, Komal Patel, Labdhi Pandya, Afzal Ansari, Nikha Trivedi, Gauravi Dhruv, Arti Trivedi, Apurvasinh Puvar, Janvi Raval, Zarna Patel, R D Dixit, A M Kadri, Harsh Bakshi, Chaitanya Joshi, Madhvi Joshi                                                                      |
| EPI_ISL_483849                                                                                                                                                                                                                                                                                                                                                                                                                                                 | Pandit Deendayal Upadhyay Government Medical College, Rajkot                 | Gujarat Biotechnology Research Centre                                                                     |  | Nidhi Patel, Nitin Savaliya, Raghawendra Kumar, Dinesh Kumar, Zuber Saiyed, Komal Patel, Labdhi Pandya, Afzal Ansari, Nikha Trivedi, Gauravi Dhruv, Arti Trivedi, Apurvasinh Puvar, Janvi Raval, Zarna Patel, Monika Gandhi, Pinal Trivedi, Maharshi Pandya, R D Dixit, A M Kadri, Harsh Bakshi, Chaitanya Joshi, Madhvi Joshi                                                                      |
| EPI_ISL_483850                                                                                                                                                                                                                                                                                                                                                                                                                                                 | Department of Microbiology, Government Medical College, Surat                | Gujarat Biotechnology Research Centre                                                                     |  | Nitin Savaliya, Raghawendra Kumar, Dinesh Kumar, Zuber Saiyed, Komal Patel, Labdhi Pandya, Afzal Ansari, Nikha Trivedi, Naresh Chauhan, Summaiya Mullan, Amit gamit, Apurvasinh Puvar, Janvi Raval, Zarna Patel, Monika Gandhi, Pinal Trivedi, Maharshi Pandya, Nidhi Patel, R D Dixit, A M Kadri, Harsh Bakshi, Chaitanya Joshi, Madhvi Joshi                                                      |
| EPI_ISL_483857                                                                                                                                                                                                                                                                                                                                                                                                                                                 | Department of Microbiology, Government Medical College, Surat                | Gujarat Biotechnology Research Centre                                                                     |  | Nikha Trivedi, Naresh Chauhan, Summaiya Mullan, Amit gamit, Apurvasinh Puvar, Janvi Raval, Zarna Patel, Monika Gandhi, Pinal Trivedi, Maharshi Pandya, Nidhi Patel, Nitin Savaliya, Raghawendra Kumar, Dinesh Kumar, Zuber Saiyed, Komal Patel, Labdhi Pandya, Afzal Ansari, R D Dixit, A M Kadri, Harsh Bakshi, Chaitanya Joshi, Madhvi Joshi                                                      |
| EPI_ISL_483858                                                                                                                                                                                                                                                                                                                                                                                                                                                 | Department of Microbiology, Government Medical College, Surat                | Gujarat Biotechnology Research Centre                                                                     |  | Naresh Chauhan, Summaiya Mullan, Amit gamit, Apurvasinh Puvar, Janvi Raval, Zarna Patel, Monika Gandhi, Pinal Trivedi, Maharshi Pandya, Nidhi Patel, Nitin Savaliya, Raghawendra Kumar, Dinesh Kumar, Zuber Saiyed, Komal Patel, Labdhi Pandya, Afzal Ansari, Nikha Trivedi, R D Dixit, A M Kadri, Harsh                                                                                            |

|                                                                                                                                                                                                                                                                                                                                                                                                                                                                                                                                                                                                                                                                                                                                                                                                                                                                                                                                                                                                                                                                                                                                                                                                                                                                                                                                                                                                                                                                                                                                                                                                                                                                                                                                                                                                                                |                                                                                                                         |                                                                               |  |                                                                                                                                                                                                                                                                                                                                                                                                                                                |
|--------------------------------------------------------------------------------------------------------------------------------------------------------------------------------------------------------------------------------------------------------------------------------------------------------------------------------------------------------------------------------------------------------------------------------------------------------------------------------------------------------------------------------------------------------------------------------------------------------------------------------------------------------------------------------------------------------------------------------------------------------------------------------------------------------------------------------------------------------------------------------------------------------------------------------------------------------------------------------------------------------------------------------------------------------------------------------------------------------------------------------------------------------------------------------------------------------------------------------------------------------------------------------------------------------------------------------------------------------------------------------------------------------------------------------------------------------------------------------------------------------------------------------------------------------------------------------------------------------------------------------------------------------------------------------------------------------------------------------------------------------------------------------------------------------------------------------|-------------------------------------------------------------------------------------------------------------------------|-------------------------------------------------------------------------------|--|------------------------------------------------------------------------------------------------------------------------------------------------------------------------------------------------------------------------------------------------------------------------------------------------------------------------------------------------------------------------------------------------------------------------------------------------|
|                                                                                                                                                                                                                                                                                                                                                                                                                                                                                                                                                                                                                                                                                                                                                                                                                                                                                                                                                                                                                                                                                                                                                                                                                                                                                                                                                                                                                                                                                                                                                                                                                                                                                                                                                                                                                                |                                                                                                                         |                                                                               |  | Bakshi, Chaitanya Joshi, Madhvi Joshi                                                                                                                                                                                                                                                                                                                                                                                                          |
| EPI_ISL_483864                                                                                                                                                                                                                                                                                                                                                                                                                                                                                                                                                                                                                                                                                                                                                                                                                                                                                                                                                                                                                                                                                                                                                                                                                                                                                                                                                                                                                                                                                                                                                                                                                                                                                                                                                                                                                 | Department of Microbiology, Government Medical College, Surat                                                           | Gujarat Biotechnology Research Centre                                         |  | Monika Gandhi, Pinal Trivedi, Maharshi Pandya, Nidhi Patel, Nitin Savaliya, Raghawendra Kumar, Dinesh Kumar, Zuber Saiyed, Komal Patel, Labdhi Pandya, Afzal Ansari, Nikha Trivedi, Naresh Chauhan, Summaiya Mullan, Amit gamit, Apurvasinh Puvar, Janvi Raval, Zarna Patel, R D Dixit, A M Kadri, Harsh Bakshi, Chaitanya Joshi, Madhvi Joshi                                                                                                 |
| EPI_ISL_483867                                                                                                                                                                                                                                                                                                                                                                                                                                                                                                                                                                                                                                                                                                                                                                                                                                                                                                                                                                                                                                                                                                                                                                                                                                                                                                                                                                                                                                                                                                                                                                                                                                                                                                                                                                                                                 | Department of Microbiology, Government Medical College, Surat                                                           | Gujarat Biotechnology Research Centre                                         |  | Nidhi Patel, Nitin Savaliya, Raghawendra Kumar, Dinesh Kumar, Zuber Saiyed, Komal Patel, Labdhi Pandya, Afzal Ansari, Nikha Trivedi, Naresh Chauhan, Summaiya Mullan, Amit gamit, Apurvasinh Puvar, Janvi Raval, Zarna Patel, Monika Gandhi, Pinal Trivedi, Maharshi Pandya, R D Dixit, A M Kadri, Harsh Bakshi, Chaitanya Joshi, Madhvi Joshi                                                                                                 |
| EPI_ISL_483868                                                                                                                                                                                                                                                                                                                                                                                                                                                                                                                                                                                                                                                                                                                                                                                                                                                                                                                                                                                                                                                                                                                                                                                                                                                                                                                                                                                                                                                                                                                                                                                                                                                                                                                                                                                                                 | Department of Microbiology, Government Medical College, Surat                                                           | Gujarat Biotechnology Research Centre                                         |  | Nitin Savaliya, Raghawendra Kumar, Dinesh Kumar, Zuber Saiyed, Komal Patel, Labdhi Pandya, Afzal Ansari, Nikha Trivedi, Naresh Chauhan, Summaiya Mullan, Amit gamit, Apurvasinh Puvar, Janvi Raval, Zarna Patel, Monika Gandhi, Pinal Trivedi, Maharshi Pandya, Nidhi Patel, R D Dixit, A M Kadri, Harsh Bakshi, Chaitanya Joshi, Madhvi Joshi                                                                                                 |
| EPI_ISL_483875                                                                                                                                                                                                                                                                                                                                                                                                                                                                                                                                                                                                                                                                                                                                                                                                                                                                                                                                                                                                                                                                                                                                                                                                                                                                                                                                                                                                                                                                                                                                                                                                                                                                                                                                                                                                                 | Department of Microbiology, Government Medical College, Surat                                                           | Gujarat Biotechnology Research Centre                                         |  | Nikha Trivedi, Naresh Chauhan, Summaiya Mullan, Amit gamit, Apurvasinh Puvar, Janvi Raval, Zarna Patel, Monika Gandhi, Pinal Trivedi, Maharshi Pandya, Nidhi Patel, Nitin Savaliya, Raghawendra Kumar, Dinesh Kumar, Zuber Saiyed, Komal Patel, Labdhi Pandya, Afzal Ansari, R D Dixit, A M Kadri, Harsh Bakshi, Chaitanya Joshi, Madhvi Joshi                                                                                                 |
| EPI_ISL_483876                                                                                                                                                                                                                                                                                                                                                                                                                                                                                                                                                                                                                                                                                                                                                                                                                                                                                                                                                                                                                                                                                                                                                                                                                                                                                                                                                                                                                                                                                                                                                                                                                                                                                                                                                                                                                 | Department of Microbiology, Government Medical College, Surat                                                           | Gujarat Biotechnology Research Centre                                         |  | Naresh Chauhan, Summaiya Mullan, Amit gamit, Apurvasinh Puvar, Janvi Raval, Zarna Patel, Monika Gandhi, Pinal Trivedi, Maharshi Pandya, Nidhi Patel, Nitin Savaliya, Raghawendra Kumar, Dinesh Kumar, Zuber Saiyed, Komal Patel, Labdhi Pandya, Afzal Ansari, Nikha Trivedi, R D Dixit, A M Kadri, Harsh Bakshi, Chaitanya Joshi, Madhvi Joshi                                                                                                 |
| EPI_ISL_484354, EPI_ISL_484355, EPI_ISL_484356, EPI_ISL_484357, EPI_ISL_484358, EPI_ISL_484359, EPI_ISL_484360, EPI_ISL_484361, EPI_ISL_484362, EPI_ISL_484363, EPI_ISL_484364, EPI_ISL_484365, EPI_ISL_484366, EPI_ISL_484367, EPI_ISL_484368, EPI_ISL_484369, EPI_ISL_484370, EPI_ISL_484371, EPI_ISL_484372, EPI_ISL_484373, EPI_ISL_484392, EPI_ISL_484393, EPI_ISL_484394, EPI_ISL_484395, EPI_ISL_484396, EPI_ISL_484397, EPI_ISL_484398, EPI_ISL_484399, EPI_ISL_484400, EPI_ISL_484401, EPI_ISL_484402, EPI_ISL_484403, EPI_ISL_484404, EPI_ISL_484405, EPI_ISL_484406                                                                                                                                                                                                                                                                                                                                                                                                                                                                                                                                                                                                                                                                                                                                                                                                                                                                                                                                                                                                                                                                                                                                                                                                                                                 |                                                                                                                         |                                                                               |  |                                                                                                                                                                                                                                                                                                                                                                                                                                                |
| see above                                                                                                                                                                                                                                                                                                                                                                                                                                                                                                                                                                                                                                                                                                                                                                                                                                                                                                                                                                                                                                                                                                                                                                                                                                                                                                                                                                                                                                                                                                                                                                                                                                                                                                                                                                                                                      | Lincolnshire Hospitals and DeepSeq Nottingham                                                                           | COVID-19 Genomics UK (COG-UK) Consortium                                      |  | Nichola Duckworth, Tim Sloan, Sarah Walsh, Jonathan Ball, Patrick McClure, Joseph Chappell, Nadine Holmes, Matthew Carlisle, Christopher Moore, Fei Sang, Johnny Debebe, Victoria Wright, Matthew Loose                                                                                                                                                                                                                                        |
| EPI_ISL_485635, EPI_ISL_485708, EPI_ISL_485710, EPI_ISL_485711                                                                                                                                                                                                                                                                                                                                                                                                                                                                                                                                                                                                                                                                                                                                                                                                                                                                                                                                                                                                                                                                                                                                                                                                                                                                                                                                                                                                                                                                                                                                                                                                                                                                                                                                                                 | Institut Pasteur Dakar                                                                                                  | Institut Pasteur de Dakar                                                     |  | Ndongo Dia, Moussa Moise Diagne, Mamadou diop, Marie Henriette Dior Ndione, Mamadou Malado Jallow, Safietou Sanke, Ousmane Faye, Amadou Alpha Sall.                                                                                                                                                                                                                                                                                            |
| EPI_ISL_485712                                                                                                                                                                                                                                                                                                                                                                                                                                                                                                                                                                                                                                                                                                                                                                                                                                                                                                                                                                                                                                                                                                                                                                                                                                                                                                                                                                                                                                                                                                                                                                                                                                                                                                                                                                                                                 | Institut Pasteur                                                                                                        | Institut Pasteur de Dakar                                                     |  | Ndongo Dia, Moussa Moise Diagne, Mamadou diop, Marie Henriette Dior Ndione, Mamadou Malado Jallow, Safietou Sanke, Ousmane Faye, Amadou Alpha Sall.                                                                                                                                                                                                                                                                                            |
| EPI_ISL_485713, EPI_ISL_485715, EPI_ISL_485716, EPI_ISL_485717                                                                                                                                                                                                                                                                                                                                                                                                                                                                                                                                                                                                                                                                                                                                                                                                                                                                                                                                                                                                                                                                                                                                                                                                                                                                                                                                                                                                                                                                                                                                                                                                                                                                                                                                                                 | Institut Pasteur Dakar                                                                                                  | Institut Pasteur de Dakar                                                     |  | Ndongo Dia, Moussa Moise Diagne, Mamadou diop, Marie Henriette Dior Ndione, Mamadou Malado Jallow, Safietou Sanke, Ousmane Faye, Amadou Alpha Sall.                                                                                                                                                                                                                                                                                            |
| EPI_ISL_486648, EPI_ISL_486652, EPI_ISL_486656, EPI_ISL_486659, EPI_ISL_486663                                                                                                                                                                                                                                                                                                                                                                                                                                                                                                                                                                                                                                                                                                                                                                                                                                                                                                                                                                                                                                                                                                                                                                                                                                                                                                                                                                                                                                                                                                                                                                                                                                                                                                                                                 | Microbiology, Virology and Biemergency Laboratory-ASST FBF Sacco                                                        | Microbiology, Virology and Biemergency Laboratory-ASST FBF Sacco              |  | Micheli V, Comandatore F, Romeri F, Mancon A, Rimoldi SG                                                                                                                                                                                                                                                                                                                                                                                       |
| EPI_ISL_486665                                                                                                                                                                                                                                                                                                                                                                                                                                                                                                                                                                                                                                                                                                                                                                                                                                                                                                                                                                                                                                                                                                                                                                                                                                                                                                                                                                                                                                                                                                                                                                                                                                                                                                                                                                                                                 | Microbiology, Virology and Biemergency Laboratory-ASST FBF Sacco                                                        | Microbiology, Virology and Biemergency Laboratory-ASST FBF Sacco              |  | Micheli V, Rimoldi SG, Comandatore F, Mancon A, Romeri F                                                                                                                                                                                                                                                                                                                                                                                       |
| EPI_ISL_486857, EPI_ISL_486858, EPI_ISL_486859, EPI_ISL_486860, EPI_ISL_486861, EPI_ISL_486862, EPI_ISL_486863, EPI_ISL_486864, EPI_ISL_486865, EPI_ISL_486866, EPI_ISL_486867, EPI_ISL_486868, EPI_ISL_486869, EPI_ISL_486870, EPI_ISL_486871, EPI_ISL_486872, EPI_ISL_486873                                                                                                                                                                                                                                                                                                                                                                                                                                                                                                                                                                                                                                                                                                                                                                                                                                                                                                                                                                                                                                                                                                                                                                                                                                                                                                                                                                                                                                                                                                                                                 |                                                                                                                         |                                                                               |  |                                                                                                                                                                                                                                                                                                                                                                                                                                                |
| see above                                                                                                                                                                                                                                                                                                                                                                                                                                                                                                                                                                                                                                                                                                                                                                                                                                                                                                                                                                                                                                                                                                                                                                                                                                                                                                                                                                                                                                                                                                                                                                                                                                                                                                                                                                                                                      | Institut Pasteur Dakar                                                                                                  | Institut Pasteur de Dakar                                                     |  | Ndongo Dia, Moussa Moise Diagne, Mamadou Diop, Marie Henriette Dior Ndione, Mamadou Malado Jallow, Safietou Sanke, Ousmane Faye, Amadou Alpha Sall.                                                                                                                                                                                                                                                                                            |
| EPI_ISL_486876                                                                                                                                                                                                                                                                                                                                                                                                                                                                                                                                                                                                                                                                                                                                                                                                                                                                                                                                                                                                                                                                                                                                                                                                                                                                                                                                                                                                                                                                                                                                                                                                                                                                                                                                                                                                                 | Clinical Microbiology Laboratory- Basurto University Hospital                                                           | Biocruces-Bizkaia                                                             |  | Mikel J. Urrutikoetxea-Gutierrez, Ana Belén Belén de la Hoz, Matxalen Vidal-García, M <sup>o</sup> Carmen Nieto Toboso, Estibaliz Ugalde-Zarraga, José Luis Díaz de Tuesta del Arco                                                                                                                                                                                                                                                            |
| EPI_ISL_487362                                                                                                                                                                                                                                                                                                                                                                                                                                                                                                                                                                                                                                                                                                                                                                                                                                                                                                                                                                                                                                                                                                                                                                                                                                                                                                                                                                                                                                                                                                                                                                                                                                                                                                                                                                                                                 | National Institute of Laboratory Medicine and Referral Center                                                           | Genomic Research Lab, BCSIR                                                   |  | Md. Ahasan Habib, Abu Sayeed Mohammad Mahmud, Mohammad Samir Uzzaman, Eshrar Osman, Shahina Akter, Tanjina Akhter Banu, Md. Murshed Hasan Sarkar, Barna Goswami, Iffat Jahan, Md. Saddam Hossain, Tasnim Nafisa, Md. Maruf Ahmed Molla, Mahmuda Yeasmin, Asish Kumar Ghosh, A. K. M. Shamsuzzaman, Sheikh Md. Selim Al Din, Utpal Chandra Ray, Salek Ahmed Sajib, Md. Salim Khan                                                               |
| EPI_ISL_487375, EPI_ISL_487376                                                                                                                                                                                                                                                                                                                                                                                                                                                                                                                                                                                                                                                                                                                                                                                                                                                                                                                                                                                                                                                                                                                                                                                                                                                                                                                                                                                                                                                                                                                                                                                                                                                                                                                                                                                                 | National Institute of Laboratory Medicine and Referral Center                                                           | Genomic Research Lab, BCSIR                                                   |  | Md. Saddam Hossain, Abu Sayeed Mohammad Mahmud, Mohammad Samir Uzzaman, Eshrar Osman, Md. Ahasan Habib, Shahina Akter, Tanjina Akhter Banu, Md. Murshed Hasan Sarkar, Barna Goswami, Iffat Jahan, Tasnim Nafisa, Md. Maruf Ahmed Molla, Mahmuda Yeasmin, Asish Kumar Ghosh, A. K. M. Shamsuzzaman, Sheikh Md. Selim Al Din, Utpal Chandra Ray, Salek Ahmed Sajib, Md. Salim Khan                                                               |
| EPI_ISL_487378, EPI_ISL_487380, EPI_ISL_487382, EPI_ISL_487383, EPI_ISL_487384, EPI_ISL_487385                                                                                                                                                                                                                                                                                                                                                                                                                                                                                                                                                                                                                                                                                                                                                                                                                                                                                                                                                                                                                                                                                                                                                                                                                                                                                                                                                                                                                                                                                                                                                                                                                                                                                                                                 | National Institute of Laboratory Medicine and Referral Center                                                           | Genomic Research Lab, BCSIR                                                   |  | Md. Murshed Hasan Sarkar, Abu Sayeed Mohammad Mahmud, Mohammad Samir Uzzaman, Eshrar Osman, Md. Ahasan Habib, Shahina Akhter, Tanjina Akhter Banu, Barna Goswami, Iffat Jahan, Md. Saddam Hossain, Tasnim Nafisa, Md. Maruf Ahmed Molla, Mahmuda Yeasmin, Asish Kumar Ghosh, A. K. M. Shamsuzzaman, Sheikh Md. Selim Al Din, Utpal Chandra Ray, Salek Ahmed Sajib, Md. Salim Khan                                                              |
| EPI_ISL_487647, EPI_ISL_487652, EPI_ISL_487653, EPI_ISL_487654, EPI_ISL_487655, EPI_ISL_487656, EPI_ISL_487658, EPI_ISL_487661, EPI_ISL_487662, EPI_ISL_487666, EPI_ISL_487667, EPI_ISL_487670, EPI_ISL_487672, EPI_ISL_487676, EPI_ISL_487678, EPI_ISL_487679, EPI_ISL_487680, EPI_ISL_487681, EPI_ISL_487686, EPI_ISL_487688, EPI_ISL_487689, EPI_ISL_487693, EPI_ISL_487694, EPI_ISL_487695, EPI_ISL_487696, EPI_ISL_487711, EPI_ISL_487715, EPI_ISL_487716, EPI_ISL_487721, EPI_ISL_487725, EPI_ISL_487728, EPI_ISL_487731, EPI_ISL_487734, EPI_ISL_487735, EPI_ISL_487737, EPI_ISL_487739, EPI_ISL_487747, EPI_ISL_487750, EPI_ISL_487752, EPI_ISL_487758                                                                                                                                                                                                                                                                                                                                                                                                                                                                                                                                                                                                                                                                                                                                                                                                                                                                                                                                                                                                                                                                                                                                                                 |                                                                                                                         |                                                                               |  |                                                                                                                                                                                                                                                                                                                                                                                                                                                |
| see above                                                                                                                                                                                                                                                                                                                                                                                                                                                                                                                                                                                                                                                                                                                                                                                                                                                                                                                                                                                                                                                                                                                                                                                                                                                                                                                                                                                                                                                                                                                                                                                                                                                                                                                                                                                                                      | Virology Department, Royal Infirmary of Edinburgh, NHS Lothian / School of Biological Sciences, University of Edinburgh | Wellcome Sanger Institute for the COVID-19 Genomics UK (COG-UK) consortium    |  | McHugh M, Dewar R, Rooke S, O'Toole Á, Scher E, Hill V, McCrone JT, Colquhoun R, Yu X, Jackson B, Rambaut A, Templeton K and Alex Alderton, Roberto Amato, Sonia Goncalves, Ewan Harrison, David K. Jackson, Ian Johnston, Dominic Kwiatkowski, Cordelia Langford, John Sillitoe on behalf of the Wellcome Sanger Institute COVID-19 Surveillance Team ( <a href="http://www.sanger.ac.uk/covid-team">http://www.sanger.ac.uk/covid-team</a> ) |
| EPI_ISL_487767                                                                                                                                                                                                                                                                                                                                                                                                                                                                                                                                                                                                                                                                                                                                                                                                                                                                                                                                                                                                                                                                                                                                                                                                                                                                                                                                                                                                                                                                                                                                                                                                                                                                                                                                                                                                                 | Virology Department, Royal Infirmary of Edinburgh, NHS Lothian / School of Biological Sciences, University of Edinburgh | Wellcome Sanger Institute for the COVID-19 Genomics UK (COG-UK) Consortium    |  | McHugh M, Dewar R, Rooke S, O'Toole Á, Scher E, Hill V, McCrone JT, Colquhoun R, Yu X, Jackson B, Rambaut A, Templeton K and Alex Alderton, Roberto Amato, Sonia Goncalves, Ewan Harrison, David K. Jackson, Ian Johnston, Dominic Kwiatkowski, Cordelia Langford, John Sillitoe on behalf of the Wellcome Sanger Institute COVID-19 Surveillance Team                                                                                         |
| EPI_ISL_487771, EPI_ISL_487776, EPI_ISL_487779, EPI_ISL_487782, EPI_ISL_487789, EPI_ISL_487790, EPI_ISL_487792, EPI_ISL_487799, EPI_ISL_487801, EPI_ISL_487803, EPI_ISL_487805, EPI_ISL_487809, EPI_ISL_487817, EPI_ISL_487819, EPI_ISL_487824, EPI_ISL_487825, EPI_ISL_487828, EPI_ISL_487833, EPI_ISL_487836, EPI_ISL_487844, EPI_ISL_487845, EPI_ISL_487848, EPI_ISL_487852, EPI_ISL_487854, EPI_ISL_487858, EPI_ISL_487867, EPI_ISL_487868, EPI_ISL_487870, EPI_ISL_487871, EPI_ISL_487874, EPI_ISL_487875, EPI_ISL_487876, EPI_ISL_487878, EPI_ISL_487880, EPI_ISL_487881, EPI_ISL_487886, EPI_ISL_487895, EPI_ISL_487905, EPI_ISL_487907, EPI_ISL_487908, EPI_ISL_487910, EPI_ISL_487912, EPI_ISL_487914, EPI_ISL_487915, EPI_ISL_487922, EPI_ISL_487925, EPI_ISL_487926, EPI_ISL_487929, EPI_ISL_487937, EPI_ISL_487939, EPI_ISL_487942, EPI_ISL_487944, EPI_ISL_487948, EPI_ISL_487951, EPI_ISL_487952, EPI_ISL_487956, EPI_ISL_487957, EPI_ISL_487971, EPI_ISL_487976, EPI_ISL_487977, EPI_ISL_487979, EPI_ISL_487981, EPI_ISL_487983, EPI_ISL_487990, EPI_ISL_487991, EPI_ISL_487992, EPI_ISL_487993, EPI_ISL_487994, EPI_ISL_487996, EPI_ISL_487997, EPI_ISL_488882, EPI_ISL_488886, EPI_ISL_488888, EPI_ISL_488894, EPI_ISL_488895, EPI_ISL_488899, EPI_ISL_488908, EPI_ISL_488909, EPI_ISL_488915, EPI_ISL_488916, EPI_ISL_488933, EPI_ISL_488935, EPI_ISL_488936, EPI_ISL_488941, EPI_ISL_488958, EPI_ISL_488969, EPI_ISL_488974, EPI_ISL_488982, EPI_ISL_488983, EPI_ISL_488988, EPI_ISL_488992, EPI_ISL_488993, EPI_ISL_488996, EPI_ISL_489001, EPI_ISL_489006, EPI_ISL_489015, EPI_ISL_489016, EPI_ISL_489017, EPI_ISL_489018, EPI_ISL_489019, EPI_ISL_489022, EPI_ISL_489026, EPI_ISL_489029, EPI_ISL_489030, EPI_ISL_489033, EPI_ISL_489035, EPI_ISL_489037, EPI_ISL_489039, EPI_ISL_489040, EPI_ISL_489041 |                                                                                                                         |                                                                               |  |                                                                                                                                                                                                                                                                                                                                                                                                                                                |
| see above                                                                                                                                                                                                                                                                                                                                                                                                                                                                                                                                                                                                                                                                                                                                                                                                                                                                                                                                                                                                                                                                                                                                                                                                                                                                                                                                                                                                                                                                                                                                                                                                                                                                                                                                                                                                                      | Virology Department, Royal Infirmary of Edinburgh, NHS Lothian / School of Biological Sciences, University of Edinburgh | Wellcome Sanger Institute for the COVID-19 Genomics UK (COG-UK) consortium    |  | McHugh M, Dewar R, Rooke S, O'Toole Á, Scher E, Hill V, McCrone JT, Colquhoun R, Yu X, Jackson B, Rambaut A, Templeton K and Alex Alderton, Roberto Amato, Sonia Goncalves, Ewan Harrison, David K. Jackson, Ian Johnston, Dominic Kwiatkowski, Cordelia Langford, John Sillitoe on behalf of the Wellcome Sanger Institute COVID-19 Surveillance Team ( <a href="http://www.sanger.ac.uk/covid-team">http://www.sanger.ac.uk/covid-team</a> ) |
| EPI_ISL_489043                                                                                                                                                                                                                                                                                                                                                                                                                                                                                                                                                                                                                                                                                                                                                                                                                                                                                                                                                                                                                                                                                                                                                                                                                                                                                                                                                                                                                                                                                                                                                                                                                                                                                                                                                                                                                 | Virology Department, Royal Infirmary of Edinburgh, NHS Lothian / School of Biological Sciences, University of Edinburgh | Wellcome Sanger Institute for the COVID-19 Genomics UK (COG-UK) Consortium    |  | McHugh M, Dewar R, Rooke S, O'Toole Á, Scher E, Hill V, McCrone JT, Colquhoun R, Yu X, Jackson B, Rambaut A, Templeton K and Alex Alderton, Roberto Amato, Sonia Goncalves, Ewan Harrison, David K. Jackson, Ian Johnston, Dominic Kwiatkowski, Cordelia Langford, John Sillitoe on behalf of the Wellcome Sanger Institute COVID-19 Surveillance Team                                                                                         |
| EPI_ISL_489045, EPI_ISL_489049, EPI_ISL_489057, EPI_ISL_489063                                                                                                                                                                                                                                                                                                                                                                                                                                                                                                                                                                                                                                                                                                                                                                                                                                                                                                                                                                                                                                                                                                                                                                                                                                                                                                                                                                                                                                                                                                                                                                                                                                                                                                                                                                 | Virology Department, Royal Infirmary of Edinburgh, NHS Lothian / School of Biological Sciences, University of Edinburgh | Wellcome Sanger Institute for the COVID-19 Genomics UK (COG-UK) consortium    |  | McHugh M, Dewar R, Rooke S, O'Toole Á, Scher E, Hill V, McCrone JT, Colquhoun R, Yu X, Jackson B, Rambaut A, Templeton K and Alex Alderton, Roberto Amato, Sonia Goncalves, Ewan Harrison, David K. Jackson, Ian Johnston, Dominic Kwiatkowski, Cordelia Langford, John Sillitoe on behalf of the Wellcome Sanger Institute COVID-19 Surveillance Team ( <a href="http://www.sanger.ac.uk/covid-team">http://www.sanger.ac.uk/covid-team</a> ) |
| EPI_ISL_489708, EPI_ISL_489709                                                                                                                                                                                                                                                                                                                                                                                                                                                                                                                                                                                                                                                                                                                                                                                                                                                                                                                                                                                                                                                                                                                                                                                                                                                                                                                                                                                                                                                                                                                                                                                                                                                                                                                                                                                                 | The National Institute of Public Health                                                                                 | The National Institute of Public Health and State Veterinary Institute Prague |  | Nagy,A.;Jirincova,H;Novakova,L;Trnka,D;Vecerova,J                                                                                                                                                                                                                                                                                                                                                                                              |
| EPI_ISL_489833, EPI_ISL_489834, EPI_ISL_489835                                                                                                                                                                                                                                                                                                                                                                                                                                                                                                                                                                                                                                                                                                                                                                                                                                                                                                                                                                                                                                                                                                                                                                                                                                                                                                                                                                                                                                                                                                                                                                                                                                                                                                                                                                                 | Clinical Microbiology Laboratory- Basurto University Hospital                                                           | Biocruces-Bizkaia                                                             |  | Mikel J. Urrutikoetxea-Gutierrez, Ana Belén Belén de la Hoz, Matxalen Vidal-García, M <sup>o</sup> Carmen Nieto Toboso, Estibaliz Ugalde-Zarraga, José Luis Díaz de Tuesta del Arco                                                                                                                                                                                                                                                            |

|                                                                                                                                                                                                                                                                                                                                                                                                                                                                                                                                                                                                                                                                                                                                                                                                                                                                                                                                                                                |                                                                                                                         |                                                                                                                         |                                                                                                                                                                                                                                                                                                                                                                                                                                                |                                                                                                                                                                                                                                                                                                                                                                                                                                                |
|--------------------------------------------------------------------------------------------------------------------------------------------------------------------------------------------------------------------------------------------------------------------------------------------------------------------------------------------------------------------------------------------------------------------------------------------------------------------------------------------------------------------------------------------------------------------------------------------------------------------------------------------------------------------------------------------------------------------------------------------------------------------------------------------------------------------------------------------------------------------------------------------------------------------------------------------------------------------------------|-------------------------------------------------------------------------------------------------------------------------|-------------------------------------------------------------------------------------------------------------------------|------------------------------------------------------------------------------------------------------------------------------------------------------------------------------------------------------------------------------------------------------------------------------------------------------------------------------------------------------------------------------------------------------------------------------------------------|------------------------------------------------------------------------------------------------------------------------------------------------------------------------------------------------------------------------------------------------------------------------------------------------------------------------------------------------------------------------------------------------------------------------------------------------|
| EPI_ISL_490109, EPI_ISL_490110, EPI_ISL_490111                                                                                                                                                                                                                                                                                                                                                                                                                                                                                                                                                                                                                                                                                                                                                                                                                                                                                                                                 | National Institute of Laboratory Medicine and Referral Center                                                           | Genomic Research Lab, BCSIR                                                                                             | Md. Murshed Hasan Sarkar, Abu Sayeed Mohammad Mahmud, Mohammad Samir Uzzaman, Eshrar Osman, Md. Ahasan Habib, Shahina Akter, Tanjina Akhter Banu, Barna Goswami, Iffat Jahana, Md. Saddam Hossain, Tasnim Nafisa, Md. Maruf Ahmed Molla, Mahmuda Yeasmin, Asish Kumar Ghosh, A. K. M. Shamsuzzaman, Sheikh Md. Selim Al Din, Utpal Chandra Ray, Salek Ahmed Sajib, Md. Salim Khan                                                              |                                                                                                                                                                                                                                                                                                                                                                                                                                                |
| EPI_ISL_490112                                                                                                                                                                                                                                                                                                                                                                                                                                                                                                                                                                                                                                                                                                                                                                                                                                                                                                                                                                 | The National Institute of Public Health                                                                                 | The National Institute of Public Health and State Veterinary Institute Prague                                           | Nagy,A.;Jirincova,H;Novakova,L;Trnka,D;Vecerova,J                                                                                                                                                                                                                                                                                                                                                                                              |                                                                                                                                                                                                                                                                                                                                                                                                                                                |
| EPI_ISL_490165                                                                                                                                                                                                                                                                                                                                                                                                                                                                                                                                                                                                                                                                                                                                                                                                                                                                                                                                                                 | National Institute of Laboratory Medicine and Referral Center                                                           | Genomic Research Lab, BCSIR                                                                                             | Md. Saddam Hossain, Abu Sayeed Mohammad Mahmud, Mohammad Samir Uzzaman, Eshrar Osman, Md. Ahasan Habib, Shahina Akter, Tanjina Akhter Banu, Md. Murshed Hasan Sarkar, Barna Goswami, Iffat Jahana, Tasnim Nafisa, Md. Maruf Ahmed Molla, Mahmuda Yeasmin, Asish Kumar Ghosh, A. K. M. Shamsuzzaman, Sheikh Md. Selim Al Din, Utpal Chandra Ray, Salek Ahmed Sajib, Md. Salim Khan                                                              |                                                                                                                                                                                                                                                                                                                                                                                                                                                |
| EPI_ISL_490202, EPI_ISL_490203, EPI_ISL_490204                                                                                                                                                                                                                                                                                                                                                                                                                                                                                                                                                                                                                                                                                                                                                                                                                                                                                                                                 | Clinical Microbiology Laboratory- Basurto University Hospital                                                           | Biocruces-Bizkaia                                                                                                       | Mikel J. Urrutikoetxea-Gutierrez, Ana Belén Belén de la Hoz, Matxalen Vidal-García, M <sup>o</sup> Carmen Nieto Toboso, Estibaliz Ugalde-Zarraga, José Luis Díaz de Tuesta del Arco                                                                                                                                                                                                                                                            |                                                                                                                                                                                                                                                                                                                                                                                                                                                |
| EPI_ISL_490563, EPI_ISL_490564, EPI_ISL_490565, EPI_ISL_490566, EPI_ISL_490567, EPI_ISL_490568, EPI_ISL_490569, EPI_ISL_490570, EPI_ISL_490571, EPI_ISL_490572, EPI_ISL_490573, EPI_ISL_490574, EPI_ISL_490575, EPI_ISL_490576, EPI_ISL_490577, EPI_ISL_490578, EPI_ISL_490579, EPI_ISL_490580                                                                                                                                                                                                                                                                                                                                                                                                                                                                                                                                                                                                                                                                                 | see above                                                                                                               | Lincolnshire Hospitals and DeepSeq Nottingham                                                                           | COVID-19 Genomics UK (COG-UK) Consortium                                                                                                                                                                                                                                                                                                                                                                                                       | Nichola Duckworth, Tim Sloan, Sarah Walsh, Jonathan Ball, Patrick McClure, Joseph Chappell, Nadine Holmes, Matthew Carlisle, Christopher Moore, Fei Sang, Johnny Debebe, Victoria Wright, Matthew Loose                                                                                                                                                                                                                                        |
| EPI_ISL_490977                                                                                                                                                                                                                                                                                                                                                                                                                                                                                                                                                                                                                                                                                                                                                                                                                                                                                                                                                                 | Clinical Microbiology Laboratory- Basurto University Hospital                                                           | Biocruces-Bizkaia                                                                                                       | Mikel J. Urrutikoetxea-Gutierrez, Ana Belén Belén de la Hoz, Matxalen Vidal-García, M <sup>o</sup> Carmen Nieto Toboso, Estibaliz Ugalde-Zarraga, José Luis Díaz de Tuesta del Arco                                                                                                                                                                                                                                                            |                                                                                                                                                                                                                                                                                                                                                                                                                                                |
| EPI_ISL_491092                                                                                                                                                                                                                                                                                                                                                                                                                                                                                                                                                                                                                                                                                                                                                                                                                                                                                                                                                                 | The National Institute of Public Health                                                                                 | State Veterinary Institute Prague                                                                                       | Nagy,A.;Jirincova,H;Novakova,L;Trnka,D;Vecerova,J                                                                                                                                                                                                                                                                                                                                                                                              |                                                                                                                                                                                                                                                                                                                                                                                                                                                |
| EPI_ISL_491093, EPI_ISL_491094, EPI_ISL_491095                                                                                                                                                                                                                                                                                                                                                                                                                                                                                                                                                                                                                                                                                                                                                                                                                                                                                                                                 | The National Institute of Public Health                                                                                 | The National Institute of Public Health and State Veterinary Institute Prague                                           | Nagy,A.; Jirincova,H; Novakova,L; Trnka,D; Vecerova,J                                                                                                                                                                                                                                                                                                                                                                                          |                                                                                                                                                                                                                                                                                                                                                                                                                                                |
| EPI_ISL_491117, EPI_ISL_491118, EPI_ISL_491119                                                                                                                                                                                                                                                                                                                                                                                                                                                                                                                                                                                                                                                                                                                                                                                                                                                                                                                                 | The National Institute of Public Health                                                                                 | The National Institute of Public Health and State Veterinary Institute Prague                                           | Nagy,A.;Jirincova,H;Novakova,L;Trnka,D;Vecerova,J                                                                                                                                                                                                                                                                                                                                                                                              |                                                                                                                                                                                                                                                                                                                                                                                                                                                |
| EPI_ISL_491476                                                                                                                                                                                                                                                                                                                                                                                                                                                                                                                                                                                                                                                                                                                                                                                                                                                                                                                                                                 | BSL3 Lab, Pendik Veterinary Control Enstitute                                                                           | Genomic Laboratory (GLAB), Istanbul Technical University                                                                | Mustafa HASOKSUZ, Fahriye SARAC, Osman ERGANIS, Serdar UZAR, Hakan ENUL, Cumhur ADIAY, Ahmet SAIT, Orbay SAYI, Kadir YESILBAG, Oguz KARABEY                                                                                                                                                                                                                                                                                                    |                                                                                                                                                                                                                                                                                                                                                                                                                                                |
| EPI_ISL_491501, EPI_ISL_491502, EPI_ISL_491505, EPI_ISL_491506, EPI_ISL_491507, EPI_ISL_491511, EPI_ISL_491515, EPI_ISL_491519, EPI_ISL_491520, EPI_ISL_491522, EPI_ISL_491524, EPI_ISL_491525, EPI_ISL_491526, EPI_ISL_491531, EPI_ISL_491532, EPI_ISL_491533, EPI_ISL_491539, EPI_ISL_491562                                                                                                                                                                                                                                                                                                                                                                                                                                                                                                                                                                                                                                                                                 | see above                                                                                                               | Virology Department, Royal Infirmary of Edinburgh, NHS Lothian / School of Biological Sciences, University of Edinburgh | Wellcome Sanger Institute for the COVID-19 Genomics UK (COG-UK) consortium                                                                                                                                                                                                                                                                                                                                                                     | McHugh M, Dewar R, Rooke S, O'Toole Á, Scher E, Hill V, McCrone JT, Colquhoun R, Yu X, Jackson B, Rambaut A, Templeton K and Alex Alderton, Roberto Amato, Sonia Goncalves, Ewan Harrison, David K. Jackson, Ian Johnston, Dominic Kwiatkowski, Cordelia Langford, John Sillitoe on behalf of the Wellcome Sanger Institute COVID-19 Surveillance Team ( <a href="http://www.sanger.ac.uk/covid-team">http://www.sanger.ac.uk/covid-team</a> ) |
| EPI_ISL_491572                                                                                                                                                                                                                                                                                                                                                                                                                                                                                                                                                                                                                                                                                                                                                                                                                                                                                                                                                                 | Virology Department, Royal Infirmary of Edinburgh, NHS Lothian / School of Biological Sciences, University of Edinburgh | Wellcome Sanger Institute for the COVID-19 Genomics UK (COG-UK) Consortium                                              | McHugh M, Dewar R, Rooke S, O'Toole Á, Scher E, Hill V, McCrone JT, Colquhoun R, Yu X, Jackson B, Rambaut A, Templeton K and Alex Alderton, Roberto Amato, Sonia Goncalves, Ewan Harrison, David K. Jackson, Ian Johnston, Dominic Kwiatkowski, Cordelia Langford, John Sillitoe on behalf of the Wellcome Sanger Institute COVID-19 Surveillance Team                                                                                         |                                                                                                                                                                                                                                                                                                                                                                                                                                                |
| EPI_ISL_491578, EPI_ISL_491579, EPI_ISL_491587, EPI_ISL_491593, EPI_ISL_491595, EPI_ISL_491598, EPI_ISL_491599, EPI_ISL_491600, EPI_ISL_491604, EPI_ISL_491606                                                                                                                                                                                                                                                                                                                                                                                                                                                                                                                                                                                                                                                                                                                                                                                                                 | Virology Department, Royal Infirmary of Edinburgh, NHS Lothian / School of Biological Sciences, University of Edinburgh | Wellcome Sanger Institute for the COVID-19 Genomics UK (COG-UK) consortium                                              | McHugh M, Dewar R, Rooke S, O'Toole Á, Scher E, Hill V, McCrone JT, Colquhoun R, Yu X, Jackson B, Rambaut A, Templeton K and Alex Alderton, Roberto Amato, Sonia Goncalves, Ewan Harrison, David K. Jackson, Ian Johnston, Dominic Kwiatkowski, Cordelia Langford, John Sillitoe on behalf of the Wellcome Sanger Institute COVID-19 Surveillance Team ( <a href="http://www.sanger.ac.uk/covid-team">http://www.sanger.ac.uk/covid-team</a> ) |                                                                                                                                                                                                                                                                                                                                                                                                                                                |
| EPI_ISL_491608                                                                                                                                                                                                                                                                                                                                                                                                                                                                                                                                                                                                                                                                                                                                                                                                                                                                                                                                                                 | Virology Department, Royal Infirmary of Edinburgh, NHS Lothian / School of Biological Sciences, University of Edinburgh | Wellcome Sanger Institute for the COVID-19 Genomics UK (COG-UK) Consortium                                              | McHugh M, Dewar R, Rooke S, O'Toole Á, Scher E, Hill V, McCrone JT, Colquhoun R, Yu X, Jackson B, Rambaut A, Templeton K and Alex Alderton, Roberto Amato, Sonia Goncalves, Ewan Harrison, David K. Jackson, Ian Johnston, Dominic Kwiatkowski, Cordelia Langford, John Sillitoe on behalf of the Wellcome Sanger Institute COVID-19 Surveillance Team                                                                                         |                                                                                                                                                                                                                                                                                                                                                                                                                                                |
| EPI_ISL_491615                                                                                                                                                                                                                                                                                                                                                                                                                                                                                                                                                                                                                                                                                                                                                                                                                                                                                                                                                                 | Virology Department, Royal Infirmary of Edinburgh, NHS Lothian / School of Biological Sciences, University of Edinburgh | Wellcome Sanger Institute for the COVID-19 Genomics UK (COG-UK) consortium                                              | McHugh M, Dewar R, Rooke S, O'Toole Á, Scher E, Hill V, McCrone JT, Colquhoun R, Yu X, Jackson B, Rambaut A, Templeton K and Alex Alderton, Roberto Amato, Sonia Goncalves, Ewan Harrison, David K. Jackson, Ian Johnston, Dominic Kwiatkowski, Cordelia Langford, John Sillitoe on behalf of the Wellcome Sanger Institute COVID-19 Surveillance Team ( <a href="http://www.sanger.ac.uk/covid-team">http://www.sanger.ac.uk/covid-team</a> ) |                                                                                                                                                                                                                                                                                                                                                                                                                                                |
| EPI_ISL_491616                                                                                                                                                                                                                                                                                                                                                                                                                                                                                                                                                                                                                                                                                                                                                                                                                                                                                                                                                                 | Virology Department, Royal Infirmary of Edinburgh, NHS Lothian / School of Biological Sciences, University of Edinburgh | Wellcome Sanger Institute for the COVID-19 Genomics UK (COG-UK) Consortium                                              | McHugh M, Dewar R, Rooke S, O'Toole Á, Scher E, Hill V, McCrone JT, Colquhoun R, Yu X, Jackson B, Rambaut A, Templeton K and Alex Alderton, Roberto Amato, Sonia Goncalves, Ewan Harrison, David K. Jackson, Ian Johnston, Dominic Kwiatkowski, Cordelia Langford, John Sillitoe on behalf of the Wellcome Sanger Institute COVID-19 Surveillance Team                                                                                         |                                                                                                                                                                                                                                                                                                                                                                                                                                                |
| EPI_ISL_491619, EPI_ISL_491622, EPI_ISL_491627, EPI_ISL_491634, EPI_ISL_491636, EPI_ISL_491637, EPI_ISL_491650, EPI_ISL_491652, EPI_ISL_491653                                                                                                                                                                                                                                                                                                                                                                                                                                                                                                                                                                                                                                                                                                                                                                                                                                 | Virology Department, Royal Infirmary of Edinburgh, NHS Lothian / School of Biological Sciences, University of Edinburgh | Wellcome Sanger Institute for the COVID-19 Genomics UK (COG-UK) consortium                                              | McHugh M, Dewar R, Rooke S, O'Toole Á, Scher E, Hill V, McCrone JT, Colquhoun R, Yu X, Jackson B, Rambaut A, Templeton K and Alex Alderton, Roberto Amato, Sonia Goncalves, Ewan Harrison, David K. Jackson, Ian Johnston, Dominic Kwiatkowski, Cordelia Langford, John Sillitoe on behalf of the Wellcome Sanger Institute COVID-19 Surveillance Team ( <a href="http://www.sanger.ac.uk/covid-team">http://www.sanger.ac.uk/covid-team</a> ) |                                                                                                                                                                                                                                                                                                                                                                                                                                                |
| EPI_ISL_491655                                                                                                                                                                                                                                                                                                                                                                                                                                                                                                                                                                                                                                                                                                                                                                                                                                                                                                                                                                 | Virology Department, Royal Infirmary of Edinburgh, NHS Lothian / School of Biological Sciences, University of Edinburgh | Wellcome Sanger Institute for the COVID-19 Genomics UK (COG-UK) Consortium                                              | McHugh M, Dewar R, Rooke S, O'Toole Á, Scher E, Hill V, McCrone JT, Colquhoun R, Yu X, Jackson B, Rambaut A, Templeton K and Alex Alderton, Roberto Amato, Sonia Goncalves, Ewan Harrison, David K. Jackson, Ian Johnston, Dominic Kwiatkowski, Cordelia Langford, John Sillitoe on behalf of the Wellcome Sanger Institute COVID-19 Surveillance Team                                                                                         |                                                                                                                                                                                                                                                                                                                                                                                                                                                |
| EPI_ISL_491657, EPI_ISL_491659, EPI_ISL_491672, EPI_ISL_491683, EPI_ISL_491697, EPI_ISL_491699                                                                                                                                                                                                                                                                                                                                                                                                                                                                                                                                                                                                                                                                                                                                                                                                                                                                                 | Virology Department, Royal Infirmary of Edinburgh, NHS Lothian / School of Biological Sciences, University of Edinburgh | Wellcome Sanger Institute for the COVID-19 Genomics UK (COG-UK) consortium                                              | McHugh M, Dewar R, Rooke S, O'Toole Á, Scher E, Hill V, McCrone JT, Colquhoun R, Yu X, Jackson B, Rambaut A, Templeton K and Alex Alderton, Roberto Amato, Sonia Goncalves, Ewan Harrison, David K. Jackson, Ian Johnston, Dominic Kwiatkowski, Cordelia Langford, John Sillitoe on behalf of the Wellcome Sanger Institute COVID-19 Surveillance Team ( <a href="http://www.sanger.ac.uk/covid-team">http://www.sanger.ac.uk/covid-team</a> ) |                                                                                                                                                                                                                                                                                                                                                                                                                                                |
| EPI_ISL_493001, EPI_ISL_493061, EPI_ISL_493062, EPI_ISL_493063, EPI_ISL_493064, EPI_ISL_493125, EPI_ISL_493126, EPI_ISL_493127, EPI_ISL_493128                                                                                                                                                                                                                                                                                                                                                                                                                                                                                                                                                                                                                                                                                                                                                                                                                                 | Wyoming Public Health Laboratory                                                                                        | Wyoming Public Health Laboratory                                                                                        | Noah Hull, Rob Christensen, Jim Mildenerger, Joel Sevinsky, Cari Sloma, and Wanda Manley                                                                                                                                                                                                                                                                                                                                                       |                                                                                                                                                                                                                                                                                                                                                                                                                                                |
| EPI_ISL_493549, EPI_ISL_493550, EPI_ISL_493551, EPI_ISL_493552, EPI_ISL_493553, EPI_ISL_493554, EPI_ISL_493555, EPI_ISL_493556, EPI_ISL_493557, EPI_ISL_493558, EPI_ISL_493559, EPI_ISL_493560, EPI_ISL_493561, EPI_ISL_493562, EPI_ISL_493563, EPI_ISL_493564, EPI_ISL_493565, EPI_ISL_493566, EPI_ISL_493567, EPI_ISL_493568, EPI_ISL_493569, EPI_ISL_493570, EPI_ISL_493571, EPI_ISL_493572, EPI_ISL_493573, EPI_ISL_493574, EPI_ISL_493575, EPI_ISL_493576, EPI_ISL_493577, EPI_ISL_493578, EPI_ISL_493579, EPI_ISL_493580, EPI_ISL_493581, EPI_ISL_493582, EPI_ISL_493583, EPI_ISL_493584, EPI_ISL_493585, EPI_ISL_493586, EPI_ISL_493587, EPI_ISL_493588, EPI_ISL_493589, EPI_ISL_493590, EPI_ISL_493591, EPI_ISL_493592, EPI_ISL_493593, EPI_ISL_493594, EPI_ISL_493595, EPI_ISL_493596, EPI_ISL_493597, EPI_ISL_493598, EPI_ISL_493599, EPI_ISL_493600, EPI_ISL_493603, EPI_ISL_493604, EPI_ISL_493605, EPI_ISL_493610, EPI_ISL_493611, EPI_ISL_493612, EPI_ISL_493613 | see above                                                                                                               | Lincolnshire Hospitals and DeepSeq Nottingham                                                                           | COVID-19 Genomics UK (COG-UK) Consortium                                                                                                                                                                                                                                                                                                                                                                                                       | Nichola Duckworth, Tim Sloan, Sarah Walsh, Jonathan Ball, Patrick McClure, Joseph Chappell, Nadine Holmes, Matthew Carlisle, Christopher Moore, Fei Sang, Johnny Debebe, Victoria Wright, Matthew Loose                                                                                                                                                                                                                                        |
| EPI_ISL_493901, EPI_ISL_493903, EPI_ISL_493908, EPI_ISL_493911, EPI_ISL_493913, EPI_ISL_493914, EPI_ISL_493919, EPI_ISL_493920, EPI_ISL_493936, EPI_ISL_493937, EPI_ISL_493942, EPI_ISL_493945, EPI_ISL_493952, EPI_ISL_493955, EPI_ISL_493957, EPI_ISL_493958, EPI_ISL_493961, EPI_ISL_493963, EPI_ISL_493965, EPI_ISL_493966, EPI_ISL_493969, EPI_ISL_493974                                                                                                                                                                                                                                                                                                                                                                                                                                                                                                                                                                                                                 | see above                                                                                                               | Virology Department, Royal Infirmary of Edinburgh, NHS Lothian / School of Biological Sciences, University of Edinburgh | COVID-19 Genomics UK (COG-UK) Consortium                                                                                                                                                                                                                                                                                                                                                                                                       | McHugh M, Dewar R, Rooke S, Gallagher M, Balcaza C, O'Toole Á, Scher E, Hill V, McCrone JT, Colquhoun R, Yu X, Jackson B, Rambaut A, Williams TC, Templeton K                                                                                                                                                                                                                                                                                  |
| EPI_ISL_495016                                                                                                                                                                                                                                                                                                                                                                                                                                                                                                                                                                                                                                                                                                                                                                                                                                                                                                                                                                 | B.J. Medical College and Civil hospital                                                                                 | Gujarat Biotechnology Research Centre                                                                                   | Monika Gandhi, Pinal Trivedi, Maharshi Pandya, Nidhi Patel, Nitin Savaliya, Raghawendra Kumar, Dinesh Kumar, Zuber Saiyed, Komal Patel, Labdhi Pandya, Afzal Ansari, Nikha Trivedi, Pranay Shah, Kamlesh J Upadhyay, Sanjay Kapadia, Apurvashin Puvar, Janvi Raval, Zarna Patel, R D Dixit, A M Kadri, Harsh Bakshi, Chaitanya Joshi, Madhvi Joshi                                                                                             |                                                                                                                                                                                                                                                                                                                                                                                                                                                |

|                |                                                               |                                                |                                                                                                                                                                                                                                                                                                                                                                                                                                                                                                            |
|----------------|---------------------------------------------------------------|------------------------------------------------|------------------------------------------------------------------------------------------------------------------------------------------------------------------------------------------------------------------------------------------------------------------------------------------------------------------------------------------------------------------------------------------------------------------------------------------------------------------------------------------------------------|
| EPI_ISL_495019 | B.J. Medical College and Civil hospital                       | Gujarat Biotechnology Research Centre          | Nidhi Patel, Nitin Savaliya, Raghawendra Kumar, Dinesh Kumar, Zuber Saiyed, Komal Patel, Labdhi Pandya, Afzal Ansari, Nikha Trivedi, Pranay Shah, Kamlesh J Upadhyay, Sanjay Kapadia, Apurvasinh Puvar, Janvi Raval, Zarna Patel, Monika Gandhi, Pinal Trivedi, Maharshi Pandya, R D Dixit, A M Kadri, Harsh Bakshi, Chaitanya Joshi, Madhvi Joshi                                                                                                                                                         |
| EPI_ISL_495023 | Government Medical College, Bhavnagar                         | Gujarat Biotechnology Research Centre          | Nitin Savaliya, Raghawendra Kumar, Dinesh Kumar, Zuber Saiyed, Komal Patel, Labdhi Pandya, Afzal Ansari, Nikha Trivedi, Kairavi Desai, Saklin Malek, Shirish Patel, Apurvasinh Puvar, Janvi Raval, Zarna Patel, Monika Gandhi, Pinal Trivedi, Maharshi Pandya, Nidhi Patel, R D Dixit, A M Kadri, Harsh Bakshi, Chaitanya Joshi, Madhvi Joshi                                                                                                                                                              |
| EPI_ISL_495029 | GMERS Medical College & Hospital, Gotri, Vadodara             | Gujarat Biotechnology Research Centre          | Nikha Trivedi, Meenakshi Shah, Neena Doshi, Varsha Godbole, Apurvasinh Puvar, Janvi Raval, Zarna Patel, Monika Gandhi, Pinal Trivedi, Maharshi Pandya, Nidhi Patel, Nitin Savaliya, Raghawendra Kumar, Dinesh Kumar, Zuber Saiyed, Komal Patel, Labdhi Pandya, Afzal Ansari, R D Dixit, A M Kadri, Harsh Bakshi, Chaitanya Joshi, Madhvi Joshi                                                                                                                                                             |
| EPI_ISL_495030 | GMERS Medical College & Hospital, Gotri, Vadodara             | Gujarat Biotechnology Research Centre          | Meenakshi Shah, Neena Doshi, Varsha Godbole, Apurvasinh Puvar, Janvi Raval, Zarna Patel, Monika Gandhi, Pinal Trivedi, Maharshi Pandya, Nidhi Patel, Nitin Savaliya, Raghawendra Kumar, Dinesh Kumar, Zuber Saiyed, Komal Patel, Labdhi Pandya, Afzal Ansari, Nikha Trivedi, R D Dixit, A M Kadri, Harsh Bakshi, Chaitanya Joshi, Madhvi Joshi                                                                                                                                                             |
| EPI_ISL_495031 | GMERS Medical College & Hospital, Gotri, Vadodara             | Gujarat Biotechnology Research Centre          | Neena Doshi, Varsha Godbole, Apurvasinh Puvar, Janvi Raval, Zarna Patel, Monika Gandhi, Pinal Trivedi, Maharshi Pandya, Nidhi Patel, Nitin Savaliya, Raghawendra Kumar, Dinesh Kumar, Zuber Saiyed, Komal Patel, Labdhi Pandya, Afzal Ansari, Nikha Trivedi, Meenakshi Shah, R D Dixit, A M Kadri, Harsh Bakshi, Chaitanya Joshi, Madhvi Joshi                                                                                                                                                             |
| EPI_ISL_495036 | GMERS Medical College & Hospital, Gotri, Vadodara             | Gujarat Biotechnology Research Centre          | Monika Gandhi, Pinal Trivedi, Maharshi Pandya, Nidhi Patel, Nitin Savaliya, Raghawendra Kumar, Dinesh Kumar, Zuber Saiyed, Komal Patel, Labdhi Pandya, Afzal Ansari, Nikha Trivedi, Meenakshi Shah, Neena Doshi, Varsha Godbole, Apurvasinh Puvar, Janvi Raval, Zarna Patel, R D Dixit, A M Kadri, Harsh Bakshi, Chaitanya Joshi, Madhvi Joshi                                                                                                                                                             |
| EPI_ISL_495039 | GMERS Medical College & Hospital, Gotri, Vadodara             | Gujarat Biotechnology Research Centre          | Nidhi Patel, Nitin Savaliya, Raghawendra Kumar, Dinesh Kumar, Zuber Saiyed, Komal Patel, Labdhi Pandya, Afzal Ansari, Nikha Trivedi, Meenakshi Shah, Neena Doshi, Varsha Godbole, Apurvasinh Puvar, Janvi Raval, Zarna Patel, Monika Gandhi, Pinal Trivedi, Maharshi Pandya, R D Dixit, A M Kadri, Harsh Bakshi, Chaitanya Joshi, Madhvi Joshi                                                                                                                                                             |
| EPI_ISL_495040 | GMERS Medical College & Hospital, Gotri, Vadodara             | Gujarat Biotechnology Research Centre          | Nitin Savaliya, Raghawendra Kumar, Dinesh Kumar, Zuber Saiyed, Komal Patel, Labdhi Pandya, Afzal Ansari, Nikha Trivedi, Meenakshi Shah, Neena Doshi, Varsha Godbole, Apurvasinh Puvar, Janvi Raval, Zarna Patel, Monika Gandhi, Pinal Trivedi, Maharshi Pandya, Nidhi Patel, R D Dixit, A M Kadri, Harsh Bakshi, Chaitanya Joshi, Madhvi Joshi                                                                                                                                                             |
| EPI_ISL_495047 | GMERS Medical College & Hospital, Gotri, Vadodara             | Gujarat Biotechnology Research Centre          | Nikha Trivedi, Meenakshi Shah, Neena Doshi, Varsha Godbole, Apurvasinh Puvar, Janvi Raval, Zarna Patel, Monika Gandhi, Pinal Trivedi, Maharshi Pandya, Nidhi Patel, Nitin Savaliya, Raghawendra Kumar, Dinesh Kumar, Zuber Saiyed, Komal Patel, Labdhi Pandya, Afzal Ansari, R D Dixit, A M Kadri, Harsh Bakshi, Chaitanya Joshi, Madhvi Joshi                                                                                                                                                             |
| EPI_ISL_495048 | GMERS Medical College & Hospital, Gotri, Vadodara             | Gujarat Biotechnology Research Centre          | Meenakshi Shah, Neena Doshi, Varsha Godbole, Apurvasinh Puvar, Janvi Raval, Zarna Patel, Monika Gandhi, Pinal Trivedi, Maharshi Pandya, Nidhi Patel, Nitin Savaliya, Raghawendra Kumar, Dinesh Kumar, Zuber Saiyed, Komal Patel, Labdhi Pandya, Afzal Ansari, Nikha Trivedi, R D Dixit, A M Kadri, Harsh Bakshi, Chaitanya Joshi, Madhvi Joshi                                                                                                                                                             |
| EPI_ISL_495049 | GMERS Medical College & Hospital, Gotri, Vadodara             | Gujarat Biotechnology Research Centre          | Neena Doshi, Varsha Godbole, Apurvasinh Puvar, Janvi Raval, Zarna Patel, Monika Gandhi, Pinal Trivedi, Maharshi Pandya, Nidhi Patel, Nitin Savaliya, Raghawendra Kumar, Dinesh Kumar, Zuber Saiyed, Komal Patel, Labdhi Pandya, Afzal Ansari, Nikha Trivedi, Meenakshi Shah, R D Dixit, A M Kadri, Harsh Bakshi, Chaitanya Joshi, Madhvi Joshi                                                                                                                                                             |
| EPI_ISL_495054 | GMERS Medical College & Hospital, Gotri, Vadodara             | Gujarat Biotechnology Research Centre          | Monika Gandhi, Pinal Trivedi, Maharshi Pandya, Nidhi Patel, Nitin Savaliya, Raghawendra Kumar, Dinesh Kumar, Zuber Saiyed, Komal Patel, Labdhi Pandya, Afzal Ansari, Nikha Trivedi, Meenakshi Shah, Neena Doshi, Varsha Godbole, Apurvasinh Puvar, Janvi Raval, Zarna Patel, R D Dixit, A M Kadri, Harsh Bakshi, Chaitanya Joshi, Madhvi Joshi                                                                                                                                                             |
| EPI_ISL_495057 | GMERS Medical College & Hospital, Gotri, Vadodara             | Gujarat Biotechnology Research Centre          | Nidhi Patel, Nitin Savaliya, Raghawendra Kumar, Dinesh Kumar, Zuber Saiyed, Komal Patel, Labdhi Pandya, Afzal Ansari, Nikha Trivedi, Meenakshi Shah, Neena Doshi, Varsha Godbole, Apurvasinh Puvar, Janvi Raval, Zarna Patel, Monika Gandhi, Pinal Trivedi, Maharshi Pandya, R D Dixit, A M Kadri, Harsh Bakshi, Chaitanya Joshi, Madhvi Joshi                                                                                                                                                             |
| EPI_ISL_495058 | GMERS Medical College & Hospital, Gotri, Vadodara             | Gujarat Biotechnology Research Centre          | Nitin Savaliya, Raghawendra Kumar, Dinesh Kumar, Zuber Saiyed, Komal Patel, Labdhi Pandya, Afzal Ansari, Nikha Trivedi, Meenakshi Shah, Neena Doshi, Varsha Godbole, Apurvasinh Puvar, Janvi Raval, Zarna Patel, Monika Gandhi, Pinal Trivedi, Maharshi Pandya, Nidhi Patel, R D Dixit, A M Kadri, Harsh Bakshi, Chaitanya Joshi, Madhvi Joshi                                                                                                                                                             |
| EPI_ISL_495065 | GAIMS & G K General Hospital                                  | Gujarat Biotechnology Research Centre          | Nikha Trivedi, Babulal Babhoriya, Hitesh Assudani, Apurvasinh Puvar, Janvi Raval, Zarna Patel, Monika Gandhi, Pinal Trivedi, Maharshi Pandya, Nidhi Patel, Nitin Savaliya, Raghawendra Kumar, Dinesh Kumar, Zuber Saiyed, Komal Patel, Labdhi Pandya, Afzal Ansari, R D Dixit, A M Kadri, Harsh Bakshi, Chaitanya Joshi, Madhvi Joshi                                                                                                                                                                      |
| EPI_ISL_495073 | Department of MicroBiology, Government Medical College, Surat | Gujarat Biotechnology Research Centre          | Monika Gandhi, Pinal Trivedi, Maharshi Pandya, Nidhi Patel, Nitin Savaliya, Raghawendra Kumar, Dinesh Kumar, Zuber Saiyed, Komal Patel, Labdhi Pandya, Afzal Ansari, Nikha Trivedi, Naresh Chauhan, Summaiya Mullan, Amit gamit, Apurvasinh Puvar, Janvi Raval, Zarna Patel, R D Dixit, A M Kadri, Harsh Bakshi, Chaitanya Joshi, Madhvi Joshi                                                                                                                                                             |
| EPI_ISL_495075 | Department of MicroBiology, Government Medical College, Surat | Gujarat Biotechnology Research Centre          | Nidhi Patel, Nitin Savaliya, Raghawendra Kumar, Dinesh Kumar, Zuber Saiyed, Komal Patel, Labdhi Pandya, Afzal Ansari, Nikha Trivedi, Naresh Chauhan, Summaiya Mullan, Amit gamit, Apurvasinh Puvar, Janvi Raval, Zarna Patel, Monika Gandhi, Pinal Trivedi, Maharshi Pandya, R D Dixit, A M Kadri, Harsh Bakshi, Chaitanya Joshi, Madhvi Joshi                                                                                                                                                             |
| EPI_ISL_495076 | Department of MicroBiology, Government Medical College, Surat | Gujarat Biotechnology Research Centre          | Nitin Savaliya, Raghawendra Kumar, Dinesh Kumar, Zuber Saiyed, Komal Patel, Labdhi Pandya, Afzal Ansari, Nikha Trivedi, Naresh Chauhan, Summaiya Mullan, Amit gamit, Apurvasinh Puvar, Janvi Raval, Zarna Patel, Monika Gandhi, Pinal Trivedi, Maharshi Pandya, Nidhi Patel, R D Dixit, A M Kadri, Harsh Bakshi, Chaitanya Joshi, Madhvi Joshi                                                                                                                                                             |
| EPI_ISL_495080 | Department of MicroBiology, Government Medical College, Surat | Gujarat Biotechnology Research Centre          | Nikha Trivedi, Naresh Chauhan, Summaiya Mullan, Amit gamit, Apurvasinh Puvar, Janvi Raval, Zarna Patel, Monika Gandhi, Pinal Trivedi, Maharshi Pandya, Nidhi Patel, Nitin Savaliya, Raghawendra Kumar, Dinesh Kumar, Zuber Saiyed, Komal Patel, Labdhi Pandya, Afzal Ansari, R D Dixit, A M Kadri, Harsh Bakshi, Chaitanya Joshi, Madhvi Joshi                                                                                                                                                             |
| EPI_ISL_495183 | CSIR-Centre for Cellular and Molecular Biology                | CSIR-Centre for Cellular and Molecular Biology | Namami Gaur, Sakshi Shambhavi, Lamuk Zaveri, Shagufta Khan, Nikhil Hajirnis, M Soujanya Reddy, Pratheusa Maccha, Tulasi Nagabandi, Purushotham Vodnala, Payel Mukherjee, Sofia Banu, Priya Singh, Onkar Kulkarni, Dhiviya Vedagiri, Divya Gupta, Vishal Sah, Santosh Kumar Kuncha, Krishnan Harinivas Harshan, Archana Bharadwaj Siva, Karthik Bharadwaj Tallapaka, Zeba Rizvi, Zuberwasim Sayyad, Kakade Aishwarya Arun, Amrutha H C, Ananga Ghosh, Rakesh K Mishra, Divya Tej Sowpati                    |
| EPI_ISL_495184 | CSIR-Centre for Cellular and Molecular Biology                | CSIR-Centre for Cellular and Molecular Biology | Namami Gaur, Sakshi Shambhavi, Lamuk Zaveri, Shagufta Khan, Nikhil Hajirnis, M Soujanya Reddy, Pratheusa Maccha, Tulasi Nagabandi, Purushotham Vodnala, Payel Mukherjee, Sofia Banu, Priya Singh, Onkar Kulkarni, Dhiviya Vedagiri, Divya Gupta, Vishal Sah, Santosh Kumar Kuncha, Krishnan Harinivas Harshan, Archana Bharadwaj Siva, Karthik Bharadwaj Tallapaka, Zeba Rizvi, Zuberwasim Sayyad, Kakade Aishwarya Arun, Amrutha H C, Ananga Ghosh, Rakesh K Mishra, Divya Tej Sowpati                    |
| EPI_ISL_495188 | CSIR-Centre for Cellular and Molecular Biology                | CSIR-Centre for Cellular and Molecular Biology | Nikhil Hajirnis, M Soujanya Reddy, Pratheusa Maccha, Payel Mukherjee, Sofia Banu, Priya Singh, Onkar Kulkarni, Dhiviya Vedagiri, Divya Gupta, Vishal Sah, Santosh Kumar Kuncha, Krishnan Harinivas Harshan, Archana Bharadwaj Siva, Karthik Bharadwaj Tallapaka, Shagufta Khan, Lamuk Zaveri, Namami Gaur, Sakshi Shambhavi, Tulasi Nagabandi, Purushotham Vodnala, Deepak Kumar, Devi Prasad Vijayashankar, Disha Nanda, Divya Das, Jotin Gogoi, Manish Bhattacharjee, Rakesh K Mishra, Divya Tej Sowpati |
| EPI_ISL_495191 | CSIR-Centre for Cellular and Molecular Biology                | CSIR-Centre for Cellular and Molecular Biology | Nikhil Hajirnis, M Soujanya Reddy, Pratheusa Maccha, Lamuk Zaveri, Shagufta Khan, Namami Gaur, Sakshi Shambhavi, Tulasi Nagabandi, Purushotham Vodnala, Payel Mukherjee, Sofia Banu, Priya Singh, Onkar Kulkarni, Dhiviya Vedagiri, Divya Gupta, Vishal Sah, Santosh Kumar Kuncha, Krishnan Harinivas Harshan, Archana Bharadwaj Siva, Karthik Bharadwaj Tallapaka, Zeba Rizvi, Zuberwasim Sayyad, Kakade Aishwarya Arun, Amrutha H C, Ananga Ghosh, Rakesh K Mishra, Divya Tej Sowpati                    |
| EPI_ISL_495193 | CSIR-Centre for Cellular and Molecular Biology                | CSIR-Centre for Cellular and Molecular Biology | Namami Gaur, Sakshi Shambhavi, Lamuk Zaveri, Shagufta Khan, Nikhil Hajirnis, M Soujanya Reddy, Pratheusa Maccha, Tulasi Nagabandi, Purushotham Vodnala, Payel Mukherjee, Sofia Banu, Priya Singh, Onkar Kulkarni, Dhiviya Vedagiri, Divya Gupta, Vishal Sah, Santosh Kumar Kuncha, Krishnan Harinivas Harshan, Archana Bharadwaj Siva, Karthik Bharadwaj Tallapaka, Zeba Rizvi, Zuberwasim Sayyad, Kakade Aishwarya Arun, Amrutha H C, Ananga Ghosh, Rakesh K Mishra, Divya Tej Sowpati                    |

| EPI_ISL                                                                                                                                                                                                                                                                                                                                                                                                                                                                                                                                                                                                                                                                                                                                                                        | Organization                                                               | Organization                                                               | Organization                                   | Organization                                                                                                                                                                                                                                                                                                                                                                                                                                                                                                                  |
|--------------------------------------------------------------------------------------------------------------------------------------------------------------------------------------------------------------------------------------------------------------------------------------------------------------------------------------------------------------------------------------------------------------------------------------------------------------------------------------------------------------------------------------------------------------------------------------------------------------------------------------------------------------------------------------------------------------------------------------------------------------------------------|----------------------------------------------------------------------------|----------------------------------------------------------------------------|------------------------------------------------|-------------------------------------------------------------------------------------------------------------------------------------------------------------------------------------------------------------------------------------------------------------------------------------------------------------------------------------------------------------------------------------------------------------------------------------------------------------------------------------------------------------------------------|
| EPI_ISL_495195                                                                                                                                                                                                                                                                                                                                                                                                                                                                                                                                                                                                                                                                                                                                                                 | CSIR-Centre for Cellular and Molecular Biology                             | CSIR-Centre for Cellular and Molecular Biology                             | CSIR-Centre for Cellular and Molecular Biology | Rakesh K Mishra, Divya Tej Sowpati<br>Nikhil Hajirnis, M Soujanya Reddy, Pratheusa Maccha, Namami Gaur, Sakshi Shambhavi, Lamuk Zaveri, Shagufta Khan, Tulasi Nagabandi, Purushotham Vodnala, Payel Mukherjee, Sofia Banu, Priya Singh, Onkar Kulkarni, Dhiviya Vedagiri, Divya Gupta, Vishal Sah, Santosh Kumar Kuncha, Krishnan Harinivas Harshan, Archana Bharadwaj Siva, Karthik Bharadwaj Tallapaka, Kezia J Ann, Radhika Khandelwal, Roshan Maku Venkata, Shemin Mansuri, Sonu Uday, Rakesh K Mishra, Divya Tej Sowpati |
| EPI_ISL_495207                                                                                                                                                                                                                                                                                                                                                                                                                                                                                                                                                                                                                                                                                                                                                                 | CSIR-Centre for Cellular and Molecular Biology                             | CSIR-Centre for Cellular and Molecular Biology                             | CSIR-Centre for Cellular and Molecular Biology | Namami Gaur, Sakshi Shambhavi, Lamuk Zaveri, Shagufta Khan, Nikhil Hajirnis, M Soujanya Reddy, Pratheusa Maccha, Tulasi Nagabandi, Purushotham Vodnala, Payel Mukherjee, Sofia Banu, Priya Singh, Onkar Kulkarni, Dhiviya Vedagiri, Divya Gupta, Vishal Sah, Santosh Kumar Kuncha, Krishnan Harinivas Harshan, Archana Bharadwaj Siva, Karthik Bharadwaj Tallapaka, G. Aditya Kumar, Koushick Sivakumar, Rakesh K Mishra, Divya Tej Sowpati                                                                                   |
| EPI_ISL_495216                                                                                                                                                                                                                                                                                                                                                                                                                                                                                                                                                                                                                                                                                                                                                                 | CSIR-Centre for Cellular and Molecular Biology                             | CSIR-Centre for Cellular and Molecular Biology                             | CSIR-Centre for Cellular and Molecular Biology | Nikhil Hajirnis, M Soujanya Reddy, Pratheusa Maccha, Lamuk Zaveri, Shagufta Khan, Namami Gaur, Sakshi Shambhavi, Tulasi Nagabandi, Purushotham Vodnala, Payel Mukherjee, Sofia Banu, Priya Singh, Onkar Kulkarni, Dhiviya Vedagiri, Divya Gupta, Vishal Sah, Santosh Kumar Kuncha, Krishnan Harinivas Harshan, Archana Bharadwaj Siva, Karthik Bharadwaj Tallapaka, Zeba Rizvi, Zuberwasim Sayyad, Kakade Aishwarya Arun, Amrutha H C, Ananga Ghosh, Rakesh K Mishra, Divya Tej Sowpati                                       |
| EPI_ISL_495217                                                                                                                                                                                                                                                                                                                                                                                                                                                                                                                                                                                                                                                                                                                                                                 | CSIR-Centre for Cellular and Molecular Biology                             | CSIR-Centre for Cellular and Molecular Biology                             | CSIR-Centre for Cellular and Molecular Biology | Nikhil Hajirnis, M Soujanya Reddy, Pratheusa Maccha, Namami Gaur, Sakshi Shambhavi, Lamuk Zaveri, Shagufta Khan, Tulasi Nagabandi, Purushotham Vodnala, Payel Mukherjee, Sofia Banu, Priya Singh, Onkar Kulkarni, Dhiviya Vedagiri, Divya Gupta, Vishal Sah, Santosh Kumar Kuncha, Krishnan Harinivas Harshan, Archana Bharadwaj Siva, Karthik Bharadwaj Tallapaka, Kezia J Ann, Radhika Khandelwal, Roshan Maku Venkata, Shemin Mansuri, Sonu Uday, Rakesh K Mishra, Divya Tej Sowpati                                       |
| EPI_ISL_495223                                                                                                                                                                                                                                                                                                                                                                                                                                                                                                                                                                                                                                                                                                                                                                 | CSIR-Centre for Cellular and Molecular Biology                             | CSIR-Centre for Cellular and Molecular Biology                             | CSIR-Centre for Cellular and Molecular Biology | Nikhil Hajirnis, M Soujanya Reddy, Pratheusa Maccha, Payel Mukherjee, Sofia Banu, Priya Singh, Onkar Kulkarni, Dhiviya Vedagiri, Divya Gupta, Vishal Sah, Santosh Kumar Kuncha, Krishnan Harinivas Harshan, Archana Bharadwaj Siva, Karthik Bharadwaj Tallapaka, Shagufta Khan, Lamuk Zaveri, Namami Gaur, Sakshi Shambhavi, Tulasi Nagabandi, Purushotham Vodnala, Deepak Kumar, Devi Prasad Vijayashankar, Disha Nanda, Divya Das, Jotin Gogoi, Manish Bhattacharjee, Rakesh K Mishra, Divya Tej Sowpati                    |
| EPI_ISL_495224                                                                                                                                                                                                                                                                                                                                                                                                                                                                                                                                                                                                                                                                                                                                                                 | CSIR-Centre for Cellular and Molecular Biology                             | CSIR-Centre for Cellular and Molecular Biology                             | CSIR-Centre for Cellular and Molecular Biology | Namami Gaur, Sakshi Shambhavi, Lamuk Zaveri, Shagufta Khan, Nikhil Hajirnis, M Soujanya Reddy, Pratheusa Maccha, Tulasi Nagabandi, Purushotham Vodnala, Payel Mukherjee, Sofia Banu, Priya Singh, Onkar Kulkarni, Dhiviya Vedagiri, Divya Gupta, Vishal Sah, Santosh Kumar Kuncha, Krishnan Harinivas Harshan, Archana Bharadwaj Siva, Karthik Bharadwaj Tallapaka, G. Aditya Kumar, Koushick Sivakumar, Rakesh K Mishra, Divya Tej Sowpati                                                                                   |
| EPI_ISL_495229                                                                                                                                                                                                                                                                                                                                                                                                                                                                                                                                                                                                                                                                                                                                                                 | CSIR-Centre for Cellular and Molecular Biology                             | CSIR-Centre for Cellular and Molecular Biology                             | CSIR-Centre for Cellular and Molecular Biology | Namami Gaur, Sakshi Shambhavi, Lamuk Zaveri, Shagufta Khan, Nikhil Hajirnis, M Soujanya Reddy, Pratheusa Maccha, Tulasi Nagabandi, Purushotham Vodnala, Payel Mukherjee, Sofia Banu, Priya Singh, Onkar Kulkarni, Dhiviya Vedagiri, Divya Gupta, Vishal Sah, Santosh Kumar Kuncha, Krishnan Harinivas Harshan, Archana Bharadwaj Siva, Karthik Bharadwaj Tallapaka, Zeba Rizvi, Zuberwasim Sayyad, Kakade Aishwarya Arun, Amrutha H C, Ananga Ghosh, Rakesh K Mishra, Divya Tej Sowpati                                       |
| EPI_ISL_495231                                                                                                                                                                                                                                                                                                                                                                                                                                                                                                                                                                                                                                                                                                                                                                 | CSIR-Centre for Cellular and Molecular Biology                             | CSIR-Centre for Cellular and Molecular Biology                             | CSIR-Centre for Cellular and Molecular Biology | Namami Gaur, Sakshi Shambhavi, Lamuk Zaveri, Shagufta Khan, Nikhil Hajirnis, M Soujanya Reddy, Pratheusa Maccha, Tulasi Nagabandi, Purushotham Vodnala, Payel Mukherjee, Sofia Banu, Priya Singh, Onkar Kulkarni, Dhiviya Vedagiri, Divya Gupta, Vishal Sah, Santosh Kumar Kuncha, Krishnan Harinivas Harshan, Archana Bharadwaj Siva, Karthik Bharadwaj Tallapaka, Zeba Rizvi, Zuberwasim Sayyad, Kakade Aishwarya Arun, Amrutha H C, Ananga Ghosh, Rakesh K Mishra, Divya Tej Sowpati                                       |
| EPI_ISL_495236                                                                                                                                                                                                                                                                                                                                                                                                                                                                                                                                                                                                                                                                                                                                                                 | CSIR-Centre for Cellular and Molecular Biology                             | CSIR-Centre for Cellular and Molecular Biology                             | CSIR-Centre for Cellular and Molecular Biology | Nikhil Hajirnis, M Soujanya Reddy, Pratheusa Maccha, Lamuk Zaveri, Shagufta Khan, Namami Gaur, Sakshi Shambhavi, Tulasi Nagabandi, Purushotham Vodnala, Payel Mukherjee, Sofia Banu, Priya Singh, Onkar Kulkarni, Dhiviya Vedagiri, Divya Gupta, Vishal Sah, Santosh Kumar Kuncha, Krishnan Harinivas Harshan, Archana Bharadwaj Siva, Karthik Bharadwaj Tallapaka, Zeba Rizvi, Zuberwasim Sayyad, Kakade Aishwarya Arun, Amrutha H C, Ananga Ghosh, Rakesh K Mishra, Divya Tej Sowpati                                       |
| EPI_ISL_495239                                                                                                                                                                                                                                                                                                                                                                                                                                                                                                                                                                                                                                                                                                                                                                 | CSIR-Centre for Cellular and Molecular Biology                             | CSIR-Centre for Cellular and Molecular Biology                             | CSIR-Centre for Cellular and Molecular Biology | Nikhil Hajirnis, M Soujanya Reddy, Pratheusa Maccha, Payel Mukherjee, Sofia Banu, Priya Singh, Onkar Kulkarni, Dhiviya Vedagiri, Divya Gupta, Vishal Sah, Santosh Kumar Kuncha, Krishnan Harinivas Harshan, Archana Bharadwaj Siva, Karthik Bharadwaj Tallapaka, Zeba Rizvi, Zuberwasim Sayyad, Kakade Aishwarya Arun, Amrutha H C, Ananga Ghosh, Rakesh K Mishra, Divya Tej Sowpati                                                                                                                                          |
| EPI_ISL_495259                                                                                                                                                                                                                                                                                                                                                                                                                                                                                                                                                                                                                                                                                                                                                                 | CSIR-Centre for Cellular and Molecular Biology                             | CSIR-Centre for Cellular and Molecular Biology                             | CSIR-Centre for Cellular and Molecular Biology | Nikhil Hajirnis, M Soujanya Reddy, Pratheusa Maccha, Namami Gaur, Sakshi Shambhavi, Lamuk Zaveri, Shagufta Khan, Tulasi Nagabandi, Purushotham Vodnala, Payel Mukherjee, Sofia Banu, Priya Singh, Onkar Kulkarni, Dhiviya Vedagiri, Divya Gupta, Vishal Sah, Santosh Kumar Kuncha, Krishnan Harinivas Harshan, Archana Bharadwaj Siva, Karthik Bharadwaj Tallapaka, Kezia J Ann, Radhika Khandelwal, Roshan Maku Venkata, Shemin Mansuri, Sonu Uday, Rakesh K Mishra, Divya Tej Sowpati                                       |
| EPI_ISL_495260                                                                                                                                                                                                                                                                                                                                                                                                                                                                                                                                                                                                                                                                                                                                                                 | CSIR-Centre for Cellular and Molecular Biology                             | CSIR-Centre for Cellular and Molecular Biology                             | CSIR-Centre for Cellular and Molecular Biology | Namami Gaur, Sakshi Shambhavi, Lamuk Zaveri, Shagufta Khan, Nikhil Hajirnis, M Soujanya Reddy, Pratheusa Maccha, Tulasi Nagabandi, Purushotham Vodnala, Payel Mukherjee, Sofia Banu, Priya Singh, Onkar Kulkarni, Dhiviya Vedagiri, Divya Gupta, Vishal Sah, Santosh Kumar Kuncha, Krishnan Harinivas Harshan, Archana Bharadwaj Siva, Karthik Bharadwaj Tallapaka, G. Aditya Kumar, Koushick Sivakumar, Rakesh K Mishra, Divya Tej Sowpati                                                                                   |
| EPI_ISL_495261                                                                                                                                                                                                                                                                                                                                                                                                                                                                                                                                                                                                                                                                                                                                                                 | CSIR-Centre for Cellular and Molecular Biology                             | CSIR-Centre for Cellular and Molecular Biology                             | CSIR-Centre for Cellular and Molecular Biology | Nikhil Hajirnis, M Soujanya Reddy, Pratheusa Maccha, Lamuk Zaveri, Shagufta Khan, Namami Gaur, Sakshi Shambhavi, Tulasi Nagabandi, Purushotham Vodnala, Payel Mukherjee, Sofia Banu, Priya Singh, Onkar Kulkarni, Dhiviya Vedagiri, Divya Gupta, Vishal Sah, Santosh Kumar Kuncha, Krishnan Harinivas Harshan, Archana Bharadwaj Siva, Karthik Bharadwaj Tallapaka, Zeba Rizvi, Zuberwasim Sayyad, Kakade Aishwarya Arun, Amrutha H C, Ananga Ghosh, Rakesh K Mishra, Divya Tej Sowpati                                       |
| EPI_ISL_495266                                                                                                                                                                                                                                                                                                                                                                                                                                                                                                                                                                                                                                                                                                                                                                 | CSIR-Centre for Cellular and Molecular Biology                             | CSIR-Centre for Cellular and Molecular Biology                             | CSIR-Centre for Cellular and Molecular Biology | Namami Gaur, Sakshi Shambhavi, Lamuk Zaveri, Shagufta Khan, Nikhil Hajirnis, M Soujanya Reddy, Pratheusa Maccha, Tulasi Nagabandi, Purushotham Vodnala, Payel Mukherjee, Sofia Banu, Priya Singh, Onkar Kulkarni, Dhiviya Vedagiri, Divya Gupta, Vishal Sah, Santosh Kumar Kuncha, Krishnan Harinivas Harshan, Archana Bharadwaj Siva, Karthik Bharadwaj Tallapaka, Zeba Rizvi, Zuberwasim Sayyad, Kakade Aishwarya Arun, Amrutha H C, Ananga Ghosh, Rakesh K Mishra, Divya Tej Sowpati                                       |
| EPI_ISL_495270                                                                                                                                                                                                                                                                                                                                                                                                                                                                                                                                                                                                                                                                                                                                                                 | CSIR-Centre for Cellular and Molecular Biology                             | CSIR-Centre for Cellular and Molecular Biology                             | CSIR-Centre for Cellular and Molecular Biology | Namami Gaur, Sakshi Shambhavi, Lamuk Zaveri, Shagufta Khan, Nikhil Hajirnis, M Soujanya Reddy, Pratheusa Maccha, Tulasi Nagabandi, Purushotham Vodnala, Payel Mukherjee, Sofia Banu, Priya Singh, Onkar Kulkarni, Dhiviya Vedagiri, Divya Gupta, Vishal Sah, Santosh Kumar Kuncha, Krishnan Harinivas Harshan, Archana Bharadwaj Siva, Karthik Bharadwaj Tallapaka, Zeba Rizvi, Zuberwasim Sayyad, Kakade Aishwarya Arun, Amrutha H C, Ananga Ghosh, Rakesh K Mishra, Divya Tej Sowpati                                       |
| EPI_ISL_495411, EPI_ISL_495412, EPI_ISL_495413, EPI_ISL_495414, EPI_ISL_495415, EPI_ISL_495416, EPI_ISL_495417, EPI_ISL_495418, EPI_ISL_495419, EPI_ISL_495420, EPI_ISL_495421, EPI_ISL_495422, EPI_ISL_495423, EPI_ISL_495424, EPI_ISL_495425, EPI_ISL_495426, EPI_ISL_495427, EPI_ISL_495428, EPI_ISL_495429, EPI_ISL_495430, EPI_ISL_495431, EPI_ISL_495432, EPI_ISL_495433, EPI_ISL_495434, EPI_ISL_495435, EPI_ISL_495436, EPI_ISL_495437, EPI_ISL_495438, EPI_ISL_495439, EPI_ISL_495440, EPI_ISL_495441, EPI_ISL_495442, EPI_ISL_495443, EPI_ISL_495444, EPI_ISL_495445, EPI_ISL_495446, EPI_ISL_495447, EPI_ISL_495448, EPI_ISL_495449, EPI_ISL_495450, EPI_ISL_495451, EPI_ISL_495452, EPI_ISL_495453, EPI_ISL_495454, EPI_ISL_495455, EPI_ISL_495456, EPI_ISL_495457 | Kafkas University, Faculty of Medicine, Department of Medical Microbiology | Kafkas University, Faculty of Medicine, Department of Medical Microbiology | Murat Karamese, Didem Ozgur, E. Ediz Tutuncu   |                                                                                                                                                                                                                                                                                                                                                                                                                                                                                                                               |
| EPI_ISL_498171, EPI_ISL_498172, EPI_ISL_498173, EPI_ISL_498174, EPI_ISL_498175, EPI_ISL_498176, EPI_ISL_498177, EPI_ISL_498178, EPI_ISL_498179, EPI_ISL_498180, EPI_ISL_498181, EPI_ISL_498182, EPI_ISL_498183, EPI_ISL_498184, EPI_ISL_498185, EPI_ISL_498186, EPI_ISL_498187, EPI_ISL_498188, EPI_ISL_498189, EPI_ISL_498190, EPI_ISL_498191, EPI_ISL_498192                                                                                                                                                                                                                                                                                                                                                                                                                 | see above                                                                  | OUCRU                                                                      | OUCRU                                          | Nguyen Van Vinh Chau, Nguyen Thi Thu Hong, Nguyen Thi Han Ny, Le Nguyen Truc Nhu, Nghiem My Ngoc, Vo Thanh Lam, Nguyen Thanh Dung, Nguyen Thanh Yen, Ngo Ngoc Quang Minh, Le Manh Hung, Nguyen Tri Dung, Dinh Nguyen Huy Man, Lam Anh Nguyet, Tran Chanh Xuan, Tran Tinh Hien, Nguyen Minh Phong, Tran Nguyen Hoang Tu, Tran Tan Thanh, Nguyen Thanh Trung, Nguyen Tan Binh, Tang Chi Thuong, Guy Thuwaites, and Le Van Tan, for OUCRU COVID-19 research group*                                                               |
| EPI_ISL_498229, EPI_ISL_498230, EPI_ISL_498231, EPI_ISL_498232, EPI_ISL_498233, EPI_ISL_498234, EPI_ISL_498235, EPI_ISL_498236, EPI_ISL_498237, EPI_ISL_498238, EPI_ISL_498239, EPI_ISL_498240, EPI_ISL_498241, EPI_ISL_498242, EPI_ISL_498243, EPI_ISL_498244, EPI_ISL_498245, EPI_ISL_498246, EPI_ISL_498247, EPI_ISL_498248, EPI_ISL_498249, EPI_ISL_498250, EPI_ISL_498251, EPI_ISL_498252                                                                                                                                                                                                                                                                                                                                                                                 | see above                                                                  | Institut Pasteur de Dakar                                                  | Institut Pasteur de Dakar                      | Ndongo Dia, Moussa Moise Diagne, Mamadou Diop, Marie Henriette Dior Ndione, Mamadou Malado Jallow, Safietou Sankhe Mbengue, Ousmane Faye, Amadou Alpha Fall.                                                                                                                                                                                                                                                                                                                                                                  |
| EPI_ISL_498418, EPI_ISL_498419                                                                                                                                                                                                                                                                                                                                                                                                                                                                                                                                                                                                                                                                                                                                                 | National Institute of Laboratory Medicine and Referral Center              | Genomic Research Lab, BCSIR                                                | Genomic Research Lab, BCSIR                    | Md. Maruf Ahmed Molla, Abu Sayeed Mohammad Mahmud, Mohammad Samir Uzzaman, Eshrar Osman, Md. Ahasan Habib, Shahina Akter, Tanjina Akhter Banu, Md. Murshed Hasan Sarkar, Barna Goswami, Iffat Jahan, Md. Saddam Hossain, Tasnim Nafisa, Mahmuda Yeasmin, Asish Kumar Ghosh, A. K. M. Shamsuzzaman, Sheikh Md. Selim Al Din, Upal Chandra Ray, Salek Ahmed Sajib, Md. Salim Khan                                                                                                                                               |



|                                                                                                                                                                                                                                                                                                                                                                                                                                                                                                                                                                                                                                                                                                                                                                                                                                                                                                                                                                                                |                                                                                                                                                                                                 |                                                                                                                                  |                                                                                                                                                                                                                                                                                                                                                                                                                                                |                                                                                                                                                                                                                                                                                                                                                                                                |
|------------------------------------------------------------------------------------------------------------------------------------------------------------------------------------------------------------------------------------------------------------------------------------------------------------------------------------------------------------------------------------------------------------------------------------------------------------------------------------------------------------------------------------------------------------------------------------------------------------------------------------------------------------------------------------------------------------------------------------------------------------------------------------------------------------------------------------------------------------------------------------------------------------------------------------------------------------------------------------------------|-------------------------------------------------------------------------------------------------------------------------------------------------------------------------------------------------|----------------------------------------------------------------------------------------------------------------------------------|------------------------------------------------------------------------------------------------------------------------------------------------------------------------------------------------------------------------------------------------------------------------------------------------------------------------------------------------------------------------------------------------------------------------------------------------|------------------------------------------------------------------------------------------------------------------------------------------------------------------------------------------------------------------------------------------------------------------------------------------------------------------------------------------------------------------------------------------------|
| EPI_ISL_498783, EPI_ISL_498784, EPI_ISL_498785, EPI_ISL_498786, EPI_ISL_498787, EPI_ISL_498788, EPI_ISL_498789, EPI_ISL_498790, EPI_ISL_498791, EPI_ISL_498792                                                                                                                                                                                                                                                                                                                                                                                                                                                                                                                                                                                                                                                                                                                                                                                                                                 | National Institute of Laboratory Medicine and Referral Center                                                                                                                                   | Genomic Research Lab, BCSIR                                                                                                      | Md. Saddam Hossain, Abu Sayeed Mohammad Mahmud, Mohammad Samir Uzzaman, Eshrar Osman, Md. Ahasan Habib, Shahina Akter, Tanjina Akhter Banu, Md. Murshed Hasan Sarkar, Barna Goswami, Iffat Jahan, Tasnim Nafisa, Md. Maruf Ahmed Molla, Mahmuda Yeasmin, Asish Kumar Ghosh, A. K. M. Shamsuzzaman, Sheikh Md. Selim Al Din, Utpal Chandra Ray, Salek Ahmed Sajib, Md. Salim Khan                                                               |                                                                                                                                                                                                                                                                                                                                                                                                |
| EPI_ISL_498793, EPI_ISL_498794, EPI_ISL_498795, EPI_ISL_498796, EPI_ISL_498797, EPI_ISL_498800, EPI_ISL_498801, EPI_ISL_498802, EPI_ISL_498803, EPI_ISL_498804, EPI_ISL_498805, EPI_ISL_498806                                                                                                                                                                                                                                                                                                                                                                                                                                                                                                                                                                                                                                                                                                                                                                                                 | see above                                                                                                                                                                                       | National Institute of Laboratory Medicine and Referral Center                                                                    | Genomic Research Lab, BCSIR                                                                                                                                                                                                                                                                                                                                                                                                                    | Md. Murshed Hasan Sarkar, Abu Sayeed Mohammad Mahmud, Mohammad Samir Uzzaman, Eshrar Osman, Md. Ahasan Habib, Shahina Akter, Tanjina Akhter Banu, Barna Goswami, Iffat Jahan, Md. Saddam Hossain, Tasnim Nafisa, Md. Maruf Ahmed Molla, Mahmuda Yeasmin, Asish Kumar Ghosh, A. K. M. Shamsuzzaman, Sheikh Md. Selim Al Din, Utpal Chandra Ray, Salek Ahmed Sajib, Md. Salim Khan               |
| EPI_ISL_500160, EPI_ISL_500161, EPI_ISL_500163, EPI_ISL_500164, EPI_ISL_500165, EPI_ISL_500168, EPI_ISL_500169, EPI_ISL_500170, EPI_ISL_500171, EPI_ISL_500172, EPI_ISL_500173, EPI_ISL_500174, EPI_ISL_500175, EPI_ISL_500176, EPI_ISL_500177, EPI_ISL_500178, EPI_ISL_500179, EPI_ISL_500180, EPI_ISL_500181, EPI_ISL_500182, EPI_ISL_500183, EPI_ISL_500184, EPI_ISL_500185, EPI_ISL_500186, EPI_ISL_500187, EPI_ISL_500188, EPI_ISL_500189, EPI_ISL_500190, EPI_ISL_500191, EPI_ISL_500192, EPI_ISL_500193, EPI_ISL_500194, EPI_ISL_500195, EPI_ISL_500196, EPI_ISL_500197, EPI_ISL_500198, EPI_ISL_500199, EPI_ISL_500200, EPI_ISL_500201, EPI_ISL_500202, EPI_ISL_500203, EPI_ISL_500204, EPI_ISL_500205, EPI_ISL_500206, EPI_ISL_500208, EPI_ISL_500210, EPI_ISL_500211, EPI_ISL_500212, EPI_ISL_500213, EPI_ISL_500214, EPI_ISL_500215, EPI_ISL_500216, EPI_ISL_500217, EPI_ISL_500220, EPI_ISL_500222, EPI_ISL_500223, EPI_ISL_500224, EPI_ISL_500225, EPI_ISL_500226, EPI_ISL_500227 | see above                                                                                                                                                                                       | Hospital Universitario Virgen de las Nieves de Granada-SAS                                                                       | SeqCOVID-SPAIN consortium/IBV(CSIC)                                                                                                                                                                                                                                                                                                                                                                                                            | Mercedes Pérez Ruiz, Sara Sanbonmatsu Gámez, Irene Pedrosa Corral, José M. Navarro-Marí and SeqCOVID-SPAIN consortium                                                                                                                                                                                                                                                                          |
| EPI_ISL_500539, EPI_ISL_500540, EPI_ISL_500541, EPI_ISL_500542, EPI_ISL_500543, EPI_ISL_500544, EPI_ISL_500545, EPI_ISL_500546, EPI_ISL_500547, EPI_ISL_500548, EPI_ISL_500549, EPI_ISL_500550, EPI_ISL_500551, EPI_ISL_500552, EPI_ISL_500553, EPI_ISL_500554, EPI_ISL_500555, EPI_ISL_500556, EPI_ISL_500557, EPI_ISL_500558, EPI_ISL_500559, EPI_ISL_500560, EPI_ISL_500561, EPI_ISL_500562, EPI_ISL_500563, EPI_ISL_500564, EPI_ISL_500565, EPI_ISL_500566, EPI_ISL_500567, EPI_ISL_500568, EPI_ISL_500569, EPI_ISL_500570, EPI_ISL_500571, EPI_ISL_500572                                                                                                                                                                                                                                                                                                                                                                                                                                 | see above                                                                                                                                                                                       | Singapore General Hospital                                                                                                       | Department of Microbiology                                                                                                                                                                                                                                                                                                                                                                                                                     | Nurdyana Abdul Rahman, Kun Lee Lim, Chenhao Li, Kian Sing Chan, Lynette Oon, Kern Rei Chng, Niranjan Nagarajan, Karrie Ko                                                                                                                                                                                                                                                                      |
| EPI_ISL_500573, EPI_ISL_500574, EPI_ISL_500575, EPI_ISL_500576, EPI_ISL_500577, EPI_ISL_500578, EPI_ISL_500579, EPI_ISL_500580, EPI_ISL_500581, EPI_ISL_500582, EPI_ISL_500583, EPI_ISL_500584, EPI_ISL_500585, EPI_ISL_500586, EPI_ISL_500587, EPI_ISL_500588, EPI_ISL_500589, EPI_ISL_500590, EPI_ISL_500591, EPI_ISL_500592, EPI_ISL_500593, EPI_ISL_500594, EPI_ISL_500595                                                                                                                                                                                                                                                                                                                                                                                                                                                                                                                                                                                                                 | see above                                                                                                                                                                                       | National Virus Reference Laboratory                                                                                              | National Virus Reference Laboratory                                                                                                                                                                                                                                                                                                                                                                                                            | Michael Carr, Gabriel Gonzalez, Jonathan Dean, Suzie Coughlan, Cillian F De Gascun                                                                                                                                                                                                                                                                                                             |
| EPI_ISL_500716                                                                                                                                                                                                                                                                                                                                                                                                                                                                                                                                                                                                                                                                                                                                                                                                                                                                                                                                                                                 | BSL3 Lab Pendik Veterinary Control Institute                                                                                                                                                    | Department of Medicinal Genetics, Bursa Uluda University, Faculty of medicine By Sehime Gülsün Temel, Adem Alemdar, Kadir Yeilba | Mustafa HASOKSUZ, Fahriye SARAC, Osman ERGANIS, Serdar UZAR, Hakan ENUZ, Cumhur ADIAY, Ahmet SAIT, Orbay SAYI, Kadir YESILBAG, Oguz KARABEY                                                                                                                                                                                                                                                                                                    |                                                                                                                                                                                                                                                                                                                                                                                                |
| EPI_ISL_501252, EPI_ISL_501253, EPI_ISL_501254, EPI_ISL_501255, EPI_ISL_501256, EPI_ISL_501257, EPI_ISL_501258, EPI_ISL_501259, EPI_ISL_501260, EPI_ISL_501261, EPI_ISL_501262, EPI_ISL_501263, EPI_ISL_501264, EPI_ISL_501265, EPI_ISL_501266, EPI_ISL_501267, EPI_ISL_501268, EPI_ISL_501269, EPI_ISL_501270, EPI_ISL_501271, EPI_ISL_501272, EPI_ISL_501273, EPI_ISL_501274                                                                                                                                                                                                                                                                                                                                                                                                                                                                                                                                                                                                                 | see above                                                                                                                                                                                       | National Virus Reference Laboratory                                                                                              | National Virus Reference Laboratory                                                                                                                                                                                                                                                                                                                                                                                                            | Michael Carr, Gabriel Gonzalez, Jonathan Dean, Suzie Coughlan, Cillian F De Gascun                                                                                                                                                                                                                                                                                                             |
| EPI_ISL_501632                                                                                                                                                                                                                                                                                                                                                                                                                                                                                                                                                                                                                                                                                                                                                                                                                                                                                                                                                                                 | Virology Department, Royal Infirmary of Edinburgh, NHS Lothian / School of Biological Sciences, University of Edinburgh                                                                         | Wellcome Sanger Institute for the COVID-19 Genomics UK (COG-UK) consortium                                                       | McHugh M, Dewar R, Rooke S, O'Toole Á, Scher E, Hill V, McCrone JT, Colquhoun R, Yu X, Jackson B, Rambaut A, Templeton K and Alex Alderton, Roberto Amato, Sonia Goncalves, Ewan Harrison, David K. Jackson, Ian Johnston, Dominic Kwiatkowski, Cordelia Langford, John Sillitoe on behalf of the Wellcome Sanger Institute COVID-19 Surveillance Team ( <a href="http://www.sanger.ac.uk/covid-team">http://www.sanger.ac.uk/covid-team</a> ) |                                                                                                                                                                                                                                                                                                                                                                                                |
| EPI_ISL_503958, EPI_ISL_504040                                                                                                                                                                                                                                                                                                                                                                                                                                                                                                                                                                                                                                                                                                                                                                                                                                                                                                                                                                 | National Institute of Laboratory Medicine and Referral Center                                                                                                                                   | Genomic Research Lab, BCSIR                                                                                                      | Md. Ahasan Habib, Abu Sayeed Mohammad Mahmud, Mohammad Samir Uzzaman, Eshrar Osman, Shahina Akter, Tanjina Akhter Banu, Md. Murshed Hasan Sarkar, Barna Goswami, Iffat Jahan, Md. Saddam Hossain, Tarannum Taznin, Tasnim Nafisa, Md. Maruf Ahmed Molla, Mahmuda Yeasmin, Asish Kumar Ghosh, A. K. M. Shamsuzzaman, Sheikh Md. Selim Al Din, Utpal Chandra Ray, Salek Ahmed Sajib, Md. Salim Khan                                              |                                                                                                                                                                                                                                                                                                                                                                                                |
| EPI_ISL_507180, EPI_ISL_507183, EPI_ISL_507186, EPI_ISL_507190, EPI_ISL_507195, EPI_ISL_507200                                                                                                                                                                                                                                                                                                                                                                                                                                                                                                                                                                                                                                                                                                                                                                                                                                                                                                 | Virology Department, Royal Infirmary of Edinburgh, NHS Lothian / School of Biological Sciences, University of Edinburgh / Institute of Genetics and Molecular Medicine, University of Edinburgh | COVID-19 Genomics UK (COG-UK) Consortium                                                                                         | McHugh M, Dewar R, Rooke S, Gallagher M, Balcaza C, O'Toole Á, Scher E, Hill V, Hill V, McCrone JT, Colquhoun R, Yu X, Jackson B, Rambaut A, Williams TC, Templeton K                                                                                                                                                                                                                                                                          |                                                                                                                                                                                                                                                                                                                                                                                                |
| EPI_ISL_509372, EPI_ISL_509373, EPI_ISL_509374, EPI_ISL_509375, EPI_ISL_509376, EPI_ISL_509377, EPI_ISL_509378, EPI_ISL_509379, EPI_ISL_509380, EPI_ISL_509381, EPI_ISL_509382, EPI_ISL_509383, EPI_ISL_509384, EPI_ISL_509385, EPI_ISL_509386, EPI_ISL_509387, EPI_ISL_509388, EPI_ISL_509389, EPI_ISL_509390, EPI_ISL_509391, EPI_ISL_509392, EPI_ISL_509393, EPI_ISL_509394, EPI_ISL_509395                                                                                                                                                                                                                                                                                                                                                                                                                                                                                                                                                                                                 | see above                                                                                                                                                                                       | Singapore General Hospital                                                                                                       | Department of Microbiology                                                                                                                                                                                                                                                                                                                                                                                                                     | Nurdyana Abdul Rahman, Kun Lee Lim, Chenhao Li, Kian Sing Chan, Lynette Oon, Kern Rei Chng, Niranjan Nagarajan, Karrie Ko                                                                                                                                                                                                                                                                      |
| EPI_ISL_509436, EPI_ISL_509437, EPI_ISL_509438, EPI_ISL_509439, EPI_ISL_509440, EPI_ISL_509441, EPI_ISL_509442, EPI_ISL_509443                                                                                                                                                                                                                                                                                                                                                                                                                                                                                                                                                                                                                                                                                                                                                                                                                                                                 | see above                                                                                                                                                                                       | The Princess Alexandra Hospital                                                                                                  | Wellcome Sanger Institute for the COVID-19 Genomics UK (COG-UK) consortium                                                                                                                                                                                                                                                                                                                                                                     | Nick Levene, Louise Lopez, Lynn Monaghan, Jessica Scott, Claudia McCrean and Alex Alderton, Roberto Amato, Sonia Goncalves, Ewan Harrison, David K. Jackson, Ian Johnston, Dominic Kwiatkowski, Cordelia Langford, John Sillitoe on behalf of the Wellcome Sanger Institute COVID-19 Surveillance Team ( <a href="http://www.sanger.ac.uk/covid-team">http://www.sanger.ac.uk/covid-team</a> ) |
| EPI_ISL_510424, EPI_ISL_510425, EPI_ISL_510426, EPI_ISL_510427, EPI_ISL_510428, EPI_ISL_510429, EPI_ISL_510430, EPI_ISL_510431, EPI_ISL_510432, EPI_ISL_510433, EPI_ISL_510434, EPI_ISL_510435, EPI_ISL_510436, EPI_ISL_510437, EPI_ISL_510438, EPI_ISL_510439, EPI_ISL_510440, EPI_ISL_510441, EPI_ISL_510442, EPI_ISL_510443, EPI_ISL_510444, EPI_ISL_510445, EPI_ISL_510446, EPI_ISL_510447, EPI_ISL_510448, EPI_ISL_510449, EPI_ISL_510450, EPI_ISL_510451, EPI_ISL_510452, EPI_ISL_510453, EPI_ISL_510454, EPI_ISL_510455, EPI_ISL_510456, EPI_ISL_510457, EPI_ISL_510458, EPI_ISL_510459, EPI_ISL_510460                                                                                                                                                                                                                                                                                                                                                                                 | see above                                                                                                                                                                                       | Hospital Universitario Virgen de las Nieves de Granada-SAS                                                                       | SeqCOVID-SPAIN consortium/IBV(CSIC)                                                                                                                                                                                                                                                                                                                                                                                                            | Mercedes Pérez Ruiz, Sara Sanbonmatsu Gámez, Irene Pedrosa Corral, José M. Navarro-Marí and SeqCOVID-SPAIN consortium                                                                                                                                                                                                                                                                          |
| EPI_ISL_511891, EPI_ISL_511892, EPI_ISL_511893, EPI_ISL_511894, EPI_ISL_511895, EPI_ISL_511896, EPI_ISL_511897, EPI_ISL_511898                                                                                                                                                                                                                                                                                                                                                                                                                                                                                                                                                                                                                                                                                                                                                                                                                                                                 | see above                                                                                                                                                                                       | National Hospital of Tropical Diseases                                                                                           | Oxford University Clinical Research Unit, Hanoi, Vietnam                                                                                                                                                                                                                                                                                                                                                                                       | Nguyen Thi Tam, Van Dinh Trang, Nguyen Thi Hong Thuong, Vu Thi Ngoc Bich, Nguyen Thu Trang, Nguyen Thi Ngoc Diep, Le Nguyen Minh Hoa, Pham Ngoc Thach, H. Rogier van Doorn, on behalf of the OUCRU COVID-19 research group                                                                                                                                                                     |
| EPI_ISL_512058                                                                                                                                                                                                                                                                                                                                                                                                                                                                                                                                                                                                                                                                                                                                                                                                                                                                                                                                                                                 | B.J. Medical College and Civil hospital, Ahmedabad                                                                                                                                              | Gujarat Biotechnology Research Centre                                                                                            | Monika Gandhi, Pinal Trivedi, Maharshi Pandya, Nidhi Patel, Nitin Savaliya, Raghawendra Kumar, Dinesh Kumar, Zuber Saiyed, Komal Patel, Labdhi Pandya, Afzal Ansari, Nikha Trivedi, Pranay Shah, Kamlesh J Upadhyay, Sanjay Kapadia, Apurvasinh Puvar, Janvi Raval, Zarna Patel, R D Dixit, A M Kadri, Harsh Bakshi, Chaitanya Joshi, Madhvi Joshi                                                                                             |                                                                                                                                                                                                                                                                                                                                                                                                |
| EPI_ISL_512061                                                                                                                                                                                                                                                                                                                                                                                                                                                                                                                                                                                                                                                                                                                                                                                                                                                                                                                                                                                 | B.J. Medical College and Civil hospital, Ahmedabad                                                                                                                                              | Gujarat Biotechnology Research Centre                                                                                            | Nidhi Patel, Nitin Savaliya, Raghawendra Kumar, Dinesh Kumar, Zuber Saiyed, Komal Patel, Labdhi Pandya, Afzal Ansari, Nikha Trivedi, Pranay Shah, Kamlesh J Upadhyay, Sanjay Kapadia, Apurvasinh Puvar, Janvi Raval, Zarna Patel, Monika Gandhi, Pinal Trivedi, Maharshi Pandya, R D Dixit, A M Kadri, Harsh Bakshi, Chaitanya Joshi, Madhvi Joshi                                                                                             |                                                                                                                                                                                                                                                                                                                                                                                                |
| EPI_ISL_512062                                                                                                                                                                                                                                                                                                                                                                                                                                                                                                                                                                                                                                                                                                                                                                                                                                                                                                                                                                                 | B.J. Medical College and Civil hospital, Ahmedabad                                                                                                                                              | Gujarat Biotechnology Research Centre                                                                                            | Nitin Savaliya, Raghawendra Kumar, Dinesh Kumar, Zuber Saiyed, Komal Patel, Labdhi Pandya, Afzal Ansari, Nikha Trivedi, Pranay Shah, Kamlesh J Upadhyay, Sanjay Kapadia, Apurvasinh Puvar, Janvi Raval, Zarna Patel, Monika Gandhi, Pinal Trivedi, Maharshi Pandya, Nidhi Patel, R D Dixit, A M Kadri, Harsh Bakshi, Chaitanya Joshi, Madhvi Joshi                                                                                             |                                                                                                                                                                                                                                                                                                                                                                                                |
| EPI_ISL_512069                                                                                                                                                                                                                                                                                                                                                                                                                                                                                                                                                                                                                                                                                                                                                                                                                                                                                                                                                                                 | Sardar Vallabhbhai Patel Institute of Medical Sciences & Research                                                                                                                               | Gujarat Biotechnology Research Centre                                                                                            | Nikha Trivedi, Pranay Shah, Kamlesh J Upadhyay, Sanjay Kapadia, Apurvasinh Puvar, Janvi Raval, Zarna Patel, Monika Gandhi, Pinal Trivedi, Maharshi Pandya, Nidhi Patel, Nitin Savaliya, Raghawendra Kumar, Dinesh Kumar, Zuber Saiyed, Komal Patel, Labdhi Pandya, Afzal Ansari, R D Dixit, A M Kadri, Harsh Bakshi, Chaitanya Joshi, Madhvi Joshi                                                                                             |                                                                                                                                                                                                                                                                                                                                                                                                |
| EPI_ISL_512070                                                                                                                                                                                                                                                                                                                                                                                                                                                                                                                                                                                                                                                                                                                                                                                                                                                                                                                                                                                 | Department of MicroBiology, Government Medical College, Surat                                                                                                                                   | Gujarat Biotechnology Research Centre                                                                                            | Naresh Chauhan, Summaiya Mullan, Amit gamit, Apurvasinh Puvar, Janvi Raval, Zarna Patel, Monika Gandhi, Pinal Trivedi, Maharshi Pandya, Nidhi Patel, Nitin Savaliya, Raghawendra Kumar, Dinesh Kumar, Zuber Saiyed, Komal Patel, Labdhi Pandya, Afzal Ansari, Nikha Trivedi, R D Dixit, A M Kadri, Harsh Bakshi, Chaitanya Joshi, Madhvi Joshi                                                                                                 |                                                                                                                                                                                                                                                                                                                                                                                                |
| EPI_ISL_512075                                                                                                                                                                                                                                                                                                                                                                                                                                                                                                                                                                                                                                                                                                                                                                                                                                                                                                                                                                                 | Dr. RSS Hospital, Modasa                                                                                                                                                                        | Gujarat Biotechnology Research Centre                                                                                            | Monika Gandhi, Pinal Trivedi, Maharshi Pandya, Nidhi Patel, Nitin Savaliya, Raghawendra Kumar, Dinesh Kumar, Zuber Saiyed, Komal Patel, Labdhi Pandya, Afzal Ansari, Nikha Trivedi, Harsh Chaudhari, Apurvasinh Puvar, Janvi Raval, Zarna Patel, R D Dixit, A M Kadri, Harsh Bakshi, Chaitanya Joshi, Madhvi Joshi                                                                                                                             |                                                                                                                                                                                                                                                                                                                                                                                                |
| EPI_ISL_512087, EPI_ISL_512088, EPI_ISL_512089, EPI_ISL_512090, EPI_ISL_512091, EPI_ISL_512092, EPI_ISL_512093, EPI_ISL_512094, EPI_ISL_512095, EPI_ISL_512096, EPI_ISL_512097, EPI_ISL_512098, EPI_ISL_512099, EPI_ISL_512100, EPI_ISL_512101, EPI_ISL_512102, EPI_ISL_512103, EPI_ISL_512104, EPI_ISL_512105, EPI_ISL_512106                                                                                                                                                                                                                                                                                                                                                                                                                                                                                                                                                                                                                                                                 | see above                                                                                                                                                                                       | National Virus Reference Laboratory                                                                                              | National Virus Reference Laboratory                                                                                                                                                                                                                                                                                                                                                                                                            | Michael Carr, Gabriel Gonzalez, Jonathan Dean, Aditi Chaturvedi, Suzie Coughlan, Cillian F De Gascun                                                                                                                                                                                                                                                                                           |
| EPI_ISL_512844                                                                                                                                                                                                                                                                                                                                                                                                                                                                                                                                                                                                                                                                                                                                                                                                                                                                                                                                                                                 | Department of Medical Research                                                                                                                                                                  | DMR_Myanmar                                                                                                                      | Myat Htut Nyunt, Hnin Ohnmar Soe, Kay Thi Aye, Wah Wah Aung, Yi Yi Kyaw, Aung Kyaw Kyaw, Theingi Win Myat, Phyu Win Ei, Aung Zaw Latt, Nan Aye Thida Oo, Lai Lai San, Su Mon Win, Ni Ni Zaw, Htin Lin, Hlaing Myat Thu, Zaw Than Htun                                                                                                                                                                                                          |                                                                                                                                                                                                                                                                                                                                                                                                |

|                                                                                                                                                                                                                                                                                                                                                                                                                                                                                                                                                                                                                                                                                |                                                                                                                                                                                                                                                                                                                                                                                                                                                                                                                                                                                                |                                                                                                                                                                                                 |                                                                                                                                                                                                                                                                                                                                                                                                 |
|--------------------------------------------------------------------------------------------------------------------------------------------------------------------------------------------------------------------------------------------------------------------------------------------------------------------------------------------------------------------------------------------------------------------------------------------------------------------------------------------------------------------------------------------------------------------------------------------------------------------------------------------------------------------------------|------------------------------------------------------------------------------------------------------------------------------------------------------------------------------------------------------------------------------------------------------------------------------------------------------------------------------------------------------------------------------------------------------------------------------------------------------------------------------------------------------------------------------------------------------------------------------------------------|-------------------------------------------------------------------------------------------------------------------------------------------------------------------------------------------------|-------------------------------------------------------------------------------------------------------------------------------------------------------------------------------------------------------------------------------------------------------------------------------------------------------------------------------------------------------------------------------------------------|
| EPI_ISL_513314, EPI_ISL_513511, EPI_ISL_513512                                                                                                                                                                                                                                                                                                                                                                                                                                                                                                                                                                                                                                 | The National Institute of Public Health                                                                                                                                                                                                                                                                                                                                                                                                                                                                                                                                                        | The National Institute of Public Health and State Veterinary Institute Prague                                                                                                                   | Nagy,A;Jirincova,H;Novakova,L;Trnka,D;Vecerova,J                                                                                                                                                                                                                                                                                                                                                |
| EPI_ISL_514129, EPI_ISL_514130                                                                                                                                                                                                                                                                                                                                                                                                                                                                                                                                                                                                                                                 | National Institute of Laboratory Medicine and Referral Center                                                                                                                                                                                                                                                                                                                                                                                                                                                                                                                                  | Genomic Research Lab, BCSIR                                                                                                                                                                     | Md. Murshed Hasan Sarkar, Abu Sayeed Mohammad Mahmud, Mohammad Samir Uzzaman, Eshrar Osman, Md. Ahashan Habib, Shahina Akter, Tanjina Akhter Banu, Barna Goswami, Iffat Jahan, Md. Saddam Hossain, Tasnim Nafisa, Md. Maruf Ahmed Molla, Mahmuda Yeasmin, Asish Kumar Ghosh, A. K. M. Shamsuzzaman, Sheikh Md. Selim Al Din, Utpal Chandra Ray, Salek Ahmed Sajib, Md. Salim Khan               |
| EPI_ISL_514233, EPI_ISL_514234, EPI_ISL_514235, EPI_ISL_514236                                                                                                                                                                                                                                                                                                                                                                                                                                                                                                                                                                                                                 | National Institute of Laboratory Medicine and Referral Center                                                                                                                                                                                                                                                                                                                                                                                                                                                                                                                                  | Genomic Research Lab, BCSIR                                                                                                                                                                     | Md. Murshed Hasan Sarkar, Abu Sayeed Mohammad Mahmud, Mohammad Samir Uzzaman, Eshrar Osman, Md. Ahashan Habib, Shahina Akter, Tanjina Akhter Banu, Barna Goswami, Iffat Jahan, Md. Saddam Hossain, Tasnim Nafisa, Md. Maruf Ahmed Molla, Mahmuda Yeasmin, Asish Kumar Ghosh, A. K. M. Shamsuzzaman, Sheikh Md. Selim Al Din, Utpal Chandra Ray, Salek Ahmed Sajib, Md. Salim Khan               |
| EPI_ISL_514237, EPI_ISL_514238, EPI_ISL_514239, EPI_ISL_514240, EPI_ISL_514241                                                                                                                                                                                                                                                                                                                                                                                                                                                                                                                                                                                                 | National Institute of Laboratory Medicine and Referral Center                                                                                                                                                                                                                                                                                                                                                                                                                                                                                                                                  | Genomic Research Lab, BCSIR                                                                                                                                                                     | Md. Saddam Hossain, Abu Sayeed Mohammad Mahmud, Mohammad Samir Uzzaman, Eshrar Osman, Md. Ahashan Habib, Shahina Akter, Tanjina Akhter Banu, Md. Murshed Hasan Sarkar, Barna Goswami, Iffat Jahan, Tasnim Nafisa, Md. Maruf Ahmed Molla, Mahmuda Yeasmin, Asish Kumar Ghosh, A. K. M. Shamsuzzaman, Sheikh Md. Selim Al Din, Utpal Chandra Ray, Salek Ahmed Sajib, Md. Salim Khan               |
| EPI_ISL_514266, EPI_ISL_514267, EPI_ISL_514268, EPI_ISL_514269, EPI_ISL_514270, EPI_ISL_514271, EPI_ISL_514272, EPI_ISL_514273, EPI_ISL_514274                                                                                                                                                                                                                                                                                                                                                                                                                                                                                                                                 | Israel Central Virology laboratory                                                                                                                                                                                                                                                                                                                                                                                                                                                                                                                                                             | Israel Central Virology laboratory                                                                                                                                                              | Neta Zuckerman, Efrat Dahan Bucris, Oran Erster, Ella Mendelson, Michal Mandelboim                                                                                                                                                                                                                                                                                                              |
| EPI_ISL_514275                                                                                                                                                                                                                                                                                                                                                                                                                                                                                                                                                                                                                                                                 | Israeli Central Virology laboratory                                                                                                                                                                                                                                                                                                                                                                                                                                                                                                                                                            | Israel Central Virology laboratory                                                                                                                                                              | Neta Zuckerman, Efrat Dahan Bucris, Oran Erster, Ella Mendelson, Michal Mandelboim                                                                                                                                                                                                                                                                                                              |
| EPI_ISL_514276, EPI_ISL_514277, EPI_ISL_514278, EPI_ISL_514279, EPI_ISL_514280, EPI_ISL_514281, EPI_ISL_514282, EPI_ISL_514283, EPI_ISL_514284, EPI_ISL_514285, EPI_ISL_514286, EPI_ISL_514287, EPI_ISL_514288, EPI_ISL_514289, EPI_ISL_514290, EPI_ISL_514291, EPI_ISL_514292, EPI_ISL_514293, EPI_ISL_514294, EPI_ISL_514295, EPI_ISL_514296, EPI_ISL_514297, EPI_ISL_514298, EPI_ISL_514299, EPI_ISL_514300, EPI_ISL_514301, EPI_ISL_514302, EPI_ISL_514303, EPI_ISL_514304, EPI_ISL_514305, EPI_ISL_514306, EPI_ISL_514307, EPI_ISL_514308, EPI_ISL_514309, EPI_ISL_514310, EPI_ISL_514311, EPI_ISL_514312, EPI_ISL_514313, EPI_ISL_514314, EPI_ISL_514315, EPI_ISL_514316 | Israel Central Virology laboratory                                                                                                                                                                                                                                                                                                                                                                                                                                                                                                                                                             | Israel Central Virology laboratory                                                                                                                                                              | Neta Zuckerman, Efrat Dahan Bucris, Oran Erster, Ella Mendelson, Michal Mandelboim                                                                                                                                                                                                                                                                                                              |
| see above                                                                                                                                                                                                                                                                                                                                                                                                                                                                                                                                                                                                                                                                      | Israel Central Virology laboratory                                                                                                                                                                                                                                                                                                                                                                                                                                                                                                                                                             | Israel Central Virology laboratory                                                                                                                                                              | Neta Zuckerman, Efrat Dahan Bucris, Oran Erster, Ella Mendelson, Michal Mandelboim                                                                                                                                                                                                                                                                                                              |
| EPI_ISL_514437                                                                                                                                                                                                                                                                                                                                                                                                                                                                                                                                                                                                                                                                 | Dr. RSS Hospital, Modasa                                                                                                                                                                                                                                                                                                                                                                                                                                                                                                                                                                       | Gujarat Biotechnology Research Centre                                                                                                                                                           | Nidhi Patel, Nitin Savaliya, Raghawendra Kumar, Dinesh Kumar, Zuber Saiyed, Komal Patel, Labdhi Pandya, Afzal Ansari, Nikha Trivedi, Harsh Chaudhari, Apurvasinh Puvar, Janvi Raval, Zarna Patel, Monika Gandhi, Pinal Trivedi, Maharshi Pandya, R D Dixit, A M Kadri, Harsh Bakshi, Chaitanya Joshi, Madhvi Joshi                                                                              |
| EPI_ISL_514522, EPI_ISL_514523, EPI_ISL_514527, EPI_ISL_514530, EPI_ISL_514533, EPI_ISL_514542, EPI_ISL_514543, EPI_ISL_514545, EPI_ISL_514549, EPI_ISL_514550, EPI_ISL_514551, EPI_ISL_514558                                                                                                                                                                                                                                                                                                                                                                                                                                                                                 | see above                                                                                                                                                                                                                                                                                                                                                                                                                                                                                                                                                                                      | Virology Department, Royal Infirmary of Edinburgh, NHS Lothian / School of Biological Sciences, University of Edinburgh / Institute of Genetics and Molecular Medicine, University of Edinburgh | COVID-19 Genomics UK (COG-UK) Consortium                                                                                                                                                                                                                                                                                                                                                        |
| see above                                                                                                                                                                                                                                                                                                                                                                                                                                                                                                                                                                                                                                                                      | Virology Department, Royal Infirmary of Edinburgh, NHS Lothian / School of Biological Sciences, University of Edinburgh / Institute of Genetics and Molecular Medicine, University of Edinburgh                                                                                                                                                                                                                                                                                                                                                                                                | COVID-19 Genomics UK (COG-UK) Consortium                                                                                                                                                        | McHugh M, Dewar R, Rooke S, Gallagher M, Balcaza C, O'Toole Á, Scher E, Hill V, McCrone JT, Colquhoun R, Yu X, Jackson B, Rambaut A, Williams TC, Templeton K                                                                                                                                                                                                                                   |
| EPI_ISL_514581                                                                                                                                                                                                                                                                                                                                                                                                                                                                                                                                                                                                                                                                 | B.J. Medical College and Civil hospital, Ahmedabad                                                                                                                                                                                                                                                                                                                                                                                                                                                                                                                                             | Gujarat Biotechnology Research Centre                                                                                                                                                           | Nitin Savaliya, Raghawendra Kumar, Dinesh Kumar, Zuber Saiyed, Komal Patel, Labdhi Pandya, Afzal Ansari, Nikha Trivedi, Pranay Shah, Kamlesh J Upadhyay, Sanjay Kapadia, Apurvasinh Puvar, Janvi Raval, Zarna Patel, Monika Gandhi, Pinal Trivedi, Maharshi Pandya, Nidhi Patel, R D Dixit, A M Kadri, Harsh Bakshi, Chaitanya Joshi, Madhvi Joshi                                              |
| EPI_ISL_514588                                                                                                                                                                                                                                                                                                                                                                                                                                                                                                                                                                                                                                                                 | B.J. Medical College and Civil hospital, Ahmedabad                                                                                                                                                                                                                                                                                                                                                                                                                                                                                                                                             | Gujarat Biotechnology Research Centre                                                                                                                                                           | Nikha Trivedi, Pranay Shah, Kamlesh J Upadhyay, Sanjay Kapadia, Apurvasinh Puvar, Janvi Raval, Zarna Patel, Monika Gandhi, Pinal Trivedi, Maharshi Pandya, Nidhi Patel, Nitin Savaliya, Raghawendra Kumar, Dinesh Kumar, Zuber Saiyed, Komal Patel, Labdhi Pandya, Afzal Ansari, R D Dixit, A M Kadri, Harsh Bakshi, Chaitanya Joshi, Madhvi Joshi                                              |
| EPI_ISL_514595                                                                                                                                                                                                                                                                                                                                                                                                                                                                                                                                                                                                                                                                 | B.J. Medical College and Civil hospital, Ahmedabad                                                                                                                                                                                                                                                                                                                                                                                                                                                                                                                                             | Gujarat Biotechnology Research Centre                                                                                                                                                           | Monika Gandhi, Pinal Trivedi, Maharshi Pandya, Nidhi Patel, Nitin Savaliya, Raghawendra Kumar, Dinesh Kumar, Zuber Saiyed, Komal Patel, Labdhi Pandya, Afzal Ansari, Nikha Trivedi, Pranay Shah, Kamlesh J Upadhyay, Sanjay Kapadia, Apurvasinh Puvar, Janvi Raval, Zarna Patel, R D Dixit, A M Kadri, Harsh Bakshi, Chaitanya Joshi, Madhvi Joshi                                              |
| EPI_ISL_514598                                                                                                                                                                                                                                                                                                                                                                                                                                                                                                                                                                                                                                                                 | B.J. Medical College and Civil hospital, Ahmedabad                                                                                                                                                                                                                                                                                                                                                                                                                                                                                                                                             | Gujarat Biotechnology Research Centre                                                                                                                                                           | Nidhi Patel, Nitin Savaliya, Raghawendra Kumar, Dinesh Kumar, Zuber Saiyed, Komal Patel, Labdhi Pandya, Afzal Ansari, Nikha Trivedi, Pranay Shah, Kamlesh J Upadhyay, Sanjay Kapadia, Apurvasinh Puvar, Janvi Raval, Zarna Patel, Monika Gandhi, Pinal Trivedi, Maharshi Pandya, R D Dixit, A M Kadri, Harsh Bakshi, Chaitanya Joshi, Madhvi Joshi                                              |
| EPI_ISL_514599                                                                                                                                                                                                                                                                                                                                                                                                                                                                                                                                                                                                                                                                 | B.J. Medical College and Civil hospital, Ahmedabad                                                                                                                                                                                                                                                                                                                                                                                                                                                                                                                                             | Gujarat Biotechnology Research Centre                                                                                                                                                           | Nitin Savaliya, Raghawendra Kumar, Dinesh Kumar, Zuber Saiyed, Komal Patel, Labdhi Pandya, Afzal Ansari, Nikha Trivedi, Pranay Shah, Kamlesh J Upadhyay, Sanjay Kapadia, Apurvasinh Puvar, Janvi Raval, Zarna Patel, Monika Gandhi, Pinal Trivedi, Maharshi Pandya, Nidhi Patel, R D Dixit, A M Kadri, Harsh Bakshi, Chaitanya Joshi, Madhvi Joshi                                              |
| EPI_ISL_514606                                                                                                                                                                                                                                                                                                                                                                                                                                                                                                                                                                                                                                                                 | B.J. Medical College and Civil hospital, Ahmedabad                                                                                                                                                                                                                                                                                                                                                                                                                                                                                                                                             | Gujarat Biotechnology Research Centre                                                                                                                                                           | Nikha Trivedi, Pranay Shah, Kamlesh J Upadhyay, Sanjay Kapadia, Apurvasinh Puvar, Janvi Raval, Zarna Patel, Monika Gandhi, Pinal Trivedi, Maharshi Pandya, Nidhi Patel, Nitin Savaliya, Raghawendra Kumar, Dinesh Kumar, Zuber Saiyed, Komal Patel, Labdhi Pandya, Afzal Ansari, R D Dixit, A M Kadri, Harsh Bakshi, Chaitanya Joshi, Madhvi Joshi                                              |
| EPI_ISL_514610                                                                                                                                                                                                                                                                                                                                                                                                                                                                                                                                                                                                                                                                 | GMERS Medical College & Hospital, Gotri, Vadodara                                                                                                                                                                                                                                                                                                                                                                                                                                                                                                                                              | Gujarat Biotechnology Research Centre                                                                                                                                                           | Meenakshi Shah, Neena Doshi, Varsha Godbole, Apurvasinh Puvar, Janvi Raval, Zarna Patel, Monika Gandhi, Pinal Trivedi, Maharshi Pandya, Nidhi Patel, Nitin Savaliya, Raghawendra Kumar, Dinesh Kumar, Zuber Saiyed, Komal Patel, Labdhi Pandya, Afzal Ansari, Nikha Trivedi, Pranay Shah, Kamlesh J Upadhyay, Sanjay Kapadia, R D Dixit, A M Kadri, Harsh Bakshi, Chaitanya Joshi, Madhvi Joshi |
| EPI_ISL_515082, EPI_ISL_515083, EPI_ISL_515084, EPI_ISL_515085, EPI_ISL_515086, EPI_ISL_515087, EPI_ISL_515088, EPI_ISL_515089, EPI_ISL_515090, EPI_ISL_515091, EPI_ISL_515092, EPI_ISL_515093, EPI_ISL_515094, EPI_ISL_515095, EPI_ISL_515096, EPI_ISL_515097, EPI_ISL_515098, EPI_ISL_515099, EPI_ISL_515100, EPI_ISL_515101, EPI_ISL_515102, EPI_ISL_515103, EPI_ISL_515104, EPI_ISL_515105, EPI_ISL_515106, EPI_ISL_515107, EPI_ISL_515108, EPI_ISL_515109, EPI_ISL_515110, EPI_ISL_515111, EPI_ISL_515112                                                                                                                                                                 | see above                                                                                                                                                                                                                                                                                                                                                                                                                                                                                                                                                                                      | Department of Biochemistry, Cell and Molecular Biology                                                                                                                                          | WACCIP, University of Ghana                                                                                                                                                                                                                                                                                                                                                                     |
| see above                                                                                                                                                                                                                                                                                                                                                                                                                                                                                                                                                                                                                                                                      | Department of Biochemistry, Cell and Molecular Biology                                                                                                                                                                                                                                                                                                                                                                                                                                                                                                                                         | WACCIP, University of Ghana                                                                                                                                                                     | Ngoi,J.M., Quashie,P., Morang'a,C.M., Amuzu,D.S., Adu,B., Kumordjie,S., Eshun,M., Boatema,L., Magnussen,V., Kotey,E., Tei-Maya,F., Arjarquah,A., Mutungi,J.K., Bediako,Y., Asante,I., Bonney,E., Kyei,G.B., Bonney,K., Amenga-Etego,L.N., Anang,A.K., Awandare,G.A., Ampofo,W.                                                                                                                  |
| EPI_ISL_516884, EPI_ISL_516885, EPI_ISL_516886, EPI_ISL_516887, EPI_ISL_516888, EPI_ISL_516889, EPI_ISL_516890, EPI_ISL_516891                                                                                                                                                                                                                                                                                                                                                                                                                                                                                                                                                 | Israel Central Virology laboratory                                                                                                                                                                                                                                                                                                                                                                                                                                                                                                                                                             | Israel Central Virology laboratory                                                                                                                                                              | Neta Zuckerman, Efrat Dahan Bucris, Oran Erster, Ella Mendelson, Michal Mandelboim                                                                                                                                                                                                                                                                                                              |
| EPI_ISL_516892                                                                                                                                                                                                                                                                                                                                                                                                                                                                                                                                                                                                                                                                 | Israeli Central Virology laboratory                                                                                                                                                                                                                                                                                                                                                                                                                                                                                                                                                            | Israel Central Virology laboratory                                                                                                                                                              | Neta Zuckerman, Efrat Dahan Bucris, Oran Erster, Ella Mendelson, Michal Mandelboim                                                                                                                                                                                                                                                                                                              |
| EPI_ISL_516893, EPI_ISL_516894, EPI_ISL_516895, EPI_ISL_516896, EPI_ISL_516897, EPI_ISL_516898, EPI_ISL_516899, EPI_ISL_516900, EPI_ISL_516901, EPI_ISL_516902, EPI_ISL_516903, EPI_ISL_516904, EPI_ISL_516905, EPI_ISL_516906, EPI_ISL_516907, EPI_ISL_516908, EPI_ISL_516909, EPI_ISL_516910, EPI_ISL_516911, EPI_ISL_516912, EPI_ISL_516913, EPI_ISL_516914, EPI_ISL_516915, EPI_ISL_516916, EPI_ISL_516917, EPI_ISL_516918, EPI_ISL_516919, EPI_ISL_516920, EPI_ISL_516921                                                                                                                                                                                                 | see above                                                                                                                                                                                                                                                                                                                                                                                                                                                                                                                                                                                      | Israel Central Virology laboratory                                                                                                                                                              | Israel Central Virology laboratory                                                                                                                                                                                                                                                                                                                                                              |
| see above                                                                                                                                                                                                                                                                                                                                                                                                                                                                                                                                                                                                                                                                      | Israel Central Virology laboratory                                                                                                                                                                                                                                                                                                                                                                                                                                                                                                                                                             | Israel Central Virology laboratory                                                                                                                                                              | Neta Zuckerman, Efrat Dahan Bucris, Oran Erster, Ella Mendelson, Michal Mandelboim                                                                                                                                                                                                                                                                                                              |
| EPI_ISL_517583, EPI_ISL_517584, EPI_ISL_517588                                                                                                                                                                                                                                                                                                                                                                                                                                                                                                                                                                                                                                 | Virology Department, Royal Infirmary of Edinburgh, NHS Lothian / School of Biological Sciences, University of Edinburgh / Institute of Genetics and Molecular Medicine, University of Edinburgh                                                                                                                                                                                                                                                                                                                                                                                                | COVID-19 Genomics UK (COG-UK) Consortium                                                                                                                                                        | McHugh M, Dewar R, Rooke S, Gallagher M, Balcaza C, O'Toole Á, Scher E, Hill V, McCrone JT, Colquhoun R, Yu X, Jackson B, Rambaut A, Williams TC, Templeton K                                                                                                                                                                                                                                   |
| EPI_ISL_517996, EPI_ISL_517997, EPI_ISL_517998, EPI_ISL_517999, EPI_ISL_518000, EPI_ISL_518001, EPI_ISL_518002, EPI_ISL_518003, EPI_ISL_518004, EPI_ISL_518005, EPI_ISL_518006, EPI_ISL_518007, EPI_ISL_518008, EPI_ISL_518009, EPI_ISL_518010, EPI_ISL_518011, EPI_ISL_518012, EPI_ISL_518013, EPI_ISL_518014, EPI_ISL_518015, EPI_ISL_518016, EPI_ISL_518017                                                                                                                                                                                                                                                                                                                 | see above                                                                                                                                                                                                                                                                                                                                                                                                                                                                                                                                                                                      | Singapore General Hospital                                                                                                                                                                      | Department of Microbiology                                                                                                                                                                                                                                                                                                                                                                      |
| see above                                                                                                                                                                                                                                                                                                                                                                                                                                                                                                                                                                                                                                                                      | Singapore General Hospital                                                                                                                                                                                                                                                                                                                                                                                                                                                                                                                                                                     | Department of Microbiology                                                                                                                                                                      | Nurdyana Abdul Rahman, Kun Lee Lim, Chenhao Li, Kian Sing Chan, Lynette Oon, Kern Rei Chng, Niranjan Nagarajan, Karrie Ko                                                                                                                                                                                                                                                                       |
| EPI_ISL_521860, EPI_ISL_521861, EPI_ISL_521862                                                                                                                                                                                                                                                                                                                                                                                                                                                                                                                                                                                                                                 | Royal Darwin Hospital Pathology                                                                                                                                                                                                                                                                                                                                                                                                                                                                                                                                                                | MDU-PHL                                                                                                                                                                                         | Meumann, E., Cally L., Seemann T., Sait, M., Schultz M., Druce J., Sherry, N.                                                                                                                                                                                                                                                                                                                   |
| EPI_ISL_522987, EPI_ISL_522988, EPI_ISL_522989, EPI_ISL_522990, EPI_ISL_522991, EPI_ISL_522992, EPI_ISL_522993, EPI_ISL_522994, EPI_ISL_522995, EPI_ISL_522997, EPI_ISL_522998, EPI_ISL_522999, EPI_ISL_523001, EPI_ISL_523003, EPI_ISL_523004, EPI_ISL_523005, EPI_ISL_523007, EPI_ISL_523009, EPI_ISL_523010, EPI_ISL_523013, EPI_ISL_523014, EPI_ISL_523015, EPI_ISL_523016, EPI_ISL_523017, EPI_ISL_523018, EPI_ISL_523021, EPI_ISL_523022, EPI_ISL_523023, EPI_ISL_523026, EPI_ISL_523027, EPI_ISL_523028, EPI_ISL_523029, EPI_ISL_523030, EPI_ISL_523031, EPI_ISL_523032, EPI_ISL_523034                                                                                 | EPI_ISL_522987, EPI_ISL_522988, EPI_ISL_522989, EPI_ISL_522990, EPI_ISL_522991, EPI_ISL_522992, EPI_ISL_522993, EPI_ISL_522994, EPI_ISL_522995, EPI_ISL_522997, EPI_ISL_522998, EPI_ISL_522999, EPI_ISL_523001, EPI_ISL_523003, EPI_ISL_523004, EPI_ISL_523005, EPI_ISL_523007, EPI_ISL_523009, EPI_ISL_523010, EPI_ISL_523013, EPI_ISL_523014, EPI_ISL_523015, EPI_ISL_523016, EPI_ISL_523017, EPI_ISL_523018, EPI_ISL_523021, EPI_ISL_523022, EPI_ISL_523023, EPI_ISL_523026, EPI_ISL_523027, EPI_ISL_523028, EPI_ISL_523029, EPI_ISL_523030, EPI_ISL_523031, EPI_ISL_523032, EPI_ISL_523034 |                                                                                                                                                                                                 |                                                                                                                                                                                                                                                                                                                                                                                                 |

|                                                                                                                                                                                                                                                                                                                                                                                                                                                                                                                                                                                                                                                                                                                                                                                                                                                                                                                                                                                                                                                                                                |           |                                                                                                                                                                                                 |                                          |                                                                                                                                                                                                                                                                                                                                                                    |
|------------------------------------------------------------------------------------------------------------------------------------------------------------------------------------------------------------------------------------------------------------------------------------------------------------------------------------------------------------------------------------------------------------------------------------------------------------------------------------------------------------------------------------------------------------------------------------------------------------------------------------------------------------------------------------------------------------------------------------------------------------------------------------------------------------------------------------------------------------------------------------------------------------------------------------------------------------------------------------------------------------------------------------------------------------------------------------------------|-----------|-------------------------------------------------------------------------------------------------------------------------------------------------------------------------------------------------|------------------------------------------|--------------------------------------------------------------------------------------------------------------------------------------------------------------------------------------------------------------------------------------------------------------------------------------------------------------------------------------------------------------------|
| EPI_ISL_523035, EPI_ISL_523036, EPI_ISL_523037, EPI_ISL_523038, EPI_ISL_523040, EPI_ISL_523042, EPI_ISL_523043, EPI_ISL_523044, EPI_ISL_523045, EPI_ISL_523047, EPI_ISL_523048, EPI_ISL_523049, EPI_ISL_523051, EPI_ISL_523052, EPI_ISL_523053, EPI_ISL_523054, EPI_ISL_523057, EPI_ISL_523058, EPI_ISL_523059, EPI_ISL_523060, EPI_ISL_523061, EPI_ISL_523064, EPI_ISL_523065, EPI_ISL_523066, EPI_ISL_523067, EPI_ISL_523068, EPI_ISL_523070, EPI_ISL_523071, EPI_ISL_523072, EPI_ISL_523073, EPI_ISL_523075, EPI_ISL_523077, EPI_ISL_523078, EPI_ISL_523080, EPI_ISL_523081, EPI_ISL_523083, EPI_ISL_523084, EPI_ISL_523085, EPI_ISL_523087, EPI_ISL_523088, EPI_ISL_523089, EPI_ISL_523090, EPI_ISL_523092, EPI_ISL_523095, EPI_ISL_523096, EPI_ISL_523098, EPI_ISL_523099, EPI_ISL_523100, EPI_ISL_523101, EPI_ISL_523104, EPI_ISL_523106, EPI_ISL_523108, EPI_ISL_523109, EPI_ISL_523111, EPI_ISL_523112, EPI_ISL_523113, EPI_ISL_523114, EPI_ISL_523115, EPI_ISL_523116, EPI_ISL_523117, EPI_ISL_523118, EPI_ISL_523119, EPI_ISL_523120                                                 | see above | Dutch COVID-19 response team                                                                                                                                                                    | Erasmus Medical Center                   | OH consortium                                                                                                                                                                                                                                                                                                                                                      |
| EPI_ISL_524445, EPI_ISL_524446, EPI_ISL_524447, EPI_ISL_524448, EPI_ISL_524449                                                                                                                                                                                                                                                                                                                                                                                                                                                                                                                                                                                                                                                                                                                                                                                                                                                                                                                                                                                                                 |           | Singapore General Hospital                                                                                                                                                                      | Department of Microbiology               | Nurdyana Abdul Rahman, Kun Lee Lim, Chenhao Li, Kian Sing Chan, Lynette Oon, Kern Rei Chng, Niranjan Nagarajan, Karrie Ko                                                                                                                                                                                                                                          |
| EPI_ISL_524716                                                                                                                                                                                                                                                                                                                                                                                                                                                                                                                                                                                                                                                                                                                                                                                                                                                                                                                                                                                                                                                                                 |           | B.J. Medical College and Civil hospital, Ahmedabad                                                                                                                                              | Gujarat Biotechnology Research Centre    | Monika Gandhi, Pinal Trivedi, Maharshi Pandya, Nidhi Patel, Nitin Savaliya, Raghawendra Kumar, Dinesh Kumar, Zuber Saiyed, Komal Patel, Labdhi Pandya, Afzal Ansari, Nikha Trivedi, Pranay Shah, Kamlesh J Upadhyay, Sanjay Kapadia, Apurvasinh Puvar, Janvi Raval, Zarna Patel, R D Dixit, A M Kadri, Harsh Bakshi, Chaitanya Joshi, Madhvi Joshi                 |
| EPI_ISL_524719                                                                                                                                                                                                                                                                                                                                                                                                                                                                                                                                                                                                                                                                                                                                                                                                                                                                                                                                                                                                                                                                                 |           | B.J. Medical College and Civil hospital, Ahmedabad                                                                                                                                              | Gujarat Biotechnology Research Centre    | Nidhi Patel, Nitin Savaliya, Raghawendra Kumar, Dinesh Kumar, Zuber Saiyed, Komal Patel, Labdhi Pandya, Afzal Ansari, Nikha Trivedi, Pranay Shah, Kamlesh J Upadhyay, Sanjay Kapadia, Apurvasinh Puvar, Janvi Raval, Zarna Patel, Monika Gandhi, Pinal Trivedi, Maharshi Pandya, R D Dixit, A M Kadri, Harsh Bakshi, Chaitanya Joshi, Madhvi Joshi                 |
| EPI_ISL_524720                                                                                                                                                                                                                                                                                                                                                                                                                                                                                                                                                                                                                                                                                                                                                                                                                                                                                                                                                                                                                                                                                 |           | B.J. Medical College and Civil hospital, Ahmedabad                                                                                                                                              | Gujarat Biotechnology Research Centre    | Nitin Savaliya, Raghawendra Kumar, Dinesh Kumar, Zuber Saiyed, Komal Patel, Labdhi Pandya, Afzal Ansari, Nikha Trivedi, Pranay Shah, Kamlesh J Upadhyay, Sanjay Kapadia, Apurvasinh Puvar, Janvi Raval, Zarna Patel, Monika Gandhi, Pinal Trivedi, Maharshi Pandya, Nidhi Patel, R D Dixit, A M Kadri, Harsh Bakshi, Chaitanya Joshi, Madhvi Joshi                 |
| EPI_ISL_524727                                                                                                                                                                                                                                                                                                                                                                                                                                                                                                                                                                                                                                                                                                                                                                                                                                                                                                                                                                                                                                                                                 |           | B.J. Medical College and Civil hospital, Ahmedabad                                                                                                                                              | Gujarat Biotechnology Research Centre    | Nikha Trivedi, Pranay Shah, Kamlesh J Upadhyay, Sanjay Kapadia, Apurvasinh Puvar, Janvi Raval, Zarna Patel, Monika Gandhi, Pinal Trivedi, Maharshi Pandya, Nidhi Patel, Nitin Savaliya, Raghawendra Kumar, Dinesh Kumar, Zuber Saiyed, Komal Patel, Labdhi Pandya, Afzal Ansari, R D Dixit, A M Kadri, Harsh Bakshi, Chaitanya Joshi, Madhvi Joshi                 |
| EPI_ISL_524730                                                                                                                                                                                                                                                                                                                                                                                                                                                                                                                                                                                                                                                                                                                                                                                                                                                                                                                                                                                                                                                                                 |           | GMERS Medical College & Hospital, Gotri, Vadodara                                                                                                                                               | Gujarat Biotechnology Research Centre    | Meenakshi Shah, Neena Doshi, Varsha Godbole, Apurvasinh Puvar, Janvi Raval, Zarna Patel, Monika Gandhi, Pinal Trivedi, Maharshi Pandya, Nidhi Patel, Nitin Savaliya, Raghawendra Kumar, Dinesh Kumar, Zuber Saiyed, Komal Patel, Labdhi Pandya, Afzal Ansari, Nikha Trivedi, R D Dixit, A M Kadri, Harsh Bakshi, Chaitanya Joshi, Madhvi Joshi                     |
| EPI_ISL_524731                                                                                                                                                                                                                                                                                                                                                                                                                                                                                                                                                                                                                                                                                                                                                                                                                                                                                                                                                                                                                                                                                 |           | GMERS Medical College & Hospital, Gotri, Vadodara                                                                                                                                               | Gujarat Biotechnology Research Centre    | Neena Doshi, Varsha Godbole, Apurvasinh Puvar, Janvi Raval, Zarna Patel, Monika Gandhi, Pinal Trivedi, Meenakshi Shah, R D Dixit, A M Kadri, Harsh Bakshi, Chaitanya Joshi, Madhvi Joshi                                                                                                                                                                           |
| EPI_ISL_524738                                                                                                                                                                                                                                                                                                                                                                                                                                                                                                                                                                                                                                                                                                                                                                                                                                                                                                                                                                                                                                                                                 |           | GMERS Medical College and Hospital, Gandhinagar                                                                                                                                                 | Gujarat Biotechnology Research Centre    | Monika Gandhi, Pinal Trivedi, Maharshi Pandya, Nidhi Patel, Nitin Savaliya, Raghawendra Kumar, Dinesh Kumar, Zuber Saiyed, Komal Patel, Labdhi Pandya, Afzal Ansari, Nikha Trivedi, Seema Bhatt, Gaurishankar Shrimali, Bhavesh Modi, Bharti Rajani, Apurvasinh Puvar, Janvi Raval, Zarna Patel, R D Dixit, A M Kadri, Harsh Bakshi, Chaitanya Joshi, Madhvi Joshi |
| EPI_ISL_524741                                                                                                                                                                                                                                                                                                                                                                                                                                                                                                                                                                                                                                                                                                                                                                                                                                                                                                                                                                                                                                                                                 |           | GMERS Medical College and Hospital, Gandhinagar                                                                                                                                                 | Gujarat Biotechnology Research Centre    | Nidhi Patel, Nitin Savaliya, Raghawendra Kumar, Dinesh Kumar, Zuber Saiyed, Komal Patel, Labdhi Pandya, Afzal Ansari, Nikha Trivedi, Seema Bhatt, Gaurishankar Shrimali, Bhavesh Modi, Bharti Rajani, Apurvasinh Puvar, Janvi Raval, Zarna Patel, Monika Gandhi, Pinal Trivedi, Maharshi Pandya, R D Dixit, A M Kadri, Harsh Bakshi, Chaitanya Joshi, Madhvi Joshi |
| EPI_ISL_524748                                                                                                                                                                                                                                                                                                                                                                                                                                                                                                                                                                                                                                                                                                                                                                                                                                                                                                                                                                                                                                                                                 |           | Sir M P Shah Government Medical College, Jamnagar                                                                                                                                               | Gujarat Biotechnology Research Centre    | Nikha Trivedi, Apurvasinh Puvar, Janvi Raval, Binita Aring, Zarna Patel, Monika Gandhi, Pinal Trivedi, Maharshi Pandya, Nidhi Patel, Nitin Savaliya, Raghawendra Kumar, Dinesh Kumar, Zuber Saiyed, Komal Patel, Labdhi Pandya, Afzal Ansari, R D Dixit, A M Kadri, Harsh Bakshi, Chaitanya Joshi, Madhvi Joshi                                                    |
| EPI_ISL_524752                                                                                                                                                                                                                                                                                                                                                                                                                                                                                                                                                                                                                                                                                                                                                                                                                                                                                                                                                                                                                                                                                 |           | GMERS Medical College and Hospital, Dharpur, Patan                                                                                                                                              | Gujarat Biotechnology Research Centre    | Monika Gandhi, Pinal Trivedi, Maharshi Pandya, Nidhi Patel, Nitin Savaliya, Raghawendra Kumar, Dinesh Kumar, Zuber Saiyed, Komal Patel, Labdhi Pandya, Afzal Ansari, Nikha Trivedi, A N Parmar, Apurvasinh Puvar, Janvi Raval, Zarna Patel, R D Dixit, A M Kadri, Harsh Bakshi, Chaitanya Joshi, Madhvi Joshi                                                      |
| EPI_ISL_524755                                                                                                                                                                                                                                                                                                                                                                                                                                                                                                                                                                                                                                                                                                                                                                                                                                                                                                                                                                                                                                                                                 |           | GMERS Medical College and Hospital, Dharpur, Patan                                                                                                                                              | Gujarat Biotechnology Research Centre    | Nidhi Patel, Nitin Savaliya, Raghawendra Kumar, Dinesh Kumar, Zuber Saiyed, Komal Patel, Labdhi Pandya, Afzal Ansari, Nikha Trivedi, A N Parmar, Apurvasinh Puvar, Janvi Raval, Zarna Patel, Monika Gandhi, Pinal Trivedi, Maharshi Pandya, R D Dixit, A M Kadri, Harsh Bakshi, Chaitanya Joshi, Madhvi Joshi                                                      |
| EPI_ISL_524756                                                                                                                                                                                                                                                                                                                                                                                                                                                                                                                                                                                                                                                                                                                                                                                                                                                                                                                                                                                                                                                                                 |           | GMERS Medical College and Hospital, Dharpur, Patan                                                                                                                                              | Gujarat Biotechnology Research Centre    | Nitin Savaliya, Raghawendra Kumar, Dinesh Kumar, Zuber Saiyed, Komal Patel, Labdhi Pandya, Afzal Ansari, Nikha Trivedi, A N Parmar, Apurvasinh Puvar, Janvi Raval, Zarna Patel, Monika Gandhi, Pinal Trivedi, Maharshi Pandya, Nidhi Patel, R D Dixit, A M Kadri, Harsh Bakshi, Chaitanya Joshi, Madhvi Joshi                                                      |
| EPI_ISL_524763                                                                                                                                                                                                                                                                                                                                                                                                                                                                                                                                                                                                                                                                                                                                                                                                                                                                                                                                                                                                                                                                                 |           | GMERS Medical College and Hospital, Dharpur, Patan                                                                                                                                              | Gujarat Biotechnology Research Centre    | Nikha Trivedi, A N Parmar, Apurvasinh Puvar, Janvi Raval, Zarna Patel, Monika Gandhi, Pinal Trivedi, Maharshi Pandya, Nidhi Patel, Nitin Savaliya, Raghawendra Kumar, Dinesh Kumar, Zuber Saiyed, Komal Patel, Labdhi Pandya, Afzal Ansari, R D Dixit, A M Kadri, Harsh Bakshi, Chaitanya Joshi, Madhvi Joshi                                                      |
| EPI_ISL_525352, EPI_ISL_525353, EPI_ISL_525354, EPI_ISL_525355, EPI_ISL_525356, EPI_ISL_525357, EPI_ISL_525358, EPI_ISL_525359, EPI_ISL_525360, EPI_ISL_525361, EPI_ISL_525362, EPI_ISL_525363, EPI_ISL_525364, EPI_ISL_525365, EPI_ISL_525366, EPI_ISL_525367, EPI_ISL_525368, EPI_ISL_525370, EPI_ISL_525371, EPI_ISL_525372, EPI_ISL_525373, EPI_ISL_525374, EPI_ISL_525375, EPI_ISL_525376, EPI_ISL_525377, EPI_ISL_525378, EPI_ISL_525379, EPI_ISL_525380, EPI_ISL_525381, EPI_ISL_525382, EPI_ISL_525383, EPI_ISL_525384, EPI_ISL_525385, EPI_ISL_525386, EPI_ISL_525387, EPI_ISL_525388, EPI_ISL_525389, EPI_ISL_525390, EPI_ISL_525391, EPI_ISL_525392, EPI_ISL_525393, EPI_ISL_525394, EPI_ISL_525395, EPI_ISL_525396, EPI_ISL_525397, EPI_ISL_525398, EPI_ISL_525399, EPI_ISL_525400, EPI_ISL_525401, EPI_ISL_525402, EPI_ISL_525403, EPI_ISL_525404, EPI_ISL_525405, EPI_ISL_525406, EPI_ISL_525407, EPI_ISL_525408, EPI_ISL_525409, EPI_ISL_525410, EPI_ISL_525411, EPI_ISL_525412, EPI_ISL_525413, EPI_ISL_525414, EPI_ISL_525415, EPI_ISL_525416, EPI_ISL_525417, EPI_ISL_525418 | see above | National Virus Reference Laboratory                                                                                                                                                             | National Virus Reference Laboratory      | Michael Carr, Gabriel Gonzalez, Jonathan Dean, Aditi Chaturvedi, Suzie Coughlan, Cillian F De Gascun                                                                                                                                                                                                                                                               |
| EPI_ISL_525419                                                                                                                                                                                                                                                                                                                                                                                                                                                                                                                                                                                                                                                                                                                                                                                                                                                                                                                                                                                                                                                                                 |           | GMERS Medical College and Hospital, Gandhinagar                                                                                                                                                 | Gujarat Biotechnology Research Centre    | Nitin Savaliya, Raghawendra Kumar, Dinesh Kumar, Zuber Saiyed, Komal Patel, Labdhi Pandya, Afzal Ansari, Nikha Trivedi, Seema Bhatt, Gaurishankar Shrimali, Bhavesh Modi, Bharti Rajani, Apurvasinh Puvar, Janvi Raval, Zarna Patel, Monika Gandhi, Pinal Trivedi, Maharshi Pandya, Nidhi Patel, R D Dixit, A M Kadri, Harsh Bakshi, Chaitanya Joshi, Madhvi Joshi |
| EPI_ISL_525422                                                                                                                                                                                                                                                                                                                                                                                                                                                                                                                                                                                                                                                                                                                                                                                                                                                                                                                                                                                                                                                                                 |           | B.J. Medical College and Civil hospital, Ahmedabad                                                                                                                                              | Gujarat Biotechnology Research Centre    | Monika Gandhi, Pinal Trivedi, Maharshi Pandya, Nidhi Patel, Nitin Savaliya, Raghawendra Kumar, Dinesh Kumar, Zuber Saiyed, Komal Patel, Labdhi Pandya, Afzal Ansari, Nikha Trivedi, Pranay Shah, Kamlesh J Upadhyay, Sanjay Kapadia, Apurvasinh Puvar, Janvi Raval, Zarna Patel, R D Dixit, A M Kadri, Harsh Bakshi, Chaitanya Joshi, Madhvi Joshi                 |
| EPI_ISL_526431, EPI_ISL_526432                                                                                                                                                                                                                                                                                                                                                                                                                                                                                                                                                                                                                                                                                                                                                                                                                                                                                                                                                                                                                                                                 |           | Lincolnshire Hospitals and DeepSeq Nottingham                                                                                                                                                   | COVID-19 Genomics UK (COG-UK) Consortium | Nichola Duckworth, Tim Sloan, Sarah Walsh, Jonathan Ball, Patrick McClure, Joesepp Chappell, Nadine Holmes, Matthew Carlisle, Christopher Moore, Fei Sang, Johnny Debebe, Victoria Wright, Matthew Loose                                                                                                                                                           |
| EPI_ISL_526465, EPI_ISL_526467, EPI_ISL_526470, EPI_ISL_526473, EPI_ISL_526478, EPI_ISL_526483, EPI_ISL_526490, EPI_ISL_526491, EPI_ISL_526495, EPI_ISL_526500, EPI_ISL_526508, EPI_ISL_526512, EPI_ISL_526513, EPI_ISL_526516, EPI_ISL_526518, EPI_ISL_526522, EPI_ISL_526524, EPI_ISL_526528, EPI_ISL_526534                                                                                                                                                                                                                                                                                                                                                                                                                                                                                                                                                                                                                                                                                                                                                                                 | see above | Virology Department, Royal Infirmary of Edinburgh, NHS Lothian / School of Biological Sciences, University of Edinburgh / Institute of Genetics and Molecular Medicine, University of Edinburgh | COVID-19 Genomics UK (COG-UK) Consortium | McHugh M, Dewar R, Rooke S, Gallagher M, Balcaza C, O'Toole A, Scher E, Hill V, McCrone JT, Colquhoun R, Yu X, Jackson B, Rambaut A, Williams TC, Templeton K                                                                                                                                                                                                      |
| EPI_ISL_528440, EPI_ISL_528441, EPI_ISL_528442, EPI_ISL_528443, EPI_ISL_528444, EPI_ISL_528445, EPI_ISL_528446, EPI_ISL_528447, EPI_ISL_528448, EPI_ISL_528449, EPI_ISL_528450, EPI_ISL_528451, EPI_ISL_528452, EPI_ISL_528453, EPI_ISL_528454, EPI_ISL_528455, EPI_ISL_528456, EPI_ISL_528457, EPI_ISL_528458, EPI_ISL_528459, EPI_ISL_528460, EPI_ISL_528461, EPI_ISL_528462, EPI_ISL_528463, EPI_ISL_528464, EPI_ISL_528465, EPI_ISL_528466, EPI_ISL_528467, EPI_ISL_528468, EPI_ISL_528469, EPI_ISL_528470, EPI_ISL_528471, EPI_ISL_528472, EPI_ISL_528473, EPI_ISL_528474, EPI_ISL_528475, EPI_ISL_528476, EPI_ISL_528477, EPI_ISL_528478, EPI_ISL_528479, EPI_ISL_528480, EPI_ISL_528481, EPI_ISL_528482, EPI_ISL_528483, EPI_ISL_528484                                                                                                                                                                                                                                                                                                                                                 | see above | National Virus Reference Laboratory                                                                                                                                                             | National Virus Reference Laboratory      | Michael Carr, Gabriel Gonzalez, Jonathan Dean, Suzie Coughlan, Cillian F De Gascun                                                                                                                                                                                                                                                                                 |
| EPI_ISL_528738, EPI_ISL_528739, EPI_ISL_528740, EPI_ISL_528741                                                                                                                                                                                                                                                                                                                                                                                                                                                                                                                                                                                                                                                                                                                                                                                                                                                                                                                                                                                                                                 |           | Malaysia Genome Institute                                                                                                                                                                       | Malaysia Genome Institute                | Mohd Noor Mat Isa, Irni Suhayu Sapian, Yusuf Muhammad Noor, Nurhezreen Md Iqbal, Mohd Faizal Abu Bakar, Enizza Kasim, Shamsidar Sophie, Siti Noraini Othman, Azrin Ahmad, Nor Azfa Johari, Shahruh Hisham Zainal Ariffin                                                                                                                                           |
| EPI_ISL_528742                                                                                                                                                                                                                                                                                                                                                                                                                                                                                                                                                                                                                                                                                                                                                                                                                                                                                                                                                                                                                                                                                 |           | Malaysia Genome Institute                                                                                                                                                                       | Malaysia Genome Institute                | Mohd Noor Mat Isa, Irni Suhayu Sapian, Gan Han Ming, Yusuf Muhammad Noor, Tan Ju Lin, Nurhezreen Md Iqbal, Mohd Faizal Abu Bakar, Enizza Kasim, Shamsidar Sophie, Siti Noraini Othman, Azrin Ahmad, Nor Azfa Johari, Shahruh Hisham Zainal Ariffin                                                                                                                 |
| EPI_ISL_528743, EPI_ISL_528744                                                                                                                                                                                                                                                                                                                                                                                                                                                                                                                                                                                                                                                                                                                                                                                                                                                                                                                                                                                                                                                                 |           | Malaysia Genome Institute                                                                                                                                                                       | Malaysia Genome Institute                | Mohd Noor Mat Isa, Irni Suhayu Sapian, Yusuf Muhammad Noor, Nurhezreen Md Iqbal, Mohd Faizal Abu Bakar, Enizza Kasim, Shamsidar Sophie, Siti Noraini Othman, Azrin Ahmad, Nor Azfa Johari, Shahruh Hisham Zainal Ariffin                                                                                                                                           |

|                                                                                                                                                                                                                                                                                                                                                                                                                                                                                                                                                                                                                                                                                |                                                                                                                                                                                                 |                                                                                              |                                                                                                                                                                                                                                                                                                                                                                                                                                                                                         |                                                                                                                       |
|--------------------------------------------------------------------------------------------------------------------------------------------------------------------------------------------------------------------------------------------------------------------------------------------------------------------------------------------------------------------------------------------------------------------------------------------------------------------------------------------------------------------------------------------------------------------------------------------------------------------------------------------------------------------------------|-------------------------------------------------------------------------------------------------------------------------------------------------------------------------------------------------|----------------------------------------------------------------------------------------------|-----------------------------------------------------------------------------------------------------------------------------------------------------------------------------------------------------------------------------------------------------------------------------------------------------------------------------------------------------------------------------------------------------------------------------------------------------------------------------------------|-----------------------------------------------------------------------------------------------------------------------|
| EPI_ISL_528827, EPI_ISL_528843, EPI_ISL_528844, EPI_ISL_528846                                                                                                                                                                                                                                                                                                                                                                                                                                                                                                                                                                                                                 | CSIR-Centre for Cellular and Molecular Biology                                                                                                                                                  | CSIR-Centre for Cellular and Molecular Biology                                               | Namami Gaur, Sakshi Shambhavi, Lamuk Zaveri, Shagufta Khan, Nikhil Hajirnis, M Soujanya Reddy, Pratheusa Maccha, Tulasi Nagabandi, Purushotham Vodnala, Payel Mukherjee, Sofia Banu, Priya Singh, Onkar Kulkarni, Dhiviya Vedagiri, Divya Gupta, Vishal Sah, Santosh Kumar Kuncha, Krishnan Harinivas Harshan, Archana Bharadwaj Siva, Karthik Bharadwaj Tallapaka, Zeba Rizvi, Zuberwasim Sayyad, Kakade Aishwarya Arun, Amrutha H C, Ananga Ghosh, Rakesh K Mishra, Divya Tej Sowpati |                                                                                                                       |
| EPI_ISL_528849                                                                                                                                                                                                                                                                                                                                                                                                                                                                                                                                                                                                                                                                 | CSIR-Centre for Cellular and Molecular Biology                                                                                                                                                  | CSIR-Centre for Cellular and Molecular Biology                                               | Nikhil Hajirnis, M Soujanya Reddy, Pratheusa Maccha, Lamuk Zaveri, Shagufta Khan, Namami Gaur, Sakshi Shambhavi, Tulasi Nagabandi, Purushotham Vodnala, Payel Mukherjee, Sofia Banu, Priya Singh, Onkar Kulkarni, Dhiviya Vedagiri, Divya Gupta, Vishal Sah, Santosh Kumar Kuncha, Krishnan Harinivas Harshan, Archana Bharadwaj Siva, Karthik Bharadwaj Tallapaka, Zeba Rizvi, Zuberwasim Sayyad, Kakade Aishwarya Arun, Amrutha H C, Ananga Ghosh, Rakesh K Mishra, Divya Tej Sowpati |                                                                                                                       |
| EPI_ISL_528852                                                                                                                                                                                                                                                                                                                                                                                                                                                                                                                                                                                                                                                                 | CSIR-Centre for Cellular and Molecular Biology                                                                                                                                                  | CSIR-Centre for Cellular and Molecular Biology                                               | Namami Gaur, Sakshi Shambhavi, Lamuk Zaveri, Shagufta Khan, Nikhil Hajirnis, M Soujanya Reddy, Pratheusa Maccha, Tulasi Nagabandi, Purushotham Vodnala, Payel Mukherjee, Sofia Banu, Priya Singh, Onkar Kulkarni, Dhiviya Vedagiri, Divya Gupta, Vishal Sah, Santosh Kumar Kuncha, Krishnan Harinivas Harshan, Archana Bharadwaj Siva, Karthik Bharadwaj Tallapaka, Zeba Rizvi, Zuberwasim Sayyad, Kakade Aishwarya Arun, Amrutha H C, Ananga Ghosh, Rakesh K Mishra, Divya Tej Sowpati |                                                                                                                       |
| EPI_ISL_528855, EPI_ISL_528857                                                                                                                                                                                                                                                                                                                                                                                                                                                                                                                                                                                                                                                 | CSIR-Centre for Cellular and Molecular Biology                                                                                                                                                  | CSIR-Centre for Cellular and Molecular Biology                                               | Nikhil Hajirnis, M Soujanya Reddy, Pratheusa Maccha, Lamuk Zaveri, Shagufta Khan, Namami Gaur, Sakshi Shambhavi, Tulasi Nagabandi, Purushotham Vodnala, Payel Mukherjee, Sofia Banu, Priya Singh, Onkar Kulkarni, Dhiviya Vedagiri, Divya Gupta, Vishal Sah, Santosh Kumar Kuncha, Krishnan Harinivas Harshan, Archana Bharadwaj Siva, Karthik Bharadwaj Tallapaka, Zeba Rizvi, Zuberwasim Sayyad, Kakade Aishwarya Arun, Amrutha H C, Ananga Ghosh, Rakesh K Mishra, Divya Tej Sowpati |                                                                                                                       |
| EPI_ISL_529317, EPI_ISL_529690, EPI_ISL_529694, EPI_ISL_529695, EPI_ISL_529696                                                                                                                                                                                                                                                                                                                                                                                                                                                                                                                                                                                                 | Virology Department, Royal Infirmary of Edinburgh, NHS Lothian / School of Biological Sciences, University of Edinburgh / Institute of Genetics and Molecular Medicine, University of Edinburgh | COVID-19 Genomics UK (COG-UK) Consortium                                                     | McHugh M, Dewar R, Rooke S, Gallagher M, Balcaza C, O'Toole Á, Scher E, Hill V, McCrone JT, Colquhoun R, Yu X, Jackson B, Rambaut A, Williams TC, Templeton K                                                                                                                                                                                                                                                                                                                           |                                                                                                                       |
| EPI_ISL_530347, EPI_ISL_530348, EPI_ISL_530349, EPI_ISL_530350                                                                                                                                                                                                                                                                                                                                                                                                                                                                                                                                                                                                                 | The National Institute of Public Health                                                                                                                                                         | State Veterinary Institute Prague                                                            | Nagy,A.;Jirincova,H;Novakova,L;Trnka,D;Vecerova,J                                                                                                                                                                                                                                                                                                                                                                                                                                       |                                                                                                                       |
| EPI_ISL_537809, EPI_ISL_537810                                                                                                                                                                                                                                                                                                                                                                                                                                                                                                                                                                                                                                                 | Hospital Universitario Marqués de Valdecilla (Santander), Servicio de Microbiología                                                                                                             | SeqCOVID-SPAIN consortium/IBV(CSIC)                                                          | Mónica Gozalo Margüello, María Eliecer Cano García, Jose Manuel Méndez Legaza, Daniel Pablo Marcos, Jesús Rodríguez Lozano, María Siller Ruiz and SeqCOVID-SPAIN consortium                                                                                                                                                                                                                                                                                                             |                                                                                                                       |
| EPI_ISL_538082, EPI_ISL_538083, EPI_ISL_538084, EPI_ISL_538085, EPI_ISL_538086, EPI_ISL_538087, EPI_ISL_538088, EPI_ISL_538089, EPI_ISL_538090, EPI_ISL_538091, EPI_ISL_538092, EPI_ISL_538093, EPI_ISL_538094, EPI_ISL_538095, EPI_ISL_538096, EPI_ISL_538097, EPI_ISL_538098, EPI_ISL_538099, EPI_ISL_538100, EPI_ISL_538101, EPI_ISL_538102, EPI_ISL_538103, EPI_ISL_538104, EPI_ISL_538105, EPI_ISL_538106, EPI_ISL_538107, EPI_ISL_538108, EPI_ISL_538109, EPI_ISL_538110, EPI_ISL_538111, EPI_ISL_538112, EPI_ISL_538113, EPI_ISL_538114, EPI_ISL_538115, EPI_ISL_538116, EPI_ISL_538117, EPI_ISL_538608, EPI_ISL_538609, EPI_ISL_538610, EPI_ISL_538611, EPI_ISL_538612 | see above                                                                                                                                                                                       | Clinica Universidad de Navarra. Servicio de Enfermedades Infecciosas y Microbiología clínica | SeqCOVID-SPAIN consortium/IBV(CSIC)                                                                                                                                                                                                                                                                                                                                                                                                                                                     | Mirian Fernández-Alonso, Jose Luis del Pozo and SeqCOVID-SPAIN consortium                                             |
| EPI_ISL_538672, EPI_ISL_538673, EPI_ISL_538674, EPI_ISL_538675, EPI_ISL_538676, EPI_ISL_538677, EPI_ISL_538678, EPI_ISL_538679, EPI_ISL_538680, EPI_ISL_538681, EPI_ISL_538682, EPI_ISL_538683, EPI_ISL_538684, EPI_ISL_538685, EPI_ISL_538686, EPI_ISL_538687, EPI_ISL_538688, EPI_ISL_538689                                                                                                                                                                                                                                                                                                                                                                                 | see above                                                                                                                                                                                       | Hospital Universitario Virgen de las Nieves de Granada-SAS                                   | SeqCOVID-SPAIN consortium/IBV(CSIC)                                                                                                                                                                                                                                                                                                                                                                                                                                                     | Mercedes Pérez Ruiz, Sara Sanbonmatsu Gámez, Irene Pedrosa Corral, José M. Navarro-Mari and SeqCOVID-SPAIN consortium |
| EPI_ISL_539493, EPI_ISL_539494                                                                                                                                                                                                                                                                                                                                                                                                                                                                                                                                                                                                                                                 | The National Institute of Public Health                                                                                                                                                         | State Veterinary Institute Prague                                                            | Nagy,A.;Jirincova,H;Novakova,L;Trnka,D;Vecerova,J                                                                                                                                                                                                                                                                                                                                                                                                                                       |                                                                                                                       |
| EPI_ISL_539622                                                                                                                                                                                                                                                                                                                                                                                                                                                                                                                                                                                                                                                                 | CSIR-Centre for Cellular and Molecular Biology                                                                                                                                                  | CSIR-Centre for Cellular and Molecular Biology                                               | Namami Gaur, Sakshi Shambhavi, Lamuk Zaveri, Shagufta Khan, Nikhil Hajirnis, M Soujanya Reddy, Pratheusa Maccha, Tulasi Nagabandi, Purushotham Vodnala, Payel Mukherjee, Sofia Banu, Priya Singh, Onkar Kulkarni, Dhiviya Vedagiri, Divya Gupta, Vishal Sah, Santosh Kumar Kuncha, Krishnan Harinivas Harshan, Archana Bharadwaj Siva, Karthik Bharadwaj Tallapaka, Zeba Rizvi, Zuberwasim Sayyad, Kakade Aishwarya Arun, Amrutha H C, Ananga Ghosh, Rakesh K Mishra, Divya Tej Sowpati |                                                                                                                       |
| EPI_ISL_539623                                                                                                                                                                                                                                                                                                                                                                                                                                                                                                                                                                                                                                                                 | CSIR-Centre for Cellular and Molecular Biology                                                                                                                                                  | CSIR-Centre for Cellular and Molecular Biology                                               | Namami Gaur, Sakshi Shambhavi, Lamuk Zaveri, Shagufta Khan, Nikhil Hajirnis, M Soujanya Reddy, Pratheusa Maccha, Tulasi Nagabandi, Purushotham Vodnala, Payel Mukherjee, Sofia Banu, Priya Singh, Onkar Kulkarni, Dhiviya Vedagiri, Divya Gupta, Vishal Sah, Santosh Kumar Kuncha, Krishnan Harinivas Harshan, Archana Bharadwaj Siva, Karthik Bharadwaj Tallapaka, G. Aditya Kumar, Koushick Sivakumar, Rakesh K Mishra, Divya Tej Sowpati                                             |                                                                                                                       |
| EPI_ISL_539624                                                                                                                                                                                                                                                                                                                                                                                                                                                                                                                                                                                                                                                                 | CSIR-Centre for Cellular and Molecular Biology                                                                                                                                                  | CSIR-Centre for Cellular and Molecular Biology                                               | Namami Gaur, Sakshi Shambhavi, Lamuk Zaveri, Shagufta Khan, Nikhil Hajirnis, M Soujanya Reddy, Pratheusa Maccha, Tulasi Nagabandi, Purushotham Vodnala, Payel Mukherjee, Sofia Banu, Priya Singh, Onkar Kulkarni, Dhiviya Vedagiri, Divya Gupta, Vishal Sah, Santosh Kumar Kuncha, Krishnan Harinivas Harshan, Archana Bharadwaj Siva, Karthik Bharadwaj Tallapaka, Zeba Rizvi, Zuberwasim Sayyad, Kakade Aishwarya Arun, Amrutha H C, Ananga Ghosh, Rakesh K Mishra, Divya Tej Sowpati |                                                                                                                       |
| EPI_ISL_539625                                                                                                                                                                                                                                                                                                                                                                                                                                                                                                                                                                                                                                                                 | CSIR-Centre for Cellular and Molecular Biology                                                                                                                                                  | CSIR-Centre for Cellular and Molecular Biology                                               | Nikhil Hajirnis, M Soujanya Reddy, Pratheusa Maccha, Lamuk Zaveri, Shagufta Khan, Namami Gaur, Sakshi Shambhavi, Tulasi Nagabandi, Purushotham Vodnala, Payel Mukherjee, Sofia Banu, Priya Singh, Onkar Kulkarni, Dhiviya Vedagiri, Divya Gupta, Vishal Sah, Santosh Kumar Kuncha, Krishnan Harinivas Harshan, Archana Bharadwaj Siva, Karthik Bharadwaj Tallapaka, Zeba Rizvi, Zuberwasim Sayyad, Kakade Aishwarya Arun, Amrutha H C, Ananga Ghosh, Rakesh K Mishra, Divya Tej Sowpati |                                                                                                                       |
| EPI_ISL_539626                                                                                                                                                                                                                                                                                                                                                                                                                                                                                                                                                                                                                                                                 | CSIR-Centre for Cellular and Molecular Biology                                                                                                                                                  | CSIR-Centre for Cellular and Molecular Biology                                               | Nikhil Hajirnis, M Soujanya Reddy, Pratheusa Maccha, Namami Gaur, Sakshi Shambhavi, Lamuk Zaveri, Shagufta Khan, Tulasi Nagabandi, Purushotham Vodnala, Payel Mukherjee, Sofia Banu, Priya Singh, Onkar Kulkarni, Dhiviya Vedagiri, Divya Gupta, Vishal Sah, Santosh Kumar Kuncha, Krishnan Harinivas Harshan, Archana Bharadwaj Siva, Karthik Bharadwaj Tallapaka, Kezia J Ann, Radhika Khandelwal, Roshan Maku Venkata, Shemin Mansuri, Sonu Uday, Rakesh K Mishra, Divya Tej Sowpati |                                                                                                                       |
| EPI_ISL_539627                                                                                                                                                                                                                                                                                                                                                                                                                                                                                                                                                                                                                                                                 | CSIR-Centre for Cellular and Molecular Biology                                                                                                                                                  | CSIR-Centre for Cellular and Molecular Biology                                               | Nikhil Hajirnis, M Soujanya Reddy, Pratheusa Maccha, Payel Mukherjee, Sofia Banu, Priya Singh, Onkar Kulkarni, Dhiviya Vedagiri, Divya Gupta, Vishal Sah, Santosh Kumar Kuncha, Krishnan Harinivas Harshan, Archana Bharadwaj Siva, Karthik Bharadwaj Tallapaka, Zeba Rizvi, Zuberwasim Sayyad, Kakade Aishwarya Arun, Amrutha H C, Ananga Ghosh, Rakesh K Mishra, Divya Tej Sowpati                                                                                                    |                                                                                                                       |
| EPI_ISL_539652                                                                                                                                                                                                                                                                                                                                                                                                                                                                                                                                                                                                                                                                 | CSIR-Centre for Cellular and Molecular Biology                                                                                                                                                  | CSIR-Centre for Cellular and Molecular Biology                                               | Namami Gaur, Sakshi Shambhavi, Lamuk Zaveri, Shagufta Khan, Nikhil Hajirnis, M Soujanya Reddy, Pratheusa Maccha, Tulasi Nagabandi, Purushotham Vodnala, Payel Mukherjee, Sofia Banu, Priya Singh, Onkar Kulkarni, Dhiviya Vedagiri, Divya Gupta, Vishal Sah, Santosh Kumar Kuncha, Krishnan Harinivas Harshan, Archana Bharadwaj Siva, Karthik Bharadwaj Tallapaka, Zeba Rizvi, Zuberwasim Sayyad, Kakade Aishwarya Arun, Amrutha H C, Ananga Ghosh, Rakesh K Mishra, Divya Tej Sowpati |                                                                                                                       |
| EPI_ISL_539653                                                                                                                                                                                                                                                                                                                                                                                                                                                                                                                                                                                                                                                                 | CSIR-Centre for Cellular and Molecular Biology                                                                                                                                                  | CSIR-Centre for Cellular and Molecular Biology                                               | Namami Gaur, Sakshi Shambhavi, Lamuk Zaveri, Shagufta Khan, Nikhil Hajirnis, M Soujanya Reddy, Pratheusa Maccha, Tulasi Nagabandi, Purushotham Vodnala, Payel Mukherjee, Sofia Banu, Priya Singh, Onkar Kulkarni, Dhiviya Vedagiri, Divya Gupta, Vishal Sah, Santosh Kumar Kuncha, Krishnan Harinivas Harshan, Archana Bharadwaj Siva, Karthik Bharadwaj Tallapaka, G. Aditya Kumar, Koushick Sivakumar, Rakesh K Mishra, Divya Tej Sowpati                                             |                                                                                                                       |
| EPI_ISL_539654                                                                                                                                                                                                                                                                                                                                                                                                                                                                                                                                                                                                                                                                 | CSIR-Centre for Cellular and Molecular Biology                                                                                                                                                  | CSIR-Centre for Cellular and Molecular Biology                                               | Namami Gaur, Sakshi Shambhavi, Lamuk Zaveri, Shagufta Khan, Nikhil Hajirnis, M Soujanya Reddy, Pratheusa Maccha, Tulasi Nagabandi, Purushotham Vodnala, Payel Mukherjee, Sofia Banu, Priya Singh, Onkar Kulkarni, Dhiviya Vedagiri, Divya Gupta, Vishal Sah, Santosh Kumar Kuncha, Krishnan Harinivas Harshan, Archana Bharadwaj Siva, Karthik Bharadwaj Tallapaka, Zeba Rizvi, Zuberwasim Sayyad, Kakade Aishwarya Arun, Amrutha H C, Ananga Ghosh, Rakesh K Mishra, Divya Tej Sowpati |                                                                                                                       |
| EPI_ISL_539655                                                                                                                                                                                                                                                                                                                                                                                                                                                                                                                                                                                                                                                                 | CSIR-Centre for Cellular and Molecular Biology                                                                                                                                                  | CSIR-Centre for Cellular and Molecular Biology                                               | Nikhil Hajirnis, M Soujanya Reddy, Pratheusa Maccha, Lamuk Zaveri, Shagufta Khan, Namami Gaur, Sakshi Shambhavi, Tulasi Nagabandi, Purushotham Vodnala, Payel Mukherjee, Sofia Banu, Priya Singh, Onkar Kulkarni, Dhiviya Vedagiri, Divya Gupta, Vishal Sah, Santosh Kumar Kuncha, Krishnan Harinivas Harshan, Archana Bharadwaj Siva, Karthik Bharadwaj Tallapaka, Zeba Rizvi, Zuberwasim Sayyad, Kakade Aishwarya Arun, Amrutha H C, Ananga Ghosh, Rakesh K Mishra, Divya Tej Sowpati |                                                                                                                       |
| EPI_ISL_539656                                                                                                                                                                                                                                                                                                                                                                                                                                                                                                                                                                                                                                                                 | CSIR-Centre for Cellular and Molecular Biology                                                                                                                                                  | CSIR-Centre for Cellular and Molecular Biology                                               | Nikhil Hajirnis, M Soujanya Reddy, Pratheusa Maccha, Namami Gaur, Sakshi Shambhavi, Lamuk Zaveri, Shagufta Khan, Tulasi Nagabandi, Purushotham Vodnala, Payel Mukherjee, Sofia Banu, Priya Singh, Onkar Kulkarni, Dhiviya Vedagiri, Divya Gupta, Vishal Sah, Santosh Kumar Kuncha, Krishnan Harinivas Harshan, Archana Bharadwaj Siva, Karthik Bharadwaj Tallapaka, Kezia J Ann, Radhika Khandelwal, Roshan Maku Venkata, Shemin Mansuri, Sonu Uday, Rakesh K Mishra, Divya Tej Sowpati |                                                                                                                       |
| EPI_ISL_539657                                                                                                                                                                                                                                                                                                                                                                                                                                                                                                                                                                                                                                                                 | CSIR-Centre for Cellular and Molecular Biology                                                                                                                                                  | CSIR-Centre for Cellular and Molecular Biology                                               | Nikhil Hajirnis, M Soujanya Reddy, Pratheusa Maccha, Payel Mukherjee, Sofia Banu, Priya Singh, Onkar Kulkarni, Dhiviya Vedagiri, Divya Gupta, Vishal Sah, Santosh Kumar Kuncha, Krishnan Harinivas Harshan, Archana Bharadwaj Siva, Karthik Bharadwaj Tallapaka, Shagufta Khan, Lamuk Zaveri, Namami Gaur,                                                                                                                                                                              |                                                                                                                       |



|                                                                                                                                                                                                                                                                                                                                                                                                                                                                                                                                                                                                                                                                                                                                                                                                                                                                                                                                                                                                                                                                                                                                                                                                                |           |                                                                                                                                                                                                 |                                                                          |                                                                                                                                                                                                                         |
|----------------------------------------------------------------------------------------------------------------------------------------------------------------------------------------------------------------------------------------------------------------------------------------------------------------------------------------------------------------------------------------------------------------------------------------------------------------------------------------------------------------------------------------------------------------------------------------------------------------------------------------------------------------------------------------------------------------------------------------------------------------------------------------------------------------------------------------------------------------------------------------------------------------------------------------------------------------------------------------------------------------------------------------------------------------------------------------------------------------------------------------------------------------------------------------------------------------|-----------|-------------------------------------------------------------------------------------------------------------------------------------------------------------------------------------------------|--------------------------------------------------------------------------|-------------------------------------------------------------------------------------------------------------------------------------------------------------------------------------------------------------------------|
| EPI_ISL_539794, EPI_ISL_539795, EPI_ISL_539796, EPI_ISL_539797, EPI_ISL_539798, EPI_ISL_539799, EPI_ISL_539800, EPI_ISL_539801, EPI_ISL_539802, EPI_ISL_540421, EPI_ISL_540422                                                                                                                                                                                                                                                                                                                                                                                                                                                                                                                                                                                                                                                                                                                                                                                                                                                                                                                                                                                                                                 | see above | Wyoming Public Health Laboratory                                                                                                                                                                | Wyoming Public Health Laboratory                                         | Noah Hull, Rob Christensen, Jim Mildenerberger, Joel Sevinsky, Cari Sloma, and Wanda Manley                                                                                                                             |
| EPI_ISL_540871, EPI_ISL_540877, EPI_ISL_540879, EPI_ISL_540880, EPI_ISL_540886, EPI_ISL_540892                                                                                                                                                                                                                                                                                                                                                                                                                                                                                                                                                                                                                                                                                                                                                                                                                                                                                                                                                                                                                                                                                                                 |           | Virology Department, Royal Infirmary of Edinburgh, NHS Lothian / School of Biological Sciences, University of Edinburgh / Institute of Genetics and Molecular Medicine, University of Edinburgh | COVID-19 Genomics UK (COG-UK) Consortium                                 | McHugh M, Dewar R, Rooke S, Gallagher M, Balcaza C, O'Toole Á, Scher E, Hill V, McCrone JT, Colqhoun R, Yu X, Jackson B, Rambaut A, Williams TC, Templeton K                                                            |
| EPI_ISL_540921                                                                                                                                                                                                                                                                                                                                                                                                                                                                                                                                                                                                                                                                                                                                                                                                                                                                                                                                                                                                                                                                                                                                                                                                 |           | Wyoming Public Health Laboratory                                                                                                                                                                | Wyoming Public Health Laboratory                                         | Noah Hull, Rob Christensen, Jim Mildenerberger, Joel Sevinsky, Cari Sloma, and Wanda Manley                                                                                                                             |
| EPI_ISL_540993, EPI_ISL_540994, EPI_ISL_540995, EPI_ISL_540996, EPI_ISL_540997, EPI_ISL_540998, EPI_ISL_540999, EPI_ISL_541000, EPI_ISL_541001, EPI_ISL_541002, EPI_ISL_541003, EPI_ISL_541004, EPI_ISL_541005, EPI_ISL_541006, EPI_ISL_541007                                                                                                                                                                                                                                                                                                                                                                                                                                                                                                                                                                                                                                                                                                                                                                                                                                                                                                                                                                 | see above | Health and Environmental Research Institute of Gwangju Metropolitan city                                                                                                                        | Health and Environmental Research Institute of Gwangju Metropolitan city | Min Ji Kim, Ji-eun Lee                                                                                                                                                                                                  |
| EPI_ISL_541082                                                                                                                                                                                                                                                                                                                                                                                                                                                                                                                                                                                                                                                                                                                                                                                                                                                                                                                                                                                                                                                                                                                                                                                                 |           | The National Institute of Public Health                                                                                                                                                         | State Veterinary Institute Prague                                        | Nagy,A;Jirincova,H;Novakova,L;Trnka,D;Vecerova,J                                                                                                                                                                        |
| EPI_ISL_541138, EPI_ISL_541332, EPI_ISL_541333, EPI_ISL_541334                                                                                                                                                                                                                                                                                                                                                                                                                                                                                                                                                                                                                                                                                                                                                                                                                                                                                                                                                                                                                                                                                                                                                 |           | The National Institute of Public Health                                                                                                                                                         | State Veterinary Institute Prague                                        | Nagy,A; Jirincova,H; Novakova,L; Trnka,D; Vecerova,J                                                                                                                                                                    |
| EPI_ISL_541335                                                                                                                                                                                                                                                                                                                                                                                                                                                                                                                                                                                                                                                                                                                                                                                                                                                                                                                                                                                                                                                                                                                                                                                                 |           | The National Institute of Public Health                                                                                                                                                         | Sídlištní 136/24 165 03, Prague Czech Republic                           | Nagy,A; Jirincova,H; Novakova,L; Trnka,D; Vecerova,J                                                                                                                                                                    |
| EPI_ISL_541336, EPI_ISL_541337                                                                                                                                                                                                                                                                                                                                                                                                                                                                                                                                                                                                                                                                                                                                                                                                                                                                                                                                                                                                                                                                                                                                                                                 |           | The National Institute of Public Health                                                                                                                                                         | State Veterinary Institute Prague                                        | Nagy,A; Jirincova,H; Novakova,L; Trnka,D; Vecerova,J                                                                                                                                                                    |
| EPI_ISL_541942                                                                                                                                                                                                                                                                                                                                                                                                                                                                                                                                                                                                                                                                                                                                                                                                                                                                                                                                                                                                                                                                                                                                                                                                 |           | Health and Environmental Research Institute of Gwangju                                                                                                                                          | Health & Environment Institute of Gwangju                                | Min Ji Kim, Ji-eun Lee                                                                                                                                                                                                  |
| EPI_ISL_545580, EPI_ISL_545954, EPI_ISL_545956                                                                                                                                                                                                                                                                                                                                                                                                                                                                                                                                                                                                                                                                                                                                                                                                                                                                                                                                                                                                                                                                                                                                                                 |           | The National Institute of Public Health                                                                                                                                                         | State Veterinary Institute Prague                                        | Nagy,A;Jirincova,H;Novakova,L;Trnka,D;Vecerova,J                                                                                                                                                                        |
| EPI_ISL_545957, EPI_ISL_546436, EPI_ISL_546935, EPI_ISL_546936                                                                                                                                                                                                                                                                                                                                                                                                                                                                                                                                                                                                                                                                                                                                                                                                                                                                                                                                                                                                                                                                                                                                                 |           | The National Institute of Public Health                                                                                                                                                         | State Veterinary Institute Prague                                        | Nagy,A; Jirincova,H; Novakova,L; Trnka,D; Vecerova,J                                                                                                                                                                    |
| EPI_ISL_547966, EPI_ISL_547967, EPI_ISL_547968                                                                                                                                                                                                                                                                                                                                                                                                                                                                                                                                                                                                                                                                                                                                                                                                                                                                                                                                                                                                                                                                                                                                                                 |           | The National Institute of Public Health                                                                                                                                                         | State Veterinary Institute Prague                                        | Nagy,A;Jirincova,H;Novakova,L;Trnka,D;Vecerova,J                                                                                                                                                                        |
| EPI_ISL_549352, EPI_ISL_549356, EPI_ISL_549362, EPI_ISL_549365, EPI_ISL_549371, EPI_ISL_549372, EPI_ISL_549375, EPI_ISL_549381, EPI_ISL_549387, EPI_ISL_549517, EPI_ISL_549518, EPI_ISL_549519, EPI_ISL_549520, EPI_ISL_549521, EPI_ISL_549522                                                                                                                                                                                                                                                                                                                                                                                                                                                                                                                                                                                                                                                                                                                                                                                                                                                                                                                                                                 | see above | Lincolnshire Hospitals and DeepSeq Nottingham                                                                                                                                                   | COVID-19 Genomics UK (COG-UK) Consortium                                 | Nichola Duckworth, Tim Sloan, Sarah Walsh, Jonathan Ball, Patrick McClure, Joesepp Chappell, Nadine Holmes, Matthew Carlisle, Christopher Moore, Fei Sang, Johnny Debebe, Victoria Wright, Matthew Loose                |
| EPI_ISL_559976, EPI_ISL_559977, EPI_ISL_559978, EPI_ISL_559979                                                                                                                                                                                                                                                                                                                                                                                                                                                                                                                                                                                                                                                                                                                                                                                                                                                                                                                                                                                                                                                                                                                                                 |           | Virology Department, Royal Infirmary of Edinburgh, NHS Lothian / School of Biological Sciences, University of Edinburgh / Institute of Genetics and Molecular Medicine, University of Edinburgh | COVID-19 Genomics UK (COG-UK) Consortium                                 | McHugh M, Dewar R, Rooke S, Gallagher M, Balcaza C, O'Toole Á, Scher E, Hill V, McCrone JT, Colqhoun R, Yu X, Jackson B, Rambaut A, Williams TC, Templeton K                                                            |
| EPI_ISL_560408, EPI_ISL_560409, EPI_ISL_560410, EPI_ISL_560411, EPI_ISL_560412                                                                                                                                                                                                                                                                                                                                                                                                                                                                                                                                                                                                                                                                                                                                                                                                                                                                                                                                                                                                                                                                                                                                 |           | The National Institute of Public Health                                                                                                                                                         | State Veterinary Institute Prague                                        | Nagy, A; Jirincova, H; Novakova, L; Trnka, D; Vecerova, J                                                                                                                                                               |
| EPI_ISL_568577                                                                                                                                                                                                                                                                                                                                                                                                                                                                                                                                                                                                                                                                                                                                                                                                                                                                                                                                                                                                                                                                                                                                                                                                 |           | The National Institute of Public Health                                                                                                                                                         | State Veterinary Institute Prague                                        | Nagy, A; Jirincova, H; Novakova, L; Trnka,D; Vecerova, J                                                                                                                                                                |
| EPI_ISL_568873, EPI_ISL_568874, EPI_ISL_568875                                                                                                                                                                                                                                                                                                                                                                                                                                                                                                                                                                                                                                                                                                                                                                                                                                                                                                                                                                                                                                                                                                                                                                 |           | Malaysia Genome Institute                                                                                                                                                                       | Malaysia Genome Institute                                                | Mohd Noor Mat Isa, Imi Suhayu Sopian, Yusuf Muhammad Noor, Nurhezreen Md Iqbal, Mohd Faizal Abu Bakar, Enizza Kasim, Shamsidar Sopia, Siti Noraini Othman, Azrin Ahmad, Nor Azfa Johari, Shahruil Hisham Zainal Ariffin |
| EPI_ISL_569864, EPI_ISL_569865, EPI_ISL_569866, EPI_ISL_569867, EPI_ISL_569868, EPI_ISL_569869, EPI_ISL_569870, EPI_ISL_569871, EPI_ISL_569872, EPI_ISL_569873, EPI_ISL_569874, EPI_ISL_569875, EPI_ISL_569876, EPI_ISL_569877, EPI_ISL_569878, EPI_ISL_569879, EPI_ISL_569880, EPI_ISL_569881, EPI_ISL_569882, EPI_ISL_569883, EPI_ISL_569884, EPI_ISL_569885, EPI_ISL_569886                                                                                                                                                                                                                                                                                                                                                                                                                                                                                                                                                                                                                                                                                                                                                                                                                                 | see above | Amedeo di Savoia                                                                                                                                                                                | Crosetto lab, Karolinska Institutet, SciLifeLab                          | Michele Simonetti, Maria Grazia Milià, Luuk Harbers, Ning Zhang, Anna Sapino, Valeria Ghisetti, Nicola Crosetto                                                                                                         |
| EPI_ISL_572411, EPI_ISL_572416, EPI_ISL_572427                                                                                                                                                                                                                                                                                                                                                                                                                                                                                                                                                                                                                                                                                                                                                                                                                                                                                                                                                                                                                                                                                                                                                                 |           | Virology Department, Royal Infirmary of Edinburgh, NHS Lothian / School of Biological Sciences, University of Edinburgh / Institute of Genetics and Molecular Medicine, University of Edinburgh | COVID-19 Genomics UK (COG-UK) Consortium                                 | McHugh M, Dewar R, Rooke S, Gallagher M, Balcaza C, O'Toole Á, Scher E, Hill V, McCrone JT, Colqhoun R, Yu X, Jackson B, Rambaut A, Williams TC, Templeton K                                                            |
| EPI_ISL_572507, EPI_ISL_572508, EPI_ISL_572510                                                                                                                                                                                                                                                                                                                                                                                                                                                                                                                                                                                                                                                                                                                                                                                                                                                                                                                                                                                                                                                                                                                                                                 |           | Lincolnshire Hospitals and DeepSeq Nottingham                                                                                                                                                   | COVID-19 Genomics UK (COG-UK) Consortium                                 | Nichola Duckworth, Tim Sloan, Sarah Walsh, Jonathan Ball, Patrick McClure, Joesepp Chappell, Nadine Holmes, Matthew Carlisle, Christopher Moore, Fei Sang, Johnny Debebe, Victoria Wright, Matthew Loose                |
| EPI_ISL_572514                                                                                                                                                                                                                                                                                                                                                                                                                                                                                                                                                                                                                                                                                                                                                                                                                                                                                                                                                                                                                                                                                                                                                                                                 |           | Virology Department, Royal Infirmary of Edinburgh, NHS Lothian / School of Biological Sciences, University of Edinburgh / Institute of Genetics and Molecular Medicine, University of Edinburgh | COVID-19 Genomics UK (COG-UK) Consortium                                 | McHugh M, Dewar R, Rooke S, Gallagher M, Balcaza C, O'Toole Á, Scher E, Hill V, McCrone JT, Colqhoun R, Yu X, Jackson B, Rambaut A, Williams TC, Templeton K                                                            |
| EPI_ISL_572527, EPI_ISL_572705                                                                                                                                                                                                                                                                                                                                                                                                                                                                                                                                                                                                                                                                                                                                                                                                                                                                                                                                                                                                                                                                                                                                                                                 |           | Lincolnshire Hospitals and DeepSeq Nottingham                                                                                                                                                   | COVID-19 Genomics UK (COG-UK) Consortium                                 | Nichola Duckworth, Tim Sloan, Sarah Walsh, Jonathan Ball, Patrick McClure, Joesepp Chappell, Nadine Holmes, Matthew Carlisle, Christopher Moore, Fei Sang, Johnny Debebe, Victoria Wright, Matthew Loose                |
| EPI_ISL_572760, EPI_ISL_572834, EPI_ISL_572839                                                                                                                                                                                                                                                                                                                                                                                                                                                                                                                                                                                                                                                                                                                                                                                                                                                                                                                                                                                                                                                                                                                                                                 |           | Virology Department, Royal Infirmary of Edinburgh, NHS Lothian / School of Biological Sciences, University of Edinburgh / Institute of Genetics and Molecular Medicine, University of Edinburgh | COVID-19 Genomics UK (COG-UK) Consortium                                 | McHugh M, Dewar R, Rooke S, Gallagher M, Balcaza C, O'Toole Á, Scher E, Hill V, McCrone JT, Colqhoun R, Yu X, Jackson B, Rambaut A, Williams TC, Templeton K                                                            |
| EPI_ISL_572938, EPI_ISL_572943, EPI_ISL_572944, EPI_ISL_573437, EPI_ISL_573438, EPI_ISL_573439, EPI_ISL_573440, EPI_ISL_573441, EPI_ISL_573442, EPI_ISL_573443, EPI_ISL_573444, EPI_ISL_573445, EPI_ISL_573446, EPI_ISL_573447, EPI_ISL_573448, EPI_ISL_573449                                                                                                                                                                                                                                                                                                                                                                                                                                                                                                                                                                                                                                                                                                                                                                                                                                                                                                                                                 | see above | Lincolnshire Hospitals and DeepSeq Nottingham                                                                                                                                                   | COVID-19 Genomics UK (COG-UK) Consortium                                 | Nichola Duckworth, Tim Sloan, Sarah Walsh, Jonathan Ball, Patrick McClure, Joesepp Chappell, Nadine Holmes, Matthew Carlisle, Christopher Moore, Fei Sang, Johnny Debebe, Victoria Wright, Matthew Loose                |
| EPI_ISL_573797, EPI_ISL_573798                                                                                                                                                                                                                                                                                                                                                                                                                                                                                                                                                                                                                                                                                                                                                                                                                                                                                                                                                                                                                                                                                                                                                                                 |           | Virology Department, Royal Infirmary of Edinburgh, NHS Lothian / School of Biological Sciences, University of Edinburgh / Institute of Genetics and Molecular Medicine, University of Edinburgh | COVID-19 Genomics UK (COG-UK) Consortium                                 | McHugh M, Dewar R, Rooke S, Gallagher M, Balcaza C, O'Toole Á, Scher E, Hill V, McCrone JT, Colqhoun R, Yu X, Jackson B, Rambaut A, Williams TC, Templeton K                                                            |
| EPI_ISL_574790, EPI_ISL_574791, EPI_ISL_574792, EPI_ISL_574793, EPI_ISL_574794, EPI_ISL_574795, EPI_ISL_574796, EPI_ISL_574797, EPI_ISL_574798, EPI_ISL_574799, EPI_ISL_574800, EPI_ISL_574801, EPI_ISL_574802, EPI_ISL_574803, EPI_ISL_574804, EPI_ISL_574805, EPI_ISL_574806, EPI_ISL_574807, EPI_ISL_574808, EPI_ISL_574809, EPI_ISL_574810, EPI_ISL_574811, EPI_ISL_574812, EPI_ISL_574813, EPI_ISL_574814, EPI_ISL_574815, EPI_ISL_574816, EPI_ISL_574817, EPI_ISL_574818, EPI_ISL_574819, EPI_ISL_574820, EPI_ISL_574821, EPI_ISL_574822, EPI_ISL_574823, EPI_ISL_574824, EPI_ISL_574825, EPI_ISL_574826, EPI_ISL_574827, EPI_ISL_574828, EPI_ISL_574829, EPI_ISL_574830, EPI_ISL_574831, EPI_ISL_574832, EPI_ISL_574833, EPI_ISL_574834, EPI_ISL_574835, EPI_ISL_574836, EPI_ISL_574837, EPI_ISL_574838, EPI_ISL_574839, EPI_ISL_574840, EPI_ISL_574841, EPI_ISL_574842, EPI_ISL_574843, EPI_ISL_574844, EPI_ISL_574845, EPI_ISL_574846, EPI_ISL_574847, EPI_ISL_574848, EPI_ISL_574849, EPI_ISL_574850, EPI_ISL_574851, EPI_ISL_574852, EPI_ISL_574853, EPI_ISL_574854, EPI_ISL_574855, EPI_ISL_574856, EPI_ISL_574857, EPI_ISL_574858, EPI_ISL_574859, EPI_ISL_574860, EPI_ISL_574861, EPI_ISL_574862 | see above | Institute for Infectious Diseases, University of Bern                                                                                                                                           | Institute for Infectious Diseases, University of Bern                    | Michel C Koch, Christian Baumann, Miguel A Terrazos Miani, Cora Säggerer, Stephen L Leib, Peter Keller, Franziska Suter-Riniker, Alban Ramette                                                                          |
| EPI_ISL_575332, EPI_ISL_575333, EPI_ISL_575334                                                                                                                                                                                                                                                                                                                                                                                                                                                                                                                                                                                                                                                                                                                                                                                                                                                                                                                                                                                                                                                                                                                                                                 |           | Israel Central Virology laboratory                                                                                                                                                              | Israel Central Virology laboratory                                       | Neta Zuckerman, Efrat Dahan Bucris, Oran Erster, Ella Mendelson, Michal Mandelboim                                                                                                                                      |
| EPI_ISL_576127                                                                                                                                                                                                                                                                                                                                                                                                                                                                                                                                                                                                                                                                                                                                                                                                                                                                                                                                                                                                                                                                                                                                                                                                 |           | Oklahoma Animal Disease Diagnostic Laboratory, Oklahoma State University                                                                                                                        | Oklahoma Animal Disease Diagnostic Laboratory, Oklahoma State University | Narayanan,S., Ritchey,J.C., Patil,G., Narasaraju,T., More,S., Malayer,J.R., Saliki,J.T., Kaul,A., Ramachandran,A.                                                                                                       |

|                                                                                                                                                                                                                                                                                                                                                                                                                                                                                                                                                                                                                                                                                                                                                                                                                                                                                                                                                                                                                                                                                                                                                                                                                                                                                                                                                                                                                                                                                                                                                                                                                                                                                                                                                                                                                                                                                                                                                                                                                                                                                                                                                                                                                |                                                                                                                                                                                                 |                                                                                                                                                                                                 |                                                                                                                                                               |                                                                                                                                                                                                                                                                                                                                                    |
|----------------------------------------------------------------------------------------------------------------------------------------------------------------------------------------------------------------------------------------------------------------------------------------------------------------------------------------------------------------------------------------------------------------------------------------------------------------------------------------------------------------------------------------------------------------------------------------------------------------------------------------------------------------------------------------------------------------------------------------------------------------------------------------------------------------------------------------------------------------------------------------------------------------------------------------------------------------------------------------------------------------------------------------------------------------------------------------------------------------------------------------------------------------------------------------------------------------------------------------------------------------------------------------------------------------------------------------------------------------------------------------------------------------------------------------------------------------------------------------------------------------------------------------------------------------------------------------------------------------------------------------------------------------------------------------------------------------------------------------------------------------------------------------------------------------------------------------------------------------------------------------------------------------------------------------------------------------------------------------------------------------------------------------------------------------------------------------------------------------------------------------------------------------------------------------------------------------|-------------------------------------------------------------------------------------------------------------------------------------------------------------------------------------------------|-------------------------------------------------------------------------------------------------------------------------------------------------------------------------------------------------|---------------------------------------------------------------------------------------------------------------------------------------------------------------|----------------------------------------------------------------------------------------------------------------------------------------------------------------------------------------------------------------------------------------------------------------------------------------------------------------------------------------------------|
| EPI_ISL_577347, EPI_ISL_577353, EPI_ISL_577357                                                                                                                                                                                                                                                                                                                                                                                                                                                                                                                                                                                                                                                                                                                                                                                                                                                                                                                                                                                                                                                                                                                                                                                                                                                                                                                                                                                                                                                                                                                                                                                                                                                                                                                                                                                                                                                                                                                                                                                                                                                                                                                                                                 | Virology Department, Royal Infirmary of Edinburgh, NHS Lothian / School of Biological Sciences, University of Edinburgh / Institute of Genetics and Molecular Medicine, University of Edinburgh | COVID-19 Genomics UK (COG-UK) Consortium                                                                                                                                                        | McHugh M, Dewar R, Rooke S, Gallagher M, Balcaza C, O'Toole Á, Scher E, Hill V, McCrone JT, Colquhoun R, Yu X, Jackson B, Rambaut A, Williams TC, Templeton K |                                                                                                                                                                                                                                                                                                                                                    |
| EPI_ISL_577623, EPI_ISL_577624, EPI_ISL_577625, EPI_ISL_577626, EPI_ISL_577627, EPI_ISL_577628, EPI_ISL_577629, EPI_ISL_577630, EPI_ISL_577631, EPI_ISL_577632, EPI_ISL_577633, EPI_ISL_577634, EPI_ISL_577635, EPI_ISL_577636, EPI_ISL_577637, EPI_ISL_577638                                                                                                                                                                                                                                                                                                                                                                                                                                                                                                                                                                                                                                                                                                                                                                                                                                                                                                                                                                                                                                                                                                                                                                                                                                                                                                                                                                                                                                                                                                                                                                                                                                                                                                                                                                                                                                                                                                                                                 | see above                                                                                                                                                                                       | The National Institute of Public Health                                                                                                                                                         | State Veterinary Institute Prague                                                                                                                             | Nagy,A;Jirincova,H;Novakova,L;Trnka,D;Vecerova,J                                                                                                                                                                                                                                                                                                   |
| EPI_ISL_577749, EPI_ISL_577750, EPI_ISL_577752, EPI_ISL_577753, EPI_ISL_577754, EPI_ISL_577755, EPI_ISL_577757, EPI_ISL_577758, EPI_ISL_577760, EPI_ISL_577761, EPI_ISL_577762, EPI_ISL_577763, EPI_ISL_577764, EPI_ISL_577767, EPI_ISL_577768, EPI_ISL_577769, EPI_ISL_577770, EPI_ISL_577771, EPI_ISL_577772, EPI_ISL_577775, EPI_ISL_577776, EPI_ISL_577777, EPI_ISL_577778, EPI_ISL_577779, EPI_ISL_577781, EPI_ISL_577782, EPI_ISL_577785, EPI_ISL_577786, EPI_ISL_577787, EPI_ISL_577790, EPI_ISL_577791, EPI_ISL_577792, EPI_ISL_577793, EPI_ISL_577794, EPI_ISL_577796, EPI_ISL_577797, EPI_ISL_577798, EPI_ISL_577799, EPI_ISL_577800, EPI_ISL_577801, EPI_ISL_577805, EPI_ISL_577807, EPI_ISL_577808, EPI_ISL_577810, EPI_ISL_577811, EPI_ISL_577812, EPI_ISL_577814, EPI_ISL_577815, EPI_ISL_577817, EPI_ISL_577818, EPI_ISL_577819, EPI_ISL_577820, EPI_ISL_577821, EPI_ISL_577822, EPI_ISL_577824, EPI_ISL_577825, EPI_ISL_577826, EPI_ISL_577828                                                                                                                                                                                                                                                                                                                                                                                                                                                                                                                                                                                                                                                                                                                                                                                                                                                                                                                                                                                                                                                                                                                                                                                                                                                 | see above                                                                                                                                                                                       | Dutch COVID-19 response team                                                                                                                                                                    | Erasmus Medical Center                                                                                                                                        | OH consortium                                                                                                                                                                                                                                                                                                                                      |
| EPI_ISL_578202, EPI_ISL_578203, EPI_ISL_578204, EPI_ISL_578205, EPI_ISL_578206, EPI_ISL_578207, EPI_ISL_578208, EPI_ISL_578209, EPI_ISL_578210, EPI_ISL_578211, EPI_ISL_578212, EPI_ISL_578213, EPI_ISL_578214, EPI_ISL_578215, EPI_ISL_578216, EPI_ISL_578217, EPI_ISL_578218, EPI_ISL_578219, EPI_ISL_578220, EPI_ISL_578221, EPI_ISL_578222, EPI_ISL_578223, EPI_ISL_578224, EPI_ISL_578225, EPI_ISL_578226, EPI_ISL_578227, EPI_ISL_578228, EPI_ISL_578229, EPI_ISL_578230, EPI_ISL_578231, EPI_ISL_578232, EPI_ISL_578233, EPI_ISL_578234, EPI_ISL_578235, EPI_ISL_578236, EPI_ISL_578237, EPI_ISL_578238, EPI_ISL_578239, EPI_ISL_578240, EPI_ISL_578241, EPI_ISL_578242, EPI_ISL_578243, EPI_ISL_578244, EPI_ISL_578245, EPI_ISL_578246, EPI_ISL_578247, EPI_ISL_578248, EPI_ISL_578249, EPI_ISL_578250, EPI_ISL_578251, EPI_ISL_578252, EPI_ISL_578253, EPI_ISL_578254, EPI_ISL_578255, EPI_ISL_578256, EPI_ISL_578257, EPI_ISL_578258, EPI_ISL_578259, EPI_ISL_578260, EPI_ISL_578261, EPI_ISL_578262, EPI_ISL_578263, EPI_ISL_578264, EPI_ISL_578265, EPI_ISL_578266, EPI_ISL_578267, EPI_ISL_578268, EPI_ISL_578269, EPI_ISL_578270, EPI_ISL_578271, EPI_ISL_578272, EPI_ISL_578273, EPI_ISL_578274, EPI_ISL_578275, EPI_ISL_578276, EPI_ISL_578277, EPI_ISL_578278, EPI_ISL_578279, EPI_ISL_578280, EPI_ISL_578281, EPI_ISL_578282, EPI_ISL_578283, EPI_ISL_578284, EPI_ISL_578285, EPI_ISL_578286, EPI_ISL_578287, EPI_ISL_578288, EPI_ISL_578289, EPI_ISL_578290, EPI_ISL_578291, EPI_ISL_578292, EPI_ISL_578293, EPI_ISL_578294, EPI_ISL_578295, EPI_ISL_578296, EPI_ISL_578297, EPI_ISL_578298, EPI_ISL_578299, EPI_ISL_578300, EPI_ISL_578301, EPI_ISL_578302, EPI_ISL_578303, EPI_ISL_578304, EPI_ISL_578305, EPI_ISL_578306, EPI_ISL_578307, EPI_ISL_578308, EPI_ISL_578309, EPI_ISL_578310, EPI_ISL_578311, EPI_ISL_578312, EPI_ISL_578313, EPI_ISL_578314, EPI_ISL_578315, EPI_ISL_578316, EPI_ISL_578317, EPI_ISL_578318, EPI_ISL_578319, EPI_ISL_578320, EPI_ISL_578321, EPI_ISL_578322, EPI_ISL_578323, EPI_ISL_578324, EPI_ISL_578325, EPI_ISL_578326, EPI_ISL_578327, EPI_ISL_578328, EPI_ISL_578329, EPI_ISL_578330, EPI_ISL_578331, EPI_ISL_578332, EPI_ISL_578333, EPI_ISL_578334 | see above                                                                                                                                                                                       | National Virus Reference Laboratory                                                                                                                                                             | National Virus Reference Laboratory                                                                                                                           | Michael Carr, Gabriel Gonzalez, Jonathan Dean, Suzie Coughlan, Cilian F De Gascun                                                                                                                                                                                                                                                                  |
| EPI_ISL_582029, EPI_ISL_582030                                                                                                                                                                                                                                                                                                                                                                                                                                                                                                                                                                                                                                                                                                                                                                                                                                                                                                                                                                                                                                                                                                                                                                                                                                                                                                                                                                                                                                                                                                                                                                                                                                                                                                                                                                                                                                                                                                                                                                                                                                                                                                                                                                                 | see above                                                                                                                                                                                       | Biology Department, College of Science, Al-Muthanna University                                                                                                                                  | International Centre for Genetic Engineering and Biotechnology (ICGEB) and ARGO Open Lab Platform                                                             | Nihad Al-Rashedi, Danilo Licastro, Sreejith Rajasekharan, Simeone Dal Monego, Alessandro Marcello                                                                                                                                                                                                                                                  |
| EPI_ISL_582124                                                                                                                                                                                                                                                                                                                                                                                                                                                                                                                                                                                                                                                                                                                                                                                                                                                                                                                                                                                                                                                                                                                                                                                                                                                                                                                                                                                                                                                                                                                                                                                                                                                                                                                                                                                                                                                                                                                                                                                                                                                                                                                                                                                                 | Malaysia Genome Institute                                                                                                                                                                       | Malaysia Genome Institute                                                                                                                                                                       | Malaysia Genome Institute                                                                                                                                     | Mohd Noor Mat Isa, Irni Suhayu Sapian, Yusuf Muhammad Noor, Nurhezreen Md Iqbal, Mohd Faizal Abu Bakar, Enizza Kasim, Shamsidar Sopia, Siti Noraini Othman, Azrin Ahmad, Nor Azfa Johari, Shahrul Hisham Zainal Ariffin                                                                                                                            |
| EPI_ISL_583893, EPI_ISL_583894, EPI_ISL_583895, EPI_ISL_583896, EPI_ISL_583897, EPI_ISL_583898, EPI_ISL_583899, EPI_ISL_583900                                                                                                                                                                                                                                                                                                                                                                                                                                                                                                                                                                                                                                                                                                                                                                                                                                                                                                                                                                                                                                                                                                                                                                                                                                                                                                                                                                                                                                                                                                                                                                                                                                                                                                                                                                                                                                                                                                                                                                                                                                                                                 | Singapore General Hospital                                                                                                                                                                      | Singapore General Hospital                                                                                                                                                                      | Department of Microbiology                                                                                                                                    | Nurdyana Abdul Rahman, Kun Lee Lim, Chenhao Li, Sui Sin Goh, Kenneth Xin Long Chan, Kian Sing Chan, Lynette Oon, Kern Rei Chng, Niranjana Nagarajan, Karrie Ko                                                                                                                                                                                     |
| EPI_ISL_584073, EPI_ISL_584074, EPI_ISL_584075, EPI_ISL_584076, EPI_ISL_584077, EPI_ISL_584078, EPI_ISL_584079, EPI_ISL_584080, EPI_ISL_584081, EPI_ISL_584082                                                                                                                                                                                                                                                                                                                                                                                                                                                                                                                                                                                                                                                                                                                                                                                                                                                                                                                                                                                                                                                                                                                                                                                                                                                                                                                                                                                                                                                                                                                                                                                                                                                                                                                                                                                                                                                                                                                                                                                                                                                 | see above                                                                                                                                                                                       | The National Institute of Public Health                                                                                                                                                         | State Veterinary Institute Prague                                                                                                                             | Nagy,A;Jirincova,H;Novakova,L;Trnka,D;Vecerova,J                                                                                                                                                                                                                                                                                                   |
| EPI_ISL_585427, EPI_ISL_585428, EPI_ISL_585431, EPI_ISL_585434, EPI_ISL_585437, EPI_ISL_585446, EPI_ISL_585449, EPI_ISL_585451, EPI_ISL_585454, EPI_ISL_585461, EPI_ISL_585469, EPI_ISL_585474, EPI_ISL_585476, EPI_ISL_585479, EPI_ISL_585480, EPI_ISL_585482, EPI_ISL_585484, EPI_ISL_585486, EPI_ISL_585488, EPI_ISL_585499, EPI_ISL_585501                                                                                                                                                                                                                                                                                                                                                                                                                                                                                                                                                                                                                                                                                                                                                                                                                                                                                                                                                                                                                                                                                                                                                                                                                                                                                                                                                                                                                                                                                                                                                                                                                                                                                                                                                                                                                                                                 | see above                                                                                                                                                                                       | Virology Department, Royal Infirmary of Edinburgh, NHS Lothian / School of Biological Sciences, University of Edinburgh / Institute of Genetics and Molecular Medicine, University of Edinburgh | COVID-19 Genomics UK (COG-UK) Consortium                                                                                                                      | McHugh M, Dewar R, Rooke S, Gallagher M, Balcaza C, O'Toole Á, Scher E, Hill V, McCrone JT, Colquhoun R, Yu X, Jackson B, Rambaut A, Williams TC, Templeton K                                                                                                                                                                                      |
| EPI_ISL_586515                                                                                                                                                                                                                                                                                                                                                                                                                                                                                                                                                                                                                                                                                                                                                                                                                                                                                                                                                                                                                                                                                                                                                                                                                                                                                                                                                                                                                                                                                                                                                                                                                                                                                                                                                                                                                                                                                                                                                                                                                                                                                                                                                                                                 | B.J. Medical College and Civil hospital, Ahmedabad                                                                                                                                              | B.J. Medical College and Civil hospital, Ahmedabad                                                                                                                                              | Gujarat Biotechnology Research Centre                                                                                                                         | Nidhi Patel, Nitin Savaliya, Raghawendra Kumar, Dinesh Kumar, Zuber Saiyed, Komal Patel, Labdhi Pandya, Afzal Ansari, Nikha Trivedi, Pranay Shah, Kamlesh J Upadhyay, Sanjay Kapadia, Apurvasinh Puvar, Janvi Raval, Zarna Patel, Monika Gandhi, Pinal Trivedi, Maharshi Pandya, R D Dixit, A M Kadri, Harsh Bakshi, Chaitanya Joshi, Madhvi Joshi |
| EPI_ISL_586516                                                                                                                                                                                                                                                                                                                                                                                                                                                                                                                                                                                                                                                                                                                                                                                                                                                                                                                                                                                                                                                                                                                                                                                                                                                                                                                                                                                                                                                                                                                                                                                                                                                                                                                                                                                                                                                                                                                                                                                                                                                                                                                                                                                                 | B.J. Medical College and Civil hospital, Ahmedabad                                                                                                                                              | B.J. Medical College and Civil hospital, Ahmedabad                                                                                                                                              | Gujarat Biotechnology Research Centre                                                                                                                         | Nitin Savaliya, Raghawendra Kumar, Dinesh Kumar, Zuber Saiyed, Komal Patel, Labdhi Pandya, Afzal Ansari, Nikha Trivedi, Pranay Shah, Kamlesh J Upadhyay, Sanjay Kapadia, Apurvasinh Puvar, Janvi Raval, Zarna Patel, Monika Gandhi, Pinal Trivedi, Maharshi Pandya, Nidhi Patel, R D Dixit, A M Kadri, Harsh Bakshi, Chaitanya Joshi, Madhvi Joshi |
| EPI_ISL_586523                                                                                                                                                                                                                                                                                                                                                                                                                                                                                                                                                                                                                                                                                                                                                                                                                                                                                                                                                                                                                                                                                                                                                                                                                                                                                                                                                                                                                                                                                                                                                                                                                                                                                                                                                                                                                                                                                                                                                                                                                                                                                                                                                                                                 | B.J. Medical College and Civil hospital, Ahmedabad                                                                                                                                              | B.J. Medical College and Civil hospital, Ahmedabad                                                                                                                                              | Gujarat Biotechnology Research Centre                                                                                                                         | Nikha Trivedi, Pranay Shah, Kamlesh J Upadhyay, Sanjay Kapadia, Apurvasinh Puvar, Janvi Raval, Zarna Patel, Monika Gandhi, Pinal Trivedi, Maharshi Pandya, Nidhi Patel, Nitin Savaliya, Raghawendra Kumar, Dinesh Kumar, Zuber Saiyed, Komal Patel, Labdhi Pandya, Afzal Ansari, R D Dixit, A M Kadri, Harsh Bakshi, Chaitanya Joshi, Madhvi Joshi |
| EPI_ISL_586529                                                                                                                                                                                                                                                                                                                                                                                                                                                                                                                                                                                                                                                                                                                                                                                                                                                                                                                                                                                                                                                                                                                                                                                                                                                                                                                                                                                                                                                                                                                                                                                                                                                                                                                                                                                                                                                                                                                                                                                                                                                                                                                                                                                                 | B.J. Medical College and Civil hospital, Ahmedabad                                                                                                                                              | B.J. Medical College and Civil hospital, Ahmedabad                                                                                                                                              | Gujarat Biotechnology Research Centre                                                                                                                         | Monika Gandhi, Pinal Trivedi, Maharshi Pandya, Nidhi Patel, Nitin Savaliya, Raghawendra Kumar, Dinesh Kumar, Zuber Saiyed, Komal Patel, Labdhi Pandya, Afzal Ansari, Nikha Trivedi, Pranay Shah, Kamlesh J Upadhyay, Sanjay Kapadia, Apurvasinh Puvar, Janvi Raval, Zarna Patel, R D Dixit, A M Kadri, Harsh Bakshi, Chaitanya Joshi, Madhvi Joshi |
| EPI_ISL_586535                                                                                                                                                                                                                                                                                                                                                                                                                                                                                                                                                                                                                                                                                                                                                                                                                                                                                                                                                                                                                                                                                                                                                                                                                                                                                                                                                                                                                                                                                                                                                                                                                                                                                                                                                                                                                                                                                                                                                                                                                                                                                                                                                                                                 | General Hospital,Chhotaudepur                                                                                                                                                                   | General Hospital,Chhotaudepur                                                                                                                                                                   | Gujarat Biotechnology Research Centre                                                                                                                         | Nidhi Patel, Nitin Savaliya, Raghawendra Kumar, Dinesh Kumar, Zuber Saiyed, Komal Patel, Labdhi Pandya, Afzal Ansari, Nikha Trivedi, Apurvasinh Puvar, Janvi Raval, Zarna Patel, Monika Gandhi, Pinal Trivedi, Yogesh Parmar, Arti Thakur, Dharak Pandya, Maharshi Pandya, R D Dixit, A M Kadri, Harsh Bakshi, Chaitanya Joshi, Madhvi Joshi       |
| EPI_ISL_586537                                                                                                                                                                                                                                                                                                                                                                                                                                                                                                                                                                                                                                                                                                                                                                                                                                                                                                                                                                                                                                                                                                                                                                                                                                                                                                                                                                                                                                                                                                                                                                                                                                                                                                                                                                                                                                                                                                                                                                                                                                                                                                                                                                                                 | Zydus Medical Hospital,Dahod                                                                                                                                                                    | Zydus Medical Hospital,Dahod                                                                                                                                                                    | Gujarat Biotechnology Research Centre                                                                                                                         | Mohit Desai, Nitin Savaliya, Raghawendra Kumar, Dinesh Kumar, Zuber Saiyed, Komal Patel, Labdhi Pandya, Afzal Ansari, Nikha Trivedi, Apurvasinh Puvar, Janvi Raval, Zarna Patel, Monika Gandhi, Pinal Trivedi, Maharshi Pandya, Nidhi Patel, Kalpesh Labana, R D Dixit, A M Kadri, Harsh Bakshi, Chaitanya Joshi, Madhvi Joshi                     |
| EPI_ISL_586538                                                                                                                                                                                                                                                                                                                                                                                                                                                                                                                                                                                                                                                                                                                                                                                                                                                                                                                                                                                                                                                                                                                                                                                                                                                                                                                                                                                                                                                                                                                                                                                                                                                                                                                                                                                                                                                                                                                                                                                                                                                                                                                                                                                                 | Zydus Medical Hospital,Dahod                                                                                                                                                                    | Zydus Medical Hospital,Dahod                                                                                                                                                                    | Gujarat Biotechnology Research Centre                                                                                                                         | Nitin Savaliya, Raghawendra Kumar, Dinesh Kumar, Zuber Saiyed, Komal Patel, Labdhi Pandya, Afzal Ansari, Nikha Trivedi, Apurvasinh Puvar, Janvi Raval, Zarna Patel, Monika Gandhi, Pinal Trivedi, Maharshi Pandya, Nidhi Patel, Kalpesh Labana, Mohit Desai, R D Dixit, A M Kadri, Harsh Bakshi, Chaitanya Joshi, Madhvi Joshi                     |
| EPI_ISL_586545                                                                                                                                                                                                                                                                                                                                                                                                                                                                                                                                                                                                                                                                                                                                                                                                                                                                                                                                                                                                                                                                                                                                                                                                                                                                                                                                                                                                                                                                                                                                                                                                                                                                                                                                                                                                                                                                                                                                                                                                                                                                                                                                                                                                 | Government General Hospital, Jam Khambhaliya, Devbhoomi Dwarka                                                                                                                                  | Government General Hospital, Jam Khambhaliya, Devbhoomi Dwarka                                                                                                                                  | Gujarat Biotechnology Research Centre                                                                                                                         | Nikha Trivedi, Harish Matani, Apurvasinh Puvar, Janvi Raval, Zarna Patel, Monika Gandhi, Pinal Trivedi, Maharshi Pandya, Nidhi Patel, Nitin Savaliya, Raghawendra Kumar, Dinesh Kumar, Zuber Saiyed, Komal Patel, Labdhi Pandya, Afzal Ansari, R D Dixit, A M Kadri, Harsh Bakshi, Chaitanya Joshi, Madhvi Joshi                                   |
| EPI_ISL_586546                                                                                                                                                                                                                                                                                                                                                                                                                                                                                                                                                                                                                                                                                                                                                                                                                                                                                                                                                                                                                                                                                                                                                                                                                                                                                                                                                                                                                                                                                                                                                                                                                                                                                                                                                                                                                                                                                                                                                                                                                                                                                                                                                                                                 | General Hospital,Godhra                                                                                                                                                                         | General Hospital,Godhra                                                                                                                                                                         | Gujarat Biotechnology Research Centre                                                                                                                         | Neela Katara, Pinal Gandhi, Sangeeta Kumar, Apurvasinh Puvar, Janvi Raval, Zarna Patel, Monika Gandhi, Pinal Trivedi, Maharshi Pandya, Nidhi Patel, Nitin Savaliya, Raghawendra Kumar, Dinesh Kumar, Zuber Saiyed, Komal Patel, Labdhi Pandya, Afzal Ansari, Nikha Trivedi, R D Dixit, A M Kadri, Harsh Bakshi, Chaitanya Joshi, Madhvi Joshi      |
| EPI_ISL_586551                                                                                                                                                                                                                                                                                                                                                                                                                                                                                                                                                                                                                                                                                                                                                                                                                                                                                                                                                                                                                                                                                                                                                                                                                                                                                                                                                                                                                                                                                                                                                                                                                                                                                                                                                                                                                                                                                                                                                                                                                                                                                                                                                                                                 | Government Hospital,Veraval                                                                                                                                                                     | Government Hospital,Veraval                                                                                                                                                                     | Gujarat Biotechnology Research Centre                                                                                                                         | Monika Gandhi, Pinal Trivedi, Maharshi Pandya, Nidhi Patel, Nitin Savaliya, Raghawendra Kumar, Dinesh Kumar, Zuber Saiyed, Komal Patel, Labdhi Pandya, Afzal Ansari, Nikha Trivedi, Jignesh Parmar, Jitendra Bamrotia, Apurvasinh Puvar, Janvi Raval, Zarna Patel, R D Dixit, A M Kadri, Harsh Bakshi, Chaitanya Joshi, Madhvi Joshi               |
| EPI_ISL_586554                                                                                                                                                                                                                                                                                                                                                                                                                                                                                                                                                                                                                                                                                                                                                                                                                                                                                                                                                                                                                                                                                                                                                                                                                                                                                                                                                                                                                                                                                                                                                                                                                                                                                                                                                                                                                                                                                                                                                                                                                                                                                                                                                                                                 | Government Hospital,Veraval                                                                                                                                                                     | Government Hospital,Veraval                                                                                                                                                                     | Gujarat Biotechnology Research Centre                                                                                                                         | Nidhi Patel, Nitin Savaliya, Raghawendra Kumar, Dinesh Kumar, Zuber Saiyed, Komal Patel, Labdhi Pandya, Afzal Ansari, Nikha Trivedi, Jignesh Parmar, Jitendra Bamrotia, Apurvasinh Puvar, Janvi Raval, Zarna Patel, Monika Gandhi, Pinal Trivedi, Maharshi Pandya, R D Dixit, A M Kadri, Harsh Bakshi, Chaitanya Joshi, Madhvi Joshi               |
| EPI_ISL_586555                                                                                                                                                                                                                                                                                                                                                                                                                                                                                                                                                                                                                                                                                                                                                                                                                                                                                                                                                                                                                                                                                                                                                                                                                                                                                                                                                                                                                                                                                                                                                                                                                                                                                                                                                                                                                                                                                                                                                                                                                                                                                                                                                                                                 | CCC,Veraval                                                                                                                                                                                     | CCC,Veraval                                                                                                                                                                                     | Gujarat Biotechnology Research Centre                                                                                                                         | Nitin Savaliya, Raghawendra Kumar, Dinesh Kumar, Zuber Saiyed, Komal Patel, Labdhi Pandya, Afzal Ansari, Nikha Trivedi, Jignesh Parmar, Jitendra Bamrotia, Apurvasinh Puvar, Janvi Raval, Zarna Patel, Monika Gandhi, Pinal Trivedi, Maharshi Pandya, Nidhi Patel, R D Dixit, A M Kadri, Harsh Bakshi, Chaitanya Joshi, Madhvi Joshi               |

|                                                                                                                                                                                                                                                                                                                                                                                                                                                                                                                                                                                                                                                                                                                                                                                                                                                                                                                                                                                                                                                                                                                                                |                                                                                                                             |                                                                                                                                                                                                 |                                                                                                                                                                                                                                                                                                                                                            |                                                                                                                                                                      |
|------------------------------------------------------------------------------------------------------------------------------------------------------------------------------------------------------------------------------------------------------------------------------------------------------------------------------------------------------------------------------------------------------------------------------------------------------------------------------------------------------------------------------------------------------------------------------------------------------------------------------------------------------------------------------------------------------------------------------------------------------------------------------------------------------------------------------------------------------------------------------------------------------------------------------------------------------------------------------------------------------------------------------------------------------------------------------------------------------------------------------------------------|-----------------------------------------------------------------------------------------------------------------------------|-------------------------------------------------------------------------------------------------------------------------------------------------------------------------------------------------|------------------------------------------------------------------------------------------------------------------------------------------------------------------------------------------------------------------------------------------------------------------------------------------------------------------------------------------------------------|----------------------------------------------------------------------------------------------------------------------------------------------------------------------|
| EPI_ISL_586562                                                                                                                                                                                                                                                                                                                                                                                                                                                                                                                                                                                                                                                                                                                                                                                                                                                                                                                                                                                                                                                                                                                                 | GMERS GMERS Medical College and Hospital, Junagadh                                                                          | Gujarat Biotechnology Research Centre                                                                                                                                                           | Nikha Trivedi, Bhavesh Bagda , Ravi Dedaniya, Apurvashin Puvar, Janvi Ravai, Zarna Patel, Monika Gandhi, Pinal Trivedi, Maharshi Pandya, Nidhi Patel, Nitin Savaliya, Raghavendra Kumar, Dinesh Kumar, Zuber Saiyed, Komal Patel, Labdhi Pandya, Afzal Ansari, R D Dixit, A M Kadri, Harsh Bakshi, Chaitanya Joshi, Madhvi Joshi                           |                                                                                                                                                                      |
| EPI_ISL_594817, EPI_ISL_594818, EPI_ISL_594819, EPI_ISL_594821, EPI_ISL_594823, EPI_ISL_594828, EPI_ISL_594829, EPI_ISL_594832, EPI_ISL_594839, EPI_ISL_594842, EPI_ISL_594847, EPI_ISL_594848                                                                                                                                                                                                                                                                                                                                                                                                                                                                                                                                                                                                                                                                                                                                                                                                                                                                                                                                                 | see above                                                                                                                   | Virology Department, Royal Infirmary of Edinburgh, NHS Lothian / School of Biological Sciences, University of Edinburgh / Institute of Genetics and Molecular Medicine, University of Edinburgh | COVID-19 Genomics UK (COG-UK) Consortium                                                                                                                                                                                                                                                                                                                   |                                                                                                                                                                      |
| EPI_ISL_596500, EPI_ISL_596501, EPI_ISL_596502, EPI_ISL_596503, EPI_ISL_596504, EPI_ISL_596505, EPI_ISL_596506, EPI_ISL_596507, EPI_ISL_596508, EPI_ISL_596509, EPI_ISL_596510, EPI_ISL_596511, EPI_ISL_596512, EPI_ISL_596513, EPI_ISL_596514, EPI_ISL_596515, EPI_ISL_596516, EPI_ISL_596517, EPI_ISL_596518, EPI_ISL_596519, EPI_ISL_596520, EPI_ISL_596521, EPI_ISL_596522, EPI_ISL_596523, EPI_ISL_596524, EPI_ISL_596525, EPI_ISL_596526, EPI_ISL_596527, EPI_ISL_596528, EPI_ISL_596529, EPI_ISL_596530, EPI_ISL_596531, EPI_ISL_596532, EPI_ISL_596533, EPI_ISL_596534, EPI_ISL_596535, EPI_ISL_596536, EPI_ISL_596537, EPI_ISL_596538, EPI_ISL_596539, EPI_ISL_596540, EPI_ISL_596541, EPI_ISL_596542, EPI_ISL_596543, EPI_ISL_596544, EPI_ISL_596545, EPI_ISL_596546, EPI_ISL_596547, EPI_ISL_596548, EPI_ISL_596549, EPI_ISL_596550, EPI_ISL_596551, EPI_ISL_596552, EPI_ISL_596553, EPI_ISL_596554, EPI_ISL_596555, EPI_ISL_596556, EPI_ISL_596557, EPI_ISL_596558, EPI_ISL_596559, EPI_ISL_596560, EPI_ISL_596561, EPI_ISL_596562, EPI_ISL_596563, EPI_ISL_596564, EPI_ISL_596565, EPI_ISL_596566, EPI_ISL_596567, EPI_ISL_596568 | see above                                                                                                                   | Palestinian Ministry of Health                                                                                                                                                                  | Molecular Genetics Lab                                                                                                                                                                                                                                                                                                                                     | Nouar Qutob, Zaidoun Salah, Damien Richard, Hisham Darwish, Husam Sallam, Issa Shtayeh, Osama Najjar, Mahmoud Ruzayqat, Dana Najjar, Francois Balloux, Lucy van Dorp |
| EPI_ISL_596889, EPI_ISL_596890, EPI_ISL_596891, EPI_ISL_596892, EPI_ISL_596893, EPI_ISL_596894, EPI_ISL_596895, EPI_ISL_596896, EPI_ISL_596897, EPI_ISL_596898, EPI_ISL_596899, EPI_ISL_596900, EPI_ISL_596901, EPI_ISL_596902, EPI_ISL_596903, EPI_ISL_596904, EPI_ISL_596905, EPI_ISL_596906, EPI_ISL_596907, EPI_ISL_596908, EPI_ISL_596909, EPI_ISL_596910, EPI_ISL_596911, EPI_ISL_596912, EPI_ISL_596913, EPI_ISL_596914, EPI_ISL_596915, EPI_ISL_596916, EPI_ISL_596917, EPI_ISL_596918, EPI_ISL_596919, EPI_ISL_596920, EPI_ISL_596921, EPI_ISL_596922, EPI_ISL_596923, EPI_ISL_596924, EPI_ISL_596925, EPI_ISL_596926, EPI_ISL_596927                                                                                                                                                                                                                                                                                                                                                                                                                                                                                                 | see above                                                                                                                   | National Virus Reference Laboratory                                                                                                                                                             | National Virus Reference Laboratory                                                                                                                                                                                                                                                                                                                        | Michael Carr, Gabriel Gonzalez, Jonathan Dean, Daniel Hare, Cillian F De Gascun                                                                                      |
| EPI_ISL_603223, EPI_ISL_603224, EPI_ISL_603225                                                                                                                                                                                                                                                                                                                                                                                                                                                                                                                                                                                                                                                                                                                                                                                                                                                                                                                                                                                                                                                                                                 | National Institute of Laboratory Medicine and Referral Center                                                               | Genomic Research Lab, BCSIR                                                                                                                                                                     | Md. Murshed Hasan Sarkar, Abu Sayeed Mohammad Mahmud, Mohammad Samir Uzzaman, Eshrar Osman, Md. Ahashan Habib, Shahina Akter, Tanjina Akhter Banu, Barna Goswami, Iffat Jahan, Md. Saddam Hossain, Tasnim Nafisa, Md. Maruf Ahmed Molla, Mahmuda Yeasmin, Asish Kumar Ghosh, A. K. M. Shamsuzzaman, Monira Parveen, Md. Masum Hossain Arif, Md. Salim Khan |                                                                                                                                                                      |
| EPI_ISL_603246, EPI_ISL_603247                                                                                                                                                                                                                                                                                                                                                                                                                                                                                                                                                                                                                                                                                                                                                                                                                                                                                                                                                                                                                                                                                                                 | National Institute of Laboratory Medicine and Referral Center                                                               | Genomic Research Lab, BCSIR                                                                                                                                                                     | Md. Saddam Hossain, Abu Sayeed Mohammad Mahmud, Mohammad Samir Uzzaman, Eshrar Osman, Md. Ahashan Habib, Shahina Akter, Tanjina Akhter Banu, Md. Murshed Hasan Sarkar, Barna Goswami, Iffat Jahan, Tasnim Nafisa, Md. Maruf Ahmed Molla, Mahmuda Yeasmin, Asish Kumar Ghosh, A. K. M. Shamsuzzaman, Monira Parveen, Md. Masum Hossain Arif, Md. Salim Khan |                                                                                                                                                                      |
| EPI_ISL_603249, EPI_ISL_603250                                                                                                                                                                                                                                                                                                                                                                                                                                                                                                                                                                                                                                                                                                                                                                                                                                                                                                                                                                                                                                                                                                                 | National Institute of Laboratory Medicine and Referral Center                                                               | Genomic Research Lab, BCSIR                                                                                                                                                                     | Md. Ahashan Habib, Abu Sayeed Mohammad Mahmud, Mohammad Samir Uzzaman, Eshrar Osman, Shahina Akter, Tanjina Akhter Banu, Md. Murshed Hasan Sarkar, Barna Goswami, Iffat Jahan, Md. Saddam Hossain, Tasnim Nafisa, Md. Maruf Ahmed Molla, Mahmuda Yeasmin, Asish Kumar Ghosh, A. K. M. Shamsuzzaman, Monira Parveen, Md. Masum Hossain Arif, Md. Salim Khan |                                                                                                                                                                      |
| EPI_ISL_605783                                                                                                                                                                                                                                                                                                                                                                                                                                                                                                                                                                                                                                                                                                                                                                                                                                                                                                                                                                                                                                                                                                                                 | Genome Center                                                                                                               | Genome Center                                                                                                                                                                                   | Md. Shazid Hasan, Hassan M. Al-Emran, Ovinu Kibria Islam, A. S. M. Rubayet- Ul- Alam, Selina Akter, Shireen Nigar, Md. Tanvir Islam, Pravas Chandra Roy, Shovon Lal Sarkar, Najmuj Sakib, S. M. Tanjil Shah, Md. Iqbal Kabir Jahid, Md. Anwar Hossain                                                                                                      |                                                                                                                                                                      |
| EPI_ISL_610152, EPI_ISL_610153, EPI_ISL_610154                                                                                                                                                                                                                                                                                                                                                                                                                                                                                                                                                                                                                                                                                                                                                                                                                                                                                                                                                                                                                                                                                                 | Singapore General Hospital                                                                                                  | Department of Microbiology                                                                                                                                                                      | Nurdyana Abdul Rahman, Kun Lee Lim, Chenhao Li, Sui Sin Goh, Kenneth Xin Long Chan, Kian Sing Chan, Lynette Oon, Kern Rei Chng, Niranan Nagarajan, Karrie Ko                                                                                                                                                                                               |                                                                                                                                                                      |
| EPI_ISL_610245                                                                                                                                                                                                                                                                                                                                                                                                                                                                                                                                                                                                                                                                                                                                                                                                                                                                                                                                                                                                                                                                                                                                 | Virology, National Institute for Biological Standards and Control                                                           | Virology, National Institute for Biological Standards and Control                                                                                                                               | Mee,E.T., Bentley,E., Routley,S., Mate,R., Fritzsche,M. and Mattiuzzo,G.                                                                                                                                                                                                                                                                                   |                                                                                                                                                                      |
| EPI_ISL_611685, EPI_ISL_611842, EPI_ISL_612127, EPI_ISL_612187, EPI_ISL_612318, EPI_ISL_612322, EPI_ISL_612323, EPI_ISL_612325, EPI_ISL_612327, EPI_ISL_612331, EPI_ISL_612332, EPI_ISL_612337, EPI_ISL_612341, EPI_ISL_612350, EPI_ISL_612364, EPI_ISL_612369, EPI_ISL_612371, EPI_ISL_612372, EPI_ISL_612374                                                                                                                                                                                                                                                                                                                                                                                                                                                                                                                                                                                                                                                                                                                                                                                                                                 | see above                                                                                                                   | Virology Department, Royal Infirmary of Edinburgh, NHS Lothian / School of Biological Sciences, University of Edinburgh / Institute of Genetics and Molecular Medicine, University of Edinburgh | COVID-19 Genomics UK (COG-UK) Consortium                                                                                                                                                                                                                                                                                                                   |                                                                                                                                                                      |
| EPI_ISL_613461, EPI_ISL_613462                                                                                                                                                                                                                                                                                                                                                                                                                                                                                                                                                                                                                                                                                                                                                                                                                                                                                                                                                                                                                                                                                                                 | Microbiology, Koc University                                                                                                | Microbiology, Koc University                                                                                                                                                                    | Nurtop,E., Ozer,B., Kuskucu,M.A., Dogan,O., Can,F.                                                                                                                                                                                                                                                                                                         |                                                                                                                                                                      |
| EPI_ISL_614763                                                                                                                                                                                                                                                                                                                                                                                                                                                                                                                                                                                                                                                                                                                                                                                                                                                                                                                                                                                                                                                                                                                                 | Rwanda National Reference Laboratory                                                                                        | Rwanda National Reference Laboratory                                                                                                                                                            | Mukantwari Enatha,Stefan Rooke,Aine O'Toole,Umuringa Jeanne d'Arc                                                                                                                                                                                                                                                                                          |                                                                                                                                                                      |
| EPI_ISL_614891                                                                                                                                                                                                                                                                                                                                                                                                                                                                                                                                                                                                                                                                                                                                                                                                                                                                                                                                                                                                                                                                                                                                 | Rwanda National Reference Laboratory                                                                                        | Rwanda National Reference Laboratory                                                                                                                                                            | Mukantwari Enatha,Stefan Rooke,Aine O'Toole ,Umuringa Jeanne d'Arc                                                                                                                                                                                                                                                                                         |                                                                                                                                                                      |
| EPI_ISL_614892                                                                                                                                                                                                                                                                                                                                                                                                                                                                                                                                                                                                                                                                                                                                                                                                                                                                                                                                                                                                                                                                                                                                 | Rwanda National Reference Laboratory                                                                                        | Rwanda National Reference Laboratory                                                                                                                                                            | Mukantwari Enatha,Stefan Rooke,Aine O'Toole,Umuringa Jeanne d'Arc                                                                                                                                                                                                                                                                                          |                                                                                                                                                                      |
| EPI_ISL_615063, EPI_ISL_615064, EPI_ISL_615066                                                                                                                                                                                                                                                                                                                                                                                                                                                                                                                                                                                                                                                                                                                                                                                                                                                                                                                                                                                                                                                                                                 | Rwanda National Reference Laboratory                                                                                        | Rwanda National Reference Laboratory                                                                                                                                                            | Mukantwari Enatha,Stefan Rooke,Aine O'Toole,UMuringa Jeanne d'Arc                                                                                                                                                                                                                                                                                          |                                                                                                                                                                      |
| EPI_ISL_615074                                                                                                                                                                                                                                                                                                                                                                                                                                                                                                                                                                                                                                                                                                                                                                                                                                                                                                                                                                                                                                                                                                                                 | Rwanda National Reference Laboratory                                                                                        | Rwanda National Reference Laboratory                                                                                                                                                            | Mukantwari Enatha,Stefan Rooke,Aine O'Toole ,Umuringa Jeanne d'Arc                                                                                                                                                                                                                                                                                         |                                                                                                                                                                      |
| EPI_ISL_626566                                                                                                                                                                                                                                                                                                                                                                                                                                                                                                                                                                                                                                                                                                                                                                                                                                                                                                                                                                                                                                                                                                                                 | National Centre for Communication Disease (NCCD) National Influenza Center                                                  | National Centre for Communication Disease (NCCD) National Influenza Center                                                                                                                      | Naranzul Ts,Darmaa B,Bayagsalan N,Ankhbayar S,Tsogbaatar B,Erden-Ochir Ts,Nymadawa P,Chang-Seon Song                                                                                                                                                                                                                                                       |                                                                                                                                                                      |
| EPI_ISL_626567, EPI_ISL_626568, EPI_ISL_626569                                                                                                                                                                                                                                                                                                                                                                                                                                                                                                                                                                                                                                                                                                                                                                                                                                                                                                                                                                                                                                                                                                 | National Centre for Communicable Disease (NCCD) National Influenza Center                                                   | National Centre for Communicable Disease (NCCD) National Influenza Center                                                                                                                       | Naranzul Ts,Darmaa B,Bayagsalan N,Ankhbayar S, Nyamkhuu D, Erden-Ochir Ts,Nymadawa P Chang-Seon Song                                                                                                                                                                                                                                                       |                                                                                                                                                                      |
| EPI_ISL_626570, EPI_ISL_626571, EPI_ISL_626572, EPI_ISL_626573, EPI_ISL_626574, EPI_ISL_626575, EPI_ISL_626576, EPI_ISL_626577, EPI_ISL_626578, EPI_ISL_626579, EPI_ISL_626580, EPI_ISL_626581, EPI_ISL_626582, EPI_ISL_626583, EPI_ISL_626584, EPI_ISL_626585, EPI_ISL_626586, EPI_ISL_626587, EPI_ISL_626588, EPI_ISL_626589, EPI_ISL_626590, EPI_ISL_626591, EPI_ISL_626592, EPI_ISL_626593, EPI_ISL_626594, EPI_ISL_626595, EPI_ISL_626596, EPI_ISL_626597, EPI_ISL_626598, EPI_ISL_626599, EPI_ISL_626600, EPI_ISL_626601, EPI_ISL_626602, EPI_ISL_626603, EPI_ISL_626604, EPI_ISL_626605, EPI_ISL_626606, EPI_ISL_626607, EPI_ISL_626608, EPI_ISL_626609, EPI_ISL_626610, EPI_ISL_626611, EPI_ISL_626612, EPI_ISL_626613, EPI_ISL_626614, EPI_ISL_626615, EPI_ISL_626616, EPI_ISL_626617, EPI_ISL_626618, EPI_ISL_626619, EPI_ISL_626620, EPI_ISL_626621, EPI_ISL_626622, EPI_ISL_626623, EPI_ISL_626624, EPI_ISL_626625                                                                                                                                                                                                                 | see above                                                                                                                   | The National Institute of Public Health                                                                                                                                                         | State Veterinary Institute Prague                                                                                                                                                                                                                                                                                                                          | Nagy,A;Jirincova,H;Novakova,L;Trnka,D;Vecerova,J                                                                                                                     |
| EPI_ISL_626626, EPI_ISL_626627                                                                                                                                                                                                                                                                                                                                                                                                                                                                                                                                                                                                                                                                                                                                                                                                                                                                                                                                                                                                                                                                                                                 | National Centre for Communicable Disease (NCCD) National Influenza Center                                                   | National Centre for Communicable Disease (NCCD) National Influenza Center                                                                                                                       | Naranzul Ts,Darmaa B,Bayagsalan N,Ankhbayar S, Nyamkhuu D, Erden-Ochir Ts,Nymadawa P Chang-Seon Song                                                                                                                                                                                                                                                       |                                                                                                                                                                      |
| EPI_ISL_632324, EPI_ISL_632334, EPI_ISL_632348, EPI_ISL_632351, EPI_ISL_632385, EPI_ISL_632429, EPI_ISL_632430, EPI_ISL_632434, EPI_ISL_632435, EPI_ISL_632436, EPI_ISL_632438, EPI_ISL_632439, EPI_ISL_632450, EPI_ISL_632451, EPI_ISL_632452, EPI_ISL_632453, EPI_ISL_632454, EPI_ISL_632455, EPI_ISL_632457, EPI_ISL_632458, EPI_ISL_632462, EPI_ISL_632463, EPI_ISL_632465, EPI_ISL_632466, EPI_ISL_632468, EPI_ISL_632470, EPI_ISL_632471, EPI_ISL_632472, EPI_ISL_632473, EPI_ISL_632474, EPI_ISL_632475, EPI_ISL_632476, EPI_ISL_632478, EPI_ISL_632483, EPI_ISL_632484, EPI_ISL_632486, EPI_ISL_632487, EPI_ISL_632488, EPI_ISL_632489, EPI_ISL_632491                                                                                                                                                                                                                                                                                                                                                                                                                                                                                 | see above                                                                                                                   | Dutch COVID-19 response team                                                                                                                                                                    | Erasmus Medical Center                                                                                                                                                                                                                                                                                                                                     | OH consortium                                                                                                                                                        |
| EPI_ISL_632934                                                                                                                                                                                                                                                                                                                                                                                                                                                                                                                                                                                                                                                                                                                                                                                                                                                                                                                                                                                                                                                                                                                                 | Department of Acute Infectious Diseases Control and Prevention,Yunnan Provincial Center for Disease Control and Prevention  | Department of Acute Infectious Diseases Control and Prevention,Yunnan Provincial Center for Disease Control and Prevention                                                                      | Meiling Zhang,Jienan Zhou,Senquan Jia,Xiaonan Zhao,Xiaoqing Fu                                                                                                                                                                                                                                                                                             |                                                                                                                                                                      |
| EPI_ISL_632935                                                                                                                                                                                                                                                                                                                                                                                                                                                                                                                                                                                                                                                                                                                                                                                                                                                                                                                                                                                                                                                                                                                                 | Department of Acute Infectious Diseases Control and Prevention, Yunnan Provincial Center for Disease Control and Prevention | Department of Acute Infectious Diseases Control and Prevention, Yunnan Provincial Center for Disease Control and Prevention                                                                     | Meiling Zhang, Jienan Zhou, Senquan Jia, Xiaonan Zhao, Xiaoqing Fu                                                                                                                                                                                                                                                                                         |                                                                                                                                                                      |
| EPI_ISL_634886, EPI_ISL_634887, EPI_ISL_634888, EPI_ISL_634889, EPI_ISL_634890, EPI_ISL_634891, EPI_ISL_634892, EPI_ISL_634893, EPI_ISL_634894, EPI_ISL_634895                                                                                                                                                                                                                                                                                                                                                                                                                                                                                                                                                                                                                                                                                                                                                                                                                                                                                                                                                                                 | Lab voor klinische biologie                                                                                                 | Onderzoeksgroep Virologie                                                                                                                                                                       | Nick Vereecke, Laurens Lambrechts, Marthe Pauwels, Bruno Verhasselt, Linos Vandekerckhove, Hans Nauwynck, Sebastiaan Theuns                                                                                                                                                                                                                                |                                                                                                                                                                      |



|                                                                                                                                                                                                                                                                                                                                                                                                                                                                                                                                                                                                                                                                                                                                                                                                                                                                                                                                                                                                                                                                                                                                                                                                                                                                                                                                                                                                                                                |           |                                                                                                                                                                                                 |                                                                                   |                                                                                                                                                                                                                                                                                                                                                                                                                                                                                                                                                                                                                                                                                                                                                  |
|------------------------------------------------------------------------------------------------------------------------------------------------------------------------------------------------------------------------------------------------------------------------------------------------------------------------------------------------------------------------------------------------------------------------------------------------------------------------------------------------------------------------------------------------------------------------------------------------------------------------------------------------------------------------------------------------------------------------------------------------------------------------------------------------------------------------------------------------------------------------------------------------------------------------------------------------------------------------------------------------------------------------------------------------------------------------------------------------------------------------------------------------------------------------------------------------------------------------------------------------------------------------------------------------------------------------------------------------------------------------------------------------------------------------------------------------|-----------|-------------------------------------------------------------------------------------------------------------------------------------------------------------------------------------------------|-----------------------------------------------------------------------------------|--------------------------------------------------------------------------------------------------------------------------------------------------------------------------------------------------------------------------------------------------------------------------------------------------------------------------------------------------------------------------------------------------------------------------------------------------------------------------------------------------------------------------------------------------------------------------------------------------------------------------------------------------------------------------------------------------------------------------------------------------|
| EPI_ISL_639825, EPI_ISL_639826, EPI_ISL_639827, EPI_ISL_639828, EPI_ISL_639829, EPI_ISL_639830, EPI_ISL_639831, EPI_ISL_639832, EPI_ISL_639833, EPI_ISL_639834, EPI_ISL_639835, EPI_ISL_639836, EPI_ISL_639837, EPI_ISL_639838, EPI_ISL_639839, EPI_ISL_639840, EPI_ISL_639841, EPI_ISL_639842, EPI_ISL_639843, EPI_ISL_639844, EPI_ISL_639845, EPI_ISL_639846, EPI_ISL_639847, EPI_ISL_639848, EPI_ISL_639849, EPI_ISL_639850, EPI_ISL_639851, EPI_ISL_639852, EPI_ISL_639853, EPI_ISL_639854, EPI_ISL_639855, EPI_ISL_639856, EPI_ISL_639857, EPI_ISL_639858, EPI_ISL_639859, EPI_ISL_639860, EPI_ISL_639861, EPI_ISL_639862, EPI_ISL_639863, EPI_ISL_639864, EPI_ISL_639865, EPI_ISL_639866, EPI_ISL_639867, EPI_ISL_639868, EPI_ISL_639869, EPI_ISL_639870, EPI_ISL_639871, EPI_ISL_639872, EPI_ISL_639873, EPI_ISL_639874, EPI_ISL_639875, EPI_ISL_639876, EPI_ISL_639877, EPI_ISL_639878, EPI_ISL_639879, EPI_ISL_639880, EPI_ISL_639881, EPI_ISL_639882, EPI_ISL_639883, EPI_ISL_639884, EPI_ISL_639885, EPI_ISL_639886, EPI_ISL_639887, EPI_ISL_639888, EPI_ISL_639889, EPI_ISL_639890, EPI_ISL_639891, EPI_ISL_639892, EPI_ISL_639893, EPI_ISL_639894, EPI_ISL_639895, EPI_ISL_639896, EPI_ISL_639897, EPI_ISL_639898, EPI_ISL_639899, EPI_ISL_639900, EPI_ISL_639901, EPI_ISL_639902, EPI_ISL_639903, EPI_ISL_639904, EPI_ISL_639905, EPI_ISL_639906, EPI_ISL_639907, EPI_ISL_639908, EPI_ISL_639909, EPI_ISL_639910                 | see above | National Virus Reference Laboratory                                                                                                                                                             | National Virus Reference Laboratory                                               | Michael Carr, Gabriel Gonzalez, Jonathan Dean, Daniel Hare, Cillian F De Gascun                                                                                                                                                                                                                                                                                                                                                                                                                                                                                                                                                                                                                                                                  |
| EPI_ISL_644209, EPI_ISL_644210, EPI_ISL_644211, EPI_ISL_644212, EPI_ISL_644213, EPI_ISL_644214, EPI_ISL_644215, EPI_ISL_644216, EPI_ISL_644217, EPI_ISL_644218, EPI_ISL_644219, EPI_ISL_644220, EPI_ISL_644221, EPI_ISL_644222, EPI_ISL_644223, EPI_ISL_644224, EPI_ISL_644225, EPI_ISL_644226, EPI_ISL_644227, EPI_ISL_644228                                                                                                                                                                                                                                                                                                                                                                                                                                                                                                                                                                                                                                                                                                                                                                                                                                                                                                                                                                                                                                                                                                                 | see above | Environmental and Global Health, University of Florida                                                                                                                                          | Environmental and Global Health, University of Florida                            | Nannu-Shankar,S., Witanachchi,C.T., Alam,M.M., Loeb,J.C., Stephenson,C.J., Fan,Z.H., Wu,C.-Y., Lednický,J.A.                                                                                                                                                                                                                                                                                                                                                                                                                                                                                                                                                                                                                                     |
| EPI_ISL_644229, EPI_ISL_644230                                                                                                                                                                                                                                                                                                                                                                                                                                                                                                                                                                                                                                                                                                                                                                                                                                                                                                                                                                                                                                                                                                                                                                                                                                                                                                                                                                                                                 | see above | CEPHR / Vincent's Hospital                                                                                                                                                                      | Irish Coronavirus Sequencing Consortium - National Virus Reference Laboratory     | Michael Carr, Gabriel Gonzalez, Alejandro Abner Garcia Leon, Patrick Mallon                                                                                                                                                                                                                                                                                                                                                                                                                                                                                                                                                                                                                                                                      |
| EPI_ISL_644231, EPI_ISL_644232, EPI_ISL_644233, EPI_ISL_644234, EPI_ISL_644235, EPI_ISL_644236, EPI_ISL_644237, EPI_ISL_644238, EPI_ISL_644239, EPI_ISL_644240, EPI_ISL_644241, EPI_ISL_644242, EPI_ISL_644243, EPI_ISL_644244, EPI_ISL_644245, EPI_ISL_644246, EPI_ISL_644247, EPI_ISL_644248, EPI_ISL_644249                                                                                                                                                                                                                                                                                                                                                                                                                                                                                                                                                                                                                                                                                                                                                                                                                                                                                                                                                                                                                                                                                                                                 | see above | CEPHR / Mater Hospital                                                                                                                                                                          | Irish Coronavirus Sequencing Consortium - National Virus Reference Laboratory     | Michael Carr, Gabriel Gonzalez, Alejandro Abner Garcia Leon, Patrick Mallon                                                                                                                                                                                                                                                                                                                                                                                                                                                                                                                                                                                                                                                                      |
| EPI_ISL_644250, EPI_ISL_644251, EPI_ISL_644252, EPI_ISL_644253, EPI_ISL_644254                                                                                                                                                                                                                                                                                                                                                                                                                                                                                                                                                                                                                                                                                                                                                                                                                                                                                                                                                                                                                                                                                                                                                                                                                                                                                                                                                                 | see above | CEPHR / Vincent's Hospital                                                                                                                                                                      | Irish Coronavirus Sequencing Consortium - National Virus Reference Laboratory     | Michael Carr, Gabriel Gonzalez, Alejandro Abner Garcia Leon, Patrick Mallon                                                                                                                                                                                                                                                                                                                                                                                                                                                                                                                                                                                                                                                                      |
| EPI_ISL_644255                                                                                                                                                                                                                                                                                                                                                                                                                                                                                                                                                                                                                                                                                                                                                                                                                                                                                                                                                                                                                                                                                                                                                                                                                                                                                                                                                                                                                                 | see above | CEPHR / Mater Hospital                                                                                                                                                                          | Irish Coronavirus Sequencing Consortium - National Virus Reference Laboratory     | Michael Carr, Gabriel Gonzalez, Alejandro Abner Garcia Leon, Patrick Mallon                                                                                                                                                                                                                                                                                                                                                                                                                                                                                                                                                                                                                                                                      |
| EPI_ISL_644256                                                                                                                                                                                                                                                                                                                                                                                                                                                                                                                                                                                                                                                                                                                                                                                                                                                                                                                                                                                                                                                                                                                                                                                                                                                                                                                                                                                                                                 | see above | CEPHR / Vincent's Hospital                                                                                                                                                                      | Irish Coronavirus Sequencing Consortium - National Virus Reference Laboratory     | Michael Carr, Gabriel Gonzalez, Alejandro Abner Garcia Leon, Patrick Mallon                                                                                                                                                                                                                                                                                                                                                                                                                                                                                                                                                                                                                                                                      |
| EPI_ISL_644257                                                                                                                                                                                                                                                                                                                                                                                                                                                                                                                                                                                                                                                                                                                                                                                                                                                                                                                                                                                                                                                                                                                                                                                                                                                                                                                                                                                                                                 | see above | CEPHR / Mater Hospital                                                                                                                                                                          | Irish Coronavirus Sequencing Consortium - National Virus Reference Laboratory     | Michael Carr, Gabriel Gonzalez, Alejandro Abner Garcia Leon, Patrick Mallon                                                                                                                                                                                                                                                                                                                                                                                                                                                                                                                                                                                                                                                                      |
| EPI_ISL_644258                                                                                                                                                                                                                                                                                                                                                                                                                                                                                                                                                                                                                                                                                                                                                                                                                                                                                                                                                                                                                                                                                                                                                                                                                                                                                                                                                                                                                                 | see above | CEPHR / Vincent's Hospital                                                                                                                                                                      | Irish Coronavirus Sequencing Consortium - National Virus Reference Laboratory     | Michael Carr, Gabriel Gonzalez, Alejandro Abner Garcia Leon, Patrick Mallon                                                                                                                                                                                                                                                                                                                                                                                                                                                                                                                                                                                                                                                                      |
| EPI_ISL_644259, EPI_ISL_644260, EPI_ISL_644261, EPI_ISL_644262, EPI_ISL_644263, EPI_ISL_644264, EPI_ISL_644265, EPI_ISL_644266, EPI_ISL_644267, EPI_ISL_644268, EPI_ISL_644269, EPI_ISL_644270, EPI_ISL_644271, EPI_ISL_644272, EPI_ISL_644273, EPI_ISL_644274, EPI_ISL_644275, EPI_ISL_644276, EPI_ISL_644277, EPI_ISL_644278, EPI_ISL_644279, EPI_ISL_644280, EPI_ISL_644281, EPI_ISL_644282, EPI_ISL_644283, EPI_ISL_644284, EPI_ISL_644285, EPI_ISL_644286, EPI_ISL_644287, EPI_ISL_644288, EPI_ISL_644289, EPI_ISL_644290, EPI_ISL_644291, EPI_ISL_644292, EPI_ISL_644293, EPI_ISL_644294, EPI_ISL_644295, EPI_ISL_644296, EPI_ISL_644297, EPI_ISL_644298, EPI_ISL_644299, EPI_ISL_644300, EPI_ISL_644301, EPI_ISL_644302, EPI_ISL_644303, EPI_ISL_644304, EPI_ISL_644305, EPI_ISL_644306, EPI_ISL_644307, EPI_ISL_644308, EPI_ISL_644309, EPI_ISL_644310, EPI_ISL_644311, EPI_ISL_644312, EPI_ISL_644313, EPI_ISL_644314, EPI_ISL_644315, EPI_ISL_644316, EPI_ISL_644317, EPI_ISL_644318, EPI_ISL_644319, EPI_ISL_644320, EPI_ISL_644321, EPI_ISL_644322, EPI_ISL_644323, EPI_ISL_644324, EPI_ISL_644325, EPI_ISL_644326, EPI_ISL_644327, EPI_ISL_644328, EPI_ISL_644329, EPI_ISL_644330, EPI_ISL_644331, EPI_ISL_644332, EPI_ISL_644333, EPI_ISL_644334, EPI_ISL_644335, EPI_ISL_644336, EPI_ISL_644337, EPI_ISL_644338, EPI_ISL_644339, EPI_ISL_644340, EPI_ISL_644341, EPI_ISL_644342, EPI_ISL_644343, EPI_ISL_644344, EPI_ISL_644345 | see above | CEPHR / Vincent's Hospital                                                                                                                                                                      | Irish Coronavirus Sequencing Consortium - National Virus Reference Laboratory     | Michael Carr, Gabriel Gonzalez, Alejandro Abner Garcia Leon, Patrick Mallon                                                                                                                                                                                                                                                                                                                                                                                                                                                                                                                                                                                                                                                                      |
| EPI_ISL_649060, EPI_ISL_649061, EPI_ISL_649062, EPI_ISL_649063, EPI_ISL_649064, EPI_ISL_649065, EPI_ISL_649066, EPI_ISL_649067, EPI_ISL_649068, EPI_ISL_649069, EPI_ISL_649070, EPI_ISL_649071, EPI_ISL_649072, EPI_ISL_649073, EPI_ISL_649074, EPI_ISL_649075, EPI_ISL_649076, EPI_ISL_649077, EPI_ISL_649078, EPI_ISL_649079, EPI_ISL_649080, EPI_ISL_649081, EPI_ISL_649082, EPI_ISL_649083, EPI_ISL_649084, EPI_ISL_649085, EPI_ISL_649086, EPI_ISL_649087, EPI_ISL_649088, EPI_ISL_649089, EPI_ISL_649090, EPI_ISL_649091, EPI_ISL_649092, EPI_ISL_649093, EPI_ISL_649094, EPI_ISL_649095, EPI_ISL_649096, EPI_ISL_649097, EPI_ISL_649098, EPI_ISL_649099, EPI_ISL_649100, EPI_ISL_649101, EPI_ISL_649102, EPI_ISL_649103, EPI_ISL_649104, EPI_ISL_649105, EPI_ISL_649106, EPI_ISL_649107                                                                                                                                                                                                                                                                                                                                                                                                                                                                                                                                                                                                                                                 | see above | National Virus Reference Laboratory                                                                                                                                                             | National Virus Reference Laboratory                                               | Michael Carr, Gabriel Gonzalez, Jonathan Dean, Daniel Hare, Cillian F De Gascun                                                                                                                                                                                                                                                                                                                                                                                                                                                                                                                                                                                                                                                                  |
| EPI_ISL_649153                                                                                                                                                                                                                                                                                                                                                                                                                                                                                                                                                                                                                                                                                                                                                                                                                                                                                                                                                                                                                                                                                                                                                                                                                                                                                                                                                                                                                                 | see above | Israel Central Virology laboratory                                                                                                                                                              | Israel Central Virology laboratory                                                | Neta Zuckerman, Efrat Dahan Bucris, Oran Erster, Ella Mendelson, Michal Mandelboim                                                                                                                                                                                                                                                                                                                                                                                                                                                                                                                                                                                                                                                               |
| EPI_ISL_650179, EPI_ISL_650264, EPI_ISL_650280, EPI_ISL_650301, EPI_ISL_650303, EPI_ISL_650304, EPI_ISL_650308, EPI_ISL_650439, EPI_ISL_650456, EPI_ISL_650478, EPI_ISL_650618, EPI_ISL_650757, EPI_ISL_650777, EPI_ISL_650779, EPI_ISL_650780, EPI_ISL_650781, EPI_ISL_650794, EPI_ISL_650797, EPI_ISL_650815, EPI_ISL_650819, EPI_ISL_650832, EPI_ISL_651120, EPI_ISL_651141, EPI_ISL_651228, EPI_ISL_651229, EPI_ISL_651301, EPI_ISL_651366, EPI_ISL_651385, EPI_ISL_651395, EPI_ISL_651426, EPI_ISL_651427, EPI_ISL_651521, EPI_ISL_651957, EPI_ISL_651959, EPI_ISL_651961, EPI_ISL_651967, EPI_ISL_651968, EPI_ISL_651970, EPI_ISL_651971, EPI_ISL_651982, EPI_ISL_651995, EPI_ISL_651996, EPI_ISL_651997, EPI_ISL_651999, EPI_ISL_652001, EPI_ISL_652004, EPI_ISL_652009, EPI_ISL_652011, EPI_ISL_652016, EPI_ISL_652018, EPI_ISL_652019, EPI_ISL_652031, EPI_ISL_652036, EPI_ISL_652041, EPI_ISL_652050, EPI_ISL_652051, EPI_ISL_652054, EPI_ISL_652062, EPI_ISL_652065, EPI_ISL_652066                                                                                                                                                                                                                                                                                                                                                                                                                                                 | see above | Al-Quds Nutrition and Health Research Institute, Al-Quds University                                                                                                                             | Al-Quds Nutrition and Health Research Institute, Al-Quds University               | Nasereddin,A., Ereqat,S. and Al-Jawabreh,A.                                                                                                                                                                                                                                                                                                                                                                                                                                                                                                                                                                                                                                                                                                      |
| EPI_ISL_654874                                                                                                                                                                                                                                                                                                                                                                                                                                                                                                                                                                                                                                                                                                                                                                                                                                                                                                                                                                                                                                                                                                                                                                                                                                                                                                                                                                                                                                 | see above | Virology Department, Royal Infirmary of Edinburgh, NHS Lothian / School of Biological Sciences, University of Edinburgh / Institute of Genetics and Molecular Medicine, University of Edinburgh | COVID-19 Genomics UK (COG-UK) Consortium                                          | McHugh M, Dewar R, Rooke S, Gallagher M, Balcaza C, O'Toole Á, Scher E, Hill V, McCrone JT, Colquhoun R, Yu X, Jackson B, Rambaut A, Williams TC, Templeton K                                                                                                                                                                                                                                                                                                                                                                                                                                                                                                                                                                                    |
| EPI_ISL_654880                                                                                                                                                                                                                                                                                                                                                                                                                                                                                                                                                                                                                                                                                                                                                                                                                                                                                                                                                                                                                                                                                                                                                                                                                                                                                                                                                                                                                                 | see above | Pasteur Institute in Ho Chi Minh city                                                                                                                                                           | Department of Microbiology and Immunology - Pasteur Institute in Ho Chi Minh city | Nguyen Th Ngc Tho, V Phm Hng Nhung, ào Huy Mnh, Phm Th Thu Hng, Cao Minh Thng, Hnh Th Kim Loan, Nguyen Hoàng Quân, Hnh Phng Tho, Hoàng Nh ào, Trn Tôn, Nguyen Hoàng Anh, Nguyen Thu Ngc, Phm Th Nhung, ng Thanh Giang, Nguyn Th Thanh Thng, Hoàng Minh, Trn Th Hng Kim, Nguyen Thanh Long, Phm Duy Quang, Lng Chn Quang, Hoàng Quc Cng, Phan Trng Lân, Nguyen V Thng                                                                                                                                                                                                                                                                                                                                                                             |
| EPI_ISL_654883                                                                                                                                                                                                                                                                                                                                                                                                                                                                                                                                                                                                                                                                                                                                                                                                                                                                                                                                                                                                                                                                                                                                                                                                                                                                                                                                                                                                                                 | see above | Pasteur Institute in Ho Chi Minh city                                                                                                                                                           | Department of Microbiology and Immunology - Pasteur Institute in Ho Chi Minh city | Nguyen Thu Ngc, Lng Chn Quang, ào Huy Mnh, Phm Th Thu Hng, V Phm Hng Nhung, Cao Minh Thng, Hnh Th Kim Loan, Nguyen Hoàng Quân, Hnh Phng Tho, Hoàng Nh ào, Nguyen Trung Hiu, Nguyen Hoàng Anh, Phm Th Nhung, Nguyen Th Ngc Tho, ng Thanh Giang, Nguyen Th Thanh Thng, oàn Ngc Minh Quân, Trn Th Hng Kim, Nguyen Thanh Long, Phm Duy Quang, Hoàng Quc Cng, Phan Trng Lân, Nguyen V Thng                                                                                                                                                                                                                                                                                                                                                            |
| EPI_ISL_654884                                                                                                                                                                                                                                                                                                                                                                                                                                                                                                                                                                                                                                                                                                                                                                                                                                                                                                                                                                                                                                                                                                                                                                                                                                                                                                                                                                                                                                 | see above | Pasteur Institute in Ho Chi Minh city                                                                                                                                                           | Department of Microbiology and Immunology - Pasteur Institute in Ho Chi Minh city | Nguyen Thanh Long, ào Huy Mnh, Phm Th Thu Hng, V Phm Hng Nhung, Cao Minh Thng, Hnh Th Kim Loan, Nguyen Hoàng Quân, Hnh Phng Tho, Hoàng Nh ào, Nguyen Trung Hiu, Nguyen Hoàng Anh, Nguyen Thu Ngc, Lê Hoàng Chng, Nguyen Th Ngc Tho, ng Thanh Giang, Nguyen Th Thanh Thng, Hoàng Minh, Trn Th Hng Kim, Phm Duy Quang, Lng Chn Quang, Hoàng Quc Cng, Phan Trng Lân, Nguyen V Thng, ào Huy Mnh, Phm Th Thu Hng, V Phm Hng Nhung, Cao Minh Thng, Hnh Th Kim Loan, Nguyen Hoàng Quân, Hnh Phng Tho, Hoàng Nh ào, Nguyen Trung Hiu, Nguyen Hoàng Anh, Nguyen Thu Ngc, Phm Th Nhung, Nguyen Th Ngc Tho, ng Thanh Giang, Nguyen Th Thanh Thng, Hoàng Minh, Trn Th Hng Kim, Nguyen Thanh Long, Phm Duy Quang, Lng Chn Quang, Hoàng Quc Cng, Phan Trng Lân |
| EPI_ISL_654885                                                                                                                                                                                                                                                                                                                                                                                                                                                                                                                                                                                                                                                                                                                                                                                                                                                                                                                                                                                                                                                                                                                                                                                                                                                                                                                                                                                                                                 | see above | Pasteur Institute in Ho Chi Minh city                                                                                                                                                           | Department of Microbiology and Immunology - Pasteur Institute in Ho Chi Minh city | Nguyen V Thng, ào Huy Mnh, Phm Th Thu Hng, V Phm Hng Nhung, Cao Minh Thng, Hnh Th Kim Loan, Nguyen Hoàng Quân, Hnh Phng Tho, Hoàng Nh ào, Nguyen Trung Hiu, Nguyen Hoàng Anh, Nguyen Thu Ngc, Phm Th Nhung, Nguyen Th Ngc Tho, ng Thanh Giang, Nguyen Th Thanh Thng, Hoàng Minh, Trn Th Hng Kim, Nguyen Thanh Long, Phm Duy Quang, Lng Chn Quang, Hoàng Quc Cng, Phan Trng Lân                                                                                                                                                                                                                                                                                                                                                                   |
| EPI_ISL_654888                                                                                                                                                                                                                                                                                                                                                                                                                                                                                                                                                                                                                                                                                                                                                                                                                                                                                                                                                                                                                                                                                                                                                                                                                                                                                                                                                                                                                                 | see above | Pasteur Institute in Ho Chi Minh city                                                                                                                                                           | Department of Microbiology and Immunology - Pasteur Institute in Ho Chi Minh city | Nguyen V Thng, ào Huy Mnh, Phm Th Thu Hng, V Phm Hng Nhung, Cao Minh Thng, Hnh Th Kim Loan, Nguyen Hoàng Quân, Hnh Phng Tho, Hoàng Nh ào, Nguyen Trung Hiu, Nguyen Hoàng Anh, Nguyen Thu Ngc, Phm Th Nhung, Nguyen Th Ngc Tho, ng Thanh Giang, Nguyen Th Thanh Thng, Hoàng Minh, Trn Th Hng Kim, Nguyen Thanh Long, Phm Duy Quang, Lng Chn Quang, Hoàng Quc Cng, Phan Trng Lân                                                                                                                                                                                                                                                                                                                                                                   |
| EPI_ISL_660109, EPI_ISL_660110                                                                                                                                                                                                                                                                                                                                                                                                                                                                                                                                                                                                                                                                                                                                                                                                                                                                                                                                                                                                                                                                                                                                                                                                                                                                                                                                                                                                                 | see above | Division of Infectious Diseases, Department of Internal Medicine, Yonsei University College of Medicine                                                                                         | Department of biotechnology, Yonsei University                                    | Minwoo Kim, Youn-Jung Lee, Jae sun Yoon, Jin Young Ahn, Jung Ho Kim, Jun Yong Choi*, and Jong-Won Oh*                                                                                                                                                                                                                                                                                                                                                                                                                                                                                                                                                                                                                                            |
| EPI_ISL_660553, EPI_ISL_660554, EPI_ISL_660555, EPI_ISL_660556, EPI_ISL_660557, EPI_ISL_660558, EPI_ISL_660559, EPI_ISL_660560, EPI_ISL_660561, EPI_ISL_660562, EPI_ISL_660563, EPI_ISL_660564, EPI_ISL_660565, EPI_ISL_660566, EPI_ISL_660567, EPI_ISL_660568, EPI_ISL_660569, EPI_ISL_660570, EPI_ISL_660571, EPI_ISL_660572, EPI_ISL_660573, EPI_ISL_660574, EPI_ISL_660575, EPI_ISL_660576, EPI_ISL_660577, EPI_ISL_660578, EPI_ISL_660579, EPI_ISL_660580, EPI_ISL_660581, EPI_ISL_660582, EPI_ISL_660583, EPI_ISL_660584, EPI_ISL_660585, EPI_ISL_660586, EPI_ISL_660587, EPI_ISL_660588, EPI_ISL_660589, EPI_ISL_660590, EPI_ISL_660591, EPI_ISL_660592, EPI_ISL_660593, EPI_ISL_660594, EPI_ISL_660595, EPI_ISL_660596, EPI_ISL_660597, EPI_ISL_660598, EPI_ISL_660599                                                                                                                                                                                                                                                                                                                                                                                                                                                                                                                                                                                                                                                                 | see above | see above                                                                                                                                                                                       | see above                                                                         | see above                                                                                                                                                                                                                                                                                                                                                                                                                                                                                                                                                                                                                                                                                                                                        |

|                                                                                                                                                                                                                                                                                                                                                                                                                                                                                                                                                                                                                                                                                                                                                                                                                                                                                                                                                                                                                                                                                                                                                                                                                                                                                                                                                                                                                                                                                                                                                                                                                                                                                                                                                |                                                                                                                                                                                                 |                                                                                 |                                                                                                                                                                                                                                                                   |
|------------------------------------------------------------------------------------------------------------------------------------------------------------------------------------------------------------------------------------------------------------------------------------------------------------------------------------------------------------------------------------------------------------------------------------------------------------------------------------------------------------------------------------------------------------------------------------------------------------------------------------------------------------------------------------------------------------------------------------------------------------------------------------------------------------------------------------------------------------------------------------------------------------------------------------------------------------------------------------------------------------------------------------------------------------------------------------------------------------------------------------------------------------------------------------------------------------------------------------------------------------------------------------------------------------------------------------------------------------------------------------------------------------------------------------------------------------------------------------------------------------------------------------------------------------------------------------------------------------------------------------------------------------------------------------------------------------------------------------------------|-------------------------------------------------------------------------------------------------------------------------------------------------------------------------------------------------|---------------------------------------------------------------------------------|-------------------------------------------------------------------------------------------------------------------------------------------------------------------------------------------------------------------------------------------------------------------|
| see above                                                                                                                                                                                                                                                                                                                                                                                                                                                                                                                                                                                                                                                                                                                                                                                                                                                                                                                                                                                                                                                                                                                                                                                                                                                                                                                                                                                                                                                                                                                                                                                                                                                                                                                                      | The National Institute of Public Health                                                                                                                                                         | State Veterinary Institute Prague                                               | Nagy,A;Jirincova,H;Novakova,L;Trnka,D;Vecerova,J                                                                                                                                                                                                                  |
| EPI_ISL_665553, EPI_ISL_665646, EPI_ISL_665791, EPI_ISL_666062, EPI_ISL_666065, EPI_ISL_666066, EPI_ISL_666068, EPI_ISL_666074, EPI_ISL_666075, EPI_ISL_666077, EPI_ISL_666080                                                                                                                                                                                                                                                                                                                                                                                                                                                                                                                                                                                                                                                                                                                                                                                                                                                                                                                                                                                                                                                                                                                                                                                                                                                                                                                                                                                                                                                                                                                                                                 |                                                                                                                                                                                                 |                                                                                 |                                                                                                                                                                                                                                                                   |
| see above                                                                                                                                                                                                                                                                                                                                                                                                                                                                                                                                                                                                                                                                                                                                                                                                                                                                                                                                                                                                                                                                                                                                                                                                                                                                                                                                                                                                                                                                                                                                                                                                                                                                                                                                      | Virology Department, Royal Infirmary of Edinburgh, NHS Lothian / School of Biological Sciences, University of Edinburgh / Institute of Genetics and Molecular Medicine, University of Edinburgh | COVID-19 Genomics UK (COG-UK) Consortium                                        | McHugh M, Dewar R, Rooke S, Gallagher M, Balcaza C, O'Toole Á, Scher E, Hill V, McCrone JT, Colquhoun R, Yu X, Jackson B, Rambaut A, Williams TC, Templeton K                                                                                                     |
| EPI_ISL_666870                                                                                                                                                                                                                                                                                                                                                                                                                                                                                                                                                                                                                                                                                                                                                                                                                                                                                                                                                                                                                                                                                                                                                                                                                                                                                                                                                                                                                                                                                                                                                                                                                                                                                                                                 | Laboratoire de Virologie, CHU de Caen, Normandie, France.                                                                                                                                       | GRAM2.0, Université de Caen Normandie                                           | Meriadeg LE GOUIL, Januel VOUTEAU, Juliette ECHE, Estelle LEPERCHOIS, Astrid VABRET                                                                                                                                                                               |
| EPI_ISL_671864, EPI_ISL_671865, EPI_ISL_671866, EPI_ISL_671867, EPI_ISL_671868, EPI_ISL_671869, EPI_ISL_671870, EPI_ISL_671871, EPI_ISL_671872, EPI_ISL_671873, EPI_ISL_671874, EPI_ISL_671875, EPI_ISL_671876, EPI_ISL_671877, EPI_ISL_671878, EPI_ISL_671879, EPI_ISL_671880, EPI_ISL_671881, EPI_ISL_671882, EPI_ISL_671883, EPI_ISL_671884, EPI_ISL_671885, EPI_ISL_671886, EPI_ISL_671887, EPI_ISL_671888, EPI_ISL_671889, EPI_ISL_671890, EPI_ISL_671891, EPI_ISL_671892, EPI_ISL_671893, EPI_ISL_671894, EPI_ISL_671895, EPI_ISL_671896, EPI_ISL_671897, EPI_ISL_671898, EPI_ISL_671899, EPI_ISL_671900, EPI_ISL_671901, EPI_ISL_671902, EPI_ISL_671903, EPI_ISL_671904, EPI_ISL_671905, EPI_ISL_671906, EPI_ISL_671907, EPI_ISL_671908, EPI_ISL_671909, EPI_ISL_671910, EPI_ISL_671911, EPI_ISL_671912, EPI_ISL_671913, EPI_ISL_671914, EPI_ISL_671915, EPI_ISL_671916, EPI_ISL_671917, EPI_ISL_671918, EPI_ISL_671919, EPI_ISL_671920, EPI_ISL_671921, EPI_ISL_671922, EPI_ISL_671923, EPI_ISL_671924, EPI_ISL_671925, EPI_ISL_671926, EPI_ISL_671927, EPI_ISL_671928, EPI_ISL_671929, EPI_ISL_671930, EPI_ISL_671931, EPI_ISL_671932, EPI_ISL_671933, EPI_ISL_671934, EPI_ISL_671935, EPI_ISL_671936, EPI_ISL_671937, EPI_ISL_671938, EPI_ISL_671939, EPI_ISL_671940                                                                                                                                                                                                                                                                                                                                                                                                                                                                 |                                                                                                                                                                                                 |                                                                                 |                                                                                                                                                                                                                                                                   |
| see above                                                                                                                                                                                                                                                                                                                                                                                                                                                                                                                                                                                                                                                                                                                                                                                                                                                                                                                                                                                                                                                                                                                                                                                                                                                                                                                                                                                                                                                                                                                                                                                                                                                                                                                                      | National Virus Reference Laboratory                                                                                                                                                             | National Virus Reference Laboratory                                             | Michael Carr, Gabriel Gonzalez, Jonathan Dean, Daniel Hare, Cillian F De Gascun                                                                                                                                                                                   |
| EPI_ISL_676652, EPI_ISL_676659, EPI_ISL_676661, EPI_ISL_676663, EPI_ISL_676665, EPI_ISL_676668, EPI_ISL_676673, EPI_ISL_676680, EPI_ISL_676709, EPI_ISL_676713, EPI_ISL_676726, EPI_ISL_676995, EPI_ISL_676996, EPI_ISL_676997, EPI_ISL_676998, EPI_ISL_676999, EPI_ISL_677000, EPI_ISL_677001, EPI_ISL_677002, EPI_ISL_677003, EPI_ISL_677004, EPI_ISL_677005, EPI_ISL_677006, EPI_ISL_677007, EPI_ISL_677008, EPI_ISL_677009, EPI_ISL_677010, EPI_ISL_677011, EPI_ISL_677012, EPI_ISL_677013, EPI_ISL_677014, EPI_ISL_677015, EPI_ISL_677016, EPI_ISL_677017, EPI_ISL_677018, EPI_ISL_677019, EPI_ISL_677020, EPI_ISL_677021, EPI_ISL_677022, EPI_ISL_677023, EPI_ISL_677024, EPI_ISL_677025, EPI_ISL_677026, EPI_ISL_677027, EPI_ISL_677028, EPI_ISL_677029, EPI_ISL_677030, EPI_ISL_677031, EPI_ISL_677032, EPI_ISL_677033, EPI_ISL_677034, EPI_ISL_677035, EPI_ISL_677036, EPI_ISL_677037, EPI_ISL_677038, EPI_ISL_677039, EPI_ISL_677040, EPI_ISL_677041, EPI_ISL_677042, EPI_ISL_677043, EPI_ISL_677044, EPI_ISL_677045, EPI_ISL_677046, EPI_ISL_677047, EPI_ISL_677048, EPI_ISL_677049, EPI_ISL_677050, EPI_ISL_677051, EPI_ISL_677052, EPI_ISL_677053, EPI_ISL_677054, EPI_ISL_677055, EPI_ISL_677056, EPI_ISL_677057, EPI_ISL_677058, EPI_ISL_677059, EPI_ISL_677060, EPI_ISL_677061, EPI_ISL_677062, EPI_ISL_677063, EPI_ISL_677064, EPI_ISL_677065, EPI_ISL_677066, EPI_ISL_677067, EPI_ISL_677068, EPI_ISL_677069, EPI_ISL_677070, EPI_ISL_677071, EPI_ISL_677072, EPI_ISL_677073, EPI_ISL_677074, EPI_ISL_677075, EPI_ISL_677076, EPI_ISL_677077, EPI_ISL_677078, EPI_ISL_677079, EPI_ISL_677102, EPI_ISL_677125, EPI_ISL_677126, EPI_ISL_677127, EPI_ISL_677128, EPI_ISL_677129, EPI_ISL_677129, EPI_ISL_677669, EPI_ISL_677672 |                                                                                                                                                                                                 |                                                                                 |                                                                                                                                                                                                                                                                   |
| see above                                                                                                                                                                                                                                                                                                                                                                                                                                                                                                                                                                                                                                                                                                                                                                                                                                                                                                                                                                                                                                                                                                                                                                                                                                                                                                                                                                                                                                                                                                                                                                                                                                                                                                                                      | Masonic Medical Research Institute                                                                                                                                                              | Wadsworth Center, New York State Department of Health                           | Nathan Tucker, Kirsten St. George, Daryl M. Lamson, Alexis Russel, Jonathan Plitnick, Navjot Singh, John Kelly, Sara Griesemer, Erasmus Schneider, Erica Lasek-Nesselquist                                                                                        |
| EPI_ISL_677911, EPI_ISL_677914                                                                                                                                                                                                                                                                                                                                                                                                                                                                                                                                                                                                                                                                                                                                                                                                                                                                                                                                                                                                                                                                                                                                                                                                                                                                                                                                                                                                                                                                                                                                                                                                                                                                                                                 | Pathogen Genomics Lab King Abdullah University of Science and Technology(KAUST)                                                                                                                 | Pathogen Genomics Lab King Abdullah University of Science and Technology(KAUST) | Muhammad Shuaib, Raaeece Naeem, Sara Mfarrej, Raushan Nugmanova, Olga Douvropoulou, Luke Esau, Amanda Ooi, Sharif Hala, Afrah Alsomali, Asim Khogeer, Fadwa Alofi, Jumana Taha, Abdulaziz Alahmadi, Kahled Alqithami, Anwar Hashem, Naif Almontashiri, Arnab Pain |
| EPI_ISL_677922                                                                                                                                                                                                                                                                                                                                                                                                                                                                                                                                                                                                                                                                                                                                                                                                                                                                                                                                                                                                                                                                                                                                                                                                                                                                                                                                                                                                                                                                                                                                                                                                                                                                                                                                 | Pathogen Genomics Lab King Abdullah University of Science and Technology(KAUST)                                                                                                                 | Pathogen Genomics Lab King Abdullah University of Science and Technology(KAUST) | Muhammad Shuaib, Raaeece Naeem, Raushan Nugmanova, Olga Douvropoulou, Sharif Hala, Sara Mfarrej, Afrah Alsomali, Asim Khogeer, Fadwa Alofi, Jumana Taha, Abdulaziz Alahmadi, Kahled Alqithami, Anwar Hashem, Naif Almontashiri, Arnab Pain                        |
| EPI_ISL_677923                                                                                                                                                                                                                                                                                                                                                                                                                                                                                                                                                                                                                                                                                                                                                                                                                                                                                                                                                                                                                                                                                                                                                                                                                                                                                                                                                                                                                                                                                                                                                                                                                                                                                                                                 | Pathogen Genomics Lab King Abdullah University of Science and Technology(KAUST)                                                                                                                 | Pathogen Genomics Lab King Abdullah University of Science and Technology(KAUST) | Muhammad Shuaib, Sharif Hala, Sara Mfarrej, Luke Esau, Amanda Ooi, Raaeece Naeem, Afrah Alsomali, Asim Khogeer, Fadwa Alofi, Jumana Taha, Abdulaziz Alahmadi, Kahled Alqithami, Anwar Hashem, Naif Almontashiri, Arnab Pain                                       |
| EPI_ISL_677924                                                                                                                                                                                                                                                                                                                                                                                                                                                                                                                                                                                                                                                                                                                                                                                                                                                                                                                                                                                                                                                                                                                                                                                                                                                                                                                                                                                                                                                                                                                                                                                                                                                                                                                                 | Pathogen Genomics Lab King Abdullah University of Science and Technology(KAUST)                                                                                                                 | Pathogen Genomics Lab King Abdullah University of Science and Technology(KAUST) | Muhammad Shuaib, Raaeece Naeem, Sara Mfarrej, Raushan Nugmanova, Olga Douvropoulou, Luke Esau, Amanda Ooi, Sharif Hala, Afrah Alsomali, Asim Khogeer, Fadwa Alofi, Jumana Taha, Abdulaziz Alahmadi, Kahled Alqithami, Anwar Hashem, Naif Almontashiri, Arnab Pain |
| EPI_ISL_677925, EPI_ISL_677926                                                                                                                                                                                                                                                                                                                                                                                                                                                                                                                                                                                                                                                                                                                                                                                                                                                                                                                                                                                                                                                                                                                                                                                                                                                                                                                                                                                                                                                                                                                                                                                                                                                                                                                 | Pathogen Genomics Lab King Abdullah University of Science and Technology(KAUST)                                                                                                                 | Pathogen Genomics Lab King Abdullah University of Science and Technology(KAUST) | Muhammad Shuaib, Sharif Hala, Sara Mfarrej, Luke Esau, Amanda Ooi, Raaeece Naeem, Afrah Alsomali, Asim Khogeer, Fadwa Alofi, Jumana Taha, Abdulaziz Alahmadi, Kahled Alqithami, Anwar Hashem, Naif Almontashiri, Arnab Pain                                       |
| EPI_ISL_677927                                                                                                                                                                                                                                                                                                                                                                                                                                                                                                                                                                                                                                                                                                                                                                                                                                                                                                                                                                                                                                                                                                                                                                                                                                                                                                                                                                                                                                                                                                                                                                                                                                                                                                                                 | Pathogen Genomics Lab King Abdullah University of Science and Technology(KAUST)                                                                                                                 | Pathogen Genomics Lab King Abdullah University of Science and Technology(KAUST) | Muhammad Shuaib, Raaeece Naeem, Raushan Nugmanova, Olga Douvropoulou, Sharif Hala, Sara Mfarrej, Afrah Alsomali, Asim Khogeer, Fadwa Alofi, Jumana Taha, Abdulaziz Alahmadi, Kahled Alqithami, Anwar Hashem, Naif Almontashiri, Arnab Pain                        |
| EPI_ISL_677949                                                                                                                                                                                                                                                                                                                                                                                                                                                                                                                                                                                                                                                                                                                                                                                                                                                                                                                                                                                                                                                                                                                                                                                                                                                                                                                                                                                                                                                                                                                                                                                                                                                                                                                                 | Pathogen Genomics Lab King Abdullah University of Science and Technology(KAUST)                                                                                                                 | Pathogen Genomics Lab King Abdullah University of Science and Technology(KAUST) | Muhammad Shuaib, Raaeece Naeem, Sharif Hala, Sara Mfarrej, Olga Douvropoulou, Raushan Nugmanova, Luke Esau, Amanda Ooi, Fadwa Alofi, Afrah Alsomali, Asim Khogeer, Jumana Taha, Abdulaziz Alahmadi, Kahled Alqithami, Anwar Hashem, Naif Almontashiri, Arnab Pain |
| EPI_ISL_677954                                                                                                                                                                                                                                                                                                                                                                                                                                                                                                                                                                                                                                                                                                                                                                                                                                                                                                                                                                                                                                                                                                                                                                                                                                                                                                                                                                                                                                                                                                                                                                                                                                                                                                                                 | Pathogen Genomics Lab King Abdullah University of Science and Technology(KAUST)                                                                                                                 | Pathogen Genomics Lab King Abdullah University of Science and Technology(KAUST) | Muhammad Shuaib, Raaeece Naeem, Amanda Ooi, Luke Esau, Sharif Hala, Sara Mfarrej, Fadwa Alofi, Afrah Alsomali, Asim Khogeer, Jumana Taha, Abdulaziz Alahmadi, Kahled Alqithami, Anwar Hashem, Naif Almontashiri, Arnab Pain                                       |
| EPI_ISL_678010                                                                                                                                                                                                                                                                                                                                                                                                                                                                                                                                                                                                                                                                                                                                                                                                                                                                                                                                                                                                                                                                                                                                                                                                                                                                                                                                                                                                                                                                                                                                                                                                                                                                                                                                 | Pathogen Genomics Lab King Abdullah University of Science and Technology(KAUST)                                                                                                                 | Pathogen Genomics Lab King Abdullah University of Science and Technology(KAUST) | Muhammad Shuaib, Raaeece Naeem, Amanda Ooi, Luke Esau, Sharif Hala, Sara Mfarrej, Fadwa Alofi, Afrah Alsomali, Asim Khogeer, Jumana Taha, Abdulaziz Alahmadi, Kahled Alqithami, Anwar Hashem, Naif Almontashiri, Arnab Pain                                       |
| EPI_ISL_678011, EPI_ISL_678012, EPI_ISL_678013, EPI_ISL_678014                                                                                                                                                                                                                                                                                                                                                                                                                                                                                                                                                                                                                                                                                                                                                                                                                                                                                                                                                                                                                                                                                                                                                                                                                                                                                                                                                                                                                                                                                                                                                                                                                                                                                 | Pathogen Genomics Lab King Abdullah University of Science and Technology(KAUST)                                                                                                                 | Pathogen Genomics Lab King Abdullah University of Science and Technology(KAUST) | Muhammad Shuaib, Raaeece Naeem, Sharif Hala, Sara Mfarrej, Olga Douvropoulou, Raushan Nugmanova, Fadwa Alofi, Afrah Alsomali, Asim Khogeer, Jumana Taha, Abdulaziz Alahmadi, Kahled Alqithami, Anwar Hashem, Naif Almontashiri, Arnab Pain                        |
| EPI_ISL_678015                                                                                                                                                                                                                                                                                                                                                                                                                                                                                                                                                                                                                                                                                                                                                                                                                                                                                                                                                                                                                                                                                                                                                                                                                                                                                                                                                                                                                                                                                                                                                                                                                                                                                                                                 | Pathogen Genomics Lab King Abdullah University of Science and Technology(KAUST)                                                                                                                 | Pathogen Genomics Lab King Abdullah University of Science and Technology(KAUST) | Muhammad Shuaib, Amanda Ooi, Luke Esau, Sharif Hala, Raaeece Naeem, Sara Mfarrej, Fadwa Alofi, Afrah Alsomali, Asim Khogeer, Jumana Taha, Abdulaziz Alahmadi, Kahled Alqithami, Anwar Hashem, Naif Almontashiri, Arnab Pain                                       |
| EPI_ISL_678016                                                                                                                                                                                                                                                                                                                                                                                                                                                                                                                                                                                                                                                                                                                                                                                                                                                                                                                                                                                                                                                                                                                                                                                                                                                                                                                                                                                                                                                                                                                                                                                                                                                                                                                                 | Pathogen Genomics Lab King Abdullah University of Science and Technology(KAUST)                                                                                                                 | Pathogen Genomics Lab King Abdullah University of Science and Technology(KAUST) | Muhammad Shuaib, Raaeece Naeem, Sharif Hala, Sara Mfarrej, Olga Douvropoulou, Raushan Nugmanova, Fadwa Alofi, Afrah Alsomali, Asim Khogeer, Jumana Taha, Abdulaziz Alahmadi, Kahled Alqithami, Anwar Hashem, Naif Almontashiri, Arnab Pain                        |
| EPI_ISL_678017                                                                                                                                                                                                                                                                                                                                                                                                                                                                                                                                                                                                                                                                                                                                                                                                                                                                                                                                                                                                                                                                                                                                                                                                                                                                                                                                                                                                                                                                                                                                                                                                                                                                                                                                 | Pathogen Genomics Lab King Abdullah University of Science and Technology(KAUST)                                                                                                                 | Pathogen Genomics Lab King Abdullah University of Science and Technology(KAUST) | Muhammad Shuaib, Raaeece Naeem, Amanda Ooi, Luke Esau, Sharif Hala, Sara Mfarrej, Fadwa Alofi, Afrah Alsomali, Asim Khogeer, Jumana Taha, Abdulaziz Alahmadi, Kahled Alqithami, Anwar Hashem, Naif Almontashiri, Arnab Pain                                       |
| EPI_ISL_678018                                                                                                                                                                                                                                                                                                                                                                                                                                                                                                                                                                                                                                                                                                                                                                                                                                                                                                                                                                                                                                                                                                                                                                                                                                                                                                                                                                                                                                                                                                                                                                                                                                                                                                                                 | Pathogen Genomics Lab King Abdullah University of Science and Technology(KAUST)                                                                                                                 | Pathogen Genomics Lab King Abdullah University of Science and Technology(KAUST) | Muhammad Shuaib, Amanda Ooi, Luke Esau, Sharif Hala, Raaeece Naeem, Sara Mfarrej, Fadwa Alofi, Afrah Alsomali, Asim Khogeer, Jumana Taha, Abdulaziz Alahmadi, Kahled Alqithami, Anwar Hashem, Naif Almontashiri, Arnab Pain                                       |
| EPI_ISL_678019                                                                                                                                                                                                                                                                                                                                                                                                                                                                                                                                                                                                                                                                                                                                                                                                                                                                                                                                                                                                                                                                                                                                                                                                                                                                                                                                                                                                                                                                                                                                                                                                                                                                                                                                 | Pathogen Genomics Lab King Abdullah University of Science and Technology(KAUST)                                                                                                                 | Pathogen Genomics Lab King Abdullah University of Science and Technology(KAUST) | Muhammad Shuaib, Raaeece Naeem, Sharif Hala, Sara Mfarrej, Olga Douvropoulou, Raushan Nugmanova, Fadwa Alofi, Afrah Alsomali, Asim Khogeer, Jumana Taha, Abdulaziz Alahmadi, Kahled Alqithami, Anwar Hashem, Naif Almontashiri, Arnab Pain                        |
| EPI_ISL_678049                                                                                                                                                                                                                                                                                                                                                                                                                                                                                                                                                                                                                                                                                                                                                                                                                                                                                                                                                                                                                                                                                                                                                                                                                                                                                                                                                                                                                                                                                                                                                                                                                                                                                                                                 | Pathogen Genomics Lab King Abdullah University of Science and Technology(KAUST)                                                                                                                 | Pathogen Genomics Lab King Abdullah University of Science and Technology(KAUST) | Muhammad Shuaib, Sara Mfarrej, Raushan Nugmanova, Olga Douvropoulou, Raaeece Naeem, Sharif Hala, Luke Esau, Amanda Ooi, Asim Khogeer, Fadwa Alofi, Afrah Alsomali, Jumana Taha, Abdulaziz Alahmadi, Kahled Alqithami, Anwar Hashem, Naif Almontashiri, Arnab Pain |
| EPI_ISL_678064, EPI_ISL_678070, EPI_ISL_678083, EPI_ISL_678084, EPI_ISL_678085, EPI_ISL_678086, EPI_ISL_678087, EPI_ISL_678088                                                                                                                                                                                                                                                                                                                                                                                                                                                                                                                                                                                                                                                                                                                                                                                                                                                                                                                                                                                                                                                                                                                                                                                                                                                                                                                                                                                                                                                                                                                                                                                                                 | Pathogen Genomics Lab King Abdullah University of Science and Technology(KAUST)                                                                                                                 | Pathogen Genomics Lab King Abdullah University of Science and Technology(KAUST) | Muhammad Shuaib, Raaeece Naeem, Sharif Hala, Sara Mfarrej, Olga Douvropoulou, Raushan Nugmanova, Asim Khogeer, Fadwa Alofi, Afrah Alsomali, Jumana Taha, Abdulaziz Alahmadi, Kahled Alqithami, Anwar Hashem, Naif Almontashiri, Arnab Pain                        |
| EPI_ISL_678089                                                                                                                                                                                                                                                                                                                                                                                                                                                                                                                                                                                                                                                                                                                                                                                                                                                                                                                                                                                                                                                                                                                                                                                                                                                                                                                                                                                                                                                                                                                                                                                                                                                                                                                                 | Pathogen Genomics Lab King Abdullah University of Science and Technology(KAUST)                                                                                                                 | Pathogen Genomics Lab King Abdullah University of Science and Technology(KAUST) | Muhammad Shuaib, Amanda Ooi, Luke Esau, Sharif Hala, Raaeece Naeem, Sara Mfarrej, Asim Khogeer, Fadwa Alofi, Afrah Alsomali, Jumana Taha, Abdulaziz Alahmadi, Kahled Alqithami, Anwar Hashem, Naif Almontashiri, Arnab Pain                                       |
| EPI_ISL_678090, EPI_ISL_678091                                                                                                                                                                                                                                                                                                                                                                                                                                                                                                                                                                                                                                                                                                                                                                                                                                                                                                                                                                                                                                                                                                                                                                                                                                                                                                                                                                                                                                                                                                                                                                                                                                                                                                                 | Pathogen Genomics Lab King Abdullah University of Science and Technology(KAUST)                                                                                                                 | Pathogen Genomics Lab King Abdullah University of Science and Technology(KAUST) | Muhammad Shuaib, Raaeece Naeem, Sharif Hala, Sara Mfarrej, Olga Douvropoulou, Raushan Nugmanova, Asim Khogeer, Fadwa Alofi, Afrah Alsomali, Jumana Taha, Abdulaziz Alahmadi, Kahled Alqithami, Anwar Hashem, Naif Almontashiri, Arnab Pain                        |
| EPI_ISL_678092                                                                                                                                                                                                                                                                                                                                                                                                                                                                                                                                                                                                                                                                                                                                                                                                                                                                                                                                                                                                                                                                                                                                                                                                                                                                                                                                                                                                                                                                                                                                                                                                                                                                                                                                 | Pathogen Genomics Lab King Abdullah University of Science and Technology(KAUST)                                                                                                                 | Pathogen Genomics Lab King Abdullah University of Science and Technology(KAUST) | Muhammad Shuaib, Raaeece Naeem, Raushan Nugmanova, Olga Douvropoulou, Sara Mfarrej, Sharif Hala, Asim Khogeer, Fadwa Alofi, Afrah Alsomali, Jumana Taha, Abdulaziz Alahmadi, Kahled Alqithami, Anwar Hashem, Naif Almontashiri, Arnab Pain                        |
| EPI_ISL_678093                                                                                                                                                                                                                                                                                                                                                                                                                                                                                                                                                                                                                                                                                                                                                                                                                                                                                                                                                                                                                                                                                                                                                                                                                                                                                                                                                                                                                                                                                                                                                                                                                                                                                                                                 | Pathogen Genomics Lab King Abdullah University of Science and Technology(KAUST)                                                                                                                 | Pathogen Genomics Lab King Abdullah University of Science and Technology(KAUST) | Muhammad Shuaib, Sara Mfarrej, Raaeece Naeem, Raushan Nugmanova, Olga Douvropoulou, Sharif Hala, Asim Khogeer, Fadwa Alofi, Afrah Alsomali, Jumana Taha, Abdulaziz Alahmadi, Kahled Alqithami, Anwar Hashem, Naif Almontashiri, Arnab Pain                        |
| EPI_ISL_678170                                                                                                                                                                                                                                                                                                                                                                                                                                                                                                                                                                                                                                                                                                                                                                                                                                                                                                                                                                                                                                                                                                                                                                                                                                                                                                                                                                                                                                                                                                                                                                                                                                                                                                                                 | Pathogen Genomics Lab King Abdullah University of Science and Technology(KAUST)                                                                                                                 | Pathogen Genomics Lab King Abdullah University of Science and Technology(KAUST) | Muhammad Shuaib, Sara Mfarrej, Raushan Nugmanova, Olga Douvropoulou, Raaeece Naeem, Sharif Hala, Luke Esau, Amanda Ooi, Awad Al-Omari, Samer Salih, Abbas Al Mutair, Arnab Pain                                                                                   |
| EPI_ISL_678174                                                                                                                                                                                                                                                                                                                                                                                                                                                                                                                                                                                                                                                                                                                                                                                                                                                                                                                                                                                                                                                                                                                                                                                                                                                                                                                                                                                                                                                                                                                                                                                                                                                                                                                                 | Pathogen Genomics Lab King Abdullah University of Science and Technology(KAUST)                                                                                                                 | Pathogen Genomics Lab King Abdullah University of Science and Technology(KAUST) | Muhammad Shuaib, Sara Mfarrej, Amanda Ooi, Luke Esau, Sharif Hala, Raaeece Naeem, Awad Al-Omari, Samer Salih, Abbas Al Mutair, Arnab Pain                                                                                                                         |
| EPI_ISL_678184                                                                                                                                                                                                                                                                                                                                                                                                                                                                                                                                                                                                                                                                                                                                                                                                                                                                                                                                                                                                                                                                                                                                                                                                                                                                                                                                                                                                                                                                                                                                                                                                                                                                                                                                 | Pathogen Genomics Lab King Abdullah University of Science and Technology(KAUST)                                                                                                                 | Pathogen Genomics Lab King Abdullah University of Science and Technology(KAUST) | Muhammad Shuaib, Raaeece Naeem, Sara Mfarrej, Olga Douvropoulou, Raushan Nugmanova, Sharif Hala, Awad Al-Omari, Samer Salih, Abbas Al Mutair, Arnab Pain                                                                                                          |
| EPI_ISL_678206, EPI_ISL_678207,                                                                                                                                                                                                                                                                                                                                                                                                                                                                                                                                                                                                                                                                                                                                                                                                                                                                                                                                                                                                                                                                                                                                                                                                                                                                                                                                                                                                                                                                                                                                                                                                                                                                                                                | Pathogen Genomics Lab King Abdullah University of Science                                                                                                                                       | Pathogen Genomics Lab King Abdullah University of                               | Muhammad Shuaib, Sara Mfarrej, Amanda Ooi, Luke Esau, Sharif Hala, Raaeece Naeem, Awad Al-Omari, Samer Salih, Abbas Al Mutair, Arnab Pain                                                                                                                         |

|                                                                                                                                                                                                                                                                                                                                                                                                                                                                                                                                                                                                                                                                                                                                                                                                                                                                                                                                                                                                                                                                                                                                                                                                                                                                                                                                                                                                                                                                                                                                                                                                                                                                                                                                                                                                                                                                                                                                                                                                                                                                                                                                |                                                                                                                                                                                                 |                                                                                                                    |                                                                                                                                                                                                                                                                                                                                                                                  |
|--------------------------------------------------------------------------------------------------------------------------------------------------------------------------------------------------------------------------------------------------------------------------------------------------------------------------------------------------------------------------------------------------------------------------------------------------------------------------------------------------------------------------------------------------------------------------------------------------------------------------------------------------------------------------------------------------------------------------------------------------------------------------------------------------------------------------------------------------------------------------------------------------------------------------------------------------------------------------------------------------------------------------------------------------------------------------------------------------------------------------------------------------------------------------------------------------------------------------------------------------------------------------------------------------------------------------------------------------------------------------------------------------------------------------------------------------------------------------------------------------------------------------------------------------------------------------------------------------------------------------------------------------------------------------------------------------------------------------------------------------------------------------------------------------------------------------------------------------------------------------------------------------------------------------------------------------------------------------------------------------------------------------------------------------------------------------------------------------------------------------------|-------------------------------------------------------------------------------------------------------------------------------------------------------------------------------------------------|--------------------------------------------------------------------------------------------------------------------|----------------------------------------------------------------------------------------------------------------------------------------------------------------------------------------------------------------------------------------------------------------------------------------------------------------------------------------------------------------------------------|
| EPI_ISL_678208, EPI_ISL_678209                                                                                                                                                                                                                                                                                                                                                                                                                                                                                                                                                                                                                                                                                                                                                                                                                                                                                                                                                                                                                                                                                                                                                                                                                                                                                                                                                                                                                                                                                                                                                                                                                                                                                                                                                                                                                                                                                                                                                                                                                                                                                                 | and Technology(KAUST)                                                                                                                                                                           | Science and Technology(KAUST)                                                                                      |                                                                                                                                                                                                                                                                                                                                                                                  |
| EPI_ISL_678210                                                                                                                                                                                                                                                                                                                                                                                                                                                                                                                                                                                                                                                                                                                                                                                                                                                                                                                                                                                                                                                                                                                                                                                                                                                                                                                                                                                                                                                                                                                                                                                                                                                                                                                                                                                                                                                                                                                                                                                                                                                                                                                 | Pathogen Genomics Lab King Abdullah University of Science and Technology(KAUST)                                                                                                                 | Pathogen Genomics Lab King Abdullah University of Science and Technology(KAUST)                                    | Muhammad Shuaib, Raaece Naeem, Sara Mfarrej, Olga Douvropoulou, Raushan Nugmanova, Sharif Hala, Awad Al-Omari, Samer Salih, Abbas Al Mutair, Arnab Pain                                                                                                                                                                                                                          |
| EPI_ISL_678211, EPI_ISL_678212                                                                                                                                                                                                                                                                                                                                                                                                                                                                                                                                                                                                                                                                                                                                                                                                                                                                                                                                                                                                                                                                                                                                                                                                                                                                                                                                                                                                                                                                                                                                                                                                                                                                                                                                                                                                                                                                                                                                                                                                                                                                                                 | Pathogen Genomics Lab King Abdullah University of Science and Technology(KAUST)                                                                                                                 | Pathogen Genomics Lab King Abdullah University of Science and Technology(KAUST)                                    | Muhammad Shuaib, Sara Mfarrej, Amanda Ooi, Luke Esau, Sharif Hala, Raaece Naeem, Awad Al-Omari, Samer Salih, Abbas Al Mutair, Arnab Pain                                                                                                                                                                                                                                         |
| EPI_ISL_678213                                                                                                                                                                                                                                                                                                                                                                                                                                                                                                                                                                                                                                                                                                                                                                                                                                                                                                                                                                                                                                                                                                                                                                                                                                                                                                                                                                                                                                                                                                                                                                                                                                                                                                                                                                                                                                                                                                                                                                                                                                                                                                                 | Pathogen Genomics Lab King Abdullah University of Science and Technology(KAUST)                                                                                                                 | Pathogen Genomics Lab King Abdullah University of Science and Technology(KAUST)                                    | Muhammad Shuaib, Raaece Naeem, Sara Mfarrej, Olga Douvropoulou, Raushan Nugmanova, Sharif Hala, Awad Al-Omari, Samer Salih, Abbas Al Mutair, Arnab Pain                                                                                                                                                                                                                          |
| EPI_ISL_678214                                                                                                                                                                                                                                                                                                                                                                                                                                                                                                                                                                                                                                                                                                                                                                                                                                                                                                                                                                                                                                                                                                                                                                                                                                                                                                                                                                                                                                                                                                                                                                                                                                                                                                                                                                                                                                                                                                                                                                                                                                                                                                                 | Pathogen Genomics Lab King Abdullah University of Science and Technology(KAUST)                                                                                                                 | Pathogen Genomics Lab King Abdullah University of Science and Technology(KAUST)                                    | Muhammad Shuaib, Raaece Naeem, Sara Mfarrej, Olga Douvropoulou, Raushan Nugmanova, Sharif Hala, Awad Al-Omari, Samer Salih, Abbas Al Mutair, Arnab Pain                                                                                                                                                                                                                          |
| EPI_ISL_678238                                                                                                                                                                                                                                                                                                                                                                                                                                                                                                                                                                                                                                                                                                                                                                                                                                                                                                                                                                                                                                                                                                                                                                                                                                                                                                                                                                                                                                                                                                                                                                                                                                                                                                                                                                                                                                                                                                                                                                                                                                                                                                                 | Pathogen Genomics Lab King Abdullah University of Science and Technology(KAUST)                                                                                                                 | Pathogen Genomics Lab King Abdullah University of Science and Technology(KAUST)                                    | Muhammad Shuaib, Sara Mfarrej, Amanda Ooi, Luke Esau, Sharif Hala, Raaece Naeem, Awad Al-Omari, Samer Salih, Abbas Al Mutair, Arnab Pain                                                                                                                                                                                                                                         |
| EPI_ISL_678239                                                                                                                                                                                                                                                                                                                                                                                                                                                                                                                                                                                                                                                                                                                                                                                                                                                                                                                                                                                                                                                                                                                                                                                                                                                                                                                                                                                                                                                                                                                                                                                                                                                                                                                                                                                                                                                                                                                                                                                                                                                                                                                 | Pathogen Genomics Lab King Abdullah University of Science and Technology(KAUST)                                                                                                                 | Pathogen Genomics Lab King Abdullah University of Science and Technology(KAUST)                                    | Muhammad Shuaib, Raaece Naeem, Sara Mfarrej, Olga Douvropoulou, Raushan Nugmanova, Sharif Hala, Awad Al-Omari, Samer Salih, Abbas Al Mutair, Arnab Pain                                                                                                                                                                                                                          |
| EPI_ISL_678241                                                                                                                                                                                                                                                                                                                                                                                                                                                                                                                                                                                                                                                                                                                                                                                                                                                                                                                                                                                                                                                                                                                                                                                                                                                                                                                                                                                                                                                                                                                                                                                                                                                                                                                                                                                                                                                                                                                                                                                                                                                                                                                 | Pathogen Genomics Lab King Abdullah University of Science and Technology(KAUST)                                                                                                                 | Pathogen Genomics Lab King Abdullah University of Science and Technology(KAUST)                                    | Muhammad Shuaib, Raaece Naeem, Raushan Nugmanova, Olga Douvropoulou, Sharif Hala, Sara Mfarrej, Afrah Alsomali, Asim Khogeer, Fadwa Alofi, Jumana Taha, Abdulaziz Alahmadi, Kahled Alghithami, Anwar Hashem, Naif Almontashiri, Arnab Pain                                                                                                                                       |
| EPI_ISL_678242                                                                                                                                                                                                                                                                                                                                                                                                                                                                                                                                                                                                                                                                                                                                                                                                                                                                                                                                                                                                                                                                                                                                                                                                                                                                                                                                                                                                                                                                                                                                                                                                                                                                                                                                                                                                                                                                                                                                                                                                                                                                                                                 | Pathogen Genomics Lab King Abdullah University of Science and Technology(KAUST)                                                                                                                 | Pathogen Genomics Lab King Abdullah University of Science and Technology(KAUST)                                    | Muhammad Shuaib, Sharif Hala, Sara Mfarrej, Luke Esau, Amanda Ooi, Raaece Naeem, Afrah Alsomali, Asim Khogeer, Fadwa Alofi, Jumana Taha, Abdulaziz Alahmadi, Kahled Alghithami, Anwar Hashem, Naif Almontashiri, Arnab Pain                                                                                                                                                      |
| EPI_ISL_678247                                                                                                                                                                                                                                                                                                                                                                                                                                                                                                                                                                                                                                                                                                                                                                                                                                                                                                                                                                                                                                                                                                                                                                                                                                                                                                                                                                                                                                                                                                                                                                                                                                                                                                                                                                                                                                                                                                                                                                                                                                                                                                                 | Pathogen Genomics Lab King Abdullah University of Science and Technology(KAUST)                                                                                                                 | Pathogen Genomics Lab King Abdullah University of Science and Technology(KAUST)                                    | Muhammad Shuaib, Raaece Naeem, Sara Mfarrej, Olga Douvropoulou, Raushan Nugmanova, Sharif Hala, Awad Al-Omari, Samer Salih, Abbas Al Mutair, Arnab Pain                                                                                                                                                                                                                          |
| EPI_ISL_679946, EPI_ISL_679947, EPI_ISL_679948, EPI_ISL_679949, EPI_ISL_679950, EPI_ISL_679951, EPI_ISL_679952, EPI_ISL_679953, EPI_ISL_679954, EPI_ISL_679955, EPI_ISL_679956, EPI_ISL_679957, EPI_ISL_679958, EPI_ISL_679959, EPI_ISL_679960, EPI_ISL_679961, EPI_ISL_679962, EPI_ISL_679963, EPI_ISL_679964, EPI_ISL_679965, EPI_ISL_679966, EPI_ISL_679967, EPI_ISL_679968                                                                                                                                                                                                                                                                                                                                                                                                                                                                                                                                                                                                                                                                                                                                                                                                                                                                                                                                                                                                                                                                                                                                                                                                                                                                                                                                                                                                                                                                                                                                                                                                                                                                                                                                                 |                                                                                                                                                                                                 |                                                                                                                    |                                                                                                                                                                                                                                                                                                                                                                                  |
| see above                                                                                                                                                                                                                                                                                                                                                                                                                                                                                                                                                                                                                                                                                                                                                                                                                                                                                                                                                                                                                                                                                                                                                                                                                                                                                                                                                                                                                                                                                                                                                                                                                                                                                                                                                                                                                                                                                                                                                                                                                                                                                                                      | Lincolnshire Hospitals and DeepSeq Nottingham                                                                                                                                                   | COVID-19 Genomics UK (COG-UK) Consortium                                                                           | Nichola Duckworth, Tim Sloan, Sarah Walsh, Jonathan Ball, Patrick McClure, Joseph Chappell, Nadine Holmes, Matthew Carlisle, Christopher Moore, Fei Sang, Johnny Debebe, Victoria Wright, Matthew Loose                                                                                                                                                                          |
| EPI_ISL_680461, EPI_ISL_680463, EPI_ISL_680466, EPI_ISL_680468, EPI_ISL_680476, EPI_ISL_680478, EPI_ISL_680484, EPI_ISL_680488, EPI_ISL_680494, EPI_ISL_680497, EPI_ISL_680498, EPI_ISL_680505, EPI_ISL_680512, EPI_ISL_680516, EPI_ISL_680517, EPI_ISL_680519, EPI_ISL_680520, EPI_ISL_680521, EPI_ISL_680523, EPI_ISL_680524, EPI_ISL_680525, EPI_ISL_680526, EPI_ISL_680528, EPI_ISL_680529, EPI_ISL_680531, EPI_ISL_680532, EPI_ISL_680539, EPI_ISL_680541, EPI_ISL_680542, EPI_ISL_680543, EPI_ISL_680544, EPI_ISL_680547, EPI_ISL_680550, EPI_ISL_680555                                                                                                                                                                                                                                                                                                                                                                                                                                                                                                                                                                                                                                                                                                                                                                                                                                                                                                                                                                                                                                                                                                                                                                                                                                                                                                                                                                                                                                                                                                                                                                 |                                                                                                                                                                                                 |                                                                                                                    |                                                                                                                                                                                                                                                                                                                                                                                  |
| see above                                                                                                                                                                                                                                                                                                                                                                                                                                                                                                                                                                                                                                                                                                                                                                                                                                                                                                                                                                                                                                                                                                                                                                                                                                                                                                                                                                                                                                                                                                                                                                                                                                                                                                                                                                                                                                                                                                                                                                                                                                                                                                                      | Virology Department, Royal Infirmary of Edinburgh, NHS Lothian / School of Biological Sciences, University of Edinburgh / Institute of Genetics and Molecular Medicine, University of Edinburgh | COVID-19 Genomics UK (COG-UK) Consortium                                                                           | McHugh M, Dewar R, Rooke S, Gallagher M, Balcaza C, O'Toole Á, Scher E, Hill V, McCrone JT, Colquhoun R, Yu X, Jackson B, Rambaut A, Williams TC, Templeton K                                                                                                                                                                                                                    |
| EPI_ISL_681320, EPI_ISL_681321                                                                                                                                                                                                                                                                                                                                                                                                                                                                                                                                                                                                                                                                                                                                                                                                                                                                                                                                                                                                                                                                                                                                                                                                                                                                                                                                                                                                                                                                                                                                                                                                                                                                                                                                                                                                                                                                                                                                                                                                                                                                                                 | Pathology and Laboratory Medicine, UW-Madison                                                                                                                                                   | Pathology and Laboratory Medicine, UW-Madison                                                                      | Moreno,G., Braun,K., Baczenas,J.J., Baker,D.                                                                                                                                                                                                                                                                                                                                     |
| EPI_ISL_681929, EPI_ISL_681930, EPI_ISL_681931, EPI_ISL_681932, EPI_ISL_681933, EPI_ISL_681934, EPI_ISL_681935, EPI_ISL_681936, EPI_ISL_681937, EPI_ISL_681938, EPI_ISL_681939, EPI_ISL_681940, EPI_ISL_681941, EPI_ISL_681942, EPI_ISL_681943, EPI_ISL_681944, EPI_ISL_681945, EPI_ISL_681946, EPI_ISL_681947, EPI_ISL_681948, EPI_ISL_681949, EPI_ISL_681950, EPI_ISL_681951, EPI_ISL_681952, EPI_ISL_681953, EPI_ISL_681954, EPI_ISL_681955, EPI_ISL_681956, EPI_ISL_681957, EPI_ISL_681958, EPI_ISL_681959, EPI_ISL_681960, EPI_ISL_681961, EPI_ISL_681962, EPI_ISL_681963, EPI_ISL_681964, EPI_ISL_681965, EPI_ISL_681966, EPI_ISL_681967, EPI_ISL_681968, EPI_ISL_681969, EPI_ISL_681970, EPI_ISL_681971, EPI_ISL_681972, EPI_ISL_681973, EPI_ISL_681974, EPI_ISL_681975, EPI_ISL_681976, EPI_ISL_681977, EPI_ISL_681978, EPI_ISL_681979, EPI_ISL_681980, EPI_ISL_681981, EPI_ISL_681982, EPI_ISL_681983, EPI_ISL_681984, EPI_ISL_681985, EPI_ISL_681986, EPI_ISL_681987, EPI_ISL_681988, EPI_ISL_681989, EPI_ISL_681990, EPI_ISL_681991, EPI_ISL_681992, EPI_ISL_681993, EPI_ISL_681994, EPI_ISL_681995, EPI_ISL_681996, EPI_ISL_681997, EPI_ISL_681998, EPI_ISL_681999, EPI_ISL_682000, EPI_ISL_682001, EPI_ISL_682002, EPI_ISL_682003, EPI_ISL_682004, EPI_ISL_682005, EPI_ISL_682006, EPI_ISL_682007, EPI_ISL_682008, EPI_ISL_682009, EPI_ISL_682010, EPI_ISL_682011, EPI_ISL_682012, EPI_ISL_682013, EPI_ISL_682014, EPI_ISL_682015, EPI_ISL_682016, EPI_ISL_682017, EPI_ISL_682018, EPI_ISL_682019, EPI_ISL_682020, EPI_ISL_682021, EPI_ISL_682022, EPI_ISL_682023, EPI_ISL_682024, EPI_ISL_682025, EPI_ISL_682026, EPI_ISL_682027, EPI_ISL_682028, EPI_ISL_682029, EPI_ISL_682030, EPI_ISL_682031, EPI_ISL_682032, EPI_ISL_682033, EPI_ISL_682034, EPI_ISL_682035, EPI_ISL_682036, EPI_ISL_682037, EPI_ISL_682038, EPI_ISL_682039, EPI_ISL_682040, EPI_ISL_682041, EPI_ISL_682042, EPI_ISL_682043, EPI_ISL_682044, EPI_ISL_682045, EPI_ISL_682046, EPI_ISL_682047, EPI_ISL_682048, EPI_ISL_682049, EPI_ISL_682050, EPI_ISL_682051, EPI_ISL_682052, EPI_ISL_682053, EPI_ISL_682054, EPI_ISL_682055, EPI_ISL_682056 |                                                                                                                                                                                                 |                                                                                                                    |                                                                                                                                                                                                                                                                                                                                                                                  |
| see above                                                                                                                                                                                                                                                                                                                                                                                                                                                                                                                                                                                                                                                                                                                                                                                                                                                                                                                                                                                                                                                                                                                                                                                                                                                                                                                                                                                                                                                                                                                                                                                                                                                                                                                                                                                                                                                                                                                                                                                                                                                                                                                      | UPMC Clinical Microbiology Laboratory                                                                                                                                                           | Microbial Genomic Epidemiology Laboratory, University of Pittsburgh                                                | Mustapha M. Mustapha, Jane W. Marsh, Dan Snyder, Marissa P. Griffith, Stephanie L. Mitchell, Vatsala R. Srinivasa, Kady D. Waggle, Chinezo Ezeonwuku, Vaughn S. Cooper, Lee H. Harrison                                                                                                                                                                                          |
| EPI_ISL_693660, EPI_ISL_693661, EPI_ISL_693662, EPI_ISL_693663, EPI_ISL_693664, EPI_ISL_693665, EPI_ISL_693666, EPI_ISL_693667, EPI_ISL_693668, EPI_ISL_693669, EPI_ISL_693670, EPI_ISL_693671, EPI_ISL_693672, EPI_ISL_693673, EPI_ISL_693674, EPI_ISL_693675, EPI_ISL_693676, EPI_ISL_693677, EPI_ISL_693678, EPI_ISL_693679, EPI_ISL_693680, EPI_ISL_693681, EPI_ISL_693682, EPI_ISL_693683, EPI_ISL_693684, EPI_ISL_693685, EPI_ISL_693686, EPI_ISL_693687                                                                                                                                                                                                                                                                                                                                                                                                                                                                                                                                                                                                                                                                                                                                                                                                                                                                                                                                                                                                                                                                                                                                                                                                                                                                                                                                                                                                                                                                                                                                                                                                                                                                 |                                                                                                                                                                                                 |                                                                                                                    |                                                                                                                                                                                                                                                                                                                                                                                  |
| see above                                                                                                                                                                                                                                                                                                                                                                                                                                                                                                                                                                                                                                                                                                                                                                                                                                                                                                                                                                                                                                                                                                                                                                                                                                                                                                                                                                                                                                                                                                                                                                                                                                                                                                                                                                                                                                                                                                                                                                                                                                                                                                                      | The National Institute of Public Health                                                                                                                                                         | State Veterinary Institute Prague                                                                                  | Nagy,A,Jirincova,H,Trnka,D,Vecerova,J                                                                                                                                                                                                                                                                                                                                            |
| EPI_ISL_703198, EPI_ISL_703784, EPI_ISL_703863, EPI_ISL_704559, EPI_ISL_705734, EPI_ISL_705742, EPI_ISL_705743, EPI_ISL_705744, EPI_ISL_705750, EPI_ISL_705755, EPI_ISL_705763, EPI_ISL_705764, EPI_ISL_705776, EPI_ISL_705782, EPI_ISL_705784, EPI_ISL_705786, EPI_ISL_705787, EPI_ISL_705789, EPI_ISL_705794, EPI_ISL_705795, EPI_ISL_705801, EPI_ISL_705804                                                                                                                                                                                                                                                                                                                                                                                                                                                                                                                                                                                                                                                                                                                                                                                                                                                                                                                                                                                                                                                                                                                                                                                                                                                                                                                                                                                                                                                                                                                                                                                                                                                                                                                                                                 |                                                                                                                                                                                                 |                                                                                                                    |                                                                                                                                                                                                                                                                                                                                                                                  |
| see above                                                                                                                                                                                                                                                                                                                                                                                                                                                                                                                                                                                                                                                                                                                                                                                                                                                                                                                                                                                                                                                                                                                                                                                                                                                                                                                                                                                                                                                                                                                                                                                                                                                                                                                                                                                                                                                                                                                                                                                                                                                                                                                      | Virology Department, Royal Infirmary of Edinburgh, NHS Lothian / School of Biological Sciences, University of Edinburgh / Institute of Genetics and Molecular Medicine, University of Edinburgh | COVID-19 Genomics UK (COG-UK) Consortium                                                                           | McHugh M, Dewar R, Rooke S, Gallagher M, Balcaza C, O'Toole Á, Scher E, Hill V, McCrone JT, Colquhoun R, Yu X, Jackson B, Rambaut A, Williams TC, Templeton K                                                                                                                                                                                                                    |
| EPI_ISL_708508, EPI_ISL_708509, EPI_ISL_708510, EPI_ISL_708511, EPI_ISL_708512, EPI_ISL_708513, EPI_ISL_708514, EPI_ISL_708515, EPI_ISL_708516, EPI_ISL_708517, EPI_ISL_708518, EPI_ISL_708519, EPI_ISL_708520, EPI_ISL_708521, EPI_ISL_708522, EPI_ISL_708523, EPI_ISL_708524, EPI_ISL_708525, EPI_ISL_708526, EPI_ISL_708527, EPI_ISL_710119                                                                                                                                                                                                                                                                                                                                                                                                                                                                                                                                                                                                                                                                                                                                                                                                                                                                                                                                                                                                                                                                                                                                                                                                                                                                                                                                                                                                                                                                                                                                                                                                                                                                                                                                                                                 |                                                                                                                                                                                                 |                                                                                                                    |                                                                                                                                                                                                                                                                                                                                                                                  |
| see above                                                                                                                                                                                                                                                                                                                                                                                                                                                                                                                                                                                                                                                                                                                                                                                                                                                                                                                                                                                                                                                                                                                                                                                                                                                                                                                                                                                                                                                                                                                                                                                                                                                                                                                                                                                                                                                                                                                                                                                                                                                                                                                      | National Virus Reference Laboratory                                                                                                                                                             | Irish Coronavirus Sequencing Consortium - Teagasc Oakpark                                                          | Michele Della Bartola, Matthew McCabe, Ewen Mullins                                                                                                                                                                                                                                                                                                                              |
| EPI_ISL_712070, EPI_ISL_712071, EPI_ISL_712072, EPI_ISL_712073, EPI_ISL_712074, EPI_ISL_712075, EPI_ISL_712076                                                                                                                                                                                                                                                                                                                                                                                                                                                                                                                                                                                                                                                                                                                                                                                                                                                                                                                                                                                                                                                                                                                                                                                                                                                                                                                                                                                                                                                                                                                                                                                                                                                                                                                                                                                                                                                                                                                                                                                                                 | Port Elizabeth Provincial Hospital, National Health Laboratory Services, Eastern Cape, South Africa                                                                                             | National Institute for Communicable Diseases of the National Health Laboratory Service                             | Mohale T, Ntuli N, Mahlangu B, Allam M, Ismail A, Bhiman JN                                                                                                                                                                                                                                                                                                                      |
| EPI_ISL_712077, EPI_ISL_712078                                                                                                                                                                                                                                                                                                                                                                                                                                                                                                                                                                                                                                                                                                                                                                                                                                                                                                                                                                                                                                                                                                                                                                                                                                                                                                                                                                                                                                                                                                                                                                                                                                                                                                                                                                                                                                                                                                                                                                                                                                                                                                 | East London NHLS Laboratory, Eastern Cape, South Africa                                                                                                                                         | National Institute for Communicable Diseases of the National Health Laboratory Service                             | Mohale T, Ntuli N, Mahlangu B, Allam M, Ismail A, Bhiman JN                                                                                                                                                                                                                                                                                                                      |
| EPI_ISL_712079, EPI_ISL_712080, EPI_ISL_712081, EPI_ISL_712082, EPI_ISL_712083, EPI_ISL_712084, EPI_ISL_712085, EPI_ISL_712086, EPI_ISL_712087, EPI_ISL_712088, EPI_ISL_712089, EPI_ISL_712090, EPI_ISL_712091                                                                                                                                                                                                                                                                                                                                                                                                                                                                                                                                                                                                                                                                                                                                                                                                                                                                                                                                                                                                                                                                                                                                                                                                                                                                                                                                                                                                                                                                                                                                                                                                                                                                                                                                                                                                                                                                                                                 |                                                                                                                                                                                                 |                                                                                                                    |                                                                                                                                                                                                                                                                                                                                                                                  |
| see above                                                                                                                                                                                                                                                                                                                                                                                                                                                                                                                                                                                                                                                                                                                                                                                                                                                                                                                                                                                                                                                                                                                                                                                                                                                                                                                                                                                                                                                                                                                                                                                                                                                                                                                                                                                                                                                                                                                                                                                                                                                                                                                      | Port Elizabeth Provincial Hospital, National Health Laboratory Services, Eastern Cape, South Africa                                                                                             | National Institute for Communicable Diseases of the National Health Laboratory Service                             | Mohale T, Ntuli N, Mahlangu B, Allam M, Ismail A, Bhiman JN                                                                                                                                                                                                                                                                                                                      |
| EPI_ISL_712092                                                                                                                                                                                                                                                                                                                                                                                                                                                                                                                                                                                                                                                                                                                                                                                                                                                                                                                                                                                                                                                                                                                                                                                                                                                                                                                                                                                                                                                                                                                                                                                                                                                                                                                                                                                                                                                                                                                                                                                                                                                                                                                 | East London NHLS Laboratory, Eastern Cape, South Africa                                                                                                                                         | National Institute for Communicable Diseases of the National Health Laboratory Service                             | Mohale T, Ntuli N, Mahlangu B, Allam M, Ismail A, Bhiman JN                                                                                                                                                                                                                                                                                                                      |
| EPI_ISL_712093, EPI_ISL_712094, EPI_ISL_712095, EPI_ISL_712096                                                                                                                                                                                                                                                                                                                                                                                                                                                                                                                                                                                                                                                                                                                                                                                                                                                                                                                                                                                                                                                                                                                                                                                                                                                                                                                                                                                                                                                                                                                                                                                                                                                                                                                                                                                                                                                                                                                                                                                                                                                                 | Port Elizabeth Provincial Hospital, National Health Laboratory Services, Eastern Cape, South Africa                                                                                             | National Institute for Communicable Diseases of the National Health Laboratory Service                             | Mohale T, Ntuli N, Mahlangu B, Allam M, Ismail A, Bhiman JN                                                                                                                                                                                                                                                                                                                      |
| EPI_ISL_717573, EPI_ISL_717577, EPI_ISL_717580, EPI_ISL_717581, EPI_ISL_717586, EPI_ISL_717588, EPI_ISL_717589, EPI_ISL_717592, EPI_ISL_717594, EPI_ISL_717597, EPI_ISL_717600, EPI_ISL_717601, EPI_ISL_717602, EPI_ISL_717604, EPI_ISL_717605, EPI_ISL_717610, EPI_ISL_717611, EPI_ISL_717617, EPI_ISL_717618, EPI_ISL_717619, EPI_ISL_717620, EPI_ISL_717621, EPI_ISL_717622, EPI_ISL_717626, EPI_ISL_717627, EPI_ISL_717628, EPI_ISL_717629, EPI_ISL_717630, EPI_ISL_717631, EPI_ISL_717633                                                                                                                                                                                                                                                                                                                                                                                                                                                                                                                                                                                                                                                                                                                                                                                                                                                                                                                                                                                                                                                                                                                                                                                                                                                                                                                                                                                                                                                                                                                                                                                                                                 |                                                                                                                                                                                                 |                                                                                                                    |                                                                                                                                                                                                                                                                                                                                                                                  |
| see above                                                                                                                                                                                                                                                                                                                                                                                                                                                                                                                                                                                                                                                                                                                                                                                                                                                                                                                                                                                                                                                                                                                                                                                                                                                                                                                                                                                                                                                                                                                                                                                                                                                                                                                                                                                                                                                                                                                                                                                                                                                                                                                      | Lab voor klinische biologie                                                                                                                                                                     | Onderzoeksgroep Virologie                                                                                          | Nick Vereecke, Laurens Lambrechts, Marthe Pauwels, Bruno Verhasselt, Linos Vandekerckhove, Hans Nauwynck, Sebastiaan Theuns                                                                                                                                                                                                                                                      |
| EPI_ISL_717692, EPI_ISL_717694, EPI_ISL_717695, EPI_ISL_717696, EPI_ISL_717697, EPI_ISL_717698                                                                                                                                                                                                                                                                                                                                                                                                                                                                                                                                                                                                                                                                                                                                                                                                                                                                                                                                                                                                                                                                                                                                                                                                                                                                                                                                                                                                                                                                                                                                                                                                                                                                                                                                                                                                                                                                                                                                                                                                                                 | Trinidad Public Health Laboratory                                                                                                                                                               | Carrington Lab, Department of PreClinical Sciences, Faculty of Medical Sciences, The University of the West Indies | Nikita S. D. Sahadeo, Arianne Brown-Jordan, Sarah Hill, Vernie Ramkissoon, Naresh Nandram, Avery Hinds, Jerome Foster, Stanley Giddings, Karla Georges, Marsha Ivey, Rahul Naidu, Risha Singh, SueMin Nathaniel, Rajini Harakingsh, Jaya Jayaraman, Chhina Chinnadurai, Adesh Ramsubhag, Nuno Faria, Oliver Pybus, Christopher Oura, Gabriel Escobar, Christine V. F. Carrington |

|                                                                                                                                                                                                                                                                                                                                                                                                                                                                                                                                                                                                                                                                                                                                                                                                                                                                                                                                                                                                                                                                                                                                                                                                                                                                                                                                                                                                                                                                                                                                                                                                                                                                                                                                                                                                                                                                                                                                                                                                                                                                                                                                                                                                                                                                                                                                                                                                                                                                                                |                                                                                                                                                                                                 |                                                                                             |                                                                                                                                                                                                         |
|------------------------------------------------------------------------------------------------------------------------------------------------------------------------------------------------------------------------------------------------------------------------------------------------------------------------------------------------------------------------------------------------------------------------------------------------------------------------------------------------------------------------------------------------------------------------------------------------------------------------------------------------------------------------------------------------------------------------------------------------------------------------------------------------------------------------------------------------------------------------------------------------------------------------------------------------------------------------------------------------------------------------------------------------------------------------------------------------------------------------------------------------------------------------------------------------------------------------------------------------------------------------------------------------------------------------------------------------------------------------------------------------------------------------------------------------------------------------------------------------------------------------------------------------------------------------------------------------------------------------------------------------------------------------------------------------------------------------------------------------------------------------------------------------------------------------------------------------------------------------------------------------------------------------------------------------------------------------------------------------------------------------------------------------------------------------------------------------------------------------------------------------------------------------------------------------------------------------------------------------------------------------------------------------------------------------------------------------------------------------------------------------------------------------------------------------------------------------------------------------|-------------------------------------------------------------------------------------------------------------------------------------------------------------------------------------------------|---------------------------------------------------------------------------------------------|---------------------------------------------------------------------------------------------------------------------------------------------------------------------------------------------------------|
| EPI_ISL_717699, EPI_ISL_717700                                                                                                                                                                                                                                                                                                                                                                                                                                                                                                                                                                                                                                                                                                                                                                                                                                                                                                                                                                                                                                                                                                                                                                                                                                                                                                                                                                                                                                                                                                                                                                                                                                                                                                                                                                                                                                                                                                                                                                                                                                                                                                                                                                                                                                                                                                                                                                                                                                                                 |                                                                                                                                                                                                 |                                                                                             |                                                                                                                                                                                                         |
| EPI_ISL_717982, EPI_ISL_717983, EPI_ISL_717986, EPI_ISL_717987, EPI_ISL_717988, EPI_ISL_718001, EPI_ISL_718002, EPI_ISL_718003, EPI_ISL_718004, EPI_ISL_718005, EPI_ISL_718006, EPI_ISL_718007, EPI_ISL_718008, EPI_ISL_718016, EPI_ISL_718017, EPI_ISL_718018, EPI_ISL_718019, EPI_ISL_718020, EPI_ISL_718021, EPI_ISL_718022, EPI_ISL_718025, EPI_ISL_718026                                                                                                                                                                                                                                                                                                                                                                                                                                                                                                                                                                                                                                                                                                                                                                                                                                                                                                                                                                                                                                                                                                                                                                                                                                                                                                                                                                                                                                                                                                                                                                                                                                                                                                                                                                                                                                                                                                                                                                                                                                                                                                                                 |                                                                                                                                                                                                 |                                                                                             |                                                                                                                                                                                                         |
| see above                                                                                                                                                                                                                                                                                                                                                                                                                                                                                                                                                                                                                                                                                                                                                                                                                                                                                                                                                                                                                                                                                                                                                                                                                                                                                                                                                                                                                                                                                                                                                                                                                                                                                                                                                                                                                                                                                                                                                                                                                                                                                                                                                                                                                                                                                                                                                                                                                                                                                      | Lab voor klinische biologie                                                                                                                                                                     | Onderzoeksgroep Virologie                                                                   | Nick Vereecke, Laurens Lambrechts, Marthe Pauwels, Bruno Verhasselt, Linos Vandekerckhove, Hans Nauwynck, Sebastiaan Theuns                                                                             |
| EPI_ISL_722320, EPI_ISL_722414, EPI_ISL_722415, EPI_ISL_722416, EPI_ISL_722417, EPI_ISL_722418, EPI_ISL_722448, EPI_ISL_722449, EPI_ISL_722450, EPI_ISL_722451                                                                                                                                                                                                                                                                                                                                                                                                                                                                                                                                                                                                                                                                                                                                                                                                                                                                                                                                                                                                                                                                                                                                                                                                                                                                                                                                                                                                                                                                                                                                                                                                                                                                                                                                                                                                                                                                                                                                                                                                                                                                                                                                                                                                                                                                                                                                 | Dutch COVID-19 response team                                                                                                                                                                    | Erasmus Medical Center                                                                      | OH consortium                                                                                                                                                                                           |
| EPI_ISL_723468                                                                                                                                                                                                                                                                                                                                                                                                                                                                                                                                                                                                                                                                                                                                                                                                                                                                                                                                                                                                                                                                                                                                                                                                                                                                                                                                                                                                                                                                                                                                                                                                                                                                                                                                                                                                                                                                                                                                                                                                                                                                                                                                                                                                                                                                                                                                                                                                                                                                                 | Port Elizabeth Provincial Hospital, National Health Laboratory Services, Eastern Cape, South Africa                                                                                             | National Institute for Communicable Diseases of the National Health Laboratory Service      | Mohale T, Ntuli N, Mahlangu B, Allam M, Ismail A, Bhiman JN                                                                                                                                             |
| EPI_ISL_723469                                                                                                                                                                                                                                                                                                                                                                                                                                                                                                                                                                                                                                                                                                                                                                                                                                                                                                                                                                                                                                                                                                                                                                                                                                                                                                                                                                                                                                                                                                                                                                                                                                                                                                                                                                                                                                                                                                                                                                                                                                                                                                                                                                                                                                                                                                                                                                                                                                                                                 | Laboratoire Biolife                                                                                                                                                                             | Laboratoire de Biotechnologie                                                               | Mouna Ouadghiri, Tarik Aanniz, Mohammed Walid Chemaou Elfihri, Mohamed Chenaoui, Hanae Dakka, Afaf Alaoui, Otmame Touzani, Bouchra Belfquih, Lahcen Belyamani, Saaid Amzazi and Azeddine Ibrahim        |
| EPI_ISL_724224, EPI_ISL_724226, EPI_ISL_724229, EPI_ISL_724235, EPI_ISL_724240, EPI_ISL_724241, EPI_ISL_724243, EPI_ISL_724249, EPI_ISL_724251                                                                                                                                                                                                                                                                                                                                                                                                                                                                                                                                                                                                                                                                                                                                                                                                                                                                                                                                                                                                                                                                                                                                                                                                                                                                                                                                                                                                                                                                                                                                                                                                                                                                                                                                                                                                                                                                                                                                                                                                                                                                                                                                                                                                                                                                                                                                                 | Virology Department, Royal Infirmary of Edinburgh, NHS Lothian / School of Biological Sciences, University of Edinburgh / Institute of Genetics and Molecular Medicine, University of Edinburgh | COVID-19 Genomics UK (COG-UK) Consortium                                                    | McHugh M, Dewar R, Rooke S, Gallagher M, Balcaza C, O'Toole Á, Scher E, Hill V, McCrone JT, Colquhoun R, Yu X, Jackson B, Rambaut A, Williams TC, Templeton K                                           |
| EPI_ISL_725540, EPI_ISL_725541, EPI_ISL_725542, EPI_ISL_725543, EPI_ISL_725544, EPI_ISL_725545, EPI_ISL_725546, EPI_ISL_725547, EPI_ISL_725548, EPI_ISL_725549, EPI_ISL_725550, EPI_ISL_725551, EPI_ISL_725552, EPI_ISL_725553, EPI_ISL_725554, EPI_ISL_725555, EPI_ISL_725556, EPI_ISL_725557, EPI_ISL_725558, EPI_ISL_725559, EPI_ISL_725560, EPI_ISL_725561, EPI_ISL_725562, EPI_ISL_725563, EPI_ISL_725564, EPI_ISL_725565, EPI_ISL_725566, EPI_ISL_725567, EPI_ISL_725568, EPI_ISL_725569, EPI_ISL_725570, EPI_ISL_725571, EPI_ISL_725572, EPI_ISL_725573, EPI_ISL_725574, EPI_ISL_725575, EPI_ISL_725576, EPI_ISL_725577, EPI_ISL_725578, EPI_ISL_725579, EPI_ISL_725580, EPI_ISL_725581, EPI_ISL_725582, EPI_ISL_725583, EPI_ISL_725584, EPI_ISL_725585, EPI_ISL_725586, EPI_ISL_725587, EPI_ISL_725588, EPI_ISL_725589, EPI_ISL_725590, EPI_ISL_725591, EPI_ISL_725592, EPI_ISL_725593, EPI_ISL_725594, EPI_ISL_725595, EPI_ISL_725596, EPI_ISL_725597, EPI_ISL_725598, EPI_ISL_725599, EPI_ISL_725600, EPI_ISL_725601, EPI_ISL_725602, EPI_ISL_725603, EPI_ISL_725604                                                                                                                                                                                                                                                                                                                                                                                                                                                                                                                                                                                                                                                                                                                                                                                                                                                                                                                                                                                                                                                                                                                                                                                                                                                                                                                                                                                                                 | Lincolnshire Hospitals and DeepSeq Nottingham                                                                                                                                                   | COVID-19 Genomics UK (COG-UK) Consortium                                                    | Nichola Duckworth, Tim Sloan, Sarah Walsh, Jonathan Ball, Patrick McClure, Joseph Chappell, Nadine Holmes, Matthew Carlisle, Christopher Moore, Fei Sang, Johnny Debebe, Victoria Wright, Matthew Loose |
| see above                                                                                                                                                                                                                                                                                                                                                                                                                                                                                                                                                                                                                                                                                                                                                                                                                                                                                                                                                                                                                                                                                                                                                                                                                                                                                                                                                                                                                                                                                                                                                                                                                                                                                                                                                                                                                                                                                                                                                                                                                                                                                                                                                                                                                                                                                                                                                                                                                                                                                      | Laboratoire Biolife                                                                                                                                                                             | Laboratoire de Biotechnologie                                                               | Mouna Ouadghiri, Tarik Aanniz, Mohammed Walid Chemaou Elfihri, Mohamed Chenaoui, Hanae Dakka, Afaf Alaoui, Otmame Touzani, Bouchra Belfquih, Lahcen Belyamani, Saaid Amzazi and Azeddine Ibrahim        |
| EPI_ISL_728219                                                                                                                                                                                                                                                                                                                                                                                                                                                                                                                                                                                                                                                                                                                                                                                                                                                                                                                                                                                                                                                                                                                                                                                                                                                                                                                                                                                                                                                                                                                                                                                                                                                                                                                                                                                                                                                                                                                                                                                                                                                                                                                                                                                                                                                                                                                                                                                                                                                                                 | Laboratoire Biolife                                                                                                                                                                             | Laboratoire de Biotechnologie                                                               | Mouna Ouadghiri, Tarik Aanniz, Mohammed Walid Chemaou Elfihri, Mohamed Chenaoui, Hanae Dakka, Afaf Alaoui, Otmame Touzani, Bouchra Belfquih, Lahcen Belyamani, Saaid Amzazi and Azeddine Ibrahim        |
| EPI_ISL_728272, EPI_ISL_728273, EPI_ISL_728274, EPI_ISL_728275, EPI_ISL_728276, EPI_ISL_728277, EPI_ISL_728278, EPI_ISL_728289, EPI_ISL_728290, EPI_ISL_728291, EPI_ISL_728295, EPI_ISL_728297, EPI_ISL_728301, EPI_ISL_728322, EPI_ISL_728332, EPI_ISL_728334, EPI_ISL_728336, EPI_ISL_728339                                                                                                                                                                                                                                                                                                                                                                                                                                                                                                                                                                                                                                                                                                                                                                                                                                                                                                                                                                                                                                                                                                                                                                                                                                                                                                                                                                                                                                                                                                                                                                                                                                                                                                                                                                                                                                                                                                                                                                                                                                                                                                                                                                                                 | Laboratoire Biolife                                                                                                                                                                             | Laboratoire de Biotechnologie                                                               | Mouna Ouadghiri, Tarik Aanniz, Mohammed Walid Chemaou Elfihri, Mohamed Chenaoui, Hanae Dakka, Afaf Alaoui, Otmame Touzani, Bouchra Belfquih, Lahcen Belyamani, Saaid Amzazi and Azeddine Ibrahim        |
| see above                                                                                                                                                                                                                                                                                                                                                                                                                                                                                                                                                                                                                                                                                                                                                                                                                                                                                                                                                                                                                                                                                                                                                                                                                                                                                                                                                                                                                                                                                                                                                                                                                                                                                                                                                                                                                                                                                                                                                                                                                                                                                                                                                                                                                                                                                                                                                                                                                                                                                      | Laboratoire Biolife                                                                                                                                                                             | Laboratoire de Biotechnologie                                                               | Mouna Ouadghiri, Tarik Aanniz, Mohammed Walid Chemaou Elfihri, Mohamed Chenaoui, Hanae Dakka, Afaf Alaoui, Otmame Touzani, Bouchra Belfquih, Lahcen Belyamani, Saaid Amzazi and Azeddine Ibrahim        |
| EPI_ISL_728340                                                                                                                                                                                                                                                                                                                                                                                                                                                                                                                                                                                                                                                                                                                                                                                                                                                                                                                                                                                                                                                                                                                                                                                                                                                                                                                                                                                                                                                                                                                                                                                                                                                                                                                                                                                                                                                                                                                                                                                                                                                                                                                                                                                                                                                                                                                                                                                                                                                                                 | Laboratoire Biolife                                                                                                                                                                             | Laboratoire de Biotechnologie                                                               | Mouna Ouadghiri, Tarik Aanniz, Mohammed Walid Chemaou Elfihri, Mohamed Chenaoui, Hanae Dakka, Afaf Alaoui, Otmame Touzani, Bouchra Belfquih, Lahcen Belyamani, Saaid Amzazi and Azeddine Ibrahim        |
| EPI_ISL_728342, EPI_ISL_728344, EPI_ISL_728347, EPI_ISL_728349, EPI_ISL_728352, EPI_ISL_728353, EPI_ISL_728355, EPI_ISL_728359, EPI_ISL_728360, EPI_ISL_728363, EPI_ISL_728366, EPI_ISL_728367                                                                                                                                                                                                                                                                                                                                                                                                                                                                                                                                                                                                                                                                                                                                                                                                                                                                                                                                                                                                                                                                                                                                                                                                                                                                                                                                                                                                                                                                                                                                                                                                                                                                                                                                                                                                                                                                                                                                                                                                                                                                                                                                                                                                                                                                                                 | Laboratoire Biolife                                                                                                                                                                             | Laboratoire de Biotechnologie                                                               | Mouna Ouadghiri, Tarik Aanniz, Mohammed Walid Chemaou Elfihri, Mohamed Chenaoui, Hanae Dakka, Afaf Alaoui, Otmame Touzani, Bouchra Belfquih, Lahcen Belyamani, Saaid Amzazi and Azeddine Ibrahim        |
| see above                                                                                                                                                                                                                                                                                                                                                                                                                                                                                                                                                                                                                                                                                                                                                                                                                                                                                                                                                                                                                                                                                                                                                                                                                                                                                                                                                                                                                                                                                                                                                                                                                                                                                                                                                                                                                                                                                                                                                                                                                                                                                                                                                                                                                                                                                                                                                                                                                                                                                      | Laboratoire Biolife                                                                                                                                                                             | Laboratoire de Biotechnologie                                                               | Mouna Ouadghiri, Tarik Aanniz, Mohammed Walid Chemaou Elfihri, Mohamed Chenaoui, Hanae Dakka, Afaf Alaoui, Otmame Touzani, Bouchra Belfquih, Lahcen Belyamani, Saaid Amzazi and Azeddine Ibrahim        |
| EPI_ISL_730652                                                                                                                                                                                                                                                                                                                                                                                                                                                                                                                                                                                                                                                                                                                                                                                                                                                                                                                                                                                                                                                                                                                                                                                                                                                                                                                                                                                                                                                                                                                                                                                                                                                                                                                                                                                                                                                                                                                                                                                                                                                                                                                                                                                                                                                                                                                                                                                                                                                                                 | University of Bari, Valenzano, Italy                                                                                                                                                            | Dept. Food safety, Nutrition and Veterinary Public Health, Istituto superiore di sanità     | N. Decaro, E. Lorusso, G. Elia, C. Desario, D. Buonavoglia, V., Martella, C. Buonavoglia, G. Vaccari, I. Di Bartolo, L. De Sabato, U. Agrimi                                                            |
| EPI_ISL_730653                                                                                                                                                                                                                                                                                                                                                                                                                                                                                                                                                                                                                                                                                                                                                                                                                                                                                                                                                                                                                                                                                                                                                                                                                                                                                                                                                                                                                                                                                                                                                                                                                                                                                                                                                                                                                                                                                                                                                                                                                                                                                                                                                                                                                                                                                                                                                                                                                                                                                 | University of Bari, Valenzano, Italy                                                                                                                                                            | Istituto Zooprofilattico Sperimentale dell'Abruzzo e del Molise "G. Caporale".              | N. Decaro, E. Lorusso, G. Elia, C. Desario, D. Buonavoglia, V., Martella, C. Buonavoglia, A. Lorusso, C. Cammà, V. Curini                                                                               |
| EPI_ISL_732374, EPI_ISL_732375, EPI_ISL_732376, EPI_ISL_732377, EPI_ISL_732378, EPI_ISL_732379, EPI_ISL_732380, EPI_ISL_732381, EPI_ISL_732382, EPI_ISL_732383, EPI_ISL_732384, EPI_ISL_732385, EPI_ISL_732386, EPI_ISL_732387, EPI_ISL_732388, EPI_ISL_732389, EPI_ISL_732390, EPI_ISL_732391, EPI_ISL_732392, EPI_ISL_732393, EPI_ISL_732394, EPI_ISL_732395, EPI_ISL_732396, EPI_ISL_732397, EPI_ISL_732398, EPI_ISL_732399, EPI_ISL_732400, EPI_ISL_732401, EPI_ISL_732402, EPI_ISL_732403, EPI_ISL_732404, EPI_ISL_732405, EPI_ISL_732406, EPI_ISL_732407, EPI_ISL_732408, EPI_ISL_732409, EPI_ISL_732410, EPI_ISL_732411, EPI_ISL_732412, EPI_ISL_732413, EPI_ISL_732414, EPI_ISL_732415, EPI_ISL_732416, EPI_ISL_732417, EPI_ISL_732418, EPI_ISL_732419, EPI_ISL_732420, EPI_ISL_732421, EPI_ISL_732422, EPI_ISL_732423, EPI_ISL_732424, EPI_ISL_732425, EPI_ISL_732426, EPI_ISL_732427, EPI_ISL_732428, EPI_ISL_732429, EPI_ISL_732430, EPI_ISL_732431, EPI_ISL_732432, EPI_ISL_732433, EPI_ISL_732434, EPI_ISL_732435, EPI_ISL_732436, EPI_ISL_732437, EPI_ISL_732438, EPI_ISL_732439, EPI_ISL_732440, EPI_ISL_732441, EPI_ISL_732442, EPI_ISL_732443, EPI_ISL_732444, EPI_ISL_732445, EPI_ISL_732446, EPI_ISL_732447, EPI_ISL_732448, EPI_ISL_732449, EPI_ISL_732450, EPI_ISL_732451, EPI_ISL_732452, EPI_ISL_732453, EPI_ISL_732454, EPI_ISL_732455, EPI_ISL_732456, EPI_ISL_732457, EPI_ISL_732458, EPI_ISL_732459, EPI_ISL_732460, EPI_ISL_732461, EPI_ISL_732462, EPI_ISL_732463, EPI_ISL_732464, EPI_ISL_732465, EPI_ISL_732466, EPI_ISL_732467, EPI_ISL_732468, EPI_ISL_732469, EPI_ISL_732470, EPI_ISL_732471, EPI_ISL_732472, EPI_ISL_732473, EPI_ISL_732474, EPI_ISL_732475, EPI_ISL_732476, EPI_ISL_732477, EPI_ISL_732478, EPI_ISL_732479, EPI_ISL_732480, EPI_ISL_732481, EPI_ISL_732482, EPI_ISL_732483, EPI_ISL_732484, EPI_ISL_732485, EPI_ISL_732486, EPI_ISL_732487, EPI_ISL_732488, EPI_ISL_732489, EPI_ISL_732490, EPI_ISL_732491, EPI_ISL_732492, EPI_ISL_732493, EPI_ISL_732494, EPI_ISL_732495, EPI_ISL_732496, EPI_ISL_732497, EPI_ISL_732498, EPI_ISL_732499, EPI_ISL_732500, EPI_ISL_732501, EPI_ISL_732502, EPI_ISL_732503, EPI_ISL_732504, EPI_ISL_732505, EPI_ISL_732506, EPI_ISL_732507, EPI_ISL_732508, EPI_ISL_732509, EPI_ISL_732510, EPI_ISL_732511, EPI_ISL_732512, EPI_ISL_732513, EPI_ISL_732514, EPI_ISL_732515, EPI_ISL_732516, EPI_ISL_732517, EPI_ISL_732518, EPI_ISL_732519, EPI_ISL_732520, EPI_ISL_732521, EPI_ISL_732522, EPI_ISL_732523 | National Virus Reference Laboratory                                                                                                                                                             | National Virus Reference Laboratory                                                         | Michael Carr, Gabriel Gonzalez, Jonathan Dean, Daniel Hare, Cillian F De Gascun                                                                                                                         |
| see above                                                                                                                                                                                                                                                                                                                                                                                                                                                                                                                                                                                                                                                                                                                                                                                                                                                                                                                                                                                                                                                                                                                                                                                                                                                                                                                                                                                                                                                                                                                                                                                                                                                                                                                                                                                                                                                                                                                                                                                                                                                                                                                                                                                                                                                                                                                                                                                                                                                                                      | Central Virology Laboratory, Israel Ministry of Health                                                                                                                                          | Central Virology Laboratory, Israel Ministry of Health                                      | Neta S. Zuckerman, Efrat Dahan Bucris, Oran Erster, Ella Mendelson, Michal Mandelboim, Orna Mor                                                                                                         |
| EPI_ISL_735384, EPI_ISL_735385, EPI_ISL_735386, EPI_ISL_735387, EPI_ISL_735388, EPI_ISL_735389, EPI_ISL_735390                                                                                                                                                                                                                                                                                                                                                                                                                                                                                                                                                                                                                                                                                                                                                                                                                                                                                                                                                                                                                                                                                                                                                                                                                                                                                                                                                                                                                                                                                                                                                                                                                                                                                                                                                                                                                                                                                                                                                                                                                                                                                                                                                                                                                                                                                                                                                                                 | National Virus Reference Laboratory                                                                                                                                                             | National Virus Reference Laboratory                                                         | Michael Carr, Gabriel Gonzalez, Jonathan Dean, Daniel Hare, Cillian F De Gascun                                                                                                                         |
| EPI_ISL_735494                                                                                                                                                                                                                                                                                                                                                                                                                                                                                                                                                                                                                                                                                                                                                                                                                                                                                                                                                                                                                                                                                                                                                                                                                                                                                                                                                                                                                                                                                                                                                                                                                                                                                                                                                                                                                                                                                                                                                                                                                                                                                                                                                                                                                                                                                                                                                                                                                                                                                 | Cox's Bazar Medical College                                                                                                                                                                     | Central Biological Research Laboratory and Department of Biochemistry and Molecular Biology | Md. Imranul Hoq, Robiul Hasan Bhuiyan, Md. Khondakar Raziur Rahman, Imam Hossen, Sajib Rudra, Md. Arif Hossain, Shanta Paul, Md. Omer Faruq, Mohammad Omar Faruque, H. M. Abdullah Al Masud             |
| EPI_ISL_735495                                                                                                                                                                                                                                                                                                                                                                                                                                                                                                                                                                                                                                                                                                                                                                                                                                                                                                                                                                                                                                                                                                                                                                                                                                                                                                                                                                                                                                                                                                                                                                                                                                                                                                                                                                                                                                                                                                                                                                                                                                                                                                                                                                                                                                                                                                                                                                                                                                                                                 | Bhashabir M A Wadud RT-PCR Lab, Chandpur                                                                                                                                                        | Central Biological Research Laboratory and Department of Biochemistry and Molecular Biology | Md. Imranul Hoq, Robiul Hasan Bhuiyan, Md. Khondakar Raziur Rahman, Imam Hossen, Sajib Rudra, Md. Arif Hossain, Shanta Paul, Md. Omer Faruq, Mohammad Omar Faruque, H. M. Abdullah Al Masud             |
| EPI_ISL_735496                                                                                                                                                                                                                                                                                                                                                                                                                                                                                                                                                                                                                                                                                                                                                                                                                                                                                                                                                                                                                                                                                                                                                                                                                                                                                                                                                                                                                                                                                                                                                                                                                                                                                                                                                                                                                                                                                                                                                                                                                                                                                                                                                                                                                                                                                                                                                                                                                                                                                 | Chattogram Veterinary and Animal Sciences University                                                                                                                                            | Central Biological Research Laboratory and Department of Biochemistry and Molecular Biology | Md. Imranul Hoq, Robiul Hasan Bhuiyan, Md. Khondakar Raziur Rahman, Imam Hossen, Sajib Rudra, Md. Arif Hossain, Shanta Paul, Md. Omer Faruq, Mohammad Omar Faruque, H. M. Abdullah Al Masud             |
| EPI_ISL_735497                                                                                                                                                                                                                                                                                                                                                                                                                                                                                                                                                                                                                                                                                                                                                                                                                                                                                                                                                                                                                                                                                                                                                                                                                                                                                                                                                                                                                                                                                                                                                                                                                                                                                                                                                                                                                                                                                                                                                                                                                                                                                                                                                                                                                                                                                                                                                                                                                                                                                 | Chattogram Veterinary and Animal Sciences University                                                                                                                                            | Central Biological Research Laboratory and Department of Biochemistry and Molecular Biology | Mohammad Omar Faruque, H. M. Abdullah Al Masud, Imam Hossen, Md. Khondakar Raziur Rahman, Sajib Rudra, Md. Arif Hossain, Shanta Paul, Md. Omer Faruq, Robiul Hasan Bhuiyan, Md. Imranul Hoq             |
| EPI_ISL_735498, EPI_ISL_735499                                                                                                                                                                                                                                                                                                                                                                                                                                                                                                                                                                                                                                                                                                                                                                                                                                                                                                                                                                                                                                                                                                                                                                                                                                                                                                                                                                                                                                                                                                                                                                                                                                                                                                                                                                                                                                                                                                                                                                                                                                                                                                                                                                                                                                                                                                                                                                                                                                                                 | University of Chittagong                                                                                                                                                                        | Central Biological Research Laboratory and Department of Biochemistry and Molecular Biology | Mohammad Omar Faruque, H. M. Abdullah Al Masud, Imam Hossen, Md. Khondakar Raziur Rahman, Sajib Rudra, Md. Arif Hossain, Shanta Paul, Md. Omer Faruq, Robiul Hasan Bhuiyan, Md. Imranul Hoq             |
| EPI_ISL_736998, EPI_ISL_736999, EPI_ISL_737000, EPI_ISL_737001, EPI_ISL_737002, EPI_ISL_737003, EPI_ISL_737004, EPI_ISL_737005, EPI_ISL_737006, EPI_ISL_737007, EPI_ISL_737008, EPI_ISL_737009, EPI_ISL_737010, EPI_ISL_737011, EPI_ISL_737012, EPI_ISL_737013, EPI_ISL_737014, EPI_ISL_737015, EPI_ISL_737016, EPI_ISL_737017, EPI_ISL_737018, EPI_ISL_737019, EPI_ISL_737020, EPI_ISL_737021, EPI_ISL_737022, EPI_ISL_737023, EPI_ISL_737024, EPI_ISL_737025, EPI_ISL_737026, EPI_ISL_737027, EPI_ISL_737028, EPI_ISL_737029, EPI_ISL_737030, EPI_ISL_737031, EPI_ISL_737032, EPI_ISL_737033                                                                                                                                                                                                                                                                                                                                                                                                                                                                                                                                                                                                                                                                                                                                                                                                                                                                                                                                                                                                                                                                                                                                                                                                                                                                                                                                                                                                                                                                                                                                                                                                                                                                                                                                                                                                                                                                                                 | The National Institute of Public Health                                                                                                                                                         | State Veterinary Institute Prague                                                           | Nagy A, Jirincova, H, Trnka, D, Vecerova, J                                                                                                                                                             |
| see above                                                                                                                                                                                                                                                                                                                                                                                                                                                                                                                                                                                                                                                                                                                                                                                                                                                                                                                                                                                                                                                                                                                                                                                                                                                                                                                                                                                                                                                                                                                                                                                                                                                                                                                                                                                                                                                                                                                                                                                                                                                                                                                                                                                                                                                                                                                                                                                                                                                                                      | Central Virology Laboratory, Israel Ministry of Health                                                                                                                                          | Central Virology Laboratory, Israel Ministry of Health                                      | Neta S. Zuckerman, Efrat Dahan Bucris, Oran Erster, Michal Mandelboim, Orna Mor, Ella Mendelson                                                                                                         |
| EPI_ISL_739659, EPI_ISL_739660, EPI_ISL_739661                                                                                                                                                                                                                                                                                                                                                                                                                                                                                                                                                                                                                                                                                                                                                                                                                                                                                                                                                                                                                                                                                                                                                                                                                                                                                                                                                                                                                                                                                                                                                                                                                                                                                                                                                                                                                                                                                                                                                                                                                                                                                                                                                                                                                                                                                                                                                                                                                                                 | Al-Quds Nutrition and Health Research Institute, Al-Quds University                                                                                                                             | Al-Quds Nutrition and Health Research Institute, Al-Quds University                         | Nasereddin, A., Ereqat, S., Al-Jawabreh, A., Rishmawi, C.                                                                                                                                               |
| EPI_ISL_742176, EPI_ISL_742182, EPI_ISL_742183, EPI_ISL_742186, EPI_ISL_742192, EPI_ISL_742194, EPI_ISL_742204, EPI_ISL_742205, EPI_ISL_742207, EPI_ISL_742208, EPI_ISL_742213, EPI_ISL_742214, EPI_ISL_742215, EPI_ISL_742217, EPI_ISL_742220, EPI_ISL_742224, EPI_ISL_742225, EPI_ISL_742227, EPI_ISL_742231, EPI_ISL_742233, EPI_ISL_742236, EPI_ISL_742240, EPI_ISL_742241                                                                                                                                                                                                                                                                                                                                                                                                                                                                                                                                                                                                                                                                                                                                                                                                                                                                                                                                                                                                                                                                                                                                                                                                                                                                                                                                                                                                                                                                                                                                                                                                                                                                                                                                                                                                                                                                                                                                                                                                                                                                                                                 |                                                                                                                                                                                                 |                                                                                             |                                                                                                                                                                                                         |

|                                                                                                                                                                                                                                                                                                                                                                                                                                                                                                                                                                                                                                                                                                                                                                                                                                                                                                                                                                                                                                                                                                                                                                                                                                                                                                                                                                                                                                                |                                                                                                                                                                                                 |                                                                                                                                                                                         |                                                                                                                                                                                                                                                                                                                                                                                                                                                                                                                                                                 |
|------------------------------------------------------------------------------------------------------------------------------------------------------------------------------------------------------------------------------------------------------------------------------------------------------------------------------------------------------------------------------------------------------------------------------------------------------------------------------------------------------------------------------------------------------------------------------------------------------------------------------------------------------------------------------------------------------------------------------------------------------------------------------------------------------------------------------------------------------------------------------------------------------------------------------------------------------------------------------------------------------------------------------------------------------------------------------------------------------------------------------------------------------------------------------------------------------------------------------------------------------------------------------------------------------------------------------------------------------------------------------------------------------------------------------------------------|-------------------------------------------------------------------------------------------------------------------------------------------------------------------------------------------------|-----------------------------------------------------------------------------------------------------------------------------------------------------------------------------------------|-----------------------------------------------------------------------------------------------------------------------------------------------------------------------------------------------------------------------------------------------------------------------------------------------------------------------------------------------------------------------------------------------------------------------------------------------------------------------------------------------------------------------------------------------------------------|
| see above                                                                                                                                                                                                                                                                                                                                                                                                                                                                                                                                                                                                                                                                                                                                                                                                                                                                                                                                                                                                                                                                                                                                                                                                                                                                                                                                                                                                                                      | Virology Department, Royal Infirmary of Edinburgh, NHS Lothian / School of Biological Sciences, University of Edinburgh / Institute of Genetics and Molecular Medicine, University of Edinburgh | COVID-19 Genomics UK (COG-UK) Consortium                                                                                                                                                | McHugh M, Dewar R, Rooke S, Gallagher M, Balcaza C, O'Toole Á, Scher E, Hill V, McCrone JT, Colqhoun R, Yu X, Jackson B, Rambaut A, Williams TC, Templeton K                                                                                                                                                                                                                                                                                                                                                                                                    |
| EPI_ISL_745034, EPI_ISL_745035, EPI_ISL_745036, EPI_ISL_745037, EPI_ISL_745038, EPI_ISL_745039, EPI_ISL_745040, EPI_ISL_745041, EPI_ISL_745042, EPI_ISL_745043, EPI_ISL_745044, EPI_ISL_745045, EPI_ISL_745046, EPI_ISL_745047, EPI_ISL_745048, EPI_ISL_745049, EPI_ISL_745050, EPI_ISL_745051, EPI_ISL_745052, EPI_ISL_745053, EPI_ISL_745054, EPI_ISL_745055, EPI_ISL_745056, EPI_ISL_745057, EPI_ISL_745058, EPI_ISL_745059, EPI_ISL_745060, EPI_ISL_745061, EPI_ISL_745062, EPI_ISL_745063, EPI_ISL_745064, EPI_ISL_745065, EPI_ISL_745066, EPI_ISL_745067, EPI_ISL_745068, EPI_ISL_745069, EPI_ISL_745070, EPI_ISL_745071, EPI_ISL_745072, EPI_ISL_745073, EPI_ISL_745074, EPI_ISL_745075, EPI_ISL_745076, EPI_ISL_745077, EPI_ISL_745078, EPI_ISL_745079, EPI_ISL_745080, EPI_ISL_745081, EPI_ISL_745083, EPI_ISL_745084, EPI_ISL_745085, EPI_ISL_745086                                                                                                                                                                                                                                                                                                                                                                                                                                                                                                                                                                                 |                                                                                                                                                                                                 |                                                                                                                                                                                         |                                                                                                                                                                                                                                                                                                                                                                                                                                                                                                                                                                 |
| see above                                                                                                                                                                                                                                                                                                                                                                                                                                                                                                                                                                                                                                                                                                                                                                                                                                                                                                                                                                                                                                                                                                                                                                                                                                                                                                                                                                                                                                      | Israel Central Virology laboratory                                                                                                                                                              | Israel Central Virology laboratory                                                                                                                                                      | Neta Zuckerman, Efrat Dahan Bucris, Oran Erster, Michal Mandelboim, Orna Mor, Ella Mendelson                                                                                                                                                                                                                                                                                                                                                                                                                                                                    |
| EPI_ISL_745212, EPI_ISL_745213, EPI_ISL_745214, EPI_ISL_745215, EPI_ISL_745216, EPI_ISL_745217, EPI_ISL_745218, EPI_ISL_745219, EPI_ISL_745220, EPI_ISL_745221                                                                                                                                                                                                                                                                                                                                                                                                                                                                                                                                                                                                                                                                                                                                                                                                                                                                                                                                                                                                                                                                                                                                                                                                                                                                                 | Lab voor klinische biologie                                                                                                                                                                     | Onderzoeksgroep Virologie                                                                                                                                                               | Nick Vereecke, Laurens Lambrechts, Marthe Pauwels, Bruno Verhasselt, Linos Vandekerckhove, Hans Nauwynck, Sebastiaan Theuns                                                                                                                                                                                                                                                                                                                                                                                                                                     |
| EPI_ISL_746319                                                                                                                                                                                                                                                                                                                                                                                                                                                                                                                                                                                                                                                                                                                                                                                                                                                                                                                                                                                                                                                                                                                                                                                                                                                                                                                                                                                                                                 | Genome Center                                                                                                                                                                                   | Genome Center                                                                                                                                                                           | Md. Shazid Hasan, Hassan M. Al-Emran, Ovinu Kibria Islam, A. S. M. Rubayet- Ul- Alam, Selina Akter, Md. Tanvir Islam, Pravas Chandra Roy, Shovon Lal Sarkar, Najmuj Sakib, Nigar Sultana Meghla, S. M. Tanjil Shah, Shireen Nigar, Md. Iqbal Kabir Jahid, Md. Anwar Hossain                                                                                                                                                                                                                                                                                     |
| EPI_ISL_747283                                                                                                                                                                                                                                                                                                                                                                                                                                                                                                                                                                                                                                                                                                                                                                                                                                                                                                                                                                                                                                                                                                                                                                                                                                                                                                                                                                                                                                 | DNA SOLUTION LTD.                                                                                                                                                                               | DNA SOLUTION LTD.                                                                                                                                                                       | Md. Imran Khan, Kazi Nadim Hasan, Abu Sufian, Jannatun Naima, Abdul Khaleque, Mizanur Rahman, Firoz Kabir, Mohammad Fazle Alam Rabbi, Sharif Akhteruzzaman                                                                                                                                                                                                                                                                                                                                                                                                      |
| EPI_ISL_752511, EPI_ISL_752512, EPI_ISL_752513, EPI_ISL_752514, EPI_ISL_752515, EPI_ISL_752516, EPI_ISL_752517, EPI_ISL_752518, EPI_ISL_752519, EPI_ISL_752520, EPI_ISL_752521, EPI_ISL_752522, EPI_ISL_752523, EPI_ISL_752524, EPI_ISL_752525, EPI_ISL_752526, EPI_ISL_752527, EPI_ISL_752528, EPI_ISL_752529, EPI_ISL_752530, EPI_ISL_752531, EPI_ISL_752532, EPI_ISL_752533, EPI_ISL_752534, EPI_ISL_752535, EPI_ISL_752536, EPI_ISL_752537, EPI_ISL_752538, EPI_ISL_752539, EPI_ISL_752540, EPI_ISL_752541, EPI_ISL_752542, EPI_ISL_752543, EPI_ISL_752544, EPI_ISL_752545, EPI_ISL_752546, EPI_ISL_752547, EPI_ISL_752548, EPI_ISL_752549, EPI_ISL_752550, EPI_ISL_752551, EPI_ISL_752552, EPI_ISL_752553, EPI_ISL_752554, EPI_ISL_752555, EPI_ISL_752556, EPI_ISL_752557, EPI_ISL_752558, EPI_ISL_752559, EPI_ISL_752560, EPI_ISL_752561, EPI_ISL_752562, EPI_ISL_752563, EPI_ISL_752564, EPI_ISL_752565, EPI_ISL_752566, EPI_ISL_752567, EPI_ISL_752568, EPI_ISL_752569, EPI_ISL_752570, EPI_ISL_752571, EPI_ISL_752572, EPI_ISL_752573, EPI_ISL_752574, EPI_ISL_752575, EPI_ISL_752576, EPI_ISL_752577, EPI_ISL_752578, EPI_ISL_752579, EPI_ISL_752580, EPI_ISL_752581, EPI_ISL_752582, EPI_ISL_752583, EPI_ISL_752584, EPI_ISL_752585, EPI_ISL_752586, EPI_ISL_752587, EPI_ISL_752588, EPI_ISL_752589, EPI_ISL_752590, EPI_ISL_752591, EPI_ISL_752592, EPI_ISL_752593, EPI_ISL_752594, EPI_ISL_752595, EPI_ISL_752596, EPI_ISL_752597 |                                                                                                                                                                                                 |                                                                                                                                                                                         |                                                                                                                                                                                                                                                                                                                                                                                                                                                                                                                                                                 |
| see above                                                                                                                                                                                                                                                                                                                                                                                                                                                                                                                                                                                                                                                                                                                                                                                                                                                                                                                                                                                                                                                                                                                                                                                                                                                                                                                                                                                                                                      | National Virus Reference Laboratory                                                                                                                                                             | National Virus Reference Laboratory                                                                                                                                                     | Michael Carr, Gabriel Gonzalez, Jonathan Dean, Daniel Hare, Cillian F De Gascun                                                                                                                                                                                                                                                                                                                                                                                                                                                                                 |
| EPI_ISL_753701                                                                                                                                                                                                                                                                                                                                                                                                                                                                                                                                                                                                                                                                                                                                                                                                                                                                                                                                                                                                                                                                                                                                                                                                                                                                                                                                                                                                                                 | Specialized Lab for COVID-19 Detection, Department of Genetic Engineering and Biotechnology                                                                                                     | Specialized Lab for COVID-19 Detection, Department of Genetic Engineering and Biotechnology                                                                                             | Nurnabi Azad Jewel, Ziaul Faruque Joy , Md. Nazmul Hasan, Shamsul H. Prodhon, Hammadul Hoque , Md. Mobarok Karim, Shahrear Arefin, Md. Tahnin Khan                                                                                                                                                                                                                                                                                                                                                                                                              |
| EPI_ISL_754059                                                                                                                                                                                                                                                                                                                                                                                                                                                                                                                                                                                                                                                                                                                                                                                                                                                                                                                                                                                                                                                                                                                                                                                                                                                                                                                                                                                                                                 | Specialized Lab for COVID-19 Detection, Department of Genetic Engineering and Biotechnology                                                                                                     | Specialized Lab for COVID-19 Detection, Department of Genetic Engineering and Biotechnology                                                                                             | Md. Nazmul Hasan, Md. Akkas Ali, Shamsul H. Prodhon, Hammadul Hoque , Nurnabi Azad Jewel, Md Mohsin Bapary, Diptha Chakraborty                                                                                                                                                                                                                                                                                                                                                                                                                                  |
| EPI_ISL_754173                                                                                                                                                                                                                                                                                                                                                                                                                                                                                                                                                                                                                                                                                                                                                                                                                                                                                                                                                                                                                                                                                                                                                                                                                                                                                                                                                                                                                                 | Specialized Lab for COVID-19 Detection, Department of Genetic Engineering and Biotechnology                                                                                                     | Specialized Lab for COVID-19 Detection, Department of Genetic Engineering and Biotechnology                                                                                             | Md. Nazmul Hasan, Shamsul H. Prodhon, Hammadul Hoque , Nurnabi Azad Jewel, Mumtahn Hammad, Mahedi Hasan Ridoy, Avishek Sarkar                                                                                                                                                                                                                                                                                                                                                                                                                                   |
| EPI_ISL_754177                                                                                                                                                                                                                                                                                                                                                                                                                                                                                                                                                                                                                                                                                                                                                                                                                                                                                                                                                                                                                                                                                                                                                                                                                                                                                                                                                                                                                                 | Specialized Lab for COVID-19 Detection, Department of Genetic Engineering and Biotechnology                                                                                                     | Specialized Lab for COVID-19 Detection, Department of Genetic Engineering and Biotechnology                                                                                             | Nurnabi Azad Jewel, Md. Nazmul Hasan, Shamsul H. Prodhon, Hammadul Hoque, Asim Debnath, Sudipto Sakib Duranto                                                                                                                                                                                                                                                                                                                                                                                                                                                   |
| EPI_ISL_754181                                                                                                                                                                                                                                                                                                                                                                                                                                                                                                                                                                                                                                                                                                                                                                                                                                                                                                                                                                                                                                                                                                                                                                                                                                                                                                                                                                                                                                 | Department for Virology, Molecular Biology and Genome Research, R. G. Lugar Center for Public Health Research, National Center for Disease Control and Public Health (NCDC) of Georgia.         | Department for Virology, Molecular Biology and Genome Research, R. G. Lugar Center for Public Health Research, National Center for Disease Control and Public Health (NCDC) of Georgia. | Meri Pantsulaia, Nino Berishvili, Tata Imnadze, Giorgi Tomashvili, Ana Papkauri, Gvantsa Brachveli, Gvantsa Chanturia, Ann Machabishvili, Nato Kotaria, Marine Murtskhaladze, Lela Sabadze, Mari Gavashelidze, Tamar Jashiaashvili, Tea Tevdoradze, Ketevan Sidamonidze, Ekaterine Khmaladze, Ekaterine Zhgenti, Roena Sukhiasvili, Mariam Zakalashvili, Lela Urushadze, Magda Dgebuadze, Davit Tsaguria, Ekaterine Zangaladze, Adam Kotorashvili, Maia Alkhashashvili, Irma Burjanadze, Anna Kasradze, Khatuna Zakhashvili, Paata Imnadze, Amiran Gamkrelidze. |
| EPI_ISL_754182                                                                                                                                                                                                                                                                                                                                                                                                                                                                                                                                                                                                                                                                                                                                                                                                                                                                                                                                                                                                                                                                                                                                                                                                                                                                                                                                                                                                                                 | Wyoming Public Health Laboratory                                                                                                                                                                | Wyoming Public Health Laboratory                                                                                                                                                        | Noah Hull, Taylor Fearing, Channing Weber, Ashley Norberg, Bailey Bowcutt, and Wanda Manley                                                                                                                                                                                                                                                                                                                                                                                                                                                                     |
| EPI_ISL_754183                                                                                                                                                                                                                                                                                                                                                                                                                                                                                                                                                                                                                                                                                                                                                                                                                                                                                                                                                                                                                                                                                                                                                                                                                                                                                                                                                                                                                                 | Wyoming Public Health Laboratory                                                                                                                                                                | Wyoming Public Health Laboratory                                                                                                                                                        | Noah Hull, Taylor Fearing, Channing Weber, Ashley Norberg, Bailey Bowcutt, and Wanda Manley                                                                                                                                                                                                                                                                                                                                                                                                                                                                     |
| EPI_ISL_754215, EPI_ISL_754216, EPI_ISL_754217, EPI_ISL_754218, EPI_ISL_754219, EPI_ISL_754220, EPI_ISL_754221, EPI_ISL_754222, EPI_ISL_754223, EPI_ISL_754224, EPI_ISL_754225, EPI_ISL_754226, EPI_ISL_754227, EPI_ISL_754228, EPI_ISL_754389, EPI_ISL_756126, EPI_ISL_756127, EPI_ISL_756128, EPI_ISL_756129, EPI_ISL_756130, EPI_ISL_756131, EPI_ISL_756132, EPI_ISL_756133, EPI_ISL_756134, EPI_ISL_756164, EPI_ISL_756184, EPI_ISL_756185, EPI_ISL_756186, EPI_ISL_756187, EPI_ISL_756188, EPI_ISL_756189, EPI_ISL_756190, EPI_ISL_756241, EPI_ISL_756242, EPI_ISL_756243, EPI_ISL_756244, EPI_ISL_756245, EPI_ISL_756246, EPI_ISL_756253, EPI_ISL_756254, EPI_ISL_756255, EPI_ISL_756256, EPI_ISL_756257, EPI_ISL_756258, EPI_ISL_756259, EPI_ISL_756260, EPI_ISL_756261, EPI_ISL_756262, EPI_ISL_756263, EPI_ISL_756264, EPI_ISL_756265, EPI_ISL_756266, EPI_ISL_756267, EPI_ISL_756268, EPI_ISL_756269, EPI_ISL_756270                                                                                                                                                                                                                                                                                                                                                                                                                                                                                                                 |                                                                                                                                                                                                 |                                                                                                                                                                                         |                                                                                                                                                                                                                                                                                                                                                                                                                                                                                                                                                                 |
| see above                                                                                                                                                                                                                                                                                                                                                                                                                                                                                                                                                                                                                                                                                                                                                                                                                                                                                                                                                                                                                                                                                                                                                                                                                                                                                                                                                                                                                                      | Wyoming Public Health Laboratory                                                                                                                                                                | Wyoming Public Health Laboratory                                                                                                                                                        | Noah Hull, Taylor Fearing, Channing Weber, Ashley Norberg, Bailey Bowcutt, and Wanda Manley                                                                                                                                                                                                                                                                                                                                                                                                                                                                     |
| EPI_ISL_756306                                                                                                                                                                                                                                                                                                                                                                                                                                                                                                                                                                                                                                                                                                                                                                                                                                                                                                                                                                                                                                                                                                                                                                                                                                                                                                                                                                                                                                 | The Caribbean Public Health Agency                                                                                                                                                              | Carrington Lab, Department of PreClinical Sciences, Faculty of Medical Sciences, The University of the West Indies                                                                      | Nikita S. D. Sahadeo, Gabriel Escobar, Sarah Hill, Vernie Ramkissoon, Risha Singh, SueMin Nathaniel, Arianne Brown-Jordan, Naresh Nandram, Avery Hinds, Jerome Foster, Stanley Giddings, Karla Georges, Marsha Ivey, Rahul Naidu, , Rajini Haraksingh, Jaya Jayaraman, Chinna Chinnadurai, Adesh Ramsuhbag, Nuno Faria, Oliver Pybus, Christopher Oura, Christine V. F. Carrington                                                                                                                                                                              |
| EPI_ISL_756307, EPI_ISL_756308, EPI_ISL_756309, EPI_ISL_756310, EPI_ISL_756311, EPI_ISL_756357                                                                                                                                                                                                                                                                                                                                                                                                                                                                                                                                                                                                                                                                                                                                                                                                                                                                                                                                                                                                                                                                                                                                                                                                                                                                                                                                                 | The Caribbean Public Health Agency                                                                                                                                                              | Carrington Lab, Department of PreClinical Sciences, Faculty of Medical Sciences, The University of the West Indies                                                                      | Nikita S. D. Sahadeo, Arianne Brown-Jordan, Sarah Hill, Vernie Ramkissoon, Roshan Parasram, Naresh Nandram, Avery Hinds, Jerome Foster, Stanley Giddings, Karla Georges, Marsha Ivey, Rahul Naidu, Risha Singh, SueMin Nathaniel, Rajini Haraksingh, Jaya Jayaraman, Chinna Chinnadurai, Adesh Ramsuhbag, Nuno Faria, Oliver Pybus, Christopher Oura, Gabriel Escobar, Christine V. F. Carrington                                                                                                                                                               |
| EPI_ISL_756358, EPI_ISL_756359                                                                                                                                                                                                                                                                                                                                                                                                                                                                                                                                                                                                                                                                                                                                                                                                                                                                                                                                                                                                                                                                                                                                                                                                                                                                                                                                                                                                                 | The Caribbean Public Health Agency                                                                                                                                                              | Carrington Lab, Department of PreClinical Sciences, Faculty of Medical Sciences, The University of the West Indies                                                                      | Nikita S. D. Sahadeo, Gabriel Escobar, Sarah Hill, Vernie Ramkissoon, Risha Singh, SueMin Nathaniel, Arianne Brown-Jordan, Naresh Nandram, Avery Hinds, Jerome Foster, Stanley Giddings, Karla Georges, Marsha Ivey, Rahul Naidu, , Rajini Haraksingh, Jaya Jayaraman, Chinna Chinnadurai, Adesh Ramsuhbag, Nuno Faria, Oliver Pybus, Christopher Oura, Christine V. F. Carrington                                                                                                                                                                              |
| EPI_ISL_756360                                                                                                                                                                                                                                                                                                                                                                                                                                                                                                                                                                                                                                                                                                                                                                                                                                                                                                                                                                                                                                                                                                                                                                                                                                                                                                                                                                                                                                 | Caribbean Regional Public Health Authority                                                                                                                                                      | Carrington Lab, Department of PreClinical Sciences, Faculty of Medical Sciences, The University of the West Indies                                                                      | Nikita S. D. Sahadeo, Gabriel Escobar, Sarah Hill, Vernie Ramkissoon, Risha Singh, SueMin Nathaniel, Simone Keizer-Beache, Arianne Brown-Jordan, Naresh Nandram, Avery Hinds, Jerome Foster, Stanley Giddings, Karla Georges, Marsha Ivey, Rahul Naidu, , Rajini Haraksingh, Jaya Jayaraman, Chinna Chinnadurai, Adesh Ramsuhbag, Nuno Faria, Oliver Pybus, Christopher Oura, Christine V. F. Carrington                                                                                                                                                        |
| EPI_ISL_756361                                                                                                                                                                                                                                                                                                                                                                                                                                                                                                                                                                                                                                                                                                                                                                                                                                                                                                                                                                                                                                                                                                                                                                                                                                                                                                                                                                                                                                 | The Caribbean Public Health Agency                                                                                                                                                              | Carrington Lab, Department of PreClinical Sciences, Faculty of Medical Sciences, The University of the West Indies                                                                      | Nikita S. D. Sahadeo, Gabriel Escobar, Sarah Hill, Vernie Ramkissoon, Risha Singh, SueMin Nathaniel, Arianne Brown-Jordan, Naresh Nandram, Avery Hinds, Jerome Foster, Stanley Giddings, Karla Georges, Marsha Ivey, Rahul Naidu, , Rajini Haraksingh, Jaya Jayaraman, Chinna Chinnadurai, Adesh Ramsuhbag, Nuno Faria, Oliver Pybus, Christopher Oura, Christine V. F. Carrington                                                                                                                                                                              |
| EPI_ISL_756362, EPI_ISL_756363                                                                                                                                                                                                                                                                                                                                                                                                                                                                                                                                                                                                                                                                                                                                                                                                                                                                                                                                                                                                                                                                                                                                                                                                                                                                                                                                                                                                                 | Trinidad Public Health Laboratory                                                                                                                                                               | Carrington Lab, Department of PreClinical Sciences, Faculty of Medical Sciences, The University of the West Indies                                                                      | Nikita S. D. Sahadeo, Arianne Brown-Jordan, Sarah Hill, Vernie Ramkissoon, Roshan Parasram, Naresh Nandram, Avery Hinds, Jerome Foster, Stanley Giddings, Karla Georges, Marsha Ivey, Rahul Naidu, Risha Singh, SueMin Nathaniel, Rajini Haraksingh, Jaya Jayaraman, Chinna Chinnadurai, Adesh Ramsuhbag, Nuno Faria, Oliver Pybus, Christopher Oura, Gabriel Escobar, Christine V. F. Carrington                                                                                                                                                               |
| EPI_ISL_756364, EPI_ISL_756365, EPI_ISL_756366                                                                                                                                                                                                                                                                                                                                                                                                                                                                                                                                                                                                                                                                                                                                                                                                                                                                                                                                                                                                                                                                                                                                                                                                                                                                                                                                                                                                 | The Caribbean Public Health Agency                                                                                                                                                              | Carrington Lab, Department of PreClinical Sciences, Faculty of Medical Sciences, The University of the West Indies                                                                      | Nikita S. D. Sahadeo, Gabriel Escobar, Sarah Hill, Vernie Ramkissoon, Risha Singh, SueMin Nathaniel, Jacqueline Bissar-McKenzie, Arianne Brown-Jordan, Naresh Nandram, Avery Hinds, Jerome Foster, Stanley Giddings, Karla Georges, Marsha Ivey, Rahul Naidu, , Rajini Haraksingh, Jaya Jayaraman, Chinna Chinnadurai, Adesh Ramsuhbag, Nuno Faria, Oliver Pybus, Christopher Oura, Christine V. F. Carrington                                                                                                                                                  |
| EPI_ISL_756367                                                                                                                                                                                                                                                                                                                                                                                                                                                                                                                                                                                                                                                                                                                                                                                                                                                                                                                                                                                                                                                                                                                                                                                                                                                                                                                                                                                                                                 | The Caribbean Public Health Agency                                                                                                                                                              | Carrington Lab, Department of PreClinical Sciences, Faculty of Medical Sciences, The University of the West Indies                                                                      | Nikita S. D. Sahadeo, Gabriel Escobar, Sarah Hill, Vernie Ramkissoon, Risha Singh, SueMin Nathaniel, Jacqueline Bissor-McKenzie, Arianne Brown-Jordan, Naresh Nandram, Avery Hinds, Jerome Foster, Stanley Giddings, Karla Georges, Marsha Ivey, Rahul Naidu, , Rajini Haraksingh, Jaya Jayaraman, Chinna Chinnadurai, Adesh Ramsuhbag, Nuno Faria, Oliver Pybus, Christopher Oura, Christine V. F. Carrington                                                                                                                                                  |
| EPI_ISL_756368                                                                                                                                                                                                                                                                                                                                                                                                                                                                                                                                                                                                                                                                                                                                                                                                                                                                                                                                                                                                                                                                                                                                                                                                                                                                                                                                                                                                                                 | The Caribbean Public Health Agency                                                                                                                                                              | Carrington Lab, Department of PreClinical Sciences, Faculty of Medical Sciences, The University of the West Indies                                                                      | Nikita S. D. Sahadeo, Gabriel Escobar, Sarah Hill, Vernie Ramkissoon, Risha Singh, SueMin Nathaniel, Jacqueline Bissar-McKenzie, Arianne Brown-Jordan, Naresh Nandram, Avery Hinds, Jerome Foster, Stanley Giddings, Karla Georges, Marsha Ivey, Rahul Naidu, , Rajini Haraksingh, Jaya Jayaraman, Chinna Chinnadurai, Adesh Ramsuhbag, Nuno Faria, Oliver Pybus, Christopher Oura, Christine V. F. Carrington                                                                                                                                                  |
| EPI_ISL_756369, EPI_ISL_756370, EPI_ISL_756371, EPI_ISL_756372, EPI_ISL_756373, EPI_ISL_756374                                                                                                                                                                                                                                                                                                                                                                                                                                                                                                                                                                                                                                                                                                                                                                                                                                                                                                                                                                                                                                                                                                                                                                                                                                                                                                                                                 | CUMC - CHI Bergan Mercy                                                                                                                                                                         | Creighton University School of Medicine, Departments of Medical Microbiology and Pharmacology and Neuroscience                                                                          | Michael Belshan, Morgan A. Raine, Anne V. Cheng, Christopher J. Destache, Richard V. Goering, Jacob A. Siedlik, Holly A. Stessman                                                                                                                                                                                                                                                                                                                                                                                                                               |
| EPI_ISL_763362, EPI_ISL_763363, EPI_ISL_763364                                                                                                                                                                                                                                                                                                                                                                                                                                                                                                                                                                                                                                                                                                                                                                                                                                                                                                                                                                                                                                                                                                                                                                                                                                                                                                                                                                                                 | AIID                                                                                                                                                                                            | Irish Coronavirus Sequencing Consortium - National Virus Reference Laboratory                                                                                                           | Michael Carr, Gabriel Gonzalez, Alejandro Abner Garcia Leon, Patrick Mallon                                                                                                                                                                                                                                                                                                                                                                                                                                                                                     |

|                                                                                                                                                                                                                                                                                                                                                                                                                                                                                                                                                                                                                                                                                                                                                                                                                                                                                                                                                                                                                                                                                                                                                                                                                                                                                                                                                                                                                                                                                                                                                                                                                                                                                                                                                                                                                                                                                                                                                                                                                                                                                                                                                                                                                                                                                                                                                                                                                                                                                                                                                                                                                                                                                                                                                                                                                                                                                                                                                                                                                                                                                                                                                                                                                                                                                                                                                                                                                                                                                                                                                                                                                                                                                                                                                                                                                                                                                                                                                                                                                                                                                                                                                                                                                                                                                                                                                                                                                                                                                                                                                                                                                                                                                                                                                                                                                                                                                                                                                                                                                                                                                                                                                                                                                                                                                                                                                                                                                                                                                                                                                                                                                                                                                                                                                                                                                                                                                                                                                                                                                                                                                                                                                                                                                                                                                                                                                                                                                                                                                                                                                                                                                                                                                                                                                                                                                                                                                                                                                                                                                                                                                                                                                                                                                                                                                                                                                                                                                                                                                                                                                                                                                                                                                                                                                                                                                                                                                                                                                                                                                                                                                                                                                                                                                |                                                                          |                                                                                                                                                                                                 |                                                                                                                                                                                                                                                                                                        |                                                                                                                                                                                        |
|----------------------------------------------------------------------------------------------------------------------------------------------------------------------------------------------------------------------------------------------------------------------------------------------------------------------------------------------------------------------------------------------------------------------------------------------------------------------------------------------------------------------------------------------------------------------------------------------------------------------------------------------------------------------------------------------------------------------------------------------------------------------------------------------------------------------------------------------------------------------------------------------------------------------------------------------------------------------------------------------------------------------------------------------------------------------------------------------------------------------------------------------------------------------------------------------------------------------------------------------------------------------------------------------------------------------------------------------------------------------------------------------------------------------------------------------------------------------------------------------------------------------------------------------------------------------------------------------------------------------------------------------------------------------------------------------------------------------------------------------------------------------------------------------------------------------------------------------------------------------------------------------------------------------------------------------------------------------------------------------------------------------------------------------------------------------------------------------------------------------------------------------------------------------------------------------------------------------------------------------------------------------------------------------------------------------------------------------------------------------------------------------------------------------------------------------------------------------------------------------------------------------------------------------------------------------------------------------------------------------------------------------------------------------------------------------------------------------------------------------------------------------------------------------------------------------------------------------------------------------------------------------------------------------------------------------------------------------------------------------------------------------------------------------------------------------------------------------------------------------------------------------------------------------------------------------------------------------------------------------------------------------------------------------------------------------------------------------------------------------------------------------------------------------------------------------------------------------------------------------------------------------------------------------------------------------------------------------------------------------------------------------------------------------------------------------------------------------------------------------------------------------------------------------------------------------------------------------------------------------------------------------------------------------------------------------------------------------------------------------------------------------------------------------------------------------------------------------------------------------------------------------------------------------------------------------------------------------------------------------------------------------------------------------------------------------------------------------------------------------------------------------------------------------------------------------------------------------------------------------------------------------------------------------------------------------------------------------------------------------------------------------------------------------------------------------------------------------------------------------------------------------------------------------------------------------------------------------------------------------------------------------------------------------------------------------------------------------------------------------------------------------------------------------------------------------------------------------------------------------------------------------------------------------------------------------------------------------------------------------------------------------------------------------------------------------------------------------------------------------------------------------------------------------------------------------------------------------------------------------------------------------------------------------------------------------------------------------------------------------------------------------------------------------------------------------------------------------------------------------------------------------------------------------------------------------------------------------------------------------------------------------------------------------------------------------------------------------------------------------------------------------------------------------------------------------------------------------------------------------------------------------------------------------------------------------------------------------------------------------------------------------------------------------------------------------------------------------------------------------------------------------------------------------------------------------------------------------------------------------------------------------------------------------------------------------------------------------------------------------------------------------------------------------------------------------------------------------------------------------------------------------------------------------------------------------------------------------------------------------------------------------------------------------------------------------------------------------------------------------------------------------------------------------------------------------------------------------------------------------------------------------------------------------------------------------------------------------------------------------------------------------------------------------------------------------------------------------------------------------------------------------------------------------------------------------------------------------------------------------------------------------------------------------------------------------------------------------------------------------------------------------------------------------------------------------------------------------------------------------------------------------------------------------------------------------------------------------------------------------------------------------------------------------------------------------------------------------------------------------------------------------------------------------------------------------------------------------------------------------------------------------------------------------------------------------------------------|--------------------------------------------------------------------------|-------------------------------------------------------------------------------------------------------------------------------------------------------------------------------------------------|--------------------------------------------------------------------------------------------------------------------------------------------------------------------------------------------------------------------------------------------------------------------------------------------------------|----------------------------------------------------------------------------------------------------------------------------------------------------------------------------------------|
| EPI_ISL_763647, EPI_ISL_763893, EPI_ISL_763894, EPI_ISL_763899, EPI_ISL_763900, EPI_ISL_763902, EPI_ISL_763903, EPI_ISL_764071, EPI_ISL_764221, EPI_ISL_764356, EPI_ISL_764360, EPI_ISL_764361, EPI_ISL_764366, EPI_ISL_764368, EPI_ISL_764372                                                                                                                                                                                                                                                                                                                                                                                                                                                                                                                                                                                                                                                                                                                                                                                                                                                                                                                                                                                                                                                                                                                                                                                                                                                                                                                                                                                                                                                                                                                                                                                                                                                                                                                                                                                                                                                                                                                                                                                                                                                                                                                                                                                                                                                                                                                                                                                                                                                                                                                                                                                                                                                                                                                                                                                                                                                                                                                                                                                                                                                                                                                                                                                                                                                                                                                                                                                                                                                                                                                                                                                                                                                                                                                                                                                                                                                                                                                                                                                                                                                                                                                                                                                                                                                                                                                                                                                                                                                                                                                                                                                                                                                                                                                                                                                                                                                                                                                                                                                                                                                                                                                                                                                                                                                                                                                                                                                                                                                                                                                                                                                                                                                                                                                                                                                                                                                                                                                                                                                                                                                                                                                                                                                                                                                                                                                                                                                                                                                                                                                                                                                                                                                                                                                                                                                                                                                                                                                                                                                                                                                                                                                                                                                                                                                                                                                                                                                                                                                                                                                                                                                                                                                                                                                                                                                                                                                                                                                                                                 | see above                                                                | Virology Department, Royal Infirmary of Edinburgh, NHS Lothian / School of Biological Sciences, University of Edinburgh / Institute of Genetics and Molecular Medicine, University of Edinburgh | COVID-19 Genomics UK (COG-UK) Consortium                                                                                                                                                                                                                                                               | McHugh M, Dewar R, Rooke S, Gallagher M, Balcaza C, O'Toole A, Scher E, Hill V, McCrone JT, Colquhoun R, Yu X, Jackson B, Rambaut A, Williams TC, Templeton K                          |
| EPI_ISL_765568                                                                                                                                                                                                                                                                                                                                                                                                                                                                                                                                                                                                                                                                                                                                                                                                                                                                                                                                                                                                                                                                                                                                                                                                                                                                                                                                                                                                                                                                                                                                                                                                                                                                                                                                                                                                                                                                                                                                                                                                                                                                                                                                                                                                                                                                                                                                                                                                                                                                                                                                                                                                                                                                                                                                                                                                                                                                                                                                                                                                                                                                                                                                                                                                                                                                                                                                                                                                                                                                                                                                                                                                                                                                                                                                                                                                                                                                                                                                                                                                                                                                                                                                                                                                                                                                                                                                                                                                                                                                                                                                                                                                                                                                                                                                                                                                                                                                                                                                                                                                                                                                                                                                                                                                                                                                                                                                                                                                                                                                                                                                                                                                                                                                                                                                                                                                                                                                                                                                                                                                                                                                                                                                                                                                                                                                                                                                                                                                                                                                                                                                                                                                                                                                                                                                                                                                                                                                                                                                                                                                                                                                                                                                                                                                                                                                                                                                                                                                                                                                                                                                                                                                                                                                                                                                                                                                                                                                                                                                                                                                                                                                                                                                                                                                 | National Institute for Infectious Diseases, INMI, "L. Spallanzani" IRCCS | National Institute for Infectious Diseases, INMI, "L. Spallanzani" IRCCS                                                                                                                        | O Butera, C.E.M Gruber, F Messina, M Rueca, B Bartolini, E Giombini, MR Capobianchi, A Di Caro                                                                                                                                                                                                         |                                                                                                                                                                                        |
| EPI_ISL_765960, EPI_ISL_765961, EPI_ISL_765962, EPI_ISL_765963, EPI_ISL_765964, EPI_ISL_765965, EPI_ISL_765966, EPI_ISL_765967, EPI_ISL_765968, EPI_ISL_765969, EPI_ISL_765970, EPI_ISL_765971, EPI_ISL_765972, EPI_ISL_765973, EPI_ISL_765974, EPI_ISL_765975, EPI_ISL_765976, EPI_ISL_765977, EPI_ISL_765978, EPI_ISL_765979, EPI_ISL_765980, EPI_ISL_765981, EPI_ISL_765982, EPI_ISL_765983, EPI_ISL_765984, EPI_ISL_765985, EPI_ISL_766786, EPI_ISL_766787, EPI_ISL_766788, EPI_ISL_766789, EPI_ISL_766790                                                                                                                                                                                                                                                                                                                                                                                                                                                                                                                                                                                                                                                                                                                                                                                                                                                                                                                                                                                                                                                                                                                                                                                                                                                                                                                                                                                                                                                                                                                                                                                                                                                                                                                                                                                                                                                                                                                                                                                                                                                                                                                                                                                                                                                                                                                                                                                                                                                                                                                                                                                                                                                                                                                                                                                                                                                                                                                                                                                                                                                                                                                                                                                                                                                                                                                                                                                                                                                                                                                                                                                                                                                                                                                                                                                                                                                                                                                                                                                                                                                                                                                                                                                                                                                                                                                                                                                                                                                                                                                                                                                                                                                                                                                                                                                                                                                                                                                                                                                                                                                                                                                                                                                                                                                                                                                                                                                                                                                                                                                                                                                                                                                                                                                                                                                                                                                                                                                                                                                                                                                                                                                                                                                                                                                                                                                                                                                                                                                                                                                                                                                                                                                                                                                                                                                                                                                                                                                                                                                                                                                                                                                                                                                                                                                                                                                                                                                                                                                                                                                                                                                                                                                                                                 | see above                                                                | Wyoming Public Health Laboratory                                                                                                                                                                | Wyoming Public Health Laboratory                                                                                                                                                                                                                                                                       | Noah Hull, Taylor Fearing, Channing Weber, Ashley Norberg, Bailey Bowcutt, and Wanda Manley                                                                                            |
| EPI_ISL_766861, EPI_ISL_766862, EPI_ISL_766863, EPI_ISL_766864, EPI_ISL_766865, EPI_ISL_766866, EPI_ISL_766867, EPI_ISL_766868, EPI_ISL_766869, EPI_ISL_766870, EPI_ISL_766871, EPI_ISL_766872, EPI_ISL_766873, EPI_ISL_766874, EPI_ISL_766875                                                                                                                                                                                                                                                                                                                                                                                                                                                                                                                                                                                                                                                                                                                                                                                                                                                                                                                                                                                                                                                                                                                                                                                                                                                                                                                                                                                                                                                                                                                                                                                                                                                                                                                                                                                                                                                                                                                                                                                                                                                                                                                                                                                                                                                                                                                                                                                                                                                                                                                                                                                                                                                                                                                                                                                                                                                                                                                                                                                                                                                                                                                                                                                                                                                                                                                                                                                                                                                                                                                                                                                                                                                                                                                                                                                                                                                                                                                                                                                                                                                                                                                                                                                                                                                                                                                                                                                                                                                                                                                                                                                                                                                                                                                                                                                                                                                                                                                                                                                                                                                                                                                                                                                                                                                                                                                                                                                                                                                                                                                                                                                                                                                                                                                                                                                                                                                                                                                                                                                                                                                                                                                                                                                                                                                                                                                                                                                                                                                                                                                                                                                                                                                                                                                                                                                                                                                                                                                                                                                                                                                                                                                                                                                                                                                                                                                                                                                                                                                                                                                                                                                                                                                                                                                                                                                                                                                                                                                                                                 | see above                                                                | NIC Viral Respiratory Unit - Institut Pasteur of Algeria                                                                                                                                        | National Reference Center for Viruses of Respiratory Infections, Institut Pasteur, Paris                                                                                                                                                                                                               | Mélanie Albert, Marion Barbet, Sylvie Behillil, Méline Bizard, Angela Brisebarre, Flora Donati, Etienne Simon-Lorière, Vincent Enouf, Maud Vanpeene, Sylvie van der Werf, Fawzi Derrar |
| EPI_ISL_766877, EPI_ISL_766878, EPI_ISL_766879, EPI_ISL_766880, EPI_ISL_766881, EPI_ISL_766882                                                                                                                                                                                                                                                                                                                                                                                                                                                                                                                                                                                                                                                                                                                                                                                                                                                                                                                                                                                                                                                                                                                                                                                                                                                                                                                                                                                                                                                                                                                                                                                                                                                                                                                                                                                                                                                                                                                                                                                                                                                                                                                                                                                                                                                                                                                                                                                                                                                                                                                                                                                                                                                                                                                                                                                                                                                                                                                                                                                                                                                                                                                                                                                                                                                                                                                                                                                                                                                                                                                                                                                                                                                                                                                                                                                                                                                                                                                                                                                                                                                                                                                                                                                                                                                                                                                                                                                                                                                                                                                                                                                                                                                                                                                                                                                                                                                                                                                                                                                                                                                                                                                                                                                                                                                                                                                                                                                                                                                                                                                                                                                                                                                                                                                                                                                                                                                                                                                                                                                                                                                                                                                                                                                                                                                                                                                                                                                                                                                                                                                                                                                                                                                                                                                                                                                                                                                                                                                                                                                                                                                                                                                                                                                                                                                                                                                                                                                                                                                                                                                                                                                                                                                                                                                                                                                                                                                                                                                                                                                                                                                                                                                 | see above                                                                | Wyoming Public Health Laboratory                                                                                                                                                                | Wyoming Public Health Laboratory                                                                                                                                                                                                                                                                       | Noah Hull, Taylor Fearing, Lynette Gumbleton, Channing Weber, Ashley Norberg, Bailey Bowcutt, and Wanda Manley                                                                         |
| EPI_ISL_768324                                                                                                                                                                                                                                                                                                                                                                                                                                                                                                                                                                                                                                                                                                                                                                                                                                                                                                                                                                                                                                                                                                                                                                                                                                                                                                                                                                                                                                                                                                                                                                                                                                                                                                                                                                                                                                                                                                                                                                                                                                                                                                                                                                                                                                                                                                                                                                                                                                                                                                                                                                                                                                                                                                                                                                                                                                                                                                                                                                                                                                                                                                                                                                                                                                                                                                                                                                                                                                                                                                                                                                                                                                                                                                                                                                                                                                                                                                                                                                                                                                                                                                                                                                                                                                                                                                                                                                                                                                                                                                                                                                                                                                                                                                                                                                                                                                                                                                                                                                                                                                                                                                                                                                                                                                                                                                                                                                                                                                                                                                                                                                                                                                                                                                                                                                                                                                                                                                                                                                                                                                                                                                                                                                                                                                                                                                                                                                                                                                                                                                                                                                                                                                                                                                                                                                                                                                                                                                                                                                                                                                                                                                                                                                                                                                                                                                                                                                                                                                                                                                                                                                                                                                                                                                                                                                                                                                                                                                                                                                                                                                                                                                                                                                                                 | Singapore General Hospital                                               | Department of Microbiology                                                                                                                                                                      | Nurdyana Abdul Rahman, Kun Lee Lim, Chenhao Li, Sui Sin Goh, Kenneth Xin Long Chan, Kian Sing Chan, Lynette Oon, Kern Rei Chng, Niranjana Nagarajan, Karrie Ko                                                                                                                                         |                                                                                                                                                                                        |
| EPI_ISL_768752, EPI_ISL_768753, EPI_ISL_768754, EPI_ISL_768755, EPI_ISL_768756, EPI_ISL_768757, EPI_ISL_768758, EPI_ISL_768759, EPI_ISL_768760, EPI_ISL_768762, EPI_ISL_768763, EPI_ISL_768764, EPI_ISL_768765, EPI_ISL_768766, EPI_ISL_768767, EPI_ISL_768768, EPI_ISL_768769, EPI_ISL_768770, EPI_ISL_768771, EPI_ISL_768772, EPI_ISL_768773, EPI_ISL_768774, EPI_ISL_768775, EPI_ISL_768776, EPI_ISL_768777, EPI_ISL_768778, EPI_ISL_768779, EPI_ISL_768780, EPI_ISL_768781, EPI_ISL_768782, EPI_ISL_768783, EPI_ISL_768784, EPI_ISL_768785, EPI_ISL_768786, EPI_ISL_768787, EPI_ISL_768788, EPI_ISL_768789, EPI_ISL_768790, EPI_ISL_768791, EPI_ISL_768792, EPI_ISL_768793, EPI_ISL_768794, EPI_ISL_768795, EPI_ISL_768796, EPI_ISL_768797                                                                                                                                                                                                                                                                                                                                                                                                                                                                                                                                                                                                                                                                                                                                                                                                                                                                                                                                                                                                                                                                                                                                                                                                                                                                                                                                                                                                                                                                                                                                                                                                                                                                                                                                                                                                                                                                                                                                                                                                                                                                                                                                                                                                                                                                                                                                                                                                                                                                                                                                                                                                                                                                                                                                                                                                                                                                                                                                                                                                                                                                                                                                                                                                                                                                                                                                                                                                                                                                                                                                                                                                                                                                                                                                                                                                                                                                                                                                                                                                                                                                                                                                                                                                                                                                                                                                                                                                                                                                                                                                                                                                                                                                                                                                                                                                                                                                                                                                                                                                                                                                                                                                                                                                                                                                                                                                                                                                                                                                                                                                                                                                                                                                                                                                                                                                                                                                                                                                                                                                                                                                                                                                                                                                                                                                                                                                                                                                                                                                                                                                                                                                                                                                                                                                                                                                                                                                                                                                                                                                                                                                                                                                                                                                                                                                                                                                                                                                                                                                 | see above                                                                | AIID                                                                                                                                                                                            | Irish Coronavirus Sequencing Consortium - National Virus Reference Laboratory                                                                                                                                                                                                                          | Michael Carr, Gabriel Gonzalez, Alejandro Abner Garcia Leon, Patrick Mallon                                                                                                            |
| EPI_ISL_768831, EPI_ISL_768832                                                                                                                                                                                                                                                                                                                                                                                                                                                                                                                                                                                                                                                                                                                                                                                                                                                                                                                                                                                                                                                                                                                                                                                                                                                                                                                                                                                                                                                                                                                                                                                                                                                                                                                                                                                                                                                                                                                                                                                                                                                                                                                                                                                                                                                                                                                                                                                                                                                                                                                                                                                                                                                                                                                                                                                                                                                                                                                                                                                                                                                                                                                                                                                                                                                                                                                                                                                                                                                                                                                                                                                                                                                                                                                                                                                                                                                                                                                                                                                                                                                                                                                                                                                                                                                                                                                                                                                                                                                                                                                                                                                                                                                                                                                                                                                                                                                                                                                                                                                                                                                                                                                                                                                                                                                                                                                                                                                                                                                                                                                                                                                                                                                                                                                                                                                                                                                                                                                                                                                                                                                                                                                                                                                                                                                                                                                                                                                                                                                                                                                                                                                                                                                                                                                                                                                                                                                                                                                                                                                                                                                                                                                                                                                                                                                                                                                                                                                                                                                                                                                                                                                                                                                                                                                                                                                                                                                                                                                                                                                                                                                                                                                                                                                 | Laboratoire Biolife                                                      | Laboratoire de Biotechnologie                                                                                                                                                                   | Mouna Ouadghiri, Tarik Aanniz, Mohammed Walid Chemaou Elifhiri, Mohamed Chenaoui, Hanae Dakka, Afaf Alaoui, Otmane Touzani, Amina Benouda, Bouchra Belfquih, Lahcen belyamani, Saaid Amzazi and Azeddine Ibrahim                                                                                       |                                                                                                                                                                                        |
| EPI_ISL_768833                                                                                                                                                                                                                                                                                                                                                                                                                                                                                                                                                                                                                                                                                                                                                                                                                                                                                                                                                                                                                                                                                                                                                                                                                                                                                                                                                                                                                                                                                                                                                                                                                                                                                                                                                                                                                                                                                                                                                                                                                                                                                                                                                                                                                                                                                                                                                                                                                                                                                                                                                                                                                                                                                                                                                                                                                                                                                                                                                                                                                                                                                                                                                                                                                                                                                                                                                                                                                                                                                                                                                                                                                                                                                                                                                                                                                                                                                                                                                                                                                                                                                                                                                                                                                                                                                                                                                                                                                                                                                                                                                                                                                                                                                                                                                                                                                                                                                                                                                                                                                                                                                                                                                                                                                                                                                                                                                                                                                                                                                                                                                                                                                                                                                                                                                                                                                                                                                                                                                                                                                                                                                                                                                                                                                                                                                                                                                                                                                                                                                                                                                                                                                                                                                                                                                                                                                                                                                                                                                                                                                                                                                                                                                                                                                                                                                                                                                                                                                                                                                                                                                                                                                                                                                                                                                                                                                                                                                                                                                                                                                                                                                                                                                                                                 | AIID                                                                     | Irish Coronavirus Sequencing Consortium - National Virus Reference Laboratory                                                                                                                   | Michael Carr, Gabriel Gonzalez, Alejandro Abner Garcia Leon, Patrick Mallon                                                                                                                                                                                                                            |                                                                                                                                                                                        |
| EPI_ISL_768834, EPI_ISL_768835, EPI_ISL_768836, EPI_ISL_768837, EPI_ISL_768838, EPI_ISL_768839, EPI_ISL_768840, EPI_ISL_769863                                                                                                                                                                                                                                                                                                                                                                                                                                                                                                                                                                                                                                                                                                                                                                                                                                                                                                                                                                                                                                                                                                                                                                                                                                                                                                                                                                                                                                                                                                                                                                                                                                                                                                                                                                                                                                                                                                                                                                                                                                                                                                                                                                                                                                                                                                                                                                                                                                                                                                                                                                                                                                                                                                                                                                                                                                                                                                                                                                                                                                                                                                                                                                                                                                                                                                                                                                                                                                                                                                                                                                                                                                                                                                                                                                                                                                                                                                                                                                                                                                                                                                                                                                                                                                                                                                                                                                                                                                                                                                                                                                                                                                                                                                                                                                                                                                                                                                                                                                                                                                                                                                                                                                                                                                                                                                                                                                                                                                                                                                                                                                                                                                                                                                                                                                                                                                                                                                                                                                                                                                                                                                                                                                                                                                                                                                                                                                                                                                                                                                                                                                                                                                                                                                                                                                                                                                                                                                                                                                                                                                                                                                                                                                                                                                                                                                                                                                                                                                                                                                                                                                                                                                                                                                                                                                                                                                                                                                                                                                                                                                                                                 | Laboratoire Biolife                                                      | Laboratoire de Biotechnologie                                                                                                                                                                   | Mouna Ouadghiri, Tarik Aanniz, Mohammed Walid Chemaou Elifhiri, Mohamed Chenaoui, Hanae Dakka, Afaf Alaoui, Otmane Touzani, Amina Benouda, Bouchra Belfquih, Lahcen belyamani, Saaid Amzazi and Azeddine Ibrahim                                                                                       |                                                                                                                                                                                        |
| EPI_ISL_769879, EPI_ISL_769880, EPI_ISL_769881, EPI_ISL_769882, EPI_ISL_769883, EPI_ISL_769884, EPI_ISL_769885, EPI_ISL_769886, EPI_ISL_769887, EPI_ISL_769888, EPI_ISL_769889, EPI_ISL_769890, EPI_ISL_769891, EPI_ISL_769892, EPI_ISL_769893, EPI_ISL_769894, EPI_ISL_769895, EPI_ISL_769896, EPI_ISL_769897, EPI_ISL_769898, EPI_ISL_769899, EPI_ISL_769900, EPI_ISL_769901, EPI_ISL_769902, EPI_ISL_769903, EPI_ISL_769904, EPI_ISL_769905, EPI_ISL_769906, EPI_ISL_769907, EPI_ISL_769908, EPI_ISL_769909, EPI_ISL_769910, EPI_ISL_769911, EPI_ISL_769912, EPI_ISL_769913, EPI_ISL_769914, EPI_ISL_769915, EPI_ISL_770063, EPI_ISL_770064, EPI_ISL_770065, EPI_ISL_770066, EPI_ISL_770067, EPI_ISL_770068, EPI_ISL_770069, EPI_ISL_770070, EPI_ISL_770071, EPI_ISL_770072, EPI_ISL_770073, EPI_ISL_770074, EPI_ISL_770075, EPI_ISL_770076, EPI_ISL_770077, EPI_ISL_770078, EPI_ISL_770079, EPI_ISL_770080, EPI_ISL_770081, EPI_ISL_770082, EPI_ISL_770083, EPI_ISL_770084, EPI_ISL_770085, EPI_ISL_770086, EPI_ISL_770087, EPI_ISL_770088, EPI_ISL_770089, EPI_ISL_770090, EPI_ISL_770091, EPI_ISL_770092, EPI_ISL_770093, EPI_ISL_770094, EPI_ISL_770095, EPI_ISL_770096, EPI_ISL_770097, EPI_ISL_770098, EPI_ISL_770099, EPI_ISL_770100, EPI_ISL_770101, EPI_ISL_770102, EPI_ISL_770103, EPI_ISL_770104, EPI_ISL_770105, EPI_ISL_770106, EPI_ISL_770107, EPI_ISL_770108, EPI_ISL_770109, EPI_ISL_770110, EPI_ISL_770111, EPI_ISL_770112, EPI_ISL_770113, EPI_ISL_770114, EPI_ISL_770115, EPI_ISL_770116, EPI_ISL_770117, EPI_ISL_770118, EPI_ISL_770119, EPI_ISL_770120, EPI_ISL_770121, EPI_ISL_770122, EPI_ISL_770123, EPI_ISL_770124, EPI_ISL_770125, EPI_ISL_770126, EPI_ISL_770127, EPI_ISL_770128, EPI_ISL_770129, EPI_ISL_770130, EPI_ISL_770131, EPI_ISL_770132, EPI_ISL_770133, EPI_ISL_770134, EPI_ISL_770135, EPI_ISL_770136, EPI_ISL_770137, EPI_ISL_770138, EPI_ISL_770139, EPI_ISL_770140, EPI_ISL_770141, EPI_ISL_770142, EPI_ISL_770143, EPI_ISL_770144, EPI_ISL_770145, EPI_ISL_770146, EPI_ISL_770147, EPI_ISL_770148, EPI_ISL_770149, EPI_ISL_770150, EPI_ISL_770151, EPI_ISL_770152, EPI_ISL_770153, EPI_ISL_770154, EPI_ISL_770155, EPI_ISL_770156, EPI_ISL_770157, EPI_ISL_770158, EPI_ISL_770159, EPI_ISL_770160, EPI_ISL_770161, EPI_ISL_770162, EPI_ISL_770163, EPI_ISL_770164, EPI_ISL_770165, EPI_ISL_770166, EPI_ISL_770167, EPI_ISL_770168, EPI_ISL_770169, EPI_ISL_770170, EPI_ISL_770171, EPI_ISL_770172, EPI_ISL_770173, EPI_ISL_770174, EPI_ISL_770175, EPI_ISL_770176, EPI_ISL_770177, EPI_ISL_770178, EPI_ISL_770179, EPI_ISL_770180, EPI_ISL_770181, EPI_ISL_770182, EPI_ISL_770183, EPI_ISL_770184, EPI_ISL_770185, EPI_ISL_770186, EPI_ISL_770187, EPI_ISL_770188, EPI_ISL_770189, EPI_ISL_770190, EPI_ISL_770191, EPI_ISL_770192, EPI_ISL_770193, EPI_ISL_770194, EPI_ISL_770195, EPI_ISL_770196, EPI_ISL_770197, EPI_ISL_770198, EPI_ISL_770199, EPI_ISL_770200, EPI_ISL_770201, EPI_ISL_770202, EPI_ISL_770203, EPI_ISL_770204, EPI_ISL_770205, EPI_ISL_770206, EPI_ISL_770207, EPI_ISL_770208, EPI_ISL_770209, EPI_ISL_770210, EPI_ISL_770211, EPI_ISL_770212, EPI_ISL_770213, EPI_ISL_770214, EPI_ISL_770215, EPI_ISL_770216, EPI_ISL_770217, EPI_ISL_770218, EPI_ISL_770219, EPI_ISL_770220, EPI_ISL_770221, EPI_ISL_770222, EPI_ISL_770223, EPI_ISL_770224, EPI_ISL_770225, EPI_ISL_770226, EPI_ISL_770227, EPI_ISL_770228, EPI_ISL_770229, EPI_ISL_770230, EPI_ISL_770231, EPI_ISL_770232, EPI_ISL_770233, EPI_ISL_770234, EPI_ISL_770235, EPI_ISL_770236, EPI_ISL_770237, EPI_ISL_770238, EPI_ISL_770239, EPI_ISL_770240, EPI_ISL_770241, EPI_ISL_770242, EPI_ISL_770243, EPI_ISL_770244, EPI_ISL_770245, EPI_ISL_770246, EPI_ISL_770247, EPI_ISL_770248, EPI_ISL_770249, EPI_ISL_770250, EPI_ISL_770251, EPI_ISL_770252, EPI_ISL_770253, EPI_ISL_770254, EPI_ISL_770255, EPI_ISL_770256, EPI_ISL_770257, EPI_ISL_770258, EPI_ISL_770259, EPI_ISL_770260, EPI_ISL_770261, EPI_ISL_770262, EPI_ISL_770263, EPI_ISL_770264, EPI_ISL_770265, EPI_ISL_770266, EPI_ISL_770267, EPI_ISL_770268, EPI_ISL_770269, EPI_ISL_770270, EPI_ISL_770271, EPI_ISL_770272, EPI_ISL_770273, EPI_ISL_770274, EPI_ISL_770275, EPI_ISL_770276, EPI_ISL_770277, EPI_ISL_770278, EPI_ISL_770279, EPI_ISL_770280, EPI_ISL_770281, EPI_ISL_770282, EPI_ISL_770283, EPI_ISL_770284, EPI_ISL_770285, EPI_ISL_770286, EPI_ISL_770287, EPI_ISL_770288, EPI_ISL_770289, EPI_ISL_770290, EPI_ISL_770291, EPI_ISL_770292, EPI_ISL_770293, EPI_ISL_770294, EPI_ISL_770295, EPI_ISL_770296, EPI_ISL_770297, EPI_ISL_770298, EPI_ISL_770299, EPI_ISL_770300, EPI_ISL_770301, EPI_ISL_770302, EPI_ISL_770303, EPI_ISL_770304, EPI_ISL_770305, EPI_ISL_770306, EPI_ISL_770307, EPI_ISL_770308, EPI_ISL_770309, EPI_ISL_770310, EPI_ISL_770311, EPI_ISL_770312, EPI_ISL_770313, EPI_ISL_770314, EPI_ISL_770315, EPI_ISL_770316, EPI_ISL_770317, EPI_ISL_770318, EPI_ISL_770319, EPI_ISL_770320, EPI_ISL_770321, EPI_ISL_770322, EPI_ISL_770323, EPI_ISL_770324, EPI_ISL_770325, EPI_ISL_770326, EPI_ISL_770327, EPI_ISL_770328, EPI_ISL_770329, EPI_ISL_770330, EPI_ISL_770331, EPI_ISL_770332, EPI_ISL_770333, EPI_ISL_770334, EPI_ISL_770335, EPI_ISL_770336, EPI_ISL_770337, EPI_ISL_770338, EPI_ISL_770339, EPI_ISL_770340, EPI_ISL_770341, EPI_ISL_770342, EPI_ISL_770343, EPI_ISL_770344, EPI_ISL_770345, EPI_ISL_770346, EPI_ISL_770347, EPI_ISL_770348, EPI_ISL_770349, EPI_ISL_770350, EPI_ISL_770351, EPI_ISL_770352, EPI_ISL_770353, EPI_ISL_770354, EPI_ISL_770355, EPI_ISL_770356, EPI_ISL_770357, EPI_ISL_770358, EPI_ISL_770359, EPI_ISL_770360, EPI_ISL_770361, EPI_ISL_770362, EPI_ISL_770363, EPI_ISL_770364, EPI_ISL_770365, EPI_ISL_770366, EPI_ISL_770367, EPI_ISL_770368, EPI_ISL_770369, EPI_ISL_770370, EPI_ISL_770371, EPI_ISL_770372, EPI_ISL_770373, EPI_ISL_770374, EPI_ISL_770375, EPI_ISL_770376, EPI_ISL_770377, EPI_ISL_770378, EPI_ISL_770379, EPI_ISL_770380, EPI_ISL_770381, EPI_ISL_770382, EPI_ISL_770383, EPI_ISL_770384, EPI_ISL_770385, EPI_ISL_770386, EPI_ISL_770387, EPI_ISL_770388, EPI_ISL_770389, EPI_ISL_770390, EPI_ISL_770391, EPI_ISL_770392, EPI_ISL_770393, EPI_ISL_770394, EPI_ISL_770395, EPI_ISL_770396, EPI_ISL_770397, EPI_ISL_770398, EPI_ISL_770399, EPI_ISL_770400, EPI_ISL_770401, EPI_ISL_770402, EPI_ISL_770403, EPI_ISL_770404, EPI_ISL_770405, EPI_ISL_770406, EPI_ISL_770407, EPI_ISL_770408, EPI_ISL_770409, EPI_ISL_770410, EPI_ISL_770411, EPI_ISL_770412, EPI_ISL_770413, EPI_ISL_770414, EPI_ISL_770415, EPI_ISL_770416, EPI_ISL_770417, EPI_ISL_770418, EPI_ISL_770419, EPI_ISL_770420, EPI_ISL_770421, EPI_ISL_770422, EPI_ISL_770423, EPI_ISL_770424, EPI_ISL_770425, EPI_ISL_770426, EPI_ISL_770427, EPI_ISL_770428, EPI_ISL_770429, EPI_ISL_770430, EPI_ISL_770431, EPI_ISL_770432, EPI_ISL_770433, EPI_ISL_770434, EPI_ISL_770435, EPI_ISL_770436, EPI_ISL_770437, EPI_ISL_770438, EPI_ISL_770439, EPI_ISL_770440, EPI_ISL_770441, EPI_ISL_770442, EPI_ISL_770443, EPI_ISL_770444, EPI_ISL_770445, EPI_ISL_770446, EPI_ISL_770447, EPI_ISL_770448, EPI_ISL_770449, EPI_ISL_770450, EPI_ISL_770451, EPI_ISL_770452, EPI_ISL_770453, EPI_ISL_770454, EPI_ISL_770455, EPI_ISL_770456, EPI_ISL_770457, EPI_ISL_770458, EPI_ISL_770459, EPI_ISL_770460, EPI_ISL_770461, EPI_ISL_770462, EPI_ISL_770463, EPI_ISL_770464, EPI_ISL_770465, EPI_ISL_770466, EPI_ISL_770467, EPI_ISL_770468, EPI_ISL_770469, EPI_ISL_770470, EPI_ISL_770471, EPI_ISL_770472, EPI_ISL_770473, EPI_ISL_770474, EPI_ISL_770475, EPI_ISL_770476, EPI_ISL_770477, EPI_ISL_770478, EPI_ISL_770479, EPI_ISL_770480, EPI_ISL_770481, EPI_ISL_770482, EPI_ISL_770483, EPI_ISL_770484, EPI_ISL_770485, EPI_ISL_770486, EPI_ISL_770487, EPI_ISL_770488, EPI_ISL_770489, EPI_ISL_770490, EPI_ISL_770491, EPI_ISL_770492, EPI_ISL_770493, EPI_ISL_770494, EPI_ISL_770495, EPI_ISL_770496, EPI_ISL_770497, EPI_ISL_770498, EPI_ISL_770499, EPI_ISL_770500, EPI_ISL_770501, EPI_ISL_770502, EPI_ISL_770503, EPI_ISL_770504, EPI_ISL_770505, EPI_ISL_770506, EPI_ISL_770507, EPI_ISL_770508, EPI_ISL_770509, EPI_ISL_770510, EPI_ISL_770511, EPI_ISL_770512, EPI_ISL_770513, EPI_ISL_770514, EPI_ISL_770515, EPI_ISL_770516, EPI_ISL_770517, EPI_ISL_770518 | see above                                                                | Designated Reference Institute for Chemical Measurements (DRICM)                                                                                                                                | DNA SOLUTION LTD.                                                                                                                                                                                                                                                                                      | Md. Imran Khan, Kazi Nadim Hasan, Abu Sufian, Jannatun Naima, Abdul Khaleque, Mizanur Rahman, MSM Chowdhury, Hasan UI Haider, Mamudul Hasan Razu, Mala Khan, Mohammad Fazle Alam Rabbi |
| EPI_ISL_774976                                                                                                                                                                                                                                                                                                                                                                                                                                                                                                                                                                                                                                                                                                                                                                                                                                                                                                                                                                                                                                                                                                                                                                                                                                                                                                                                                                                                                                                                                                                                                                                                                                                                                                                                                                                                                                                                                                                                                                                                                                                                                                                                                                                                                                                                                                                                                                                                                                                                                                                                                                                                                                                                                                                                                                                                                                                                                                                                                                                                                                                                                                                                                                                                                                                                                                                                                                                                                                                                                                                                                                                                                                                                                                                                                                                                                                                                                                                                                                                                                                                                                                                                                                                                                                                                                                                                                                                                                                                                                                                                                                                                                                                                                                                                                                                                                                                                                                                                                                                                                                                                                                                                                                                                                                                                                                                                                                                                                                                                                                                                                                                                                                                                                                                                                                                                                                                                                                                                                                                                                                                                                                                                                                                                                                                                                                                                                                                                                                                                                                                                                                                                                                                                                                                                                                                                                                                                                                                                                                                                                                                                                                                                                                                                                                                                                                                                                                                                                                                                                                                                                                                                                                                                                                                                                                                                                                                                                                                                                                                                                                                                                                                                                                                                 | Gonoshasthya-RNA Molecular Diagnostic and Research Center                | Gonoshasthya-RNA Molecular Diagnostic and Research Center                                                                                                                                       | Nihad Adnan, Mohd. Raaed Jamiruddin, Md. Ahsanul Haq, Mohib Ullah Khondoker, Nafisa Azmuda, Firoz Ahmed, Shahana Sharmin, Salma Akter, Taslin Jahan Mou, Mahfuza Marzan, Sayeda Moriam Liza, Nowshin Jahan, Tamanna Ali, Maha Jamiruddin, Mousumi Chaity, Shahad Saif Khandker, Mumtarin Jannat Oishee |                                                                                                                                                                                        |
| EPI_ISL_774977, EPI_ISL_774978, EPI_ISL_774979, EPI_ISL_774980, EPI_ISL_774981, EPI_ISL_774982, EPI_ISL_774983, EPI_ISL_774984, EPI_ISL_774985, EPI_ISL_774986, EPI_ISL_774987, EPI_ISL_774988, EPI_ISL_774989, EPI_ISL_774990, EPI_ISL_774991, EPI_ISL_774992, EPI_ISL_774993, EPI_ISL_774994, EPI_ISL_774995, EPI_ISL_774996, EPI_ISL_774997, EPI_ISL_774998, EPI_ISL_774999, EPI_ISL_775000, EPI_ISL_775001, EPI_ISL_775002, EPI_ISL_775003, EPI_ISL_775004, EPI_ISL_775005, EPI_ISL_775006, EPI_ISL_775007, EPI_ISL_775008, EPI_ISL_775009, EPI_ISL_775010, EPI_ISL_775011, EPI_ISL_775012, EPI_ISL_775013, EPI_ISL_775014, EPI_ISL_775015, EPI_ISL_775016, EPI_ISL_775017, EPI_ISL_775018                                                                                                                                                                                                                                                                                                                                                                                                                                                                                                                                                                                                                                                                                                                                                                                                                                                                                                                                                                                                                                                                                                                                                                                                                                                                                                                                                                                                                                                                                                                                                                                                                                                                                                                                                                                                                                                                                                                                                                                                                                                                                                                                                                                                                                                                                                                                                                                                                                                                                                                                                                                                                                                                                                                                                                                                                                                                                                                                                                                                                                                                                                                                                                                                                                                                                                                                                                                                                                                                                                                                                                                                                                                                                                                                                                                                                                                                                                                                                                                                                                                                                                                                                                                                                                                                                                                                                                                                                                                                                                                                                                                                                                                                                                                                                                                                                                                                                                                                                                                                                                                                                                                                                                                                                                                                                                                                                                                                                                                                                                                                                                                                                                                                                                                                                                                                                                                                                                                                                                                                                                                                                                                                                                                                                                                                                                                                                                                                                                                                                                                                                                                                                                                                                                                                                                                                                                                                                                                                                                                                                                                                                                                                                                                                                                                                                                                                                                                                                                                                                                                 | see above                                                                | Designated Reference Institute for Chemical Measurements (DRICM)                                                                                                                                | DNA SOLUTION LTD.                                                                                                                                                                                                                                                                                      | Md. Imran Khan, Kazi Nadim Hasan, Abu Sufian, Jannatun Naima, Abdul Khaleque, Mizanur Rahman, MSM Chowdhury, Hasan UI Haider, Mamudul Hasan Razu, Mala Khan, Mohammad Fazle Alam Rabbi |
| EPI_ISL_775019                                                                                                                                                                                                                                                                                                                                                                                                                                                                                                                                                                                                                                                                                                                                                                                                                                                                                                                                                                                                                                                                                                                                                                                                                                                                                                                                                                                                                                                                                                                                                                                                                                                                                                                                                                                                                                                                                                                                                                                                                                                                                                                                                                                                                                                                                                                                                                                                                                                                                                                                                                                                                                                                                                                                                                                                                                                                                                                                                                                                                                                                                                                                                                                                                                                                                                                                                                                                                                                                                                                                                                                                                                                                                                                                                                                                                                                                                                                                                                                                                                                                                                                                                                                                                                                                                                                                                                                                                                                                                                                                                                                                                                                                                                                                                                                                                                                                                                                                                                                                                                                                                                                                                                                                                                                                                                                                                                                                                                                                                                                                                                                                                                                                                                                                                                                                                                                                                                                                                                                                                                                                                                                                                                                                                                                                                                                                                                                                                                                                                                                                                                                                                                                                                                                                                                                                                                                                                                                                                                                                                                                                                                                                                                                                                                                                                                                                                                                                                                                                                                                                                                                                                                                                                                                                                                                                                                                                                                                                                                                                                                                                                                                                                                                                 | Gonoshasthya-RNA Molecular Research Center                               | Gonoshasthya-RNA Molecular Research Center                                                                                                                                                      | Nihad Adnan, Mohd. Raaed Jamiruddin, Md. Ahsanul Haq, Mohib Ullah Khondoker, Nafisa Azmuda, Firoz Ahmed, Shahana Sharmin, Salma Akter, Taslin Jahan Mou, Mahfuza Marzan, Sayeda Moriam Liza, Nowshin Jahan, Tamanna Ali, Maha Jamiruddin, Mousumi Chaity, Shahad Saif Khandker, Mumtarin Jannat Oishee |                                                                                                                                                                                        |
| EPI_ISL_775020                                                                                                                                                                                                                                                                                                                                                                                                                                                                                                                                                                                                                                                                                                                                                                                                                                                                                                                                                                                                                                                                                                                                                                                                                                                                                                                                                                                                                                                                                                                                                                                                                                                                                                                                                                                                                                                                                                                                                                                                                                                                                                                                                                                                                                                                                                                                                                                                                                                                                                                                                                                                                                                                                                                                                                                                                                                                                                                                                                                                                                                                                                                                                                                                                                                                                                                                                                                                                                                                                                                                                                                                                                                                                                                                                                                                                                                                                                                                                                                                                                                                                                                                                                                                                                                                                                                                                                                                                                                                                                                                                                                                                                                                                                                                                                                                                                                                                                                                                                                                                                                                                                                                                                                                                                                                                                                                                                                                                                                                                                                                                                                                                                                                                                                                                                                                                                                                                                                                                                                                                                                                                                                                                                                                                                                                                                                                                                                                                                                                                                                                                                                                                                                                                                                                                                                                                                                                                                                                                                                                                                                                                                                                                                                                                                                                                                                                                                                                                                                                                                                                                                                                                                                                                                                                                                                                                                                                                                                                                                                                                                                                                                                                                                                                 | Gonoshasthya-RNA Molecular Research Center                               | Gonoshasthya-RNA Molecular Research Center                                                                                                                                                      | Mohd. Raaed Jamiruddin, Nihad Adnan, Md. Ahsanul Haq, Mohib Ullah Khondoker, Nafisa Azmuda, Firoz Ahmed, Shahana Sharmin, Salma Akter, Taslin Jahan Mou, Mahfuza Marzan, Sayeda Moriam Liza, Nowshin Jahan, Tamanna Ali, Maha Jamiruddin, Mousumi Chaity, Shahad Saif Khandker, Mumtarin Jannat Oishee |                                                                                                                                                                                        |
| EPI_ISL_775213                                                                                                                                                                                                                                                                                                                                                                                                                                                                                                                                                                                                                                                                                                                                                                                                                                                                                                                                                                                                                                                                                                                                                                                                                                                                                                                                                                                                                                                                                                                                                                                                                                                                                                                                                                                                                                                                                                                                                                                                                                                                                                                                                                                                                                                                                                                                                                                                                                                                                                                                                                                                                                                                                                                                                                                                                                                                                                                                                                                                                                                                                                                                                                                                                                                                                                                                                                                                                                                                                                                                                                                                                                                                                                                                                                                                                                                                                                                                                                                                                                                                                                                                                                                                                                                                                                                                                                                                                                                                                                                                                                                                                                                                                                                                                                                                                                                                                                                                                                                                                                                                                                                                                                                                                                                                                                                                                                                                                                                                                                                                                                                                                                                                                                                                                                                                                                                                                                                                                                                                                                                                                                                                                                                                                                                                                                                                                                                                                                                                                                                                                                                                                                                                                                                                                                                                                                                                                                                                                                                                                                                                                                                                                                                                                                                                                                                                                                                                                                                                                                                                                                                                                                                                                                                                                                                                                                                                                                                                                                                                                                                                                                                                                                                                 | Gonoshasthya-RNA Molecular Research Center                               | Gonoshasthya-RNA Molecular Research Center                                                                                                                                                      | Nihad Adnan, Mohd. Raaed Jamiruddin, Md. Ahsanul Haq, Mohib Ullah Khondoker, Nafisa Azmuda, Firoz Ahmed, Shahana Sharmin, Salma Akter, Taslin Jahan Mou, Mahfuza Marzan, Sayeda Moriam Liza, Nowshin Jahan, Tamanna Ali, Maha Jamiruddin, Mousumi Chaity, Shahad Saif Khandker, Mumtarin Jannat Oishee |                                                                                                                                                                                        |
| EPI_ISL_775214                                                                                                                                                                                                                                                                                                                                                                                                                                                                                                                                                                                                                                                                                                                                                                                                                                                                                                                                                                                                                                                                                                                                                                                                                                                                                                                                                                                                                                                                                                                                                                                                                                                                                                                                                                                                                                                                                                                                                                                                                                                                                                                                                                                                                                                                                                                                                                                                                                                                                                                                                                                                                                                                                                                                                                                                                                                                                                                                                                                                                                                                                                                                                                                                                                                                                                                                                                                                                                                                                                                                                                                                                                                                                                                                                                                                                                                                                                                                                                                                                                                                                                                                                                                                                                                                                                                                                                                                                                                                                                                                                                                                                                                                                                                                                                                                                                                                                                                                                                                                                                                                                                                                                                                                                                                                                                                                                                                                                                                                                                                                                                                                                                                                                                                                                                                                                                                                                                                                                                                                                                                                                                                                                                                                                                                                                                                                                                                                                                                                                                                                                                                                                                                                                                                                                                                                                                                                                                                                                                                                                                                                                                                                                                                                                                                                                                                                                                                                                                                                                                                                                                                                                                                                                                                                                                                                                                                                                                                                                                                                                                                                                                                                                                                                 | Gonoshasthya-RNA Molecular Research Center                               | Gonoshasthya-RNA Molecular Research Center                                                                                                                                                      | Mohd. Raaed Jamiruddin, Nihad Adnan, Md. Ahsanul Haq, Mohib Ullah Khondoker, Nafisa Azmuda, Firoz Ahmed, Shahana Sharmin, Salma Akter, Taslin Jahan Mou, Mahfuza Marzan, Sayeda Moriam Liza, Nowshin Jahan, Tamanna Ali, Maha Jamiruddin, Mousumi Chaity, Shahad Saif Khandker, Mumtarin Jannat Oishee |                                                                                                                                                                                        |
| EPI_ISL_775215                                                                                                                                                                                                                                                                                                                                                                                                                                                                                                                                                                                                                                                                                                                                                                                                                                                                                                                                                                                                                                                                                                                                                                                                                                                                                                                                                                                                                                                                                                                                                                                                                                                                                                                                                                                                                                                                                                                                                                                                                                                                                                                                                                                                                                                                                                                                                                                                                                                                                                                                                                                                                                                                                                                                                                                                                                                                                                                                                                                                                                                                                                                                                                                                                                                                                                                                                                                                                                                                                                                                                                                                                                                                                                                                                                                                                                                                                                                                                                                                                                                                                                                                                                                                                                                                                                                                                                                                                                                                                                                                                                                                                                                                                                                                                                                                                                                                                                                                                                                                                                                                                                                                                                                                                                                                                                                                                                                                                                                                                                                                                                                                                                                                                                                                                                                                                                                                                                                                                                                                                                                                                                                                                                                                                                                                                                                                                                                                                                                                                                                                                                                                                                                                                                                                                                                                                                                                                                                                                                                                                                                                                                                                                                                                                                                                                                                                                                                                                                                                                                                                                                                                                                                                                                                                                                                                                                                                                                                                                                                                                                                                                                                                                                                                 | Gonoshasthya-RNA Molecular Research Center                               | Gonoshasthya-RNA Molecular Research Center                                                                                                                                                      | Nihad Adnan, Mohd. Raaed Jamiruddin, Md. Ahsanul Haq, Mohib Ullah Khondoker, Nafisa Azmuda, Firoz Ahmed, Shahana Sharmin, Salma Akter, Taslin Jahan Mou, Mahfuza Marzan, Sayeda Moriam Liza, Nowshin Jahan, Tamanna Ali, Maha Jamiruddin, Mousumi Chaity, Shahad Saif Khandker, Mumtarin Jannat Oishee |                                                                                                                                                                                        |
| EPI_ISL_775216                                                                                                                                                                                                                                                                                                                                                                                                                                                                                                                                                                                                                                                                                                                                                                                                                                                                                                                                                                                                                                                                                                                                                                                                                                                                                                                                                                                                                                                                                                                                                                                                                                                                                                                                                                                                                                                                                                                                                                                                                                                                                                                                                                                                                                                                                                                                                                                                                                                                                                                                                                                                                                                                                                                                                                                                                                                                                                                                                                                                                                                                                                                                                                                                                                                                                                                                                                                                                                                                                                                                                                                                                                                                                                                                                                                                                                                                                                                                                                                                                                                                                                                                                                                                                                                                                                                                                                                                                                                                                                                                                                                                                                                                                                                                                                                                                                                                                                                                                                                                                                                                                                                                                                                                                                                                                                                                                                                                                                                                                                                                                                                                                                                                                                                                                                                                                                                                                                                                                                                                                                                                                                                                                                                                                                                                                                                                                                                                                                                                                                                                                                                                                                                                                                                                                                                                                                                                                                                                                                                                                                                                                                                                                                                                                                                                                                                                                                                                                                                                                                                                                                                                                                                                                                                                                                                                                                                                                                                                                                                                                                                                                                                                                                                                 | Gonoshasthya-RNA Molecular Research Center                               | Gonoshasthya-RNA Molecular Research Center                                                                                                                                                      | Mohd. Raaed Jamiruddin, Nihad Adnan, Md. Ahsanul Haq, Mohib Ullah Khondoker, Nafisa Azmuda, Firoz Ahmed, Shahana Sharmin, Salma Akter, Taslin Jahan Mou, Mahfuza Marzan, Sayeda Moriam Liza, Nowshin Jahan, Tamanna Ali, Maha Jamiruddin, Mousumi Chaity, Shahad Saif Khandker, Mumtarin Jannat Oishee |                                                                                                                                                                                        |

|                                                                                                                                                                                                                                                                                                                                                                                                                                                                                                                                                                                                                                                                                                                                                                                                                                                                                                                                                                                                                                                                                                                                                                                                                                                                                                                                                                                                                                                                                                                                                                                                                                                                                                                                                                                                                                                                                                                                                                                                                                                                                                                                                                                                                                                                                                                                                                                                                                                                                                                                                                                                                                                                                                                                                                                                                                                                                                                                                                                                                                                                                                                                                                                                                                                                                                                                                                                                                                                                                                                                                                                                                                                                                                                                                                                                                                                                                                                                                                                                                                                                                                                                                                                                                                                                                                                                                                                                                                                                                                                                                                                                                                                                                                                                                                                                                                                                                                                                                                                                |                                                                                                    |                                                                                                                                                                                                 |                                                                                                                                                                                                                                                                                                       |
|------------------------------------------------------------------------------------------------------------------------------------------------------------------------------------------------------------------------------------------------------------------------------------------------------------------------------------------------------------------------------------------------------------------------------------------------------------------------------------------------------------------------------------------------------------------------------------------------------------------------------------------------------------------------------------------------------------------------------------------------------------------------------------------------------------------------------------------------------------------------------------------------------------------------------------------------------------------------------------------------------------------------------------------------------------------------------------------------------------------------------------------------------------------------------------------------------------------------------------------------------------------------------------------------------------------------------------------------------------------------------------------------------------------------------------------------------------------------------------------------------------------------------------------------------------------------------------------------------------------------------------------------------------------------------------------------------------------------------------------------------------------------------------------------------------------------------------------------------------------------------------------------------------------------------------------------------------------------------------------------------------------------------------------------------------------------------------------------------------------------------------------------------------------------------------------------------------------------------------------------------------------------------------------------------------------------------------------------------------------------------------------------------------------------------------------------------------------------------------------------------------------------------------------------------------------------------------------------------------------------------------------------------------------------------------------------------------------------------------------------------------------------------------------------------------------------------------------------------------------------------------------------------------------------------------------------------------------------------------------------------------------------------------------------------------------------------------------------------------------------------------------------------------------------------------------------------------------------------------------------------------------------------------------------------------------------------------------------------------------------------------------------------------------------------------------------------------------------------------------------------------------------------------------------------------------------------------------------------------------------------------------------------------------------------------------------------------------------------------------------------------------------------------------------------------------------------------------------------------------------------------------------------------------------------------------------------------------------------------------------------------------------------------------------------------------------------------------------------------------------------------------------------------------------------------------------------------------------------------------------------------------------------------------------------------------------------------------------------------------------------------------------------------------------------------------------------------------------------------------------------------------------------------------------------------------------------------------------------------------------------------------------------------------------------------------------------------------------------------------------------------------------------------------------------------------------------------------------------------------------------------------------------------------------------------------------------------------------------------------------|----------------------------------------------------------------------------------------------------|-------------------------------------------------------------------------------------------------------------------------------------------------------------------------------------------------|-------------------------------------------------------------------------------------------------------------------------------------------------------------------------------------------------------------------------------------------------------------------------------------------------------|
|                                                                                                                                                                                                                                                                                                                                                                                                                                                                                                                                                                                                                                                                                                                                                                                                                                                                                                                                                                                                                                                                                                                                                                                                                                                                                                                                                                                                                                                                                                                                                                                                                                                                                                                                                                                                                                                                                                                                                                                                                                                                                                                                                                                                                                                                                                                                                                                                                                                                                                                                                                                                                                                                                                                                                                                                                                                                                                                                                                                                                                                                                                                                                                                                                                                                                                                                                                                                                                                                                                                                                                                                                                                                                                                                                                                                                                                                                                                                                                                                                                                                                                                                                                                                                                                                                                                                                                                                                                                                                                                                                                                                                                                                                                                                                                                                                                                                                                                                                                                                |                                                                                                    |                                                                                                                                                                                                 | Jahan Mou, Mahfuza Marzan, Sayeda Moriam Liza, Nowshin Jahan, Tamanna Ali, Shahad Saif Khandker, Maha Jamiruddin, Mousumi Chaity, Mumtarin Jannat Oishee                                                                                                                                              |
| EPI_ISL_775217                                                                                                                                                                                                                                                                                                                                                                                                                                                                                                                                                                                                                                                                                                                                                                                                                                                                                                                                                                                                                                                                                                                                                                                                                                                                                                                                                                                                                                                                                                                                                                                                                                                                                                                                                                                                                                                                                                                                                                                                                                                                                                                                                                                                                                                                                                                                                                                                                                                                                                                                                                                                                                                                                                                                                                                                                                                                                                                                                                                                                                                                                                                                                                                                                                                                                                                                                                                                                                                                                                                                                                                                                                                                                                                                                                                                                                                                                                                                                                                                                                                                                                                                                                                                                                                                                                                                                                                                                                                                                                                                                                                                                                                                                                                                                                                                                                                                                                                                                                                 | Gonoshasthya-RNA Molecular Research Center                                                         | Gonoshasthya-RNA Molecular Research Center                                                                                                                                                      | Nihad Adnan, Mohd. Raeed Jamiruddin, Md. Ahsanul Haq, Mohib Ullah Khondoker, Nafisa Azmda, Firoz Ahmed, Shahana Sharmin, Salma Akter, Taslin Jahan Mou, Mahfuza Marzan, Sayeda Moriam Liza, Nowshin Jahan, Tamanna Ali, Maha Jamiruddin, Mousumi Chaity, Shahad Saif Khandker, Mumtarin Jannat Oishee |
| EPI_ISL_775218                                                                                                                                                                                                                                                                                                                                                                                                                                                                                                                                                                                                                                                                                                                                                                                                                                                                                                                                                                                                                                                                                                                                                                                                                                                                                                                                                                                                                                                                                                                                                                                                                                                                                                                                                                                                                                                                                                                                                                                                                                                                                                                                                                                                                                                                                                                                                                                                                                                                                                                                                                                                                                                                                                                                                                                                                                                                                                                                                                                                                                                                                                                                                                                                                                                                                                                                                                                                                                                                                                                                                                                                                                                                                                                                                                                                                                                                                                                                                                                                                                                                                                                                                                                                                                                                                                                                                                                                                                                                                                                                                                                                                                                                                                                                                                                                                                                                                                                                                                                 | Gonoshasthya-RNA Molecular Research Center                                                         | Gonoshasthya-RNA Molecular Research Center                                                                                                                                                      | Mohd. Raeed Jamiruddin, Nihad Adnan, Md. Ahsanul Haq, Mohib Ullah Khondoker, Nafisa Azmda, Firoz Ahmed, Shahana Sharmin, Salma Akter, Taslin Jahan Mou, Mahfuza Marzan, Sayeda Moriam Liza, Nowshin Jahan, Tamanna Ali, Shahad Saif Khandker, Maha Jamiruddin, Mousumi Chaity, Mumtarin Jannat Oishee |
| EPI_ISL_775219, EPI_ISL_775220, EPI_ISL_775221, EPI_ISL_775222, EPI_ISL_775223, EPI_ISL_775224, EPI_ISL_775225, EPI_ISL_775226, EPI_ISL_775247, EPI_ISL_775249, EPI_ISL_775250, EPI_ISL_775252, EPI_ISL_775254, EPI_ISL_775255, EPI_ISL_775256, EPI_ISL_775258, EPI_ISL_775260, EPI_ISL_775262, EPI_ISL_775263, EPI_ISL_775264, EPI_ISL_775265                                                                                                                                                                                                                                                                                                                                                                                                                                                                                                                                                                                                                                                                                                                                                                                                                                                                                                                                                                                                                                                                                                                                                                                                                                                                                                                                                                                                                                                                                                                                                                                                                                                                                                                                                                                                                                                                                                                                                                                                                                                                                                                                                                                                                                                                                                                                                                                                                                                                                                                                                                                                                                                                                                                                                                                                                                                                                                                                                                                                                                                                                                                                                                                                                                                                                                                                                                                                                                                                                                                                                                                                                                                                                                                                                                                                                                                                                                                                                                                                                                                                                                                                                                                                                                                                                                                                                                                                                                                                                                                                                                                                                                                 |                                                                                                    |                                                                                                                                                                                                 |                                                                                                                                                                                                                                                                                                       |
| see above                                                                                                                                                                                                                                                                                                                                                                                                                                                                                                                                                                                                                                                                                                                                                                                                                                                                                                                                                                                                                                                                                                                                                                                                                                                                                                                                                                                                                                                                                                                                                                                                                                                                                                                                                                                                                                                                                                                                                                                                                                                                                                                                                                                                                                                                                                                                                                                                                                                                                                                                                                                                                                                                                                                                                                                                                                                                                                                                                                                                                                                                                                                                                                                                                                                                                                                                                                                                                                                                                                                                                                                                                                                                                                                                                                                                                                                                                                                                                                                                                                                                                                                                                                                                                                                                                                                                                                                                                                                                                                                                                                                                                                                                                                                                                                                                                                                                                                                                                                                      | Laboratoire Biolife                                                                                | Laboratoire de Biotechnologie                                                                                                                                                                   | Mouna Ouadghiri, Tarik Aanniz, Mohammed Walid Chemao Elfihri, Mohamed Chenaoui, Hanae Dakka, Afaf Alaoui, Otmane Touzani, Amina Benouda, Bouchra Belfquih, Lahcen belyamani, Saaid Amzazi and Azeddine Ibrahim                                                                                        |
| EPI_ISL_775594                                                                                                                                                                                                                                                                                                                                                                                                                                                                                                                                                                                                                                                                                                                                                                                                                                                                                                                                                                                                                                                                                                                                                                                                                                                                                                                                                                                                                                                                                                                                                                                                                                                                                                                                                                                                                                                                                                                                                                                                                                                                                                                                                                                                                                                                                                                                                                                                                                                                                                                                                                                                                                                                                                                                                                                                                                                                                                                                                                                                                                                                                                                                                                                                                                                                                                                                                                                                                                                                                                                                                                                                                                                                                                                                                                                                                                                                                                                                                                                                                                                                                                                                                                                                                                                                                                                                                                                                                                                                                                                                                                                                                                                                                                                                                                                                                                                                                                                                                                                 | Balitvet Lampung                                                                                   | National Institute of Health Research and Development                                                                                                                                           | Nugraha,AA;Subangkit;Pawestri,HA;Ikawati,HD;Puspa,KD;Saswiyanti,E;Srihanto,EA;Pangesti,KNA;Soekarso,T;Puspandari,N;Setiawaty,V                                                                                                                                                                        |
| EPI_ISL_776569, EPI_ISL_776570, EPI_ISL_776571, EPI_ISL_776572, EPI_ISL_776573, EPI_ISL_776574, EPI_ISL_776575, EPI_ISL_776576, EPI_ISL_776577, EPI_ISL_776578, EPI_ISL_776579, EPI_ISL_776580, EPI_ISL_776581, EPI_ISL_776582, EPI_ISL_776583, EPI_ISL_776584, EPI_ISL_776585, EPI_ISL_776586, EPI_ISL_776587, EPI_ISL_776588, EPI_ISL_776589, EPI_ISL_776590, EPI_ISL_776591, EPI_ISL_776592, EPI_ISL_776593, EPI_ISL_776594, EPI_ISL_776595, EPI_ISL_776596, EPI_ISL_776597, EPI_ISL_776598, EPI_ISL_776599, EPI_ISL_776600, EPI_ISL_776601, EPI_ISL_776602, EPI_ISL_776603, EPI_ISL_776604, EPI_ISL_776605, EPI_ISL_776606, EPI_ISL_776607, EPI_ISL_776608, EPI_ISL_776609, EPI_ISL_776610, EPI_ISL_776611, EPI_ISL_776612, EPI_ISL_776613, EPI_ISL_776614, EPI_ISL_776615, EPI_ISL_776616, EPI_ISL_776617, EPI_ISL_776618, EPI_ISL_776619, EPI_ISL_776620, EPI_ISL_776621, EPI_ISL_776622, EPI_ISL_776623, EPI_ISL_776624, EPI_ISL_776625, EPI_ISL_776626, EPI_ISL_776627, EPI_ISL_776628, EPI_ISL_776629, EPI_ISL_776630, EPI_ISL_776631, EPI_ISL_776632, EPI_ISL_776633, EPI_ISL_776634, EPI_ISL_776635, EPI_ISL_776636, EPI_ISL_776637, EPI_ISL_776638, EPI_ISL_776639, EPI_ISL_776640, EPI_ISL_776641, EPI_ISL_776642, EPI_ISL_776643, EPI_ISL_776644, EPI_ISL_776645, EPI_ISL_776646, EPI_ISL_776647, EPI_ISL_776648, EPI_ISL_776649, EPI_ISL_776650, EPI_ISL_776651, EPI_ISL_776652, EPI_ISL_776653, EPI_ISL_776654, EPI_ISL_776655, EPI_ISL_776656, EPI_ISL_776657, EPI_ISL_776658, EPI_ISL_776659, EPI_ISL_776660, EPI_ISL_776661, EPI_ISL_776662, EPI_ISL_776663, EPI_ISL_776664, EPI_ISL_776665, EPI_ISL_776666, EPI_ISL_776667, EPI_ISL_776668, EPI_ISL_776669, EPI_ISL_776670, EPI_ISL_776671, EPI_ISL_776672, EPI_ISL_776673, EPI_ISL_776674, EPI_ISL_776675, EPI_ISL_776676, EPI_ISL_776677, EPI_ISL_776678, EPI_ISL_776679, EPI_ISL_776680, EPI_ISL_776681, EPI_ISL_776682, EPI_ISL_776683, EPI_ISL_776684, EPI_ISL_776685, EPI_ISL_776686, EPI_ISL_776687, EPI_ISL_776688, EPI_ISL_776689, EPI_ISL_776690, EPI_ISL_776691, EPI_ISL_776692, EPI_ISL_776693, EPI_ISL_776694, EPI_ISL_776695, EPI_ISL_776696, EPI_ISL_776697, EPI_ISL_776698, EPI_ISL_776699, EPI_ISL_776700, EPI_ISL_776701, EPI_ISL_776702, EPI_ISL_776703, EPI_ISL_776704, EPI_ISL_776705, EPI_ISL_776706, EPI_ISL_776707, EPI_ISL_776708, EPI_ISL_776709, EPI_ISL_776710, EPI_ISL_776711, EPI_ISL_776712, EPI_ISL_776713, EPI_ISL_776714, EPI_ISL_776715, EPI_ISL_776716, EPI_ISL_776717, EPI_ISL_776718, EPI_ISL_776719, EPI_ISL_776720, EPI_ISL_776721, EPI_ISL_776722, EPI_ISL_776723, EPI_ISL_776724, EPI_ISL_776725, EPI_ISL_776726, EPI_ISL_776727, EPI_ISL_776728, EPI_ISL_776729, EPI_ISL_776730, EPI_ISL_776731, EPI_ISL_776732, EPI_ISL_776733, EPI_ISL_776734, EPI_ISL_776735, EPI_ISL_776736, EPI_ISL_776737, EPI_ISL_776738, EPI_ISL_776739, EPI_ISL_776740, EPI_ISL_776741, EPI_ISL_776742, EPI_ISL_776743, EPI_ISL_776744, EPI_ISL_776745, EPI_ISL_776746, EPI_ISL_776747, EPI_ISL_776748, EPI_ISL_776749, EPI_ISL_776750, EPI_ISL_776751, EPI_ISL_776752, EPI_ISL_776753, EPI_ISL_776754, EPI_ISL_776755, EPI_ISL_776756, EPI_ISL_776757, EPI_ISL_776758, EPI_ISL_776759, EPI_ISL_776760, EPI_ISL_776761, EPI_ISL_776762, EPI_ISL_776763, EPI_ISL_776764, EPI_ISL_776765, EPI_ISL_776766, EPI_ISL_776767, EPI_ISL_776768, EPI_ISL_776769, EPI_ISL_776770, EPI_ISL_776771, EPI_ISL_776772, EPI_ISL_776773, EPI_ISL_776774, EPI_ISL_776775, EPI_ISL_776776, EPI_ISL_776777, EPI_ISL_776778, EPI_ISL_776779, EPI_ISL_776780, EPI_ISL_776781, EPI_ISL_776782, EPI_ISL_776783, EPI_ISL_776784, EPI_ISL_776785, EPI_ISL_776786, EPI_ISL_776787, EPI_ISL_776788, EPI_ISL_776789, EPI_ISL_776790, EPI_ISL_776791, EPI_ISL_776792, EPI_ISL_776793, EPI_ISL_776794, EPI_ISL_776795, EPI_ISL_776796, EPI_ISL_776797, EPI_ISL_776798, EPI_ISL_776799, EPI_ISL_776800, EPI_ISL_776801, EPI_ISL_776802, EPI_ISL_776803, EPI_ISL_776804, EPI_ISL_776805, EPI_ISL_776806, EPI_ISL_776807, EPI_ISL_776808, EPI_ISL_776809, EPI_ISL_776810, EPI_ISL_776811, EPI_ISL_776812, EPI_ISL_776813, EPI_ISL_776814, EPI_ISL_776815, EPI_ISL_776816, EPI_ISL_776817, EPI_ISL_776818, EPI_ISL_776819, EPI_ISL_776820, EPI_ISL_776821, EPI_ISL_776822, EPI_ISL_776823, EPI_ISL_776824, EPI_ISL_776825, EPI_ISL_776826, EPI_ISL_776827, EPI_ISL_776828, EPI_ISL_776829, EPI_ISL_776830, EPI_ISL_776831, EPI_ISL_776832, EPI_ISL_776833, EPI_ISL_776834, EPI_ISL_776835, EPI_ISL_776836, EPI_ISL_776837, EPI_ISL_776838, EPI_ISL_776839, EPI_ISL_776840, EPI_ISL_776841, EPI_ISL_776842, EPI_ISL_776843, EPI_ISL_776844, EPI_ISL_776845, EPI_ISL_776846, EPI_ISL_776847, EPI_ISL_776848, EPI_ISL_776849, EPI_ISL_776850, EPI_ISL_776851, EPI_ISL_776852, EPI_ISL_776853, EPI_ISL_776854, EPI_ISL_776855, EPI_ISL_776856, EPI_ISL_776857, EPI_ISL_776858, EPI_ISL_776859, EPI_ISL_776860, EPI_ISL_776861, EPI_ISL_776862, EPI_ISL_776863, EPI_ISL_776864, EPI_ISL_776865, EPI_ISL_776866, EPI_ISL_776867, EPI_ISL_776868 |                                                                                                    |                                                                                                                                                                                                 |                                                                                                                                                                                                                                                                                                       |
| see above                                                                                                                                                                                                                                                                                                                                                                                                                                                                                                                                                                                                                                                                                                                                                                                                                                                                                                                                                                                                                                                                                                                                                                                                                                                                                                                                                                                                                                                                                                                                                                                                                                                                                                                                                                                                                                                                                                                                                                                                                                                                                                                                                                                                                                                                                                                                                                                                                                                                                                                                                                                                                                                                                                                                                                                                                                                                                                                                                                                                                                                                                                                                                                                                                                                                                                                                                                                                                                                                                                                                                                                                                                                                                                                                                                                                                                                                                                                                                                                                                                                                                                                                                                                                                                                                                                                                                                                                                                                                                                                                                                                                                                                                                                                                                                                                                                                                                                                                                                                      | Israel Central Virology laboratory                                                                 | Israel Central Virology laboratory                                                                                                                                                              | Neta Zuckerman, Efrat Dahan Bucris, Oran Erster, Michal Mandelboim, Orna Mor, Ella Mendelson                                                                                                                                                                                                          |
| EPI_ISL_778867                                                                                                                                                                                                                                                                                                                                                                                                                                                                                                                                                                                                                                                                                                                                                                                                                                                                                                                                                                                                                                                                                                                                                                                                                                                                                                                                                                                                                                                                                                                                                                                                                                                                                                                                                                                                                                                                                                                                                                                                                                                                                                                                                                                                                                                                                                                                                                                                                                                                                                                                                                                                                                                                                                                                                                                                                                                                                                                                                                                                                                                                                                                                                                                                                                                                                                                                                                                                                                                                                                                                                                                                                                                                                                                                                                                                                                                                                                                                                                                                                                                                                                                                                                                                                                                                                                                                                                                                                                                                                                                                                                                                                                                                                                                                                                                                                                                                                                                                                                                 | Synergy Laboratories                                                                               | Synergy Laboratories                                                                                                                                                                            | Megan Cornwell                                                                                                                                                                                                                                                                                        |
| EPI_ISL_778870                                                                                                                                                                                                                                                                                                                                                                                                                                                                                                                                                                                                                                                                                                                                                                                                                                                                                                                                                                                                                                                                                                                                                                                                                                                                                                                                                                                                                                                                                                                                                                                                                                                                                                                                                                                                                                                                                                                                                                                                                                                                                                                                                                                                                                                                                                                                                                                                                                                                                                                                                                                                                                                                                                                                                                                                                                                                                                                                                                                                                                                                                                                                                                                                                                                                                                                                                                                                                                                                                                                                                                                                                                                                                                                                                                                                                                                                                                                                                                                                                                                                                                                                                                                                                                                                                                                                                                                                                                                                                                                                                                                                                                                                                                                                                                                                                                                                                                                                                                                 | Laboratoire Biolife                                                                                | Laboratoire de Biotechnologie                                                                                                                                                                   | Mouna Ouadghiri, Tarik Aanniz, Mohammed Walid Chemao Elfihri, Mohamed Chenaoui, Hanae Dakka, Afaf Alaoui, Otmane Touzani, Amina Benouda, Bouchra Belfquih, Lahcen belyamani, Saaid Amzazi and Azeddine Ibrahim                                                                                        |
| EPI_ISL_779131, EPI_ISL_779132, EPI_ISL_779133, EPI_ISL_779134, EPI_ISL_779135, EPI_ISL_779136                                                                                                                                                                                                                                                                                                                                                                                                                                                                                                                                                                                                                                                                                                                                                                                                                                                                                                                                                                                                                                                                                                                                                                                                                                                                                                                                                                                                                                                                                                                                                                                                                                                                                                                                                                                                                                                                                                                                                                                                                                                                                                                                                                                                                                                                                                                                                                                                                                                                                                                                                                                                                                                                                                                                                                                                                                                                                                                                                                                                                                                                                                                                                                                                                                                                                                                                                                                                                                                                                                                                                                                                                                                                                                                                                                                                                                                                                                                                                                                                                                                                                                                                                                                                                                                                                                                                                                                                                                                                                                                                                                                                                                                                                                                                                                                                                                                                                                 | Wyoming Public Health Laboratory                                                                   | Wyoming Public Health Laboratory                                                                                                                                                                | Noah Hull, Taylor Fearing, Lynette Gumbleton, Channing Weber, Ashley Norberg, Bailey Bowcutt, and Wanda Manley                                                                                                                                                                                        |
| EPI_ISL_779404, EPI_ISL_779405, EPI_ISL_779406, EPI_ISL_779407, EPI_ISL_779408, EPI_ISL_779409, EPI_ISL_779410, EPI_ISL_779411, EPI_ISL_779412, EPI_ISL_779413                                                                                                                                                                                                                                                                                                                                                                                                                                                                                                                                                                                                                                                                                                                                                                                                                                                                                                                                                                                                                                                                                                                                                                                                                                                                                                                                                                                                                                                                                                                                                                                                                                                                                                                                                                                                                                                                                                                                                                                                                                                                                                                                                                                                                                                                                                                                                                                                                                                                                                                                                                                                                                                                                                                                                                                                                                                                                                                                                                                                                                                                                                                                                                                                                                                                                                                                                                                                                                                                                                                                                                                                                                                                                                                                                                                                                                                                                                                                                                                                                                                                                                                                                                                                                                                                                                                                                                                                                                                                                                                                                                                                                                                                                                                                                                                                                                 | Royal Darwin Hospital Pathology                                                                    | MDU-PHL                                                                                                                                                                                         | Meumann, E., Caly L., Seemann T., Sait, M.L., Druce J., Sherry, N.L.                                                                                                                                                                                                                                  |
| EPI_ISL_789060, EPI_ISL_789061, EPI_ISL_789062, EPI_ISL_789063, EPI_ISL_789064, EPI_ISL_789065, EPI_ISL_789066, EPI_ISL_789067, EPI_ISL_789068, EPI_ISL_789069, EPI_ISL_789070, EPI_ISL_789071, EPI_ISL_789072, EPI_ISL_789073, EPI_ISL_789074, EPI_ISL_789075, EPI_ISL_789076, EPI_ISL_789077, EPI_ISL_789078, EPI_ISL_789079, EPI_ISL_789080, EPI_ISL_789081, EPI_ISL_789082, EPI_ISL_789083, EPI_ISL_789084, EPI_ISL_789085, EPI_ISL_789086, EPI_ISL_789087, EPI_ISL_789088, EPI_ISL_789089, EPI_ISL_789090, EPI_ISL_789091, EPI_ISL_789092, EPI_ISL_789093, EPI_ISL_789094, EPI_ISL_789095, EPI_ISL_789096, EPI_ISL_789097, EPI_ISL_789098, EPI_ISL_789099, EPI_ISL_789100, EPI_ISL_789101                                                                                                                                                                                                                                                                                                                                                                                                                                                                                                                                                                                                                                                                                                                                                                                                                                                                                                                                                                                                                                                                                                                                                                                                                                                                                                                                                                                                                                                                                                                                                                                                                                                                                                                                                                                                                                                                                                                                                                                                                                                                                                                                                                                                                                                                                                                                                                                                                                                                                                                                                                                                                                                                                                                                                                                                                                                                                                                                                                                                                                                                                                                                                                                                                                                                                                                                                                                                                                                                                                                                                                                                                                                                                                                                                                                                                                                                                                                                                                                                                                                                                                                                                                                                                                                                                                 |                                                                                                    |                                                                                                                                                                                                 |                                                                                                                                                                                                                                                                                                       |
| see above                                                                                                                                                                                                                                                                                                                                                                                                                                                                                                                                                                                                                                                                                                                                                                                                                                                                                                                                                                                                                                                                                                                                                                                                                                                                                                                                                                                                                                                                                                                                                                                                                                                                                                                                                                                                                                                                                                                                                                                                                                                                                                                                                                                                                                                                                                                                                                                                                                                                                                                                                                                                                                                                                                                                                                                                                                                                                                                                                                                                                                                                                                                                                                                                                                                                                                                                                                                                                                                                                                                                                                                                                                                                                                                                                                                                                                                                                                                                                                                                                                                                                                                                                                                                                                                                                                                                                                                                                                                                                                                                                                                                                                                                                                                                                                                                                                                                                                                                                                                      | National Virus Reference Laboratory                                                                | National Virus Reference Laboratory                                                                                                                                                             | Michael Carr, Gabriel Gonzalez, Dana Alalwan, Jonathan Dean, Daniel Hare, Cillian F De Gascun                                                                                                                                                                                                         |
| EPI_ISL_791977                                                                                                                                                                                                                                                                                                                                                                                                                                                                                                                                                                                                                                                                                                                                                                                                                                                                                                                                                                                                                                                                                                                                                                                                                                                                                                                                                                                                                                                                                                                                                                                                                                                                                                                                                                                                                                                                                                                                                                                                                                                                                                                                                                                                                                                                                                                                                                                                                                                                                                                                                                                                                                                                                                                                                                                                                                                                                                                                                                                                                                                                                                                                                                                                                                                                                                                                                                                                                                                                                                                                                                                                                                                                                                                                                                                                                                                                                                                                                                                                                                                                                                                                                                                                                                                                                                                                                                                                                                                                                                                                                                                                                                                                                                                                                                                                                                                                                                                                                                                 | Laboratorium Mikrobiologi Samarinda                                                                | National Institute of Health Research and Development                                                                                                                                           | Nugraha,AA;Subangkit;Pawestri,HA;Ikawati,HD;Puspa,KD;Tandirogang,N;Yadi;Pangesti,KNA;Soekarso,T;Puspandari,N;Setiawaty,V                                                                                                                                                                              |
| EPI_ISL_791978                                                                                                                                                                                                                                                                                                                                                                                                                                                                                                                                                                                                                                                                                                                                                                                                                                                                                                                                                                                                                                                                                                                                                                                                                                                                                                                                                                                                                                                                                                                                                                                                                                                                                                                                                                                                                                                                                                                                                                                                                                                                                                                                                                                                                                                                                                                                                                                                                                                                                                                                                                                                                                                                                                                                                                                                                                                                                                                                                                                                                                                                                                                                                                                                                                                                                                                                                                                                                                                                                                                                                                                                                                                                                                                                                                                                                                                                                                                                                                                                                                                                                                                                                                                                                                                                                                                                                                                                                                                                                                                                                                                                                                                                                                                                                                                                                                                                                                                                                                                 | Balai Labkes Lampung                                                                               | National Institute of Health Research and Development                                                                                                                                           | Nugraha,AA;Subangkit;Pawestri,HA;Ikawati,HD;Puspa,KD;Yurina,L;Pangesti,KNA;Soekarso,T;Puspandari,N;Setiawaty,V                                                                                                                                                                                        |
| EPI_ISL_791979                                                                                                                                                                                                                                                                                                                                                                                                                                                                                                                                                                                                                                                                                                                                                                                                                                                                                                                                                                                                                                                                                                                                                                                                                                                                                                                                                                                                                                                                                                                                                                                                                                                                                                                                                                                                                                                                                                                                                                                                                                                                                                                                                                                                                                                                                                                                                                                                                                                                                                                                                                                                                                                                                                                                                                                                                                                                                                                                                                                                                                                                                                                                                                                                                                                                                                                                                                                                                                                                                                                                                                                                                                                                                                                                                                                                                                                                                                                                                                                                                                                                                                                                                                                                                                                                                                                                                                                                                                                                                                                                                                                                                                                                                                                                                                                                                                                                                                                                                                                 | RSUD Curup Bengkulu                                                                                | National Institute of Health Research and Development                                                                                                                                           | Nugraha,AA;Subangkit;Pawestri,HA;Ikawati,HD;Puspa,KD;Mardiani;Pangesti,KNA;Soekarso,T;Puspandari,N;Setiawaty,V                                                                                                                                                                                        |
| EPI_ISL_792117, EPI_ISL_792118, EPI_ISL_792119, EPI_ISL_792120, EPI_ISL_792121, EPI_ISL_792122, EPI_ISL_792123, EPI_ISL_792124, EPI_ISL_792125, EPI_ISL_792126, EPI_ISL_792127, EPI_ISL_792128, EPI_ISL_792129, EPI_ISL_792130, EPI_ISL_792131, EPI_ISL_792132, EPI_ISL_792133, EPI_ISL_792134, EPI_ISL_792135, EPI_ISL_792136, EPI_ISL_792137, EPI_ISL_792138, EPI_ISL_792139, EPI_ISL_792140, EPI_ISL_792141, EPI_ISL_792142, EPI_ISL_792143, EPI_ISL_792144, EPI_ISL_792145, EPI_ISL_792146, EPI_ISL_792147, EPI_ISL_792148, EPI_ISL_792149, EPI_ISL_792150, EPI_ISL_792151, EPI_ISL_792152, EPI_ISL_792153, EPI_ISL_792154, EPI_ISL_792155, EPI_ISL_792156, EPI_ISL_792157, EPI_ISL_792158, EPI_ISL_792159, EPI_ISL_792160, EPI_ISL_792161, EPI_ISL_792162, EPI_ISL_792163, EPI_ISL_792164, EPI_ISL_792165, EPI_ISL_792166, EPI_ISL_792167, EPI_ISL_792168, EPI_ISL_792169, EPI_ISL_792170, EPI_ISL_792171, EPI_ISL_792172, EPI_ISL_792173, EPI_ISL_792174, EPI_ISL_792175, EPI_ISL_792176, EPI_ISL_792177, EPI_ISL_792178, EPI_ISL_792179, EPI_ISL_792180, EPI_ISL_792181, EPI_ISL_792182, EPI_ISL_792183, EPI_ISL_792184, EPI_ISL_792185, EPI_ISL_792186, EPI_ISL_792187, EPI_ISL_792188, EPI_ISL_792189, EPI_ISL_792190, EPI_ISL_792191, EPI_ISL_792192, EPI_ISL_792193, EPI_ISL_792194, EPI_ISL_792195, EPI_ISL_792196, EPI_ISL_792197, EPI_ISL_792198, EPI_ISL_792199, EPI_ISL_792200, EPI_ISL_792201, EPI_ISL_792202, EPI_ISL_792203, EPI_ISL_792204, EPI_ISL_792205, EPI_ISL_792206, EPI_ISL_792207, EPI_ISL_792208, EPI_ISL_792209, EPI_ISL_792210, EPI_ISL_792211, EPI_ISL_792212, EPI_ISL_792213, EPI_ISL_792214, EPI_ISL_792215, EPI_ISL_792216, EPI_ISL_792217, EPI_ISL_792218, EPI_ISL_792219, EPI_ISL_792220, EPI_ISL_792221, EPI_ISL_792222, EPI_ISL_792223, EPI_ISL_792224, EPI_ISL_792225, EPI_ISL_792226, EPI_ISL_792227, EPI_ISL_792228, EPI_ISL_792229, EPI_ISL_792230, EPI_ISL_792231, EPI_ISL_792232, EPI_ISL_792233, EPI_ISL_792234, EPI_ISL_792235, EPI_ISL_792236, EPI_ISL_792237, EPI_ISL_792238, EPI_ISL_792239, EPI_ISL_792240, EPI_ISL_792241, EPI_ISL_792242, EPI_ISL_792243, EPI_ISL_792244, EPI_ISL_792245, EPI_ISL_792246, EPI_ISL_792247, EPI_ISL_792248, EPI_ISL_792249, EPI_ISL_792250, EPI_ISL_792251, EPI_ISL_792252, EPI_ISL_792253, EPI_ISL_792254, EPI_ISL_792255, EPI_ISL_792256, EPI_ISL_792257, EPI_ISL_792258, EPI_ISL_792259, EPI_ISL_792260, EPI_ISL_792261, EPI_ISL_792262, EPI_ISL_792263, EPI_ISL_792264, EPI_ISL_792265, EPI_ISL_792266, EPI_ISL_792267, EPI_ISL_792268, EPI_ISL_792269, EPI_ISL_792270, EPI_ISL_792271, EPI_ISL_792272, EPI_ISL_792273, EPI_ISL_792274, EPI_ISL_792275, EPI_ISL_792276, EPI_ISL_792277, EPI_ISL_792278, EPI_ISL_792279, EPI_ISL_792280, EPI_ISL_792281, EPI_ISL_792282, EPI_ISL_792283, EPI_ISL_792284, EPI_ISL_792285, EPI_ISL_792286, EPI_ISL_792287, EPI_ISL_792288, EPI_ISL_792289                                                                                                                                                                                                                                                                                                                                                                                                                                                                                                                                                                                                                                                                                                                                                                                                                                                                                                                                                                                                                                                                                                                                                                                                                                                                                                                                                                                                                                                                                                                                                                                                                                                                                                                                                                                                                                                                                                                                                                                                                                                                                                                 |                                                                                                    |                                                                                                                                                                                                 |                                                                                                                                                                                                                                                                                                       |
| see above                                                                                                                                                                                                                                                                                                                                                                                                                                                                                                                                                                                                                                                                                                                                                                                                                                                                                                                                                                                                                                                                                                                                                                                                                                                                                                                                                                                                                                                                                                                                                                                                                                                                                                                                                                                                                                                                                                                                                                                                                                                                                                                                                                                                                                                                                                                                                                                                                                                                                                                                                                                                                                                                                                                                                                                                                                                                                                                                                                                                                                                                                                                                                                                                                                                                                                                                                                                                                                                                                                                                                                                                                                                                                                                                                                                                                                                                                                                                                                                                                                                                                                                                                                                                                                                                                                                                                                                                                                                                                                                                                                                                                                                                                                                                                                                                                                                                                                                                                                                      | Laboratorio de Virología del Hospital de Niños Dr. Ricardo Gutierrez                               | Área de Secuenciación del Laboratorio de Virología del Hospital de Niños Dr. Ricardo Gutierrez on behalf of 'Proyecto Argentino Interinstitucional de genómica de SARS-CoV-2' (PAIS Consortium) | Nabaes Jodar, MS; Goya, S; Natale, MI; Lusso, S; Gravis, E; Acevedo, ME; Alvarez Lopez, C; Alexy, S; Jacques, O; Mistchenko, AS; Valinotto, LE; Viegas, M.                                                                                                                                            |
| EPI_ISL_792290                                                                                                                                                                                                                                                                                                                                                                                                                                                                                                                                                                                                                                                                                                                                                                                                                                                                                                                                                                                                                                                                                                                                                                                                                                                                                                                                                                                                                                                                                                                                                                                                                                                                                                                                                                                                                                                                                                                                                                                                                                                                                                                                                                                                                                                                                                                                                                                                                                                                                                                                                                                                                                                                                                                                                                                                                                                                                                                                                                                                                                                                                                                                                                                                                                                                                                                                                                                                                                                                                                                                                                                                                                                                                                                                                                                                                                                                                                                                                                                                                                                                                                                                                                                                                                                                                                                                                                                                                                                                                                                                                                                                                                                                                                                                                                                                                                                                                                                                                                                 | Laboratorio de Virología del Hospital de Niños Dr. Ricardo Gutierrez                               | Área de Secuenciación del Laboratorio de Virología del Hospital de Niños Dr. Ricardo Gutierrez on behalf of 'Proyecto Argentino Interinstitucional de genómica de SARS-CoV-2' (PAIS Consortium) | Nabaes Jodar, MS; Goya, S; Natale, MI; Lusso, S; Primost, I; Gallino, MI; Valinotto, LE; Viegas, M.                                                                                                                                                                                                   |
| EPI_ISL_792291, EPI_ISL_792292, EPI_ISL_792293, EPI_ISL_792294, EPI_ISL_792295, EPI_ISL_792296, EPI_ISL_792297, EPI_ISL_792298                                                                                                                                                                                                                                                                                                                                                                                                                                                                                                                                                                                                                                                                                                                                                                                                                                                                                                                                                                                                                                                                                                                                                                                                                                                                                                                                                                                                                                                                                                                                                                                                                                                                                                                                                                                                                                                                                                                                                                                                                                                                                                                                                                                                                                                                                                                                                                                                                                                                                                                                                                                                                                                                                                                                                                                                                                                                                                                                                                                                                                                                                                                                                                                                                                                                                                                                                                                                                                                                                                                                                                                                                                                                                                                                                                                                                                                                                                                                                                                                                                                                                                                                                                                                                                                                                                                                                                                                                                                                                                                                                                                                                                                                                                                                                                                                                                                                 | Laboratorio de genética y biología molecular del Hospital de trauma y emergencia Dr Federico Abete | Área de Secuenciación del Laboratorio de Virología del Hospital de Niños Dr. Ricardo Gutierrez on behalf of 'Proyecto Argentino Interinstitucional de genómica de SARS-CoV-2' (PAIS Consortium) | Nabaes Jodar, MS; Goya, S; Natale, MI; Lusso, S; Primost, I; Gallino, MI; Valinotto, LE; Viegas, M.                                                                                                                                                                                                   |
| EPI_ISL_792299, EPI_ISL_792300                                                                                                                                                                                                                                                                                                                                                                                                                                                                                                                                                                                                                                                                                                                                                                                                                                                                                                                                                                                                                                                                                                                                                                                                                                                                                                                                                                                                                                                                                                                                                                                                                                                                                                                                                                                                                                                                                                                                                                                                                                                                                                                                                                                                                                                                                                                                                                                                                                                                                                                                                                                                                                                                                                                                                                                                                                                                                                                                                                                                                                                                                                                                                                                                                                                                                                                                                                                                                                                                                                                                                                                                                                                                                                                                                                                                                                                                                                                                                                                                                                                                                                                                                                                                                                                                                                                                                                                                                                                                                                                                                                                                                                                                                                                                                                                                                                                                                                                                                                 | Laboratorio del Hospital Alemán                                                                    | Área de Secuenciación del Laboratorio de Virología del Hospital de Niños Dr. Ricardo Gutierrez on behalf of 'Proyecto Argentino Interinstitucional de genómica de SARS-CoV-2' (PAIS Consortium) | Nabaes Jodar, MS; Goya, S; Natale, MI; Lusso, S; Ibañez, E; Della Latta, MP; Garcia Allende, N; Valinotto, LE; Viegas, M.                                                                                                                                                                             |
| EPI_ISL_792301                                                                                                                                                                                                                                                                                                                                                                                                                                                                                                                                                                                                                                                                                                                                                                                                                                                                                                                                                                                                                                                                                                                                                                                                                                                                                                                                                                                                                                                                                                                                                                                                                                                                                                                                                                                                                                                                                                                                                                                                                                                                                                                                                                                                                                                                                                                                                                                                                                                                                                                                                                                                                                                                                                                                                                                                                                                                                                                                                                                                                                                                                                                                                                                                                                                                                                                                                                                                                                                                                                                                                                                                                                                                                                                                                                                                                                                                                                                                                                                                                                                                                                                                                                                                                                                                                                                                                                                                                                                                                                                                                                                                                                                                                                                                                                                                                                                                                                                                                                                 | Departamento de Biología y genética molecular, IACA Laboratorios.                                  | Área de Secuenciación del Laboratorio de Virología del Hospital de Niños Dr. Ricardo Gutierrez on behalf of 'Proyecto Argentino Interinstitucional de genómica de SARS-CoV-2' (PAIS Consortium) | Nabaes Jodar, MS; Goya, S; Natale, MI; Lusso, S; Tittarelli, E; Suárez, A; Masciovecchio MV; Streitenberger ER; Mistchenko, AS; Valinotto, LE; Viegas, M.                                                                                                                                             |
| EPI_ISL_792302, EPI_ISL_792303, EPI_ISL_792304, EPI_ISL_792305                                                                                                                                                                                                                                                                                                                                                                                                                                                                                                                                                                                                                                                                                                                                                                                                                                                                                                                                                                                                                                                                                                                                                                                                                                                                                                                                                                                                                                                                                                                                                                                                                                                                                                                                                                                                                                                                                                                                                                                                                                                                                                                                                                                                                                                                                                                                                                                                                                                                                                                                                                                                                                                                                                                                                                                                                                                                                                                                                                                                                                                                                                                                                                                                                                                                                                                                                                                                                                                                                                                                                                                                                                                                                                                                                                                                                                                                                                                                                                                                                                                                                                                                                                                                                                                                                                                                                                                                                                                                                                                                                                                                                                                                                                                                                                                                                                                                                                                                 | Unidad de Virología, Centro de Educación Médica en Investigaciones Clínicas CEMIC                  | Área de Secuenciación del Laboratorio de Virología del Hospital de Niños Dr. Ricardo Gutierrez on behalf of 'Proyecto Argentino Interinstitucional de genómica de                               | Nabaes Jodar, MS; Goya, S; Natale, MI; Lusso, S; Echavarría, M; Mistchenko, AS; Valinotto, LE; Viegas, M.                                                                                                                                                                                             |

## SARS-CoV-2 (PAIS Consortium)

|                                                                                                                                                                                                                                                                                                                                                                                                                                                                                                                                                                                                                                                                                                                                                                                                                                                                                                                                                                                                                                                                                                                                                                                                                                                                                                                                                                                                                                                                                                                                                                                                                                                                                                                                                                                                                                                                                                                                                                                                                                                                                                                                                                                                                                                                                                                                                                                                                                                                                                                                                                                                                                |           |                                                                                              |                                                                                                                                                                                                 |                                                                                                                                                                                                                                                                                                                                                            |
|--------------------------------------------------------------------------------------------------------------------------------------------------------------------------------------------------------------------------------------------------------------------------------------------------------------------------------------------------------------------------------------------------------------------------------------------------------------------------------------------------------------------------------------------------------------------------------------------------------------------------------------------------------------------------------------------------------------------------------------------------------------------------------------------------------------------------------------------------------------------------------------------------------------------------------------------------------------------------------------------------------------------------------------------------------------------------------------------------------------------------------------------------------------------------------------------------------------------------------------------------------------------------------------------------------------------------------------------------------------------------------------------------------------------------------------------------------------------------------------------------------------------------------------------------------------------------------------------------------------------------------------------------------------------------------------------------------------------------------------------------------------------------------------------------------------------------------------------------------------------------------------------------------------------------------------------------------------------------------------------------------------------------------------------------------------------------------------------------------------------------------------------------------------------------------------------------------------------------------------------------------------------------------------------------------------------------------------------------------------------------------------------------------------------------------------------------------------------------------------------------------------------------------------------------------------------------------------------------------------------------------|-----------|----------------------------------------------------------------------------------------------|-------------------------------------------------------------------------------------------------------------------------------------------------------------------------------------------------|------------------------------------------------------------------------------------------------------------------------------------------------------------------------------------------------------------------------------------------------------------------------------------------------------------------------------------------------------------|
| EPI_ISL_792306, EPI_ISL_792307, EPI_ISL_792308, EPI_ISL_792309, EPI_ISL_792310, EPI_ISL_792311, EPI_ISL_792312, EPI_ISL_792313, EPI_ISL_792314, EPI_ISL_792315, EPI_ISL_792316, EPI_ISL_792317, EPI_ISL_792318, EPI_ISL_792319                                                                                                                                                                                                                                                                                                                                                                                                                                                                                                                                                                                                                                                                                                                                                                                                                                                                                                                                                                                                                                                                                                                                                                                                                                                                                                                                                                                                                                                                                                                                                                                                                                                                                                                                                                                                                                                                                                                                                                                                                                                                                                                                                                                                                                                                                                                                                                                                 | see above | Laboratorio del Hospital El Cruce Dr. Néstor C. Kirchner                                     | Área de Secuenciación del Laboratorio de Virología del Hospital de Niños Dr. Ricardo Gutierrez on behalf of 'Proyecto Argentino Interinstitucional de genómica de SARS-CoV-2' (PAIS Consortium) | Nabaes Jodar, MS; Goya, S; Natale, MI; Lusso, S; Zubieta, M; Rahhal, M; Valinotto, LE; Viegas, M.                                                                                                                                                                                                                                                          |
| EPI_ISL_792320, EPI_ISL_792321, EPI_ISL_792322, EPI_ISL_792323, EPI_ISL_792324, EPI_ISL_792325, EPI_ISL_792326, EPI_ISL_792327, EPI_ISL_792328, EPI_ISL_792329, EPI_ISL_792330, EPI_ISL_792331, EPI_ISL_792332                                                                                                                                                                                                                                                                                                                                                                                                                                                                                                                                                                                                                                                                                                                                                                                                                                                                                                                                                                                                                                                                                                                                                                                                                                                                                                                                                                                                                                                                                                                                                                                                                                                                                                                                                                                                                                                                                                                                                                                                                                                                                                                                                                                                                                                                                                                                                                                                                 | see above | Instituto de Investigaciones Biomédicas en Retrovirus y SIDA                                 | Área de Secuenciación del Laboratorio de Virología del Hospital de Niños Dr. Ricardo Gutierrez on behalf of 'Proyecto Argentino Interinstitucional de genómica de SARS-CoV-2' (PAIS Consortium) | Nabaes Jodar, MS; Goya, S; Natale, MI; Lusso, S; Seery, V; Remes Lenicov, F; Salomón, H; Valinotto, LE; Viegas, M.                                                                                                                                                                                                                                         |
| EPI_ISL_792333, EPI_ISL_792334, EPI_ISL_792335, EPI_ISL_792336, EPI_ISL_792337, EPI_ISL_792338, EPI_ISL_792339, EPI_ISL_792340, EPI_ISL_792341, EPI_ISL_792342, EPI_ISL_792343, EPI_ISL_792344, EPI_ISL_792345, EPI_ISL_792346, EPI_ISL_792347, EPI_ISL_792348, EPI_ISL_792349, EPI_ISL_792350                                                                                                                                                                                                                                                                                                                                                                                                                                                                                                                                                                                                                                                                                                                                                                                                                                                                                                                                                                                                                                                                                                                                                                                                                                                                                                                                                                                                                                                                                                                                                                                                                                                                                                                                                                                                                                                                                                                                                                                                                                                                                                                                                                                                                                                                                                                                 | see above | Laboratorio del Hospital Interzonal General de Agudos Evita                                  | Área de Secuenciación del Laboratorio de Virología del Hospital de Niños Dr. Ricardo Gutierrez on behalf of 'Proyecto Argentino Interinstitucional de genómica de SARS-CoV-2' (PAIS Consortium) | Nabaes Jodar, MS; Goya, S; Natale, MI; Lusso, S; Desimone, I; Luczac, E; Serrano, L; Grossi, O; Musto, A; Valinotto, LE; Viegas, M.                                                                                                                                                                                                                        |
| EPI_ISL_792351, EPI_ISL_792352, EPI_ISL_792353                                                                                                                                                                                                                                                                                                                                                                                                                                                                                                                                                                                                                                                                                                                                                                                                                                                                                                                                                                                                                                                                                                                                                                                                                                                                                                                                                                                                                                                                                                                                                                                                                                                                                                                                                                                                                                                                                                                                                                                                                                                                                                                                                                                                                                                                                                                                                                                                                                                                                                                                                                                 |           | Instituto Nacional de Epidemiología Dr. Jara                                                 | Área de Secuenciación del Laboratorio de Virología del Hospital de Niños Dr. Ricardo Gutierrez on behalf of 'Proyecto Argentino Interinstitucional de genómica de SARS-CoV-2' (PAIS Consortium) | Nabaes Jodar, MS; Goya, S; Natale, MI; Lusso, S; Pagano, I; Uez, O; Cimmino, CJ; Valinotto, LE; Viegas, M.                                                                                                                                                                                                                                                 |
| EPI_ISL_792354, EPI_ISL_792355, EPI_ISL_792356, EPI_ISL_792357                                                                                                                                                                                                                                                                                                                                                                                                                                                                                                                                                                                                                                                                                                                                                                                                                                                                                                                                                                                                                                                                                                                                                                                                                                                                                                                                                                                                                                                                                                                                                                                                                                                                                                                                                                                                                                                                                                                                                                                                                                                                                                                                                                                                                                                                                                                                                                                                                                                                                                                                                                 |           | Laboratorio de Biología Molecular. Hospital Dr. Héctor Cura                                  | Área de Secuenciación del Laboratorio de Virología del Hospital de Niños Dr. Ricardo Gutierrez on behalf of 'Proyecto Argentino Interinstitucional de genómica de SARS-CoV-2' (PAIS Consortium) | Nabaes Jodar, MS; Goya, S; Natale, MI; Lusso, S; Spina, J; Ghiano, N; Zaffanella, MB; Turrina, R; Valinotto, LE; Viegas, M.                                                                                                                                                                                                                                |
| EPI_ISL_792358, EPI_ISL_792359, EPI_ISL_792360, EPI_ISL_792361, EPI_ISL_792362, EPI_ISL_792363, EPI_ISL_792364, EPI_ISL_792365, EPI_ISL_792366, EPI_ISL_792367, EPI_ISL_792368, EPI_ISL_792369, EPI_ISL_792370                                                                                                                                                                                                                                                                                                                                                                                                                                                                                                                                                                                                                                                                                                                                                                                                                                                                                                                                                                                                                                                                                                                                                                                                                                                                                                                                                                                                                                                                                                                                                                                                                                                                                                                                                                                                                                                                                                                                                                                                                                                                                                                                                                                                                                                                                                                                                                                                                 | see above | Laboratorio de Virología - HIEAyC San Juan de Dios                                           | Área de Secuenciación del Laboratorio de Virología del Hospital de Niños Dr. Ricardo Gutierrez on behalf of 'Proyecto Argentino Interinstitucional de genómica de SARS-CoV-2' (PAIS Consortium) | Nabaes Jodar, MS; Goya, S; Natale, MI; Lusso, S; Ferioli, M; Colmeiro, M; Gatelli, A; Ercole, R; Valinotto, LE; Viegas, M.                                                                                                                                                                                                                                 |
| EPI_ISL_792371, EPI_ISL_792372, EPI_ISL_792373, EPI_ISL_792374                                                                                                                                                                                                                                                                                                                                                                                                                                                                                                                                                                                                                                                                                                                                                                                                                                                                                                                                                                                                                                                                                                                                                                                                                                                                                                                                                                                                                                                                                                                                                                                                                                                                                                                                                                                                                                                                                                                                                                                                                                                                                                                                                                                                                                                                                                                                                                                                                                                                                                                                                                 |           | Laboratorio del Hospital Interzonal General de Agudos Eva Perón                              | Área de Secuenciación del Laboratorio de Virología del Hospital de Niños Dr. Ricardo Gutierrez on behalf of 'Proyecto Argentino Interinstitucional de genómica de SARS-CoV-2' (PAIS Consortium) | Nabaes Jodar, MS; Goya, S; Natale, MI; Lusso, S; Kairiyama, C; Carulla, M; Pengue, C; Piñeyro C; Valinotto, LE; Viegas, M.                                                                                                                                                                                                                                 |
| EPI_ISL_792375, EPI_ISL_792376, EPI_ISL_792377, EPI_ISL_792378, EPI_ISL_792379, EPI_ISL_792380, EPI_ISL_792381, EPI_ISL_792382, EPI_ISL_792383, EPI_ISL_792384, EPI_ISL_792385                                                                                                                                                                                                                                                                                                                                                                                                                                                                                                                                                                                                                                                                                                                                                                                                                                                                                                                                                                                                                                                                                                                                                                                                                                                                                                                                                                                                                                                                                                                                                                                                                                                                                                                                                                                                                                                                                                                                                                                                                                                                                                                                                                                                                                                                                                                                                                                                                                                 | see above | Laboratorio de salud pública, Facultad de Ciencias Exactas, Universidad Nacional de La Plata | Área de Secuenciación del Laboratorio de Virología del Hospital de Niños Dr. Ricardo Gutierrez on behalf of 'Proyecto Argentino Interinstitucional de genómica de SARS-CoV-2' (PAIS Consortium) | Nabaes Jodar, MS; Goya, S; Natale, MI; Lusso, S; Angeletti, A; Nadalich, V; Cordero, A; Toro, R ; Valinotto, LE; Viegas, M.                                                                                                                                                                                                                                |
| EPI_ISL_792386, EPI_ISL_792387, EPI_ISL_792388, EPI_ISL_792389, EPI_ISL_792390, EPI_ISL_792391, EPI_ISL_792392, EPI_ISL_792393, EPI_ISL_792394, EPI_ISL_792395, EPI_ISL_792396                                                                                                                                                                                                                                                                                                                                                                                                                                                                                                                                                                                                                                                                                                                                                                                                                                                                                                                                                                                                                                                                                                                                                                                                                                                                                                                                                                                                                                                                                                                                                                                                                                                                                                                                                                                                                                                                                                                                                                                                                                                                                                                                                                                                                                                                                                                                                                                                                                                 | see above | Plataforma de Servicios Biotecnológicos: UTTPP/PSB , Universidad Nacional de Quilmes.        | Área de Secuenciación del Laboratorio de Virología del Hospital de Niños Dr. Ricardo Gutierrez on behalf of 'Proyecto Argentino Interinstitucional de genómica de SARS-CoV-2' (PAIS Consortium) | Nabaes Jodar, MS; Goya, S; Natale, MI; Lusso, S; Farina, H; Goñi, S; Cardama, G; Castello, A; Valinotto, LE; Viegas, M.                                                                                                                                                                                                                                    |
| EPI_ISL_792684, EPI_ISL_792685, EPI_ISL_792686, EPI_ISL_792687, EPI_ISL_792688, EPI_ISL_792689, EPI_ISL_792690, EPI_ISL_792691, EPI_ISL_792692, EPI_ISL_792693, EPI_ISL_792694, EPI_ISL_792695, EPI_ISL_792696, EPI_ISL_792697, EPI_ISL_792698, EPI_ISL_792699, EPI_ISL_792700, EPI_ISL_792701, EPI_ISL_792702, EPI_ISL_792703, EPI_ISL_792704, EPI_ISL_792705, EPI_ISL_792706, EPI_ISL_792707                                                                                                                                                                                                                                                                                                                                                                                                                                                                                                                                                                                                                                                                                                                                                                                                                                                                                                                                                                                                                                                                                                                                                                                                                                                                                                                                                                                                                                                                                                                                                                                                                                                                                                                                                                                                                                                                                                                                                                                                                                                                                                                                                                                                                                 | see above | The National Institute of Public Health                                                      | State Veterinary Institute Prague                                                                                                                                                               | Nagy,A;Jirincova,H;Trnka,D;Vecerova,J                                                                                                                                                                                                                                                                                                                      |
| EPI_ISL_793013                                                                                                                                                                                                                                                                                                                                                                                                                                                                                                                                                                                                                                                                                                                                                                                                                                                                                                                                                                                                                                                                                                                                                                                                                                                                                                                                                                                                                                                                                                                                                                                                                                                                                                                                                                                                                                                                                                                                                                                                                                                                                                                                                                                                                                                                                                                                                                                                                                                                                                                                                                                                                 |           | Laboratorio de Virología del Hospital de Niños Dr. Ricardo Gutierrez                         | Área de Secuenciación del Laboratorio de Virología del Hospital de Niños Dr. Ricardo Gutierrez on behalf of 'Proyecto Argentino Interinstitucional de genómica de SARS-CoV-2' (PAIS Consortium) | Nabaes Jodar, MS; Goya, S; Natale, MI; Lusso, S; Gravis, E; Mistchenko, AS; Valinotto, LE; Viegas, M.                                                                                                                                                                                                                                                      |
| EPI_ISL_796127, EPI_ISL_796128, EPI_ISL_796129, EPI_ISL_796130, EPI_ISL_796131, EPI_ISL_796132, EPI_ISL_796133, EPI_ISL_796134                                                                                                                                                                                                                                                                                                                                                                                                                                                                                                                                                                                                                                                                                                                                                                                                                                                                                                                                                                                                                                                                                                                                                                                                                                                                                                                                                                                                                                                                                                                                                                                                                                                                                                                                                                                                                                                                                                                                                                                                                                                                                                                                                                                                                                                                                                                                                                                                                                                                                                 |           | Laboratorio de Microbiología. Hospital General Universitario de Eida, Alicante               | SeqCOVID-SPAIN consortium/IBV(CSIC)                                                                                                                                                             | Mª Isabel Gascón Ros, Cristina Torregrosa Hetland, Eva Pastor Boix, Paloma Cascales Ramos and SeqCOVID-SPAIN consortium                                                                                                                                                                                                                                    |
| EPI_ISL_803117                                                                                                                                                                                                                                                                                                                                                                                                                                                                                                                                                                                                                                                                                                                                                                                                                                                                                                                                                                                                                                                                                                                                                                                                                                                                                                                                                                                                                                                                                                                                                                                                                                                                                                                                                                                                                                                                                                                                                                                                                                                                                                                                                                                                                                                                                                                                                                                                                                                                                                                                                                                                                 |           | National Institute of Laboratory Medicine and Referral Center                                | Bangladesh Council of Scientific and Industrial Research                                                                                                                                        | Md. Murshed Hasan Sarkar, Mohammad Samir Uzzaman, Eshrar Osman, Md. Ahashan Habib, Shahina Akter, Tanjina Akhter Banu, Abu Sayeed Mohammad Mahmud, Barna Goswami, Iffat Jahan, Md. Saddam Hossain, Tasnim Nafisa, Md. Maruf Ahmed Molla, Mahmuda Yeasmin, Asish Kumar Ghosh, A. K. M. Shamsuzzaman, Monira Parveen, Md. Masum Hossain Arif, Md. Salim Khan |
| EPI_ISL_803121                                                                                                                                                                                                                                                                                                                                                                                                                                                                                                                                                                                                                                                                                                                                                                                                                                                                                                                                                                                                                                                                                                                                                                                                                                                                                                                                                                                                                                                                                                                                                                                                                                                                                                                                                                                                                                                                                                                                                                                                                                                                                                                                                                                                                                                                                                                                                                                                                                                                                                                                                                                                                 |           | National Institute of Laboratory Medicine and Referral Center                                | Genomic Research Lab, BCSIR                                                                                                                                                                     | Md. Saddam Hossain, Mohammad Samir Uzzaman, Eshrar Osman, Md. Ahasan Habib, Shahina Akter, Tanjina Akhter Banu, Abu Sayeed Mohammad Mahmud, Md. Murshed Hasan Sarkar, Barna Goswami, Iffat Jahan, Md. Maruf Ahmed Molla, Mahmuda Yeasmin, Asish Kumar Ghosh, A. K. M. Shamsuzzaman, Monira Parveen, Md. Masum Hossain Arif, Md. Salim Khan                 |
| EPI_ISL_803865                                                                                                                                                                                                                                                                                                                                                                                                                                                                                                                                                                                                                                                                                                                                                                                                                                                                                                                                                                                                                                                                                                                                                                                                                                                                                                                                                                                                                                                                                                                                                                                                                                                                                                                                                                                                                                                                                                                                                                                                                                                                                                                                                                                                                                                                                                                                                                                                                                                                                                                                                                                                                 |           | National Institute of Laboratory Medicine and Referral Center                                | Genomic Research Lab, BCSIR                                                                                                                                                                     | Md. Ahashan Habib, Mohammad Samir Uzzaman, Eshrar Osman, Shahina Akter, Tanjina Akhter Banu, Abu Sayeed Mohammad Mahmud, Md. Murshed Hasan Sarkar, Barna Goswami, Iffat Jahan, Md. Saddam Hossain, Tasnim Nafisa, Md. Maruf Ahmed Molla, Mahmuda Yeasmin, Asish Kumar Ghosh, A. K. M. Shamsuzzaman, Monira Parveen, Md. Masum Hossain Arif, Md. Salim Khan |
| EPI_ISL_803870                                                                                                                                                                                                                                                                                                                                                                                                                                                                                                                                                                                                                                                                                                                                                                                                                                                                                                                                                                                                                                                                                                                                                                                                                                                                                                                                                                                                                                                                                                                                                                                                                                                                                                                                                                                                                                                                                                                                                                                                                                                                                                                                                                                                                                                                                                                                                                                                                                                                                                                                                                                                                 |           | National Institute of Laboratory Medicine and Referral Center                                | Genomic Research Lab, BCSIR                                                                                                                                                                     | Md. Murshed Hasan Sarkar, Mohammad Samir Uzzaman, Eshrar Osman, Md. Ahashan Habib, Shahina Akter, Tanjina Akhter Banu, Abu Sayeed Mohammad Mahmud, Barna Goswami, Iffat Jahan, Md. Saddam Hossain, Tasnim Nafisa, Md. Maruf Ahmed Molla, Mahmuda Yeasmin, Asish Kumar Ghosh, A. K. M. Shamsuzzaman, Monira Parveen, Md. Masum Hossain Arif, Md. Salim Khan |
| EPI_ISL_804056, EPI_ISL_804057, EPI_ISL_804058, EPI_ISL_804059, EPI_ISL_804060, EPI_ISL_804061, EPI_ISL_804062, EPI_ISL_804063, EPI_ISL_804064, EPI_ISL_804065, EPI_ISL_804066, EPI_ISL_804067, EPI_ISL_804068, EPI_ISL_804069, EPI_ISL_804070, EPI_ISL_804071, EPI_ISL_804072, EPI_ISL_804073, EPI_ISL_804074, EPI_ISL_804075, EPI_ISL_804076, EPI_ISL_804077, EPI_ISL_804078, EPI_ISL_804079, EPI_ISL_804080, EPI_ISL_804081, EPI_ISL_804082, EPI_ISL_804083, EPI_ISL_804084, EPI_ISL_804085, EPI_ISL_804086, EPI_ISL_804087, EPI_ISL_804088, EPI_ISL_804089, EPI_ISL_804090, EPI_ISL_804091, EPI_ISL_804092, EPI_ISL_804093, EPI_ISL_804094, EPI_ISL_804095, EPI_ISL_804096, EPI_ISL_804097, EPI_ISL_804098, EPI_ISL_804099, EPI_ISL_804100, EPI_ISL_804101, EPI_ISL_804102, EPI_ISL_804103, EPI_ISL_804104, EPI_ISL_804105, EPI_ISL_804106, EPI_ISL_804107, EPI_ISL_804108, EPI_ISL_804109, EPI_ISL_804110, EPI_ISL_804111, EPI_ISL_804112, EPI_ISL_804113, EPI_ISL_804114, EPI_ISL_804115, EPI_ISL_804116, EPI_ISL_804117, EPI_ISL_804118, EPI_ISL_804119, EPI_ISL_804120, EPI_ISL_804121, EPI_ISL_804122, EPI_ISL_804123, EPI_ISL_804124, EPI_ISL_804125, EPI_ISL_804126, EPI_ISL_804127, EPI_ISL_804128, EPI_ISL_804129, EPI_ISL_804130, EPI_ISL_804131, EPI_ISL_804132, EPI_ISL_804133, EPI_ISL_804134, EPI_ISL_804135, EPI_ISL_804136, EPI_ISL_804137, EPI_ISL_804138, EPI_ISL_804139, EPI_ISL_804140, EPI_ISL_804141, EPI_ISL_804142, EPI_ISL_804143, EPI_ISL_804144, EPI_ISL_804145, EPI_ISL_804146, EPI_ISL_804147, EPI_ISL_804148, EPI_ISL_804149, EPI_ISL_804150, EPI_ISL_804151, EPI_ISL_804152, EPI_ISL_804153, EPI_ISL_804154, EPI_ISL_804155, EPI_ISL_804156, EPI_ISL_804157, EPI_ISL_804158, EPI_ISL_804159, EPI_ISL_804160, EPI_ISL_804161, EPI_ISL_804162, EPI_ISL_804163, EPI_ISL_804164, EPI_ISL_804165, EPI_ISL_804166, EPI_ISL_804167, EPI_ISL_804168, EPI_ISL_804169, EPI_ISL_804170, EPI_ISL_804171, EPI_ISL_804172, EPI_ISL_804173, EPI_ISL_804174, EPI_ISL_804175, EPI_ISL_804176, EPI_ISL_804177, EPI_ISL_804178, EPI_ISL_804179, EPI_ISL_804180, EPI_ISL_804181, EPI_ISL_804182, EPI_ISL_804183, EPI_ISL_804184, EPI_ISL_804185, EPI_ISL_804186, EPI_ISL_804187, EPI_ISL_804188, EPI_ISL_804189, EPI_ISL_804190, EPI_ISL_804191, EPI_ISL_804192, EPI_ISL_804193, EPI_ISL_804194, EPI_ISL_804195, EPI_ISL_804196, EPI_ISL_804197, EPI_ISL_804198, EPI_ISL_804199, EPI_ISL_804200, EPI_ISL_804201, EPI_ISL_804202, EPI_ISL_804203, EPI_ISL_804204, EPI_ISL_804205, EPI_ISL_804206, EPI_ISL_804207, EPI_ISL_804208, EPI_ISL_804209, EPI_ISL_804210, EPI_ISL_804211, EPI_ISL_804212, EPI_ISL_804213 |           |                                                                                              |                                                                                                                                                                                                 |                                                                                                                                                                                                                                                                                                                                                            |



|                                                                                                                                                                                                                                                                                                                                                                                                                                                                                                                                                                                                                                                                                                                                                                                                                                                                                                                                                                                                                                                                                                                                                                                                                                                                                                                                                                                                                                                                                                |                                                                                                                                                                                                 |                                                                                                                                       |                                                                                                                                                                                                                                                                                                                                                                                                                                                                     |
|------------------------------------------------------------------------------------------------------------------------------------------------------------------------------------------------------------------------------------------------------------------------------------------------------------------------------------------------------------------------------------------------------------------------------------------------------------------------------------------------------------------------------------------------------------------------------------------------------------------------------------------------------------------------------------------------------------------------------------------------------------------------------------------------------------------------------------------------------------------------------------------------------------------------------------------------------------------------------------------------------------------------------------------------------------------------------------------------------------------------------------------------------------------------------------------------------------------------------------------------------------------------------------------------------------------------------------------------------------------------------------------------------------------------------------------------------------------------------------------------|-------------------------------------------------------------------------------------------------------------------------------------------------------------------------------------------------|---------------------------------------------------------------------------------------------------------------------------------------|---------------------------------------------------------------------------------------------------------------------------------------------------------------------------------------------------------------------------------------------------------------------------------------------------------------------------------------------------------------------------------------------------------------------------------------------------------------------|
| see above                                                                                                                                                                                                                                                                                                                                                                                                                                                                                                                                                                                                                                                                                                                                                                                                                                                                                                                                                                                                                                                                                                                                                                                                                                                                                                                                                                                                                                                                                      | Israel Central Virology laboratory                                                                                                                                                              | Israel National Consortium for SARS-CoV-2 sequencing                                                                                  | Neta Zuckerman, Efrat Dahan Bucris, Michal Mandelboim, Dana Bar-Ilan, Oran Erster, Tzvia Mann, Omer Murik, David A. Zeevi, Assaf Rokney, Joseph Jaffe, Eva Nachum, Maya Davidovich Cohen, Ephraim Fass, Gal Zizelski Valenci, Mor Rubinstein, Efrat Rorman, Israel Nissan, Efrat Glick-Saar, Omri Naysnool, Gideon Rechavi, Ella Mendelson, Orna Mor                                                                                                                |
| EPI_ISL_804814, EPI_ISL_804815, EPI_ISL_804816, EPI_ISL_804817, EPI_ISL_804818, EPI_ISL_804819, EPI_ISL_804820, EPI_ISL_804821, EPI_ISL_804822, EPI_ISL_804823, EPI_ISL_804824, EPI_ISL_804825, EPI_ISL_804826, EPI_ISL_804827, EPI_ISL_804828, EPI_ISL_804829, EPI_ISL_804830, EPI_ISL_804831, EPI_ISL_804832, EPI_ISL_804833, EPI_ISL_804834, EPI_ISL_804835, EPI_ISL_804836, EPI_ISL_804837, EPI_ISL_804838, EPI_ISL_804839, EPI_ISL_804840, EPI_ISL_804841, EPI_ISL_804842, EPI_ISL_804843, EPI_ISL_804844                                                                                                                                                                                                                                                                                                                                                                                                                                                                                                                                                                                                                                                                                                                                                                                                                                                                                                                                                                                 | DB Diagnosticos do Brasil                                                                                                                                                                       | Laboratório de Parasitologia Médica - Instituto de Medicina Tropical - Universidade de São Paulo                                      | Nuno Faria, Ingra Morales Claro, Darlan Candido, Lucas A. Moyses Franco, Pamela dos Santos Andrade, Thais de Moura Coletti, Camila A. Maia da Silva, Flavia Cristina Sales, Erika Regina Manuli, Renato A. Santana, Nelson Gaburo, Cecilia da Cunha Camilo, Nelson Abraham Fraiji, Myuki Alfaia Esashika Crispim, Maria do Perpétuo Socorro Sampaio Carvalho, Andrew Rambaut, Nick Loman, Oliver G. Pybus, Ester C. Sabino, DB; HEMOAM; CDL; CADDE Genomic Network. |
| see above                                                                                                                                                                                                                                                                                                                                                                                                                                                                                                                                                                                                                                                                                                                                                                                                                                                                                                                                                                                                                                                                                                                                                                                                                                                                                                                                                                                                                                                                                      | Makmal Kesihatan Awam Kebangsaan, Kementerian Kesihatan Malaysia.                                                                                                                               | Integrative Pharmacogenomics Institute (iPROMISE)                                                                                     | Mohd Zaki Salleh, Teh Lay Kek, Ariza Adnan, Sazzli Shahlan Kassim, Siti Hamimah Sheikh Abdul Kadir, Fadzilah Mohd Nor, Mohd Nur Fakhruzzaman Noorizhab, Siti Farah Alwani Mohd Nawi, Wang Seok Mui, Hani Mat Hussin, Nor Zahrin Hasran, Lim Wai Feng                                                                                                                                                                                                                |
| EPI_ISL_807150                                                                                                                                                                                                                                                                                                                                                                                                                                                                                                                                                                                                                                                                                                                                                                                                                                                                                                                                                                                                                                                                                                                                                                                                                                                                                                                                                                                                                                                                                 | Makmal Kesihatan Awam Kebangsaan, Kementerian Kesihatan Malaysia                                                                                                                                | Integrative Pharmacogenomics Institute (iPROMISE)                                                                                     | Mohd Zaki Salleh, Teh Lay Kek, Ariza Adnan, Sazzli Shahlan Kassim, Siti Hamimah Sheikh Abdul Kadir, Fadzilah Mohd Nor, Mohd Nur Fakhruzzaman Noorizhab, Siti Farah Alwani Mohd Nawi, Wang Seok Mui, Hani Mat Hussin, Nor Zahrin Hasran, Lim Wai Feng                                                                                                                                                                                                                |
| EPI_ISL_807151, EPI_ISL_807152, EPI_ISL_807153                                                                                                                                                                                                                                                                                                                                                                                                                                                                                                                                                                                                                                                                                                                                                                                                                                                                                                                                                                                                                                                                                                                                                                                                                                                                                                                                                                                                                                                 | Royal Darwin Hospital Pathology                                                                                                                                                                 | MDU-PHL                                                                                                                               | Meumann, E., Cally L., Seemann T., Sait, M.L., Druce J., Sherry, N.L.                                                                                                                                                                                                                                                                                                                                                                                               |
| EPI_ISL_812423                                                                                                                                                                                                                                                                                                                                                                                                                                                                                                                                                                                                                                                                                                                                                                                                                                                                                                                                                                                                                                                                                                                                                                                                                                                                                                                                                                                                                                                                                 | Royal Darwin Hospital Pathology                                                                                                                                                                 | MDU-PHL                                                                                                                               | Meumann, E., Cally L., Seemann T., Sait, M.L., Druce J., Sherry, N.L.                                                                                                                                                                                                                                                                                                                                                                                               |
| EPI_ISL_814463, EPI_ISL_814465, EPI_ISL_814535, EPI_ISL_814569, EPI_ISL_814570, EPI_ISL_814571, EPI_ISL_814671, EPI_ISL_814672, EPI_ISL_814674, EPI_ISL_814676, EPI_ISL_814679, EPI_ISL_814681, EPI_ISL_814683                                                                                                                                                                                                                                                                                                                                                                                                                                                                                                                                                                                                                                                                                                                                                                                                                                                                                                                                                                                                                                                                                                                                                                                                                                                                                 | Virology Department, Royal Infirmary of Edinburgh, NHS Lothian / School of Biological Sciences, University of Edinburgh / Institute of Genetics and Molecular Medicine, University of Edinburgh | COVID-19 Genomics UK (COG-UK) Consortium                                                                                              | McHugh M, Dewar R, Rooke S, Gallagher M, Balcaza C, O'Toole Á, Scher E, Hill V, McCrone JT, Colquhoun R, Yu X, Jackson B, Rambaut A, Williams TC, Templeton K                                                                                                                                                                                                                                                                                                       |
| see above                                                                                                                                                                                                                                                                                                                                                                                                                                                                                                                                                                                                                                                                                                                                                                                                                                                                                                                                                                                                                                                                                                                                                                                                                                                                                                                                                                                                                                                                                      | Wyoming Public Health Laboratory                                                                                                                                                                | Wyoming Public Health Laboratory                                                                                                      | Noah Hull, Taylor Fearing, Lynette Gumbleton, Channing Weber, Ashley Norberg, Bailey Bowcutt, and Wanda Manley                                                                                                                                                                                                                                                                                                                                                      |
| EPI_ISL_819215, EPI_ISL_819204, EPI_ISL_819205, EPI_ISL_819206, EPI_ISL_819207, EPI_ISL_819208, EPI_ISL_819209, EPI_ISL_819210, EPI_ISL_819211, EPI_ISL_819212, EPI_ISL_819213, EPI_ISL_819214, EPI_ISL_819215, EPI_ISL_819216, EPI_ISL_819217, EPI_ISL_819218, EPI_ISL_819219, EPI_ISL_819220, EPI_ISL_819221, EPI_ISL_819222, EPI_ISL_819223, EPI_ISL_819224, EPI_ISL_819225, EPI_ISL_819226, EPI_ISL_819227, EPI_ISL_819228, EPI_ISL_819229, EPI_ISL_819230, EPI_ISL_819231, EPI_ISL_819232, EPI_ISL_819233, EPI_ISL_819234, EPI_ISL_819235, EPI_ISL_819236, EPI_ISL_819237, EPI_ISL_819238, EPI_ISL_819239, EPI_ISL_819240, EPI_ISL_819241, EPI_ISL_819242, EPI_ISL_819243, EPI_ISL_819244, EPI_ISL_819245, EPI_ISL_819246, EPI_ISL_819247, EPI_ISL_819248, EPI_ISL_819249, EPI_ISL_819250, EPI_ISL_819251, EPI_ISL_819252, EPI_ISL_819253, EPI_ISL_819254, EPI_ISL_819255, EPI_ISL_819256, EPI_ISL_819257, EPI_ISL_819258, EPI_ISL_819259, EPI_ISL_819260, EPI_ISL_819261, EPI_ISL_819262, EPI_ISL_819263, EPI_ISL_819264, EPI_ISL_819265, EPI_ISL_819266, EPI_ISL_819267, EPI_ISL_819268, EPI_ISL_819269, EPI_ISL_819270, EPI_ISL_819271, EPI_ISL_819272, EPI_ISL_819273, EPI_ISL_819274, EPI_ISL_819275, EPI_ISL_819276, EPI_ISL_819277, EPI_ISL_819278, EPI_ISL_819279, EPI_ISL_819280, EPI_ISL_819281, EPI_ISL_819282, EPI_ISL_819283, EPI_ISL_819284, EPI_ISL_819285, EPI_ISL_819286, EPI_ISL_819287, EPI_ISL_819288, EPI_ISL_819289, EPI_ISL_819290, EPI_ISL_819291, EPI_ISL_819292 | Wyoming Public Health Laboratory                                                                                                                                                                | Noah Hull, Taylor Fearing, Lynette Gumbleton, Channing Weber, Ashley Norberg, Bailey Bowcutt, and Wanda Manley                        |                                                                                                                                                                                                                                                                                                                                                                                                                                                                     |
| see above                                                                                                                                                                                                                                                                                                                                                                                                                                                                                                                                                                                                                                                                                                                                                                                                                                                                                                                                                                                                                                                                                                                                                                                                                                                                                                                                                                                                                                                                                      | Wyoming Public Health Laboratory                                                                                                                                                                | Wyoming Public Health Laboratory                                                                                                      | Noah Hull, Taylor Fearing, Lynette Gumbleton, Channing Weber, Ashley Norberg, Bailey Bowcutt, and Wanda Manley                                                                                                                                                                                                                                                                                                                                                      |
| EPI_ISL_819476, EPI_ISL_819478, EPI_ISL_819479, EPI_ISL_819480, EPI_ISL_819481, EPI_ISL_819482, EPI_ISL_819487, EPI_ISL_819488, EPI_ISL_819489, EPI_ISL_819493, EPI_ISL_819499, EPI_ISL_819503, EPI_ISL_819504, EPI_ISL_819506, EPI_ISL_819507, EPI_ISL_819520, EPI_ISL_819521, EPI_ISL_819522, EPI_ISL_819523, EPI_ISL_819529, EPI_ISL_819532                                                                                                                                                                                                                                                                                                                                                                                                                                                                                                                                                                                                                                                                                                                                                                                                                                                                                                                                                                                                                                                                                                                                                 | Lincolnshire Hospitals and DeepSeq Nottingham                                                                                                                                                   | COVID-19 Genomics UK (COG-UK) Consortium                                                                                              | Nichola Duckworth, Tim Sloan, Sarah Walsh, Jonathan Ball, Patrick McClure, Joseph Chappell, Nadine Holmes, Matthew Carlisle, Christopher Moore, Fei Sang, Johnny Debebe, Victoria Wright, Matthew Loose                                                                                                                                                                                                                                                             |
| see above                                                                                                                                                                                                                                                                                                                                                                                                                                                                                                                                                                                                                                                                                                                                                                                                                                                                                                                                                                                                                                                                                                                                                                                                                                                                                                                                                                                                                                                                                      | Lincolnshire Hospitals and DeepSeq Nottingham                                                                                                                                                   | COVID-19 Genomics UK (COG-UK) Consortium                                                                                              | Nichola Duckworth, Tim Sloan, Sarah Walsh, Jonathan Ball, Patrick McClure, Joseph Chappell, Nadine Holmes, Matthew Carlisle, Christopher Moore, Fei Sang, Johnny Debebe, Victoria Wright, Matthew Loose                                                                                                                                                                                                                                                             |
| EPI_ISL_825028, EPI_ISL_825029, EPI_ISL_825030, EPI_ISL_825031, EPI_ISL_825032                                                                                                                                                                                                                                                                                                                                                                                                                                                                                                                                                                                                                                                                                                                                                                                                                                                                                                                                                                                                                                                                                                                                                                                                                                                                                                                                                                                                                 | Infectious Diseases, NC SLPH COVID-19 Response Team                                                                                                                                             | Infectious Diseases, NC SLPH COVID-19 Response Team                                                                                   | Miller,M.C., Chase,K.                                                                                                                                                                                                                                                                                                                                                                                                                                               |
| EPI_ISL_825035                                                                                                                                                                                                                                                                                                                                                                                                                                                                                                                                                                                                                                                                                                                                                                                                                                                                                                                                                                                                                                                                                                                                                                                                                                                                                                                                                                                                                                                                                 | B.J. Medical College and Civil hospital, Ahmedabad                                                                                                                                              | Gujarat Biotechnology Research Centre                                                                                                 | Niima Shah, Sanjay Kapadia, Nitin Savaliya, Dinesh Kumar, Zuber Saiyed, Labdhi Pandya, Afzal Ansari, Nikha Trivedi, Apurvasinh Puvar, Ramesh Pandit, Janvi Raval, Zarna Patel, Kamlesh J Upadhyay, Pranay Shah, Dipa Kinariwala, Chaitanya Joshi, Madhvi Joshi                                                                                                                                                                                                      |
| EPI_ISL_825041                                                                                                                                                                                                                                                                                                                                                                                                                                                                                                                                                                                                                                                                                                                                                                                                                                                                                                                                                                                                                                                                                                                                                                                                                                                                                                                                                                                                                                                                                 | B.J. Medical College and Civil hospital, Ahmedabad                                                                                                                                              | Gujarat Biotechnology Research Centre                                                                                                 | Nikha Trivedi, Apurvasinh Puvar, Ramesh Pandit, Janvi Raval, Zarna Patel, Nitin Savaliya, Dinesh Kumar, Zuber Saiyed, Labdhi Pandya, Afzal Ansari, Pranay Shah, Kamlesh J Upadhyay, Sanjay Kapadia, Dipa Kinariwala, Chaitanya Joshi, Madhvi Joshi                                                                                                                                                                                                                  |
| EPI_ISL_825044                                                                                                                                                                                                                                                                                                                                                                                                                                                                                                                                                                                                                                                                                                                                                                                                                                                                                                                                                                                                                                                                                                                                                                                                                                                                                                                                                                                                                                                                                 | NHL Municipal Medical College, Ahmedbad                                                                                                                                                         | Gujarat Biotechnology Research Centre                                                                                                 | Monila Patel, Janvi Raval, Zarna Patel, Nitin Savaliya, Dinesh Kumar, Zuber Saiyed, Labdhi Pandya, Afzal Ansari, Nikha Trivedi, Apurvasinh Puvar, Ramesh Pandit, Jayshri Pethani, Atit Shah, NM Shaikh, Bimal Chauhan, Tanmay Mehta, Bhavin Prajapati, Chaitanya Joshi, Madhvi Joshi                                                                                                                                                                                |
| EPI_ISL_825046                                                                                                                                                                                                                                                                                                                                                                                                                                                                                                                                                                                                                                                                                                                                                                                                                                                                                                                                                                                                                                                                                                                                                                                                                                                                                                                                                                                                                                                                                 | NHL Municipal Medical College, Ahmedbad                                                                                                                                                         | Gujarat Biotechnology Research Centre                                                                                                 | NM Shaikh, Nitin Savaliya, Dinesh Kumar, Zuber Saiyed, Labdhi Pandya, Afzal Ansari, Nikha Trivedi, Apurvasinh Puvar, Ramesh Pandit, Janvi Raval, Zarna Patel, Jayshri Pethani, Monila Patel, Atit Shah, Bimal Chauhan, Tanmay Mehta, Bhavin Prajapati, Chaitanya Joshi, Madhvi Joshi                                                                                                                                                                                |
| EPI_ISL_825048                                                                                                                                                                                                                                                                                                                                                                                                                                                                                                                                                                                                                                                                                                                                                                                                                                                                                                                                                                                                                                                                                                                                                                                                                                                                                                                                                                                                                                                                                 | GMERS Medical College and Hospital, Gotri, Vadodara                                                                                                                                             | Gujarat Biotechnology Research Centre                                                                                                 | Mitesh Kamothi, Zuber Saiyed, Labdhi Pandya, Afzal Ansari, Nikha Trivedi, Apurvasinh Puvar, Ramesh Pandit, Janvi Raval, Zarna Patel, Nitin Savaliya, Dinesh Kumar, Bithika Duttaroy, Kalpesh Mistry, Chaitanya Joshi, Madhvi Joshi                                                                                                                                                                                                                                  |
| EPI_ISL_825056                                                                                                                                                                                                                                                                                                                                                                                                                                                                                                                                                                                                                                                                                                                                                                                                                                                                                                                                                                                                                                                                                                                                                                                                                                                                                                                                                                                                                                                                                 | GMERS Medical College and Hospital, Gotri, Vadodara                                                                                                                                             | Gujarat Biotechnology Research Centre                                                                                                 | Nitin Savaliya, Dinesh Kumar, Zuber Saiyed, Afzal Ansari, Nikha Trivedi, Apurvasinh Puvar, Ramesh Pandit, Janvi Raval, Zarna Patel, Mitesh Kamothi, Bithika Duttaroy, Kalpesh Mistry, Chaitanya Joshi, Madhvi Joshi                                                                                                                                                                                                                                                 |
| EPI_ISL_825060                                                                                                                                                                                                                                                                                                                                                                                                                                                                                                                                                                                                                                                                                                                                                                                                                                                                                                                                                                                                                                                                                                                                                                                                                                                                                                                                                                                                                                                                                 | NHL Municipal Medical College, Ahmedbad                                                                                                                                                         | Gujarat Biotechnology Research Centre                                                                                                 | Nikha Trivedi, Apurvasinh Puvar, Ramesh Pandit, Janvi Raval, Zarna Patel, Nitin Savaliya, Dinesh Kumar, Zuber Saiyed, Afzal Ansari, Jayshri Pethani, Monila Patel, Atit Shah, NM Shaikh, Bimal Chauhan, Tanmay Mehta, Bhavin Prajapati, Chaitanya Joshi, Madhvi Joshi                                                                                                                                                                                               |
| EPI_ISL_826274                                                                                                                                                                                                                                                                                                                                                                                                                                                                                                                                                                                                                                                                                                                                                                                                                                                                                                                                                                                                                                                                                                                                                                                                                                                                                                                                                                                                                                                                                 | Sterling Hospital, Memnagar, Ahmedabad                                                                                                                                                          | Gujarat Biotechnology Research Centre                                                                                                 | Naman Shashtri, Zarna Patel, Nitin Savaliya, Dinesh Kumar, Zuber Saiyed, Labdhi Pandya, Afzal Ansari, Nikha Trivedi, Apurvasinh Puvar, Ramesh Pandit, Janvi Raval, Atul K Patel, Chaitanya Joshi, Madhvi Joshi                                                                                                                                                                                                                                                      |
| EPI_ISL_826297, EPI_ISL_826298, EPI_ISL_826299, EPI_ISL_826300, EPI_ISL_826301, EPI_ISL_826302, EPI_ISL_826303, EPI_ISL_826304, EPI_ISL_826305, EPI_ISL_826306, EPI_ISL_826307, EPI_ISL_826308, EPI_ISL_826309, EPI_ISL_826310, EPI_ISL_826311, EPI_ISL_826312, EPI_ISL_826313, EPI_ISL_826314, EPI_ISL_826315, EPI_ISL_826316, EPI_ISL_826317, EPI_ISL_826318                                                                                                                                                                                                                                                                                                                                                                                                                                                                                                                                                                                                                                                                                                                                                                                                                                                                                                                                                                                                                                                                                                                                 | Wyoming Public Health Laboratory                                                                                                                                                                | Wyoming Public Health Laboratory                                                                                                      | Noah Hull, Taylor Fearing, Lynette Gumbleton, Channing Weber, Ashley Norberg, Bailey Bowcutt, and Wanda Manley                                                                                                                                                                                                                                                                                                                                                      |
| see above                                                                                                                                                                                                                                                                                                                                                                                                                                                                                                                                                                                                                                                                                                                                                                                                                                                                                                                                                                                                                                                                                                                                                                                                                                                                                                                                                                                                                                                                                      | Wyoming Public Health Laboratory                                                                                                                                                                | Wyoming Public Health Laboratory                                                                                                      | Noah Hull, Taylor Fearing, Lynette Gumbleton, Channing Weber, Ashley Norberg, Bailey Bowcutt, and Wanda Manley                                                                                                                                                                                                                                                                                                                                                      |
| EPI_ISL_826461                                                                                                                                                                                                                                                                                                                                                                                                                                                                                                                                                                                                                                                                                                                                                                                                                                                                                                                                                                                                                                                                                                                                                                                                                                                                                                                                                                                                                                                                                 | Montana Public Health Laboratory                                                                                                                                                                | Wyoming Public Health Laboratory                                                                                                      | Noah Hull, Joy Ritter, Taylor Fearing, Lynette Gumbleton, Channing Weber, Ashley Norberg, Bailey Bowcutt, Wanda Manley, Deborah Gibson                                                                                                                                                                                                                                                                                                                              |
| EPI_ISL_830648, EPI_ISL_831649, EPI_ISL_831650, EPI_ISL_831651, EPI_ISL_831652, EPI_ISL_831653, EPI_ISL_831654, EPI_ISL_831655, EPI_ISL_831656, EPI_ISL_831657, EPI_ISL_831658, EPI_ISL_831659                                                                                                                                                                                                                                                                                                                                                                                                                                                                                                                                                                                                                                                                                                                                                                                                                                                                                                                                                                                                                                                                                                                                                                                                                                                                                                 | Institute for Infectious Diseases, University of Bern, Switzerland                                                                                                                              | Institute for Infectious Diseases, University of Bern, Switzerland                                                                    | Michel C Koch, Christian Baumann, Miguel A Terrazos Miani, Cora Sägesser, Pascal Bittel, Stephen L Leib, Peter Keller, Franziska Suter-Riniker, Alban Ramette                                                                                                                                                                                                                                                                                                       |
| see above                                                                                                                                                                                                                                                                                                                                                                                                                                                                                                                                                                                                                                                                                                                                                                                                                                                                                                                                                                                                                                                                                                                                                                                                                                                                                                                                                                                                                                                                                      | Institute for Infectious Diseases, University of Bern, Switzerland                                                                                                                              | Institute for Infectious Diseases, University of Bern, Switzerland                                                                    | Michel C Koch, Christian Baumann, Miguel A Terrazos Miani, Cora Sägesser, Pascal Bittel, Stephen L Leib, Peter Keller, Franziska Suter-Riniker, Alban Ramette                                                                                                                                                                                                                                                                                                       |
| EPI_ISL_832019                                                                                                                                                                                                                                                                                                                                                                                                                                                                                                                                                                                                                                                                                                                                                                                                                                                                                                                                                                                                                                                                                                                                                                                                                                                                                                                                                                                                                                                                                 | Southern Nevada Public Health Laboratory                                                                                                                                                        | Southern Nevada Public Health Laboratory                                                                                              | Michael Picker, Holly Hansen, Erin Buttery, Joseph Benson                                                                                                                                                                                                                                                                                                                                                                                                           |
| EPI_ISL_832023, EPI_ISL_832024, EPI_ISL_832025, EPI_ISL_832026, EPI_ISL_832027, EPI_ISL_832028, EPI_ISL_832029, EPI_ISL_832030, EPI_ISL_832031, EPI_ISL_832032, EPI_ISL_832033, EPI_ISL_832034, EPI_ISL_832035, EPI_ISL_832036, EPI_ISL_832037, EPI_ISL_832038, EPI_ISL_832039, EPI_ISL_832040, EPI_ISL_832041, EPI_ISL_832042, EPI_ISL_832043, EPI_ISL_832044, EPI_ISL_832045, EPI_ISL_832046, EPI_ISL_832047, EPI_ISL_832048, EPI_ISL_832049, EPI_ISL_832050, EPI_ISL_832051, EPI_ISL_832052, EPI_ISL_832053, EPI_ISL_832054, EPI_ISL_832055, EPI_ISL_832056, EPI_ISL_832057, EPI_ISL_832058, EPI_ISL_832059, EPI_ISL_832060, EPI_ISL_832061, EPI_ISL_832062, EPI_ISL_832063, EPI_ISL_832064                                                                                                                                                                                                                                                                                                                                                                                                                                                                                                                                                                                                                                                                                                                                                                                                 | Wyoming Public Health Laboratory                                                                                                                                                                | Wyoming Public Health Laboratory                                                                                                      | Noah Hull, Taylor Fearing, Lynette Gumbleton, Channing Weber, Ashley Norberg, Bailey Bowcutt, and Wanda Manley                                                                                                                                                                                                                                                                                                                                                      |
| see above                                                                                                                                                                                                                                                                                                                                                                                                                                                                                                                                                                                                                                                                                                                                                                                                                                                                                                                                                                                                                                                                                                                                                                                                                                                                                                                                                                                                                                                                                      | Wyoming Public Health Laboratory                                                                                                                                                                | Wyoming Public Health Laboratory                                                                                                      | Noah Hull, Taylor Fearing, Lynette Gumbleton, Channing Weber, Ashley Norberg, Bailey Bowcutt, and Wanda Manley                                                                                                                                                                                                                                                                                                                                                      |
| EPI_ISL_833180                                                                                                                                                                                                                                                                                                                                                                                                                                                                                                                                                                                                                                                                                                                                                                                                                                                                                                                                                                                                                                                                                                                                                                                                                                                                                                                                                                                                                                                                                 | National Institute of Laboratory Medicine and Referral Center                                                                                                                                   | Genomic Research Lab, BCSIR                                                                                                           | Md. Ashahan Habib, Mohammad Samir Uzzaman, Eshrar Osman, Shahina Akter, Tanjina Akhtar Banu, Abu Sayeed Mohammad Mahmud, Md. Murshed Hasan Sarkar, Barna Goswami, Iflat Jahan, Md. Saddam Hossain, TasnimNafisa, Md. Maruf Ahmed Molla, Mahmuda Yeasmin, Ashik Kumar Ghosh, A. K. M. Shamsuzzaman, MoniraParveen, Md. Masum Hossain Arif, Md. Salim Khan                                                                                                            |
| EPI_ISL_833183                                                                                                                                                                                                                                                                                                                                                                                                                                                                                                                                                                                                                                                                                                                                                                                                                                                                                                                                                                                                                                                                                                                                                                                                                                                                                                                                                                                                                                                                                 | Microbiology Department, Complexo Hospitalario Universitario de Vigo                                                                                                                            | Microbiology Department, Complexo Hospitalario Universitario de Vigo                                                                  | Microbiology Department, Complexo Hospitalario Universitario de Vigo. EPICOVIGAL.                                                                                                                                                                                                                                                                                                                                                                                   |
| EPI_ISL_833184                                                                                                                                                                                                                                                                                                                                                                                                                                                                                                                                                                                                                                                                                                                                                                                                                                                                                                                                                                                                                                                                                                                                                                                                                                                                                                                                                                                                                                                                                 | Microbiology Department, Hospital Clinico Universitario de Santiago                                                                                                                             | Microbiology Department, Complexo Hospitalario Universitario de Vigo                                                                  | Microbiology Departments from Complexo Hospitalario Universitario de Vigo and Hospital Clinico Universitario de Santiago. EPICOVIGAL.                                                                                                                                                                                                                                                                                                                               |
| EPI_ISL_837341, EPI_ISL_837342, EPI_ISL_837343, EPI_ISL_837344, EPI_ISL_837345, EPI_ISL_837346, EPI_ISL_837347, EPI_ISL_837348, EPI_ISL_837349, EPI_ISL_837350, EPI_ISL_837351, EPI_ISL_837352, EPI_ISL_837353, EPI_ISL_837354, EPI_ISL_837355, EPI_ISL_837356, EPI_ISL_837357, EPI_ISL_837358, EPI_ISL_837359, EPI_ISL_837360, EPI_ISL_837361, EPI_ISL_837362, EPI_ISL_837363, EPI_ISL_837364, EPI_ISL_837365, EPI_ISL_837366, EPI_ISL_837367, EPI_ISL_837368, EPI_ISL_837369, EPI_ISL_837370, EPI_ISL_837371, EPI_ISL_837372, EPI_ISL_837373, EPI_ISL_837374, EPI_ISL_837375, EPI_ISL_837376, EPI_ISL_837377, EPI_ISL_837378, EPI_ISL_837379, EPI_ISL_837380, EPI_ISL_837381, EPI_ISL_837382, EPI_ISL_837383, EPI_ISL_837384, EPI_ISL_837385, EPI_ISL_837386, EPI_ISL_837387, EPI_ISL_837388, EPI_ISL_837389, EPI_ISL_837390, EPI_ISL_837391, EPI_ISL_837392, EPI_ISL_837393, EPI_ISL_837394                                                                                                                                                                                                                                                                                                                                                                                                                                                                                                                                                                                                 | Microbiology Department, Complexo Hospitalario Universitario de Vigo                                                                                                                            | Microbiology Departments from Complexo Hospitalario Universitario de Vigo and Hospital Clinico Universitario de Santiago. EPICOVIGAL. |                                                                                                                                                                                                                                                                                                                                                                                                                                                                     |

|                                                                                                                                                                                                                                                                                                                                                                                                                                                                                                                                                                                                                                                                                                                                                                                                                                                                                                                                                                                                                                                                                                                                                                                                                                                                                                                                                                                                                                                                                                                                                                                                                                                                                                                                                                                                                                                                                                                                                                                                                                                                                                                                                                                                                                                                                                                                                                                                                                                                                                                                                                                                                                |           |                                                                                                                                                                                                 |                                                                      |                                                                                                                                                                                                                                                                                                                    |
|--------------------------------------------------------------------------------------------------------------------------------------------------------------------------------------------------------------------------------------------------------------------------------------------------------------------------------------------------------------------------------------------------------------------------------------------------------------------------------------------------------------------------------------------------------------------------------------------------------------------------------------------------------------------------------------------------------------------------------------------------------------------------------------------------------------------------------------------------------------------------------------------------------------------------------------------------------------------------------------------------------------------------------------------------------------------------------------------------------------------------------------------------------------------------------------------------------------------------------------------------------------------------------------------------------------------------------------------------------------------------------------------------------------------------------------------------------------------------------------------------------------------------------------------------------------------------------------------------------------------------------------------------------------------------------------------------------------------------------------------------------------------------------------------------------------------------------------------------------------------------------------------------------------------------------------------------------------------------------------------------------------------------------------------------------------------------------------------------------------------------------------------------------------------------------------------------------------------------------------------------------------------------------------------------------------------------------------------------------------------------------------------------------------------------------------------------------------------------------------------------------------------------------------------------------------------------------------------------------------------------------|-----------|-------------------------------------------------------------------------------------------------------------------------------------------------------------------------------------------------|----------------------------------------------------------------------|--------------------------------------------------------------------------------------------------------------------------------------------------------------------------------------------------------------------------------------------------------------------------------------------------------------------|
| EPI_ISL_837395, EPI_ISL_837396, EPI_ISL_837397, EPI_ISL_837398, EPI_ISL_837399, EPI_ISL_837400, EPI_ISL_837401, EPI_ISL_837402, EPI_ISL_837403, EPI_ISL_837404, EPI_ISL_837405, EPI_ISL_837406, EPI_ISL_837407, EPI_ISL_837408, EPI_ISL_837409, EPI_ISL_837410, EPI_ISL_837411, EPI_ISL_837412, EPI_ISL_837413, EPI_ISL_837414, EPI_ISL_837415, EPI_ISL_837416, EPI_ISL_837417, EPI_ISL_837418, EPI_ISL_837419, EPI_ISL_837420, EPI_ISL_837421, EPI_ISL_837422, EPI_ISL_837423, EPI_ISL_837424, EPI_ISL_837425, EPI_ISL_837426, EPI_ISL_837427, EPI_ISL_837428, EPI_ISL_837429, EPI_ISL_837430, EPI_ISL_837431, EPI_ISL_837432                                                                                                                                                                                                                                                                                                                                                                                                                                                                                                                                                                                                                                                                                                                                                                                                                                                                                                                                                                                                                                                                                                                                                                                                                                                                                                                                                                                                                                                                                                                                                                                                                                                                                                                                                                                                                                                                                                                                                                                                 | see above | National Virus Reference Laboratory                                                                                                                                                             | National Virus Reference Laboratory                                  | Michael Carr, Gabriel Gonzalez, Jonathan Dean, Cillian F De Gascun                                                                                                                                                                                                                                                 |
| EPI_ISL_837815, EPI_ISL_837816, EPI_ISL_837817, EPI_ISL_837818, EPI_ISL_837819, EPI_ISL_837820, EPI_ISL_837821, EPI_ISL_837822, EPI_ISL_837823, EPI_ISL_837824, EPI_ISL_837825, EPI_ISL_837826, EPI_ISL_837827, EPI_ISL_837828, EPI_ISL_837829, EPI_ISL_837830, EPI_ISL_837831, EPI_ISL_837832, EPI_ISL_837833                                                                                                                                                                                                                                                                                                                                                                                                                                                                                                                                                                                                                                                                                                                                                                                                                                                                                                                                                                                                                                                                                                                                                                                                                                                                                                                                                                                                                                                                                                                                                                                                                                                                                                                                                                                                                                                                                                                                                                                                                                                                                                                                                                                                                                                                                                                 | see above | Wyoming Public Health Laboratory                                                                                                                                                                | Wyoming Public Health Laboratory                                     | Noah Hull, Taylor Fearing, Lynette Gumbleton, Channing Weber, Ashley Norberg, Bailey Bowcutt, and Wanda Manley                                                                                                                                                                                                     |
| EPI_ISL_838219, EPI_ISL_838221, EPI_ISL_838222, EPI_ISL_838226, EPI_ISL_838227, EPI_ISL_838228, EPI_ISL_838232, EPI_ISL_838236, EPI_ISL_838244, EPI_ISL_838247, EPI_ISL_838255, EPI_ISL_838260, EPI_ISL_838263, EPI_ISL_838265, EPI_ISL_838273, EPI_ISL_838275, EPI_ISL_838277, EPI_ISL_838281, EPI_ISL_838284, EPI_ISL_838290, EPI_ISL_838296, EPI_ISL_838299, EPI_ISL_838300, EPI_ISL_838306, EPI_ISL_838310, EPI_ISL_838312                                                                                                                                                                                                                                                                                                                                                                                                                                                                                                                                                                                                                                                                                                                                                                                                                                                                                                                                                                                                                                                                                                                                                                                                                                                                                                                                                                                                                                                                                                                                                                                                                                                                                                                                                                                                                                                                                                                                                                                                                                                                                                                                                                                                 | see above | Virology Department, Royal Infirmary of Edinburgh, NHS Lothian / School of Biological Sciences, University of Edinburgh / Institute of Genetics and Molecular Medicine, University of Edinburgh | COVID-19 Genomics UK (COG-UK) Consortium                             | McHugh M, Dewar R, Rooke S, Gallagher M, Balcaza C, O'Toole Á, Scher E, Hill V, McCrone JT, Colquhoun R, Yu X, Jackson B, Rambaut A, Williams TC, Templeton K                                                                                                                                                      |
| EPI_ISL_840017, EPI_ISL_840018, EPI_ISL_840019, EPI_ISL_840020, EPI_ISL_840021, EPI_ISL_840022, EPI_ISL_840023, EPI_ISL_840024, EPI_ISL_840025, EPI_ISL_840026, EPI_ISL_840027, EPI_ISL_840028, EPI_ISL_840029, EPI_ISL_840030, EPI_ISL_840031, EPI_ISL_840032, EPI_ISL_840033, EPI_ISL_840034, EPI_ISL_840035, EPI_ISL_840036, EPI_ISL_840037, EPI_ISL_840038, EPI_ISL_840039, EPI_ISL_840040, EPI_ISL_840041, EPI_ISL_840042, EPI_ISL_840043, EPI_ISL_840044, EPI_ISL_840045, EPI_ISL_840046, EPI_ISL_840047, EPI_ISL_840048, EPI_ISL_840049, EPI_ISL_840050, EPI_ISL_840062, EPI_ISL_840063, EPI_ISL_840064, EPI_ISL_840065, EPI_ISL_840066, EPI_ISL_840067, EPI_ISL_840068, EPI_ISL_840069, EPI_ISL_840070, EPI_ISL_840071, EPI_ISL_840072, EPI_ISL_840073, EPI_ISL_840074, EPI_ISL_840075, EPI_ISL_840076, EPI_ISL_840077, EPI_ISL_840078, EPI_ISL_840079, EPI_ISL_840080, EPI_ISL_840081, EPI_ISL_840082, EPI_ISL_840083, EPI_ISL_840084, EPI_ISL_840085, EPI_ISL_840086, EPI_ISL_840087, EPI_ISL_840088, EPI_ISL_840089, EPI_ISL_840090, EPI_ISL_840091, EPI_ISL_840092, EPI_ISL_840093, EPI_ISL_840094, EPI_ISL_840095, EPI_ISL_840096, EPI_ISL_840097, EPI_ISL_840098, EPI_ISL_840099, EPI_ISL_840100, EPI_ISL_840101, EPI_ISL_840102, EPI_ISL_840103, EPI_ISL_840104, EPI_ISL_840105, EPI_ISL_840106, EPI_ISL_840107, EPI_ISL_840108, EPI_ISL_840109, EPI_ISL_840110, EPI_ISL_840111, EPI_ISL_840112, EPI_ISL_840113, EPI_ISL_840114, EPI_ISL_840115, EPI_ISL_840116, EPI_ISL_840117, EPI_ISL_840118, EPI_ISL_840119, EPI_ISL_840120, EPI_ISL_840121, EPI_ISL_840122, EPI_ISL_840123, EPI_ISL_840124, EPI_ISL_840125, EPI_ISL_840126, EPI_ISL_840127, EPI_ISL_840128, EPI_ISL_840129, EPI_ISL_840130, EPI_ISL_840131, EPI_ISL_840132, EPI_ISL_840133, EPI_ISL_840134, EPI_ISL_840135, EPI_ISL_840136, EPI_ISL_840137, EPI_ISL_840138, EPI_ISL_840139, EPI_ISL_840140, EPI_ISL_840141, EPI_ISL_840142, EPI_ISL_840143, EPI_ISL_840144, EPI_ISL_840145, EPI_ISL_840146, EPI_ISL_840147, EPI_ISL_840148, EPI_ISL_840149, EPI_ISL_840150, EPI_ISL_840151, EPI_ISL_840152, EPI_ISL_840153, EPI_ISL_840154, EPI_ISL_840155, EPI_ISL_840156, EPI_ISL_840157, EPI_ISL_840158, EPI_ISL_840159, EPI_ISL_840160, EPI_ISL_840161, EPI_ISL_840162, EPI_ISL_840163, EPI_ISL_840164, EPI_ISL_840165, EPI_ISL_840166, EPI_ISL_840167, EPI_ISL_840168, EPI_ISL_840169, EPI_ISL_840170, EPI_ISL_840171, EPI_ISL_840172, EPI_ISL_840173, EPI_ISL_840174, EPI_ISL_840175, EPI_ISL_840176, EPI_ISL_840177, EPI_ISL_840178, EPI_ISL_840179, EPI_ISL_840180, EPI_ISL_840181, EPI_ISL_840182, EPI_ISL_840183, EPI_ISL_840184, EPI_ISL_840185 | see above | Lincolnshire Hospitals and DeepSeq Nottingham                                                                                                                                                   | COVID-19 Genomics UK (COG-UK) Consortium                             | Nichola Duckworth, Tim Sloan, Sarah Walsh, Jonathan Ball, Patrick McClure, Joseph Chappell, Nadine Holmes, Matthew Carlisle, Christopher Moore, Fei Sang, Johnny Debebe, Victoria Wright, Matthew Loose                                                                                                            |
| EPI_ISL_840637, EPI_ISL_840650, EPI_ISL_842609, EPI_ISL_842610, EPI_ISL_842611, EPI_ISL_842612, EPI_ISL_842613, EPI_ISL_842614, EPI_ISL_842615, EPI_ISL_842616, EPI_ISL_842617, EPI_ISL_842618, EPI_ISL_842619, EPI_ISL_842620, EPI_ISL_842621, EPI_ISL_842622, EPI_ISL_842623, EPI_ISL_842624, EPI_ISL_842625, EPI_ISL_842626, EPI_ISL_842627, EPI_ISL_842628, EPI_ISL_842629, EPI_ISL_842630, EPI_ISL_842631, EPI_ISL_842632                                                                                                                                                                                                                                                                                                                                                                                                                                                                                                                                                                                                                                                                                                                                                                                                                                                                                                                                                                                                                                                                                                                                                                                                                                                                                                                                                                                                                                                                                                                                                                                                                                                                                                                                                                                                                                                                                                                                                                                                                                                                                                                                                                                                 | see above | Wyoming Public Health Laboratory                                                                                                                                                                | Wyoming Public Health Laboratory                                     | Noah Hull, Taylor Fearing, Lynette Gumbleton, Channing Weber, Ashley Norberg, Bailey Bowcutt, and Wanda Manley                                                                                                                                                                                                     |
| EPI_ISL_845807                                                                                                                                                                                                                                                                                                                                                                                                                                                                                                                                                                                                                                                                                                                                                                                                                                                                                                                                                                                                                                                                                                                                                                                                                                                                                                                                                                                                                                                                                                                                                                                                                                                                                                                                                                                                                                                                                                                                                                                                                                                                                                                                                                                                                                                                                                                                                                                                                                                                                                                                                                                                                 |           | National Institute of Laboratory Medicine and Referral Center                                                                                                                                   | Genomic Research Lab, BCSIR                                          | Md. Murshed Hasan Sarkar, Mohammad Samir Uzzaman, Eshrar Osman, Md. Ahashan Habib, Shahina Akter, Tanjina Akhtar Banu, Abu Sayeed Mohammad Mahmud, Barna Goswami, Iffat Jahan, Md. Saddam Hossain, Tasnim Nafisa, Md. Maruf Ahmed Molla, Mahmuda Yeasmin, Asish Kumar Ghosh, A. K. M. Shamsuzzaman, Md. Salim Khan |
| EPI_ISL_845808                                                                                                                                                                                                                                                                                                                                                                                                                                                                                                                                                                                                                                                                                                                                                                                                                                                                                                                                                                                                                                                                                                                                                                                                                                                                                                                                                                                                                                                                                                                                                                                                                                                                                                                                                                                                                                                                                                                                                                                                                                                                                                                                                                                                                                                                                                                                                                                                                                                                                                                                                                                                                 |           | National Institute of Laboratory Medicine and Referral Center                                                                                                                                   | Genomic Research Lab, BCSIR                                          | Md. Saddam Hossain, Mohammad Samir Uzzaman, Eshrar Osman, Md. Ahashan Habib, Shahina Akter, Tanjina Akhtar Banu, Abu Sayeed Mohammad Mahmud, Md. Murshed Hasan Sarkar, Barna Goswami, Iffat Jahan, Tasnim Nafisa, Md. Maruf Ahmed Molla, Mahmuda Yeasmin, Asish Kumar Ghosh, A. K. M. Shamsuzzaman, Md. Salim Khan |
| EPI_ISL_848199                                                                                                                                                                                                                                                                                                                                                                                                                                                                                                                                                                                                                                                                                                                                                                                                                                                                                                                                                                                                                                                                                                                                                                                                                                                                                                                                                                                                                                                                                                                                                                                                                                                                                                                                                                                                                                                                                                                                                                                                                                                                                                                                                                                                                                                                                                                                                                                                                                                                                                                                                                                                                 |           | Microbiology Department, Complejo Hospitalario Universitario de Vigo                                                                                                                            | Microbiology Department, Complejo Hospitalario Universitario de Vigo | Microbiology Department, Complejo Hospitalario Universitario de Vigo (CHUVI). EPICOVIGAL.                                                                                                                                                                                                                          |
| EPI_ISL_848630, EPI_ISL_848631, EPI_ISL_848632, EPI_ISL_848633, EPI_ISL_848642                                                                                                                                                                                                                                                                                                                                                                                                                                                                                                                                                                                                                                                                                                                                                                                                                                                                                                                                                                                                                                                                                                                                                                                                                                                                                                                                                                                                                                                                                                                                                                                                                                                                                                                                                                                                                                                                                                                                                                                                                                                                                                                                                                                                                                                                                                                                                                                                                                                                                                                                                 |           | Montana Public Health Laboratory                                                                                                                                                                | Wyoming Public Health Laboratory                                     | Noah Hull, Joy Ritter, Taylor Fearing, Lynette Gumbleton, Channing Weber, Ashley Norberg, Bailey Bowcutt, Wanda Manley, Deborah Gibson                                                                                                                                                                             |
| EPI_ISL_850507                                                                                                                                                                                                                                                                                                                                                                                                                                                                                                                                                                                                                                                                                                                                                                                                                                                                                                                                                                                                                                                                                                                                                                                                                                                                                                                                                                                                                                                                                                                                                                                                                                                                                                                                                                                                                                                                                                                                                                                                                                                                                                                                                                                                                                                                                                                                                                                                                                                                                                                                                                                                                 |           | Gandhi Medical College and Hospital                                                                                                                                                             | VRDL-Gandhi Medical College                                          | Nagamani Kammili, Rajeshwar Rao, Madhavi Latha Manolla, Winnie Thomas, Shailaja VV, Sudhamadhuri Devara, Vanisree Rajoli, Archana GJ, Sushma Rajyalakshmi Gudiseva, Sunitha Pakalapati, Manisha Rani, Amrithesh Kumar, Raja Rao Mesepogu, Vinay Shekar Reddy, Thriok Chander Bingi, Sofia Banu, Divya Tej Sowpati  |
| EPI_ISL_850509                                                                                                                                                                                                                                                                                                                                                                                                                                                                                                                                                                                                                                                                                                                                                                                                                                                                                                                                                                                                                                                                                                                                                                                                                                                                                                                                                                                                                                                                                                                                                                                                                                                                                                                                                                                                                                                                                                                                                                                                                                                                                                                                                                                                                                                                                                                                                                                                                                                                                                                                                                                                                 |           | Gandhi Medical College and Hospital                                                                                                                                                             | VRDL-Gandhi Medical College                                          | Nagamani Kammili, Rajeshwar Rao, Winnie Thomas, Madhavi Latha Manolla, Shailaja VV, Sudhamadhuri Devara, Vanisree Rajoli, Archana GJ, Sushma Rajyalakshmi Gudiseva, Sunitha Pakalapati, Manisha Rani, Amrithesh Kumar, Raja Rao Mesepogu, Vinay Shekar Reddy, Thriok Chander Bingi, Sofia Banu, Divya Tej Sowpati  |
| EPI_ISL_850510                                                                                                                                                                                                                                                                                                                                                                                                                                                                                                                                                                                                                                                                                                                                                                                                                                                                                                                                                                                                                                                                                                                                                                                                                                                                                                                                                                                                                                                                                                                                                                                                                                                                                                                                                                                                                                                                                                                                                                                                                                                                                                                                                                                                                                                                                                                                                                                                                                                                                                                                                                                                                 |           | Gandhi Medical College and Hospital                                                                                                                                                             | MDRU-DHR, Gandhi Medical College                                     | Nagamani Kammili, Winnie Thomas, Madhavi Latha Manolla, Shailaja VV, Sudhamadhuri Devara, Vanisree Rajoli, Archana GJ, Sushma Rajyalakshmi Gudiseva, Sunitha Pakalapati, Manisha Rani, Amrithesh Kumar, Raja Rao Mesepogu, Vinay Shekar Reddy, Thriok Chander Bingi, Sofia Banu, Divya Tej Sowpati                 |
| EPI_ISL_850514                                                                                                                                                                                                                                                                                                                                                                                                                                                                                                                                                                                                                                                                                                                                                                                                                                                                                                                                                                                                                                                                                                                                                                                                                                                                                                                                                                                                                                                                                                                                                                                                                                                                                                                                                                                                                                                                                                                                                                                                                                                                                                                                                                                                                                                                                                                                                                                                                                                                                                                                                                                                                 |           | Gandhi Medical College and Hospital                                                                                                                                                             | MDRU-DHR, Gandhi Medical College                                     | Nagamani Kammili, Madhavi Latha Manolla, Winnie Thomas, Shailaja VV, Sudhamadhuri Devara, Vanisree Rajoli, Archana GJ, Sushma Rajyalakshmi Gudiseva, Sunitha Pakalapati, Manisha Rani, Amrithesh Kumar, Raja Rao Mesepogu, Vinay Shekar Reddy, Thriok Chander Bingi, Sofia Banu, Divya Tej Sowpati                 |
| EPI_ISL_850663, EPI_ISL_850664, EPI_ISL_850665, EPI_ISL_850666, EPI_ISL_850667, EPI_ISL_850668, EPI_ISL_850669, EPI_ISL_850670, EPI_ISL_850671, EPI_ISL_850672, EPI_ISL_850673, EPI_ISL_850674, EPI_ISL_850675, EPI_ISL_850676                                                                                                                                                                                                                                                                                                                                                                                                                                                                                                                                                                                                                                                                                                                                                                                                                                                                                                                                                                                                                                                                                                                                                                                                                                                                                                                                                                                                                                                                                                                                                                                                                                                                                                                                                                                                                                                                                                                                                                                                                                                                                                                                                                                                                                                                                                                                                                                                 | see above | The National Institute of Public Health                                                                                                                                                         | State Veterinary Institute Prague                                    | Nagy, A.; Jirincova, H.; Trnka, D.; Vecerova, J.; Trinklova, M                                                                                                                                                                                                                                                     |
| EPI_ISL_850677, EPI_ISL_850678, EPI_ISL_850679, EPI_ISL_850680, EPI_ISL_850681, EPI_ISL_850682, EPI_ISL_850683, EPI_ISL_850684, EPI_ISL_850685, EPI_ISL_850686, EPI_ISL_850687, EPI_ISL_850688                                                                                                                                                                                                                                                                                                                                                                                                                                                                                                                                                                                                                                                                                                                                                                                                                                                                                                                                                                                                                                                                                                                                                                                                                                                                                                                                                                                                                                                                                                                                                                                                                                                                                                                                                                                                                                                                                                                                                                                                                                                                                                                                                                                                                                                                                                                                                                                                                                 | see above | The National Institute of Public Health                                                                                                                                                         | State Veterinary Institute Prague                                    | Nagy, A.; Jirincova, H.; Trnka, D.; Vecerova, J                                                                                                                                                                                                                                                                    |
| EPI_ISL_851048                                                                                                                                                                                                                                                                                                                                                                                                                                                                                                                                                                                                                                                                                                                                                                                                                                                                                                                                                                                                                                                                                                                                                                                                                                                                                                                                                                                                                                                                                                                                                                                                                                                                                                                                                                                                                                                                                                                                                                                                                                                                                                                                                                                                                                                                                                                                                                                                                                                                                                                                                                                                                 |           | Gandhi Medical College and Hospital                                                                                                                                                             | CSIR-Centre for Cellular and Molecular Biology                       | Nagamani Kammili, Winnie Thomas, Madhavi Latha Manolla, Shailaja VV, Sudhamadhuri Devara, Vanisree Rajoli, Archana GJ, Sushma Rajyalakshmi Gudiseva, Sunitha Pakalapati, Manisha Rani, Amrithesh Kumar, Raja Rao Mesepogu, Vinay Shekar Reddy, Thriok Chander Bingi, Sofia Banu, Divya Tej Sowpati                 |
| EPI_ISL_851049                                                                                                                                                                                                                                                                                                                                                                                                                                                                                                                                                                                                                                                                                                                                                                                                                                                                                                                                                                                                                                                                                                                                                                                                                                                                                                                                                                                                                                                                                                                                                                                                                                                                                                                                                                                                                                                                                                                                                                                                                                                                                                                                                                                                                                                                                                                                                                                                                                                                                                                                                                                                                 |           | Gandhi Medical College and Hospital                                                                                                                                                             | CSIR-Centre for Cellular and Molecular Biology                       | Nagamani Kammili, Madhavi Latha Manolla, Winnie Thomas, Shailaja VV, Sudhamadhuri Devara, Vanisree Rajoli, Archana GJ, Sushma Rajyalakshmi Gudiseva, Sunitha Pakalapati, Manisha Rani, Amrithesh Kumar, Raja Rao Mesepogu, Vinay Shekar Reddy, Thriok Chander Bingi, Sofia Banu, Divya Tej Sowpati                 |
| EPI_ISL_851050                                                                                                                                                                                                                                                                                                                                                                                                                                                                                                                                                                                                                                                                                                                                                                                                                                                                                                                                                                                                                                                                                                                                                                                                                                                                                                                                                                                                                                                                                                                                                                                                                                                                                                                                                                                                                                                                                                                                                                                                                                                                                                                                                                                                                                                                                                                                                                                                                                                                                                                                                                                                                 |           | Gandhi Medical College and Hospital                                                                                                                                                             | CSIR-Centre for Cellular and Molecular Biology                       | Nagamani Kammili, Winnie Thomas, Madhavi Latha Manolla, Shailaja VV, Sudhamadhuri Devara, Vanisree Rajoli, Archana GJ, Sushma Rajyalakshmi Gudiseva, Sunitha Pakalapati, Manisha Rani, Amrithesh Kumar, Raja Rao Mesepogu, Vinay Shekar Reddy, Thriok Chander Bingi, Sofia Banu, Divya Tej Sowpati                 |
| EPI_ISL_851051                                                                                                                                                                                                                                                                                                                                                                                                                                                                                                                                                                                                                                                                                                                                                                                                                                                                                                                                                                                                                                                                                                                                                                                                                                                                                                                                                                                                                                                                                                                                                                                                                                                                                                                                                                                                                                                                                                                                                                                                                                                                                                                                                                                                                                                                                                                                                                                                                                                                                                                                                                                                                 |           | Gandhi Medical College and Hospital                                                                                                                                                             | CSIR-Centre for Cellular and Molecular Biology                       | Nagamani Kammili, Madhavi Latha Manolla, Winnie Thomas, Shailaja VV, Sudhamadhuri Devara, Vanisree Rajoli, Archana GJ, Sushma Rajyalakshmi Gudiseva, Sunitha Pakalapati, Manisha Rani, Amrithesh Kumar, Raja Rao Mesepogu, Vinay Shekar Reddy, Thriok Chander Bingi, Sofia Banu, Divya Tej Sowpati                 |
| EPI_ISL_853275, EPI_ISL_853276, EPI_ISL_853277, EPI_ISL_853278, EPI_ISL_853279, EPI_ISL_853280, EPI_ISL_853281, EPI_ISL_853282, EPI_ISL_853283, EPI_ISL_853284, EPI_ISL_853285, EPI_ISL_853286, EPI_ISL_853287, EPI_ISL_853288, EPI_ISL_853289, EPI_ISL_853290, EPI_ISL_853291, EPI_ISL_853292, EPI_ISL_853293, EPI_ISL_853294, EPI_ISL_853295, EPI_ISL_853296, EPI_ISL_853297, EPI_ISL_853298, EPI_ISL_853299, EPI_ISL_853300, EPI_ISL_853301, EPI_ISL_853302, EPI_ISL_853303, EPI_ISL_853304, EPI_ISL_853305, EPI_ISL_853306, EPI_ISL_853307, EPI_ISL_853308, EPI_ISL_853309, EPI_ISL_853310, EPI_ISL_853311, EPI_ISL_853312, EPI_ISL_853313, EPI_ISL_853314, EPI_ISL_853316, EPI_ISL_853317, EPI_ISL_853318, EPI_ISL_853319, EPI_ISL_853320, EPI_ISL_853321, EPI_ISL_853322, EPI_ISL_853323, EPI_ISL_853324, EPI_ISL_853325, EPI_ISL_853326, EPI_ISL_853327, EPI_ISL_853328, EPI_ISL_853329, EPI_ISL_853330, EPI_ISL_853331, EPI_ISL_853332, EPI_ISL_853333, EPI_ISL_853334, EPI_ISL_853335, EPI_ISL_853336, EPI_ISL_853337, EPI_ISL_853338, EPI_ISL_853339, EPI_ISL_853340, EPI_ISL_853341, EPI_ISL_853342, EPI_ISL_853343, EPI_ISL_853344, EPI_ISL_853345, EPI_ISL_853346, EPI_ISL_853347, EPI_ISL_853348, EPI_ISL_853349, EPI_ISL_853350, EPI_ISL_853351, EPI_ISL_853352, EPI_ISL_853353, EPI_ISL_853354, EPI_ISL_853355, EPI_ISL_853356, EPI_ISL_853357, EPI_ISL_853358, EPI_ISL_853359, EPI_ISL_853360, EPI_ISL_853361, EPI_ISL_853362, EPI_ISL_853363, EPI_ISL_853364, EPI_ISL_853365, EPI_ISL_853366, EPI_ISL_853367, EPI_ISL_853368, EPI_ISL_853369, EPI_ISL_853370, EPI_ISL_853371, EPI_ISL_853372, EPI_ISL_853373, EPI_ISL_853374, EPI_ISL_853375, EPI_ISL_853376, EPI_ISL_853377, EPI_ISL_853378, EPI_ISL_853379, EPI_ISL_853380, EPI_ISL_853381, EPI_ISL_853382, EPI_ISL_853383, EPI_ISL_853384, EPI_ISL_853385, EPI_ISL_853386, EPI_ISL_853387, EPI_ISL_853388, EPI_ISL_853389, EPI_ISL_853390, EPI_ISL_853391, EPI_ISL_853392, EPI_ISL_853393                                                                                                                                                                                                                                                                                                                                                                                                                                                                                                                                                                                                                                                                 | see above | UPMC Clinical Microbiology Laboratory                                                                                                                                                           | Microbial Genome Sequencing Center; Microbial Genomic                | Mustapha M. Mustapha, Jane W. Marsh, Dan Snyder, Marissa P. Griffith, Stephanie L. Mitchell, Vatsala R. Srinivasa, Kady D. Waggle, Chinele Zeonwuku,                                                                                                                                                               |

|                                                                                                                                                                                                                                                                                                                                                                                                                                                                                                                                                                                                                                                                                                                                                                                                                                                                                                                                                                                                                                                                                                                                                                                                                                                                                                                                                                                                                                                                                                                                                                                                                                                                                                                                                                                                                                                                                                                                                                                                                                                                                                                                                                                                                                                                                                                                                                                                                                                                                                                                                                                                                                                                                                                                                |                                                                                                                  | Epidemiology Laboratory                                                                                                                                                                         | Vaughn S. Cooper, Lee H. Harrison                                                                                                                                                                                                                                                                                                                                                 |
|------------------------------------------------------------------------------------------------------------------------------------------------------------------------------------------------------------------------------------------------------------------------------------------------------------------------------------------------------------------------------------------------------------------------------------------------------------------------------------------------------------------------------------------------------------------------------------------------------------------------------------------------------------------------------------------------------------------------------------------------------------------------------------------------------------------------------------------------------------------------------------------------------------------------------------------------------------------------------------------------------------------------------------------------------------------------------------------------------------------------------------------------------------------------------------------------------------------------------------------------------------------------------------------------------------------------------------------------------------------------------------------------------------------------------------------------------------------------------------------------------------------------------------------------------------------------------------------------------------------------------------------------------------------------------------------------------------------------------------------------------------------------------------------------------------------------------------------------------------------------------------------------------------------------------------------------------------------------------------------------------------------------------------------------------------------------------------------------------------------------------------------------------------------------------------------------------------------------------------------------------------------------------------------------------------------------------------------------------------------------------------------------------------------------------------------------------------------------------------------------------------------------------------------------------------------------------------------------------------------------------------------------------------------------------------------------------------------------------------------------|------------------------------------------------------------------------------------------------------------------|-------------------------------------------------------------------------------------------------------------------------------------------------------------------------------------------------|-----------------------------------------------------------------------------------------------------------------------------------------------------------------------------------------------------------------------------------------------------------------------------------------------------------------------------------------------------------------------------------|
| EPI_ISL_854745, EPI_ISL_854746, EPI_ISL_854747                                                                                                                                                                                                                                                                                                                                                                                                                                                                                                                                                                                                                                                                                                                                                                                                                                                                                                                                                                                                                                                                                                                                                                                                                                                                                                                                                                                                                                                                                                                                                                                                                                                                                                                                                                                                                                                                                                                                                                                                                                                                                                                                                                                                                                                                                                                                                                                                                                                                                                                                                                                                                                                                                                 | Royal Darwin Hospital Pathology                                                                                  | MDU-PHL                                                                                                                                                                                         | Meumann, E., Caly L., Seemann T., Sait, M.L., Druce J., Sherry, N.L.                                                                                                                                                                                                                                                                                                              |
| EPI_ISL_855908, EPI_ISL_855936, EPI_ISL_855938, EPI_ISL_855940, EPI_ISL_855942, EPI_ISL_855944, EPI_ISL_855945, EPI_ISL_855947, EPI_ISL_855949, EPI_ISL_855951, EPI_ISL_855953, EPI_ISL_855955, EPI_ISL_855957, EPI_ISL_855959, EPI_ISL_855960, EPI_ISL_855962, EPI_ISL_855964, EPI_ISL_855966, EPI_ISL_855968                                                                                                                                                                                                                                                                                                                                                                                                                                                                                                                                                                                                                                                                                                                                                                                                                                                                                                                                                                                                                                                                                                                                                                                                                                                                                                                                                                                                                                                                                                                                                                                                                                                                                                                                                                                                                                                                                                                                                                                                                                                                                                                                                                                                                                                                                                                                                                                                                                 | see above                                                                                                        | Lab voor klinische biologie                                                                                                                                                                     | Nick Vereecke, Laurens Lambrechts, Marthe Pauwels, Bruno Verhasselt, Linos Vandekerckhove, Hans Nauwynck, Sebastiaan Theuns                                                                                                                                                                                                                                                       |
| EPI_ISL_856711                                                                                                                                                                                                                                                                                                                                                                                                                                                                                                                                                                                                                                                                                                                                                                                                                                                                                                                                                                                                                                                                                                                                                                                                                                                                                                                                                                                                                                                                                                                                                                                                                                                                                                                                                                                                                                                                                                                                                                                                                                                                                                                                                                                                                                                                                                                                                                                                                                                                                                                                                                                                                                                                                                                                 | Wyoming Public Health Laboratory                                                                                 | Wyoming Public Health Laboratory                                                                                                                                                                | Noah Hull, Kevin Libuit, Joel Sevinsky, Taylor Fearing, Lynette Gumbleton, Channing Weber, Ashley Norberg, Bailey Bowcutt, and Wanda Manley                                                                                                                                                                                                                                       |
| EPI_ISL_856912, EPI_ISL_856913, EPI_ISL_856914, EPI_ISL_856915, EPI_ISL_856916, EPI_ISL_856917, EPI_ISL_856918, EPI_ISL_856919, EPI_ISL_856920, EPI_ISL_856921, EPI_ISL_856922, EPI_ISL_856923, EPI_ISL_856924, EPI_ISL_856925, EPI_ISL_856926, EPI_ISL_856927, EPI_ISL_856928, EPI_ISL_856929, EPI_ISL_856930, EPI_ISL_856931, EPI_ISL_856932, EPI_ISL_856933, EPI_ISL_856934, EPI_ISL_856935, EPI_ISL_856936, EPI_ISL_856937, EPI_ISL_856938, EPI_ISL_856939, EPI_ISL_856940, EPI_ISL_856941, EPI_ISL_856942, EPI_ISL_856943, EPI_ISL_856944, EPI_ISL_856945, EPI_ISL_856946, EPI_ISL_856947, EPI_ISL_856948, EPI_ISL_856949, EPI_ISL_856950, EPI_ISL_856951, EPI_ISL_856952, EPI_ISL_856953, EPI_ISL_856954, EPI_ISL_856955, EPI_ISL_856956, EPI_ISL_856957, EPI_ISL_856958, EPI_ISL_856959, EPI_ISL_856960, EPI_ISL_856961, EPI_ISL_856962, EPI_ISL_856963, EPI_ISL_856964, EPI_ISL_856965, EPI_ISL_856966, EPI_ISL_856967, EPI_ISL_856968, EPI_ISL_856969                                                                                                                                                                                                                                                                                                                                                                                                                                                                                                                                                                                                                                                                                                                                                                                                                                                                                                                                                                                                                                                                                                                                                                                                                                                                                                                                                                                                                                                                                                                                                                                                                                                                                                                                                                                 | see above                                                                                                        | Wyoming Public Health Laboratory                                                                                                                                                                |                                                                                                                                                                                                                                                                                                                                                                                   |
| EPI_ISL_857348                                                                                                                                                                                                                                                                                                                                                                                                                                                                                                                                                                                                                                                                                                                                                                                                                                                                                                                                                                                                                                                                                                                                                                                                                                                                                                                                                                                                                                                                                                                                                                                                                                                                                                                                                                                                                                                                                                                                                                                                                                                                                                                                                                                                                                                                                                                                                                                                                                                                                                                                                                                                                                                                                                                                 | Wyoming Public Health Laboratory                                                                                 | Wyoming Public Health Laboratory                                                                                                                                                                | Noah Hull, Taylor Fearing, Lynette Gumbleton, Channing Weber, Ashley Norberg, Bailey Bowcutt, and Wanda Manley                                                                                                                                                                                                                                                                    |
| EPI_ISL_860719, EPI_ISL_860721, EPI_ISL_860722, EPI_ISL_860723, EPI_ISL_860724, EPI_ISL_860725, EPI_ISL_860726                                                                                                                                                                                                                                                                                                                                                                                                                                                                                                                                                                                                                                                                                                                                                                                                                                                                                                                                                                                                                                                                                                                                                                                                                                                                                                                                                                                                                                                                                                                                                                                                                                                                                                                                                                                                                                                                                                                                                                                                                                                                                                                                                                                                                                                                                                                                                                                                                                                                                                                                                                                                                                 | Institute for Infectious Diseases, University of Bern, Switzerland                                               | Institute for Infectious Diseases, University of Bern, Switzerland                                                                                                                              | Michel C Koch, Christian Baumann, Miguel A Terrazos Miani, Cora Sägesser, Pascal Bittel, Stephen L Leib, Peter Keller, Franziska Suter-Riniker, Alban Ramette                                                                                                                                                                                                                     |
| EPI_ISL_861427, EPI_ISL_861428, EPI_ISL_861429, EPI_ISL_861430, EPI_ISL_861431, EPI_ISL_861432, EPI_ISL_861476, EPI_ISL_861477, EPI_ISL_861478, EPI_ISL_861479, EPI_ISL_861480, EPI_ISL_861482, EPI_ISL_861483, EPI_ISL_861484, EPI_ISL_861485, EPI_ISL_861486, EPI_ISL_861487                                                                                                                                                                                                                                                                                                                                                                                                                                                                                                                                                                                                                                                                                                                                                                                                                                                                                                                                                                                                                                                                                                                                                                                                                                                                                                                                                                                                                                                                                                                                                                                                                                                                                                                                                                                                                                                                                                                                                                                                                                                                                                                                                                                                                                                                                                                                                                                                                                                                 | see above                                                                                                        | Wyoming Public Health Laboratory                                                                                                                                                                | Noah Hull, Taylor Fearing, Lynette Gumbleton, Channing Weber, Ashley Norberg, Bailey Bowcutt, and Wanda Manley                                                                                                                                                                                                                                                                    |
| EPI_ISL_861710                                                                                                                                                                                                                                                                                                                                                                                                                                                                                                                                                                                                                                                                                                                                                                                                                                                                                                                                                                                                                                                                                                                                                                                                                                                                                                                                                                                                                                                                                                                                                                                                                                                                                                                                                                                                                                                                                                                                                                                                                                                                                                                                                                                                                                                                                                                                                                                                                                                                                                                                                                                                                                                                                                                                 | Laboratory for Respiratory Viruses, Cantacuzino National Military-Medical Institute for Research and Development | Cantacuzino Institute Virology                                                                                                                                                                  | Mihaela Lazar, Luiza Ustea, Nicoleta Paraschiv, Tim Durfee                                                                                                                                                                                                                                                                                                                        |
| EPI_ISL_861711, EPI_ISL_861712, EPI_ISL_861713                                                                                                                                                                                                                                                                                                                                                                                                                                                                                                                                                                                                                                                                                                                                                                                                                                                                                                                                                                                                                                                                                                                                                                                                                                                                                                                                                                                                                                                                                                                                                                                                                                                                                                                                                                                                                                                                                                                                                                                                                                                                                                                                                                                                                                                                                                                                                                                                                                                                                                                                                                                                                                                                                                 | Laboratory for Respiratory Viruses, Cantacuzino National Military-Medical Institute for Research and Development | Cantacuzino Institute Virology                                                                                                                                                                  | Mihaela Lazar, Luiza Ustea, Nicoleta Paraschiv, Tim Durfee                                                                                                                                                                                                                                                                                                                        |
| EPI_ISL_861717, EPI_ISL_861718, EPI_ISL_861719, EPI_ISL_861720, EPI_ISL_861721, EPI_ISL_861722, EPI_ISL_861723, EPI_ISL_861724, EPI_ISL_861725, EPI_ISL_861726, EPI_ISL_861729                                                                                                                                                                                                                                                                                                                                                                                                                                                                                                                                                                                                                                                                                                                                                                                                                                                                                                                                                                                                                                                                                                                                                                                                                                                                                                                                                                                                                                                                                                                                                                                                                                                                                                                                                                                                                                                                                                                                                                                                                                                                                                                                                                                                                                                                                                                                                                                                                                                                                                                                                                 | see above                                                                                                        | Department of Medical Microbiology, Hospital Pengajar Universiti Putra Malaysia                                                                                                                 | Malaysia Genome Institute                                                                                                                                                                                                                                                                                                                                                         |
| EPI_ISL_862076                                                                                                                                                                                                                                                                                                                                                                                                                                                                                                                                                                                                                                                                                                                                                                                                                                                                                                                                                                                                                                                                                                                                                                                                                                                                                                                                                                                                                                                                                                                                                                                                                                                                                                                                                                                                                                                                                                                                                                                                                                                                                                                                                                                                                                                                                                                                                                                                                                                                                                                                                                                                                                                                                                                                 | National Influenza Center, Virology Department                                                                   | National Influenza Center                                                                                                                                                                       | NZ Shafiei Jandaghi, V Salimi, A Nejadi, K Sadeghi, J Yavarian, N Ghavami, F Ajaminejad and T Mokhtari Azad                                                                                                                                                                                                                                                                       |
| EPI_ISL_862081                                                                                                                                                                                                                                                                                                                                                                                                                                                                                                                                                                                                                                                                                                                                                                                                                                                                                                                                                                                                                                                                                                                                                                                                                                                                                                                                                                                                                                                                                                                                                                                                                                                                                                                                                                                                                                                                                                                                                                                                                                                                                                                                                                                                                                                                                                                                                                                                                                                                                                                                                                                                                                                                                                                                 | National Influenza Center, Virology Department                                                                   | National Influenza Center                                                                                                                                                                       | NZ Shafiei Jandaghi, V Salimi, A Nejadi, K Sadeghi, J Yavarian, F Ajaminejad, N Ghavami and T Mokhtari Azad                                                                                                                                                                                                                                                                       |
| EPI_ISL_865096, EPI_ISL_865097, EPI_ISL_865099, EPI_ISL_865103, EPI_ISL_865111, EPI_ISL_865114, EPI_ISL_865116, EPI_ISL_865118, EPI_ISL_865121, EPI_ISL_865124, EPI_ISL_865125, EPI_ISL_865127, EPI_ISL_865132, EPI_ISL_865133, EPI_ISL_865134, EPI_ISL_865139, EPI_ISL_865145, EPI_ISL_865147, EPI_ISL_865149, EPI_ISL_865152, EPI_ISL_865155                                                                                                                                                                                                                                                                                                                                                                                                                                                                                                                                                                                                                                                                                                                                                                                                                                                                                                                                                                                                                                                                                                                                                                                                                                                                                                                                                                                                                                                                                                                                                                                                                                                                                                                                                                                                                                                                                                                                                                                                                                                                                                                                                                                                                                                                                                                                                                                                 | see above                                                                                                        | Virology Department, Royal Infirmary of Edinburgh, NHS Lothian / School of Biological Sciences, University of Edinburgh / Institute of Genetics and Molecular Medicine, University of Edinburgh | COVID-19 Genomics UK (COG-UK) Consortium                                                                                                                                                                                                                                                                                                                                          |
| EPI_ISL_866992, EPI_ISL_866993, EPI_ISL_866994, EPI_ISL_866995, EPI_ISL_866996, EPI_ISL_866997, EPI_ISL_866998, EPI_ISL_866999, EPI_ISL_867000, EPI_ISL_867001, EPI_ISL_867002, EPI_ISL_867003, EPI_ISL_867004, EPI_ISL_867005, EPI_ISL_867006, EPI_ISL_867007, EPI_ISL_867008, EPI_ISL_867009, EPI_ISL_867010, EPI_ISL_867011, EPI_ISL_867012, EPI_ISL_867013, EPI_ISL_867014, EPI_ISL_867015, EPI_ISL_867016, EPI_ISL_867017, EPI_ISL_867018, EPI_ISL_867019, EPI_ISL_867020, EPI_ISL_867021, EPI_ISL_867022, EPI_ISL_867023, EPI_ISL_867024, EPI_ISL_867025, EPI_ISL_867026, EPI_ISL_867027, EPI_ISL_867028, EPI_ISL_867029, EPI_ISL_867030, EPI_ISL_867031, EPI_ISL_867032, EPI_ISL_867033, EPI_ISL_867034                                                                                                                                                                                                                                                                                                                                                                                                                                                                                                                                                                                                                                                                                                                                                                                                                                                                                                                                                                                                                                                                                                                                                                                                                                                                                                                                                                                                                                                                                                                                                                                                                                                                                                                                                                                                                                                                                                                                                                                                                                 | see above                                                                                                        | Lincolnshire Hospitals and DeepSeq Nottingham                                                                                                                                                   | COVID-19 Genomics UK (COG-UK) Consortium                                                                                                                                                                                                                                                                                                                                          |
| EPI_ISL_871840, EPI_ISL_871841, EPI_ISL_871842, EPI_ISL_871843, EPI_ISL_871844, EPI_ISL_871845, EPI_ISL_871846, EPI_ISL_871847, EPI_ISL_871848, EPI_ISL_871849, EPI_ISL_871850, EPI_ISL_871851, EPI_ISL_871852, EPI_ISL_871853, EPI_ISL_871854, EPI_ISL_871855, EPI_ISL_871856, EPI_ISL_871857, EPI_ISL_871858, EPI_ISL_871859, EPI_ISL_871860, EPI_ISL_871861, EPI_ISL_871862, EPI_ISL_871863, EPI_ISL_871864, EPI_ISL_871865, EPI_ISL_871866, EPI_ISL_871867, EPI_ISL_871868, EPI_ISL_871869, EPI_ISL_871870, EPI_ISL_871871, EPI_ISL_871873, EPI_ISL_871874, EPI_ISL_871875, EPI_ISL_871877, EPI_ISL_871878                                                                                                                                                                                                                                                                                                                                                                                                                                                                                                                                                                                                                                                                                                                                                                                                                                                                                                                                                                                                                                                                                                                                                                                                                                                                                                                                                                                                                                                                                                                                                                                                                                                                                                                                                                                                                                                                                                                                                                                                                                                                                                                                 | see above                                                                                                        | Wyoming Public Health Laboratory                                                                                                                                                                | Wyoming Public Health Laboratory                                                                                                                                                                                                                                                                                                                                                  |
| EPI_ISL_871879, EPI_ISL_871880, EPI_ISL_871881, EPI_ISL_871882, EPI_ISL_871883, EPI_ISL_871884, EPI_ISL_871885, EPI_ISL_871886, EPI_ISL_871887, EPI_ISL_871888, EPI_ISL_871889, EPI_ISL_871890, EPI_ISL_871891, EPI_ISL_871892, EPI_ISL_871893, EPI_ISL_871894, EPI_ISL_871895, EPI_ISL_871896, EPI_ISL_871897, EPI_ISL_871898, EPI_ISL_871899, EPI_ISL_871900, EPI_ISL_871901, EPI_ISL_871902, EPI_ISL_871903, EPI_ISL_871904, EPI_ISL_871905, EPI_ISL_871906, EPI_ISL_871907, EPI_ISL_871911                                                                                                                                                                                                                                                                                                                                                                                                                                                                                                                                                                                                                                                                                                                                                                                                                                                                                                                                                                                                                                                                                                                                                                                                                                                                                                                                                                                                                                                                                                                                                                                                                                                                                                                                                                                                                                                                                                                                                                                                                                                                                                                                                                                                                                                 | see above                                                                                                        | Hospital Universitario Marqués de Valdecilla - IDIVAL (Santander, Cantabria)                                                                                                                    | SeqCOVID-SPAIN consortium/IBV(CSIC)                                                                                                                                                                                                                                                                                                                                               |
| EPI_ISL_871970, EPI_ISL_871971, EPI_ISL_871999, EPI_ISL_872001, EPI_ISL_872094, EPI_ISL_872096, EPI_ISL_872156, EPI_ISL_872157, EPI_ISL_872158, EPI_ISL_872159, EPI_ISL_872160, EPI_ISL_872161, EPI_ISL_872162, EPI_ISL_872163, EPI_ISL_872164, EPI_ISL_872165, EPI_ISL_872166, EPI_ISL_872167, EPI_ISL_872168, EPI_ISL_872169, EPI_ISL_872170, EPI_ISL_872171, EPI_ISL_872172, EPI_ISL_872173, EPI_ISL_872174, EPI_ISL_872175, EPI_ISL_872176, EPI_ISL_872177, EPI_ISL_872178, EPI_ISL_872179, EPI_ISL_872180, EPI_ISL_872181, EPI_ISL_872182, EPI_ISL_872183, EPI_ISL_872184, EPI_ISL_872185, EPI_ISL_872186, EPI_ISL_872187                                                                                                                                                                                                                                                                                                                                                                                                                                                                                                                                                                                                                                                                                                                                                                                                                                                                                                                                                                                                                                                                                                                                                                                                                                                                                                                                                                                                                                                                                                                                                                                                                                                                                                                                                                                                                                                                                                                                                                                                                                                                                                                 | see above                                                                                                        | Wyoming Public Health Laboratory                                                                                                                                                                | Wyoming Public Health Laboratory                                                                                                                                                                                                                                                                                                                                                  |
| EPI_ISL_872193                                                                                                                                                                                                                                                                                                                                                                                                                                                                                                                                                                                                                                                                                                                                                                                                                                                                                                                                                                                                                                                                                                                                                                                                                                                                                                                                                                                                                                                                                                                                                                                                                                                                                                                                                                                                                                                                                                                                                                                                                                                                                                                                                                                                                                                                                                                                                                                                                                                                                                                                                                                                                                                                                                                                 | Caribbean Public Health Agency                                                                                   | Carrington Lab, Department of Building 36, First Floor Biochemistry Unit, Faculty of Medical Sciences, The University of the West Indies                                                        | Nikita S. D. Sahadeo, Arianne Brown-Jordan, Vernie Ramkissoon, Sarah Hill, Naresh Nandram, Avery Hinds, Jerome Foster, Stanley Giddings, Karla Georges, Marsha Ivey, Rahul Naidu, Risha Singh, SueMin Nathaniel, Rajini Haraksingh, Jaya Jayaraman, Chinnna Chinnadurai, Adesh Ramsubhag, Nuno Faria, Oliver Pybus, Christopher Oura, Gabriel Escobar, Christine V. F. Carrington |
| EPI_ISL_872194, EPI_ISL_872195, EPI_ISL_872196                                                                                                                                                                                                                                                                                                                                                                                                                                                                                                                                                                                                                                                                                                                                                                                                                                                                                                                                                                                                                                                                                                                                                                                                                                                                                                                                                                                                                                                                                                                                                                                                                                                                                                                                                                                                                                                                                                                                                                                                                                                                                                                                                                                                                                                                                                                                                                                                                                                                                                                                                                                                                                                                                                 | Caribbean Public Health Agency                                                                                   | Carrington Lab, Department of PreClinical Sciences, Faculty of Medical Sciences, The University of the West Indies                                                                              | Nikita S. D. Sahadeo, Arianne Brown-Jordan, Vernie Ramkissoon, Sarah Hill, Naresh Nandram, Avery Hinds, Jerome Foster, Stanley Giddings, Karla Georges, Marsha Ivey, Rahul Naidu, Risha Singh, SueMin Nathaniel, Rajini Haraksingh, Jaya Jayaraman, Chinnna Chinnadurai, Adesh Ramsubhag, Nuno Faria, Oliver Pybus, Christopher Oura, Gabriel Escobar, Christine V. F. Carrington |
| EPI_ISL_875349, EPI_ISL_875350, EPI_ISL_875351, EPI_ISL_875352, EPI_ISL_875353, EPI_ISL_875354, EPI_ISL_875355, EPI_ISL_875356, EPI_ISL_875357, EPI_ISL_875358, EPI_ISL_875359, EPI_ISL_875360, EPI_ISL_875361, EPI_ISL_875362, EPI_ISL_875363, EPI_ISL_875364, EPI_ISL_875365, EPI_ISL_875366, EPI_ISL_875367, EPI_ISL_875368, EPI_ISL_875369, EPI_ISL_875370, EPI_ISL_875371, EPI_ISL_875372, EPI_ISL_875373, EPI_ISL_875374, EPI_ISL_875375, EPI_ISL_875376, EPI_ISL_875377, EPI_ISL_875378, EPI_ISL_875379, EPI_ISL_875380, EPI_ISL_875381, EPI_ISL_875382, EPI_ISL_875383, EPI_ISL_875384, EPI_ISL_875385, EPI_ISL_875386, EPI_ISL_875387, EPI_ISL_875388, EPI_ISL_875389, EPI_ISL_875390, EPI_ISL_875391, EPI_ISL_875392, EPI_ISL_875393, EPI_ISL_875394, EPI_ISL_875395, EPI_ISL_875396, EPI_ISL_875397, EPI_ISL_875398, EPI_ISL_875399, EPI_ISL_875400, EPI_ISL_875401, EPI_ISL_875402, EPI_ISL_875403, EPI_ISL_875404, EPI_ISL_875405, EPI_ISL_875406, EPI_ISL_875407, EPI_ISL_875408, EPI_ISL_875409, EPI_ISL_875410, EPI_ISL_875411, EPI_ISL_875412, EPI_ISL_875413, EPI_ISL_875414, EPI_ISL_875415, EPI_ISL_875416, EPI_ISL_875417, EPI_ISL_875418, EPI_ISL_875419, EPI_ISL_875420, EPI_ISL_875421, EPI_ISL_875422, EPI_ISL_875423, EPI_ISL_875424, EPI_ISL_875425, EPI_ISL_875426, EPI_ISL_875427, EPI_ISL_875428, EPI_ISL_875429, EPI_ISL_875430, EPI_ISL_875431, EPI_ISL_875432, EPI_ISL_875433, EPI_ISL_875434, EPI_ISL_875435, EPI_ISL_875436, EPI_ISL_875437, EPI_ISL_875438, EPI_ISL_875439, EPI_ISL_875440, EPI_ISL_875441, EPI_ISL_875442, EPI_ISL_875443, EPI_ISL_875444, EPI_ISL_875445, EPI_ISL_875446, EPI_ISL_875447, EPI_ISL_875448, EPI_ISL_875449, EPI_ISL_875450, EPI_ISL_875451, EPI_ISL_875452, EPI_ISL_875453, EPI_ISL_875454, EPI_ISL_875455, EPI_ISL_875456, EPI_ISL_875457, EPI_ISL_875458, EPI_ISL_875459, EPI_ISL_875460, EPI_ISL_875461, EPI_ISL_875462, EPI_ISL_875463, EPI_ISL_875464, EPI_ISL_875465, EPI_ISL_875466, EPI_ISL_875467, EPI_ISL_875468, EPI_ISL_875469, EPI_ISL_875470, EPI_ISL_875471, EPI_ISL_875472, EPI_ISL_875473, EPI_ISL_875474, EPI_ISL_875475, EPI_ISL_875476, EPI_ISL_875477, EPI_ISL_875478, EPI_ISL_875479, EPI_ISL_875480, EPI_ISL_875481, EPI_ISL_875482, EPI_ISL_875483, EPI_ISL_875484, EPI_ISL_875485, EPI_ISL_875486, EPI_ISL_875487, EPI_ISL_875488, EPI_ISL_875489, EPI_ISL_875490, EPI_ISL_875491, EPI_ISL_875492, EPI_ISL_875493, EPI_ISL_875494, EPI_ISL_875495, EPI_ISL_875496, EPI_ISL_875497, EPI_ISL_875498, EPI_ISL_875499, EPI_ISL_875500, EPI_ISL_875501, EPI_ISL_875502, EPI_ISL_875503, EPI_ISL_875504, EPI_ISL_875505, EPI_ISL_875506, EPI_ISL_875507, EPI_ISL_875508, EPI_ISL_875509, EPI_ISL_875510, EPI_ISL_875511, EPI_ISL_875512, EPI_ISL_875513 | see above                                                                                                        | National Virus Reference Laboratory                                                                                                                                                             | National Virus Reference Laboratory                                                                                                                                                                                                                                                                                                                                               |
| EPI_ISL_875675, EPI_ISL_875676, EPI_ISL_875677, EPI_ISL_875678,                                                                                                                                                                                                                                                                                                                                                                                                                                                                                                                                                                                                                                                                                                                                                                                                                                                                                                                                                                                                                                                                                                                                                                                                                                                                                                                                                                                                                                                                                                                                                                                                                                                                                                                                                                                                                                                                                                                                                                                                                                                                                                                                                                                                                                                                                                                                                                                                                                                                                                                                                                                                                                                                                | Kansas Health and Environmental Lab                                                                              | Kansas Health and Environmental Lab                                                                                                                                                             | Michael Carr, Gabriel Gonzalez, Jonathan Dean, Cillian F De Gascun<br>Mike Grose, Carissa Robertson, Ben Olsen, and Phil Adam                                                                                                                                                                                                                                                     |

|                                                                                                                                                                                                                                                                                                                                                                                                                                                                                                                                                                                                                                                                                                                                                                                                                                                                                                                                                                                                                                                                                                                                                                                                |                                                                                                                                                     |                                                                                                                                                     |                                                                                                                                                                                                                                                                                                                                                       |
|------------------------------------------------------------------------------------------------------------------------------------------------------------------------------------------------------------------------------------------------------------------------------------------------------------------------------------------------------------------------------------------------------------------------------------------------------------------------------------------------------------------------------------------------------------------------------------------------------------------------------------------------------------------------------------------------------------------------------------------------------------------------------------------------------------------------------------------------------------------------------------------------------------------------------------------------------------------------------------------------------------------------------------------------------------------------------------------------------------------------------------------------------------------------------------------------|-----------------------------------------------------------------------------------------------------------------------------------------------------|-----------------------------------------------------------------------------------------------------------------------------------------------------|-------------------------------------------------------------------------------------------------------------------------------------------------------------------------------------------------------------------------------------------------------------------------------------------------------------------------------------------------------|
| EPI_ISL_875679, EPI_ISL_875680, EPI_ISL_875681, EPI_ISL_875682, EPI_ISL_875683, EPI_ISL_875684                                                                                                                                                                                                                                                                                                                                                                                                                                                                                                                                                                                                                                                                                                                                                                                                                                                                                                                                                                                                                                                                                                 | National Virus Reference Laboratory                                                                                                                 | National Virus Reference Laboratory                                                                                                                 | Michael Carr, Gabriel Gonzalez, Jonathan Dean, Cillian F De Gascun                                                                                                                                                                                                                                                                                    |
| EPI_ISL_875685, EPI_ISL_875686                                                                                                                                                                                                                                                                                                                                                                                                                                                                                                                                                                                                                                                                                                                                                                                                                                                                                                                                                                                                                                                                                                                                                                 | Royal Darwin Hospital Pathology                                                                                                                     | MDU-PHL                                                                                                                                             | Meumann, E., Caly L., Seemann T., Sait, M.L., Druce J., Sherry, N.L.                                                                                                                                                                                                                                                                                  |
| EPI_ISL_882943, EPI_ISL_882944, EPI_ISL_882945, EPI_ISL_882946, EPI_ISL_882947, EPI_ISL_882948, EPI_ISL_882949, EPI_ISL_882950, EPI_ISL_882951, EPI_ISL_882952, EPI_ISL_882953                                                                                                                                                                                                                                                                                                                                                                                                                                                                                                                                                                                                                                                                                                                                                                                                                                                                                                                                                                                                                 | The National Institute of Public Health                                                                                                             | State Veterinary Institute Prague                                                                                                                   | Nagy,A.;Jirincova,H;Vecerova,JTrnka,D                                                                                                                                                                                                                                                                                                                 |
| see above                                                                                                                                                                                                                                                                                                                                                                                                                                                                                                                                                                                                                                                                                                                                                                                                                                                                                                                                                                                                                                                                                                                                                                                      | State Veterinary Institute Prague                                                                                                                   | State Veterinary Institute Prague                                                                                                                   | Nagy,A;Cernikova,L;Stara,M                                                                                                                                                                                                                                                                                                                            |
| EPI_ISL_883037, EPI_ISL_883038, EPI_ISL_883039, EPI_ISL_883040, EPI_ISL_883041, EPI_ISL_883042, EPI_ISL_883043, EPI_ISL_883044, EPI_ISL_883045, EPI_ISL_883046, EPI_ISL_883047, EPI_ISL_883048, EPI_ISL_883049, EPI_ISL_883050, EPI_ISL_883051, EPI_ISL_883052, EPI_ISL_883053, EPI_ISL_883054, EPI_ISL_883055, EPI_ISL_883056, EPI_ISL_883057, EPI_ISL_883058, EPI_ISL_883059, EPI_ISL_883060, EPI_ISL_883061, EPI_ISL_883062, EPI_ISL_883063, EPI_ISL_883064, EPI_ISL_883065                                                                                                                                                                                                                                                                                                                                                                                                                                                                                                                                                                                                                                                                                                                 | Kansas Health and Environmental Lab                                                                                                                 | Kansas Health and Environmental Lab                                                                                                                 | Mike Grose, Carissa Robertson, Ben Olsen, and Phil Adam                                                                                                                                                                                                                                                                                               |
| see above                                                                                                                                                                                                                                                                                                                                                                                                                                                                                                                                                                                                                                                                                                                                                                                                                                                                                                                                                                                                                                                                                                                                                                                      | Wazed Mia Science Research Center, Jahangirnagar University in collaboration with GRMDRC, Dhaka and Invent Technologies Ltd, Dhaka, Bangladesh      | COVID Research Cell (CRC), Wazed Miah Science Research Center                                                                                       | Md. Abdul Matin, Bishajit Sarkar, Md. Asad Ullah, Yusha Araf, Nihad Adnan, Abdullah Al Nahid, Rashedul Islam, Mohammad Shahedur Rahman                                                                                                                                                                                                                |
| EPI_ISL_884182, EPI_ISL_884183, EPI_ISL_884184, EPI_ISL_884185, EPI_ISL_884186, EPI_ISL_884187, EPI_ISL_884188, EPI_ISL_884189, EPI_ISL_884190, EPI_ISL_884191, EPI_ISL_884192, EPI_ISL_884193, EPI_ISL_884194, EPI_ISL_884195, EPI_ISL_884204, EPI_ISL_884205, EPI_ISL_884206                                                                                                                                                                                                                                                                                                                                                                                                                                                                                                                                                                                                                                                                                                                                                                                                                                                                                                                 | Wyoming Public Health Laboratory                                                                                                                    | Wyoming Public Health Laboratory                                                                                                                    | Noah Hull, Taylor Fearing, Lynette Gumbleton, Channing Weber, Ashley Norberg, Bailey Bowcutt, and Wanda Manley                                                                                                                                                                                                                                        |
| see above                                                                                                                                                                                                                                                                                                                                                                                                                                                                                                                                                                                                                                                                                                                                                                                                                                                                                                                                                                                                                                                                                                                                                                                      | Kansas Health and Environmental Lab                                                                                                                 | Kansas Health and Environmental Lab                                                                                                                 | Mike Grose, Paige Drury, Carissa Robertson, Ben Olsen, and Phil Adam                                                                                                                                                                                                                                                                                  |
| EPI_ISL_884223, EPI_ISL_884224, EPI_ISL_884225, EPI_ISL_884226, EPI_ISL_884227, EPI_ISL_884228, EPI_ISL_884229, EPI_ISL_884230, EPI_ISL_884231, EPI_ISL_884232, EPI_ISL_884233, EPI_ISL_884234, EPI_ISL_884235, EPI_ISL_884236, EPI_ISL_884237, EPI_ISL_884238, EPI_ISL_884239, EPI_ISL_884240, EPI_ISL_884241, EPI_ISL_884242, EPI_ISL_884243, EPI_ISL_884244, EPI_ISL_884245, EPI_ISL_884246, EPI_ISL_884247, EPI_ISL_884248                                                                                                                                                                                                                                                                                                                                                                                                                                                                                                                                                                                                                                                                                                                                                                 | Department of Biochemistry, Cell and Molecular Biology, West African Centre for Cell Biology of Infectious Pathogens (WACCBIP), University of Ghana | Department of Biochemistry, Cell and Molecular Biology, West African Centre for Cell Biology of Infectious Pathogens (WACCBIP), University of Ghana | Ngoi,J.M., Tei-Maya,F., Morang'a,C.M., Magnusen,V., Amuzu,D.S., Mohammed,A., Tapela,K., Kibinge.N., Diallo,A.B., Kumi-Ansah,F., Odoom,T., Boakye,O.D., Amoako,E., Abass,A.-K., Quashie,P., Amenga-Etego,L.N., Akorinya,S.K., Awandare,G.A., Bediako,Y.                                                                                                |
| see above                                                                                                                                                                                                                                                                                                                                                                                                                                                                                                                                                                                                                                                                                                                                                                                                                                                                                                                                                                                                                                                                                                                                                                                      | Instituto Nacional de Saude (INS), Mozambique                                                                                                       | KRISP, KZN Research Innovation and Sequencing Platform                                                                                              | Nalia Ismael, Nadia Sioes, Paulo Arnaldo, Nedio Mabunda, Giandhari J, Pillay S, Tegally H, Wilkinson E, de Oliveira T                                                                                                                                                                                                                                 |
| EPI_ISL_885597, EPI_ISL_885598, EPI_ISL_885599, EPI_ISL_885600, EPI_ISL_885601, EPI_ISL_885602, EPI_ISL_885603, EPI_ISL_885604, EPI_ISL_885605, EPI_ISL_885606, EPI_ISL_885607, EPI_ISL_885608, EPI_ISL_885609, EPI_ISL_885610, EPI_ISL_885611, EPI_ISL_885612, EPI_ISL_885613, EPI_ISL_885614, EPI_ISL_885615, EPI_ISL_885616, EPI_ISL_885617, EPI_ISL_885618, EPI_ISL_885619, EPI_ISL_885620, EPI_ISL_885621, EPI_ISL_885622, EPI_ISL_885624, EPI_ISL_885625                                                                                                                                                                                                                                                                                                                                                                                                                                                                                                                                                                                                                                                                                                                                 | Wyoming Public Health Laboratory                                                                                                                    | Wyoming Public Health Laboratory                                                                                                                    | Noah Hull, Taylor Fearing, Lynette Gumbleton, Channing Weber, Ashley Norberg, Bailey Bowcutt, and Wanda Manley                                                                                                                                                                                                                                        |
| see above                                                                                                                                                                                                                                                                                                                                                                                                                                                                                                                                                                                                                                                                                                                                                                                                                                                                                                                                                                                                                                                                                                                                                                                      | Montana Public Health Laboratory                                                                                                                    | Wyoming Public Health Laboratory                                                                                                                    | Noah Hull, Joy Ritter, Taylor Fearing, Lynette Gumbleton, Channing Weber, Ashley Norberg, Bailey Bowcutt, Wanda Manley, Deborah Gibson                                                                                                                                                                                                                |
| EPI_ISL_888677                                                                                                                                                                                                                                                                                                                                                                                                                                                                                                                                                                                                                                                                                                                                                                                                                                                                                                                                                                                                                                                                                                                                                                                 | Laboratory for Respiratory Viruses, Cantacuzino National Military-Medical Institute for Research and Development                                    | Cantacuzino Institute Virology                                                                                                                      | Mihaela Lazar, Luiza Ustean, Nicoleta Paraschiv, Tim Durfee                                                                                                                                                                                                                                                                                           |
| EPI_ISL_888830, EPI_ISL_888831, EPI_ISL_888832, EPI_ISL_888833, EPI_ISL_888834                                                                                                                                                                                                                                                                                                                                                                                                                                                                                                                                                                                                                                                                                                                                                                                                                                                                                                                                                                                                                                                                                                                 | National Virus Reference Laboratory                                                                                                                 | National Virus Reference Laboratory                                                                                                                 | Michael Carr, Gabriel Gonzalez, Jonathan Dean, Cillian F De Gascun                                                                                                                                                                                                                                                                                    |
| EPI_ISL_888907, EPI_ISL_888908, EPI_ISL_888909, EPI_ISL_888910, EPI_ISL_888911, EPI_ISL_888912, EPI_ISL_888913, EPI_ISL_888914, EPI_ISL_888915, EPI_ISL_888916, EPI_ISL_888917, EPI_ISL_888918, EPI_ISL_888919, EPI_ISL_888920, EPI_ISL_888921, EPI_ISL_888922, EPI_ISL_888923, EPI_ISL_888924, EPI_ISL_888925, EPI_ISL_888926, EPI_ISL_888927, EPI_ISL_888928, EPI_ISL_888929, EPI_ISL_888930, EPI_ISL_888931, EPI_ISL_888932, EPI_ISL_888933, EPI_ISL_888934, EPI_ISL_888935, EPI_ISL_888936, EPI_ISL_888937, EPI_ISL_888938, EPI_ISL_888939, EPI_ISL_888940, EPI_ISL_888941, EPI_ISL_888942, EPI_ISL_888943, EPI_ISL_888944, EPI_ISL_888945, EPI_ISL_888946, EPI_ISL_888947, EPI_ISL_888948, EPI_ISL_888949, EPI_ISL_888950, EPI_ISL_888951, EPI_ISL_888952, EPI_ISL_888953, EPI_ISL_888954, EPI_ISL_888955, EPI_ISL_888956, EPI_ISL_888957, EPI_ISL_888958, EPI_ISL_888959, EPI_ISL_888960, EPI_ISL_888961, EPI_ISL_888962, EPI_ISL_888963, EPI_ISL_888964, EPI_ISL_888965, EPI_ISL_888966, EPI_ISL_888967, EPI_ISL_888968, EPI_ISL_888969, EPI_ISL_888970, EPI_ISL_888971, EPI_ISL_888972, EPI_ISL_888973, EPI_ISL_888974, EPI_ISL_888975, EPI_ISL_888976, EPI_ISL_888977, EPI_ISL_888978 | Wyoming Public Health Laboratory                                                                                                                    | Wyoming Public Health Laboratory                                                                                                                    | Noah Hull, Taylor Fearing, Lynette Gumbleton, Channing Weber, Ashley Norberg, Bailey Bowcutt, and Wanda Manley                                                                                                                                                                                                                                        |
| see above                                                                                                                                                                                                                                                                                                                                                                                                                                                                                                                                                                                                                                                                                                                                                                                                                                                                                                                                                                                                                                                                                                                                                                                      | Israel Central Virology laboratory                                                                                                                  | Israel National Consortium for SARS-CoV-2 sequencing                                                                                                | Neta Zuckerman, Efrat Dahan Bucris, Michal Mandelboim, Dana Bar-Ilan, Oran Erster, Tzvia Mann, Ormer Murik, David A. Zeevi, Assaf Rokney, Joseph Jaffe, Eva Nachum, Maya Davidovich Choch, Ephraim Fass, Gal Zizelski Valenci, Mor Rubinstein, Efrat Rorman, Israel Nissan, Efrat Glick-Saar, Omri Nayshool, Gideon Rechavi, Ella Mendelson, Orna Mor |
| EPI_ISL_889440, EPI_ISL_889441, EPI_ISL_889442                                                                                                                                                                                                                                                                                                                                                                                                                                                                                                                                                                                                                                                                                                                                                                                                                                                                                                                                                                                                                                                                                                                                                 | Wyoming Public Health Laboratory                                                                                                                    | Wyoming Public Health Laboratory                                                                                                                    | Noah Hull, Taylor Fearing, Lynette Gumbleton, Channing Weber, Ashley Norberg, Bailey Bowcutt, and Wanda Manley                                                                                                                                                                                                                                        |
| EPI_ISL_889773, EPI_ISL_889774, EPI_ISL_889775                                                                                                                                                                                                                                                                                                                                                                                                                                                                                                                                                                                                                                                                                                                                                                                                                                                                                                                                                                                                                                                                                                                                                 | LSUHS Emerging Viral Threat Laboratory                                                                                                              | Microbial Genome Sequencing Center                                                                                                                  | Mohammed N.A. Siddiquey, Jennifer L. Carroll, Camille F. Abshire, Maarten Van Diest, Andrew D. Yurochko, Martin J. Sapp, Rona S. Scott, Christopher G. Kevil, Daniel J. Snyder, Vaughn S. Cooper, John A. Vanchiere, Jeremy P. Kamil,                                                                                                                 |

We gratefully acknowledge the following Authors from the Originating laboratories responsible for obtaining the specimens, as well as the Submitting laboratories where the genome data were generated and shared via GISAID, on which this research is based.

All Submitters of data may be contacted directly via [www.gisaid.org](http://www.gisaid.org)

Authors are sorted alphabetically.

| Accession ID                                                                                                                                                                                                                                                                                                                                                                                                                                                                                                                                                                                                                                                                                                   | Originating Laboratory                                                                                                                                                                                              | Submitting Laboratory                                                                                                      | Authors                                                                                                                                                                                                                                                                                             |
|----------------------------------------------------------------------------------------------------------------------------------------------------------------------------------------------------------------------------------------------------------------------------------------------------------------------------------------------------------------------------------------------------------------------------------------------------------------------------------------------------------------------------------------------------------------------------------------------------------------------------------------------------------------------------------------------------------------|---------------------------------------------------------------------------------------------------------------------------------------------------------------------------------------------------------------------|----------------------------------------------------------------------------------------------------------------------------|-----------------------------------------------------------------------------------------------------------------------------------------------------------------------------------------------------------------------------------------------------------------------------------------------------|
| EPI_ISL_410713, EPI_ISL_410714, EPI_ISL_410715                                                                                                                                                                                                                                                                                                                                                                                                                                                                                                                                                                                                                                                                 | National Public Health Laboratory, National Centre for Infectious Diseases                                                                                                                                          | National Public Health Laboratory, National Centre for Infectious Diseases                                                 | Octavia S, Mak TM, Cui L, Lin RTP                                                                                                                                                                                                                                                                   |
| EPI_ISL_410716                                                                                                                                                                                                                                                                                                                                                                                                                                                                                                                                                                                                                                                                                                 | National Public Health Laboratory, National Centre for Infectious Diseases                                                                                                                                          | National Centre for Infectious Diseases, National Centre for Infectious Diseases                                           | Octavia S, Mak TM, Cui L, Lin RTP                                                                                                                                                                                                                                                                   |
| EPI_ISL_410719                                                                                                                                                                                                                                                                                                                                                                                                                                                                                                                                                                                                                                                                                                 | National Public Health Laboratory                                                                                                                                                                                   | National Public Health Laboratory                                                                                          | Octavia S, Mak TM, Cui L, Lin RTP                                                                                                                                                                                                                                                                   |
| EPI_ISL_411218                                                                                                                                                                                                                                                                                                                                                                                                                                                                                                                                                                                                                                                                                                 | Department of Infectious and Tropical Diseases, Bichat Claude Bernard Hospital, Paris                                                                                                                               | Laboratoire Virpath, CIRI U111, UCBL1, INSERM, CNRS, ENS Lyon                                                              | Olivier Terrier, Aurélien Traversier, Julien Fouret, Yazdan Yazdanpanah, Xavier Lescure, Catherine Legras-Lachuer, Alexandre Gaymard, Bruno Lina, Manuel Rosa-Calatrava                                                                                                                             |
| EPI_ISL_411219, EPI_ISL_411220                                                                                                                                                                                                                                                                                                                                                                                                                                                                                                                                                                                                                                                                                 | Department of Infectious and Tropical Diseases, Bichat Claude Bernard Hospital, Paris                                                                                                                               | Laboratoire Virpath, CIRI U111, UCBL1, INSERM, CNRS, ENS Lyon                                                              | Olivier Terrier, Aurélien Traversier, Julien Fouret, Yazdan Yazdanpanah, Xavier Lescure, Alexandre Gaymard, Bruno Lina, Manuel Rosa-Calatrava                                                                                                                                                       |
| EPI_ISL_411929                                                                                                                                                                                                                                                                                                                                                                                                                                                                                                                                                                                                                                                                                                 | Department of Clinical Diagnostics                                                                                                                                                                                  | Department of Clinical Diagnostics                                                                                         | Park,W.B., Kwon,N.-J., Choi,S.-J., Kang,C.K., Choe,P.G., Kim,J.Y., Yun,J., Lee,G.-W., Seong,M.-W., Kim,N., Seo,J.-S. and Oh,M.-D.                                                                                                                                                                   |
| EPI_ISL_412973                                                                                                                                                                                                                                                                                                                                                                                                                                                                                                                                                                                                                                                                                                 | Department of Infectious Diseases, Istituto Superiore di Sanità, Roma , Italy                                                                                                                                       | Virology Laboratory, Scientific Department, Army Medical Center                                                            | Paola Stefanelli, Stefano Fiore, Antonella Marchi, Eleonora Benedetti, Concetta Fabiani, Giovanni Faggioni, Antonella Fortunato, Riccardo De Santis, Silvia Fillo, Anna Anselmo, Andrea Ciammaruconi, Stefano Palomba, Florio Lista                                                                 |
| EPI_ISL_412974                                                                                                                                                                                                                                                                                                                                                                                                                                                                                                                                                                                                                                                                                                 | Department of Infectious Diseases, Istituto Superiore di Sanità, Rome, Italy                                                                                                                                        | Virology Laboratory, Scientific Department, Army Medical Center                                                            | Paola Stefanelli, Stefano Fiore, Antonella Marchi, Eleonora Benedetti, Concetta Fabiani, Giovanni Faggioni, Antonella Fortunato, Silvia Fillo, Riccardo De Santis, Andrea Ciammaruconi, Giancarlo Petralito, Filippo Molinari, Florio Lista                                                         |
| EPI_ISL_413488                                                                                                                                                                                                                                                                                                                                                                                                                                                                                                                                                                                                                                                                                                 | Center of Medical Microbiology, Virology, and Hospital Hygiene, University of Duesseldorf                                                                                                                           | Center of Medical Microbiology, Virology, and Hospital Hygiene, University of Duesseldorf                                  | Ortwin Adams, Marcel Andree, Alexander Diltthey, Torsten Feldt, Sandra Hauka, Torsten Houwaart, Björn-Erik Jensen, Detlef Kindgen-Milles, Malte Kohns Vasconcelos, Klaus Pfeffer, Tina Senff, Daniel Strelow, Jörg Timm, Andreas Walker, Tobias Wienemann                                           |
| EPI_ISL_413550                                                                                                                                                                                                                                                                                                                                                                                                                                                                                                                                                                                                                                                                                                 | Centre for Human and Zoonotic Virology (CHAZVY), College of Medicine University of Lagos/Lagos University Teaching Hospital (LUTH), part of the Laboratory Network of the Nigeria Centre for Disease Control (NCDC) | African Centre of Excellence for Genomics of Infectious Diseases (ACEGID), Redeemer's University, Ede, Osun State, Nigeria | Oluniji P.E., Ajogbasile F.V., Kayode A., Oguzie J., Folarin O.A., Ihekweazu C. Happi C.T.                                                                                                                                                                                                          |
| EPI_ISL_414045                                                                                                                                                                                                                                                                                                                                                                                                                                                                                                                                                                                                                                                                                                 | Laboratório Central de Saúde Pública Noel Nutels (LACEN-RJ)                                                                                                                                                         | Laboratory of Respiratory Viruses and Measles, Oswaldo Cruz Institute, FIOCRUZ                                             | Paola Resende, Alisson Fabri, Joilson Xavier, Sunando Roy, Fernando Motta, Aline Mattos, Milene Miranda, Cristiana Garcia, Braulia Caetano, Maria Ogrzewalska, Jonathan Lopes, Luciana Appolinario, Maria Nóbrega, Marilda Siqueira Fio Cruz COVID-19 Genomic Surveillance Network                  |
| EPI_ISL_414497, EPI_ISL_414498, EPI_ISL_414499, EPI_ISL_414504, EPI_ISL_414505, EPI_ISL_414506, EPI_ISL_414507, EPI_ISL_414508, EPI_ISL_414509, EPI_ISL_414574                                                                                                                                                                                                                                                                                                                                                                                                                                                                                                                                                 | Center of Medical Microbiology, Virology, and Hospital Hygiene, University of Duesseldorf                                                                                                                           | Center of Medical Microbiology, Virology, and Hospital Hygiene, University of Duesseldorf                                  | Ortwin Adams, Marcel Andree, Alexander Diltthey, Torsten Feldt, Sandra Hauka, Torsten Houwaart, Björn-Erik Jensen, Detlef Kindgen-Milles, Malte Kohns Vasconcelos, Klaus Pfeffer, Tina Senff, Daniel Strelow, Jörg Timm, Andreas Walker, Tobias Wienemann                                           |
| EPI_ISL_415105                                                                                                                                                                                                                                                                                                                                                                                                                                                                                                                                                                                                                                                                                                 | Laboratório Central de Saúde Pública Professor Gonçalves Moniz (LACEN-BA)                                                                                                                                           | Laboratory of Respiratory Viruses and Measles, Oswaldo Cruz Institute, FIOCRUZ                                             | Paola Resende, Allison Fabri, Joilson Xavier, Sunando Roy, Fernando Motta, Aline Mattos, Milene Miranda, Cristiana Garcia, Braulia Caetano, Maria Ogrzewalska, Jonathan Lopes, Luciana Appolinario, Maria Nóbrega, Marilda Siqueira Fio Cruz COVID-19 Genomic Surveillance Network                  |
| EPI_ISL_415128                                                                                                                                                                                                                                                                                                                                                                                                                                                                                                                                                                                                                                                                                                 | Laboratório Central de Saúde Pública do Estado do Espírito Santo (LACEN-ES)                                                                                                                                         | Laboratory of Respiratory Viruses and Measles, Oswaldo Cruz Institute, FIOCRUZ                                             | Paola Resende, Allison Fabri, Joilson Xavier, Sunando Roy, Fernando Motta, Aline Mattos, Milene Miranda, Cristiana Garcia, Braulia Caetano, Maria Ogrzewalska, Jonathan Lopes, Luciana Appolinario, Maria Nóbrega, Marilda Siqueira on behalf of the Fio Cruz COVID-19 Genomic Surveillance Network |
| EPI_ISL_417394, EPI_ISL_417411                                                                                                                                                                                                                                                                                                                                                                                                                                                                                                                                                                                                                                                                                 | Centre for Infectious Diseases and Microbiology Public Health                                                                                                                                                       | NSW Health Pathology - Institute of Clinical Pathology and Medical Research; Westmead Hospital; University of Sydney       | O'Sullivan MV, Sintchenko V, Chen SC, Maddocks S, Kok J, Dwyer DE, Rockett R, Eden J-S, Lam C, Gray K, Timms V, Gall M, Arnott A, Sadsad R, Carter I, Rahman H and Holmes EC for the 2019-nCoV Study Group                                                                                          |
| EPI_ISL_417457, EPI_ISL_417458, EPI_ISL_417459, EPI_ISL_417460, EPI_ISL_417461, EPI_ISL_417462, EPI_ISL_417463, EPI_ISL_417464, EPI_ISL_417465, EPI_ISL_417466, EPI_ISL_417467, EPI_ISL_417468, EPI_ISL_419541, EPI_ISL_419542, EPI_ISL_419543, EPI_ISL_419544, EPI_ISL_419545, EPI_ISL_419546, EPI_ISL_419547, EPI_ISL_419548, EPI_ISL_419549, EPI_ISL_419550, EPI_ISL_419551, EPI_ISL_419552, EPI_ISL_425120, EPI_ISL_425121, EPI_ISL_425122, EPI_ISL_425123, EPI_ISL_425124, EPI_ISL_425125, EPI_ISL_425126, EPI_ISL_425127, EPI_ISL_425128                                                                                                                                                                 | Center of Medical Microbiology, Virology, and Hospital Hygiene, University of Duesseldorf                                                                                                                           | Center of Medical Microbiology, Virology, and Hospital Hygiene, University of Duesseldorf                                  | Ortwin Adams, Marcel Andree, Alexander Diltthey, Torsten Feldt, Sandra Hauka, Torsten Houwaart, Björn-Erik Jensen, Detlef Kindgen-Milles, Malte Kohns Vasconcelos, Klaus Pfeffer, Tina Senff, Daniel Strelow, Jörg Timm, Andreas Walker, Tobias Wienemann                                           |
| see above                                                                                                                                                                                                                                                                                                                                                                                                                                                                                                                                                                                                                                                                                                      | Center of Medical Microbiology, Virology, and Hospital Hygiene, University of Duesseldorf                                                                                                                           | Center of Medical Microbiology, Virology, and Hospital Hygiene, University of Duesseldorf                                  | Ortwin Adams, Marcel Andree, Alexander Diltthey, Torsten Feldt, Sandra Hauka, Torsten Houwaart, Björn-Erik Jensen, Detlef Kindgen-Milles, Malte Kohns Vasconcelos, Klaus Pfeffer, Tina Senff, Daniel Strelow, Jörg Timm, Andreas Walker, Tobias Wienemann                                           |
| EPI_ISL_425129, EPI_ISL_425130, EPI_ISL_425131, EPI_ISL_425132, EPI_ISL_425133, EPI_ISL_425134, EPI_ISL_425135, EPI_ISL_425136, EPI_ISL_425137                                                                                                                                                                                                                                                                                                                                                                                                                                                                                                                                                                 | Center of Medical Microbiology, Virology, and Hospital Hygiene, University of Duesseldorf                                                                                                                           | Center of Medical Microbiology, Virology, and Hospital Hygiene, University of Duesseldorf                                  | Ortwin Adams, Marcel Andree, Alexander Diltthey, Torsten Feldt, Sandra Hauka, Torsten Houwaart, Björn-Erik Jensen, Detlef Kindgen-Milles, Malte Kohns Vasconcelos, Klaus Pfeffer, Tina Senff, Daniel Strelow, Jörg Timm, Andreas Walker, Tobias Wienemann                                           |
| EPI_ISL_425138, EPI_ISL_425139, EPI_ISL_425140                                                                                                                                                                                                                                                                                                                                                                                                                                                                                                                                                                                                                                                                 | Center of Medical Microbiology, Virology, and Hospital Hygiene, University of Duesseldorf                                                                                                                           | Center of Medical Microbiology, Virology, and Hospital Hygiene, University of Duesseldorf                                  | Ortwin Adams, Marcel Andree, Alexander Diltthey, Torsten Feldt, Sandra Hauka, Torsten Houwaart, Björn-Erik Jensen, Detlef Kindgen-Milles, Malte Kohns Vasconcelos, Klaus Pfeffer, Tina Senff, Daniel Strelow, Jörg Timm, Andreas Walker, Tobias Wienemann                                           |
| EPI_ISL_427292                                                                                                                                                                                                                                                                                                                                                                                                                                                                                                                                                                                                                                                                                                 | Laboratório Central de Saúde Pública do Estado de Alagoas (LACEN-AL)                                                                                                                                                | Laboratory of Respiratory Viruses and Measles, Oswaldo Cruz Institute, FIOCRUZ                                             | Paola Resende, Fernando Motta, Luciana Appolinario, Sunando Roy, Aline Mattos, Milene Miranda, Cristiana Garcia, Braulia Caetano, Maria Ogrzewalska, Priscila Born, Jonathan Lopes, Marilda Siqueira on behalf of the Fio Cruz COVID-19 Genomic Surveillance Network                                |
| EPI_ISL_427293                                                                                                                                                                                                                                                                                                                                                                                                                                                                                                                                                                                                                                                                                                 | Laboratório Central de Saúde Pública Professor Gonçalves Moniz (LACEN-BA)                                                                                                                                           | Laboratory of Respiratory Viruses and Measles, Oswaldo Cruz Institute, FIOCRUZ                                             | Paola Resende, Fernando Motta, Luciana Appolinario, Sunando Roy, Aline Mattos, Milene Miranda, Cristiana Garcia, Braulia Caetano, Maria Ogrzewalska, Priscila Born, Jonathan Lopes, Marilda Siqueira on behalf of the Fio Cruz COVID-19 Genomic Surveillance Network                                |
| EPI_ISL_427294, EPI_ISL_427295, EPI_ISL_427296, EPI_ISL_427297, EPI_ISL_427298, EPI_ISL_427299, EPI_ISL_427300, EPI_ISL_427301, EPI_ISL_427302, EPI_ISL_427303, EPI_ISL_427304                                                                                                                                                                                                                                                                                                                                                                                                                                                                                                                                 | Laboratory of Respiratory Viruses and Measles, Oswaldo Cruz Institute, FIOCRUZ                                                                                                                                      | Laboratory of Respiratory Viruses and Measles, Oswaldo Cruz Institute, FIOCRUZ                                             | Paola Resende, Fernando Motta, Luciana Appolinario, Sunando Roy, Aline Mattos, Milene Miranda, Cristiana Garcia, Braulia Caetano, Maria Ogrzewalska, Priscila Born, Jonathan Lopes, Marilda Siqueira on behalf of the Fio Cruz COVID-19 Genomic Surveillance Network                                |
| see above                                                                                                                                                                                                                                                                                                                                                                                                                                                                                                                                                                                                                                                                                                      | Laboratory of Respiratory Viruses and Measles, Oswaldo Cruz Institute, FIOCRUZ                                                                                                                                      | Laboratory of Respiratory Viruses and Measles, Oswaldo Cruz Institute, FIOCRUZ                                             | Paola Resende, Fernando Motta, Luciana Appolinario, Sunando Roy, Aline Mattos, Milene Miranda, Cristiana Garcia, Braulia Caetano, Maria Ogrzewalska, Priscila Born, Jonathan Lopes, Marilda Siqueira on behalf of the Fio Cruz COVID-19 Genomic Surveillance Network                                |
| EPI_ISL_427305, EPI_ISL_427306                                                                                                                                                                                                                                                                                                                                                                                                                                                                                                                                                                                                                                                                                 | Laboratório Central de Saúde Pública do Estado de Santa Catarina (LACEN-SC)                                                                                                                                         | Laboratory of Respiratory Viruses and Measles, Oswaldo Cruz Institute, FIOCRUZ                                             | Paola Resende, Fernando Motta, Luciana Appolinario, Sunando Roy, Aline Mattos, Milene Miranda, Cristiana Garcia, Braulia Caetano, Maria Ogrzewalska, Priscila Born, Jonathan Lopes, Marilda Siqueira on behalf of the Fio Cruz COVID-19 Genomic Surveillance Network                                |
| EPI_ISL_428860, EPI_ISL_428861                                                                                                                                                                                                                                                                                                                                                                                                                                                                                                                                                                                                                                                                                 | State Research Center of Virology and Biotechnology VECTOR, Department of Collection of Microorganisms                                                                                                              | State Research Center of Virology and Biotechnology VECTOR, Department of Collection of Microorganisms                     | Oleg V. Pyankov, Sergey A. Bodnev, Tatyana V. Tregubchak, Alexander N. Shvalov, Elena V. Gavrilova, Rinat A. Maksyutov                                                                                                                                                                              |
| EPI_ISL_428862, EPI_ISL_428863                                                                                                                                                                                                                                                                                                                                                                                                                                                                                                                                                                                                                                                                                 | State Research Center of Virology and Biotechnology VECTOR, Department of Collection of Microorganisms                                                                                                              | State Research Center of Virology and Biotechnology VECTOR, Department of Collection of Microorganisms                     | Oleg V. Pyankov, Sergey A. Bodnev, Anastasiya M. Smirnova, Anastasiya A. Nazarenko, Tatyana V. Tregubchak, Alexander N. Shvalov, Elena V. Gavrilova, Rinat A. Maksyutov                                                                                                                             |
| EPI_ISL_428864, EPI_ISL_428865, EPI_ISL_428866, EPI_ISL_428867, EPI_ISL_428868, EPI_ISL_428869, EPI_ISL_428870, EPI_ISL_428871, EPI_ISL_428872, EPI_ISL_428873, EPI_ISL_428874, EPI_ISL_428875, EPI_ISL_428876, EPI_ISL_428877, EPI_ISL_428878, EPI_ISL_428879, EPI_ISL_428880, EPI_ISL_428881, EPI_ISL_428882, EPI_ISL_428883, EPI_ISL_428884, EPI_ISL_428885, EPI_ISL_428886, EPI_ISL_428887, EPI_ISL_428888, EPI_ISL_428889, EPI_ISL_428890, EPI_ISL_428891, EPI_ISL_428892, EPI_ISL_428893, EPI_ISL_428894, EPI_ISL_428895, EPI_ISL_428896, EPI_ISL_428907, EPI_ISL_428908, EPI_ISL_428909, EPI_ISL_428910, EPI_ISL_428911, EPI_ISL_428912, EPI_ISL_428913, EPI_ISL_428914, EPI_ISL_428915, EPI_ISL_428916 | State Research Center of Virology and Biotechnology VECTOR, Department of Collection of Microorganisms                                                                                                              | State Research Center of Virology and Biotechnology VECTOR, Department of Collection of Microorganisms                     | Oleg V. Pyankov, Sergey A. Bodnev, Tatyana V. Tregubchak, Alexander N. Shvalov, Elena V. Gavrilova, Rinat A. Maksyutov                                                                                                                                                                              |
| see above                                                                                                                                                                                                                                                                                                                                                                                                                                                                                                                                                                                                                                                                                                      | State Research Center of Virology and Biotechnology VECTOR, Department of Collection of Microorganisms                                                                                                              | State Research Center of Virology and Biotechnology VECTOR, Department of Collection of Microorganisms                     | Oleg V. Pyankov, Sergey A. Bodnev, Tatyana V. Tregubchak, Alexander N. Shvalov, Elena V. Gavrilova, Rinat A. Maksyutov                                                                                                                                                                              |

|                                                                                                                                                                                                                                                                                                |                                                                                                                                                                                                                                                                                       |                                                                                                                            |                                                                                                                                                                                                                                                                                                                                      |
|------------------------------------------------------------------------------------------------------------------------------------------------------------------------------------------------------------------------------------------------------------------------------------------------|---------------------------------------------------------------------------------------------------------------------------------------------------------------------------------------------------------------------------------------------------------------------------------------|----------------------------------------------------------------------------------------------------------------------------|--------------------------------------------------------------------------------------------------------------------------------------------------------------------------------------------------------------------------------------------------------------------------------------------------------------------------------------|
| EPI_ISL_429128, EPI_ISL_429129, EPI_ISL_429130, EPI_ISL_429131, EPI_ISL_429132, EPI_ISL_429133, EPI_ISL_429134, EPI_ISL_429135                                                                                                                                                                 | Laboratoriemedicin                                                                                                                                                                                                                                                                    | The Public Health Agency of Sweden                                                                                         | Olov Svartstrom, Maria Lind Karlberg, Anna-Malin Linde, Oskar Karlsson Lindsjo, Anna Risberg, Shaman Murdrasoli, Karin Tegmark-Wisell                                                                                                                                                                                                |
| EPI_ISL_429161, EPI_ISL_429162, EPI_ISL_429163                                                                                                                                                                                                                                                 | The Public Health Agency of Sweden                                                                                                                                                                                                                                                    | The Public Health Agency of Sweden                                                                                         | Olov Svartstrom, Maria Lind Karlberg, Anna-Malin Linde, Oskar Karlsson Lindsjo, Anna Risberg, Shaman Murdrasoli, Karin Tegmark-Wisell                                                                                                                                                                                                |
| EPI_ISL_430856, EPI_ISL_430857, EPI_ISL_430858, EPI_ISL_430859                                                                                                                                                                                                                                 | Laboratoriemedicin                                                                                                                                                                                                                                                                    | The Public Health Agency of Sweden                                                                                         | Oskar Karlsson Lindsjo, Maria Lind Karlberg, Anna-Malin Linde, Olov Svartstrom, Anna Risberg, Shaman Murdrasoli, Karin Tegmark-Wisell                                                                                                                                                                                                |
| EPI_ISL_430862, EPI_ISL_430864, EPI_ISL_431778                                                                                                                                                                                                                                                 | The Public Health Agency of Sweden<br>Virology, Wageningen Bioveterinary Research                                                                                                                                                                                                     | The Public Health Agency of Sweden<br>Virology, Wageningen Bioveterinary Research                                          | Oskar Karlsson Lindsjo, Maria Lind Karlberg, Anna-Malin Linde, Olov Svartstrom, Anna Risberg, Shaman Murdrasoli, Karin Tegmark-Wisell<br>Oreshkova,N., Vreman,S., Molenaar,R.J., Harders,F., Hakze van der Honing,R.W., Gerhards,N., Bouwstra,R., Hissink,H., Smit,L., Tacken,M., Weesendorp,E., Stegeman,A. and van der Poel,W.H.M. |
| EPI_ISL_434641, EPI_ISL_434642, EPI_ISL_444493                                                                                                                                                                                                                                                 | Laboratoriemedicin<br>Departamento de Laboratorios de Salud Publica (DLSP, Division Epidemiologia, Ministerio de Salud Publica)                                                                                                                                                       | The Public Health Agency of Sweden<br>Facultad de Ciencias (Sección Genética Evolutiva, Sección Virología).                | Oskar Karlsson Lindsjo, Maria Lind Karlberg, Anna-Malin Linde, Olov Svartstrom, Anna Risberg, Shaman Murdrasoli, Karin Tegmark-Wisell<br>Panzera,Y., Delfraro,A., Ramos,N., Frabasile,S., Calleros,L., Techera,C., Grecco,S., Fuques,E., Goni,N., Coppola,L., Ramos,V., Chiparelli,H., Arbiza,J. and Perez,R.                        |
| EPI_ISL_447631                                                                                                                                                                                                                                                                                 | Virology, Wageningen Bioveterinary Research                                                                                                                                                                                                                                           | Virology, Wageningen Bioveterinary Research                                                                                | Oreshkova,N., Vreman,S., Molenaar,R.J., Harders,F., Hakze van der Honing,R.W., Gerhards,N., Bouwstra,R., Hissink,H., Smit,L., Tacken,M., Weesendorp,E., Stegeman,A., van der Poel,W.H.M., Engelsma,M.Y.                                                                                                                              |
| EPI_ISL_447632, EPI_ISL_447633, EPI_ISL_447634                                                                                                                                                                                                                                                 | Virology, Wageningen Bioveterinary Research                                                                                                                                                                                                                                           | Virology, Wageningen Bioveterinary Research                                                                                | Oreshkova,N., Vreman,S., Molenaar,R.J., Harders,F., Hakze van der Honing,R.W., Gerhards,N., Bouwstra,R., Hissink,H., Smit,L., Tacken,M., Weesendorp,E., Stegeman,A., van der Poel,W., Engelsma,M.Y.                                                                                                                                  |
| EPI_ISL_450813                                                                                                                                                                                                                                                                                 | Bla Kustens halsocentral                                                                                                                                                                                                                                                              | The Public Health Agency of Sweden                                                                                         | Olof Norrby, Anna-Malin Linde, Maria Lind Karlberg, Oskar Karlsson Lindsjo, Olov Svartstrom, Anna Risberg, Theresa Enkirch, Mia Brytting, Karin Tegmark-Wisell                                                                                                                                                                       |
| EPI_ISL_451961                                                                                                                                                                                                                                                                                 | Istituto Zooprofilattico Sperimentale Puglia e Basilicata; Dipartimento di Bioscienze, Biotecnologie e Biofarmaceutica dell'Università degli Studi di Bari "A.Moro"; Istituto di Biomembrane, Bioenergetica e Biotecnologie Molecolari del Consiglio Nazionale delle Ricerche di Bari | Beaconlab (Bioinformatics Evolution and Comparative Genomics lab), Dept of Biosciences, University of Milan                | Parisi A.,Pesole G., Manzari C., Chiara M.                                                                                                                                                                                                                                                                                           |
| EPI_ISL_451962                                                                                                                                                                                                                                                                                 | Istituto Zooprofilattico Sperimentale Puglia e Basilicata; Dipartimento di Bioscienze, Biotecnologie e Biofarmaceutica dell'Università degli Studi di Bari "A.Moro"; Istituto di Biomembrane, Bioenergetica e Biotecnologie Molecolari del Consiglio Nazionale delle Ricerche di Bari | Beaconlab (Bioinformatics, Evolution and Comparative Genomics lab), Dept of Biosciences, University on Milan               | Parisi A.,Pesole G., Manzari C., Chiara M.                                                                                                                                                                                                                                                                                           |
| EPI_ISL_452180                                                                                                                                                                                                                                                                                 | Center of Medical Microbiology, Virology, and Hospital Hygiene, University of Duesseldorf                                                                                                                                                                                             | Center of Medical Microbiology, Virology, and Hospital Hygiene, University of Duesseldorf                                  | Ortwin Adams, Marcel Andree, Alexander Dilthey, Torsten Feldt, Sandra Hauka, Torsten Houwaart, Björn-ErikJensen, Detlef Kindgen-Milles, Malte Kohns Vasconcelos, Klaus Pfeffer, Tina Senff, Daniel Strelow, Jörg Timm, Andreas Walker, Tobias Wienemann                                                                              |
| EPI_ISL_455362                                                                                                                                                                                                                                                                                 | Nigeria Centre for Disease Control (NCDC)                                                                                                                                                                                                                                             | African Centre of Excellence for Genomics of Infectious Diseases (ACEGID), Redeemer's University, Ede, Osun State, Nigeria | Oluniyi P.E., Ajogbasile F.V., Kayode A., Olawoye I., Uwanibe J., Oguzie J., Olumade T., Folarin O.A., Ihekweazu C., Happi C.T.                                                                                                                                                                                                      |
| EPI_ISL_455412, EPI_ISL_455413, EPI_ISL_455414                                                                                                                                                                                                                                                 | Nigeria Centre for Disease Control (NCDC)                                                                                                                                                                                                                                             | African Centre of Excellence for Genomics of Infectious Diseases (ACEGID), Redeemer's University, Ede, Osun State, Nigeria | Oluniyi P.E., Ajogbasile F.V., Kayode A., Oguzie J., Olawoye I., Uwanibe J., Olumade T., Folarin O.A., Ihekweazu C., Happi C.T.                                                                                                                                                                                                      |
| EPI_ISL_455415                                                                                                                                                                                                                                                                                 | Nigeria Centre for Disease Control (NCDC)                                                                                                                                                                                                                                             | African Centre of Excellence for Genomics of Infectious Diseases (ACEGID), Redeemer's University, Ede, Osun State, Nigeria | Oluniyi P.E., Ajogbasile F.V., Kayode A., Oguzie J., Olawoye I., Uwanibe J., Olumade T., Folarin O.A., Ihekweazu C., Happi C.T.                                                                                                                                                                                                      |
| EPI_ISL_455418, EPI_ISL_455419                                                                                                                                                                                                                                                                 | Nigeria Centre for Disease Control (NCDC)                                                                                                                                                                                                                                             | African Centre of Excellence for Genomics of Infectious Diseases (ACEGID), Redeemer's University, Ede, Osun State, Nigeria | Oluniyi P.E., Ajogbasile F.V., Kayode A., Oguzie J., Olawoye I., Uwanibe J., Olumade T., Folarin O.A., Ihekweazu C., Happi C.T.                                                                                                                                                                                                      |
| EPI_ISL_455422                                                                                                                                                                                                                                                                                 | Nigeria Centre for Disease Control                                                                                                                                                                                                                                                    | African Centre of Excellence for Genomics of Infectious Diseases (ACEGID), Redeemer's University, Ede, Osun State, Nigeria | Oluniyi P.E., Ajogbasile F.V., Kayode A., Oguzie J., Olawoye I., Uwanibe J., Olumade T., Folarin O.A., Ihekweazu C., Happi C.T.                                                                                                                                                                                                      |
| EPI_ISL_455423, EPI_ISL_455424, EPI_ISL_455425                                                                                                                                                                                                                                                 | Nigeria Centre for Disease Control (NCDC)                                                                                                                                                                                                                                             | African Centre of Excellence for Genomics of Infectious Diseases (ACEGID), Redeemer's University, Ede, Osun State, Nigeria | Oluniyi P.E., Ajogbasile F.V., Kayode A., Oguzie J., Olawoye I., Uwanibe J., Olumade T., Folarin O.A., Ihekweazu C., Happi C.T.                                                                                                                                                                                                      |
| EPI_ISL_455426                                                                                                                                                                                                                                                                                 | Nigeria Centre for Disease Control                                                                                                                                                                                                                                                    | African Centre of Excellence for Genomics of Infectious Diseases (ACEGID), Redeemer's University, Ede, Osun State, Nigeria | Oluniyi P.E., Ajogbasile F.V., Kayode A., Oguzie J., Olawoye I., Uwanibe J., Olumade T., Folarin O.A., Ihekweazu C., Happi C.T.                                                                                                                                                                                                      |
| EPI_ISL_455427, EPI_ISL_455429, EPI_ISL_455430, EPI_ISL_455431                                                                                                                                                                                                                                 | Nigeria Centre for Disease Control (NCDC)                                                                                                                                                                                                                                             | African Centre of Excellence for Genomics of Infectious Diseases (ACEGID), Redeemer's University, Ede, Osun State, Nigeria | Oluniyi P.E., Ajogbasile F.V., Kayode A., Oguzie J., Olawoye I., Uwanibe J., Olumade T., Folarin O.A., Ihekweazu C., Happi C.T.                                                                                                                                                                                                      |
| EPI_ISL_456071, EPI_ISL_456072, EPI_ISL_456073, EPI_ISL_456074, EPI_ISL_456075                                                                                                                                                                                                                 | Laboratory of Respiratory Viruses and Measles, Oswaldo Cruz Institute, FIOCRUZ                                                                                                                                                                                                        | Laboratory of Respiratory Viruses and Measles, Oswaldo Cruz Institute, FIOCRUZ                                             | Paola Resende, Luciana Appolinario, Fernando Motta, Aline Mattos, Milene Miranda, Cristiana Garcia, Bráulia Caetano, Maria Ogrzewalska, Jonathan Lopes, Marilda Siqueira on behalf of the Fiocruz COVID-19 Genomic Surveillance Network                                                                                              |
| EPI_ISL_456076, EPI_ISL_456077                                                                                                                                                                                                                                                                 | Laboratório Central de Saúde Pública Noel Nutels (LACEN-RJ)                                                                                                                                                                                                                           | Laboratory of Respiratory Viruses and Measles, Oswaldo Cruz Institute, FIOCRUZ                                             | Paola Resende, Luciana Appolinario, Fernando Motta, Aline Mattos, Milene Miranda, Cristiana Garcia, Bráulia Caetano, Maria Ogrzewalska, Jonathan Lopes, Marilda Siqueira on behalf of the Fiocruz COVID-19 Genomic Surveillance Network                                                                                              |
| EPI_ISL_456079, EPI_ISL_456080, EPI_ISL_456081                                                                                                                                                                                                                                                 | Laboratory of Respiratory Viruses and Measles, Oswaldo Cruz Institute, FIOCRUZ                                                                                                                                                                                                        | Laboratory of Respiratory Viruses and Measles, Oswaldo Cruz Institute, FIOCRUZ                                             | Paola Resende, Luciana Appolinario, Fernando Motta, Aline Mattos, Milene Miranda, Cristiana Garcia, Bráulia Caetano, Maria Ogrzewalska, Jonathan Lopes, Marilda Siqueira on behalf of the Fiocruz COVID-19 Genomic Surveillance Network                                                                                              |
| EPI_ISL_456082, EPI_ISL_456083                                                                                                                                                                                                                                                                 | Laboratório Central de Saúde Pública Noel Nutels (LACEN-RJ)                                                                                                                                                                                                                           | Laboratory of Respiratory Viruses and Measles, Oswaldo Cruz Institute, FIOCRUZ                                             | Paola Resende, Luciana Appolinario, Fernando Motta, Aline Mattos, Milene Miranda, Cristiana Garcia, Bráulia Caetano, Maria Ogrzewalska, Jonathan Lopes, Marilda Siqueira on behalf of the Fiocruz COVID-19 Genomic Surveillance Network                                                                                              |
| EPI_ISL_456084, EPI_ISL_456085, EPI_ISL_456086, EPI_ISL_456087                                                                                                                                                                                                                                 | Laboratory of Respiratory Viruses and Measles, Oswaldo Cruz Institute, FIOCRUZ                                                                                                                                                                                                        | Laboratory of Respiratory Viruses and Measles, Oswaldo Cruz Institute, FIOCRUZ                                             | Paola Resende, Luciana Appolinario, Fernando Motta, Aline Mattos, Milene Miranda, Cristiana Garcia, Bráulia Caetano, Maria Ogrzewalska, Jonathan Lopes, Marilda Siqueira on behalf of the Fiocruz COVID-19 Genomic Surveillance Network                                                                                              |
| EPI_ISL_456088                                                                                                                                                                                                                                                                                 | Laboratório Central de Saúde Pública Noel Nutels (LACEN-RJ)                                                                                                                                                                                                                           | Laboratory of Respiratory Viruses and Measles, Oswaldo Cruz Institute, FIOCRUZ                                             | Paola Resende, Luciana Appolinario, Fernando Motta, Aline Mattos, Milene Miranda, Cristiana Garcia, Bráulia Caetano, Maria Ogrzewalska, Jonathan Lopes, Marilda Siqueira on behalf of the Fiocruz COVID-19 Genomic Surveillance Network                                                                                              |
| EPI_ISL_456089, EPI_ISL_456090, EPI_ISL_456091, EPI_ISL_456092, EPI_ISL_456093, EPI_ISL_456094, EPI_ISL_456095, EPI_ISL_456096, EPI_ISL_456097, EPI_ISL_456098, EPI_ISL_456099, EPI_ISL_456100, EPI_ISL_456101, EPI_ISL_456102, EPI_ISL_456103, EPI_ISL_456104, EPI_ISL_456105, EPI_ISL_456106 | see above                                                                                                                                                                                                                                                                             | Laboratory of Respiratory Viruses and Measles, Oswaldo Cruz Institute, FIOCRUZ                                             | Paola Resende, Luciana Appolinario, Fernando Motta, Aline Mattos, Milene Miranda, Cristiana Garcia, Bráulia Caetano, Maria Ogrzewalska, Jonathan Lopes, Marilda Siqueira on behalf of the Fiocruz COVID-19 Genomic Surveillance Network                                                                                              |
| EPI_ISL_457699, EPI_ISL_457700                                                                                                                                                                                                                                                                 | Department of Infectious Diseases, Istituto Superiore di                                                                                                                                                                                                                              | Army Medical and Veterinary Research Center                                                                                | Paola Stefanelli, Alessandra Lo Presti, Stefano Fiore, Antonella Marchi, Eleonora Benedetti, Concetta Fabiani Silvia Fillo, Giovanni Faggioni, Riccardo De                                                                                                                                                                           |













|                                                                                                                                                                                                                                                                                                                                                                                                                                                                                                                                                                                                                                                                                                                                                                                                                                                                                                                                                                |                                                                                |                                                                                                                            |                                                                                                                                                                                                                                                                                                                                                                                                                                                                                                                         |
|----------------------------------------------------------------------------------------------------------------------------------------------------------------------------------------------------------------------------------------------------------------------------------------------------------------------------------------------------------------------------------------------------------------------------------------------------------------------------------------------------------------------------------------------------------------------------------------------------------------------------------------------------------------------------------------------------------------------------------------------------------------------------------------------------------------------------------------------------------------------------------------------------------------------------------------------------------------|--------------------------------------------------------------------------------|----------------------------------------------------------------------------------------------------------------------------|-------------------------------------------------------------------------------------------------------------------------------------------------------------------------------------------------------------------------------------------------------------------------------------------------------------------------------------------------------------------------------------------------------------------------------------------------------------------------------------------------------------------------|
| EPI_ISL_477195, EPI_ISL_477196, EPI_ISL_477197, EPI_ISL_477198, EPI_ISL_477199, EPI_ISL_477200, EPI_ISL_477201                                                                                                                                                                                                                                                                                                                                                                                                                                                                                                                                                                                                                                                                                                                                                                                                                                                 | Istituto Zooprofilattico Sperimentale Puglia e Basilicata;                     | Beaconlab (Bioinformatics, Evolution and Comparative Genomics lab), Dept of Biosciences, University on Milan               | Parisi A.,Pesole G., Manzari C., Chiara M.                                                                                                                                                                                                                                                                                                                                                                                                                                                                              |
| EPI_ISL_477202, EPI_ISL_477203                                                                                                                                                                                                                                                                                                                                                                                                                                                                                                                                                                                                                                                                                                                                                                                                                                                                                                                                 | Istituto Zooprofilattico Sperimentale Puglia e Basilicata;                     | Beaconlab (Bioinformatics, Evolution and Comparative Genomics lab), Dept of Biosciences, University on Mila                | Parisi A.,Pesole G., Manzari C., Chiara M.                                                                                                                                                                                                                                                                                                                                                                                                                                                                              |
| EPI_ISL_485604, EPI_ISL_485605, EPI_ISL_485606, EPI_ISL_485607, EPI_ISL_485608, EPI_ISL_485609, EPI_ISL_485610, EPI_ISL_485611                                                                                                                                                                                                                                                                                                                                                                                                                                                                                                                                                                                                                                                                                                                                                                                                                                 | Respiratory Virus Unit, Microbiology Services Colindale, Public Health England | Respiratory Virus Unit, Microbiology Services Colindale, Public Health England                                             | PHE Covid Sequencing Team                                                                                                                                                                                                                                                                                                                                                                                                                                                                                               |
| EPI_ISL_487087, EPI_ISL_487089, EPI_ISL_487090, EPI_ISL_487091, EPI_ISL_487092, EPI_ISL_487095, EPI_ISL_487096, EPI_ISL_487098, EPI_ISL_487099, EPI_ISL_487101, EPI_ISL_487102, EPI_ISL_487103, EPI_ISL_487104, EPI_ISL_487105, EPI_ISL_487106, EPI_ISL_487107, EPI_ISL_487108, EPI_ISL_487109, EPI_ISL_487110, EPI_ISL_487111, EPI_ISL_487112                                                                                                                                                                                                                                                                                                                                                                                                                                                                                                                                                                                                                 |                                                                                |                                                                                                                            |                                                                                                                                                                                                                                                                                                                                                                                                                                                                                                                         |
| see above                                                                                                                                                                                                                                                                                                                                                                                                                                                                                                                                                                                                                                                                                                                                                                                                                                                                                                                                                      | Nigeria Centre for Disease Control (NCDC)                                      | African Centre of Excellence for Genomics of Infectious Diseases (ACEGID), Redeemer's University, Ede, Osun State, Nigeria | Oluniyi P.E., Ajogbasile F.V., Kayode A., Oguzie J., Olawoye I., Uwanibe J., Olumade T., Folarin O.A., Ihekweazu C., Happi C.T.                                                                                                                                                                                                                                                                                                                                                                                         |
| EPI_ISL_487113                                                                                                                                                                                                                                                                                                                                                                                                                                                                                                                                                                                                                                                                                                                                                                                                                                                                                                                                                 | Nigeria Centre for Disease Control (NCDC)                                      | Redeemer's University, ACEGID                                                                                              | Oluniyi P.E., Ajogbasile F.V., Kayode A., Oguzie J., Olawoye I., Uwanibe J., Olumade T., Folarin O.A., Ihekweazu C., Happi C.T.                                                                                                                                                                                                                                                                                                                                                                                         |
| EPI_ISL_490224, EPI_ISL_490225, EPI_ISL_490226, EPI_ISL_490227, EPI_ISL_490228, EPI_ISL_490229, EPI_ISL_490230, EPI_ISL_490231, EPI_ISL_490232, EPI_ISL_490233, EPI_ISL_490234, EPI_ISL_490235, EPI_ISL_490236, EPI_ISL_490237, EPI_ISL_490238, EPI_ISL_490239, EPI_ISL_490240, EPI_ISL_490241, EPI_ISL_490242, EPI_ISL_490243, EPI_ISL_490244, EPI_ISL_490245, EPI_ISL_490246, EPI_ISL_490247, EPI_ISL_490248, EPI_ISL_490249, EPI_ISL_490250, EPI_ISL_490251, EPI_ISL_490252, EPI_ISL_490253, EPI_ISL_490254, EPI_ISL_491709, EPI_ISL_491710, EPI_ISL_491711, EPI_ISL_491712, EPI_ISL_491713, EPI_ISL_491714, EPI_ISL_491715, EPI_ISL_491716, EPI_ISL_491717, EPI_ISL_491718, EPI_ISL_491719, EPI_ISL_491720, EPI_ISL_491721, EPI_ISL_491722, EPI_ISL_491723, EPI_ISL_491724, EPI_ISL_491725, EPI_ISL_491726, EPI_ISL_491727, EPI_ISL_491728, EPI_ISL_491729, EPI_ISL_491730, EPI_ISL_491731, EPI_ISL_491732, EPI_ISL_491733, EPI_ISL_491734, EPI_ISL_491735 |                                                                                |                                                                                                                            |                                                                                                                                                                                                                                                                                                                                                                                                                                                                                                                         |
| see above                                                                                                                                                                                                                                                                                                                                                                                                                                                                                                                                                                                                                                                                                                                                                                                                                                                                                                                                                      | Respiratory Virus Unit, Microbiology Services Colindale, Public Health England | Respiratory Virus Unit, Microbiology Services Colindale, Public Health England                                             | PHE Covid Sequencing Team                                                                                                                                                                                                                                                                                                                                                                                                                                                                                               |
| EPI_ISL_492184                                                                                                                                                                                                                                                                                                                                                                                                                                                                                                                                                                                                                                                                                                                                                                                                                                                                                                                                                 | INT Fondazione Pascale                                                         | INT Fondazione Pascale                                                                                                     | Pascale                                                                                                                                                                                                                                                                                                                                                                                                                                                                                                                 |
| EPI_ISL_493002, EPI_ISL_493003                                                                                                                                                                                                                                                                                                                                                                                                                                                                                                                                                                                                                                                                                                                                                                                                                                                                                                                                 | Respiratory Virus Unit, Microbiology Services Colindale, Public Health England | Respiratory Virus Unit, Microbiology Services Colindale, Public Health England                                             | PHE Covid Sequencing Team                                                                                                                                                                                                                                                                                                                                                                                                                                                                                               |
| EPI_ISL_493197, EPI_ISL_493213                                                                                                                                                                                                                                                                                                                                                                                                                                                                                                                                                                                                                                                                                                                                                                                                                                                                                                                                 | INT Fondazione Pascale                                                         | INT Fondazione Pascale                                                                                                     | Pascale                                                                                                                                                                                                                                                                                                                                                                                                                                                                                                                 |
| EPI_ISL_495161                                                                                                                                                                                                                                                                                                                                                                                                                                                                                                                                                                                                                                                                                                                                                                                                                                                                                                                                                 | CSIR-Centre for Cellular and Molecular Biology                                 | CSIR-Centre for Cellular and Molecular Biology                                                                             | Onkar Kulkarni, Sofia Banu, Payel Mukherjee, Priya Singh, Dhiviya Vedagiri, Divya Gupta, Vishal Sah, Santosh Kumar Kuncha, Krishnan Harinivas Harshan, Archana Bharadwaj Siva, Karthik Bharadwaj Tallapaka, Shagufta Khan, Lamuk Zaveri, Nikhil Hajirnis, M Soujanya Reddy, Pratheusa Maccha, Namami Gaur, Sakshi Shambhavi, Tulasi Nagabandi, Purushotham Vodnala, Deepak Kumar, Devi Prasad Vijayashankar, Disha Nanda, Divya Das, Jotin Gogoi, Manish Bhattacharjee, Rakesh K Mishra, Divya Tej Sowpati              |
| EPI_ISL_495162                                                                                                                                                                                                                                                                                                                                                                                                                                                                                                                                                                                                                                                                                                                                                                                                                                                                                                                                                 | CSIR-Centre for Cellular and Molecular Biology                                 | CSIR-Centre for Cellular and Molecular Biology                                                                             | Onkar Kulkarni, Payel Mukherjee, Sofia Banu, Priya Singh, Dhiviya Vedagiri, Divya Gupta, Vishal Sah, Santosh Kumar Kuncha, Krishnan Harinivas Harshan, Archana Bharadwaj Siva, Karthik Bharadwaj Tallapaka, Shagufta Khan, Lamuk Zaveri, Nikhil Hajirnis, M Soujanya Reddy, Pratheusa Maccha, Namami Gaur, Sakshi Shambhavi, Tulasi Nagabandi, Purushotham Vodnala, Deepak Kumar, Devi Prasad Vijayashankar, Disha Nanda, Divya Das, Jotin Gogoi, Manish Bhattacharjee, Rakesh K Mishra, Divya Tej Sowpati              |
| EPI_ISL_495163                                                                                                                                                                                                                                                                                                                                                                                                                                                                                                                                                                                                                                                                                                                                                                                                                                                                                                                                                 | CSIR-Centre for Cellular and Molecular Biology                                 | CSIR-Centre for Cellular and Molecular Biology                                                                             | Onkar Kulkarni, Payel Mukherjee, Sofia Banu, Priya Singh, Dhiviya Vedagiri, Divya Gupta, Vishal Sah, Santosh Kumar Kuncha, Krishnan Harinivas Harshan, Archana Bharadwaj Siva, Karthik Bharadwaj Tallapaka, Shagufta Khan, Lamuk Zaveri, Nikhil Hajirnis, M Soujanya Reddy, Pratheusa Maccha, Namami Gaur, Sakshi Shambhavi, Tulasi Nagabandi, Purushotham Vodnala, Deepak Kumar, Devi Prasad Vijayashankar, Disha Nanda, Divya Das, Jotin Gogoi, Manish Bhattacharjee, Rakesh K Mishra, Divya Tej Sowpati              |
| EPI_ISL_495164                                                                                                                                                                                                                                                                                                                                                                                                                                                                                                                                                                                                                                                                                                                                                                                                                                                                                                                                                 | CSIR-Centre for Cellular and Molecular Biology                                 | CSIR-Centre for Cellular and Molecular Biology                                                                             | Onkar Kulkarni, Payel Mukherjee, Sofia Banu, Priya Singh, Dhiviya Vedagiri, Divya Gupta, Vishal Sah, Santosh Kumar Kuncha, Krishnan Harinivas Harshan, Archana Bharadwaj Siva, Karthik Bharadwaj Tallapaka, Shagufta Khan, Lamuk Zaveri, Namami Gaur, Sakshi Shambhavi, Nikhil Hajirnis, M Soujanya Reddy, Pratheusa Maccha, Tulasi Nagabandi, Purushotham Vodnala, Preethi Jampala, Sharada Ravi Iyer, Sulagana Mukherjee, Swetha Sundar, Peddapuvala Sai Uday Kiran, Rakesh K Mishra, Divya Tej Sowpati               |
| EPI_ISL_495165                                                                                                                                                                                                                                                                                                                                                                                                                                                                                                                                                                                                                                                                                                                                                                                                                                                                                                                                                 | CSIR-Centre for Cellular and Molecular Biology                                 | CSIR-Centre for Cellular and Molecular Biology                                                                             | Onkar Kulkarni, Payel Mukherjee, Sofia Banu, Priya Singh, Dhiviya Vedagiri, Divya Gupta, Vishal Sah, Santosh Kumar Kuncha, Krishnan Harinivas Harshan, Archana Bharadwaj Siva, Karthik Bharadwaj Tallapaka, Shagufta Khan, Lamuk Zaveri, Namami Gaur, Sakshi Shambhavi, Nikhil Hajirnis, M Soujanya Reddy, Pratheusa Maccha, Tulasi Nagabandi, Purushotham Vodnala, Preethi Jampala, Sharada Ravi Iyer, Sulagana Mukherjee, Swetha Sundar, Peddapuvala Sai Uday Kiran, Rakesh K Mishra, Divya Tej Sowpati               |
| EPI_ISL_495166                                                                                                                                                                                                                                                                                                                                                                                                                                                                                                                                                                                                                                                                                                                                                                                                                                                                                                                                                 | CSIR-Centre for Cellular and Molecular Biology                                 | CSIR-Centre for Cellular and Molecular Biology                                                                             | Onkar Kulkarni, Sofia Banu, Payel Mukherjee, Priya Singh, Dhiviya Vedagiri, Divya Gupta, Vishal Sah, Santosh Kumar Kuncha, Krishnan Harinivas Harshan, Archana Bharadwaj Siva, Karthik Bharadwaj Tallapaka, Shagufta Khan, Lamuk Zaveri, Namami Gaur, Nikhil Hajirnis, M Soujanya Reddy, Pratheusa Maccha, Sakshi Shambhavi, Tulasi Nagabandi, Purushotham Vodnala, Deepak Kumar, Devi Prasad Vijayashankar, Disha Nanda, Divya Das, Jotin Gogoi, Manish Bhattacharjee, Rakesh K Mishra, Divya Tej Sowpati              |
| EPI_ISL_495167                                                                                                                                                                                                                                                                                                                                                                                                                                                                                                                                                                                                                                                                                                                                                                                                                                                                                                                                                 | CSIR-Centre for Cellular and Molecular Biology                                 | CSIR-Centre for Cellular and Molecular Biology                                                                             | Onkar Kulkarni, Payel Mukherjee, Sofia Banu, Priya Singh, Dhiviya Vedagiri, Divya Gupta, Vishal Sah, Santosh Kumar Kuncha, Krishnan Harinivas Harshan, Archana Bharadwaj Siva, Karthik Bharadwaj Tallapaka, Shagufta Khan, Lamuk Zaveri, Namami Gaur, Sakshi Shambhavi, Nikhil Hajirnis, M Soujanya Reddy, Pratheusa Maccha, Tulasi Nagabandi, Purushotham Vodnala, Deepak Kumar, Devi Prasad Vijayashankar, Disha Nanda, Divya Das, Jotin Gogoi, Manish Bhattacharjee, Rakesh K Mishra, Divya Tej Sowpati              |
| EPI_ISL_495169                                                                                                                                                                                                                                                                                                                                                                                                                                                                                                                                                                                                                                                                                                                                                                                                                                                                                                                                                 | CSIR-Centre for Cellular and Molecular Biology                                 | CSIR-Centre for Cellular and Molecular Biology                                                                             | Onkar Kulkarni, Payel Mukherjee, Sofia Banu, Priya Singh, Dhiviya Vedagiri, Divya Gupta, Vishal Sah, Santosh Kumar Kuncha, Krishnan Harinivas Harshan, Archana Bharadwaj Siva, Karthik Bharadwaj Tallapaka, Shagufta Khan, Lamuk Zaveri, Namami Gaur, Nikhil Hajirnis, M Soujanya Reddy, Pratheusa Maccha, Sakshi Shambhavi, Tulasi Nagabandi, Purushotham Vodnala, Deepak Kumar, Devi Prasad Vijayashankar, Disha Nanda, Divya Das, Jotin Gogoi, Manish Bhattacharjee, Rakesh K Mishra, Divya Tej Sowpati              |
| EPI_ISL_495170                                                                                                                                                                                                                                                                                                                                                                                                                                                                                                                                                                                                                                                                                                                                                                                                                                                                                                                                                 | CSIR-Centre for Cellular and Molecular Biology                                 | CSIR-Centre for Cellular and Molecular Biology                                                                             | Onkar Kulkarni, Tulasi Nagabandi, Namami Gaur, Sakshi Shambhavi, Lamuk Zaveri, Nikhil Hajirnis, M Soujanya Reddy, Pratheusa Maccha, Shagufta Khan, Purushotham Vodnala, Payel Mukherjee, Sofia Banu, Priya Singh, Onkar Kulkarni, Dhiviya Vedagiri, Divya Gupta, Vishal Sah, Santosh Kumar Kuncha, Krishnan Harinivas Harshan, Archana Bharadwaj Siva, Karthik Bharadwaj Tallapaka, G. Aditya Kumar, Koushick Sivakumar, Pooja Ramesh Gupta, Rajan Kumar Jha, Shraddha Vijay Lahoti, Rakesh K Mishra, Divya Tej Sowpati |
| EPI_ISL_495172                                                                                                                                                                                                                                                                                                                                                                                                                                                                                                                                                                                                                                                                                                                                                                                                                                                                                                                                                 | CSIR-Centre for Cellular and Molecular Biology                                 | CSIR-Centre for Cellular and Molecular Biology                                                                             | Onkar Kulkarni, Tulasi Nagabandi, Namami Gaur, Sakshi Shambhavi, Lamuk Zaveri, Nikhil Hajirnis, M Soujanya Reddy, Pratheusa Maccha, Shagufta Khan, Purushotham Vodnala, Payel Mukherjee, Sofia Banu, Priya Singh, Onkar Kulkarni, Dhiviya Vedagiri, Divya Gupta, Vishal Sah, Santosh Kumar Kuncha, Krishnan Harinivas Harshan, Archana Bharadwaj Siva, Karthik Bharadwaj Tallapaka, Kezia J Ann, Radhika Khandelwal, Roshan Maku Venkata, Shemini Mansuri, Sonu Uday, Rakesh K Mishra, Divya Tej Sowpati                |
| EPI_ISL_495173                                                                                                                                                                                                                                                                                                                                                                                                                                                                                                                                                                                                                                                                                                                                                                                                                                                                                                                                                 | CSIR-Centre for Cellular and Molecular Biology                                 | CSIR-Centre for Cellular and Molecular Biology                                                                             | Onkar Kulkarni, Lamuk Zaveri, Nikhil Hajirnis, M Soujanya Reddy, Pratheusa Maccha, Tulasi Nagabandi, Namami Gaur, Sakshi Shambhavi, Shagufta Khan, Purushotham Vodnala, Payel Mukherjee, Sofia Banu, Priya Singh, Dhiviya Vedagiri, Divya Gupta, Vishal Sah, Santosh Kumar Kuncha, Krishnan Harinivas Harshan, Archana Bharadwaj Siva, Karthik Bharadwaj Tallapaka, G. Aditya Kumar, Koushick Sivakumar, Pooja Ramesh Gupta, Rajan Kumar Jha, Shraddha Vijay Lahoti, Rakesh K Mishra, Divya Tej Sowpati                 |
| EPI_ISL_495175                                                                                                                                                                                                                                                                                                                                                                                                                                                                                                                                                                                                                                                                                                                                                                                                                                                                                                                                                 | CSIR-Centre for Cellular and Molecular Biology                                 | CSIR-Centre for Cellular and Molecular Biology                                                                             | Onkar Kulkarni, Lamuk Zaveri, Tulasi Nagabandi, Namami Gaur, Sakshi Shambhavi, Shagufta Khan, Nikhil Hajirnis, M Soujanya Reddy, Pratheusa Maccha, Purushotham Vodnala, Payel Mukherjee, Sofia Banu, Priya Singh, Dhiviya Vedagiri, Divya Gupta, Vishal Sah, Santosh Kumar Kuncha, Krishnan Harinivas Harshan, Archana Bharadwaj Siva, Karthik Bharadwaj Tallapaka, G. Aditya Kumar, Koushick Sivakumar, Pooja Ramesh Gupta, Rajan Kumar Jha, Shraddha Vijay Lahoti, Rakesh K Mishra, Divya Tej Sowpati                 |
| EPI_ISL_500707, EPI_ISL_500708, EPI_ISL_500709, EPI_ISL_500710, EPI_ISL_500711, EPI_ISL_500712, EPI_ISL_500713, EPI_ISL_500714, EPI_ISL_500715, EPI_ISL_500719, EPI_ISL_500951, EPI_ISL_500952, EPI_ISL_500953                                                                                                                                                                                                                                                                                                                                                                                                                                                                                                                                                                                                                                                                                                                                                 |                                                                                |                                                                                                                            |                                                                                                                                                                                                                                                                                                                                                                                                                                                                                                                         |

|                                                                                                                                                                                                                                                                                                                                                                                                                                                                                                                                                                                                                                                                                                                                                                                                |                                                                                                                            |                                                                                         |                                                                                                                                                                                                   |
|------------------------------------------------------------------------------------------------------------------------------------------------------------------------------------------------------------------------------------------------------------------------------------------------------------------------------------------------------------------------------------------------------------------------------------------------------------------------------------------------------------------------------------------------------------------------------------------------------------------------------------------------------------------------------------------------------------------------------------------------------------------------------------------------|----------------------------------------------------------------------------------------------------------------------------|-----------------------------------------------------------------------------------------|---------------------------------------------------------------------------------------------------------------------------------------------------------------------------------------------------|
| see above                                                                                                                                                                                                                                                                                                                                                                                                                                                                                                                                                                                                                                                                                                                                                                                      | Respiratory Virus Unit, Microbiology Services Colindale, Public Health England                                             | Respiratory Virus Unit, Microbiology Services Colindale, Public Health England          | PHE Covid Sequencing Team                                                                                                                                                                         |
| EPI_ISL_509412, EPI_ISL_509413, EPI_ISL_509414, EPI_ISL_509415, EPI_ISL_509416, EPI_ISL_509417                                                                                                                                                                                                                                                                                                                                                                                                                                                                                                                                                                                                                                                                                                 | Acibadem Labcell Cellular Therapy Laboratory                                                                               | Acibadem Mehmet Ali Aydinlar University School of Medicine, Medical Genetics Department | Ozden Hatirnaz Ng, Sezer Akyonev, Ilayda Sahin, Günseli Bayram Akcapinar, Ozkan Ozdemir, Derya Dilek Kancagi, Gozde Sir Karakus, Bulut Yurtsever, Cihan Tastan, Ercument Ovali, Ugur Ozbek        |
| EPI_ISL_510810, EPI_ISL_510811, EPI_ISL_510812, EPI_ISL_510813, EPI_ISL_510814, EPI_ISL_510815, EPI_ISL_510816                                                                                                                                                                                                                                                                                                                                                                                                                                                                                                                                                                                                                                                                                 | NA                                                                                                                         | The Public Health Agency of Sweden                                                      | Oskar Karlsson Lindsjo, Maria Lind Karlberg, Mattias Haukland, Reza Advani, Olov Svartstrom, Anna-Malin Linde, Sandra Broddesson, Petra Edquist, Mia Brytting, Anna Risberg, Karin Tegmark-Wisell |
| EPI_ISL_510817                                                                                                                                                                                                                                                                                                                                                                                                                                                                                                                                                                                                                                                                                                                                                                                 | Orebro klinisk mikrobiologi                                                                                                | The Public Health Agency of Sweden                                                      | Oskar Karlsson Lindsjo, Maria Lind Karlberg, Mattias Haukland, Reza Advani, Olov Svartstrom, Anna-Malin Linde, Sandra Broddesson, Petra Edquist, Mia Brytting, Anna Risberg, Karin Tegmark-Wisell |
| EPI_ISL_510818, EPI_ISL_510819                                                                                                                                                                                                                                                                                                                                                                                                                                                                                                                                                                                                                                                                                                                                                                 | Klinisk mikrobiologi Vasternorrland                                                                                        | The Public Health Agency of Sweden                                                      | Oskar Karlsson Lindsjo, Maria Lind Karlberg, Mattias Haukland, Reza Advani, Olov Svartstrom, Anna-Malin Linde, Sandra Broddesson, Petra Edquist, Mia Brytting, Anna Risberg, Karin Tegmark-Wisell |
| EPI_ISL_510820, EPI_ISL_510821, EPI_ISL_510822, EPI_ISL_510823, EPI_ISL_510824                                                                                                                                                                                                                                                                                                                                                                                                                                                                                                                                                                                                                                                                                                                 | Klinisk mikrobiologi centralsjukhuset Karlstad                                                                             | The Public Health Agency of Sweden                                                      | Oskar Karlsson Lindsjo, Maria Lind Karlberg, Mattias Haukland, Reza Advani, Olov Svartstrom, Anna-Malin Linde, Sandra Broddesson, Petra Edquist, Mia Brytting, Anna Risberg, Karin Tegmark-Wisell |
| EPI_ISL_510825, EPI_ISL_510826                                                                                                                                                                                                                                                                                                                                                                                                                                                                                                                                                                                                                                                                                                                                                                 | Kalmar klinisk mikrobiologi                                                                                                | The Public Health Agency of Sweden                                                      | Oskar Karlsson Lindsjo, Maria Lind Karlberg, Mattias Haukland, Reza Advani, Olov Svartstrom, Anna-Malin Linde, Sandra Broddesson, Petra Edquist, Mia Brytting, Anna Risberg, Karin Tegmark-Wisell |
| EPI_ISL_510827, EPI_ISL_510828, EPI_ISL_510829, EPI_ISL_510830                                                                                                                                                                                                                                                                                                                                                                                                                                                                                                                                                                                                                                                                                                                                 | Unilabs Eskilstuna                                                                                                         | The Public Health Agency of Sweden                                                      | Oskar Karlsson Lindsjo, Maria Lind Karlberg, Mattias Haukland, Reza Advani, Olov Svartstrom, Anna-Malin Linde, Sandra Broddesson, Petra Edquist, Mia Brytting, Anna Risberg, Karin Tegmark-Wisell |
| EPI_ISL_510831                                                                                                                                                                                                                                                                                                                                                                                                                                                                                                                                                                                                                                                                                                                                                                                 | Halmstad klinisk mikrobiologi                                                                                              | The Public Health Agency of Sweden                                                      | Oskar Karlsson Lindsjo, Maria Lind Karlberg, Mattias Haukland, Reza Advani, Olov Svartstrom, Anna-Malin Linde, Sandra Broddesson, Petra Edquist, Mia Brytting, Anna Risberg, Karin Tegmark-Wisell |
| EPI_ISL_510832, EPI_ISL_510833                                                                                                                                                                                                                                                                                                                                                                                                                                                                                                                                                                                                                                                                                                                                                                 | Kalmar klinisk mikrobiologi                                                                                                | The Public Health Agency of Sweden                                                      | Oskar Karlsson Lindsjo, Maria Lind Karlberg, Mattias Haukland, Reza Advani, Olov Svartstrom, Anna-Malin Linde, Sandra Broddesson, Petra Edquist, Mia Brytting, Anna Risberg, Karin Tegmark-Wisell |
| EPI_ISL_510834, EPI_ISL_510835                                                                                                                                                                                                                                                                                                                                                                                                                                                                                                                                                                                                                                                                                                                                                                 | Karolinska Universitetslaboratoriet                                                                                        | The Public Health Agency of Sweden                                                      | Oskar Karlsson Lindsjo, Maria Lind Karlberg, Mattias Haukland, Reza Advani, Olov Svartstrom, Anna-Malin Linde, Sandra Broddesson, Petra Edquist, Mia Brytting, Anna Risberg, Karin Tegmark-Wisell |
| EPI_ISL_510836, EPI_ISL_510837                                                                                                                                                                                                                                                                                                                                                                                                                                                                                                                                                                                                                                                                                                                                                                 | Kalmar klinisk mikrobiologi                                                                                                | The Public Health Agency of Sweden                                                      | Oskar Karlsson Lindsjo, Maria Lind Karlberg, Mattias Haukland, Reza Advani, Olov Svartstrom, Anna-Malin Linde, Sandra Broddesson, Petra Edquist, Mia Brytting, Anna Risberg, Karin Tegmark-Wisell |
| EPI_ISL_510838, EPI_ISL_510839, EPI_ISL_510840                                                                                                                                                                                                                                                                                                                                                                                                                                                                                                                                                                                                                                                                                                                                                 | Karolinska Universitetslaboratoriet                                                                                        | The Public Health Agency of Sweden                                                      | Oskar Karlsson Lindsjo, Maria Lind Karlberg, Mattias Haukland, Reza Advani, Olov Svartstrom, Anna-Malin Linde, Sandra Broddesson, Petra Edquist, Mia Brytting, Anna Risberg, Karin Tegmark-Wisell |
| EPI_ISL_510841, EPI_ISL_510842, EPI_ISL_510843, EPI_ISL_510844                                                                                                                                                                                                                                                                                                                                                                                                                                                                                                                                                                                                                                                                                                                                 | Klinisk mikrobiologi NAL Trollhattan                                                                                       | The Public Health Agency of Sweden                                                      | Oskar Karlsson Lindsjo, Maria Lind Karlberg, Mattias Haukland, Reza Advani, Olov Svartstrom, Anna-Malin Linde, Sandra Broddesson, Petra Edquist, Mia Brytting, Anna Risberg, Karin Tegmark-Wisell |
| EPI_ISL_510845, EPI_ISL_510846, EPI_ISL_510847, EPI_ISL_510848, EPI_ISL_510849, EPI_ISL_510850, EPI_ISL_510851                                                                                                                                                                                                                                                                                                                                                                                                                                                                                                                                                                                                                                                                                 | Skovde/Unilabs                                                                                                             | The Public Health Agency of Sweden                                                      | Oskar Karlsson Lindsjo, Maria Lind Karlberg, Mattias Haukland, Reza Advani, Olov Svartstrom, Anna-Malin Linde, Sandra Broddesson, Petra Edquist, Mia Brytting, Anna Risberg, Karin Tegmark-Wisell |
| EPI_ISL_510852                                                                                                                                                                                                                                                                                                                                                                                                                                                                                                                                                                                                                                                                                                                                                                                 | Karolinska Universitetslaboratoriet                                                                                        | The Public Health Agency of Sweden                                                      | Oskar Karlsson Lindsjo, Maria Lind Karlberg, Mattias Haukland, Reza Advani, Olov Svartstrom, Anna-Malin Linde, Sandra Broddesson, Petra Edquist, Mia Brytting, Anna Risberg, Karin Tegmark-Wisell |
| EPI_ISL_510853, EPI_ISL_510854, EPI_ISL_510855, EPI_ISL_510856, EPI_ISL_510857, EPI_ISL_510858                                                                                                                                                                                                                                                                                                                                                                                                                                                                                                                                                                                                                                                                                                 | Klinisk mikrobiologi Vasternorrland                                                                                        | The Public Health Agency of Sweden                                                      | Oskar Karlsson Lindsjo, Maria Lind Karlberg, Mattias Haukland, Reza Advani, Olov Svartstrom, Anna-Malin Linde, Sandra Broddesson, Petra Edquist, Mia Brytting, Anna Risberg, Karin Tegmark-Wisell |
| EPI_ISL_510859                                                                                                                                                                                                                                                                                                                                                                                                                                                                                                                                                                                                                                                                                                                                                                                 | Kalmar klinisk mikrobiologi                                                                                                | The Public Health Agency of Sweden                                                      | Oskar Karlsson Lindsjo, Maria Lind Karlberg, Mattias Haukland, Reza Advani, Olov Svartstrom, Anna-Malin Linde, Sandra Broddesson, Petra Edquist, Mia Brytting, Anna Risberg, Karin Tegmark-Wisell |
| EPI_ISL_510860, EPI_ISL_510861, EPI_ISL_510862, EPI_ISL_510863                                                                                                                                                                                                                                                                                                                                                                                                                                                                                                                                                                                                                                                                                                                                 | Karolinska Universitetslaboratoriet                                                                                        | The Public Health Agency of Sweden                                                      | Oskar Karlsson Lindsjo, Maria Lind Karlberg, Mattias Haukland, Reza Advani, Olov Svartstrom, Anna-Malin Linde, Sandra Broddesson, Petra Edquist, Mia Brytting, Anna Risberg, Karin Tegmark-Wisell |
| EPI_ISL_510864, EPI_ISL_510865                                                                                                                                                                                                                                                                                                                                                                                                                                                                                                                                                                                                                                                                                                                                                                 | Kalmar klinisk mikrobiologi                                                                                                | The Public Health Agency of Sweden                                                      | Oskar Karlsson Lindsjo, Maria Lind Karlberg, Mattias Haukland, Reza Advani, Olov Svartstrom, Anna-Malin Linde, Sandra Broddesson, Petra Edquist, Mia Brytting, Anna Risberg, Karin Tegmark-Wisell |
| EPI_ISL_510866                                                                                                                                                                                                                                                                                                                                                                                                                                                                                                                                                                                                                                                                                                                                                                                 | Halmstad klinisk mikrobiologi                                                                                              | The Public Health Agency of Sweden                                                      | Oskar Karlsson Lindsjo, Maria Lind Karlberg, Mattias Haukland, Reza Advani, Olov Svartstrom, Anna-Malin Linde, Sandra Broddesson, Petra Edquist, Mia Brytting, Anna Risberg, Karin Tegmark-Wisell |
| EPI_ISL_510867                                                                                                                                                                                                                                                                                                                                                                                                                                                                                                                                                                                                                                                                                                                                                                                 | Klinisk mikrobiologi centralsjukhuset Karlstad                                                                             | The Public Health Agency of Sweden                                                      | Oskar Karlsson Lindsjo, Maria Lind Karlberg, Mattias Haukland, Reza Advani, Olov Svartstrom, Anna-Malin Linde, Sandra Broddesson, Petra Edquist, Mia Brytting, Anna Risberg, Karin Tegmark-Wisell |
| EPI_ISL_510868, EPI_ISL_510869, EPI_ISL_510870                                                                                                                                                                                                                                                                                                                                                                                                                                                                                                                                                                                                                                                                                                                                                 | Klinisk mikrobiologi NAL Trollhattan                                                                                       | The Public Health Agency of Sweden                                                      | Oskar Karlsson Lindsjo, Maria Lind Karlberg, Mattias Haukland, Reza Advani, Olov Svartstrom, Anna-Malin Linde, Sandra Broddesson, Petra Edquist, Mia Brytting, Anna Risberg, Karin Tegmark-Wisell |
| EPI_ISL_510871, EPI_ISL_510872, EPI_ISL_510873, EPI_ISL_510874, EPI_ISL_510875, EPI_ISL_510876, EPI_ISL_510877                                                                                                                                                                                                                                                                                                                                                                                                                                                                                                                                                                                                                                                                                 | Klinisk mikrobiologi Linköping                                                                                             | The Public Health Agency of Sweden                                                      | Oskar Karlsson Lindsjo, Maria Lind Karlberg, Mattias Haukland, Reza Advani, Olov Svartstrom, Anna-Malin Linde, Sandra Broddesson, Petra Edquist, Mia Brytting, Anna Risberg, Karin Tegmark-Wisell |
| EPI_ISL_512597, EPI_ISL_512598, EPI_ISL_512599, EPI_ISL_512600, EPI_ISL_512601, EPI_ISL_512602, EPI_ISL_512603, EPI_ISL_512604, EPI_ISL_512605, EPI_ISL_512606, EPI_ISL_512607, EPI_ISL_512608, EPI_ISL_512609, EPI_ISL_512610, EPI_ISL_512611, EPI_ISL_512612, EPI_ISL_512613, EPI_ISL_512614, EPI_ISL_512615, EPI_ISL_512616, EPI_ISL_512617, EPI_ISL_512618, EPI_ISL_512619, EPI_ISL_512620, EPI_ISL_512621, EPI_ISL_512622, EPI_ISL_512623, EPI_ISL_512624, EPI_ISL_512625, EPI_ISL_512626, EPI_ISL_512627, EPI_ISL_512628, EPI_ISL_512629, EPI_ISL_512630, EPI_ISL_512631, EPI_ISL_512632, EPI_ISL_512633, EPI_ISL_512634, EPI_ISL_512635, EPI_ISL_512636, EPI_ISL_512637, EPI_ISL_512638, EPI_ISL_512639, EPI_ISL_512640, EPI_ISL_512641, EPI_ISL_512642, EPI_ISL_512643, EPI_ISL_512644 | National Laboratory for Influenza/Virology reference laboratory, Public Health Center of the Ministry of Health of Ukraine | Respiratory Virus Unit, Microbiology Services Colindale, Public Health England          | PHE Covid Sequencing Team, Dr. Iryna Demchyshyna                                                                                                                                                  |
| EPI_ISL_512713, EPI_ISL_512714, EPI_ISL_512715, EPI_ISL_512716, EPI_ISL_512720, EPI_ISL_512721, EPI_ISL_512722, EPI_ISL_512724, EPI_ISL_512726, EPI_ISL_512727, EPI_ISL_512728, EPI_ISL_512730, EPI_ISL_512731, EPI_ISL_512732, EPI_ISL_512735, EPI_ISL_512736, EPI_ISL_512737, EPI_ISL_512740, EPI_ISL_512741, EPI_ISL_512742, EPI_ISL_512743, EPI_ISL_512744, EPI_ISL_512746, EPI_ISL_512748, EPI_ISL_512749, EPI_ISL_512751, EPI_ISL_512752, EPI_ISL_512753, EPI_ISL_512755, EPI_ISL_512759, EPI_ISL_512760, EPI_ISL_512761, EPI_ISL_512763, EPI_ISL_512765                                                                                                                                                                                                                                 | PathWest Laboratory Medicine WA                                                                                            | PathWest Laboratory Medicine WA Microbial Surveillance Unit                             | PathWest Laboratory Medicine WA Microbial Surveillance Unit                                                                                                                                       |
| EPI_ISL_512810                                                                                                                                                                                                                                                                                                                                                                                                                                                                                                                                                                                                                                                                                                                                                                                 | National Laboratory for Influenza/Virology reference laboratory, Public Health Center of the Ministry of Health of Ukraine | Respiratory Virus Unit, Microbiology Services Colindale, Public Health England          | PHE Covid Sequencing Team, Dr. Iryna Demchyshyna                                                                                                                                                  |
| EPI_ISL_514343, EPI_ISL_514344, EPI_ISL_514345, EPI_ISL_514346, EPI_ISL_514347, EPI_ISL_514348, EPI_ISL_514349, EPI_ISL_514350, EPI_ISL_514351, EPI_ISL_514352, EPI_ISL_514353                                                                                                                                                                                                                                                                                                                                                                                                                                                                                                                                                                                                                 | Respiratory Virus Unit, Microbiology Services Colindale, Public Health England                                             | Respiratory Virus Unit, Microbiology Services Colindale, Public Health England          | PHE Covid Sequencing Team                                                                                                                                                                         |



|                                                                                                                                                                                                                                                                                                                                                                                                                                                                                                                                                                                                                                                                                                                                                                                                                                                                                                                                                                                                                                                                                                                                                                                                                                                                                                                                                                                                                                                                                                                                                                                                                                                                                                                                                                                                                                                                                                                                                                                                                                                                                                                                                                                                                                                                                                                                                                                                |                                                                                             |                                                                                          |                                                                                                                                                                                                                                                         |
|------------------------------------------------------------------------------------------------------------------------------------------------------------------------------------------------------------------------------------------------------------------------------------------------------------------------------------------------------------------------------------------------------------------------------------------------------------------------------------------------------------------------------------------------------------------------------------------------------------------------------------------------------------------------------------------------------------------------------------------------------------------------------------------------------------------------------------------------------------------------------------------------------------------------------------------------------------------------------------------------------------------------------------------------------------------------------------------------------------------------------------------------------------------------------------------------------------------------------------------------------------------------------------------------------------------------------------------------------------------------------------------------------------------------------------------------------------------------------------------------------------------------------------------------------------------------------------------------------------------------------------------------------------------------------------------------------------------------------------------------------------------------------------------------------------------------------------------------------------------------------------------------------------------------------------------------------------------------------------------------------------------------------------------------------------------------------------------------------------------------------------------------------------------------------------------------------------------------------------------------------------------------------------------------------------------------------------------------------------------------------------------------|---------------------------------------------------------------------------------------------|------------------------------------------------------------------------------------------|---------------------------------------------------------------------------------------------------------------------------------------------------------------------------------------------------------------------------------------------------------|
| EPI_ISL_541367                                                                                                                                                                                                                                                                                                                                                                                                                                                                                                                                                                                                                                                                                                                                                                                                                                                                                                                                                                                                                                                                                                                                                                                                                                                                                                                                                                                                                                                                                                                                                                                                                                                                                                                                                                                                                                                                                                                                                                                                                                                                                                                                                                                                                                                                                                                                                                                 | Laboratory of Respiratory Viruses and Measles, Oswaldo Cruz Institute, FIOCRUZ              | Laboratory of Respiratory Viruses and Measles, Oswaldo Cruz Institute, FIOCRUZ           | Paola Resende, Luciana Appolinario, Fernando Motta, Anna Carolina Paixão, Ana Carolina Mendonça, Jonathan Lopes, Marilda Siqueira on behalf of the Fiocruz COVID-19 Genomic Surveillance Network                                                        |
| EPI_ISL_541368, EPI_ISL_541369                                                                                                                                                                                                                                                                                                                                                                                                                                                                                                                                                                                                                                                                                                                                                                                                                                                                                                                                                                                                                                                                                                                                                                                                                                                                                                                                                                                                                                                                                                                                                                                                                                                                                                                                                                                                                                                                                                                                                                                                                                                                                                                                                                                                                                                                                                                                                                 | Laboratory of Respiratory Viruses and Measles, Oswaldo Cruz Institute, FIOCRUZ              | Laboratory of Respiratory Viruses and Measles, Oswaldo Cruz Institute, FIOCRUZ           | Paola Resende, Roxana Loayza, Cinthia Avila, Luciana Appolinario, Fernando Motta, Anna Carolina Paixao, Ana Carolina Mendonca, Marilda Siqueira on behalf of the Fiocruz COVID-19 Genomic Surveillance Network                                          |
| EPI_ISL_541370, EPI_ISL_541371                                                                                                                                                                                                                                                                                                                                                                                                                                                                                                                                                                                                                                                                                                                                                                                                                                                                                                                                                                                                                                                                                                                                                                                                                                                                                                                                                                                                                                                                                                                                                                                                                                                                                                                                                                                                                                                                                                                                                                                                                                                                                                                                                                                                                                                                                                                                                                 | Laboratório Central de Saúde Pública do Estado de Santa Catarina (LACEN-SC)                 | Laboratory of Respiratory Viruses and Measles, Oswaldo Cruz Institute, FIOCRUZ           | Paola Resende, Luciana Appolinario, Fernando Motta, Anna Carolina Paixão, Ana Carolina Mendonça, Jonathan Lopes, Sandra Bianchini, Marilda Siqueira on behalf of the Fiocruz COVID-19 Genomic Surveillance Network                                      |
| EPI_ISL_541372, EPI_ISL_541373, EPI_ISL_541374, EPI_ISL_541375, EPI_ISL_541376, EPI_ISL_541377, EPI_ISL_541378, EPI_ISL_541379, EPI_ISL_541380, EPI_ISL_541381, EPI_ISL_541382, EPI_ISL_541383, EPI_ISL_541384, EPI_ISL_541385, EPI_ISL_541386, EPI_ISL_541387, EPI_ISL_541388, EPI_ISL_541389, EPI_ISL_541390, EPI_ISL_541391, EPI_ISL_541392, EPI_ISL_541393, EPI_ISL_541394, EPI_ISL_541395, EPI_ISL_541396                                                                                                                                                                                                                                                                                                                                                                                                                                                                                                                                                                                                                                                                                                                                                                                                                                                                                                                                                                                                                                                                                                                                                                                                                                                                                                                                                                                                                                                                                                                                                                                                                                                                                                                                                                                                                                                                                                                                                                                 | Laboratório Central de Saúde Pública do Estado de Sergipe (LACEN-SE)                        | Laboratory of Respiratory Viruses and Measles, Oswaldo Cruz Institute, FIOCRUZ           | Paola Resende, Luciana Appolinario, Fernando Motta, Anna Carolina Paixão, Ana Carolina Mendonça, Jonathan Lopes, Clíoma Santos, Marilda Siqueira on behalf of the Fiocruz COVID-19 Genomic Surveillance Network                                         |
| see above                                                                                                                                                                                                                                                                                                                                                                                                                                                                                                                                                                                                                                                                                                                                                                                                                                                                                                                                                                                                                                                                                                                                                                                                                                                                                                                                                                                                                                                                                                                                                                                                                                                                                                                                                                                                                                                                                                                                                                                                                                                                                                                                                                                                                                                                                                                                                                                      | Laboratório Central de Saúde Pública do Estado de Sergipe (LACEN-SE)                        | Laboratory of Respiratory Viruses and Measles, Oswaldo Cruz Institute, FIOCRUZ           | Paola Resende, Luciana Appolinario, Fernando Motta, Anna Carolina Paixão, Ana Carolina Mendonça, Jonathan Lopes, Clíoma Santos, Marilda Siqueira on behalf of the Fiocruz COVID-19 Genomic Surveillance Network                                         |
| EPI_ISL_541397, EPI_ISL_541398, EPI_ISL_541399                                                                                                                                                                                                                                                                                                                                                                                                                                                                                                                                                                                                                                                                                                                                                                                                                                                                                                                                                                                                                                                                                                                                                                                                                                                                                                                                                                                                                                                                                                                                                                                                                                                                                                                                                                                                                                                                                                                                                                                                                                                                                                                                                                                                                                                                                                                                                 | Laboratório de Virologia Comparada e Ambiental - LVCA - IOC                                 | Laboratory of Respiratory Viruses and Measles, Oswaldo Cruz Institute, FIOCRUZ           | Paola Resende, Luciana Appolinario, Tulo Machado Fumian, Tatiana Prado, Camille Ferreira Mannarino, Fernando Motta, Ana Carolina Mendonça, Marilda Siqueira, Marize Pereira Miagostovich on behalf of the Fiocruz COVID-19 Genomic Surveillance Network |
| EPI_ISL_547433, EPI_ISL_547434, EPI_ISL_547435, EPI_ISL_547436, EPI_ISL_547437, EPI_ISL_547438, EPI_ISL_547439, EPI_ISL_547440, EPI_ISL_547441, EPI_ISL_547442, EPI_ISL_547443, EPI_ISL_547444                                                                                                                                                                                                                                                                                                                                                                                                                                                                                                                                                                                                                                                                                                                                                                                                                                                                                                                                                                                                                                                                                                                                                                                                                                                                                                                                                                                                                                                                                                                                                                                                                                                                                                                                                                                                                                                                                                                                                                                                                                                                                                                                                                                                 | Microbiology, Department of Pathology, St. Bernard's Hospital, Gibraltar Health Authority   | Respiratory Virus Unit, Microbiology Services Colindale, Public Health England           | PHE Covid Sequencing Team, Dr Nicholas Cortes (Gibraltar), Charlotte Gilborn-Jones (Gibraltar)                                                                                                                                                          |
| see above                                                                                                                                                                                                                                                                                                                                                                                                                                                                                                                                                                                                                                                                                                                                                                                                                                                                                                                                                                                                                                                                                                                                                                                                                                                                                                                                                                                                                                                                                                                                                                                                                                                                                                                                                                                                                                                                                                                                                                                                                                                                                                                                                                                                                                                                                                                                                                                      | Microbiology, Department of Pathology, St. Bernard's Hospital, Gibraltar Health Authority   | Respiratory Virus Unit, Microbiology Services Colindale, Public Health England           | PHE Covid Sequencing Team, Dr Nicholas Cortes (Gibraltar), Charlotte Gilborn-Jones (Gibraltar)                                                                                                                                                          |
| EPI_ISL_566045, EPI_ISL_566046, EPI_ISL_566047, EPI_ISL_566048, EPI_ISL_566049, EPI_ISL_566050, EPI_ISL_566051, EPI_ISL_566052, EPI_ISL_566053, EPI_ISL_566054, EPI_ISL_566055, EPI_ISL_566056, EPI_ISL_566057, EPI_ISL_566058, EPI_ISL_566059, EPI_ISL_566060, EPI_ISL_566061, EPI_ISL_566062, EPI_ISL_566063, EPI_ISL_566064, EPI_ISL_566065, EPI_ISL_566066, EPI_ISL_566067, EPI_ISL_566068, EPI_ISL_566069, EPI_ISL_566070, EPI_ISL_566071, EPI_ISL_566072, EPI_ISL_566073, EPI_ISL_566074, EPI_ISL_566075, EPI_ISL_566076                                                                                                                                                                                                                                                                                                                                                                                                                                                                                                                                                                                                                                                                                                                                                                                                                                                                                                                                                                                                                                                                                                                                                                                                                                                                                                                                                                                                                                                                                                                                                                                                                                                                                                                                                                                                                                                                 | Respiratory Virus Unit, Microbiology Services Colindale, Public Health England              | Respiratory Virus Unit, Microbiology Services Colindale, Public Health England           | PHE Covid Sequencing Team                                                                                                                                                                                                                               |
| see above                                                                                                                                                                                                                                                                                                                                                                                                                                                                                                                                                                                                                                                                                                                                                                                                                                                                                                                                                                                                                                                                                                                                                                                                                                                                                                                                                                                                                                                                                                                                                                                                                                                                                                                                                                                                                                                                                                                                                                                                                                                                                                                                                                                                                                                                                                                                                                                      | Respiratory Virus Unit, Microbiology Services Colindale, Public Health England              | Respiratory Virus Unit, Microbiology Services Colindale, Public Health England           | PHE Covid Sequencing Team                                                                                                                                                                                                                               |
| EPI_ISL_568510, EPI_ISL_568511, EPI_ISL_568512, EPI_ISL_568513, EPI_ISL_568514, EPI_ISL_568515, EPI_ISL_568516, EPI_ISL_568517, EPI_ISL_568518, EPI_ISL_568519, EPI_ISL_568520, EPI_ISL_568521, EPI_ISL_568522, EPI_ISL_568523, EPI_ISL_568524, EPI_ISL_568525, EPI_ISL_568526, EPI_ISL_568527, EPI_ISL_568528, EPI_ISL_568529, EPI_ISL_568530, EPI_ISL_568531, EPI_ISL_568532, EPI_ISL_568533, EPI_ISL_568534, EPI_ISL_568535, EPI_ISL_568536, EPI_ISL_568537, EPI_ISL_568538, EPI_ISL_568539, EPI_ISL_568540, EPI_ISL_568541, EPI_ISL_568542, EPI_ISL_568543, EPI_ISL_568544, EPI_ISL_568545, EPI_ISL_568546, EPI_ISL_568547, EPI_ISL_568548, EPI_ISL_568549, EPI_ISL_568550, EPI_ISL_568551, EPI_ISL_568552, EPI_ISL_568553, EPI_ISL_568554, EPI_ISL_568555                                                                                                                                                                                                                                                                                                                                                                                                                                                                                                                                                                                                                                                                                                                                                                                                                                                                                                                                                                                                                                                                                                                                                                                                                                                                                                                                                                                                                                                                                                                                                                                                                                 | Laboratorio de Referencia Nacional de Virus Respiratorios, Instituto Nacional de Salud Peru | Laboratorio de Genómica Microbiana, Universidad Peruana Cayetano Heredia                 | Pablo Tsukayama, Alejandra Dávila-Barclay, Luis González, Pedro E. Romero, Brenda Ayzanoa, Janet Huancachoque, Pool Marcos, Maribel Huarina, Camila Castillo-Vilcahuaman, Guillermo Salvatierra                                                         |
| see above                                                                                                                                                                                                                                                                                                                                                                                                                                                                                                                                                                                                                                                                                                                                                                                                                                                                                                                                                                                                                                                                                                                                                                                                                                                                                                                                                                                                                                                                                                                                                                                                                                                                                                                                                                                                                                                                                                                                                                                                                                                                                                                                                                                                                                                                                                                                                                                      | Laboratorio de Referencia Nacional de Virus Respiratorios, Instituto Nacional de Salud Peru | Laboratorio de Genómica Microbiana, Universidad Peruana Cayetano Heredia                 | Pablo Tsukayama, Alejandra Dávila-Barclay, Luis González, Pedro E. Romero, Brenda Ayzanoa, Janet Huancachoque, Pool Marcos, Maribel Huarina, Camila Castillo-Vilcahuaman, Guillermo Salvatierra                                                         |
| EPI_ISL_574697, EPI_ISL_574698, EPI_ISL_574699, EPI_ISL_574700, EPI_ISL_574701, EPI_ISL_574702, EPI_ISL_574703, EPI_ISL_574704                                                                                                                                                                                                                                                                                                                                                                                                                                                                                                                                                                                                                                                                                                                                                                                                                                                                                                                                                                                                                                                                                                                                                                                                                                                                                                                                                                                                                                                                                                                                                                                                                                                                                                                                                                                                                                                                                                                                                                                                                                                                                                                                                                                                                                                                 | Respiratory Virus Unit, Microbiology Services Colindale, Public Health England              | Respiratory Virus Unit, Microbiology Services Colindale, Public Health England           | PHE Covid Sequencing Team                                                                                                                                                                                                                               |
| see above                                                                                                                                                                                                                                                                                                                                                                                                                                                                                                                                                                                                                                                                                                                                                                                                                                                                                                                                                                                                                                                                                                                                                                                                                                                                                                                                                                                                                                                                                                                                                                                                                                                                                                                                                                                                                                                                                                                                                                                                                                                                                                                                                                                                                                                                                                                                                                                      | Respiratory Virus Unit, Microbiology Services Colindale, Public Health England              | Respiratory Virus Unit, Microbiology Services Colindale, Public Health England           | PHE Covid Sequencing Team                                                                                                                                                                                                                               |
| EPI_ISL_577751, EPI_ISL_577756, EPI_ISL_577759, EPI_ISL_577765, EPI_ISL_577766, EPI_ISL_577771, EPI_ISL_577776, EPI_ISL_577780, EPI_ISL_577783, EPI_ISL_577784, EPI_ISL_577788, EPI_ISL_577789, EPI_ISL_577795, EPI_ISL_577802, EPI_ISL_577803, EPI_ISL_577809, EPI_ISL_577813, EPI_ISL_577816, EPI_ISL_577823, EPI_ISL_577827                                                                                                                                                                                                                                                                                                                                                                                                                                                                                                                                                                                                                                                                                                                                                                                                                                                                                                                                                                                                                                                                                                                                                                                                                                                                                                                                                                                                                                                                                                                                                                                                                                                                                                                                                                                                                                                                                                                                                                                                                                                                 | Dutch COVID-19 response team                                                                | Erasmus Medical Center                                                                   | OH consortium                                                                                                                                                                                                                                           |
| see above                                                                                                                                                                                                                                                                                                                                                                                                                                                                                                                                                                                                                                                                                                                                                                                                                                                                                                                                                                                                                                                                                                                                                                                                                                                                                                                                                                                                                                                                                                                                                                                                                                                                                                                                                                                                                                                                                                                                                                                                                                                                                                                                                                                                                                                                                                                                                                                      | Dutch COVID-19 response team                                                                | Erasmus Medical Center                                                                   | OH consortium                                                                                                                                                                                                                                           |
| EPI_ISL_583968, EPI_ISL_583969, EPI_ISL_583970, EPI_ISL_583971, EPI_ISL_583972, EPI_ISL_583973, EPI_ISL_583974, EPI_ISL_583975, EPI_ISL_583976, EPI_ISL_583977, EPI_ISL_583978, EPI_ISL_583979, EPI_ISL_583980, EPI_ISL_583981, EPI_ISL_583982, EPI_ISL_583983, EPI_ISL_583984, EPI_ISL_583985, EPI_ISL_583986, EPI_ISL_583987, EPI_ISL_583988, EPI_ISL_583989, EPI_ISL_583990, EPI_ISL_583991, EPI_ISL_583992, EPI_ISL_583993, EPI_ISL_583994, EPI_ISL_583995, EPI_ISL_583996, EPI_ISL_583997, EPI_ISL_583998, EPI_ISL_583999, EPI_ISL_590000, EPI_ISL_590001, EPI_ISL_590002, EPI_ISL_590003, EPI_ISL_590004, EPI_ISL_590005, EPI_ISL_590006, EPI_ISL_590007, EPI_ISL_590008, EPI_ISL_590009, EPI_ISL_590010, EPI_ISL_590011, EPI_ISL_590012, EPI_ISL_590013, EPI_ISL_590014, EPI_ISL_590015, EPI_ISL_590016, EPI_ISL_590017, EPI_ISL_590018, EPI_ISL_590019, EPI_ISL_590020, EPI_ISL_590021, EPI_ISL_590022, EPI_ISL_590023, EPI_ISL_590024, EPI_ISL_590025, EPI_ISL_590026, EPI_ISL_590027, EPI_ISL_590028, EPI_ISL_590029, EPI_ISL_590030, EPI_ISL_590031, EPI_ISL_590032, EPI_ISL_590033, EPI_ISL_590034, EPI_ISL_590035, EPI_ISL_590036, EPI_ISL_590037, EPI_ISL_590038, EPI_ISL_590039, EPI_ISL_590040, EPI_ISL_590041, EPI_ISL_590042, EPI_ISL_590043, EPI_ISL_590044, EPI_ISL_590045, EPI_ISL_590046, EPI_ISL_590047, EPI_ISL_590048, EPI_ISL_590049, EPI_ISL_590050, EPI_ISL_590051, EPI_ISL_590052, EPI_ISL_590053, EPI_ISL_590054, EPI_ISL_590055, EPI_ISL_590056, EPI_ISL_590057, EPI_ISL_590058, EPI_ISL_590059, EPI_ISL_590060, EPI_ISL_590061, EPI_ISL_590062, EPI_ISL_590063, EPI_ISL_590064, EPI_ISL_590065, EPI_ISL_590066, EPI_ISL_590067, EPI_ISL_590068, EPI_ISL_590069, EPI_ISL_590070, EPI_ISL_590071, EPI_ISL_590072, EPI_ISL_590073, EPI_ISL_590074, EPI_ISL_590075, EPI_ISL_590076, EPI_ISL_590077, EPI_ISL_590078, EPI_ISL_590079, EPI_ISL_590080, EPI_ISL_590081, EPI_ISL_590082, EPI_ISL_590083, EPI_ISL_590084, EPI_ISL_590085, EPI_ISL_590086, EPI_ISL_590087, EPI_ISL_590088, EPI_ISL_590089, EPI_ISL_590090, EPI_ISL_590091, EPI_ISL_590092, EPI_ISL_590093, EPI_ISL_590094, EPI_ISL_590095, EPI_ISL_590096, EPI_ISL_590097, EPI_ISL_590098, EPI_ISL_590099, EPI_ISL_590100                                                                                                                                                                                 | Respiratory Virus Unit, Microbiology Services Colindale, Public Health England              | Respiratory Virus Unit, Microbiology Services Colindale, Public Health England           | PHE Covid Sequencing Team                                                                                                                                                                                                                               |
| see above                                                                                                                                                                                                                                                                                                                                                                                                                                                                                                                                                                                                                                                                                                                                                                                                                                                                                                                                                                                                                                                                                                                                                                                                                                                                                                                                                                                                                                                                                                                                                                                                                                                                                                                                                                                                                                                                                                                                                                                                                                                                                                                                                                                                                                                                                                                                                                                      | Respiratory Virus Unit, Microbiology Services Colindale, Public Health England              | Respiratory Virus Unit, Microbiology Services Colindale, Public Health England           | PHE Covid Sequencing Team                                                                                                                                                                                                                               |
| EPI_ISL_594169, EPI_ISL_594170, EPI_ISL_594172, EPI_ISL_594174, EPI_ISL_594177, EPI_ISL_594178, EPI_ISL_594179, EPI_ISL_596679, EPI_ISL_596682, EPI_ISL_596683, EPI_ISL_596685, EPI_ISL_596687, EPI_ISL_596688, EPI_ISL_596689, EPI_ISL_596693, EPI_ISL_596694, EPI_ISL_596697, EPI_ISL_596699, EPI_ISL_596702, EPI_ISL_596704, EPI_ISL_596705, EPI_ISL_596707, EPI_ISL_596708, EPI_ISL_596709, EPI_ISL_596710, EPI_ISL_596712, EPI_ISL_596713, EPI_ISL_596715, EPI_ISL_596716, EPI_ISL_596717, EPI_ISL_596720, EPI_ISL_596722, EPI_ISL_596723, EPI_ISL_596724, EPI_ISL_596726, EPI_ISL_596727, EPI_ISL_596728, EPI_ISL_596729, EPI_ISL_596730, EPI_ISL_596731, EPI_ISL_596732, EPI_ISL_596733, EPI_ISL_596734, EPI_ISL_596736, EPI_ISL_596737, EPI_ISL_596738, EPI_ISL_596739, EPI_ISL_596743, EPI_ISL_596744, EPI_ISL_596745, EPI_ISL_596746, EPI_ISL_596747, EPI_ISL_596749, EPI_ISL_596751, EPI_ISL_596753, EPI_ISL_596754, EPI_ISL_596755, EPI_ISL_596756, EPI_ISL_596757, EPI_ISL_596758, EPI_ISL_596759, EPI_ISL_596762, EPI_ISL_596763, EPI_ISL_596766, EPI_ISL_596767, EPI_ISL_596773, EPI_ISL_596775, EPI_ISL_596777, EPI_ISL_596778, EPI_ISL_596782, EPI_ISL_596783, EPI_ISL_596784, EPI_ISL_596788, EPI_ISL_596791, EPI_ISL_596792, EPI_ISL_596793, EPI_ISL_596795, EPI_ISL_596796, EPI_ISL_596799, EPI_ISL_596801, EPI_ISL_596802, EPI_ISL_596803, EPI_ISL_596806, EPI_ISL_596807, EPI_ISL_596811, EPI_ISL_596814, EPI_ISL_596815, EPI_ISL_596816, EPI_ISL_596817, EPI_ISL_596818, EPI_ISL_596821, EPI_ISL_596822, EPI_ISL_596823, EPI_ISL_596824, EPI_ISL_596825, EPI_ISL_596827, EPI_ISL_596829, EPI_ISL_596830, EPI_ISL_596833, EPI_ISL_596834, EPI_ISL_596836, EPI_ISL_596839, EPI_ISL_596841, EPI_ISL_596844, EPI_ISL_596846, EPI_ISL_596847, EPI_ISL_596848, EPI_ISL_596849, EPI_ISL_596850, EPI_ISL_596851, EPI_ISL_596856, EPI_ISL_596858, EPI_ISL_596859, EPI_ISL_596861, EPI_ISL_596862, EPI_ISL_596863, EPI_ISL_596864, EPI_ISL_596866, EPI_ISL_596867, EPI_ISL_596868, EPI_ISL_596869, EPI_ISL_596871, EPI_ISL_596874, EPI_ISL_596876, EPI_ISL_596877, EPI_ISL_596878, EPI_ISL_596879, EPI_ISL_596881, EPI_ISL_596882, EPI_ISL_596884, EPI_ISL_596885, EPI_ISL_596888, EPI_ISL_596889, EPI_ISL_596890, EPI_ISL_596891, EPI_ISL_596892, EPI_ISL_596893, EPI_ISL_596894, EPI_ISL_596895, EPI_ISL_596896, EPI_ISL_596897, EPI_ISL_596898, EPI_ISL_596899, EPI_ISL_596900 | PathWest Laboratory Medicine WA                                                             | PathWest Laboratory Medicine WA Microbial Surveillance Unit                              | PathWest Laboratory Medicine WA Microbial Surveillance Unit                                                                                                                                                                                             |
| see above                                                                                                                                                                                                                                                                                                                                                                                                                                                                                                                                                                                                                                                                                                                                                                                                                                                                                                                                                                                                                                                                                                                                                                                                                                                                                                                                                                                                                                                                                                                                                                                                                                                                                                                                                                                                                                                                                                                                                                                                                                                                                                                                                                                                                                                                                                                                                                                      | PathWest Laboratory Medicine WA                                                             | PathWest Laboratory Medicine WA Microbial Surveillance Unit                              | PathWest Laboratory Medicine WA Microbial Surveillance Unit                                                                                                                                                                                             |
| EPI_ISL_602462, EPI_ISL_602463, EPI_ISL_602464, EPI_ISL_602465, EPI_ISL_602466, EPI_ISL_602467, EPI_ISL_602468, EPI_ISL_602469, EPI_ISL_602470, EPI_ISL_602471, EPI_ISL_602472, EPI_ISL_602473, EPI_ISL_602474, EPI_ISL_602475, EPI_ISL_602476, EPI_ISL_602477, EPI_ISL_602478, EPI_ISL_602479, EPI_ISL_602480, EPI_ISL_602481, EPI_ISL_602482, EPI_ISL_602483, EPI_ISL_602484, EPI_ISL_602485, EPI_ISL_602486, EPI_ISL_602487, EPI_ISL_602488, EPI_ISL_602489, EPI_ISL_602490, EPI_ISL_602491, EPI_ISL_602492, EPI_ISL_602493, EPI_ISL_602494, EPI_ISL_602495, EPI_ISL_602496, EPI_ISL_602497, EPI_ISL_602498, EPI_ISL_602499, EPI_ISL_602500, EPI_ISL_602501, EPI_ISL_602502, EPI_ISL_602503, EPI_ISL_602504, EPI_ISL_602505, EPI_ISL_602506, EPI_ISL_602507, EPI_ISL_602508, EPI_ISL_602509, EPI_ISL_602510, EPI_ISL_602511, EPI_ISL_602512, EPI_ISL_602513, EPI_ISL_602514, EPI_ISL_602515, EPI_ISL_602516, EPI_ISL_602517, EPI_ISL_602518, EPI_ISL_602519, EPI_ISL_602520, EPI_ISL_602521, EPI_ISL_602522, EPI_ISL_602523, EPI_ISL_602524, EPI_ISL_602525, EPI_ISL_602526, EPI_ISL_602527, EPI_ISL_602528, EPI_ISL_602529, EPI_ISL_602530, EPI_ISL_602531, EPI_ISL_602532                                                                                                                                                                                                                                                                                                                                                                                                                                                                                                                                                                                                                                                                                                                                                                                                                                                                                                                                                                                                                                                                                                                                                                                                                 | Institute for Virology, University Hospital Essen                                           | Center of Medical Microbiology, Virology, and Hospital Hygiene, University of Dusseldorf | Olympia E. Anastasiou, Ulf Dittmer, Maximilian Damagnez, Alexander Dilthey, Torsten Houwaart, Lisanna Hübne, Malte Kohns Vasconcelos, Nadine Lübke, Jessica Nicolai, Klaus Pfeiffer, Daniel Strelow, Jörg Timm, Andreas Walker, Tobias Wienenmann       |
| EPI_ISL_603188, EPI_ISL_603189, EPI_ISL_603190, EPI_ISL_603191, EPI_ISL_603192, EPI_ISL_603193, EPI_ISL_603194, EPI_ISL_603195, EPI_ISL_603196, EPI_ISL_603197, EPI_ISL_603198, EPI_ISL_603199, EPI_ISL_603200, EPI_ISL_603201, EPI_ISL_603202, EPI_ISL_603203, EPI_ISL_603204, EPI_ISL_603205, EPI_ISL_603206, EPI_ISL_603207, EPI_ISL_603208, EPI_ISL_603209, EPI_ISL_603210, EPI_ISL_603211, EPI_ISL_603212, EPI_ISL_603213, EPI_ISL_603214, EPI_ISL_603215                                                                                                                                                                                                                                                                                                                                                                                                                                                                                                                                                                                                                                                                                                                                                                                                                                                                                                                                                                                                                                                                                                                                                                                                                                                                                                                                                                                                                                                                                                                                                                                                                                                                                                                                                                                                                                                                                                                                 | Respiratory Virus Unit, Microbiology Services Colindale, Public Health England              | Respiratory Virus Unit, Microbiology Services Colindale, Public Health England           | PHE Covid Sequencing Team                                                                                                                                                                                                                               |
| see above                                                                                                                                                                                                                                                                                                                                                                                                                                                                                                                                                                                                                                                                                                                                                                                                                                                                                                                                                                                                                                                                                                                                                                                                                                                                                                                                                                                                                                                                                                                                                                                                                                                                                                                                                                                                                                                                                                                                                                                                                                                                                                                                                                                                                                                                                                                                                                                      | Respiratory Virus Unit, Microbiology Services Colindale, Public Health England              | Respiratory Virus Unit, Microbiology Services Colindale, Public Health England           | PHE Covid Sequencing Team                                                                                                                                                                                                                               |
| EPI_ISL_605825, EPI_ISL_605826, EPI_ISL_605828, EPI_ISL_605829, EPI_ISL_605830, EPI_ISL_605831, EPI_ISL_605833, EPI_ISL_605838, EPI_ISL_605839, EPI_ISL_605840, EPI_ISL_605842, EPI_ISL_605843, EPI_ISL_605849, EPI_ISL_605851, EPI_ISL_605852, EPI_ISL_605856, EPI_ISL_605857, EPI_ISL_605859, EPI_ISL_605860, EPI_ISL_605861, EPI_ISL_605862, EPI_ISL_605864, EPI_ISL_605865, EPI_ISL_605866, EPI_ISL_605867, EPI_ISL_605871, EPI_ISL_605872, EPI_ISL_605873, EPI_ISL_605874, EPI_ISL_605875, EPI_ISL_605876, EPI_ISL_605880                                                                                                                                                                                                                                                                                                                                                                                                                                                                                                                                                                                                                                                                                                                                                                                                                                                                                                                                                                                                                                                                                                                                                                                                                                                                                                                                                                                                                                                                                                                                                                                                                                                                                                                                                                                                                                                                 | PathWest Laboratory Medicine WA                                                             | PathWest Laboratory Medicine WA Microbial Surveillance Unit                              | PathWest Laboratory Medicine WA Microbial Surveillance Unit                                                                                                                                                                                             |
| see above                                                                                                                                                                                                                                                                                                                                                                                                                                                                                                                                                                                                                                                                                                                                                                                                                                                                                                                                                                                                                                                                                                                                                                                                                                                                                                                                                                                                                                                                                                                                                                                                                                                                                                                                                                                                                                                                                                                                                                                                                                                                                                                                                                                                                                                                                                                                                                                      | PathWest Laboratory Medicine WA                                                             | PathWest Laboratory Medicine WA Microbial Surveillance Unit                              | PathWest Laboratory Medicine WA Microbial Surveillance Unit                                                                                                                                                                                             |
| EPI_ISL_609827, EPI_ISL_609828, EPI_ISL_609829, EPI_ISL_609830, EPI_ISL_609831, EPI_ISL_609832, EPI_ISL_609833, EPI_ISL_609834, EPI_ISL_609835, EPI_ISL_609836, EPI_ISL_609837, EPI_ISL_609838, EPI_ISL_609839, EPI_ISL_609840, EPI_ISL_609841, EPI_ISL_609842, EPI_ISL_609843, EPI_ISL_609844, EPI_ISL_609845, EPI_ISL_609846, EPI_ISL_609847, EPI_ISL_609848, EPI_ISL_609849, EPI_ISL_609850, EPI_ISL_609851, EPI_ISL_609852, EPI_ISL_609853, EPI_ISL_609854, EPI_ISL_609855, EPI_ISL_609856, EPI_ISL_609857, EPI_ISL_609858, EPI_ISL_609859, EPI_ISL_609860, EPI_ISL_609861, EPI_ISL_609862, EPI_ISL_609863, EPI_ISL_609864, EPI_ISL_609865, EPI_ISL_609866, EPI_ISL_609867, EPI_ISL_609868, EPI_ISL_609869, EPI_ISL_609870, EPI_ISL_609871, EPI_ISL_609872, EPI_ISL_609873, EPI_ISL_609874, EPI_ISL_609875, EPI_ISL_609876, EPI_ISL_609877, EPI_ISL_609878, EPI_ISL_609879, EPI_ISL_609880, EPI_ISL_609881, EPI_ISL_609882, EPI_ISL_609883, EPI_ISL_609884, EPI_ISL_609885, EPI_ISL_609886, EPI_ISL_609887, EPI_ISL_609888, EPI_ISL_609889, EPI_ISL_609890, EPI_ISL_609891, EPI_ISL_609892, EPI_ISL_609893, EPI_ISL_609894, EPI_ISL_609895, EPI_ISL_609896, EPI_ISL_609897, EPI_ISL_609898, EPI_ISL_609899, EPI_ISL_609900                                                                                                                                                                                                                                                                                                                                                                                                                                                                                                                                                                                                                                                                                                                                                                                                                                                                                                                                                                                                                                                                                                                                                                 | Respiratory Virus Unit, Microbiology Services Colindale, Public Health England              | Respiratory Virus Unit, Microbiology Services Colindale, Public Health England           | PHE Covid Sequencing Team                                                                                                                                                                                                                               |
| see above                                                                                                                                                                                                                                                                                                                                                                                                                                                                                                                                                                                                                                                                                                                                                                                                                                                                                                                                                                                                                                                                                                                                                                                                                                                                                                                                                                                                                                                                                                                                                                                                                                                                                                                                                                                                                                                                                                                                                                                                                                                                                                                                                                                                                                                                                                                                                                                      | Respiratory Virus Unit, Microbiology Services Colindale, Public Health England              | Respiratory Virus Unit, Microbiology Services Colindale, Public Health England           | PHE Covid Sequencing Team                                                                                                                                                                                                                               |
| EPI_ISL_613459, EPI_ISL_613460                                                                                                                                                                                                                                                                                                                                                                                                                                                                                                                                                                                                                                                                                                                                                                                                                                                                                                                                                                                                                                                                                                                                                                                                                                                                                                                                                                                                                                                                                                                                                                                                                                                                                                                                                                                                                                                                                                                                                                                                                                                                                                                                                                                                                                                                                                                                                                 | Microbiology, Koc University                                                                | Microbiology, Koc University                                                             | Ozer,B., Nurtop,E., Kuskucu,M.A., Dogan,O., Can.F.                                                                                                                                                                                                      |
| EPI_ISL_613565                                                                                                                                                                                                                                                                                                                                                                                                                                                                                                                                                                                                                                                                                                                                                                                                                                                                                                                                                                                                                                                                                                                                                                                                                                                                                                                                                                                                                                                                                                                                                                                                                                                                                                                                                                                                                                                                                                                                                                                                                                                                                                                                                                                                                                                                                                                                                                                 | Respiratory Virus Unit, Microbiology Services Colindale, Public Health England              | Respiratory Virus Unit, Microbiology Services Colindale, Public Health England           | PHE Covid Sequencing Team                                                                                                                                                                                                                               |
| EPI_ISL_613566, EPI_ISL_613567                                                                                                                                                                                                                                                                                                                                                                                                                                                                                                                                                                                                                                                                                                                                                                                                                                                                                                                                                                                                                                                                                                                                                                                                                                                                                                                                                                                                                                                                                                                                                                                                                                                                                                                                                                                                                                                                                                                                                                                                                                                                                                                                                                                                                                                                                                                                                                 | Microbiology, Department of Pathology, St. Bernard's Hospital,                              | Respiratory Virus Unit, Microbiology Services Colindale, Public Health England           | PHE Covid Sequencing Team, Dr Nicholas Cortes (Gibraltar), Charlotte Gilborn-Jones (Gibraltar)                                                                                                                                                          |









|                                                                                                                                                                                                                                                                                                                                                                                                                                                                                                                                                                                                                                                                                                                                                                                                                                                                                                                                                                                                                                                                                                                                                                                                                                                                                                                |                                                                                                                  |                                                                                           |                                                                                                                                                                                                                                                 |
|----------------------------------------------------------------------------------------------------------------------------------------------------------------------------------------------------------------------------------------------------------------------------------------------------------------------------------------------------------------------------------------------------------------------------------------------------------------------------------------------------------------------------------------------------------------------------------------------------------------------------------------------------------------------------------------------------------------------------------------------------------------------------------------------------------------------------------------------------------------------------------------------------------------------------------------------------------------------------------------------------------------------------------------------------------------------------------------------------------------------------------------------------------------------------------------------------------------------------------------------------------------------------------------------------------------|------------------------------------------------------------------------------------------------------------------|-------------------------------------------------------------------------------------------|-------------------------------------------------------------------------------------------------------------------------------------------------------------------------------------------------------------------------------------------------|
| EPI_ISL_707936, EPI_ISL_707937, EPI_ISL_707938, EPI_ISL_707939                                                                                                                                                                                                                                                                                                                                                                                                                                                                                                                                                                                                                                                                                                                                                                                                                                                                                                                                                                                                                                                                                                                                                                                                                                                 | Pamukkale University Hospital                                                                                    | Pamukkale University Department of Medical Genetics                                       | Onur TOKGUN et al.                                                                                                                                                                                                                              |
| EPI_ISL_708182, EPI_ISL_708183                                                                                                                                                                                                                                                                                                                                                                                                                                                                                                                                                                                                                                                                                                                                                                                                                                                                                                                                                                                                                                                                                                                                                                                                                                                                                 | Los Angeles County PHL                                                                                           | Los Angeles County PHL                                                                    | P. Hemarajata et al.                                                                                                                                                                                                                            |
| EPI_ISL_708184, EPI_ISL_708185, EPI_ISL_708186, EPI_ISL_708188, EPI_ISL_708189, EPI_ISL_708190, EPI_ISL_708191, EPI_ISL_708192, EPI_ISL_708193, EPI_ISL_708194, EPI_ISL_708195                                                                                                                                                                                                                                                                                                                                                                                                                                                                                                                                                                                                                                                                                                                                                                                                                                                                                                                                                                                                                                                                                                                                 | see above                                                                                                        | see above                                                                                 | see above                                                                                                                                                                                                                                       |
| EPI_ISL_708505, EPI_ISL_708506, EPI_ISL_708507                                                                                                                                                                                                                                                                                                                                                                                                                                                                                                                                                                                                                                                                                                                                                                                                                                                                                                                                                                                                                                                                                                                                                                                                                                                                 | Los Angeles County Public Health Laboratory                                                                      | Los Angeles County Public Health Laboratory                                               | P. Hemarajata et al.                                                                                                                                                                                                                            |
| EPI_ISL_708528                                                                                                                                                                                                                                                                                                                                                                                                                                                                                                                                                                                                                                                                                                                                                                                                                                                                                                                                                                                                                                                                                                                                                                                                                                                                                                 | Los Angeles County PHL                                                                                           | Los Angeles County PHL                                                                    | P. Hemarajata et al.                                                                                                                                                                                                                            |
| EPI_ISL_708724, EPI_ISL_708725, EPI_ISL_708726, EPI_ISL_708727, EPI_ISL_708728, EPI_ISL_708729, EPI_ISL_708730, EPI_ISL_708731, EPI_ISL_708732, EPI_ISL_708733, EPI_ISL_708734                                                                                                                                                                                                                                                                                                                                                                                                                                                                                                                                                                                                                                                                                                                                                                                                                                                                                                                                                                                                                                                                                                                                 | see above                                                                                                        | see above                                                                                 | see above                                                                                                                                                                                                                                       |
| EPI_ISL_708740, EPI_ISL_708741, EPI_ISL_708742, EPI_ISL_708743, EPI_ISL_708745, EPI_ISL_708746, EPI_ISL_708747, EPI_ISL_708749, EPI_ISL_708752, EPI_ISL_708753, EPI_ISL_708754, EPI_ISL_708755, EPI_ISL_708756, EPI_ISL_708759, EPI_ISL_708761, EPI_ISL_708762, EPI_ISL_708764, EPI_ISL_708765, EPI_ISL_708767, EPI_ISL_708769, EPI_ISL_708770, EPI_ISL_708775, EPI_ISL_708777, EPI_ISL_708778, EPI_ISL_708781, EPI_ISL_708785, EPI_ISL_708786, EPI_ISL_708788, EPI_ISL_708789, EPI_ISL_708790, EPI_ISL_708791, EPI_ISL_708794, EPI_ISL_708795                                                                                                                                                                                                                                                                                                                                                                                                                                                                                                                                                                                                                                                                                                                                                                 | see above                                                                                                        | see above                                                                                 | see above                                                                                                                                                                                                                                       |
| EPI_ISL_709948                                                                                                                                                                                                                                                                                                                                                                                                                                                                                                                                                                                                                                                                                                                                                                                                                                                                                                                                                                                                                                                                                                                                                                                                                                                                                                 | Microbiology, Department of Pathology, St. Bernard's Hospital, Gibraltar Health Authority                        | Respiratory Virus Unit, National Infection Service, Public Health England                 | PHE Covid Sequencing Team, Dr Nicholas Cortes (Gibraltar), Charlotte Gillborn-Jones (Gibraltar)                                                                                                                                                 |
| EPI_ISL_709949                                                                                                                                                                                                                                                                                                                                                                                                                                                                                                                                                                                                                                                                                                                                                                                                                                                                                                                                                                                                                                                                                                                                                                                                                                                                                                 | Respiratory Virus Unit, National Infection Service, Public Health England                                        | COVID-19 Genomics UK (COG-UK) Consortium                                                  | PHE Covid Sequencing Team                                                                                                                                                                                                                       |
| EPI_ISL_709950, EPI_ISL_709951, EPI_ISL_709952, EPI_ISL_709953, EPI_ISL_709954, EPI_ISL_709955, EPI_ISL_709956, EPI_ISL_709957                                                                                                                                                                                                                                                                                                                                                                                                                                                                                                                                                                                                                                                                                                                                                                                                                                                                                                                                                                                                                                                                                                                                                                                 | Microbiology, Department of Pathology, St. Bernard's Hospital, Gibraltar Health Authority                        | Respiratory Virus Unit, National Infection Service, Public Health England                 | PHE Covid Sequencing Team, Dr Nicholas Cortes (Gibraltar), Charlotte Gillborn-Jones (Gibraltar)                                                                                                                                                 |
| EPI_ISL_709958                                                                                                                                                                                                                                                                                                                                                                                                                                                                                                                                                                                                                                                                                                                                                                                                                                                                                                                                                                                                                                                                                                                                                                                                                                                                                                 | Respiratory Virus Unit, National Infection Service, Public Health England                                        | COVID-19 Genomics UK (COG-UK) Consortium                                                  | PHE Covid Sequencing Team                                                                                                                                                                                                                       |
| EPI_ISL_709959, EPI_ISL_709960, EPI_ISL_709961, EPI_ISL_709962, EPI_ISL_709963, EPI_ISL_709964, EPI_ISL_709965, EPI_ISL_709966, EPI_ISL_709967, EPI_ISL_709968, EPI_ISL_709969, EPI_ISL_709970, EPI_ISL_709971, EPI_ISL_709972, EPI_ISL_709973, EPI_ISL_709974, EPI_ISL_709975, EPI_ISL_709976, EPI_ISL_709977, EPI_ISL_709978, EPI_ISL_709979, EPI_ISL_709980, EPI_ISL_709981, EPI_ISL_709982, EPI_ISL_709983, EPI_ISL_709984, EPI_ISL_709985, EPI_ISL_709986, EPI_ISL_709987, EPI_ISL_709988, EPI_ISL_709989, EPI_ISL_709990, EPI_ISL_709991, EPI_ISL_709992, EPI_ISL_709993, EPI_ISL_709994, EPI_ISL_709995, EPI_ISL_709996, EPI_ISL_709997, EPI_ISL_709998, EPI_ISL_709999, EPI_ISL_710000, EPI_ISL_710001, EPI_ISL_710002, EPI_ISL_710003, EPI_ISL_710004, EPI_ISL_710005, EPI_ISL_710006, EPI_ISL_710007, EPI_ISL_710008, EPI_ISL_710009, EPI_ISL_710010, EPI_ISL_710011, EPI_ISL_710012, EPI_ISL_710013, EPI_ISL_710014, EPI_ISL_710015, EPI_ISL_710016, EPI_ISL_710017, EPI_ISL_710018, EPI_ISL_710019, EPI_ISL_710020, EPI_ISL_710021, EPI_ISL_710022, EPI_ISL_710023, EPI_ISL_710024, EPI_ISL_710025, EPI_ISL_710026, EPI_ISL_710027, EPI_ISL_710028, EPI_ISL_710029, EPI_ISL_710030, EPI_ISL_710031, EPI_ISL_710032, EPI_ISL_710033                                                                 | see above                                                                                                        | see above                                                                                 |                                                                                                                                                                                                                                                 |
| EPI_ISL_710099, EPI_ISL_710100, EPI_ISL_710101, EPI_ISL_710102, EPI_ISL_710103, EPI_ISL_710104, EPI_ISL_710105, EPI_ISL_710106, EPI_ISL_710107, EPI_ISL_710108, EPI_ISL_710109, EPI_ISL_710110, EPI_ISL_710111, EPI_ISL_710112, EPI_ISL_710113, EPI_ISL_710114, EPI_ISL_710115, EPI_ISL_710116, EPI_ISL_710117, EPI_ISL_710118, EPI_ISL_710119, EPI_ISL_710120, EPI_ISL_710121, EPI_ISL_710122, EPI_ISL_710123, EPI_ISL_710124, EPI_ISL_710125, EPI_ISL_710126, EPI_ISL_710127, EPI_ISL_710128, EPI_ISL_710129, EPI_ISL_710130, EPI_ISL_710131, EPI_ISL_710132, EPI_ISL_710133, EPI_ISL_710134, EPI_ISL_710135, EPI_ISL_710136, EPI_ISL_710137, EPI_ISL_710138, EPI_ISL_710139, EPI_ISL_710140, EPI_ISL_710141, EPI_ISL_710142, EPI_ISL_710143, EPI_ISL_710144, EPI_ISL_710145, EPI_ISL_710146, EPI_ISL_710147, EPI_ISL_710148, EPI_ISL_710149, EPI_ISL_710150, EPI_ISL_710151, EPI_ISL_710152, EPI_ISL_710153, EPI_ISL_710154, EPI_ISL_710155, EPI_ISL_710156, EPI_ISL_710157, EPI_ISL_710158, EPI_ISL_710159, EPI_ISL_710160, EPI_ISL_710161, EPI_ISL_710162, EPI_ISL_710163, EPI_ISL_710164, EPI_ISL_710165, EPI_ISL_710166, EPI_ISL_710167, EPI_ISL_710168, EPI_ISL_710169, EPI_ISL_710170, EPI_ISL_710171, EPI_ISL_710172, EPI_ISL_710173, EPI_ISL_710174, EPI_ISL_710175, EPI_ISL_710176, EPI_ISL_710177 | see above                                                                                                        | see above                                                                                 | see above                                                                                                                                                                                                                                       |
| EPI_ISL_710514, EPI_ISL_710515, EPI_ISL_710516, EPI_ISL_710517, EPI_ISL_710518, EPI_ISL_710519, EPI_ISL_710520, EPI_ISL_710521, EPI_ISL_710522, EPI_ISL_710523, EPI_ISL_710524, EPI_ISL_710525, EPI_ISL_710526, EPI_ISL_710527, EPI_ISL_710528, EPI_ISL_710529, EPI_ISL_710530, EPI_ISL_710531                                                                                                                                                                                                                                                                                                                                                                                                                                                                                                                                                                                                                                                                                                                                                                                                                                                                                                                                                                                                                 | see above                                                                                                        | see above                                                                                 | see above                                                                                                                                                                                                                                       |
| EPI_ISL_710535, EPI_ISL_710536                                                                                                                                                                                                                                                                                                                                                                                                                                                                                                                                                                                                                                                                                                                                                                                                                                                                                                                                                                                                                                                                                                                                                                                                                                                                                 | Microbiology, Department of Pathology, St. Bernard's Hospital, Gibraltar Health Authority                        | Respiratory Virus Unit, National Infection Service, Public Health England                 | PHE Covid Sequencing Team, Dr Nicholas Cortes (Gibraltar), Charlotte Gillborn-Jones (Gibraltar)                                                                                                                                                 |
| EPI_ISL_717714, EPI_ISL_717715, EPI_ISL_717716, EPI_ISL_717717                                                                                                                                                                                                                                                                                                                                                                                                                                                                                                                                                                                                                                                                                                                                                                                                                                                                                                                                                                                                                                                                                                                                                                                                                                                 | Animal Health Centre, British Columbia Ministry of Agriculture                                                   | National Centre for Foreign Animal Disease, Canadian Food Inspection Agency               | Oliver Lung, Asma Sultana, Peter Kruczkiewicz, Tomy Joseph, Brad Pickering                                                                                                                                                                      |
| EPI_ISL_717977                                                                                                                                                                                                                                                                                                                                                                                                                                                                                                                                                                                                                                                                                                                                                                                                                                                                                                                                                                                                                                                                                                                                                                                                                                                                                                 | Institute for Virology, University Hospital Essen                                                                | Center of Medical Microbiology, Virology, and Hospital Hygiene, University of Duesseldorf | Olympia E. Anastasiou, Ulf Dittmer, Maximilian Damagnez, Alexander Dilthey, Torsten Houwaart, Lisanna Hülse, Malte Kohns Vasconcelos, Nadine Lübke, Jessica Nicolai, Klaus Pfeffer, Daniel Strelow, Jörg Timm, Andreas Walker, Tobias Wienemann |
| EPI_ISL_722851                                                                                                                                                                                                                                                                                                                                                                                                                                                                                                                                                                                                                                                                                                                                                                                                                                                                                                                                                                                                                                                                                                                                                                                                                                                                                                 | I.R.C.C.S. "S. De Bellis" - Ente Ospedaliero                                                                     | Istituto Zooprofilattico Sperimentale della Puglia e della Basilicata                     | Parisi A., Bianco A., Capozzi L., Del Sambro L., Lippolis A., Notarnicola M., Manzulli V., Rondinone V., Pace L.                                                                                                                                |
| EPI_ISL_722852                                                                                                                                                                                                                                                                                                                                                                                                                                                                                                                                                                                                                                                                                                                                                                                                                                                                                                                                                                                                                                                                                                                                                                                                                                                                                                 | I.R.C.C.S. "S. De Bellis" - Ente Ospedaliero                                                                     | Istituto Zooprofilattico Sperimentale della Puglia e della Basilicata                     | Parisi A., Bianco A., Capozzi L., Del Sambro L., Lippolis A., Notarnicola M., Cipolletta D., Galante D.                                                                                                                                         |
| EPI_ISL_722853                                                                                                                                                                                                                                                                                                                                                                                                                                                                                                                                                                                                                                                                                                                                                                                                                                                                                                                                                                                                                                                                                                                                                                                                                                                                                                 | I.R.C.C.S. "S. De Bellis" - Ente Ospedaliero                                                                     | Istituto Zooprofilattico Sperimentale della Puglia e della Basilicata                     | Parisi A., Bianco A., Capozzi L., Del Sambro L., Lippolis A., Notarnicola M., Manzulli V., Rondinone V., Pace L.                                                                                                                                |
| EPI_ISL_722854                                                                                                                                                                                                                                                                                                                                                                                                                                                                                                                                                                                                                                                                                                                                                                                                                                                                                                                                                                                                                                                                                                                                                                                                                                                                                                 | I.R.C.C.S. "S. De Bellis" - Ente Ospedaliero                                                                     | Istituto Zooprofilattico Sperimentale della Puglia e della Basilicata                     | Parisi A., Bianco A., Capozzi L., Del Sambro L., Lippolis A., Notarnicola M., Cipolletta D., Galante D.                                                                                                                                         |
| EPI_ISL_722855, EPI_ISL_722856, EPI_ISL_722857, EPI_ISL_722858                                                                                                                                                                                                                                                                                                                                                                                                                                                                                                                                                                                                                                                                                                                                                                                                                                                                                                                                                                                                                                                                                                                                                                                                                                                 | Dipartimento di Scienze Biomediche e Oncologia Umana - Azienda Ospedaliero Universitaria Consorziale Policlinico | Istituto Zooprofilattico Sperimentale della Puglia e della Basilicata                     | Parisi A., Bianco A., Capozzi L., Del Sambro L., Chironna M., Loconsole D.                                                                                                                                                                      |
| EPI_ISL_722859, EPI_ISL_722860                                                                                                                                                                                                                                                                                                                                                                                                                                                                                                                                                                                                                                                                                                                                                                                                                                                                                                                                                                                                                                                                                                                                                                                                                                                                                 | I.R.C.C.S. "S. De Bellis" - Ente Ospedaliero                                                                     | Istituto Zooprofilattico Sperimentale della Puglia e della Basilicata                     | Parisi A., Bianco A., Capozzi L., Del Sambro L., Lippolis A., Notarnicola M., Manzulli V., Rondinone V., Pace L.                                                                                                                                |
| EPI_ISL_722861                                                                                                                                                                                                                                                                                                                                                                                                                                                                                                                                                                                                                                                                                                                                                                                                                                                                                                                                                                                                                                                                                                                                                                                                                                                                                                 | I.R.C.C.S. "S. De Bellis" - Ente Ospedaliero                                                                     | Istituto Zooprofilattico Sperimentale della Puglia e della Basilicata                     | Parisi A., Bianco A., Capozzi L., Del Sambro L., Lippolis A., Notarnicola M., Cipolletta D., Galante D.                                                                                                                                         |
| EPI_ISL_722862                                                                                                                                                                                                                                                                                                                                                                                                                                                                                                                                                                                                                                                                                                                                                                                                                                                                                                                                                                                                                                                                                                                                                                                                                                                                                                 | I.R.C.C.S. "S. De Bellis" - Ente Ospedaliero                                                                     | Istituto Zooprofilattico Sperimentale della Puglia e della Basilicata                     | Parisi A., Bianco A., Capozzi L., Del Sambro L., Lippolis A., Notarnicola M., Manzulli V., Rondinone V., Pace L.                                                                                                                                |
| EPI_ISL_722863                                                                                                                                                                                                                                                                                                                                                                                                                                                                                                                                                                                                                                                                                                                                                                                                                                                                                                                                                                                                                                                                                                                                                                                                                                                                                                 | I.R.C.C.S. "S. De Bellis" - Ente Ospedaliero                                                                     | Istituto Zooprofilattico Sperimentale della Puglia e della Basilicata                     | Parisi A., Bianco A., Capozzi L., Del Sambro L., Lippolis A., Notarnicola M., Cipolletta D., Galante D.                                                                                                                                         |
| EPI_ISL_722864, EPI_ISL_722865                                                                                                                                                                                                                                                                                                                                                                                                                                                                                                                                                                                                                                                                                                                                                                                                                                                                                                                                                                                                                                                                                                                                                                                                                                                                                 | I.R.C.C.S. "S. De Bellis" - Ente Ospedaliero                                                                     | Istituto Zooprofilattico Sperimentale della Puglia e della Basilicata                     | Parisi A., Bianco A., Capozzi L., Del Sambro L., Lippolis A., Notarnicola M., Manzulli V., Rondinone V., Pace L.                                                                                                                                |
| EPI_ISL_722866                                                                                                                                                                                                                                                                                                                                                                                                                                                                                                                                                                                                                                                                                                                                                                                                                                                                                                                                                                                                                                                                                                                                                                                                                                                                                                 | I.R.C.C.S. "S. De Bellis" - Ente Ospedaliero                                                                     | Istituto Zooprofilattico Sperimentale della Puglia e della Basilicata                     | Parisi A., Bianco A., Capozzi L., Del Sambro L., Lippolis A., Notarnicola M., Cipolletta D., Galante D.                                                                                                                                         |
| EPI_ISL_722867, EPI_ISL_722868                                                                                                                                                                                                                                                                                                                                                                                                                                                                                                                                                                                                                                                                                                                                                                                                                                                                                                                                                                                                                                                                                                                                                                                                                                                                                 | I.R.C.C.S. "S. De Bellis" - Ente Ospedaliero                                                                     | Istituto Zooprofilattico Sperimentale della Puglia e della Basilicata                     | Parisi A., Bianco A., Capozzi L., Del Sambro L., Lippolis A., Notarnicola M., Manzulli V., Rondinone V., Pace L.                                                                                                                                |
| EPI_ISL_722869                                                                                                                                                                                                                                                                                                                                                                                                                                                                                                                                                                                                                                                                                                                                                                                                                                                                                                                                                                                                                                                                                                                                                                                                                                                                                                 | I.R.C.C.S. "S. De Bellis" - Ente Ospedaliero                                                                     | Istituto Zooprofilattico Sperimentale della Puglia e della Basilicata                     | Parisi A., Bianco A., Capozzi L., Del Sambro L., Lippolis A., Notarnicola M., Cipolletta D., Galante D.                                                                                                                                         |

|                                                                                                                                                                                                                                                                                                                                                                                                                                                                                                                                                                                                                                                                                                                                                                                                                                                                                                                                                                                                                                                                                                                                                                                                                                                                                                                                                                                                                                                                                                                                                                                                                                                                                                                                                                                                                                                                                                                                                                                                                                                                                                |                                                                                                                  |                                                                                                                            |                                                                                                                                                                                                                                           |
|------------------------------------------------------------------------------------------------------------------------------------------------------------------------------------------------------------------------------------------------------------------------------------------------------------------------------------------------------------------------------------------------------------------------------------------------------------------------------------------------------------------------------------------------------------------------------------------------------------------------------------------------------------------------------------------------------------------------------------------------------------------------------------------------------------------------------------------------------------------------------------------------------------------------------------------------------------------------------------------------------------------------------------------------------------------------------------------------------------------------------------------------------------------------------------------------------------------------------------------------------------------------------------------------------------------------------------------------------------------------------------------------------------------------------------------------------------------------------------------------------------------------------------------------------------------------------------------------------------------------------------------------------------------------------------------------------------------------------------------------------------------------------------------------------------------------------------------------------------------------------------------------------------------------------------------------------------------------------------------------------------------------------------------------------------------------------------------------|------------------------------------------------------------------------------------------------------------------|----------------------------------------------------------------------------------------------------------------------------|-------------------------------------------------------------------------------------------------------------------------------------------------------------------------------------------------------------------------------------------|
| EPI_ISL_722870                                                                                                                                                                                                                                                                                                                                                                                                                                                                                                                                                                                                                                                                                                                                                                                                                                                                                                                                                                                                                                                                                                                                                                                                                                                                                                                                                                                                                                                                                                                                                                                                                                                                                                                                                                                                                                                                                                                                                                                                                                                                                 | I.R.C.C.S. "S. De Bellis" - Ente Ospedaliero                                                                     | Istituto Zooprofilattico Sperimentale della Puglia e della Basilicata                                                      | Parisi A., Bianco A., Capozzi L., Del Sambio L., Lippolis A., Notarnicola M., Manzulli V., Rondinone V., Pace L.                                                                                                                          |
| EPI_ISL_722871                                                                                                                                                                                                                                                                                                                                                                                                                                                                                                                                                                                                                                                                                                                                                                                                                                                                                                                                                                                                                                                                                                                                                                                                                                                                                                                                                                                                                                                                                                                                                                                                                                                                                                                                                                                                                                                                                                                                                                                                                                                                                 | I.R.C.C.S. "S. De Bellis" - Ente Ospedaliero                                                                     | Istituto Zooprofilattico Sperimentale della Puglia e della Basilicata                                                      | Parisi A., Bianco A., Capozzi L., Del Sambio L., Lippolis A., Notarnicola M., Cipolletta D., Galante D.                                                                                                                                   |
| EPI_ISL_722872                                                                                                                                                                                                                                                                                                                                                                                                                                                                                                                                                                                                                                                                                                                                                                                                                                                                                                                                                                                                                                                                                                                                                                                                                                                                                                                                                                                                                                                                                                                                                                                                                                                                                                                                                                                                                                                                                                                                                                                                                                                                                 | Dipartimento di Scienze Biomediche e Oncologia Umana - Azienda Ospedaliero Universitaria Consorziata Policlinico | Istituto Zooprofilattico Sperimentale della Puglia e della Basilicata                                                      | Parisi A., Bianco A., Capozzi L., Del Sambio L., Chironna M., Loconsole D.                                                                                                                                                                |
| EPI_ISL_722873, EPI_ISL_722874, EPI_ISL_722875, EPI_ISL_722876, EPI_ISL_722877, EPI_ISL_722878, EPI_ISL_722879, EPI_ISL_722880, EPI_ISL_722881, EPI_ISL_722882, EPI_ISL_722883, EPI_ISL_722884, EPI_ISL_722885, EPI_ISL_722886, EPI_ISL_722887, EPI_ISL_722888, EPI_ISL_722889, EPI_ISL_722890, EPI_ISL_722891, EPI_ISL_722892, EPI_ISL_722893, EPI_ISL_722894                                                                                                                                                                                                                                                                                                                                                                                                                                                                                                                                                                                                                                                                                                                                                                                                                                                                                                                                                                                                                                                                                                                                                                                                                                                                                                                                                                                                                                                                                                                                                                                                                                                                                                                                 |                                                                                                                  |                                                                                                                            |                                                                                                                                                                                                                                           |
| see above                                                                                                                                                                                                                                                                                                                                                                                                                                                                                                                                                                                                                                                                                                                                                                                                                                                                                                                                                                                                                                                                                                                                                                                                                                                                                                                                                                                                                                                                                                                                                                                                                                                                                                                                                                                                                                                                                                                                                                                                                                                                                      | Istituto Zooprofilattico Sperimentale della Puglia e della Basilicata                                            | Istituto Zooprofilattico Sperimentale della Puglia e della Basilicata                                                      | Parisi A., Bianco A., Capozzi L., Del Sambio L., Manzulli V., Rondinone V., Pace L., Cipolletta D., Galante D.                                                                                                                            |
| EPI_ISL_722895                                                                                                                                                                                                                                                                                                                                                                                                                                                                                                                                                                                                                                                                                                                                                                                                                                                                                                                                                                                                                                                                                                                                                                                                                                                                                                                                                                                                                                                                                                                                                                                                                                                                                                                                                                                                                                                                                                                                                                                                                                                                                 | I.R.C.C.S. "S. De Bellis" - Ente Ospedaliero                                                                     | Istituto Zooprofilattico Sperimentale della Puglia e della Basilicata                                                      | Parisi A., Bianco A., Capozzi L., Del Sambio L., Lippolis A., Notarnicola M., Cipolletta D., Galante D.                                                                                                                                   |
| EPI_ISL_722896, EPI_ISL_722897                                                                                                                                                                                                                                                                                                                                                                                                                                                                                                                                                                                                                                                                                                                                                                                                                                                                                                                                                                                                                                                                                                                                                                                                                                                                                                                                                                                                                                                                                                                                                                                                                                                                                                                                                                                                                                                                                                                                                                                                                                                                 | Dipartimento di Scienze Biomediche e Oncologia Umana - Azienda Ospedaliero Universitaria Consorziata Policlinico | Istituto Zooprofilattico Sperimentale della Puglia e della Basilicata                                                      | Parisi A., Bianco A., Capozzi L., Del Sambio L., Chironna M., Loconsole D.                                                                                                                                                                |
| EPI_ISL_722898                                                                                                                                                                                                                                                                                                                                                                                                                                                                                                                                                                                                                                                                                                                                                                                                                                                                                                                                                                                                                                                                                                                                                                                                                                                                                                                                                                                                                                                                                                                                                                                                                                                                                                                                                                                                                                                                                                                                                                                                                                                                                 | I.R.C.C.S. "S. De Bellis" - Ente Ospedaliero                                                                     | Istituto Zooprofilattico Sperimentale della Puglia e della Basilicata                                                      | Parisi A., Bianco A., Capozzi L., Del Sambio L., Lippolis A., Notarnicola M., Cipolletta D., Galante D.                                                                                                                                   |
| EPI_ISL_722899                                                                                                                                                                                                                                                                                                                                                                                                                                                                                                                                                                                                                                                                                                                                                                                                                                                                                                                                                                                                                                                                                                                                                                                                                                                                                                                                                                                                                                                                                                                                                                                                                                                                                                                                                                                                                                                                                                                                                                                                                                                                                 | Dipartimento di Scienze Biomediche e Oncologia Umana - Azienda Ospedaliero Universitaria Consorziata Policlinico | Istituto Zooprofilattico Sperimentale della Puglia e della Basilicata                                                      | Parisi A., Bianco A., Capozzi L., Del Sambio L., Chironna M., Loconsole D.                                                                                                                                                                |
| EPI_ISL_722900                                                                                                                                                                                                                                                                                                                                                                                                                                                                                                                                                                                                                                                                                                                                                                                                                                                                                                                                                                                                                                                                                                                                                                                                                                                                                                                                                                                                                                                                                                                                                                                                                                                                                                                                                                                                                                                                                                                                                                                                                                                                                 | I.R.C.C.S. "S. De Bellis" - Ente Ospedaliero                                                                     | Istituto Zooprofilattico Sperimentale della Puglia e della Basilicata                                                      | Parisi A., Bianco A., Capozzi L., Del Sambio L., Lippolis A., Notarnicola M., Cipolletta D., Galante D.                                                                                                                                   |
| EPI_ISL_722901, EPI_ISL_722902, EPI_ISL_722903, EPI_ISL_722904, EPI_ISL_722905, EPI_ISL_722906, EPI_ISL_722907, EPI_ISL_722908, EPI_ISL_722909, EPI_ISL_722910, EPI_ISL_722911                                                                                                                                                                                                                                                                                                                                                                                                                                                                                                                                                                                                                                                                                                                                                                                                                                                                                                                                                                                                                                                                                                                                                                                                                                                                                                                                                                                                                                                                                                                                                                                                                                                                                                                                                                                                                                                                                                                 |                                                                                                                  |                                                                                                                            |                                                                                                                                                                                                                                           |
| see above                                                                                                                                                                                                                                                                                                                                                                                                                                                                                                                                                                                                                                                                                                                                                                                                                                                                                                                                                                                                                                                                                                                                                                                                                                                                                                                                                                                                                                                                                                                                                                                                                                                                                                                                                                                                                                                                                                                                                                                                                                                                                      | Istituto Zooprofilattico Sperimentale della Puglia e della Basilicata                                            | Istituto Zooprofilattico Sperimentale della Puglia e della Basilicata                                                      | Parisi A., Bianco A., Capozzi L., Del Sambio L., Manzulli V., Rondinone V., Pace L., Cipolletta D., Galante D.                                                                                                                            |
| EPI_ISL_722912                                                                                                                                                                                                                                                                                                                                                                                                                                                                                                                                                                                                                                                                                                                                                                                                                                                                                                                                                                                                                                                                                                                                                                                                                                                                                                                                                                                                                                                                                                                                                                                                                                                                                                                                                                                                                                                                                                                                                                                                                                                                                 | Dipartimento di Scienze Biomediche e Oncologia Umana - Azienda Ospedaliero Universitaria Consorziata Policlinico | Istituto Zooprofilattico Sperimentale della Puglia e della Basilicata                                                      | Parisi A., Bianco A., Capozzi L., Del Sambio L., Chironna M., Loconsole D.                                                                                                                                                                |
| EPI_ISL_722913, EPI_ISL_722914, EPI_ISL_722915, EPI_ISL_722916, EPI_ISL_722917, EPI_ISL_722918, EPI_ISL_722919, EPI_ISL_722920, EPI_ISL_722921, EPI_ISL_722922, EPI_ISL_722923, EPI_ISL_722924, EPI_ISL_722925                                                                                                                                                                                                                                                                                                                                                                                                                                                                                                                                                                                                                                                                                                                                                                                                                                                                                                                                                                                                                                                                                                                                                                                                                                                                                                                                                                                                                                                                                                                                                                                                                                                                                                                                                                                                                                                                                 |                                                                                                                  |                                                                                                                            |                                                                                                                                                                                                                                           |
| see above                                                                                                                                                                                                                                                                                                                                                                                                                                                                                                                                                                                                                                                                                                                                                                                                                                                                                                                                                                                                                                                                                                                                                                                                                                                                                                                                                                                                                                                                                                                                                                                                                                                                                                                                                                                                                                                                                                                                                                                                                                                                                      | Istituto Zooprofilattico Sperimentale della Puglia e della Basilicata                                            | Istituto Zooprofilattico Sperimentale della Puglia e della Basilicata                                                      | Parisi A., Bianco A., Capozzi L., Del Sambio L., Manzulli V., Rondinone V., Pace L., Cipolletta D., Galante D.                                                                                                                            |
| EPI_ISL_722967, EPI_ISL_722968, EPI_ISL_722969, EPI_ISL_722970, EPI_ISL_722971, EPI_ISL_722972, EPI_ISL_722973, EPI_ISL_722974, EPI_ISL_722975, EPI_ISL_722976, EPI_ISL_722977, EPI_ISL_722978, EPI_ISL_722979, EPI_ISL_722980, EPI_ISL_722981, EPI_ISL_722982, EPI_ISL_722983, EPI_ISL_722984, EPI_ISL_722985, EPI_ISL_722986, EPI_ISL_722987, EPI_ISL_722988, EPI_ISL_722989, EPI_ISL_722990, EPI_ISL_722991, EPI_ISL_722992, EPI_ISL_722993, EPI_ISL_722994, EPI_ISL_722995, EPI_ISL_722996, EPI_ISL_722997, EPI_ISL_722998, EPI_ISL_722999, EPI_ISL_730000, EPI_ISL_730001, EPI_ISL_730002, EPI_ISL_730003, EPI_ISL_730004, EPI_ISL_730005, EPI_ISL_730006, EPI_ISL_730007, EPI_ISL_730008, EPI_ISL_730009, EPI_ISL_730010, EPI_ISL_730011, EPI_ISL_730012, EPI_ISL_730013, EPI_ISL_730014, EPI_ISL_730015, EPI_ISL_730016, EPI_ISL_730017, EPI_ISL_730018, EPI_ISL_730019, EPI_ISL_730020, EPI_ISL_730021, EPI_ISL_730022, EPI_ISL_730023, EPI_ISL_730024, EPI_ISL_730025, EPI_ISL_730026, EPI_ISL_730027, EPI_ISL_730028, EPI_ISL_730029, EPI_ISL_730030, EPI_ISL_730031, EPI_ISL_730032, EPI_ISL_730033, EPI_ISL_730034, EPI_ISL_730035, EPI_ISL_730036, EPI_ISL_730037, EPI_ISL_730038, EPI_ISL_730039, EPI_ISL_730040, EPI_ISL_730041, EPI_ISL_730042, EPI_ISL_730043, EPI_ISL_730044, EPI_ISL_728343                                                                                                                                                                                                                                                                                                                                                                                                                                                                                                                                                                                                                                                                                                                                                                                 |                                                                                                                  |                                                                                                                            |                                                                                                                                                                                                                                           |
| see above                                                                                                                                                                                                                                                                                                                                                                                                                                                                                                                                                                                                                                                                                                                                                                                                                                                                                                                                                                                                                                                                                                                                                                                                                                                                                                                                                                                                                                                                                                                                                                                                                                                                                                                                                                                                                                                                                                                                                                                                                                                                                      | Respiratory Virus Unit, National Infection Service, Public Health England                                        | COVID-19 Genomics UK (COG-UK) Consortium                                                                                   | PHE Covid Sequencing Team                                                                                                                                                                                                                 |
| EPI_ISL_729794, EPI_ISL_729795, EPI_ISL_729796, EPI_ISL_729797, EPI_ISL_729798, EPI_ISL_729799, EPI_ISL_729800, EPI_ISL_729801, EPI_ISL_729802, EPI_ISL_729803, EPI_ISL_729804, EPI_ISL_729805, EPI_ISL_729806, EPI_ISL_729807, EPI_ISL_729808, EPI_ISL_729809, EPI_ISL_729810, EPI_ISL_729811, EPI_ISL_729812, EPI_ISL_729813, EPI_ISL_729814, EPI_ISL_729815, EPI_ISL_729816, EPI_ISL_729817, EPI_ISL_729818, EPI_ISL_729819, EPI_ISL_729820, EPI_ISL_729821, EPI_ISL_729822, EPI_ISL_729823, EPI_ISL_729824, EPI_ISL_729825, EPI_ISL_729826, EPI_ISL_729827, EPI_ISL_729828, EPI_ISL_729829, EPI_ISL_729830, EPI_ISL_729831, EPI_ISL_729832, EPI_ISL_729833, EPI_ISL_729834, EPI_ISL_729835, EPI_ISL_729836, EPI_ISL_729837, EPI_ISL_729838, EPI_ISL_729839, EPI_ISL_729840, EPI_ISL_729841, EPI_ISL_729842, EPI_ISL_729843, EPI_ISL_729844, EPI_ISL_729845, EPI_ISL_729846, EPI_ISL_729847, EPI_ISL_729848, EPI_ISL_729849, EPI_ISL_729850, EPI_ISL_729851, EPI_ISL_729852, EPI_ISL_729853, EPI_ISL_729854, EPI_ISL_729855, EPI_ISL_729856, EPI_ISL_729857, EPI_ISL_729858, EPI_ISL_729859, EPI_ISL_729860, EPI_ISL_729861                                                                                                                                                                                                                                                                                                                                                                                                                                                                                                                                                                                                                                                                                                                                                                                                                                                                                                                                                                 |                                                                                                                  |                                                                                                                            |                                                                                                                                                                                                                                           |
| see above                                                                                                                                                                                                                                                                                                                                                                                                                                                                                                                                                                                                                                                                                                                                                                                                                                                                                                                                                                                                                                                                                                                                                                                                                                                                                                                                                                                                                                                                                                                                                                                                                                                                                                                                                                                                                                                                                                                                                                                                                                                                                      | Laboratório Central de Saúde Pública do Estado do Rio Grande do Sul (LACEN-RS)                                   | Laboratory of Respiratory Viruses and Measles, Oswaldo Cruz Institute, FIOCRUZ                                             | Paola Resende, Luciana Appolinario, Fernando Motta, Anna Carolina Paixão, Ana Carolina Mendonça, Tatiana Schaffer Gregianini, Marilda Tereza Mar da Rosa, Marilda Siqueira on behalf of the Fiocruz COVID-19 Genomic Surveillance Network |
| EPI_ISL_729862, EPI_ISL_729863, EPI_ISL_729864, EPI_ISL_729865, EPI_ISL_729866, EPI_ISL_729867, EPI_ISL_729868                                                                                                                                                                                                                                                                                                                                                                                                                                                                                                                                                                                                                                                                                                                                                                                                                                                                                                                                                                                                                                                                                                                                                                                                                                                                                                                                                                                                                                                                                                                                                                                                                                                                                                                                                                                                                                                                                                                                                                                 | Laboratorio de Referencia Nacional de Virus Respiratorios, Instituto Nacional de Salud Peru                      | Laboratorio de Genómica Microbiana, Universidad Peruana Cayetano Heredia                                                   | Pablo Tsukayama, Alejandra Dávila-Barclay, Luis González, Guillermo Salvatierra, Pedro E. Romero, Brenda Ayzanoa, Janet Huancachoque, Pool Marcos, Marco Galarza, Priscila Lope, Nancy Rojas                                              |
| EPI_ISL_729869, EPI_ISL_729870, EPI_ISL_729871                                                                                                                                                                                                                                                                                                                                                                                                                                                                                                                                                                                                                                                                                                                                                                                                                                                                                                                                                                                                                                                                                                                                                                                                                                                                                                                                                                                                                                                                                                                                                                                                                                                                                                                                                                                                                                                                                                                                                                                                                                                 | Instituto de Medicina Tropical, Universidad Nacional Toribio Rodríguez de Mendoza de Amazonas                    | Laboratorio de Genómica Microbiana, Universidad Peruana Cayetano Heredia                                                   | Pablo Tsukayama, Alejandra Dávila-Barclay, Luis González, Pedro E. Romero, Brenda Ayzanoa, Janet Huancachoque, Pool Marcos, Stella Chenet, Rafael Tapia, Cecilia Pajuelo, Carla Montenegro                                                |
| EPI_ISL_729872, EPI_ISL_729873, EPI_ISL_729874, EPI_ISL_729875, EPI_ISL_729876, EPI_ISL_729877, EPI_ISL_729878, EPI_ISL_729879, EPI_ISL_729880, EPI_ISL_729881, EPI_ISL_729882, EPI_ISL_729883, EPI_ISL_729884, EPI_ISL_729885, EPI_ISL_729886, EPI_ISL_729887, EPI_ISL_729888, EPI_ISL_729889, EPI_ISL_729890, EPI_ISL_729891, EPI_ISL_729892, EPI_ISL_729893, EPI_ISL_729894, EPI_ISL_729895, EPI_ISL_729896, EPI_ISL_729897, EPI_ISL_729898, EPI_ISL_729899, EPI_ISL_729900, EPI_ISL_729901                                                                                                                                                                                                                                                                                                                                                                                                                                                                                                                                                                                                                                                                                                                                                                                                                                                                                                                                                                                                                                                                                                                                                                                                                                                                                                                                                                                                                                                                                                                                                                                                 |                                                                                                                  |                                                                                                                            |                                                                                                                                                                                                                                           |
| see above                                                                                                                                                                                                                                                                                                                                                                                                                                                                                                                                                                                                                                                                                                                                                                                                                                                                                                                                                                                                                                                                                                                                                                                                                                                                                                                                                                                                                                                                                                                                                                                                                                                                                                                                                                                                                                                                                                                                                                                                                                                                                      | Laboratorio de Referencia Nacional de Virus Respiratorios, Instituto Nacional de Salud Peru                      | Laboratorio de Genómica Microbiana, Universidad Peruana Cayetano Heredia                                                   | Pablo Tsukayama, Alejandra Dávila-Barclay, Luis González, Guillermo Salvatierra, Pedro E. Romero, Brenda Ayzanoa, Janet Huancachoque, Pool Marcos, Marco Galarza, Priscila Lope, Nancy Rojas                                              |
| EPI_ISL_729902, EPI_ISL_729903, EPI_ISL_729904, EPI_ISL_729905, EPI_ISL_729906, EPI_ISL_729907, EPI_ISL_729908, EPI_ISL_729909, EPI_ISL_729910, EPI_ISL_729911, EPI_ISL_729912, EPI_ISL_729913, EPI_ISL_729914, EPI_ISL_729915, EPI_ISL_729916, EPI_ISL_729917, EPI_ISL_729918, EPI_ISL_729919                                                                                                                                                                                                                                                                                                                                                                                                                                                                                                                                                                                                                                                                                                                                                                                                                                                                                                                                                                                                                                                                                                                                                                                                                                                                                                                                                                                                                                                                                                                                                                                                                                                                                                                                                                                                 |                                                                                                                  |                                                                                                                            |                                                                                                                                                                                                                                           |
| see above                                                                                                                                                                                                                                                                                                                                                                                                                                                                                                                                                                                                                                                                                                                                                                                                                                                                                                                                                                                                                                                                                                                                                                                                                                                                                                                                                                                                                                                                                                                                                                                                                                                                                                                                                                                                                                                                                                                                                                                                                                                                                      | Instituto de Medicina Tropical, Universidad Nacional Toribio Rodríguez de Mendoza de Amazonas                    | Laboratorio de Genómica Microbiana, Universidad Peruana Cayetano Heredia                                                   | Pablo Tsukayama, Alejandra Dávila-Barclay, Luis González, Pedro E. Romero, Brenda Ayzanoa, Janet Huancachoque, Pool Marcos, Stella Chenet, Rafael Tapia, Cecilia Pajuelo, Carla Montenegro                                                |
| EPI_ISL_729920, EPI_ISL_729921, EPI_ISL_729922, EPI_ISL_729923, EPI_ISL_729924, EPI_ISL_729925, EPI_ISL_729926, EPI_ISL_729927, EPI_ISL_729928, EPI_ISL_729929, EPI_ISL_729930, EPI_ISL_729931, EPI_ISL_729932, EPI_ISL_729933, EPI_ISL_729934, EPI_ISL_729935, EPI_ISL_729936, EPI_ISL_729937, EPI_ISL_729938, EPI_ISL_729939, EPI_ISL_729940, EPI_ISL_729941, EPI_ISL_729942, EPI_ISL_729943, EPI_ISL_729944, EPI_ISL_729945, EPI_ISL_729946, EPI_ISL_729947, EPI_ISL_729948, EPI_ISL_729949, EPI_ISL_729950, EPI_ISL_729951, EPI_ISL_729952, EPI_ISL_729953, EPI_ISL_729954, EPI_ISL_729955, EPI_ISL_729956, EPI_ISL_729957, EPI_ISL_729958, EPI_ISL_729959, EPI_ISL_729960, EPI_ISL_729961, EPI_ISL_729962, EPI_ISL_729963, EPI_ISL_729964, EPI_ISL_729965, EPI_ISL_729966, EPI_ISL_729967, EPI_ISL_729968, EPI_ISL_729969, EPI_ISL_729970, EPI_ISL_729971, EPI_ISL_729972, EPI_ISL_729973, EPI_ISL_729974, EPI_ISL_729975, EPI_ISL_729976, EPI_ISL_729977, EPI_ISL_729978, EPI_ISL_729979, EPI_ISL_729980, EPI_ISL_729981, EPI_ISL_729982, EPI_ISL_729983, EPI_ISL_729984, EPI_ISL_729985, EPI_ISL_729986, EPI_ISL_729987, EPI_ISL_729988, EPI_ISL_729989, EPI_ISL_729990, EPI_ISL_729991, EPI_ISL_729992, EPI_ISL_729993, EPI_ISL_729994, EPI_ISL_729995, EPI_ISL_729996, EPI_ISL_729997, EPI_ISL_729998, EPI_ISL_729999, EPI_ISL_730000, EPI_ISL_730001, EPI_ISL_730002, EPI_ISL_730003, EPI_ISL_730004, EPI_ISL_730005, EPI_ISL_730006, EPI_ISL_730007, EPI_ISL_730008, EPI_ISL_730009, EPI_ISL_730010, EPI_ISL_730011, EPI_ISL_730012, EPI_ISL_730013, EPI_ISL_730014, EPI_ISL_730015, EPI_ISL_730016, EPI_ISL_730017, EPI_ISL_730018, EPI_ISL_730019, EPI_ISL_730020, EPI_ISL_730021, EPI_ISL_730022, EPI_ISL_730023, EPI_ISL_730024, EPI_ISL_730025, EPI_ISL_730026, EPI_ISL_730027, EPI_ISL_730028, EPI_ISL_730029, EPI_ISL_730030, EPI_ISL_730031, EPI_ISL_730032, EPI_ISL_730033, EPI_ISL_730034, EPI_ISL_730035, EPI_ISL_730036, EPI_ISL_730037, EPI_ISL_730038, EPI_ISL_730039, EPI_ISL_730040, EPI_ISL_730041, EPI_ISL_730042, EPI_ISL_730043, EPI_ISL_730044, EPI_ISL_730045 |                                                                                                                  |                                                                                                                            |                                                                                                                                                                                                                                           |
| see above                                                                                                                                                                                                                                                                                                                                                                                                                                                                                                                                                                                                                                                                                                                                                                                                                                                                                                                                                                                                                                                                                                                                                                                                                                                                                                                                                                                                                                                                                                                                                                                                                                                                                                                                                                                                                                                                                                                                                                                                                                                                                      | Nigeria Centre for Disease Control (NCDC)                                                                        | African Centre of Excellence for Genomics of Infectious Diseases (ACEGID), Redeemer's University, Ede, Osun State, Nigeria | Oluniji P.E. et al                                                                                                                                                                                                                        |
| EPI_ISL_733580, EPI_ISL_733581, EPI_ISL_733582, EPI_ISL_733583, EPI_ISL_733584, EPI_ISL_733585, EPI_ISL_733586, EPI_ISL_733587, EPI_ISL_733588, EPI_ISL_733589, EPI_ISL_733590, EPI_ISL_733591, EPI_ISL_733592, EPI_ISL_733593                                                                                                                                                                                                                                                                                                                                                                                                                                                                                                                                                                                                                                                                                                                                                                                                                                                                                                                                                                                                                                                                                                                                                                                                                                                                                                                                                                                                                                                                                                                                                                                                                                                                                                                                                                                                                                                                 |                                                                                                                  |                                                                                                                            |                                                                                                                                                                                                                                           |
| see above                                                                                                                                                                                                                                                                                                                                                                                                                                                                                                                                                                                                                                                                                                                                                                                                                                                                                                                                                                                                                                                                                                                                                                                                                                                                                                                                                                                                                                                                                                                                                                                                                                                                                                                                                                                                                                                                                                                                                                                                                                                                                      | Respiratory Virus Unit, National Infection Service, Public Health England                                        | COVID-19 Genomics UK (COG-UK) Consortium                                                                                   | PHE Covid Sequencing Team                                                                                                                                                                                                                 |
| EPI_ISL_735374, EPI_ISL_735375, EPI_ISL_735376, EPI_ISL_735377, EPI_ISL_735378, EPI_ISL_735379, EPI_ISL_735380, EPI_ISL_735381, EPI_ISL_735382, EPI_ISL_735383                                                                                                                                                                                                                                                                                                                                                                                                                                                                                                                                                                                                                                                                                                                                                                                                                                                                                                                                                                                                                                                                                                                                                                                                                                                                                                                                                                                                                                                                                                                                                                                                                                                                                                                                                                                                                                                                                                                                 | Los Angeles County Public Health Laboratory                                                                      | Los Angeles County Public Health Laboratory                                                                                | P. Hemarajata et al.                                                                                                                                                                                                                      |





|                                                                                                                                                                                                                                                                                                                                                                                                                                                                                                                                                                                                                                                                                                                                                                                                                                                                                                                                                                                                                                                                                                                                                                                                                                                                                                                                                                                                                                                                                                                                                                                                |           |                                                                                                                       |                                                                                                                       |                                                                                                                                                                                                                                                                                                                       |
|------------------------------------------------------------------------------------------------------------------------------------------------------------------------------------------------------------------------------------------------------------------------------------------------------------------------------------------------------------------------------------------------------------------------------------------------------------------------------------------------------------------------------------------------------------------------------------------------------------------------------------------------------------------------------------------------------------------------------------------------------------------------------------------------------------------------------------------------------------------------------------------------------------------------------------------------------------------------------------------------------------------------------------------------------------------------------------------------------------------------------------------------------------------------------------------------------------------------------------------------------------------------------------------------------------------------------------------------------------------------------------------------------------------------------------------------------------------------------------------------------------------------------------------------------------------------------------------------|-----------|-----------------------------------------------------------------------------------------------------------------------|-----------------------------------------------------------------------------------------------------------------------|-----------------------------------------------------------------------------------------------------------------------------------------------------------------------------------------------------------------------------------------------------------------------------------------------------------------------|
| EPI_ISL_766557, EPI_ISL_766558, EPI_ISL_766559, EPI_ISL_766560, EPI_ISL_766561, EPI_ISL_766562, EPI_ISL_766563, EPI_ISL_766564, EPI_ISL_766565, EPI_ISL_766566, EPI_ISL_766567, EPI_ISL_766568, EPI_ISL_766842, EPI_ISL_766853, EPI_ISL_766859, EPI_ISL_766860, EPI_ISL_768800, EPI_ISL_768801, EPI_ISL_768802, EPI_ISL_768803, EPI_ISL_768804, EPI_ISL_768805, EPI_ISL_768806, EPI_ISL_768807, EPI_ISL_768808, EPI_ISL_768809, EPI_ISL_768810, EPI_ISL_768811, EPI_ISL_768812, EPI_ISL_768813, EPI_ISL_768814, EPI_ISL_768815, EPI_ISL_768816, EPI_ISL_769864, EPI_ISL_769865, EPI_ISL_769866, EPI_ISL_769867, EPI_ISL_769868, EPI_ISL_769869, EPI_ISL_769870                                                                                                                                                                                                                                                                                                                                                                                                                                                                                                                                                                                                                                                                                                                                                                                                                                                                                                                                 | see above | Respiratory Virus Unit, National Infection Service, Public Health England                                             | COVID-19 Genomics UK (COG-UK) Consortium                                                                              | PHE Covid Sequencing Team                                                                                                                                                                                                                                                                                             |
| EPI_ISL_769871, EPI_ISL_769872                                                                                                                                                                                                                                                                                                                                                                                                                                                                                                                                                                                                                                                                                                                                                                                                                                                                                                                                                                                                                                                                                                                                                                                                                                                                                                                                                                                                                                                                                                                                                                 |           | Microbiology, Department of Pathology, St. Bernard's Hospital, Gibraltar Health Authority                             | Respiratory Virus Unit, National Infection Service, Public Health England                                             | PHE Covid Sequencing Team, Dr Nicholas Cortes (Gibraltar), Charlotte Gillborn-Jones (Gibraltar)                                                                                                                                                                                                                       |
| EPI_ISL_769873, EPI_ISL_769874, EPI_ISL_769875, EPI_ISL_769876, EPI_ISL_769877, EPI_ISL_769878                                                                                                                                                                                                                                                                                                                                                                                                                                                                                                                                                                                                                                                                                                                                                                                                                                                                                                                                                                                                                                                                                                                                                                                                                                                                                                                                                                                                                                                                                                 |           | Respiratory Virus Unit, National Infection Service, Public Health England                                             | COVID-19 Genomics UK (COG-UK) Consortium                                                                              | PHE Covid Sequencing Team                                                                                                                                                                                                                                                                                             |
| EPI_ISL_770129                                                                                                                                                                                                                                                                                                                                                                                                                                                                                                                                                                                                                                                                                                                                                                                                                                                                                                                                                                                                                                                                                                                                                                                                                                                                                                                                                                                                                                                                                                                                                                                 |           | Instituto Nacional de Investigación y Tecnología Agraria y Alimentaria (INIA)/ Departamento de Mejora Genética Animal | Instituto Nacional de Investigación y Tecnología Agraria y Alimentaria (INIA)/ Departamento de Mejora Genética Animal | Oscar González-Recio, Mónica Gutiérrez-Rivas, Ramón Peiró-Pastor, Miguel Ángel Jiménez-Clavero, Jovita Fernández-Pinero and SeqCOVID-SPAIN consortium                                                                                                                                                                 |
| EPI_ISL_770437, EPI_ISL_770438, EPI_ISL_770439, EPI_ISL_770440, EPI_ISL_770441, EPI_ISL_770462, EPI_ISL_770463, EPI_ISL_770464, EPI_ISL_770465, EPI_ISL_770466, EPI_ISL_770467, EPI_ISL_770468, EPI_ISL_770469                                                                                                                                                                                                                                                                                                                                                                                                                                                                                                                                                                                                                                                                                                                                                                                                                                                                                                                                                                                                                                                                                                                                                                                                                                                                                                                                                                                 | see above | Respiratory Virus Unit, National Infection Service, Public Health England                                             | COVID-19 Genomics UK (COG-UK) Consortium                                                                              | PHE Covid Sequencing Team                                                                                                                                                                                                                                                                                             |
| EPI_ISL_780382, EPI_ISL_780383, EPI_ISL_780384, EPI_ISL_780385, EPI_ISL_780386, EPI_ISL_780387, EPI_ISL_780388, EPI_ISL_780389, EPI_ISL_780390, EPI_ISL_780391, EPI_ISL_780392, EPI_ISL_780393, EPI_ISL_780394, EPI_ISL_780395, EPI_ISL_780396, EPI_ISL_780397, EPI_ISL_780398, EPI_ISL_780399, EPI_ISL_780400, EPI_ISL_780401, EPI_ISL_780402, EPI_ISL_780403, EPI_ISL_780404, EPI_ISL_780405, EPI_ISL_780406, EPI_ISL_780407, EPI_ISL_780408, EPI_ISL_780409, EPI_ISL_780410, EPI_ISL_783850                                                                                                                                                                                                                                                                                                                                                                                                                                                                                                                                                                                                                                                                                                                                                                                                                                                                                                                                                                                                                                                                                                 | see above | Bermuda Government Molecular Diagnostics Laboratory (MDL)                                                             | Respiratory Virus Unit, National Infection Service, Public Health England                                             | PHE Covid Sequencing Team, Dr Carika Weldon (Bermuda), Dr Ayoola Oyinloye (Bermuda)                                                                                                                                                                                                                                   |
| EPI_ISL_791183, EPI_ISL_791184, EPI_ISL_791185, EPI_ISL_791186, EPI_ISL_791187, EPI_ISL_791188, EPI_ISL_791189, EPI_ISL_791190, EPI_ISL_791191, EPI_ISL_791192, EPI_ISL_791193, EPI_ISL_791194, EPI_ISL_791195, EPI_ISL_791196, EPI_ISL_791197, EPI_ISL_791198, EPI_ISL_791199, EPI_ISL_791200, EPI_ISL_791201, EPI_ISL_791202, EPI_ISL_791203, EPI_ISL_791204, EPI_ISL_791205, EPI_ISL_791206, EPI_ISL_791207, EPI_ISL_791208, EPI_ISL_791209, EPI_ISL_791210, EPI_ISL_791211, EPI_ISL_791212, EPI_ISL_791213, EPI_ISL_791214, EPI_ISL_791215, EPI_ISL_791216, EPI_ISL_791217, EPI_ISL_791218, EPI_ISL_791219, EPI_ISL_791220, EPI_ISL_791221, EPI_ISL_791222, EPI_ISL_791223, EPI_ISL_791224, EPI_ISL_791225, EPI_ISL_791226, EPI_ISL_791227, EPI_ISL_791228, EPI_ISL_791229, EPI_ISL_791230, EPI_ISL_791231, EPI_ISL_791232, EPI_ISL_791233, EPI_ISL_791234, EPI_ISL_791235, EPI_ISL_791236, EPI_ISL_791237, EPI_ISL_791238, EPI_ISL_791239, EPI_ISL_791240, EPI_ISL_791241, EPI_ISL_791242, EPI_ISL_791243, EPI_ISL_791244, EPI_ISL_791245, EPI_ISL_791246, EPI_ISL_791247, EPI_ISL_791248, EPI_ISL_791249, EPI_ISL_791250, EPI_ISL_791251, EPI_ISL_791252, EPI_ISL_791253, EPI_ISL_791254, EPI_ISL_791255, EPI_ISL_791256, EPI_ISL_791257, EPI_ISL_791258, EPI_ISL_791259, EPI_ISL_791260, EPI_ISL_791261, EPI_ISL_791262, EPI_ISL_791263, EPI_ISL_791264, EPI_ISL_791265, EPI_ISL_791266, EPI_ISL_791267, EPI_ISL_791268, EPI_ISL_791269, EPI_ISL_791270, EPI_ISL_791271, EPI_ISL_791272, EPI_ISL_791273, EPI_ISL_791274, EPI_ISL_791275, EPI_ISL_791276, EPI_ISL_791277, EPI_ISL_791278 | see above | Respiratory Virus Unit, National Infection Service, Public Health England                                             | COVID-19 Genomics UK (COG-UK) Consortium                                                                              | PHE Covid Sequencing Team                                                                                                                                                                                                                                                                                             |
| EPI_ISL_792561, EPI_ISL_792562, EPI_ISL_792563, EPI_ISL_792564, EPI_ISL_792565, EPI_ISL_792566, EPI_ISL_792567, EPI_ISL_792568, EPI_ISL_792569, EPI_ISL_792570, EPI_ISL_792571, EPI_ISL_792572, EPI_ISL_792573, EPI_ISL_792574, EPI_ISL_792575, EPI_ISL_792576, EPI_ISL_792577, EPI_ISL_792578, EPI_ISL_792579, EPI_ISL_792580, EPI_ISL_792581, EPI_ISL_792582, EPI_ISL_792583, EPI_ISL_792584, EPI_ISL_792585, EPI_ISL_792586, EPI_ISL_792587, EPI_ISL_792588, EPI_ISL_792589, EPI_ISL_792590, EPI_ISL_792591, EPI_ISL_792592, EPI_ISL_792593, EPI_ISL_792594, EPI_ISL_792595, EPI_ISL_792596, EPI_ISL_792597, EPI_ISL_792598, EPI_ISL_792599, EPI_ISL_792600, EPI_ISL_792601, EPI_ISL_792602, EPI_ISL_792603, EPI_ISL_792604, EPI_ISL_792605, EPI_ISL_792606, EPI_ISL_792607, EPI_ISL_792608, EPI_ISL_792609, EPI_ISL_792610, EPI_ISL_792611, EPI_ISL_792612, EPI_ISL_792613, EPI_ISL_792614, EPI_ISL_792615, EPI_ISL_792616, EPI_ISL_792617, EPI_ISL_792618, EPI_ISL_792619, EPI_ISL_792620, EPI_ISL_792621, EPI_ISL_792622, EPI_ISL_792623, EPI_ISL_792624, EPI_ISL_792625, EPI_ISL_792626, EPI_ISL_792627, EPI_ISL_792628, EPI_ISL_792629, EPI_ISL_792630, EPI_ISL_792631, EPI_ISL_792632, EPI_ISL_792633, EPI_ISL_792634, EPI_ISL_792635, EPI_ISL_792636, EPI_ISL_792637, EPI_ISL_792638                                                                                                                                                                                                                                                                                                 | see above | Laboratório Central de Saúde Pública do Estado da Paraíba (LACEN-PB)                                                  | Laboratory of Respiratory Viruses and Measles, Oswaldo Cruz Institute, FIOCRUZ                                        | Paola Resende, Luciana Appolinario, Fernando Motta, Anna Carolina Paixao, Ana Carolina Mendonca, João Felipe Bezerra, Romero Henrique Teixeira de Vasconcelos, Dalane Loudal Florentino Teixeira, Thiago Franco de Oliveira Carneiro, Marilda Siqueira on behalf of the Fiocruz COVID-19 Genomic Surveillance Network |
| EPI_ISL_792639, EPI_ISL_792640, EPI_ISL_792641, EPI_ISL_792642, EPI_ISL_792643, EPI_ISL_792644                                                                                                                                                                                                                                                                                                                                                                                                                                                                                                                                                                                                                                                                                                                                                                                                                                                                                                                                                                                                                                                                                                                                                                                                                                                                                                                                                                                                                                                                                                 |           | Laboratório Central de Saúde Pública do Estado de Alagoas (LACEN-AL)                                                  | Laboratory of Respiratory Viruses and Measles, Oswaldo Cruz Institute, FIOCRUZ                                        | Paola Resende, Luciana Appolinario, Fernando Motta, Anna Carolina Paixao, Ana Carolina Mendonca, Anderson Brandao Leite, Marilda Siqueira on behalf of the Fiocruz COVID-19 Genomic Surveillance Network                                                                                                              |
| EPI_ISL_792645, EPI_ISL_792646, EPI_ISL_792647, EPI_ISL_792648, EPI_ISL_792649, EPI_ISL_792650, EPI_ISL_792651, EPI_ISL_792652, EPI_ISL_792653, EPI_ISL_792654                                                                                                                                                                                                                                                                                                                                                                                                                                                                                                                                                                                                                                                                                                                                                                                                                                                                                                                                                                                                                                                                                                                                                                                                                                                                                                                                                                                                                                 |           | Laboratório Central de Saúde Pública do Estado do Paraná (LACEN-PR)                                                   | Laboratory of Respiratory Viruses and Measles, Oswaldo Cruz Institute, FIOCRUZ                                        | Paola Resende, Luciana Appolinario, Fernando Motta, Anna Carolina Paixao, Ana Carolina Mendonca, Maria do Carmo Debur, Irina Nastassja Riediger, Marilda Siqueira on behalf of the Fiocruz COVID-19 Genomic Surveillance Network                                                                                      |
| EPI_ISL_792655, EPI_ISL_792656, EPI_ISL_792657, EPI_ISL_792658, EPI_ISL_792659, EPI_ISL_792660, EPI_ISL_792661, EPI_ISL_792662, EPI_ISL_792663, EPI_ISL_792664, EPI_ISL_792665, EPI_ISL_792666, EPI_ISL_792667, EPI_ISL_792668, EPI_ISL_792669, EPI_ISL_792670, EPI_ISL_792671, EPI_ISL_792672, EPI_ISL_792673, EPI_ISL_792674, EPI_ISL_792675, EPI_ISL_792676, EPI_ISL_792677, EPI_ISL_792678                                                                                                                                                                                                                                                                                                                                                                                                                                                                                                                                                                                                                                                                                                                                                                                                                                                                                                                                                                                                                                                                                                                                                                                                 | see above | Los Angeles County PHL                                                                                                | Los Angeles County PHL                                                                                                | P. Hemarajata et al.                                                                                                                                                                                                                                                                                                  |
| EPI_ISL_792679                                                                                                                                                                                                                                                                                                                                                                                                                                                                                                                                                                                                                                                                                                                                                                                                                                                                                                                                                                                                                                                                                                                                                                                                                                                                                                                                                                                                                                                                                                                                                                                 |           | Olive View Medical Center                                                                                             | Los Angeles County PHL                                                                                                | P. Hemarajata et al.                                                                                                                                                                                                                                                                                                  |
| EPI_ISL_794635, EPI_ISL_794636, EPI_ISL_794637, EPI_ISL_794638, EPI_ISL_794639, EPI_ISL_794640                                                                                                                                                                                                                                                                                                                                                                                                                                                                                                                                                                                                                                                                                                                                                                                                                                                                                                                                                                                                                                                                                                                                                                                                                                                                                                                                                                                                                                                                                                 |           | USC Clinical Lab                                                                                                      | Los Angeles County PHL                                                                                                | P. Hemarajata et al.                                                                                                                                                                                                                                                                                                  |
| EPI_ISL_794641, EPI_ISL_794642, EPI_ISL_794643, EPI_ISL_794644, EPI_ISL_794645, EPI_ISL_794646, EPI_ISL_794647, EPI_ISL_794648                                                                                                                                                                                                                                                                                                                                                                                                                                                                                                                                                                                                                                                                                                                                                                                                                                                                                                                                                                                                                                                                                                                                                                                                                                                                                                                                                                                                                                                                 |           | UCLA Clinical Micro Lab                                                                                               | Los Angeles County PHL                                                                                                | P. Hemarajata et al.                                                                                                                                                                                                                                                                                                  |
| EPI_ISL_794669                                                                                                                                                                                                                                                                                                                                                                                                                                                                                                                                                                                                                                                                                                                                                                                                                                                                                                                                                                                                                                                                                                                                                                                                                                                                                                                                                                                                                                                                                                                                                                                 |           | USC Clinical Lab                                                                                                      | Los Angeles County PHL                                                                                                | P. Hemarajata et al.                                                                                                                                                                                                                                                                                                  |
| EPI_ISL_794670                                                                                                                                                                                                                                                                                                                                                                                                                                                                                                                                                                                                                                                                                                                                                                                                                                                                                                                                                                                                                                                                                                                                                                                                                                                                                                                                                                                                                                                                                                                                                                                 |           | UCLA Clinical Micro Lab                                                                                               | Los Angeles County PHL                                                                                                | P. Hemarajata et al.                                                                                                                                                                                                                                                                                                  |
| EPI_ISL_794672, EPI_ISL_794673, EPI_ISL_794674, EPI_ISL_794675, EPI_ISL_794676, EPI_ISL_794677, EPI_ISL_794678, EPI_ISL_794679, EPI_ISL_794680, EPI_ISL_794681, EPI_ISL_794682, EPI_ISL_794683, EPI_ISL_794684, EPI_ISL_794685, EPI_ISL_794686, EPI_ISL_794687, EPI_ISL_794688, EPI_ISL_794689, EPI_ISL_794690, EPI_ISL_794691, EPI_ISL_794692, EPI_ISL_794693, EPI_ISL_794694, EPI_ISL_794695, EPI_ISL_794696, EPI_ISL_794697, EPI_ISL_794700, EPI_ISL_794701, EPI_ISL_794702, EPI_ISL_794703, EPI_ISL_794705, EPI_ISL_794706, EPI_ISL_794707, EPI_ISL_794709, EPI_ISL_794711, EPI_ISL_794712, EPI_ISL_794713, EPI_ISL_794716, EPI_ISL_794717, EPI_ISL_794718, EPI_ISL_794721, EPI_ISL_794724, EPI_ISL_794727, EPI_ISL_794728, EPI_ISL_794729, EPI_ISL_794732, EPI_ISL_794734                                                                                                                                                                                                                                                                                                                                                                                                                                                                                                                                                                                                                                                                                                                                                                                                                 | see above | PathWest Laboratory Medicine WA                                                                                       | PathWest Laboratory Medicine WA Microbial Surveillance Unit                                                           | PathWest Laboratory Medicine WA Microbial Surveillance Unit                                                                                                                                                                                                                                                           |
| EPI_ISL_794745                                                                                                                                                                                                                                                                                                                                                                                                                                                                                                                                                                                                                                                                                                                                                                                                                                                                                                                                                                                                                                                                                                                                                                                                                                                                                                                                                                                                                                                                                                                                                                                 |           | Istituto Zooprofilattico Sperimentale della Puglia e della Basilicata                                                 | Istituto Zooprofilattico Sperimentale della Puglia e della Basilicata                                                 | Parisi A., Bianco A., Capozzi L., Del Sambio L., Manzulli V, Rondinone V., Pace L., Cipolletta D., Galante D.                                                                                                                                                                                                         |
| EPI_ISL_794746                                                                                                                                                                                                                                                                                                                                                                                                                                                                                                                                                                                                                                                                                                                                                                                                                                                                                                                                                                                                                                                                                                                                                                                                                                                                                                                                                                                                                                                                                                                                                                                 |           | SISP ASL BA AREA SUD                                                                                                  | Istituto Zooprofilattico Sperimentale della Puglia e della Basilicata                                                 | Parisi A., Bianco A., Capozzi L., Del Sambio L., Manzulli V, Rondinone V., Pace L., Cipolletta D., Galante D.                                                                                                                                                                                                         |
| EPI_ISL_794747                                                                                                                                                                                                                                                                                                                                                                                                                                                                                                                                                                                                                                                                                                                                                                                                                                                                                                                                                                                                                                                                                                                                                                                                                                                                                                                                                                                                                                                                                                                                                                                 |           | Ospedale Vito Fazzi                                                                                                   | Istituto Zooprofilattico Sperimentale della Puglia e della Basilicata                                                 | Parisi A., Bianco A., Capozzi L., Del Sambio L., Manzulli V, Rondinone V., Pace L., Cipolletta D., Galante D.                                                                                                                                                                                                         |
| EPI_ISL_794748                                                                                                                                                                                                                                                                                                                                                                                                                                                                                                                                                                                                                                                                                                                                                                                                                                                                                                                                                                                                                                                                                                                                                                                                                                                                                                                                                                                                                                                                                                                                                                                 |           | SISP ASL BA AREA SUD                                                                                                  | Istituto Zooprofilattico Sperimentale della Puglia e della Basilicata                                                 | Parisi A., Bianco A., Capozzi L., Del Sambio L., Manzulli V, Rondinone V., Pace L., Cipolletta D., Galante D.                                                                                                                                                                                                         |
| EPI_ISL_794749                                                                                                                                                                                                                                                                                                                                                                                                                                                                                                                                                                                                                                                                                                                                                                                                                                                                                                                                                                                                                                                                                                                                                                                                                                                                                                                                                                                                                                                                                                                                                                                 |           | Istituto Zooprofilattico Sperimentale della Puglia e della Basilicata                                                 | Istituto Zooprofilattico Sperimentale della Puglia e della Basilicata                                                 | Parisi A., Bianco A., Capozzi L., Del Sambio L., Manzulli V, Rondinone V., Pace L., Cipolletta D., Galante D.                                                                                                                                                                                                         |
| EPI_ISL_794750                                                                                                                                                                                                                                                                                                                                                                                                                                                                                                                                                                                                                                                                                                                                                                                                                                                                                                                                                                                                                                                                                                                                                                                                                                                                                                                                                                                                                                                                                                                                                                                 |           | Ospedale Santa Caterina Novella                                                                                       | Istituto Zooprofilattico Sperimentale della Puglia e della Basilicata                                                 | Parisi A., Bianco A., Capozzi L., Del Sambio L., Manzulli V, Rondinone V., Pace L., Cipolletta D., Galante D.                                                                                                                                                                                                         |
| EPI_ISL_794751                                                                                                                                                                                                                                                                                                                                                                                                                                                                                                                                                                                                                                                                                                                                                                                                                                                                                                                                                                                                                                                                                                                                                                                                                                                                                                                                                                                                                                                                                                                                                                                 |           | Ospedale Vito Fazzi                                                                                                   | Istituto Zooprofilattico Sperimentale della Puglia e della Basilicata                                                 | Parisi A., Bianco A., Capozzi L., Del Sambio L., Manzulli V, Rondinone V., Pace L., Cipolletta D., Galante D.                                                                                                                                                                                                         |





|                                                                                                                                                                                                                                                                                                                                                                                                                                                                                                                                                                                                                                                                                                                                                                                                                                                                                                                                                                                                                                                                                                                                                                                                                                                                                                                                                                                                                                                                                                                                                                                                                                                                                                                                                                                                                                                                                                                                                                                                                                                                                                                                                                                                                                                                                                                                                                                                                                                                                                                                                                                                                                                                                                                                                                                                                                                                                                                                                                                                                                                                                                                                                                                                                                                                                                                                                                                                                                                                                                                                                                                                                                                                                                                                                                                                                                                                                                                                                                                                                                                                                                                                                                                                                                                                                                                                                                                                                                                                |                                                                                                                                                               |                                                                                                  |                                                                                                                                                                                                                                                               |
|----------------------------------------------------------------------------------------------------------------------------------------------------------------------------------------------------------------------------------------------------------------------------------------------------------------------------------------------------------------------------------------------------------------------------------------------------------------------------------------------------------------------------------------------------------------------------------------------------------------------------------------------------------------------------------------------------------------------------------------------------------------------------------------------------------------------------------------------------------------------------------------------------------------------------------------------------------------------------------------------------------------------------------------------------------------------------------------------------------------------------------------------------------------------------------------------------------------------------------------------------------------------------------------------------------------------------------------------------------------------------------------------------------------------------------------------------------------------------------------------------------------------------------------------------------------------------------------------------------------------------------------------------------------------------------------------------------------------------------------------------------------------------------------------------------------------------------------------------------------------------------------------------------------------------------------------------------------------------------------------------------------------------------------------------------------------------------------------------------------------------------------------------------------------------------------------------------------------------------------------------------------------------------------------------------------------------------------------------------------------------------------------------------------------------------------------------------------------------------------------------------------------------------------------------------------------------------------------------------------------------------------------------------------------------------------------------------------------------------------------------------------------------------------------------------------------------------------------------------------------------------------------------------------------------------------------------------------------------------------------------------------------------------------------------------------------------------------------------------------------------------------------------------------------------------------------------------------------------------------------------------------------------------------------------------------------------------------------------------------------------------------------------------------------------------------------------------------------------------------------------------------------------------------------------------------------------------------------------------------------------------------------------------------------------------------------------------------------------------------------------------------------------------------------------------------------------------------------------------------------------------------------------------------------------------------------------------------------------------------------------------------------------------------------------------------------------------------------------------------------------------------------------------------------------------------------------------------------------------------------------------------------------------------------------------------------------------------------------------------------------------------------------------------------------------------------------------------|---------------------------------------------------------------------------------------------------------------------------------------------------------------|--------------------------------------------------------------------------------------------------|---------------------------------------------------------------------------------------------------------------------------------------------------------------------------------------------------------------------------------------------------------------|
| EPI_ISL_833490, EPI_ISL_833491                                                                                                                                                                                                                                                                                                                                                                                                                                                                                                                                                                                                                                                                                                                                                                                                                                                                                                                                                                                                                                                                                                                                                                                                                                                                                                                                                                                                                                                                                                                                                                                                                                                                                                                                                                                                                                                                                                                                                                                                                                                                                                                                                                                                                                                                                                                                                                                                                                                                                                                                                                                                                                                                                                                                                                                                                                                                                                                                                                                                                                                                                                                                                                                                                                                                                                                                                                                                                                                                                                                                                                                                                                                                                                                                                                                                                                                                                                                                                                                                                                                                                                                                                                                                                                                                                                                                                                                                                                 | MD Laboratories                                                                                                                                               | Los Angeles County PHL                                                                           | P. Hemarajata et al.                                                                                                                                                                                                                                          |
| EPI_ISL_836979, EPI_ISL_836980, EPI_ISL_836981, EPI_ISL_836982, EPI_ISL_836983, EPI_ISL_836984, EPI_ISL_836985, EPI_ISL_836986, EPI_ISL_836987, EPI_ISL_836988, EPI_ISL_836989, EPI_ISL_836990, EPI_ISL_836991, EPI_ISL_836992, EPI_ISL_836993, EPI_ISL_836994, EPI_ISL_836995, EPI_ISL_836996, EPI_ISL_836997, EPI_ISL_836998, EPI_ISL_836999, EPI_ISL_837000, EPI_ISL_837001, EPI_ISL_837002, EPI_ISL_837003, EPI_ISL_837004, EPI_ISL_837005, EPI_ISL_837006, EPI_ISL_837007, EPI_ISL_837008, EPI_ISL_837009, EPI_ISL_837010, EPI_ISL_837011, EPI_ISL_837012, EPI_ISL_837013, EPI_ISL_837014, EPI_ISL_837015, EPI_ISL_837016, EPI_ISL_837017, EPI_ISL_837018, EPI_ISL_837019, EPI_ISL_837020, EPI_ISL_837021, EPI_ISL_837022, EPI_ISL_837023, EPI_ISL_837024, EPI_ISL_837025, EPI_ISL_837026, EPI_ISL_837027, EPI_ISL_837028, EPI_ISL_837029, EPI_ISL_837030, EPI_ISL_837031, EPI_ISL_837032, EPI_ISL_837033, EPI_ISL_837034, EPI_ISL_837035, EPI_ISL_837036, EPI_ISL_837037, EPI_ISL_837038, EPI_ISL_837039, EPI_ISL_837040, EPI_ISL_837041, EPI_ISL_837042, EPI_ISL_837043, EPI_ISL_837044, EPI_ISL_837045, EPI_ISL_837046, EPI_ISL_837047, EPI_ISL_837048, EPI_ISL_837049, EPI_ISL_837050, EPI_ISL_837051, EPI_ISL_837052, EPI_ISL_837053, EPI_ISL_837054, EPI_ISL_837055, EPI_ISL_837056, EPI_ISL_837057, EPI_ISL_837058, EPI_ISL_837059, EPI_ISL_837060, EPI_ISL_837061, EPI_ISL_837062, EPI_ISL_837063, EPI_ISL_837064, EPI_ISL_837065, EPI_ISL_837066, EPI_ISL_837067, EPI_ISL_837068, EPI_ISL_837069, EPI_ISL_837070, EPI_ISL_837071, EPI_ISL_837072, EPI_ISL_837073, EPI_ISL_837074, EPI_ISL_837075, EPI_ISL_837076, EPI_ISL_837077, EPI_ISL_837078, EPI_ISL_837079, EPI_ISL_837080, EPI_ISL_837081, EPI_ISL_837082, EPI_ISL_837083, EPI_ISL_837084, EPI_ISL_837085, EPI_ISL_837086, EPI_ISL_837087, EPI_ISL_837088, EPI_ISL_837089, EPI_ISL_837090, EPI_ISL_837091, EPI_ISL_837092, EPI_ISL_837093, EPI_ISL_837094, EPI_ISL_837095, EPI_ISL_837096, EPI_ISL_837097, EPI_ISL_837098, EPI_ISL_837099, EPI_ISL_837100, EPI_ISL_837101, EPI_ISL_837102, EPI_ISL_837103, EPI_ISL_837104, EPI_ISL_837105, EPI_ISL_837106, EPI_ISL_837107, EPI_ISL_837108, EPI_ISL_837109, EPI_ISL_837110, EPI_ISL_837111, EPI_ISL_837112, EPI_ISL_837113, EPI_ISL_837114, EPI_ISL_837115, EPI_ISL_837116, EPI_ISL_837117, EPI_ISL_837118, EPI_ISL_837119, EPI_ISL_837120, EPI_ISL_837121, EPI_ISL_837122, EPI_ISL_837123, EPI_ISL_837124, EPI_ISL_837125, EPI_ISL_837126, EPI_ISL_837127, EPI_ISL_837128, EPI_ISL_837129, EPI_ISL_837130, EPI_ISL_837131, EPI_ISL_837132, EPI_ISL_837133, EPI_ISL_837134, EPI_ISL_837135, EPI_ISL_837136, EPI_ISL_837137, EPI_ISL_837138, EPI_ISL_837139, EPI_ISL_837140, EPI_ISL_837141, EPI_ISL_837142, EPI_ISL_837143, EPI_ISL_837144, EPI_ISL_837145, EPI_ISL_837146, EPI_ISL_837147, EPI_ISL_837148, EPI_ISL_837149, EPI_ISL_837150, EPI_ISL_837151, EPI_ISL_837152, EPI_ISL_837153, EPI_ISL_837154, EPI_ISL_837155, EPI_ISL_837156, EPI_ISL_837157, EPI_ISL_837158, EPI_ISL_837159, EPI_ISL_837160, EPI_ISL_837161, EPI_ISL_837162, EPI_ISL_837163, EPI_ISL_837164, EPI_ISL_837165, EPI_ISL_837166, EPI_ISL_837167, EPI_ISL_837168, EPI_ISL_837169, EPI_ISL_837170, EPI_ISL_837171, EPI_ISL_837172, EPI_ISL_837173, EPI_ISL_837174, EPI_ISL_837175, EPI_ISL_837176, EPI_ISL_837177, EPI_ISL_837178, EPI_ISL_837179, EPI_ISL_837180, EPI_ISL_837181, EPI_ISL_837182, EPI_ISL_837183, EPI_ISL_837184, EPI_ISL_837185, EPI_ISL_837186, EPI_ISL_837187, EPI_ISL_837188, EPI_ISL_837189, EPI_ISL_837190, EPI_ISL_837191, EPI_ISL_837192, EPI_ISL_837193, EPI_ISL_837194, EPI_ISL_837195, EPI_ISL_837196, EPI_ISL_837197, EPI_ISL_837198, EPI_ISL_837199, EPI_ISL_837200, EPI_ISL_837201, EPI_ISL_837202, EPI_ISL_837203, EPI_ISL_837204, EPI_ISL_837205, EPI_ISL_837206, EPI_ISL_837207, EPI_ISL_837208, EPI_ISL_837209, EPI_ISL_837210, EPI_ISL_837211, EPI_ISL_837212, EPI_ISL_837213, EPI_ISL_837214, EPI_ISL_837215, EPI_ISL_837216, EPI_ISL_837217, EPI_ISL_837218, EPI_ISL_837219, EPI_ISL_837220, EPI_ISL_837221, EPI_ISL_837222, EPI_ISL_837223, EPI_ISL_837224, EPI_ISL_837225, EPI_ISL_837226, EPI_ISL_837227, EPI_ISL_837228, EPI_ISL_837229, EPI_ISL_837230, EPI_ISL_837231, EPI_ISL_837232, EPI_ISL_837233, EPI_ISL_837234, EPI_ISL_837235, EPI_ISL_837236, EPI_ISL_837237, EPI_ISL_837238, EPI_ISL_837239, EPI_ISL_837240, EPI_ISL_837241, EPI_ISL_837242, EPI_ISL_837243, EPI_ISL_837244, EPI_ISL_837245, EPI_ISL_837246 | Respiratory Virus Unit, National Infection Service, Public Health England                                                                                     | COVID-19 Genomics UK (COG-UK) Consortium                                                         | PHE Covid Sequencing Team                                                                                                                                                                                                                                     |
| EPI_ISL_837550                                                                                                                                                                                                                                                                                                                                                                                                                                                                                                                                                                                                                                                                                                                                                                                                                                                                                                                                                                                                                                                                                                                                                                                                                                                                                                                                                                                                                                                                                                                                                                                                                                                                                                                                                                                                                                                                                                                                                                                                                                                                                                                                                                                                                                                                                                                                                                                                                                                                                                                                                                                                                                                                                                                                                                                                                                                                                                                                                                                                                                                                                                                                                                                                                                                                                                                                                                                                                                                                                                                                                                                                                                                                                                                                                                                                                                                                                                                                                                                                                                                                                                                                                                                                                                                                                                                                                                                                                                                 | Centro Nacional de Enfermedades Tropicales (CENETROP)                                                                                                         | Laboratory of Respiratory Viruses and Measles, Oswaldo Cruz Institute, FIOCRUZ                   | Paola Resende, Roxana Loayza, Cinthia Avila, Luciana Appolinario, Fernando Motta, Anna Carolina Paixao, Ana Carolina Mendonca, Marilda Siqueira on behalf of the Fiocruz COVID-19 Genomic Surveillance Network                                                |
| EPI_ISL_837551, EPI_ISL_837552                                                                                                                                                                                                                                                                                                                                                                                                                                                                                                                                                                                                                                                                                                                                                                                                                                                                                                                                                                                                                                                                                                                                                                                                                                                                                                                                                                                                                                                                                                                                                                                                                                                                                                                                                                                                                                                                                                                                                                                                                                                                                                                                                                                                                                                                                                                                                                                                                                                                                                                                                                                                                                                                                                                                                                                                                                                                                                                                                                                                                                                                                                                                                                                                                                                                                                                                                                                                                                                                                                                                                                                                                                                                                                                                                                                                                                                                                                                                                                                                                                                                                                                                                                                                                                                                                                                                                                                                                                 | Laboratorio Nacional de Salud                                                                                                                                 | Laboratory of Respiratory Viruses and Measles, Oswaldo Cruz Institute, FIOCRUZ                   | Paola Resende, Cesar Roberto Conde Pereira, Claudia Estrada, Luciana Appolinario, Fernando Motta, Anna Carolina Paixao, Ana Carolina Mendonca, Marilda Siqueira on behalf of the Fiocruz COVID-19 Genomic Surveillance Network                                |
| EPI_ISL_837553, EPI_ISL_837554, EPI_ISL_837555, EPI_ISL_837556, EPI_ISL_837557, EPI_ISL_837558, EPI_ISL_837559, EPI_ISL_837560, EPI_ISL_837561, EPI_ISL_837562, EPI_ISL_837563, EPI_ISL_837564, EPI_ISL_837565, EPI_ISL_837566, EPI_ISL_837567, EPI_ISL_837568, EPI_ISL_837569, EPI_ISL_837570, EPI_ISL_837571, EPI_ISL_837572, EPI_ISL_837573, EPI_ISL_837574, EPI_ISL_837575, EPI_ISL_837576, EPI_ISL_837577, EPI_ISL_837578                                                                                                                                                                                                                                                                                                                                                                                                                                                                                                                                                                                                                                                                                                                                                                                                                                                                                                                                                                                                                                                                                                                                                                                                                                                                                                                                                                                                                                                                                                                                                                                                                                                                                                                                                                                                                                                                                                                                                                                                                                                                                                                                                                                                                                                                                                                                                                                                                                                                                                                                                                                                                                                                                                                                                                                                                                                                                                                                                                                                                                                                                                                                                                                                                                                                                                                                                                                                                                                                                                                                                                                                                                                                                                                                                                                                                                                                                                                                                                                                                                 | Centro Nacional de Enfermedades Tropicales (CENETROP)                                                                                                         | Laboratory of Respiratory Viruses and Measles, Oswaldo Cruz Institute, FIOCRUZ                   | Paola Resende, Roxana Loayza, Cinthia Avila, Luciana Appolinario, Fernando Motta, Anna Carolina Paixao, Ana Carolina Mendonca, Marilda Siqueira on behalf of the Fiocruz COVID-19 Genomic Surveillance Network                                                |
| EPI_ISL_837579, EPI_ISL_837580, EPI_ISL_837581, EPI_ISL_837582, EPI_ISL_837583, EPI_ISL_837584, EPI_ISL_837585, EPI_ISL_837586, EPI_ISL_837587, EPI_ISL_837588, EPI_ISL_837589, EPI_ISL_837590, EPI_ISL_837591, EPI_ISL_837592, EPI_ISL_837593, EPI_ISL_837594, EPI_ISL_837595, EPI_ISL_837596                                                                                                                                                                                                                                                                                                                                                                                                                                                                                                                                                                                                                                                                                                                                                                                                                                                                                                                                                                                                                                                                                                                                                                                                                                                                                                                                                                                                                                                                                                                                                                                                                                                                                                                                                                                                                                                                                                                                                                                                                                                                                                                                                                                                                                                                                                                                                                                                                                                                                                                                                                                                                                                                                                                                                                                                                                                                                                                                                                                                                                                                                                                                                                                                                                                                                                                                                                                                                                                                                                                                                                                                                                                                                                                                                                                                                                                                                                                                                                                                                                                                                                                                                                 | Laboratorio Nacional de Salud                                                                                                                                 | Laboratory of Respiratory Viruses and Measles, Oswaldo Cruz Institute, FIOCRUZ                   | Paola Resende, Cesar Roberto Conde Pereira, Claudia Estrada, Luciana Appolinario, Fernando Motta, Anna Carolina Paixao, Ana Carolina Mendonca, Marilda Siqueira on behalf of the Fiocruz COVID-19 Genomic Surveillance Network                                |
| EPI_ISL_845545, EPI_ISL_845546, EPI_ISL_845547, EPI_ISL_845548, EPI_ISL_845549, EPI_ISL_845550, EPI_ISL_845551, EPI_ISL_845552, EPI_ISL_845553, EPI_ISL_845554, EPI_ISL_845555, EPI_ISL_845556, EPI_ISL_845557, EPI_ISL_845558, EPI_ISL_845559, EPI_ISL_845560, EPI_ISL_845561, EPI_ISL_845562, EPI_ISL_845563, EPI_ISL_845564, EPI_ISL_845565                                                                                                                                                                                                                                                                                                                                                                                                                                                                                                                                                                                                                                                                                                                                                                                                                                                                                                                                                                                                                                                                                                                                                                                                                                                                                                                                                                                                                                                                                                                                                                                                                                                                                                                                                                                                                                                                                                                                                                                                                                                                                                                                                                                                                                                                                                                                                                                                                                                                                                                                                                                                                                                                                                                                                                                                                                                                                                                                                                                                                                                                                                                                                                                                                                                                                                                                                                                                                                                                                                                                                                                                                                                                                                                                                                                                                                                                                                                                                                                                                                                                                                                 | National Public Health Laboratory, Cameroon                                                                                                                   | African Centre of Excellence for Genomics of Infectious Diseases (ACEGID), Redeemer's University | Oluiniyi P.E. et al                                                                                                                                                                                                                                           |
| EPI_ISL_846588, EPI_ISL_846589, EPI_ISL_846590, EPI_ISL_846591, EPI_ISL_846592, EPI_ISL_846593, EPI_ISL_846594, EPI_ISL_846595, EPI_ISL_846596, EPI_ISL_846597, EPI_ISL_846598, EPI_ISL_846774                                                                                                                                                                                                                                                                                                                                                                                                                                                                                                                                                                                                                                                                                                                                                                                                                                                                                                                                                                                                                                                                                                                                                                                                                                                                                                                                                                                                                                                                                                                                                                                                                                                                                                                                                                                                                                                                                                                                                                                                                                                                                                                                                                                                                                                                                                                                                                                                                                                                                                                                                                                                                                                                                                                                                                                                                                                                                                                                                                                                                                                                                                                                                                                                                                                                                                                                                                                                                                                                                                                                                                                                                                                                                                                                                                                                                                                                                                                                                                                                                                                                                                                                                                                                                                                                 | Respiratory Virus Unit, National Infection Service, Public Health England                                                                                     | COVID-19 Genomics UK (COG-UK) Consortium                                                         | PHE Covid Sequencing Team                                                                                                                                                                                                                                     |
| EPI_ISL_849736, EPI_ISL_849737, EPI_ISL_849738, EPI_ISL_849739, EPI_ISL_849740, EPI_ISL_849741, EPI_ISL_849742, EPI_ISL_849743                                                                                                                                                                                                                                                                                                                                                                                                                                                                                                                                                                                                                                                                                                                                                                                                                                                                                                                                                                                                                                                                                                                                                                                                                                                                                                                                                                                                                                                                                                                                                                                                                                                                                                                                                                                                                                                                                                                                                                                                                                                                                                                                                                                                                                                                                                                                                                                                                                                                                                                                                                                                                                                                                                                                                                                                                                                                                                                                                                                                                                                                                                                                                                                                                                                                                                                                                                                                                                                                                                                                                                                                                                                                                                                                                                                                                                                                                                                                                                                                                                                                                                                                                                                                                                                                                                                                 | Special Operations Medical Research Division, Defence Services Medical Research Centre                                                                        | Special Operations Medical Research Division, Defence Services Medical Research Centre           | Oo,K.Z., Aung,N.M., Win,K.K., Aung,P.K., Htun,Z.W., Zaw,T., Myint,K., Lwin,K.K.                                                                                                                                                                               |
| EPI_ISL_855550                                                                                                                                                                                                                                                                                                                                                                                                                                                                                                                                                                                                                                                                                                                                                                                                                                                                                                                                                                                                                                                                                                                                                                                                                                                                                                                                                                                                                                                                                                                                                                                                                                                                                                                                                                                                                                                                                                                                                                                                                                                                                                                                                                                                                                                                                                                                                                                                                                                                                                                                                                                                                                                                                                                                                                                                                                                                                                                                                                                                                                                                                                                                                                                                                                                                                                                                                                                                                                                                                                                                                                                                                                                                                                                                                                                                                                                                                                                                                                                                                                                                                                                                                                                                                                                                                                                                                                                                                                                 | Department of Infectious Diseases, Istituto Superiore di Sanità, Rome, Italy                                                                                  | Istituto Superiore di Sanità (ISS)                                                               | Paola Stefanelli, Angela Di Martino, Alessandra Lo Presti, Stefano Fiore, Gabriele Vaccari, Luca De Sabato, Ilaria Di Bartolo, Giovanni Ianiro, Manuela Marra, Maria Carollo, Marco Crescenzi                                                                 |
| EPI_ISL_855552                                                                                                                                                                                                                                                                                                                                                                                                                                                                                                                                                                                                                                                                                                                                                                                                                                                                                                                                                                                                                                                                                                                                                                                                                                                                                                                                                                                                                                                                                                                                                                                                                                                                                                                                                                                                                                                                                                                                                                                                                                                                                                                                                                                                                                                                                                                                                                                                                                                                                                                                                                                                                                                                                                                                                                                                                                                                                                                                                                                                                                                                                                                                                                                                                                                                                                                                                                                                                                                                                                                                                                                                                                                                                                                                                                                                                                                                                                                                                                                                                                                                                                                                                                                                                                                                                                                                                                                                                                                 | Department of Infectious Diseases, Istituto Superiore di Sanità, Rome, Italy; Ospedali Riuniti, Laboratorio Virologia, Ancona, Italy                          | Istituto Superiore di Sanità (ISS)                                                               | Paola Stefanelli, Angela Di Martino, Alessandra Lo Presti, Stefano Fiore, Patrizia Bagnarelli, Gabriele Vaccari, Luca De Sabato, Ilaria Di Bartolo, Giovanni Ianiro, Manuela Marra, Maria Carollo, Marco Crescenzi                                            |
| EPI_ISL_855553                                                                                                                                                                                                                                                                                                                                                                                                                                                                                                                                                                                                                                                                                                                                                                                                                                                                                                                                                                                                                                                                                                                                                                                                                                                                                                                                                                                                                                                                                                                                                                                                                                                                                                                                                                                                                                                                                                                                                                                                                                                                                                                                                                                                                                                                                                                                                                                                                                                                                                                                                                                                                                                                                                                                                                                                                                                                                                                                                                                                                                                                                                                                                                                                                                                                                                                                                                                                                                                                                                                                                                                                                                                                                                                                                                                                                                                                                                                                                                                                                                                                                                                                                                                                                                                                                                                                                                                                                                                 | Department of Infectious Diseases, Istituto Superiore di Sanità, Rome, Italy                                                                                  | Istituto Superiore di Sanità (ISS)                                                               | Paola Stefanelli, Angela Di Martino, Alessandra Lo Presti, Stefano Fiore, Gabriele Vaccari, Luca De Sabato, Ilaria Di Bartolo, Giovanni Ianiro, Manuela Marra, Maria Carollo, Marco Crescenzi                                                                 |
| EPI_ISL_855554, EPI_ISL_855555                                                                                                                                                                                                                                                                                                                                                                                                                                                                                                                                                                                                                                                                                                                                                                                                                                                                                                                                                                                                                                                                                                                                                                                                                                                                                                                                                                                                                                                                                                                                                                                                                                                                                                                                                                                                                                                                                                                                                                                                                                                                                                                                                                                                                                                                                                                                                                                                                                                                                                                                                                                                                                                                                                                                                                                                                                                                                                                                                                                                                                                                                                                                                                                                                                                                                                                                                                                                                                                                                                                                                                                                                                                                                                                                                                                                                                                                                                                                                                                                                                                                                                                                                                                                                                                                                                                                                                                                                                 | Department of Infectious Diseases, Istituto Superiore di Sanità, Rome, Italy; ASST G.O.M. Niguarda, Sezione Microbiologia e Virologia, Milano, Italy          | Istituto Superiore di Sanità (ISS)                                                               | Paola Stefanelli, Angela Di Martino, Alessandra Lo Presti, Stefano Fiore, Carlo Federico Perno, Gabriele Vaccari, Luca De Sabato, Ilaria Di Bartolo, Giovanni Ianiro, Manuela Marra, Maria Carollo, Marco Crescenzi                                           |
| EPI_ISL_855574, EPI_ISL_855575, EPI_ISL_855576, EPI_ISL_855577, EPI_ISL_855578, EPI_ISL_855579, EPI_ISL_855580, EPI_ISL_855581, EPI_ISL_855582, EPI_ISL_855583, EPI_ISL_855584, EPI_ISL_855585, EPI_ISL_855586, EPI_ISL_855587, EPI_ISL_855588, EPI_ISL_855589, EPI_ISL_855590, EPI_ISL_855591, EPI_ISL_855592, EPI_ISL_855593, EPI_ISL_855594, EPI_ISL_855595, EPI_ISL_855596, EPI_ISL_855597, EPI_ISL_855598, EPI_ISL_855599, EPI_ISL_855600, EPI_ISL_855601, EPI_ISL_855602, EPI_ISL_855603, EPI_ISL_855604, EPI_ISL_855605, EPI_ISL_855606, EPI_ISL_855607, EPI_ISL_855608, EPI_ISL_855609, EPI_ISL_856703, EPI_ISL_856704, EPI_ISL_856705, EPI_ISL_856706                                                                                                                                                                                                                                                                                                                                                                                                                                                                                                                                                                                                                                                                                                                                                                                                                                                                                                                                                                                                                                                                                                                                                                                                                                                                                                                                                                                                                                                                                                                                                                                                                                                                                                                                                                                                                                                                                                                                                                                                                                                                                                                                                                                                                                                                                                                                                                                                                                                                                                                                                                                                                                                                                                                                                                                                                                                                                                                                                                                                                                                                                                                                                                                                                                                                                                                                                                                                                                                                                                                                                                                                                                                                                                                                                                                                 | Respiratory Virus Unit, National Infection Service, Public Health England                                                                                     | COVID-19 Genomics UK (COG-UK) Consortium                                                         | PHE Covid Sequencing Team                                                                                                                                                                                                                                     |
| EPI_ISL_856871                                                                                                                                                                                                                                                                                                                                                                                                                                                                                                                                                                                                                                                                                                                                                                                                                                                                                                                                                                                                                                                                                                                                                                                                                                                                                                                                                                                                                                                                                                                                                                                                                                                                                                                                                                                                                                                                                                                                                                                                                                                                                                                                                                                                                                                                                                                                                                                                                                                                                                                                                                                                                                                                                                                                                                                                                                                                                                                                                                                                                                                                                                                                                                                                                                                                                                                                                                                                                                                                                                                                                                                                                                                                                                                                                                                                                                                                                                                                                                                                                                                                                                                                                                                                                                                                                                                                                                                                                                                 | Department of Infectious Diseases, Istituto Superiore di Sanità, Roma, Italy; AORN dei Colli, UOC Microbiologia Virologia, Napoli, Italy                      | Virology Laboratory, Scientific Department, Army Medical Center                                  | Paola Stefanelli, Angela Di Martino, Alessandra Lo Presti, Stefano Fiore, Luigi Atripaldi, Silvia Fillo, Giovanni Faggioni, Riccardo De Sanctis, Antonella Fortunato, Anna Anselmo, Francesco Giordani, Vanessa Vera Fain, Nino D'Amore, Florigio Lista       |
| EPI_ISL_856880                                                                                                                                                                                                                                                                                                                                                                                                                                                                                                                                                                                                                                                                                                                                                                                                                                                                                                                                                                                                                                                                                                                                                                                                                                                                                                                                                                                                                                                                                                                                                                                                                                                                                                                                                                                                                                                                                                                                                                                                                                                                                                                                                                                                                                                                                                                                                                                                                                                                                                                                                                                                                                                                                                                                                                                                                                                                                                                                                                                                                                                                                                                                                                                                                                                                                                                                                                                                                                                                                                                                                                                                                                                                                                                                                                                                                                                                                                                                                                                                                                                                                                                                                                                                                                                                                                                                                                                                                                                 | Department of Infectious Diseases, Istituto Superiore di Sanità, Roma, Italy; Ospedali Riuniti, Laboratorio Virologia, Ancona, Italy                          | Virology Laboratory, Scientific Department, Army Medical Center                                  | Paola Stefanelli, Angela Di Martino, Alessandra Lo Presti, Stefano Fiore, Patrizia Bagnarelli, Silvia Fillo, Giovanni Faggioni, Riccardo De Sanctis, Antonella Fortunato, Anna Anselmo, Francesco Giordani, Vanessa Vera Fain, Nino D'Amore, Florigio Lista   |
| EPI_ISL_856881                                                                                                                                                                                                                                                                                                                                                                                                                                                                                                                                                                                                                                                                                                                                                                                                                                                                                                                                                                                                                                                                                                                                                                                                                                                                                                                                                                                                                                                                                                                                                                                                                                                                                                                                                                                                                                                                                                                                                                                                                                                                                                                                                                                                                                                                                                                                                                                                                                                                                                                                                                                                                                                                                                                                                                                                                                                                                                                                                                                                                                                                                                                                                                                                                                                                                                                                                                                                                                                                                                                                                                                                                                                                                                                                                                                                                                                                                                                                                                                                                                                                                                                                                                                                                                                                                                                                                                                                                                                 | Department of Infectious Diseases, Istituto Superiore di Sanità, Roma, Italy; PO Cardarelli, Laboratorio Analisi Microbiologia e Virologia, Campobasso, Italy | Virology Laboratory, Scientific Department, Army Medical Center                                  | Paola Stefanelli, Angela Di Martino, Alessandra Lo Presti, Stefano Fiore, Massimiliano Scutellà, Silvia Fillo, Giovanni Faggioni, Riccardo De Sanctis, Antonella Fortunato, Anna Anselmo, Francesco Giordani, Vanessa Vera Fain, Nino D'Amore, Florigio Lista |
| EPI_ISL_856884                                                                                                                                                                                                                                                                                                                                                                                                                                                                                                                                                                                                                                                                                                                                                                                                                                                                                                                                                                                                                                                                                                                                                                                                                                                                                                                                                                                                                                                                                                                                                                                                                                                                                                                                                                                                                                                                                                                                                                                                                                                                                                                                                                                                                                                                                                                                                                                                                                                                                                                                                                                                                                                                                                                                                                                                                                                                                                                                                                                                                                                                                                                                                                                                                                                                                                                                                                                                                                                                                                                                                                                                                                                                                                                                                                                                                                                                                                                                                                                                                                                                                                                                                                                                                                                                                                                                                                                                                                                 | Department of Infectious Diseases, Istituto Superiore di Sanità, Roma, Italy; PO Santa Chiara, Microbiologia e Virologia, Trento, Italy                       | Virology Laboratory, Scientific Department, Army Medical Center                                  | Paola Stefanelli, Angela Di Martino, Alessandra Lo Presti, Stefano Fiore, Paolo Lanzafame, Silvia Fillo, Giovanni Faggioni, Riccardo De Sanctis, Antonella Fortunato, Anna Anselmo, Francesco Giordani, Vanessa Vera Fain, Nino D'Amore, Florigio Lista       |
| EPI_ISL_856886                                                                                                                                                                                                                                                                                                                                                                                                                                                                                                                                                                                                                                                                                                                                                                                                                                                                                                                                                                                                                                                                                                                                                                                                                                                                                                                                                                                                                                                                                                                                                                                                                                                                                                                                                                                                                                                                                                                                                                                                                                                                                                                                                                                                                                                                                                                                                                                                                                                                                                                                                                                                                                                                                                                                                                                                                                                                                                                                                                                                                                                                                                                                                                                                                                                                                                                                                                                                                                                                                                                                                                                                                                                                                                                                                                                                                                                                                                                                                                                                                                                                                                                                                                                                                                                                                                                                                                                                                                                 | Department of Infectious Diseases, Istituto Superiore di Sanità, Roma, Italy; PO Spirito Santo, UOC Microbiologia e Virologia Clinica, Pescara, Italy         | Virology Laboratory, Scientific Department, Army Medical Center                                  | Paola Stefanelli, Angela Di Martino, Alessandra Lo Presti, Stefano Fiore, Paolo Fazzi, Silvia Fillo, Giovanni Faggioni, Riccardo De Sanctis, Antonella Fortunato, Anna Anselmo, Francesco Giordani, Vanessa Vera Fain, Nino D'Amore, Florigio Lista           |
| EPI_ISL_856887                                                                                                                                                                                                                                                                                                                                                                                                                                                                                                                                                                                                                                                                                                                                                                                                                                                                                                                                                                                                                                                                                                                                                                                                                                                                                                                                                                                                                                                                                                                                                                                                                                                                                                                                                                                                                                                                                                                                                                                                                                                                                                                                                                                                                                                                                                                                                                                                                                                                                                                                                                                                                                                                                                                                                                                                                                                                                                                                                                                                                                                                                                                                                                                                                                                                                                                                                                                                                                                                                                                                                                                                                                                                                                                                                                                                                                                                                                                                                                                                                                                                                                                                                                                                                                                                                                                                                                                                                                                 | Department of Infectious Diseases, Istituto Superiore di Sanità, Roma, Italy; AUOC Policlinico Bari, UOC Igiene, Bari, Italy                                  | Virology Laboratory, Scientific Department, Army Medical Center                                  | Paola Stefanelli, Angela Di Martino, Alessandra Lo Presti, Stefano Fiore, Maria Chironna, Silvia Fillo, Giovanni Faggioni, Riccardo De Sanctis, Antonella Fortunato, Anna Anselmo, Francesco Giordani, Vanessa Vera Fain, Nino D'Amore, Florigio Lista        |
| EPI_ISL_856888                                                                                                                                                                                                                                                                                                                                                                                                                                                                                                                                                                                                                                                                                                                                                                                                                                                                                                                                                                                                                                                                                                                                                                                                                                                                                                                                                                                                                                                                                                                                                                                                                                                                                                                                                                                                                                                                                                                                                                                                                                                                                                                                                                                                                                                                                                                                                                                                                                                                                                                                                                                                                                                                                                                                                                                                                                                                                                                                                                                                                                                                                                                                                                                                                                                                                                                                                                                                                                                                                                                                                                                                                                                                                                                                                                                                                                                                                                                                                                                                                                                                                                                                                                                                                                                                                                                                                                                                                                                 | Department of Infectious Diseases, Istituto Superiore di                                                                                                      | Virology Laboratory, Scientific Department, Army Medical                                         | Paola Stefanelli, Angela Di Martino, Alessandra Lo Presti, Stefano Fiore, Antonio Picerno, Silvia Fillo, Giovanni Faggioni, Riccardo De Sanctis, Antonella                                                                                                    |

|                                                                                                                                                                                                                                                                                                                                                                                                                                                                                                                                                                                                                                                                                                                                                                                                                                                                                                                                                                                                                                                                                                                                                                                                                                                                                                                |                                                                                                                                                                   |                                                                 |                                                                                                                                                                                                                                                               |
|----------------------------------------------------------------------------------------------------------------------------------------------------------------------------------------------------------------------------------------------------------------------------------------------------------------------------------------------------------------------------------------------------------------------------------------------------------------------------------------------------------------------------------------------------------------------------------------------------------------------------------------------------------------------------------------------------------------------------------------------------------------------------------------------------------------------------------------------------------------------------------------------------------------------------------------------------------------------------------------------------------------------------------------------------------------------------------------------------------------------------------------------------------------------------------------------------------------------------------------------------------------------------------------------------------------|-------------------------------------------------------------------------------------------------------------------------------------------------------------------|-----------------------------------------------------------------|---------------------------------------------------------------------------------------------------------------------------------------------------------------------------------------------------------------------------------------------------------------|
|                                                                                                                                                                                                                                                                                                                                                                                                                                                                                                                                                                                                                                                                                                                                                                                                                                                                                                                                                                                                                                                                                                                                                                                                                                                                                                                | Sanità, Roma, Italy; A.O.R. San Carlo di Potenza, Laboratorio Microbiologia e Virologia, Potenza, Italy                                                           | Center                                                          | Fortunato, Anna Anselmo, Francesco Giordani, Vanessa Vera Fain, Nino D'Amore, Florigio Lista                                                                                                                                                                  |
| EPI_ISL_856889                                                                                                                                                                                                                                                                                                                                                                                                                                                                                                                                                                                                                                                                                                                                                                                                                                                                                                                                                                                                                                                                                                                                                                                                                                                                                                 | Department of Infectious Diseases, Istituto Superiore di Sanità, Roma, Italy                                                                                      | Virology Laboratory, Scientific Department, Army Medical Center | Paola Stefanelli, Angela Di Martino, Alessandra Lo Presti, Stefano Fiore, Silvia Fillo, Giovanni Faggioni, Riccardo De Sanctis, Antonella Fortunato, Anna Anselmo, Francesco Giordani, Vanessa Vera Fain, Nino D'Amore, Florigio Lista                        |
| EPI_ISL_856890                                                                                                                                                                                                                                                                                                                                                                                                                                                                                                                                                                                                                                                                                                                                                                                                                                                                                                                                                                                                                                                                                                                                                                                                                                                                                                 | Department of Infectious Diseases, Istituto Superiore di Sanità, Roma, Italy; AO Annunziata, UOC Microbiologia e Virologia, Cosenza, Italy                        | Virology Laboratory, Scientific Department, Army Medical Center | Paola Stefanelli, Angela Di Martino, Alessandra Lo Presti, Stefano Fiore, Cristina Giraldi, Silvia Fillo, Giovanni Faggioni, Riccardo De Sanctis, Antonella Fortunato, Anna Anselmo, Francesco Giordani, Vanessa Vera Fain, Nino D'Amore, Florigio Lista      |
| EPI_ISL_856891, EPI_ISL_856892                                                                                                                                                                                                                                                                                                                                                                                                                                                                                                                                                                                                                                                                                                                                                                                                                                                                                                                                                                                                                                                                                                                                                                                                                                                                                 | Department of Infectious Diseases, Istituto Superiore di Sanità, Roma, Italy; AORN dei Colli, UOC Microbiologia Virologia, Napoli, Italy                          | Virology Laboratory, Scientific Department, Army Medical Center | Paola Stefanelli, Angela Di Martino, Alessandra Lo Presti, Stefano Fiore, Luigi Atripaldi, Silvia Fillo, Giovanni Faggioni, Riccardo De Sanctis, Antonella Fortunato, Anna Anselmo, Francesco Giordani, Vanessa Vera Fain, Nino D'Amore, Florigio Lista       |
| EPI_ISL_856893, EPI_ISL_856894                                                                                                                                                                                                                                                                                                                                                                                                                                                                                                                                                                                                                                                                                                                                                                                                                                                                                                                                                                                                                                                                                                                                                                                                                                                                                 | Department of Infectious Diseases, Istituto Superiore di Sanità, Roma, Italy; ASUITS - Ospedale Maggiore, S.C. UOC Igiene e Sanità Pubblica, Trieste, Italy       | Virology Laboratory, Scientific Department, Army Medical Center | Paola Stefanelli, Angela Di Martino, Alessandra Lo Presti, Stefano Fiore, Pierlanfranco D'Agaro, Silvia Fillo, Giovanni Faggioni, Riccardo De Sanctis, Antonella Fortunato, Anna Anselmo, Francesco Giordani, Vanessa Vera Fain, Nino D'Amore, Florigio Lista |
| EPI_ISL_856895, EPI_ISL_856896                                                                                                                                                                                                                                                                                                                                                                                                                                                                                                                                                                                                                                                                                                                                                                                                                                                                                                                                                                                                                                                                                                                                                                                                                                                                                 | Department of Infectious Diseases, Istituto Superiore di Sanità, Roma, Italy; Ospedali Riuniti, Laboratorio Virologia, Ancona, Italy                              | Virology Laboratory, Scientific Department, Army Medical Center | Paola Stefanelli, Angela Di Martino, Alessandra Lo Presti, Stefano Fiore, Patrizia Bagnarelli, Silvia Fillo, Giovanni Faggioni, Riccardo De Sanctis, Antonella Fortunato, Anna Anselmo, Francesco Giordani, Vanessa Vera Fain, Nino D'Amore, Florigio Lista   |
| EPI_ISL_856897                                                                                                                                                                                                                                                                                                                                                                                                                                                                                                                                                                                                                                                                                                                                                                                                                                                                                                                                                                                                                                                                                                                                                                                                                                                                                                 | Department of Infectious Diseases, Istituto Superiore di Sanità, Roma, Italy; PO Cardarelli, Laboratorio Analisi Microbiologia e Virologia, Campobasso, Italy     | Virology Laboratory, Scientific Department, Army Medical Center | Paola Stefanelli, Angela Di Martino, Alessandra Lo Presti, Stefano Fiore, Massimiliano Scutellà, Silvia Fillo, Giovanni Faggioni, Riccardo De Sanctis, Antonella Fortunato, Anna Anselmo, Francesco Giordani, Vanessa Vera Fain, Nino D'Amore, Florigio Lista |
| EPI_ISL_856898, EPI_ISL_856899                                                                                                                                                                                                                                                                                                                                                                                                                                                                                                                                                                                                                                                                                                                                                                                                                                                                                                                                                                                                                                                                                                                                                                                                                                                                                 | Department of Infectious Diseases, Istituto Superiore di Sanità, Roma, Italy; ASL Città di Torino, S.C. Microbiologia e Virologia, Torino, Italy                  | Virology Laboratory, Scientific Department, Army Medical Center | Paola Stefanelli, Angela Di Martino, Alessandra Lo Presti, Stefano Fiore, Valeria Ghisetti, Silvia Fillo, Giovanni Faggioni, Riccardo De Sanctis, Antonella Fortunato, Anna Anselmo, Francesco Giordani, Vanessa Vera Fain, Nino D'Amore, Florigio Lista      |
| EPI_ISL_856900, EPI_ISL_856901                                                                                                                                                                                                                                                                                                                                                                                                                                                                                                                                                                                                                                                                                                                                                                                                                                                                                                                                                                                                                                                                                                                                                                                                                                                                                 | Department of Infectious Diseases, Istituto Superiore di Sanità, Roma, Italy; AOUP V. Emanuele di Catania, P.O. Gaspare Rodolico, Catania, Italy                  | Virology Laboratory, Scientific Department, Army Medical Center | Paola Stefanelli, Angela Di Martino, Alessandra Lo Presti, Stefano Fiore, Guido Scalia, Silvia Fillo, Giovanni Faggioni, Riccardo De Sanctis, Antonella Fortunato, Anna Anselmo, Francesco Giordani, Vanessa Vera Fain, Nino D'Amore, Florigio Lista          |
| EPI_ISL_856902                                                                                                                                                                                                                                                                                                                                                                                                                                                                                                                                                                                                                                                                                                                                                                                                                                                                                                                                                                                                                                                                                                                                                                                                                                                                                                 | Department of Infectious Diseases, Istituto Superiore di Sanità, Roma, Italy; AS Alto Adige, Microbiologia e Virologia, Bolzano, Italy                            | Virology Laboratory, Scientific Department, Army Medical Center | Paola Stefanelli, Angela Di Martino, Alessandra Lo Presti, Stefano Fiore, Elisabetta Pagani, Silvia Fillo, Giovanni Faggioni, Riccardo De Sanctis, Antonella Fortunato, Anna Anselmo, Francesco Giordani, Vanessa Vera Fain, Nino D'Amore, Florigio Lista     |
| EPI_ISL_856903                                                                                                                                                                                                                                                                                                                                                                                                                                                                                                                                                                                                                                                                                                                                                                                                                                                                                                                                                                                                                                                                                                                                                                                                                                                                                                 | Department of Infectious Diseases, Istituto Superiore di Sanità, Roma, Italy; PO Santa Chiara, Microbiologia e Virologia, Trento, Italy                           | Virology Laboratory, Scientific Department, Army Medical Center | Paola Stefanelli, Angela Di Martino, Alessandra Lo Presti, Stefano Fiore, Paolo Lanzafame, Silvia Fillo, Giovanni Faggioni, Riccardo De Sanctis, Antonella Fortunato, Anna Anselmo, Francesco Giordani, Vanessa Vera Fain, Nino D'Amore, Florigio Lista       |
| EPI_ISL_856904                                                                                                                                                                                                                                                                                                                                                                                                                                                                                                                                                                                                                                                                                                                                                                                                                                                                                                                                                                                                                                                                                                                                                                                                                                                                                                 | Department of Infectious Diseases, Istituto Superiore di Sanità, Roma, Italy                                                                                      | Virology Laboratory, Scientific Department, Army Medical Center | Paola Stefanelli, Angela Di Martino, Alessandra Lo Presti, Stefano Fiore, Silvia Fillo, Giovanni Faggioni, Riccardo De Sanctis, Antonella Fortunato, Anna Anselmo, Francesco Giordani, Vanessa Vera Fain, Nino D'Amore, Florigio Lista                        |
| EPI_ISL_856905, EPI_ISL_856906                                                                                                                                                                                                                                                                                                                                                                                                                                                                                                                                                                                                                                                                                                                                                                                                                                                                                                                                                                                                                                                                                                                                                                                                                                                                                 | Department of Infectious Diseases, Istituto Superiore di Sanità, Roma, Italy; AO S.M. della Misericordia, S.C. Microbiologia, Perugia, Italy                      | Virology Laboratory, Scientific Department, Army Medical Center | Paola Stefanelli, Angela Di Martino, Alessandra Lo Presti, Stefano Fiore, Barbara Camillonì, Silvia Fillo, Giovanni Faggioni, Riccardo De Sanctis, Antonella Fortunato, Anna Anselmo, Francesco Giordani, Vanessa Vera Fain, Nino D'Amore, Florigio Lista     |
| EPI_ISL_856907                                                                                                                                                                                                                                                                                                                                                                                                                                                                                                                                                                                                                                                                                                                                                                                                                                                                                                                                                                                                                                                                                                                                                                                                                                                                                                 | Department of Infectious Diseases, Istituto Superiore di Sanità, Roma, Italy; AUSL Valle d'Aosta, Aosta, Italy                                                    | Virology Laboratory, Scientific Department, Army Medical Center | Paola Stefanelli, Angela Di Martino, Alessandra Lo Presti, Stefano Fiore, Massimo Di Benedetto, Silvia Fillo, Giovanni Faggioni, Riccardo De Sanctis, Antonella Fortunato, Anna Anselmo, Francesco Giordani, Vanessa Vera Fain, Nino D'Amore, Florigio Lista  |
| EPI_ISL_856908                                                                                                                                                                                                                                                                                                                                                                                                                                                                                                                                                                                                                                                                                                                                                                                                                                                                                                                                                                                                                                                                                                                                                                                                                                                                                                 | Department of Infectious Diseases, Istituto Superiore di Sanità, Roma, Italy; PO Madre Teresa di Calcutta, UOC. Laboratorio Analisi ULSS 6 Euganea, Padova, Italy | Virology Laboratory, Scientific Department, Army Medical Center | Paola Stefanelli, Angela Di Martino, Alessandra Lo Presti, Stefano Fiore, Giacomo Mezzapelle, Silvia Fillo, Giovanni Faggioni, Riccardo De Sanctis, Antonella Fortunato, Anna Anselmo, Francesco Giordani, Vanessa Vera Fain, Nino D'Amore, Florigio Lista    |
| EPI_ISL_856909                                                                                                                                                                                                                                                                                                                                                                                                                                                                                                                                                                                                                                                                                                                                                                                                                                                                                                                                                                                                                                                                                                                                                                                                                                                                                                 | Department of Infectious Diseases, Istituto Superiore di Sanità, Roma, Italy; ULSS 8 Berica Vicenza, UOC Microbiologia, Vicenza, Italy                            | Virology Laboratory, Scientific Department, Army Medical Center | Paola Stefanelli, Angela Di Martino, Alessandra Lo Presti, Stefano Fiore, Mario Rassa, Silvia Fillo, Giovanni Faggioni, Riccardo De Sanctis, Antonella Fortunato, Anna Anselmo, Francesco Giordani, Vanessa Vera Fain, Nino D'Amore, Florigio Lista           |
| EPI_ISL_857466, EPI_ISL_857467, EPI_ISL_857468, EPI_ISL_857487, EPI_ISL_857488                                                                                                                                                                                                                                                                                                                                                                                                                                                                                                                                                                                                                                                                                                                                                                                                                                                                                                                                                                                                                                                                                                                                                                                                                                 | PathWest Laboratory Medicine WA                                                                                                                                   | PathWest Laboratory Medicine WA Microbial Surveillance Unit     | PathWest Laboratory Medicine WA Microbial Surveillance Unit                                                                                                                                                                                                   |
| EPI_ISL_860635, EPI_ISL_860636, EPI_ISL_860637, EPI_ISL_860638, EPI_ISL_860639, EPI_ISL_860640, EPI_ISL_860641, EPI_ISL_860642, EPI_ISL_860643, EPI_ISL_860644, EPI_ISL_860645, EPI_ISL_860646, EPI_ISL_860647, EPI_ISL_860648, EPI_ISL_860649, EPI_ISL_860650, EPI_ISL_860651, EPI_ISL_860652, EPI_ISL_860653, EPI_ISL_860654, EPI_ISL_860655, EPI_ISL_860656, EPI_ISL_860657, EPI_ISL_860658, EPI_ISL_860659, EPI_ISL_860660, EPI_ISL_860661, EPI_ISL_860662, EPI_ISL_860663, EPI_ISL_860664, EPI_ISL_860665, EPI_ISL_860666, EPI_ISL_860667, EPI_ISL_860668, EPI_ISL_860669, EPI_ISL_860670, EPI_ISL_860671, EPI_ISL_860672, EPI_ISL_860673, EPI_ISL_860674, EPI_ISL_860675, EPI_ISL_860676, EPI_ISL_860678, EPI_ISL_860679, EPI_ISL_860680, EPI_ISL_860681, EPI_ISL_860682, EPI_ISL_860683, EPI_ISL_860684, EPI_ISL_860685, EPI_ISL_860686, EPI_ISL_860687, EPI_ISL_860688, EPI_ISL_860689, EPI_ISL_860690, EPI_ISL_860691, EPI_ISL_860692, EPI_ISL_860693, EPI_ISL_860694, EPI_ISL_860695, EPI_ISL_860696, EPI_ISL_860697, EPI_ISL_860698, EPI_ISL_860699, EPI_ISL_860700, EPI_ISL_860701, EPI_ISL_860702, EPI_ISL_860704, EPI_ISL_860705, EPI_ISL_860706, EPI_ISL_860707, EPI_ISL_860708, EPI_ISL_860709, EPI_ISL_860782, EPI_ISL_860783                                                                 |                                                                                                                                                                   |                                                                 |                                                                                                                                                                                                                                                               |
| see above                                                                                                                                                                                                                                                                                                                                                                                                                                                                                                                                                                                                                                                                                                                                                                                                                                                                                                                                                                                                                                                                                                                                                                                                                                                                                                      | Respiratory Virus Unit, National Infection Service, Public Health England                                                                                         | COVID-19 Genomics UK (COG-UK) Consortium                        | PHE Covid Sequencing Team                                                                                                                                                                                                                                     |
| EPI_ISL_861686, EPI_ISL_861687, EPI_ISL_861688, EPI_ISL_861689, EPI_ISL_861690, EPI_ISL_861691, EPI_ISL_861692, EPI_ISL_861693, EPI_ISL_861694, EPI_ISL_861695, EPI_ISL_861696, EPI_ISL_861697, EPI_ISL_861698, EPI_ISL_861699                                                                                                                                                                                                                                                                                                                                                                                                                                                                                                                                                                                                                                                                                                                                                                                                                                                                                                                                                                                                                                                                                 |                                                                                                                                                                   |                                                                 |                                                                                                                                                                                                                                                               |
| see above                                                                                                                                                                                                                                                                                                                                                                                                                                                                                                                                                                                                                                                                                                                                                                                                                                                                                                                                                                                                                                                                                                                                                                                                                                                                                                      | Los Angeles County PHL                                                                                                                                            | Los Angeles County PHL                                          | P. Hemarajata et al.                                                                                                                                                                                                                                          |
| EPI_ISL_861700, EPI_ISL_861701, EPI_ISL_861702, EPI_ISL_861703                                                                                                                                                                                                                                                                                                                                                                                                                                                                                                                                                                                                                                                                                                                                                                                                                                                                                                                                                                                                                                                                                                                                                                                                                                                 | MD Laboratories                                                                                                                                                   | Los Angeles County PHL                                          | P. Hemarajata et al.                                                                                                                                                                                                                                          |
| EPI_ISL_861704, EPI_ISL_861705, EPI_ISL_861706                                                                                                                                                                                                                                                                                                                                                                                                                                                                                                                                                                                                                                                                                                                                                                                                                                                                                                                                                                                                                                                                                                                                                                                                                                                                 | UCLA Clinical Micro Lab                                                                                                                                           | Los Angeles County PHL                                          | P. Hemarajata et al.                                                                                                                                                                                                                                          |
| EPI_ISL_862048                                                                                                                                                                                                                                                                                                                                                                                                                                                                                                                                                                                                                                                                                                                                                                                                                                                                                                                                                                                                                                                                                                                                                                                                                                                                                                 | Respiratory Virus Unit, National Infection Service, Public Health England                                                                                         | COVID-19 Genomics UK (COG-UK) Consortium                        | PHE Covid Sequencing Team                                                                                                                                                                                                                                     |
| EPI_ISL_862121                                                                                                                                                                                                                                                                                                                                                                                                                                                                                                                                                                                                                                                                                                                                                                                                                                                                                                                                                                                                                                                                                                                                                                                                                                                                                                 | MD Laboratories                                                                                                                                                   | Los Angeles County PHL                                          | P. Hemarajata et al.                                                                                                                                                                                                                                          |
| EPI_ISL_862122, EPI_ISL_862123                                                                                                                                                                                                                                                                                                                                                                                                                                                                                                                                                                                                                                                                                                                                                                                                                                                                                                                                                                                                                                                                                                                                                                                                                                                                                 | UCLA Clinical Micro Lab                                                                                                                                           | Los Angeles County PHL                                          | P. Hemarajata et al.                                                                                                                                                                                                                                          |
| EPI_ISL_862188, EPI_ISL_862189, EPI_ISL_862190, EPI_ISL_862191, EPI_ISL_862192, EPI_ISL_862193, EPI_ISL_862194, EPI_ISL_862195, EPI_ISL_862196, EPI_ISL_862197, EPI_ISL_862198, EPI_ISL_862199, EPI_ISL_862200, EPI_ISL_862201, EPI_ISL_862202, EPI_ISL_862203, EPI_ISL_862204, EPI_ISL_862205, EPI_ISL_862206, EPI_ISL_862207, EPI_ISL_862208, EPI_ISL_862209, EPI_ISL_862210, EPI_ISL_862211, EPI_ISL_862212, EPI_ISL_862213, EPI_ISL_862214, EPI_ISL_862215, EPI_ISL_862216, EPI_ISL_862217, EPI_ISL_862218, EPI_ISL_862219, EPI_ISL_862220, EPI_ISL_862221, EPI_ISL_862222, EPI_ISL_862223, EPI_ISL_862224, EPI_ISL_862225, EPI_ISL_862226, EPI_ISL_862227, EPI_ISL_862228, EPI_ISL_862229, EPI_ISL_862230, EPI_ISL_862231, EPI_ISL_862232, EPI_ISL_862233, EPI_ISL_862234, EPI_ISL_862235, EPI_ISL_862236, EPI_ISL_862237, EPI_ISL_862238, EPI_ISL_862239, EPI_ISL_862240, EPI_ISL_862241, EPI_ISL_862242, EPI_ISL_862243, EPI_ISL_862244, EPI_ISL_862245, EPI_ISL_862246, EPI_ISL_862247, EPI_ISL_862248, EPI_ISL_862249, EPI_ISL_862250, EPI_ISL_862251, EPI_ISL_862252, EPI_ISL_862253, EPI_ISL_862254, EPI_ISL_862255, EPI_ISL_862256, EPI_ISL_862257, EPI_ISL_862258, EPI_ISL_862259, EPI_ISL_862260, EPI_ISL_862261, EPI_ISL_862262, EPI_ISL_862263, EPI_ISL_862264, EPI_ISL_862265, EPI_ISL_862266 |                                                                                                                                                                   |                                                                 |                                                                                                                                                                                                                                                               |
| see above                                                                                                                                                                                                                                                                                                                                                                                                                                                                                                                                                                                                                                                                                                                                                                                                                                                                                                                                                                                                                                                                                                                                                                                                                                                                                                      | Respiratory Virus Unit, National Infection Service, Public Health England                                                                                         | COVID-19 Genomics UK (COG-UK) Consortium                        | PHE Covid Sequencing Team                                                                                                                                                                                                                                     |
| EPI_ISL_862268, EPI_ISL_862269, EPI_ISL_862270, EPI_ISL_862271, EPI_ISL_862272, EPI_ISL_862273, EPI_ISL_862274, EPI_ISL_862275, EPI_ISL_862276, EPI_ISL_862277, EPI_ISL_862278, EPI_ISL_862279, EPI_ISL_862280, EPI_ISL_862281, EPI_ISL_862282, EPI_ISL_862283, EPI_ISL_862284, EPI_ISL_862285, EPI_ISL_862286, EPI_ISL_862287, EPI_ISL_862288, EPI_ISL_862289, EPI_ISL_862290, EPI_ISL_862291, EPI_ISL_862292, EPI_ISL_862293, EPI_ISL_862294, EPI_ISL_862295, EPI_ISL_862296, EPI_ISL_862297, EPI_ISL_862298, EPI_ISL_862299, EPI_ISL_862300, EPI_ISL_862301, EPI_ISL_862302, EPI_ISL_862303,                                                                                                                                                                                                                                                                                                                                                                                                                                                                                                                                                                                                                                                                                                                |                                                                                                                                                                   |                                                                 |                                                                                                                                                                                                                                                               |

|                                                                                                                                                                                                                                                                                                                                                                                                                                                                                                                                                                                                                                                                                                                                                                                                                                                                                                                                                                                                                                                                                                                                                                                                                                                                                                                                                                                                                                                                                                                                                                                                                                                                                                                                                                                                                                                                                                                                                                                                                                                                                                                                                                                                                                                                                                                                                                                                                                                                                                                                                                                                                                                                                                                                                                                                                                                                                                                                                                                                                                                                                                                                                                                                                                                                                                                                                                                                                                                                                                                                                                                                                                                                                                                                                                                                                                                                                                                                                                                                |                                                                                                                                                                                                                                                                                      |                                                                       |                                                                                                                                                                                                      |                                                                                                                                                                                                                                                                                                                                                                                                                   |
|------------------------------------------------------------------------------------------------------------------------------------------------------------------------------------------------------------------------------------------------------------------------------------------------------------------------------------------------------------------------------------------------------------------------------------------------------------------------------------------------------------------------------------------------------------------------------------------------------------------------------------------------------------------------------------------------------------------------------------------------------------------------------------------------------------------------------------------------------------------------------------------------------------------------------------------------------------------------------------------------------------------------------------------------------------------------------------------------------------------------------------------------------------------------------------------------------------------------------------------------------------------------------------------------------------------------------------------------------------------------------------------------------------------------------------------------------------------------------------------------------------------------------------------------------------------------------------------------------------------------------------------------------------------------------------------------------------------------------------------------------------------------------------------------------------------------------------------------------------------------------------------------------------------------------------------------------------------------------------------------------------------------------------------------------------------------------------------------------------------------------------------------------------------------------------------------------------------------------------------------------------------------------------------------------------------------------------------------------------------------------------------------------------------------------------------------------------------------------------------------------------------------------------------------------------------------------------------------------------------------------------------------------------------------------------------------------------------------------------------------------------------------------------------------------------------------------------------------------------------------------------------------------------------------------------------------------------------------------------------------------------------------------------------------------------------------------------------------------------------------------------------------------------------------------------------------------------------------------------------------------------------------------------------------------------------------------------------------------------------------------------------------------------------------------------------------------------------------------------------------------------------------------------------------------------------------------------------------------------------------------------------------------------------------------------------------------------------------------------------------------------------------------------------------------------------------------------------------------------------------------------------------------------------------------------------------------------------------------------------------|--------------------------------------------------------------------------------------------------------------------------------------------------------------------------------------------------------------------------------------------------------------------------------------|-----------------------------------------------------------------------|------------------------------------------------------------------------------------------------------------------------------------------------------------------------------------------------------|-------------------------------------------------------------------------------------------------------------------------------------------------------------------------------------------------------------------------------------------------------------------------------------------------------------------------------------------------------------------------------------------------------------------|
| EPI_ISL_862304, EPI_ISL_862305, EPI_ISL_862306, EPI_ISL_862307, EPI_ISL_862308, EPI_ISL_862309, EPI_ISL_862310, EPI_ISL_862311, EPI_ISL_862312, EPI_ISL_862313, EPI_ISL_862314, EPI_ISL_862315, EPI_ISL_862316, EPI_ISL_862317, EPI_ISL_862318, EPI_ISL_862319, EPI_ISL_862320, EPI_ISL_862321, EPI_ISL_862322, EPI_ISL_862323, EPI_ISL_862324, EPI_ISL_862325, EPI_ISL_862326, EPI_ISL_862327, EPI_ISL_862328, EPI_ISL_862329, EPI_ISL_862330, EPI_ISL_862331, EPI_ISL_862332, EPI_ISL_862333, EPI_ISL_862334, EPI_ISL_862335, EPI_ISL_862336, EPI_ISL_862337, EPI_ISL_862338, EPI_ISL_862339, EPI_ISL_862340, EPI_ISL_862341, EPI_ISL_862342, EPI_ISL_862343, EPI_ISL_862344, EPI_ISL_862345, EPI_ISL_862346, EPI_ISL_862347, EPI_ISL_862348, EPI_ISL_862349, EPI_ISL_862350, EPI_ISL_862351, EPI_ISL_862352, EPI_ISL_862353, EPI_ISL_862354, EPI_ISL_862355, EPI_ISL_862356, EPI_ISL_862357, EPI_ISL_862358, EPI_ISL_862359, EPI_ISL_862360, EPI_ISL_862361, EPI_ISL_862362, EPI_ISL_862363, EPI_ISL_862364, EPI_ISL_862365, EPI_ISL_862366, EPI_ISL_862367, EPI_ISL_862368, EPI_ISL_862369, EPI_ISL_862370, EPI_ISL_862371, EPI_ISL_862372, EPI_ISL_862373, EPI_ISL_862374, EPI_ISL_862375, EPI_ISL_862376, EPI_ISL_862377, EPI_ISL_862378, EPI_ISL_862379, EPI_ISL_862380, EPI_ISL_862381, EPI_ISL_862382, EPI_ISL_862383, EPI_ISL_862384, EPI_ISL_862385, EPI_ISL_862386, EPI_ISL_862387, EPI_ISL_862388, EPI_ISL_862389, EPI_ISL_862390, EPI_ISL_862391, EPI_ISL_862392, EPI_ISL_862393, EPI_ISL_862394, EPI_ISL_862395, EPI_ISL_862396, EPI_ISL_862397, EPI_ISL_862398, EPI_ISL_862399, EPI_ISL_862400, EPI_ISL_862401, EPI_ISL_862402, EPI_ISL_862403, EPI_ISL_862404, EPI_ISL_862405, EPI_ISL_862406, EPI_ISL_862407, EPI_ISL_862408, EPI_ISL_862409, EPI_ISL_862410, EPI_ISL_862411, EPI_ISL_862412, EPI_ISL_862413, EPI_ISL_862414, EPI_ISL_862415, EPI_ISL_862416, EPI_ISL_862417, EPI_ISL_862418, EPI_ISL_862419, EPI_ISL_862420, EPI_ISL_862421, EPI_ISL_862422, EPI_ISL_862423, EPI_ISL_862424, EPI_ISL_862425, EPI_ISL_862426, EPI_ISL_862427, EPI_ISL_862428, EPI_ISL_862429, EPI_ISL_862430, EPI_ISL_862431, EPI_ISL_862432, EPI_ISL_862433, EPI_ISL_862434, EPI_ISL_862435, EPI_ISL_862436, EPI_ISL_862437, EPI_ISL_862438, EPI_ISL_862439, EPI_ISL_862440, EPI_ISL_862441, EPI_ISL_862442, EPI_ISL_862443, EPI_ISL_862444, EPI_ISL_862445, EPI_ISL_862446, EPI_ISL_862447, EPI_ISL_862448, EPI_ISL_862449, EPI_ISL_862450, EPI_ISL_862451, EPI_ISL_862452, EPI_ISL_862453, EPI_ISL_862454, EPI_ISL_862455, EPI_ISL_862456, EPI_ISL_862457, EPI_ISL_862458, EPI_ISL_862459, EPI_ISL_862460, EPI_ISL_862461, EPI_ISL_862462, EPI_ISL_862463, EPI_ISL_862464, EPI_ISL_862465, EPI_ISL_862466, EPI_ISL_862467, EPI_ISL_862468, EPI_ISL_862469, EPI_ISL_862470, EPI_ISL_862471, EPI_ISL_862472, EPI_ISL_862473, EPI_ISL_862474, EPI_ISL_862475, EPI_ISL_862476, EPI_ISL_862477, EPI_ISL_862478, EPI_ISL_862479, EPI_ISL_862480, EPI_ISL_862481, EPI_ISL_862482, EPI_ISL_862483, EPI_ISL_862484, EPI_ISL_862485, EPI_ISL_862486, EPI_ISL_862487, EPI_ISL_862488, EPI_ISL_862489, EPI_ISL_862490, EPI_ISL_862491, EPI_ISL_862492, EPI_ISL_862493, EPI_ISL_862494, EPI_ISL_862495, EPI_ISL_862496, EPI_ISL_862497, EPI_ISL_862498, EPI_ISL_862499, EPI_ISL_862500, EPI_ISL_862501, EPI_ISL_862502, EPI_ISL_862503, EPI_ISL_862504, EPI_ISL_862505, EPI_ISL_862506, EPI_ISL_862507, EPI_ISL_862508, EPI_ISL_862509, EPI_ISL_862510, EPI_ISL_862511, EPI_ISL_862512, EPI_ISL_862513, EPI_ISL_862514, EPI_ISL_862515, EPI_ISL_862516, EPI_ISL_862517, EPI_ISL_862518, EPI_ISL_862519, EPI_ISL_862520, EPI_ISL_862521, EPI_ISL_862522, EPI_ISL_862523, EPI_ISL_862524, EPI_ISL_862525, EPI_ISL_862526, EPI_ISL_862527, EPI_ISL_862528, EPI_ISL_862529, EPI_ISL_862530, EPI_ISL_862531, EPI_ISL_862532, EPI_ISL_862533, EPI_ISL_862534, EPI_ISL_862535, EPI_ISL_862536, EPI_ISL_862537, EPI_ISL_862538, EPI_ISL_862539, EPI_ISL_862540, EPI_ISL_862541, EPI_ISL_862542, EPI_ISL_862543 | see above                                                                                                                                                                                                                                                                            | Kurnool Medical College (KMC)                                         | CSIR Institute of Genomics and Integrative Biology                                                                                                                                                   | Pallavali Roja Rani, Mohamed Imran, J. Vijaya Lakshmi, Bani Jolly, S. Afsar, Abhinav Jain, Mohit Kumar Divakar, Panyam Suresh, Disha Sharma, Nambi Rajesh, Rahul C Bhoiyar, Dasari Ankaiah, Sanaga Shanthi Kumari, Gyan Ranjan, Valluri Anitha Lavanya, Mercy Rophina, S. Umadevi, Paras Sehgal, Avula Renuka Devi, A. Surekha, Pulala Chandra, Rajamadugu Hymavathy, P R Vanaja, Vinod Scaria, Sridhar Sivasubbu |
| EPI_ISL_866432, EPI_ISL_866619, EPI_ISL_866793, EPI_ISL_866985, EPI_ISL_867156                                                                                                                                                                                                                                                                                                                                                                                                                                                                                                                                                                                                                                                                                                                                                                                                                                                                                                                                                                                                                                                                                                                                                                                                                                                                                                                                                                                                                                                                                                                                                                                                                                                                                                                                                                                                                                                                                                                                                                                                                                                                                                                                                                                                                                                                                                                                                                                                                                                                                                                                                                                                                                                                                                                                                                                                                                                                                                                                                                                                                                                                                                                                                                                                                                                                                                                                                                                                                                                                                                                                                                                                                                                                                                                                                                                                                                                                                                                 | Respiratory Virus Unit, National Infection Service, Public Health England                                                                                                                                                                                                            | COVID-19 Genomics UK (COG-UK) Consortium                              | PHE Covid Sequencing Team                                                                                                                                                                            |                                                                                                                                                                                                                                                                                                                                                                                                                   |
| EPI_ISL_872600, EPI_ISL_872601, EPI_ISL_872602, EPI_ISL_872603, EPI_ISL_872604, EPI_ISL_872605, EPI_ISL_872606, EPI_ISL_872607, EPI_ISL_872608, EPI_ISL_872609, EPI_ISL_872610, EPI_ISL_872611, EPI_ISL_872612, EPI_ISL_872613, EPI_ISL_872614, EPI_ISL_872615, EPI_ISL_872616, EPI_ISL_872617, EPI_ISL_872618, EPI_ISL_872619, EPI_ISL_872620, EPI_ISL_872621, EPI_ISL_872622, EPI_ISL_872623, EPI_ISL_872624, EPI_ISL_872625, EPI_ISL_872626, EPI_ISL_872627                                                                                                                                                                                                                                                                                                                                                                                                                                                                                                                                                                                                                                                                                                                                                                                                                                                                                                                                                                                                                                                                                                                                                                                                                                                                                                                                                                                                                                                                                                                                                                                                                                                                                                                                                                                                                                                                                                                                                                                                                                                                                                                                                                                                                                                                                                                                                                                                                                                                                                                                                                                                                                                                                                                                                                                                                                                                                                                                                                                                                                                                                                                                                                                                                                                                                                                                                                                                                                                                                                                                 | see above                                                                                                                                                                                                                                                                            | Nigeria Centre for Disease Control (NCDC)                             | African Centre of Excellence for Genomics of Infectious Diseases (ACEGID), Redeemer's University                                                                                                     | Oluniyi P.E. et al                                                                                                                                                                                                                                                                                                                                                                                                |
| EPI_ISL_875687                                                                                                                                                                                                                                                                                                                                                                                                                                                                                                                                                                                                                                                                                                                                                                                                                                                                                                                                                                                                                                                                                                                                                                                                                                                                                                                                                                                                                                                                                                                                                                                                                                                                                                                                                                                                                                                                                                                                                                                                                                                                                                                                                                                                                                                                                                                                                                                                                                                                                                                                                                                                                                                                                                                                                                                                                                                                                                                                                                                                                                                                                                                                                                                                                                                                                                                                                                                                                                                                                                                                                                                                                                                                                                                                                                                                                                                                                                                                                                                 | Department of Infectious Diseases, Istituto Superiore di Sanità, Rome, Italy; UCO Igiene e Sanità Pubblica, ASUGI, Trieste, Italy; Laboratorio di Genomica ed Epigenomica sistema Argo, Area SciencePark, Trieste, Italy; Laboratorio di Virologia Molecolare, ICGEB, Trieste, Italy | Istituto Superiore di Sanità (ISS)                                    | Paola Stefanelli, Angela Di Martino, Alessandra Lo Presti, Stefano Fiore, Pierlanfranco D'Agaro, Ludovica Segat, Danilo Licastro, Alessandro Marcello, Manuela Marra, Maria Carollo, Marco Crescenzi |                                                                                                                                                                                                                                                                                                                                                                                                                   |
| EPI_ISL_876738, EPI_ISL_876739, EPI_ISL_876740, EPI_ISL_876741                                                                                                                                                                                                                                                                                                                                                                                                                                                                                                                                                                                                                                                                                                                                                                                                                                                                                                                                                                                                                                                                                                                                                                                                                                                                                                                                                                                                                                                                                                                                                                                                                                                                                                                                                                                                                                                                                                                                                                                                                                                                                                                                                                                                                                                                                                                                                                                                                                                                                                                                                                                                                                                                                                                                                                                                                                                                                                                                                                                                                                                                                                                                                                                                                                                                                                                                                                                                                                                                                                                                                                                                                                                                                                                                                                                                                                                                                                                                 | Istituto Zooprofilattico Sperimentale della Puglia e della Basilicata                                                                                                                                                                                                                | Istituto Zooprofilattico Sperimentale della Puglia e della Basilicata | Parisi A., Bianco A., Capozzi L., Del Sambro L., Manzulli V, Rondinone V., Pace L., Cipolletta D., Galante D.                                                                                        |                                                                                                                                                                                                                                                                                                                                                                                                                   |
| EPI_ISL_876742                                                                                                                                                                                                                                                                                                                                                                                                                                                                                                                                                                                                                                                                                                                                                                                                                                                                                                                                                                                                                                                                                                                                                                                                                                                                                                                                                                                                                                                                                                                                                                                                                                                                                                                                                                                                                                                                                                                                                                                                                                                                                                                                                                                                                                                                                                                                                                                                                                                                                                                                                                                                                                                                                                                                                                                                                                                                                                                                                                                                                                                                                                                                                                                                                                                                                                                                                                                                                                                                                                                                                                                                                                                                                                                                                                                                                                                                                                                                                                                 | Ospedale Santa Caterina Novella                                                                                                                                                                                                                                                      | Istituto Zooprofilattico Sperimentale della Puglia e della Basilicata | Parisi A., Bianco A., Capozzi L., Del Sambro L., Manzulli V, Rondinone V., Pace L., Cipolletta D., Galante D.                                                                                        |                                                                                                                                                                                                                                                                                                                                                                                                                   |
| EPI_ISL_876743                                                                                                                                                                                                                                                                                                                                                                                                                                                                                                                                                                                                                                                                                                                                                                                                                                                                                                                                                                                                                                                                                                                                                                                                                                                                                                                                                                                                                                                                                                                                                                                                                                                                                                                                                                                                                                                                                                                                                                                                                                                                                                                                                                                                                                                                                                                                                                                                                                                                                                                                                                                                                                                                                                                                                                                                                                                                                                                                                                                                                                                                                                                                                                                                                                                                                                                                                                                                                                                                                                                                                                                                                                                                                                                                                                                                                                                                                                                                                                                 | Presidio di Brindisi Di Summa - Perrino                                                                                                                                                                                                                                              | Istituto Zooprofilattico Sperimentale della Puglia e della Basilicata | Parisi A., Bianco A., Capozzi L., Del Sambro L., Manzulli V, Rondinone V., Pace L., Cipolletta D., Galante D.                                                                                        |                                                                                                                                                                                                                                                                                                                                                                                                                   |
| EPI_ISL_876744, EPI_ISL_876745, EPI_ISL_876746, EPI_ISL_876747, EPI_ISL_876748, EPI_ISL_876749, EPI_ISL_876750, EPI_ISL_876751, EPI_ISL_876752, EPI_ISL_876753, EPI_ISL_876754, EPI_ISL_876755, EPI_ISL_876756, EPI_ISL_876757, EPI_ISL_876758, EPI_ISL_876759, EPI_ISL_876760, EPI_ISL_876761, EPI_ISL_876762, EPI_ISL_876763, EPI_ISL_876764, EPI_ISL_876765, EPI_ISL_876766, EPI_ISL_876767, EPI_ISL_876768, EPI_ISL_876769, EPI_ISL_876770, EPI_ISL_876771, EPI_ISL_876772, EPI_ISL_876773, EPI_ISL_876774, EPI_ISL_876775, EPI_ISL_876776, EPI_ISL_876777, EPI_ISL_876778, EPI_ISL_876779, EPI_ISL_876780, EPI_ISL_876781, EPI_ISL_876782, EPI_ISL_876783, EPI_ISL_876784, EPI_ISL_876785, EPI_ISL_876786, EPI_ISL_876787, EPI_ISL_876788, EPI_ISL_876789, EPI_ISL_876790, EPI_ISL_876791, EPI_ISL_876792, EPI_ISL_876793, EPI_ISL_876794, EPI_ISL_876795, EPI_ISL_876796, EPI_ISL_876797, EPI_ISL_876798, EPI_ISL_876799, EPI_ISL_876800, EPI_ISL_876801, EPI_ISL_876802, EPI_ISL_876803, EPI_ISL_876804, EPI_ISL_876805, EPI_ISL_876806, EPI_ISL_876807, EPI_ISL_876808, EPI_ISL_876809, EPI_ISL_876810, EPI_ISL_876811, EPI_ISL_876812, EPI_ISL_876813                                                                                                                                                                                                                                                                                                                                                                                                                                                                                                                                                                                                                                                                                                                                                                                                                                                                                                                                                                                                                                                                                                                                                                                                                                                                                                                                                                                                                                                                                                                                                                                                                                                                                                                                                                                                                                                                                                                                                                                                                                                                                                                                                                                                                                                                                                                                                                                                                                                                                                                                                                                                                                                                                                                                                                                                                                 | see above                                                                                                                                                                                                                                                                            | Istituto Zooprofilattico Sperimentale della Puglia e della Basilicata | Istituto Zooprofilattico Sperimentale della Puglia e della Basilicata                                                                                                                                | Parisi A., Bianco A., Capozzi L., Del Sambro L., Manzulli V, Rondinone V., Pace L., Cipolletta D., Galante D.                                                                                                                                                                                                                                                                                                     |
| EPI_ISL_882963, EPI_ISL_882964, EPI_ISL_882965, EPI_ISL_882966                                                                                                                                                                                                                                                                                                                                                                                                                                                                                                                                                                                                                                                                                                                                                                                                                                                                                                                                                                                                                                                                                                                                                                                                                                                                                                                                                                                                                                                                                                                                                                                                                                                                                                                                                                                                                                                                                                                                                                                                                                                                                                                                                                                                                                                                                                                                                                                                                                                                                                                                                                                                                                                                                                                                                                                                                                                                                                                                                                                                                                                                                                                                                                                                                                                                                                                                                                                                                                                                                                                                                                                                                                                                                                                                                                                                                                                                                                                                 | MD Laboratories                                                                                                                                                                                                                                                                      | Los Angeles County PHL                                                | P. Hemarajata et al.                                                                                                                                                                                 |                                                                                                                                                                                                                                                                                                                                                                                                                   |
| EPI_ISL_882967, EPI_ISL_882968, EPI_ISL_882969, EPI_ISL_882970, EPI_ISL_882971, EPI_ISL_882972, EPI_ISL_882973, EPI_ISL_882974, EPI_ISL_882975, EPI_ISL_882976, EPI_ISL_882977, EPI_ISL_882978, EPI_ISL_882979, EPI_ISL_882980, EPI_ISL_882981, EPI_ISL_882982, EPI_ISL_882983, EPI_ISL_882984                                                                                                                                                                                                                                                                                                                                                                                                                                                                                                                                                                                                                                                                                                                                                                                                                                                                                                                                                                                                                                                                                                                                                                                                                                                                                                                                                                                                                                                                                                                                                                                                                                                                                                                                                                                                                                                                                                                                                                                                                                                                                                                                                                                                                                                                                                                                                                                                                                                                                                                                                                                                                                                                                                                                                                                                                                                                                                                                                                                                                                                                                                                                                                                                                                                                                                                                                                                                                                                                                                                                                                                                                                                                                                 | see above                                                                                                                                                                                                                                                                            | UCLA Clinical Micro Lab                                               | Los Angeles County PHL                                                                                                                                                                               | P. Hemarajata et al.                                                                                                                                                                                                                                                                                                                                                                                              |
| EPI_ISL_882985, EPI_ISL_882986, EPI_ISL_882987, EPI_ISL_882988, EPI_ISL_882989, EPI_ISL_882990, EPI_ISL_882991, EPI_ISL_882992, EPI_ISL_882993, EPI_ISL_882994, EPI_ISL_882995, EPI_ISL_882996                                                                                                                                                                                                                                                                                                                                                                                                                                                                                                                                                                                                                                                                                                                                                                                                                                                                                                                                                                                                                                                                                                                                                                                                                                                                                                                                                                                                                                                                                                                                                                                                                                                                                                                                                                                                                                                                                                                                                                                                                                                                                                                                                                                                                                                                                                                                                                                                                                                                                                                                                                                                                                                                                                                                                                                                                                                                                                                                                                                                                                                                                                                                                                                                                                                                                                                                                                                                                                                                                                                                                                                                                                                                                                                                                                                                 | see above                                                                                                                                                                                                                                                                            | MD Laboratories                                                       | Los Angeles County PHL                                                                                                                                                                               | P. Hemarajata et al.                                                                                                                                                                                                                                                                                                                                                                                              |
| EPI_ISL_882997, EPI_ISL_882998                                                                                                                                                                                                                                                                                                                                                                                                                                                                                                                                                                                                                                                                                                                                                                                                                                                                                                                                                                                                                                                                                                                                                                                                                                                                                                                                                                                                                                                                                                                                                                                                                                                                                                                                                                                                                                                                                                                                                                                                                                                                                                                                                                                                                                                                                                                                                                                                                                                                                                                                                                                                                                                                                                                                                                                                                                                                                                                                                                                                                                                                                                                                                                                                                                                                                                                                                                                                                                                                                                                                                                                                                                                                                                                                                                                                                                                                                                                                                                 | Motion Picture Television Fund Hospital Lab                                                                                                                                                                                                                                          | Los Angeles County PHL                                                | P. Hemarajata et al.                                                                                                                                                                                 |                                                                                                                                                                                                                                                                                                                                                                                                                   |
| EPI_ISL_885140                                                                                                                                                                                                                                                                                                                                                                                                                                                                                                                                                                                                                                                                                                                                                                                                                                                                                                                                                                                                                                                                                                                                                                                                                                                                                                                                                                                                                                                                                                                                                                                                                                                                                                                                                                                                                                                                                                                                                                                                                                                                                                                                                                                                                                                                                                                                                                                                                                                                                                                                                                                                                                                                                                                                                                                                                                                                                                                                                                                                                                                                                                                                                                                                                                                                                                                                                                                                                                                                                                                                                                                                                                                                                                                                                                                                                                                                                                                                                                                 | PathWest Laboratory Medicine WA                                                                                                                                                                                                                                                      | PathWest Laboratory Medicine WA Microbial Surveillance Unit           | PathWest Laboratory Medicine WA Microbial Surveillance Unit                                                                                                                                          |                                                                                                                                                                                                                                                                                                                                                                                                                   |

We gratefully acknowledge the following Authors from the Originating laboratories responsible for obtaining the specimens, as well as the Submitting laboratories where the genome data were generated and shared via GISAID, on which this research is based.

All Submitters of data may be contacted directly via [www.gisaid.org](http://www.gisaid.org)

Authors are sorted alphabetically.

| Accession ID                                                                                                                                                                                                                                                                                                                                                                                                                                                                                                                                                                                                                                                                                                                                                                                                                                                                                                                                                                                                                                                                                                                                                                                                                                                                                                                                                                                                                                                                                                                                                                   | Originating Laboratory                                                                | Submitting Laboratory                                                                                                                                                                                               | Authors                                                                                                                                                                                                                                                                                                                                                                    |
|--------------------------------------------------------------------------------------------------------------------------------------------------------------------------------------------------------------------------------------------------------------------------------------------------------------------------------------------------------------------------------------------------------------------------------------------------------------------------------------------------------------------------------------------------------------------------------------------------------------------------------------------------------------------------------------------------------------------------------------------------------------------------------------------------------------------------------------------------------------------------------------------------------------------------------------------------------------------------------------------------------------------------------------------------------------------------------------------------------------------------------------------------------------------------------------------------------------------------------------------------------------------------------------------------------------------------------------------------------------------------------------------------------------------------------------------------------------------------------------------------------------------------------------------------------------------------------|---------------------------------------------------------------------------------------|---------------------------------------------------------------------------------------------------------------------------------------------------------------------------------------------------------------------|----------------------------------------------------------------------------------------------------------------------------------------------------------------------------------------------------------------------------------------------------------------------------------------------------------------------------------------------------------------------------|
| EPI_ISL_402124, EPI_ISL_402127, EPI_ISL_402128, EPI_ISL_402129, EPI_ISL_402130                                                                                                                                                                                                                                                                                                                                                                                                                                                                                                                                                                                                                                                                                                                                                                                                                                                                                                                                                                                                                                                                                                                                                                                                                                                                                                                                                                                                                                                                                                 | Wuhan Jinyintan Hospital                                                              | Wuhan Institute of Virology, Chinese Academy of Sciences                                                                                                                                                            | Peng Zhou, Xing-Lou Yang, Ding-Yu Zhang, Lei Zhang, Yan Zhu, Hao-Rui Si, Zhengli Shi                                                                                                                                                                                                                                                                                       |
| EPI_ISL_403962, EPI_ISL_403963                                                                                                                                                                                                                                                                                                                                                                                                                                                                                                                                                                                                                                                                                                                                                                                                                                                                                                                                                                                                                                                                                                                                                                                                                                                                                                                                                                                                                                                                                                                                                 | Bamrasnaradura Hospital                                                               | 1. Department of Medical Sciences, Ministry of Public Health, Thailand 2. Thai Red Cross Emerging Infectious Diseases - Health Science Centre 3. Department of Disease Control, Ministry of Public Health, Thailand | Pilailuk,Okada; Siripaporn,Phuygun; Thanutsapa,Thanadachakul; Supaporn,Wacharapluesadee; Sittiporn,Parmmen; Warawan,Wongboot; Sunthareeya,Waicharoen; Rome,Buathong; Malinee,Chittaganpicht; Nanthawan,Mekha                                                                                                                                                               |
| EPI_ISL_404895                                                                                                                                                                                                                                                                                                                                                                                                                                                                                                                                                                                                                                                                                                                                                                                                                                                                                                                                                                                                                                                                                                                                                                                                                                                                                                                                                                                                                                                                                                                                                                 | Providence Regional Medical Center                                                    | Division of Viral Diseases, Centers for Disease Control and Prevention                                                                                                                                              | Queen,K., Tao,Y., Li,Y., Paden,C.R., Lu,X., Zhang,J., Gerber,S.I., Lindstrom,S., Tong,S.                                                                                                                                                                                                                                                                                   |
| EPI_ISL_412972                                                                                                                                                                                                                                                                                                                                                                                                                                                                                                                                                                                                                                                                                                                                                                                                                                                                                                                                                                                                                                                                                                                                                                                                                                                                                                                                                                                                                                                                                                                                                                 | Instituto Nacional de Enfermedades Respiratorias                                      | Instituto de Diagnostico y Referencia Epidemiologicos (INDRE)                                                                                                                                                       | Ramirez-Gonzalez Ernesto, Garces-Ayala Fabiola, Araiza-Rodriguez Adnan, Mendieta-Condado Edgar, Rodriguez-Maldonado Abril, Wong-Arambula Claudia, Vazquez-Perez Joel, Martinez Arturo, Boukadida Celia, Munoz-Medina Esteban, Sanchez Alejandro, Isa Pavel, Taboada Blanca, Lopez Susana, Arias Carlos, Barrera-Badillo Gisela, Hernandez-Rivas Lucia, Lopez-Martinez Irma |
| EPI_ISL_413025                                                                                                                                                                                                                                                                                                                                                                                                                                                                                                                                                                                                                                                                                                                                                                                                                                                                                                                                                                                                                                                                                                                                                                                                                                                                                                                                                                                                                                                                                                                                                                 | Harborview Medical Center                                                             | UW Virology Lab                                                                                                                                                                                                     | Pavitra Roychoudhury, Arun Nalla, Hong Xie, Keith Jerome, Alexander Greninger                                                                                                                                                                                                                                                                                              |
| EPI_ISL_413455                                                                                                                                                                                                                                                                                                                                                                                                                                                                                                                                                                                                                                                                                                                                                                                                                                                                                                                                                                                                                                                                                                                                                                                                                                                                                                                                                                                                                                                                                                                                                                 | Washington State Public Health Lab                                                    | University of Washington Virology Lab                                                                                                                                                                               | Pavitra Roychoudhury, Arun Nalla, Hong Xie, Keith Jerome, Alexander Greninger                                                                                                                                                                                                                                                                                              |
| EPI_ISL_413457, EPI_ISL_413458                                                                                                                                                                                                                                                                                                                                                                                                                                                                                                                                                                                                                                                                                                                                                                                                                                                                                                                                                                                                                                                                                                                                                                                                                                                                                                                                                                                                                                                                                                                                                 | Washington State Public Health Lab                                                    | UW Virology Lab                                                                                                                                                                                                     | Pavitra Roychoudhury, Arun Nalla, Hong Xie, Keith Jerome, Alexander Greninger                                                                                                                                                                                                                                                                                              |
| EPI_ISL_413486                                                                                                                                                                                                                                                                                                                                                                                                                                                                                                                                                                                                                                                                                                                                                                                                                                                                                                                                                                                                                                                                                                                                                                                                                                                                                                                                                                                                                                                                                                                                                                 | Valley Medical Center                                                                 | University of Washington Virology Lab                                                                                                                                                                               | Pavitra Roychoudhury, Arun Nalla, Hong Xie, Keith Jerome, Alexander Greninger                                                                                                                                                                                                                                                                                              |
| EPI_ISL_413487                                                                                                                                                                                                                                                                                                                                                                                                                                                                                                                                                                                                                                                                                                                                                                                                                                                                                                                                                                                                                                                                                                                                                                                                                                                                                                                                                                                                                                                                                                                                                                 | Harborview Medical Center                                                             | University of Washington Virology Lab                                                                                                                                                                               | Pavitra Roychoudhury, Arun Nalla, Hong Xie, Keith Jerome, Alexander Greninger                                                                                                                                                                                                                                                                                              |
| EPI_ISL_413489                                                                                                                                                                                                                                                                                                                                                                                                                                                                                                                                                                                                                                                                                                                                                                                                                                                                                                                                                                                                                                                                                                                                                                                                                                                                                                                                                                                                                                                                                                                                                                 | Laboratorio di Microbiologia e Virologia, Università Vita-Salute San Raffaele, Milano | Laboratorio di Microbiologia e Virologia, Università Vita-Salute San Raffaele, Milano                                                                                                                               | R.A Diotti, E. Criscuolo, M. Castelli, V. Caputo, R. Ferrarese, M. Sampaolo, E. Boeri, I. Negri, V. Amato, G. Lo Raso, C. Di Resta, R. Burioni, M. Clementi, N. Mancini & N. Clementi                                                                                                                                                                                      |
| EPI_ISL_413522                                                                                                                                                                                                                                                                                                                                                                                                                                                                                                                                                                                                                                                                                                                                                                                                                                                                                                                                                                                                                                                                                                                                                                                                                                                                                                                                                                                                                                                                                                                                                                 | Indian Council of Medical Research - National Institute of Virology                   | National Influenza Center, Indian Council of Medical Research - National Institute of Virology                                                                                                                      | Potdar V, Yadav PD, Choudhary ML, Shete-Aich A                                                                                                                                                                                                                                                                                                                             |
| EPI_ISL_413523                                                                                                                                                                                                                                                                                                                                                                                                                                                                                                                                                                                                                                                                                                                                                                                                                                                                                                                                                                                                                                                                                                                                                                                                                                                                                                                                                                                                                                                                                                                                                                 | Indian Council of Medical Research-National Institute of Virology                     | National Influenza Center, Indian Council of Medical Research-National Institute of Virology                                                                                                                        | Potdar V, Yadav PD, Choudhary ML, Shete-Aich A                                                                                                                                                                                                                                                                                                                             |
| EPI_ISL_413562, EPI_ISL_413563, EPI_ISL_413601, EPI_ISL_413649, EPI_ISL_413650, EPI_ISL_413651, EPI_ISL_413652, EPI_ISL_413653                                                                                                                                                                                                                                                                                                                                                                                                                                                                                                                                                                                                                                                                                                                                                                                                                                                                                                                                                                                                                                                                                                                                                                                                                                                                                                                                                                                                                                                 | UW Virology Lab                                                                       | UW Virology Lab                                                                                                                                                                                                     | Pavitra Roychoudhury, Hong Xie, Keith Jerome, Alexander Greninger                                                                                                                                                                                                                                                                                                          |
| EPI_ISL_413691, EPI_ISL_413692, EPI_ISL_413693, EPI_ISL_413694, EPI_ISL_413695, EPI_ISL_413696, EPI_ISL_413697, EPI_ISL_413711, EPI_ISL_413729, EPI_ISL_413746, EPI_ISL_413747, EPI_ISL_413748, EPI_ISL_413749, EPI_ISL_413750, EPI_ISL_413751, EPI_ISL_413752, EPI_ISL_413753, EPI_ISL_413761, EPI_ISL_413791, EPI_ISL_413809                                                                                                                                                                                                                                                                                                                                                                                                                                                                                                                                                                                                                                                                                                                                                                                                                                                                                                                                                                                                                                                                                                                                                                                                                                                 | see above                                                                             | Weifang Center for Disease Control and Prevention                                                                                                                                                                   | Qing Nie, Xingguang Li, Erik M Volz, Han Fu, Haowei Wang, Xiaoyue Xi, Wei Chen, Dehui Liu, Yingying Chen, Mengmeng Tian, Wei Tan, Junjie Zai, Wanying Sun, Jiandong Li, Junhua Li                                                                                                                                                                                          |
| EPI_ISL_414363, EPI_ISL_414364, EPI_ISL_414365, EPI_ISL_414366, EPI_ISL_414367, EPI_ISL_414368, EPI_ISL_414369, EPI_ISL_414591, EPI_ISL_414592, EPI_ISL_414593, EPI_ISL_414594, EPI_ISL_414595, EPI_ISL_414596, EPI_ISL_414597, EPI_ISL_414616, EPI_ISL_414617, EPI_ISL_414618, EPI_ISL_414619, EPI_ISL_414620, EPI_ISL_414621, EPI_ISL_414622                                                                                                                                                                                                                                                                                                                                                                                                                                                                                                                                                                                                                                                                                                                                                                                                                                                                                                                                                                                                                                                                                                                                                                                                                                 | see above                                                                             | UW Virology Lab                                                                                                                                                                                                     | Pavitra Roychoudhury, Hong Xie, Keith Jerome, Alexander Greninger                                                                                                                                                                                                                                                                                                          |
| EPI_ISL_414647                                                                                                                                                                                                                                                                                                                                                                                                                                                                                                                                                                                                                                                                                                                                                                                                                                                                                                                                                                                                                                                                                                                                                                                                                                                                                                                                                                                                                                                                                                                                                                 | Viral Respiratory Lab, National Institute for Biomedical Research (INRB)              | Pathogen Sequencing Lab, National Institute for Biomedical Research (INRB)                                                                                                                                          | Placide Mbala-Kingebeni, Edith Nkwembe, Eddy Kinganda-Lusamaki, Amuri Aziza, Catherine Pratt, Matthias Pauthner, Josh Quick, Allison Black, James Hadfield, Trevor Bedford, Ian Goodfellow, Nick Loman, Kristian Andersen, Michael Wiley, Steve Ahuka-Mundeye, Jean-Jacques Muyembe Tamfum                                                                                 |
| EPI_ISL_415591, EPI_ISL_415592, EPI_ISL_415593, EPI_ISL_415594, EPI_ISL_415595, EPI_ISL_415596, EPI_ISL_415597, EPI_ISL_415598, EPI_ISL_415599, EPI_ISL_415600, EPI_ISL_415601, EPI_ISL_415602, EPI_ISL_415603, EPI_ISL_415604, EPI_ISL_415605, EPI_ISL_415606, EPI_ISL_415607, EPI_ISL_415608, EPI_ISL_415609, EPI_ISL_415610, EPI_ISL_415611, EPI_ISL_415612, EPI_ISL_415613, EPI_ISL_415614, EPI_ISL_415615, EPI_ISL_415616, EPI_ISL_415617, EPI_ISL_415618, EPI_ISL_415619, EPI_ISL_415620, EPI_ISL_415621, EPI_ISL_415622, EPI_ISL_415623, EPI_ISL_415624, EPI_ISL_415625, EPI_ISL_415626, EPI_ISL_415627                                                                                                                                                                                                                                                                                                                                                                                                                                                                                                                                                                                                                                                                                                                                                                                                                                                                                                                                                                 | see above                                                                             | UW Virology Lab                                                                                                                                                                                                     | Pavitra Roychoudhury, Hong Xie, Keith Jerome, Alexander Greninger                                                                                                                                                                                                                                                                                                          |
| EPI_ISL_415658, EPI_ISL_415660, EPI_ISL_415661                                                                                                                                                                                                                                                                                                                                                                                                                                                                                                                                                                                                                                                                                                                                                                                                                                                                                                                                                                                                                                                                                                                                                                                                                                                                                                                                                                                                                                                                                                                                 | Laboratory of Molecular Virology, Pontificia Universidad Católica de Chile            | MSHS Pathogen Surveillance Program                                                                                                                                                                                  | Rafael A. Medina, Pablo Vial, Tamara Garcia, Eileen Serrano, Ana Silvia Gonzalez-Reiche, Zenab Khan, Mitchell Sullivan, Ajay Obla, Matthew Hernandez, Hala Alshammry, Juan Soto, Shwetha Sridhar Hara, Ying-Chih Wang, Melissa Smith, Robert Sebra, Viviana Simon, Harm van Bakel                                                                                          |
| EPI_ISL_416426                                                                                                                                                                                                                                                                                                                                                                                                                                                                                                                                                                                                                                                                                                                                                                                                                                                                                                                                                                                                                                                                                                                                                                                                                                                                                                                                                                                                                                                                                                                                                                 | Virological Research Group, Szentágotthai Research Centre, University of Pécs         | Bioinformatics Research Group, Szentágotthai Research Centre, University of Pécs                                                                                                                                    | Péter Urbán, Endre Gábor Tóth, Gábor Kemenesi, Róbert Herczeg, Attila Gyenesei, Ferenc Jakab                                                                                                                                                                                                                                                                               |
| EPI_ISL_416433, EPI_ISL_416434, EPI_ISL_416435, EPI_ISL_416436, EPI_ISL_416437, EPI_ISL_416438, EPI_ISL_416439, EPI_ISL_416440, EPI_ISL_416441, EPI_ISL_416442, EPI_ISL_416443, EPI_ISL_416444, EPI_ISL_416445, EPI_ISL_416446, EPI_ISL_416447, EPI_ISL_416448, EPI_ISL_416449, EPI_ISL_416450, EPI_ISL_416451, EPI_ISL_416452, EPI_ISL_416453, EPI_ISL_416454, EPI_ISL_416455, EPI_ISL_416456, EPI_ISL_416457, EPI_ISL_416458, EPI_ISL_416459, EPI_ISL_416460, EPI_ISL_416461, EPI_ISL_416462, EPI_ISL_416463, EPI_ISL_416464, EPI_ISL_416465, EPI_ISL_416466, EPI_ISL_416467, EPI_ISL_416468, EPI_ISL_416469, EPI_ISL_416470, EPI_ISL_416471, EPI_ISL_416472, EPI_ISL_416473, EPI_ISL_416474, EPI_ISL_416475, EPI_ISL_416476, EPI_ISL_416477, EPI_ISL_416478, EPI_ISL_416479, EPI_ISL_416480, EPI_ISL_416481, EPI_ISL_416482, EPI_ISL_416483, EPI_ISL_416484, EPI_ISL_416485, EPI_ISL_416486, EPI_ISL_416487, EPI_ISL_416488, EPI_ISL_416489, EPI_ISL_416490, EPI_ISL_416491, EPI_ISL_416492, EPI_ISL_416493, EPI_ISL_416494, EPI_ISL_416495, EPI_ISL_416496, EPI_ISL_416497, EPI_ISL_416498, EPI_ISL_416499, EPI_ISL_416500, EPI_ISL_416501, EPI_ISL_416502, EPI_ISL_416503, EPI_ISL_416504, EPI_ISL_416505, EPI_ISL_416506, EPI_ISL_416507, EPI_ISL_416508, EPI_ISL_416509, EPI_ISL_416510, EPI_ISL_416511, EPI_ISL_416512, EPI_ISL_416513, EPI_ISL_416514, EPI_ISL_416515, EPI_ISL_416516, EPI_ISL_416517, EPI_ISL_416518, EPI_ISL_416519, EPI_ISL_416520, EPI_ISL_416521, EPI_ISL_416522, EPI_ISL_416523, EPI_ISL_416524, EPI_ISL_416525, EPI_ISL_416526, EPI_ISL_416527 | see above                                                                             | UW Virology Lab                                                                                                                                                                                                     | Pavitra Roychoudhury, Hong Xie, Keith Jerome, Alexander Greninger                                                                                                                                                                                                                                                                                                          |
| EPI_ISL_416744                                                                                                                                                                                                                                                                                                                                                                                                                                                                                                                                                                                                                                                                                                                                                                                                                                                                                                                                                                                                                                                                                                                                                                                                                                                                                                                                                                                                                                                                                                                                                                 | Virological Research Group, Szentágotthai Research Centre                             | Bioinformatics Research Group, Szentágotthai Research Centre                                                                                                                                                        | Péter Urbán, Endre Gábor Tóth, Gábor Kemenesi, Róbert Herczeg, Attila Gyenesei, Ferenc Jakab                                                                                                                                                                                                                                                                               |
| EPI_ISL_417341, EPI_ISL_417342, EPI_ISL_417343, EPI_ISL_417344, EPI_ISL_417345, EPI_ISL_417346, EPI_ISL_417347, EPI_ISL_417348, EPI_ISL_417349, EPI_ISL_417350, EPI_ISL_417351, EPI_ISL_417352, EPI_ISL_417353, EPI_ISL_417354, EPI_ISL_417355, EPI_ISL_417356, EPI_ISL_417357, EPI_ISL_417358, EPI_ISL_417359, EPI_ISL_417360, EPI_ISL_417361, EPI_ISL_417362, EPI_ISL_417363, EPI_ISL_417364, EPI_ISL_417365, EPI_ISL_417366, EPI_ISL_417367, EPI_ISL_417368, EPI_ISL_417369, EPI_ISL_417370, EPI_ISL_417371, EPI_ISL_417372, EPI_ISL_417373, EPI_ISL_417374, EPI_ISL_417375, EPI_ISL_417376, EPI_ISL_417377, EPI_ISL_417378, EPI_ISL_417379, EPI_ISL_417380, EPI_ISL_417381, EPI_ISL_417382                                                                                                                                                                                                                                                                                                                                                                                                                                                                                                                                                                                                                                                                                                                                                                                                                                                                                 | see above                                                                             | UW Virology Lab                                                                                                                                                                                                     | Pavitra Roychoudhury, Hong Xie, Keith Jerome, Alexander Greninger                                                                                                                                                                                                                                                                                                          |
| EPI_ISL_417392, EPI_ISL_417409                                                                                                                                                                                                                                                                                                                                                                                                                                                                                                                                                                                                                                                                                                                                                                                                                                                                                                                                                                                                                                                                                                                                                                                                                                                                                                                                                                                                                                                                                                                                                 | Centre for Infectious Diseases and Microbiology Public Health                         | NSW Health Pathology - Institute of Clinical Pathology and Medical Research; Westmead Hospital; University of Sydney                                                                                                | Rahman H, Holmes EC, O'Sullivan MV, Sintchenko V, Chen SC, Maddocks S, Kok J, Dwyer DE, Rockett R, Eden J-S, Lam C, Gray K, Timms V, Gall M, Arnott A, Sadsad R and Carter I for the 2019-nCoV Study Group                                                                                                                                                                 |
| EPI_ISL_417433, EPI_ISL_417434                                                                                                                                                                                                                                                                                                                                                                                                                                                                                                                                                                                                                                                                                                                                                                                                                                                                                                                                                                                                                                                                                                                                                                                                                                                                                                                                                                                                                                                                                                                                                 | Viral Respiratory Lab, National Institute for Biomedical                              | Pathogen Sequencing Lab, National Institute for Biomedical                                                                                                                                                          | Placide Mbala-Kingebeni, Edith Nkwembe, Eddy Kinganda-Lusamaki, Amuri Aziza, Catherine Pratt, Matthias Pauthner, Josh Quick, Allison Black, James                                                                                                                                                                                                                          |

|                                                                                                                                                                                                                                                                                                                                                                                                                                                                                                                                                                                                                                                                                                                                                                                                                                                                                                                                                                                                                                                                                                                                                                                                                                                                                                                                                                                                                                                                                                |                                                                                                                                                    |                                                                                                                                                    |                                                                                                                                                                                                                                                                                                                                         |
|------------------------------------------------------------------------------------------------------------------------------------------------------------------------------------------------------------------------------------------------------------------------------------------------------------------------------------------------------------------------------------------------------------------------------------------------------------------------------------------------------------------------------------------------------------------------------------------------------------------------------------------------------------------------------------------------------------------------------------------------------------------------------------------------------------------------------------------------------------------------------------------------------------------------------------------------------------------------------------------------------------------------------------------------------------------------------------------------------------------------------------------------------------------------------------------------------------------------------------------------------------------------------------------------------------------------------------------------------------------------------------------------------------------------------------------------------------------------------------------------|----------------------------------------------------------------------------------------------------------------------------------------------------|----------------------------------------------------------------------------------------------------------------------------------------------------|-----------------------------------------------------------------------------------------------------------------------------------------------------------------------------------------------------------------------------------------------------------------------------------------------------------------------------------------|
| EPI_ISL_417435, EPI_ISL_417436, EPI_ISL_417437, EPI_ISL_417438, EPI_ISL_417439, EPI_ISL_417440, EPI_ISL_417441, EPI_ISL_417442                                                                                                                                                                                                                                                                                                                                                                                                                                                                                                                                                                                                                                                                                                                                                                                                                                                                                                                                                                                                                                                                                                                                                                                                                                                                                                                                                                 | Research (INRB)                                                                                                                                    | Research (INRB)                                                                                                                                    | Hadfield, Trevor Bedford, Ian Goodfellow, Nick Loman, Kristian Andersen, Michael Wiley, Steve Ahuka-Mundeke, Jean-Jacques Muyembe Tamfum                                                                                                                                                                                                |
| EPI_ISL_417443                                                                                                                                                                                                                                                                                                                                                                                                                                                                                                                                                                                                                                                                                                                                                                                                                                                                                                                                                                                                                                                                                                                                                                                                                                                                                                                                                                                                                                                                                 | State Key Laboratory for Emerging Infectious Diseases<br>Department of Microbiology Li Ka Shing Faculty of Medicine<br>The University of Hong Kong | State Key Laboratory for Emerging Infectious Diseases<br>Department of Microbiology Li Ka Shing Faculty of Medicine<br>The University of Hong Kong | Pui Wang, Siu-Ying Lau, Shaofeng Deng, Bobo Wing-Yee Mok, Wenjun Song, Kwok-Yung Yuen, Honglin Chen                                                                                                                                                                                                                                     |
| EPI_ISL_417448, EPI_ISL_417449, EPI_ISL_417450, EPI_ISL_417451, EPI_ISL_417452, EPI_ISL_417453, EPI_ISL_417454, EPI_ISL_417455, EPI_ISL_417456                                                                                                                                                                                                                                                                                                                                                                                                                                                                                                                                                                                                                                                                                                                                                                                                                                                                                                                                                                                                                                                                                                                                                                                                                                                                                                                                                 | UW Virology Lab                                                                                                                                    | UW Virology Lab                                                                                                                                    | Pavitra Roychoudhury, Hong Xie, Keith Jerome, Alexander Greninger                                                                                                                                                                                                                                                                       |
| EPI_ISL_417941, EPI_ISL_417942, EPI_ISL_417944, EPI_ISL_417946, EPI_ISL_417947, EPI_ISL_417948, EPI_ISL_417950, EPI_ISL_417955                                                                                                                                                                                                                                                                                                                                                                                                                                                                                                                                                                                                                                                                                                                                                                                                                                                                                                                                                                                                                                                                                                                                                                                                                                                                                                                                                                 | Viral Respiratory Lab, National Institute for Biomedical Research (INRB)                                                                           | Pathogen Sequencing Lab, National Institute for Biomedical Research (INRB)                                                                         | Placide Mbala-Kingebeni, Edith Nkwembe, Eddy Kinganda-Lusamaki, Amuri Aziza, Catherine Pratt, Matthias Pauthner, Josh Quick, Allison Black, James Hadfield, Trevor Bedford, Ian Goodfellow, Nick Loman, Kristian Andersen, Michael Wiley, Steve Ahuka-Mundeke, Jean-Jacques Muyembe Tamfum                                              |
| EPI_ISL_418028, EPI_ISL_418029, EPI_ISL_418030, EPI_ISL_418031, EPI_ISL_418032, EPI_ISL_418033, EPI_ISL_418034, EPI_ISL_418035, EPI_ISL_418036, EPI_ISL_418037, EPI_ISL_418038, EPI_ISL_418039, EPI_ISL_418040, EPI_ISL_418041, EPI_ISL_418042, EPI_ISL_418043, EPI_ISL_418044, EPI_ISL_418045, EPI_ISL_418046, EPI_ISL_418047, EPI_ISL_418048, EPI_ISL_418049, EPI_ISL_418050, EPI_ISL_418051, EPI_ISL_418052, EPI_ISL_418053, EPI_ISL_418054, EPI_ISL_418055, EPI_ISL_418056, EPI_ISL_418057, EPI_ISL_418058, EPI_ISL_418059, EPI_ISL_418060, EPI_ISL_418061, EPI_ISL_418062, EPI_ISL_418063, EPI_ISL_418064, EPI_ISL_418065, EPI_ISL_418067, EPI_ISL_418068, EPI_ISL_418069, EPI_ISL_418070, EPI_ISL_418071, EPI_ISL_418072, EPI_ISL_418073, EPI_ISL_418074, EPI_ISL_418075, EPI_ISL_418076, EPI_ISL_418077, EPI_ISL_418078, EPI_ISL_418079, EPI_ISL_418080, EPI_ISL_418081, EPI_ISL_418082                                                                                                                                                                                                                                                                                                                                                                                                                                                                                                                                                                                                 | UW Virology Lab                                                                                                                                    | UW Virology Lab                                                                                                                                    | Pavitra Roychoudhury, Hong Xie, Keith Jerome, Alexander Greninger                                                                                                                                                                                                                                                                       |
| see above                                                                                                                                                                                                                                                                                                                                                                                                                                                                                                                                                                                                                                                                                                                                                                                                                                                                                                                                                                                                                                                                                                                                                                                                                                                                                                                                                                                                                                                                                      | UW Virology Lab                                                                                                                                    | UW Virology Lab                                                                                                                                    | Pavitra Roychoudhury, Hong Xie, Keith Jerome, Alexander Greninger                                                                                                                                                                                                                                                                       |
| EPI_ISL_418183                                                                                                                                                                                                                                                                                                                                                                                                                                                                                                                                                                                                                                                                                                                                                                                                                                                                                                                                                                                                                                                                                                                                                                                                                                                                                                                                                                                                                                                                                 | Virological Research Group, Szentágotthai Research Centre                                                                                          | Bioinformatics Research Group, Szentágotthai Research Centre                                                                                       | Péter Urbán, Endre Gábor Tóth, Gábor Kemeneši, Róbert Herczeg, Attila Gyenesei, Ferenc Jakab                                                                                                                                                                                                                                            |
| EPI_ISL_418268                                                                                                                                                                                                                                                                                                                                                                                                                                                                                                                                                                                                                                                                                                                                                                                                                                                                                                                                                                                                                                                                                                                                                                                                                                                                                                                                                                                                                                                                                 | Hospital Universitari Germans Trias i Pujol(HUGTIP)/Fundació Lluita contra la SIDA (FLSida)/IRTA-CReSA                                             | IrsiCaixa AIDS Research Lab                                                                                                                        | Pilar Armengol, Marc Noguera-Julian, Jordi Rodón, Julia Vergara, Lidia Ruiz, Nuria Izquierdo, Jorge Carrillo, Roger Paredes, Albert Bensaid, Julia Blanco, Joaquim Segalés, Bonaventura Clotet                                                                                                                                          |
| EPI_ISL_418866, EPI_ISL_418867, EPI_ISL_418868, EPI_ISL_418869, EPI_ISL_418870, EPI_ISL_418871, EPI_ISL_418872, EPI_ISL_418873, EPI_ISL_418874, EPI_ISL_418875, EPI_ISL_418876, EPI_ISL_418877, EPI_ISL_418878, EPI_ISL_418879, EPI_ISL_418880, EPI_ISL_418881, EPI_ISL_418882, EPI_ISL_418883, EPI_ISL_418884, EPI_ISL_418885, EPI_ISL_418886, EPI_ISL_418887, EPI_ISL_418888, EPI_ISL_418889, EPI_ISL_418890, EPI_ISL_418891, EPI_ISL_418892, EPI_ISL_418893, EPI_ISL_418894, EPI_ISL_418895, EPI_ISL_418896, EPI_ISL_418897, EPI_ISL_418898, EPI_ISL_418899, EPI_ISL_418900, EPI_ISL_418901, EPI_ISL_418902, EPI_ISL_418903, EPI_ISL_418904, EPI_ISL_418905, EPI_ISL_418906, EPI_ISL_418907, EPI_ISL_418908, EPI_ISL_418909, EPI_ISL_418910, EPI_ISL_418911, EPI_ISL_418912, EPI_ISL_418913, EPI_ISL_418914, EPI_ISL_418915, EPI_ISL_418916, EPI_ISL_418917, EPI_ISL_418918, EPI_ISL_418919, EPI_ISL_418920, EPI_ISL_418921, EPI_ISL_418922, EPI_ISL_418923, EPI_ISL_418924, EPI_ISL_418925, EPI_ISL_418926, EPI_ISL_418927, EPI_ISL_418928, EPI_ISL_418929, EPI_ISL_418930, EPI_ISL_418931, EPI_ISL_418932, EPI_ISL_418933, EPI_ISL_418934, EPI_ISL_418935, EPI_ISL_418936, EPI_ISL_418937, EPI_ISL_418938, EPI_ISL_418939, EPI_ISL_418940, EPI_ISL_418941, EPI_ISL_418942, EPI_ISL_418943, EPI_ISL_418944, EPI_ISL_418945, EPI_ISL_418946, EPI_ISL_418947, EPI_ISL_418948, EPI_ISL_418949, EPI_ISL_418950, EPI_ISL_418951, EPI_ISL_418952, EPI_ISL_418953, EPI_ISL_418954, EPI_ISL_418955 | UW Virology Lab                                                                                                                                    | UW Virology Lab                                                                                                                                    | Pavitra Roychoudhury, Hong Xie, Keith Jerome, Alexander Greninger                                                                                                                                                                                                                                                                       |
| see above                                                                                                                                                                                                                                                                                                                                                                                                                                                                                                                                                                                                                                                                                                                                                                                                                                                                                                                                                                                                                                                                                                                                                                                                                                                                                                                                                                                                                                                                                      | UW Virology Lab                                                                                                                                    | UW Virology Lab                                                                                                                                    | Pavitra Roychoudhury, Hong Xie, Keith Jerome, Alexander Greninger                                                                                                                                                                                                                                                                       |
| EPI_ISL_420030, EPI_ISL_420031, EPI_ISL_420032, EPI_ISL_420033, EPI_ISL_420034, EPI_ISL_420035                                                                                                                                                                                                                                                                                                                                                                                                                                                                                                                                                                                                                                                                                                                                                                                                                                                                                                                                                                                                                                                                                                                                                                                                                                                                                                                                                                                                 | Viral Respiratory Lab, National Institute for Biomedical Research (INRB)                                                                           | Pathogen Sequencing Lab, National Institute for Biomedical Research (INRB)                                                                         | Placide Mbala-Kingebeni, Edith Nkwembe, Eddy Kinganda-Lusamaki, Amuri Aziza, Catherine Pratt, Matthias Pauthner, Josh Quick, Allison Black, James Hadfield, Trevor Bedford, Ian Goodfellow, Nick Loman, Kristian Andersen, Michael Wiley, Steve Ahuka-Mundeke, Jean-Jacques Muyembe Tamfum                                              |
| EPI_ISL_420119                                                                                                                                                                                                                                                                                                                                                                                                                                                                                                                                                                                                                                                                                                                                                                                                                                                                                                                                                                                                                                                                                                                                                                                                                                                                                                                                                                                                                                                                                 | Servicio de Microbiología. Consorcio Hospital General Universitario de Valencia                                                                    | Sequencing and Bioinformatics Service and Molecular Epidemiology Research Group. FISABIO-Public Health                                             | Paula Ruiz-Hueso, Mariana Reyes-Prieto, Vicente Soriano Chirona, Maria Alma Bracho, Griselda De Marco, Beatriz Beamud, Lidia Ruiz Roldan, Marta Pla Diaz, Neris Garcia-Gonzalez, Loreto Ferrús Abad, Inma Galán Vendrell, Maria Dolores Ocete, Lúcia Martínez-Priego, Concepcion Gimeno, Giuseppe D'Auria, Fernando Gonzalez-Candelas   |
| EPI_ISL_420131                                                                                                                                                                                                                                                                                                                                                                                                                                                                                                                                                                                                                                                                                                                                                                                                                                                                                                                                                                                                                                                                                                                                                                                                                                                                                                                                                                                                                                                                                 | Servicio de Microbiología. Hospital Clínico Universitario de Valencia                                                                              | Sequencing and Bioinformatics Service and Molecular Epidemiology Research Group. FISABIO-Public Health                                             | Paula Ruiz-Hueso, Loreto Ferrús Abad, Maria Alma Bracho, Griselda De Marco, Beatriz Beamud, Sandra Carbo, Lidia Ruiz Roldan, Marta Pla Diaz, Neris Garcia-Gonzalez, Inma Galán Vendrell, Mariana Reyes-Prieto, Vicente Soriano Chirona, Ivan Ansari, David Navarro, Lidia Martínez-Priego, Giuseppe D'Auria, Fernando Gonzalez-Candelas |
| EPI_ISL_420293                                                                                                                                                                                                                                                                                                                                                                                                                                                                                                                                                                                                                                                                                                                                                                                                                                                                                                                                                                                                                                                                                                                                                                                                                                                                                                                                                                                                                                                                                 | Wildlife Conservation Society, Bronx Zoo                                                                                                           | Diagnostic Virology Laboratory, United States Department of Agriculture, National Veterinary Services Laboratories                                 | Patrick K. Mitchell, Renee R. Anderson, Brittany Chilson, Roopa Venugopalan, D. G. Diel, Laura B. Goodman, L. Wang, F. Yuan, Y. Fang, Mary Lea Killian, Kerrie Franzen, Nichole Hines Bergeson, Ivan Kuzmin, Melinda Jenkins-Moore, Tod P. Stuber                                                                                       |
| EPI_ISL_420543                                                                                                                                                                                                                                                                                                                                                                                                                                                                                                                                                                                                                                                                                                                                                                                                                                                                                                                                                                                                                                                                                                                                                                                                                                                                                                                                                                                                                                                                                 | National Influenza Center, Indian Council of Medical Research - National Institute of Virology                                                     | Indian Council of Medical Research-National Institute of Virology, Microbial Containment Complex                                                   | Pragya D. Yadav, Savita Patil, Varsha Potdar, Prasad Sarkale, Dimpal A. Nyayanit, Gajanan Sapkal, Anita M. Shete, Atanu Basu, Lalit Dar, M Choudhary, Amita Jain, Bharati Malhotra, Pranita Gawande, Sarah Cherian, Priya Abraham                                                                                                       |
| EPI_ISL_420544                                                                                                                                                                                                                                                                                                                                                                                                                                                                                                                                                                                                                                                                                                                                                                                                                                                                                                                                                                                                                                                                                                                                                                                                                                                                                                                                                                                                                                                                                 | Indian Council of Medical Research-National Institute of Virology, Microbial Containment Complex                                                   | Indian Council of Medical Research-National Institute of Virology, Microbial Containment Complex                                                   | Pragya D. Yadav, Savita Patil, Varsha Potdar, Prasad Sarkale, Dimpal A. Nyayanit, Gajanan Sapkal, Anita M. Shete, Atanu Basu, Lalit Dar, M Choudhary, Amita Jain, Bharati Malhotra, Pranita Gawande, Sarah Cherian, Priya Abraham                                                                                                       |
| EPI_ISL_420545                                                                                                                                                                                                                                                                                                                                                                                                                                                                                                                                                                                                                                                                                                                                                                                                                                                                                                                                                                                                                                                                                                                                                                                                                                                                                                                                                                                                                                                                                 | National Influenza Center, Indian Council of Medical Research - National Institute of Virology                                                     | Indian Council of Medical Research-National Institute of Virology, Microbial Containment Complex                                                   | Pragya D. Yadav, Savita Patil, Varsha Potdar, Prasad Sarkale, Dimpal A. Nyayanit, Gajanan Sapkal, Anita M. Shete, Atanu Basu, Lalit Dar, M Choudhary, Amita Jain, Bharati Malhotra, Pranita Gawande, Sarah Cherian, Priya Abraham                                                                                                       |
| EPI_ISL_420546                                                                                                                                                                                                                                                                                                                                                                                                                                                                                                                                                                                                                                                                                                                                                                                                                                                                                                                                                                                                                                                                                                                                                                                                                                                                                                                                                                                                                                                                                 | Indian Council of Medical Research-National Institute of Virology, Microbial Containment Complex                                                   | Indian Council of Medical Research-National Institute of Virology, Microbial Containment Complex                                                   | Pragya D. Yadav, Savita Patil, Varsha Potdar, Prasad Sarkale, Dimpal A. Nyayanit, Gajanan Sapkal, Anita M. Shete, Atanu Basu, Lalit Dar, M Choudhary, Amita Jain, Bharati Malhotra, Pranita Gawande, Sarah Cherian, Priya Abraham                                                                                                       |
| EPI_ISL_420547                                                                                                                                                                                                                                                                                                                                                                                                                                                                                                                                                                                                                                                                                                                                                                                                                                                                                                                                                                                                                                                                                                                                                                                                                                                                                                                                                                                                                                                                                 | National Influenza Center, Indian Council of Medical Research - National Institute of Virology                                                     | Indian Council of Medical Research-National Institute of Virology, Microbial Containment Complex                                                   | Pragya D. Yadav, Savita Patil, Varsha Potdar, Prasad Sarkale, Dimpal A. Nyayanit, Gajanan Sapkal, Anita M. Shete, Atanu Basu, Lalit Dar, M Choudhary, Amita Jain, Bharati Malhotra, Pranita Gawande, Sarah Cherian, Priya Abraham                                                                                                       |
| EPI_ISL_420548                                                                                                                                                                                                                                                                                                                                                                                                                                                                                                                                                                                                                                                                                                                                                                                                                                                                                                                                                                                                                                                                                                                                                                                                                                                                                                                                                                                                                                                                                 | Indian Council of Medical Research-National Institute of Virology, Microbial Containment Complex                                                   | Indian Council of Medical Research-National Institute of Virology, Microbial Containment Complex                                                   | Pragya D. Yadav, Savita Patil, Varsha Potdar, Prasad Sarkale, Dimpal A. Nyayanit, Gajanan Sapkal, Anita M. Shete, Atanu Basu, Lalit Dar, M Choudhary, Amita Jain, Bharati Malhotra, Pranita Gawande, Sarah Cherian, Priya Abraham                                                                                                       |
| EPI_ISL_420549                                                                                                                                                                                                                                                                                                                                                                                                                                                                                                                                                                                                                                                                                                                                                                                                                                                                                                                                                                                                                                                                                                                                                                                                                                                                                                                                                                                                                                                                                 | National Influenza Center, Indian Council of Medical Research - National Institute of Virology                                                     | Indian Council of Medical Research-National Institute of Virology, Microbial Containment Complex                                                   | Pragya D. Yadav, Savita Patil, Varsha Potdar, Prasad Sarkale, Dimpal A. Nyayanit, Gajanan Sapkal, Anita M. Shete, Atanu Basu, Lalit Dar, M Choudhary, Amita Jain, Bharati Malhotra, Pranita Gawande, Sarah Cherian, Priya Abraham                                                                                                       |
| EPI_ISL_420550                                                                                                                                                                                                                                                                                                                                                                                                                                                                                                                                                                                                                                                                                                                                                                                                                                                                                                                                                                                                                                                                                                                                                                                                                                                                                                                                                                                                                                                                                 | Indian Council of Medical Research-National Institute of Virology, Microbial Containment Complex                                                   | Indian Council of Medical Research-National Institute of Virology, Microbial Containment Complex                                                   | Pragya D. Yadav, Savita Patil, Varsha Potdar, Prasad Sarkale, Dimpal A. Nyayanit, Gajanan Sapkal, Anita M. Shete, Atanu Basu, Lalit Dar, M Choudhary, Amita Jain, Bharati Malhotra, Pranita Gawande, Sarah Cherian, Priya Abraham                                                                                                       |
| EPI_ISL_420551                                                                                                                                                                                                                                                                                                                                                                                                                                                                                                                                                                                                                                                                                                                                                                                                                                                                                                                                                                                                                                                                                                                                                                                                                                                                                                                                                                                                                                                                                 | National Influenza Center, Indian Council of Medical Research - National Institute of Virology                                                     | Indian Council of Medical Research-National Institute of Virology, Microbial Containment Complex                                                   | Pragya D. Yadav, Savita Patil, Varsha Potdar, Prasad Sarkale, Dimpal A. Nyayanit, Gajanan Sapkal, Anita M. Shete, Atanu Basu, Lalit Dar, M Choudhary, Amita Jain, Bharati Malhotra, Pranita Gawande, Sarah Cherian, Priya Abraham                                                                                                       |
| EPI_ISL_420552                                                                                                                                                                                                                                                                                                                                                                                                                                                                                                                                                                                                                                                                                                                                                                                                                                                                                                                                                                                                                                                                                                                                                                                                                                                                                                                                                                                                                                                                                 | Indian Council of Medical Research-National Institute of Virology, Microbial Containment Complex                                                   | Indian Council of Medical Research-National Institute of Virology, Microbial Containment Complex                                                   | Pragya D. Yadav, Savita Patil, Varsha Potdar, Prasad Sarkale, Dimpal A. Nyayanit, Gajanan Sapkal, Anita M. Shete, Atanu Basu, Lalit Dar, M Choudhary, Amita Jain, Bharati Malhotra, Pranita Gawande, Sarah Cherian, Priya Abraham                                                                                                       |
| EPI_ISL_420553                                                                                                                                                                                                                                                                                                                                                                                                                                                                                                                                                                                                                                                                                                                                                                                                                                                                                                                                                                                                                                                                                                                                                                                                                                                                                                                                                                                                                                                                                 | National Influenza Center, Indian Council of Medical Research - National Institute of Virology                                                     | Indian Council of Medical Research-National Institute of Virology, Microbial Containment Complex                                                   | Pragya D. Yadav, Savita Patil, Varsha Potdar, Prasad Sarkale, Dimpal A. Nyayanit, Gajanan Sapkal, Anita M. Shete, Atanu Basu, Lalit Dar, M Choudhary, Amita Jain, Bharati Malhotra, Pranita Gawande, Sarah Cherian, Priya Abraham                                                                                                       |
| EPI_ISL_420554                                                                                                                                                                                                                                                                                                                                                                                                                                                                                                                                                                                                                                                                                                                                                                                                                                                                                                                                                                                                                                                                                                                                                                                                                                                                                                                                                                                                                                                                                 | Indian Council of Medical Research-National Institute of Virology, Microbial Containment Complex                                                   | Indian Council of Medical Research-National Institute of Virology, Microbial Containment Complex                                                   | Pragya D. Yadav, Savita Patil, Varsha Potdar, Prasad Sarkale, Dimpal A. Nyayanit, Gajanan Sapkal, Anita M. Shete, Atanu Basu, Lalit Dar, M Choudhary, Amita Jain, Bharati Malhotra, Pranita Gawande, Sarah Cherian, Priya Abraham                                                                                                       |
| EPI_ISL_420555                                                                                                                                                                                                                                                                                                                                                                                                                                                                                                                                                                                                                                                                                                                                                                                                                                                                                                                                                                                                                                                                                                                                                                                                                                                                                                                                                                                                                                                                                 | National Influenza Center, Indian Council of Medical Research - National Institute of Virology                                                     | Indian Council of Medical Research-National Institute of Virology, Microbial Containment Complex                                                   | Pragya D. Yadav, Savita Patil, Varsha Potdar, Prasad Sarkale, Dimpal A. Nyayanit, Gajanan Sapkal, Anita M. Shete, Atanu Basu, Lalit Dar, M Choudhary, Amita Jain, Bharati Malhotra, Pranita Gawande, Sarah Cherian, Priya Abraham                                                                                                       |
| EPI_ISL_420556                                                                                                                                                                                                                                                                                                                                                                                                                                                                                                                                                                                                                                                                                                                                                                                                                                                                                                                                                                                                                                                                                                                                                                                                                                                                                                                                                                                                                                                                                 | Indian Council of Medical Research-National Institute of Virology, Microbial Containment Complex                                                   | Indian Council of Medical Research-National Institute of Virology, Microbial Containment Complex                                                   | Pragya D. Yadav, Savita Patil, Varsha Potdar, Prasad Sarkale, Dimpal A. Nyayanit, Gajanan Sapkal, Anita M. Shete, Atanu Basu, Lalit Dar, M Choudhary, Amita Jain, Bharati Malhotra, Pranita Gawande, Sarah Cherian, Priya Abraham                                                                                                       |
| EPI_ISL_420838, EPI_ISL_420839, EPI_ISL_420840, EPI_ISL_420841, EPI_ISL_420842, EPI_ISL_420843, EPI_ISL_420844, EPI_ISL_420845, EPI_ISL_420846, EPI_ISL_420847, EPI_ISL_420848, EPI_ISL_420849, EPI_ISL_420850, EPI_ISL_420851, EPI_ISL_420852, EPI_ISL_420853, EPI_ISL_420854                                                                                                                                                                                                                                                                                                                                                                                                                                                                                                                                                                                                                                                                                                                                                                                                                                                                                                                                                                                                                                                                                                                                                                                                                 | UW Virology Lab                                                                                                                                    | UW Virology Lab                                                                                                                                    | Pavitra Roychoudhury, Hong Xie, Keith Jerome, Alexander Greninger                                                                                                                                                                                                                                                                       |
| see above                                                                                                                                                                                                                                                                                                                                                                                                                                                                                                                                                                                                                                                                                                                                                                                                                                                                                                                                                                                                                                                                                                                                                                                                                                                                                                                                                                                                                                                                                      | UW Virology Lab                                                                                                                                    | UW Virology Lab                                                                                                                                    | Pavitra Roychoudhury, Hong Xie, Keith Jerome, Alexander Greninger                                                                                                                                                                                                                                                                       |
| EPI_ISL_420838, EPI_ISL_420839, EPI_ISL_420840, EPI_ISL_420841, EPI_ISL_420842, EPI_ISL_420843, EPI_ISL_420844, EPI_ISL_420845, EPI_ISL_420846, EPI_ISL_420847, EPI_ISL_420848, EPI_ISL_420849, EPI_ISL_420850, EPI_ISL_420851, EPI_ISL_420852, EPI_ISL_420853, EPI_ISL_420854                                                                                                                                                                                                                                                                                                                                                                                                                                                                                                                                                                                                                                                                                                                                                                                                                                                                                                                                                                                                                                                                                                                                                                                                                 | Viral Respiratory Lab, National Institute for Biomedical Research (INRB)                                                                           | Pathogen Sequencing Lab, National Institute for Biomedical Research (INRB)                                                                         | Placide Mbala-Kingebeni, Edith Nkwembe, Eddy Kinganda-Lusamaki, Amuri Aziza, Catherine Pratt, Matthias Pauthner, Josh Quick, Allison Black, James Hadfield, Trevor Bedford, Ian Goodfellow, Nick Loman, Kristian Andersen, Michael Wiley, Steve Ahuka-Mundeke, Jean-Jacques Muyembe Tamfum                                              |

|                                                                                                                                                                                                                                                                                                                                                                                                                                                                                                                                                                                                                                                                                                                                                                                                                                                                                                                                                                                                                                                                                                                                                                                                                                                                                                                                                                                                                                                                                                                                                                                                                                                                                                                                                                                                                                                                                                                                                                                                                                                                                                                                                                                                                                                                                                                                                                                                                                                                                                                                                                                                                                                                                                                                                                                                                                                                                                                                                                                                                                                                                                                                                                                                                                                                                                                                                                                                                                                                                                                                                                                                                                                                                                                                                                                                                                                                                                                                                                                                                                                                                                                                                |           |                                                                                                |                                                                                                        |                                                                                                                                                                                                                                                                                                                                                                                                                              |
|------------------------------------------------------------------------------------------------------------------------------------------------------------------------------------------------------------------------------------------------------------------------------------------------------------------------------------------------------------------------------------------------------------------------------------------------------------------------------------------------------------------------------------------------------------------------------------------------------------------------------------------------------------------------------------------------------------------------------------------------------------------------------------------------------------------------------------------------------------------------------------------------------------------------------------------------------------------------------------------------------------------------------------------------------------------------------------------------------------------------------------------------------------------------------------------------------------------------------------------------------------------------------------------------------------------------------------------------------------------------------------------------------------------------------------------------------------------------------------------------------------------------------------------------------------------------------------------------------------------------------------------------------------------------------------------------------------------------------------------------------------------------------------------------------------------------------------------------------------------------------------------------------------------------------------------------------------------------------------------------------------------------------------------------------------------------------------------------------------------------------------------------------------------------------------------------------------------------------------------------------------------------------------------------------------------------------------------------------------------------------------------------------------------------------------------------------------------------------------------------------------------------------------------------------------------------------------------------------------------------------------------------------------------------------------------------------------------------------------------------------------------------------------------------------------------------------------------------------------------------------------------------------------------------------------------------------------------------------------------------------------------------------------------------------------------------------------------------------------------------------------------------------------------------------------------------------------------------------------------------------------------------------------------------------------------------------------------------------------------------------------------------------------------------------------------------------------------------------------------------------------------------------------------------------------------------------------------------------------------------------------------------------------------------------------------------------------------------------------------------------------------------------------------------------------------------------------------------------------------------------------------------------------------------------------------------------------------------------------------------------------------------------------------------------------------------------------------------------------------------------------------------|-----------|------------------------------------------------------------------------------------------------|--------------------------------------------------------------------------------------------------------|------------------------------------------------------------------------------------------------------------------------------------------------------------------------------------------------------------------------------------------------------------------------------------------------------------------------------------------------------------------------------------------------------------------------------|
| EPI_ISL_421662, EPI_ISL_421663, EPI_ISL_421664, EPI_ISL_421665, EPI_ISL_421666, EPI_ISL_421667, EPI_ISL_421668, EPI_ISL_421669, EPI_ISL_421670, EPI_ISL_421671, EPI_ISL_421672                                                                                                                                                                                                                                                                                                                                                                                                                                                                                                                                                                                                                                                                                                                                                                                                                                                                                                                                                                                                                                                                                                                                                                                                                                                                                                                                                                                                                                                                                                                                                                                                                                                                                                                                                                                                                                                                                                                                                                                                                                                                                                                                                                                                                                                                                                                                                                                                                                                                                                                                                                                                                                                                                                                                                                                                                                                                                                                                                                                                                                                                                                                                                                                                                                                                                                                                                                                                                                                                                                                                                                                                                                                                                                                                                                                                                                                                                                                                                                 | see above | National Influenza Center, Indian Council of Medical Research - National Institute of Virology | Indian Council of Medical Research-National Institute of Virology, Microbial Containment Complex       | Pragya D. Yadav, Varsha Potdar, Savita Patil, Dimpal A. Nyayanit, Triparna Majumdar, Manohar. L. Chaudhary, Gururaj Deshpande, Padinjarematthail Thankappan Ullas, Anita Shete-Aich, Hitesh Dighe, Sreelekshmy Mohandas, Gajanan Sapkal, Atanu Basu, Amita Jain, Bharti Malhotra, Deepika Chaudhary, Sarah Cherian, Priya Abraham                                                                                            |
| EPI_ISL_422961, EPI_ISL_422962, EPI_ISL_422963, EPI_ISL_422964, EPI_ISL_422965, EPI_ISL_422966, EPI_ISL_422967, EPI_ISL_422968, EPI_ISL_422969, EPI_ISL_422970, EPI_ISL_422971, EPI_ISL_422972, EPI_ISL_422973, EPI_ISL_422974, EPI_ISL_422975, EPI_ISL_422976, EPI_ISL_422977, EPI_ISL_422978, EPI_ISL_422979, EPI_ISL_422980, EPI_ISL_422981, EPI_ISL_422982, EPI_ISL_422983, EPI_ISL_422984, EPI_ISL_422985, EPI_ISL_422986, EPI_ISL_422987, EPI_ISL_422988, EPI_ISL_422989, EPI_ISL_422990, EPI_ISL_422991, EPI_ISL_422992, EPI_ISL_422993, EPI_ISL_422994, EPI_ISL_422995, EPI_ISL_422996, EPI_ISL_422997, EPI_ISL_422998, EPI_ISL_422999, EPI_ISL_423000, EPI_ISL_423001, EPI_ISL_423002, EPI_ISL_423003, EPI_ISL_423004, EPI_ISL_423005, EPI_ISL_423006, EPI_ISL_423007, EPI_ISL_423008, EPI_ISL_423009, EPI_ISL_423010, EPI_ISL_423011, EPI_ISL_423012, EPI_ISL_423013, EPI_ISL_423014, EPI_ISL_423015, EPI_ISL_423016, EPI_ISL_423017, EPI_ISL_423018, EPI_ISL_423019, EPI_ISL_423020, EPI_ISL_423021, EPI_ISL_423022, EPI_ISL_423023, EPI_ISL_423024, EPI_ISL_423025, EPI_ISL_423026, EPI_ISL_423027, EPI_ISL_423028, EPI_ISL_423029, EPI_ISL_423030, EPI_ISL_423031, EPI_ISL_423032, EPI_ISL_423033, EPI_ISL_424166, EPI_ISL_424167, EPI_ISL_424168, EPI_ISL_424169, EPI_ISL_424170, EPI_ISL_424171, EPI_ISL_424172, EPI_ISL_424173, EPI_ISL_424174, EPI_ISL_424175, EPI_ISL_424176, EPI_ISL_424177, EPI_ISL_424178, EPI_ISL_424179, EPI_ISL_424180, EPI_ISL_424181, EPI_ISL_424182, EPI_ISL_424183, EPI_ISL_424184, EPI_ISL_424185, EPI_ISL_424186, EPI_ISL_424187, EPI_ISL_424188, EPI_ISL_424189, EPI_ISL_424190, EPI_ISL_424191, EPI_ISL_424192, EPI_ISL_424193, EPI_ISL_424194, EPI_ISL_424195, EPI_ISL_424196, EPI_ISL_424197, EPI_ISL_424198, EPI_ISL_424199, EPI_ISL_424200, EPI_ISL_424201, EPI_ISL_424202, EPI_ISL_424203, EPI_ISL_424204, EPI_ISL_424205, EPI_ISL_424206, EPI_ISL_424207, EPI_ISL_424208, EPI_ISL_424209, EPI_ISL_424210, EPI_ISL_424211, EPI_ISL_424212, EPI_ISL_424213, EPI_ISL_424214, EPI_ISL_424215, EPI_ISL_424216, EPI_ISL_424217, EPI_ISL_424218, EPI_ISL_424219, EPI_ISL_424220, EPI_ISL_424221, EPI_ISL_424222, EPI_ISL_424223, EPI_ISL_424224, EPI_ISL_424225, EPI_ISL_424226, EPI_ISL_424227, EPI_ISL_424228, EPI_ISL_424229, EPI_ISL_424230, EPI_ISL_424231, EPI_ISL_424232, EPI_ISL_424233, EPI_ISL_424234, EPI_ISL_424235, EPI_ISL_424236, EPI_ISL_424237, EPI_ISL_424238, EPI_ISL_424239, EPI_ISL_424240, EPI_ISL_424241, EPI_ISL_424242, EPI_ISL_424243, EPI_ISL_424244, EPI_ISL_424245, EPI_ISL_424246, EPI_ISL_424247, EPI_ISL_424248, EPI_ISL_424249, EPI_ISL_424250, EPI_ISL_424251, EPI_ISL_424252, EPI_ISL_424253, EPI_ISL_424254, EPI_ISL_424255, EPI_ISL_424256, EPI_ISL_424257, EPI_ISL_424258, EPI_ISL_424259, EPI_ISL_424260, EPI_ISL_424261, EPI_ISL_424262, EPI_ISL_424263, EPI_ISL_424264, EPI_ISL_424265, EPI_ISL_424266, EPI_ISL_424267, EPI_ISL_424268, EPI_ISL_424269, EPI_ISL_424270, EPI_ISL_424271, EPI_ISL_424272, EPI_ISL_424273, EPI_ISL_424274, EPI_ISL_424275, EPI_ISL_424276, EPI_ISL_424277, EPI_ISL_424278, EPI_ISL_424279, EPI_ISL_424280, EPI_ISL_424281, EPI_ISL_424282, EPI_ISL_424283, EPI_ISL_424284, EPI_ISL_424285, EPI_ISL_424286, EPI_ISL_424287, EPI_ISL_424288, EPI_ISL_424289, EPI_ISL_424290, EPI_ISL_424291, EPI_ISL_424292, EPI_ISL_424293, EPI_ISL_424294, EPI_ISL_424295, EPI_ISL_424296, EPI_ISL_424297, EPI_ISL_424298, EPI_ISL_424299, EPI_ISL_424300, EPI_ISL_424301, EPI_ISL_424302, EPI_ISL_424303, EPI_ISL_424304, EPI_ISL_424305, EPI_ISL_424306, EPI_ISL_424307, EPI_ISL_424308, EPI_ISL_424309, EPI_ISL_424310, EPI_ISL_424311, EPI_ISL_424312, EPI_ISL_424313, EPI_ISL_424314, EPI_ISL_424315, EPI_ISL_424316, EPI_ISL_424317, EPI_ISL_424318, EPI_ISL_424319, EPI_ISL_424320, EPI_ISL_424321, EPI_ISL_424322, EPI_ISL_424323, EPI_ISL_424324, EPI_ISL_424325, EPI_ISL_424326, EPI_ISL_424327, EPI_ISL_424328, EPI_ISL_424329, EPI_ISL_424330, EPI_ISL_424331, EPI_ISL_424332, EPI_ISL_424333, EPI_ISL_424334, EPI_ISL_424335, EPI_ISL_424336, EPI_ISL_424337, EPI_ISL_424338, EPI_ISL_424339, EPI_ISL_424340, EPI_ISL_424341 | see above | UW Virology Lab                                                                                | UW Virology Lab                                                                                        | Pavitra Roychoudhury, Hong Xie, Keith Jerome, Alexander Greninger                                                                                                                                                                                                                                                                                                                                                            |
| EPI_ISL_424361, EPI_ISL_424362, EPI_ISL_424363, EPI_ISL_424364, EPI_ISL_424365                                                                                                                                                                                                                                                                                                                                                                                                                                                                                                                                                                                                                                                                                                                                                                                                                                                                                                                                                                                                                                                                                                                                                                                                                                                                                                                                                                                                                                                                                                                                                                                                                                                                                                                                                                                                                                                                                                                                                                                                                                                                                                                                                                                                                                                                                                                                                                                                                                                                                                                                                                                                                                                                                                                                                                                                                                                                                                                                                                                                                                                                                                                                                                                                                                                                                                                                                                                                                                                                                                                                                                                                                                                                                                                                                                                                                                                                                                                                                                                                                                                                 | see above | National Influenza Center, Indian Council of Medical Research - National Institute of Virology | Indian Council of Medical Research-National Institute of Virology, Microbial Containment Complex       | Pragya D. Yadav, Varsha Potdar, Savita Patil, Dimpal A. Nyayanit, Triparna Majumdar, Manohar. L. Chaudhary, Gururaj Deshpande, Padinjarematthail Thankappan Ullas, Anita Shete-Aich, Hitesh Dighe, Sreelekshmy Mohandas, Gajanan Sapkal, Atanu Basu, Amita Jain, Bharti Malhotra, Deepika Chaudhary, Sarah Cherian, Priya Abraham                                                                                            |
| EPI_ISL_424668, EPI_ISL_424669, EPI_ISL_424671                                                                                                                                                                                                                                                                                                                                                                                                                                                                                                                                                                                                                                                                                                                                                                                                                                                                                                                                                                                                                                                                                                                                                                                                                                                                                                                                                                                                                                                                                                                                                                                                                                                                                                                                                                                                                                                                                                                                                                                                                                                                                                                                                                                                                                                                                                                                                                                                                                                                                                                                                                                                                                                                                                                                                                                                                                                                                                                                                                                                                                                                                                                                                                                                                                                                                                                                                                                                                                                                                                                                                                                                                                                                                                                                                                                                                                                                                                                                                                                                                                                                                                 | see above | Arizona State University Health Services                                                       | Arizona State University                                                                               | Rabia Maqsood, LaRinda A. Holland, Emily A. Kaelin, Bereket Estifanos, Nicholas J. Mellor, Jason Steel, Lily I. Wu, Arvind Varsani, Rolf U. Halden, Brenda G. Hogue, Matthew Scotch, Efrim S. Lim                                                                                                                                                                                                                            |
| EPI_ISL_425188                                                                                                                                                                                                                                                                                                                                                                                                                                                                                                                                                                                                                                                                                                                                                                                                                                                                                                                                                                                                                                                                                                                                                                                                                                                                                                                                                                                                                                                                                                                                                                                                                                                                                                                                                                                                                                                                                                                                                                                                                                                                                                                                                                                                                                                                                                                                                                                                                                                                                                                                                                                                                                                                                                                                                                                                                                                                                                                                                                                                                                                                                                                                                                                                                                                                                                                                                                                                                                                                                                                                                                                                                                                                                                                                                                                                                                                                                                                                                                                                                                                                                                                                 | see above | Servicio de Microbiología. Consorcio Hospital General Universitario de Valencia                | Sequencing and Bioinformatics Service and Molecular Epidemiology Research Group. FISABIO-Public Health | Paula Ruiz-Hueso, Mariana Reyes-Prieto, Vicente Soriano Chirona, Ivan Ansari, David Navarro, Maria Alma Bracho, Griselda De Marco, Beatriz Beamud, Lidia Ruiz Roldan, Marta Pla Diaz, Neris Garcia-Gonzalez, Inma Galán Vendrell, Sandra Carbo, Loreto Ferrús Abad, Lúcia Martínez-Priego, Giuseppe D'Auria, Fernando Gonzalez-Candelas                                                                                      |
| EPI_ISL_425200                                                                                                                                                                                                                                                                                                                                                                                                                                                                                                                                                                                                                                                                                                                                                                                                                                                                                                                                                                                                                                                                                                                                                                                                                                                                                                                                                                                                                                                                                                                                                                                                                                                                                                                                                                                                                                                                                                                                                                                                                                                                                                                                                                                                                                                                                                                                                                                                                                                                                                                                                                                                                                                                                                                                                                                                                                                                                                                                                                                                                                                                                                                                                                                                                                                                                                                                                                                                                                                                                                                                                                                                                                                                                                                                                                                                                                                                                                                                                                                                                                                                                                                                 | see above | Servicio de Microbiología. Hospital Clínico Universitario de Valencia                          | Sequencing and Bioinformatics Service and Molecular Epidemiology Research Group. FISABIO-Public Health | Paula Ruiz-Hueso, Mariana Reyes-Prieto, Vicente Soriano Chirona, Maria Alma Bracho, Griselda De Marco, Beatriz Beamud, Lidia Ruiz Roldan, Marta Pla Diaz, Neris Garcia-Gonzalez, Loreto Ferrús Abad, Maria Dolores Ocete, Lúcia Martínez-Priego, Inma Galán Vendrell, Concepcion Gimeno, Giuseppe D'Auria, Fernando Gonzalez-Candelas                                                                                        |
| EPI_ISL_425223                                                                                                                                                                                                                                                                                                                                                                                                                                                                                                                                                                                                                                                                                                                                                                                                                                                                                                                                                                                                                                                                                                                                                                                                                                                                                                                                                                                                                                                                                                                                                                                                                                                                                                                                                                                                                                                                                                                                                                                                                                                                                                                                                                                                                                                                                                                                                                                                                                                                                                                                                                                                                                                                                                                                                                                                                                                                                                                                                                                                                                                                                                                                                                                                                                                                                                                                                                                                                                                                                                                                                                                                                                                                                                                                                                                                                                                                                                                                                                                                                                                                                                                                 | see above | Servicio de Microbiología. Consorcio Hospital General Universitario de Valencia                | Sequencing and Bioinformatics Service and Molecular Epidemiology Research Group. FISABIO-Public Health | Paula Ruiz-Hueso, Mariana Reyes-Prieto, Vicente Soriano Chirona, Ivan Ansari, David Navarro, Maria Alma Bracho, Griselda De Marco, Beatriz Beamud, Lidia Ruiz Roldan, Marta Pla Diaz, Neris Garcia-Gonzalez, Inma Galán Vendrell, Sandra Carbo, Loreto Ferrús Abad, Lúcia Martínez-Priego, Giuseppe D'Auria, Fernando Gonzalez-Candelas                                                                                      |
| EPI_ISL_426052, EPI_ISL_426053, EPI_ISL_426054, EPI_ISL_426055, EPI_ISL_426056, EPI_ISL_426057, EPI_ISL_426058, EPI_ISL_426059, EPI_ISL_426060, EPI_ISL_426061, EPI_ISL_426062, EPI_ISL_426063, EPI_ISL_426064, EPI_ISL_426065, EPI_ISL_426066, EPI_ISL_426067, EPI_ISL_426068, EPI_ISL_426069, EPI_ISL_426070, EPI_ISL_426071, EPI_ISL_426072, EPI_ISL_426073, EPI_ISL_426074, EPI_ISL_426075, EPI_ISL_426076, EPI_ISL_426077, EPI_ISL_426078, EPI_ISL_426079, EPI_ISL_426080, EPI_ISL_426081, EPI_ISL_426082, EPI_ISL_426083, EPI_ISL_426084, EPI_ISL_426085, EPI_ISL_426086, EPI_ISL_426087, EPI_ISL_426088, EPI_ISL_426089, EPI_ISL_426090, EPI_ISL_426091, EPI_ISL_426092, EPI_ISL_426093, EPI_ISL_426094, EPI_ISL_426095, EPI_ISL_426096, EPI_ISL_426097, EPI_ISL_426098, EPI_ISL_426099, EPI_ISL_426100, EPI_ISL_426101, EPI_ISL_426102, EPI_ISL_426103, EPI_ISL_426104, EPI_ISL_426105, EPI_ISL_426106, EPI_ISL_426107, EPI_ISL_426108, EPI_ISL_426109, EPI_ISL_426110, EPI_ISL_426111, EPI_ISL_426112, EPI_ISL_426113, EPI_ISL_426114, EPI_ISL_426115, EPI_ISL_426116, EPI_ISL_426117, EPI_ISL_426118, EPI_ISL_426119, EPI_ISL_426120, EPI_ISL_426121, EPI_ISL_426122, EPI_ISL_426123, EPI_ISL_426124, EPI_ISL_426125, EPI_ISL_426126, EPI_ISL_426127, EPI_ISL_426128, EPI_ISL_426129, EPI_ISL_426130, EPI_ISL_426131, EPI_ISL_426132, EPI_ISL_426133, EPI_ISL_426134, EPI_ISL_426135, EPI_ISL_426136, EPI_ISL_426137                                                                                                                                                                                                                                                                                                                                                                                                                                                                                                                                                                                                                                                                                                                                                                                                                                                                                                                                                                                                                                                                                                                                                                                                                                                                                                                                                                                                                                                                                                                                                                                                                                                                                                                                                                                                                                                                                                                                                                                                                                                                                                                                                                                                                                                                                                                                                                                                                                                                                                                                                                                                                                                                                                                 | see above | UW Virology Lab                                                                                | UW Virology Lab                                                                                        | Pavitra Roychoudhury, Hong Xie, Keith Jerome, Alexander Greninger                                                                                                                                                                                                                                                                                                                                                            |
| EPI_ISL_426179                                                                                                                                                                                                                                                                                                                                                                                                                                                                                                                                                                                                                                                                                                                                                                                                                                                                                                                                                                                                                                                                                                                                                                                                                                                                                                                                                                                                                                                                                                                                                                                                                                                                                                                                                                                                                                                                                                                                                                                                                                                                                                                                                                                                                                                                                                                                                                                                                                                                                                                                                                                                                                                                                                                                                                                                                                                                                                                                                                                                                                                                                                                                                                                                                                                                                                                                                                                                                                                                                                                                                                                                                                                                                                                                                                                                                                                                                                                                                                                                                                                                                                                                 | see above | National Influenza Center, Indian Council of Medical Research - National Institute of Virology | Indian Council of Medical Research-National Institute of Virology, Microbial Containment Complex       | Pragya D. Yadav, Varsha Potdar, Savita Patil, Dimpal A. Nyayanit, Triparna Majumdar, Manohar. L. Chaudhary, Gururaj Deshpande, Padinjarematthail Thankappan Ullas, Anita Shete-Aich, Hitesh Dighe, Sreelekshmy Mohandas, Gajanan Sapkal, Atanu Basu, Amita Jain, Bharti Malhotra, Deepika Chaudhary, Sarah Cherian, Priya Abraham                                                                                            |
| EPI_ISL_426414                                                                                                                                                                                                                                                                                                                                                                                                                                                                                                                                                                                                                                                                                                                                                                                                                                                                                                                                                                                                                                                                                                                                                                                                                                                                                                                                                                                                                                                                                                                                                                                                                                                                                                                                                                                                                                                                                                                                                                                                                                                                                                                                                                                                                                                                                                                                                                                                                                                                                                                                                                                                                                                                                                                                                                                                                                                                                                                                                                                                                                                                                                                                                                                                                                                                                                                                                                                                                                                                                                                                                                                                                                                                                                                                                                                                                                                                                                                                                                                                                                                                                                                                 | see above | Sir M P Shah Government Medical College                                                        | Gujarat Biotechnology Research Centre                                                                  | Ramesh Pandit, Tejas Shah, Ankit Hinsu, Pritesh Sabara, Apurvasinh Puvar, Janvi Raval, Monika Gandhi, Pinal Trivedi, Maharshi Pandya, Amit Kanani, Akanksha Verma, Nitin Savaliya, Raghavendra Kumar, Dinesh Kumar, Zubair Saiyed, Dipa Kinariwala, Disha Patel, Binita Aring, Geeta Vaghela, Sonia Barve, Bhavesh Modi, Kairavi Joshi, Nidhi Sood, Pranay Shah, R D Dixit, Snehal Bagatharia, Madhvi Joshi, Chaitanya Joshi |
| EPI_ISL_426415                                                                                                                                                                                                                                                                                                                                                                                                                                                                                                                                                                                                                                                                                                                                                                                                                                                                                                                                                                                                                                                                                                                                                                                                                                                                                                                                                                                                                                                                                                                                                                                                                                                                                                                                                                                                                                                                                                                                                                                                                                                                                                                                                                                                                                                                                                                                                                                                                                                                                                                                                                                                                                                                                                                                                                                                                                                                                                                                                                                                                                                                                                                                                                                                                                                                                                                                                                                                                                                                                                                                                                                                                                                                                                                                                                                                                                                                                                                                                                                                                                                                                                                                 | see above | Sir M P Shah Government Medical College, Jamnagar                                              | Gujarat Biotechnology Research Centre, Gandhinagar                                                     | Ramesh Pandit, Tejas Shah, Ankit Hinsu, Pritesh Sabara, Apurvasinh Puvar, Janvi Raval, Monika Gandhi, Pinal Trivedi, Maharshi Pandya, Amit Kanani, Akanksha Verma, Nitin Savaliya, Raghavendra Kumar, Dinesh Kumar, Zuber Saiyed, Dipa Kinariwala, Disha Patel, Binita Aring, Geeta Vaghela, Sonia Barve, Bhavesh Modi, Kairavi Joshi, Nidhi Sood, Pranay Shah, R D Dixit, Snehal Bagatharia, Madhvi Joshi, Chaitanya Joshi  |
| EPI_ISL_426581, EPI_ISL_426582, EPI_ISL_426583, EPI_ISL_426584, EPI_ISL_426585, EPI_ISL_426586, EPI_ISL_426587, EPI_ISL_426588, EPI_ISL_426589, EPI_ISL_426590, EPI_ISL_426591, EPI_ISL_426592, EPI_ISL_426593, EPI_ISL_426594, EPI_ISL_426595, EPI_ISL_426596, EPI_ISL_426597, EPI_ISL_426598, EPI_ISL_426599, EPI_ISL_426600, EPI_ISL_426601, EPI_ISL_426602, EPI_ISL_426603, EPI_ISL_426604, EPI_ISL_426605, EPI_ISL_426606, EPI_ISL_426607, EPI_ISL_426608, EPI_ISL_426609, EPI_ISL_426610, EPI_ISL_426611, EPI_ISL_426612, EPI_ISL_426613, EPI_ISL_426614, EPI_ISL_426615, EPI_ISL_426616, EPI_ISL_426617, EPI_ISL_426618, EPI_ISL_426619, EPI_ISL_426620, EPI_ISL_426621, EPI_ISL_426622, EPI_ISL_426623, EPI_ISL_426624, EPI_ISL_426625, EPI_ISL_426626, EPI_ISL_426627, EPI_ISL_426628, EPI_ISL_426629, EPI_ISL_426630, EPI_ISL_426631, EPI_ISL_426632, EPI_ISL_426633, EPI_ISL_426634, EPI_ISL_426635, EPI_ISL_426636, EPI_ISL_426637, EPI_ISL_426638, EPI_ISL_426639, EPI_ISL_426640, EPI_ISL_426641, EPI_ISL_426642, EPI_ISL_426643, EPI_ISL_426644, EPI_ISL_426645, EPI_ISL_426646, EPI_ISL_426647, EPI_ISL_426648, EPI_ISL_426649, EPI_ISL_426650, EPI_ISL_426651, EPI_ISL_426652, EPI_ISL_426653, EPI_ISL_426654, EPI_ISL_426655, EPI_ISL_426656                                                                                                                                                                                                                                                                                                                                                                                                                                                                                                                                                                                                                                                                                                                                                                                                                                                                                                                                                                                                                                                                                                                                                                                                                                                                                                                                                                                                                                                                                                                                                                                                                                                                                                                                                                                                                                                                                                                                                                                                                                                                                                                                                                                                                                                                                                                                                                                                                                                                                                                                                                                                                                                                                                                                                                                                                                                                                 | see above | Motol University Hospital                                                                      | Institute of Applied Biotechnologies a.s.                                                              | Petr Brož, Jan Genyk, Petr Klempert, Martin Kašný, Adam Novotný, Kateina Kvapilová, Pavel Devinek, Petr Kvapil, Milan Macek                                                                                                                                                                                                                                                                                                  |
| EPI_ISL_427161, EPI_ISL_427162, EPI_ISL_427163, EPI_ISL_427164, EPI_ISL_427165, EPI_ISL_427166, EPI_ISL_427167, EPI_ISL_427168, EPI_ISL_427169, EPI_ISL_427170, EPI_ISL_427171, EPI_ISL_427172, EPI_ISL_427173, EPI_ISL_427174, EPI_ISL_427175, EPI_ISL_427176, EPI_ISL_427177, EPI_ISL_427178, EPI_ISL_427179, EPI_ISL_427180, EPI_ISL_427181, EPI_ISL_427182, EPI_ISL_427183, EPI_ISL_427184, EPI_ISL_427185, EPI_ISL_427186, EPI_ISL_427187, EPI_ISL_427188, EPI_ISL_427189, EPI_ISL_427190, EPI_ISL_427191, EPI_ISL_427192, EPI_ISL_427193, EPI_ISL_427194, EPI_ISL_427195, EPI_ISL_427196, EPI_ISL_427197, EPI_ISL_427198, EPI_ISL_427199, EPI_ISL_427200, EPI_ISL_427201, EPI_ISL_427202, EPI_ISL_427203, EPI_ISL_427204, EPI_ISL_427205, EPI_ISL_427206, EPI_ISL_427207, EPI_ISL_427208, EPI_ISL_427209, EPI_ISL_427210, EPI_ISL_427211, EPI_ISL_427212, EPI_ISL_427213, EPI_ISL_427214, EPI_ISL_427215, EPI_ISL_427216, EPI_ISL_427217, EPI_ISL_427218, EPI_ISL_427219, EPI_ISL_427220, EPI_ISL_427221, EPI_ISL_427222, EPI_ISL_427223, EPI_ISL_427224, EPI_ISL_427225, EPI_ISL_427226, EPI_ISL_427227, EPI_ISL_427228, EPI_ISL_427229, EPI_ISL_427230, EPI_ISL_427231, EPI_ISL_427232, EPI_ISL_427233, EPI_ISL_427234, EPI_ISL_427235, EPI_ISL_427236, EPI_ISL_427237, EPI_ISL_427238, EPI_ISL_427239, EPI_ISL_427240, EPI_ISL_427241, EPI_ISL_427242, EPI_ISL_427243, EPI_ISL_427244, EPI_ISL_427245, EPI_ISL_427246, EPI_ISL_427247, EPI_ISL_427248, EPI_ISL_427249, EPI_ISL_427250, EPI_ISL_427251, EPI_ISL_427252, EPI_ISL_427253, EPI_ISL_427254, EPI_ISL_427255, EPI_ISL_427256, EPI_ISL_427257, EPI_ISL_427258, EPI_ISL_427259, EPI_ISL_427260, EPI_ISL_427261, EPI_ISL_427262, EPI_ISL_427263, EPI_ISL_427264, EPI_ISL_427265, EPI_ISL_427266, EPI_ISL_427267, EPI_ISL_427268, EPI_ISL_427269, EPI_ISL_427270                                                                                                                                                                                                                                                                                                                                                                                                                                                                                                                                                                                                                                                                                                                                                                                                                                                                                                                                                                                                                                                                                                                                                                                                                                                                                                                                                                                                                                                                                                                                                                                                                                                                                                                                                                                                                                                                                                                                                                                                                                                                                                                                                                                                                                                                                                                 | see above | UW Virology Lab                                                                                | UW Virology Lab                                                                                        | Pavitra Roychoudhury, Hong Xie, Keith Jerome, Alexander Greninger                                                                                                                                                                                                                                                                                                                                                            |
| EPI_ISL_429254, EPI_ISL_429255, EPI_ISL_429256, EPI_ISL_429257                                                                                                                                                                                                                                                                                                                                                                                                                                                                                                                                                                                                                                                                                                                                                                                                                                                                                                                                                                                                                                                                                                                                                                                                                                                                                                                                                                                                                                                                                                                                                                                                                                                                                                                                                                                                                                                                                                                                                                                                                                                                                                                                                                                                                                                                                                                                                                                                                                                                                                                                                                                                                                                                                                                                                                                                                                                                                                                                                                                                                                                                                                                                                                                                                                                                                                                                                                                                                                                                                                                                                                                                                                                                                                                                                                                                                                                                                                                                                                                                                                                                                 | see above | Viral Respiratory Lab, National Institute for Biomedical Research (INRB)                       | Pathogen Sequencing Lab, National Institute for Biomedical Research (INRB)                             | Placide Mbala-Kingebeni, Edith Nkwebem, Eddy Kinganda-Lusamaki, Amuri Aziza, Catherine Pratt, Matthias Pauthner, Josh Quick, Allison Black, James Hadfield, Trevor Bedford, Ian Goodfellow, Nick Longman, Kristian Andersen, Michael Wiley, Steve Ahuka-Mundeke, Jean-Jacques Muyembe Tamfum                                                                                                                                 |
| EPI_ISL_429597, EPI_ISL_429598, EPI_ISL_429599, EPI_ISL_429600, EPI_ISL_429601, EPI_ISL_429602, EPI_ISL_429603, EPI_ISL_429604, EPI_ISL_429605, EPI_ISL_429606, EPI_ISL_429607, EPI_ISL_429608, EPI_ISL_429609, EPI_ISL_429610, EPI_ISL_429611, EPI_ISL_429612, EPI_ISL_429613, EPI_ISL_429614, EPI_ISL_429615, EPI_ISL_429616, EPI_ISL_429617, EPI_ISL_429618, EPI_ISL_429619, EPI_ISL_429620, EPI_ISL_429621, EPI_ISL_429622, EPI_ISL_429623, EPI_ISL_429624, EPI_ISL_429625, EPI_ISL_429626, EPI_ISL_429627, EPI_ISL_429628, EPI_ISL_429629, EPI_ISL_429630, EPI_ISL_429631, EPI_ISL_429632, EPI_ISL_429633, EPI_ISL_429634, EPI_ISL_429635, EPI_ISL_429636, EPI_ISL_429637, EPI_ISL_429638, EPI_ISL_429639, EPI_ISL_429640, EPI_ISL_429641, EPI_ISL_429642, EPI_ISL_429643, EPI_ISL_429644, EPI_ISL_429645, EPI_ISL_429646, EPI_ISL_429647, EPI_ISL_429648, EPI_ISL_429649, EPI_ISL_429650, EPI_ISL_429651, EPI_ISL_429652, EPI_ISL_429653, EPI_ISL_429654, EPI_ISL_429655, EPI_ISL_429656                                                                                                                                                                                                                                                                                                                                                                                                                                                                                                                                                                                                                                                                                                                                                                                                                                                                                                                                                                                                                                                                                                                                                                                                                                                                                                                                                                                                                                                                                                                                                                                                                                                                                                                                                                                                                                                                                                                                                                                                                                                                                                                                                                                                                                                                                                                                                                                                                                                                                                                                                                                                                                                                                                                                                                                                                                                                                                                                                                                                                                                                                                                                                 | see above | UW Virology Lab                                                                                | UW Virology Lab                                                                                        | Pavitra Roychoudhury, Hong Xie, Keith Jerome, Alexander Greninger                                                                                                                                                                                                                                                                                                                                                            |
| EPI_ISL_430722, EPI_ISL_430723, EPI_ISL_430724, EPI_ISL_430725, EPI_ISL_430726, EPI_ISL_430727, EPI_ISL_430728, EPI_ISL_430729, EPI_ISL_430730, EPI_ISL_430731, EPI_ISL_430732, EPI_ISL_430733, EPI_ISL_430734, EPI_ISL_430735, EPI_ISL_430736, EPI_ISL_430737, EPI_ISL_430738, EPI_ISL_430739, EPI_ISL_430740, EPI_ISL_430741, EPI_ISL_430742, EPI_ISL_430743, EPI_ISL_430744, EPI_ISL_430745, EPI_ISL_430746                                                                                                                                                                                                                                                                                                                                                                                                                                                                                                                                                                                                                                                                                                                                                                                                                                                                                                                                                                                                                                                                                                                                                                                                                                                                                                                                                                                                                                                                                                                                                                                                                                                                                                                                                                                                                                                                                                                                                                                                                                                                                                                                                                                                                                                                                                                                                                                                                                                                                                                                                                                                                                                                                                                                                                                                                                                                                                                                                                                                                                                                                                                                                                                                                                                                                                                                                                                                                                                                                                                                                                                                                                                                                                                                 | see above | Chinese PLA Institute for Disease Control and Prevention                                       | Chinese PLA Institute for Disease Control and Prevention                                               | Peng Lijinhui Li, Lizhong Li                                                                                                                                                                                                                                                                                                                                                                                                 |
| EPI_ISL_430837                                                                                                                                                                                                                                                                                                                                                                                                                                                                                                                                                                                                                                                                                                                                                                                                                                                                                                                                                                                                                                                                                                                                                                                                                                                                                                                                                                                                                                                                                                                                                                                                                                                                                                                                                                                                                                                                                                                                                                                                                                                                                                                                                                                                                                                                                                                                                                                                                                                                                                                                                                                                                                                                                                                                                                                                                                                                                                                                                                                                                                                                                                                                                                                                                                                                                                                                                                                                                                                                                                                                                                                                                                                                                                                                                                                                                                                                                                                                                                                                                                                                                                                                 | see above | n/a                                                                                            | Thai National Influenza Center, Department of medical Science, Ministry of Public Health, Thailand     | Pilailuk,Okada; Siripaporn,Phuygun; Thanutsapa,Thanadachaku; Sittiporn,Parmmen;Warawan,Wongboot;Sunthareeya,Waicharoen; Malinee,Chittaganpitch                                                                                                                                                                                                                                                                               |
| EPI_ISL_430841                                                                                                                                                                                                                                                                                                                                                                                                                                                                                                                                                                                                                                                                                                                                                                                                                                                                                                                                                                                                                                                                                                                                                                                                                                                                                                                                                                                                                                                                                                                                                                                                                                                                                                                                                                                                                                                                                                                                                                                                                                                                                                                                                                                                                                                                                                                                                                                                                                                                                                                                                                                                                                                                                                                                                                                                                                                                                                                                                                                                                                                                                                                                                                                                                                                                                                                                                                                                                                                                                                                                                                                                                                                                                                                                                                                                                                                                                                                                                                                                                                                                                                                                 | see above | Praram 9 Hospital                                                                              | National Institute of Health. Department of medical Sciences, Ministry of Public Health, Thailand      | Pilailuk,Okada; Siripaporn,Phuygun; Thanutsapa,Thanadachaku; Sittiporn,Parmmen;Warawan,Wongboot; Sunthareeya,Waicharoen; Malinee,Chittaganpitch                                                                                                                                                                                                                                                                              |
| EPI_ISL_430842                                                                                                                                                                                                                                                                                                                                                                                                                                                                                                                                                                                                                                                                                                                                                                                                                                                                                                                                                                                                                                                                                                                                                                                                                                                                                                                                                                                                                                                                                                                                                                                                                                                                                                                                                                                                                                                                                                                                                                                                                                                                                                                                                                                                                                                                                                                                                                                                                                                                                                                                                                                                                                                                                                                                                                                                                                                                                                                                                                                                                                                                                                                                                                                                                                                                                                                                                                                                                                                                                                                                                                                                                                                                                                                                                                                                                                                                                                                                                                                                                                                                                                                                 | see above | Central chest Institute of Thailand                                                            | National Institute of Health. Department of medical Sciences, Ministry of Public Health, Thailand      | Pilailuk,Okada; Siripaporn,Phuygun; Thanutsapa,Thanadachaku; Sittiporn,Parmmen;Warawan,Wongboot; Sunthareeya,Waicharoen; Malinee,Chittaganpitch                                                                                                                                                                                                                                                                              |

|                                                                                                                                                                                                                                                                                                                                                                                                                                                                                                                                                                                                                                                                                                                                                                                                                                                                                                                                                                                                                                                                                                                                                                                                                                                                                                                                                                                                                                                                                                                                                                                                                                                                                                                                                                                                                                                                                                |           |                                                                                                            |                                                                                                   |                                                                                                                                                                                                                                                                                                                                                                                                                                                                                        |
|------------------------------------------------------------------------------------------------------------------------------------------------------------------------------------------------------------------------------------------------------------------------------------------------------------------------------------------------------------------------------------------------------------------------------------------------------------------------------------------------------------------------------------------------------------------------------------------------------------------------------------------------------------------------------------------------------------------------------------------------------------------------------------------------------------------------------------------------------------------------------------------------------------------------------------------------------------------------------------------------------------------------------------------------------------------------------------------------------------------------------------------------------------------------------------------------------------------------------------------------------------------------------------------------------------------------------------------------------------------------------------------------------------------------------------------------------------------------------------------------------------------------------------------------------------------------------------------------------------------------------------------------------------------------------------------------------------------------------------------------------------------------------------------------------------------------------------------------------------------------------------------------|-----------|------------------------------------------------------------------------------------------------------------|---------------------------------------------------------------------------------------------------|----------------------------------------------------------------------------------------------------------------------------------------------------------------------------------------------------------------------------------------------------------------------------------------------------------------------------------------------------------------------------------------------------------------------------------------------------------------------------------------|
| EPI_ISL_430867, EPI_ISL_430868, EPI_ISL_430869, EPI_ISL_430870, EPI_ISL_430871, EPI_ISL_430872, EPI_ISL_430873, EPI_ISL_430874, EPI_ISL_430875, EPI_ISL_430876, EPI_ISL_430877, EPI_ISL_430878, EPI_ISL_430879, EPI_ISL_430880, EPI_ISL_430881, EPI_ISL_430882, EPI_ISL_430883, EPI_ISL_430884, EPI_ISL_430885, EPI_ISL_430886, EPI_ISL_430887, EPI_ISL_430888, EPI_ISL_430889, EPI_ISL_430890, EPI_ISL_430891, EPI_ISL_430892, EPI_ISL_430893, EPI_ISL_430894, EPI_ISL_430895, EPI_ISL_430896, EPI_ISL_430897, EPI_ISL_430898, EPI_ISL_430899, EPI_ISL_430900, EPI_ISL_430901, EPI_ISL_430902, EPI_ISL_430903, EPI_ISL_430904, EPI_ISL_430905, EPI_ISL_430906, EPI_ISL_430907, EPI_ISL_430908, EPI_ISL_430909, EPI_ISL_430910, EPI_ISL_430911, EPI_ISL_430912, EPI_ISL_430913, EPI_ISL_430914, EPI_ISL_430915, EPI_ISL_430916, EPI_ISL_430917, EPI_ISL_430918, EPI_ISL_430919, EPI_ISL_430920, EPI_ISL_430921, EPI_ISL_430922, EPI_ISL_430923, EPI_ISL_430924, EPI_ISL_430925, EPI_ISL_430926, EPI_ISL_430927, EPI_ISL_430928, EPI_ISL_430929, EPI_ISL_430930, EPI_ISL_430931, EPI_ISL_430932, EPI_ISL_430933, EPI_ISL_430934, EPI_ISL_430935, EPI_ISL_430936, EPI_ISL_430937, EPI_ISL_430938, EPI_ISL_430939, EPI_ISL_430940, EPI_ISL_430941, EPI_ISL_430942, EPI_ISL_430943, EPI_ISL_430944, EPI_ISL_430945, EPI_ISL_430946, EPI_ISL_430947, EPI_ISL_430948, EPI_ISL_430949, EPI_ISL_430950, EPI_ISL_430951, EPI_ISL_430952, EPI_ISL_430953, EPI_ISL_430954, EPI_ISL_430955, EPI_ISL_430956, EPI_ISL_430957, EPI_ISL_430958, EPI_ISL_430959, EPI_ISL_430960, EPI_ISL_430961, EPI_ISL_430962, EPI_ISL_430963, EPI_ISL_430964, EPI_ISL_430965, EPI_ISL_430966, EPI_ISL_430967, EPI_ISL_430968, EPI_ISL_430969, EPI_ISL_430970, EPI_ISL_430971, EPI_ISL_430972, EPI_ISL_430973, EPI_ISL_430974, EPI_ISL_430975, EPI_ISL_430976, EPI_ISL_430977, EPI_ISL_430978, EPI_ISL_430979, EPI_ISL_430980 | see above | UW Virology Lab                                                                                            | UW Virology Lab                                                                                   | Pavitra Roychoudhury, Hong Xie, Keith Jerome, Alexander Greninger                                                                                                                                                                                                                                                                                                                                                                                                                      |
| EPI_ISL_431011, EPI_ISL_431012                                                                                                                                                                                                                                                                                                                                                                                                                                                                                                                                                                                                                                                                                                                                                                                                                                                                                                                                                                                                                                                                                                                                                                                                                                                                                                                                                                                                                                                                                                                                                                                                                                                                                                                                                                                                                                                                 |           | Viral Respiratory Lab, National Institute for Biomedical Research (INRB)                                   | Pathogen Sequencing Lab, National Institute for Biomedical Research (INRB)                        | Placide Mbala-Kingebeni, Edith Nkwembe, Eddy Kinganda-Lusamaki, Amuri Aziza, Francisca Muyembe Mawete, Catherine Pratt, Matthias Pauthner, Josh Quick, Allison Black, James Hadfield, Trevor Bedford, Ian Goodfellow, Andrew Rambaut, Nick Loman, Kristian Andersen, Michael Wiley, Steve Ahuka-Mundeke, Jean-Jacques Muyembe Tamfum                                                                                                                                                   |
| EPI_ISL_434366, EPI_ISL_434367, EPI_ISL_434368, EPI_ISL_434369, EPI_ISL_434370, EPI_ISL_434371                                                                                                                                                                                                                                                                                                                                                                                                                                                                                                                                                                                                                                                                                                                                                                                                                                                                                                                                                                                                                                                                                                                                                                                                                                                                                                                                                                                                                                                                                                                                                                                                                                                                                                                                                                                                 |           | Hospital AZ Rivierenland                                                                                   | Institute of Tropical Medicine                                                                    | Philippe Selhorst, Colin Anthony                                                                                                                                                                                                                                                                                                                                                                                                                                                       |
| EPI_ISL_434372, EPI_ISL_434373, EPI_ISL_434374, EPI_ISL_434375, EPI_ISL_434376, EPI_ISL_434377, EPI_ISL_434378, EPI_ISL_434379, EPI_ISL_434380, EPI_ISL_434381, EPI_ISL_434382, EPI_ISL_434383                                                                                                                                                                                                                                                                                                                                                                                                                                                                                                                                                                                                                                                                                                                                                                                                                                                                                                                                                                                                                                                                                                                                                                                                                                                                                                                                                                                                                                                                                                                                                                                                                                                                                                 | see above | Hospital AZ Rivierenland                                                                                   | Institute of Tropical Medicine                                                                    | Philippe Selhorst, Colin Anthony,                                                                                                                                                                                                                                                                                                                                                                                                                                                      |
| EPI_ISL_434384, EPI_ISL_434385, EPI_ISL_434386                                                                                                                                                                                                                                                                                                                                                                                                                                                                                                                                                                                                                                                                                                                                                                                                                                                                                                                                                                                                                                                                                                                                                                                                                                                                                                                                                                                                                                                                                                                                                                                                                                                                                                                                                                                                                                                 |           | Hospital AZ Rivierenland                                                                                   | Institute of Tropical Medicine                                                                    | Philippe Selhorst, Colin Anthony                                                                                                                                                                                                                                                                                                                                                                                                                                                       |
| EPI_ISL_434586, EPI_ISL_434587, EPI_ISL_434588, EPI_ISL_434638, EPI_ISL_434639, EPI_ISL_434640                                                                                                                                                                                                                                                                                                                                                                                                                                                                                                                                                                                                                                                                                                                                                                                                                                                                                                                                                                                                                                                                                                                                                                                                                                                                                                                                                                                                                                                                                                                                                                                                                                                                                                                                                                                                 |           | Johns Hopkins Hospital Department of Pathology                                                             | Johns Hopkins Hospital Department of Pathology                                                    | Peter M. Thielen, Thomas Mehoke, Shirlee Wohl, Srividya Ramakrishnan, Oluwaseun Nwulia-Falade, Amanda Emlund, Melanie Kirsche, Paul Morris, Norah Sadowski, Nidiá Trovao, Victoria Gniadzowski, Michael Schatz, Stuart C. Ray, Winston Timp, Heba Mostafa                                                                                                                                                                                                                              |
| EPI_ISL_434678, EPI_ISL_434679, EPI_ISL_434680, EPI_ISL_434681                                                                                                                                                                                                                                                                                                                                                                                                                                                                                                                                                                                                                                                                                                                                                                                                                                                                                                                                                                                                                                                                                                                                                                                                                                                                                                                                                                                                                                                                                                                                                                                                                                                                                                                                                                                                                                 |           | Viral Respiratory Lab, National Institute for Biomedical Research (INRB)                                   | Pathogen Sequencing Lab, National Institute for Biomedical Research (INRB)                        | Placide Mbala-Kingebeni; Edith Nkwembe; Eddy Kinganda-Lusamaki; Amuri Aziza; Francisca Muyembe Mawete; Catherine Pratt; Matthias Pauthner; Josh Quick; Allison Black; James Hadfield; Trevor Bedford; Ian Goodfellow; Andrew Rambaut; Nick Loman; Kristian Andersen; Michael Wiley; Steve Ahuka-Mundeke; Jean-Jacques Muyembe Tamfum                                                                                                                                                   |
| EPI_ISL_434682, EPI_ISL_434683, EPI_ISL_434684, EPI_ISL_434685, EPI_ISL_434686, EPI_ISL_434687, EPI_ISL_434688, EPI_ISL_434689, EPI_ISL_434690, EPI_ISL_434691                                                                                                                                                                                                                                                                                                                                                                                                                                                                                                                                                                                                                                                                                                                                                                                                                                                                                                                                                                                                                                                                                                                                                                                                                                                                                                                                                                                                                                                                                                                                                                                                                                                                                                                                 |           | Johns Hopkins Hospital Department of Pathology                                                             | Johns Hopkins Hospital Department of Pathology                                                    | Peter M. Thielen, Thomas Mehoke, Shirlee Wohl, Srividya Ramakrishnan, Melanie Kirsche, Amanda Emlund, Oluwaseun Falade-Nwulia, Timothy Gilpatrick, Paul Morris, Norah Sadowski, Nidiá Trovao, Victoria Gniadzowski, Michael Schatz, Stuart C. Ray, Winston Timp, Heba Mostafa                                                                                                                                                                                                          |
| EPI_ISL_434692, EPI_ISL_434693, EPI_ISL_434694                                                                                                                                                                                                                                                                                                                                                                                                                                                                                                                                                                                                                                                                                                                                                                                                                                                                                                                                                                                                                                                                                                                                                                                                                                                                                                                                                                                                                                                                                                                                                                                                                                                                                                                                                                                                                                                 |           | Bamrasnaradura hospital                                                                                    | National Institute of Health. Department of medical Sciences, Ministry of Public Health, Thailand | Pilailuk,Okada; Siripaporn,Phuygun; Thanutsapa,Thanadachakul; Sittiporn,Parmmen;Warawan,Wongboot; Sunthareeya,Waicharoen; Malinee,Chittaganpitch                                                                                                                                                                                                                                                                                                                                       |
| EPI_ISL_434695                                                                                                                                                                                                                                                                                                                                                                                                                                                                                                                                                                                                                                                                                                                                                                                                                                                                                                                                                                                                                                                                                                                                                                                                                                                                                                                                                                                                                                                                                                                                                                                                                                                                                                                                                                                                                                                                                 |           | unknown                                                                                                    | National Institute of Health. Department of medical Sciences, Ministry of Public Health, Thailand | Pilailuk,Okada; Siripaporn,Phuygun; Thanutsapa,Thanadachakul; Sittiporn,Parmmen;Warawan,Wongboot; Sunthareeya,Waicharoen; Malinee,Chittaganpitch                                                                                                                                                                                                                                                                                                                                       |
| EPI_ISL_434696                                                                                                                                                                                                                                                                                                                                                                                                                                                                                                                                                                                                                                                                                                                                                                                                                                                                                                                                                                                                                                                                                                                                                                                                                                                                                                                                                                                                                                                                                                                                                                                                                                                                                                                                                                                                                                                                                 |           | Bamrasnaradura hospital                                                                                    | National Institute of Health. Department of medical Sciences, Ministry of Public Health, Thailand | Pilailuk,Okada; Siripaporn,Phuygun; Thanutsapa,Thanadachakul; Sittiporn,Parmmen;Warawan,Wongboot; Sunthareeya,Waicharoen; Malinee,Chittaganpitch                                                                                                                                                                                                                                                                                                                                       |
| EPI_ISL_434697                                                                                                                                                                                                                                                                                                                                                                                                                                                                                                                                                                                                                                                                                                                                                                                                                                                                                                                                                                                                                                                                                                                                                                                                                                                                                                                                                                                                                                                                                                                                                                                                                                                                                                                                                                                                                                                                                 |           | unknown                                                                                                    | National Institute of Health. Department of medical Sciences, Ministry of Public Health, Thailand | Pilailuk,Okada; Siripaporn,Phuygun; Thanutsapa,Thanadachakul; Sittiporn,Parmmen;Warawan,Wongboot; Sunthareeya,Waicharoen; Malinee,Chittaganpitch                                                                                                                                                                                                                                                                                                                                       |
| EPI_ISL_434698, EPI_ISL_434699                                                                                                                                                                                                                                                                                                                                                                                                                                                                                                                                                                                                                                                                                                                                                                                                                                                                                                                                                                                                                                                                                                                                                                                                                                                                                                                                                                                                                                                                                                                                                                                                                                                                                                                                                                                                                                                                 |           | Praram 9 Hospital                                                                                          | National Institute of Health. Department of medical Sciences, Ministry of Public Health, Thailand | Pilailuk,Okada; Siripaporn,Phuygun; Thanutsapa,Thanadachakul; Sittiporn,Parmmen;Warawan,Wongboot; Sunthareeya,Waicharoen; Malinee,Chittaganpitch                                                                                                                                                                                                                                                                                                                                       |
| EPI_ISL_434700                                                                                                                                                                                                                                                                                                                                                                                                                                                                                                                                                                                                                                                                                                                                                                                                                                                                                                                                                                                                                                                                                                                                                                                                                                                                                                                                                                                                                                                                                                                                                                                                                                                                                                                                                                                                                                                                                 |           | Ramkhamhaeng Hospital                                                                                      | National Institute of Health. Department of medical Sciences, Ministry of Public Health, Thailand | Pilailuk,Okada; Siripaporn,Phuygun; Thanutsapa,Thanadachakul; Sittiporn,Parmmen;Warawan,Wongboot; Sunthareeya,Waicharoen; Malinee,Chittaganpitch                                                                                                                                                                                                                                                                                                                                       |
| EPI_ISL_434701                                                                                                                                                                                                                                                                                                                                                                                                                                                                                                                                                                                                                                                                                                                                                                                                                                                                                                                                                                                                                                                                                                                                                                                                                                                                                                                                                                                                                                                                                                                                                                                                                                                                                                                                                                                                                                                                                 |           | Panyanunthaphikhku Chonprathan Medical Center (PCMC)                                                       | National Institute of Health. Department of medical Sciences, Ministry of Public Health, Thailand | Pilailuk,Okada; Siripaporn,Phuygun; Thanutsapa,Thanadachakul; Sittiporn,Parmmen;Warawan,Wongboot; Sunthareeya,Waicharoen; Malinee,Chittaganpitch                                                                                                                                                                                                                                                                                                                                       |
| EPI_ISL_434702, EPI_ISL_434703, EPI_ISL_434704, EPI_ISL_434705, EPI_ISL_434706                                                                                                                                                                                                                                                                                                                                                                                                                                                                                                                                                                                                                                                                                                                                                                                                                                                                                                                                                                                                                                                                                                                                                                                                                                                                                                                                                                                                                                                                                                                                                                                                                                                                                                                                                                                                                 |           | Praram 9 Hospital                                                                                          | National Institute of Health. Department of medical Sciences, Ministry of Public Health, Thailand | Pilailuk,Okada; Siripaporn,Phuygun; Thanutsapa,Thanadachakul; Sittiporn,Parmmen;Warawan,Wongboot; Sunthareeya,Waicharoen; Malinee,Chittaganpitch                                                                                                                                                                                                                                                                                                                                       |
| EPI_ISL_434707                                                                                                                                                                                                                                                                                                                                                                                                                                                                                                                                                                                                                                                                                                                                                                                                                                                                                                                                                                                                                                                                                                                                                                                                                                                                                                                                                                                                                                                                                                                                                                                                                                                                                                                                                                                                                                                                                 |           | Thammasat University Hospital                                                                              | National Institute of Health. Department of medical Sciences, Ministry of Public Health, Thailand | Pilailuk,Okada; Siripaporn,Phuygun; Thanutsapa,Thanadachakul; Sittiporn,Parmmen;Warawan,Wongboot; Sunthareeya,Waicharoen; Malinee,Chittaganpitch                                                                                                                                                                                                                                                                                                                                       |
| EPI_ISL_434708, EPI_ISL_434709                                                                                                                                                                                                                                                                                                                                                                                                                                                                                                                                                                                                                                                                                                                                                                                                                                                                                                                                                                                                                                                                                                                                                                                                                                                                                                                                                                                                                                                                                                                                                                                                                                                                                                                                                                                                                                                                 |           | unknown                                                                                                    | National Institute of Health. Department of medical Sciences, Ministry of Public Health, Thailand | Pilailuk,Okada; Siripaporn,Phuygun; Thanutsapa,Thanadachakul; Sittiporn,Parmmen;Warawan,Wongboot; Sunthareeya,Waicharoen; Malinee,Chittaganpitch                                                                                                                                                                                                                                                                                                                                       |
| EPI_ISL_434710, EPI_ISL_434711, EPI_ISL_435032, EPI_ISL_435033                                                                                                                                                                                                                                                                                                                                                                                                                                                                                                                                                                                                                                                                                                                                                                                                                                                                                                                                                                                                                                                                                                                                                                                                                                                                                                                                                                                                                                                                                                                                                                                                                                                                                                                                                                                                                                 |           | Viral Respiratory Lab, National Institute for Biomedical Research (INRB)                                   | Pathogen Sequencing Lab, National Institute for Biomedical Research (INRB)                        | Placide Mbala-Kingebeni, Edith Nkwembe, Eddy Kinganda-Lusamaki, Adrienne Amuri Aziza, Francisca Muyembe Mawete, Catherine Pratt, Matthias Pauthner, Josh Quick, Allison Black, James Hadfield, Trevor Bedford, Ian Goodfellow, Andrew Rambaut, Nick Loman, Kristian Andersen, Michael Wiley, Steve Ahuka-Mundeke, Jean-Jacques Muyembe Tamfum                                                                                                                                          |
| EPI_ISL_435049                                                                                                                                                                                                                                                                                                                                                                                                                                                                                                                                                                                                                                                                                                                                                                                                                                                                                                                                                                                                                                                                                                                                                                                                                                                                                                                                                                                                                                                                                                                                                                                                                                                                                                                                                                                                                                                                                 |           | B.J. Medical College and Civil hospital                                                                    | Gujarat Biotechnology Research Centre                                                             | Pinal Trivedi, Maharshi Pandya, Amit Kanani, Akanksha Verma, Nitin Savaliya, Raghawendra Kumar, Dinesh Kumar, Zuber Saiyed, Dipa Kinariwala, Disha Patel, Binita Aring, Geeta Vaghela, Sonia Barve, Bhavesh Modi, Kairavi Joshi, Gaurishankar Shrimali, Nidhi Sood, Pranay Shah, R D Dixit, Snehal Bagatharia, Kamlesh J Upadhyay, Ramesh Pandit, Tejas Shah, Ankit Hinsu, Pritesh Sabara, Apurvasinh Puvar, Janvi Raval, Monika Gandhi, Neha Rajpara, Chaitanya Joshi, Madhvi Joshi   |
| EPI_ISL_435051                                                                                                                                                                                                                                                                                                                                                                                                                                                                                                                                                                                                                                                                                                                                                                                                                                                                                                                                                                                                                                                                                                                                                                                                                                                                                                                                                                                                                                                                                                                                                                                                                                                                                                                                                                                                                                                                                 |           | B.J. Medical College and Civil hospital                                                                    | Gujarat Biotechnology Research Centre                                                             | Pritesh Sabara, Apurvasinh Puvar, Janvi Raval, Monika Gandhi, Pinal Trivedi, Maharshi Pandya, Amit Kanani, Akanksha Verma, Nitin Savaliya, Raghawendra Kumar, Dinesh Kumar, Zuber Saiyed, Dipa Kinariwala, Disha Patel, Binita Aring, Geeta Vaghela, Sonia Barve, Bhavesh Modi, Kairavi Joshi, Gaurishankar Shrimali, Nidhi Sood, Pranay Shah, R D Dixit, Snehal Bagatharia, Kamlesh J Upadhyay, Ramesh Pandit, Tejas Shah, Ankit Hinsu, Vasudha Sharma, Chaitanya Joshi, Madhvi Joshi |
| EPI_ISL_435060, EPI_ISL_435061, EPI_ISL_435062, EPI_ISL_435063, EPI_ISL_435064, EPI_ISL_435065, EPI_ISL_435066, EPI_ISL_435067, EPI_ISL_435068, EPI_ISL_435069, EPI_ISL_435070, EPI_ISL_435071, EPI_ISL_435072, EPI_ISL_435073, EPI_ISL_435074, EPI_ISL_435075, EPI_ISL_435076, EPI_ISL_435077, EPI_ISL_435078, EPI_ISL_435079, EPI_ISL_435080, EPI_ISL_435081, EPI_ISL_435082, EPI_ISL_435083, EPI_ISL_435084, EPI_ISL_435085, EPI_ISL_435086, EPI_ISL_435087, EPI_ISL_435088, EPI_ISL_435089, EPI_ISL_435090, EPI_ISL_435091, EPI_ISL_435092, EPI_ISL_435093, EPI_ISL_435094, EPI_ISL_435095, EPI_ISL_435096, EPI_ISL_435097, EPI_ISL_435098, EPI_ISL_435099, EPI_ISL_435100, EPI_ISL_435101, EPI_ISL_435102, EPI_ISL_435103, EPI_ISL_435104, EPI_ISL_435105, EPI_ISL_435106, EPI_ISL_435107, EPI_ISL_435108, EPI_ISL_435109, EPI_ISL_435110, EPI_ISL_435111, EPI_ISL_435112                                                                                                                                                                                                                                                                                                                                                                                                                                                                                                                                                                                                                                                                                                                                                                                                                                                                                                                                                                                                                 | see above | National Centre for Disease control (NCDC), CSIR-Institute of Genomics and Integrative Biology (CSIR-IGIB) | NCDC/CSIR-IGIB                                                                                    | Pramod Kumar, Rajesh Pandey, Pooja Sharma, Mahesh Dhar, Vivekanand A. Bharathram Uppili, Himanshu Vashisht, Saruchi Wadhwa, Nishu Tyagi, Uma Sharma, Priyanka Singh, Hemlata Lal, Meena Datta, Poonam Gupta, Nidhi Saini, Aarti Tewari, Bibhash Nandi, Dharendra Kumar, Satyabrata Bag, Varun Jaiswal, Hema Gogia, Preeti Madan, Simrita Singh, Prateek Singh, Debasis Dash, Mitali Mukerji, Manju Bala, Sandhya Kabra, Sujeet Singh, Mohammed Faruq, Anurag Agrawal, Partha Rakshit   |
| EPI_ISL_435113, EPI_ISL_435114, EPI_ISL_435116, EPI_ISL_435117, EPI_ISL_435118                                                                                                                                                                                                                                                                                                                                                                                                                                                                                                                                                                                                                                                                                                                                                                                                                                                                                                                                                                                                                                                                                                                                                                                                                                                                                                                                                                                                                                                                                                                                                                                                                                                                                                                                                                                                                 |           | Viral Respiratory Lab, National Institute for Biomedical Research (INRB)                                   | Pathogen Sequencing Lab, National Institute for Biomedical Research (INRB)                        | Placide Mbala-Kingebeni, Edith Nkwembe, Eddy Kinganda-Lusamaki, Adrienne Amuri Aziza, Francisca Muyembe Mawete, Catherine Pratt, Matthias Pauthner, Josh Quick, Allison Black, James Hadfield, Trevor Bedford, Ian Goodfellow, Andrew Rambaut, Nick Loman, Kristian Andersen, Michael Wiley, Steve Ahuka-Mundeke, Jean-Jacques Muyembe Tamfum                                                                                                                                          |
| EPI_ISL_435156, EPI_ISL_435157, EPI_ISL_435158, EPI_ISL_435159, EPI_ISL_435160, EPI_ISL_435161, EPI_ISL_435162, EPI_ISL_435163, EPI_ISL_435164, EPI_ISL_435165, EPI_ISL_435166, EPI_ISL_435167, EPI_ISL_435168                                                                                                                                                                                                                                                                                                                                                                                                                                                                                                                                                                                                                                                                                                                                                                                                                                                                                                                                                                                                                                                                                                                                                                                                                                                                                                                                                                                                                                                                                                                                                                                                                                                                                 | see above | Viral Respiratory Lab, National Institute for Biomedical Research (INRB)                                   | Pathogen Sequencing Lab, National Institute for Biomedical Research (INRB)                        | Placide Mbala-Kingebeni, Edith Nkwembe, Eddy Kinganda-Lusamaki, Amuri Aziza, Francisca Muyembe Mawete, Catherine Pratt, Matthias Pauthner, Josh Quick, Allison Black, James Hadfield, Trevor Bedford, Ian Goodfellow, Andrew Rambaut, Nick Loman, Kristian Andersen, Michael Wiley, Steve Ahuka-Mundeke, Jean-Jacques Muyembe Tamfum                                                                                                                                                   |

|                                                                                                                                                                                                                                                                                                                                                                                                                                                                                                                                                                                                                                                                                                                                                                                                                                                                                                                                                                                                                                                                                                                                                |           |                                                                          |                                                                                                        |                                                                                                                                                                                                                                                                                                                                                                                                                                                                                                               |
|------------------------------------------------------------------------------------------------------------------------------------------------------------------------------------------------------------------------------------------------------------------------------------------------------------------------------------------------------------------------------------------------------------------------------------------------------------------------------------------------------------------------------------------------------------------------------------------------------------------------------------------------------------------------------------------------------------------------------------------------------------------------------------------------------------------------------------------------------------------------------------------------------------------------------------------------------------------------------------------------------------------------------------------------------------------------------------------------------------------------------------------------|-----------|--------------------------------------------------------------------------|--------------------------------------------------------------------------------------------------------|---------------------------------------------------------------------------------------------------------------------------------------------------------------------------------------------------------------------------------------------------------------------------------------------------------------------------------------------------------------------------------------------------------------------------------------------------------------------------------------------------------------|
| EPI_ISL_435403, EPI_ISL_435404, EPI_ISL_435405, EPI_ISL_435406, EPI_ISL_435407, EPI_ISL_435408, EPI_ISL_435409, EPI_ISL_435410, EPI_ISL_435411, EPI_ISL_435412, EPI_ISL_435413, EPI_ISL_435414, EPI_ISL_435415, EPI_ISL_435416, EPI_ISL_435417, EPI_ISL_435418, EPI_ISL_435419, EPI_ISL_435420, EPI_ISL_435421, EPI_ISL_435422, EPI_ISL_435423, EPI_ISL_435424, EPI_ISL_435425, EPI_ISL_435426, EPI_ISL_435427, EPI_ISL_435428, EPI_ISL_435429, EPI_ISL_435430, EPI_ISL_435431                                                                                                                                                                                                                                                                                                                                                                                                                                                                                                                                                                                                                                                                 | see above | Virological Research Group, Szentágotthai Research Centre                | Bioinformatics Research Group, Szentágotthai Research Centre                                           | Péter Urbán, Endre Gábor Tóth, Gábor Kemenesi, Róbert Herczeg, Attila Gyenesei, Ferenc Jakab                                                                                                                                                                                                                                                                                                                                                                                                                  |
| EPI_ISL_436194                                                                                                                                                                                                                                                                                                                                                                                                                                                                                                                                                                                                                                                                                                                                                                                                                                                                                                                                                                                                                                                                                                                                 |           | Viral Respiratory Lab, National Institute for Biomedical Research (INRB) | Pathogen Sequencing Lab, National Institute for Biomedical Research (INRB)                             | Placide Mbala-Kingebeni, Edith Nkwembe, Eddy Kinganda-Lusamaki, Amuri Aziza, Francisca Muyembe Mawete, Catherine Pratt, Matthias Pauthner, Josh Quick, Allison Black, James Hadfield, Trevor Bedford, Ian Goodfellow, Andrew Rambaut, Nick Loman, Kristian Andersen, Michael Wiley, Steve Ahuka-Mundeke, Jean-Jacques Muyembe Tamfum                                                                                                                                                                          |
| EPI_ISL_436287, EPI_ISL_436307, EPI_ISL_436327, EPI_ISL_436347, EPI_ISL_436371, EPI_ISL_436398                                                                                                                                                                                                                                                                                                                                                                                                                                                                                                                                                                                                                                                                                                                                                                                                                                                                                                                                                                                                                                                 |           | Servicio de Microbiología. Hospital Clínico Universitario de Valencia    | Sequencing and Bioinformatics Service and Molecular Epidemiology Research Group. FISABIO-Public Health | Paula Ruiz-Hueso, Mariana Reyes-Prieto, Vicente Soriano Chirona, Ivan Ansari, David Navarro, Maria Alma Bracho, Griselda De Marco, Beatriz Beamud, Lidia Ruiz Roldan, Marta Pla Diaz, Neris Garcia-Gonzalez, Inma Galán Vendrell, Sandra Carbo, Loreto Ferrús Abad, Lúcia Martínez-Priego, Giuseppe D'Auria, Fernando Gonzalez-Candelas                                                                                                                                                                       |
| EPI_ISL_436412                                                                                                                                                                                                                                                                                                                                                                                                                                                                                                                                                                                                                                                                                                                                                                                                                                                                                                                                                                                                                                                                                                                                 |           | Viral Respiratory Lab, National Institute for Biomedical Research (INRB) | Pathogen Sequencing Lab, National Institute for Biomedical Research (INRB)                             | Placide Mbala-Kingebeni, Edith Nkwembe, Eddy Kinganda-Lusamaki, Amuri Aziza, Francisca Muyembe Mawete, Catherine Pratt, Matthias Pauthner, Josh Quick, Allison Black, James Hadfield, Trevor Bedford, Ian Goodfellow, Andrew Rambaut, Nick Loman, Kristian Andersen, Michael Wiley, Steve Ahuka-Mundeke, Jean-Jacques Muyembe Tamfum                                                                                                                                                                          |
| EPI_ISL_436413, EPI_ISL_436414, EPI_ISL_436415, EPI_ISL_436416, EPI_ISL_436417, EPI_ISL_436418, EPI_ISL_436419, EPI_ISL_436420, EPI_ISL_436421, EPI_ISL_436422, EPI_ISL_436423, EPI_ISL_436424, EPI_ISL_436425, EPI_ISL_436426, EPI_ISL_436427, EPI_ISL_436428, EPI_ISL_436429, EPI_ISL_436430, EPI_ISL_436431, EPI_ISL_436432, EPI_ISL_436433, EPI_ISL_436434, EPI_ISL_436435, EPI_ISL_436436, EPI_ISL_436437, EPI_ISL_436438, EPI_ISL_436439, EPI_ISL_436440, EPI_ISL_436441, EPI_ISL_436442, EPI_ISL_436443, EPI_ISL_436444, EPI_ISL_436445, EPI_ISL_436446, EPI_ISL_436447, EPI_ISL_436448, EPI_ISL_436449, EPI_ISL_436450, EPI_ISL_436451, EPI_ISL_436452, EPI_ISL_436453, EPI_ISL_436454, EPI_ISL_436455, EPI_ISL_436456, EPI_ISL_436457, EPI_ISL_436458, EPI_ISL_436459, EPI_ISL_436460, EPI_ISL_436461, EPI_ISL_436462, EPI_ISL_436463                                                                                                                                                                                                                                                                                                 | see above | National Centre for Disease control (NCDC)                               | NCDC/CSIR-IGIB                                                                                         | Pramod Kumar#, Rajesh Pandey#, Pooja Sharma, Mahesh S Dhar, Vivekanand A, Bharathram Uppili, Himanshu Vashisht, Saruchi Wadhwa, Nishu Tyagi, Uma Sharma, Priyanka Singh, Hemlata Lal, Meena Datta, Poonam Gupta, Nidhi Saini, Aarti Tewari, Bibhash Nandi, Dharendra Kumar, Satyabrata Bag, Varun Jaiswal, Hema Gogia, Preeti Madan, Simrita Singh, Prateek Singh, Debasis Dash, Mitali Mukerji, Manju Bala, Sandhya Kabra, Sujeet Singh, Mohammed Faruq, Anurag Agrawal*, Partha Rakshit*                    |
| EPI_ISL_437193, EPI_ISL_437194, EPI_ISL_437195, EPI_ISL_437196, EPI_ISL_437337, EPI_ISL_437338, EPI_ISL_437339, EPI_ISL_437340, EPI_ISL_437341, EPI_ISL_437342, EPI_ISL_437343, EPI_ISL_437344, EPI_ISL_437345, EPI_ISL_437346, EPI_ISL_437347, EPI_ISL_437348, EPI_ISL_437350, EPI_ISL_437351, EPI_ISL_437352, EPI_ISL_437353, EPI_ISL_437354, EPI_ISL_437355, EPI_ISL_437356, EPI_ISL_437357, EPI_ISL_437358                                                                                                                                                                                                                                                                                                                                                                                                                                                                                                                                                                                                                                                                                                                                 | see above | Viral Respiratory Lab, National Institute for Biomedical Research (INRB) | Pathogen Sequencing Lab, National Institute for Biomedical Research (INRB)                             | Placide Mbala-Kingebeni, Edith Nkwembe, Eddy Kinganda-Lusamaki, Amuri Aziza, Francisca Muyembe Mawete, Catherine Pratt, Matthias Pauthner, Josh Quick, Allison Black, James Hadfield, Trevor Bedford, Ian Goodfellow, Andrew Rambaut, Nick Loman, Kristian Andersen, Michael Wiley, Steve Ahuka-Mundeke, Jean-Jacques Muyembe Tamfum                                                                                                                                                                          |
| EPI_ISL_437441                                                                                                                                                                                                                                                                                                                                                                                                                                                                                                                                                                                                                                                                                                                                                                                                                                                                                                                                                                                                                                                                                                                                 |           | Department of MicroBiology, Government Medical College, Surat            | Gujarat Biotechnology Research Centre                                                                  | Raghawendra Kumar, Dinesh Kumar, Zuber Saiyed, Dipa Kinariwala, Disha Patel, Binita Aring, Neeta Khandelwal, Geeta Vaghela, Sonia Barve, Bhavesh Modi, Kairavi Joshi, Gaurishankar Shrimali, Nidhi Sood, Pranay Shah, R D Dixit, Snehal Bagatharia, Kamlesh J Upadhyay, Ramesh Pandit, Tejas Shah, Ankit Hinsu, Pritesh Sabara, Apurvasinh Puvar, Janvi Raval, Monika Gandhi, Pinal Trivedi, Maharshi Pandya, Amit Kanani, Akanksha Verma, Nitin Savaliya, Anjali Rajwar, Chaitanya Joshi, Madhvi Joshi       |
| EPI_ISL_437454                                                                                                                                                                                                                                                                                                                                                                                                                                                                                                                                                                                                                                                                                                                                                                                                                                                                                                                                                                                                                                                                                                                                 |           | B.J. Medical College and Civil hospital                                  | Gujarat Biotechnology Research Centre                                                                  | Pranay Shah, R D Dixit, Snehal Bagatharia, Kamlesh J Upadhyay, Ramesh Pandit, Tejas Shah, Ankit Hinsu, Pritesh Sabara, Apurvasinh Puvar, Janvi Raval, Monika Gandhi, Pinal Trivedi, Maharshi Pandya, Amit Kanani, Akanksha Verma, Nitin Savaliya, Raghawendra Kumar, Dinesh Kumar, Zuber Saiyed, Dipa Kinariwala, Disha Patel, Binita Aring, Neeta Khandelwal, Geeta Vaghela, Sonia Barve, Bhavesh Modi, Kairavi Joshi, Gaurishankar Shrimali, Nidhi Sood, Chaitanya Joshi, Sharmistha Majumdar, Madhvi Joshi |
| EPI_ISL_437803, EPI_ISL_437804, EPI_ISL_437805, EPI_ISL_437806, EPI_ISL_437807, EPI_ISL_437808, EPI_ISL_437809, EPI_ISL_437810, EPI_ISL_437811, EPI_ISL_437812, EPI_ISL_437813, EPI_ISL_437814, EPI_ISL_437815, EPI_ISL_437816, EPI_ISL_437817, EPI_ISL_437818, EPI_ISL_437819, EPI_ISL_437820, EPI_ISL_437821, EPI_ISL_437822, EPI_ISL_437823, EPI_ISL_437824, EPI_ISL_437825, EPI_ISL_437826, EPI_ISL_437827, EPI_ISL_437828, EPI_ISL_437829, EPI_ISL_437830, EPI_ISL_437831, EPI_ISL_437832, EPI_ISL_437833, EPI_ISL_437834, EPI_ISL_437835, EPI_ISL_437836, EPI_ISL_437837, EPI_ISL_437838, EPI_ISL_437839, EPI_ISL_437840, EPI_ISL_437841, EPI_ISL_437842, EPI_ISL_437843, EPI_ISL_437844, EPI_ISL_437845, EPI_ISL_437846, EPI_ISL_437847, EPI_ISL_437848, EPI_ISL_437849, EPI_ISL_437850, EPI_ISL_437851, EPI_ISL_437852, EPI_ISL_437853, EPI_ISL_437854, EPI_ISL_437855, EPI_ISL_437856, EPI_ISL_437857, EPI_ISL_437858, EPI_ISL_437859, EPI_ISL_437860, EPI_ISL_437861, EPI_ISL_437862, EPI_ISL_437863, EPI_ISL_437864, EPI_ISL_437865, EPI_ISL_437866, EPI_ISL_437868, EPI_ISL_437869, EPI_ISL_437870, EPI_ISL_437871, EPI_ISL_437872 | see above | UW Virology Lab                                                          | UW Virology Lab                                                                                        | Pavitra Roychoudhury, Hong Xie, Keith Jerome, Alexander Greninger                                                                                                                                                                                                                                                                                                                                                                                                                                             |
| EPI_ISL_438138                                                                                                                                                                                                                                                                                                                                                                                                                                                                                                                                                                                                                                                                                                                                                                                                                                                                                                                                                                                                                                                                                                                                 |           | Department of Microbiology, Gandhi Medical College and Hospital          | Department of Microbiology, Gandhi Medical College and Hospital Secendrabad, Hyderabad, India          | Raja Rao Mesipogu, Muttineni Radhakrishna, Nagamani K, Thrilok Chandar B, Kalyani Putty, Ravikumar P, Sunitha P, Pankaj Singh D, Anand Kumar K, Amit A. Upadhyay, Steven Bosinger, Rama Amara                                                                                                                                                                                                                                                                                                                 |
| EPI_ISL_438222, EPI_ISL_438223, EPI_ISL_438224, EPI_ISL_438225, EPI_ISL_438226, EPI_ISL_438227, EPI_ISL_438228, EPI_ISL_438229, EPI_ISL_438230, EPI_ISL_438231, EPI_ISL_438232, EPI_ISL_438233, EPI_ISL_438234                                                                                                                                                                                                                                                                                                                                                                                                                                                                                                                                                                                                                                                                                                                                                                                                                                                                                                                                 | see above | Johns Hopkins Hospital Department of Pathology                           | Johns Hopkins Hospital Department of Pathology                                                         | Peter M. Thielen, Thomas Mehoke, Shirlee Wohl, Srividya Ramakrishnan, Melanie Kirsche, Amanda Emlund, Oluwaseun Falade-Nwulia, Timothy Gilpatrick, Paul Morris, Norah Sadowski, N. di. Trovao, Victoria Gniazdowski, Michael Schatz, Stuart C. Ray, Winston Timp, Heba Mostafa                                                                                                                                                                                                                                |
| EPI_ISL_438235, EPI_ISL_438236, EPI_ISL_438237, EPI_ISL_438238, EPI_ISL_438239, EPI_ISL_438240, EPI_ISL_438241, EPI_ISL_438242, EPI_ISL_438243, EPI_ISL_438244, EPI_ISL_438245, EPI_ISL_438246, EPI_ISL_438247                                                                                                                                                                                                                                                                                                                                                                                                                                                                                                                                                                                                                                                                                                                                                                                                                                                                                                                                 | see above | Johns Hopkins Hospital Department of Pathology                           | Johns Hopkins Hospital Department of Pathology                                                         | Peter M. Thielen, Thomas Mehoke, Shirlee Wohl, Srividya Ramakrishnan, Melanie Kirsche, Amanda Emlund, Oluwaseun Falade-Nwulia, Timothy Gilpatrick, Paul Morris, Norah Sadowski, Nidia Trovao, Victoria Gniazdowski, Michael Schatz, Stuart C. Ray, Winston Timp, Heba Mostafa                                                                                                                                                                                                                                 |
| EPI_ISL_443184, EPI_ISL_443185, EPI_ISL_443186                                                                                                                                                                                                                                                                                                                                                                                                                                                                                                                                                                                                                                                                                                                                                                                                                                                                                                                                                                                                                                                                                                 |           | UW Virology Lab                                                          | UW Virology Lab                                                                                        | Pavitra Roychoudhury, Hong Xie, Keith Jerome, Alexander Greninger                                                                                                                                                                                                                                                                                                                                                                                                                                             |
| EPI_ISL_444456                                                                                                                                                                                                                                                                                                                                                                                                                                                                                                                                                                                                                                                                                                                                                                                                                                                                                                                                                                                                                                                                                                                                 |           | B.J. Medical College and Civil hospital                                  | Gujarat Biotechnology Research Centre                                                                  | R D Dixit, Snehal Bagatharia, Kamlesh J Upadhyay, Ramesh Pandit, Tejas Shah, Ankit Hinsu, Pritesh Sabara, Apurvasinh Puvar, Janvi Raval, Monika Gandhi, Pinal Trivedi, Maharshi Pandya, Amit Kanani, Akanksha Verma, Nitin Savaliya, Raghawendra Kumar, Dinesh Kumar, Zuber Saiyed, Dipa Kinariwala, Disha Patel, Binita Aring, Neeta Khandelwal, Geeta Vaghela, Sonia Barve, Bhavesh Modi, Kairavi Joshi, Gaurishankar Shrimali, Nidhi Sood, Pranay Shah, Pooja P Doshi, Chaitanya Joshi, Madhvi Joshi       |
| EPI_ISL_444459                                                                                                                                                                                                                                                                                                                                                                                                                                                                                                                                                                                                                                                                                                                                                                                                                                                                                                                                                                                                                                                                                                                                 |           | B.J. Medical College and Civil hospital                                  | Gujarat Biotechnology Research Centre                                                                  | Ramesh Pandit, Tejas Shah, Ankit Hinsu, Pritesh Sabara, Apurvasinh Puvar, Janvi Raval, Monika Gandhi, Pinal Trivedi, Maharshi Pandya, Amit Kanani, Akanksha Verma, Nitin Savaliya, Raghawendra Kumar, Dinesh Kumar, Zuber Saiyed, Dipa Kinariwala, Disha Patel, Binita Aring, Neeta Khandelwal, Geeta Vaghela, Sonia Barve, Bhavesh Modi, Kairavi Joshi, Gaurishankar Shrimali, Nidhi Sood, Pranay Shah, R D Dixit, Snehal Bagatharia, Kamlesh J Upadhyay, Neha Rajpara, Chaitanya Joshi, Madhvi Joshi        |
| EPI_ISL_444462                                                                                                                                                                                                                                                                                                                                                                                                                                                                                                                                                                                                                                                                                                                                                                                                                                                                                                                                                                                                                                                                                                                                 |           | B.J. Medical College and Civil hospital                                  | Gujarat Biotechnology Research Centre                                                                  | Pritesh Sabara, Apurvasinh Puvar, Janvi Raval, Monika Gandhi, Pinal Trivedi, Maharshi Pandya, Amit Kanani, Akanksha Verma, Nitin Savaliya, Raghawendra Kumar, Dinesh Kumar, Zuber Saiyed, Dipa Kinariwala, Disha Patel, Binita Aring, Neeta Khandelwal, Geeta Vaghela, Sonia Barve, Bhavesh Modi, Kairavi Joshi, Gaurishankar Shrimali, Nidhi Sood, Pranay Shah, R D Dixit, Snehal Bagatharia, Kamlesh J Upadhyay, Ramesh Pandit, Tejas Shah, Ankit Hinsu, Armi Chaudhari, Chaitanya Joshi, Madhvi Joshi      |
| EPI_ISL_444466                                                                                                                                                                                                                                                                                                                                                                                                                                                                                                                                                                                                                                                                                                                                                                                                                                                                                                                                                                                                                                                                                                                                 |           | B.J. Medical College and Civil hospital                                  | Gujarat Biotechnology Research Centre                                                                  | Pinal Trivedi, Maharshi Pandya, Amit Kanani, Akanksha Verma, Nitin Savaliya, Raghawendra Kumar, Dinesh Kumar, Zuber Saiyed, Dipa Kinariwala, Disha Patel, Binita Aring, Neeta Khandelwal, Geeta Vaghela, Sonia Barve, Bhavesh Modi, Kairavi Joshi, Gaurishankar Shrimali, Nidhi Sood, Pranay Shah, R D Dixit, Snehal Bagatharia, Kamlesh J Upadhyay, Ramesh Pandit, Tejas Shah, Ankit Hinsu, Pritesh Sabara, Apurvasinh Puvar, Janvi Raval, Monika Gandhi, Sharmistha Majumdar, Chaitanya Joshi, Madhvi Joshi |
| EPI_ISL_444471                                                                                                                                                                                                                                                                                                                                                                                                                                                                                                                                                                                                                                                                                                                                                                                                                                                                                                                                                                                                                                                                                                                                 |           | B.J. Medical College and Civil hospital                                  | Gujarat Biotechnology Research Centre                                                                  | Raghawendra Kumar, Dinesh Kumar, Zuber Saiyed, Dipa Kinariwala, Disha Patel, Binita Aring, Neeta Khandelwal, Geeta Vaghela, Sonia Barve, Bhavesh Modi, Kairavi Joshi, Gaurishankar Shrimali, Nidhi Sood, Pranay Shah, R D Dixit, Snehal Bagatharia, Kamlesh J Upadhyay, Ramesh Pandit, Tejas Shah, Ankit Hinsu, Pritesh Sabara, Apurvasinh Puvar, Janvi Raval, Monika Gandhi, Pinal Trivedi, Maharshi Pandya, Amit Kanani, Akanksha Verma, Nitin Savaliya, Afzal Ansari, Chaitanya Joshi, Madhvi Joshi        |
| EPI_ISL_444484                                                                                                                                                                                                                                                                                                                                                                                                                                                                                                                                                                                                                                                                                                                                                                                                                                                                                                                                                                                                                                                                                                                                 |           | Gujarat Biotechnology Research Centre                                    | Gujarat Biotechnology Research Centre                                                                  | Pranay Shah, R D Dixit, Snehal Bagatharia, Kamlesh J Upadhyay, Ramesh Pandit, Tejas Shah, Ankit Hinsu, Pritesh Sabara, Apurvasinh Puvar, Janvi Raval, Monika Gandhi, Pinal Trivedi, Maharshi Pandya, Amit Kanani, Akanksha Verma, Nitin Savaliya, Raghawendra Kumar, Dinesh Kumar, Zuber Saiyed, Dipa Kinariwala, Disha Patel, Binita Aring, Neeta Khandelwal, Geeta Vaghela, Sonia Barve, Bhavesh Modi, Kairavi Joshi, Gaurishankar Shrimali, Nidhi Sood, Armi Chaudhari, Chaitanya Joshi, Madhvi Joshi      |
| EPI_ISL_444485                                                                                                                                                                                                                                                                                                                                                                                                                                                                                                                                                                                                                                                                                                                                                                                                                                                                                                                                                                                                                                                                                                                                 |           | Gujarat Biotechnology Research Centre                                    | Gujarat Biotechnology Research Centre                                                                  | R D Dixit, Snehal Bagatharia, Kamlesh J Upadhyay, Ramesh Pandit, Tejas Shah, Ankit Hinsu, Pritesh Sabara, Apurvasinh Puvar, Janvi Raval, Monika Gandhi,                                                                                                                                                                                                                                                                                                                                                       |



|                                                                                                                                                                                                                                                                                                                                |           |                                                                                                   |                                                                                                        |                                                                                                                                                                                                                                                                                                                                                                                                                                                                                                               |
|--------------------------------------------------------------------------------------------------------------------------------------------------------------------------------------------------------------------------------------------------------------------------------------------------------------------------------|-----------|---------------------------------------------------------------------------------------------------|--------------------------------------------------------------------------------------------------------|---------------------------------------------------------------------------------------------------------------------------------------------------------------------------------------------------------------------------------------------------------------------------------------------------------------------------------------------------------------------------------------------------------------------------------------------------------------------------------------------------------------|
|                                                                                                                                                                                                                                                                                                                                |           |                                                                                                   |                                                                                                        | Pinal Trivedi, Maharshi Pandya, Amit Kanani, Akanksha Verma, Nitin Savaliya, Raghawendra Kumar, Dinesh Kumar, Zuber Saiyed, Dipa Kinariwala, Disha Patel, Binita Aring, Neeta Khandelwal, Geeta Vaghela, Sonia Barve, Bhavesh Modi, Kairavi Joshi, Gaurishankar Shrimali, Nidhi Sood, Pranay Shah, Bhavya Jindal, Chaitanya Joshi, Madhvi Joshi                                                                                                                                                               |
| EPI_ISL_444520, EPI_ISL_444525, EPI_ISL_444542, EPI_ISL_444554, EPI_ISL_444555, EPI_ISL_444561, EPI_ISL_444562, EPI_ISL_444564, EPI_ISL_444572, EPI_ISL_444579, EPI_ISL_444587, EPI_ISL_444590, EPI_ISL_444591, EPI_ISL_444594                                                                                                 | see above | Northwestern Memorial Hospital                                                                    | Ozer Lab                                                                                               | Ramon Lorenzo-Redondo, Hannah H. Nam, Scott C. Roberts, Lacy M. Simons, Chad J. Achenbach, Lawrence J. Jennings, Chao Qi, Alan R. Hauser, Michael G. Ison, Judd F. Hultquist, Egon A. Ozer                                                                                                                                                                                                                                                                                                                    |
| EPI_ISL_447031                                                                                                                                                                                                                                                                                                                 |           | B.J. Medical College and Civil hospital                                                           | Gujarat Biotechnology Research Centre                                                                  | Ramesh Pandit, Tejas Shah, Ankit Hinsu, Pritesh Sabara, Apurvasinh Puvar, Janvi Raval, Monika Gandhi, Pinal Trivedi, Maharshi Pandya, Amit Kanani, Akanksha Verma, Nitin Savaliya, Raghawendra Kumar, Dinesh Kumar, Zuber Saiyed, Dipa Kinariwala, Disha Patel, Binita Aring, Neeta Khandelwal, Geeta Vaghela, Sonia Barve, Bhavesh Modi, Kairavi Joshi, Gaurishankar Shrimali, Nidhi Sood, Pranay Shah, R D Dixit, Snehal Bagatharia, Kamlesh J Upadhyay, Sharmistha Majumdar, Chaitanya Joshi, Madhvi Joshi |
| EPI_ISL_447034                                                                                                                                                                                                                                                                                                                 |           | B.J. Medical College and Civil hospital                                                           | Gujarat Biotechnology Research Centre                                                                  | Pritesh Sabara, Apurvasinh Puvar, Janvi Raval, Monika Gandhi, Pinal Trivedi, Maharshi Pandya, Amit Kanani, Akanksha Verma, Nitin Savaliya, Raghawendra Kumar, Dinesh Kumar, Zuber Saiyed, Dipa Kinariwala, Disha Patel, Binita Aring, Neeta Khandelwal, Geeta Vaghela, Sonia Barve, Bhavesh Modi, Kairavi Joshi, Gaurishankar Shrimali, Nidhi Sood, Pranay Shah, R D Dixit, Snehal Bagatharia, Kamlesh J Upadhyay, Ramesh Pandit, Tejas Shah, Ankit Hinsu, Priti Pandita, Chaitanya Joshi, Madhvi Joshi       |
| EPI_ISL_447038                                                                                                                                                                                                                                                                                                                 |           | B.J. Medical College and Civil hospital                                                           | Gujarat Biotechnology Research Centre                                                                  | Pinal Trivedi, Maharshi Pandya, Amit Kanani, Akanksha Verma, Nitin Savaliya, Raghawendra Kumar, Dinesh Kumar, Zuber Saiyed, Dipa Kinariwala, Disha Patel, Binita Aring, Neeta Khandelwal, Geeta Vaghela, Sonia Barve, Bhavesh Modi, Kairavi Joshi, Gaurishankar Shrimali, Nidhi Sood, Pranay Shah, R D Dixit, Snehal Bagatharia, Kamlesh J Upadhyay, Ramesh Pandit, Tejas Shah, Ankit Hinsu, Pritesh Sabara, Apurvasinh Puvar, Janvi Raval, Monika Gandhi, Armi Chaudhari, Chaitanya Joshi, Madhvi Joshi      |
| EPI_ISL_447043                                                                                                                                                                                                                                                                                                                 |           | B.J. Medical College and Civil hospital                                                           | Gujarat Biotechnology Research Centre                                                                  | Raghawendra Kumar, Dinesh Kumar, Zuber Saiyed, Dipa Kinariwala, Disha Patel, Binita Aring, Neeta Khandelwal, Geeta Vaghela, Sonia Barve, Bhavesh Modi, Kairavi Joshi, Gaurishankar Shrimali, Nidhi Sood, Pranay Shah, R D Dixit, Snehal Bagatharia, Kamlesh J Upadhyay, Ramesh Pandit, Tejas Shah, Ankit Hinsu, Pritesh Sabara, Apurvasinh Puvar, Janvi Raval, Monika Gandhi, Armi Patel, Chaitanya Joshi, Madhvi Joshi                                                                                       |
| EPI_ISL_447230, EPI_ISL_447231, EPI_ISL_447232, EPI_ISL_447233, EPI_ISL_447234, EPI_ISL_447235, EPI_ISL_447236, EPI_ISL_447237, EPI_ISL_447238, EPI_ISL_447239, EPI_ISL_447240, EPI_ISL_447241, EPI_ISL_447242, EPI_ISL_447243, EPI_ISL_447244, EPI_ISL_447245, EPI_ISL_447246, EPI_ISL_447247, EPI_ISL_447248, EPI_ISL_447249 | see above | Viral Respiratory Lab, National Institute for Biomedical Research (INRB)                          | Pathogen Sequencing Lab, National Institute for Biomedical Research (INRB)                             | Placide Mbala-Kingebeni, Edith Nkwembe, Eddy Kinganda-Lusamaki, Amuri Aziza, Francisca Muyembe Mawete, Catherine Pratt, Matthias Pauthner, Josh Quick, Allison Black, James Hadfield, Trevor Bedford, Ian Goodfellow, Andrew Rambaut, Nick Loman, Kristian Andersen, Michael Wiley, Steve Ahuka-Mundeke, Jean-Jacques Muyembe Tamfum                                                                                                                                                                          |
| EPI_ISL_447479, EPI_ISL_447493, EPI_ISL_447507, EPI_ISL_447521                                                                                                                                                                                                                                                                 |           | Servicio de Microbiología. Hospital Clínico Universitario de Valencia                             | Sequencing and Bioinformatics Service and Molecular Epidemiology Research Group. FISABIO-Public Health | Paula Ruiz-Hueso, Mariana Reyes-Prieto, Vicente Soriano Chirona, Ivan Ansari, Lúcia Martínez-Priego, Giuseppe 'Auria, David Navarro, Eliseo Albert, María Alma Bracho, Lidia Ruiz Roldan, Neris Garcia-Gonzalez, Inma Galán Vendrell, Sandra Carbo, Loreto Ferrús Abad, Fernando Gonzalez-Candelas                                                                                                                                                                                                            |
| EPI_ISL_447536                                                                                                                                                                                                                                                                                                                 |           | Gujarat Biotechnology Research Centre                                                             | Gujarat Biotechnology Research Centre                                                                  | Pranay Shah, R D Dixit, Snehal Bagatharia, Kamlesh J Upadhyay, Ramesh Pandit, Tejas Shah, Ankit Hinsu, Pritesh Sabara, Apurvasinh Puvar, Janvi Raval, Monika Gandhi, Pinal Trivedi, Maharshi Pandya, Amit Kanani, Akanksha Verma, Nitin Savaliya, Raghawendra Kumar, Dinesh Kumar, Zuber Saiyed, Dipa Kinariwala, Disha Patel, Binita Aring, Neeta Khandelwal, Geeta Vaghela, Sonia Barve, Bhavesh Modi, Kairavi Joshi, Gaurishankar Shrimali, Nidhi Sood, Neha Rajpara, Chaitanya Joshi, Madhvi Joshi        |
| EPI_ISL_447537                                                                                                                                                                                                                                                                                                                 |           | Gujarat Biotechnology Research Centre                                                             | Gujarat Biotechnology Research Centre                                                                  | R D Dixit, Snehal Bagatharia, Kamlesh J Upadhyay, Ramesh Pandit, Tejas Shah, Ankit Hinsu, Pritesh Sabara, Apurvasinh Puvar, Janvi Raval, Monika Gandhi, Pinal Trivedi, Maharshi Pandya, Amit Kanani, Akanksha Verma, Nitin Savaliya, Raghawendra Kumar, Dinesh Kumar, Zuber Saiyed, Dipa Kinariwala, Disha Patel, Binita Aring, Neeta Khandelwal, Geeta Vaghela, Sonia Barve, Bhavesh Modi, Kairavi Joshi, Gaurishankar Shrimali, Nidhi Sood, Pranay Shah, Afzal Ansari, Chaitanya Joshi, Madhvi Joshi        |
| EPI_ISL_447540                                                                                                                                                                                                                                                                                                                 |           | Gujarat Biotechnology Research Centre                                                             | Gujarat Biotechnology Research Centre                                                                  | Ramesh Pandit, Tejas Shah, Ankit Hinsu, Pritesh Sabara, Apurvasinh Puvar, Janvi Raval, Monika Gandhi, Pinal Trivedi, Maharshi Pandya, Amit Kanani, Akanksha Verma, Nitin Savaliya, Raghawendra Kumar, Dinesh Kumar, Zuber Saiyed, Dipa Kinariwala, Disha Patel, Binita Aring, Neeta Khandelwal, Geeta Vaghela, Sonia Barve, Bhavesh Modi, Kairavi Joshi, Gaurishankar Shrimali, Nidhi Sood, Pranay Shah, R D Dixit, Snehal Bagatharia, Kamlesh J Upadhyay, Bhavya Jindal, Chaitanya Joshi, Madhvi Joshi       |
| EPI_ISL_447543                                                                                                                                                                                                                                                                                                                 |           | Gujarat Biotechnology Research Centre                                                             | Gujarat Biotechnology Research Centre                                                                  | Pritesh Sabara, Apurvasinh Puvar, Janvi Raval, Monika Gandhi, Pinal Trivedi, Maharshi Pandya, Amit Kanani, Akanksha Verma, Nitin Savaliya, Raghawendra Kumar, Dinesh Kumar, Zuber Saiyed, Dipa Kinariwala, Disha Patel, Binita Aring, Neeta Khandelwal, Geeta Vaghela, Sonia Barve, Bhavesh Modi, Kairavi Joshi, Gaurishankar Shrimali, Nidhi Sood, Pranay Shah, R D Dixit, Snehal Bagatharia, Kamlesh J Upadhyay, Ramesh Pandit, Tejas Shah, Ankit Hinsu, Sharmistha Majumdar, Chaitanya Joshi, Madhvi Joshi |
| EPI_ISL_447547                                                                                                                                                                                                                                                                                                                 |           | GMERS Medical College and Hospital, Gandhinagar                                                   | Gujarat Biotechnology Research Centre                                                                  | Pinal Trivedi, Maharshi Pandya, Amit Kanani, Akanksha Verma, Nitin Savaliya, Raghawendra Kumar, Dinesh Kumar, Zuber Saiyed, Dipa Kinariwala, Disha Patel, Binita Aring, Neeta Khandelwal, Geeta Vaghela, Sonia Barve, Bhavesh Modi, Kairavi Joshi, Gaurishankar Shrimali, Nidhi Sood, Pranay Shah, R D Dixit, Snehal Bagatharia, Kamlesh J Upadhyay, Ramesh Pandit, Tejas Shah, Ankit Hinsu, Pritesh Sabara, Apurvasinh Puvar, Janvi Raval, Monika Gandhi, Neha Rajpara, Chaitanya Joshi, Madhvi Joshi        |
| EPI_ISL_447552                                                                                                                                                                                                                                                                                                                 |           | GMERS Medical College and Hospital, Gandhinagar                                                   | Gujarat Biotechnology Research Centre                                                                  | Raghawendra Kumar, Dinesh Kumar, Zuber Saiyed, Dipa Kinariwala, Disha Patel, Binita Aring, Neeta Khandelwal, Geeta Vaghela, Sonia Barve, Bhavesh Modi, Kairavi Joshi, Gaurishankar Shrimali, Nidhi Sood, Pranay Shah, R D Dixit, Snehal Bagatharia, Kamlesh J Upadhyay, Ramesh Pandit, Tejas Shah, Ankit Hinsu, Pritesh Sabara, Apurvasinh Puvar, Janvi Raval, Monika Gandhi, Pinal Trivedi, Maharshi Pandya, Amit Kanani, Akanksha Verma, Nitin Savaliya, Anjali Rajwar, Chaitanya Joshi, Madhvi Joshi       |
| EPI_ISL_447557, EPI_ISL_447558, EPI_ISL_447560, EPI_ISL_447567                                                                                                                                                                                                                                                                 |           | CSIR-Centre for Cellular and Molecular Biology                                                    | CSIR-Centre for Cellular and Molecular Biology                                                         | Payel Mukherjee, Sofia Banu, Priya Singh, Dhiviya Vedagiri, Divya Gupta, Vishal Sah, Santosh Kumar Kuncha, Krishnan Harinivas Harshan, Archana Bharadwaj Siva, Karthik Bharadwaj Tallapaka, Shagufta Khan, Lamuk Zaveri, Namami Gaur, Sakshi Shambhavi, Tulasi Nagabandi, Purushotham Vodnala, Rakesh K Mishra, Divya Tej Sowpati                                                                                                                                                                             |
| EPI_ISL_447596, EPI_ISL_447597, EPI_ISL_447598, EPI_ISL_447599, EPI_ISL_447600, EPI_ISL_447601, EPI_ISL_447602, EPI_ISL_447603, EPI_ISL_447604, EPI_ISL_447605, EPI_ISL_447606, EPI_ISL_447607                                                                                                                                 | see above | Viral Respiratory Lab, National Institute for Biomedical Research (INRB)                          | Pathogen Sequencing Lab, National Institute for Biomedical Research (INRB)                             | Placide Mbala-Kingebeni, Edith Nkwembe, Eddy Kinganda-Lusamaki, Amuri Aziza, Francisca Muyembe Mawete, Catherine Pratt, Matthias Pauthner, Josh Quick, Allison Black, James Hadfield, Trevor Bedford, Ian Goodfellow, Andrew Rambaut, Nick Loman, Kristian Andersen, Michael Wiley, Steve Ahuka-Mundeke, Jean-Jacques Muyembe Tamfum                                                                                                                                                                          |
| EPI_ISL_447847, EPI_ISL_447854, EPI_ISL_447859, EPI_ISL_447862, EPI_ISL_447863, EPI_ISL_447864                                                                                                                                                                                                                                 |           | CSIR-Centre for Cellular and Molecular Biology                                                    | CSIR-Centre for Cellular and Molecular Biology                                                         | Payel Mukherjee, Sofia Banu, Priya Singh, Dhiviya Vedagiri, Divya Gupta, Vishal Sah, Santosh Kumar Kuncha, Krishnan Harinivas Harshan, Archana Bharadwaj Siva, Karthik Bharadwaj Tallapaka, Shagufta Khan, Lamuk Zaveri, Namami Gaur, Sakshi Shambhavi, Tulasi Nagabandi, Purushotham Vodnala, Rakesh K Mishra, Divya Tej Sowpati                                                                                                                                                                             |
| EPI_ISL_447902                                                                                                                                                                                                                                                                                                                 |           | Osmania University                                                                                | Osmania University                                                                                     | Radhakrishna,M., Nagamani,K., Thrilok Chander,B., Raja Rao,M., Kalyani,P., Ravikumar,P., Sunitha,P., Pankaj Singh,D., An and Kumar,K., Amit,U.A., Bosinger,S.E. and Rama,A.                                                                                                                                                                                                                                                                                                                                   |
| EPI_ISL_447906, EPI_ISL_447907, EPI_ISL_447908                                                                                                                                                                                                                                                                                 |           | Siriraj hospital                                                                                  | National Institute of Health. Department of medical Sciences, Ministry of Public Health, Thailand      | Pilailuk,Okada; Navin Horthongkham, Siripaporn,Phuygun; Thanutsapa,Thanadachakul; Sittiporn,Parmmen;Warawan,Wongboot; Sunthareeya,Waicharoen; Malinee,Chittaganpitch                                                                                                                                                                                                                                                                                                                                          |
| EPI_ISL_447909, EPI_ISL_447910, EPI_ISL_447911, EPI_ISL_447912, EPI_ISL_447913, EPI_ISL_447914, EPI_ISL_447915, EPI_ISL_447916, EPI_ISL_447917, EPI_ISL_447918, EPI_ISL_447919, EPI_ISL_447920, EPI_ISL_447921                                                                                                                 | see above | n/a                                                                                               | National Institute of Health. Department of medical Sciences, Ministry of Public Health, Thailand      | Pilailuk,Okada; Siripaporn,Phuygun; Thanutsapa,Thanadachakul; Sittiporn,Parmmen;Warawan,Wongboot; Sunthareeya,Waicharoen; Malinee,Chittaganpitch                                                                                                                                                                                                                                                                                                                                                              |
| EPI_ISL_450196                                                                                                                                                                                                                                                                                                                 |           | bumrungrad international hospital                                                                 | National Institute of Health. Department of medical Sciences, Ministry of Public Health, Thailand      | Pilailuk,Okada; Siripaporn,Phuygun; Thanutsapa,Thanadachakul; Sittiporn,Parmmen;Warawan,Wongboot; Sunthareeya,Waicharoen; Malinee,Chittaganpitch                                                                                                                                                                                                                                                                                                                                                              |
| EPI_ISL_450197                                                                                                                                                                                                                                                                                                                 |           | National Institute of Health. Department of medical Sciences, Ministry of Public Health, Thailand | National Institute of Health. Department of medical Sciences, Ministry of Public Health, Thailand      | Pilailuk,Okada; Siripaporn,Phuygun; Thanutsapa,Thanadachakul; Sittiporn,Parmmen;Warawan,Wongboot; Sunthareeya,Waicharoen; Malinee,Chittaganpitch                                                                                                                                                                                                                                                                                                                                                              |

|                                                                                                                                                                                                                                                                                                                                                                                                                                                                                                                                                                                                                                                                                                                                                                                                                                                                                                                                                                                                                                                                                                                                                                                                |                                                                                                   |                                                                                                   |                                                                                                                                                                                                                                                                                                                                                                                                                                                                                                                                         |          |
|------------------------------------------------------------------------------------------------------------------------------------------------------------------------------------------------------------------------------------------------------------------------------------------------------------------------------------------------------------------------------------------------------------------------------------------------------------------------------------------------------------------------------------------------------------------------------------------------------------------------------------------------------------------------------------------------------------------------------------------------------------------------------------------------------------------------------------------------------------------------------------------------------------------------------------------------------------------------------------------------------------------------------------------------------------------------------------------------------------------------------------------------------------------------------------------------|---------------------------------------------------------------------------------------------------|---------------------------------------------------------------------------------------------------|-----------------------------------------------------------------------------------------------------------------------------------------------------------------------------------------------------------------------------------------------------------------------------------------------------------------------------------------------------------------------------------------------------------------------------------------------------------------------------------------------------------------------------------------|----------|
| EPI_ISL_450326, EPI_ISL_450332                                                                                                                                                                                                                                                                                                                                                                                                                                                                                                                                                                                                                                                                                                                                                                                                                                                                                                                                                                                                                                                                                                                                                                 | CSIR-Centre for Cellular and Molecular Biology                                                    | CSIR-Centre for Cellular and Molecular Biology                                                    | Payel Mukherjee, Sofia Banu, Priya Singh, Dhiviya Vedagiri, Divya Gupta, Vishal Sah, Santosh Kumar Kuncha, Krishnan Harinivas Harshan, Archana Bharadwaj Siva, Karthik Bharadwaj Tallapaka, Shaguftha Khan, Lamuk Zaveri, Namami Gaur, Sakshi Shambhavi, Tulasi Nagabandi, Purushotham Vodnala, G. Aditya Kumar, Koushick Sivakumar, Pooja Ramesh Gupta, Rajan Kumar Jha, Shradha Vijay Lahoti, Deepak Kumar, Devi Prasad Vijayashankara, Disha Nanda, Divya Das, Jotin Gogoi, Manish Bhattacharjee, Rakesh K Mishra, Divya Tej Sowpati |          |
| EPI_ISL_450724, EPI_ISL_450725, EPI_ISL_450726, EPI_ISL_450727, EPI_ISL_450728, EPI_ISL_450729, EPI_ISL_450730, EPI_ISL_450731, EPI_ISL_450732, EPI_ISL_450733, EPI_ISL_450734, EPI_ISL_450735, EPI_ISL_450736, EPI_ISL_450737                                                                                                                                                                                                                                                                                                                                                                                                                                                                                                                                                                                                                                                                                                                                                                                                                                                                                                                                                                 | see above                                                                                         | Hospital AZ Rivierenland                                                                          | Institute of Tropical Medicine                                                                                                                                                                                                                                                                                                                                                                                                                                                                                                          |          |
| EPI_ISL_450785                                                                                                                                                                                                                                                                                                                                                                                                                                                                                                                                                                                                                                                                                                                                                                                                                                                                                                                                                                                                                                                                                                                                                                                 | Pandit Deendayal Upadhyay Government Medical College, Rajkot                                      | Gujarat Biotechnology Research Centre                                                             | Prakash Modi, Sejul Antala, Manish Pattani, Apurvasinh Puvar, Janvi Raval, Zarna Patel, Monika Gandhi, Pinal Trivedi, Maharshi Pandya, Amit Kanani, Nidhi Patel, Nitin Savaliya, Raghawendra Kumar, Dinesh Kumar, Zuber Saiyed, Komal Patel, Labdhi Pandya, Snehal Bagatharia, Ramesh Pandit, Tejas Shah, Ankit Hinsu, Pritesh Sabara, Bhavesh Modi, Gaurishankar Shrimali, R D Dixit, A M Kadri, Neelam Nathani, Chaitanya Joshi, Madhvi Joshi                                                                                         |          |
| EPI_ISL_450832                                                                                                                                                                                                                                                                                                                                                                                                                                                                                                                                                                                                                                                                                                                                                                                                                                                                                                                                                                                                                                                                                                                                                                                 | Byjorden vardcentral                                                                              | The Public Health Agency of Sweden                                                                | Pernilla Brunman, Anna-Malin Linde, Maria Lind Karlberg, Oskar Karlsson Lindsjo, Olov Svartstrom, Anna Risberg, Theresa Enkirch, Mia Brytting, Karin Tegmark-Wisell                                                                                                                                                                                                                                                                                                                                                                     |          |
| EPI_ISL_451152                                                                                                                                                                                                                                                                                                                                                                                                                                                                                                                                                                                                                                                                                                                                                                                                                                                                                                                                                                                                                                                                                                                                                                                 | M.P Shah Government Medocal college Jamnagar                                                      | Gujarat Biotechnology Research Centre                                                             | Pinal Trivedi, Maharshi Pandya, Amit Kanani, Nidhi Patel, Nitin Savaliya, Raghawendra Kumar, Dinesh Kumar, Zuber Saiyed, Komal Patel, Labdhi Pandya, Snehal Bagatharia, Ramesh Pandit, Tejas Shah, Ankit Hinsu, Pritesh Sabara, Apurvasinh Puvar, Binita Aring, Janvi Raval, Zarna Patel, Monika Gandhi, Bhavesh Modi, Gaurishankar Shrimali, R D Dixit, A M Kadri, Afzal Ansari, Chaitanya Joshi, Madhvi Joshi,                                                                                                                        |          |
| EPI_ISL_451159                                                                                                                                                                                                                                                                                                                                                                                                                                                                                                                                                                                                                                                                                                                                                                                                                                                                                                                                                                                                                                                                                                                                                                                 | Government Medical College, Vadodara                                                              | Gujarat Biotechnology Research Centre                                                             | Raghawendra Kumar, Dinesh Kumar, Zuber Saiyed, Komal Patel, Labdhi Pandya, Snehal Bagatharia, Ramesh Pandit, Tejas Shah, Ankit Hinsu, Pritesh Sabara, Apurvasinh Puvar, Janvi Raval, Zarna Patel, Monika Gandhi, Pinal Trivedi, Maharshi Pandya, Manish Pattani, Tanuja Javadekar , Amit Kanani, Nidhi Patel, Nitin Savaliya, Bhavesh Modi, Gaurishankar Shrimali, R D Dixit, A M Kadri, Sharmistha Majumdar, Chaitanya Joshi, Madhvi Joshi                                                                                             |          |
| EPI_ISL_451935                                                                                                                                                                                                                                                                                                                                                                                                                                                                                                                                                                                                                                                                                                                                                                                                                                                                                                                                                                                                                                                                                                                                                                                 | CUB Hopital Erasme Laboratoire d'Anatomie Pathologique                                            | CUB Hopital Erasme Laboratoire d'Anatomie Pathologique                                            | Prof. Isabelle Salmon, Dr. Nicky D'Haene                                                                                                                                                                                                                                                                                                                                                                                                                                                                                                |          |
| EPI_ISL_451960                                                                                                                                                                                                                                                                                                                                                                                                                                                                                                                                                                                                                                                                                                                                                                                                                                                                                                                                                                                                                                                                                                                                                                                 | VI-US Virgin Islands Department of Health                                                         | Centers for Disease Control and Prevention                                                        | Queen,K., Li,Y., Montmayeur,A., Tao,Y., Zhang,J., Uehara,A., Paden,C.R., Marine,R., Wang,H., Padilla,J., Lee,J., Weiner,Z., Bankamp,B. and Tong,S.                                                                                                                                                                                                                                                                                                                                                                                      |          |
| EPI_ISL_452139                                                                                                                                                                                                                                                                                                                                                                                                                                                                                                                                                                                                                                                                                                                                                                                                                                                                                                                                                                                                                                                                                                                                                                                 | Instituto de Diagnostico y Referencia Epidemiologicos (INDRE)                                     | Instituto de diagnóstico y Referencia Epidemiologicos (INDRE)                                     | Ramirez-Gonzalez Ernesto, Garces-Ayala Fabiola, Araiza-Rodriguez Adnan, Mendieta-Condado Edgar, Rodriguez-Maldonado Abril, Wong-Arambula Claudia, Barrera-Badillo Gisela, Hernandez-Rivas Lucia, Lopez-Martinez Irma                                                                                                                                                                                                                                                                                                                    |          |
| EPI_ISL_452141                                                                                                                                                                                                                                                                                                                                                                                                                                                                                                                                                                                                                                                                                                                                                                                                                                                                                                                                                                                                                                                                                                                                                                                 | Instituto de Diagnostico y Referencia Epidemiologicos (INDRE)                                     | Instituto de diagnóstico y Referencia Epidemiologicos (INDRE)                                     | Ramirez-Gonzalez Ernesto, Garces-Ayala Fabiola, Araiza-Rodriguez Adnan, Mendieta-Condado Edgar, Rodriguez-Maldonado Abril, Wong-Arambula Claudia, Barrera-Badillo Gisela, Hernandez-Rivas Lucia, Lopez-Martinez Irma.                                                                                                                                                                                                                                                                                                                   |          |
| EPI_ISL_452150                                                                                                                                                                                                                                                                                                                                                                                                                                                                                                                                                                                                                                                                                                                                                                                                                                                                                                                                                                                                                                                                                                                                                                                 | CUB Hopital Erasme Laboratoire d'Anatomie Pathologique                                            | CUB Hopital Erasme Laboratoire d'Anatomie Pathologique                                            | Prof. Isabelle Salmon, Dr Nicky D'Haene                                                                                                                                                                                                                                                                                                                                                                                                                                                                                                 |          |
| EPI_ISL_452151                                                                                                                                                                                                                                                                                                                                                                                                                                                                                                                                                                                                                                                                                                                                                                                                                                                                                                                                                                                                                                                                                                                                                                                 | CUB Hopital Erasme Laboratoire d'Anatomie Pathologique                                            | CUB Hopital Erasme Laboratoire d'Anatomie Pathologique                                            | Prof. Isabelle Salmon, Dr.Nicky D'Haene                                                                                                                                                                                                                                                                                                                                                                                                                                                                                                 |          |
| EPI_ISL_452152                                                                                                                                                                                                                                                                                                                                                                                                                                                                                                                                                                                                                                                                                                                                                                                                                                                                                                                                                                                                                                                                                                                                                                                 | CUB Hopital Erasme Laboratoire d'Anatomie Pathologique                                            | CUB Hopital Erasme Laboratoire d'Anatomie Pathologique                                            | Prof. Isabelle Salmon, Dr Nicky D'Haene                                                                                                                                                                                                                                                                                                                                                                                                                                                                                                 |          |
| EPI_ISL_452192, EPI_ISL_452193, EPI_ISL_452194, EPI_ISL_452195, EPI_ISL_452196, EPI_ISL_452197, EPI_ISL_452198, EPI_ISL_452199, EPI_ISL_452200, EPI_ISL_452201, EPI_ISL_452202, EPI_ISL_452203, EPI_ISL_452204, EPI_ISL_452205, EPI_ISL_452206, EPI_ISL_452207, EPI_ISL_452208, EPI_ISL_452209, EPI_ISL_452210, EPI_ISL_452211, EPI_ISL_452212, EPI_ISL_452213, EPI_ISL_452214, EPI_ISL_452215, EPI_ISL_452216, EPI_ISL_452217, EPI_ISL_454521, EPI_ISL_454522, EPI_ISL_454523, EPI_ISL_454524, EPI_ISL_454525, EPI_ISL_454526, EPI_ISL_454527, EPI_ISL_454528, EPI_ISL_454529, EPI_ISL_454530, EPI_ISL_454531, EPI_ISL_454532, EPI_ISL_454533, EPI_ISL_454534, EPI_ISL_454535, EPI_ISL_454536, EPI_ISL_454537, EPI_ISL_454538, EPI_ISL_454539, EPI_ISL_454540, EPI_ISL_454541, EPI_ISL_454542, EPI_ISL_454543, EPI_ISL_454544, EPI_ISL_454545, EPI_ISL_454546, EPI_ISL_454547, EPI_ISL_454548, EPI_ISL_454549, EPI_ISL_454550, EPI_ISL_454551, EPI_ISL_454552, EPI_ISL_454553, EPI_ISL_454554, EPI_ISL_454555, EPI_ISL_454556, EPI_ISL_454557, EPI_ISL_454558, EPI_ISL_454559, EPI_ISL_454560, EPI_ISL_454561, EPI_ISL_454562, EPI_ISL_454563, EPI_ISL_454564, EPI_ISL_454565, EPI_ISL_454566 | see above                                                                                         | NIV Influenza                                                                                     | NIV Influenza                                                                                                                                                                                                                                                                                                                                                                                                                                                                                                                           | Potdar V |
| EPI_ISL_455016                                                                                                                                                                                                                                                                                                                                                                                                                                                                                                                                                                                                                                                                                                                                                                                                                                                                                                                                                                                                                                                                                                                                                                                 | Pandit Deendayal Upadhyay Government Medical College, Rajkot                                      | Gujarat Biotechnology Research Centre                                                             | Prakash Modi, Sejul Antala, Manish Pattani, Ramesh Pandit, Tejas Shah, Ankit Hinsu, Pritesh Sabara, Apurvasinh Puvar, Janvi Raval, Zarna Patel, Monika Gandhi, Pinal Trivedi, Maharshi Pandya, Amit Kanani, Nidhi Patel, Nitin Savaliya, Raghawendra Kumar, Dinesh Kumar, Zuber Saiyed, Komal Patel, Labdhi Pandya, Snehal Bagatharia, Afzal Ansari, Bhavesh Modi, Gaurishankar Shrimali, R D Dixit, A M Kadri, Umang Mishra, Chaitanya Joshi, Madhvi Joshi                                                                             |          |
| EPI_ISL_455018                                                                                                                                                                                                                                                                                                                                                                                                                                                                                                                                                                                                                                                                                                                                                                                                                                                                                                                                                                                                                                                                                                                                                                                 | Government Medical College, Vadodara                                                              | Gujarat Biotechnology Research Centre                                                             | R N Daveswkar, Ramesh Pandit, Tejas Shah, Ankit Hinsu, Pritesh Sabara, Apurvasinh Puvar, Janvi Raval, Zarna Patel, Monika Gandhi, Pinal Trivedi, Maharshi Pandya, Amit Kanani, Nidhi Patel, Nitin Savaliya, Raghawendra Kumar, Dinesh Kumar, Zuber Saiyed, Komal Patel, Labdhi Pandya, Snehal Bagatharia, Tanuja Javadekar , Neelam Nathani, Bhavesh Modi, Gaurishankar Shrimali, R D Dixit, A M Kadri, Umang Mishra, Chaitanya Joshi, Madhvi Joshi,                                                                                    |          |
| EPI_ISL_455019                                                                                                                                                                                                                                                                                                                                                                                                                                                                                                                                                                                                                                                                                                                                                                                                                                                                                                                                                                                                                                                                                                                                                                                 | Government Medical College, Vadodara                                                              | Gujarat Biotechnology Research Centre                                                             | Ramesh Pandit, Tejas Shah, Ankit Hinsu, Pritesh Sabara, Apurvasinh Puvar, Janvi Raval, Zarna Patel, Monika Gandhi, Pinal Trivedi, Maharshi Pandya, Amit Kanani, Nidhi Patel, Nitin Savaliya, Raghawendra Kumar, Dinesh Kumar, Zuber Saiyed, Komal Patel, Labdhi Pandya, Snehal Bagatharia, Tanuja Javadekar , R N Daveswkar, Armi Chaudhari, Bhavesh Modi, Gaurishankar Shrimali, R D Dixit, A M Kadri, Umang Mishra, Chaitanya Joshi, Madhvi Joshi,                                                                                    |          |
| EPI_ISL_455022                                                                                                                                                                                                                                                                                                                                                                                                                                                                                                                                                                                                                                                                                                                                                                                                                                                                                                                                                                                                                                                                                                                                                                                 | Government Medical College, Vadodara                                                              | Gujarat Biotechnology Research Centre                                                             | Pritesh Sabara, Apurvasinh Puvar, Janvi Raval, Zarna Patel, Monika Gandhi, Pinal Trivedi, Maharshi Pandya, Amit Kanani, Nidhi Patel, Nitin Savaliya, Raghawendra Kumar, Dinesh Kumar, Zuber Saiyed, Komal Patel, Labdhi Pandya, Snehal Bagatharia, Tanuja Javadekar , R N Daveswkar, Ramesh Pandit, Tejas Shah, Ankit Hinsu, Siddhant Kumar, Bhavesh Modi, Gaurishankar Shrimali, R D Dixit, A M Kadri, Umang Mishra, Chaitanya Joshi, Madhvi Joshi,                                                                                    |          |
| EPI_ISL_455027                                                                                                                                                                                                                                                                                                                                                                                                                                                                                                                                                                                                                                                                                                                                                                                                                                                                                                                                                                                                                                                                                                                                                                                 | Government Medical College, Vadodara                                                              | Gujarat Biotechnology Research Centre                                                             | Pinal Trivedi, Maharshi Pandya, Amit Kanani, Nidhi Patel, Nitin Savaliya, Raghawendra Kumar, Dinesh Kumar, Zuber Saiyed, Komal Patel, Labdhi Pandya, Snehal Bagatharia, Tanuja Javadekar , R N Daveswkar, Ramesh Pandit, Tejas Shah, Ankit Hinsu, Pritesh Sabara, Apurvasinh Puvar, Janvi Raval, Zarna Patel, Monika Gandhi, Pragy Sharma, Bhavesh Modi, Gaurishankar Shrimali, R D Dixit, A M Kadri, Umang Mishra, Chaitanya Joshi, Madhvi Joshi,                                                                                      |          |
| EPI_ISL_455583                                                                                                                                                                                                                                                                                                                                                                                                                                                                                                                                                                                                                                                                                                                                                                                                                                                                                                                                                                                                                                                                                                                                                                                 | Central Chest Institute of Thailand                                                               | National Institute of Health. Department of medical Sciences, Ministry of Public Health, Thailand | Pilailuk,Okada; Siripaporn,Phuygun; Thanutsapa,Thanadachakul; Sittiporn,Parmmen;Warawan,Wongboot; Sunthareeya,Waicharoen; Malinee,Chittaganpitch                                                                                                                                                                                                                                                                                                                                                                                        |          |
| EPI_ISL_455584                                                                                                                                                                                                                                                                                                                                                                                                                                                                                                                                                                                                                                                                                                                                                                                                                                                                                                                                                                                                                                                                                                                                                                                 | National Institute of Health. Department of medical Sciences, Ministry of Public Health, Thailand | National Institute of Health. Department of medical Sciences, Ministry of Public Health, Thailand | Pilailuk,Okada; Siripaporn,Phuygun; Thanutsapa,Thanadachakul; Sittiporn,Parmmen;Warawan,Wongboot; Sunthareeya,Waicharoen; Malinee,Chittaganpitch                                                                                                                                                                                                                                                                                                                                                                                        |          |
| EPI_ISL_455585                                                                                                                                                                                                                                                                                                                                                                                                                                                                                                                                                                                                                                                                                                                                                                                                                                                                                                                                                                                                                                                                                                                                                                                 | Phramongkutklao Hospital                                                                          | National Institute of Health. Department of medical Sciences, Ministry of Public Health, Thailand | Pilailuk,Okada; Siripaporn,Phuygun; Thanutsapa,Thanadachakul; Sittiporn,Parmmen;Warawan,Wongboot; Sunthareeya,Waicharoen; Malinee,Chittaganpitch                                                                                                                                                                                                                                                                                                                                                                                        |          |
| EPI_ISL_455586                                                                                                                                                                                                                                                                                                                                                                                                                                                                                                                                                                                                                                                                                                                                                                                                                                                                                                                                                                                                                                                                                                                                                                                 | Siriraj hospital                                                                                  | National Institute of Health. Department of medical Sciences, Ministry of Public Health, Thailand | Pilailuk,Okada; Siripaporn,Phuygun; Thanutsapa,Thanadachakul; Sittiporn,Parmmen;Warawan,Wongboot; Sunthareeya,Waicharoen; Malinee,Chittaganpitch                                                                                                                                                                                                                                                                                                                                                                                        |          |
| EPI_ISL_455587                                                                                                                                                                                                                                                                                                                                                                                                                                                                                                                                                                                                                                                                                                                                                                                                                                                                                                                                                                                                                                                                                                                                                                                 | H.R.H. Maha Chakri Sirindhorn Medical Center                                                      | National Institute of Health. Department of medical Sciences, Ministry of Public Health, Thailand | Pilailuk,Okada; Siripaporn,Phuygun; Thanutsapa,Thanadachakul; Sittiporn,Parmmen;Warawan,Wongboot; Sunthareeya,Waicharoen; Malinee,Chittaganpitch                                                                                                                                                                                                                                                                                                                                                                                        |          |
| EPI_ISL_455588                                                                                                                                                                                                                                                                                                                                                                                                                                                                                                                                                                                                                                                                                                                                                                                                                                                                                                                                                                                                                                                                                                                                                                                 | Trang Hospital                                                                                    | National Institute of Health. Department of medical Sciences, Ministry of Public Health, Thailand | Pilailuk,Okada; Siripaporn,Phuygun; Thanutsapa,Thanadachakul; Sittiporn,Parmmen;Warawan,Wongboot; Sunthareeya,Waicharoen; Malinee,Chittaganpitch                                                                                                                                                                                                                                                                                                                                                                                        |          |
| EPI_ISL_455589, EPI_ISL_455590, EPI_ISL_455591, EPI_ISL_455592, EPI_ISL_455593                                                                                                                                                                                                                                                                                                                                                                                                                                                                                                                                                                                                                                                                                                                                                                                                                                                                                                                                                                                                                                                                                                                 | National Institute of Health. Department of medical Sciences, Ministry of Public Health, Thailand | National Institute of Health. Department of medical Sciences, Ministry of Public Health, Thailand | Pilailuk,Okada; Siripaporn,Phuygun; Thanutsapa,Thanadachakul; Sittiporn,Parmmen;Warawan,Wongboot; Sunthareeya,Waicharoen; Malinee,Chittaganpitch                                                                                                                                                                                                                                                                                                                                                                                        |          |
| EPI_ISL_455594                                                                                                                                                                                                                                                                                                                                                                                                                                                                                                                                                                                                                                                                                                                                                                                                                                                                                                                                                                                                                                                                                                                                                                                 | Central Chest Institute of Thailand                                                               | National Institute of Health. Department of medical Sciences, Ministry of Public Health, Thailand | Pilailuk,Okada; Siripaporn,Phuygun; Thanutsapa,Thanadachakul; Sittiporn,Parmmen;Warawan,Wongboot; Sunthareeya,Waicharoen; Malinee,Chittaganpitch                                                                                                                                                                                                                                                                                                                                                                                        |          |
| EPI_ISL_455604                                                                                                                                                                                                                                                                                                                                                                                                                                                                                                                                                                                                                                                                                                                                                                                                                                                                                                                                                                                                                                                                                                                                                                                 | Ramkhamhaeng Hospital                                                                             | National Institute of Health. Department of medical Sciences, Ministry of Public Health, Thailand | Pilailuk,Okada; Siripaporn,Phuygun; Thanutsapa,Thanadachakul; Sittiporn,Parmmen;Warawan,Wongboot; Sunthareeya,Waicharoen; Malinee,Chittaganpitch                                                                                                                                                                                                                                                                                                                                                                                        |          |
| EPI_ISL_455605                                                                                                                                                                                                                                                                                                                                                                                                                                                                                                                                                                                                                                                                                                                                                                                                                                                                                                                                                                                                                                                                                                                                                                                 | Panyananthaphikkhru Chonprathan Medical Center                                                    | National Institute of Health. Department of medical Sciences, Ministry of Public Health, Thailand | Pilailuk,Okada; Siripaporn,Phuygun; Thanutsapa,Thanadachakul; Sittiporn,Parmmen;Warawan,Wongboot; Sunthareeya,Waicharoen; Malinee,Chittaganpitch                                                                                                                                                                                                                                                                                                                                                                                        |          |
| EPI_ISL_455606, EPI_ISL_455607                                                                                                                                                                                                                                                                                                                                                                                                                                                                                                                                                                                                                                                                                                                                                                                                                                                                                                                                                                                                                                                                                                                                                                 | Praram 9 Hospital                                                                                 | National Institute of Health. Department of medical Sciences, Ministry of Public Health, Thailand | Pilailuk,Okada; Siripaporn,Phuygun; Thanutsapa,Thanadachakul; Sittiporn,Parmmen;Warawan,Wongboot; Sunthareeya,Waicharoen; Malinee,Chittaganpitch                                                                                                                                                                                                                                                                                                                                                                                        |          |
| EPI_ISL_455608                                                                                                                                                                                                                                                                                                                                                                                                                                                                                                                                                                                                                                                                                                                                                                                                                                                                                                                                                                                                                                                                                                                                                                                 | Phramongkutklao Hospital                                                                          | National Institute of Health. Department of medical Sciences, Ministry of Public Health, Thailand | Pilailuk,Okada; Siripaporn,Phuygun; Thanutsapa,Thanadachakul; Sittiporn,Parmmen;Warawan,Wongboot; Sunthareeya,Waicharoen; Malinee,Chittaganpitch                                                                                                                                                                                                                                                                                                                                                                                        |          |

|                                                                                                                                                                                                                                                                                                                                                                                                                                                                                                                                                                                                                                                                                                                                                                                                                                                                                                                                                                                                                                                                                                                                                                                                                |                                                                                                                                                     |                                                                                                                                       |                                                                                                                                                                                                                                                                                                                                                                                                                                                                                  |
|----------------------------------------------------------------------------------------------------------------------------------------------------------------------------------------------------------------------------------------------------------------------------------------------------------------------------------------------------------------------------------------------------------------------------------------------------------------------------------------------------------------------------------------------------------------------------------------------------------------------------------------------------------------------------------------------------------------------------------------------------------------------------------------------------------------------------------------------------------------------------------------------------------------------------------------------------------------------------------------------------------------------------------------------------------------------------------------------------------------------------------------------------------------------------------------------------------------|-----------------------------------------------------------------------------------------------------------------------------------------------------|---------------------------------------------------------------------------------------------------------------------------------------|----------------------------------------------------------------------------------------------------------------------------------------------------------------------------------------------------------------------------------------------------------------------------------------------------------------------------------------------------------------------------------------------------------------------------------------------------------------------------------|
| EPI_ISL_455624                                                                                                                                                                                                                                                                                                                                                                                                                                                                                                                                                                                                                                                                                                                                                                                                                                                                                                                                                                                                                                                                                                                                                                                                 | National Institute of Health, Department of medical Sciences, Ministry of Public Health, Thailand                                                   | National Institute of Health, Department of medical Sciences, Ministry of Public Health, Thailand                                     | Pilailuk,Okada; Siripaporn,Phuygun; Thanutsapa,Thanadachakul; Sittiporn,Parmanen;Warawan,Wongboot; Sunthareeya,Waicharoen; Malinee,Chittaganpitch                                                                                                                                                                                                                                                                                                                                |
| EPI_ISL_455740                                                                                                                                                                                                                                                                                                                                                                                                                                                                                                                                                                                                                                                                                                                                                                                                                                                                                                                                                                                                                                                                                                                                                                                                 | Servicio de Microbiología. Hospital Clínico Universitario de Valencia                                                                               | Sequencing and Bioinformatics Service and Molecular Epidemiology Research Group. FISABIO-Public Health, and SeqCOVID-Spain Consortium | Paula Ruiz-Hueso, Mariana Reyes-Prieto, Vicente Soriano Chirona, Ivan Ansari, Lúcia Martínez-Priego, Giuseppe 'Auria, David Navarro, Eliseo Albert, Maria Alma Bracho, Lidia Ruiz Roldan, Neris Garcia-Gonzalez, Inma Galán Vendrell, Sandra Carbo, Loreto Ferrús Abad, Fernando Gonzalez-Candelas                                                                                                                                                                               |
| EPI_ISL_457750                                                                                                                                                                                                                                                                                                                                                                                                                                                                                                                                                                                                                                                                                                                                                                                                                                                                                                                                                                                                                                                                                                                                                                                                 | Centogene AG                                                                                                                                        | Centogene AG                                                                                                                          | Prof. Dr. Peter Bauer, Dr. Krishna Kumar Kandaswamy                                                                                                                                                                                                                                                                                                                                                                                                                              |
| EPI_ISL_457751, EPI_ISL_457752, EPI_ISL_457753, EPI_ISL_457754, EPI_ISL_457755, EPI_ISL_457756, EPI_ISL_457757, EPI_ISL_457758, EPI_ISL_457759, EPI_ISL_457760, EPI_ISL_457761, EPI_ISL_457762, EPI_ISL_457763, EPI_ISL_457764, EPI_ISL_457765, EPI_ISL_457766, EPI_ISL_457767, EPI_ISL_457768, EPI_ISL_457769, EPI_ISL_457770, EPI_ISL_457771, EPI_ISL_457772, EPI_ISL_457773, EPI_ISL_457774, EPI_ISL_457775, EPI_ISL_457776, EPI_ISL_457777, EPI_ISL_457778, EPI_ISL_457779, EPI_ISL_457780, EPI_ISL_457781, EPI_ISL_457782, EPI_ISL_457783, EPI_ISL_457784, EPI_ISL_457785, EPI_ISL_457786, EPI_ISL_457787, EPI_ISL_457788, EPI_ISL_457789, EPI_ISL_457790, EPI_ISL_457791, EPI_ISL_457792, EPI_ISL_457793, EPI_ISL_457794, EPI_ISL_457795, EPI_ISL_457796, EPI_ISL_457797, EPI_ISL_457798, EPI_ISL_457799, EPI_ISL_457800, EPI_ISL_457801, EPI_ISL_457802, EPI_ISL_457803, EPI_ISL_457804, EPI_ISL_457805, EPI_ISL_457806, EPI_ISL_457807, EPI_ISL_457808, EPI_ISL_457809, EPI_ISL_457810, EPI_ISL_457811, EPI_ISL_457812, EPI_ISL_457813, EPI_ISL_457814, EPI_ISL_457815, EPI_ISL_457816, EPI_ISL_457817, EPI_ISL_457818, EPI_ISL_457819, EPI_ISL_457820, EPI_ISL_457821, EPI_ISL_457822, EPI_ISL_457823 |                                                                                                                                                     |                                                                                                                                       |                                                                                                                                                                                                                                                                                                                                                                                                                                                                                  |
| see above                                                                                                                                                                                                                                                                                                                                                                                                                                                                                                                                                                                                                                                                                                                                                                                                                                                                                                                                                                                                                                                                                                                                                                                                      | Johns Hopkins Hospital Department of Pathology                                                                                                      | Johns Hopkins Hospital Department of Pathology                                                                                        | Peter M. Thielen, Thomas Mehoke, Shirlee Wohl, Srividya Ramakrishnan, Melanie Kirsche, Amanda Erlund, Craig Howser, Kristina Zudock, Oluwaseun Falade-Nwulia, Norah Sadowski, Paul Morris, Mark Hopkins, Yunfan Fan, Nidia Trovao, Victoria Gniazdowski, Michael C. Schatz, Stuart C. Ray, Winston Timp, Heba H. Mostafa                                                                                                                                                         |
| EPI_ISL_458045                                                                                                                                                                                                                                                                                                                                                                                                                                                                                                                                                                                                                                                                                                                                                                                                                                                                                                                                                                                                                                                                                                                                                                                                 | CSIR-Centre for Cellular and Molecular Biology                                                                                                      | CSIR-Centre for Cellular and Molecular Biology                                                                                        | Payel Mukherjee, Sofia Banu, Priya Singh, Dhivya Vedagiri, Divya Gupta, Vishal Sah, Santosh Kumar Kuncha, Krishnan Harinivas Harshan, Archana Bharadwaj Siva, Karthik Bharadwaj Tallapaka, Shagufta Khan, Lamuk Zaveri, Namami Gaur, Sakshi Shambhavi, Tulasi Nagabandi, Purushotham Vodnala, G. Aditya Kumar, Koushick Sivakumar, Pooja Ramesh Gupta, Rajan Kumar Jha, Shraddha Vijay Lahoti, Rakesh K Mishra, Divya Tej Sowpati                                                |
| EPI_ISL_458051                                                                                                                                                                                                                                                                                                                                                                                                                                                                                                                                                                                                                                                                                                                                                                                                                                                                                                                                                                                                                                                                                                                                                                                                 | CSIR-Centre for Cellular and Molecular Biology                                                                                                      | CSIR-Centre for Cellular and Molecular Biology                                                                                        | Payel Mukherjee, Sofia Banu, Priya Singh, Dhivya Vedagiri, Divya Gupta, Vishal Sah, Santosh Kumar Kuncha, Krishnan Harinivas Harshan, Archana Bharadwaj Siva, Karthik Bharadwaj Tallapaka, Shagufta Khan, Lamuk Zaveri, Namami Gaur, Sakshi Shambhavi, Tulasi Nagabandi, Purushotham Vodnala, Gokulan C G, Gunjan Purohit, Hanuman Tulashiram Kale, Pankaj Kumar, Prachand Issarapur, Rakesh K Mishra, Divya Tej Sowpati                                                         |
| EPI_ISL_458057                                                                                                                                                                                                                                                                                                                                                                                                                                                                                                                                                                                                                                                                                                                                                                                                                                                                                                                                                                                                                                                                                                                                                                                                 | CSIR-Centre for Cellular and Molecular Biology                                                                                                      | CSIR-Centre for Cellular and Molecular Biology                                                                                        | Payel Mukherjee, Sofia Banu, Priya Singh, Dhivya Vedagiri, Divya Gupta, Vishal Sah, Santosh Kumar Kuncha, Krishnan Harinivas Harshan, Archana Bharadwaj Siva, Karthik Bharadwaj Tallapaka, Shagufta Khan, Lamuk Zaveri, Namami Gaur, Sakshi Shambhavi, Tulasi Nagabandi, Purushotham Vodnala, Deepak Kumar, Devi Prasad Vijayashankar, Disha Nanda, Divya Das, Jotin Gogoi, Manish Bhattacharjee, Rakesh K Mishra, Divya Tej Sowpati                                             |
| EPI_ISL_458062                                                                                                                                                                                                                                                                                                                                                                                                                                                                                                                                                                                                                                                                                                                                                                                                                                                                                                                                                                                                                                                                                                                                                                                                 | CSIR-Centre for Cellular and Molecular Biology                                                                                                      | CSIR-Centre for Cellular and Molecular Biology                                                                                        | Payel Mukherjee, Sofia Banu, Priya Singh, Dhivya Vedagiri, Divya Gupta, Vishal Sah, Santosh Kumar Kuncha, Krishnan Harinivas Harshan, Archana Bharadwaj Siva, Karthik Bharadwaj Tallapaka, Shagufta Khan, Lamuk Zaveri, Namami Gaur, Sakshi Shambhavi, Tulasi Nagabandi, Purushotham Vodnala, Rakesh K Mishra, Sonu Uday, Sudipta Mondal, Annapoorna P Karthyayani, Debabrata Jana, Debrya Saha, Divya Tej Sowpati                                                               |
| EPI_ISL_458084                                                                                                                                                                                                                                                                                                                                                                                                                                                                                                                                                                                                                                                                                                                                                                                                                                                                                                                                                                                                                                                                                                                                                                                                 | Laboratorio Biologia Molecolare Sars Cov2 - UOC Laboratorio Analisi - Servizio Medicina di Laboratorio, Ospedale "San Francesco" - ATS-ASSL Nuoro   | Laboratorio specialistico UOC Ematologia - Ospedale "San Francesco" - ATS-ASSL Nuoro                                                  | Piras Giovanna, Fancello Tatiana, Asproni Rosanna, Fiamma Maura, Monne Maria Itria, Toja Alessandro, Sanna Filomena, Floris Anna Rita, Sulis Vincenzo, Palmas Angelo Domenico, Casu Gavino, Lo Maglio lana, Mamei Giuseppe                                                                                                                                                                                                                                                       |
| EPI_ISL_458085                                                                                                                                                                                                                                                                                                                                                                                                                                                                                                                                                                                                                                                                                                                                                                                                                                                                                                                                                                                                                                                                                                                                                                                                 | Laboratorio Biologia Molecolare Sars Cov2 - UOC Laboratorio Analisi - Servizio Medicina di Laboratorio , Ospedale "San Francesco" - ATS- ASSL Nuoro | Laboratorio specialistico UOC Ematologia - Ospedale "San Francesco" - ATS-ASSL Nuoro                                                  | Piras Giovanna, Fancello Tatiana, Asproni Rosanna, Fiamma Maura, Monne Maria Itria, Toja Alessandro, Sanna Filomena, Floris Anna Rita, Sulis Vincenzo, Palmas Angelo Domenico, Casu Gavino, Lo Maglio lana, Mamei Giuseppe.                                                                                                                                                                                                                                                      |
| EPI_ISL_458087                                                                                                                                                                                                                                                                                                                                                                                                                                                                                                                                                                                                                                                                                                                                                                                                                                                                                                                                                                                                                                                                                                                                                                                                 | B.J. Medical College and Civil hospital                                                                                                             | Gujarat Biotechnology Research Centre                                                                                                 | Ramesh Patel, Pranay Shah, Kamlesh J Upadhyay, Ramesh Pandit, Tejas Shah, Ankit Hinsu, Pritesh Sabara, Apurvasinh Puvar, Janvi Ravai, Zarna Patel, Monika Gandhi, Pinal Trivedi, Maharshi Pandya, Amit Kanani, Nidhi Patel, Nitin Savaliya, Raghawendra Kumar, Dinesh Kumar, Zuber Saiyed, Komal Patel, Labdhi Pandya, Snehal Bagatharia, Dhaval Vaghela, Afzal Ansari, Bhavesh Modi, Gaurishankar Shrimali, R D Dixit, A M Kadri, Umang Mishra, Chaitanya Joshi, Madhvi Joshi   |
| EPI_ISL_458088                                                                                                                                                                                                                                                                                                                                                                                                                                                                                                                                                                                                                                                                                                                                                                                                                                                                                                                                                                                                                                                                                                                                                                                                 | B.J. Medical College and Civil hospital                                                                                                             | Gujarat Biotechnology Research Centre                                                                                                 | Pranay Shah, Kamlesh J Upadhyay, Ramesh Pandit, Tejas Shah, Ankit Hinsu, Pritesh Sabara, Apurvasinh Puvar, Janvi Ravai, Zarna Patel, Monika Gandhi, Pinal Trivedi, Maharshi Pandya, Amit Kanani, Nidhi Patel, Nitin Savaliya, Raghawendra Kumar, Dinesh Kumar, Zuber Saiyed, Komal Patel, Labdhi Pandya, Snehal Bagatharia, Dhaval Vaghela, Ramesh Patel, Fenil Patel, Bhavesh Modi, Gaurishankar Shrimali, R D Dixit, A M Kadri, Umang Mishra, Chaitanya Joshi, Madhvi Joshi    |
| EPI_ISL_458089                                                                                                                                                                                                                                                                                                                                                                                                                                                                                                                                                                                                                                                                                                                                                                                                                                                                                                                                                                                                                                                                                                                                                                                                 | B.J. Medical College and Civil hospital                                                                                                             | Gujarat Biotechnology Research Centre                                                                                                 | Pranay Shah, Kamlesh J Upadhyay, Ramesh Pandit, Tejas Shah, Ankit Hinsu, Pritesh Sabara, Apurvasinh Puvar, Janvi Ravai, Zarna Patel, Monika Gandhi, Pinal Trivedi, Maharshi Pandya, Amit Kanani, Nidhi Patel, Nitin Savaliya, Raghawendra Kumar, Dinesh Kumar, Zuber Saiyed, Komal Patel, Labdhi Pandya, Snehal Bagatharia, Dhaval Vaghela, Ramesh Patel, Neelam Nathani, Bhavesh Modi, Gaurishankar Shrimali, R D Dixit, A M Kadri, Umang Mishra, Chaitanya Joshi, Madhvi Joshi |
| EPI_ISL_458095                                                                                                                                                                                                                                                                                                                                                                                                                                                                                                                                                                                                                                                                                                                                                                                                                                                                                                                                                                                                                                                                                                                                                                                                 | B.J. Medical College and Civil hospital                                                                                                             | Gujarat Biotechnology Research Centre                                                                                                 | Raghawendra Kumar, Dinesh Kumar, Zuber Saiyed, Komal Patel, Labdhi Pandya, Snehal Bagatharia, Dhaval Vaghela, Ramesh Patel, Pranay Shah, Kamlesh J Upadhyay, Ramesh Pandit, Tejas Shah, Ankit Hinsu, Pritesh Sabara, Apurvasinh Puvar, Janvi Ravai, Zarna Patel, Monika Gandhi, Pinal Trivedi, Maharshi Pandya, Amit Kanani, Nidhi Patel, Nitin Savaliya, Pooja P Doshi, Bhavesh Modi, Gaurishankar Shrimali, R D Dixit, A M Kadri, Umang Mishra, Chaitanya Joshi, Madhvi Joshi  |
| EPI_ISL_458102                                                                                                                                                                                                                                                                                                                                                                                                                                                                                                                                                                                                                                                                                                                                                                                                                                                                                                                                                                                                                                                                                                                                                                                                 | B.J. Medical College and Civil hospital                                                                                                             | Gujarat Biotechnology Research Centre                                                                                                 | Ramesh Patel, Pranay Shah, Kamlesh J Upadhyay, Ramesh Pandit, Tejas Shah, Ankit Hinsu, Pritesh Sabara, Apurvasinh Puvar, Janvi Ravai, Zarna Patel, Monika Gandhi, Pinal Trivedi, Maharshi Pandya, Amit Kanani, Nidhi Patel, Nitin Savaliya, Raghawendra Kumar, Dinesh Kumar, Zuber Saiyed, Komal Patel, Labdhi Pandya, Snehal Bagatharia, Dhaval Vaghela, Neelam Nathani, Bhavesh Modi, Gaurishankar Shrimali, R D Dixit, A M Kadri, Umang Mishra, Chaitanya Joshi, Madhvi Joshi |
| EPI_ISL_458103                                                                                                                                                                                                                                                                                                                                                                                                                                                                                                                                                                                                                                                                                                                                                                                                                                                                                                                                                                                                                                                                                                                                                                                                 | Gujarat Biotechnology Research Centre                                                                                                               | Gujarat Biotechnology Research Centre                                                                                                 | Ramesh Pandit, Tejas Shah, Ankit Hinsu, Pritesh Sabara, Apurvasinh Puvar, Janvi Ravai, Zarna Patel, Monika Gandhi, Pinal Trivedi, Maharshi Pandya, Amit Kanani, Nidhi Patel, Nitin Savaliya, Raghawendra Kumar, Dinesh Kumar, Zuber Saiyed, Komal Patel, Labdhi Pandya, Snehal Bagatharia, Armi Chaudhari, Bhavesh Modi, Gaurishankar Shrimali, R D Dixit, A M Kadri, Umang Mishra, Chaitanya Joshi, Madhvi Joshi, , , ,                                                         |
| EPI_ISL_458106                                                                                                                                                                                                                                                                                                                                                                                                                                                                                                                                                                                                                                                                                                                                                                                                                                                                                                                                                                                                                                                                                                                                                                                                 | Gujarat Biotechnology Research Centre                                                                                                               | Gujarat Biotechnology Research Centre                                                                                                 | Pritesh Sabara, Apurvasinh Puvar, Janvi Ravai, Zarna Patel, Monika Gandhi, Pinal Trivedi, Maharshi Pandya, Amit Kanani, Nidhi Patel, Nitin Savaliya, Raghawendra Kumar, Dinesh Kumar, Zuber Saiyed, Komal Patel, Labdhi Pandya, Snehal Bagatharia, Ramesh Pandit, Tejas Shah, Ankit Hinsu, Siddhant Kumar, Bhavesh Modi, Gaurishankar Shrimali, R D Dixit, A M Kadri, Umang Mishra, Chaitanya Joshi, Madhvi Joshi, , , ,                                                         |
| EPI_ISL_458111                                                                                                                                                                                                                                                                                                                                                                                                                                                                                                                                                                                                                                                                                                                                                                                                                                                                                                                                                                                                                                                                                                                                                                                                 | Gujarat Biotechnology Research Centre                                                                                                               | Gujarat Biotechnology Research Centre                                                                                                 | Pinal Trivedi, Maharshi Pandya, Amit Kanani, Nidhi Patel, Nitin Savaliya, Raghawendra Kumar, Dinesh Kumar, Zuber Saiyed, Komal Patel, Labdhi Pandya, Snehal Bagatharia, Ramesh Pandit, Tejas Shah, Ankit Hinsu, Pritesh Sabara, Apurvasinh Puvar, Janvi Ravai, Zarna Patel, Monika Gandhi, Pragya Sharma, Bhavesh Modi, Gaurishankar Shrimali, R D Dixit, A M Kadri, Umang Mishra, Chaitanya Joshi, Madhvi Joshi, , , ,                                                          |
| EPI_ISL_459911                                                                                                                                                                                                                                                                                                                                                                                                                                                                                                                                                                                                                                                                                                                                                                                                                                                                                                                                                                                                                                                                                                                                                                                                 | Devki Devi Foundation, a unit of Max Healthcare                                                                                                     | CSIR-IGIB/Max                                                                                                                         | Rajesh Pandey#, Samreen Siddiqui, Pooja Sharma, Bansidhar Tarai, Vivekanand A, Bharathram Uppili, Saruchi Wadhwa, Nishu Tyagi, Mitali Mukerji, Poonam Das, Sujeet Jha, Mohammed Faruq, Vinita Jha, Anurag Agrawal                                                                                                                                                                                                                                                                |
| EPI_ISL_459912, EPI_ISL_459913, EPI_ISL_459914, EPI_ISL_459915, EPI_ISL_459916, EPI_ISL_459917, EPI_ISL_459918, EPI_ISL_459919, EPI_ISL_459920, EPI_ISL_459921, EPI_ISL_459922, EPI_ISL_459923, EPI_ISL_459924, EPI_ISL_459925, EPI_ISL_459926, EPI_ISL_459927, EPI_ISL_459928, EPI_ISL_459929, EPI_ISL_459930, EPI_ISL_459931, EPI_ISL_459932, EPI_ISL_459933, EPI_ISL_459934, EPI_ISL_459935, EPI_ISL_459936, EPI_ISL_459937, EPI_ISL_459938, EPI_ISL_459939, EPI_ISL_459940, EPI_ISL_459941, EPI_ISL_459942, EPI_ISL_459943, EPI_ISL_459944, EPI_ISL_459945, EPI_ISL_459946, EPI_ISL_459947, EPI_ISL_459948, EPI_ISL_459949, EPI_ISL_459950, EPI_ISL_459951, EPI_ISL_459952                                                                                                                                                                                                                                                                                                                                                                                                                                                                                                                                 |                                                                                                                                                     |                                                                                                                                       |                                                                                                                                                                                                                                                                                                                                                                                                                                                                                  |
| see above                                                                                                                                                                                                                                                                                                                                                                                                                                                                                                                                                                                                                                                                                                                                                                                                                                                                                                                                                                                                                                                                                                                                                                                                      | Devki Devi Foundation, a unit of Max Healthcare                                                                                                     | CSIR-IGIB/Max                                                                                                                         | Rajesh Pandey#, Samreen Siddiqui, Pooja Sharma, Bansidhar Tarai, Vivekanand A, Bharathram Uppili, Saruchi Wadhwa, Nishu Tyagi, Mitali Mukerji, Poonam Das, Sujeet Jha, Mohammed Faruq, Vinita Jha, Anurag Agrawal                                                                                                                                                                                                                                                                |
| EPI_ISL_459962, EPI_ISL_459963, EPI_ISL_459964                                                                                                                                                                                                                                                                                                                                                                                                                                                                                                                                                                                                                                                                                                                                                                                                                                                                                                                                                                                                                                                                                                                                                                 | Centogene AG                                                                                                                                        | Centogene AG                                                                                                                          | Prof. Dr. Peter Bauer, Dr. Krishna Kumar Kandaswamy                                                                                                                                                                                                                                                                                                                                                                                                                              |
| EPI_ISL_460617, EPI_ISL_460618, EPI_ISL_460619                                                                                                                                                                                                                                                                                                                                                                                                                                                                                                                                                                                                                                                                                                                                                                                                                                                                                                                                                                                                                                                                                                                                                                 | unknown                                                                                                                                             | Physiology                                                                                                                            | Pence,S., Caykara,B., Pence,H.H., Tekin,S., Yiyit,N., Cevher Keskin,B., Kara,A.                                                                                                                                                                                                                                                                                                                                                                                                  |
| EPI_ISL_460621, EPI_ISL_460622, EPI_ISL_460623, EPI_ISL_460624, EPI_ISL_460625, EPI_ISL_460626, EPI_ISL_460627, EPI_ISL_460628, EPI_ISL_460629, EPI_ISL_460630, EPI_ISL_460631, EPI_ISL_460632, EPI_ISL_460633, EPI_ISL_460634, EPI_ISL_461399, EPI_ISL_461400, EPI_ISL_461401, EPI_ISL_461402, EPI_ISL_461403, EPI_ISL_461404, EPI_ISL_461405, EPI_ISL_461406, EPI_ISL_461407, EPI_ISL_461408, EPI_ISL_461409, EPI_ISL_461410, EPI_ISL_461411, EPI_ISL_461412, EPI_ISL_461413, EPI_ISL_461414, EPI_ISL_461415, EPI_ISL_461416, EPI_ISL_461417, EPI_ISL_461418, EPI_ISL_461419, EPI_ISL_461420, EPI_ISL_461421, EPI_ISL_461422, EPI_ISL_461423, EPI_ISL_461424, EPI_ISL_461425, EPI_ISL_461426, EPI_ISL_461427, EPI_ISL_461428, EPI_ISL_461429, EPI_ISL_461430, EPI_ISL_461431, EPI_ISL_461432, EPI_ISL_461433, EPI_ISL_461434, EPI_ISL_461435, EPI_ISL_461436, EPI_ISL_461437, EPI_ISL_461438,                                                                                                                                                                                                                                                                                                                |                                                                                                                                                     |                                                                                                                                       |                                                                                                                                                                                                                                                                                                                                                                                                                                                                                  |

|                                                                                                                                                                                                                                                                                                                                                                                                                                                                                                                                                                                                                                                |           |                                                                          |                                                                            |                                                                                                                                                                                                                                                                                                                                                                                                                                   |
|------------------------------------------------------------------------------------------------------------------------------------------------------------------------------------------------------------------------------------------------------------------------------------------------------------------------------------------------------------------------------------------------------------------------------------------------------------------------------------------------------------------------------------------------------------------------------------------------------------------------------------------------|-----------|--------------------------------------------------------------------------|----------------------------------------------------------------------------|-----------------------------------------------------------------------------------------------------------------------------------------------------------------------------------------------------------------------------------------------------------------------------------------------------------------------------------------------------------------------------------------------------------------------------------|
| EPI_ISL_461439, EPI_ISL_461440, EPI_ISL_461441, EPI_ISL_461442, EPI_ISL_461443, EPI_ISL_461444, EPI_ISL_461445, EPI_ISL_461446, EPI_ISL_461447, EPI_ISL_461448, EPI_ISL_461449, EPI_ISL_461450, EPI_ISL_461451, EPI_ISL_461452, EPI_ISL_461453, EPI_ISL_461454, EPI_ISL_461455, EPI_ISL_461456, EPI_ISL_461457, EPI_ISL_461458, EPI_ISL_461459, EPI_ISL_461460, EPI_ISL_461461, EPI_ISL_461462, EPI_ISL_461463, EPI_ISL_461464, EPI_ISL_461465, EPI_ISL_461466, EPI_ISL_461467, EPI_ISL_461468, EPI_ISL_461469, EPI_ISL_461470, EPI_ISL_461471, EPI_ISL_461472, EPI_ISL_461473, EPI_ISL_461474, EPI_ISL_461475, EPI_ISL_461476, EPI_ISL_461477 | see above | UW Virology Lab                                                          | UW Virology Lab                                                            | Pavitra Roychoudhury, Amin Addetia, Hong Xie, Lasata Shrestha, Truong Nguyen, Meei-Li Huang, Keith Jerome, Alexander Greninger                                                                                                                                                                                                                                                                                                    |
| EPI_ISL_461484                                                                                                                                                                                                                                                                                                                                                                                                                                                                                                                                                                                                                                 |           | B.J. Medical College and Civil hospital                                  | Gujarat Biotechnology Research Centre                                      | Priyanka P Vatsa, Labdhi Pandya, Snehal Bagatharia, Pranay Shah, Kamlesh J Upadhyay, Tejas Shah, Ankit Hinsu, Pritesh Sabara, Apurvasinh Puvar, Janvi Raval, Zarna Patel, Monika Gandhi, Pinal Trivedi, Maharshi Pandya, Nidhi Patel, Nitin Savaliya, Raghawendra Kumar, Dinesh Kumar, Zuber Saiyed, Komal Patel, R D Dixit, A M Kadri, Harsh Bakshi, Chaitanya Joshi, Madhvi Joshi,                                              |
| EPI_ISL_461485                                                                                                                                                                                                                                                                                                                                                                                                                                                                                                                                                                                                                                 |           | B.J. Medical College and Civil hospital                                  | Gujarat Biotechnology Research Centre                                      | Pooja P Doshi, Snehal Bagatharia, Pranay Shah, Kamlesh J Upadhyay, Tejas Shah, Ankit Hinsu, Pritesh Sabara, Apurvasinh Puvar, Janvi Raval, Zarna Patel, Monika Gandhi, Pinal Trivedi, Maharshi Pandya, Nidhi Patel, Nitin Savaliya, Raghawendra Kumar, Dinesh Kumar, Zuber Saiyed, Komal Patel, Labdhi Pandya, R D Dixit, A M Kadri, Harsh Bakshi, Chaitanya Joshi, Madhvi Joshi,                                                 |
| EPI_ISL_461487                                                                                                                                                                                                                                                                                                                                                                                                                                                                                                                                                                                                                                 |           | B.J. Medical College and Civil hospital                                  | Gujarat Biotechnology Research Centre                                      | Priti Pandita, Kamlesh J Upadhyay, Tejas Shah, Ankit Hinsu, Pritesh Sabara, Apurvasinh Puvar, Janvi Raval, Zarna Patel, Monika Gandhi, Pinal Trivedi, Maharshi Pandya, Nidhi Patel, Nitin Savaliya, Raghawendra Kumar, Dinesh Kumar, Zuber Saiyed, Komal Patel, Labdhi Pandya, Snehal Bagatharia, Pranay Shah, R D Dixit, A M Kadri, Harsh Bakshi, Chaitanya Joshi, Madhvi Joshi,                                                 |
| EPI_ISL_461488                                                                                                                                                                                                                                                                                                                                                                                                                                                                                                                                                                                                                                 |           | B.J. Medical College and Civil hospital                                  | Gujarat Biotechnology Research Centre                                      | Pragya Sharma, Tejas Shah, Ankit Hinsu, Pritesh Sabara, Apurvasinh Puvar, Janvi Raval, Zarna Patel, Monika Gandhi, Pinal Trivedi, Maharshi Pandya, Nidhi Patel, Nitin Savaliya, Raghawendra Kumar, Dinesh Kumar, Zuber Saiyed, Komal Patel, Labdhi Pandya, Snehal Bagatharia, Pranay Shah, Kamlesh J Upadhyay, R D Dixit, A M Kadri, Harsh Bakshi, Chaitanya Joshi, Madhvi Joshi,                                                 |
| EPI_ISL_461497                                                                                                                                                                                                                                                                                                                                                                                                                                                                                                                                                                                                                                 |           | B.J. Medical College and Civil hospital                                  | Gujarat Biotechnology Research Centre                                      | Priyanka P Vatsa, Nidhi Patel, Nitin Savaliya, Raghawendra Kumar, Dinesh Kumar, Zuber Saiyed, Komal Patel, Labdhi Pandya, Snehal Bagatharia, Pranay Shah, Kamlesh J Upadhyay, Tejas Shah, Ankit Hinsu, Pritesh Sabara, Apurvasinh Puvar, Janvi Raval, Zarna Patel, Monika Gandhi, Pinal Trivedi, Maharshi Pandya, R D Dixit, A M Kadri, Harsh Bakshi, Chaitanya Joshi, Madhvi Joshi,                                              |
| EPI_ISL_461498                                                                                                                                                                                                                                                                                                                                                                                                                                                                                                                                                                                                                                 |           | B.J. Medical College and Civil hospital                                  | Gujarat Biotechnology Research Centre                                      | Pooja P Doshi, Nitin Savaliya, Raghawendra Kumar, Dinesh Kumar, Zuber Saiyed, Komal Patel, Labdhi Pandya, Snehal Bagatharia, Pranay Shah, Kamlesh J Upadhyay, Tejas Shah, Ankit Hinsu, Pritesh Sabara, Apurvasinh Puvar, Janvi Raval, Zarna Patel, Monika Gandhi, Pinal Trivedi, Maharshi Pandya, Nidhi Patel, R D Dixit, A M Kadri, Harsh Bakshi, Chaitanya Joshi, Madhvi Joshi,                                                 |
| EPI_ISL_461500                                                                                                                                                                                                                                                                                                                                                                                                                                                                                                                                                                                                                                 |           | B.J. Medical College and Civil hospital                                  | Gujarat Biotechnology Research Centre                                      | Priti Pandita, Dinesh Kumar, Zuber Saiyed, Komal Patel, Labdhi Pandya, Snehal Bagatharia, Pranay Shah, Kamlesh J Upadhyay, Tejas Shah, Ankit Hinsu, Pritesh Sabara, Apurvasinh Puvar, Janvi Raval, Zarna Patel, Monika Gandhi, Pinal Trivedi, Maharshi Pandya, Nidhi Patel, Nitin Savaliya, Raghawendra Kumar, R D Dixit, A M Kadri, Harsh Bakshi, Chaitanya Joshi, Madhvi Joshi,                                                 |
| EPI_ISL_461501                                                                                                                                                                                                                                                                                                                                                                                                                                                                                                                                                                                                                                 |           | B.J. Medical College and Civil hospital                                  | Gujarat Biotechnology Research Centre                                      | Pragya Sharma, Zuber Saiyed, Komal Patel, Labdhi Pandya, Snehal Bagatharia, Pranay Shah, Kamlesh J Upadhyay, Tejas Shah, Ankit Hinsu, Pritesh Sabara, Apurvasinh Puvar, Janvi Raval, Zarna Patel, Monika Gandhi, Pinal Trivedi, Maharshi Pandya, Nidhi Patel, Nitin Savaliya, Raghawendra Kumar, Dinesh Kumar, R D Dixit, A M Kadri, Harsh Bakshi, Chaitanya Joshi, Madhvi Joshi,                                                 |
| EPI_ISL_461505                                                                                                                                                                                                                                                                                                                                                                                                                                                                                                                                                                                                                                 |           | B.J. Medical College and Civil hospital                                  | Gujarat Biotechnology Research Centre                                      | Pranay Shah, Kamlesh J Upadhyay, Tejas Shah, Ankit Hinsu, Pritesh Sabara, Apurvasinh Puvar, Janvi Raval, Zarna Patel, Monika Gandhi, Pinal Trivedi, Maharshi Pandya, Nidhi Patel, Nitin Savaliya, Raghawendra Kumar, Dinesh Kumar, Zuber Saiyed, Komal Patel, Labdhi Pandya, Snehal Bagatharia, Neelam Nathani, R D Dixit, A M Kadri, Harsh Bakshi, Chaitanya Joshi, Madhvi Joshi,                                                |
| EPI_ISL_467035                                                                                                                                                                                                                                                                                                                                                                                                                                                                                                                                                                                                                                 |           | GMERS Medical College and Hospital, Gandhinagar                          | Gujarat Biotechnology Research Centre                                      | Pritesh Sabara, Apurvasinh Puvar, Janvi Raval, Zarna Patel, Monika Gandhi, Pinal Trivedi, Maharshi Pandya, Nidhi Patel, Nitin Savaliya, Raghawendra Kumar, Dinesh Kumar, Zuber Saiyed, Komal Patel, Labdhi Pandya, Snehal Bagatharia, Seema Bhatt, Gaurishankar Shrimali, Bhavesh Modi, Bharti Rajani, Tejas Shah, Ankit Hinsu, Neha Rajpara, R D Dixit, A M Kadri, Harsh Bakshi, Chaitanya Joshi, Madhvi Joshi                   |
| EPI_ISL_467042                                                                                                                                                                                                                                                                                                                                                                                                                                                                                                                                                                                                                                 |           | B.J. Medical College and Civil hospital                                  | Gujarat Biotechnology Research Centre                                      | Pinal Trivedi, Maharshi Pandya, Nidhi Patel, Nitin Savaliya, Raghawendra Kumar, Dinesh Kumar, Zuber Saiyed, Komal Patel, Labdhi Pandya, Snehal Bagatharia, Pranay Shah, Kamlesh J Upadhyay, Nirav Mungalpara, Tejas Shah, Ankit Hinsu, Pritesh Sabara, Apurvasinh Puvar, Janvi Raval, Zarna Patel, Monika Gandhi, Pooja P Doshi, R D Dixit, A M Kadri, Harsh Bakshi, Chaitanya Joshi, Madhvi Joshi,                               |
| EPI_ISL_467046                                                                                                                                                                                                                                                                                                                                                                                                                                                                                                                                                                                                                                 |           | B.J. Medical College and Civil hospital                                  | Gujarat Biotechnology Research Centre                                      | Raghawendra Kumar, Dinesh Kumar, Zuber Saiyed, Komal Patel, Labdhi Pandya, Snehal Bagatharia, Pranay Shah, Kamlesh J Upadhyay, Nirav Mungalpara, Tejas Shah, Ankit Hinsu, Pritesh Sabara, Apurvasinh Puvar, Janvi Raval, Zarna Patel, Monika Gandhi, Pinal Trivedi, Maharshi Pandya, Nidhi Patel, Nitin Savaliya, Neha Rajpara, R D Dixit, A M Kadri, Harsh Bakshi, Chaitanya Joshi, Madhvi Joshi,                                |
| EPI_ISL_467052                                                                                                                                                                                                                                                                                                                                                                                                                                                                                                                                                                                                                                 |           | B.J. Medical College and Civil hospital                                  | Gujarat Biotechnology Research Centre                                      | Pranay Shah, Kamlesh J Upadhyay, Nirav Mungalpara, Tejas Shah, Ankit Hinsu, Pritesh Sabara, Apurvasinh Puvar, Janvi Raval, Zarna Patel, Monika Gandhi, Pinal Trivedi, Maharshi Pandya, Nidhi Patel, Nitin Savaliya, Raghawendra Kumar, Dinesh Kumar, Zuber Saiyed, Komal Patel, Labdhi Pandya, Snehal Bagatharia, Priyanka P Vatsa, R D Dixit, A M Kadri, Harsh Bakshi, Chaitanya Joshi, Madhvi Joshi,                            |
| EPI_ISL_467372, EPI_ISL_467373                                                                                                                                                                                                                                                                                                                                                                                                                                                                                                                                                                                                                 |           | Arizona State University Health Services                                 | Arizona State University                                                   | Peter T. Skidmore, Rabia Maqsood, LaRinda A. Holland, Emily A. Kaelin, Lily I. Wu, Arvind Varsani, Rolf U. Halden, Brenda G. Hogue, Matthew Scotch, Efrém S. Lim                                                                                                                                                                                                                                                                  |
| EPI_ISL_468066                                                                                                                                                                                                                                                                                                                                                                                                                                                                                                                                                                                                                                 |           | Physiology, Istanbul Medeniyet University                                | Physiology, Istanbul Medeniyet University                                  | Pence,S., Caykara,B., Pence,H.H., Tekin,S., Yiyit,N., Cevher Keskin,B. and Kara,A.                                                                                                                                                                                                                                                                                                                                                |
| EPI_ISL_468726                                                                                                                                                                                                                                                                                                                                                                                                                                                                                                                                                                                                                                 |           | unknown                                                                  | Department of Microbiology                                                 | Peng,H., Tang,H., Jiang,L., Qi,Z., Zhao,P.                                                                                                                                                                                                                                                                                                                                                                                        |
| EPI_ISL_469026                                                                                                                                                                                                                                                                                                                                                                                                                                                                                                                                                                                                                                 |           | B.J. Medical College and Civil hospital                                  | Gujarat Biotechnology Research Centre                                      | Pritesh Sabara, Apurvasinh Puvar, Janvi Raval, Zarna Patel, Monika Gandhi, Pinal Trivedi, Maharshi Pandya, Nidhi Patel, Nitin Savaliya, Raghawendra Kumar, Dinesh Kumar, Zuber Saiyed, Komal Patel, Labdhi Pandya, Snehal Bagatharia, Pranay Shah, Kamlesh J Upadhyay, Nirav Mungalpara, Tejas Shah, Ankit Hinsu, Neha Rajpara, R D Dixit, A M Kadri, Harsh Bakshi, Chaitanya Joshi, Madhvi Joshi                                 |
| EPI_ISL_469031                                                                                                                                                                                                                                                                                                                                                                                                                                                                                                                                                                                                                                 |           | Government Medical College, Vadodara                                     | Gujarat Biotechnology Research Centre                                      | Pinal Trivedi, Maharshi Pandya, Nidhi Patel, Nitin Savaliya, Raghawendra Kumar, Dinesh Kumar, Zuber Saiyed, Komal Patel, Labdhi Pandya, Snehal Bagatharia, Meenakshi Shah, Neena Doshi, Varsha Godbole, Tejas Shah, Ankit Hinsu, Pritesh Sabara, Apurvasinh Puvar, Janvi Raval, Zarna Patel, Monika Gandhi, Bhavya Jindal, R D Dixit, A M Kadri, Harsh Bakshi, Chaitanya Joshi, Madhvi Joshi                                      |
| EPI_ISL_469035                                                                                                                                                                                                                                                                                                                                                                                                                                                                                                                                                                                                                                 |           | Government Medical College, Vadodara                                     | Gujarat Biotechnology Research Centre                                      | Raghawendra Kumar, Dinesh Kumar, Zuber Saiyed, Komal Patel, Labdhi Pandya, Snehal Bagatharia, Meenakshi Shah, Neena Doshi, Varsha Godbole, Tejas Shah, Ankit Hinsu, Pritesh Sabara, Apurvasinh Puvar, Janvi Raval, Zarna Patel, Monika Gandhi, Pinal Trivedi, Maharshi Pandya, Nidhi Patel, Nitin Savaliya, Akanksha Verma, R D Dixit, A M Kadri, Harsh Bakshi, Chaitanya Joshi, Madhvi Joshi                                     |
| EPI_ISL_469048                                                                                                                                                                                                                                                                                                                                                                                                                                                                                                                                                                                                                                 |           | Banas Medical College and Research Institute                             | Gujarat Biotechnology Research Centre                                      | Radhika Khara, Sunil R Joshi, Viren s Doshi, Zarna Patel, Monika Gandhi, Pinal Trivedi, Maharshi Pandya, Nidhi Patel, Nitin Savaliya, Raghawendra Kumar, Dinesh Kumar, Zuber Saiyed, Komal Patel, Labdhi Pandya, Snehal Bagatharia, Tejas Shah, Ankit Hinsu, Pritesh Sabara, Apurvasinh Puvar, Janvi Raval, Priti Pandita, R D Dixit, A M Kadri, Harsh Bakshi, Chaitanya Joshi, Madhvi Joshi                                      |
| EPI_ISL_469253                                                                                                                                                                                                                                                                                                                                                                                                                                                                                                                                                                                                                                 |           | Second Military Medical University, Department of Microbiology           | Second Military Medical University, Department of Microbiology             | Peng,H., Tang,H., Jiang,L., Qi,Z. and Zhao,P.                                                                                                                                                                                                                                                                                                                                                                                     |
| EPI_ISL_471396, EPI_ISL_471397, EPI_ISL_471398, EPI_ISL_471399, EPI_ISL_471400, EPI_ISL_471401, EPI_ISL_471402, EPI_ISL_471403, EPI_ISL_471404, EPI_ISL_471405, EPI_ISL_471406, EPI_ISL_471407, EPI_ISL_471408, EPI_ISL_471409, EPI_ISL_471410, EPI_ISL_471411, EPI_ISL_471412, EPI_ISL_471413, EPI_ISL_471414, EPI_ISL_471415                                                                                                                                                                                                                                                                                                                 | see above | Viral Respiratory Lab, National Institute for Biomedical Research (INRB) | Pathogen Sequencing Lab, National Institute for Biomedical Research (INRB) | Placide Mbala-Kingebeni, Edith Nkwembe, Eddy Kinganda-Lusamaki, Amuri Aziza, Francisca Muyembe Mawete, Catherine Pratt, Matthias Pauthner, Josh Quick, Allison Black, James Hadfield, Trevor Bedford, Ian Goodfellow, Andrew Rambaut, Nick Loman, Kristian Andersen, Michael Wiley, Steve Ahuka-Mundekwe, Jean-Jacques Muyembe Tamfum                                                                                             |
| EPI_ISL_471595                                                                                                                                                                                                                                                                                                                                                                                                                                                                                                                                                                                                                                 |           | CSIR-Centre for Cellular and Molecular Biology                           | CSIR-Centre for Cellular and Molecular Biology                             | Payel Mukherjee, Sofia Banu, Priya Singh, Dhivya Vedagiri, Divya Gupta, Vishal Sah, Santosh Kumar Kuncha, Krishnan Harinivas Harshan, Archana Bharadwaj Siva, Karthik Bharadwaj Tallapaka, Shagufta Khan, Lamuk Zaveri, Namami Gaur, Sakshi Shambhavi, Tulasi Nagabandi, Purushotham Vodnala, G. Aditya Kumar, Koushick Sivakumar, Pooja Ramesh Gupta, Rajan Kumar Jha, Shraddha Vijay Lahoti, Rakesh K Mishra, Divya Tej Sowpati |
| EPI_ISL_471596                                                                                                                                                                                                                                                                                                                                                                                                                                                                                                                                                                                                                                 |           | CSIR-Centre for Cellular and Molecular Biology                           | CSIR-Centre for Cellular and Molecular Biology                             | Payel Mukherjee, Sofia Banu, Priya Singh, Dhivya Vedagiri, Divya Gupta, Vishal Sah, Santosh Kumar Kuncha, Krishnan Harinivas Harshan, Archana Bharadwaj Siva, Karthik Bharadwaj Tallapaka, Shagufta Khan, Lamuk Zaveri, Namami Gaur, Sakshi Shambhavi, Tulasi Nagabandi, Purushotham Vodnala, Gokulan C G, Gunjan Purohit, Hanuman Tulashiram Kale, Pankaj Kumar, Prachand Issarapu, Rakesh K Mishra, Divya Tej Sowpati           |
| EPI_ISL_471597                                                                                                                                                                                                                                                                                                                                                                                                                                                                                                                                                                                                                                 |           | CSIR-Centre for Cellular and Molecular Biology                           | CSIR-Centre for Cellular and Molecular Biology                             | Payel Mukherjee, Sofia Banu, Priya Singh, Dhivya Vedagiri, Divya Gupta, Vishal Sah, Santosh Kumar Kuncha, Krishnan Harinivas Harshan, Archana Bharadwaj Siva, Karthik Bharadwaj Tallapaka, Shagufta Khan, Lamuk Zaveri, Namami Gaur, Sakshi Shambhavi, Tulasi Nagabandi, Purushotham Vodnala,                                                                                                                                     |



| Madhvi Joshi                                                                                                                                                                                                                                                                                                                                                                                                                                                                                                                                                                                                                                                                                                                                                                                                                                                                                                                                                                                                                                                                                                                                                                                                                                                                                                                                                                                                                                                                                                                                                                                                                                                                                                                                                                                                                                                                                                                                                                                                                                                                                                                                                                                                                                                                                                                                                                                                                                                                                                                                                                                                                                                                                                                                                                                                                                                                                                                   |                                                                                                   |                                                                                                   |                                                                                                                                                                                                                                                                                                                                                              |  |
|--------------------------------------------------------------------------------------------------------------------------------------------------------------------------------------------------------------------------------------------------------------------------------------------------------------------------------------------------------------------------------------------------------------------------------------------------------------------------------------------------------------------------------------------------------------------------------------------------------------------------------------------------------------------------------------------------------------------------------------------------------------------------------------------------------------------------------------------------------------------------------------------------------------------------------------------------------------------------------------------------------------------------------------------------------------------------------------------------------------------------------------------------------------------------------------------------------------------------------------------------------------------------------------------------------------------------------------------------------------------------------------------------------------------------------------------------------------------------------------------------------------------------------------------------------------------------------------------------------------------------------------------------------------------------------------------------------------------------------------------------------------------------------------------------------------------------------------------------------------------------------------------------------------------------------------------------------------------------------------------------------------------------------------------------------------------------------------------------------------------------------------------------------------------------------------------------------------------------------------------------------------------------------------------------------------------------------------------------------------------------------------------------------------------------------------------------------------------------------------------------------------------------------------------------------------------------------------------------------------------------------------------------------------------------------------------------------------------------------------------------------------------------------------------------------------------------------------------------------------------------------------------------------------------------------|---------------------------------------------------------------------------------------------------|---------------------------------------------------------------------------------------------------|--------------------------------------------------------------------------------------------------------------------------------------------------------------------------------------------------------------------------------------------------------------------------------------------------------------------------------------------------------------|--|
| EPI_ISL_483847                                                                                                                                                                                                                                                                                                                                                                                                                                                                                                                                                                                                                                                                                                                                                                                                                                                                                                                                                                                                                                                                                                                                                                                                                                                                                                                                                                                                                                                                                                                                                                                                                                                                                                                                                                                                                                                                                                                                                                                                                                                                                                                                                                                                                                                                                                                                                                                                                                                                                                                                                                                                                                                                                                                                                                                                                                                                                                                 | Pandit Deendayal Upadhyay Government Medical College, Rajkot                                      | Gujarat Biotechnology Research Centre                                                             | Pinal Trivedi, Maharshi Pandya, Nidhi Patel, Nitin Savaliya, Raghawendra Kumar, Dinesh Kumar, Zuber Saiyed, Komal Patel, Labdhi Pandya, Afzal Ansari, Nikha Trivedi, Gauravi Dhruv, Arti Trivedi, Apurvasinh Puvar, Janvi Raval, Zarna Patel, Monika Gandhi, R D Dixit, A M Kadri, Harsh Bakshi, Chaitanya Joshi, Madhvi Joshi                               |  |
| EPI_ISL_483851                                                                                                                                                                                                                                                                                                                                                                                                                                                                                                                                                                                                                                                                                                                                                                                                                                                                                                                                                                                                                                                                                                                                                                                                                                                                                                                                                                                                                                                                                                                                                                                                                                                                                                                                                                                                                                                                                                                                                                                                                                                                                                                                                                                                                                                                                                                                                                                                                                                                                                                                                                                                                                                                                                                                                                                                                                                                                                                 | Department of Microbiology, Government Medical College, Surat                                     | Gujarat Biotechnology Research Centre                                                             | Raghawendra Kumar, Dinesh Kumar, Zuber Saiyed, Komal Patel, Labdhi Pandya, Afzal Ansari, Nikha Trivedi, Naresh Chauhan, Summaiya Mullan, Amit gamit, Apurvasinh Puvar, Janvi Raval, Zarna Patel, Monika Gandhi, Pinal Trivedi, Maharshi Pandya, Nidhi Patel, Nitin Savaliya, R D Dixit, A M Kadri, Harsh Bakshi, Chaitanya Joshi, Madhvi Joshi               |  |
| EPI_ISL_483865                                                                                                                                                                                                                                                                                                                                                                                                                                                                                                                                                                                                                                                                                                                                                                                                                                                                                                                                                                                                                                                                                                                                                                                                                                                                                                                                                                                                                                                                                                                                                                                                                                                                                                                                                                                                                                                                                                                                                                                                                                                                                                                                                                                                                                                                                                                                                                                                                                                                                                                                                                                                                                                                                                                                                                                                                                                                                                                 | Department of Microbiology, Government Medical College, Surat                                     | Gujarat Biotechnology Research Centre                                                             | Pinal Trivedi, Maharshi Pandya, Nidhi Patel, Nitin Savaliya, Raghawendra Kumar, Dinesh Kumar, Zuber Saiyed, Komal Patel, Labdhi Pandya, Afzal Ansari, Nikha Trivedi, Naresh Chauhan, Summaiya Mullan, Amit gamit, Apurvasinh Puvar, Janvi Raval, Zarna Patel, Monika Gandhi, R D Dixit, A M Kadri, Harsh Bakshi, Chaitanya Joshi, Madhvi Joshi               |  |
| EPI_ISL_483869                                                                                                                                                                                                                                                                                                                                                                                                                                                                                                                                                                                                                                                                                                                                                                                                                                                                                                                                                                                                                                                                                                                                                                                                                                                                                                                                                                                                                                                                                                                                                                                                                                                                                                                                                                                                                                                                                                                                                                                                                                                                                                                                                                                                                                                                                                                                                                                                                                                                                                                                                                                                                                                                                                                                                                                                                                                                                                                 | Department of Microbiology, Government Medical College, Surat                                     | Gujarat Biotechnology Research Centre                                                             | Raghawendra Kumar, Dinesh Kumar, Zuber Saiyed, Komal Patel, Labdhi Pandya, Afzal Ansari, Nikha Trivedi, Naresh Chauhan, Summaiya Mullan, Amit gamit, Apurvasinh Puvar, Janvi Raval, Zarna Patel, Monika Gandhi, Pinal Trivedi, Maharshi Pandya, Nidhi Patel, Nitin Savaliya, R D Dixit, A M Kadri, Harsh Bakshi, Chaitanya Joshi, Madhvi Joshi               |  |
| EPI_ISL_485917, EPI_ISL_485918, EPI_ISL_485919, EPI_ISL_485920, EPI_ISL_485921, EPI_ISL_485922, EPI_ISL_485923, EPI_ISL_485924, EPI_ISL_485925, EPI_ISL_485926, EPI_ISL_485927, EPI_ISL_485928, EPI_ISL_485929, EPI_ISL_485930, EPI_ISL_485931, EPI_ISL_485932, EPI_ISL_485933, EPI_ISL_485934, EPI_ISL_485936, EPI_ISL_485937, EPI_ISL_485938, EPI_ISL_485939, EPI_ISL_485940, EPI_ISL_485941, EPI_ISL_485942, EPI_ISL_485944, EPI_ISL_485945, EPI_ISL_485946, EPI_ISL_485947, EPI_ISL_485948, EPI_ISL_485949, EPI_ISL_485950, EPI_ISL_485951, EPI_ISL_485952, EPI_ISL_485953, EPI_ISL_485954, EPI_ISL_485955, EPI_ISL_485956, EPI_ISL_485957, EPI_ISL_485958, EPI_ISL_485959, EPI_ISL_485960, EPI_ISL_485961, EPI_ISL_485963, EPI_ISL_485964, EPI_ISL_485967, EPI_ISL_485968, EPI_ISL_485969, EPI_ISL_485972, EPI_ISL_485973, EPI_ISL_485974, EPI_ISL_485975, EPI_ISL_485976, EPI_ISL_485977, EPI_ISL_485978, EPI_ISL_485979, EPI_ISL_485981, EPI_ISL_485982, EPI_ISL_485983, EPI_ISL_485984, EPI_ISL_485985, EPI_ISL_485986, EPI_ISL_485987, EPI_ISL_485988, EPI_ISL_485989, EPI_ISL_485990, EPI_ISL_485991, EPI_ISL_485992, EPI_ISL_485993, EPI_ISL_485994, EPI_ISL_485995, EPI_ISL_485996, EPI_ISL_485997, EPI_ISL_485998, EPI_ISL_485999, EPI_ISL_486000, EPI_ISL_486001, EPI_ISL_486002, EPI_ISL_486003, EPI_ISL_486004, EPI_ISL_486005, EPI_ISL_486006, EPI_ISL_486007, EPI_ISL_486008, EPI_ISL_486009, EPI_ISL_486010, EPI_ISL_486011, EPI_ISL_486012, EPI_ISL_486013, EPI_ISL_486014, EPI_ISL_486015, EPI_ISL_486016, EPI_ISL_486018, EPI_ISL_486019, EPI_ISL_486020, EPI_ISL_486021, EPI_ISL_486022, EPI_ISL_486023, EPI_ISL_486024, EPI_ISL_486025, EPI_ISL_486026, EPI_ISL_486027, EPI_ISL_486028, EPI_ISL_486029, EPI_ISL_486030, EPI_ISL_486032, EPI_ISL_486033, EPI_ISL_486034, EPI_ISL_486035, EPI_ISL_486036, EPI_ISL_486037, EPI_ISL_486038, EPI_ISL_486039, EPI_ISL_486040, EPI_ISL_486041, EPI_ISL_486042, EPI_ISL_486043, EPI_ISL_486044, EPI_ISL_486046, EPI_ISL_486047, EPI_ISL_486048, EPI_ISL_486049, EPI_ISL_486050, EPI_ISL_486051, EPI_ISL_486052, EPI_ISL_486053, EPI_ISL_486054, EPI_ISL_486055, EPI_ISL_486056, EPI_ISL_486057, EPI_ISL_486058, EPI_ISL_486059, EPI_ISL_486060, EPI_ISL_486061, EPI_ISL_486062, EPI_ISL_486063, EPI_ISL_486064, EPI_ISL_486065, EPI_ISL_486067, EPI_ISL_486068, EPI_ISL_486069, EPI_ISL_486070, EPI_ISL_486071, EPI_ISL_486072, EPI_ISL_486074, EPI_ISL_486075, EPI_ISL_486076, EPI_ISL_486077, EPI_ISL_486078, EPI_ISL_486079, EPI_ISL_486080, EPI_ISL_486081, EPI_ISL_486082, EPI_ISL_486083, EPI_ISL_486084, EPI_ISL_486085, EPI_ISL_486086, EPI_ISL_486087, EPI_ISL_486088, EPI_ISL_486089, EPI_ISL_486093, EPI_ISL_486094, EPI_ISL_486095, EPI_ISL_486097, EPI_ISL_486098, EPI_ISL_486099, EPI_ISL_486102, EPI_ISL_486103, EPI_ISL_486105, EPI_ISL_486106, EPI_ISL_486108, EPI_ISL_486109, EPI_ISL_486110, EPI_ISL_486112, EPI_ISL_486113, EPI_ISL_486114 |                                                                                                   |                                                                                                   |                                                                                                                                                                                                                                                                                                                                                              |  |
| see above                                                                                                                                                                                                                                                                                                                                                                                                                                                                                                                                                                                                                                                                                                                                                                                                                                                                                                                                                                                                                                                                                                                                                                                                                                                                                                                                                                                                                                                                                                                                                                                                                                                                                                                                                                                                                                                                                                                                                                                                                                                                                                                                                                                                                                                                                                                                                                                                                                                                                                                                                                                                                                                                                                                                                                                                                                                                                                                      | UW Virology Lab                                                                                   | UW Virology Lab                                                                                   | Pavitra Roychoudhury, Hong Xie, Lasata Shrestha, Amin Addetia, Trung Nguyen, Victoria M Rachleff, Meei-Li Huang, Keith R Jerome, Alexander Greninger                                                                                                                                                                                                         |  |
| EPI_ISL_487192                                                                                                                                                                                                                                                                                                                                                                                                                                                                                                                                                                                                                                                                                                                                                                                                                                                                                                                                                                                                                                                                                                                                                                                                                                                                                                                                                                                                                                                                                                                                                                                                                                                                                                                                                                                                                                                                                                                                                                                                                                                                                                                                                                                                                                                                                                                                                                                                                                                                                                                                                                                                                                                                                                                                                                                                                                                                                                                 | Viral Respiratory Lab, National Institute for Biomedical Research (INRB)                          | Pathogen Sequencing Lab, National Institute for Biomedical Research (INRB)                        | Placide Mbala-Kingebeni, Edith Nkwembe, Eddy Kinganda-Lusamaki, Amuri Aziza, Francisca Muyembe-Mawete, Emmanuel Lokilo-Lofiko, Catherine Pratt, Matthias Pauthner, Josh Quick, Allison Black, James Hadfield, Trevor Bedford, Ian Goodfellow, Andrew Rambaut, Nick Loman, Kristian Andersen, Michael Wiley, Steve Ahuka-Mundeke, Jean-Jacques Muyembe Tamfum |  |
| EPI_ISL_487365, EPI_ISL_487369                                                                                                                                                                                                                                                                                                                                                                                                                                                                                                                                                                                                                                                                                                                                                                                                                                                                                                                                                                                                                                                                                                                                                                                                                                                                                                                                                                                                                                                                                                                                                                                                                                                                                                                                                                                                                                                                                                                                                                                                                                                                                                                                                                                                                                                                                                                                                                                                                                                                                                                                                                                                                                                                                                                                                                                                                                                                                                 | Viral Respiratory Lab, National Institute for Biomedical Research (INRB)                          | Pathogen Sequencing Lab, National Institute for Biomedical Research (INRB)                        | Placide Mbala-Kingebeni, Edith Nkwembe, Eddy Kinganda-Lusamaki, Amuri Aziza, Francisca Muyembe-Mawete, Emmanuel Lokilo-Lofiko, Catherine Pratt, Matthias Pauthner, Josh Quick, Allison Black, James Hadfield, Trevor Bedford, Ian Goodfellow, Andrew Rambaut, Nick Loman, Kristian Andersen, Michael Wiley, Steve Ahuka-Mundeke, Jean-Jacques Muyembe Tamfum |  |
| EPI_ISL_487432, EPI_ISL_487433, EPI_ISL_487434, EPI_ISL_487435, EPI_ISL_487436                                                                                                                                                                                                                                                                                                                                                                                                                                                                                                                                                                                                                                                                                                                                                                                                                                                                                                                                                                                                                                                                                                                                                                                                                                                                                                                                                                                                                                                                                                                                                                                                                                                                                                                                                                                                                                                                                                                                                                                                                                                                                                                                                                                                                                                                                                                                                                                                                                                                                                                                                                                                                                                                                                                                                                                                                                                 | Queen Astrid Military Hospital                                                                    | Institute of Tropical Medicine                                                                    | Philippe Selhorst, Colin Anthony                                                                                                                                                                                                                                                                                                                             |  |
| EPI_ISL_489991                                                                                                                                                                                                                                                                                                                                                                                                                                                                                                                                                                                                                                                                                                                                                                                                                                                                                                                                                                                                                                                                                                                                                                                                                                                                                                                                                                                                                                                                                                                                                                                                                                                                                                                                                                                                                                                                                                                                                                                                                                                                                                                                                                                                                                                                                                                                                                                                                                                                                                                                                                                                                                                                                                                                                                                                                                                                                                                 | National Institute of Health, Department of Medical Sciences, Ministry of Public Health, Thailand | National Institute of Health, Department of Medical Sciences, Ministry of Public Health, Thailand | Pilailuk, Okada; Siripaporn, Phuygun; Thanutsapa, Thanadachakul; Sittiporn, Pannmen; Warawan, Wongboot; Sunthareeya, Waicharoen; Malinee, Chittaganpitch                                                                                                                                                                                                     |  |
| EPI_ISL_490978                                                                                                                                                                                                                                                                                                                                                                                                                                                                                                                                                                                                                                                                                                                                                                                                                                                                                                                                                                                                                                                                                                                                                                                                                                                                                                                                                                                                                                                                                                                                                                                                                                                                                                                                                                                                                                                                                                                                                                                                                                                                                                                                                                                                                                                                                                                                                                                                                                                                                                                                                                                                                                                                                                                                                                                                                                                                                                                 | Mayo Clinic Laboratories                                                                          | UW Virology Lab                                                                                   | Pavitra Roychoudhury, Hong Xie, Lasata Shrestha, Amin Addetia, Trung Nguyen, Victoria M Rachleff, Meei-Li Huang, Keith R Jerome, Alexander Greninger                                                                                                                                                                                                         |  |
| EPI_ISL_490979, EPI_ISL_490980, EPI_ISL_490982, EPI_ISL_490983, EPI_ISL_490984, EPI_ISL_490985, EPI_ISL_490986, EPI_ISL_490987                                                                                                                                                                                                                                                                                                                                                                                                                                                                                                                                                                                                                                                                                                                                                                                                                                                                                                                                                                                                                                                                                                                                                                                                                                                                                                                                                                                                                                                                                                                                                                                                                                                                                                                                                                                                                                                                                                                                                                                                                                                                                                                                                                                                                                                                                                                                                                                                                                                                                                                                                                                                                                                                                                                                                                                                 | UW Virology Lab                                                                                   | UW Virology Lab                                                                                   | Pavitra Roychoudhury, Hong Xie, Lasata Shrestha, Amin Addetia, Trung Nguyen, Victoria M Rachleff, Meei-Li Huang, Keith R Jerome, Alexander Greninger                                                                                                                                                                                                         |  |
| EPI_ISL_490988                                                                                                                                                                                                                                                                                                                                                                                                                                                                                                                                                                                                                                                                                                                                                                                                                                                                                                                                                                                                                                                                                                                                                                                                                                                                                                                                                                                                                                                                                                                                                                                                                                                                                                                                                                                                                                                                                                                                                                                                                                                                                                                                                                                                                                                                                                                                                                                                                                                                                                                                                                                                                                                                                                                                                                                                                                                                                                                 | Mayo Clinic Laboratories                                                                          | UW Virology Lab                                                                                   | Pavitra Roychoudhury, Hong Xie, Lasata Shrestha, Amin Addetia, Trung Nguyen, Victoria M Rachleff, Meei-Li Huang, Keith R Jerome, Alexander Greninger                                                                                                                                                                                                         |  |
| EPI_ISL_490989, EPI_ISL_490990, EPI_ISL_490991, EPI_ISL_490992, EPI_ISL_490993, EPI_ISL_490994, EPI_ISL_490995, EPI_ISL_490996                                                                                                                                                                                                                                                                                                                                                                                                                                                                                                                                                                                                                                                                                                                                                                                                                                                                                                                                                                                                                                                                                                                                                                                                                                                                                                                                                                                                                                                                                                                                                                                                                                                                                                                                                                                                                                                                                                                                                                                                                                                                                                                                                                                                                                                                                                                                                                                                                                                                                                                                                                                                                                                                                                                                                                                                 | UW Virology Lab                                                                                   | UW Virology Lab                                                                                   | Pavitra Roychoudhury, Hong Xie, Lasata Shrestha, Amin Addetia, Trung Nguyen, Victoria M Rachleff, Meei-Li Huang, Keith R Jerome, Alexander Greninger                                                                                                                                                                                                         |  |
| EPI_ISL_490997, EPI_ISL_490998, EPI_ISL_490999, EPI_ISL_491000                                                                                                                                                                                                                                                                                                                                                                                                                                                                                                                                                                                                                                                                                                                                                                                                                                                                                                                                                                                                                                                                                                                                                                                                                                                                                                                                                                                                                                                                                                                                                                                                                                                                                                                                                                                                                                                                                                                                                                                                                                                                                                                                                                                                                                                                                                                                                                                                                                                                                                                                                                                                                                                                                                                                                                                                                                                                 | Mayo Clinic Laboratories                                                                          | UW Virology Lab                                                                                   | Pavitra Roychoudhury, Hong Xie, Lasata Shrestha, Amin Addetia, Trung Nguyen, Victoria M Rachleff, Meei-Li Huang, Keith R Jerome, Alexander Greninger                                                                                                                                                                                                         |  |
| EPI_ISL_491001, EPI_ISL_491002, EPI_ISL_491003                                                                                                                                                                                                                                                                                                                                                                                                                                                                                                                                                                                                                                                                                                                                                                                                                                                                                                                                                                                                                                                                                                                                                                                                                                                                                                                                                                                                                                                                                                                                                                                                                                                                                                                                                                                                                                                                                                                                                                                                                                                                                                                                                                                                                                                                                                                                                                                                                                                                                                                                                                                                                                                                                                                                                                                                                                                                                 | UW Virology Lab                                                                                   | UW Virology Lab                                                                                   | Pavitra Roychoudhury, Hong Xie, Lasata Shrestha, Amin Addetia, Trung Nguyen, Victoria M Rachleff, Meei-Li Huang, Keith R Jerome, Alexander Greninger                                                                                                                                                                                                         |  |
| EPI_ISL_491004                                                                                                                                                                                                                                                                                                                                                                                                                                                                                                                                                                                                                                                                                                                                                                                                                                                                                                                                                                                                                                                                                                                                                                                                                                                                                                                                                                                                                                                                                                                                                                                                                                                                                                                                                                                                                                                                                                                                                                                                                                                                                                                                                                                                                                                                                                                                                                                                                                                                                                                                                                                                                                                                                                                                                                                                                                                                                                                 | Mayo Clinic Laboratories                                                                          | UW Virology Lab                                                                                   | Pavitra Roychoudhury, Hong Xie, Lasata Shrestha, Amin Addetia, Trung Nguyen, Victoria M Rachleff, Meei-Li Huang, Keith R Jerome, Alexander Greninger                                                                                                                                                                                                         |  |
| EPI_ISL_491005, EPI_ISL_491006, EPI_ISL_491007, EPI_ISL_491009, EPI_ISL_491010, EPI_ISL_491011, EPI_ISL_491012, EPI_ISL_491013, EPI_ISL_491014, EPI_ISL_491016, EPI_ISL_491017, EPI_ISL_491018, EPI_ISL_491019, EPI_ISL_491020, EPI_ISL_491021, EPI_ISL_491022, EPI_ISL_491023, EPI_ISL_491024, EPI_ISL_491025, EPI_ISL_491026, EPI_ISL_491027, EPI_ISL_491028, EPI_ISL_491029, EPI_ISL_491030, EPI_ISL_491031, EPI_ISL_491032, EPI_ISL_491033, EPI_ISL_491034                                                                                                                                                                                                                                                                                                                                                                                                                                                                                                                                                                                                                                                                                                                                                                                                                                                                                                                                                                                                                                                                                                                                                                                                                                                                                                                                                                                                                                                                                                                                                                                                                                                                                                                                                                                                                                                                                                                                                                                                                                                                                                                                                                                                                                                                                                                                                                                                                                                                 | UW Virology Lab                                                                                   | UW Virology Lab                                                                                   | Pavitra Roychoudhury, Hong Xie, Lasata Shrestha, Amin Addetia, Trung Nguyen, Victoria M Rachleff, Meei-Li Huang, Keith R Jerome, Alexander Greninger                                                                                                                                                                                                         |  |
| see above                                                                                                                                                                                                                                                                                                                                                                                                                                                                                                                                                                                                                                                                                                                                                                                                                                                                                                                                                                                                                                                                                                                                                                                                                                                                                                                                                                                                                                                                                                                                                                                                                                                                                                                                                                                                                                                                                                                                                                                                                                                                                                                                                                                                                                                                                                                                                                                                                                                                                                                                                                                                                                                                                                                                                                                                                                                                                                                      | UW Virology Lab                                                                                   | UW Virology Lab                                                                                   | Pavitra Roychoudhury, Hong Xie, Lasata Shrestha, Amin Addetia, Trung Nguyen, Victoria M Rachleff, Meei-Li Huang, Keith R Jerome, Alexander Greninger                                                                                                                                                                                                         |  |
| EPI_ISL_492181, EPI_ISL_492182                                                                                                                                                                                                                                                                                                                                                                                                                                                                                                                                                                                                                                                                                                                                                                                                                                                                                                                                                                                                                                                                                                                                                                                                                                                                                                                                                                                                                                                                                                                                                                                                                                                                                                                                                                                                                                                                                                                                                                                                                                                                                                                                                                                                                                                                                                                                                                                                                                                                                                                                                                                                                                                                                                                                                                                                                                                                                                 | University of Arkansas for Medical Sciences (UAMS)                                                | Department of Biomedical Informatics, University of Arkansas for Medical Sciences (UAMS)          | Piroon Jenjaroenpun, David W Ussery, Thidathip Wongsurawat                                                                                                                                                                                                                                                                                                   |  |
| EPI_ISL_495017                                                                                                                                                                                                                                                                                                                                                                                                                                                                                                                                                                                                                                                                                                                                                                                                                                                                                                                                                                                                                                                                                                                                                                                                                                                                                                                                                                                                                                                                                                                                                                                                                                                                                                                                                                                                                                                                                                                                                                                                                                                                                                                                                                                                                                                                                                                                                                                                                                                                                                                                                                                                                                                                                                                                                                                                                                                                                                                 | B.J. Medical College and Civil hospital                                                           | Gujarat Biotechnology Research Centre                                                             | Pinal Trivedi, Maharshi Pandya, Nidhi Patel, Nitin Savaliya, Raghawendra Kumar, Dinesh Kumar, Zuber Saiyed, Komal Patel, Labdhi Pandya, Afzal Ansari, Nikha Trivedi, Pranay Shah, Kamlesh J Upadhyay, Sanjay Kapadia, Apurvasinh Puvar, Janvi Raval, Zarna Patel, Monika Gandhi, R D Dixit, A M Kadri, Harsh Bakshi, Chaitanya Joshi, Madhvi Joshi           |  |
| EPI_ISL_495024                                                                                                                                                                                                                                                                                                                                                                                                                                                                                                                                                                                                                                                                                                                                                                                                                                                                                                                                                                                                                                                                                                                                                                                                                                                                                                                                                                                                                                                                                                                                                                                                                                                                                                                                                                                                                                                                                                                                                                                                                                                                                                                                                                                                                                                                                                                                                                                                                                                                                                                                                                                                                                                                                                                                                                                                                                                                                                                 | Government Medical College, Bhavnagar                                                             | Gujarat Biotechnology Research Centre                                                             | Raghawendra Kumar, Dinesh Kumar, Zuber Saiyed, Komal Patel, Labdhi Pandya, Afzal Ansari, Nikha Trivedi, Kairavi Desai, Saklin Malek, Shirish Patel, Apurvasinh Puvar, Janvi Raval, Zarna Patel, Monika Gandhi, Pinal Trivedi, Maharshi Pandya, Nidhi Patel, Nitin Savaliya, R D Dixit, A M Kadri, Harsh Bakshi, Chaitanya Joshi, Madhvi Joshi                |  |
| EPI_ISL_495037                                                                                                                                                                                                                                                                                                                                                                                                                                                                                                                                                                                                                                                                                                                                                                                                                                                                                                                                                                                                                                                                                                                                                                                                                                                                                                                                                                                                                                                                                                                                                                                                                                                                                                                                                                                                                                                                                                                                                                                                                                                                                                                                                                                                                                                                                                                                                                                                                                                                                                                                                                                                                                                                                                                                                                                                                                                                                                                 | GMERS Medical College & Hospital, Gotri, Vadodara                                                 | Gujarat Biotechnology Research Centre                                                             | Pinal Trivedi, Maharshi Pandya, Nidhi Patel, Nitin Savaliya, Raghawendra Kumar, Dinesh Kumar, Zuber Saiyed, Komal Patel, Labdhi Pandya, Afzal Ansari, Nikha Trivedi, Meenakshi Shah, Neena Doshi, Varsha Godbole, Apurvasinh Puvar, Janvi Raval, Zarna Patel, Monika Gandhi, R D Dixit, A M Kadri, Harsh Bakshi, Chaitanya Joshi, Madhvi Joshi               |  |
| EPI_ISL_495041                                                                                                                                                                                                                                                                                                                                                                                                                                                                                                                                                                                                                                                                                                                                                                                                                                                                                                                                                                                                                                                                                                                                                                                                                                                                                                                                                                                                                                                                                                                                                                                                                                                                                                                                                                                                                                                                                                                                                                                                                                                                                                                                                                                                                                                                                                                                                                                                                                                                                                                                                                                                                                                                                                                                                                                                                                                                                                                 | GMERS Medical College & Hospital, Gotri, Vadodara                                                 | Gujarat Biotechnology Research Centre                                                             | Raghawendra Kumar, Dinesh Kumar, Zuber Saiyed, Komal Patel, Labdhi Pandya, Afzal Ansari, Nikha Trivedi, Meenakshi Shah, Neena Doshi, Varsha Godbole, Apurvasinh Puvar, Janvi Raval, Zarna Patel, Monika Gandhi, Pinal Trivedi, Maharshi Pandya, Nidhi Patel, Nitin Savaliya, R D Dixit, A M Kadri, Harsh Bakshi, Chaitanya Joshi, Madhvi Joshi               |  |
| EPI_ISL_495055                                                                                                                                                                                                                                                                                                                                                                                                                                                                                                                                                                                                                                                                                                                                                                                                                                                                                                                                                                                                                                                                                                                                                                                                                                                                                                                                                                                                                                                                                                                                                                                                                                                                                                                                                                                                                                                                                                                                                                                                                                                                                                                                                                                                                                                                                                                                                                                                                                                                                                                                                                                                                                                                                                                                                                                                                                                                                                                 | GMERS Medical College & Hospital, Gotri, Vadodara                                                 | Gujarat Biotechnology Research Centre                                                             | Pinal Trivedi, Maharshi Pandya, Nidhi Patel, Nitin Savaliya, Raghawendra Kumar, Dinesh Kumar, Zuber Saiyed, Komal Patel, Labdhi Pandya, Afzal Ansari, Nikha Trivedi, Meenakshi Shah, Neena Doshi, Varsha Godbole, Apurvasinh Puvar, Janvi Raval, Zarna Patel, Monika Gandhi, R D Dixit, A M Kadri, Harsh Bakshi, Chaitanya Joshi, Madhvi Joshi               |  |
| EPI_ISL_495059                                                                                                                                                                                                                                                                                                                                                                                                                                                                                                                                                                                                                                                                                                                                                                                                                                                                                                                                                                                                                                                                                                                                                                                                                                                                                                                                                                                                                                                                                                                                                                                                                                                                                                                                                                                                                                                                                                                                                                                                                                                                                                                                                                                                                                                                                                                                                                                                                                                                                                                                                                                                                                                                                                                                                                                                                                                                                                                 | GMERS Medical College & Hospital, Gotri, Vadodara                                                 | Gujarat Biotechnology Research Centre                                                             | Raghawendra Kumar, Dinesh Kumar, Zuber Saiyed, Komal Patel, Labdhi Pandya, Afzal Ansari, Nikha Trivedi, Meenakshi Shah, Neena Doshi, Varsha Godbole, Apurvasinh Puvar, Janvi Raval, Zarna Patel, Monika Gandhi, Pinal Trivedi, Maharshi Pandya, Nidhi Patel, Nitin Savaliya, R D Dixit, A M Kadri, Harsh Bakshi, Chaitanya Joshi, Madhvi Joshi               |  |
| EPI_ISL_495074                                                                                                                                                                                                                                                                                                                                                                                                                                                                                                                                                                                                                                                                                                                                                                                                                                                                                                                                                                                                                                                                                                                                                                                                                                                                                                                                                                                                                                                                                                                                                                                                                                                                                                                                                                                                                                                                                                                                                                                                                                                                                                                                                                                                                                                                                                                                                                                                                                                                                                                                                                                                                                                                                                                                                                                                                                                                                                                 | Department of MicroBiology, Government Medical College,                                           | Gujarat Biotechnology Research Centre                                                             | Pinal Trivedi, Maharshi Pandya, Nidhi Patel, Nitin Savaliya, Raghawendra Kumar, Dinesh Kumar, Zuber Saiyed, Komal Patel, Labdhi Pandya, Afzal Ansari,                                                                                                                                                                                                        |  |

|                                                                                                                                                                                                                                                                                                                                                                                                                                                                                                                                                                                                                                                                |                                                               |                                                            |                                                                                                                                                                                                                                                                                                                                                                                                                                                                                                                                                                                                                                                       |
|----------------------------------------------------------------------------------------------------------------------------------------------------------------------------------------------------------------------------------------------------------------------------------------------------------------------------------------------------------------------------------------------------------------------------------------------------------------------------------------------------------------------------------------------------------------------------------------------------------------------------------------------------------------|---------------------------------------------------------------|------------------------------------------------------------|-------------------------------------------------------------------------------------------------------------------------------------------------------------------------------------------------------------------------------------------------------------------------------------------------------------------------------------------------------------------------------------------------------------------------------------------------------------------------------------------------------------------------------------------------------------------------------------------------------------------------------------------------------|
|                                                                                                                                                                                                                                                                                                                                                                                                                                                                                                                                                                                                                                                                | Surat                                                         |                                                            | Nikha Trivedi, Naresh Chauhan, Summaiya Mullan, Amit gamit, Apurvasinh Puvar, Janvi Raval, Zarna Patel, Monika Gandhi, R D Dixit, A M Kadri, Harsh Bakshi, Chaitanya Joshi, Madhvi Joshi                                                                                                                                                                                                                                                                                                                                                                                                                                                              |
| EPI_ISL_495077                                                                                                                                                                                                                                                                                                                                                                                                                                                                                                                                                                                                                                                 | Department of MicroBiology, Government Medical College, Surat | Gujarat Biotechnology Research Centre                      | Raghawendra Kumar, Dinesh Kumar, Zuber Saiyed, Komal Patel, Labdhi Pandya, Afzal Ansari, Nikha Trivedi, Naresh Chauhan, Summaiya Mullan, Amit gamit, Apurvasinh Puvar, Janvi Raval, Zarna Patel, Monika Gandhi, Pinal Trivedi, Maharshi Pandya, Nidhi Patel, Nitin Savaliya, R D Dixit, A M Kadri, Harsh Bakshi, Chaitanya Joshi, Madhvi Joshi                                                                                                                                                                                                                                                                                                        |
| EPI_ISL_495178                                                                                                                                                                                                                                                                                                                                                                                                                                                                                                                                                                                                                                                 | CSIR-Centre for Cellular and Molecular Biology                | CSIR-Centre for Cellular and Molecular Biology             | Payel Mukherjee, Sofia Banu, Priya Singh, Onkar Kulkarni, Dhiviya Vedagiri, Divya Gupta, Vishal Sah, Santosh Kumar Kuncha, Krishnan Harinivas Harshan, Archana Bharadwaj Siva, Karthik Bharadwaj Tallapaka, Shagufta Khan, Lamuk Zaveri, Nikhil Hajirnis, M Soujanya Reddy, Pratheusa Maccha, Namami Gaur, Sakshi Shambhavi, Tulasi Nagabandi, Purushotham Vodnala, Rakesh K Mishra, Sonu Uday, Sudipta Mondal, Annapoorna P Karthyayani, Debabrata Jana, Debrya Saha, Divya Tej Sowpati                                                                                                                                                              |
| EPI_ISL_495179                                                                                                                                                                                                                                                                                                                                                                                                                                                                                                                                                                                                                                                 | CSIR-Centre for Cellular and Molecular Biology                | CSIR-Centre for Cellular and Molecular Biology             | Pratheusa Maccha, Sakshi Shambhavi, Lamuk Zaveri, Shagufta Khan, Namami Gaur, Nikhil Hajirnis, M Soujanya Reddy, Tulasi Nagabandi, Purushotham Vodnala, Payel Mukherjee, Sofia Banu, Priya Singh, Onkar Kulkarni, Dhiviya Vedagiri, Divya Gupta, Vishal Sah, Santosh Kumar Kuncha, Krishnan Harinivas Harshan, Archana Bharadwaj Siva, Karthik Bharadwaj Tallapaka, G. Aditya Kumar, Koushick Sivakumar, Disha Nanda, Divya Das, Jotin Gogoi, Manish Bhattacharjee, Ravi Prasad Mukku, Rakesh K Mishra, Divya Tej Sowpati                                                                                                                             |
| EPI_ISL_495181                                                                                                                                                                                                                                                                                                                                                                                                                                                                                                                                                                                                                                                 | CSIR-Centre for Cellular and Molecular Biology                | CSIR-Centre for Cellular and Molecular Biology             | Pratheusa Maccha, Sofia Banu, Payel Mukherjee, Priya Singh, Onkar Kulkarni, Dhiviya Vedagiri, Divya Gupta, Vishal Sah, Santosh Kumar Kuncha, Krishnan Harinivas Harshan, Archana Bharadwaj Siva, Karthik Bharadwaj Tallapaka, Shagufta Khan, Lamuk Zaveri, Nikhil Hajirnis, M Soujanya Reddy, Tulasi Nagabandi, Purushotham Vodnala, Preethi Jampala, Sharada Ravi Iyer, Sulagana Mukherjee, Swetha Sundar, Peddapuvala Sai Uday Kiran, Rakesh K Mishra, Divya Tej Sowpati                                                                                                                                                                            |
| EPI_ISL_495196                                                                                                                                                                                                                                                                                                                                                                                                                                                                                                                                                                                                                                                 | CSIR-Centre for Cellular and Molecular Biology                | CSIR-Centre for Cellular and Molecular Biology             | Payel Mukherjee, Sofia Banu, Priya Singh, Onkar Kulkarni, Dhiviya Vedagiri, Divya Gupta, Vishal Sah, Santosh Kumar Kuncha, Krishnan Harinivas Harshan, Archana Bharadwaj Siva, Karthik Bharadwaj Tallapaka, Shagufta Khan, Lamuk Zaveri, Nikhil Hajirnis, M Soujanya Reddy, Pratheusa Maccha, Namami Gaur, Sakshi Shambhavi, Tulasi Nagabandi, Purushotham Vodnala, G. Aditya Kumar, Koushick Sivakumar, Pooja Ramesh Gupta, Rajan Kumar Jha, Shradha Vijay Lahoti, Rakesh K Mishra, Divya Tej Sowpati                                                                                                                                                |
| EPI_ISL_495199                                                                                                                                                                                                                                                                                                                                                                                                                                                                                                                                                                                                                                                 | CSIR-Centre for Cellular and Molecular Biology                | CSIR-Centre for Cellular and Molecular Biology             | Pratheusa Maccha, Sakshi Shambhavi, Lamuk Zaveri, Shagufta Khan, Namami Gaur, Nikhil Hajirnis, M Soujanya Reddy, Tulasi Nagabandi, Purushotham Vodnala, Payel Mukherjee, Sofia Banu, Priya Singh, Onkar Kulkarni, Dhiviya Vedagiri, Divya Gupta, Vishal Sah, Santosh Kumar Kuncha, Krishnan Harinivas Harshan, Archana Bharadwaj Siva, Karthik Bharadwaj Tallapaka, G. Aditya Kumar, Koushick Sivakumar, Disha Nanda, Divya Das, Jotin Gogoi, Manish Bhattacharjee, Ravi Prasad Mukku, Rakesh K Mishra, Divya Tej Sowpati                                                                                                                             |
| EPI_ISL_495204                                                                                                                                                                                                                                                                                                                                                                                                                                                                                                                                                                                                                                                 | CSIR-Centre for Cellular and Molecular Biology                | CSIR-Centre for Cellular and Molecular Biology             | Pratheusa Maccha, Shagufta Khan, Lamuk Zaveri, Namami Gaur, Sakshi Shambhavi, Tulasi Nagabandi, Nikhil Hajirnis, M Soujanya Reddy, Purushotham Vodnala, Payel Mukherjee, Sofia Banu, Priya Singh, Onkar Kulkarni, Dhiviya Vedagiri, Divya Gupta, Vishal Sah, Santosh Kumar Kuncha, Krishnan Harinivas Harshan, Archana Bharadwaj Siva, Karthik Bharadwaj Tallapaka, Shagufta Khan, Lamuk Zaveri, Nikhil Hajirnis, M Soujanya Reddy, Pratheusa Maccha, Namami Gaur, Sakshi Shambhavi, Tulasi Nagabandi, Purushotham Vodnala, Gokulan C G, Gunjan Purohit, Hanuman Tulashiram Kale, Pankaj Kumar, Prachand Issarapu, Rakesh K Mishra, Divya Tej Sowpati |
| EPI_ISL_495209                                                                                                                                                                                                                                                                                                                                                                                                                                                                                                                                                                                                                                                 | CSIR-Centre for Cellular and Molecular Biology                | CSIR-Centre for Cellular and Molecular Biology             | Payel Mukherjee, Sofia Banu, Priya Singh, Onkar Kulkarni, Dhiviya Vedagiri, Divya Gupta, Vishal Sah, Santosh Kumar Kuncha, Krishnan Harinivas Harshan, Archana Bharadwaj Siva, Karthik Bharadwaj Tallapaka, Shagufta Khan, Lamuk Zaveri, Nikhil Hajirnis, M Soujanya Reddy, Pratheusa Maccha, Namami Gaur, Sakshi Shambhavi, Tulasi Nagabandi, Purushotham Vodnala, Gokulan C G, Gunjan Purohit, Hanuman Tulashiram Kale, Pankaj Kumar, Prachand Issarapu, Rakesh K Mishra, Divya Tej Sowpati                                                                                                                                                         |
| EPI_ISL_495222                                                                                                                                                                                                                                                                                                                                                                                                                                                                                                                                                                                                                                                 | CSIR-Centre for Cellular and Molecular Biology                | CSIR-Centre for Cellular and Molecular Biology             | Pratheusa Maccha, Shagufta Khan, Lamuk Zaveri, Namami Gaur, Sakshi Shambhavi, Tulasi Nagabandi, Nikhil Hajirnis, M Soujanya Reddy, Purushotham Vodnala, Payel Mukherjee, Sofia Banu, Priya Singh, Onkar Kulkarni, Dhiviya Vedagiri, Divya Gupta, Vishal Sah, Santosh Kumar Kuncha, Krishnan Harinivas Harshan, Archana Bharadwaj Siva, Karthik Bharadwaj Tallapaka, Shagufta Khan, Lamuk Zaveri, Nikhil Hajirnis, M Soujanya Reddy, Pratheusa Maccha, Namami Gaur, Sakshi Shambhavi, Tulasi Nagabandi, Purushotham Vodnala, Disha Nanda, Divya Das, Jotin Gogoi, Manish Bhattacharjee, Ravi Prasad Mukku, Rakesh K Mishra, Divya Tej Sowpati          |
| EPI_ISL_495225                                                                                                                                                                                                                                                                                                                                                                                                                                                                                                                                                                                                                                                 | CSIR-Centre for Cellular and Molecular Biology                | CSIR-Centre for Cellular and Molecular Biology             | Pratheusa Maccha, Sakshi Shambhavi, Lamuk Zaveri, Shagufta Khan, Namami Gaur, Nikhil Hajirnis, M Soujanya Reddy, Tulasi Nagabandi, Purushotham Vodnala, Payel Mukherjee, Sofia Banu, Priya Singh, Onkar Kulkarni, Dhiviya Vedagiri, Divya Gupta, Vishal Sah, Santosh Kumar Kuncha, Krishnan Harinivas Harshan, Archana Bharadwaj Siva, Karthik Bharadwaj Tallapaka, G. Aditya Kumar, Koushick Sivakumar, Disha Nanda, Divya Das, Jotin Gogoi, Manish Bhattacharjee, Ravi Prasad Mukku, Rakesh K Mishra, Divya Tej Sowpati                                                                                                                             |
| EPI_ISL_495227                                                                                                                                                                                                                                                                                                                                                                                                                                                                                                                                                                                                                                                 | CSIR-Centre for Cellular and Molecular Biology                | CSIR-Centre for Cellular and Molecular Biology             | Payel Mukherjee, Sofia Banu, Priya Singh, Onkar Kulkarni, Dhiviya Vedagiri, Divya Gupta, Vishal Sah, Santosh Kumar Kuncha, Krishnan Harinivas Harshan, Archana Bharadwaj Siva, Karthik Bharadwaj Tallapaka, Shagufta Khan, Lamuk Zaveri, Nikhil Hajirnis, M Soujanya Reddy, Pratheusa Maccha, Namami Gaur, Sakshi Shambhavi, Tulasi Nagabandi, Purushotham Vodnala, Gokulan C G, Gunjan Purohit, Hanuman Tulashiram Kale, Pankaj Kumar, Prachand Issarapu, Rakesh K Mishra, Divya Tej Sowpati                                                                                                                                                         |
| EPI_ISL_495228, EPI_ISL_495237                                                                                                                                                                                                                                                                                                                                                                                                                                                                                                                                                                                                                                 | CSIR-Centre for Cellular and Molecular Biology                | CSIR-Centre for Cellular and Molecular Biology             | Payel Mukherjee, Sofia Banu, Priya Singh, Onkar Kulkarni, Dhiviya Vedagiri, Divya Gupta, Vishal Sah, Santosh Kumar Kuncha, Krishnan Harinivas Harshan, Archana Bharadwaj Siva, Karthik Bharadwaj Tallapaka, Shagufta Khan, Lamuk Zaveri, Nikhil Hajirnis, M Soujanya Reddy, Pratheusa Maccha, Namami Gaur, Sakshi Shambhavi, Tulasi Nagabandi, Purushotham Vodnala, Rakesh K Mishra, Sonu Uday, Sudipta Mondal, Annapoorna P Karthyayani, Debabrata Jana, Debrya Saha, Divya Tej Sowpati                                                                                                                                                              |
| EPI_ISL_495238                                                                                                                                                                                                                                                                                                                                                                                                                                                                                                                                                                                                                                                 | CSIR-Centre for Cellular and Molecular Biology                | CSIR-Centre for Cellular and Molecular Biology             | Pratheusa Maccha, Sakshi Shambhavi, Lamuk Zaveri, Shagufta Khan, Namami Gaur, Nikhil Hajirnis, M Soujanya Reddy, Tulasi Nagabandi, Purushotham Vodnala, Payel Mukherjee, Sofia Banu, Priya Singh, Onkar Kulkarni, Dhiviya Vedagiri, Divya Gupta, Vishal Sah, Santosh Kumar Kuncha, Krishnan Harinivas Harshan, Archana Bharadwaj Siva, Karthik Bharadwaj Tallapaka, G. Aditya Kumar, Koushick Sivakumar, Disha Nanda, Divya Das, Jotin Gogoi, Manish Bhattacharjee, Ravi Prasad Mukku, Rakesh K Mishra, Divya Tej Sowpati                                                                                                                             |
| EPI_ISL_495244                                                                                                                                                                                                                                                                                                                                                                                                                                                                                                                                                                                                                                                 | CSIR-Centre for Cellular and Molecular Biology                | CSIR-Centre for Cellular and Molecular Biology             | Payel Mukherjee, Sofia Banu, Priya Singh, Onkar Kulkarni, Dhiviya Vedagiri, Divya Gupta, Vishal Sah, Santosh Kumar Kuncha, Krishnan Harinivas Harshan, Archana Bharadwaj Siva, Karthik Bharadwaj Tallapaka, Shagufta Khan, Lamuk Zaveri, Nikhil Hajirnis, M Soujanya Reddy, Pratheusa Maccha, Namami Gaur, Sakshi Shambhavi, Tulasi Nagabandi, Purushotham Vodnala, G. Aditya Kumar, Koushick Sivakumar, Pooja Ramesh Gupta, Rajan Kumar Jha, Shradha Vijay Lahoti, Rakesh K Mishra, Divya Tej Sowpati                                                                                                                                                |
| EPI_ISL_495245, EPI_ISL_495249                                                                                                                                                                                                                                                                                                                                                                                                                                                                                                                                                                                                                                 | CSIR-Centre for Cellular and Molecular Biology                | CSIR-Centre for Cellular and Molecular Biology             | Payel Mukherjee, Sofia Banu, Priya Singh, Onkar Kulkarni, Dhiviya Vedagiri, Divya Gupta, Vishal Sah, Santosh Kumar Kuncha, Krishnan Harinivas Harshan, Archana Bharadwaj Siva, Karthik Bharadwaj Tallapaka, Shagufta Khan, Lamuk Zaveri, Nikhil Hajirnis, M Soujanya Reddy, Pratheusa Maccha, Namami Gaur, Sakshi Shambhavi, Tulasi Nagabandi, Purushotham Vodnala, Gokulan C G, Gunjan Purohit, Hanuman Tulashiram Kale, Pankaj Kumar, Prachand Issarapu, Rakesh K Mishra, Divya Tej Sowpati                                                                                                                                                         |
| EPI_ISL_495251                                                                                                                                                                                                                                                                                                                                                                                                                                                                                                                                                                                                                                                 | CSIR-Centre for Cellular and Molecular Biology                | CSIR-Centre for Cellular and Molecular Biology             | Pratheusa Maccha, Shagufta Khan, Lamuk Zaveri, Namami Gaur, Sakshi Shambhavi, Tulasi Nagabandi, Nikhil Hajirnis, M Soujanya Reddy, Purushotham Vodnala, Payel Mukherjee, Sofia Banu, Priya Singh, Onkar Kulkarni, Dhiviya Vedagiri, Divya Gupta, Vishal Sah, Santosh Kumar Kuncha, Krishnan Harinivas Harshan, Archana Bharadwaj Siva, Karthik Bharadwaj Tallapaka, Shagufta Khan, Lamuk Zaveri, Nikhil Hajirnis, M Soujanya Reddy, Pratheusa Maccha, Namami Gaur, Sakshi Shambhavi, Tulasi Nagabandi, Purushotham Vodnala, Disha Nanda, Divya Das, Jotin Gogoi, Manish Bhattacharjee, Ravi Prasad Mukku, Rakesh K Mishra, Divya Tej Sowpati          |
| EPI_ISL_495252                                                                                                                                                                                                                                                                                                                                                                                                                                                                                                                                                                                                                                                 | CSIR-Centre for Cellular and Molecular Biology                | CSIR-Centre for Cellular and Molecular Biology             | Payel Mukherjee, Sofia Banu, Priya Singh, Onkar Kulkarni, Dhiviya Vedagiri, Divya Gupta, Vishal Sah, Santosh Kumar Kuncha, Krishnan Harinivas Harshan, Archana Bharadwaj Siva, Karthik Bharadwaj Tallapaka, Shagufta Khan, Lamuk Zaveri, Nikhil Hajirnis, M Soujanya Reddy, Pratheusa Maccha, Namami Gaur, Sakshi Shambhavi, Tulasi Nagabandi, Purushotham Vodnala, G. Aditya Kumar, Koushick Sivakumar, Pooja Ramesh Gupta, Rajan Kumar Jha, Shradha Vijay Lahoti, Rakesh K Mishra, Divya Tej Sowpati                                                                                                                                                |
| EPI_ISL_495254, EPI_ISL_495273                                                                                                                                                                                                                                                                                                                                                                                                                                                                                                                                                                                                                                 | CSIR-Centre for Cellular and Molecular Biology                | CSIR-Centre for Cellular and Molecular Biology             | Pratheusa Maccha, Sofia Banu, Payel Mukherjee, Priya Singh, Onkar Kulkarni, Dhiviya Vedagiri, Divya Gupta, Vishal Sah, Santosh Kumar Kuncha, Krishnan Harinivas Harshan, Archana Bharadwaj Siva, Karthik Bharadwaj Tallapaka, Shagufta Khan, Lamuk Zaveri, Namami Gaur, Sakshi Shambhavi, Nikhil Hajirnis, M Soujanya Reddy, Tulasi Nagabandi, Purushotham Vodnala, Preethi Jampala, Sharada Ravi Iyer, Sulagana Mukherjee, Swetha Sundar, Peddapuvala Sai Uday Kiran, Rakesh K Mishra, Divya Tej Sowpati                                                                                                                                             |
| EPI_ISL_495629, EPI_ISL_495630, EPI_ISL_495631, EPI_ISL_495632, EPI_ISL_495633, EPI_ISL_495634, EPI_ISL_495635, EPI_ISL_495636, EPI_ISL_495637, EPI_ISL_495638, EPI_ISL_495639, EPI_ISL_495640, EPI_ISL_495641, EPI_ISL_496491, EPI_ISL_496492, EPI_ISL_496493, EPI_ISL_496494, EPI_ISL_496495, EPI_ISL_496496, EPI_ISL_496497, EPI_ISL_496498, EPI_ISL_496499, EPI_ISL_496500, EPI_ISL_496501, EPI_ISL_496502, EPI_ISL_496503, EPI_ISL_496504, EPI_ISL_496505, EPI_ISL_496506, EPI_ISL_496507, EPI_ISL_496508, EPI_ISL_496509, EPI_ISL_496510, EPI_ISL_496511, EPI_ISL_496512, EPI_ISL_496513, EPI_ISL_496514, EPI_ISL_496515, EPI_ISL_496516, EPI_ISL_496517 |                                                               |                                                            |                                                                                                                                                                                                                                                                                                                                                                                                                                                                                                                                                                                                                                                       |
| see above                                                                                                                                                                                                                                                                                                                                                                                                                                                                                                                                                                                                                                                      | Viral Respiratory Lab, National Institute for Biomedical      | Pathogen Sequencing Lab, National Institute for Biomedical | Placide Mbala-Kingebeni, Edith Nkwembe, Eddy Kinganda-Lusamaki, Amuri Aziza, Francisca Muyembe Mawete, Emmanuel Lokilo Lofiko, Catherine Pratt,                                                                                                                                                                                                                                                                                                                                                                                                                                                                                                       |

|                                                                                                                                                                                                                                                                                                                                                                                                                                                                                                                                                                                                                                                                                                                                                                                                                                                                                                                                                                                                                                                                                                                                                                                                |                                                                                                        |                                                                                                                                                       |                                                                                                                                                                                                                                                                                                                                                               |
|------------------------------------------------------------------------------------------------------------------------------------------------------------------------------------------------------------------------------------------------------------------------------------------------------------------------------------------------------------------------------------------------------------------------------------------------------------------------------------------------------------------------------------------------------------------------------------------------------------------------------------------------------------------------------------------------------------------------------------------------------------------------------------------------------------------------------------------------------------------------------------------------------------------------------------------------------------------------------------------------------------------------------------------------------------------------------------------------------------------------------------------------------------------------------------------------|--------------------------------------------------------------------------------------------------------|-------------------------------------------------------------------------------------------------------------------------------------------------------|---------------------------------------------------------------------------------------------------------------------------------------------------------------------------------------------------------------------------------------------------------------------------------------------------------------------------------------------------------------|
|                                                                                                                                                                                                                                                                                                                                                                                                                                                                                                                                                                                                                                                                                                                                                                                                                                                                                                                                                                                                                                                                                                                                                                                                | Research (INRB)                                                                                        | Research (INRB)                                                                                                                                       | Matthias Pauthner, Josh Quick, Allison Black, James Hadfield, Trevor Bedford, Ian Goodfellow, Andrew Rambaut, Nick Loman, Kristian Andersen, Michael Wiley, Steve Ahuka-Mundeke, Jean-Jacques Muyembe Tarnfum                                                                                                                                                 |
| EPI_ISL_497872                                                                                                                                                                                                                                                                                                                                                                                                                                                                                                                                                                                                                                                                                                                                                                                                                                                                                                                                                                                                                                                                                                                                                                                 | UW Virology Lab                                                                                        | UW Virology Lab                                                                                                                                       | Pavitra Roychoudhury, Amin Addetia, Hong Xie, Lasata Shrestha, Truong Nguyen, Meei-Li Huang, Keith Jerome, Alexander Greninger                                                                                                                                                                                                                                |
| EPI_ISL_500500, EPI_ISL_500501, EPI_ISL_500502                                                                                                                                                                                                                                                                                                                                                                                                                                                                                                                                                                                                                                                                                                                                                                                                                                                                                                                                                                                                                                                                                                                                                 | University of Washington Virology Lab                                                                  | University of Washington Virology Lab                                                                                                                 | Pavitra Roychoudhury, Hong Xie, Lasata Shrestha, Amin Addetia, Truong Nguyen, Victoria M Rachleff, Meei-Li Huang, Keith R Jerome, Alexander Greninger                                                                                                                                                                                                         |
| EPI_ISL_500503, EPI_ISL_500504, EPI_ISL_500505, EPI_ISL_500506, EPI_ISL_500507, EPI_ISL_500508, EPI_ISL_500509, EPI_ISL_500510, EPI_ISL_500511, EPI_ISL_500512, EPI_ISL_500513, EPI_ISL_500514, EPI_ISL_500515, EPI_ISL_500516, EPI_ISL_500517, EPI_ISL_500518, EPI_ISL_500519, EPI_ISL_500520, EPI_ISL_500521, EPI_ISL_500522, EPI_ISL_500523, EPI_ISL_500524, EPI_ISL_500525, EPI_ISL_500526, EPI_ISL_500527, EPI_ISL_500528, EPI_ISL_500529, EPI_ISL_500530, EPI_ISL_500531, EPI_ISL_500532, EPI_ISL_500533, EPI_ISL_500534, EPI_ISL_500535, EPI_ISL_500536, EPI_ISL_500537, EPI_ISL_500538, EPI_ISL_501072, EPI_ISL_501073, EPI_ISL_501074, EPI_ISL_501075, EPI_ISL_501076, EPI_ISL_501077, EPI_ISL_501078, EPI_ISL_501079, EPI_ISL_501080, EPI_ISL_501081, EPI_ISL_501082                                                                                                                                                                                                                                                                                                                                                                                                                 | University of Washington Virology Lab                                                                  | Pavitra Roychoudhury, Hong Xie, Lasata Shrestha, Amin Addetia, Truong Nguyen, Victoria M Rachleff, Meei-Li Huang, Keith R Jerome, Alexander Greninger |                                                                                                                                                                                                                                                                                                                                                               |
| see above                                                                                                                                                                                                                                                                                                                                                                                                                                                                                                                                                                                                                                                                                                                                                                                                                                                                                                                                                                                                                                                                                                                                                                                      | Mayo Clinic Laboratories                                                                               | University of Washington Virology Lab                                                                                                                 | Pavitra Roychoudhury, Hong Xie, Lasata Shrestha, Amin Addetia, Truong Nguyen, Victoria M Rachleff, Meei-Li Huang, Keith R Jerome, Alexander Greninger                                                                                                                                                                                                         |
| EPI_ISL_501083, EPI_ISL_501084, EPI_ISL_501085, EPI_ISL_501086, EPI_ISL_501087, EPI_ISL_501088, EPI_ISL_501089, EPI_ISL_501090, EPI_ISL_501091, EPI_ISL_501092, EPI_ISL_501093, EPI_ISL_501094, EPI_ISL_501095, EPI_ISL_501096, EPI_ISL_501097, EPI_ISL_501098, EPI_ISL_501099, EPI_ISL_501100, EPI_ISL_501101, EPI_ISL_501102, EPI_ISL_501103, EPI_ISL_501104, EPI_ISL_501105, EPI_ISL_501106, EPI_ISL_501107, EPI_ISL_501108, EPI_ISL_501109, EPI_ISL_501110, EPI_ISL_501111, EPI_ISL_501112, EPI_ISL_501113, EPI_ISL_501114, EPI_ISL_501115, EPI_ISL_501116, EPI_ISL_501117, EPI_ISL_501118, EPI_ISL_501120, EPI_ISL_501121, EPI_ISL_501122, EPI_ISL_501123, EPI_ISL_501124, EPI_ISL_501125, EPI_ISL_501126, EPI_ISL_501127, EPI_ISL_501128, EPI_ISL_501129, EPI_ISL_501130, EPI_ISL_501131, EPI_ISL_501132, EPI_ISL_501133, EPI_ISL_501134, EPI_ISL_501135, EPI_ISL_501136, EPI_ISL_501137, EPI_ISL_501138, EPI_ISL_501139, EPI_ISL_501140, EPI_ISL_501141, EPI_ISL_501142, EPI_ISL_501143, EPI_ISL_501144, EPI_ISL_501145, EPI_ISL_501146, EPI_ISL_501147, EPI_ISL_501148, EPI_ISL_501149, EPI_ISL_501150, EPI_ISL_501151, EPI_ISL_501152, EPI_ISL_501153, EPI_ISL_501154, EPI_ISL_501155 | University of Washington Virology Lab                                                                  | Pavitra Roychoudhury, Hong Xie, Lasata Shrestha, Amin Addetia, Truong Nguyen, Victoria M Rachleff, Meei-Li Huang, Keith R Jerome, Alexander Greninger |                                                                                                                                                                                                                                                                                                                                                               |
| see above                                                                                                                                                                                                                                                                                                                                                                                                                                                                                                                                                                                                                                                                                                                                                                                                                                                                                                                                                                                                                                                                                                                                                                                      | University of Washington Virology Lab                                                                  | University of Washington Virology Lab                                                                                                                 | Pavitra Roychoudhury, Hong Xie, Lasata Shrestha, Amin Addetia, Truong Nguyen, Victoria M Rachleff, Meei-Li Huang, Keith R Jerome, Alexander Greninger                                                                                                                                                                                                         |
| EPI_ISL_501165                                                                                                                                                                                                                                                                                                                                                                                                                                                                                                                                                                                                                                                                                                                                                                                                                                                                                                                                                                                                                                                                                                                                                                                 | Mayo Clinic Laboratories                                                                               | University of Washington Virology Lab                                                                                                                 | Pavitra Roychoudhury, Hong Xie, Lasata Shrestha, Amin Addetia, Truong Nguyen, Victoria M Rachleff, Meei-Li Huang, Keith R Jerome, Alexander Greninger                                                                                                                                                                                                         |
| EPI_ISL_510689                                                                                                                                                                                                                                                                                                                                                                                                                                                                                                                                                                                                                                                                                                                                                                                                                                                                                                                                                                                                                                                                                                                                                                                 | Hospital Universitari Germans Trias i Pujol(HUGTIP)/Fundació Lluita contra la SIDA (FLSida)/IRTA-CReSA | IrsiCaixa AIDS Research Lab                                                                                                                           | Pilar Armengol, Marc Noguera-Julian, Jordi Rodón, Julia Vergara, Lidia Ruiz, Nuria Izquierdo, Jorge Carrillo, Roger Paredes, Albert Bensaïd, Julia Blanco, Joaquim Segalés, Bonaventura Clotet                                                                                                                                                                |
| EPI_ISL_511852, EPI_ISL_511853, EPI_ISL_511854, EPI_ISL_511855, EPI_ISL_511856, EPI_ISL_511857, EPI_ISL_511858, EPI_ISL_511859, EPI_ISL_511860, EPI_ISL_511861                                                                                                                                                                                                                                                                                                                                                                                                                                                                                                                                                                                                                                                                                                                                                                                                                                                                                                                                                                                                                                 | UW Virology Lab                                                                                        | UW Virology Lab                                                                                                                                       | Pavitra Roychoudhury, Amin Addetia, Hong Xie, Lasata Shrestha, Truong Nguyen, Meei-Li Huang, Keith Jerome, Alexander Greninger                                                                                                                                                                                                                                |
| EPI_ISL_511863, EPI_ISL_511864, EPI_ISL_511865, EPI_ISL_511866, EPI_ISL_511867, EPI_ISL_511868, EPI_ISL_511869, EPI_ISL_511870, EPI_ISL_511871, EPI_ISL_511872, EPI_ISL_511873, EPI_ISL_511874, EPI_ISL_511875, EPI_ISL_511876, EPI_ISL_511877                                                                                                                                                                                                                                                                                                                                                                                                                                                                                                                                                                                                                                                                                                                                                                                                                                                                                                                                                 | see above                                                                                              | Johns Hopkins Hospital Department of Pathology                                                                                                        | Peter M. Thielen, Thomas Mehoke, Shirlee Wohl, Srividya Ramakrishnan, Melanie Kirsche, Amanda Ertlund, Craig Howser, Kristina Zudock, Oluwaseun Falade-Nwulia, Norah Sadowski, Paul Morris, Mark Hopkins, Yunfan Fan, Nidia Trovao, Victoria Gniazdowski, Michael C. Schatz, Stuart C. Ray, Winston Timp, Heba H. Mostafa                                     |
| EPI_ISL_512059                                                                                                                                                                                                                                                                                                                                                                                                                                                                                                                                                                                                                                                                                                                                                                                                                                                                                                                                                                                                                                                                                                                                                                                 | B.J. Medical College and Civil hospital, Ahmedabad                                                     | Gujarat Biotechnology Research Centre                                                                                                                 | Pinal Trivedi, Maharshi Pandya, Nidhi Patel, Nitin Savaliya, Raghavendra Kumar, Dinesh Kumar, Zuber Saiyed, Komal Patel, Labdhi Pandya, Afzal Ansari, Nikha Trivedi, Pranay Shah, Kamlesh J Upadhyay, Sanjay Kapadia, Apurvasinh Puvar, Janvi Raval, Zarna Patel, Monika Gandhi, R D Dixit, A M Kadri, Harsh Bakshi, Chaitanya Joshi, Madhvi Joshi            |
| EPI_ISL_512063                                                                                                                                                                                                                                                                                                                                                                                                                                                                                                                                                                                                                                                                                                                                                                                                                                                                                                                                                                                                                                                                                                                                                                                 | B.J. Medical College and Civil hospital, Ahmedabad                                                     | Gujarat Biotechnology Research Centre                                                                                                                 | Raghavendra Kumar, Dinesh Kumar, Zuber Saiyed, Komal Patel, Labdhi Pandya, Afzal Ansari, Nikha Trivedi, Pranay Shah, Kamlesh J Upadhyay, Sanjay Kapadia, Apurvasinh Puvar, Janvi Raval, Zarna Patel, Monika Gandhi, Pinal Trivedi, Maharshi Pandya, Nidhi Patel, Nitin Savaliya, R D Dixit, A M Kadri, Harsh Bakshi, Chaitanya Joshi, Madhvi Joshi            |
| EPI_ISL_512076                                                                                                                                                                                                                                                                                                                                                                                                                                                                                                                                                                                                                                                                                                                                                                                                                                                                                                                                                                                                                                                                                                                                                                                 | Dr. RSS Hospital, Modasa                                                                               | Gujarat Biotechnology Research Centre                                                                                                                 | Pinal Trivedi, Maharshi Pandya, Nidhi Patel, Nitin Savaliya, Raghavendra Kumar, Dinesh Kumar, Zuber Saiyed, Komal Patel, Labdhi Pandya, Afzal Ansari, Nikha Trivedi, Harsh Chaudhari, Apurvasinh Puvar, Janvi Raval, Zarna Patel, Monika Gandhi, R D Dixit, A M Kadri, Harsh Bakshi, Chaitanya Joshi, Madhvi Joshi                                            |
| EPI_ISL_512086                                                                                                                                                                                                                                                                                                                                                                                                                                                                                                                                                                                                                                                                                                                                                                                                                                                                                                                                                                                                                                                                                                                                                                                 | UW Virology lab                                                                                        | UW Virology lab                                                                                                                                       | Pavitra Roychoudhury, Amin Addetia, Hong Xie, Lasata Shrestha, Truong Nguyen, Meei-Li Huang, Keith Jerome, Alexander Greninger                                                                                                                                                                                                                                |
| EPI_ISL_512712, EPI_ISL_512717, EPI_ISL_512718, EPI_ISL_512719, EPI_ISL_512723, EPI_ISL_512725, EPI_ISL_512729, EPI_ISL_512733, EPI_ISL_512734, EPI_ISL_512738, EPI_ISL_512739, EPI_ISL_512745, EPI_ISL_512747, EPI_ISL_512750, EPI_ISL_512754, EPI_ISL_512756, EPI_ISL_512757, EPI_ISL_512758                                                                                                                                                                                                                                                                                                                                                                                                                                                                                                                                                                                                                                                                                                                                                                                                                                                                                                 | see above                                                                                              | PathWest Laboratory Medicine WA                                                                                                                       | PathWest Laboratory Medicine WA Microbial Surveillance Unit                                                                                                                                                                                                                                                                                                   |
| EPI_ISL_512874, EPI_ISL_512875, EPI_ISL_512876, EPI_ISL_512877, EPI_ISL_512878, EPI_ISL_512879, EPI_ISL_512880, EPI_ISL_512881, EPI_ISL_512882, EPI_ISL_512883, EPI_ISL_512884, EPI_ISL_512885, EPI_ISL_512886, EPI_ISL_512887, EPI_ISL_512888, EPI_ISL_512889, EPI_ISL_512890, EPI_ISL_512891, EPI_ISL_512892, EPI_ISL_512893, EPI_ISL_512894, EPI_ISL_512895, EPI_ISL_512896, EPI_ISL_512897, EPI_ISL_512898, EPI_ISL_512899, EPI_ISL_512900, EPI_ISL_512901, EPI_ISL_512902, EPI_ISL_512903                                                                                                                                                                                                                                                                                                                                                                                                                                                                                                                                                                                                                                                                                                 | see above                                                                                              | Pathogen Genomics Lab King Abdullah University of Science and Technology(KAUST)                                                                       | Raece Naeem, Rahul P Salunke, Sharif Hala, Sara Mfarrej, Amit Kumar Subudhi, Fadwa Alofi, Fathia Ben Rached, Afrah Alsomali, Asim Khogeer, Ahmad Bakur Mahmoud, Anwar Hashem, Naif Almontashiri, Arnab Pain                                                                                                                                                   |
| EPI_ISL_513027, EPI_ISL_513028, EPI_ISL_513029, EPI_ISL_513030, EPI_ISL_513031, EPI_ISL_513032, EPI_ISL_513033, EPI_ISL_513034, EPI_ISL_513035, EPI_ISL_513036, EPI_ISL_513037, EPI_ISL_513038, EPI_ISL_513039, EPI_ISL_513040, EPI_ISL_513041, EPI_ISL_513042, EPI_ISL_513043, EPI_ISL_513044, EPI_ISL_513045, EPI_ISL_513046, EPI_ISL_513047, EPI_ISL_513048, EPI_ISL_513049, EPI_ISL_513050, EPI_ISL_513051, EPI_ISL_513052, EPI_ISL_513053, EPI_ISL_513054, EPI_ISL_513055, EPI_ISL_513056, EPI_ISL_513057, EPI_ISL_513058, EPI_ISL_513059, EPI_ISL_513060, EPI_ISL_513061, EPI_ISL_513062, EPI_ISL_513063                                                                                                                                                                                                                                                                                                                                                                                                                                                                                                                                                                                 | see above                                                                                              | Pathogen Genomics Lab King Abdullah University of Science and Technology(KAUST)                                                                       | Rahul P Salunke, Sharif Hala, Raece Naeem, Sara Mfarrej, Amit Kumar Subudhi, Amanda Ooi, Luke Esau, Fadwa Alofi, Fathia Ben Rached, Afrah Alsomali, Asim Khogeer, Ahmad Bakur Mahmoud, Anwar Hashem, Naif Almontashiri, Arnab Pain                                                                                                                            |
| EPI_ISL_513064, EPI_ISL_513065, EPI_ISL_513066, EPI_ISL_513067, EPI_ISL_513068, EPI_ISL_513069, EPI_ISL_513070, EPI_ISL_513071, EPI_ISL_513072, EPI_ISL_513073, EPI_ISL_513074, EPI_ISL_513075, EPI_ISL_513076                                                                                                                                                                                                                                                                                                                                                                                                                                                                                                                                                                                                                                                                                                                                                                                                                                                                                                                                                                                 | see above                                                                                              | Pathogen Genomics Lab King Abdullah University of Science and Technology(KAUST)                                                                       | Raece Naeem, Rahul P Salunke, Sharif Hala, Sara Mfarrej, Amit Kumar Subudhi, Fadwa Alofi, Fathia Ben Rached, Afrah Alsomali, Asim Khogeer, Ahmad Bakur Mahmoud, Anwar Hashem, Naif Almontashiri, Arnab Pain                                                                                                                                                   |
| EPI_ISL_513198, EPI_ISL_513199, EPI_ISL_513200, EPI_ISL_513201, EPI_ISL_513202, EPI_ISL_513203, EPI_ISL_513204, EPI_ISL_513205, EPI_ISL_513206, EPI_ISL_513207                                                                                                                                                                                                                                                                                                                                                                                                                                                                                                                                                                                                                                                                                                                                                                                                                                                                                                                                                                                                                                 | Pathogen Genomics Lab King Abdullah University of Science and Technology(KAUST)                        | Pathogen Genomics Lab King Abdullah University of Science and Technology(KAUST)                                                                       | Rahul P Salunke, Sharif Hala, Raece Naeem, Sara Mfarrej, Amit Kumar Subudhi, Amanda Ooi, Luke Esau, Fadwa Alofi, Fathia Ben Rached, Afrah Alsomali, Asim Khogeer, Ahmad Bakur Mahmoud, Anwar Hashem, Naif Almontashiri, Arnab Pain                                                                                                                            |
| EPI_ISL_513208, EPI_ISL_513209, EPI_ISL_513210, EPI_ISL_513211, EPI_ISL_513212, EPI_ISL_513213                                                                                                                                                                                                                                                                                                                                                                                                                                                                                                                                                                                                                                                                                                                                                                                                                                                                                                                                                                                                                                                                                                 | Pathogen Genomics Lab King Abdullah University of Science and Technology(KAUST)                        | Pathogen Genomics Lab King Abdullah University of Science and Technology(KAUST)                                                                       | Raece Naeem, Rahul P Salunke, Sharif Hala, Sara Mfarrej, Amit Kumar Subudhi, Fadwa Alofi, Fathia Ben Rached, Afrah Alsomali, Asim Khogeer, Ahmad Bakur Mahmoud, Anwar Hashem, Naif Almontashiri, Arnab Pain                                                                                                                                                   |
| EPI_ISL_513589, EPI_ISL_513590, EPI_ISL_513591, EPI_ISL_513592, EPI_ISL_513593, EPI_ISL_513594, EPI_ISL_513595, EPI_ISL_513596, EPI_ISL_513597, EPI_ISL_513598, EPI_ISL_513599, EPI_ISL_513600, EPI_ISL_513601, EPI_ISL_513602, EPI_ISL_513603, EPI_ISL_513604, EPI_ISL_513605, EPI_ISL_513606, EPI_ISL_513607, EPI_ISL_513608, EPI_ISL_513609, EPI_ISL_513610, EPI_ISL_513611, EPI_ISL_513612, EPI_ISL_513613, EPI_ISL_513614, EPI_ISL_513615, EPI_ISL_513616, EPI_ISL_513617, EPI_ISL_513618, EPI_ISL_513619, EPI_ISL_513620, EPI_ISL_513621, EPI_ISL_513622, EPI_ISL_513623, EPI_ISL_513624, EPI_ISL_513625, EPI_ISL_513626, EPI_ISL_513627, EPI_ISL_513628, EPI_ISL_513629, EPI_ISL_513630, EPI_ISL_513631                                                                                                                                                                                                                                                                                                                                                                                                                                                                                 | see above                                                                                              | Viral Respiratory Lab, National Institute for Biomedical Research (INRB)                                                                              | Placide Mbala-Kingebeni, Edith Nkwembe, Eddy Kinganda-Lusamaki, Amuri Aziza, Francisca Muyembe Mawete, Emmanuel Lokilo Lofiko, Catherine Pratt, Matthias Pauthner, Josh Quick, Allison Black, James Hadfield, Trevor Bedford, Ian Goodfellow, Andrew Rambaut, Nick Loman, Kristian Andersen, Michael Wiley, Steve Ahuka-Mundeke, Jean-Jacques Muyembe Tarnfum |
| EPI_ISL_513632, EPI_ISL_513633, EPI_ISL_513634, EPI_ISL_513635, EPI_ISL_513636, EPI_ISL_513637, EPI_ISL_513638                                                                                                                                                                                                                                                                                                                                                                                                                                                                                                                                                                                                                                                                                                                                                                                                                                                                                                                                                                                                                                                                                 | University of Washington Virology Lab                                                                  | University of Washington Virology Lab                                                                                                                 | Pavitra Roychoudhury, Hong Xie, Lasata Shrestha, Amin Addetia, Truong Nguyen, Victoria M Rachleff, Meei-Li Huang, Keith R Jerome, Alexander Greninger                                                                                                                                                                                                         |
| EPI_ISL_514103, EPI_ISL_514104, EPI_ISL_514105, EPI_ISL_514106, EPI_ISL_514107, EPI_ISL_514108, EPI_ISL_514109, EPI_ISL_514110, EPI_ISL_514111, EPI_ISL_514112, EPI_ISL_514113, EPI_ISL_514114, EPI_ISL_514115, EPI_ISL_514116, EPI_ISL_514117, EPI_ISL_514118, EPI_ISL_514119, EPI_ISL_514120                                                                                                                                                                                                                                                                                                                                                                                                                                                                                                                                                                                                                                                                                                                                                                                                                                                                                                 |                                                                                                        |                                                                                                                                                       |                                                                                                                                                                                                                                                                                                                                                               |



|                                                                                                                                                                                                                                                                                                                                                                                                                                                                                                                                                                                                                                                                                                                                                                                |                                                                                                   |                                                                                                   |                                                                                                                        |                                                                                                                                                                                                                                                                                                                                                               |
|--------------------------------------------------------------------------------------------------------------------------------------------------------------------------------------------------------------------------------------------------------------------------------------------------------------------------------------------------------------------------------------------------------------------------------------------------------------------------------------------------------------------------------------------------------------------------------------------------------------------------------------------------------------------------------------------------------------------------------------------------------------------------------|---------------------------------------------------------------------------------------------------|---------------------------------------------------------------------------------------------------|------------------------------------------------------------------------------------------------------------------------|---------------------------------------------------------------------------------------------------------------------------------------------------------------------------------------------------------------------------------------------------------------------------------------------------------------------------------------------------------------|
| EPI_ISL_514121, EPI_ISL_514122, EPI_ISL_514123, EPI_ISL_514124, EPI_ISL_514125                                                                                                                                                                                                                                                                                                                                                                                                                                                                                                                                                                                                                                                                                                 | see above                                                                                         | Viral Respiratory Lab, National Institute for Biomedical Research (INRB)                          | Pathogen Sequencing Lab, National Institute for Biomedical Research (INRB)                                             | Placide Mbala-Kingebeni, Edith Nkwembe, Eddy Kinganda-Lusamaki, Amuri Aziza, Francisca Muyembe Mawete, Emmanuel Lokilo Lofiko, Catherine Pratt, Matthias Pauthner, Josh Quick, Allison Black, James Hadfield, Trevor Bedford, Ian Goodfellow, Andrew Rambaut, Nick Loman, Kristian Andersen, Michael Wiley, Steve Ahuka-Mundeke, Jean-Jacques Muyembe Tarnfum |
| EPI_ISL_514354                                                                                                                                                                                                                                                                                                                                                                                                                                                                                                                                                                                                                                                                                                                                                                 | General Hospital - Prilep                                                                         |                                                                                                   | Research Center for Genetic Engineering and Biotechnology "Georgi D. Efremov", Macedonian Academy of Sciences and Arts | RCGEB - MASA                                                                                                                                                                                                                                                                                                                                                  |
| EPI_ISL_514582                                                                                                                                                                                                                                                                                                                                                                                                                                                                                                                                                                                                                                                                                                                                                                 | B.J. Medical College and Civil hospital, Ahmedabad                                                |                                                                                                   | Gujarat Biotechnology Research Centre                                                                                  | Raghawendra Kumar, Dinesh Kumar, Zuber Saiyed, Komal Patel, Labdhi Pandya, Afzal Ansari, Nikha Trivedi, Pranay Shah, Kamlesh J Upadhyay, Sanjay Kapadia, Apurvasinh Puvar, Janvi Raval, Zarna Patel, Monika Gandhi, Pinal Trivedi, Maharshi Pandya, Nidhi Patel, Nitin Savaliya, R D Dixit, A M Kadri, Harsh Bakshi, Chaitanya Joshi, Madhvi Joshi            |
| EPI_ISL_514589                                                                                                                                                                                                                                                                                                                                                                                                                                                                                                                                                                                                                                                                                                                                                                 | B.J. Medical College and Civil hospital, Ahmedabad                                                |                                                                                                   | Gujarat Biotechnology Research Centre                                                                                  | Pranay Shah, Kamlesh J Upadhyay, Sanjay Kapadia, Apurvasinh Puvar, Janvi Raval, Zarna Patel, Monika Gandhi, Pinal Trivedi, Maharshi Pandya, Nidhi Patel, Nitin Savaliya, Raghawendra Kumar, Dinesh Kumar, Zuber Saiyed, Komal Patel, Labdhi Pandya, Afzal Ansari, Nikha Trivedi, R D Dixit, A M Kadri, Harsh Bakshi, Chaitanya Joshi, Madhvi Joshi            |
| EPI_ISL_514596                                                                                                                                                                                                                                                                                                                                                                                                                                                                                                                                                                                                                                                                                                                                                                 | B.J. Medical College and Civil hospital, Ahmedabad                                                |                                                                                                   | Gujarat Biotechnology Research Centre                                                                                  | Pinal Trivedi, Maharshi Pandya, Nidhi Patel, Nitin Savaliya, Raghawendra Kumar, Dinesh Kumar, Zuber Saiyed, Komal Patel, Labdhi Pandya, Afzal Ansari, Nikha Trivedi, Pranay Shah, Kamlesh J Upadhyay, Sanjay Kapadia, Apurvasinh Puvar, Janvi Raval, Zarna Patel, Monika Gandhi, R D Dixit, A M Kadri, Harsh Bakshi, Chaitanya Joshi, Madhvi Joshi            |
| EPI_ISL_514600                                                                                                                                                                                                                                                                                                                                                                                                                                                                                                                                                                                                                                                                                                                                                                 | B.J. Medical College and Civil hospital, Ahmedabad                                                |                                                                                                   | Gujarat Biotechnology Research Centre                                                                                  | Raghawendra Kumar, Dinesh Kumar, Zuber Saiyed, Komal Patel, Labdhi Pandya, Afzal Ansari, Nikha Trivedi, Pranay Shah, Kamlesh J Upadhyay, Sanjay Kapadia, Apurvasinh Puvar, Janvi Raval, Zarna Patel, Monika Gandhi, Pinal Trivedi, Maharshi Pandya, Nidhi Patel, Nitin Savaliya, R D Dixit, A M Kadri, Harsh Bakshi, Chaitanya Joshi, Madhvi Joshi            |
| EPI_ISL_514607                                                                                                                                                                                                                                                                                                                                                                                                                                                                                                                                                                                                                                                                                                                                                                 | B.J. Medical College and Civil hospital, Ahmedabad                                                |                                                                                                   | Gujarat Biotechnology Research Centre                                                                                  | Pranay Shah, Kamlesh J Upadhyay, Sanjay Kapadia, Apurvasinh Puvar, Janvi Raval, Zarna Patel, Monika Gandhi, Pinal Trivedi, Maharshi Pandya, Nidhi Patel, Nitin Savaliya, Raghawendra Kumar, Dinesh Kumar, Zuber Saiyed, Komal Patel, Labdhi Pandya, Afzal Ansari, Nikha Trivedi, R D Dixit, A M Kadri, Harsh Bakshi, Chaitanya Joshi, Madhvi Joshi            |
| EPI_ISL_515270, EPI_ISL_515271, EPI_ISL_515272, EPI_ISL_515273, EPI_ISL_515274, EPI_ISL_515275, EPI_ISL_515276, EPI_ISL_515277, EPI_ISL_515278, EPI_ISL_515279, EPI_ISL_515280, EPI_ISL_515281, EPI_ISL_515282, EPI_ISL_515283, EPI_ISL_515284, EPI_ISL_515285, EPI_ISL_515286                                                                                                                                                                                                                                                                                                                                                                                                                                                                                                 | see above                                                                                         | University of Washington Virology Lab                                                             | University of Washington Virology Lab                                                                                  | Pavitra Roychoudhury, Hong Xie, Lasata Shrestha, Amin Addetia, Truong Nguyen, Victoria M Rachleff, Meei-Li Huang, Keith R Jerome, Alexander Greninger                                                                                                                                                                                                         |
| EPI_ISL_515287, EPI_ISL_515288, EPI_ISL_515289, EPI_ISL_515290, EPI_ISL_515291                                                                                                                                                                                                                                                                                                                                                                                                                                                                                                                                                                                                                                                                                                 | National Institute of Health, Department of medical Sciences, Ministry of Public Health, Thailand | National Institute of Health, Department of medical Sciences, Ministry of Public Health, Thailand | National Institute of Health, Department of medical Sciences, Ministry of Public Health, Thailand                      | Pilailuk, Okada; Siripaporn, Phuygun; Thanutsapa, Thanadachakul; Sittiporn, Parmmen; Warawan, Wongboot; Sunthareeya, Waicharoen; Malinee, Chittaganpitch                                                                                                                                                                                                      |
| EPI_ISL_515292                                                                                                                                                                                                                                                                                                                                                                                                                                                                                                                                                                                                                                                                                                                                                                 | Ramkhamhaeng Hospital                                                                             | National Institute of Health, Department of medical Sciences, Ministry of Public Health, Thailand | National Institute of Health, Department of medical Sciences, Ministry of Public Health, Thailand                      | Pilailuk, Okada; Siripaporn, Phuygun; Thanutsapa, Thanadachakul; Sittiporn, Parmmen; Warawan, Wongboot; Sunthareeya, Waicharoen; Malinee, Chittaganpitch                                                                                                                                                                                                      |
| EPI_ISL_515463                                                                                                                                                                                                                                                                                                                                                                                                                                                                                                                                                                                                                                                                                                                                                                 | National Institute of Health, Department of medical Sciences, Ministry of Public Health, Thailand | National Institute of Health, Department of medical Sciences, Ministry of Public Health, Thailand | National Institute of Health, Department of medical Sciences, Ministry of Public Health, Thailand                      | Pilailuk, Okada; Siripaporn, Phuygun; Thanutsapa, Thanadachakul; Sittiporn, Parmmen; Warawan, Wongboot; Sunthareeya, Waicharoen; Malinee, Chittaganpitch                                                                                                                                                                                                      |
| EPI_ISL_515464                                                                                                                                                                                                                                                                                                                                                                                                                                                                                                                                                                                                                                                                                                                                                                 | Siriraj Hospital                                                                                  | National Institute of Health, Department of medical Sciences, Ministry of Public Health, Thailand | National Institute of Health, Department of medical Sciences, Ministry of Public Health, Thailand                      | Pilailuk, Okada; Siripaporn, Phuygun; Thanutsapa, Thanadachakul; Sittiporn, Parmmen; Warawan, Wongboot; Sunthareeya, Waicharoen; Malinee, Chittaganpitch                                                                                                                                                                                                      |
| EPI_ISL_515465, EPI_ISL_515467, EPI_ISL_515468                                                                                                                                                                                                                                                                                                                                                                                                                                                                                                                                                                                                                                                                                                                                 | Ramathibodi Hospital                                                                              | National Institute of Health, Department of medical Sciences, Ministry of Public Health, Thailand | National Institute of Health, Department of medical Sciences, Ministry of Public Health, Thailand                      | Pilailuk, Okada; Siripaporn, Phuygun; Thanutsapa, Thanadachakul; Sittiporn, Parmmen; Warawan, Wongboot; Sunthareeya, Waicharoen; Malinee, Chittaganpitch                                                                                                                                                                                                      |
| EPI_ISL_515469                                                                                                                                                                                                                                                                                                                                                                                                                                                                                                                                                                                                                                                                                                                                                                 | Bamrasnaradura hospital                                                                           | National Institute of Health, Department of medical Sciences, Ministry of Public Health, Thailand | National Institute of Health, Department of medical Sciences, Ministry of Public Health, Thailand                      | Pilailuk, Okada; Siripaporn, Phuygun; Thanutsapa, Thanadachakul; Sittiporn, Parmmen; Warawan, Wongboot; Sunthareeya, Waicharoen; Malinee, Chittaganpitch                                                                                                                                                                                                      |
| EPI_ISL_515470                                                                                                                                                                                                                                                                                                                                                                                                                                                                                                                                                                                                                                                                                                                                                                 | National Institute of Health, Department of medical Sciences, Ministry of Public Health, Thailand | National Institute of Health, Department of medical Sciences, Ministry of Public Health, Thailand | National Institute of Health, Department of medical Sciences, Ministry of Public Health, Thailand                      | Pilailuk, Okada; Siripaporn, Phuygun; Thanutsapa, Thanadachakul; Sittiporn, Parmmen; Warawan, Wongboot; Sunthareeya, Waicharoen; Malinee, Chittaganpitch                                                                                                                                                                                                      |
| EPI_ISL_515471, EPI_ISL_515472, EPI_ISL_515473, EPI_ISL_515474, EPI_ISL_515475, EPI_ISL_515476, EPI_ISL_515477                                                                                                                                                                                                                                                                                                                                                                                                                                                                                                                                                                                                                                                                 | National Institute of Health, Department of Medical Sciences, Ministry of Public Health, Thailand | National Institute of Health, Department of Medical Sciences, Ministry of Public Health, Thailand | National Institute of Health, Department of Medical Sciences, Ministry of Public Health, Thailand                      | Pilailuk Okada; Siripaporn Phuygun; Thanutsapa Thanadachakul; Sittiporn Parmmen; Warawan Wongboot; Sunthareeya Waicharoen; Malinee Chittaganpitch                                                                                                                                                                                                             |
| EPI_ISL_516413                                                                                                                                                                                                                                                                                                                                                                                                                                                                                                                                                                                                                                                                                                                                                                 | General Hospital - Kumanovo                                                                       |                                                                                                   | Research Center for Genetic Engineering and Biotechnology "Georgi D. Efremov", Macedonian Academy of Sciences and Arts | RCGEB - MASA                                                                                                                                                                                                                                                                                                                                                  |
| EPI_ISL_516414, EPI_ISL_516415, EPI_ISL_516416, EPI_ISL_516417, EPI_ISL_516418, EPI_ISL_516419, EPI_ISL_516420, EPI_ISL_516421, EPI_ISL_516422, EPI_ISL_516423, EPI_ISL_516424, EPI_ISL_516425                                                                                                                                                                                                                                                                                                                                                                                                                                                                                                                                                                                 | see above                                                                                         | Center for public health - Skopje                                                                 | Research Center for Genetic Engineering and Biotechnology "Georgi D. Efremov", Macedonian Academy of Sciences and Arts | RCGEB - MASA                                                                                                                                                                                                                                                                                                                                                  |
| EPI_ISL_516426, EPI_ISL_516427, EPI_ISL_516428, EPI_ISL_516429, EPI_ISL_516430, EPI_ISL_516431                                                                                                                                                                                                                                                                                                                                                                                                                                                                                                                                                                                                                                                                                 | Clinical Hospital - Shtip                                                                         |                                                                                                   | Research Center for Genetic Engineering and Biotechnology "Georgi D. Efremov", Macedonian Academy of Sciences and Arts | RCGEB - MASA                                                                                                                                                                                                                                                                                                                                                  |
| EPI_ISL_516650                                                                                                                                                                                                                                                                                                                                                                                                                                                                                                                                                                                                                                                                                                                                                                 | Institute of Microbiology, Universidad San Francisco de Quito                                     | Institute of Microbiology, Universidad San Francisco de Quito                                     | Institute of Microbiology, Universidad San Francisco de Quito                                                          | Prado-Vivar, Sully Márquez, Juan José Guadalupe, Monica Becerra-Wong, Bernardo Gutiérrez, Verónica Barragán, Patricio Rojas-Silva, Gabriel Trueba, Michelle Grunauer, Paúl Cárdenas                                                                                                                                                                           |
| EPI_ISL_516651                                                                                                                                                                                                                                                                                                                                                                                                                                                                                                                                                                                                                                                                                                                                                                 | Institute of Microbiology, Universidad San Francisco de Quito                                     | Institute of Microbiology, Universidad San Francisco de Quito                                     | Institute of Microbiology, Universidad San Francisco de Quito                                                          | Prado-Vivar, Sully Márquez, Juan José Guadalupe, Monica Becerra-Wong, Bernardo Gutiérrez, Nabih Dahik, Carlos Mena, Eulalia Pazmiño, Carolina Pacheco, Damaris Sandoya, Verónica Barragán, Patricio Rojas-Silva, Gabriel Trueba, Michelle Grunauer, Paúl Cárdenas                                                                                             |
| EPI_ISL_516652                                                                                                                                                                                                                                                                                                                                                                                                                                                                                                                                                                                                                                                                                                                                                                 | Institute of Microbiology, Universidad San Francisco de Quito                                     | Institute of Microbiology, Universidad San Francisco de Quito                                     | Institute of Microbiology, Universidad San Francisco de Quito                                                          | Prado-Vivar, Sully Márquez, Juan José Guadalupe, Monica Becerra-Wong, Bernardo Gutiérrez, Nabih Dahik, Carlos Mena, Edy Quizhpe, Yomara Napa, Verónica Barragán, Patricio Rojas-Silva, Gabriel Trueba, Michelle Grunauer, Paúl Cárdenas                                                                                                                       |
| EPI_ISL_516940, EPI_ISL_516941, EPI_ISL_516942, EPI_ISL_516943, EPI_ISL_516944, EPI_ISL_516945, EPI_ISL_516946, EPI_ISL_516947, EPI_ISL_516948, EPI_ISL_516949, EPI_ISL_516950, EPI_ISL_516951, EPI_ISL_516952, EPI_ISL_516953, EPI_ISL_516954, EPI_ISL_516955, EPI_ISL_516956, EPI_ISL_516957, EPI_ISL_516958, EPI_ISL_516959, EPI_ISL_516960, EPI_ISL_516961, EPI_ISL_516962, EPI_ISL_516963, EPI_ISL_516964, EPI_ISL_516965, EPI_ISL_516966, EPI_ISL_516967, EPI_ISL_516968, EPI_ISL_516969, EPI_ISL_516970, EPI_ISL_516971, EPI_ISL_516972, EPI_ISL_516973, EPI_ISL_516974, EPI_ISL_516975, EPI_ISL_516976, EPI_ISL_516977, EPI_ISL_516978, EPI_ISL_516979, EPI_ISL_516980, EPI_ISL_516981, EPI_ISL_516982, EPI_ISL_516983, EPI_ISL_516984, EPI_ISL_516985, EPI_ISL_516986 | see above                                                                                         | King Georges Medical University                                                                   | CSIR-National Botanical Research Institute                                                                             | Priti Prasad, Shantanu Prakash, Kishan Sahu, Babita Singh, Suruchi Shukla, Hricha Mishra, Danish Nasar Khan, Om Prakash, MLB Bhatt, SK Barik, Mehar H.Asif, Samir V. Sawant, Amita Jain, Sumit Kr. Bag                                                                                                                                                        |
| EPI_ISL_524717                                                                                                                                                                                                                                                                                                                                                                                                                                                                                                                                                                                                                                                                                                                                                                 | B.J. Medical College and Civil hospital, Ahmedabad                                                |                                                                                                   | Gujarat Biotechnology Research Centre                                                                                  | Pinal Trivedi, Maharshi Pandya, Nidhi Patel, Nitin Savaliya, Raghawendra Kumar, Dinesh Kumar, Zuber Saiyed, Komal Patel, Labdhi Pandya, Afzal Ansari, Nikha Trivedi, Pranay Shah, Kamlesh J Upadhyay, Sanjay Kapadia, Apurvasinh Puvar, Janvi Raval, Zarna Patel, Monika Gandhi, R D Dixit, A M Kadri, Harsh Bakshi, Chaitanya Joshi, Madhvi Joshi            |
| EPI_ISL_524721                                                                                                                                                                                                                                                                                                                                                                                                                                                                                                                                                                                                                                                                                                                                                                 | B.J. Medical College and Civil hospital, Ahmedabad                                                |                                                                                                   | Gujarat Biotechnology Research Centre                                                                                  | Raghawendra Kumar, Dinesh Kumar, Zuber Saiyed, Komal Patel, Labdhi Pandya, Afzal Ansari, Nikha Trivedi, Pranay Shah, Kamlesh J Upadhyay, Sanjay Kapadia, Apurvasinh Puvar, Janvi Raval, Zarna Patel, Monika Gandhi, Pinal Trivedi, Maharshi Pandya, Nidhi Patel, Nitin Savaliya, R D Dixit, A M Kadri, Harsh Bakshi, Chaitanya Joshi, Madhvi Joshi            |
| EPI_ISL_524728                                                                                                                                                                                                                                                                                                                                                                                                                                                                                                                                                                                                                                                                                                                                                                 | B.J. Medical College and Civil hospital, Ahmedabad                                                |                                                                                                   | Gujarat Biotechnology Research Centre                                                                                  | Pranay Shah, Kamlesh J Upadhyay, Sanjay Kapadia, Apurvasinh Puvar, Janvi Raval, Zarna Patel, Monika Gandhi, Pinal Trivedi, Maharshi Pandya, Nidhi Patel, Nitin Savaliya, Raghawendra Kumar, Dinesh Kumar, Zuber Saiyed, Komal Patel, Labdhi Pandya, Afzal Ansari, Nikha Trivedi, R D Dixit, A M Kadri, Harsh Bakshi, Chaitanya Joshi, Madhvi Joshi            |

|                                                                                                                                                                                                                                                                                                                                                                                                                                                                                                                                                                                                                                                                                                                                                                                                                                                                                                                                                                                                                                                                                                                                                                                                                                                                                                                                                                                                |                                                                                 |                                                                                               |                                                                                                                                                                                                                                                                                                                                                                                                                                                                                                                                                                |                                                                                                                                                                                                                                                                                                                                                              |
|------------------------------------------------------------------------------------------------------------------------------------------------------------------------------------------------------------------------------------------------------------------------------------------------------------------------------------------------------------------------------------------------------------------------------------------------------------------------------------------------------------------------------------------------------------------------------------------------------------------------------------------------------------------------------------------------------------------------------------------------------------------------------------------------------------------------------------------------------------------------------------------------------------------------------------------------------------------------------------------------------------------------------------------------------------------------------------------------------------------------------------------------------------------------------------------------------------------------------------------------------------------------------------------------------------------------------------------------------------------------------------------------|---------------------------------------------------------------------------------|-----------------------------------------------------------------------------------------------|----------------------------------------------------------------------------------------------------------------------------------------------------------------------------------------------------------------------------------------------------------------------------------------------------------------------------------------------------------------------------------------------------------------------------------------------------------------------------------------------------------------------------------------------------------------|--------------------------------------------------------------------------------------------------------------------------------------------------------------------------------------------------------------------------------------------------------------------------------------------------------------------------------------------------------------|
| EPI_ISL_524739                                                                                                                                                                                                                                                                                                                                                                                                                                                                                                                                                                                                                                                                                                                                                                                                                                                                                                                                                                                                                                                                                                                                                                                                                                                                                                                                                                                 | GMERS Medical College and Hospital, Gandhinagar                                 | Gujarat Biotechnology Research Centre                                                         | Pinal Trivedi, Maharshi Pandya, Nidhi Patel, Nitin Savaliya, Raghawendra Kumar, Dinesh Kumar, Zuber Saiyed, Komal Patel, Labdhi Pandya, Afzal Ansari, Nikha Trivedi, Seema Bhatt, Gaurishankar Shrimali, Bhavesh Modi, Bharti Rajani, Apurvasinh Puvar, Janvi Raval, Zarna Patel, Monika Gandhi, R D Dixit, A M Kadri, Harsh Bakshi, Chaitanya Joshi, Madhvi Joshi                                                                                                                                                                                             |                                                                                                                                                                                                                                                                                                                                                              |
| EPI_ISL_524753                                                                                                                                                                                                                                                                                                                                                                                                                                                                                                                                                                                                                                                                                                                                                                                                                                                                                                                                                                                                                                                                                                                                                                                                                                                                                                                                                                                 | GMERS Medical College and Hospital, Dharpur, Patan                              | Gujarat Biotechnology Research Centre                                                         | Pinal Trivedi, Maharshi Pandya, Nidhi Patel, Nitin Savaliya, Raghawendra Kumar, Dinesh Kumar, Zuber Saiyed, Komal Patel, Labdhi Pandya, Afzal Ansari, Nikha Trivedi, A N Parmar, Apurvasinh Puvar, Janvi Raval, Zarna Patel, Monika Gandhi, R D Dixit, A M Kadri, Harsh Bakshi, Chaitanya Joshi, Madhvi Joshi                                                                                                                                                                                                                                                  |                                                                                                                                                                                                                                                                                                                                                              |
| EPI_ISL_524757                                                                                                                                                                                                                                                                                                                                                                                                                                                                                                                                                                                                                                                                                                                                                                                                                                                                                                                                                                                                                                                                                                                                                                                                                                                                                                                                                                                 | GMERS Medical College and Hospital, Dharpur, Patan                              | Gujarat Biotechnology Research Centre                                                         | Raghawendra Kumar, Dinesh Kumar, Zuber Saiyed, Komal Patel, Labdhi Pandya, Afzal Ansari, Nikha Trivedi, A N Parmar, Apurvasinh Puvar, Janvi Raval, Zarna Patel, Monika Gandhi, Pinal Trivedi, Maharshi Pandya, Nidhi Patel, Nitin Savaliya, R D Dixit, A M Kadri, Harsh Bakshi, Chaitanya Joshi, Madhvi Joshi                                                                                                                                                                                                                                                  |                                                                                                                                                                                                                                                                                                                                                              |
| EPI_ISL_525420                                                                                                                                                                                                                                                                                                                                                                                                                                                                                                                                                                                                                                                                                                                                                                                                                                                                                                                                                                                                                                                                                                                                                                                                                                                                                                                                                                                 | GMERS Medical College and Hospital, Gandhinagar                                 | Gujarat Biotechnology Research Centre                                                         | Raghawendra Kumar, Dinesh Kumar, Zuber Saiyed, Komal Patel, Labdhi Pandya, Afzal Ansari, Nikha Trivedi, Seema Bhatt, Gaurishankar Shrimali, Bhavesh Modi, Bharti Rajani, Apurvasinh Puvar, Janvi Raval, Zarna Patel, Monika Gandhi, Pinal Trivedi, Maharshi Pandya, Nidhi Patel, Nitin Savaliya, R D Dixit, A M Kadri, Harsh Bakshi, Chaitanya Joshi, Madhvi Joshi                                                                                                                                                                                             |                                                                                                                                                                                                                                                                                                                                                              |
| EPI_ISL_527489, EPI_ISL_527490, EPI_ISL_527491, EPI_ISL_527492, EPI_ISL_527493, EPI_ISL_527494, EPI_ISL_527495, EPI_ISL_527496, EPI_ISL_527497, EPI_ISL_527498, EPI_ISL_527499, EPI_ISL_527500, EPI_ISL_527501, EPI_ISL_527502, EPI_ISL_527503, EPI_ISL_527504, EPI_ISL_527505, EPI_ISL_527506, EPI_ISL_527507, EPI_ISL_527508, EPI_ISL_527509, EPI_ISL_527510, EPI_ISL_527511, EPI_ISL_527512, EPI_ISL_527513, EPI_ISL_527514, EPI_ISL_527515, EPI_ISL_527516, EPI_ISL_527517, EPI_ISL_527518, EPI_ISL_527519, EPI_ISL_527520, EPI_ISL_527521, EPI_ISL_527522, EPI_ISL_527523, EPI_ISL_527524, EPI_ISL_527525, EPI_ISL_527526, EPI_ISL_527527, EPI_ISL_527528, EPI_ISL_527529, EPI_ISL_527530, EPI_ISL_527531, EPI_ISL_527532, EPI_ISL_527533, EPI_ISL_527534, EPI_ISL_527535, EPI_ISL_527536, EPI_ISL_527537, EPI_ISL_527538, EPI_ISL_527539, EPI_ISL_527540, EPI_ISL_527541, EPI_ISL_527542, EPI_ISL_527543, EPI_ISL_527544, EPI_ISL_527545, EPI_ISL_527546, EPI_ISL_527547, EPI_ISL_527548, EPI_ISL_527549, EPI_ISL_527550, EPI_ISL_527551, EPI_ISL_527552, EPI_ISL_527553, EPI_ISL_527554, EPI_ISL_527555, EPI_ISL_527556, EPI_ISL_527557, EPI_ISL_527558, EPI_ISL_527559, EPI_ISL_527560, EPI_ISL_527561, EPI_ISL_527562, EPI_ISL_527563, EPI_ISL_527564, EPI_ISL_527565, EPI_ISL_527566, EPI_ISL_527567, EPI_ISL_527568, EPI_ISL_527569, EPI_ISL_527570, EPI_ISL_527571, EPI_ISL_527572 | see above                                                                       | Viral Respiratory Lab, National Institute for Biomedical Research (INRB)                      | Pathogen Sequencing Lab, National Institute for Biomedical Research (INRB)                                                                                                                                                                                                                                                                                                                                                                                                                                                                                     | Placide Mbala-Kingebeni, Edith Nkwembe, Eddy Kinganda-Lusamaki, Amuri Aziza, Francisca Muyembe Mawete, Emmanuel Lokilo Lofiko, Catherine Pratt, Matthias Pauthner, Josh Quick, Allison Black, James Hadfield, Trevor Bedford, Ian Goodfellow, Andrew Rambaut, Nick Loman, Kristian Andersen, Michael Wiley, Steve Ahuka-Mundeke, Jean-Jacques Muyembe Tamfum |
| EPI_ISL_528419, EPI_ISL_528420, EPI_ISL_528421, EPI_ISL_528422, EPI_ISL_528423, EPI_ISL_528424                                                                                                                                                                                                                                                                                                                                                                                                                                                                                                                                                                                                                                                                                                                                                                                                                                                                                                                                                                                                                                                                                                                                                                                                                                                                                                 | TNMC & BYL NAIR CH. HOSPITAL                                                    | Institute of Genomics and Integrative Biology - Council of Scientific and Industrial Research | Rajesh Pandey, Jayanthi Shastri, Akshay Kanakan, Vivekanand A, Janani Srinivasa Vasudevan, Ranjeet Baurya, Sachee Agrawal, Nirjhar Chatterjee, Swapneil Parikh, Manish Pathak, Subrat Thanapati, Jasmina Savak, Suresh Poojari, Mahesh Sangar, Amol Borse, Shweta Kawankar, Vasil Nachan, Mayuresh Vishwanathan, Shruthi Sachidanandan, Shrutika Pophale, Utkarsha Yelwe                                                                                                                                                                                       |                                                                                                                                                                                                                                                                                                                                                              |
| EPI_ISL_528425, EPI_ISL_528426                                                                                                                                                                                                                                                                                                                                                                                                                                                                                                                                                                                                                                                                                                                                                                                                                                                                                                                                                                                                                                                                                                                                                                                                                                                                                                                                                                 | P. D. Hinduja Hospital and Medical Research Centre                              | Institute of Genomics and Integrative Biology - Council of Scientific and Industrial Research | Rajesh Pandey, Jayanthi Shastri, Akshay Kanakan, Vivekanand A, Janani Srinivasa Vasudevan, Ranjeet Baurya, Sachee Agrawal, Nirjhar Chatterjee, Swapneil Parikh, Manish Pathak, Subrat Thanapati, Jasmina Savak, Suresh Poojari, Mahesh Sangar, Amol Borse, Shweta Kawankar, Vasil Nachan, Mayuresh Vishwanathan, Shruthi Sachidanandan, Shrutika Pophale, Utkarsha Yelwe                                                                                                                                                                                       |                                                                                                                                                                                                                                                                                                                                                              |
| EPI_ISL_528809, EPI_ISL_528814, EPI_ISL_528816, EPI_ISL_528819, EPI_ISL_528820                                                                                                                                                                                                                                                                                                                                                                                                                                                                                                                                                                                                                                                                                                                                                                                                                                                                                                                                                                                                                                                                                                                                                                                                                                                                                                                 | Department of Medicine, Gandhi hospital, Hyderabad                              | CSIR-Centre for Cellular and Molecular Biology                                                | Rajaro Mesipogu , Thrilok Chander Bingi ,Vinayasekhar Aedula,Tulasi Nagabandi, Namami Gaur, Sakshi Shambhavi, Lamuk Zaveri, Shagufta Khan, Nikhil Hajirnis, M Soujanya Reddy, Pratheusa Maccha, Purushotham Vodnala, Payel Mukherjee, Sofia Banu, Priya Singh, Onkar Kulkarni, Dhiviya Vedagiri, Divya Gupta, Vishal Sah, Santosh Kumar Kuncha, Krishnan Harinivas Harshan, Archana Bharadwaj Tallapaka, G. Aditya Kumar, Koushick Sivakumar, Disha Nanda, Divya Das, Jotin Gogoi, Manish Bhattacharjee, Ravi Prasad Mukku, Rakesh K Mishra, Divya Tej Sowpati |                                                                                                                                                                                                                                                                                                                                                              |
| EPI_ISL_528834                                                                                                                                                                                                                                                                                                                                                                                                                                                                                                                                                                                                                                                                                                                                                                                                                                                                                                                                                                                                                                                                                                                                                                                                                                                                                                                                                                                 | CSIR-Centre for Cellular and Molecular Biology                                  | CSIR-Centre for Cellular and Molecular Biology                                                | Pratheusa Maccha, Sakshi Shambhavi, Lamuk Zaveri, Shagufta Khan, Namami Gaur, Nikhil Hajirnis, M Soujanya Reddy, Tulasi Nagabandi, Purushotham Vodnala, Payel Mukherjee, Sofia Banu, Priya Singh, Onkar Kulkarni, Dhiviya Vedagiri, Divya Gupta, Vishal Sah, Santosh Kumar Kuncha, Krishnan Harinivas Harshan, Archana Bharadwaj Siva, Karthik Bharadwaj Tallapaka, G. Aditya Kumar, Koushick Sivakumar, Disha Nanda, Divya Das, Jotin Gogoi, Manish Bhattacharjee, Ravi Prasad Mukku, Rakesh K Mishra, Divya Tej Sowpati                                      |                                                                                                                                                                                                                                                                                                                                                              |
| EPI_ISL_528838                                                                                                                                                                                                                                                                                                                                                                                                                                                                                                                                                                                                                                                                                                                                                                                                                                                                                                                                                                                                                                                                                                                                                                                                                                                                                                                                                                                 | CSIR-Centre for Cellular and Molecular Biology                                  | CSIR-Centre for Cellular and Molecular Biology                                                | Payel Mukherjee, Sofia Banu, Priya Singh, Onkar Kulkarni, Dhiviya Vedagiri, Divya Gupta, Vishal Sah, Santosh Kumar Kuncha, Krishnan Harinivas Harshan, Archana Bharadwaj Siva, Karthik Bharadwaj Tallapaka, Shagufta Khan, Lamuk Zaveri, Nikhil Hajirnis, M Soujanya Reddy, Pratheusa Maccha, Namami Gaur, Sakshi Shambhavi, Tulasi Nagabandi, Purushotham Vodnala, Rakesh K Mishra, Sonu Uday, Sudipta Mondal, Annapoorna P Karthyayani, Debabrata Jana, Debrya Saha, Divya Tej Sowpati                                                                       |                                                                                                                                                                                                                                                                                                                                                              |
| EPI_ISL_528839                                                                                                                                                                                                                                                                                                                                                                                                                                                                                                                                                                                                                                                                                                                                                                                                                                                                                                                                                                                                                                                                                                                                                                                                                                                                                                                                                                                 | CSIR-Centre for Cellular and Molecular Biology                                  | CSIR-Centre for Cellular and Molecular Biology                                                | Pratheusa Maccha, Sakshi Shambhavi, Lamuk Zaveri, Shagufta Khan, Namami Gaur, Nikhil Hajirnis, M Soujanya Reddy, Tulasi Nagabandi, Purushotham Vodnala, Payel Mukherjee, Sofia Banu, Priya Singh, Onkar Kulkarni, Dhiviya Vedagiri, Divya Gupta, Vishal Sah, Santosh Kumar Kuncha, Krishnan Harinivas Harshan, Archana Bharadwaj Siva, Karthik Bharadwaj Tallapaka, G. Aditya Kumar, Koushick Sivakumar, Disha Nanda, Divya Das, Jotin Gogoi, Manish Bhattacharjee, Ravi Prasad Mukku, Rakesh K Mishra, Divya Tej Sowpati                                      |                                                                                                                                                                                                                                                                                                                                                              |
| EPI_ISL_528841, EPI_ISL_528842, EPI_ISL_528845, EPI_ISL_528851, EPI_ISL_528854                                                                                                                                                                                                                                                                                                                                                                                                                                                                                                                                                                                                                                                                                                                                                                                                                                                                                                                                                                                                                                                                                                                                                                                                                                                                                                                 | CSIR-Centre for Cellular and Molecular Biology                                  | CSIR-Centre for Cellular and Molecular Biology                                                | Payel Mukherjee, Sofia Banu, Priya Singh, Onkar Kulkarni, Dhiviya Vedagiri, Divya Gupta, Vishal Sah, Santosh Kumar Kuncha, Krishnan Harinivas Harshan, Archana Bharadwaj Siva, Karthik Bharadwaj Tallapaka, Shagufta Khan, Lamuk Zaveri, Nikhil Hajirnis, M Soujanya Reddy, Pratheusa Maccha, Namami Gaur, Sakshi Shambhavi, Tulasi Nagabandi, Purushotham Vodnala, Rakesh K Mishra, Sonu Uday, Sudipta Mondal, Annapoorna P Karthyayani, Debabrata Jana, Debrya Saha, Divya Tej Sowpati                                                                       |                                                                                                                                                                                                                                                                                                                                                              |
| EPI_ISL_528856, EPI_ISL_528858, EPI_ISL_528859                                                                                                                                                                                                                                                                                                                                                                                                                                                                                                                                                                                                                                                                                                                                                                                                                                                                                                                                                                                                                                                                                                                                                                                                                                                                                                                                                 | CSIR-Centre for Cellular and Molecular Biology                                  | CSIR-Centre for Cellular and Molecular Biology                                                | Pratheusa Maccha, Sakshi Shambhavi, Lamuk Zaveri, Shagufta Khan, Namami Gaur, Nikhil Hajirnis, M Soujanya Reddy, Tulasi Nagabandi, Purushotham Vodnala, Payel Mukherjee, Sofia Banu, Priya Singh, Onkar Kulkarni, Dhiviya Vedagiri, Divya Gupta, Vishal Sah, Santosh Kumar Kuncha, Krishnan Harinivas Harshan, Archana Bharadwaj Siva, Karthik Bharadwaj Tallapaka, G. Aditya Kumar, Koushick Sivakumar, Disha Nanda, Divya Das, Jotin Gogoi, Manish Bhattacharjee, Ravi Prasad Mukku, Rakesh K Mishra, Divya Tej Sowpati                                      |                                                                                                                                                                                                                                                                                                                                                              |
| EPI_ISL_528863                                                                                                                                                                                                                                                                                                                                                                                                                                                                                                                                                                                                                                                                                                                                                                                                                                                                                                                                                                                                                                                                                                                                                                                                                                                                                                                                                                                 | CSIR-Centre for Cellular and Molecular Biology                                  | CSIR-Centre for Cellular and Molecular Biology                                                | Payel Mukherjee, Sofia Banu, Priya Singh, Onkar Kulkarni, Dhiviya Vedagiri, Divya Gupta, Vishal Sah, Santosh Kumar Kuncha, Krishnan Harinivas Harshan, Archana Bharadwaj Siva, Karthik Bharadwaj Tallapaka, Shagufta Khan, Lamuk Zaveri, Nikhil Hajirnis, M Soujanya Reddy, Pratheusa Maccha, Namami Gaur, Sakshi Shambhavi, Tulasi Nagabandi, Purushotham Vodnala, Rakesh K Mishra, Sonu Uday, Sudipta Mondal, Annapoorna P Karthyayani, Debabrata Jana, Debrya Saha, Divya Tej Sowpati                                                                       |                                                                                                                                                                                                                                                                                                                                                              |
| EPI_ISL_529151, EPI_ISL_529152, EPI_ISL_529153                                                                                                                                                                                                                                                                                                                                                                                                                                                                                                                                                                                                                                                                                                                                                                                                                                                                                                                                                                                                                                                                                                                                                                                                                                                                                                                                                 | Department of Immunology, The Scripps Research Institute                        | Andersen lab at Scripps Research                                                              | Quigley, M., Stefanski, E., Mchardy, I. with SEARCH Alliance San Diego                                                                                                                                                                                                                                                                                                                                                                                                                                                                                         |                                                                                                                                                                                                                                                                                                                                                              |
| EPI_ISL_537608                                                                                                                                                                                                                                                                                                                                                                                                                                                                                                                                                                                                                                                                                                                                                                                                                                                                                                                                                                                                                                                                                                                                                                                                                                                                                                                                                                                 | Servicio de Microbiología. Consorcio Hospital General Universitario de Valencia | SeqCOVID-SPAIN consortium/IBV(CSIC)                                                           | Paula Ruiz-Hueso, Mariana Reyes-Prieto, Vicente Soriano Chirona, Ivan Ansari, David Navarro, Maria Alma Bracho, Griselda De Marco, Beatriz Beamud, Lidia Ruiz Roldan, Marta Pla Diaz, Neris Garcia-Gonzalez, Inma Galán Vendrell, Sandra Carbo, Loreto Ferrús Abad, Lúcia Martínez-Priego, Giuseppe D'Auria, Fernando Gonzalez-Candelas and SeqCOVID-SPAIN consortium                                                                                                                                                                                          |                                                                                                                                                                                                                                                                                                                                                              |
| EPI_ISL_538321, EPI_ISL_538322, EPI_ISL_538323, EPI_ISL_538324, EPI_ISL_538325, EPI_ISL_538326, EPI_ISL_538327, EPI_ISL_538328, EPI_ISL_538329, EPI_ISL_538330, EPI_ISL_538331, EPI_ISL_538332, EPI_ISL_538333, EPI_ISL_538334, EPI_ISL_538335, EPI_ISL_538336, EPI_ISL_538337, EPI_ISL_538338, EPI_ISL_538339, EPI_ISL_538340, EPI_ISL_538341, EPI_ISL_538342, EPI_ISL_538343, EPI_ISL_538344, EPI_ISL_538345, EPI_ISL_538346, EPI_ISL_538347, EPI_ISL_538348, EPI_ISL_538349, EPI_ISL_538350, EPI_ISL_538351, EPI_ISL_538352, EPI_ISL_538353, EPI_ISL_538354, EPI_ISL_538355, EPI_ISL_538356, EPI_ISL_538357, EPI_ISL_538358, EPI_ISL_538359, EPI_ISL_538360, EPI_ISL_538361, EPI_ISL_538362, EPI_ISL_538363, EPI_ISL_538364, EPI_ISL_538365, EPI_ISL_538366, EPI_ISL_538367, EPI_ISL_538368, EPI_ISL_538369, EPI_ISL_538370, EPI_ISL_538371, EPI_ISL_538372, EPI_ISL_538373, EPI_ISL_538374, EPI_ISL_538375, EPI_ISL_538376, EPI_ISL_538377, EPI_ISL_538378, EPI_ISL_538379, EPI_ISL_538380, EPI_ISL_538381, EPI_ISL_538382, EPI_ISL_538383, EPI_ISL_538384, EPI_ISL_538385, EPI_ISL_538386                                                                                                                                                                                                                                                                                                 | see above                                                                       | Kingston Health Sciences Centre / Queen's University                                          | Ontario Institute for Cancer Research                                                                                                                                                                                                                                                                                                                                                                                                                                                                                                                          | Prameet M. Sheth, Calvin Sjaarda, Robert Colautti, Katya Douchant, Ilinca Lungu, Bernard Lam, Paul Krzyzanowski, Michael Laszloffy, Lawrence E Heisler, Richard de Borja, Jared T. Simpson                                                                                                                                                                   |
| EPI_ISL_538498                                                                                                                                                                                                                                                                                                                                                                                                                                                                                                                                                                                                                                                                                                                                                                                                                                                                                                                                                                                                                                                                                                                                                                                                                                                                                                                                                                                 | RSUD Soediono Madiun East Java                                                  | National Institute of Health Research and Development                                         | Pawestri, HA; Subangkit; Puspa, KD; Nugraha, AA; Ikawati, HD; Pangesti, KNA; Soekarso, T; Paisal; Setiawaty, V.                                                                                                                                                                                                                                                                                                                                                                                                                                                |                                                                                                                                                                                                                                                                                                                                                              |
| EPI_ISL_538499                                                                                                                                                                                                                                                                                                                                                                                                                                                                                                                                                                                                                                                                                                                                                                                                                                                                                                                                                                                                                                                                                                                                                                                                                                                                                                                                                                                 | RS Lavallete Malang East Java                                                   | National Institute of Health Research and Development                                         | Pawestri, HA; Subangkit; Puspa, KD; Nugraha, AA; Ikawati, HD; Pangesti, KNA; Soekarso, T; Paisal; Setiawaty, V.                                                                                                                                                                                                                                                                                                                                                                                                                                                |                                                                                                                                                                                                                                                                                                                                                              |
| EPI_ISL_538500, EPI_ISL_538501                                                                                                                                                                                                                                                                                                                                                                                                                                                                                                                                                                                                                                                                                                                                                                                                                                                                                                                                                                                                                                                                                                                                                                                                                                                                                                                                                                 | RS Prima Husada Cipta Medan North Sumatra                                       | National Institute of Health Research and Development                                         | Pawestri, HA; Subangkit; Puspa, KD; Nugraha, AA; Ikawati, HD; Pangesti, KNA; Soekarso, T; Paisal; Setiawaty, V.                                                                                                                                                                                                                                                                                                                                                                                                                                                |                                                                                                                                                                                                                                                                                                                                                              |
| EPI_ISL_538502                                                                                                                                                                                                                                                                                                                                                                                                                                                                                                                                                                                                                                                                                                                                                                                                                                                                                                                                                                                                                                                                                                                                                                                                                                                                                                                                                                                 | RSUD Sultan Imanudin Pangkalan Bun Center Kalimantan                            | National Institute of Health Research and Development                                         | Pawestri, HA; Subangkit; Puspa, KD; Nugraha, AA; Ikawati, HD; Pangesti, KNA; Soekarso, T; Paisal; Setiawaty, V.                                                                                                                                                                                                                                                                                                                                                                                                                                                |                                                                                                                                                                                                                                                                                                                                                              |
| EPI_ISL_538503                                                                                                                                                                                                                                                                                                                                                                                                                                                                                                                                                                                                                                                                                                                                                                                                                                                                                                                                                                                                                                                                                                                                                                                                                                                                                                                                                                                 | RSUD Bali Mandara Denpasar Bali                                                 | National Institute of Health Research and Development                                         | Pawestri, HA; Subangkit; Puspa, KD; Nugraha, AA; Ikawati, HD; Pangesti, KNA; Soekarso, T; Paisal; Setiawaty, V.                                                                                                                                                                                                                                                                                                                                                                                                                                                |                                                                                                                                                                                                                                                                                                                                                              |
| EPI_ISL_538504, EPI_ISL_538505                                                                                                                                                                                                                                                                                                                                                                                                                                                                                                                                                                                                                                                                                                                                                                                                                                                                                                                                                                                                                                                                                                                                                                                                                                                                                                                                                                 | National Institute of Health Research and Development                           | National Institute of Health Research and Development                                         | Pawestri, HA; Subangkit; Puspa, KD; Nugraha, AA; Ikawati, HD; Pangesti, KNA; Soekarso, T; Susilarini, NK; Hariastuti, NI; Nikmah, UA; Mursinah; Febriyani, A; Herman, R; Susanti, N; Hema; Febriyanti, T; Nurhadi, M; Paisal; Ramadhany, R; Agustingsih; Kurniawati, J; Kipuw, NL; Muna, F; Indalau, IL; Adam, K; Wibowo, HA; Rizki, A; Puspandary, N; Setiawaty, V.                                                                                                                                                                                           |                                                                                                                                                                                                                                                                                                                                                              |
| EPI_ISL_538506, EPI_ISL_538507                                                                                                                                                                                                                                                                                                                                                                                                                                                                                                                                                                                                                                                                                                                                                                                                                                                                                                                                                                                                                                                                                                                                                                                                                                                                                                                                                                 | Balai Penelitian dan Pengembangan Biomedis Papua                                | National Institute of Health Research and Development                                         | Pawestri, HA; Subangkit; Puspa, KD; Nugraha, AA; Ikawati, HD; Pangesti, KNA; Soekarso, T; Paisal; Oktavian, A; Hutapea, HML; Setiawaty, V.                                                                                                                                                                                                                                                                                                                                                                                                                     |                                                                                                                                                                                                                                                                                                                                                              |
| EPI_ISL_538508, EPI_ISL_538509                                                                                                                                                                                                                                                                                                                                                                                                                                                                                                                                                                                                                                                                                                                                                                                                                                                                                                                                                                                                                                                                                                                                                                                                                                                                                                                                                                 | National Institute of Health Research and Development                           | National Institute of Health Research and Development                                         | Pawestri, HA; Subangkit; Puspa, KD; Nugraha, AA; Ikawati, HD; Pangesti, KNA; Soekarso, T; Susilarini, NK; Hariastuti, NI; Nikmah, UA; Mursinah; Febriyani, A; Herman, R; Susanti, N; Hema; Febriyanti, T; Nurhadi, M; Paisal; Ramadhany, R; Agustingsih; Kurniawati, J; Kipuw, NL; Muna, F; Indalau, IL; Adam, K;                                                                                                                                                                                                                                              |                                                                                                                                                                                                                                                                                                                                                              |

|                                                                                                                                                                                                                                |                                                                       |                                                                       |                                                                                                                                                                                                                                                                                                                                                                                                                                                                                                                           |
|--------------------------------------------------------------------------------------------------------------------------------------------------------------------------------------------------------------------------------|-----------------------------------------------------------------------|-----------------------------------------------------------------------|---------------------------------------------------------------------------------------------------------------------------------------------------------------------------------------------------------------------------------------------------------------------------------------------------------------------------------------------------------------------------------------------------------------------------------------------------------------------------------------------------------------------------|
|                                                                                                                                                                                                                                |                                                                       |                                                                       | Wibowo, HA; Rizki, A; Puspandary, N; Setiawaty,V.                                                                                                                                                                                                                                                                                                                                                                                                                                                                         |
| EPI_ISL_538510                                                                                                                                                                                                                 | RSUD Ulin Banjarmasin South Kalimantan                                | National Institute of Health Research and Development                 | Pawestri, HA; Subangkit; Puspa, KD; Nugraha, AA; Ikawati, HD; Pangesti, KNA; Soekarso, T; Paisal; Pasaribu, M; Setiawaty,V.                                                                                                                                                                                                                                                                                                                                                                                               |
| EPI_ISL_538511                                                                                                                                                                                                                 | RSUD Wahidin Sudirohusodo Mojokerto East Java                         | National Institute of Health Research and Development                 | Pawestri, HA; Subangkit; Puspa, KD; Nugraha, AA; Ikawati, HD; Pangesti, KNA; Soekarso, T; Paisal; Setiawaty,V.                                                                                                                                                                                                                                                                                                                                                                                                            |
| EPI_ISL_538512                                                                                                                                                                                                                 | Balai Penelitian dan Pengembangan Biomedis Papua                      | National Institute of Health Research and Development                 | Pawestri, HA; Subangkit; Puspa, KD; Nugraha, AA; Ikawati, HD; Pangesti, KNA; Soekarso, T; Paisal; Pasaribu, M; Setiawaty,V.                                                                                                                                                                                                                                                                                                                                                                                               |
| EPI_ISL_538513                                                                                                                                                                                                                 | Provincial Health Laboratory Bekasi West Java                         | National Institute of Health Research and Development                 | Pawestri, HA; Subangkit; Puspa, KD; Nugraha, AA; Ikawati, HD; Pangesti, KNA; Soekarso, T; Paisal; Setiawaty,V.                                                                                                                                                                                                                                                                                                                                                                                                            |
| EPI_ISL_539234, EPI_ISL_539240, EPI_ISL_539241, EPI_ISL_539242, EPI_ISL_539289, EPI_ISL_539290, EPI_ISL_539291, EPI_ISL_539292, EPI_ISL_539293, EPI_ISL_539294, EPI_ISL_539295, EPI_ISL_539296, EPI_ISL_539297, EPI_ISL_539298 | see above                                                             | SeqCOVID-SPAIN consortium/IBV(CSIC)                                   | Paula Ruiz-Hueso, Mariana Reyes-Prieto, Vicente Soriano Chirona, Ivan Ansari, David Navarro, Maria Alma Bracho, Griselda De Marco, Beatriz Beamud, Lidia Ruiz Roldan, Marta Pla Diaz, Veris Garcia-Gonzalez, Inma Galán Vendrell, Sandra Carbo, Loreto Ferrús Abad, Lúcia Martínez-Priego, Giuseppe D'Auria, Fernando Gonzalez-Candelas and SeqCOVID-SPAIN consortium                                                                                                                                                     |
| EPI_ISL_539333, EPI_ISL_539334, EPI_ISL_539335, EPI_ISL_539336, EPI_ISL_539337, EPI_ISL_539338, EPI_ISL_539339                                                                                                                 | Institute of Disease Control and Prevention, People's Liberation Army | Institute of Disease Control and Prevention, People's Liberation Army | Qiu,S., Li,P.                                                                                                                                                                                                                                                                                                                                                                                                                                                                                                             |
| EPI_ISL_539628                                                                                                                                                                                                                 | CSIR-Centre for Cellular and Molecular Biology                        | CSIR-Centre for Cellular and Molecular Biology                        | Payel Mukherjee, Sofia Banu, Priya Singh, Onkar Kulkarni, Dhiviya Vedagiri, Divya Gupta, Vishal Sah, Santosh Kumar Kuncha, Krishnan Harinivas Harshan, Archana Bharadwaj Siva, Karthik Bharadwaj Tallapaka, Shagufta Khan, Lamuk Zaveri, Nikhil Hajirnis, M Soujanya Reddy, Pratheusa Maccha, Namami Gaur, Sakshi Shambhavi, Tulasi Nagabandi, Purushotham Vodnala, G. Aditya Kumar, Koushick Sivakumar, Pooja Ramesh Gupta, Rajan Kumar Jha, Shradha Vijay Lahoti, Rakesh K Mishra, Divya Tej Sowpati                    |
| EPI_ISL_539629                                                                                                                                                                                                                 | CSIR-Centre for Cellular and Molecular Biology                        | CSIR-Centre for Cellular and Molecular Biology                        | Payel Mukherjee, Sofia Banu, Priya Singh, Onkar Kulkarni, Dhiviya Vedagiri, Divya Gupta, Vishal Sah, Santosh Kumar Kuncha, Krishnan Harinivas Harshan, Archana Bharadwaj Siva, Karthik Bharadwaj Tallapaka, Shagufta Khan, Lamuk Zaveri, Nikhil Hajirnis, M Soujanya Reddy, Pratheusa Maccha, Namami Gaur, Sakshi Shambhavi, Tulasi Nagabandi, Purushotham Vodnala, Gokulan C G, Gunjan Purohit, Hanuman Tulashiram Kale, Pankaj Kumar, Prachand Issarapu, Rakesh K Mishra, Divya Tej Sowpati                             |
| EPI_ISL_539630                                                                                                                                                                                                                 | CSIR-Centre for Cellular and Molecular Biology                        | CSIR-Centre for Cellular and Molecular Biology                        | Payel Mukherjee, Sofia Banu, Priya Singh, Onkar Kulkarni, Dhiviya Vedagiri, Divya Gupta, Vishal Sah, Santosh Kumar Kuncha, Krishnan Harinivas Harshan, Archana Bharadwaj Siva, Karthik Bharadwaj Tallapaka, Shagufta Khan, Lamuk Zaveri, Nikhil Hajirnis, M Soujanya Reddy, Pratheusa Maccha, Namami Gaur, Sakshi Shambhavi, Tulasi Nagabandi, Purushotham Vodnala, Rakesh K Mishra, Sonu Uday, Sudipta Mondal, Annapoorna P Karthyayani, Debabrata Jana, Debrya Saha, Divya Tej Sowpati                                  |
| EPI_ISL_539631                                                                                                                                                                                                                 | CSIR-Centre for Cellular and Molecular Biology                        | CSIR-Centre for Cellular and Molecular Biology                        | Pratheusa Maccha, Sakshi Shambhavi, Lamuk Zaveri, Shagufta Khan, Namami Gaur, Nikhil Hajirnis, M Soujanya Reddy, Tulasi Nagabandi, Purushotham Vodnala, Payel Mukherjee, Sofia Banu, Priya Singh, Onkar Kulkarni, Dhiviya Vedagiri, Divya Gupta, Vishal Sah, Santosh Kumar Kuncha, Krishnan Harinivas Harshan, Archana Bharadwaj Siva, Karthik Bharadwaj Tallapaka, G. Aditya Kumar, Koushick Sivakumar, Disha Nanda, Divya Das, Jotin Gogoi, Manish Bhattacharjee, Ravi Prasad Mukku, Rakesh K Mishra, Divya Tej Sowpati |
| EPI_ISL_539632                                                                                                                                                                                                                 | CSIR-Centre for Cellular and Molecular Biology                        | CSIR-Centre for Cellular and Molecular Biology                        | Pratheusa Maccha, Shagufta Khan, Lamuk Zaveri, Namami Gaur, Sakshi Shambhavi, Tulasi Nagabandi, Nikhil Hajirnis, M Soujanya Reddy, Purushotham Vodnala, Payel Mukherjee, Sofia Banu, Priya Singh, Onkar Kulkarni, Dhiviya Vedagiri, Divya Gupta, Vishal Sah, Santosh Kumar Kuncha, Krishnan Harinivas Harshan, Archana Bharadwaj Siva, Karthik Bharadwaj Tallapaka, Disha Nanda, Divya Das, Jotin Gogoi, Manish Bhattacharjee, Ravi Prasad Mukku, Rakesh K Mishra, Divya Tej Sowpati                                      |
| EPI_ISL_539633                                                                                                                                                                                                                 | CSIR-Centre for Cellular and Molecular Biology                        | CSIR-Centre for Cellular and Molecular Biology                        | Pratheusa Maccha, Sofia Banu, Payel Mukherjee, Priya Singh, Onkar Kulkarni, Dhiviya Vedagiri, Divya Gupta, Vishal Sah, Santosh Kumar Kuncha, Krishnan Harinivas Harshan, Archana Bharadwaj Siva, Karthik Bharadwaj Tallapaka, Shagufta Khan, Lamuk Zaveri, Namami Gaur, Sakshi Shambhavi, Nikhil Hajirnis, M Soujanya Reddy, Tulasi Nagabandi, Purushotham Vodnala, Preethi Jampala, Sharada Ravi Iyer, Sulagana Mukherjee, Swetha Sundar, Peddapuvalla Sai Uday Kiran, Rakesh K Mishra, Divya Tej Sowpati                |
| EPI_ISL_539658                                                                                                                                                                                                                 | CSIR-Centre for Cellular and Molecular Biology                        | CSIR-Centre for Cellular and Molecular Biology                        | Payel Mukherjee, Sofia Banu, Priya Singh, Onkar Kulkarni, Dhiviya Vedagiri, Divya Gupta, Vishal Sah, Santosh Kumar Kuncha, Krishnan Harinivas Harshan, Archana Bharadwaj Siva, Karthik Bharadwaj Tallapaka, Shagufta Khan, Lamuk Zaveri, Nikhil Hajirnis, M Soujanya Reddy, Pratheusa Maccha, Namami Gaur, Sakshi Shambhavi, Tulasi Nagabandi, Purushotham Vodnala, G. Aditya Kumar, Koushick Sivakumar, Pooja Ramesh Gupta, Rajan Kumar Jha, Shradha Vijay Lahoti, Rakesh K Mishra, Divya Tej Sowpati                    |
| EPI_ISL_539659                                                                                                                                                                                                                 | CSIR-Centre for Cellular and Molecular Biology                        | CSIR-Centre for Cellular and Molecular Biology                        | Payel Mukherjee, Sofia Banu, Priya Singh, Onkar Kulkarni, Dhiviya Vedagiri, Divya Gupta, Vishal Sah, Santosh Kumar Kuncha, Krishnan Harinivas Harshan, Archana Bharadwaj Siva, Karthik Bharadwaj Tallapaka, Shagufta Khan, Lamuk Zaveri, Nikhil Hajirnis, M Soujanya Reddy, Pratheusa Maccha, Namami Gaur, Sakshi Shambhavi, Tulasi Nagabandi, Purushotham Vodnala, Gokulan C G, Gunjan Purohit, Hanuman Tulashiram Kale, Pankaj Kumar, Prachand Issarapu, Rakesh K Mishra, Divya Tej Sowpati                             |
| EPI_ISL_539660                                                                                                                                                                                                                 | CSIR-Centre for Cellular and Molecular Biology                        | CSIR-Centre for Cellular and Molecular Biology                        | Payel Mukherjee, Sofia Banu, Priya Singh, Onkar Kulkarni, Dhiviya Vedagiri, Divya Gupta, Vishal Sah, Santosh Kumar Kuncha, Krishnan Harinivas Harshan, Archana Bharadwaj Siva, Karthik Bharadwaj Tallapaka, Shagufta Khan, Lamuk Zaveri, Nikhil Hajirnis, M Soujanya Reddy, Pratheusa Maccha, Namami Gaur, Sakshi Shambhavi, Tulasi Nagabandi, Purushotham Vodnala, Rakesh K Mishra, Sonu Uday, Sudipta Mondal, Annapoorna P Karthyayani, Debabrata Jana, Debrya Saha, Divya Tej Sowpati                                  |
| EPI_ISL_539661                                                                                                                                                                                                                 | CSIR-Centre for Cellular and Molecular Biology                        | CSIR-Centre for Cellular and Molecular Biology                        | Pratheusa Maccha, Sakshi Shambhavi, Lamuk Zaveri, Shagufta Khan, Namami Gaur, Nikhil Hajirnis, M Soujanya Reddy, Tulasi Nagabandi, Purushotham Vodnala, Payel Mukherjee, Sofia Banu, Priya Singh, Onkar Kulkarni, Dhiviya Vedagiri, Divya Gupta, Vishal Sah, Santosh Kumar Kuncha, Krishnan Harinivas Harshan, Archana Bharadwaj Siva, Karthik Bharadwaj Tallapaka, G. Aditya Kumar, Koushick Sivakumar, Disha Nanda, Divya Das, Jotin Gogoi, Manish Bhattacharjee, Ravi Prasad Mukku, Rakesh K Mishra, Divya Tej Sowpati |
| EPI_ISL_539662                                                                                                                                                                                                                 | CSIR-Centre for Cellular and Molecular Biology                        | CSIR-Centre for Cellular and Molecular Biology                        | Pratheusa Maccha, Shagufta Khan, Lamuk Zaveri, Namami Gaur, Sakshi Shambhavi, Tulasi Nagabandi, Nikhil Hajirnis, M Soujanya Reddy, Purushotham Vodnala, Payel Mukherjee, Sofia Banu, Priya Singh, Onkar Kulkarni, Dhiviya Vedagiri, Divya Gupta, Vishal Sah, Santosh Kumar Kuncha, Krishnan Harinivas Harshan, Archana Bharadwaj Siva, Karthik Bharadwaj Tallapaka, Disha Nanda, Divya Das, Jotin Gogoi, Manish Bhattacharjee, Ravi Prasad Mukku, Rakesh K Mishra, Divya Tej Sowpati                                      |
| EPI_ISL_539663                                                                                                                                                                                                                 | CSIR-Centre for Cellular and Molecular Biology                        | CSIR-Centre for Cellular and Molecular Biology                        | Pratheusa Maccha, Sofia Banu, Payel Mukherjee, Priya Singh, Onkar Kulkarni, Dhiviya Vedagiri, Divya Gupta, Vishal Sah, Santosh Kumar Kuncha, Krishnan Harinivas Harshan, Archana Bharadwaj Siva, Karthik Bharadwaj Tallapaka, Shagufta Khan, Lamuk Zaveri, Namami Gaur, Sakshi Shambhavi, Nikhil Hajirnis, M Soujanya Reddy, Tulasi Nagabandi, Purushotham Vodnala, Preethi Jampala, Sharada Ravi Iyer, Sulagana Mukherjee, Swetha Sundar, Peddapuvalla Sai Uday Kiran, Rakesh K Mishra, Divya Tej Sowpati                |
| EPI_ISL_539688                                                                                                                                                                                                                 | CSIR-Centre for Cellular and Molecular Biology                        | CSIR-Centre for Cellular and Molecular Biology                        | Payel Mukherjee, Sofia Banu, Priya Singh, Onkar Kulkarni, Dhiviya Vedagiri, Divya Gupta, Vishal Sah, Santosh Kumar Kuncha, Krishnan Harinivas Harshan, Archana Bharadwaj Siva, Karthik Bharadwaj Tallapaka, Shagufta Khan, Lamuk Zaveri, Nikhil Hajirnis, M Soujanya Reddy, Pratheusa Maccha, Namami Gaur, Sakshi Shambhavi, Tulasi Nagabandi, Purushotham Vodnala, G. Aditya Kumar, Koushick Sivakumar, Pooja Ramesh Gupta, Rajan Kumar Jha, Shradha Vijay Lahoti, Rakesh K Mishra, Divya Tej Sowpati                    |
| EPI_ISL_539689                                                                                                                                                                                                                 | CSIR-Centre for Cellular and Molecular Biology                        | CSIR-Centre for Cellular and Molecular Biology                        | Payel Mukherjee, Sofia Banu, Priya Singh, Onkar Kulkarni, Dhiviya Vedagiri, Divya Gupta, Vishal Sah, Santosh Kumar Kuncha, Krishnan Harinivas Harshan, Archana Bharadwaj Siva, Karthik Bharadwaj Tallapaka, Shagufta Khan, Lamuk Zaveri, Nikhil Hajirnis, M Soujanya Reddy, Pratheusa Maccha, Namami Gaur, Sakshi Shambhavi, Tulasi Nagabandi, Purushotham Vodnala, Gokulan C G, Gunjan Purohit, Hanuman Tulashiram Kale, Pankaj Kumar, Prachand Issarapu, Rakesh K Mishra, Divya Tej Sowpati                             |
| EPI_ISL_539690                                                                                                                                                                                                                 | CSIR-Centre for Cellular and Molecular Biology                        | CSIR-Centre for Cellular and Molecular Biology                        | Payel Mukherjee, Sofia Banu, Priya Singh, Onkar Kulkarni, Dhiviya Vedagiri, Divya Gupta, Vishal Sah, Santosh Kumar Kuncha, Krishnan Harinivas Harshan, Archana Bharadwaj Siva, Karthik Bharadwaj Tallapaka, Shagufta Khan, Lamuk Zaveri, Nikhil Hajirnis, M Soujanya Reddy, Pratheusa Maccha, Namami Gaur, Sakshi Shambhavi, Tulasi Nagabandi, Purushotham Vodnala, Rakesh K Mishra, Sonu Uday, Sudipta Mondal, Annapoorna P Karthyayani, Debabrata Jana, Debrya Saha, Divya Tej Sowpati                                  |
| EPI_ISL_539691                                                                                                                                                                                                                 | CSIR-Centre for Cellular and Molecular Biology                        | CSIR-Centre for Cellular and Molecular Biology                        | Pratheusa Maccha, Sakshi Shambhavi, Lamuk Zaveri, Shagufta Khan, Namami Gaur, Nikhil Hajirnis, M Soujanya Reddy, Tulasi Nagabandi, Purushotham Vodnala, Payel Mukherjee, Sofia Banu, Priya Singh, Onkar Kulkarni, Dhiviya Vedagiri, Divya Gupta, Vishal Sah, Santosh Kumar Kuncha, Krishnan Harinivas Harshan, Archana Bharadwaj Siva, Karthik Bharadwaj Tallapaka, G. Aditya Kumar, Koushick Sivakumar, Disha Nanda, Divya Das, Jotin Gogoi, Manish                                                                      |





|                                                                                                                                                                                                                                                                                                                                                                                                                                                                                                                                                                                                                                                                                                                                                                                                                                                                                                                                                                                                                                                                                                                                                                                                                                                                                                                                                                                                                                                                                                                                                                                                                                                                |                                                                                                                                                                                |                                                                                                                                  |                                                                                                                                                                                                                                                                                                                                                                                     |                                                                                                                                                                                                                                                                                                                                                    |
|----------------------------------------------------------------------------------------------------------------------------------------------------------------------------------------------------------------------------------------------------------------------------------------------------------------------------------------------------------------------------------------------------------------------------------------------------------------------------------------------------------------------------------------------------------------------------------------------------------------------------------------------------------------------------------------------------------------------------------------------------------------------------------------------------------------------------------------------------------------------------------------------------------------------------------------------------------------------------------------------------------------------------------------------------------------------------------------------------------------------------------------------------------------------------------------------------------------------------------------------------------------------------------------------------------------------------------------------------------------------------------------------------------------------------------------------------------------------------------------------------------------------------------------------------------------------------------------------------------------------------------------------------------------|--------------------------------------------------------------------------------------------------------------------------------------------------------------------------------|----------------------------------------------------------------------------------------------------------------------------------|-------------------------------------------------------------------------------------------------------------------------------------------------------------------------------------------------------------------------------------------------------------------------------------------------------------------------------------------------------------------------------------|----------------------------------------------------------------------------------------------------------------------------------------------------------------------------------------------------------------------------------------------------------------------------------------------------------------------------------------------------|
| EPI_ISL_577693, EPI_ISL_577694, EPI_ISL_577695, EPI_ISL_577696, EPI_ISL_577697, EPI_ISL_577698, EPI_ISL_577699, EPI_ISL_577700, EPI_ISL_577701, EPI_ISL_577702, EPI_ISL_577703, EPI_ISL_577704, EPI_ISL_577705, EPI_ISL_577706, EPI_ISL_577707, EPI_ISL_577708, EPI_ISL_577709, EPI_ISL_577710, EPI_ISL_577711, EPI_ISL_577712, EPI_ISL_577713, EPI_ISL_577714, EPI_ISL_577715, EPI_ISL_577716, EPI_ISL_577717, EPI_ISL_577718, EPI_ISL_577719, EPI_ISL_577720, EPI_ISL_577721, EPI_ISL_577722, EPI_ISL_577723, EPI_ISL_577724, EPI_ISL_577725, EPI_ISL_577726, EPI_ISL_577727, EPI_ISL_577728, EPI_ISL_577729, EPI_ISL_577730, EPI_ISL_577731, EPI_ISL_577732, EPI_ISL_577733                                                                                                                                                                                                                                                                                                                                                                                                                                                                                                                                                                                                                                                                                                                                                                                                                                                                                                                                                                                 | see above                                                                                                                                                                      | NIV Influenza                                                                                                                    | NIV Influenza                                                                                                                                                                                                                                                                                                                                                                       | Potdar V                                                                                                                                                                                                                                                                                                                                           |
| EPI_ISL_582127, EPI_ISL_582128, EPI_ISL_582129, EPI_ISL_582130, EPI_ISL_582131, EPI_ISL_582132                                                                                                                                                                                                                                                                                                                                                                                                                                                                                                                                                                                                                                                                                                                                                                                                                                                                                                                                                                                                                                                                                                                                                                                                                                                                                                                                                                                                                                                                                                                                                                 |                                                                                                                                                                                | Antwerp University Hospital                                                                                                      | Institute of Tropical Medicine                                                                                                                                                                                                                                                                                                                                                      | Philippe Selhorst, Colin Anthony                                                                                                                                                                                                                                                                                                                   |
| EPI_ISL_582241                                                                                                                                                                                                                                                                                                                                                                                                                                                                                                                                                                                                                                                                                                                                                                                                                                                                                                                                                                                                                                                                                                                                                                                                                                                                                                                                                                                                                                                                                                                                                                                                                                                 |                                                                                                                                                                                | NIV Influenza                                                                                                                    | NIV Influenza                                                                                                                                                                                                                                                                                                                                                                       | Potdar V                                                                                                                                                                                                                                                                                                                                           |
| EPI_ISL_586513                                                                                                                                                                                                                                                                                                                                                                                                                                                                                                                                                                                                                                                                                                                                                                                                                                                                                                                                                                                                                                                                                                                                                                                                                                                                                                                                                                                                                                                                                                                                                                                                                                                 | B.J. Medical College and Civil hospital, Ahmedabad                                                                                                                             |                                                                                                                                  | Gujarat Biotechnology Research Centre                                                                                                                                                                                                                                                                                                                                               | Pinal Trivedi, Maharshi Pandya, Nidhi Patel, Nitin Savaliya, Raghavendra Kumar, Dinesh Kumar, Zuber Saiyed, Komal Patel, Labdhi Pandya, Afzal Ansari, Nikha Trivedi, Pranay Shah, Kamlesh J Upadhyay, Sanjay Kapadia, Apurvasinh Puvar, Janvi Raval, Zarna Patel, Monika Gandhi, R D Dixit, A M Kadri, Harsh Bakshi, Chaitanya Joshi, Madhvi Joshi |
| EPI_ISL_586517                                                                                                                                                                                                                                                                                                                                                                                                                                                                                                                                                                                                                                                                                                                                                                                                                                                                                                                                                                                                                                                                                                                                                                                                                                                                                                                                                                                                                                                                                                                                                                                                                                                 | B.J. Medical College and Civil hospital, Ahmedabad                                                                                                                             |                                                                                                                                  | Gujarat Biotechnology Research Centre                                                                                                                                                                                                                                                                                                                                               | Raghavendra Kumar, Dinesh Kumar, Zuber Saiyed, Komal Patel, Labdhi Pandya, Afzal Ansari, Nikha Trivedi, Pranay Shah, Kamlesh J Upadhyay, Sanjay Kapadia, Apurvasinh Puvar, Janvi Raval, Zarna Patel, Monika Gandhi, Pinal Trivedi, Maharshi Pandya, Nidhi Patel, Nitin Savaliya, R D Dixit, A M Kadri, Harsh Bakshi, Chaitanya Joshi, Madhvi Joshi |
| EPI_ISL_586524                                                                                                                                                                                                                                                                                                                                                                                                                                                                                                                                                                                                                                                                                                                                                                                                                                                                                                                                                                                                                                                                                                                                                                                                                                                                                                                                                                                                                                                                                                                                                                                                                                                 | B.J. Medical College and Civil hospital, Ahmedabad                                                                                                                             |                                                                                                                                  | Gujarat Biotechnology Research Centre                                                                                                                                                                                                                                                                                                                                               | Pranay Shah, Kamlesh J Upadhyay, Sanjay Kapadia, Apurvasinh Puvar, Janvi Raval, Zarna Patel, Monika Gandhi, Pinal Trivedi, Maharshi Pandya, Nidhi Patel, Nitin Savaliya, Raghavendra Kumar, Dinesh Kumar, Zuber Saiyed, Komal Patel, Labdhi Pandya, Afzal Ansari, Nikha Trivedi, R D Dixit, A M Kadri, Harsh Bakshi, Chaitanya Joshi, Madhvi Joshi |
| EPI_ISL_586530                                                                                                                                                                                                                                                                                                                                                                                                                                                                                                                                                                                                                                                                                                                                                                                                                                                                                                                                                                                                                                                                                                                                                                                                                                                                                                                                                                                                                                                                                                                                                                                                                                                 | B.J. Medical College and Civil hospital, Ahmedabad                                                                                                                             |                                                                                                                                  | Gujarat Biotechnology Research Centre                                                                                                                                                                                                                                                                                                                                               | Pinal Trivedi, Maharshi Pandya, Nidhi Patel, Nitin Savaliya, Raghavendra Kumar, Dinesh Kumar, Zuber Saiyed, Komal Patel, Labdhi Pandya, Afzal Ansari, Nikha Trivedi, Pranay Shah, Kamlesh J Upadhyay, Sanjay Kapadia, Apurvasinh Puvar, Janvi Raval, Zarna Patel, Monika Gandhi, R D Dixit, A M Kadri, Harsh Bakshi, Chaitanya Joshi, Madhvi Joshi |
| EPI_ISL_586539                                                                                                                                                                                                                                                                                                                                                                                                                                                                                                                                                                                                                                                                                                                                                                                                                                                                                                                                                                                                                                                                                                                                                                                                                                                                                                                                                                                                                                                                                                                                                                                                                                                 | Zydus Medical Hospital, Dahod                                                                                                                                                  |                                                                                                                                  | Gujarat Biotechnology Research Centre                                                                                                                                                                                                                                                                                                                                               | Raghavendra Kumar, Dinesh Kumar, Zuber Saiyed, Komal Patel, Labdhi Pandya, Afzal Ansari, Nikha Trivedi, Apurvasinh Puvar, Janvi Raval, Zarna Patel, Monika Gandhi, Pinal Trivedi, Maharshi Pandya, Nidhi Patel, Kalpesh Labana, Mohit Desai, Nitin Savaliya, R D Dixit, A M Kadri, Harsh Bakshi, Chaitanya Joshi, Madhvi Joshi                     |
| EPI_ISL_586547                                                                                                                                                                                                                                                                                                                                                                                                                                                                                                                                                                                                                                                                                                                                                                                                                                                                                                                                                                                                                                                                                                                                                                                                                                                                                                                                                                                                                                                                                                                                                                                                                                                 | General Hospital, Godhra                                                                                                                                                       |                                                                                                                                  | Gujarat Biotechnology Research Centre                                                                                                                                                                                                                                                                                                                                               | Pinal Gandhi, Sangeeta Kumar, Apurvasinh Puvar, Janvi Raval, Zarna Patel, Monika Gandhi, Pinal Trivedi, Maharshi Pandya, Nidhi Patel, Nitin Savaliya, Raghavendra Kumar, Dinesh Kumar, Zuber Saiyed, Komal Patel, Labdhi Pandya, Afzal Ansari, Nikha Trivedi, Neela Katara, R D Dixit, A M Kadri, Harsh Bakshi, Chaitanya Joshi, Madhvi Joshi      |
| EPI_ISL_586552                                                                                                                                                                                                                                                                                                                                                                                                                                                                                                                                                                                                                                                                                                                                                                                                                                                                                                                                                                                                                                                                                                                                                                                                                                                                                                                                                                                                                                                                                                                                                                                                                                                 | Government Hospital, Veraval                                                                                                                                                   |                                                                                                                                  | Gujarat Biotechnology Research Centre                                                                                                                                                                                                                                                                                                                                               | Pinal Trivedi, Maharshi Pandya, Nidhi Patel, Nitin Savaliya, Raghavendra Kumar, Dinesh Kumar, Zuber Saiyed, Komal Patel, Labdhi Pandya, Afzal Ansari, Nikha Trivedi, Jignesh Parmar, Jitendra Bamrotia, Apurvasinh Puvar, Janvi Raval, Zarna Patel, Monika Gandhi, R D Dixit, A M Kadri, Harsh Bakshi, Chaitanya Joshi, Madhvi Joshi               |
| EPI_ISL_586556                                                                                                                                                                                                                                                                                                                                                                                                                                                                                                                                                                                                                                                                                                                                                                                                                                                                                                                                                                                                                                                                                                                                                                                                                                                                                                                                                                                                                                                                                                                                                                                                                                                 | CCC, Veraval                                                                                                                                                                   |                                                                                                                                  | Gujarat Biotechnology Research Centre                                                                                                                                                                                                                                                                                                                                               | Raghavendra Kumar, Dinesh Kumar, Zuber Saiyed, Komal Patel, Labdhi Pandya, Afzal Ansari, Nikha Trivedi, Jignesh Parmar, Jitendra Bamrotia, Apurvasinh Puvar, Janvi Raval, Zarna Patel, Monika Gandhi, Pinal Trivedi, Maharshi Pandya, Nidhi Patel, Nitin Savaliya, R D Dixit, A M Kadri, Harsh Bakshi, Chaitanya Joshi, Madhvi Joshi               |
| EPI_ISL_591083, EPI_ISL_591084, EPI_ISL_591085, EPI_ISL_591086, EPI_ISL_591087, EPI_ISL_591088, EPI_ISL_591089                                                                                                                                                                                                                                                                                                                                                                                                                                                                                                                                                                                                                                                                                                                                                                                                                                                                                                                                                                                                                                                                                                                                                                                                                                                                                                                                                                                                                                                                                                                                                 | Viral Respiratory Lab, National Institute for Biomedical Research (INRB)                                                                                                       | Pathogen Sequencing Lab, National Institute for Biomedical Research (INRB)                                                       | Placide Mbala-Kingebeni, Edith Nkwembe, Eddy Kinganda-Lusamaki, Amuri Aziza, Francisca Muyembe Mawete, Emmanuel Lokilo Lofiko, Jean Claude Makangara, Catherine Pratt, Matthias Pauthner, Josh Quick, Allison Black, James Hadfield, Trevor Bedford, Ian Goodfellow, Andrew Rambaut, Nick Loman, Kristian Andersen, Michael Wiley, Steve Ahuka-Mundeke, Jean-Jacques Muyembe Tamfum |                                                                                                                                                                                                                                                                                                                                                    |
| EPI_ISL_594166, EPI_ISL_594167, EPI_ISL_594168, EPI_ISL_594171, EPI_ISL_594173, EPI_ISL_594175, EPI_ISL_594176, EPI_ISL_596677, EPI_ISL_596678, EPI_ISL_596680, EPI_ISL_596681, EPI_ISL_596684, EPI_ISL_596686, EPI_ISL_596690, EPI_ISL_596691, EPI_ISL_596692, EPI_ISL_596695, EPI_ISL_596696, EPI_ISL_596698, EPI_ISL_596700, EPI_ISL_596701, EPI_ISL_596703, EPI_ISL_596706, EPI_ISL_596711, EPI_ISL_596714, EPI_ISL_596718, EPI_ISL_596719, EPI_ISL_596721, EPI_ISL_596725, EPI_ISL_596733, EPI_ISL_596735, EPI_ISL_596740, EPI_ISL_596741, EPI_ISL_596742, EPI_ISL_596748, EPI_ISL_596750, EPI_ISL_596752, EPI_ISL_596756, EPI_ISL_596757, EPI_ISL_596759, EPI_ISL_596760, EPI_ISL_596764, EPI_ISL_596765, EPI_ISL_596768, EPI_ISL_596769, EPI_ISL_596770, EPI_ISL_596771, EPI_ISL_596772, EPI_ISL_596774, EPI_ISL_596776, EPI_ISL_596779, EPI_ISL_596780, EPI_ISL_596781, EPI_ISL_596785, EPI_ISL_596786, EPI_ISL_596787, EPI_ISL_596789, EPI_ISL_596790, EPI_ISL_596794, EPI_ISL_596796, EPI_ISL_596797, EPI_ISL_596800, EPI_ISL_596804, EPI_ISL_596807, EPI_ISL_596808, EPI_ISL_596809, EPI_ISL_596810, EPI_ISL_596811, EPI_ISL_596812, EPI_ISL_596816, EPI_ISL_596819, EPI_ISL_596820, EPI_ISL_596824, EPI_ISL_596826, EPI_ISL_596828, EPI_ISL_596831, EPI_ISL_596832, EPI_ISL_596835, EPI_ISL_596837, EPI_ISL_596838, EPI_ISL_596840, EPI_ISL_596842, EPI_ISL_596843, EPI_ISL_596845, EPI_ISL_596848, EPI_ISL_596852, EPI_ISL_596853, EPI_ISL_596854, EPI_ISL_596855, EPI_ISL_596857, EPI_ISL_596860, EPI_ISL_596865, EPI_ISL_596870, EPI_ISL_596872, EPI_ISL_596873, EPI_ISL_596875, EPI_ISL_596877, EPI_ISL_596880, EPI_ISL_596883, EPI_ISL_596886 | see above                                                                                                                                                                      | PathWest Laboratory Medicine WA                                                                                                  | PathWest Laboratory Medicine WA Microbial Surveillance Unit                                                                                                                                                                                                                                                                                                                         | PathWest Laboratory Medicine WA Microbial Surveillance Unit                                                                                                                                                                                                                                                                                        |
| EPI_ISL_603251, EPI_ISL_603252, EPI_ISL_603253, EPI_ISL_603254, EPI_ISL_603255, EPI_ISL_603256, EPI_ISL_603257, EPI_ISL_603258, EPI_ISL_603259, EPI_ISL_603260, EPI_ISL_603261, EPI_ISL_603262, EPI_ISL_603263, EPI_ISL_603264, EPI_ISL_603265                                                                                                                                                                                                                                                                                                                                                                                                                                                                                                                                                                                                                                                                                                                                                                                                                                                                                                                                                                                                                                                                                                                                                                                                                                                                                                                                                                                                                 | see above                                                                                                                                                                      | UW Virology Lab                                                                                                                  | UW Virology Lab                                                                                                                                                                                                                                                                                                                                                                     | Pavitra Roychoudhury, Hong Xie, Lasata Shrestha, Meei-Li Huang, Keith R Jerome, Alexander Greninger                                                                                                                                                                                                                                                |
| EPI_ISL_605827, EPI_ISL_605832, EPI_ISL_605834, EPI_ISL_605835, EPI_ISL_605836, EPI_ISL_605837, EPI_ISL_605841, EPI_ISL_605844, EPI_ISL_605845, EPI_ISL_605846, EPI_ISL_605847, EPI_ISL_605848, EPI_ISL_605849, EPI_ISL_605850, EPI_ISL_605851, EPI_ISL_605852, EPI_ISL_605853, EPI_ISL_605854, EPI_ISL_605855, EPI_ISL_605858, EPI_ISL_605863, EPI_ISL_605868, EPI_ISL_605869, EPI_ISL_605870, EPI_ISL_605877, EPI_ISL_605879, EPI_ISL_605881                                                                                                                                                                                                                                                                                                                                                                                                                                                                                                                                                                                                                                                                                                                                                                                                                                                                                                                                                                                                                                                                                                                                                                                                                 | see above                                                                                                                                                                      | PathWest Laboratory Medicine WA                                                                                                  | PathWest Laboratory Medicine WA Microbial Surveillance Unit                                                                                                                                                                                                                                                                                                                         | PathWest Laboratory Medicine WA Microbial Surveillance Unit                                                                                                                                                                                                                                                                                        |
| EPI_ISL_610283, EPI_ISL_610284, EPI_ISL_610285                                                                                                                                                                                                                                                                                                                                                                                                                                                                                                                                                                                                                                                                                                                                                                                                                                                                                                                                                                                                                                                                                                                                                                                                                                                                                                                                                                                                                                                                                                                                                                                                                 | see above                                                                                                                                                                      | UW Virology Lab                                                                                                                  | UW Virology Lab                                                                                                                                                                                                                                                                                                                                                                     | Pavitra Roychoudhury, Hong Xie, Lasata Shrestha, Meei-Li Huang, Keith R Jerome, Alexander Greninger                                                                                                                                                                                                                                                |
| EPI_ISL_613463, EPI_ISL_613464, EPI_ISL_613465, EPI_ISL_613466, EPI_ISL_613467, EPI_ISL_613468, EPI_ISL_613469, EPI_ISL_613470, EPI_ISL_613471, EPI_ISL_613472, EPI_ISL_613473, EPI_ISL_613474, EPI_ISL_613475, EPI_ISL_613476, EPI_ISL_613477, EPI_ISL_613478, EPI_ISL_613479, EPI_ISL_613480, EPI_ISL_613481, EPI_ISL_613482, EPI_ISL_613483, EPI_ISL_613484, EPI_ISL_613485, EPI_ISL_613486, EPI_ISL_613487, EPI_ISL_613488, EPI_ISL_613489, EPI_ISL_613490, EPI_ISL_613491, EPI_ISL_613492, EPI_ISL_613493, EPI_ISL_613494, EPI_ISL_613495, EPI_ISL_613496, EPI_ISL_613497, EPI_ISL_613498, EPI_ISL_613499, EPI_ISL_613500, EPI_ISL_613501, EPI_ISL_613502, EPI_ISL_613503, EPI_ISL_613504, EPI_ISL_613505, EPI_ISL_613506, EPI_ISL_613507, EPI_ISL_613508, EPI_ISL_613509, EPI_ISL_613510, EPI_ISL_613511, EPI_ISL_613512, EPI_ISL_613513, EPI_ISL_613514, EPI_ISL_613515, EPI_ISL_613516, EPI_ISL_613517, EPI_ISL_613518, EPI_ISL_613519, EPI_ISL_613520, EPI_ISL_613521, EPI_ISL_613522, EPI_ISL_613523, EPI_ISL_613524, EPI_ISL_613525, EPI_ISL_613526, EPI_ISL_613527, EPI_ISL_613528, EPI_ISL_613529, EPI_ISL_613530, EPI_ISL_613531, EPI_ISL_613532, EPI_ISL_613533, EPI_ISL_613534, EPI_ISL_613535, EPI_ISL_613536, EPI_ISL_613537, EPI_ISL_613538, EPI_ISL_613539, EPI_ISL_613540                                                                                                                                                                                                                                                                                                                                                                 | see above                                                                                                                                                                      | Public Health Laboratory - Infectious Disease Lab, Minnesota Department of Health Infectious Disease Laboratory Submission Group | Minnesota Department of Health, Public Health Laboratory                                                                                                                                                                                                                                                                                                                            | Plumb, M., Garfin, J., Lorentz, A., Wang, X.                                                                                                                                                                                                                                                                                                       |
| EPI_ISL_613560                                                                                                                                                                                                                                                                                                                                                                                                                                                                                                                                                                                                                                                                                                                                                                                                                                                                                                                                                                                                                                                                                                                                                                                                                                                                                                                                                                                                                                                                                                                                                                                                                                                 | Laboratorio Biologia Molecolare Sars Cov2 - UOC Laboratorio Analisi - Servizio Medicina di Laboratorio, Ospedale "San Francesco" - ATS-ASSL Nuoro Via Mannironi 1, 08100 Nuoro | Laboratorio specialistico UOC Ematologia - Ospedale "San Francesco" - ATS-ASSL Nuoro                                             | Piras Giovanna, Fancello Tatiana, Asproni Rosanna, Fiamma Maura, Monne Maria Itria, Toja Alessandro, Sanna Filomena, Floris Anna Rita, Sulis Vincenzo, Palmas Angelo Domenico, Casu Gavino, Lo Maglio Iana, Marmeli Giuseppe                                                                                                                                                        |                                                                                                                                                                                                                                                                                                                                                    |
| EPI_ISL_613706                                                                                                                                                                                                                                                                                                                                                                                                                                                                                                                                                                                                                                                                                                                                                                                                                                                                                                                                                                                                                                                                                                                                                                                                                                                                                                                                                                                                                                                                                                                                                                                                                                                 | Laboratorio Biologia Molecolare Sars Cov2 - UOC Laboratorio Analisi - Servizio Medicina di Laboratorio, Ospedale "San Francesco" - ATS-ASSL Nuoro                              | Laboratorio specialistico UOC Ematologia - Ospedale "San Francesco" - ATS-ASSL Nuoro                                             | Piras Giovanna, Fancello Tatiana, Asproni Rosanna, Fiamma Maura, Monne Maria Itria, Toja Alessandro, Sanna Filomena, Floris Anna Rita, Sulis Vincenzo, Palmas Angelo Domenico, Casu Gavino, Lo Maglio Iana, Marmeli Giuseppe                                                                                                                                                        |                                                                                                                                                                                                                                                                                                                                                    |
| EPI_ISL_613710                                                                                                                                                                                                                                                                                                                                                                                                                                                                                                                                                                                                                                                                                                                                                                                                                                                                                                                                                                                                                                                                                                                                                                                                                                                                                                                                                                                                                                                                                                                                                                                                                                                 | Laboratorio Biologia Molecolare Sars Cov2 - UOC Laboratorio Analisi - Servizio Medicina di Laboratorio, Ospedale "San Francesco" - ATS-ASSL Nuoro                              | Laboratorio specialistico UOC Ematologia - Ospedale "San Francesco" - ATS-ASSL Nuoro                                             | Piras Giovanna, Fancello Tatiana, Asproni Rosanna, Fiamma Maura, Monne Maria Itria, Toja Alessandro, Sanna Filomena, Floris Anna Rita, Sulis Vincenzo, Palmas Angelo Domenico, Casu Gavino, Lo Maglio Iana, Marmeli Giuseppe                                                                                                                                                        |                                                                                                                                                                                                                                                                                                                                                    |
| EPI_ISL_613953, EPI_ISL_613955, EPI_ISL_614396, EPI_ISL_614397, EPI_ISL_614398, EPI_ISL_614889                                                                                                                                                                                                                                                                                                                                                                                                                                                                                                                                                                                                                                                                                                                                                                                                                                                                                                                                                                                                                                                                                                                                                                                                                                                                                                                                                                                                                                                                                                                                                                 | Laboratorio Biologia Molecolare Sars Cov2 - UOC Laboratorio Analisi - Servizio Medicina di Laboratorio, Ospedale "San Francesco" - ATS-ASSL Nuoro                              | Laboratorio specialistico UOC Ematologia - Ospedale "San Francesco" - ATS-ASSL Nuoro                                             | Piras Giovanna, Fancello Tatiana, Asproni Rosanna, Fiamma Maura, Monne Maria Itria, Toja Alessandro, Sanna Filomena, Floris Anna Rita, Sulis Vincenzo, Palmas Angelo Domenico, Casu Gavino, Lo Maglio Iana, Marmeli Giuseppe                                                                                                                                                        |                                                                                                                                                                                                                                                                                                                                                    |
| EPI_ISL_626357, EPI_ISL_626362, EPI_ISL_626366, EPI_ISL_626367, EPI_ISL_626375, EPI_ISL_626380, EPI_ISL_626381, EPI_ISL_626388, EPI_ISL_626389, EPI_ISL_626392, EPI_ISL_626407, EPI_ISL_626414, EPI_ISL_626420, EPI_ISL_626425, EPI_ISL_626432, EPI_ISL_626433, EPI_ISL_626435, EPI_ISL_626436,                                                                                                                                                                                                                                                                                                                                                                                                                                                                                                                                                                                                                                                                                                                                                                                                                                                                                                                                                                                                                                                                                                                                                                                                                                                                                                                                                                |                                                                                                                                                                                |                                                                                                                                  |                                                                                                                                                                                                                                                                                                                                                                                     |                                                                                                                                                                                                                                                                                                                                                    |

|                                                                                                                                                                                                                                                                                                                                                                                                                                                                                                                                                                                                                                                                                                                                                                                                                                                                                                                                                |           |                                                                                                                                                   |                                                                                                                        |                                                                                                                                                                                                                                                                                                                                                                                     |
|------------------------------------------------------------------------------------------------------------------------------------------------------------------------------------------------------------------------------------------------------------------------------------------------------------------------------------------------------------------------------------------------------------------------------------------------------------------------------------------------------------------------------------------------------------------------------------------------------------------------------------------------------------------------------------------------------------------------------------------------------------------------------------------------------------------------------------------------------------------------------------------------------------------------------------------------|-----------|---------------------------------------------------------------------------------------------------------------------------------------------------|------------------------------------------------------------------------------------------------------------------------|-------------------------------------------------------------------------------------------------------------------------------------------------------------------------------------------------------------------------------------------------------------------------------------------------------------------------------------------------------------------------------------|
| EPI_ISL_626454, EPI_ISL_626455, EPI_ISL_626457, EPI_ISL_626463, EPI_ISL_626468, EPI_ISL_626469, EPI_ISL_626472, EPI_ISL_626479, EPI_ISL_626493, EPI_ISL_626494, EPI_ISL_626503, EPI_ISL_626506, EPI_ISL_626513, EPI_ISL_626515, EPI_ISL_626517, EPI_ISL_626519, EPI_ISL_626538, EPI_ISL_626543                                                                                                                                                                                                                                                                                                                                                                                                                                                                                                                                                                                                                                                 | see above | Northwestern Memorial Hospital                                                                                                                    | Ozer Lab                                                                                                               | Ramon Lorenzo-Redondo, Hannah H. Nam, Scott C. Roberts, Lacy M. Simons, Chad J. Achenbach, Lawrence J. Jennings, Chao Qi, Alan R. Hauser, Michael G. Ison, Judd F. Hultquist, Egon A. Ozer                                                                                                                                                                                          |
| EPI_ISL_636962, EPI_ISL_636963, EPI_ISL_636964                                                                                                                                                                                                                                                                                                                                                                                                                                                                                                                                                                                                                                                                                                                                                                                                                                                                                                 |           | Pathogen Genomics Lab King Abdullah University of Science and Technology(KAUST)                                                                   | Pathogen Genomics Lab King Abdullah University of Science and Technology(KAUST)                                        | Rahul P Salunke, Sharif Hala, Raaeece Naeem, Sara Mfarrej, Amit Kumar Subudhi, Amanda Ooi, Luke Esau, Fadwa Alofi, Fathia Ben Rached, Afrah Alsomali, Asim Khogeer, Ahmad Bakur Mahmoud, Anwar Hashem, Naif Almontashiri, Arnab Pain                                                                                                                                                |
| EPI_ISL_636965                                                                                                                                                                                                                                                                                                                                                                                                                                                                                                                                                                                                                                                                                                                                                                                                                                                                                                                                 |           | Pathogen Genomics Lab King Abdullah University of Science and Technology(KAUST)                                                                   | Pathogen Genomics Lab King Abdullah University of Science and Technology(KAUST)                                        | Raaeece Naeem, Rahul P Salunke, Sharif Hala, Sara Mfarrej, Amit Kumar Subudhi, Fadwa Alofi, Fathia Ben Rached, Afrah Alsomali, Asim Khogeer, Ahmad Bakur Mahmoud, Anwar Hashem, Naif Almontashiri, Arnab Pain                                                                                                                                                                       |
| EPI_ISL_637099                                                                                                                                                                                                                                                                                                                                                                                                                                                                                                                                                                                                                                                                                                                                                                                                                                                                                                                                 |           | Indian Council of Medical Research-National Institute of Virology, Microbial Containment Complex                                                  | Indian Council of Medical Research-National Institute of Virology, Microbial Containment Complex                       | Pragya D. Yadav, Gururaj Rao Deshpande, Padinjarematathil Thankappan Ullas, Varsha Potdar, Prasad Sarkale, Dimpal A. Nyayanit, Anita Shete-Aich, Priya Abraham                                                                                                                                                                                                                      |
| EPI_ISL_637100, EPI_ISL_637101                                                                                                                                                                                                                                                                                                                                                                                                                                                                                                                                                                                                                                                                                                                                                                                                                                                                                                                 |           | Indian Council of Medical Research-National Institute of Virology, Microbial Containment Complex                                                  | Indian Council of Medical Research-National Institute of Virology, Microbial Containment Complex                       | Pragya D. Yadav, Prasad Sarkale, Gururaj Rao Deshpande, Padinjarematathil Thankappan Ullas, Varsha Potdar, Dimpal A. Nyayanit, Anita Shete-Aich, Priya Abraham                                                                                                                                                                                                                      |
| EPI_ISL_637102                                                                                                                                                                                                                                                                                                                                                                                                                                                                                                                                                                                                                                                                                                                                                                                                                                                                                                                                 |           | Indian Council of Medical Research-National Institute of Virology, Microbial Containment Complex                                                  | Indian Council of Medical Research-National Institute of Virology, Microbial Containment Complex                       | Pragya D. Yadav, Gururaj Rao Deshpande, Padinjarematathil Thankappan Ullas, Varsha Potdar, Prasad Sarkale, Dimpal A. Nyayanit, Anita Shete-Aich, Priya Abraham                                                                                                                                                                                                                      |
| EPI_ISL_637103, EPI_ISL_637104                                                                                                                                                                                                                                                                                                                                                                                                                                                                                                                                                                                                                                                                                                                                                                                                                                                                                                                 |           | Indian Council of Medical Research-National Institute of Virology, Microbial Containment Complex                                                  | Indian Council of Medical Research-National Institute of Virology, Microbial Containment Complex                       | Pragya D. Yadav, Prasad Sarkale, Gururaj Rao Deshpande, Padinjarematathil Thankappan Ullas, Varsha Potdar, Dimpal A. Nyayanit, Anita Shete-Aich, Priya Abraham                                                                                                                                                                                                                      |
| EPI_ISL_637107, EPI_ISL_637108, EPI_ISL_637109                                                                                                                                                                                                                                                                                                                                                                                                                                                                                                                                                                                                                                                                                                                                                                                                                                                                                                 |           | Laboratorio Biologia Molecolare Sars Cov2 - UOC Laboratorio Analisi - Servizio Medicina di Laboratorio, Ospedale "San Francesco" - ATS-ASSL Nuoro | Laboratorio specialistico UOC Ematologia - Ospedale "San Francesco" - ATS-ASSL Nuoro                                   | Piras Giovanna, Fancello Tatiana, Asproni Rosanna, Fiamma Maura, Monne Maria Itria, Toja Alessandro, Sanna Filomena, Floris Anna Rita, Sulis Vincenzo, Palmas Angelo Domenico, Casu Gavino, Lo Maglio Iana, Marmeli Giuseppe                                                                                                                                                        |
| EPI_ISL_641320, EPI_ISL_641321, EPI_ISL_641322, EPI_ISL_641323, EPI_ISL_641324, EPI_ISL_641325, EPI_ISL_641326, EPI_ISL_641327, EPI_ISL_641328, EPI_ISL_641329, EPI_ISL_641330, EPI_ISL_641331, EPI_ISL_641332, EPI_ISL_641333, EPI_ISL_641334, EPI_ISL_641335, EPI_ISL_641336, EPI_ISL_641337, EPI_ISL_641338, EPI_ISL_641339, EPI_ISL_641340, EPI_ISL_641341, EPI_ISL_641342, EPI_ISL_641343, EPI_ISL_641344, EPI_ISL_641345, EPI_ISL_641346, EPI_ISL_641347, EPI_ISL_641348, EPI_ISL_641349, EPI_ISL_641350, EPI_ISL_641351, EPI_ISL_641352, EPI_ISL_641353, EPI_ISL_641354, EPI_ISL_641355, EPI_ISL_641356, EPI_ISL_641357, EPI_ISL_641358, EPI_ISL_641359, EPI_ISL_641360, EPI_ISL_641361, EPI_ISL_641362, EPI_ISL_641363, EPI_ISL_641364, EPI_ISL_641365, EPI_ISL_641366, EPI_ISL_641367, EPI_ISL_641368, EPI_ISL_641369, EPI_ISL_641370, EPI_ISL_641371, EPI_ISL_641372, EPI_ISL_641373, EPI_ISL_641374, EPI_ISL_641375, EPI_ISL_641376 | see above | Devki Devi Foundation, a unit of Max Healthcare                                                                                                   | CSIR Institute of Genomics and Integrative Biology (CSIR-IGIB) / Max                                                   | Rajesh Pandey#, Samreen Siddiqui, Pooja Sharma, Bansidhar Tarai, Vivekanand A, Bharathram Uppili, Saruchi Wadhwa, Nishu Tyagi, Mitali Mukerji, Poonam Das, Sujeet Jha, Mohammed Faruq, Vinitaa Jha, Anurag Agrawal                                                                                                                                                                  |
| EPI_ISL_649154                                                                                                                                                                                                                                                                                                                                                                                                                                                                                                                                                                                                                                                                                                                                                                                                                                                                                                                                 |           | Queen Astrid Military Hospital                                                                                                                    | Institute of Tropical Medicine                                                                                         | Philippe Selhorst, Colin Anthony                                                                                                                                                                                                                                                                                                                                                    |
| EPI_ISL_654869                                                                                                                                                                                                                                                                                                                                                                                                                                                                                                                                                                                                                                                                                                                                                                                                                                                                                                                                 |           | Pasteur Institute in Ho Chi Minh city                                                                                                             | Department of Microbiology and Immunology - Pasteur Institute in Ho Chi Minh city                                      | Phm Th Nhung, ào Huy Mnh, Phm Th Thu Hng, V Phm Hng Nhung, Cao Minh Thng, Hunh Th Kim Loan, Nguyen Hoàng Quân, Hunh Phng Tho, Hoàng Nh ào, Nguyen Trung Hiu, Nguyen Hoàng Anh, Nguyen Thu Ngc, Nguyen Th Ngc Tho, ng Thanh Giang, Võ Th Trang ài, Hoàng Minh, Trn Th Hng Kim, Nguyen Thanh Long, Phm Duy Quang, Lng Chn Quang, Hoàng Quc Cng, Phan Trng Lán, Nguyen V Thng          |
| EPI_ISL_654872                                                                                                                                                                                                                                                                                                                                                                                                                                                                                                                                                                                                                                                                                                                                                                                                                                                                                                                                 |           | Pasteur Institute in Ho Chi Minh city                                                                                                             | Department of Microbiology and Immunology - Pasteur Institute in Ho Chi Minh city                                      | Phm Th Thu Hng, ào Huy Mnh, V Phm Hng Nhung, Cao Minh Thng, Hunh Th Kim Loan, Nguyen Hoàng Quân, Hunh Phng Tho, Hoàng Nh ào, Nguyen Trung Hiu, Nguyen Hoàng Anh, Nguyen Thu Ngc, Phm Th Nhung, Nguyen Th Ngc Tho, ng Thanh Giang, Nguyen Th Thanh Thng, Hoàng Minh, Nguyen Hoàng V, Nguyen Thanh Long, Phm Duy Quang, Lng Chn Quang, Hoàng Quc Cng, Phan Trng Lán, Nguyen V Thng    |
| EPI_ISL_654873                                                                                                                                                                                                                                                                                                                                                                                                                                                                                                                                                                                                                                                                                                                                                                                                                                                                                                                                 |           | Pasteur Institute in Ho Chi Minh city                                                                                                             | Department of Microbiology and Immunology - Pasteur Institute in Ho Chi Minh city                                      | Phm Th Thu Hng, ào Huy Mnh, V Phm Hng Nhung, Cao Minh Thng, Hunh Th Kim Loan, Nguyen Hoàng Quân, Hunh Phng Tho, Hoàng Nh ào, Nguyen Trung Hiu, Nguyen Th Thanh Tho, Nguyen Thu Ngc, Phm Th Nhung, Nguyen Th Ngc Tho, ng Thanh Giang, Nguyen Th Thanh Thng, Hoàng Minh, Trn Th Hng Kim, Nguyen Thanh Long, Phm Duy Quang, Lng Chn Quang, Hoàng Quc Cng, Nguyen V Thng, Phan Trng Lán |
| EPI_ISL_654878                                                                                                                                                                                                                                                                                                                                                                                                                                                                                                                                                                                                                                                                                                                                                                                                                                                                                                                                 |           | Pasteur Institute in Ho Chi Minh city                                                                                                             | Department of Microbiology and Immunology - Pasteur Institute in Ho Chi Minh city                                      | Phm Duy Quang, ào Huy Mnh, Phm Th Thu Hng, V Phm Hng Nhung, Cao Minh Thng, Hunh Th Kim Loan, Nguyen Hoàng Quân, Hunh Phng Tho, Hoàng Nh ào, Nguyen Trung Hiu, Nguyen Hoàng Anh, Nguyen Thu Ngc, Phm Th Nhung, Nguyen Th Ngc Tho, ng Thanh Giang, Nguyễn Th Thanh Thng, Hoàng Minh, Trn Th Hng Kim, Nguyen Thanh Long, Lng Chn Quang, Hoàng Quc Cng, Phan Trng Lán, Nguyen V Thng    |
| EPI_ISL_654879                                                                                                                                                                                                                                                                                                                                                                                                                                                                                                                                                                                                                                                                                                                                                                                                                                                                                                                                 |           | Pasteur Institute in Ho Chi Minh city                                                                                                             | Department of Microbiology and Immunology - Pasteur Institute in Ho Chi Minh city                                      | Phm Duy Quang, ào Huy Mnh, Phm Th Thu Hng, V Phm Hng Nhung, Cao Minh Thng, Hunh Th Kim Loan, Nguyen Hoàng Quân, Hunh Phng Tho, Hoàng Nh ào, Nguyen Trung Hiu, Nguyen Hoàng Anh, Nguyen Thu Ngc, Phm Th Nhung, Nguyen Th Ngc Tho, ng Thanh Giang, Lê Ngc Tú, Hoàng Minh, Trn Th Hng Kim, Nguyen Thanh Long, Lng Chn Quang, Hoàng Quc Cng, Nguyen V Thng, Phan Trng Lán               |
| EPI_ISL_654886, EPI_ISL_654887                                                                                                                                                                                                                                                                                                                                                                                                                                                                                                                                                                                                                                                                                                                                                                                                                                                                                                                 |           | Pasteur Institute in Ho Chi Minh city                                                                                                             | Department of Microbiology and Immunology - Pasteur Institute in Ho Chi Minh city                                      | Phan Trng Lán, ào Huy Mnh, Phm Th Thu Hng, V Phm Hng Nhung, Cao Minh Thng, Hunh Th Kim Loan, Nguyen Hoàng Quân, Hunh Phng Tho, Hoàng Nh ào, Nguyen Trung Hiu, Nguyen Hoàng Anh, Nguyen Thu Ngc, Phm Th Nhung, Nguyen Th Ngc Tho, ng Thanh Giang, Nguyễn Th Thanh Thng, Hoàng Minh, Trn Th Hng Kim, Nguyen Thanh Long, Phm Duy Quang, Lng Chn Quang, Hoàng Quc Cng, Nguyen V Thng    |
| EPI_ISL_667776                                                                                                                                                                                                                                                                                                                                                                                                                                                                                                                                                                                                                                                                                                                                                                                                                                                                                                                                 |           | Texas Department of State Health Services                                                                                                         | Texas Department of State Health Services                                                                              | Pedruenza, M., Oh, B., Zhang, J., Rahman, M., Pokharel, A., Tuladhar, R., Koag, M., Wang, C., Lee, R., Kubin, G. and Bonser, J.                                                                                                                                                                                                                                                     |
| EPI_ISL_671794, EPI_ISL_671795, EPI_ISL_671796, EPI_ISL_671797, EPI_ISL_671798, EPI_ISL_671799, EPI_ISL_671800, EPI_ISL_671801, EPI_ISL_671802, EPI_ISL_671803, EPI_ISL_671804                                                                                                                                                                                                                                                                                                                                                                                                                                                                                                                                                                                                                                                                                                                                                                 | see above | Hospital Clínico Universitario Lozano Blesa de Zaragoza (España)                                                                                  | SeqCOVID-SPAIN consortium/IBV(CSIC)                                                                                    | Rafael Benito, Sonia Algarate, Jessica Bueno and SeqCOVID-SPAIN consortium                                                                                                                                                                                                                                                                                                          |
| EPI_ISL_672621, EPI_ISL_672622, EPI_ISL_672623, EPI_ISL_672627, EPI_ISL_672629, EPI_ISL_672630, EPI_ISL_672632, EPI_ISL_672633, EPI_ISL_672634, EPI_ISL_672635, EPI_ISL_672640, EPI_ISL_672641, EPI_ISL_672642, EPI_ISL_672644, EPI_ISL_672646, EPI_ISL_672652                                                                                                                                                                                                                                                                                                                                                                                                                                                                                                                                                                                                                                                                                 | see above | PathWest Laboratory Medicine WA                                                                                                                   | PathWest Laboratory Medicine WA Microbial Surveillance Unit                                                            | PathWest Laboratory Medicine WA Microbial Surveillance Unit                                                                                                                                                                                                                                                                                                                         |
| EPI_ISL_676509, EPI_ISL_676541                                                                                                                                                                                                                                                                                                                                                                                                                                                                                                                                                                                                                                                                                                                                                                                                                                                                                                                 |           | TNMC & Nair ch. Hospital                                                                                                                          | CSIR-Institute of Genomics and Integrative Biology                                                                     | Rajesh Pandey, Jayanthi Shastri, Akshay Kanan, Janani Srinivasa Vasudevan, Ranjeet Maurya, Sachee Agrawal, Nirhar Chatterjee, Swapnil Parikh, Manish Pathak, Subrat Thanapati, Jasmira Savak, Suresh Poojari, Mahesh Sangar, Arnol Borse, Shweta Kawankar, Vasil Nachan, Mayuresh Vishwanathan, Shruthi Sachidanandan, Shrutika Pophale, Ulkarsha Yelwe                             |
| EPI_ISL_677674                                                                                                                                                                                                                                                                                                                                                                                                                                                                                                                                                                                                                                                                                                                                                                                                                                                                                                                                 |           | General Hospital - Prilep                                                                                                                         | Research Center for Genetic Engineering and Biotechnology "Georgi D. Efremov", Macedonian Academy of Sciences and Arts | RCGEB - MASA                                                                                                                                                                                                                                                                                                                                                                        |
| EPI_ISL_677675                                                                                                                                                                                                                                                                                                                                                                                                                                                                                                                                                                                                                                                                                                                                                                                                                                                                                                                                 |           | General Hospital - Veles                                                                                                                          | Research Center for Genetic Engineering and Biotechnology "Georgi D. Efremov", Macedonian Academy of Sciences and Arts | RCGEB - MASA                                                                                                                                                                                                                                                                                                                                                                        |
| EPI_ISL_677676, EPI_ISL_677677                                                                                                                                                                                                                                                                                                                                                                                                                                                                                                                                                                                                                                                                                                                                                                                                                                                                                                                 |           | Clinical Hospital - Shtip                                                                                                                         | Research Center for Genetic Engineering and Biotechnology "Georgi D. Efremov", Macedonian Academy of Sciences and Arts | RCGEB - MASA                                                                                                                                                                                                                                                                                                                                                                        |
| EPI_ISL_677700, EPI_ISL_677701, EPI_ISL_677702                                                                                                                                                                                                                                                                                                                                                                                                                                                                                                                                                                                                                                                                                                                                                                                                                                                                                                 |           | Center for public health - Skopje                                                                                                                 | Research Center for Genetic Engineering and Biotechnology "Georgi D. Efremov", Macedonian Academy of Sciences and Arts | RCGEB - MASA                                                                                                                                                                                                                                                                                                                                                                        |
| EPI_ISL_677703                                                                                                                                                                                                                                                                                                                                                                                                                                                                                                                                                                                                                                                                                                                                                                                                                                                                                                                                 |           | General Hospital - Prilep                                                                                                                         | Research Center for Genetic Engineering and Biotechnology "Georgi D. Efremov", Macedonian Academy of Sciences and Arts | RCGEB - MASA                                                                                                                                                                                                                                                                                                                                                                        |
| EPI_ISL_677704                                                                                                                                                                                                                                                                                                                                                                                                                                                                                                                                                                                                                                                                                                                                                                                                                                                                                                                                 |           | General Hospital - Ohrid                                                                                                                          | Research Center for Genetic Engineering and Biotechnology "Georgi D. Efremov", Macedonian Academy of Sciences and Arts | RCGEB - MASA                                                                                                                                                                                                                                                                                                                                                                        |
| EPI_ISL_677705                                                                                                                                                                                                                                                                                                                                                                                                                                                                                                                                                                                                                                                                                                                                                                                                                                                                                                                                 |           | General Hospital - Kumanovo                                                                                                                       | Research Center for Genetic Engineering and Biotechnology "Georgi D. Efremov", Macedonian Academy of Sciences          | RCGEB - MASA                                                                                                                                                                                                                                                                                                                                                                        |

and Arts

|                                                                                                                                |                                                                                 |                                                                                                                         |                                                                                                                                                                                                                          |
|--------------------------------------------------------------------------------------------------------------------------------|---------------------------------------------------------------------------------|-------------------------------------------------------------------------------------------------------------------------|--------------------------------------------------------------------------------------------------------------------------------------------------------------------------------------------------------------------------|
| EPI_ISL_677706                                                                                                                 | Center for public health - Skopje                                               | Research Center for Genetic Engineering and Biotechnology "Georgi D. Efremov" , Macedonian Academy of Sciences and Arts | RCGEB - MASA                                                                                                                                                                                                             |
| EPI_ISL_677707                                                                                                                 | General Hospital - Kumanovo                                                     | Research Center for Genetic Engineering and Biotechnology "Georgi D. Efremov" , Macedonian Academy of Sciences and Arts | RCGEB - MASA                                                                                                                                                                                                             |
| EPI_ISL_677708                                                                                                                 | Center for public health - Skopje                                               | Research Center for Genetic Engineering and Biotechnology "Georgi D. Efremov" , Macedonian Academy of Sciences and Arts | RCGEB - MASA                                                                                                                                                                                                             |
| EPI_ISL_677709                                                                                                                 | General Hospital - Ohrid                                                        | Research Center for Genetic Engineering and Biotechnology "Georgi D. Efremov" , Macedonian Academy of Sciences and Arts | RCGEB - MASA                                                                                                                                                                                                             |
| EPI_ISL_677710                                                                                                                 | General Hospital - Veles                                                        | Research Center for Genetic Engineering and Biotechnology "Georgi D. Efremov" , Macedonian Academy of Sciences and Arts | RCGEB - MASA                                                                                                                                                                                                             |
| EPI_ISL_677711                                                                                                                 | General Hospital - Ohrid                                                        | Research Center for Genetic Engineering and Biotechnology "Georgi D. Efremov" , Macedonian Academy of Sciences and Arts | RCGEB - MASA                                                                                                                                                                                                             |
| EPI_ISL_677712, EPI_ISL_677713, EPI_ISL_677714                                                                                 | General Hospital - Prilep                                                       | Research Center for Genetic Engineering and Biotechnology "Georgi D. Efremov" , Macedonian Academy of Sciences and Arts | RCGEB - MASA                                                                                                                                                                                                             |
| EPI_ISL_677715                                                                                                                 | Clinical Hospital - Bitola                                                      | Research Center for Genetic Engineering and Biotechnology "Georgi D. Efremov" , Macedonian Academy of Sciences and Arts | RCGEB - MASA                                                                                                                                                                                                             |
| EPI_ISL_677716, EPI_ISL_677717                                                                                                 | Clinical Hospital - Shtip                                                       | Research Center for Genetic Engineering and Biotechnology "Georgi D. Efremov" , Macedonian Academy of Sciences and Arts | RCGEB - MASA                                                                                                                                                                                                             |
| EPI_ISL_677718                                                                                                                 | Clinical Hospital - Bitola                                                      | Research Center for Genetic Engineering and Biotechnology "Georgi D. Efremov" , Macedonian Academy of Sciences and Arts | RCGEB - MASA                                                                                                                                                                                                             |
| EPI_ISL_677719                                                                                                                 | General Hospital - Struga                                                       | Research Center for Genetic Engineering and Biotechnology "Georgi D. Efremov" , Macedonian Academy of Sciences and Arts | RCGEB - MASA                                                                                                                                                                                                             |
| EPI_ISL_677720, EPI_ISL_677721                                                                                                 | Clinical Hospital - Shtip                                                       | Research Center for Genetic Engineering and Biotechnology "Georgi D. Efremov" , Macedonian Academy of Sciences and Arts | RCGEB - MASA                                                                                                                                                                                                             |
| EPI_ISL_677722                                                                                                                 | General Hospital - Ohrid                                                        | Research Center for Genetic Engineering and Biotechnology "Georgi D. Efremov" , Macedonian Academy of Sciences and Arts | RCGEB - MASA                                                                                                                                                                                                             |
| EPI_ISL_677723                                                                                                                 | Institute for Lung Diseases in Children - Skopje                                | Research Center for Genetic Engineering and Biotechnology "Georgi D. Efremov" , Macedonian Academy of Sciences and Arts | RCGEB - MASA                                                                                                                                                                                                             |
| EPI_ISL_677724                                                                                                                 | Clinical Hospital - Shtip                                                       | Research Center for Genetic Engineering and Biotechnology "Georgi D. Efremov" , Macedonian Academy of Sciences and Arts | RCGEB - MASA                                                                                                                                                                                                             |
| EPI_ISL_677725, EPI_ISL_677726                                                                                                 | General Hospital - Ohrid                                                        | Research Center for Genetic Engineering and Biotechnology "Georgi D. Efremov" , Macedonian Academy of Sciences and Arts | RCGEB - MASA                                                                                                                                                                                                             |
| EPI_ISL_677992, EPI_ISL_677993, EPI_ISL_677994, EPI_ISL_677995, EPI_ISL_677996, EPI_ISL_677997, EPI_ISL_677998, EPI_ISL_677999 | Pathogen Genomics Lab King Abdullah University of Science and Technology(KAUST) | Pathogen Genomics Lab King Abdullah University of Science and Technology(KAUST)                                         | Raece Naeem, Sara Mfarrej, Sharif Hala, Olga Douvropoulou, Raushan Nugmanova, Fadwa Alofi, Asim Khogeer, Afrah Alsomali, Jumana Taha, Abdulaziz Alahmadi, Kahled Alghithami, Anwar Hashem, Naif Almontashiri, Arnab Pain |
| EPI_ISL_678000, EPI_ISL_678001, EPI_ISL_678002, EPI_ISL_678003                                                                 | Pathogen Genomics Lab King Abdullah University of Science and Technology(KAUST) | Pathogen Genomics Lab King Abdullah University of Science and Technology(KAUST)                                         | Raece Naeem, Sara Mfarrej, Amanda Ooi, Luke Esau, Sharif Hala, Fadwa Alofi, Afrah Alsomali, Asim Khogeer, Jumana Taha, Abdulaziz Alahmadi, Kahled Alghithami, Anwar Hashem, Naif Almontashiri, Arnab Pain                |
| EPI_ISL_678160                                                                                                                 | Pathogen Genomics Lab King Abdullah University of Science and Technology(KAUST) | Pathogen Genomics Lab King Abdullah University of Science and Technology(KAUST)                                         | Raece Naeem, Sara Mfarrej, Amanda Ooi, Luke Esau, Sharif Hala, Awad Al-Omari, Samer Salih, Abbas Al Mutair, Arnab Pain                                                                                                   |
| EPI_ISL_678161, EPI_ISL_678166                                                                                                 | Pathogen Genomics Lab King Abdullah University of Science and Technology(KAUST) | Pathogen Genomics Lab King Abdullah University of Science and Technology(KAUST)                                         | Raece Naeem, Sara Mfarrej, Luke Esau, Amanda Ooi, Sharif Hala, Awad Al-Omari, Samer Salih, Abbas Al Mutair, Arnab Pain                                                                                                   |
| EPI_ISL_678169                                                                                                                 | Pathogen Genomics Lab King Abdullah University of Science and Technology(KAUST) | Pathogen Genomics Lab King Abdullah University of Science and Technology(KAUST)                                         | Raece Naeem, Sara Mfarrej, Amanda Ooi, Luke Esau, Sharif Hala, Awad Al-Omari, Samer Salih, Abbas Al Mutair, Arnab Pain                                                                                                   |
| EPI_ISL_678173                                                                                                                 | Pathogen Genomics Lab King Abdullah University of Science and Technology(KAUST) | Pathogen Genomics Lab King Abdullah University of Science and Technology(KAUST)                                         | Raece Naeem, Sara Mfarrej, Luke Esau, Amanda Ooi, Sharif Hala, Awad Al-Omari, Samer Salih, Abbas Al Mutair, Arnab Pain                                                                                                   |
| EPI_ISL_678175, EPI_ISL_678181, EPI_ISL_678188                                                                                 | Pathogen Genomics Lab King Abdullah University of Science and Technology(KAUST) | Pathogen Genomics Lab King Abdullah University of Science and Technology(KAUST)                                         | Raece Naeem, Sara Mfarrej, Amanda Ooi, Luke Esau, Sharif Hala, Awad Al-Omari, Samer Salih, Abbas Al Mutair, Arnab Pain                                                                                                   |
| EPI_ISL_678189                                                                                                                 | Pathogen Genomics Lab King Abdullah University of Science and Technology(KAUST) | Pathogen Genomics Lab King Abdullah University of Science and Technology(KAUST)                                         | Raece Naeem, Sara Mfarrej, Luke Esau, Amanda Ooi, Sharif Hala, Awad Al-Omari, Samer Salih, Abbas Al Mutair, Arnab Pain                                                                                                   |
| EPI_ISL_678191                                                                                                                 | Pathogen Genomics Lab King Abdullah University of Science and Technology(KAUST) | Pathogen Genomics Lab King Abdullah University of Science and Technology(KAUST)                                         | Raece Naeem, Sara Mfarrej, Amanda Ooi, Luke Esau, Sharif Hala, Awad Al-Omari, Samer Salih, Abbas Al Mutair, Arnab Pain                                                                                                   |
| EPI_ISL_678192                                                                                                                 | Pathogen Genomics Lab King Abdullah University of Science and Technology(KAUST) | Pathogen Genomics Lab King Abdullah University of Science and Technology(KAUST)                                         | Raece Naeem, Sharif Hala, Sara Mfarrej, Raushan Nugmanova, Olga Douvropoulou, Awad Al-Omari, Samer Salih, Abbas Al Mutair, Arnab Pain                                                                                    |
| EPI_ISL_678193                                                                                                                 | Pathogen Genomics Lab King Abdullah University of Science and Technology(KAUST) | Pathogen Genomics Lab King Abdullah University of Science and Technology(KAUST)                                         | Raece Naeem, Sara Mfarrej, Luke Esau, Amanda Ooi, Sharif Hala, Awad Al-Omari, Samer Salih, Abbas Al Mutair, Arnab Pain                                                                                                   |



|                                                                |                                                                                 |                                                                                                                         |                                                                                                                                       |
|----------------------------------------------------------------|---------------------------------------------------------------------------------|-------------------------------------------------------------------------------------------------------------------------|---------------------------------------------------------------------------------------------------------------------------------------|
| EPI_ISL_678194                                                 | Pathogen Genomics Lab King Abdullah University of Science and Technology(KAUST) | Pathogen Genomics Lab King Abdullah University of Science and Technology(KAUST)                                         | Raece Naeem, Sharif Hala, Sara Mfarrej, Raushan Nugmanova, Olga Douvropoulou, Awad Al-Omari, Samer Salih, Abbas Al Mutair, Arnab Pain |
| EPI_ISL_678195                                                 | Pathogen Genomics Lab King Abdullah University of Science and Technology(KAUST) | Pathogen Genomics Lab King Abdullah University of Science and Technology(KAUST)                                         | Raece Naeem, Sara Mfarrej, Luke Esau, Amanda Ooi, Sharif Hala, Awad A-Omari, Samer Salih, Abbas Al Mutair, Arnab Pain                 |
| EPI_ISL_678196, EPI_ISL_678197                                 | Pathogen Genomics Lab King Abdullah University of Science and Technology(KAUST) | Pathogen Genomics Lab King Abdullah University of Science and Technology(KAUST)                                         | Raece Naeem, Sara Mfarrej, Luke Esau, Amanda Ooi, Sharif Hala, Awad Al-Omari, Samer Salih, Abbas Al Mutair, Arnab Pain                |
| EPI_ISL_678198, EPI_ISL_678199                                 | Pathogen Genomics Lab King Abdullah University of Science and Technology(KAUST) | Pathogen Genomics Lab King Abdullah University of Science and Technology(KAUST)                                         | Raece Naeem, Sara Mfarrej, Luke Esau, Amanda Ooi, Sharif Hala, Awad Al-Omari, Samer Salih, Abbas Al Mutair, Arnab Pain                |
| EPI_ISL_678248, EPI_ISL_678249                                 | Center for public health - Skopje                                               | Research Center for Genetic Engineering and Biotechnology "Georgi D. Efremov" , Macedonian Academy of Sciences and Arts | RCGEB - MASA                                                                                                                          |
| EPI_ISL_678250                                                 | Clinical Hospital - Shtip                                                       | Research Center for Genetic Engineering and Biotechnology "Georgi D. Efremov" , Macedonian Academy of Sciences and Arts | RCGEB - MASA                                                                                                                          |
| EPI_ISL_678251                                                 | Institute for Lung Diseases in Children - Skopje                                | Research Center for Genetic Engineering and Biotechnology "Georgi D. Efremov" , Macedonian Academy of Sciences and Arts | RCGEB - MASA                                                                                                                          |
| EPI_ISL_678252                                                 | General Hospital - Kumanovo                                                     | Research Center for Genetic Engineering and Biotechnology "Georgi D. Efremov" , Macedonian Academy of Sciences and Arts | RCGEB - MASA                                                                                                                          |
| EPI_ISL_678253                                                 | Institute for Lung Diseases in Children - Skopje                                | Research Center for Genetic Engineering and Biotechnology "Georgi D. Efremov" , Macedonian Academy of Sciences and Arts | RCGEB - MASA                                                                                                                          |
| EPI_ISL_678254                                                 | General Hospital - Strumica                                                     | Research Center for Genetic Engineering and Biotechnology "Georgi D. Efremov" , Macedonian Academy of Sciences and Arts | RCGEB - MASA                                                                                                                          |
| EPI_ISL_678255, EPI_ISL_678256                                 | General Hospital - Ohrid                                                        | Research Center for Genetic Engineering and Biotechnology "Georgi D. Efremov" , Macedonian Academy of Sciences and Arts | RCGEB - MASA                                                                                                                          |
| EPI_ISL_678257                                                 | PHI Institute of Nephrology - Struga                                            | Research Center for Genetic Engineering and Biotechnology "Georgi D. Efremov" , Macedonian Academy of Sciences and Arts | RCGEB - MASA                                                                                                                          |
| EPI_ISL_678258                                                 | General Hospital - Prilep                                                       | Research Center for Genetic Engineering and Biotechnology "Georgi D. Efremov" , Macedonian Academy of Sciences and Arts | RCGEB - MASA                                                                                                                          |
| EPI_ISL_678259                                                 | Clinical Hospital - Shtip                                                       | Research Center for Genetic Engineering and Biotechnology "Georgi D. Efremov" , Macedonian Academy of Sciences and Arts | RCGEB - MASA                                                                                                                          |
| EPI_ISL_678260                                                 | General Hospital - Struga                                                       | Research Center for Genetic Engineering and Biotechnology "Georgi D. Efremov" , Macedonian Academy of Sciences and Arts | RCGEB - MASA                                                                                                                          |
| EPI_ISL_681705, EPI_ISL_681706                                 | University Hospital Limerick                                                    | Irish Coronavirus Sequencing Consortium - Teagasc Moorepark                                                             | Paul Cotter, Fiona Crispie, Amy Fitzpatrick, John Kenny, Elaine Lawton, Carolyn Meaney, Patrick Stapleton, Calum Walsh                |
| EPI_ISL_681707                                                 | University Hospital Limerick                                                    | Irish Coronavirus Sequencing Consortium - Teagasc Moorepark                                                             | Paul Cotter, Fiona Crispie, Amy Fitzpatrick, John Kenny, Carolyn Meaney, Patrick Stapleton, Calum Walsh                               |
| EPI_ISL_681708, EPI_ISL_681709, EPI_ISL_681710                 | University Hospital Limerick                                                    | Irish Coronavirus Sequencing Consortium - Teagasc Moorepark                                                             | Paul Cotter, Fiona Crispie, Amy Fitzpatrick, John Kenny, Elaine Lawton, Carolyn Meaney, Patrick Stapleton, Calum Walsh                |
| EPI_ISL_681711                                                 | University Hospital Limerick                                                    | Irish Coronavirus Sequencing Consortium - Teagasc Moorepark                                                             | Paul Cotter, Fiona Crispie, John Kenny, Calum Walsh                                                                                   |
| EPI_ISL_681712, EPI_ISL_681713                                 | University Hospital Limerick                                                    | Irish Coronavirus Sequencing Consortium - Teagasc Moorepark                                                             | Paul Cotter, Fiona Crispie, Amy Fitzpatrick, John Kenny, Elaine Lawton, Carolyn Meaney, Patrick Stapleton, Calum Walsh                |
| EPI_ISL_681714, EPI_ISL_681715                                 | University Hospital Limerick                                                    | Irish Coronavirus Sequencing Consortium - Teagasc Moorepark                                                             | Paul Cotter, Fiona Crispie, Amy Fitzpatrick, John Kenny, Carolyn Meaney, Patrick Stapleton, Calum Walsh                               |
| EPI_ISL_681716, EPI_ISL_681717, EPI_ISL_681718                 | University Hospital Limerick                                                    | Irish Coronavirus Sequencing Consortium - Teagasc Moorepark                                                             | Paul Cotter, Fiona Crispie, Amy Fitzpatrick, John Kenny, Elaine Lawton, Carolyn Meaney, Patrick Stapleton, Calum Walsh                |
| EPI_ISL_681719                                                 | University Hospital Limerick                                                    | Irish Coronavirus Sequencing Consortium - Teagasc Moorepark                                                             | Paul Cotter, Fiona Crispie, John Kenny, Calum Walsh                                                                                   |
| EPI_ISL_681720                                                 | University Hospital Limerick                                                    | Irish Coronavirus Sequencing Consortium - Teagasc Moorepark                                                             | Paul Cotter, Fiona Crispie, Amy Fitzpatrick, John Kenny, Elaine Lawton, Carolyn Meaney, Patrick Stapleton, Calum Walsh                |
| EPI_ISL_681721                                                 | University Hospital Limerick                                                    | Irish Coronavirus Sequencing Consortium - Teagasc Moorepark                                                             | Paul Cotter, Fiona Crispie, John Kenny, Calum Walsh                                                                                   |
| EPI_ISL_681722, EPI_ISL_681723, EPI_ISL_681724, EPI_ISL_681725 | University Hospital Limerick                                                    | Irish Coronavirus Sequencing Consortium - Teagasc Moorepark                                                             | Paul Cotter, Fiona Crispie, Amy Fitzpatrick, John Kenny, Elaine Lawton, Carolyn Meaney, Patrick Stapleton, Calum Walsh                |
| EPI_ISL_681726, EPI_ISL_681727                                 | University Hospital Limerick                                                    | Irish Coronavirus Sequencing Consortium - Teagasc Moorepark                                                             | Paul Cotter, Fiona Crispie, Amy Fitzpatrick, John Kenny, Carolyn Meaney, Patrick Stapleton, Calum Walsh                               |
| EPI_ISL_681728                                                 | University Hospital Limerick                                                    | Irish Coronavirus Sequencing Consortium - Teagasc Moorepark                                                             | Paul Cotter, Fiona Crispie, John Kenny, Calum Walsh                                                                                   |
| EPI_ISL_681729, EPI_ISL_681730                                 | University Hospital Limerick                                                    | Irish Coronavirus Sequencing Consortium - Teagasc Moorepark                                                             | Paul Cotter, Fiona Crispie, Amy Fitzpatrick, John Kenny, Elaine Lawton, Carolyn Meaney, Patrick Stapleton, Calum Walsh                |
| EPI_ISL_681731                                                 | University Hospital Limerick                                                    | Irish Coronavirus Sequencing Consortium - Teagasc Moorepark                                                             | Paul Cotter, Fiona Crispie, John Kenny, Calum Walsh                                                                                   |
| EPI_ISL_681732, EPI_ISL_681733, EPI_ISL_681734, EPI_ISL_681735 | University Hospital Limerick                                                    | Irish Coronavirus Sequencing Consortium - Teagasc Moorepark                                                             | Paul Cotter, Fiona Crispie, Amy Fitzpatrick, John Kenny, Elaine Lawton, Carolyn Meaney, Patrick Stapleton, Calum Walsh                |

|                                                                                                                                                                                                                                                                                                                                                                                                                                                                                                                                                                                                                                                                                                                                                |                                                                  |                                                                                                   |                                                                                                                                                                     |                                                                     |
|------------------------------------------------------------------------------------------------------------------------------------------------------------------------------------------------------------------------------------------------------------------------------------------------------------------------------------------------------------------------------------------------------------------------------------------------------------------------------------------------------------------------------------------------------------------------------------------------------------------------------------------------------------------------------------------------------------------------------------------------|------------------------------------------------------------------|---------------------------------------------------------------------------------------------------|---------------------------------------------------------------------------------------------------------------------------------------------------------------------|---------------------------------------------------------------------|
| EPI_ISL_681736, EPI_ISL_681737                                                                                                                                                                                                                                                                                                                                                                                                                                                                                                                                                                                                                                                                                                                 | University Hospital Limerick                                     | Irish Coronavirus Sequencing Consortium - Teagasc Moorepark                                       | Paul Cotter, Fiona Crispie, John Kenny, Calum Walsh                                                                                                                 |                                                                     |
| EPI_ISL_681738, EPI_ISL_681739                                                                                                                                                                                                                                                                                                                                                                                                                                                                                                                                                                                                                                                                                                                 | University Hospital Limerick                                     | Irish Coronavirus Sequencing Consortium - Teagasc Moorepark                                       | Paul Cotter, Fiona Crispie, Amy Fitzpatrick, John Kenny, Carolyn Meaney, Patrick Stapleton, Calum Walsh                                                             |                                                                     |
| EPI_ISL_681740, EPI_ISL_681741, EPI_ISL_681742, EPI_ISL_681743                                                                                                                                                                                                                                                                                                                                                                                                                                                                                                                                                                                                                                                                                 | University Hospital Limerick                                     | Irish Coronavirus Sequencing Consortium - Teagasc Moorepark                                       | Paul Cotter, Fiona Crispie, Amy Fitzpatrick, John Kenny, Elaine Lawton, Carolyn Meaney, Patrick Stapleton, Calum Walsh                                              |                                                                     |
| EPI_ISL_681744, EPI_ISL_681745                                                                                                                                                                                                                                                                                                                                                                                                                                                                                                                                                                                                                                                                                                                 | University Hospital Limerick                                     | Irish Coronavirus Sequencing Consortium - Teagasc Moorepark                                       | Paul Cotter, Fiona Crispie, Amy Fitzpatrick, John Kenny, Carolyn Meaney, Patrick Stapleton, Calum Walsh                                                             |                                                                     |
| EPI_ISL_681746                                                                                                                                                                                                                                                                                                                                                                                                                                                                                                                                                                                                                                                                                                                                 | University Hospital Limerick                                     | Irish Coronavirus Sequencing Consortium - Teagasc Moorepark                                       | Paul Cotter, Fiona Crispie, Amy Fitzpatrick, John Kenny, Elaine Lawton, Carolyn Meaney, Patrick Stapleton, Calum Walsh                                              |                                                                     |
| EPI_ISL_681747, EPI_ISL_681748, EPI_ISL_681749, EPI_ISL_681750, EPI_ISL_681751                                                                                                                                                                                                                                                                                                                                                                                                                                                                                                                                                                                                                                                                 | University Hospital Limerick                                     | Irish Coronavirus Sequencing Consortium - Teagasc Moorepark                                       | Paul Cotter, Fiona Crispie, Amy Fitzpatrick, John Kenny, Carolyn Meaney, Patrick Stapleton, Calum Walsh                                                             |                                                                     |
| EPI_ISL_681752                                                                                                                                                                                                                                                                                                                                                                                                                                                                                                                                                                                                                                                                                                                                 | University Hospital Limerick                                     | Irish Coronavirus Sequencing Consortium - Teagasc Moorepark                                       | Paul Cotter, Fiona Crispie, John Kenny, Calum Walsh                                                                                                                 |                                                                     |
| EPI_ISL_681753                                                                                                                                                                                                                                                                                                                                                                                                                                                                                                                                                                                                                                                                                                                                 | University Hospital Limerick                                     | Irish Coronavirus Sequencing Consortium - Teagasc Moorepark                                       | Paul Cotter, Fiona Crispie, Amy Fitzpatrick, John Kenny, Carolyn Meaney, Patrick Stapleton, Calum Walsh                                                             |                                                                     |
| EPI_ISL_681754                                                                                                                                                                                                                                                                                                                                                                                                                                                                                                                                                                                                                                                                                                                                 | University Hospital Limerick                                     | Irish Coronavirus Sequencing Consortium - Teagasc Moorepark                                       | Paul Cotter, Fiona Crispie, John Kenny, Calum Walsh                                                                                                                 |                                                                     |
| EPI_ISL_681755, EPI_ISL_681756                                                                                                                                                                                                                                                                                                                                                                                                                                                                                                                                                                                                                                                                                                                 | University Hospital Limerick                                     | Irish Coronavirus Sequencing Consortium - Teagasc Moorepark                                       | Paul Cotter, Fiona Crispie, Amy Fitzpatrick, John Kenny, Carolyn Meaney, Patrick Stapleton, Calum Walsh                                                             |                                                                     |
| EPI_ISL_681757                                                                                                                                                                                                                                                                                                                                                                                                                                                                                                                                                                                                                                                                                                                                 | University Hospital Limerick                                     | Irish Coronavirus Sequencing Consortium - Teagasc Moorepark                                       | Paul Cotter, Fiona Crispie, John Kenny, Calum Walsh                                                                                                                 |                                                                     |
| EPI_ISL_681758                                                                                                                                                                                                                                                                                                                                                                                                                                                                                                                                                                                                                                                                                                                                 | University Hospital Limerick                                     | Irish Coronavirus Sequencing Consortium - Teagasc Moorepark                                       | Paul Cotter, Fiona Crispie, Amy Fitzpatrick, John Kenny, Elaine Lawton, Carolyn Meaney, Patrick Stapleton, Calum Walsh                                              |                                                                     |
| EPI_ISL_681759, EPI_ISL_681760                                                                                                                                                                                                                                                                                                                                                                                                                                                                                                                                                                                                                                                                                                                 | University Hospital Limerick                                     | Irish Coronavirus Sequencing Consortium - Teagasc Moorepark                                       | Paul Cotter, Fiona Crispie, John Kenny, Calum Walsh                                                                                                                 |                                                                     |
| EPI_ISL_681761, EPI_ISL_681762, EPI_ISL_681763                                                                                                                                                                                                                                                                                                                                                                                                                                                                                                                                                                                                                                                                                                 | University Hospital Limerick                                     | Irish Coronavirus Sequencing Consortium - Teagasc Moorepark                                       | Paul Cotter, Fiona Crispie, Amy Fitzpatrick, John Kenny, Elaine Lawton, Carolyn Meaney, Patrick Stapleton, Calum Walsh                                              |                                                                     |
| EPI_ISL_681764                                                                                                                                                                                                                                                                                                                                                                                                                                                                                                                                                                                                                                                                                                                                 | University Hospital Limerick                                     | Irish Coronavirus Sequencing Consortium - Teagasc Moorepark                                       | Paul Cotter, Fiona Crispie, John Kenny, Calum Walsh                                                                                                                 |                                                                     |
| EPI_ISL_681765, EPI_ISL_681766                                                                                                                                                                                                                                                                                                                                                                                                                                                                                                                                                                                                                                                                                                                 | University Hospital Limerick                                     | Irish Coronavirus Sequencing Consortium - Teagasc Moorepark                                       | Paul Cotter, Fiona Crispie, Amy Fitzpatrick, John Kenny, Elaine Lawton, Carolyn Meaney, Patrick Stapleton, Calum Walsh                                              |                                                                     |
| EPI_ISL_681767, EPI_ISL_681768                                                                                                                                                                                                                                                                                                                                                                                                                                                                                                                                                                                                                                                                                                                 | University Hospital Limerick                                     | Irish Coronavirus Sequencing Consortium - Teagasc Moorepark                                       | Paul Cotter, Fiona Crispie, John Kenny, Calum Walsh                                                                                                                 |                                                                     |
| EPI_ISL_681769                                                                                                                                                                                                                                                                                                                                                                                                                                                                                                                                                                                                                                                                                                                                 | University Hospital Limerick                                     | Irish Coronavirus Sequencing Consortium - Teagasc Moorepark                                       | Paul Cotter, Fiona Crispie, Amy Fitzpatrick, John Kenny, Carolyn Meaney, Patrick Stapleton, Calum Walsh                                                             |                                                                     |
| EPI_ISL_681770                                                                                                                                                                                                                                                                                                                                                                                                                                                                                                                                                                                                                                                                                                                                 | University Hospital Limerick                                     | Irish Coronavirus Sequencing Consortium - Teagasc Moorepark                                       | Paul Cotter, Fiona Crispie, Amy Fitzpatrick, John Kenny, Elaine Lawton, Carolyn Meaney, Patrick Stapleton, Calum Walsh                                              |                                                                     |
| EPI_ISL_681771, EPI_ISL_681772, EPI_ISL_681773                                                                                                                                                                                                                                                                                                                                                                                                                                                                                                                                                                                                                                                                                                 | University Hospital Limerick                                     | Irish Coronavirus Sequencing Consortium - Teagasc Moorepark                                       | Paul Cotter, Fiona Crispie, Amy Fitzpatrick, John Kenny, Carolyn Meaney, Patrick Stapleton, Calum Walsh                                                             |                                                                     |
| EPI_ISL_681774, EPI_ISL_681775                                                                                                                                                                                                                                                                                                                                                                                                                                                                                                                                                                                                                                                                                                                 | University Hospital Limerick                                     | Irish Coronavirus Sequencing Consortium - Teagasc Moorepark                                       | Paul Cotter, Fiona Crispie, Amy Fitzpatrick, John Kenny, Elaine Lawton, Carolyn Meaney, Patrick Stapleton, Calum Walsh                                              |                                                                     |
| EPI_ISL_681885, EPI_ISL_681886, EPI_ISL_681887, EPI_ISL_681888, EPI_ISL_681889, EPI_ISL_681890, EPI_ISL_681891, EPI_ISL_681892, EPI_ISL_681893, EPI_ISL_681894, EPI_ISL_681895, EPI_ISL_681896, EPI_ISL_681897, EPI_ISL_681898, EPI_ISL_681899, EPI_ISL_681900, EPI_ISL_681901, EPI_ISL_681902, EPI_ISL_681903, EPI_ISL_681904, EPI_ISL_681905, EPI_ISL_681906, EPI_ISL_681907, EPI_ISL_681908, EPI_ISL_681909, EPI_ISL_681910, EPI_ISL_681911, EPI_ISL_681912, EPI_ISL_681913, EPI_ISL_681914, EPI_ISL_681915, EPI_ISL_681916, EPI_ISL_681917, EPI_ISL_681918, EPI_ISL_681919, EPI_ISL_681920, EPI_ISL_681921, EPI_ISL_681922, EPI_ISL_681923, EPI_ISL_681924, EPI_ISL_681925, EPI_ISL_681926, EPI_ISL_681927, EPI_ISL_681928, EPI_ISL_682057 | see above                                                        | National Virus Reference Laboratory                                                               | Irish Coronavirus Sequencing Consortium - Teagasc Moorepark                                                                                                         | Paul Cotter, Fiona Crispie, John Kenny, Matthew McCabe, Calum Walsh |
| EPI_ISL_683595, EPI_ISL_683596, EPI_ISL_683597                                                                                                                                                                                                                                                                                                                                                                                                                                                                                                                                                                                                                                                                                                 | Hospital Clínico Universitario Lozano Blesa de Zaragoza (España) | SeqCOVID-SPAIN consortium/IBV(CSIC)                                                               | Rafael Benito, Sonia Algarate, Jessica Bueno and SeqCOVID-SPAIN consortium                                                                                          |                                                                     |
| EPI_ISL_694046                                                                                                                                                                                                                                                                                                                                                                                                                                                                                                                                                                                                                                                                                                                                 | Los Angeles County Public Health Laboratory                      | Los Angeles County Public Health Laboratory                                                       | Peera Hemarajata et al.                                                                                                                                             |                                                                     |
| EPI_ISL_699464                                                                                                                                                                                                                                                                                                                                                                                                                                                                                                                                                                                                                                                                                                                                 | Regional Medical Sciences Center 11/1 phuket                     | National Institute of Health, Department of Medical Sciences, Ministry of Public Health, Thailand | Pilailuk Okada; Siripaporn Phuygun; Thanutsapa Thanadachakul; Sittiporn Parmmen; Warawan Wongboot; Sunthareeya Waicharoen; Malinee Chittaganpitch                   |                                                                     |
| EPI_ISL_699484, EPI_ISL_708721, EPI_ISL_708722                                                                                                                                                                                                                                                                                                                                                                                                                                                                                                                                                                                                                                                                                                 | Bangpakok 9 international hospital                               | National Institute of Health, Department of Medical Sciences, Ministry of Public Health, Thailand | Pilailuk Okada; Siripaporn Phuygun; Thanutsapa Thanadachakul; Sittiporn Parmmen; Warawan Wongboot; Sunthareeya Waicharoen; Malinee Chittaganpitch                   |                                                                     |
| EPI_ISL_708723, EPI_ISL_708735                                                                                                                                                                                                                                                                                                                                                                                                                                                                                                                                                                                                                                                                                                                 | Regional Medical Sciences Center 11/1 phuket                     | National Institute of Health, Department of Medical Sciences, Ministry of Public Health, Thailand | Pilailuk Okada; Siripaporn Phuygun; Thanutsapa Thanadachakul; Sittiporn Parmmen; Warawan Wongboot; Sunthareeya Waicharoen; Malinee Chittaganpitch                   |                                                                     |
| EPI_ISL_708736                                                                                                                                                                                                                                                                                                                                                                                                                                                                                                                                                                                                                                                                                                                                 | Bangpakok 9 international hospital                               | National Institute of Health, Department of Medical Sciences, Ministry of Public Health, Thailand | Pilailuk Okada; Siripaporn Phuygun; Thanutsapa Thanadachakul; Sittiporn Parmmen; Warawan Wongboot; Sunthareeya Waicharoen; Malinee Chittaganpitch                   |                                                                     |
| EPI_ISL_708737                                                                                                                                                                                                                                                                                                                                                                                                                                                                                                                                                                                                                                                                                                                                 | Regional medical sciences center 6 chonburi                      | National Institute of Health, Department of Medical Sciences, Ministry of Public Health, Thailand | Pilailuk Okada; Siripaporn Phuygun; Thanutsapa Thanadachakul; Sittiporn Parmmen; Warawan Wongboot; Sunthareeya Waicharoen; Malinee Chittaganpitch                   |                                                                     |
| EPI_ISL_708738, EPI_ISL_708739, EPI_ISL_708744, EPI_ISL_708748, EPI_ISL_708750, EPI_ISL_708751, EPI_ISL_708757, EPI_ISL_708758, EPI_ISL_708760, EPI_ISL_708763, EPI_ISL_708766, EPI_ISL_708768, EPI_ISL_708771, EPI_ISL_708772, EPI_ISL_708773, EPI_ISL_708774, EPI_ISL_708776, EPI_ISL_708779, EPI_ISL_708780, EPI_ISL_708782, EPI_ISL_708783, EPI_ISL_708784, EPI_ISL_708787, EPI_ISL_708792, EPI_ISL_708793, EPI_ISL_708796                                                                                                                                                                                                                                                                                                                 | see above                                                        | PathWest Laboratory Medicine WA                                                                   | PathWest Laboratory Medicine WA Microbial Surveillance Unit                                                                                                         |                                                                     |
| EPI_ISL_708797, EPI_ISL_708800                                                                                                                                                                                                                                                                                                                                                                                                                                                                                                                                                                                                                                                                                                                 | Regional medical sciences center 6 chonburi                      | National Institute of Health, Department of Medical Sciences, Ministry of Public Health, Thailand | Pilailuk Okada; Siripaporn Phuygun; Thanutsapa Thanadachakul; Sittiporn Parmmen; Warawan Wongboot; Sunthareeya Waicharoen; Malinee Chittaganpitch                   |                                                                     |
| EPI_ISL_708801, EPI_ISL_708802, EPI_ISL_708804, EPI_ISL_708806, EPI_ISL_708807, EPI_ISL_708808                                                                                                                                                                                                                                                                                                                                                                                                                                                                                                                                                                                                                                                 | Regional medical sciences center 6 chonburi                      | National Institute of Health, Department of Medical Sciences, Ministry of Public Health, Thailand | Pilailuk Okada; Siripaporn Phuygun; Thanutsapa Thanadachakul; Sittiporn Parmmen; Pakorn Piromtong; Warawan Wongboot; Sunthareeya Waicharoen; Malinee Chittaganpitch |                                                                     |

|                                                                                                                                                                                                                                                                                                                                                                                                                                                                                                                                                                                                                                                                                                                                                                                                                                                                                                                                                                                                                                                                                                                                                                                                                                                                                                                                                                                                                                                                                                                                                                                                                                                                                                                                                                                                                                                                                                                                                                                                                                                                                                                                                                                                                                                                                                                                                                                                                                                                                                                                                                                                                                                                                                                                                                                                                                                                                                                                                                                                                                                                                                                                                                                                                                                                                                                                                                                                                                                                                                                                                                                                                                                                                                                                                                                                                                                                                                                                                                                                                                                                                                                                                                                                                                                                                                                                                                                                                                                                                                                                                                                                                                                                                                                                                                                                                                                                                                                                                                                                                                                                                                                                                                                                                                                                |                                                                        |                                                                                                   |                                                                                                                                                                                            |                                                                                                                                                                                                                                                                                       |
|----------------------------------------------------------------------------------------------------------------------------------------------------------------------------------------------------------------------------------------------------------------------------------------------------------------------------------------------------------------------------------------------------------------------------------------------------------------------------------------------------------------------------------------------------------------------------------------------------------------------------------------------------------------------------------------------------------------------------------------------------------------------------------------------------------------------------------------------------------------------------------------------------------------------------------------------------------------------------------------------------------------------------------------------------------------------------------------------------------------------------------------------------------------------------------------------------------------------------------------------------------------------------------------------------------------------------------------------------------------------------------------------------------------------------------------------------------------------------------------------------------------------------------------------------------------------------------------------------------------------------------------------------------------------------------------------------------------------------------------------------------------------------------------------------------------------------------------------------------------------------------------------------------------------------------------------------------------------------------------------------------------------------------------------------------------------------------------------------------------------------------------------------------------------------------------------------------------------------------------------------------------------------------------------------------------------------------------------------------------------------------------------------------------------------------------------------------------------------------------------------------------------------------------------------------------------------------------------------------------------------------------------------------------------------------------------------------------------------------------------------------------------------------------------------------------------------------------------------------------------------------------------------------------------------------------------------------------------------------------------------------------------------------------------------------------------------------------------------------------------------------------------------------------------------------------------------------------------------------------------------------------------------------------------------------------------------------------------------------------------------------------------------------------------------------------------------------------------------------------------------------------------------------------------------------------------------------------------------------------------------------------------------------------------------------------------------------------------------------------------------------------------------------------------------------------------------------------------------------------------------------------------------------------------------------------------------------------------------------------------------------------------------------------------------------------------------------------------------------------------------------------------------------------------------------------------------------------------------------------------------------------------------------------------------------------------------------------------------------------------------------------------------------------------------------------------------------------------------------------------------------------------------------------------------------------------------------------------------------------------------------------------------------------------------------------------------------------------------------------------------------------------------------------------------------------------------------------------------------------------------------------------------------------------------------------------------------------------------------------------------------------------------------------------------------------------------------------------------------------------------------------------------------------------------------------------------------------------------------------------------------------|------------------------------------------------------------------------|---------------------------------------------------------------------------------------------------|--------------------------------------------------------------------------------------------------------------------------------------------------------------------------------------------|---------------------------------------------------------------------------------------------------------------------------------------------------------------------------------------------------------------------------------------------------------------------------------------|
| EPI_ISL_708810, EPI_ISL_708811                                                                                                                                                                                                                                                                                                                                                                                                                                                                                                                                                                                                                                                                                                                                                                                                                                                                                                                                                                                                                                                                                                                                                                                                                                                                                                                                                                                                                                                                                                                                                                                                                                                                                                                                                                                                                                                                                                                                                                                                                                                                                                                                                                                                                                                                                                                                                                                                                                                                                                                                                                                                                                                                                                                                                                                                                                                                                                                                                                                                                                                                                                                                                                                                                                                                                                                                                                                                                                                                                                                                                                                                                                                                                                                                                                                                                                                                                                                                                                                                                                                                                                                                                                                                                                                                                                                                                                                                                                                                                                                                                                                                                                                                                                                                                                                                                                                                                                                                                                                                                                                                                                                                                                                                                                 | Regional medical sciences center 2 Phitsanulok                         | National Institute of Health, Department of Medical Sciences, Ministry of Public Health, Thailand | Pilailuk Okada; Siripaporn Phuygun; Thanutsapa Thanadachakul; Sittiporn Parmmen; Pakorn Piromtong; Warawan Wongboot; Sunthareeya Waichareon; Malinee Chittaganpich                         |                                                                                                                                                                                                                                                                                       |
| EPI_ISL_708812, EPI_ISL_708813, EPI_ISL_708814                                                                                                                                                                                                                                                                                                                                                                                                                                                                                                                                                                                                                                                                                                                                                                                                                                                                                                                                                                                                                                                                                                                                                                                                                                                                                                                                                                                                                                                                                                                                                                                                                                                                                                                                                                                                                                                                                                                                                                                                                                                                                                                                                                                                                                                                                                                                                                                                                                                                                                                                                                                                                                                                                                                                                                                                                                                                                                                                                                                                                                                                                                                                                                                                                                                                                                                                                                                                                                                                                                                                                                                                                                                                                                                                                                                                                                                                                                                                                                                                                                                                                                                                                                                                                                                                                                                                                                                                                                                                                                                                                                                                                                                                                                                                                                                                                                                                                                                                                                                                                                                                                                                                                                                                                 | World Medical Hospital                                                 | National Institute of Health, Department of Medical Sciences, Ministry of Public Health, Thailand | Pilailuk Okada; Siripaporn Phuygun; Thanutsapa Thanadachakul; Sittiporn Parmmen; Pakorn Piromtong; Warawan Wongboot; Sunthareeya Waichareon; Malinee Chittaganpich                         |                                                                                                                                                                                                                                                                                       |
| EPI_ISL_708815, EPI_ISL_708816, EPI_ISL_708817, EPI_ISL_708818, EPI_ISL_708819                                                                                                                                                                                                                                                                                                                                                                                                                                                                                                                                                                                                                                                                                                                                                                                                                                                                                                                                                                                                                                                                                                                                                                                                                                                                                                                                                                                                                                                                                                                                                                                                                                                                                                                                                                                                                                                                                                                                                                                                                                                                                                                                                                                                                                                                                                                                                                                                                                                                                                                                                                                                                                                                                                                                                                                                                                                                                                                                                                                                                                                                                                                                                                                                                                                                                                                                                                                                                                                                                                                                                                                                                                                                                                                                                                                                                                                                                                                                                                                                                                                                                                                                                                                                                                                                                                                                                                                                                                                                                                                                                                                                                                                                                                                                                                                                                                                                                                                                                                                                                                                                                                                                                                                 | Urban Institute for Disease Prevention and Control                     | National Institute of Health, Department of Medical Sciences, Ministry of Public Health, Thailand | Pilailuk Okada; Siripaporn Phuygun; Thanutsapa Thanadachakul; Sittiporn Parmmen; Pakorn Piromtong; Warawan Wongboot; Sunthareeya Waichareon; Malinee Chittaganpich                         |                                                                                                                                                                                                                                                                                       |
| EPI_ISL_708820                                                                                                                                                                                                                                                                                                                                                                                                                                                                                                                                                                                                                                                                                                                                                                                                                                                                                                                                                                                                                                                                                                                                                                                                                                                                                                                                                                                                                                                                                                                                                                                                                                                                                                                                                                                                                                                                                                                                                                                                                                                                                                                                                                                                                                                                                                                                                                                                                                                                                                                                                                                                                                                                                                                                                                                                                                                                                                                                                                                                                                                                                                                                                                                                                                                                                                                                                                                                                                                                                                                                                                                                                                                                                                                                                                                                                                                                                                                                                                                                                                                                                                                                                                                                                                                                                                                                                                                                                                                                                                                                                                                                                                                                                                                                                                                                                                                                                                                                                                                                                                                                                                                                                                                                                                                 | Vajira Hospital                                                        | National Institute of Health, Department of Medical Sciences, Ministry of Public Health, Thailand | Pilailuk Okada; Siripaporn Phuygun; Thanutsapa Thanadachakul; Sittiporn Parmmen; Pakorn Piromtong; Warawan Wongboot; Sunthareeya Waichareon; Malinee Chittaganpich                         |                                                                                                                                                                                                                                                                                       |
| EPI_ISL_708821                                                                                                                                                                                                                                                                                                                                                                                                                                                                                                                                                                                                                                                                                                                                                                                                                                                                                                                                                                                                                                                                                                                                                                                                                                                                                                                                                                                                                                                                                                                                                                                                                                                                                                                                                                                                                                                                                                                                                                                                                                                                                                                                                                                                                                                                                                                                                                                                                                                                                                                                                                                                                                                                                                                                                                                                                                                                                                                                                                                                                                                                                                                                                                                                                                                                                                                                                                                                                                                                                                                                                                                                                                                                                                                                                                                                                                                                                                                                                                                                                                                                                                                                                                                                                                                                                                                                                                                                                                                                                                                                                                                                                                                                                                                                                                                                                                                                                                                                                                                                                                                                                                                                                                                                                                                 | Synphaet Hospital                                                      | National Institute of Health, Department of Medical Sciences, Ministry of Public Health, Thailand | Pilailuk Okada; Siripaporn Phuygun; Thanutsapa Thanadachakul; Sittiporn Parmmen; Pakorn Piromtong; Warawan Wongboot; Sunthareeya Waichareon; Malinee Chittaganpich                         |                                                                                                                                                                                                                                                                                       |
| EPI_ISL_708822                                                                                                                                                                                                                                                                                                                                                                                                                                                                                                                                                                                                                                                                                                                                                                                                                                                                                                                                                                                                                                                                                                                                                                                                                                                                                                                                                                                                                                                                                                                                                                                                                                                                                                                                                                                                                                                                                                                                                                                                                                                                                                                                                                                                                                                                                                                                                                                                                                                                                                                                                                                                                                                                                                                                                                                                                                                                                                                                                                                                                                                                                                                                                                                                                                                                                                                                                                                                                                                                                                                                                                                                                                                                                                                                                                                                                                                                                                                                                                                                                                                                                                                                                                                                                                                                                                                                                                                                                                                                                                                                                                                                                                                                                                                                                                                                                                                                                                                                                                                                                                                                                                                                                                                                                                                 | Emergency Operation Center, (EOC)                                      | National Institute of Health, Department of Medical Sciences, Ministry of Public Health, Thailand | Pilailuk Okada; Siripaporn Phuygun; Thanutsapa Thanadachakul; Sittiporn Parmmen; Pakorn Piromtong; Warawan Wongboot; Sunthareeya Waichareon; Malinee Chittaganpich                         |                                                                                                                                                                                                                                                                                       |
| EPI_ISL_708823                                                                                                                                                                                                                                                                                                                                                                                                                                                                                                                                                                                                                                                                                                                                                                                                                                                                                                                                                                                                                                                                                                                                                                                                                                                                                                                                                                                                                                                                                                                                                                                                                                                                                                                                                                                                                                                                                                                                                                                                                                                                                                                                                                                                                                                                                                                                                                                                                                                                                                                                                                                                                                                                                                                                                                                                                                                                                                                                                                                                                                                                                                                                                                                                                                                                                                                                                                                                                                                                                                                                                                                                                                                                                                                                                                                                                                                                                                                                                                                                                                                                                                                                                                                                                                                                                                                                                                                                                                                                                                                                                                                                                                                                                                                                                                                                                                                                                                                                                                                                                                                                                                                                                                                                                                                 | Vibharam Hospital                                                      | National Institute of Health, Department of Medical Sciences, Ministry of Public Health, Thailand | Pilailuk Okada; Siripaporn Phuygun; Thanutsapa Thanadachakul; Sittiporn Parmmen; Pakorn Piromtong; Warawan Wongboot; Sunthareeya Waichareon; Malinee Chittaganpich                         |                                                                                                                                                                                                                                                                                       |
| EPI_ISL_708824, EPI_ISL_708825, EPI_ISL_708826                                                                                                                                                                                                                                                                                                                                                                                                                                                                                                                                                                                                                                                                                                                                                                                                                                                                                                                                                                                                                                                                                                                                                                                                                                                                                                                                                                                                                                                                                                                                                                                                                                                                                                                                                                                                                                                                                                                                                                                                                                                                                                                                                                                                                                                                                                                                                                                                                                                                                                                                                                                                                                                                                                                                                                                                                                                                                                                                                                                                                                                                                                                                                                                                                                                                                                                                                                                                                                                                                                                                                                                                                                                                                                                                                                                                                                                                                                                                                                                                                                                                                                                                                                                                                                                                                                                                                                                                                                                                                                                                                                                                                                                                                                                                                                                                                                                                                                                                                                                                                                                                                                                                                                                                                 | Emergency Operation Center, (EOC)                                      | National Institute of Health, Department of Medical Sciences, Ministry of Public Health, Thailand | Pilailuk Okada; Siripaporn Phuygun; Thanutsapa Thanadachakul; Sittiporn Parmmen; Pakorn Piromtong; Warawan Wongboot; Sunthareeya Waichareon; Malinee Chittaganpich                         |                                                                                                                                                                                                                                                                                       |
| EPI_ISL_717723, EPI_ISL_717724, EPI_ISL_717725, EPI_ISL_717726, EPI_ISL_717727, EPI_ISL_717728, EPI_ISL_717729, EPI_ISL_717730, EPI_ISL_717731, EPI_ISL_717732, EPI_ISL_717733, EPI_ISL_717734, EPI_ISL_717735, EPI_ISL_717736, EPI_ISL_717737, EPI_ISL_717738, EPI_ISL_717739, EPI_ISL_717740, EPI_ISL_717741, EPI_ISL_717742, EPI_ISL_717743, EPI_ISL_717744, EPI_ISL_717745, EPI_ISL_717746, EPI_ISL_717747, EPI_ISL_717748, EPI_ISL_717749, EPI_ISL_717750, EPI_ISL_717751, EPI_ISL_717752, EPI_ISL_717753, EPI_ISL_717754, EPI_ISL_717755, EPI_ISL_717756, EPI_ISL_717757, EPI_ISL_717758, EPI_ISL_717759, EPI_ISL_717760, EPI_ISL_717761, EPI_ISL_717762, EPI_ISL_717763, EPI_ISL_717764                                                                                                                                                                                                                                                                                                                                                                                                                                                                                                                                                                                                                                                                                                                                                                                                                                                                                                                                                                                                                                                                                                                                                                                                                                                                                                                                                                                                                                                                                                                                                                                                                                                                                                                                                                                                                                                                                                                                                                                                                                                                                                                                                                                                                                                                                                                                                                                                                                                                                                                                                                                                                                                                                                                                                                                                                                                                                                                                                                                                                                                                                                                                                                                                                                                                                                                                                                                                                                                                                                                                                                                                                                                                                                                                                                                                                                                                                                                                                                                                                                                                                                                                                                                                                                                                                                                                                                                                                                                                                                                                                                 | see above                                                              | Kingston Health Sciences Centre and Queen's University                                            | Ontario Institute for Cancer Research                                                                                                                                                      | Prameet M. Sheth, Calvin Sjaarda, Robert Colautti, Katya Douchant, Ilina Lungu, Bernard Lam, Paul Krzyzanowski, Michael Laszloffy, Lawrence E. Heisler, Richard de Borja, Jared T. Simpson                                                                                            |
| EPI_ISL_717766, EPI_ISL_717767, EPI_ISL_717768, EPI_ISL_717769, EPI_ISL_717770, EPI_ISL_717771, EPI_ISL_717772, EPI_ISL_717773, EPI_ISL_717774, EPI_ISL_717775, EPI_ISL_717776, EPI_ISL_717777, EPI_ISL_717778, EPI_ISL_717779, EPI_ISL_717780, EPI_ISL_717781, EPI_ISL_717782, EPI_ISL_717783, EPI_ISL_717784                                                                                                                                                                                                                                                                                                                                                                                                                                                                                                                                                                                                                                                                                                                                                                                                                                                                                                                                                                                                                                                                                                                                                                                                                                                                                                                                                                                                                                                                                                                                                                                                                                                                                                                                                                                                                                                                                                                                                                                                                                                                                                                                                                                                                                                                                                                                                                                                                                                                                                                                                                                                                                                                                                                                                                                                                                                                                                                                                                                                                                                                                                                                                                                                                                                                                                                                                                                                                                                                                                                                                                                                                                                                                                                                                                                                                                                                                                                                                                                                                                                                                                                                                                                                                                                                                                                                                                                                                                                                                                                                                                                                                                                                                                                                                                                                                                                                                                                                                 | see above                                                              | UW Virology Lab                                                                                   | UW Virology Lab                                                                                                                                                                            | Pavitra Roychoudhury, Hong Xie, Lasata Shrestha, Michelle Lin, Meei-Li Huang, Keith R Jerome, Alexander Greninger                                                                                                                                                                     |
| EPI_ISL_718105                                                                                                                                                                                                                                                                                                                                                                                                                                                                                                                                                                                                                                                                                                                                                                                                                                                                                                                                                                                                                                                                                                                                                                                                                                                                                                                                                                                                                                                                                                                                                                                                                                                                                                                                                                                                                                                                                                                                                                                                                                                                                                                                                                                                                                                                                                                                                                                                                                                                                                                                                                                                                                                                                                                                                                                                                                                                                                                                                                                                                                                                                                                                                                                                                                                                                                                                                                                                                                                                                                                                                                                                                                                                                                                                                                                                                                                                                                                                                                                                                                                                                                                                                                                                                                                                                                                                                                                                                                                                                                                                                                                                                                                                                                                                                                                                                                                                                                                                                                                                                                                                                                                                                                                                                                                 | Kingston Health Sciences Centre and Queen's University                 | Ontario Institute for Cancer Research                                                             | Prameet M. Sheth, Calvin Sjaarda, Robert Colautti, Katya Douchant, Ilina Lungu, Bernard Lam, Paul Krzyzanowski, Michael Laszloffy, Lawrence E. Heisler, Richard de Borja, Jared T. Simpson |                                                                                                                                                                                                                                                                                       |
| EPI_ISL_728346, EPI_ISL_728348, EPI_ISL_728350, EPI_ISL_728351, EPI_ISL_728354, EPI_ISL_728356, EPI_ISL_728357                                                                                                                                                                                                                                                                                                                                                                                                                                                                                                                                                                                                                                                                                                                                                                                                                                                                                                                                                                                                                                                                                                                                                                                                                                                                                                                                                                                                                                                                                                                                                                                                                                                                                                                                                                                                                                                                                                                                                                                                                                                                                                                                                                                                                                                                                                                                                                                                                                                                                                                                                                                                                                                                                                                                                                                                                                                                                                                                                                                                                                                                                                                                                                                                                                                                                                                                                                                                                                                                                                                                                                                                                                                                                                                                                                                                                                                                                                                                                                                                                                                                                                                                                                                                                                                                                                                                                                                                                                                                                                                                                                                                                                                                                                                                                                                                                                                                                                                                                                                                                                                                                                                                                 | Institute of medical Microbiology and hospital Hygiene                 | Institute of medical Microbiology and hospital Hygiene                                            | Prof. Dr. Achim Kaasch, Aljoscha Tersteegen                                                                                                                                                |                                                                                                                                                                                                                                                                                       |
| EPI_ISL_735449, EPI_ISL_735450, EPI_ISL_735451, EPI_ISL_735452, EPI_ISL_735453, EPI_ISL_735454, EPI_ISL_735455, EPI_ISL_735456, EPI_ISL_735457, EPI_ISL_735458, EPI_ISL_735459, EPI_ISL_735460, EPI_ISL_735461, EPI_ISL_735462, EPI_ISL_735463, EPI_ISL_735464, EPI_ISL_735465, EPI_ISL_735466, EPI_ISL_735467, EPI_ISL_735468, EPI_ISL_735469, EPI_ISL_735470, EPI_ISL_735471, EPI_ISL_735472, EPI_ISL_735473, EPI_ISL_735474, EPI_ISL_735475, EPI_ISL_735476, EPI_ISL_735477, EPI_ISL_735478, EPI_ISL_735479, EPI_ISL_735480, EPI_ISL_735481, EPI_ISL_735482, EPI_ISL_735483, EPI_ISL_735484, EPI_ISL_735485, EPI_ISL_735486, EPI_ISL_735487, EPI_ISL_735488, EPI_ISL_735489, EPI_ISL_736775, EPI_ISL_736776                                                                                                                                                                                                                                                                                                                                                                                                                                                                                                                                                                                                                                                                                                                                                                                                                                                                                                                                                                                                                                                                                                                                                                                                                                                                                                                                                                                                                                                                                                                                                                                                                                                                                                                                                                                                                                                                                                                                                                                                                                                                                                                                                                                                                                                                                                                                                                                                                                                                                                                                                                                                                                                                                                                                                                                                                                                                                                                                                                                                                                                                                                                                                                                                                                                                                                                                                                                                                                                                                                                                                                                                                                                                                                                                                                                                                                                                                                                                                                                                                                                                                                                                                                                                                                                                                                                                                                                                                                                                                                                                                 | see above                                                              | UW Virology Lab                                                                                   | UW Virology Lab                                                                                                                                                                            | Pavitra Roychoudhury, Hong Xie, Lasata Shrestha, Meei-Li Huang, Keith R Jerome, Alexander Greninger                                                                                                                                                                                   |
| EPI_ISL_736777, EPI_ISL_736778, EPI_ISL_736779, EPI_ISL_736780, EPI_ISL_736781, EPI_ISL_736782, EPI_ISL_736783, EPI_ISL_736784, EPI_ISL_736785, EPI_ISL_736786, EPI_ISL_736787, EPI_ISL_736788, EPI_ISL_736789, EPI_ISL_736790, EPI_ISL_736791, EPI_ISL_736792, EPI_ISL_736793, EPI_ISL_736794, EPI_ISL_736795, EPI_ISL_736796, EPI_ISL_736797, EPI_ISL_736798, EPI_ISL_736799, EPI_ISL_736800, EPI_ISL_736801, EPI_ISL_736802, EPI_ISL_736803, EPI_ISL_736804, EPI_ISL_736805, EPI_ISL_736806, EPI_ISL_736807, EPI_ISL_736808, EPI_ISL_736809, EPI_ISL_736810, EPI_ISL_736811, EPI_ISL_736812, EPI_ISL_736813, EPI_ISL_736814, EPI_ISL_736815, EPI_ISL_736816, EPI_ISL_736817, EPI_ISL_736818, EPI_ISL_736819, EPI_ISL_736820, EPI_ISL_736821, EPI_ISL_736822, EPI_ISL_736823, EPI_ISL_736824, EPI_ISL_736825, EPI_ISL_736826, EPI_ISL_736827, EPI_ISL_736828, EPI_ISL_736829, EPI_ISL_736830, EPI_ISL_736831, EPI_ISL_736832, EPI_ISL_736833, EPI_ISL_736834, EPI_ISL_736835, EPI_ISL_736836, EPI_ISL_736837, EPI_ISL_736838, EPI_ISL_736839, EPI_ISL_736840, EPI_ISL_736841, EPI_ISL_736842, EPI_ISL_736843, EPI_ISL_736844, EPI_ISL_736845, EPI_ISL_736846, EPI_ISL_736847, EPI_ISL_736848, EPI_ISL_736849, EPI_ISL_736850, EPI_ISL_736851, EPI_ISL_736852, EPI_ISL_736853, EPI_ISL_736854, EPI_ISL_736855, EPI_ISL_736856, EPI_ISL_736857, EPI_ISL_736858, EPI_ISL_736859, EPI_ISL_736860, EPI_ISL_736861, EPI_ISL_736862, EPI_ISL_736863, EPI_ISL_736864, EPI_ISL_736865, EPI_ISL_736866, EPI_ISL_736867, EPI_ISL_736868, EPI_ISL_736869, EPI_ISL_736870, EPI_ISL_736871, EPI_ISL_736872, EPI_ISL_736873, EPI_ISL_736874, EPI_ISL_736875, EPI_ISL_736876, EPI_ISL_736877, EPI_ISL_736878, EPI_ISL_736879, EPI_ISL_736880, EPI_ISL_736881, EPI_ISL_736882, EPI_ISL_736883, EPI_ISL_736884, EPI_ISL_736885, EPI_ISL_736886, EPI_ISL_736887, EPI_ISL_736888, EPI_ISL_736889, EPI_ISL_736890                                                                                                                                                                                                                                                                                                                                                                                                                                                                                                                                                                                                                                                                                                                                                                                                                                                                                                                                                                                                                                                                                                                                                                                                                                                                                                                                                                                                                                                                                                                                                                                                                                                                                                                                                                                                                                                                                                                                                                                                                                                                                                                                                                                                                                                                                                                                                                                                                                                                                                                                                                                                                                                                                                                                                                                                                                                                                                                                                                                                                                                                                                                                                                                                                                                                                                                                                                 | see above                                                              | Istituto Zooprofilattico Sperimentale del Mezzogiorno                                             | TIGEM                                                                                                                                                                                      | Antonio Grimaldi, Lucia Annunziata, Francesco Panariello, Biancamaria Pierri, Valentina Bouche, Chiara Colantuono, Maria Concetta Cuomo, Denise Di Concilio, Lizio Di Filippo, Anna Manfredi, Marcello Salvi, Antonio Limone, Pellegrino Cerino, Andrea Ballabio, Davide Cacciarielli |
| EPI_ISL_737081, EPI_ISL_737082, EPI_ISL_737083, EPI_ISL_737084, EPI_ISL_737085, EPI_ISL_737086, EPI_ISL_737087, EPI_ISL_737088, EPI_ISL_737089, EPI_ISL_737090, EPI_ISL_737091, EPI_ISL_737092, EPI_ISL_737093, EPI_ISL_737094, EPI_ISL_737095, EPI_ISL_737096, EPI_ISL_737097, EPI_ISL_737098, EPI_ISL_737099, EPI_ISL_737309                                                                                                                                                                                                                                                                                                                                                                                                                                                                                                                                                                                                                                                                                                                                                                                                                                                                                                                                                                                                                                                                                                                                                                                                                                                                                                                                                                                                                                                                                                                                                                                                                                                                                                                                                                                                                                                                                                                                                                                                                                                                                                                                                                                                                                                                                                                                                                                                                                                                                                                                                                                                                                                                                                                                                                                                                                                                                                                                                                                                                                                                                                                                                                                                                                                                                                                                                                                                                                                                                                                                                                                                                                                                                                                                                                                                                                                                                                                                                                                                                                                                                                                                                                                                                                                                                                                                                                                                                                                                                                                                                                                                                                                                                                                                                                                                                                                                                                                                 | see above                                                              | UW Virology Lab                                                                                   | UW Virology Lab                                                                                                                                                                            | Pavitra Roychoudhury, Hong Xie, Lasata Shrestha, Meei-Li Huang, Keith R Jerome, Alexander Greninger                                                                                                                                                                                   |
| EPI_ISL_738080                                                                                                                                                                                                                                                                                                                                                                                                                                                                                                                                                                                                                                                                                                                                                                                                                                                                                                                                                                                                                                                                                                                                                                                                                                                                                                                                                                                                                                                                                                                                                                                                                                                                                                                                                                                                                                                                                                                                                                                                                                                                                                                                                                                                                                                                                                                                                                                                                                                                                                                                                                                                                                                                                                                                                                                                                                                                                                                                                                                                                                                                                                                                                                                                                                                                                                                                                                                                                                                                                                                                                                                                                                                                                                                                                                                                                                                                                                                                                                                                                                                                                                                                                                                                                                                                                                                                                                                                                                                                                                                                                                                                                                                                                                                                                                                                                                                                                                                                                                                                                                                                                                                                                                                                                                                 | Laboratory Services Section, Texas Department of State Health Services | Laboratory Services Section, Texas Department of State Health Services                            | Pokharel,A., Oh,B., Bonser,J.D., Tuladhar,R., Pedruza,M., Zhang,J., Rahman,M., Koag,M., Wang,C., Lee,R. and Kubin,G.                                                                       |                                                                                                                                                                                                                                                                                       |
| EPI_ISL_739662, EPI_ISL_740548, EPI_ISL_740549, EPI_ISL_740550, EPI_ISL_740551, EPI_ISL_740552, EPI_ISL_740553, EPI_ISL_740554, EPI_ISL_740555, EPI_ISL_740556, EPI_ISL_740557, EPI_ISL_740558, EPI_ISL_740559, EPI_ISL_740560, EPI_ISL_740561, EPI_ISL_740562, EPI_ISL_740563, EPI_ISL_740564, EPI_ISL_740565, EPI_ISL_740566, EPI_ISL_740567, EPI_ISL_740568, EPI_ISL_740569, EPI_ISL_740570, EPI_ISL_740571, EPI_ISL_740572, EPI_ISL_740573, EPI_ISL_740574, EPI_ISL_740575, EPI_ISL_740576, EPI_ISL_740577, EPI_ISL_740578, EPI_ISL_740579, EPI_ISL_740580, EPI_ISL_740581, EPI_ISL_740582, EPI_ISL_740583, EPI_ISL_740584, EPI_ISL_740585, EPI_ISL_740586, EPI_ISL_740587, EPI_ISL_740588, EPI_ISL_740589, EPI_ISL_740590, EPI_ISL_740591, EPI_ISL_740592, EPI_ISL_740593, EPI_ISL_740594, EPI_ISL_740595, EPI_ISL_740596, EPI_ISL_740597, EPI_ISL_740598, EPI_ISL_740599, EPI_ISL_740600, EPI_ISL_740601, EPI_ISL_740602, EPI_ISL_740603, EPI_ISL_740604, EPI_ISL_740605, EPI_ISL_740606, EPI_ISL_740607, EPI_ISL_740608, EPI_ISL_740609, EPI_ISL_740610, EPI_ISL_740611, EPI_ISL_740612, EPI_ISL_740613, EPI_ISL_740614, EPI_ISL_740615, EPI_ISL_740616, EPI_ISL_740617, EPI_ISL_740618, EPI_ISL_740619, EPI_ISL_740620, EPI_ISL_740621, EPI_ISL_740622, EPI_ISL_740623, EPI_ISL_740624, EPI_ISL_740625, EPI_ISL_740626, EPI_ISL_740627, EPI_ISL_740628, EPI_ISL_740629, EPI_ISL_740630, EPI_ISL_740631, EPI_ISL_740632, EPI_ISL_740633, EPI_ISL_740634, EPI_ISL_740635, EPI_ISL_740636, EPI_ISL_740637, EPI_ISL_740638, EPI_ISL_740639, EPI_ISL_740640, EPI_ISL_740641, EPI_ISL_740642, EPI_ISL_740643, EPI_ISL_740644, EPI_ISL_740645, EPI_ISL_740646, EPI_ISL_740647, EPI_ISL_740648, EPI_ISL_740649, EPI_ISL_740650, EPI_ISL_740651, EPI_ISL_740652, EPI_ISL_740653, EPI_ISL_740654, EPI_ISL_740655, EPI_ISL_740656, EPI_ISL_740657, EPI_ISL_740658, EPI_ISL_740659, EPI_ISL_740660, EPI_ISL_740661, EPI_ISL_740662, EPI_ISL_740663, EPI_ISL_740664, EPI_ISL_740665, EPI_ISL_740666, EPI_ISL_740667, EPI_ISL_740668, EPI_ISL_740669, EPI_ISL_740670, EPI_ISL_740671, EPI_ISL_740672, EPI_ISL_740673, EPI_ISL_740674, EPI_ISL_740675, EPI_ISL_740676, EPI_ISL_740677, EPI_ISL_740678, EPI_ISL_740679, EPI_ISL_740680, EPI_ISL_740681, EPI_ISL_740682, EPI_ISL_740683, EPI_ISL_740684, EPI_ISL_740685, EPI_ISL_740686, EPI_ISL_740687, EPI_ISL_740688, EPI_ISL_740689, EPI_ISL_740690, EPI_ISL_740691, EPI_ISL_740692, EPI_ISL_740693, EPI_ISL_740694, EPI_ISL_740695, EPI_ISL_740696, EPI_ISL_740697, EPI_ISL_740698, EPI_ISL_740699, EPI_ISL_740700, EPI_ISL_740701, EPI_ISL_740702, EPI_ISL_740703, EPI_ISL_740704, EPI_ISL_740705, EPI_ISL_740706, EPI_ISL_740707, EPI_ISL_740708, EPI_ISL_740709, EPI_ISL_740710, EPI_ISL_740711, EPI_ISL_740712, EPI_ISL_740713, EPI_ISL_740714, EPI_ISL_740715, EPI_ISL_740716, EPI_ISL_740717, EPI_ISL_740718, EPI_ISL_740719, EPI_ISL_740720, EPI_ISL_740721, EPI_ISL_740722, EPI_ISL_740723, EPI_ISL_740724, EPI_ISL_740725, EPI_ISL_740726, EPI_ISL_740727, EPI_ISL_740728, EPI_ISL_740729, EPI_ISL_740730, EPI_ISL_740731, EPI_ISL_740732, EPI_ISL_740733, EPI_ISL_740734, EPI_ISL_740735, EPI_ISL_740736, EPI_ISL_740737, EPI_ISL_740738, EPI_ISL_740739, EPI_ISL_740740, EPI_ISL_740741, EPI_ISL_740742, EPI_ISL_740743, EPI_ISL_740744, EPI_ISL_740745, EPI_ISL_740746, EPI_ISL_740747, EPI_ISL_740748, EPI_ISL_740749, EPI_ISL_740750, EPI_ISL_740751, EPI_ISL_740752, EPI_ISL_740753, EPI_ISL_740754, EPI_ISL_740755, EPI_ISL_740756, EPI_ISL_740757, EPI_ISL_740758, EPI_ISL_740759, EPI_ISL_740760, EPI_ISL_740761, EPI_ISL_740762, EPI_ISL_740763, EPI_ISL_740764, EPI_ISL_740765, EPI_ISL_740766, EPI_ISL_740767, EPI_ISL_740768, EPI_ISL_740769, EPI_ISL_740770, EPI_ISL_740771, EPI_ISL_740772, EPI_ISL_740773, EPI_ISL_740774, EPI_ISL_740775, EPI_ISL_740776, EPI_ISL_740777, EPI_ISL_740778, EPI_ISL_740779, EPI_ISL_740780, EPI_ISL_740781, EPI_ISL_740782, EPI_ISL_740783, EPI_ISL_740784, EPI_ISL_740785, EPI_ISL_740786, EPI_ISL_740787, EPI_ISL_740788, EPI_ISL_740789, EPI_ISL_740790, EPI_ISL_740791, EPI_ISL_740792, EPI_ISL_740793, EPI_ISL_740794, EPI_ISL_740795, EPI_ISL_740796, EPI_ISL_740797, EPI_ISL_740798, EPI_ISL_740799, EPI_ISL_740800, EPI_ISL_740801, EPI_ISL_740802, EPI_ISL_740803, EPI_ISL_740804, EPI_ISL_740805, EPI_ISL_740806, EPI_ISL_740807, EPI_ISL_740808, EPI_ISL_740809, EPI_ISL_740810, EPI_ISL_740811, EPI_ISL_740812, EPI_ISL_740813, EPI_ISL_740814, EPI_ISL_740815, EPI_ISL_740816, EPI_ISL_740817, EPI_ISL_740818, EPI_ISL_740819, EPI_ISL_740820, EPI_ISL_740821, EPI_ISL_740822, EPI_ISL_740823, EPI_ISL_740824, EPI_ISL_740825, EPI_ISL_740826, EPI_ISL_740827, EPI_ISL_740828, EPI_ISL_740829, EPI_ISL_740830, EPI_ISL_740831, EPI_ISL_740832, EPI_ISL_740833, EPI_ISL_740834, EPI_ISL_740835, EPI_ISL_740836, EPI_ISL_740837, EPI_ISL_740838, EPI_ISL_740839, EPI_ISL_740840, EPI_ISL_740841, EPI_ISL_740842, EPI_ISL_740843, EPI_ISL_740844, EPI_ISL_740845, EPI_ISL_740846, EPI_ISL_740847, EPI_ISL_740848, EPI_ISL_740849, EPI_ISL_740850, EPI_ISL_740851, EPI_ISL_740852, EPI_ISL_740853, EPI_ISL_740854, EPI_ISL_740855, EPI_ISL_740856, EPI_ISL_740857, EPI_ISL_740858, EPI_ISL_740859, EPI_ISL_740860, EPI_ISL_740861, EPI_ISL_740862 | see above                                                              | BCCDC Public Health Laboratory                                                                    | BCCDC Public Health Laboratory                                                                                                                                                             | Prystajecy Natalie, Linda Hoang, Dan Fornika, Shannon Russell, Kim Macdonald, Kimia Kamelian, John Tyson, Inna Sekirov, Mel Krajdin                                                                                                                                                   |
| EPI_ISL_747032, EPI_ISL_747033, EPI_ISL_747034, EPI_ISL_747035, EPI_ISL_747036, EPI_ISL_747037, EPI_ISL_747038, EPI_ISL_747039, EPI_ISL_747040, EPI_ISL_747041, EPI_ISL_747042, EPI_ISL_747043, EPI_ISL_747044, EPI_ISL_747045, EPI_ISL_747046, EPI_ISL_747047, EPI_ISL_747048, EPI_ISL_747049, EPI_ISL_747050, EPI_ISL_747051, EPI_ISL_747052, EPI_ISL_747053, EPI_ISL_747054, EPI_ISL_747055, EPI_ISL_747056, EPI_ISL_747057, EPI_ISL_747058, EPI_ISL_747059, EPI_ISL_747060, EPI_ISL_747061, EPI_ISL_747062, EPI_ISL_747063, EPI_ISL_747064, EPI_ISL_747065, EPI_ISL_747066, EPI_ISL_747067, EPI_ISL_747068, EPI_ISL_747069, EPI_ISL_747070, EPI_ISL_747071, EPI_ISL_747072, EPI_ISL_747073, EPI_ISL_747074, EPI_ISL_747075, EPI_ISL_747076, EPI_ISL_747077, EPI_ISL_747078, EPI_ISL_747079, EPI_ISL_747080, EPI_ISL_747081, EPI_ISL_747082, EPI_ISL_747083, EPI_ISL_747084, EPI_ISL_747085, EPI_ISL_747086, EPI_ISL_747087, EPI_ISL_747088, EPI_ISL_747089, EPI_ISL_747090, EPI_ISL_747091, EPI_ISL_747092, EPI_ISL_747093, EPI_ISL_747094, EPI_ISL_747095, EPI_ISL_747096, EPI_ISL_747097, EPI_ISL_747098, EPI_ISL_747099, EPI_ISL_747100, EPI_ISL_747101, EPI_ISL_747102, EPI_ISL_747103, EPI_ISL_747104, EPI_ISL_747105, EPI_ISL_747106, EPI_ISL_747107, EPI_ISL_747108, EPI_ISL_747109, EPI_ISL_747110, EPI_ISL_747111, EPI_ISL_747112, EPI_ISL_747113, EPI_ISL_747114, EPI_ISL_747115, EPI_ISL_747116, EPI_ISL_747117, EPI_ISL_747118, EPI_ISL_747119, EPI_ISL_747120, EPI_ISL_747121, EPI_ISL_747122, EPI_ISL_747123, EPI_ISL_747124, EPI_ISL_747125, EPI_ISL_747126, EPI_ISL_747127, EPI_ISL_747128, EPI_ISL_747129, EPI_ISL_747130, EPI_ISL_747131, EPI_ISL_747132, EPI_ISL_747133, EPI_ISL_747134, EPI_ISL_747135, EPI_ISL_747136, EPI_ISL_747137, EPI_ISL_747138, EPI_ISL_747139                                                                                                                                                                                                                                                                                                                                                                                                                                                                                                                                                                                                                                                                                                                                                                                                                                                                                                                                                                                                                                                                                                                                                                                                                                                                                                                                                                                                                                                                                                                                                                                                                                                                                                                                                                                                                                                                                                                                                                                                                                                                                                                                                                                                                                                                                                                                                                                                                                                                                                                                                                                                                                                                                                                                                                                                                                                                                                                                                                                                                                                                                                                                                                                                                                                                                                                                                                                                                                                                 |                                                                        |                                                                                                   |                                                                                                                                                                                            |                                                                                                                                                                                                                                                                                       |

|                                                                                                                                                                                                                                                                                                                                                                                                                                                                                                                                                                                                                                                                                                                                                                                                                                                                                                                                                                                                                                                                                                                                                                                                                                                                                                |           |                                                                                 |                                                                                                                            |                                                                                                                                                                                                                                                                                                                                                                                                                                                                                                                                                             |
|------------------------------------------------------------------------------------------------------------------------------------------------------------------------------------------------------------------------------------------------------------------------------------------------------------------------------------------------------------------------------------------------------------------------------------------------------------------------------------------------------------------------------------------------------------------------------------------------------------------------------------------------------------------------------------------------------------------------------------------------------------------------------------------------------------------------------------------------------------------------------------------------------------------------------------------------------------------------------------------------------------------------------------------------------------------------------------------------------------------------------------------------------------------------------------------------------------------------------------------------------------------------------------------------|-----------|---------------------------------------------------------------------------------|----------------------------------------------------------------------------------------------------------------------------|-------------------------------------------------------------------------------------------------------------------------------------------------------------------------------------------------------------------------------------------------------------------------------------------------------------------------------------------------------------------------------------------------------------------------------------------------------------------------------------------------------------------------------------------------------------|
| EPI_ISL_747140, EPI_ISL_747141, EPI_ISL_747142, EPI_ISL_747143, EPI_ISL_747144, EPI_ISL_747145, EPI_ISL_747146, EPI_ISL_747147, EPI_ISL_747148, EPI_ISL_747149, EPI_ISL_747150, EPI_ISL_747151, EPI_ISL_747152, EPI_ISL_747153, EPI_ISL_747154, EPI_ISL_747155, EPI_ISL_747156, EPI_ISL_747157, EPI_ISL_747158, EPI_ISL_747159, EPI_ISL_747160, EPI_ISL_747161, EPI_ISL_747162, EPI_ISL_747163, EPI_ISL_747164, EPI_ISL_747165, EPI_ISL_747166, EPI_ISL_747167, EPI_ISL_747168, EPI_ISL_747169, EPI_ISL_747170, EPI_ISL_747171, EPI_ISL_747172, EPI_ISL_747173, EPI_ISL_747174, EPI_ISL_747175, EPI_ISL_747176, EPI_ISL_747177, EPI_ISL_747178, EPI_ISL_747179, EPI_ISL_747180, EPI_ISL_747181, EPI_ISL_747182, EPI_ISL_747183, EPI_ISL_747184, EPI_ISL_747185, EPI_ISL_747186, EPI_ISL_747187, EPI_ISL_747188, EPI_ISL_747189, EPI_ISL_747190, EPI_ISL_747191, EPI_ISL_747192, EPI_ISL_747193                                                                                                                                                                                                                                                                                                                                                                                                 | see above | Respiratory Viruses Branch, Centers for Disease Control and Prevention          | Respiratory Viruses Branch, Centers for Disease Control and Prevention                                                     | Queen,K., Li,Y., Tao,Y., Uehara,A., Montmayeur,A., Paden,C.R., Cook,P.W., Marine,R., Sheth,M., Wang,H., Lee,J., Tong,S.                                                                                                                                                                                                                                                                                                                                                                                                                                     |
| EPI_ISL_747195, EPI_ISL_747196, EPI_ISL_747197, EPI_ISL_747198, EPI_ISL_747199, EPI_ISL_747200, EPI_ISL_747201, EPI_ISL_747202, EPI_ISL_747203, EPI_ISL_747204, EPI_ISL_747205, EPI_ISL_747206, EPI_ISL_747207, EPI_ISL_747208, EPI_ISL_747209, EPI_ISL_747210, EPI_ISL_747211, EPI_ISL_747212, EPI_ISL_747213, EPI_ISL_747214, EPI_ISL_747215, EPI_ISL_747216, EPI_ISL_747217, EPI_ISL_747218, EPI_ISL_747219, EPI_ISL_747220, EPI_ISL_747221, EPI_ISL_747222, EPI_ISL_747223, EPI_ISL_747224, EPI_ISL_747225, EPI_ISL_747226, EPI_ISL_747227, EPI_ISL_747228, EPI_ISL_747229, EPI_ISL_747230, EPI_ISL_747231, EPI_ISL_747232                                                                                                                                                                                                                                                                                                                                                                                                                                                                                                                                                                                                                                                                 | see above | UW Virology Lab                                                                 | UW Virology Lab                                                                                                            | Pavitra Roychoudhury, Hong Xie, Lasata Shrestha, Michelle Lin, Meei-Li Huang, Keith R Jerome, Alexander Greninger                                                                                                                                                                                                                                                                                                                                                                                                                                           |
| EPI_ISL_751222                                                                                                                                                                                                                                                                                                                                                                                                                                                                                                                                                                                                                                                                                                                                                                                                                                                                                                                                                                                                                                                                                                                                                                                                                                                                                 | see above | Pathogen Genomics Lab King Abdullah University of Science and Technology(KAUST) | Pathogen Genomics Lab King Abdullah University of Science and Technology(KAUST)                                            | Raeecae Naem, Sara Mfarrej, Sharif Hala, Olga Douvropoulou, Raushan Nugmanova, Awad Al-Omari, Samer Salih, Abbas Al Mutair, Arnab Pain                                                                                                                                                                                                                                                                                                                                                                                                                      |
| EPI_ISL_751239, EPI_ISL_751240, EPI_ISL_751241, EPI_ISL_751242, EPI_ISL_751243, EPI_ISL_751244, EPI_ISL_751245, EPI_ISL_751246, EPI_ISL_751247, EPI_ISL_751248, EPI_ISL_751249, EPI_ISL_751250, EPI_ISL_751251, EPI_ISL_751252, EPI_ISL_751253, EPI_ISL_751254, EPI_ISL_751255, EPI_ISL_751256, EPI_ISL_751257, EPI_ISL_751258, EPI_ISL_751259, EPI_ISL_751260, EPI_ISL_751261, EPI_ISL_751262, EPI_ISL_751263, EPI_ISL_751264, EPI_ISL_751265, EPI_ISL_751266, EPI_ISL_751267, EPI_ISL_751268, EPI_ISL_751269, EPI_ISL_751270, EPI_ISL_751271, EPI_ISL_751272, EPI_ISL_751273, EPI_ISL_751274, EPI_ISL_751275, EPI_ISL_751276, EPI_ISL_751277, EPI_ISL_751278, EPI_ISL_751279, EPI_ISL_751280, EPI_ISL_751281, EPI_ISL_751282, EPI_ISL_751283, EPI_ISL_751284, EPI_ISL_751285, EPI_ISL_751286, EPI_ISL_751287, EPI_ISL_751288, EPI_ISL_751289, EPI_ISL_751290, EPI_ISL_751291, EPI_ISL_751292, EPI_ISL_751293, EPI_ISL_751294, EPI_ISL_751295, EPI_ISL_751296, EPI_ISL_751297, EPI_ISL_751298, EPI_ISL_751299, EPI_ISL_751300, EPI_ISL_751301, EPI_ISL_751302, EPI_ISL_751303, EPI_ISL_751304, EPI_ISL_751305, EPI_ISL_751306, EPI_ISL_751307, EPI_ISL_751308, EPI_ISL_751309, EPI_ISL_751310, EPI_ISL_751311, EPI_ISL_751312, EPI_ISL_751313, EPI_ISL_751315, EPI_ISL_751316, EPI_ISL_751317 | see above | Devki Devi Foundation, a unit of Max Healthcare                                 | CSIR-IGIB/Max                                                                                                              | Rajesh Pandey#, Samreen Siddiqui, Janani Srinivasa Vasudevan, Akshay Kanakan, Ranjeet Maurya, Uzma Shamim, Bansidhar Tarai, Akansha Tyagi, Mital Mukerji, Poonam Das, Sujeet Jha, Mohammed Faruq, Anurag Agrawal                                                                                                                                                                                                                                                                                                                                            |
| EPI_ISL_753698                                                                                                                                                                                                                                                                                                                                                                                                                                                                                                                                                                                                                                                                                                                                                                                                                                                                                                                                                                                                                                                                                                                                                                                                                                                                                 | see above | Balai Besar Veteriner Maros, Sulawesi Selatan                                   | National Institute of Health Research and Development                                                                      | Puspa,KD;Subangkit;Pawestri,HA;Nugraha,AA;Ikawati,HD;Pangesti,KNA;Soekarso,T;Puspandari,N;Muflihanah;Mangidi,R;Setiawaty,V                                                                                                                                                                                                                                                                                                                                                                                                                                  |
| EPI_ISL_754060, EPI_ISL_754061                                                                                                                                                                                                                                                                                                                                                                                                                                                                                                                                                                                                                                                                                                                                                                                                                                                                                                                                                                                                                                                                                                                                                                                                                                                                 | see above | National Public Health Laboratory                                               | Nepal Health Research Council                                                                                              | Pradip Gyanwali, Meghnath Dhimal                                                                                                                                                                                                                                                                                                                                                                                                                                                                                                                            |
| EPI_ISL_754062, EPI_ISL_754063, EPI_ISL_754064, EPI_ISL_754065, EPI_ISL_754066, EPI_ISL_754067                                                                                                                                                                                                                                                                                                                                                                                                                                                                                                                                                                                                                                                                                                                                                                                                                                                                                                                                                                                                                                                                                                                                                                                                 | see above | Kathmandu University                                                            | Nepal Health Research Council                                                                                              | Pradip Gyanwali, Meghnath Dhimal                                                                                                                                                                                                                                                                                                                                                                                                                                                                                                                            |
| EPI_ISL_754068, EPI_ISL_754069, EPI_ISL_754070, EPI_ISL_754071                                                                                                                                                                                                                                                                                                                                                                                                                                                                                                                                                                                                                                                                                                                                                                                                                                                                                                                                                                                                                                                                                                                                                                                                                                 | see above | Nepal Korea Friendship Municipality Hospital                                    | Nepal Health Research Council                                                                                              | Pradip Gyanwali, Meghnath Dhimal                                                                                                                                                                                                                                                                                                                                                                                                                                                                                                                            |
| EPI_ISL_754072, EPI_ISL_754073                                                                                                                                                                                                                                                                                                                                                                                                                                                                                                                                                                                                                                                                                                                                                                                                                                                                                                                                                                                                                                                                                                                                                                                                                                                                 | see above | National Public Health Laboratory                                               | Nepal Health Research Council                                                                                              | Pradip Gyanwali, Meghnath Dhimal                                                                                                                                                                                                                                                                                                                                                                                                                                                                                                                            |
| EPI_ISL_755588                                                                                                                                                                                                                                                                                                                                                                                                                                                                                                                                                                                                                                                                                                                                                                                                                                                                                                                                                                                                                                                                                                                                                                                                                                                                                 | see above | Regional medical sciences center 6 Chonburi                                     | National Institute of Health, Department of Medical Sciences, Ministry of Public Health, Thailand                          | Pilailuk Okada; Siripaporn Phuygun; Thanutsapa Thanadachakul; Sittiporn Parmmen; Pakorn Piromtong; Warawan Wongboot; Sunthareeya Waicharoen; Malinee Chittaganpitch                                                                                                                                                                                                                                                                                                                                                                                         |
| EPI_ISL_755590, EPI_ISL_755591, EPI_ISL_755592, EPI_ISL_755593, EPI_ISL_755594, EPI_ISL_755595, EPI_ISL_755596, EPI_ISL_755597, EPI_ISL_755598, EPI_ISL_755599, EPI_ISL_755600, EPI_ISL_755601, EPI_ISL_755602, EPI_ISL_755603, EPI_ISL_755604, EPI_ISL_755605, EPI_ISL_755606, EPI_ISL_755607, EPI_ISL_755608, EPI_ISL_755609, EPI_ISL_755610, EPI_ISL_755611, EPI_ISL_755612, EPI_ISL_755613, EPI_ISL_755614, EPI_ISL_755615, EPI_ISL_755616, EPI_ISL_755617, EPI_ISL_755618                                                                                                                                                                                                                                                                                                                                                                                                                                                                                                                                                                                                                                                                                                                                                                                                                 | see above | Helix/Illumina                                                                  | Genomics and Discovery, Respiratory Viruses Branch, Division of Viral Diseases, Centers for Disease Control and Prevention | Peter W. Cook, Dhvani Batra, Eileen de Feo, Jan Antico, Christine Tran, Matthew Tolentino, Shannon Wickline, Kim Gietzen, Brad Sickler, Jingtao Liu, Eric Allen, Phil Febbo, Summer Galloway, Nicole L. Washington, Simon White, Geraint Levan, Kelly Schiabor Barrett, Elizabeth Cirulli, Alexandre Bolze, Ary Ascencio, Charlotte Rivera-Garcia, Ryan Cho, Jason Nguyen, Sherry Wang, Jimmy Ramirez, Tyler Cassens, Efrén Sandoval, Magnus Isaksson, William Lee, David Becker, Marc Laurent, James Lu, Clinton R. Paden, Suxiang Tong, Duncan MacCannell |
| EPI_ISL_756191, EPI_ISL_756192, EPI_ISL_756193, EPI_ISL_756194, EPI_ISL_756195, EPI_ISL_756196, EPI_ISL_756197, EPI_ISL_756198, EPI_ISL_756199, EPI_ISL_756200, EPI_ISL_756201, EPI_ISL_756202, EPI_ISL_756203, EPI_ISL_756204, EPI_ISL_756205, EPI_ISL_756206, EPI_ISL_756207, EPI_ISL_756208, EPI_ISL_756209, EPI_ISL_756210, EPI_ISL_756211, EPI_ISL_756212, EPI_ISL_756213, EPI_ISL_756214, EPI_ISL_756215, EPI_ISL_756216, EPI_ISL_756217, EPI_ISL_756218, EPI_ISL_756219, EPI_ISL_756220, EPI_ISL_756221, EPI_ISL_756222, EPI_ISL_756223, EPI_ISL_756224, EPI_ISL_756225, EPI_ISL_756226, EPI_ISL_756227, EPI_ISL_756228, EPI_ISL_756229, EPI_ISL_756230, EPI_ISL_756231, EPI_ISL_756232, EPI_ISL_756233, EPI_ISL_756234, EPI_ISL_756235, EPI_ISL_756236, EPI_ISL_756237, EPI_ISL_756238, EPI_ISL_756239, EPI_ISL_756240, EPI_ISL_756241, EPI_ISL_756242, EPI_ISL_756243, EPI_ISL_756244, EPI_ISL_756245, EPI_ISL_756246, EPI_ISL_756247, EPI_ISL_756248, EPI_ISL_756249, EPI_ISL_756250, EPI_ISL_756251, EPI_ISL_756252, EPI_ISL_756253, EPI_ISL_756254, EPI_ISL_756255, EPI_ISL_756256, EPI_ISL_756257, EPI_ISL_756258, EPI_ISL_756259, EPI_ISL_756300, EPI_ISL_756301, EPI_ISL_756302, EPI_ISL_756303, EPI_ISL_756304, EPI_ISL_756305                                                 | see above | UW Virology Lab                                                                 | UW Virology Lab                                                                                                            | Pavitra Roychoudhury, Hong Xie, Lasata Shrestha, Meei-Li Huang, Keith R Jerome, Alexander Greninger                                                                                                                                                                                                                                                                                                                                                                                                                                                         |
| EPI_ISL_756375                                                                                                                                                                                                                                                                                                                                                                                                                                                                                                                                                                                                                                                                                                                                                                                                                                                                                                                                                                                                                                                                                                                                                                                                                                                                                 | see above | Siriraj Hospital, Mahidol University                                            | National Institute of Health, Department of Medical Sciences, Ministry of Public Health, Thailand                          | Pilailuk Okada; Siripaporn Phuygun; Sittiporn Parmmen; Navin Horthongkham; Ratana Tacharoenmuang; Pakorn Piromtong; Natchaya Khiahsang; Thanutsapa Thanadachakul; Warawan Wongboot; Sirikanda wimol; Sunthareeya Waicharoen; Niracha Athipanyasil; Archiraya Pattama; Chutikarn Chaimayo; Ruengpung Suthent; Wannee Kantakamalaku.                                                                                                                                                                                                                          |
| EPI_ISL_756376                                                                                                                                                                                                                                                                                                                                                                                                                                                                                                                                                                                                                                                                                                                                                                                                                                                                                                                                                                                                                                                                                                                                                                                                                                                                                 | see above | National Institute of Health Research and Development                           | National Institute of Health Research and Development                                                                      | Ramadhany,R; Rukminiati,Y; Agustinsingh; Adam,K; Wibowo,HA; Pawestri,HA; Subangkit;Puspa,KD; Nugraha,AA; Ikawati,HD; Pangesti,KNA; Soekarso,T; Susilarini,NK; Hariastuti,NI; Nikmah,UA;Mursinah; Febriyani,A; Herman,R; Susanti,N;Herna; Febriyanti,T; Nurhadi,M; Kurniawati,J; Kipuw,NL; Muna,F; Indalao,IL; Rizki,A; Puspandari,N; Setiawaty,Vivi                                                                                                                                                                                                         |
| EPI_ISL_763350                                                                                                                                                                                                                                                                                                                                                                                                                                                                                                                                                                                                                                                                                                                                                                                                                                                                                                                                                                                                                                                                                                                                                                                                                                                                                 | see above | National Virus Reference Laboratory                                             | Irish Coronavirus Sequencing Consortium - Teagasc Moorepark                                                                | Paul Cotter, Fiona Crispie, John Kenny, Matthew McCabe, Calum Walsh                                                                                                                                                                                                                                                                                                                                                                                                                                                                                         |
| EPI_ISL_763351                                                                                                                                                                                                                                                                                                                                                                                                                                                                                                                                                                                                                                                                                                                                                                                                                                                                                                                                                                                                                                                                                                                                                                                                                                                                                 | see above | University Hospital Limerick                                                    | Irish Coronavirus Sequencing Consortium - Teagasc Moorepark                                                                | Paul Cotter, Fiona Crispie, John Kenny, Calum Walsh                                                                                                                                                                                                                                                                                                                                                                                                                                                                                                         |
| EPI_ISL_768521                                                                                                                                                                                                                                                                                                                                                                                                                                                                                                                                                                                                                                                                                                                                                                                                                                                                                                                                                                                                                                                                                                                                                                                                                                                                                 | see above | Regional medical sciences center 6 Chonburi                                     | National Institute of Health, Department of Medical Sciences, Ministry of Public Health, Thailand                          | Pilailuk Okada; Siripaporn Phuygun; Sittiporn Parmmen; Ratana Tacharoenmuang; Pakorn Piromtong; Natchaya Khiahsang; Thanutsapa Thanadachakul; Warawan Wongboot; sirikanda wimol; Sunthareeya Waicharoen;                                                                                                                                                                                                                                                                                                                                                    |
| EPI_ISL_768522                                                                                                                                                                                                                                                                                                                                                                                                                                                                                                                                                                                                                                                                                                                                                                                                                                                                                                                                                                                                                                                                                                                                                                                                                                                                                 | see above | Synphaet Hospital                                                               | National Institute of Health, Department of Medical Sciences, Ministry of Public Health, Thailand                          | Pilailuk Okada; Siripaporn Phuygun; Sittiporn Parmmen; Ratana Tacharoenmuang; Pakorn Piromtong; Natchaya Khiahsang; Thanutsapa Thanadachakul; Warawan Wongboot; sirikanda wimol; Sunthareeya Waicharoen;                                                                                                                                                                                                                                                                                                                                                    |
| EPI_ISL_768523                                                                                                                                                                                                                                                                                                                                                                                                                                                                                                                                                                                                                                                                                                                                                                                                                                                                                                                                                                                                                                                                                                                                                                                                                                                                                 | see above | Singburi Hospital                                                               | National Institute of Health, Department of Medical Sciences, Ministry of Public Health, Thailand                          | Pilailuk Okada; Siripaporn Phuygun; Sittiporn Parmmen; Ratana Tacharoenmuang; Pakorn Piromtong; Natchaya Khiahsang; Thanutsapa Thanadachakul; Warawan Wongboot; sirikanda wimol; Sunthareeya Waicharoen;                                                                                                                                                                                                                                                                                                                                                    |
| EPI_ISL_768524, EPI_ISL_768528, EPI_ISL_768529                                                                                                                                                                                                                                                                                                                                                                                                                                                                                                                                                                                                                                                                                                                                                                                                                                                                                                                                                                                                                                                                                                                                                                                                                                                 | see above | Regional Medical Sciences Center 1/1 Chiang Rai                                 | National Institute of Health, Department of Medical Sciences, Ministry of Public Health, Thailand                          | Pilailuk Okada; Siripaporn Phuygun; Sittiporn Parmmen; Ratana Tacharoenmuang; Pakorn Piromtong; Natchaya Khiahsang; Thanutsapa Thanadachakul; Warawan Wongboot; sirikanda wimol; Sunthareeya Waicharoen;                                                                                                                                                                                                                                                                                                                                                    |
| EPI_ISL_768530, EPI_ISL_768531, EPI_ISL_768532, EPI_ISL_768533, EPI_ISL_768534, EPI_ISL_768535, EPI_ISL_768536, EPI_ISL_768537, EPI_ISL_768538, EPI_ISL_768539, EPI_ISL_768540, EPI_ISL_768541, EPI_ISL_768542, EPI_ISL_768543, EPI_ISL_768544                                                                                                                                                                                                                                                                                                                                                                                                                                                                                                                                                                                                                                                                                                                                                                                                                                                                                                                                                                                                                                                 | see above | Regional Medical Sciences Center 5 Samut Songkhram                              | National Institute of Health, Department of Medical Sciences, Ministry of Public Health, Thailand                          | Pilailuk Okada; Siripaporn Phuygun; Sittiporn Parmmen; Ratana Tacharoenmuang; Pakorn Piromtong; Natchaya Khiahsang; Thanutsapa Thanadachakul; Warawan Wongboot; sirikanda wimol; Sunthareeya Waicharoen;                                                                                                                                                                                                                                                                                                                                                    |
| EPI_ISL_768609                                                                                                                                                                                                                                                                                                                                                                                                                                                                                                                                                                                                                                                                                                                                                                                                                                                                                                                                                                                                                                                                                                                                                                                                                                                                                 | see above | Regional Medical Sciences Center 1/1 Chiang Rai                                 | National Institute of Health, Department of Medical Sciences, Ministry of Public Health, Thailand                          | Pilailuk Okada; Siripaporn Phuygun; Sittiporn Parmmen; Ratana Tacharoenmuang; Pakorn Piromtong; Natchaya Khiahsang; Thanutsapa Thanadachakul; Warawan Wongboot; sirikanda wimol; Sunthareeya Waicharoen;                                                                                                                                                                                                                                                                                                                                                    |
| EPI_ISL_768610, EPI_ISL_768611                                                                                                                                                                                                                                                                                                                                                                                                                                                                                                                                                                                                                                                                                                                                                                                                                                                                                                                                                                                                                                                                                                                                                                                                                                                                 | see above | Regional medical sciences center 6 Chonburi                                     | National Institute of Health, Department of Medical Sciences, Ministry of Public Health, Thailand                          | Pilailuk Okada; Siripaporn Phuygun; Sittiporn Parmmen; Ratana Tacharoenmuang; Pakorn Piromtong; Natchaya Khiahsang; Thanutsapa Thanadachakul; Warawan Wongboot; sirikanda wimol; Sunthareeya Waicharoen;                                                                                                                                                                                                                                                                                                                                                    |
| EPI_ISL_768612, EPI_ISL_768613                                                                                                                                                                                                                                                                                                                                                                                                                                                                                                                                                                                                                                                                                                                                                                                                                                                                                                                                                                                                                                                                                                                                                                                                                                                                 | see above | Emergency Operation Center, (EOC)                                               | National Institute of Health, Department of Medical Sciences, Ministry of Public Health, Thailand                          | Pilailuk Okada; Siripaporn Phuygun; Sittiporn Parmmen; Ratana Tacharoenmuang; Pakorn Piromtong; Natchaya Khiahsang; Thanutsapa Thanadachakul; Warawan Wongboot; sirikanda wimol; Sunthareeya Waicharoen;                                                                                                                                                                                                                                                                                                                                                    |
| EPI_ISL_768614                                                                                                                                                                                                                                                                                                                                                                                                                                                                                                                                                                                                                                                                                                                                                                                                                                                                                                                                                                                                                                                                                                                                                                                                                                                                                 | see above | Regional Medical Sciences Center 1/1 Chiang Rai                                 | National Institute of Health, Department of Medical Sciences, Ministry of Public Health, Thailand                          | Pilailuk Okada; Siripaporn Phuygun; Sittiporn Parmmen; Ratana Tacharoenmuang; Pakorn Piromtong; Natchaya Khiahsang; Thanutsapa Thanadachakul; Warawan Wongboot; sirikanda wimol; Sunthareeya Waicharoen;                                                                                                                                                                                                                                                                                                                                                    |
| EPI_ISL_768615                                                                                                                                                                                                                                                                                                                                                                                                                                                                                                                                                                                                                                                                                                                                                                                                                                                                                                                                                                                                                                                                                                                                                                                                                                                                                 | see above | Regional Medical Sciences Center 5 Samut Songkhram                              | National Institute of Health, Department of Medical Sciences, Ministry of Public Health, Thailand                          | Pilailuk Okada; Siripaporn Phuygun; Sittiporn Parmmen; Ratana Tacharoenmuang; Pakorn Piromtong; Natchaya Khiahsang; Thanutsapa Thanadachakul; Warawan Wongboot; sirikanda wimol; Sunthareeya Waicharoen;                                                                                                                                                                                                                                                                                                                                                    |
| EPI_ISL_768616                                                                                                                                                                                                                                                                                                                                                                                                                                                                                                                                                                                                                                                                                                                                                                                                                                                                                                                                                                                                                                                                                                                                                                                                                                                                                 | see above | Rajavithi Hospital                                                              | National Institute of Health, Department of Medical Sciences, Ministry of Public Health, Thailand                          | Pilailuk Okada; Siripaporn Phuygun; Sittiporn Parmmen; Ratana Tacharoenmuang; Pakorn Piromtong; Natchaya Khiahsang; Thanutsapa Thanadachakul; Warawan Wongboot; sirikanda wimol; Sunthareeya Waicharoen;                                                                                                                                                                                                                                                                                                                                                    |





| Prevention                                                                                                                                                                                                                                                                                                                                                                                                                                                                                                                                                                                                                                                                                                                                                                                                                                                                                                                                                                                                                                                                                                                                                                                                                                                                                                                                                                                                                                                                                                                                                                                                                                                                                                                                                                                                                                                                                                                                                                                                                                                                                                                                                                                                                                                                                                                                                                                                                                                                                                                                                                                                                                                                                                                                                                                                                                                                                                                                                                                                                                                                                                                                                                                                                                                                                                                                                                                                                                                                                                                                                                                                                                                                                                                                                                                                                                                                                                                                                                                                                                                                                                                                                                                                                                                                                                                                                                                                                                                                                                                                                                                                                                                                                                                                                                                                                                                                                                                                                                                                                                                                                                                                                                                                                                                                                                                                                                                                                                                                                                                                                                                                                                                                                                                                                                                                                                                                                                                                                                                                                                                                                                                                                                                                                                                                                                                                                                                                                                                                                                                                                                                                                                                                                                                                                                                                                                                                                                                                                                                                                                                                                                                                                                                                                                                                                                                                                                                                                                                                                                                                                                                                                                                                                                                                                                                                                                                                                                                                                                                                                                                                                                                                                                                                                                                                                                                                                                                                                                                                                                                                                                                                                                                                                                                                                                                                                                                                                                                                                                                                                                                                                                                                                                                                                                                                                                                                                                                                                                                                                                                                                                                                                                                                                                                                                                                                                                                                                                                                                                                                                                                                                                                                                                                                                                                                                                                                                                                                                                                                                                                                                                                                                                                                                                                                                                                                                                                                                                                                                                                                                                                                                                                                                                                                                                                                                                                                                                                                                                                                                                                                                                                                                                                                                                                                                                                                                                                                                                                                                                                                                                                                                                                                                                                                                                                                                                                                                                                                                                                                                                                                                                                                                 |                                                                                                                 | Alexandre Bolze, Ary Ascencio, Charlotte Rivera-Garcia, Ryan Cho, Jason Nguyen, Sherry Wang, Jimmy Ramirez, Tyler Cassens, Efrén Sandoval, Magnus Isaksson, William Lee, David Becker, Marc Laurent, James Lu, Clinton R. Paden, Suxiang Tong, Duncan MacCannell |                                                                                                                                                                                                                                                                                                                                                                                                                                                                                                                                                                                    |
|----------------------------------------------------------------------------------------------------------------------------------------------------------------------------------------------------------------------------------------------------------------------------------------------------------------------------------------------------------------------------------------------------------------------------------------------------------------------------------------------------------------------------------------------------------------------------------------------------------------------------------------------------------------------------------------------------------------------------------------------------------------------------------------------------------------------------------------------------------------------------------------------------------------------------------------------------------------------------------------------------------------------------------------------------------------------------------------------------------------------------------------------------------------------------------------------------------------------------------------------------------------------------------------------------------------------------------------------------------------------------------------------------------------------------------------------------------------------------------------------------------------------------------------------------------------------------------------------------------------------------------------------------------------------------------------------------------------------------------------------------------------------------------------------------------------------------------------------------------------------------------------------------------------------------------------------------------------------------------------------------------------------------------------------------------------------------------------------------------------------------------------------------------------------------------------------------------------------------------------------------------------------------------------------------------------------------------------------------------------------------------------------------------------------------------------------------------------------------------------------------------------------------------------------------------------------------------------------------------------------------------------------------------------------------------------------------------------------------------------------------------------------------------------------------------------------------------------------------------------------------------------------------------------------------------------------------------------------------------------------------------------------------------------------------------------------------------------------------------------------------------------------------------------------------------------------------------------------------------------------------------------------------------------------------------------------------------------------------------------------------------------------------------------------------------------------------------------------------------------------------------------------------------------------------------------------------------------------------------------------------------------------------------------------------------------------------------------------------------------------------------------------------------------------------------------------------------------------------------------------------------------------------------------------------------------------------------------------------------------------------------------------------------------------------------------------------------------------------------------------------------------------------------------------------------------------------------------------------------------------------------------------------------------------------------------------------------------------------------------------------------------------------------------------------------------------------------------------------------------------------------------------------------------------------------------------------------------------------------------------------------------------------------------------------------------------------------------------------------------------------------------------------------------------------------------------------------------------------------------------------------------------------------------------------------------------------------------------------------------------------------------------------------------------------------------------------------------------------------------------------------------------------------------------------------------------------------------------------------------------------------------------------------------------------------------------------------------------------------------------------------------------------------------------------------------------------------------------------------------------------------------------------------------------------------------------------------------------------------------------------------------------------------------------------------------------------------------------------------------------------------------------------------------------------------------------------------------------------------------------------------------------------------------------------------------------------------------------------------------------------------------------------------------------------------------------------------------------------------------------------------------------------------------------------------------------------------------------------------------------------------------------------------------------------------------------------------------------------------------------------------------------------------------------------------------------------------------------------------------------------------------------------------------------------------------------------------------------------------------------------------------------------------------------------------------------------------------------------------------------------------------------------------------------------------------------------------------------------------------------------------------------------------------------------------------------------------------------------------------------------------------------------------------------------------------------------------------------------------------------------------------------------------------------------------------------------------------------------------------------------------------------------------------------------------------------------------------------------------------------------------------------------------------------------------------------------------------------------------------------------------------------------------------------------------------------------------------------------------------------------------------------------------------------------------------------------------------------------------------------------------------------------------------------------------------------------------------------------------------------------------------------------------------------------------------------------------------------------------------------------------------------------------------------------------------------------------------------------------------------------------------------------------------------------------------------------------------------------------------------------------------------------------------------------------------------------------------------------------------------------------------------------------------------------------------------------------------------------------------------------------------------------------------------------------------------------------------------------------------------------------------------------------------------------------------------------------------------------------------------------------------------------------------------------------------------------------------------------------------------------------------------------------------------------------------------------------------------------------------------------------------------------------------------------------------------------------------------------------------------------------------------------------------------------------------------------------------------------------------------------------------------------------------------------------------------------------------------------------------------------------------------------------------------------------------------------------------------------------------------------------------------------------------------------------------------------------------------------------------------------------------------------------------------------------------------------------------------------------------------------------------------------------------------------------------------------------------------------------------------------------------------------------------------------------------------------------------------------------------------------------------------------------------------------------------------------------------------------------------------------------------------------------------------------------------------------------------------------------------------------------------------------------------------------------------------------------------------------------------------------------------------------------------------------------------------------------------------------------------------------------------------------------------------------------------------------------------------------------------------------------------------------------------------------------------------------------------------------------------------------------------------------------------------------------------------------------------------------------------------------------------------------------------------------------------------------------------------------------------------------------------------------------------------------------------------------------------------------------------------------------------------------------------------------------------------------------------------------------------------------------------------------------------------------------------------------------------------------------------------------------------------------------------------------------------------------------------------------------------------------------------------------------------------------------------------------------------------------------------------------------------------------------------------------------------------------------------------------------------------------------------------------------------------------------------------------------------------------------------------------------------------------------------------------------------------------------------------------------------------------------------------------------------------------------------------------------------------------------------------------------------------------------------------------------------------------------------------------------------------------------------------------------------------------------------------------------------------------------------------------------------------------------------------------------------------------------------------------------------------------------------------------------------------------------------------------------------------------------------------------|-----------------------------------------------------------------------------------------------------------------|------------------------------------------------------------------------------------------------------------------------------------------------------------------------------------------------------------------------------------------------------------------|------------------------------------------------------------------------------------------------------------------------------------------------------------------------------------------------------------------------------------------------------------------------------------------------------------------------------------------------------------------------------------------------------------------------------------------------------------------------------------------------------------------------------------------------------------------------------------|
| EPI_ISL_861488                                                                                                                                                                                                                                                                                                                                                                                                                                                                                                                                                                                                                                                                                                                                                                                                                                                                                                                                                                                                                                                                                                                                                                                                                                                                                                                                                                                                                                                                                                                                                                                                                                                                                                                                                                                                                                                                                                                                                                                                                                                                                                                                                                                                                                                                                                                                                                                                                                                                                                                                                                                                                                                                                                                                                                                                                                                                                                                                                                                                                                                                                                                                                                                                                                                                                                                                                                                                                                                                                                                                                                                                                                                                                                                                                                                                                                                                                                                                                                                                                                                                                                                                                                                                                                                                                                                                                                                                                                                                                                                                                                                                                                                                                                                                                                                                                                                                                                                                                                                                                                                                                                                                                                                                                                                                                                                                                                                                                                                                                                                                                                                                                                                                                                                                                                                                                                                                                                                                                                                                                                                                                                                                                                                                                                                                                                                                                                                                                                                                                                                                                                                                                                                                                                                                                                                                                                                                                                                                                                                                                                                                                                                                                                                                                                                                                                                                                                                                                                                                                                                                                                                                                                                                                                                                                                                                                                                                                                                                                                                                                                                                                                                                                                                                                                                                                                                                                                                                                                                                                                                                                                                                                                                                                                                                                                                                                                                                                                                                                                                                                                                                                                                                                                                                                                                                                                                                                                                                                                                                                                                                                                                                                                                                                                                                                                                                                                                                                                                                                                                                                                                                                                                                                                                                                                                                                                                                                                                                                                                                                                                                                                                                                                                                                                                                                                                                                                                                                                                                                                                                                                                                                                                                                                                                                                                                                                                                                                                                                                                                                                                                                                                                                                                                                                                                                                                                                                                                                                                                                                                                                                                                                                                                                                                                                                                                                                                                                                                                                                                                                                                                                                                                             | Cerballiance Côte d'Azur                                                                                        | CERBA LAB                                                                                                                                                                                                                                                        | Prots.L; Pichon R; Barrieu-Moussat S.                                                                                                                                                                                                                                                                                                                                                                                                                                                                                                                                              |
| EPI_ISL_861494                                                                                                                                                                                                                                                                                                                                                                                                                                                                                                                                                                                                                                                                                                                                                                                                                                                                                                                                                                                                                                                                                                                                                                                                                                                                                                                                                                                                                                                                                                                                                                                                                                                                                                                                                                                                                                                                                                                                                                                                                                                                                                                                                                                                                                                                                                                                                                                                                                                                                                                                                                                                                                                                                                                                                                                                                                                                                                                                                                                                                                                                                                                                                                                                                                                                                                                                                                                                                                                                                                                                                                                                                                                                                                                                                                                                                                                                                                                                                                                                                                                                                                                                                                                                                                                                                                                                                                                                                                                                                                                                                                                                                                                                                                                                                                                                                                                                                                                                                                                                                                                                                                                                                                                                                                                                                                                                                                                                                                                                                                                                                                                                                                                                                                                                                                                                                                                                                                                                                                                                                                                                                                                                                                                                                                                                                                                                                                                                                                                                                                                                                                                                                                                                                                                                                                                                                                                                                                                                                                                                                                                                                                                                                                                                                                                                                                                                                                                                                                                                                                                                                                                                                                                                                                                                                                                                                                                                                                                                                                                                                                                                                                                                                                                                                                                                                                                                                                                                                                                                                                                                                                                                                                                                                                                                                                                                                                                                                                                                                                                                                                                                                                                                                                                                                                                                                                                                                                                                                                                                                                                                                                                                                                                                                                                                                                                                                                                                                                                                                                                                                                                                                                                                                                                                                                                                                                                                                                                                                                                                                                                                                                                                                                                                                                                                                                                                                                                                                                                                                                                                                                                                                                                                                                                                                                                                                                                                                                                                                                                                                                                                                                                                                                                                                                                                                                                                                                                                                                                                                                                                                                                                                                                                                                                                                                                                                                                                                                                                                                                                                                                                                                                                             | Cerballiance Côte d'Azur                                                                                        | CERBA LAB                                                                                                                                                                                                                                                        | Prots L. Raimondi V.                                                                                                                                                                                                                                                                                                                                                                                                                                                                                                                                                               |
| EPI_ISL_861495                                                                                                                                                                                                                                                                                                                                                                                                                                                                                                                                                                                                                                                                                                                                                                                                                                                                                                                                                                                                                                                                                                                                                                                                                                                                                                                                                                                                                                                                                                                                                                                                                                                                                                                                                                                                                                                                                                                                                                                                                                                                                                                                                                                                                                                                                                                                                                                                                                                                                                                                                                                                                                                                                                                                                                                                                                                                                                                                                                                                                                                                                                                                                                                                                                                                                                                                                                                                                                                                                                                                                                                                                                                                                                                                                                                                                                                                                                                                                                                                                                                                                                                                                                                                                                                                                                                                                                                                                                                                                                                                                                                                                                                                                                                                                                                                                                                                                                                                                                                                                                                                                                                                                                                                                                                                                                                                                                                                                                                                                                                                                                                                                                                                                                                                                                                                                                                                                                                                                                                                                                                                                                                                                                                                                                                                                                                                                                                                                                                                                                                                                                                                                                                                                                                                                                                                                                                                                                                                                                                                                                                                                                                                                                                                                                                                                                                                                                                                                                                                                                                                                                                                                                                                                                                                                                                                                                                                                                                                                                                                                                                                                                                                                                                                                                                                                                                                                                                                                                                                                                                                                                                                                                                                                                                                                                                                                                                                                                                                                                                                                                                                                                                                                                                                                                                                                                                                                                                                                                                                                                                                                                                                                                                                                                                                                                                                                                                                                                                                                                                                                                                                                                                                                                                                                                                                                                                                                                                                                                                                                                                                                                                                                                                                                                                                                                                                                                                                                                                                                                                                                                                                                                                                                                                                                                                                                                                                                                                                                                                                                                                                                                                                                                                                                                                                                                                                                                                                                                                                                                                                                                                                                                                                                                                                                                                                                                                                                                                                                                                                                                                                                                                                             | Cerballiance Côte d'Azur                                                                                        | CERBA LAB                                                                                                                                                                                                                                                        | Pichon X. Quinte S; Sanza O; Mangiarotti T; Vitard B; Prots L.                                                                                                                                                                                                                                                                                                                                                                                                                                                                                                                     |
| EPI_ISL_861730, EPI_ISL_861731                                                                                                                                                                                                                                                                                                                                                                                                                                                                                                                                                                                                                                                                                                                                                                                                                                                                                                                                                                                                                                                                                                                                                                                                                                                                                                                                                                                                                                                                                                                                                                                                                                                                                                                                                                                                                                                                                                                                                                                                                                                                                                                                                                                                                                                                                                                                                                                                                                                                                                                                                                                                                                                                                                                                                                                                                                                                                                                                                                                                                                                                                                                                                                                                                                                                                                                                                                                                                                                                                                                                                                                                                                                                                                                                                                                                                                                                                                                                                                                                                                                                                                                                                                                                                                                                                                                                                                                                                                                                                                                                                                                                                                                                                                                                                                                                                                                                                                                                                                                                                                                                                                                                                                                                                                                                                                                                                                                                                                                                                                                                                                                                                                                                                                                                                                                                                                                                                                                                                                                                                                                                                                                                                                                                                                                                                                                                                                                                                                                                                                                                                                                                                                                                                                                                                                                                                                                                                                                                                                                                                                                                                                                                                                                                                                                                                                                                                                                                                                                                                                                                                                                                                                                                                                                                                                                                                                                                                                                                                                                                                                                                                                                                                                                                                                                                                                                                                                                                                                                                                                                                                                                                                                                                                                                                                                                                                                                                                                                                                                                                                                                                                                                                                                                                                                                                                                                                                                                                                                                                                                                                                                                                                                                                                                                                                                                                                                                                                                                                                                                                                                                                                                                                                                                                                                                                                                                                                                                                                                                                                                                                                                                                                                                                                                                                                                                                                                                                                                                                                                                                                                                                                                                                                                                                                                                                                                                                                                                                                                                                                                                                                                                                                                                                                                                                                                                                                                                                                                                                                                                                                                                                                                                                                                                                                                                                                                                                                                                                                                                                                                                                                                                             | UW Virology Lab                                                                                                 | UW Virology Lab                                                                                                                                                                                                                                                  | Pavitra Roychoudhury, Hong Xie, Lasata Shrestha, Michelle Lin, Meei-Li Huang, Keith R Devas, Alexander Greninger                                                                                                                                                                                                                                                                                                                                                                                                                                                                   |
| EPI_ISL_862051                                                                                                                                                                                                                                                                                                                                                                                                                                                                                                                                                                                                                                                                                                                                                                                                                                                                                                                                                                                                                                                                                                                                                                                                                                                                                                                                                                                                                                                                                                                                                                                                                                                                                                                                                                                                                                                                                                                                                                                                                                                                                                                                                                                                                                                                                                                                                                                                                                                                                                                                                                                                                                                                                                                                                                                                                                                                                                                                                                                                                                                                                                                                                                                                                                                                                                                                                                                                                                                                                                                                                                                                                                                                                                                                                                                                                                                                                                                                                                                                                                                                                                                                                                                                                                                                                                                                                                                                                                                                                                                                                                                                                                                                                                                                                                                                                                                                                                                                                                                                                                                                                                                                                                                                                                                                                                                                                                                                                                                                                                                                                                                                                                                                                                                                                                                                                                                                                                                                                                                                                                                                                                                                                                                                                                                                                                                                                                                                                                                                                                                                                                                                                                                                                                                                                                                                                                                                                                                                                                                                                                                                                                                                                                                                                                                                                                                                                                                                                                                                                                                                                                                                                                                                                                                                                                                                                                                                                                                                                                                                                                                                                                                                                                                                                                                                                                                                                                                                                                                                                                                                                                                                                                                                                                                                                                                                                                                                                                                                                                                                                                                                                                                                                                                                                                                                                                                                                                                                                                                                                                                                                                                                                                                                                                                                                                                                                                                                                                                                                                                                                                                                                                                                                                                                                                                                                                                                                                                                                                                                                                                                                                                                                                                                                                                                                                                                                                                                                                                                                                                                                                                                                                                                                                                                                                                                                                                                                                                                                                                                                                                                                                                                                                                                                                                                                                                                                                                                                                                                                                                                                                                                                                                                                                                                                                                                                                                                                                                                                                                                                                                                                                                                             | Multidisciplinary Research Unit, DHR-ICMR, Institute of Medical Sciences, Banaras Hindu University              | Multidisciplinary Research Unit, DHR-ICMR, Institute of Medical Sciences, Banaras Hindu University                                                                                                                                                               | Priyoneel Basu, Ashish, Nitish Kumar Singh, Abhay Kumar Yadav, Manpreet Kaur, Arup Acharjee, Deepa Devadas, Chetan Sahni, Sanjay Kumar, Tribhuwan Mohan Mahapatra, Richa Arya, Prashant Singh, Jay Prakash Maurya, Surendra Pratap Mishra, Royana Singh                                                                                                                                                                                                                                                                                                                            |
| EPI_ISL_864544, EPI_ISL_864545, EPI_ISL_864546, EPI_ISL_864563, EPI_ISL_864564, EPI_ISL_864565, EPI_ISL_864566, EPI_ISL_864567, EPI_ISL_864568, EPI_ISL_864569, EPI_ISL_864570, EPI_ISL_864571, EPI_ISL_864572, EPI_ISL_864573, EPI_ISL_864574, EPI_ISL_864575, EPI_ISL_864576, EPI_ISL_864577, EPI_ISL_864578, EPI_ISL_864579                                                                                                                                                                                                                                                                                                                                                                                                                                                                                                                                                                                                                                                                                                                                                                                                                                                                                                                                                                                                                                                                                                                                                                                                                                                                                                                                                                                                                                                                                                                                                                                                                                                                                                                                                                                                                                                                                                                                                                                                                                                                                                                                                                                                                                                                                                                                                                                                                                                                                                                                                                                                                                                                                                                                                                                                                                                                                                                                                                                                                                                                                                                                                                                                                                                                                                                                                                                                                                                                                                                                                                                                                                                                                                                                                                                                                                                                                                                                                                                                                                                                                                                                                                                                                                                                                                                                                                                                                                                                                                                                                                                                                                                                                                                                                                                                                                                                                                                                                                                                                                                                                                                                                                                                                                                                                                                                                                                                                                                                                                                                                                                                                                                                                                                                                                                                                                                                                                                                                                                                                                                                                                                                                                                                                                                                                                                                                                                                                                                                                                                                                                                                                                                                                                                                                                                                                                                                                                                                                                                                                                                                                                                                                                                                                                                                                                                                                                                                                                                                                                                                                                                                                                                                                                                                                                                                                                                                                                                                                                                                                                                                                                                                                                                                                                                                                                                                                                                                                                                                                                                                                                                                                                                                                                                                                                                                                                                                                                                                                                                                                                                                                                                                                                                                                                                                                                                                                                                                                                                                                                                                                                                                                                                                                                                                                                                                                                                                                                                                                                                                                                                                                                                                                                                                                                                                                                                                                                                                                                                                                                                                                                                                                                                                                                                                                                                                                                                                                                                                                                                                                                                                                                                                                                                                                                                                                                                                                                                                                                                                                                                                                                                                                                                                                                                                                                                                                                                                                                                                                                                                                                                                                                                                                                                                                                                                                             |                                                                                                                 |                                                                                                                                                                                                                                                                  |                                                                                                                                                                                                                                                                                                                                                                                                                                                                                                                                                                                    |
| see above                                                                                                                                                                                                                                                                                                                                                                                                                                                                                                                                                                                                                                                                                                                                                                                                                                                                                                                                                                                                                                                                                                                                                                                                                                                                                                                                                                                                                                                                                                                                                                                                                                                                                                                                                                                                                                                                                                                                                                                                                                                                                                                                                                                                                                                                                                                                                                                                                                                                                                                                                                                                                                                                                                                                                                                                                                                                                                                                                                                                                                                                                                                                                                                                                                                                                                                                                                                                                                                                                                                                                                                                                                                                                                                                                                                                                                                                                                                                                                                                                                                                                                                                                                                                                                                                                                                                                                                                                                                                                                                                                                                                                                                                                                                                                                                                                                                                                                                                                                                                                                                                                                                                                                                                                                                                                                                                                                                                                                                                                                                                                                                                                                                                                                                                                                                                                                                                                                                                                                                                                                                                                                                                                                                                                                                                                                                                                                                                                                                                                                                                                                                                                                                                                                                                                                                                                                                                                                                                                                                                                                                                                                                                                                                                                                                                                                                                                                                                                                                                                                                                                                                                                                                                                                                                                                                                                                                                                                                                                                                                                                                                                                                                                                                                                                                                                                                                                                                                                                                                                                                                                                                                                                                                                                                                                                                                                                                                                                                                                                                                                                                                                                                                                                                                                                                                                                                                                                                                                                                                                                                                                                                                                                                                                                                                                                                                                                                                                                                                                                                                                                                                                                                                                                                                                                                                                                                                                                                                                                                                                                                                                                                                                                                                                                                                                                                                                                                                                                                                                                                                                                                                                                                                                                                                                                                                                                                                                                                                                                                                                                                                                                                                                                                                                                                                                                                                                                                                                                                                                                                                                                                                                                                                                                                                                                                                                                                                                                                                                                                                                                                                                                                                                  | Institute of Medical Microbiology and Hospital Hygiene                                                          | Institute of Medical Microbiology and Hospital Hygiene                                                                                                                                                                                                           | Prof. Dr. Achim Kaasch, Aļjoscha Tersteegen                                                                                                                                                                                                                                                                                                                                                                                                                                                                                                                                        |
| EPI_ISL_871876                                                                                                                                                                                                                                                                                                                                                                                                                                                                                                                                                                                                                                                                                                                                                                                                                                                                                                                                                                                                                                                                                                                                                                                                                                                                                                                                                                                                                                                                                                                                                                                                                                                                                                                                                                                                                                                                                                                                                                                                                                                                                                                                                                                                                                                                                                                                                                                                                                                                                                                                                                                                                                                                                                                                                                                                                                                                                                                                                                                                                                                                                                                                                                                                                                                                                                                                                                                                                                                                                                                                                                                                                                                                                                                                                                                                                                                                                                                                                                                                                                                                                                                                                                                                                                                                                                                                                                                                                                                                                                                                                                                                                                                                                                                                                                                                                                                                                                                                                                                                                                                                                                                                                                                                                                                                                                                                                                                                                                                                                                                                                                                                                                                                                                                                                                                                                                                                                                                                                                                                                                                                                                                                                                                                                                                                                                                                                                                                                                                                                                                                                                                                                                                                                                                                                                                                                                                                                                                                                                                                                                                                                                                                                                                                                                                                                                                                                                                                                                                                                                                                                                                                                                                                                                                                                                                                                                                                                                                                                                                                                                                                                                                                                                                                                                                                                                                                                                                                                                                                                                                                                                                                                                                                                                                                                                                                                                                                                                                                                                                                                                                                                                                                                                                                                                                                                                                                                                                                                                                                                                                                                                                                                                                                                                                                                                                                                                                                                                                                                                                                                                                                                                                                                                                                                                                                                                                                                                                                                                                                                                                                                                                                                                                                                                                                                                                                                                                                                                                                                                                                                                                                                                                                                                                                                                                                                                                                                                                                                                                                                                                                                                                                                                                                                                                                                                                                                                                                                                                                                                                                                                                                                                                                                                                                                                                                                                                                                                                                                                                                                                                                                                                                             | Cerballiance Côte d'Azur                                                                                        | CERBA LAB                                                                                                                                                                                                                                                        | Prots L; Barrieu-Moussat S; Roquebert B; Costa JM; Hedbaut E; Trombert S; Lecorche E; Verdurme L; Malek Ramdane, Olivi M; Haïm-Boukobza S.                                                                                                                                                                                                                                                                                                                                                                                                                                         |
| EPI_ISL_876625, EPI_ISL_876626, EPI_ISL_876627, EPI_ISL_876628, EPI_ISL_876629, EPI_ISL_876630, EPI_ISL_876631, EPI_ISL_876632, EPI_ISL_876633, EPI_ISL_876634, EPI_ISL_876635, EPI_ISL_876636, EPI_ISL_876637, EPI_ISL_876638, EPI_ISL_876639, EPI_ISL_876640, EPI_ISL_876641, EPI_ISL_876642, EPI_ISL_876643, EPI_ISL_876644, EPI_ISL_876645, EPI_ISL_876646, EPI_ISL_876647, EPI_ISL_876648, EPI_ISL_876649, EPI_ISL_876650, EPI_ISL_876651, EPI_ISL_876652, EPI_ISL_876653, EPI_ISL_876654, EPI_ISL_876655, EPI_ISL_876656, EPI_ISL_876657, EPI_ISL_876658, EPI_ISL_876659, EPI_ISL_876660, EPI_ISL_876661, EPI_ISL_876662, EPI_ISL_876663, EPI_ISL_876664, EPI_ISL_876665, EPI_ISL_876666, EPI_ISL_876667, EPI_ISL_876668, EPI_ISL_876669, EPI_ISL_876670, EPI_ISL_876671, EPI_ISL_876672, EPI_ISL_876673, EPI_ISL_876674, EPI_ISL_876675, EPI_ISL_876676, EPI_ISL_876677, EPI_ISL_876678, EPI_ISL_876679, EPI_ISL_876680, EPI_ISL_876681, EPI_ISL_876682, EPI_ISL_876683, EPI_ISL_876684, EPI_ISL_876685, EPI_ISL_876686, EPI_ISL_876687, EPI_ISL_876688, EPI_ISL_876689, EPI_ISL_876690, EPI_ISL_876691, EPI_ISL_876692, EPI_ISL_876693, EPI_ISL_876694, EPI_ISL_876695, EPI_ISL_876696, EPI_ISL_876697, EPI_ISL_876698, EPI_ISL_876699, EPI_ISL_877000, EPI_ISL_877001, EPI_ISL_877002, EPI_ISL_877003, EPI_ISL_877004, EPI_ISL_877005, EPI_ISL_877006, EPI_ISL_877007, EPI_ISL_877008, EPI_ISL_877009, EPI_ISL_877010, EPI_ISL_877011, EPI_ISL_877012, EPI_ISL_877013, EPI_ISL_877014, EPI_ISL_877015, EPI_ISL_877016, EPI_ISL_877017, EPI_ISL_877018, EPI_ISL_877019, EPI_ISL_877020, EPI_ISL_877021, EPI_ISL_877022, EPI_ISL_877023, EPI_ISL_877024, EPI_ISL_877025, EPI_ISL_877026, EPI_ISL_877027, EPI_ISL_877028, EPI_ISL_877029, EPI_ISL_877030, EPI_ISL_877031, EPI_ISL_877032, EPI_ISL_877033, EPI_ISL_877034, EPI_ISL_877035, EPI_ISL_877036                                                                                                                                                                                                                                                                                                                                                                                                                                                                                                                                                                                                                                                                                                                                                                                                                                                                                                                                                                                                                                                                                                                                                                                                                                                                                                                                                                                                                                                                                                                                                                                                                                                                                                                                                                                                                                                                                                                                                                                                                                                                                                                                                                                                                                                                                                                                                                                                                                                                                                                                                                                                                                                                                                                                                                                                                                                                                                                                                                                                                                                                                                                                                                                                                                                                                                                                                                                                                                                                                                                                                                                                                                                                                                                                                                                                                                                                                                                                                                                                                                                                                                                                                                                                                                                                                                                                                                                                                                                                                                                                                                                                                                                                                                                                                                                                                                                                                                                                                                                                                                                                                                                                                                                                                                                                                                                                                                                                                                                                                                                                                                                                                                                                                                                                                                                                                                                                                                                                                                                                                                                                                                                                                                                                                                                                                                                                                                                                                                                                                                                                                                                                                                                                                                                                                                                                                                                                                                                                                                                                                                                                                                                                                                                                                                                                                                                                                                                                                                                                                                                                                                                                                                                                                                                                                                                                                                                                                                                                                                                                                                                                                                                                                                                                                                                                                                                                                                                                                                                                                                                                                                                                                                                                                                                                                                                                                                                                                                                                                                                                                                                                                                                                                                                                                                                                                                                                                                                                                                                                                                                                                                                                                                                                                                                                                                                                                                                                                                                                                                                                                                                                                                                                                                                                                                                                                                                                                                                                                                                                                                                                                                                                                                                                                                                                                             |                                                                                                                 |                                                                                                                                                                                                                                                                  |                                                                                                                                                                                                                                                                                                                                                                                                                                                                                                                                                                                    |
| see above                                                                                                                                                                                                                                                                                                                                                                                                                                                                                                                                                                                                                                                                                                                                                                                                                                                                                                                                                                                                                                                                                                                                                                                                                                                                                                                                                                                                                                                                                                                                                                                                                                                                                                                                                                                                                                                                                                                                                                                                                                                                                                                                                                                                                                                                                                                                                                                                                                                                                                                                                                                                                                                                                                                                                                                                                                                                                                                                                                                                                                                                                                                                                                                                                                                                                                                                                                                                                                                                                                                                                                                                                                                                                                                                                                                                                                                                                                                                                                                                                                                                                                                                                                                                                                                                                                                                                                                                                                                                                                                                                                                                                                                                                                                                                                                                                                                                                                                                                                                                                                                                                                                                                                                                                                                                                                                                                                                                                                                                                                                                                                                                                                                                                                                                                                                                                                                                                                                                                                                                                                                                                                                                                                                                                                                                                                                                                                                                                                                                                                                                                                                                                                                                                                                                                                                                                                                                                                                                                                                                                                                                                                                                                                                                                                                                                                                                                                                                                                                                                                                                                                                                                                                                                                                                                                                                                                                                                                                                                                                                                                                                                                                                                                                                                                                                                                                                                                                                                                                                                                                                                                                                                                                                                                                                                                                                                                                                                                                                                                                                                                                                                                                                                                                                                                                                                                                                                                                                                                                                                                                                                                                                                                                                                                                                                                                                                                                                                                                                                                                                                                                                                                                                                                                                                                                                                                                                                                                                                                                                                                                                                                                                                                                                                                                                                                                                                                                                                                                                                                                                                                                                                                                                                                                                                                                                                                                                                                                                                                                                                                                                                                                                                                                                                                                                                                                                                                                                                                                                                                                                                                                                                                                                                                                                                                                                                                                                                                                                                                                                                                                                                                                                                  | Helix/Ilumina                                                                                                   | Genomics and Discovery, Respiratory Viruses Branch, Division of Viral Diseases, Centers for Disease Control and Prevention                                                                                                                                       | Peter W. Cook, Dhvani Batra, Ben L. Rambo-Martin, Eileen de Feo, Jan Antico, Christine Tran, Matthew Tolentino, Shannon Wickline, Kim Gietzen, Brad Sickler, Jingtao Liu, Eric Allen, Phil Febbo, Summer Galloway, Nicole L. Washington, Simon White, Geraint Levan, Kelly Schiabor Barrett, Elizabeth Cirulli, Alexandrea Bolze, Ary Ascencio, Charlotte Rivera-Garcia, Ryan Cho, Jason Nguyen, Sherry Wang, Jimmy Ramirez, Tyler Cassens, Efrén Sandoval, Magnus Isaksson, William Lee, David Becker, Marc Laurent, James Lu, Clinton R. Paden, Suxiang Tong, Duncan MacCannell, |
| EPI_ISL_877765                                                                                                                                                                                                                                                                                                                                                                                                                                                                                                                                                                                                                                                                                                                                                                                                                                                                                                                                                                                                                                                                                                                                                                                                                                                                                                                                                                                                                                                                                                                                                                                                                                                                                                                                                                                                                                                                                                                                                                                                                                                                                                                                                                                                                                                                                                                                                                                                                                                                                                                                                                                                                                                                                                                                                                                                                                                                                                                                                                                                                                                                                                                                                                                                                                                                                                                                                                                                                                                                                                                                                                                                                                                                                                                                                                                                                                                                                                                                                                                                                                                                                                                                                                                                                                                                                                                                                                                                                                                                                                                                                                                                                                                                                                                                                                                                                                                                                                                                                                                                                                                                                                                                                                                                                                                                                                                                                                                                                                                                                                                                                                                                                                                                                                                                                                                                                                                                                                                                                                                                                                                                                                                                                                                                                                                                                                                                                                                                                                                                                                                                                                                                                                                                                                                                                                                                                                                                                                                                                                                                                                                                                                                                                                                                                                                                                                                                                                                                                                                                                                                                                                                                                                                                                                                                                                                                                                                                                                                                                                                                                                                                                                                                                                                                                                                                                                                                                                                                                                                                                                                                                                                                                                                                                                                                                                                                                                                                                                                                                                                                                                                                                                                                                                                                                                                                                                                                                                                                                                                                                                                                                                                                                                                                                                                                                                                                                                                                                                                                                                                                                                                                                                                                                                                                                                                                                                                                                                                                                                                                                                                                                                                                                                                                                                                                                                                                                                                                                                                                                                                                                                                                                                                                                                                                                                                                                                                                                                                                                                                                                                                                                                                                                                                                                                                                                                                                                                                                                                                                                                                                                                                                                                                                                                                                                                                                                                                                                                                                                                                                                                                                                                                                             | UCO Igiene e Sanità Pubblica. ASUGI. Trieste, Italy; Laboratorio di Virologia Molecolare, ICGBE, Trieste, Italy | Laboratorio di Genomica ed Epigenomica sistema Argo, Area SciencePark, Trieste, Italy;                                                                                                                                                                           | Pierlanfranco D'Agaro, Danilo Licastro, Alessandro Marcello                                                                                                                                                                                                                                                                                                                                                                                                                                                                                                                        |
| EPI_ISL_884260, EPI_ISL_884261, EPI_ISL_884262, EPI_ISL_884263, EPI_ISL_884264, EPI_ISL_884265, EPI_ISL_884266, EPI_ISL_884267, EPI_ISL_884268, EPI_ISL_884269, EPI_ISL_884270, EPI_ISL_884271, EPI_ISL_884272, EPI_ISL_884273, EPI_ISL_884274, EPI_ISL_884275, EPI_ISL_884276, EPI_ISL_884277, EPI_ISL_884278, EPI_ISL_884279, EPI_ISL_884280, EPI_ISL_884281, EPI_ISL_884282, EPI_ISL_884283, EPI_ISL_884284, EPI_ISL_884285, EPI_ISL_884286, EPI_ISL_884287, EPI_ISL_884288, EPI_ISL_884289, EPI_ISL_884290                                                                                                                                                                                                                                                                                                                                                                                                                                                                                                                                                                                                                                                                                                                                                                                                                                                                                                                                                                                                                                                                                                                                                                                                                                                                                                                                                                                                                                                                                                                                                                                                                                                                                                                                                                                                                                                                                                                                                                                                                                                                                                                                                                                                                                                                                                                                                                                                                                                                                                                                                                                                                                                                                                                                                                                                                                                                                                                                                                                                                                                                                                                                                                                                                                                                                                                                                                                                                                                                                                                                                                                                                                                                                                                                                                                                                                                                                                                                                                                                                                                                                                                                                                                                                                                                                                                                                                                                                                                                                                                                                                                                                                                                                                                                                                                                                                                                                                                                                                                                                                                                                                                                                                                                                                                                                                                                                                                                                                                                                                                                                                                                                                                                                                                                                                                                                                                                                                                                                                                                                                                                                                                                                                                                                                                                                                                                                                                                                                                                                                                                                                                                                                                                                                                                                                                                                                                                                                                                                                                                                                                                                                                                                                                                                                                                                                                                                                                                                                                                                                                                                                                                                                                                                                                                                                                                                                                                                                                                                                                                                                                                                                                                                                                                                                                                                                                                                                                                                                                                                                                                                                                                                                                                                                                                                                                                                                                                                                                                                                                                                                                                                                                                                                                                                                                                                                                                                                                                                                                                                                                                                                                                                                                                                                                                                                                                                                                                                                                                                                                                                                                                                                                                                                                                                                                                                                                                                                                                                                                                                                                                                                                                                                                                                                                                                                                                                                                                                                                                                                                                                                                                                                                                                                                                                                                                                                                                                                                                                                                                                                                                                                                                                                                                                                                                                                                                                                                                                                                                                                                                                                                                                                             |                                                                                                                 |                                                                                                                                                                                                                                                                  |                                                                                                                                                                                                                                                                                                                                                                                                                                                                                                                                                                                    |
| see above                                                                                                                                                                                                                                                                                                                                                                                                                                                                                                                                                                                                                                                                                                                                                                                                                                                                                                                                                                                                                                                                                                                                                                                                                                                                                                                                                                                                                                                                                                                                                                                                                                                                                                                                                                                                                                                                                                                                                                                                                                                                                                                                                                                                                                                                                                                                                                                                                                                                                                                                                                                                                                                                                                                                                                                                                                                                                                                                                                                                                                                                                                                                                                                                                                                                                                                                                                                                                                                                                                                                                                                                                                                                                                                                                                                                                                                                                                                                                                                                                                                                                                                                                                                                                                                                                                                                                                                                                                                                                                                                                                                                                                                                                                                                                                                                                                                                                                                                                                                                                                                                                                                                                                                                                                                                                                                                                                                                                                                                                                                                                                                                                                                                                                                                                                                                                                                                                                                                                                                                                                                                                                                                                                                                                                                                                                                                                                                                                                                                                                                                                                                                                                                                                                                                                                                                                                                                                                                                                                                                                                                                                                                                                                                                                                                                                                                                                                                                                                                                                                                                                                                                                                                                                                                                                                                                                                                                                                                                                                                                                                                                                                                                                                                                                                                                                                                                                                                                                                                                                                                                                                                                                                                                                                                                                                                                                                                                                                                                                                                                                                                                                                                                                                                                                                                                                                                                                                                                                                                                                                                                                                                                                                                                                                                                                                                                                                                                                                                                                                                                                                                                                                                                                                                                                                                                                                                                                                                                                                                                                                                                                                                                                                                                                                                                                                                                                                                                                                                                                                                                                                                                                                                                                                                                                                                                                                                                                                                                                                                                                                                                                                                                                                                                                                                                                                                                                                                                                                                                                                                                                                                                                                                                                                                                                                                                                                                                                                                                                                                                                                                                                                                                                  | Institute of Medical Microbiology and Hospital Hygiene                                                          | Institute of Medical Microbiology and Hospital Hygiene                                                                                                                                                                                                           | Prof. Dr. Achim Kaasch, Aļjoscha Tersteegen                                                                                                                                                                                                                                                                                                                                                                                                                                                                                                                                        |
| EPI_ISL_885139                                                                                                                                                                                                                                                                                                                                                                                                                                                                                                                                                                                                                                                                                                                                                                                                                                                                                                                                                                                                                                                                                                                                                                                                                                                                                                                                                                                                                                                                                                                                                                                                                                                                                                                                                                                                                                                                                                                                                                                                                                                                                                                                                                                                                                                                                                                                                                                                                                                                                                                                                                                                                                                                                                                                                                                                                                                                                                                                                                                                                                                                                                                                                                                                                                                                                                                                                                                                                                                                                                                                                                                                                                                                                                                                                                                                                                                                                                                                                                                                                                                                                                                                                                                                                                                                                                                                                                                                                                                                                                                                                                                                                                                                                                                                                                                                                                                                                                                                                                                                                                                                                                                                                                                                                                                                                                                                                                                                                                                                                                                                                                                                                                                                                                                                                                                                                                                                                                                                                                                                                                                                                                                                                                                                                                                                                                                                                                                                                                                                                                                                                                                                                                                                                                                                                                                                                                                                                                                                                                                                                                                                                                                                                                                                                                                                                                                                                                                                                                                                                                                                                                                                                                                                                                                                                                                                                                                                                                                                                                                                                                                                                                                                                                                                                                                                                                                                                                                                                                                                                                                                                                                                                                                                                                                                                                                                                                                                                                                                                                                                                                                                                                                                                                                                                                                                                                                                                                                                                                                                                                                                                                                                                                                                                                                                                                                                                                                                                                                                                                                                                                                                                                                                                                                                                                                                                                                                                                                                                                                                                                                                                                                                                                                                                                                                                                                                                                                                                                                                                                                                                                                                                                                                                                                                                                                                                                                                                                                                                                                                                                                                                                                                                                                                                                                                                                                                                                                                                                                                                                                                                                                                                                                                                                                                                                                                                                                                                                                                                                                                                                                                                                                                             | PathWest Laboratory Medicine WA                                                                                 | PathWest Laboratory Medicine WA Microbial Surveillance Unit                                                                                                                                                                                                      | PathWest Laboratory Medicine WA Microbial Surveillance Unit                                                                                                                                                                                                                                                                                                                                                                                                                                                                                                                        |
| EPI_ISL_886158, EPI_ISL_886159, EPI_ISL_886160, EPI_ISL_886161, EPI_ISL_886162, EPI_ISL_886163, EPI_ISL_886164, EPI_ISL_886165, EPI_ISL_886166, EPI_ISL_886167, EPI_ISL_886168, EPI_ISL_886169, EPI_ISL_886170, EPI_ISL_886171, EPI_ISL_886172, EPI_ISL_886173, EPI_ISL_886174, EPI_ISL_886175, EPI_ISL_886176, EPI_ISL_886177, EPI_ISL_886178, EPI_ISL_886179, EPI_ISL_886180, EPI_ISL_886181, EPI_ISL_886182, EPI_ISL_886183, EPI_ISL_886184, EPI_ISL_886185, EPI_ISL_886186, EPI_ISL_886187, EPI_ISL_886188, EPI_ISL_886189, EPI_ISL_886190, EPI_ISL_886191, EPI_ISL_886192, EPI_ISL_886193, EPI_ISL_886194, EPI_ISL_886195, EPI_ISL_886196, EPI_ISL_886197, EPI_ISL_886198, EPI_ISL_886199, EPI_ISL_886200, EPI_ISL_886201, EPI_ISL_886202, EPI_ISL_886203, EPI_ISL_886204, EPI_ISL_886205, EPI_ISL_886206, EPI_ISL_886207, EPI_ISL_886208, EPI_ISL_886209, EPI_ISL_886210, EPI_ISL_886211, EPI_ISL_886212, EPI_ISL_886213, EPI_ISL_886214, EPI_ISL_886215, EPI_ISL_886216, EPI_ISL_886217, EPI_ISL_886218, EPI_ISL_886219, EPI_ISL_886220, EPI_ISL_886221, EPI_ISL_886222, EPI_ISL_886223, EPI_ISL_886224, EPI_ISL_886225, EPI_ISL_886226, EPI_ISL_886227, EPI_ISL_886228, EPI_ISL_886229, EPI_ISL_886230, EPI_ISL_886231, EPI_ISL_886232, EPI_ISL_886233, EPI_ISL_886234, EPI_ISL_886235, EPI_ISL_886236, EPI_ISL_886237, EPI_ISL_886238, EPI_ISL_886239, EPI_ISL_886240, EPI_ISL_886241, EPI_ISL_886242, EPI_ISL_886243, EPI_ISL_886244, EPI_ISL_886245, EPI_ISL_886246, EPI_ISL_886247, EPI_ISL_886248, EPI_ISL_886249, EPI_ISL_886250, EPI_ISL_886251, EPI_ISL_886252, EPI_ISL_886253, EPI_ISL_886254, EPI_ISL_886255, EPI_ISL_886256, EPI_ISL_886257, EPI_ISL_886258, EPI_ISL_886259, EPI_ISL_886260, EPI_ISL_886261, EPI_ISL_886262, EPI_ISL_886263, EPI_ISL_886264, EPI_ISL_886265, EPI_ISL_886266, EPI_ISL_886267, EPI_ISL_886268, EPI_ISL_886269, EPI_ISL_886270, EPI_ISL_886271, EPI_ISL_886272, EPI_ISL_886273, EPI_ISL_886274, EPI_ISL_886275, EPI_ISL_886276, EPI_ISL_886277, EPI_ISL_886278, EPI_ISL_886279, EPI_ISL_886280, EPI_ISL_886281, EPI_ISL_886282, EPI_ISL_886283, EPI_ISL_886284, EPI_ISL_886285, EPI_ISL_886286, EPI_ISL_886287, EPI_ISL_886288, EPI_ISL_886289, EPI_ISL_886290, EPI_ISL_886291, EPI_ISL_886292, EPI_ISL_886293, EPI_ISL_886294, EPI_ISL_886295, EPI_ISL_886296, EPI_ISL_886297, EPI_ISL_886298, EPI_ISL_886299, EPI_ISL_886300, EPI_ISL_886301, EPI_ISL_886302, EPI_ISL_886303, EPI_ISL_886304, EPI_ISL_886305, EPI_ISL_886306, EPI_ISL_886307, EPI_ISL_886308, EPI_ISL_886309, EPI_ISL_886310, EPI_ISL_886311, EPI_ISL_886312, EPI_ISL_886313, EPI_ISL_886314, EPI_ISL_886315, EPI_ISL_886316, EPI_ISL_886317, EPI_ISL_886318, EPI_ISL_886319, EPI_ISL_886320, EPI_ISL_886321, EPI_ISL_886322, EPI_ISL_886323, EPI_ISL_886324, EPI_ISL_886325, EPI_ISL_886326, EPI_ISL_886327, EPI_ISL_886328, EPI_ISL_886329, EPI_ISL_886330, EPI_ISL_886331, EPI_ISL_886332, EPI_ISL_886333, EPI_ISL_886334, EPI_ISL_886335, EPI_ISL_886336, EPI_ISL_886337, EPI_ISL_886338, EPI_ISL_886339, EPI_ISL_886340, EPI_ISL_886341, EPI_ISL_886342, EPI_ISL_886343, EPI_ISL_886344, EPI_ISL_886345, EPI_ISL_886346, EPI_ISL_886347, EPI_ISL_886348, EPI_ISL_886349, EPI_ISL_886350, EPI_ISL_886351, EPI_ISL_886352, EPI_ISL_886353, EPI_ISL_886354, EPI_ISL_886355, EPI_ISL_886356, EPI_ISL_886357, EPI_ISL_886358, EPI_ISL_886359, EPI_ISL_886360, EPI_ISL_886361, EPI_ISL_886362, EPI_ISL_886363, EPI_ISL_886364, EPI_ISL_886365, EPI_ISL_886366, EPI_ISL_886367, EPI_ISL_886368, EPI_ISL_886369, EPI_ISL_886370, EPI_ISL_886371, EPI_ISL_886372, EPI_ISL_886373, EPI_ISL_886374, EPI_ISL_886375, EPI_ISL_886376, EPI_ISL_886377, EPI_ISL_886378, EPI_ISL_886379, EPI_ISL_886380, EPI_ISL_886381, EPI_ISL_886382, EPI_ISL_886383, EPI_ISL_886384, EPI_ISL_886385, EPI_ISL_886386, EPI_ISL_886387, EPI_ISL_886388, EPI_ISL_886389, EPI_ISL_886390, EPI_ISL_886391, EPI_ISL_886392, EPI_ISL_886393, EPI_ISL_886394, EPI_ISL_886395, EPI_ISL_886396, EPI_ISL_886397, EPI_ISL_886398, EPI_ISL_886399, EPI_ISL_886400, EPI_ISL_886401, EPI_ISL_886402, EPI_ISL_886403, EPI_ISL_886404, EPI_ISL_886405, EPI_ISL_886406, EPI_ISL_886407, EPI_ISL_886408, EPI_ISL_886409, EPI_ISL_886410, EPI_ISL_886411, EPI_ISL_886412, EPI_ISL_886413, EPI_ISL_886414, EPI_ISL_886415, EPI_ISL_886416, EPI_ISL_886417, EPI_ISL_886418, EPI_ISL_886419, EPI_ISL_886420, EPI_ISL_886421, EPI_ISL_886422, EPI_ISL_886423, EPI_ISL_886424, EPI_ISL_886425, EPI_ISL_886426, EPI_ISL_886427, EPI_ISL_886428, EPI_ISL_886429, EPI_ISL_886430, EPI_ISL_886431, EPI_ISL_886432, EPI_ISL_886433, EPI_ISL_886434, EPI_ISL_886435, EPI_ISL_886436, EPI_ISL_886437, EPI_ISL_886438, EPI_ISL_886439, EPI_ISL_886440, EPI_ISL_886441, EPI_ISL_886442, EPI_ISL_886443, EPI_ISL_886444, EPI_ISL_886445, EPI_ISL_886446, EPI_ISL_886447, EPI_ISL_886448, EPI_ISL_886449, EPI_ISL_886450, EPI_ISL_886451, EPI_ISL_886452, EPI_ISL_886453, EPI_ISL_886454, EPI_ISL_886455, EPI_ISL_886456, EPI_ISL_886457, EPI_ISL_886458, EPI_ISL_886459, EPI_ISL_886460, EPI_ISL_886461, EPI_ISL_886462, EPI_ISL_886463, EPI_ISL_886464, EPI_ISL_886465, EPI_ISL_886466, EPI_ISL_886467, EPI_ISL_886468, EPI_ISL_886469, EPI_ISL_886470, EPI_ISL_886471, EPI_ISL_886472, EPI_ISL_886473, EPI_ISL_886474, EPI_ISL_886475, EPI_ISL_886476, EPI_ISL_886477, EPI_ISL_886478, EPI_ISL_886479, EPI_ISL_886480, EPI_ISL_886481, EPI_ISL_886482, EPI_ISL_886483, EPI_ISL_886484, EPI_ISL_886485, EPI_ISL_886486, EPI_ISL_886487, EPI_ISL_886488, EPI_ISL_886489, EPI_ISL_886490, EPI_ISL_886491, EPI_ISL_886492, EPI_ISL_886493, EPI_ISL_886494, EPI_ISL_886495, EPI_ISL_886496, EPI_ISL_886497, EPI_ISL_886498, EPI_ISL_886499, EPI_ISL_886500, EPI_ISL_886501, EPI_ISL_886502, EPI_ISL_886503, EPI_ISL_886504, EPI_ISL_886505, EPI_ISL_886506, EPI_ISL_886507, EPI_ISL_886508, EPI_ISL_886509, EPI_ISL_886510, EPI_ISL_886511, EPI_ISL_886512, EPI_ISL_886513, EPI_ISL_886514, EPI_ISL_886515, EPI_ISL_886516, EPI_ISL_886517, EPI_ISL_886518, EPI_ISL_886519, EPI_ISL_886520, EPI_ISL_886521, EPI_ISL_886522, EPI_ISL_886523, EPI_ISL_886524, EPI_ISL_886525, EPI_ISL_886526, EPI_ISL_886527, EPI_ISL_886528, EPI_ISL_886529, EPI_ISL_886530, EPI_ISL_886531, EPI_ISL_886532, EPI_ISL_886533, EPI_ISL_886534, EPI_ISL_886535, EPI_ISL_886536, EPI_ISL_886537, EPI_ISL_886538, EPI_ISL_886539, EPI_ISL_886540, EPI_ISL_886541, EPI_ISL_886542, EPI_ISL_886543, EPI_ISL_886544, EPI_ISL_886545, EPI_ISL_886546, EPI_ISL_886547, EPI_ISL_886548, EPI_ISL_886549, EPI_ISL_886550, EPI_ISL_886551, EPI_ISL_886552, EPI_ISL_886553, EPI_ISL_886554, EPI_ISL_886555, EPI_ISL_886556, EPI_ISL_886557, EPI_ISL_886558, EPI_ISL_886559, EPI_ISL_886560, EPI_ISL_886561, EPI_ISL_886562, EPI_ISL_886563, EPI_ISL_886564, EPI_ISL_886565, EPI_ISL_886566, EPI_ISL_886567, EPI_ISL_886568, EPI_ISL_886569, EPI_ISL_886570, EPI_ISL_886571, EPI_ISL_886572, EPI_ISL_886573, EPI_ISL_886574, EPI_ISL_886575, EPI_ISL_886576, EPI_ISL_886577, EPI_ISL_886578, EPI_ISL_886579, EPI_ISL_886580, EPI_ISL_886581, EPI_ISL_886582, EPI_ISL_886583, EPI_ISL_886584, EPI_ISL_886585, EPI_ISL_886586, EPI_ISL_886587, EPI_ISL_886588, EPI_ISL_886589, EPI_ISL_886590, EPI_ISL_886591, EPI_ISL_886592, EPI_ISL_886593, EPI_ISL_886594, EPI_ISL_886595, EPI_ISL_886596, EPI_ISL_886597, EPI_ISL_886598, EPI_ISL_886599, EPI_ISL_886600, EPI_ISL_886601, EPI_ISL_886602, EPI_ISL_886603, EPI_ISL_886604, EPI_ISL_886605, EPI_ISL_886606, EPI_ISL_886607, EPI_ISL_886608, EPI_ISL_886609, EPI_ISL_886610, EPI_ISL_886611, EPI_ISL_886612, EPI_ISL_886613, EPI_ISL_886614, EPI_ISL_886615, EPI_ISL_886616, EPI_ISL_886617, EPI_ISL_886618, EPI_ISL_886619, EPI_ISL_886620, EPI_ISL_886621, EPI_ISL_886622, EPI_ISL_886623, EPI_ISL_886624, EPI_ISL_886625, EPI_ISL_886626, EPI_ISL_886627, EPI_ISL_886628, EPI_ISL_886629, EPI_ISL_886630, EPI_ISL_886631, EPI_ISL_886632, EPI_ISL_886633, EPI_ISL_886634, EPI_ISL_886635, EPI_ISL_886636, EPI_ISL_886637, EPI_ISL_886638, EPI_ISL_886639, EPI_ISL_886640, EPI_ISL_886641, EPI_ISL_886642, EPI_ISL_886643, EPI_ISL_886644, EPI_ISL_886645, EPI_ISL_886646, EPI_ISL_886647, EPI_ISL_886648, EPI_ISL_886649, EPI_ISL_886650, EPI_ISL_886651, EPI_ISL_886652, EPI_ISL_886653, EPI_ISL_886654, EPI_ISL_886655, EPI_ISL_886656, EPI_ISL_886657, EPI_ISL_886658, EPI_ISL_886659, EPI_ISL_886660, EPI_ISL_886661, EPI_ISL_886662, EPI_ISL_886663, EPI_ISL_886664, EPI_ISL_886665, EPI_ISL_886666, EPI_ISL_886667, EPI_ISL_886668, EPI_ISL_886669, EPI_ISL_886670, EPI_ISL_886671, EPI_ISL_886672, EPI_ISL_886673, EPI_ISL_886674, EPI_ISL_886675, EPI_ISL_886676, EPI_ISL_886677, EPI_ISL_886678, EPI_ISL_886679, EPI_ISL_886680, EPI_ISL_886681, EPI_ISL_886682, EPI_ISL_886683, EPI_ISL_886684, EPI_ISL_886685, EPI_ISL_886686, EPI_ISL_886687, EPI_ISL_886688, EPI_ISL_886689, EPI_ISL_886690, EPI_ISL_886691, EPI_ISL_886692, EPI_ISL_886693, EPI_ISL_886694, EPI_ISL_886695, EPI_ISL_886696, EPI_ISL_886697, EPI_ISL_886698, EPI_ISL_886699, EPI_ISL_886700, EPI_ISL_886701, EPI_ISL_886702, EPI_ISL_886703, EPI_ISL_886704, EPI_ISL_886705, EPI_ISL_886706, EPI_ISL_886707, EPI_ISL_886708, EPI_ISL_886709, EPI_ISL_886710, EPI_ISL_886711, EPI_ISL_886712, EPI_ISL_886713, EPI_ISL_886714, EPI_ISL_886715, EPI_ISL_886716, EPI_ISL_886717, EPI_ISL_886718, EPI_ISL_886719, EPI_ISL_886720, EPI_ISL_886721, EPI_ISL_886722, EPI_ISL_886723, EPI_ISL_886724, EPI_ISL_886725, EPI_ISL_886726, EPI_ISL_886727, EPI_ISL_886728, EPI_ISL_886729, EPI_ISL_886730, EPI_ISL_886731, EPI_ISL_886732, EPI_ISL_886733, EPI_ISL_886734, EPI_ISL_886735, EPI_ISL_886736, EPI_ISL_886737, EPI_ISL_886738, EPI_ISL_886739, EPI_ISL_886740, EPI_ISL_886741, EPI_ISL_886742, EPI_ISL_886743, EPI_ISL_886744, EPI_ISL_886745, EPI_ISL_886746, EPI_ISL_886747, EPI_ISL_886748, EPI_ISL_886749, EPI_ISL_886750, EPI_ISL_886751, EPI_ISL_886752, EPI_ISL_886753, EPI_ISL_886754, EPI_ISL_886755, EPI_ISL_886756, EPI_ISL_886757, EPI_ISL_886758, EPI_ISL_886759, EPI_ISL_886760, EPI_ISL_886761, EPI_ISL_886762, EPI_ISL_886763, EPI_ISL_886764, EPI_ISL_886765, EPI_ISL_886766, EPI_ISL_886767, EPI_ISL_886768, EPI_ISL_886769, EPI_ISL_886770, EPI_ISL_886771, EPI_ISL_886772, EPI_ISL_886773, EPI_ISL_886774, EPI_ISL_886775, EPI_ISL_886776, EPI_ISL_886777, EPI_ISL_886778, EPI_ISL_886779, EPI_ISL_886780, EPI_ISL_886781, EPI_ISL_886782, EPI_ISL_886783, EPI_ISL_886784, EPI_ISL_886785, EPI_ISL_886786, EPI_ISL_886787, EPI_ISL_886788, EPI_ISL_886789, EPI_ISL_886790, EPI_ISL_886791, EPI_ISL_886792, EPI_ISL_886793, EPI_ISL_886794, EPI_ISL_886795, EPI_ISL_886796, EPI_ISL_886797, EPI_ISL_886798, EPI_ISL_886799, EPI_ISL_886800, EPI_ISL_886801, EPI_ISL_886802, EPI_ISL_886803, EPI_ISL_886804, EPI_ISL_886805, EPI_ISL_886806, EPI_ISL_886807, EPI_ISL_886808, EPI_ISL_886809, EPI_ISL_886810, EPI_ISL_886811, EPI_ISL_886812, EPI_ISL_886813, EPI_ISL_886814, EPI_ISL_886815, EPI_ISL_886816, EPI_ISL_886817, EPI_ISL_886818, EPI_ISL_886819, EPI_ISL_886820, EPI_ISL_886821, EPI_ISL_886822, EPI_ISL_886823, EPI_ISL_886824, EPI_ISL_886825, EPI_ISL_886826, EPI_ISL_886827, EPI_ISL_886828, EPI_ISL_886829, EPI_ISL_886830, EPI_ISL_886831, EPI_ISL_886832, EPI_ISL_886833, EPI_ISL_886834, EPI_ISL_886835, EPI_ISL_886836, EPI_ISL_886837, EPI_ISL_886838, EPI_ISL_886839, EPI_ISL_886840, EPI_ISL_886841, EPI_ISL_886842, EPI_ISL_886843, EPI_ISL_886844, EPI_ISL_886845, EPI_ISL_886846, EPI_ISL_886847, EPI_ISL_886848, EPI_ISL_886849, EPI_ISL_886850, EPI_ISL_886851, EPI_ISL_886852, EPI_ISL_886853, EPI_ISL_886854, EPI_ISL_886855, EPI_ISL_886856, EPI_ISL_886857, EPI_ISL_886858, EPI_ISL_886859, EPI_ISL_886860, EPI_ISL_886861, EPI_ISL_886862, EPI_ISL_886863, EPI_ISL_886864, EPI_ISL_886865, EPI_ISL_886866, EPI_ISL_886867, EPI_ISL_886868, EPI_ISL_886869, EPI_ISL_886870, EPI_ISL_886871, EPI_ISL_886872, EPI_ISL_886873, EPI_ISL_886874, EPI_ISL_886875, EPI_ISL_886876, EPI_ISL_886877, EPI_ISL_886878, EPI_ISL_886879, EPI_ISL_886880, EPI_ISL_886881, EPI_ISL_886882, EPI_ISL_886883, EPI_ISL_886884, EPI_ISL_886885, EPI_ISL_886886, EPI_ISL_886887, EPI_ISL_886888, EPI_ISL_886889, EPI_ISL_886890, EPI_ISL_886891, EPI_ISL_886892, EPI_ISL_886893, EPI_ISL_886894, EPI_ISL_886895, EPI_ISL_886896, EPI_ISL_886897, EPI_ISL_886898, EPI_ISL_886899, EPI_ISL_886900, EPI_ISL_886901, EPI_ISL_886902, EPI_ISL_886903, EPI_ISL_886904, EPI_ISL_886905, EPI_ISL_886906, EPI_ISL_886907, EPI_ISL_886908, EPI_ISL_886909, EPI_ISL_886910, EPI_ISL_886911, EPI_ISL_886912, EPI_ISL_886913, EPI_ISL_886914, EPI_ISL_88 |                                                                                                                 |                                                                                                                                                                                                                                                                  |                                                                                                                                                                                                                                                                                                                                                                                                                                                                                                                                                                                    |





|                                                                                                                                                                                                                                                                                                                                                                                                                                                                                                                                                                                                                                                                                                                                                                                                                                                                                                                                                                                                                                                                                                                |                             |                                           |                                                                                       |
|----------------------------------------------------------------------------------------------------------------------------------------------------------------------------------------------------------------------------------------------------------------------------------------------------------------------------------------------------------------------------------------------------------------------------------------------------------------------------------------------------------------------------------------------------------------------------------------------------------------------------------------------------------------------------------------------------------------------------------------------------------------------------------------------------------------------------------------------------------------------------------------------------------------------------------------------------------------------------------------------------------------------------------------------------------------------------------------------------------------|-----------------------------|-------------------------------------------|---------------------------------------------------------------------------------------|
| EPI_ISL_889371, EPI_ISL_889372                                                                                                                                                                                                                                                                                                                                                                                                                                                                                                                                                                                                                                                                                                                                                                                                                                                                                                                                                                                                                                                                                 | Olomouc University Hospital | Institute of Applied Biotechnologies a.s. | Petr Klempt, Ondej Brzo, Martin Kašný, Kateina Kvapilová, Petr Kvapil                 |
| EPI_ISL_889373, EPI_ISL_889374, EPI_ISL_889375, EPI_ISL_889376, EPI_ISL_889377, EPI_ISL_889378, EPI_ISL_889379, EPI_ISL_889380, EPI_ISL_889381, EPI_ISL_889382, EPI_ISL_889383, EPI_ISL_889384, EPI_ISL_889385, EPI_ISL_889386, EPI_ISL_889387, EPI_ISL_889388, EPI_ISL_889389, EPI_ISL_889390, EPI_ISL_889391, EPI_ISL_889392, EPI_ISL_889393, EPI_ISL_889394, EPI_ISL_889395, EPI_ISL_889396, EPI_ISL_889397, EPI_ISL_889398, EPI_ISL_889399, EPI_ISL_889400, EPI_ISL_889401, EPI_ISL_889402, EPI_ISL_889403, EPI_ISL_889404, EPI_ISL_889405, EPI_ISL_889406, EPI_ISL_889407, EPI_ISL_889408, EPI_ISL_889409, EPI_ISL_889410, EPI_ISL_889411, EPI_ISL_889412, EPI_ISL_889413, EPI_ISL_889414, EPI_ISL_889415, EPI_ISL_889416, EPI_ISL_889417, EPI_ISL_889418, EPI_ISL_889419, EPI_ISL_889420, EPI_ISL_889421, EPI_ISL_889422, EPI_ISL_889423, EPI_ISL_889424, EPI_ISL_889425, EPI_ISL_889426, EPI_ISL_889427, EPI_ISL_889428, EPI_ISL_889429, EPI_ISL_889430, EPI_ISL_889431, EPI_ISL_889432, EPI_ISL_889433, EPI_ISL_889434, EPI_ISL_889435, EPI_ISL_889436, EPI_ISL_889437, EPI_ISL_889438, EPI_ISL_889439 | Olomouc University Hospital | Institute of Applied Biotechnologies a.s. | Petr Klempt, Ondej Brzo, Martin Kašný, Kateina Kvapilová, Marián Hajdúch, Petr Kvapil |
| see above                                                                                                                                                                                                                                                                                                                                                                                                                                                                                                                                                                                                                                                                                                                                                                                                                                                                                                                                                                                                                                                                                                      |                             |                                           |                                                                                       |



|                                                                                                                                                                                                                                                                                                                                                                                                                                                                                                                                                                                                                                                                                                                                                                                                                                                                                                                                                                                                                                                                                                                                                                                                                                                                                                                                                                                                                                                                                                                                                                                                                                                                                                                                                                                                                                                                                                                                                                                                                                                                                                                                                                                                                                                                                                                                                                                                                                                                                                                                                                                                                                                                                                                                                                                                                                                                                                                                                                                                                                                                                                                                                                                                                                                                                                                                                                                                                                                                                                                                                                                                                                                                                                                                                                                                                                                                                                                                                                                                                                                                                                                                                                                                                                                                                                                                                                                                                                                                                                                                                                                                                                                                                                                                                                                                                                                                                                                                                                                                                                                                                                                                                                                                                                                                                                                                                                                                                                                                                                                                                                                                                                                                                                                                                                                                                                                                                                                                                                                                                                                                                                                                                                                                                                                                                                                                                                                                                                                                                                                                                                                                                                                                                                                                                                                                                                                                                                                                                                                |                                |                                                                                                                                          |                                                                                    |                                                                                                                                                                                                                                                                |
|--------------------------------------------------------------------------------------------------------------------------------------------------------------------------------------------------------------------------------------------------------------------------------------------------------------------------------------------------------------------------------------------------------------------------------------------------------------------------------------------------------------------------------------------------------------------------------------------------------------------------------------------------------------------------------------------------------------------------------------------------------------------------------------------------------------------------------------------------------------------------------------------------------------------------------------------------------------------------------------------------------------------------------------------------------------------------------------------------------------------------------------------------------------------------------------------------------------------------------------------------------------------------------------------------------------------------------------------------------------------------------------------------------------------------------------------------------------------------------------------------------------------------------------------------------------------------------------------------------------------------------------------------------------------------------------------------------------------------------------------------------------------------------------------------------------------------------------------------------------------------------------------------------------------------------------------------------------------------------------------------------------------------------------------------------------------------------------------------------------------------------------------------------------------------------------------------------------------------------------------------------------------------------------------------------------------------------------------------------------------------------------------------------------------------------------------------------------------------------------------------------------------------------------------------------------------------------------------------------------------------------------------------------------------------------------------------------------------------------------------------------------------------------------------------------------------------------------------------------------------------------------------------------------------------------------------------------------------------------------------------------------------------------------------------------------------------------------------------------------------------------------------------------------------------------------------------------------------------------------------------------------------------------------------------------------------------------------------------------------------------------------------------------------------------------------------------------------------------------------------------------------------------------------------------------------------------------------------------------------------------------------------------------------------------------------------------------------------------------------------------------------------------------------------------------------------------------------------------------------------------------------------------------------------------------------------------------------------------------------------------------------------------------------------------------------------------------------------------------------------------------------------------------------------------------------------------------------------------------------------------------------------------------------------------------------------------------------------------------------------------------------------------------------------------------------------------------------------------------------------------------------------------------------------------------------------------------------------------------------------------------------------------------------------------------------------------------------------------------------------------------------------------------------------------------------------------------------------------------------------------------------------------------------------------------------------------------------------------------------------------------------------------------------------------------------------------------------------------------------------------------------------------------------------------------------------------------------------------------------------------------------------------------------------------------------------------------------------------------------------------------------------------------------------------------------------------------------------------------------------------------------------------------------------------------------------------------------------------------------------------------------------------------------------------------------------------------------------------------------------------------------------------------------------------------------------------------------------------------------------------------------------------------------------------------------------------------------------------------------------------------------------------------------------------------------------------------------------------------------------------------------------------------------------------------------------------------------------------------------------------------------------------------------------------------------------------------------------------------------------------------------------------------------------------------------------------------------------------------------------------------------------------------------------------------------------------------------------------------------------------------------------------------------------------------------------------------------------------------------------------------------------------------------------------------------------------------------------------------------------------------------------------------------------------------------------------------------------------------|--------------------------------|------------------------------------------------------------------------------------------------------------------------------------------|------------------------------------------------------------------------------------|----------------------------------------------------------------------------------------------------------------------------------------------------------------------------------------------------------------------------------------------------------------|
| EPI_ISL_450510, EPI_ISL_450511, EPI_ISL_450512, EPI_ISL_450513, EPI_ISL_450514, EPI_ISL_450515, EPI_ISL_450516, EPI_ISL_450517                                                                                                                                                                                                                                                                                                                                                                                                                                                                                                                                                                                                                                                                                                                                                                                                                                                                                                                                                                                                                                                                                                                                                                                                                                                                                                                                                                                                                                                                                                                                                                                                                                                                                                                                                                                                                                                                                                                                                                                                                                                                                                                                                                                                                                                                                                                                                                                                                                                                                                                                                                                                                                                                                                                                                                                                                                                                                                                                                                                                                                                                                                                                                                                                                                                                                                                                                                                                                                                                                                                                                                                                                                                                                                                                                                                                                                                                                                                                                                                                                                                                                                                                                                                                                                                                                                                                                                                                                                                                                                                                                                                                                                                                                                                                                                                                                                                                                                                                                                                                                                                                                                                                                                                                                                                                                                                                                                                                                                                                                                                                                                                                                                                                                                                                                                                                                                                                                                                                                                                                                                                                                                                                                                                                                                                                                                                                                                                                                                                                                                                                                                                                                                                                                                                                                                                                                                                 |                                |                                                                                                                                          |                                                                                    |                                                                                                                                                                                                                                                                |
| EPI_ISL_451988, EPI_ISL_451989, EPI_ISL_451990, EPI_ISL_451991, EPI_ISL_451992, EPI_ISL_451993, EPI_ISL_451994, EPI_ISL_451995, EPI_ISL_451996, EPI_ISL_451997, EPI_ISL_451998, EPI_ISL_451999, EPI_ISL_452000, EPI_ISL_452001, EPI_ISL_452002, EPI_ISL_452003, EPI_ISL_452004, EPI_ISL_452005, EPI_ISL_452006, EPI_ISL_452007, EPI_ISL_452008, EPI_ISL_452009, EPI_ISL_452010, EPI_ISL_452011, EPI_ISL_452012, EPI_ISL_452013, EPI_ISL_452014, EPI_ISL_452015, EPI_ISL_452016, EPI_ISL_452017, EPI_ISL_452018, EPI_ISL_452019, EPI_ISL_452020, EPI_ISL_452021, EPI_ISL_452022, EPI_ISL_452023, EPI_ISL_452024, EPI_ISL_452025, EPI_ISL_452026, EPI_ISL_452027, EPI_ISL_452028, EPI_ISL_452029, EPI_ISL_452030, EPI_ISL_452031, EPI_ISL_452032, EPI_ISL_452033, EPI_ISL_452034, EPI_ISL_452035, EPI_ISL_452036, EPI_ISL_452037, EPI_ISL_452038, EPI_ISL_452039, EPI_ISL_452040, EPI_ISL_452041, EPI_ISL_452042, EPI_ISL_452043, EPI_ISL_452044, EPI_ISL_452045, EPI_ISL_452046, EPI_ISL_452047, EPI_ISL_452048, EPI_ISL_452049, EPI_ISL_452050, EPI_ISL_452051, EPI_ISL_452052, EPI_ISL_452053, EPI_ISL_452054, EPI_ISL_452055, EPI_ISL_452056, EPI_ISL_452057, EPI_ISL_452058, EPI_ISL_452059, EPI_ISL_452060, EPI_ISL_452061, EPI_ISL_452062, EPI_ISL_452063, EPI_ISL_452064, EPI_ISL_452065, EPI_ISL_452066, EPI_ISL_452067, EPI_ISL_452068, EPI_ISL_452069, EPI_ISL_452070, EPI_ISL_452071, EPI_ISL_452072, EPI_ISL_452073, EPI_ISL_452074, EPI_ISL_452075, EPI_ISL_452076, EPI_ISL_452077, EPI_ISL_452078, EPI_ISL_452079, EPI_ISL_452080, EPI_ISL_452081, EPI_ISL_452082, EPI_ISL_452083, EPI_ISL_452084, EPI_ISL_452085, EPI_ISL_452086, EPI_ISL_452087, EPI_ISL_452088, EPI_ISL_452089, EPI_ISL_452090, EPI_ISL_452091, EPI_ISL_452092, EPI_ISL_452093, EPI_ISL_452094, EPI_ISL_452095, EPI_ISL_452096, EPI_ISL_452097, EPI_ISL_452098, EPI_ISL_452099, EPI_ISL_452100                                                                                                                                                                                                                                                                                                                                                                                                                                                                                                                                                                                                                                                                                                                                                                                                                                                                                                                                                                                                                                                                                                                                                                                                                                                                                                                                                                                                                                                                                                                                                                                                                                                                                                                                                                                                                                                                                                                                                                                                                                                                                                                                                                                                                                                                                                                                                                                                                                                                                                                                                                                                                                                                                                                                                                                                                                                                                                                                                                                                                                                                                                                                                                                                                                                                                                                                                                                                                                                                                                                                                                                                                                                                                                                                                                                                                                                                                                                                                                                                                                                                                                                                                                                                                                                                                                                                                                                                                                                                                                                                                                                                                                                                                                                                                                                                                                                                                                                                                                                                                                                                                                 | see above                      | Department of Clinical Microbiology, Copenhagen University Hospital, Hvidovre, Kettegaard Alle 30, 2650 Hvidovre.                        | Albertsen lab, Department of Chemistry and Bioscience, Aalborg University, Denmark | Rasmus Kirkegaard                                                                                                                                                                                                                                              |
| EPI_ISL_452101, EPI_ISL_452102                                                                                                                                                                                                                                                                                                                                                                                                                                                                                                                                                                                                                                                                                                                                                                                                                                                                                                                                                                                                                                                                                                                                                                                                                                                                                                                                                                                                                                                                                                                                                                                                                                                                                                                                                                                                                                                                                                                                                                                                                                                                                                                                                                                                                                                                                                                                                                                                                                                                                                                                                                                                                                                                                                                                                                                                                                                                                                                                                                                                                                                                                                                                                                                                                                                                                                                                                                                                                                                                                                                                                                                                                                                                                                                                                                                                                                                                                                                                                                                                                                                                                                                                                                                                                                                                                                                                                                                                                                                                                                                                                                                                                                                                                                                                                                                                                                                                                                                                                                                                                                                                                                                                                                                                                                                                                                                                                                                                                                                                                                                                                                                                                                                                                                                                                                                                                                                                                                                                                                                                                                                                                                                                                                                                                                                                                                                                                                                                                                                                                                                                                                                                                                                                                                                                                                                                                                                                                                                                                 | EPI_ISL_452101, EPI_ISL_452102 | Department of Virus and Microbiology Special Diagnostics, Statens Serum Institut, Copenhagen, Denmark, Artillerivej 5, 2300 Copenhagen S | Albertsen lab, Department of Chemistry and Bioscience, Aalborg University, Denmark | Rasmus Kirkegaard                                                                                                                                                                                                                                              |
| EPI_ISL_454420                                                                                                                                                                                                                                                                                                                                                                                                                                                                                                                                                                                                                                                                                                                                                                                                                                                                                                                                                                                                                                                                                                                                                                                                                                                                                                                                                                                                                                                                                                                                                                                                                                                                                                                                                                                                                                                                                                                                                                                                                                                                                                                                                                                                                                                                                                                                                                                                                                                                                                                                                                                                                                                                                                                                                                                                                                                                                                                                                                                                                                                                                                                                                                                                                                                                                                                                                                                                                                                                                                                                                                                                                                                                                                                                                                                                                                                                                                                                                                                                                                                                                                                                                                                                                                                                                                                                                                                                                                                                                                                                                                                                                                                                                                                                                                                                                                                                                                                                                                                                                                                                                                                                                                                                                                                                                                                                                                                                                                                                                                                                                                                                                                                                                                                                                                                                                                                                                                                                                                                                                                                                                                                                                                                                                                                                                                                                                                                                                                                                                                                                                                                                                                                                                                                                                                                                                                                                                                                                                                 | EPI_ISL_454420                 | Rafik Hariiri University Hospital                                                                                                        | Rafik Hariiri University Hospital                                                  | Rita Feghali                                                                                                                                                                                                                                                   |
| EPI_ISL_456656                                                                                                                                                                                                                                                                                                                                                                                                                                                                                                                                                                                                                                                                                                                                                                                                                                                                                                                                                                                                                                                                                                                                                                                                                                                                                                                                                                                                                                                                                                                                                                                                                                                                                                                                                                                                                                                                                                                                                                                                                                                                                                                                                                                                                                                                                                                                                                                                                                                                                                                                                                                                                                                                                                                                                                                                                                                                                                                                                                                                                                                                                                                                                                                                                                                                                                                                                                                                                                                                                                                                                                                                                                                                                                                                                                                                                                                                                                                                                                                                                                                                                                                                                                                                                                                                                                                                                                                                                                                                                                                                                                                                                                                                                                                                                                                                                                                                                                                                                                                                                                                                                                                                                                                                                                                                                                                                                                                                                                                                                                                                                                                                                                                                                                                                                                                                                                                                                                                                                                                                                                                                                                                                                                                                                                                                                                                                                                                                                                                                                                                                                                                                                                                                                                                                                                                                                                                                                                                                                                 | EPI_ISL_456656                 | American Type Culture Collection Inc. (ATCC)                                                                                             | American Type Culture Collection Inc. (ATCC)                                       | Riojas, M.A., Frank,A.M., Puthuveetil, N.P., Benton,B., Peiris, J.S.M., Chu, D.K.W., King,S.P., Flores, B., Parker, M. and Rashid, S.                                                                                                                          |
| EPI_ISL_458083                                                                                                                                                                                                                                                                                                                                                                                                                                                                                                                                                                                                                                                                                                                                                                                                                                                                                                                                                                                                                                                                                                                                                                                                                                                                                                                                                                                                                                                                                                                                                                                                                                                                                                                                                                                                                                                                                                                                                                                                                                                                                                                                                                                                                                                                                                                                                                                                                                                                                                                                                                                                                                                                                                                                                                                                                                                                                                                                                                                                                                                                                                                                                                                                                                                                                                                                                                                                                                                                                                                                                                                                                                                                                                                                                                                                                                                                                                                                                                                                                                                                                                                                                                                                                                                                                                                                                                                                                                                                                                                                                                                                                                                                                                                                                                                                                                                                                                                                                                                                                                                                                                                                                                                                                                                                                                                                                                                                                                                                                                                                                                                                                                                                                                                                                                                                                                                                                                                                                                                                                                                                                                                                                                                                                                                                                                                                                                                                                                                                                                                                                                                                                                                                                                                                                                                                                                                                                                                                                                 | EPI_ISL_458083                 | Adi Husada Undaan Hospital                                                                                                               | Institute of Tropical Disease, Universitas Airlangga                               | Rima R Prasetya, Krisnoadi Rahardjo, Aldise M Nastri, Jezy R Dewantari, Irawati Marga, Gatot Soegiarto, Laksmi Wulandari, Retno A Setyoningrum, Resti Yudhawati, Yokko K Shimizu, Mitsuhiro Nishimura, Yasuko Mori, Soetjpto, Kazufumi Shimizu, Maria I Lusida |
| EPI_ISL_460635                                                                                                                                                                                                                                                                                                                                                                                                                                                                                                                                                                                                                                                                                                                                                                                                                                                                                                                                                                                                                                                                                                                                                                                                                                                                                                                                                                                                                                                                                                                                                                                                                                                                                                                                                                                                                                                                                                                                                                                                                                                                                                                                                                                                                                                                                                                                                                                                                                                                                                                                                                                                                                                                                                                                                                                                                                                                                                                                                                                                                                                                                                                                                                                                                                                                                                                                                                                                                                                                                                                                                                                                                                                                                                                                                                                                                                                                                                                                                                                                                                                                                                                                                                                                                                                                                                                                                                                                                                                                                                                                                                                                                                                                                                                                                                                                                                                                                                                                                                                                                                                                                                                                                                                                                                                                                                                                                                                                                                                                                                                                                                                                                                                                                                                                                                                                                                                                                                                                                                                                                                                                                                                                                                                                                                                                                                                                                                                                                                                                                                                                                                                                                                                                                                                                                                                                                                                                                                                                                                 | EPI_ISL_460635                 | UHCW Pathology / University of Warwick                                                                                                   | University of Warwick, for the COVID-19 Genomics (COG) UK Consortium               | Richard Stark, Chrystala Constantinidou, Maera Unnikrishnan, Laura Baxter, Jeff Cheng, Grace Taylor-Joyce, Hannah Elizabeth Bridgewater, Lucy Frost, Sarojini Pandey, Paul Brown, Taqeer Alam, Sascha Ott, Dimitris Grammatopoulos                             |
| EPI_ISL_463186, EPI_ISL_463187, EPI_ISL_463188, EPI_ISL_463189, EPI_ISL_463190, EPI_ISL_463191, EPI_ISL_463192, EPI_ISL_463193, EPI_ISL_463194, EPI_ISL_463195, EPI_ISL_463196, EPI_ISL_463197, EPI_ISL_463198, EPI_ISL_463199, EPI_ISL_463200, EPI_ISL_463201, EPI_ISL_463202, EPI_ISL_463203, EPI_ISL_463204, EPI_ISL_463205, EPI_ISL_463206, EPI_ISL_463207, EPI_ISL_463208, EPI_ISL_463209, EPI_ISL_463210, EPI_ISL_463211, EPI_ISL_463212, EPI_ISL_463213, EPI_ISL_463214, EPI_ISL_463215, EPI_ISL_463216, EPI_ISL_463217, EPI_ISL_463218, EPI_ISL_463219, EPI_ISL_463220, EPI_ISL_463221, EPI_ISL_463222, EPI_ISL_463223, EPI_ISL_463224, EPI_ISL_463225, EPI_ISL_463226, EPI_ISL_463227, EPI_ISL_463228, EPI_ISL_463229, EPI_ISL_463230, EPI_ISL_463231, EPI_ISL_463232, EPI_ISL_463233, EPI_ISL_463234, EPI_ISL_463235, EPI_ISL_463236, EPI_ISL_463237, EPI_ISL_463238, EPI_ISL_463239, EPI_ISL_463240, EPI_ISL_463241, EPI_ISL_463242, EPI_ISL_463243, EPI_ISL_463244, EPI_ISL_463245, EPI_ISL_463246, EPI_ISL_463247, EPI_ISL_463248, EPI_ISL_463249, EPI_ISL_463250, EPI_ISL_463251, EPI_ISL_463252, EPI_ISL_463253, EPI_ISL_463254, EPI_ISL_463255, EPI_ISL_463256, EPI_ISL_463257, EPI_ISL_463258, EPI_ISL_463259, EPI_ISL_463260, EPI_ISL_463261, EPI_ISL_463262, EPI_ISL_463263, EPI_ISL_463264, EPI_ISL_463265, EPI_ISL_463266, EPI_ISL_463267, EPI_ISL_463268, EPI_ISL_463269, EPI_ISL_463270, EPI_ISL_463271, EPI_ISL_463272, EPI_ISL_463273, EPI_ISL_463274, EPI_ISL_463275, EPI_ISL_463276                                                                                                                                                                                                                                                                                                                                                                                                                                                                                                                                                                                                                                                                                                                                                                                                                                                                                                                                                                                                                                                                                                                                                                                                                                                                                                                                                                                                                                                                                                                                                                                                                                                                                                                                                                                                                                                                                                                                                                                                                                                                                                                                                                                                                                                                                                                                                                                                                                                                                                                                                                                                                                                                                                                                                                                                                                                                                                                                                                                                                                                                                                                                                                                                                                                                                                                                                                                                                                                                                                                                                                                                                                                                                                                                                                                                                                                                                                                                                                                                                                                                                                                                                                                                                                                                                                                                                                                                                                                                                                                                                                                                                                                                                                                                                                                                                                                                                                                                                                                                                                                                                                                                                                                                                                                                                                                                                                                                                                                                 | see above                      | BCCDC Public Health Laboratory                                                                                                           | BCCDC Public Health Laboratory                                                     | Richard Harrigan, Hope Lapointe, Jinny Choi, Kimia Kamelian, John Tyson, Terry Snutch, Linda Hoang, Inna Sekirov, Paul Levett, Mel Kraiden, Natalie Prystajeky                                                                                                 |
| EPI_ISL_463995, EPI_ISL_463996, EPI_ISL_463997, EPI_ISL_463998, EPI_ISL_463999, EPI_ISL_464000, EPI_ISL_464001, EPI_ISL_464002, EPI_ISL_464003, EPI_ISL_464004, EPI_ISL_464005, EPI_ISL_464006, EPI_ISL_464007, EPI_ISL_464008, EPI_ISL_464009, EPI_ISL_464010, EPI_ISL_464011, EPI_ISL_464012, EPI_ISL_464013, EPI_ISL_464014, EPI_ISL_464015, EPI_ISL_464016, EPI_ISL_464017, EPI_ISL_464018, EPI_ISL_464019, EPI_ISL_464020, EPI_ISL_464021, EPI_ISL_464022, EPI_ISL_464023, EPI_ISL_464024, EPI_ISL_464025, EPI_ISL_464026, EPI_ISL_464027, EPI_ISL_464028, EPI_ISL_464029, EPI_ISL_464030, EPI_ISL_464031, EPI_ISL_464032, EPI_ISL_464033, EPI_ISL_464034, EPI_ISL_464035, EPI_ISL_464036, EPI_ISL_464037, EPI_ISL_464038, EPI_ISL_464039, EPI_ISL_464040, EPI_ISL_464041, EPI_ISL_464042, EPI_ISL_464043, EPI_ISL_464044, EPI_ISL_464045, EPI_ISL_464046, EPI_ISL_464047, EPI_ISL_464048, EPI_ISL_464049, EPI_ISL_464050, EPI_ISL_464051, EPI_ISL_464052, EPI_ISL_464053, EPI_ISL_464054, EPI_ISL_464055, EPI_ISL_464056, EPI_ISL_464057, EPI_ISL_464058, EPI_ISL_464059, EPI_ISL_464060, EPI_ISL_464061, EPI_ISL_464062, EPI_ISL_464063, EPI_ISL_464064                                                                                                                                                                                                                                                                                                                                                                                                                                                                                                                                                                                                                                                                                                                                                                                                                                                                                                                                                                                                                                                                                                                                                                                                                                                                                                                                                                                                                                                                                                                                                                                                                                                                                                                                                                                                                                                                                                                                                                                                                                                                                                                                                                                                                                                                                                                                                                                                                                                                                                                                                                                                                                                                                                                                                                                                                                                                                                                                                                                                                                                                                                                                                                                                                                                                                                                                                                                                                                                                                                                                                                                                                                                                                                                                                                                                                                                                                                                                                                                                                                                                                                                                                                                                                                                                                                                                                                                                                                                                                                                                                                                                                                                                                                                                                                                                                                                                                                                                                                                                                                                                                                                                                                                                                                                                                                                                                                                                                                                                                                                                                                                                                                                                                                                                                                                                                 | see above                      | Unity Health Toronto                                                                                                                     | Ontario Institute for Cancer Research                                              | Ramzi Fattouh, Larissa M. Matukas, Mark Downing, Annette Gower, Karel Boissinet, Samira Mubareka, TIBDN, Ilinca Lungu, Bernard Lam, Jeremy Johns, Paul Krzyzanowski, Richard de Borja, Philip Zuzarte, Jared Simpson                                           |
| EPI_ISL_466696, EPI_ISL_466697, EPI_ISL_466698, EPI_ISL_466699, EPI_ISL_466700, EPI_ISL_466701, EPI_ISL_466702, EPI_ISL_466703, EPI_ISL_466704, EPI_ISL_466705, EPI_ISL_466706, EPI_ISL_466707, EPI_ISL_466708, EPI_ISL_466709, EPI_ISL_466710, EPI_ISL_466711, EPI_ISL_466712, EPI_ISL_466713, EPI_ISL_466714, EPI_ISL_466715, EPI_ISL_466716, EPI_ISL_466717, EPI_ISL_466718, EPI_ISL_466719, EPI_ISL_466720, EPI_ISL_466721, EPI_ISL_466722, EPI_ISL_466723, EPI_ISL_466724, EPI_ISL_466725, EPI_ISL_466726, EPI_ISL_466727, EPI_ISL_466728, EPI_ISL_466729, EPI_ISL_466730, EPI_ISL_466731, EPI_ISL_466732, EPI_ISL_466733, EPI_ISL_466734, EPI_ISL_466735, EPI_ISL_466736, EPI_ISL_466737, EPI_ISL_466738, EPI_ISL_466739, EPI_ISL_466740, EPI_ISL_466741, EPI_ISL_466742, EPI_ISL_466743, EPI_ISL_466744, EPI_ISL_466745, EPI_ISL_466746, EPI_ISL_466747, EPI_ISL_466748, EPI_ISL_466749, EPI_ISL_466750, EPI_ISL_466751, EPI_ISL_466752, EPI_ISL_466753, EPI_ISL_466754, EPI_ISL_466755, EPI_ISL_466756, EPI_ISL_466757, EPI_ISL_466758, EPI_ISL_466759, EPI_ISL_466760, EPI_ISL_466761, EPI_ISL_466762, EPI_ISL_466763, EPI_ISL_466764, EPI_ISL_466765, EPI_ISL_466766, EPI_ISL_466767, EPI_ISL_466768, EPI_ISL_466769, EPI_ISL_466770, EPI_ISL_466771, EPI_ISL_466772, EPI_ISL_466773, EPI_ISL_466774, EPI_ISL_466775, EPI_ISL_466776, EPI_ISL_466777, EPI_ISL_466778, EPI_ISL_466779, EPI_ISL_466780, EPI_ISL_466781, EPI_ISL_466782, EPI_ISL_466783, EPI_ISL_466784, EPI_ISL_466785, EPI_ISL_466786, EPI_ISL_466787, EPI_ISL_466788, EPI_ISL_466789, EPI_ISL_466790, EPI_ISL_466791, EPI_ISL_466792, EPI_ISL_466793, EPI_ISL_466794, EPI_ISL_466795, EPI_ISL_466796, EPI_ISL_466797, EPI_ISL_466798, EPI_ISL_466799, EPI_ISL_466800, EPI_ISL_466801, EPI_ISL_466802, EPI_ISL_466803, EPI_ISL_466804, EPI_ISL_466805, EPI_ISL_466806, EPI_ISL_466807, EPI_ISL_466808, EPI_ISL_466809, EPI_ISL_466810, EPI_ISL_466811, EPI_ISL_466812, EPI_ISL_466813, EPI_ISL_466814, EPI_ISL_466815, EPI_ISL_466816, EPI_ISL_466817, EPI_ISL_466818, EPI_ISL_466819, EPI_ISL_466820, EPI_ISL_466821, EPI_ISL_466822, EPI_ISL_466823, EPI_ISL_466824, EPI_ISL_466825, EPI_ISL_466826, EPI_ISL_466827, EPI_ISL_466828, EPI_ISL_466829, EPI_ISL_466830, EPI_ISL_466831, EPI_ISL_466832, EPI_ISL_466833, EPI_ISL_466834, EPI_ISL_466835, EPI_ISL_466836, EPI_ISL_466837, EPI_ISL_466838                                                                                                                                                                                                                                                                                                                                                                                                                                                                                                                                                                                                                                                                                                                                                                                                                                                                                                                                                                                                                                                                                                                                                                                                                                                                                                                                                                                                                                                                                                                                                                                                                                                                                                                                                                                                                                                                                                                                                                                                                                                                                                                                                                                                                                                                                                                                                                                                                                                                                                                                                                                                                                                                                                                                                                                                                                                                                                                                                                                                                                                                                                                                                                                                                                                                                                                                                                                                                                                                                                                                                                                                                                                                                                                                                                                                                                                                                                                                                                                                                                                                                                                                                                                                                                                                                                                                                                                                                                                                                                                                                                                                 | see above                      | BCCDC Public Health Laboratory                                                                                                           | BCCDC Public Health Laboratory                                                     | Richard Harrigan, Hope Lapointe, Jinny Choi, Kimia Kamelian, John Tyson, Terry Snutch, Linda Hoang, Inna Sekirov, Paul Levett, Mel Kraiden, Natalie Prystajeky                                                                                                 |
| EPI_ISL_467300                                                                                                                                                                                                                                                                                                                                                                                                                                                                                                                                                                                                                                                                                                                                                                                                                                                                                                                                                                                                                                                                                                                                                                                                                                                                                                                                                                                                                                                                                                                                                                                                                                                                                                                                                                                                                                                                                                                                                                                                                                                                                                                                                                                                                                                                                                                                                                                                                                                                                                                                                                                                                                                                                                                                                                                                                                                                                                                                                                                                                                                                                                                                                                                                                                                                                                                                                                                                                                                                                                                                                                                                                                                                                                                                                                                                                                                                                                                                                                                                                                                                                                                                                                                                                                                                                                                                                                                                                                                                                                                                                                                                                                                                                                                                                                                                                                                                                                                                                                                                                                                                                                                                                                                                                                                                                                                                                                                                                                                                                                                                                                                                                                                                                                                                                                                                                                                                                                                                                                                                                                                                                                                                                                                                                                                                                                                                                                                                                                                                                                                                                                                                                                                                                                                                                                                                                                                                                                                                                                 | EPI_ISL_467300                 | General Hospital "Abdulah Nakas"                                                                                                         | Alea Genetic Center                                                                | Rijad Konjhodzic; Lana Salihfendic; Teufik Goletic; Sead Jazic; Dino Pecar; Nihad Fejzic; Damir Marjanovic; Enis Kandic                                                                                                                                        |
| EPI_ISL_467301, EPI_ISL_467302, EPI_ISL_467303, EPI_ISL_467304, EPI_ISL_467305, EPI_ISL_467306, EPI_ISL_467307, EPI_ISL_467308, EPI_ISL_467309, EPI_ISL_467310, EPI_ISL_467311, EPI_ISL_467312, EPI_ISL_467313, EPI_ISL_467314, EPI_ISL_467315, EPI_ISL_467316, EPI_ISL_467317, EPI_ISL_467318, EPI_ISL_467319, EPI_ISL_467320, EPI_ISL_467321, EPI_ISL_467322, EPI_ISL_467323, EPI_ISL_467324, EPI_ISL_467325, EPI_ISL_467326, EPI_ISL_467327, EPI_ISL_467328, EPI_ISL_467329, EPI_ISL_467330, EPI_ISL_467331, EPI_ISL_467332, EPI_ISL_467333, EPI_ISL_467334, EPI_ISL_467335, EPI_ISL_467336, EPI_ISL_467337, EPI_ISL_467338, EPI_ISL_467339, EPI_ISL_467340, EPI_ISL_467341, EPI_ISL_467342, EPI_ISL_467343, EPI_ISL_467344, EPI_ISL_467345, EPI_ISL_467346, EPI_ISL_467347, EPI_ISL_467348, EPI_ISL_467349, EPI_ISL_467350, EPI_ISL_467351, EPI_ISL_467352, EPI_ISL_467353, EPI_ISL_467354, EPI_ISL_467355, EPI_ISL_467356, EPI_ISL_467357, EPI_ISL_467358, EPI_ISL_467359, EPI_ISL_467360, EPI_ISL_467361, EPI_ISL_467362, EPI_ISL_467363, EPI_ISL_467364, EPI_ISL_467365, EPI_ISL_467366, EPI_ISL_467367, EPI_ISL_467368, EPI_ISL_467369, EPI_ISL_467370, EPI_ISL_467371, EPI_ISL_467372, EPI_ISL_467373, EPI_ISL_467374, EPI_ISL_467375, EPI_ISL_467376, EPI_ISL_467377, EPI_ISL_467378, EPI_ISL_467379, EPI_ISL_467380, EPI_ISL_467381, EPI_ISL_467382, EPI_ISL_467383, EPI_ISL_467384, EPI_ISL_467385, EPI_ISL_467386, EPI_ISL_467387, EPI_ISL_467388, EPI_ISL_467389, EPI_ISL_467390, EPI_ISL_467391, EPI_ISL_467392, EPI_ISL_467393, EPI_ISL_467394, EPI_ISL_467395, EPI_ISL_467396, EPI_ISL_467397, EPI_ISL_467398, EPI_ISL_467399, EPI_ISL_467400, EPI_ISL_467401, EPI_ISL_467402, EPI_ISL_467403, EPI_ISL_467404, EPI_ISL_467405, EPI_ISL_467406, EPI_ISL_467407, EPI_ISL_467408, EPI_ISL_467409, EPI_ISL_467410, EPI_ISL_467411, EPI_ISL_467412, EPI_ISL_467413, EPI_ISL_467414, EPI_ISL_467415, EPI_ISL_467416, EPI_ISL_467417, EPI_ISL_467418, EPI_ISL_467419, EPI_ISL_467420, EPI_ISL_467421, EPI_ISL_467422, EPI_ISL_467423, EPI_ISL_467424, EPI_ISL_467425, EPI_ISL_467426, EPI_ISL_467427, EPI_ISL_467428, EPI_ISL_467429, EPI_ISL_467430, EPI_ISL_467431, EPI_ISL_467432, EPI_ISL_467433, EPI_ISL_467434, EPI_ISL_467435, EPI_ISL_467436, EPI_ISL_467437, EPI_ISL_467438, EPI_ISL_467439, EPI_ISL_467440, EPI_ISL_467441, EPI_ISL_467442, EPI_ISL_467443, EPI_ISL_467444, EPI_ISL_467445, EPI_ISL_467446, EPI_ISL_467447, EPI_ISL_467448, EPI_ISL_467449, EPI_ISL_467450, EPI_ISL_467451, EPI_ISL_467452, EPI_ISL_467453, EPI_ISL_467454, EPI_ISL_467455, EPI_ISL_467456, EPI_ISL_467457, EPI_ISL_467458, EPI_ISL_467459, EPI_ISL_467460, EPI_ISL_467461, EPI_ISL_467462, EPI_ISL_467463, EPI_ISL_467464, EPI_ISL_467465, EPI_ISL_467466, EPI_ISL_467467, EPI_ISL_467468, EPI_ISL_467469, EPI_ISL_467470, EPI_ISL_467471, EPI_ISL_467472, EPI_ISL_467473, EPI_ISL_467474, EPI_ISL_467475, EPI_ISL_467476, EPI_ISL_467477, EPI_ISL_467478, EPI_ISL_467479, EPI_ISL_467480, EPI_ISL_467481, EPI_ISL_467482, EPI_ISL_467483, EPI_ISL_467484, EPI_ISL_467485, EPI_ISL_467486, EPI_ISL_467487, EPI_ISL_467488, EPI_ISL_467489, EPI_ISL_467490, EPI_ISL_467491, EPI_ISL_467492, EPI_ISL_467493, EPI_ISL_467494, EPI_ISL_467495, EPI_ISL_467496, EPI_ISL_467497, EPI_ISL_467498, EPI_ISL_467499, EPI_ISL_467500, EPI_ISL_467501, EPI_ISL_467502, EPI_ISL_467503, EPI_ISL_467504, EPI_ISL_467505, EPI_ISL_467506, EPI_ISL_467507, EPI_ISL_467508, EPI_ISL_467509, EPI_ISL_467510, EPI_ISL_467511, EPI_ISL_467512, EPI_ISL_467513, EPI_ISL_467514, EPI_ISL_467515, EPI_ISL_467516, EPI_ISL_467517, EPI_ISL_467518, EPI_ISL_467519, EPI_ISL_467520, EPI_ISL_467521, EPI_ISL_467522, EPI_ISL_467523, EPI_ISL_467524, EPI_ISL_467525, EPI_ISL_467526, EPI_ISL_467527, EPI_ISL_467528, EPI_ISL_467529, EPI_ISL_467530, EPI_ISL_467531, EPI_ISL_467532, EPI_ISL_467533, EPI_ISL_467534, EPI_ISL_467535, EPI_ISL_467536, EPI_ISL_467537, EPI_ISL_467538, EPI_ISL_467539, EPI_ISL_467540, EPI_ISL_467541, EPI_ISL_467542, EPI_ISL_467543, EPI_ISL_467544, EPI_ISL_467545, EPI_ISL_467546, EPI_ISL_467547, EPI_ISL_467548, EPI_ISL_467549, EPI_ISL_467550, EPI_ISL_467551, EPI_ISL_467552, EPI_ISL_467553, EPI_ISL_467554, EPI_ISL_467555, EPI_ISL_467556, EPI_ISL_467557, EPI_ISL_467558, EPI_ISL_467559, EPI_ISL_467560, EPI_ISL_467561, EPI_ISL_467562, EPI_ISL_467563, EPI_ISL_467564, EPI_ISL_467565, EPI_ISL_467566, EPI_ISL_467567, EPI_ISL_467568, EPI_ISL_467569, EPI_ISL_467570, EPI_ISL_467571, EPI_ISL_467572, EPI_ISL_467573, EPI_ISL_467574, EPI_ISL_467575, EPI_ISL_467576, EPI_ISL_467577, EPI_ISL_467578, EPI_ISL_467579, EPI_ISL_467580, EPI_ISL_467581, EPI_ISL_467582, EPI_ISL_467583, EPI_ISL_467584, EPI_ISL_467585, EPI_ISL_467586, EPI_ISL_467587, EPI_ISL_467588, EPI_ISL_467589, EPI_ISL_467590, EPI_ISL_467591, EPI_ISL_467592, EPI_ISL_467593, EPI_ISL_467594, EPI_ISL_467595, EPI_ISL_467596, EPI_ISL_467597, EPI_ISL_467598, EPI_ISL_467599, EPI_ISL_467600, EPI_ISL_467601, EPI_ISL_467602, EPI_ISL_467603, EPI_ISL_467604, EPI_ISL_467605, EPI_ISL_467606, EPI_ISL_467607, EPI_ISL_467608, EPI_ISL_467609, EPI_ISL_467610, EPI_ISL_467611, EPI_ISL_467612, EPI_ISL_467613, EPI_ISL_467614, EPI_ISL_467615, EPI_ISL_467616, EPI_ISL_467617, EPI_ISL_467618, EPI_ISL_467619, EPI_ISL_467620, EPI_ISL_467621, EPI_ISL_467622, EPI_ISL_467623, EPI_ISL_467624, EPI_ISL_467625, EPI_ISL_467626, EPI_ISL_467627, EPI_ISL_467628, EPI_ISL_467629, EPI_ISL_467630, EPI_ISL_467631, EPI_ISL_467632, EPI_ISL_467633, EPI_ISL_467634, EPI_ISL_467635, EPI_ISL_467636, EPI_ISL_467637, EPI_ISL_467638, EPI_ISL_467639, EPI_ISL_467640, EPI_ISL_467641, EPI_ISL_467642, EPI_ISL_467643, EPI_ISL_467644, EPI_ISL_467645, EPI_ISL_467646, EPI_ISL_467647, EPI_ISL_467648, EPI_ISL_467649, EPI_ISL_467650, EPI_ISL_467651, EPI_ISL_467652, EPI_ISL_467653, EPI_ISL_467654, EPI_ISL_467655, EPI_ISL_467656, EPI_ISL_467657, EPI_ISL_467658, EPI_ISL_467659, EPI_ISL_467660, EPI_ISL_467661, EPI_ISL_467662, EPI_ISL_467663, EPI_ISL_467664, EPI_ISL_467665, EPI_ISL_467666, EPI_ISL_467667, EPI_ISL_467668, EPI_ISL_467669, EPI_ISL_467670, EPI_ISL_467671, EPI_ISL_467672, EPI_ISL_467673, EPI_ISL_467674, EPI_ISL_467675, EPI_ISL_467676, EPI_ISL_467677, EPI_ISL_467678, EPI_ISL_467679, EPI_ISL_467680, EPI_ISL_467681, EPI_ISL_467682, EPI_ISL_467683, EPI_ISL_467684, EPI_ISL_467685, EPI_ISL_467686, EPI_ISL_467687, EPI_ISL_467688, EPI_ISL_467689, EPI_ISL_467690, EPI_ISL_467691, EPI_ISL_467692, EPI_ISL_467693, EPI_ISL_467694, EPI_ISL_467695, EPI_ISL_467696, EPI_ISL_467697, EPI_ISL_467698, EPI_ISL_467699, EPI_ISL_467700, EPI_ISL_467701, EPI_ISL_467702, EPI_ISL_467703, EPI_ISL_467704, EPI_ISL_467705, EPI_ISL_467706, EPI_ISL_467707, EPI_ISL_467708, EPI_ISL_467709, EPI_ISL_467710, EPI_ISL_467711, EPI_ISL_467712, EPI_ISL_467713, EPI_ISL_467714, EPI_ISL_467715, EPI_ISL_467716, EPI_ISL_467717, EPI_ISL_467718, EPI_ISL_467719 | see above                      | BCCDC Public Health Laboratory                                                                                                           | BCCDC Public Health Laboratory                                                     | Richard Harrigan, Hope Lapointe, Jinny Choi, Kimia Kamelian, John Tyson, Terry Snutch, Linda Hoang, Inna Sekirov, Paul Levett, Mel Kraiden, Natalie Prystajeky                                                                                                 |
| EPI_ISL_468701, EPI_ISL_468702, EPI_ISL_468703, EPI_ISL_468704, EPI_ISL_468705, EPI_ISL_468706, EPI_ISL_468707, EPI_ISL_468708, EPI_ISL_468709, EPI_ISL_468710, EPI_ISL_468711, EPI_ISL_468712, EPI_ISL_468713, EPI_ISL_468714, EPI_ISL_468715, EPI_ISL_468716, EPI_ISL_468717                                                                                                                                                                                                                                                                                                                                                                                                                                                                                                                                                                                                                                                                                                                                                                                                                                                                                                                                                                                                                                                                                                                                                                                                                                                                                                                                                                                                                                                                                                                                                                                                                                                                                                                                                                                                                                                                                                                                                                                                                                                                                                                                                                                                                                                                                                                                                                                                                                                                                                                                                                                                                                                                                                                                                                                                                                                                                                                                                                                                                                                                                                                                                                                                                                                                                                                                                                                                                                                                                                                                                                                                                                                                                                                                                                                                                                                                                                                                                                                                                                                                                                                                                                                                                                                                                                                                                                                                                                                                                                                                                                                                                                                                                                                                                                                                                                                                                                                                                                                                                                                                                                                                                                                                                                                                                                                                                                                                                                                                                                                                                                                                                                                                                                                                                                                                                                                                                                                                                                                                                                                                                                                                                                                                                                                                                                                                                                                                                                                                                                                                                                                                                                                                                                 | see above                      | Ochsner Health                                                                                                                           | Bioinfoexperts, LLC                                                                | Rebecca Rose, Amy Feehan, David J. Nolan, Sissy Gross, David Moraga Amador, Tong Yang, Luke Caruso, Wayra Navia, Lydia Von Borstel, Xiao Hui Zhou, Julia Garcia-Diaz, Susanna L. Lamers                                                                        |
| EPI_ISL_469209, EPI_ISL_469210, EPI_ISL_469211, EPI_ISL_469212, EPI_ISL_469213, EPI_ISL_469214, EPI_ISL_469215, EPI_ISL_469216, EPI_ISL_469217, EPI_ISL_469218, EPI_ISL_469219, EPI_ISL_469220, EPI_ISL_469221, EPI_ISL_469222, EPI_ISL_469223, EPI_ISL_477017, EPI_ISL_477018, EPI_ISL_477019, EPI_ISL_477020, EPI_ISL_477021, EPI_ISL_477022, EPI_ISL_477023, EPI_ISL_477024, EPI_ISL_477025, EPI_ISL_477026, EPI_ISL_477027, EPI_ISL_477028, EPI_ISL_477029, EPI_ISL_477030, EPI_ISL_477031, EPI_ISL_477032, EPI_ISL_477033, EPI_ISL_477034, EPI_ISL_477035, EPI_ISL_477036, EPI_ISL_477037, EPI_ISL_477038, EPI_ISL_477039, EPI_ISL_477040, EPI_ISL_477041, EPI_ISL_477042, EPI_ISL_477043, EPI_ISL_477044, EPI_ISL_477045, EPI_ISL_477046, EPI_ISL_477047, EPI_ISL_477048, EPI_ISL_477049, EPI_ISL_477050, EPI_ISL_477051, EPI_ISL_477052, EPI_ISL_477053, EPI_ISL_477054, EPI_ISL_477055, EPI_ISL_477056, EPI_ISL_477057, EPI_ISL_477058, EPI_ISL_477059, EPI_ISL_477060, EPI_ISL_477061, EPI_ISL_477062, EPI_IS                                                                                                                                                                                                                                                                                                                                                                                                                                                                                                                                                                                                                                                                                                                                                                                                                                                                                                                                                                                                                                                                                                                                                                                                                                                                                                                                                                                                                                                                                                                                                                                                                                                                                                                                                                                                                                                                                                                                                                                                                                                                                                                                                                                                                                                                                                                                                                                                                                                                                                                                                                                                                                                                                                                                                                                                                                                                                                                                                                                                                                                                                                                                                                                                                                                                                                                                                                                                                                                                                                                                                                                                                                                                                                                                                                                                                                                                                                                                                                                                                                                                                                                                                                                                                                                                                                                                                                                                                                                                                                                                                                                                                                                                                                                                                                                                                                                                                                                                                                                                                                                                                                                                                                                                                                                                                                                                                                                                                                                                                                                                                                                                                                                                                                                                                                                                                                                                                                                                                         |                                |                                                                                                                                          |                                                                                    |                                                                                                                                                                                                                                                                |



|                                                                                                                                                                                                                                                                                                                                                                                                                                                                                                                                                                                                                                                                                                                                                                                                                                                                                                                                                                                                                                                                                                                                                                                                                                                                                                                                |           |                                                                                                     |                                                                                                     |                                                                                                                                                                                                                                                                                                                                                                  |
|--------------------------------------------------------------------------------------------------------------------------------------------------------------------------------------------------------------------------------------------------------------------------------------------------------------------------------------------------------------------------------------------------------------------------------------------------------------------------------------------------------------------------------------------------------------------------------------------------------------------------------------------------------------------------------------------------------------------------------------------------------------------------------------------------------------------------------------------------------------------------------------------------------------------------------------------------------------------------------------------------------------------------------------------------------------------------------------------------------------------------------------------------------------------------------------------------------------------------------------------------------------------------------------------------------------------------------|-----------|-----------------------------------------------------------------------------------------------------|-----------------------------------------------------------------------------------------------------|------------------------------------------------------------------------------------------------------------------------------------------------------------------------------------------------------------------------------------------------------------------------------------------------------------------------------------------------------------------|
| EPI_ISL_529972, EPI_ISL_529973, EPI_ISL_529974, EPI_ISL_529975, EPI_ISL_529976, EPI_ISL_529977, EPI_ISL_529978, EPI_ISL_529979, EPI_ISL_529980, EPI_ISL_529981, EPI_ISL_529982, EPI_ISL_529983, EPI_ISL_529984, EPI_ISL_529985, EPI_ISL_529986, EPI_ISL_529987, EPI_ISL_529988                                                                                                                                                                                                                                                                                                                                                                                                                                                                                                                                                                                                                                                                                                                                                                                                                                                                                                                                                                                                                                                 | see above | Hospital Universitario 12 de Octubre                                                                | Hospital Universitario 12 de Octubre                                                                | Raúl Recio, Sara González, Esther Viedma, Elias Dahdouh, Fernando Lázaro, Natalia Stella, Julio García, Juan Carlos Galán, Rafael Cantón, Mª Dolores Folgueira, Rafael Delgado, Jesús Mingorance                                                                                                                                                                 |
| EPI_ISL_530094, EPI_ISL_530095, EPI_ISL_530096, EPI_ISL_530097, EPI_ISL_530098, EPI_ISL_530099                                                                                                                                                                                                                                                                                                                                                                                                                                                                                                                                                                                                                                                                                                                                                                                                                                                                                                                                                                                                                                                                                                                                                                                                                                 |           | Hospital Universitario Ramón y Cajal                                                                | Hospital Universitario 12 de Octubre                                                                | Raúl Recio, Sara González, Elias Dahdouh, Fernando Lázaro, Esther Viedma, Natalia Stella, Julio García, Juan Carlos Galán, Rafael Cantón, Mª Dolores Folgueira, Rafael Delgado, Jesús Mingorance                                                                                                                                                                 |
| EPI_ISL_530100, EPI_ISL_530101, EPI_ISL_530102, EPI_ISL_530103, EPI_ISL_530104, EPI_ISL_530105, EPI_ISL_530106, EPI_ISL_530107, EPI_ISL_530108, EPI_ISL_530109, EPI_ISL_530110, EPI_ISL_530111, EPI_ISL_530112, EPI_ISL_530113                                                                                                                                                                                                                                                                                                                                                                                                                                                                                                                                                                                                                                                                                                                                                                                                                                                                                                                                                                                                                                                                                                 | see above | Hospital Universitario Ramón y Cajal                                                                | Hospital Universitario La Paz                                                                       | Raúl Recio, Sara González, Elias Dahdouh, Fernando Lázaro, Esther Viedma, Natalia Stella, Julio García, Juan Carlos Galán, Rafael Cantón, Mª Dolores Folgueira, Rafael Delgado, Jesús Mingorance                                                                                                                                                                 |
| EPI_ISL_530334, EPI_ISL_530335, EPI_ISL_530336, EPI_ISL_530337, EPI_ISL_530338, EPI_ISL_530339, EPI_ISL_530340                                                                                                                                                                                                                                                                                                                                                                                                                                                                                                                                                                                                                                                                                                                                                                                                                                                                                                                                                                                                                                                                                                                                                                                                                 |           | Area of Virology, Serology and Virology Division (SAVID), New South Wales Health Pathology Randwick | Area of Virology, Serology and Virology Division (SAVID), New South Wales Health Pathology Randwick | Rawlinson, W., Deveson, I., Bull, R., Van Hal, S.                                                                                                                                                                                                                                                                                                                |
| EPI_ISL_534260, EPI_ISL_534261, EPI_ISL_534262, EPI_ISL_534263, EPI_ISL_534264, EPI_ISL_534265, EPI_ISL_534266, EPI_ISL_534267, EPI_ISL_534268, EPI_ISL_534269, EPI_ISL_534270, EPI_ISL_534271, EPI_ISL_534272, EPI_ISL_534273, EPI_ISL_534274, EPI_ISL_534275, EPI_ISL_534276, EPI_ISL_534277, EPI_ISL_534278, EPI_ISL_534279, EPI_ISL_534280, EPI_ISL_534281, EPI_ISL_534282, EPI_ISL_534283, EPI_ISL_534284, EPI_ISL_534285, EPI_ISL_534286, EPI_ISL_534287, EPI_ISL_534288, EPI_ISL_534289, EPI_ISL_534290, EPI_ISL_534291, EPI_ISL_534292, EPI_ISL_534293, EPI_ISL_534294, EPI_ISL_534295, EPI_ISL_534296, EPI_ISL_534297, EPI_ISL_534298, EPI_ISL_534299, EPI_ISL_534300, EPI_ISL_534301, EPI_ISL_534302                                                                                                                                                                                                                                                                                                                                                                                                                                                                                                                                                                                                                 | see above | Texas Department of State Health Services                                                           | Texas Department of State Health Services                                                           | Rashmi Tuladhar, Bonnie Oh, Jenny Zhang, Maliha Rahman, Anita Pokharel, Myong Koag, Chun Wang, Rachel Lee, Grace Kubin                                                                                                                                                                                                                                           |
| EPI_ISL_534327, EPI_ISL_534328                                                                                                                                                                                                                                                                                                                                                                                                                                                                                                                                                                                                                                                                                                                                                                                                                                                                                                                                                                                                                                                                                                                                                                                                                                                                                                 |           | Hospital Universitario 12 de Octubre                                                                | Hospital Universitario 12 de Octubre                                                                | Raúl Recio, Sara González, Esther Viedma, Elias Dahdouh, Fernando Lázaro, Natalia Stella, Julio García, Juan Carlos Galán, Rafael Cantón, Ma Dolores Folgueira, Rafael Delgado, Jesús Mingorance                                                                                                                                                                 |
| EPI_ISL_537286, EPI_ISL_537287                                                                                                                                                                                                                                                                                                                                                                                                                                                                                                                                                                                                                                                                                                                                                                                                                                                                                                                                                                                                                                                                                                                                                                                                                                                                                                 |           | Area of Virology, Serology and Virology Division (SAVID), New South Wales Health Pathology Randwick | Area of Virology, Serology and Virology Division (SAVID), New South Wales Health Pathology Randwick | Rawlinson, W., Deveson, I., Bull, R., Van Hal, S.                                                                                                                                                                                                                                                                                                                |
| EPI_ISL_539300, EPI_ISL_539301, EPI_ISL_539302, EPI_ISL_539303, EPI_ISL_539304, EPI_ISL_539305, EPI_ISL_539306, EPI_ISL_539307, EPI_ISL_539308, EPI_ISL_539309, EPI_ISL_539310, EPI_ISL_539311, EPI_ISL_539312, EPI_ISL_539313, EPI_ISL_539314, EPI_ISL_539315, EPI_ISL_539316, EPI_ISL_539317, EPI_ISL_539318, EPI_ISL_539319, EPI_ISL_539320, EPI_ISL_539321, EPI_ISL_539322, EPI_ISL_539323, EPI_ISL_539324, EPI_ISL_539325                                                                                                                                                                                                                                                                                                                                                                                                                                                                                                                                                                                                                                                                                                                                                                                                                                                                                                 | see above | KWR Watercycle Research Institute                                                                   | Erasmus Medical Center                                                                              | Ray Izquierdo-Lara, Goffe Elsinga, Leo Heijnen, Bas B. Oude Munnink, Claudia M. E. Schapendonk, David Nieuwenhuijse, Matthijs Kon, Lu Lu, Frank M. Aarestrup, Samantha Lycett, Gertjan Medema, Marion P.G. Koopmans, Miranda de Graaf                                                                                                                            |
| EPI_ISL_539327                                                                                                                                                                                                                                                                                                                                                                                                                                                                                                                                                                                                                                                                                                                                                                                                                                                                                                                                                                                                                                                                                                                                                                                                                                                                                                                 |           | Area of Virology, Serology and Virology Division (SAVID), New South Wales Health Pathology Randwick | Area of Virology, Serology and Virology Division (SAVID), New South Wales Health Pathology Randwick | Rawlinson, W., Bull, R., Deveson, I., Van Hal, S.                                                                                                                                                                                                                                                                                                                |
| EPI_ISL_541971, EPI_ISL_541972, EPI_ISL_541973, EPI_ISL_541974, EPI_ISL_541975, EPI_ISL_541976, EPI_ISL_541977, EPI_ISL_541978, EPI_ISL_541979, EPI_ISL_541980, EPI_ISL_541981, EPI_ISL_541982, EPI_ISL_541983, EPI_ISL_541984, EPI_ISL_541985, EPI_ISL_541986, EPI_ISL_541987, EPI_ISL_541988, EPI_ISL_541989, EPI_ISL_541990, EPI_ISL_541991, EPI_ISL_541992, EPI_ISL_541993, EPI_ISL_541994, EPI_ISL_541995, EPI_ISL_541996, EPI_ISL_541997, EPI_ISL_541998, EPI_ISL_541999, EPI_ISL_542000, EPI_ISL_542001, EPI_ISL_542002, EPI_ISL_542003, EPI_ISL_542004, EPI_ISL_542005, EPI_ISL_542006, EPI_ISL_542007, EPI_ISL_542008, EPI_ISL_542009, EPI_ISL_542010, EPI_ISL_542011                                                                                                                                                                                                                                                                                                                                                                                                                                                                                                                                                                                                                                                 | see above | Texas Department of State Health Services                                                           | Texas Department of State Health Services                                                           | Rashmi Tuladhar, Bonnie Oh, Jenny Zhang, Maliha Rahman, Anita Pokharel, Myong Koag, Chun Wang, Rachel Lee, Grace Kubin                                                                                                                                                                                                                                           |
| EPI_ISL_542444, EPI_ISL_542445, EPI_ISL_542446, EPI_ISL_542447, EPI_ISL_542448, EPI_ISL_542449, EPI_ISL_542450, EPI_ISL_542451, EPI_ISL_542452, EPI_ISL_542453, EPI_ISL_542454, EPI_ISL_542455, EPI_ISL_542456, EPI_ISL_542457, EPI_ISL_542458, EPI_ISL_542459, EPI_ISL_542460, EPI_ISL_542461, EPI_ISL_542462, EPI_ISL_542463, EPI_ISL_542464, EPI_ISL_542465, EPI_ISL_542466, EPI_ISL_542467, EPI_ISL_542468, EPI_ISL_542469, EPI_ISL_542470, EPI_ISL_542471, EPI_ISL_542472, EPI_ISL_542473, EPI_ISL_542474, EPI_ISL_542475, EPI_ISL_542476, EPI_ISL_542477, EPI_ISL_542478, EPI_ISL_542479, EPI_ISL_542480, EPI_ISL_542481, EPI_ISL_542482, EPI_ISL_542483, EPI_ISL_542484, EPI_ISL_542485                                                                                                                                                                                                                                                                                                                                                                                                                                                                                                                                                                                                                                 | see above | Texas Department of State Health Services                                                           | Texas Department of State Health Services                                                           | Rashmi Tuladhar, Bonnie Oh, Jenny Zhang, Maliha Rahman, Anita Pokharel, Myong Koag, Chun Wang, Rachel Lee, Grace Kubin                                                                                                                                                                                                                                           |
| EPI_ISL_549006, EPI_ISL_549007, EPI_ISL_549008, EPI_ISL_549009, EPI_ISL_549010, EPI_ISL_549011, EPI_ISL_549012, EPI_ISL_549013, EPI_ISL_549014, EPI_ISL_549015, EPI_ISL_549016, EPI_ISL_549017, EPI_ISL_549018, EPI_ISL_549019, EPI_ISL_549020, EPI_ISL_549021, EPI_ISL_549022, EPI_ISL_549023                                                                                                                                                                                                                                                                                                                                                                                                                                                                                                                                                                                                                                                                                                                                                                                                                                                                                                                                                                                                                                 | see above | KWR Watercycle Research Institute                                                                   | Erasmus Medical Center                                                                              | Ray Izquierdo-Lara, Goffe Elsinga, Leo Heijnen, Bas B. Oude Munnink, Claudia M. E. Schapendonk, David Nieuwenhuijse, Matthijs Kon, Lu Lu, Frank M. Aarestrup, Samantha Lycett, Gertjan Medema, Marion P.G. Koopmans, Miranda de Graaf                                                                                                                            |
| EPI_ISL_551836, EPI_ISL_551841, EPI_ISL_551842, EPI_ISL_551843, EPI_ISL_551844, EPI_ISL_551845, EPI_ISL_551849                                                                                                                                                                                                                                                                                                                                                                                                                                                                                                                                                                                                                                                                                                                                                                                                                                                                                                                                                                                                                                                                                                                                                                                                                 |           | Lighthouse Lab in Cambridge                                                                         | Wellcome Sanger Institute for the COVID-19 Genomics UK (COG-UK) consortium                          | Rob Howes, The Lighthouse Lab in Cambridge and Alex Alderton, Roberto Amato, Sonia Goncalves, Ewan Harrison, David K. Jackson, Ian Johnston, Dominic Kwiatkowski, Cordelia Langford, John Sillitoe on behalf of the Wellcome Sanger Institute COVID-19 Surveillance Team                                                                                         |
| EPI_ISL_551850                                                                                                                                                                                                                                                                                                                                                                                                                                                                                                                                                                                                                                                                                                                                                                                                                                                                                                                                                                                                                                                                                                                                                                                                                                                                                                                 |           | Lighthouse Lab in Cambridge                                                                         | Wellcome Sanger Institute for the COVID-19 Genomics UK (COG-UK) Consortium                          | Rob Howes, The Lighthouse Lab in Cambridge and Alex Alderton, Roberto Amato, Sonia Goncalves, Ewan Harrison, David K. Jackson, Ian Johnston, Dominic Kwiatkowski, Cordelia Langford, John Sillitoe on behalf of the Wellcome Sanger Institute COVID-19 Surveillance Team                                                                                         |
| EPI_ISL_551852, EPI_ISL_551855, EPI_ISL_551856, EPI_ISL_551857, EPI_ISL_551864, EPI_ISL_551865, EPI_ISL_551869, EPI_ISL_551881, EPI_ISL_551883, EPI_ISL_551886, EPI_ISL_551887, EPI_ISL_551889, EPI_ISL_551892, EPI_ISL_551894, EPI_ISL_551902, EPI_ISL_551909, EPI_ISL_551910, EPI_ISL_551912, EPI_ISL_551915, EPI_ISL_551916, EPI_ISL_551925, EPI_ISL_551953, EPI_ISL_551967, EPI_ISL_552001, EPI_ISL_552010, EPI_ISL_552073, EPI_ISL_552094, EPI_ISL_552098, EPI_ISL_552151, EPI_ISL_552170, EPI_ISL_552173, EPI_ISL_552185, EPI_ISL_555843, EPI_ISL_555910, EPI_ISL_555976, EPI_ISL_556039, EPI_ISL_556058, EPI_ISL_556063, EPI_ISL_556309, EPI_ISL_556317, EPI_ISL_556321, EPI_ISL_556425, EPI_ISL_556446, EPI_ISL_556459, EPI_ISL_556500, EPI_ISL_556508, EPI_ISL_556520, EPI_ISL_556521, EPI_ISL_556523, EPI_ISL_556528, EPI_ISL_556533, EPI_ISL_556537, EPI_ISL_556538, EPI_ISL_556539, EPI_ISL_556545, EPI_ISL_556547, EPI_ISL_556549, EPI_ISL_556551, EPI_ISL_556558, EPI_ISL_556562, EPI_ISL_556564, EPI_ISL_556565, EPI_ISL_556570, EPI_ISL_556639, EPI_ISL_556640, EPI_ISL_556646, EPI_ISL_556651, EPI_ISL_556654, EPI_ISL_556655, EPI_ISL_556662, EPI_ISL_556668, EPI_ISL_556674, EPI_ISL_556675, EPI_ISL_556680, EPI_ISL_556685, EPI_ISL_556687, EPI_ISL_556689, EPI_ISL_556691, EPI_ISL_556694, EPI_ISL_556697 | see above | Lighthouse Lab in Cambridge                                                                         | Wellcome Sanger Institute for the COVID-19 Genomics UK (COG-UK) consortium                          | Rob Howes, The Lighthouse Lab in Cambridge and Alex Alderton, Roberto Amato, Sonia Goncalves, Ewan Harrison, David K. Jackson, Ian Johnston, Dominic Kwiatkowski, Cordelia Langford, John Sillitoe on behalf of the Wellcome Sanger Institute COVID-19 Surveillance Team                                                                                         |
| EPI_ISL_556698                                                                                                                                                                                                                                                                                                                                                                                                                                                                                                                                                                                                                                                                                                                                                                                                                                                                                                                                                                                                                                                                                                                                                                                                                                                                                                                 |           | Lighthouse Lab in Cambridge                                                                         | Wellcome Sanger Institute for the COVID-19 Genomics UK (COG-UK) Consortium                          | Rob Howes, The Lighthouse Lab in Cambridge and Alex Alderton, Roberto Amato, Sonia Goncalves, Ewan Harrison, David K. Jackson, Ian Johnston, Dominic Kwiatkowski, Cordelia Langford, John Sillitoe on behalf of the Wellcome Sanger Institute COVID-19 Surveillance Team                                                                                         |
| EPI_ISL_556699, EPI_ISL_556702, EPI_ISL_556703, EPI_ISL_556710, EPI_ISL_556711, EPI_ISL_556712, EPI_ISL_556716, EPI_ISL_556717, EPI_ISL_556718, EPI_ISL_556719, EPI_ISL_556723, EPI_ISL_556724, EPI_ISL_556726, EPI_ISL_556729, EPI_ISL_556740, EPI_ISL_556741, EPI_ISL_556744, EPI_ISL_556747, EPI_ISL_556749, EPI_ISL_556753, EPI_ISL_556756, EPI_ISL_556759, EPI_ISL_556766, EPI_ISL_556767, EPI_ISL_556768, EPI_ISL_556771, EPI_ISL_556772, EPI_ISL_556774, EPI_ISL_556776, EPI_ISL_556778, EPI_ISL_556782                                                                                                                                                                                                                                                                                                                                                                                                                                                                                                                                                                                                                                                                                                                                                                                                                 | see above | Lighthouse Lab in Cambridge                                                                         | Wellcome Sanger Institute for the COVID-19 Genomics UK (COG-UK) consortium                          | Rob Howes, The Lighthouse Lab in Cambridge and Alex Alderton, Roberto Amato, Sonia Goncalves, Ewan Harrison, David K. Jackson, Ian Johnston, Dominic Kwiatkowski, Cordelia Langford, John Sillitoe on behalf of the Wellcome Sanger Institute COVID-19 Surveillance Team                                                                                         |
| EPI_ISL_556787                                                                                                                                                                                                                                                                                                                                                                                                                                                                                                                                                                                                                                                                                                                                                                                                                                                                                                                                                                                                                                                                                                                                                                                                                                                                                                                 |           | Lighthouse Lab in Cambridge                                                                         | Wellcome Sanger Institute for the COVID-19 Genomics UK (COG-UK) consortium                          | Rob Howes, The Lighthouse Lab in Cambridge and Alex Alderton, Roberto Amato, Sonia Goncalves, Ewan Harrison, David K. Jackson, Ian Johnston, Dominic Kwiatkowski, Cordelia Langford, John Sillitoe on behalf of the Wellcome Sanger Institute COVID-19 Surveillance Team ( <a href="http://www.sanger.ac.uk/covid-team">http://www.sanger.ac.uk/covid-team</a> ) |
| EPI_ISL_556789, EPI_ISL_556791, EPI_ISL_556793, EPI_ISL_556794, EPI_ISL_556796, EPI_ISL_556798, EPI_ISL_556800, EPI_ISL_556806, EPI_ISL_556813, EPI_ISL_556814, EPI_ISL_556817, EPI_ISL_556819, EPI_ISL_556823, EPI_ISL_556824, EPI_ISL_556828, EPI_ISL_556832, EPI_ISL_556835, EPI_ISL_556838, EPI_ISL_556841, EPI_ISL_556843, EPI_ISL_556854, EPI_ISL_556855, EPI_ISL_556857, EPI_ISL_556862, EPI_ISL_556868, EPI_ISL_556869, EPI_ISL_556870, EPI_ISL_556871, EPI_ISL_556875, EPI_ISL_556877, EPI_ISL_556884, EPI_ISL_556885, EPI_ISL_556890, EPI_ISL_556891, EPI_ISL_556893                                                                                                                                                                                                                                                                                                                                                                                                                                                                                                                                                                                                                                                                                                                                                 | see above | Lighthouse Lab in Cambridge                                                                         | Wellcome Sanger Institute for the COVID-19 Genomics UK (COG-UK) consortium                          | Rob Howes, The Lighthouse Lab in Cambridge and Alex Alderton, Roberto Amato, Sonia Goncalves, Ewan Harrison, David K. Jackson, Ian Johnston, Dominic Kwiatkowski, Cordelia Langford, John Sillitoe on behalf of the Wellcome Sanger Institute COVID-19 Surveillance Team                                                                                         |
| EPI_ISL_556894                                                                                                                                                                                                                                                                                                                                                                                                                                                                                                                                                                                                                                                                                                                                                                                                                                                                                                                                                                                                                                                                                                                                                                                                                                                                                                                 |           | Lighthouse Lab in Cambridge                                                                         | Wellcome Sanger Institute for the COVID-19 Genomics UK (COG-UK) consortium                          | Rob Howes, The Lighthouse Lab in Cambridge and Alex Alderton, Roberto Amato, Sonia Goncalves, Ewan Harrison, David K. Jackson, Ian Johnston, Dominic Kwiatkowski, Cordelia Langford, John Sillitoe on behalf of the Wellcome Sanger Institute COVID-19 Surveillance Team ( <a href="http://www.sanger.ac.uk/covid-team">http://www.sanger.ac.uk/covid-team</a> ) |
| EPI_ISL_556895, EPI_ISL_556902, EPI_ISL_556903                                                                                                                                                                                                                                                                                                                                                                                                                                                                                                                                                                                                                                                                                                                                                                                                                                                                                                                                                                                                                                                                                                                                                                                                                                                                                 |           | Lighthouse Lab in Cambridge                                                                         | Wellcome Sanger Institute for the COVID-19 Genomics UK (COG-UK) consortium                          | Rob Howes, The Lighthouse Lab in Cambridge and Alex Alderton, Roberto Amato, Sonia Goncalves, Ewan Harrison, David K. Jackson, Ian Johnston, Dominic Kwiatkowski, Cordelia Langford, John Sillitoe on behalf of the Wellcome Sanger Institute COVID-19 Surveillance Team                                                                                         |
| EPI_ISL_556904                                                                                                                                                                                                                                                                                                                                                                                                                                                                                                                                                                                                                                                                                                                                                                                                                                                                                                                                                                                                                                                                                                                                                                                                                                                                                                                 |           | Lighthouse Lab in Cambridge                                                                         | Wellcome Sanger Institute for the COVID-19 Genomics UK (COG-UK) consortium                          | Rob Howes, The Lighthouse Lab in Cambridge and Alex Alderton, Roberto Amato, Sonia Goncalves, Ewan Harrison, David K. Jackson, Ian Johnston, Dominic Kwiatkowski, Cordelia Langford, John Sillitoe on behalf of the Wellcome Sanger Institute COVID-19 Surveillance Team ( <a href="http://www.sanger.ac.uk/covid-team">http://www.sanger.ac.uk/covid-team</a> ) |

|                                                                                                                                                                                                                                                                                                                                                                                                                                                                                                                                                                                                                                                                                                                                                                                                                                                                                                                                                                                                                                                                                                                                                                                                                                                                                                                                                                                                                                                                                                                                                                                                                                                                                                                                                                                                                                                                                                                                                                                                                                                                                                                                                                                                                                                                                                                                                                                                                                                                                                                                                                                                |           |                                                                                                     |                                                                                                     |                                                                                                                                                                                                                                                                                                                                  |
|------------------------------------------------------------------------------------------------------------------------------------------------------------------------------------------------------------------------------------------------------------------------------------------------------------------------------------------------------------------------------------------------------------------------------------------------------------------------------------------------------------------------------------------------------------------------------------------------------------------------------------------------------------------------------------------------------------------------------------------------------------------------------------------------------------------------------------------------------------------------------------------------------------------------------------------------------------------------------------------------------------------------------------------------------------------------------------------------------------------------------------------------------------------------------------------------------------------------------------------------------------------------------------------------------------------------------------------------------------------------------------------------------------------------------------------------------------------------------------------------------------------------------------------------------------------------------------------------------------------------------------------------------------------------------------------------------------------------------------------------------------------------------------------------------------------------------------------------------------------------------------------------------------------------------------------------------------------------------------------------------------------------------------------------------------------------------------------------------------------------------------------------------------------------------------------------------------------------------------------------------------------------------------------------------------------------------------------------------------------------------------------------------------------------------------------------------------------------------------------------------------------------------------------------------------------------------------------------|-----------|-----------------------------------------------------------------------------------------------------|-----------------------------------------------------------------------------------------------------|----------------------------------------------------------------------------------------------------------------------------------------------------------------------------------------------------------------------------------------------------------------------------------------------------------------------------------|
| EPI_ISL_556912, EPI_ISL_556919, EPI_ISL_556926, EPI_ISL_556930, EPI_ISL_556935, EPI_ISL_556941, EPI_ISL_556942, EPI_ISL_556943, EPI_ISL_556946, EPI_ISL_556947, EPI_ISL_556949, EPI_ISL_556950, EPI_ISL_556951, EPI_ISL_556952, EPI_ISL_556955, EPI_ISL_556961, EPI_ISL_556962, EPI_ISL_556966, EPI_ISL_556969, EPI_ISL_556971, EPI_ISL_556973, EPI_ISL_556974, EPI_ISL_556975, EPI_ISL_556980, EPI_ISL_556983                                                                                                                                                                                                                                                                                                                                                                                                                                                                                                                                                                                                                                                                                                                                                                                                                                                                                                                                                                                                                                                                                                                                                                                                                                                                                                                                                                                                                                                                                                                                                                                                                                                                                                                                                                                                                                                                                                                                                                                                                                                                                                                                                                                 | see above | Lighthouse Lab in Cambridge                                                                         | Wellcome Sanger Institute for the COVID-19 Genomics UK (COG-UK) consortium                          | Rob Howes, The Lighthouse Lab in Cambridge and Alex Alderton, Roberto Amato, Sonia Goncalves, Ewan Harrison, David K. Jackson, Ian Johnston, Dominic Kwiatkowski, Cordelia Langford, John Sillitoe on behalf of the Wellcome Sanger Institute COVID-19 Surveillance Team                                                         |
| EPI_ISL_560926, EPI_ISL_560927, EPI_ISL_560928, EPI_ISL_560929, EPI_ISL_560930, EPI_ISL_560931, EPI_ISL_560932, EPI_ISL_560933, EPI_ISL_560934, EPI_ISL_560935, EPI_ISL_560936, EPI_ISL_560937, EPI_ISL_560938, EPI_ISL_560939, EPI_ISL_560942, EPI_ISL_560943, EPI_ISL_560944, EPI_ISL_560945, EPI_ISL_560946, EPI_ISL_560947, EPI_ISL_560948, EPI_ISL_560949, EPI_ISL_560950, EPI_ISL_560951, EPI_ISL_560952, EPI_ISL_560953, EPI_ISL_560954, EPI_ISL_560955, EPI_ISL_560956, EPI_ISL_560957, EPI_ISL_560958, EPI_ISL_560959, EPI_ISL_560960, EPI_ISL_560961, EPI_ISL_560962, EPI_ISL_560963, EPI_ISL_560964, EPI_ISL_560965, EPI_ISL_560966, EPI_ISL_560967, EPI_ISL_560968, EPI_ISL_560969, EPI_ISL_560970                                                                                                                                                                                                                                                                                                                                                                                                                                                                                                                                                                                                                                                                                                                                                                                                                                                                                                                                                                                                                                                                                                                                                                                                                                                                                                                                                                                                                                                                                                                                                                                                                                                                                                                                                                                                                                                                                 | see above | Texas Department of State Health Services                                                           | Texas Department of State Health Services                                                           | Rashmi Tuladhar, Bonnie Oh, Jenny Zhang, Maliha Rahman, Anita Pokharel, Myong Koag, Chun Wang, Rachel Lee, Grace Kubin                                                                                                                                                                                                           |
| EPI_ISL_560991                                                                                                                                                                                                                                                                                                                                                                                                                                                                                                                                                                                                                                                                                                                                                                                                                                                                                                                                                                                                                                                                                                                                                                                                                                                                                                                                                                                                                                                                                                                                                                                                                                                                                                                                                                                                                                                                                                                                                                                                                                                                                                                                                                                                                                                                                                                                                                                                                                                                                                                                                                                 | see above | RSUD Dr. Soetomo                                                                                    | Institute of Tropical Disease, Universitas Airlangga                                                | Rima R Prasetya, Krisnoadi Rahardjo, Aldise M Nastro, Jezzy R Dewantari, Joni Wahyuhadi, Gatot Soegiarto, Laksmi Wulandari, Retno A Setyoningrum, Resti Yudhawati, Yohko K Shimizu, Mitsuhiko Nishimura, Yasuko Mori, Soetjipo, Kazufumi Shimizu, Maria I Lusida                                                                 |
| EPI_ISL_566444, EPI_ISL_566453                                                                                                                                                                                                                                                                                                                                                                                                                                                                                                                                                                                                                                                                                                                                                                                                                                                                                                                                                                                                                                                                                                                                                                                                                                                                                                                                                                                                                                                                                                                                                                                                                                                                                                                                                                                                                                                                                                                                                                                                                                                                                                                                                                                                                                                                                                                                                                                                                                                                                                                                                                 | see above | Lighthouse Lab in Cambridge                                                                         | Wellcome Sanger Institute for the COVID-19 Genomics UK (COG-UK) consortium                          | Rob Howes, The Lighthouse Lab in Cambridge and Alex Alderton, Roberto Amato, Sonia Goncalves, Ewan Harrison, David K. Jackson, Ian Johnston, Dominic Kwiatkowski, Cordelia Langford, John Sillitoe on behalf of the Wellcome Sanger Institute COVID-19 Surveillance Team                                                         |
| EPI_ISL_566455                                                                                                                                                                                                                                                                                                                                                                                                                                                                                                                                                                                                                                                                                                                                                                                                                                                                                                                                                                                                                                                                                                                                                                                                                                                                                                                                                                                                                                                                                                                                                                                                                                                                                                                                                                                                                                                                                                                                                                                                                                                                                                                                                                                                                                                                                                                                                                                                                                                                                                                                                                                 | see above | Lighthouse Lab in Cambridge                                                                         | Wellcome Sanger Institute for the COVID-19 Genomics UK (COG-UK) Consortium                          | Rob Howes, The Lighthouse Lab in Cambridge and Alex Alderton, Roberto Amato, Sonia Goncalves, Ewan Harrison, David K. Jackson, Ian Johnston, Dominic Kwiatkowski, Cordelia Langford, John Sillitoe on behalf of the Wellcome Sanger Institute COVID-19 Surveillance Team                                                         |
| EPI_ISL_566456, EPI_ISL_566492, EPI_ISL_566493, EPI_ISL_566500, EPI_ISL_566519, EPI_ISL_566528, EPI_ISL_566586, EPI_ISL_566589, EPI_ISL_566625, EPI_ISL_566659, EPI_ISL_566662, EPI_ISL_566672, EPI_ISL_566674, EPI_ISL_568385, EPI_ISL_568436, EPI_ISL_568453, EPI_ISL_568454, EPI_ISL_568458, EPI_ISL_568461                                                                                                                                                                                                                                                                                                                                                                                                                                                                                                                                                                                                                                                                                                                                                                                                                                                                                                                                                                                                                                                                                                                                                                                                                                                                                                                                                                                                                                                                                                                                                                                                                                                                                                                                                                                                                                                                                                                                                                                                                                                                                                                                                                                                                                                                                 | see above | Lighthouse Lab in Cambridge                                                                         | Wellcome Sanger Institute for the COVID-19 Genomics UK (COG-UK) consortium                          | Rob Howes, The Lighthouse Lab in Cambridge and Alex Alderton, Roberto Amato, Sonia Goncalves, Ewan Harrison, David K. Jackson, Ian Johnston, Dominic Kwiatkowski, Cordelia Langford, John Sillitoe on behalf of the Wellcome Sanger Institute COVID-19 Surveillance Team                                                         |
| EPI_ISL_569689, EPI_ISL_569690, EPI_ISL_569691, EPI_ISL_569692, EPI_ISL_569693, EPI_ISL_569694, EPI_ISL_569695, EPI_ISL_569696, EPI_ISL_569697, EPI_ISL_569698, EPI_ISL_569699, EPI_ISL_569700, EPI_ISL_569701, EPI_ISL_569702, EPI_ISL_569703, EPI_ISL_569704, EPI_ISL_569705, EPI_ISL_569706, EPI_ISL_569707, EPI_ISL_569708, EPI_ISL_569709, EPI_ISL_569710, EPI_ISL_569711, EPI_ISL_569712, EPI_ISL_569713, EPI_ISL_569714, EPI_ISL_569715, EPI_ISL_569716, EPI_ISL_569717, EPI_ISL_569718, EPI_ISL_569719, EPI_ISL_569720, EPI_ISL_569721, EPI_ISL_569722, EPI_ISL_569723, EPI_ISL_569724, EPI_ISL_569725, EPI_ISL_569726, EPI_ISL_569727, EPI_ISL_569728, EPI_ISL_569729, EPI_ISL_569730, EPI_ISL_569731, EPI_ISL_569732, EPI_ISL_569733, EPI_ISL_569734                                                                                                                                                                                                                                                                                                                                                                                                                                                                                                                                                                                                                                                                                                                                                                                                                                                                                                                                                                                                                                                                                                                                                                                                                                                                                                                                                                                                                                                                                                                                                                                                                                                                                                                                                                                                                                 | see above | Texas Department of State Health Services                                                           | Texas Department of State Health Services                                                           | Rashmi Tuladhar, Bonnie Oh, Jenny Zhang, Maliha Rahman, Anita Pokharel, Myong Koag, Chun Wang, Rachel Lee, Grace Kubin                                                                                                                                                                                                           |
| EPI_ISL_569858                                                                                                                                                                                                                                                                                                                                                                                                                                                                                                                                                                                                                                                                                                                                                                                                                                                                                                                                                                                                                                                                                                                                                                                                                                                                                                                                                                                                                                                                                                                                                                                                                                                                                                                                                                                                                                                                                                                                                                                                                                                                                                                                                                                                                                                                                                                                                                                                                                                                                                                                                                                 | see above | Area of Virology, Serology and Virology Division (SAVID), New South Wales Health Pathology Randwick | Area of Virology, Serology and Virology Division (SAVID), New South Wales Health Pathology Randwick | Rawlinson, W., Deveson, I., Bull, R., Van Hal, S.                                                                                                                                                                                                                                                                                |
| EPI_ISL_569949, EPI_ISL_569950, EPI_ISL_569951, EPI_ISL_569952, EPI_ISL_569953, EPI_ISL_569954, EPI_ISL_569955, EPI_ISL_569956, EPI_ISL_569957, EPI_ISL_569958, EPI_ISL_569959, EPI_ISL_569960, EPI_ISL_569961, EPI_ISL_569962, EPI_ISL_569963, EPI_ISL_569964, EPI_ISL_569965, EPI_ISL_569966, EPI_ISL_569967, EPI_ISL_569968, EPI_ISL_569969, EPI_ISL_569970, EPI_ISL_569971, EPI_ISL_569972, EPI_ISL_569973, EPI_ISL_569974, EPI_ISL_569975, EPI_ISL_569976, EPI_ISL_569977, EPI_ISL_569978, EPI_ISL_569979, EPI_ISL_569980, EPI_ISL_569981, EPI_ISL_569982, EPI_ISL_569983, EPI_ISL_569984, EPI_ISL_569985, EPI_ISL_569986, EPI_ISL_569987, EPI_ISL_569988, EPI_ISL_569989, EPI_ISL_569990, EPI_ISL_569991, EPI_ISL_569992, EPI_ISL_569993, EPI_ISL_569994, EPI_ISL_569995, EPI_ISL_569996, EPI_ISL_569997, EPI_ISL_569998, EPI_ISL_569999, EPI_ISL_570000, EPI_ISL_570001, EPI_ISL_570002, EPI_ISL_570003, EPI_ISL_570004, EPI_ISL_570005, EPI_ISL_570006, EPI_ISL_570007, EPI_ISL_570008, EPI_ISL_570009, EPI_ISL_570010, EPI_ISL_570011, EPI_ISL_570012, EPI_ISL_570013, EPI_ISL_570014, EPI_ISL_570015, EPI_ISL_570016, EPI_ISL_570017, EPI_ISL_570018, EPI_ISL_570019, EPI_ISL_570020, EPI_ISL_570021, EPI_ISL_570022, EPI_ISL_570023, EPI_ISL_570024, EPI_ISL_570025, EPI_ISL_570026                                                                                                                                                                                                                                                                                                                                                                                                                                                                                                                                                                                                                                                                                                                                                                                                                                                                                                                                                                                                                                                                                                                                                                                                                                                                                                 | see above | Unity Health Toronto                                                                                | Ontario Institute for Cancer Research                                                               | Ramzi Fattouh, Larissa M. Matukas, Yan Chen, Mark Downing, Trina Otterman, Karel Boissinot, Wai Sum Siu, Zhi Cui, Le Luu, Samira Mubareka, TIBDN, Ilina Lingu, Bernard Lan, Jeremy Johns, Paul Krzyzanowski, Richard de Borja, Felicia Vincelli, Phillip Zuzarte, Jared T. Simpson                                               |
| EPI_ISL_574434, EPI_ISL_574435, EPI_ISL_574436, EPI_ISL_574437, EPI_ISL_574438, EPI_ISL_574439, EPI_ISL_574440, EPI_ISL_574441, EPI_ISL_574442, EPI_ISL_574443, EPI_ISL_574444, EPI_ISL_574445, EPI_ISL_574446, EPI_ISL_574447, EPI_ISL_574448, EPI_ISL_574449, EPI_ISL_574450, EPI_ISL_574451, EPI_ISL_574452, EPI_ISL_574453, EPI_ISL_574454, EPI_ISL_574455, EPI_ISL_574456, EPI_ISL_574457, EPI_ISL_574458, EPI_ISL_574459, EPI_ISL_574460, EPI_ISL_574461, EPI_ISL_574462, EPI_ISL_574463, EPI_ISL_574464, EPI_ISL_574465, EPI_ISL_574466, EPI_ISL_574467, EPI_ISL_574468, EPI_ISL_574469, EPI_ISL_574470, EPI_ISL_574471, EPI_ISL_574472, EPI_ISL_574473, EPI_ISL_574474, EPI_ISL_574475, EPI_ISL_574476, EPI_ISL_574477, EPI_ISL_574478, EPI_ISL_574479, EPI_ISL_574480, EPI_ISL_574481, EPI_ISL_574482, EPI_ISL_574483, EPI_ISL_574484, EPI_ISL_574485, EPI_ISL_574486, EPI_ISL_574487, EPI_ISL_574488, EPI_ISL_574489, EPI_ISL_574490, EPI_ISL_574491, EPI_ISL_574492, EPI_ISL_574493, EPI_ISL_574494, EPI_ISL_574495, EPI_ISL_574496, EPI_ISL_574497, EPI_ISL_574498, EPI_ISL_574499, EPI_ISL_574500, EPI_ISL_574501, EPI_ISL_574502, EPI_ISL_574503, EPI_ISL_574504, EPI_ISL_574505, EPI_ISL_574506, EPI_ISL_574507, EPI_ISL_574508, EPI_ISL_574509, EPI_ISL_574510, EPI_ISL_574511, EPI_ISL_574512, EPI_ISL_574513, EPI_ISL_574514, EPI_ISL_574515, EPI_ISL_574516, EPI_ISL_574517, EPI_ISL_574518, EPI_ISL_574519, EPI_ISL_574520, EPI_ISL_574521, EPI_ISL_574522, EPI_ISL_574523, EPI_ISL_574524, EPI_ISL_574525, EPI_ISL_574526, EPI_ISL_574527, EPI_ISL_574528, EPI_ISL_574529, EPI_ISL_574530, EPI_ISL_574531, EPI_ISL_574532, EPI_ISL_574533, EPI_ISL_574534, EPI_ISL_574535, EPI_ISL_574536, EPI_ISL_574537, EPI_ISL_574538, EPI_ISL_574539, EPI_ISL_574540, EPI_ISL_574541, EPI_ISL_574542, EPI_ISL_574543, EPI_ISL_574544, EPI_ISL_574545, EPI_ISL_574546, EPI_ISL_574547, EPI_ISL_574548, EPI_ISL_574549, EPI_ISL_574550, EPI_ISL_574551, EPI_ISL_574552, EPI_ISL_574553, EPI_ISL_574554, EPI_ISL_574555, EPI_ISL_574556, EPI_ISL_574557, EPI_ISL_574558, EPI_ISL_574559, EPI_ISL_574560, EPI_ISL_574561, EPI_ISL_574562, EPI_ISL_574563, EPI_ISL_574564, EPI_ISL_574565, EPI_ISL_574566, EPI_ISL_574567, EPI_ISL_574568, EPI_ISL_574569, EPI_ISL_574570, EPI_ISL_574571, EPI_ISL_574572, EPI_ISL_574573, EPI_ISL_574574, EPI_ISL_574575, EPI_ISL_574576, EPI_ISL_574577, EPI_ISL_574578, EPI_ISL_574579, EPI_ISL_574580, EPI_ISL_574581, EPI_ISL_574582, EPI_ISL_574583, EPI_ISL_574584, EPI_ISL_574585, EPI_ISL_574586, EPI_ISL_574587, EPI_ISL_574588, EPI_ISL_574589 | see above | Texas Department of State Health Services                                                           | Texas Department of State Health Services                                                           | Rashmi Tuladhar, Bonnie Oh, Jenny Zhang, Maliha Rahman, Anita Pokharel, Myong Koag, Chun Wang, Rachel Lee, Grace Kubin                                                                                                                                                                                                           |
| EPI_ISL_574451, EPI_ISL_574452, EPI_ISL_574453, EPI_ISL_574454, EPI_ISL_574455, EPI_ISL_574456, EPI_ISL_574457, EPI_ISL_574458, EPI_ISL_574459, EPI_ISL_574460, EPI_ISL_574461, EPI_ISL_574462, EPI_ISL_574463, EPI_ISL_574464, EPI_ISL_574465, EPI_ISL_574466, EPI_ISL_574467, EPI_ISL_574468, EPI_ISL_574469, EPI_ISL_574470, EPI_ISL_574471, EPI_ISL_574472, EPI_ISL_574473, EPI_ISL_574474, EPI_ISL_574475, EPI_ISL_574476, EPI_ISL_574477, EPI_ISL_574478, EPI_ISL_574479, EPI_ISL_574480, EPI_ISL_574481, EPI_ISL_574482, EPI_ISL_574483, EPI_ISL_574484, EPI_ISL_574485, EPI_ISL_574486, EPI_ISL_574487, EPI_ISL_574488, EPI_ISL_574489, EPI_ISL_574490, EPI_ISL_574491, EPI_ISL_574492, EPI_ISL_574493, EPI_ISL_574494, EPI_ISL_574495, EPI_ISL_574496, EPI_ISL_574497, EPI_ISL_574498, EPI_ISL_574499, EPI_ISL_574500, EPI_ISL_574501, EPI_ISL_574502, EPI_ISL_574503, EPI_ISL_574504, EPI_ISL_574505, EPI_ISL_574506, EPI_ISL_574507, EPI_ISL_574508, EPI_ISL_574509, EPI_ISL_574510, EPI_ISL_574511, EPI_ISL_574512, EPI_ISL_574513, EPI_ISL_574514, EPI_ISL_574515, EPI_ISL_574516, EPI_ISL_574517, EPI_ISL_574518, EPI_ISL_574519, EPI_ISL_574520, EPI_ISL_574521, EPI_ISL_574522, EPI_ISL_574523, EPI_ISL_574524, EPI_ISL_574525, EPI_ISL_574526, EPI_ISL_574527, EPI_ISL_574528, EPI_ISL_574529, EPI_ISL_574530, EPI_ISL_574531, EPI_ISL_574532, EPI_ISL_574533, EPI_ISL_574534, EPI_ISL_574535, EPI_ISL_574536, EPI_ISL_574537, EPI_ISL_574538, EPI_ISL_574539, EPI_ISL_574540, EPI_ISL_574541, EPI_ISL_574542, EPI_ISL_574543, EPI_ISL_574544, EPI_ISL_574545, EPI_ISL_574546, EPI_ISL_574547, EPI_ISL_574548, EPI_ISL_574549, EPI_ISL_574550, EPI_ISL_574551, EPI_ISL_574552, EPI_ISL_574553, EPI_ISL_574554, EPI_ISL_574555, EPI_ISL_574556, EPI_ISL_574557, EPI_ISL_574558, EPI_ISL_574559, EPI_ISL_574560, EPI_ISL_574561, EPI_ISL_574562, EPI_ISL_574563, EPI_ISL_574564, EPI_ISL_574565, EPI_ISL_574566, EPI_ISL_574567, EPI_ISL_574568, EPI_ISL_574569, EPI_ISL_574570, EPI_ISL_574571, EPI_ISL_574572, EPI_ISL_574573, EPI_ISL_574574, EPI_ISL_574575, EPI_ISL_574576, EPI_ISL_574577, EPI_ISL_574578, EPI_ISL_574579, EPI_ISL_574580, EPI_ISL_574581, EPI_ISL_574582, EPI_ISL_574583, EPI_ISL_574584, EPI_ISL_574585, EPI_ISL_574586, EPI_ISL_574587, EPI_ISL_574588, EPI_ISL_574589                                                                                                                                                                                                                                                                                 | see above | Area of Virology, Serology and Virology Division (SAVID), New South Wales Health Pathology Randwick | Area of Virology, Serology and Virology Division (SAVID), New South Wales Health Pathology Randwick | Rawlinson, W., Bull, R., Deveson, I.                                                                                                                                                                                                                                                                                             |
| EPI_ISL_577604                                                                                                                                                                                                                                                                                                                                                                                                                                                                                                                                                                                                                                                                                                                                                                                                                                                                                                                                                                                                                                                                                                                                                                                                                                                                                                                                                                                                                                                                                                                                                                                                                                                                                                                                                                                                                                                                                                                                                                                                                                                                                                                                                                                                                                                                                                                                                                                                                                                                                                                                                                                 | see above | Area of Virology, Serology and Virology Division (SAVID), New South Wales Health Pathology Randwick | Area of Virology, Serology and Virology Division (SAVID), New South Wales Health Pathology Randwick | Rawlinson, W., Deveson, I., Bull, R., Van Hal, S.                                                                                                                                                                                                                                                                                |
| EPI_ISL_580283, EPI_ISL_580305, EPI_ISL_580327, EPI_ISL_580338, EPI_ISL_580364, EPI_ISL_580367, EPI_ISL_580373, EPI_ISL_580435, EPI_ISL_580449, EPI_ISL_580478, EPI_ISL_580486, EPI_ISL_580509, EPI_ISL_580533, EPI_ISL_580559, EPI_ISL_580569                                                                                                                                                                                                                                                                                                                                                                                                                                                                                                                                                                                                                                                                                                                                                                                                                                                                                                                                                                                                                                                                                                                                                                                                                                                                                                                                                                                                                                                                                                                                                                                                                                                                                                                                                                                                                                                                                                                                                                                                                                                                                                                                                                                                                                                                                                                                                 | see above | Lighthouse Lab in Cambridge                                                                         | Wellcome Sanger Institute for the COVID-19 Genomics UK (COG-UK) consortium                          | Rob Howes, The Lighthouse Lab in Cambridge and Alex Alderton, Roberto Amato, Sonia Goncalves, Ewan Harrison, David K. Jackson, Ian Johnston, Dominic Kwiatkowski, Cordelia Langford, John Sillitoe on behalf of the Wellcome Sanger Institute COVID-19 Surveillance Team                                                         |
| EPI_ISL_580594                                                                                                                                                                                                                                                                                                                                                                                                                                                                                                                                                                                                                                                                                                                                                                                                                                                                                                                                                                                                                                                                                                                                                                                                                                                                                                                                                                                                                                                                                                                                                                                                                                                                                                                                                                                                                                                                                                                                                                                                                                                                                                                                                                                                                                                                                                                                                                                                                                                                                                                                                                                 | see above | Lighthouse Lab in Cambridge                                                                         | Wellcome Sanger Institute for the COVID-19 Genomics UK (COG-UK) Consortium                          | Rob Howes, The Lighthouse Lab in Cambridge and Alex Alderton, Roberto Amato, Sonia Goncalves, Ewan Harrison, David K. Jackson, Ian Johnston, Dominic Kwiatkowski, Cordelia Langford, John Sillitoe on behalf of the Wellcome Sanger Institute COVID-19 Surveillance Team                                                         |
| EPI_ISL_580603, EPI_ISL_580621, EPI_ISL_581394                                                                                                                                                                                                                                                                                                                                                                                                                                                                                                                                                                                                                                                                                                                                                                                                                                                                                                                                                                                                                                                                                                                                                                                                                                                                                                                                                                                                                                                                                                                                                                                                                                                                                                                                                                                                                                                                                                                                                                                                                                                                                                                                                                                                                                                                                                                                                                                                                                                                                                                                                 | see above | Lighthouse Lab in Cambridge                                                                         | Wellcome Sanger Institute for the COVID-19 Genomics UK (COG-UK) consortium                          | Rob Howes, The Lighthouse Lab in Cambridge and Alex Alderton, Roberto Amato, Sonia Goncalves, Ewan Harrison, David K. Jackson, Ian Johnston, Dominic Kwiatkowski, Cordelia Langford, John Sillitoe on behalf of the Wellcome Sanger Institute COVID-19 Surveillance Team                                                         |
| EPI_ISL_584123, EPI_ISL_584124, EPI_ISL_584125, EPI_ISL_584126, EPI_ISL_584127, EPI_ISL_584128, EPI_ISL_584129, EPI_ISL_584130, EPI_ISL_584131, EPI_ISL_584132, EPI_ISL_584133, EPI_ISL_584134, EPI_ISL_584135, EPI_ISL_584136, EPI_ISL_584137, EPI_ISL_584138, EPI_ISL_584139, EPI_ISL_584140, EPI_ISL_584141, EPI_ISL_584142, EPI_ISL_584143, EPI_ISL_584144, EPI_ISL_584145, EPI_ISL_584146, EPI_ISL_584147, EPI_ISL_584148, EPI_ISL_584149, EPI_ISL_584150, EPI_ISL_584151, EPI_ISL_584152, EPI_ISL_584153, EPI_ISL_584154, EPI_ISL_584155, EPI_ISL_584156, EPI_ISL_584157, EPI_ISL_584158, EPI_ISL_584159, EPI_ISL_584160, EPI_ISL_584161, EPI_ISL_584162, EPI_ISL_584163, EPI_ISL_584164                                                                                                                                                                                                                                                                                                                                                                                                                                                                                                                                                                                                                                                                                                                                                                                                                                                                                                                                                                                                                                                                                                                                                                                                                                                                                                                                                                                                                                                                                                                                                                                                                                                                                                                                                                                                                                                                                                 | see above | Texas Department of State Health Services                                                           | Texas Department of State Health Services                                                           | Rashmi Tuladhar, Bonnie Oh, Jenny Zhang, Maliha Rahman, Anita Pokharel, Myong Koag, Chun Wang, Rachel Lee, Grace Kubin                                                                                                                                                                                                           |
| EPI_ISL_584440, EPI_ISL_584441, EPI_ISL_584442, EPI_ISL_584443, EPI_ISL_584444, EPI_ISL_584445, EPI_ISL_584446, EPI_ISL_584447, EPI_ISL_584448, EPI_ISL_584449, EPI_ISL_584450, EPI_ISL_584451, EPI_ISL_584452, EPI_ISL_584453, EPI_ISL_584454, EPI_ISL_584455, EPI_ISL_584456, EPI_ISL_584457, EPI_ISL_584458, EPI_ISL_584459, EPI_ISL_584460, EPI_ISL_584461, EPI_ISL_584462, EPI_ISL_584463, EPI_ISL_584464, EPI_ISL_584465, EPI_ISL_584466, EPI_ISL_584467, EPI_ISL_584468, EPI_ISL_584469, EPI_ISL_584470, EPI_ISL_584471, EPI_ISL_584472, EPI_ISL_584473, EPI_ISL_584474, EPI_ISL_584475, EPI_ISL_584476, EPI_ISL_584477, EPI_ISL_584478, EPI_ISL_584479, EPI_ISL_584480, EPI_ISL_584481, EPI_ISL_584482, EPI_ISL_584483, EPI_ISL_584484, EPI_ISL_584485, EPI_ISL_584486, EPI_ISL_584487, EPI_ISL_584488, EPI_ISL_584489, EPI_ISL_584490, EPI_ISL_584491, EPI_ISL_584492, EPI_ISL_584493, EPI_ISL_584494, EPI_ISL_584495, EPI_ISL_584496, EPI_ISL_584497, EPI_ISL_584498, EPI_ISL_584499, EPI_ISL_584500, EPI_ISL_584501, EPI_ISL_584502, EPI_ISL_584503, EPI_ISL_584504, EPI_ISL_584505, EPI_ISL_584506, EPI_ISL_584507, EPI_ISL_584508, EPI_ISL_584509, EPI_ISL_584510, EPI_ISL_584511, EPI_ISL_584512, EPI_ISL_584513, EPI_ISL_584514, EPI_ISL_584515, EPI_ISL_584516, EPI_ISL_584517, EPI_ISL_584518, EPI_ISL_584519, EPI_ISL_584520, EPI_ISL_584521, EPI_ISL_584522, EPI_ISL_584523, EPI_ISL_584524, EPI_ISL_584525, EPI_ISL_584526, EPI_ISL_584527, EPI_ISL_584528, EPI_ISL_584529, EPI_ISL_584530, EPI_ISL_584531, EPI_ISL_584532, EPI_ISL_584533, EPI_ISL_584534, EPI_ISL_584535, EPI_ISL_584536, EPI_ISL_584537, EPI_ISL_584538, EPI_ISL_584539, EPI_ISL_584540, EPI_ISL_584541, EPI_ISL_584542, EPI_ISL_584543, EPI_ISL_584544, EPI_ISL_584545, EPI_ISL_584546, EPI_ISL_584547, EPI_ISL_584548, EPI_ISL_584549, EPI_ISL_584550, EPI_ISL_584551, EPI_ISL_584552, EPI_ISL_584553, EPI_ISL_584554, EPI_ISL_584555, EPI_ISL_584556, EPI_ISL_584557, EPI_ISL_584558, EPI_ISL_584559, EPI_ISL_584560, EPI_ISL_584561, EPI_ISL_584562, EPI_ISL_584563, EPI_ISL_584564, EPI_ISL_584565, EPI_ISL_584566, EPI_ISL_584567, EPI_ISL_584568, EPI_ISL_584569, EPI_ISL_584570, EPI_ISL_584571, EPI_ISL_584572, EPI_ISL_584573, EPI_ISL_584574, EPI_ISL_584575, EPI_ISL_584576, EPI_ISL_584577, EPI_ISL_584578, EPI_ISL_584579, EPI_ISL_584580, EPI_ISL_584581, EPI_ISL_584582, EPI_ISL_584583, EPI_ISL_584584, EPI_ISL_584585, EPI_ISL_584586, EPI_ISL_584587, EPI_ISL_584588, EPI_ISL_584589                                                                                                 | see above | UHCW / University of Warwick                                                                        | COVID-19 Genomics UK (COG-UK) Consortium                                                            | Richard Stark, Chrystala Constantinidou, Meera Unnikrishnan, Laura Baxter, Jeff Cheng, Grace Taylor-Joyce, Hannah Elizabeth Bridgewater, Lucy Frost, Sarojini Pandey, Paul Brown, Taqueer Alam, Sascha Ott, Dimitris Grammatopoulos                                                                                              |
| EPI_ISL_586564                                                                                                                                                                                                                                                                                                                                                                                                                                                                                                                                                                                                                                                                                                                                                                                                                                                                                                                                                                                                                                                                                                                                                                                                                                                                                                                                                                                                                                                                                                                                                                                                                                                                                                                                                                                                                                                                                                                                                                                                                                                                                                                                                                                                                                                                                                                                                                                                                                                                                                                                                                                 | see above | GMERS GMERS Medical College and Hospital, Junagadh                                                  | Gujarat Biotechnology Research Centre                                                               | Ravi Dedaniya, Apurvashin Puvar, Janvi Ravai, Zarna Patel, Monika Gandhi, Pinal Trivedi, Maharshi Pandya, Nidhi Patel, Nitin Savaliya, Raghawendra Kumar, Dinesh Kumar, Zuber Saiyed, Komal Patel, Labdhi Pandya, Afzal Ansari, Nikha Trivedi, Bhavesh Bagda , R D Dixit, A M Kadri, Harsh Bakshi, Chaitanya Joshi, Madhvi Joshi |
| EPI_ISL_586571                                                                                                                                                                                                                                                                                                                                                                                                                                                                                                                                                                                                                                                                                                                                                                                                                                                                                                                                                                                                                                                                                                                                                                                                                                                                                                                                                                                                                                                                                                                                                                                                                                                                                                                                                                                                                                                                                                                                                                                                                                                                                                                                                                                                                                                                                                                                                                                                                                                                                                                                                                                 | see above | Area of Virology, Serology and Virology Division (SAVID), New South Wales Health Pathology Randwick | Area of Virology, Serology and Virology Division (SAVID), New South Wales Health Pathology Randwick | Rawlinson, W., Deveson, I., Bull, R.                                                                                                                                                                                                                                                                                             |
| EPI_ISL_590173                                                                                                                                                                                                                                                                                                                                                                                                                                                                                                                                                                                                                                                                                                                                                                                                                                                                                                                                                                                                                                                                                                                                                                                                                                                                                                                                                                                                                                                                                                                                                                                                                                                                                                                                                                                                                                                                                                                                                                                                                                                                                                                                                                                                                                                                                                                                                                                                                                                                                                                                                                                 | see above | Lighthouse Lab in Cambridge                                                                         | Wellcome Sanger Institute for the COVID-19 Genomics UK                                              | Rob Howes, The Lighthouse Lab in Cambridge and Alex Alderton, Roberto Amato, Sonia Goncalves, Ewan Harrison, David K. Jackson, Ian Johnston,                                                                                                                                                                                     |









EPI\_ISL\_657860, EPI\_ISL\_657867, EPI\_ISL\_657873, EPI\_ISL\_657875, EPI\_ISL\_657881, EPI\_ISL\_657882, EPI\_ISL\_657883, EPI\_ISL\_657888, EPI\_ISL\_657890, EPI\_ISL\_657891, EPI\_ISL\_657895, EPI\_ISL\_657896, EPI\_ISL\_657904, EPI\_ISL\_657914, EPI\_ISL\_657934, EPI\_ISL\_657935, EPI\_ISL\_657937, EPI\_ISL\_657939, EPI\_ISL\_657942, EPI\_ISL\_657949, EPI\_ISL\_657951, EPI\_ISL\_657952, EPI\_ISL\_657953, EPI\_ISL\_657960, EPI\_ISL\_657966, EPI\_ISL\_657978, EPI\_ISL\_657987, EPI\_ISL\_658001, EPI\_ISL\_658007, EPI\_ISL\_658008, EPI\_ISL\_658010, EPI\_ISL\_658011, EPI\_ISL\_658012, EPI\_ISL\_658013, EPI\_ISL\_658019, EPI\_ISL\_658028, EPI\_ISL\_658031, EPI\_ISL\_658032, EPI\_ISL\_658055, EPI\_ISL\_658064, EPI\_ISL\_658069, EPI\_ISL\_658080, EPI\_ISL\_658083, EPI\_ISL\_658085, EPI\_ISL\_658086, EPI\_ISL\_658096, EPI\_ISL\_658097, EPI\_ISL\_658098, EPI\_ISL\_658100, EPI\_ISL\_658101, EPI\_ISL\_658102, EPI\_ISL\_658104, EPI\_ISL\_658119, EPI\_ISL\_658122, EPI\_ISL\_658125, EPI\_ISL\_658128, EPI\_ISL\_658142, EPI\_ISL\_658144, EPI\_ISL\_658159, EPI\_ISL\_658161, EPI\_ISL\_658167, EPI\_ISL\_658178, EPI\_ISL\_658179, EPI\_ISL\_658181, EPI\_ISL\_658187, EPI\_ISL\_658191, EPI\_ISL\_658192, EPI\_ISL\_658194, EPI\_ISL\_658195, EPI\_ISL\_658196, EPI\_ISL\_658198, EPI\_ISL\_658199, EPI\_ISL\_658200, EPI\_ISL\_658203, EPI\_ISL\_658209, EPI\_ISL\_658234, EPI\_ISL\_658242, EPI\_ISL\_658246, EPI\_ISL\_658274, EPI\_ISL\_658275, EPI\_ISL\_658304, EPI\_ISL\_658312, EPI\_ISL\_658313, EPI\_ISL\_658314, EPI\_ISL\_658320, EPI\_ISL\_658321, EPI\_ISL\_658323, EPI\_ISL\_658330, EPI\_ISL\_658331, EPI\_ISL\_658343, EPI\_ISL\_658345, EPI\_ISL\_658362, EPI\_ISL\_658355, EPI\_ISL\_658360, EPI\_ISL\_658370, EPI\_ISL\_658381, EPI\_ISL\_658387, EPI\_ISL\_658388, EPI\_ISL\_658402, EPI\_ISL\_658474, EPI\_ISL\_658475, EPI\_ISL\_658476, EPI\_ISL\_658477, EPI\_ISL\_658478, EPI\_ISL\_658479, EPI\_ISL\_658480, EPI\_ISL\_658481, EPI\_ISL\_658482, EPI\_ISL\_658483, EPI\_ISL\_658484, EPI\_ISL\_658485, EPI\_ISL\_658486, EPI\_ISL\_658487, EPI\_ISL\_658488, EPI\_ISL\_658489, EPI\_ISL\_658490, EPI\_ISL\_658491, EPI\_ISL\_658492, EPI\_ISL\_658493, EPI\_ISL\_658494, EPI\_ISL\_658495, EPI\_ISL\_658496, EPI\_ISL\_658497, EPI\_ISL\_658498, EPI\_ISL\_658499, EPI\_ISL\_658500, EPI\_ISL\_658501, EPI\_ISL\_658502, EPI\_ISL\_658503, EPI\_ISL\_658504, EPI\_ISL\_658505, EPI\_ISL\_658506, EPI\_ISL\_658507, EPI\_ISL\_658508, EPI\_ISL\_658509, EPI\_ISL\_658510, EPI\_ISL\_658511, EPI\_ISL\_658512, EPI\_ISL\_658513, EPI\_ISL\_658514, EPI\_ISL\_658515, EPI\_ISL\_658516, EPI\_ISL\_658517, EPI\_ISL\_658518, EPI\_ISL\_658519, EPI\_ISL\_658520, EPI\_ISL\_658521, EPI\_ISL\_658522, EPI\_ISL\_658523, EPI\_ISL\_658524, EPI\_ISL\_658525, EPI\_ISL\_658526, EPI\_ISL\_658527, EPI\_ISL\_658528, EPI\_ISL\_658529, EPI\_ISL\_658530, EPI\_ISL\_658531, EPI\_ISL\_658532, EPI\_ISL\_658533, EPI\_ISL\_658534, EPI\_ISL\_658535, EPI\_ISL\_658536, EPI\_ISL\_658537, EPI\_ISL\_658538, EPI\_ISL\_658539, EPI\_ISL\_658540, EPI\_ISL\_658541, EPI\_ISL\_658542, EPI\_ISL\_658543, EPI\_ISL\_658544, EPI\_ISL\_658545, EPI\_ISL\_658546, EPI\_ISL\_658547, EPI\_ISL\_658548, EPI\_ISL\_658549, EPI\_ISL\_658550, EPI\_ISL\_658551, EPI\_ISL\_658552, EPI\_ISL\_658553, EPI\_ISL\_658554, EPI\_ISL\_658555, EPI\_ISL\_658556, EPI\_ISL\_658557, EPI\_ISL\_658558, EPI\_ISL\_658559, EPI\_ISL\_658560, EPI\_ISL\_658561, EPI\_ISL\_658562, EPI\_ISL\_658563, EPI\_ISL\_658564, EPI\_ISL\_658565, EPI\_ISL\_658566, EPI\_ISL\_658567, EPI\_ISL\_658568, EPI\_ISL\_658569, EPI\_ISL\_658570, EPI\_ISL\_658571, EPI\_ISL\_658572, EPI\_ISL\_658573, EPI\_ISL\_658574, EPI\_ISL\_658575, EPI\_ISL\_658576, EPI\_ISL\_658577, EPI\_ISL\_658578, EPI\_ISL\_658579, EPI\_ISL\_658580, EPI\_ISL\_658581, EPI\_ISL\_658582, EPI\_ISL\_658583, EPI\_ISL\_658584, EPI\_ISL\_658585, EPI\_ISL\_658586, EPI\_ISL\_658587, EPI\_ISL\_658588, EPI\_ISL\_658589, EPI\_ISL\_658590, EPI\_ISL\_658591, EPI\_ISL\_658592, EPI\_ISL\_658593, EPI\_ISL\_658594, EPI\_ISL\_658595, EPI\_ISL\_658596, EPI\_ISL\_658597, EPI\_ISL\_658598, EPI\_ISL\_658599, EPI\_ISL\_658600, EPI\_ISL\_658601, EPI\_ISL\_658602, EPI\_ISL\_658603, EPI\_ISL\_658604, EPI\_ISL\_658605, EPI\_ISL\_658606, EPI\_ISL\_658607, EPI\_ISL\_658608, EPI\_ISL\_658609, EPI\_ISL\_658610, EPI\_ISL\_658611, EPI\_ISL\_658612, EPI\_ISL\_658613, EPI\_ISL\_658614, EPI\_ISL\_658615, EPI\_ISL\_658616, EPI\_ISL\_658617, EPI\_ISL\_658618, EPI\_ISL\_658619, EPI\_ISL\_658620, EPI\_ISL\_658621, EPI\_ISL\_658622, EPI\_ISL\_658623, EPI\_ISL\_658624, EPI\_ISL\_658625, EPI\_ISL\_658626, EPI\_ISL\_658627, EPI\_ISL\_658628, EPI\_ISL\_658629

see above Lighthouse Lab in Cambridge Wellcome Sanger Institute for the COVID-19 Genomics UK (COG-UK) Consortium Rob Howes, The Lighthouse Lab in Cambridge and Alex Alderton, Roberto Amato, Sonia Goncalves, Ewan Harrison, David K. Jackson, Ian Johnston, Dominic Kwiatkowski, Cordelia Langford, John Sillitoe on behalf of the Wellcome Sanger Institute COVID-19 Surveillance Team

EPI\_ISL\_668313, EPI\_ISL\_668315, EPI\_ISL\_668341, EPI\_ISL\_668342, EPI\_ISL\_668355, EPI\_ISL\_668365, EPI\_ISL\_668369, EPI\_ISL\_668374 Lighthouse Lab in Cambridge Wellcome Sanger Institute for the COVID-19 Genomics UK (COG-UK) Consortium Rob Howes, The Lighthouse Lab in Cambridge and Alex Alderton, Roberto Amato, Sonia Goncalves, Ewan Harrison, David K. Jackson, Ian Johnston, Dominic Kwiatkowski, Cordelia Langford, John Sillitoe on behalf of the Wellcome Sanger Institute COVID-19 Surveillance Team (<http://www.sanger.ac.uk/covid-team>)

EPI\_ISL\_671607, EPI\_ISL\_671608, EPI\_ISL\_671609, EPI\_ISL\_671610, EPI\_ISL\_671611, EPI\_ISL\_671612, EPI\_ISL\_671613, EPI\_ISL\_671614, EPI\_ISL\_671615, EPI\_ISL\_671616, EPI\_ISL\_671617, EPI\_ISL\_671618, EPI\_ISL\_671619, EPI\_ISL\_671620, EPI\_ISL\_671621, EPI\_ISL\_671622, EPI\_ISL\_671623, EPI\_ISL\_671624, EPI\_ISL\_671625, EPI\_ISL\_671626, EPI\_ISL\_671627, EPI\_ISL\_671628, EPI\_ISL\_671629, EPI\_ISL\_671630, EPI\_ISL\_671631, EPI\_ISL\_671632, EPI\_ISL\_671633, EPI\_ISL\_671634, EPI\_ISL\_671635, EPI\_ISL\_671636, EPI\_ISL\_671637, EPI\_ISL\_671638, EPI\_ISL\_671639, EPI\_ISL\_671640, EPI\_ISL\_671641, EPI\_ISL\_671642, EPI\_ISL\_671643, EPI\_ISL\_671644, EPI\_ISL\_671645, EPI\_ISL\_671646, EPI\_ISL\_671647, EPI\_ISL\_671648, EPI\_ISL\_671649, EPI\_ISL\_671650, EPI\_ISL\_671651

see above Texas Department of State Health Services Texas Department of State Health Services Rashmi Tuladhar, Bonnie Oh, Jenny Zhang, Maliha Rahman, Anita Pokharel, Myong Koag, Chung Wang, Rachel Lee, Grace Kubin, Mayela Pedruze, James Daniel Bonser

EPI\_ISL\_671652, EPI\_ISL\_671653, EPI\_ISL\_671654, EPI\_ISL\_671655, EPI\_ISL\_671656, EPI\_ISL\_671657, EPI\_ISL\_671658, EPI\_ISL\_671659, EPI\_ISL\_671660, EPI\_ISL\_671661, EPI\_ISL\_671662, EPI\_ISL\_671663, EPI\_ISL\_671664, EPI\_ISL\_671665, EPI\_ISL\_671666, EPI\_ISL\_671667, EPI\_ISL\_671668, EPI\_ISL\_671669, EPI\_ISL\_671670, EPI\_ISL\_671671, EPI\_ISL\_671672

see above Unity Health Toronto Ontario Institute for Cancer Research Ramzi Fattouh, Larissa M. Matukas, Yan Chen, Mark Downing, Trina Otterman, Karel Boissinot, Wai Sum Siu, Zhi Cui, Le Luu, Samira Mubareka, TIBDN, Ilinca Lungu, Bernard Lam, Jeremy Johns, Paul Krzyzanowski, Richard de Borja, Felicia Vincelli, Philip Zuzarte, Jared T. Simpson

EPI\_ISL\_671974 Laboratorio de Virología y Microbiología Molecular, Depto. de Microbiología, Facultad de Medicina, Universidad de El Salvador/INS-laboratorio de Ref. Ministerio de Salud Laboratorio de Virología y Microbiología Molecular, Depto. de Microbiología, Facultad de Medicina, Universidad de El Salvador/INS-laboratorio de Ref. Ministerio de Salud Rivera NR, Ortega-Pérez C A, Xochitl Sandoval López, Carlos Hernández Ávila

EPI\_ISL\_671978 Laboratorio de Virología y Microbiología Molecular, Depto. de Microbiología, Facultad de Medicina, Universidad de El Salvador/INS-laboratorio de Ref. Ministerio de Salud Laboratorio de Virología y Microbiología Molecular, Depto. de Microbiología, Facultad de Medicina, Universidad de El Salvador/INS-laboratorio de Ref. Ministerio de Salud Rivera NR et al

EPI\_ISL\_672572 Laboratorio de Virología y Microbiología Molecular, Depto. de Microbiología, Facultad de Medicina, Universidad de El Salvador/INS-laboratorio de Ref. Ministerio de Salud. 1°: Dr. Noé Rigoberto Rivera, profesor del Departamento de Bioquímica e Investigador adjunto de la Sección de Virología y Microbiología Molecular; director de la Unidad de Investigaciones Científicas (UNICA), Facultad de Medicina Universidad de El Salvador, El Salvador C.A 1°: Dr. Carlos Alexander Ortega Pérez, Profesor del Departamento de Microbiología; investigador y Jefe de la Sección de Virología, Director Metodológico de la Unidad de Investigaciones Científicas (UNICA), Facultad de Medicina, Universidad de El Salvador, El Salvador C.A 2°: Dra. Xochitl Sandoval López: Directora e investigadora del Instituto Nacional de Salud (INS) El Salvador C.A 2° Dr. Hernandez Avila Carlos E Director de Gobernanza e investigador del Instituto Nacional de Salud (INS) El Salvador C.A

EPI\_ISL\_672573 Laboratorio de Virología y Microbiología Molecular, Depto. de Microbiología, Facultad de Medicina, Universidad de El Salvador/INS-laboratorio de Ref. Ministerio de Salud. 1°: Dr. Noé Rigoberto Rivera, profesor del Departamento de Bioquímica e Investigador adjunto de la Sección de Virología y Microbiología Molecular;director de la Unidad de Investigaciones Científicas (UNICA), Facultad de Medicina Universidad de El Salvador, El Salvador C.A 1°: Dr. Carlos Alexander Ortega Pérez, Profesor del Departamento de Microbiología; investigador y Jefe de la Sección de Virología, Director Metodológico de la Unidad de Investigaciones Científicas(UNICA), Facultad de Medicina, Universidad de El Salvador, El Salvador C.A 2°: Dra. Xochitl Sandoval López:Directora e investigadora del Instituto Nacional de Salud (INS) El Salvador C.A 2° Dr. Hernandez Avila Carlos E Director de Gobernanza e investigador del Instituto Nacional de Salud (INS) El Salvador C.A

EPI\_ISL\_672912, EPI\_ISL\_672919, EPI\_ISL\_672921, EPI\_ISL\_672923, EPI\_ISL\_672926, EPI\_ISL\_672927, EPI\_ISL\_672928, EPI\_ISL\_672938, EPI\_ISL\_672940, EPI\_ISL\_672947, EPI\_ISL\_672950, EPI\_ISL\_672954, EPI\_ISL\_672957, EPI\_ISL\_672960, EPI\_ISL\_672966, EPI\_ISL\_672967, EPI\_ISL\_672970, EPI\_ISL\_672972,









EPI\_ISL\_879312, EPI\_ISL\_879317, EPI\_ISL\_879325, EPI\_ISL\_879352, EPI\_ISL\_879355, EPI\_ISL\_879364, EPI\_ISL\_879365, EPI\_ISL\_879368, EPI\_ISL\_879370, EPI\_ISL\_879376, EPI\_ISL\_879381, EPI\_ISL\_879385, EPI\_ISL\_879391, EPI\_ISL\_879407, EPI\_ISL\_879408, EPI\_ISL\_879410, EPI\_ISL\_879421, EPI\_ISL\_879422, EPI\_ISL\_879423, EPI\_ISL\_879428, EPI\_ISL\_879437, EPI\_ISL\_879438, EPI\_ISL\_879441, EPI\_ISL\_879454, EPI\_ISL\_879465, EPI\_ISL\_879470, EPI\_ISL\_879484, EPI\_ISL\_879488, EPI\_ISL\_879489, EPI\_ISL\_879491, EPI\_ISL\_879498, EPI\_ISL\_879530, EPI\_ISL\_879536, EPI\_ISL\_879537, EPI\_ISL\_879541, EPI\_ISL\_879544, EPI\_ISL\_879545, EPI\_ISL\_879558, EPI\_ISL\_879567, EPI\_ISL\_879574, EPI\_ISL\_879580, EPI\_ISL\_879595, EPI\_ISL\_879606, EPI\_ISL\_879607, EPI\_ISL\_879620, EPI\_ISL\_879622, EPI\_ISL\_879634, EPI\_ISL\_879636, EPI\_ISL\_879639, EPI\_ISL\_879640, EPI\_ISL\_879644, EPI\_ISL\_879648, EPI\_ISL\_879660, EPI\_ISL\_879661, EPI\_ISL\_879667, EPI\_ISL\_879670, EPI\_ISL\_879673, EPI\_ISL\_879676, EPI\_ISL\_879680, EPI\_ISL\_879684, EPI\_ISL\_879690, EPI\_ISL\_879691, EPI\_ISL\_879696, EPI\_ISL\_879705, EPI\_ISL\_879706, EPI\_ISL\_879709, EPI\_ISL\_879716, EPI\_ISL\_879724, EPI\_ISL\_879725, EPI\_ISL\_879731, EPI\_ISL\_879734, EPI\_ISL\_879738, EPI\_ISL\_879746, EPI\_ISL\_879749, EPI\_ISL\_879754, EPI\_ISL\_879764, EPI\_ISL\_879774, EPI\_ISL\_879786, EPI\_ISL\_879788, EPI\_ISL\_879790, EPI\_ISL\_879799, EPI\_ISL\_879805, EPI\_ISL\_879823, EPI\_ISL\_879824, EPI\_ISL\_879852, EPI\_ISL\_879853, EPI\_ISL\_879861, EPI\_ISL\_879890, EPI\_ISL\_879902, EPI\_ISL\_879909, EPI\_ISL\_879910, EPI\_ISL\_879917, EPI\_ISL\_879935, EPI\_ISL\_879940, EPI\_ISL\_879941, EPI\_ISL\_879944, EPI\_ISL\_879951, EPI\_ISL\_879958, EPI\_ISL\_879962, EPI\_ISL\_879989, EPI\_ISL\_879992, EPI\_ISL\_880001, EPI\_ISL\_880035, EPI\_ISL\_880038, EPI\_ISL\_880039, EPI\_ISL\_880054, EPI\_ISL\_880059, EPI\_ISL\_880076, EPI\_ISL\_880081

see above

Lighthouse Lab in Cambridge

Wellcome Sanger Institute for the COVID-19 Genomics UK (COG-UK) Consortium

Rob Howes, The Lighthouse Lab in Cambridge and Alex Alderton, Roberto Amato, Sonia Goncalves, Ewan Harrison, David K. Jackson, Ian Johnston, Dominic Kwiatkowski, Cordelia Langford, John Sillitoe on behalf of the Wellcome Sanger Institute COVID-19 Surveillance Team

EPI\_ISL\_884291, EPI\_ISL\_884292, EPI\_ISL\_884293

Clinical Molecular Microbiology Laboratory, UNC Hospital

Dirk Dittmer

Razia Moorad , Justin T. Landis , Brent A. Eason, Melissa B. Miller, Linda Pluta, Dirk Dittmer, Angelica Juarez, Cecilia Thompson , Cameroon Grant, Evelyn Hoffman, Patricio Cano, Jason Wong, Carolina Caro-Vegas, Blossom Damania.

EPI\_ISL\_884857, EPI\_ISL\_884858, EPI\_ISL\_884859, EPI\_ISL\_884860, EPI\_ISL\_884861, EPI\_ISL\_884862, EPI\_ISL\_884863

Bacteriology, Georgia Public Health Laboratory (GPHL)

Bacteriology, Georgia Public Health Laboratory (GPHL)

Reeves,S., Edwards,J., Dixey,C., Parroti,T.

EPI\_ISL\_888593

Siti Khodijah Hospital

Institute of Tropical Disease, Universitas Airlangga

Rima R Prasetya, Krisnoadi Rahardjo, Aldise M Nastri, Jezy R Dewantari, Muhammad Hamdan, Gatot Soegiarto, Laksmi Wulandari, Resti Yudhawati, Soetjipto, Yasuko Mori, Kazufumi Shimizu, Maria I Lusida























EPI\_ISL\_879402, EPI\_ISL\_879403, EPI\_ISL\_879405, EPI\_ISL\_879406, EPI\_ISL\_879411, EPI\_ISL\_879414, EPI\_ISL\_879419, EPI\_ISL\_879430, EPI\_ISL\_879431, EPI\_ISL\_879432, EPI\_ISL\_879436, EPI\_ISL\_879439, EPI\_ISL\_879440, EPI\_ISL\_879443, EPI\_ISL\_879445, EPI\_ISL\_879447, EPI\_ISL\_879453, EPI\_ISL\_879468, EPI\_ISL\_879469, EPI\_ISL\_879472, EPI\_ISL\_879474, EPI\_ISL\_879478, EPI\_ISL\_879481, EPI\_ISL\_879482, EPI\_ISL\_879485, EPI\_ISL\_879490, EPI\_ISL\_879494, EPI\_ISL\_879496, EPI\_ISL\_879500, EPI\_ISL\_879503, EPI\_ISL\_879506, EPI\_ISL\_879507, EPI\_ISL\_879508, EPI\_ISL\_879509, EPI\_ISL\_879511, EPI\_ISL\_879512, EPI\_ISL\_879513, EPI\_ISL\_879516, EPI\_ISL\_879517, EPI\_ISL\_879521, EPI\_ISL\_879523, EPI\_ISL\_879525, EPI\_ISL\_879527, EPI\_ISL\_879528, EPI\_ISL\_879529, EPI\_ISL\_879531, EPI\_ISL\_879533, EPI\_ISL\_879543, EPI\_ISL\_879551, EPI\_ISL\_879555, EPI\_ISL\_879557, EPI\_ISL\_879559, EPI\_ISL\_879562, EPI\_ISL\_879568, EPI\_ISL\_879569, EPI\_ISL\_879570, EPI\_ISL\_879573, EPI\_ISL\_879577, EPI\_ISL\_879579, EPI\_ISL\_879583, EPI\_ISL\_879584, EPI\_ISL\_879587, EPI\_ISL\_879588, EPI\_ISL\_879590, EPI\_ISL\_879598, EPI\_ISL\_879605, EPI\_ISL\_879609, EPI\_ISL\_879610, EPI\_ISL\_879612, EPI\_ISL\_879615, EPI\_ISL\_879624, EPI\_ISL\_879625, EPI\_ISL\_879626, EPI\_ISL\_879630, EPI\_ISL\_879632, EPI\_ISL\_879633, EPI\_ISL\_879635, EPI\_ISL\_879637, EPI\_ISL\_879638, EPI\_ISL\_879645, EPI\_ISL\_879650, EPI\_ISL\_879651, EPI\_ISL\_879652, EPI\_ISL\_879657, EPI\_ISL\_879658, EPI\_ISL\_879659, EPI\_ISL\_879662, EPI\_ISL\_879668, EPI\_ISL\_879669, EPI\_ISL\_879671, EPI\_ISL\_879677, EPI\_ISL\_879685, EPI\_ISL\_879688, EPI\_ISL\_879694, EPI\_ISL\_879697, EPI\_ISL\_879699, EPI\_ISL\_879701, EPI\_ISL\_879704, EPI\_ISL\_879708, EPI\_ISL\_879720, EPI\_ISL\_879722, EPI\_ISL\_879723, EPI\_ISL\_879727, EPI\_ISL\_879729, EPI\_ISL\_879730, EPI\_ISL\_879732, EPI\_ISL\_879733, EPI\_ISL\_879735, EPI\_ISL\_879739, EPI\_ISL\_879741, EPI\_ISL\_879743, EPI\_ISL\_879745, EPI\_ISL\_879763, EPI\_ISL\_879769, EPI\_ISL\_879770, EPI\_ISL\_879771, EPI\_ISL\_879772, EPI\_ISL\_879773, EPI\_ISL\_879776, EPI\_ISL\_879777, EPI\_ISL\_879779, EPI\_ISL\_879782, EPI\_ISL\_879795, EPI\_ISL\_879796, EPI\_ISL\_879797, EPI\_ISL\_879798, EPI\_ISL\_879804, EPI\_ISL\_879807, EPI\_ISL\_879809, EPI\_ISL\_879812, EPI\_ISL\_879815, EPI\_ISL\_879816, EPI\_ISL\_879818, EPI\_ISL\_879820, EPI\_ISL\_879828, EPI\_ISL\_879830, EPI\_ISL\_879832, EPI\_ISL\_879833, EPI\_ISL\_879834, EPI\_ISL\_879835, EPI\_ISL\_879839, EPI\_ISL\_879840, EPI\_ISL\_879845, EPI\_ISL\_879847, EPI\_ISL\_879848, EPI\_ISL\_879850, EPI\_ISL\_879857, EPI\_ISL\_879860, EPI\_ISL\_879862, EPI\_ISL\_879864, EPI\_ISL\_879867, EPI\_ISL\_879874, EPI\_ISL\_879876, EPI\_ISL\_879877, EPI\_ISL\_879880, EPI\_ISL\_879881, EPI\_ISL\_879883, EPI\_ISL\_879889, EPI\_ISL\_879891, EPI\_ISL\_879892, EPI\_ISL\_879893, EPI\_ISL\_879896, EPI\_ISL\_879899, EPI\_ISL\_879900, EPI\_ISL\_879908, EPI\_ISL\_879911, EPI\_ISL\_879920, EPI\_ISL\_879921, EPI\_ISL\_879928, EPI\_ISL\_879930, EPI\_ISL\_879943, EPI\_ISL\_879946, EPI\_ISL\_879952, EPI\_ISL\_879954, EPI\_ISL\_879960, EPI\_ISL\_879963, EPI\_ISL\_879973, EPI\_ISL\_879983, EPI\_ISL\_879994, EPI\_ISL\_879996, EPI\_ISL\_880004, EPI\_ISL\_880005, EPI\_ISL\_880012, EPI\_ISL\_880013, EPI\_ISL\_880015, EPI\_ISL\_880020, EPI\_ISL\_880025, EPI\_ISL\_880026, EPI\_ISL\_880033, EPI\_ISL\_880046, EPI\_ISL\_880047, EPI\_ISL\_880049, EPI\_ISL\_880051, EPI\_ISL\_880060, EPI\_ISL\_880065, EPI\_ISL\_880068, EPI\_ISL\_880070, EPI\_ISL\_880073, EPI\_ISL\_880075, EPI\_ISL\_880078, EPI\_ISL\_880080, EPI\_ISL\_881620, EPI\_ISL\_881622

see above

Lighthouse Lab in Cambridge

Wellcome Sanger Institute for the COVID-19 Genomics UK  
(COG-UK) Consortium

Rob Howes, The Lighthouse Lab in Cambridge and Alex Alderton, Roberto Amato, Sonia Goncalves, Ewan Harrison, David K. Jackson, Ian Johnston,  
Dominic Kwiatkowski, Cordelia Langford, John Sillitoe on behalf of the Wellcome Sanger Institute COVID-19 Surveillance Team

We gratefully acknowledge the following Authors from the Originating laboratories responsible for obtaining the specimens, as well as the Submitting laboratories where the genome data were generated and shared via GISAID, on which this research is based.

All Submitters of data may be contacted directly via [www.gisaid.org](http://www.gisaid.org)

Authors are sorted alphabetically.

| Accession ID                                                                                                                                                                                                                                                                                                                                                                                                                                                                                                                                                                                                                                                                                                                                                                                                                                                                                                                                                                                                                                                                                                                                                                                                                                                                                                                                                                                                                                                                                                                                                                                                                                                                                                                                                                                                                                                                                                                   | Originating Laboratory                                              | Submitting Laboratory                                                                                                | Authors                                                                                                                                                                                                                                                                                                                                                    |                                                                                                                                                                                                                                                                                                                                                                           |
|--------------------------------------------------------------------------------------------------------------------------------------------------------------------------------------------------------------------------------------------------------------------------------------------------------------------------------------------------------------------------------------------------------------------------------------------------------------------------------------------------------------------------------------------------------------------------------------------------------------------------------------------------------------------------------------------------------------------------------------------------------------------------------------------------------------------------------------------------------------------------------------------------------------------------------------------------------------------------------------------------------------------------------------------------------------------------------------------------------------------------------------------------------------------------------------------------------------------------------------------------------------------------------------------------------------------------------------------------------------------------------------------------------------------------------------------------------------------------------------------------------------------------------------------------------------------------------------------------------------------------------------------------------------------------------------------------------------------------------------------------------------------------------------------------------------------------------------------------------------------------------------------------------------------------------|---------------------------------------------------------------------|----------------------------------------------------------------------------------------------------------------------|------------------------------------------------------------------------------------------------------------------------------------------------------------------------------------------------------------------------------------------------------------------------------------------------------------------------------------------------------------|---------------------------------------------------------------------------------------------------------------------------------------------------------------------------------------------------------------------------------------------------------------------------------------------------------------------------------------------------------------------------|
| EPI_ISL_408976                                                                                                                                                                                                                                                                                                                                                                                                                                                                                                                                                                                                                                                                                                                                                                                                                                                                                                                                                                                                                                                                                                                                                                                                                                                                                                                                                                                                                                                                                                                                                                                                                                                                                                                                                                                                                                                                                                                 | Centre for Infectious Diseases and Microbiology Laboratory Services | NSW Health Pathology - Institute of Clinical Pathology and Medical Research; Westmead Hospital; University of Sydney | Rockett R, Sadsad R, Eden J-S, Carter I, Rahman H, Holmes EC, O'Sullivan MV, Sintchenko V, Chen SC, Maddocks S, Kok J and Dwyer DE for the 2019-nCoV Study Group*                                                                                                                                                                                          |                                                                                                                                                                                                                                                                                                                                                                           |
| EPI_ISL_413594                                                                                                                                                                                                                                                                                                                                                                                                                                                                                                                                                                                                                                                                                                                                                                                                                                                                                                                                                                                                                                                                                                                                                                                                                                                                                                                                                                                                                                                                                                                                                                                                                                                                                                                                                                                                                                                                                                                 | Centre for Infectious Diseases and Microbiology Laboratory Services | NSW Health Pathology - Institute of Clinical Pathology and Medical Research; Westmead Hospital; University of Sydney | Rockett R, Eden J-S, Lam C, Gray K, Timms, V, Gall, M, Alicia, A, Carter I, Rahman H, Holmes EC, , O'Sullivan MV, Sintchenko V, Chen SC, Maddocks S, Kok J and Dwyer DE for the 2019-nCoV Study Group*                                                                                                                                                     |                                                                                                                                                                                                                                                                                                                                                                           |
| EPI_ISL_413595                                                                                                                                                                                                                                                                                                                                                                                                                                                                                                                                                                                                                                                                                                                                                                                                                                                                                                                                                                                                                                                                                                                                                                                                                                                                                                                                                                                                                                                                                                                                                                                                                                                                                                                                                                                                                                                                                                                 | Centre for Infectious Diseases and Microbiology Laboratory Services | NSW Health Pathology - Institute of Clinical Pathology and Medical Research; Westmead Hospital; University of Sydney | Rockett R, Eden J-S, Lam C, Gray K, Timms, V, Gall, M, Carter I, Rahman H, Holmes EC, O'Sullivan MV, Sintchenko V, Chen SC, Maddocks S, Kok J and Dwyer DE for the 2019-nCoV Study Group*                                                                                                                                                                  |                                                                                                                                                                                                                                                                                                                                                                           |
| EPI_ISL_413596                                                                                                                                                                                                                                                                                                                                                                                                                                                                                                                                                                                                                                                                                                                                                                                                                                                                                                                                                                                                                                                                                                                                                                                                                                                                                                                                                                                                                                                                                                                                                                                                                                                                                                                                                                                                                                                                                                                 | Centre for Infectious Diseases and Microbiology - Public Health     | NSW Health Pathology - Institute of Clinical Pathology and Medical Research; Westmead Hospital; University of Sydney | Rockett R, Eden J-S, Lam C, Gray K, Timms, V, Gall, M, Carter I, Rahman H, Holmes EC, O'Sullivan MV, Sintchenko V, Chen SC, Maddocks S, Kok J and Dwyer DE for the 2019-nCoV Study Group*                                                                                                                                                                  |                                                                                                                                                                                                                                                                                                                                                                           |
| EPI_ISL_417383, EPI_ISL_417400                                                                                                                                                                                                                                                                                                                                                                                                                                                                                                                                                                                                                                                                                                                                                                                                                                                                                                                                                                                                                                                                                                                                                                                                                                                                                                                                                                                                                                                                                                                                                                                                                                                                                                                                                                                                                                                                                                 | Centre for Infectious Diseases and Microbiology Public Health       | NSW Health Pathology - Institute of Clinical Pathology and Medical Research; Westmead Hospital; University of Sydney | Rockett R, Eden J-S, Lam C, Gray K, Timms V, Gall M, Arnott A, Sadsad R, Carter I, Rahman H, Holmes EC, O'Sullivan MV, Sintchenko V, Chen SC, Maddocks S, Kok J and Dwyer DE for the 2019-nCoV Study Group                                                                                                                                                 |                                                                                                                                                                                                                                                                                                                                                                           |
| EPI_ISL_427644, EPI_ISL_427653, EPI_ISL_427657, EPI_ISL_427660, EPI_ISL_427681                                                                                                                                                                                                                                                                                                                                                                                                                                                                                                                                                                                                                                                                                                                                                                                                                                                                                                                                                                                                                                                                                                                                                                                                                                                                                                                                                                                                                                                                                                                                                                                                                                                                                                                                                                                                                                                 | Centre for Infectious Diseases and Microbiology Public Health       | NSW Health Pathology - Institute of Clinical Pathology and Medical Research; Westmead Hospital; University of Sydney | Rockett R, Lam C, Gray K, Timms V, Gall M, Arnott A, Sadsad R, Draper J, Sim E, Bachmann N, Carter I, Holmes EC, O'Sullivan MV, Byun R, Sintchenko V, Chen SC, Eden JS, Maddocks S, Kok J, Propenko M, Sorrell T, Chang S, Basile K, Dwyer DE for the 2019-nCoV Study Group                                                                                |                                                                                                                                                                                                                                                                                                                                                                           |
| EPI_ISL_427711                                                                                                                                                                                                                                                                                                                                                                                                                                                                                                                                                                                                                                                                                                                                                                                                                                                                                                                                                                                                                                                                                                                                                                                                                                                                                                                                                                                                                                                                                                                                                                                                                                                                                                                                                                                                                                                                                                                 | ACT Pathology, The Canberra Hospital                                | NSW Health Pathology - Institute of Clinical Pathology and Medical Research; Westmead Hospital; University of Sydney | Rockett R, Lam C, Gray K, Timms V, Gall M, Arnott A, Sadsad R, Draper J, Sim E, Bachmann N, Carter I, Holmes EC, O'Sullivan MV, Byun R, Sintchenko V, Chen SC, Eden JS, Maddocks S, Kok J, Propenko M, Sorrell T, Chang S, Basile K, Dwyer DE for the 2019-nCoV Study Group                                                                                |                                                                                                                                                                                                                                                                                                                                                                           |
| EPI_ISL_427714, EPI_ISL_427726, EPI_ISL_427728, EPI_ISL_427737, EPI_ISL_427750, EPI_ISL_427765, EPI_ISL_427780, EPI_ISL_427789, EPI_ISL_427791, EPI_ISL_427798, EPI_ISL_427801                                                                                                                                                                                                                                                                                                                                                                                                                                                                                                                                                                                                                                                                                                                                                                                                                                                                                                                                                                                                                                                                                                                                                                                                                                                                                                                                                                                                                                                                                                                                                                                                                                                                                                                                                 | see above                                                           | Centre for Infectious Diseases and Microbiology Public Health                                                        | Rockett R, Lam C, Gray K, Timms V, Gall M, Arnott A, Sadsad R, Draper J, Sim E, Bachmann N, Carter I, Holmes EC, O'Sullivan MV, Byun R, Sintchenko V, Chen SC, Eden JS, Maddocks S, Kok J, Propenko M, Sorrell T, Chang S, Basile K, Dwyer DE for the 2019-nCoV Study Group                                                                                |                                                                                                                                                                                                                                                                                                                                                                           |
| EPI_ISL_434715, EPI_ISL_434717, EPI_ISL_434718, EPI_ISL_434720, EPI_ISL_434721, EPI_ISL_434722, EPI_ISL_434726, EPI_ISL_434728, EPI_ISL_434729, EPI_ISL_434731, EPI_ISL_434735, EPI_ISL_434738, EPI_ISL_434739, EPI_ISL_434743, EPI_ISL_434744, EPI_ISL_434745, EPI_ISL_434748, EPI_ISL_434749, EPI_ISL_434750, EPI_ISL_434754, EPI_ISL_434763, EPI_ISL_434770, EPI_ISL_434773, EPI_ISL_434774, EPI_ISL_434775, EPI_ISL_434776, EPI_ISL_434777, EPI_ISL_434778, EPI_ISL_434787, EPI_ISL_434788, EPI_ISL_434789, EPI_ISL_434790, EPI_ISL_434792, EPI_ISL_434798, EPI_ISL_434801, EPI_ISL_434802, EPI_ISL_434803, EPI_ISL_434804, EPI_ISL_434808, EPI_ISL_434809, EPI_ISL_434810, EPI_ISL_434811, EPI_ISL_434812, EPI_ISL_434816, EPI_ISL_434819, EPI_ISL_434820, EPI_ISL_434822, EPI_ISL_434830, EPI_ISL_434832, EPI_ISL_434837, EPI_ISL_434838, EPI_ISL_434841, EPI_ISL_434844, EPI_ISL_434846, EPI_ISL_434847, EPI_ISL_434864, EPI_ISL_434866, EPI_ISL_434872, EPI_ISL_434873, EPI_ISL_434875, EPI_ISL_434877, EPI_ISL_434881, EPI_ISL_434882, EPI_ISL_434883, EPI_ISL_434887, EPI_ISL_434892, EPI_ISL_434893, EPI_ISL_434894, EPI_ISL_434899, EPI_ISL_434901, EPI_ISL_434903, EPI_ISL_434904, EPI_ISL_434906, EPI_ISL_434919, EPI_ISL_434921, EPI_ISL_434923, EPI_ISL_434927, EPI_ISL_434928, EPI_ISL_434931, EPI_ISL_434934, EPI_ISL_434937, EPI_ISL_434940, EPI_ISL_434942, EPI_ISL_434944, EPI_ISL_434949, EPI_ISL_434952, EPI_ISL_434953, EPI_ISL_434956, EPI_ISL_434957, EPI_ISL_434959, EPI_ISL_434963, EPI_ISL_434964, EPI_ISL_434966, EPI_ISL_434967, EPI_ISL_434971, EPI_ISL_434972, EPI_ISL_434974, EPI_ISL_434980, EPI_ISL_434982, EPI_ISL_434984, EPI_ISL_434987, EPI_ISL_434988, EPI_ISL_434991, EPI_ISL_434994, EPI_ISL_435003, EPI_ISL_435007, EPI_ISL_435010, EPI_ISL_435013, EPI_ISL_435019, EPI_ISL_435020, EPI_ISL_435021, EPI_ISL_435023, EPI_ISL_435024, EPI_ISL_435025, EPI_ISL_435027, EPI_ISL_435030 | see above                                                           | Houston Methodist Hospital                                                                                           | S. Wesley Long, Randall J. Olsen, Paul A. Christensen, David W. Bernard, James J. Davis, Maulik Shukla, Marcus Nguyen, Matthew Ojeda Saavedra, Concepcion C. Cantu, Prasanti Yerramilli, Layne Pruitt, Sishir Subedi, Heather Hendrickson, Ghazaleh Eskandari, Muhiyah Kumaraswami, Jason S. McLellan, Hakon Jonsson, Karl Stefansson, and James M. Musser |                                                                                                                                                                                                                                                                                                                                                                           |
| EPI_ISL_435550, EPI_ISL_435551, EPI_ISL_435552, EPI_ISL_435553, EPI_ISL_435554                                                                                                                                                                                                                                                                                                                                                                                                                                                                                                                                                                                                                                                                                                                                                                                                                                                                                                                                                                                                                                                                                                                                                                                                                                                                                                                                                                                                                                                                                                                                                                                                                                                                                                                                                                                                                                                 | see above                                                           | LSUHS Emerging Viral Threat Laboratory                                                                               | Microbial Genome Sequencing Center                                                                                                                                                                                                                                                                                                                         | Rona S. Scott, Jeremy P. Kamil, John A. Vanchiere, Camille F. Abshire, Abida Siddiqi, Byeong-Jae Lee, Chan-ki Min, Md Maksudul Alam, Monica Gestal-Carteles, Edna Ondari, Adam Greer, Malgorzata Bienkowska-Haba, Katarzyna Zwolinska, Jason M. Bodily, Andrew D. Yurochko, Paul M. Weinberger, Christopher G. Kevill, Martin J. Sapp, Daniel J. Snyder, Vaughn S. Cooper |
| EPI_ISL_437602, EPI_ISL_437603, EPI_ISL_437604, EPI_ISL_437605, EPI_ISL_437606, EPI_ISL_437607, EPI_ISL_437608, EPI_ISL_437609, EPI_ISL_437610, EPI_ISL_437611, EPI_ISL_437612, EPI_ISL_437613, EPI_ISL_437614, EPI_ISL_437615, EPI_ISL_437616, EPI_ISL_437617, EPI_ISL_437618, EPI_ISL_437619, EPI_ISL_437620, EPI_ISL_437621, EPI_ISL_437622, EPI_ISL_437623, EPI_ISL_437624                                                                                                                                                                                                                                                                                                                                                                                                                                                                                                                                                                                                                                                                                                                                                                                                                                                                                                                                                                                                                                                                                                                                                                                                                                                                                                                                                                                                                                                                                                                                                 | see above                                                           | unknown                                                                                                              | Faculty of Medicine                                                                                                                                                                                                                                                                                                                                        | Rodpan.A., Joyjinda.Y., Wacharaplusadee.S., Buathong.R., Ghai.S., Petcharat.S., Bunprakob.S., Sirichan.N., Prasithsirikul.W., Mungaomklang.A., Pliapat.T. and Hemachudha.T.                                                                                                                                                                                               |
| EPI_ISL_447654, EPI_ISL_447655, EPI_ISL_447657, EPI_ISL_447658, EPI_ISL_447659, EPI_ISL_447660, EPI_ISL_447661, EPI_ISL_447662, EPI_ISL_447663, EPI_ISL_447664, EPI_ISL_447665, EPI_ISL_447666, EPI_ISL_447667, EPI_ISL_447668, EPI_ISL_447669, EPI_ISL_447670, EPI_ISL_447671, EPI_ISL_447672, EPI_ISL_447673, EPI_ISL_447674, EPI_ISL_447675, EPI_ISL_447676, EPI_ISL_447677, EPI_ISL_447678, EPI_ISL_447679, EPI_ISL_447680, EPI_ISL_447681, EPI_ISL_447682, EPI_ISL_447683, EPI_ISL_447684, EPI_ISL_447685, EPI_ISL_447686, EPI_ISL_447687, EPI_ISL_447688, EPI_ISL_447689, EPI_ISL_447691, EPI_ISL_447692, EPI_ISL_447693, EPI_ISL_447694, EPI_ISL_447695, EPI_ISL_447696, EPI_ISL_447697, EPI_ISL_447698, EPI_ISL_447699, EPI_ISL_447700, EPI_ISL_447701, EPI_ISL_447702, EPI_ISL_447703, EPI_ISL_447704, EPI_ISL_447705, EPI_ISL_447706, EPI_ISL_447707, EPI_ISL_447708, EPI_ISL_447709, EPI_ISL_447710, EPI_ISL_447711, EPI_ISL_447712, EPI_ISL_447713, EPI_ISL_447714, EPI_ISL_447715, EPI_ISL_447716, EPI_ISL_447717, EPI_ISL_447718, EPI_ISL_447719, EPI_ISL_447720, EPI_ISL_447721, EPI_ISL_447722, EPI_ISL_447723, EPI_ISL_447724, EPI_ISL_447725, EPI_ISL_447726, EPI_ISL_447727, EPI_ISL_447728, EPI_ISL_447729, EPI_ISL_447730, EPI_ISL_447731, EPI_ISL_447732, EPI_ISL_447733                                                                                                                                                                                                                                                                                                                                                                                                                                                                                                                                                                                                                                 | see above                                                           | Hôpital Henri-Mondor Ap-Hp                                                                                           | Hôpital Henri-Mondor Ap-Hp                                                                                                                                                                                                                                                                                                                                 | Rodriguez.C., De Prost.N., Fourati.S., Lamoureux.C., Schmitz.D., Deveaux.I., Picard.O., Lepule.R., Surgers.L., Mekontso-Dessap.A., Woerther.P.-L., Canoui-Poitrine.F., Pawlotsky.J.-M., Clinical Study Group.C., Gricourt.G., N'debi.M., Demontant.V., Trawinski.E.                                                                                                       |
| EPI_ISL_451219, EPI_ISL_451220, EPI_ISL_451221, EPI_ISL_451222, EPI_ISL_451223, EPI_ISL_451224, EPI_ISL_451225, EPI_ISL_451226, EPI_ISL_451227, EPI_ISL_451228, EPI_ISL_451229                                                                                                                                                                                                                                                                                                                                                                                                                                                                                                                                                                                                                                                                                                                                                                                                                                                                                                                                                                                                                                                                                                                                                                                                                                                                                                                                                                                                                                                                                                                                                                                                                                                                                                                                                 | see above                                                           | LSUHS Emerging Viral                                                                                                 | Microbial Genome                                                                                                                                                                                                                                                                                                                                           | Rona S. Scott, Jeremy P. Kamil, John A. Vanchiere, Camille F. Abshire, Abida Siddiqi, Byeong-Jae Lee, Chan-ki Min, Md Maksudul Alam, Monica Gestal-Carteles, Edna Ondari, Adam Greer, Malgorzata Bienkowska-Haba, Katarzyna Zwolinska, Jason                                                                                                                              |

|                                                                                                                                                                                                                                                                                                                                                                                                                                                                                                                                                                                                                                                                                                                                                                                                                                                                                | Threat Laboratory                                                         | Sequencing Center                                                                                 | M. Bodily, Andrew D. Yurochko, Paul M. Weinberger, Christopher G. Kevil, Martin J. Sapp, Daniel J. Snyder, Vaughn S. Cooper                                                                                                                                                                                                                                                                   |
|--------------------------------------------------------------------------------------------------------------------------------------------------------------------------------------------------------------------------------------------------------------------------------------------------------------------------------------------------------------------------------------------------------------------------------------------------------------------------------------------------------------------------------------------------------------------------------------------------------------------------------------------------------------------------------------------------------------------------------------------------------------------------------------------------------------------------------------------------------------------------------|---------------------------------------------------------------------------|---------------------------------------------------------------------------------------------------|-----------------------------------------------------------------------------------------------------------------------------------------------------------------------------------------------------------------------------------------------------------------------------------------------------------------------------------------------------------------------------------------------|
| EPI_ISL_455455                                                                                                                                                                                                                                                                                                                                                                                                                                                                                                                                                                                                                                                                                                                                                                                                                                                                 | Instituto de Diagnostico y Referencia Epidemiologicos (INDRE)             | Instituto de Diagnostico y Referencia Epidemiologicos (INDRE)                                     | Rodriguez-Maldonado Abril, Mendieta-Condado Edgar, Araiza-Rodriguez Adnan, Garces-Ayala Fabiola. Taboada Ramirez Blanca. Ramirez-Gonzalez Ernesto, Barrera-Badillo Gisela, Hernandez-Rivas Lucia, Lopez-Martinez Irma, Wong-Arambula Claudia.                                                                                                                                                 |
| EPI_ISL_455456                                                                                                                                                                                                                                                                                                                                                                                                                                                                                                                                                                                                                                                                                                                                                                                                                                                                 | Instituto de Diagnostico y Referencia Epidemiologicos (INDRE)             | Instituto de Diagnostico y Referencia Epidemiologicos (INDRE)                                     | Rodriguez-Maldonado Abril, Mendieta-Condado Edgar, Araiza-Rodriguez Adnan, Garces-Ayala Fabiola. Taboada Ramirez Blanca. Ramirez-Gonzalez Ernesto, Barrera-Badillo Gisela, Hernandez-Rivas Lucia, Lopez-Martinez Irma, Wong-Arambula Claudia.                                                                                                                                                 |
| EPI_ISL_456000, EPI_ISL_456001, EPI_ISL_456002                                                                                                                                                                                                                                                                                                                                                                                                                                                                                                                                                                                                                                                                                                                                                                                                                                 | LSUHS Emerging Viral Threat Laboratory                                    | Microbial Genome Sequencing Center                                                                | Rona S. Scott, Jeremy P. Kamil, John A. Vanchiere, Camille F. Abshire, Abida Siddiqui, Byeong-Jae Lee, Chan-ki Min, Md Maksudul Alam, Monica Gestal-Carteles, Edna Ondari, Adam Greer, Malgorzata Bienkowska-Haba, Katarzyna Zwolinska, Michelle M. Arnold, Jason M. Bodily, Andrew D. Yurochko, Paul M. Weinberger, Christopher G. Kevil, Martin J. Sapp, Daniel J. Snyder, Vaughn S. Cooper |
| EPI_ISL_468063, EPI_ISL_468064, EPI_ISL_468065                                                                                                                                                                                                                                                                                                                                                                                                                                                                                                                                                                                                                                                                                                                                                                                                                                 | unknown                                                                   | Computer Science and Engineering                                                                  | Rouchka,E.C., Chariker,J.H., Chung,D., Ramirez,J., Palmer,K.E., Lasnik,A.B., Carrico,R., Arnold,F.W., Adcock,R.S., Zhang,M., Alejandro,B., Wolf,L.A., Hwang,J.Y., Park,J.W., Waigel,S., Zacharias,W.                                                                                                                                                                                          |
| EPI_ISL_476561                                                                                                                                                                                                                                                                                                                                                                                                                                                                                                                                                                                                                                                                                                                                                                                                                                                                 | Hospital Garrahan                                                         | Héritas                                                                                           | Roberta Crespo, Dalmacio Pereyra, Mauricio Grisolia, Cristian Rohr, Andrea Mangano, Maria Florencia Fernandez, Fabian Fay, Martin Vazquez                                                                                                                                                                                                                                                     |
| EPI_ISL_479663, EPI_ISL_479664, EPI_ISL_479665, EPI_ISL_479666, EPI_ISL_479667, EPI_ISL_479668, EPI_ISL_479669, EPI_ISL_479670, EPI_ISL_479671, EPI_ISL_479672, EPI_ISL_479673, EPI_ISL_479674, EPI_ISL_479675                                                                                                                                                                                                                                                                                                                                                                                                                                                                                                                                                                                                                                                                 | see above                                                                 | Center for Genomics and System Biology, New York University                                       | Roder,A., Banakis,S., Johnson,K., Khalfan,M., Borenstein,E.S., Samanovic,M., Cornelius,A., Herati,R., Ulrich,R., Fleming,A., Kottkamp,A., Raabe,V., Mulligan,M.J., Gresham,D., Ghedin,E.                                                                                                                                                                                                      |
| EPI_ISL_481283                                                                                                                                                                                                                                                                                                                                                                                                                                                                                                                                                                                                                                                                                                                                                                                                                                                                 | Center for Genomics and System Biology, New York University               | Center for Genomics and System Biology, New York University                                       | Roder,A., Banakis,S., Johnson,K., Khalfan,M., Borenstein,E.S., Samanovic,M., Cornelius,A., Herati,R., Ulrich,R., Fleming,A., Kottkamp,A., Raabe,V., Mulligan,M.J., Gresham,D. and Ghedin,E.                                                                                                                                                                                                   |
| EPI_ISL_486650, EPI_ISL_486654, EPI_ISL_486658, EPI_ISL_486661                                                                                                                                                                                                                                                                                                                                                                                                                                                                                                                                                                                                                                                                                                                                                                                                                 | Microbiology, Virology and Biemergency Laboratory-ASST FBF Sacco          | Microbiology, Virology and Biemergency Laboratory-ASST FBF Sacco                                  | Romeri F, Comandatore F, Mancon A, Micheli V, Rimoldi SG                                                                                                                                                                                                                                                                                                                                      |
| EPI_ISL_498695, EPI_ISL_498696, EPI_ISL_498697, EPI_ISL_498698, EPI_ISL_498699, EPI_ISL_498700, EPI_ISL_498701, EPI_ISL_498702, EPI_ISL_498703, EPI_ISL_498704, EPI_ISL_498705, EPI_ISL_498706, EPI_ISL_498707, EPI_ISL_498708, EPI_ISL_498709, EPI_ISL_498710, EPI_ISL_498711, EPI_ISL_498712, EPI_ISL_498713, EPI_ISL_498714, EPI_ISL_498715, EPI_ISL_498716, EPI_ISL_498717, EPI_ISL_498718, EPI_ISL_498719, EPI_ISL_498720, EPI_ISL_498721, EPI_ISL_498722, EPI_ISL_498723, EPI_ISL_498724, EPI_ISL_498725, EPI_ISL_498726, EPI_ISL_498727, EPI_ISL_498728, EPI_ISL_498729, EPI_ISL_498730, EPI_ISL_498731, EPI_ISL_498732, EPI_ISL_498733, EPI_ISL_498734, EPI_ISL_498735, EPI_ISL_498736, EPI_ISL_498737, EPI_ISL_498738, EPI_ISL_498739, EPI_ISL_498740, EPI_ISL_498741, EPI_ISL_498742, EPI_ISL_498743, EPI_ISL_498744, EPI_ISL_498745, EPI_ISL_498746, EPI_ISL_498747 | see above                                                                 | Quest Diagnostics                                                                                 |                                                                                                                                                                                                                                                                                                                                                                                               |
| EPI_ISL_500459                                                                                                                                                                                                                                                                                                                                                                                                                                                                                                                                                                                                                                                                                                                                                                                                                                                                 | Quest Diagnostics                                                         | Quest Diagnostics                                                                                 | Rosenthal,S.H., Gerasimova,A., Kagan,R.M. and Owen, R.                                                                                                                                                                                                                                                                                                                                        |
| EPI_ISL_522406                                                                                                                                                                                                                                                                                                                                                                                                                                                                                                                                                                                                                                                                                                                                                                                                                                                                 | Universidad Iberoamericana (UNIBE)                                        | International Centre for Genetic Engineering and Biotechnology (ICGEB)and ARGO Open Lab Platform  | Rosenthal,S.H., Gerasimova,A., Kagan,R.M., Owen, R. AND Lacbawan, F.<br>Robert Paulino-Ramirez, Eileen Riego, Alejandro Vallejo, Victor Calderon, Leandro Tapia, Danilo Licastro, Simeone Dal Monego, Sreejith Rajasekharan, and Alessandro Marcello.                                                                                                                                         |
| EPI_ISL_523811, EPI_ISL_523812                                                                                                                                                                                                                                                                                                                                                                                                                                                                                                                                                                                                                                                                                                                                                                                                                                                 | Universidad Iberoamericana, Instituto de Medicina Tropical & Salud Global | International Centre for Genetic Engineering and Biotechnology (ICGEB) and ARGO Open Lab Platform | Robert Paulino-Ramirez, Eileen Riego, Alejandro Vallejo Degaudenzi, Victor Virgilio Calderon, Leandro Tapia, Danilo Licastro, Simeone Dal Monego, Sreejith Rajasekharan and Alessandro Marcello.                                                                                                                                                                                              |
| EPI_ISL_524437, EPI_ISL_524438, EPI_ISL_524439, EPI_ISL_524440, EPI_ISL_524441, EPI_ISL_524442, EPI_ISL_524443                                                                                                                                                                                                                                                                                                                                                                                                                                                                                                                                                                                                                                                                                                                                                                 | University of Washington Virology Lab                                     | Laboratory Medicine, University of Washington                                                     | Roychoudhury,P., Greninger,A., Jerome,K.                                                                                                                                                                                                                                                                                                                                                      |
| EPI_ISL_524444                                                                                                                                                                                                                                                                                                                                                                                                                                                                                                                                                                                                                                                                                                                                                                                                                                                                 | University of Washington Virology Lab                                     | Fred Hutchinson Cancer Research Center                                                            | Roychoudhury,P., Greninger,A., Jerome,K.                                                                                                                                                                                                                                                                                                                                                      |
| EPI_ISL_525467                                                                                                                                                                                                                                                                                                                                                                                                                                                                                                                                                                                                                                                                                                                                                                                                                                                                 | Universidad Iberoamericana                                                | International Centre for Genetic Engineering and Biotechnology (ICGEB) and ARGO Open Lab Platform | Robert Paulino-Ramirez, Eileen Riego, Alejandro Vallejo Degaudenzi, Victor Virgilio Calderon, Leandro Tapia, Patricia Leon, Danilo Licastro, Simeone Dal Monego, Sreejith Rajasekharan and Alessandro Marcello.                                                                                                                                                                               |
| EPI_ISL_525468                                                                                                                                                                                                                                                                                                                                                                                                                                                                                                                                                                                                                                                                                                                                                                                                                                                                 | Universidad Iberoamericana                                                | International Centre for Genetic Engineering and Biotechnology (ICGEB) and ARGO Open Lab Platform | Robert Paulino-Ramirez, Eileen Riego, Alejandro Vallejo Degaudenzi, Victor Virgilio Calderon, Leandro Tapia, Patricia Leon, Danilo Licastro, Simeone Dal Monego, Sreejith Rajasekharan and Alessandro Marcello.                                                                                                                                                                               |
| EPI_ISL_525469, EPI_ISL_525470, EPI_ISL_525471                                                                                                                                                                                                                                                                                                                                                                                                                                                                                                                                                                                                                                                                                                                                                                                                                                 | Universidad Iberoamericana                                                | International Centre for Genetic Engineering and Biotechnology (ICGEB) and ARGO Open Lab Platform | Robert Paulino-Ramirez, Eileen Riego, Alejandro Vallejo Degaudenzi, Victor Virgilio Calderon, Leandro Tapia, Patricia Leon, Danilo Licastro, Simeone Dal Monego, Sreejith Rajasekharan and Alessandro Marcello.                                                                                                                                                                               |
| EPI_ISL_529155, EPI_ISL_529156, EPI_ISL_529157, EPI_ISL_529158, EPI_ISL_529159                                                                                                                                                                                                                                                                                                                                                                                                                                                                                                                                                                                                                                                                                                                                                                                                 | University of Washington, Laboratory Medicine                             | University of Washington, Laboratory Medicine                                                     | Roychoudhury,P., Greninger,A., Jerome,K.                                                                                                                                                                                                                                                                                                                                                      |
| EPI_ISL_529160, EPI_ISL_529161                                                                                                                                                                                                                                                                                                                                                                                                                                                                                                                                                                                                                                                                                                                                                                                                                                                 | University of Washington, Laboratory Medicine                             | University of Washington, Laboratory Medicine                                                     | Roychoudhury, P., Greninger, A., Jerome, K.                                                                                                                                                                                                                                                                                                                                                   |
| EPI_ISL_529170, EPI_ISL_529200                                                                                                                                                                                                                                                                                                                                                                                                                                                                                                                                                                                                                                                                                                                                                                                                                                                 | University of Washington, Laboratory Medicine                             | University of Washington, Laboratory Medicine                                                     | Roychoudhury,P., Greninger,A., Jerome,K.                                                                                                                                                                                                                                                                                                                                                      |
| EPI_ISL_529208, EPI_ISL_529209, EPI_ISL_529210, EPI_ISL_529211, EPI_ISL_529212                                                                                                                                                                                                                                                                                                                                                                                                                                                                                                                                                                                                                                                                                                                                                                                                 | Laboratory Medicine, University of Washington                             | University of Washington, Laboratory Medicine                                                     | Roychoudhury,P., Greninger,A., Jerome,K.                                                                                                                                                                                                                                                                                                                                                      |
| EPI_ISL_537946, EPI_ISL_537947, EPI_ISL_537948, EPI_ISL_537949, EPI_ISL_537950, EPI_ISL_537951, EPI_ISL_537952, EPI_ISL_537953, EPI_ISL_537954, EPI_ISL_537955, EPI_ISL_537956, EPI_ISL_537957, EPI_ISL_537958, EPI_ISL_537959, EPI_ISL_537960, EPI_ISL_537961, EPI_ISL_537962, EPI_ISL_537963, EPI_ISL_537964, EPI_ISL_537965, EPI_ISL_537966, EPI_ISL_537967, EPI_ISL_537968, EPI_ISL_537969, EPI_ISL_537970, EPI_ISL_537971, EPI_ISL_537972, EPI_ISL_537973, EPI_ISL_537974, EPI_ISL_537975, EPI_ISL_537976, EPI_ISL_537977, EPI_ISL_537978, EPI_ISL_537979, EPI_ISL_537980, EPI_ISL_537981,                                                                                                                                                                                                                                                                                |                                                                           |                                                                                                   |                                                                                                                                                                                                                                                                                                                                                                                               |







EPI\_ISL\_604533, EPI\_ISL\_604534, EPI\_ISL\_604535, EPI\_ISL\_604536, EPI\_ISL\_604537, EPI\_ISL\_604538, EPI\_ISL\_604539, EPI\_ISL\_604540, EPI\_ISL\_604541, EPI\_ISL\_604542, EPI\_ISL\_604543, EPI\_ISL\_604544, EPI\_ISL\_604545, EPI\_ISL\_604546, EPI\_ISL\_604547, EPI\_ISL\_604548, EPI\_ISL\_604549, EPI\_ISL\_604550, EPI\_ISL\_604551, EPI\_ISL\_604552, EPI\_ISL\_604553, EPI\_ISL\_604554, EPI\_ISL\_604555, EPI\_ISL\_604556, EPI\_ISL\_604557, EPI\_ISL\_604558, EPI\_ISL\_604559, EPI\_ISL\_604560, EPI\_ISL\_604561, EPI\_ISL\_604562, EPI\_ISL\_604563, EPI\_ISL\_604564, EPI\_ISL\_604565, EPI\_ISL\_604566, EPI\_ISL\_604567, EPI\_ISL\_604568, EPI\_ISL\_604569, EPI\_ISL\_604570, EPI\_ISL\_604571, EPI\_ISL\_604572, EPI\_ISL\_604573, EPI\_ISL\_604574, EPI\_ISL\_604575, EPI\_ISL\_604576, EPI\_ISL\_604577, EPI\_ISL\_604578, EPI\_ISL\_604579, EPI\_ISL\_604580, EPI\_ISL\_604581, EPI\_ISL\_604582, EPI\_ISL\_604583, EPI\_ISL\_604584, EPI\_ISL\_604585, EPI\_ISL\_604586, EPI\_ISL\_604587, EPI\_ISL\_604588, EPI\_ISL\_604589, EPI\_ISL\_604590, EPI\_ISL\_604591, EPI\_ISL\_604592, EPI\_ISL\_604593, EPI\_ISL\_604594, EPI\_ISL\_604595, EPI\_ISL\_604596, EPI\_ISL\_604597, EPI\_ISL\_604598, EPI\_ISL\_604599, EPI\_ISL\_604600, EPI\_ISL\_604601, EPI\_ISL\_604602, EPI\_ISL\_604603, EPI\_ISL\_604604, EPI\_ISL\_604605, EPI\_ISL\_604606, EPI\_ISL\_604607, EPI\_ISL\_604608, EPI\_ISL\_604609, EPI\_ISL\_604610, EPI\_ISL\_604611, EPI\_ISL\_604612, EPI\_ISL\_604613, EPI\_ISL\_604614, EPI\_ISL\_604615, EPI\_ISL\_604616, EPI\_ISL\_604617, EPI\_ISL\_604618, EPI\_ISL\_604619, EPI\_ISL\_604620, EPI\_ISL\_604621, EPI\_ISL\_604622, EPI\_ISL\_604623, EPI\_ISL\_604624, EPI\_ISL\_604625, EPI\_ISL\_604626, EPI\_ISL\_604627, EPI\_ISL\_604628, EPI\_ISL\_604629, EPI\_ISL\_604630, EPI\_ISL\_604631, EPI\_ISL\_604632, EPI\_ISL\_604633, EPI\_ISL\_604634, EPI\_ISL\_604635, EPI\_ISL\_604636, EPI\_ISL\_604637, EPI\_ISL\_604638, EPI\_ISL\_604639, EPI\_ISL\_604640, EPI\_ISL\_604641, EPI\_ISL\_604642, EPI\_ISL\_604643, EPI\_ISL\_604644, EPI\_ISL\_604645, EPI\_ISL\_604646, EPI\_ISL\_604647, EPI\_ISL\_604648, EPI\_ISL\_604649, EPI\_ISL\_604650, EPI\_ISL\_604651, EPI\_ISL\_604652, EPI\_ISL\_604653, EPI\_ISL\_604654, EPI\_ISL\_604655, EPI\_ISL\_604656, EPI\_ISL\_604657, EPI\_ISL\_604658, EPI\_ISL\_604659, EPI\_ISL\_604660, EPI\_ISL\_604661, EPI\_ISL\_604662, EPI\_ISL\_604663, EPI\_ISL\_604664, EPI\_ISL\_604665, EPI\_ISL\_604666, EPI\_ISL\_604667, EPI\_ISL\_604668, EPI\_ISL\_604669, EPI\_ISL\_604670, EPI\_ISL\_604671, EPI\_ISL\_604672, EPI\_ISL\_604673, EPI\_ISL\_604674, EPI\_ISL\_604675, EPI\_ISL\_604676, EPI\_ISL\_604677, EPI\_ISL\_604678, EPI\_ISL\_604679, EPI\_ISL\_604680, EPI\_ISL\_604681, EPI\_ISL\_604682, EPI\_ISL\_604683, EPI\_ISL\_604684, EPI\_ISL\_604685, EPI\_ISL\_604686, EPI\_ISL\_604687, EPI\_ISL\_604688, EPI\_ISL\_604689, EPI\_ISL\_604690, EPI\_ISL\_604691, EPI\_ISL\_604692, EPI\_ISL\_604693, EPI\_ISL\_604694, EPI\_ISL\_604695, EPI\_ISL\_604696, EPI\_ISL\_604697, EPI\_ISL\_604698, EPI\_ISL\_604699, EPI\_ISL\_604700, EPI\_ISL\_604701, EPI\_ISL\_604702, EPI\_ISL\_604703, EPI\_ISL\_604704, EPI\_ISL\_604705, EPI\_ISL\_604706, EPI\_ISL\_604707, EPI\_ISL\_604708, EPI\_ISL\_604709, EPI\_ISL\_604710, EPI\_ISL\_604711, EPI\_ISL\_604712, EPI\_ISL\_604713, EPI\_ISL\_604714, EPI\_ISL\_604715, EPI\_ISL\_604716, EPI\_ISL\_604717, EPI\_ISL\_604718, EPI\_ISL\_604719, EPI\_ISL\_604720, EPI\_ISL\_604721, EPI\_ISL\_604722, EPI\_ISL\_604723, EPI\_ISL\_604724, EPI\_ISL\_604725, EPI\_ISL\_604726, EPI\_ISL\_604727, EPI\_ISL\_604728, EPI\_ISL\_604729, EPI\_ISL\_604730, EPI\_ISL\_604731, EPI\_ISL\_604732, EPI\_ISL\_604733, EPI\_ISL\_604734, EPI\_ISL\_604735, EPI\_ISL\_604736, EPI\_ISL\_604737, EPI\_ISL\_604738, EPI\_ISL\_604739, EPI\_ISL\_604740, EPI\_ISL\_604741, EPI\_ISL\_604742, EPI\_ISL\_604743, EPI\_ISL\_604744, EPI\_ISL\_604745, EPI\_ISL\_604746, EPI\_ISL\_604747, EPI\_ISL\_604748, EPI\_ISL\_604749, EPI\_ISL\_604750, EPI\_ISL\_604751, EPI\_ISL\_604752, EPI\_ISL\_604753, EPI\_ISL\_604754, EPI\_ISL\_604755, EPI\_ISL\_604756, EPI\_ISL\_604757, EPI\_ISL\_604758, EPI\_ISL\_604759, EPI\_ISL\_604760, EPI\_ISL\_604761, EPI\_ISL\_604762, EPI\_ISL\_604763, EPI\_ISL\_604764, EPI\_ISL\_604765, EPI\_ISL\_604766, EPI\_ISL\_604767, EPI\_ISL\_604768, EPI\_ISL\_604769, EPI\_ISL\_604770, EPI\_ISL\_604771, EPI\_ISL\_604772, EPI\_ISL\_604773, EPI\_ISL\_604774, EPI\_ISL\_604775, EPI\_ISL\_604776, EPI\_ISL\_604777, EPI\_ISL\_604778, EPI\_ISL\_604779, EPI\_ISL\_604780, EPI\_ISL\_604781, EPI\_ISL\_604782, EPI\_ISL\_604783, EPI\_ISL\_604784, EPI\_ISL\_604785, EPI\_ISL\_604786, EPI\_ISL\_604787, EPI\_ISL\_604788, EPI\_ISL\_604789, EPI\_ISL\_604790, EPI\_ISL\_604791, EPI\_ISL\_604792, EPI\_ISL\_604793, EPI\_ISL\_604794, EPI\_ISL\_604795, EPI\_ISL\_604796, EPI\_ISL\_604797, EPI\_ISL\_604798, EPI\_ISL\_604799, EPI\_ISL\_604800, EPI\_ISL\_604801, EPI\_ISL\_604802, EPI\_ISL\_604803, EPI\_ISL\_604804, EPI\_ISL\_604805, EPI\_ISL\_604806, EPI\_ISL\_604807, EPI\_ISL\_604808, EPI\_ISL\_604809, EPI\_ISL\_604810, EPI\_ISL\_604811, EPI\_ISL\_604812, EPI\_ISL\_604813, EPI\_ISL\_604814, EPI\_ISL\_604815, EPI\_ISL\_604816, EPI\_ISL\_604817, EPI\_ISL\_604818, EPI\_ISL\_604819, EPI\_ISL\_604820, EPI\_ISL\_604821, EPI\_ISL\_604822, EPI\_ISL\_604823, EPI\_ISL\_604824, EPI\_ISL\_604825, EPI\_ISL\_604826, EPI\_ISL\_604827, EPI\_ISL\_604828, EPI\_ISL\_604829, EPI\_ISL\_604830, EPI\_ISL\_604831, EPI\_ISL\_604832, EPI\_ISL\_604833, EPI\_ISL\_604834, EPI\_ISL\_604835, EPI\_ISL\_604836, EPI\_ISL\_604837, EPI\_ISL\_604838, EPI\_ISL\_604839, EPI\_ISL\_604840, EPI\_ISL\_604841, EPI\_ISL\_604842, EPI\_ISL\_604843, EPI\_ISL\_604844, EPI\_ISL\_604845, EPI\_ISL\_604846, EPI\_ISL\_604847, EPI\_ISL\_604848, EPI\_ISL\_604849, EPI\_ISL\_604850, EPI\_ISL\_604851, EPI\_ISL\_604852, EPI\_ISL\_604853, EPI\_ISL\_604854, EPI\_ISL\_604855, EPI\_ISL\_604856, EPI\_ISL\_604857, EPI\_ISL\_604858, EPI\_ISL\_604859, EPI\_ISL\_604860, EPI\_ISL\_604861, EPI\_ISL\_604862, EPI\_ISL\_604863, EPI\_ISL\_604864, EPI\_ISL\_604865, EPI\_ISL\_604866, EPI\_ISL\_604867, EPI\_ISL\_604868, EPI\_ISL\_604869, EPI\_ISL\_604870, EPI\_ISL\_604871, EPI\_ISL\_604872, EPI\_ISL\_604873, EPI\_ISL\_604874, EPI\_ISL\_604875, EPI\_ISL\_604876, EPI\_ISL\_604877, EPI\_ISL\_604878, EPI\_ISL\_604879, EPI\_ISL\_604880, EPI\_ISL\_604881, EPI\_ISL\_604882, EPI\_ISL\_604883, EPI\_ISL\_604884, EPI\_ISL\_604885, EPI\_ISL\_604886, EPI\_ISL\_604887, EPI\_ISL\_604888, EPI\_ISL\_604889, EPI\_ISL\_604890, EPI\_ISL\_604891, EPI\_ISL\_604892, EPI\_ISL\_604893, EPI\_ISL\_604894, EPI\_ISL\_604895, EPI\_ISL\_604896, EPI\_ISL\_604897, EPI\_ISL\_604898, EPI\_ISL\_604899, EPI\_ISL\_604900, EPI\_ISL\_604901, EPI\_ISL\_604902, EPI\_ISL\_604903, EPI\_ISL\_604904, EPI\_ISL\_604905, EPI\_ISL\_604906, EPI\_ISL\_604907, EPI\_ISL\_604908, EPI\_ISL\_604909, EPI\_ISL\_604910, EPI\_ISL\_604911, EPI\_ISL\_604912, EPI\_ISL\_604913, EPI\_ISL\_604914, EPI\_ISL\_604915, EPI\_ISL\_604916, EPI\_ISL\_604917, EPI\_ISL\_604918, EPI\_ISL\_604919, EPI\_ISL\_604920, EPI\_ISL\_604921, EPI\_ISL\_604922, EPI\_ISL\_604923, EPI\_ISL\_604924, EPI\_ISL\_604925, EPI\_ISL\_604926, EPI\_ISL\_604927, EPI\_ISL\_604928, EPI\_ISL\_604929, EPI\_ISL\_604930, EPI\_ISL\_604931, EPI\_ISL\_604932, EPI\_ISL\_604933, EPI\_ISL\_604934, EPI\_ISL\_604935, EPI\_ISL\_604936, EPI\_ISL\_604937, EPI\_ISL\_604938, EPI\_ISL\_604939, EPI\_ISL\_604940, EPI\_ISL\_604941, EPI\_ISL\_604942, EPI\_ISL\_604943, EPI\_ISL\_604944, EPI\_ISL\_604945, EPI\_ISL\_604946, EPI\_ISL\_604947, EPI\_ISL\_604948, EPI\_ISL\_604949, EPI\_ISL\_604950, EPI\_ISL\_604951, EPI\_ISL\_604952, EPI\_ISL\_604953, EPI\_ISL\_604954, EPI\_ISL\_604955, EPI\_ISL\_604956, EPI\_ISL\_604957, EPI\_ISL\_604958, EPI\_ISL\_604959, EPI\_ISL\_604960, EPI\_ISL\_604961, EPI\_ISL\_604962, EPI\_ISL\_604963, EPI\_ISL\_604964, EPI\_ISL\_604965, EPI\_ISL\_604966, EPI\_ISL\_604967, EPI\_ISL\_604968, EPI\_ISL\_604969, EPI\_ISL\_604970, EPI\_ISL\_604971, EPI\_ISL\_604972, EPI\_ISL\_604973, EPI\_ISL\_604974, EPI\_ISL\_604975, EPI\_ISL\_604976, EPI\_ISL\_604977, EPI\_ISL\_604978, EPI\_ISL\_604979, EPI\_ISL\_604980, EPI\_ISL\_604981, EPI\_ISL\_604982, EPI\_ISL\_604983, EPI\_ISL\_604984, EPI\_ISL\_604985, EPI\_ISL\_604986, EPI\_ISL\_604987, EPI\_ISL\_604988, EPI\_ISL\_604989, EPI\_ISL\_604990, EPI\_ISL\_604991, EPI\_ISL\_604992, EPI\_ISL\_604993, EPI\_ISL\_604994, EPI\_ISL\_604995, EPI\_ISL\_604996, EPI\_ISL\_604997, EPI\_ISL\_604998, EPI\_ISL\_604999, EPI\_ISL\_605000, EPI\_ISL\_605001, EPI\_ISL\_605002, EPI\_ISL\_605003, EPI\_ISL\_605004, EPI\_ISL\_605005, EPI\_ISL\_605006, EPI\_ISL\_605007, EPI\_ISL\_605008, EPI\_ISL\_605009, EPI\_ISL\_605010, EPI\_ISL\_605011, EPI\_ISL\_605012, EPI\_ISL\_605013, EPI\_ISL\_605014, EPI\_ISL\_605015, EPI\_ISL\_605016, EPI\_ISL\_605017, EPI\_ISL\_605018, EPI\_ISL\_605019, EPI\_ISL\_605020, EPI\_ISL\_605021, EPI\_ISL\_605022, EPI\_ISL\_605023, EPI\_ISL\_605024, EPI\_ISL\_605025, EPI\_ISL\_605026, EPI\_ISL\_605027, EPI\_ISL\_605028, EPI\_ISL\_605029, EPI\_ISL\_605030, EPI\_ISL\_605031, EPI\_ISL\_605032, EPI\_ISL\_605033, EPI\_ISL\_605034, EPI\_ISL\_605035, EPI\_ISL\_605036, EPI\_ISL\_605037, EPI\_ISL\_605038, EPI\_ISL\_605039, EPI\_ISL\_605040, EPI\_ISL\_605041, EPI\_ISL\_605042, EPI\_ISL\_605043, EPI\_ISL\_605044, EPI\_ISL\_605045, EPI\_ISL\_605046, EPI\_ISL\_605047, EPI\_ISL\_605048, EPI\_ISL\_605049, EPI\_ISL\_605050, EPI\_ISL\_605051, EPI\_ISL\_605052, EPI\_ISL\_605053, EPI\_ISL\_605054, EPI\_ISL\_605055, EPI\_ISL\_605056, EPI\_ISL\_605057

| see above                                                                                                                                                                                                                                                                                                                                                                                                                                                                                                                                                                                                                                                                                                                                                                                                                                                                                                                                                                                                                      | Quest Diagnostics                                                                                                            | Quest Diagnostics                                                                                                            | Rosenthal,S.H., Gerasimova,A., Kagan,R.M., Anderson,B., Grover, D., Livingston, K.E., Hua, M., Liu Y., Shalhout, D.F., Owen, R., Lacbawan, F.                                                                                                                                                                                                                    |
|--------------------------------------------------------------------------------------------------------------------------------------------------------------------------------------------------------------------------------------------------------------------------------------------------------------------------------------------------------------------------------------------------------------------------------------------------------------------------------------------------------------------------------------------------------------------------------------------------------------------------------------------------------------------------------------------------------------------------------------------------------------------------------------------------------------------------------------------------------------------------------------------------------------------------------------------------------------------------------------------------------------------------------|------------------------------------------------------------------------------------------------------------------------------|------------------------------------------------------------------------------------------------------------------------------|------------------------------------------------------------------------------------------------------------------------------------------------------------------------------------------------------------------------------------------------------------------------------------------------------------------------------------------------------------------|
| EPI_ISL_605780, EPI_ISL_605781, EPI_ISL_605782                                                                                                                                                                                                                                                                                                                                                                                                                                                                                                                                                                                                                                                                                                                                                                                                                                                                                                                                                                                 | CEIRS Data Processing and Coordinating Center, St. Jude Center of Excellence for Influenza Research and Surveillance (CEIRS) | CEIRS Data Processing and Coordinating Center, St. Jude Center of Excellence for Influenza Research and Surveillance (CEIRS) | Roshdy,W.H., Kayed,A.E., Naguib,A., Kamel,M.N., El-Taweel,A., El-Sheshery,R., Kandeil,A., Mostafa,A., Shehata,M., Goma,M., Mahmoud,S.H., Moatasim,Y., Kutkat,O., Mahrous,N., El-Sayes,M., Showky,S., El-Quindy,N.M., Webby,R., Kayali,G., Ali,M.A.                                                                                                               |
| EPI_ISL_608529, EPI_ISL_608566, EPI_ISL_608607, EPI_ISL_608631, EPI_ISL_608918, EPI_ISL_609067, EPI_ISL_609365, EPI_ISL_609407, EPI_ISL_609429, EPI_ISL_609438, EPI_ISL_609452, EPI_ISL_609501, EPI_ISL_609514, EPI_ISL_609519, EPI_ISL_609548, EPI_ISL_609609, EPI_ISL_609634, EPI_ISL_609645, EPI_ISL_609696, EPI_ISL_609704, EPI_ISL_609712, EPI_ISL_609740                                                                                                                                                                                                                                                                                                                                                                                                                                                                                                                                                                                                                                                                 |                                                                                                                              |                                                                                                                              |                                                                                                                                                                                                                                                                                                                                                                  |
| see above                                                                                                                                                                                                                                                                                                                                                                                                                                                                                                                                                                                                                                                                                                                                                                                                                                                                                                                                                                                                                      | Lighthouse Lab in Cambridge                                                                                                  | Wellcome Sanger Institute for the COVID-19 Genomics UK (COG-UK) consortium                                                   | Rob Howes, The Lighthouse Lab in Cambridge and Alex Alderton, Roberto Amato, Sonia Goncalves, Ewan Harrison, David K. Jackson, Ian Johnston, Dominic Kwiatkowski, Cordelia Langford, John Sillitoe on behalf of the Wellcome Sanger Institute COVID-19 Surveillance Team                                                                                         |
| EPI_ISL_609746                                                                                                                                                                                                                                                                                                                                                                                                                                                                                                                                                                                                                                                                                                                                                                                                                                                                                                                                                                                                                 | Lighthouse Lab in Cambridge                                                                                                  | Wellcome Sanger Institute for the COVID-19 Genomics UK (COG-UK) Consortium                                                   | Rob Howes, The Lighthouse Lab in Cambridge and Alex Alderton, Roberto Amato, Sonia Goncalves, Ewan Harrison, David K. Jackson, Ian Johnston, Dominic Kwiatkowski, Cordelia Langford, John Sillitoe on behalf of the Wellcome Sanger Institute COVID-19 Surveillance Team                                                                                         |
| EPI_ISL_609756, EPI_ISL_609764, EPI_ISL_609765, EPI_ISL_609770, EPI_ISL_610642, EPI_ISL_610648, EPI_ISL_610649, EPI_ISL_610718                                                                                                                                                                                                                                                                                                                                                                                                                                                                                                                                                                                                                                                                                                                                                                                                                                                                                                 | Lighthouse Lab in Cambridge                                                                                                  | Wellcome Sanger Institute for the COVID-19 Genomics UK (COG-UK) consortium                                                   | Rob Howes, The Lighthouse Lab in Cambridge and Alex Alderton, Roberto Amato, Sonia Goncalves, Ewan Harrison, David K. Jackson, Ian Johnston, Dominic Kwiatkowski, Cordelia Langford, John Sillitoe on behalf of the Wellcome Sanger Institute COVID-19 Surveillance Team                                                                                         |
| EPI_ISL_610846, EPI_ISL_610876, EPI_ISL_623245, EPI_ISL_623539, EPI_ISL_623600, EPI_ISL_623608, EPI_ISL_623647, EPI_ISL_623721, EPI_ISL_623772, EPI_ISL_625287, EPI_ISL_625294, EPI_ISL_625306                                                                                                                                                                                                                                                                                                                                                                                                                                                                                                                                                                                                                                                                                                                                                                                                                                 |                                                                                                                              |                                                                                                                              |                                                                                                                                                                                                                                                                                                                                                                  |
| see above                                                                                                                                                                                                                                                                                                                                                                                                                                                                                                                                                                                                                                                                                                                                                                                                                                                                                                                                                                                                                      | Lighthouse Lab in Cambridge                                                                                                  | Wellcome Sanger Institute for the COVID-19 Genomics UK (COG-UK) consortium                                                   | Rob Howes, The Lighthouse Lab in Cambridge and Alex Alderton, Roberto Amato, Sonia Goncalves, Ewan Harrison, David K. Jackson, Ian Johnston, Dominic Kwiatkowski, Cordelia Langford, John Sillitoe on behalf of the Wellcome Sanger Institute COVID-19 Surveillance Team ( <a href="http://www.sanger.ac.uk/covid-team">http://www.sanger.ac.uk/covid-team</a> ) |
| EPI_ISL_631038, EPI_ISL_631053, EPI_ISL_631080, EPI_ISL_631137, EPI_ISL_633110, EPI_ISL_633124, EPI_ISL_633183, EPI_ISL_633198, EPI_ISL_633252, EPI_ISL_633340                                                                                                                                                                                                                                                                                                                                                                                                                                                                                                                                                                                                                                                                                                                                                                                                                                                                 | Lighthouse Lab in Cambridge                                                                                                  | Wellcome Sanger Institute for the COVID-19 Genomics UK (COG-UK) consortium                                                   | Rob Howes, The Lighthouse Lab in Cambridge and Alex Alderton, Roberto Amato, Sonia Goncalves, Ewan Harrison, David K. Jackson, Ian Johnston, Dominic Kwiatkowski, Cordelia Langford, John Sillitoe on behalf of the Wellcome Sanger Institute COVID-19 Surveillance Team                                                                                         |
| EPI_ISL_634816                                                                                                                                                                                                                                                                                                                                                                                                                                                                                                                                                                                                                                                                                                                                                                                                                                                                                                                                                                                                                 | Lighthouse Lab in Cambridge                                                                                                  | Wellcome Sanger Institute for the COVID-19 Genomics UK (COG-UK) consortium                                                   | Rob Howes, The Lighthouse Lab in Cambridge and Alex Alderton, Roberto Amato, Sonia Goncalves, Ewan Harrison, David K. Jackson, Ian Johnston, Dominic Kwiatkowski, Cordelia Langford, John Sillitoe on behalf of the Wellcome Sanger Institute COVID-19 Surveillance Team ( <a href="http://www.sanger.ac.uk/covid-team">http://www.sanger.ac.uk/covid-team</a> ) |
| EPI_ISL_643323, EPI_ISL_643327, EPI_ISL_643337, EPI_ISL_643339, EPI_ISL_643344, EPI_ISL_643360, EPI_ISL_643382, EPI_ISL_643388, EPI_ISL_643419, EPI_ISL_643458, EPI_ISL_643472, EPI_ISL_643491, EPI_ISL_643499, EPI_ISL_643502, EPI_ISL_643592, EPI_ISL_643660, EPI_ISL_643689, EPI_ISL_643704, EPI_ISL_643722, EPI_ISL_643762, EPI_ISL_643862, EPI_ISL_643879, EPI_ISL_643893, EPI_ISL_643947, EPI_ISL_643966, EPI_ISL_645220, EPI_ISL_645225, EPI_ISL_645275, EPI_ISL_645306, EPI_ISL_645322, EPI_ISL_645342, EPI_ISL_645353, EPI_ISL_645363, EPI_ISL_645379, EPI_ISL_645437, EPI_ISL_645482, EPI_ISL_645528, EPI_ISL_646031, EPI_ISL_647158, EPI_ISL_647158, EPI_ISL_647159, EPI_ISL_647221, EPI_ISL_647224, EPI_ISL_647230, EPI_ISL_647234, EPI_ISL_647257, EPI_ISL_647330, EPI_ISL_647345, EPI_ISL_647436, EPI_ISL_647440, EPI_ISL_647451, EPI_ISL_647456, EPI_ISL_647456, EPI_ISL_647595, EPI_ISL_647620, EPI_ISL_647621, EPI_ISL_647629, EPI_ISL_647637, EPI_ISL_647657, EPI_ISL_647662, EPI_ISL_647663, EPI_ISL_647678 |                                                                                                                              |                                                                                                                              |                                                                                                                                                                                                                                                                                                                                                                  |
| see above                                                                                                                                                                                                                                                                                                                                                                                                                                                                                                                                                                                                                                                                                                                                                                                                                                                                                                                                                                                                                      | Lighthouse Lab in Cambridge                                                                                                  | Wellcome Sanger Institute for the COVID-19 Genomics UK (COG-UK) Consortium                                                   | Rob Howes, The Lighthouse Lab in Cambridge and Alex Alderton, Roberto Amato, Sonia Goncalves, Ewan Harrison, David K. Jackson, Ian Johnston, Dominic Kwiatkowski, Cordelia Langford, John Sillitoe on behalf of the Wellcome Sanger Institute COVID-19 Surveillance Team                                                                                         |
| EPI_ISL_653370, EPI_ISL_653371, EPI_ISL_653372, EPI_ISL_653373, EPI_ISL_653374, EPI_ISL_653375, EPI_ISL_653376, EPI_ISL_653377, EPI_ISL_653378, EPI_ISL_653379, EPI_ISL_653380, EPI_ISL_653381, EPI_ISL_653382, EPI_ISL_653383, EPI_ISL_653384, EPI_ISL_653385, EPI_ISL_653386, EPI_ISL_653387, EPI_ISL_653388, EPI_ISL_653389, EPI_ISL_653390, EPI_ISL_653391, EPI_ISL_653392, EPI_ISL_653393, EPI_ISL_653394                                                                                                                                                                                                                                                                                                                                                                                                                                                                                                                                                                                                                 |                                                                                                                              |                                                                                                                              |                                                                                                                                                                                                                                                                                                                                                                  |
| see above                                                                                                                                                                                                                                                                                                                                                                                                                                                                                                                                                                                                                                                                                                                                                                                                                                                                                                                                                                                                                      | LSUHS Emerging Viral                                                                                                         | Microbial Genome                                                                                                             | Rona S. Scott, Jeremy P. Kamil, Maarten Van Diest, Malgorzata Bienkowska-Haba, Katarzyna Zwolinska, Andrew D. Yurochko, Christopher G. Kevil, Martin J. Sapp, Daniel J. Snyder, Vaughn S. Cooper, John A. Vanchiere                                                                                                                                              |





EPI\_ISL\_698809, EPI\_ISL\_698810, EPI\_ISL\_698811, EPI\_ISL\_698812, EPI\_ISL\_698813, EPI\_ISL\_698814, EPI\_ISL\_698815, EPI\_ISL\_698816, EPI\_ISL\_698817, EPI\_ISL\_698818, EPI\_ISL\_698819, EPI\_ISL\_698820, EPI\_ISL\_698821, EPI\_ISL\_698822, EPI\_ISL\_698823, EPI\_ISL\_698824, EPI\_ISL\_698825, EPI\_ISL\_698826, EPI\_ISL\_698827, EPI\_ISL\_698828, EPI\_ISL\_698829, EPI\_ISL\_698830, EPI\_ISL\_698831, EPI\_ISL\_698832, EPI\_ISL\_698833, EPI\_ISL\_698834, EPI\_ISL\_698835, EPI\_ISL\_698836, EPI\_ISL\_698837, EPI\_ISL\_698838, EPI\_ISL\_698839, EPI\_ISL\_698840, EPI\_ISL\_698841, EPI\_ISL\_698842, EPI\_ISL\_698843, EPI\_ISL\_698844, EPI\_ISL\_698845, EPI\_ISL\_698846, EPI\_ISL\_698847, EPI\_ISL\_698848, EPI\_ISL\_698849, EPI\_ISL\_698850, EPI\_ISL\_698851, EPI\_ISL\_698852, EPI\_ISL\_698853, EPI\_ISL\_698854, EPI\_ISL\_698855, EPI\_ISL\_698856, EPI\_ISL\_698857, EPI\_ISL\_698858, EPI\_ISL\_698859, EPI\_ISL\_698860, EPI\_ISL\_698861, EPI\_ISL\_698862, EPI\_ISL\_698863, EPI\_ISL\_698864, EPI\_ISL\_698865, EPI\_ISL\_698866, EPI\_ISL\_698867, EPI\_ISL\_698868, EPI\_ISL\_698869, EPI\_ISL\_698870, EPI\_ISL\_698871, EPI\_ISL\_698872, EPI\_ISL\_698873, EPI\_ISL\_698874, EPI\_ISL\_698875, EPI\_ISL\_698876, EPI\_ISL\_698877, EPI\_ISL\_698878, EPI\_ISL\_698879, EPI\_ISL\_698880, EPI\_ISL\_698881, EPI\_ISL\_698882, EPI\_ISL\_698883, EPI\_ISL\_698884, EPI\_ISL\_698885, EPI\_ISL\_698886, EPI\_ISL\_698887, EPI\_ISL\_698888, EPI\_ISL\_698889, EPI\_ISL\_698890, EPI\_ISL\_698891, EPI\_ISL\_698892, EPI\_ISL\_698893, EPI\_ISL\_698894, EPI\_ISL\_698895, EPI\_ISL\_698896, EPI\_ISL\_698897, EPI\_ISL\_698898, EPI\_ISL\_698899, EPI\_ISL\_698900, EPI\_ISL\_698901, EPI\_ISL\_698902, EPI\_ISL\_698903, EPI\_ISL\_698904, EPI\_ISL\_698905, EPI\_ISL\_698906, EPI\_ISL\_698907, EPI\_ISL\_698908, EPI\_ISL\_698909, EPI\_ISL\_698910, EPI\_ISL\_698911, EPI\_ISL\_698912, EPI\_ISL\_698913, EPI\_ISL\_698914, EPI\_ISL\_698915, EPI\_ISL\_698916, EPI\_ISL\_698917, EPI\_ISL\_698918, EPI\_ISL\_698919, EPI\_ISL\_698920, EPI\_ISL\_698921, EPI\_ISL\_698922, EPI\_ISL\_698923, EPI\_ISL\_698924, EPI\_ISL\_698925, EPI\_ISL\_698926, EPI\_ISL\_698927, EPI\_ISL\_698928, EPI\_ISL\_698929, EPI\_ISL\_698930, EPI\_ISL\_698931, EPI\_ISL\_698932, EPI\_ISL\_698933, EPI\_ISL\_698934, EPI\_ISL\_698935, EPI\_ISL\_698936, EPI\_ISL\_698937, EPI\_ISL\_698938, EPI\_ISL\_698939, EPI\_ISL\_698940, EPI\_ISL\_698941, EPI\_ISL\_698942, EPI\_ISL\_698943, EPI\_ISL\_698944, EPI\_ISL\_698945, EPI\_ISL\_698946, EPI\_ISL\_698947, EPI\_ISL\_698948, EPI\_ISL\_698949, EPI\_ISL\_698950, EPI\_ISL\_698951, EPI\_ISL\_698952, EPI\_ISL\_698953, EPI\_ISL\_698954, EPI\_ISL\_698955, EPI\_ISL\_698956, EPI\_ISL\_698957, EPI\_ISL\_698958, EPI\_ISL\_698959, EPI\_ISL\_698960, EPI\_ISL\_698961, EPI\_ISL\_698962, EPI\_ISL\_698963, EPI\_ISL\_698964, EPI\_ISL\_698965, EPI\_ISL\_698966, EPI\_ISL\_698967, EPI\_ISL\_698968, EPI\_ISL\_698969, EPI\_ISL\_698970, EPI\_ISL\_698971, EPI\_ISL\_698972, EPI\_ISL\_698973, EPI\_ISL\_698974, EPI\_ISL\_698975, EPI\_ISL\_698976, EPI\_ISL\_698977, EPI\_ISL\_698978, EPI\_ISL\_698979, EPI\_ISL\_698980, EPI\_ISL\_698981, EPI\_ISL\_698982, EPI\_ISL\_698983, EPI\_ISL\_698984, EPI\_ISL\_698985, EPI\_ISL\_698986, EPI\_ISL\_698987, EPI\_ISL\_698988, EPI\_ISL\_698989, EPI\_ISL\_698990, EPI\_ISL\_698991, EPI\_ISL\_698992, EPI\_ISL\_698993, EPI\_ISL\_698994, EPI\_ISL\_698995, EPI\_ISL\_698996, EPI\_ISL\_698997, EPI\_ISL\_698998, EPI\_ISL\_698999, EPI\_ISL\_699000, EPI\_ISL\_699001, EPI\_ISL\_699002, EPI\_ISL\_699003, EPI\_ISL\_699004, EPI\_ISL\_699005, EPI\_ISL\_699006, EPI\_ISL\_699007, EPI\_ISL\_699008, EPI\_ISL\_699009, EPI\_ISL\_699010, EPI\_ISL\_699011, EPI\_ISL\_699012, EPI\_ISL\_699013, EPI\_ISL\_699014, EPI\_ISL\_699015, EPI\_ISL\_699016, EPI\_ISL\_699017, EPI\_ISL\_699018, EPI\_ISL\_699019, EPI\_ISL\_699020, EPI\_ISL\_699021, EPI\_ISL\_699022, EPI\_ISL\_699023, EPI\_ISL\_699024, EPI\_ISL\_699025, EPI\_ISL\_699026, EPI\_ISL\_699027, EPI\_ISL\_699028, EPI\_ISL\_699029, EPI\_ISL\_699030, EPI\_ISL\_699031, EPI\_ISL\_699032, EPI\_ISL\_699033, EPI\_ISL\_699034, EPI\_ISL\_699035, EPI\_ISL\_699036, EPI\_ISL\_699037, EPI\_ISL\_699038, EPI\_ISL\_699039, EPI\_ISL\_699040, EPI\_ISL\_699041, EPI\_ISL\_699042, EPI\_ISL\_699043, EPI\_ISL\_699044, EPI\_ISL\_699045, EPI\_ISL\_699046, EPI\_ISL\_699047, EPI\_ISL\_699048, EPI\_ISL\_699049, EPI\_ISL\_699050, EPI\_ISL\_699051, EPI\_ISL\_699052, EPI\_ISL\_699053, EPI\_ISL\_699054, EPI\_ISL\_699055, EPI\_ISL\_699056, EPI\_ISL\_699057, EPI\_ISL\_699058, EPI\_ISL\_699059, EPI\_ISL\_699060, EPI\_ISL\_699061, EPI\_ISL\_699062, EPI\_ISL\_699063, EPI\_ISL\_699064, EPI\_ISL\_699065, EPI\_ISL\_699066, EPI\_ISL\_699067, EPI\_ISL\_699068, EPI\_ISL\_699069, EPI\_ISL\_699070, EPI\_ISL\_699071, EPI\_ISL\_699072, EPI\_ISL\_699073, EPI\_ISL\_699074, EPI\_ISL\_699075, EPI\_ISL\_699076, EPI\_ISL\_699077, EPI\_ISL\_699078, EPI\_ISL\_699079, EPI\_ISL\_699080, EPI\_ISL\_699081, EPI\_ISL\_699082, EPI\_ISL\_699083, EPI\_ISL\_699084, EPI\_ISL\_699085, EPI\_ISL\_699086, EPI\_ISL\_699087, EPI\_ISL\_699088, EPI\_ISL\_699089, EPI\_ISL\_699090, EPI\_ISL\_699091, EPI\_ISL\_699092, EPI\_ISL\_699093, EPI\_ISL\_699094, EPI\_ISL\_699095, EPI\_ISL\_699096, EPI\_ISL\_699097, EPI\_ISL\_699098, EPI\_ISL\_699099, EPI\_ISL\_699100, EPI\_ISL\_699101, EPI\_ISL\_699102, EPI\_ISL\_699103, EPI\_ISL\_699104, EPI\_ISL\_699105, EPI\_ISL\_699106, EPI\_ISL\_699107, EPI\_ISL\_699108, EPI\_ISL\_699109, EPI\_ISL\_699110, EPI\_ISL\_699111, EPI\_ISL\_699112, EPI\_ISL\_699113, EPI\_ISL\_699114, EPI\_ISL\_699115, EPI\_ISL\_699116, EPI\_ISL\_699117, EPI\_ISL\_699118, EPI\_ISL\_699119, EPI\_ISL\_699120, EPI\_ISL\_699121, EPI\_ISL\_699122, EPI\_ISL\_699123, EPI\_ISL\_699124, EPI\_ISL\_699125, EPI\_ISL\_699126, EPI\_ISL\_699127, EPI\_ISL\_699128, EPI\_ISL\_699129, EPI\_ISL\_699130, EPI\_ISL\_699131, EPI\_ISL\_699132, EPI\_ISL\_699133, EPI\_ISL\_699134, EPI\_ISL\_699135, EPI\_ISL\_699136, EPI\_ISL\_699137, EPI\_ISL\_699138, EPI\_ISL\_699139, EPI\_ISL\_699140, EPI\_ISL\_699141, EPI\_ISL\_699142, EPI\_ISL\_699143, EPI\_ISL\_699144, EPI\_ISL\_699145, EPI\_ISL\_699146, EPI\_ISL\_699147, EPI\_ISL\_699148, EPI\_ISL\_699149, EPI\_ISL\_699150, EPI\_ISL\_699151, EPI\_ISL\_699152, EPI\_ISL\_699153, EPI\_ISL\_699154, EPI\_ISL\_699155, EPI\_ISL\_699156, EPI\_ISL\_699157, EPI\_ISL\_699158, EPI\_ISL\_699159, EPI\_ISL\_699160, EPI\_ISL\_699161

see above Group 42 (G42) Healthcare, Abu Dhabi, United Arab Emirates; Department of Health, The United Arab Emirates G42 Healthcare Rong Liu, Pei Wu, Sally Mahmoud, Ke Liang, Pauline Ogrodzki, Pengjun Liu, Stephen S. Francis, Tao Ma, Hanif Khalak, Fang Chen, Denghui Liu, Junhua Li, Weibin Liu, Wenjun He, Xinyu Huang, Zhaorong Yuan, Long Lin, Nan Qiao, Xin Meng, Budoor Alqarni, Javier Quilez, Vinay Kusuma, Xin Jin, Xavier Anton, Ashish Koshy, Huanming Yang, Xun Xu, Jian Wang, Peng Xiao, Nawal Ahmed Mohamed Al Kaabi, Mohammed Saifuddin Fashihuddin, Siyang Liu, Walid Abbas Zaher

EPI\_ISL\_702031, EPI\_ISL\_702032, EPI\_ISL\_702155, EPI\_ISL\_702157, EPI\_ISL\_702198, EPI\_ISL\_702204, EPI\_ISL\_702225, EPI\_ISL\_702248, EPI\_ISL\_702327, EPI\_ISL\_702329, EPI\_ISL\_702341, EPI\_ISL\_702357, EPI\_ISL\_702368, EPI\_ISL\_704721, EPI\_ISL\_704774, EPI\_ISL\_704821, EPI\_ISL\_704822, EPI\_ISL\_704841, EPI\_ISL\_704857, EPI\_ISL\_704893, EPI\_ISL\_704898, EPI\_ISL\_704919, EPI\_ISL\_704928, EPI\_ISL\_705020, EPI\_ISL\_705037, EPI\_ISL\_705052, EPI\_ISL\_705071, EPI\_ISL\_705188

see above Lighthouse Lab in Cambridge Wellcome Sanger Institute for the COVID-19 Genomics UK (COG-UK) Consortium Rob Howes, The Lighthouse Lab in Cambridge and Alex Alderton, Roberto Amato, Sonia Goncalves, Ewan Harrison, David K. Jackson, Ian Johnston, Dominic Kwiatkowski, Cordelia Langford, John Sillitoe on behalf of the Wellcome Sanger Institute COVID-19 Surveillance Team

EPI\_ISL\_708827, EPI\_ISL\_708828, EPI\_ISL\_708829, EPI\_ISL\_708830, EPI\_ISL\_708831, EPI\_ISL\_708832, EPI\_ISL\_708833, EPI\_ISL\_708834, EPI\_ISL\_708835, EPI\_ISL\_708836, EPI\_ISL\_708837, EPI\_ISL\_708838

see above Group 42 (G42) Healthcare, Abu Dhabi, United Arab Emirates; Department of Health, The United Arab Emirates G42 Healthcare Rong Liu, Pei Wu, Sally Mahmoud, Ke Liang, Pauline Ogrodzki, Pengjun Liu, Stephen S. Francis, Tao Ma, Hanif Khalak, Fang Chen, Denghui Liu, Junhua Li, Weibin Liu, Wenjun He, Xinyu Huang, Zhaorong Yuan, Long Lin, Nan Qiao, Xin Meng, Budoor Alqarni, Javier Quilez, Vinay Kusuma, Xin Jin, Xavier Anton, Ashish Koshy, Huanming Yang, Xun Xu, Jian Wang, Peng Xiao, Nawal Ahmed Mohamed Al Kaabi, Mohammed Saifuddin Fashihuddin, Siyang Liu, Walid Abbas Zaher

EPI\_ISL\_709200, EPI\_ISL\_709250, EPI\_ISL\_709254, EPI\_ISL\_709258, EPI\_ISL\_709262 Lighthouse Lab in Cambridge Wellcome Sanger Institute for the COVID-19 Genomics UK (COG-UK) Consortium Rob Howes, The Lighthouse Lab in Cambridge and Alex Alderton, Roberto Amato, Sonia Goncalves, Ewan Harrison, David K. Jackson, Ian Johnston, Dominic Kwiatkowski, Cordelia Langford, John Sillitoe on behalf of the Wellcome Sanger Institute COVID-19 Surveillance Team

EPI\_ISL\_710547 Sestre Milosrdnice University Hospital Center Ruer Boškovic Institute; Forensic Science Centre Ivan Vueti; University of Zagreb Faculty of Science Robert Beluži, Marina Korolija, Ivana elap, Vjekoslav Tomai, Maja Kuzman, Dunja Glavaš, Maja Kuzman, Paula Štancil, Lucija Markulin, Antonela Blažekovi, Fran Boroveki, Lidija Cvetko-Krajinovi, Mirjana Domazet-Lošo, Tomislav Domazet-Lošo, Kristina Gotovac Jere, Vladimir Krajinovi, Danilo Licastro, Ana Livun, Boris Maek, Zeljka Maak Šafranko, Gordana Maravi Vlahoviek, Josipa Skelin, Ivan Šarnija, Mario Štefanovi, Sanja Tadinac, Rosa Karli, Kristian Vlahoviek

EPI\_ISL\_710548, EPI\_ISL\_710549, EPI\_ISL\_710550, EPI\_ISL\_710551, EPI\_ISL\_710552, EPI\_ISL\_710553 University Hospital Dubrava Ruer Boškovic Institute; Forensic Science Centre Ivan Vueti; University of Zagreb Faculty of Science Robert Beluži, Marina Korolija, Ana Livun, Vjekoslav Tomai, Dunja Glavaš, Maja Kuzman, Paula Štancil, Lucija Markulin, Lucija Basi, Antonela Blažekovi, Fran Boroveki, Lidija Cvetko-Krajinovi, Ivana elap, Fuad osovi, Mirjana Domazet-Lošo, Tomislav Domazet-Lošo, Valentina umljan-Combaj, Kristina Gotovac Jere, Jasna Kašman, Vladimir Krajinovi, Danilo Licastro, Boris Maek, Zeljka Maak Šafranko, Gordana Maravi Vlahoviek, Senica Pejša, Josipa Skelin, Ivan Šarnija, Mario Štefanovi, Sanja Tadinac, Katarina Marija Tupek, Petra Vrabec, Rosa Karli, Kristian Vlahoviek

EPI\_ISL\_710554 Sestre Milosrdnice University Hospital Center Ruer Boškovic Institute; Forensic Science Centre Ivan Vueti; University of Zagreb Faculty of Science Robert Beluži, Marina Korolija, Ivana elap, Vjekoslav Tomai, Maja Kuzman, Dunja Glavaš, Maja Kuzman, Paula Štancil, Lucija Markulin, Antonela Blažekovi, Fran Boroveki, Lidija Cvetko-Krajinovi, Mirjana Domazet-Lošo, Tomislav Domazet-Lošo, Kristina Gotovac Jere, Vladimir Krajinovi, Danilo Licastro, Ana Livun, Boris Maek, Zeljka Maak Šafranko, Gordana Maravi Vlahoviek, Josipa Skelin, Ivan Šarnija, Mario Štefanovi, Sanja Tadinac, Rosa Karli, Kristian Vlahoviek

EPI\_ISL\_710555, EPI\_ISL\_710556, EPI\_ISL\_710557, EPI\_ISL\_710558, EPI\_ISL\_710559, EPI\_ISL\_710560, EPI\_ISL\_710561, EPI\_ISL\_710562 University Hospital Dubrava Ruer Boškovic Institute; Forensic Science Centre Ivan Vueti; University of Zagreb Faculty of Science Robert Beluži, Marina Korolija, Ana Livun, Vjekoslav Tomai, Dunja Glavaš, Maja Kuzman, Paula Štancil, Lucija Markulin, Lucija Basi, Antonela Blažekovi, Fran Boroveki, Lidija Cvetko-Krajinovi, Ivana elap, Fuad osovi, Mirjana Domazet-Lošo, Tomislav Domazet-Lošo, Valentina umljan-Combaj, Kristina Gotovac Jere, Jasna Kašman, Vladimir Krajinovi, Danilo Licastro, Boris Maek, Zeljka Maak Šafranko, Gordana Maravi Vlahoviek, Senica Pejša, Josipa Skelin, Ivan Šarnija, Mario Štefanovi, Sanja Tadinac, Katarina Marija Tupek, Petra Vrabec, Rosa Karli, Kristian Vlahoviek

EPI\_ISL\_710563 Sestre Milosrdnice University Hospital Center Ruer Boškovic Institute; Forensic Science Centre Ivan Vueti; University of Zagreb Faculty of Science Robert Beluži, Marina Korolija, Ivana elap, Vjekoslav Tomai, Maja Kuzman, Dunja Glavaš, Maja Kuzman, Paula Štancil, Lucija Markulin, Antonela Blažekovi, Fran Boroveki, Lidija Cvetko-Krajinovi, Mirjana Domazet-Lošo, Tomislav Domazet-Lošo, Kristina Gotovac Jere, Vladimir Krajinovi, Danilo Licastro, Ana Livun, Boris Maek, Zeljka Maak Šafranko, Gordana Maravi Vlahoviek, Josipa Skelin, Ivan Šarnija, Mario Štefanovi, Sanja Tadinac, Rosa Karli, Kristian Vlahoviek

EPI\_ISL\_710564, EPI\_ISL\_710565, EPI\_ISL\_710566, EPI\_ISL\_710567, EPI\_ISL\_710568, EPI\_ISL\_710569, EPI\_ISL\_710570, EPI\_ISL\_710571, EPI\_ISL\_710572, EPI\_ISL\_710573, EPI\_ISL\_710574

see above University Hospital Dubrava Ruer Boškovic Institute; Forensic Science Centre Ivan Vueti; University of Zagreb Faculty of Science Robert Beluži, Marina Korolija, Ana Livun, Vjekoslav Tomai, Dunja Glavaš, Maja Kuzman, Paula Štancil, Lucija Markulin, Lucija Basi, Antonela Blažekovi, Fran Boroveki, Lidija Cvetko-Krajinovi, Ivana elap, Fuad osovi, Mirjana Domazet-Lošo, Tomislav Domazet-Lošo, Valentina umljan-Combaj, Kristina Gotovac Jere, Jasna Kašman, Vladimir Krajinovi, Danilo Licastro, Boris Maek, Zeljka Maak Šafranko, Gordana Maravi Vlahoviek, Senica Pejša, Josipa Skelin, Ivan Šarnija, Mario Štefanovi, Sanja Tadinac, Katarina Marija Tupek, Petra Vrabec, Rosa Karli, Kristian Vlahoviek

EPI\_ISL\_718323, EPI\_ISL\_718342, EPI\_ISL\_718354, EPI\_ISL\_718368, EPI\_ISL\_718378, EPI\_ISL\_718389, EPI\_ISL\_718413, EPI\_ISL\_718446, EPI\_ISL\_718452, EPI\_ISL\_718541, EPI\_ISL\_718545, EPI\_ISL\_718590, EPI\_ISL\_718617, EPI\_ISL\_718649, EPI\_ISL\_718660, EPI\_ISL\_718661, EPI\_ISL\_718693, EPI\_ISL\_718701, EPI\_ISL\_718793, EPI\_ISL\_718800, EPI\_ISL\_718906, EPI\_ISL\_718949, EPI\_ISL\_718972, EPI\_ISL\_719048, EPI\_ISL\_719057, EPI\_ISL\_719158, EPI\_ISL\_719168, EPI\_ISL\_719168, EPI\_ISL\_719168, EPI\_ISL\_719196, EPI\_ISL\_719196, EPI\_ISL\_719242, EPI\_ISL\_719270, EPI\_ISL\_719280, EPI\_ISL\_719313, EPI\_ISL\_719351, EPI\_ISL\_719371, EPI\_ISL\_719421, EPI\_ISL\_719425, EPI\_ISL\_719427, EPI\_ISL\_719448, EPI\_ISL\_719461, EPI\_ISL\_719480, EPI\_ISL\_719482, EPI\_ISL\_719493, EPI\_ISL\_719554, EPI\_ISL\_719558

see above Lighthouse Lab in Cambridge Wellcome Sanger Institute for the COVID-19 Genomics UK (COG-UK) Consortium Rob Howes, The Lighthouse Lab in Cambridge and Alex Alderton, Roberto Amato, Sonia Goncalves, Ewan Harrison, David K. Jackson, Ian Johnston, Dominic Kwiatkowski, Cordelia Langford, John Sillitoe on behalf of the Wellcome Sanger Institute COVID-19 Surveillance Team

EPI\_ISL\_722211, Servicio de Microbiología, SeqCOVID-SPAIN Rosario Moreno Muñoz, María Dolores Tirado Balaguer and SeqCOVID-SPAIN consortium

|                                                                                                                                                                                                                                                                                                                                                                                                                                                                                                                                                                                                                                                                                                                                                                                                                                                                                                                                                                                                                                                                                                                                                                                                                                                                                                                                                                                                                                                                                                                                                                                                                                                                                                                                                                                                                                                                                                                                                                                                                                                                                                                                                                                                                                                                                                                                                                                                                                                                                                                                                                                                                                                                                                                                                                                                                                                                                                                                                                                                                                                                                                                                                                                                                                                                                                                                                                                                                                                                                                                                                                                                                |                                                             |                                                                                                                                                                                                              |                                                                                                                                                                                                                                                                                                                               |
|----------------------------------------------------------------------------------------------------------------------------------------------------------------------------------------------------------------------------------------------------------------------------------------------------------------------------------------------------------------------------------------------------------------------------------------------------------------------------------------------------------------------------------------------------------------------------------------------------------------------------------------------------------------------------------------------------------------------------------------------------------------------------------------------------------------------------------------------------------------------------------------------------------------------------------------------------------------------------------------------------------------------------------------------------------------------------------------------------------------------------------------------------------------------------------------------------------------------------------------------------------------------------------------------------------------------------------------------------------------------------------------------------------------------------------------------------------------------------------------------------------------------------------------------------------------------------------------------------------------------------------------------------------------------------------------------------------------------------------------------------------------------------------------------------------------------------------------------------------------------------------------------------------------------------------------------------------------------------------------------------------------------------------------------------------------------------------------------------------------------------------------------------------------------------------------------------------------------------------------------------------------------------------------------------------------------------------------------------------------------------------------------------------------------------------------------------------------------------------------------------------------------------------------------------------------------------------------------------------------------------------------------------------------------------------------------------------------------------------------------------------------------------------------------------------------------------------------------------------------------------------------------------------------------------------------------------------------------------------------------------------------------------------------------------------------------------------------------------------------------------------------------------------------------------------------------------------------------------------------------------------------------------------------------------------------------------------------------------------------------------------------------------------------------------------------------------------------------------------------------------------------------------------------------------------------------------------------------------------------|-------------------------------------------------------------|--------------------------------------------------------------------------------------------------------------------------------------------------------------------------------------------------------------|-------------------------------------------------------------------------------------------------------------------------------------------------------------------------------------------------------------------------------------------------------------------------------------------------------------------------------|
| EPI_ISL_722216,<br>EPI_ISL_722235,<br>EPI_ISL_722236,<br>EPI_ISL_722238,<br>EPI_ISL_722239                                                                                                                                                                                                                                                                                                                                                                                                                                                                                                                                                                                                                                                                                                                                                                                                                                                                                                                                                                                                                                                                                                                                                                                                                                                                                                                                                                                                                                                                                                                                                                                                                                                                                                                                                                                                                                                                                                                                                                                                                                                                                                                                                                                                                                                                                                                                                                                                                                                                                                                                                                                                                                                                                                                                                                                                                                                                                                                                                                                                                                                                                                                                                                                                                                                                                                                                                                                                                                                                                                                     | Hospital General<br>Universitario de Castellón              | consortium/IBV(CSIC)                                                                                                                                                                                         |                                                                                                                                                                                                                                                                                                                               |
| EPI_ISL_733612,<br>EPI_ISL_733677,<br>EPI_ISL_733744,<br>EPI_ISL_733841,<br>EPI_ISL_733874                                                                                                                                                                                                                                                                                                                                                                                                                                                                                                                                                                                                                                                                                                                                                                                                                                                                                                                                                                                                                                                                                                                                                                                                                                                                                                                                                                                                                                                                                                                                                                                                                                                                                                                                                                                                                                                                                                                                                                                                                                                                                                                                                                                                                                                                                                                                                                                                                                                                                                                                                                                                                                                                                                                                                                                                                                                                                                                                                                                                                                                                                                                                                                                                                                                                                                                                                                                                                                                                                                                     | Lighthouse Lab in<br>Cambridge                              | Wellcome Sanger Institute for<br>the COVID-19 Genomics UK<br>(COG-UK) Consortium                                                                                                                             | Rob Howes, The Lighthouse Lab in Cambridge and Alex Alderton, Roberto Amato, Sonia Goncalves, Ewan Harrison, David K. Jackson, Ian Johnston, Dominic Kwiatkowski, Cordelia Langford, John Sillitoe on behalf of the Wellcome Sanger Institute<br>COVID-19 Surveillance Team                                                   |
| EPI_ISL_735490                                                                                                                                                                                                                                                                                                                                                                                                                                                                                                                                                                                                                                                                                                                                                                                                                                                                                                                                                                                                                                                                                                                                                                                                                                                                                                                                                                                                                                                                                                                                                                                                                                                                                                                                                                                                                                                                                                                                                                                                                                                                                                                                                                                                                                                                                                                                                                                                                                                                                                                                                                                                                                                                                                                                                                                                                                                                                                                                                                                                                                                                                                                                                                                                                                                                                                                                                                                                                                                                                                                                                                                                 | Rangamati General<br>Hospital RT-PCR lab,                   | Central Biological Research<br>Laboratory and Department<br>of Biochemistry and<br>Molecular Biology                                                                                                         | Robiul Hasan Bhuiyan, Md. Imranul Hoq, Md. Khondakar Raziur Rahman, Imam Hossen, Sajib Rudra, Md. Arif Hossain, Shanta Paul, Md. Omer Faruq, H. M. Abdullah Al Masud, Mohammad Omar Faruque                                                                                                                                   |
| EPI_ISL_735492                                                                                                                                                                                                                                                                                                                                                                                                                                                                                                                                                                                                                                                                                                                                                                                                                                                                                                                                                                                                                                                                                                                                                                                                                                                                                                                                                                                                                                                                                                                                                                                                                                                                                                                                                                                                                                                                                                                                                                                                                                                                                                                                                                                                                                                                                                                                                                                                                                                                                                                                                                                                                                                                                                                                                                                                                                                                                                                                                                                                                                                                                                                                                                                                                                                                                                                                                                                                                                                                                                                                                                                                 | Kumilla Medical College                                     | Central Biological Research<br>Laboratory and Department<br>of Biochemistry and<br>Molecular Biology                                                                                                         | Robiul Hasan Bhuiyan, Md. Imranul Hoq, Md. Khondakar Raziur Rahman, Imam Hossen, Sajib Rudra, Md. Arif Hossain, Shanta Paul, Md. Omer Faruq, H. M. Abdullah Al Masud, Mohammad Omar Faruque                                                                                                                                   |
| EPI_ISL_735493                                                                                                                                                                                                                                                                                                                                                                                                                                                                                                                                                                                                                                                                                                                                                                                                                                                                                                                                                                                                                                                                                                                                                                                                                                                                                                                                                                                                                                                                                                                                                                                                                                                                                                                                                                                                                                                                                                                                                                                                                                                                                                                                                                                                                                                                                                                                                                                                                                                                                                                                                                                                                                                                                                                                                                                                                                                                                                                                                                                                                                                                                                                                                                                                                                                                                                                                                                                                                                                                                                                                                                                                 | Cox's Bazar Medicila<br>College                             | Central Biological Research<br>Laboratory and Department<br>of Biochemistry and<br>Molecular Biology Central<br>Biological Research<br>Laboratory and Department<br>of Biochemistry and<br>Molecular Biology | Robiul Hasan Bhuiyan, Md. Imranul Hoq, Md. Khondakar Raziur Rahman, Imam Hossen, Sajib Rudra, Md. Arif Hossain, Shanta Paul, Md. Omer Faruq, H. M. Abdullah Al Masud, Mohammad Omar Faruque                                                                                                                                   |
| EPI_ISL_735503                                                                                                                                                                                                                                                                                                                                                                                                                                                                                                                                                                                                                                                                                                                                                                                                                                                                                                                                                                                                                                                                                                                                                                                                                                                                                                                                                                                                                                                                                                                                                                                                                                                                                                                                                                                                                                                                                                                                                                                                                                                                                                                                                                                                                                                                                                                                                                                                                                                                                                                                                                                                                                                                                                                                                                                                                                                                                                                                                                                                                                                                                                                                                                                                                                                                                                                                                                                                                                                                                                                                                                                                 | ACT Pathology                                               | Schwessinger Lab                                                                                                                                                                                             | Robyn N Hall, Benjamin Schwessinger, Ashley Jones, Robert Lanfear, Megan McDonald, Ming-Dao Chia, Kevin Murray, Craig Kennedy, Karina Kennedy                                                                                                                                                                                 |
| EPI_ISL_756448,<br>EPI_ISL_756480,<br>EPI_ISL_756490,<br>EPI_ISL_756519,<br>EPI_ISL_756570,<br>EPI_ISL_756671                                                                                                                                                                                                                                                                                                                                                                                                                                                                                                                                                                                                                                                                                                                                                                                                                                                                                                                                                                                                                                                                                                                                                                                                                                                                                                                                                                                                                                                                                                                                                                                                                                                                                                                                                                                                                                                                                                                                                                                                                                                                                                                                                                                                                                                                                                                                                                                                                                                                                                                                                                                                                                                                                                                                                                                                                                                                                                                                                                                                                                                                                                                                                                                                                                                                                                                                                                                                                                                                                                  | Lighthouse Lab in<br>Cambridge                              | Wellcome Sanger Institute for<br>the COVID-19 Genomics UK<br>(COG-UK) Consortium                                                                                                                             | Rob Howes, The Lighthouse Lab in Cambridge and Alex Alderton, Roberto Amato, Sonia Goncalves, Ewan Harrison, David K. Jackson, Ian Johnston, Dominic Kwiatkowski, Cordelia Langford, John Sillitoe on behalf of the Wellcome Sanger Institute<br>COVID-19 Surveillance Team                                                   |
| EPI_ISL_757287                                                                                                                                                                                                                                                                                                                                                                                                                                                                                                                                                                                                                                                                                                                                                                                                                                                                                                                                                                                                                                                                                                                                                                                                                                                                                                                                                                                                                                                                                                                                                                                                                                                                                                                                                                                                                                                                                                                                                                                                                                                                                                                                                                                                                                                                                                                                                                                                                                                                                                                                                                                                                                                                                                                                                                                                                                                                                                                                                                                                                                                                                                                                                                                                                                                                                                                                                                                                                                                                                                                                                                                                 | National Institute of<br>Health Research and<br>Development | National Institute of Health<br>Research and Development                                                                                                                                                     | Rukminiati,Y;Agustiniingsih;Adam,K;Wibowo,HA;Ramadhany,R;Pawestri,HA;Subangkit;Puspa,KD;Nugraha,AA;Ikawati,HD;Pangesti,KNA;Soekarso,T;Susilarini,NK;Hariastuti,NI;Nikmah,UA;Mursinah;Febriyani,A;Herman,R;Susanti,N;Herna;Febriyanti,T;<br>Nurhadi,M;Kurniawati,J;Kipuw,NL;Muna,F;Indalao,IL;Rizki,A;Puspandari,N;Setiawaty,V |
| EPI_ISL_760859, EPI_ISL_762067, EPI_ISL_762135, EPI_ISL_762546, EPI_ISL_762549, EPI_ISL_762592, EPI_ISL_762650, EPI_ISL_762665, EPI_ISL_762780, EPI_ISL_762852, EPI_ISL_768989, EPI_ISL_768992, EPI_ISL_769104, EPI_ISL_769109, EPI_ISL_769214, EPI_ISL_777320, EPI_ISL_777508, EPI_ISL_777519, EPI_ISL_777545, EPI_ISL_777745, EPI_ISL_777749, EPI_ISL_777757, EPI_ISL_777774, EPI_ISL_777815, EPI_ISL_777830, EPI_ISL_777835, EPI_ISL_777853, EPI_ISL_777888, EPI_ISL_777916, EPI_ISL_777917, EPI_ISL_777940, EPI_ISL_777959, EPI_ISL_777987, EPI_ISL_777997, EPI_ISL_778152, EPI_ISL_778177, EPI_ISL_778220, EPI_ISL_778231, EPI_ISL_778273, EPI_ISL_778285                                                                                                                                                                                                                                                                                                                                                                                                                                                                                                                                                                                                                                                                                                                                                                                                                                                                                                                                                                                                                                                                                                                                                                                                                                                                                                                                                                                                                                                                                                                                                                                                                                                                                                                                                                                                                                                                                                                                                                                                                                                                                                                                                                                                                                                                                                                                                                                                                                                                                                                                                                                                                                                                                                                                                                                                                                                                                                                                                 |                                                             |                                                                                                                                                                                                              |                                                                                                                                                                                                                                                                                                                               |
| see above                                                                                                                                                                                                                                                                                                                                                                                                                                                                                                                                                                                                                                                                                                                                                                                                                                                                                                                                                                                                                                                                                                                                                                                                                                                                                                                                                                                                                                                                                                                                                                                                                                                                                                                                                                                                                                                                                                                                                                                                                                                                                                                                                                                                                                                                                                                                                                                                                                                                                                                                                                                                                                                                                                                                                                                                                                                                                                                                                                                                                                                                                                                                                                                                                                                                                                                                                                                                                                                                                                                                                                                                      | Lighthouse Lab in<br>Cambridge                              | Wellcome Sanger Institute for<br>the COVID-19 Genomics UK<br>(COG-UK) Consortium                                                                                                                             | Rob Howes, The Lighthouse Lab in Cambridge and Alex Alderton, Roberto Amato, Sonia Goncalves, Ewan Harrison, David K. Jackson, Ian Johnston, Dominic Kwiatkowski, Cordelia Langford, John Sillitoe on behalf of the Wellcome Sanger Institute<br>COVID-19 Surveillance Team                                                   |
| EPI_ISL_780103, EPI_ISL_780105, EPI_ISL_780106, EPI_ISL_780110, EPI_ISL_780117, EPI_ISL_780118, EPI_ISL_780119, EPI_ISL_780135, EPI_ISL_780139, EPI_ISL_780142, EPI_ISL_780144, EPI_ISL_780146, EPI_ISL_780152, EPI_ISL_780169, EPI_ISL_780170, EPI_ISL_780173, EPI_ISL_780175, EPI_ISL_780176, EPI_ISL_780180, EPI_ISL_780182, EPI_ISL_780189, EPI_ISL_780193, EPI_ISL_780196, EPI_ISL_780197, EPI_ISL_780198, EPI_ISL_780199, EPI_ISL_780200, EPI_ISL_780203, EPI_ISL_780204, EPI_ISL_780207, EPI_ISL_780209, EPI_ISL_780212, EPI_ISL_780214, EPI_ISL_780216, EPI_ISL_780219, EPI_ISL_780222, EPI_ISL_780225, EPI_ISL_780227, EPI_ISL_780228, EPI_ISL_780229, EPI_ISL_780231, EPI_ISL_780232, EPI_ISL_780234, EPI_ISL_780236, EPI_ISL_780237, EPI_ISL_780239, EPI_ISL_780248, EPI_ISL_780249, EPI_ISL_780250, EPI_ISL_780251, EPI_ISL_780256, EPI_ISL_780259, EPI_ISL_780260, EPI_ISL_780269, EPI_ISL_780278, EPI_ISL_780286, EPI_ISL_780297, EPI_ISL_780298, EPI_ISL_780305, EPI_ISL_780308, EPI_ISL_780310, EPI_ISL_780315, EPI_ISL_780318, EPI_ISL_780319, EPI_ISL_780322, EPI_ISL_780329, EPI_ISL_780331, EPI_ISL_780332, EPI_ISL_780334, EPI_ISL_780336, EPI_ISL_780337, EPI_ISL_780338, EPI_ISL_780359, EPI_ISL_780361, EPI_ISL_780363, EPI_ISL_780365, EPI_ISL_780368, EPI_ISL_780372, EPI_ISL_780374                                                                                                                                                                                                                                                                                                                                                                                                                                                                                                                                                                                                                                                                                                                                                                                                                                                                                                                                                                                                                                                                                                                                                                                                                                                                                                                                                                                                                                                                                                                                                                                                                                                                                                                                                                                                                                                                                                                                                                                                                                                                                                                                                                                                                                                                                                 |                                                             |                                                                                                                                                                                                              |                                                                                                                                                                                                                                                                                                                               |
| see above                                                                                                                                                                                                                                                                                                                                                                                                                                                                                                                                                                                                                                                                                                                                                                                                                                                                                                                                                                                                                                                                                                                                                                                                                                                                                                                                                                                                                                                                                                                                                                                                                                                                                                                                                                                                                                                                                                                                                                                                                                                                                                                                                                                                                                                                                                                                                                                                                                                                                                                                                                                                                                                                                                                                                                                                                                                                                                                                                                                                                                                                                                                                                                                                                                                                                                                                                                                                                                                                                                                                                                                                      | Houston Methodist<br>Hospital                               | Houston Methodist Hospital                                                                                                                                                                                   | S. Wesley Long, Randall J. Olsen, Paul A. Christensen, David W. Bernard, James J. Davis, Maulik Shukla, Marcus Nguyen, Matthew Ojeda Saavedra, Prasanti Yerramilli, Layne Pruitt, Sishir Subedi, Heather Hendrickson, and James M. Musser                                                                                     |
| EPI_ISL_780418                                                                                                                                                                                                                                                                                                                                                                                                                                                                                                                                                                                                                                                                                                                                                                                                                                                                                                                                                                                                                                                                                                                                                                                                                                                                                                                                                                                                                                                                                                                                                                                                                                                                                                                                                                                                                                                                                                                                                                                                                                                                                                                                                                                                                                                                                                                                                                                                                                                                                                                                                                                                                                                                                                                                                                                                                                                                                                                                                                                                                                                                                                                                                                                                                                                                                                                                                                                                                                                                                                                                                                                                 | CERBA LAB                                                   | CERBA LAB                                                                                                                                                                                                    | Roquebert B; Costa JM; Hedbaut E; Trombert S; Lecorche E; Verdurem L; Malek Ramdane, Olivi M; Haïm-Boukobza S                                                                                                                                                                                                                 |
| EPI_ISL_780429, EPI_ISL_780434, EPI_ISL_780440, EPI_ISL_780445, EPI_ISL_780446, EPI_ISL_780447, EPI_ISL_780448, EPI_ISL_780450, EPI_ISL_780453, EPI_ISL_780457, EPI_ISL_780459, EPI_ISL_780463, EPI_ISL_780476, EPI_ISL_780478, EPI_ISL_780479, EPI_ISL_780481, EPI_ISL_780483, EPI_ISL_780484, EPI_ISL_780487, EPI_ISL_780488, EPI_ISL_780532, EPI_ISL_780534, EPI_ISL_780535, EPI_ISL_780537, EPI_ISL_780549, EPI_ISL_780554, EPI_ISL_780558, EPI_ISL_780560, EPI_ISL_780561, EPI_ISL_780565, EPI_ISL_780576, EPI_ISL_780581, EPI_ISL_780583, EPI_ISL_780590, EPI_ISL_780594, EPI_ISL_780596, EPI_ISL_780598, EPI_ISL_780601, EPI_ISL_780604, EPI_ISL_780606, EPI_ISL_780609, EPI_ISL_780610, EPI_ISL_780614, EPI_ISL_780619, EPI_ISL_780621, EPI_ISL_780623, EPI_ISL_780625, EPI_ISL_780632, EPI_ISL_780636, EPI_ISL_780637, EPI_ISL_780644, EPI_ISL_780649, EPI_ISL_780655, EPI_ISL_780656, EPI_ISL_780661, EPI_ISL_780664, EPI_ISL_780665, EPI_ISL_780667, EPI_ISL_780668, EPI_ISL_780672, EPI_ISL_780673, EPI_ISL_780675, EPI_ISL_780677, EPI_ISL_780678, EPI_ISL_780682, EPI_ISL_780686, EPI_ISL_780689, EPI_ISL_780693, EPI_ISL_780694, EPI_ISL_780696, EPI_ISL_780701, EPI_ISL_780703, EPI_ISL_780710, EPI_ISL_780713, EPI_ISL_780715, EPI_ISL_780720, EPI_ISL_780725, EPI_ISL_780728, EPI_ISL_780729, EPI_ISL_780735, EPI_ISL_780737, EPI_ISL_780738, EPI_ISL_780742, EPI_ISL_780746, EPI_ISL_780747, EPI_ISL_780751, EPI_ISL_780752, EPI_ISL_780753, EPI_ISL_780755, EPI_ISL_780758, EPI_ISL_780760, EPI_ISL_780762, EPI_ISL_780763, EPI_ISL_780764, EPI_ISL_780765, EPI_ISL_780768, EPI_ISL_780773, EPI_ISL_780777, EPI_ISL_780784, EPI_ISL_780785, EPI_ISL_780788, EPI_ISL_780790, EPI_ISL_780794, EPI_ISL_780796, EPI_ISL_780800, EPI_ISL_780804, EPI_ISL_780805, EPI_ISL_780806, EPI_ISL_780807, EPI_ISL_780808, EPI_ISL_780810, EPI_ISL_780811, EPI_ISL_780814, EPI_ISL_780816, EPI_ISL_780819, EPI_ISL_780821, EPI_ISL_780830, EPI_ISL_780832, EPI_ISL_780833, EPI_ISL_780837, EPI_ISL_780839, EPI_ISL_780842, EPI_ISL_780844, EPI_ISL_780848, EPI_ISL_780849, EPI_ISL_780853, EPI_ISL_780856, EPI_ISL_780857, EPI_ISL_780859, EPI_ISL_780861, EPI_ISL_780865, EPI_ISL_780869, EPI_ISL_780874, EPI_ISL_780876, EPI_ISL_780881, EPI_ISL_780885, EPI_ISL_780889, EPI_ISL_780895, EPI_ISL_780896, EPI_ISL_780897, EPI_ISL_780899, EPI_ISL_780922, EPI_ISL_780923, EPI_ISL_780924, EPI_ISL_780926, EPI_ISL_780930, EPI_ISL_780935, EPI_ISL_780941, EPI_ISL_780944, EPI_ISL_780946, EPI_ISL_780949, EPI_ISL_780953, EPI_ISL_780955, EPI_ISL_780959, EPI_ISL_780967, EPI_ISL_780970, EPI_ISL_780972, EPI_ISL_780975, EPI_ISL_780978, EPI_ISL_780988, EPI_ISL_780989, EPI_ISL_780991, EPI_ISL_780997, EPI_ISL_780998, EPI_ISL_781002, EPI_ISL_781003, EPI_ISL_781004, EPI_ISL_781005, EPI_ISL_781006, EPI_ISL_781007, EPI_ISL_781008, EPI_ISL_781009, EPI_ISL_781010, EPI_ISL_781011, EPI_ISL_781012, EPI_ISL_781023, EPI_ISL_781033, EPI_ISL_781038, EPI_ISL_781049, EPI_ISL_781051, EPI_ISL_781052, EPI_ISL_781053, EPI_ISL_781056, EPI_ISL_781057, EPI_ISL_781063, EPI_ISL_781068, EPI_ISL_781073, EPI_ISL_781074, EPI_ISL_781076, EPI_ISL_781078, EPI_ISL_781079, EPI_ISL_781081, EPI_ISL_781086, EPI_ISL_781094, EPI_ISL_781095, EPI_ISL_781106, EPI_ISL_781110, EPI_ISL_781111, EPI_ISL_781115, EPI_ISL_781118, EPI_ISL_781119, EPI_ISL_781120, EPI_ISL_781121, EPI_ISL_781125, EPI_ISL_781126, EPI_ISL_781128, EPI_ISL_781139, EPI_ISL_781142, EPI_ISL_781144, EPI_ISL_781145, EPI_ISL_781153, EPI_ISL_781156, EPI_ISL_781162, EPI_ISL_781169, EPI_ISL_781173, EPI_ISL_781175, EPI_ISL_781177 |                                                             |                                                                                                                                                                                                              |                                                                                                                                                                                                                                                                                                                               |
| see above                                                                                                                                                                                                                                                                                                                                                                                                                                                                                                                                                                                                                                                                                                                                                                                                                                                                                                                                                                                                                                                                                                                                                                                                                                                                                                                                                                                                                                                                                                                                                                                                                                                                                                                                                                                                                                                                                                                                                                                                                                                                                                                                                                                                                                                                                                                                                                                                                                                                                                                                                                                                                                                                                                                                                                                                                                                                                                                                                                                                                                                                                                                                                                                                                                                                                                                                                                                                                                                                                                                                                                                                      | Houston Methodist<br>Hospital                               | Houston Methodist Hospital                                                                                                                                                                                   | S. Wesley Long, Randall J. Olsen, Paul A. Christensen, David W. Bernard, James J. Davis, Maulik Shukla, Marcus Nguyen, Matthew Ojeda Saavedra, Prasanti Yerramilli, Layne Pruitt, Sishir Subedi, Heather Hendrickson, and James M. Musser                                                                                     |
| EPI_ISL_781260, EPI_ISL_781287, EPI_ISL_781299, EPI_ISL_781342, EPI_ISL_781448, EPI_ISL_781481, EPI_ISL_781498, EPI_ISL_781583, EPI_ISL_781610, EPI_ISL_781634, EPI_ISL_781667, EPI_ISL_781685, EPI_ISL_781745, EPI_ISL_781775, EPI_ISL_781800, EPI_ISL_781813, EPI_ISL_781819, EPI_ISL_781824, EPI_ISL_781830, EPI_ISL_781861, EPI_ISL_782761, EPI_ISL_783023, EPI_ISL_783066, EPI_ISL_783367, EPI_ISL_783460, EPI_ISL_783494, EPI_ISL_783526, EPI_ISL_783529, EPI_ISL_783533                                                                                                                                                                                                                                                                                                                                                                                                                                                                                                                                                                                                                                                                                                                                                                                                                                                                                                                                                                                                                                                                                                                                                                                                                                                                                                                                                                                                                                                                                                                                                                                                                                                                                                                                                                                                                                                                                                                                                                                                                                                                                                                                                                                                                                                                                                                                                                                                                                                                                                                                                                                                                                                                                                                                                                                                                                                                                                                                                                                                                                                                                                                                 |                                                             |                                                                                                                                                                                                              |                                                                                                                                                                                                                                                                                                                               |
| see above                                                                                                                                                                                                                                                                                                                                                                                                                                                                                                                                                                                                                                                                                                                                                                                                                                                                                                                                                                                                                                                                                                                                                                                                                                                                                                                                                                                                                                                                                                                                                                                                                                                                                                                                                                                                                                                                                                                                                                                                                                                                                                                                                                                                                                                                                                                                                                                                                                                                                                                                                                                                                                                                                                                                                                                                                                                                                                                                                                                                                                                                                                                                                                                                                                                                                                                                                                                                                                                                                                                                                                                                      | Lighthouse Lab in<br>Cambridge                              | Wellcome Sanger Institute for<br>the COVID-19 Genomics UK<br>(COG-UK) Consortium                                                                                                                             | Rob Howes, The Lighthouse Lab in Cambridge and Alex Alderton, Roberto Amato, Sonia Goncalves, Ewan Harrison, David K. Jackson, Ian Johnston, Dominic Kwiatkowski, Cordelia Langford, John Sillitoe on behalf of the Wellcome Sanger Institute<br>COVID-19 Surveillance Team                                                   |
| EPI_ISL_783541, EPI_ISL_783546, EPI_ISL_783548, EPI_ISL_783549, EPI_ISL_783550, EPI_ISL_783551, EPI_ISL_783552, EPI_ISL_783555, EPI_ISL_783560, EPI_ISL_783562, EPI_ISL_783587, EPI_ISL_783591, EPI_ISL_783594, EPI_ISL_783600, EPI_ISL_783602, EPI_ISL_783604, EPI_ISL_783605, EPI_ISL_783606, EPI_ISL_783609, EPI_ISL_783611, EPI_ISL_783613, EPI_ISL_783614, EPI_ISL_783618, EPI_ISL_783622, EPI_ISL_783623, EPI_ISL_783625, EPI_ISL_783626, EPI_ISL_783630, EPI_ISL_783632, EPI_ISL_783636, EPI_ISL_783639, EPI_ISL_783640, EPI_ISL_783647, EPI_ISL_783649, EPI_ISL_783650, EPI_ISL_783651, EPI_ISL_783654, EPI_ISL_783655, EPI_ISL_783656, EPI_ISL_783657, EPI_ISL_783658, EPI_ISL_783661, EPI_ISL_783662, EPI_ISL_783665, EPI_ISL_783666, EPI_ISL_783668, EPI_ISL_783669, EPI_ISL_783671, EPI_ISL_783674, EPI_ISL_783675, EPI_ISL_783676, EPI_ISL_783684, EPI_ISL_783685, EPI_ISL_783687, EPI_ISL_783688, EPI_ISL_783690, EPI_ISL_783696, EPI_ISL_783697, EPI_ISL_783699, EPI_ISL_783700, EPI_ISL_783702, EPI_ISL_783705, EPI_ISL_783716, EPI_ISL_783720, EPI_ISL_783727, EPI_ISL_783729, EPI_ISL_783733, EPI_ISL_783734, EPI_ISL_783736, EPI_ISL_783747, EPI_ISL_783749, EPI_ISL_783755, EPI_ISL_783759, EPI_ISL_783762, EPI_ISL_783765, EPI_ISL_783768, EPI_ISL_783771, EPI_ISL_783773, EPI_ISL_783777, EPI_ISL_783778, EPI_ISL_783780, EPI_ISL_783786, EPI_ISL_783787, EPI_ISL_783788, EPI_ISL_783789, EPI_ISL_783800, EPI_ISL_783801, EPI_ISL_783807, EPI_ISL_783808, EPI_ISL_783813, EPI_ISL_783815, EPI_ISL_783816, EPI_ISL_783825, EPI_ISL_783828, EPI_ISL_783832, EPI_ISL_783833, EPI_ISL_783834, EPI_ISL_783836, EPI_ISL_783839, EPI_ISL_783841, EPI_ISL_783844, EPI_ISL_783849, EPI_ISL_783853, EPI_ISL_783854, EPI_ISL_783855, EPI_ISL_783861, EPI_ISL_783862, EPI_ISL_783870, EPI_ISL_783872, EPI_ISL_783873, EPI_ISL_783874, EPI_ISL_783875, EPI_ISL_783876, EPI_ISL_783877, EPI_ISL_783878, EPI_ISL_783884, EPI_ISL_783886, EPI_ISL_783889, EPI_ISL_783891, EPI_ISL_783892, EPI_ISL_783893, EPI_ISL_783894, EPI_ISL_783895, EPI_ISL_783896, EPI_ISL_783897, EPI_ISL_783898, EPI_ISL_783899, EPI_ISL_783900, EPI_ISL_783907, EPI_ISL_783908, EPI_ISL_783912, EPI_ISL_783913, EPI_ISL_783914, EPI_ISL_783919, EPI_ISL_783920, EPI_ISL_783921, EPI_ISL_783922, EPI_ISL_783923, EPI_ISL_783924, EPI_ISL_783925, EPI_ISL_783926, EPI_ISL_783927, EPI_ISL_783928, EPI_ISL_783929, EPI_ISL_783930, EPI_ISL_783931, EPI_ISL_783932, EPI_ISL_783933, EPI_ISL_783934, EPI_ISL_783935, EPI_ISL_783936, EPI_ISL_783937, EPI_ISL_783938, EPI_ISL_783939, EPI_ISL_783940, EPI_ISL_783945, EPI_ISL_783948, EPI_ISL_783955, EPI_ISL_783959, EPI_ISL_783961, EPI_ISL_783962, EPI_ISL_783968, EPI_ISL_783969, EPI_ISL_783970, EPI_ISL_783980, EPI_ISL_783982, EPI_ISL_783984, EPI_ISL_783985, EPI_ISL_783989, EPI_ISL_784000, EPI_ISL_784001, EPI_ISL_784007, EPI_ISL_784008,                                                                                                                                                                                                                                                                                                                                                                                                                                                                                                                                                                                                                                                                                                                                |                                                             |                                                                                                                                                                                                              |                                                                                                                                                                                                                                                                                                                               |





|                                                                                                                                                                                                                                                                                                                                                                                                                                                                                                                                                                                                                                                                                                                                                                                                                                                                                                                                                                                                                                                                                                                                                                                                                                                                                                                                                                                                                                                                                                                                                                                                                                                                                                                                                                                                                                                                                                                                                                                                                                                                                                                                                                                                                                                                                                                                                                                                                                                                                                                                                                                                                                                                                                                                                                                                                                                                                                                                                                                                                                                                                                                                                                                                                                                                                                                                                                                                                                                                                                                                                                                                                                                                                                                                                                                                                                                                                                                                                                                                                                                                                                                                                                                                                                                                                                                                                                                                                                                                                                                                                                                                                                                                                                                                                                                                                                                                                                                                                                                                                                                                                                                                                                                                                                                                                                                                |                                                                                                                                          |                                                                                                              |                                                                                                                                                                                                                                                                          |                                                                                                                                                                                                                                                                          |
|--------------------------------------------------------------------------------------------------------------------------------------------------------------------------------------------------------------------------------------------------------------------------------------------------------------------------------------------------------------------------------------------------------------------------------------------------------------------------------------------------------------------------------------------------------------------------------------------------------------------------------------------------------------------------------------------------------------------------------------------------------------------------------------------------------------------------------------------------------------------------------------------------------------------------------------------------------------------------------------------------------------------------------------------------------------------------------------------------------------------------------------------------------------------------------------------------------------------------------------------------------------------------------------------------------------------------------------------------------------------------------------------------------------------------------------------------------------------------------------------------------------------------------------------------------------------------------------------------------------------------------------------------------------------------------------------------------------------------------------------------------------------------------------------------------------------------------------------------------------------------------------------------------------------------------------------------------------------------------------------------------------------------------------------------------------------------------------------------------------------------------------------------------------------------------------------------------------------------------------------------------------------------------------------------------------------------------------------------------------------------------------------------------------------------------------------------------------------------------------------------------------------------------------------------------------------------------------------------------------------------------------------------------------------------------------------------------------------------------------------------------------------------------------------------------------------------------------------------------------------------------------------------------------------------------------------------------------------------------------------------------------------------------------------------------------------------------------------------------------------------------------------------------------------------------------------------------------------------------------------------------------------------------------------------------------------------------------------------------------------------------------------------------------------------------------------------------------------------------------------------------------------------------------------------------------------------------------------------------------------------------------------------------------------------------------------------------------------------------------------------------------------------------------------------------------------------------------------------------------------------------------------------------------------------------------------------------------------------------------------------------------------------------------------------------------------------------------------------------------------------------------------------------------------------------------------------------------------------------------------------------------------------------------------------------------------------------------------------------------------------------------------------------------------------------------------------------------------------------------------------------------------------------------------------------------------------------------------------------------------------------------------------------------------------------------------------------------------------------------------------------------------------------------------------------------------------------------------------------------------------------------------------------------------------------------------------------------------------------------------------------------------------------------------------------------------------------------------------------------------------------------------------------------------------------------------------------------------------------------------------------------------------------------------------------------------------------|------------------------------------------------------------------------------------------------------------------------------------------|--------------------------------------------------------------------------------------------------------------|--------------------------------------------------------------------------------------------------------------------------------------------------------------------------------------------------------------------------------------------------------------------------|--------------------------------------------------------------------------------------------------------------------------------------------------------------------------------------------------------------------------------------------------------------------------|
| EPI_ISL_854864, EPI_ISL_854865, EPI_ISL_854866, EPI_ISL_854867, EPI_ISL_854868, EPI_ISL_854869, EPI_ISL_854870, EPI_ISL_854871, EPI_ISL_854872, EPI_ISL_854873, EPI_ISL_854874, EPI_ISL_854875, EPI_ISL_854876, EPI_ISL_854877, EPI_ISL_854878, EPI_ISL_854879, EPI_ISL_854880, EPI_ISL_854881, EPI_ISL_854882, EPI_ISL_854883, EPI_ISL_854884, EPI_ISL_854885, EPI_ISL_854886, EPI_ISL_854887, EPI_ISL_854888, EPI_ISL_854889, EPI_ISL_854900, EPI_ISL_854901, EPI_ISL_854902, EPI_ISL_854903, EPI_ISL_854904, EPI_ISL_854905, EPI_ISL_854906, EPI_ISL_854907, EPI_ISL_854908, EPI_ISL_854909, EPI_ISL_854910, EPI_ISL_854911, EPI_ISL_854912, EPI_ISL_854913, EPI_ISL_854914, EPI_ISL_854915, EPI_ISL_854916, EPI_ISL_854917, EPI_ISL_854918, EPI_ISL_854919, EPI_ISL_854920, EPI_ISL_854921, EPI_ISL_854922, EPI_ISL_854923, EPI_ISL_854924, EPI_ISL_854925, EPI_ISL_854926, EPI_ISL_854927, EPI_ISL_854928, EPI_ISL_854929, EPI_ISL_854930, EPI_ISL_854931, EPI_ISL_854932, EPI_ISL_854933, EPI_ISL_854934, EPI_ISL_854935, EPI_ISL_854936, EPI_ISL_854937, EPI_ISL_854938, EPI_ISL_854939, EPI_ISL_854940, EPI_ISL_854941, EPI_ISL_854942, EPI_ISL_854943, EPI_ISL_854944, EPI_ISL_854945, EPI_ISL_854946, EPI_ISL_854947, EPI_ISL_854948, EPI_ISL_854949, EPI_ISL_854950, EPI_ISL_854951, EPI_ISL_854952, EPI_ISL_854953, EPI_ISL_854954, EPI_ISL_854955, EPI_ISL_854956, EPI_ISL_854957, EPI_ISL_854958, EPI_ISL_854959, EPI_ISL_854960, EPI_ISL_854961, EPI_ISL_854962, EPI_ISL_854963, EPI_ISL_854964, EPI_ISL_854965, EPI_ISL_854966, EPI_ISL_854967, EPI_ISL_854968, EPI_ISL_854969, EPI_ISL_854970, EPI_ISL_854971, EPI_ISL_854972, EPI_ISL_854973, EPI_ISL_854974, EPI_ISL_854975, EPI_ISL_854976, EPI_ISL_855014, EPI_ISL_855015, EPI_ISL_855016, EPI_ISL_855017, EPI_ISL_855018, EPI_ISL_855019, EPI_ISL_855020, EPI_ISL_855021, EPI_ISL_855022, EPI_ISL_855023, EPI_ISL_855024, EPI_ISL_855025, EPI_ISL_855026, EPI_ISL_855027, EPI_ISL_855028, EPI_ISL_855029, EPI_ISL_855030, EPI_ISL_855031, EPI_ISL_855032, EPI_ISL_855033, EPI_ISL_855034, EPI_ISL_855035, EPI_ISL_855036, EPI_ISL_855037, EPI_ISL_855038, EPI_ISL_855039, EPI_ISL_855040, EPI_ISL_855041, EPI_ISL_855042, EPI_ISL_855043, EPI_ISL_855044, EPI_ISL_855045, EPI_ISL_855046, EPI_ISL_855047, EPI_ISL_855048, EPI_ISL_855049, EPI_ISL_855050, EPI_ISL_855051, EPI_ISL_855052, EPI_ISL_855053, EPI_ISL_855054, EPI_ISL_855055, EPI_ISL_855056, EPI_ISL_855057, EPI_ISL_855058, EPI_ISL_855059, EPI_ISL_855060, EPI_ISL_855061, EPI_ISL_855062, EPI_ISL_855063, EPI_ISL_855064, EPI_ISL_855065, EPI_ISL_855066, EPI_ISL_855067, EPI_ISL_855068, EPI_ISL_855069, EPI_ISL_855070, EPI_ISL_855071, EPI_ISL_855072, EPI_ISL_855073, EPI_ISL_855074, EPI_ISL_855075, EPI_ISL_855076, EPI_ISL_855077, EPI_ISL_855078, EPI_ISL_855079, EPI_ISL_855080, EPI_ISL_855081, EPI_ISL_855082, EPI_ISL_855083, EPI_ISL_855084, EPI_ISL_855085, EPI_ISL_855086, EPI_ISL_855087, EPI_ISL_855088, EPI_ISL_855089, EPI_ISL_855090, EPI_ISL_855091, EPI_ISL_855092, EPI_ISL_855093, EPI_ISL_855094, EPI_ISL_855095, EPI_ISL_855096, EPI_ISL_855097, EPI_ISL_855098, EPI_ISL_855099, EPI_ISL_855100, EPI_ISL_855101, EPI_ISL_855102, EPI_ISL_855103, EPI_ISL_855104, EPI_ISL_855105, EPI_ISL_855106, EPI_ISL_855107, EPI_ISL_855108, EPI_ISL_855109, EPI_ISL_855110, EPI_ISL_855111, EPI_ISL_855112, EPI_ISL_855113, EPI_ISL_855114, EPI_ISL_855115, EPI_ISL_855116, EPI_ISL_855117, EPI_ISL_855118, EPI_ISL_855119, EPI_ISL_855120, EPI_ISL_855121, EPI_ISL_855122, EPI_ISL_855123, EPI_ISL_855124, EPI_ISL_855125, EPI_ISL_855126, EPI_ISL_855127, EPI_ISL_855128, EPI_ISL_855129, EPI_ISL_855130, EPI_ISL_855131, EPI_ISL_855132, EPI_ISL_855133, EPI_ISL_855134, EPI_ISL_855135, EPI_ISL_855136, EPI_ISL_855137, EPI_ISL_855138, EPI_ISL_855139, EPI_ISL_855140, EPI_ISL_855141, EPI_ISL_855142, EPI_ISL_855143, EPI_ISL_855144, EPI_ISL_855145, EPI_ISL_855146, EPI_ISL_855147, EPI_ISL_855148, EPI_ISL_855149, EPI_ISL_855150, EPI_ISL_855151, EPI_ISL_855152, EPI_ISL_855153, EPI_ISL_855154, EPI_ISL_855155, EPI_ISL_855156, EPI_ISL_855157, EPI_ISL_855158, EPI_ISL_855159, EPI_ISL_855160, EPI_ISL_855161, EPI_ISL_855162, EPI_ISL_855163, EPI_ISL_855164, EPI_ISL_855165, EPI_ISL_855166, EPI_ISL_855167, EPI_ISL_855168, EPI_ISL_855169, EPI_ISL_855170, EPI_ISL_855171, EPI_ISL_855172, EPI_ISL_855173, EPI_ISL_855174, EPI_ISL_855175, EPI_ISL_855176, EPI_ISL_855177, EPI_ISL_855178, EPI_ISL_855179, EPI_ISL_855180, EPI_ISL_855181, EPI_ISL_855182, EPI_ISL_855183, EPI_ISL_855184, EPI_ISL_855185                                                                                                                                                                                                                                                                                                                                                                                                                                                                                                                                                                                                                                                                                                                                                 | see above                                                                                                                                | Quest Diagnostics                                                                                            | Quest Diagnostics                                                                                                                                                                                                                                                        | Rosenthal,S.H., Gerasimova.A., Kagan,R.M., Anderson, B., Hua, M., Liu Y., Bernstein, L.E., Livingston, K.E., Perez, A., Shalhout, D.F., Shlyakhter, I.A., Owen, R., Tanpaiboon, P., Lacbawan, F.                                                                         |
| EPI_ISL_855551                                                                                                                                                                                                                                                                                                                                                                                                                                                                                                                                                                                                                                                                                                                                                                                                                                                                                                                                                                                                                                                                                                                                                                                                                                                                                                                                                                                                                                                                                                                                                                                                                                                                                                                                                                                                                                                                                                                                                                                                                                                                                                                                                                                                                                                                                                                                                                                                                                                                                                                                                                                                                                                                                                                                                                                                                                                                                                                                                                                                                                                                                                                                                                                                                                                                                                                                                                                                                                                                                                                                                                                                                                                                                                                                                                                                                                                                                                                                                                                                                                                                                                                                                                                                                                                                                                                                                                                                                                                                                                                                                                                                                                                                                                                                                                                                                                                                                                                                                                                                                                                                                                                                                                                                                                                                                                                 | Cerballiance Wilson                                                                                                                      | CERBA LAB                                                                                                    |                                                                                                                                                                                                                                                                          | Roquebert B; Merah K; Olivi M; Hehriha S; Lecorche E; Trombert S; Verdurme L; Malek R; Zimmer S; Costa JM; Haïm-Boukobza S                                                                                                                                               |
| EPI_ISL_857542, EPI_ISL_857557, EPI_ISL_857600, EPI_ISL_857613, EPI_ISL_857651, EPI_ISL_857653, EPI_ISL_857702, EPI_ISL_857740, EPI_ISL_857752, EPI_ISL_857755, EPI_ISL_857785, EPI_ISL_857799, EPI_ISL_857818, EPI_ISL_857844, EPI_ISL_859555                                                                                                                                                                                                                                                                                                                                                                                                                                                                                                                                                                                                                                                                                                                                                                                                                                                                                                                                                                                                                                                                                                                                                                                                                                                                                                                                                                                                                                                                                                                                                                                                                                                                                                                                                                                                                                                                                                                                                                                                                                                                                                                                                                                                                                                                                                                                                                                                                                                                                                                                                                                                                                                                                                                                                                                                                                                                                                                                                                                                                                                                                                                                                                                                                                                                                                                                                                                                                                                                                                                                                                                                                                                                                                                                                                                                                                                                                                                                                                                                                                                                                                                                                                                                                                                                                                                                                                                                                                                                                                                                                                                                                                                                                                                                                                                                                                                                                                                                                                                                                                                                                 | see above                                                                                                                                | Lighthouse Lab in Cambridge                                                                                  | Wellcome Sanger Institute for the COVID-19 Genomics UK (COG-UK) Consortium                                                                                                                                                                                               | Rob Howes, The Lighthouse Lab in Cambridge and Alex Alderton, Roberto Amato, Sonia Goncalves, Ewan Harrison, David K. Jackson, Ian Johnston, Dominic Kwiatkowski, Cordelia Langford, John Sillitoe on behalf of the Wellcome Sanger Institute COVID-19 Surveillance Team |
| EPI_ISL_860716                                                                                                                                                                                                                                                                                                                                                                                                                                                                                                                                                                                                                                                                                                                                                                                                                                                                                                                                                                                                                                                                                                                                                                                                                                                                                                                                                                                                                                                                                                                                                                                                                                                                                                                                                                                                                                                                                                                                                                                                                                                                                                                                                                                                                                                                                                                                                                                                                                                                                                                                                                                                                                                                                                                                                                                                                                                                                                                                                                                                                                                                                                                                                                                                                                                                                                                                                                                                                                                                                                                                                                                                                                                                                                                                                                                                                                                                                                                                                                                                                                                                                                                                                                                                                                                                                                                                                                                                                                                                                                                                                                                                                                                                                                                                                                                                                                                                                                                                                                                                                                                                                                                                                                                                                                                                                                                 | Cerballiance Côte d'Azur                                                                                                                 | CERBA LAB                                                                                                    |                                                                                                                                                                                                                                                                          | Roquebert B; Prots.L; Barrieu-Moussat S;Haïm-Boukobza S.                                                                                                                                                                                                                 |
| EPI_ISL_861506, EPI_ISL_861507                                                                                                                                                                                                                                                                                                                                                                                                                                                                                                                                                                                                                                                                                                                                                                                                                                                                                                                                                                                                                                                                                                                                                                                                                                                                                                                                                                                                                                                                                                                                                                                                                                                                                                                                                                                                                                                                                                                                                                                                                                                                                                                                                                                                                                                                                                                                                                                                                                                                                                                                                                                                                                                                                                                                                                                                                                                                                                                                                                                                                                                                                                                                                                                                                                                                                                                                                                                                                                                                                                                                                                                                                                                                                                                                                                                                                                                                                                                                                                                                                                                                                                                                                                                                                                                                                                                                                                                                                                                                                                                                                                                                                                                                                                                                                                                                                                                                                                                                                                                                                                                                                                                                                                                                                                                                                                 | Cerballiance Provence                                                                                                                    | CERBA LAB                                                                                                    |                                                                                                                                                                                                                                                                          | Roig JC; Delaunay E; Prots L.                                                                                                                                                                                                                                            |
| EPI_ISL_861714                                                                                                                                                                                                                                                                                                                                                                                                                                                                                                                                                                                                                                                                                                                                                                                                                                                                                                                                                                                                                                                                                                                                                                                                                                                                                                                                                                                                                                                                                                                                                                                                                                                                                                                                                                                                                                                                                                                                                                                                                                                                                                                                                                                                                                                                                                                                                                                                                                                                                                                                                                                                                                                                                                                                                                                                                                                                                                                                                                                                                                                                                                                                                                                                                                                                                                                                                                                                                                                                                                                                                                                                                                                                                                                                                                                                                                                                                                                                                                                                                                                                                                                                                                                                                                                                                                                                                                                                                                                                                                                                                                                                                                                                                                                                                                                                                                                                                                                                                                                                                                                                                                                                                                                                                                                                                                                 | Cerba                                                                                                                                    | CERBA LAB                                                                                                    |                                                                                                                                                                                                                                                                          | Roquebert B; Costa JM; Hedbaut E; Trombert S; Lecorche E; Verdurme L; Malek Ramdane, Olivi M; Haïm-Boukobza S.                                                                                                                                                           |
| EPI_ISL_861715                                                                                                                                                                                                                                                                                                                                                                                                                                                                                                                                                                                                                                                                                                                                                                                                                                                                                                                                                                                                                                                                                                                                                                                                                                                                                                                                                                                                                                                                                                                                                                                                                                                                                                                                                                                                                                                                                                                                                                                                                                                                                                                                                                                                                                                                                                                                                                                                                                                                                                                                                                                                                                                                                                                                                                                                                                                                                                                                                                                                                                                                                                                                                                                                                                                                                                                                                                                                                                                                                                                                                                                                                                                                                                                                                                                                                                                                                                                                                                                                                                                                                                                                                                                                                                                                                                                                                                                                                                                                                                                                                                                                                                                                                                                                                                                                                                                                                                                                                                                                                                                                                                                                                                                                                                                                                                                 | CERBA                                                                                                                                    | CERBA LAB                                                                                                    |                                                                                                                                                                                                                                                                          | Roquebert B; Costa JM; Hedbaut E; Trombert S; Lecorche E; Verdurme L; Malek Ramdane, Olivi M; Haïm-Boukobza S.                                                                                                                                                           |
| EPI_ISL_861716, EPI_ISL_861727, EPI_ISL_861728                                                                                                                                                                                                                                                                                                                                                                                                                                                                                                                                                                                                                                                                                                                                                                                                                                                                                                                                                                                                                                                                                                                                                                                                                                                                                                                                                                                                                                                                                                                                                                                                                                                                                                                                                                                                                                                                                                                                                                                                                                                                                                                                                                                                                                                                                                                                                                                                                                                                                                                                                                                                                                                                                                                                                                                                                                                                                                                                                                                                                                                                                                                                                                                                                                                                                                                                                                                                                                                                                                                                                                                                                                                                                                                                                                                                                                                                                                                                                                                                                                                                                                                                                                                                                                                                                                                                                                                                                                                                                                                                                                                                                                                                                                                                                                                                                                                                                                                                                                                                                                                                                                                                                                                                                                                                                 | CERBA                                                                                                                                    | CERBA LAB                                                                                                    |                                                                                                                                                                                                                                                                          | Roquebert B; Costa JM; Hedbaut E; Trombert S; Lecorche E; Verdurme L; Malek Ramdane; Olivi M; Haïm-Boukobza S.                                                                                                                                                           |
| EPI_ISL_862042, EPI_ISL_862043, EPI_ISL_862044, EPI_ISL_862045                                                                                                                                                                                                                                                                                                                                                                                                                                                                                                                                                                                                                                                                                                                                                                                                                                                                                                                                                                                                                                                                                                                                                                                                                                                                                                                                                                                                                                                                                                                                                                                                                                                                                                                                                                                                                                                                                                                                                                                                                                                                                                                                                                                                                                                                                                                                                                                                                                                                                                                                                                                                                                                                                                                                                                                                                                                                                                                                                                                                                                                                                                                                                                                                                                                                                                                                                                                                                                                                                                                                                                                                                                                                                                                                                                                                                                                                                                                                                                                                                                                                                                                                                                                                                                                                                                                                                                                                                                                                                                                                                                                                                                                                                                                                                                                                                                                                                                                                                                                                                                                                                                                                                                                                                                                                 | CERBA                                                                                                                                    | CERBA LAB                                                                                                    |                                                                                                                                                                                                                                                                          | Roquebert B; Costa JM; Hedbaut E; Trombert S; Lecorche E; Verdurme L; Malek Ramdane, Olivi M; Haïm-Boukobza S.                                                                                                                                                           |
| EPI_ISL_862815                                                                                                                                                                                                                                                                                                                                                                                                                                                                                                                                                                                                                                                                                                                                                                                                                                                                                                                                                                                                                                                                                                                                                                                                                                                                                                                                                                                                                                                                                                                                                                                                                                                                                                                                                                                                                                                                                                                                                                                                                                                                                                                                                                                                                                                                                                                                                                                                                                                                                                                                                                                                                                                                                                                                                                                                                                                                                                                                                                                                                                                                                                                                                                                                                                                                                                                                                                                                                                                                                                                                                                                                                                                                                                                                                                                                                                                                                                                                                                                                                                                                                                                                                                                                                                                                                                                                                                                                                                                                                                                                                                                                                                                                                                                                                                                                                                                                                                                                                                                                                                                                                                                                                                                                                                                                                                                 | Multidisciplinary Research Unit, DHR-ICMR, Institute of Medical Sciences, Banaras Hindu University, Varanasi                             | Multidisciplinary Research Unit, DHR-ICMR, Institute of Medical Sciences, Banaras Hindu University, Varanasi | Royana Singh, Priyoneel Basu, Ashish, Nitish Kumar Singh, Abhay Kumar Yadav, Manpreet Kaur, Deepa Devadas, Chetan Sahni, Gulshan Kumar, Tribhuwan Mohan Mohapatra, Richa Arya, Prashant Singh, Jay Prakash Maurya, Surendra Pratap Mishra                                |                                                                                                                                                                                                                                                                          |
| EPI_ISL_871790                                                                                                                                                                                                                                                                                                                                                                                                                                                                                                                                                                                                                                                                                                                                                                                                                                                                                                                                                                                                                                                                                                                                                                                                                                                                                                                                                                                                                                                                                                                                                                                                                                                                                                                                                                                                                                                                                                                                                                                                                                                                                                                                                                                                                                                                                                                                                                                                                                                                                                                                                                                                                                                                                                                                                                                                                                                                                                                                                                                                                                                                                                                                                                                                                                                                                                                                                                                                                                                                                                                                                                                                                                                                                                                                                                                                                                                                                                                                                                                                                                                                                                                                                                                                                                                                                                                                                                                                                                                                                                                                                                                                                                                                                                                                                                                                                                                                                                                                                                                                                                                                                                                                                                                                                                                                                                                 | Multidisciplinary Research Unit, DHR-ICMR, Institute of Medical Sciences, Banaras Hindu University                                       | Multidisciplinary Research Unit, DHR-ICMR, Institute of Medical Sciences, Banaras Hindu University           | Royana Singh, Priyoneel Basu, Ashish, Nitish Kumar Singh, Abhay Kumar Yadav, Manpreet Kaur, Arup Acharjee, Deepa Devadas, Chetan Sahni, Gulshan Kumar, Tribhuwan Mohan Mohapatra, Richa Arya, Prashant Singh, Jay Prakash Maurya, Surendra Pratap Mishra                 |                                                                                                                                                                                                                                                                          |
| EPI_ISL_873342, EPI_ISL_873347, EPI_ISL_873359, EPI_ISL_873676, EPI_ISL_873683, EPI_ISL_873805, EPI_ISL_873854, EPI_ISL_873866, EPI_ISL_873878, EPI_ISL_873958                                                                                                                                                                                                                                                                                                                                                                                                                                                                                                                                                                                                                                                                                                                                                                                                                                                                                                                                                                                                                                                                                                                                                                                                                                                                                                                                                                                                                                                                                                                                                                                                                                                                                                                                                                                                                                                                                                                                                                                                                                                                                                                                                                                                                                                                                                                                                                                                                                                                                                                                                                                                                                                                                                                                                                                                                                                                                                                                                                                                                                                                                                                                                                                                                                                                                                                                                                                                                                                                                                                                                                                                                                                                                                                                                                                                                                                                                                                                                                                                                                                                                                                                                                                                                                                                                                                                                                                                                                                                                                                                                                                                                                                                                                                                                                                                                                                                                                                                                                                                                                                                                                                                                                 | Lighthouse Lab in Cambridge                                                                                                              | Wellcome Sanger Institute for the COVID-19 Genomics UK (COG-UK) Consortium                                   | Rob Howes, The Lighthouse Lab in Cambridge and Alex Alderton, Roberto Amato, Sonia Goncalves, Ewan Harrison, David K. Jackson, Ian Johnston, Dominic Kwiatkowski, Cordelia Langford, John Sillitoe on behalf of the Wellcome Sanger Institute COVID-19 Surveillance Team |                                                                                                                                                                                                                                                                          |
| EPI_ISL_876814, EPI_ISL_876815, EPI_ISL_876816, EPI_ISL_876817, EPI_ISL_876818, EPI_ISL_876819, EPI_ISL_876820, EPI_ISL_876821, EPI_ISL_876822, EPI_ISL_876823, EPI_ISL_876824, EPI_ISL_876825, EPI_ISL_876826, EPI_ISL_876827, EPI_ISL_876828, EPI_ISL_876829, EPI_ISL_876830, EPI_ISL_876831, EPI_ISL_876832, EPI_ISL_876833, EPI_ISL_876834, EPI_ISL_876835, EPI_ISL_876836, EPI_ISL_876837, EPI_ISL_876838, EPI_ISL_876839, EPI_ISL_876840, EPI_ISL_876841, EPI_ISL_876842, EPI_ISL_876843, EPI_ISL_876844, EPI_ISL_876845, EPI_ISL_876846, EPI_ISL_876847, EPI_ISL_876848, EPI_ISL_876849, EPI_ISL_876850, EPI_ISL_876851, EPI_ISL_876852, EPI_ISL_876853, EPI_ISL_876854, EPI_ISL_876855, EPI_ISL_876856, EPI_ISL_876857, EPI_ISL_876858, EPI_ISL_876859, EPI_ISL_876860, EPI_ISL_876861, EPI_ISL_876862, EPI_ISL_876863, EPI_ISL_876864, EPI_ISL_876865, EPI_ISL_876866, EPI_ISL_876867, EPI_ISL_876868, EPI_ISL_876869, EPI_ISL_876870, EPI_ISL_876871, EPI_ISL_876872, EPI_ISL_876873, EPI_ISL_876874, EPI_ISL_876875, EPI_ISL_876876, EPI_ISL_876877, EPI_ISL_876878, EPI_ISL_876879, EPI_ISL_876880, EPI_ISL_876881, EPI_ISL_876882, EPI_ISL_876883, EPI_ISL_876884, EPI_ISL_876885, EPI_ISL_876886, EPI_ISL_876887, EPI_ISL_876888, EPI_ISL_876889, EPI_ISL_876890, EPI_ISL_876891, EPI_ISL_876892, EPI_ISL_876893, EPI_ISL_876894, EPI_ISL_876895, EPI_ISL_876896, EPI_ISL_876897, EPI_ISL_876898, EPI_ISL_876899, EPI_ISL_876900, EPI_ISL_876901, EPI_ISL_876902, EPI_ISL_876903, EPI_ISL_876904, EPI_ISL_876905, EPI_ISL_876906, EPI_ISL_876907, EPI_ISL_876908, EPI_ISL_876909, EPI_ISL_876910, EPI_ISL_876911, EPI_ISL_876912, EPI_ISL_876913, EPI_ISL_876914, EPI_ISL_876915, EPI_ISL_876916, EPI_ISL_876917, EPI_ISL_876918, EPI_ISL_876919, EPI_ISL_876920, EPI_ISL_876921, EPI_ISL_876922, EPI_ISL_876923, EPI_ISL_876924, EPI_ISL_876925, EPI_ISL_876926, EPI_ISL_876927, EPI_ISL_876928, EPI_ISL_876929, EPI_ISL_876930, EPI_ISL_876931, EPI_ISL_876932, EPI_ISL_876933, EPI_ISL_876934, EPI_ISL_876935, EPI_ISL_876936, EPI_ISL_876937, EPI_ISL_876938, EPI_ISL_876939, EPI_ISL_876940, EPI_ISL_876941, EPI_ISL_876942, EPI_ISL_876943, EPI_ISL_876944, EPI_ISL_876945, EPI_ISL_876946, EPI_ISL_876947, EPI_ISL_876948, EPI_ISL_876949, EPI_ISL_876950, EPI_ISL_876951, EPI_ISL_876952, EPI_ISL_876953, EPI_ISL_876954, EPI_ISL_876955, EPI_ISL_876956, EPI_ISL_876957, EPI_ISL_876958, EPI_ISL_876959, EPI_ISL_876960, EPI_ISL_876961, EPI_ISL_876962, EPI_ISL_876963, EPI_ISL_876964, EPI_ISL_876965, EPI_ISL_876966, EPI_ISL_876967, EPI_ISL_876968, EPI_ISL_876969, EPI_ISL_877001, EPI_ISL_877002, EPI_ISL_877003, EPI_ISL_877004, EPI_ISL_877045, EPI_ISL_877046, EPI_ISL_877047, EPI_ISL_877048, EPI_ISL_877049, EPI_ISL_877050, EPI_ISL_877051, EPI_ISL_877052, EPI_ISL_877053, EPI_ISL_877054, EPI_ISL_877055, EPI_ISL_877056, EPI_ISL_877057, EPI_ISL_877058, EPI_ISL_877059, EPI_ISL_877060, EPI_ISL_877061, EPI_ISL_877062, EPI_ISL_877063, EPI_ISL_877064, EPI_ISL_877065, EPI_ISL_877066, EPI_ISL_877067, EPI_ISL_877068, EPI_ISL_877069, EPI_ISL_877070, EPI_ISL_877071, EPI_ISL_877072, EPI_ISL_877073, EPI_ISL_877074, EPI_ISL_877075, EPI_ISL_877076, EPI_ISL_877077, EPI_ISL_877078, EPI_ISL_877079, EPI_ISL_877080, EPI_ISL_877081, EPI_ISL_877082, EPI_ISL_877083, EPI_ISL_877084, EPI_ISL_877085, EPI_ISL_877086, EPI_ISL_877087, EPI_ISL_877088, EPI_ISL_877089, EPI_ISL_877090, EPI_ISL_877091, EPI_ISL_877092, EPI_ISL_877093, EPI_ISL_877094, EPI_ISL_877095, EPI_ISL_877096, EPI_ISL_877097, EPI_ISL_877098, EPI_ISL_877099, EPI_ISL_877100, EPI_ISL_877101, EPI_ISL_877102, EPI_ISL_877103, EPI_ISL_877104, EPI_ISL_877105, EPI_ISL_877106, EPI_ISL_877107, EPI_ISL_877108, EPI_ISL_877109, EPI_ISL_877110, EPI_ISL_877111, EPI_ISL_877112, EPI_ISL_877113, EPI_ISL_877114, EPI_ISL_877115, EPI_ISL_877116, EPI_ISL_877117, EPI_ISL_877118, EPI_ISL_877119, EPI_ISL_877120, EPI_ISL_877121, EPI_ISL_877122, EPI_ISL_877123, EPI_ISL_877124, EPI_ISL_877125, EPI_ISL_877126, EPI_ISL_877127, EPI_ISL_877128, EPI_ISL_877129, EPI_ISL_877130, EPI_ISL_877131, EPI_ISL_877132, EPI_ISL_877133, EPI_ISL_877134, EPI_ISL_877135, EPI_ISL_877136, EPI_ISL_877137, EPI_ISL_877138, EPI_ISL_877139, EPI_ISL_877140, EPI_ISL_877141, EPI_ISL_877142, EPI_ISL_877143, EPI_ISL_877144, EPI_ISL_877145, EPI_ISL_877146, EPI_ISL_877147, EPI_ISL_877148, EPI_ISL_877149, EPI_ISL_877150, EPI_ISL_877151, EPI_ISL_877152, EPI_ISL_877153, EPI_ISL_877154, EPI_ISL_877155, EPI_ISL_877156, EPI_ISL_877157, EPI_ISL_877158, EPI_ISL_877159, EPI_ISL_877160, EPI_ISL_877161, EPI_ISL_877162, EPI_ISL_877163, EPI_ISL_877164, EPI_ISL_877165, EPI_ISL_877166, EPI_ISL_877167, EPI_ISL_877168, EPI_ISL_877169, EPI_ISL_877170, EPI_ISL_877171, EPI_ISL_877172, EPI_ISL_877173, EPI_ISL_877174, EPI_ISL_877175, EPI_ISL_877176, EPI_ISL_877177, EPI_ISL_877178, EPI_ISL_877179, EPI_ISL_877180, EPI_ISL_877181, EPI_ISL_877182, EPI_ISL_877183, EPI_ISL_877184, EPI_ISL_877185, EPI_ISL_877186, EPI_ISL_877187, EPI_ISL_877188, EPI_ISL_877189, EPI_ISL_877190, EPI_ISL_877191, EPI_ISL_877192, EPI_ISL_877193, EPI_ISL_877194, EPI_ISL_877195, EPI_ISL_877196, EPI_ISL_877197, EPI_ISL_877198, EPI_ISL_877199, EPI_ISL_877200, EPI_ISL_877201, EPI_ISL_877202, EPI_ISL_877203, EPI_ISL_877204 | see above                                                                                                                                | Quest Diagnostics                                                                                            | Quest Diagnostics                                                                                                                                                                                                                                                        | Rosenthal,S.H., Gerasimova.A., Kagan,R.M., Anderson, B., Hua, M., Liu Y., Bernstein, L.E., Livingston, K.E., Perez, A., Shalhout, D.F., Shlyakhter, I.A., Owen, R., Tanpaiboon, P., Lacbawan, F.                                                                         |
| EPI_ISL_877766                                                                                                                                                                                                                                                                                                                                                                                                                                                                                                                                                                                                                                                                                                                                                                                                                                                                                                                                                                                                                                                                                                                                                                                                                                                                                                                                                                                                                                                                                                                                                                                                                                                                                                                                                                                                                                                                                                                                                                                                                                                                                                                                                                                                                                                                                                                                                                                                                                                                                                                                                                                                                                                                                                                                                                                                                                                                                                                                                                                                                                                                                                                                                                                                                                                                                                                                                                                                                                                                                                                                                                                                                                                                                                                                                                                                                                                                                                                                                                                                                                                                                                                                                                                                                                                                                                                                                                                                                                                                                                                                                                                                                                                                                                                                                                                                                                                                                                                                                                                                                                                                                                                                                                                                                                                                                                                 | Thai Red Cross Emerging Infectious Diseases Health Science Centre, Chulalongkorn Hospital, Faculty of Medicine, Chulalongkorn University | Thai Red Cross Emerging Infectious Diseases Center and Faculty of Medicine, Chulalongkorn University         |                                                                                                                                                                                                                                                                          | Rome Buathong, Sopon Iamsirithaworn, Sininat Petcharat, Yutthana Joyjinda, Weenassarin Ampoot, Apaporn Rodpan, Opass Putcharoen, Thiravat Hemachudha, Supaporn Wacharapluesadee                                                                                          |
| EPI_ISL_878815, EPI_ISL_878871, EPI_ISL_879074, EPI_ISL_879076, EPI_ISL_879106, EPI_ISL_879205, EPI_ISL_879210, EPI_ISL_879221, EPI_ISL_879242, EPI_ISL_879281, EPI_ISL_879328, EPI_ISL_879435, EPI_ISL_879463, EPI_ISL_879599, EPI_ISL_879698, EPI_ISL_879768, EPI_ISL_879781, EPI_ISL_879806, EPI_ISL_879904, EPI_ISL_880044, EPI_ISL_881619                                                                                                                                                                                                                                                                                                                                                                                                                                                                                                                                                                                                                                                                                                                                                                                                                                                                                                                                                                                                                                                                                                                                                                                                                                                                                                                                                                                                                                                                                                                                                                                                                                                                                                                                                                                                                                                                                                                                                                                                                                                                                                                                                                                                                                                                                                                                                                                                                                                                                                                                                                                                                                                                                                                                                                                                                                                                                                                                                                                                                                                                                                                                                                                                                                                                                                                                                                                                                                                                                                                                                                                                                                                                                                                                                                                                                                                                                                                                                                                                                                                                                                                                                                                                                                                                                                                                                                                                                                                                                                                                                                                                                                                                                                                                                                                                                                                                                                                                                                                 |                                                                                                                                          |                                                                                                              |                                                                                                                                                                                                                                                                          |                                                                                                                                                                                                                                                                          |

see above      Lighthouse Lab in Cambridge      Wellcome Sanger Institute for the COVID-19 Genomics UK (COG-UK) Consortium      Rob Howes, The Lighthouse Lab in Cambridge and Alex Alderton, Roberto Amato, Sonia Goncalves, Ewan Harrison, David K. Jackson, Ian Johnston, Dominic Kwiatkowski, Cordelia Langford, John Sillitoe on behalf of the Wellcome Sanger Institute COVID-19 Surveillance Team

EPI\_ISL\_884303, EPI\_ISL\_884304, EPI\_ISL\_884305, EPI\_ISL\_884306, EPI\_ISL\_884307, EPI\_ISL\_884308, EPI\_ISL\_884309, EPI\_ISL\_884310, EPI\_ISL\_884311, EPI\_ISL\_884312, EPI\_ISL\_884313, EPI\_ISL\_884314, EPI\_ISL\_884315, EPI\_ISL\_884316, EPI\_ISL\_884317, EPI\_ISL\_884318, EPI\_ISL\_884319, EPI\_ISL\_884320, EPI\_ISL\_884321, EPI\_ISL\_884322, EPI\_ISL\_884323, EPI\_ISL\_884324, EPI\_ISL\_884325, EPI\_ISL\_884326, EPI\_ISL\_884327, EPI\_ISL\_884328, EPI\_ISL\_884329, EPI\_ISL\_884330, EPI\_ISL\_884331, EPI\_ISL\_884332, EPI\_ISL\_884333, EPI\_ISL\_884334, EPI\_ISL\_884335, EPI\_ISL\_884336, EPI\_ISL\_884337, EPI\_ISL\_884338, EPI\_ISL\_884339, EPI\_ISL\_884340, EPI\_ISL\_884341, EPI\_ISL\_884342, EPI\_ISL\_884343, EPI\_ISL\_884344, EPI\_ISL\_884345, EPI\_ISL\_884346, EPI\_ISL\_884347, EPI\_ISL\_884348, EPI\_ISL\_884349, EPI\_ISL\_884350, EPI\_ISL\_884351, EPI\_ISL\_884352, EPI\_ISL\_884353, EPI\_ISL\_884354, EPI\_ISL\_884355, EPI\_ISL\_884356, EPI\_ISL\_884357, EPI\_ISL\_884358, EPI\_ISL\_884359, EPI\_ISL\_884360, EPI\_ISL\_884361, EPI\_ISL\_884362, EPI\_ISL\_884363, EPI\_ISL\_884364, EPI\_ISL\_884365, EPI\_ISL\_884366, EPI\_ISL\_884367, EPI\_ISL\_884368, EPI\_ISL\_884369, EPI\_ISL\_884370, EPI\_ISL\_884371, EPI\_ISL\_884372, EPI\_ISL\_884373, EPI\_ISL\_884374, EPI\_ISL\_884375, EPI\_ISL\_884376, EPI\_ISL\_884377, EPI\_ISL\_884378, EPI\_ISL\_884379, EPI\_ISL\_884380, EPI\_ISL\_884381, EPI\_ISL\_884382, EPI\_ISL\_884383, EPI\_ISL\_884384, EPI\_ISL\_884385, EPI\_ISL\_884386, EPI\_ISL\_884387, EPI\_ISL\_884388, EPI\_ISL\_884389, EPI\_ISL\_884390, EPI\_ISL\_884391, EPI\_ISL\_884392, EPI\_ISL\_884393, EPI\_ISL\_884394, EPI\_ISL\_884395, EPI\_ISL\_884396, EPI\_ISL\_884397, EPI\_ISL\_884398, EPI\_ISL\_884399, EPI\_ISL\_884400, EPI\_ISL\_884401, EPI\_ISL\_884402, EPI\_ISL\_884403, EPI\_ISL\_884404, EPI\_ISL\_884405, EPI\_ISL\_884406, EPI\_ISL\_884407, EPI\_ISL\_884408, EPI\_ISL\_884409, EPI\_ISL\_884410, EPI\_ISL\_884411, EPI\_ISL\_884412, EPI\_ISL\_884413, EPI\_ISL\_884414, EPI\_ISL\_884415, EPI\_ISL\_884416, EPI\_ISL\_884417, EPI\_ISL\_884418, EPI\_ISL\_884419, EPI\_ISL\_884420, EPI\_ISL\_884421, EPI\_ISL\_884422, EPI\_ISL\_884423, EPI\_ISL\_884424, EPI\_ISL\_884425, EPI\_ISL\_884426, EPI\_ISL\_884427, EPI\_ISL\_884428, EPI\_ISL\_884429, EPI\_ISL\_884430, EPI\_ISL\_884431, EPI\_ISL\_884432, EPI\_ISL\_884433, EPI\_ISL\_884434, EPI\_ISL\_884435, EPI\_ISL\_884436, EPI\_ISL\_884437, EPI\_ISL\_884438, EPI\_ISL\_884439, EPI\_ISL\_884440, EPI\_ISL\_884441, EPI\_ISL\_884442, EPI\_ISL\_884443, EPI\_ISL\_884444

see above      Infectious Diseases, Quest Diagnostics      Infectious Diseases, Quest Diagnostics      Rosenthal,S.H., Gerasimova,A., Kagan,R.M., Anderson,B., Bernstein,L.E., Livingston,K.E., Hua,M., Liu,Y., Shalhout,D.F., Owen,R., Lacbawan,F.

EPI\_ISL\_889792, EPI\_ISL\_889793, EPI\_ISL\_889794, EPI\_ISL\_889795, EPI\_ISL\_889796, EPI\_ISL\_889797, EPI\_ISL\_889798, EPI\_ISL\_889799, EPI\_ISL\_889800, EPI\_ISL\_889801

LSUHS Emerging Viral Threat Laboratory      Microbial Genome Sequencing Center      Rona S. Scott, Jennifer L. Carroll, Camille F. Abshire, Maarten Van Diest, Mohammed N.A. Siddiquey, Andrew D. Yurochko, Martin J. Sapp, Christopher G. Kevil, Daniel J. Snyder, Vaughn S. Cooper, John A. Vanchiere, Jeremy P. Kamil,



















We gratefully acknowledge the following Authors from the Originating laboratories responsible for obtaining the specimens, as well as the Submitting laboratories where the genome data were generated and shared via GISAID, on which this research is based.

All Submitters of data may be contacted directly via [www.gisaid.org](http://www.gisaid.org)

Authors are sorted alphabetically.

| Accession ID                                                                                                                                                                                                                                                                                                                                                                                                                                                                                                                                                                                                                                                                                                                                                                                                                                                                                                                                                                                                                                                                                                                                                                                                                                                                                                                                                                                                                                                                                                                                                                                                                                                                                                                                                                                                                                                                                                                                                                                                                                                                                                                                                                                                                                                                                                                                                                                                                                                                                                                                                                                                                                                                                                                                                                                                                                                                                                                                                                                                                                                                                                                                                                                                                                                                                                                                                                                                                                                                                                                                                                                                                                                                                                                                                                                                                                                                                                                                                                                                                                                                                                                                                                                                                                                                                                                                                                                                                                                                                                                                                                                                                                                                                                                                                                                                                                                                                                                   | Originating Laboratory                                                                 | Submitting Laboratory                                                                                                | Authors                                                                                                                                                                                                                                                                                                                                 |
|--------------------------------------------------------------------------------------------------------------------------------------------------------------------------------------------------------------------------------------------------------------------------------------------------------------------------------------------------------------------------------------------------------------------------------------------------------------------------------------------------------------------------------------------------------------------------------------------------------------------------------------------------------------------------------------------------------------------------------------------------------------------------------------------------------------------------------------------------------------------------------------------------------------------------------------------------------------------------------------------------------------------------------------------------------------------------------------------------------------------------------------------------------------------------------------------------------------------------------------------------------------------------------------------------------------------------------------------------------------------------------------------------------------------------------------------------------------------------------------------------------------------------------------------------------------------------------------------------------------------------------------------------------------------------------------------------------------------------------------------------------------------------------------------------------------------------------------------------------------------------------------------------------------------------------------------------------------------------------------------------------------------------------------------------------------------------------------------------------------------------------------------------------------------------------------------------------------------------------------------------------------------------------------------------------------------------------------------------------------------------------------------------------------------------------------------------------------------------------------------------------------------------------------------------------------------------------------------------------------------------------------------------------------------------------------------------------------------------------------------------------------------------------------------------------------------------------------------------------------------------------------------------------------------------------------------------------------------------------------------------------------------------------------------------------------------------------------------------------------------------------------------------------------------------------------------------------------------------------------------------------------------------------------------------------------------------------------------------------------------------------------------------------------------------------------------------------------------------------------------------------------------------------------------------------------------------------------------------------------------------------------------------------------------------------------------------------------------------------------------------------------------------------------------------------------------------------------------------------------------------------------------------------------------------------------------------------------------------------------------------------------------------------------------------------------------------------------------------------------------------------------------------------------------------------------------------------------------------------------------------------------------------------------------------------------------------------------------------------------------------------------------------------------------------------------------------------------------------------------------------------------------------------------------------------------------------------------------------------------------------------------------------------------------------------------------------------------------------------------------------------------------------------------------------------------------------------------------------------------------------------------------------------------------------------|----------------------------------------------------------------------------------------|----------------------------------------------------------------------------------------------------------------------|-----------------------------------------------------------------------------------------------------------------------------------------------------------------------------------------------------------------------------------------------------------------------------------------------------------------------------------------|
| EPI_ISL_417390, EPI_ISL_417407                                                                                                                                                                                                                                                                                                                                                                                                                                                                                                                                                                                                                                                                                                                                                                                                                                                                                                                                                                                                                                                                                                                                                                                                                                                                                                                                                                                                                                                                                                                                                                                                                                                                                                                                                                                                                                                                                                                                                                                                                                                                                                                                                                                                                                                                                                                                                                                                                                                                                                                                                                                                                                                                                                                                                                                                                                                                                                                                                                                                                                                                                                                                                                                                                                                                                                                                                                                                                                                                                                                                                                                                                                                                                                                                                                                                                                                                                                                                                                                                                                                                                                                                                                                                                                                                                                                                                                                                                                                                                                                                                                                                                                                                                                                                                                                                                                                                                                 | Centre for Infectious Diseases and Microbiology Public Health                          | NSW Health Pathology - Institute of Clinical Pathology and Medical Research; Westmead Hospital; University of Sydney | Sadsad R, Carter I, Rahman H, Holmes EC, O'Sullivan MV, Sintchenko V, Chen SC, Maddocks S, Kok J, Dwyer DE, Rockett R, Eden J-S, Lam C, Gray K, Timms V, Gall M and Arnott A for the 2019-nCoV Study Group                                                                                                                              |
| EPI_ISL_420294, EPI_ISL_420295                                                                                                                                                                                                                                                                                                                                                                                                                                                                                                                                                                                                                                                                                                                                                                                                                                                                                                                                                                                                                                                                                                                                                                                                                                                                                                                                                                                                                                                                                                                                                                                                                                                                                                                                                                                                                                                                                                                                                                                                                                                                                                                                                                                                                                                                                                                                                                                                                                                                                                                                                                                                                                                                                                                                                                                                                                                                                                                                                                                                                                                                                                                                                                                                                                                                                                                                                                                                                                                                                                                                                                                                                                                                                                                                                                                                                                                                                                                                                                                                                                                                                                                                                                                                                                                                                                                                                                                                                                                                                                                                                                                                                                                                                                                                                                                                                                                                                                 | Institute of Microbiology and Immunology, Faculty of Medicine, University of Ljubljana | Institute of Microbiology and Immunology, Faculty of Medicine, University of Ljubljana                               | Samo Zakotnik, Tomaž Mark Zorec, Lucijan Skubic, Miša Korva, Mario Poljak, Tatjana Avši - Županc                                                                                                                                                                                                                                        |
| EPI_ISL_421517                                                                                                                                                                                                                                                                                                                                                                                                                                                                                                                                                                                                                                                                                                                                                                                                                                                                                                                                                                                                                                                                                                                                                                                                                                                                                                                                                                                                                                                                                                                                                                                                                                                                                                                                                                                                                                                                                                                                                                                                                                                                                                                                                                                                                                                                                                                                                                                                                                                                                                                                                                                                                                                                                                                                                                                                                                                                                                                                                                                                                                                                                                                                                                                                                                                                                                                                                                                                                                                                                                                                                                                                                                                                                                                                                                                                                                                                                                                                                                                                                                                                                                                                                                                                                                                                                                                                                                                                                                                                                                                                                                                                                                                                                                                                                                                                                                                                                                                 | Servicio de Microbiología. Hospital Clínico Universitario de Valencia                  | Sequencing and Bioinformatics Service and Molecular Epidemiology Research Group. FISABIO-Public Health               | Sandra Carbo, Loreto Ferrús Abad, María Alma Bracho, Griselda De Marco, Beatriz Beamud, Lidia Ruiz Roldan, Marta Pla Diaz, Neris García-Gonzalez, Inma Galán Vendrell, Paula Ruiz-Hueso, Mariana Reyes-Prieto, Vicente Soriano Chirona, Ivan Ansari, David Navarro, Lúcia Martínez-Priego, Giuseppe D'Auria, Fernando Gonzalez-Candelas |
| EPI_ISL_425186, EPI_ISL_425221                                                                                                                                                                                                                                                                                                                                                                                                                                                                                                                                                                                                                                                                                                                                                                                                                                                                                                                                                                                                                                                                                                                                                                                                                                                                                                                                                                                                                                                                                                                                                                                                                                                                                                                                                                                                                                                                                                                                                                                                                                                                                                                                                                                                                                                                                                                                                                                                                                                                                                                                                                                                                                                                                                                                                                                                                                                                                                                                                                                                                                                                                                                                                                                                                                                                                                                                                                                                                                                                                                                                                                                                                                                                                                                                                                                                                                                                                                                                                                                                                                                                                                                                                                                                                                                                                                                                                                                                                                                                                                                                                                                                                                                                                                                                                                                                                                                                                                 | Servicio de Microbiología. Consorcio Hospital General Universitario de Valencia        | Sequencing and Bioinformatics Service and Molecular Epidemiology Research Group. FISABIO-Public Health               | Sandra Carbo, Loreto Ferrús Abad, Paula Ruiz-Hueso, Mariana Reyes-Prieto, Vicente Soriano Chirona, Ivan Ansari, David Navarro, María Alma Bracho, Griselda De Marco, Beatriz Beamud, Lidia Ruiz Roldan, Marta Pla Diaz, Neris García-Gonzalez, Inma Galán Vendrell, Lúcia Martínez-Priego, Giuseppe D'Auria, Fernando Gonzalez-Candelas |
| EPI_ISL_427654, EPI_ISL_427669, EPI_ISL_427685, EPI_ISL_427705, EPI_ISL_427740, EPI_ISL_427747, EPI_ISL_427754, EPI_ISL_427755, EPI_ISL_427760, EPI_ISL_427775, EPI_ISL_427776, EPI_ISL_427777, EPI_ISL_427778, EPI_ISL_427779, EPI_ISL_427781, EPI_ISL_427790, EPI_ISL_427795                                                                                                                                                                                                                                                                                                                                                                                                                                                                                                                                                                                                                                                                                                                                                                                                                                                                                                                                                                                                                                                                                                                                                                                                                                                                                                                                                                                                                                                                                                                                                                                                                                                                                                                                                                                                                                                                                                                                                                                                                                                                                                                                                                                                                                                                                                                                                                                                                                                                                                                                                                                                                                                                                                                                                                                                                                                                                                                                                                                                                                                                                                                                                                                                                                                                                                                                                                                                                                                                                                                                                                                                                                                                                                                                                                                                                                                                                                                                                                                                                                                                                                                                                                                                                                                                                                                                                                                                                                                                                                                                                                                                                                                 | see above                                                                              | Centre for Infectious Diseases and Microbiology Public Health                                                        | NSW Health Pathology - Institute of Clinical Pathology and Medical Research; Westmead Hospital; University of Sydney                                                                                                                                                                                                                    |
| EPI_ISL_436285, EPI_ISL_436305, EPI_ISL_436325, EPI_ISL_436345, EPI_ISL_436369, EPI_ISL_436396                                                                                                                                                                                                                                                                                                                                                                                                                                                                                                                                                                                                                                                                                                                                                                                                                                                                                                                                                                                                                                                                                                                                                                                                                                                                                                                                                                                                                                                                                                                                                                                                                                                                                                                                                                                                                                                                                                                                                                                                                                                                                                                                                                                                                                                                                                                                                                                                                                                                                                                                                                                                                                                                                                                                                                                                                                                                                                                                                                                                                                                                                                                                                                                                                                                                                                                                                                                                                                                                                                                                                                                                                                                                                                                                                                                                                                                                                                                                                                                                                                                                                                                                                                                                                                                                                                                                                                                                                                                                                                                                                                                                                                                                                                                                                                                                                                 | Servicio de Microbiología. Hospital Clínico Universitario de Valencia                  | Sequencing and Bioinformatics Service and Molecular Epidemiology Research Group. FISABIO-Public Health               | Sandra Carbo, Loreto Ferrús Abad, Paula Ruiz-Hueso, Mariana Reyes-Prieto, Vicente Soriano Chirona, Ivan Ansari, David Navarro, María Alma Bracho, Griselda De Marco, Beatriz Beamud, Lidia Ruiz Roldan, Marta Pla Diaz, Neris García-Gonzalez, Inma Galán Vendrell, Lúcia Martínez-Priego, Giuseppe D'Auria, Fernando Gonzalez-Candelas |
| EPI_ISL_439672, EPI_ISL_439673, EPI_ISL_439674, EPI_ISL_439675, EPI_ISL_439676, EPI_ISL_439677, EPI_ISL_439678, EPI_ISL_439679, EPI_ISL_439680, EPI_ISL_439681, EPI_ISL_439682, EPI_ISL_439683, EPI_ISL_439684, EPI_ISL_439685, EPI_ISL_439686, EPI_ISL_439687, EPI_ISL_439688, EPI_ISL_439689, EPI_ISL_439690, EPI_ISL_439691, EPI_ISL_439692, EPI_ISL_439693, EPI_ISL_439694, EPI_ISL_439695, EPI_ISL_439696, EPI_ISL_439697, EPI_ISL_439698, EPI_ISL_439699, EPI_ISL_439700, EPI_ISL_439701, EPI_ISL_439702, EPI_ISL_439703, EPI_ISL_439704, EPI_ISL_439705, EPI_ISL_439706, EPI_ISL_439707, EPI_ISL_439708, EPI_ISL_439709, EPI_ISL_439710, EPI_ISL_439711, EPI_ISL_439712, EPI_ISL_439713, EPI_ISL_439714, EPI_ISL_439715, EPI_ISL_439716, EPI_ISL_439717, EPI_ISL_439718, EPI_ISL_439719, EPI_ISL_439720, EPI_ISL_439721, EPI_ISL_439722, EPI_ISL_439723, EPI_ISL_439724, EPI_ISL_439725, EPI_ISL_439726, EPI_ISL_439727, EPI_ISL_439728, EPI_ISL_439729, EPI_ISL_439730, EPI_ISL_439731, EPI_ISL_439732, EPI_ISL_439733, EPI_ISL_439734, EPI_ISL_439735, EPI_ISL_439736, EPI_ISL_439737, EPI_ISL_439738, EPI_ISL_439739, EPI_ISL_439740, EPI_ISL_439741, EPI_ISL_439742, EPI_ISL_439743, EPI_ISL_439744, EPI_ISL_439745, EPI_ISL_439746, EPI_ISL_439747, EPI_ISL_439748, EPI_ISL_439749, EPI_ISL_439750, EPI_ISL_439751, EPI_ISL_439752, EPI_ISL_439753, EPI_ISL_439754, EPI_ISL_439755, EPI_ISL_439756, EPI_ISL_439757, EPI_ISL_439758, EPI_ISL_439759, EPI_ISL_439760, EPI_ISL_439761, EPI_ISL_439762, EPI_ISL_439763, EPI_ISL_439764, EPI_ISL_439765, EPI_ISL_439766, EPI_ISL_439767, EPI_ISL_439768, EPI_ISL_439769, EPI_ISL_439770, EPI_ISL_439771, EPI_ISL_439772, EPI_ISL_439773, EPI_ISL_439774, EPI_ISL_439775, EPI_ISL_439776, EPI_ISL_439777, EPI_ISL_439778, EPI_ISL_439779, EPI_ISL_439780, EPI_ISL_439781, EPI_ISL_439782, EPI_ISL_439783, EPI_ISL_439784, EPI_ISL_439785, EPI_ISL_439786, EPI_ISL_439787, EPI_ISL_439788, EPI_ISL_439789, EPI_ISL_439790, EPI_ISL_439791, EPI_ISL_439792, EPI_ISL_439793, EPI_ISL_439794, EPI_ISL_439795, EPI_ISL_439796, EPI_ISL_439797, EPI_ISL_439798, EPI_ISL_439799, EPI_ISL_439800, EPI_ISL_439801, EPI_ISL_439802, EPI_ISL_439803, EPI_ISL_439804, EPI_ISL_439805, EPI_ISL_439806, EPI_ISL_439807, EPI_ISL_439808, EPI_ISL_439809, EPI_ISL_439810, EPI_ISL_439811, EPI_ISL_439812, EPI_ISL_439813, EPI_ISL_439814, EPI_ISL_439815, EPI_ISL_439816, EPI_ISL_439817, EPI_ISL_439818, EPI_ISL_439819, EPI_ISL_439820, EPI_ISL_439821, EPI_ISL_439822, EPI_ISL_439823, EPI_ISL_439824, EPI_ISL_439825, EPI_ISL_439826, EPI_ISL_439827, EPI_ISL_439828, EPI_ISL_439829, EPI_ISL_439830, EPI_ISL_439831, EPI_ISL_439832, EPI_ISL_439833, EPI_ISL_439834, EPI_ISL_439835, EPI_ISL_439836, EPI_ISL_439837, EPI_ISL_439838, EPI_ISL_439839, EPI_ISL_439840, EPI_ISL_439841, EPI_ISL_439842, EPI_ISL_439843, EPI_ISL_439844, EPI_ISL_439845, EPI_ISL_439846, EPI_ISL_439847, EPI_ISL_439848, EPI_ISL_439849, EPI_ISL_439850, EPI_ISL_439851, EPI_ISL_439852, EPI_ISL_439853, EPI_ISL_439854, EPI_ISL_439855, EPI_ISL_439856, EPI_ISL_439857, EPI_ISL_439858, EPI_ISL_439859, EPI_ISL_439860, EPI_ISL_439861, EPI_ISL_439862, EPI_ISL_440852, EPI_ISL_440853, EPI_ISL_440854, EPI_ISL_440855, EPI_ISL_440856, EPI_ISL_440857, EPI_ISL_440858, EPI_ISL_440859, EPI_ISL_440860, EPI_ISL_440861, EPI_ISL_440862, EPI_ISL_440863, EPI_ISL_440864, EPI_ISL_440865, EPI_ISL_440866, EPI_ISL_440867, EPI_ISL_440868, EPI_ISL_440869, EPI_ISL_440870, EPI_ISL_440871, EPI_ISL_440872, EPI_ISL_440873, EPI_ISL_440874, EPI_ISL_440875, EPI_ISL_440876, EPI_ISL_440877, EPI_ISL_440878, EPI_ISL_440879, EPI_ISL_440880, EPI_ISL_440881, EPI_ISL_440882, EPI_ISL_440883, EPI_ISL_440884, EPI_ISL_440885, EPI_ISL_440886, EPI_ISL_440887, EPI_ISL_440888, EPI_ISL_440889, EPI_ISL_440890, EPI_ISL_440891, EPI_ISL_440892, EPI_ISL_440893, EPI_ISL_440894, EPI_ISL_440895, EPI_ISL_440896, EPI_ISL_440897, EPI_ISL_440898, EPI_ISL_440899, EPI_ISL_440900, EPI_ISL_440901, EPI_ISL_440902, EPI_ISL_440903, EPI_ISL_440904, EPI_ISL_440905, EPI_ISL_440906, EPI_ISL_440907, EPI_ISL_440908, EPI_ISL_440909, EPI_ISL_440910, EPI_ISL_440911, EPI_ISL_440912, EPI_ISL_440913, EPI_ISL_440914, EPI_ISL_440915, EPI_ISL_440916, EPI_ISL_440917, EPI_ISL_440918, EPI_ISL_440919, EPI_ISL_440920, EPI_ISL_440921, EPI_ISL_440922, EPI_ISL_440923, EPI_ISL_440924, EPI_ISL_440925, EPI_ISL_440926, EPI_ISL_440927, EPI_ISL_440928, EPI_ISL_440929, EPI_ISL_440930, EPI_ISL_440931, EPI_ISL_440932, EPI_ISL_440933, EPI_ISL_440934, EPI_ISL_440935, EPI_ISL_440936, EPI_ISL_440937, EPI_ISL_440938, EPI_ISL_440939, EPI_ISL_440940, EPI_ISL_440941, EPI_ISL_440942, EPI_ISL_440943, EPI_ISL_440944, EPI_ISL_440945, EPI_ISL_440946, EPI_ISL_440947, EPI_ISL_440948, EPI_ISL_440949                                                                                                                 | see above                                                                              | Liverpool Clinical Laboratories                                                                                      | COVID-19 Genomics UK (COG-UK) Consortium                                                                                                                                                                                                                                                                                                |
| EPI_ISL_447477, EPI_ISL_447491, EPI_ISL_447505, EPI_ISL_447519                                                                                                                                                                                                                                                                                                                                                                                                                                                                                                                                                                                                                                                                                                                                                                                                                                                                                                                                                                                                                                                                                                                                                                                                                                                                                                                                                                                                                                                                                                                                                                                                                                                                                                                                                                                                                                                                                                                                                                                                                                                                                                                                                                                                                                                                                                                                                                                                                                                                                                                                                                                                                                                                                                                                                                                                                                                                                                                                                                                                                                                                                                                                                                                                                                                                                                                                                                                                                                                                                                                                                                                                                                                                                                                                                                                                                                                                                                                                                                                                                                                                                                                                                                                                                                                                                                                                                                                                                                                                                                                                                                                                                                                                                                                                                                                                                                                                 | Servicio de Microbiología. Hospital Clínico Universitario de Valencia                  | Sequencing and Bioinformatics Service and Molecular Epidemiology Research Group. FISABIO-Public Health               | Sandra Carbo, Loreto Ferrús Abad, Paula Ruiz-Hueso, Mariana Reyes-Prieto, Vicente Soriano Chirona, Ivan Ansari, Lidia Martínez-Priego, Giuseppe 'Auria, David Navarro, Eliseo Albert, María Alma Bracho, Lidia Ruiz Roldan, Neris García-Gonzalez, Inma Galán Vendrell, Fernando Gonzalez-Candelas                                      |
| EPI_ISL_447563, EPI_ISL_447573, EPI_ISL_447581, EPI_ISL_447856, EPI_ISL_447857, EPI_ISL_447858                                                                                                                                                                                                                                                                                                                                                                                                                                                                                                                                                                                                                                                                                                                                                                                                                                                                                                                                                                                                                                                                                                                                                                                                                                                                                                                                                                                                                                                                                                                                                                                                                                                                                                                                                                                                                                                                                                                                                                                                                                                                                                                                                                                                                                                                                                                                                                                                                                                                                                                                                                                                                                                                                                                                                                                                                                                                                                                                                                                                                                                                                                                                                                                                                                                                                                                                                                                                                                                                                                                                                                                                                                                                                                                                                                                                                                                                                                                                                                                                                                                                                                                                                                                                                                                                                                                                                                                                                                                                                                                                                                                                                                                                                                                                                                                                                                 | CSIR-Centre for Cellular and Molecular Biology                                         | CSIR-Centre for Cellular and Molecular Biology                                                                       | Sakshi Shambhavi, Lamuk Zaveri, Shagufta Khan, Namami Garcia, Tulsai Nagabandi, Purushotham Vodnala, Payal Mukherjee, Sofia Banu, Priya Singh, Dhiviya Vedagiri, Divya Gupta, Vishal Sah, Santosh Kumar Kuncha, Krishnan Harinivas Harshan, Archana Bharadwaj Siva, Karthik Bharadwaj Tallapaka, Rakesh K Mishra, Divya Tej Sowpati     |
| EPI_ISL_447899                                                                                                                                                                                                                                                                                                                                                                                                                                                                                                                                                                                                                                                                                                                                                                                                                                                                                                                                                                                                                                                                                                                                                                                                                                                                                                                                                                                                                                                                                                                                                                                                                                                                                                                                                                                                                                                                                                                                                                                                                                                                                                                                                                                                                                                                                                                                                                                                                                                                                                                                                                                                                                                                                                                                                                                                                                                                                                                                                                                                                                                                                                                                                                                                                                                                                                                                                                                                                                                                                                                                                                                                                                                                                                                                                                                                                                                                                                                                                                                                                                                                                                                                                                                                                                                                                                                                                                                                                                                                                                                                                                                                                                                                                                                                                                                                                                                                                                                 | Microbiology                                                                           | Microbiology                                                                                                         | Saha,S., Malaker,R., Sajib,M.S.I., Hasanuzzaman,M., Rahman,H., Islam,M.S., Ahmed,Z.B., Islam,M. and Saha,S.K.                                                                                                                                                                                                                           |
| EPI_ISL_449338, EPI_ISL_449341, EPI_ISL_449343, EPI_ISL_449333, EPI_ISL_449334, EPI_ISL_449335, EPI_ISL_449336, EPI_ISL_449337, EPI_ISL_449338, EPI_ISL_449339, EPI_ISL_449340, EPI_ISL_449341, EPI_ISL_449342, EPI_ISL_449343, EPI_ISL_449344, EPI_ISL_449345, EPI_ISL_449346, EPI_ISL_449347, EPI_ISL_449348, EPI_ISL_449349, EPI_ISL_449350, EPI_ISL_449351, EPI_ISL_449352, EPI_ISL_449353, EPI_ISL_449354, EPI_ISL_449355, EPI_ISL_449356, EPI_ISL_449357, EPI_ISL_449358, EPI_ISL_449359, EPI_ISL_449360, EPI_ISL_449361, EPI_ISL_449362, EPI_ISL_449363, EPI_ISL_449364, EPI_ISL_449365, EPI_ISL_449366, EPI_ISL_449367, EPI_ISL_449368, EPI_ISL_449369, EPI_ISL_449370, EPI_ISL_449371, EPI_ISL_449372, EPI_ISL_449373, EPI_ISL_449374, EPI_ISL_449375, EPI_ISL_449376, EPI_ISL_449377, EPI_ISL_449378, EPI_ISL_449379, EPI_ISL_449380, EPI_ISL_449381, EPI_ISL_449382, EPI_ISL_449383, EPI_ISL_449384, EPI_ISL_449385, EPI_ISL_449386, EPI_ISL_449387, EPI_ISL_449388, EPI_ISL_449389, EPI_ISL_449390, EPI_ISL_449391, EPI_ISL_449392, EPI_ISL_449393, EPI_ISL_449394, EPI_ISL_449395, EPI_ISL_449396, EPI_ISL_449397, EPI_ISL_449398, EPI_ISL_449399, EPI_ISL_449400, EPI_ISL_449401, EPI_ISL_449402, EPI_ISL_449403, EPI_ISL_449404, EPI_ISL_449405, EPI_ISL_449406, EPI_ISL_449407, EPI_ISL_449408, EPI_ISL_449409, EPI_ISL_449410, EPI_ISL_449411, EPI_ISL_449412, EPI_ISL_449413, EPI_ISL_449414, EPI_ISL_449415, EPI_ISL_449416, EPI_ISL_449417, EPI_ISL_449418, EPI_ISL_449419, EPI_ISL_449420, EPI_ISL_449421, EPI_ISL_449422, EPI_ISL_449423, EPI_ISL_449424, EPI_ISL_449425, EPI_ISL_449426, EPI_ISL_449427, EPI_ISL_449428, EPI_ISL_449429, EPI_ISL_449430, EPI_ISL_449431, EPI_ISL_449432, EPI_ISL_449433, EPI_ISL_449434, EPI_ISL_449435, EPI_ISL_449436, EPI_ISL_449437, EPI_ISL_449438, EPI_ISL_449439, EPI_ISL_449440, EPI_ISL_449441, EPI_ISL_449442, EPI_ISL_449443, EPI_ISL_449444, EPI_ISL_449445, EPI_ISL_449446, EPI_ISL_449447, EPI_ISL_449448, EPI_ISL_449449, EPI_ISL_449450, EPI_ISL_449451, EPI_ISL_449452, EPI_ISL_449453, EPI_ISL_449454, EPI_ISL_449455, EPI_ISL_449456, EPI_ISL_449457, EPI_ISL_449458, EPI_ISL_449459, EPI_ISL_449460, EPI_ISL_449461, EPI_ISL_449462, EPI_ISL_449463, EPI_ISL_449464, EPI_ISL_449465, EPI_ISL_449466, EPI_ISL_449467, EPI_ISL_449468, EPI_ISL_449469, EPI_ISL_449470, EPI_ISL_449471, EPI_ISL_449472, EPI_ISL_449473, EPI_ISL_449474, EPI_ISL_449475, EPI_ISL_449476, EPI_ISL_449477, EPI_ISL_449478, EPI_ISL_449479, EPI_ISL_449480, EPI_ISL_449481, EPI_ISL_449482, EPI_ISL_449483, EPI_ISL_449484, EPI_ISL_449485, EPI_ISL_449486, EPI_ISL_449487, EPI_ISL_449488, EPI_ISL_449489, EPI_ISL_449490, EPI_ISL_449491, EPI_ISL_449492, EPI_ISL_449493, EPI_ISL_449494, EPI_ISL_449495, EPI_ISL_449496, EPI_ISL_449497, EPI_ISL_449498, EPI_ISL_449499, EPI_ISL_449500, EPI_ISL_449501, EPI_ISL_449502, EPI_ISL_449503, EPI_ISL_449504, EPI_ISL_449505, EPI_ISL_449506, EPI_ISL_449507, EPI_ISL_449508, EPI_ISL_449509, EPI_ISL_449510, EPI_ISL_449511, EPI_ISL_449512, EPI_ISL_449513, EPI_ISL_449514, EPI_ISL_449515, EPI_ISL_449516, EPI_ISL_449517, EPI_ISL_449518, EPI_ISL_449519, EPI_ISL_449520, EPI_ISL_449521, EPI_ISL_449522, EPI_ISL_449523, EPI_ISL_449524, EPI_ISL_449525, EPI_ISL_449526, EPI_ISL_449527, EPI_ISL_449528, EPI_ISL_449529, EPI_ISL_449530, EPI_ISL_449531, EPI_ISL_449532, EPI_ISL_449533, EPI_ISL_449534, EPI_ISL_449535, EPI_ISL_449536, EPI_ISL_449537, EPI_ISL_449538, EPI_ISL_449539, EPI_ISL_449540, EPI_ISL_449541, EPI_ISL_449542, EPI_ISL_449543, EPI_ISL_449544, EPI_ISL_449545, EPI_ISL_449546, EPI_ISL_449547, EPI_ISL_449548, EPI_ISL_449549, EPI_ISL_449550, EPI_ISL_449551, EPI_ISL_449552, EPI_ISL_449553, EPI_ISL_449554, EPI_ISL_449555, EPI_ISL_449556, EPI_ISL_449557, EPI_ISL_449558, EPI_ISL_449559, EPI_ISL_449560, EPI_ISL_449561, EPI_ISL_449562, EPI_ISL_449563, EPI_ISL_449564, EPI_ISL_449565, EPI_ISL_449566, EPI_ISL_449567, EPI_ISL_449568, EPI_ISL_449569, EPI_ISL_449570, EPI_ISL_449571, EPI_ISL_449572, EPI_ISL_449573, EPI_ISL_449574, EPI_ISL_449575, EPI_ISL_449576, EPI_ISL_449577, EPI_ISL_449578, EPI_ISL_449579, EPI_ISL_449580, EPI_ISL_449581, EPI_ISL_449582, EPI_ISL_449583, EPI_ISL_449584, EPI_ISL_449585, EPI_ISL_449586, EPI_ISL_449587, EPI_ISL_449588, EPI_ISL_449589, EPI_ISL_449590, EPI_ISL_449591, EPI_ISL_449592, EPI_ISL_449593, EPI_ISL_449594, EPI_ISL_449595, EPI_ISL_449596, EPI_ISL_449597, EPI_ISL_449598, EPI_ISL_449599, EPI_ISL_449600, EPI_ISL_449601, EPI_ISL_449602, EPI_ISL_449603, EPI_ISL_449604, EPI_ISL_449605, EPI_ISL_449606, EPI_ISL_449607, EPI_ISL_449608, EPI_ISL_449609, EPI_ISL_449610, EPI_ISL_449611, EPI_ISL_449612, EPI_ISL_449613, EPI_ISL_449614, EPI_ISL_449615, EPI_ISL_449616, EPI_ISL_449617, EPI_ISL_449618, EPI_ISL_449619, EPI_ISL_449620, EPI_ISL_449621, EPI_ISL_449622, EPI_ISL_449623, EPI_ISL_449624, EPI_ISL_449625 | see above                                                                              | Liverpool Clinical Laboratories                                                                                      | COVID-19 Genomics UK (COG-UK) Consortium                                                                                                                                                                                                                                                                                                |
| EPI_ISL_450302, EPI_ISL_450303                                                                                                                                                                                                                                                                                                                                                                                                                                                                                                                                                                                                                                                                                                                                                                                                                                                                                                                                                                                                                                                                                                                                                                                                                                                                                                                                                                                                                                                                                                                                                                                                                                                                                                                                                                                                                                                                                                                                                                                                                                                                                                                                                                                                                                                                                                                                                                                                                                                                                                                                                                                                                                                                                                                                                                                                                                                                                                                                                                                                                                                                                                                                                                                                                                                                                                                                                                                                                                                                                                                                                                                                                                                                                                                                                                                                                                                                                                                                                                                                                                                                                                                                                                                                                                                                                                                                                                                                                                                                                                                                                                                                                                                                                                                                                                                                                                                                                                 | Centre hospitalier Anla-Laberge                                                        | Laboratoire de santé publique du Québec                                                                              | Sandrine Moreira, Ioannis Ragoussis, Guillaume Bourque, Jesse Shapiro, Mark Lathrop and Michel Roger on behalf of the CoVSeQ research group                                                                                                                                                                                             |
| EPI_ISL_450304, EPI_ISL_450305                                                                                                                                                                                                                                                                                                                                                                                                                                                                                                                                                                                                                                                                                                                                                                                                                                                                                                                                                                                                                                                                                                                                                                                                                                                                                                                                                                                                                                                                                                                                                                                                                                                                                                                                                                                                                                                                                                                                                                                                                                                                                                                                                                                                                                                                                                                                                                                                                                                                                                                                                                                                                                                                                                                                                                                                                                                                                                                                                                                                                                                                                                                                                                                                                                                                                                                                                                                                                                                                                                                                                                                                                                                                                                                                                                                                                                                                                                                                                                                                                                                                                                                                                                                                                                                                                                                                                                                                                                                                                                                                                                                                                                                                                                                                                                                                                                                                                                 | Hôpital Charles-LeMoigne                                                               | Laboratoire de santé publique du Québec                                                                              | Sandrine Moreira, Ioannis Ragoussis, Guillaume Bourque, Jesse Shapiro, Mark Lathrop and Michel Roger on behalf of the CoVSeQ research group                                                                                                                                                                                             |

|                                                                                                                                                                                                                                                                                                                                                                                                                                                                                                                                                                                                                                                                                                                                                                                                                                                                                                                                                                                                                                                                                                                                                                                                                                                                                                                                                                                                                                                                                                                                                                                                                                                                                                                                                                                                                                                                                                                                                                                                                                                                                                                                                                                                                                                                                                                                                                                                                                                                                                                                                                                                                                                                                                                                                                                                                                                                                                                                                                                                                                                                                                                                                                                                                                                                                                                                                                                                                                                                                                                                                                                                                                                                                                                                                                                                                                                                                                                                                                                                                                                                                                                                                                                                                                                                                                                                                                                                                |                                                                         |                                                                                                                                       |                                                                                                                                                                                                                                                                                                                                                                                                                                                                                                                                                                                                                                                                                             |
|----------------------------------------------------------------------------------------------------------------------------------------------------------------------------------------------------------------------------------------------------------------------------------------------------------------------------------------------------------------------------------------------------------------------------------------------------------------------------------------------------------------------------------------------------------------------------------------------------------------------------------------------------------------------------------------------------------------------------------------------------------------------------------------------------------------------------------------------------------------------------------------------------------------------------------------------------------------------------------------------------------------------------------------------------------------------------------------------------------------------------------------------------------------------------------------------------------------------------------------------------------------------------------------------------------------------------------------------------------------------------------------------------------------------------------------------------------------------------------------------------------------------------------------------------------------------------------------------------------------------------------------------------------------------------------------------------------------------------------------------------------------------------------------------------------------------------------------------------------------------------------------------------------------------------------------------------------------------------------------------------------------------------------------------------------------------------------------------------------------------------------------------------------------------------------------------------------------------------------------------------------------------------------------------------------------------------------------------------------------------------------------------------------------------------------------------------------------------------------------------------------------------------------------------------------------------------------------------------------------------------------------------------------------------------------------------------------------------------------------------------------------------------------------------------------------------------------------------------------------------------------------------------------------------------------------------------------------------------------------------------------------------------------------------------------------------------------------------------------------------------------------------------------------------------------------------------------------------------------------------------------------------------------------------------------------------------------------------------------------------------------------------------------------------------------------------------------------------------------------------------------------------------------------------------------------------------------------------------------------------------------------------------------------------------------------------------------------------------------------------------------------------------------------------------------------------------------------------------------------------------------------------------------------------------------------------------------------------------------------------------------------------------------------------------------------------------------------------------------------------------------------------------------------------------------------------------------------------------------------------------------------------------------------------------------------------------------------------------------------------------------------------------------------|-------------------------------------------------------------------------|---------------------------------------------------------------------------------------------------------------------------------------|---------------------------------------------------------------------------------------------------------------------------------------------------------------------------------------------------------------------------------------------------------------------------------------------------------------------------------------------------------------------------------------------------------------------------------------------------------------------------------------------------------------------------------------------------------------------------------------------------------------------------------------------------------------------------------------------|
| EPI_ISL_450306                                                                                                                                                                                                                                                                                                                                                                                                                                                                                                                                                                                                                                                                                                                                                                                                                                                                                                                                                                                                                                                                                                                                                                                                                                                                                                                                                                                                                                                                                                                                                                                                                                                                                                                                                                                                                                                                                                                                                                                                                                                                                                                                                                                                                                                                                                                                                                                                                                                                                                                                                                                                                                                                                                                                                                                                                                                                                                                                                                                                                                                                                                                                                                                                                                                                                                                                                                                                                                                                                                                                                                                                                                                                                                                                                                                                                                                                                                                                                                                                                                                                                                                                                                                                                                                                                                                                                                                                 | CSSS Haut-Richelieu/Rouville (Hôpital)                                  | Laboratoire de santé publique du Québec                                                                                               | Sandrine Moreira, Ioannis Ragoussis, Guillaume Bourque, Jesse Shapiro, Mark Lathrop and Michel Roger on behalf of the CoVSeQ research group                                                                                                                                                                                                                                                                                                                                                                                                                                                                                                                                                 |
| EPI_ISL_450307                                                                                                                                                                                                                                                                                                                                                                                                                                                                                                                                                                                                                                                                                                                                                                                                                                                                                                                                                                                                                                                                                                                                                                                                                                                                                                                                                                                                                                                                                                                                                                                                                                                                                                                                                                                                                                                                                                                                                                                                                                                                                                                                                                                                                                                                                                                                                                                                                                                                                                                                                                                                                                                                                                                                                                                                                                                                                                                                                                                                                                                                                                                                                                                                                                                                                                                                                                                                                                                                                                                                                                                                                                                                                                                                                                                                                                                                                                                                                                                                                                                                                                                                                                                                                                                                                                                                                                                                 | Hôpital du Suroît                                                       | Laboratoire de santé publique du Québec                                                                                               | Sandrine Moreira, Ioannis Ragoussis, Guillaume Bourque, Jesse Shapiro, Mark Lathrop and Michel Roger on behalf of the CoVSeQ research group                                                                                                                                                                                                                                                                                                                                                                                                                                                                                                                                                 |
| EPI_ISL_450308                                                                                                                                                                                                                                                                                                                                                                                                                                                                                                                                                                                                                                                                                                                                                                                                                                                                                                                                                                                                                                                                                                                                                                                                                                                                                                                                                                                                                                                                                                                                                                                                                                                                                                                                                                                                                                                                                                                                                                                                                                                                                                                                                                                                                                                                                                                                                                                                                                                                                                                                                                                                                                                                                                                                                                                                                                                                                                                                                                                                                                                                                                                                                                                                                                                                                                                                                                                                                                                                                                                                                                                                                                                                                                                                                                                                                                                                                                                                                                                                                                                                                                                                                                                                                                                                                                                                                                                                 | Hôpital Charles-LeMoyne                                                 | Laboratoire de santé publique du Québec                                                                                               | Sandrine Moreira, Ioannis Ragoussis, Guillaume Bourque, Jesse Shapiro, Mark Lathrop and Michel Roger on behalf of the CoVSeQ research group                                                                                                                                                                                                                                                                                                                                                                                                                                                                                                                                                 |
| EPI_ISL_450309                                                                                                                                                                                                                                                                                                                                                                                                                                                                                                                                                                                                                                                                                                                                                                                                                                                                                                                                                                                                                                                                                                                                                                                                                                                                                                                                                                                                                                                                                                                                                                                                                                                                                                                                                                                                                                                                                                                                                                                                                                                                                                                                                                                                                                                                                                                                                                                                                                                                                                                                                                                                                                                                                                                                                                                                                                                                                                                                                                                                                                                                                                                                                                                                                                                                                                                                                                                                                                                                                                                                                                                                                                                                                                                                                                                                                                                                                                                                                                                                                                                                                                                                                                                                                                                                                                                                                                                                 | Hôpital Pierre-Boucher                                                  | Laboratoire de santé publique du Québec                                                                                               | Sandrine Moreira, Ioannis Ragoussis, Guillaume Bourque, Jesse Shapiro, Mark Lathrop and Michel Roger on behalf of the CoVSeQ research group                                                                                                                                                                                                                                                                                                                                                                                                                                                                                                                                                 |
| EPI_ISL_450310                                                                                                                                                                                                                                                                                                                                                                                                                                                                                                                                                                                                                                                                                                                                                                                                                                                                                                                                                                                                                                                                                                                                                                                                                                                                                                                                                                                                                                                                                                                                                                                                                                                                                                                                                                                                                                                                                                                                                                                                                                                                                                                                                                                                                                                                                                                                                                                                                                                                                                                                                                                                                                                                                                                                                                                                                                                                                                                                                                                                                                                                                                                                                                                                                                                                                                                                                                                                                                                                                                                                                                                                                                                                                                                                                                                                                                                                                                                                                                                                                                                                                                                                                                                                                                                                                                                                                                                                 | Hôpital Charles-LeMoyne                                                 | Laboratoire de santé publique du Québec                                                                                               | Sandrine Moreira, Ioannis Ragoussis, Guillaume Bourque, Jesse Shapiro, Mark Lathrop and Michel Roger on behalf of the CoVSeQ research group                                                                                                                                                                                                                                                                                                                                                                                                                                                                                                                                                 |
| EPI_ISL_450311, EPI_ISL_450312, EPI_ISL_450313                                                                                                                                                                                                                                                                                                                                                                                                                                                                                                                                                                                                                                                                                                                                                                                                                                                                                                                                                                                                                                                                                                                                                                                                                                                                                                                                                                                                                                                                                                                                                                                                                                                                                                                                                                                                                                                                                                                                                                                                                                                                                                                                                                                                                                                                                                                                                                                                                                                                                                                                                                                                                                                                                                                                                                                                                                                                                                                                                                                                                                                                                                                                                                                                                                                                                                                                                                                                                                                                                                                                                                                                                                                                                                                                                                                                                                                                                                                                                                                                                                                                                                                                                                                                                                                                                                                                                                 | Hôpital du Suroît                                                       | Laboratoire de santé publique du Québec                                                                                               | Sandrine Moreira, Ioannis Ragoussis, Guillaume Bourque, Jesse Shapiro, Mark Lathrop and Michel Roger on behalf of the CoVSeQ research group                                                                                                                                                                                                                                                                                                                                                                                                                                                                                                                                                 |
| EPI_ISL_450314, EPI_ISL_450315                                                                                                                                                                                                                                                                                                                                                                                                                                                                                                                                                                                                                                                                                                                                                                                                                                                                                                                                                                                                                                                                                                                                                                                                                                                                                                                                                                                                                                                                                                                                                                                                                                                                                                                                                                                                                                                                                                                                                                                                                                                                                                                                                                                                                                                                                                                                                                                                                                                                                                                                                                                                                                                                                                                                                                                                                                                                                                                                                                                                                                                                                                                                                                                                                                                                                                                                                                                                                                                                                                                                                                                                                                                                                                                                                                                                                                                                                                                                                                                                                                                                                                                                                                                                                                                                                                                                                                                 | Hôpital Pierre-Boucher                                                  | Laboratoire de santé publique du Québec                                                                                               | Sandrine Moreira, Ioannis Ragoussis, Guillaume Bourque, Jesse Shapiro, Mark Lathrop and Michel Roger on behalf of the CoVSeQ research group                                                                                                                                                                                                                                                                                                                                                                                                                                                                                                                                                 |
| EPI_ISL_450316                                                                                                                                                                                                                                                                                                                                                                                                                                                                                                                                                                                                                                                                                                                                                                                                                                                                                                                                                                                                                                                                                                                                                                                                                                                                                                                                                                                                                                                                                                                                                                                                                                                                                                                                                                                                                                                                                                                                                                                                                                                                                                                                                                                                                                                                                                                                                                                                                                                                                                                                                                                                                                                                                                                                                                                                                                                                                                                                                                                                                                                                                                                                                                                                                                                                                                                                                                                                                                                                                                                                                                                                                                                                                                                                                                                                                                                                                                                                                                                                                                                                                                                                                                                                                                                                                                                                                                                                 | Hôpital Charles-LeMoyne                                                 | Laboratoire de santé publique du Québec                                                                                               | Sandrine Moreira, Ioannis Ragoussis, Guillaume Bourque, Jesse Shapiro, Mark Lathrop and Michel Roger on behalf of the CoVSeQ research group                                                                                                                                                                                                                                                                                                                                                                                                                                                                                                                                                 |
| EPI_ISL_450317, EPI_ISL_450318                                                                                                                                                                                                                                                                                                                                                                                                                                                                                                                                                                                                                                                                                                                                                                                                                                                                                                                                                                                                                                                                                                                                                                                                                                                                                                                                                                                                                                                                                                                                                                                                                                                                                                                                                                                                                                                                                                                                                                                                                                                                                                                                                                                                                                                                                                                                                                                                                                                                                                                                                                                                                                                                                                                                                                                                                                                                                                                                                                                                                                                                                                                                                                                                                                                                                                                                                                                                                                                                                                                                                                                                                                                                                                                                                                                                                                                                                                                                                                                                                                                                                                                                                                                                                                                                                                                                                                                 | Hôpital Pierre-Boucher                                                  | Laboratoire de santé publique du Québec                                                                                               | Sandrine Moreira, Ioannis Ragoussis, Guillaume Bourque, Jesse Shapiro, Mark Lathrop and Michel Roger on behalf of the CoVSeQ research group                                                                                                                                                                                                                                                                                                                                                                                                                                                                                                                                                 |
| EPI_ISL_450330                                                                                                                                                                                                                                                                                                                                                                                                                                                                                                                                                                                                                                                                                                                                                                                                                                                                                                                                                                                                                                                                                                                                                                                                                                                                                                                                                                                                                                                                                                                                                                                                                                                                                                                                                                                                                                                                                                                                                                                                                                                                                                                                                                                                                                                                                                                                                                                                                                                                                                                                                                                                                                                                                                                                                                                                                                                                                                                                                                                                                                                                                                                                                                                                                                                                                                                                                                                                                                                                                                                                                                                                                                                                                                                                                                                                                                                                                                                                                                                                                                                                                                                                                                                                                                                                                                                                                                                                 | CSIR-Centre for Cellular and Molecular Biology                          | CSIR-Centre for Cellular and Molecular Biology                                                                                        | Sakshi Shambhavi, Lamuk Zaveri, Shagufta Khan, Namami Gaur, Tulasi Nagabandi, Purushotham Vodnala, Payel Mukherjee, Sofia Banu, Priya Singh, Dhiviya Vedagiri, Divya Gupta, Vishal Sah, Santosh Kumar Kuncha, Krishnan Harinivas Harshan, Archana Bharadwaj Siva, Karthik Bharadwaj Tallapaka, Preethi Jampala, Sharada Ravi Iyer, Sulagana Mukherjee, Swetha Sundar, Peddapuvala Sai Uday Kiran, Umesh Kumar, Unis Ahmad Bhat, Ajay Sarawagi, Priyanka Pant, Rajkanwar Nathawat, Nikhil Hajirnis, Pratheusa Maccha, M Soujanya Reddy Rakesh K Mishra, Divya Tej Sowpati                                                                                                                    |
| EPI_ISL_450782                                                                                                                                                                                                                                                                                                                                                                                                                                                                                                                                                                                                                                                                                                                                                                                                                                                                                                                                                                                                                                                                                                                                                                                                                                                                                                                                                                                                                                                                                                                                                                                                                                                                                                                                                                                                                                                                                                                                                                                                                                                                                                                                                                                                                                                                                                                                                                                                                                                                                                                                                                                                                                                                                                                                                                                                                                                                                                                                                                                                                                                                                                                                                                                                                                                                                                                                                                                                                                                                                                                                                                                                                                                                                                                                                                                                                                                                                                                                                                                                                                                                                                                                                                                                                                                                                                                                                                                                 | Government Medical College-Bhavnagar                                    | Gujarat Biotechnology Research Centre                                                                                                 | Saklain Malek, Shirish Patel, Kairavi Desai, Tejas Shah, Ankit Hinsu, Pritesh Sabara, Apurvansh Puvar, Janvi Raval, Zarna Patel, Monika Gandhi, Pinal Trivedi, Maharshi Pandya, Amit Kanani, Nidhi Patel, Nitin Savaliya, Raghawendra Kumar, Dinesh Kumar, Zubir Saiyed, Komal Patel, Labdhi Pandya, Snehal Bagatharia, Ramesh Pandit, Bhavesh Modi, Gaurishankar Shrimali, R D Dixit, A M Kadri, Priti Pandita, Chaitanya Joshi, Madhvi Joshi                                                                                                                                                                                                                                              |
| EPI_ISL_451400                                                                                                                                                                                                                                                                                                                                                                                                                                                                                                                                                                                                                                                                                                                                                                                                                                                                                                                                                                                                                                                                                                                                                                                                                                                                                                                                                                                                                                                                                                                                                                                                                                                                                                                                                                                                                                                                                                                                                                                                                                                                                                                                                                                                                                                                                                                                                                                                                                                                                                                                                                                                                                                                                                                                                                                                                                                                                                                                                                                                                                                                                                                                                                                                                                                                                                                                                                                                                                                                                                                                                                                                                                                                                                                                                                                                                                                                                                                                                                                                                                                                                                                                                                                                                                                                                                                                                                                                 | Laboratoire de Recherche et d'Analyse Médicale de la Gendarmerie Royale | Laboratoire de Recherche et d'Analyse Médicale de la Gendarmerie Royale                                                               | Sanaâ LEMRISS, Amal SOUIRI, Saâd EL KABBAJ                                                                                                                                                                                                                                                                                                                                                                                                                                                                                                                                                                                                                                                  |
| EPI_ISL_452453, EPI_ISL_452454, EPI_ISL_452455, EPI_ISL_452456, EPI_ISL_452457, EPI_ISL_452458, EPI_ISL_452459, EPI_ISL_452460, EPI_ISL_452461, EPI_ISL_452462, EPI_ISL_452463, EPI_ISL_452464, EPI_ISL_452465, EPI_ISL_452466, EPI_ISL_452467, EPI_ISL_452468, EPI_ISL_452469, EPI_ISL_452470, EPI_ISL_452471                                                                                                                                                                                                                                                                                                                                                                                                                                                                                                                                                                                                                                                                                                                                                                                                                                                                                                                                                                                                                                                                                                                                                                                                                                                                                                                                                                                                                                                                                                                                                                                                                                                                                                                                                                                                                                                                                                                                                                                                                                                                                                                                                                                                                                                                                                                                                                                                                                                                                                                                                                                                                                                                                                                                                                                                                                                                                                                                                                                                                                                                                                                                                                                                                                                                                                                                                                                                                                                                                                                                                                                                                                                                                                                                                                                                                                                                                                                                                                                                                                                                                                 | see above                                                               | Hospital Universitario Puerta del Mar de Cádiz - INIBICA                                                                              | SeqCOVID-SPAIN consortium/IBV(CSIC)                                                                                                                                                                                                                                                                                                                                                                                                                                                                                                                                                                                                                                                         |
| EPI_ISL_453195, EPI_ISL_453196, EPI_ISL_453197, EPI_ISL_453198, EPI_ISL_453199, EPI_ISL_453200, EPI_ISL_453201, EPI_ISL_453202, EPI_ISL_453203, EPI_ISL_453204, EPI_ISL_453205, EPI_ISL_453206, EPI_ISL_453207, EPI_ISL_453208, EPI_ISL_453209, EPI_ISL_453210, EPI_ISL_453211, EPI_ISL_453212, EPI_ISL_453213, EPI_ISL_453214, EPI_ISL_453215, EPI_ISL_453216, EPI_ISL_453217, EPI_ISL_453218, EPI_ISL_453219, EPI_ISL_453220, EPI_ISL_453221, EPI_ISL_453222, EPI_ISL_453223, EPI_ISL_453224, EPI_ISL_453225, EPI_ISL_453226, EPI_ISL_453227, EPI_ISL_453228, EPI_ISL_453229, EPI_ISL_453230, EPI_ISL_453231, EPI_ISL_453232, EPI_ISL_453233, EPI_ISL_453234, EPI_ISL_453235, EPI_ISL_453236, EPI_ISL_453237, EPI_ISL_453238, EPI_ISL_453239, EPI_ISL_453240, EPI_ISL_453241, EPI_ISL_453242, EPI_ISL_453243, EPI_ISL_453244, EPI_ISL_453245, EPI_ISL_453246, EPI_ISL_453247, EPI_ISL_453248, EPI_ISL_453249, EPI_ISL_453250, EPI_ISL_453251, EPI_ISL_453252, EPI_ISL_453253, EPI_ISL_453254, EPI_ISL_453255, EPI_ISL_453256, EPI_ISL_453257, EPI_ISL_453258, EPI_ISL_453259, EPI_ISL_453260, EPI_ISL_453261, EPI_ISL_453262, EPI_ISL_453263, EPI_ISL_453264, EPI_ISL_453265, EPI_ISL_453266, EPI_ISL_453267, EPI_ISL_453268, EPI_ISL_453269, EPI_ISL_453270, EPI_ISL_453271, EPI_ISL_453272, EPI_ISL_453273, EPI_ISL_453274, EPI_ISL_453275, EPI_ISL_453276, EPI_ISL_453277, EPI_ISL_453278, EPI_ISL_453279, EPI_ISL_453280, EPI_ISL_453281, EPI_ISL_453282, EPI_ISL_453283, EPI_ISL_453284, EPI_ISL_453285, EPI_ISL_453286, EPI_ISL_453287, EPI_ISL_453288, EPI_ISL_453289, EPI_ISL_453290, EPI_ISL_453291, EPI_ISL_453292, EPI_ISL_453293, EPI_ISL_453294, EPI_ISL_453295, EPI_ISL_453296, EPI_ISL_453297, EPI_ISL_453298, EPI_ISL_453299, EPI_ISL_453300, EPI_ISL_453301, EPI_ISL_453302, EPI_ISL_453303, EPI_ISL_453304, EPI_ISL_453305, EPI_ISL_453306, EPI_ISL_453307, EPI_ISL_453308, EPI_ISL_453309, EPI_ISL_453310, EPI_ISL_453311, EPI_ISL_453312, EPI_ISL_453313, EPI_ISL_453314, EPI_ISL_453315, EPI_ISL_453316, EPI_ISL_453317, EPI_ISL_453318, EPI_ISL_453319, EPI_ISL_453320, EPI_ISL_453321, EPI_ISL_453322, EPI_ISL_453323, EPI_ISL_453324, EPI_ISL_453325, EPI_ISL_453326, EPI_ISL_453327, EPI_ISL_453328, EPI_ISL_453329, EPI_ISL_453330, EPI_ISL_453331, EPI_ISL_453332, EPI_ISL_453333, EPI_ISL_453334, EPI_ISL_453335, EPI_ISL_453336, EPI_ISL_453337, EPI_ISL_453338, EPI_ISL_453339, EPI_ISL_453340, EPI_ISL_453341, EPI_ISL_453342, EPI_ISL_453343, EPI_ISL_453344, EPI_ISL_453345, EPI_ISL_453346, EPI_ISL_453347, EPI_ISL_453348, EPI_ISL_453349, EPI_ISL_453350, EPI_ISL_453351, EPI_ISL_453352, EPI_ISL_453353, EPI_ISL_453354, EPI_ISL_453355, EPI_ISL_453356, EPI_ISL_453357, EPI_ISL_453358, EPI_ISL_453359, EPI_ISL_453360, EPI_ISL_453361, EPI_ISL_453362, EPI_ISL_453363, EPI_ISL_453364, EPI_ISL_453365, EPI_ISL_453366, EPI_ISL_453367, EPI_ISL_453368, EPI_ISL_453369, EPI_ISL_453370, EPI_ISL_453371, EPI_ISL_453372, EPI_ISL_453373, EPI_ISL_453374, EPI_ISL_453375, EPI_ISL_453376, EPI_ISL_453377, EPI_ISL_453378, EPI_ISL_453379, EPI_ISL_453380, EPI_ISL_453381, EPI_ISL_453382, EPI_ISL_453383, EPI_ISL_453384, EPI_ISL_453385, EPI_ISL_453386, EPI_ISL_453387, EPI_ISL_453388, EPI_ISL_453389, EPI_ISL_453390, EPI_ISL_453391, EPI_ISL_453392, EPI_ISL_453393, EPI_ISL_453394, EPI_ISL_453395, EPI_ISL_453396, EPI_ISL_453397, EPI_ISL_453398, EPI_ISL_453399, EPI_ISL_453400, EPI_ISL_453401, EPI_ISL_453402, EPI_ISL_453403, EPI_ISL_453404, EPI_ISL_453405, EPI_ISL_453406, EPI_ISL_453407, EPI_ISL_453408, EPI_ISL_453409, EPI_ISL_453410, EPI_ISL_453411, EPI_ISL_453412, EPI_ISL_453413, EPI_ISL_453414, EPI_ISL_453415, EPI_ISL_453416, EPI_ISL_453417, EPI_ISL_453418, EPI_ISL_453419, EPI_ISL_453420, EPI_ISL_453421, EPI_ISL_453422, EPI_ISL_453423, EPI_ISL_453424, EPI_ISL_453425, EPI_ISL_453426, EPI_ISL_453427, EPI_ISL_453428, EPI_ISL_453429, EPI_ISL_453430, EPI_ISL_453431, EPI_ISL_453432, EPI_ISL_453433, EPI_ISL_453434, EPI_ISL_453435, EPI_ISL_453436, EPI_ISL_453437, EPI_ISL_453438, EPI_ISL_453439, EPI_ISL_453440, EPI_ISL_453441, EPI_ISL_453442, EPI_ISL_453443, EPI_ISL_453444, EPI_ISL_453445, EPI_ISL_453446, EPI_ISL_453447, EPI_ISL_453448, EPI_ISL_453449, EPI_ISL_453450, EPI_ISL_453451, EPI_ISL_453452, EPI_ISL_453453, EPI_ISL_453454, EPI_ISL_453455, EPI_ISL_453456, EPI_ISL_453457, EPI_ISL_453458, EPI_ISL_453459 | see above                                                               | Liverpool Clinical Laboratories                                                                                                       | COVID-19 Genomics UK (COG-UK) Consortium                                                                                                                                                                                                                                                                                                                                                                                                                                                                                                                                                                                                                                                    |
| EPI_ISL_455101                                                                                                                                                                                                                                                                                                                                                                                                                                                                                                                                                                                                                                                                                                                                                                                                                                                                                                                                                                                                                                                                                                                                                                                                                                                                                                                                                                                                                                                                                                                                                                                                                                                                                                                                                                                                                                                                                                                                                                                                                                                                                                                                                                                                                                                                                                                                                                                                                                                                                                                                                                                                                                                                                                                                                                                                                                                                                                                                                                                                                                                                                                                                                                                                                                                                                                                                                                                                                                                                                                                                                                                                                                                                                                                                                                                                                                                                                                                                                                                                                                                                                                                                                                                                                                                                                                                                                                                                 | Jourcentralen                                                           | The Public Health Agency of Sweden                                                                                                    | Sam Haldenby, Anita Lucaci, Steve Paterson, Julian Hiscox, Alistair Darby, M Almsaud, A Alrezaihi, Muhannad Alruwaili, Stuart D Armstrong, Jones Benjamin , Eleanor G Bentley, Anu Chawla, Jordan J Clark, Angela Cowell, Richard Eccles, Isabel Garcia-Dorival, Matthew Gemmill, Alessandro Gerada, PKF Gilmore, Richard Gregory, Ximeng Han, Catherine Hartley, Margaret Hughes, Miren Iturriza-Gomara, James Johnson, L Luu, Jenifer Manson , Charlotte Nelson, Elaine O'Toole, Cassie Olateju, Rebekah Penrice-Randal , Lucille Rainbow, N.P Randle, Trevor Ian Robinson, Parul Sharma, Ghada T Shawli, James P Stewart , Neil Swainston, Ecaterina Vamos, Joanne Watts, Mark Whitehead |
| EPI_ISL_455721, EPI_ISL_455729                                                                                                                                                                                                                                                                                                                                                                                                                                                                                                                                                                                                                                                                                                                                                                                                                                                                                                                                                                                                                                                                                                                                                                                                                                                                                                                                                                                                                                                                                                                                                                                                                                                                                                                                                                                                                                                                                                                                                                                                                                                                                                                                                                                                                                                                                                                                                                                                                                                                                                                                                                                                                                                                                                                                                                                                                                                                                                                                                                                                                                                                                                                                                                                                                                                                                                                                                                                                                                                                                                                                                                                                                                                                                                                                                                                                                                                                                                                                                                                                                                                                                                                                                                                                                                                                                                                                                                                 | Servicio de Microbiología. Hospital Clínico Universitario de Valencia   | Sequencing and Bioinformatics Service and Molecular Epidemiology Research Group. FISABIO-Public Health, and SeqCOVID-Spain Consortium | Sandra Carbo, Loreto Ferrús Abad, Paula Ruiz-Hueso, Mariana Reyes-Prieto, Vicente Soriano Chirona, Ivan Ansari, Lúcia Martínez-Priego, Giuseppe Auria, David Navarro, Eliseo Albert, Maria Alma Bracho, Lidia Ruiz Roldan, Neris Garcia-Gonzalez, Inma Galán Vendrell, Fernando Gonzalez-Candelas                                                                                                                                                                                                                                                                                                                                                                                           |
| EPI_ISL_457259, EPI_ISL_457260, EPI_ISL_457261, EPI_ISL_457262, EPI_ISL_457263, EPI_ISL_457264, EPI_ISL_457265, EPI_ISL_457266, EPI_ISL_457267, EPI_ISL_457268, EPI_ISL_457269                                                                                                                                                                                                                                                                                                                                                                                                                                                                                                                                                                                                                                                                                                                                                                                                                                                                                                                                                                                                                                                                                                                                                                                                                                                                                                                                                                                                                                                                                                                                                                                                                                                                                                                                                                                                                                                                                                                                                                                                                                                                                                                                                                                                                                                                                                                                                                                                                                                                                                                                                                                                                                                                                                                                                                                                                                                                                                                                                                                                                                                                                                                                                                                                                                                                                                                                                                                                                                                                                                                                                                                                                                                                                                                                                                                                                                                                                                                                                                                                                                                                                                                                                                                                                                 | see above                                                               | Liverpool Clinical Laboratories                                                                                                       | COVID-19 Genomics UK (COG-UK) Consortium                                                                                                                                                                                                                                                                                                                                                                                                                                                                                                                                                                                                                                                    |
| EPI_ISL_457701, EPI_ISL_457704, EPI_ISL_457706, EPI_ISL_457937, EPI_ISL_457938, EPI_ISL_457939, EPI_ISL_457974, EPI_ISL_457975, EPI_ISL_457976, EPI_ISL_457977, EPI_ISL_457978, EPI_ISL_457979, EPI_ISL_457991, EPI_ISL_457992, EPI_ISL_457993, EPI_ISL_457994, EPI_ISL_457995, EPI_ISL_457996, EPI_ISL_457997, EPI_ISL_457998                                                                                                                                                                                                                                                                                                                                                                                                                                                                                                                                                                                                                                                                                                                                                                                                                                                                                                                                                                                                                                                                                                                                                                                                                                                                                                                                                                                                                                                                                                                                                                                                                                                                                                                                                                                                                                                                                                                                                                                                                                                                                                                                                                                                                                                                                                                                                                                                                                                                                                                                                                                                                                                                                                                                                                                                                                                                                                                                                                                                                                                                                                                                                                                                                                                                                                                                                                                                                                                                                                                                                                                                                                                                                                                                                                                                                                                                                                                                                                                                                                                                                 | see above                                                               | Oman-NIC                                                                                                                              | Oman-NIC                                                                                                                                                                                                                                                                                                                                                                                                                                                                                                                                                                                                                                                                                    |
| EPI_ISL_458070                                                                                                                                                                                                                                                                                                                                                                                                                                                                                                                                                                                                                                                                                                                                                                                                                                                                                                                                                                                                                                                                                                                                                                                                                                                                                                                                                                                                                                                                                                                                                                                                                                                                                                                                                                                                                                                                                                                                                                                                                                                                                                                                                                                                                                                                                                                                                                                                                                                                                                                                                                                                                                                                                                                                                                                                                                                                                                                                                                                                                                                                                                                                                                                                                                                                                                                                                                                                                                                                                                                                                                                                                                                                                                                                                                                                                                                                                                                                                                                                                                                                                                                                                                                                                                                                                                                                                                                                 | CSIR-Centre for Cellular and Molecular Biology                          | CSIR-Centre for Cellular and Molecular Biology                                                                                        | Samira Al-Maruqi, Fahad Zadjali, Amina Al Jardani, Khulood Al-Mammary, Hanan Al-kind, Fatma BaAlawi, Hamida AL Barwani, Zeyana AL-Dahmani, Intisar Al-Shukri, Aisha Al-Busaidi, Aisha Al-Amri, Ahlam Al-Amri, Mohammed Al-Tobi, Samiha Al Kharusi, Abdulla Balkhair                                                                                                                                                                                                                                                                                                                                                                                                                         |
| EPI_ISL_458071                                                                                                                                                                                                                                                                                                                                                                                                                                                                                                                                                                                                                                                                                                                                                                                                                                                                                                                                                                                                                                                                                                                                                                                                                                                                                                                                                                                                                                                                                                                                                                                                                                                                                                                                                                                                                                                                                                                                                                                                                                                                                                                                                                                                                                                                                                                                                                                                                                                                                                                                                                                                                                                                                                                                                                                                                                                                                                                                                                                                                                                                                                                                                                                                                                                                                                                                                                                                                                                                                                                                                                                                                                                                                                                                                                                                                                                                                                                                                                                                                                                                                                                                                                                                                                                                                                                                                                                                 | CSIR-Centre for Cellular and Molecular Biology                          | CSIR-Centre for Cellular and Molecular Biology                                                                                        | Sakshi Shambhavi, Lamuk Zaveri, Shagufta Khan, Namami Gaur, Tulasi Nagabandi, Purushotham Vodnala, Payel Mukherjee, Sofia Banu, Priya Singh, Dhiviya Vedagiri, Divya Gupta, Vishal Sah, Santosh Kumar Kuncha, Krishnan Harinivas Harshan, Archana Bharadwaj Siva, Karthik Bharadwaj Tallapaka, Nikhil Hajirnis, Pratheusa Maccha, M Soujanya Reddy, G. Aditya Kumar, Koushick Sivakumar, Rakesh K Mishra, Divya Tej Sowpati                                                                                                                                                                                                                                                                 |
| EPI_ISL_458080                                                                                                                                                                                                                                                                                                                                                                                                                                                                                                                                                                                                                                                                                                                                                                                                                                                                                                                                                                                                                                                                                                                                                                                                                                                                                                                                                                                                                                                                                                                                                                                                                                                                                                                                                                                                                                                                                                                                                                                                                                                                                                                                                                                                                                                                                                                                                                                                                                                                                                                                                                                                                                                                                                                                                                                                                                                                                                                                                                                                                                                                                                                                                                                                                                                                                                                                                                                                                                                                                                                                                                                                                                                                                                                                                                                                                                                                                                                                                                                                                                                                                                                                                                                                                                                                                                                                                                                                 | CSIR-Centre for Cellular and Molecular Biology                          | CSIR-Centre for Cellular and Molecular Biology                                                                                        | Sakshi Shambhavi, Lamuk Zaveri, Shagufta Khan, Namami Gaur, Tulasi Nagabandi, Purushotham Vodnala, Payel Mukherjee, Sofia Banu, Priya Singh, Dhiviya Vedagiri, Divya Gupta, Vishal Sah, Santosh Kumar Kuncha, Krishnan Harinivas Harshan, Archana Bharadwaj Siva, Karthik Bharadwaj Tallapaka, G. Aditya Kumar, Koushick Sivakumar, Pooja Ramesh Gupta, Rajan Kumar Jha, Shraddha Vijay Lahoti, Rakesh K Mishra, Divya Tej Sowpati                                                                                                                                                                                                                                                          |
| EPI_ISL_458138, EPI_ISL_458139, EPI_ISL_458141, EPI_ISL_458142, EPI_ISL_458146, EPI_ISL_458148, EPI_ISL_458149                                                                                                                                                                                                                                                                                                                                                                                                                                                                                                                                                                                                                                                                                                                                                                                                                                                                                                                                                                                                                                                                                                                                                                                                                                                                                                                                                                                                                                                                                                                                                                                                                                                                                                                                                                                                                                                                                                                                                                                                                                                                                                                                                                                                                                                                                                                                                                                                                                                                                                                                                                                                                                                                                                                                                                                                                                                                                                                                                                                                                                                                                                                                                                                                                                                                                                                                                                                                                                                                                                                                                                                                                                                                                                                                                                                                                                                                                                                                                                                                                                                                                                                                                                                                                                                                                                 | Evandro Chagas Institute                                                | Evandro Chagas Institute                                                                                                              | Santos, M.C.; Silva, A.M.; Junior, W.D.C.; Barbagemata, L.S.; Ferreira, J.A.; Sousa, E.M.A.; da Silva, P.S.; Resque, H.R; Martins, L.C.; Sousa Junior, E.C.; Viana, G.M.R                                                                                                                                                                                                                                                                                                                                                                                                                                                                                                                   |
| EPI_ISL_458298                                                                                                                                                                                                                                                                                                                                                                                                                                                                                                                                                                                                                                                                                                                                                                                                                                                                                                                                                                                                                                                                                                                                                                                                                                                                                                                                                                                                                                                                                                                                                                                                                                                                                                                                                                                                                                                                                                                                                                                                                                                                                                                                                                                                                                                                                                                                                                                                                                                                                                                                                                                                                                                                                                                                                                                                                                                                                                                                                                                                                                                                                                                                                                                                                                                                                                                                                                                                                                                                                                                                                                                                                                                                                                                                                                                                                                                                                                                                                                                                                                                                                                                                                                                                                                                                                                                                                                                                 | CSIR-Centre for Cellular and Molecular Biology                          | CSIR-Centre for Cellular and Molecular Biology                                                                                        | Sakshi Shambhavi, Lamuk Zaveri, Shagufta Khan, Namami Gaur, Tulasi Nagabandi, Purushotham Vodnala, Payel Mukherjee, Sofia Banu, Priya Singh, Dhiviya Vedagiri, Divya Gupta, Vishal Sah, Santosh Kumar Kuncha, Krishnan Harinivas Harshan, Archana Bharadwaj Siva, Karthik Bharadwaj Tallapaka, Deepak Kumar, Devi Prasad Vijayashankar, Disha Nanda, Divya Das, Jotin Gogoi, Manish Bhattacharjee, Rakesh K Mishra, Divya Tej Sowpati                                                                                                                                                                                                                                                       |



|                                                                                                                                                                                                                                                                                                                                                                                                                                                                                                                                                                                                                                                                                                                                                                                                                                                                                                                                                                                                                                                                                                                                                                                                                                                                                                                                                                                                                                                                                                                                                                                                                                                                                                                                                                                                                                                                                                                                                                                                                                                                                                                                                                                                                                                                                                                                                                |                                                                |                                                                |                                                                                                                                                                                                                                                                                                                                                                                                                                                                                                                                                                                                                                                                                        |
|----------------------------------------------------------------------------------------------------------------------------------------------------------------------------------------------------------------------------------------------------------------------------------------------------------------------------------------------------------------------------------------------------------------------------------------------------------------------------------------------------------------------------------------------------------------------------------------------------------------------------------------------------------------------------------------------------------------------------------------------------------------------------------------------------------------------------------------------------------------------------------------------------------------------------------------------------------------------------------------------------------------------------------------------------------------------------------------------------------------------------------------------------------------------------------------------------------------------------------------------------------------------------------------------------------------------------------------------------------------------------------------------------------------------------------------------------------------------------------------------------------------------------------------------------------------------------------------------------------------------------------------------------------------------------------------------------------------------------------------------------------------------------------------------------------------------------------------------------------------------------------------------------------------------------------------------------------------------------------------------------------------------------------------------------------------------------------------------------------------------------------------------------------------------------------------------------------------------------------------------------------------------------------------------------------------------------------------------------------------|----------------------------------------------------------------|----------------------------------------------------------------|----------------------------------------------------------------------------------------------------------------------------------------------------------------------------------------------------------------------------------------------------------------------------------------------------------------------------------------------------------------------------------------------------------------------------------------------------------------------------------------------------------------------------------------------------------------------------------------------------------------------------------------------------------------------------------------|
| EPI_ISL_462992                                                                                                                                                                                                                                                                                                                                                                                                                                                                                                                                                                                                                                                                                                                                                                                                                                                                                                                                                                                                                                                                                                                                                                                                                                                                                                                                                                                                                                                                                                                                                                                                                                                                                                                                                                                                                                                                                                                                                                                                                                                                                                                                                                                                                                                                                                                                                 | Nigerian Institute of Medical Research                         | Nigerian Institute of Medical Research                         | Saibu,J.O., Onwuamah,C.K., Okwuraiwe,A.P., Amoo,O.S., Salu,O.B., Ige,F.A., Liboro,G., Odewale,E., Adesegun,A., Abosede,O., Ahmed,R., Sokei,J., Oyefolu,A., Adegbola,R., Salako,B., Omilabu,S. and Audu,R.                                                                                                                                                                                                                                                                                                                                                                                                                                                                              |
| EPI_ISL_465679, EPI_ISL_465680                                                                                                                                                                                                                                                                                                                                                                                                                                                                                                                                                                                                                                                                                                                                                                                                                                                                                                                                                                                                                                                                                                                                                                                                                                                                                                                                                                                                                                                                                                                                                                                                                                                                                                                                                                                                                                                                                                                                                                                                                                                                                                                                                                                                                                                                                                                                 | Hôpital du Suroît                                              | Laboratoire de santé publique du Québec                        | Sandrine Moreira, Ioannis Ragoussis, Guillaume Bourque, Jesse Shapiro, Mark Lathrop and Michel Roger on behalf of the CoVSeQ research group                                                                                                                                                                                                                                                                                                                                                                                                                                                                                                                                            |
| EPI_ISL_465681, EPI_ISL_465682                                                                                                                                                                                                                                                                                                                                                                                                                                                                                                                                                                                                                                                                                                                                                                                                                                                                                                                                                                                                                                                                                                                                                                                                                                                                                                                                                                                                                                                                                                                                                                                                                                                                                                                                                                                                                                                                                                                                                                                                                                                                                                                                                                                                                                                                                                                                 | Hôpital Charles-LeMoyne                                        | Laboratoire de santé publique du Québec                        | Sandrine Moreira, Ioannis Ragoussis, Guillaume Bourque, Jesse Shapiro, Mark Lathrop and Michel Roger on behalf of the CoVSeQ research group                                                                                                                                                                                                                                                                                                                                                                                                                                                                                                                                            |
| EPI_ISL_465683, EPI_ISL_465684                                                                                                                                                                                                                                                                                                                                                                                                                                                                                                                                                                                                                                                                                                                                                                                                                                                                                                                                                                                                                                                                                                                                                                                                                                                                                                                                                                                                                                                                                                                                                                                                                                                                                                                                                                                                                                                                                                                                                                                                                                                                                                                                                                                                                                                                                                                                 | Hôpital de Maria                                               | Laboratoire de santé publique du Québec                        | Sandrine Moreira, Ioannis Ragoussis, Guillaume Bourque, Jesse Shapiro, Mark Lathrop and Michel Roger on behalf of the CoVSeQ research group                                                                                                                                                                                                                                                                                                                                                                                                                                                                                                                                            |
| EPI_ISL_465685                                                                                                                                                                                                                                                                                                                                                                                                                                                                                                                                                                                                                                                                                                                                                                                                                                                                                                                                                                                                                                                                                                                                                                                                                                                                                                                                                                                                                                                                                                                                                                                                                                                                                                                                                                                                                                                                                                                                                                                                                                                                                                                                                                                                                                                                                                                                                 | CSSS Haut-Richelieu/Rouville (Hôpital)                         | Laboratoire de santé publique du Québec                        | Sandrine Moreira, Ioannis Ragoussis, Guillaume Bourque, Jesse Shapiro, Mark Lathrop and Michel Roger on behalf of the CoVSeQ research group                                                                                                                                                                                                                                                                                                                                                                                                                                                                                                                                            |
| EPI_ISL_465686                                                                                                                                                                                                                                                                                                                                                                                                                                                                                                                                                                                                                                                                                                                                                                                                                                                                                                                                                                                                                                                                                                                                                                                                                                                                                                                                                                                                                                                                                                                                                                                                                                                                                                                                                                                                                                                                                                                                                                                                                                                                                                                                                                                                                                                                                                                                                 | Hôpital de Hull                                                | Laboratoire de santé publique du Québec                        | Sandrine Moreira, Ioannis Ragoussis, Guillaume Bourque, Jesse Shapiro, Mark Lathrop and Michel Roger on behalf of the CoVSeQ research group                                                                                                                                                                                                                                                                                                                                                                                                                                                                                                                                            |
| EPI_ISL_465687                                                                                                                                                                                                                                                                                                                                                                                                                                                                                                                                                                                                                                                                                                                                                                                                                                                                                                                                                                                                                                                                                                                                                                                                                                                                                                                                                                                                                                                                                                                                                                                                                                                                                                                                                                                                                                                                                                                                                                                                                                                                                                                                                                                                                                                                                                                                                 | CSSS Haut-Richelieu/Rouville (Hôpital)                         | Laboratoire de santé publique du Québec                        | Sandrine Moreira, Ioannis Ragoussis, Guillaume Bourque, Jesse Shapiro, Mark Lathrop and Michel Roger on behalf of the CoVSeQ research group                                                                                                                                                                                                                                                                                                                                                                                                                                                                                                                                            |
| EPI_ISL_465688, EPI_ISL_465689, EPI_ISL_465690                                                                                                                                                                                                                                                                                                                                                                                                                                                                                                                                                                                                                                                                                                                                                                                                                                                                                                                                                                                                                                                                                                                                                                                                                                                                                                                                                                                                                                                                                                                                                                                                                                                                                                                                                                                                                                                                                                                                                                                                                                                                                                                                                                                                                                                                                                                 | Centre hospitalier Anna-Laberge                                | Laboratoire de santé publique du Québec                        | Sandrine Moreira, Ioannis Ragoussis, Guillaume Bourque, Jesse Shapiro, Mark Lathrop and Michel Roger on behalf of the CoVSeQ research group                                                                                                                                                                                                                                                                                                                                                                                                                                                                                                                                            |
| EPI_ISL_465691                                                                                                                                                                                                                                                                                                                                                                                                                                                                                                                                                                                                                                                                                                                                                                                                                                                                                                                                                                                                                                                                                                                                                                                                                                                                                                                                                                                                                                                                                                                                                                                                                                                                                                                                                                                                                                                                                                                                                                                                                                                                                                                                                                                                                                                                                                                                                 | Hôpital de Gatineau                                            | Laboratoire de santé publique du Québec                        | Sandrine Moreira, Ioannis Ragoussis, Guillaume Bourque, Jesse Shapiro, Mark Lathrop and Michel Roger on behalf of the CoVSeQ research group                                                                                                                                                                                                                                                                                                                                                                                                                                                                                                                                            |
| EPI_ISL_465692                                                                                                                                                                                                                                                                                                                                                                                                                                                                                                                                                                                                                                                                                                                                                                                                                                                                                                                                                                                                                                                                                                                                                                                                                                                                                                                                                                                                                                                                                                                                                                                                                                                                                                                                                                                                                                                                                                                                                                                                                                                                                                                                                                                                                                                                                                                                                 | CSSS Haut-Richelieu/Rouville (Hôpital)                         | Laboratoire de santé publique du Québec                        | Sandrine Moreira, Ioannis Ragoussis, Guillaume Bourque, Jesse Shapiro, Mark Lathrop and Michel Roger on behalf of the CoVSeQ research group                                                                                                                                                                                                                                                                                                                                                                                                                                                                                                                                            |
| EPI_ISL_465693                                                                                                                                                                                                                                                                                                                                                                                                                                                                                                                                                                                                                                                                                                                                                                                                                                                                                                                                                                                                                                                                                                                                                                                                                                                                                                                                                                                                                                                                                                                                                                                                                                                                                                                                                                                                                                                                                                                                                                                                                                                                                                                                                                                                                                                                                                                                                 | Hôpital du Suroît                                              | Laboratoire de santé publique du Québec                        | Sandrine Moreira, Ioannis Ragoussis, Guillaume Bourque, Jesse Shapiro, Mark Lathrop and Michel Roger on behalf of the CoVSeQ research group                                                                                                                                                                                                                                                                                                                                                                                                                                                                                                                                            |
| EPI_ISL_465694                                                                                                                                                                                                                                                                                                                                                                                                                                                                                                                                                                                                                                                                                                                                                                                                                                                                                                                                                                                                                                                                                                                                                                                                                                                                                                                                                                                                                                                                                                                                                                                                                                                                                                                                                                                                                                                                                                                                                                                                                                                                                                                                                                                                                                                                                                                                                 | Hôpital Charles-LeMoyne                                        | Laboratoire de santé publique du Québec                        | Sandrine Moreira, Ioannis Ragoussis, Guillaume Bourque, Jesse Shapiro, Mark Lathrop and Michel Roger on behalf of the CoVSeQ research group                                                                                                                                                                                                                                                                                                                                                                                                                                                                                                                                            |
| EPI_ISL_465695, EPI_ISL_465696                                                                                                                                                                                                                                                                                                                                                                                                                                                                                                                                                                                                                                                                                                                                                                                                                                                                                                                                                                                                                                                                                                                                                                                                                                                                                                                                                                                                                                                                                                                                                                                                                                                                                                                                                                                                                                                                                                                                                                                                                                                                                                                                                                                                                                                                                                                                 | Hôpital Pierre-Boucher                                         | Laboratoire de santé publique du Québec                        | Sandrine Moreira, Ioannis Ragoussis, Guillaume Bourque, Jesse Shapiro, Mark Lathrop and Michel Roger on behalf of the CoVSeQ research group                                                                                                                                                                                                                                                                                                                                                                                                                                                                                                                                            |
| EPI_ISL_465697                                                                                                                                                                                                                                                                                                                                                                                                                                                                                                                                                                                                                                                                                                                                                                                                                                                                                                                                                                                                                                                                                                                                                                                                                                                                                                                                                                                                                                                                                                                                                                                                                                                                                                                                                                                                                                                                                                                                                                                                                                                                                                                                                                                                                                                                                                                                                 | Centre de santé Inuulitsivik                                   | Laboratoire de santé publique du Québec                        | Sandrine Moreira, Ioannis Ragoussis, Guillaume Bourque, Jesse Shapiro, Mark Lathrop and Michel Roger on behalf of the CoVSeQ research group                                                                                                                                                                                                                                                                                                                                                                                                                                                                                                                                            |
| EPI_ISL_465698, EPI_ISL_465699                                                                                                                                                                                                                                                                                                                                                                                                                                                                                                                                                                                                                                                                                                                                                                                                                                                                                                                                                                                                                                                                                                                                                                                                                                                                                                                                                                                                                                                                                                                                                                                                                                                                                                                                                                                                                                                                                                                                                                                                                                                                                                                                                                                                                                                                                                                                 | Hôpital Charles-LeMoyne                                        | Laboratoire de santé publique du Québec                        | Sandrine Moreira, Ioannis Ragoussis, Guillaume Bourque, Jesse Shapiro, Mark Lathrop and Michel Roger on behalf of the CoVSeQ research group                                                                                                                                                                                                                                                                                                                                                                                                                                                                                                                                            |
| EPI_ISL_465700                                                                                                                                                                                                                                                                                                                                                                                                                                                                                                                                                                                                                                                                                                                                                                                                                                                                                                                                                                                                                                                                                                                                                                                                                                                                                                                                                                                                                                                                                                                                                                                                                                                                                                                                                                                                                                                                                                                                                                                                                                                                                                                                                                                                                                                                                                                                                 | Hôpital Pierre-Boucher                                         | Laboratoire de santé publique du Québec                        | Sandrine Moreira, Ioannis Ragoussis, Guillaume Bourque, Jesse Shapiro, Mark Lathrop and Michel Roger on behalf of the CoVSeQ research group                                                                                                                                                                                                                                                                                                                                                                                                                                                                                                                                            |
| EPI_ISL_465701                                                                                                                                                                                                                                                                                                                                                                                                                                                                                                                                                                                                                                                                                                                                                                                                                                                                                                                                                                                                                                                                                                                                                                                                                                                                                                                                                                                                                                                                                                                                                                                                                                                                                                                                                                                                                                                                                                                                                                                                                                                                                                                                                                                                                                                                                                                                                 | Hôpital du Suroît                                              | Laboratoire de santé publique du Québec                        | Sandrine Moreira, Ioannis Ragoussis, Guillaume Bourque, Jesse Shapiro, Mark Lathrop and Michel Roger on behalf of the CoVSeQ research group                                                                                                                                                                                                                                                                                                                                                                                                                                                                                                                                            |
| EPI_ISL_465702, EPI_ISL_465703                                                                                                                                                                                                                                                                                                                                                                                                                                                                                                                                                                                                                                                                                                                                                                                                                                                                                                                                                                                                                                                                                                                                                                                                                                                                                                                                                                                                                                                                                                                                                                                                                                                                                                                                                                                                                                                                                                                                                                                                                                                                                                                                                                                                                                                                                                                                 | Hôpital Pierre-Boucher                                         | Laboratoire de santé publique du Québec                        | Sandrine Moreira, Ioannis Ragoussis, Guillaume Bourque, Jesse Shapiro, Mark Lathrop and Michel Roger on behalf of the CoVSeQ research group                                                                                                                                                                                                                                                                                                                                                                                                                                                                                                                                            |
| EPI_ISL_467064, EPI_ISL_467065, EPI_ISL_467066, EPI_ISL_467067, EPI_ISL_467068, EPI_ISL_467069, EPI_ISL_467070, EPI_ISL_467071, EPI_ISL_467072, EPI_ISL_467073, EPI_ISL_467074, EPI_ISL_467075, EPI_ISL_467076, EPI_ISL_467077, EPI_ISL_467078, EPI_ISL_467079, EPI_ISL_467080, EPI_ISL_467081, EPI_ISL_467082, EPI_ISL_467083, EPI_ISL_467084, EPI_ISL_467085                                                                                                                                                                                                                                                                                                                                                                                                                                                                                                                                                                                                                                                                                                                                                                                                                                                                                                                                                                                                                                                                                                                                                                                                                                                                                                                                                                                                                                                                                                                                                                                                                                                                                                                                                                                                                                                                                                                                                                                                 |                                                                |                                                                |                                                                                                                                                                                                                                                                                                                                                                                                                                                                                                                                                                                                                                                                                        |
| see above                                                                                                                                                                                                                                                                                                                                                                                                                                                                                                                                                                                                                                                                                                                                                                                                                                                                                                                                                                                                                                                                                                                                                                                                                                                                                                                                                                                                                                                                                                                                                                                                                                                                                                                                                                                                                                                                                                                                                                                                                                                                                                                                                                                                                                                                                                                                                      | Hospital Universitario Puerta del Mar de Cádiz - INIBICA       | SeqCOVID-SPAIN consortium/IBV(CSIC)                            | Salud Rodríguez-Pallares, Fátima-Galán-Sánchez, Manuel Rodríguez-Iglesias and SeqCOVID-SPAIN consortium                                                                                                                                                                                                                                                                                                                                                                                                                                                                                                                                                                                |
| EPI_ISL_467299                                                                                                                                                                                                                                                                                                                                                                                                                                                                                                                                                                                                                                                                                                                                                                                                                                                                                                                                                                                                                                                                                                                                                                                                                                                                                                                                                                                                                                                                                                                                                                                                                                                                                                                                                                                                                                                                                                                                                                                                                                                                                                                                                                                                                                                                                                                                                 | Research and Medical Analysis Laboratory of Gendarmerie Royale | Research and Medical Analysis Laboratory of Gendarmerie Royale | Sanaâ LEMRISS Amal SOUIRI Hicham EL OSSMANI Saâd EL Kabbaj                                                                                                                                                                                                                                                                                                                                                                                                                                                                                                                                                                                                                             |
| EPI_ISL_467950, EPI_ISL_467951, EPI_ISL_467952, EPI_ISL_467953, EPI_ISL_467954, EPI_ISL_467955, EPI_ISL_467956, EPI_ISL_467957, EPI_ISL_467958, EPI_ISL_467959, EPI_ISL_467961, EPI_ISL_467962, EPI_ISL_467964, EPI_ISL_467965, EPI_ISL_467966                                                                                                                                                                                                                                                                                                                                                                                                                                                                                                                                                                                                                                                                                                                                                                                                                                                                                                                                                                                                                                                                                                                                                                                                                                                                                                                                                                                                                                                                                                                                                                                                                                                                                                                                                                                                                                                                                                                                                                                                                                                                                                                 |                                                                |                                                                |                                                                                                                                                                                                                                                                                                                                                                                                                                                                                                                                                                                                                                                                                        |
| see above                                                                                                                                                                                                                                                                                                                                                                                                                                                                                                                                                                                                                                                                                                                                                                                                                                                                                                                                                                                                                                                                                                                                                                                                                                                                                                                                                                                                                                                                                                                                                                                                                                                                                                                                                                                                                                                                                                                                                                                                                                                                                                                                                                                                                                                                                                                                                      | San Diego County Public Health Laboratory                      | Andersen lab at Scripps Research                               | SEARCH Alliance San Diego with Tracy Basler, Jovan Shephard, Brett Austin                                                                                                                                                                                                                                                                                                                                                                                                                                                                                                                                                                                                              |
| EPI_ISL_467967                                                                                                                                                                                                                                                                                                                                                                                                                                                                                                                                                                                                                                                                                                                                                                                                                                                                                                                                                                                                                                                                                                                                                                                                                                                                                                                                                                                                                                                                                                                                                                                                                                                                                                                                                                                                                                                                                                                                                                                                                                                                                                                                                                                                                                                                                                                                                 | Scripps Medical Laboratory                                     | Andersen lab at Scripps Research                               | SEARCH Alliance San Diego with Tracy Basler, Jovan Shephard, Brett Austin                                                                                                                                                                                                                                                                                                                                                                                                                                                                                                                                                                                                              |
| EPI_ISL_467968, EPI_ISL_467969, EPI_ISL_467971, EPI_ISL_467973, EPI_ISL_467974, EPI_ISL_467975, EPI_ISL_467978, EPI_ISL_467979, EPI_ISL_467980, EPI_ISL_467982, EPI_ISL_467983                                                                                                                                                                                                                                                                                                                                                                                                                                                                                                                                                                                                                                                                                                                                                                                                                                                                                                                                                                                                                                                                                                                                                                                                                                                                                                                                                                                                                                                                                                                                                                                                                                                                                                                                                                                                                                                                                                                                                                                                                                                                                                                                                                                 |                                                                |                                                                |                                                                                                                                                                                                                                                                                                                                                                                                                                                                                                                                                                                                                                                                                        |
| see above                                                                                                                                                                                                                                                                                                                                                                                                                                                                                                                                                                                                                                                                                                                                                                                                                                                                                                                                                                                                                                                                                                                                                                                                                                                                                                                                                                                                                                                                                                                                                                                                                                                                                                                                                                                                                                                                                                                                                                                                                                                                                                                                                                                                                                                                                                                                                      | San Diego County Public Health Laboratory                      | Andersen lab at Scripps Research                               | SEARCH Alliance San Diego with Tracy Basler, Jovan Shephard, Brett Austin                                                                                                                                                                                                                                                                                                                                                                                                                                                                                                                                                                                                              |
| EPI_ISL_471599                                                                                                                                                                                                                                                                                                                                                                                                                                                                                                                                                                                                                                                                                                                                                                                                                                                                                                                                                                                                                                                                                                                                                                                                                                                                                                                                                                                                                                                                                                                                                                                                                                                                                                                                                                                                                                                                                                                                                                                                                                                                                                                                                                                                                                                                                                                                                 | CSIR-Centre for Cellular and Molecular Biology                 | CSIR-Centre for Cellular and Molecular Biology                 | Sakshi Shambhavi, Lamuk Zaveri, Shaguftha Khan, Namami Gaur, Tulasi Nagabandi, Purushotham Vodnala, Payel Mukherjee, Sofia Banu, Priya Singh, Dhiviya Vedagiri, Divya Gupta, Vishal Sah, Santosh Kumar Kuncha, Krishnan Harinivas Harshan, Archana Bharadwaj Siva, Karthik Bharadwaj Tallapaka, Deepak Kumar, Devi Prasad Vijayashankar, Disha Nanda, Divya Das, Jotin Gogoi, Manish Bhattacharjee, Rakesh K Mishra, Divya Tej Sowpati                                                                                                                                                                                                                                                 |
| EPI_ISL_471600                                                                                                                                                                                                                                                                                                                                                                                                                                                                                                                                                                                                                                                                                                                                                                                                                                                                                                                                                                                                                                                                                                                                                                                                                                                                                                                                                                                                                                                                                                                                                                                                                                                                                                                                                                                                                                                                                                                                                                                                                                                                                                                                                                                                                                                                                                                                                 | CSIR-Centre for Cellular and Molecular Biology                 | CSIR-Centre for Cellular and Molecular Biology                 | Sakshi Shambhavi, Lamuk Zaveri, Shaguftha Khan, Namami Gaur, Tulasi Nagabandi, Purushotham Vodnala, Payel Mukherjee, Sofia Banu, Priya Singh, Dhiviya Vedagiri, Divya Gupta, Vishal Sah, Santosh Kumar Kuncha, Krishnan Harinivas Harshan, Archana Bharadwaj Siva, Karthik Bharadwaj Tallapaka, G. Aditya Kumar, Koushick Sivakumar, Pooja Ramesh Gupta, Rajan Kumar Jha, Shraddha Vijay Lahoti, Rakesh K Mishra, Divya Tej Sowpati                                                                                                                                                                                                                                                    |
| EPI_ISL_471601                                                                                                                                                                                                                                                                                                                                                                                                                                                                                                                                                                                                                                                                                                                                                                                                                                                                                                                                                                                                                                                                                                                                                                                                                                                                                                                                                                                                                                                                                                                                                                                                                                                                                                                                                                                                                                                                                                                                                                                                                                                                                                                                                                                                                                                                                                                                                 | CSIR-Centre for Cellular and Molecular Biology                 | CSIR-Centre for Cellular and Molecular Biology                 | Sakshi Shambhavi, Lamuk Zaveri, Shaguftha Khan, Namami Gaur, Tulasi Nagabandi, Purushotham Vodnala, Payel Mukherjee, Sofia Banu, Priya Singh, Dhiviya Vedagiri, Divya Gupta, Vishal Sah, Santosh Kumar Kuncha, Krishnan Harinivas Harshan, Archana Bharadwaj Siva, Karthik Bharadwaj Tallapaka, Nikhil Hajimis, Pratheusa Maccha, M Soujanya Reddy, G. Aditya Kumar, Koushick Sivakumar, Rakesh K Mishra, Divya Tej Sowpati                                                                                                                                                                                                                                                            |
| EPI_ISL_471602                                                                                                                                                                                                                                                                                                                                                                                                                                                                                                                                                                                                                                                                                                                                                                                                                                                                                                                                                                                                                                                                                                                                                                                                                                                                                                                                                                                                                                                                                                                                                                                                                                                                                                                                                                                                                                                                                                                                                                                                                                                                                                                                                                                                                                                                                                                                                 | CSIR-Centre for Cellular and Molecular Biology                 | CSIR-Centre for Cellular and Molecular Biology                 | Sakshi Shambhavi, Lamuk Zaveri, Shaguftha Khan, Namami Gaur, Tulasi Nagabandi, Purushotham Vodnala, Payel Mukherjee, Sofia Banu, Priya Singh, Dhiviya Vedagiri, Divya Gupta, Vishal Sah, Santosh Kumar Kuncha, Krishnan Harinivas Harshan, Archana Bharadwaj Siva, Karthik Bharadwaj Tallapaka, Nikhil Hajimis, Pratheusa Maccha, M Soujanya Reddy, G. Aditya Kumar, Koushick Sivakumar, Disha Nanda, Divya Das, Jotin Gogoi, Manish Bhattacharjee, Ravi Prasad Mukku, Rakesh K Mishra, Divya Tej Sowpati                                                                                                                                                                              |
| EPI_ISL_471627                                                                                                                                                                                                                                                                                                                                                                                                                                                                                                                                                                                                                                                                                                                                                                                                                                                                                                                                                                                                                                                                                                                                                                                                                                                                                                                                                                                                                                                                                                                                                                                                                                                                                                                                                                                                                                                                                                                                                                                                                                                                                                                                                                                                                                                                                                                                                 | CSIR-Centre for Cellular and Molecular Biology                 | CSIR-Centre for Cellular and Molecular Biology                 | Sakshi Shambhavi, Lamuk Zaveri, Shaguftha Khan, Namami Gaur, Tulasi Nagabandi, Purushotham Vodnala, Payel Mukherjee, Sofia Banu, Priya Singh, Dhiviya Vedagiri, Divya Gupta, Vishal Sah, Santosh Kumar Kuncha, Krishnan Harinivas Harshan, Archana Bharadwaj Siva, Karthik Bharadwaj Tallapaka, Deepak Kumar, Devi Prasad Vijayashankar, Disha Nanda, Divya Das, Jotin Gogoi, Manish Bhattacharjee, Rakesh K Mishra, Divya Tej Sowpati                                                                                                                                                                                                                                                 |
| EPI_ISL_471628                                                                                                                                                                                                                                                                                                                                                                                                                                                                                                                                                                                                                                                                                                                                                                                                                                                                                                                                                                                                                                                                                                                                                                                                                                                                                                                                                                                                                                                                                                                                                                                                                                                                                                                                                                                                                                                                                                                                                                                                                                                                                                                                                                                                                                                                                                                                                 | CSIR-Centre for Cellular and Molecular Biology                 | CSIR-Centre for Cellular and Molecular Biology                 | Sakshi Shambhavi, Lamuk Zaveri, Shaguftha Khan, Namami Gaur, Tulasi Nagabandi, Purushotham Vodnala, Payel Mukherjee, Sofia Banu, Priya Singh, Dhiviya Vedagiri, Divya Gupta, Vishal Sah, Santosh Kumar Kuncha, Krishnan Harinivas Harshan, Archana Bharadwaj Siva, Karthik Bharadwaj Tallapaka, G. Aditya Kumar, Koushick Sivakumar, Pooja Ramesh Gupta, Rajan Kumar Jha, Shraddha Vijay Lahoti, Rakesh K Mishra, Divya Tej Sowpati                                                                                                                                                                                                                                                    |
| EPI_ISL_471629                                                                                                                                                                                                                                                                                                                                                                                                                                                                                                                                                                                                                                                                                                                                                                                                                                                                                                                                                                                                                                                                                                                                                                                                                                                                                                                                                                                                                                                                                                                                                                                                                                                                                                                                                                                                                                                                                                                                                                                                                                                                                                                                                                                                                                                                                                                                                 | CSIR-Centre for Cellular and Molecular Biology                 | CSIR-Centre for Cellular and Molecular Biology                 | Sakshi Shambhavi, Lamuk Zaveri, Shaguftha Khan, Namami Gaur, Tulasi Nagabandi, Purushotham Vodnala, Payel Mukherjee, Sofia Banu, Priya Singh, Dhiviya Vedagiri, Divya Gupta, Vishal Sah, Santosh Kumar Kuncha, Krishnan Harinivas Harshan, Archana Bharadwaj Siva, Karthik Bharadwaj Tallapaka, Nikhil Hajimis, Pratheusa Maccha, M Soujanya Reddy, G. Aditya Kumar, Koushick Sivakumar, Rakesh K Mishra, Divya Tej Sowpati                                                                                                                                                                                                                                                            |
| EPI_ISL_471630                                                                                                                                                                                                                                                                                                                                                                                                                                                                                                                                                                                                                                                                                                                                                                                                                                                                                                                                                                                                                                                                                                                                                                                                                                                                                                                                                                                                                                                                                                                                                                                                                                                                                                                                                                                                                                                                                                                                                                                                                                                                                                                                                                                                                                                                                                                                                 | CSIR-Centre for Cellular and Molecular Biology                 | CSIR-Centre for Cellular and Molecular Biology                 | Sakshi Shambhavi, Lamuk Zaveri, Shaguftha Khan, Namami Gaur, Tulasi Nagabandi, Purushotham Vodnala, Payel Mukherjee, Sofia Banu, Priya Singh, Dhiviya Vedagiri, Divya Gupta, Vishal Sah, Santosh Kumar Kuncha, Krishnan Harinivas Harshan, Archana Bharadwaj Siva, Karthik Bharadwaj Tallapaka, Nikhil Hajimis, Pratheusa Maccha, M Soujanya Reddy, G. Aditya Kumar, Koushick Sivakumar, Disha Nanda, Divya Das, Jotin Gogoi, Manish Bhattacharjee, Ravi Prasad Mukku, Rakesh K Mishra, Divya Tej Sowpati                                                                                                                                                                              |
| EPI_ISL_471993, EPI_ISL_471994, EPI_ISL_471995, EPI_ISL_471996, EPI_ISL_471997, EPI_ISL_471998, EPI_ISL_471999, EPI_ISL_472000, EPI_ISL_472001, EPI_ISL_472002, EPI_ISL_472003, EPI_ISL_472004, EPI_ISL_472005, EPI_ISL_472006, EPI_ISL_472007, EPI_ISL_472008, EPI_ISL_472009, EPI_ISL_472010, EPI_ISL_472011, EPI_ISL_472012, EPI_ISL_472013, EPI_ISL_472014, EPI_ISL_472015, EPI_ISL_472016, EPI_ISL_472017, EPI_ISL_472018, EPI_ISL_472019, EPI_ISL_472020, EPI_ISL_472021, EPI_ISL_472022, EPI_ISL_472023, EPI_ISL_472024, EPI_ISL_472025, EPI_ISL_472026, EPI_ISL_472027, EPI_ISL_472028, EPI_ISL_472029, EPI_ISL_472030, EPI_ISL_472031, EPI_ISL_472032, EPI_ISL_472033, EPI_ISL_472034, EPI_ISL_472035, EPI_ISL_472036, EPI_ISL_472037, EPI_ISL_472038, EPI_ISL_472039, EPI_ISL_472040, EPI_ISL_472041, EPI_ISL_472042, EPI_ISL_472043, EPI_ISL_472044, EPI_ISL_472045, EPI_ISL_472046, EPI_ISL_472047, EPI_ISL_472048, EPI_ISL_472049, EPI_ISL_472050, EPI_ISL_472051, EPI_ISL_472052, EPI_ISL_472053, EPI_ISL_472054, EPI_ISL_472055, EPI_ISL_472056, EPI_ISL_472057, EPI_ISL_472058, EPI_ISL_472059, EPI_ISL_472060, EPI_ISL_472061, EPI_ISL_472062, EPI_ISL_472063, EPI_ISL_472064, EPI_ISL_472065, EPI_ISL_472066, EPI_ISL_472067, EPI_ISL_472068, EPI_ISL_472069, EPI_ISL_472070, EPI_ISL_472071, EPI_ISL_472072, EPI_ISL_472073, EPI_ISL_472074, EPI_ISL_472075, EPI_ISL_472076, EPI_ISL_472077, EPI_ISL_472078, EPI_ISL_472079, EPI_ISL_472080, EPI_ISL_472081, EPI_ISL_472082, EPI_ISL_472083, EPI_ISL_472084, EPI_ISL_472085, EPI_ISL_472086, EPI_ISL_472087, EPI_ISL_472088, EPI_ISL_472089, EPI_ISL_472090, EPI_ISL_472091, EPI_ISL_472092, EPI_ISL_472093, EPI_ISL_472094, EPI_ISL_472095, EPI_ISL_472097, EPI_ISL_472098, EPI_ISL_472099, EPI_ISL_472100, EPI_ISL_472101, EPI_ISL_472102, EPI_ISL_472103, EPI_ISL_472104, EPI_ISL_472105, EPI_ISL_472106, EPI_ISL_472107, EPI_ISL_472108, EPI_ISL_472109, EPI_ISL_472110, EPI_ISL_472111, EPI_ISL_472112, EPI_ISL_472113, EPI_ISL_472114, EPI_ISL_472115, EPI_ISL_472116, EPI_ISL_472117, EPI_ISL_472118, EPI_ISL_472119, EPI_ISL_472120, EPI_ISL_472121, EPI_ISL_472122, EPI_ISL_472123, EPI_ISL_472124, EPI_ISL_472125, EPI_ISL_472126, EPI_ISL_472127, EPI_ISL_472128, EPI_ISL_472129, EPI_ISL_472130, EPI_ISL_472131, EPI_ISL_472132, EPI_ISL_472133, EPI_ISL_472134, EPI_ISL_472135 |                                                                |                                                                |                                                                                                                                                                                                                                                                                                                                                                                                                                                                                                                                                                                                                                                                                        |
| see above                                                                                                                                                                                                                                                                                                                                                                                                                                                                                                                                                                                                                                                                                                                                                                                                                                                                                                                                                                                                                                                                                                                                                                                                                                                                                                                                                                                                                                                                                                                                                                                                                                                                                                                                                                                                                                                                                                                                                                                                                                                                                                                                                                                                                                                                                                                                                      | Liverpool Clinical Laboratories                                | COVID-19 Genomics UK (COG-UK) Consortium                       | Sam Haldenby, Anita Lucaci, Steve Paterson, Julian Hiscox, Alistair Darby, M Almsaud, A Alrezaihi, Muhannad Alruwali, Stuart D Armstrong, Jones Benjamin, Eleanor G Bentley, Anu Chawla, Jordan J Clark, Angela Cowell, Richard Eccles, Isabel Garcia-Dorival, Matthew Gemmill, Alessandro Gerada, PKF Gilmore, Richard Gregory, Ximeng Han, Catherine Hartley, Margaret Hughes, Miren Iurriza-Gomara, James Johnson, L Luu, Jennifer Manson, Charlotte Nelson, Elaine O'Toole, Cassie Olateju, Rebekah Penrice-Randal, Lucille Rainbow, N.P Randle, Trevor Ian Robinson, Parul Sharma, Ghada T Shawli, James P Stewart, Neil Swainston, Ecaterina Vamos, Joanne Watts, Mark Whitehead |
| EPI_ISL_476024                                                                                                                                                                                                                                                                                                                                                                                                                                                                                                                                                                                                                                                                                                                                                                                                                                                                                                                                                                                                                                                                                                                                                                                                                                                                                                                                                                                                                                                                                                                                                                                                                                                                                                                                                                                                                                                                                                                                                                                                                                                                                                                                                                                                                                                                                                                                                 | Laboratoire de Recherche et d'Analyses Médicales de la         | Laboratoire de Recherche et d'Analyses Médicales de la         | Sanaâ Lemriss, Amal SOUIRI, Nabil Lemzaoui, Omar Mestoui, Mohamed Labioui, Nabil Ouairiba, Ayoub Jibjibe, Mahmoud Yartaoui, Mohamed Chahmi,                                                                                                                                                                                                                                                                                                                                                                                                                                                                                                                                            |



|                                                                                                                                                                                                                                                                                                                                                                                                                                                                                                                                                                                                                                                                                                                                                                                                                                                                                                                                                                                                                                                                                                                                                                                                                                                                                                                                                                                                                                                                                                                                                                                                                                                                                                                                                                                                                                                                                                                                                                                                                                                                                                                                                                                                                                                                                                                                                                                                                                                                                                                                                                                                                                                                                                                                                                                                                                                                                                                                                                |                                                                                               |                                                                                                                                                      |                                                                                                                                                                                                                                                                                                                                                                                                                                                                                                                                                                                                                                                                                         |
|----------------------------------------------------------------------------------------------------------------------------------------------------------------------------------------------------------------------------------------------------------------------------------------------------------------------------------------------------------------------------------------------------------------------------------------------------------------------------------------------------------------------------------------------------------------------------------------------------------------------------------------------------------------------------------------------------------------------------------------------------------------------------------------------------------------------------------------------------------------------------------------------------------------------------------------------------------------------------------------------------------------------------------------------------------------------------------------------------------------------------------------------------------------------------------------------------------------------------------------------------------------------------------------------------------------------------------------------------------------------------------------------------------------------------------------------------------------------------------------------------------------------------------------------------------------------------------------------------------------------------------------------------------------------------------------------------------------------------------------------------------------------------------------------------------------------------------------------------------------------------------------------------------------------------------------------------------------------------------------------------------------------------------------------------------------------------------------------------------------------------------------------------------------------------------------------------------------------------------------------------------------------------------------------------------------------------------------------------------------------------------------------------------------------------------------------------------------------------------------------------------------------------------------------------------------------------------------------------------------------------------------------------------------------------------------------------------------------------------------------------------------------------------------------------------------------------------------------------------------------------------------------------------------------------------------------------------------|-----------------------------------------------------------------------------------------------|------------------------------------------------------------------------------------------------------------------------------------------------------|-----------------------------------------------------------------------------------------------------------------------------------------------------------------------------------------------------------------------------------------------------------------------------------------------------------------------------------------------------------------------------------------------------------------------------------------------------------------------------------------------------------------------------------------------------------------------------------------------------------------------------------------------------------------------------------------|
| see above                                                                                                                                                                                                                                                                                                                                                                                                                                                                                                                                                                                                                                                                                                                                                                                                                                                                                                                                                                                                                                                                                                                                                                                                                                                                                                                                                                                                                                                                                                                                                                                                                                                                                                                                                                                                                                                                                                                                                                                                                                                                                                                                                                                                                                                                                                                                                                                                                                                                                                                                                                                                                                                                                                                                                                                                                                                                                                                                                      | Liverpool Clinical Laboratories                                                               | COVID-19 Genomics UK (COG-UK) Consortium                                                                                                             | Sam Haldenby, Anita Lucaci, Steve Paterson, Julian Hiscox, Alistair Darby, M Almsaud, A Alrezaihi, Muhannad Alruwaili, Stuart D Armstrong, Jones Benjamin, Eleanor G Bentley, Anu Chawla, Jordan J Clark, Angela Cowell, Richard Eccles, Isabel Garcia-Dorival, Matthew Gemmill, Alessandro Gerada, PKF Gilmore, Richard Gregory, Ximeng Han, Catherine Hartley, Margaret Hughes, Miren Iturriza-Gomara, James Johnson, L Luu, Jenifer Manson, Charlotte Nelson, Elaine O'Toole, Cassie Olateju, Rebekah Penrice-Randal, Lucille Rainbow, N.P Randle, Trevor Ian Robinson, Parul Sharma, Ghada T Shawli, James P Stewart, Neil Swainston, Ecaterina Vamos, Joanne Watts, Mark Whitehead |
| EPI_ISL_483158, EPI_ISL_483159, EPI_ISL_483160, EPI_ISL_483161, EPI_ISL_483162, EPI_ISL_483163, EPI_ISL_483164, EPI_ISL_483531, EPI_ISL_483532, EPI_ISL_483533, EPI_ISL_483534, EPI_ISL_483535, EPI_ISL_483536, EPI_ISL_483537, EPI_ISL_483538, EPI_ISL_483539, EPI_ISL_483540, EPI_ISL_483541                                                                                                                                                                                                                                                                                                                                                                                                                                                                                                                                                                                                                                                                                                                                                                                                                                                                                                                                                                                                                                                                                                                                                                                                                                                                                                                                                                                                                                                                                                                                                                                                                                                                                                                                                                                                                                                                                                                                                                                                                                                                                                                                                                                                                                                                                                                                                                                                                                                                                                                                                                                                                                                                 | San Diego County Public Health Laboratory                                                     | Andersen lab at Scripps Research                                                                                                                     | SEARCH Alliance San Diego with Tracy Basler, Jovan Shephard, Brett Austin                                                                                                                                                                                                                                                                                                                                                                                                                                                                                                                                                                                                               |
| see above                                                                                                                                                                                                                                                                                                                                                                                                                                                                                                                                                                                                                                                                                                                                                                                                                                                                                                                                                                                                                                                                                                                                                                                                                                                                                                                                                                                                                                                                                                                                                                                                                                                                                                                                                                                                                                                                                                                                                                                                                                                                                                                                                                                                                                                                                                                                                                                                                                                                                                                                                                                                                                                                                                                                                                                                                                                                                                                                                      | Liverpool Clinical Laboratories                                                               | COVID-19 Genomics UK (COG-UK) Consortium                                                                                                             | Sam Haldenby, Anita Lucaci, Steve Paterson, Julian Hiscox, Alistair Darby, M Almsaud, A Alrezaihi, Muhannad Alruwaili, Stuart D Armstrong, Jones Benjamin, Eleanor G Bentley, Anu Chawla, Jordan J Clark, Angela Cowell, Richard Eccles, Isabel Garcia-Dorival, Matthew Gemmill, Alessandro Gerada, PKF Gilmore, Richard Gregory, Ximeng Han, Catherine Hartley, Margaret Hughes, Miren Iturriza-Gomara, James Johnson, L Luu, Jenifer Manson, Charlotte Nelson, Elaine O'Toole, Cassie Olateju, Rebekah Penrice-Randal, Lucille Rainbow, N.P Randle, Trevor Ian Robinson, Parul Sharma, Ghada T Shawli, James P Stewart, Neil Swainston, Ecaterina Vamos, Joanne Watts, Mark Whitehead |
| EPI_ISL_484254, EPI_ISL_484255, EPI_ISL_484256, EPI_ISL_484257, EPI_ISL_484258, EPI_ISL_484259, EPI_ISL_484260, EPI_ISL_484261, EPI_ISL_484262, EPI_ISL_484263                                                                                                                                                                                                                                                                                                                                                                                                                                                                                                                                                                                                                                                                                                                                                                                                                                                                                                                                                                                                                                                                                                                                                                                                                                                                                                                                                                                                                                                                                                                                                                                                                                                                                                                                                                                                                                                                                                                                                                                                                                                                                                                                                                                                                                                                                                                                                                                                                                                                                                                                                                                                                                                                                                                                                                                                 | Oklahoma State University Diagnostic Laboratory-Oklahoma Animal Disease Diagnostic Laboratory | Oklahoma Animal Disease Diagnostic Laboratory                                                                                                        | Sai Narayanan, Teluguakula Narasaraju, John Ritchey, Girish Patil, Sunil More, Jerry Saliki, Anil Kaul, Akhilesh Ramachandran                                                                                                                                                                                                                                                                                                                                                                                                                                                                                                                                                           |
| EPI_ISL_487231                                                                                                                                                                                                                                                                                                                                                                                                                                                                                                                                                                                                                                                                                                                                                                                                                                                                                                                                                                                                                                                                                                                                                                                                                                                                                                                                                                                                                                                                                                                                                                                                                                                                                                                                                                                                                                                                                                                                                                                                                                                                                                                                                                                                                                                                                                                                                                                                                                                                                                                                                                                                                                                                                                                                                                                                                                                                                                                                                 |                                                                                               |                                                                                                                                                      |                                                                                                                                                                                                                                                                                                                                                                                                                                                                                                                                                                                                                                                                                         |
| EPI_ISL_490331, EPI_ISL_490332, EPI_ISL_490333, EPI_ISL_490334, EPI_ISL_490335, EPI_ISL_490336, EPI_ISL_490337, EPI_ISL_490338, EPI_ISL_490339, EPI_ISL_490340, EPI_ISL_490341, EPI_ISL_490342, EPI_ISL_490343, EPI_ISL_490344, EPI_ISL_490345, EPI_ISL_490346, EPI_ISL_490347, EPI_ISL_490348, EPI_ISL_490349, EPI_ISL_490350, EPI_ISL_490351, EPI_ISL_490352, EPI_ISL_490353, EPI_ISL_490354, EPI_ISL_490355, EPI_ISL_490356, EPI_ISL_490357, EPI_ISL_490358, EPI_ISL_490359, EPI_ISL_490360, EPI_ISL_490361, EPI_ISL_490362, EPI_ISL_490363, EPI_ISL_490364, EPI_ISL_490366, EPI_ISL_490367, EPI_ISL_490368, EPI_ISL_490369, EPI_ISL_490370, EPI_ISL_490371, EPI_ISL_490372, EPI_ISL_490373, EPI_ISL_490374, EPI_ISL_490375, EPI_ISL_490376, EPI_ISL_490377, EPI_ISL_490378, EPI_ISL_490379, EPI_ISL_490380, EPI_ISL_490381, EPI_ISL_490382, EPI_ISL_490383, EPI_ISL_490384, EPI_ISL_490385, EPI_ISL_490386, EPI_ISL_490387, EPI_ISL_490388, EPI_ISL_490389, EPI_ISL_490390, EPI_ISL_490391, EPI_ISL_490392, EPI_ISL_490393, EPI_ISL_490394, EPI_ISL_490395, EPI_ISL_490396, EPI_ISL_490397, EPI_ISL_490398, EPI_ISL_490399, EPI_ISL_490400, EPI_ISL_490401, EPI_ISL_490402, EPI_ISL_490403, EPI_ISL_490404, EPI_ISL_490405, EPI_ISL_490406, EPI_ISL_490407, EPI_ISL_490408, EPI_ISL_490409, EPI_ISL_490410, EPI_ISL_490411, EPI_ISL_490412, EPI_ISL_490413, EPI_ISL_490414, EPI_ISL_490415, EPI_ISL_490416, EPI_ISL_490417, EPI_ISL_490418, EPI_ISL_490419, EPI_ISL_490420                                                                                                                                                                                                                                                                                                                                                                                                                                                                                                                                                                                                                                                                                                                                                                                                                                                                                                                                                                                                                                                                                                                                                                                                                                                                                                                                                                                                                                                                                 | Liverpool Clinical Laboratories                                                               | COVID-19 Genomics UK (COG-UK) Consortium                                                                                                             | Sam Haldenby, Anita Lucaci, Steve Paterson, Julian Hiscox, Alistair Darby, M Almsaud, A Alrezaihi, Muhannad Alruwaili, Stuart D Armstrong, Jones Benjamin, Eleanor G Bentley, Anu Chawla, Jordan J Clark, Angela Cowell, Richard Eccles, Isabel Garcia-Dorival, Matthew Gemmill, Alessandro Gerada, PKF Gilmore, Richard Gregory, Ximeng Han, Catherine Hartley, Margaret Hughes, Miren Iturriza-Gomara, James Johnson, L Luu, Jenifer Manson, Charlotte Nelson, Elaine O'Toole, Cassie Olateju, Rebekah Penrice-Randal, Lucille Rainbow, N.P Randle, Trevor Ian Robinson, Parul Sharma, Ghada T Shawli, James P Stewart, Neil Swainston, Ecaterina Vamos, Joanne Watts, Mark Whitehead |
| see above                                                                                                                                                                                                                                                                                                                                                                                                                                                                                                                                                                                                                                                                                                                                                                                                                                                                                                                                                                                                                                                                                                                                                                                                                                                                                                                                                                                                                                                                                                                                                                                                                                                                                                                                                                                                                                                                                                                                                                                                                                                                                                                                                                                                                                                                                                                                                                                                                                                                                                                                                                                                                                                                                                                                                                                                                                                                                                                                                      |                                                                                               |                                                                                                                                                      |                                                                                                                                                                                                                                                                                                                                                                                                                                                                                                                                                                                                                                                                                         |
| EPI_ISL_491116, EPI_ISL_491121, EPI_ISL_491122, EPI_ISL_491123, EPI_ISL_491124, EPI_ISL_491125, EPI_ISL_491126, EPI_ISL_491127, EPI_ISL_491128, EPI_ISL_491129, EPI_ISL_491130, EPI_ISL_491131, EPI_ISL_491132                                                                                                                                                                                                                                                                                                                                                                                                                                                                                                                                                                                                                                                                                                                                                                                                                                                                                                                                                                                                                                                                                                                                                                                                                                                                                                                                                                                                                                                                                                                                                                                                                                                                                                                                                                                                                                                                                                                                                                                                                                                                                                                                                                                                                                                                                                                                                                                                                                                                                                                                                                                                                                                                                                                                                 | Oman-National Influenza Center                                                                | Biotechnology & OMICs Laboratory                                                                                                                     | Samira Al-Mahrqi, Abdul Latif Khan, Samiha Al-Kharusi, Adil Khan, Ahmed Al-Rawahi, Sajjad Asaf, Amina Al-Jardani, Hanan Al-Kindi, Intisar Al-Shukri, Ahlam Al-Amri, Aisha Al-Amri, Aisha Al-Busaidi, Adil Al-Wahaibi, Seif Al-Abri, Ahmed Al-Harrasi                                                                                                                                                                                                                                                                                                                                                                                                                                    |
| EPI_ISL_491133, EPI_ISL_491134, EPI_ISL_491135, EPI_ISL_491136, EPI_ISL_491137, EPI_ISL_491138, EPI_ISL_491139, EPI_ISL_491140, EPI_ISL_491141, EPI_ISL_491142, EPI_ISL_491143, EPI_ISL_491144, EPI_ISL_491145                                                                                                                                                                                                                                                                                                                                                                                                                                                                                                                                                                                                                                                                                                                                                                                                                                                                                                                                                                                                                                                                                                                                                                                                                                                                                                                                                                                                                                                                                                                                                                                                                                                                                                                                                                                                                                                                                                                                                                                                                                                                                                                                                                                                                                                                                                                                                                                                                                                                                                                                                                                                                                                                                                                                                 | Oman-National Influenza Center                                                                | Biotechnology & OMICs Laboratory                                                                                                                     | Samiha Al-Kharusi, Sajjad Asaf, Abdul Latif Khan, Samira Al-Mahrqi, Adil Khan, Ahmed Al-Rawahi, Amina Al-Jardani, Hanan Al-Kindi, Intisar Al-Shukri, Ahlam Al-Amri, Aisha Al-Amri, Aisha Al-Busaidi, Adil Al-Wahaibi, Seif Al-Abri, Ahmed Al-Harrasi                                                                                                                                                                                                                                                                                                                                                                                                                                    |
| EPI_ISL_491159, EPI_ISL_491160, EPI_ISL_491161, EPI_ISL_491162, EPI_ISL_491163, EPI_ISL_491164, EPI_ISL_491165, EPI_ISL_491166, EPI_ISL_491167, EPI_ISL_491168, EPI_ISL_491169, EPI_ISL_491170, EPI_ISL_491171                                                                                                                                                                                                                                                                                                                                                                                                                                                                                                                                                                                                                                                                                                                                                                                                                                                                                                                                                                                                                                                                                                                                                                                                                                                                                                                                                                                                                                                                                                                                                                                                                                                                                                                                                                                                                                                                                                                                                                                                                                                                                                                                                                                                                                                                                                                                                                                                                                                                                                                                                                                                                                                                                                                                                 | Oman-National Influenza Center                                                                | Biotechnology & OMICs Laboratory                                                                                                                     | Sajjad Asaf, Samiha Al-Kharusi, Ahmed Al-Harrasi, Samira Al-Mahrqi, Adil Khan, Ahmed Al-Rawahi, Abdul Latif Khan, Amina Al-Jardani, Hanan Al-Kindi, Intisar Al-Shukri, Ahlam Al-Amri, Aisha Al-Amri, Aisha Al-Busaidi, Adil Al-Wahaibi, Seif Al-Abri.                                                                                                                                                                                                                                                                                                                                                                                                                                   |
| see above                                                                                                                                                                                                                                                                                                                                                                                                                                                                                                                                                                                                                                                                                                                                                                                                                                                                                                                                                                                                                                                                                                                                                                                                                                                                                                                                                                                                                                                                                                                                                                                                                                                                                                                                                                                                                                                                                                                                                                                                                                                                                                                                                                                                                                                                                                                                                                                                                                                                                                                                                                                                                                                                                                                                                                                                                                                                                                                                                      |                                                                                               |                                                                                                                                                      |                                                                                                                                                                                                                                                                                                                                                                                                                                                                                                                                                                                                                                                                                         |
| EPI_ISL_492065                                                                                                                                                                                                                                                                                                                                                                                                                                                                                                                                                                                                                                                                                                                                                                                                                                                                                                                                                                                                                                                                                                                                                                                                                                                                                                                                                                                                                                                                                                                                                                                                                                                                                                                                                                                                                                                                                                                                                                                                                                                                                                                                                                                                                                                                                                                                                                                                                                                                                                                                                                                                                                                                                                                                                                                                                                                                                                                                                 | Oman-National Influenza Center                                                                | Department of Microbiology and Immunology-SQUH Department of Microbiology and Immunology, Sultan Qaboos University Hospital, P.O 35, Postal code 123 | Samira Al-Maruqi, Fahad Zadjali, Amina Al Jardani, Khulood Al-Mammary, Hanan Al-Kindi, Fatma BaAlawi, Hamida AL Barwani, Zeyana AL-Dahmani, Intisar Al-Shukri, Azza Al-Rashdi, Samiha Al Kharusi, Abdulla Balkhair                                                                                                                                                                                                                                                                                                                                                                                                                                                                      |
| EPI_ISL_494372, EPI_ISL_494373, EPI_ISL_494374, EPI_ISL_494375, EPI_ISL_494377, EPI_ISL_494378, EPI_ISL_494379, EPI_ISL_494380, EPI_ISL_494381, EPI_ISL_494382, EPI_ISL_494383, EPI_ISL_494384, EPI_ISL_494385, EPI_ISL_494387, EPI_ISL_494388, EPI_ISL_494389, EPI_ISL_494390, EPI_ISL_494391, EPI_ISL_494393, EPI_ISL_494394, EPI_ISL_494396, EPI_ISL_494397, EPI_ISL_494398, EPI_ISL_494400, EPI_ISL_494401, EPI_ISL_494402, EPI_ISL_494403, EPI_ISL_494404, EPI_ISL_494406, EPI_ISL_494407, EPI_ISL_494409, EPI_ISL_494410, EPI_ISL_494412, EPI_ISL_494413, EPI_ISL_494414, EPI_ISL_494415, EPI_ISL_494417, EPI_ISL_494418, EPI_ISL_494419, EPI_ISL_494420, EPI_ISL_494421, EPI_ISL_494422, EPI_ISL_494423, EPI_ISL_494424, EPI_ISL_494426, EPI_ISL_494427, EPI_ISL_494428, EPI_ISL_494429, EPI_ISL_494430, EPI_ISL_494431, EPI_ISL_494432, EPI_ISL_494433, EPI_ISL_494434, EPI_ISL_494435, EPI_ISL_494436, EPI_ISL_494437, EPI_ISL_494438, EPI_ISL_494439, EPI_ISL_494441, EPI_ISL_494442, EPI_ISL_494443, EPI_ISL_494444, EPI_ISL_494445, EPI_ISL_494446, EPI_ISL_494447, EPI_ISL_494448, EPI_ISL_494449, EPI_ISL_494451, EPI_ISL_494452, EPI_ISL_494453, EPI_ISL_494454, EPI_ISL_494455, EPI_ISL_494457, EPI_ISL_494458, EPI_ISL_494459, EPI_ISL_494460, EPI_ISL_494461, EPI_ISL_494462, EPI_ISL_494464, EPI_ISL_494465, EPI_ISL_494466, EPI_ISL_494469, EPI_ISL_494471, EPI_ISL_494472, EPI_ISL_494473, EPI_ISL_494474, EPI_ISL_494475, EPI_ISL_494476, EPI_ISL_494477, EPI_ISL_494478, EPI_ISL_494479, EPI_ISL_494480, EPI_ISL_494481, EPI_ISL_494482, EPI_ISL_494483, EPI_ISL_494484, EPI_ISL_494485, EPI_ISL_494487, EPI_ISL_494488, EPI_ISL_494489, EPI_ISL_494492, EPI_ISL_494493, EPI_ISL_494494, EPI_ISL_494495, EPI_ISL_494496, EPI_ISL_494497, EPI_ISL_494498, EPI_ISL_494499, EPI_ISL_494500, EPI_ISL_494501, EPI_ISL_494503, EPI_ISL_494568, EPI_ISL_494569, EPI_ISL_494571, EPI_ISL_494572, EPI_ISL_494574, EPI_ISL_494575, EPI_ISL_494576, EPI_ISL_494577, EPI_ISL_494578, EPI_ISL_494579, EPI_ISL_494580, EPI_ISL_494581, EPI_ISL_494582, EPI_ISL_494583, EPI_ISL_494584, EPI_ISL_494585, EPI_ISL_494586, EPI_ISL_494587, EPI_ISL_494588, EPI_ISL_494589, EPI_ISL_494590, EPI_ISL_494591, EPI_ISL_494592, EPI_ISL_494593, EPI_ISL_494594, EPI_ISL_494595, EPI_ISL_494620, EPI_ISL_494621, EPI_ISL_494622, EPI_ISL_494623, EPI_ISL_494624, EPI_ISL_494625, EPI_ISL_494626, EPI_ISL_494627, EPI_ISL_494628, EPI_ISL_494630, EPI_ISL_494631, EPI_ISL_494632, EPI_ISL_494633, EPI_ISL_494634, EPI_ISL_494715, EPI_ISL_494716, EPI_ISL_494717, EPI_ISL_494718, EPI_ISL_494720, EPI_ISL_494721, EPI_ISL_494722, EPI_ISL_494723, EPI_ISL_494726, EPI_ISL_494727, EPI_ISL_494728, EPI_ISL_494729, EPI_ISL_494730, EPI_ISL_494731, EPI_ISL_494732, EPI_ISL_494733, EPI_ISL_494734, EPI_ISL_494735, EPI_ISL_494736, EPI_ISL_494737, EPI_ISL_494739, EPI_ISL_494740, EPI_ISL_494741, EPI_ISL_494743, EPI_ISL_494744, EPI_ISL_494745, EPI_ISL_494746 | San Diego County Public Health Laboratory                                                     | Andersen lab at Scripps Research                                                                                                                     | SEARCH Alliance San Diego with Tracy Basler, Jovan Shephard, Brett Austin                                                                                                                                                                                                                                                                                                                                                                                                                                                                                                                                                                                                               |
| EPI_ISL_495021                                                                                                                                                                                                                                                                                                                                                                                                                                                                                                                                                                                                                                                                                                                                                                                                                                                                                                                                                                                                                                                                                                                                                                                                                                                                                                                                                                                                                                                                                                                                                                                                                                                                                                                                                                                                                                                                                                                                                                                                                                                                                                                                                                                                                                                                                                                                                                                                                                                                                                                                                                                                                                                                                                                                                                                                                                                                                                                                                 | Government Medical College, Bhavnagar                                                         | Gujarat Biotechnology Research Centre                                                                                                                | Saklin Malek, Shirish Patel, Kairavi Desai, Raghawendra Kumar, Dinesh Kumar, Zuber Saiyed, Komal Patel, Labdhi Pandya, Afzal Ansari, Nikha Trivedi, Apurvasinh Puvar, Janvi Raval, Zarna Patel, Monika Gandhi, Pinal Trivedi, Maharshi Pandya, Nidhi Patel, Nitin Sanvalya, R D Dixit, A M Kadri, Harsh Bakshi, Chaitanya Joshi, Madhvi Joshi                                                                                                                                                                                                                                                                                                                                           |
| EPI_ISL_495177                                                                                                                                                                                                                                                                                                                                                                                                                                                                                                                                                                                                                                                                                                                                                                                                                                                                                                                                                                                                                                                                                                                                                                                                                                                                                                                                                                                                                                                                                                                                                                                                                                                                                                                                                                                                                                                                                                                                                                                                                                                                                                                                                                                                                                                                                                                                                                                                                                                                                                                                                                                                                                                                                                                                                                                                                                                                                                                                                 | CSIR-Centre for Cellular and Molecular Biology                                                | CSIR-Centre for Cellular and Molecular Biology                                                                                                       | Sakshi Shambhavi, Lamuk Zaveri, Shagufta Khan, Namami Gaur, Nikhil Hajirnis, M Soujanya Reddy, Pratheusa Maccha, Tulasi Nagabandi, Purushotham Vodnala, Payel Mukherjee, Sofia Banu, Priya Singh, Onkar Kulkarni, Dhiviya Vedagiri, Divya Gupta, Vishal Sah, Santosh Kumar Kuncha, Krishnan Harinivas Harshan, Archana Bharadwaj Siva, Karthik Bharadwaj Tallapaka, G. Aditya Kumar, Koushick Sivakumar, Pooja Ramesh Gupta, Rajan Kumar Jha, Shradha Vijay Lahoti, Rakesh K Mishra, Divya Tej Sowpati                                                                                                                                                                                  |
| EPI_ISL_495182                                                                                                                                                                                                                                                                                                                                                                                                                                                                                                                                                                                                                                                                                                                                                                                                                                                                                                                                                                                                                                                                                                                                                                                                                                                                                                                                                                                                                                                                                                                                                                                                                                                                                                                                                                                                                                                                                                                                                                                                                                                                                                                                                                                                                                                                                                                                                                                                                                                                                                                                                                                                                                                                                                                                                                                                                                                                                                                                                 | CSIR-Centre for Cellular and Molecular Biology                                                | CSIR-Centre for Cellular and Molecular Biology                                                                                                       | Sakshi Shambhavi, Lamuk Zaveri, Shagufta Khan, Namami Gaur, Nikhil Hajirnis, M Soujanya Reddy, Pratheusa Maccha, Tulasi Nagabandi, Purushotham Vodnala, Payel Mukherjee, Sofia Banu, Priya Singh, Onkar Kulkarni, Dhiviya Vedagiri, Divya Gupta, Vishal Sah, Santosh Kumar Kuncha, Krishnan Harinivas Harshan, Archana Bharadwaj Siva, Karthik Bharadwaj Tallapaka, G. Aditya Kumar, Koushick Sivakumar, Rakesh K Mishra, Divya Tej Sowpati                                                                                                                                                                                                                                             |
| EPI_ISL_495190                                                                                                                                                                                                                                                                                                                                                                                                                                                                                                                                                                                                                                                                                                                                                                                                                                                                                                                                                                                                                                                                                                                                                                                                                                                                                                                                                                                                                                                                                                                                                                                                                                                                                                                                                                                                                                                                                                                                                                                                                                                                                                                                                                                                                                                                                                                                                                                                                                                                                                                                                                                                                                                                                                                                                                                                                                                                                                                                                 | CSIR-Centre for Cellular and Molecular Biology                                                | CSIR-Centre for Cellular and Molecular Biology                                                                                                       | Sakshi Shambhavi, Lamuk Zaveri, Shagufta Khan, Nikhil Hajirnis, M Soujanya Reddy, Pratheusa Maccha, Namami Gaur, Tulasi Nagabandi, Purushotham Vodnala, Payel Mukherjee, Sofia Banu, Priya Singh, Onkar Kulkarni, Dhiviya Vedagiri, Divya Gupta, Vishal Sah, Santosh Kumar Kuncha, Krishnan Harinivas Harshan, Archana Bharadwaj Siva, Karthik Bharadwaj Tallapaka, G. Aditya Kumar, Koushick Sivakumar, Rakesh K Mishra, Divya Tej Sowpati                                                                                                                                                                                                                                             |
| EPI_ISL_495201                                                                                                                                                                                                                                                                                                                                                                                                                                                                                                                                                                                                                                                                                                                                                                                                                                                                                                                                                                                                                                                                                                                                                                                                                                                                                                                                                                                                                                                                                                                                                                                                                                                                                                                                                                                                                                                                                                                                                                                                                                                                                                                                                                                                                                                                                                                                                                                                                                                                                                                                                                                                                                                                                                                                                                                                                                                                                                                                                 | CSIR-Centre for Cellular and Molecular Biology                                                | CSIR-Centre for Cellular and Molecular Biology                                                                                                       | Sakshi Shambhavi, Lamuk Zaveri, Shagufta Khan, Namami Gaur, Nikhil Hajirnis, M Soujanya Reddy, Pratheusa Maccha, Tulasi Nagabandi, Purushotham Vodnala, Payel Mukherjee, Sofia Banu, Priya Singh, Onkar Kulkarni, Dhiviya Vedagiri, Divya Gupta, Vishal Sah, Santosh Kumar Kuncha, Krishnan Harinivas Harshan, Archana Bharadwaj Siva, Karthik Bharadwaj Tallapaka, G. Aditya Kumar, Koushick Sivakumar, Pooja Ramesh Gupta, Rajan Kumar Jha, Shradha Vijay Lahoti, Rakesh K Mishra, Divya Tej Sowpati                                                                                                                                                                                  |
| EPI_ISL_495213                                                                                                                                                                                                                                                                                                                                                                                                                                                                                                                                                                                                                                                                                                                                                                                                                                                                                                                                                                                                                                                                                                                                                                                                                                                                                                                                                                                                                                                                                                                                                                                                                                                                                                                                                                                                                                                                                                                                                                                                                                                                                                                                                                                                                                                                                                                                                                                                                                                                                                                                                                                                                                                                                                                                                                                                                                                                                                                                                 | CSIR-Centre for Cellular and Molecular Biology                                                | CSIR-Centre for Cellular and Molecular Biology                                                                                                       | Sakshi Shambhavi, Lamuk Zaveri, Shagufta Khan, Nikhil Hajirnis, M Soujanya Reddy, Pratheusa Maccha, Namami Gaur, Tulasi Nagabandi, Purushotham Vodnala, Payel Mukherjee, Sofia Banu, Priya Singh, Onkar Kulkarni, Dhiviya Vedagiri, Divya Gupta, Vishal Sah, Santosh Kumar Kuncha, Krishnan Harinivas Harshan, Archana Bharadwaj Siva, Karthik Bharadwaj Tallapaka, G. Aditya Kumar, Koushick Sivakumar, Rakesh K Mishra, Divya Tej Sowpati                                                                                                                                                                                                                                             |
| EPI_ISL_495218                                                                                                                                                                                                                                                                                                                                                                                                                                                                                                                                                                                                                                                                                                                                                                                                                                                                                                                                                                                                                                                                                                                                                                                                                                                                                                                                                                                                                                                                                                                                                                                                                                                                                                                                                                                                                                                                                                                                                                                                                                                                                                                                                                                                                                                                                                                                                                                                                                                                                                                                                                                                                                                                                                                                                                                                                                                                                                                                                 | CSIR-Centre for Cellular and Molecular Biology                                                | CSIR-Centre for Cellular and Molecular Biology                                                                                                       | Sakshi Shambhavi, Lamuk Zaveri, Shagufta Khan, Namami Gaur, Nikhil Hajirnis, M Soujanya Reddy, Pratheusa Maccha, Tulasi Nagabandi, Purushotham Vodnala, Payel Mukherjee, Sofia Banu, Priya Singh, Onkar Kulkarni, Dhiviya Vedagiri, Divya Gupta, Vishal Sah, Santosh Kumar Kuncha, Krishnan Harinivas Harshan, Archana Bharadwaj Siva, Karthik Bharadwaj Tallapaka, Deepak Kumar, Devi Prasad Vijayashankar, Disha Nanda, Divya Das, Jotin Gogoi, Manish Bhattacharjee, Rakesh K Mishra, Divya Tej Sowpati                                                                                                                                                                              |
| EPI_ISL_495248                                                                                                                                                                                                                                                                                                                                                                                                                                                                                                                                                                                                                                                                                                                                                                                                                                                                                                                                                                                                                                                                                                                                                                                                                                                                                                                                                                                                                                                                                                                                                                                                                                                                                                                                                                                                                                                                                                                                                                                                                                                                                                                                                                                                                                                                                                                                                                                                                                                                                                                                                                                                                                                                                                                                                                                                                                                                                                                                                 | CSIR-Centre for Cellular and Molecular Biology                                                | CSIR-Centre for Cellular and Molecular Biology                                                                                                       | Sakshi Shambhavi, Lamuk Zaveri, Shagufta Khan, Nikhil Hajirnis, M Soujanya Reddy, Pratheusa Maccha, Namami Gaur, Tulasi Nagabandi, Purushotham Vodnala, Payel Mukherjee, Sofia Banu, Priya Singh, Onkar Kulkarni, Dhiviya Vedagiri, Divya Gupta, Vishal Sah, Santosh Kumar Kuncha, Krishnan Harinivas Harshan, Archana Bharadwaj Siva, Karthik Bharadwaj Tallapaka, G. Aditya Kumar, Koushick Sivakumar, Rakesh K Mishra, Divya Tej Sowpati                                                                                                                                                                                                                                             |



|                                                                                                                                                                                                                                                                                                                                                                                                                                                                                                                                                                                                                                                                                                                                                                                                                                                                                                                                                                                                                                                                                                                                                                                                                                                                                                                                                                                                                                                                                                                                                                                                                                                                                                                                                                                                                                                                                                                                                                                                                                                                                                                                                                                                                                                                                                                                                                                                                                                                                                                                                                                                                                                                                                                                                                                                                                                                                                                                                                                                                                                                                                                                                                                                                                                                                                                                                                                                                                                                                                                                                                                                                                                                                                                                                                                                                                                                                                                                                                                                                                                                                                                                                                                                                                                                                                                                                                                                                                                                                                                                                                                                                                                                                                                                                                                                                                                                                                                                                                                                                                                                                                                                                                                                                                                                                                                                                                                                                                                                                                                                                                                                                                                                                                                                                                                                                                                                                                                                                                                                                                                                                                                                                                                                                                                                                                                                                                                |                                                                        |                                                                        |                                                                                                                                                                                                                                                                                                                                                                                                                                                                                                             |                                                                                                                                                                                                                                                                                                                                                                                                                                                                                                                                                                                                                                                                                        |
|--------------------------------------------------------------------------------------------------------------------------------------------------------------------------------------------------------------------------------------------------------------------------------------------------------------------------------------------------------------------------------------------------------------------------------------------------------------------------------------------------------------------------------------------------------------------------------------------------------------------------------------------------------------------------------------------------------------------------------------------------------------------------------------------------------------------------------------------------------------------------------------------------------------------------------------------------------------------------------------------------------------------------------------------------------------------------------------------------------------------------------------------------------------------------------------------------------------------------------------------------------------------------------------------------------------------------------------------------------------------------------------------------------------------------------------------------------------------------------------------------------------------------------------------------------------------------------------------------------------------------------------------------------------------------------------------------------------------------------------------------------------------------------------------------------------------------------------------------------------------------------------------------------------------------------------------------------------------------------------------------------------------------------------------------------------------------------------------------------------------------------------------------------------------------------------------------------------------------------------------------------------------------------------------------------------------------------------------------------------------------------------------------------------------------------------------------------------------------------------------------------------------------------------------------------------------------------------------------------------------------------------------------------------------------------------------------------------------------------------------------------------------------------------------------------------------------------------------------------------------------------------------------------------------------------------------------------------------------------------------------------------------------------------------------------------------------------------------------------------------------------------------------------------------------------------------------------------------------------------------------------------------------------------------------------------------------------------------------------------------------------------------------------------------------------------------------------------------------------------------------------------------------------------------------------------------------------------------------------------------------------------------------------------------------------------------------------------------------------------------------------------------------------------------------------------------------------------------------------------------------------------------------------------------------------------------------------------------------------------------------------------------------------------------------------------------------------------------------------------------------------------------------------------------------------------------------------------------------------------------------------------------------------------------------------------------------------------------------------------------------------------------------------------------------------------------------------------------------------------------------------------------------------------------------------------------------------------------------------------------------------------------------------------------------------------------------------------------------------------------------------------------------------------------------------------------------------------------------------------------------------------------------------------------------------------------------------------------------------------------------------------------------------------------------------------------------------------------------------------------------------------------------------------------------------------------------------------------------------------------------------------------------------------------------------------------------------------------------------------------------------------------------------------------------------------------------------------------------------------------------------------------------------------------------------------------------------------------------------------------------------------------------------------------------------------------------------------------------------------------------------------------------------------------------------------------------------------------------------------------------------------------------------------------------------------------------------------------------------------------------------------------------------------------------------------------------------------------------------------------------------------------------------------------------------------------------------------------------------------------------------------------------------------------------------------------------------------------------------------------------------|------------------------------------------------------------------------|------------------------------------------------------------------------|-------------------------------------------------------------------------------------------------------------------------------------------------------------------------------------------------------------------------------------------------------------------------------------------------------------------------------------------------------------------------------------------------------------------------------------------------------------------------------------------------------------|----------------------------------------------------------------------------------------------------------------------------------------------------------------------------------------------------------------------------------------------------------------------------------------------------------------------------------------------------------------------------------------------------------------------------------------------------------------------------------------------------------------------------------------------------------------------------------------------------------------------------------------------------------------------------------------|
| EPI_ISL_517127, EPI_ISL_517128, EPI_ISL_517129, EPI_ISL_517130, EPI_ISL_517131, EPI_ISL_517132, EPI_ISL_517133, EPI_ISL_517134, EPI_ISL_517135, EPI_ISL_517136, EPI_ISL_517137, EPI_ISL_517138, EPI_ISL_517139, EPI_ISL_517140, EPI_ISL_517141, EPI_ISL_517142, EPI_ISL_517143, EPI_ISL_517144, EPI_ISL_517145, EPI_ISL_517146, EPI_ISL_517147, EPI_ISL_517148, EPI_ISL_517149, EPI_ISL_517150, EPI_ISL_517151, EPI_ISL_517152, EPI_ISL_517153, EPI_ISL_517154, EPI_ISL_517155, EPI_ISL_517156, EPI_ISL_517157, EPI_ISL_517158, EPI_ISL_517159, EPI_ISL_517160, EPI_ISL_517161, EPI_ISL_517162, EPI_ISL_517163, EPI_ISL_517164, EPI_ISL_517165, EPI_ISL_517166, EPI_ISL_517167, EPI_ISL_517168, EPI_ISL_517169, EPI_ISL_517170, EPI_ISL_517171, EPI_ISL_517172, EPI_ISL_517173, EPI_ISL_517174, EPI_ISL_517175, EPI_ISL_517176, EPI_ISL_517177, EPI_ISL_517178, EPI_ISL_517179, EPI_ISL_517180, EPI_ISL_517181, EPI_ISL_517182, EPI_ISL_517183, EPI_ISL_517184, EPI_ISL_517185, EPI_ISL_517186, EPI_ISL_517187, EPI_ISL_517188, EPI_ISL_517189, EPI_ISL_517190, EPI_ISL_517191, EPI_ISL_517192, EPI_ISL_517193, EPI_ISL_517194, EPI_ISL_517195, EPI_ISL_517196, EPI_ISL_517197, EPI_ISL_517198, EPI_ISL_517199, EPI_ISL_517200, EPI_ISL_517201, EPI_ISL_517202, EPI_ISL_517203, EPI_ISL_517204, EPI_ISL_517205, EPI_ISL_517206, EPI_ISL_517207, EPI_ISL_517208, EPI_ISL_517209, EPI_ISL_517210, EPI_ISL_517211, EPI_ISL_517212, EPI_ISL_517213, EPI_ISL_517214, EPI_ISL_517215, EPI_ISL_517216, EPI_ISL_517217, EPI_ISL_517218, EPI_ISL_517219, EPI_ISL_517220, EPI_ISL_517221, EPI_ISL_517222, EPI_ISL_517223, EPI_ISL_517224, EPI_ISL_517225, EPI_ISL_517226, EPI_ISL_517227, EPI_ISL_517228, EPI_ISL_517229, EPI_ISL_517230, EPI_ISL_517231, EPI_ISL_517232, EPI_ISL_517233, EPI_ISL_517234, EPI_ISL_517235, EPI_ISL_517236, EPI_ISL_517237, EPI_ISL_517238, EPI_ISL_517239, EPI_ISL_517240, EPI_ISL_517241, EPI_ISL_517242, EPI_ISL_517243, EPI_ISL_517244, EPI_ISL_517245, EPI_ISL_517246, EPI_ISL_517247, EPI_ISL_517248, EPI_ISL_517249, EPI_ISL_517250, EPI_ISL_517251, EPI_ISL_517252, EPI_ISL_517253, EPI_ISL_517254, EPI_ISL_517255, EPI_ISL_517256, EPI_ISL_517257, EPI_ISL_517258, EPI_ISL_517259, EPI_ISL_517260, EPI_ISL_517261, EPI_ISL_517262, EPI_ISL_517263, EPI_ISL_517264, EPI_ISL_517265, EPI_ISL_517266, EPI_ISL_517267, EPI_ISL_517268, EPI_ISL_517269, EPI_ISL_517270, EPI_ISL_517271, EPI_ISL_517272, EPI_ISL_517273, EPI_ISL_517274, EPI_ISL_517275, EPI_ISL_517276, EPI_ISL_517277, EPI_ISL_517278, EPI_ISL_517279, EPI_ISL_517280, EPI_ISL_517281, EPI_ISL_517282, EPI_ISL_517283, EPI_ISL_517284, EPI_ISL_517285, EPI_ISL_517286, EPI_ISL_517287, EPI_ISL_517288, EPI_ISL_517289, EPI_ISL_517290, EPI_ISL_517291, EPI_ISL_517292, EPI_ISL_517293, EPI_ISL_517294, EPI_ISL_517295, EPI_ISL_517296, EPI_ISL_517297, EPI_ISL_517298, EPI_ISL_517299, EPI_ISL_517300, EPI_ISL_517301, EPI_ISL_517302, EPI_ISL_517303, EPI_ISL_517304, EPI_ISL_517305, EPI_ISL_517306, EPI_ISL_517307, EPI_ISL_517308, EPI_ISL_517309, EPI_ISL_517310, EPI_ISL_517311, EPI_ISL_517312, EPI_ISL_517313, EPI_ISL_517314, EPI_ISL_517315, EPI_ISL_517316, EPI_ISL_517317, EPI_ISL_517318, EPI_ISL_517319, EPI_ISL_517320, EPI_ISL_517321, EPI_ISL_517322, EPI_ISL_517323, EPI_ISL_517324, EPI_ISL_517325, EPI_ISL_517326, EPI_ISL_517327, EPI_ISL_517328, EPI_ISL_517329, EPI_ISL_517330, EPI_ISL_517331, EPI_ISL_517332, EPI_ISL_517333, EPI_ISL_517334, EPI_ISL_517335, EPI_ISL_517336, EPI_ISL_517337, EPI_ISL_517338, EPI_ISL_517339, EPI_ISL_517340, EPI_ISL_517341, EPI_ISL_517342, EPI_ISL_517343, EPI_ISL_517344, EPI_ISL_517345, EPI_ISL_517346, EPI_ISL_517347, EPI_ISL_517348, EPI_ISL_517349, EPI_ISL_517350, EPI_ISL_517351, EPI_ISL_517352, EPI_ISL_517353, EPI_ISL_517354, EPI_ISL_517355, EPI_ISL_517356, EPI_ISL_517357, EPI_ISL_517358, EPI_ISL_517359, EPI_ISL_517360, EPI_ISL_517361, EPI_ISL_517362, EPI_ISL_517363, EPI_ISL_517364, EPI_ISL_517365, EPI_ISL_517366, EPI_ISL_517367, EPI_ISL_517368, EPI_ISL_517369, EPI_ISL_517370, EPI_ISL_517371, EPI_ISL_517372, EPI_ISL_517373, EPI_ISL_517374, EPI_ISL_517375, EPI_ISL_517376, EPI_ISL_517377, EPI_ISL_517378, EPI_ISL_517379, EPI_ISL_517380, EPI_ISL_517381, EPI_ISL_517382, EPI_ISL_517383, EPI_ISL_517384, EPI_ISL_517385, EPI_ISL_517386, EPI_ISL_517387, EPI_ISL_517388, EPI_ISL_517389, EPI_ISL_517390, EPI_ISL_517391, EPI_ISL_517392, EPI_ISL_517393, EPI_ISL_517394, EPI_ISL_517395, EPI_ISL_517396, EPI_ISL_517397, EPI_ISL_517398, EPI_ISL_517399, EPI_ISL_517400, EPI_ISL_517401, EPI_ISL_517402, EPI_ISL_517403, EPI_ISL_517404, EPI_ISL_517405, EPI_ISL_517406, EPI_ISL_517407, EPI_ISL_517408, EPI_ISL_517409, EPI_ISL_517410, EPI_ISL_517411, EPI_ISL_517412, EPI_ISL_517413, EPI_ISL_517414, EPI_ISL_517415, EPI_ISL_517416, EPI_ISL_517417, EPI_ISL_517418, EPI_ISL_517419, EPI_ISL_517420, EPI_ISL_517421, EPI_ISL_517422, EPI_ISL_517423, EPI_ISL_517424, EPI_ISL_517425, EPI_ISL_517426, EPI_ISL_517427, EPI_ISL_517428, EPI_ISL_517429, EPI_ISL_517430, EPI_ISL_517431, EPI_ISL_517432, EPI_ISL_517433, EPI_ISL_517434, EPI_ISL_517435, EPI_ISL_517436, EPI_ISL_517437, EPI_ISL_517438, EPI_ISL_517439, EPI_ISL_517440, EPI_ISL_517441, EPI_ISL_517442, EPI_ISL_517443, EPI_ISL_517444, EPI_ISL_517445, EPI_ISL_517446, EPI_ISL_517447, EPI_ISL_517448, EPI_ISL_517449, EPI_ISL_517450, EPI_ISL_517451, EPI_ISL_517452, EPI_ISL_517453, EPI_ISL_517454, EPI_ISL_517455, EPI_ISL_517456, EPI_ISL_517457, EPI_ISL_517458, EPI_ISL_517459, EPI_ISL_517460, EPI_ISL_517461, EPI_ISL_517462, EPI_ISL_517463, EPI_ISL_517464, EPI_ISL_517465, EPI_ISL_517466, EPI_ISL_517467, EPI_ISL_517468, EPI_ISL_517469, EPI_ISL_517470, EPI_ISL_517471, EPI_ISL_517472, EPI_ISL_517473, EPI_ISL_517474, EPI_ISL_517475, EPI_ISL_517476, EPI_ISL_517477, EPI_ISL_517478, EPI_ISL_517479, EPI_ISL_517480, EPI_ISL_517481, EPI_ISL_517482, EPI_ISL_517483, EPI_ISL_517484, EPI_ISL_517485, EPI_ISL_517486, EPI_ISL_517487, EPI_ISL_517488, EPI_ISL_517489, EPI_ISL_517490, EPI_ISL_517491, EPI_ISL_517492, EPI_ISL_517493, EPI_ISL_517494, EPI_ISL_517495, EPI_ISL_517496, EPI_ISL_517497, EPI_ISL_517498, EPI_ISL_517499, EPI_ISL_517500, EPI_ISL_517501, EPI_ISL_517502, EPI_ISL_517503, EPI_ISL_517504, EPI_ISL_517505, EPI_ISL_517506, EPI_ISL_517507, EPI_ISL_517508, EPI_ISL_517509 | see above                                                              | Liverpool Clinical Laboratories                                        | COVID-19 Genomics UK (COG-UK) Consortium                                                                                                                                                                                                                                                                                                                                                                                                                                                                    | Sam Haldenby, Anita Lucaci, Steve Paterson, Julian Hiscox, Alistair Darby, M Almsaud, A Alrezaihi, Muhannad Alruwaili, Stuart D Armstrong, Jones Benjamin, Eleanor G Bentley, Anu Chawla, Jordan J Clark, Angela Cowell, Richard Eccles, Isabel Garcia-Dorival, Matthew Gemmill, Alessandro Gerada, PKF Gilmore, Richard Gregory, Ximeng Han, Catherine Hartley, Margaret Hughes, Miren Iurriza-Gomara, James Johnson, L Luu, Jenifer Manson, Charlotte Nelson, Elaine O'Toole, Cassie Olateju, Rebekah Penrice-Randal, Lucille Rainbow, N.P Randle, Trevor Ian Robinson, Parul Sharma, Ghada T Shawli, James P Stewart, Neil Swainston, Eaterina Vamos, Joanne Watts, Mark Whitehead  |
| EPI_ISL_518821, EPI_ISL_518822, EPI_ISL_518823, EPI_ISL_518825                                                                                                                                                                                                                                                                                                                                                                                                                                                                                                                                                                                                                                                                                                                                                                                                                                                                                                                                                                                                                                                                                                                                                                                                                                                                                                                                                                                                                                                                                                                                                                                                                                                                                                                                                                                                                                                                                                                                                                                                                                                                                                                                                                                                                                                                                                                                                                                                                                                                                                                                                                                                                                                                                                                                                                                                                                                                                                                                                                                                                                                                                                                                                                                                                                                                                                                                                                                                                                                                                                                                                                                                                                                                                                                                                                                                                                                                                                                                                                                                                                                                                                                                                                                                                                                                                                                                                                                                                                                                                                                                                                                                                                                                                                                                                                                                                                                                                                                                                                                                                                                                                                                                                                                                                                                                                                                                                                                                                                                                                                                                                                                                                                                                                                                                                                                                                                                                                                                                                                                                                                                                                                                                                                                                                                                                                                                 |                                                                        | Oman-National Influenza Center                                         | Biotechnology & OMICs Laboratory, Natural & Medical Sciences Research Center, University of Nizwa                                                                                                                                                                                                                                                                                                                                                                                                           | Samira Al-Mahruqi, Abdul Latif Khan, Samiha Al-Kharusi, Adil Khan , Ahmed Al-Rawahi, Sajjad Asaf, Amna Al-Jardani, Hanan Al-Kindi, Intisar Al-Shukri, Adil Al-Wahaibi, Seif Al-Abri, Ahmed Al-Harrasi                                                                                                                                                                                                                                                                                                                                                                                                                                                                                  |
| EPI_ISL_518826, EPI_ISL_518827, EPI_ISL_518828, EPI_ISL_518829, EPI_ISL_518830, EPI_ISL_518831, EPI_ISL_518832                                                                                                                                                                                                                                                                                                                                                                                                                                                                                                                                                                                                                                                                                                                                                                                                                                                                                                                                                                                                                                                                                                                                                                                                                                                                                                                                                                                                                                                                                                                                                                                                                                                                                                                                                                                                                                                                                                                                                                                                                                                                                                                                                                                                                                                                                                                                                                                                                                                                                                                                                                                                                                                                                                                                                                                                                                                                                                                                                                                                                                                                                                                                                                                                                                                                                                                                                                                                                                                                                                                                                                                                                                                                                                                                                                                                                                                                                                                                                                                                                                                                                                                                                                                                                                                                                                                                                                                                                                                                                                                                                                                                                                                                                                                                                                                                                                                                                                                                                                                                                                                                                                                                                                                                                                                                                                                                                                                                                                                                                                                                                                                                                                                                                                                                                                                                                                                                                                                                                                                                                                                                                                                                                                                                                                                                 |                                                                        | Oman-National Influenza Center                                         | Biotechnology & OMICs Laboratory, Natural & Medical Sciences Research Center, University of Nizwa                                                                                                                                                                                                                                                                                                                                                                                                           | Sajjad Asaf, Samiha Al-Kharusi, Ahmed Al-Harrasi, Samira Al-Mahruqi, Adil Khan, Ahmed Al-Rawahi, Abdul Latif Khan, Amna Al-Jardani, Hanan Al-Kindi, Intisar Al-Shukri, Ahlam Al-Amri, Aisha Al-Amri, Aisha Al-Busaidi, Adil Al-Wahaibi, Seif Al-Abri.                                                                                                                                                                                                                                                                                                                                                                                                                                  |
| EPI_ISL_518833, EPI_ISL_518834, EPI_ISL_518835, EPI_ISL_518836                                                                                                                                                                                                                                                                                                                                                                                                                                                                                                                                                                                                                                                                                                                                                                                                                                                                                                                                                                                                                                                                                                                                                                                                                                                                                                                                                                                                                                                                                                                                                                                                                                                                                                                                                                                                                                                                                                                                                                                                                                                                                                                                                                                                                                                                                                                                                                                                                                                                                                                                                                                                                                                                                                                                                                                                                                                                                                                                                                                                                                                                                                                                                                                                                                                                                                                                                                                                                                                                                                                                                                                                                                                                                                                                                                                                                                                                                                                                                                                                                                                                                                                                                                                                                                                                                                                                                                                                                                                                                                                                                                                                                                                                                                                                                                                                                                                                                                                                                                                                                                                                                                                                                                                                                                                                                                                                                                                                                                                                                                                                                                                                                                                                                                                                                                                                                                                                                                                                                                                                                                                                                                                                                                                                                                                                                                                 |                                                                        | Oman-National Influenza Center                                         | Biotechnology & OMICs Laboratory, Natural & Medical Sciences Research Center, University of Nizwa                                                                                                                                                                                                                                                                                                                                                                                                           | Samira Al-Mahruqi, Abdul Latif Khan, Samiha Al-Kharusi, Adil Khan , Ahmed Al-Rawahi, Sajjad Asaf, Amna Al-Jardani, Hanan Al-Kindi, Intisar Al-Shukri, Adil Al-Wahaibi, Seif Al-Abri, Ahmed Al-Harrasi                                                                                                                                                                                                                                                                                                                                                                                                                                                                                  |
| EPI_ISL_518837, EPI_ISL_518838, EPI_ISL_518840, EPI_ISL_518841, EPI_ISL_518842, EPI_ISL_518843, EPI_ISL_518844, EPI_ISL_518845                                                                                                                                                                                                                                                                                                                                                                                                                                                                                                                                                                                                                                                                                                                                                                                                                                                                                                                                                                                                                                                                                                                                                                                                                                                                                                                                                                                                                                                                                                                                                                                                                                                                                                                                                                                                                                                                                                                                                                                                                                                                                                                                                                                                                                                                                                                                                                                                                                                                                                                                                                                                                                                                                                                                                                                                                                                                                                                                                                                                                                                                                                                                                                                                                                                                                                                                                                                                                                                                                                                                                                                                                                                                                                                                                                                                                                                                                                                                                                                                                                                                                                                                                                                                                                                                                                                                                                                                                                                                                                                                                                                                                                                                                                                                                                                                                                                                                                                                                                                                                                                                                                                                                                                                                                                                                                                                                                                                                                                                                                                                                                                                                                                                                                                                                                                                                                                                                                                                                                                                                                                                                                                                                                                                                                                 |                                                                        | Oman-National Influenza Center                                         | Biotechnology & OMICs Laboratory, Natural & Medical Sciences Research Center, University of Nizwa                                                                                                                                                                                                                                                                                                                                                                                                           | Samiha Al-Kharusi, Sajjad Asaf, Abdul Latif Khan, Samira Al-Mahruqi, Adil Khan, Ahmed Al-Rawahi, Amna Al-Jardani, Hanan Al-Kindi, Intisar Al-Shukri, Ahlam Al-Amri, Aisha Al-Amri, Aisha Al-Busaidi, Adil Al-Wahaibi, Seif Al-Abri, Ahmed Al-Harrasi                                                                                                                                                                                                                                                                                                                                                                                                                                   |
| EPI_ISL_524435                                                                                                                                                                                                                                                                                                                                                                                                                                                                                                                                                                                                                                                                                                                                                                                                                                                                                                                                                                                                                                                                                                                                                                                                                                                                                                                                                                                                                                                                                                                                                                                                                                                                                                                                                                                                                                                                                                                                                                                                                                                                                                                                                                                                                                                                                                                                                                                                                                                                                                                                                                                                                                                                                                                                                                                                                                                                                                                                                                                                                                                                                                                                                                                                                                                                                                                                                                                                                                                                                                                                                                                                                                                                                                                                                                                                                                                                                                                                                                                                                                                                                                                                                                                                                                                                                                                                                                                                                                                                                                                                                                                                                                                                                                                                                                                                                                                                                                                                                                                                                                                                                                                                                                                                                                                                                                                                                                                                                                                                                                                                                                                                                                                                                                                                                                                                                                                                                                                                                                                                                                                                                                                                                                                                                                                                                                                                                                 | Department of Immunology, The Scripps Research Institute               | Department of Immunology, The Scripps Research Institute               |                                                                                                                                                                                                                                                                                                                                                                                                                                                                                                             | SEARCH Alliance S.D., Pride,D., Shin,J.H.                                                                                                                                                                                                                                                                                                                                                                                                                                                                                                                                                                                                                                              |
| EPI_ISL_524785, EPI_ISL_524787, EPI_ISL_524788, EPI_ISL_524789, EPI_ISL_524790, EPI_ISL_524793, EPI_ISL_524794, EPI_ISL_524795, EPI_ISL_524796, EPI_ISL_524798                                                                                                                                                                                                                                                                                                                                                                                                                                                                                                                                                                                                                                                                                                                                                                                                                                                                                                                                                                                                                                                                                                                                                                                                                                                                                                                                                                                                                                                                                                                                                                                                                                                                                                                                                                                                                                                                                                                                                                                                                                                                                                                                                                                                                                                                                                                                                                                                                                                                                                                                                                                                                                                                                                                                                                                                                                                                                                                                                                                                                                                                                                                                                                                                                                                                                                                                                                                                                                                                                                                                                                                                                                                                                                                                                                                                                                                                                                                                                                                                                                                                                                                                                                                                                                                                                                                                                                                                                                                                                                                                                                                                                                                                                                                                                                                                                                                                                                                                                                                                                                                                                                                                                                                                                                                                                                                                                                                                                                                                                                                                                                                                                                                                                                                                                                                                                                                                                                                                                                                                                                                                                                                                                                                                                 | Evandro Chagas Institute                                               | Evandro Chagas Institute                                               |                                                                                                                                                                                                                                                                                                                                                                                                                                                                                                             | Santos, M.C.; Silva, A.M.; Junior, W.D.C.; Barbagelata, L.S.; Ferreira, J.A.; Sousa, E.M.A.; da Silva, P.S.; Resque, H.R; Martins, L.C.; Sousa Junior, E.C.;Viana, G.M.R                                                                                                                                                                                                                                                                                                                                                                                                                                                                                                               |
| EPI_ISL_525423                                                                                                                                                                                                                                                                                                                                                                                                                                                                                                                                                                                                                                                                                                                                                                                                                                                                                                                                                                                                                                                                                                                                                                                                                                                                                                                                                                                                                                                                                                                                                                                                                                                                                                                                                                                                                                                                                                                                                                                                                                                                                                                                                                                                                                                                                                                                                                                                                                                                                                                                                                                                                                                                                                                                                                                                                                                                                                                                                                                                                                                                                                                                                                                                                                                                                                                                                                                                                                                                                                                                                                                                                                                                                                                                                                                                                                                                                                                                                                                                                                                                                                                                                                                                                                                                                                                                                                                                                                                                                                                                                                                                                                                                                                                                                                                                                                                                                                                                                                                                                                                                                                                                                                                                                                                                                                                                                                                                                                                                                                                                                                                                                                                                                                                                                                                                                                                                                                                                                                                                                                                                                                                                                                                                                                                                                                                                                                 | Oman-National Influenza Center                                         | Biotechnology & OMICs Laboratory                                       | Sajjad Asaf, Samiha Al-Kharusi, Ahmed Al-Harrasi, Samira Al-Mahruqi, Adil Khan, Ahmed Al-Rawahi, Abdul Latif Khan, Amna Al-Jardani, Hanan Al-Kindi, Intisar Al-Shukri, Ahlam Al-Amri, Aisha Al-Amri, Aisha Al-Busaidi, Adil Al-Wahaibi, Seif Al-Abri.                                                                                                                                                                                                                                                       |                                                                                                                                                                                                                                                                                                                                                                                                                                                                                                                                                                                                                                                                                        |
| EPI_ISL_525424                                                                                                                                                                                                                                                                                                                                                                                                                                                                                                                                                                                                                                                                                                                                                                                                                                                                                                                                                                                                                                                                                                                                                                                                                                                                                                                                                                                                                                                                                                                                                                                                                                                                                                                                                                                                                                                                                                                                                                                                                                                                                                                                                                                                                                                                                                                                                                                                                                                                                                                                                                                                                                                                                                                                                                                                                                                                                                                                                                                                                                                                                                                                                                                                                                                                                                                                                                                                                                                                                                                                                                                                                                                                                                                                                                                                                                                                                                                                                                                                                                                                                                                                                                                                                                                                                                                                                                                                                                                                                                                                                                                                                                                                                                                                                                                                                                                                                                                                                                                                                                                                                                                                                                                                                                                                                                                                                                                                                                                                                                                                                                                                                                                                                                                                                                                                                                                                                                                                                                                                                                                                                                                                                                                                                                                                                                                                                                 | Oman-National Influenza Center                                         | Biotechnology & OMICs Laboratory                                       | Samira Al-Mahruqi, Abdul Latif Khan, Samiha Al-Kharusi, Adil Khan , Ahmed Al-Rawahi, Sajjad Asaf, Amna Al-Jardani, Hanan Al-Kindi, Intisar Al-Shukri, Ahlam Al-Amri, Aisha Al-Amri, Aisha Al-Busaidi, Adil Al-Wahaibi, Seif Al-Abri, Ahmed Al-Harrasi                                                                                                                                                                                                                                                       |                                                                                                                                                                                                                                                                                                                                                                                                                                                                                                                                                                                                                                                                                        |
| EPI_ISL_525425                                                                                                                                                                                                                                                                                                                                                                                                                                                                                                                                                                                                                                                                                                                                                                                                                                                                                                                                                                                                                                                                                                                                                                                                                                                                                                                                                                                                                                                                                                                                                                                                                                                                                                                                                                                                                                                                                                                                                                                                                                                                                                                                                                                                                                                                                                                                                                                                                                                                                                                                                                                                                                                                                                                                                                                                                                                                                                                                                                                                                                                                                                                                                                                                                                                                                                                                                                                                                                                                                                                                                                                                                                                                                                                                                                                                                                                                                                                                                                                                                                                                                                                                                                                                                                                                                                                                                                                                                                                                                                                                                                                                                                                                                                                                                                                                                                                                                                                                                                                                                                                                                                                                                                                                                                                                                                                                                                                                                                                                                                                                                                                                                                                                                                                                                                                                                                                                                                                                                                                                                                                                                                                                                                                                                                                                                                                                                                 | Oman-National Influenza Center                                         | Biotechnology & OMICs Laboratory                                       | Samira Al-Mahruqi, Abdul Latif Khan, Samiha Al-Kharusi, Adil Khan , Ahmed Al-Rawahi, Sajjad Asaf, Amna Al-Jardani, Hanan Al-Kindi, Intisar Al-Shukri, Adil Al-Wahaibi, Seif Al-Abri, Ahmed Al-Harrasi                                                                                                                                                                                                                                                                                                       |                                                                                                                                                                                                                                                                                                                                                                                                                                                                                                                                                                                                                                                                                        |
| EPI_ISL_525426, EPI_ISL_525427, EPI_ISL_525428                                                                                                                                                                                                                                                                                                                                                                                                                                                                                                                                                                                                                                                                                                                                                                                                                                                                                                                                                                                                                                                                                                                                                                                                                                                                                                                                                                                                                                                                                                                                                                                                                                                                                                                                                                                                                                                                                                                                                                                                                                                                                                                                                                                                                                                                                                                                                                                                                                                                                                                                                                                                                                                                                                                                                                                                                                                                                                                                                                                                                                                                                                                                                                                                                                                                                                                                                                                                                                                                                                                                                                                                                                                                                                                                                                                                                                                                                                                                                                                                                                                                                                                                                                                                                                                                                                                                                                                                                                                                                                                                                                                                                                                                                                                                                                                                                                                                                                                                                                                                                                                                                                                                                                                                                                                                                                                                                                                                                                                                                                                                                                                                                                                                                                                                                                                                                                                                                                                                                                                                                                                                                                                                                                                                                                                                                                                                 | Oman-National Influenza Center                                         | Biotechnology & OMICs Laboratory                                       | Sajjad Asaf, Samiha Al-Kharusi, Ahmed Al-Harrasi, Samira Al-Mahruqi, Adil Khan, Ahmed Al-Rawahi, Abdul Latif Khan, Amna Al-Jardani, Hanan Al-Kindi, Intisar Al-Shukri, Ahlam Al-Amri, Aisha Al-Amri, Aisha Al-Busaidi, Adil Al-Wahaibi, Seif Al-Abri.                                                                                                                                                                                                                                                       |                                                                                                                                                                                                                                                                                                                                                                                                                                                                                                                                                                                                                                                                                        |
| EPI_ISL_525429                                                                                                                                                                                                                                                                                                                                                                                                                                                                                                                                                                                                                                                                                                                                                                                                                                                                                                                                                                                                                                                                                                                                                                                                                                                                                                                                                                                                                                                                                                                                                                                                                                                                                                                                                                                                                                                                                                                                                                                                                                                                                                                                                                                                                                                                                                                                                                                                                                                                                                                                                                                                                                                                                                                                                                                                                                                                                                                                                                                                                                                                                                                                                                                                                                                                                                                                                                                                                                                                                                                                                                                                                                                                                                                                                                                                                                                                                                                                                                                                                                                                                                                                                                                                                                                                                                                                                                                                                                                                                                                                                                                                                                                                                                                                                                                                                                                                                                                                                                                                                                                                                                                                                                                                                                                                                                                                                                                                                                                                                                                                                                                                                                                                                                                                                                                                                                                                                                                                                                                                                                                                                                                                                                                                                                                                                                                                                                 | Oman-National Influenza Center                                         | Biotechnology & OMICs Laboratory                                       | Samira Al-Mahruqi, Abdul Latif Khan, Samiha Al-Kharusi, Adil Khan , Ahmed Al-Rawahi, Sajjad Asaf, Amna Al-Jardani, Hanan Al-Kindi, Intisar Al-Shukri, Adil Al-Wahaibi, Seif Al-Abri, Ahmed Al-Harrasi                                                                                                                                                                                                                                                                                                       |                                                                                                                                                                                                                                                                                                                                                                                                                                                                                                                                                                                                                                                                                        |
| EPI_ISL_525466                                                                                                                                                                                                                                                                                                                                                                                                                                                                                                                                                                                                                                                                                                                                                                                                                                                                                                                                                                                                                                                                                                                                                                                                                                                                                                                                                                                                                                                                                                                                                                                                                                                                                                                                                                                                                                                                                                                                                                                                                                                                                                                                                                                                                                                                                                                                                                                                                                                                                                                                                                                                                                                                                                                                                                                                                                                                                                                                                                                                                                                                                                                                                                                                                                                                                                                                                                                                                                                                                                                                                                                                                                                                                                                                                                                                                                                                                                                                                                                                                                                                                                                                                                                                                                                                                                                                                                                                                                                                                                                                                                                                                                                                                                                                                                                                                                                                                                                                                                                                                                                                                                                                                                                                                                                                                                                                                                                                                                                                                                                                                                                                                                                                                                                                                                                                                                                                                                                                                                                                                                                                                                                                                                                                                                                                                                                                                                 | Oman-National Influenza Center                                         | Biotechnology & OMICs Laboratory                                       | Samiha Al-Kharusi, Sajjad Asaf, Abdul Latif Khan, Samira Al-Mahruqi, Adil Khan, Ahmed Al-Rawahi, Amna Al-Jardani, Hanan Al-Kindi, Intisar Al-Shukri, Aisha Al-Busaidi, Adil Al-Wahaibi, Seif Al-Abri, Ahmed Al-Harrasi                                                                                                                                                                                                                                                                                      |                                                                                                                                                                                                                                                                                                                                                                                                                                                                                                                                                                                                                                                                                        |
| EPI_ISL_526367, EPI_ISL_526368, EPI_ISL_526369, EPI_ISL_526370, EPI_ISL_526371, EPI_ISL_526372, EPI_ISL_526373, EPI_ISL_526374, EPI_ISL_526375, EPI_ISL_526376, EPI_ISL_526377, EPI_ISL_526378, EPI_ISL_526379, EPI_ISL_526380, EPI_ISL_526381, EPI_ISL_526382, EPI_ISL_526383, EPI_ISL_526384, EPI_ISL_526385, EPI_ISL_526386, EPI_ISL_526387, EPI_ISL_526388, EPI_ISL_526389, EPI_ISL_526390, EPI_ISL_526391, EPI_ISL_526392, EPI_ISL_526393, EPI_ISL_526394                                                                                                                                                                                                                                                                                                                                                                                                                                                                                                                                                                                                                                                                                                                                                                                                                                                                                                                                                                                                                                                                                                                                                                                                                                                                                                                                                                                                                                                                                                                                                                                                                                                                                                                                                                                                                                                                                                                                                                                                                                                                                                                                                                                                                                                                                                                                                                                                                                                                                                                                                                                                                                                                                                                                                                                                                                                                                                                                                                                                                                                                                                                                                                                                                                                                                                                                                                                                                                                                                                                                                                                                                                                                                                                                                                                                                                                                                                                                                                                                                                                                                                                                                                                                                                                                                                                                                                                                                                                                                                                                                                                                                                                                                                                                                                                                                                                                                                                                                                                                                                                                                                                                                                                                                                                                                                                                                                                                                                                                                                                                                                                                                                                                                                                                                                                                                                                                                                                 | see above                                                              | Liverpool Clinical Laboratories                                        | COVID-19 Genomics UK (COG-UK) Consortium                                                                                                                                                                                                                                                                                                                                                                                                                                                                    | Sam Haldenby, Anita Lucaci, Steve Paterson, Julian Hiscox, Alistair Darby, M Almsaud, A Alrezaihi, Muhannad Alruwaili, Stuart D Armstrong, Jones Benjamin, Eleanor G Bentley, Anu Chawla, Jordan J Clark, Angela Cowell, Richard Eccles, Isabel Garcia-Dorival, Matthew Gemmill, Alessandro Gerada, PKF Gilmore, Richard Gregory, Ximeng Han, Catherine Hartley, Margaret Hughes, Miren Iurriza-Gomara, James Johnson, L Luu, Jenifer Manson, Charlotte Nelson, Elaine O'Toole, Cassie Olateju, Rebekah Penrice-Randal , Lucille Rainbow, N.P Randle, Trevor Ian Robinson, Parul Sharma, Ghada T Shawli, James P Stewart, Neil Swainston, Eaterina Vamos, Joanne Watts, Mark Whitehead |
| EPI_ISL_528386                                                                                                                                                                                                                                                                                                                                                                                                                                                                                                                                                                                                                                                                                                                                                                                                                                                                                                                                                                                                                                                                                                                                                                                                                                                                                                                                                                                                                                                                                                                                                                                                                                                                                                                                                                                                                                                                                                                                                                                                                                                                                                                                                                                                                                                                                                                                                                                                                                                                                                                                                                                                                                                                                                                                                                                                                                                                                                                                                                                                                                                                                                                                                                                                                                                                                                                                                                                                                                                                                                                                                                                                                                                                                                                                                                                                                                                                                                                                                                                                                                                                                                                                                                                                                                                                                                                                                                                                                                                                                                                                                                                                                                                                                                                                                                                                                                                                                                                                                                                                                                                                                                                                                                                                                                                                                                                                                                                                                                                                                                                                                                                                                                                                                                                                                                                                                                                                                                                                                                                                                                                                                                                                                                                                                                                                                                                                                                 | Viral vaccines, VSVRI- Veterinary serum and vaccine research institute | Viral vaccines, VSVRI- Veterinary serum and vaccine research institute |                                                                                                                                                                                                                                                                                                                                                                                                                                                                                                             | Saleh,A.A., Saad,M.A.                                                                                                                                                                                                                                                                                                                                                                                                                                                                                                                                                                                                                                                                  |
| EPI_ISL_528829, EPI_ISL_528837, EPI_ISL_528861, EPI_ISL_528866                                                                                                                                                                                                                                                                                                                                                                                                                                                                                                                                                                                                                                                                                                                                                                                                                                                                                                                                                                                                                                                                                                                                                                                                                                                                                                                                                                                                                                                                                                                                                                                                                                                                                                                                                                                                                                                                                                                                                                                                                                                                                                                                                                                                                                                                                                                                                                                                                                                                                                                                                                                                                                                                                                                                                                                                                                                                                                                                                                                                                                                                                                                                                                                                                                                                                                                                                                                                                                                                                                                                                                                                                                                                                                                                                                                                                                                                                                                                                                                                                                                                                                                                                                                                                                                                                                                                                                                                                                                                                                                                                                                                                                                                                                                                                                                                                                                                                                                                                                                                                                                                                                                                                                                                                                                                                                                                                                                                                                                                                                                                                                                                                                                                                                                                                                                                                                                                                                                                                                                                                                                                                                                                                                                                                                                                                                                 | CSIR-Centre for Cellular and Molecular Biology                         | CSIR-Centre for Cellular and Molecular Biology                         | Sakshi Shambhavi, Lamuk Zaveri, Shagufta Khan, Namami Gaur, Nikhil Hajirnis, M Soujanya Reddy, Pratheusa Maccha, Tulasi Nagabandi, Purushotham Vodnala, Payel Mukherjee, Sofia Banu, Priya Singh, Onkar Kulkarni, Dhiviya Vedagiri, Divya Gupta, Vishal Shak, Santosh Kumar Kuncha, Krishnan Harinivas Harshan, Archana Bharadwaj Siva, Karthik Bharadwaj Tallapaka, Deepak Kumar, Devi Prasad Vijayashankar, Disha Nanda, Divya Das, Jotin Gogoi, Manish Bhattacharjee, Rakesh K Mishra, Divya Tej Sowpati |                                                                                                                                                                                                                                                                                                                                                                                                                                                                                                                                                                                                                                                                                        |
| EPI_ISL_529254, EPI_ISL_529258, EPI_ISL_529259, EPI_ISL_529260, EPI_ISL_529263, EPI_ISL_529270, EPI_ISL_529271, EPI_ISL_529274, EPI_ISL_529280, EPI_ISL_529284, EPI_ISL_529287, EPI_ISL_529293, EPI_ISL_529295, EPI_ISL_529302, EPI_ISL_529304, EPI_ISL_529305, EPI_ISL_529466, EPI_ISL_529484, EPI_ISL_529490, EPI_ISL_529498, EPI_ISL_529509, EPI_ISL_529510, EPI_ISL_529513, EPI_ISL_529516, EPI_ISL_534732, EPI_ISL_534733, EPI_ISL_534734, EPI_ISL_534735, EPI_ISL_534736, EPI_ISL_534737, EPI_ISL_534738, EPI_ISL_534739, EPI_ISL_534740, EPI_ISL_534741, EPI_ISL_534742, EPI_ISL_534743, EPI_ISL_534744, EPI_ISL_534745, EPI_ISL_534746, EPI_ISL_534747, EPI_ISL_534748, EPI_ISL_534749, EPI_ISL_534750, EPI_ISL_534751, EPI_ISL_534752, EPI_ISL_534753, EPI_ISL_534754, EPI_ISL_534755                                                                                                                                                                                                                                                                                                                                                                                                                                                                                                                                                                                                                                                                                                                                                                                                                                                                                                                                                                                                                                                                                                                                                                                                                                                                                                                                                                                                                                                                                                                                                                                                                                                                                                                                                                                                                                                                                                                                                                                                                                                                                                                                                                                                                                                                                                                                                                                                                                                                                                                                                                                                                                                                                                                                                                                                                                                                                                                                                                                                                                                                                                                                                                                                                                                                                                                                                                                                                                                                                                                                                                                                                                                                                                                                                                                                                                                                                                                                                                                                                                                                                                                                                                                                                                                                                                                                                                                                                                                                                                                                                                                                                                                                                                                                                                                                                                                                                                                                                                                                                                                                                                                                                                                                                                                                                                                                                                                                                                                                                                                                                                                 | see above                                                              | Liverpool Clinical Laboratories                                        | COVID-19 Genomics UK (COG-UK) Consortium                                                                                                                                                                                                                                                                                                                                                                                                                                                                    | Sam Haldenby, Anita Lucaci, Steve Paterson, Julian Hiscox, Alistair Darby, M Almsaud, A Alrezaihi, Muhannad Alruwaili, Stuart D Armstrong, Jones Benjamin, Eleanor G Bentley, Anu Chawla, Jordan J Clark, Angela Cowell, Richard Eccles, Isabel Garcia-Dorival, Matthew Gemmill, Alessandro Gerada,                                                                                                                                                                                                                                                                                                                                                                                    |





















|                                                                                                                                                                                                                                                                                                                                                                                                                                                                                                                                                                                                                                                                                                                                                                                                                                                                                                                                                                                                                                                                                                                                                                                                                                                                                                                                                                                                                                                                                                                                                                                                                                                                                                                                                                                                                                                                                                                                                                                                                                                                                |                                                        |                                                |                                                                                                                                                                                                                                                                                                                                                                                                                                                                                                                                                                                                                                                                                         |
|--------------------------------------------------------------------------------------------------------------------------------------------------------------------------------------------------------------------------------------------------------------------------------------------------------------------------------------------------------------------------------------------------------------------------------------------------------------------------------------------------------------------------------------------------------------------------------------------------------------------------------------------------------------------------------------------------------------------------------------------------------------------------------------------------------------------------------------------------------------------------------------------------------------------------------------------------------------------------------------------------------------------------------------------------------------------------------------------------------------------------------------------------------------------------------------------------------------------------------------------------------------------------------------------------------------------------------------------------------------------------------------------------------------------------------------------------------------------------------------------------------------------------------------------------------------------------------------------------------------------------------------------------------------------------------------------------------------------------------------------------------------------------------------------------------------------------------------------------------------------------------------------------------------------------------------------------------------------------------------------------------------------------------------------------------------------------------|--------------------------------------------------------|------------------------------------------------|-----------------------------------------------------------------------------------------------------------------------------------------------------------------------------------------------------------------------------------------------------------------------------------------------------------------------------------------------------------------------------------------------------------------------------------------------------------------------------------------------------------------------------------------------------------------------------------------------------------------------------------------------------------------------------------------|
| EPI_ISL_539665                                                                                                                                                                                                                                                                                                                                                                                                                                                                                                                                                                                                                                                                                                                                                                                                                                                                                                                                                                                                                                                                                                                                                                                                                                                                                                                                                                                                                                                                                                                                                                                                                                                                                                                                                                                                                                                                                                                                                                                                                                                                 | CSIR-Centre for Cellular and Molecular Biology         | CSIR-Centre for Cellular and Molecular Biology | Sakshi Shambhavi, Lamuk Zaveri, Shagufta Khan, Namami Gaur, Nikhil Hajirnis, M Soujanya Reddy, Pratheusa Maccha, Tulasi Nagabandi, Purushotham Vodnala, Payel Mukherjee, Sofia Banu, Priya Singh, Onkar Kulkarni, Dhiviya Vedagiri, Divya Gupta, Vishal Sah, Santosh Kumar Kuncha, Krishnan Harinivas Harshan, Archana Bharadwaj Siva, Karthik Bharadwaj Tallapaka, G. Aditya Kumar, Koushick Sivakumar, Pooja Ramesh Gupta, Rajan Kumar Jha, Shraddha Vijay Lahoti, Rakesh K Mishra, Divya Tej Sowpati                                                                                                                                                                                 |
| EPI_ISL_539666                                                                                                                                                                                                                                                                                                                                                                                                                                                                                                                                                                                                                                                                                                                                                                                                                                                                                                                                                                                                                                                                                                                                                                                                                                                                                                                                                                                                                                                                                                                                                                                                                                                                                                                                                                                                                                                                                                                                                                                                                                                                 | CSIR-Centre for Cellular and Molecular Biology         | CSIR-Centre for Cellular and Molecular Biology | Sakshi Shambhavi, Lamuk Zaveri, Shagufta Khan, Nikhil Hajirnis, M Soujanya Reddy, Pratheusa Maccha, Namami Gaur, Tulasi Nagabandi, Purushotham Vodnala, Payel Mukherjee, Sofia Banu, Priya Singh, Onkar Kulkarni, Dhiviya Vedagiri, Divya Gupta, Vishal Sah, Santosh Kumar Kuncha, Krishnan Harinivas Harshan, Archana Bharadwaj Siva, Karthik Bharadwaj Tallapaka, G. Aditya Kumar, Koushick Sivakumar, Rakesh K Mishra, Divya Tej Sowpati                                                                                                                                                                                                                                             |
| EPI_ISL_539694                                                                                                                                                                                                                                                                                                                                                                                                                                                                                                                                                                                                                                                                                                                                                                                                                                                                                                                                                                                                                                                                                                                                                                                                                                                                                                                                                                                                                                                                                                                                                                                                                                                                                                                                                                                                                                                                                                                                                                                                                                                                 | CSIR-Centre for Cellular and Molecular Biology         | CSIR-Centre for Cellular and Molecular Biology | Sakshi Shambhavi, Lamuk Zaveri, Shagufta Khan, Namami Gaur, Nikhil Hajirnis, M Soujanya Reddy, Pratheusa Maccha, Tulasi Nagabandi, Purushotham Vodnala, Payel Mukherjee, Sofia Banu, Priya Singh, Onkar Kulkarni, Dhiviya Vedagiri, Divya Gupta, Vishal Sah, Santosh Kumar Kuncha, Krishnan Harinivas Harshan, Archana Bharadwaj Siva, Karthik Bharadwaj Tallapaka, Deepak Kumar, Devi Prasad Vijayashankar, Disha Nanda, Divya Das, Jotin Gogoi, Manish Bhattacharjee, Rakesh K Mishra, Divya Tej Sowpati                                                                                                                                                                              |
| EPI_ISL_539695                                                                                                                                                                                                                                                                                                                                                                                                                                                                                                                                                                                                                                                                                                                                                                                                                                                                                                                                                                                                                                                                                                                                                                                                                                                                                                                                                                                                                                                                                                                                                                                                                                                                                                                                                                                                                                                                                                                                                                                                                                                                 | CSIR-Centre for Cellular and Molecular Biology         | CSIR-Centre for Cellular and Molecular Biology | Sakshi Shambhavi, Lamuk Zaveri, Shagufta Khan, Namami Gaur, Nikhil Hajirnis, M Soujanya Reddy, Pratheusa Maccha, Tulasi Nagabandi, Purushotham Vodnala, Payel Mukherjee, Sofia Banu, Priya Singh, Onkar Kulkarni, Dhiviya Vedagiri, Divya Gupta, Vishal Sah, Santosh Kumar Kuncha, Krishnan Harinivas Harshan, Archana Bharadwaj Siva, Karthik Bharadwaj Tallapaka, G. Aditya Kumar, Koushick Sivakumar, Pooja Ramesh Gupta, Rajan Kumar Jha, Shraddha Vijay Lahoti, Rakesh K Mishra, Divya Tej Sowpati                                                                                                                                                                                 |
| EPI_ISL_539696                                                                                                                                                                                                                                                                                                                                                                                                                                                                                                                                                                                                                                                                                                                                                                                                                                                                                                                                                                                                                                                                                                                                                                                                                                                                                                                                                                                                                                                                                                                                                                                                                                                                                                                                                                                                                                                                                                                                                                                                                                                                 | CSIR-Centre for Cellular and Molecular Biology         | CSIR-Centre for Cellular and Molecular Biology | Sakshi Shambhavi, Lamuk Zaveri, Shagufta Khan, Nikhil Hajirnis, M Soujanya Reddy, Pratheusa Maccha, Namami Gaur, Tulasi Nagabandi, Purushotham Vodnala, Payel Mukherjee, Sofia Banu, Priya Singh, Onkar Kulkarni, Dhiviya Vedagiri, Divya Gupta, Vishal Sah, Santosh Kumar Kuncha, Krishnan Harinivas Harshan, Archana Bharadwaj Siva, Karthik Bharadwaj Tallapaka, G. Aditya Kumar, Koushick Sivakumar, Rakesh K Mishra, Divya Tej Sowpati                                                                                                                                                                                                                                             |
| EPI_ISL_539724                                                                                                                                                                                                                                                                                                                                                                                                                                                                                                                                                                                                                                                                                                                                                                                                                                                                                                                                                                                                                                                                                                                                                                                                                                                                                                                                                                                                                                                                                                                                                                                                                                                                                                                                                                                                                                                                                                                                                                                                                                                                 | CSIR-Centre for Cellular and Molecular Biology         | CSIR-Centre for Cellular and Molecular Biology | Sakshi Shambhavi, Lamuk Zaveri, Shagufta Khan, Namami Gaur, Nikhil Hajirnis, M Soujanya Reddy, Pratheusa Maccha, Tulasi Nagabandi, Purushotham Vodnala, Payel Mukherjee, Sofia Banu, Priya Singh, Onkar Kulkarni, Dhiviya Vedagiri, Divya Gupta, Vishal Sah, Santosh Kumar Kuncha, Krishnan Harinivas Harshan, Archana Bharadwaj Siva, Karthik Bharadwaj Tallapaka, Deepak Kumar, Devi Prasad Vijayashankar, Disha Nanda, Divya Das, Jotin Gogoi, Manish Bhattacharjee, Rakesh K Mishra, Divya Tej Sowpati                                                                                                                                                                              |
| EPI_ISL_539725                                                                                                                                                                                                                                                                                                                                                                                                                                                                                                                                                                                                                                                                                                                                                                                                                                                                                                                                                                                                                                                                                                                                                                                                                                                                                                                                                                                                                                                                                                                                                                                                                                                                                                                                                                                                                                                                                                                                                                                                                                                                 | CSIR-Centre for Cellular and Molecular Biology         | CSIR-Centre for Cellular and Molecular Biology | Sakshi Shambhavi, Lamuk Zaveri, Shagufta Khan, Namami Gaur, Nikhil Hajirnis, M Soujanya Reddy, Pratheusa Maccha, Tulasi Nagabandi, Purushotham Vodnala, Payel Mukherjee, Sofia Banu, Priya Singh, Onkar Kulkarni, Dhiviya Vedagiri, Divya Gupta, Vishal Sah, Santosh Kumar Kuncha, Krishnan Harinivas Harshan, Archana Bharadwaj Siva, Karthik Bharadwaj Tallapaka, G. Aditya Kumar, Koushick Sivakumar, Pooja Ramesh Gupta, Rajan Kumar Jha, Shraddha Vijay Lahoti, Rakesh K Mishra, Divya Tej Sowpati                                                                                                                                                                                 |
| EPI_ISL_539726                                                                                                                                                                                                                                                                                                                                                                                                                                                                                                                                                                                                                                                                                                                                                                                                                                                                                                                                                                                                                                                                                                                                                                                                                                                                                                                                                                                                                                                                                                                                                                                                                                                                                                                                                                                                                                                                                                                                                                                                                                                                 | CSIR-Centre for Cellular and Molecular Biology         | CSIR-Centre for Cellular and Molecular Biology | Sakshi Shambhavi, Lamuk Zaveri, Shagufta Khan, Nikhil Hajirnis, M Soujanya Reddy, Pratheusa Maccha, Namami Gaur, Tulasi Nagabandi, Purushotham Vodnala, Payel Mukherjee, Sofia Banu, Priya Singh, Onkar Kulkarni, Dhiviya Vedagiri, Divya Gupta, Vishal Sah, Santosh Kumar Kuncha, Krishnan Harinivas Harshan, Archana Bharadwaj Siva, Karthik Bharadwaj Tallapaka, G. Aditya Kumar, Koushick Sivakumar, Rakesh K Mishra, Divya Tej Sowpati                                                                                                                                                                                                                                             |
| EPI_ISL_539754                                                                                                                                                                                                                                                                                                                                                                                                                                                                                                                                                                                                                                                                                                                                                                                                                                                                                                                                                                                                                                                                                                                                                                                                                                                                                                                                                                                                                                                                                                                                                                                                                                                                                                                                                                                                                                                                                                                                                                                                                                                                 | CSIR-Centre for Cellular and Molecular Biology         | CSIR-Centre for Cellular and Molecular Biology | Sakshi Shambhavi, Lamuk Zaveri, Shagufta Khan, Namami Gaur, Nikhil Hajirnis, M Soujanya Reddy, Pratheusa Maccha, Tulasi Nagabandi, Purushotham Vodnala, Payel Mukherjee, Sofia Banu, Priya Singh, Onkar Kulkarni, Dhiviya Vedagiri, Divya Gupta, Vishal Sah, Santosh Kumar Kuncha, Krishnan Harinivas Harshan, Archana Bharadwaj Siva, Karthik Bharadwaj Tallapaka, Deepak Kumar, Devi Prasad Vijayashankar, Disha Nanda, Divya Das, Jotin Gogoi, Manish Bhattacharjee, Rakesh K Mishra, Divya Tej Sowpati                                                                                                                                                                              |
| EPI_ISL_539755                                                                                                                                                                                                                                                                                                                                                                                                                                                                                                                                                                                                                                                                                                                                                                                                                                                                                                                                                                                                                                                                                                                                                                                                                                                                                                                                                                                                                                                                                                                                                                                                                                                                                                                                                                                                                                                                                                                                                                                                                                                                 | CSIR-Centre for Cellular and Molecular Biology         | CSIR-Centre for Cellular and Molecular Biology | Sakshi Shambhavi, Lamuk Zaveri, Shagufta Khan, Namami Gaur, Nikhil Hajirnis, M Soujanya Reddy, Pratheusa Maccha, Tulasi Nagabandi, Purushotham Vodnala, Payel Mukherjee, Sofia Banu, Priya Singh, Onkar Kulkarni, Dhiviya Vedagiri, Divya Gupta, Vishal Sah, Santosh Kumar Kuncha, Krishnan Harinivas Harshan, Archana Bharadwaj Siva, Karthik Bharadwaj Tallapaka, G. Aditya Kumar, Koushick Sivakumar, Pooja Ramesh Gupta, Rajan Kumar Jha, Shraddha Vijay Lahoti, Rakesh K Mishra, Divya Tej Sowpati                                                                                                                                                                                 |
| EPI_ISL_539756                                                                                                                                                                                                                                                                                                                                                                                                                                                                                                                                                                                                                                                                                                                                                                                                                                                                                                                                                                                                                                                                                                                                                                                                                                                                                                                                                                                                                                                                                                                                                                                                                                                                                                                                                                                                                                                                                                                                                                                                                                                                 | CSIR-Centre for Cellular and Molecular Biology         | CSIR-Centre for Cellular and Molecular Biology | Sakshi Shambhavi, Lamuk Zaveri, Shagufta Khan, Nikhil Hajirnis, M Soujanya Reddy, Pratheusa Maccha, Namami Gaur, Tulasi Nagabandi, Purushotham Vodnala, Payel Mukherjee, Sofia Banu, Priya Singh, Onkar Kulkarni, Dhiviya Vedagiri, Divya Gupta, Vishal Sah, Santosh Kumar Kuncha, Krishnan Harinivas Harshan, Archana Bharadwaj Siva, Karthik Bharadwaj Tallapaka, G. Aditya Kumar, Koushick Sivakumar, Rakesh K Mishra, Divya Tej Sowpati                                                                                                                                                                                                                                             |
| EPI_ISL_540584, EPI_ISL_540585, EPI_ISL_540586, EPI_ISL_540587, EPI_ISL_540588, EPI_ISL_540589, EPI_ISL_540590, EPI_ISL_540591, EPI_ISL_540592, EPI_ISL_540593, EPI_ISL_540594, EPI_ISL_540595, EPI_ISL_540596, EPI_ISL_540597, EPI_ISL_540598, EPI_ISL_540599, EPI_ISL_540600, EPI_ISL_540601, EPI_ISL_540602, EPI_ISL_540603, EPI_ISL_540604, EPI_ISL_540605, EPI_ISL_540606, EPI_ISL_540607, EPI_ISL_540608, EPI_ISL_540609, EPI_ISL_540610, EPI_ISL_540611, EPI_ISL_540612, EPI_ISL_540613, EPI_ISL_540614, EPI_ISL_540615, EPI_ISL_540616, EPI_ISL_540617, EPI_ISL_540618, EPI_ISL_540619, EPI_ISL_540620, EPI_ISL_540621, EPI_ISL_540622, EPI_ISL_540623, EPI_ISL_540624, EPI_ISL_540625, EPI_ISL_540626, EPI_ISL_540627, EPI_ISL_540628, EPI_ISL_540629, EPI_ISL_540630, EPI_ISL_540631, EPI_ISL_540632, EPI_ISL_540633, EPI_ISL_540634, EPI_ISL_540635, EPI_ISL_540636, EPI_ISL_540637, EPI_ISL_540638, EPI_ISL_540639, EPI_ISL_549354, EPI_ISL_549358                                                                                                                                                                                                                                                                                                                                                                                                                                                                                                                                                                                                                                                                                                                                                                                                                                                                                                                                                                                                                                                                                                                 | Liverpool Clinical Laboratories                        | COVID-19 Genomics UK (COG-UK) Consortium       | Sam Haldenby, Anita Lucaci, Steve Paterson, Julian Hiscox, Alistair Darby, M Almsaud, A Alrezaihi, Muhannad Alruwaili, Stuart D Armstrong, Jones Benjamin, Eleanor G Bentley, Anu Chawla, Jordan J Clark, Angela Cowell, Richard Eccles, Isabel Garcia-Dorival, Matthew Gemmill, Alessandro Gerada, PKF Gilmore, Richard Gregory, Ximeng Han, Catherine Hartley, Margaret Hughes, Miren Iturriza-Gomara, James Johnson, L Luu, Jenifer Manson, Charlotte Nelson, Elaine O'Toole, Cassie Olateju, Rebekah Penrice-Randal, Lucille Rainbow, N.P Randle, Trevor Ian Robinson, Parul Sharma, Ghada T Shawli, James P Stewart, Neil Swainston, Ecaterina Vamos, Joanne Watts, Mark Whitehead |
| EPI_ISL_560413, EPI_ISL_560414                                                                                                                                                                                                                                                                                                                                                                                                                                                                                                                                                                                                                                                                                                                                                                                                                                                                                                                                                                                                                                                                                                                                                                                                                                                                                                                                                                                                                                                                                                                                                                                                                                                                                                                                                                                                                                                                                                                                                                                                                                                 | Centre de SSS D'Arthabaska-et-de-l'érablé - Hôtel-Dieu | Laboratoire de santé publique du Québec        | Sandrine Moreira, Ioannis Ragoussis, Guillaume Bourque, Jesse Shapiro, Mark Lathrop and Michel Roger on behalf of the CoVSeQ research group                                                                                                                                                                                                                                                                                                                                                                                                                                                                                                                                             |
| EPI_ISL_560415                                                                                                                                                                                                                                                                                                                                                                                                                                                                                                                                                                                                                                                                                                                                                                                                                                                                                                                                                                                                                                                                                                                                                                                                                                                                                                                                                                                                                                                                                                                                                                                                                                                                                                                                                                                                                                                                                                                                                                                                                                                                 | Centre Hospitalier Régional de Lanaudière              | Laboratoire de santé publique du Québec        | Sandrine Moreira, Ioannis Ragoussis, Guillaume Bourque, Jesse Shapiro, Mark Lathrop and Michel Roger on behalf of the CoVSeQ research group                                                                                                                                                                                                                                                                                                                                                                                                                                                                                                                                             |
| EPI_ISL_572402, EPI_ISL_572404, EPI_ISL_572426, EPI_ISL_572429, EPI_ISL_572431, EPI_ISL_572436, EPI_ISL_572443, EPI_ISL_572445, EPI_ISL_572451, EPI_ISL_572466, EPI_ISL_572473, EPI_ISL_572478, EPI_ISL_572479, EPI_ISL_572500, EPI_ISL_572502, EPI_ISL_572506, EPI_ISL_572511, EPI_ISL_572552, EPI_ISL_572554, EPI_ISL_572557, EPI_ISL_572562, EPI_ISL_572578, EPI_ISL_572584, EPI_ISL_572588, EPI_ISL_572601, EPI_ISL_572604, EPI_ISL_572650, EPI_ISL_572669, EPI_ISL_572677, EPI_ISL_572679, EPI_ISL_572682, EPI_ISL_572687, EPI_ISL_572688, EPI_ISL_572691, EPI_ISL_572695, EPI_ISL_572696, EPI_ISL_572710, EPI_ISL_572733, EPI_ISL_572734, EPI_ISL_572736, EPI_ISL_572737, EPI_ISL_572738, EPI_ISL_572739, EPI_ISL_572740, EPI_ISL_572748, EPI_ISL_572750, EPI_ISL_572761, EPI_ISL_572761, EPI_ISL_572769, EPI_ISL_572771, EPI_ISL_572773, EPI_ISL_572813, EPI_ISL_572815, EPI_ISL_572817, EPI_ISL_572822, EPI_ISL_572824, EPI_ISL_572827, EPI_ISL_572843, EPI_ISL_572904, EPI_ISL_572905, EPI_ISL_572906, EPI_ISL_572907, EPI_ISL_572908, EPI_ISL_573236, EPI_ISL_573237, EPI_ISL_573238, EPI_ISL_573239, EPI_ISL_573240, EPI_ISL_573241, EPI_ISL_573242, EPI_ISL_573243, EPI_ISL_573244, EPI_ISL_573245, EPI_ISL_573246, EPI_ISL_576961, EPI_ISL_576962, EPI_ISL_576963, EPI_ISL_576964, EPI_ISL_576965, EPI_ISL_576966, EPI_ISL_576967, EPI_ISL_576971, EPI_ISL_576972, EPI_ISL_576973, EPI_ISL_576974, EPI_ISL_576975, EPI_ISL_576976, EPI_ISL_576977, EPI_ISL_576978, EPI_ISL_576979, EPI_ISL_576980, EPI_ISL_576981, EPI_ISL_576982, EPI_ISL_576983, EPI_ISL_584591, EPI_ISL_584592, EPI_ISL_584593, EPI_ISL_584594, EPI_ISL_584595, EPI_ISL_584596, EPI_ISL_584597, EPI_ISL_584598, EPI_ISL_584599, EPI_ISL_584600, EPI_ISL_584601, EPI_ISL_584602, EPI_ISL_584603, EPI_ISL_584604, EPI_ISL_584605, EPI_ISL_584606, EPI_ISL_584607, EPI_ISL_584608, EPI_ISL_584609, EPI_ISL_584610, EPI_ISL_584611, EPI_ISL_584612, EPI_ISL_584613, EPI_ISL_584614, EPI_ISL_584615, EPI_ISL_584616, EPI_ISL_584617, EPI_ISL_584618, EPI_ISL_584619, EPI_ISL_584620, EPI_ISL_584621 | Liverpool Clinical Laboratories                        | COVID-19 Genomics UK (COG-UK) Consortium       | Sam Haldenby, Anita Lucaci, Steve Paterson, Julian Hiscox, Alistair Darby, M Almsaud, A Alrezaihi, Muhannad Alruwaili, Stuart D Armstrong, Jones Benjamin, Eleanor G Bentley, Anu Chawla, Jordan J Clark, Angela Cowell, Richard Eccles, Isabel Garcia-Dorival, Matthew Gemmill, Alessandro Gerada, PKF Gilmore, Richard Gregory, Ximeng Han, Catherine Hartley, Margaret Hughes, Miren Iturriza-Gomara, James Johnson, L Luu, Jenifer Manson, Charlotte Nelson, Elaine O'Toole, Cassie Olateju, Rebekah Penrice-Randal, Lucille Rainbow, N.P Randle, Trevor Ian Robinson, Parul Sharma, Ghada T Shawli, James P Stewart, Neil Swainston, Ecaterina Vamos, Joanne Watts, Mark Whitehead |
| EPI_ISL_586526                                                                                                                                                                                                                                                                                                                                                                                                                                                                                                                                                                                                                                                                                                                                                                                                                                                                                                                                                                                                                                                                                                                                                                                                                                                                                                                                                                                                                                                                                                                                                                                                                                                                                                                                                                                                                                                                                                                                                                                                                                                                 | B.J. Medical College and Civil hospital, Ahmedabad     | Gujarat Biotechnology Research Centre          | Sanjay Kapadia, Apurvasinh Puvar, Janvi Ravai, Zarna Patel, Monika Gandhi, Pinal Trivedi, Maharshi Pandya, Nitin Patel, Nitin Savaliya, Raghawendra Kumar, Dinesh Kumar, Zuber Saiyed, Komal Patel, Labdhi Pandya, Afzal Ansari, Nikha Trivedi, Pranay Shah, Kamlesh J Upadhyay, R D Dixit, A M Kadri, Harsh Bakshi, Chaitanya Joshi, Madhvi Joshi                                                                                                                                                                                                                                                                                                                                      |
| EPI_ISL_586548                                                                                                                                                                                                                                                                                                                                                                                                                                                                                                                                                                                                                                                                                                                                                                                                                                                                                                                                                                                                                                                                                                                                                                                                                                                                                                                                                                                                                                                                                                                                                                                                                                                                                                                                                                                                                                                                                                                                                                                                                                                                 | General Hospital, Godhra                               | Gujarat Biotechnology Research Centre          | Sangeeta Kumar, Apurvasinh Puvar, Janvi Ravai, Zarna Patel, Monika Gandhi, Pinal Trivedi, Maharshi Pandya, Nitin Patel, Nitin Savaliya, Raghawendra Kumar, Dinesh Kumar, Zuber Saiyed, Komal Patel, Labdhi Pandya, Afzal Ansari, Nikha Trivedi, Neela Katara, Pinal Gandhi, R D Dixit, A M Kadri, Harsh Bakshi, Chaitanya Joshi, Madhvi Joshi                                                                                                                                                                                                                                                                                                                                           |
| EPI_ISL_594849, EPI_ISL_594850, EPI_ISL_594851, EPI_ISL_594852, EPI_ISL_594853, EPI_ISL_594854, EPI_ISL_594855, EPI_ISL_594856, EPI_ISL_594857, EPI_ISL_594858, EPI_ISL_594859, EPI_ISL_594860, EPI_ISL_595799, EPI_ISL_595800, EPI_ISL_595801, EPI_ISL_595822                                                                                                                                                                                                                                                                                                                                                                                                                                                                                                                                                                                                                                                                                                                                                                                                                                                                                                                                                                                                                                                                                                                                                                                                                                                                                                                                                                                                                                                                                                                                                                                                                                                                                                                                                                                                                 | Liverpool Clinical Laboratories                        | COVID-19 Genomics UK (COG-UK) Consortium       | Sam Haldenby, Anita Lucaci, Steve Paterson, Julian Hiscox, Alistair Darby, M Almsaud, A Alrezaihi, Muhannad Alruwaili, Stuart D Armstrong, Jones Benjamin, Eleanor G Bentley, Anu Chawla, Jordan J Clark, Angela Cowell, Richard Eccles, Isabel Garcia-Dorival, Matthew Gemmill, Alessandro Gerada, PKF Gilmore, Richard Gregory, Ximeng Han, Catherine Hartley, Margaret Hughes, Miren Iturriza-Gomara, James Johnson, L Luu, Jenifer Manson, Charlotte Nelson, Elaine O'Toole, Cassie Olateju, Rebekah Penrice-Randal, Lucille Rainbow, N.P Randle, Trevor Ian Robinson, Parul Sharma, Ghada T Shawli, James P Stewart, Neil Swainston, Ecaterina Vamos, Joanne Watts, Mark Whitehead |
| EPI_ISL_605058, EPI_ISL_605059, EPI_ISL_605060, EPI_ISL_605061, EPI_ISL_605062, EPI_ISL_605063, EPI_ISL_605064, EPI_ISL_605065, EPI_ISL_605066, EPI_ISL_605067, EPI_ISL_605068, EPI_ISL_605069, EPI_ISL_605070, EPI_ISL_605071, EPI_ISL_605072, EPI_ISL_605073, EPI_ISL_605074, EPI_ISL_605075,                                                                                                                                                                                                                                                                                                                                                                                                                                                                                                                                                                                                                                                                                                                                                                                                                                                                                                                                                                                                                                                                                                                                                                                                                                                                                                                                                                                                                                                                                                                                                                                                                                                                                                                                                                                | Liverpool Clinical Laboratories                        | COVID-19 Genomics UK (COG-UK) Consortium       | Sam Haldenby, Anita Lucaci, Steve Paterson, Julian Hiscox, Alistair Darby, M Almsaud, A Alrezaihi, Muhannad Alruwaili, Stuart D Armstrong, Jones Benjamin, Eleanor G Bentley, Anu Chawla, Jordan J Clark, Angela Cowell, Richard Eccles, Isabel Garcia-Dorival, Matthew Gemmill, Alessandro Gerada, PKF Gilmore, Richard Gregory, Ximeng Han, Catherine Hartley, Margaret Hughes, Miren Iturriza-Gomara, James Johnson, L Luu, Jenifer Manson, Charlotte Nelson, Elaine O'Toole, Cassie Olateju, Rebekah Penrice-Randal, Lucille Rainbow, N.P Randle, Trevor Ian Robinson, Parul Sharma, Ghada T Shawli, James P Stewart, Neil Swainston, Ecaterina Vamos, Joanne Watts, Mark Whitehead |















EPI\_ISL\_890641, EPI\_ISL\_890642, EPI\_ISL\_890643, EPI\_ISL\_890644, EPI\_ISL\_890645, EPI\_ISL\_890646, EPI\_ISL\_890647, EPI\_ISL\_890648, EPI\_ISL\_890649, EPI\_ISL\_890650, EPI\_ISL\_890651, EPI\_ISL\_890652, EPI\_ISL\_890653, EPI\_ISL\_890654, EPI\_ISL\_890655, EPI\_ISL\_890656, EPI\_ISL\_890657, EPI\_ISL\_890658, EPI\_ISL\_890659, EPI\_ISL\_890660, EPI\_ISL\_890661, EPI\_ISL\_890662, EPI\_ISL\_890663, EPI\_ISL\_890664, EPI\_ISL\_890665, EPI\_ISL\_890666, EPI\_ISL\_890667, EPI\_ISL\_890668, EPI\_ISL\_890669, EPI\_ISL\_890670, EPI\_ISL\_890671, EPI\_ISL\_890672, EPI\_ISL\_890673, EPI\_ISL\_890674, EPI\_ISL\_890675, EPI\_ISL\_890676, EPI\_ISL\_890677, EPI\_ISL\_890678, EPI\_ISL\_890679, EPI\_ISL\_890680, EPI\_ISL\_890681, EPI\_ISL\_890682, EPI\_ISL\_890683, EPI\_ISL\_890684, EPI\_ISL\_890685, EPI\_ISL\_890686, EPI\_ISL\_890687, EPI\_ISL\_890688, EPI\_ISL\_890689, EPI\_ISL\_890690, EPI\_ISL\_890691, EPI\_ISL\_890692, EPI\_ISL\_890693, EPI\_ISL\_890694, EPI\_ISL\_890695, EPI\_ISL\_890696, EPI\_ISL\_890697, EPI\_ISL\_890698, EPI\_ISL\_890699, EPI\_ISL\_890700, EPI\_ISL\_890701, EPI\_ISL\_890702, EPI\_ISL\_890703, EPI\_ISL\_890704, EPI\_ISL\_890705, EPI\_ISL\_890706, EPI\_ISL\_890707, EPI\_ISL\_890708, EPI\_ISL\_890709, EPI\_ISL\_890710, EPI\_ISL\_890711, EPI\_ISL\_890712, EPI\_ISL\_890713, EPI\_ISL\_890714, EPI\_ISL\_890715, EPI\_ISL\_890716, EPI\_ISL\_890717, EPI\_ISL\_890718, EPI\_ISL\_890719, EPI\_ISL\_890720, EPI\_ISL\_890721, EPI\_ISL\_890722, EPI\_ISL\_890723, EPI\_ISL\_890724, EPI\_ISL\_890725, EPI\_ISL\_890726, EPI\_ISL\_890727, EPI\_ISL\_890728, EPI\_ISL\_890729, EPI\_ISL\_890730, EPI\_ISL\_890731, EPI\_ISL\_890732, EPI\_ISL\_890733, EPI\_ISL\_890734, EPI\_ISL\_890735, EPI\_ISL\_890736, EPI\_ISL\_890737, EPI\_ISL\_890738, EPI\_ISL\_890739, EPI\_ISL\_890740, EPI\_ISL\_890741, EPI\_ISL\_890742, EPI\_ISL\_890743, EPI\_ISL\_890744, EPI\_ISL\_890745, EPI\_ISL\_890746, EPI\_ISL\_890747, EPI\_ISL\_890748, EPI\_ISL\_890749, EPI\_ISL\_890750, EPI\_ISL\_890751, EPI\_ISL\_890752, EPI\_ISL\_890753, EPI\_ISL\_890754, EPI\_ISL\_890755, EPI\_ISL\_890756, EPI\_ISL\_890757, EPI\_ISL\_890758, EPI\_ISL\_890759, EPI\_ISL\_890760, EPI\_ISL\_890761, EPI\_ISL\_890762, EPI\_ISL\_890763, EPI\_ISL\_890764, EPI\_ISL\_890765, EPI\_ISL\_890766, EPI\_ISL\_890767, EPI\_ISL\_890768, EPI\_ISL\_890769, EPI\_ISL\_890770, EPI\_ISL\_890771, EPI\_ISL\_890772, EPI\_ISL\_890773, EPI\_ISL\_890774, EPI\_ISL\_890775, EPI\_ISL\_890776, EPI\_ISL\_890777, EPI\_ISL\_890778, EPI\_ISL\_890779, EPI\_ISL\_890780, EPI\_ISL\_890781, EPI\_ISL\_890782, EPI\_ISL\_890783, EPI\_ISL\_890784, EPI\_ISL\_890785, EPI\_ISL\_890786, EPI\_ISL\_890787, EPI\_ISL\_890788, EPI\_ISL\_890789, EPI\_ISL\_890790, EPI\_ISL\_890791, EPI\_ISL\_890792, EPI\_ISL\_890793, EPI\_ISL\_890794, EPI\_ISL\_890795, EPI\_ISL\_890796, EPI\_ISL\_890797, EPI\_ISL\_890798, EPI\_ISL\_890799, EPI\_ISL\_890800, EPI\_ISL\_890801, EPI\_ISL\_890802, EPI\_ISL\_890803, EPI\_ISL\_890804, EPI\_ISL\_890805, EPI\_ISL\_890806, EPI\_ISL\_890807, EPI\_ISL\_890808, EPI\_ISL\_890809, EPI\_ISL\_890810, EPI\_ISL\_890811, EPI\_ISL\_890812, EPI\_ISL\_890813, EPI\_ISL\_890814, EPI\_ISL\_890815, EPI\_ISL\_890816, EPI\_ISL\_890817, EPI\_ISL\_890818, EPI\_ISL\_890819, EPI\_ISL\_890820, EPI\_ISL\_890821, EPI\_ISL\_890822, EPI\_ISL\_890823, EPI\_ISL\_890824, EPI\_ISL\_890825, EPI\_ISL\_890826, EPI\_ISL\_890827, EPI\_ISL\_890828, EPI\_ISL\_890829, EPI\_ISL\_890830, EPI\_ISL\_890831, EPI\_ISL\_890832, EPI\_ISL\_890833, EPI\_ISL\_890834, EPI\_ISL\_890835, EPI\_ISL\_890836, EPI\_ISL\_890837, EPI\_ISL\_890838, EPI\_ISL\_890839, EPI\_ISL\_890840, EPI\_ISL\_890841, EPI\_ISL\_890842, EPI\_ISL\_890843, EPI\_ISL\_890844, EPI\_ISL\_890845, EPI\_ISL\_890846, EPI\_ISL\_890847, EPI\_ISL\_890848, EPI\_ISL\_890849, EPI\_ISL\_890850, EPI\_ISL\_890851, EPI\_ISL\_890852, EPI\_ISL\_890853, EPI\_ISL\_890854, EPI\_ISL\_890855, EPI\_ISL\_890856, EPI\_ISL\_890857, EPI\_ISL\_890858, EPI\_ISL\_890859, EPI\_ISL\_890860, EPI\_ISL\_890861, EPI\_ISL\_890862, EPI\_ISL\_890863, EPI\_ISL\_890864, EPI\_ISL\_890865, EPI\_ISL\_890866, EPI\_ISL\_890867, EPI\_ISL\_890868, EPI\_ISL\_890869, EPI\_ISL\_890870, EPI\_ISL\_890871, EPI\_ISL\_890872, EPI\_ISL\_890873, EPI\_ISL\_890874, EPI\_ISL\_890875, EPI\_ISL\_890876, EPI\_ISL\_890877, EPI\_ISL\_890878, EPI\_ISL\_890879, EPI\_ISL\_890880, EPI\_ISL\_890881, EPI\_ISL\_890882, EPI\_ISL\_890883, EPI\_ISL\_890884, EPI\_ISL\_890885, EPI\_ISL\_890886, EPI\_ISL\_890887, EPI\_ISL\_890888

see above

Laboratoire de santé publique du Québec

Laboratoire de santé publique du Québec

Sandrine Moreira, Ioannis Ragoussis, Guillaume Bourque, Jesse Shapiro, Mark Lathrop and Michel Roger on behalf of the CoVSeQ research group (<http://covseq.ca/researchgroup>)

We gratefully acknowledge the following Authors from the Originating laboratories responsible for obtaining the specimens, as well as the Submitting laboratories where the genome data were generated and shared via GISAID, on which this research is based.

All Submitters of data may be contacted directly via [www.gisaid.org](http://www.gisaid.org)

Authors are sorted alphabetically.

| Accession ID                                                                                                                                                                                                                                                                                                                                                                                                                                                                                                                                                                                                                                                                                                                                                                                                                                                                                                                                                                                                                                                                                                                                                                                                                                                                                                                                                                                                                                                                                                                                                                                                                                                                                                                                                                                                                                                                                                                                                                                                                                                                                                                                                                                                                                                                                                                                                                                                                                                                                                                                                                                                                                                                                                                                                                                                                                                                                                                                                                                                                                                                                                                                                                                                                                                                                                                                                                                                                                                                                                                                                                                                                                                   | Originating Laboratory                                                                              | Submitting Laboratory                                                                                            | Authors                                                                                                                                                                                                                                                                                                                                                                                                          |
|----------------------------------------------------------------------------------------------------------------------------------------------------------------------------------------------------------------------------------------------------------------------------------------------------------------------------------------------------------------------------------------------------------------------------------------------------------------------------------------------------------------------------------------------------------------------------------------------------------------------------------------------------------------------------------------------------------------------------------------------------------------------------------------------------------------------------------------------------------------------------------------------------------------------------------------------------------------------------------------------------------------------------------------------------------------------------------------------------------------------------------------------------------------------------------------------------------------------------------------------------------------------------------------------------------------------------------------------------------------------------------------------------------------------------------------------------------------------------------------------------------------------------------------------------------------------------------------------------------------------------------------------------------------------------------------------------------------------------------------------------------------------------------------------------------------------------------------------------------------------------------------------------------------------------------------------------------------------------------------------------------------------------------------------------------------------------------------------------------------------------------------------------------------------------------------------------------------------------------------------------------------------------------------------------------------------------------------------------------------------------------------------------------------------------------------------------------------------------------------------------------------------------------------------------------------------------------------------------------------------------------------------------------------------------------------------------------------------------------------------------------------------------------------------------------------------------------------------------------------------------------------------------------------------------------------------------------------------------------------------------------------------------------------------------------------------------------------------------------------------------------------------------------------------------------------------------------------------------------------------------------------------------------------------------------------------------------------------------------------------------------------------------------------------------------------------------------------------------------------------------------------------------------------------------------------------------------------------------------------------------------------------------------------|-----------------------------------------------------------------------------------------------------|------------------------------------------------------------------------------------------------------------------|------------------------------------------------------------------------------------------------------------------------------------------------------------------------------------------------------------------------------------------------------------------------------------------------------------------------------------------------------------------------------------------------------------------|
| EPI_ISL_419714, EPI_ISL_419715, EPI_ISL_419716, EPI_ISL_419717, EPI_ISL_419718, EPI_ISL_419719, EPI_ISL_419720, EPI_ISL_419721, EPI_ISL_419722, EPI_ISL_419723, EPI_ISL_419724, EPI_ISL_419725, EPI_ISL_419726, EPI_ISL_419727, EPI_ISL_419728, EPI_ISL_419729, EPI_ISL_419730, EPI_ISL_419731, EPI_ISL_419732, EPI_ISL_419823, EPI_ISL_419824, EPI_ISL_419825, EPI_ISL_419827, EPI_ISL_419828, EPI_ISL_419829, EPI_ISL_419830, EPI_ISL_419980, EPI_ISL_419981, EPI_ISL_419999, EPI_ISL_420000, EPI_ISL_420001, EPI_ISL_420002, EPI_ISL_420003, EPI_ISL_420006, EPI_ISL_420007, EPI_ISL_420008, EPI_ISL_420009, EPI_ISL_420010, EPI_ISL_420011, EPI_ISL_420012, EPI_ISL_420013, EPI_ISL_420014, EPI_ISL_420015, EPI_ISL_420016, EPI_ISL_420017, EPI_ISL_426905, EPI_ISL_426906, EPI_ISL_426907, EPI_ISL_426908, EPI_ISL_426909, EPI_ISL_426910, EPI_ISL_426911, EPI_ISL_426912, EPI_ISL_426913, EPI_ISL_426914, EPI_ISL_426915, EPI_ISL_426916, EPI_ISL_426917, EPI_ISL_426918, EPI_ISL_426919, EPI_ISL_426920, EPI_ISL_426921, EPI_ISL_426922, EPI_ISL_427054, EPI_ISL_427055, EPI_ISL_427056, EPI_ISL_427057, EPI_ISL_427058, EPI_ISL_427059, EPI_ISL_427060, EPI_ISL_427061, EPI_ISL_427062, EPI_ISL_427063, EPI_ISL_427064, EPI_ISL_427065, EPI_ISL_427066, EPI_ISL_427067, EPI_ISL_427068, EPI_ISL_427069, EPI_ISL_427070, EPI_ISL_427071, EPI_ISL_427072, EPI_ISL_427073, EPI_ISL_427074, EPI_ISL_427075, EPI_ISL_427076, EPI_ISL_427077, EPI_ISL_427078, EPI_ISL_427148, EPI_ISL_427149                                                                                                                                                                                                                                                                                                                                                                                                                                                                                                                                                                                                                                                                                                                                                                                                                                                                                                                                                                                                                                                                                                                                                                                                                                                                                                                                                                                                                                                                                                                                                                                                                                                                                                                                                                                                                                                                                                                                                                                                                                                                                                                                                                 | Microbiological Diagnostic Unit Public Health Laboratory                                            | Microbiological Diagnostic Unit Public Health Laboratory                                                         | Seemann T., Schultz M., Sait, M., Sherry, N.                                                                                                                                                                                                                                                                                                                                                                     |
| see above                                                                                                                                                                                                                                                                                                                                                                                                                                                                                                                                                                                                                                                                                                                                                                                                                                                                                                                                                                                                                                                                                                                                                                                                                                                                                                                                                                                                                                                                                                                                                                                                                                                                                                                                                                                                                                                                                                                                                                                                                                                                                                                                                                                                                                                                                                                                                                                                                                                                                                                                                                                                                                                                                                                                                                                                                                                                                                                                                                                                                                                                                                                                                                                                                                                                                                                                                                                                                                                                                                                                                                                                                                                      | Microbiological Diagnostic Unit Public Health Laboratory                                            | Microbiological Diagnostic Unit Public Health Laboratory                                                         | Seemann T., Schultz M., Sait, M., Sherry, N.                                                                                                                                                                                                                                                                                                                                                                     |
| EPI_ISL_428683, EPI_ISL_428684, EPI_ISL_428685, EPI_ISL_428686, EPI_ISL_428687, EPI_ISL_428688, EPI_ISL_428689, EPI_ISL_428690, EPI_ISL_428691, EPI_ISL_428692, EPI_ISL_428693, EPI_ISL_428694                                                                                                                                                                                                                                                                                                                                                                                                                                                                                                                                                                                                                                                                                                                                                                                                                                                                                                                                                                                                                                                                                                                                                                                                                                                                                                                                                                                                                                                                                                                                                                                                                                                                                                                                                                                                                                                                                                                                                                                                                                                                                                                                                                                                                                                                                                                                                                                                                                                                                                                                                                                                                                                                                                                                                                                                                                                                                                                                                                                                                                                                                                                                                                                                                                                                                                                                                                                                                                                                 | Hospital Universitario 12 de Octubre                                                                | Hospital Universitario 12 de Octubre                                                                             | Sara González, Raúl Recio, Elias Dahdouh, Fernando Lázaro, Esther Viedma, Natalia Stella, Julio García, Juan Carlos Galán, Rafael Cantón, M <sup>o</sup> Dolores Folgueira, Rafael Delgado, Jesús Mingorance                                                                                                                                                                                                     |
| see above                                                                                                                                                                                                                                                                                                                                                                                                                                                                                                                                                                                                                                                                                                                                                                                                                                                                                                                                                                                                                                                                                                                                                                                                                                                                                                                                                                                                                                                                                                                                                                                                                                                                                                                                                                                                                                                                                                                                                                                                                                                                                                                                                                                                                                                                                                                                                                                                                                                                                                                                                                                                                                                                                                                                                                                                                                                                                                                                                                                                                                                                                                                                                                                                                                                                                                                                                                                                                                                                                                                                                                                                                                                      | Hospital Universitario 12 de Octubre                                                                | Hospital Universitario 12 de Octubre                                                                             | Sara González, Raúl Recio, Elias Dahdouh, Fernando Lázaro, Esther Viedma, Natalia Stella, Julio García, Juan Carlos Galán, Rafael Cantón, M <sup>o</sup> Dolores Folgueira, Rafael Delgado, Jesús Mingorance                                                                                                                                                                                                     |
| EPI_ISL_430470, EPI_ISL_430471, EPI_ISL_430472, EPI_ISL_430639, EPI_ISL_430640, EPI_ISL_430641, EPI_ISL_430642, EPI_ISL_430643, EPI_ISL_430644, EPI_ISL_430645, EPI_ISL_430646, EPI_ISL_430647, EPI_ISL_430648, EPI_ISL_430649, EPI_ISL_430650, EPI_ISL_430651, EPI_ISL_430652, EPI_ISL_430653, EPI_ISL_430654, EPI_ISL_430655, EPI_ISL_430656, EPI_ISL_430657, EPI_ISL_430658, EPI_ISL_430659, EPI_ISL_430660, EPI_ISL_430661, EPI_ISL_430662, EPI_ISL_430663, EPI_ISL_430664, EPI_ISL_430665, EPI_ISL_430666, EPI_ISL_430667, EPI_ISL_430668, EPI_ISL_430669, EPI_ISL_430670, EPI_ISL_430671, EPI_ISL_430672, EPI_ISL_430673, EPI_ISL_430674, EPI_ISL_430675, EPI_ISL_430676, EPI_ISL_430677, EPI_ISL_430678, EPI_ISL_430679, EPI_ISL_430680, EPI_ISL_430681, EPI_ISL_430682, EPI_ISL_430683, EPI_ISL_430684, EPI_ISL_430685, EPI_ISL_430686, EPI_ISL_430687, EPI_ISL_430715, EPI_ISL_430716, EPI_ISL_430717                                                                                                                                                                                                                                                                                                                                                                                                                                                                                                                                                                                                                                                                                                                                                                                                                                                                                                                                                                                                                                                                                                                                                                                                                                                                                                                                                                                                                                                                                                                                                                                                                                                                                                                                                                                                                                                                                                                                                                                                                                                                                                                                                                                                                                                                                                                                                                                                                                                                                                                                                                                                                                                                                                                                                 | Microbiological Diagnostic Unit Public Health Laboratory                                            | Microbiological Diagnostic Unit Public Health Laboratory                                                         | Seemann T., Schultz M., Sait, M., Sherry, N.                                                                                                                                                                                                                                                                                                                                                                     |
| EPI_ISL_430718                                                                                                                                                                                                                                                                                                                                                                                                                                                                                                                                                                                                                                                                                                                                                                                                                                                                                                                                                                                                                                                                                                                                                                                                                                                                                                                                                                                                                                                                                                                                                                                                                                                                                                                                                                                                                                                                                                                                                                                                                                                                                                                                                                                                                                                                                                                                                                                                                                                                                                                                                                                                                                                                                                                                                                                                                                                                                                                                                                                                                                                                                                                                                                                                                                                                                                                                                                                                                                                                                                                                                                                                                                                 | Hospital Universitario 12 de Octubre                                                                | Hospital Universitario 12 de Octubre                                                                             | Sara González, Raúl Recio, Elias Dahdouh, Fernando Lázaro, Esther Viedma, Natalia Stella, Julio García, Juan Carlos Galán, Rafael Cantón, M <sup>o</sup> Dolores Folgueira, Rafael Delgado, Jesús Mingorance                                                                                                                                                                                                     |
| EPI_ISL_434647, EPI_ISL_434648                                                                                                                                                                                                                                                                                                                                                                                                                                                                                                                                                                                                                                                                                                                                                                                                                                                                                                                                                                                                                                                                                                                                                                                                                                                                                                                                                                                                                                                                                                                                                                                                                                                                                                                                                                                                                                                                                                                                                                                                                                                                                                                                                                                                                                                                                                                                                                                                                                                                                                                                                                                                                                                                                                                                                                                                                                                                                                                                                                                                                                                                                                                                                                                                                                                                                                                                                                                                                                                                                                                                                                                                                                 | Victoria Vard och Halsä                                                                             | The Public Health Agency of Sweden                                                                               | Sarah Henriksson, Oskar Karlsson Lindsjö, Maria Lind Karlberg, Anna-Malin Linde, Olov Svartstrom, Anna Risberg, Theresa Enkirch, Mia Brytting, Karin Tegmark-Wisell                                                                                                                                                                                                                                              |
| EPI_ISL_436505, EPI_ISL_436506, EPI_ISL_436507, EPI_ISL_436508, EPI_ISL_436509, EPI_ISL_436510, EPI_ISL_436511, EPI_ISL_436512, EPI_ISL_436513, EPI_ISL_436514, EPI_ISL_436515, EPI_ISL_436516, EPI_ISL_436517, EPI_ISL_436518, EPI_ISL_436519, EPI_ISL_436520, EPI_ISL_436521, EPI_ISL_436522, EPI_ISL_436523, EPI_ISL_436524, EPI_ISL_436525, EPI_ISL_436526, EPI_ISL_436527, EPI_ISL_436528, EPI_ISL_436529, EPI_ISL_436530, EPI_ISL_436531, EPI_ISL_436532, EPI_ISL_436533, EPI_ISL_436534, EPI_ISL_436535, EPI_ISL_436536, EPI_ISL_436537, EPI_ISL_436538, EPI_ISL_436539, EPI_ISL_436540, EPI_ISL_436541, EPI_ISL_436542, EPI_ISL_436543, EPI_ISL_436544, EPI_ISL_436545, EPI_ISL_436546, EPI_ISL_436547, EPI_ISL_436548, EPI_ISL_436549, EPI_ISL_436550, EPI_ISL_436551, EPI_ISL_436552, EPI_ISL_436553, EPI_ISL_436554, EPI_ISL_436555, EPI_ISL_436556, EPI_ISL_436557, EPI_ISL_436558, EPI_ISL_436559, EPI_ISL_436560, EPI_ISL_436561, EPI_ISL_436562, EPI_ISL_436563                                                                                                                                                                                                                                                                                                                                                                                                                                                                                                                                                                                                                                                                                                                                                                                                                                                                                                                                                                                                                                                                                                                                                                                                                                                                                                                                                                                                                                                                                                                                                                                                                                                                                                                                                                                                                                                                                                                                                                                                                                                                                                                                                                                                                                                                                                                                                                                                                                                                                                                                                                                                                                                                                 | Florida Bureau of Public Health Laboratories                                                        | Florida Bureau of Public Health Laboratories                                                                     | Sarah Schmedes, Jason Blanton                                                                                                                                                                                                                                                                                                                                                                                    |
| see above                                                                                                                                                                                                                                                                                                                                                                                                                                                                                                                                                                                                                                                                                                                                                                                                                                                                                                                                                                                                                                                                                                                                                                                                                                                                                                                                                                                                                                                                                                                                                                                                                                                                                                                                                                                                                                                                                                                                                                                                                                                                                                                                                                                                                                                                                                                                                                                                                                                                                                                                                                                                                                                                                                                                                                                                                                                                                                                                                                                                                                                                                                                                                                                                                                                                                                                                                                                                                                                                                                                                                                                                                                                      | Florida Bureau of Public Health Laboratories                                                        | Florida Bureau of Public Health Laboratories                                                                     | Sarah Schmedes, Jason Blanton                                                                                                                                                                                                                                                                                                                                                                                    |
| EPI_ISL_437481, EPI_ISL_437482, EPI_ISL_437483, EPI_ISL_437484, EPI_ISL_437485, EPI_ISL_437486, EPI_ISL_437487, EPI_ISL_437488, EPI_ISL_437489, EPI_ISL_437490, EPI_ISL_437491, EPI_ISL_437492, EPI_ISL_437493, EPI_ISL_437494, EPI_ISL_437495, EPI_ISL_437496, EPI_ISL_437497                                                                                                                                                                                                                                                                                                                                                                                                                                                                                                                                                                                                                                                                                                                                                                                                                                                                                                                                                                                                                                                                                                                                                                                                                                                                                                                                                                                                                                                                                                                                                                                                                                                                                                                                                                                                                                                                                                                                                                                                                                                                                                                                                                                                                                                                                                                                                                                                                                                                                                                                                                                                                                                                                                                                                                                                                                                                                                                                                                                                                                                                                                                                                                                                                                                                                                                                                                                 | Pathogen Genomics Lab King Abdullah University of Science and Technology(KAUST)                     | Pathogen Genomics Lab King Abdullah University of Science and Technology(KAUST)                                  | Sara Mfarrej, Raaeece Naem, Sharif Hala, Amit Subudhi, Fathia Rached, Arnab Pain                                                                                                                                                                                                                                                                                                                                 |
| see above                                                                                                                                                                                                                                                                                                                                                                                                                                                                                                                                                                                                                                                                                                                                                                                                                                                                                                                                                                                                                                                                                                                                                                                                                                                                                                                                                                                                                                                                                                                                                                                                                                                                                                                                                                                                                                                                                                                                                                                                                                                                                                                                                                                                                                                                                                                                                                                                                                                                                                                                                                                                                                                                                                                                                                                                                                                                                                                                                                                                                                                                                                                                                                                                                                                                                                                                                                                                                                                                                                                                                                                                                                                      | Pathogen Genomics Lab King Abdullah University of Science and Technology(KAUST)                     | Pathogen Genomics Lab King Abdullah University of Science and Technology(KAUST)                                  | Sara Mfarrej, Raaeece Naem, Sharif Hala, Amit Subudhi, Fathia Rached, Arnab Pain                                                                                                                                                                                                                                                                                                                                 |
| EPI_ISL_445003, EPI_ISL_445004, EPI_ISL_445005, EPI_ISL_445006, EPI_ISL_445007, EPI_ISL_445008, EPI_ISL_445009, EPI_ISL_445010, EPI_ISL_445011, EPI_ISL_445012, EPI_ISL_445013, EPI_ISL_445014, EPI_ISL_445015, EPI_ISL_445016, EPI_ISL_445017, EPI_ISL_445018, EPI_ISL_445019, EPI_ISL_445020, EPI_ISL_445021, EPI_ISL_445022, EPI_ISL_445023, EPI_ISL_445024, EPI_ISL_445025, EPI_ISL_445026, EPI_ISL_445027, EPI_ISL_445028, EPI_ISL_445029, EPI_ISL_445030, EPI_ISL_445031, EPI_ISL_445032, EPI_ISL_445033, EPI_ISL_445034, EPI_ISL_445035, EPI_ISL_445036, EPI_ISL_445037, EPI_ISL_445038, EPI_ISL_445039, EPI_ISL_445040, EPI_ISL_445041, EPI_ISL_445042, EPI_ISL_445043, EPI_ISL_445044, EPI_ISL_445045, EPI_ISL_445046, EPI_ISL_445047, EPI_ISL_445048, EPI_ISL_445049, EPI_ISL_445050                                                                                                                                                                                                                                                                                                                                                                                                                                                                                                                                                                                                                                                                                                                                                                                                                                                                                                                                                                                                                                                                                                                                                                                                                                                                                                                                                                                                                                                                                                                                                                                                                                                                                                                                                                                                                                                                                                                                                                                                                                                                                                                                                                                                                                                                                                                                                                                                                                                                                                                                                                                                                                                                                                                                                                                                                                                                 | Florida Bureau of Public Health Laboratories                                                        | Florida Bureau of Public Health Laboratories                                                                     | Sarah Schmedes, Jason Blanton                                                                                                                                                                                                                                                                                                                                                                                    |
| see above                                                                                                                                                                                                                                                                                                                                                                                                                                                                                                                                                                                                                                                                                                                                                                                                                                                                                                                                                                                                                                                                                                                                                                                                                                                                                                                                                                                                                                                                                                                                                                                                                                                                                                                                                                                                                                                                                                                                                                                                                                                                                                                                                                                                                                                                                                                                                                                                                                                                                                                                                                                                                                                                                                                                                                                                                                                                                                                                                                                                                                                                                                                                                                                                                                                                                                                                                                                                                                                                                                                                                                                                                                                      | Florida Bureau of Public Health Laboratories                                                        | Florida Bureau of Public Health Laboratories                                                                     | Sarah Schmedes, Jason Blanton                                                                                                                                                                                                                                                                                                                                                                                    |
| EPI_ISL_445223                                                                                                                                                                                                                                                                                                                                                                                                                                                                                                                                                                                                                                                                                                                                                                                                                                                                                                                                                                                                                                                                                                                                                                                                                                                                                                                                                                                                                                                                                                                                                                                                                                                                                                                                                                                                                                                                                                                                                                                                                                                                                                                                                                                                                                                                                                                                                                                                                                                                                                                                                                                                                                                                                                                                                                                                                                                                                                                                                                                                                                                                                                                                                                                                                                                                                                                                                                                                                                                                                                                                                                                                                                                 | Victoria Vard och Halsä                                                                             | The Public Health Agency of Sweden                                                                               | Sarah Henriksson, Oskar Karlsson Lindsjö, Maria Lind Karlberg, Anna-Malin Linde, Olov Svartstrom, Anna Risberg, Theresa Enkirch, Mia Brytting, Karin Tegmark-Wisell                                                                                                                                                                                                                                              |
| EPI_ISL_450807                                                                                                                                                                                                                                                                                                                                                                                                                                                                                                                                                                                                                                                                                                                                                                                                                                                                                                                                                                                                                                                                                                                                                                                                                                                                                                                                                                                                                                                                                                                                                                                                                                                                                                                                                                                                                                                                                                                                                                                                                                                                                                                                                                                                                                                                                                                                                                                                                                                                                                                                                                                                                                                                                                                                                                                                                                                                                                                                                                                                                                                                                                                                                                                                                                                                                                                                                                                                                                                                                                                                                                                                                                                 | Victoria Vard och Halsä                                                                             | The Public Health Agency of Sweden                                                                               | Sarah Henriksson, Anna-Malin Linde, Maria Lind Karlberg, Oskar Karlsson Lindsjö, Olov Svartstrom, Anna Risberg, Theresa Enkirch, Mia Brytting, Karin Tegmark-Wisell                                                                                                                                                                                                                                              |
| EPI_ISL_450844, EPI_ISL_450845, EPI_ISL_450846, EPI_ISL_450847, EPI_ISL_450848, EPI_ISL_450849, EPI_ISL_450850, EPI_ISL_450851, EPI_ISL_450852, EPI_ISL_450853, EPI_ISL_450854, EPI_ISL_450855, EPI_ISL_450856, EPI_ISL_450857, EPI_ISL_450858, EPI_ISL_450859, EPI_ISL_450860, EPI_ISL_450861, EPI_ISL_450862, EPI_ISL_450863, EPI_ISL_450864, EPI_ISL_450865, EPI_ISL_450866, EPI_ISL_450867, EPI_ISL_450868, EPI_ISL_450869, EPI_ISL_450870, EPI_ISL_450871, EPI_ISL_450872                                                                                                                                                                                                                                                                                                                                                                                                                                                                                                                                                                                                                                                                                                                                                                                                                                                                                                                                                                                                                                                                                                                                                                                                                                                                                                                                                                                                                                                                                                                                                                                                                                                                                                                                                                                                                                                                                                                                                                                                                                                                                                                                                                                                                                                                                                                                                                                                                                                                                                                                                                                                                                                                                                                                                                                                                                                                                                                                                                                                                                                                                                                                                                                 | Florida Bureau of Public Health Laboratories                                                        | Florida Bureau of Public Health Laboratories                                                                     | Sarah Schmedes, Jason Blanton                                                                                                                                                                                                                                                                                                                                                                                    |
| see above                                                                                                                                                                                                                                                                                                                                                                                                                                                                                                                                                                                                                                                                                                                                                                                                                                                                                                                                                                                                                                                                                                                                                                                                                                                                                                                                                                                                                                                                                                                                                                                                                                                                                                                                                                                                                                                                                                                                                                                                                                                                                                                                                                                                                                                                                                                                                                                                                                                                                                                                                                                                                                                                                                                                                                                                                                                                                                                                                                                                                                                                                                                                                                                                                                                                                                                                                                                                                                                                                                                                                                                                                                                      | Florida Bureau of Public Health Laboratories                                                        | Florida Bureau of Public Health Laboratories                                                                     | Sarah Schmedes, Jason Blanton                                                                                                                                                                                                                                                                                                                                                                                    |
| EPI_ISL_450873                                                                                                                                                                                                                                                                                                                                                                                                                                                                                                                                                                                                                                                                                                                                                                                                                                                                                                                                                                                                                                                                                                                                                                                                                                                                                                                                                                                                                                                                                                                                                                                                                                                                                                                                                                                                                                                                                                                                                                                                                                                                                                                                                                                                                                                                                                                                                                                                                                                                                                                                                                                                                                                                                                                                                                                                                                                                                                                                                                                                                                                                                                                                                                                                                                                                                                                                                                                                                                                                                                                                                                                                                                                 | Evandro Chagas Institute                                                                            | Evandro Chagas Institute                                                                                         | Santos, M.C.; Silva, A.M.; Junior, W.D.C.; Barbagelata, L.S.; Ferreira, J.A.; Sousa, E.M.A.; da Silva, P.S.; Martins, L.C.; Sousa Junior, E.C.; Viana, G.M.R                                                                                                                                                                                                                                                     |
| EPI_ISL_450874                                                                                                                                                                                                                                                                                                                                                                                                                                                                                                                                                                                                                                                                                                                                                                                                                                                                                                                                                                                                                                                                                                                                                                                                                                                                                                                                                                                                                                                                                                                                                                                                                                                                                                                                                                                                                                                                                                                                                                                                                                                                                                                                                                                                                                                                                                                                                                                                                                                                                                                                                                                                                                                                                                                                                                                                                                                                                                                                                                                                                                                                                                                                                                                                                                                                                                                                                                                                                                                                                                                                                                                                                                                 | Evandro Chagas Institute                                                                            | Evandro Chagas Institute                                                                                         | Santos, M.C.; Silva, A.M.; Junior, W.D.C.; Barbagelata, L.S.; Ferreira, J.A.; Sousa, E.M.A.; da Silva, P.S.; Martins, L.C.; Sousa Junior, E.C.; Viana, G.M.R                                                                                                                                                                                                                                                     |
| EPI_ISL_452233                                                                                                                                                                                                                                                                                                                                                                                                                                                                                                                                                                                                                                                                                                                                                                                                                                                                                                                                                                                                                                                                                                                                                                                                                                                                                                                                                                                                                                                                                                                                                                                                                                                                                                                                                                                                                                                                                                                                                                                                                                                                                                                                                                                                                                                                                                                                                                                                                                                                                                                                                                                                                                                                                                                                                                                                                                                                                                                                                                                                                                                                                                                                                                                                                                                                                                                                                                                                                                                                                                                                                                                                                                                 | Victoria Vard och Halsä                                                                             | The Public Health Agency of Sweden                                                                               | Sarah Henriksson, Anna-Malin Linde, Maria Lind Karlberg, Oskar Karlsson Lindsjö, Olov Svartstrom, Anna Risberg, Theresa Enkirch, Mia Brytting, Karin Tegmark-Wisell                                                                                                                                                                                                                                              |
| EPI_ISL_454858, EPI_ISL_454859, EPI_ISL_454860, EPI_ISL_454861, EPI_ISL_454862, EPI_ISL_454863, EPI_ISL_454864, EPI_ISL_454865, EPI_ISL_454866, EPI_ISL_454867                                                                                                                                                                                                                                                                                                                                                                                                                                                                                                                                                                                                                                                                                                                                                                                                                                                                                                                                                                                                                                                                                                                                                                                                                                                                                                                                                                                                                                                                                                                                                                                                                                                                                                                                                                                                                                                                                                                                                                                                                                                                                                                                                                                                                                                                                                                                                                                                                                                                                                                                                                                                                                                                                                                                                                                                                                                                                                                                                                                                                                                                                                                                                                                                                                                                                                                                                                                                                                                                                                 | Translational Health Science and Technology Institute -ESIC medical college and hospital, Faridabad | THSTI Biocassay laboratory                                                                                       | Saurabh Kumar, Jigme Wangchuk, Anil Kumar Pandey, Asim Das, Guruprasad R. Medigeshi                                                                                                                                                                                                                                                                                                                              |
| EPI_ISL_456478, EPI_ISL_456479, EPI_ISL_456594, EPI_ISL_456595                                                                                                                                                                                                                                                                                                                                                                                                                                                                                                                                                                                                                                                                                                                                                                                                                                                                                                                                                                                                                                                                                                                                                                                                                                                                                                                                                                                                                                                                                                                                                                                                                                                                                                                                                                                                                                                                                                                                                                                                                                                                                                                                                                                                                                                                                                                                                                                                                                                                                                                                                                                                                                                                                                                                                                                                                                                                                                                                                                                                                                                                                                                                                                                                                                                                                                                                                                                                                                                                                                                                                                                                 | Microbiological Diagnostic Unit Public Health Laboratory                                            | Microbiological Diagnostic Unit Public Health Laboratory, The Peter Doherty Institute for Infection and Immunity | Seemann T., Schultz M., Sait, M., Sherry, N.                                                                                                                                                                                                                                                                                                                                                                     |
| EPI_ISL_458140, EPI_ISL_458143, EPI_ISL_458144, EPI_ISL_458145, EPI_ISL_458147                                                                                                                                                                                                                                                                                                                                                                                                                                                                                                                                                                                                                                                                                                                                                                                                                                                                                                                                                                                                                                                                                                                                                                                                                                                                                                                                                                                                                                                                                                                                                                                                                                                                                                                                                                                                                                                                                                                                                                                                                                                                                                                                                                                                                                                                                                                                                                                                                                                                                                                                                                                                                                                                                                                                                                                                                                                                                                                                                                                                                                                                                                                                                                                                                                                                                                                                                                                                                                                                                                                                                                                 | Evandro Chagas Institute                                                                            | Evandro Chagas Institute                                                                                         | Santos, M.C.; Silva, A.M.; Junior, W.D.C.; Barbagelata, L.S.; Ferreira, J.A.; Sousa, E.M.A.; da Silva, P.S.; Resque, H.R.; Martins, L.C.; Sousa Junior, E.C.; Viana, G.M.R                                                                                                                                                                                                                                       |
| EPI_ISL_467029                                                                                                                                                                                                                                                                                                                                                                                                                                                                                                                                                                                                                                                                                                                                                                                                                                                                                                                                                                                                                                                                                                                                                                                                                                                                                                                                                                                                                                                                                                                                                                                                                                                                                                                                                                                                                                                                                                                                                                                                                                                                                                                                                                                                                                                                                                                                                                                                                                                                                                                                                                                                                                                                                                                                                                                                                                                                                                                                                                                                                                                                                                                                                                                                                                                                                                                                                                                                                                                                                                                                                                                                                                                 | GMERS Medical College and Hospital, Gandhinagar                                                     | Gujarat Biotechnology Research Centre                                                                            | Seema Bhatt, Gaurishankar Shrimali, Bhavesh Modi, Bharti Rajani, Tejas Shah, Ankit Hinsu, Pritesh Sabara, Apurvashin Puvar, Jarvi Raval, Zarna Patel, Monika Gandhi, Pinal Trivedi, Maharshi Pandya, Nidhi Patel, Nitin Savaliya, Raghawendra Kumar, Dinesh Kumar, Zuber Saiyed, Komal Patel, Labdhi Pandya, Snehal Bagatharia, Bhavya Jindal, R D Dixit, A M Kadri, Harsh Bakshi, Chaitanya Joshi, Madhvi Joshi |
| EPI_ISL_467667                                                                                                                                                                                                                                                                                                                                                                                                                                                                                                                                                                                                                                                                                                                                                                                                                                                                                                                                                                                                                                                                                                                                                                                                                                                                                                                                                                                                                                                                                                                                                                                                                                                                                                                                                                                                                                                                                                                                                                                                                                                                                                                                                                                                                                                                                                                                                                                                                                                                                                                                                                                                                                                                                                                                                                                                                                                                                                                                                                                                                                                                                                                                                                                                                                                                                                                                                                                                                                                                                                                                                                                                                                                 | Florida Bureau of Public Health Laboratories                                                        | Florida Bureau of Public Health Laboratories                                                                     | Schmedes, S. and Blanton, J.                                                                                                                                                                                                                                                                                                                                                                                     |
| EPI_ISL_476832                                                                                                                                                                                                                                                                                                                                                                                                                                                                                                                                                                                                                                                                                                                                                                                                                                                                                                                                                                                                                                                                                                                                                                                                                                                                                                                                                                                                                                                                                                                                                                                                                                                                                                                                                                                                                                                                                                                                                                                                                                                                                                                                                                                                                                                                                                                                                                                                                                                                                                                                                                                                                                                                                                                                                                                                                                                                                                                                                                                                                                                                                                                                                                                                                                                                                                                                                                                                                                                                                                                                                                                                                                                 | Medical Biology Department, Kocaeli University                                                      | Medical Genetics Department, Kocaeli University                                                                  | Savli H, Cine N, Sunnetci-Akkoyunlu D, Eren-Keskin S, Ilgazli A, Akhan S, Karadenizli A, Kasap M, Sayan M, Akpinar G, Canturk NZ.                                                                                                                                                                                                                                                                                |
| EPI_ISL_480558, EPI_ISL_480559, EPI_ISL_480560, EPI_ISL_480561, EPI_ISL_480562, EPI_ISL_480563, EPI_ISL_480564, EPI_ISL_480565, EPI_ISL_480566, EPI_ISL_480567, EPI_ISL_480568, EPI_ISL_480569, EPI_ISL_480570, EPI_ISL_480571, EPI_ISL_480572, EPI_ISL_480573, EPI_ISL_480574, EPI_ISL_480575, EPI_ISL_480576, EPI_ISL_480577, EPI_ISL_480578, EPI_ISL_480579, EPI_ISL_480580, EPI_ISL_480581, EPI_ISL_480582, EPI_ISL_480583, EPI_ISL_480584, EPI_ISL_480585, EPI_ISL_480586, EPI_ISL_480587, EPI_ISL_480588, EPI_ISL_480589, EPI_ISL_480590, EPI_ISL_480591, EPI_ISL_480592, EPI_ISL_480593, EPI_ISL_480594, EPI_ISL_480595, EPI_ISL_480596, EPI_ISL_480597, EPI_ISL_480598, EPI_ISL_480599, EPI_ISL_480600, EPI_ISL_480601, EPI_ISL_480602, EPI_ISL_480603, EPI_ISL_480604, EPI_ISL_480605, EPI_ISL_480606, EPI_ISL_480607, EPI_ISL_480608, EPI_ISL_480609, EPI_ISL_480610, EPI_ISL_480611, EPI_ISL_480612, EPI_ISL_480613, EPI_ISL_480614, EPI_ISL_480615, EPI_ISL_480616, EPI_ISL_480617, EPI_ISL_480618, EPI_ISL_480619, EPI_ISL_480620, EPI_ISL_480621, EPI_ISL_480622, EPI_ISL_480623, EPI_ISL_480624, EPI_ISL_480625, EPI_ISL_480626, EPI_ISL_480627, EPI_ISL_480628, EPI_ISL_480629, EPI_ISL_480630, EPI_ISL_480631, EPI_ISL_480632, EPI_ISL_480633, EPI_ISL_480634, EPI_ISL_480635, EPI_ISL_480636, EPI_ISL_480637, EPI_ISL_480638, EPI_ISL_480639, EPI_ISL_480640, EPI_ISL_480641, EPI_ISL_480642, EPI_ISL_480643, EPI_ISL_480644, EPI_ISL_480645, EPI_ISL_480646, EPI_ISL_480647, EPI_ISL_480648, EPI_ISL_480649, EPI_ISL_480650, EPI_ISL_480651, EPI_ISL_480652, EPI_ISL_480653, EPI_ISL_480654, EPI_ISL_480655, EPI_ISL_480656, EPI_ISL_480657, EPI_ISL_480658, EPI_ISL_480659, EPI_ISL_480660, EPI_ISL_480661, EPI_ISL_480662, EPI_ISL_480663, EPI_ISL_480664, EPI_ISL_480665, EPI_ISL_480666, EPI_ISL_480667, EPI_ISL_480668, EPI_ISL_480669, EPI_ISL_480670, EPI_ISL_480671, EPI_ISL_480672, EPI_ISL_480673, EPI_ISL_480674, EPI_ISL_480675, EPI_ISL_480676, EPI_ISL_480677, EPI_ISL_480678, EPI_ISL_480679, EPI_ISL_480680, EPI_ISL_480681, EPI_ISL_480682, EPI_ISL_480683, EPI_ISL_480684, EPI_ISL_480685, EPI_ISL_480686, EPI_ISL_480687, EPI_ISL_480688, EPI_ISL_480689, EPI_ISL_480690, EPI_ISL_480691, EPI_ISL_480692, EPI_ISL_480693, EPI_ISL_480694, EPI_ISL_480695, EPI_ISL_480696, EPI_ISL_480697, EPI_ISL_480698, EPI_ISL_480699, EPI_ISL_480700, EPI_ISL_480701, EPI_ISL_480702, EPI_ISL_480703, EPI_ISL_480704, EPI_ISL_480705, EPI_ISL_480706, EPI_ISL_480707, EPI_ISL_480708, EPI_ISL_480709, EPI_ISL_480710, EPI_ISL_480711, EPI_ISL_480712, EPI_ISL_480713, EPI_ISL_480714, EPI_ISL_480715, EPI_ISL_480716, EPI_ISL_480717, EPI_ISL_480718, EPI_ISL_480719, EPI_ISL_480720, EPI_ISL_480721, EPI_ISL_480722, EPI_ISL_480723, EPI_ISL_480724, EPI_ISL_480725, EPI_ISL_480726, EPI_ISL_480727, EPI_ISL_480728, EPI_ISL_480729, EPI_ISL_480730, EPI_ISL_480731, EPI_ISL_480732, EPI_ISL_480733, EPI_ISL_480734, EPI_ISL_480735, EPI_ISL_480736, EPI_ISL_480737, EPI_ISL_480738, EPI_ISL_480739, EPI_ISL_480740, EPI_ISL_480741, EPI_ISL_480742, EPI_ISL_480743, EPI_ISL_480744, EPI_ISL_480745, EPI_ISL_480746, EPI_ISL_480747, EPI_ISL_480748, EPI_ISL_480749, EPI_ISL_480750, EPI_ISL_480751, EPI_ISL_480752, EPI_ISL_480753, EPI_ISL_480754, EPI_ISL_480755, EPI_ISL_480756, EPI_ISL_480757, EPI_ISL_480758, EPI_ISL_480759, EPI_ISL_480760, EPI_ISL_480761, EPI_ISL_480762, EPI_ISL_480763, EPI_ISL_480764, EPI_ISL_480765, EPI_ISL_480766, EPI_ISL_480767, EPI_ISL_480768, EPI_ISL_480769, EPI_ISL_480770, EPI_ISL_480771, EPI_ISL_480772, EPI_ISL_480773, EPI_ISL_480774, EPI_ISL_480775, EPI_ISL_480776, EPI_ISL_480777 | Microbiological Diagnostic Unit - Public Health Laboratory                                          | MDU-PHL                                                                                                          | Seemann T., Schultz M., Sait, M., Sherry, N.                                                                                                                                                                                                                                                                                                                                                                     |
| see above                                                                                                                                                                                                                                                                                                                                                                                                                                                                                                                                                                                                                                                                                                                                                                                                                                                                                                                                                                                                                                                                                                                                                                                                                                                                                                                                                                                                                                                                                                                                                                                                                                                                                                                                                                                                                                                                                                                                                                                                                                                                                                                                                                                                                                                                                                                                                                                                                                                                                                                                                                                                                                                                                                                                                                                                                                                                                                                                                                                                                                                                                                                                                                                                                                                                                                                                                                                                                                                                                                                                                                                                                                                      | Microbiological Diagnostic Unit - Public Health Laboratory                                          | MDU-PHL                                                                                                          | Seemann T., Schultz M., Sait, M., Sherry, N.                                                                                                                                                                                                                                                                                                                                                                     |





























We gratefully acknowledge the following Authors from the Originating laboratories responsible for obtaining the specimens, as well as the Submitting laboratories where the genome data were generated and shared via GISAID, on which this research is based.

All Submitters of data may be contacted directly via [www.gisaid.org](http://www.gisaid.org)

Authors are sorted alphabetically.

| Accession ID                                                                                                                                                                                                                                                                                                                                                                                                                                                                                                                                                                                                                                                                                                                                                                                                                                                                                                                                                                                                                                                                                                                                                                                                                                                                                                                                                                                                                                                                                                                                                   | Originating Laboratory                                                                                 | Submitting Laboratory                                                                                                                                                                   | Authors                                                                                                                                                                                                                                                                                                              |
|----------------------------------------------------------------------------------------------------------------------------------------------------------------------------------------------------------------------------------------------------------------------------------------------------------------------------------------------------------------------------------------------------------------------------------------------------------------------------------------------------------------------------------------------------------------------------------------------------------------------------------------------------------------------------------------------------------------------------------------------------------------------------------------------------------------------------------------------------------------------------------------------------------------------------------------------------------------------------------------------------------------------------------------------------------------------------------------------------------------------------------------------------------------------------------------------------------------------------------------------------------------------------------------------------------------------------------------------------------------------------------------------------------------------------------------------------------------------------------------------------------------------------------------------------------------|--------------------------------------------------------------------------------------------------------|-----------------------------------------------------------------------------------------------------------------------------------------------------------------------------------------|----------------------------------------------------------------------------------------------------------------------------------------------------------------------------------------------------------------------------------------------------------------------------------------------------------------------|
| EPI_ISL_408489, EPI_ISL_410218                                                                                                                                                                                                                                                                                                                                                                                                                                                                                                                                                                                                                                                                                                                                                                                                                                                                                                                                                                                                                                                                                                                                                                                                                                                                                                                                                                                                                                                                                                                                 | Department of Laboratory Medicine, National Taiwan University Hospital                                 | Microbial Genomics Core Lab, National Taiwan University Centers of Genomic and Precision Medicine                                                                                       | Shiou-Hwei Yeh, You-Yu Lin, Ya-Yun Lai, Chiao-Ling Li, Shan-Chwen Chang, Pei-Jer Chen, Sui-Yuan Chang                                                                                                                                                                                                                |
| EPI_ISL_412966                                                                                                                                                                                                                                                                                                                                                                                                                                                                                                                                                                                                                                                                                                                                                                                                                                                                                                                                                                                                                                                                                                                                                                                                                                                                                                                                                                                                                                                                                                                                                 | Technology Centre, Guangzhou Customs                                                                   | Technology Centre, Guangzhou Customs                                                                                                                                                    | Shi,Y., Sun,J., Zheng,K., Huang,J. and Zhao,J.                                                                                                                                                                                                                                                                       |
| EPI_ISL_412967                                                                                                                                                                                                                                                                                                                                                                                                                                                                                                                                                                                                                                                                                                                                                                                                                                                                                                                                                                                                                                                                                                                                                                                                                                                                                                                                                                                                                                                                                                                                                 | Technology Centre, Guangzhou Customs                                                                   | Technology Centre, Guangzhou Customs                                                                                                                                                    | Shi,Y., Zheng,K., Sun,J., Huang,J., Zhu,A., Zhuang,Z., Dai,J., Chen,Z., Sun,F., Zhang,Z., Li,X. and Wang,Y.                                                                                                                                                                                                          |
| EPI_ISL_413015                                                                                                                                                                                                                                                                                                                                                                                                                                                                                                                                                                                                                                                                                                                                                                                                                                                                                                                                                                                                                                                                                                                                                                                                                                                                                                                                                                                                                                                                                                                                                 | Public Health Ontario Laboratory                                                                       | National Microbiology Laboratory                                                                                                                                                        | Shari Tyson, Anna Majer, Erika Landry, Morag Graham, Grace Seo, Philip Mabon, Natalie Knox, Adrian Zetner, Samira Mubareka, Rob Kozak, Jocelyne Lew, Darryl Falzarano, Gerdis Volker, Jonathan Gubbay, Stephanie Booth, Guillaume Poliquin, Tom Graefenhan, Matthew Gilmour, Nathalie Bastien, Yan Li, Timothy Booth |
| EPI_ISL_413019, EPI_ISL_413020                                                                                                                                                                                                                                                                                                                                                                                                                                                                                                                                                                                                                                                                                                                                                                                                                                                                                                                                                                                                                                                                                                                                                                                                                                                                                                                                                                                                                                                                                                                                 | Department of Internal Medicine, Triemli Hospital                                                      | Institute of Medical Virology, University of Zurich                                                                                                                                     | Stefan Schmutz, Maryam Zaheri, Verena Kufner, Patrick Redli, Fiona Steiner, Jon Huder, Riccarda Capaul, Andrea Zbinden, Jürg Böni, Michael Huber, Gerhard Eich, Alexandra Trkola                                                                                                                                     |
| EPI_ISL_413021                                                                                                                                                                                                                                                                                                                                                                                                                                                                                                                                                                                                                                                                                                                                                                                                                                                                                                                                                                                                                                                                                                                                                                                                                                                                                                                                                                                                                                                                                                                                                 | Klinik Hirslanden Zurich                                                                               | Institute of Medical Virology, University of Zurich                                                                                                                                     | Stefan Schmutz, Maryam Zaheri, Verena Kufner, Gabriela Ziltener, Patrick Redli, Fiona Steiner, Jon Huder, Riccarda Capaul, Andrea Zbinden, Jürg Böni, Michael Huber, Christian Ruef, Alexandra Trkola                                                                                                                |
| EPI_ISL_413022, EPI_ISL_413023, EPI_ISL_413024                                                                                                                                                                                                                                                                                                                                                                                                                                                                                                                                                                                                                                                                                                                                                                                                                                                                                                                                                                                                                                                                                                                                                                                                                                                                                                                                                                                                                                                                                                                 | Division of Infectious Diseases, University Hospital Zurich                                            | Institute of Medical Virology, University of Zurich                                                                                                                                     | Stefan Schmutz, Maryam Zaheri, Verena Kufner, Gabriela Ziltener, Patrick Redli, Fiona Steiner, Jon Huder, Riccarda Capaul, Andrea Zbinden, Jürg Böni, Michael Huber, Roberto Speck, Alexandra Trkola                                                                                                                 |
| EPI_ISL_413592                                                                                                                                                                                                                                                                                                                                                                                                                                                                                                                                                                                                                                                                                                                                                                                                                                                                                                                                                                                                                                                                                                                                                                                                                                                                                                                                                                                                                                                                                                                                                 | Department of Laboratory Medicine, National Taiwan University Hospital                                 | Microbial Genomics Core Lab, National Taiwan University Centers of Genomic and Precision Medicine                                                                                       | Shiou-Hwei Yeh, You-Yu Lin, Ya-Yun Lai, Chiao-Ling Li, Shan-Chwen Chang, Pei-Jer Chen, Sui-Yuan Chang                                                                                                                                                                                                                |
| EPI_ISL_416316, EPI_ISL_416317, EPI_ISL_416318, EPI_ISL_416319, EPI_ISL_416320, EPI_ISL_416321, EPI_ISL_416322, EPI_ISL_416323, EPI_ISL_416324, EPI_ISL_416325, EPI_ISL_416326, EPI_ISL_416327, EPI_ISL_416328, EPI_ISL_416329, EPI_ISL_416330, EPI_ISL_416331, EPI_ISL_416332, EPI_ISL_416333, EPI_ISL_416334, EPI_ISL_416335, EPI_ISL_416336, EPI_ISL_416337, EPI_ISL_416338, EPI_ISL_416339, EPI_ISL_416340, EPI_ISL_416341, EPI_ISL_416342, EPI_ISL_416343, EPI_ISL_416344, EPI_ISL_416345, EPI_ISL_416346, EPI_ISL_416347, EPI_ISL_416348, EPI_ISL_416349, EPI_ISL_416350, EPI_ISL_416351, EPI_ISL_416352, EPI_ISL_416353, EPI_ISL_416354, EPI_ISL_416355, EPI_ISL_416356, EPI_ISL_416357, EPI_ISL_416358, EPI_ISL_416359, EPI_ISL_416360, EPI_ISL_416361, EPI_ISL_416362, EPI_ISL_416363, EPI_ISL_416364, EPI_ISL_416365, EPI_ISL_416366, EPI_ISL_416367, EPI_ISL_416368, EPI_ISL_416369, EPI_ISL_416370, EPI_ISL_416371, EPI_ISL_416372, EPI_ISL_416373, EPI_ISL_416374, EPI_ISL_416375, EPI_ISL_416376, EPI_ISL_416377, EPI_ISL_416378, EPI_ISL_416379, EPI_ISL_416380, EPI_ISL_416381, EPI_ISL_416382, EPI_ISL_416383, EPI_ISL_416384, EPI_ISL_416385, EPI_ISL_416386, EPI_ISL_416387, EPI_ISL_416388, EPI_ISL_416389, EPI_ISL_416390, EPI_ISL_416391, EPI_ISL_416392, EPI_ISL_416393, EPI_ISL_416394, EPI_ISL_416395, EPI_ISL_416396, EPI_ISL_416397, EPI_ISL_416398, EPI_ISL_416399, EPI_ISL_416400, EPI_ISL_416401, EPI_ISL_416402, EPI_ISL_416403, EPI_ISL_416404, EPI_ISL_416405, EPI_ISL_416406, EPI_ISL_416407, EPI_ISL_416408, EPI_ISL_416409 | Shanghai Public Health Clinical Center, Shanghai Medical College, Fudan University                     | National Research Center for Translational Medicine (Shanghai), Ruijin Hospital affiliated to Shanghai Jiao Tong University School of Medicine & Shanghai Public Health Clinical Center | Shengyue Wang, Xiaonan Zhang, Gang Lu, Yun Tan, Yun Ling, Hongzhou Lu, Saijuan Chen                                                                                                                                                                                                                                  |
| EPI_ISL_417395, EPI_ISL_417412                                                                                                                                                                                                                                                                                                                                                                                                                                                                                                                                                                                                                                                                                                                                                                                                                                                                                                                                                                                                                                                                                                                                                                                                                                                                                                                                                                                                                                                                                                                                 | Centre for Infectious Diseases and Microbiology Public Health                                          | NSW Health Pathology - Institute of Clinical Pathology and Medical Research; Westmead Hospital; University of Sydney                                                                    | Sintchenko V, Chen SC, Maddocks S, Kok J, Dwyer DE, Rockett R, Eden J-S, Lam C, Gray K, Timms V, Gall M, Arnott A, Sadsad R, Carter I, Rahman H, Holmes EC and O'Sullivan MV for the 2019-nCoV Study Group                                                                                                           |
| EPI_ISL_417931, EPI_ISL_417932, EPI_ISL_417933, EPI_ISL_417935, EPI_ISL_417937, EPI_ISL_417938, EPI_ISL_417939                                                                                                                                                                                                                                                                                                                                                                                                                                                                                                                                                                                                                                                                                                                                                                                                                                                                                                                                                                                                                                                                                                                                                                                                                                                                                                                                                                                                                                                 | UCSF Clinical Microbiology Laboratory                                                                  | Chan-Zuckerberg Biohub                                                                                                                                                                  | Shaun Arevalo, Josh Batson, Olga Botvinnik, Gloria Castaneda, Angela Detweiler, David Dnyerman, Samantha Hao, Jack Kamm, Amy Kistler, G. Renuka Kumar, Chaz Langelier, Lucy Li, Steve Miller, Lusajo Mwakibete, Norma Neff, Angela Pisco, Maira Phelps, Michelle Tan, Chunyu Zhao                                    |
| EPI_ISL_422407, EPI_ISL_422408, EPI_ISL_422409, EPI_ISL_422410, EPI_ISL_422411, EPI_ISL_422412, EPI_ISL_422413, EPI_ISL_422414, EPI_ISL_422415, EPI_ISL_422416, EPI_ISL_422417, EPI_ISL_422418, EPI_ISL_422419, EPI_ISL_422420, EPI_ISL_422421, EPI_ISL_422422                                                                                                                                                                                                                                                                                                                                                                                                                                                                                                                                                                                                                                                                                                                                                                                                                                                                                                                                                                                                                                                                                                                                                                                                                                                                                                 | Department of Laboratory Medicine, National Taiwan University Hospital                                 | Microbial Genomics Core Lab, National Taiwan University Centers of Genomic and Precision Medicine                                                                                       | Shiou-Hwei Yeh, You-Yu Lin, Ya-Yun Lai, Chiao-Ling Li, Shan-Chwen Chang, Pei-Jer Chen, Sui-Yuan Chang                                                                                                                                                                                                                |
| EPI_ISL_424366                                                                                                                                                                                                                                                                                                                                                                                                                                                                                                                                                                                                                                                                                                                                                                                                                                                                                                                                                                                                                                                                                                                                                                                                                                                                                                                                                                                                                                                                                                                                                 | Vaccine Research, Development and Application Center, Erciyes University                               | Gen Era Diagnostics Inc.                                                                                                                                                                | Shaikh Terkis Islam Pavel, Hazel Yetiskin, Günsu Aydın, Can Holyavkin, Muhammet Ali Uygut, Zehra B Dursun, İhami Celik, Alper İseri, Aykut Ozdarendeli                                                                                                                                                               |
| EPI_ISL_427658, EPI_ISL_427661, EPI_ISL_427688, EPI_ISL_427699, EPI_ISL_427709, EPI_ISL_427710, EPI_ISL_427712                                                                                                                                                                                                                                                                                                                                                                                                                                                                                                                                                                                                                                                                                                                                                                                                                                                                                                                                                                                                                                                                                                                                                                                                                                                                                                                                                                                                                                                 | Centre for Infectious Diseases and Microbiology Public Health                                          | NSW Health Pathology - Institute of Clinical Pathology and Medical Research; Westmead Hospital; University of Sydney                                                                    | Sim E, Bachmann N, Rockett R, Lam C, Gray K, Timms V, Gall M, Arnott A, Sadsad R, Draper J, Carter I, Holmes EC, O'Sullivan MV, Byun R, Sintchenko V, Chen SC, Eden JS, Maddocks S, Kok J, Propenko M, Sorrell T, Chang S, Basile K, Dwyer DE for the 2019-nCoV Study Group                                          |
| EPI_ISL_427717                                                                                                                                                                                                                                                                                                                                                                                                                                                                                                                                                                                                                                                                                                                                                                                                                                                                                                                                                                                                                                                                                                                                                                                                                                                                                                                                                                                                                                                                                                                                                 | ACT Pathology, The Canberra Hospital                                                                   | NSW Health Pathology - Institute of Clinical Pathology and Medical Research; Westmead Hospital; University of Sydney                                                                    | Sim E, Bachmann N, Rockett R, Lam C, Gray K, Timms V, Gall M, Arnott A, Sadsad R, Draper J, Carter I, Holmes EC, O'Sullivan MV, Byun R, Sintchenko V, Chen SC, Eden JS, Maddocks S, Kok J, Propenko M, Sorrell T, Chang S, Basile K, Dwyer DE for the 2019-nCoV Study Group                                          |
| EPI_ISL_427720                                                                                                                                                                                                                                                                                                                                                                                                                                                                                                                                                                                                                                                                                                                                                                                                                                                                                                                                                                                                                                                                                                                                                                                                                                                                                                                                                                                                                                                                                                                                                 | Centre for Infectious Diseases and Microbiology Public Health                                          | NSW Health Pathology - Institute of Clinical Pathology and Medical Research; Westmead Hospital; University of Sydney                                                                    | Sim E, Bachmann N, Rockett R, Lam C, Gray K, Timms V, Gall M, Arnott A, Sadsad R, Draper J, Carter I, Holmes EC, O'Sullivan MV, Byun R, Sintchenko V, Chen SC, Eden JS, Maddocks S, Kok J, Propenko M, Sorrell T, Chang S, Basile K, Dwyer DE for the 2019-nCoV Study Group                                          |
| EPI_ISL_427721                                                                                                                                                                                                                                                                                                                                                                                                                                                                                                                                                                                                                                                                                                                                                                                                                                                                                                                                                                                                                                                                                                                                                                                                                                                                                                                                                                                                                                                                                                                                                 | ACT Pathology, The Canberra Hospital                                                                   | NSW Health Pathology - Institute of Clinical Pathology and Medical Research; Westmead Hospital; University of Sydney                                                                    | Sim E, Bachmann N, Rockett R, Lam C, Gray K, Timms V, Gall M, Arnott A, Sadsad R, Draper J, Carter I, Holmes EC, O'Sullivan MV, Byun R, Sintchenko V, Chen SC, Eden JS, Maddocks S, Kok J, Propenko M, Sorrell T, Chang S, Basile K, Dwyer DE for the 2019-nCoV Study Group                                          |
| EPI_ISL_427743, EPI_ISL_427759, EPI_ISL_427783, EPI_ISL_427786, EPI_ISL_427788, EPI_ISL_427802                                                                                                                                                                                                                                                                                                                                                                                                                                                                                                                                                                                                                                                                                                                                                                                                                                                                                                                                                                                                                                                                                                                                                                                                                                                                                                                                                                                                                                                                 | Centre for Infectious Diseases and Microbiology Public Health                                          | NSW Health Pathology - Institute of Clinical Pathology and Medical Research; Westmead Hospital; University of Sydney                                                                    | Sim E, Bachmann N, Rockett R, Lam C, Gray K, Timms V, Gall M, Arnott A, Sadsad R, Draper J, Carter I, Holmes EC, O'Sullivan MV, Byun R, Sintchenko V, Chen SC, Eden JS, Maddocks S, Kok J, Propenko M, Sorrell T, Chang S, Basile K, Dwyer DE for the 2019-nCoV Study Group                                          |
| EPI_ISL_428855                                                                                                                                                                                                                                                                                                                                                                                                                                                                                                                                                                                                                                                                                                                                                                                                                                                                                                                                                                                                                                                                                                                                                                                                                                                                                                                                                                                                                                                                                                                                                 | MRCG at LSHTM Genomics lab                                                                             | MRCG at LSHTM Genomics lab                                                                                                                                                              | Sesay et al                                                                                                                                                                                                                                                                                                          |
| EPI_ISL_428856                                                                                                                                                                                                                                                                                                                                                                                                                                                                                                                                                                                                                                                                                                                                                                                                                                                                                                                                                                                                                                                                                                                                                                                                                                                                                                                                                                                                                                                                                                                                                 | MRCG at LSHTM Genomics Lab                                                                             | MRCG at LSHTM Genomics lab                                                                                                                                                              | Sesay et al                                                                                                                                                                                                                                                                                                          |
| EPI_ISL_428857                                                                                                                                                                                                                                                                                                                                                                                                                                                                                                                                                                                                                                                                                                                                                                                                                                                                                                                                                                                                                                                                                                                                                                                                                                                                                                                                                                                                                                                                                                                                                 | MRCG at LSHTM Genomics lab                                                                             | MRCG at LSHTM Genomics lab                                                                                                                                                              | Sesay et al                                                                                                                                                                                                                                                                                                          |
| EPI_ISL_428872, EPI_ISL_428873, EPI_ISL_428874, EPI_ISL_428875                                                                                                                                                                                                                                                                                                                                                                                                                                                                                                                                                                                                                                                                                                                                                                                                                                                                                                                                                                                                                                                                                                                                                                                                                                                                                                                                                                                                                                                                                                 | State Research Center of Virology and Biotechnology VECTOR, Department of Collection of Microorganisms | State Research Center of Virology and Biotechnology VECTOR, Department of Collection of Microorganisms                                                                                  | Sergey A. Bodnev, Oleg V. Pyankov, Tatyana V. Tregubchak, Alexander N. Shvalov, Elena V. Gavrilova, Rinat A. Maksyutov                                                                                                                                                                                               |
| EPI_ISL_428876, EPI_ISL_428877                                                                                                                                                                                                                                                                                                                                                                                                                                                                                                                                                                                                                                                                                                                                                                                                                                                                                                                                                                                                                                                                                                                                                                                                                                                                                                                                                                                                                                                                                                                                 | State Research Center of Virology and Biotechnology VECTOR, Department of Collection of Microorganisms | State Research Center of Virology and Biotechnology VECTOR, Department of Collection of Microorganisms                                                                                  | Sergey A. Bodnev, Oleg V. Pyankov, Anastasiya M. Smirnova, Anastasiya A. Nazarenko, Tatyana V. Tregubchak, Alexander N. Shvalov, Elena V. Gavrilova, Rinat A. Maksyutov                                                                                                                                              |
| EPI_ISL_428878, EPI_ISL_428879, EPI_ISL_428880, EPI_ISL_428881, EPI_ISL_428885, EPI_ISL_428896, EPI_ISL_428897, EPI_ISL_428898, EPI_ISL_428899, EPI_ISL_428900, EPI_ISL_428901, EPI_ISL_428902, EPI_ISL_428903, EPI_ISL_428924                                                                                                                                                                                                                                                                                                                                                                                                                                                                                                                                                                                                                                                                                                                                                                                                                                                                                                                                                                                                                                                                                                                                                                                                                                                                                                                                 | State Research Center of Virology and Biotechnology VECTOR, Department of Collection of Microorganisms | State Research Center of Virology and Biotechnology VECTOR, Department of Collection of Microorganisms                                                                                  | Sergey A. Bodnev, Oleg V. Pyankov, Tatyana V. Tregubchak, Alexander N. Shvalov, Elena V. Gavrilova, Rinat A. Maksyutov                                                                                                                                                                                               |
| EPI_ISL_428920, EPI_ISL_428921, EPI_ISL_428922                                                                                                                                                                                                                                                                                                                                                                                                                                                                                                                                                                                                                                                                                                                                                                                                                                                                                                                                                                                                                                                                                                                                                                                                                                                                                                                                                                                                                                                                                                                 | State Research Center of Virology and Biotechnology VECTOR, Department of Collection of Microorganisms | State Research Center of Virology and Biotechnology VECTOR, Department of Collection of Microorganisms                                                                                  | Sergey A. Bodnev, Oleg V. Pyankov, Tatyana V. Tregubchak, Alexander N. Shvalov, Elena V. Gavrilova, Rinat A. Maksyutov                                                                                                                                                                                               |
| EPI_ISL_434677                                                                                                                                                                                                                                                                                                                                                                                                                                                                                                                                                                                                                                                                                                                                                                                                                                                                                                                                                                                                                                                                                                                                                                                                                                                                                                                                                                                                                                                                                                                                                 | Lednický Laboratory at Emerging Pathogens Institute                                                    | Lednický Laboratory at Emerging Pathogens Institute                                                                                                                                     | Shankar,S.N., Wu,C.-Y., Clugston,J.R., Elbadry,M.A., Morris,J.G. Jr. and Lednický,J.A.                                                                                                                                                                                                                               |



| EPI_ISL                                                                                                                                                                                                                                                                                                                                                                                                                                                                                                                                                                                                                                                                                                                                                                                                                                                                                                                                                                                                                                                                                                                                                                                                                                                                                                                                                                                                                                                                                                                                                                                                                                                                                                                        | Organization                                                                                                                     | Organization                                                                                                                     | Organization                                                                                                                                                                                                                                                                                              | Organization                                                                                                                                                                                                                                                                                                                                                                                                                                                                                                                                                        |
|--------------------------------------------------------------------------------------------------------------------------------------------------------------------------------------------------------------------------------------------------------------------------------------------------------------------------------------------------------------------------------------------------------------------------------------------------------------------------------------------------------------------------------------------------------------------------------------------------------------------------------------------------------------------------------------------------------------------------------------------------------------------------------------------------------------------------------------------------------------------------------------------------------------------------------------------------------------------------------------------------------------------------------------------------------------------------------------------------------------------------------------------------------------------------------------------------------------------------------------------------------------------------------------------------------------------------------------------------------------------------------------------------------------------------------------------------------------------------------------------------------------------------------------------------------------------------------------------------------------------------------------------------------------------------------------------------------------------------------|----------------------------------------------------------------------------------------------------------------------------------|----------------------------------------------------------------------------------------------------------------------------------|-----------------------------------------------------------------------------------------------------------------------------------------------------------------------------------------------------------------------------------------------------------------------------------------------------------|---------------------------------------------------------------------------------------------------------------------------------------------------------------------------------------------------------------------------------------------------------------------------------------------------------------------------------------------------------------------------------------------------------------------------------------------------------------------------------------------------------------------------------------------------------------------|
| EPI_ISL_447051                                                                                                                                                                                                                                                                                                                                                                                                                                                                                                                                                                                                                                                                                                                                                                                                                                                                                                                                                                                                                                                                                                                                                                                                                                                                                                                                                                                                                                                                                                                                                                                                                                                                                                                 | GMERS Medical College and Hospital, Gandhinagar                                                                                  | Gujarat Biotechnology Research Centre                                                                                            | Gujarat Biotechnology Research Centre                                                                                                                                                                                                                                                                     | Dixit, Dipeshwari Shewale, Chaitanya Joshi, Madhvi Joshi<br>Sonia Barve, Bhavesh Modi, Kairavi Joshi, Gaurishankar Shrimali, Nidhi Sood, Pranay Shah, R D Dixit, Snehal Bagatharia, Kamlesh J Upadhyay, Ramesh Pandit, Tejas Shah, Ankit Hinsu, Pritesh Sabara, Apurvasinh Puvar, Janvi Raval, Monika Gandhi, Pinal Trivedi, Maharshi Pandya, Amit Kanani, Akanksha Verma, Nitin Savaliya, Raghawendra Kumar, Dinesh Kumar, Zuber Saiyed, Dipa Kinariwala, Disha Patel, Binita Aring, Neeta Khandelwal, Geeta Vaghela, Anjali Rajwar, Chaitanya Joshi, Madhvi Joshi |
| EPI_ISL_447538                                                                                                                                                                                                                                                                                                                                                                                                                                                                                                                                                                                                                                                                                                                                                                                                                                                                                                                                                                                                                                                                                                                                                                                                                                                                                                                                                                                                                                                                                                                                                                                                                                                                                                                 | Gujarat Biotechnology Research Centre                                                                                            | Gujarat Biotechnology Research Centre                                                                                            | Gujarat Biotechnology Research Centre                                                                                                                                                                                                                                                                     | Snehal Bagatharia, Kamlesh J Upadhyay, Ramesh Pandit, Tejas Shah, Ankit Hinsu, Pritesh Sabara, Apurvasinh Puvar, Janvi Raval, Monika Gandhi, Pinal Trivedi, Maharshi Pandya, Amit Kanani, Akanksha Verma, Nitin Savaliya, Raghawendra Kumar, Dinesh Kumar, Zuber Saiyed, Dipa Kinariwala, Disha Patel, Binita Aring, Neeta Khandelwal, Geeta Vaghela, Sonia Barve, Bhavesh Modi, Kairavi Joshi, Gaurishankar Shrimali, Nidhi Sood, Pranay Shah, R D Dixit, Neelam Nathani, Chaitanya Joshi, Madhvi Joshi                                                            |
| EPI_ISL_447556, EPI_ISL_447559                                                                                                                                                                                                                                                                                                                                                                                                                                                                                                                                                                                                                                                                                                                                                                                                                                                                                                                                                                                                                                                                                                                                                                                                                                                                                                                                                                                                                                                                                                                                                                                                                                                                                                 | CSIR-Centre for Cellular and Molecular Biology                                                                                   | CSIR-Centre for Cellular and Molecular Biology                                                                                   | CSIR-Centre for Cellular and Molecular Biology                                                                                                                                                                                                                                                            | Sofia Banu, Payel Mukherjee, Priya Singh, Dhiviya Vedagiri, Divya Gupta, Vishal Sah, Santosh Kumar Kuncha, Krishnan Harinivas Harshan, Archana Bharadwaj Siva, Karthik Bharadwaj Tallapaka, Shagufta Khan, Lamuk Zaveri, Namami Gaur, Sakshi Shambhavi, Tulasi Nagabandi, Purushotham Vodnala, Rakesh K Mishra, Divya Tej Sowpati                                                                                                                                                                                                                                   |
| EPI_ISL_447561, EPI_ISL_447562                                                                                                                                                                                                                                                                                                                                                                                                                                                                                                                                                                                                                                                                                                                                                                                                                                                                                                                                                                                                                                                                                                                                                                                                                                                                                                                                                                                                                                                                                                                                                                                                                                                                                                 | CSIR-Centre for Cellular and Molecular Biology                                                                                   | CSIR-Centre for Cellular and Molecular Biology                                                                                   | CSIR-Centre for Cellular and Molecular Biology                                                                                                                                                                                                                                                            | Shagufta Khan, Lamuk Zaveri, Namami Gaur, Sakshi Shambhavi, Tulasi Nagabandi, Purushotham Vodnala, Payel Mukherjee, Sofia Banu, Priya Singh, Dhiviya Vedagiri, Divya Gupta, Vishal Sah, Santosh Kumar Kuncha, Krishnan Harinivas Harshan, Archana Bharadwaj Siva, Karthik Bharadwaj Tallapaka, Rakesh K Mishra, Divya Tej Sowpati                                                                                                                                                                                                                                   |
| EPI_ISL_447564, EPI_ISL_447565, EPI_ISL_447566                                                                                                                                                                                                                                                                                                                                                                                                                                                                                                                                                                                                                                                                                                                                                                                                                                                                                                                                                                                                                                                                                                                                                                                                                                                                                                                                                                                                                                                                                                                                                                                                                                                                                 | CSIR-Centre for Cellular and Molecular Biology                                                                                   | CSIR-Centre for Cellular and Molecular Biology                                                                                   | CSIR-Centre for Cellular and Molecular Biology                                                                                                                                                                                                                                                            | Sofia Banu, Payel Mukherjee, Priya Singh, Dhiviya Vedagiri, Divya Gupta, Vishal Sah, Santosh Kumar Kuncha, Krishnan Harinivas Harshan, Archana Bharadwaj Siva, Karthik Bharadwaj Tallapaka, Shagufta Khan, Lamuk Zaveri, Namami Gaur, Sakshi Shambhavi, Tulasi Nagabandi, Purushotham Vodnala, Rakesh K Mishra, Divya Tej Sowpati                                                                                                                                                                                                                                   |
| EPI_ISL_447568, EPI_ISL_447569                                                                                                                                                                                                                                                                                                                                                                                                                                                                                                                                                                                                                                                                                                                                                                                                                                                                                                                                                                                                                                                                                                                                                                                                                                                                                                                                                                                                                                                                                                                                                                                                                                                                                                 | CSIR-Centre for Cellular and Molecular Biology                                                                                   | CSIR-Centre for Cellular and Molecular Biology                                                                                   | CSIR-Centre for Cellular and Molecular Biology                                                                                                                                                                                                                                                            | Shagufta Khan, Lamuk Zaveri, Namami Gaur, Sakshi Shambhavi, Tulasi Nagabandi, Purushotham Vodnala, Payel Mukherjee, Sofia Banu, Priya Singh, Dhiviya Vedagiri, Divya Gupta, Vishal Sah, Santosh Kumar Kuncha, Krishnan Harinivas Harshan, Archana Bharadwaj Siva, Karthik Bharadwaj Tallapaka, Rakesh K Mishra, Divya Tej Sowpati                                                                                                                                                                                                                                   |
| EPI_ISL_447575                                                                                                                                                                                                                                                                                                                                                                                                                                                                                                                                                                                                                                                                                                                                                                                                                                                                                                                                                                                                                                                                                                                                                                                                                                                                                                                                                                                                                                                                                                                                                                                                                                                                                                                 | CSIR-Centre for Cellular and Molecular Biology                                                                                   | CSIR-Centre for Cellular and Molecular Biology                                                                                   | CSIR-Centre for Cellular and Molecular Biology                                                                                                                                                                                                                                                            | Sofia Banu, Payel Mukherjee, Priya Singh, Dhiviya Vedagiri, Divya Gupta, Vishal Sah, Santosh Kumar Kuncha, Krishnan Harinivas Harshan, Archana Bharadwaj Siva, Karthik Bharadwaj Tallapaka, Shagufta Khan, Lamuk Zaveri, Namami Gaur, Sakshi Shambhavi, Tulasi Nagabandi, Purushotham Vodnala, Rakesh K Mishra, Divya Tej Sowpati                                                                                                                                                                                                                                   |
| EPI_ISL_447614, EPI_ISL_447615, EPI_ISL_447616, EPI_ISL_447617, EPI_ISL_447618, EPI_ISL_447619, EPI_ISL_447620, EPI_ISL_447621, EPI_ISL_447622                                                                                                                                                                                                                                                                                                                                                                                                                                                                                                                                                                                                                                                                                                                                                                                                                                                                                                                                                                                                                                                                                                                                                                                                                                                                                                                                                                                                                                                                                                                                                                                 | Department of Laboratory Medicine, National Taiwan University Hospital                                                           | Microbial Genomics Core Lab, National Taiwan University Centers of Genomic and Precision Medicine                                | Microbial Genomics Core Lab, National Taiwan University Centers of Genomic and Precision Medicine                                                                                                                                                                                                         | Shiou-Hwei Yeh, You-Yu Lin, Ya-Yun Lai, Chiao-Ling Li, Shan-Chwen Chang, Pei-Jer Chen, Sui-Yuan Chang                                                                                                                                                                                                                                                                                                                                                                                                                                                               |
| EPI_ISL_447848                                                                                                                                                                                                                                                                                                                                                                                                                                                                                                                                                                                                                                                                                                                                                                                                                                                                                                                                                                                                                                                                                                                                                                                                                                                                                                                                                                                                                                                                                                                                                                                                                                                                                                                 | CSIR-Centre for Cellular and Molecular Biology                                                                                   | CSIR-Centre for Cellular and Molecular Biology                                                                                   | CSIR-Centre for Cellular and Molecular Biology                                                                                                                                                                                                                                                            | Sofia Banu, Payel Mukherjee, Priya Singh, Dhiviya Vedagiri, Divya Gupta, Vishal Sah, Santosh Kumar Kuncha, Krishnan Harinivas Harshan, Archana Bharadwaj Siva, Karthik Bharadwaj Tallapaka, Shagufta Khan, Lamuk Zaveri, Namami Gaur, Sakshi Shambhavi, Tulasi Nagabandi, Purushotham Vodnala, Rakesh K Mishra, Divya Tej Sowpati                                                                                                                                                                                                                                   |
| EPI_ISL_447849, EPI_ISL_447850                                                                                                                                                                                                                                                                                                                                                                                                                                                                                                                                                                                                                                                                                                                                                                                                                                                                                                                                                                                                                                                                                                                                                                                                                                                                                                                                                                                                                                                                                                                                                                                                                                                                                                 | CSIR-Centre for Cellular and Molecular Biology                                                                                   | CSIR-Centre for Cellular and Molecular Biology                                                                                   | CSIR-Centre for Cellular and Molecular Biology                                                                                                                                                                                                                                                            | Shagufta Khan, Lamuk Zaveri, Namami Gaur, Sakshi Shambhavi, Tulasi Nagabandi, Purushotham Vodnala, Payel Mukherjee, Sofia Banu, Priya Singh, Dhiviya Vedagiri, Divya Gupta, Vishal Sah, Santosh Kumar Kuncha, Krishnan Harinivas Harshan, Archana Bharadwaj Siva, Karthik Bharadwaj Tallapaka, Rakesh K Mishra, Divya Tej Sowpati                                                                                                                                                                                                                                   |
| EPI_ISL_447865, EPI_ISL_447866                                                                                                                                                                                                                                                                                                                                                                                                                                                                                                                                                                                                                                                                                                                                                                                                                                                                                                                                                                                                                                                                                                                                                                                                                                                                                                                                                                                                                                                                                                                                                                                                                                                                                                 | CSIR-Centre for Cellular and Molecular Biology                                                                                   | CSIR-Centre for Cellular and Molecular Biology                                                                                   | CSIR-Centre for Cellular and Molecular Biology                                                                                                                                                                                                                                                            | Sofia Banu, Payel Mukherjee, Priya Singh, Dhiviya Vedagiri, Divya Gupta, Vishal Sah, Santosh Kumar Kuncha, Krishnan Harinivas Harshan, Archana Bharadwaj Siva, Karthik Bharadwaj Tallapaka, Shagufta Khan, Lamuk Zaveri, Namami Gaur, Sakshi Shambhavi, Tulasi Nagabandi, Purushotham Vodnala, Rakesh K Mishra, Divya Tej Sowpati                                                                                                                                                                                                                                   |
| EPI_ISL_449626, EPI_ISL_449627, EPI_ISL_449628, EPI_ISL_449629, EPI_ISL_449630, EPI_ISL_449631, EPI_ISL_449632, EPI_ISL_449633, EPI_ISL_449634, EPI_ISL_449635, EPI_ISL_449636, EPI_ISL_449637, EPI_ISL_449638, EPI_ISL_449639, EPI_ISL_449640, EPI_ISL_449641, EPI_ISL_449642, EPI_ISL_449643, EPI_ISL_449644, EPI_ISL_449645, EPI_ISL_449646, EPI_ISL_449647, EPI_ISL_449648, EPI_ISL_449649, EPI_ISL_449650, EPI_ISL_449651, EPI_ISL_449652, EPI_ISL_449653, EPI_ISL_449654, EPI_ISL_449655, EPI_ISL_449656, EPI_ISL_449657, EPI_ISL_449658, EPI_ISL_449659, EPI_ISL_449660, EPI_ISL_449661, EPI_ISL_449662, EPI_ISL_449663, EPI_ISL_449664, EPI_ISL_449665, EPI_ISL_449666, EPI_ISL_449667, EPI_ISL_449668, EPI_ISL_449669, EPI_ISL_449670, EPI_ISL_449671, EPI_ISL_449672, EPI_ISL_449673, EPI_ISL_449674, EPI_ISL_449675, EPI_ISL_449676, EPI_ISL_449677, EPI_ISL_449678, EPI_ISL_449679, EPI_ISL_449680, EPI_ISL_449681, EPI_ISL_449682, EPI_ISL_449683, EPI_ISL_449684, EPI_ISL_449685, EPI_ISL_449686, EPI_ISL_449687, EPI_ISL_449688, EPI_ISL_449689, EPI_ISL_449690, EPI_ISL_449691, EPI_ISL_449692, EPI_ISL_449693, EPI_ISL_449694, EPI_ISL_449695, EPI_ISL_449696, EPI_ISL_449697, EPI_ISL_449698, EPI_ISL_449699, EPI_ISL_449700, EPI_ISL_449701, EPI_ISL_449702, EPI_ISL_449703, EPI_ISL_449704, EPI_ISL_449705, EPI_ISL_449706, EPI_ISL_449707, EPI_ISL_449708, EPI_ISL_449709, EPI_ISL_449710, EPI_ISL_449711, EPI_ISL_449712, EPI_ISL_449713, EPI_ISL_449714, EPI_ISL_449715, EPI_ISL_449716, EPI_ISL_449717, EPI_ISL_449718, EPI_ISL_449719, EPI_ISL_449720, EPI_ISL_449721, EPI_ISL_449722, EPI_ISL_449723, EPI_ISL_449724, EPI_ISL_449725, EPI_ISL_449726, EPI_ISL_449727, EPI_ISL_449728, EPI_ISL_449729 | University College London, Great Ormond Street Hospital for Children NHS Foundation Trust, Imperial College Healthcare NHS Trust | COVID-19 Genomics UK (COG-UK) Consortium                                                                                         | Sergi Castellano, Rachel Williams, Mark Kristiansen, Paola Resende Silva, Sundano Roy, Tony Brooks, Helena Tutill, Paola Niola, Charlote Williams, Leysa Forrest, Yasmin Panchbhaya, Jacqueline Findlay, Sam Weeks, Julianne Brown, Kathryn Harris, Paul Rando, James Price, Alison Holmes, Judith Breuer |                                                                                                                                                                                                                                                                                                                                                                                                                                                                                                                                                                     |
| EPI_ISL_450212, EPI_ISL_450213, EPI_ISL_450214, EPI_ISL_450215, EPI_ISL_450216                                                                                                                                                                                                                                                                                                                                                                                                                                                                                                                                                                                                                                                                                                                                                                                                                                                                                                                                                                                                                                                                                                                                                                                                                                                                                                                                                                                                                                                                                                                                                                                                                                                 | unknown                                                                                                                          | Microbiological Diagnostic Unit Public Health Laboratory (MDU-PHL) and Victorian Infectious Disease Reference Laboratory (VIDRL) | Microbiological Diagnostic Unit Public Health Laboratory (MDU-PHL) and Victorian Infectious Disease Reference Laboratory (VIDRL)                                                                                                                                                                          | Seemann,T., Lane,C.R., Sherry,N.L., Duchene,S., Goncalves da Silva,A., Cally,L., Sait,M., Ballard,S.A., Horan,K., Schultz,M.B., Hoang,T., Easton,M., Dougal,S., Stinear,T.P., Druce,J., Catton,M., Sutton,B., van Diemen,A., Alpren,C., Williamson,D.A., Howden,B.P.                                                                                                                                                                                                                                                                                                |
| EPI_ISL_450327                                                                                                                                                                                                                                                                                                                                                                                                                                                                                                                                                                                                                                                                                                                                                                                                                                                                                                                                                                                                                                                                                                                                                                                                                                                                                                                                                                                                                                                                                                                                                                                                                                                                                                                 | CSIR-Centre for Cellular and Molecular Biology                                                                                   | CSIR-Centre for Cellular and Molecular Biology                                                                                   | CSIR-Centre for Cellular and Molecular Biology                                                                                                                                                                                                                                                            | Sofia Banu, Payel Mukherjee, Priya Singh, Dhiviya Vedagiri, Divya Gupta, Vishal Sah, Santosh Kumar Kuncha, Krishnan Harinivas Harshan, Archana Bharadwaj Siva, Karthik Bharadwaj Tallapaka, Shagufta Khan, Lamuk Zaveri, Namami Gaur, Sakshi Shambhavi, Tulasi Nagabandi, Purushotham Vodnala, Disha Nanda, Divya Das, Jotin Gogoi, Manish Bhattacharjee, Ravi Prasad Mukku, Renu Sudhakar, Somesh Gorge, Gangumala Srinivas Reddy, Sujoy Deb, Swati Bayyana, Zeba Rizvi, Rakesh K Mishra, Divya Tej Sowpati                                                        |
| EPI_ISL_450328                                                                                                                                                                                                                                                                                                                                                                                                                                                                                                                                                                                                                                                                                                                                                                                                                                                                                                                                                                                                                                                                                                                                                                                                                                                                                                                                                                                                                                                                                                                                                                                                                                                                                                                 | CSIR-Centre for Cellular and Molecular Biology                                                                                   | CSIR-Centre for Cellular and Molecular Biology                                                                                   | CSIR-Centre for Cellular and Molecular Biology                                                                                                                                                                                                                                                            | Shagufta Khan, Lamuk Zaveri, Namami Gaur, Sakshi Shambhavi, Tulasi Nagabandi, Purushotham Vodnala, Payel Mukherjee, Sofia Banu, Priya Singh, Dhiviya Vedagiri, Divya Gupta, Vishal Sah, Santosh Kumar Kuncha, Krishnan Harinivas Harshan, Archana Bharadwaj Siva, Karthik Bharadwaj Tallapaka, Zeba Rizvi, Zuberwasim Sayyad, Kakade Aishwarya Arun, Amrutha H C, Ananga Ghosh, Kezia J Ann, Radhika Khandelwal, Roshan Maku Venkata, Shemin Mansuri, Sonu Uday, Sudipta Mondal, Rakesh K Mishra, Divya Tej Sowpati                                                 |
| EPI_ISL_450403                                                                                                                                                                                                                                                                                                                                                                                                                                                                                                                                                                                                                                                                                                                                                                                                                                                                                                                                                                                                                                                                                                                                                                                                                                                                                                                                                                                                                                                                                                                                                                                                                                                                                                                 | School of Public Health, The University of Hong Kong                                                                             | School of Public Health, The University of Hong Kong                                                                             | School of Public Health, The University of Hong Kong                                                                                                                                                                                                                                                      | Sit,T.H.S., Brackman,C.J., Sims,L.D., Tsang,D.N.C., Chu,D.K.W., Perera,R.A.P.M., Poon,L.L.M. and Peiris,M.                                                                                                                                                                                                                                                                                                                                                                                                                                                          |
| EPI_ISL_450404, EPI_ISL_450405                                                                                                                                                                                                                                                                                                                                                                                                                                                                                                                                                                                                                                                                                                                                                                                                                                                                                                                                                                                                                                                                                                                                                                                                                                                                                                                                                                                                                                                                                                                                                                                                                                                                                                 | unknown                                                                                                                          | School of Public Health, The University of Hong Kong                                                                             | School of Public Health, The University of Hong Kong                                                                                                                                                                                                                                                      | Sit,T.H.S., Brackman,C.J., Sims,L.D., Tsang,D.N.C., Chu,D.K.W., Perera,R.A.P.M., Poon,L.L.M. and Peiris,M.                                                                                                                                                                                                                                                                                                                                                                                                                                                          |
| EPI_ISL_450489                                                                                                                                                                                                                                                                                                                                                                                                                                                                                                                                                                                                                                                                                                                                                                                                                                                                                                                                                                                                                                                                                                                                                                                                                                                                                                                                                                                                                                                                                                                                                                                                                                                                                                                 | Wuhan Institute of Virology, Chinese Academy of Sciences                                                                         | Wuhan Institute of Virology, Chinese Academy of Sciences                                                                         | Wuhan Institute of Virology, Chinese Academy of Sciences                                                                                                                                                                                                                                                  | Si,H., Zhu,Y., Lin,H., Xie,S., Shi,Z. and Zhou,P.                                                                                                                                                                                                                                                                                                                                                                                                                                                                                                                   |
| EPI_ISL_450500, EPI_ISL_450501, EPI_ISL_450502, EPI_ISL_450503, EPI_ISL_450504                                                                                                                                                                                                                                                                                                                                                                                                                                                                                                                                                                                                                                                                                                                                                                                                                                                                                                                                                                                                                                                                                                                                                                                                                                                                                                                                                                                                                                                                                                                                                                                                                                                 | unknown                                                                                                                          | CAS Key Laboratory of Special Pathogens and Biosafety and Center for Emerging Infectious Diseases                                | CAS Key Laboratory of Special Pathogens and Biosafety and Center for Emerging Infectious Diseases                                                                                                                                                                                                         | Si,H., Zhu,Y., Lin,H., Xie,S., Shi,Z., Zhou,P.                                                                                                                                                                                                                                                                                                                                                                                                                                                                                                                      |
| EPI_ISL_450783                                                                                                                                                                                                                                                                                                                                                                                                                                                                                                                                                                                                                                                                                                                                                                                                                                                                                                                                                                                                                                                                                                                                                                                                                                                                                                                                                                                                                                                                                                                                                                                                                                                                                                                 | Government Medical College-Bhavnagar                                                                                             | Gujarat Biotechnology Research Centre                                                                                            | Gujarat Biotechnology Research Centre                                                                                                                                                                                                                                                                     | Shirish Patel, Kairavi Desai, Saklain Malek, Ankit Hinsu, Pritesh Sabara, Apurvasinh Puvar, Janvi Raval, Zarna Patel, Monika Gandhi, Pinal Trivedi, Maharshi Pandya, Amit Kanani, Nidhi Patel, Nitin Savaliya, Raghawendra Kumar, Dinesh Kumar, Zuber Saiyed, Komal Patel, Labdhi Pandya, Snehal Bagatharia, Ramesh Pandit, Tejas Shah, Bhavesh Modi, Gaurishankar Shrimali, R D Dixit, A M Kadri, Neha Rajpara, Chaitanya Joshi, Madhvi Joshi                                                                                                                      |
| EPI_ISL_450786                                                                                                                                                                                                                                                                                                                                                                                                                                                                                                                                                                                                                                                                                                                                                                                                                                                                                                                                                                                                                                                                                                                                                                                                                                                                                                                                                                                                                                                                                                                                                                                                                                                                                                                 | Pandit Deendayal Upadhyay Government Medical College, Rajkot                                                                     | Gujarat Biotechnology Research Centre                                                                                            | Gujarat Biotechnology Research Centre                                                                                                                                                                                                                                                                     | Sejul Antala, Manish Pattani, Prakash Modi, Janvi Raval, Zarna Patel, Monika Gandhi, Pinal Trivedi, Maharshi Pandya, Amit Kanani, Nidhi Patel, Nitin Savaliya, Raghawendra Kumar, Dinesh Kumar, Zuber Saiyed, Komal Patel, Labdhi Pandya, Snehal Bagatharia, Ramesh Pandit, Tejas Shah, Ankit Hinsu, Pritesh Sabara, Apurvasinh Puvar, Bhavesh Modi, Gaurishankar Shrimali, R D Dixit, A M Kadri, Armi Chaudhari, Chaitanya Joshi, Madhvi Joshi                                                                                                                     |
| EPI_ISL_450839                                                                                                                                                                                                                                                                                                                                                                                                                                                                                                                                                                                                                                                                                                                                                                                                                                                                                                                                                                                                                                                                                                                                                                                                                                                                                                                                                                                                                                                                                                                                                                                                                                                                                                                 | COVID-19 Laboratory Centre for Advanced Research in Sciences (CARS), University of Dhaka, Dhaka-1000, Bangladesh                 | DNA Solution Ltd                                                                                                                 | DNA Solution Ltd                                                                                                                                                                                                                                                                                          | Sharif Akhteruzzaman, Zeba Islam Seraj, Nazmul Ahsan, Md Imdadul Hoque, MA Malek, Shahryar Nabi, Sabrina Moriom Elius, ABM Khademul Islam, Richard Malo, Imran Khan, Abu Sufian, Sabita Rezwana Rahman, Habibul Bari Shozib, Mamun Ahmed, AHM Nurun Nabi, Mohammad Riazul Islam, Md Mizanur Rahman, Md Ismail Hosen, Latiful Bari, Gazi Nurun Nahar, Haseena Khan, M Anwar Hossain                                                                                                                                                                                  |
| EPI_ISL_450840                                                                                                                                                                                                                                                                                                                                                                                                                                                                                                                                                                                                                                                                                                                                                                                                                                                                                                                                                                                                                                                                                                                                                                                                                                                                                                                                                                                                                                                                                                                                                                                                                                                                                                                 | COVID-19 Laboratory                                                                                                              | DNA Solution Ltd. L-5                                                                                                            | DNA Solution Ltd. L-5                                                                                                                                                                                                                                                                                     | Sharif Akhteruzzaman, Zeba Islam Seraj, Nazmul Ahsan, Md Imdadul Hoque, MA Malek, Shahryar Nabi, Sabrina Moriom Elius, ABM Khademul Islam, Richard Malo, Imran Khan, Abu Sufian, Sabita Rezwana Rahman, Habibul Bari Shozib, Mamun Ahmed, AHM Nurun Nabi, Mohammad Riazul Islam, Md                                                                                                                                                                                                                                                                                 |

|                                                                                                                                                                                                                                                                                                                                                                                                                                                                                                                                                                                                                                                                                                                                                                                                                                                                                                                                                                                                                                                                                                                                                                                                                                                                                                                                                                                                                                                                                                                                                                                |                                                                                                                                                                                            |                                                                                                                                                                                            |                                                                                                                                                                                                                                                                                                                                                                                                                                                             |
|--------------------------------------------------------------------------------------------------------------------------------------------------------------------------------------------------------------------------------------------------------------------------------------------------------------------------------------------------------------------------------------------------------------------------------------------------------------------------------------------------------------------------------------------------------------------------------------------------------------------------------------------------------------------------------------------------------------------------------------------------------------------------------------------------------------------------------------------------------------------------------------------------------------------------------------------------------------------------------------------------------------------------------------------------------------------------------------------------------------------------------------------------------------------------------------------------------------------------------------------------------------------------------------------------------------------------------------------------------------------------------------------------------------------------------------------------------------------------------------------------------------------------------------------------------------------------------|--------------------------------------------------------------------------------------------------------------------------------------------------------------------------------------------|--------------------------------------------------------------------------------------------------------------------------------------------------------------------------------------------|-------------------------------------------------------------------------------------------------------------------------------------------------------------------------------------------------------------------------------------------------------------------------------------------------------------------------------------------------------------------------------------------------------------------------------------------------------------|
| EPI_ISL_450841                                                                                                                                                                                                                                                                                                                                                                                                                                                                                                                                                                                                                                                                                                                                                                                                                                                                                                                                                                                                                                                                                                                                                                                                                                                                                                                                                                                                                                                                                                                                                                 | COVID-19 Laboratory                                                                                                                                                                        | DNA Solution Ltd                                                                                                                                                                           | Mizanur Rahman, Md Ismail Hosen, Latiful Bari, Gazi Nurun Nahar, Haseena Khan, M Anwar Hossain.                                                                                                                                                                                                                                                                                                                                                             |
| EPI_ISL_450842, EPI_ISL_450843                                                                                                                                                                                                                                                                                                                                                                                                                                                                                                                                                                                                                                                                                                                                                                                                                                                                                                                                                                                                                                                                                                                                                                                                                                                                                                                                                                                                                                                                                                                                                 | COVID-19 Laboratory                                                                                                                                                                        | DNA Solution Ltd.                                                                                                                                                                          | Sharif Akhteruzzaman, Zeba Islam Seraj, Nazmul Ahsan, Md Imdadul Hoque, MA Malek, Shahryar Nabi, Sabrina Moriom Elius, ABM Khademul Islam, Richard Malo, Imran Khan, Abu Sufian, Sabita Rezwana Rahman, Habibul Bari Shozib, Mamun Ahmed, AHM Nurun Nabi, Mohammad Riazul Islam, Md Mizanur Rahman, Md Ismail Hosen, Latiful Bari, Gazi Nurun Nahar, Haseena Khan, M Anwar Hossain.                                                                         |
| EPI_ISL_451958                                                                                                                                                                                                                                                                                                                                                                                                                                                                                                                                                                                                                                                                                                                                                                                                                                                                                                                                                                                                                                                                                                                                                                                                                                                                                                                                                                                                                                                                                                                                                                 | Jamil-ur-Rahman Center for Genome Research, Dr. Panjwani Center for Molecular Medicine and Drug Research, International Center for Chemical and Biological Sciences, University of Karachi | Jamil-ur-Rahman Center for Genome Research, Dr. Panjwani Center for Molecular Medicine and Drug Research, International Center for Chemical and Biological Sciences, University of Karachi | Shakeel,M., Raza,S.A., Khan,S., Khan,B.A., Zahid,M., Qureshi,M.A.and Khan,I.A                                                                                                                                                                                                                                                                                                                                                                               |
| EPI_ISL_452327, EPI_ISL_452328, EPI_ISL_452329, EPI_ISL_452330, EPI_ISL_452331, EPI_ISL_452332, EPI_ISL_452333, EPI_ISL_452334, EPI_ISL_452335, EPI_ISL_452336, EPI_ISL_452337, EPI_ISL_452338, EPI_ISL_452339, EPI_ISL_452340, EPI_ISL_452341, EPI_ISL_452342, EPI_ISL_452343, EPI_ISL_452344, EPI_ISL_452345, EPI_ISL_452346, EPI_ISL_452347, EPI_ISL_452348, EPI_ISL_452349, EPI_ISL_452350, EPI_ISL_452351, EPI_ISL_452352, EPI_ISL_452353, EPI_ISL_452354, EPI_ISL_452355, EPI_ISL_452356, EPI_ISL_452357, EPI_ISL_452358, EPI_ISL_452359, EPI_ISL_452360, EPI_ISL_452361, EPI_ISL_452362, EPI_ISL_452363, EPI_ISL_452364                                                                                                                                                                                                                                                                                                                                                                                                                                                                                                                                                                                                                                                                                                                                                                                                                                                                                                                                                 | Laboratory of Infectious Diseases Center of Beijing Ditan Hospital                                                                                                                         | Laboratory of Infectious Diseases Center of Beijing Ditan Hospital                                                                                                                         | Siyuan Yang, Chengjie Jie, Fengting Yu, Yunxia Tang, Liting Yan, Linghang Wang                                                                                                                                                                                                                                                                                                                                                                              |
| see above                                                                                                                                                                                                                                                                                                                                                                                                                                                                                                                                                                                                                                                                                                                                                                                                                                                                                                                                                                                                                                                                                                                                                                                                                                                                                                                                                                                                                                                                                                                                                                      | Laboratory of Infectious Diseases Center of Beijing Ditan Hospital                                                                                                                         | Laboratory of Infectious Diseases Center of Beijing Ditan Hospital                                                                                                                         | Siyuan Yang, Chengjie Jie, Fengting Yu, Yunxia Tang, Liting Yan, Linghang Wang                                                                                                                                                                                                                                                                                                                                                                              |
| EPI_ISL_452692, EPI_ISL_452693, EPI_ISL_452694, EPI_ISL_452695, EPI_ISL_452696, EPI_ISL_452697, EPI_ISL_452698, EPI_ISL_452699, EPI_ISL_452700, EPI_ISL_452701, EPI_ISL_452702, EPI_ISL_452703, EPI_ISL_452704, EPI_ISL_452705, EPI_ISL_452706, EPI_ISL_452707, EPI_ISL_452708, EPI_ISL_452709, EPI_ISL_452710, EPI_ISL_452711, EPI_ISL_452712, EPI_ISL_452713, EPI_ISL_452714, EPI_ISL_452715, EPI_ISL_452716, EPI_ISL_452717, EPI_ISL_452718, EPI_ISL_452719, EPI_ISL_452720, EPI_ISL_452721, EPI_ISL_452722, EPI_ISL_452723, EPI_ISL_452724, EPI_ISL_452725, EPI_ISL_452726, EPI_ISL_452727, EPI_ISL_452728, EPI_ISL_452729, EPI_ISL_452730, EPI_ISL_452731, EPI_ISL_452732, EPI_ISL_452733, EPI_ISL_452734, EPI_ISL_452735, EPI_ISL_452736, EPI_ISL_452737, EPI_ISL_452738, EPI_ISL_452739, EPI_ISL_452740, EPI_ISL_452741, EPI_ISL_452742, EPI_ISL_452743, EPI_ISL_452744, EPI_ISL_452745, EPI_ISL_452746, EPI_ISL_452747, EPI_ISL_452748, EPI_ISL_452749, EPI_ISL_452750, EPI_ISL_452751, EPI_ISL_452752, EPI_ISL_452753, EPI_ISL_452754, EPI_ISL_452755, EPI_ISL_452756, EPI_ISL_452757, EPI_ISL_452758, EPI_ISL_452759, EPI_ISL_452760, EPI_ISL_452761, EPI_ISL_452762, EPI_ISL_452763, EPI_ISL_452764, EPI_ISL_452765, EPI_ISL_452766, EPI_ISL_452767, EPI_ISL_452768, EPI_ISL_452769, EPI_ISL_452770, EPI_ISL_452771, EPI_ISL_452772, EPI_ISL_452773, EPI_ISL_452774, EPI_ISL_452775, EPI_ISL_452776, EPI_ISL_452777, EPI_ISL_452778, EPI_ISL_452779, EPI_ISL_452780, EPI_ISL_452781, EPI_ISL_452782, EPI_ISL_452783, EPI_ISL_452784, EPI_ISL_452785, EPI_ISL_452786 | Laboratory of Infectious Diseases Center of Beijing Ditan Hospital                                                                                                                         | Laboratory of Infectious Diseases Center of Beijing Ditan Hospital                                                                                                                         | Siyuan Yang, Chengjie Jie, Fengting Yu, Yunxia Tang, Liting Yan, Linghang Wang                                                                                                                                                                                                                                                                                                                                                                              |
| see above                                                                                                                                                                                                                                                                                                                                                                                                                                                                                                                                                                                                                                                                                                                                                                                                                                                                                                                                                                                                                                                                                                                                                                                                                                                                                                                                                                                                                                                                                                                                                                      | Hospital Universitario Araba. Vitoria-Gasteiz,                                                                                                                                             | SeqCOVID-SPAIN consortium/IBV(CSIC)                                                                                                                                                        | Silvia Hernandez Crespo, Carmen Gomez Gonzalez, Amaia Aguirre Quionero, Marina Fernandez Torres, Maria Rosario Almela Ferrer, Maria Concepcion Lecaroz Agara, Andres Canut Blasco and SeqCOVID-SPAIN consortium                                                                                                                                                                                                                                      |
| EPI_ISL_453460, EPI_ISL_453461, EPI_ISL_453462, EPI_ISL_453463, EPI_ISL_453464                                                                                                                                                                                                                                                                                                                                                                                                                                                                                                                                                                                                                                                                                                                                                                                                                                                                                                                                                                                                                                                                                                                                                                                                                                                                                                                                                                                                                                                                                                 | University College London, Great Ormond Street Hospital for Children NHS Foundation Trust, Imperial College Healthcare NHS Trust                                                           | COVID-19 Genomics UK (COG-UK) Consortium                                                                                                                                                   | Sergi Castellano, Rachel Williams, Mark Kristiansen, Paola Resende Silva, Sunando Roy, Tony Brooks, Helena Tutill, Paola Niola, Patricia Dyal, Charlotte Williams, Leysa Forrest, Yasmin Panchbhaya, Jacqueline Findlay, Sam Weeks, Julianne Brown, Kathryn Harris, Paul Randell, James Price, Alison Holmes, Judith Breuer                                                                                                                                 |
| EPI_ISL_454416                                                                                                                                                                                                                                                                                                                                                                                                                                                                                                                                                                                                                                                                                                                                                                                                                                                                                                                                                                                                                                                                                                                                                                                                                                                                                                                                                                                                                                                                                                                                                                 | Department of Medical Microbiology, Leiden University Medical Center                                                                                                                       | Department of Medical Microbiology, Leiden University Medical Center                                                                                                                       | Snijder,E.J., Ogando,N.S., Zevenhoven,J.C., Dalebout,T.J., de Vries,J.J. and Sidorov,I.                                                                                                                                                                                                                                                                                                                                                                     |
| EPI_ISL_455015                                                                                                                                                                                                                                                                                                                                                                                                                                                                                                                                                                                                                                                                                                                                                                                                                                                                                                                                                                                                                                                                                                                                                                                                                                                                                                                                                                                                                                                                                                                                                                 | Pandit Deendayal Upadhyay Government Medical College, Rajkot                                                                                                                               | Gujarat Biotechnology Research Centre                                                                                                                                                      | Snehal Bagatharia, Prakash Modi, Sejul Antala, Manish Pattani, Ramesh Pandit, Tejas Shah, Ankit Hinsu, Pritesh Sabara, Apurvasinh Puvar, Janvi Raval, Zarna Patel, Monika Gandhi, Pinal Trivedi, Maharshi Pandya, Amit Kanani, Nidhi Patel, Nitin Savaliya, Raghawendra Kumar, Dinesh Kumar, Zuber Saiyed, Komal Patel, Labdhi Pandya, Neha Rajpara, Bhavesh Modi, Gaurishankar Shrimali, R D Dixit, A M Kadri, Umang Mishra, Chaitanya Joshi, Madhvi Joshi |
| EPI_ISL_456596, EPI_ISL_456597, EPI_ISL_456598, EPI_ISL_456599, EPI_ISL_456600, EPI_ISL_456601, EPI_ISL_456602, EPI_ISL_456603, EPI_ISL_456604, EPI_ISL_456605, EPI_ISL_456606, EPI_ISL_456607, EPI_ISL_456608, EPI_ISL_456609, EPI_ISL_456610, EPI_ISL_456611, EPI_ISL_456612                                                                                                                                                                                                                                                                                                                                                                                                                                                                                                                                                                                                                                                                                                                                                                                                                                                                                                                                                                                                                                                                                                                                                                                                                                                                                                 | National Health Laboratory, Timor-Leste                                                                                                                                                    | Microbiological Diagnostic Unit Public Health Laboratory, The Peter Doherty Institute for Infection and Immunity                                                                           | Soares da Silva, E., Dolores de Jesus da Costa, M., Salles de Sousa, A., Jayanti Pereira Tilman, A., Antonia da Costa, E., Barreto, I., Marr, I., Wapling, J., Francis, J., Ximenes, J., Canisia, D., Freeman, K., Dakh, F., Douglas, N., Baird, R., Cally, L., Seemann, T., Sait, M., Schultz, M., Sherry, N.                                                                                                                                              |
| see above                                                                                                                                                                                                                                                                                                                                                                                                                                                                                                                                                                                                                                                                                                                                                                                                                                                                                                                                                                                                                                                                                                                                                                                                                                                                                                                                                                                                                                                                                                                                                                      | National Health Laboratory, Timor-Leste                                                                                                                                                    | Microbiological Diagnostic Unit Public Health Laboratory, The Peter Doherty Institute for Infection and Immunity                                                                           | Soares da Silva, E., Dolores de Jesus da Costa, M., Salles de Sousa, A., Jayanti Pereira Tilman, A., Antonia da Costa, E., Barreto, I., Marr, I., Wapling, J., Francis, J., Ximenes, J., Canisia, D., Freeman, K., Dakh, F., Douglas, N., Baird, R., Cally, L., Seemann, T., Sait, M., Schultz, M., Sherry, N.                                                                                                                                              |
| EPI_ISL_457270, EPI_ISL_457271, EPI_ISL_457272, EPI_ISL_457273, EPI_ISL_457274, EPI_ISL_457275, EPI_ISL_457276, EPI_ISL_457277, EPI_ISL_457278, EPI_ISL_457279, EPI_ISL_457280, EPI_ISL_457281, EPI_ISL_457282, EPI_ISL_457283, EPI_ISL_457284, EPI_ISL_457285, EPI_ISL_457286, EPI_ISL_457287, EPI_ISL_457288, EPI_ISL_457289, EPI_ISL_457290, EPI_ISL_457291, EPI_ISL_457292, EPI_ISL_457293, EPI_ISL_457294, EPI_ISL_457295, EPI_ISL_457296, EPI_ISL_457297, EPI_ISL_457298, EPI_ISL_457299, EPI_ISL_457300, EPI_ISL_457301, EPI_ISL_457302                                                                                                                                                                                                                                                                                                                                                                                                                                                                                                                                                                                                                                                                                                                                                                                                                                                                                                                                                                                                                                 | University College London, Great Ormond Street Hospital for Children NHS Foundation Trust, Imperial College Healthcare NHS Trust                                                           | COVID-19 Genomics UK (COG-UK) Consortium                                                                                                                                                   | Sergi Castellano, Rachel Williams, Mark Kristiansen, Paola Resende Silva, Sunando Roy, Tony Brooks, Helena Tutill, Paola Niola, Patricia Dyal, Charlotte Williams, Leysa Forrest, Yasmin Panchbhaya, Jacqueline Findlay, Sam Weeks, Julianne Brown, Kathryn Harris, Paul Randell, James Price, Alison Holmes, Judith Breuer                                                                                                                                 |
| EPI_ISL_457825                                                                                                                                                                                                                                                                                                                                                                                                                                                                                                                                                                                                                                                                                                                                                                                                                                                                                                                                                                                                                                                                                                                                                                                                                                                                                                                                                                                                                                                                                                                                                                 | Army Medical Research Center - Scientific Department                                                                                                                                       | Army Medical and Veterinary Research Center                                                                                                                                                | Silvia Fillo, Giovanni Faggioni, Riccardo De Sanctis, Antonella Fortunato, Anna Anselmo, Francesco Giordani, Vanessa Vera Fain, Nino D'Amore, Florigio Lista                                                                                                                                                                                                                                                                                                |
| EPI_ISL_457826                                                                                                                                                                                                                                                                                                                                                                                                                                                                                                                                                                                                                                                                                                                                                                                                                                                                                                                                                                                                                                                                                                                                                                                                                                                                                                                                                                                                                                                                                                                                                                 | Army Medical Center - Scientific Department                                                                                                                                                | Army Medical and Veterinary Research Center                                                                                                                                                | Silvia Fillo, Giovanni Faggioni, Riccardo De Sanctis, Antonella Fortunato, Anna Anselmo, Francesco Giordani, Vanessa Vera Fain, Nino D'Amore, Florigio Lista                                                                                                                                                                                                                                                                                                |
| EPI_ISL_458046                                                                                                                                                                                                                                                                                                                                                                                                                                                                                                                                                                                                                                                                                                                                                                                                                                                                                                                                                                                                                                                                                                                                                                                                                                                                                                                                                                                                                                                                                                                                                                 | CSIR-Centre for Cellular and Molecular Biology                                                                                                                                             | CSIR-Centre for Cellular and Molecular Biology                                                                                                                                             | Sofia Banu, Payel Mukherjee, Priya Singh, Dhiviya Vedagiri, Divya Gupta, Vishal Sah, Santosh Kumar Kuncha, Krishnan Harinivas Harshan, Archana Bharadwaj Siva, Karthik Bharadwaj Tallapaka, Shagufta Khan, Lamuk Zaveri, Namami Gaur, Sakshi Shambhavi, Tulasi Nagabandi, Purushotham Vodnala, Deepak Kumar, Devi Prasad Vijayashankar, Disha Nanda, Divya Das, Jotin Gogoi, Manish Bhattacharjee, Rakesh K Mishra, Divya Tej Sowpati                       |
| EPI_ISL_458047                                                                                                                                                                                                                                                                                                                                                                                                                                                                                                                                                                                                                                                                                                                                                                                                                                                                                                                                                                                                                                                                                                                                                                                                                                                                                                                                                                                                                                                                                                                                                                 | CSIR-Centre for Cellular and Molecular Biology                                                                                                                                             | CSIR-Centre for Cellular and Molecular Biology                                                                                                                                             | Shagufta Khan, Lamuk Zaveri, Namami Gaur, Sakshi Shambhavi, Tulasi Nagabandi, Purushotham Vodnala, Payel Mukherjee, Sofia Banu, Priya Singh, Dhiviya Vedagiri, Divya Gupta, Vishal Sah, Santosh Kumar Kuncha, Krishnan Harinivas Harshan, Archana Bharadwaj Siva, Karthik Bharadwaj Tallapaka, Disha Nanda, Divya Das, Jotin Gogoi, Manish Bhattacharjee, Ravi Prasad Mukku, Rakesh K Mishra, Divya Tej Sowpati                                             |
| EPI_ISL_458052                                                                                                                                                                                                                                                                                                                                                                                                                                                                                                                                                                                                                                                                                                                                                                                                                                                                                                                                                                                                                                                                                                                                                                                                                                                                                                                                                                                                                                                                                                                                                                 | CSIR-Centre for Cellular and Molecular Biology                                                                                                                                             | CSIR-Centre for Cellular and Molecular Biology                                                                                                                                             | Sofia Banu, Payel Mukherjee, Priya Singh, Dhiviya Vedagiri, Divya Gupta, Vishal Sah, Santosh Kumar Kuncha, Krishnan Harinivas Harshan, Archana Bharadwaj Siva, Karthik Bharadwaj Tallapaka, Shagufta Khan, Lamuk Zaveri, Namami Gaur, Sakshi Shambhavi, Tulasi Nagabandi, Purushotham Vodnala, Preethi Jampala, Sharada Ravi Iyer, Sulagana Mukherjee, Swetha Sundar, Peddapuvula Sai Uday Kiran, Rakesh K Mishra, Divya Tej Sowpati                        |
| EPI_ISL_458053                                                                                                                                                                                                                                                                                                                                                                                                                                                                                                                                                                                                                                                                                                                                                                                                                                                                                                                                                                                                                                                                                                                                                                                                                                                                                                                                                                                                                                                                                                                                                                 | CSIR-Centre for Cellular and Molecular Biology                                                                                                                                             | CSIR-Centre for Cellular and Molecular Biology                                                                                                                                             | Shagufta Khan, Lamuk Zaveri, Namami Gaur, Sakshi Shambhavi, Tulasi Nagabandi, Purushotham Vodnala, Payel Mukherjee, Sofia Banu, Priya Singh, Dhiviya Vedagiri, Divya Gupta, Vishal Sah, Santosh Kumar Kuncha, Krishnan Harinivas Harshan, Archana Bharadwaj Siva, Karthik Bharadwaj Tallapaka, Umesh Kumar, Unis Ahmad Bhat, Ajay Sarawagi, Priyanka Pant, Rajkanwar Nathawat, Rakesh K Mishra, Divya Tej Sowpati                                           |
| EPI_ISL_458058                                                                                                                                                                                                                                                                                                                                                                                                                                                                                                                                                                                                                                                                                                                                                                                                                                                                                                                                                                                                                                                                                                                                                                                                                                                                                                                                                                                                                                                                                                                                                                 | CSIR-Centre for Cellular and Molecular Biology                                                                                                                                             | CSIR-Centre for Cellular and Molecular Biology                                                                                                                                             | Sofia Banu, Payel Mukherjee, Priya Singh, Dhiviya Vedagiri, Divya Gupta, Vishal Sah, Santosh Kumar Kuncha, Krishnan Harinivas Harshan, Archana Bharadwaj Siva, Karthik Bharadwaj Tallapaka, Shagufta Khan, Lamuk Zaveri, Namami Gaur, Sakshi Shambhavi, Tulasi Nagabandi, Purushotham Vodnala, Disha Nanda, Divya Das, Jotin Gogoi, Manish Bhattacharjee, Ravi Prasad Mukku, Rakesh K Mishra, Divya Tej Sowpati                                             |
| EPI_ISL_458059                                                                                                                                                                                                                                                                                                                                                                                                                                                                                                                                                                                                                                                                                                                                                                                                                                                                                                                                                                                                                                                                                                                                                                                                                                                                                                                                                                                                                                                                                                                                                                 | CSIR-Centre for Cellular and Molecular Biology                                                                                                                                             | CSIR-Centre for Cellular and Molecular Biology                                                                                                                                             | Shagufta Khan, Lamuk Zaveri, Namami Gaur, Sakshi Shambhavi, Tulasi Nagabandi, Purushotham Vodnala, Payel Mukherjee, Sofia Banu, Priya Singh, Dhiviya Vedagiri, Divya Gupta, Vishal Sah, Santosh Kumar Kuncha, Krishnan Harinivas Harshan, Archana Bharadwaj Siva, Karthik Bharadwaj Tallapaka, Renu Sudhakar, Somesh Gorde, Gangumala Srinivas Reddy, Sujoy Deb, Swati Bayyana, Rakesh K Mishra, Divya Tej Sowpati                                          |
| EPI_ISL_458063                                                                                                                                                                                                                                                                                                                                                                                                                                                                                                                                                                                                                                                                                                                                                                                                                                                                                                                                                                                                                                                                                                                                                                                                                                                                                                                                                                                                                                                                                                                                                                 | CSIR-Centre for Cellular and Molecular Biology                                                                                                                                             | CSIR-Centre for Cellular and Molecular Biology                                                                                                                                             | Sofia Banu, Payel Mukherjee, Priya Singh, Dhiviya Vedagiri, Divya Gupta, Vishal Sah, Santosh Kumar Kuncha, Krishnan Harinivas Harshan, Archana Bharadwaj Siva, Karthik Bharadwaj Tallapaka, Shagufta Khan, Lamuk Zaveri, Namami Gaur, Sakshi Shambhavi, Tulasi Nagabandi, Purushotham Vodnala, Gokulan C G, Gunjan Purohit, Hanuman Tulashiram Kale, Pankaj Kumar, Prachand Issarapu, Rakesh K Mishra, Divya Tej Sowpati                                    |
| EPI_ISL_458064                                                                                                                                                                                                                                                                                                                                                                                                                                                                                                                                                                                                                                                                                                                                                                                                                                                                                                                                                                                                                                                                                                                                                                                                                                                                                                                                                                                                                                                                                                                                                                 | CSIR-Centre for Cellular and Molecular Biology                                                                                                                                             | CSIR-Centre for Cellular and Molecular Biology                                                                                                                                             | Shagufta Khan, Lamuk Zaveri, Namami Gaur, Sakshi Shambhavi, Tulasi Nagabandi, Purushotham Vodnala, Payel Mukherjee, Sofia Banu, Priya Singh, Dhiviya Vedagiri, Divya Gupta, Vishal Sah, Santosh Kumar Kuncha, Krishnan Harinivas Harshan, Archana Bharadwaj Siva, Karthik Bharadwaj Tallapaka, Preethi Jampala, Sharada Ravi Iyer, Sulagana Mukherjee, Swetha Sundar, Peddapuvula Sai Uday Kiran Rakesh K Mishra, Divya Tej Sowpati                         |
| EPI_ISL_458066, EPI_ISL_458067, EPI_ISL_458068, EPI_ISL_458069                                                                                                                                                                                                                                                                                                                                                                                                                                                                                                                                                                                                                                                                                                                                                                                                                                                                                                                                                                                                                                                                                                                                                                                                                                                                                                                                                                                                                                                                                                                 | Osmania Medical College                                                                                                                                                                    | CSIR-Centre for Cellular and Molecular Biology                                                                                                                                             | Shashikala Reddy, Mahboob Khan, Payel Mukherjee, Sofia Banu, Priya Singh, Dhiviya Vedagiri, Divya Gupta, Vishal Sah, Santosh Kumar Kuncha, Krishnan Harinivas Harshan, Archana Bharadwaj Siva, Karthik Bharadwaj Tallapaka, Shagufta Khan, Lamuk Zaveri, Namami Gaur, Sakshi Shambhavi, Tulasi Nagabandi, Purushotham Vodnala, Rakesh K Mishra, Divya Tej Sowpati                                                                                           |
| EPI_ISL_458100                                                                                                                                                                                                                                                                                                                                                                                                                                                                                                                                                                                                                                                                                                                                                                                                                                                                                                                                                                                                                                                                                                                                                                                                                                                                                                                                                                                                                                                                                                                                                                 | B.J. Medical College and Civil hospital                                                                                                                                                    | Gujarat Biotechnology Research Centre                                                                                                                                                      | Snehal Bagatharia, Dhaval Vaghela, Ramesh Patel, Pranay Shah, Kamlesh J Upadhyay, Ramesh Pandit, Tejas Shah, Ankit Hinsu, Pritesh Sabara, Apurvasinh Puvar, Janvi Raval, Zarna Patel, Monika Gandhi, Pinal Trivedi, Maharshi Pandya, Amit Kanani, Nidhi Patel, Nitin Savaliya, Raghawendra Kumar, Dinesh Kumar, Zuber Saiyed, Komal Patel, Labdhi Pandya, Afzal Ansari, Bhavesh Modi, Gaurishankar Shrimali, R D Dixit, A M Kadri, Umang                    |

|                                                                                                                                                                                                                                                                                                                                                                                                                                                                                                                                                                                                                                                                                                                                                                                                                                                                                                                                                                                                                                                                                                                                                                                                                                                                                                                                                                                                                                                                                                                                                                                                                                                                                                |           |                                                                                                                                                                                                                |                                                                                                   |                                                                                                                                                                                                                                                                                                                                                                                                      |
|------------------------------------------------------------------------------------------------------------------------------------------------------------------------------------------------------------------------------------------------------------------------------------------------------------------------------------------------------------------------------------------------------------------------------------------------------------------------------------------------------------------------------------------------------------------------------------------------------------------------------------------------------------------------------------------------------------------------------------------------------------------------------------------------------------------------------------------------------------------------------------------------------------------------------------------------------------------------------------------------------------------------------------------------------------------------------------------------------------------------------------------------------------------------------------------------------------------------------------------------------------------------------------------------------------------------------------------------------------------------------------------------------------------------------------------------------------------------------------------------------------------------------------------------------------------------------------------------------------------------------------------------------------------------------------------------|-----------|----------------------------------------------------------------------------------------------------------------------------------------------------------------------------------------------------------------|---------------------------------------------------------------------------------------------------|------------------------------------------------------------------------------------------------------------------------------------------------------------------------------------------------------------------------------------------------------------------------------------------------------------------------------------------------------------------------------------------------------|
| EPI_ISL_458301, EPI_ISL_458303, EPI_ISL_458312, EPI_ISL_458313, EPI_ISL_458314, EPI_ISL_458315, EPI_ISL_458319, EPI_ISL_458322, EPI_ISL_458323, EPI_ISL_458329, EPI_ISL_458332, EPI_ISL_458333, EPI_ISL_458335, EPI_ISL_458337, EPI_ISL_458339, EPI_ISL_458340, EPI_ISL_458341, EPI_ISL_458349, EPI_ISL_458350, EPI_ISL_458351, EPI_ISL_458352, EPI_ISL_458354, EPI_ISL_458358, EPI_ISL_458361, EPI_ISL_458367, EPI_ISL_458373, EPI_ISL_458388, EPI_ISL_458390, EPI_ISL_458392, EPI_ISL_458393, EPI_ISL_458395, EPI_ISL_458396, EPI_ISL_458400, EPI_ISL_458403, EPI_ISL_458411, EPI_ISL_458412, EPI_ISL_458415, EPI_ISL_458416, EPI_ISL_458418, EPI_ISL_458421, EPI_ISL_458423, EPI_ISL_458430, EPI_ISL_458431, EPI_ISL_458439, EPI_ISL_458446, EPI_ISL_458451, EPI_ISL_458457, EPI_ISL_458460, EPI_ISL_458461, EPI_ISL_458462, EPI_ISL_458464, EPI_ISL_458468, EPI_ISL_458471, EPI_ISL_458473, EPI_ISL_458476, EPI_ISL_458479, EPI_ISL_458499, EPI_ISL_458502, EPI_ISL_458507, EPI_ISL_458512, EPI_ISL_458520, EPI_ISL_458573, EPI_ISL_458575, EPI_ISL_458577, EPI_ISL_458578, EPI_ISL_458579, EPI_ISL_458580, EPI_ISL_458583, EPI_ISL_458584, EPI_ISL_458585, EPI_ISL_458586, EPI_ISL_458587, EPI_ISL_458588, EPI_ISL_458589, EPI_ISL_458590, EPI_ISL_458591, EPI_ISL_458592, EPI_ISL_458593, EPI_ISL_458594, EPI_ISL_458595, EPI_ISL_458596, EPI_ISL_458597, EPI_ISL_458598, EPI_ISL_458599, EPI_ISL_459005, EPI_ISL_459009, EPI_ISL_459010, EPI_ISL_459015, EPI_ISL_459018, EPI_ISL_459020, EPI_ISL_459027, EPI_ISL_459030, EPI_ISL_459037, EPI_ISL_459054, EPI_ISL_459055, EPI_ISL_459062, EPI_ISL_459066, EPI_ISL_459072, EPI_ISL_459078, EPI_ISL_459081, EPI_ISL_459084, EPI_ISL_459094 | see above | PHE South West Regional Laboratory, National Infection Service                                                                                                                                                 | Wellcome Sanger Institute for the COVID-19 Genomics UK (COG-UK) consortium                        | Stephanie Hutchings, Hannah Pymont, Dr Peter Muir, Barry Vipond, Rich Hopes; and Alex Alderton, Roberto Amato, Sonia Goncalves, Ewan Harrison, David K. Jackson, Ian Johnston, Dominic Kwiatkowski, Cordelia Langford, John Sillitoe on behalf of the Wellcome Sanger Institute COVID-19 Surveillance Team ( <a href="http://www.sanger.ac.uk/covid-team">http://www.sanger.ac.uk/covid-team</a> )   |
| EPI_ISL_458872                                                                                                                                                                                                                                                                                                                                                                                                                                                                                                                                                                                                                                                                                                                                                                                                                                                                                                                                                                                                                                                                                                                                                                                                                                                                                                                                                                                                                                                                                                                                                                                                                                                                                 |           | PHE South West Regional Laboratory, National Infection Service                                                                                                                                                 | Wellcome Sanger Institute for the COVID-19 Genomics UK (COG-UK) Consortium                        | Stephanie Hutchings, Hannah Pymont, Dr Peter Muir, Barry Vipond, Rich Hopes; and Alex Alderton, Roberto Amato, Sonia Goncalves, Ewan Harrison, David K. Jackson, Ian Johnston, Dominic Kwiatkowski, Cordelia Langford, John Sillitoe on behalf of the Wellcome Sanger Institute COVID-19 Surveillance Team                                                                                           |
| EPI_ISL_458874, EPI_ISL_458878, EPI_ISL_458879, EPI_ISL_458889, EPI_ISL_458891, EPI_ISL_458892, EPI_ISL_458901, EPI_ISL_458908, EPI_ISL_458909, EPI_ISL_458912, EPI_ISL_458917, EPI_ISL_458919, EPI_ISL_458920, EPI_ISL_458921, EPI_ISL_458926, EPI_ISL_458929, EPI_ISL_458930, EPI_ISL_458932, EPI_ISL_458936, EPI_ISL_458942, EPI_ISL_458948, EPI_ISL_458957, EPI_ISL_458958, EPI_ISL_458966, EPI_ISL_458970, EPI_ISL_458974, EPI_ISL_458975, EPI_ISL_458980, EPI_ISL_458982, EPI_ISL_458984, EPI_ISL_458987, EPI_ISL_458988, EPI_ISL_458998, EPI_ISL_459005, EPI_ISL_459009, EPI_ISL_459010, EPI_ISL_459015, EPI_ISL_459018, EPI_ISL_459020, EPI_ISL_459027, EPI_ISL_459030, EPI_ISL_459037, EPI_ISL_459054, EPI_ISL_459055, EPI_ISL_459062, EPI_ISL_459066, EPI_ISL_459072, EPI_ISL_459078, EPI_ISL_459081, EPI_ISL_459084, EPI_ISL_459094                                                                                                                                                                                                                                                                                                                                                                                                                                                                                                                                                                                                                                                                                                                                                                                                                                                 | see above | PHE South West Regional Laboratory, National Infection Service                                                                                                                                                 | Wellcome Sanger Institute for the COVID-19 Genomics UK (COG-UK) consortium                        | Stephanie Hutchings, Hannah Pymont, Dr Peter Muir, Barry Vipond, Rich Hopes; and Alex Alderton, Roberto Amato, Sonia Goncalves, Ewan Harrison, David K. Jackson, Ian Johnston, Dominic Kwiatkowski, Cordelia Langford, John Sillitoe on behalf of the Wellcome Sanger Institute COVID-19 Surveillance Team ( <a href="http://www.sanger.ac.uk/covid-team">http://www.sanger.ac.uk/covid-team</a> )   |
| EPI_ISL_459866, EPI_ISL_459867, EPI_ISL_459868, EPI_ISL_459869, EPI_ISL_459871, EPI_ISL_459872, EPI_ISL_459873, EPI_ISL_459874, EPI_ISL_459875, EPI_ISL_459877, EPI_ISL_459878, EPI_ISL_459879, EPI_ISL_459880, EPI_ISL_459881, EPI_ISL_459882, EPI_ISL_459883, EPI_ISL_459884, EPI_ISL_459885, EPI_ISL_459886, EPI_ISL_459887, EPI_ISL_459888, EPI_ISL_459889, EPI_ISL_459890, EPI_ISL_459891, EPI_ISL_459892                                                                                                                                                                                                                                                                                                                                                                                                                                                                                                                                                                                                                                                                                                                                                                                                                                                                                                                                                                                                                                                                                                                                                                                                                                                                                 | see above | Kingston Health Sciences Center                                                                                                                                                                                | Queen's Genomics Lab at Ongwanada (Q-GLO)                                                         | Sjaarda CP, Rustom N, Huang D, Perez-Patrigeon S, Hudson ML, Wong H, Guan H, Ayub M, Soares CN, Colautti R, Evans GA, Sheth P                                                                                                                                                                                                                                                                        |
| EPI_ISL_460096, EPI_ISL_460604, EPI_ISL_460605                                                                                                                                                                                                                                                                                                                                                                                                                                                                                                                                                                                                                                                                                                                                                                                                                                                                                                                                                                                                                                                                                                                                                                                                                                                                                                                                                                                                                                                                                                                                                                                                                                                 |           | Molecular diagnostic laboratory of Federal Budget Institution of Science "Central Research Institute of Epidemiology" of The Federal Service on Customers' Rights Protection and Human Well-being Surveillance | Group of Genomics and Postgenomic Technologies of Central Research Institute of Epidemiology      | Speranskaya AS, Kapteleva VV, Samoiloiev AE, Korneenko EV, Tivanova EV, Shipulina OY, Akimkin VG                                                                                                                                                                                                                                                                                                     |
| EPI_ISL_461504                                                                                                                                                                                                                                                                                                                                                                                                                                                                                                                                                                                                                                                                                                                                                                                                                                                                                                                                                                                                                                                                                                                                                                                                                                                                                                                                                                                                                                                                                                                                                                                                                                                                                 |           | B.J. Medical College and Civil hospital                                                                                                                                                                        | Gujarat Biotechnology Research Centre                                                             | Snehal Bagatharia, Pranay Shah, Kamllesh J Upadhyay, Tejas Shah, Ankit Hinsu, Pritesh Sabara, Apurvasinh Puvar, Janvi Raval, Zarna Patel, Monika Gandhi, Pinal Trivedi, Maharshi Pandya, Nidhi Patel, Nitin Savaliya, Raghawendra Kumar, Dinesh Kumar, Zuber Saiyed, Komal Patel, Labdhi Pandya, Fenil Patel, R D Dixit, A M Kadri, Harsh Bakshi, Chaitanya Joshi, Madhvi Joshi,                     |
| EPI_ISL_461763, EPI_ISL_461764, EPI_ISL_461765, EPI_ISL_461766, EPI_ISL_461767, EPI_ISL_461768, EPI_ISL_461769, EPI_ISL_461770, EPI_ISL_461771, EPI_ISL_461772                                                                                                                                                                                                                                                                                                                                                                                                                                                                                                                                                                                                                                                                                                                                                                                                                                                                                                                                                                                                                                                                                                                                                                                                                                                                                                                                                                                                                                                                                                                                 |           | University College London, Great Ormond Street Hospital for Children NHS Foundation Trust, Imperial College Healthcare NHS Trust                                                                               | COVID-19 Genomics UK (COG-UK) Consortium                                                          | Sergi Castellano, Rachel Williams, Mark Kristiansen, Paola Resende Silva, Sunando Roy, Tony Brooks, Helena Tutill, Paola Niola, Patricia Dyal, Charlotte Williams, Leysa Forrest, Yasmin Panchbhaya, Jacqueline Findlay, Sam Weeks, Julianne Brown, Kathryn Harris, Paul Randell, James Price, Alison Holmes, Judith Breuer                                                                          |
| EPI_ISL_462092                                                                                                                                                                                                                                                                                                                                                                                                                                                                                                                                                                                                                                                                                                                                                                                                                                                                                                                                                                                                                                                                                                                                                                                                                                                                                                                                                                                                                                                                                                                                                                                                                                                                                 |           | National Institute of Laboratory Medicine and Referral Center                                                                                                                                                  | Genomic Research Lab, BCSIR                                                                       | Shahina Akter, Abu Sayeed Mohammad Mahmud, Mohammad Samir Uzzaman, Eshrar Osman, Md. Ahasan Habib, Tanjina Akhter Banu, Barna Goswami, Iffat Jahan, Md. Saddam Hossain, Tasnim Nafisa, Md. Maruf Ahmed Molla, Mahmuda Yeasmin, Asish Kumar Ghosh, Bayzid Bin Monir, Arifa Akram, Sheikh Md. Selim Al Din, Salek Ahmed Sajib, Utpal Chandra Ray, Md. Salim Khan                                       |
| EPI_ISL_462149, EPI_ISL_462150                                                                                                                                                                                                                                                                                                                                                                                                                                                                                                                                                                                                                                                                                                                                                                                                                                                                                                                                                                                                                                                                                                                                                                                                                                                                                                                                                                                                                                                                                                                                                                                                                                                                 |           | Molecular diagnostic laboratory of Federal Budget Institution of Science "Central Research Institute of Epidemiology" of The Federal Service on Customers' Rights Protection and Human Well-being Surveillance | Group of Genomics and Postgenomic Technologies of Central Research Institute of Epidemiology      | Speranskaya AS, Kapteleva VV, Samoiloiev AE, Korneenko EV, Sizova TV, Tivanova EV, Shipulina OY, Akimkin VG                                                                                                                                                                                                                                                                                          |
| EPI_ISL_463007                                                                                                                                                                                                                                                                                                                                                                                                                                                                                                                                                                                                                                                                                                                                                                                                                                                                                                                                                                                                                                                                                                                                                                                                                                                                                                                                                                                                                                                                                                                                                                                                                                                                                 |           | Department of Laboratory Medicine, National Taiwan University Hospital                                                                                                                                         | Microbial Genomics Core Lab, National Taiwan University Centers of Genomic and Precision Medicine | Shiou-Hwei Yeh, You-Yu Lin, Ya-Yun Lai, Chiao-Ling Li, Shan-Chwen Chang, Pei-Jer Chen, Sui-Yuan Chang                                                                                                                                                                                                                                                                                                |
| EPI_ISL_464159, EPI_ISL_464160                                                                                                                                                                                                                                                                                                                                                                                                                                                                                                                                                                                                                                                                                                                                                                                                                                                                                                                                                                                                                                                                                                                                                                                                                                                                                                                                                                                                                                                                                                                                                                                                                                                                 |           | National Institute of Laboratory Medicine and Referral Center                                                                                                                                                  | Genomic Research Lab, BCSIR                                                                       | Shahina Akter, Abu Sayeed Mohammad Mahmud, Mohammad Samir Uzzaman, Eshrar Osman, Md. Ahasan Habib, Tanjina Akhter Banu, Md. Murshed Hasan Sarker, Barna Goswami, Iffat Jahan, Md. Saddam Hossain, Tasnim Nafisa, Md. Maruf Ahmed Molla, Mahmuda Yeasmin, Asish Kumar Ghosh, Arifa Akram, A. K. M. Shamsuzzaman, Sheikh Md. Selim Al Din, Utpal Chandra Ray, Salek Ahmed Sajib, Md. Salim Khan        |
| EPI_ISL_466648                                                                                                                                                                                                                                                                                                                                                                                                                                                                                                                                                                                                                                                                                                                                                                                                                                                                                                                                                                                                                                                                                                                                                                                                                                                                                                                                                                                                                                                                                                                                                                                                                                                                                 |           | Innovative Genomics Institute, UCB                                                                                                                                                                             | Innovative Genomics Institute, UCB                                                                | Stacia Wyman, Haridha Shivram, Liana Lareau, Shana McDevitt, Justin Choi                                                                                                                                                                                                                                                                                                                             |
| EPI_ISL_467051                                                                                                                                                                                                                                                                                                                                                                                                                                                                                                                                                                                                                                                                                                                                                                                                                                                                                                                                                                                                                                                                                                                                                                                                                                                                                                                                                                                                                                                                                                                                                                                                                                                                                 |           | B.J. Medical College and Civil hospital                                                                                                                                                                        | Gujarat Biotechnology Research Centre                                                             | Snehal Bagatharia, Pranay Shah, Kamllesh J Upadhyay, Nirav Mungalpara, Tejas Shah, Ankit Hinsu, Pritesh Sabara, Apurvasinh Puvar, Janvi Raval, Zarna Patel, Monika Gandhi, Pinal Trivedi, Maharshi Pandya, Nidhi Patel, Nitin Savaliya, Raghawendra Kumar, Dinesh Kumar, Zuber Saiyed, Komal Patel, Labdhi Pandya, Bhavya Jindal, R D Dixit, A M Kadri, Harsh Bakshi, Chaitanya Joshi, Madhvi Joshi, |
| EPI_ISL_467092, EPI_ISL_467093, EPI_ISL_467094, EPI_ISL_467095, EPI_ISL_467096, EPI_ISL_467097, EPI_ISL_467098, EPI_ISL_467099, EPI_ISL_467100, EPI_ISL_467101, EPI_ISL_467102, EPI_ISL_467103, EPI_ISL_467104, EPI_ISL_467105, EPI_ISL_467106, EPI_ISL_467107, EPI_ISL_467108, EPI_ISL_467109, EPI_ISL_467110, EPI_ISL_467111, EPI_ISL_467112, EPI_ISL_467113, EPI_ISL_467114, EPI_ISL_467115, EPI_ISL_467116, EPI_ISL_467117, EPI_ISL_467118, EPI_ISL_467119, EPI_ISL_467120, EPI_ISL_467121, EPI_ISL_467122, EPI_ISL_467123, EPI_ISL_467124, EPI_ISL_467125, EPI_ISL_467126, EPI_ISL_467127, EPI_ISL_467128, EPI_ISL_467129, EPI_ISL_467130, EPI_ISL_467131, EPI_ISL_467132, EPI_ISL_467133, EPI_ISL_467134, EPI_ISL_467135, EPI_ISL_467136, EPI_ISL_467137, EPI_ISL_467138, EPI_ISL_467139, EPI_ISL_467140, EPI_ISL_467141, EPI_ISL_467142, EPI_ISL_467143, EPI_ISL_467144, EPI_ISL_467145, EPI_ISL_467146, EPI_ISL_467147, EPI_ISL_467148, EPI_ISL_467149, EPI_ISL_467150, EPI_ISL_467151, EPI_ISL_467152, EPI_ISL_467153, EPI_ISL_467154, EPI_ISL_467155, EPI_ISL_467156, EPI_ISL_467157, EPI_ISL_467158, EPI_ISL_467159, EPI_ISL_467160, EPI_ISL_467161, EPI_ISL_467162, EPI_ISL_467163, EPI_ISL_467164, EPI_ISL_467165, EPI_ISL_467166, EPI_ISL_467167, EPI_ISL_467168, EPI_ISL_467169, EPI_ISL_467170, EPI_ISL_467171, EPI_ISL_467172, EPI_ISL_467173, EPI_ISL_467174, EPI_ISL_467175, EPI_ISL_467176, EPI_ISL_467177, EPI_ISL_467178, EPI_ISL_467179, EPI_ISL_467180, EPI_ISL_467181, EPI_ISL_467182, EPI_ISL_467183                                                                                                                                                                 | see above | Hospital Universitario Araba. Vitoria-Gasteiz                                                                                                                                                                  | SeqCOVID-SPAIN consortium/IB(CSIC)                                                                | Silvia Hernández Crespo, Carmen Gómez González, Amaia Aguirre Quiñonero, Marina Fernández Torres, M <sup>o</sup> Rosario Almela Ferrer, M <sup>o</sup> Concepción Lecaroz Ágala, Andrés Canut Blasco. and SeqCOVID-SPAIN consortium                                                                                                                                                                  |
| EPI_ISL_467696, EPI_ISL_467697, EPI_ISL_467712, EPI_ISL_467713                                                                                                                                                                                                                                                                                                                                                                                                                                                                                                                                                                                                                                                                                                                                                                                                                                                                                                                                                                                                                                                                                                                                                                                                                                                                                                                                                                                                                                                                                                                                                                                                                                 |           | PHE South West Regional Laboratory, National Infection Service                                                                                                                                                 | Wellcome Sanger Institute for the COVID-19 Genomics UK (COG-UK) consortium                        | Stephanie Hutchings, Hannah Pymont, Dr Peter Muir, Barry Vipond, Rich Hopes; and Alex Alderton, Roberto Amato, Sonia Goncalves, Ewan Harrison, David K. Jackson, Ian Johnston, Dominic Kwiatkowski, Cordelia Langford, John Sillitoe on behalf of the Wellcome Sanger Institute COVID-19 Surveillance Team ( <a href="http://www.sanger.ac.uk/covid-team">http://www.sanger.ac.uk/covid-team</a> )   |
| EPI_ISL_467774, EPI_ISL_467775                                                                                                                                                                                                                                                                                                                                                                                                                                                                                                                                                                                                                                                                                                                                                                                                                                                                                                                                                                                                                                                                                                                                                                                                                                                                                                                                                                                                                                                                                                                                                                                                                                                                 |           | Molecular diagnostic laboratory of Federal Budget Institution of Science "Central Research Institute of Epidemiology" of The Federal Service on Customers' Rights Protection and Human Well-being Surveillance | Group of Genomics and Postgenomic Technologies of Central Research Institute of Epidemiology      | Speranskaya AS, Kapteleva VV, Samoiloiev AE, Korneenko EV, Sizova TV, Tivanova EV, Shipulina OY, Akimkin VG                                                                                                                                                                                                                                                                                          |
| EPI_ISL_467946, EPI_ISL_467947, EPI_ISL_467948, EPI_ISL_467949                                                                                                                                                                                                                                                                                                                                                                                                                                                                                                                                                                                                                                                                                                                                                                                                                                                                                                                                                                                                                                                                                                                                                                                                                                                                                                                                                                                                                                                                                                                                                                                                                                 |           | Innovative Genomics Institute, UC Berkeley                                                                                                                                                                     | Innovative Genomics Institute, UC Berkeley                                                        | Stacia Wyman, Haridha Shivram, Liana Lareau, Shana McDevitt, Justin Choi                                                                                                                                                                                                                                                                                                                             |
| EPI_ISL_468070, EPI_ISL_468071, EPI_ISL_468072, EPI_ISL_468073                                                                                                                                                                                                                                                                                                                                                                                                                                                                                                                                                                                                                                                                                                                                                                                                                                                                                                                                                                                                                                                                                                                                                                                                                                                                                                                                                                                                                                                                                                                                                                                                                                 |           | Child Health Research Foundation                                                                                                                                                                               | Child Health Research Foundation                                                                  | Senjuti Saha, Roly Malaker, Md Saiful Islam Sajib, Hafizur Rahman, Maksuda Islam, Samir K Saha                                                                                                                                                                                                                                                                                                       |
| EPI_ISL_468074, EPI_ISL_468075, EPI_ISL_468076, EPI_ISL_468077, EPI_ISL_468078                                                                                                                                                                                                                                                                                                                                                                                                                                                                                                                                                                                                                                                                                                                                                                                                                                                                                                                                                                                                                                                                                                                                                                                                                                                                                                                                                                                                                                                                                                                                                                                                                 |           | Child Health Research Foundation                                                                                                                                                                               | Child Health Research Foundation                                                                  | Senjuti Saha, Roly Malaker, Md Saiful Islam Sajib, Hafizur Rahman, Afroza Akter Tanni, Syed Mukhtar Al Sium, Maksuda Islam, Samir K Saha                                                                                                                                                                                                                                                             |
| EPI_ISL_469040                                                                                                                                                                                                                                                                                                                                                                                                                                                                                                                                                                                                                                                                                                                                                                                                                                                                                                                                                                                                                                                                                                                                                                                                                                                                                                                                                                                                                                                                                                                                                                                                                                                                                 |           | GMERS Medical College & Hospital                                                                                                                                                                               | Gujarat Biotechnology Research Centre                                                             | Snehal Bagatharia, Meenakshi Shah, Neena Doshi, Varsha Godbole, Tejas Shah, Ankit Hinsu, Pritesh Sabara, Apurvasinh Puvar, Janvi Raval, Zarna Patel, Monika Gandhi, Pinal Trivedi, Maharshi Pandya, Nidhi Patel, Nitin Savaliya, Raghawendra Kumar, Dinesh Kumar, Zuber Saiyed, Komal Patel, Labdhi Pandya, Fenil Patel, R D Dixit, A M Kadri, Harsh Bakshi, Chaitanya Joshi, Madhvi Joshi           |



|                                                                                                                                                                                                                                                                                                                                                                                                                                                                                                                                                                                                                                                                                                                                                                                                                                                                                                                                                                                                                                                                                                                                                                                                                                                                                                                                                                                                                                                                                                                                                                                                                                                                                                                                                                                                                                                                                                                |           |                                                                                                                                                                                                                |                                                                                              |                                                                                                                                                                                                                                                                                                                                                                                                                                        |
|----------------------------------------------------------------------------------------------------------------------------------------------------------------------------------------------------------------------------------------------------------------------------------------------------------------------------------------------------------------------------------------------------------------------------------------------------------------------------------------------------------------------------------------------------------------------------------------------------------------------------------------------------------------------------------------------------------------------------------------------------------------------------------------------------------------------------------------------------------------------------------------------------------------------------------------------------------------------------------------------------------------------------------------------------------------------------------------------------------------------------------------------------------------------------------------------------------------------------------------------------------------------------------------------------------------------------------------------------------------------------------------------------------------------------------------------------------------------------------------------------------------------------------------------------------------------------------------------------------------------------------------------------------------------------------------------------------------------------------------------------------------------------------------------------------------------------------------------------------------------------------------------------------------|-----------|----------------------------------------------------------------------------------------------------------------------------------------------------------------------------------------------------------------|----------------------------------------------------------------------------------------------|----------------------------------------------------------------------------------------------------------------------------------------------------------------------------------------------------------------------------------------------------------------------------------------------------------------------------------------------------------------------------------------------------------------------------------------|
| EPI_ISL_469345, EPI_ISL_469348, EPI_ISL_469350, EPI_ISL_469356, EPI_ISL_469359, EPI_ISL_469365, EPI_ISL_469370, EPI_ISL_469377, EPI_ISL_469379, EPI_ISL_469380, EPI_ISL_469381, EPI_ISL_469383, EPI_ISL_469387, EPI_ISL_469388, EPI_ISL_469390, EPI_ISL_469392, EPI_ISL_469400, EPI_ISL_469401, EPI_ISL_469407, EPI_ISL_469410, EPI_ISL_469413, EPI_ISL_469415, EPI_ISL_469419, EPI_ISL_469430, EPI_ISL_469431, EPI_ISL_469433, EPI_ISL_469437, EPI_ISL_469442, EPI_ISL_469455, EPI_ISL_469456, EPI_ISL_469457, EPI_ISL_469460, EPI_ISL_469464, EPI_ISL_469468, EPI_ISL_469470, EPI_ISL_469473, EPI_ISL_469475, EPI_ISL_469483, EPI_ISL_469485, EPI_ISL_469492, EPI_ISL_469493, EPI_ISL_469511, EPI_ISL_469513, EPI_ISL_469526, EPI_ISL_469531, EPI_ISL_469533, EPI_ISL_469534, EPI_ISL_469536, EPI_ISL_469538, EPI_ISL_469539, EPI_ISL_469540, EPI_ISL_469547, EPI_ISL_469550, EPI_ISL_469551, EPI_ISL_469552, EPI_ISL_469557, EPI_ISL_469565, EPI_ISL_469568, EPI_ISL_469576, EPI_ISL_469578, EPI_ISL_469579, EPI_ISL_469581, EPI_ISL_469583, EPI_ISL_469598, EPI_ISL_469599, EPI_ISL_469601, EPI_ISL_469605, EPI_ISL_469611, EPI_ISL_469612, EPI_ISL_469615, EPI_ISL_469617, EPI_ISL_469618, EPI_ISL_469619, EPI_ISL_469622, EPI_ISL_469623, EPI_ISL_469624, EPI_ISL_469628, EPI_ISL_469636, EPI_ISL_469639, EPI_ISL_469651, EPI_ISL_469654, EPI_ISL_469656, EPI_ISL_469664, EPI_ISL_469670, EPI_ISL_469679, EPI_ISL_469681, EPI_ISL_469682, EPI_ISL_469683, EPI_ISL_469684, EPI_ISL_469687, EPI_ISL_469688, EPI_ISL_469689, EPI_ISL_469690, EPI_ISL_469692, EPI_ISL_469695, EPI_ISL_469697, EPI_ISL_469758, EPI_ISL_469775, EPI_ISL_469779, EPI_ISL_469780, EPI_ISL_469781, EPI_ISL_469786, EPI_ISL_469787, EPI_ISL_469792, EPI_ISL_469794, EPI_ISL_469795, EPI_ISL_469801, EPI_ISL_469806, EPI_ISL_469819, EPI_ISL_469827, EPI_ISL_469831, EPI_ISL_469840, EPI_ISL_469842, EPI_ISL_469847, EPI_ISL_470530 | see above | PHE South West Regional Laboratory, National Infection Service                                                                                                                                                 | Wellcome Sanger Institute for the COVID-19 Genomics UK (COG-UK) consortium                   | Stephanie Hutchings, Hannah Pymont, Dr Peter Muir, Barry Vipond, Rich Hopes; and Alex Alderton, Roberto Amato, Sonia Goncalves, Ewan Harrison, David K. Jackson, Ian Johnston, Dominic Kwiatkowski, Cordelia Langford, John Sillitoe on behalf of the Wellcome Sanger Institute COVID-19 Surveillance Team ( <a href="http://www.sanger.ac.uk/covid-team">http://www.sanger.ac.uk/covid-team</a> )                                     |
| EPI_ISL_470539                                                                                                                                                                                                                                                                                                                                                                                                                                                                                                                                                                                                                                                                                                                                                                                                                                                                                                                                                                                                                                                                                                                                                                                                                                                                                                                                                                                                                                                                                                                                                                                                                                                                                                                                                                                                                                                                                                 |           | Molecular diagnostic laboratory of Federal Budget Institution of Science "Central Research Institute of Epidemiology" of The Federal Service on Customers' Rights Protection and Human Well-being Surveillance | Group of Genomics and Postgenomic Technologies of Central Research Institute of Epidemiology | Speranskaya AS, Kapteleva VV, Samoiloiv AE, Korneenko EV, Sizova TV, Tivanova EV, Shipulina OY, Akimkin VG                                                                                                                                                                                                                                                                                                                             |
| EPI_ISL_471158, EPI_ISL_471159, EPI_ISL_471160, EPI_ISL_471161, EPI_ISL_471162, EPI_ISL_471163, EPI_ISL_471164, EPI_ISL_471165, EPI_ISL_471166, EPI_ISL_471167, EPI_ISL_471168, EPI_ISL_471169, EPI_ISL_471170, EPI_ISL_471171                                                                                                                                                                                                                                                                                                                                                                                                                                                                                                                                                                                                                                                                                                                                                                                                                                                                                                                                                                                                                                                                                                                                                                                                                                                                                                                                                                                                                                                                                                                                                                                                                                                                                 | see above | MRCG at LSHTM Genomics lab                                                                                                                                                                                     | MRCG at LSHTM Genomics lab                                                                   | Sesay et al                                                                                                                                                                                                                                                                                                                                                                                                                            |
| EPI_ISL_471603                                                                                                                                                                                                                                                                                                                                                                                                                                                                                                                                                                                                                                                                                                                                                                                                                                                                                                                                                                                                                                                                                                                                                                                                                                                                                                                                                                                                                                                                                                                                                                                                                                                                                                                                                                                                                                                                                                 |           | CSIR-Centre for Cellular and Molecular Biology                                                                                                                                                                 | CSIR-Centre for Cellular and Molecular Biology                                               | Shaguftha Khan, Lamuk Zaveri, Namami Gaur, Sakshi Shambhavi, Tulasi Nagabandi, Purushotham Vodnala, Payel Mukherjee, Sofia Banu, Priya Singh, Dhiviya Vedagiri, Divya Gupta, Vishal Sah, Santosh Kumar Kuncha, Krishnan Harinivas Harshan, Archana Bharadwaj Siva, Karthik Bharadwaj Tallapaka, Disha Nanda, Divya Das, Jotin Gogoi, Manish Bhattacharjee, Ravi Prasad Mukku, Rakesh K Mishra, Divya Tej Sowpati                       |
| EPI_ISL_471604                                                                                                                                                                                                                                                                                                                                                                                                                                                                                                                                                                                                                                                                                                                                                                                                                                                                                                                                                                                                                                                                                                                                                                                                                                                                                                                                                                                                                                                                                                                                                                                                                                                                                                                                                                                                                                                                                                 |           | CSIR-Centre for Cellular and Molecular Biology                                                                                                                                                                 | CSIR-Centre for Cellular and Molecular Biology                                               | Shaguftha Khan, Lamuk Zaveri, Namami Gaur, Sakshi Shambhavi, Tulasi Nagabandi, Purushotham Vodnala, Payel Mukherjee, Sofia Banu, Priya Singh, Dhiviya Vedagiri, Divya Gupta, Vishal Sah, Santosh Kumar Kuncha, Krishnan Harinivas Harshan, Archana Bharadwaj Siva, Karthik Bharadwaj Tallapaka, Renu Sudhakar, Somesh Gorde, Gangumala Srinivas Reddy, Sujoy Deb, Swati Bayyana, Rakesh K Mishra, Divya Tej Sowpati                    |
| EPI_ISL_471605                                                                                                                                                                                                                                                                                                                                                                                                                                                                                                                                                                                                                                                                                                                                                                                                                                                                                                                                                                                                                                                                                                                                                                                                                                                                                                                                                                                                                                                                                                                                                                                                                                                                                                                                                                                                                                                                                                 |           | CSIR-Centre for Cellular and Molecular Biology                                                                                                                                                                 | CSIR-Centre for Cellular and Molecular Biology                                               | Shaguftha Khan, Lamuk Zaveri, Namami Gaur, Sakshi Shambhavi, Tulasi Nagabandi, Purushotham Vodnala, Payel Mukherjee, Sofia Banu, Priya Singh, Dhiviya Vedagiri, Divya Gupta, Vishal Sah, Santosh Kumar Kuncha, Krishnan Harinivas Harshan, Archana Bharadwaj Siva, Karthik Bharadwaj Tallapaka, Preethi Jampala, Sharada Ravi Iyer, Sulagana Mukherjee, Swetha Sundar, Peddapuvula Sai Uday Kiran Rakesh K Mishra, Divya Tej Sowpati   |
| EPI_ISL_471606                                                                                                                                                                                                                                                                                                                                                                                                                                                                                                                                                                                                                                                                                                                                                                                                                                                                                                                                                                                                                                                                                                                                                                                                                                                                                                                                                                                                                                                                                                                                                                                                                                                                                                                                                                                                                                                                                                 |           | CSIR-Centre for Cellular and Molecular Biology                                                                                                                                                                 | CSIR-Centre for Cellular and Molecular Biology                                               | Shaguftha Khan, Lamuk Zaveri, Namami Gaur, Sakshi Shambhavi, Tulasi Nagabandi, Purushotham Vodnala, Payel Mukherjee, Sofia Banu, Priya Singh, Dhiviya Vedagiri, Divya Gupta, Vishal Sah, Santosh Kumar Kuncha, Krishnan Harinivas Harshan, Archana Bharadwaj Siva, Karthik Bharadwaj Tallapaka, Umesh Kumar, Unis Ahmad Bhat, Ajay Sarawagi, Priyanka Pant, Rajkanwar Nathawat, Rakesh K Mishra, Divya Tej Sowpati                     |
| EPI_ISL_471607                                                                                                                                                                                                                                                                                                                                                                                                                                                                                                                                                                                                                                                                                                                                                                                                                                                                                                                                                                                                                                                                                                                                                                                                                                                                                                                                                                                                                                                                                                                                                                                                                                                                                                                                                                                                                                                                                                 |           | CSIR-Centre for Cellular and Molecular Biology                                                                                                                                                                 | CSIR-Centre for Cellular and Molecular Biology                                               | Sofia Banu, Payel Mukherjee, Priya Singh, Dhiviya Vedagiri, Divya Gupta, Vishal Sah, Santosh Kumar Kuncha, Krishnan Harinivas Harshan, Archana Bharadwaj Siva, Karthik Bharadwaj Tallapaka, Shaguftha Khan, Lamuk Zaveri, Namami Gaur, Sakshi Shambhavi, Tulasi Nagabandi, Purushotham Vodnala, Deepak Kumar, Devi Prasad Vijayashankar, Disha Nanda, Divya Das, Jotin Gogoi, Manish Bhattacharjee, Rakesh K Mishra, Divya Tej Sowpati |
| EPI_ISL_471608                                                                                                                                                                                                                                                                                                                                                                                                                                                                                                                                                                                                                                                                                                                                                                                                                                                                                                                                                                                                                                                                                                                                                                                                                                                                                                                                                                                                                                                                                                                                                                                                                                                                                                                                                                                                                                                                                                 |           | CSIR-Centre for Cellular and Molecular Biology                                                                                                                                                                 | CSIR-Centre for Cellular and Molecular Biology                                               | Sofia Banu, Payel Mukherjee, Priya Singh, Dhiviya Vedagiri, Divya Gupta, Vishal Sah, Santosh Kumar Kuncha, Krishnan Harinivas Harshan, Archana Bharadwaj Siva, Karthik Bharadwaj Tallapaka, Shaguftha Khan, Lamuk Zaveri, Namami Gaur, Sakshi Shambhavi, Tulasi Nagabandi, Purushotham Vodnala, Disha Nanda, Divya Das, Jotin Gogoi, Manish Bhattacharjee, Ravi Prasad Mukku, Rakesh K Mishra, Divya Tej Sowpati                       |
| EPI_ISL_471609                                                                                                                                                                                                                                                                                                                                                                                                                                                                                                                                                                                                                                                                                                                                                                                                                                                                                                                                                                                                                                                                                                                                                                                                                                                                                                                                                                                                                                                                                                                                                                                                                                                                                                                                                                                                                                                                                                 |           | CSIR-Centre for Cellular and Molecular Biology                                                                                                                                                                 | CSIR-Centre for Cellular and Molecular Biology                                               | Sofia Banu, Payel Mukherjee, Priya Singh, Dhiviya Vedagiri, Divya Gupta, Vishal Sah, Santosh Kumar Kuncha, Krishnan Harinivas Harshan, Archana Bharadwaj Siva, Karthik Bharadwaj Tallapaka, Shaguftha Khan, Lamuk Zaveri, Namami Gaur, Sakshi Shambhavi, Tulasi Nagabandi, Purushotham Vodnala, Gokulan C G, Gunjan Purohit, Hanuman Tulashiram Kale, Pankaj Kumar, Prachand Issarapu, Rakesh K Mishra, Divya Tej Sowpati              |
| EPI_ISL_471610                                                                                                                                                                                                                                                                                                                                                                                                                                                                                                                                                                                                                                                                                                                                                                                                                                                                                                                                                                                                                                                                                                                                                                                                                                                                                                                                                                                                                                                                                                                                                                                                                                                                                                                                                                                                                                                                                                 |           | CSIR-Centre for Cellular and Molecular Biology                                                                                                                                                                 | CSIR-Centre for Cellular and Molecular Biology                                               | Sofia Banu, Payel Mukherjee, Priya Singh, Dhiviya Vedagiri, Divya Gupta, Vishal Sah, Santosh Kumar Kuncha, Krishnan Harinivas Harshan, Archana Bharadwaj Siva, Karthik Bharadwaj Tallapaka, Shaguftha Khan, Lamuk Zaveri, Namami Gaur, Sakshi Shambhavi, Tulasi Nagabandi, Purushotham Vodnala, Preethi Jampala, Sharada Ravi Iyer, Sulagana Mukherjee, Swetha Sundar, Peddapuvula Sai Uday Kiran, Rakesh K Mishra, Divya Tej Sowpati  |
| EPI_ISL_471631                                                                                                                                                                                                                                                                                                                                                                                                                                                                                                                                                                                                                                                                                                                                                                                                                                                                                                                                                                                                                                                                                                                                                                                                                                                                                                                                                                                                                                                                                                                                                                                                                                                                                                                                                                                                                                                                                                 |           | CSIR-Centre for Cellular and Molecular Biology                                                                                                                                                                 | CSIR-Centre for Cellular and Molecular Biology                                               | Shaguftha Khan, Lamuk Zaveri, Namami Gaur, Sakshi Shambhavi, Tulasi Nagabandi, Purushotham Vodnala, Payel Mukherjee, Sofia Banu, Priya Singh, Dhiviya Vedagiri, Divya Gupta, Vishal Sah, Santosh Kumar Kuncha, Krishnan Harinivas Harshan, Archana Bharadwaj Siva, Karthik Bharadwaj Tallapaka, Disha Nanda, Divya Das, Jotin Gogoi, Manish Bhattacharjee, Ravi Prasad Mukku, Rakesh K Mishra, Divya Tej Sowpati                       |
| EPI_ISL_471632                                                                                                                                                                                                                                                                                                                                                                                                                                                                                                                                                                                                                                                                                                                                                                                                                                                                                                                                                                                                                                                                                                                                                                                                                                                                                                                                                                                                                                                                                                                                                                                                                                                                                                                                                                                                                                                                                                 |           | CSIR-Centre for Cellular and Molecular Biology                                                                                                                                                                 | CSIR-Centre for Cellular and Molecular Biology                                               | Shaguftha Khan, Lamuk Zaveri, Namami Gaur, Sakshi Shambhavi, Tulasi Nagabandi, Purushotham Vodnala, Payel Mukherjee, Sofia Banu, Priya Singh, Dhiviya Vedagiri, Divya Gupta, Vishal Sah, Santosh Kumar Kuncha, Krishnan Harinivas Harshan, Archana Bharadwaj Siva, Karthik Bharadwaj Tallapaka, Renu Sudhakar, Somesh Gorde, Gangumala Srinivas Reddy, Sujoy Deb, Swati Bayyana, Rakesh K Mishra, Divya Tej Sowpati                    |
| EPI_ISL_471633                                                                                                                                                                                                                                                                                                                                                                                                                                                                                                                                                                                                                                                                                                                                                                                                                                                                                                                                                                                                                                                                                                                                                                                                                                                                                                                                                                                                                                                                                                                                                                                                                                                                                                                                                                                                                                                                                                 |           | CSIR-Centre for Cellular and Molecular Biology                                                                                                                                                                 | CSIR-Centre for Cellular and Molecular Biology                                               | Shaguftha Khan, Lamuk Zaveri, Namami Gaur, Sakshi Shambhavi, Tulasi Nagabandi, Purushotham Vodnala, Payel Mukherjee, Sofia Banu, Priya Singh, Dhiviya Vedagiri, Divya Gupta, Vishal Sah, Santosh Kumar Kuncha, Krishnan Harinivas Harshan, Archana Bharadwaj Siva, Karthik Bharadwaj Tallapaka, Preethi Jampala, Sharada Ravi Iyer, Sulagana Mukherjee, Swetha Sundar, Peddapuvula Sai Uday Kiran Rakesh K Mishra, Divya Tej Sowpati   |
| EPI_ISL_471634                                                                                                                                                                                                                                                                                                                                                                                                                                                                                                                                                                                                                                                                                                                                                                                                                                                                                                                                                                                                                                                                                                                                                                                                                                                                                                                                                                                                                                                                                                                                                                                                                                                                                                                                                                                                                                                                                                 |           | CSIR-Centre for Cellular and Molecular Biology                                                                                                                                                                 | CSIR-Centre for Cellular and Molecular Biology                                               | Shaguftha Khan, Lamuk Zaveri, Namami Gaur, Sakshi Shambhavi, Tulasi Nagabandi, Purushotham Vodnala, Payel Mukherjee, Sofia Banu, Priya Singh, Dhiviya Vedagiri, Divya Gupta, Vishal Sah, Santosh Kumar Kuncha, Krishnan Harinivas Harshan, Archana Bharadwaj Siva, Karthik Bharadwaj Tallapaka, Umesh Kumar, Unis Ahmad Bhat, Ajay Sarawagi, Priyanka Pant, Rajkanwar Nathawat, Rakesh K Mishra, Divya Tej Sowpati                     |
| EPI_ISL_471635                                                                                                                                                                                                                                                                                                                                                                                                                                                                                                                                                                                                                                                                                                                                                                                                                                                                                                                                                                                                                                                                                                                                                                                                                                                                                                                                                                                                                                                                                                                                                                                                                                                                                                                                                                                                                                                                                                 |           | CSIR-Centre for Cellular and Molecular Biology                                                                                                                                                                 | CSIR-Centre for Cellular and Molecular Biology                                               | Sofia Banu, Payel Mukherjee, Priya Singh, Dhiviya Vedagiri, Divya Gupta, Vishal Sah, Santosh Kumar Kuncha, Krishnan Harinivas Harshan, Archana Bharadwaj Siva, Karthik Bharadwaj Tallapaka, Shaguftha Khan, Lamuk Zaveri, Namami Gaur, Sakshi Shambhavi, Tulasi Nagabandi, Purushotham Vodnala, Deepak Kumar, Devi Prasad Vijayashankar, Disha Nanda, Divya Das, Jotin Gogoi, Manish Bhattacharjee, Rakesh K Mishra, Divya Tej Sowpati |
| EPI_ISL_471636                                                                                                                                                                                                                                                                                                                                                                                                                                                                                                                                                                                                                                                                                                                                                                                                                                                                                                                                                                                                                                                                                                                                                                                                                                                                                                                                                                                                                                                                                                                                                                                                                                                                                                                                                                                                                                                                                                 |           | CSIR-Centre for Cellular and Molecular Biology                                                                                                                                                                 | CSIR-Centre for Cellular and Molecular Biology                                               | Sofia Banu, Payel Mukherjee, Priya Singh, Dhiviya Vedagiri, Divya Gupta, Vishal Sah, Santosh Kumar Kuncha, Krishnan Harinivas Harshan, Archana Bharadwaj Siva, Karthik Bharadwaj Tallapaka, Shaguftha Khan, Lamuk Zaveri, Namami Gaur, Sakshi Shambhavi, Tulasi Nagabandi, Purushotham Vodnala, Disha Nanda, Divya Das, Jotin Gogoi, Manish Bhattacharjee, Ravi Prasad Mukku, Rakesh K Mishra, Divya Tej Sowpati                       |
| EPI_ISL_471637                                                                                                                                                                                                                                                                                                                                                                                                                                                                                                                                                                                                                                                                                                                                                                                                                                                                                                                                                                                                                                                                                                                                                                                                                                                                                                                                                                                                                                                                                                                                                                                                                                                                                                                                                                                                                                                                                                 |           | CSIR-Centre for Cellular and Molecular Biology                                                                                                                                                                 | CSIR-Centre for Cellular and Molecular Biology                                               | Sofia Banu, Payel Mukherjee, Priya Singh, Dhiviya Vedagiri, Divya Gupta, Vishal Sah, Santosh Kumar Kuncha, Krishnan Harinivas Harshan, Archana Bharadwaj Siva, Karthik Bharadwaj Tallapaka, Shaguftha Khan, Lamuk Zaveri, Namami Gaur, Sakshi Shambhavi, Tulasi Nagabandi, Purushotham Vodnala, Gokulan C G, Gunjan Purohit, Hanuman Tulashiram Kale, Pankaj Kumar, Prachand Issarapu, Rakesh K Mishra, Divya Tej Sowpati              |
| EPI_ISL_471638                                                                                                                                                                                                                                                                                                                                                                                                                                                                                                                                                                                                                                                                                                                                                                                                                                                                                                                                                                                                                                                                                                                                                                                                                                                                                                                                                                                                                                                                                                                                                                                                                                                                                                                                                                                                                                                                                                 |           | CSIR-Centre for Cellular and Molecular Biology                                                                                                                                                                 | CSIR-Centre for Cellular and Molecular Biology                                               | Sofia Banu, Payel Mukherjee, Priya Singh, Dhiviya Vedagiri, Divya Gupta, Vishal Sah, Santosh Kumar Kuncha, Krishnan Harinivas Harshan, Archana Bharadwaj Siva, Karthik Bharadwaj Tallapaka, Shaguftha Khan, Lamuk Zaveri, Namami Gaur, Sakshi Shambhavi, Tulasi Nagabandi, Purushotham Vodnala, Preethi Jampala, Sharada Ravi Iyer, Sulagana Mukherjee, Swetha Sundar, Peddapuvula Sai Uday Kiran, Rakesh K Mishra, Divya Tej Sowpati  |
| EPI_ISL_475042                                                                                                                                                                                                                                                                                                                                                                                                                                                                                                                                                                                                                                                                                                                                                                                                                                                                                                                                                                                                                                                                                                                                                                                                                                                                                                                                                                                                                                                                                                                                                                                                                                                                                                                                                                                                                                                                                                 |           | Department of MicroBiology, Government Medical College, Surat                                                                                                                                                  | Gujarat Biotechnology Research Centre                                                        | Snehal Bagatharia, Naresh Chauhan, Summaiya Mullan, Amit gamit, Pritesh Sabara, Apurvasini Puvar, Janvi Raval, Zarna Patel, Monika Gandhi, Pinal Trivedi, Maharshi Pandya, Nidhi Patel, Nitin Savaliya, Raghawendra Kumar, Dinesh Kumar, Zuber Saiyed, Komal, Labdhi Pandey, Bhavya Jindal, R D Dixit, A M Kadri, Harsh Bakshi, Chaitanya Joshi, Madhvi Joshi                                                                          |
| EPI_ISL_475165                                                                                                                                                                                                                                                                                                                                                                                                                                                                                                                                                                                                                                                                                                                                                                                                                                                                                                                                                                                                                                                                                                                                                                                                                                                                                                                                                                                                                                                                                                                                                                                                                                                                                                                                                                                                                                                                                                 |           | National Institute of Laboratory Medicine and Referral Center                                                                                                                                                  | Genomic Research Lab, BCSIR                                                                  | Shahina Akter, Abu Sayeed Mohammad Mahmud, Mohammad Samir Uzzaman, Eshrar Osman, Md. Ahasan Habib, Tanjina Akhter Banu, Md. Murshed Hasan Sarkar, Barna Goswami, Iffat Jahan, Md. Saddam Hossain, Tasnim Nafisa, Md. Maruf Ahmed Molla, Mahmuda Yeasmin, Asish Kumar Ghosh, Bayzid Bin Monir, A. K. M. Shamsuzzaman, Sheikh Md. Selim Al Din, Utpal Chandra Ray, Salek Ahmed Sajid, Md. Salim Khan                                     |
| EPI_ISL_475754                                                                                                                                                                                                                                                                                                                                                                                                                                                                                                                                                                                                                                                                                                                                                                                                                                                                                                                                                                                                                                                                                                                                                                                                                                                                                                                                                                                                                                                                                                                                                                                                                                                                                                                                                                                                                                                                                                 |           | National Institute of Laboratory Medicine and Referral Center                                                                                                                                                  | Genomic Research Lab, BCSIR                                                                  | Shahina Akter, Abu Sayeed Mohammad Mahmud, Mohammad Samir Uzzaman, Eshrar Osman, Md. Ahasan Habib, Tanjina Akhter Banu, Md. Murshed Hasan Sarkar, Barna Goswami, Iffat Jahan, Md. Saddam Hossain, Tasnim Nafisa, Md. Maruf Ahmed Molla, Mahmuda Yeasmin, Asish Kumar Ghosh, Arifa Akram, A. K. M. Shamsuzzaman, Sheikh Md. Selim Al Din, Utpal Chandra Ray, Salek Ahmed Sajid, Md. Salim Khan                                          |
| EPI_ISL_476022                                                                                                                                                                                                                                                                                                                                                                                                                                                                                                                                                                                                                                                                                                                                                                                                                                                                                                                                                                                                                                                                                                                                                                                                                                                                                                                                                                                                                                                                                                                                                                                                                                                                                                                                                                                                                                                                                                 |           | Defence Research & Development Establishment                                                                                                                                                                   | Defence Research & Development Establishment                                                 | Shashi Sharma, Paban Kumar Dash, Jyoti S Kumar, Sushil Kumar Sharma, Ambuj Shrivastava                                                                                                                                                                                                                                                                                                                                                 |
| EPI_ISL_476023, EPI_ISL_476840, EPI_ISL_476842, EPI_ISL_476844, EPI_ISL_476846, EPI_ISL_476848, EPI_ISL_476849, EPI_ISL_476850, EPI_ISL_476852, EPI_ISL_476853, EPI_ISL_476854, EPI_ISL_476883, EPI_ISL_476884, EPI_ISL_476885, EPI_ISL_476886, EPI_ISL_476887, EPI_ISL_476888, EPI_ISL_476889,                                                                                                                                                                                                                                                                                                                                                                                                                                                                                                                                                                                                                                                                                                                                                                                                                                                                                                                                                                                                                                                                                                                                                                                                                                                                                                                                                                                                                                                                                                                                                                                                                |           |                                                                                                                                                                                                                |                                                                                              |                                                                                                                                                                                                                                                                                                                                                                                                                                        |

|                                                                                                                                                                                                                                                                                                                                                                                                                                                                                                                                                                                                                                                                                                                                                                                                                                                                                                                                                                                                                                                                                                                                                |           |                                                                                                                                                                                                                |                                                                                              |                                                                                                                                                                                                                                                                                                                                                                                                                                                                                                                                                                                                                                                   |
|------------------------------------------------------------------------------------------------------------------------------------------------------------------------------------------------------------------------------------------------------------------------------------------------------------------------------------------------------------------------------------------------------------------------------------------------------------------------------------------------------------------------------------------------------------------------------------------------------------------------------------------------------------------------------------------------------------------------------------------------------------------------------------------------------------------------------------------------------------------------------------------------------------------------------------------------------------------------------------------------------------------------------------------------------------------------------------------------------------------------------------------------|-----------|----------------------------------------------------------------------------------------------------------------------------------------------------------------------------------------------------------------|----------------------------------------------------------------------------------------------|---------------------------------------------------------------------------------------------------------------------------------------------------------------------------------------------------------------------------------------------------------------------------------------------------------------------------------------------------------------------------------------------------------------------------------------------------------------------------------------------------------------------------------------------------------------------------------------------------------------------------------------------------|
| EPI_ISL_476890, EPI_ISL_476891, EPI_ISL_476892, EPI_ISL_476893, EPI_ISL_476894, EPI_ISL_476895, EPI_ISL_476896                                                                                                                                                                                                                                                                                                                                                                                                                                                                                                                                                                                                                                                                                                                                                                                                                                                                                                                                                                                                                                 | see above | Defence Research & Development Establishment (DRDE)                                                                                                                                                            | Defence Research & Development Establishment (DRDE)                                          | Shashi Sharma, Paban Kumar Dash, Sushil Kumar Sharma, Ambuj Shrivastava, Jyoti S. Kumar                                                                                                                                                                                                                                                                                                                                                                                                                                                                                                                                                           |
| EPI_ISL_477125, EPI_ISL_477126, EPI_ISL_477127, EPI_ISL_477128, EPI_ISL_477129, EPI_ISL_477130, EPI_ISL_477131, EPI_ISL_477132, EPI_ISL_477133, EPI_ISL_477134, EPI_ISL_477135, EPI_ISL_477136, EPI_ISL_477137, EPI_ISL_477138, EPI_ISL_477139                                                                                                                                                                                                                                                                                                                                                                                                                                                                                                                                                                                                                                                                                                                                                                                                                                                                                                 | see above | Child Health Research Foundation                                                                                                                                                                               | Child Health Research Foundation                                                             | Senjuti Saha, Md Saiful Islam Sajib, Roly Malaker, Md Hafizur Rahman, Afroza Akter Tanni, Syed Mukhtadir Al Sium, Maksuda Islam, Samir K Saha                                                                                                                                                                                                                                                                                                                                                                                                                                                                                                     |
| EPI_ISL_478404, EPI_ISL_478405, EPI_ISL_478406, EPI_ISL_478407, EPI_ISL_478408, EPI_ISL_478409, EPI_ISL_478410, EPI_ISL_478411, EPI_ISL_478412, EPI_ISL_478413, EPI_ISL_478414, EPI_ISL_478415, EPI_ISL_478416, EPI_ISL_478417, EPI_ISL_478418, EPI_ISL_478419, EPI_ISL_478420, EPI_ISL_478421, EPI_ISL_478422, EPI_ISL_478423, EPI_ISL_478424, EPI_ISL_478425, EPI_ISL_478426, EPI_ISL_478427, EPI_ISL_478428, EPI_ISL_478429, EPI_ISL_478430, EPI_ISL_478431, EPI_ISL_478432, EPI_ISL_478433, EPI_ISL_478434, EPI_ISL_478435, EPI_ISL_478436, EPI_ISL_478437, EPI_ISL_478438, EPI_ISL_478439, EPI_ISL_478440, EPI_ISL_478441, EPI_ISL_478442, EPI_ISL_478443, EPI_ISL_478444, EPI_ISL_478445, EPI_ISL_478446, EPI_ISL_478447, EPI_ISL_478448, EPI_ISL_478449, EPI_ISL_478450, EPI_ISL_478451, EPI_ISL_478452, EPI_ISL_478453, EPI_ISL_478454, EPI_ISL_478455, EPI_ISL_478456, EPI_ISL_478457, EPI_ISL_478458, EPI_ISL_478459, EPI_ISL_478460, EPI_ISL_478461, EPI_ISL_478462, EPI_ISL_478463, EPI_ISL_478464, EPI_ISL_478465, EPI_ISL_478466, EPI_ISL_478467, EPI_ISL_478468, EPI_ISL_478469, EPI_ISL_478470, EPI_ISL_478471, EPI_ISL_478472 | see above | University College London, Great Ormond Street Hospital for Children NHS Foundation Trust, Imperial College Healthcare NHS Trust                                                                               | COVID-19 Genomics UK (COG-UK) Consortium                                                     | Sergi Castellano, Rachel Williams, Mark Kristiansen, Paola Resende Silva, Sunando Roy, Tony Brooks, Helena Tutill, Paola Niola, Patricia Dyal, Charlotte Williams, Leysa Forrest, Yasmin Panchbhaya, Jacqueline Findlay, Samuel Weeks, Julianne Brown, Kathryn Harris, Paul Randell, James Price, Alison Holmes, Judith Breuer                                                                                                                                                                                                                                                                                                                    |
| EPI_ISL_479620, EPI_ISL_479621, EPI_ISL_479622, EPI_ISL_479623, EPI_ISL_479624                                                                                                                                                                                                                                                                                                                                                                                                                                                                                                                                                                                                                                                                                                                                                                                                                                                                                                                                                                                                                                                                 |           | Molecular diagnostic laboratory of Federal Budget Institution of Science "Central Research Institute of Epidemiology" of The Federal Service on Customers' Rights Protection and Human Well-being Surveillance | Group of Genomics and Postgenomic Technologies of Central Research Institute of Epidemiology | Speranskaya AS, Kaptelova VV, Valdokhina AV, Bulanenko VP, Samoiloiv AE, Korneenko EV, Sizova TV, Tivanova EV, Shipulina OY, Akimkin VG                                                                                                                                                                                                                                                                                                                                                                                                                                                                                                           |
| EPI_ISL_479662                                                                                                                                                                                                                                                                                                                                                                                                                                                                                                                                                                                                                                                                                                                                                                                                                                                                                                                                                                                                                                                                                                                                 |           | College of Veterinary Medicine, Chungnam National University                                                                                                                                                   | College of Veterinary Medicine, Chungnam National University                                 | Seo,S.                                                                                                                                                                                                                                                                                                                                                                                                                                                                                                                                                                                                                                            |
| EPI_ISL_480426, EPI_ISL_480427                                                                                                                                                                                                                                                                                                                                                                                                                                                                                                                                                                                                                                                                                                                                                                                                                                                                                                                                                                                                                                                                                                                 |           | National Institute of Laboratory Medicine and Referral Center                                                                                                                                                  | Bangladesh Council of Scientific and Industrial Research                                     | Shahina Akter, Abu Sayeed Mohammad Mahmud, Mohammad Samir Uzzaman, Eshrar Osman, Md. Ahasan Habib, Tanjina Akhter Banu, Md. Murshed Hasan Sarkar, Barna Goswami, Iffat Jahan, Md. Saddam Hossain, Tasnim Nafisa, Md. Maruf Ahmed Molla, Mahmuda Yeasmin, Ashish Kumar Ghosh, Shahjahan Siddike, A. K. M. Shamsuzzaman, Sheikh Md. Selim Al Din, Utpal Chandra Ray, Salek Ahmed Sajib, Md. Salim Khan                                                                                                                                                                                                                                              |
| EPI_ISL_480601, EPI_ISL_480602                                                                                                                                                                                                                                                                                                                                                                                                                                                                                                                                                                                                                                                                                                                                                                                                                                                                                                                                                                                                                                                                                                                 |           | National Health Laboratory, Timor-Leste                                                                                                                                                                        | MDU-PHL                                                                                      | Soares da Silva, E., Dolores de Jesus da Costa, M., Salles de Sousa, A., Jayanti Pereira Tilman, A., Antonia da Costa, E., Barreto, I., Marr, I., Wapling, J., Francis, J., Ximenes, J., Canisia, D., Freeman, K., Dakh, F., Douglas, N., Baird, R., Cally, L., Seemann, T., Sait, M., Schultz, M., Sherry, N.                                                                                                                                                                                                                                                                                                                                    |
| EPI_ISL_481767, EPI_ISL_481768, EPI_ISL_481774, EPI_ISL_481776, EPI_ISL_481777, EPI_ISL_481778, EPI_ISL_481780, EPI_ISL_481785, EPI_ISL_481793, EPI_ISL_481794, EPI_ISL_481798, EPI_ISL_481802, EPI_ISL_481806, EPI_ISL_481810, EPI_ISL_481811, EPI_ISL_481813, EPI_ISL_481816, EPI_ISL_481818, EPI_ISL_481819, EPI_ISL_481823, EPI_ISL_481824, EPI_ISL_481827, EPI_ISL_481829, EPI_ISL_481830, EPI_ISL_481832, EPI_ISL_481833, EPI_ISL_481834, EPI_ISL_481836, EPI_ISL_481843, EPI_ISL_481849, EPI_ISL_481850, EPI_ISL_481851, EPI_ISL_481856, EPI_ISL_481859, EPI_ISL_481860, EPI_ISL_481862, EPI_ISL_481873, EPI_ISL_481877, EPI_ISL_481879, EPI_ISL_481883, EPI_ISL_481887, EPI_ISL_481893, EPI_ISL_481895, EPI_ISL_481899, EPI_ISL_481902, EPI_ISL_481909, EPI_ISL_481912, EPI_ISL_481916, EPI_ISL_481920, EPI_ISL_481922, EPI_ISL_481930, EPI_ISL_481932, EPI_ISL_481943, EPI_ISL_481947, EPI_ISL_481949, EPI_ISL_481952, EPI_ISL_481954, EPI_ISL_481956, EPI_ISL_481960, EPI_ISL_481961, EPI_ISL_481978, EPI_ISL_481987, EPI_ISL_481988, EPI_ISL_482005, EPI_ISL_482006, EPI_ISL_482014, EPI_ISL_482018, EPI_ISL_482021, EPI_ISL_482030 | see above | PHE South West Regional Laboratory, National Infection Service                                                                                                                                                 | Wellcome Sanger Institute for the COVID-19 Genomics UK (COG-UK) consortium                   | Stephanie Hutchings, Hannah Pymont, Dr Peter Muir, Barry Vipond, Rich Hopes; and Alex Alderton, Roberto Amato, Sonia Goncalves, Ewan Harrison, David K. Jackson, Ian Johnston, Dominic Kwiatkowski, Cordelia Langford, John Sillitoe on behalf of the Wellcome Sanger Institute COVID-19 Surveillance Team ( <a href="http://www.sanger.ac.uk/covid-team">http://www.sanger.ac.uk/covid-team</a> )                                                                                                                                                                                                                                                |
| EPI_ISL_482160, EPI_ISL_482161, EPI_ISL_482162, EPI_ISL_482163, EPI_ISL_482164, EPI_ISL_482165, EPI_ISL_482166, EPI_ISL_482167, EPI_ISL_482168, EPI_ISL_482169, EPI_ISL_482170, EPI_ISL_482171, EPI_ISL_482172, EPI_ISL_482173, EPI_ISL_482174, EPI_ISL_482175, EPI_ISL_482176, EPI_ISL_482177, EPI_ISL_482178, EPI_ISL_482179, EPI_ISL_482180, EPI_ISL_482181, EPI_ISL_482182, EPI_ISL_482183, EPI_ISL_482184, EPI_ISL_482185, EPI_ISL_482186, EPI_ISL_482187, EPI_ISL_482188, EPI_ISL_482189, EPI_ISL_482190, EPI_ISL_482192, EPI_ISL_482193, EPI_ISL_482194, EPI_ISL_482195, EPI_ISL_482196, EPI_ISL_482197, EPI_ISL_482198, EPI_ISL_482199, EPI_ISL_482200, EPI_ISL_482201, EPI_ISL_482202, EPI_ISL_482203, EPI_ISL_482204, EPI_ISL_482205, EPI_ISL_482206, EPI_ISL_482207, EPI_ISL_482208, EPI_ISL_482209, EPI_ISL_482210, EPI_ISL_482211, EPI_ISL_482212, EPI_ISL_482213, EPI_ISL_482214, EPI_ISL_482215, EPI_ISL_482216, EPI_ISL_482217, EPI_ISL_482218                                                                                                                                                                                 | see above | University College London, Great Ormond Street Hospital for Children NHS Foundation Trust, Imperial College Healthcare NHS Trust                                                                               | Wellcome Sanger Institute for the COVID-19 Genomics UK (COG-UK) consortium                   | Sergi Castellano, Rachel Williams, Mark Kristiansen, Paola Resende Silva, Sunando Roy, Tony Brooks, Helena Tutill, Paola Niola, Patricia Dyal, Charlotte Williams, Leysa Forrest, Yasmin Panchbhaya, Jacqueline Findlay, Sam Weeks, Julianne Brown, Kathryn Harris, Paul Randell, James Price, Alison Holmes, Judith Breuer and Alex Alderton, Roberto Amato, Sonia Goncalves, Ewan Harrison, David K. Jackson, Ian Johnston, Dominic Kwiatkowski, Cordelia Langford, John Sillitoe on behalf of the Wellcome Sanger Institute COVID-19 Surveillance Team ( <a href="http://www.sanger.ac.uk/covid-team">http://www.sanger.ac.uk/covid-team</a> ) |
| EPI_ISL_482745                                                                                                                                                                                                                                                                                                                                                                                                                                                                                                                                                                                                                                                                                                                                                                                                                                                                                                                                                                                                                                                                                                                                 |           | Medical Microbiology, Leiden University Medical Center                                                                                                                                                         | Medical Microbiology, Leiden University Medical Center                                       | Snijder,E.J., Ogando,N.S., Zevenhoven,J.C., Dalebout,T.J., de Vries,J.C. and Sidorov,I.                                                                                                                                                                                                                                                                                                                                                                                                                                                                                                                                                           |
| EPI_ISL_482746                                                                                                                                                                                                                                                                                                                                                                                                                                                                                                                                                                                                                                                                                                                                                                                                                                                                                                                                                                                                                                                                                                                                 |           | Medical Microbiology, Leiden University Medical Center                                                                                                                                                         | Medical Microbiology, Leiden University Medical Center                                       | Snijder,E.J., Ogando,N.S., Zevenhoven,J.C., Dalebout,T.J., de Vries,J.J. and Sidorov,I.                                                                                                                                                                                                                                                                                                                                                                                                                                                                                                                                                           |
| EPI_ISL_483065                                                                                                                                                                                                                                                                                                                                                                                                                                                                                                                                                                                                                                                                                                                                                                                                                                                                                                                                                                                                                                                                                                                                 |           | Centro de Desenvolvimento Tecnológico em Saude, Fundacao Oswaldo Cruz                                                                                                                                          | Centro de Desenvolvimento Tecnológico em Saude, Fundacao Oswaldo Cruz                        | Souza,T.M., Fintelman-Rodrigues,N., De Paula,A.D., Tschoeke,D., Barroso,S.P., Gregorio,M.L., Oliveira,J.S., Saraiva,F.B., Ferreira,M.A., Sacramento,C.Q.                                                                                                                                                                                                                                                                                                                                                                                                                                                                                          |
| EPI_ISL_483633, EPI_ISL_483634                                                                                                                                                                                                                                                                                                                                                                                                                                                                                                                                                                                                                                                                                                                                                                                                                                                                                                                                                                                                                                                                                                                 |           | National Institute of Laboratory Medicine and Referral Center                                                                                                                                                  | Genomic Research Lab, BCSIR                                                                  | Shahina Akter, Abu Sayeed Mohammad Mahmud, Mohammad Samir Uzzaman, Eshrar Osman, Md. Ahasan Habib, Tanjina Akhter Banu, Md. Murshed Hasan Sarkar, Barna Goswami, Iffat Jahan, Md. Saddam Hossain, Tasnim Nafisa, Md. Maruf Ahmed Molla, Mahmuda Yeasmin, Ashish Kumar Ghosh, A. K. M. Shamsuzzaman, Sheikh Md. Selim Al Din, Utpal Chandra Ray, Salek Ahmed Sajib, Md. Salim Khan                                                                                                                                                                                                                                                                 |
| EPI_ISL_486815, EPI_ISL_486816, EPI_ISL_486817, EPI_ISL_486818, EPI_ISL_486819, EPI_ISL_486820, EPI_ISL_486821, EPI_ISL_486822, EPI_ISL_486823, EPI_ISL_486824, EPI_ISL_486825, EPI_ISL_486826, EPI_ISL_486827, EPI_ISL_486828, EPI_ISL_486829                                                                                                                                                                                                                                                                                                                                                                                                                                                                                                                                                                                                                                                                                                                                                                                                                                                                                                 | see above | Molecular diagnostic laboratory of Federal Budget Institution of Science "Central Research Institute of Epidemiology" of The Federal Service on Customers' Rights Protection and Human Well-being Surveillance | Group of Genomics and Postgenomic Technologies of Central Research Institute of Epidemiology | Speranskaya AS, Kaptelova VV, Valdokhina AV, Bulanenko VP, Samoiloiv AE, Korneenko EV, Tivanova EV, Shipulina OY, Akimkin VG                                                                                                                                                                                                                                                                                                                                                                                                                                                                                                                      |
| EPI_ISL_487366, EPI_ISL_487367                                                                                                                                                                                                                                                                                                                                                                                                                                                                                                                                                                                                                                                                                                                                                                                                                                                                                                                                                                                                                                                                                                                 |           | National Institute of Laboratory Medicine and Referral Center                                                                                                                                                  | Genomic Research Lab, BCSIR                                                                  | Shahina Akter, Abu Sayeed Mohammad Mahmud, Mohammad Samir Uzzaman, Eshrar Osman, Md. Ahasan Habib, Tanjina Akhter Banu, Md. Murshed Hasan Sarkar, Barna Goswami, Iffat Jahan, Md. Saddam Hossain, Tasnim Nafisa, Md. Maruf Ahmed Molla, Mahmuda Yeasmin, Ashish Kumar Ghosh, A. K. M. Shamsuzzaman, Sheikh Md. Selim Al Din, Utpal Chandra Ray, Salek Ahmed Sajib, Md. Salim Khan                                                                                                                                                                                                                                                                 |
| EPI_ISL_487525, EPI_ISL_487529                                                                                                                                                                                                                                                                                                                                                                                                                                                                                                                                                                                                                                                                                                                                                                                                                                                                                                                                                                                                                                                                                                                 |           | University College London, Great Ormond Street Hospital for Children NHS Foundation Trust, Imperial College Healthcare NHS Trust                                                                               | Wellcome Sanger Institute for the COVID-19 Genomics UK (COG-UK) consortium                   | Sergi Castellano, Rachel Williams, Mark Kristiansen, Paola Resende Silva, Sunando Roy, Tony Brooks, Helena Tutill, Paola Niola, Patricia Dyal, Charlotte Williams, Leysa Forrest, Yasmin Panchbhaya, Jacqueline Findlay, Sam Weeks, Julianne Brown, Kathryn Harris, Paul Randell, James Price, Alison Holmes, Judith Breuer and Alex Alderton, Roberto Amato, Sonia Goncalves, Ewan Harrison, David K. Jackson, Ian Johnston, Dominic Kwiatkowski, Cordelia Langford, John Sillitoe on behalf of the Wellcome Sanger Institute COVID-19 Surveillance Team ( <a href="http://www.sanger.ac.uk/covid-team">http://www.sanger.ac.uk/covid-team</a> ) |
| EPI_ISL_487532, EPI_ISL_487533                                                                                                                                                                                                                                                                                                                                                                                                                                                                                                                                                                                                                                                                                                                                                                                                                                                                                                                                                                                                                                                                                                                 |           | PHE South West Regional Laboratory, National Infection Service                                                                                                                                                 | Wellcome Sanger Institute for the COVID-19 Genomics UK (COG-UK) consortium                   | Stephanie Hutchings, Hannah Pymont, Dr Peter Muir, Barry Vipond, Rich Hopes; and Alex Alderton, Roberto Amato, Sonia Goncalves, Ewan Harrison, David K. Jackson, Ian Johnston, Dominic Kwiatkowski, Cordelia Langford, John Sillitoe on behalf of the Wellcome Sanger Institute COVID-19 Surveillance Team ( <a href="http://www.sanger.ac.uk/covid-team">http://www.sanger.ac.uk/covid-team</a> )                                                                                                                                                                                                                                                |
| EPI_ISL_487534, EPI_ISL_487537                                                                                                                                                                                                                                                                                                                                                                                                                                                                                                                                                                                                                                                                                                                                                                                                                                                                                                                                                                                                                                                                                                                 |           | University College London, Great Ormond Street Hospital for Children NHS Foundation Trust, Imperial College Healthcare NHS Trust                                                                               | Wellcome Sanger Institute for the COVID-19 Genomics UK (COG-UK) consortium                   | Sergi Castellano, Rachel Williams, Mark Kristiansen, Paola Resende Silva, Sunando Roy, Tony Brooks, Helena Tutill, Paola Niola, Patricia Dyal, Charlotte Williams, Leysa Forrest, Yasmin Panchbhaya, Jacqueline Findlay, Sam Weeks, Julianne Brown, Kathryn Harris, Paul Randell, James Price, Alison Holmes, Judith Breuer and Alex Alderton, Roberto Amato, Sonia Goncalves, Ewan Harrison, David K. Jackson, Ian Johnston, Dominic Kwiatkowski, Cordelia Langford, John Sillitoe on behalf of the Wellcome Sanger Institute COVID-19 Surveillance Team ( <a href="http://www.sanger.ac.uk/covid-team">http://www.sanger.ac.uk/covid-team</a> ) |
| EPI_ISL_487538                                                                                                                                                                                                                                                                                                                                                                                                                                                                                                                                                                                                                                                                                                                                                                                                                                                                                                                                                                                                                                                                                                                                 |           | PHE South West Regional Laboratory, National Infection Service                                                                                                                                                 | Wellcome Sanger Institute for the COVID-19 Genomics UK (COG-UK) consortium                   | Stephanie Hutchings, Hannah Pymont, Dr Peter Muir, Barry Vipond, Rich Hopes; and Alex Alderton, Roberto Amato, Sonia Goncalves, Ewan Harrison, David K. Jackson, Ian Johnston, Dominic Kwiatkowski, Cordelia Langford, John Sillitoe on behalf of the Wellcome Sanger Institute COVID-19 Surveillance Team ( <a href="http://www.sanger.ac.uk/covid-team">http://www.sanger.ac.uk/covid-team</a> )                                                                                                                                                                                                                                                |
| EPI_ISL_487540                                                                                                                                                                                                                                                                                                                                                                                                                                                                                                                                                                                                                                                                                                                                                                                                                                                                                                                                                                                                                                                                                                                                 |           | University College London, Great Ormond Street Hospital for Children NHS Foundation Trust, Imperial College Healthcare NHS Trust                                                                               | Wellcome Sanger Institute for the COVID-19 Genomics UK (COG-UK) consortium                   | Sergi Castellano, Rachel Williams, Mark Kristiansen, Paola Resende Silva, Sunando Roy, Tony Brooks, Helena Tutill, Paola Niola, Patricia Dyal, Charlotte Williams, Leysa Forrest, Yasmin Panchbhaya, Jacqueline Findlay, Sam Weeks, Julianne Brown, Kathryn Harris, Paul Randell, James Price, Alison Holmes, Judith Breuer and Alex Alderton, Roberto Amato, Sonia Goncalves, Ewan Harrison, David K. Jackson, Ian Johnston, Dominic Kwiatkowski, Cordelia Langford, John Sillitoe on behalf of the Wellcome Sanger Institute COVID-19 Surveillance Team ( <a href="http://www.sanger.ac.uk/covid-team">http://www.sanger.ac.uk/covid-team</a> ) |
| EPI_ISL_487543, EPI_ISL_487544                                                                                                                                                                                                                                                                                                                                                                                                                                                                                                                                                                                                                                                                                                                                                                                                                                                                                                                                                                                                                                                                                                                 |           | PHE South West Regional Laboratory, National Infection Service                                                                                                                                                 | Wellcome Sanger Institute for the COVID-19 Genomics UK (COG-UK) consortium                   | Stephanie Hutchings, Hannah Pymont, Dr Peter Muir, Barry Vipond, Rich Hopes; and Alex Alderton, Roberto Amato, Sonia Goncalves, Ewan Harrison, David K. Jackson, Ian Johnston, Dominic Kwiatkowski, Cordelia Langford, John Sillitoe on behalf of the Wellcome Sanger Institute COVID-19 Surveillance Team ( <a href="http://www.sanger.ac.uk/covid-team">http://www.sanger.ac.uk/covid-team</a> )                                                                                                                                                                                                                                                |
| EPI_ISL_487546, EPI_ISL_487550                                                                                                                                                                                                                                                                                                                                                                                                                                                                                                                                                                                                                                                                                                                                                                                                                                                                                                                                                                                                                                                                                                                 |           | University College London, Great Ormond Street Hospital for                                                                                                                                                    | Wellcome Sanger Institute for the COVID-19 Genomics UK                                       | Sergi Castellano, Rachel Williams, Mark Kristiansen, Paola Resende Silva, Sunando Roy, Tony Brooks, Helena Tutill, Paola Niola, Patricia Dyal, Charlotte                                                                                                                                                                                                                                                                                                                                                                                                                                                                                          |



|                                                                                                                                                                                                                                                                                                                                                                                                                                                                                                                                                                                                                                                                                                                                                                                                                                                                                                                                                                                                                                                                                                                                |                                                                                                                                  |                                                                            |                                                                                                                                                                                                                                                                                                                                                                                                                                                                                                                                                                                                                                                   |                                                                                                                                                                                                                                                                                                                                                                                                    |
|--------------------------------------------------------------------------------------------------------------------------------------------------------------------------------------------------------------------------------------------------------------------------------------------------------------------------------------------------------------------------------------------------------------------------------------------------------------------------------------------------------------------------------------------------------------------------------------------------------------------------------------------------------------------------------------------------------------------------------------------------------------------------------------------------------------------------------------------------------------------------------------------------------------------------------------------------------------------------------------------------------------------------------------------------------------------------------------------------------------------------------|----------------------------------------------------------------------------------------------------------------------------------|----------------------------------------------------------------------------|---------------------------------------------------------------------------------------------------------------------------------------------------------------------------------------------------------------------------------------------------------------------------------------------------------------------------------------------------------------------------------------------------------------------------------------------------------------------------------------------------------------------------------------------------------------------------------------------------------------------------------------------------|----------------------------------------------------------------------------------------------------------------------------------------------------------------------------------------------------------------------------------------------------------------------------------------------------------------------------------------------------------------------------------------------------|
|                                                                                                                                                                                                                                                                                                                                                                                                                                                                                                                                                                                                                                                                                                                                                                                                                                                                                                                                                                                                                                                                                                                                | NHS Trust                                                                                                                        |                                                                            | Judith Breuer and Alex Alderton, Roberto Amato, Sonia Goncalves, Ewan Harrison, David K. Jackson, Ian Johnston, Dominic Kwiatkowski, Cordelia Langford, John Sillitoe on behalf of the Wellcome Sanger Institute COVID-19 Surveillance Team ( <a href="http://www.sanger.ac.uk/covid-team">http://www.sanger.ac.uk/covid-team</a> )                                                                                                                                                                                                                                                                                                               |                                                                                                                                                                                                                                                                                                                                                                                                    |
| EPI_ISL_488190, EPI_ISL_488193, EPI_ISL_488202, EPI_ISL_488207, EPI_ISL_488208, EPI_ISL_488209, EPI_ISL_488210, EPI_ISL_488211, EPI_ISL_488214, EPI_ISL_488215, EPI_ISL_488220, EPI_ISL_488222, EPI_ISL_488224, EPI_ISL_488225, EPI_ISL_488232, EPI_ISL_488236, EPI_ISL_488237, EPI_ISL_488238, EPI_ISL_488239, EPI_ISL_488250, EPI_ISL_488253, EPI_ISL_488257, EPI_ISL_488264, EPI_ISL_488267, EPI_ISL_488273, EPI_ISL_488274, EPI_ISL_488278, EPI_ISL_488280, EPI_ISL_488283, EPI_ISL_488287, EPI_ISL_488289, EPI_ISL_488290, EPI_ISL_488298, EPI_ISL_488299, EPI_ISL_488300, EPI_ISL_488304, EPI_ISL_488308, EPI_ISL_488310, EPI_ISL_488311, EPI_ISL_488313, EPI_ISL_488315, EPI_ISL_488318, EPI_ISL_488321, EPI_ISL_488324, EPI_ISL_488326, EPI_ISL_488327, EPI_ISL_488328, EPI_ISL_488330, EPI_ISL_488333, EPI_ISL_488336, EPI_ISL_488339, EPI_ISL_488340, EPI_ISL_488341, EPI_ISL_488345, EPI_ISL_488346, EPI_ISL_488347, EPI_ISL_488355, EPI_ISL_488363, EPI_ISL_488364, EPI_ISL_488367, EPI_ISL_488370, EPI_ISL_488371, EPI_ISL_488377, EPI_ISL_488385, EPI_ISL_488392, EPI_ISL_488395, EPI_ISL_488400, EPI_ISL_488408 | see above                                                                                                                        | PHE South West Regional Laboratory, National Infection Service             | Wellcome Sanger Institute for the COVID-19 Genomics UK (COG-UK) consortium                                                                                                                                                                                                                                                                                                                                                                                                                                                                                                                                                                        | Stephanie Hutchings, Hannah Pymont, Dr Peter Muir, Barry Vipond, Rich Hopes; and Alex Alderton, Roberto Amato, Sonia Goncalves, Ewan Harrison, David K. Jackson, Ian Johnston, Dominic Kwiatkowski, Cordelia Langford, John Sillitoe on behalf of the Wellcome Sanger Institute COVID-19 Surveillance Team ( <a href="http://www.sanger.ac.uk/covid-team">http://www.sanger.ac.uk/covid-team</a> ) |
| EPI_ISL_488409, EPI_ISL_488411                                                                                                                                                                                                                                                                                                                                                                                                                                                                                                                                                                                                                                                                                                                                                                                                                                                                                                                                                                                                                                                                                                 | PHE South West Regional Laboratory, National Infection Service                                                                   | Wellcome Sanger Institute for the COVID-19 Genomics UK (COG-UK) Consortium | Stephanie Hutchings, Hannah Pymont, Dr Peter Muir, Barry Vipond, Rich Hopes; and Alex Alderton, Roberto Amato, Sonia Goncalves, Ewan Harrison, David K. Jackson, Ian Johnston, Dominic Kwiatkowski, Cordelia Langford, John Sillitoe on behalf of the Wellcome Sanger Institute COVID-19 Surveillance Team                                                                                                                                                                                                                                                                                                                                        |                                                                                                                                                                                                                                                                                                                                                                                                    |
| EPI_ISL_488414, EPI_ISL_488420, EPI_ISL_488422, EPI_ISL_488423, EPI_ISL_488425, EPI_ISL_488428, EPI_ISL_488430, EPI_ISL_488437, EPI_ISL_488438, EPI_ISL_488440, EPI_ISL_488447, EPI_ISL_488450, EPI_ISL_488451, EPI_ISL_488454                                                                                                                                                                                                                                                                                                                                                                                                                                                                                                                                                                                                                                                                                                                                                                                                                                                                                                 | see above                                                                                                                        | PHE South West Regional Laboratory, National Infection Service             | Wellcome Sanger Institute for the COVID-19 Genomics UK (COG-UK) consortium                                                                                                                                                                                                                                                                                                                                                                                                                                                                                                                                                                        | Stephanie Hutchings, Hannah Pymont, Dr Peter Muir, Barry Vipond, Rich Hopes; and Alex Alderton, Roberto Amato, Sonia Goncalves, Ewan Harrison, David K. Jackson, Ian Johnston, Dominic Kwiatkowski, Cordelia Langford, John Sillitoe on behalf of the Wellcome Sanger Institute COVID-19 Surveillance Team ( <a href="http://www.sanger.ac.uk/covid-team">http://www.sanger.ac.uk/covid-team</a> ) |
| EPI_ISL_490113                                                                                                                                                                                                                                                                                                                                                                                                                                                                                                                                                                                                                                                                                                                                                                                                                                                                                                                                                                                                                                                                                                                 | National Institute of Laboratory Medicine and Referral Center                                                                    | Genomic Research Lab, BCSIR                                                | Shahina Akter, Abu Sayeed Mohammad Mahmud, Mohammad Samir Uzzaman, Eshrar Osman, Md. Ahasan Habib, Tanjina Akhter Banu, Md. Murshed Hasan Sarkar, Barna Goswami, Iffat Jahan, Md. Saddam Hossain, Tasmin Nafisa, Md. Maruf Ahmed Molla, Mahmuda Yeasmin, Asish Kumar Ghosh, A. K. M. Shamsuzzaman, Sheikh Md. Selim Al Din, Utpal Chandra Ray, Salek Ahmed Sajib, Md. Salim Khan                                                                                                                                                                                                                                                                  |                                                                                                                                                                                                                                                                                                                                                                                                    |
| EPI_ISL_492028, EPI_ISL_492029, EPI_ISL_492030, EPI_ISL_492031                                                                                                                                                                                                                                                                                                                                                                                                                                                                                                                                                                                                                                                                                                                                                                                                                                                                                                                                                                                                                                                                 | Child Health Research Foundation                                                                                                 | Child Health Research Foundation                                           | Senjuti Saha, Md Saiful Islam Sajib, Roly Malaker, Md Hafizur Rahman, Afroza Akter Tanni, Syed Muktedir Al Siium, Maksudha Islam, Samir K Saha                                                                                                                                                                                                                                                                                                                                                                                                                                                                                                    |                                                                                                                                                                                                                                                                                                                                                                                                    |
| EPI_ISL_492187, EPI_ISL_492197, EPI_ISL_492215, EPI_ISL_492220, EPI_ISL_492226, EPI_ISL_492228, EPI_ISL_492231, EPI_ISL_492233, EPI_ISL_492235, EPI_ISL_492246, EPI_ISL_492250, EPI_ISL_492276, EPI_ISL_492284, EPI_ISL_492286, EPI_ISL_492288, EPI_ISL_492299, EPI_ISL_492302, EPI_ISL_492306, EPI_ISL_492309, EPI_ISL_492316, EPI_ISL_492317, EPI_ISL_492323, EPI_ISL_492328, EPI_ISL_492335, EPI_ISL_492346, EPI_ISL_492350, EPI_ISL_492356, EPI_ISL_492357, EPI_ISL_492361, EPI_ISL_492362, EPI_ISL_492372, EPI_ISL_492373, EPI_ISL_492382, EPI_ISL_492388, EPI_ISL_492390, EPI_ISL_492391, EPI_ISL_492398, EPI_ISL_492404, EPI_ISL_492408, EPI_ISL_492409, EPI_ISL_492415, EPI_ISL_492423, EPI_ISL_492427, EPI_ISL_492433, EPI_ISL_492434, EPI_ISL_492439, EPI_ISL_492440, EPI_ISL_492442, EPI_ISL_492447, EPI_ISL_492448                                                                                                                                                                                                                                                                                                 | see above                                                                                                                        | PHE South West Regional Laboratory, National Infection Service             | Wellcome Sanger Institute for the COVID-19 Genomics UK (COG-UK) consortium                                                                                                                                                                                                                                                                                                                                                                                                                                                                                                                                                                        | Stephanie Hutchings, Hannah Pymont, Dr Peter Muir, Barry Vipond, Rich Hopes; and Alex Alderton, Roberto Amato, Sonia Goncalves, Ewan Harrison, David K. Jackson, Ian Johnston, Dominic Kwiatkowski, Cordelia Langford, John Sillitoe on behalf of the Wellcome Sanger Institute COVID-19 Surveillance Team ( <a href="http://www.sanger.ac.uk/covid-team">http://www.sanger.ac.uk/covid-team</a> ) |
| EPI_ISL_492495                                                                                                                                                                                                                                                                                                                                                                                                                                                                                                                                                                                                                                                                                                                                                                                                                                                                                                                                                                                                                                                                                                                 | University College London, Great Ormond Street Hospital for Children NHS Foundation Trust, Imperial College Healthcare NHS Trust | Wellcome Sanger Institute for the COVID-19 Genomics UK (COG-UK) Consortium | Sergi Castellano, Rachel Williams, Mark Kristiansen, Paola Resende Silva, Sunando Roy, Tony Brooks, Helena Tutill, Paola Niola, Patricia Dyal, Charlotte Williams, Leysa Forrest, Yasmin Panchbhaya, Jacqueline Findlay, Sam Weeks, Julianne Brown, Kathryn Harris, Paul Randell, James Price, Alison Holmes, Judith Breuer and Alex Alderton, Roberto Amato, Sonia Goncalves, Ewan Harrison, David K. Jackson, Ian Johnston, Dominic Kwiatkowski, Cordelia Langford, John Sillitoe on behalf of the Wellcome Sanger Institute COVID-19 Surveillance Team                                                                                         |                                                                                                                                                                                                                                                                                                                                                                                                    |
| EPI_ISL_492496                                                                                                                                                                                                                                                                                                                                                                                                                                                                                                                                                                                                                                                                                                                                                                                                                                                                                                                                                                                                                                                                                                                 | University College London, Great Ormond Street Hospital for Children NHS Foundation Trust, Imperial College Healthcare NHS Trust | Wellcome Sanger Institute for the COVID-19 Genomics UK (COG-UK) consortium | Sergi Castellano, Rachel Williams, Mark Kristiansen, Paola Resende Silva, Sunando Roy, Tony Brooks, Helena Tutill, Paola Niola, Patricia Dyal, Charlotte Williams, Leysa Forrest, Yasmin Panchbhaya, Jacqueline Findlay, Sam Weeks, Julianne Brown, Kathryn Harris, Paul Randell, James Price, Alison Holmes, Judith Breuer and Alex Alderton, Roberto Amato, Sonia Goncalves, Ewan Harrison, David K. Jackson, Ian Johnston, Dominic Kwiatkowski, Cordelia Langford, John Sillitoe on behalf of the Wellcome Sanger Institute COVID-19 Surveillance Team ( <a href="http://www.sanger.ac.uk/covid-team">http://www.sanger.ac.uk/covid-team</a> ) |                                                                                                                                                                                                                                                                                                                                                                                                    |
| EPI_ISL_492497                                                                                                                                                                                                                                                                                                                                                                                                                                                                                                                                                                                                                                                                                                                                                                                                                                                                                                                                                                                                                                                                                                                 | University College London, Great Ormond Street Hospital for Children NHS Foundation Trust, Imperial College Healthcare NHS Trust | Wellcome Sanger Institute for the COVID-19 Genomics UK (COG-UK) Consortium | Sergi Castellano, Rachel Williams, Mark Kristiansen, Paola Resende Silva, Sunando Roy, Tony Brooks, Helena Tutill, Paola Niola, Patricia Dyal, Charlotte Williams, Leysa Forrest, Yasmin Panchbhaya, Jacqueline Findlay, Sam Weeks, Julianne Brown, Kathryn Harris, Paul Randell, James Price, Alison Holmes, Judith Breuer and Alex Alderton, Roberto Amato, Sonia Goncalves, Ewan Harrison, David K. Jackson, Ian Johnston, Dominic Kwiatkowski, Cordelia Langford, John Sillitoe on behalf of the Wellcome Sanger Institute COVID-19 Surveillance Team                                                                                         |                                                                                                                                                                                                                                                                                                                                                                                                    |
| EPI_ISL_492498, EPI_ISL_492499, EPI_ISL_492500, EPI_ISL_492501, EPI_ISL_492502, EPI_ISL_492503, EPI_ISL_492504                                                                                                                                                                                                                                                                                                                                                                                                                                                                                                                                                                                                                                                                                                                                                                                                                                                                                                                                                                                                                 | University College London, Great Ormond Street Hospital for Children NHS Foundation Trust, Imperial College Healthcare NHS Trust | Wellcome Sanger Institute for the COVID-19 Genomics UK (COG-UK) consortium | Sergi Castellano, Rachel Williams, Mark Kristiansen, Paola Resende Silva, Sunando Roy, Tony Brooks, Helena Tutill, Paola Niola, Patricia Dyal, Charlotte Williams, Leysa Forrest, Yasmin Panchbhaya, Jacqueline Findlay, Sam Weeks, Julianne Brown, Kathryn Harris, Paul Randell, James Price, Alison Holmes, Judith Breuer and Alex Alderton, Roberto Amato, Sonia Goncalves, Ewan Harrison, David K. Jackson, Ian Johnston, Dominic Kwiatkowski, Cordelia Langford, John Sillitoe on behalf of the Wellcome Sanger Institute COVID-19 Surveillance Team ( <a href="http://www.sanger.ac.uk/covid-team">http://www.sanger.ac.uk/covid-team</a> ) |                                                                                                                                                                                                                                                                                                                                                                                                    |
| EPI_ISL_492509, EPI_ISL_492511, EPI_ISL_492512, EPI_ISL_492513, EPI_ISL_492516, EPI_ISL_492527, EPI_ISL_492529, EPI_ISL_492530, EPI_ISL_492531, EPI_ISL_492534, EPI_ISL_492540, EPI_ISL_492541, EPI_ISL_492542, EPI_ISL_492547, EPI_ISL_492548, EPI_ISL_492556, EPI_ISL_492561, EPI_ISL_492563, EPI_ISL_492565, EPI_ISL_492567, EPI_ISL_492569, EPI_ISL_492570, EPI_ISL_492571, EPI_ISL_492583, EPI_ISL_492584, EPI_ISL_492590, EPI_ISL_492591, EPI_ISL_492592, EPI_ISL_492595                                                                                                                                                                                                                                                                                                                                                                                                                                                                                                                                                                                                                                                 | see above                                                                                                                        | PHE South West Regional Laboratory, National Infection Service             | Wellcome Sanger Institute for the COVID-19 Genomics UK (COG-UK) consortium                                                                                                                                                                                                                                                                                                                                                                                                                                                                                                                                                                        | Stephanie Hutchings, Hannah Pymont, Dr Peter Muir, Barry Vipond, Rich Hopes; and Alex Alderton, Roberto Amato, Sonia Goncalves, Ewan Harrison, David K. Jackson, Ian Johnston, Dominic Kwiatkowski, Cordelia Langford, John Sillitoe on behalf of the Wellcome Sanger Institute COVID-19 Surveillance Team ( <a href="http://www.sanger.ac.uk/covid-team">http://www.sanger.ac.uk/covid-team</a> ) |
| EPI_ISL_492596                                                                                                                                                                                                                                                                                                                                                                                                                                                                                                                                                                                                                                                                                                                                                                                                                                                                                                                                                                                                                                                                                                                 | PHE South West Regional Laboratory, National Infection Service                                                                   | Wellcome Sanger Institute for the COVID-19 Genomics UK (COG-UK) Consortium | Stephanie Hutchings, Hannah Pymont, Dr Peter Muir, Barry Vipond, Rich Hopes; and Alex Alderton, Roberto Amato, Sonia Goncalves, Ewan Harrison, David K. Jackson, Ian Johnston, Dominic Kwiatkowski, Cordelia Langford, John Sillitoe on behalf of the Wellcome Sanger Institute COVID-19 Surveillance Team                                                                                                                                                                                                                                                                                                                                        |                                                                                                                                                                                                                                                                                                                                                                                                    |
| EPI_ISL_492602, EPI_ISL_492604, EPI_ISL_492605, EPI_ISL_492611, EPI_ISL_492618, EPI_ISL_492622, EPI_ISL_492626, EPI_ISL_492633, EPI_ISL_492637, EPI_ISL_492638, EPI_ISL_492646, EPI_ISL_492647, EPI_ISL_492650, EPI_ISL_492653, EPI_ISL_492663, EPI_ISL_492666, EPI_ISL_492667, EPI_ISL_492671, EPI_ISL_492672, EPI_ISL_492673, EPI_ISL_492677, EPI_ISL_492678, EPI_ISL_492679, EPI_ISL_492680, EPI_ISL_492681, EPI_ISL_492687, EPI_ISL_492688, EPI_ISL_492694, EPI_ISL_492696, EPI_ISL_492701, EPI_ISL_492702, EPI_ISL_492705, EPI_ISL_492714, EPI_ISL_492715, EPI_ISL_492724, EPI_ISL_492727, EPI_ISL_492730, EPI_ISL_492731, EPI_ISL_492733, EPI_ISL_492741, EPI_ISL_492743, EPI_ISL_492744, EPI_ISL_492745                                                                                                                                                                                                                                                                                                                                                                                                                 | see above                                                                                                                        | PHE South West Regional Laboratory, National Infection Service             | Wellcome Sanger Institute for the COVID-19 Genomics UK (COG-UK) consortium                                                                                                                                                                                                                                                                                                                                                                                                                                                                                                                                                                        | Stephanie Hutchings, Hannah Pymont, Dr Peter Muir, Barry Vipond, Rich Hopes; and Alex Alderton, Roberto Amato, Sonia Goncalves, Ewan Harrison, David K. Jackson, Ian Johnston, Dominic Kwiatkowski, Cordelia Langford, John Sillitoe on behalf of the Wellcome Sanger Institute COVID-19 Surveillance Team ( <a href="http://www.sanger.ac.uk/covid-team">http://www.sanger.ac.uk/covid-team</a> ) |
| EPI_ISL_492746                                                                                                                                                                                                                                                                                                                                                                                                                                                                                                                                                                                                                                                                                                                                                                                                                                                                                                                                                                                                                                                                                                                 | University College London, Great Ormond Street Hospital for Children NHS Foundation Trust, Imperial College Healthcare NHS Trust | Wellcome Sanger Institute for the COVID-19 Genomics UK (COG-UK) Consortium | Sergi Castellano, Rachel Williams, Mark Kristiansen, Paola Resende Silva, Sunando Roy, Tony Brooks, Helena Tutill, Paola Niola, Patricia Dyal, Charlotte Williams, Leysa Forrest, Yasmin Panchbhaya, Jacqueline Findlay, Sam Weeks, Julianne Brown, Kathryn Harris, Paul Randell, James Price, Alison Holmes, Judith Breuer and Alex Alderton, Roberto Amato, Sonia Goncalves, Ewan Harrison, David K. Jackson, Ian Johnston, Dominic Kwiatkowski, Cordelia Langford, John Sillitoe on behalf of the Wellcome Sanger Institute COVID-19 Surveillance Team                                                                                         |                                                                                                                                                                                                                                                                                                                                                                                                    |
| EPI_ISL_492747                                                                                                                                                                                                                                                                                                                                                                                                                                                                                                                                                                                                                                                                                                                                                                                                                                                                                                                                                                                                                                                                                                                 | University College London, Great Ormond Street Hospital for Children NHS Foundation Trust, Imperial College Healthcare NHS Trust | Wellcome Sanger Institute for the COVID-19 Genomics UK (COG-UK) consortium | Sergi Castellano, Rachel Williams, Mark Kristiansen, Paola Resende Silva, Sunando Roy, Tony Brooks, Helena Tutill, Paola Niola, Patricia Dyal, Charlotte Williams, Leysa Forrest, Yasmin Panchbhaya, Jacqueline Findlay, Sam Weeks, Julianne Brown, Kathryn Harris, Paul Randell, James Price, Alison Holmes, Judith Breuer and Alex Alderton, Roberto Amato, Sonia Goncalves, Ewan Harrison, David K. Jackson, Ian Johnston, Dominic Kwiatkowski, Cordelia Langford, John Sillitoe on behalf of the Wellcome Sanger Institute COVID-19 Surveillance Team ( <a href="http://www.sanger.ac.uk/covid-team">http://www.sanger.ac.uk/covid-team</a> ) |                                                                                                                                                                                                                                                                                                                                                                                                    |
| EPI_ISL_492748                                                                                                                                                                                                                                                                                                                                                                                                                                                                                                                                                                                                                                                                                                                                                                                                                                                                                                                                                                                                                                                                                                                 | University College London, Great Ormond Street Hospital for Children NHS Foundation Trust, Imperial College Healthcare NHS Trust | Wellcome Sanger Institute for the COVID-19 Genomics UK (COG-UK) Consortium | Sergi Castellano, Rachel Williams, Mark Kristiansen, Paola Resende Silva, Sunando Roy, Tony Brooks, Helena Tutill, Paola Niola, Patricia Dyal, Charlotte Williams, Leysa Forrest, Yasmin Panchbhaya, Jacqueline Findlay, Sam Weeks, Julianne Brown, Kathryn Harris, Paul Randell, James Price, Alison Holmes, Judith Breuer and Alex Alderton, Roberto Amato, Sonia Goncalves, Ewan Harrison, David K. Jackson, Ian Johnston, Dominic Kwiatkowski, Cordelia Langford, John Sillitoe on behalf of the Wellcome Sanger Institute COVID-19 Surveillance Team                                                                                         |                                                                                                                                                                                                                                                                                                                                                                                                    |
| EPI_ISL_492749                                                                                                                                                                                                                                                                                                                                                                                                                                                                                                                                                                                                                                                                                                                                                                                                                                                                                                                                                                                                                                                                                                                 | University College London, Great Ormond Street Hospital for Children NHS Foundation Trust, Imperial College Healthcare NHS Trust | Wellcome Sanger Institute for the COVID-19 Genomics UK (COG-UK) consortium | Sergi Castellano, Rachel Williams, Mark Kristiansen, Paola Resende Silva, Sunando Roy, Tony Brooks, Helena Tutill, Paola Niola, Patricia Dyal, Charlotte Williams, Leysa Forrest, Yasmin Panchbhaya, Jacqueline Findlay, Sam Weeks, Julianne Brown, Kathryn Harris, Paul Randell, James Price, Alison Holmes, Judith Breuer and Alex Alderton, Roberto Amato, Sonia Goncalves, Ewan Harrison, David K. Jackson, Ian Johnston, Dominic Kwiatkowski, Cordelia Langford, John Sillitoe on behalf of the Wellcome Sanger Institute COVID-19 Surveillance Team ( <a href="http://www.sanger.ac.uk/covid-team">http://www.sanger.ac.uk/covid-team</a> ) |                                                                                                                                                                                                                                                                                                                                                                                                    |
| EPI_ISL_492750                                                                                                                                                                                                                                                                                                                                                                                                                                                                                                                                                                                                                                                                                                                                                                                                                                                                                                                                                                                                                                                                                                                 | University College London, Great Ormond Street Hospital for Children NHS Foundation Trust, Imperial College Healthcare NHS Trust | Wellcome Sanger Institute for the COVID-19 Genomics UK (COG-UK) Consortium | Sergi Castellano, Rachel Williams, Mark Kristiansen, Paola Resende Silva, Sunando Roy, Tony Brooks, Helena Tutill, Paola Niola, Patricia Dyal, Charlotte Williams, Leysa Forrest, Yasmin Panchbhaya, Jacqueline Findlay, Sam Weeks, Julianne Brown, Kathryn Harris, Paul Randell, James Price, Alison Holmes, Judith Breuer and Alex Alderton, Roberto Amato, Sonia Goncalves, Ewan Harrison, David K. Jackson, Ian Johnston, Dominic Kwiatkowski, Cordelia                                                                                                                                                                                       |                                                                                                                                                                                                                                                                                                                                                                                                    |

|                                                                                                                                                                                                                                                                                                                                                                                                                                                                                                                                                                                                                                                |                                                                                                                                  |                                                                            |                                                                                                                                                                                                                                                                                                                                                                                                                                                                                                                                                                                                                                                   |
|------------------------------------------------------------------------------------------------------------------------------------------------------------------------------------------------------------------------------------------------------------------------------------------------------------------------------------------------------------------------------------------------------------------------------------------------------------------------------------------------------------------------------------------------------------------------------------------------------------------------------------------------|----------------------------------------------------------------------------------------------------------------------------------|----------------------------------------------------------------------------|---------------------------------------------------------------------------------------------------------------------------------------------------------------------------------------------------------------------------------------------------------------------------------------------------------------------------------------------------------------------------------------------------------------------------------------------------------------------------------------------------------------------------------------------------------------------------------------------------------------------------------------------------|
|                                                                                                                                                                                                                                                                                                                                                                                                                                                                                                                                                                                                                                                |                                                                                                                                  |                                                                            | Langford, John Sillitoe on behalf of the Wellcome Sanger Institute COVID-19 Surveillance Team                                                                                                                                                                                                                                                                                                                                                                                                                                                                                                                                                     |
| EPI_ISL_492751, EPI_ISL_492752, EPI_ISL_492753, EPI_ISL_492754, EPI_ISL_492755, EPI_ISL_492756, EPI_ISL_492757                                                                                                                                                                                                                                                                                                                                                                                                                                                                                                                                 | University College London, Great Ormond Street Hospital for Children NHS Foundation Trust, Imperial College Healthcare NHS Trust | Wellcome Sanger Institute for the COVID-19 Genomics UK (COG-UK) consortium | Sergi Castellano, Rachel Williams, Mark Kristiansen, Paola Resende Silva, Sunando Roy, Tony Brooks, Helena Tutill, Paola Niola, Patricia Dyal, Charlotte Williams, Leysa Forrest, Yasmin Panchbhaya, Jacqueline Findlay, Sam Weeks, Julianne Brown, Kathryn Harris, Paul Randell, James Price, Alison Holmes, Judith Breuer and Alex Alderton, Roberto Amato, Sonia Goncalves, Ewan Harrison, David K. Jackson, Ian Johnston, Dominic Kwiatkowski, Cordelia Langford, John Sillitoe on behalf of the Wellcome Sanger Institute COVID-19 Surveillance Team ( <a href="http://www.sanger.ac.uk/covid-team">http://www.sanger.ac.uk/covid-team</a> ) |
| EPI_ISL_492758                                                                                                                                                                                                                                                                                                                                                                                                                                                                                                                                                                                                                                 | University College London, Great Ormond Street Hospital for Children NHS Foundation Trust, Imperial College Healthcare NHS Trust | Wellcome Sanger Institute for the COVID-19 Genomics UK (COG-UK) Consortium | Sergi Castellano, Rachel Williams, Mark Kristiansen, Paola Resende Silva, Sunando Roy, Tony Brooks, Helena Tutill, Paola Niola, Patricia Dyal, Charlotte Williams, Leysa Forrest, Yasmin Panchbhaya, Jacqueline Findlay, Sam Weeks, Julianne Brown, Kathryn Harris, Paul Randell, James Price, Alison Holmes, Judith Breuer and Alex Alderton, Roberto Amato, Sonia Goncalves, Ewan Harrison, David K. Jackson, Ian Johnston, Dominic Kwiatkowski, Cordelia Langford, John Sillitoe on behalf of the Wellcome Sanger Institute COVID-19 Surveillance Team                                                                                         |
| EPI_ISL_492759, EPI_ISL_492760, EPI_ISL_492761, EPI_ISL_492762, EPI_ISL_492763                                                                                                                                                                                                                                                                                                                                                                                                                                                                                                                                                                 | University College London, Great Ormond Street Hospital for Children NHS Foundation Trust, Imperial College Healthcare NHS Trust | Wellcome Sanger Institute for the COVID-19 Genomics UK (COG-UK) consortium | Sergi Castellano, Rachel Williams, Mark Kristiansen, Paola Resende Silva, Sunando Roy, Tony Brooks, Helena Tutill, Paola Niola, Patricia Dyal, Charlotte Williams, Leysa Forrest, Yasmin Panchbhaya, Jacqueline Findlay, Sam Weeks, Julianne Brown, Kathryn Harris, Paul Randell, James Price, Alison Holmes, Judith Breuer and Alex Alderton, Roberto Amato, Sonia Goncalves, Ewan Harrison, David K. Jackson, Ian Johnston, Dominic Kwiatkowski, Cordelia Langford, John Sillitoe on behalf of the Wellcome Sanger Institute COVID-19 Surveillance Team ( <a href="http://www.sanger.ac.uk/covid-team">http://www.sanger.ac.uk/covid-team</a> ) |
| EPI_ISL_492766, EPI_ISL_492768, EPI_ISL_492775, EPI_ISL_492780, EPI_ISL_492783, EPI_ISL_492786, EPI_ISL_492789, EPI_ISL_492792, EPI_ISL_492798, EPI_ISL_492802, EPI_ISL_492803, EPI_ISL_492810, EPI_ISL_492811, EPI_ISL_492817, EPI_ISL_492821, EPI_ISL_492823, EPI_ISL_492825, EPI_ISL_492832                                                                                                                                                                                                                                                                                                                                                 | see above                                                                                                                        | PHE South West Regional Laboratory, National Infection Service             | Stephanie Hutchings, Hannah Pymont, Dr Peter Muir, Barry Vipond, Rich Hopes; and Alex Alderton, Roberto Amato, Sonia Goncalves, Ewan Harrison, David K. Jackson, Ian Johnston, Dominic Kwiatkowski, Cordelia Langford, John Sillitoe on behalf of the Wellcome Sanger Institute COVID-19 Surveillance Team ( <a href="http://www.sanger.ac.uk/covid-team">http://www.sanger.ac.uk/covid-team</a> )                                                                                                                                                                                                                                                |
| EPI_ISL_495022                                                                                                                                                                                                                                                                                                                                                                                                                                                                                                                                                                                                                                 | Government Medical College, Bhavnagar                                                                                            | Gujarat Biotechnology Research Centre                                      | Shirish Patel, Kairavi Desai, Saklin Malek, Dinesh Kumar, Zuber Saiyed, Komal Patel, Labdhi Pandya, Afzal Ansari, Nikha Trivedi, Apurvashin Puvar, Janvi Raval, Zarna Patel, Monika Gandhi, Pinal Trivedi, Maharshi Pandya, Nidhi Patel, Nitin Savaliya, Raghawendra Kumar, R D Dixit, A M Kadri, Harsh Bakshi, Chaitanya Joshi, Madhvi Joshi                                                                                                                                                                                                                                                                                                     |
| EPI_ISL_495098, EPI_ISL_495099, EPI_ISL_495100, EPI_ISL_495108, EPI_ISL_495115, EPI_ISL_495121                                                                                                                                                                                                                                                                                                                                                                                                                                                                                                                                                 | PHE South West Regional Laboratory, National Infection Service                                                                   | Wellcome Sanger Institute for the COVID-19 Genomics UK (COG-UK) consortium | Stephanie Hutchings, Hannah Pymont, Dr Peter Muir, Barry Vipond, Rich Hopes; and Alex Alderton, Roberto Amato, Sonia Goncalves, Ewan Harrison, David K. Jackson, Ian Johnston, Dominic Kwiatkowski, Cordelia Langford, John Sillitoe on behalf of the Wellcome Sanger Institute COVID-19 Surveillance Team ( <a href="http://www.sanger.ac.uk/covid-team">http://www.sanger.ac.uk/covid-team</a> )                                                                                                                                                                                                                                                |
| EPI_ISL_495122, EPI_ISL_495123, EPI_ISL_495124, EPI_ISL_495125, EPI_ISL_495126, EPI_ISL_495127, EPI_ISL_495128, EPI_ISL_495129, EPI_ISL_495130, EPI_ISL_495131, EPI_ISL_495132, EPI_ISL_495133, EPI_ISL_495134, EPI_ISL_495135, EPI_ISL_495136, EPI_ISL_495137, EPI_ISL_495138, EPI_ISL_495139, EPI_ISL_495140, EPI_ISL_495141, EPI_ISL_495142, EPI_ISL_495143, EPI_ISL_495144, EPI_ISL_495145, EPI_ISL_495146, EPI_ISL_495147, EPI_ISL_495148, EPI_ISL_495149, EPI_ISL_495150, EPI_ISL_495151, EPI_ISL_495152, EPI_ISL_495153, EPI_ISL_495154, EPI_ISL_495155, EPI_ISL_495156, EPI_ISL_495157, EPI_ISL_495158, EPI_ISL_495159, EPI_ISL_495160 | see above                                                                                                                        | Innovative Genomics Institute, UC Berkeley                                 | Stacia Wyman, Haridha Shivram, Liana Lareau, Shana McDevitt, Justin Choi                                                                                                                                                                                                                                                                                                                                                                                                                                                                                                                                                                          |
| EPI_ISL_495168                                                                                                                                                                                                                                                                                                                                                                                                                                                                                                                                                                                                                                 | Innovative Genomics Institute, UC Berkeley                                                                                       | CSIR-Centre for Cellular and Molecular Biology                             | Sofia Banu, Payel Mukherjee, Priya Singh, Onkar Kulkarni, Dhiviya Vedagiri, Divya Gupta, Vishal Sah, Santosh Kumar Kuncha, Krishnan Harinivas Harshan, Archana Bharadwaj Siva, Karthik Bharadwaj Tallapaka, Shagufta Khan, Lamuk Zaveri, Namami Gaur, Sakshi Shambhavi, Nikhil Hajirnis, M Soujanya Reddy, Pratheusa Maccha, Tulasi Nagabandi, Purushotham Vodnala, Deepak Kumar, Devi Prasad Vijayashankar, Disha Nanda, Divya Das, Jotin Gogoi, Manish Bhattacharjee, Rakesh K Mishra, Divya Tej Sowpati                                                                                                                                        |
| EPI_ISL_495185, EPI_ISL_495186                                                                                                                                                                                                                                                                                                                                                                                                                                                                                                                                                                                                                 | CSIR-Centre for Cellular and Molecular Biology                                                                                   | CSIR-Centre for Cellular and Molecular Biology                             | Shagufta Khan, Lamuk Zaveri, Namami Gaur, Sakshi Shambhavi, Nikhil Hajirnis, M Soujanya Reddy, Pratheusa Maccha, Tulasi Nagabandi, Purushotham Vodnala, Payel Mukherjee, Sofia Banu, Priya Singh, Onkar Kulkarni, Dhiviya Vedagiri, Divya Gupta, Vishal Sah, Santosh Kumar Kuncha, Krishnan Harinivas Harshan, Archana Bharadwaj Siva, Karthik Bharadwaj Tallapaka, Renu Sudhakar, Somesh Gorde, Gangumala Srinivas Reddy, Sujoy Deb, Swati Bayyana, Rakesh K Mishra, Divya Tej Sowpati                                                                                                                                                           |
| EPI_ISL_495187                                                                                                                                                                                                                                                                                                                                                                                                                                                                                                                                                                                                                                 | CSIR-Centre for Cellular and Molecular Biology                                                                                   | CSIR-Centre for Cellular and Molecular Biology                             | Shagufta Khan, Lamuk Zaveri, Namami Gaur, Sakshi Shambhavi, Nikhil Hajirnis, M Soujanya Reddy, Pratheusa Maccha, Tulasi Nagabandi, Purushotham Vodnala, Payel Mukherjee, Sofia Banu, Priya Singh, Onkar Kulkarni, Dhiviya Vedagiri, Divya Gupta, Vishal Sah, Santosh Kumar Kuncha, Krishnan Harinivas Harshan, Archana Bharadwaj Siva, Karthik Bharadwaj Tallapaka, Umesh Kumar, Unis Ahmad Bhat, Ajay Sarawagi, Priyanka Pant, Rajkanwar Nathawat, Rakesh K Mishra, Divya Tej Sowpati                                                                                                                                                            |
| EPI_ISL_495189                                                                                                                                                                                                                                                                                                                                                                                                                                                                                                                                                                                                                                 | CSIR-Centre for Cellular and Molecular Biology                                                                                   | CSIR-Centre for Cellular and Molecular Biology                             | Sofia Banu, Payel Mukherjee, Priya Singh, Onkar Kulkarni, Dhiviya Vedagiri, Divya Gupta, Vishal Sah, Santosh Kumar Kuncha, Krishnan Harinivas Harshan, Archana Bharadwaj Siva, Karthik Bharadwaj Tallapaka, Shagufta Khan, Lamuk Zaveri, Namami Gaur, Sakshi Shambhavi, Nikhil Hajirnis, M Soujanya Reddy, Pratheusa Maccha, Tulasi Nagabandi, Purushotham Vodnala, Deepak Kumar, Devi Prasad Vijayashankar, Disha Nanda, Divya Das, Jotin Gogoi, Manish Bhattacharjee, Rakesh K Mishra, Divya Tej Sowpati                                                                                                                                        |
| EPI_ISL_495192                                                                                                                                                                                                                                                                                                                                                                                                                                                                                                                                                                                                                                 | CSIR-Centre for Cellular and Molecular Biology                                                                                   | CSIR-Centre for Cellular and Molecular Biology                             | Sofia Banu, Payel Mukherjee, Priya Singh, Onkar Kulkarni, Dhiviya Vedagiri, Divya Gupta, Vishal Sah, Santosh Kumar Kuncha, Krishnan Harinivas Harshan, Archana Bharadwaj Siva, Karthik Bharadwaj Tallapaka, Shagufta Khan, Lamuk Zaveri, Namami Gaur, Sakshi Shambhavi, Tulasi Nagabandi, Nikhil Hajirnis, M Soujanya Reddy, Pratheusa Maccha, Purushotham Vodnala, Gokulan C G, Gunjan Purohit, Hamuman Tulashiram Kale, Pankaj Kumar, Prachand Issarapu, Rakesh K Mishra, Divya Tej Sowpati                                                                                                                                                     |
| EPI_ISL_495194                                                                                                                                                                                                                                                                                                                                                                                                                                                                                                                                                                                                                                 | CSIR-Centre for Cellular and Molecular Biology                                                                                   | CSIR-Centre for Cellular and Molecular Biology                             | Sofia Banu, Payel Mukherjee, Priya Singh, Onkar Kulkarni, Dhiviya Vedagiri, Divya Gupta, Vishal Sah, Santosh Kumar Kuncha, Krishnan Harinivas Harshan, Archana Bharadwaj Siva, Karthik Bharadwaj Tallapaka, Shagufta Khan, Lamuk Zaveri, Namami Gaur, Sakshi Shambhavi, Nikhil Hajirnis, M Soujanya Reddy, Pratheusa Maccha, Tulasi Nagabandi, Purushotham Vodnala, Deepak Kumar, Devi Prasad Vijayashankar, Disha Nanda, Divya Das, Jotin Gogoi, Manish Bhattacharjee, Rakesh K Mishra, Divya Tej Sowpati                                                                                                                                        |
| EPI_ISL_495197                                                                                                                                                                                                                                                                                                                                                                                                                                                                                                                                                                                                                                 | CSIR-Centre for Cellular and Molecular Biology                                                                                   | CSIR-Centre for Cellular and Molecular Biology                             | Sofia Banu, Payel Mukherjee, Priya Singh, Onkar Kulkarni, Dhiviya Vedagiri, Divya Gupta, Vishal Sah, Santosh Kumar Kuncha, Krishnan Harinivas Harshan, Archana Bharadwaj Siva, Karthik Bharadwaj Tallapaka, Shagufta Khan, Lamuk Zaveri, Namami Gaur, Sakshi Shambhavi, Nikhil Hajirnis, M Soujanya Reddy, Pratheusa Maccha, Tulasi Nagabandi, Purushotham Vodnala, Disha Nanda, Divya Das, Jotin Gogoi, Manish Bhattacharjee, Ravi Prasad Mukku, Rakesh K Mishra, Divya Tej Sowpati                                                                                                                                                              |
| EPI_ISL_495202                                                                                                                                                                                                                                                                                                                                                                                                                                                                                                                                                                                                                                 | CSIR-Centre for Cellular and Molecular Biology                                                                                   | CSIR-Centre for Cellular and Molecular Biology                             | Shagufta Khan, Lamuk Zaveri, Namami Gaur, Sakshi Shambhavi, Nikhil Hajirnis, M Soujanya Reddy, Pratheusa Maccha, Tulasi Nagabandi, Purushotham Vodnala, Payel Mukherjee, Sofia Banu, Priya Singh, Onkar Kulkarni, Dhiviya Vedagiri, Divya Gupta, Vishal Sah, Santosh Kumar Kuncha, Krishnan Harinivas Harshan, Archana Bharadwaj Siva, Karthik Bharadwaj Tallapaka, Renu Sudhakar, Somesh Gorde, Gangumala Srinivas Reddy, Sujoy Deb, Swati Bayyana, Rakesh K Mishra, Divya Tej Sowpati                                                                                                                                                           |
| EPI_ISL_495205                                                                                                                                                                                                                                                                                                                                                                                                                                                                                                                                                                                                                                 | CSIR-Centre for Cellular and Molecular Biology                                                                                   | CSIR-Centre for Cellular and Molecular Biology                             | Shagufta Khan, Lamuk Zaveri, Namami Gaur, Sakshi Shambhavi, Nikhil Hajirnis, M Soujanya Reddy, Pratheusa Maccha, Tulasi Nagabandi, Purushotham Vodnala, Payel Mukherjee, Sofia Banu, Priya Singh, Onkar Kulkarni, Dhiviya Vedagiri, Divya Gupta, Vishal Sah, Santosh Kumar Kuncha, Krishnan Harinivas Harshan, Archana Bharadwaj Siva, Karthik Bharadwaj Tallapaka, Preethi Jampala, Sharada Ravi Iyer, Sulagana Mukherjee, Swetha Sundar, Peddapuvala Sai Uday Kiran Rakesh K Mishra, Divya Tej Sowpati                                                                                                                                          |
| EPI_ISL_495206                                                                                                                                                                                                                                                                                                                                                                                                                                                                                                                                                                                                                                 | CSIR-Centre for Cellular and Molecular Biology                                                                                   | CSIR-Centre for Cellular and Molecular Biology                             | Shagufta Khan, Lamuk Zaveri, Namami Gaur, Sakshi Shambhavi, Nikhil Hajirnis, M Soujanya Reddy, Pratheusa Maccha, Tulasi Nagabandi, Purushotham Vodnala, Payel Mukherjee, Sofia Banu, Priya Singh, Onkar Kulkarni, Dhiviya Vedagiri, Divya Gupta, Vishal Sah, Santosh Kumar Kuncha, Krishnan Harinivas Harshan, Archana Bharadwaj Siva, Karthik Bharadwaj Tallapaka, Umesh Kumar, Unis Ahmad Bhat, Ajay Sarawagi, Priyanka Pant, Rajkanwar Nathawat, Rakesh K Mishra, Divya Tej Sowpati                                                                                                                                                            |
| EPI_ISL_495208                                                                                                                                                                                                                                                                                                                                                                                                                                                                                                                                                                                                                                 | CSIR-Centre for Cellular and Molecular Biology                                                                                   | CSIR-Centre for Cellular and Molecular Biology                             | Shagufta Khan, Lamuk Zaveri, Namami Gaur, Sakshi Shambhavi, Nikhil Hajirnis, M Soujanya Reddy, Pratheusa Maccha, Tulasi Nagabandi, Purushotham Vodnala, Payel Mukherjee, Sofia Banu, Priya Singh, Onkar Kulkarni, Dhiviya Vedagiri, Divya Gupta, Vishal Sah, Santosh Kumar Kuncha, Krishnan Harinivas Harshan, Archana Bharadwaj Siva, Karthik Bharadwaj Tallapaka, Renu Sudhakar, Somesh Gorde, Gangumala Srinivas Reddy, Sujoy Deb, Swati Bayyana, Rakesh K Mishra, Divya Tej Sowpati                                                                                                                                                           |
| EPI_ISL_495210                                                                                                                                                                                                                                                                                                                                                                                                                                                                                                                                                                                                                                 | CSIR-Centre for Cellular and Molecular Biology                                                                                   | CSIR-Centre for Cellular and Molecular Biology                             | Sofia Banu, Payel Mukherjee, Priya Singh, Onkar Kulkarni, Dhiviya Vedagiri, Divya Gupta, Vishal Sah, Santosh Kumar Kuncha, Krishnan Harinivas Harshan, Archana Bharadwaj Siva, Karthik Bharadwaj Tallapaka, Shagufta Khan, Lamuk Zaveri, Namami Gaur, Sakshi Shambhavi, Nikhil Hajirnis, M Soujanya Reddy, Pratheusa Maccha, Tulasi Nagabandi, Purushotham Vodnala, Deepak Kumar, Devi Prasad Vijayashankar, Disha Nanda, Divya Das, Jotin Gogoi, Manish Bhattacharjee, Rakesh K Mishra, Divya Tej Sowpati                                                                                                                                        |
| EPI_ISL_495211                                                                                                                                                                                                                                                                                                                                                                                                                                                                                                                                                                                                                                 | CSIR-Centre for Cellular and Molecular Biology                                                                                   | CSIR-Centre for Cellular and Molecular Biology                             | Shagufta Khan, Lamuk Zaveri, Namami Gaur, Sakshi Shambhavi, Nikhil Hajirnis, M Soujanya Reddy, Pratheusa Maccha, Tulasi Nagabandi, Purushotham                                                                                                                                                                                                                                                                                                                                                                                                                                                                                                    |



|                                                                                                                                                                                                                                                                                                                                                                                                                                                                                                                                                                                                                                                                                                                                                                                                                                                                                                                                                                                |                                                                                 |                                                                                 |                                                                                                                                                                                                                                                                                                                                                                                                                                                                                         |
|--------------------------------------------------------------------------------------------------------------------------------------------------------------------------------------------------------------------------------------------------------------------------------------------------------------------------------------------------------------------------------------------------------------------------------------------------------------------------------------------------------------------------------------------------------------------------------------------------------------------------------------------------------------------------------------------------------------------------------------------------------------------------------------------------------------------------------------------------------------------------------------------------------------------------------------------------------------------------------|---------------------------------------------------------------------------------|---------------------------------------------------------------------------------|-----------------------------------------------------------------------------------------------------------------------------------------------------------------------------------------------------------------------------------------------------------------------------------------------------------------------------------------------------------------------------------------------------------------------------------------------------------------------------------------|
| EPI_ISL_495289                                                                                                                                                                                                                                                                                                                                                                                                                                                                                                                                                                                                                                                                                                                                                                                                                                                                                                                                                                 | Osmania Medical College                                                         | CSIR-Centre for Cellular and Molecular Biology                                  | Shashikala Reddy, Mahboob Khan, Namami Gaur, Lamuk Zaveri, Shagufta Khan, Sofia Banu, Onkar Kulkarni, Payel Mukherjee, Priya Singh, Dhiviya Vedagiri, Divya Gupta, Vishal Sah, Santosh Kumar Kuncha, Krishnan Harinivas Harshan, Archana Bharadwaj Siva, Karthik Bharadwaj Tallapaka, Sakshi Shambhavi, Nikhil Hajirnis, M Soujanya Reddy, Pratheusa Maccha, Tulasi Nagabandi, Purushotham Vodnala, Rakesh K Mishra, Divya Tej Sowpati                                                  |
| EPI_ISL_495290                                                                                                                                                                                                                                                                                                                                                                                                                                                                                                                                                                                                                                                                                                                                                                                                                                                                                                                                                                 | Osmania Medical College                                                         | CSIR-Centre for Cellular and Molecular Biology                                  | Shashikala Reddy, Mahboob Khan, Tulasi Nagabandi, Namami Gaur, Lamuk Zaveri, Shagufta Khan, Sofia Banu, Payel Mukherjee, Priya Singh, Onkar Kulkarni, Dhiviya Vedagiri, Divya Gupta, Vishal Sah, Santosh Kumar Kuncha, Krishnan Harinivas Harshan, Archana Bharadwaj Siva, Karthik Bharadwaj Tallapaka, Sakshi Shambhavi, Nikhil Hajirnis, M Soujanya Reddy, Pratheusa Maccha, Namami Gaur, Sakshi Shambhavi, Tulasi Nagabandi, Purushotham Vodnala, Rakesh K Mishra, Divya Tej Sowpati |
| EPI_ISL_495291                                                                                                                                                                                                                                                                                                                                                                                                                                                                                                                                                                                                                                                                                                                                                                                                                                                                                                                                                                 | Osmania Medical College                                                         | CSIR-Centre for Cellular and Molecular Biology                                  | Shashikala Reddy, Mahboob Khan, Onkar Kulkarni, Shagufta Khan, Sofia Banu, Payel Mukherjee, Priya Singh, Dhiviya Vedagiri, Divya Gupta, Vishal Sah, Santosh Kumar Kuncha, Krishnan Harinivas Harshan, Archana Bharadwaj Siva, Karthik Bharadwaj Tallapaka, Lamuk Zaveri, Nikhil Hajirnis, M Soujanya Reddy, Pratheusa Maccha, Namami Gaur, Sakshi Shambhavi, Tulasi Nagabandi, Purushotham Vodnala, Rakesh K Mishra, Divya Tej Sowpati                                                  |
| EPI_ISL_495292                                                                                                                                                                                                                                                                                                                                                                                                                                                                                                                                                                                                                                                                                                                                                                                                                                                                                                                                                                 | Osmania Medical College                                                         | CSIR-Centre for Cellular and Molecular Biology                                  | Shashikala Reddy, Mahboob Khan, Shagufta Khan, Sofia Banu, Payel Mukherjee, Priya Singh, Onkar Kulkarni, Dhiviya Vedagiri, Divya Gupta, Vishal Sah, Santosh Kumar Kuncha, Krishnan Harinivas Harshan, Archana Bharadwaj Siva, Karthik Bharadwaj Tallapaka, Lamuk Zaveri, Namami Gaur, Sakshi Shambhavi, Nikhil Hajirnis, M Soujanya Reddy, Pratheusa Maccha, Tulasi Nagabandi, Purushotham Vodnala, Rakesh K Mishra, Divya Tej Sowpati                                                  |
| EPI_ISL_495293                                                                                                                                                                                                                                                                                                                                                                                                                                                                                                                                                                                                                                                                                                                                                                                                                                                                                                                                                                 | Osmania Medical College                                                         | CSIR-Centre for Cellular and Molecular Biology                                  | Shashikala Reddy, Mahboob Khan, Lamuk Zaveri, Sofia Banu, Payel Mukherjee, Shagufta Khan, Priya Singh, Onkar Kulkarni, Dhiviya Vedagiri, Divya Gupta, Vishal Sah, Santosh Kumar Kuncha, Krishnan Harinivas Harshan, Archana Bharadwaj Siva, Karthik Bharadwaj Tallapaka, Namami Gaur, Sakshi Shambhavi, Nikhil Hajirnis, M Soujanya Reddy, Pratheusa Maccha, Tulasi Nagabandi, Purushotham Vodnala, Rakesh K Mishra, Divya Tej Sowpati                                                  |
| EPI_ISL_495294                                                                                                                                                                                                                                                                                                                                                                                                                                                                                                                                                                                                                                                                                                                                                                                                                                                                                                                                                                 | Osmania Medical College                                                         | CSIR-Centre for Cellular and Molecular Biology                                  | Shashikala Reddy, Mahboob Khan, Onkar Kulkarni, Lamuk Zaveri, Sofia Banu, Payel Mukherjee, Shagufta Khan, Priya Singh, Dhiviya Vedagiri, Divya Gupta, Vishal Sah, Santosh Kumar Kuncha, Krishnan Harinivas Harshan, Archana Bharadwaj Siva, Karthik Bharadwaj Tallapaka, Lamuk Zaveri, Nikhil Hajirnis, M Soujanya Reddy, Pratheusa Maccha, Namami Gaur, Sakshi Shambhavi, Tulasi Nagabandi, Purushotham Vodnala, Rakesh K Mishra, Divya Tej Sowpati                                    |
| EPI_ISL_495295                                                                                                                                                                                                                                                                                                                                                                                                                                                                                                                                                                                                                                                                                                                                                                                                                                                                                                                                                                 | Osmania Medical College                                                         | CSIR-Centre for Cellular and Molecular Biology                                  | Shashikala Reddy, Mahboob Khan, Sofia Banu, Payel Mukherjee, Priya Singh, Onkar Kulkarni, Dhiviya Vedagiri, Divya Gupta, Vishal Sah, Santosh Kumar Kuncha, Krishnan Harinivas Harshan, Archana Bharadwaj Siva, Karthik Bharadwaj Tallapaka, Lamuk Zaveri, Nikhil Hajirnis, M Soujanya Reddy, Pratheusa Maccha, Namami Gaur, Sakshi Shambhavi, Tulasi Nagabandi, Purushotham Vodnala, Rakesh K Mishra, Divya Tej Sowpati                                                                 |
| EPI_ISL_495296                                                                                                                                                                                                                                                                                                                                                                                                                                                                                                                                                                                                                                                                                                                                                                                                                                                                                                                                                                 | Osmania Medical College                                                         | CSIR-Centre for Cellular and Molecular Biology                                  | Shashikala Reddy, Mahboob Khan, Shagufta Khan, Sofia Banu, Payel Mukherjee, Priya Singh, Onkar Kulkarni, Dhiviya Vedagiri, Divya Gupta, Vishal Sah, Santosh Kumar Kuncha, Krishnan Harinivas Harshan, Archana Bharadwaj Siva, Karthik Bharadwaj Tallapaka, Lamuk Zaveri, Nikhil Hajirnis, M Soujanya Reddy, Pratheusa Maccha, Namami Gaur, Sakshi Shambhavi, Tulasi Nagabandi, Purushotham Vodnala, Rakesh K Mishra, Divya Tej Sowpati                                                  |
| EPI_ISL_495297                                                                                                                                                                                                                                                                                                                                                                                                                                                                                                                                                                                                                                                                                                                                                                                                                                                                                                                                                                 | Osmania Medical College                                                         | CSIR-Centre for Cellular and Molecular Biology                                  | Shashikala Reddy, Mahboob Khan, Sakshi Shambhavi, Tulasi Nagabandi, Namami Gaur, Lamuk Zaveri, Shagufta Khan, Sofia Banu, Payel Mukherjee, Priya Singh, Onkar Kulkarni, Dhiviya Vedagiri, Divya Gupta, Vishal Sah, Santosh Kumar Kuncha, Krishnan Harinivas Harshan, Archana Bharadwaj Siva, Karthik Bharadwaj Tallapaka, Sakshi Shambhavi, Nikhil Hajirnis, M Soujanya Reddy, Pratheusa Maccha, Purushotham Vodnala, Rakesh K Mishra, Divya Tej Sowpati                                |
| EPI_ISL_498227, EPI_ISL_498228                                                                                                                                                                                                                                                                                                                                                                                                                                                                                                                                                                                                                                                                                                                                                                                                                                                                                                                                                 | National Institute of Laboratory Medicine and Referral Center                   | Genomic Research Lab, BCSIR                                                     | Shahina Akter, Abu Sayeed Mohammad Mahmud, Mohammad Samir Uzzaman, Eshrar Osman, Md. Ahasan Habib, Tanjina Akhter Banu, Md. Murshed Hasan Sarkar, Barna Goswami, Iffat Jahan, Md. Saddam Hossain, Tasnim Nafisa, Md. Maruf Ahmed Molla, Mahmuda Yeasmin, Asish Kumar Ghosh, A. K. M. Shamsuzzaman, Sheikh Md. Selim Al Din, Utpal Chandra Ray, Salek Ahmed Sajib, Md. Salim Khan                                                                                                        |
| EPI_ISL_500228, EPI_ISL_500229, EPI_ISL_500230, EPI_ISL_500231, EPI_ISL_500232, EPI_ISL_500233, EPI_ISL_500234, EPI_ISL_500235, EPI_ISL_500236, EPI_ISL_500237, EPI_ISL_500238, EPI_ISL_500239, EPI_ISL_500240, EPI_ISL_500241, EPI_ISL_500242, EPI_ISL_500243, EPI_ISL_500244, EPI_ISL_500245, EPI_ISL_500246, EPI_ISL_500247, EPI_ISL_500248, EPI_ISL_500249, EPI_ISL_500250, EPI_ISL_500251, EPI_ISL_500252, EPI_ISL_500253, EPI_ISL_500254, EPI_ISL_500255, EPI_ISL_500256, EPI_ISL_500257, EPI_ISL_500258, EPI_ISL_500259, EPI_ISL_500260, EPI_ISL_500261, EPI_ISL_500262, EPI_ISL_500263, EPI_ISL_500264, EPI_ISL_500265, EPI_ISL_500266, EPI_ISL_500267, EPI_ISL_500268, EPI_ISL_500269, EPI_ISL_500270, EPI_ISL_500271, EPI_ISL_500272, EPI_ISL_500273, EPI_ISL_500274, EPI_ISL_500275, EPI_ISL_500276, EPI_ISL_500277, EPI_ISL_500278, EPI_ISL_500279, EPI_ISL_500280, EPI_ISL_500281, EPI_ISL_500282, EPI_ISL_500283, EPI_ISL_500284, EPI_ISL_500285, EPI_ISL_500286 | Hospital Universitario Araba. Vitoria-Gasteiz                                   | SeqCOVID-SPAIN consortium/IBV(CSIC)                                             | Silvia Hernáez Crespo, Carmen Gómez González, Amaia Aguirre Quiñero, Marina Fernández Torres, M <sup>a</sup> Rosario Almela Ferrer, M <sup>a</sup> Concepción Lecaroz Agara, Andrés Canut Blasco and SeqCOVID-SPAIN consortium                                                                                                                                                                                                                                                          |
| EPI_ISL_501559, EPI_ISL_501560, EPI_ISL_501565, EPI_ISL_501566, EPI_ISL_501574, EPI_ISL_501577, EPI_ISL_501578, EPI_ISL_501579, EPI_ISL_501585, EPI_ISL_501594, EPI_ISL_501595, EPI_ISL_501596, EPI_ISL_501598, EPI_ISL_501599, EPI_ISL_501601, EPI_ISL_501604, EPI_ISL_501605                                                                                                                                                                                                                                                                                                                                                                                                                                                                                                                                                                                                                                                                                                 | PHE South West Regional Laboratory, National Infection Service                  | Wellcome Sanger Institute for the COVID-19 Genomics UK (COG-UK) consortium      | Stephanie Hutchings, Hannah Pymont, Dr Peter Muir, Barry Vipond, Rich Hopes; and Alex Alderton, Roberto Amato, Sonia Goncalves, Ewan Harrison, David K. Jackson, Ian Johnston, Dominic Kwiatkowski, Cordelia Langford, John Sillitoe on behalf of the Wellcome Sanger Institute COVID-19 Surveillance Team ( <a href="http://www.sanger.ac.uk/covid-team">http://www.sanger.ac.uk/covid-team</a> )                                                                                      |
| EPI_ISL_507007                                                                                                                                                                                                                                                                                                                                                                                                                                                                                                                                                                                                                                                                                                                                                                                                                                                                                                                                                                 | Yaftabad Hospital, Covid Lab Center                                             | Tehran University of Medical Sciences                                           | Shahabzadeh, Z., Hosseinzadeh Gharajeh, N., Hashemian, S.M. and Barati, O.                                                                                                                                                                                                                                                                                                                                                                                                              |
| EPI_ISL_507008                                                                                                                                                                                                                                                                                                                                                                                                                                                                                                                                                                                                                                                                                                                                                                                                                                                                                                                                                                 | National Veterinary Institute                                                   | National Veterinary Institute                                                   | Siamak Zohari                                                                                                                                                                                                                                                                                                                                                                                                                                                                           |
| EPI_ISL_509430, EPI_ISL_509431, EPI_ISL_509432, EPI_ISL_509433, EPI_ISL_509434, EPI_ISL_509435                                                                                                                                                                                                                                                                                                                                                                                                                                                                                                                                                                                                                                                                                                                                                                                                                                                                                 | Centro de Desenvolvimento Tecnológico em Saude, Fundacao Oswaldo Cruz           | Centro de Desenvolvimento Tecnológico em Saude, Fundacao Oswaldo Cruz           | Souza, T.M., Fintelman-Rodrigues, N., De Paula, A.D., Saraiva, F.B., Ferreira, M.A., Sacramento, C.Q., Medeiros, M.A.                                                                                                                                                                                                                                                                                                                                                                   |
| EPI_ISL_509616, EPI_ISL_509617, EPI_ISL_509618                                                                                                                                                                                                                                                                                                                                                                                                                                                                                                                                                                                                                                                                                                                                                                                                                                                                                                                                 | Hospital Universitario Araba. Vitoria-Gasteiz                                   | SeqCOVID-SPAIN consortium/IBV(CSIC)                                             | Silvia Hernáez Crespo, Carmen Gómez González, Amaia Aguirre Quiñero, Marina Fernández Torres, M <sup>a</sup> Rosario Almela Ferrer, M <sup>a</sup> Concepción Lecaroz Agara, Andrés Canut Blasco and SeqCOVID-SPAIN consortium                                                                                                                                                                                                                                                          |
| EPI_ISL_510529                                                                                                                                                                                                                                                                                                                                                                                                                                                                                                                                                                                                                                                                                                                                                                                                                                                                                                                                                                 | School of Veterinary Medicine, Disease Control                                  | School of Veterinary Medicine, Disease Control                                  | Simulundu, E., Kapata, N., Mupeta, F., Kapata, P.C., Saasa, N., Changula, K., Muleya, W., Chitanga, S., Chambambo, H., Mubemba, B., Masahiro, K., Chanda, D., Melunga, L., Fwoloshi, S., Shimbema, A.L., Kapaya, F., Zulu, P., Musonda, K., Monze, M., Sinyange, N., Liwewe, M.M., Kapin'a, M., Chipimo, P.J., Ngosa, W., Morales, A.N., Kayeyi, N., Malama, K., Tembo, J., Bates, M., Sawa, H., Takada, A., Nalubamba, K.S., Mukonka, V., Chiufluya, C. and Zumla, A.                  |
| EPI_ISL_510531                                                                                                                                                                                                                                                                                                                                                                                                                                                                                                                                                                                                                                                                                                                                                                                                                                                                                                                                                                 | Communicable Disease Laboratory, Public Health Directorate                      | Communicable Disease Laboratory, Public Health Directorate                      | Shehab, F., Altaif, Z., AlWasti, H., Zaed, A.                                                                                                                                                                                                                                                                                                                                                                                                                                           |
| EPI_ISL_510536                                                                                                                                                                                                                                                                                                                                                                                                                                                                                                                                                                                                                                                                                                                                                                                                                                                                                                                                                                 | Centro de Desenvolvimento Tecnológico em Saude, Fundacao Oswaldo Cruz           | Centro de Desenvolvimento Tecnológico em Saude, Fundacao Oswaldo Cruz           | Souza, T.M., Fintelman-Rodrigues, N., De Paula, A.D., Saraiva, F.B., Ferreira, M.A., Sacramento, C.Q. and Medeiros, M.A.                                                                                                                                                                                                                                                                                                                                                                |
| EPI_ISL_510541                                                                                                                                                                                                                                                                                                                                                                                                                                                                                                                                                                                                                                                                                                                                                                                                                                                                                                                                                                 | Centro de Desenvolvimento Tecnológico em Saude, Fundacao Oswaldo Cruz           | Centro de Desenvolvimento Tecnológico em Saude, Fundacao Oswaldo Cruz           | Souza, T.M., Fintelman-Rodrigues, N., De Paula, A.D., Saraiva, F.B., Ferreira, M.A., Sacramento, C.Q. and Medeiros, M.A.                                                                                                                                                                                                                                                                                                                                                                |
| EPI_ISL_511805, EPI_ISL_511806, EPI_ISL_511807, EPI_ISL_511808, EPI_ISL_511809, EPI_ISL_511810, EPI_ISL_511811, EPI_ISL_511812, EPI_ISL_511813, EPI_ISL_511814, EPI_ISL_511815, EPI_ISL_511816, EPI_ISL_511817, EPI_ISL_511818, EPI_ISL_511819, EPI_ISL_511820, EPI_ISL_511821, EPI_ISL_511822, EPI_ISL_511823, EPI_ISL_511824, EPI_ISL_511825, EPI_ISL_511826, EPI_ISL_511827, EPI_ISL_511828, EPI_ISL_511829, EPI_ISL_511830, EPI_ISL_511831, EPI_ISL_511832, EPI_ISL_511833, EPI_ISL_511834, EPI_ISL_511835, EPI_ISL_511836, EPI_ISL_511837, EPI_ISL_511838, EPI_ISL_511839, EPI_ISL_511840, EPI_ISL_511841, EPI_ISL_511842, EPI_ISL_511843, EPI_ISL_511844, EPI_ISL_511845, EPI_ISL_511846, EPI_ISL_511847, EPI_ISL_511848, EPI_ISL_511849, EPI_ISL_511850, EPI_ISL_511851, EPI_ISL_511862                                                                                                                                                                                 | Innovative Genomics Institute, UC Berkeley                                      | Innovative Genomics Institute, UC Berkeley                                      | Stacia Wyman, Haridha Shivram, Liana Lareau, Shana McDevitt, Justin Choi                                                                                                                                                                                                                                                                                                                                                                                                                |
| EPI_ISL_511955, EPI_ISL_511956, EPI_ISL_511960, EPI_ISL_511961, EPI_ISL_511964, EPI_ISL_511966, EPI_ISL_511969, EPI_ISL_511976, EPI_ISL_511980                                                                                                                                                                                                                                                                                                                                                                                                                                                                                                                                                                                                                                                                                                                                                                                                                                 | PHE South West Regional Laboratory, National Infection Service                  | Wellcome Sanger Institute for the COVID-19 Genomics UK (COG-UK) consortium      | Stephanie Hutchings, Hannah Pymont, Dr Peter Muir, Barry Vipond, Rich Hopes; and Alex Alderton, Roberto Amato, Sonia Goncalves, Ewan Harrison, David K. Jackson, Ian Johnston, Dominic Kwiatkowski, Cordelia Langford, John Sillitoe on behalf of the Wellcome Sanger Institute COVID-19 Surveillance Team ( <a href="http://www.sanger.ac.uk/covid-team">http://www.sanger.ac.uk/covid-team</a> )                                                                                      |
| EPI_ISL_512908, EPI_ISL_512909, EPI_ISL_512910, EPI_ISL_512911, EPI_ISL_512912, EPI_ISL_512913, EPI_ISL_512914, EPI_ISL_512915, EPI_ISL_512916, EPI_ISL_512917, EPI_ISL_513121, EPI_ISL_513122, EPI_ISL_513123, EPI_ISL_513124, EPI_ISL_513125, EPI_ISL_513126, EPI_ISL_513127, EPI_ISL_513128, EPI_ISL_513129, EPI_ISL_513130, EPI_ISL_513131, EPI_ISL_513132, EPI_ISL_513133, EPI_ISL_513134, EPI_ISL_513135, EPI_ISL_513136, EPI_ISL_513137, EPI_ISL_513138, EPI_ISL_513139, EPI_ISL_513140, EPI_ISL_513141, EPI_ISL_513142, EPI_ISL_513143, EPI_ISL_513144, EPI_ISL_513145, EPI_ISL_513146, EPI_ISL_513214, EPI_ISL_513215, EPI_ISL_513216, EPI_ISL_513217, EPI_ISL_513218, EPI_ISL_513219, EPI_ISL_513220, EPI_ISL_513221, EPI_ISL_513222, EPI_ISL_513223, EPI_ISL_513224, EPI_ISL_513225, EPI_ISL_513226                                                                                                                                                                 | Pathogen Genomics Lab King Abdullah University of Science and Technology(KAUST) | Pathogen Genomics Lab King Abdullah University of Science and Technology(KAUST) | Sharif Hala, Fadwa Alofi, Sara Mfarrej, Amit Kumar Subudhi, Rahul P Salunke, Fathia Ben Rached, Amanda Ooi, Luke Esau, Afrah Alsomali, Asim Khogeer, Jumana Taha, Abdulaziz Alahmadi, Kahled Alghithami, Raaee Naeem, Anwar Hashem, Naif Almontashiri, Arnab Pain                                                                                                                                                                                                                       |
| EPI_ISL_514231, EPI_ISL_514232                                                                                                                                                                                                                                                                                                                                                                                                                                                                                                                                                                                                                                                                                                                                                                                                                                                                                                                                                 | National Institute of Laboratory Medicine and Referral Center                   | Genomic Research Lab, BCSIR                                                     | Shahina Akter, Abu Sayeed Mohammad Mahmud, Mohammad Samir Uzzaman, Eshrar Osman, Md. Ahasan Habib, Tanjina Akhter Banu, Md. Murshed Hasan Sarkar, Barna Goswami, Iffat Jahan, Md. Saddam Hossain, Tasnim Nafisa, Md. Maruf Ahmed Molla, Mahmuda Yeasmin, Asish Kumar Ghosh, A. K. M. Shamsuzzaman, Sheikh Md. Selim Al Din, Utpal Chandra Ray, Salek Ahmed Sajib, Md. Salim Khan                                                                                                        |

|                                                                                                                                                                                                                                                                                                                                                                                                                                                                                                                                                                                                                                                                                                                                                                                                                                                                                                                                                                                                                                                                                                                                                                                                |                                                                                                                                                                                                                |                                                                                                   |                                                                                                                                                                                                                                                                                                                                                                                                                                                                                                            |
|------------------------------------------------------------------------------------------------------------------------------------------------------------------------------------------------------------------------------------------------------------------------------------------------------------------------------------------------------------------------------------------------------------------------------------------------------------------------------------------------------------------------------------------------------------------------------------------------------------------------------------------------------------------------------------------------------------------------------------------------------------------------------------------------------------------------------------------------------------------------------------------------------------------------------------------------------------------------------------------------------------------------------------------------------------------------------------------------------------------------------------------------------------------------------------------------|----------------------------------------------------------------------------------------------------------------------------------------------------------------------------------------------------------------|---------------------------------------------------------------------------------------------------|------------------------------------------------------------------------------------------------------------------------------------------------------------------------------------------------------------------------------------------------------------------------------------------------------------------------------------------------------------------------------------------------------------------------------------------------------------------------------------------------------------|
| EPI_ISL_514753                                                                                                                                                                                                                                                                                                                                                                                                                                                                                                                                                                                                                                                                                                                                                                                                                                                                                                                                                                                                                                                                                                                                                                                 | Yaftabad Hospital, COVID Lab Center                                                                                                                                                                            | University of Tabriz                                                                              | Shahabzadeh,Z., Hosseinzadeh Gharajeh,N., Hashemian,S.M. and Barati,O.                                                                                                                                                                                                                                                                                                                                                                                                                                     |
| EPI_ISL_524436                                                                                                                                                                                                                                                                                                                                                                                                                                                                                                                                                                                                                                                                                                                                                                                                                                                                                                                                                                                                                                                                                                                                                                                 | Department of Immunology, The Scripps Research Institute                                                                                                                                                       | Department of Immunology, The Scripps Research Institute                                          | Smither,A., Sabino-Santos,G., Snarski,P., Melnik,L., Bell,A., Genemaras,K., Drouin,A., Fusco,D., Garry,R., SEARCH Alliance,S.D.                                                                                                                                                                                                                                                                                                                                                                            |
| EPI_ISL_524474                                                                                                                                                                                                                                                                                                                                                                                                                                                                                                                                                                                                                                                                                                                                                                                                                                                                                                                                                                                                                                                                                                                                                                                 | Department of Infectious Diseases, Cantonal Hospital Baden                                                                                                                                                     | Institute of Medical Virology, University of Zurich                                               | Stefan Schmutz, Maryam Zaheri, Verena Kufner, Gabriela Ziltener, Patrick Redli, Fiona Steiner, Jon Huder, Riccarda Capaul, Andrea Zbinden, Jürg Böni, Michael Huber, Alexandra Trkola                                                                                                                                                                                                                                                                                                                      |
| EPI_ISL_524475                                                                                                                                                                                                                                                                                                                                                                                                                                                                                                                                                                                                                                                                                                                                                                                                                                                                                                                                                                                                                                                                                                                                                                                 | Division of Infectious Diseases, University Hospital Zürich                                                                                                                                                    | Institute of Medical Virology, University of Zurich                                               | Stefan Schmutz, Maryam Zaheri, Verena Kufner, Gabriela Ziltener, Patrick Redli, Fiona Steiner, Jon Huder, Riccarda Capaul, Andrea Zbinden, Jürg Böni, Michael Huber, Alexandra Trkola                                                                                                                                                                                                                                                                                                                      |
| EPI_ISL_524476                                                                                                                                                                                                                                                                                                                                                                                                                                                                                                                                                                                                                                                                                                                                                                                                                                                                                                                                                                                                                                                                                                                                                                                 | Bülach Hospital                                                                                                                                                                                                | Institute of Medical Virology, University of Zurich                                               | Stefan Schmutz, Maryam Zaheri, Verena Kufner, Gabriela Ziltener, Patrick Redli, Fiona Steiner, Jon Huder, Riccarda Capaul, Andrea Zbinden, Jürg Böni, Michael Huber, Alexandra Trkola                                                                                                                                                                                                                                                                                                                      |
| EPI_ISL_524477                                                                                                                                                                                                                                                                                                                                                                                                                                                                                                                                                                                                                                                                                                                                                                                                                                                                                                                                                                                                                                                                                                                                                                                 | Division of Infectious Diseases, University Hospital Zürich                                                                                                                                                    | Institute of Medical Virology, University of Zurich                                               | Stefan Schmutz, Maryam Zaheri, Verena Kufner, Gabriela Ziltener, Patrick Redli, Fiona Steiner, Jon Huder, Riccarda Capaul, Andrea Zbinden, Jürg Böni, Michael Huber, Alexandra Trkola                                                                                                                                                                                                                                                                                                                      |
| EPI_ISL_524478                                                                                                                                                                                                                                                                                                                                                                                                                                                                                                                                                                                                                                                                                                                                                                                                                                                                                                                                                                                                                                                                                                                                                                                 | Cantonal Hospital Winterthur                                                                                                                                                                                   | Institute of Medical Virology, University of Zurich                                               | Stefan Schmutz, Maryam Zaheri, Verena Kufner, Gabriela Ziltener, Patrick Redli, Fiona Steiner, Jon Huder, Riccarda Capaul, Andrea Zbinden, Jürg Böni, Michael Huber, Alexandra Trkola                                                                                                                                                                                                                                                                                                                      |
| EPI_ISL_524479                                                                                                                                                                                                                                                                                                                                                                                                                                                                                                                                                                                                                                                                                                                                                                                                                                                                                                                                                                                                                                                                                                                                                                                 | Klinik Hirslanden Zürich                                                                                                                                                                                       | Institute of Medical Virology, University of Zurich                                               | Stefan Schmutz, Maryam Zaheri, Verena Kufner, Gabriela Ziltener, Patrick Redli, Fiona Steiner, Jon Huder, Riccarda Capaul, Andrea Zbinden, Jürg Böni, Michael Huber, Alexandra Trkola                                                                                                                                                                                                                                                                                                                      |
| EPI_ISL_524480, EPI_ISL_524481                                                                                                                                                                                                                                                                                                                                                                                                                                                                                                                                                                                                                                                                                                                                                                                                                                                                                                                                                                                                                                                                                                                                                                 | Department of Infectious Diseases, Cantonal Hospital Baden                                                                                                                                                     | Institute of Medical Virology, University of Zurich                                               | Stefan Schmutz, Maryam Zaheri, Verena Kufner, Gabriela Ziltener, Patrick Redli, Fiona Steiner, Jon Huder, Riccarda Capaul, Andrea Zbinden, Jürg Böni, Michael Huber, Alexandra Trkola                                                                                                                                                                                                                                                                                                                      |
| EPI_ISL_524486, EPI_ISL_524488, EPI_ISL_524491, EPI_ISL_524492                                                                                                                                                                                                                                                                                                                                                                                                                                                                                                                                                                                                                                                                                                                                                                                                                                                                                                                                                                                                                                                                                                                                 | PHE South West Regional Laboratory, National Infection Service                                                                                                                                                 | Wellcome Sanger Institute for the COVID-19 Genomics UK (COG-UK) consortium                        | Stephanie Hutchings, Hannah Pymont, Dr Peter Muir, Barry Vipond, Rich Hopes; and Alex Alderton, Roberto Amato, Sonia Goncalves, Ewan Harrison, David K. Jackson, Ian Johnston, Dominic Kwiatkowski, Cordelia Langford, John Sillitoe on behalf of the Wellcome Sanger Institute COVID-19 Surveillance Team ( <a href="http://www.sanger.ac.uk/covid-team">http://www.sanger.ac.uk/covid-team</a> )                                                                                                         |
| EPI_ISL_524782                                                                                                                                                                                                                                                                                                                                                                                                                                                                                                                                                                                                                                                                                                                                                                                                                                                                                                                                                                                                                                                                                                                                                                                 | University Hospital Zürich                                                                                                                                                                                     | Institute of Medical Virology, University of Zurich                                               | Stefan Schmutz, Maryam Zaheri, Verena Kufner, Gabriela Ziltener, Patrick Redli, Fiona Steiner, Jon Huder, Riccarda Capaul, Andrea Zbinden, Jürg Böni, Michael Huber, Alexandra Trkola                                                                                                                                                                                                                                                                                                                      |
| EPI_ISL_528823, EPI_ISL_528825, EPI_ISL_528826                                                                                                                                                                                                                                                                                                                                                                                                                                                                                                                                                                                                                                                                                                                                                                                                                                                                                                                                                                                                                                                                                                                                                 | CSIR-Centre for Cellular and Molecular Biology                                                                                                                                                                 | CSIR-Centre for Cellular and Molecular Biology                                                    | Shagufta Khan, Lamuk Zaveri, Namami Gaur, Sakshi Shambhavi, Nikhil Hajirnis, M Soujanya Reddy, Pratheusa Maccha, Tulasi Nagabandi, Purushotham Vodnala, Payel Mukherjee, Sofia Banu, Priya Singh, Onkar Kulkarni, Dhiviya Vedagiri, Divya Gupta, Vishal Sah, Santosh Kumar Kuncha, Krishnan Harinivas Harshan, Archana Bharadwaj Siva, Karthik Bharadwaj Tallapaka, Renu Sudhakar, Suresh Gorde, Gangumala Srinivas Reddy, Sujoy Deb, Swati Bayyana, Rakesh K Mishra, Divya Tej Sowpati                    |
| EPI_ISL_528828, EPI_ISL_528832                                                                                                                                                                                                                                                                                                                                                                                                                                                                                                                                                                                                                                                                                                                                                                                                                                                                                                                                                                                                                                                                                                                                                                 | CSIR-Centre for Cellular and Molecular Biology                                                                                                                                                                 | CSIR-Centre for Cellular and Molecular Biology                                                    | Sofia Banu, Payel Mukherjee, Priya Singh, Onkar Kulkarni, Dhiviya Vedagiri, Divya Gupta, Vishal Sah, Santosh Kumar Kuncha, Krishnan Harinivas Harshan, Archana Bharadwaj Siva, Karthik Bharadwaj Tallapaka, Shagufta Khan, Lamuk Zaveri, Namami Gaur, Sakshi Shambhavi, Nikhil Hajirnis, M Soujanya Reddy, Pratheusa Maccha, Tulasi Nagabandi, Purushotham Vodnala, Deepak Kumar, Devi Prasad Vijayashankar, Disha Nanda, Divya Das, Jotin Gogoi, Manish Bhattacharjee, Rakesh K Mishra, Divya Tej Sowpati |
| EPI_ISL_528847                                                                                                                                                                                                                                                                                                                                                                                                                                                                                                                                                                                                                                                                                                                                                                                                                                                                                                                                                                                                                                                                                                                                                                                 | CSIR-Centre for Cellular and Molecular Biology                                                                                                                                                                 | CSIR-Centre for Cellular and Molecular Biology                                                    | Shagufta Khan, Lamuk Zaveri, Namami Gaur, Sakshi Shambhavi, Nikhil Hajirnis, M Soujanya Reddy, Pratheusa Maccha, Tulasi Nagabandi, Purushotham Vodnala, Payel Mukherjee, Sofia Banu, Priya Singh, Onkar Kulkarni, Dhiviya Vedagiri, Divya Gupta, Vishal Sah, Santosh Kumar Kuncha, Krishnan Harinivas Harshan, Archana Bharadwaj Siva, Karthik Bharadwaj Tallapaka, Renu Sudhakar, Suresh Gorde, Gangumala Srinivas Reddy, Sujoy Deb, Swati Bayyana, Rakesh K Mishra, Divya Tej Sowpati                    |
| EPI_ISL_528848, EPI_ISL_528864                                                                                                                                                                                                                                                                                                                                                                                                                                                                                                                                                                                                                                                                                                                                                                                                                                                                                                                                                                                                                                                                                                                                                                 | CSIR-Centre for Cellular and Molecular Biology                                                                                                                                                                 | CSIR-Centre for Cellular and Molecular Biology                                                    | Sofia Banu, Payel Mukherjee, Priya Singh, Onkar Kulkarni, Dhiviya Vedagiri, Divya Gupta, Vishal Sah, Santosh Kumar Kuncha, Krishnan Harinivas Harshan, Archana Bharadwaj Siva, Karthik Bharadwaj Tallapaka, Shagufta Khan, Lamuk Zaveri, Namami Gaur, Sakshi Shambhavi, Nikhil Hajirnis, M Soujanya Reddy, Pratheusa Maccha, Tulasi Nagabandi, Purushotham Vodnala, Deepak Kumar, Devi Prasad Vijayashankar, Disha Nanda, Divya Das, Jotin Gogoi, Manish Bhattacharjee, Rakesh K Mishra, Divya Tej Sowpati |
| EPI_ISL_528865, EPI_ISL_528868, EPI_ISL_528869                                                                                                                                                                                                                                                                                                                                                                                                                                                                                                                                                                                                                                                                                                                                                                                                                                                                                                                                                                                                                                                                                                                                                 | CSIR-Centre for Cellular and Molecular Biology                                                                                                                                                                 | CSIR-Centre for Cellular and Molecular Biology                                                    | Shagufta Khan, Lamuk Zaveri, Namami Gaur, Sakshi Shambhavi, Nikhil Hajirnis, M Soujanya Reddy, Pratheusa Maccha, Tulasi Nagabandi, Purushotham Vodnala, Payel Mukherjee, Sofia Banu, Priya Singh, Onkar Kulkarni, Dhiviya Vedagiri, Divya Gupta, Vishal Sah, Santosh Kumar Kuncha, Krishnan Harinivas Harshan, Archana Bharadwaj Siva, Karthik Bharadwaj Tallapaka, Renu Sudhakar, Suresh Gorde, Gangumala Srinivas Reddy, Sujoy Deb, Swati Bayyana, Rakesh K Mishra, Divya Tej Sowpati                    |
| EPI_ISL_529029, EPI_ISL_529030                                                                                                                                                                                                                                                                                                                                                                                                                                                                                                                                                                                                                                                                                                                                                                                                                                                                                                                                                                                                                                                                                                                                                                 | Kingston Health Sciences Center                                                                                                                                                                                | Queen's Genomics Lab at Ongwanada (Q-GLO)                                                         | Sjaarda CP, Rustom N, Huang D, Perez-Patrigeon S, Hudson ML, Wong H, Guan H, Ayub M, Soares CN, Colautti R, Evans GA, Sheth P                                                                                                                                                                                                                                                                                                                                                                              |
| EPI_ISL_529139                                                                                                                                                                                                                                                                                                                                                                                                                                                                                                                                                                                                                                                                                                                                                                                                                                                                                                                                                                                                                                                                                                                                                                                 | Centro de Desenvolvimento Tecnológico em Saude, Fundacao Oswaldo Cruz                                                                                                                                          | Centro de Desenvolvimento Tecnológico em Saude, Fundacao Oswaldo Cruz                             | Souza,T.M., Fintelman-Rodrigues,N., De Paula,A.D., Saraiva,F.B., Ferreira,M.A., Sacramento,C.Q., Medeiros,M.A.                                                                                                                                                                                                                                                                                                                                                                                             |
| EPI_ISL_529140                                                                                                                                                                                                                                                                                                                                                                                                                                                                                                                                                                                                                                                                                                                                                                                                                                                                                                                                                                                                                                                                                                                                                                                 | Centro de Desenvolvimento Tecnológico em Saude, Fundacao Oswaldo Cruz                                                                                                                                          | Centro de Desenvolvimento Tecnológico em Saude, Fundacao Oswaldo Cruz                             | Souza,T.M., Fintelman-Rodrigues,N., De Paula,A.D., Saraiva,F.B., Ferreira,M.A., Sacramento,C.Q., Medeiros,M.A.                                                                                                                                                                                                                                                                                                                                                                                             |
| EPI_ISL_530225, EPI_ISL_530226, EPI_ISL_530227, EPI_ISL_530228, EPI_ISL_530229, EPI_ISL_530230, EPI_ISL_530231, EPI_ISL_530232, EPI_ISL_530233, EPI_ISL_530234, EPI_ISL_530235, EPI_ISL_530236, EPI_ISL_530237, EPI_ISL_530238, EPI_ISL_530239, EPI_ISL_530240, EPI_ISL_530241, EPI_ISL_530242, EPI_ISL_530243, EPI_ISL_530244, EPI_ISL_530245, EPI_ISL_530246, EPI_ISL_530247, EPI_ISL_530248, EPI_ISL_530249, EPI_ISL_530250, EPI_ISL_530251, EPI_ISL_530252, EPI_ISL_530253, EPI_ISL_530254, EPI_ISL_530255, EPI_ISL_530256, EPI_ISL_530257, EPI_ISL_530258, EPI_ISL_530259, EPI_ISL_530260, EPI_ISL_530261, EPI_ISL_530262, EPI_ISL_530263, EPI_ISL_530264, EPI_ISL_530265, EPI_ISL_530266, EPI_ISL_530267, EPI_ISL_530268, EPI_ISL_530269, EPI_ISL_530270, EPI_ISL_530271, EPI_ISL_530272, EPI_ISL_530273, EPI_ISL_530274, EPI_ISL_530275, EPI_ISL_530276, EPI_ISL_530277, EPI_ISL_530278, EPI_ISL_530279, EPI_ISL_530280, EPI_ISL_530281, EPI_ISL_530282, EPI_ISL_530283                                                                                                                                                                                                                 |                                                                                                                                                                                                                |                                                                                                   |                                                                                                                                                                                                                                                                                                                                                                                                                                                                                                            |
| see above                                                                                                                                                                                                                                                                                                                                                                                                                                                                                                                                                                                                                                                                                                                                                                                                                                                                                                                                                                                                                                                                                                                                                                                      | Queensland Health Forensic and Scientific Services, Public Health Virology                                                                                                                                     | Public Health Virology Laboratory, Forensic and Scientific Services, Queensland Health            | Son Nguyen et al                                                                                                                                                                                                                                                                                                                                                                                                                                                                                           |
| EPI_ISL_534336                                                                                                                                                                                                                                                                                                                                                                                                                                                                                                                                                                                                                                                                                                                                                                                                                                                                                                                                                                                                                                                                                                                                                                                 | Department of Laboratory Medicine, National Taiwan University Hospital                                                                                                                                         | Microbial Genomics Core Lab, National Taiwan University Centers of Genomic and Precision Medicine | Shiou-Hwei Yeh, You-Yu Lin, Ya-Yun Lai, Chiao-Ling Li, Shan-Chwen Chang, Pei-Jer Chen, Sui-Yuan Chang                                                                                                                                                                                                                                                                                                                                                                                                      |
| EPI_ISL_534337, EPI_ISL_534338, EPI_ISL_534339, EPI_ISL_534340, EPI_ISL_534341, EPI_ISL_534342, EPI_ISL_534343, EPI_ISL_534344, EPI_ISL_534345                                                                                                                                                                                                                                                                                                                                                                                                                                                                                                                                                                                                                                                                                                                                                                                                                                                                                                                                                                                                                                                 | Molecular diagnostic laboratory of Federal Budget Institution of Science "Central Research Institute of Epidemiology" of The Federal Service on Customers' Rights Protection and Human Well-being Surveillance | Group of Genomics and Postgenomic Technologies of Central Research Institute of Epidemiology      | Speranskaya AS, Kapteleva VV, Samoilo AE, Valdokhina AV, Bulanenko VP, Bukharina A.Y., Tivanova EV, Shipulina OY, Akimkin VG                                                                                                                                                                                                                                                                                                                                                                               |
| EPI_ISL_534346, EPI_ISL_534347, EPI_ISL_534348, EPI_ISL_534349                                                                                                                                                                                                                                                                                                                                                                                                                                                                                                                                                                                                                                                                                                                                                                                                                                                                                                                                                                                                                                                                                                                                 | Molecular diagnostic laboratory of Federal Budget Institution of Science "Central Research Institute of Epidemiology" of The Federal Service on Customers' Rights Protection and Human Well-being Surveillance | Group of Genomics and Postgenomic Technologies of Central Research Institute of Epidemiology      | Speranskaya AS, Kapteleva VV, Valdokhina AV, Bulanenko VP, Samoilo AE, Korneenko EV, Tivanova EV, Shipulina OY, Akimkin VG                                                                                                                                                                                                                                                                                                                                                                                 |
| EPI_ISL_537874, EPI_ISL_537875, EPI_ISL_537876, EPI_ISL_537877, EPI_ISL_537878, EPI_ISL_537879, EPI_ISL_537880, EPI_ISL_537881, EPI_ISL_537882, EPI_ISL_537883, EPI_ISL_537884, EPI_ISL_537885, EPI_ISL_537886, EPI_ISL_537887, EPI_ISL_537888, EPI_ISL_537889, EPI_ISL_537890, EPI_ISL_537891, EPI_ISL_537892, EPI_ISL_537893, EPI_ISL_537894, EPI_ISL_537895, EPI_ISL_537896, EPI_ISL_537897, EPI_ISL_537898, EPI_ISL_537899, EPI_ISL_537900, EPI_ISL_537901, EPI_ISL_537902, EPI_ISL_537903, EPI_ISL_537904, EPI_ISL_537905, EPI_ISL_537906, EPI_ISL_537907, EPI_ISL_537908, EPI_ISL_537909, EPI_ISL_537910, EPI_ISL_537911, EPI_ISL_537912, EPI_ISL_537913, EPI_ISL_537914, EPI_ISL_537915, EPI_ISL_537916, EPI_ISL_537917, EPI_ISL_537918, EPI_ISL_537919, EPI_ISL_537920, EPI_ISL_537921, EPI_ISL_537922, EPI_ISL_537923, EPI_ISL_537924, EPI_ISL_537925, EPI_ISL_537926, EPI_ISL_537927, EPI_ISL_537928, EPI_ISL_537929, EPI_ISL_537930, EPI_ISL_537931, EPI_ISL_537932, EPI_ISL_537933, EPI_ISL_537934, EPI_ISL_537935, EPI_ISL_537936, EPI_ISL_537937, EPI_ISL_537938, EPI_ISL_537939, EPI_ISL_537940, EPI_ISL_537941, EPI_ISL_537942, EPI_ISL_537943, EPI_ISL_537944, EPI_ISL_537945 |                                                                                                                                                                                                                |                                                                                                   |                                                                                                                                                                                                                                                                                                                                                                                                                                                                                                            |
| see above                                                                                                                                                                                                                                                                                                                                                                                                                                                                                                                                                                                                                                                                                                                                                                                                                                                                                                                                                                                                                                                                                                                                                                                      | Hospital Universitario Araba. Vitoria-Gasteiz                                                                                                                                                                  | SeqCOVID-SPAIN consortium/IBV(CSIC)                                                               | Silvia Hernández Crespo, Carmen Gómez González, Amaia Aguirre Quiñero, Marina Fernández Torres, Ma Rosario Almela Ferrer, Ma Concepción Lecaroz Agara, Andrés Canut Blasco and SeqCOVID-SPAIN consortium                                                                                                                                                                                                                                                                                                   |
| EPI_ISL_538118, EPI_ISL_538231, EPI_ISL_538232                                                                                                                                                                                                                                                                                                                                                                                                                                                                                                                                                                                                                                                                                                                                                                                                                                                                                                                                                                                                                                                                                                                                                 | Hospital Universitario Araba. Vitoria-Gasteiz                                                                                                                                                                  | SeqCOVID-SPAIN consortium/IBV(CSIC)                                                               | Silvia Hernández Crespo, Carmen Gómez González, Amaia Aguirre Quiñero, Marina Fernández Torres, Mª Rosario Almela Ferrer, Mª Concepción Lecaroz Agara, Andrés Canut Blasco and SeqCOVID-SPAIN consortium                                                                                                                                                                                                                                                                                                   |
| EPI_ISL_539299                                                                                                                                                                                                                                                                                                                                                                                                                                                                                                                                                                                                                                                                                                                                                                                                                                                                                                                                                                                                                                                                                                                                                                                 | Molecular diagnostic laboratory of Federal Budget Institution of Science "Central Research Institute of Epidemiology" of The Federal Service on Customers' Rights Protection and                               | Group of Genomics and Postgenomic Technologies of Central Research Institute of Epidemiology      | Speranskaya AS, Kapteleva VV, Valdokhina AV, Bulanenko VP, Samoilo AE, Korneenko EV, Tivanova EV, Shipulina OY, Akimkin VG                                                                                                                                                                                                                                                                                                                                                                                 |











|                                                                                                                                                                                                                                                                                                                                                                                                                                                                                                                                                                                                                                                                                                                                                                                                                                                                                                                                                                                                                                                                |           |                                                                                                                                  |                                                                                       |                                                                                                                                                                                                                                                                                                                                                          |
|----------------------------------------------------------------------------------------------------------------------------------------------------------------------------------------------------------------------------------------------------------------------------------------------------------------------------------------------------------------------------------------------------------------------------------------------------------------------------------------------------------------------------------------------------------------------------------------------------------------------------------------------------------------------------------------------------------------------------------------------------------------------------------------------------------------------------------------------------------------------------------------------------------------------------------------------------------------------------------------------------------------------------------------------------------------|-----------|----------------------------------------------------------------------------------------------------------------------------------|---------------------------------------------------------------------------------------|----------------------------------------------------------------------------------------------------------------------------------------------------------------------------------------------------------------------------------------------------------------------------------------------------------------------------------------------------------|
| EPI_ISL_573680, EPI_ISL_573681, EPI_ISL_573682, EPI_ISL_573683, EPI_ISL_573684, EPI_ISL_573685, EPI_ISL_573764, EPI_ISL_573800, EPI_ISL_573801, EPI_ISL_573802, EPI_ISL_573803, EPI_ISL_573804, EPI_ISL_573805, EPI_ISL_573856, EPI_ISL_573857, EPI_ISL_573858, EPI_ISL_573859, EPI_ISL_573860, EPI_ISL_573861, EPI_ISL_573862, EPI_ISL_573863, EPI_ISL_573864, EPI_ISL_573865, EPI_ISL_574258                                                                                                                                                                                                                                                                                                                                                                                                                                                                                                                                                                                                                                                                 | see above | University College London, Great Ormond Street Hospital for Children NHS Foundation Trust, Imperial College Healthcare NHS Trust | COVID-19 Genomics UK (COG-UK) Consortium                                              | Sergi Castellano, Rachel Williams, Mark Kristiansen, Paola Resende Silva, Sunando Roy, Tony Brooks, Helena Tutill, Paola Niola, Patricia Dyal, Charlotte Williams, Leysa Forrest, Yasmin Panchbhaya, Jacqueline Findlay, Samuel Weeks, Julianne Brown, Kathryn Harris, Paul Randell, James Price, Alison Holmes, Judith Breuer                           |
| EPI_ISL_576131, EPI_ISL_576132, EPI_ISL_576133, EPI_ISL_576134, EPI_ISL_576135, EPI_ISL_576136, EPI_ISL_576137, EPI_ISL_576138, EPI_ISL_576139, EPI_ISL_576140, EPI_ISL_576141, EPI_ISL_576142, EPI_ISL_576143, EPI_ISL_576144                                                                                                                                                                                                                                                                                                                                                                                                                                                                                                                                                                                                                                                                                                                                                                                                                                 | see above | Public Health Virology Laboratory, Forensic and Scientific Services (PHV-FSS)                                                    | Public Health Virology Laboratory, Forensic and Scientific Services (PHV-FSS)         | Son Nguyen et al                                                                                                                                                                                                                                                                                                                                         |
| EPI_ISL_576518, EPI_ISL_576519, EPI_ISL_576520, EPI_ISL_576521, EPI_ISL_576522, EPI_ISL_576523, EPI_ISL_576524, EPI_ISL_576525, EPI_ISL_576526, EPI_ISL_576527, EPI_ISL_576528, EPI_ISL_576529, EPI_ISL_576530, EPI_ISL_576531, EPI_ISL_576532, EPI_ISL_576533, EPI_ISL_576534, EPI_ISL_576535, EPI_ISL_576536, EPI_ISL_576537, EPI_ISL_576538, EPI_ISL_576539, EPI_ISL_576540, EPI_ISL_576541, EPI_ISL_576542, EPI_ISL_576543, EPI_ISL_576544, EPI_ISL_576545, EPI_ISL_576546, EPI_ISL_576547, EPI_ISL_576548, EPI_ISL_576549, EPI_ISL_576550, EPI_ISL_576551, EPI_ISL_576552, EPI_ISL_576553, EPI_ISL_576554, EPI_ISL_576555, EPI_ISL_576556                                                                                                                                                                                                                                                                                                                                                                                                                 | see above | Innovative Genomics Institute, UC Berkeley                                                                                       | Innovative Genomics Institute, UC Berkeley                                            | Stacia Wyman, Haridha Shivram, Phil Frankino, Liana Lareau, Shana McDevitt, Justin Choi                                                                                                                                                                                                                                                                  |
| EPI_ISL_576984, EPI_ISL_576985, EPI_ISL_584670, EPI_ISL_584671, EPI_ISL_584672, EPI_ISL_584673, EPI_ISL_584674, EPI_ISL_584675, EPI_ISL_584676, EPI_ISL_584677, EPI_ISL_584678, EPI_ISL_584679, EPI_ISL_584811, EPI_ISL_584812, EPI_ISL_584813, EPI_ISL_584814, EPI_ISL_584815, EPI_ISL_584816, EPI_ISL_584817, EPI_ISL_584818, EPI_ISL_584819, EPI_ISL_584820, EPI_ISL_584821, EPI_ISL_584822, EPI_ISL_584823, EPI_ISL_584824, EPI_ISL_584825, EPI_ISL_584826, EPI_ISL_584827, EPI_ISL_584828, EPI_ISL_584829, EPI_ISL_584830, EPI_ISL_584831, EPI_ISL_584832, EPI_ISL_584833, EPI_ISL_584834, EPI_ISL_584835, EPI_ISL_584836, EPI_ISL_584837, EPI_ISL_584838, EPI_ISL_584839, EPI_ISL_584840, EPI_ISL_584841, EPI_ISL_584842, EPI_ISL_584843, EPI_ISL_584844, EPI_ISL_584845, EPI_ISL_584846, EPI_ISL_585502, EPI_ISL_585503                                                                                                                                                                                                                                 | see above | University College London, Great Ormond Street Hospital for Children NHS Foundation Trust, Imperial College Healthcare NHS Trust | COVID-19 Genomics UK (COG-UK) Consortium                                              | Sergi Castellano, Rachel Williams, Mark Kristiansen, Paola Resende Silva, Sunando Roy, Tony Brooks, Helena Tutill, Paola Niola, Patricia Dyal, Charlotte Williams, Leysa Forrest, Yasmin Panchbhaya, Jacqueline Findlay, Samuel Weeks, Julianne Brown, Kathryn Harris, Paul Randell, James Price, Alison Holmes, Judith Breuer                           |
| EPI_ISL_586569                                                                                                                                                                                                                                                                                                                                                                                                                                                                                                                                                                                                                                                                                                                                                                                                                                                                                                                                                                                                                                                 |           | GCRI,Ahmedabad                                                                                                                   | Gujarat Biotechnology Research Centre                                                 | Shashank Pandya, Harsha Panchal, Apurvasinh Puvar, Janvi Raval, Zarna Patel, Monika Gandhi, Pinal Trivedi, Maharshi Pandya, Nidhi Patel, Nitin Savaliya, Raghawendra Kumar, Dinesh Kumar, Zuber Saiyed, Komal Patel, Labdhi Pandya, Atzal Ansari, Nikha Trivedi, R D Dixit, A M Kadri, Harsh Bakshi, Chaitanya Joshi, Madhvi Joshi                       |
| EPI_ISL_591070                                                                                                                                                                                                                                                                                                                                                                                                                                                                                                                                                                                                                                                                                                                                                                                                                                                                                                                                                                                                                                                 |           | College of Veterinary Medicine, Chungnam National University                                                                     | College of Veterinary Medicine, Chungnam National University                          | Seo,S.H. and Jang,Y.                                                                                                                                                                                                                                                                                                                                     |
| EPI_ISL_593597, EPI_ISL_593598, EPI_ISL_593599, EPI_ISL_593600, EPI_ISL_593601, EPI_ISL_593602, EPI_ISL_593603, EPI_ISL_593604, EPI_ISL_593605, EPI_ISL_593606, EPI_ISL_593607, EPI_ISL_593608, EPI_ISL_593609, EPI_ISL_593610, EPI_ISL_593611, EPI_ISL_593612, EPI_ISL_593613, EPI_ISL_593614, EPI_ISL_593615, EPI_ISL_593616, EPI_ISL_593617, EPI_ISL_593618, EPI_ISL_593619, EPI_ISL_593620, EPI_ISL_593621, EPI_ISL_593622, EPI_ISL_593623, EPI_ISL_593624, EPI_ISL_593625, EPI_ISL_593626, EPI_ISL_593627, EPI_ISL_593628, EPI_ISL_593629, EPI_ISL_593630, EPI_ISL_593631, EPI_ISL_593632, EPI_ISL_593633, EPI_ISL_593634, EPI_ISL_593635, EPI_ISL_593636, EPI_ISL_593637, EPI_ISL_593638, EPI_ISL_593639, EPI_ISL_593640, EPI_ISL_593641, EPI_ISL_593642, EPI_ISL_593643, EPI_ISL_593644, EPI_ISL_593645                                                                                                                                                                                                                                                 | see above | Public Health Virology Laboratory, Forensic and Scientific Services (PHV-FSS)                                                    | Public Health Virology Laboratory, Forensic and Scientific Services (PHV-FSS)         | Son Nguyen et al                                                                                                                                                                                                                                                                                                                                         |
| EPI_ISL_594861, EPI_ISL_594862, EPI_ISL_594863, EPI_ISL_594864, EPI_ISL_594865, EPI_ISL_594866, EPI_ISL_594867, EPI_ISL_594868, EPI_ISL_594869, EPI_ISL_594870, EPI_ISL_594871, EPI_ISL_594872, EPI_ISL_594873, EPI_ISL_594874, EPI_ISL_594875, EPI_ISL_594876, EPI_ISL_594877, EPI_ISL_594878, EPI_ISL_594879, EPI_ISL_594880, EPI_ISL_594881, EPI_ISL_594882, EPI_ISL_594883, EPI_ISL_594884, EPI_ISL_594885, EPI_ISL_594886, EPI_ISL_594887, EPI_ISL_594888                                                                                                                                                                                                                                                                                                                                                                                                                                                                                                                                                                                                 | see above | University College London, Great Ormond Street Hospital for Children NHS Foundation Trust, Imperial College Healthcare NHS Trust | COVID-19 Genomics UK (COG-UK) Consortium                                              | Sergi Castellano, Rachel Williams, Mark Kristiansen, Paola Resende Silva, Sunando Roy, Tony Brooks, Helena Tutill, Paola Niola, Patricia Dyal, Charlotte Williams, Leysa Forrest, Yasmin Panchbhaya, Jacqueline Findlay, Samuel Weeks, Julianne Brown, Kathryn Harris, Paul Randell, James Price, Alison Holmes, Judith Breuer                           |
| EPI_ISL_603040, EPI_ISL_603041, EPI_ISL_603042, EPI_ISL_603043, EPI_ISL_603044, EPI_ISL_603045, EPI_ISL_603046, EPI_ISL_603047, EPI_ISL_603048                                                                                                                                                                                                                                                                                                                                                                                                                                                                                                                                                                                                                                                                                                                                                                                                                                                                                                                 |           | MDU-PHL, The Peter Doherty Institute for Infection and Immunity                                                                  | MDU-PHL, The Peter Doherty Institute for Infection and Immunity                       | Seemann,T., Caly,L., Sait,M., Schultz,M.B., Druce,J., Sherry,N.                                                                                                                                                                                                                                                                                          |
| EPI_ISL_603238, EPI_ISL_603239                                                                                                                                                                                                                                                                                                                                                                                                                                                                                                                                                                                                                                                                                                                                                                                                                                                                                                                                                                                                                                 |           | National Institute of Laboratory Medicine and Referral Center                                                                    | Genomic Research Lab, BCSIR                                                           | Shahina Akter, Abu Sayeed Mohammad Mahmud, Mohammad Samir Uzzaman, Eshrar Osman, Md. Ahasan Habib, Tanjina Akhter Banu, Md. Murshed Hasan Sarkar, Barna Goswami, Iflat Jahan, Md. Saddam Hossain, Tasnim Nafisa, Md. Maruf Ahmed Molla, Mahmuda Yasmin, Asish Kumar Ghosh, A. K. M. Shamsuzzaman, Monira Parveen, Md. Masum Hossain Arif, Md. Salim Khan |
| EPI_ISL_610163, EPI_ISL_610164, EPI_ISL_610165, EPI_ISL_610166, EPI_ISL_610167, EPI_ISL_610168, EPI_ISL_610169, EPI_ISL_610170, EPI_ISL_610171, EPI_ISL_610172, EPI_ISL_610173, EPI_ISL_610174, EPI_ISL_610175, EPI_ISL_610176, EPI_ISL_610177, EPI_ISL_610178, EPI_ISL_610179, EPI_ISL_610180, EPI_ISL_610181, EPI_ISL_610182, EPI_ISL_610183, EPI_ISL_610184, EPI_ISL_610185, EPI_ISL_610186, EPI_ISL_610187, EPI_ISL_610188, EPI_ISL_610189, EPI_ISL_610190, EPI_ISL_610191, EPI_ISL_610192, EPI_ISL_610193, EPI_ISL_610194, EPI_ISL_610195, EPI_ISL_610196, EPI_ISL_610197, EPI_ISL_610198, EPI_ISL_610199, EPI_ISL_610200, EPI_ISL_610201, EPI_ISL_610202, EPI_ISL_610203, EPI_ISL_610204, EPI_ISL_610205, EPI_ISL_610206, EPI_ISL_610207, EPI_ISL_610208, EPI_ISL_610209, EPI_ISL_610210, EPI_ISL_610211, EPI_ISL_610212, EPI_ISL_610213, EPI_ISL_610214, EPI_ISL_610215, EPI_ISL_610216, EPI_ISL_610217, EPI_ISL_610218, EPI_ISL_610219, EPI_ISL_610220, EPI_ISL_610221, EPI_ISL_610222, EPI_ISL_610223, EPI_ISL_610224, EPI_ISL_610225, EPI_ISL_610226 | see above | Department of Health Technology and Informatics, The Hong Kong Polytechnic University                                            | Department of Health Technology and Informatics, The Hong Kong Polytechnic University | Siu,G.K.-H., Lee,L.-K., Leung,K.S.-S., Leung,J.S.-L., Ng,T.T.-L., Chan,C.T.-M., Tam,K.K.-G., Lao,H.-Y., Wu,A.K.-L., Yau,M.C.-Y., Lai,Y.W.-M., Fung,K.S.-C., Chau,S.K.-Y., Wong,B.K.-C., To,W.-K., Luk,K., Ho,A.Y.-M., Que,T.-L., Yip,K.-T., Yam,W.C., Shum,D.H.-K., Yip,S.P.                                                                             |
| EPI_ISL_611523, EPI_ISL_611527, EPI_ISL_611558, EPI_ISL_611559, EPI_ISL_611595, EPI_ISL_611596, EPI_ISL_611597, EPI_ISL_611622, EPI_ISL_611623, EPI_ISL_611665, EPI_ISL_611822, EPI_ISL_611823, EPI_ISL_611996, EPI_ISL_612000, EPI_ISL_612014, EPI_ISL_612078, EPI_ISL_612079, EPI_ISL_612103, EPI_ISL_612105, EPI_ISL_612131, EPI_ISL_612198, EPI_ISL_612450, EPI_ISL_612451, EPI_ISL_612452, EPI_ISL_612453, EPI_ISL_612454, EPI_ISL_612455, EPI_ISL_612456, EPI_ISL_612457                                                                                                                                                                                                                                                                                                                                                                                                                                                                                                                                                                                 | see above | University College London, Great Ormond Street Hospital for Children NHS Foundation Trust, Imperial College Healthcare NHS Trust | COVID-19 Genomics UK (COG-UK) Consortium                                              | Sergi Castellano, Rachel Williams, Mark Kristiansen, Paola Resende Silva, Sunando Roy, Tony Brooks, Helena Tutill, Paola Niola, Patricia Dyal, Charlotte Williams, Leysa Forrest, Yasmin Panchbhaya, Jacqueline Findlay, Samuel Weeks, Julianne Brown, Kathryn Harris, Paul Randell, James Price, Alison Holmes, Judith Breuer                           |
| EPI_ISL_625457, EPI_ISL_625458, EPI_ISL_625459, EPI_ISL_625460, EPI_ISL_625461, EPI_ISL_625462, EPI_ISL_625463, EPI_ISL_625464, EPI_ISL_625465, EPI_ISL_625466, EPI_ISL_625467, EPI_ISL_625468, EPI_ISL_625469, EPI_ISL_625470, EPI_ISL_625471, EPI_ISL_625472, EPI_ISL_625473, EPI_ISL_625474, EPI_ISL_625475, EPI_ISL_625476, EPI_ISL_625477                                                                                                                                                                                                                                                                                                                                                                                                                                                                                                                                                                                                                                                                                                                 | see above | Child Health Research Foundation                                                                                                 | Child Health Research Foundation                                                      | Senjuti Saha, Md Saiful Islam Sajib, Nikkon Sarkar, Syed Mukhtar Al Siyum, Afroza Akter Tanni, Roly Malaker, Arif Mohammad Tanmoy, Md Hafizur Rahman, Samir K Saha                                                                                                                                                                                       |
| EPI_ISL_627082, EPI_ISL_627104, EPI_ISL_627108, EPI_ISL_627110, EPI_ISL_627175, EPI_ISL_627211, EPI_ISL_627450, EPI_ISL_627451, EPI_ISL_627452, EPI_ISL_627453, EPI_ISL_627454, EPI_ISL_627455, EPI_ISL_627456, EPI_ISL_627457, EPI_ISL_627458, EPI_ISL_627459, EPI_ISL_627460, EPI_ISL_627461, EPI_ISL_627462, EPI_ISL_627463, EPI_ISL_627465, EPI_ISL_627466, EPI_ISL_627467, EPI_ISL_627468, EPI_ISL_627469, EPI_ISL_627470, EPI_ISL_627471, EPI_ISL_627472, EPI_ISL_627473, EPI_ISL_627474, EPI_ISL_627475, EPI_ISL_627476, EPI_ISL_627477, EPI_ISL_627478, EPI_ISL_627479, EPI_ISL_627480, EPI_ISL_627481, EPI_ISL_627491                                                                                                                                                                                                                                                                                                                                                                                                                                 | see above | University College London, Great Ormond Street Hospital for Children NHS Foundation Trust, Imperial College Healthcare NHS Trust | COVID-19 Genomics UK (COG-UK) Consortium                                              | Sergi Castellano, Rachel Williams, Mark Kristiansen, Paola Resende Silva, Sunando Roy, Tony Brooks, Helena Tutill, Paola Niola, Patricia Dyal, Charlotte Williams, Leysa Forrest, Yasmin Panchbhaya, Jacqueline Findlay, Samuel Weeks, Julianne Brown, Kathryn Harris, Paul Randell, James Price, Alison Holmes, Judith Breuer                           |
| EPI_ISL_632938                                                                                                                                                                                                                                                                                                                                                                                                                                                                                                                                                                                                                                                                                                                                                                                                                                                                                                                                                                                                                                                 |           | Jena University Hospital; Institute for Infectious Diseases and Infection Control                                                | Institute of infectious medicine & hospital hygiene, CaSe-Group                       | Spott, Ricardo; Marquet, Mike; Pletz, Matthias W.; Brandt, Christian                                                                                                                                                                                                                                                                                     |
| EPI_ISL_636737, EPI_ISL_636834, EPI_ISL_636835, EPI_ISL_636836, EPI_ISL_636837, EPI_ISL_636838                                                                                                                                                                                                                                                                                                                                                                                                                                                                                                                                                                                                                                                                                                                                                                                                                                                                                                                                                                 |           | Laboratório de Imunofarmacologia - Instituto Oswaldo Cruz                                                                        | Laboratório de Imunofarmacologia - Instituto Oswaldo Cruz                             | Souza,T.M., Fintelman-Rodriguez,N., De Paula,A.D., Saraiva,F.B., Ferreira,M.A. and Sacramento,C.Q.                                                                                                                                                                                                                                                       |
| EPI_ISL_636960                                                                                                                                                                                                                                                                                                                                                                                                                                                                                                                                                                                                                                                                                                                                                                                                                                                                                                                                                                                                                                                 |           | Pathogen Genomics Lab King Abdullah University of Science and Technology(KAUST)                                                  | Pathogen Genomics Lab King Abdullah University of Science and Technology(KAUST)       | Sharif Hala, Fadwa Alofi, Sara Mfarrej, Amit Kumar Subudhi, Rahul P Salunke, Fathia Ben Rached, Amanda Ooi, Luke Esau, Afrah Alsomali, Asim Khogeer, Jumana Taha, Abdulaziz Alahmadi, Kahled Alghithami, Raece Naem, Anwar Hashem, Naif Almontashiri, Arnab Pain                                                                                         |
| EPI_ISL_637446, EPI_ISL_637895, EPI_ISL_637912, EPI_ISL_637937, EPI_ISL_637995, EPI_ISL_637999, EPI_ISL_638003, EPI_ISL_638022, EPI_ISL_638031, EPI_ISL_638032                                                                                                                                                                                                                                                                                                                                                                                                                                                                                                                                                                                                                                                                                                                                                                                                                                                                                                 |           | University College London, Great Ormond Street Hospital for Children NHS Foundation Trust, Imperial College Healthcare NHS Trust | COVID-19 Genomics UK (COG-UK) Consortium                                              | Sergi Castellano, Rachel Williams, Mark Kristiansen, Paola Resende Silva, Sunando Roy, Tony Brooks, Helena Tutill, Paola Niola, Patricia Dyal, Charlotte Williams, Leysa Forrest, Yasmin Panchbhaya, Jacqueline Findlay, Samuel Weeks, Julianne Brown, Kathryn Harris, Paul Randell, James Price, Alison Holmes, Judith Breuer                           |

|                                                                                                                                                                                                                                                                                                                                                                                                                                                                                                                                                                                                                                                                                                                                                                                                                                                                                                                                                                                                                                                                                                                                                                                                                                                                                                                                                                |                                                                                                                                  |                                                                                                                              |                                                                                                                                                                                                                                                                                                                                |
|----------------------------------------------------------------------------------------------------------------------------------------------------------------------------------------------------------------------------------------------------------------------------------------------------------------------------------------------------------------------------------------------------------------------------------------------------------------------------------------------------------------------------------------------------------------------------------------------------------------------------------------------------------------------------------------------------------------------------------------------------------------------------------------------------------------------------------------------------------------------------------------------------------------------------------------------------------------------------------------------------------------------------------------------------------------------------------------------------------------------------------------------------------------------------------------------------------------------------------------------------------------------------------------------------------------------------------------------------------------|----------------------------------------------------------------------------------------------------------------------------------|------------------------------------------------------------------------------------------------------------------------------|--------------------------------------------------------------------------------------------------------------------------------------------------------------------------------------------------------------------------------------------------------------------------------------------------------------------------------|
| EPI_ISL_639741, EPI_ISL_639742, EPI_ISL_639743, EPI_ISL_639744, EPI_ISL_639745, EPI_ISL_639746, EPI_ISL_639747, EPI_ISL_639748, EPI_ISL_639749, EPI_ISL_639750, EPI_ISL_639751, EPI_ISL_639752, EPI_ISL_639753, EPI_ISL_639754, EPI_ISL_639755, EPI_ISL_639756, EPI_ISL_639757, EPI_ISL_639758, EPI_ISL_639759, EPI_ISL_639760, EPI_ISL_639761, EPI_ISL_639762, EPI_ISL_639763, EPI_ISL_639764, EPI_ISL_639765, EPI_ISL_639766, EPI_ISL_639767, EPI_ISL_639768, EPI_ISL_639769, EPI_ISL_639770, EPI_ISL_639771, EPI_ISL_639772, EPI_ISL_639773, EPI_ISL_639774, EPI_ISL_639775, EPI_ISL_639776, EPI_ISL_639777, EPI_ISL_639778, EPI_ISL_639779, EPI_ISL_639780, EPI_ISL_639781, EPI_ISL_639782, EPI_ISL_639783, EPI_ISL_639784, EPI_ISL_639785, EPI_ISL_639786, EPI_ISL_639787, EPI_ISL_639788, EPI_ISL_639789, EPI_ISL_639790, EPI_ISL_639791, EPI_ISL_639792, EPI_ISL_639793, EPI_ISL_639794, EPI_ISL_639795, EPI_ISL_639796, EPI_ISL_639797, EPI_ISL_639798, EPI_ISL_639799, EPI_ISL_639800, EPI_ISL_639801, EPI_ISL_639802, EPI_ISL_639803, EPI_ISL_639804, EPI_ISL_639805, EPI_ISL_639806, EPI_ISL_639807, EPI_ISL_639808, EPI_ISL_639809, EPI_ISL_639810, EPI_ISL_639811, EPI_ISL_639812, EPI_ISL_639813, EPI_ISL_639814, EPI_ISL_639815, EPI_ISL_639816, EPI_ISL_639817, EPI_ISL_639818, EPI_ISL_639819, EPI_ISL_639820, EPI_ISL_641309, EPI_ISL_641310 | Public Health Virology Laboratory, Forensic and Scientific Services (PHV-FSS)                                                    | Public Health Virology Laboratory, Forensic and Scientific Services (PHV-FSS)                                                | Son Nguyen et al                                                                                                                                                                                                                                                                                                               |
| EPI_ISL_649149, EPI_ISL_649150, EPI_ISL_649151                                                                                                                                                                                                                                                                                                                                                                                                                                                                                                                                                                                                                                                                                                                                                                                                                                                                                                                                                                                                                                                                                                                                                                                                                                                                                                                 | Microbiological Diagnostic Unit - Public Health Laboratory (MDU-PHL), The Peter Doherty Institute for Infection and Immunity     | Microbiological Diagnostic Unit - Public Health Laboratory (MDU-PHL), The Peter Doherty Institute for Infection and Immunity | Seemann,T., Cally,L., Sait,M.L., Schultz,M.B., Druce,J., Sherry,N.L.                                                                                                                                                                                                                                                           |
| EPI_ISL_650123, EPI_ISL_651132, EPI_ISL_651179, EPI_ISL_651201, EPI_ISL_651240, EPI_ISL_651253                                                                                                                                                                                                                                                                                                                                                                                                                                                                                                                                                                                                                                                                                                                                                                                                                                                                                                                                                                                                                                                                                                                                                                                                                                                                 | University College London, Great Ormond Street Hospital for Children NHS Foundation Trust, Imperial College Healthcare NHS Trust | COVID-19 Genomics UK (COG-UK) Consortium                                                                                     | Sergi Castellano, Rachel Williams, Mark Kristiansen, Paola Resende Silva, Sunando Roy, Tony Brooks, Helena Tutill, Paola Niola, Patricia Dyal, Charlotte Williams, Leysa Forrest, Yasmin Panchbhaya, Jacqueline Findlay, Samuel Weeks, Julianne Brown, Kathryn Harris, Paul Randell, James Price, Alison Holmes, Judith Breuer |
| EPI_ISL_654794                                                                                                                                                                                                                                                                                                                                                                                                                                                                                                                                                                                                                                                                                                                                                                                                                                                                                                                                                                                                                                                                                                                                                                                                                                                                                                                                                 | Centre for Human Virology & Genomics, Nigerian Institute of Medical Research                                                     | Centre for Human Virology & Genomics, Nigerian Institute of Medical Research                                                 | Shaibu,J.                                                                                                                                                                                                                                                                                                                      |
| EPI_ISL_660442                                                                                                                                                                                                                                                                                                                                                                                                                                                                                                                                                                                                                                                                                                                                                                                                                                                                                                                                                                                                                                                                                                                                                                                                                                                                                                                                                 | Centre Muraz                                                                                                                     | Project group Epidemiology of Highly Pathogenic Microorganisms, Robert Koch Institut                                         | Soumeya Ouangraoua, Abdoul-Salam Ouedraogo, Arsène Zongo, Yacouba Sawadogo, Essia Belarbi, Grit Schubert, Fabian Leendertz                                                                                                                                                                                                     |
| EPI_ISL_665266, EPI_ISL_665270, EPI_ISL_665335, EPI_ISL_665339, EPI_ISL_665378, EPI_ISL_665413, EPI_ISL_665428, EPI_ISL_665661, EPI_ISL_665664, EPI_ISL_665669, EPI_ISL_665674, EPI_ISL_665688, EPI_ISL_665695, EPI_ISL_665703, EPI_ISL_665705, EPI_ISL_665709, EPI_ISL_665710, EPI_ISL_665711, EPI_ISL_665715, EPI_ISL_665716, EPI_ISL_665720, EPI_ISL_665733, EPI_ISL_665741                                                                                                                                                                                                                                                                                                                                                                                                                                                                                                                                                                                                                                                                                                                                                                                                                                                                                                                                                                                 | University College London, Great Ormond Street Hospital for Children NHS Foundation Trust, Imperial College Healthcare NHS Trust | COVID-19 Genomics UK (COG-UK) Consortium                                                                                     | Sergi Castellano, Rachel Williams, Mark Kristiansen, Paola Resende Silva, Sunando Roy, Tony Brooks, Helena Tutill, Paola Niola, Patricia Dyal, Charlotte Williams, Leysa Forrest, Yasmin Panchbhaya, Jacqueline Findlay, Samuel Weeks, Julianne Brown, Kathryn Harris, Paul Randell, James Price, Alison Holmes, Judith Breuer |
| EPI_ISL_677821, EPI_ISL_677822, EPI_ISL_677823, EPI_ISL_677824, EPI_ISL_677825, EPI_ISL_677826, EPI_ISL_677827, EPI_ISL_677828, EPI_ISL_677829, EPI_ISL_677830, EPI_ISL_677831, EPI_ISL_677832, EPI_ISL_677833, EPI_ISL_677834, EPI_ISL_677835, EPI_ISL_677836, EPI_ISL_677837, EPI_ISL_677838, EPI_ISL_677839, EPI_ISL_677840, EPI_ISL_677841, EPI_ISL_677842, EPI_ISL_677843, EPI_ISL_677844, EPI_ISL_677845, EPI_ISL_677846, EPI_ISL_677847, EPI_ISL_677848, EPI_ISL_677849, EPI_ISL_677850, EPI_ISL_677851, EPI_ISL_677852, EPI_ISL_677853, EPI_ISL_677854, EPI_ISL_677855, EPI_ISL_677856, EPI_ISL_677857, EPI_ISL_677858, EPI_ISL_677859, EPI_ISL_677860, EPI_ISL_677861, EPI_ISL_677862, EPI_ISL_677863, EPI_ISL_677864, EPI_ISL_677865, EPI_ISL_677866, EPI_ISL_677867, EPI_ISL_677868, EPI_ISL_677869, EPI_ISL_677870, EPI_ISL_677871, EPI_ISL_677872, EPI_ISL_677873, EPI_ISL_677874, EPI_ISL_677875, EPI_ISL_677876, EPI_ISL_677877, EPI_ISL_677878, EPI_ISL_677879, EPI_ISL_677880, EPI_ISL_677881, EPI_ISL_677882, EPI_ISL_677883, EPI_ISL_677884, EPI_ISL_677885, EPI_ISL_677886, EPI_ISL_677887, EPI_ISL_677888, EPI_ISL_677889, EPI_ISL_677890, EPI_ISL_677901, EPI_ISL_677902, EPI_ISL_677903, EPI_ISL_677904, EPI_ISL_677905, EPI_ISL_677906, EPI_ISL_677907                                                                                 | Innovative Genomics Institute, UC Berkeley                                                                                       | Innovative Genomics Institute, UC Berkeley                                                                                   | Stacia Wyman, Haridha Shivram, Phil Frankino, Liana Lareau, Shana McDevitt, Justin Choi                                                                                                                                                                                                                                        |
| EPI_ISL_677940                                                                                                                                                                                                                                                                                                                                                                                                                                                                                                                                                                                                                                                                                                                                                                                                                                                                                                                                                                                                                                                                                                                                                                                                                                                                                                                                                 | Pathogen Genomics Lab King Abdullah University of Science and Technology(KAUST)                                                  | Pathogen Genomics Lab King Abdullah University of Science and Technology(KAUST)                                              | Sharif Hala, Afrah Alsomali, Sara Mfarrej, Amit Kumar Subudhi, Fathia Ben Rached, Raaeece Naeem, Fadwa Alofi, Asim Khogeer, Jumana Taha, Abdulaziz Alahmadi, Kahled Alqithami, Anwar Hashem, Naif Almontashiri, Arnab Pain                                                                                                     |
| EPI_ISL_677964, EPI_ISL_677976                                                                                                                                                                                                                                                                                                                                                                                                                                                                                                                                                                                                                                                                                                                                                                                                                                                                                                                                                                                                                                                                                                                                                                                                                                                                                                                                 | Pathogen Genomics Lab King Abdullah University of Science and Technology(KAUST)                                                  | Pathogen Genomics Lab King Abdullah University of Science and Technology(KAUST)                                              | Sharif Hala, Fadwa Alofi, Sara Mfarrej, Amit Kumar Subudhi, Fathia Ben Rached, Raaeece Naeem, Asim Khogeer, Afrah Alsomali, Jumana Taha, Abdulaziz Alahmadi, Kahled Alqithami, Anwar Hashem, Naif Almontashiri, Arnab Pain                                                                                                     |
| EPI_ISL_678026                                                                                                                                                                                                                                                                                                                                                                                                                                                                                                                                                                                                                                                                                                                                                                                                                                                                                                                                                                                                                                                                                                                                                                                                                                                                                                                                                 | Pathogen Genomics Lab King Abdullah University of Science and Technology(KAUST)                                                  | Pathogen Genomics Lab King Abdullah University of Science and Technology(KAUST)                                              | Sharif Hala, Sara Mfarrej, Raaeece Naeem, Amit Kumar Subudhi, Rahul P Salunke, Fadwa Alofi, Asim Khogeer, Afrah Alsomali, Jumana Taha, Abdulaziz Alahmadi, Kahled Alqithami, Anwar Hashem, Naif Almontashiri, Arnab Pain                                                                                                       |
| EPI_ISL_678029                                                                                                                                                                                                                                                                                                                                                                                                                                                                                                                                                                                                                                                                                                                                                                                                                                                                                                                                                                                                                                                                                                                                                                                                                                                                                                                                                 | Pathogen Genomics Lab King Abdullah University of Science and Technology(KAUST)                                                  | Pathogen Genomics Lab King Abdullah University of Science and Technology(KAUST)                                              | Sharif Hala, Sara Mfarrej, Raushan Nugmanova, Olga Douvropoulou, Raaeece Naeem, Fadwa Alofi, Asim Khogeer, Afrah Alsomali, Jumana Taha, Abdulaziz Alahmadi, Kahled Alqithami, Anwar Hashem, Naif Almontashiri, Arnab Pain                                                                                                      |
| EPI_ISL_678039                                                                                                                                                                                                                                                                                                                                                                                                                                                                                                                                                                                                                                                                                                                                                                                                                                                                                                                                                                                                                                                                                                                                                                                                                                                                                                                                                 | Pathogen Genomics Lab King Abdullah University of Science and Technology(KAUST)                                                  | Pathogen Genomics Lab King Abdullah University of Science and Technology(KAUST)                                              | Sharif Hala, Sara Mfarrej, Amit Kumar Subudhi, Raaeece Naeem, Rahul P Salunke, Asim Khogeer, Fadwa Alofi, Afrah Alsomali, Jumana Taha, Abdulaziz Alahmadi, Kahled Alqithami, Anwar Hashem, Naif Almontashiri, Arnab Pain                                                                                                       |
| EPI_ISL_678041                                                                                                                                                                                                                                                                                                                                                                                                                                                                                                                                                                                                                                                                                                                                                                                                                                                                                                                                                                                                                                                                                                                                                                                                                                                                                                                                                 | Pathogen Genomics Lab King Abdullah University of Science and Technology(KAUST)                                                  | Pathogen Genomics Lab King Abdullah University of Science and Technology(KAUST)                                              | Sharif Hala, Asim Khogeer, Sara Mfarrej, Amit Kumar Subudhi, Fathia Ben Rached, Raaeece Naeem, Fadwa Alofi, Afrah Alsomali, Jumana Taha, Abdulaziz Alahmadi, Kahled Alqithami, Anwar Hashem, Naif Almontashiri, Arnab Pain                                                                                                     |
| EPI_ISL_678042, EPI_ISL_678043                                                                                                                                                                                                                                                                                                                                                                                                                                                                                                                                                                                                                                                                                                                                                                                                                                                                                                                                                                                                                                                                                                                                                                                                                                                                                                                                 | Pathogen Genomics Lab King Abdullah University of Science and Technology(KAUST)                                                  | Pathogen Genomics Lab King Abdullah University of Science and Technology(KAUST)                                              | Sharif Hala, Sara Mfarrej, Amit Kumar Subudhi, Raaeece Naeem, Rahul P Salunke, Asim Khogeer, Fadwa Alofi, Afrah Alsomali, Jumana Taha, Abdulaziz Alahmadi, Kahled Alqithami, Anwar Hashem, Naif Almontashiri, Arnab Pain                                                                                                       |
| EPI_ISL_678047                                                                                                                                                                                                                                                                                                                                                                                                                                                                                                                                                                                                                                                                                                                                                                                                                                                                                                                                                                                                                                                                                                                                                                                                                                                                                                                                                 | Pathogen Genomics Lab King Abdullah University of Science and Technology(KAUST)                                                  | Pathogen Genomics Lab King Abdullah University of Science and Technology(KAUST)                                              | Sharif Hala, Sara Mfarrej, Raaeece Naeem, Amit Kumar Subudhi, Rahul P Salunke, Asim Khogeer, Fadwa Alofi, Afrah Alsomali, Jumana Taha, Abdulaziz Alahmadi, Kahled Alqithami, Anwar Hashem, Naif Almontashiri, Arnab Pain                                                                                                       |
| EPI_ISL_678048, EPI_ISL_678052                                                                                                                                                                                                                                                                                                                                                                                                                                                                                                                                                                                                                                                                                                                                                                                                                                                                                                                                                                                                                                                                                                                                                                                                                                                                                                                                 | Pathogen Genomics Lab King Abdullah University of Science and Technology(KAUST)                                                  | Pathogen Genomics Lab King Abdullah University of Science and Technology(KAUST)                                              | Sharif Hala, Sara Mfarrej, Amit Kumar Subudhi, Raaeece Naeem, Rahul P Salunke, Asim Khogeer, Fadwa Alofi, Afrah Alsomali, Jumana Taha, Abdulaziz Alahmadi, Kahled Alqithami, Anwar Hashem, Naif Almontashiri, Arnab Pain                                                                                                       |
| EPI_ISL_678054                                                                                                                                                                                                                                                                                                                                                                                                                                                                                                                                                                                                                                                                                                                                                                                                                                                                                                                                                                                                                                                                                                                                                                                                                                                                                                                                                 | Pathogen Genomics Lab King Abdullah University of Science and Technology(KAUST)                                                  | Pathogen Genomics Lab King Abdullah University of Science and Technology(KAUST)                                              | Sharif Hala, Fathia Ben Rached, Amit Kumar Subudhi, Sara Mfarrej, Raaeece Naeem, Rahul P Salunke, Asim Khogeer, Fadwa Alofi, Afrah Alsomali, Jumana Taha, Abdulaziz Alahmadi, Kahled Alqithami, Anwar Hashem, Naif Almontashiri, Arnab Pain                                                                                    |
| EPI_ISL_678055                                                                                                                                                                                                                                                                                                                                                                                                                                                                                                                                                                                                                                                                                                                                                                                                                                                                                                                                                                                                                                                                                                                                                                                                                                                                                                                                                 | Pathogen Genomics Lab King Abdullah University of Science and Technology(KAUST)                                                  | Pathogen Genomics Lab King Abdullah University of Science and Technology(KAUST)                                              | Sharif Hala, Sara Mfarrej, Raaeece Naeem, Amit Kumar Subudhi, Rahul P Salunke, Asim Khogeer, Fadwa Alofi, Afrah Alsomali, Jumana Taha, Abdulaziz Alahmadi, Kahled Alqithami, Anwar Hashem, Naif Almontashiri, Arnab Pain                                                                                                       |
| EPI_ISL_678057, EPI_ISL_678058, EPI_ISL_678061, EPI_ISL_678062, EPI_ISL_678063                                                                                                                                                                                                                                                                                                                                                                                                                                                                                                                                                                                                                                                                                                                                                                                                                                                                                                                                                                                                                                                                                                                                                                                                                                                                                 | Pathogen Genomics Lab King Abdullah University of Science and Technology(KAUST)                                                  | Pathogen Genomics Lab King Abdullah University of Science and Technology(KAUST)                                              | Sharif Hala, Sara Mfarrej, Amit Kumar Subudhi, Raaeece Naeem, Rahul P Salunke, Asim Khogeer, Fadwa Alofi, Afrah Alsomali, Jumana Taha, Abdulaziz Alahmadi, Kahled Alqithami, Anwar Hashem, Naif Almontashiri, Arnab Pain                                                                                                       |
| EPI_ISL_678068, EPI_ISL_678071                                                                                                                                                                                                                                                                                                                                                                                                                                                                                                                                                                                                                                                                                                                                                                                                                                                                                                                                                                                                                                                                                                                                                                                                                                                                                                                                 | Pathogen Genomics Lab King Abdullah University of Science and Technology(KAUST)                                                  | Pathogen Genomics Lab King Abdullah University of Science and Technology(KAUST)                                              | Sharif Hala, Sara Mfarrej, Raaeece Naeem, Amit Kumar Subudhi, Rahul P Salunke, Asim Khogeer, Fadwa Alofi, Afrah Alsomali, Jumana Taha, Abdulaziz Alahmadi, Kahled Alqithami, Anwar Hashem, Naif Almontashiri, Arnab Pain                                                                                                       |
| EPI_ISL_678072                                                                                                                                                                                                                                                                                                                                                                                                                                                                                                                                                                                                                                                                                                                                                                                                                                                                                                                                                                                                                                                                                                                                                                                                                                                                                                                                                 | Pathogen Genomics Lab King Abdullah University of Science and Technology(KAUST)                                                  | Pathogen Genomics Lab King Abdullah University of Science and Technology(KAUST)                                              | Sharif Hala, Sara Mfarrej, Amit Kumar Subudhi, Raaeece Naeem, Rahul P Salunke, Asim Khogeer, Fadwa Alofi, Afrah Alsomali, Jumana Taha, Abdulaziz Alahmadi, Kahled Alqithami, Anwar Hashem, Naif Almontashiri, Arnab Pain                                                                                                       |
| EPI_ISL_678076                                                                                                                                                                                                                                                                                                                                                                                                                                                                                                                                                                                                                                                                                                                                                                                                                                                                                                                                                                                                                                                                                                                                                                                                                                                                                                                                                 | Pathogen Genomics Lab King Abdullah University of Science and Technology(KAUST)                                                  | Pathogen Genomics Lab King Abdullah University of Science and Technology(KAUST)                                              | Sharif Hala, Fathia Ben Rached, Amit Kumar Subudhi, Sara Mfarrej, Raaeece Naeem, Rahul P Salunke, Asim Khogeer, Fadwa Alofi, Afrah Alsomali, Jumana Taha, Abdulaziz Alahmadi, Kahled Alqithami, Anwar Hashem, Naif Almontashiri, Arnab Pain                                                                                    |
| EPI_ISL_678077                                                                                                                                                                                                                                                                                                                                                                                                                                                                                                                                                                                                                                                                                                                                                                                                                                                                                                                                                                                                                                                                                                                                                                                                                                                                                                                                                 | Pathogen Genomics Lab King Abdullah University of Science and Technology(KAUST)                                                  | Pathogen Genomics Lab King Abdullah University of Science and Technology(KAUST)                                              | Sharif Hala, Sara Mfarrej, Raaeece Naeem, Amit Kumar Subudhi, Rahul P Salunke, Asim Khogeer, Fadwa Alofi, Afrah Alsomali, Jumana Taha, Abdulaziz Alahmadi, Kahled Alqithami, Anwar Hashem, Naif Almontashiri, Arnab Pain                                                                                                       |
| EPI_ISL_678078, EPI_ISL_678079                                                                                                                                                                                                                                                                                                                                                                                                                                                                                                                                                                                                                                                                                                                                                                                                                                                                                                                                                                                                                                                                                                                                                                                                                                                                                                                                 | Pathogen Genomics Lab King Abdullah University of Science and Technology(KAUST)                                                  | Pathogen Genomics Lab King Abdullah University of Science and Technology(KAUST)                                              | Sharif Hala, Sara Mfarrej, Amit Kumar Subudhi, Raaeece Naeem, Rahul P Salunke, Asim Khogeer, Fadwa Alofi, Afrah Alsomali, Jumana Taha, Abdulaziz Alahmadi, Kahled Alqithami, Anwar Hashem, Naif Almontashiri, Arnab Pain                                                                                                       |
| EPI_ISL_678080                                                                                                                                                                                                                                                                                                                                                                                                                                                                                                                                                                                                                                                                                                                                                                                                                                                                                                                                                                                                                                                                                                                                                                                                                                                                                                                                                 | Pathogen Genomics Lab King Abdullah University of Science and Technology(KAUST)                                                  | Pathogen Genomics Lab King Abdullah University of Science and Technology(KAUST)                                              | Sharif Hala, Asim Khogeer, Sara Mfarrej, Amit Kumar Subudhi, Fathia Ben Rached, Raaeece Naeem, Fadwa Alofi, Afrah Alsomali, Jumana Taha, Abdulaziz Alahmadi, Kahled Alqithami, Anwar Hashem, Naif Almontashiri, Arnab Pain                                                                                                     |
| EPI_ISL_678081                                                                                                                                                                                                                                                                                                                                                                                                                                                                                                                                                                                                                                                                                                                                                                                                                                                                                                                                                                                                                                                                                                                                                                                                                                                                                                                                                 | Pathogen Genomics Lab King Abdullah University of Science and Technology(KAUST)                                                  | Pathogen Genomics Lab King Abdullah University of Science and Technology(KAUST)                                              | Sharif Hala, Sara Mfarrej, Amit Kumar Subudhi, Raaeece Naeem, Rahul P Salunke, Asim Khogeer, Fadwa Alofi, Afrah Alsomali, Jumana Taha, Abdulaziz Alahmadi, Kahled Alqithami, Anwar Hashem, Naif Almontashiri, Arnab Pain                                                                                                       |
| EPI_ISL_678082                                                                                                                                                                                                                                                                                                                                                                                                                                                                                                                                                                                                                                                                                                                                                                                                                                                                                                                                                                                                                                                                                                                                                                                                                                                                                                                                                 | Pathogen Genomics Lab King Abdullah University of Science and Technology(KAUST)                                                  | Pathogen Genomics Lab King Abdullah University of Science and Technology(KAUST)                                              | Sharif Hala, Fathia Ben Rached, Amit Kumar Subudhi, Sara Mfarrej, Raaeece Naeem, Rahul P Salunke, Asim Khogeer, Fadwa Alofi, Afrah Alsomali, Jumana Taha, Abdulaziz Alahmadi, Kahled Alqithami, Anwar Hashem, Naif Almontashiri, Arnab Pain                                                                                    |
| EPI_ISL_678096, EPI_ISL_678135, EPI_ISL_678136                                                                                                                                                                                                                                                                                                                                                                                                                                                                                                                                                                                                                                                                                                                                                                                                                                                                                                                                                                                                                                                                                                                                                                                                                                                                                                                 | Pathogen Genomics Lab King Abdullah University of Science and Technology(KAUST)                                                  | Pathogen Genomics Lab King Abdullah University of Science and Technology(KAUST)                                              | Sharif Hala, Sara Mfarrej, Amit Kumar Subudhi, Raaeece Naeem, Rahul P Salunke, Asim Khogeer, Fadwa Alofi, Afrah Alsomali, Jumana Taha, Abdulaziz Alahmadi, Kahled Alqithami, Anwar Hashem, Naif Almontashiri, Arnab Pain                                                                                                       |
| EPI_ISL_678137, EPI_ISL_678138                                                                                                                                                                                                                                                                                                                                                                                                                                                                                                                                                                                                                                                                                                                                                                                                                                                                                                                                                                                                                                                                                                                                                                                                                                                                                                                                 | Pathogen Genomics Lab King Abdullah University of Science and Technology(KAUST)                                                  | Pathogen Genomics Lab King Abdullah University of Science and Technology(KAUST)                                              | Sharif Hala, Sara Mfarrej, Raaeece Naeem, Amit Kumar Subudhi, Rahul P Salunke, Asim Khogeer, Fadwa Alofi, Afrah Alsomali, Jumana Taha, Abdulaziz Alahmadi, Kahled Alqithami, Anwar Hashem, Naif Almontashiri, Arnab Pain                                                                                                       |

|                                                                                                                                                                                                                                                                                                                                                                                                                                                                                                                                                                                                                                                                                                                                                                                                                                                                                                                                                                                                                                                                                                                                                                                                                                                                                                                                                                                                                                                                                                                                                                                                                                                                                                                                                                                                                                                                                                                                                                                                                                                                                                                                                                                                                                                                                                                                                                                                                                                                                                                                                                                                                                                                                                                                                                                                                                                                                                                                                                                                                                                                                                                                                                                                                                                                                                                                                                                                                                                                                                                                                                                                                                                                                                                                                                                                                                                                                                |                                                                                                                                  |                                                                                                   |                                                                                                                                                                                                                                                                                                                                                                |
|------------------------------------------------------------------------------------------------------------------------------------------------------------------------------------------------------------------------------------------------------------------------------------------------------------------------------------------------------------------------------------------------------------------------------------------------------------------------------------------------------------------------------------------------------------------------------------------------------------------------------------------------------------------------------------------------------------------------------------------------------------------------------------------------------------------------------------------------------------------------------------------------------------------------------------------------------------------------------------------------------------------------------------------------------------------------------------------------------------------------------------------------------------------------------------------------------------------------------------------------------------------------------------------------------------------------------------------------------------------------------------------------------------------------------------------------------------------------------------------------------------------------------------------------------------------------------------------------------------------------------------------------------------------------------------------------------------------------------------------------------------------------------------------------------------------------------------------------------------------------------------------------------------------------------------------------------------------------------------------------------------------------------------------------------------------------------------------------------------------------------------------------------------------------------------------------------------------------------------------------------------------------------------------------------------------------------------------------------------------------------------------------------------------------------------------------------------------------------------------------------------------------------------------------------------------------------------------------------------------------------------------------------------------------------------------------------------------------------------------------------------------------------------------------------------------------------------------------------------------------------------------------------------------------------------------------------------------------------------------------------------------------------------------------------------------------------------------------------------------------------------------------------------------------------------------------------------------------------------------------------------------------------------------------------------------------------------------------------------------------------------------------------------------------------------------------------------------------------------------------------------------------------------------------------------------------------------------------------------------------------------------------------------------------------------------------------------------------------------------------------------------------------------------------------------------------------------------------------------------------------------------------|----------------------------------------------------------------------------------------------------------------------------------|---------------------------------------------------------------------------------------------------|----------------------------------------------------------------------------------------------------------------------------------------------------------------------------------------------------------------------------------------------------------------------------------------------------------------------------------------------------------------|
|                                                                                                                                                                                                                                                                                                                                                                                                                                                                                                                                                                                                                                                                                                                                                                                                                                                                                                                                                                                                                                                                                                                                                                                                                                                                                                                                                                                                                                                                                                                                                                                                                                                                                                                                                                                                                                                                                                                                                                                                                                                                                                                                                                                                                                                                                                                                                                                                                                                                                                                                                                                                                                                                                                                                                                                                                                                                                                                                                                                                                                                                                                                                                                                                                                                                                                                                                                                                                                                                                                                                                                                                                                                                                                                                                                                                                                                                                                | and Technology(KAUST)                                                                                                            | and Technology(KAUST)                                                                             | Alahmadi, Kahled Alghithami, Anwar Hashem, Naif Almontashiri, Arnab Pain                                                                                                                                                                                                                                                                                       |
| EPI_ISL_678141                                                                                                                                                                                                                                                                                                                                                                                                                                                                                                                                                                                                                                                                                                                                                                                                                                                                                                                                                                                                                                                                                                                                                                                                                                                                                                                                                                                                                                                                                                                                                                                                                                                                                                                                                                                                                                                                                                                                                                                                                                                                                                                                                                                                                                                                                                                                                                                                                                                                                                                                                                                                                                                                                                                                                                                                                                                                                                                                                                                                                                                                                                                                                                                                                                                                                                                                                                                                                                                                                                                                                                                                                                                                                                                                                                                                                                                                                 | Pathogen Genomics Lab King Abdullah University of Science and Technology(KAUST)                                                  | Pathogen Genomics Lab King Abdullah University of Science and Technology(KAUST)                   | Sharif Hala, Asim Khogeer, Sara Mfarrej, Amit Kumar Subudhi, Fathia Ben Rached, Raaee Naeem, Fadwa Alofi, Afrah Alsomali, Jumana Taha, Abdulaziz Alahmadi, Kahled Alghithami, Anwar Hashem, Naif Almontashiri, Arnab Pain                                                                                                                                      |
| EPI_ISL_678227, EPI_ISL_678228, EPI_ISL_678229                                                                                                                                                                                                                                                                                                                                                                                                                                                                                                                                                                                                                                                                                                                                                                                                                                                                                                                                                                                                                                                                                                                                                                                                                                                                                                                                                                                                                                                                                                                                                                                                                                                                                                                                                                                                                                                                                                                                                                                                                                                                                                                                                                                                                                                                                                                                                                                                                                                                                                                                                                                                                                                                                                                                                                                                                                                                                                                                                                                                                                                                                                                                                                                                                                                                                                                                                                                                                                                                                                                                                                                                                                                                                                                                                                                                                                                 | Pathogen Genomics Lab King Abdullah University of Science and Technology(KAUST)                                                  | Pathogen Genomics Lab King Abdullah University of Science and Technology(KAUST)                   | Sharif Hala, Sara Mfarrej, Amit Kumar Subudhi, Raaee Naeem, Rahul P Salunke, Asim Khogeer, Fadwa Alofi, Afrah Alsomali, Jumana Taha, Abdulaziz Alahmadi, Kahled Alghithami, Anwar Hashem, Naif Almontashiri, Arnab Pain                                                                                                                                        |
| EPI_ISL_678233                                                                                                                                                                                                                                                                                                                                                                                                                                                                                                                                                                                                                                                                                                                                                                                                                                                                                                                                                                                                                                                                                                                                                                                                                                                                                                                                                                                                                                                                                                                                                                                                                                                                                                                                                                                                                                                                                                                                                                                                                                                                                                                                                                                                                                                                                                                                                                                                                                                                                                                                                                                                                                                                                                                                                                                                                                                                                                                                                                                                                                                                                                                                                                                                                                                                                                                                                                                                                                                                                                                                                                                                                                                                                                                                                                                                                                                                                 | Pathogen Genomics Lab King Abdullah University of Science and Technology(KAUST)                                                  | Pathogen Genomics Lab King Abdullah University of Science and Technology(KAUST)                   | Sharif Hala, Sara Mfarrej, Raaee Naeem, Amit Kumar Subudhi, Rahul P Salunke, Asim Khogeer, Fadwa Alofi, Afrah Alsomali, Jumana Taha, Abdulaziz Alahmadi, Kahled Alghithami, Anwar Hashem, Naif Almontashiri, Arnab Pain                                                                                                                                        |
| EPI_ISL_678234                                                                                                                                                                                                                                                                                                                                                                                                                                                                                                                                                                                                                                                                                                                                                                                                                                                                                                                                                                                                                                                                                                                                                                                                                                                                                                                                                                                                                                                                                                                                                                                                                                                                                                                                                                                                                                                                                                                                                                                                                                                                                                                                                                                                                                                                                                                                                                                                                                                                                                                                                                                                                                                                                                                                                                                                                                                                                                                                                                                                                                                                                                                                                                                                                                                                                                                                                                                                                                                                                                                                                                                                                                                                                                                                                                                                                                                                                 | Pathogen Genomics Lab King Abdullah University of Science and Technology(KAUST)                                                  | Pathogen Genomics Lab King Abdullah University of Science and Technology(KAUST)                   | Sharif Hala, Sara Mfarrej, Raaee Naeem, Amit Kumar Subudhi, Rahul P Salunke, Fadwa Alofi, Asim Khogeer, Afrah Alsomali, Jumana Taha, Abdulaziz Alahmadi, Kahled Alghithami, Anwar Hashem, Naif Almontashiri, Arnab Pain                                                                                                                                        |
| EPI_ISL_679447, EPI_ISL_679448, EPI_ISL_679449, EPI_ISL_679450, EPI_ISL_679451, EPI_ISL_679452, EPI_ISL_679453, EPI_ISL_679454, EPI_ISL_679455, EPI_ISL_679456, EPI_ISL_679457, EPI_ISL_679458, EPI_ISL_679459, EPI_ISL_679460, EPI_ISL_679461, EPI_ISL_679462, EPI_ISL_679463, EPI_ISL_679464, EPI_ISL_679465, EPI_ISL_679466, EPI_ISL_679467, EPI_ISL_679468, EPI_ISL_679469, EPI_ISL_679470, EPI_ISL_679471, EPI_ISL_679472, EPI_ISL_679473, EPI_ISL_679474, EPI_ISL_679475, EPI_ISL_679476, EPI_ISL_679477, EPI_ISL_679478, EPI_ISL_679479, EPI_ISL_679480, EPI_ISL_679481, EPI_ISL_679482, EPI_ISL_679483, EPI_ISL_679484, EPI_ISL_679485, EPI_ISL_679486, EPI_ISL_679487, EPI_ISL_679488, EPI_ISL_679489, EPI_ISL_679490, EPI_ISL_679491, EPI_ISL_679492, EPI_ISL_679493, EPI_ISL_679494, EPI_ISL_679495, EPI_ISL_679496, EPI_ISL_679497, EPI_ISL_679498, EPI_ISL_679499, EPI_ISL_679500, EPI_ISL_679501, EPI_ISL_679502, EPI_ISL_679503, EPI_ISL_679504, EPI_ISL_679505, EPI_ISL_679506, EPI_ISL_679507, EPI_ISL_679508, EPI_ISL_679509, EPI_ISL_679510, EPI_ISL_679511, EPI_ISL_679512, EPI_ISL_679513, EPI_ISL_679514, EPI_ISL_679515, EPI_ISL_679516, EPI_ISL_679517, EPI_ISL_679518, EPI_ISL_679519, EPI_ISL_679520, EPI_ISL_679521, EPI_ISL_679522, EPI_ISL_679523, EPI_ISL_679524, EPI_ISL_679525, EPI_ISL_679526, EPI_ISL_679527, EPI_ISL_679528, EPI_ISL_679529, EPI_ISL_679530, EPI_ISL_679531, EPI_ISL_679532, EPI_ISL_679533, EPI_ISL_679534, EPI_ISL_679535, EPI_ISL_679536, EPI_ISL_679537, EPI_ISL_679538, EPI_ISL_679539, EPI_ISL_679540, EPI_ISL_679541, EPI_ISL_679542, EPI_ISL_679543, EPI_ISL_679544, EPI_ISL_679545, EPI_ISL_679546, EPI_ISL_679547, EPI_ISL_679548, EPI_ISL_679549, EPI_ISL_679550, EPI_ISL_679551, EPI_ISL_679552, EPI_ISL_679553, EPI_ISL_679554, EPI_ISL_679555, EPI_ISL_679556, EPI_ISL_679557, EPI_ISL_679558, EPI_ISL_679559, EPI_ISL_679560, EPI_ISL_679561, EPI_ISL_679562, EPI_ISL_679563, EPI_ISL_679564, EPI_ISL_679565, EPI_ISL_679566, EPI_ISL_679567, EPI_ISL_679568, EPI_ISL_679569, EPI_ISL_679570, EPI_ISL_679571, EPI_ISL_679572, EPI_ISL_679573, EPI_ISL_679574, EPI_ISL_679575, EPI_ISL_679576, EPI_ISL_679577, EPI_ISL_679578, EPI_ISL_679579, EPI_ISL_679580, EPI_ISL_679581, EPI_ISL_679582, EPI_ISL_679583, EPI_ISL_679584, EPI_ISL_679585, EPI_ISL_679586, EPI_ISL_679587, EPI_ISL_679588, EPI_ISL_679589, EPI_ISL_679590, EPI_ISL_679591, EPI_ISL_679592, EPI_ISL_679593, EPI_ISL_679594, EPI_ISL_679595, EPI_ISL_679596, EPI_ISL_679597, EPI_ISL_679598, EPI_ISL_679599, EPI_ISL_679600, EPI_ISL_679601, EPI_ISL_679602, EPI_ISL_679603, EPI_ISL_679604, EPI_ISL_679605, EPI_ISL_679606, EPI_ISL_679607, EPI_ISL_679608, EPI_ISL_679609, EPI_ISL_679610, EPI_ISL_679611, EPI_ISL_679612, EPI_ISL_679613, EPI_ISL_679614, EPI_ISL_679615, EPI_ISL_679616, EPI_ISL_679617, EPI_ISL_679618, EPI_ISL_679619, EPI_ISL_679620, EPI_ISL_679621, EPI_ISL_679622, EPI_ISL_679623, EPI_ISL_679624, EPI_ISL_679625, EPI_ISL_679626, EPI_ISL_679627, EPI_ISL_679628                                                                                                                                                                                                                                                                                                                                                                                                                                                                                                                                                                                                                                                                                                                                                                                                                                                                 | University College London, Great Ormond Street Hospital for Children NHS Foundation Trust, Imperial College Healthcare NHS Trust | COVID-19 Genomics UK (COG-UK) Consortium                                                          | Sergi Castellano, Rachel Williams, Mark Kristiansen, Paola Resende Silva, Sunando Roy, Tony Brooks, Helena Tutill, Paola Niola, Patricia Dyal, Charlotte Williams, Leysa Forrest, Yasmin Panchbhaya, Jacqueline Findlay, Samuel Weeks, Julianne Brown, Kathryn Harris, Paul Randell, James Price, Alison Holmes, Judith Breuer                                 |
| EPI_ISL_693250, EPI_ISL_693251, EPI_ISL_693252, EPI_ISL_693253, EPI_ISL_693254, EPI_ISL_693255, EPI_ISL_693256, EPI_ISL_693257, EPI_ISL_693258, EPI_ISL_693259, EPI_ISL_693260, EPI_ISL_693261, EPI_ISL_693262, EPI_ISL_693263, EPI_ISL_693264, EPI_ISL_693265, EPI_ISL_693266, EPI_ISL_693267, EPI_ISL_693268, EPI_ISL_693269, EPI_ISL_693270, EPI_ISL_693271, EPI_ISL_693272, EPI_ISL_693273, EPI_ISL_693274, EPI_ISL_693275, EPI_ISL_693276, EPI_ISL_693277, EPI_ISL_693278, EPI_ISL_693279, EPI_ISL_693280, EPI_ISL_693281, EPI_ISL_693282, EPI_ISL_693283, EPI_ISL_693284, EPI_ISL_693285, EPI_ISL_693286, EPI_ISL_693287, EPI_ISL_693288, EPI_ISL_693289, EPI_ISL_693290, EPI_ISL_693291, EPI_ISL_693292, EPI_ISL_693293, EPI_ISL_693294, EPI_ISL_693295, EPI_ISL_693296, EPI_ISL_693297                                                                                                                                                                                                                                                                                                                                                                                                                                                                                                                                                                                                                                                                                                                                                                                                                                                                                                                                                                                                                                                                                                                                                                                                                                                                                                                                                                                                                                                                                                                                                                                                                                                                                                                                                                                                                                                                                                                                                                                                                                                                                                                                                                                                                                                                                                                                                                                                                                                                                                                                                                                                                                                                                                                                                                                                                                                                                                                                                                                                                                                                                                 | Public Health Virology Laboratory, Forensic and Scientific Services (PHV-FSS)                                                    | Public Health Virology Laboratory, Forensic and Scientific Services (PHV-FSS)                     | Son Nguyen et al                                                                                                                                                                                                                                                                                                                                               |
| EPI_ISL_693302, EPI_ISL_693303, EPI_ISL_693304, EPI_ISL_693305, EPI_ISL_693306                                                                                                                                                                                                                                                                                                                                                                                                                                                                                                                                                                                                                                                                                                                                                                                                                                                                                                                                                                                                                                                                                                                                                                                                                                                                                                                                                                                                                                                                                                                                                                                                                                                                                                                                                                                                                                                                                                                                                                                                                                                                                                                                                                                                                                                                                                                                                                                                                                                                                                                                                                                                                                                                                                                                                                                                                                                                                                                                                                                                                                                                                                                                                                                                                                                                                                                                                                                                                                                                                                                                                                                                                                                                                                                                                                                                                 | Department of Laboratory Medicine, National Taiwan University Hospital                                                           | Microbial Genomics Core Lab, National Taiwan University Centers of Genomic and Precision Medicine | Shiou-Hwei Yeh, You-Yu Lin, Ya-Yun Lai, Chiao-Ling Li, Shan-Chwen Chang, Pei-Jer Chen, Sui-Yuan Chang                                                                                                                                                                                                                                                          |
| EPI_ISL_700328, EPI_ISL_700329, EPI_ISL_700330, EPI_ISL_700331, EPI_ISL_700332, EPI_ISL_700333, EPI_ISL_700334, EPI_ISL_700335, EPI_ISL_700336, EPI_ISL_700337, EPI_ISL_700338, EPI_ISL_700339, EPI_ISL_700340, EPI_ISL_700341, EPI_ISL_700342, EPI_ISL_700343, EPI_ISL_700344, EPI_ISL_700345, EPI_ISL_700346, EPI_ISL_700347                                                                                                                                                                                                                                                                                                                                                                                                                                                                                                                                                                                                                                                                                                                                                                                                                                                                                                                                                                                                                                                                                                                                                                                                                                                                                                                                                                                                                                                                                                                                                                                                                                                                                                                                                                                                                                                                                                                                                                                                                                                                                                                                                                                                                                                                                                                                                                                                                                                                                                                                                                                                                                                                                                                                                                                                                                                                                                                                                                                                                                                                                                                                                                                                                                                                                                                                                                                                                                                                                                                                                                 | Child Health Research Foundation                                                                                                 | Child Health Research Foundation                                                                  | Senjuti Saha, Afroza Akter Tanni, Syed Muktadir Al Sium, Roly Malaker, Sharmistha Goswami, Arif Mohammad Tanmoy, Md Hafizur Rahman, Samir K Saha                                                                                                                                                                                                               |
| EPI_ISL_702544, EPI_ISL_702610, EPI_ISL_702661, EPI_ISL_702731, EPI_ISL_702824, EPI_ISL_702831, EPI_ISL_702839, EPI_ISL_702910, EPI_ISL_702930, EPI_ISL_702999, EPI_ISL_703069, EPI_ISL_703107, EPI_ISL_703179, EPI_ISL_703319, EPI_ISL_703332, EPI_ISL_703335, EPI_ISL_703383, EPI_ISL_703385, EPI_ISL_703706, EPI_ISL_703739, EPI_ISL_703740, EPI_ISL_703745, EPI_ISL_703767, EPI_ISL_703865, EPI_ISL_703879, EPI_ISL_704025, EPI_ISL_704036, EPI_ISL_704046, EPI_ISL_704084, EPI_ISL_704086, EPI_ISL_704092, EPI_ISL_704163, EPI_ISL_704179, EPI_ISL_704193, EPI_ISL_704312, EPI_ISL_704372, EPI_ISL_704955, EPI_ISL_704963, EPI_ISL_704965, EPI_ISL_704994, EPI_ISL_704997, EPI_ISL_704999, EPI_ISL_705007, EPI_ISL_705018, EPI_ISL_705035, EPI_ISL_705072, EPI_ISL_705078, EPI_ISL_705132, EPI_ISL_705143, EPI_ISL_705171, EPI_ISL_705184, EPI_ISL_705205, EPI_ISL_705209, EPI_ISL_705215, EPI_ISL_705216, EPI_ISL_705232, EPI_ISL_705236, EPI_ISL_705243, EPI_ISL_705268, EPI_ISL_705278, EPI_ISL_705283, EPI_ISL_705285, EPI_ISL_705297, EPI_ISL_705307, EPI_ISL_705308, EPI_ISL_705309, EPI_ISL_705310, EPI_ISL_705311, EPI_ISL_705331, EPI_ISL_705332, EPI_ISL_705338, EPI_ISL_705339, EPI_ISL_705342, EPI_ISL_705368, EPI_ISL_705392, EPI_ISL_705395, EPI_ISL_705396, EPI_ISL_705397, EPI_ISL_705425, EPI_ISL_705961, EPI_ISL_705962, EPI_ISL_705963, EPI_ISL_705964, EPI_ISL_705965, EPI_ISL_705966, EPI_ISL_705967, EPI_ISL_705968, EPI_ISL_705969, EPI_ISL_705970, EPI_ISL_705971                                                                                                                                                                                                                                                                                                                                                                                                                                                                                                                                                                                                                                                                                                                                                                                                                                                                                                                                                                                                                                                                                                                                                                                                                                                                                                                                                                                                                                                                                                                                                                                                                                                                                                                                                                                                                                                                                                                                                                                                                                                                                                                                                                                                                                                                                                                                                                                                 | University College London, Great Ormond Street Hospital for Children NHS Foundation Trust, Imperial College Healthcare NHS Trust | COVID-19 Genomics UK (COG-UK) Consortium                                                          | Sergi Castellano, Rachel Williams, Mark Kristiansen, Paola Resende Silva, Sunando Roy, Tony Brooks, Helena Tutill, Paola Niola, Patricia Dyal, Charlotte Williams, Leysa Forrest, Yasmin Panchbhaya, Jacqueline Findlay, Samuel Weeks, Julianne Brown, Kathryn Harris, Paul Randell, James Price, Alison Holmes, Judith Breuer                                 |
| EPI_ISL_710532, EPI_ISL_710534, EPI_ISL_710537, EPI_ISL_710540, EPI_ISL_710541, EPI_ISL_710575, EPI_ISL_711057, EPI_ISL_712060                                                                                                                                                                                                                                                                                                                                                                                                                                                                                                                                                                                                                                                                                                                                                                                                                                                                                                                                                                                                                                                                                                                                                                                                                                                                                                                                                                                                                                                                                                                                                                                                                                                                                                                                                                                                                                                                                                                                                                                                                                                                                                                                                                                                                                                                                                                                                                                                                                                                                                                                                                                                                                                                                                                                                                                                                                                                                                                                                                                                                                                                                                                                                                                                                                                                                                                                                                                                                                                                                                                                                                                                                                                                                                                                                                 | Hôpital Fattouma-Bourguiba de Monastir                                                                                           | Laboratoire des Procédés de Criblage Moléculaire et Cellulaire-Centre de Biotechnologie de Sfax   | Souissi,A., Abid,N., Ben Ayed,I., Gargouri,S., Abdelmoulah,F.,Elargoubi,A., Smeti,I., Bensaïd,M., Stambouli,N., Kharat,N., Ajili,F., Fki-berrajah,L., Mhalla,S., Chtourou,A., Gaaloul,I., Nabil,A., Turki,M., Aouni,M., Hammami,A., Mastouri,M., Karray Hakim,H., Kamoun,S., Rebai,A., and Masmoudi,S.                                                         |
| EPI_ISL_712062, EPI_ISL_712063, EPI_ISL_712064, EPI_ISL_712065, EPI_ISL_712066, EPI_ISL_712067, EPI_ISL_712068, EPI_ISL_712069, EPI_ISL_712568                                                                                                                                                                                                                                                                                                                                                                                                                                                                                                                                                                                                                                                                                                                                                                                                                                                                                                                                                                                                                                                                                                                                                                                                                                                                                                                                                                                                                                                                                                                                                                                                                                                                                                                                                                                                                                                                                                                                                                                                                                                                                                                                                                                                                                                                                                                                                                                                                                                                                                                                                                                                                                                                                                                                                                                                                                                                                                                                                                                                                                                                                                                                                                                                                                                                                                                                                                                                                                                                                                                                                                                                                                                                                                                                                 | Laboratoire de Microbiologie- CHU Habib Bourguiba - Sfax adresse                                                                 | Laboratoire des Procédés de Criblage Moléculaire et Cellulaire-Centre de Biotechnologie de Sfax   | Souissi,A., Abid,N., Ben Ayed,I., Gargouri,S., Abdelmoulah,F.,Elargoubi,A., Smeti,I., Bensaïd,M., Stambouli,N., Kharat,N., Ajili,F., Fki-berrajah,L., Mhalla,S., Chtourou,A., Gaaloul,I., Nabil,A., Turki,M., Aouni,M., Hammami,A., Mastouri,M., Karray Hakim,H., Kamoun,S., Rebai,A., and Masmoudi,S.                                                         |
| EPI_ISL_717978                                                                                                                                                                                                                                                                                                                                                                                                                                                                                                                                                                                                                                                                                                                                                                                                                                                                                                                                                                                                                                                                                                                                                                                                                                                                                                                                                                                                                                                                                                                                                                                                                                                                                                                                                                                                                                                                                                                                                                                                                                                                                                                                                                                                                                                                                                                                                                                                                                                                                                                                                                                                                                                                                                                                                                                                                                                                                                                                                                                                                                                                                                                                                                                                                                                                                                                                                                                                                                                                                                                                                                                                                                                                                                                                                                                                                                                                                 | Army Medical Center, Scientific Department, Virology Laboratory                                                                  | Army Medical Center, Scientific Department, Virology Laboratory                                   | Silvia Fillo, Giovanni Faggioni, Riccardo De Santis, Antonella Fortunato, Anna Anselmo, Vanessa Vera Fain, Francesco Giordani, Nino D'Amore, Anella Monte, Marzia Cavalli, Alessandra Amoroso, Stella Lia, Roberta Sorrentino, Rossella Tirelli, Federica Galeano, Annalisa Pelo, Margherita De Santis, Giulia Campoli, Andrea Ciammarrucchi, Florigio Listera |
| EPI_ISL_722202, EPI_ISL_722203, EPI_ISL_722204, EPI_ISL_722205, EPI_ISL_722206, EPI_ISL_722207                                                                                                                                                                                                                                                                                                                                                                                                                                                                                                                                                                                                                                                                                                                                                                                                                                                                                                                                                                                                                                                                                                                                                                                                                                                                                                                                                                                                                                                                                                                                                                                                                                                                                                                                                                                                                                                                                                                                                                                                                                                                                                                                                                                                                                                                                                                                                                                                                                                                                                                                                                                                                                                                                                                                                                                                                                                                                                                                                                                                                                                                                                                                                                                                                                                                                                                                                                                                                                                                                                                                                                                                                                                                                                                                                                                                 | University Hospital Zurich                                                                                                       | Institute of Medical Virology, University of Zurich                                               | Stefan Schmutz, Verena Kufner, Maryam Zaheri, Gabriela Ziltener, Aline Wolfensberger, Thomas Scheier, Jürg Böni, Michael Huber, Alexandra Trkola                                                                                                                                                                                                               |
| EPI_ISL_722208                                                                                                                                                                                                                                                                                                                                                                                                                                                                                                                                                                                                                                                                                                                                                                                                                                                                                                                                                                                                                                                                                                                                                                                                                                                                                                                                                                                                                                                                                                                                                                                                                                                                                                                                                                                                                                                                                                                                                                                                                                                                                                                                                                                                                                                                                                                                                                                                                                                                                                                                                                                                                                                                                                                                                                                                                                                                                                                                                                                                                                                                                                                                                                                                                                                                                                                                                                                                                                                                                                                                                                                                                                                                                                                                                                                                                                                                                 | Triemli Hospital Zurich                                                                                                          | Institute of Medical Virology, University of Zurich                                               | Stefan Schmutz, Verena Kufner, Maryam Zaheri, Gabriela Ziltener, Gerhard Eich, Daniel Röösl, Jürg Böni, Michael Huber, Alexandra Trkola                                                                                                                                                                                                                        |
| EPI_ISL_724540, EPI_ISL_724541, EPI_ISL_724542, EPI_ISL_724543, EPI_ISL_724544, EPI_ISL_724545, EPI_ISL_724546, EPI_ISL_724547, EPI_ISL_724548, EPI_ISL_724549, EPI_ISL_724550, EPI_ISL_724551, EPI_ISL_724552, EPI_ISL_724553, EPI_ISL_724554, EPI_ISL_724555, EPI_ISL_724556, EPI_ISL_724557, EPI_ISL_724558, EPI_ISL_724559, EPI_ISL_724560, EPI_ISL_724561, EPI_ISL_724562, EPI_ISL_724563, EPI_ISL_724564, EPI_ISL_724565, EPI_ISL_724566, EPI_ISL_724567, EPI_ISL_724568, EPI_ISL_724569, EPI_ISL_724570, EPI_ISL_724571, EPI_ISL_724572, EPI_ISL_724573, EPI_ISL_724574, EPI_ISL_724575, EPI_ISL_724576, EPI_ISL_724577, EPI_ISL_724578, EPI_ISL_724579, EPI_ISL_724580, EPI_ISL_724581, EPI_ISL_724582, EPI_ISL_724583, EPI_ISL_724584, EPI_ISL_724585, EPI_ISL_724586, EPI_ISL_724587, EPI_ISL_724588, EPI_ISL_724589, EPI_ISL_724590, EPI_ISL_724591, EPI_ISL_724592, EPI_ISL_724593, EPI_ISL_724594, EPI_ISL_724595, EPI_ISL_724596, EPI_ISL_724597, EPI_ISL_724598, EPI_ISL_724599, EPI_ISL_724600, EPI_ISL_724601, EPI_ISL_724602, EPI_ISL_724603, EPI_ISL_724604, EPI_ISL_724605, EPI_ISL_724606, EPI_ISL_724607, EPI_ISL_724608, EPI_ISL_724609, EPI_ISL_724610, EPI_ISL_724611, EPI_ISL_724612, EPI_ISL_724613, EPI_ISL_724614, EPI_ISL_724615, EPI_ISL_724616, EPI_ISL_724617, EPI_ISL_724618, EPI_ISL_724619, EPI_ISL_724620, EPI_ISL_724621, EPI_ISL_724622, EPI_ISL_724623, EPI_ISL_724624, EPI_ISL_724625, EPI_ISL_724626, EPI_ISL_724627, EPI_ISL_724628, EPI_ISL_724629, EPI_ISL_724630, EPI_ISL_724631, EPI_ISL_724632, EPI_ISL_724633, EPI_ISL_724634, EPI_ISL_724635, EPI_ISL_724636, EPI_ISL_724637, EPI_ISL_724638, EPI_ISL_724639, EPI_ISL_724640, EPI_ISL_724641, EPI_ISL_724642, EPI_ISL_724643, EPI_ISL_724644, EPI_ISL_724645, EPI_ISL_724646, EPI_ISL_724647, EPI_ISL_724648, EPI_ISL_724649, EPI_ISL_724650, EPI_ISL_724651, EPI_ISL_724652, EPI_ISL_724653, EPI_ISL_724654, EPI_ISL_724655, EPI_ISL_724656, EPI_ISL_724657, EPI_ISL_724658, EPI_ISL_724659, EPI_ISL_724660, EPI_ISL_724661, EPI_ISL_724662, EPI_ISL_724663, EPI_ISL_724664, EPI_ISL_724665, EPI_ISL_724666, EPI_ISL_724667, EPI_ISL_724668, EPI_ISL_724669, EPI_ISL_724670, EPI_ISL_724671, EPI_ISL_724672, EPI_ISL_724673, EPI_ISL_724674, EPI_ISL_724675, EPI_ISL_724676, EPI_ISL_724677, EPI_ISL_724678, EPI_ISL_724679, EPI_ISL_724680, EPI_ISL_724681, EPI_ISL_724682, EPI_ISL_724683, EPI_ISL_724684, EPI_ISL_724685, EPI_ISL_724686, EPI_ISL_724687, EPI_ISL_724688, EPI_ISL_724689, EPI_ISL_724690, EPI_ISL_724691, EPI_ISL_724692, EPI_ISL_724693, EPI_ISL_724694, EPI_ISL_724695, EPI_ISL_724696, EPI_ISL_724697, EPI_ISL_724698, EPI_ISL_724699, EPI_ISL_724700, EPI_ISL_724701, EPI_ISL_724702, EPI_ISL_724703, EPI_ISL_724704, EPI_ISL_724705, EPI_ISL_724706, EPI_ISL_724707, EPI_ISL_724708, EPI_ISL_724709, EPI_ISL_724710, EPI_ISL_724711, EPI_ISL_724712, EPI_ISL_724713, EPI_ISL_724714, EPI_ISL_724715, EPI_ISL_724716, EPI_ISL_724717, EPI_ISL_724718, EPI_ISL_724719, EPI_ISL_724720, EPI_ISL_724721, EPI_ISL_724722, EPI_ISL_724723, EPI_ISL_724724, EPI_ISL_724725, EPI_ISL_724726, EPI_ISL_724727, EPI_ISL_724728, EPI_ISL_724729, EPI_ISL_724730, EPI_ISL_724731, EPI_ISL_724732, EPI_ISL_724733, EPI_ISL_724734, EPI_ISL_724735, EPI_ISL_724736, EPI_ISL_724737, EPI_ISL_724738, EPI_ISL_724739, EPI_ISL_724740, EPI_ISL_724741, EPI_ISL_724742, EPI_ISL_724743, EPI_ISL_724744, EPI_ISL_724745, EPI_ISL_724746, EPI_ISL_724747, EPI_ISL_724748, EPI_ISL_724749, EPI_ISL_724750, EPI_ISL_724751, EPI_ISL_724752, EPI_ISL_724753, EPI_ISL_724754, EPI_ISL_724755, EPI_ISL_724756, EPI_ISL_724757, EPI_ISL_724758, EPI_ISL_724759, EPI_ISL_724760, EPI_ISL_724761, EPI_ISL_724762, EPI_ISL_724763, EPI_ISL_724764, EPI_ISL_724765, EPI_ISL_724766, EPI_ISL_724767, EPI_ISL_724768, EPI_ISL_724769, EPI_ISL_724770, EPI_ISL_724771, EPI_ISL_724772, EPI_ISL_724773 | University College London, Great Ormond Street Hospital for Children NHS Foundation Trust, Imperial College Healthcare NHS Trust | COVID-19 Genomics UK (COG-UK) Consortium                                                          | Sergi Castellano, Rachel Williams, Mark Kristiansen, Paola Resende Silva, Sunando Roy, Tony Brooks, Helena Tutill, Paola Niola, Patricia Dyal, Charlotte Williams, Leysa Forrest, Yasmin Panchbhaya, Jacqueline Findlay, Samuel Weeks, Julianne Brown, Kathryn Harris, Paul Randell, James Price, Alison Holmes, Judith Breuer                                 |
| EPI_ISL_728221, EPI_ISL_728222                                                                                                                                                                                                                                                                                                                                                                                                                                                                                                                                                                                                                                                                                                                                                                                                                                                                                                                                                                                                                                                                                                                                                                                                                                                                                                                                                                                                                                                                                                                                                                                                                                                                                                                                                                                                                                                                                                                                                                                                                                                                                                                                                                                                                                                                                                                                                                                                                                                                                                                                                                                                                                                                                                                                                                                                                                                                                                                                                                                                                                                                                                                                                                                                                                                                                                                                                                                                                                                                                                                                                                                                                                                                                                                                                                                                                                                                 | LNR National Reference Laboratory, Mohammed VI University                                                                        | Medical Biotechnology Laboratory, Rabat Medical and                                               | Souad KARTTI, Housna ARROUCHI, Loubna ALLAM, Mounem Essabbar, Mouna OUADGHIRI, Tarek Aanniz, Nabila Soara, Adib Ghassan, Saaid                                                                                                                                                                                                                                 |

|                                                                                                                                                                                                                                                                                                                                                                                                                                                                                                                                                                                                                                                                                                                                                                                                                                                                                                                                                                                                                                                                                                                                                                                                                                                                                                                                                                                                                                                                                                                                                                                                                                                                                                                                                                                                                                                                                                                                                                                                                                                                                                                                                                                                                                                                                                                                                                                                                                                                                                                                                                                                                                                                                |                                                                                                                                  |                                                                                                           |                                                                                                                                                                                                                                                                                                                                  |
|--------------------------------------------------------------------------------------------------------------------------------------------------------------------------------------------------------------------------------------------------------------------------------------------------------------------------------------------------------------------------------------------------------------------------------------------------------------------------------------------------------------------------------------------------------------------------------------------------------------------------------------------------------------------------------------------------------------------------------------------------------------------------------------------------------------------------------------------------------------------------------------------------------------------------------------------------------------------------------------------------------------------------------------------------------------------------------------------------------------------------------------------------------------------------------------------------------------------------------------------------------------------------------------------------------------------------------------------------------------------------------------------------------------------------------------------------------------------------------------------------------------------------------------------------------------------------------------------------------------------------------------------------------------------------------------------------------------------------------------------------------------------------------------------------------------------------------------------------------------------------------------------------------------------------------------------------------------------------------------------------------------------------------------------------------------------------------------------------------------------------------------------------------------------------------------------------------------------------------------------------------------------------------------------------------------------------------------------------------------------------------------------------------------------------------------------------------------------------------------------------------------------------------------------------------------------------------------------------------------------------------------------------------------------------------|----------------------------------------------------------------------------------------------------------------------------------|-----------------------------------------------------------------------------------------------------------|----------------------------------------------------------------------------------------------------------------------------------------------------------------------------------------------------------------------------------------------------------------------------------------------------------------------------------|
| EPI_ISL_728223, EPI_ISL_728224, EPI_ISL_728235, EPI_ISL_728236, EPI_ISL_728237, EPI_ISL_728239                                                                                                                                                                                                                                                                                                                                                                                                                                                                                                                                                                                                                                                                                                                                                                                                                                                                                                                                                                                                                                                                                                                                                                                                                                                                                                                                                                                                                                                                                                                                                                                                                                                                                                                                                                                                                                                                                                                                                                                                                                                                                                                                                                                                                                                                                                                                                                                                                                                                                                                                                                                 | of Health Sciences                                                                                                               | Pharmacy School, Mohammed The Vth University in Rabat                                                     | AMZAZI, Lahcen BELYAMANI and Azeddine IBRAHIMI                                                                                                                                                                                                                                                                                   |
| EPI_ISL_728240                                                                                                                                                                                                                                                                                                                                                                                                                                                                                                                                                                                                                                                                                                                                                                                                                                                                                                                                                                                                                                                                                                                                                                                                                                                                                                                                                                                                                                                                                                                                                                                                                                                                                                                                                                                                                                                                                                                                                                                                                                                                                                                                                                                                                                                                                                                                                                                                                                                                                                                                                                                                                                                                 | Microbiology Laboratory, Arrazi hospital, CHU Mohamed VI, Marrakech, Morocco                                                     | Medical Biotechnology Laboratory, Rabat Medical and Pharmacy School, Mohammed The Vth University in Rabat | Souad KARTTI, Housna ARROUCHI, Loubna ALLAM, Mounem Essabbar, Mouna OUADGHIRI, Tarek Aanniz, Nabila Soara, Adib Ghassan, Saaid AMZAZI, Lahcen BELYAMANI and Azeddine IBRAHIMI                                                                                                                                                    |
| EPI_ISL_728288                                                                                                                                                                                                                                                                                                                                                                                                                                                                                                                                                                                                                                                                                                                                                                                                                                                                                                                                                                                                                                                                                                                                                                                                                                                                                                                                                                                                                                                                                                                                                                                                                                                                                                                                                                                                                                                                                                                                                                                                                                                                                                                                                                                                                                                                                                                                                                                                                                                                                                                                                                                                                                                                 | Jena University Hospital, Institute for Infectious Diseases and Infection Control                                                | Institute for infectious medicine & hospital hygiene, CaSe-Group                                          | Spott, Riccardo; Marquet, Mike; Pletz, Matthias W.; Brandt, Christian                                                                                                                                                                                                                                                            |
| EPI_ISL_728292, EPI_ISL_728293, EPI_ISL_728294, EPI_ISL_728296, EPI_ISL_728298, EPI_ISL_728302, EPI_ISL_728303, EPI_ISL_728321, EPI_ISL_728323, EPI_ISL_728324, EPI_ISL_728331, EPI_ISL_728333, EPI_ISL_728335, EPI_ISL_728337, EPI_ISL_728338, EPI_ISL_728341, EPI_ISL_728345                                                                                                                                                                                                                                                                                                                                                                                                                                                                                                                                                                                                                                                                                                                                                                                                                                                                                                                                                                                                                                                                                                                                                                                                                                                                                                                                                                                                                                                                                                                                                                                                                                                                                                                                                                                                                                                                                                                                                                                                                                                                                                                                                                                                                                                                                                                                                                                                 | Jena University Hospital, Institute for Infectious Diseases and Infection Control                                                | Institute of infectious medicine & hospital hygiene, CaSe-Group                                           | Spott, Riccardo; Marquet, Mike; Pletz, Matthias W.; Brandt, Christian                                                                                                                                                                                                                                                            |
| see above                                                                                                                                                                                                                                                                                                                                                                                                                                                                                                                                                                                                                                                                                                                                                                                                                                                                                                                                                                                                                                                                                                                                                                                                                                                                                                                                                                                                                                                                                                                                                                                                                                                                                                                                                                                                                                                                                                                                                                                                                                                                                                                                                                                                                                                                                                                                                                                                                                                                                                                                                                                                                                                                      | Jena University Hospital, Institute for Infectious Diseases and Infection Control                                                | Institute of infectious medicine & hospital hygiene, CaSe-Group                                           | Spott, Riccardo; Marquet, Mike; Pletz, Matthias W.; Brandt, Christian                                                                                                                                                                                                                                                            |
| EPI_ISL_730621                                                                                                                                                                                                                                                                                                                                                                                                                                                                                                                                                                                                                                                                                                                                                                                                                                                                                                                                                                                                                                                                                                                                                                                                                                                                                                                                                                                                                                                                                                                                                                                                                                                                                                                                                                                                                                                                                                                                                                                                                                                                                                                                                                                                                                                                                                                                                                                                                                                                                                                                                                                                                                                                 | Limmattal Hospital                                                                                                               | Institute of Medical Virology, University of Zurich                                                       | Stefan Schmutz, Verena Kufner, Maryam Zaheri, Gabriela Ziltener, Jürg Böni, Michael Huber, Alexandra Trkola                                                                                                                                                                                                                      |
| EPI_ISL_730622                                                                                                                                                                                                                                                                                                                                                                                                                                                                                                                                                                                                                                                                                                                                                                                                                                                                                                                                                                                                                                                                                                                                                                                                                                                                                                                                                                                                                                                                                                                                                                                                                                                                                                                                                                                                                                                                                                                                                                                                                                                                                                                                                                                                                                                                                                                                                                                                                                                                                                                                                                                                                                                                 | Männedorf Hospital                                                                                                               | Institute of Medical Virology, University of Zurich                                                       | Stefan Schmutz, Verena Kufner, Maryam Zaheri, Gabriela Ziltener, Jürg Böni, Michael Huber, Alexandra Trkola                                                                                                                                                                                                                      |
| EPI_ISL_730623                                                                                                                                                                                                                                                                                                                                                                                                                                                                                                                                                                                                                                                                                                                                                                                                                                                                                                                                                                                                                                                                                                                                                                                                                                                                                                                                                                                                                                                                                                                                                                                                                                                                                                                                                                                                                                                                                                                                                                                                                                                                                                                                                                                                                                                                                                                                                                                                                                                                                                                                                                                                                                                                 | Cantonal Hospital Frauenfeld                                                                                                     | Institute of Medical Virology, University of Zurich                                                       | Stefan Schmutz, Verena Kufner, Maryam Zaheri, Gabriela Ziltener, Jürg Böni, Michael Huber, Alexandra Trkola                                                                                                                                                                                                                      |
| EPI_ISL_730624, EPI_ISL_730625                                                                                                                                                                                                                                                                                                                                                                                                                                                                                                                                                                                                                                                                                                                                                                                                                                                                                                                                                                                                                                                                                                                                                                                                                                                                                                                                                                                                                                                                                                                                                                                                                                                                                                                                                                                                                                                                                                                                                                                                                                                                                                                                                                                                                                                                                                                                                                                                                                                                                                                                                                                                                                                 | Limmattal Hospital                                                                                                               | Institute of Medical Virology, University of Zurich                                                       | Stefan Schmutz, Verena Kufner, Maryam Zaheri, Gabriela Ziltener, Jürg Böni, Michael Huber, Alexandra Trkola                                                                                                                                                                                                                      |
| EPI_ISL_730626, EPI_ISL_730627, EPI_ISL_730628, EPI_ISL_730629                                                                                                                                                                                                                                                                                                                                                                                                                                                                                                                                                                                                                                                                                                                                                                                                                                                                                                                                                                                                                                                                                                                                                                                                                                                                                                                                                                                                                                                                                                                                                                                                                                                                                                                                                                                                                                                                                                                                                                                                                                                                                                                                                                                                                                                                                                                                                                                                                                                                                                                                                                                                                 | Männedorf Hospital                                                                                                               | Institute of Medical Virology, University of Zurich                                                       | Stefan Schmutz, Verena Kufner, Maryam Zaheri, Gabriela Ziltener, Jürg Böni, Michael Huber, Alexandra Trkola                                                                                                                                                                                                                      |
| EPI_ISL_730630                                                                                                                                                                                                                                                                                                                                                                                                                                                                                                                                                                                                                                                                                                                                                                                                                                                                                                                                                                                                                                                                                                                                                                                                                                                                                                                                                                                                                                                                                                                                                                                                                                                                                                                                                                                                                                                                                                                                                                                                                                                                                                                                                                                                                                                                                                                                                                                                                                                                                                                                                                                                                                                                 | Limmattal Hospital                                                                                                               | Institute of Medical Virology, University of Zurich                                                       | Stefan Schmutz, Verena Kufner, Maryam Zaheri, Gabriela Ziltener, Jürg Böni, Michael Huber, Alexandra Trkola                                                                                                                                                                                                                      |
| EPI_ISL_730631, EPI_ISL_730632, EPI_ISL_730633                                                                                                                                                                                                                                                                                                                                                                                                                                                                                                                                                                                                                                                                                                                                                                                                                                                                                                                                                                                                                                                                                                                                                                                                                                                                                                                                                                                                                                                                                                                                                                                                                                                                                                                                                                                                                                                                                                                                                                                                                                                                                                                                                                                                                                                                                                                                                                                                                                                                                                                                                                                                                                 | Männedorf Hospital                                                                                                               | Institute of Medical Virology, University of Zurich                                                       | Stefan Schmutz, Verena Kufner, Maryam Zaheri, Gabriela Ziltener, Jürg Böni, Michael Huber, Alexandra Trkola                                                                                                                                                                                                                      |
| EPI_ISL_730634                                                                                                                                                                                                                                                                                                                                                                                                                                                                                                                                                                                                                                                                                                                                                                                                                                                                                                                                                                                                                                                                                                                                                                                                                                                                                                                                                                                                                                                                                                                                                                                                                                                                                                                                                                                                                                                                                                                                                                                                                                                                                                                                                                                                                                                                                                                                                                                                                                                                                                                                                                                                                                                                 | University Hospital Zürich                                                                                                       | Institute of Medical Virology, University of Zurich                                                       | Stefan Schmutz, Verena Kufner, Maryam Zaheri, Gabriela Ziltener, Jürg Böni, Michael Huber, Alexandra Trkola                                                                                                                                                                                                                      |
| EPI_ISL_730635                                                                                                                                                                                                                                                                                                                                                                                                                                                                                                                                                                                                                                                                                                                                                                                                                                                                                                                                                                                                                                                                                                                                                                                                                                                                                                                                                                                                                                                                                                                                                                                                                                                                                                                                                                                                                                                                                                                                                                                                                                                                                                                                                                                                                                                                                                                                                                                                                                                                                                                                                                                                                                                                 | Limmattal Hospital                                                                                                               | Institute of Medical Virology, University of Zurich                                                       | Stefan Schmutz, Verena Kufner, Maryam Zaheri, Gabriela Ziltener, Jürg Böni, Michael Huber, Alexandra Trkola                                                                                                                                                                                                                      |
| EPI_ISL_730636                                                                                                                                                                                                                                                                                                                                                                                                                                                                                                                                                                                                                                                                                                                                                                                                                                                                                                                                                                                                                                                                                                                                                                                                                                                                                                                                                                                                                                                                                                                                                                                                                                                                                                                                                                                                                                                                                                                                                                                                                                                                                                                                                                                                                                                                                                                                                                                                                                                                                                                                                                                                                                                                 | University Hospital Zürich                                                                                                       | Institute of Medical Virology, University of Zurich                                                       | Stefan Schmutz, Verena Kufner, Maryam Zaheri, Gabriela Ziltener, Jürg Böni, Michael Huber, Alexandra Trkola                                                                                                                                                                                                                      |
| EPI_ISL_730637, EPI_ISL_730638, EPI_ISL_730639                                                                                                                                                                                                                                                                                                                                                                                                                                                                                                                                                                                                                                                                                                                                                                                                                                                                                                                                                                                                                                                                                                                                                                                                                                                                                                                                                                                                                                                                                                                                                                                                                                                                                                                                                                                                                                                                                                                                                                                                                                                                                                                                                                                                                                                                                                                                                                                                                                                                                                                                                                                                                                 | Männedorf Hospital                                                                                                               | Institute of Medical Virology, University of Zurich                                                       | Stefan Schmutz, Verena Kufner, Maryam Zaheri, Gabriela Ziltener, Jürg Böni, Michael Huber, Alexandra Trkola                                                                                                                                                                                                                      |
| EPI_ISL_733496, EPI_ISL_733497                                                                                                                                                                                                                                                                                                                                                                                                                                                                                                                                                                                                                                                                                                                                                                                                                                                                                                                                                                                                                                                                                                                                                                                                                                                                                                                                                                                                                                                                                                                                                                                                                                                                                                                                                                                                                                                                                                                                                                                                                                                                                                                                                                                                                                                                                                                                                                                                                                                                                                                                                                                                                                                 | University Hospital Zürich                                                                                                       | Institute of Medical Virology, University of Zurich                                                       | Stefan Schmutz, Verena Kufner, Maryam Zaheri, Gabriela Ziltener, Thomas Scheier, Jürg Böni, Michael Huber, Alexandra Trkola                                                                                                                                                                                                      |
| EPI_ISL_738064, EPI_ISL_738065, EPI_ISL_740547                                                                                                                                                                                                                                                                                                                                                                                                                                                                                                                                                                                                                                                                                                                                                                                                                                                                                                                                                                                                                                                                                                                                                                                                                                                                                                                                                                                                                                                                                                                                                                                                                                                                                                                                                                                                                                                                                                                                                                                                                                                                                                                                                                                                                                                                                                                                                                                                                                                                                                                                                                                                                                 | Department of Laboratory Medicine, National Taiwan University Hospital                                                           | Microbial Genomics Core Lab, National Taiwan University Centers of Genomic and Precision Medicine         | Shiou-Hwei Yeh, You-Yu Lin, Ya-Yun Lai, Chiao-Ling Li, Shan-Chwen Chang, Pei-Jer Chen, Sui-Yuan Chang                                                                                                                                                                                                                            |
| EPI_ISL_741186, EPI_ISL_741187, EPI_ISL_741188, EPI_ISL_741189, EPI_ISL_741190, EPI_ISL_741191, EPI_ISL_741192, EPI_ISL_741193, EPI_ISL_741194, EPI_ISL_741195, EPI_ISL_741196, EPI_ISL_741197, EPI_ISL_741198, EPI_ISL_741199, EPI_ISL_741200, EPI_ISL_741201, EPI_ISL_741202, EPI_ISL_741203, EPI_ISL_741204, EPI_ISL_741205, EPI_ISL_741206, EPI_ISL_741207, EPI_ISL_741208, EPI_ISL_741209, EPI_ISL_741210, EPI_ISL_741211, EPI_ISL_741212, EPI_ISL_741213, EPI_ISL_741214, EPI_ISL_741215, EPI_ISL_741216, EPI_ISL_741217, EPI_ISL_741218, EPI_ISL_741219, EPI_ISL_741220, EPI_ISL_741221, EPI_ISL_741222, EPI_ISL_741223, EPI_ISL_741224, EPI_ISL_741225, EPI_ISL_741226, EPI_ISL_741227, EPI_ISL_741228, EPI_ISL_741229, EPI_ISL_741230, EPI_ISL_741231, EPI_ISL_741232, EPI_ISL_741233, EPI_ISL_741234, EPI_ISL_741235, EPI_ISL_741236, EPI_ISL_741237, EPI_ISL_741238, EPI_ISL_741239, EPI_ISL_741240, EPI_ISL_741241, EPI_ISL_741242, EPI_ISL_741243, EPI_ISL_741244, EPI_ISL_741245, EPI_ISL_741246, EPI_ISL_741247, EPI_ISL_741248, EPI_ISL_741249, EPI_ISL_741250, EPI_ISL_741251, EPI_ISL_741252, EPI_ISL_741253, EPI_ISL_741254, EPI_ISL_741255, EPI_ISL_741256, EPI_ISL_741257, EPI_ISL_741258, EPI_ISL_741259, EPI_ISL_741260, EPI_ISL_741261, EPI_ISL_741262, EPI_ISL_741263, EPI_ISL_741264, EPI_ISL_741265, EPI_ISL_741266, EPI_ISL_741267, EPI_ISL_741268, EPI_ISL_741269, EPI_ISL_741270, EPI_ISL_741271, EPI_ISL_741272, EPI_ISL_741273, EPI_ISL_741274, EPI_ISL_741275, EPI_ISL_741276, EPI_ISL_741277, EPI_ISL_741278, EPI_ISL_741279, EPI_ISL_741280, EPI_ISL_741281, EPI_ISL_741282, EPI_ISL_741283, EPI_ISL_741284, EPI_ISL_741285, EPI_ISL_741286, EPI_ISL_741287, EPI_ISL_741288, EPI_ISL_741289, EPI_ISL_741290, EPI_ISL_741291, EPI_ISL_741292, EPI_ISL_741293, EPI_ISL_741294, EPI_ISL_741295, EPI_ISL_741296, EPI_ISL_741297, EPI_ISL_741298, EPI_ISL_741299, EPI_ISL_741300, EPI_ISL_741301, EPI_ISL_741302, EPI_ISL_741303, EPI_ISL_741304, EPI_ISL_741305, EPI_ISL_741306, EPI_ISL_741307, EPI_ISL_741308, EPI_ISL_741309, EPI_ISL_741310, EPI_ISL_741311, EPI_ISL_741312, EPI_ISL_741313, EPI_ISL_741314, EPI_ISL_741315, EPI_ISL_741316, EPI_ISL_741317, EPI_ISL_741318, EPI_ISL_741319, EPI_ISL_741320, EPI_ISL_741321, EPI_ISL_741322, EPI_ISL_741323, EPI_ISL_741324, EPI_ISL_741325, EPI_ISL_741326, EPI_ISL_741327, EPI_ISL_741328, EPI_ISL_741329, EPI_ISL_741330, EPI_ISL_741331, EPI_ISL_741332, EPI_ISL_741333, EPI_ISL_741334, EPI_ISL_741335, EPI_ISL_741336, EPI_ISL_741337, EPI_ISL_741338, EPI_ISL_741339, EPI_ISL_741340, EPI_ISL_741341, EPI_ISL_741342, EPI_ISL_741343, EPI_ISL_741344, EPI_ISL_741345, EPI_ISL_741346 | University College London, Great Ormond Street Hospital for Children NHS Foundation Trust, Imperial College Healthcare NHS Trust | COVID-19 Genomics UK (COG-UK) Consortium                                                                  | Sergi Castellano, Rachel Williams, Mark Kristiansen, Paola Resende Silva, Sunando Roy, Tony Brooks, Helena Tutill, Paola Niola, Patricia Dyal, Charlotte Williams, Leysa Forrester, Yasmin Panchbhaya, Jacqueline Findlay, Samuel Weeks, Julianne Brown, Kathryn Harris, Paul Randell, James Price, Alison Holmes, Judith Breuer |
| EPI_ISL_751191, EPI_ISL_751192                                                                                                                                                                                                                                                                                                                                                                                                                                                                                                                                                                                                                                                                                                                                                                                                                                                                                                                                                                                                                                                                                                                                                                                                                                                                                                                                                                                                                                                                                                                                                                                                                                                                                                                                                                                                                                                                                                                                                                                                                                                                                                                                                                                                                                                                                                                                                                                                                                                                                                                                                                                                                                                 | Limmattal Hospital                                                                                                               | Institute of Medical Virology, University of Zurich                                                       | Stefan Schmutz, Kevin Steiner, Verena Kufner, Maryam Zaheri, Gabriela Ziltener, Jürg Böni, Michael Huber, Alexandra Trkola, Roberto Buonomano                                                                                                                                                                                    |
| EPI_ISL_751193                                                                                                                                                                                                                                                                                                                                                                                                                                                                                                                                                                                                                                                                                                                                                                                                                                                                                                                                                                                                                                                                                                                                                                                                                                                                                                                                                                                                                                                                                                                                                                                                                                                                                                                                                                                                                                                                                                                                                                                                                                                                                                                                                                                                                                                                                                                                                                                                                                                                                                                                                                                                                                                                 | University Hospital Zürich                                                                                                       | Institute of Medical Virology, University of Zurich                                                       | Stefan Schmutz, Kevin Steiner, Verena Kufner, Maryam Zaheri, Gabriela Ziltener, Jürg Böni, Michael Huber, Alexandra Trkola                                                                                                                                                                                                       |
| EPI_ISL_751194, EPI_ISL_751195, EPI_ISL_751196, EPI_ISL_751197, EPI_ISL_751198, EPI_ISL_751199, EPI_ISL_751200                                                                                                                                                                                                                                                                                                                                                                                                                                                                                                                                                                                                                                                                                                                                                                                                                                                                                                                                                                                                                                                                                                                                                                                                                                                                                                                                                                                                                                                                                                                                                                                                                                                                                                                                                                                                                                                                                                                                                                                                                                                                                                                                                                                                                                                                                                                                                                                                                                                                                                                                                                 | Dienststelle Gesundheit und Sport Kanton Luzern                                                                                  | Institute of Medical Virology, University of Zurich                                                       | Stefan Schmutz, Kevin Steiner, Verena Kufner, Maryam Zaheri, Gabriela Ziltener, Jürg Böni, Michael Huber, Alexandra Trkola, Claudia Schmutz, Eva Spieler                                                                                                                                                                         |
| EPI_ISL_751203                                                                                                                                                                                                                                                                                                                                                                                                                                                                                                                                                                                                                                                                                                                                                                                                                                                                                                                                                                                                                                                                                                                                                                                                                                                                                                                                                                                                                                                                                                                                                                                                                                                                                                                                                                                                                                                                                                                                                                                                                                                                                                                                                                                                                                                                                                                                                                                                                                                                                                                                                                                                                                                                 | Pathogen Genomics Lab King Abdullah University of Science and Technology(KAUST)                                                  | Pathogen Genomics Lab King Abdullah University of Science and Technology(KAUST)                           | Sharif Hala, Raaee Naeem, Raushan Nugmanova, Olga Douvropoulou, Rahul P Salunke, Fadwa Alofi, Asim Khogeer, Afrah Alsomali, Jumana Taha, Abdulaziz Alahmadi, Kahled Alghithami, Anwar Hashem, Naif Almontashiri, Arnab Pain                                                                                                      |
| EPI_ISL_751204                                                                                                                                                                                                                                                                                                                                                                                                                                                                                                                                                                                                                                                                                                                                                                                                                                                                                                                                                                                                                                                                                                                                                                                                                                                                                                                                                                                                                                                                                                                                                                                                                                                                                                                                                                                                                                                                                                                                                                                                                                                                                                                                                                                                                                                                                                                                                                                                                                                                                                                                                                                                                                                                 | Pathogen Genomics Lab King Abdullah University of Science and Technology(KAUST)                                                  | Pathogen Genomics Lab King Abdullah University of Science and Technology(KAUST)                           | Sharif Hala, Sara Mfarrej, Raushan Nugmanova, Olga Douvropoulou, Rahul P Salunke, Raaee Naeem, Fadwa Alofi, Asim Khogeer, Afrah Alsomali, Jumana Taha, Abdulaziz Alahmadi, Kahled Alghithami, Anwar Hashem, Naif Almontashiri, Arnab Pain                                                                                        |
| EPI_ISL_751208                                                                                                                                                                                                                                                                                                                                                                                                                                                                                                                                                                                                                                                                                                                                                                                                                                                                                                                                                                                                                                                                                                                                                                                                                                                                                                                                                                                                                                                                                                                                                                                                                                                                                                                                                                                                                                                                                                                                                                                                                                                                                                                                                                                                                                                                                                                                                                                                                                                                                                                                                                                                                                                                 | Pathogen Genomics Lab King Abdullah University of Science and Technology(KAUST)                                                  | Pathogen Genomics Lab King Abdullah University of Science and Technology(KAUST)                           | Sharif Hala, Sara Mfarrej, Olga Douvropoulou, Raushan Nugmanova, Raaee Naeem, Rahul P Salunke, Afrah Alsomali, Fadwa Alofi, Asim Khogeer, Jumana Taha, Abdulaziz Alahmadi, Kahled Alghithami, Anwar Hashem, Naif Almontashiri, Arnab Pain                                                                                        |
| EPI_ISL_751212                                                                                                                                                                                                                                                                                                                                                                                                                                                                                                                                                                                                                                                                                                                                                                                                                                                                                                                                                                                                                                                                                                                                                                                                                                                                                                                                                                                                                                                                                                                                                                                                                                                                                                                                                                                                                                                                                                                                                                                                                                                                                                                                                                                                                                                                                                                                                                                                                                                                                                                                                                                                                                                                 | Pathogen Genomics Lab King Abdullah University of Science and Technology(KAUST)                                                  | Pathogen Genomics Lab King Abdullah University of Science and Technology(KAUST)                           | Sharif Hala, Sara Mfarrej, Raushan Nugmanova, Olga Douvropoulou, Rahul P Salunke, Raaee Naeem, Fadwa Alofi, Asim Khogeer, Afrah Alsomali, Jumana Taha, Abdulaziz Alahmadi, Kahled Alghithami, Anwar Hashem, Naif Almontashiri, Arnab Pain                                                                                        |
| EPI_ISL_751218                                                                                                                                                                                                                                                                                                                                                                                                                                                                                                                                                                                                                                                                                                                                                                                                                                                                                                                                                                                                                                                                                                                                                                                                                                                                                                                                                                                                                                                                                                                                                                                                                                                                                                                                                                                                                                                                                                                                                                                                                                                                                                                                                                                                                                                                                                                                                                                                                                                                                                                                                                                                                                                                 | Pathogen Genomics Lab King Abdullah University of Science and Technology(KAUST)                                                  | Pathogen Genomics Lab King Abdullah University of Science and Technology(KAUST)                           | Sharif Hala, Fathia Ben Rached, Sara Mfarrej, Raushan Nugmanova, Olga Douvropoulou, Rahul P Salunke, Raaee Naeem, Fadwa Alofi, Asim Khogeer, Afrah Alsomali, Jumana Taha, Abdulaziz Alahmadi, Kahled Alghithami, Anwar Hashem, Naif Almontashiri, Arnab Pain                                                                     |
| EPI_ISL_751221                                                                                                                                                                                                                                                                                                                                                                                                                                                                                                                                                                                                                                                                                                                                                                                                                                                                                                                                                                                                                                                                                                                                                                                                                                                                                                                                                                                                                                                                                                                                                                                                                                                                                                                                                                                                                                                                                                                                                                                                                                                                                                                                                                                                                                                                                                                                                                                                                                                                                                                                                                                                                                                                 | Pathogen Genomics Lab King Abdullah University of Science and Technology(KAUST)                                                  | Pathogen Genomics Lab King Abdullah University of Science and Technology(KAUST)                           | Sharif Hala, Fathia Ben Rached, Sara Mfarrej, Olga Douvropoulou, Raushan Nugmanova, Raaee Naeem, Rahul P Salunke, Afrah Alsomali, Fadwa Alofi, Asim Khogeer, Jumana Taha, Abdulaziz Alahmadi, Kahled Alghithami, Anwar Hashem, Naif Almontashiri, Arnab Pain                                                                     |
| EPI_ISL_751224                                                                                                                                                                                                                                                                                                                                                                                                                                                                                                                                                                                                                                                                                                                                                                                                                                                                                                                                                                                                                                                                                                                                                                                                                                                                                                                                                                                                                                                                                                                                                                                                                                                                                                                                                                                                                                                                                                                                                                                                                                                                                                                                                                                                                                                                                                                                                                                                                                                                                                                                                                                                                                                                 | Pathogen Genomics Lab King Abdullah University of Science and Technology(KAUST)                                                  | Pathogen Genomics Lab King Abdullah University of Science and Technology(KAUST)                           | Sharif Hala, Sara Mfarrej, Raushan Nugmanova, Olga Douvropoulou, Rahul P Salunke, Raaee Naeem, Afrah Alsomali, Fadwa Alofi, Asim Khogeer, Jumana Taha, Abdulaziz Alahmadi, Kahled Alghithami, Anwar Hashem, Naif Almontashiri, Arnab Pain                                                                                        |
| EPI_ISL_751237                                                                                                                                                                                                                                                                                                                                                                                                                                                                                                                                                                                                                                                                                                                                                                                                                                                                                                                                                                                                                                                                                                                                                                                                                                                                                                                                                                                                                                                                                                                                                                                                                                                                                                                                                                                                                                                                                                                                                                                                                                                                                                                                                                                                                                                                                                                                                                                                                                                                                                                                                                                                                                                                 | Pathogen Genomics Lab King Abdullah University of Science and Technology(KAUST)                                                  | Pathogen Genomics Lab King Abdullah University of Science and Technology(KAUST)                           | Sharif Hala, Fadwa Alofi, Sara Mfarrej, Fathia Ben Rached, Olga Douvropoulou, Raushan Nugmanova, Raaee Naeem, Asim Khogeer, Afrah Alsomali, Jumana Taha, Abdulaziz Alahmadi, Kahled Alghithami, Anwar Hashem, Naif Almontashiri, Arnab Pain                                                                                      |
| EPI_ISL_753697                                                                                                                                                                                                                                                                                                                                                                                                                                                                                                                                                                                                                                                                                                                                                                                                                                                                                                                                                                                                                                                                                                                                                                                                                                                                                                                                                                                                                                                                                                                                                                                                                                                                                                                                                                                                                                                                                                                                                                                                                                                                                                                                                                                                                                                                                                                                                                                                                                                                                                                                                                                                                                                                 | Specialized Lab for COVID-19 Detection, Department of Genetic Engineering and Biotechnology                                      | Specialized Lab for COVID-19 Detection, Department of Genetic Engineering and Biotechnology               | Shamsul H. Prodhan, Md. Asrafal Jahan, Hammadul Hoque, Nurnabi Azad Jewel, Md. Nazmul Hasan, Hafiz Al Ashad, Rahatul Islam, Salman Ahmed                                                                                                                                                                                         |
| EPI_ISL_754176                                                                                                                                                                                                                                                                                                                                                                                                                                                                                                                                                                                                                                                                                                                                                                                                                                                                                                                                                                                                                                                                                                                                                                                                                                                                                                                                                                                                                                                                                                                                                                                                                                                                                                                                                                                                                                                                                                                                                                                                                                                                                                                                                                                                                                                                                                                                                                                                                                                                                                                                                                                                                                                                 | Specialized Lab for COVID-19 Detection, Department of Genetic Engineering and Biotechnology                                      | Specialized Lab for COVID-19 Detection, Department of Genetic Engineering and Biotechnology               | Shamsul H. Prodhan, Hammadul Hoque, Nurnabi Azad Jewel, Md. Nazmul Hasan, Md. Mainul Hossain Bakul, Md. Rabiul Awal                                                                                                                                                                                                              |
| EPI_ISL_754178                                                                                                                                                                                                                                                                                                                                                                                                                                                                                                                                                                                                                                                                                                                                                                                                                                                                                                                                                                                                                                                                                                                                                                                                                                                                                                                                                                                                                                                                                                                                                                                                                                                                                                                                                                                                                                                                                                                                                                                                                                                                                                                                                                                                                                                                                                                                                                                                                                                                                                                                                                                                                                                                 | Specialized Lab for COVID-19 Detection, Department of Genetic Engineering and Biotechnology                                      | Specialized Lab for COVID-19 Detection, Department of Genetic Engineering and Biotechnology               | Shamsul H. Prodhan, Hammadul Hoque, Nurnabi Azad Jewel, Md. Nazmul Hasan                                                                                                                                                                                                                                                         |
| EPI_ISL_754857, EPI_ISL_754858, EPI_ISL_754859, EPI_ISL_754860, EPI_ISL_754861, EPI_ISL_754862, EPI_ISL_754863, EPI_ISL_754864, EPI_ISL_754865, EPI_ISL_754866, EPI_ISL_754867, EPI_ISL_754868, EPI_ISL_754869, EPI_ISL_754870, EPI_ISL_754871, EPI_ISL_754872, EPI_ISL_754873, EPI_ISL_754874, EPI_ISL_754875, EPI_ISL_754876, EPI_ISL_754877, EPI_ISL_754878, EPI_ISL_754879, EPI_ISL_754880, EPI_ISL_754881, EPI_ISL_754882, EPI_ISL_754883, EPI_ISL_754884, EPI_ISL_754885, EPI_ISL_754886, EPI_ISL_754887, EPI_ISL_754888, EPI_ISL_754889, EPI_ISL_754890, EPI_ISL_754891, EPI_ISL_754892, EPI_ISL_754893, EPI_ISL_754894, EPI_ISL_754895, EPI_ISL_754896, EPI_ISL_754897, EPI_ISL_754898, EPI_ISL_754899, EPI_ISL_754900, EPI_ISL_754901                                                                                                                                                                                                                                                                                                                                                                                                                                                                                                                                                                                                                                                                                                                                                                                                                                                                                                                                                                                                                                                                                                                                                                                                                                                                                                                                                                                                                                                                                                                                                                                                                                                                                                                                                                                                                                                                                                                                 |                                                                                                                                  |                                                                                                           |                                                                                                                                                                                                                                                                                                                                  |



|                                                                                                                                                                                                                                                                                                                                                                                                                                                                                                                                                                                                                                                                                                                                                                                                                                                                                                                                                                                                                                                                                                                                                                                                                                                                                                                                                                                |                                                                                                                                                                  |                                                                                                                                                                  |                                                                                                                                                                                                                                                                                                                                                          |
|--------------------------------------------------------------------------------------------------------------------------------------------------------------------------------------------------------------------------------------------------------------------------------------------------------------------------------------------------------------------------------------------------------------------------------------------------------------------------------------------------------------------------------------------------------------------------------------------------------------------------------------------------------------------------------------------------------------------------------------------------------------------------------------------------------------------------------------------------------------------------------------------------------------------------------------------------------------------------------------------------------------------------------------------------------------------------------------------------------------------------------------------------------------------------------------------------------------------------------------------------------------------------------------------------------------------------------------------------------------------------------|------------------------------------------------------------------------------------------------------------------------------------------------------------------|------------------------------------------------------------------------------------------------------------------------------------------------------------------|----------------------------------------------------------------------------------------------------------------------------------------------------------------------------------------------------------------------------------------------------------------------------------------------------------------------------------------------------------|
| see above                                                                                                                                                                                                                                                                                                                                                                                                                                                                                                                                                                                                                                                                                                                                                                                                                                                                                                                                                                                                                                                                                                                                                                                                                                                                                                                                                                      | Innovative Genomics Institute, UC Berkeley                                                                                                                       | Innovative Genomics Institute, UC Berkeley                                                                                                                       | Stacia Wyman, Hariha Shivram, Phil Frankino, Liana Lareau, Shana McDevitt, Justin Choi                                                                                                                                                                                                                                                                   |
| EPI_ISL_756271                                                                                                                                                                                                                                                                                                                                                                                                                                                                                                                                                                                                                                                                                                                                                                                                                                                                                                                                                                                                                                                                                                                                                                                                                                                                                                                                                                 | Hospital General Universitario Gregorio Marañón                                                                                                                  | Hospital General Universitario Gregorio Marañón                                                                                                                  | Sergio Buenestado Serrano, Pedro Sola Campoy, Pilar Catalán, Patricia Muñoz, Darío García de Viedma.                                                                                                                                                                                                                                                     |
| EPI_ISL_756272                                                                                                                                                                                                                                                                                                                                                                                                                                                                                                                                                                                                                                                                                                                                                                                                                                                                                                                                                                                                                                                                                                                                                                                                                                                                                                                                                                 | Hospital General Universitario La Princesa                                                                                                                       | Hospital General Universitario Gregorio Marañón                                                                                                                  | Sergio Buenestado Serrano, Pedro Sola Campoy, Pilar Catalán, Arturo fraile Torres, Andrés Von Wernitz, Carmen del Arco, Patricia Muñoz, Laura Cardeñoso, Darío García de Viedma.                                                                                                                                                                         |
| EPI_ISL_756273, EPI_ISL_756274                                                                                                                                                                                                                                                                                                                                                                                                                                                                                                                                                                                                                                                                                                                                                                                                                                                                                                                                                                                                                                                                                                                                                                                                                                                                                                                                                 | Hospital General Universitario Gregorio Marañón                                                                                                                  | Hospital General Universitario Gregorio Marañón                                                                                                                  | Sergio Buenestado Serrano, Pedro Sola Campoy, Pilar Catalán, Patricia Muñoz, Darío García de Viedma.                                                                                                                                                                                                                                                     |
| EPI_ISL_756312, EPI_ISL_756313, EPI_ISL_756314, EPI_ISL_756315, EPI_ISL_756316, EPI_ISL_756317, EPI_ISL_756318, EPI_ISL_756319, EPI_ISL_756320, EPI_ISL_756321, EPI_ISL_756322, EPI_ISL_756323, EPI_ISL_756324, EPI_ISL_756325, EPI_ISL_756326, EPI_ISL_756327, EPI_ISL_756328, EPI_ISL_756329, EPI_ISL_756330, EPI_ISL_756331, EPI_ISL_756332, EPI_ISL_756333, EPI_ISL_756334, EPI_ISL_756335, EPI_ISL_756336, EPI_ISL_756337, EPI_ISL_756338, EPI_ISL_756339, EPI_ISL_756340, EPI_ISL_756341, EPI_ISL_756342, EPI_ISL_756343, EPI_ISL_756344, EPI_ISL_756345, EPI_ISL_756346, EPI_ISL_756347, EPI_ISL_756348, EPI_ISL_756349, EPI_ISL_756350, EPI_ISL_756351, EPI_ISL_756352, EPI_ISL_756353, EPI_ISL_756354, EPI_ISL_756355, EPI_ISL_756356                                                                                                                                                                                                                                                                                                                                                                                                                                                                                                                                                                                                                                 |                                                                                                                                                                  |                                                                                                                                                                  |                                                                                                                                                                                                                                                                                                                                                          |
| see above                                                                                                                                                                                                                                                                                                                                                                                                                                                                                                                                                                                                                                                                                                                                                                                                                                                                                                                                                                                                                                                                                                                                                                                                                                                                                                                                                                      | Innovative Genomics Institute, UC Berkeley                                                                                                                       | Innovative Genomics Institute, UC Berkeley                                                                                                                       | Stacia Wyman, Hariha Shivram, Phil Frankino, Liana Lareau, Shana McDevitt, Justin Choi                                                                                                                                                                                                                                                                   |
| EPI_ISL_763077, EPI_ISL_763086, EPI_ISL_763087, EPI_ISL_763088, EPI_ISL_763089, EPI_ISL_763090, EPI_ISL_763091, EPI_ISL_763092, EPI_ISL_763093                                                                                                                                                                                                                                                                                                                                                                                                                                                                                                                                                                                                                                                                                                                                                                                                                                                                                                                                                                                                                                                                                                                                                                                                                                 | Jena University Hospital, Institute for Infectious Diseases and Infection Control                                                                                | Institute of infectious medicine & hospital hygiene, CaSe-Group                                                                                                  | Spott, Riccardo; Marquet, Mike; Pletz, Matthias W.; Brandt, Christian                                                                                                                                                                                                                                                                                    |
| EPI_ISL_763377, EPI_ISL_763381, EPI_ISL_763393, EPI_ISL_763397, EPI_ISL_763398, EPI_ISL_763399, EPI_ISL_763404, EPI_ISL_763442, EPI_ISL_763455, EPI_ISL_763468, EPI_ISL_763485, EPI_ISL_763486, EPI_ISL_763491, EPI_ISL_763500, EPI_ISL_763510, EPI_ISL_763520, EPI_ISL_763540, EPI_ISL_763544, EPI_ISL_763545, EPI_ISL_763551, EPI_ISL_763552, EPI_ISL_763557, EPI_ISL_763578, EPI_ISL_763582, EPI_ISL_763628, EPI_ISL_763640, EPI_ISL_763643, EPI_ISL_763644, EPI_ISL_763682, EPI_ISL_763687, EPI_ISL_763700, EPI_ISL_763720, EPI_ISL_763728, EPI_ISL_763730, EPI_ISL_763745, EPI_ISL_763756, EPI_ISL_763757, EPI_ISL_763767, EPI_ISL_763772, EPI_ISL_763784, EPI_ISL_763785, EPI_ISL_763809, EPI_ISL_763810, EPI_ISL_763811, EPI_ISL_763813, EPI_ISL_763826, EPI_ISL_764037, EPI_ISL_764038, EPI_ISL_764039, EPI_ISL_764040, EPI_ISL_764041, EPI_ISL_764042, EPI_ISL_764043, EPI_ISL_764044, EPI_ISL_764045, EPI_ISL_764046, EPI_ISL_764047, EPI_ISL_764048, EPI_ISL_764049, EPI_ISL_764050, EPI_ISL_764051, EPI_ISL_764052, EPI_ISL_764053, EPI_ISL_764054, EPI_ISL_764055, EPI_ISL_764056, EPI_ISL_764057, EPI_ISL_764058, EPI_ISL_764059, EPI_ISL_764060, EPI_ISL_764128, EPI_ISL_764131, EPI_ISL_764146, EPI_ISL_764160, EPI_ISL_764175, EPI_ISL_764188, EPI_ISL_764228, EPI_ISL_764238, EPI_ISL_764241, EPI_ISL_764383, EPI_ISL_764384, EPI_ISL_764385, EPI_ISL_764386 |                                                                                                                                                                  |                                                                                                                                                                  |                                                                                                                                                                                                                                                                                                                                                          |
| see above                                                                                                                                                                                                                                                                                                                                                                                                                                                                                                                                                                                                                                                                                                                                                                                                                                                                                                                                                                                                                                                                                                                                                                                                                                                                                                                                                                      | University College London, Great Ormond Street Hospital for Children NHS Foundation Trust, Imperial College Healthcare NHS Trust                                 | COVID-19 Genomics UK (COG-UK) Consortium                                                                                                                         | Sergi Castellano, Rachel Williams, Mark Kristiansen, Paola Resende Silva, Sunando Roy, Tony Brooks, Helena Tutill, Paola Niola, Patricia Dyal, Charlotte Williams, Leysa Forrest, Yasmin Panchbhaya, Jacqueline Findlay, Samuel Weeks, Julianne Brown, Kathryn Harris, Paul Randell, James Price, Alison Holmes, Judith Breuer                           |
| EPI_ISL_766585                                                                                                                                                                                                                                                                                                                                                                                                                                                                                                                                                                                                                                                                                                                                                                                                                                                                                                                                                                                                                                                                                                                                                                                                                                                                                                                                                                 | Triemli Hospital                                                                                                                                                 | Institute of Medical Virology, University of Zurich                                                                                                              | Stefan Schmutz, Maryam Zaheri, Verena Kufner, Annette Audigé, Maria Grünberg, Kevin Steiner, Jon Huder, Cyril Shah, Riccarda Capaul, Jürg Böni, Michael Huber, Alexandra Trkola                                                                                                                                                                          |
| EPI_ISL_766586                                                                                                                                                                                                                                                                                                                                                                                                                                                                                                                                                                                                                                                                                                                                                                                                                                                                                                                                                                                                                                                                                                                                                                                                                                                                                                                                                                 | Limmattal Hospital                                                                                                                                               | Institute of Medical Virology, University of Zurich                                                                                                              | Stefan Schmutz, Maryam Zaheri, Verena Kufner, Annette Audigé, Maria Grünberg, Kevin Steiner, Jon Huder, Cyril Shah, Riccarda Capaul, Jürg Böni, Michael Huber, Alexandra Trkola                                                                                                                                                                          |
| EPI_ISL_766587                                                                                                                                                                                                                                                                                                                                                                                                                                                                                                                                                                                                                                                                                                                                                                                                                                                                                                                                                                                                                                                                                                                                                                                                                                                                                                                                                                 | Analytica Medizinische Laboratorien AG                                                                                                                           | Institute of Medical Virology, University of Zurich                                                                                                              | Stefan Schmutz, Maryam Zaheri, Verena Kufner, Annette Audigé, Maria Grünberg, Kevin Steiner, Jon Huder, Cyril Shah, Riccarda Capaul, Jürg Böni, Michael Huber, Alexandra Trkola                                                                                                                                                                          |
| EPI_ISL_766588                                                                                                                                                                                                                                                                                                                                                                                                                                                                                                                                                                                                                                                                                                                                                                                                                                                                                                                                                                                                                                                                                                                                                                                                                                                                                                                                                                 | Xundheitszentrum Wengen                                                                                                                                          | Institute of Medical Virology, University of Zurich                                                                                                              | Stefan Schmutz, Maryam Zaheri, Verena Kufner, Annette Audigé, Maria Grünberg, Kevin Steiner, Jon Huder, Cyril Shah, Riccarda Capaul, Jürg Böni, Michael Huber, Alexandra Trkola                                                                                                                                                                          |
| EPI_ISL_766589, EPI_ISL_766590                                                                                                                                                                                                                                                                                                                                                                                                                                                                                                                                                                                                                                                                                                                                                                                                                                                                                                                                                                                                                                                                                                                                                                                                                                                                                                                                                 | Dr. Boubaker Karim laboratory                                                                                                                                    | Institute of Medical Virology, University of Zurich                                                                                                              | Stefan Schmutz, Maryam Zaheri, Verena Kufner, Annette Audigé, Maria Grünberg, Kevin Steiner, Jon Huder, Cyril Shah, Riccarda Capaul, Jürg Böni, Michael Huber, Alexandra Trkola                                                                                                                                                                          |
| EPI_ISL_768633, EPI_ISL_768725, EPI_ISL_768726, EPI_ISL_768727                                                                                                                                                                                                                                                                                                                                                                                                                                                                                                                                                                                                                                                                                                                                                                                                                                                                                                                                                                                                                                                                                                                                                                                                                                                                                                                 | Jena University Hospital, Institute for Infectious Diseases and Infection Control                                                                                | Institute of infectious medicine & hospital hygiene, CaSe-Group                                                                                                  | Spott, Riccardo; Marquet, Mike; Pletz, Matthias W.; Brandt, Christian                                                                                                                                                                                                                                                                                    |
| EPI_ISL_768728, EPI_ISL_768729, EPI_ISL_768730, EPI_ISL_768731, EPI_ISL_768732, EPI_ISL_768733, EPI_ISL_768734, EPI_ISL_768735, EPI_ISL_768736, EPI_ISL_768737, EPI_ISL_768738, EPI_ISL_768739, EPI_ISL_768740, EPI_ISL_768741, EPI_ISL_768742                                                                                                                                                                                                                                                                                                                                                                                                                                                                                                                                                                                                                                                                                                                                                                                                                                                                                                                                                                                                                                                                                                                                 |                                                                                                                                                                  |                                                                                                                                                                  |                                                                                                                                                                                                                                                                                                                                                          |
| see above                                                                                                                                                                                                                                                                                                                                                                                                                                                                                                                                                                                                                                                                                                                                                                                                                                                                                                                                                                                                                                                                                                                                                                                                                                                                                                                                                                      | Child Health Research Foundation                                                                                                                                 | Child Health Research Foundation                                                                                                                                 | Senjuti Saha, Afroza Akter Tanni, Roly Malaker, Sharmistha Goswami, Syed Mukhtar Al Sium, Arif Mohammad Tanmoy, Md Hafizur Rahman, Samir K Saha                                                                                                                                                                                                          |
| EPI_ISL_776770, EPI_ISL_776772, EPI_ISL_776870, EPI_ISL_776871, EPI_ISL_776875, EPI_ISL_776877, EPI_ISL_777490, EPI_ISL_777902, EPI_ISL_778445, EPI_ISL_778644, EPI_ISL_778645                                                                                                                                                                                                                                                                                                                                                                                                                                                                                                                                                                                                                                                                                                                                                                                                                                                                                                                                                                                                                                                                                                                                                                                                 |                                                                                                                                                                  |                                                                                                                                                                  |                                                                                                                                                                                                                                                                                                                                                          |
| see above                                                                                                                                                                                                                                                                                                                                                                                                                                                                                                                                                                                                                                                                                                                                                                                                                                                                                                                                                                                                                                                                                                                                                                                                                                                                                                                                                                      | Hospital General Universitario Gregorio Marañón                                                                                                                  | Hospital General Universitario Gregorio Marañón                                                                                                                  | Sergio Buenestado Serrano, Pedro Sola Campoy, Laura Pérez-Lago, Pilar Catalán, Patricia Muñoz, Darío García de Viedma                                                                                                                                                                                                                                    |
| EPI_ISL_779255, EPI_ISL_779256, EPI_ISL_779257, EPI_ISL_779258, EPI_ISL_779259, EPI_ISL_779260, EPI_ISL_779261, EPI_ISL_779262, EPI_ISL_779263, EPI_ISL_779264, EPI_ISL_779265, EPI_ISL_779266, EPI_ISL_779267, EPI_ISL_779269, EPI_ISL_779270, EPI_ISL_779271, EPI_ISL_779272, EPI_ISL_779273, EPI_ISL_779274, EPI_ISL_779275, EPI_ISL_779276, EPI_ISL_779277, EPI_ISL_779278, EPI_ISL_779279, EPI_ISL_779280, EPI_ISL_779281, EPI_ISL_779282, EPI_ISL_779283, EPI_ISL_779284, EPI_ISL_779285, EPI_ISL_779286, EPI_ISL_779287, EPI_ISL_779288, EPI_ISL_779289, EPI_ISL_779290                                                                                                                                                                                                                                                                                                                                                                                                                                                                                                                                                                                                                                                                                                                                                                                                 |                                                                                                                                                                  |                                                                                                                                                                  |                                                                                                                                                                                                                                                                                                                                                          |
| see above                                                                                                                                                                                                                                                                                                                                                                                                                                                                                                                                                                                                                                                                                                                                                                                                                                                                                                                                                                                                                                                                                                                                                                                                                                                                                                                                                                      | Jamil-ur-Rahman Center for Genome Research, Dr. Panjiwani Center for Molecular Medicine and Drug Research                                                        | Jamil-ur-Rahman Center for Genome Research, Dr. Panjiwani Center for Molecular Medicine and Drug Research                                                        | Shakeel,M., Irfan,M., Nisa,Z., Rashid,M., Ansari,S., Khan,I.                                                                                                                                                                                                                                                                                             |
| EPI_ISL_796012, EPI_ISL_796013, EPI_ISL_796014, EPI_ISL_796015, EPI_ISL_796016, EPI_ISL_796017, EPI_ISL_796018, EPI_ISL_796019, EPI_ISL_796020, EPI_ISL_796021, EPI_ISL_796022, EPI_ISL_796023, EPI_ISL_796024, EPI_ISL_796025, EPI_ISL_796026                                                                                                                                                                                                                                                                                                                                                                                                                                                                                                                                                                                                                                                                                                                                                                                                                                                                                                                                                                                                                                                                                                                                 |                                                                                                                                                                  |                                                                                                                                                                  |                                                                                                                                                                                                                                                                                                                                                          |
| see above                                                                                                                                                                                                                                                                                                                                                                                                                                                                                                                                                                                                                                                                                                                                                                                                                                                                                                                                                                                                                                                                                                                                                                                                                                                                                                                                                                      | Hebei Provincial Center for Disease Control and Prevention, Shijiazhuang, Hebei Province; National Institute for Viral Disease Control and Prevention, China CDC | Hebei Provincial Center for Disease Control and Prevention, Shijiazhuang, Hebei Province; National Institute for Viral Disease Control and Prevention, China CDC | Shunxiang Qi, Xiang Zhao, Nankun Liu, George F. Gao, Yang Song, Wenbo Xu, Qi Li                                                                                                                                                                                                                                                                          |
| EPI_ISL_803853                                                                                                                                                                                                                                                                                                                                                                                                                                                                                                                                                                                                                                                                                                                                                                                                                                                                                                                                                                                                                                                                                                                                                                                                                                                                                                                                                                 | National Institute of Laboratory Medicine and Referral Center                                                                                                    | Genomic Research Lab, BCSIR                                                                                                                                      | Shahina Akter, Mohammad Samir Uzzaman, Eshrar Osman, Md. Ahashan Habib,Tanjina Akhter Banu, Abu Sayeed Mohammad Mahmud, Md. Murshed Hasan Sarkar, Barna Goswami, Iflat Jahan, Md. Saddam Hossain, Tasnim Nafisa, Md. Maruf Ahmed Molla, Mahmuda Yeasmin, Asish Kumar Ghosh, A. K. M. Shamsuzzaman, Monira Parveen, Md. Masum Hossain Rif, Md. Salim Khan |
| EPI_ISL_803854, EPI_ISL_803855                                                                                                                                                                                                                                                                                                                                                                                                                                                                                                                                                                                                                                                                                                                                                                                                                                                                                                                                                                                                                                                                                                                                                                                                                                                                                                                                                 | Hospital General Universitario Gregorio Marañón                                                                                                                  | Hospital General Universitario Gregorio Marañón                                                                                                                  | Sergio Buenestado Serrano, Pedro Sola Campoy, Laura Pérez-Lago, Pilar Catalán, Patricia Muñoz, Darío García de Viedma                                                                                                                                                                                                                                    |
| EPI_ISL_803856, EPI_ISL_803857, EPI_ISL_803858, EPI_ISL_803859, EPI_ISL_803860, EPI_ISL_803861, EPI_ISL_803862, EPI_ISL_803863, EPI_ISL_803864                                                                                                                                                                                                                                                                                                                                                                                                                                                                                                                                                                                                                                                                                                                                                                                                                                                                                                                                                                                                                                                                                                                                                                                                                                 | Hospital General Universitario Gregorio Marañón                                                                                                                  | Hospital General Universitario Gregorio Marañón                                                                                                                  | Sergio Buenestado Serrano, Pedro Sola Campoy, Laura Pérez-Lago, Pilar Catalán, Patricia Muñoz, Darío García de Viedma.                                                                                                                                                                                                                                   |
| EPI_ISL_806810, EPI_ISL_806811, EPI_ISL_806812, EPI_ISL_806813, EPI_ISL_806814, EPI_ISL_806815, EPI_ISL_806816, EPI_ISL_806817, EPI_ISL_806818, EPI_ISL_806819, EPI_ISL_806820, EPI_ISL_806821, EPI_ISL_806822, EPI_ISL_806823, EPI_ISL_806824, EPI_ISL_806825, EPI_ISL_806826, EPI_ISL_806827, EPI_ISL_806828, EPI_ISL_806829, EPI_ISL_806830, EPI_ISL_806831, EPI_ISL_806832, EPI_ISL_806833, EPI_ISL_806834, EPI_ISL_806835, EPI_ISL_806836, EPI_ISL_806837, EPI_ISL_806838, EPI_ISL_806839, EPI_ISL_806840, EPI_ISL_806841, EPI_ISL_806842, EPI_ISL_806843, EPI_ISL_806844, EPI_ISL_806845, EPI_ISL_806846, EPI_ISL_806847, EPI_ISL_806848, EPI_ISL_806849, EPI_ISL_806850, EPI_ISL_806851, EPI_ISL_806852                                                                                                                                                                                                                                                                                                                                                                                                                                                                                                                                                                                                                                                                 |                                                                                                                                                                  |                                                                                                                                                                  |                                                                                                                                                                                                                                                                                                                                                          |
| see above                                                                                                                                                                                                                                                                                                                                                                                                                                                                                                                                                                                                                                                                                                                                                                                                                                                                                                                                                                                                                                                                                                                                                                                                                                                                                                                                                                      | Alaska State Virology Laboratory                                                                                                                                 | Alaska State Virology Laboratory                                                                                                                                 | Stephanie DeRonde, Lisa Smith, Ph.D., Devin M. Drown, Ph.D., Jack Chen, Ph.D.                                                                                                                                                                                                                                                                            |
| EPI_ISL_811127                                                                                                                                                                                                                                                                                                                                                                                                                                                                                                                                                                                                                                                                                                                                                                                                                                                                                                                                                                                                                                                                                                                                                                                                                                                                                                                                                                 | Cantonal Hospital Winterthur                                                                                                                                     | Institute of Medical Virology, University of Zurich                                                                                                              | Stefan Schmutz, Maryam Zaheri, Verena Kufner, Annette Audigé, Maria Grünberg, Kevin Steiner, Jon Huder, Cyril Shah, Riccarda Capaul, Guido Bloemberg, Jürg Böni, Michael Huber, Alexandra Trkola, Alexander Wepf, Urs Karrer                                                                                                                             |
| EPI_ISL_812249                                                                                                                                                                                                                                                                                                                                                                                                                                                                                                                                                                                                                                                                                                                                                                                                                                                                                                                                                                                                                                                                                                                                                                                                                                                                                                                                                                 | Cantonal Hospital Baden                                                                                                                                          | Institute of Medical Virology, University of Zurich                                                                                                              | Stefan Schmutz, Maryam Zaheri, Verena Kufner, Annette Audigé, Maria Grünberg, Kevin Steiner, Jon Huder, Cyril Shah, Riccarda Capaul, Guido Bloemberg, Jürg Böni, Michael Huber, Alexandra Trkola                                                                                                                                                         |
| EPI_ISL_812250                                                                                                                                                                                                                                                                                                                                                                                                                                                                                                                                                                                                                                                                                                                                                                                                                                                                                                                                                                                                                                                                                                                                                                                                                                                                                                                                                                 | Invenimus AG                                                                                                                                                     | Institute of Medical Virology, University of Zurich                                                                                                              | Stefan Schmutz, Maryam Zaheri, Verena Kufner, Annette Audigé, Maria Grünberg, Kevin Steiner, Jon Huder, Cyril Shah, Riccarda Capaul, Guido Bloemberg, Jürg Böni, Michael Huber, Alexandra Trkola                                                                                                                                                         |
| EPI_ISL_812251, EPI_ISL_812252, EPI_ISL_812253, EPI_ISL_812254                                                                                                                                                                                                                                                                                                                                                                                                                                                                                                                                                                                                                                                                                                                                                                                                                                                                                                                                                                                                                                                                                                                                                                                                                                                                                                                 | Kantonsarztamt Bern                                                                                                                                              | Institute of Medical Virology, University of Zurich                                                                                                              | Stefan Schmutz, Maryam Zaheri, Verena Kufner, Annette Audigé, Maria Grünberg, Kevin Steiner, Jon Huder, Cyril Shah, Riccarda Capaul, Guido Bloemberg, Jürg Böni, Michael Huber, Alexandra Trkola                                                                                                                                                         |
| EPI_ISL_812255                                                                                                                                                                                                                                                                                                                                                                                                                                                                                                                                                                                                                                                                                                                                                                                                                                                                                                                                                                                                                                                                                                                                                                                                                                                                                                                                                                 | Kantonsärztlicher Dienst Aargau                                                                                                                                  | Institute of Medical Virology, University of Zurich                                                                                                              | Stefan Schmutz, Maryam Zaheri, Verena Kufner, Annette Audigé, Maria Grünberg, Kevin Steiner, Jon Huder, Cyril Shah, Riccarda Capaul, Guido Bloemberg, Jürg Böni, Michael Huber, Alexandra Trkola                                                                                                                                                         |
| EPI_ISL_812256                                                                                                                                                                                                                                                                                                                                                                                                                                                                                                                                                                                                                                                                                                                                                                                                                                                                                                                                                                                                                                                                                                                                                                                                                                                                                                                                                                 | University Hospital Zürich                                                                                                                                       | Institute of Medical Virology, University of Zurich                                                                                                              | Stefan Schmutz, Maryam Zaheri, Verena Kufner, Annette Audigé, Maria Grünberg, Kevin Steiner, Jon Huder, Cyril Shah, Riccarda Capaul, Guido                                                                                                                                                                                                               |

|                |  |  |  |  |  |                                                                                                                                  |  |  |  |  |  |                                                     |  |  |  |  |  |                                                                                                                                                                                                                                                                                                                                |  |  |  |  |  |
|----------------|--|--|--|--|--|----------------------------------------------------------------------------------------------------------------------------------|--|--|--|--|--|-----------------------------------------------------|--|--|--|--|--|--------------------------------------------------------------------------------------------------------------------------------------------------------------------------------------------------------------------------------------------------------------------------------------------------------------------------------|--|--|--|--|--|
| EPI_ISL_812257 |  |  |  |  |  | Analytica Medizinische Laboratorien AG                                                                                           |  |  |  |  |  | Institute of Medical Virology, University of Zurich |  |  |  |  |  | Stefan Schmutz, Maryam Zaheer, Verena Kufner, Annette Audigé, Maria Grünberg, Kevin Steiner, Jon Huder, Cyril Shah, Riccarda Capaul, Guido Bloemberg, Jürg Böni, Michael Huber, Alexandra Trkola                                                                                                                               |  |  |  |  |  |
| see above      |  |  |  |  |  | University College London, Great Ormond Street Hospital for Children NHS Foundation Trust, Imperial College Healthcare NHS Trust |  |  |  |  |  | COVID-19 Genomics UK (COG-UK) Consortium            |  |  |  |  |  | Sergi Castellano, Rachel Williams, Mark Kristiansen, Paola Resende Silva, Sunando Roy, Tony Brooks, Helena Tutili, Paola Niola, Patricia Dyal, Charlotte Williams, Leysa Forrest, Yasmin Panchbhaya, Jacqueline Findlay, Samuel Weeks, Julianne Brown, Kathryn Harris, Paul Randell, James Price, Alison Holmes, Judith Breuer |  |  |  |  |  |

|                |  |  |  |  |  |                                                                                                                                  |  |  |  |  |  |                                          |  |  |  |  |  |                                                                                                                                                                                                                                                                                                                                                          |  |  |  |  |  |
|----------------|--|--|--|--|--|----------------------------------------------------------------------------------------------------------------------------------|--|--|--|--|--|------------------------------------------|--|--|--|--|--|----------------------------------------------------------------------------------------------------------------------------------------------------------------------------------------------------------------------------------------------------------------------------------------------------------------------------------------------------------|--|--|--|--|--|
| EPI_ISL_833177 |  |  |  |  |  | National Institute of Laboratory Medicine and Referral Center                                                                    |  |  |  |  |  | Genomic Research Lab, BCSIR              |  |  |  |  |  | Shahina Aker, Mohammad Samir Uzzaman, Eshrar Osman, Md. Ahashan Habib, Tanjina Akhtar Banu, Abu Saeed Mohammad Mahmud, Md. Murshed Hasan Sarkar, Barna Goswami, Iflat Jahan, Md. Saddam Hussain, Tasnim Nafisa, Md. Maruf Ahmed Molla, Mahmuda Yeasmin, Asish Kumar Ghosh, A. K. M. Shamsuzzaman, Monira Parveen, Md. Masum Hossain Arif, Md. Salim Khan |  |  |  |  |  |
| see above      |  |  |  |  |  | University College London, Great Ormond Street Hospital for Children NHS Foundation Trust, Imperial College Healthcare NHS Trust |  |  |  |  |  | COVID-19 Genomics UK (COG-UK) Consortium |  |  |  |  |  | Sergi Castellano, Rachel Williams, Mark Kristiansen, Paola Resende Silva, Sunando Roy, Tony Brooks, Helena Tutili, Paola Niola, Patricia Dyal, Charlotte Williams, Leysa Forrest, Yasmin Panchbhaya, Jacqueline Findlay, Samuel Weeks, Julianne Brown, Kathryn Harris, Paul Randell, James Price, Alison Holmes, Judith Breuer                           |  |  |  |  |  |

|                |  |  |  |  |  |                                                                               |  |  |  |  |  |                                                                               |  |  |  |  |  |                                                                                                                                                                                                                                                                               |  |  |  |  |  |
|----------------|--|--|--|--|--|-------------------------------------------------------------------------------|--|--|--|--|--|-------------------------------------------------------------------------------|--|--|--|--|--|-------------------------------------------------------------------------------------------------------------------------------------------------------------------------------------------------------------------------------------------------------------------------------|--|--|--|--|--|
| EPI_ISL_849664 |  |  |  |  |  | Public Health Virology Laboratory, Forensic and Scientific Services (PHV-FSS) |  |  |  |  |  | Public Health Virology Laboratory, Forensic and Scientific Services (PHV-FSS) |  |  |  |  |  | Son Nguyen et al                                                                                                                                                                                                                                                              |  |  |  |  |  |
| see above      |  |  |  |  |  | National Institute of Laboratory Medicine and Referral Center                 |  |  |  |  |  | Genomic Research Lab, BCSIR                                                   |  |  |  |  |  | Shahina Aker, Mohammad Samir Uzzaman, Eshrar Osman, Md. Ahashan Habib, Tanjina Akhtar Banu, Abu Saeed Mohammad Mahmud, Md. Murshed Hasan Sarkar, Barna Goswami, Iflat Jahan, Tasnim Nafisa, Md. Maruf Ahmed Molla, Mahmuda Yeasmin, Asish Kumar Ghosh, A. K. M. Shamsuzzaman, |  |  |  |  |  |

|                                                                                                                                                                                                                                                                                                                                                                                                                                                                                                                                                                                                                                                                                                                                                                                                                                                                                                                                                                                                                                                                                                                                                                                                                                                                                                                                                                                                                                                                                                                                                                                                                                                                                                                                                                                                                                                                                                                                                                                                                                                                                                                                                                                                                                                                                                                                                                                                                                                                                                                                                                                                                                                                                                                                                                                                                                                                                                                                                                                                                                                                                                                                                                                                                                                                                                                                                                                                                                                                                                                                                                                                                                                                                                                                                                                                                                                                                                                                                                                                                                                                                                                                                                                                                                                                                                                                                                                                                                                                                                                                                                                                                                                                                                                                                                                                                                                                                                                                                                                                                                                                                                                                                                                                                                                                                                                                                                                                                                                                                                                                                                                                                                                                                                                                                                                                                                                                                                                                                                                                                                                                                                                                                                                                                                                                                                                                                                                                                                                                                                                                                                                                                                                                                                                                                                                                                                                                                                                                                                                                                                                                                                                                                                                                                                                                                                                                                                                                                                                                                                                                                                                                                                                                                                                                                                                                                                                                                                                                                                                                                                                                                                                                                                                                                                                                                                                                                                                                                                                                                                                                                                                                                                                                                                                                                                                                                                                                                                                                                                                                                                                                                                                                                                                                                                                                                                                                                                                                                                                                                                                                                                                                                                                                                                                                                                                                                                                                                                                                                                                                                                                                                                                                                                                                                                                                                                                                                                                                                                                                                                                                                                                                                                                                                                                                                                                                                                                                                                                                                                                                                                                                                                                                                                                                                                                                                                                                                                                                                                                                                                                                                                                                                                                                                                                                                                                                                                                                                                                                                                                                                                                                                                                                                                                                                                                                                                                                                                                                                                                                                                                                                                                                                                                                                                                |                                                                                                                                  |                                                                                                   |                                                                                                                                                                                                                                                                                                                                                                                                                                   |                 |
|----------------------------------------------------------------------------------------------------------------------------------------------------------------------------------------------------------------------------------------------------------------------------------------------------------------------------------------------------------------------------------------------------------------------------------------------------------------------------------------------------------------------------------------------------------------------------------------------------------------------------------------------------------------------------------------------------------------------------------------------------------------------------------------------------------------------------------------------------------------------------------------------------------------------------------------------------------------------------------------------------------------------------------------------------------------------------------------------------------------------------------------------------------------------------------------------------------------------------------------------------------------------------------------------------------------------------------------------------------------------------------------------------------------------------------------------------------------------------------------------------------------------------------------------------------------------------------------------------------------------------------------------------------------------------------------------------------------------------------------------------------------------------------------------------------------------------------------------------------------------------------------------------------------------------------------------------------------------------------------------------------------------------------------------------------------------------------------------------------------------------------------------------------------------------------------------------------------------------------------------------------------------------------------------------------------------------------------------------------------------------------------------------------------------------------------------------------------------------------------------------------------------------------------------------------------------------------------------------------------------------------------------------------------------------------------------------------------------------------------------------------------------------------------------------------------------------------------------------------------------------------------------------------------------------------------------------------------------------------------------------------------------------------------------------------------------------------------------------------------------------------------------------------------------------------------------------------------------------------------------------------------------------------------------------------------------------------------------------------------------------------------------------------------------------------------------------------------------------------------------------------------------------------------------------------------------------------------------------------------------------------------------------------------------------------------------------------------------------------------------------------------------------------------------------------------------------------------------------------------------------------------------------------------------------------------------------------------------------------------------------------------------------------------------------------------------------------------------------------------------------------------------------------------------------------------------------------------------------------------------------------------------------------------------------------------------------------------------------------------------------------------------------------------------------------------------------------------------------------------------------------------------------------------------------------------------------------------------------------------------------------------------------------------------------------------------------------------------------------------------------------------------------------------------------------------------------------------------------------------------------------------------------------------------------------------------------------------------------------------------------------------------------------------------------------------------------------------------------------------------------------------------------------------------------------------------------------------------------------------------------------------------------------------------------------------------------------------------------------------------------------------------------------------------------------------------------------------------------------------------------------------------------------------------------------------------------------------------------------------------------------------------------------------------------------------------------------------------------------------------------------------------------------------------------------------------------------------------------------------------------------------------------------------------------------------------------------------------------------------------------------------------------------------------------------------------------------------------------------------------------------------------------------------------------------------------------------------------------------------------------------------------------------------------------------------------------------------------------------------------------------------------------------------------------------------------------------------------------------------------------------------------------------------------------------------------------------------------------------------------------------------------------------------------------------------------------------------------------------------------------------------------------------------------------------------------------------------------------------------------------------------------------------------------------------------------------------------------------------------------------------------------------------------------------------------------------------------------------------------------------------------------------------------------------------------------------------------------------------------------------------------------------------------------------------------------------------------------------------------------------------------------------------------------------------------------------------------------------------------------------------------------------------------------------------------------------------------------------------------------------------------------------------------------------------------------------------------------------------------------------------------------------------------------------------------------------------------------------------------------------------------------------------------------------------------------------------------------------------------------------------------------------------------------------------------------------------------------------------------------------------------------------------------------------------------------------------------------------------------------------------------------------------------------------------------------------------------------------------------------------------------------------------------------------------------------------------------------------------------------------------------------------------------------------------------------------------------------------------------------------------------------------------------------------------------------------------------------------------------------------------------------------------------------------------------------------------------------------------------------------------------------------------------------------------------------------------------------------------------------------------------------------------------------------------------------------------------------------------------------------------------------------------------------------------------------------------------------------------------------------------------------------------------------------------------------------------------------------------------------------------------------------------------------------------------------------------------------------------------------------------------------------------------------------------------------------------------------------------------------------------------------------------------------------------------------------------------------------------------------------------------------------------------------------------------------------------------------------------------------------------------------------------------------------------------------------------------------------------------------------------------------------------------------------------------------------------------------------------------------------------------------------------------------------------------------------------------------------------------------------------------------------------------------------------------------------------------------------------------------------------------------------------------------------------------------------------------------------------------------------------------------------------------------------------------------------------------------------------------------------------------------------------------------------------------------------------------------------------------------------------------------------------------------------------------------------------------------------------------------------------------------------------------------------------------------------------------------------------------------------------------------------------------------------------------------------------------------------------------------------------------------------------------------------------------------------------------------------------------------------------------------------------------------------------------------------------------------------------------------------------------------------------------------------------------------------------------------------------------------------------------------------------------------------------------------------------------------------------------------------------------------------------------------------------------------------------------------------------------------------------------------------------------------------------------------------------------------------------------------------------------------------------------------------------------------------------------------------------------------------------------------------------------------------------------------------------------------------------------------------------------------------------------------------------------------------------------------------------------------------------------------------------------------------------------------------------------------------------------------------------------------------------------------------------------------------------------------------------------------------------------------------------------------------------------------------------------------------------------------------------------------------------------------------------------------------------------|----------------------------------------------------------------------------------------------------------------------------------|---------------------------------------------------------------------------------------------------|-----------------------------------------------------------------------------------------------------------------------------------------------------------------------------------------------------------------------------------------------------------------------------------------------------------------------------------------------------------------------------------------------------------------------------------|-----------------|
|                                                                                                                                                                                                                                                                                                                                                                                                                                                                                                                                                                                                                                                                                                                                                                                                                                                                                                                                                                                                                                                                                                                                                                                                                                                                                                                                                                                                                                                                                                                                                                                                                                                                                                                                                                                                                                                                                                                                                                                                                                                                                                                                                                                                                                                                                                                                                                                                                                                                                                                                                                                                                                                                                                                                                                                                                                                                                                                                                                                                                                                                                                                                                                                                                                                                                                                                                                                                                                                                                                                                                                                                                                                                                                                                                                                                                                                                                                                                                                                                                                                                                                                                                                                                                                                                                                                                                                                                                                                                                                                                                                                                                                                                                                                                                                                                                                                                                                                                                                                                                                                                                                                                                                                                                                                                                                                                                                                                                                                                                                                                                                                                                                                                                                                                                                                                                                                                                                                                                                                                                                                                                                                                                                                                                                                                                                                                                                                                                                                                                                                                                                                                                                                                                                                                                                                                                                                                                                                                                                                                                                                                                                                                                                                                                                                                                                                                                                                                                                                                                                                                                                                                                                                                                                                                                                                                                                                                                                                                                                                                                                                                                                                                                                                                                                                                                                                                                                                                                                                                                                                                                                                                                                                                                                                                                                                                                                                                                                                                                                                                                                                                                                                                                                                                                                                                                                                                                                                                                                                                                                                                                                                                                                                                                                                                                                                                                                                                                                                                                                                                                                                                                                                                                                                                                                                                                                                                                                                                                                                                                                                                                                                                                                                                                                                                                                                                                                                                                                                                                                                                                                                                                                                                                                                                                                                                                                                                                                                                                                                                                                                                                                                                                                                                                                                                                                                                                                                                                                                                                                                                                                                                                                                                                                                                                                                                                                                                                                                                                                                                                                                                                                                                                                                                                                                |                                                                                                                                  |                                                                                                   |                                                                                                                                                                                                                                                                                                                                                                                                                                   | Md. Salim Khan. |
| EPI_ISL_856695                                                                                                                                                                                                                                                                                                                                                                                                                                                                                                                                                                                                                                                                                                                                                                                                                                                                                                                                                                                                                                                                                                                                                                                                                                                                                                                                                                                                                                                                                                                                                                                                                                                                                                                                                                                                                                                                                                                                                                                                                                                                                                                                                                                                                                                                                                                                                                                                                                                                                                                                                                                                                                                                                                                                                                                                                                                                                                                                                                                                                                                                                                                                                                                                                                                                                                                                                                                                                                                                                                                                                                                                                                                                                                                                                                                                                                                                                                                                                                                                                                                                                                                                                                                                                                                                                                                                                                                                                                                                                                                                                                                                                                                                                                                                                                                                                                                                                                                                                                                                                                                                                                                                                                                                                                                                                                                                                                                                                                                                                                                                                                                                                                                                                                                                                                                                                                                                                                                                                                                                                                                                                                                                                                                                                                                                                                                                                                                                                                                                                                                                                                                                                                                                                                                                                                                                                                                                                                                                                                                                                                                                                                                                                                                                                                                                                                                                                                                                                                                                                                                                                                                                                                                                                                                                                                                                                                                                                                                                                                                                                                                                                                                                                                                                                                                                                                                                                                                                                                                                                                                                                                                                                                                                                                                                                                                                                                                                                                                                                                                                                                                                                                                                                                                                                                                                                                                                                                                                                                                                                                                                                                                                                                                                                                                                                                                                                                                                                                                                                                                                                                                                                                                                                                                                                                                                                                                                                                                                                                                                                                                                                                                                                                                                                                                                                                                                                                                                                                                                                                                                                                                                                                                                                                                                                                                                                                                                                                                                                                                                                                                                                                                                                                                                                                                                                                                                                                                                                                                                                                                                                                                                                                                                                                                                                                                                                                                                                                                                                                                                                                                                                                                                                                                                                                 | University of Zambia, School of Veterinary Medicine, Disease Control                                                             | University of Zambia, School of Veterinary Medicine, Disease Control                              | Simulundu,E., Kapata,N., Mupeta,F., Kapata,P.C., Saasa,N., Changula,K., Muleya,W., Chitanga,S., Chambaro,H., Mubemba,B., Masahiro,K., Chanda,D., Mulenga,L., Fwoloshi,S., Shimbema,A.L., Kapaya,F., Zulu,P., Musonda,K., Monze,M., Sinyange,N., Liwewe,M.M., Kapin'a,M., Chipimo,P.J., Ngosa,W., Morales,A.N., Kayeyi,N., Malama,K., Tembo,J., Bates,M., Sawa,H., Takada,A., Nalubamba,K.S., Mukonka,V., Chifulya,C. and Zumla.A. |                 |
| EPI_ISL_856869                                                                                                                                                                                                                                                                                                                                                                                                                                                                                                                                                                                                                                                                                                                                                                                                                                                                                                                                                                                                                                                                                                                                                                                                                                                                                                                                                                                                                                                                                                                                                                                                                                                                                                                                                                                                                                                                                                                                                                                                                                                                                                                                                                                                                                                                                                                                                                                                                                                                                                                                                                                                                                                                                                                                                                                                                                                                                                                                                                                                                                                                                                                                                                                                                                                                                                                                                                                                                                                                                                                                                                                                                                                                                                                                                                                                                                                                                                                                                                                                                                                                                                                                                                                                                                                                                                                                                                                                                                                                                                                                                                                                                                                                                                                                                                                                                                                                                                                                                                                                                                                                                                                                                                                                                                                                                                                                                                                                                                                                                                                                                                                                                                                                                                                                                                                                                                                                                                                                                                                                                                                                                                                                                                                                                                                                                                                                                                                                                                                                                                                                                                                                                                                                                                                                                                                                                                                                                                                                                                                                                                                                                                                                                                                                                                                                                                                                                                                                                                                                                                                                                                                                                                                                                                                                                                                                                                                                                                                                                                                                                                                                                                                                                                                                                                                                                                                                                                                                                                                                                                                                                                                                                                                                                                                                                                                                                                                                                                                                                                                                                                                                                                                                                                                                                                                                                                                                                                                                                                                                                                                                                                                                                                                                                                                                                                                                                                                                                                                                                                                                                                                                                                                                                                                                                                                                                                                                                                                                                                                                                                                                                                                                                                                                                                                                                                                                                                                                                                                                                                                                                                                                                                                                                                                                                                                                                                                                                                                                                                                                                                                                                                                                                                                                                                                                                                                                                                                                                                                                                                                                                                                                                                                                                                                                                                                                                                                                                                                                                                                                                                                                                                                                                                                                                                 | Virology Laboratory, Scientific Department, Army Medical Center                                                                  | Virology Laboratory, Scientific Department, Army Medical Center                                   | Silvia Fillo, Giovanni Faggioni, Riccardo De Sanctis, Antonella Fortunato, Anella Monte, Anna Anselmo, Vanessa Vera Fain, Francesco Giordani, Nino D'Amore, Filippo Molinari, Giancarlo Petralito, Florigio Lista                                                                                                                                                                                                                 |                 |
| EPI_ISL_856870, EPI_ISL_856872, EPI_ISL_856873, EPI_ISL_856874, EPI_ISL_856875                                                                                                                                                                                                                                                                                                                                                                                                                                                                                                                                                                                                                                                                                                                                                                                                                                                                                                                                                                                                                                                                                                                                                                                                                                                                                                                                                                                                                                                                                                                                                                                                                                                                                                                                                                                                                                                                                                                                                                                                                                                                                                                                                                                                                                                                                                                                                                                                                                                                                                                                                                                                                                                                                                                                                                                                                                                                                                                                                                                                                                                                                                                                                                                                                                                                                                                                                                                                                                                                                                                                                                                                                                                                                                                                                                                                                                                                                                                                                                                                                                                                                                                                                                                                                                                                                                                                                                                                                                                                                                                                                                                                                                                                                                                                                                                                                                                                                                                                                                                                                                                                                                                                                                                                                                                                                                                                                                                                                                                                                                                                                                                                                                                                                                                                                                                                                                                                                                                                                                                                                                                                                                                                                                                                                                                                                                                                                                                                                                                                                                                                                                                                                                                                                                                                                                                                                                                                                                                                                                                                                                                                                                                                                                                                                                                                                                                                                                                                                                                                                                                                                                                                                                                                                                                                                                                                                                                                                                                                                                                                                                                                                                                                                                                                                                                                                                                                                                                                                                                                                                                                                                                                                                                                                                                                                                                                                                                                                                                                                                                                                                                                                                                                                                                                                                                                                                                                                                                                                                                                                                                                                                                                                                                                                                                                                                                                                                                                                                                                                                                                                                                                                                                                                                                                                                                                                                                                                                                                                                                                                                                                                                                                                                                                                                                                                                                                                                                                                                                                                                                                                                                                                                                                                                                                                                                                                                                                                                                                                                                                                                                                                                                                                                                                                                                                                                                                                                                                                                                                                                                                                                                                                                                                                                                                                                                                                                                                                                                                                                                                                                                                                                                                                                 | Virology Laboratory, Scientific Department, Army Medical Center                                                                  | Virology Laboratory, Scientific Department, Army Medical Center                                   | Silvia Fillo, Giovanni Faggioni, Riccardo De Sanctis, Antonella Fortunato, Anella Monte, Anna Anselmo, Vanessa Vera Fain, Francesco Giordani, Nino D'Amore, Filippo Molinari, Giancarlo Petralito, Florigio Lista                                                                                                                                                                                                                 |                 |
| EPI_ISL_856876                                                                                                                                                                                                                                                                                                                                                                                                                                                                                                                                                                                                                                                                                                                                                                                                                                                                                                                                                                                                                                                                                                                                                                                                                                                                                                                                                                                                                                                                                                                                                                                                                                                                                                                                                                                                                                                                                                                                                                                                                                                                                                                                                                                                                                                                                                                                                                                                                                                                                                                                                                                                                                                                                                                                                                                                                                                                                                                                                                                                                                                                                                                                                                                                                                                                                                                                                                                                                                                                                                                                                                                                                                                                                                                                                                                                                                                                                                                                                                                                                                                                                                                                                                                                                                                                                                                                                                                                                                                                                                                                                                                                                                                                                                                                                                                                                                                                                                                                                                                                                                                                                                                                                                                                                                                                                                                                                                                                                                                                                                                                                                                                                                                                                                                                                                                                                                                                                                                                                                                                                                                                                                                                                                                                                                                                                                                                                                                                                                                                                                                                                                                                                                                                                                                                                                                                                                                                                                                                                                                                                                                                                                                                                                                                                                                                                                                                                                                                                                                                                                                                                                                                                                                                                                                                                                                                                                                                                                                                                                                                                                                                                                                                                                                                                                                                                                                                                                                                                                                                                                                                                                                                                                                                                                                                                                                                                                                                                                                                                                                                                                                                                                                                                                                                                                                                                                                                                                                                                                                                                                                                                                                                                                                                                                                                                                                                                                                                                                                                                                                                                                                                                                                                                                                                                                                                                                                                                                                                                                                                                                                                                                                                                                                                                                                                                                                                                                                                                                                                                                                                                                                                                                                                                                                                                                                                                                                                                                                                                                                                                                                                                                                                                                                                                                                                                                                                                                                                                                                                                                                                                                                                                                                                                                                                                                                                                                                                                                                                                                                                                                                                                                                                                                                                                                 | Virology Laboratory, Scientific Department, Army Medical Center                                                                  | Virology Laboratory, Scientific Department, Army Medical Center                                   | Silvia Fillo, Giovanni Faggioni, Riccardo De Sanctis, Antonella Fortunato, Anella Monte, Anna Anselmo, Vanessa Vera Fain, Francesco Giordani, Nino D'Amore, Filippo Molinari, Giancarlo Petralito, Florigio Lista                                                                                                                                                                                                                 |                 |
| EPI_ISL_856877, EPI_ISL_856878                                                                                                                                                                                                                                                                                                                                                                                                                                                                                                                                                                                                                                                                                                                                                                                                                                                                                                                                                                                                                                                                                                                                                                                                                                                                                                                                                                                                                                                                                                                                                                                                                                                                                                                                                                                                                                                                                                                                                                                                                                                                                                                                                                                                                                                                                                                                                                                                                                                                                                                                                                                                                                                                                                                                                                                                                                                                                                                                                                                                                                                                                                                                                                                                                                                                                                                                                                                                                                                                                                                                                                                                                                                                                                                                                                                                                                                                                                                                                                                                                                                                                                                                                                                                                                                                                                                                                                                                                                                                                                                                                                                                                                                                                                                                                                                                                                                                                                                                                                                                                                                                                                                                                                                                                                                                                                                                                                                                                                                                                                                                                                                                                                                                                                                                                                                                                                                                                                                                                                                                                                                                                                                                                                                                                                                                                                                                                                                                                                                                                                                                                                                                                                                                                                                                                                                                                                                                                                                                                                                                                                                                                                                                                                                                                                                                                                                                                                                                                                                                                                                                                                                                                                                                                                                                                                                                                                                                                                                                                                                                                                                                                                                                                                                                                                                                                                                                                                                                                                                                                                                                                                                                                                                                                                                                                                                                                                                                                                                                                                                                                                                                                                                                                                                                                                                                                                                                                                                                                                                                                                                                                                                                                                                                                                                                                                                                                                                                                                                                                                                                                                                                                                                                                                                                                                                                                                                                                                                                                                                                                                                                                                                                                                                                                                                                                                                                                                                                                                                                                                                                                                                                                                                                                                                                                                                                                                                                                                                                                                                                                                                                                                                                                                                                                                                                                                                                                                                                                                                                                                                                                                                                                                                                                                                                                                                                                                                                                                                                                                                                                                                                                                                                                                                                                 | Virology Laboratory, Scientific Department, Army Medical Center                                                                  | Virology Laboratory, Scientific Department, Army Medical Center                                   | Silvia Fillo, Giovanni Faggioni, Riccardo De Sanctis, Antonella Fortunato, Anella Monte, Anna Anselmo, Vanessa Vera Fain, Francesco Giordani, Nino D'Amore, Filippo Molinari, Giancarlo Petralito, Florigio Lista                                                                                                                                                                                                                 |                 |
| EPI_ISL_856879, EPI_ISL_856882                                                                                                                                                                                                                                                                                                                                                                                                                                                                                                                                                                                                                                                                                                                                                                                                                                                                                                                                                                                                                                                                                                                                                                                                                                                                                                                                                                                                                                                                                                                                                                                                                                                                                                                                                                                                                                                                                                                                                                                                                                                                                                                                                                                                                                                                                                                                                                                                                                                                                                                                                                                                                                                                                                                                                                                                                                                                                                                                                                                                                                                                                                                                                                                                                                                                                                                                                                                                                                                                                                                                                                                                                                                                                                                                                                                                                                                                                                                                                                                                                                                                                                                                                                                                                                                                                                                                                                                                                                                                                                                                                                                                                                                                                                                                                                                                                                                                                                                                                                                                                                                                                                                                                                                                                                                                                                                                                                                                                                                                                                                                                                                                                                                                                                                                                                                                                                                                                                                                                                                                                                                                                                                                                                                                                                                                                                                                                                                                                                                                                                                                                                                                                                                                                                                                                                                                                                                                                                                                                                                                                                                                                                                                                                                                                                                                                                                                                                                                                                                                                                                                                                                                                                                                                                                                                                                                                                                                                                                                                                                                                                                                                                                                                                                                                                                                                                                                                                                                                                                                                                                                                                                                                                                                                                                                                                                                                                                                                                                                                                                                                                                                                                                                                                                                                                                                                                                                                                                                                                                                                                                                                                                                                                                                                                                                                                                                                                                                                                                                                                                                                                                                                                                                                                                                                                                                                                                                                                                                                                                                                                                                                                                                                                                                                                                                                                                                                                                                                                                                                                                                                                                                                                                                                                                                                                                                                                                                                                                                                                                                                                                                                                                                                                                                                                                                                                                                                                                                                                                                                                                                                                                                                                                                                                                                                                                                                                                                                                                                                                                                                                                                                                                                                                                                                 | Virology Laboratory, Scientific Department, Army Medical Center                                                                  | Virology Laboratory, Scientific Department, Army Medical Center                                   | Silvia Fillo, Giovanni Faggioni, Riccardo De Sanctis, Antonella Fortunato, Anella Monte, Anna Anselmo, Vanessa Vera Fain, Francesco Giordani, Nino D'Amore, Filippo Molinari, Giancarlo Petralito, Florigio Lista                                                                                                                                                                                                                 |                 |
| EPI_ISL_856883, EPI_ISL_856885                                                                                                                                                                                                                                                                                                                                                                                                                                                                                                                                                                                                                                                                                                                                                                                                                                                                                                                                                                                                                                                                                                                                                                                                                                                                                                                                                                                                                                                                                                                                                                                                                                                                                                                                                                                                                                                                                                                                                                                                                                                                                                                                                                                                                                                                                                                                                                                                                                                                                                                                                                                                                                                                                                                                                                                                                                                                                                                                                                                                                                                                                                                                                                                                                                                                                                                                                                                                                                                                                                                                                                                                                                                                                                                                                                                                                                                                                                                                                                                                                                                                                                                                                                                                                                                                                                                                                                                                                                                                                                                                                                                                                                                                                                                                                                                                                                                                                                                                                                                                                                                                                                                                                                                                                                                                                                                                                                                                                                                                                                                                                                                                                                                                                                                                                                                                                                                                                                                                                                                                                                                                                                                                                                                                                                                                                                                                                                                                                                                                                                                                                                                                                                                                                                                                                                                                                                                                                                                                                                                                                                                                                                                                                                                                                                                                                                                                                                                                                                                                                                                                                                                                                                                                                                                                                                                                                                                                                                                                                                                                                                                                                                                                                                                                                                                                                                                                                                                                                                                                                                                                                                                                                                                                                                                                                                                                                                                                                                                                                                                                                                                                                                                                                                                                                                                                                                                                                                                                                                                                                                                                                                                                                                                                                                                                                                                                                                                                                                                                                                                                                                                                                                                                                                                                                                                                                                                                                                                                                                                                                                                                                                                                                                                                                                                                                                                                                                                                                                                                                                                                                                                                                                                                                                                                                                                                                                                                                                                                                                                                                                                                                                                                                                                                                                                                                                                                                                                                                                                                                                                                                                                                                                                                                                                                                                                                                                                                                                                                                                                                                                                                                                                                                                                                                 | Virology Laboratory, Scientific Department, Army Medical Center                                                                  | Virology Laboratory, Scientific Department, Army Medical Center                                   | Silvia Fillo, Giovanni Faggioni, Riccardo De Sanctis, Antonella Fortunato, Anella Monte, Anna Anselmo, Vanessa Vera Fain, Francesco Giordani, Nino D'Amore, Filippo Molinari, Giancarlo Petralito, Florigio Lista                                                                                                                                                                                                                 |                 |
| EPI_ISL_865485, EPI_ISL_865486, EPI_ISL_865487, EPI_ISL_865585, EPI_ISL_865586, EPI_ISL_865587, EPI_ISL_865588, EPI_ISL_865589, EPI_ISL_865590, EPI_ISL_865591, EPI_ISL_865592, EPI_ISL_865593, EPI_ISL_865594, EPI_ISL_865595, EPI_ISL_865596, EPI_ISL_865597, EPI_ISL_865598, EPI_ISL_865599, EPI_ISL_865601, EPI_ISL_865602, EPI_ISL_865603, EPI_ISL_865604, EPI_ISL_865605, EPI_ISL_865606, EPI_ISL_865607, EPI_ISL_865608, EPI_ISL_865609, EPI_ISL_865610, EPI_ISL_865611, EPI_ISL_865612, EPI_ISL_865613, EPI_ISL_865614, EPI_ISL_865615, EPI_ISL_865616, EPI_ISL_865617, EPI_ISL_865618, EPI_ISL_865619, EPI_ISL_865620, EPI_ISL_865621, EPI_ISL_865622, EPI_ISL_865623, EPI_ISL_865624, EPI_ISL_865625, EPI_ISL_865626, EPI_ISL_865627, EPI_ISL_865628, EPI_ISL_865629, EPI_ISL_865630, EPI_ISL_865631, EPI_ISL_865632, EPI_ISL_865633, EPI_ISL_865634, EPI_ISL_865635, EPI_ISL_865636, EPI_ISL_865637, EPI_ISL_865638, EPI_ISL_865639, EPI_ISL_865640, EPI_ISL_865641, EPI_ISL_865642, EPI_ISL_865643, EPI_ISL_865644, EPI_ISL_865645, EPI_ISL_865646, EPI_ISL_865647, EPI_ISL_865648, EPI_ISL_865649, EPI_ISL_865650, EPI_ISL_865651, EPI_ISL_865652, EPI_ISL_865653, EPI_ISL_865654, EPI_ISL_865655, EPI_ISL_865656, EPI_ISL_865657, EPI_ISL_865658, EPI_ISL_865659, EPI_ISL_865660, EPI_ISL_865661, EPI_ISL_865662, EPI_ISL_865663, EPI_ISL_865664, EPI_ISL_865665, EPI_ISL_865666, EPI_ISL_865667, EPI_ISL_865668, EPI_ISL_865669, EPI_ISL_865670, EPI_ISL_865671, EPI_ISL_865672, EPI_ISL_865673, EPI_ISL_865674, EPI_ISL_865675, EPI_ISL_865676, EPI_ISL_865677, EPI_ISL_865678, EPI_ISL_865679, EPI_ISL_865680, EPI_ISL_865681, EPI_ISL_865682, EPI_ISL_865683, EPI_ISL_865684, EPI_ISL_865685, EPI_ISL_865686, EPI_ISL_865687, EPI_ISL_865688, EPI_ISL_865689, EPI_ISL_865690, EPI_ISL_865691, EPI_ISL_865692, EPI_ISL_865693, EPI_ISL_865694, EPI_ISL_865695, EPI_ISL_865696, EPI_ISL_865697, EPI_ISL_865698, EPI_ISL_865699, EPI_ISL_865700, EPI_ISL_865701, EPI_ISL_865702, EPI_ISL_865703, EPI_ISL_865704, EPI_ISL_865705, EPI_ISL_865706, EPI_ISL_865707, EPI_ISL_865708, EPI_ISL_865709, EPI_ISL_865710, EPI_ISL_865711, EPI_ISL_865712, EPI_ISL_865713, EPI_ISL_865714, EPI_ISL_865715, EPI_ISL_865716, EPI_ISL_865717, EPI_ISL_865718, EPI_ISL_865719, EPI_ISL_865720, EPI_ISL_865721, EPI_ISL_865722, EPI_ISL_865723, EPI_ISL_865724, EPI_ISL_865725, EPI_ISL_865726, EPI_ISL_865727, EPI_ISL_865728, EPI_ISL_865729, EPI_ISL_865730, EPI_ISL_865731, EPI_ISL_865732, EPI_ISL_865733, EPI_ISL_865734, EPI_ISL_865735, EPI_ISL_865736, EPI_ISL_865737, EPI_ISL_865738, EPI_ISL_865739, EPI_ISL_865740, EPI_ISL_865741, EPI_ISL_865742, EPI_ISL_865743, EPI_ISL_865744, EPI_ISL_865745, EPI_ISL_865746, EPI_ISL_865747, EPI_ISL_865748, EPI_ISL_865749, EPI_ISL_865750, EPI_ISL_865751, EPI_ISL_865752, EPI_ISL_865753, EPI_ISL_865754, EPI_ISL_865755, EPI_ISL_865756, EPI_ISL_865757, EPI_ISL_865758, EPI_ISL_865759, EPI_ISL_865760, EPI_ISL_865761, EPI_ISL_865762, EPI_ISL_865763, EPI_ISL_865764, EPI_ISL_865765, EPI_ISL_865766, EPI_ISL_865767, EPI_ISL_865768, EPI_ISL_865769, EPI_ISL_865770, EPI_ISL_865771, EPI_ISL_865772, EPI_ISL_865773, EPI_ISL_865774, EPI_ISL_865775, EPI_ISL_865776, EPI_ISL_865777, EPI_ISL_865778, EPI_ISL_865779, EPI_ISL_865780, EPI_ISL_865781, EPI_ISL_865782, EPI_ISL_865783, EPI_ISL_865784, EPI_ISL_865785, EPI_ISL_865786, EPI_ISL_865787, EPI_ISL_865788, EPI_ISL_865789, EPI_ISL_865790, EPI_ISL_865791, EPI_ISL_865792, EPI_ISL_865793, EPI_ISL_865794, EPI_ISL_865795, EPI_ISL_865796, EPI_ISL_865797, EPI_ISL_865798, EPI_ISL_865799, EPI_ISL_865800, EPI_ISL_865801, EPI_ISL_865802, EPI_ISL_865803, EPI_ISL_865804, EPI_ISL_865805, EPI_ISL_865806, EPI_ISL_865807, EPI_ISL_865808, EPI_ISL_865809, EPI_ISL_865810, EPI_ISL_865811, EPI_ISL_865812, EPI_ISL_865813, EPI_ISL_865814, EPI_ISL_865815, EPI_ISL_865816, EPI_ISL_865817, EPI_ISL_865818, EPI_ISL_865819, EPI_ISL_865820, EPI_ISL_865821, EPI_ISL_865822, EPI_ISL_865823, EPI_ISL_865824, EPI_ISL_865825, EPI_ISL_865826, EPI_ISL_865827, EPI_ISL_865828, EPI_ISL_865829, EPI_ISL_865830, EPI_ISL_865831, EPI_ISL_865832, EPI_ISL_865833, EPI_ISL_865834, EPI_ISL_865835, EPI_ISL_865836, EPI_ISL_865837, EPI_ISL_865838, EPI_ISL_865839, EPI_ISL_865840, EPI_ISL_865841, EPI_ISL_865842, EPI_ISL_865843, EPI_ISL_865844, EPI_ISL_865845, EPI_ISL_865846, EPI_ISL_865847, EPI_ISL_865848, EPI_ISL_865849, EPI_ISL_865850, EPI_ISL_865851, EPI_ISL_865852, EPI_ISL_865853, EPI_ISL_865854, EPI_ISL_865855, EPI_ISL_865856, EPI_ISL_865857, EPI_ISL_865858, EPI_ISL_865859, EPI_ISL_865860, EPI_ISL_865861, EPI_ISL_865862, EPI_ISL_865863, EPI_ISL_865864, EPI_ISL_865865, EPI_ISL_865866, EPI_ISL_865867, EPI_ISL_865868, EPI_ISL_865869, EPI_ISL_865870, EPI_ISL_865871, EPI_ISL_865872, EPI_ISL_865873, EPI_ISL_865874, EPI_ISL_865875, EPI_ISL_865876, EPI_ISL_865877, EPI_ISL_865878, EPI_ISL_865879, EPI_ISL_865880, EPI_ISL_865881, EPI_ISL_865882, EPI_ISL_865883, EPI_ISL_865884, EPI_ISL_865885, EPI_ISL_865886, EPI_ISL_865887, EPI_ISL_865888, EPI_ISL_865889, EPI_ISL_865890, EPI_ISL_865891, EPI_ISL_865892, EPI_ISL_865893, EPI_ISL_865894, EPI_ISL_865895, EPI_ISL_865896, EPI_ISL_865897, EPI_ISL_865898, EPI_ISL_865899, EPI_ISL_865900, EPI_ISL_865901, EPI_ISL_865902, EPI_ISL_865903, EPI_ISL_865904, EPI_ISL_865905, EPI_ISL_865906, EPI_ISL_865907, EPI_ISL_865908, EPI_ISL_865909, EPI_ISL_865910, EPI_ISL_865911, EPI_ISL_865912, EPI_ISL_865913, EPI_ISL_865914, EPI_ISL_865915, EPI_ISL_865916, EPI_ISL_865917, EPI_ISL_865918, EPI_ISL_865919, EPI_ISL_865920, EPI_ISL_865921, EPI_ISL_865922, EPI_ISL_865923, EPI_ISL_865924, EPI_ISL_865925, EPI_ISL_865926, EPI_ISL_865927, EPI_ISL_865928, EPI_ISL_865929, EPI_ISL_865930, EPI_ISL_865931, EPI_ISL_865932, EPI_ISL_865933, EPI_ISL_865934, EPI_ISL_865935, EPI_ISL_865936, EPI_ISL_865937, EPI_ISL_865938, EPI_ISL_865939, EPI_ISL_865940, EPI_ISL_865941, EPI_ISL_865942, EPI_ISL_865943, EPI_ISL_865944, EPI_ISL_865945, EPI_ISL_865946, EPI_ISL_865947, EPI_ISL_865948, EPI_ISL_865949, EPI_ISL_865950, EPI_ISL_865951, EPI_ISL_865952, EPI_ISL_865953, EPI_ISL_865954, EPI_ISL_865955, EPI_ISL_865956, EPI_ISL_865957, EPI_ISL_865958, EPI_ISL_865959, EPI_ISL_865960, EPI_ISL_865961, EPI_ISL_865962, EPI_ISL_865963, EPI_ISL_865964, EPI_ISL_865965, EPI_ISL_865966, EPI_ISL_865967, EPI_ISL_865968, EPI_ISL_865969, EPI_ISL_865970, EPI_ISL_865971, EPI_ISL_865972, EPI_ISL_865973, EPI_ISL_865974, EPI_ISL_865975, EPI_ISL_865976, EPI_ISL_865977, EPI_ISL_865978, EPI_ISL_865979, EPI_ISL_865980, EPI_ISL_865981, EPI_ISL_865982, EPI_ISL_865983, EPI_ISL_865984, EPI_ISL_865985, EPI_ISL_865986, EPI_ISL_865987, EPI_ISL_865988, EPI_ISL_865989, EPI_ISL_865990, EPI_ISL_865991, EPI_ISL_865992, EPI_ISL_865993, EPI_ISL_865994, EPI_ISL_865995, EPI_ISL_865996, EPI_ISL_865997, EPI_ISL_865998, EPI_ISL_865999, EPI_ISL_866000, EPI_ISL_866001, EPI_ISL_866002, EPI_ISL_866003, EPI_ISL_866004, EPI_ISL_866005, EPI_ISL_866006, EPI_ISL_866007, EPI_ISL_866008, EPI_ISL_866009, EPI_ISL_866010, EPI_ISL_866011, EPI_ISL_866012, EPI_ISL_866013, EPI_ISL_866014, EPI_ISL_866015, EPI_ISL_866016, EPI_ISL_866017, EPI_ISL_866018, EPI_ISL_866019, EPI_ISL_866020, EPI_ISL_866021, EPI_ISL_866022, EPI_ISL_866023, EPI_ISL_866024, EPI_ISL_866025, EPI_ISL_866026, EPI_ISL_866027, EPI_ISL_866028, EPI_ISL_866029, EPI_ISL_866030, EPI_ISL_866031, EPI_ISL_866032, EPI_ISL_866033, EPI_ISL_866034, EPI_ISL_866035, EPI_ISL_866036, EPI_ISL_866037, EPI_ISL_866038, EPI_ISL_866039, EPI_ISL_866040, EPI_ISL_866041, EPI_ISL_866042, EPI_ISL_866043, EPI_ISL_866044, EPI_ISL_866045, EPI_ISL_866046, EPI_ISL_866047, EPI_ISL_866048, EPI_ISL_866049, EPI_ISL_866050, EPI_ISL_866051, EPI_ISL_866052, EPI_ISL_866053, EPI_ISL_866054, EPI_ISL_866055, EPI_ISL_866056, EPI_ISL_866057, EPI_ISL_866058, EPI_ISL_866059, EPI_ISL_866060, EPI_ISL_866061, EPI_ISL_866062, EPI_ISL_866063, EPI_ISL_866064, EPI_ISL_866065, EPI_ISL_866066, EPI_ISL_866067, EPI_ISL_866068, EPI_ISL_866069, EPI_ISL_866070, EPI_ISL_866071, EPI_ISL_866072, EPI_ISL_866073, EPI_ISL_866074, EPI_ISL_866075, EPI_ISL_866076, EPI_ISL_866077, EPI_ISL_866078, EPI_ISL_866079, EPI_ISL_866080, EPI_ISL_866081, EPI_ISL_866082, EPI_ISL_866083, EPI_ISL_866084, EPI_ISL_866085, EPI_ISL_866086, EPI_ISL_866087, EPI_ISL_866088, EPI_ISL_866089, EPI_ISL_866090, EPI_ISL_866091, EPI_ISL_866092, EPI_ISL_866093, EPI_ISL_866094, EPI_ISL_866095, EPI_ISL_866096, EPI_ISL_866097, EPI_ISL_866098, EPI_ISL_866099, EPI_ISL_866100, EPI_ISL_866101, EPI_ISL_866102, EPI_ISL_866103, EPI_ISL_866104, EPI_ISL_866105, EPI_ISL_866106, EPI_ISL_866107, EPI_ISL_866108, EPI_ISL_866109, EPI_ISL_866110, EPI_ISL_866111, EPI_ISL_866112, EPI_ISL_866113, EPI_ISL_866114, EPI_ISL_866115, EPI_ISL_866116, EPI_ISL_866117, EPI_ISL_866118, EPI_ISL_866119, EPI_ISL_866120, EPI_ISL_866121, EPI_ISL_866122, EPI_ISL_866123, EPI_ISL_866124, EPI_ISL_866125, EPI_ISL_866126, EPI_ISL_866127, EPI_ISL_866128, EPI_ISL_866129, EPI_ISL_866130, EPI_ISL_866131, EPI_ISL_866132, EPI_ISL_866133, EPI_ISL_866134, EPI_ISL_866135, EPI_ISL_866136, EPI_ISL_866137, EPI_ISL_866138, EPI_ISL_866139, EPI_ISL_866140, EPI_ISL_866141, EPI_ISL_866142, EPI_ISL_866143, EPI_ISL_866144, EPI_ISL_866145, EPI_ISL_866146, EPI_ISL_866147, EPI_ISL_866148, EPI_ISL_866149, EPI_ISL_866150, EPI_ISL_866151, EPI_ISL_866152, EPI_ISL_866153, EPI_ISL_866154, EPI_ISL_866155, EPI_ISL_866156, EPI_ISL_866157, EPI_ISL_866158, EPI_ISL_866159, EPI_ISL_866160, EPI_ISL_866161, EPI_ISL_866162, EPI_ISL_866163, EPI_ISL_866164, EPI_ISL_866165, EPI_ISL_866166, EPI_ISL_866167, EPI_ISL_866168, EPI_ISL_866169, EPI_ISL_866170, EPI_ISL_866171, EPI_ISL_866172, EPI_ISL_866173, EPI_ISL_866174, EPI_ISL_866175, EPI_ISL_866176, EPI_ISL_866177, EPI_ISL_866178, EPI_ISL_866179, EPI_ISL_866180, EPI_ISL_866181, EPI_ISL_866182, EPI_ISL_866183, EPI_ISL_866184, EPI_ISL_866185, EPI_ISL_866186, EPI_ISL_866187, EPI_ISL_866188, EPI_ISL_866189, EPI_ISL_866190, EPI_ISL_866191, EPI_ISL_866192, EPI_ISL_866193, EPI_ISL_866194, EPI_ISL_866195, EPI_ISL_866196, EPI_ISL_866197, EPI_ISL_866198, EPI_ISL_866199, EPI_ISL_866200, EPI_ISL_866201, EPI_ISL_866202, EPI_ISL_866203, EPI_ISL_866204, EPI_ISL_866205, EPI_ISL_866206, EPI_ISL_866207, EPI_ISL_866208, EPI_ISL_866209, EPI_ISL_866210, EPI_ISL_866211, EPI_ISL_866212, EPI_ISL_866213, EPI_ISL_866214, EPI_ISL_866215, EPI_ISL_866216, EPI_ISL_866217, EPI_ISL_866218, EPI_ISL_866219, EPI_ISL_866220, EPI_ISL_866221, EPI_ISL_866222, EPI_ISL_866223, EPI_ISL_866224, EPI_ISL_866225, EPI_ISL_866226, EPI_ISL_866227, EPI_ISL_866228, EPI_ISL_866229, EPI_ISL_866230, EPI_ISL_866231, EPI_ISL_866232, EPI_ISL_866233, EPI_ISL_866234, EPI_ISL_866235, EPI_ISL_866236, EPI_ISL_866237, EPI_ISL_866238, EPI_ISL_866239, EPI_ISL_866240, EPI_ISL_866241, EPI_ISL_866242, EPI_ISL_866243, EPI_ISL_866244, EPI_ISL_866245, EPI_ISL_866246, EPI_ISL_866247, EPI_ISL_866248, EPI_ISL_866249, EPI_ISL_866250, EPI_ISL_866251, EPI_ISL_866252, EPI_ISL_866253, EPI_ISL_866254, EPI_ISL_866255, EPI_ISL_866256, EPI_ISL_866257, EPI_ISL_866258, EPI_ISL_866259, EPI_ISL_866260, EPI_ISL_866261, EPI_ISL_866262, EPI_ISL_866263, EPI_ISL_866264, EPI_ISL_866265, EPI_ISL_866266, EPI_ISL_866267, EPI_ISL_866268, EPI_ISL_866269, EPI_ISL_866270, EPI_ISL_866271, EPI_ISL_866272, EPI_ISL_866273, EPI_ISL_866274, EPI_ISL_866275, EPI_ISL_866276, EPI_ISL_866277, EPI_ISL_866278, EPI_ISL_866279, EPI_ISL_866280, EPI_ISL_866281, EPI_ISL_866282, EPI_ISL_866283, EPI_ISL_866284, EPI_ISL_866285, EPI_ISL_866286, EPI_ISL_866287, EPI_ISL_866288, EPI_ISL_866289, EPI_ISL_866290, EPI_ISL_866291, EPI_ISL_866292, EPI_ISL_866293, EPI_ISL_866294, EPI_ISL_866295, EPI_ISL_866296, EPI_ISL_866297, EPI_ISL_866298, EPI_ISL_866299, EPI_ISL_866300, EPI_ISL_866301, EPI_ISL_866302, EPI_ISL_866303, EPI_ISL_866304, EPI_ISL_866305, EPI_ISL_866306, EPI_ISL_866307, EPI_ISL_866308, EPI_ISL_866309, EPI_ISL_866310, EPI_ISL_866311, EPI_ISL_866312, EPI_ISL_866313, EPI_ISL_866314, EPI_ISL_866315, EPI_ISL_866316, EPI_ISL_866317, EPI_ISL_866318, EPI_ISL_866319, EPI_ISL_866320, EPI_ISL_866321, EPI_ISL_866322, EPI_ISL_866323, EPI_ISL_866324, EPI_ISL_866325, EPI_ISL_866326, EPI_ISL_866327, EPI_ISL_866328, EPI_ISL_866329, EPI_ISL_866330, EPI_ISL_866331, EPI_ISL_866332, EPI_ISL_866333, EPI_ISL_866334, EPI_ISL_866335, EPI_ISL_866336, EPI_ISL_866337, EPI_ISL_866338, EPI_ISL_866339, EPI_ISL_866340, EPI_ISL_866341, EPI_ISL_866342, EPI_ISL_866343, EPI_ISL_866344, EPI_ISL_866345 |                                                                                                                                  |                                                                                                   |                                                                                                                                                                                                                                                                                                                                                                                                                                   |                 |
| see above                                                                                                                                                                                                                                                                                                                                                                                                                                                                                                                                                                                                                                                                                                                                                                                                                                                                                                                                                                                                                                                                                                                                                                                                                                                                                                                                                                                                                                                                                                                                                                                                                                                                                                                                                                                                                                                                                                                                                                                                                                                                                                                                                                                                                                                                                                                                                                                                                                                                                                                                                                                                                                                                                                                                                                                                                                                                                                                                                                                                                                                                                                                                                                                                                                                                                                                                                                                                                                                                                                                                                                                                                                                                                                                                                                                                                                                                                                                                                                                                                                                                                                                                                                                                                                                                                                                                                                                                                                                                                                                                                                                                                                                                                                                                                                                                                                                                                                                                                                                                                                                                                                                                                                                                                                                                                                                                                                                                                                                                                                                                                                                                                                                                                                                                                                                                                                                                                                                                                                                                                                                                                                                                                                                                                                                                                                                                                                                                                                                                                                                                                                                                                                                                                                                                                                                                                                                                                                                                                                                                                                                                                                                                                                                                                                                                                                                                                                                                                                                                                                                                                                                                                                                                                                                                                                                                                                                                                                                                                                                                                                                                                                                                                                                                                                                                                                                                                                                                                                                                                                                                                                                                                                                                                                                                                                                                                                                                                                                                                                                                                                                                                                                                                                                                                                                                                                                                                                                                                                                                                                                                                                                                                                                                                                                                                                                                                                                                                                                                                                                                                                                                                                                                                                                                                                                                                                                                                                                                                                                                                                                                                                                                                                                                                                                                                                                                                                                                                                                                                                                                                                                                                                                                                                                                                                                                                                                                                                                                                                                                                                                                                                                                                                                                                                                                                                                                                                                                                                                                                                                                                                                                                                                                                                                                                                                                                                                                                                                                                                                                                                                                                                                                                                                                                                      | University College London, Great Ormond Street Hospital for Children NHS Foundation Trust, Imperial College Healthcare NHS Trust | COVID-19 Genomics UK (COG-UK) Consortium                                                          | Sergi Castellano, Rachel Williams, Mark Kristiansen, Paola Resende Silva, Sunando Roy, Tony Brooks, Helena Tutilil, Paola Niola, Patricia Dyal, Charlotte Williams, Leysa Forrest, Yasmin Panchbhaya, Jacqueline Findlay, Samuel Weeks, Julianne Brown, Kathryn Harris, Paul Randell, James Price, Alison Holmes, Judith Breuer                                                                                                   |                 |
| EPI_ISL_871872                                                                                                                                                                                                                                                                                                                                                                                                                                                                                                                                                                                                                                                                                                                                                                                                                                                                                                                                                                                                                                                                                                                                                                                                                                                                                                                                                                                                                                                                                                                                                                                                                                                                                                                                                                                                                                                                                                                                                                                                                                                                                                                                                                                                                                                                                                                                                                                                                                                                                                                                                                                                                                                                                                                                                                                                                                                                                                                                                                                                                                                                                                                                                                                                                                                                                                                                                                                                                                                                                                                                                                                                                                                                                                                                                                                                                                                                                                                                                                                                                                                                                                                                                                                                                                                                                                                                                                                                                                                                                                                                                                                                                                                                                                                                                                                                                                                                                                                                                                                                                                                                                                                                                                                                                                                                                                                                                                                                                                                                                                                                                                                                                                                                                                                                                                                                                                                                                                                                                                                                                                                                                                                                                                                                                                                                                                                                                                                                                                                                                                                                                                                                                                                                                                                                                                                                                                                                                                                                                                                                                                                                                                                                                                                                                                                                                                                                                                                                                                                                                                                                                                                                                                                                                                                                                                                                                                                                                                                                                                                                                                                                                                                                                                                                                                                                                                                                                                                                                                                                                                                                                                                                                                                                                                                                                                                                                                                                                                                                                                                                                                                                                                                                                                                                                                                                                                                                                                                                                                                                                                                                                                                                                                                                                                                                                                                                                                                                                                                                                                                                                                                                                                                                                                                                                                                                                                                                                                                                                                                                                                                                                                                                                                                                                                                                                                                                                                                                                                                                                                                                                                                                                                                                                                                                                                                                                                                                                                                                                                                                                                                                                                                                                                                                                                                                                                                                                                                                                                                                                                                                                                                                                                                                                                                                                                                                                                                                                                                                                                                                                                                                                                                                                                                                                                 | Botswana Harvard HIV Reference Laboratory                                                                                        | Botswana Harvard HIV Reference Laboratory                                                         | Sikhulle Moyo, Dorcas Maruapula, Wonderful Choga, Botshelo Radibe, Boitumelo Zuze, David Lawrence, Roger Shapiro, Shahin Lockman, Mosepele Mosepele, Joseph, Makhema, Simani Gaseitsiwe                                                                                                                                                                                                                                           |                 |
| EPI_ISL_872349                                                                                                                                                                                                                                                                                                                                                                                                                                                                                                                                                                                                                                                                                                                                                                                                                                                                                                                                                                                                                                                                                                                                                                                                                                                                                                                                                                                                                                                                                                                                                                                                                                                                                                                                                                                                                                                                                                                                                                                                                                                                                                                                                                                                                                                                                                                                                                                                                                                                                                                                                                                                                                                                                                                                                                                                                                                                                                                                                                                                                                                                                                                                                                                                                                                                                                                                                                                                                                                                                                                                                                                                                                                                                                                                                                                                                                                                                                                                                                                                                                                                                                                                                                                                                                                                                                                                                                                                                                                                                                                                                                                                                                                                                                                                                                                                                                                                                                                                                                                                                                                                                                                                                                                                                                                                                                                                                                                                                                                                                                                                                                                                                                                                                                                                                                                                                                                                                                                                                                                                                                                                                                                                                                                                                                                                                                                                                                                                                                                                                                                                                                                                                                                                                                                                                                                                                                                                                                                                                                                                                                                                                                                                                                                                                                                                                                                                                                                                                                                                                                                                                                                                                                                                                                                                                                                                                                                                                                                                                                                                                                                                                                                                                                                                                                                                                                                                                                                                                                                                                                                                                                                                                                                                                                                                                                                                                                                                                                                                                                                                                                                                                                                                                                                                                                                                                                                                                                                                                                                                                                                                                                                                                                                                                                                                                                                                                                                                                                                                                                                                                                                                                                                                                                                                                                                                                                                                                                                                                                                                                                                                                                                                                                                                                                                                                                                                                                                                                                                                                                                                                                                                                                                                                                                                                                                                                                                                                                                                                                                                                                                                                                                                                                                                                                                                                                                                                                                                                                                                                                                                                                                                                                                                                                                                                                                                                                                                                                                                                                                                                                                                                                                                                                                                                                 | Alaska State Virology Lab                                                                                                        | Alaska State Virology Lab                                                                         | Stephanie DeRonde, Lisa Smith, Ph.D., Jack Chen, Ph.D.                                                                                                                                                                                                                                                                                                                                                                            |                 |
| EPI_ISL_872591, EPI_ISL_872592, EPI_ISL_872593, EPI_ISL_872594, EPI_ISL_872595, EPI_ISL_872596, EPI_ISL_872597, EPI_ISL_872598, EPI_ISL_872599                                                                                                                                                                                                                                                                                                                                                                                                                                                                                                                                                                                                                                                                                                                                                                                                                                                                                                                                                                                                                                                                                                                                                                                                                                                                                                                                                                                                                                                                                                                                                                                                                                                                                                                                                                                                                                                                                                                                                                                                                                                                                                                                                                                                                                                                                                                                                                                                                                                                                                                                                                                                                                                                                                                                                                                                                                                                                                                                                                                                                                                                                                                                                                                                                                                                                                                                                                                                                                                                                                                                                                                                                                                                                                                                                                                                                                                                                                                                                                                                                                                                                                                                                                                                                                                                                                                                                                                                                                                                                                                                                                                                                                                                                                                                                                                                                                                                                                                                                                                                                                                                                                                                                                                                                                                                                                                                                                                                                                                                                                                                                                                                                                                                                                                                                                                                                                                                                                                                                                                                                                                                                                                                                                                                                                                                                                                                                                                                                                                                                                                                                                                                                                                                                                                                                                                                                                                                                                                                                                                                                                                                                                                                                                                                                                                                                                                                                                                                                                                                                                                                                                                                                                                                                                                                                                                                                                                                                                                                                                                                                                                                                                                                                                                                                                                                                                                                                                                                                                                                                                                                                                                                                                                                                                                                                                                                                                                                                                                                                                                                                                                                                                                                                                                                                                                                                                                                                                                                                                                                                                                                                                                                                                                                                                                                                                                                                                                                                                                                                                                                                                                                                                                                                                                                                                                                                                                                                                                                                                                                                                                                                                                                                                                                                                                                                                                                                                                                                                                                                                                                                                                                                                                                                                                                                                                                                                                                                                                                                                                                                                                                                                                                                                                                                                                                                                                                                                                                                                                                                                                                                                                                                                                                                                                                                                                                                                                                                                                                                                                                                                                                                                 | Department of Laboratory Medicine, National Taiwan University Hospital                                                           | Microbial Genomics Core Lab, National Taiwan University Centers of Genomic and Precision Medicine | Shiou-Hwei Yeh, You-Yu Lin, Ya-Yun Lai, Chiao-Ling Li, Shan-Chwen Chang, Pei-Jer Chen, Sui-Yuan Chang                                                                                                                                                                                                                                                                                                                             |                 |
| EPI_ISL_884214, EPI_ISL_884215, EPI_ISL_884216, EPI_ISL_884217, EPI_ISL_884218, EPI_ISL_884219, EPI_ISL_884220, EPI_ISL_884221                                                                                                                                                                                                                                                                                                                                                                                                                                                                                                                                                                                                                                                                                                                                                                                                                                                                                                                                                                                                                                                                                                                                                                                                                                                                                                                                                                                                                                                                                                                                                                                                                                                                                                                                                                                                                                                                                                                                                                                                                                                                                                                                                                                                                                                                                                                                                                                                                                                                                                                                                                                                                                                                                                                                                                                                                                                                                                                                                                                                                                                                                                                                                                                                                                                                                                                                                                                                                                                                                                                                                                                                                                                                                                                                                                                                                                                                                                                                                                                                                                                                                                                                                                                                                                                                                                                                                                                                                                                                                                                                                                                                                                                                                                                                                                                                                                                                                                                                                                                                                                                                                                                                                                                                                                                                                                                                                                                                                                                                                                                                                                                                                                                                                                                                                                                                                                                                                                                                                                                                                                                                                                                                                                                                                                                                                                                                                                                                                                                                                                                                                                                                                                                                                                                                                                                                                                                                                                                                                                                                                                                                                                                                                                                                                                                                                                                                                                                                                                                                                                                                                                                                                                                                                                                                                                                                                                                                                                                                                                                                                                                                                                                                                                                                                                                                                                                                                                                                                                                                                                                                                                                                                                                                                                                                                                                                                                                                                                                                                                                                                                                                                                                                                                                                                                                                                                                                                                                                                                                                                                                                                                                                                                                                                                                                                                                                                                                                                                                                                                                                                                                                                                                                                                                                                                                                                                                                                                                                                                                                                                                                                                                                                                                                                                                                                                                                                                                                                                                                                                                                                                                                                                                                                                                                                                                                                                                                                                                                                                                                                                                                                                                                                                                                                                                                                                                                                                                                                                                                                                                                                                                                                                                                                                                                                                                                                                                                                                                                                                                                                                                                                                                 | Alaska State Virology Laboratory                                                                                                 | Alaska State Virology Laboratory                                                                  | Stephanie DeRonde, Lisa Smith, PhD, Jack Chen, Ph.D.                                                                                                                                                                                                                                                                                                                                                                              |                 |
| EPI_ISL_885150                                                                                                                                                                                                                                                                                                                                                                                                                                                                                                                                                                                                                                                                                                                                                                                                                                                                                                                                                                                                                                                                                                                                                                                                                                                                                                                                                                                                                                                                                                                                                                                                                                                                                                                                                                                                                                                                                                                                                                                                                                                                                                                                                                                                                                                                                                                                                                                                                                                                                                                                                                                                                                                                                                                                                                                                                                                                                                                                                                                                                                                                                                                                                                                                                                                                                                                                                                                                                                                                                                                                                                                                                                                                                                                                                                                                                                                                                                                                                                                                                                                                                                                                                                                                                                                                                                                                                                                                                                                                                                                                                                                                                                                                                                                                                                                                                                                                                                                                                                                                                                                                                                                                                                                                                                                                                                                                                                                                                                                                                                                                                                                                                                                                                                                                                                                                                                                                                                                                                                                                                                                                                                                                                                                                                                                                                                                                                                                                                                                                                                                                                                                                                                                                                                                                                                                                                                                                                                                                                                                                                                                                                                                                                                                                                                                                                                                                                                                                                                                                                                                                                                                                                                                                                                                                                                                                                                                                                                                                                                                                                                                                                                                                                                                                                                                                                                                                                                                                                                                                                                                                                                                                                                                                                                                                                                                                                                                                                                                                                                                                                                                                                                                                                                                                                                                                                                                                                                                                                                                                                                                                                                                                                                                                                                                                                                                                                                                                                                                                                                                                                                                                                                                                                                                                                                                                                                                                                                                                                                                                                                                                                                                                                                                                                                                                                                                                                                                                                                                                                                                                                                                                                                                                                                                                                                                                                                                                                                                                                                                                                                                                                                                                                                                                                                                                                                                                                                                                                                                                                                                                                                                                                                                                                                                                                                                                                                                                                                                                                                                                                                                                                                                                                                                                                                 | Hospital General Universitario Gregorio Marañón                                                                                  | Hospital General Universitario Gregorio Marañón                                                   | Sergio Buenestado Serrano, Pedro Sola Campoy, Laura Pérez-Lago, Pilar Catalán, Patricia Muñoz, Darío García de Viedma.                                                                                                                                                                                                                                                                                                            |                 |

We gratefully acknowledge the following Authors from the Originating laboratories responsible for obtaining the specimens, as well as the Submitting laboratories where the genome data were generated and shared via GISAID, on which this research is based.

All Submitters of data may be contacted directly via [www.gisaid.org](http://www.gisaid.org)

Authors are sorted alphabetically.

| Accession ID                                                                                                                                                                                                                                                                                                                                                                                                                                                                                                                                                                                                                                                                                                                                                                                                                                                                                                                                                                                                                                                                                                                                                                                                                                                                                                                                                                                                                                                                                                                                                                                                                                                                                                                                                                                                                                                                                                                                                                                                                                                                                                                                                                                                                                                                                                                                                                                                                                                                                                                                                                                                                                                                                                                                                                                                                                                                                                                                                                                                                                                                                                                                                                                                                                                                                                                                                                                                                                                                                                                                                                                                                                                                                                                                                                                                                                                                                                                                                                                                                                                                                                                                                                                                                                                                                                                                                                                                                                                                                                                                                                                                                                                                                                                                                                                                                                                                                                                                                                                                                                                                                                                                                                                                                                                                                                                                                                                                                                                                                                                                                                                                                                                                                                                                                                                                                                                                                                                                                                                                                                                                                                                                                                                                                                                                                                                                                                                                                                                                                                                                                                                                                                                                                                                                                                                                                                                                                                                                                                                                                                                                                                                                                                                                                                                                   | Originating Laboratory                                                                                                         | Submitting Laboratory                                                                                                          | Authors                                                                                                                                                                                                                                                                                                                                                                                        |
|--------------------------------------------------------------------------------------------------------------------------------------------------------------------------------------------------------------------------------------------------------------------------------------------------------------------------------------------------------------------------------------------------------------------------------------------------------------------------------------------------------------------------------------------------------------------------------------------------------------------------------------------------------------------------------------------------------------------------------------------------------------------------------------------------------------------------------------------------------------------------------------------------------------------------------------------------------------------------------------------------------------------------------------------------------------------------------------------------------------------------------------------------------------------------------------------------------------------------------------------------------------------------------------------------------------------------------------------------------------------------------------------------------------------------------------------------------------------------------------------------------------------------------------------------------------------------------------------------------------------------------------------------------------------------------------------------------------------------------------------------------------------------------------------------------------------------------------------------------------------------------------------------------------------------------------------------------------------------------------------------------------------------------------------------------------------------------------------------------------------------------------------------------------------------------------------------------------------------------------------------------------------------------------------------------------------------------------------------------------------------------------------------------------------------------------------------------------------------------------------------------------------------------------------------------------------------------------------------------------------------------------------------------------------------------------------------------------------------------------------------------------------------------------------------------------------------------------------------------------------------------------------------------------------------------------------------------------------------------------------------------------------------------------------------------------------------------------------------------------------------------------------------------------------------------------------------------------------------------------------------------------------------------------------------------------------------------------------------------------------------------------------------------------------------------------------------------------------------------------------------------------------------------------------------------------------------------------------------------------------------------------------------------------------------------------------------------------------------------------------------------------------------------------------------------------------------------------------------------------------------------------------------------------------------------------------------------------------------------------------------------------------------------------------------------------------------------------------------------------------------------------------------------------------------------------------------------------------------------------------------------------------------------------------------------------------------------------------------------------------------------------------------------------------------------------------------------------------------------------------------------------------------------------------------------------------------------------------------------------------------------------------------------------------------------------------------------------------------------------------------------------------------------------------------------------------------------------------------------------------------------------------------------------------------------------------------------------------------------------------------------------------------------------------------------------------------------------------------------------------------------------------------------------------------------------------------------------------------------------------------------------------------------------------------------------------------------------------------------------------------------------------------------------------------------------------------------------------------------------------------------------------------------------------------------------------------------------------------------------------------------------------------------------------------------------------------------------------------------------------------------------------------------------------------------------------------------------------------------------------------------------------------------------------------------------------------------------------------------------------------------------------------------------------------------------------------------------------------------------------------------------------------------------------------------------------------------------------------------------------------------------------------------------------------------------------------------------------------------------------------------------------------------------------------------------------------------------------------------------------------------------------------------------------------------------------------------------------------------------------------------------------------------------------------------------------------------------------------------------------------------------------------------------------------------------------------------------------------------------------------------------------------------------------------------------------------------------------------------------------------------------------------------------------------------------------------------------------------------------------------------------------------------------------------------------------------------------------------------------------------------------------------------|--------------------------------------------------------------------------------------------------------------------------------|--------------------------------------------------------------------------------------------------------------------------------|------------------------------------------------------------------------------------------------------------------------------------------------------------------------------------------------------------------------------------------------------------------------------------------------------------------------------------------------------------------------------------------------|
| EPI_ISL_407079                                                                                                                                                                                                                                                                                                                                                                                                                                                                                                                                                                                                                                                                                                                                                                                                                                                                                                                                                                                                                                                                                                                                                                                                                                                                                                                                                                                                                                                                                                                                                                                                                                                                                                                                                                                                                                                                                                                                                                                                                                                                                                                                                                                                                                                                                                                                                                                                                                                                                                                                                                                                                                                                                                                                                                                                                                                                                                                                                                                                                                                                                                                                                                                                                                                                                                                                                                                                                                                                                                                                                                                                                                                                                                                                                                                                                                                                                                                                                                                                                                                                                                                                                                                                                                                                                                                                                                                                                                                                                                                                                                                                                                                                                                                                                                                                                                                                                                                                                                                                                                                                                                                                                                                                                                                                                                                                                                                                                                                                                                                                                                                                                                                                                                                                                                                                                                                                                                                                                                                                                                                                                                                                                                                                                                                                                                                                                                                                                                                                                                                                                                                                                                                                                                                                                                                                                                                                                                                                                                                                                                                                                                                                                                                                                                                                 | Lapland Central Hospital                                                                                                       | Department of Virology, University of Helsinki and Helsinki University Hospital, Helsinki, Finland                             | Teemu Smura, Suvi Kuivanen, Hannimari Kallio-Kokko, Olli Vapalahti                                                                                                                                                                                                                                                                                                                             |
| EPI_ISL_414642                                                                                                                                                                                                                                                                                                                                                                                                                                                                                                                                                                                                                                                                                                                                                                                                                                                                                                                                                                                                                                                                                                                                                                                                                                                                                                                                                                                                                                                                                                                                                                                                                                                                                                                                                                                                                                                                                                                                                                                                                                                                                                                                                                                                                                                                                                                                                                                                                                                                                                                                                                                                                                                                                                                                                                                                                                                                                                                                                                                                                                                                                                                                                                                                                                                                                                                                                                                                                                                                                                                                                                                                                                                                                                                                                                                                                                                                                                                                                                                                                                                                                                                                                                                                                                                                                                                                                                                                                                                                                                                                                                                                                                                                                                                                                                                                                                                                                                                                                                                                                                                                                                                                                                                                                                                                                                                                                                                                                                                                                                                                                                                                                                                                                                                                                                                                                                                                                                                                                                                                                                                                                                                                                                                                                                                                                                                                                                                                                                                                                                                                                                                                                                                                                                                                                                                                                                                                                                                                                                                                                                                                                                                                                                                                                                                                 | Department of Virology and Immunology, University of Helsinki and Helsinki University Hospital, HUSlab Finland                 | Department of Virology, Faculty of Medicine, University of Helsinki, Helsinki, Finland                                         | Teemu Smura, Hannimari Kallio-Kokko, Olli Vapalahti                                                                                                                                                                                                                                                                                                                                            |
| EPI_ISL_414949                                                                                                                                                                                                                                                                                                                                                                                                                                                                                                                                                                                                                                                                                                                                                                                                                                                                                                                                                                                                                                                                                                                                                                                                                                                                                                                                                                                                                                                                                                                                                                                                                                                                                                                                                                                                                                                                                                                                                                                                                                                                                                                                                                                                                                                                                                                                                                                                                                                                                                                                                                                                                                                                                                                                                                                                                                                                                                                                                                                                                                                                                                                                                                                                                                                                                                                                                                                                                                                                                                                                                                                                                                                                                                                                                                                                                                                                                                                                                                                                                                                                                                                                                                                                                                                                                                                                                                                                                                                                                                                                                                                                                                                                                                                                                                                                                                                                                                                                                                                                                                                                                                                                                                                                                                                                                                                                                                                                                                                                                                                                                                                                                                                                                                                                                                                                                                                                                                                                                                                                                                                                                                                                                                                                                                                                                                                                                                                                                                                                                                                                                                                                                                                                                                                                                                                                                                                                                                                                                                                                                                                                                                                                                                                                                                                                 | Regional Virus Laboratory, Belfast                                                                                             | Public Health Wales Microbiology Cardiff                                                                                       | Tanya Curran, Conall McCaughey, Catherine Moore, Joanne Watkins, Sally Corden, Tom Connor                                                                                                                                                                                                                                                                                                      |
| EPI_ISL_417482                                                                                                                                                                                                                                                                                                                                                                                                                                                                                                                                                                                                                                                                                                                                                                                                                                                                                                                                                                                                                                                                                                                                                                                                                                                                                                                                                                                                                                                                                                                                                                                                                                                                                                                                                                                                                                                                                                                                                                                                                                                                                                                                                                                                                                                                                                                                                                                                                                                                                                                                                                                                                                                                                                                                                                                                                                                                                                                                                                                                                                                                                                                                                                                                                                                                                                                                                                                                                                                                                                                                                                                                                                                                                                                                                                                                                                                                                                                                                                                                                                                                                                                                                                                                                                                                                                                                                                                                                                                                                                                                                                                                                                                                                                                                                                                                                                                                                                                                                                                                                                                                                                                                                                                                                                                                                                                                                                                                                                                                                                                                                                                                                                                                                                                                                                                                                                                                                                                                                                                                                                                                                                                                                                                                                                                                                                                                                                                                                                                                                                                                                                                                                                                                                                                                                                                                                                                                                                                                                                                                                                                                                                                                                                                                                                                                 | Institute of Microbiology, Universidad San Francisco de Quito                                                                  | Institute of Microbiology, Universidad San Francisco de Quito                                                                  | Sully Márquez, Belén Prado-Vivar, Juan José Guadalupe, Bernardo Gutiérrez, Manuel Jibaja, Milton Tobar, Verónica Barragán, Patricio Rojas-Silva, Gabriel Trueba, Michelle Grunauer, Paul Cárdenas                                                                                                                                                                                              |
| EPI_ISL_418386, EPI_ISL_418392, EPI_ISL_418403, EPI_ISL_418406, EPI_ISL_418408, EPI_ISL_418411                                                                                                                                                                                                                                                                                                                                                                                                                                                                                                                                                                                                                                                                                                                                                                                                                                                                                                                                                                                                                                                                                                                                                                                                                                                                                                                                                                                                                                                                                                                                                                                                                                                                                                                                                                                                                                                                                                                                                                                                                                                                                                                                                                                                                                                                                                                                                                                                                                                                                                                                                                                                                                                                                                                                                                                                                                                                                                                                                                                                                                                                                                                                                                                                                                                                                                                                                                                                                                                                                                                                                                                                                                                                                                                                                                                                                                                                                                                                                                                                                                                                                                                                                                                                                                                                                                                                                                                                                                                                                                                                                                                                                                                                                                                                                                                                                                                                                                                                                                                                                                                                                                                                                                                                                                                                                                                                                                                                                                                                                                                                                                                                                                                                                                                                                                                                                                                                                                                                                                                                                                                                                                                                                                                                                                                                                                                                                                                                                                                                                                                                                                                                                                                                                                                                                                                                                                                                                                                                                                                                                                                                                                                                                                                 | Department of Virology and Immunology, University of Helsinki and Helsinki University Hospital, HUSlab Finland                 | Department of Virology, Faculty of Medicine, University of Helsinki, Helsinki, Finland                                         | Teemu Smura, Hannimari Kallio-Kokko, Olli Vapalahti                                                                                                                                                                                                                                                                                                                                            |
| EPI_ISL_419313                                                                                                                                                                                                                                                                                                                                                                                                                                                                                                                                                                                                                                                                                                                                                                                                                                                                                                                                                                                                                                                                                                                                                                                                                                                                                                                                                                                                                                                                                                                                                                                                                                                                                                                                                                                                                                                                                                                                                                                                                                                                                                                                                                                                                                                                                                                                                                                                                                                                                                                                                                                                                                                                                                                                                                                                                                                                                                                                                                                                                                                                                                                                                                                                                                                                                                                                                                                                                                                                                                                                                                                                                                                                                                                                                                                                                                                                                                                                                                                                                                                                                                                                                                                                                                                                                                                                                                                                                                                                                                                                                                                                                                                                                                                                                                                                                                                                                                                                                                                                                                                                                                                                                                                                                                                                                                                                                                                                                                                                                                                                                                                                                                                                                                                                                                                                                                                                                                                                                                                                                                                                                                                                                                                                                                                                                                                                                                                                                                                                                                                                                                                                                                                                                                                                                                                                                                                                                                                                                                                                                                                                                                                                                                                                                                                                 | Molecular Biology and Biotechnology Lab II                                                                                     | Molecular Biology and Biotechnology Lab II                                                                                     | Tayyaba Zainab, Sana Shamshad, Azka Noureen, Aimen Malik, Muhammad Javaid Asad, Kumail Ali Rizvi                                                                                                                                                                                                                                                                                               |
| EPI_ISL_422565                                                                                                                                                                                                                                                                                                                                                                                                                                                                                                                                                                                                                                                                                                                                                                                                                                                                                                                                                                                                                                                                                                                                                                                                                                                                                                                                                                                                                                                                                                                                                                                                                                                                                                                                                                                                                                                                                                                                                                                                                                                                                                                                                                                                                                                                                                                                                                                                                                                                                                                                                                                                                                                                                                                                                                                                                                                                                                                                                                                                                                                                                                                                                                                                                                                                                                                                                                                                                                                                                                                                                                                                                                                                                                                                                                                                                                                                                                                                                                                                                                                                                                                                                                                                                                                                                                                                                                                                                                                                                                                                                                                                                                                                                                                                                                                                                                                                                                                                                                                                                                                                                                                                                                                                                                                                                                                                                                                                                                                                                                                                                                                                                                                                                                                                                                                                                                                                                                                                                                                                                                                                                                                                                                                                                                                                                                                                                                                                                                                                                                                                                                                                                                                                                                                                                                                                                                                                                                                                                                                                                                                                                                                                                                                                                                                                 | Institute of Microbiology Universidad San Francisco de Quito                                                                   | Institute of Microbiology Universidad San Francisco de Quito                                                                   | Sully Marquez, Belen Prado-Vivar, Juan Jose Guadalupe, Bernardo Gutierrez, Francisco Mora, Juan Gaviria, Alejandra Ramones, Franklin Espinoza, Edison Ligña, Jorge Reyes, Patricio Rojas-Silva, Veronica Barragan, Gabriel Trueba, Michelle Grunauer, Paul Cardenas                                                                                                                            |
| EPI_ISL_425023, EPI_ISL_425024                                                                                                                                                                                                                                                                                                                                                                                                                                                                                                                                                                                                                                                                                                                                                                                                                                                                                                                                                                                                                                                                                                                                                                                                                                                                                                                                                                                                                                                                                                                                                                                                                                                                                                                                                                                                                                                                                                                                                                                                                                                                                                                                                                                                                                                                                                                                                                                                                                                                                                                                                                                                                                                                                                                                                                                                                                                                                                                                                                                                                                                                                                                                                                                                                                                                                                                                                                                                                                                                                                                                                                                                                                                                                                                                                                                                                                                                                                                                                                                                                                                                                                                                                                                                                                                                                                                                                                                                                                                                                                                                                                                                                                                                                                                                                                                                                                                                                                                                                                                                                                                                                                                                                                                                                                                                                                                                                                                                                                                                                                                                                                                                                                                                                                                                                                                                                                                                                                                                                                                                                                                                                                                                                                                                                                                                                                                                                                                                                                                                                                                                                                                                                                                                                                                                                                                                                                                                                                                                                                                                                                                                                                                                                                                                                                                 | Respiratory Virus Unit, Microbiology Services Colindale, Public Health England                                                 | Respiratory Virus Unit, Microbiology Services Colindale, Public Health England                                                 | Steven Platt, Shahjahan Miah, Angie Lackenby, Omolola Akinbami, Tiina Talts, Leena Bhaw, Richard Myers, Monica Galiano, Kirstin Edwards, Jonathan Hubb, Joanna Ellis, Maria Zambon                                                                                                                                                                                                             |
| EPI_ISL_429664, EPI_ISL_429665, EPI_ISL_429666, EPI_ISL_429667, EPI_ISL_429668, EPI_ISL_429669, EPI_ISL_429670, EPI_ISL_429671, EPI_ISL_429672, EPI_ISL_429673, EPI_ISL_429674, EPI_ISL_429675, EPI_ISL_429676, EPI_ISL_429677, EPI_ISL_429678, EPI_ISL_429679, EPI_ISL_429680, EPI_ISL_429681, EPI_ISL_429682, EPI_ISL_429683, EPI_ISL_429684, EPI_ISL_429685, EPI_ISL_429686, EPI_ISL_429687, EPI_ISL_429688, EPI_ISL_429689, EPI_ISL_429690, EPI_ISL_429691, EPI_ISL_429692, EPI_ISL_429693, EPI_ISL_429694, EPI_ISL_429695, EPI_ISL_429696, EPI_ISL_429697, EPI_ISL_429698, EPI_ISL_429699, EPI_ISL_429700, EPI_ISL_429701, EPI_ISL_429702, EPI_ISL_429703                                                                                                                                                                                                                                                                                                                                                                                                                                                                                                                                                                                                                                                                                                                                                                                                                                                                                                                                                                                                                                                                                                                                                                                                                                                                                                                                                                                                                                                                                                                                                                                                                                                                                                                                                                                                                                                                                                                                                                                                                                                                                                                                                                                                                                                                                                                                                                                                                                                                                                                                                                                                                                                                                                                                                                                                                                                                                                                                                                                                                                                                                                                                                                                                                                                                                                                                                                                                                                                                                                                                                                                                                                                                                                                                                                                                                                                                                                                                                                                                                                                                                                                                                                                                                                                                                                                                                                                                                                                                                                                                                                                                                                                                                                                                                                                                                                                                                                                                                                                                                                                                                                                                                                                                                                                                                                                                                                                                                                                                                                                                                                                                                                                                                                                                                                                                                                                                                                                                                                                                                                                                                                                                                                                                                                                                                                                                                                                                                                                                                                                                                                                                                 |                                                                                                                                |                                                                                                                                |                                                                                                                                                                                                                                                                                                                                                                                                |
| see above                                                                                                                                                                                                                                                                                                                                                                                                                                                                                                                                                                                                                                                                                                                                                                                                                                                                                                                                                                                                                                                                                                                                                                                                                                                                                                                                                                                                                                                                                                                                                                                                                                                                                                                                                                                                                                                                                                                                                                                                                                                                                                                                                                                                                                                                                                                                                                                                                                                                                                                                                                                                                                                                                                                                                                                                                                                                                                                                                                                                                                                                                                                                                                                                                                                                                                                                                                                                                                                                                                                                                                                                                                                                                                                                                                                                                                                                                                                                                                                                                                                                                                                                                                                                                                                                                                                                                                                                                                                                                                                                                                                                                                                                                                                                                                                                                                                                                                                                                                                                                                                                                                                                                                                                                                                                                                                                                                                                                                                                                                                                                                                                                                                                                                                                                                                                                                                                                                                                                                                                                                                                                                                                                                                                                                                                                                                                                                                                                                                                                                                                                                                                                                                                                                                                                                                                                                                                                                                                                                                                                                                                                                                                                                                                                                                                      | Central Public Health Laboratory/Octávio Magalhães Institute (IOM) from the Ezequiel Dias Foundation (FUNED)                   | Instituto Octávio Magalhães / Fundação Ezequiel Dias (IOM/Funed)                                                               | Talita Adelino, Joilson Xavier, Marta Giovanetti, Vagner Fonseca, Marcos Vinicius Silva, Luiz Carlos Junior Alcantara, Marluce Aparecida Assunção Oliveira                                                                                                                                                                                                                                     |
| EPI_ISL_430439                                                                                                                                                                                                                                                                                                                                                                                                                                                                                                                                                                                                                                                                                                                                                                                                                                                                                                                                                                                                                                                                                                                                                                                                                                                                                                                                                                                                                                                                                                                                                                                                                                                                                                                                                                                                                                                                                                                                                                                                                                                                                                                                                                                                                                                                                                                                                                                                                                                                                                                                                                                                                                                                                                                                                                                                                                                                                                                                                                                                                                                                                                                                                                                                                                                                                                                                                                                                                                                                                                                                                                                                                                                                                                                                                                                                                                                                                                                                                                                                                                                                                                                                                                                                                                                                                                                                                                                                                                                                                                                                                                                                                                                                                                                                                                                                                                                                                                                                                                                                                                                                                                                                                                                                                                                                                                                                                                                                                                                                                                                                                                                                                                                                                                                                                                                                                                                                                                                                                                                                                                                                                                                                                                                                                                                                                                                                                                                                                                                                                                                                                                                                                                                                                                                                                                                                                                                                                                                                                                                                                                                                                                                                                                                                                                                                 | Institute for Medical Research, Infectious Disease Research Centre, National Institutes of Health, Ministry of Health Malaysia | Institute for Medical Research Infectious Disease Research Centre, National Institutes of Health, Ministry of Health Malaysia  | Suppiah.J, Mohd-Zawawi.Z, Kalyanasundram.J, Azizan.M-A, Mat-Sharani.S, Hisham.H-A, Tan.L-P, Abdul-Wahid.M-Z, Mohd-Zain.R, Ahmad.N, Thayan.R                                                                                                                                                                                                                                                    |
| EPI_ISL_430440                                                                                                                                                                                                                                                                                                                                                                                                                                                                                                                                                                                                                                                                                                                                                                                                                                                                                                                                                                                                                                                                                                                                                                                                                                                                                                                                                                                                                                                                                                                                                                                                                                                                                                                                                                                                                                                                                                                                                                                                                                                                                                                                                                                                                                                                                                                                                                                                                                                                                                                                                                                                                                                                                                                                                                                                                                                                                                                                                                                                                                                                                                                                                                                                                                                                                                                                                                                                                                                                                                                                                                                                                                                                                                                                                                                                                                                                                                                                                                                                                                                                                                                                                                                                                                                                                                                                                                                                                                                                                                                                                                                                                                                                                                                                                                                                                                                                                                                                                                                                                                                                                                                                                                                                                                                                                                                                                                                                                                                                                                                                                                                                                                                                                                                                                                                                                                                                                                                                                                                                                                                                                                                                                                                                                                                                                                                                                                                                                                                                                                                                                                                                                                                                                                                                                                                                                                                                                                                                                                                                                                                                                                                                                                                                                                                                 | Institute for Medical Research, Infectious Disease Research Centre, National Institutes of Health, Ministry of Health Malaysia | Institute for Medical Research, Infectious Disease Research Centre, National Institutes of Health, Ministry of Health Malaysia | Suppiah.J, Mohd-Zawawi.Z, Kalyanasundram.J, Azizan.M-A, Mat-Sharani.S, Hisham.H-A, Tan.L-P, Abdul-Wahid.M-Z, Tengku-Abd-Rashid.T-R, Mohd-Zain.R, Ahmad.N, Thayan.R                                                                                                                                                                                                                             |
| EPI_ISL_430441, EPI_ISL_430442, EPI_ISL_430443, EPI_ISL_430444                                                                                                                                                                                                                                                                                                                                                                                                                                                                                                                                                                                                                                                                                                                                                                                                                                                                                                                                                                                                                                                                                                                                                                                                                                                                                                                                                                                                                                                                                                                                                                                                                                                                                                                                                                                                                                                                                                                                                                                                                                                                                                                                                                                                                                                                                                                                                                                                                                                                                                                                                                                                                                                                                                                                                                                                                                                                                                                                                                                                                                                                                                                                                                                                                                                                                                                                                                                                                                                                                                                                                                                                                                                                                                                                                                                                                                                                                                                                                                                                                                                                                                                                                                                                                                                                                                                                                                                                                                                                                                                                                                                                                                                                                                                                                                                                                                                                                                                                                                                                                                                                                                                                                                                                                                                                                                                                                                                                                                                                                                                                                                                                                                                                                                                                                                                                                                                                                                                                                                                                                                                                                                                                                                                                                                                                                                                                                                                                                                                                                                                                                                                                                                                                                                                                                                                                                                                                                                                                                                                                                                                                                                                                                                                                                 | Institute for Medical Research, Infectious Disease Research Centre, National Institutes of Health, Ministry of Health Malaysia | Institute for Medical Research, Infectious Disease Research Centre, National Institutes of Health, Ministry of Health Malaysia | Suppiah.J, Mohd-Zawawi.Z, Kalyanasundram.J, Azizan.M-A, Mat-Sharani.S, Hisham.H-A, Tan.L-P, Abdul-Wahid.M-Z, Tengku-Rogayah.TAR, Mohd-Zain.R, Ahmad.N, Thayan.R                                                                                                                                                                                                                                |
| EPI_ISL_439953, EPI_ISL_439959, EPI_ISL_439960, EPI_ISL_439962, EPI_ISL_439964, EPI_ISL_439966, EPI_ISL_439971, EPI_ISL_439972, EPI_ISL_439974, EPI_ISL_439978, EPI_ISL_439979, EPI_ISL_439981, EPI_ISL_439983, EPI_ISL_439984, EPI_ISL_439985, EPI_ISL_439986, EPI_ISL_439992, EPI_ISL_440000, EPI_ISL_440001, EPI_ISL_440002, EPI_ISL_440006, EPI_ISL_440008, EPI_ISL_440013, EPI_ISL_440016, EPI_ISL_440020, EPI_ISL_440021, EPI_ISL_440022, EPI_ISL_440023, EPI_ISL_440026, EPI_ISL_440027, EPI_ISL_440028, EPI_ISL_440029, EPI_ISL_440031, EPI_ISL_440032, EPI_ISL_440037, EPI_ISL_440042, EPI_ISL_440043, EPI_ISL_440050, EPI_ISL_440051, EPI_ISL_440052, EPI_ISL_440054, EPI_ISL_440056, EPI_ISL_440058, EPI_ISL_440063, EPI_ISL_440065, EPI_ISL_440066, EPI_ISL_440070, EPI_ISL_440071, EPI_ISL_440084, EPI_ISL_440087, EPI_ISL_440091, EPI_ISL_440092, EPI_ISL_440093, EPI_ISL_440095, EPI_ISL_440100, EPI_ISL_440102, EPI_ISL_440103, EPI_ISL_440105, EPI_ISL_440113, EPI_ISL_440114, EPI_ISL_440115, EPI_ISL_440118, EPI_ISL_440119, EPI_ISL_440124, EPI_ISL_440126, EPI_ISL_440127, EPI_ISL_440128, EPI_ISL_440130, EPI_ISL_440136, EPI_ISL_440137, EPI_ISL_440141, EPI_ISL_440142, EPI_ISL_440145, EPI_ISL_440148, EPI_ISL_440151, EPI_ISL_440153, EPI_ISL_440154, EPI_ISL_440156, EPI_ISL_440157, EPI_ISL_440160, EPI_ISL_440161, EPI_ISL_440162, EPI_ISL_440166, EPI_ISL_440167, EPI_ISL_440172, EPI_ISL_440175, EPI_ISL_440178, EPI_ISL_440189, EPI_ISL_440190, EPI_ISL_440191, EPI_ISL_440192, EPI_ISL_440196, EPI_ISL_440198, EPI_ISL_440200, EPI_ISL_440201, EPI_ISL_440205, EPI_ISL_440206, EPI_ISL_440210, EPI_ISL_440214, EPI_ISL_440218, EPI_ISL_440219, EPI_ISL_440220, EPI_ISL_440221, EPI_ISL_440222, EPI_ISL_440224, EPI_ISL_440225, EPI_ISL_440228, EPI_ISL_440229, EPI_ISL_440232, EPI_ISL_440233, EPI_ISL_440236, EPI_ISL_440241, EPI_ISL_440242, EPI_ISL_440243, EPI_ISL_440245, EPI_ISL_440249, EPI_ISL_440250, EPI_ISL_440251, EPI_ISL_440252, EPI_ISL_440256, EPI_ISL_440262, EPI_ISL_440269, EPI_ISL_440272, EPI_ISL_440273, EPI_ISL_440274, EPI_ISL_440275, EPI_ISL_440277, EPI_ISL_440279, EPI_ISL_440281, EPI_ISL_440292, EPI_ISL_440294, EPI_ISL_440298, EPI_ISL_440299, EPI_ISL_440624, EPI_ISL_440625, EPI_ISL_440626, EPI_ISL_440627, EPI_ISL_440628, EPI_ISL_440629, EPI_ISL_440633, EPI_ISL_440634, EPI_ISL_440636, EPI_ISL_440637, EPI_ISL_440638, EPI_ISL_440639, EPI_ISL_440640, EPI_ISL_440641, EPI_ISL_440643, EPI_ISL_440644, EPI_ISL_440645, EPI_ISL_440646, EPI_ISL_440647, EPI_ISL_440648, EPI_ISL_440649, EPI_ISL_440650, EPI_ISL_440651, EPI_ISL_440652, EPI_ISL_440653, EPI_ISL_440654, EPI_ISL_440655, EPI_ISL_440656, EPI_ISL_440657, EPI_ISL_440658, EPI_ISL_440660, EPI_ISL_440661, EPI_ISL_440663, EPI_ISL_440665, EPI_ISL_440666, EPI_ISL_440667, EPI_ISL_440668, EPI_ISL_440669, EPI_ISL_440670, EPI_ISL_440671, EPI_ISL_440672, EPI_ISL_440673, EPI_ISL_440674, EPI_ISL_440675, EPI_ISL_440676, EPI_ISL_440677, EPI_ISL_440678, EPI_ISL_440679, EPI_ISL_440680, EPI_ISL_440681, EPI_ISL_440684, EPI_ISL_440686, EPI_ISL_440687, EPI_ISL_440688, EPI_ISL_440689, EPI_ISL_440690, EPI_ISL_440692, EPI_ISL_440693, EPI_ISL_440694, EPI_ISL_440695, EPI_ISL_440696, EPI_ISL_440697, EPI_ISL_440698, EPI_ISL_440699, EPI_ISL_440700, EPI_ISL_440701, EPI_ISL_440702, EPI_ISL_440703, EPI_ISL_440704, EPI_ISL_440705, EPI_ISL_440706, EPI_ISL_440707, EPI_ISL_440708, EPI_ISL_440710, EPI_ISL_440711, EPI_ISL_440712, EPI_ISL_440713, EPI_ISL_440714, EPI_ISL_440715, EPI_ISL_440716, EPI_ISL_440717, EPI_ISL_440718, EPI_ISL_440719, EPI_ISL_440720, EPI_ISL_440721, EPI_ISL_440722, EPI_ISL_440723, EPI_ISL_440724, EPI_ISL_440725, EPI_ISL_440726, EPI_ISL_440728, EPI_ISL_440729, EPI_ISL_440730, EPI_ISL_440732, EPI_ISL_440733, EPI_ISL_440734, EPI_ISL_440735, EPI_ISL_440736, EPI_ISL_440737, EPI_ISL_440738, EPI_ISL_440739, EPI_ISL_440740, EPI_ISL_440741, EPI_ISL_440742, EPI_ISL_440743, EPI_ISL_440744, EPI_ISL_440745, EPI_ISL_440746, EPI_ISL_440747, EPI_ISL_440748, EPI_ISL_440749, EPI_ISL_440750, EPI_ISL_440751, EPI_ISL_440752, EPI_ISL_440754, EPI_ISL_440756, EPI_ISL_440758, EPI_ISL_440759, EPI_ISL_440760, EPI_ISL_440761, EPI_ISL_440762, EPI_ISL_440763, EPI_ISL_440764, EPI_ISL_440765, EPI_ISL_440766, EPI_ISL_440767, EPI_ISL_440768, EPI_ISL_440769, EPI_ISL_440770, EPI_ISL_440771, EPI_ISL_440772, EPI_ISL_440773, EPI_ISL_440774, EPI_ISL_440775, EPI_ISL_440776, EPI_ISL_440777, EPI_ISL_440778, EPI_ISL_440779, EPI_ISL_440780, EPI_ISL_440781, EPI_ISL_440782, EPI_ISL_440783, EPI_ISL_440784, EPI_ISL_440785, EPI_ISL_440786, EPI_ISL_440787, EPI_ISL_440788, EPI_ISL_440789, EPI_ISL_440790, EPI_ISL_440791, EPI_ISL_440792, EPI_ISL_440793, EPI_ISL_440794, EPI_ISL_440795, EPI_ISL_440796, EPI_ISL_440797, EPI_ISL_440798, EPI_ISL_440800, EPI_ISL_440804, EPI_ISL_440805, EPI_ISL_440806, EPI_ISL_440807, EPI_ISL_440808, EPI_ISL_440809, EPI_ISL_442624, EPI_ISL_442642, EPI_ISL_442644, EPI_ISL_442645, EPI_ISL_442646, EPI_ISL_442647, EPI_ISL_442648, EPI_ISL_442649, EPI_ISL_442650, EPI_ISL_442651, EPI_ISL_442652, EPI_ISL_442653, EPI_ISL_442654, EPI_ISL_442655, EPI_ISL_442656, EPI_ISL_442657, EPI_ISL_442658, EPI_ISL_442659, EPI_ISL_442660, EPI_ISL_442661, EPI_ISL_442662, EPI_ISL_442663, EPI_ISL_442664, EPI_ISL_442665, EPI_ISL_442666, EPI_ISL_442667, EPI_ISL_442668, EPI_ISL_442669, EPI_ISL_442670, EPI_ISL_442671, EPI_ISL_442674, EPI_ISL_442675, EPI_ISL_442676, EPI_ISL_442677, EPI_ISL_442678, EPI_ISL_442679, EPI_ISL_442680, EPI_ISL_442681, EPI_ISL_442682, EPI_ISL_442683, EPI_ISL_442684, EPI_ISL_442685, EPI_ISL_442686, EPI_ISL_442687, EPI_ISL_442688, EPI_ISL_442689, EPI_ISL_442690, EPI_ISL_442691, EPI_ISL_442692, EPI_ISL_442694, EPI_ISL_442696, EPI_ISL_442701, EPI_ISL_442702, EPI_ISL_442703, EPI_ISL_442706, EPI_ISL_442707, EPI_ISL_442708, EPI_ISL_442709, EPI_ISL_442710, EPI_ISL_442711, EPI_ISL_442712, EPI_ISL_442713, EPI_ISL_442714, EPI_ISL_442715, EPI_ISL_442716, EPI_ISL_442717, EPI_ISL_442718, EPI_ISL_442719, EPI_ISL_442720, EPI_ISL_442721, EPI_ISL_442722, EPI_ISL_442723, EPI_ISL_442724, EPI_ISL_442725, EPI_ISL_442726, EPI_ISL_442727, EPI_ISL_442728, EPI_ISL_442729, EPI_ISL_442730, EPI_ISL_442731, EPI_ISL_442732, EPI_ISL_442733, EPI_ISL_442734, EPI_ISL_442735, EPI_ISL_442736, EPI_ISL_442737, EPI_ISL_442738, EPI_ISL_442739, EPI_ISL_442740, EPI_ISL_442741, EPI_ISL_442742, EPI_ISL_442743, EPI_ISL_442744, EPI_ISL_442745, EPI_ISL_442746, EPI_ISL_442747, EPI_ISL_442748, EPI_ISL_442749, EPI_ISL_442750, EPI_ISL_442752, EPI_ISL_442753, EPI_ISL_442754, EPI_ISL_442755, EPI_ISL_442756, EPI_ISL_442758, EPI_ISL_442759, EPI_ISL_442762, EPI_ISL_442763, EPI_ISL_442765, EPI_ISL_442766, EPI_ISL_442767, EPI_ISL_442768, EPI_ISL_442771, EPI_ISL_442772, EPI_ISL_442773, EPI_ISL_442775, EPI_ISL_442776, EPI_ISL_442777, EPI_ISL_442778, EPI_ISL_442779, EPI_ISL_442780, EPI_ISL_442781, EPI_ISL_442782, EPI_ISL_442783, EPI_ISL_442784, EPI_ISL_442785, EPI_ISL_442786, EPI_ISL_442787, EPI_ISL_442788, EPI_ISL_442789, EPI_ISL_442790, EPI_ISL_442791, EPI_ISL_442792, EPI_ISL_442793, EPI_ISL_442794, EPI_ISL_442795, EPI_ISL_442796, EPI_ISL_442797, EPI_ISL_442798, EPI_ISL_442800 |                                                                                                                                |                                                                                                                                |                                                                                                                                                                                                                                                                                                                                                                                                |
| see above                                                                                                                                                                                                                                                                                                                                                                                                                                                                                                                                                                                                                                                                                                                                                                                                                                                                                                                                                                                                                                                                                                                                                                                                                                                                                                                                                                                                                                                                                                                                                                                                                                                                                                                                                                                                                                                                                                                                                                                                                                                                                                                                                                                                                                                                                                                                                                                                                                                                                                                                                                                                                                                                                                                                                                                                                                                                                                                                                                                                                                                                                                                                                                                                                                                                                                                                                                                                                                                                                                                                                                                                                                                                                                                                                                                                                                                                                                                                                                                                                                                                                                                                                                                                                                                                                                                                                                                                                                                                                                                                                                                                                                                                                                                                                                                                                                                                                                                                                                                                                                                                                                                                                                                                                                                                                                                                                                                                                                                                                                                                                                                                                                                                                                                                                                                                                                                                                                                                                                                                                                                                                                                                                                                                                                                                                                                                                                                                                                                                                                                                                                                                                                                                                                                                                                                                                                                                                                                                                                                                                                                                                                                                                                                                                                                                      | PHE South West Regional Laboratory, National Infection Service                                                                 | Wellcome Sanger Institute for the COVID-19 Genomics UK (COG-UK) consortium                                                     | Stephanie Hutchings, Hannah Pymont, Dr Peter Muir, Barry Vipond, Rich Hopes, Alex Alderton, Roberto Amato, Sonia Goncalves, Ewan Harrison, David K. Jackson, Ian Johnston, Dominic Kwiatkowski, Cordelia Langford, John Sillitoe on behalf of the Wellcome Sanger Institute COVID-19 Surveillance Team ( <a href="http://www.sanger.ac.uk/covid-team">http://www.sanger.ac.uk/covid-team</a> ) |
| EPI_ISL_443686, EPI_ISL_443690, EPI_ISL_443691, EPI_ISL_443692, EPI_ISL_443694, EPI_ISL_443696, EPI_ISL_443699, EPI_ISL_443700, EPI_ISL_443701, EPI_ISL_443702, EPI_ISL_443703, EPI_ISL_443704, EPI_ISL_443705, EPI_ISL_443706, EPI_ISL_443707, EPI_ISL_443708, EPI_ISL_443709, EPI_ISL_443710, EPI_ISL_443712, EPI_ISL_443713, EPI_ISL_443714, EPI_ISL_443718, EPI_ISL_443724, EPI_ISL_443725, EPI_ISL_443726, EPI_ISL_443727, EPI_ISL_443728, EPI_ISL_443729, EPI_ISL_443730, EPI_ISL_443733, EPI_ISL_443734, EPI_ISL_443735, EPI_ISL_443736, EPI_ISL_443737, EPI_ISL_443738, EPI_ISL_443739, EPI_ISL_443740, EPI_ISL_443741, EPI_ISL_443745, EPI_ISL_443746, EPI_ISL_443748, EPI_ISL_443749, EPI_ISL_443750, EPI_ISL_443752, EPI_ISL_443753, EPI_ISL_443754, EPI_ISL_443755, EPI_ISL_443756, EPI_ISL_443757, EPI_ISL_443758, EPI_ISL_443759, EPI_ISL_443760, EPI_ISL_443761, EPI_ISL_443762, EPI_ISL_443763, EPI_ISL_443764, EPI_ISL_443765, EPI_ISL_443766, EPI_ISL_443767, EPI_ISL_443768, EPI_ISL_443769, EPI_ISL_443770, EPI_ISL_443771, EPI_ISL_443772, EPI_ISL_443773, EPI_ISL_443774, EPI_ISL_443775, EPI_ISL_443776, EPI_ISL_443777, EPI_ISL_443778, EPI_ISL_443779, EPI_ISL_443780, EPI_ISL_443781, EPI_ISL_443782, EPI_ISL_443783, EPI_ISL_443784, EPI_ISL_443785, EPI_ISL_443786, EPI_ISL_443787, EPI_ISL_443791, EPI_ISL_443792, EPI_ISL_443793, EPI_ISL_443794, EPI_ISL_443795, EPI_ISL_443796, EPI_ISL_443797, EPI_ISL_443799, EPI_ISL_443800, EPI_ISL_443801, EPI_ISL_443802, EPI_ISL_443803, EPI_ISL_443804, EPI_ISL_443805, EPI_ISL_443806, EPI_ISL_443807, EPI_ISL_443808, EPI_ISL_443809, EPI_ISL_443810, EPI_ISL_443811, EPI_ISL_443813, EPI_ISL_443814, EPI_ISL_443816, EPI_ISL_443819, EPI_ISL_443820, EPI_ISL_443821, EPI_ISL_443822, EPI_ISL_443823, EPI_ISL_443824, EPI_ISL_443825, EPI_ISL_443826, EPI_ISL_443827, EPI_ISL_443828, EPI_ISL_443829, EPI_ISL_443831, EPI_ISL_443832, EPI_ISL_443833, EPI_ISL_443834, EPI_ISL_443836, EPI_ISL_443837, EPI_ISL_443838, EPI_ISL_443839, EPI_ISL_443840, EPI_ISL_443841, EPI_ISL_443842, EPI_ISL_443843, EPI_ISL_443844, EPI_ISL_443845, EPI_ISL_443846, EPI_ISL_443847, EPI_ISL_443848, EPI_ISL_443849, EPI_ISL_443850, EPI_ISL_443851, EPI_ISL_443852, EPI_ISL_443853, EPI_ISL_443854, EPI_ISL_443855, EPI_ISL_443856, EPI_ISL_443857, EPI_ISL_443858, EPI_ISL_443860, EPI_ISL_443861, EPI_ISL_443862, EPI_ISL_443863, EPI_ISL_443864, EPI_ISL_443865, EPI_ISL_443866, EPI_ISL_443867, EPI_ISL_443868, EPI_ISL_443869, EPI_ISL_443870, EPI_ISL_443871, EPI_ISL_443872, EPI_ISL_443873, EPI_ISL_443874, EPI_ISL_443875, EPI_ISL_443876, EPI_ISL_443877, EPI_ISL_443878, EPI_ISL_443879, EPI_ISL_443880, EPI_ISL_443881, EPI_ISL_443882, EPI_ISL_443883, EPI_ISL_443884, EPI_ISL_443885, EPI_ISL_443886, EPI_ISL_443887, EPI_ISL_443888, EPI_ISL_443889, EPI_ISL_443890, EPI_ISL_443891, EPI_ISL_443892, EPI_ISL_443893, EPI_ISL_443894, EPI_ISL_443895, EPI_ISL_443896, EPI_ISL_443897, EPI_ISL_443898, EPI_ISL_443899, EPI_ISL_443900, EPI_ISL_443901, EPI_ISL_443902, EPI_ISL_443903, EPI_ISL_443904, EPI_ISL_443905, EPI_ISL_443906, EPI_ISL_443907, EPI_ISL_443908, EPI_ISL_443909, EPI_ISL_443910, EPI_ISL_443911, EPI_ISL_443912, EPI_ISL_443913, EPI_ISL_443914, EPI_ISL_443915, EPI_ISL_443916, EPI_ISL_443917, EPI_ISL_443918, EPI_ISL_443919, EPI_ISL_443920, EPI_ISL_443921, EPI_ISL_443922, EPI_ISL_443923, EPI_ISL_443924, EPI_ISL_443925, EPI_ISL_443926, EPI_ISL_443927, EPI_ISL_443928, EPI_ISL_443929, EPI_ISL_443930, EPI_ISL_443931, EPI_ISL_443932, EPI_ISL_443933, EPI_ISL_443935, EPI_ISL_443936, EPI_ISL_443937, EPI_ISL_443938, EPI_ISL_443939, EPI_ISL_443940, EPI_ISL_443941, EPI_ISL_443942, EPI_ISL_443943, EPI_ISL_443944, EPI_ISL_443945, EPI_ISL_443946, EPI_ISL_443947, EPI_ISL_443948, EPI_ISL_443949                                                                                                                                                                                                                                                                                                                                                                                                                                                                                                                                                                                                                                                                                                                                                                                                                                                                                                                                                                                                                                                                                                                                                                                                                                                                                                                                                                                                                                                                                                                                                                                                                                                                                                                                                                                                                                                                                                                                                                                                                                                                                                                                                                                                                                                                                                                                                                                                                                                                                                                                                                                                                                                                                                                                                                                                                                                                                                                                                                                                                                                                                                                                                                                                                                                                                                                                                                                                                                                                 |                                                                                                                                |                                                                                                                                |                                                                                                                                                                                                                                                                                                                                                                                                |

|                                                                                                                                                                                                                                                                                                                                                                                                                                                                                                                                                                                                                                                                                                                                                                                                                                                                                                                                                                                                                                                                                                                                                                                                                                                                                                                                                                                                                                                                                                                                                                                                                                                                                                                                                                                                                                                                                                                                                                                                                                                                                                                                                                                                                                                                                                                                                                                                                                                                                                                                                                                                                                                                                                                                                                                                                                                                                                                                                                                                                                                                                                                                                                                                                                                                                                                                                                                                                                                                                                                                                                                                                                                                                                                                                                                                                                                                                                                                                                                                                                                                                                                                                                                                                                                                                                                                                                                                                                                                                                                                                                                                                                                                                                                                                                                                                                                                                                                                                                                                                                                                                                                                                                                                                                                                                                                                                                                                                                                                                                                                                                                                                                                                                                                                                                                                                                                                                                                                                                                                                                                                                                                                                                                                                                                                                |                                                                                                                                                                                                                  |                                                                                                                                                                                                                  |                                                                                                                                                                                                                                                                                                                                                                                                                                        |
|--------------------------------------------------------------------------------------------------------------------------------------------------------------------------------------------------------------------------------------------------------------------------------------------------------------------------------------------------------------------------------------------------------------------------------------------------------------------------------------------------------------------------------------------------------------------------------------------------------------------------------------------------------------------------------------------------------------------------------------------------------------------------------------------------------------------------------------------------------------------------------------------------------------------------------------------------------------------------------------------------------------------------------------------------------------------------------------------------------------------------------------------------------------------------------------------------------------------------------------------------------------------------------------------------------------------------------------------------------------------------------------------------------------------------------------------------------------------------------------------------------------------------------------------------------------------------------------------------------------------------------------------------------------------------------------------------------------------------------------------------------------------------------------------------------------------------------------------------------------------------------------------------------------------------------------------------------------------------------------------------------------------------------------------------------------------------------------------------------------------------------------------------------------------------------------------------------------------------------------------------------------------------------------------------------------------------------------------------------------------------------------------------------------------------------------------------------------------------------------------------------------------------------------------------------------------------------------------------------------------------------------------------------------------------------------------------------------------------------------------------------------------------------------------------------------------------------------------------------------------------------------------------------------------------------------------------------------------------------------------------------------------------------------------------------------------------------------------------------------------------------------------------------------------------------------------------------------------------------------------------------------------------------------------------------------------------------------------------------------------------------------------------------------------------------------------------------------------------------------------------------------------------------------------------------------------------------------------------------------------------------------------------------------------------------------------------------------------------------------------------------------------------------------------------------------------------------------------------------------------------------------------------------------------------------------------------------------------------------------------------------------------------------------------------------------------------------------------------------------------------------------------------------------------------------------------------------------------------------------------------------------------------------------------------------------------------------------------------------------------------------------------------------------------------------------------------------------------------------------------------------------------------------------------------------------------------------------------------------------------------------------------------------------------------------------------------------------------------------------------------------------------------------------------------------------------------------------------------------------------------------------------------------------------------------------------------------------------------------------------------------------------------------------------------------------------------------------------------------------------------------------------------------------------------------------------------------------------------------------------------------------------------------------------------------------------------------------------------------------------------------------------------------------------------------------------------------------------------------------------------------------------------------------------------------------------------------------------------------------------------------------------------------------------------------------------------------------------------------------------------------------------------------------------------------------------------------------------------------------------------------------------------------------------------------------------------------------------------------------------------------------------------------------------------------------------------------------------------------------------------------------------------------------------------------------------------------------------------------------------------------------------------------|------------------------------------------------------------------------------------------------------------------------------------------------------------------------------------------------------------------|------------------------------------------------------------------------------------------------------------------------------------------------------------------------------------------------------------------|----------------------------------------------------------------------------------------------------------------------------------------------------------------------------------------------------------------------------------------------------------------------------------------------------------------------------------------------------------------------------------------------------------------------------------------|
| EPI_ISL_443950, EPI_ISL_443952, EPI_ISL_443955, EPI_ISL_443958, EPI_ISL_443960, EPI_ISL_443961, EPI_ISL_443962, EPI_ISL_443963, EPI_ISL_443964, EPI_ISL_443966, EPI_ISL_443968, EPI_ISL_443969, EPI_ISL_443970, EPI_ISL_443972, EPI_ISL_443974, EPI_ISL_443975, EPI_ISL_443976, EPI_ISL_443977, EPI_ISL_443978, EPI_ISL_443980, EPI_ISL_443981, EPI_ISL_443982, EPI_ISL_443983, EPI_ISL_443985, EPI_ISL_443986, EPI_ISL_443988, EPI_ISL_443989, EPI_ISL_443992, EPI_ISL_443993, EPI_ISL_443994, EPI_ISL_443997, EPI_ISL_443998, EPI_ISL_443999, EPI_ISL_444000, EPI_ISL_444001, EPI_ISL_444004, EPI_ISL_444005, EPI_ISL_444006, EPI_ISL_444007, EPI_ISL_444008, EPI_ISL_444009, EPI_ISL_444010, EPI_ISL_444011, EPI_ISL_444013, EPI_ISL_444014, EPI_ISL_444016, EPI_ISL_444020, EPI_ISL_444021                                                                                                                                                                                                                                                                                                                                                                                                                                                                                                                                                                                                                                                                                                                                                                                                                                                                                                                                                                                                                                                                                                                                                                                                                                                                                                                                                                                                                                                                                                                                                                                                                                                                                                                                                                                                                                                                                                                                                                                                                                                                                                                                                                                                                                                                                                                                                                                                                                                                                                                                                                                                                                                                                                                                                                                                                                                                                                                                                                                                                                                                                                                                                                                                                                                                                                                                                                                                                                                                                                                                                                                                                                                                                                                                                                                                                                                                                                                                                                                                                                                                                                                                                                                                                                                                                                                                                                                                                                                                                                                                                                                                                                                                                                                                                                                                                                                                                                                                                                                                                                                                                                                                                                                                                                                                                                                                                                                                                                                                                 | PHE South West Regional Laboratory, National Infection Service                                                                                                                                                   | Wellcome Sanger Institute for the COVID-19 Genomics UK (COG-UK) consortium                                                                                                                                       | Stephanie Hutchings, Hannah Pymont, Dr Peter Muir, Barry Vipond, Rich Hopes; and Alex Alderton, Roberto Amato, Sonia Goncalves, Ewan Harrison, David K. Jackson, Ian Johnston, Dominic Kwiatkowski, Cordelia Langford, John Sillitoe on behalf of the Wellcome Sanger Institute COVID-19 Surveillance Team (http://www.sanger.ac.uk/covid-team)                                                                                        |
| EPI_ISL_444273                                                                                                                                                                                                                                                                                                                                                                                                                                                                                                                                                                                                                                                                                                                                                                                                                                                                                                                                                                                                                                                                                                                                                                                                                                                                                                                                                                                                                                                                                                                                                                                                                                                                                                                                                                                                                                                                                                                                                                                                                                                                                                                                                                                                                                                                                                                                                                                                                                                                                                                                                                                                                                                                                                                                                                                                                                                                                                                                                                                                                                                                                                                                                                                                                                                                                                                                                                                                                                                                                                                                                                                                                                                                                                                                                                                                                                                                                                                                                                                                                                                                                                                                                                                                                                                                                                                                                                                                                                                                                                                                                                                                                                                                                                                                                                                                                                                                                                                                                                                                                                                                                                                                                                                                                                                                                                                                                                                                                                                                                                                                                                                                                                                                                                                                                                                                                                                                                                                                                                                                                                                                                                                                                                                                                                                                 | State Key Laboratory of Respiratory Disease, National Clinical Research Center for Respiratory Disease, Guangzhou Institute of Respiratory Health, the First Affiliated Hospital of Guangzhou Medical University | State Key Laboratory of Respiratory Disease, National Clinical Research Center for Respiratory Disease, Guangzhou Institute of Respiratory Health, the First Affiliated Hospital of Guangzhou Medical University | Sun,J., Shi,Y., Zheng,K., Huang,J. and Zhao,J.                                                                                                                                                                                                                                                                                                                                                                                         |
| EPI_ISL_447258, EPI_ISL_447259, EPI_ISL_447260, EPI_ISL_447261, EPI_ISL_447262, EPI_ISL_447263, EPI_ISL_447264, EPI_ISL_447265, EPI_ISL_447266, EPI_ISL_447267, EPI_ISL_447268, EPI_ISL_447269, EPI_ISL_447270, EPI_ISL_447271, EPI_ISL_447272, EPI_ISL_447273, EPI_ISL_447274, EPI_ISL_447275, EPI_ISL_447276, EPI_ISL_447277, EPI_ISL_447278, EPI_ISL_447279, EPI_ISL_447280                                                                                                                                                                                                                                                                                                                                                                                                                                                                                                                                                                                                                                                                                                                                                                                                                                                                                                                                                                                                                                                                                                                                                                                                                                                                                                                                                                                                                                                                                                                                                                                                                                                                                                                                                                                                                                                                                                                                                                                                                                                                                                                                                                                                                                                                                                                                                                                                                                                                                                                                                                                                                                                                                                                                                                                                                                                                                                                                                                                                                                                                                                                                                                                                                                                                                                                                                                                                                                                                                                                                                                                                                                                                                                                                                                                                                                                                                                                                                                                                                                                                                                                                                                                                                                                                                                                                                                                                                                                                                                                                                                                                                                                                                                                                                                                                                                                                                                                                                                                                                                                                                                                                                                                                                                                                                                                                                                                                                                                                                                                                                                                                                                                                                                                                                                                                                                                                                                 | Microbiology laboratory, Assuta Ashdod University-Affiliated Hospital                                                                                                                                            | Stern Lab                                                                                                                                                                                                        | Stern Lab                                                                                                                                                                                                                                                                                                                                                                                                                              |
| EPI_ISL_447281, EPI_ISL_447282, EPI_ISL_447283, EPI_ISL_447284, EPI_ISL_447285, EPI_ISL_447286, EPI_ISL_447287, EPI_ISL_447288, EPI_ISL_447289, EPI_ISL_447290, EPI_ISL_447291, EPI_ISL_447292, EPI_ISL_447293, EPI_ISL_447294, EPI_ISL_447295, EPI_ISL_447296, EPI_ISL_447297, EPI_ISL_447298, EPI_ISL_447299, EPI_ISL_447300, EPI_ISL_447301, EPI_ISL_447302, EPI_ISL_447303, EPI_ISL_447304, EPI_ISL_447305, EPI_ISL_447306, EPI_ISL_447307, EPI_ISL_447308, EPI_ISL_447309, EPI_ISL_447310                                                                                                                                                                                                                                                                                                                                                                                                                                                                                                                                                                                                                                                                                                                                                                                                                                                                                                                                                                                                                                                                                                                                                                                                                                                                                                                                                                                                                                                                                                                                                                                                                                                                                                                                                                                                                                                                                                                                                                                                                                                                                                                                                                                                                                                                                                                                                                                                                                                                                                                                                                                                                                                                                                                                                                                                                                                                                                                                                                                                                                                                                                                                                                                                                                                                                                                                                                                                                                                                                                                                                                                                                                                                                                                                                                                                                                                                                                                                                                                                                                                                                                                                                                                                                                                                                                                                                                                                                                                                                                                                                                                                                                                                                                                                                                                                                                                                                                                                                                                                                                                                                                                                                                                                                                                                                                                                                                                                                                                                                                                                                                                                                                                                                                                                                                                 | Microbiology Division, Barzilai University Medical Center                                                                                                                                                        | Stern Lab                                                                                                                                                                                                        | Stern Lab                                                                                                                                                                                                                                                                                                                                                                                                                              |
| EPI_ISL_447311, EPI_ISL_447312, EPI_ISL_447313, EPI_ISL_447314, EPI_ISL_447315, EPI_ISL_447316, EPI_ISL_447317, EPI_ISL_447318, EPI_ISL_447319, EPI_ISL_447320, EPI_ISL_447321, EPI_ISL_447322, EPI_ISL_447323, EPI_ISL_447324, EPI_ISL_447325, EPI_ISL_447326, EPI_ISL_447327, EPI_ISL_447328, EPI_ISL_447329, EPI_ISL_447330                                                                                                                                                                                                                                                                                                                                                                                                                                                                                                                                                                                                                                                                                                                                                                                                                                                                                                                                                                                                                                                                                                                                                                                                                                                                                                                                                                                                                                                                                                                                                                                                                                                                                                                                                                                                                                                                                                                                                                                                                                                                                                                                                                                                                                                                                                                                                                                                                                                                                                                                                                                                                                                                                                                                                                                                                                                                                                                                                                                                                                                                                                                                                                                                                                                                                                                                                                                                                                                                                                                                                                                                                                                                                                                                                                                                                                                                                                                                                                                                                                                                                                                                                                                                                                                                                                                                                                                                                                                                                                                                                                                                                                                                                                                                                                                                                                                                                                                                                                                                                                                                                                                                                                                                                                                                                                                                                                                                                                                                                                                                                                                                                                                                                                                                                                                                                                                                                                                                                 | Clinical Virology Laboratory, Soroka Medical Center and the Faculty of Health Sciences, Ben-Gurion University of the Negev                                                                                       | Stern Lab                                                                                                                                                                                                        | Stern Lab                                                                                                                                                                                                                                                                                                                                                                                                                              |
| EPI_ISL_447331, EPI_ISL_447332, EPI_ISL_447333, EPI_ISL_447334, EPI_ISL_447335, EPI_ISL_447336, EPI_ISL_447337, EPI_ISL_447338, EPI_ISL_447339, EPI_ISL_447340, EPI_ISL_447341, EPI_ISL_447342, EPI_ISL_447343, EPI_ISL_447344, EPI_ISL_447345, EPI_ISL_447346, EPI_ISL_447347, EPI_ISL_447348, EPI_ISL_447349, EPI_ISL_447350, EPI_ISL_447351, EPI_ISL_447352, EPI_ISL_447353, EPI_ISL_447354, EPI_ISL_447355, EPI_ISL_447356, EPI_ISL_447357, EPI_ISL_447358, EPI_ISL_447359, EPI_ISL_447360, EPI_ISL_447361, EPI_ISL_447362, EPI_ISL_447363, EPI_ISL_447364, EPI_ISL_447365, EPI_ISL_447366, EPI_ISL_447367, EPI_ISL_447368, EPI_ISL_447369, EPI_ISL_447370, EPI_ISL_447371, EPI_ISL_447372, EPI_ISL_447373, EPI_ISL_447374, EPI_ISL_447375, EPI_ISL_447376, EPI_ISL_447377, EPI_ISL_447378, EPI_ISL_447379, EPI_ISL_447380, EPI_ISL_447381, EPI_ISL_447382                                                                                                                                                                                                                                                                                                                                                                                                                                                                                                                                                                                                                                                                                                                                                                                                                                                                                                                                                                                                                                                                                                                                                                                                                                                                                                                                                                                                                                                                                                                                                                                                                                                                                                                                                                                                                                                                                                                                                                                                                                                                                                                                                                                                                                                                                                                                                                                                                                                                                                                                                                                                                                                                                                                                                                                                                                                                                                                                                                                                                                                                                                                                                                                                                                                                                                                                                                                                                                                                                                                                                                                                                                                                                                                                                                                                                                                                                                                                                                                                                                                                                                                                                                                                                                                                                                                                                                                                                                                                                                                                                                                                                                                                                                                                                                                                                                                                                                                                                                                                                                                                                                                                                                                                                                                                                                                                                                                                                 | Clinical Virology Unit, Hadassah Hebrew University Medical Center                                                                                                                                                | Stern Lab                                                                                                                                                                                                        |                                                                                                                                                                                                                                                                                                                                                                                                                                        |
| EPI_ISL_447383, EPI_ISL_447384, EPI_ISL_447385, EPI_ISL_447386, EPI_ISL_447387, EPI_ISL_447388, EPI_ISL_447389, EPI_ISL_447390, EPI_ISL_447391, EPI_ISL_447392, EPI_ISL_447393, EPI_ISL_447394, EPI_ISL_447395, EPI_ISL_447396, EPI_ISL_447397, EPI_ISL_447398, EPI_ISL_447399, EPI_ISL_447400, EPI_ISL_447401, EPI_ISL_447402, EPI_ISL_447403, EPI_ISL_447404, EPI_ISL_447405, EPI_ISL_447406                                                                                                                                                                                                                                                                                                                                                                                                                                                                                                                                                                                                                                                                                                                                                                                                                                                                                                                                                                                                                                                                                                                                                                                                                                                                                                                                                                                                                                                                                                                                                                                                                                                                                                                                                                                                                                                                                                                                                                                                                                                                                                                                                                                                                                                                                                                                                                                                                                                                                                                                                                                                                                                                                                                                                                                                                                                                                                                                                                                                                                                                                                                                                                                                                                                                                                                                                                                                                                                                                                                                                                                                                                                                                                                                                                                                                                                                                                                                                                                                                                                                                                                                                                                                                                                                                                                                                                                                                                                                                                                                                                                                                                                                                                                                                                                                                                                                                                                                                                                                                                                                                                                                                                                                                                                                                                                                                                                                                                                                                                                                                                                                                                                                                                                                                                                                                                                                                 | Clinical Microbiology Laboratory, The Baruch Padah Medical Center, Poriya                                                                                                                                        | Stern Lab                                                                                                                                                                                                        | Stern Lab                                                                                                                                                                                                                                                                                                                                                                                                                              |
| EPI_ISL_447407, EPI_ISL_447408, EPI_ISL_447409, EPI_ISL_447410, EPI_ISL_447411, EPI_ISL_447412, EPI_ISL_447413, EPI_ISL_447414, EPI_ISL_447415, EPI_ISL_447416                                                                                                                                                                                                                                                                                                                                                                                                                                                                                                                                                                                                                                                                                                                                                                                                                                                                                                                                                                                                                                                                                                                                                                                                                                                                                                                                                                                                                                                                                                                                                                                                                                                                                                                                                                                                                                                                                                                                                                                                                                                                                                                                                                                                                                                                                                                                                                                                                                                                                                                                                                                                                                                                                                                                                                                                                                                                                                                                                                                                                                                                                                                                                                                                                                                                                                                                                                                                                                                                                                                                                                                                                                                                                                                                                                                                                                                                                                                                                                                                                                                                                                                                                                                                                                                                                                                                                                                                                                                                                                                                                                                                                                                                                                                                                                                                                                                                                                                                                                                                                                                                                                                                                                                                                                                                                                                                                                                                                                                                                                                                                                                                                                                                                                                                                                                                                                                                                                                                                                                                                                                                                                                 | Clinical Virology Unit, Hadassah Hebrew University Medical Center                                                                                                                                                | Stern Lab                                                                                                                                                                                                        | Stern Lab                                                                                                                                                                                                                                                                                                                                                                                                                              |
| EPI_ISL_447417, EPI_ISL_447418                                                                                                                                                                                                                                                                                                                                                                                                                                                                                                                                                                                                                                                                                                                                                                                                                                                                                                                                                                                                                                                                                                                                                                                                                                                                                                                                                                                                                                                                                                                                                                                                                                                                                                                                                                                                                                                                                                                                                                                                                                                                                                                                                                                                                                                                                                                                                                                                                                                                                                                                                                                                                                                                                                                                                                                                                                                                                                                                                                                                                                                                                                                                                                                                                                                                                                                                                                                                                                                                                                                                                                                                                                                                                                                                                                                                                                                                                                                                                                                                                                                                                                                                                                                                                                                                                                                                                                                                                                                                                                                                                                                                                                                                                                                                                                                                                                                                                                                                                                                                                                                                                                                                                                                                                                                                                                                                                                                                                                                                                                                                                                                                                                                                                                                                                                                                                                                                                                                                                                                                                                                                                                                                                                                                                                                 | Clinical Microbiology Laboratory, The Baruch Padah Medical Center, Poriya                                                                                                                                        | Stern Lab                                                                                                                                                                                                        | Stern Lab                                                                                                                                                                                                                                                                                                                                                                                                                              |
| EPI_ISL_447419, EPI_ISL_447420, EPI_ISL_447421, EPI_ISL_447422, EPI_ISL_447423, EPI_ISL_447424, EPI_ISL_447425, EPI_ISL_447426, EPI_ISL_447427, EPI_ISL_447428, EPI_ISL_447429, EPI_ISL_447430, EPI_ISL_447431, EPI_ISL_447432, EPI_ISL_447433, EPI_ISL_447434, EPI_ISL_447435, EPI_ISL_447436, EPI_ISL_447437, EPI_ISL_447438, EPI_ISL_447439, EPI_ISL_447440, EPI_ISL_447441, EPI_ISL_447442, EPI_ISL_447443, EPI_ISL_447444, EPI_ISL_447445, EPI_ISL_447446, EPI_ISL_447447, EPI_ISL_447448, EPI_ISL_447449, EPI_ISL_447450, EPI_ISL_447451, EPI_ISL_447452, EPI_ISL_447453, EPI_ISL_447454, EPI_ISL_447455, EPI_ISL_447456, EPI_ISL_447457, EPI_ISL_447458, EPI_ISL_447459, EPI_ISL_447460, EPI_ISL_447461, EPI_ISL_447462, EPI_ISL_447463, EPI_ISL_447464, EPI_ISL_447465, EPI_ISL_447466, EPI_ISL_447467, EPI_ISL_447468, EPI_ISL_447469                                                                                                                                                                                                                                                                                                                                                                                                                                                                                                                                                                                                                                                                                                                                                                                                                                                                                                                                                                                                                                                                                                                                                                                                                                                                                                                                                                                                                                                                                                                                                                                                                                                                                                                                                                                                                                                                                                                                                                                                                                                                                                                                                                                                                                                                                                                                                                                                                                                                                                                                                                                                                                                                                                                                                                                                                                                                                                                                                                                                                                                                                                                                                                                                                                                                                                                                                                                                                                                                                                                                                                                                                                                                                                                                                                                                                                                                                                                                                                                                                                                                                                                                                                                                                                                                                                                                                                                                                                                                                                                                                                                                                                                                                                                                                                                                                                                                                                                                                                                                                                                                                                                                                                                                                                                                                                                                                                                                                                 | Clinical Microbiology Laboratory, Sheba Medical Center                                                                                                                                                           | Stern Lab                                                                                                                                                                                                        |                                                                                                                                                                                                                                                                                                                                                                                                                                        |
| EPI_ISL_448449, EPI_ISL_448450, EPI_ISL_448451, EPI_ISL_448452, EPI_ISL_448453, EPI_ISL_448454, EPI_ISL_448455, EPI_ISL_448456, EPI_ISL_448457, EPI_ISL_448458, EPI_ISL_448459, EPI_ISL_448460, EPI_ISL_448461, EPI_ISL_448462, EPI_ISL_448463, EPI_ISL_448464, EPI_ISL_448465, EPI_ISL_448466, EPI_ISL_448467, EPI_ISL_448468, EPI_ISL_448469, EPI_ISL_448470, EPI_ISL_448471, EPI_ISL_448472, EPI_ISL_448473, EPI_ISL_448474, EPI_ISL_448475, EPI_ISL_448476, EPI_ISL_448477, EPI_ISL_448478, EPI_ISL_448479, EPI_ISL_448480, EPI_ISL_448481, EPI_ISL_448482, EPI_ISL_448483, EPI_ISL_448484, EPI_ISL_448485, EPI_ISL_448486, EPI_ISL_448487, EPI_ISL_448488, EPI_ISL_448489, EPI_ISL_448490, EPI_ISL_448491, EPI_ISL_448492, EPI_ISL_448493, EPI_ISL_448494, EPI_ISL_448495, EPI_ISL_448496, EPI_ISL_448497, EPI_ISL_448498, EPI_ISL_448499, EPI_ISL_448500, EPI_ISL_448501, EPI_ISL_448502, EPI_ISL_448503, EPI_ISL_448504, EPI_ISL_448505, EPI_ISL_448506, EPI_ISL_448507, EPI_ISL_448508, EPI_ISL_448509, EPI_ISL_448510, EPI_ISL_448511, EPI_ISL_448512, EPI_ISL_448513, EPI_ISL_448514, EPI_ISL_448515, EPI_ISL_448516, EPI_ISL_448517, EPI_ISL_448518, EPI_ISL_448519, EPI_ISL_448520, EPI_ISL_448521, EPI_ISL_448522, EPI_ISL_448523, EPI_ISL_448524, EPI_ISL_448525, EPI_ISL_448526, EPI_ISL_448527, EPI_ISL_448528, EPI_ISL_448529, EPI_ISL_448530, EPI_ISL_448531, EPI_ISL_448532, EPI_ISL_448533, EPI_ISL_448534, EPI_ISL_448535, EPI_ISL_448536, EPI_ISL_448537, EPI_ISL_448538, EPI_ISL_448539, EPI_ISL_448540, EPI_ISL_448541, EPI_ISL_448542, EPI_ISL_448543, EPI_ISL_448544, EPI_ISL_448545, EPI_ISL_448546, EPI_ISL_448547, EPI_ISL_448548, EPI_ISL_448549, EPI_ISL_448550, EPI_ISL_448551, EPI_ISL_448552, EPI_ISL_448553, EPI_ISL_448554, EPI_ISL_448555, EPI_ISL_448556, EPI_ISL_448557, EPI_ISL_448558, EPI_ISL_448559, EPI_ISL_448560, EPI_ISL_448561, EPI_ISL_448562, EPI_ISL_448563, EPI_ISL_448564, EPI_ISL_448565, EPI_ISL_448566, EPI_ISL_448567, EPI_ISL_448568, EPI_ISL_448569, EPI_ISL_448570, EPI_ISL_448571, EPI_ISL_448572, EPI_ISL_448573, EPI_ISL_448574, EPI_ISL_448575, EPI_ISL_448576, EPI_ISL_448577, EPI_ISL_448578, EPI_ISL_448579, EPI_ISL_448580, EPI_ISL_448581, EPI_ISL_448582, EPI_ISL_448583, EPI_ISL_448584, EPI_ISL_448585, EPI_ISL_448586, EPI_ISL_448587, EPI_ISL_448588, EPI_ISL_448589, EPI_ISL_448590, EPI_ISL_448591, EPI_ISL_448592, EPI_ISL_448593, EPI_ISL_448594, EPI_ISL_448595, EPI_ISL_448596, EPI_ISL_448597, EPI_ISL_448598, EPI_ISL_448599, EPI_ISL_448600, EPI_ISL_448601, EPI_ISL_448602, EPI_ISL_448603, EPI_ISL_448604, EPI_ISL_448605, EPI_ISL_448606, EPI_ISL_448607, EPI_ISL_448608, EPI_ISL_448609, EPI_ISL_448610, EPI_ISL_448611, EPI_ISL_448612, EPI_ISL_448613, EPI_ISL_448614, EPI_ISL_448615, EPI_ISL_448616, EPI_ISL_448617, EPI_ISL_448618, EPI_ISL_448619, EPI_ISL_448620, EPI_ISL_448621, EPI_ISL_448622, EPI_ISL_448623, EPI_ISL_448624, EPI_ISL_448625, EPI_ISL_448626, EPI_ISL_448627, EPI_ISL_448628, EPI_ISL_448629, EPI_ISL_448630, EPI_ISL_448631, EPI_ISL_448632, EPI_ISL_448633, EPI_ISL_448634, EPI_ISL_448635, EPI_ISL_448636, EPI_ISL_448637, EPI_ISL_448638, EPI_ISL_448639, EPI_ISL_448640, EPI_ISL_448641, EPI_ISL_448642, EPI_ISL_448643, EPI_ISL_448644, EPI_ISL_448645, EPI_ISL_448646, EPI_ISL_448647, EPI_ISL_448648, EPI_ISL_448649, EPI_ISL_448650, EPI_ISL_448651, EPI_ISL_448652, EPI_ISL_448653, EPI_ISL_448654, EPI_ISL_448655, EPI_ISL_448656, EPI_ISL_448657, EPI_ISL_448658, EPI_ISL_448659, EPI_ISL_448660, EPI_ISL_448661, EPI_ISL_448662, EPI_ISL_448663, EPI_ISL_448664, EPI_ISL_448665, EPI_ISL_448666, EPI_ISL_448667, EPI_ISL_448668, EPI_ISL_448669, EPI_ISL_448670, EPI_ISL_448671, EPI_ISL_448672, EPI_ISL_448673, EPI_ISL_448674, EPI_ISL_448675, EPI_ISL_448676, EPI_ISL_448677, EPI_ISL_448678, EPI_ISL_448679, EPI_ISL_448680, EPI_ISL_448681, EPI_ISL_448682, EPI_ISL_448683, EPI_ISL_448684, EPI_ISL_448685, EPI_ISL_448686, EPI_ISL_448687, EPI_ISL_448688, EPI_ISL_448689, EPI_ISL_448690, EPI_ISL_448691, EPI_ISL_448692, EPI_ISL_448693, EPI_ISL_448694, EPI_ISL_448695, EPI_ISL_448696, EPI_ISL_448697, EPI_ISL_448698, EPI_ISL_448699, EPI_ISL_448700, EPI_ISL_448701, EPI_ISL_448702, EPI_ISL_448703, EPI_ISL_448704, EPI_ISL_448705, EPI_ISL_448706, EPI_ISL_448707, EPI_ISL_448708, EPI_ISL_448709, EPI_ISL_448710, EPI_ISL_448711, EPI_ISL_448712, EPI_ISL_448713, EPI_ISL_448714, EPI_ISL_448715, EPI_ISL_448716, EPI_ISL_448717, EPI_ISL_448718, EPI_ISL_448719, EPI_ISL_448720, EPI_ISL_448721, EPI_ISL_448722, EPI_ISL_448723, EPI_ISL_448724, EPI_ISL_448725, EPI_ISL_448726, EPI_ISL_448727, EPI_ISL_448728, EPI_ISL_448729, EPI_ISL_448730, EPI_ISL_448731, EPI_ISL_448732, EPI_ISL_448733, EPI_ISL_448734, EPI_ISL_448735, EPI_ISL_448736, EPI_ISL_448737, EPI_ISL_448738, EPI_ISL_448739, EPI_ISL_448740, EPI_ISL_448741, EPI_ISL_448742, EPI_ISL_448743, EPI_ISL_448744, EPI_ISL_448745, EPI_ISL_448746, EPI_ISL_448747, EPI_ISL_448748, EPI_ISL_448749, EPI_ISL_448750, EPI_ISL_448751, EPI_ISL_448752, EPI_ISL_448753, EPI_ISL_448754, EPI_ISL_448755, EPI_ISL_448756, EPI_ISL_448757, EPI_ISL_448758, EPI_ISL_448759, EPI_ISL_448760, EPI_ISL_448761, EPI_ISL_448762, EPI_ISL_448763, EPI_ISL_448764, EPI_ISL_448765, EPI_ISL_448766, EPI_ISL_448767, EPI_ISL_448768, EPI_ISL_448769, EPI_ISL_448770, EPI_ISL_448771, EPI_ISL_448772, EPI_ISL_448773, EPI_ISL_448774, EPI_ISL_448775, EPI_ISL_448776, EPI_ISL_448777, EPI_ISL_448778, EPI_ISL_448779, EPI_ISL_448780, EPI_ISL_448781, EPI_ISL_448782, EPI_ISL_448783, EPI_ISL_448784, EPI_ISL_448785, EPI_ISL_448786, EPI_ISL_448787, EPI_ISL_448788, EPI_ISL_448789, EPI_ISL_448790, EPI_ISL_448791, EPI_ISL_448792, EPI_ISL_448793, EPI_ISL_448794, EPI_ISL_448795, EPI_ISL_448796, EPI_ISL_448797, EPI_ISL_448798, EPI_ISL_448799, EPI_ISL_448800, EPI_ISL_448801, EPI_ISL_448802, EPI_ISL_448803, EPI_ISL_448804, EPI_ISL_448805, EPI_ISL_448806, EPI_ISL_448807, EPI_ISL_448808, EPI_ISL_448809, EPI_ISL_448810, EPI_ISL_448811, EPI_ISL_448812, EPI_ISL_448813, EPI_ISL_448814, EPI_ISL_448815, EPI_ISL_448816, EPI_ISL_448817, EPI_ISL_448818, EPI_ISL_448819, EPI_ISL_448820, EPI_ISL_448821, EPI_ISL_448822, EPI_ISL_448823, EPI_ISL_448824, EPI_ISL_448825 | Oxford Viroemics, NDM, University of Oxford; Oxford University Hospitals; Basingstoke and North Hampshire Hospital                                                                                               | COVID-19 Genomics UK (COG-UK) Consortium                                                                                                                                                                         | Tanya Golubchik, David Bonsall, George Macintyre, Amy Trebes, Mariateresa de Cesare, Catrin Moore, Alex Mobbs, Anita Justice, Robert Shaw, Monique Andersson, Emma Wise, Nathan Moore, Jessica Lynch, Nick Cortes, Stephen Kidd, David Buck, John Todd, Christophe Fraser                                                                                                                                                              |
| EPI_ISL_450294                                                                                                                                                                                                                                                                                                                                                                                                                                                                                                                                                                                                                                                                                                                                                                                                                                                                                                                                                                                                                                                                                                                                                                                                                                                                                                                                                                                                                                                                                                                                                                                                                                                                                                                                                                                                                                                                                                                                                                                                                                                                                                                                                                                                                                                                                                                                                                                                                                                                                                                                                                                                                                                                                                                                                                                                                                                                                                                                                                                                                                                                                                                                                                                                                                                                                                                                                                                                                                                                                                                                                                                                                                                                                                                                                                                                                                                                                                                                                                                                                                                                                                                                                                                                                                                                                                                                                                                                                                                                                                                                                                                                                                                                                                                                                                                                                                                                                                                                                                                                                                                                                                                                                                                                                                                                                                                                                                                                                                                                                                                                                                                                                                                                                                                                                                                                                                                                                                                                                                                                                                                                                                                                                                                                                                                                 | Institute of Human Genetics, Polish Academy of Sciences Sanitary and Epidemiological Station in Pozna                                                                                                            | Institute of Human Genetics, Polish Academy of Sciences                                                                                                                                                          | Szymon Hryhorowicz, Adam Ustaszewski, Emilia Lis, Marta Kaczmarek-Ry, Micha Witt, Andrzej Pawski                                                                                                                                                                                                                                                                                                                                       |
| EPI_ISL_450295                                                                                                                                                                                                                                                                                                                                                                                                                                                                                                                                                                                                                                                                                                                                                                                                                                                                                                                                                                                                                                                                                                                                                                                                                                                                                                                                                                                                                                                                                                                                                                                                                                                                                                                                                                                                                                                                                                                                                                                                                                                                                                                                                                                                                                                                                                                                                                                                                                                                                                                                                                                                                                                                                                                                                                                                                                                                                                                                                                                                                                                                                                                                                                                                                                                                                                                                                                                                                                                                                                                                                                                                                                                                                                                                                                                                                                                                                                                                                                                                                                                                                                                                                                                                                                                                                                                                                                                                                                                                                                                                                                                                                                                                                                                                                                                                                                                                                                                                                                                                                                                                                                                                                                                                                                                                                                                                                                                                                                                                                                                                                                                                                                                                                                                                                                                                                                                                                                                                                                                                                                                                                                                                                                                                                                                                 | Institute of Human Genetics, Polish Academy of Sciences; Sanitary and Epidemiological Station in Pozna                                                                                                           | Institute of Human Genetics, Polish Academy of Sciences                                                                                                                                                          | Szymon Hryhorowicz, Adam Ustaszewski, Emilia Lis, Marta Kaczmarek-Ry, Micha Witt, Andrzej Pawski                                                                                                                                                                                                                                                                                                                                       |
| EPI_ISL_450338                                                                                                                                                                                                                                                                                                                                                                                                                                                                                                                                                                                                                                                                                                                                                                                                                                                                                                                                                                                                                                                                                                                                                                                                                                                                                                                                                                                                                                                                                                                                                                                                                                                                                                                                                                                                                                                                                                                                                                                                                                                                                                                                                                                                                                                                                                                                                                                                                                                                                                                                                                                                                                                                                                                                                                                                                                                                                                                                                                                                                                                                                                                                                                                                                                                                                                                                                                                                                                                                                                                                                                                                                                                                                                                                                                                                                                                                                                                                                                                                                                                                                                                                                                                                                                                                                                                                                                                                                                                                                                                                                                                                                                                                                                                                                                                                                                                                                                                                                                                                                                                                                                                                                                                                                                                                                                                                                                                                                                                                                                                                                                                                                                                                                                                                                                                                                                                                                                                                                                                                                                                                                                                                                                                                                                                                 | Institute of Human Genetics, Polish Academy of Sciences; Sanitary and Epidemiological Station in Pozna                                                                                                           | Institute of Human Genetics, Polish Academy of Sciences                                                                                                                                                          | Szymon Hryhorowicz, Adam Ustaszewski, Emilia Lis, Marta Kaczmarek-Ry, Micha Witt, Andrzej Pawski                                                                                                                                                                                                                                                                                                                                       |
| EPI_ISL_451155                                                                                                                                                                                                                                                                                                                                                                                                                                                                                                                                                                                                                                                                                                                                                                                                                                                                                                                                                                                                                                                                                                                                                                                                                                                                                                                                                                                                                                                                                                                                                                                                                                                                                                                                                                                                                                                                                                                                                                                                                                                                                                                                                                                                                                                                                                                                                                                                                                                                                                                                                                                                                                                                                                                                                                                                                                                                                                                                                                                                                                                                                                                                                                                                                                                                                                                                                                                                                                                                                                                                                                                                                                                                                                                                                                                                                                                                                                                                                                                                                                                                                                                                                                                                                                                                                                                                                                                                                                                                                                                                                                                                                                                                                                                                                                                                                                                                                                                                                                                                                                                                                                                                                                                                                                                                                                                                                                                                                                                                                                                                                                                                                                                                                                                                                                                                                                                                                                                                                                                                                                                                                                                                                                                                                                                                 | Government Medical College, Vadodara                                                                                                                                                                             | Gujarat Biotechnology Research Centre                                                                                                                                                                            | Tanuja Javadekar , Manish Pattani, Amit Kanani, Nidhi Patel, Nitin Savaliya, Raghawendra Kumar, Dinesh Kumar, Zuber Saiyed, Komal Patel, Labdhi Pandya, Snehal Bagathara, Ramesh Pandit, Tejas Shah, Ankit Hinsu, Pritesh Sabara, Apurvasinh Puvar, Janvi Raval, Zarna Patel, Monika Gandhi, Pinal Trivedi, Maharshi Pandya, Bhavesh Modi, Gaurishankar Shrimaili, R D Dixit, A M Kadri, Armi Chaudhari, Chaitanya Joshi, Madhvi Joshi |
| EPI_ISL_452249, EPI_ISL_452250,                                                                                                                                                                                                                                                                                                                                                                                                                                                                                                                                                                                                                                                                                                                                                                                                                                                                                                                                                                                                                                                                                                                                                                                                                                                                                                                                                                                                                                                                                                                                                                                                                                                                                                                                                                                                                                                                                                                                                                                                                                                                                                                                                                                                                                                                                                                                                                                                                                                                                                                                                                                                                                                                                                                                                                                                                                                                                                                                                                                                                                                                                                                                                                                                                                                                                                                                                                                                                                                                                                                                                                                                                                                                                                                                                                                                                                                                                                                                                                                                                                                                                                                                                                                                                                                                                                                                                                                                                                                                                                                                                                                                                                                                                                                                                                                                                                                                                                                                                                                                                                                                                                                                                                                                                                                                                                                                                                                                                                                                                                                                                                                                                                                                                                                                                                                                                                                                                                                                                                                                                                                                                                                                                                                                                                                | Respiratory Virus Unit, Microbiology Services Colindale,                                                                                                                                                         | Respiratory Virus Unit, Microbiology Services Colindale,                                                                                                                                                         | Steven Platt, Shahjahan Miah, Angie Lackenby, Omolola Akinbami, Tina Talts, Leena Bhaw, Richard Myers, Monica Galiano, Kirstin Edwards, Jonathan Hubb,                                                                                                                                                                                                                                                                                 |

|                                                                                                                                                                                                                                                                                                                                                                                                                                                                                                                                                                                                                                                                                                                                                                                                                                                                                                                                                                                                                                                                                                                                                                                                                                                                                                                                                                                                                                                                                                                                                                                                                                                                                                                                                                                                                                                                                                                                                                                                                                                                                                                                                                                                                                                                                                                                                                                                                                                                                                                                                                                                                                                                                                                                                                                                                                                                                                                                                                                                                                                                                                                                                                                |                                                                |                                                                            |                                                                                                                                                                                                                                                                                                                                                                                                                                                            |                                                                                                                                                                                                                                                                                                                                                                                                    |
|--------------------------------------------------------------------------------------------------------------------------------------------------------------------------------------------------------------------------------------------------------------------------------------------------------------------------------------------------------------------------------------------------------------------------------------------------------------------------------------------------------------------------------------------------------------------------------------------------------------------------------------------------------------------------------------------------------------------------------------------------------------------------------------------------------------------------------------------------------------------------------------------------------------------------------------------------------------------------------------------------------------------------------------------------------------------------------------------------------------------------------------------------------------------------------------------------------------------------------------------------------------------------------------------------------------------------------------------------------------------------------------------------------------------------------------------------------------------------------------------------------------------------------------------------------------------------------------------------------------------------------------------------------------------------------------------------------------------------------------------------------------------------------------------------------------------------------------------------------------------------------------------------------------------------------------------------------------------------------------------------------------------------------------------------------------------------------------------------------------------------------------------------------------------------------------------------------------------------------------------------------------------------------------------------------------------------------------------------------------------------------------------------------------------------------------------------------------------------------------------------------------------------------------------------------------------------------------------------------------------------------------------------------------------------------------------------------------------------------------------------------------------------------------------------------------------------------------------------------------------------------------------------------------------------------------------------------------------------------------------------------------------------------------------------------------------------------------------------------------------------------------------------------------------------------|----------------------------------------------------------------|----------------------------------------------------------------------------|------------------------------------------------------------------------------------------------------------------------------------------------------------------------------------------------------------------------------------------------------------------------------------------------------------------------------------------------------------------------------------------------------------------------------------------------------------|----------------------------------------------------------------------------------------------------------------------------------------------------------------------------------------------------------------------------------------------------------------------------------------------------------------------------------------------------------------------------------------------------|
| EPI_ISL_452251, EPI_ISL_452252, EPI_ISL_452253, EPI_ISL_452254, EPI_ISL_452255, EPI_ISL_452256, EPI_ISL_452257, EPI_ISL_452258                                                                                                                                                                                                                                                                                                                                                                                                                                                                                                                                                                                                                                                                                                                                                                                                                                                                                                                                                                                                                                                                                                                                                                                                                                                                                                                                                                                                                                                                                                                                                                                                                                                                                                                                                                                                                                                                                                                                                                                                                                                                                                                                                                                                                                                                                                                                                                                                                                                                                                                                                                                                                                                                                                                                                                                                                                                                                                                                                                                                                                                 | Public Health England                                          | Public Health England                                                      | Joanna Ellis, Maria Zambon                                                                                                                                                                                                                                                                                                                                                                                                                                 |                                                                                                                                                                                                                                                                                                                                                                                                    |
| EPI_ISL_454830, EPI_ISL_454831, EPI_ISL_454832, EPI_ISL_454833                                                                                                                                                                                                                                                                                                                                                                                                                                                                                                                                                                                                                                                                                                                                                                                                                                                                                                                                                                                                                                                                                                                                                                                                                                                                                                                                                                                                                                                                                                                                                                                                                                                                                                                                                                                                                                                                                                                                                                                                                                                                                                                                                                                                                                                                                                                                                                                                                                                                                                                                                                                                                                                                                                                                                                                                                                                                                                                                                                                                                                                                                                                 | SMS Medical College, Jaipur                                    | CSIR Institute of Genomics and Integrative Biology                         | Sudhir Bhandari, Rahul Bhojar, Mohammed Imran, Mohit Divakar, Disha Sharma, Anshul Kumar, Bani Jolly, Rahul Sahlot, Abhinav Jain, Paras Sehgal, Gyan Ranjan, Vinod Scaria, Sridhar Sivasubbu, Sandeep K Mathur                                                                                                                                                                                                                                             |                                                                                                                                                                                                                                                                                                                                                                                                    |
| EPI_ISL_455017                                                                                                                                                                                                                                                                                                                                                                                                                                                                                                                                                                                                                                                                                                                                                                                                                                                                                                                                                                                                                                                                                                                                                                                                                                                                                                                                                                                                                                                                                                                                                                                                                                                                                                                                                                                                                                                                                                                                                                                                                                                                                                                                                                                                                                                                                                                                                                                                                                                                                                                                                                                                                                                                                                                                                                                                                                                                                                                                                                                                                                                                                                                                                                 | Government Medical College, Vadodara                           | Gujarat Biotechnology Research Centre                                      | Tanuja Javadekar , R N Daveswar, Ramesh Pandit, Tejas Shah, Ankit Hinsu, Pritesh Sabara, Apurvashin Puvar, Janvi Raval, Zarna Patel, Monika Gandhi, Pinal Trivedi, Maharshi Pandya, Amit Kanani, Nidhi Patel, Nitin Savaliya, Raghawendra Kumar, Dinesh Kumar, Zuber Saiyed, Komal Patel, Labdhi Pandya, Snehal Bagatharia, Fenil Patel, Bhavesh Modi, Gaurishankar Shrimali, R D Dixit, A M Kadri, Umang Mishra, Chaitanya Joshi, Madhvi Joshi,           |                                                                                                                                                                                                                                                                                                                                                                                                    |
| EPI_ISL_455108                                                                                                                                                                                                                                                                                                                                                                                                                                                                                                                                                                                                                                                                                                                                                                                                                                                                                                                                                                                                                                                                                                                                                                                                                                                                                                                                                                                                                                                                                                                                                                                                                                                                                                                                                                                                                                                                                                                                                                                                                                                                                                                                                                                                                                                                                                                                                                                                                                                                                                                                                                                                                                                                                                                                                                                                                                                                                                                                                                                                                                                                                                                                                                 | Smedby HC                                                      | The Public Health Agency of Sweden                                         | Susanne Brunby, Anna-Malin Linde, Maria Lind Karlberg, Oskar Karlsson Lindsjo, Olov Svartstrom, Anna Risberg, Theresa Enkirch, Mia Brytting, Karin Tegmark-Wisell                                                                                                                                                                                                                                                                                          |                                                                                                                                                                                                                                                                                                                                                                                                    |
| EPI_ISL_455308, EPI_ISL_455309, EPI_ISL_455310, EPI_ISL_455311                                                                                                                                                                                                                                                                                                                                                                                                                                                                                                                                                                                                                                                                                                                                                                                                                                                                                                                                                                                                                                                                                                                                                                                                                                                                                                                                                                                                                                                                                                                                                                                                                                                                                                                                                                                                                                                                                                                                                                                                                                                                                                                                                                                                                                                                                                                                                                                                                                                                                                                                                                                                                                                                                                                                                                                                                                                                                                                                                                                                                                                                                                                 | REGIONAL VRDL/ICMR-RMRC BBSR                                   | Immunogenomics group, Institute of Life Sciences, Bhubaneswar              | Sunil Raghav, Jyotirmayee Turuk, Arup Ghosh, Atimukta Jha, Viplov K. Biswas, Swati Madhulika, Manasi Priyadarshini, Shuchi Smita, Jaya Singh Khastri, Rupesh Dash, Soma Chattopadhyay, Ghulam Hussain Syed, Shanti Senapati, Tushar K. Beuria, Debdutta Bhattacharya, Rajeeb Swain, Punit Prasad, COVID-19 team of ILS & RMRC, Orissa COVID-19 study group, DBT's PAN-INDIA 1000 SARS-CoV2 RNA genome sequencing consortium, Sanghamitra Pati, Ajay Parida |                                                                                                                                                                                                                                                                                                                                                                                                    |
| EPI_ISL_455432, EPI_ISL_455434                                                                                                                                                                                                                                                                                                                                                                                                                                                                                                                                                                                                                                                                                                                                                                                                                                                                                                                                                                                                                                                                                                                                                                                                                                                                                                                                                                                                                                                                                                                                                                                                                                                                                                                                                                                                                                                                                                                                                                                                                                                                                                                                                                                                                                                                                                                                                                                                                                                                                                                                                                                                                                                                                                                                                                                                                                                                                                                                                                                                                                                                                                                                                 | Instituto de Diagnostico y Referencia Epidemiologicos (INDRE)  | Instituto de Diagnostico y Referencia Epidemiologicos (INDRE)              | Taboada Ramirez Blanca, Ramirez-Gonzalez Ernesto, Garces-Ayala Fabiola, Araiza-Rodriguez Adnan, Mendieta-Condado Edgar, Rodriguez-Maldonado Abril, Wong-Arambula Claudia, Barrera-Badillo Gisela, Hernandez-Rivas Lucia, Lopez-Martinez Irma.                                                                                                                                                                                                              |                                                                                                                                                                                                                                                                                                                                                                                                    |
| EPI_ISL_455478                                                                                                                                                                                                                                                                                                                                                                                                                                                                                                                                                                                                                                                                                                                                                                                                                                                                                                                                                                                                                                                                                                                                                                                                                                                                                                                                                                                                                                                                                                                                                                                                                                                                                                                                                                                                                                                                                                                                                                                                                                                                                                                                                                                                                                                                                                                                                                                                                                                                                                                                                                                                                                                                                                                                                                                                                                                                                                                                                                                                                                                                                                                                                                 | REGIONAL VRDL/ICMR-RMRC BBSR                                   | Immunogenomics group, Institute of Life Sciences, Bhubaneswar              | Sunil Raghav, Jyotirmayee Turuk, Arup Ghosh, Atimukta Jha, Viplov K. Biswas, Swati Madhulika, Manasi Priyadarshini, Shuchi Smita, Jaya Singh Khastri, Rupesh Dash, Soma Chattopadhyay, Ghulam Hussain Syed, Shanti Senapati, Tushar K. Beuria, Debdutta Bhattacharya, Rajeeb Swain, Punit Prasad, COVID-19 team of ILS & RMRC, Orissa COVID-19 study group, DBT's PAN-INDIA 1000 SARS-CoV2 RNA genome sequencing consortium, Sanghamitra Pati, Ajay Parida |                                                                                                                                                                                                                                                                                                                                                                                                    |
| EPI_ISL_455609, EPI_ISL_455610, EPI_ISL_455611, EPI_ISL_455612, EPI_ISL_455613, EPI_ISL_455614, EPI_ISL_455615, EPI_ISL_455616, EPI_ISL_455617, EPI_ISL_455618, EPI_ISL_455619, EPI_ISL_455620, EPI_ISL_455621, EPI_ISL_455622, EPI_ISL_455623                                                                                                                                                                                                                                                                                                                                                                                                                                                                                                                                                                                                                                                                                                                                                                                                                                                                                                                                                                                                                                                                                                                                                                                                                                                                                                                                                                                                                                                                                                                                                                                                                                                                                                                                                                                                                                                                                                                                                                                                                                                                                                                                                                                                                                                                                                                                                                                                                                                                                                                                                                                                                                                                                                                                                                                                                                                                                                                                 | see above                                                      | Ochsner Health                                                             | Bioinfoexperts, LLC                                                                                                                                                                                                                                                                                                                                                                                                                                        |                                                                                                                                                                                                                                                                                                                                                                                                    |
| EPI_ISL_455749, EPI_ISL_455750, EPI_ISL_455751, EPI_ISL_455752, EPI_ISL_455753, EPI_ISL_455754, EPI_ISL_455755, EPI_ISL_455756, EPI_ISL_455757, EPI_ISL_455758, EPI_ISL_455759, EPI_ISL_455760, EPI_ISL_455761, EPI_ISL_455762, EPI_ISL_455763, EPI_ISL_455764, EPI_ISL_455765, EPI_ISL_455766, EPI_ISL_455767, EPI_ISL_455768, EPI_ISL_455769, EPI_ISL_455770, EPI_ISL_455771, EPI_ISL_455772, EPI_ISL_455773, EPI_ISL_455774, EPI_ISL_455775, EPI_ISL_455776, EPI_ISL_455777, EPI_ISL_455778, EPI_ISL_455779, EPI_ISL_455780, EPI_ISL_455781, EPI_ISL_455782, EPI_ISL_455783, EPI_ISL_455784, EPI_ISL_455785, EPI_ISL_455786, EPI_ISL_455787, EPI_ISL_455788                                                                                                                                                                                                                                                                                                                                                                                                                                                                                                                                                                                                                                                                                                                                                                                                                                                                                                                                                                                                                                                                                                                                                                                                                                                                                                                                                                                                                                                                                                                                                                                                                                                                                                                                                                                                                                                                                                                                                                                                                                                                                                                                                                                                                                                                                                                                                                                                                                                                                                                 | see above                                                      | REGIONAL VRDL/ICMR-RMRC BBSR                                               | Immunogenomics lab, Institute of Life Sciences, Bhubaneswar                                                                                                                                                                                                                                                                                                                                                                                                |                                                                                                                                                                                                                                                                                                                                                                                                    |
| EPI_ISL_458299, EPI_ISL_458300, EPI_ISL_458302, EPI_ISL_458304, EPI_ISL_458305, EPI_ISL_458306, EPI_ISL_458307, EPI_ISL_458308, EPI_ISL_458309, EPI_ISL_458310, EPI_ISL_458311, EPI_ISL_458316, EPI_ISL_458317, EPI_ISL_458318, EPI_ISL_458320, EPI_ISL_458321, EPI_ISL_458322, EPI_ISL_458323, EPI_ISL_458324, EPI_ISL_458325, EPI_ISL_458326, EPI_ISL_458327, EPI_ISL_458328, EPI_ISL_458330, EPI_ISL_458331, EPI_ISL_458334, EPI_ISL_458336, EPI_ISL_458338, EPI_ISL_458342, EPI_ISL_458343, EPI_ISL_458344, EPI_ISL_458345, EPI_ISL_458346, EPI_ISL_458347, EPI_ISL_458348, EPI_ISL_458349, EPI_ISL_458350, EPI_ISL_458351, EPI_ISL_458352, EPI_ISL_458353, EPI_ISL_458354, EPI_ISL_458355, EPI_ISL_458356, EPI_ISL_458357, EPI_ISL_458359, EPI_ISL_458360, EPI_ISL_458362, EPI_ISL_458363, EPI_ISL_458364, EPI_ISL_458365, EPI_ISL_458366, EPI_ISL_458368, EPI_ISL_458369, EPI_ISL_458370, EPI_ISL_458371, EPI_ISL_458372, EPI_ISL_458374, EPI_ISL_458375, EPI_ISL_458376, EPI_ISL_458377, EPI_ISL_458378, EPI_ISL_458379, EPI_ISL_458380, EPI_ISL_458381, EPI_ISL_458382, EPI_ISL_458383, EPI_ISL_458384, EPI_ISL_458385, EPI_ISL_458386, EPI_ISL_458387, EPI_ISL_458389, EPI_ISL_458391, EPI_ISL_458394, EPI_ISL_458397, EPI_ISL_458398, EPI_ISL_458399, EPI_ISL_458401, EPI_ISL_458402, EPI_ISL_458403, EPI_ISL_458404, EPI_ISL_458405, EPI_ISL_458406, EPI_ISL_458407, EPI_ISL_458408, EPI_ISL_458409, EPI_ISL_458410, EPI_ISL_458413, EPI_ISL_458414, EPI_ISL_458417, EPI_ISL_458419, EPI_ISL_458420, EPI_ISL_458422, EPI_ISL_458425, EPI_ISL_458426, EPI_ISL_458427, EPI_ISL_458428, EPI_ISL_458429, EPI_ISL_458430, EPI_ISL_458432, EPI_ISL_458433, EPI_ISL_458434, EPI_ISL_458435, EPI_ISL_458436, EPI_ISL_458437, EPI_ISL_458438, EPI_ISL_458440, EPI_ISL_458441, EPI_ISL_458442, EPI_ISL_458443, EPI_ISL_458444, EPI_ISL_458445, EPI_ISL_458447, EPI_ISL_458448, EPI_ISL_458449, EPI_ISL_458450, EPI_ISL_458453, EPI_ISL_458454, EPI_ISL_458456, EPI_ISL_458458, EPI_ISL_458459, EPI_ISL_458463, EPI_ISL_458465, EPI_ISL_458466, EPI_ISL_458468, EPI_ISL_458469, EPI_ISL_458470, EPI_ISL_458472, EPI_ISL_458474, EPI_ISL_458475, EPI_ISL_458477, EPI_ISL_458478, EPI_ISL_458480, EPI_ISL_458481, EPI_ISL_458482, EPI_ISL_458483, EPI_ISL_458484, EPI_ISL_458485, EPI_ISL_458486, EPI_ISL_458487, EPI_ISL_458488, EPI_ISL_458489, EPI_ISL_458490                                                                                                                                                                                                                                                                                                                                                                                                                                                                                                                                                                                                                                                                                                                                                                                                                 | see above                                                      | PHE South West Regional Laboratory, National Infection Service             | Wellcome Sanger Institute for the COVID-19 Genomics UK (COG-UK) consortium                                                                                                                                                                                                                                                                                                                                                                                 | Stephanie Hutchings, Hannah Pymont, Dr Peter Muir, Barry Vipond, Rich Hopes; and Alex Alderton, Roberto Amato, Sonia Goncalves, Ewan Harrison, David K. Jackson, Ian Johnston, Dominic Kwiatkowski, Cordelia Langford, John Sillitoe on behalf of the Wellcome Sanger Institute COVID-19 Surveillance Team ( <a href="http://www.sanger.ac.uk/covid-team">http://www.sanger.ac.uk/covid-team</a> ) |
| EPI_ISL_458491                                                                                                                                                                                                                                                                                                                                                                                                                                                                                                                                                                                                                                                                                                                                                                                                                                                                                                                                                                                                                                                                                                                                                                                                                                                                                                                                                                                                                                                                                                                                                                                                                                                                                                                                                                                                                                                                                                                                                                                                                                                                                                                                                                                                                                                                                                                                                                                                                                                                                                                                                                                                                                                                                                                                                                                                                                                                                                                                                                                                                                                                                                                                                                 | PHE South West Regional Laboratory, National Infection Service | Wellcome Sanger Institute for the COVID-19 Genomics UK (COG-UK) Consortium | Stephanie Hutchings, Hannah Pymont, Dr Peter Muir, Barry Vipond, Rich Hopes; and Alex Alderton, Roberto Amato, Sonia Goncalves, Ewan Harrison, David K. Jackson, Ian Johnston, Dominic Kwiatkowski, Cordelia Langford, John Sillitoe on behalf of the Wellcome Sanger Institute COVID-19 Surveillance Team ( <a href="http://www.sanger.ac.uk/covid-team">http://www.sanger.ac.uk/covid-team</a> )                                                         |                                                                                                                                                                                                                                                                                                                                                                                                    |
| EPI_ISL_458492, EPI_ISL_458493, EPI_ISL_458494, EPI_ISL_458495, EPI_ISL_458496, EPI_ISL_458497, EPI_ISL_458498, EPI_ISL_458500, EPI_ISL_458501, EPI_ISL_458503, EPI_ISL_458504, EPI_ISL_458505, EPI_ISL_458506, EPI_ISL_458508, EPI_ISL_458509, EPI_ISL_458510, EPI_ISL_458511, EPI_ISL_458513, EPI_ISL_458514, EPI_ISL_458515, EPI_ISL_458719, EPI_ISL_458721, EPI_ISL_458722, EPI_ISL_458723, EPI_ISL_458724, EPI_ISL_458725, EPI_ISL_458726, EPI_ISL_458727, EPI_ISL_458730, EPI_ISL_458731, EPI_ISL_458732, EPI_ISL_458734, EPI_ISL_458735, EPI_ISL_458736, EPI_ISL_458737, EPI_ISL_458738, EPI_ISL_458739, EPI_ISL_458740, EPI_ISL_458742, EPI_ISL_458743, EPI_ISL_458744, EPI_ISL_458745, EPI_ISL_458746, EPI_ISL_458748, EPI_ISL_458749, EPI_ISL_458750, EPI_ISL_458751, EPI_ISL_458752, EPI_ISL_458753, EPI_ISL_458754, EPI_ISL_458756, EPI_ISL_458757, EPI_ISL_458758, EPI_ISL_458759, EPI_ISL_458760, EPI_ISL_458761, EPI_ISL_458762, EPI_ISL_458763, EPI_ISL_458765, EPI_ISL_458766, EPI_ISL_458767, EPI_ISL_458768, EPI_ISL_458769, EPI_ISL_458770, EPI_ISL_458772, EPI_ISL_458773, EPI_ISL_458776, EPI_ISL_458777, EPI_ISL_458778, EPI_ISL_458779, EPI_ISL_458780, EPI_ISL_458781, EPI_ISL_458782, EPI_ISL_458783, EPI_ISL_458784, EPI_ISL_458785                                                                                                                                                                                                                                                                                                                                                                                                                                                                                                                                                                                                                                                                                                                                                                                                                                                                                                                                                                                                                                                                                                                                                                                                                                                                                                                                                                                                                                                                                                                                                                                                                                                                                                                                                                                                                                                                                                                 | see above                                                      | PHE South West Regional Laboratory, National Infection Service             | Wellcome Sanger Institute for the COVID-19 Genomics UK (COG-UK) consortium                                                                                                                                                                                                                                                                                                                                                                                 | Stephanie Hutchings, Hannah Pymont, Dr Peter Muir, Barry Vipond, Rich Hopes; and Alex Alderton, Roberto Amato, Sonia Goncalves, Ewan Harrison, David K. Jackson, Ian Johnston, Dominic Kwiatkowski, Cordelia Langford, John Sillitoe on behalf of the Wellcome Sanger Institute COVID-19 Surveillance Team ( <a href="http://www.sanger.ac.uk/covid-team">http://www.sanger.ac.uk/covid-team</a> ) |
| EPI_ISL_458786                                                                                                                                                                                                                                                                                                                                                                                                                                                                                                                                                                                                                                                                                                                                                                                                                                                                                                                                                                                                                                                                                                                                                                                                                                                                                                                                                                                                                                                                                                                                                                                                                                                                                                                                                                                                                                                                                                                                                                                                                                                                                                                                                                                                                                                                                                                                                                                                                                                                                                                                                                                                                                                                                                                                                                                                                                                                                                                                                                                                                                                                                                                                                                 | PHE South West Regional Laboratory, National Infection Service | Wellcome Sanger Institute for the COVID-19 Genomics UK (COG-UK) Consortium | Stephanie Hutchings, Hannah Pymont, Dr Peter Muir, Barry Vipond, Rich Hopes; and Alex Alderton, Roberto Amato, Sonia Goncalves, Ewan Harrison, David K. Jackson, Ian Johnston, Dominic Kwiatkowski, Cordelia Langford, John Sillitoe on behalf of the Wellcome Sanger Institute COVID-19 Surveillance Team ( <a href="http://www.sanger.ac.uk/covid-team">http://www.sanger.ac.uk/covid-team</a> )                                                         |                                                                                                                                                                                                                                                                                                                                                                                                    |
| EPI_ISL_458788, EPI_ISL_458790, EPI_ISL_458791, EPI_ISL_458793, EPI_ISL_458794, EPI_ISL_458795, EPI_ISL_458796, EPI_ISL_458797, EPI_ISL_458799                                                                                                                                                                                                                                                                                                                                                                                                                                                                                                                                                                                                                                                                                                                                                                                                                                                                                                                                                                                                                                                                                                                                                                                                                                                                                                                                                                                                                                                                                                                                                                                                                                                                                                                                                                                                                                                                                                                                                                                                                                                                                                                                                                                                                                                                                                                                                                                                                                                                                                                                                                                                                                                                                                                                                                                                                                                                                                                                                                                                                                 | PHE South West Regional Laboratory, National Infection Service | Wellcome Sanger Institute for the COVID-19 Genomics UK (COG-UK) consortium | Stephanie Hutchings, Hannah Pymont, Dr Peter Muir, Barry Vipond, Rich Hopes; and Alex Alderton, Roberto Amato, Sonia Goncalves, Ewan Harrison, David K. Jackson, Ian Johnston, Dominic Kwiatkowski, Cordelia Langford, John Sillitoe on behalf of the Wellcome Sanger Institute COVID-19 Surveillance Team ( <a href="http://www.sanger.ac.uk/covid-team">http://www.sanger.ac.uk/covid-team</a> )                                                         |                                                                                                                                                                                                                                                                                                                                                                                                    |
| EPI_ISL_458800                                                                                                                                                                                                                                                                                                                                                                                                                                                                                                                                                                                                                                                                                                                                                                                                                                                                                                                                                                                                                                                                                                                                                                                                                                                                                                                                                                                                                                                                                                                                                                                                                                                                                                                                                                                                                                                                                                                                                                                                                                                                                                                                                                                                                                                                                                                                                                                                                                                                                                                                                                                                                                                                                                                                                                                                                                                                                                                                                                                                                                                                                                                                                                 | PHE South West Regional Laboratory, National Infection Service | Wellcome Sanger Institute for the COVID-19 Genomics UK (COG-UK) Consortium | Stephanie Hutchings, Hannah Pymont, Dr Peter Muir, Barry Vipond, Rich Hopes; and Alex Alderton, Roberto Amato, Sonia Goncalves, Ewan Harrison, David K. Jackson, Ian Johnston, Dominic Kwiatkowski, Cordelia Langford, John Sillitoe on behalf of the Wellcome Sanger Institute COVID-19 Surveillance Team ( <a href="http://www.sanger.ac.uk/covid-team">http://www.sanger.ac.uk/covid-team</a> )                                                         |                                                                                                                                                                                                                                                                                                                                                                                                    |
| EPI_ISL_458801, EPI_ISL_458802, EPI_ISL_458804, EPI_ISL_458805, EPI_ISL_458807, EPI_ISL_458808, EPI_ISL_458809, EPI_ISL_458810, EPI_ISL_458811, EPI_ISL_458812, EPI_ISL_458814, EPI_ISL_458816, EPI_ISL_458817, EPI_ISL_458818, EPI_ISL_458820, EPI_ISL_458821, EPI_ISL_458822, EPI_ISL_458823, EPI_ISL_458824, EPI_ISL_458825, EPI_ISL_458826, EPI_ISL_458828, EPI_ISL_458829, EPI_ISL_458831, EPI_ISL_458832, EPI_ISL_458833, EPI_ISL_458835, EPI_ISL_458836, EPI_ISL_458837, EPI_ISL_458838, EPI_ISL_458840, EPI_ISL_458841, EPI_ISL_458842, EPI_ISL_458843, EPI_ISL_458844, EPI_ISL_458845, EPI_ISL_458846, EPI_ISL_458848, EPI_ISL_458849, EPI_ISL_458850, EPI_ISL_458852, EPI_ISL_458853, EPI_ISL_458855, EPI_ISL_458858, EPI_ISL_458859, EPI_ISL_458861, EPI_ISL_458862, EPI_ISL_458863, EPI_ISL_458865, EPI_ISL_458866, EPI_ISL_458867, EPI_ISL_458868, EPI_ISL_458869, EPI_ISL_458870, EPI_ISL_458871, EPI_ISL_458872, EPI_ISL_458873, EPI_ISL_458874, EPI_ISL_458875, EPI_ISL_458876, EPI_ISL_458877, EPI_ISL_458878, EPI_ISL_458879, EPI_ISL_458880, EPI_ISL_458881, EPI_ISL_458882, EPI_ISL_458883, EPI_ISL_458884, EPI_ISL_458885, EPI_ISL_458886, EPI_ISL_458887, EPI_ISL_458888, EPI_ISL_458889, EPI_ISL_458890, EPI_ISL_458891, EPI_ISL_458892, EPI_ISL_458893, EPI_ISL_458894, EPI_ISL_458895, EPI_ISL_458896, EPI_ISL_458897, EPI_ISL_458898, EPI_ISL_458899, EPI_ISL_458900, EPI_ISL_458902, EPI_ISL_458903, EPI_ISL_458904, EPI_ISL_458905, EPI_ISL_458906, EPI_ISL_458907, EPI_ISL_458908, EPI_ISL_458909, EPI_ISL_458910, EPI_ISL_458911, EPI_ISL_458912, EPI_ISL_458913, EPI_ISL_458914, EPI_ISL_458915, EPI_ISL_458916, EPI_ISL_458918, EPI_ISL_458922, EPI_ISL_458923, EPI_ISL_458924, EPI_ISL_458925, EPI_ISL_458927, EPI_ISL_458928, EPI_ISL_458931, EPI_ISL_458933, EPI_ISL_458934, EPI_ISL_458935, EPI_ISL_458936, EPI_ISL_458937, EPI_ISL_458938, EPI_ISL_458939, EPI_ISL_458940, EPI_ISL_458941, EPI_ISL_458942, EPI_ISL_458943, EPI_ISL_458944, EPI_ISL_458945, EPI_ISL_458946, EPI_ISL_458947, EPI_ISL_458949, EPI_ISL_458950, EPI_ISL_458951, EPI_ISL_458952, EPI_ISL_458953, EPI_ISL_458954, EPI_ISL_458955, EPI_ISL_458956, EPI_ISL_458959, EPI_ISL_458961, EPI_ISL_458962, EPI_ISL_458963, EPI_ISL_458964, EPI_ISL_458965, EPI_ISL_458966, EPI_ISL_458967, EPI_ISL_458968, EPI_ISL_458969, EPI_ISL_458970, EPI_ISL_458971, EPI_ISL_458972, EPI_ISL_458973, EPI_ISL_458974, EPI_ISL_458975, EPI_ISL_458976, EPI_ISL_458977, EPI_ISL_458978, EPI_ISL_458979, EPI_ISL_458981, EPI_ISL_458982, EPI_ISL_458983, EPI_ISL_458985, EPI_ISL_458986, EPI_ISL_458987, EPI_ISL_458988, EPI_ISL_458989, EPI_ISL_458990, EPI_ISL_459000, EPI_ISL_459001, EPI_ISL_459002, EPI_ISL_459003, EPI_ISL_459004, EPI_ISL_459005, EPI_ISL_459006, EPI_ISL_459007, EPI_ISL_459008, EPI_ISL_459009, EPI_ISL_459010, EPI_ISL_459011, EPI_ISL_459012, EPI_ISL_459013, EPI_ISL_459014, EPI_ISL_459016, EPI_ISL_459017, EPI_ISL_459019, EPI_ISL_459021, EPI_ISL_459022, EPI_ISL_459023, EPI_ISL_459025, EPI_ISL_459026, EPI_ISL_459028, EPI_ISL_459029, EPI_ISL_459031, EPI_ISL_459032, EPI_ISL_459033, EPI_ISL_459034, EPI_ISL_459035, EPI_ISL_459036, EPI_ISL_459038 | see above                                                      | PHE South West Regional Laboratory, National Infection Service             | Wellcome Sanger Institute for the COVID-19 Genomics UK (COG-UK) consortium                                                                                                                                                                                                                                                                                                                                                                                 | Stephanie Hutchings, Hannah Pymont, Dr Peter Muir, Barry Vipond, Rich Hopes; and Alex Alderton, Roberto Amato, Sonia Goncalves, Ewan Harrison, David K. Jackson, Ian Johnston, Dominic Kwiatkowski, Cordelia Langford, John Sillitoe on behalf of the Wellcome Sanger Institute COVID-19 Surveillance Team ( <a href="http://www.sanger.ac.uk/covid-team">http://www.sanger.ac.uk/covid-team</a> ) |
| EPI_ISL_459039                                                                                                                                                                                                                                                                                                                                                                                                                                                                                                                                                                                                                                                                                                                                                                                                                                                                                                                                                                                                                                                                                                                                                                                                                                                                                                                                                                                                                                                                                                                                                                                                                                                                                                                                                                                                                                                                                                                                                                                                                                                                                                                                                                                                                                                                                                                                                                                                                                                                                                                                                                                                                                                                                                                                                                                                                                                                                                                                                                                                                                                                                                                                                                 | PHE South West Regional Laboratory, National Infection Service | Wellcome Sanger Institute for the COVID-19 Genomics UK (COG-UK) Consortium | Stephanie Hutchings, Hannah Pymont, Dr Peter Muir, Barry Vipond, Rich Hopes; and Alex Alderton, Roberto Amato, Sonia Goncalves, Ewan Harrison, David K. Jackson, Ian Johnston, Dominic Kwiatkowski, Cordelia Langford, John Sillitoe on behalf of the Wellcome Sanger Institute COVID-19 Surveillance Team ( <a href="http://www.sanger.ac.uk/covid-team">http://www.sanger.ac.uk/covid-team</a> )                                                         |                                                                                                                                                                                                                                                                                                                                                                                                    |

|                                                                                                                                                                                                                                                                                                                                                                                                                                                                                                                                                                                                                                                                                                                                                                                                                                                                                                 |           |                                                                                                                                |                                                                                                                                |                                                                                                                                                                                                                                                                                                                                                                                                                                                         |
|-------------------------------------------------------------------------------------------------------------------------------------------------------------------------------------------------------------------------------------------------------------------------------------------------------------------------------------------------------------------------------------------------------------------------------------------------------------------------------------------------------------------------------------------------------------------------------------------------------------------------------------------------------------------------------------------------------------------------------------------------------------------------------------------------------------------------------------------------------------------------------------------------|-----------|--------------------------------------------------------------------------------------------------------------------------------|--------------------------------------------------------------------------------------------------------------------------------|---------------------------------------------------------------------------------------------------------------------------------------------------------------------------------------------------------------------------------------------------------------------------------------------------------------------------------------------------------------------------------------------------------------------------------------------------------|
| EPI_ISL_459040, EPI_ISL_459041, EPI_ISL_459042, EPI_ISL_459043, EPI_ISL_459044, EPI_ISL_459045, EPI_ISL_459046, EPI_ISL_459047, EPI_ISL_459048, EPI_ISL_459049, EPI_ISL_459050, EPI_ISL_459051, EPI_ISL_459052, EPI_ISL_459053, EPI_ISL_459056, EPI_ISL_459057, EPI_ISL_459058, EPI_ISL_459059, EPI_ISL_459060, EPI_ISL_459061, EPI_ISL_459063, EPI_ISL_459064, EPI_ISL_459065, EPI_ISL_459069, EPI_ISL_459070, EPI_ISL_459071, EPI_ISL_459073, EPI_ISL_459074, EPI_ISL_459075, EPI_ISL_459076, EPI_ISL_459077, EPI_ISL_459079, EPI_ISL_459080, EPI_ISL_459082, EPI_ISL_459083, EPI_ISL_459084, EPI_ISL_459085, EPI_ISL_459086, EPI_ISL_459087, EPI_ISL_459088, EPI_ISL_459089, EPI_ISL_459090, EPI_ISL_459091, EPI_ISL_459092, EPI_ISL_459093, EPI_ISL_459725, EPI_ISL_459726, EPI_ISL_459727                                                                                                  | see above | PHE South West Regional Laboratory, National Infection Service                                                                 | Wellcome Sanger Institute for the COVID-19 Genomics UK (COG-UK) consortium                                                     | Stephanie Hutchings, Hannah Pymont, Dr Peter Muir, Barry Vipond, Rich Hopes; and Alex Alderton, Roberto Amato, Sonia Goncalves, Ewan Harrison, David K. Jackson, Ian Johnston, Dominic Kwiatkowski, Cordelia Langford, John Sillitoe on behalf of the Wellcome Sanger Institute COVID-19 Surveillance Team ( <a href="http://www.sanger.ac.uk/covid-team">http://www.sanger.ac.uk/covid-team</a> )                                                      |
| EPI_ISL_459953                                                                                                                                                                                                                                                                                                                                                                                                                                                                                                                                                                                                                                                                                                                                                                                                                                                                                  |           | Institute for Medical Research, Infectious Disease Research Centre, National Institutes of Health, Ministry of Health Malaysia | Institute for Medical Research Infectious Disease Research Centre, National Institutes of Health, Ministry of Health Malaysia  | Suppiah J, Mohd-Zawawi Z, Kamel KA, ELLAN K, Kalyanasundram J, Mohd-Zain R, Thayan R                                                                                                                                                                                                                                                                                                                                                                    |
| EPI_ISL_459954, EPI_ISL_459955, EPI_ISL_459956                                                                                                                                                                                                                                                                                                                                                                                                                                                                                                                                                                                                                                                                                                                                                                                                                                                  |           | Institute for Medical Research, Infectious Disease Research Centre, National Institutes of Health, Ministry of Health Malaysia | Institute for Medical Research, Infectious Disease Research Centre, National Institutes of Health, Ministry of Health Malaysia | Suppiah J, Mohd-Zawawi Z, Kamel KA, ELLAN K, Kalyanasundram J, Mohd-Zain R, Thayan R                                                                                                                                                                                                                                                                                                                                                                    |
| EPI_ISL_459957                                                                                                                                                                                                                                                                                                                                                                                                                                                                                                                                                                                                                                                                                                                                                                                                                                                                                  |           | Institute for Medical Research, Infectious Disease Research Centre, National Institutes of Health, Minis                       | Institute for Medical Research, Infectious Disease Research Centre, National Institutes of Health, Minis                       | Suppiah J, Mohd-Zawawi Z, Kamel KA, ELLAN K, Kalyanasundram J, Mohd-Zain R, Thayan R                                                                                                                                                                                                                                                                                                                                                                    |
| EPI_ISL_459958, EPI_ISL_459959, EPI_ISL_459960, EPI_ISL_459961                                                                                                                                                                                                                                                                                                                                                                                                                                                                                                                                                                                                                                                                                                                                                                                                                                  |           | Respiratory Virus Unit, Microbiology Services Colindale, Public Health England                                                 | Respiratory Virus Unit, Microbiology Services Colindale, Public Health England                                                 | Steven Platt, Shahjahan Miah, Angie Lackenby, Omolola Akinbami, Tina Talts, Leena Bhaw, Richard Myers, Monica Galiano, Kirstin Edwards, Jonathan Hubb, Joanna Ellis, Maria Zambon                                                                                                                                                                                                                                                                       |
| EPI_ISL_462480                                                                                                                                                                                                                                                                                                                                                                                                                                                                                                                                                                                                                                                                                                                                                                                                                                                                                  |           | Institute of Human Genetics, Polish Academy of Sciences                                                                        | Institute of Human Genetics, Polish Academy of Sciences                                                                        | Szymon Hryhorowicz, Adam Ustaszewski, Emilia Lis, Marta Kaczmarek-Ry, Micha Witt, Andrzej Pawski                                                                                                                                                                                                                                                                                                                                                        |
| EPI_ISL_463010, EPI_ISL_463011, EPI_ISL_463012, EPI_ISL_463013, EPI_ISL_463014, EPI_ISL_463015, EPI_ISL_463016, EPI_ISL_463017, EPI_ISL_463018, EPI_ISL_463019, EPI_ISL_463020, EPI_ISL_463021, EPI_ISL_463022, EPI_ISL_463023, EPI_ISL_463024, EPI_ISL_463025, EPI_ISL_463026, EPI_ISL_463027, EPI_ISL_463028, EPI_ISL_463029, EPI_ISL_463030                                                                                                                                                                                                                                                                                                                                                                                                                                                                                                                                                  | see above | Institute of Life Sciences, Bhubaneswar                                                                                        | Immunogenomics lab, Institute of Life Sciences, Bhubaneswar                                                                    | Sunil Raghav, Arup Ghosh, Atimukta Jha, Viplov K. Biswas, Swati Madhulika, Manasi Priyadarshini, Shuchi Smita, Kaushik Sen, Hiren G. Dodia, Deepak Singh, Jeky Chawla, Shamima Ansari, Rupesh Dash, Soma Chattopadhyay, Ghulam Hussain Syed, Shanti Senapati, Tushar K. Beuria, Rajeeb Swain, Punit Prasad, ILS COVID-19 TEAM, Orissa COVID-19 Study Group, DBT's PAN-INDIA 1000 SARS-CoV2 RNA genome sequencing consortium, Ajay Parida                |
| EPI_ISL_463031, EPI_ISL_463032, EPI_ISL_463033, EPI_ISL_463034, EPI_ISL_463035, EPI_ISL_463036, EPI_ISL_463037, EPI_ISL_463038, EPI_ISL_463039, EPI_ISL_463040, EPI_ISL_463041, EPI_ISL_463042, EPI_ISL_463043, EPI_ISL_463044, EPI_ISL_463045, EPI_ISL_463046, EPI_ISL_463047, EPI_ISL_463048, EPI_ISL_463049, EPI_ISL_463050, EPI_ISL_463051                                                                                                                                                                                                                                                                                                                                                                                                                                                                                                                                                  | see above | Institute of Life Sciences, Bhubaneswar                                                                                        | Immunogenomics lab, Institute of Life Sciences, Bhubaneswar                                                                    | Sunil Raghav, Arup Ghosh, Atimukta Jha, Viplov K. Biswas, Swati Madhulika, Manasi Priyadarshini, Shuchi Smita, O. P. Shriwas, Priyanka Mohapatra, Satya Ranjan Sahu, Aliva Minz, Debyashrita Barik, Rupesh Dash, Soma Chattopadhyay, Ghulam Hussain Syed, Shanti Senapati, Tushar K. Beuria, Rajeeb Swain, Punit Prasad, ILS COVID-19 TEAM, Orissa COVID-19 Study Group, DBT's PAN-INDIA 1000 SARS-CoV2 RNA genome sequencing consortium, Ajay Parida   |
| EPI_ISL_463052, EPI_ISL_463053, EPI_ISL_463054, EPI_ISL_463055, EPI_ISL_463056, EPI_ISL_463057, EPI_ISL_463058, EPI_ISL_463059, EPI_ISL_463060, EPI_ISL_463061, EPI_ISL_463062, EPI_ISL_463063, EPI_ISL_463064, EPI_ISL_463065, EPI_ISL_463066, EPI_ISL_463067, EPI_ISL_463068, EPI_ISL_463069, EPI_ISL_463070, EPI_ISL_463071, EPI_ISL_463072                                                                                                                                                                                                                                                                                                                                                                                                                                                                                                                                                  | see above | Institute of Life Sciences, Bhubaneswar                                                                                        | Immunogenomics lab, Institute of Life Sciences, Bhubaneswar                                                                    | Sunil Raghav, Arup Ghosh, Atimukta Jha, Viplov K. Biswas, Swati Madhulika, Manasi Priyadarshini, Shuchi Smita, Sifu Agarwal, Sanchari Chatterjee, Avula Kiran, Parej Nath, Supriya Suman, Rina Yadav, Rupesh Dash, Soma Chattopadhyay, Ghulam Hussain Syed, Shanti Senapati, Tushar K. Beuria, Rajeeb Swain, Punit Prasad, ILS COVID-19 TEAM, Orissa COVID-19 Study Group, DBT's PAN-INDIA 1000 SARS-CoV2 RNA genome sequencing consortium, Ajay Parida |
| EPI_ISL_463073, EPI_ISL_463074, EPI_ISL_463075, EPI_ISL_463076, EPI_ISL_463077, EPI_ISL_463078, EPI_ISL_463079, EPI_ISL_463080, EPI_ISL_463081, EPI_ISL_463082, EPI_ISL_463083, EPI_ISL_463084, EPI_ISL_463085, EPI_ISL_463086, EPI_ISL_463087, EPI_ISL_463088, EPI_ISL_463089, EPI_ISL_463090, EPI_ISL_463091, EPI_ISL_463092, EPI_ISL_463093                                                                                                                                                                                                                                                                                                                                                                                                                                                                                                                                                  | see above | Institute of Life Sciences, Bhubaneswar                                                                                        | Immunogenomics lab, Institute of Life Sciences, Bhubaneswar                                                                    | Sunil Raghav, Arup Ghosh, Atimukta Jha, Viplov K. Biswas, Swati Madhulika, Manasi Priyadarshini, Shuchi Smita, Kautilya Kumar Jena, Sandhya Suranjika, Neha Singh, Eshna Laha, Saiket De, Rupesh Dash, Soma Chattopadhyay, Ghulam Hussain Syed, Shanti Senapati, Tushar K. Beuria, Rajeeb Swain, Punit Prasad, ILS COVID-19 TEAM, Orissa COVID-19 Study Group, DBT's PAN-INDIA 1000 SARS-CoV2 RNA genome sequencing consortium, Ajay Parida             |
| EPI_ISL_463277, EPI_ISL_463278, EPI_ISL_463279, EPI_ISL_463280, EPI_ISL_463281, EPI_ISL_463282, EPI_ISL_463283, EPI_ISL_463284, EPI_ISL_463285, EPI_ISL_463286, EPI_ISL_463287, EPI_ISL_463288, EPI_ISL_463289, EPI_ISL_463290, EPI_ISL_463291, EPI_ISL_463292, EPI_ISL_463293, EPI_ISL_463294, EPI_ISL_463295, EPI_ISL_463296, EPI_ISL_463297, EPI_ISL_463298, EPI_ISL_463299, EPI_ISL_463300                                                                                                                                                                                                                                                                                                                                                                                                                                                                                                  | see above | Ochsner Health                                                                                                                 | Bioinfoexperts, LLC                                                                                                            | Susanna L. Lamers, David J. Nolan, Rebecca Rose, Sissy Cross, David Moraga Amador, Tong Yang, Luke Caruso, Wayra Navia, Lydia Von Borstel, Xiao Hui Zhou, Amy Feehan, Julia-Garcia-Diaz                                                                                                                                                                                                                                                                 |
| EPI_ISL_464112, EPI_ISL_464113, EPI_ISL_464114, EPI_ISL_464115, EPI_ISL_464116, EPI_ISL_464117, EPI_ISL_464118, EPI_ISL_464119, EPI_ISL_464120, EPI_ISL_464121, EPI_ISL_464122, EPI_ISL_464123, EPI_ISL_464124, EPI_ISL_464125, EPI_ISL_464126, EPI_ISL_464127, EPI_ISL_464128, EPI_ISL_464129, EPI_ISL_464130, EPI_ISL_464131, EPI_ISL_464132, EPI_ISL_464133                                                                                                                                                                                                                                                                                                                                                                                                                                                                                                                                  | see above | National Health Laboratory Service (NHLS), Tygerberg                                                                           | Division of Medical Virology, Stellenbosch University and National Health Laboratory Service (NHLS)                            | Susan Engelbrecht, Kayla Delaney, Bronwyn Kleinhans, Houriyah Tegally, Eduan Wilkindon, Gert van Zyl, Wolfgang Preiser, Tulio de Oliveira                                                                                                                                                                                                                                                                                                               |
| EPI_ISL_464134                                                                                                                                                                                                                                                                                                                                                                                                                                                                                                                                                                                                                                                                                                                                                                                                                                                                                  |           | National Health Laboratory Service (NHLS), Tygerberg                                                                           | Stellenbosch University and NHLS                                                                                               | Susan Engelbrecht, Kayla Delaney, Bronwyn Kleinhans, Houriyah Tegally, Eduan Wilkindon, Gert van Zyl, Wolfgang Preiser, Tulio de Oliveira                                                                                                                                                                                                                                                                                                               |
| EPI_ISL_464135, EPI_ISL_464136, EPI_ISL_464137, EPI_ISL_464138, EPI_ISL_464139, EPI_ISL_464140, EPI_ISL_464141, EPI_ISL_464142, EPI_ISL_464143, EPI_ISL_464144, EPI_ISL_464145, EPI_ISL_464146, EPI_ISL_464147, EPI_ISL_464148, EPI_ISL_464149, EPI_ISL_464150, EPI_ISL_464151, EPI_ISL_464152, EPI_ISL_464153, EPI_ISL_464154, EPI_ISL_464155, EPI_ISL_464156, EPI_ISL_464157, EPI_ISL_464158                                                                                                                                                                                                                                                                                                                                                                                                                                                                                                  | see above | National Health Laboratory Service (NHLS), Tygerberg                                                                           | Division of Medical Virology, Stellenbosch University and National Health Laboratory Service (NHLS)                            | Susan Engelbrecht, Kayla Delaney, Bronwyn Kleinhans, Houriyah Tegally, Eduan Wilkindon, Gert van Zyl, Wolfgang Preiser, Tulio de Oliveira                                                                                                                                                                                                                                                                                                               |
| EPI_ISL_464163, EPI_ISL_464164                                                                                                                                                                                                                                                                                                                                                                                                                                                                                                                                                                                                                                                                                                                                                                                                                                                                  |           | National Institute of Laboratory Medicine and Referral Center                                                                  | Genomic Research Lab, BCSIR                                                                                                    | Tanjina Akhter Banu, Abu Sayeed Mohammad Mahmud, Mohammad Samir Uzzaman, Eshrar Osman, Md. Ahasan Habib, Shahina Akter, Md. Murshed Hasan Sarker, Barna Goswami, Iffat Jahan, Md. Saddam Hossain, Tasnim Nafisa, Md. Maruf Ahmed Molla, Mahmuda Yasmin, Ashik Kumar Ghosh, Arifa Akram, A. K. M. Shamsuzzaman, Sheikh Md. Selim Al Din, Utpal Chandra Ray, Salek Ahmed Sajib, Md. Salim Khan                                                            |
| EPI_ISL_467693, EPI_ISL_467694, EPI_ISL_467695, EPI_ISL_467698, EPI_ISL_467699, EPI_ISL_467700, EPI_ISL_467701, EPI_ISL_467702, EPI_ISL_467703, EPI_ISL_467704, EPI_ISL_467705, EPI_ISL_467706, EPI_ISL_467707, EPI_ISL_467708, EPI_ISL_467709, EPI_ISL_467710, EPI_ISL_467711, EPI_ISL_467712, EPI_ISL_467715, EPI_ISL_467716, EPI_ISL_467717, EPI_ISL_467718, EPI_ISL_467719                                                                                                                                                                                                                                                                                                                                                                                                                                                                                                                  | see above | PHE South West Regional Laboratory, National Infection Service                                                                 | Wellcome Sanger Institute for the COVID-19 Genomics UK (COG-UK) consortium                                                     | Stephanie Hutchings, Hannah Pymont, Dr Peter Muir, Barry Vipond, Rich Hopes; and Alex Alderton, Roberto Amato, Sonia Goncalves, Ewan Harrison, David K. Jackson, Ian Johnston, Dominic Kwiatkowski, Cordelia Langford, John Sillitoe on behalf of the Wellcome Sanger Institute COVID-19 Surveillance Team ( <a href="http://www.sanger.ac.uk/covid-team">http://www.sanger.ac.uk/covid-team</a> )                                                      |
| EPI_ISL_468718                                                                                                                                                                                                                                                                                                                                                                                                                                                                                                                                                                                                                                                                                                                                                                                                                                                                                  |           | Environmental and Global Health                                                                                                | Environmental and Global Health                                                                                                | Stephenson,C.J., Subramaniam,K., Waltzek,T.B., Merck,L.H., Gibson,J.C., Morris,J.G.                                                                                                                                                                                                                                                                                                                                                                     |
| EPI_ISL_468720                                                                                                                                                                                                                                                                                                                                                                                                                                                                                                                                                                                                                                                                                                                                                                                                                                                                                  |           | University of Florida                                                                                                          | University of Florida                                                                                                          | Stephenson,C.J., Subramaniam,K., Waltzek,T.B., Lauzardo,M., Morris,J.G., Lednický,J.A.                                                                                                                                                                                                                                                                                                                                                                  |
| EPI_ISL_468721                                                                                                                                                                                                                                                                                                                                                                                                                                                                                                                                                                                                                                                                                                                                                                                                                                                                                  |           | University of Florida                                                                                                          | University of Florida                                                                                                          | Stephenson,C.J., Subramaniam,K., Waltzek,T.B., Lauzardo,M., Gibson,J.C., Morris,J.G., Lednický,J.A.                                                                                                                                                                                                                                                                                                                                                     |
| EPI_ISL_468723                                                                                                                                                                                                                                                                                                                                                                                                                                                                                                                                                                                                                                                                                                                                                                                                                                                                                  |           | University of Florida                                                                                                          | University of Florida                                                                                                          | Stephenson,C.J., Subramaniam,K., Waltzek,T.B., Lauzardo,M., Morris,J.G., Lednický,J.A.                                                                                                                                                                                                                                                                                                                                                                  |
| EPI_ISL_469045                                                                                                                                                                                                                                                                                                                                                                                                                                                                                                                                                                                                                                                                                                                                                                                                                                                                                  |           | Dr. N. D. Desai Medical College & Hospital                                                                                     | Gujarat Biotechnology Research Centre                                                                                          | Supreet Prabhu, Tejas Shah, Ankit Hinsu, Pritesh Sabara, Apurvasinh Puvar, Janvi Raval, Zarna Patel, Monika Gandhi, Pinal Trivedi, Maharshi Pandya, Nidhi Patel, Nitin Savaliya, Raghavendra Kumar, Dinesh Kumar, Zuber Saiyed, Komal Patel, Labdhi Pandya, Snehal Bagatharia, J G Buch, Jigar Gusani, Priyanka P Vatsa, R D Dixit, A M Kadri, Harsh Bakshi, Chaitanya Joshi, Madhvi Joshi                                                              |
| EPI_ISL_469286                                                                                                                                                                                                                                                                                                                                                                                                                                                                                                                                                                                                                                                                                                                                                                                                                                                                                  |           | National Institute of Laboratory Medicine and Referral Center                                                                  | Genomic Research Lab, BCSIR                                                                                                    | Tanjina Akhter Banu, Abu Sayeed Mohammad Mahmud, Mohammad Samir Uzzaman, Eshrar Osman, Md. Ahasan Habib, Shahina Akter, Md. Murshed Hasan Sarker, Iffat Jahan, Md. Saddam Hossain, Tasnim Nafisa, Md. Maruf Ahmed Molla, Mahmuda Yasmin, Ashik Kumar Ghosh, Bayzid Bin Monir, A. K. M. Shamsuzzaman, Sheikh Md. Selim Al Din, Utpal Chandra Ray, Salek Ahmed Sajib, Md. Salim Khan                                                                      |
| EPI_ISL_469346, EPI_ISL_469347, EPI_ISL_469349, EPI_ISL_469351, EPI_ISL_469352, EPI_ISL_469353, EPI_ISL_469354, EPI_ISL_469355, EPI_ISL_469357, EPI_ISL_469358, EPI_ISL_469360, EPI_ISL_469361, EPI_ISL_469362, EPI_ISL_469363, EPI_ISL_469364, EPI_ISL_469366, EPI_ISL_469367, EPI_ISL_469368, EPI_ISL_469369, EPI_ISL_469371, EPI_ISL_469372, EPI_ISL_469373, EPI_ISL_469374, EPI_ISL_469375, EPI_ISL_469376, EPI_ISL_469378, EPI_ISL_469382, EPI_ISL_469384, EPI_ISL_469385, EPI_ISL_469386, EPI_ISL_469389, EPI_ISL_469391, EPI_ISL_469393, EPI_ISL_469394, EPI_ISL_469395, EPI_ISL_469396, EPI_ISL_469397, EPI_ISL_469398, EPI_ISL_469399, EPI_ISL_469402, EPI_ISL_469403, EPI_ISL_469404, EPI_ISL_469405, EPI_ISL_469406, EPI_ISL_469408, EPI_ISL_469409, EPI_ISL_469411, EPI_ISL_469412, EPI_ISL_469414, EPI_ISL_469416, EPI_ISL_469417, EPI_ISL_469418, EPI_ISL_469420, EPI_ISL_469421, |           |                                                                                                                                |                                                                                                                                |                                                                                                                                                                                                                                                                                                                                                                                                                                                         |





|                                                                                                                                                                                                                                                                                                                                                                                                                                                                                                                                                                                                                                                                                                                                                                                                                                                                                                                                                                                                                                                                                                                                                                                                                                                                                                                                                                                                                                                                                                                                                                                                                                                                                                                                                                                                                                                                                                                                                                                                                                                                                                                                                                                                                                                                                                                                                                                                                                                                                                                                                                                                                                                                                                                                                                                                                                                                                                                                                                                                                                                                                                                                                                                                                                                |                                                                                                                |                                                                                        |                                                                                                                                                                                                                                                                                                                                                                                                                                                                                                       |
|------------------------------------------------------------------------------------------------------------------------------------------------------------------------------------------------------------------------------------------------------------------------------------------------------------------------------------------------------------------------------------------------------------------------------------------------------------------------------------------------------------------------------------------------------------------------------------------------------------------------------------------------------------------------------------------------------------------------------------------------------------------------------------------------------------------------------------------------------------------------------------------------------------------------------------------------------------------------------------------------------------------------------------------------------------------------------------------------------------------------------------------------------------------------------------------------------------------------------------------------------------------------------------------------------------------------------------------------------------------------------------------------------------------------------------------------------------------------------------------------------------------------------------------------------------------------------------------------------------------------------------------------------------------------------------------------------------------------------------------------------------------------------------------------------------------------------------------------------------------------------------------------------------------------------------------------------------------------------------------------------------------------------------------------------------------------------------------------------------------------------------------------------------------------------------------------------------------------------------------------------------------------------------------------------------------------------------------------------------------------------------------------------------------------------------------------------------------------------------------------------------------------------------------------------------------------------------------------------------------------------------------------------------------------------------------------------------------------------------------------------------------------------------------------------------------------------------------------------------------------------------------------------------------------------------------------------------------------------------------------------------------------------------------------------------------------------------------------------------------------------------------------------------------------------------------------------------------------------------------------|----------------------------------------------------------------------------------------------------------------|----------------------------------------------------------------------------------------|-------------------------------------------------------------------------------------------------------------------------------------------------------------------------------------------------------------------------------------------------------------------------------------------------------------------------------------------------------------------------------------------------------------------------------------------------------------------------------------------------------|
| see above                                                                                                                                                                                                                                                                                                                                                                                                                                                                                                                                                                                                                                                                                                                                                                                                                                                                                                                                                                                                                                                                                                                                                                                                                                                                                                                                                                                                                                                                                                                                                                                                                                                                                                                                                                                                                                                                                                                                                                                                                                                                                                                                                                                                                                                                                                                                                                                                                                                                                                                                                                                                                                                                                                                                                                                                                                                                                                                                                                                                                                                                                                                                                                                                                                      | Immunogenomics lab, Institute of Life Sciences, Bhubaneswar                                                    | Immunogenomics lab, Institute of Life Sciences, Bhubaneswar                            | Sunil Raghav, Arup Ghosh, Deepika Singh, Ankita Datey, P. Sushree Shyamli, Bharati Singh, Neha Singh, Deepika Singh, Atimukta Jha, Viplov K. Biswas, Swati Madhulika, Manasi Priyadarshini, Sneha Dutta, Auroмира Khuntia, Rupesh Dash, Soma Chattopadhyay, Ghulam Hussain Syed, Shanti Senapati, Tushar K. Beuria, Rajeeb Swain, Punit Prasad, Orissa COVID-19 Study Group, DBT's PAN-INDIA 1000 SARS-CoV2 RNA genome sequencing consortium, Ajay Parida                                             |
| EPI_ISL_481134, EPI_ISL_481135, EPI_ISL_481136, EPI_ISL_481137, EPI_ISL_481138, EPI_ISL_481139, EPI_ISL_481140, EPI_ISL_481141, EPI_ISL_481142, EPI_ISL_481143, EPI_ISL_481144, EPI_ISL_481145, EPI_ISL_481146, EPI_ISL_481147, EPI_ISL_481148, EPI_ISL_481149, EPI_ISL_481150, EPI_ISL_481151, EPI_ISL_481152, EPI_ISL_481153, EPI_ISL_481154, EPI_ISL_481155, EPI_ISL_481156, EPI_ISL_481157                                                                                                                                                                                                                                                                                                                                                                                                                                                                                                                                                                                                                                                                                                                                                                                                                                                                                                                                                                                                                                                                                                                                                                                                                                                                                                                                                                                                                                                                                                                                                                                                                                                                                                                                                                                                                                                                                                                                                                                                                                                                                                                                                                                                                                                                                                                                                                                                                                                                                                                                                                                                                                                                                                                                                                                                                                                 |                                                                                                                |                                                                                        |                                                                                                                                                                                                                                                                                                                                                                                                                                                                                                       |
| see above                                                                                                                                                                                                                                                                                                                                                                                                                                                                                                                                                                                                                                                                                                                                                                                                                                                                                                                                                                                                                                                                                                                                                                                                                                                                                                                                                                                                                                                                                                                                                                                                                                                                                                                                                                                                                                                                                                                                                                                                                                                                                                                                                                                                                                                                                                                                                                                                                                                                                                                                                                                                                                                                                                                                                                                                                                                                                                                                                                                                                                                                                                                                                                                                                                      | Immunogenomics lab, Institute of Life Sciences, Bhubaneswar                                                    | Immunogenomics lab, Institute of Life Sciences, Bhubaneswar                            | Sunil Raghav, Arup Ghosh, Ankita Datey, P. Sushree Shyamli, Bharati Singh, Neha Singh, Deepika Singh, Atimukta Jha, Viplov K. Biswas, Swati Madhulika, Manasi Priyadarshini, Aditi Chatterjee, Rahul Das, Soumyajit Ghosh, Rupesh Dash, Soma Chattopadhyay, Ghulam Hussain Syed, Shanti Senapati, Tushar K. Beuria, Rajeeb Swain, Punit Prasad, Amol Ratnakar Suryawanshi, Dileep Vasudeva, Orissa COVID-19 Study Group, DBT's PAN-INDIA 1000 SARS-CoV2 RNA genome sequencing consortium, Ajay Parida |
| EPI_ISL_481158, EPI_ISL_481159, EPI_ISL_481160, EPI_ISL_481161, EPI_ISL_481162, EPI_ISL_481163, EPI_ISL_481164, EPI_ISL_481165, EPI_ISL_481166, EPI_ISL_481167, EPI_ISL_481168, EPI_ISL_481169, EPI_ISL_481170, EPI_ISL_481171, EPI_ISL_481172, EPI_ISL_481173, EPI_ISL_481174, EPI_ISL_481175, EPI_ISL_481176, EPI_ISL_481177, EPI_ISL_481178, EPI_ISL_481179, EPI_ISL_481180, EPI_ISL_481181                                                                                                                                                                                                                                                                                                                                                                                                                                                                                                                                                                                                                                                                                                                                                                                                                                                                                                                                                                                                                                                                                                                                                                                                                                                                                                                                                                                                                                                                                                                                                                                                                                                                                                                                                                                                                                                                                                                                                                                                                                                                                                                                                                                                                                                                                                                                                                                                                                                                                                                                                                                                                                                                                                                                                                                                                                                 |                                                                                                                |                                                                                        |                                                                                                                                                                                                                                                                                                                                                                                                                                                                                                       |
| see above                                                                                                                                                                                                                                                                                                                                                                                                                                                                                                                                                                                                                                                                                                                                                                                                                                                                                                                                                                                                                                                                                                                                                                                                                                                                                                                                                                                                                                                                                                                                                                                                                                                                                                                                                                                                                                                                                                                                                                                                                                                                                                                                                                                                                                                                                                                                                                                                                                                                                                                                                                                                                                                                                                                                                                                                                                                                                                                                                                                                                                                                                                                                                                                                                                      | Immunogenomics lab, Institute of Life Sciences, Bhubaneswar                                                    | Immunogenomics lab, Institute of Life Sciences, Bhubaneswar                            | Sunil Raghav, Arup Ghosh, P. Sushree Shyamli, Bharati Singh, Neha Singh, Ankita Datey, Deepika Singh, Atimukta Jha, Viplov K. Biswas, Swati Madhulika, Manasi Priyadarshini, Tsheten Sheroa, Auroмира Khuntia, Rupesh Dash, Soma Chattopadhyay, Ghulam Hussain Syed, Shanti Senapati, Tushar K. Beuria, Rajeeb Swain, Punit Prasad, Amol Ratnakar Suryawanshi, Dileep Vasudevan, Orissa COVID-19 Study Group, DBT's PAN-INDIA 1000 SARS-CoV2 RNA genome sequencing consortium, Ajay Parida            |
| EPI_ISL_481182, EPI_ISL_481183, EPI_ISL_481184, EPI_ISL_481185, EPI_ISL_481186, EPI_ISL_481187, EPI_ISL_481188, EPI_ISL_481189, EPI_ISL_481190, EPI_ISL_481191, EPI_ISL_481192, EPI_ISL_481193, EPI_ISL_481194, EPI_ISL_481195, EPI_ISL_481196, EPI_ISL_481197, EPI_ISL_481198, EPI_ISL_481199, EPI_ISL_481200, EPI_ISL_481201, EPI_ISL_481202, EPI_ISL_481203, EPI_ISL_481204, EPI_ISL_481205                                                                                                                                                                                                                                                                                                                                                                                                                                                                                                                                                                                                                                                                                                                                                                                                                                                                                                                                                                                                                                                                                                                                                                                                                                                                                                                                                                                                                                                                                                                                                                                                                                                                                                                                                                                                                                                                                                                                                                                                                                                                                                                                                                                                                                                                                                                                                                                                                                                                                                                                                                                                                                                                                                                                                                                                                                                 |                                                                                                                |                                                                                        |                                                                                                                                                                                                                                                                                                                                                                                                                                                                                                       |
| see above                                                                                                                                                                                                                                                                                                                                                                                                                                                                                                                                                                                                                                                                                                                                                                                                                                                                                                                                                                                                                                                                                                                                                                                                                                                                                                                                                                                                                                                                                                                                                                                                                                                                                                                                                                                                                                                                                                                                                                                                                                                                                                                                                                                                                                                                                                                                                                                                                                                                                                                                                                                                                                                                                                                                                                                                                                                                                                                                                                                                                                                                                                                                                                                                                                      | Immunogenomics lab, Institute of Life Sciences, Bhubaneswar                                                    | Immunogenomics lab, Institute of Life Sciences, Bhubaneswar                            | Sunil Raghav, Arup Ghosh, Atimukta Jha, Viplov K. Biswas, Swati Madhulika, Manasi Priyadarshini, Ajit Singh, Sivaram Krishna, Naga Jogayya Kothakota, Rupesh Dash, Soma Chattopadhyay, Ghulam Hussain Syed, Shanti Senapati, Tushar K. Beuria, Rajeeb Swain, Punit Prasad, Amol Ratnakar Suryawanshi, Dileep Vasudevan, Orissa COVID-19 Study Group, DBT's PAN-INDIA 1000 SARS-CoV2 RNA genome sequencing consortium, Ajay Parida                                                                     |
| EPI_ISL_481513, EPI_ISL_481515, EPI_ISL_481524, EPI_ISL_481527, EPI_ISL_481530, EPI_ISL_481531, EPI_ISL_481532, EPI_ISL_481539, EPI_ISL_481540, EPI_ISL_481544, EPI_ISL_481546, EPI_ISL_481547, EPI_ISL_481549, EPI_ISL_481557, EPI_ISL_481559, EPI_ISL_481561, EPI_ISL_481562, EPI_ISL_481565, EPI_ISL_481568, EPI_ISL_481571, EPI_ISL_481575, EPI_ISL_481583, EPI_ISL_481593, EPI_ISL_481599, EPI_ISL_481601, EPI_ISL_481622, EPI_ISL_481629, EPI_ISL_481632, EPI_ISL_481633, EPI_ISL_481642, EPI_ISL_481648, EPI_ISL_481649, EPI_ISL_481655, EPI_ISL_481672, EPI_ISL_481678, EPI_ISL_481679, EPI_ISL_481682, EPI_ISL_481684, EPI_ISL_481688, EPI_ISL_481694, EPI_ISL_481697, EPI_ISL_481700, EPI_ISL_481704, EPI_ISL_481720, EPI_ISL_481725, EPI_ISL_481730                                                                                                                                                                                                                                                                                                                                                                                                                                                                                                                                                                                                                                                                                                                                                                                                                                                                                                                                                                                                                                                                                                                                                                                                                                                                                                                                                                                                                                                                                                                                                                                                                                                                                                                                                                                                                                                                                                                                                                                                                                                                                                                                                                                                                                                                                                                                                                                                                                                                                 |                                                                                                                |                                                                                        |                                                                                                                                                                                                                                                                                                                                                                                                                                                                                                       |
| see above                                                                                                                                                                                                                                                                                                                                                                                                                                                                                                                                                                                                                                                                                                                                                                                                                                                                                                                                                                                                                                                                                                                                                                                                                                                                                                                                                                                                                                                                                                                                                                                                                                                                                                                                                                                                                                                                                                                                                                                                                                                                                                                                                                                                                                                                                                                                                                                                                                                                                                                                                                                                                                                                                                                                                                                                                                                                                                                                                                                                                                                                                                                                                                                                                                      | Department of Virology and Immunology, University of Helsinki and Helsinki University Hospital, HUSLAB Finland | Department of Virology, Faculty of Medicine, University of Helsinki, Helsinki, Finland | Teemu Smura, Hannimari Kallio-Kokko, Jenni Virtanen, Maija Suvanto, Sari Hannula, Harri Kangas, Pekka Ellonen, Olli Vapalahti                                                                                                                                                                                                                                                                                                                                                                         |
| EPI_ISL_481763, EPI_ISL_481764, EPI_ISL_481765, EPI_ISL_481766, EPI_ISL_481769, EPI_ISL_481770, EPI_ISL_481771, EPI_ISL_481772, EPI_ISL_481773, EPI_ISL_481775, EPI_ISL_481779, EPI_ISL_481781, EPI_ISL_481782, EPI_ISL_481783, EPI_ISL_481784, EPI_ISL_481786, EPI_ISL_481787, EPI_ISL_481788, EPI_ISL_481789, EPI_ISL_481790, EPI_ISL_481791, EPI_ISL_481792, EPI_ISL_481795, EPI_ISL_481796, EPI_ISL_481797, EPI_ISL_481799, EPI_ISL_481800, EPI_ISL_481801, EPI_ISL_481803, EPI_ISL_481804, EPI_ISL_481805, EPI_ISL_481807, EPI_ISL_481808, EPI_ISL_481810, EPI_ISL_481812, EPI_ISL_481814, EPI_ISL_481815, EPI_ISL_481817, EPI_ISL_481820, EPI_ISL_481821, EPI_ISL_481822, EPI_ISL_481825, EPI_ISL_481826, EPI_ISL_481828, EPI_ISL_481831, EPI_ISL_481835, EPI_ISL_481837, EPI_ISL_481838, EPI_ISL_481839, EPI_ISL_481840, EPI_ISL_481841, EPI_ISL_481842, EPI_ISL_481844, EPI_ISL_481845, EPI_ISL_481846, EPI_ISL_481847, EPI_ISL_481848, EPI_ISL_481853, EPI_ISL_481854, EPI_ISL_481855, EPI_ISL_481857, EPI_ISL_481858, EPI_ISL_481861, EPI_ISL_481863, EPI_ISL_481866, EPI_ISL_481867, EPI_ISL_481868, EPI_ISL_481869, EPI_ISL_481870, EPI_ISL_481871, EPI_ISL_481872, EPI_ISL_481874, EPI_ISL_481875, EPI_ISL_481876, EPI_ISL_481878, EPI_ISL_481880, EPI_ISL_481881, EPI_ISL_481882, EPI_ISL_481884, EPI_ISL_481885, EPI_ISL_481886, EPI_ISL_481887, EPI_ISL_481888, EPI_ISL_481889, EPI_ISL_481890, EPI_ISL_481891, EPI_ISL_481892, EPI_ISL_481893, EPI_ISL_481894, EPI_ISL_481895, EPI_ISL_481896, EPI_ISL_481897, EPI_ISL_481898, EPI_ISL_481899, EPI_ISL_481900, EPI_ISL_481901, EPI_ISL_481903, EPI_ISL_481904, EPI_ISL_481905, EPI_ISL_481906, EPI_ISL_481907, EPI_ISL_481908, EPI_ISL_481910, EPI_ISL_481911, EPI_ISL_481913, EPI_ISL_481914, EPI_ISL_481915, EPI_ISL_481917, EPI_ISL_481918, EPI_ISL_481919, EPI_ISL_481921, EPI_ISL_481923, EPI_ISL_481924, EPI_ISL_481925, EPI_ISL_481926, EPI_ISL_481927, EPI_ISL_481928, EPI_ISL_481929, EPI_ISL_481931, EPI_ISL_481933, EPI_ISL_481934, EPI_ISL_481936, EPI_ISL_481937, EPI_ISL_481938, EPI_ISL_481939, EPI_ISL_481940, EPI_ISL_481941, EPI_ISL_481942, EPI_ISL_481945, EPI_ISL_481946, EPI_ISL_481948, EPI_ISL_481950, EPI_ISL_481951, EPI_ISL_481953, EPI_ISL_481955, EPI_ISL_481957, EPI_ISL_481958, EPI_ISL_481959, EPI_ISL_481962, EPI_ISL_481963, EPI_ISL_481964, EPI_ISL_481965, EPI_ISL_481966, EPI_ISL_481967, EPI_ISL_481968, EPI_ISL_481969, EPI_ISL_481970, EPI_ISL_481971, EPI_ISL_481972, EPI_ISL_481973, EPI_ISL_481974, EPI_ISL_481975, EPI_ISL_481976, EPI_ISL_481977, EPI_ISL_481979, EPI_ISL_481980, EPI_ISL_481981, EPI_ISL_481982, EPI_ISL_481983, EPI_ISL_481984, EPI_ISL_481985, EPI_ISL_481986, EPI_ISL_481989, EPI_ISL_481991, EPI_ISL_481992, EPI_ISL_481993, EPI_ISL_481994, EPI_ISL_481995, EPI_ISL_481996, EPI_ISL_481997, EPI_ISL_481998, EPI_ISL_481999, EPI_ISL_482000, EPI_ISL_482001, EPI_ISL_482002, EPI_ISL_482003, EPI_ISL_482004, EPI_ISL_482007, EPI_ISL_482008, EPI_ISL_482009, EPI_ISL_482010, EPI_ISL_482011, EPI_ISL_482012, EPI_ISL_482013, EPI_ISL_482015, EPI_ISL_482016, EPI_ISL_482017, EPI_ISL_482019, EPI_ISL_482020, EPI_ISL_482022, EPI_ISL_482023, EPI_ISL_482024, EPI_ISL_482025, EPI_ISL_482026, EPI_ISL_482027 |                                                                                                                |                                                                                        |                                                                                                                                                                                                                                                                                                                                                                                                                                                                                                       |
| see above                                                                                                                                                                                                                                                                                                                                                                                                                                                                                                                                                                                                                                                                                                                                                                                                                                                                                                                                                                                                                                                                                                                                                                                                                                                                                                                                                                                                                                                                                                                                                                                                                                                                                                                                                                                                                                                                                                                                                                                                                                                                                                                                                                                                                                                                                                                                                                                                                                                                                                                                                                                                                                                                                                                                                                                                                                                                                                                                                                                                                                                                                                                                                                                                                                      | PHE South West Regional Laboratory, National Infection Service                                                 | Wellcome Sanger Institute for the COVID-19 Genomics UK (COG-UK) consortium             | Stephanie Hutchings, Hannah Pymont, Dr Peter Muir, Barry Vipond, Rich Hopes; and Alex Alderton, Roberto Amato, Sonia Goncalves, Ewan Harrison, David K. Jackson, Ian Johnston, Dominic Kwiatkowski, Cordelia Langford, John Sillitoe on behalf of the Wellcome Sanger Institute COVID-19 Surveillance Team ( <a href="http://www.sanger.ac.uk/covid-team">http://www.sanger.ac.uk/covid-team</a> )                                                                                                    |
| EPI_ISL_482028                                                                                                                                                                                                                                                                                                                                                                                                                                                                                                                                                                                                                                                                                                                                                                                                                                                                                                                                                                                                                                                                                                                                                                                                                                                                                                                                                                                                                                                                                                                                                                                                                                                                                                                                                                                                                                                                                                                                                                                                                                                                                                                                                                                                                                                                                                                                                                                                                                                                                                                                                                                                                                                                                                                                                                                                                                                                                                                                                                                                                                                                                                                                                                                                                                 | PHE South West Regional Laboratory, National Infection Service                                                 | Wellcome Sanger Institute for the COVID-19 Genomics UK (COG-UK) Consortium             | Stephanie Hutchings, Hannah Pymont, Dr Peter Muir, Barry Vipond, Rich Hopes; and Alex Alderton, Roberto Amato, Sonia Goncalves, Ewan Harrison, David K. Jackson, Ian Johnston, Dominic Kwiatkowski, Cordelia Langford, John Sillitoe on behalf of the Wellcome Sanger Institute COVID-19 Surveillance Team                                                                                                                                                                                            |
| EPI_ISL_482029, EPI_ISL_482031                                                                                                                                                                                                                                                                                                                                                                                                                                                                                                                                                                                                                                                                                                                                                                                                                                                                                                                                                                                                                                                                                                                                                                                                                                                                                                                                                                                                                                                                                                                                                                                                                                                                                                                                                                                                                                                                                                                                                                                                                                                                                                                                                                                                                                                                                                                                                                                                                                                                                                                                                                                                                                                                                                                                                                                                                                                                                                                                                                                                                                                                                                                                                                                                                 | PHE South West Regional Laboratory, National Infection Service                                                 | Wellcome Sanger Institute for the COVID-19 Genomics UK (COG-UK) consortium             | Stephanie Hutchings, Hannah Pymont, Dr Peter Muir, Barry Vipond, Rich Hopes; and Alex Alderton, Roberto Amato, Sonia Goncalves, Ewan Harrison, David K. Jackson, Ian Johnston, Dominic Kwiatkowski, Cordelia Langford, John Sillitoe on behalf of the Wellcome Sanger Institute COVID-19 Surveillance Team ( <a href="http://www.sanger.ac.uk/covid-team">http://www.sanger.ac.uk/covid-team</a> )                                                                                                    |
| EPI_ISL_483622, EPI_ISL_483623                                                                                                                                                                                                                                                                                                                                                                                                                                                                                                                                                                                                                                                                                                                                                                                                                                                                                                                                                                                                                                                                                                                                                                                                                                                                                                                                                                                                                                                                                                                                                                                                                                                                                                                                                                                                                                                                                                                                                                                                                                                                                                                                                                                                                                                                                                                                                                                                                                                                                                                                                                                                                                                                                                                                                                                                                                                                                                                                                                                                                                                                                                                                                                                                                 | National Institute of Laboratory Medicine and Referral Center                                                  | Genomic Research Lab, BCSIR                                                            | Tasnim Nafisa, Abu Saeed Mohammad Mahmud, Mohammad Samir Uzzaman, Eshrar Osman, Md. Ahasan Habib, Shahina Akter, Tanjina Akhter Banu, Md. Murshed Hasan Sarkar, Barna Goswami, Ifat Jahan, Md. Saddam Hossain, Md. Maruf Ahmed Molla, Mahmuda Yeasmin, Asish Kumar Ghosh, A. K. M. Shamsuzzaman, Sheikh Md. Selim Al Din, Utpal Chandra Ray, Salek Ahmed Sajib, Md. Salim Khan                                                                                                                        |
| EPI_ISL_483635, EPI_ISL_483636                                                                                                                                                                                                                                                                                                                                                                                                                                                                                                                                                                                                                                                                                                                                                                                                                                                                                                                                                                                                                                                                                                                                                                                                                                                                                                                                                                                                                                                                                                                                                                                                                                                                                                                                                                                                                                                                                                                                                                                                                                                                                                                                                                                                                                                                                                                                                                                                                                                                                                                                                                                                                                                                                                                                                                                                                                                                                                                                                                                                                                                                                                                                                                                                                 | National Institute of Laboratory Medicine and Referral Center                                                  | Genomic Research Lab, BCSIR                                                            | Tanjina Akhter Banu, Abu Saeed Mohammad Mahmud, Mohammad Samir Uzzaman, Eshrar Osman, Md. Ahasan Habib, Shahina Akter, Md. Murshed Hasan Sarkar, Barna Goswami, Ifat Jahan, Md. Saddam Hossain, Tasnim Nafisa, Md. Maruf Ahmed Molla, Mahmuda Yeasmin, Asish Kumar Ghosh, A. K. M. Shamsuzzaman, Sheikh Md. Selim Al Din, Utpal Chandra Ray, Salek Ahmed Sajib, Md. Salim Khan                                                                                                                        |
| EPI_ISL_483859, EPI_ISL_483877                                                                                                                                                                                                                                                                                                                                                                                                                                                                                                                                                                                                                                                                                                                                                                                                                                                                                                                                                                                                                                                                                                                                                                                                                                                                                                                                                                                                                                                                                                                                                                                                                                                                                                                                                                                                                                                                                                                                                                                                                                                                                                                                                                                                                                                                                                                                                                                                                                                                                                                                                                                                                                                                                                                                                                                                                                                                                                                                                                                                                                                                                                                                                                                                                 | Department of Microbiology, Government Medical College, Surat                                                  | Gujarat Biotechnology Research Centre                                                  | Summaiya Mullan, Amit gamit, Apurvasinh Puvar, Janvi Raval, Zarna Patel, Monika Gandhi, Pinal Trivedi, Maharshi Pandya, Nidhi Patel, Nitin Savaliya, Raghawendra Kumar, Dinesh Kumar, Zuber Saiyed, Komal Patel, Labdhi Pandya, Afzal Ansari, Nikha Trivedi, Naresh Chauhan, R D Dixit, A M Kadri, Harsh Bakshi, Chaitanya Joshi, Madhvi Joshi                                                                                                                                                        |
| EPI_ISL_485399                                                                                                                                                                                                                                                                                                                                                                                                                                                                                                                                                                                                                                                                                                                                                                                                                                                                                                                                                                                                                                                                                                                                                                                                                                                                                                                                                                                                                                                                                                                                                                                                                                                                                                                                                                                                                                                                                                                                                                                                                                                                                                                                                                                                                                                                                                                                                                                                                                                                                                                                                                                                                                                                                                                                                                                                                                                                                                                                                                                                                                                                                                                                                                                                                                 | Institute of Human Genetics, Polish Academy of Sciences                                                        | Institute of Human Genetics, Polish Academy of Sciences                                | Szymon Hryhorowicz, Adam Ustaszewski, Marta Kaczmarek-Ry, Emilia Lis, Ewa Zitikiewicz, Micha Witt, Andrzej Pawski                                                                                                                                                                                                                                                                                                                                                                                     |
| EPI_ISL_485400                                                                                                                                                                                                                                                                                                                                                                                                                                                                                                                                                                                                                                                                                                                                                                                                                                                                                                                                                                                                                                                                                                                                                                                                                                                                                                                                                                                                                                                                                                                                                                                                                                                                                                                                                                                                                                                                                                                                                                                                                                                                                                                                                                                                                                                                                                                                                                                                                                                                                                                                                                                                                                                                                                                                                                                                                                                                                                                                                                                                                                                                                                                                                                                                                                 | Institute of Human Genetics, Polish Academy of Sciences                                                        | Institute of Human Genetics, Polish Academy of Sciences                                | Szymon Hryhorowicz, Adam Ustaszewski, Marta Kaczmarek-Ry, Emilia Lis, Ewa Zitikiewicz, Micha Witt, Andrzej Pawski                                                                                                                                                                                                                                                                                                                                                                                     |
| EPI_ISL_487363, EPI_ISL_487364                                                                                                                                                                                                                                                                                                                                                                                                                                                                                                                                                                                                                                                                                                                                                                                                                                                                                                                                                                                                                                                                                                                                                                                                                                                                                                                                                                                                                                                                                                                                                                                                                                                                                                                                                                                                                                                                                                                                                                                                                                                                                                                                                                                                                                                                                                                                                                                                                                                                                                                                                                                                                                                                                                                                                                                                                                                                                                                                                                                                                                                                                                                                                                                                                 | National Institute of Laboratory Medicine and Referral Center                                                  | Genomic Research Lab, BCSIR                                                            | Tanjina Akhter Banu, Abu Saeed Mohammad Mahmud, Mohammad Samir Uzzaman, Eshrar Osman, Md. Ahasan Habib, Shahina Akter, Md. Murshed Hasan Sarkar, Barna Goswami, Ifat Jahan, Md. Saddam Hossain, Tasnim Nafisa, Md. Maruf Ahmed Molla, Mahmuda Yeasmin, Asish Kumar Ghosh, A. K. M. Shamsuzzaman, Sheikh Md. Selim Al Din, Utpal Chandra Ray, Salek Ahmed Sajib, Md. Salim Khan                                                                                                                        |
| EPI_ISL_487524, EPI_ISL_487526, EPI_ISL_487527, EPI_ISL_487528, EPI_ISL_487530, EPI_ISL_487531, EPI_ISL_487535, EPI_ISL_487536, EPI_ISL_487539, EPI_ISL_487541, EPI_ISL_487542, EPI_ISL_487545, EPI_ISL_487547, EPI_ISL_487548, EPI_ISL_487549, EPI_ISL_487552, EPI_ISL_487553, EPI_ISL_487554, EPI_ISL_487561, EPI_ISL_487565, EPI_ISL_487566, EPI_ISL_487567, EPI_ISL_487570, EPI_ISL_487574, EPI_ISL_487577, EPI_ISL_487579, EPI_ISL_487583, EPI_ISL_487586, EPI_ISL_487587, EPI_ISL_487588, EPI_ISL_487590, EPI_ISL_487592                                                                                                                                                                                                                                                                                                                                                                                                                                                                                                                                                                                                                                                                                                                                                                                                                                                                                                                                                                                                                                                                                                                                                                                                                                                                                                                                                                                                                                                                                                                                                                                                                                                                                                                                                                                                                                                                                                                                                                                                                                                                                                                                                                                                                                                                                                                                                                                                                                                                                                                                                                                                                                                                                                                 |                                                                                                                |                                                                                        |                                                                                                                                                                                                                                                                                                                                                                                                                                                                                                       |
| see above                                                                                                                                                                                                                                                                                                                                                                                                                                                                                                                                                                                                                                                                                                                                                                                                                                                                                                                                                                                                                                                                                                                                                                                                                                                                                                                                                                                                                                                                                                                                                                                                                                                                                                                                                                                                                                                                                                                                                                                                                                                                                                                                                                                                                                                                                                                                                                                                                                                                                                                                                                                                                                                                                                                                                                                                                                                                                                                                                                                                                                                                                                                                                                                                                                      | PHE South West Regional Laboratory, National Infection Service                                                 | Wellcome Sanger Institute for the COVID-19 Genomics UK (COG-UK) consortium             | Stephanie Hutchings, Hannah Pymont, Dr Peter Muir, Barry Vipond, Rich Hopes; and Alex Alderton, Roberto Amato, Sonia Goncalves, Ewan Harrison, David K. Jackson, Ian Johnston, Dominic Kwiatkowski, Cordelia Langford, John Sillitoe on behalf of the Wellcome Sanger Institute COVID-19 Surveillance Team ( <a href="http://www.sanger.ac.uk/covid-team">http://www.sanger.ac.uk/covid-team</a> )                                                                                                    |
| EPI_ISL_487593                                                                                                                                                                                                                                                                                                                                                                                                                                                                                                                                                                                                                                                                                                                                                                                                                                                                                                                                                                                                                                                                                                                                                                                                                                                                                                                                                                                                                                                                                                                                                                                                                                                                                                                                                                                                                                                                                                                                                                                                                                                                                                                                                                                                                                                                                                                                                                                                                                                                                                                                                                                                                                                                                                                                                                                                                                                                                                                                                                                                                                                                                                                                                                                                                                 | PHE South West Regional Laboratory, National Infection Service                                                 | Wellcome Sanger Institute for the COVID-19 Genomics UK (COG-UK) Consortium             | Stephanie Hutchings, Hannah Pymont, Dr Peter Muir, Barry Vipond, Rich Hopes; and Alex Alderton, Roberto Amato, Sonia Goncalves, Ewan Harrison, David K. Jackson, Ian Johnston, Dominic Kwiatkowski, Cordelia Langford, John Sillitoe on behalf of the Wellcome Sanger Institute COVID-19 Surveillance Team                                                                                                                                                                                            |
| EPI_ISL_487594, EPI_ISL_487596, EPI_ISL_487598, EPI_ISL_487599, EPI_ISL_487601, EPI_ISL_487602, EPI_ISL_487603, EPI_ISL_487605, EPI_ISL_487608                                                                                                                                                                                                                                                                                                                                                                                                                                                                                                                                                                                                                                                                                                                                                                                                                                                                                                                                                                                                                                                                                                                                                                                                                                                                                                                                                                                                                                                                                                                                                                                                                                                                                                                                                                                                                                                                                                                                                                                                                                                                                                                                                                                                                                                                                                                                                                                                                                                                                                                                                                                                                                                                                                                                                                                                                                                                                                                                                                                                                                                                                                 | PHE South West Regional Laboratory, National Infection Service                                                 | Wellcome Sanger Institute for the COVID-19 Genomics UK (COG-UK) consortium             | Stephanie Hutchings, Hannah Pymont, Dr Peter Muir, Barry Vipond, Rich Hopes; and Alex Alderton, Roberto Amato, Sonia Goncalves, Ewan Harrison, David K. Jackson, Ian Johnston, Dominic Kwiatkowski, Cordelia Langford, John Sillitoe on behalf of the Wellcome Sanger Institute COVID-19 Surveillance Team ( <a href="http://www.sanger.ac.uk/covid-team">http://www.sanger.ac.uk/covid-team</a> )                                                                                                    |
| EPI_ISL_487609                                                                                                                                                                                                                                                                                                                                                                                                                                                                                                                                                                                                                                                                                                                                                                                                                                                                                                                                                                                                                                                                                                                                                                                                                                                                                                                                                                                                                                                                                                                                                                                                                                                                                                                                                                                                                                                                                                                                                                                                                                                                                                                                                                                                                                                                                                                                                                                                                                                                                                                                                                                                                                                                                                                                                                                                                                                                                                                                                                                                                                                                                                                                                                                                                                 | PHE South West Regional Laboratory, National Infection Service                                                 | Wellcome Sanger Institute for the COVID-19 Genomics UK (COG-UK) Consortium             | Stephanie Hutchings, Hannah Pymont, Dr Peter Muir, Barry Vipond, Rich Hopes; and Alex Alderton, Roberto Amato, Sonia Goncalves, Ewan Harrison, David K. Jackson, Ian Johnston, Dominic Kwiatkowski, Cordelia Langford, John Sillitoe on behalf of the Wellcome Sanger Institute COVID-19 Surveillance Team                                                                                                                                                                                            |
| EPI_ISL_487610, EPI_ISL_487611, EPI_ISL_487613, EPI_ISL_487618, EPI_ISL_487619, EPI_ISL_487620, EPI_ISL_487622, EPI_ISL_487623, EPI_ISL_487624, EPI_ISL_487629, EPI_ISL_487634, EPI_ISL_488187, EPI_ISL_488188, EPI_ISL_488189, EPI_ISL_488191, EPI_ISL_488192, EPI_ISL_488194, EPI_ISL_488195, EPI_ISL_488196, EPI_ISL_488197, EPI_ISL_488198, EPI_ISL_488199, EPI_ISL_488200, EPI_ISL_488201, EPI_ISL_488203, EPI_ISL_488204, EPI_ISL_488205, EPI_ISL_488206, EPI_ISL_488212, EPI_ISL_488213, EPI_ISL_488216, EPI_ISL_488217, EPI_ISL_488218, EPI_ISL_488219, EPI_ISL_488221, EPI_ISL_488223, EPI_ISL_488226, EPI_ISL_488227, EPI_ISL_488228, EPI_ISL_488229, EPI_ISL_488230, EPI_ISL_488231, EPI_ISL_488233, EPI_ISL_488234, EPI_ISL_488235, EPI_ISL_488240, EPI_ISL_488241, EPI_ISL_488242, EPI_ISL_488243, EPI_ISL_488244, EPI_ISL_488245, EPI_ISL_488246, EPI_ISL_488247, EPI_ISL_488248                                                                                                                                                                                                                                                                                                                                                                                                                                                                                                                                                                                                                                                                                                                                                                                                                                                                                                                                                                                                                                                                                                                                                                                                                                                                                                                                                                                                                                                                                                                                                                                                                                                                                                                                                                                                                                                                                                                                                                                                                                                                                                                                                                                                                                                                                                                                                 |                                                                                                                |                                                                                        |                                                                                                                                                                                                                                                                                                                                                                                                                                                                                                       |







|                                                                                                                                                                                                                                                                                                                                                                                                                                                                                                                                                                                                                                                                                                                                                                                                                                                                                                                                                                                                                                                                                                                                                                                                                                                                                                                                                                                                                                                                                                                                                                                                                                                                                                                                                                                                                                                                                                                                                                                                                                                                                                                                                                                                                                                                                                                                                                                                                                                                                                                                                                                                                                                                                                                                                                                                                                                                                                                                                                                                                                                                                                                                                                                                                                                                                                                                                                                                                                                                                                                                                                                                                                                                                                                                                                                                                                                                                                                                                                                                                                                                                                                                                                                                                                                                                                                                                                                                |           |                                                                                                                    |                                                                                          |                                                                                                                                                                                                                                                                                                       |
|------------------------------------------------------------------------------------------------------------------------------------------------------------------------------------------------------------------------------------------------------------------------------------------------------------------------------------------------------------------------------------------------------------------------------------------------------------------------------------------------------------------------------------------------------------------------------------------------------------------------------------------------------------------------------------------------------------------------------------------------------------------------------------------------------------------------------------------------------------------------------------------------------------------------------------------------------------------------------------------------------------------------------------------------------------------------------------------------------------------------------------------------------------------------------------------------------------------------------------------------------------------------------------------------------------------------------------------------------------------------------------------------------------------------------------------------------------------------------------------------------------------------------------------------------------------------------------------------------------------------------------------------------------------------------------------------------------------------------------------------------------------------------------------------------------------------------------------------------------------------------------------------------------------------------------------------------------------------------------------------------------------------------------------------------------------------------------------------------------------------------------------------------------------------------------------------------------------------------------------------------------------------------------------------------------------------------------------------------------------------------------------------------------------------------------------------------------------------------------------------------------------------------------------------------------------------------------------------------------------------------------------------------------------------------------------------------------------------------------------------------------------------------------------------------------------------------------------------------------------------------------------------------------------------------------------------------------------------------------------------------------------------------------------------------------------------------------------------------------------------------------------------------------------------------------------------------------------------------------------------------------------------------------------------------------------------------------------------------------------------------------------------------------------------------------------------------------------------------------------------------------------------------------------------------------------------------------------------------------------------------------------------------------------------------------------------------------------------------------------------------------------------------------------------------------------------------------------------------------------------------------------------------------------------------------------------------------------------------------------------------------------------------------------------------------------------------------------------------------------------------------------------------------------------------------------------------------------------------------------------------------------------------------------------------------------------------------------------------------------------------------------------|-----------|--------------------------------------------------------------------------------------------------------------------|------------------------------------------------------------------------------------------|-------------------------------------------------------------------------------------------------------------------------------------------------------------------------------------------------------------------------------------------------------------------------------------------------------|
| EPI_ISL_578081, EPI_ISL_578168, EPI_ISL_578175, EPI_ISL_578178, EPI_ISL_578179, EPI_ISL_578180, EPI_ISL_578181, EPI_ISL_578182, EPI_ISL_578183, EPI_ISL_578184, EPI_ISL_581449, EPI_ISL_581450, EPI_ISL_581451, EPI_ISL_581494, EPI_ISL_581495, EPI_ISL_581496, EPI_ISL_581497, EPI_ISL_581499, EPI_ISL_581500, EPI_ISL_581501, EPI_ISL_581502                                                                                                                                                                                                                                                                                                                                                                                                                                                                                                                                                                                                                                                                                                                                                                                                                                                                                                                                                                                                                                                                                                                                                                                                                                                                                                                                                                                                                                                                                                                                                                                                                                                                                                                                                                                                                                                                                                                                                                                                                                                                                                                                                                                                                                                                                                                                                                                                                                                                                                                                                                                                                                                                                                                                                                                                                                                                                                                                                                                                                                                                                                                                                                                                                                                                                                                                                                                                                                                                                                                                                                                                                                                                                                                                                                                                                                                                                                                                                                                                                                                 | see above | CSIR-Indian Institute of Chemical Biology, MEDICA Superceciapity Hospital Kolkata                                  | CSIR-Indian Institute of Chemical Biology, MEDICA Superceciapity Hospital Kolkata        | Sujay Krishna Maity, Priyanka Mallick, Debaleena Bhowmik, Abhishake Lahiri, Dr. Aviral Roy, Dr. Soumen Saha, Dr. Arpita Ghosh Mitra, Dr. Rajesh Pandey, Dr. Sandip Paul, Dr. Partha Chakrabarti, Dr. Saikat Chakrabarti                                                                               |
| EPI_ISL_581503, EPI_ISL_581504                                                                                                                                                                                                                                                                                                                                                                                                                                                                                                                                                                                                                                                                                                                                                                                                                                                                                                                                                                                                                                                                                                                                                                                                                                                                                                                                                                                                                                                                                                                                                                                                                                                                                                                                                                                                                                                                                                                                                                                                                                                                                                                                                                                                                                                                                                                                                                                                                                                                                                                                                                                                                                                                                                                                                                                                                                                                                                                                                                                                                                                                                                                                                                                                                                                                                                                                                                                                                                                                                                                                                                                                                                                                                                                                                                                                                                                                                                                                                                                                                                                                                                                                                                                                                                                                                                                                                                 |           | CSIR-Indian Institute of Chemical Biology, MEDICA Superceciapity Hospital Kolkata                                  | CSIR-Indian Institute of Chemical Biology, MEDICA Superceciapity Hospital Kolkata        | Sujay Krishna Maity, Priyanka Mallick, Debaleena Bhowmik, Abhishake Lahiri, Dr. AviralRoy, Dr. Soumen Saha, Dr. Arpita Ghosh Mitra, Dr. Rajesh Pandey, Dr. Sandip Paul, Dr. Partha Chakrabarti, Dr. Saikat Chakrabarti                                                                                |
| EPI_ISL_582028                                                                                                                                                                                                                                                                                                                                                                                                                                                                                                                                                                                                                                                                                                                                                                                                                                                                                                                                                                                                                                                                                                                                                                                                                                                                                                                                                                                                                                                                                                                                                                                                                                                                                                                                                                                                                                                                                                                                                                                                                                                                                                                                                                                                                                                                                                                                                                                                                                                                                                                                                                                                                                                                                                                                                                                                                                                                                                                                                                                                                                                                                                                                                                                                                                                                                                                                                                                                                                                                                                                                                                                                                                                                                                                                                                                                                                                                                                                                                                                                                                                                                                                                                                                                                                                                                                                                                                                 |           | CSIR-Indian Institute of Chemical Biology, MEDICA Superceciapity Hospital Kolkata                                  | CSIR-Indian Institute of Chemical Biology, MEDICA Superceciapity Hospital Kolkata        | Sujay Krishna Maity, Priyanka Mallick, Debaleena Bhowmik, Abhishake Lahiri, Dr. Aviral Roy, Dr. Soumen Saha, Dr. Arpita Ghosh Mitra, Dr. Rajesh Pandey, Dr. Sandip Paul, Dr. Partha Chakrabarti, Dr. Saikat Chakrabarti                                                                               |
| EPI_ISL_582031, EPI_ISL_582032                                                                                                                                                                                                                                                                                                                                                                                                                                                                                                                                                                                                                                                                                                                                                                                                                                                                                                                                                                                                                                                                                                                                                                                                                                                                                                                                                                                                                                                                                                                                                                                                                                                                                                                                                                                                                                                                                                                                                                                                                                                                                                                                                                                                                                                                                                                                                                                                                                                                                                                                                                                                                                                                                                                                                                                                                                                                                                                                                                                                                                                                                                                                                                                                                                                                                                                                                                                                                                                                                                                                                                                                                                                                                                                                                                                                                                                                                                                                                                                                                                                                                                                                                                                                                                                                                                                                                                 |           | Institute of Human Genetics, Polish Academy of Sciences                                                            | Institute of Human Genetics, Polish Academy of Sciences                                  | Szymon Hryhorowicz, Adam Ustaszewski, Marta Kaczmarek-Ry, Emilia Lis, Ewa Zitikiewicz, Micha Witt, Andrzej Pawski                                                                                                                                                                                     |
| EPI_ISL_584680                                                                                                                                                                                                                                                                                                                                                                                                                                                                                                                                                                                                                                                                                                                                                                                                                                                                                                                                                                                                                                                                                                                                                                                                                                                                                                                                                                                                                                                                                                                                                                                                                                                                                                                                                                                                                                                                                                                                                                                                                                                                                                                                                                                                                                                                                                                                                                                                                                                                                                                                                                                                                                                                                                                                                                                                                                                                                                                                                                                                                                                                                                                                                                                                                                                                                                                                                                                                                                                                                                                                                                                                                                                                                                                                                                                                                                                                                                                                                                                                                                                                                                                                                                                                                                                                                                                                                                                 |           | Oxford Viroemics, NDM, University of Oxford; Oxford University Hospitals; Basingstoke and North Hampshire Hospital | COVID-19 Genomics UK (COG-UK) Consortium                                                 | Tanya Golubchik, David Bonsall, George Macintyre, Amy Trebes, Mariateresa de Cesare, Catrin Moore, Alex Mobbs, Anita Justice, Robert Shaw, Monique Andersson, Timothy Peto, Emma Wise, Nathan Moore, Jessica Lynch, Nick Cortes, Matilde Mori, Stephen Kidd, David Buck, John Todd, Christophe Fraser |
| EPI_ISL_593902                                                                                                                                                                                                                                                                                                                                                                                                                                                                                                                                                                                                                                                                                                                                                                                                                                                                                                                                                                                                                                                                                                                                                                                                                                                                                                                                                                                                                                                                                                                                                                                                                                                                                                                                                                                                                                                                                                                                                                                                                                                                                                                                                                                                                                                                                                                                                                                                                                                                                                                                                                                                                                                                                                                                                                                                                                                                                                                                                                                                                                                                                                                                                                                                                                                                                                                                                                                                                                                                                                                                                                                                                                                                                                                                                                                                                                                                                                                                                                                                                                                                                                                                                                                                                                                                                                                                                                                 |           | Sentinelles, Limay                                                                                                 | National Reference Center for Viruses of Respiratory Infections, Institut Pasteur, Paris | Sylvie Behillil, Fabiana Gambaro, Etienne Simon-Lorière, Vincent Enouf, Maud Vanpeene, Sylvie van der Werf                                                                                                                                                                                            |
| EPI_ISL_593903                                                                                                                                                                                                                                                                                                                                                                                                                                                                                                                                                                                                                                                                                                                                                                                                                                                                                                                                                                                                                                                                                                                                                                                                                                                                                                                                                                                                                                                                                                                                                                                                                                                                                                                                                                                                                                                                                                                                                                                                                                                                                                                                                                                                                                                                                                                                                                                                                                                                                                                                                                                                                                                                                                                                                                                                                                                                                                                                                                                                                                                                                                                                                                                                                                                                                                                                                                                                                                                                                                                                                                                                                                                                                                                                                                                                                                                                                                                                                                                                                                                                                                                                                                                                                                                                                                                                                                                 |           | Hospital, Argenteuil                                                                                               | National Reference Center for Viruses of Respiratory Infections, Institut Pasteur, Paris | Sylvie Behillil, Fabiana Gambaro, Etienne Simon-Lorière, Vincent Enouf, Maud Vanpeene, Sylvie van der Werf                                                                                                                                                                                            |
| EPI_ISL_593904, EPI_ISL_593905, EPI_ISL_593906, EPI_ISL_593907, EPI_ISL_593908, EPI_ISL_593909                                                                                                                                                                                                                                                                                                                                                                                                                                                                                                                                                                                                                                                                                                                                                                                                                                                                                                                                                                                                                                                                                                                                                                                                                                                                                                                                                                                                                                                                                                                                                                                                                                                                                                                                                                                                                                                                                                                                                                                                                                                                                                                                                                                                                                                                                                                                                                                                                                                                                                                                                                                                                                                                                                                                                                                                                                                                                                                                                                                                                                                                                                                                                                                                                                                                                                                                                                                                                                                                                                                                                                                                                                                                                                                                                                                                                                                                                                                                                                                                                                                                                                                                                                                                                                                                                                 |           | Labo Analyses Med, Sarcelles                                                                                       | National Reference Center for Viruses of Respiratory Infections, Institut Pasteur, Paris | Sylvie Behillil, Fabiana Gambaro, Etienne Simon-Lorière, Vincent Enouf, Maud Vanpeene, Sylvie van der Werf                                                                                                                                                                                            |
| EPI_ISL_593910                                                                                                                                                                                                                                                                                                                                                                                                                                                                                                                                                                                                                                                                                                                                                                                                                                                                                                                                                                                                                                                                                                                                                                                                                                                                                                                                                                                                                                                                                                                                                                                                                                                                                                                                                                                                                                                                                                                                                                                                                                                                                                                                                                                                                                                                                                                                                                                                                                                                                                                                                                                                                                                                                                                                                                                                                                                                                                                                                                                                                                                                                                                                                                                                                                                                                                                                                                                                                                                                                                                                                                                                                                                                                                                                                                                                                                                                                                                                                                                                                                                                                                                                                                                                                                                                                                                                                                                 |           | Hospital, Boulogne-Billancourt                                                                                     | National Reference Center for Viruses of Respiratory Infections, Institut Pasteur, Paris | Sylvie Behillil, Fabiana Gambaro, Etienne Simon-Lorière, Vincent Enouf, Maud Vanpeene, Sylvie van der Werf                                                                                                                                                                                            |
| EPI_ISL_593911                                                                                                                                                                                                                                                                                                                                                                                                                                                                                                                                                                                                                                                                                                                                                                                                                                                                                                                                                                                                                                                                                                                                                                                                                                                                                                                                                                                                                                                                                                                                                                                                                                                                                                                                                                                                                                                                                                                                                                                                                                                                                                                                                                                                                                                                                                                                                                                                                                                                                                                                                                                                                                                                                                                                                                                                                                                                                                                                                                                                                                                                                                                                                                                                                                                                                                                                                                                                                                                                                                                                                                                                                                                                                                                                                                                                                                                                                                                                                                                                                                                                                                                                                                                                                                                                                                                                                                                 |           | Hospital, Le Chesnay Cédex                                                                                         | National Reference Center for Viruses of Respiratory Infections, Institut Pasteur, Paris | Sylvie Behillil, Fabiana Gambaro, Etienne Simon-Lorière, Vincent Enouf, Maud Vanpeene, Sylvie van der Werf                                                                                                                                                                                            |
| EPI_ISL_593912                                                                                                                                                                                                                                                                                                                                                                                                                                                                                                                                                                                                                                                                                                                                                                                                                                                                                                                                                                                                                                                                                                                                                                                                                                                                                                                                                                                                                                                                                                                                                                                                                                                                                                                                                                                                                                                                                                                                                                                                                                                                                                                                                                                                                                                                                                                                                                                                                                                                                                                                                                                                                                                                                                                                                                                                                                                                                                                                                                                                                                                                                                                                                                                                                                                                                                                                                                                                                                                                                                                                                                                                                                                                                                                                                                                                                                                                                                                                                                                                                                                                                                                                                                                                                                                                                                                                                                                 |           | Hospital, Marange Silvange                                                                                         | National Reference Center for Viruses of Respiratory Infections, Institut Pasteur, Paris | Sylvie Behillil, Fabiana Gambaro, Etienne Simon-Lorière, Vincent Enouf, Maud Vanpeene, Sylvie van der Werf                                                                                                                                                                                            |
| EPI_ISL_593913                                                                                                                                                                                                                                                                                                                                                                                                                                                                                                                                                                                                                                                                                                                                                                                                                                                                                                                                                                                                                                                                                                                                                                                                                                                                                                                                                                                                                                                                                                                                                                                                                                                                                                                                                                                                                                                                                                                                                                                                                                                                                                                                                                                                                                                                                                                                                                                                                                                                                                                                                                                                                                                                                                                                                                                                                                                                                                                                                                                                                                                                                                                                                                                                                                                                                                                                                                                                                                                                                                                                                                                                                                                                                                                                                                                                                                                                                                                                                                                                                                                                                                                                                                                                                                                                                                                                                                                 |           | Hospital, Talange                                                                                                  | National Reference Center for Viruses of Respiratory Infections, Institut Pasteur, Paris | Sylvie Behillil, Fabiana Gambaro, Etienne Simon-Lorière, Vincent Enouf, Maud Vanpeene, Sylvie van der Werf                                                                                                                                                                                            |
| EPI_ISL_593914                                                                                                                                                                                                                                                                                                                                                                                                                                                                                                                                                                                                                                                                                                                                                                                                                                                                                                                                                                                                                                                                                                                                                                                                                                                                                                                                                                                                                                                                                                                                                                                                                                                                                                                                                                                                                                                                                                                                                                                                                                                                                                                                                                                                                                                                                                                                                                                                                                                                                                                                                                                                                                                                                                                                                                                                                                                                                                                                                                                                                                                                                                                                                                                                                                                                                                                                                                                                                                                                                                                                                                                                                                                                                                                                                                                                                                                                                                                                                                                                                                                                                                                                                                                                                                                                                                                                                                                 |           | Hospital, Metz                                                                                                     | National Reference Center for Viruses of Respiratory Infections, Institut Pasteur, Paris | Sylvie Behillil, Fabiana Gambaro, Etienne Simon-Lorière, Vincent Enouf, Maud Vanpeene, Sylvie van der Werf                                                                                                                                                                                            |
| EPI_ISL_593915                                                                                                                                                                                                                                                                                                                                                                                                                                                                                                                                                                                                                                                                                                                                                                                                                                                                                                                                                                                                                                                                                                                                                                                                                                                                                                                                                                                                                                                                                                                                                                                                                                                                                                                                                                                                                                                                                                                                                                                                                                                                                                                                                                                                                                                                                                                                                                                                                                                                                                                                                                                                                                                                                                                                                                                                                                                                                                                                                                                                                                                                                                                                                                                                                                                                                                                                                                                                                                                                                                                                                                                                                                                                                                                                                                                                                                                                                                                                                                                                                                                                                                                                                                                                                                                                                                                                                                                 |           | Hospital, Amneville                                                                                                | National Reference Center for Viruses of Respiratory Infections, Institut Pasteur, Paris | Sylvie Behillil, Fabiana Gambaro, Etienne Simon-Lorière, Vincent Enouf, Maud Vanpeene, Sylvie van der Werf                                                                                                                                                                                            |
| EPI_ISL_593916                                                                                                                                                                                                                                                                                                                                                                                                                                                                                                                                                                                                                                                                                                                                                                                                                                                                                                                                                                                                                                                                                                                                                                                                                                                                                                                                                                                                                                                                                                                                                                                                                                                                                                                                                                                                                                                                                                                                                                                                                                                                                                                                                                                                                                                                                                                                                                                                                                                                                                                                                                                                                                                                                                                                                                                                                                                                                                                                                                                                                                                                                                                                                                                                                                                                                                                                                                                                                                                                                                                                                                                                                                                                                                                                                                                                                                                                                                                                                                                                                                                                                                                                                                                                                                                                                                                                                                                 |           | Hospital, Sarreguemines                                                                                            | National Reference Center for Viruses of Respiratory Infections, Institut Pasteur, Paris | Sylvie Behillil, Fabiana Gambaro, Etienne Simon-Lorière, Vincent Enouf, Maud Vanpeene, Sylvie van der Werf                                                                                                                                                                                            |
| EPI_ISL_593917                                                                                                                                                                                                                                                                                                                                                                                                                                                                                                                                                                                                                                                                                                                                                                                                                                                                                                                                                                                                                                                                                                                                                                                                                                                                                                                                                                                                                                                                                                                                                                                                                                                                                                                                                                                                                                                                                                                                                                                                                                                                                                                                                                                                                                                                                                                                                                                                                                                                                                                                                                                                                                                                                                                                                                                                                                                                                                                                                                                                                                                                                                                                                                                                                                                                                                                                                                                                                                                                                                                                                                                                                                                                                                                                                                                                                                                                                                                                                                                                                                                                                                                                                                                                                                                                                                                                                                                 |           | Hospital, Montigny les Metz                                                                                        | National Reference Center for Viruses of Respiratory Infections, Institut Pasteur, Paris | Sylvie Behillil, Fabiana Gambaro, Etienne Simon-Lorière, Vincent Enouf, Maud Vanpeene, Sylvie van der Werf                                                                                                                                                                                            |
| EPI_ISL_593918                                                                                                                                                                                                                                                                                                                                                                                                                                                                                                                                                                                                                                                                                                                                                                                                                                                                                                                                                                                                                                                                                                                                                                                                                                                                                                                                                                                                                                                                                                                                                                                                                                                                                                                                                                                                                                                                                                                                                                                                                                                                                                                                                                                                                                                                                                                                                                                                                                                                                                                                                                                                                                                                                                                                                                                                                                                                                                                                                                                                                                                                                                                                                                                                                                                                                                                                                                                                                                                                                                                                                                                                                                                                                                                                                                                                                                                                                                                                                                                                                                                                                                                                                                                                                                                                                                                                                                                 |           | Hospital, Joeuf                                                                                                    | National Reference Center for Viruses of Respiratory Infections, Institut Pasteur, Paris | Sylvie Behillil, Fabiana Gambaro, Etienne Simon-Lorière, Vincent Enouf, Maud Vanpeene, Sylvie van der Werf                                                                                                                                                                                            |
| EPI_ISL_593919                                                                                                                                                                                                                                                                                                                                                                                                                                                                                                                                                                                                                                                                                                                                                                                                                                                                                                                                                                                                                                                                                                                                                                                                                                                                                                                                                                                                                                                                                                                                                                                                                                                                                                                                                                                                                                                                                                                                                                                                                                                                                                                                                                                                                                                                                                                                                                                                                                                                                                                                                                                                                                                                                                                                                                                                                                                                                                                                                                                                                                                                                                                                                                                                                                                                                                                                                                                                                                                                                                                                                                                                                                                                                                                                                                                                                                                                                                                                                                                                                                                                                                                                                                                                                                                                                                                                                                                 |           | Hospital, Ottonville                                                                                               | National Reference Center for Viruses of Respiratory Infections, Institut Pasteur, Paris | Sylvie Behillil, Fabiana Gambaro, Etienne Simon-Lorière, Vincent Enouf, Maud Vanpeene, Sylvie van der Werf                                                                                                                                                                                            |
| EPI_ISL_593920                                                                                                                                                                                                                                                                                                                                                                                                                                                                                                                                                                                                                                                                                                                                                                                                                                                                                                                                                                                                                                                                                                                                                                                                                                                                                                                                                                                                                                                                                                                                                                                                                                                                                                                                                                                                                                                                                                                                                                                                                                                                                                                                                                                                                                                                                                                                                                                                                                                                                                                                                                                                                                                                                                                                                                                                                                                                                                                                                                                                                                                                                                                                                                                                                                                                                                                                                                                                                                                                                                                                                                                                                                                                                                                                                                                                                                                                                                                                                                                                                                                                                                                                                                                                                                                                                                                                                                                 |           | Hospital, Metz                                                                                                     | National Reference Center for Viruses of Respiratory Infections, Institut Pasteur, Paris | Sylvie Behillil, Fabiana Gambaro, Etienne Simon-Lorière, Vincent Enouf, Maud Vanpeene, Sylvie van der Werf                                                                                                                                                                                            |
| EPI_ISL_593921                                                                                                                                                                                                                                                                                                                                                                                                                                                                                                                                                                                                                                                                                                                                                                                                                                                                                                                                                                                                                                                                                                                                                                                                                                                                                                                                                                                                                                                                                                                                                                                                                                                                                                                                                                                                                                                                                                                                                                                                                                                                                                                                                                                                                                                                                                                                                                                                                                                                                                                                                                                                                                                                                                                                                                                                                                                                                                                                                                                                                                                                                                                                                                                                                                                                                                                                                                                                                                                                                                                                                                                                                                                                                                                                                                                                                                                                                                                                                                                                                                                                                                                                                                                                                                                                                                                                                                                 |           | Hospital, Fameck                                                                                                   | National Reference Center for Viruses of Respiratory Infections, Institut Pasteur, Paris | Sylvie Behillil, Fabiana Gambaro, Etienne Simon-Lorière, Vincent Enouf, Maud Vanpeene, Sylvie van der Werf                                                                                                                                                                                            |
| EPI_ISL_593922, EPI_ISL_593923                                                                                                                                                                                                                                                                                                                                                                                                                                                                                                                                                                                                                                                                                                                                                                                                                                                                                                                                                                                                                                                                                                                                                                                                                                                                                                                                                                                                                                                                                                                                                                                                                                                                                                                                                                                                                                                                                                                                                                                                                                                                                                                                                                                                                                                                                                                                                                                                                                                                                                                                                                                                                                                                                                                                                                                                                                                                                                                                                                                                                                                                                                                                                                                                                                                                                                                                                                                                                                                                                                                                                                                                                                                                                                                                                                                                                                                                                                                                                                                                                                                                                                                                                                                                                                                                                                                                                                 |           | Hospital, Maizières les Metz                                                                                       | National Reference Center for Viruses of Respiratory Infections, Institut Pasteur, Paris | Sylvie Behillil, Fabiana Gambaro, Etienne Simon-Lorière, Vincent Enouf, Maud Vanpeene, Sylvie van der Werf                                                                                                                                                                                            |
| EPI_ISL_593924, EPI_ISL_593925, EPI_ISL_593926, EPI_ISL_593927, EPI_ISL_593928, EPI_ISL_593929, EPI_ISL_593930, EPI_ISL_593931, EPI_ISL_593932, EPI_ISL_593933                                                                                                                                                                                                                                                                                                                                                                                                                                                                                                                                                                                                                                                                                                                                                                                                                                                                                                                                                                                                                                                                                                                                                                                                                                                                                                                                                                                                                                                                                                                                                                                                                                                                                                                                                                                                                                                                                                                                                                                                                                                                                                                                                                                                                                                                                                                                                                                                                                                                                                                                                                                                                                                                                                                                                                                                                                                                                                                                                                                                                                                                                                                                                                                                                                                                                                                                                                                                                                                                                                                                                                                                                                                                                                                                                                                                                                                                                                                                                                                                                                                                                                                                                                                                                                 |           | Labo Analyses Med, Puteaux                                                                                         | National Reference Center for Viruses of Respiratory Infections, Institut Pasteur, Paris | Sylvie Behillil, Fabiana Gambaro, Etienne Simon-Lorière, Vincent Enouf, Maud Vanpeene, Sylvie van der Werf                                                                                                                                                                                            |
| EPI_ISL_593934                                                                                                                                                                                                                                                                                                                                                                                                                                                                                                                                                                                                                                                                                                                                                                                                                                                                                                                                                                                                                                                                                                                                                                                                                                                                                                                                                                                                                                                                                                                                                                                                                                                                                                                                                                                                                                                                                                                                                                                                                                                                                                                                                                                                                                                                                                                                                                                                                                                                                                                                                                                                                                                                                                                                                                                                                                                                                                                                                                                                                                                                                                                                                                                                                                                                                                                                                                                                                                                                                                                                                                                                                                                                                                                                                                                                                                                                                                                                                                                                                                                                                                                                                                                                                                                                                                                                                                                 |           | Sentinelles, Chanteloup-En-Brie                                                                                    | National Reference Center for Viruses of Respiratory Infections, Institut Pasteur, Paris | Sylvie Behillil, Fabiana Gambaro, Etienne Simon-Lorière, Vincent Enouf, Maud Vanpeene, Sylvie van der Werf                                                                                                                                                                                            |
| EPI_ISL_593935                                                                                                                                                                                                                                                                                                                                                                                                                                                                                                                                                                                                                                                                                                                                                                                                                                                                                                                                                                                                                                                                                                                                                                                                                                                                                                                                                                                                                                                                                                                                                                                                                                                                                                                                                                                                                                                                                                                                                                                                                                                                                                                                                                                                                                                                                                                                                                                                                                                                                                                                                                                                                                                                                                                                                                                                                                                                                                                                                                                                                                                                                                                                                                                                                                                                                                                                                                                                                                                                                                                                                                                                                                                                                                                                                                                                                                                                                                                                                                                                                                                                                                                                                                                                                                                                                                                                                                                 |           | Sentinelles, Plessis-Trévisé                                                                                       | National Reference Center for Viruses of Respiratory Infections, Institut Pasteur, Paris | Sylvie Behillil, Fabiana Gambaro, Etienne Simon-Lorière, Vincent Enouf, Maud Vanpeene, Sylvie van der Werf                                                                                                                                                                                            |
| EPI_ISL_593936                                                                                                                                                                                                                                                                                                                                                                                                                                                                                                                                                                                                                                                                                                                                                                                                                                                                                                                                                                                                                                                                                                                                                                                                                                                                                                                                                                                                                                                                                                                                                                                                                                                                                                                                                                                                                                                                                                                                                                                                                                                                                                                                                                                                                                                                                                                                                                                                                                                                                                                                                                                                                                                                                                                                                                                                                                                                                                                                                                                                                                                                                                                                                                                                                                                                                                                                                                                                                                                                                                                                                                                                                                                                                                                                                                                                                                                                                                                                                                                                                                                                                                                                                                                                                                                                                                                                                                                 |           | Sentinelles, Fondettes                                                                                             | National Reference Center for Viruses of Respiratory Infections, Institut Pasteur, Paris | Sylvie Behillil, Fabiana Gambaro, Etienne Simon-Lorière, Vincent Enouf, Maud Vanpeene, Sylvie van der Werf                                                                                                                                                                                            |
| EPI_ISL_594163, EPI_ISL_594164, EPI_ISL_594165                                                                                                                                                                                                                                                                                                                                                                                                                                                                                                                                                                                                                                                                                                                                                                                                                                                                                                                                                                                                                                                                                                                                                                                                                                                                                                                                                                                                                                                                                                                                                                                                                                                                                                                                                                                                                                                                                                                                                                                                                                                                                                                                                                                                                                                                                                                                                                                                                                                                                                                                                                                                                                                                                                                                                                                                                                                                                                                                                                                                                                                                                                                                                                                                                                                                                                                                                                                                                                                                                                                                                                                                                                                                                                                                                                                                                                                                                                                                                                                                                                                                                                                                                                                                                                                                                                                                                 |           | hopital                                                                                                            | National Reference Center for Viruses of Respiratory Infections, Institut Pasteur, Paris | Sylvie Behillil, Fabiana Gambaro, Etienne Simon-Lorière, Vincent Enouf, Maud Vanpeene, Sylvie van der Werf                                                                                                                                                                                            |
| EPI_ISL_594467, EPI_ISL_594468, EPI_ISL_594469, EPI_ISL_594470, EPI_ISL_594471, EPI_ISL_594472, EPI_ISL_594473, EPI_ISL_594474, EPI_ISL_594475, EPI_ISL_594476, EPI_ISL_594477, EPI_ISL_594478, EPI_ISL_594479, EPI_ISL_594480, EPI_ISL_594481, EPI_ISL_594482, EPI_ISL_594483, EPI_ISL_594461, EPI_ISL_594618, EPI_ISL_594619, EPI_ISL_594620, EPI_ISL_594621, EPI_ISL_594622, EPI_ISL_594623, EPI_ISL_594624, EPI_ISL_594625, EPI_ISL_594626, EPI_ISL_594627, EPI_ISL_594628, EPI_ISL_594629, EPI_ISL_594630, EPI_ISL_594631, EPI_ISL_594632, EPI_ISL_594633, EPI_ISL_594634, EPI_ISL_594635, EPI_ISL_594636, EPI_ISL_594637, EPI_ISL_594638, EPI_ISL_594639, EPI_ISL_594640, EPI_ISL_594641, EPI_ISL_594642, EPI_ISL_594643, EPI_ISL_594644, EPI_ISL_594889, EPI_ISL_594890, EPI_ISL_594891, EPI_ISL_594892, EPI_ISL_594893, EPI_ISL_594894, EPI_ISL_594895, EPI_ISL_594896, EPI_ISL_594897, EPI_ISL_594898, EPI_ISL_594899, EPI_ISL_594900, EPI_ISL_594901, EPI_ISL_594902, EPI_ISL_594903, EPI_ISL_594904, EPI_ISL_594905, EPI_ISL_594906, EPI_ISL_594907, EPI_ISL_594908, EPI_ISL_594909, EPI_ISL_594910, EPI_ISL_594911, EPI_ISL_594912, EPI_ISL_594913, EPI_ISL_594914, EPI_ISL_594915, EPI_ISL_594916, EPI_ISL_594917, EPI_ISL_594918, EPI_ISL_594919, EPI_ISL_594920, EPI_ISL_594921, EPI_ISL_594922, EPI_ISL_595326, EPI_ISL_595327, EPI_ISL_595328, EPI_ISL_595617, EPI_ISL_595618, EPI_ISL_595619, EPI_ISL_595620, EPI_ISL_595621, EPI_ISL_595622, EPI_ISL_595623, EPI_ISL_595624, EPI_ISL_595625, EPI_ISL_595626, EPI_ISL_595627, EPI_ISL_595628, EPI_ISL_595629, EPI_ISL_595630, EPI_ISL_595631, EPI_ISL_595632, EPI_ISL_595633, EPI_ISL_595634, EPI_ISL_595635, EPI_ISL_595636, EPI_ISL_595637, EPI_ISL_595638, EPI_ISL_595639, EPI_ISL_595640, EPI_ISL_595641, EPI_ISL_595642, EPI_ISL_595643, EPI_ISL_595644, EPI_ISL_595645, EPI_ISL_595646, EPI_ISL_595647, EPI_ISL_595648, EPI_ISL_595649, EPI_ISL_595650, EPI_ISL_595651, EPI_ISL_595652, EPI_ISL_595653, EPI_ISL_595654, EPI_ISL_595655, EPI_ISL_595656, EPI_ISL_595657, EPI_ISL_595658, EPI_ISL_595659, EPI_ISL_595660, EPI_ISL_595661, EPI_ISL_595662, EPI_ISL_595663, EPI_ISL_595664, EPI_ISL_595665, EPI_ISL_595666, EPI_ISL_595667, EPI_ISL_595668, EPI_ISL_595669, EPI_ISL_595670, EPI_ISL_595671, EPI_ISL_595672, EPI_ISL_595673, EPI_ISL_595674, EPI_ISL_595675, EPI_ISL_595676, EPI_ISL_595677, EPI_ISL_595678, EPI_ISL_595679, EPI_ISL_595680, EPI_ISL_595681, EPI_ISL_595682, EPI_ISL_595683, EPI_ISL_595684, EPI_ISL_595685, EPI_ISL_595686, EPI_ISL_595687, EPI_ISL_595688, EPI_ISL_595689, EPI_ISL_595690, EPI_ISL_595691, EPI_ISL_595692, EPI_ISL_595693, EPI_ISL_595694, EPI_ISL_595695, EPI_ISL_595696, EPI_ISL_595697, EPI_ISL_595698, EPI_ISL_595699, EPI_ISL_595700, EPI_ISL_595701, EPI_ISL_595702, EPI_ISL_595703, EPI_ISL_595704, EPI_ISL_595705, EPI_ISL_595706, EPI_ISL_595707, EPI_ISL_595708, EPI_ISL_595709, EPI_ISL_595710, EPI_ISL_595711, EPI_ISL_595712, EPI_ISL_595713, EPI_ISL_595714, EPI_ISL_595715, EPI_ISL_595716, EPI_ISL_595717, EPI_ISL_595718, EPI_ISL_595719, EPI_ISL_595720, EPI_ISL_595721, EPI_ISL_595722, EPI_ISL_595723, EPI_ISL_595724, EPI_ISL_595725, EPI_ISL_595726, EPI_ISL_595727, EPI_ISL_595728, EPI_ISL_595729, EPI_ISL_595730, EPI_ISL_595731, EPI_ISL_595732, EPI_ISL_595733, EPI_ISL_595734, EPI_ISL_595735, EPI_ISL_595736, EPI_ISL_595737, EPI_ISL_595738, EPI_ISL_595739, EPI_ISL_595740, EPI_ISL_595741, EPI_ISL_595742, EPI_ISL_595743, EPI_ISL_595744, EPI_ISL_595745, EPI_ISL_595746, EPI_ISL_595747, EPI_ISL_595748, EPI_ISL_595749, EPI_ISL_595750, EPI_ISL_595751, EPI_ISL_595752, EPI_ISL_595753, EPI_ISL_595754, EPI_ISL_595755, EPI_ISL_595756, EPI_ISL_595757, EPI_ISL_595758, EPI_ISL_595759, EPI_ISL_595760, EPI_ISL_595761, EPI_ISL_595762, EPI_ISL_595763, EPI_ISL_595764, EPI_ISL_595765, EPI_ISL_595766, EPI_ISL_595767, EPI_ISL_595768, EPI_ISL_595769, EPI_ISL_595770, EPI_ISL_595771, EPI_ISL_595772, EPI_ISL_595773, EPI_ISL_595774, EPI_ISL_595775, EPI_ISL_595776, EPI_ISL_595777, EPI_ISL_595778, EPI_ISL_595779, EPI_ISL_595780, EPI_ISL_595781, EPI_ISL_595782, EPI_ISL_595783, EPI_ISL_595784, EPI_ISL_595785, EPI_ISL_595786, EPI_ISL_595787, EPI_ISL_595788, EPI_ISL_595789, EPI_ISL_595790, EPI_ISL_595791, EPI_ISL_595792, EPI_ISL_595793, EPI_ISL_595794, EPI_ISL_595795, EPI_ISL_595796, EPI_ISL_595797, EPI_ISL_595798 |           |                                                                                                                    |                                                                                          |                                                                                                                                                                                                                                                                                                       |



|                                                                                                                                                                                                                                                                                                                                                                                                                                                                                                                                                                                                                                                                                                                                                                                                                                                                                                                                                                                                                                                                                                                                                                                                                                                                                                                                                                                                                                                                                                                                                                                                                                                                                                                                                                                                                                                                                                                                                                                                                                                                                                                                                                                                                                                                                                                                                                                                                                                                                                                                                                                                                                                                                                                                                                                                                                                                                                                                                                                                                                                                                                                                                                                                                                                                                                                                                                                                                                                                                                                                                                                                                                                                                                                                                                                                                                                                                                                                                                                                                                                                                                                                                                                                                                                                                                                                                                                                                                                                                                                                                                                                                                                                                                                                                                                                                                                                                                                                                                                                                                                                                                                                                                                                                                                                                                                                                                                                                                                                                                                                                                                                                                                                                                                                                                                                                                                                                                                                                                                                                                                                                                                                |                                                                                                                                |                                                                                                                                |                                                                                                                                                                                                                                                                                                                                                   |
|--------------------------------------------------------------------------------------------------------------------------------------------------------------------------------------------------------------------------------------------------------------------------------------------------------------------------------------------------------------------------------------------------------------------------------------------------------------------------------------------------------------------------------------------------------------------------------------------------------------------------------------------------------------------------------------------------------------------------------------------------------------------------------------------------------------------------------------------------------------------------------------------------------------------------------------------------------------------------------------------------------------------------------------------------------------------------------------------------------------------------------------------------------------------------------------------------------------------------------------------------------------------------------------------------------------------------------------------------------------------------------------------------------------------------------------------------------------------------------------------------------------------------------------------------------------------------------------------------------------------------------------------------------------------------------------------------------------------------------------------------------------------------------------------------------------------------------------------------------------------------------------------------------------------------------------------------------------------------------------------------------------------------------------------------------------------------------------------------------------------------------------------------------------------------------------------------------------------------------------------------------------------------------------------------------------------------------------------------------------------------------------------------------------------------------------------------------------------------------------------------------------------------------------------------------------------------------------------------------------------------------------------------------------------------------------------------------------------------------------------------------------------------------------------------------------------------------------------------------------------------------------------------------------------------------------------------------------------------------------------------------------------------------------------------------------------------------------------------------------------------------------------------------------------------------------------------------------------------------------------------------------------------------------------------------------------------------------------------------------------------------------------------------------------------------------------------------------------------------------------------------------------------------------------------------------------------------------------------------------------------------------------------------------------------------------------------------------------------------------------------------------------------------------------------------------------------------------------------------------------------------------------------------------------------------------------------------------------------------------------------------------------------------------------------------------------------------------------------------------------------------------------------------------------------------------------------------------------------------------------------------------------------------------------------------------------------------------------------------------------------------------------------------------------------------------------------------------------------------------------------------------------------------------------------------------------------------------------------------------------------------------------------------------------------------------------------------------------------------------------------------------------------------------------------------------------------------------------------------------------------------------------------------------------------------------------------------------------------------------------------------------------------------------------------------------------------------------------------------------------------------------------------------------------------------------------------------------------------------------------------------------------------------------------------------------------------------------------------------------------------------------------------------------------------------------------------------------------------------------------------------------------------------------------------------------------------------------------------------------------------------------------------------------------------------------------------------------------------------------------------------------------------------------------------------------------------------------------------------------------------------------------------------------------------------------------------------------------------------------------------------------------------------------------------------------------------------------------------------------------------------|--------------------------------------------------------------------------------------------------------------------------------|--------------------------------------------------------------------------------------------------------------------------------|---------------------------------------------------------------------------------------------------------------------------------------------------------------------------------------------------------------------------------------------------------------------------------------------------------------------------------------------------|
|                                                                                                                                                                                                                                                                                                                                                                                                                                                                                                                                                                                                                                                                                                                                                                                                                                                                                                                                                                                                                                                                                                                                                                                                                                                                                                                                                                                                                                                                                                                                                                                                                                                                                                                                                                                                                                                                                                                                                                                                                                                                                                                                                                                                                                                                                                                                                                                                                                                                                                                                                                                                                                                                                                                                                                                                                                                                                                                                                                                                                                                                                                                                                                                                                                                                                                                                                                                                                                                                                                                                                                                                                                                                                                                                                                                                                                                                                                                                                                                                                                                                                                                                                                                                                                                                                                                                                                                                                                                                                                                                                                                                                                                                                                                                                                                                                                                                                                                                                                                                                                                                                                                                                                                                                                                                                                                                                                                                                                                                                                                                                                                                                                                                                                                                                                                                                                                                                                                                                                                                                                                                                                                                | University Hospitals; Basingstoke and North Hampshire Hospital                                                                 |                                                                                                                                | Andersson, Timothy Peto, Emma Wise, Nathan Moore, Jessica Lynch, Nick Cortes, Matilde Mori, Stephen Kidd, David Buck, John Todd, Christophe Fraser                                                                                                                                                                                                |
| EPI_ISL_660121, EPI_ISL_660122, EPI_ISL_660123, EPI_ISL_660124, EPI_ISL_660125, EPI_ISL_660126, EPI_ISL_660127, EPI_ISL_660128, EPI_ISL_660129                                                                                                                                                                                                                                                                                                                                                                                                                                                                                                                                                                                                                                                                                                                                                                                                                                                                                                                                                                                                                                                                                                                                                                                                                                                                                                                                                                                                                                                                                                                                                                                                                                                                                                                                                                                                                                                                                                                                                                                                                                                                                                                                                                                                                                                                                                                                                                                                                                                                                                                                                                                                                                                                                                                                                                                                                                                                                                                                                                                                                                                                                                                                                                                                                                                                                                                                                                                                                                                                                                                                                                                                                                                                                                                                                                                                                                                                                                                                                                                                                                                                                                                                                                                                                                                                                                                                                                                                                                                                                                                                                                                                                                                                                                                                                                                                                                                                                                                                                                                                                                                                                                                                                                                                                                                                                                                                                                                                                                                                                                                                                                                                                                                                                                                                                                                                                                                                                                                                                                                 | Ampath                                                                                                                         | National Health Laboratory Service (NHLS), Tygerberg                                                                           | Susan Engelbrecht, Draper C, Davis M-A, Siegfried N, Williamson C, Hsiao M, Kayla Delaney, Bronwyn Kleinhans, Houriyah Tegally, Eduan Wilkindon, Gert van Zyl, Wolfgang Preiser, Tulio de Oliveira                                                                                                                                                |
| EPI_ISL_660130, EPI_ISL_660131, EPI_ISL_660132, EPI_ISL_660133, EPI_ISL_660134, EPI_ISL_660135, EPI_ISL_660136                                                                                                                                                                                                                                                                                                                                                                                                                                                                                                                                                                                                                                                                                                                                                                                                                                                                                                                                                                                                                                                                                                                                                                                                                                                                                                                                                                                                                                                                                                                                                                                                                                                                                                                                                                                                                                                                                                                                                                                                                                                                                                                                                                                                                                                                                                                                                                                                                                                                                                                                                                                                                                                                                                                                                                                                                                                                                                                                                                                                                                                                                                                                                                                                                                                                                                                                                                                                                                                                                                                                                                                                                                                                                                                                                                                                                                                                                                                                                                                                                                                                                                                                                                                                                                                                                                                                                                                                                                                                                                                                                                                                                                                                                                                                                                                                                                                                                                                                                                                                                                                                                                                                                                                                                                                                                                                                                                                                                                                                                                                                                                                                                                                                                                                                                                                                                                                                                                                                                                                                                 | Lancet                                                                                                                         | National Health Laboratory Service (NHLS), Tygerberg                                                                           | Susan Engelbrecht, Draper C, Davis M-A, Siegfried N, Williamson C, Hsiao M, Kayla Delaney, Bronwyn Kleinhans, Houriyah Tegally, Eduan Wilkindon, Gert van Zyl, Wolfgang Preiser, Tulio de Oliveira                                                                                                                                                |
| EPI_ISL_660137, EPI_ISL_660138, EPI_ISL_660139, EPI_ISL_660141, EPI_ISL_660142                                                                                                                                                                                                                                                                                                                                                                                                                                                                                                                                                                                                                                                                                                                                                                                                                                                                                                                                                                                                                                                                                                                                                                                                                                                                                                                                                                                                                                                                                                                                                                                                                                                                                                                                                                                                                                                                                                                                                                                                                                                                                                                                                                                                                                                                                                                                                                                                                                                                                                                                                                                                                                                                                                                                                                                                                                                                                                                                                                                                                                                                                                                                                                                                                                                                                                                                                                                                                                                                                                                                                                                                                                                                                                                                                                                                                                                                                                                                                                                                                                                                                                                                                                                                                                                                                                                                                                                                                                                                                                                                                                                                                                                                                                                                                                                                                                                                                                                                                                                                                                                                                                                                                                                                                                                                                                                                                                                                                                                                                                                                                                                                                                                                                                                                                                                                                                                                                                                                                                                                                                                 | Hamadi                                                                                                                         | National Health Laboratory Service (NHLS), Tygerberg                                                                           | Susan Engelbrecht, Draper C, Davis M-A, Siegfried N, Williamson C, Hsiao M, Kayla Delaney, Bronwyn Kleinhans, Houriyah Tegally, Eduan Wilkindon, Gert van Zyl, Wolfgang Preiser, Tulio de Oliveira                                                                                                                                                |
| EPI_ISL_660143, EPI_ISL_660144, EPI_ISL_660145, EPI_ISL_660146, EPI_ISL_660147, EPI_ISL_660148, EPI_ISL_660149, EPI_ISL_660150, EPI_ISL_660151, EPI_ISL_660152, EPI_ISL_660153, EPI_ISL_660154, EPI_ISL_660155, EPI_ISL_660156, EPI_ISL_660157, EPI_ISL_660158                                                                                                                                                                                                                                                                                                                                                                                                                                                                                                                                                                                                                                                                                                                                                                                                                                                                                                                                                                                                                                                                                                                                                                                                                                                                                                                                                                                                                                                                                                                                                                                                                                                                                                                                                                                                                                                                                                                                                                                                                                                                                                                                                                                                                                                                                                                                                                                                                                                                                                                                                                                                                                                                                                                                                                                                                                                                                                                                                                                                                                                                                                                                                                                                                                                                                                                                                                                                                                                                                                                                                                                                                                                                                                                                                                                                                                                                                                                                                                                                                                                                                                                                                                                                                                                                                                                                                                                                                                                                                                                                                                                                                                                                                                                                                                                                                                                                                                                                                                                                                                                                                                                                                                                                                                                                                                                                                                                                                                                                                                                                                                                                                                                                                                                                                                                                                                                                 | see above                                                                                                                      | PathCare                                                                                                                       | National Health Laboratory Service (NHLS), Tygerberg                                                                                                                                                                                                                                                                                              |
| EPI_ISL_660529, EPI_ISL_660530, EPI_ISL_660531                                                                                                                                                                                                                                                                                                                                                                                                                                                                                                                                                                                                                                                                                                                                                                                                                                                                                                                                                                                                                                                                                                                                                                                                                                                                                                                                                                                                                                                                                                                                                                                                                                                                                                                                                                                                                                                                                                                                                                                                                                                                                                                                                                                                                                                                                                                                                                                                                                                                                                                                                                                                                                                                                                                                                                                                                                                                                                                                                                                                                                                                                                                                                                                                                                                                                                                                                                                                                                                                                                                                                                                                                                                                                                                                                                                                                                                                                                                                                                                                                                                                                                                                                                                                                                                                                                                                                                                                                                                                                                                                                                                                                                                                                                                                                                                                                                                                                                                                                                                                                                                                                                                                                                                                                                                                                                                                                                                                                                                                                                                                                                                                                                                                                                                                                                                                                                                                                                                                                                                                                                                                                 | Institute of Microbiology, Universidad San Francisco de Quito                                                                  | Institute of Microbiology, Universidad San Francisco de Quito                                                                  | Sully Márquez, Belén Prado-Vivar, Juan José Guadalupe, Monica Becerra-Wong, Bernardo Gutiérrez, Manuel Jaramillo, Verónica Barragán, Patricio Rojas-Silva, Gabriel Trueba, Michelle Grunauer, Paúl Cárdenas                                                                                                                                       |
| EPI_ISL_660532                                                                                                                                                                                                                                                                                                                                                                                                                                                                                                                                                                                                                                                                                                                                                                                                                                                                                                                                                                                                                                                                                                                                                                                                                                                                                                                                                                                                                                                                                                                                                                                                                                                                                                                                                                                                                                                                                                                                                                                                                                                                                                                                                                                                                                                                                                                                                                                                                                                                                                                                                                                                                                                                                                                                                                                                                                                                                                                                                                                                                                                                                                                                                                                                                                                                                                                                                                                                                                                                                                                                                                                                                                                                                                                                                                                                                                                                                                                                                                                                                                                                                                                                                                                                                                                                                                                                                                                                                                                                                                                                                                                                                                                                                                                                                                                                                                                                                                                                                                                                                                                                                                                                                                                                                                                                                                                                                                                                                                                                                                                                                                                                                                                                                                                                                                                                                                                                                                                                                                                                                                                                                                                 | Institute of Microbiology, Universidad San Francisco de Quito                                                                  | Institute of Microbiology, Universidad San Francisco de Quito                                                                  | Sully Márquez, Belén Prado-Vivar, Juan José Guadalupe, Monica Becerra-Wong, Bernardo Gutiérrez, Nabih Dahik, Verónica Barragán, Patricio Rojas-Silva, Gabriel Trueba, Michelle Grunauer, Paúl Cárdenas                                                                                                                                            |
| EPI_ISL_660533, EPI_ISL_660534                                                                                                                                                                                                                                                                                                                                                                                                                                                                                                                                                                                                                                                                                                                                                                                                                                                                                                                                                                                                                                                                                                                                                                                                                                                                                                                                                                                                                                                                                                                                                                                                                                                                                                                                                                                                                                                                                                                                                                                                                                                                                                                                                                                                                                                                                                                                                                                                                                                                                                                                                                                                                                                                                                                                                                                                                                                                                                                                                                                                                                                                                                                                                                                                                                                                                                                                                                                                                                                                                                                                                                                                                                                                                                                                                                                                                                                                                                                                                                                                                                                                                                                                                                                                                                                                                                                                                                                                                                                                                                                                                                                                                                                                                                                                                                                                                                                                                                                                                                                                                                                                                                                                                                                                                                                                                                                                                                                                                                                                                                                                                                                                                                                                                                                                                                                                                                                                                                                                                                                                                                                                                                 | Institute of Microbiology, Universidad San Francisco de Quito                                                                  | Institute of Microbiology, Universidad San Francisco de Quito                                                                  | Sully Márquez, Belén Prado-Vivar, Juan José Guadalupe, Monica Becerra-Wong, Bernardo Gutiérrez, Nabih Dahik, Freddy Iza, Verónica Barragán, Patricio Rojas-Silva, Gabriel Trueba, Michelle Grunauer, Paúl Cárdenas                                                                                                                                |
| EPI_ISL_660535, EPI_ISL_660536, EPI_ISL_660537, EPI_ISL_660538, EPI_ISL_660539                                                                                                                                                                                                                                                                                                                                                                                                                                                                                                                                                                                                                                                                                                                                                                                                                                                                                                                                                                                                                                                                                                                                                                                                                                                                                                                                                                                                                                                                                                                                                                                                                                                                                                                                                                                                                                                                                                                                                                                                                                                                                                                                                                                                                                                                                                                                                                                                                                                                                                                                                                                                                                                                                                                                                                                                                                                                                                                                                                                                                                                                                                                                                                                                                                                                                                                                                                                                                                                                                                                                                                                                                                                                                                                                                                                                                                                                                                                                                                                                                                                                                                                                                                                                                                                                                                                                                                                                                                                                                                                                                                                                                                                                                                                                                                                                                                                                                                                                                                                                                                                                                                                                                                                                                                                                                                                                                                                                                                                                                                                                                                                                                                                                                                                                                                                                                                                                                                                                                                                                                                                 | Institute of Microbiology, Universidad San Francisco de Quito                                                                  | Institute of Microbiology, Universidad San Francisco de Quito                                                                  | Sully Márquez, Belén Prado-Vivar, Juan José Guadalupe, Monica Becerra-Wong, Bernardo Gutiérrez, Hermelinda Paguay, Alexandra Tino, Jorge Montaña, Verónica Barragán, Patricio Rojas-Silva, Gabriel Trueba, Michelle Grunauer, Paúl Cárdenas                                                                                                       |
| EPI_ISL_661304, EPI_ISL_661305, EPI_ISL_661306, EPI_ISL_661307, EPI_ISL_661308, EPI_ISL_661309, EPI_ISL_661310, EPI_ISL_661311                                                                                                                                                                                                                                                                                                                                                                                                                                                                                                                                                                                                                                                                                                                                                                                                                                                                                                                                                                                                                                                                                                                                                                                                                                                                                                                                                                                                                                                                                                                                                                                                                                                                                                                                                                                                                                                                                                                                                                                                                                                                                                                                                                                                                                                                                                                                                                                                                                                                                                                                                                                                                                                                                                                                                                                                                                                                                                                                                                                                                                                                                                                                                                                                                                                                                                                                                                                                                                                                                                                                                                                                                                                                                                                                                                                                                                                                                                                                                                                                                                                                                                                                                                                                                                                                                                                                                                                                                                                                                                                                                                                                                                                                                                                                                                                                                                                                                                                                                                                                                                                                                                                                                                                                                                                                                                                                                                                                                                                                                                                                                                                                                                                                                                                                                                                                                                                                                                                                                                                                 | CSIR-Indian Institute of Chemical Biology, MEDICA Superccpecialty Hospital Kolkata                                             | CSIR-Indian Institute of Chemical Biology, MEDICA Superccpecialty Hospital Kolkata                                             | Sujay Krishna Maity, Priyanka Mallick, Debaleena Bhowmik, Abhishake Lahiri, Dr. Aviral Roy, Dr. Soumen Saha, Dr. Arpita Ghosh Mitra, Dr. Rajesh Pandey, Dr. Sandip Paul, Dr. Partha Chakrabarti, Dr. Saikat Chakrabarti                                                                                                                           |
| EPI_ISL_666622                                                                                                                                                                                                                                                                                                                                                                                                                                                                                                                                                                                                                                                                                                                                                                                                                                                                                                                                                                                                                                                                                                                                                                                                                                                                                                                                                                                                                                                                                                                                                                                                                                                                                                                                                                                                                                                                                                                                                                                                                                                                                                                                                                                                                                                                                                                                                                                                                                                                                                                                                                                                                                                                                                                                                                                                                                                                                                                                                                                                                                                                                                                                                                                                                                                                                                                                                                                                                                                                                                                                                                                                                                                                                                                                                                                                                                                                                                                                                                                                                                                                                                                                                                                                                                                                                                                                                                                                                                                                                                                                                                                                                                                                                                                                                                                                                                                                                                                                                                                                                                                                                                                                                                                                                                                                                                                                                                                                                                                                                                                                                                                                                                                                                                                                                                                                                                                                                                                                                                                                                                                                                                                 | Environmental and Global Health, University of Florida                                                                         | Environmental and Global Health, University of Florida                                                                         | Stephenson,C.J., Elbardy,M.A., Loeb,J.C., Silva,L.O., Morris,J.G., Lednický,J.A.                                                                                                                                                                                                                                                                  |
| EPI_ISL_679629, EPI_ISL_679630, EPI_ISL_679631, EPI_ISL_679632, EPI_ISL_679633, EPI_ISL_679634, EPI_ISL_679644, EPI_ISL_679645, EPI_ISL_679646, EPI_ISL_679647, EPI_ISL_679648, EPI_ISL_679649, EPI_ISL_679650, EPI_ISL_679651, EPI_ISL_679652, EPI_ISL_679653, EPI_ISL_679654, EPI_ISL_679655, EPI_ISL_679656, EPI_ISL_679657, EPI_ISL_679658, EPI_ISL_679659, EPI_ISL_679660, EPI_ISL_679661, EPI_ISL_679662, EPI_ISL_679663, EPI_ISL_679664, EPI_ISL_679665, EPI_ISL_679666, EPI_ISL_679667, EPI_ISL_679668, EPI_ISL_679669, EPI_ISL_679670, EPI_ISL_679671, EPI_ISL_679672, EPI_ISL_679673, EPI_ISL_679674, EPI_ISL_679675, EPI_ISL_679676, EPI_ISL_679677, EPI_ISL_679678, EPI_ISL_679679, EPI_ISL_679680, EPI_ISL_679681, EPI_ISL_679682, EPI_ISL_679683, EPI_ISL_679684, EPI_ISL_679685, EPI_ISL_679686, EPI_ISL_679687, EPI_ISL_679688, EPI_ISL_679689, EPI_ISL_679690, EPI_ISL_679691, EPI_ISL_679692, EPI_ISL_679693, EPI_ISL_679694, EPI_ISL_679695, EPI_ISL_679696, EPI_ISL_679697, EPI_ISL_679698, EPI_ISL_679699, EPI_ISL_679700, EPI_ISL_679701, EPI_ISL_679702, EPI_ISL_679703, EPI_ISL_679704, EPI_ISL_679705, EPI_ISL_679706, EPI_ISL_679707, EPI_ISL_679708, EPI_ISL_679709, EPI_ISL_679710, EPI_ISL_679711, EPI_ISL_679712, EPI_ISL_679713, EPI_ISL_679714, EPI_ISL_679715, EPI_ISL_679716, EPI_ISL_679717, EPI_ISL_679718, EPI_ISL_679719, EPI_ISL_679720, EPI_ISL_679721, EPI_ISL_679722, EPI_ISL_679723, EPI_ISL_679724, EPI_ISL_679725, EPI_ISL_679726, EPI_ISL_679727, EPI_ISL_679728, EPI_ISL_679729, EPI_ISL_679730, EPI_ISL_679731, EPI_ISL_679732, EPI_ISL_679733, EPI_ISL_679734, EPI_ISL_679735, EPI_ISL_679736, EPI_ISL_679737, EPI_ISL_679738, EPI_ISL_679739, EPI_ISL_679740, EPI_ISL_679741, EPI_ISL_679742, EPI_ISL_679743, EPI_ISL_679744, EPI_ISL_679745, EPI_ISL_679746, EPI_ISL_679747, EPI_ISL_679748, EPI_ISL_679749, EPI_ISL_679750, EPI_ISL_679751, EPI_ISL_679752, EPI_ISL_679753, EPI_ISL_679754, EPI_ISL_679755, EPI_ISL_679756, EPI_ISL_679757, EPI_ISL_679758, EPI_ISL_679759, EPI_ISL_679760, EPI_ISL_679761, EPI_ISL_679762, EPI_ISL_679763, EPI_ISL_679764, EPI_ISL_679765, EPI_ISL_679766, EPI_ISL_679767, EPI_ISL_679768, EPI_ISL_679769, EPI_ISL_679770, EPI_ISL_679771, EPI_ISL_679772, EPI_ISL_679773, EPI_ISL_679774, EPI_ISL_679775, EPI_ISL_679776, EPI_ISL_679777, EPI_ISL_679778, EPI_ISL_679779, EPI_ISL_679780, EPI_ISL_679781, EPI_ISL_679782, EPI_ISL_679783, EPI_ISL_679784, EPI_ISL_679785, EPI_ISL_679786, EPI_ISL_679787, EPI_ISL_679788, EPI_ISL_679789, EPI_ISL_679790, EPI_ISL_679791, EPI_ISL_679792, EPI_ISL_679793, EPI_ISL_679794, EPI_ISL_679795, EPI_ISL_679796, EPI_ISL_679797, EPI_ISL_679798, EPI_ISL_679799, EPI_ISL_679800, EPI_ISL_679801, EPI_ISL_679802, EPI_ISL_679803, EPI_ISL_679804, EPI_ISL_679805, EPI_ISL_679806, EPI_ISL_679807, EPI_ISL_679808, EPI_ISL_679809, EPI_ISL_679810, EPI_ISL_679811, EPI_ISL_679812, EPI_ISL_679813, EPI_ISL_679814, EPI_ISL_679815, EPI_ISL_679816, EPI_ISL_679817, EPI_ISL_679818, EPI_ISL_679819, EPI_ISL_679820, EPI_ISL_679821, EPI_ISL_679822, EPI_ISL_679823, EPI_ISL_679824, EPI_ISL_679825, EPI_ISL_679826, EPI_ISL_679827, EPI_ISL_679828, EPI_ISL_679829, EPI_ISL_679830, EPI_ISL_679831, EPI_ISL_679832, EPI_ISL_679833, EPI_ISL_679834, EPI_ISL_679835, EPI_ISL_679836, EPI_ISL_679837, EPI_ISL_679838, EPI_ISL_679839, EPI_ISL_679840, EPI_ISL_679841, EPI_ISL_679842, EPI_ISL_679843, EPI_ISL_679844, EPI_ISL_679845, EPI_ISL_679846, EPI_ISL_679847, EPI_ISL_679848, EPI_ISL_679849, EPI_ISL_679850, EPI_ISL_679851, EPI_ISL_679852, EPI_ISL_679853, EPI_ISL_679854, EPI_ISL_679855, EPI_ISL_679856, EPI_ISL_679857, EPI_ISL_679858, EPI_ISL_679859, EPI_ISL_679860, EPI_ISL_679861, EPI_ISL_679862, EPI_ISL_679863, EPI_ISL_679864, EPI_ISL_679865, EPI_ISL_679866, EPI_ISL_679867, EPI_ISL_679868, EPI_ISL_679869, EPI_ISL_679870, EPI_ISL_679871, EPI_ISL_679872, EPI_ISL_679873, EPI_ISL_679874, EPI_ISL_679875, EPI_ISL_679876, EPI_ISL_679877, EPI_ISL_679878, EPI_ISL_679879, EPI_ISL_679880, EPI_ISL_679881, EPI_ISL_679882, EPI_ISL_679883, EPI_ISL_679884, EPI_ISL_679885, EPI_ISL_679886, EPI_ISL_679887, EPI_ISL_679888, EPI_ISL_679889, EPI_ISL_679890, EPI_ISL_679891, EPI_ISL_679892, EPI_ISL_679893, EPI_ISL_679894, EPI_ISL_679895, EPI_ISL_679896, EPI_ISL_679897, EPI_ISL_679898, EPI_ISL_679899, EPI_ISL_679900, EPI_ISL_679901, EPI_ISL_679902, EPI_ISL_679903, EPI_ISL_679904, EPI_ISL_679905, EPI_ISL_679906, EPI_ISL_679907, EPI_ISL_679908, EPI_ISL_679909, EPI_ISL_679910, EPI_ISL_679911, EPI_ISL_679912, EPI_ISL_679913, EPI_ISL_679914, EPI_ISL_679915, EPI_ISL_679916, EPI_ISL_679917, EPI_ISL_679918, EPI_ISL_679919, EPI_ISL_679920, EPI_ISL_679921, EPI_ISL_679922, EPI_ISL_679923, EPI_ISL_679924, EPI_ISL_679925, EPI_ISL_679926, EPI_ISL_679927, EPI_ISL_679928, EPI_ISL_679929, EPI_ISL_679930, EPI_ISL_679931, EPI_ISL_679932, EPI_ISL_679933, EPI_ISL_679934, EPI_ISL_679935, EPI_ISL_679936, EPI_ISL_679937, EPI_ISL_679938, EPI_ISL_679939, EPI_ISL_679940, EPI_ISL_679941, EPI_ISL_679942, EPI_ISL_679943, EPI_ISL_679944, EPI_ISL_679945, EPI_ISL_679946, EPI_ISL_679947, EPI_ISL_679948, EPI_ISL_679949, EPI_ISL_679950, EPI_ISL_679951, EPI_ISL_679952, EPI_ISL_679953, EPI_ISL_679954, EPI_ISL_679955, EPI_ISL_679956, EPI_ISL_679957, EPI_ISL_679958, EPI_ISL_679959, EPI_ISL_679960, EPI_ISL_679961, EPI_ISL_679962, EPI_ISL_679963, EPI_ISL_679964, EPI_ISL_679965, EPI_ISL_679966, EPI_ISL_679967, EPI_ISL_679968, EPI_ISL_679969, EPI_ISL_679970, EPI_ISL_679971, EPI_ISL_679972, EPI_ISL_679973, EPI_ISL_679974, EPI_ISL_679975, EPI_ISL_679976, EPI_ISL_679977, EPI_ISL_679978, EPI_ISL_679979, EPI_ISL_679980, EPI_ISL_679981, EPI_ISL_679982, EPI_ISL_679983, EPI_ISL_679984, EPI_ISL_679985, EPI_ISL_679986, EPI_ISL_679987, EPI_ISL_679988, EPI_ISL_679989, EPI_ISL_679990, EPI_ISL_679991, EPI_ISL_679992, EPI_ISL_679993, EPI_ISL_679994, EPI_ISL_679995, EPI_ISL_679996, EPI_ISL_679997, EPI_ISL_679998, EPI_ISL_679999, EPI_ISL_718267, EPI_ISL_718268, EPI_ISL_718269, EPI_ISL_718270, EPI_ISL_718271, EPI_ISL_718272 | Institute for Medical Research, Infectious Disease Research Centre, National Institutes of Health, Ministry of Health Malaysia | Institute for Medical Research, Infectious Disease Research Centre, National Institutes of Health, Ministry of Health Malaysia | Suppiah J, Kamel K, Mohd-Zawawi Z, Thayan R                                                                                                                                                                                                                                                                                                       |
| EPI_ISL_718273                                                                                                                                                                                                                                                                                                                                                                                                                                                                                                                                                                                                                                                                                                                                                                                                                                                                                                                                                                                                                                                                                                                                                                                                                                                                                                                                                                                                                                                                                                                                                                                                                                                                                                                                                                                                                                                                                                                                                                                                                                                                                                                                                                                                                                                                                                                                                                                                                                                                                                                                                                                                                                                                                                                                                                                                                                                                                                                                                                                                                                                                                                                                                                                                                                                                                                                                                                                                                                                                                                                                                                                                                                                                                                                                                                                                                                                                                                                                                                                                                                                                                                                                                                                                                                                                                                                                                                                                                                                                                                                                                                                                                                                                                                                                                                                                                                                                                                                                                                                                                                                                                                                                                                                                                                                                                                                                                                                                                                                                                                                                                                                                                                                                                                                                                                                                                                                                                                                                                                                                                                                                                                                 | Fujita Health University Okazaki Medical Center                                                                                | Department of Virology and Parasitology, Fujita Health University School of Medicine                                           | Takayuki Murata, Aki Sakurai, Satoshi Komoto, Tomihiko Ide, Takuma Ishihara, Masahiro Suzuki, Yohei Doi                                                                                                                                                                                                                                           |
| EPI_ISL_718275, EPI_ISL_718276, EPI_ISL_718277, EPI_ISL_718279, EPI_ISL_718280, EPI_ISL_718281, EPI_ISL_718282, EPI_ISL_718284, EPI_ISL_718285, EPI_ISL_718286, EPI_ISL_718287, EPI_ISL_718289, EPI_ISL_718290, EPI_ISL_718291, EPI_ISL_718292, EPI_ISL_718293, EPI_ISL_718294, EPI_ISL_718295                                                                                                                                                                                                                                                                                                                                                                                                                                                                                                                                                                                                                                                                                                                                                                                                                                                                                                                                                                                                                                                                                                                                                                                                                                                                                                                                                                                                                                                                                                                                                                                                                                                                                                                                                                                                                                                                                                                                                                                                                                                                                                                                                                                                                                                                                                                                                                                                                                                                                                                                                                                                                                                                                                                                                                                                                                                                                                                                                                                                                                                                                                                                                                                                                                                                                                                                                                                                                                                                                                                                                                                                                                                                                                                                                                                                                                                                                                                                                                                                                                                                                                                                                                                                                                                                                                                                                                                                                                                                                                                                                                                                                                                                                                                                                                                                                                                                                                                                                                                                                                                                                                                                                                                                                                                                                                                                                                                                                                                                                                                                                                                                                                                                                                                                                                                                                                 | see above                                                                                                                      | Oxford Viroemics, NDM, University of Oxford; Oxford University Hospitals; Basingstoke and North Hampshire Hospital             | COVID-19 Genomics UK (COG-UK) Consortium<br>Tanya Golubchik, David Bonsall, George Macintyre, Amy Trebes, Mariateresa de Cesare, Catrin Moore, Alex Mobbs, Anita Justice, Robert Shaw, Monique Andersson, Timothy Peto, Emma Wise, Nathan Moore, Jessica Lynch, Nick Cortes, Matilde Mori, Stephen Kidd, David Buck, John Todd, Christophe Fraser |







|                                                                                                                                                                                                                                                                                                                                                                                                                                                                                                                                                                                                                                                                                                                                                                                                                                                                                                                                                                                                                                                                                                                                                                                                                                                                                                                                                                                                                                                                                                                                                                                                                                                                                                                                                                                                                                                |                                                                                                                                    |                                                                                        |                                                                                                                                                                                                                                                                                                                                                                                                                                 |
|------------------------------------------------------------------------------------------------------------------------------------------------------------------------------------------------------------------------------------------------------------------------------------------------------------------------------------------------------------------------------------------------------------------------------------------------------------------------------------------------------------------------------------------------------------------------------------------------------------------------------------------------------------------------------------------------------------------------------------------------------------------------------------------------------------------------------------------------------------------------------------------------------------------------------------------------------------------------------------------------------------------------------------------------------------------------------------------------------------------------------------------------------------------------------------------------------------------------------------------------------------------------------------------------------------------------------------------------------------------------------------------------------------------------------------------------------------------------------------------------------------------------------------------------------------------------------------------------------------------------------------------------------------------------------------------------------------------------------------------------------------------------------------------------------------------------------------------------|------------------------------------------------------------------------------------------------------------------------------------|----------------------------------------------------------------------------------------|---------------------------------------------------------------------------------------------------------------------------------------------------------------------------------------------------------------------------------------------------------------------------------------------------------------------------------------------------------------------------------------------------------------------------------|
| EPI_ISL_745165                                                                                                                                                                                                                                                                                                                                                                                                                                                                                                                                                                                                                                                                                                                                                                                                                                                                                                                                                                                                                                                                                                                                                                                                                                                                                                                                                                                                                                                                                                                                                                                                                                                                                                                                                                                                                                 | Vredenburg Hospital wc VBG                                                                                                         | National Health Laboratory Service (NHLS), Tygerberg                                   | Susan Engelbrecht, Kayla Delaney, Bronwyn Kleinhans, Houriyah Tegally, Eduan Wilkindon, Gert van Zyl, Wolfgang Preiser, Tulio de Oliveira                                                                                                                                                                                                                                                                                       |
| EPI_ISL_745166                                                                                                                                                                                                                                                                                                                                                                                                                                                                                                                                                                                                                                                                                                                                                                                                                                                                                                                                                                                                                                                                                                                                                                                                                                                                                                                                                                                                                                                                                                                                                                                                                                                                                                                                                                                                                                 | Khayelitsha Hospital wc KHA                                                                                                        | National Health Laboratory Service (NHLS), Tygerberg                                   | Susan Engelbrecht, Kayla Delaney, Bronwyn Kleinhans, Houriyah Tegally, Eduan Wilkindon, Gert van Zyl, Wolfgang Preiser, Tulio de Oliveira                                                                                                                                                                                                                                                                                       |
| EPI_ISL_745167                                                                                                                                                                                                                                                                                                                                                                                                                                                                                                                                                                                                                                                                                                                                                                                                                                                                                                                                                                                                                                                                                                                                                                                                                                                                                                                                                                                                                                                                                                                                                                                                                                                                                                                                                                                                                                 | Vredenburg Hospital wc VBG                                                                                                         | National Health Laboratory Service (NHLS), Tygerberg                                   | Susan Engelbrecht, Kayla Delaney, Bronwyn Kleinhans, Houriyah Tegally, Eduan Wilkindon, Gert van Zyl, Wolfgang Preiser, Tulio de Oliveira                                                                                                                                                                                                                                                                                       |
| EPI_ISL_745168, EPI_ISL_745169                                                                                                                                                                                                                                                                                                                                                                                                                                                                                                                                                                                                                                                                                                                                                                                                                                                                                                                                                                                                                                                                                                                                                                                                                                                                                                                                                                                                                                                                                                                                                                                                                                                                                                                                                                                                                 | Bishop Lavis CDC wc BLP                                                                                                            | National Health Laboratory Service (NHLS), Tygerberg                                   | Susan Engelbrecht, Kayla Delaney, Bronwyn Kleinhans, Houriyah Tegally, Eduan Wilkindon, Gert van Zyl, Wolfgang Preiser, Tulio de Oliveira                                                                                                                                                                                                                                                                                       |
| EPI_ISL_745170                                                                                                                                                                                                                                                                                                                                                                                                                                                                                                                                                                                                                                                                                                                                                                                                                                                                                                                                                                                                                                                                                                                                                                                                                                                                                                                                                                                                                                                                                                                                                                                                                                                                                                                                                                                                                                 | Brackengate Field Hospital COVID-19 wc BRG                                                                                         | National Health Laboratory Service (NHLS), Tygerberg                                   | Susan Engelbrecht, Kayla Delaney, Bronwyn Kleinhans, Houriyah Tegally, Eduan Wilkindon, Gert van Zyl, Wolfgang Preiser, Tulio de Oliveira                                                                                                                                                                                                                                                                                       |
| EPI_ISL_745171, EPI_ISL_745172                                                                                                                                                                                                                                                                                                                                                                                                                                                                                                                                                                                                                                                                                                                                                                                                                                                                                                                                                                                                                                                                                                                                                                                                                                                                                                                                                                                                                                                                                                                                                                                                                                                                                                                                                                                                                 | Delft CHC wc DFP                                                                                                                   | National Health Laboratory Service (NHLS), Tygerberg                                   | Susan Engelbrecht, Kayla Delaney, Bronwyn Kleinhans, Houriyah Tegally, Eduan Wilkindon, Gert van Zyl, Wolfgang Preiser, Tulio de Oliveira                                                                                                                                                                                                                                                                                       |
| EPI_ISL_745173, EPI_ISL_745174, EPI_ISL_745175, EPI_ISL_745176, EPI_ISL_745177, EPI_ISL_745178                                                                                                                                                                                                                                                                                                                                                                                                                                                                                                                                                                                                                                                                                                                                                                                                                                                                                                                                                                                                                                                                                                                                                                                                                                                                                                                                                                                                                                                                                                                                                                                                                                                                                                                                                 | Eerste River Hospital wc ERH                                                                                                       | National Health Laboratory Service (NHLS), Tygerberg                                   | Susan Engelbrecht, Kayla Delaney, Bronwyn Kleinhans, Houriyah Tegally, Eduan Wilkindon, Gert van Zyl, Wolfgang Preiser, Tulio de Oliveira                                                                                                                                                                                                                                                                                       |
| EPI_ISL_745179                                                                                                                                                                                                                                                                                                                                                                                                                                                                                                                                                                                                                                                                                                                                                                                                                                                                                                                                                                                                                                                                                                                                                                                                                                                                                                                                                                                                                                                                                                                                                                                                                                                                                                                                                                                                                                 | Kraaifontein CHC wc KFP                                                                                                            | National Health Laboratory Service (NHLS), Tygerberg                                   | Susan Engelbrecht, Kayla Delaney, Bronwyn Kleinhans, Houriyah Tegally, Eduan Wilkindon, Gert van Zyl, Wolfgang Preiser, Tulio de Oliveira                                                                                                                                                                                                                                                                                       |
| EPI_ISL_745180, EPI_ISL_745181, EPI_ISL_745182, EPI_ISL_745183, EPI_ISL_745184, EPI_ISL_745185                                                                                                                                                                                                                                                                                                                                                                                                                                                                                                                                                                                                                                                                                                                                                                                                                                                                                                                                                                                                                                                                                                                                                                                                                                                                                                                                                                                                                                                                                                                                                                                                                                                                                                                                                 | Tygerberg Hospital wc TBH                                                                                                          | National Health Laboratory Service (NHLS), Tygerberg                                   | Susan Engelbrecht, Kayla Delaney, Bronwyn Kleinhans, Houriyah Tegally, Eduan Wilkindon, Gert van Zyl, Wolfgang Preiser, Tulio de Oliveira                                                                                                                                                                                                                                                                                       |
| EPI_ISL_745186                                                                                                                                                                                                                                                                                                                                                                                                                                                                                                                                                                                                                                                                                                                                                                                                                                                                                                                                                                                                                                                                                                                                                                                                                                                                                                                                                                                                                                                                                                                                                                                                                                                                                                                                                                                                                                 | Wallacedene Clinic wc WAL                                                                                                          | National Health Laboratory Service (NHLS), Tygerberg                                   | Susan Engelbrecht, Kayla Delaney, Bronwyn Kleinhans, Houriyah Tegally, Eduan Wilkindon, Gert van Zyl, Wolfgang Preiser, Tulio de Oliveira                                                                                                                                                                                                                                                                                       |
| EPI_ISL_745187                                                                                                                                                                                                                                                                                                                                                                                                                                                                                                                                                                                                                                                                                                                                                                                                                                                                                                                                                                                                                                                                                                                                                                                                                                                                                                                                                                                                                                                                                                                                                                                                                                                                                                                                                                                                                                 | Port Nolloth Hospital                                                                                                              | National Health Laboratory Service (NHLS), Tygerberg                                   | Susan Engelbrecht, Kayla Delaney, Bronwyn Kleinhans, Houriyah Tegally, Eduan Wilkindon, Gert van Zyl, Wolfgang Preiser, Tulio de Oliveira                                                                                                                                                                                                                                                                                       |
| EPI_ISL_745188                                                                                                                                                                                                                                                                                                                                                                                                                                                                                                                                                                                                                                                                                                                                                                                                                                                                                                                                                                                                                                                                                                                                                                                                                                                                                                                                                                                                                                                                                                                                                                                                                                                                                                                                                                                                                                 | Nababeep Hospital                                                                                                                  | National Health Laboratory Service (NHLS), Tygerberg                                   | Susan Engelbrecht, Kayla Delaney, Bronwyn Kleinhans, Houriyah Tegally, Eduan Wilkindon, Gert van Zyl, Wolfgang Preiser, Tulio de Oliveira                                                                                                                                                                                                                                                                                       |
| EPI_ISL_745189                                                                                                                                                                                                                                                                                                                                                                                                                                                                                                                                                                                                                                                                                                                                                                                                                                                                                                                                                                                                                                                                                                                                                                                                                                                                                                                                                                                                                                                                                                                                                                                                                                                                                                                                                                                                                                 | Vredenburg Hospital wc VBG                                                                                                         | National Health Laboratory Service (NHLS), Tygerberg                                   | Susan Engelbrecht, Kayla Delaney, Bronwyn Kleinhans, Houriyah Tegally, Eduan Wilkindon, Gert van Zyl, Wolfgang Preiser, Tulio de Oliveira                                                                                                                                                                                                                                                                                       |
| EPI_ISL_745190                                                                                                                                                                                                                                                                                                                                                                                                                                                                                                                                                                                                                                                                                                                                                                                                                                                                                                                                                                                                                                                                                                                                                                                                                                                                                                                                                                                                                                                                                                                                                                                                                                                                                                                                                                                                                                 | Brackengate Field Hospital COVID-19 wc BRG                                                                                         | National Health Laboratory Service (NHLS), Tygerberg                                   | Susan Engelbrecht, Kayla Delaney, Bronwyn Kleinhans, Houriyah Tegally, Eduan Wilkindon, Gert van Zyl, Wolfgang Preiser, Tulio de Oliveira                                                                                                                                                                                                                                                                                       |
| EPI_ISL_747233, EPI_ISL_747234                                                                                                                                                                                                                                                                                                                                                                                                                                                                                                                                                                                                                                                                                                                                                                                                                                                                                                                                                                                                                                                                                                                                                                                                                                                                                                                                                                                                                                                                                                                                                                                                                                                                                                                                                                                                                 | National Institute of Health Research and Development                                                                              | National Institute of Health Research and Development                                  | Subangkit; Indrasari,ND; Wulandari,D; Monika,M; Pawestri,HA; Puspa,KD; Nugraha,AA; Ikawati,HD; Pangesti,KNA; Soekarso,T; Paisal; Setiawaty,V                                                                                                                                                                                                                                                                                    |
| EPI_ISL_747237                                                                                                                                                                                                                                                                                                                                                                                                                                                                                                                                                                                                                                                                                                                                                                                                                                                                                                                                                                                                                                                                                                                                                                                                                                                                                                                                                                                                                                                                                                                                                                                                                                                                                                                                                                                                                                 | National Institute of Health Research and Development                                                                              | National Institute of Health Research and Development                                  | Subangkit; Nafiandi,Estaria,V; Pawestri,HA; Puspa,KD; Nugraha,AA; Ikawati,HD; Pangesti,KNA; Soekarso,T; Paisal; Puspandari,N; Setiawaty,V                                                                                                                                                                                                                                                                                       |
| EPI_ISL_752606                                                                                                                                                                                                                                                                                                                                                                                                                                                                                                                                                                                                                                                                                                                                                                                                                                                                                                                                                                                                                                                                                                                                                                                                                                                                                                                                                                                                                                                                                                                                                                                                                                                                                                                                                                                                                                 | Yale Pathology Lab                                                                                                                 | Grubaugh Lab - Yale School of Public Health                                            | Tara Alpert, Joseph Fauver, Anderson Brito, Chen Liu, Pei Hui, Jianhui Wang, Kien Pham, Nathan Grubaugh                                                                                                                                                                                                                                                                                                                         |
| EPI_ISL_753699                                                                                                                                                                                                                                                                                                                                                                                                                                                                                                                                                                                                                                                                                                                                                                                                                                                                                                                                                                                                                                                                                                                                                                                                                                                                                                                                                                                                                                                                                                                                                                                                                                                                                                                                                                                                                                 | RSUD Ulin Banjarmasin Kalimantan Selatan                                                                                           | National Institute of Health Research and Development                                  | Subangkit;Pawestri,HA;Puspa,KD;Nugraha,AA;Ikawati,HD;Pangesti,KNA;Soekarso,T;Puspandari,N;Pasaribu,M;Setiawaty,V                                                                                                                                                                                                                                                                                                                |
| EPI_ISL_755956, EPI_ISL_755966, EPI_ISL_755969, EPI_ISL_755975, EPI_ISL_755977, EPI_ISL_755979, EPI_ISL_755991, EPI_ISL_755999, EPI_ISL_756008, EPI_ISL_756013, EPI_ISL_756018, EPI_ISL_756024, EPI_ISL_756029, EPI_ISL_756030, EPI_ISL_756042, EPI_ISL_756043, EPI_ISL_756044, EPI_ISL_756049, EPI_ISL_756050, EPI_ISL_756053, EPI_ISL_756060, EPI_ISL_756065, EPI_ISL_756071, EPI_ISL_756087, EPI_ISL_756088, EPI_ISL_756089, EPI_ISL_756102, EPI_ISL_756103, EPI_ISL_756109, EPI_ISL_756167, EPI_ISL_756169, EPI_ISL_756171, EPI_ISL_756180, EPI_ISL_756181, EPI_ISL_756183, EPI_ISL_756282, EPI_ISL_757288, EPI_ISL_757289, EPI_ISL_757316, EPI_ISL_757322, EPI_ISL_757326, EPI_ISL_757329, EPI_ISL_757334, EPI_ISL_757348, EPI_ISL_757353, EPI_ISL_757354, EPI_ISL_757355, EPI_ISL_757359, EPI_ISL_757361, EPI_ISL_757362, EPI_ISL_757368, EPI_ISL_757372, EPI_ISL_757374, EPI_ISL_757375, EPI_ISL_757392, EPI_ISL_759769, EPI_ISL_759782, EPI_ISL_759785, EPI_ISL_759809, EPI_ISL_759811, EPI_ISL_759813, EPI_ISL_759817, EPI_ISL_759825, EPI_ISL_759831, EPI_ISL_759831, EPI_ISL_759901, EPI_ISL_759908, EPI_ISL_759909, EPI_ISL_759915, EPI_ISL_759925, EPI_ISL_759927, EPI_ISL_759929, EPI_ISL_759933, EPI_ISL_759945                                                                                                                                                                                                                                                                                                                                                                                                                                                                                                                                                                                                                 | Department of Virology and Immunology, University of Helsinki and Helsinki University Hospital, Huslab Finland                     | Department of Virology, Faculty of Medicine, University of Helsinki, Helsinki, Finland | Teemu Smura, Ravi Kant, Phuoc Truong, Hussein Alburkat, Hannimari Kallio-Kokko, Jenni Virtanen, Maija Suvanto, Sari Hannula, Harri Kangas, Pekka Ellonen, Olli Vapalahti                                                                                                                                                                                                                                                        |
| EPI_ISL_763838, EPI_ISL_763841, EPI_ISL_763844, EPI_ISL_763845, EPI_ISL_763846, EPI_ISL_763859, EPI_ISL_763860, EPI_ISL_763861, EPI_ISL_763862, EPI_ISL_763863, EPI_ISL_763928, EPI_ISL_763929, EPI_ISL_763930, EPI_ISL_763931, EPI_ISL_763932, EPI_ISL_763933, EPI_ISL_763934, EPI_ISL_763935, EPI_ISL_763936, EPI_ISL_763937, EPI_ISL_763938, EPI_ISL_763939, EPI_ISL_763940, EPI_ISL_763941, EPI_ISL_763942, EPI_ISL_763954, EPI_ISL_763955, EPI_ISL_763956, EPI_ISL_763957, EPI_ISL_763958, EPI_ISL_763959, EPI_ISL_763960, EPI_ISL_763961, EPI_ISL_763962, EPI_ISL_763963, EPI_ISL_763964, EPI_ISL_763965, EPI_ISL_763966, EPI_ISL_763967, EPI_ISL_763968, EPI_ISL_763969, EPI_ISL_763970, EPI_ISL_763971, EPI_ISL_763972, EPI_ISL_763973, EPI_ISL_764066, EPI_ISL_764067, EPI_ISL_764068, EPI_ISL_764077, EPI_ISL_764078, EPI_ISL_764079, EPI_ISL_764085, EPI_ISL_764086, EPI_ISL_764087, EPI_ISL_764089, EPI_ISL_764090, EPI_ISL_764091, EPI_ISL_764092, EPI_ISL_764117, EPI_ISL_764243, EPI_ISL_764250, EPI_ISL_764264, EPI_ISL_764265, EPI_ISL_764271, EPI_ISL_764525, EPI_ISL_764526, EPI_ISL_764527, EPI_ISL_764528, EPI_ISL_764529, EPI_ISL_764530, EPI_ISL_764531, EPI_ISL_764532, EPI_ISL_764533, EPI_ISL_764534, EPI_ISL_764535, EPI_ISL_764536, EPI_ISL_764537, EPI_ISL_764538, EPI_ISL_764539, EPI_ISL_764540, EPI_ISL_764541, EPI_ISL_764542, EPI_ISL_764543, EPI_ISL_764544, EPI_ISL_764545, EPI_ISL_764546, EPI_ISL_764547, EPI_ISL_764548, EPI_ISL_764549, EPI_ISL_764551, EPI_ISL_764552, EPI_ISL_764553, EPI_ISL_764554, EPI_ISL_764555, EPI_ISL_764556, EPI_ISL_764557, EPI_ISL_764558, EPI_ISL_764559, EPI_ISL_764560, EPI_ISL_764561, EPI_ISL_764562, EPI_ISL_764563, EPI_ISL_764564, EPI_ISL_764565, EPI_ISL_764566, EPI_ISL_764567, EPI_ISL_764568, EPI_ISL_764569, EPI_ISL_764570, EPI_ISL_764571, EPI_ISL_764572 | Department of Virology and Immunology, University of Oxford; Oxford University Hospitals; Basingstoke and North Hampshire Hospital | COVID-19 Genomics UK (COG-UK) Consortium                                               | Tanya Golubchik, David Bonsall, George Macintyre, Amy Trebes, Mariateresa de Cesare, Catrin Moore, Alex Mobbs, Anita Justice, Robert Shaw, Monique Anderson, Timothy Peto, Emma Wise, Nathan Moore, Jessica Lynch, Nick Cortes, Matilde Mori, Stephen Kidd, David Buck, John Todd, Christophe Fraser                                                                                                                            |
| EPI_ISL_766016, EPI_ISL_766019, EPI_ISL_766025, EPI_ISL_766027                                                                                                                                                                                                                                                                                                                                                                                                                                                                                                                                                                                                                                                                                                                                                                                                                                                                                                                                                                                                                                                                                                                                                                                                                                                                                                                                                                                                                                                                                                                                                                                                                                                                                                                                                                                 | Department of Virology and Immunology, University of Helsinki and Helsinki University Hospital, Huslab Finland                     | Department of Virology, Faculty of Medicine, University of Helsinki, Helsinki, Finland | Teemu Smura, Olli Vapalahti, Maija Lappalainen, Satu Kurkela                                                                                                                                                                                                                                                                                                                                                                    |
| EPI_ISL_775599                                                                                                                                                                                                                                                                                                                                                                                                                                                                                                                                                                                                                                                                                                                                                                                                                                                                                                                                                                                                                                                                                                                                                                                                                                                                                                                                                                                                                                                                                                                                                                                                                                                                                                                                                                                                                                 | Balai Besar Veteriner Maros                                                                                                        | National Institute of Health Research and Development                                  | Subangkit;Pawestri,HA;Ikawati,HD;Nugraha,AA;Puspa,KD;Muflihanah;Mangidi,R;Pangesti,KNA;Soekarso,T;Puspandari,N;Setiawaty,V                                                                                                                                                                                                                                                                                                      |
| EPI_ISL_779137, EPI_ISL_779138, EPI_ISL_779139, EPI_ISL_779140, EPI_ISL_779141, EPI_ISL_779142, EPI_ISL_779143, EPI_ISL_779144, EPI_ISL_779145, EPI_ISL_779146, EPI_ISL_779147, EPI_ISL_779148, EPI_ISL_779149, EPI_ISL_779150, EPI_ISL_779151, EPI_ISL_779152                                                                                                                                                                                                                                                                                                                                                                                                                                                                                                                                                                                                                                                                                                                                                                                                                                                                                                                                                                                                                                                                                                                                                                                                                                                                                                                                                                                                                                                                                                                                                                                 | Yale Clinical Virology Laboratory                                                                                                  | Grubaugh Lab - Yale School of Public Health                                            | Tara Alpert, Joseph Fauver, Anderson Brito, Mallery Breban, Anne Wyllie, Chantal Vogels, Mary Petrone, Chaney Kalinich, Isabel Ott, Arnau Casanovas, Catherine Muenker, Adam Moore, Alice Lu, Maria Tokuyama, Patrick Wong, Peiwen Lu, Saad Omer, Richard Martinello, Allison Nelson, Shelli Farhadian, Akiko Iwasaki, Charlese Dela Cruz, Albert Ko, Nathan Grubaugh                                                           |
| EPI_ISL_779153, EPI_ISL_779154                                                                                                                                                                                                                                                                                                                                                                                                                                                                                                                                                                                                                                                                                                                                                                                                                                                                                                                                                                                                                                                                                                                                                                                                                                                                                                                                                                                                                                                                                                                                                                                                                                                                                                                                                                                                                 | Yale Pathology Lab                                                                                                                 | Grubaugh Lab - Yale School of Public Health                                            | Tara Alpert, Joseph Fauver, Chen Liu, Pei Hui, Jianhui Wang, Susan Bell and Han Zhou, Anderson Brito, Mallery Breban, Anne Wyllie, Chantal Vogels, Mary Petrone, Chaney Kalinich, Isabel Ott, Arnau Casanovas, Catherine Muenker, Adam Moore, Alice Lu, Maria Tokuyama, Patrick Wong, Peiwen Lu, Saad Omer, Richard Martinello, Allison Nelson, Shelli Farhadian, Akiko Iwasaki, Charlese Dela Cruz, Albert Ko, Nathan Grubaugh |
| EPI_ISL_791983                                                                                                                                                                                                                                                                                                                                                                                                                                                                                                                                                                                                                                                                                                                                                                                                                                                                                                                                                                                                                                                                                                                                                                                                                                                                                                                                                                                                                                                                                                                                                                                                                                                                                                                                                                                                                                 | RSUD dr. Kanujoso Djatiwibowo Balikpapan                                                                                           | National Institute of Health Research and Development                                  | Subangkit;Pawestri,HA;Ikawati,HD;Nugraha,AA;Puspa,KD;Ivanna;Pangesti,KNA;Soekarso,T;Puspandari,N;Setiawaty,V                                                                                                                                                                                                                                                                                                                    |
| EPI_ISL_791986                                                                                                                                                                                                                                                                                                                                                                                                                                                                                                                                                                                                                                                                                                                                                                                                                                                                                                                                                                                                                                                                                                                                                                                                                                                                                                                                                                                                                                                                                                                                                                                                                                                                                                                                                                                                                                 | RSUD Morotai Maluku Utara                                                                                                          | National Institute of Health Research and Development                                  | Subangkit;Pawestri,HA;Ikawati,HD;Nugraha,AA;Puspa,KD;Denggo,SD;Pangesti,KNA;Soekarso,T;Puspandari,N;Setiawaty,V                                                                                                                                                                                                                                                                                                                 |
| EPI_ISL_791988                                                                                                                                                                                                                                                                                                                                                                                                                                                                                                                                                                                                                                                                                                                                                                                                                                                                                                                                                                                                                                                                                                                                                                                                                                                                                                                                                                                                                                                                                                                                                                                                                                                                                                                                                                                                                                 | Balai Besar POM Semarang                                                                                                           | National Institute of Health Research and Development                                  | Subangkit;Pawestri,HA;Ikawati,HD;Nugraha,AA;Puspa,KD;Aryanti;Pangesti,KNA;Soekarso,T;Puspandari,N;Setiawaty,V                                                                                                                                                                                                                                                                                                                   |
| EPI_ISL_791989                                                                                                                                                                                                                                                                                                                                                                                                                                                                                                                                                                                                                                                                                                                                                                                                                                                                                                                                                                                                                                                                                                                                                                                                                                                                                                                                                                                                                                                                                                                                                                                                                                                                                                                                                                                                                                 | RSUD Waluyo Jati Kota Kraksaan, Jawa Timur                                                                                         | National Institute of Health Research and Development                                  | Subangkit;Pawestri,HA;Ikawati,HD;Nugraha,AA;Puspa,KD;Muhashonah,J;Pangesti,KNA;Soekarso,T;Puspandari,N;Setiawaty,V                                                                                                                                                                                                                                                                                                              |
| EPI_ISL_802502, EPI_ISL_802503, EPI_ISL_802504, EPI_ISL_802505                                                                                                                                                                                                                                                                                                                                                                                                                                                                                                                                                                                                                                                                                                                                                                                                                                                                                                                                                                                                                                                                                                                                                                                                                                                                                                                                                                                                                                                                                                                                                                                                                                                                                                                                                                                 | Connecticut Department of Health                                                                                                   | Grubaugh Lab - Yale School of Public Health                                            | Tara Alpert, Joseph Fauver, Anderson Brito, Mallery Breban, Anne Wyllie, Chantal Vogels, Mary Petrone, Chaney Kalinich, Isabel Ott, Nathan Grubaugh                                                                                                                                                                                                                                                                             |
| EPI_ISL_803098                                                                                                                                                                                                                                                                                                                                                                                                                                                                                                                                                                                                                                                                                                                                                                                                                                                                                                                                                                                                                                                                                                                                                                                                                                                                                                                                                                                                                                                                                                                                                                                                                                                                                                                                                                                                                                 | Institute of Microbiology, Universidad San Francisco de Quito                                                                      | Institute of Microbiology, Universidad San Francisco de Quito                          | Sully Márquez, Belén Prado-Vivar, Juan José Guadalupe, Monica Becerra-Wong, Bernardo Gutiérrez, Eulalia Pazmañá, Katalina Pacheco, Verónica Barragán, Patricia Rojas-Silva, Gabriel Trueba, Michelle Grunauer, Paúl Cárdenas                                                                                                                                                                                                    |
| EPI_ISL_803850                                                                                                                                                                                                                                                                                                                                                                                                                                                                                                                                                                                                                                                                                                                                                                                                                                                                                                                                                                                                                                                                                                                                                                                                                                                                                                                                                                                                                                                                                                                                                                                                                                                                                                                                                                                                                                 | National Institute of Laboratory Medicine and Referral Center                                                                      | Genomic Research Lab, BCSIR                                                            | Tanjina Akhter Banu, Mohammad Samir Uzzaman, Eshrar Osman, Md. Ahasan Habib, Shahina Akter, Abu Sayeed Mohammad Mahmud, Md. Murshed Hasan Sarkar, Barna Goswami, Iffat Jahan, Md. Saddam Hossain, Tasnim Nafisa, Md. Maruf Ahmed Molla, Mahmuda Yeasmin, Asish Kumar Ghosh, Bayzid Bin Monir, A. K. M. Shamsuzzaman, Monira Parveen, Md. Masum Hossain Arif, Md. Salim Khan                                                     |
| EPI_ISL_803876                                                                                                                                                                                                                                                                                                                                                                                                                                                                                                                                                                                                                                                                                                                                                                                                                                                                                                                                                                                                                                                                                                                                                                                                                                                                                                                                                                                                                                                                                                                                                                                                                                                                                                                                                                                                                                 | RSUD Tarakan Kalimantan Utara                                                                                                      | National Institute of Health Research and Development                                  | Subangkit;Pawestri,HA;Ikawati,HD;Nugraha,AA;Puspa,KD;Sriwedari,K;Sindunata,R;Pangesti,KNA;Soekarso,T;Puspandari,N;Setiawaty,V                                                                                                                                                                                                                                                                                                   |
| EPI_ISL_812970, EPI_ISL_813356, EPI_ISL_814466, EPI_ISL_814467, EPI_ISL_814572, EPI_ISL_814594, EPI_ISL_814604, EPI_ISL_814605, EPI_ISL_814688, EPI_ISL_814689, EPI_ISL_814690, EPI_ISL_814691, EPI_ISL_814692, EPI_ISL_814693, EPI_ISL_814694, EPI_ISL_814695, EPI_ISL_814696, EPI_ISL_814697, EPI_ISL_814698, EPI_ISL_814699, EPI_ISL_814700, EPI_ISL_814701, EPI_ISL_814702, EPI_ISL_814703, EPI_ISL_814704, EPI_ISL_814705, EPI_ISL_814706, EPI_ISL_814707, EPI_ISL_814708, EPI_ISL_814709, EPI_ISL_814710, EPI_ISL_814711, EPI_ISL_814712, EPI_ISL_814713, EPI_ISL_814714, EPI_ISL_814715, EPI_ISL_814716, EPI_ISL_814717, EPI_ISL_814718, EPI_ISL_814719, EPI_ISL_814720, EPI_ISL_814721, EPI_ISL_814722, EPI_ISL_814723, EPI_ISL_814724, EPI_ISL_814725, EPI_ISL_814726, EPI_ISL_814727, EPI_ISL_814728, EPI_ISL_814729, EPI_ISL_814730, EPI_ISL_814731, EPI_ISL_814732, EPI_ISL_814733, EPI_ISL_814734, EPI_ISL_814735, EPI_ISL_814736, EPI_ISL_814737, EPI_ISL_814738, EPI_ISL_814739, EPI_ISL_814740, EPI_ISL_814741, EPI_ISL_814742, EPI_ISL_814743, EPI_ISL_814744, EPI_ISL_814745, EPI_ISL_814746, EPI_ISL_814747, EPI_ISL_814748, EPI_ISL_814749, EPI_ISL_814750, EPI_ISL_814751, EPI_ISL_814752, EPI_ISL_814753, EPI_ISL_814754, EPI_ISL_814755, EPI_ISL_814756, EPI_ISL_814757, EPI_ISL_814758, EPI_ISL_814759, EPI_ISL_814760, EPI_ISL_814761, EPI_ISL_814762, EPI_ISL_814763, EPI_ISL_814764, EPI_ISL_814765, EPI_ISL_814766, EPI_ISL_814767, EPI_ISL_814768                                                                                                                                                                                                                                                                                                                                                                 |                                                                                                                                    |                                                                                        |                                                                                                                                                                                                                                                                                                                                                                                                                                 |

|                                                                                                                                                                                                                                                                                                                                                                                                                                                                                                                                                                                                                                                                                                                                                                                                                                                                                                                                                                                                                                                                                                                                                                                                                                                                                                                                                                                                                                                                                                                                                                                                                                                                                                                                                                                                                                                                                                                                                                                                                                                                                                                                                                                                                                                                                                                                                                                                                                                                                                                                                                                                                                                                                                                                                                                                                                                                                                                                                                                                                                                                                                                                                                                                                                                                                                                                                                                                                                                                                                                                                                                                                                                                                                                                                                                                                                                                                                                                                                                                                                                                                                                                                                                                                                                                                                                                                                                                                                                                                                                                                                                                                                                                                                                                                                                                                                                                                                                                                                                                                                                                                                                                                                                                                                                                                                                                                                                                                                                                                                                                                                                                                                                                                                                                                                                                                                                                                                |           |                                                                                                                    |                                                                                        |                                                                                                                                                                                                                                                                                                                                                                                                                                                                            |
|------------------------------------------------------------------------------------------------------------------------------------------------------------------------------------------------------------------------------------------------------------------------------------------------------------------------------------------------------------------------------------------------------------------------------------------------------------------------------------------------------------------------------------------------------------------------------------------------------------------------------------------------------------------------------------------------------------------------------------------------------------------------------------------------------------------------------------------------------------------------------------------------------------------------------------------------------------------------------------------------------------------------------------------------------------------------------------------------------------------------------------------------------------------------------------------------------------------------------------------------------------------------------------------------------------------------------------------------------------------------------------------------------------------------------------------------------------------------------------------------------------------------------------------------------------------------------------------------------------------------------------------------------------------------------------------------------------------------------------------------------------------------------------------------------------------------------------------------------------------------------------------------------------------------------------------------------------------------------------------------------------------------------------------------------------------------------------------------------------------------------------------------------------------------------------------------------------------------------------------------------------------------------------------------------------------------------------------------------------------------------------------------------------------------------------------------------------------------------------------------------------------------------------------------------------------------------------------------------------------------------------------------------------------------------------------------------------------------------------------------------------------------------------------------------------------------------------------------------------------------------------------------------------------------------------------------------------------------------------------------------------------------------------------------------------------------------------------------------------------------------------------------------------------------------------------------------------------------------------------------------------------------------------------------------------------------------------------------------------------------------------------------------------------------------------------------------------------------------------------------------------------------------------------------------------------------------------------------------------------------------------------------------------------------------------------------------------------------------------------------------------------------------------------------------------------------------------------------------------------------------------------------------------------------------------------------------------------------------------------------------------------------------------------------------------------------------------------------------------------------------------------------------------------------------------------------------------------------------------------------------------------------------------------------------------------------------------------------------------------------------------------------------------------------------------------------------------------------------------------------------------------------------------------------------------------------------------------------------------------------------------------------------------------------------------------------------------------------------------------------------------------------------------------------------------------------------------------------------------------------------------------------------------------------------------------------------------------------------------------------------------------------------------------------------------------------------------------------------------------------------------------------------------------------------------------------------------------------------------------------------------------------------------------------------------------------------------------------------------------------------------------------------------------------------------------------------------------------------------------------------------------------------------------------------------------------------------------------------------------------------------------------------------------------------------------------------------------------------------------------------------------------------------------------------------------------------------------------------------------------------------------------|-----------|--------------------------------------------------------------------------------------------------------------------|----------------------------------------------------------------------------------------|----------------------------------------------------------------------------------------------------------------------------------------------------------------------------------------------------------------------------------------------------------------------------------------------------------------------------------------------------------------------------------------------------------------------------------------------------------------------------|
| EPI_ISL_819769, EPI_ISL_819770, EPI_ISL_819771, EPI_ISL_819772, EPI_ISL_819773, EPI_ISL_819774, EPI_ISL_819775, EPI_ISL_819776, EPI_ISL_819777, EPI_ISL_819778, EPI_ISL_819779, EPI_ISL_819780, EPI_ISL_819781, EPI_ISL_819782, EPI_ISL_819783, EPI_ISL_819784, EPI_ISL_819785, EPI_ISL_819786, EPI_ISL_819787, EPI_ISL_819788, EPI_ISL_819789, EPI_ISL_819790, EPI_ISL_819791, EPI_ISL_819792, EPI_ISL_819793, EPI_ISL_819794, EPI_ISL_819796, EPI_ISL_819797, EPI_ISL_819798, EPI_ISL_819803, EPI_ISL_819804, EPI_ISL_819805, EPI_ISL_819806, EPI_ISL_819807, EPI_ISL_819808, EPI_ISL_819809, EPI_ISL_819810, EPI_ISL_819811, EPI_ISL_819812, EPI_ISL_819813, EPI_ISL_819814, EPI_ISL_819815, EPI_ISL_819816, EPI_ISL_819817, EPI_ISL_819818, EPI_ISL_819819, EPI_ISL_819820, EPI_ISL_819822, EPI_ISL_819823, EPI_ISL_819824, EPI_ISL_819825, EPI_ISL_819826, EPI_ISL_819827, EPI_ISL_819835, EPI_ISL_819836, EPI_ISL_819837, EPI_ISL_819838, EPI_ISL_819839, EPI_ISL_819840, EPI_ISL_819841, EPI_ISL_819842, EPI_ISL_819843, EPI_ISL_819844, EPI_ISL_819845, EPI_ISL_819846, EPI_ISL_819847, EPI_ISL_819848, EPI_ISL_819849, EPI_ISL_819850, EPI_ISL_819852, EPI_ISL_819853, EPI_ISL_819854, EPI_ISL_819855, EPI_ISL_819856, EPI_ISL_819857, EPI_ISL_819858, EPI_ISL_819859, EPI_ISL_819860, EPI_ISL_819861, EPI_ISL_819862, EPI_ISL_819863, EPI_ISL_819864, EPI_ISL_819865, EPI_ISL_819871, EPI_ISL_819872                                                                                                                                                                                                                                                                                                                                                                                                                                                                                                                                                                                                                                                                                                                                                                                                                                                                                                                                                                                                                                                                                                                                                                                                                                                                                                                                                                                                                                                                                                                                                                                                                                                                                                                                                                                                                                                                                                                                                                                                                                                                                                                                                                                                                                                                                                                                                                                                                                                                                                                                                                                                                                                                                                                                                                                                                                                                                                                                                                                                                                                                                                                                                                                                                                                                                                                                                                                                                                                                                                                                                                                                                                                                                                                                                                                                                                                                                                                                                                                                                                                                                                                                                                                                                                                                                                                                                                                                                                                                                 | see above | Oxford Viroemics, NDM, University of Oxford; Oxford University Hospitals; Basingstoke and North Hampshire Hospital | COVID-19 Genomics UK (COG-UK) Consortium                                               | Tanya Golubchik, David Bonsall, George Macintyre, Amy Trebes, Mariateresa de Cesare, Catrin Moore, Alex Mobbs, Anita Justice, Robert Shaw, Monique Andersson, Timothy Peto, Emma Wise, Nathan Moore, Jessica Lynch, Nick Cortes, Matilde Mori, Stephen Kidd, David Buck, John Todd, Christophe Fraser                                                                                                                                                                      |
| EPI_ISL_825050                                                                                                                                                                                                                                                                                                                                                                                                                                                                                                                                                                                                                                                                                                                                                                                                                                                                                                                                                                                                                                                                                                                                                                                                                                                                                                                                                                                                                                                                                                                                                                                                                                                                                                                                                                                                                                                                                                                                                                                                                                                                                                                                                                                                                                                                                                                                                                                                                                                                                                                                                                                                                                                                                                                                                                                                                                                                                                                                                                                                                                                                                                                                                                                                                                                                                                                                                                                                                                                                                                                                                                                                                                                                                                                                                                                                                                                                                                                                                                                                                                                                                                                                                                                                                                                                                                                                                                                                                                                                                                                                                                                                                                                                                                                                                                                                                                                                                                                                                                                                                                                                                                                                                                                                                                                                                                                                                                                                                                                                                                                                                                                                                                                                                                                                                                                                                                                                                 |           | NHL Municipal Medical College, Ahmedbad                                                                            | Gujarat Biotechnology Research Centre                                                  | Tanmay Mehta, Afzal Ansari, Nikha Trivedi, Apurvasinha Pujar, Ramesh Pandit, Janvi Ravai, Zarina Patel, Nitin Savaiya, Dinesh Kumar, Zuber Saiyed, Labdhi Pandya, Jayshri Pethani, Monila Patel, Ait Shah, NM Shaikh, Binai Chaulhan, Bhavin Prajapati, Chaitanya Joshi, Madhvi Joshi                                                                                                                                                                                      |
| EPI_ISL_833039                                                                                                                                                                                                                                                                                                                                                                                                                                                                                                                                                                                                                                                                                                                                                                                                                                                                                                                                                                                                                                                                                                                                                                                                                                                                                                                                                                                                                                                                                                                                                                                                                                                                                                                                                                                                                                                                                                                                                                                                                                                                                                                                                                                                                                                                                                                                                                                                                                                                                                                                                                                                                                                                                                                                                                                                                                                                                                                                                                                                                                                                                                                                                                                                                                                                                                                                                                                                                                                                                                                                                                                                                                                                                                                                                                                                                                                                                                                                                                                                                                                                                                                                                                                                                                                                                                                                                                                                                                                                                                                                                                                                                                                                                                                                                                                                                                                                                                                                                                                                                                                                                                                                                                                                                                                                                                                                                                                                                                                                                                                                                                                                                                                                                                                                                                                                                                                                                 |           | RS TK II 02.05.01 dr. AK Gani Palembang                                                                            | National Institute of Health Research and Development                                  | Subangkit;Pawestri,HA;Ikawati,HD;Nugraha,AA;Puspa,KD;Pangesti,KNA;Soekarso,T;Tantula,A;Wiradharma,RP;Puspandari,N;Setiawaty,V                                                                                                                                                                                                                                                                                                                                              |
| EPI_ISL_833040                                                                                                                                                                                                                                                                                                                                                                                                                                                                                                                                                                                                                                                                                                                                                                                                                                                                                                                                                                                                                                                                                                                                                                                                                                                                                                                                                                                                                                                                                                                                                                                                                                                                                                                                                                                                                                                                                                                                                                                                                                                                                                                                                                                                                                                                                                                                                                                                                                                                                                                                                                                                                                                                                                                                                                                                                                                                                                                                                                                                                                                                                                                                                                                                                                                                                                                                                                                                                                                                                                                                                                                                                                                                                                                                                                                                                                                                                                                                                                                                                                                                                                                                                                                                                                                                                                                                                                                                                                                                                                                                                                                                                                                                                                                                                                                                                                                                                                                                                                                                                                                                                                                                                                                                                                                                                                                                                                                                                                                                                                                                                                                                                                                                                                                                                                                                                                                                                 |           | RSUD Dr. Abdul Aziz Singkawang                                                                                     | National Institute of Health Research and Development                                  | Subangkit;Pawestri,HA;Ikawati,HD;Nugraha,AA;Puspa,KD;Pangesti,KNA;Soekarso,T;Junus,HN;Puspandari,N;Setiawaty,V                                                                                                                                                                                                                                                                                                                                                             |
| EPI_ISL_833151                                                                                                                                                                                                                                                                                                                                                                                                                                                                                                                                                                                                                                                                                                                                                                                                                                                                                                                                                                                                                                                                                                                                                                                                                                                                                                                                                                                                                                                                                                                                                                                                                                                                                                                                                                                                                                                                                                                                                                                                                                                                                                                                                                                                                                                                                                                                                                                                                                                                                                                                                                                                                                                                                                                                                                                                                                                                                                                                                                                                                                                                                                                                                                                                                                                                                                                                                                                                                                                                                                                                                                                                                                                                                                                                                                                                                                                                                                                                                                                                                                                                                                                                                                                                                                                                                                                                                                                                                                                                                                                                                                                                                                                                                                                                                                                                                                                                                                                                                                                                                                                                                                                                                                                                                                                                                                                                                                                                                                                                                                                                                                                                                                                                                                                                                                                                                                                                                 |           | National Institute of Laboratory Medicine and Referral Center                                                      | Genomic Research Lab, BCSIR                                                            | Tanjina Akhtar Banu, Mohammad Samir Uzzaman, Eshrar Osman, Md. Ahashan Habib, Shahina Akter, Abu Sayeed Mohammad Mahmud, Md. Murshed Hasan Sarkar, Barna Goswami, Iffat Jahan, Md. Saddam Hossain, Md. Maruf Ahmed Molla, Mahmuda Yeasmin, Asish Kumar Ghosh, A. K. M. Shamsuzzaman, Monira Parveen, Md. Masum Hossain Arif, Md. Salim Khan                                                                                                                                |
| EPI_ISL_833216, EPI_ISL_833219, EPI_ISL_833224                                                                                                                                                                                                                                                                                                                                                                                                                                                                                                                                                                                                                                                                                                                                                                                                                                                                                                                                                                                                                                                                                                                                                                                                                                                                                                                                                                                                                                                                                                                                                                                                                                                                                                                                                                                                                                                                                                                                                                                                                                                                                                                                                                                                                                                                                                                                                                                                                                                                                                                                                                                                                                                                                                                                                                                                                                                                                                                                                                                                                                                                                                                                                                                                                                                                                                                                                                                                                                                                                                                                                                                                                                                                                                                                                                                                                                                                                                                                                                                                                                                                                                                                                                                                                                                                                                                                                                                                                                                                                                                                                                                                                                                                                                                                                                                                                                                                                                                                                                                                                                                                                                                                                                                                                                                                                                                                                                                                                                                                                                                                                                                                                                                                                                                                                                                                                                                 |           | Department of Virology and Immunology, University of Helsinki and Helsinki University Hospital, Huslab Finland     | Department of Virology, Faculty of Medicine, University of Helsinki, Helsinki, Finland | Teemu Smura, Ravi Kant, Phuoc Truong, Hussein Alburkat, Hannimari Kallio-Kokko, Jenni Virtanen, Maija Suvanto, Fathiah Zakham, Essi Korhonen, Sari Hannula, Harri Kangas, Pekka Ellonen, Olli Vapalahti                                                                                                                                                                                                                                                                    |
| EPI_ISL_833388                                                                                                                                                                                                                                                                                                                                                                                                                                                                                                                                                                                                                                                                                                                                                                                                                                                                                                                                                                                                                                                                                                                                                                                                                                                                                                                                                                                                                                                                                                                                                                                                                                                                                                                                                                                                                                                                                                                                                                                                                                                                                                                                                                                                                                                                                                                                                                                                                                                                                                                                                                                                                                                                                                                                                                                                                                                                                                                                                                                                                                                                                                                                                                                                                                                                                                                                                                                                                                                                                                                                                                                                                                                                                                                                                                                                                                                                                                                                                                                                                                                                                                                                                                                                                                                                                                                                                                                                                                                                                                                                                                                                                                                                                                                                                                                                                                                                                                                                                                                                                                                                                                                                                                                                                                                                                                                                                                                                                                                                                                                                                                                                                                                                                                                                                                                                                                                                                 |           | Klinik Apotek Dein, Jakarta, Indonesia                                                                             | Biosafety Level-3 Laboratory, Indonesian Institute of Sciences (LIPI)                  | Syam Budi Iryanto, Andri Wardiana, Anggia Prasetyoputri, Isa Nuryana, Ade Andriani, Anik Budhi Dharmayanthi, Ahmad Fathoni, Dian Fitria Agustiyanti, Asrul M. Fuad, Ratih Asmana Ningrum                                                                                                                                                                                                                                                                                   |
| EPI_ISL_833389                                                                                                                                                                                                                                                                                                                                                                                                                                                                                                                                                                                                                                                                                                                                                                                                                                                                                                                                                                                                                                                                                                                                                                                                                                                                                                                                                                                                                                                                                                                                                                                                                                                                                                                                                                                                                                                                                                                                                                                                                                                                                                                                                                                                                                                                                                                                                                                                                                                                                                                                                                                                                                                                                                                                                                                                                                                                                                                                                                                                                                                                                                                                                                                                                                                                                                                                                                                                                                                                                                                                                                                                                                                                                                                                                                                                                                                                                                                                                                                                                                                                                                                                                                                                                                                                                                                                                                                                                                                                                                                                                                                                                                                                                                                                                                                                                                                                                                                                                                                                                                                                                                                                                                                                                                                                                                                                                                                                                                                                                                                                                                                                                                                                                                                                                                                                                                                                                 |           | Klinik Apotek Dein, Jakarta, Indonesia                                                                             | Biosafety Level-3 Laboratory, Indonesian Institute of Sciences (LIPI)                  | Syam Budi Iryanto, Andri Wardiana, Anggia Prasetyoputri, Isa Nuryana, Ade Andriani, Anik Budhi Dharmayanthi, Ahmad Fathoni, Popi Hadi Wisnuwardhani, Sri Swasthikawati, Ratih Asmana Ningrum                                                                                                                                                                                                                                                                               |
| EPI_ISL_833497                                                                                                                                                                                                                                                                                                                                                                                                                                                                                                                                                                                                                                                                                                                                                                                                                                                                                                                                                                                                                                                                                                                                                                                                                                                                                                                                                                                                                                                                                                                                                                                                                                                                                                                                                                                                                                                                                                                                                                                                                                                                                                                                                                                                                                                                                                                                                                                                                                                                                                                                                                                                                                                                                                                                                                                                                                                                                                                                                                                                                                                                                                                                                                                                                                                                                                                                                                                                                                                                                                                                                                                                                                                                                                                                                                                                                                                                                                                                                                                                                                                                                                                                                                                                                                                                                                                                                                                                                                                                                                                                                                                                                                                                                                                                                                                                                                                                                                                                                                                                                                                                                                                                                                                                                                                                                                                                                                                                                                                                                                                                                                                                                                                                                                                                                                                                                                                                                 |           | Klinik Apotek Dein, Jakarta, Indonesia                                                                             | Biosafety Level-3 Laboratory, Indonesian Institute of Sciences (LIPI)                  | Syam Budi Iryanto, Andri Wardiana, Anggia Prasetyoputri, Anik Budhi Dharmayanthi, Isa Nuryana, Ade Andriani, Ahmad Fathoni, Saiful anwar, Pamela Apriliana, Ratih Asmana Ningrum                                                                                                                                                                                                                                                                                           |
| EPI_ISL_833501                                                                                                                                                                                                                                                                                                                                                                                                                                                                                                                                                                                                                                                                                                                                                                                                                                                                                                                                                                                                                                                                                                                                                                                                                                                                                                                                                                                                                                                                                                                                                                                                                                                                                                                                                                                                                                                                                                                                                                                                                                                                                                                                                                                                                                                                                                                                                                                                                                                                                                                                                                                                                                                                                                                                                                                                                                                                                                                                                                                                                                                                                                                                                                                                                                                                                                                                                                                                                                                                                                                                                                                                                                                                                                                                                                                                                                                                                                                                                                                                                                                                                                                                                                                                                                                                                                                                                                                                                                                                                                                                                                                                                                                                                                                                                                                                                                                                                                                                                                                                                                                                                                                                                                                                                                                                                                                                                                                                                                                                                                                                                                                                                                                                                                                                                                                                                                                                                 |           | RS Sayang Bunda, Makasar, Indonesia                                                                                | Biosafety Level-3 Laboratory, Indonesian Institute of Sciences (LIPI)                  | Syam Budi Iryanto, Andri Wardiana, Anggia Prasetyoputri, Anik Budhi Dharmayanthi, Isa Nuryana, Ade Andriani, Ahmad Fathoni, Hejjuje Ari Eko Nugroho, Masrukhin, Ratih Asmana Ningrum                                                                                                                                                                                                                                                                                       |
| EPI_ISL_833509                                                                                                                                                                                                                                                                                                                                                                                                                                                                                                                                                                                                                                                                                                                                                                                                                                                                                                                                                                                                                                                                                                                                                                                                                                                                                                                                                                                                                                                                                                                                                                                                                                                                                                                                                                                                                                                                                                                                                                                                                                                                                                                                                                                                                                                                                                                                                                                                                                                                                                                                                                                                                                                                                                                                                                                                                                                                                                                                                                                                                                                                                                                                                                                                                                                                                                                                                                                                                                                                                                                                                                                                                                                                                                                                                                                                                                                                                                                                                                                                                                                                                                                                                                                                                                                                                                                                                                                                                                                                                                                                                                                                                                                                                                                                                                                                                                                                                                                                                                                                                                                                                                                                                                                                                                                                                                                                                                                                                                                                                                                                                                                                                                                                                                                                                                                                                                                                                 |           | RS Melania, Bogor, Indonesia                                                                                       | Biosafety Level-3 Laboratory, Indonesian Institute of Sciences (LIPI)                  | Syam Budi Iryanto, Andri Wardiana, Anik Budhi Dharmayanthi, Anggia Prasetyoputri, Isa Nuryana, Ade Andriani, Ahmad Fathoni, Ratih Asmana Ningrum                                                                                                                                                                                                                                                                                                                           |
| EPI_ISL_839360, EPI_ISL_839362, EPI_ISL_839363, EPI_ISL_839364, EPI_ISL_839365, EPI_ISL_839367, EPI_ISL_839368, EPI_ISL_839369, EPI_ISL_839370, EPI_ISL_839371, EPI_ISL_839372, EPI_ISL_839373, EPI_ISL_839374, EPI_ISL_839375, EPI_ISL_839376, EPI_ISL_839377, EPI_ISL_839378, EPI_ISL_839379, EPI_ISL_839380, EPI_ISL_839381, EPI_ISL_839382, EPI_ISL_839383, EPI_ISL_839384, EPI_ISL_839386, EPI_ISL_839387, EPI_ISL_839388, EPI_ISL_839389, EPI_ISL_839390, EPI_ISL_839391, EPI_ISL_839392, EPI_ISL_839393, EPI_ISL_839394, EPI_ISL_839395, EPI_ISL_839396, EPI_ISL_839397, EPI_ISL_839398, EPI_ISL_839399, EPI_ISL_839400, EPI_ISL_839401, EPI_ISL_839402, EPI_ISL_839403, EPI_ISL_839404, EPI_ISL_839405, EPI_ISL_839406, EPI_ISL_839407, EPI_ISL_839408, EPI_ISL_839409, EPI_ISL_839410, EPI_ISL_839411, EPI_ISL_839413, EPI_ISL_839414, EPI_ISL_839415, EPI_ISL_839417, EPI_ISL_839418, EPI_ISL_839419, EPI_ISL_839420, EPI_ISL_839421, EPI_ISL_839422, EPI_ISL_839423, EPI_ISL_839424, EPI_ISL_839425, EPI_ISL_839426, EPI_ISL_839427, EPI_ISL_839428, EPI_ISL_839429, EPI_ISL_839430, EPI_ISL_839431, EPI_ISL_839432, EPI_ISL_839433, EPI_ISL_839434, EPI_ISL_839435, EPI_ISL_839436, EPI_ISL_839438, EPI_ISL_839439, EPI_ISL_839440, EPI_ISL_839441, EPI_ISL_839442, EPI_ISL_839443, EPI_ISL_839444, EPI_ISL_839445, EPI_ISL_839446, EPI_ISL_839447, EPI_ISL_839448, EPI_ISL_839449, EPI_ISL_839450, EPI_ISL_839451, EPI_ISL_839452, EPI_ISL_839453, EPI_ISL_839454, EPI_ISL_839455, EPI_ISL_839456, EPI_ISL_839457, EPI_ISL_839458, EPI_ISL_839459, EPI_ISL_839460, EPI_ISL_839461, EPI_ISL_839462, EPI_ISL_839463, EPI_ISL_839464, EPI_ISL_839465, EPI_ISL_839466, EPI_ISL_839467, EPI_ISL_839470, EPI_ISL_839471, EPI_ISL_839472, EPI_ISL_839473, EPI_ISL_839474, EPI_ISL_839475, EPI_ISL_839476, EPI_ISL_839477, EPI_ISL_839478, EPI_ISL_839479, EPI_ISL_839480, EPI_ISL_839481, EPI_ISL_839482, EPI_ISL_839483, EPI_ISL_840186, EPI_ISL_840187, EPI_ISL_840188, EPI_ISL_840189, EPI_ISL_840190, EPI_ISL_840191, EPI_ISL_840192, EPI_ISL_840193, EPI_ISL_840194, EPI_ISL_840195, EPI_ISL_840196, EPI_ISL_840197, EPI_ISL_840198, EPI_ISL_840199, EPI_ISL_840201, EPI_ISL_840202, EPI_ISL_840204, EPI_ISL_840205, EPI_ISL_840206, EPI_ISL_840207, EPI_ISL_840209, EPI_ISL_840209, EPI_ISL_840211, EPI_ISL_840212, EPI_ISL_840213, EPI_ISL_840214, EPI_ISL_840215, EPI_ISL_840216, EPI_ISL_840217, EPI_ISL_840218, EPI_ISL_840219, EPI_ISL_840220, EPI_ISL_840221, EPI_ISL_840222, EPI_ISL_840223, EPI_ISL_840224, EPI_ISL_840226, EPI_ISL_840228, EPI_ISL_840229, EPI_ISL_840230, EPI_ISL_840231, EPI_ISL_840232, EPI_ISL_840233, EPI_ISL_840234, EPI_ISL_840235, EPI_ISL_840236, EPI_ISL_840237, EPI_ISL_840238, EPI_ISL_840239, EPI_ISL_840240, EPI_ISL_840241, EPI_ISL_840242, EPI_ISL_840243, EPI_ISL_840244, EPI_ISL_840245, EPI_ISL_840246, EPI_ISL_840247, EPI_ISL_840248, EPI_ISL_840249, EPI_ISL_840250, EPI_ISL_840251, EPI_ISL_840252, EPI_ISL_840253, EPI_ISL_840254, EPI_ISL_840255, EPI_ISL_840256, EPI_ISL_840257, EPI_ISL_840259, EPI_ISL_840260, EPI_ISL_840261, EPI_ISL_840262, EPI_ISL_840263, EPI_ISL_840264, EPI_ISL_840265, EPI_ISL_840266, EPI_ISL_840267, EPI_ISL_840268, EPI_ISL_840269, EPI_ISL_840270, EPI_ISL_840271, EPI_ISL_840272, EPI_ISL_840274, EPI_ISL_840275, EPI_ISL_840276, EPI_ISL_840278, EPI_ISL_840279, EPI_ISL_840280, EPI_ISL_840281, EPI_ISL_840282, EPI_ISL_840283, EPI_ISL_840284, EPI_ISL_840286, EPI_ISL_840288, EPI_ISL_840289, EPI_ISL_840290, EPI_ISL_840291, EPI_ISL_840292, EPI_ISL_840294, EPI_ISL_840295, EPI_ISL_840296, EPI_ISL_840297, EPI_ISL_840298, EPI_ISL_840299, EPI_ISL_840300, EPI_ISL_840301, EPI_ISL_840302, EPI_ISL_840303, EPI_ISL_840304, EPI_ISL_840305, EPI_ISL_840306, EPI_ISL_840307, EPI_ISL_840308, EPI_ISL_840309, EPI_ISL_840310, EPI_ISL_840311, EPI_ISL_840312, EPI_ISL_840313, EPI_ISL_840314, EPI_ISL_840315, EPI_ISL_840316, EPI_ISL_840317, EPI_ISL_840318, EPI_ISL_840319, EPI_ISL_840320, EPI_ISL_840321, EPI_ISL_840322, EPI_ISL_840323, EPI_ISL_840324, EPI_ISL_840325, EPI_ISL_840326, EPI_ISL_840327, EPI_ISL_840328, EPI_ISL_840329, EPI_ISL_840330, EPI_ISL_840331, EPI_ISL_840332, EPI_ISL_840333, EPI_ISL_840334, EPI_ISL_840335, EPI_ISL_840336, EPI_ISL_840338, EPI_ISL_840339, EPI_ISL_840340, EPI_ISL_840341, EPI_ISL_840342, EPI_ISL_840343, EPI_ISL_840344, EPI_ISL_840345, EPI_ISL_840346, EPI_ISL_840348, EPI_ISL_840349, EPI_ISL_840350, EPI_ISL_840351, EPI_ISL_840353, EPI_ISL_840357, EPI_ISL_840358, EPI_ISL_840359, EPI_ISL_840360, EPI_ISL_840361, EPI_ISL_840362, EPI_ISL_840363, EPI_ISL_840365, EPI_ISL_840366, EPI_ISL_840367, EPI_ISL_842107, EPI_ISL_842111, EPI_ISL_842112, EPI_ISL_842113, EPI_ISL_842116, EPI_ISL_842117, EPI_ISL_842118, EPI_ISL_842119, EPI_ISL_842120, EPI_ISL_842121, EPI_ISL_842122, EPI_ISL_842123, EPI_ISL_842124, EPI_ISL_842125, EPI_ISL_842126, EPI_ISL_842127, EPI_ISL_842128, EPI_ISL_842129, EPI_ISL_842130, EPI_ISL_842131, EPI_ISL_842132, EPI_ISL_842133, EPI_ISL_842134, EPI_ISL_842135, EPI_ISL_842136, EPI_ISL_842138, EPI_ISL_842139, EPI_ISL_842140, EPI_ISL_842141, EPI_ISL_842142, EPI_ISL_842143, EPI_ISL_842144, EPI_ISL_842145, EPI_ISL_842147, EPI_ISL_842148, EPI_ISL_842149, EPI_ISL_842150, EPI_ISL_842151, EPI_ISL_842152, EPI_ISL_842154, EPI_ISL_842155, EPI_ISL_842156, EPI_ISL_842157, EPI_ISL_842158, EPI_ISL_842159, EPI_ISL_842160, EPI_ISL_842162, EPI_ISL_842163, EPI_ISL_842165, EPI_ISL_842166, EPI_ISL_842167, EPI_ISL_842168, EPI_ISL_842169, EPI_ISL_842170, EPI_ISL_842171, EPI_ISL_842175, EPI_ISL_842178, EPI_ISL_842179, EPI_ISL_842180, EPI_ISL_842181, EPI_ISL_842184, EPI_ISL_842186, EPI_ISL_842187, EPI_ISL_842188, EPI_ISL_842190, EPI_ISL_842191, EPI_ISL_842192, EPI_ISL_842194, EPI_ISL_842195, EPI_ISL_842196, EPI_ISL_842197, EPI_ISL_842198, EPI_ISL_842199, EPI_ISL_842200 | see above | Oxford Viroemics, NDM, University of Oxford; Oxford University Hospitals; Basingstoke and North Hampshire Hospital | COVID-19 Genomics UK (COG-UK) Consortium                                               | Tanya Golubchik, David Bonsall, George Macintyre, Amy Trebes, Mariateresa de Cesare, Catrin Moore, Alex Mobbs, Anita Justice, Robert Shaw, Monique Andersson, Timothy Peto, Emma Wise, Nathan Moore, Jessica Lynch, Nick Cortes, Matilde Mori, Stephen Kidd, David Buck, John Todd, Christophe Fraser                                                                                                                                                                      |
| EPI_ISL_847826, EPI_ISL_847827                                                                                                                                                                                                                                                                                                                                                                                                                                                                                                                                                                                                                                                                                                                                                                                                                                                                                                                                                                                                                                                                                                                                                                                                                                                                                                                                                                                                                                                                                                                                                                                                                                                                                                                                                                                                                                                                                                                                                                                                                                                                                                                                                                                                                                                                                                                                                                                                                                                                                                                                                                                                                                                                                                                                                                                                                                                                                                                                                                                                                                                                                                                                                                                                                                                                                                                                                                                                                                                                                                                                                                                                                                                                                                                                                                                                                                                                                                                                                                                                                                                                                                                                                                                                                                                                                                                                                                                                                                                                                                                                                                                                                                                                                                                                                                                                                                                                                                                                                                                                                                                                                                                                                                                                                                                                                                                                                                                                                                                                                                                                                                                                                                                                                                                                                                                                                                                                 |           | COVID-19 National Reference Laboratory                                                                             | COVID-19 National Reference Laboratory                                                 | Tahmineh Jalali, Mohammad Hassan Pouriayevali, Zahra Ahmadi, Marzieh Sadjadi, Mahsa Tavakoli, Zahra Fereydouni, Setareh Khashanjan, Sanam Azad-Manjiri, Tahereh Mohammadi, Zabihollah Shoja, Parastoo Yekta, Farideh Niknam, Hessam Nemati, Ahmad Ghasemi, Sahar Khakifrouz, Sepideh Gerdooei, Maryam Rostamtabar, Sana Eyboosh, Mohammad Mehdi Mourtazavipour, Mohamad Sadegh Shams Nosrati, Zeynab VeisiZadeh, Amitis Ramezani, Kayhan Azadmanesh, Mostafa Salehi-Vaziri |
| EPI_ISL_847829, EPI_ISL_847830                                                                                                                                                                                                                                                                                                                                                                                                                                                                                                                                                                                                                                                                                                                                                                                                                                                                                                                                                                                                                                                                                                                                                                                                                                                                                                                                                                                                                                                                                                                                                                                                                                                                                                                                                                                                                                                                                                                                                                                                                                                                                                                                                                                                                                                                                                                                                                                                                                                                                                                                                                                                                                                                                                                                                                                                                                                                                                                                                                                                                                                                                                                                                                                                                                                                                                                                                                                                                                                                                                                                                                                                                                                                                                                                                                                                                                                                                                                                                                                                                                                                                                                                                                                                                                                                                                                                                                                                                                                                                                                                                                                                                                                                                                                                                                                                                                                                                                                                                                                                                                                                                                                                                                                                                                                                                                                                                                                                                                                                                                                                                                                                                                                                                                                                                                                                                                                                 |           | Tempus                                                                                                             | Grubaugh Lab - Yale School of Public Health                                            | Tara Alpert, Joseph Fauver, Anderson Brito, Mallery Breban, Anne Wyllie, Chantal Vogels, Mary Petrone, Chaney Kalinich, Isabel Ott, Nathan Grubaugh                                                                                                                                                                                                                                                                                                                        |
| EPI_ISL_847831, EPI_ISL_847832, EPI_ISL_847833                                                                                                                                                                                                                                                                                                                                                                                                                                                                                                                                                                                                                                                                                                                                                                                                                                                                                                                                                                                                                                                                                                                                                                                                                                                                                                                                                                                                                                                                                                                                                                                                                                                                                                                                                                                                                                                                                                                                                                                                                                                                                                                                                                                                                                                                                                                                                                                                                                                                                                                                                                                                                                                                                                                                                                                                                                                                                                                                                                                                                                                                                                                                                                                                                                                                                                                                                                                                                                                                                                                                                                                                                                                                                                                                                                                                                                                                                                                                                                                                                                                                                                                                                                                                                                                                                                                                                                                                                                                                                                                                                                                                                                                                                                                                                                                                                                                                                                                                                                                                                                                                                                                                                                                                                                                                                                                                                                                                                                                                                                                                                                                                                                                                                                                                                                                                                                                 |           | Yale New Haven Hospital                                                                                            | Grubaugh Lab - Yale School of Public Health                                            | Tara Alpert, Joseph Fauver, Anderson Brito, Mallery Breban, Anne Wyllie, Chantal Vogels, Mary Petrone, Chaney Kalinich, Isabel Ott, Nathan Grubaugh                                                                                                                                                                                                                                                                                                                        |
| EPI_ISL_847834                                                                                                                                                                                                                                                                                                                                                                                                                                                                                                                                                                                                                                                                                                                                                                                                                                                                                                                                                                                                                                                                                                                                                                                                                                                                                                                                                                                                                                                                                                                                                                                                                                                                                                                                                                                                                                                                                                                                                                                                                                                                                                                                                                                                                                                                                                                                                                                                                                                                                                                                                                                                                                                                                                                                                                                                                                                                                                                                                                                                                                                                                                                                                                                                                                                                                                                                                                                                                                                                                                                                                                                                                                                                                                                                                                                                                                                                                                                                                                                                                                                                                                                                                                                                                                                                                                                                                                                                                                                                                                                                                                                                                                                                                                                                                                                                                                                                                                                                                                                                                                                                                                                                                                                                                                                                                                                                                                                                                                                                                                                                                                                                                                                                                                                                                                                                                                                                                 |           | Connecticut Department of Health                                                                                   | Grubaugh Lab - Yale School of Public Health                                            | Tara Alpert, Joseph Fauver, Anderson Brito, Mallery Breban, Anne Wyllie, Chantal Vogels, Mary Petrone, Chaney Kalinich, Isabel Ott, Nathan Grubaugh                                                                                                                                                                                                                                                                                                                        |
| EPI_ISL_847835                                                                                                                                                                                                                                                                                                                                                                                                                                                                                                                                                                                                                                                                                                                                                                                                                                                                                                                                                                                                                                                                                                                                                                                                                                                                                                                                                                                                                                                                                                                                                                                                                                                                                                                                                                                                                                                                                                                                                                                                                                                                                                                                                                                                                                                                                                                                                                                                                                                                                                                                                                                                                                                                                                                                                                                                                                                                                                                                                                                                                                                                                                                                                                                                                                                                                                                                                                                                                                                                                                                                                                                                                                                                                                                                                                                                                                                                                                                                                                                                                                                                                                                                                                                                                                                                                                                                                                                                                                                                                                                                                                                                                                                                                                                                                                                                                                                                                                                                                                                                                                                                                                                                                                                                                                                                                                                                                                                                                                                                                                                                                                                                                                                                                                                                                                                                                                                                                 |           | Oak Ridge National Laboratory                                                                                      | Grubaugh Lab - Yale School of Public Health                                            | Tara Alpert, Joseph Fauver, Anderson Brito, Mallery Breban, Anne Wyllie, Chantal Vogels, Mary Petrone, Chaney Kalinich, Isabel Ott, Nathan Grubaugh                                                                                                                                                                                                                                                                                                                        |
| EPI_ISL_847836                                                                                                                                                                                                                                                                                                                                                                                                                                                                                                                                                                                                                                                                                                                                                                                                                                                                                                                                                                                                                                                                                                                                                                                                                                                                                                                                                                                                                                                                                                                                                                                                                                                                                                                                                                                                                                                                                                                                                                                                                                                                                                                                                                                                                                                                                                                                                                                                                                                                                                                                                                                                                                                                                                                                                                                                                                                                                                                                                                                                                                                                                                                                                                                                                                                                                                                                                                                                                                                                                                                                                                                                                                                                                                                                                                                                                                                                                                                                                                                                                                                                                                                                                                                                                                                                                                                                                                                                                                                                                                                                                                                                                                                                                                                                                                                                                                                                                                                                                                                                                                                                                                                                                                                                                                                                                                                                                                                                                                                                                                                                                                                                                                                                                                                                                                                                                                                                                 |           | Tempus                                                                                                             | Grubaugh Lab - Yale School of Public Health                                            | Tara Alpert, Joseph Fauver, Anderson Brito, Mallery Breban, Anne Wyllie, Chantal Vogels, Mary Petrone, Chaney Kalinich, Isabel Ott, Nathan Grubaugh                                                                                                                                                                                                                                                                                                                        |
| EPI_ISL_847837                                                                                                                                                                                                                                                                                                                                                                                                                                                                                                                                                                                                                                                                                                                                                                                                                                                                                                                                                                                                                                                                                                                                                                                                                                                                                                                                                                                                                                                                                                                                                                                                                                                                                                                                                                                                                                                                                                                                                                                                                                                                                                                                                                                                                                                                                                                                                                                                                                                                                                                                                                                                                                                                                                                                                                                                                                                                                                                                                                                                                                                                                                                                                                                                                                                                                                                                                                                                                                                                                                                                                                                                                                                                                                                                                                                                                                                                                                                                                                                                                                                                                                                                                                                                                                                                                                                                                                                                                                                                                                                                                                                                                                                                                                                                                                                                                                                                                                                                                                                                                                                                                                                                                                                                                                                                                                                                                                                                                                                                                                                                                                                                                                                                                                                                                                                                                                                                                 |           | Yale New Haven Hospital                                                                                            | Grubaugh Lab - Yale School of Public Health                                            | Tara Alpert, Joseph Fauver, Anderson Brito, Mallery Breban, Anne Wyllie, Chantal Vogels, Mary Petrone, Chaney Kalinich, Isabel Ott, Nathan Grubaugh                                                                                                                                                                                                                                                                                                                        |
| EPI_ISL_847838                                                                                                                                                                                                                                                                                                                                                                                                                                                                                                                                                                                                                                                                                                                                                                                                                                                                                                                                                                                                                                                                                                                                                                                                                                                                                                                                                                                                                                                                                                                                                                                                                                                                                                                                                                                                                                                                                                                                                                                                                                                                                                                                                                                                                                                                                                                                                                                                                                                                                                                                                                                                                                                                                                                                                                                                                                                                                                                                                                                                                                                                                                                                                                                                                                                                                                                                                                                                                                                                                                                                                                                                                                                                                                                                                                                                                                                                                                                                                                                                                                                                                                                                                                                                                                                                                                                                                                                                                                                                                                                                                                                                                                                                                                                                                                                                                                                                                                                                                                                                                                                                                                                                                                                                                                                                                                                                                                                                                                                                                                                                                                                                                                                                                                                                                                                                                                                                                 |           | Connecticut Department of Health                                                                                   | Grubaugh Lab - Yale School of Public Health                                            | Tara Alpert, Joseph Fauver, Anderson Brito, Mallery Breban, Anne Wyllie, Chantal Vogels, Mary Petrone, Chaney Kalinich, Isabel Ott, Nathan Grubaugh                                                                                                                                                                                                                                                                                                                        |
| EPI_ISL_847839, EPI_ISL_847840                                                                                                                                                                                                                                                                                                                                                                                                                                                                                                                                                                                                                                                                                                                                                                                                                                                                                                                                                                                                                                                                                                                                                                                                                                                                                                                                                                                                                                                                                                                                                                                                                                                                                                                                                                                                                                                                                                                                                                                                                                                                                                                                                                                                                                                                                                                                                                                                                                                                                                                                                                                                                                                                                                                                                                                                                                                                                                                                                                                                                                                                                                                                                                                                                                                                                                                                                                                                                                                                                                                                                                                                                                                                                                                                                                                                                                                                                                                                                                                                                                                                                                                                                                                                                                                                                                                                                                                                                                                                                                                                                                                                                                                                                                                                                                                                                                                                                                                                                                                                                                                                                                                                                                                                                                                                                                                                                                                                                                                                                                                                                                                                                                                                                                                                                                                                                                                                 |           | Tempus                                                                                                             | Grubaugh Lab - Yale School of Public Health                                            | Tara Alpert, Joseph Fauver, Anderson Brito, Mallery Breban, Anne Wyllie, Chantal Vogels, Mary Petrone, Chaney Kalinich, Isabel Ott, Nathan Grubaugh                                                                                                                                                                                                                                                                                                                        |
| EPI_ISL_847841                                                                                                                                                                                                                                                                                                                                                                                                                                                                                                                                                                                                                                                                                                                                                                                                                                                                                                                                                                                                                                                                                                                                                                                                                                                                                                                                                                                                                                                                                                                                                                                                                                                                                                                                                                                                                                                                                                                                                                                                                                                                                                                                                                                                                                                                                                                                                                                                                                                                                                                                                                                                                                                                                                                                                                                                                                                                                                                                                                                                                                                                                                                                                                                                                                                                                                                                                                                                                                                                                                                                                                                                                                                                                                                                                                                                                                                                                                                                                                                                                                                                                                                                                                                                                                                                                                                                                                                                                                                                                                                                                                                                                                                                                                                                                                                                                                                                                                                                                                                                                                                                                                                                                                                                                                                                                                                                                                                                                                                                                                                                                                                                                                                                                                                                                                                                                                                                                 |           | Yale New Haven Hospital                                                                                            | Grubaugh Lab - Yale School of Public Health                                            | Tara Alpert, Joseph Fauver, Anderson Brito, Mallery Breban, Anne Wyllie, Chantal Vogels, Mary Petrone, Chaney Kalinich, Isabel Ott, Nathan Grubaugh                                                                                                                                                                                                                                                                                                                        |
| EPI_ISL_850945                                                                                                                                                                                                                                                                                                                                                                                                                                                                                                                                                                                                                                                                                                                                                                                                                                                                                                                                                                                                                                                                                                                                                                                                                                                                                                                                                                                                                                                                                                                                                                                                                                                                                                                                                                                                                                                                                                                                                                                                                                                                                                                                                                                                                                                                                                                                                                                                                                                                                                                                                                                                                                                                                                                                                                                                                                                                                                                                                                                                                                                                                                                                                                                                                                                                                                                                                                                                                                                                                                                                                                                                                                                                                                                                                                                                                                                                                                                                                                                                                                                                                                                                                                                                                                                                                                                                                                                                                                                                                                                                                                                                                                                                                                                                                                                                                                                                                                                                                                                                                                                                                                                                                                                                                                                                                                                                                                                                                                                                                                                                                                                                                                                                                                                                                                                                                                                                                 |           | BCSIR                                                                                                              | Genomic Research Lab, BCSIR                                                            | Tanjina Akhtar Banu, Mohammad Samir Uzzaman, Eshrar Osman, Md. Ahashan Habib, Shahina Akter, Abu Sayeed Mohammad Mahmud, Md. Murshed Hasan Sarkar, Barna Goswami, Iffat Jahan, Md. Saddam Hossain, Md. Salim Khan                                                                                                                                                                                                                                                          |
| EPI_ISL_855557, EPI_ISL_855558, EPI_ISL_855559, EPI_ISL_855560, EPI_ISL_855561, EPI_ISL_855562, EPI_ISL_855563, EPI_ISL_855564, EPI_ISL_855565, EPI_ISL_855566, EPI_ISL_855567, EPI_ISL_855568, EPI_ISL_855569, EPI_ISL_855570, EPI_ISL_855571, EPI_ISL_855572                                                                                                                                                                                                                                                                                                                                                                                                                                                                                                                                                                                                                                                                                                                                                                                                                                                                                                                                                                                                                                                                                                                                                                                                                                                                                                                                                                                                                                                                                                                                                                                                                                                                                                                                                                                                                                                                                                                                                                                                                                                                                                                                                                                                                                                                                                                                                                                                                                                                                                                                                                                                                                                                                                                                                                                                                                                                                                                                                                                                                                                                                                                                                                                                                                                                                                                                                                                                                                                                                                                                                                                                                                                                                                                                                                                                                                                                                                                                                                                                                                                                                                                                                                                                                                                                                                                                                                                                                                                                                                                                                                                                                                                                                                                                                                                                                                                                                                                                                                                                                                                                                                                                                                                                                                                                                                                                                                                                                                                                                                                                                                                                                                 |           | Department of Virology, Principal Military Hospital of Instruction of Tunis                                        | Bundeswehr Institute of Microbiology                                                   | Susann Handrick, Malena Bestehorn-Willmann, Simone Eckstein, Mathias C. Walter, Markus H. Antwerpen, Habiba Najja, Kilian Stoecker, Roman Wölfel & Mohamed Ben Moussa                                                                                                                                                                                                                                                                                                      |
| EPI_ISL_861732, EPI_ISL_861733                                                                                                                                                                                                                                                                                                                                                                                                                                                                                                                                                                                                                                                                                                                                                                                                                                                                                                                                                                                                                                                                                                                                                                                                                                                                                                                                                                                                                                                                                                                                                                                                                                                                                                                                                                                                                                                                                                                                                                                                                                                                                                                                                                                                                                                                                                                                                                                                                                                                                                                                                                                                                                                                                                                                                                                                                                                                                                                                                                                                                                                                                                                                                                                                                                                                                                                                                                                                                                                                                                                                                                                                                                                                                                                                                                                                                                                                                                                                                                                                                                                                                                                                                                                                                                                                                                                                                                                                                                                                                                                                                                                                                                                                                                                                                                                                                                                                                                                                                                                                                                                                                                                                                                                                                                                                                                                                                                                                                                                                                                                                                                                                                                                                                                                                                                                                                                                                 |           | Tempus                                                                                                             | Grubaugh Lab - Yale School of Public Health                                            | Tara Alpert, Joseph Fauver, Anderson Brito, Mallery Breban, Anne Wyllie, Chantal Vogels, Mary Petrone, Annie Watkins, Chaney Kalinich, Isabel Ott, Nathan Grubaugh                                                                                                                                                                                                                                                                                                         |
| EPI_ISL_861734                                                                                                                                                                                                                                                                                                                                                                                                                                                                                                                                                                                                                                                                                                                                                                                                                                                                                                                                                                                                                                                                                                                                                                                                                                                                                                                                                                                                                                                                                                                                                                                                                                                                                                                                                                                                                                                                                                                                                                                                                                                                                                                                                                                                                                                                                                                                                                                                                                                                                                                                                                                                                                                                                                                                                                                                                                                                                                                                                                                                                                                                                                                                                                                                                                                                                                                                                                                                                                                                                                                                                                                                                                                                                                                                                                                                                                                                                                                                                                                                                                                                                                                                                                                                                                                                                                                                                                                                                                                                                                                                                                                                                                                                                                                                                                                                                                                                                                                                                                                                                                                                                                                                                                                                                                                                                                                                                                                                                                                                                                                                                                                                                                                                                                                                                                                                                                                                                 |           | Yale Pathology Lab                                                                                                 | Grubaugh Lab - Yale School of Public Health                                            | Tara Alpert, Joseph Fauver, Chen Liu, Pei Hui, Jianhui Wang, Susan Bell and Han Zhou, Anderson Brito, Mallery Breban, Anne Wyllie, Chantal Vogels, Mary Petrone, Chaney Kalinich, Isabel Ott, Amna Casanovas, Catherine Muenker, Adam Moore, Alice Lu, Maria Tokuyama, Patrick Wong, Peiwen Lu, Saad Omer,                                                                                                                                                                 |

| Richard Martinello, Allison Nelson, Shelli Farhadian, Akiko Iwasaki, Charlese Dela Cruz, Albert Ko, Nathan Grubaugh                                                                                                                                                                                                                                                                                                                                                                                                                                                                                                                                                                                                                                                                                                                                                                                                                                                                                                                                                                                                                                                                                                                                                                                                                                                                                                                                                                                                                                                                                                                                                                                                                                                                                                                                                                                                                                                                                                                                                                                                                                                                                                                            |                                                                                                                                |                                                                                                                                |                                                                                                                                                                                                                                                                                                                                                                                                                                 |  |  |
|------------------------------------------------------------------------------------------------------------------------------------------------------------------------------------------------------------------------------------------------------------------------------------------------------------------------------------------------------------------------------------------------------------------------------------------------------------------------------------------------------------------------------------------------------------------------------------------------------------------------------------------------------------------------------------------------------------------------------------------------------------------------------------------------------------------------------------------------------------------------------------------------------------------------------------------------------------------------------------------------------------------------------------------------------------------------------------------------------------------------------------------------------------------------------------------------------------------------------------------------------------------------------------------------------------------------------------------------------------------------------------------------------------------------------------------------------------------------------------------------------------------------------------------------------------------------------------------------------------------------------------------------------------------------------------------------------------------------------------------------------------------------------------------------------------------------------------------------------------------------------------------------------------------------------------------------------------------------------------------------------------------------------------------------------------------------------------------------------------------------------------------------------------------------------------------------------------------------------------------------|--------------------------------------------------------------------------------------------------------------------------------|--------------------------------------------------------------------------------------------------------------------------------|---------------------------------------------------------------------------------------------------------------------------------------------------------------------------------------------------------------------------------------------------------------------------------------------------------------------------------------------------------------------------------------------------------------------------------|--|--|
| EPI_ISL_861735                                                                                                                                                                                                                                                                                                                                                                                                                                                                                                                                                                                                                                                                                                                                                                                                                                                                                                                                                                                                                                                                                                                                                                                                                                                                                                                                                                                                                                                                                                                                                                                                                                                                                                                                                                                                                                                                                                                                                                                                                                                                                                                                                                                                                                 | Tempus                                                                                                                         | Grubaugh Lab - Yale School of Public Health                                                                                    | Tara Alpert, Joseph Fauver, Anderson Brito, Mallery Breban, Anne Wyllie, Chantal Vogels, Mary Petrone, Annie Watkins, Chaney Kalinich, Isabel Ott, Nathan Grubaugh                                                                                                                                                                                                                                                              |  |  |
| EPI_ISL_861736                                                                                                                                                                                                                                                                                                                                                                                                                                                                                                                                                                                                                                                                                                                                                                                                                                                                                                                                                                                                                                                                                                                                                                                                                                                                                                                                                                                                                                                                                                                                                                                                                                                                                                                                                                                                                                                                                                                                                                                                                                                                                                                                                                                                                                 | Yale Pathology Lab                                                                                                             | Grubaugh Lab - Yale School of Public Health                                                                                    | Tara Alpert, Joseph Fauver, Chen Liu, Pei Hui, Jianhui Wang, Susan Bell and Han Zhou, Anderson Brito, Mallery Breban, Anne Wyllie, Chantal Vogels, Mary Petrone, Chaney Kalinich, Isabel Ott, Arnau Casanovas, Catherine Muenker, Adam Moore, Alice Lu, Maria Tokuyama, Patrick Wong, Peiwen Lu, Saad Omer, Richard Martinello, Allison Nelson, Shelli Farhadian, Akiko Iwasaki, Charlese Dela Cruz, Albert Ko, Nathan Grubaugh |  |  |
| EPI_ISL_861737, EPI_ISL_861738, EPI_ISL_861739, EPI_ISL_861740, EPI_ISL_861741, EPI_ISL_861742, EPI_ISL_861743, EPI_ISL_861744                                                                                                                                                                                                                                                                                                                                                                                                                                                                                                                                                                                                                                                                                                                                                                                                                                                                                                                                                                                                                                                                                                                                                                                                                                                                                                                                                                                                                                                                                                                                                                                                                                                                                                                                                                                                                                                                                                                                                                                                                                                                                                                 | Tempus                                                                                                                         | Grubaugh Lab - Yale School of Public Health                                                                                    | Tara Alpert, Joseph Fauver, Anderson Brito, Mallery Breban, Anne Wyllie, Chantal Vogels, Mary Petrone, Annie Watkins, Chaney Kalinich, Isabel Ott, Nathan Grubaugh                                                                                                                                                                                                                                                              |  |  |
| EPI_ISL_861745                                                                                                                                                                                                                                                                                                                                                                                                                                                                                                                                                                                                                                                                                                                                                                                                                                                                                                                                                                                                                                                                                                                                                                                                                                                                                                                                                                                                                                                                                                                                                                                                                                                                                                                                                                                                                                                                                                                                                                                                                                                                                                                                                                                                                                 | Yale Pathology Lab                                                                                                             | Grubaugh Lab - Yale School of Public Health                                                                                    | Tara Alpert, Joseph Fauver, Chen Liu, Pei Hui, Jianhui Wang, Susan Bell and Han Zhou, Anderson Brito, Mallery Breban, Anne Wyllie, Chantal Vogels, Mary Petrone, Chaney Kalinich, Isabel Ott, Arnau Casanovas, Catherine Muenker, Adam Moore, Alice Lu, Maria Tokuyama, Patrick Wong, Peiwen Lu, Saad Omer, Richard Martinello, Allison Nelson, Shelli Farhadian, Akiko Iwasaki, Charlese Dela Cruz, Albert Ko, Nathan Grubaugh |  |  |
| EPI_ISL_861746, EPI_ISL_861747, EPI_ISL_861748, EPI_ISL_861749                                                                                                                                                                                                                                                                                                                                                                                                                                                                                                                                                                                                                                                                                                                                                                                                                                                                                                                                                                                                                                                                                                                                                                                                                                                                                                                                                                                                                                                                                                                                                                                                                                                                                                                                                                                                                                                                                                                                                                                                                                                                                                                                                                                 | Tempus                                                                                                                         | Grubaugh Lab - Yale School of Public Health                                                                                    | Tara Alpert, Joseph Fauver, Anderson Brito, Mallery Breban, Anne Wyllie, Chantal Vogels, Mary Petrone, Annie Watkins, Chaney Kalinich, Isabel Ott, Nathan Grubaugh                                                                                                                                                                                                                                                              |  |  |
| EPI_ISL_861750                                                                                                                                                                                                                                                                                                                                                                                                                                                                                                                                                                                                                                                                                                                                                                                                                                                                                                                                                                                                                                                                                                                                                                                                                                                                                                                                                                                                                                                                                                                                                                                                                                                                                                                                                                                                                                                                                                                                                                                                                                                                                                                                                                                                                                 | Yale Clinical Virology Lab                                                                                                     | Grubaugh Lab - Yale School of Public Health                                                                                    | Tara Alpert, Joseph Fauver, Anderson Brito, Mallery Breban, Anne Wyllie, Chantal Vogels, Mary Petrone, Chaney Kalinich, Isabel Ott, Nathan Grubaugh                                                                                                                                                                                                                                                                             |  |  |
| EPI_ISL_861751                                                                                                                                                                                                                                                                                                                                                                                                                                                                                                                                                                                                                                                                                                                                                                                                                                                                                                                                                                                                                                                                                                                                                                                                                                                                                                                                                                                                                                                                                                                                                                                                                                                                                                                                                                                                                                                                                                                                                                                                                                                                                                                                                                                                                                 | Tempus                                                                                                                         | Grubaugh Lab - Yale School of Public Health                                                                                    | Tara Alpert, Joseph Fauver, Anderson Brito, Mallery Breban, Anne Wyllie, Chantal Vogels, Mary Petrone, Annie Watkins, Chaney Kalinich, Isabel Ott, Nathan Grubaugh                                                                                                                                                                                                                                                              |  |  |
| EPI_ISL_861752, EPI_ISL_861753                                                                                                                                                                                                                                                                                                                                                                                                                                                                                                                                                                                                                                                                                                                                                                                                                                                                                                                                                                                                                                                                                                                                                                                                                                                                                                                                                                                                                                                                                                                                                                                                                                                                                                                                                                                                                                                                                                                                                                                                                                                                                                                                                                                                                 | Yale Clinical Virology Lab                                                                                                     | Grubaugh Lab - Yale School of Public Health                                                                                    | Tara Alpert, Joseph Fauver, Anderson Brito, Mallery Breban, Anne Wyllie, Chantal Vogels, Mary Petrone, Chaney Kalinich, Isabel Ott, Nathan Grubaugh                                                                                                                                                                                                                                                                             |  |  |
| EPI_ISL_861754, EPI_ISL_861755, EPI_ISL_861756, EPI_ISL_861757                                                                                                                                                                                                                                                                                                                                                                                                                                                                                                                                                                                                                                                                                                                                                                                                                                                                                                                                                                                                                                                                                                                                                                                                                                                                                                                                                                                                                                                                                                                                                                                                                                                                                                                                                                                                                                                                                                                                                                                                                                                                                                                                                                                 | Tempus                                                                                                                         | Grubaugh Lab - Yale School of Public Health                                                                                    | Tara Alpert, Joseph Fauver, Anderson Brito, Mallery Breban, Anne Wyllie, Chantal Vogels, Mary Petrone, Annie Watkins, Chaney Kalinich, Isabel Ott, Nathan Grubaugh                                                                                                                                                                                                                                                              |  |  |
| EPI_ISL_861758                                                                                                                                                                                                                                                                                                                                                                                                                                                                                                                                                                                                                                                                                                                                                                                                                                                                                                                                                                                                                                                                                                                                                                                                                                                                                                                                                                                                                                                                                                                                                                                                                                                                                                                                                                                                                                                                                                                                                                                                                                                                                                                                                                                                                                 | Murphy Medical Associates                                                                                                      | Grubaugh Lab - Yale School of Public Health                                                                                    | Tara Alpert, Joseph Fauver, Anderson Brito, Mallery Breban, Anne Wyllie, Chantal Vogels, Mary Petrone, Annie Watkins, Chaney Kalinich, Isabel Ott, Nathan Grubaugh                                                                                                                                                                                                                                                              |  |  |
| EPI_ISL_861759, EPI_ISL_861760, EPI_ISL_861761, EPI_ISL_861762, EPI_ISL_861763                                                                                                                                                                                                                                                                                                                                                                                                                                                                                                                                                                                                                                                                                                                                                                                                                                                                                                                                                                                                                                                                                                                                                                                                                                                                                                                                                                                                                                                                                                                                                                                                                                                                                                                                                                                                                                                                                                                                                                                                                                                                                                                                                                 | Tempus                                                                                                                         | Grubaugh Lab - Yale School of Public Health                                                                                    | Tara Alpert, Joseph Fauver, Anderson Brito, Mallery Breban, Anne Wyllie, Chantal Vogels, Mary Petrone, Annie Watkins, Chaney Kalinich, Isabel Ott, Nathan Grubaugh                                                                                                                                                                                                                                                              |  |  |
| EPI_ISL_861764                                                                                                                                                                                                                                                                                                                                                                                                                                                                                                                                                                                                                                                                                                                                                                                                                                                                                                                                                                                                                                                                                                                                                                                                                                                                                                                                                                                                                                                                                                                                                                                                                                                                                                                                                                                                                                                                                                                                                                                                                                                                                                                                                                                                                                 | Yale Pathology Lab                                                                                                             | Grubaugh Lab - Yale School of Public Health                                                                                    | Tara Alpert, Joseph Fauver, Chen Liu, Pei Hui, Jianhui Wang, Susan Bell and Han Zhou, Anderson Brito, Mallery Breban, Anne Wyllie, Chantal Vogels, Mary Petrone, Chaney Kalinich, Isabel Ott, Arnau Casanovas, Catherine Muenker, Adam Moore, Alice Lu, Maria Tokuyama, Patrick Wong, Peiwen Lu, Saad Omer, Richard Martinello, Allison Nelson, Shelli Farhadian, Akiko Iwasaki, Charlese Dela Cruz, Albert Ko, Nathan Grubaugh |  |  |
| EPI_ISL_861765, EPI_ISL_861766                                                                                                                                                                                                                                                                                                                                                                                                                                                                                                                                                                                                                                                                                                                                                                                                                                                                                                                                                                                                                                                                                                                                                                                                                                                                                                                                                                                                                                                                                                                                                                                                                                                                                                                                                                                                                                                                                                                                                                                                                                                                                                                                                                                                                 | Tempus                                                                                                                         | Grubaugh Lab - Yale School of Public Health                                                                                    | Tara Alpert, Joseph Fauver, Anderson Brito, Mallery Breban, Anne Wyllie, Chantal Vogels, Mary Petrone, Annie Watkins, Chaney Kalinich, Isabel Ott, Nathan Grubaugh                                                                                                                                                                                                                                                              |  |  |
| EPI_ISL_861767, EPI_ISL_861768                                                                                                                                                                                                                                                                                                                                                                                                                                                                                                                                                                                                                                                                                                                                                                                                                                                                                                                                                                                                                                                                                                                                                                                                                                                                                                                                                                                                                                                                                                                                                                                                                                                                                                                                                                                                                                                                                                                                                                                                                                                                                                                                                                                                                 | Yale Pathology Lab                                                                                                             | Grubaugh Lab - Yale School of Public Health                                                                                    | Tara Alpert, Joseph Fauver, Chen Liu, Pei Hui, Jianhui Wang, Susan Bell and Han Zhou, Anderson Brito, Mallery Breban, Anne Wyllie, Chantal Vogels, Mary Petrone, Chaney Kalinich, Isabel Ott, Arnau Casanovas, Catherine Muenker, Adam Moore, Alice Lu, Maria Tokuyama, Patrick Wong, Peiwen Lu, Saad Omer, Richard Martinello, Allison Nelson, Shelli Farhadian, Akiko Iwasaki, Charlese Dela Cruz, Albert Ko, Nathan Grubaugh |  |  |
| EPI_ISL_861769                                                                                                                                                                                                                                                                                                                                                                                                                                                                                                                                                                                                                                                                                                                                                                                                                                                                                                                                                                                                                                                                                                                                                                                                                                                                                                                                                                                                                                                                                                                                                                                                                                                                                                                                                                                                                                                                                                                                                                                                                                                                                                                                                                                                                                 | Tempus                                                                                                                         | Grubaugh Lab - Yale School of Public Health                                                                                    | Tara Alpert, Joseph Fauver, Anderson Brito, Mallery Breban, Anne Wyllie, Chantal Vogels, Mary Petrone, Annie Watkins, Chaney Kalinich, Isabel Ott, Nathan Grubaugh                                                                                                                                                                                                                                                              |  |  |
| EPI_ISL_861770                                                                                                                                                                                                                                                                                                                                                                                                                                                                                                                                                                                                                                                                                                                                                                                                                                                                                                                                                                                                                                                                                                                                                                                                                                                                                                                                                                                                                                                                                                                                                                                                                                                                                                                                                                                                                                                                                                                                                                                                                                                                                                                                                                                                                                 | Yale Pathology Lab                                                                                                             | Grubaugh Lab - Yale School of Public Health                                                                                    | Tara Alpert, Joseph Fauver, Chen Liu, Pei Hui, Jianhui Wang, Susan Bell and Han Zhou, Anderson Brito, Mallery Breban, Anne Wyllie, Chantal Vogels, Mary Petrone, Chaney Kalinich, Isabel Ott, Arnau Casanovas, Catherine Muenker, Adam Moore, Alice Lu, Maria Tokuyama, Patrick Wong, Peiwen Lu, Saad Omer, Richard Martinello, Allison Nelson, Shelli Farhadian, Akiko Iwasaki, Charlese Dela Cruz, Albert Ko, Nathan Grubaugh |  |  |
| EPI_ISL_861771                                                                                                                                                                                                                                                                                                                                                                                                                                                                                                                                                                                                                                                                                                                                                                                                                                                                                                                                                                                                                                                                                                                                                                                                                                                                                                                                                                                                                                                                                                                                                                                                                                                                                                                                                                                                                                                                                                                                                                                                                                                                                                                                                                                                                                 | Yale Clinical Virology Lab                                                                                                     | Grubaugh Lab - Yale School of Public Health                                                                                    | Tara Alpert, Joseph Fauver, Anderson Brito, Mallery Breban, Anne Wyllie, Chantal Vogels, Mary Petrone, Chaney Kalinich, Isabel Ott, Nathan Grubaugh                                                                                                                                                                                                                                                                             |  |  |
| EPI_ISL_861772                                                                                                                                                                                                                                                                                                                                                                                                                                                                                                                                                                                                                                                                                                                                                                                                                                                                                                                                                                                                                                                                                                                                                                                                                                                                                                                                                                                                                                                                                                                                                                                                                                                                                                                                                                                                                                                                                                                                                                                                                                                                                                                                                                                                                                 | Tempus                                                                                                                         | Grubaugh Lab - Yale School of Public Health                                                                                    | Tara Alpert, Joseph Fauver, Anderson Brito, Mallery Breban, Anne Wyllie, Chantal Vogels, Mary Petrone, Annie Watkins, Chaney Kalinich, Isabel Ott, Nathan Grubaugh                                                                                                                                                                                                                                                              |  |  |
| EPI_ISL_862052, EPI_ISL_862061, EPI_ISL_862064, EPI_ISL_862089, EPI_ISL_862090, EPI_ISL_862095, EPI_ISL_862104, EPI_ISL_862106, EPI_ISL_862109, EPI_ISL_862117, EPI_ISL_862118                                                                                                                                                                                                                                                                                                                                                                                                                                                                                                                                                                                                                                                                                                                                                                                                                                                                                                                                                                                                                                                                                                                                                                                                                                                                                                                                                                                                                                                                                                                                                                                                                                                                                                                                                                                                                                                                                                                                                                                                                                                                 |                                                                                                                                |                                                                                                                                |                                                                                                                                                                                                                                                                                                                                                                                                                                 |  |  |
| see above                                                                                                                                                                                                                                                                                                                                                                                                                                                                                                                                                                                                                                                                                                                                                                                                                                                                                                                                                                                                                                                                                                                                                                                                                                                                                                                                                                                                                                                                                                                                                                                                                                                                                                                                                                                                                                                                                                                                                                                                                                                                                                                                                                                                                                      | Department of Virology and Immunology, University of Helsinki and Helsinki University Hospital, HUSLAB Finland                 | Department of Virology, Faculty of Medicine, University of Helsinki, Helsinki, Finland                                         | Teemu Smura, Ravi Kant, Phuoc Truong, Hussein Alburkat, Hanna Liimatainen, Hannimari Kallio-Kokko, Jenni Virtanen, Maija Suvanto, Sari Hannula, Herra Kangas, Pekka Ellonen, Olli Vapalahti                                                                                                                                                                                                                                     |  |  |
| EPI_ISL_867035, EPI_ISL_867037, EPI_ISL_867038, EPI_ISL_867039, EPI_ISL_867040, EPI_ISL_867041, EPI_ISL_867044, EPI_ISL_867045, EPI_ISL_867046, EPI_ISL_867047, EPI_ISL_867048, EPI_ISL_867049, EPI_ISL_867050, EPI_ISL_867051, EPI_ISL_867052, EPI_ISL_867053, EPI_ISL_867054, EPI_ISL_867055, EPI_ISL_867056, EPI_ISL_867057, EPI_ISL_867058, EPI_ISL_867059, EPI_ISL_867060, EPI_ISL_867061, EPI_ISL_867062, EPI_ISL_867063, EPI_ISL_867064, EPI_ISL_867065, EPI_ISL_867066, EPI_ISL_867067, EPI_ISL_867068, EPI_ISL_867069, EPI_ISL_867071, EPI_ISL_867072, EPI_ISL_867073, EPI_ISL_867074, EPI_ISL_867075, EPI_ISL_867077, EPI_ISL_867078, EPI_ISL_867079, EPI_ISL_867080, EPI_ISL_867081, EPI_ISL_867082, EPI_ISL_867084, EPI_ISL_867087, EPI_ISL_867088, EPI_ISL_867089, EPI_ISL_867090, EPI_ISL_867091, EPI_ISL_867092, EPI_ISL_867093, EPI_ISL_867094, EPI_ISL_867095, EPI_ISL_867096, EPI_ISL_867097, EPI_ISL_867098, EPI_ISL_867099, EPI_ISL_867100, EPI_ISL_867101, EPI_ISL_867103, EPI_ISL_867105, EPI_ISL_867106, EPI_ISL_867107, EPI_ISL_867108, EPI_ISL_867110, EPI_ISL_867111, EPI_ISL_867112, EPI_ISL_867113, EPI_ISL_867114, EPI_ISL_867118, EPI_ISL_867119, EPI_ISL_867120, EPI_ISL_867121, EPI_ISL_867123, EPI_ISL_867125, EPI_ISL_867127, EPI_ISL_867128, EPI_ISL_867129, EPI_ISL_867130, EPI_ISL_867131, EPI_ISL_867132, EPI_ISL_867133, EPI_ISL_867134, EPI_ISL_867137, EPI_ISL_867138, EPI_ISL_867139, EPI_ISL_867140, EPI_ISL_867141, EPI_ISL_867142, EPI_ISL_867144, EPI_ISL_867145, EPI_ISL_867147, EPI_ISL_867148, EPI_ISL_867150, EPI_ISL_867151, EPI_ISL_867152, EPI_ISL_867155, EPI_ISL_867159, EPI_ISL_867161, EPI_ISL_867162, EPI_ISL_867163, EPI_ISL_867164, EPI_ISL_867165, EPI_ISL_867166, EPI_ISL_867167, EPI_ISL_867168, EPI_ISL_867169, EPI_ISL_867170, EPI_ISL_867171, EPI_ISL_867172, EPI_ISL_867173, EPI_ISL_867175, EPI_ISL_867177, EPI_ISL_867178, EPI_ISL_867179, EPI_ISL_867181, EPI_ISL_867182, EPI_ISL_867183, EPI_ISL_867184, EPI_ISL_867185                                                                                                                                                                                                                                                 |                                                                                                                                |                                                                                                                                |                                                                                                                                                                                                                                                                                                                                                                                                                                 |  |  |
| see above                                                                                                                                                                                                                                                                                                                                                                                                                                                                                                                                                                                                                                                                                                                                                                                                                                                                                                                                                                                                                                                                                                                                                                                                                                                                                                                                                                                                                                                                                                                                                                                                                                                                                                                                                                                                                                                                                                                                                                                                                                                                                                                                                                                                                                      | Oxford Viroemics, NDM, University of Oxford; Oxford University Hospitals; Basingstoke and North Hampshire Hospital             | COVID-19 Genomics UK (COG-UK) Consortium                                                                                       | Tanya Golubchik, David Bonsall, George Macintyre, Amy Trebes, Mariateresa de Cesare, Catrin Moore, Alex Kidd, Anita Justice, Robert Shaw, Monique Andersson, Timothy Peto, Emma Wise, Nathan Moore, Jessica Lynch, Nick Cortes, Matilde Mori, Stephen Kibb, David Buck, John Todd, Christophe Fraser                                                                                                                            |  |  |
| EPI_ISL_872589, EPI_ISL_872590                                                                                                                                                                                                                                                                                                                                                                                                                                                                                                                                                                                                                                                                                                                                                                                                                                                                                                                                                                                                                                                                                                                                                                                                                                                                                                                                                                                                                                                                                                                                                                                                                                                                                                                                                                                                                                                                                                                                                                                                                                                                                                                                                                                                                 | Department of Virology Institute of Tropical Medicine Nagasaki University                                                      | Department of Virology Institute of Tropical Medicine Nagasaki University                                                      | Takeshi Nabeshima Takahiro Takazono Nobuyuki Ashizawa Taiga Miyazaki Shingo Inoue Mya Myat Ngwe Tun Koichi Izumikawa Hiroshi Mukae Meng Ling Moi, Ph. D. Kouichi Morita                                                                                                                                                                                                                                                         |  |  |
| EPI_ISL_877228                                                                                                                                                                                                                                                                                                                                                                                                                                                                                                                                                                                                                                                                                                                                                                                                                                                                                                                                                                                                                                                                                                                                                                                                                                                                                                                                                                                                                                                                                                                                                                                                                                                                                                                                                                                                                                                                                                                                                                                                                                                                                                                                                                                                                                 | Institute for Medical Research, Infectious Disease Research Centre, National Institutes of Health, Ministry of Health Malaysia | Institute for Medical Research, Infectious Disease Research Centre, National Institutes of Health, Ministry of Health Malaysia | Suppiah J, Kamel K, Azizan MA, Thayan R                                                                                                                                                                                                                                                                                                                                                                                         |  |  |
| EPI_ISL_877230, EPI_ISL_877231, EPI_ISL_877232, EPI_ISL_877233, EPI_ISL_877234, EPI_ISL_877235, EPI_ISL_877236, EPI_ISL_877329, EPI_ISL_877330                                                                                                                                                                                                                                                                                                                                                                                                                                                                                                                                                                                                                                                                                                                                                                                                                                                                                                                                                                                                                                                                                                                                                                                                                                                                                                                                                                                                                                                                                                                                                                                                                                                                                                                                                                                                                                                                                                                                                                                                                                                                                                 | University College Sedaya International (UCSI University)                                                                      | Institute for Medical Research, Infectious Disease Research Centre, National Institutes of Health, Ministry of Health Malaysia | Suppiah J, Kamel K, Azizan MA, Sekaran SD, Thayan R                                                                                                                                                                                                                                                                                                                                                                             |  |  |
| EPI_ISL_884445, EPI_ISL_884446, EPI_ISL_884447, EPI_ISL_884448, EPI_ISL_884449, EPI_ISL_884450, EPI_ISL_884451, EPI_ISL_884452, EPI_ISL_884453, EPI_ISL_884454, EPI_ISL_884455, EPI_ISL_884456, EPI_ISL_884457, EPI_ISL_884458, EPI_ISL_884459, EPI_ISL_884460, EPI_ISL_884461, EPI_ISL_884462, EPI_ISL_884463, EPI_ISL_884464, EPI_ISL_884465, EPI_ISL_884466, EPI_ISL_884467, EPI_ISL_884468, EPI_ISL_884469, EPI_ISL_884470, EPI_ISL_884471, EPI_ISL_884472, EPI_ISL_884473, EPI_ISL_884474, EPI_ISL_884475, EPI_ISL_884476, EPI_ISL_884477, EPI_ISL_884478, EPI_ISL_884479, EPI_ISL_884480, EPI_ISL_884481, EPI_ISL_884482, EPI_ISL_884483, EPI_ISL_884484, EPI_ISL_884485, EPI_ISL_884486, EPI_ISL_884487, EPI_ISL_884488, EPI_ISL_884489, EPI_ISL_884490, EPI_ISL_884491, EPI_ISL_884492, EPI_ISL_884493, EPI_ISL_884494, EPI_ISL_884495, EPI_ISL_884496, EPI_ISL_884497, EPI_ISL_884498, EPI_ISL_884499, EPI_ISL_884500, EPI_ISL_884501, EPI_ISL_884502, EPI_ISL_884503, EPI_ISL_884504, EPI_ISL_884505, EPI_ISL_884506, EPI_ISL_884507, EPI_ISL_884508, EPI_ISL_884509, EPI_ISL_884510, EPI_ISL_884511, EPI_ISL_884512, EPI_ISL_884513, EPI_ISL_884514, EPI_ISL_884515, EPI_ISL_884516, EPI_ISL_884517, EPI_ISL_884518, EPI_ISL_884519, EPI_ISL_884520, EPI_ISL_884521, EPI_ISL_884522, EPI_ISL_884523, EPI_ISL_884524, EPI_ISL_884525, EPI_ISL_884526, EPI_ISL_884527, EPI_ISL_884528, EPI_ISL_884529, EPI_ISL_884530, EPI_ISL_884531, EPI_ISL_884532, EPI_ISL_884533, EPI_ISL_884534, EPI_ISL_884535, EPI_ISL_884536, EPI_ISL_884537, EPI_ISL_884538, EPI_ISL_884539, EPI_ISL_884540, EPI_ISL_884541, EPI_ISL_884542, EPI_ISL_884543, EPI_ISL_884544, EPI_ISL_884545, EPI_ISL_884546, EPI_ISL_884547, EPI_ISL_884548, EPI_ISL_884549, EPI_ISL_884550, EPI_ISL_884551, EPI_ISL_884552, EPI_ISL_884553, EPI_ISL_884554, EPI_ISL_884555, EPI_ISL_884556, EPI_ISL_884557, EPI_ISL_884558, EPI_ISL_884559, EPI_ISL_884560, EPI_ISL_884561, EPI_ISL_884562, EPI_ISL_884563, EPI_ISL_884564, EPI_ISL_884565, EPI_ISL_884566, EPI_ISL_884567, EPI_ISL_884568, EPI_ISL_884569, EPI_ISL_884570, EPI_ISL_884571, EPI_ISL_884572, EPI_ISL_884573, EPI_ISL_884574, EPI_ISL_884575, EPI_ISL_884576, EPI_ISL_884577, EPI_ISL_884578, EPI_ISL_884579 |                                                                                                                                |                                                                                                                                |                                                                                                                                                                                                                                                                                                                                                                                                                                 |  |  |
| see above                                                                                                                                                                                                                                                                                                                                                                                                                                                                                                                                                                                                                                                                                                                                                                                                                                                                                                                                                                                                                                                                                                                                                                                                                                                                                                                                                                                                                                                                                                                                                                                                                                                                                                                                                                                                                                                                                                                                                                                                                                                                                                                                                                                                                                      | Molecular Microbiology & Immunology, University of Missouri                                                                    | Molecular Microbiology & Immunology, University of Missouri                                                                    | Tang,C.Y., Li,T., Hang,J., Lidl,G.M., Wan,X.-F.                                                                                                                                                                                                                                                                                                                                                                                 |  |  |

|                |                           |                                                                                                                          |                                                                                                                                                                                    |
|----------------|---------------------------|--------------------------------------------------------------------------------------------------------------------------|------------------------------------------------------------------------------------------------------------------------------------------------------------------------------------|
| EPI_ISL_888997 | RSU Asyasyifaa            | Eijkman Institute for Molecular Biology, Ministry of Research and Technology/National Agency for Research and Innovation | Sukma Oktavianthi, Willy Agustine, Edison Johar, Hidayat Trimarsanto, Iskandar Adnan, Lydia V. Panggalo, Frilasita A Yudhaputri, Safarina G Malik, Khin Saw Myint, Amin Soebandrio |
| EPI_ISL_888998 | RSUD Cileungsi            | Eijkman Institute for Molecular Biology, Ministry of Research and Technology/National Agency for Research and Innovation | Sukma Oktavianthi, Willy Agustine, Edison Johar, Hidayat Trimarsanto, Iskandar Adnan, Lydia V. Panggalo, Frilasita A Yudhaputri, Safarina G Malik, Khin Saw Myint, Amin Soebandrio |
| EPI_ISL_888999 | RS Mitra Keluarga Cibubur | Eijkman Institute for Molecular Biology, Ministry of Research and Technology/National Agency for Research and Innovation | Sukma Oktavianthi, Willy Agustine, Edison Johar, Hidayat Trimarsanto, Iskandar Adnan, Lydia V. Panggalo, Frilasita A Yudhaputri, Safarina G Malik, Khin Saw Myint, Amin Soebandrio |
| EPI_ISL_889000 | RSUD Cileungsi            | Eijkman Institute for Molecular Biology, Ministry of Research and Technology/National Agency for Research and Innovation | Sukma Oktavianthi, Willy Agustine, Edison Johar, Hidayat Trimarsanto, Iskandar Adnan, Lydia V. Panggalo, Frilasita A Yudhaputri, Safarina G Malik, Khin Saw Myint, Amin Soebandrio |
| EPI_ISL_889001 | RSU Azra                  | Eijkman Institute for Molecular Biology, Ministry of Research and Technology/National Agency for Research and Innovation | Sukma Oktavianthi, Willy Agustine, Edison Johar, Hidayat Trimarsanto, Iskandar Adnan, Lydia V. Panggalo, Frilasita A Yudhaputri, Safarina G Malik, Khin Saw Myint, Amin Soebandrio |
| EPI_ISL_889002 | RSU Sumber Waras          | Eijkman Institute for Molecular Biology, Ministry of Research and Technology/National Agency for Research and Innovation | Sukma Oktavianthi, Willy Agustine, Edison Johar, Hidayat Trimarsanto, Iskandar Adnan, Lydia V. Panggalo, Frilasita A Yudhaputri, Safarina G Malik, Khin Saw Myint, Amin Soebandrio |

We gratefully acknowledge the following Authors from the Originating laboratories responsible for obtaining the specimens, as well as the Submitting laboratories where the genome data were generated and shared via GISAID, on which this research is based.

All Submitters of data may be contacted directly via [www.gisaid.org](http://www.gisaid.org)

Authors are sorted alphabetically.

| Accession ID                                                                                                                                                                                                                                                                                                                                                                                                                                                                                                                                                                                                                                                                                                                                                                                                                                                                                                                                                                                                                                                                                                                                                                                                                                                                                                                                                                                                                                                                                                                                                                                                                                                                                                                                                                                                                                                                                                                                                                                                                                                                                                                                                                                                                                                                                                                                                                                                                                                                                                                                                                                                                                                                                                                                                                                                                                                                                                                                                                                   | Originating Laboratory                                                                                         | Submitting Laboratory                                                                  | Authors                                                                                                                                                                                                                                                                                                                                                                                                                                                                                                 |
|------------------------------------------------------------------------------------------------------------------------------------------------------------------------------------------------------------------------------------------------------------------------------------------------------------------------------------------------------------------------------------------------------------------------------------------------------------------------------------------------------------------------------------------------------------------------------------------------------------------------------------------------------------------------------------------------------------------------------------------------------------------------------------------------------------------------------------------------------------------------------------------------------------------------------------------------------------------------------------------------------------------------------------------------------------------------------------------------------------------------------------------------------------------------------------------------------------------------------------------------------------------------------------------------------------------------------------------------------------------------------------------------------------------------------------------------------------------------------------------------------------------------------------------------------------------------------------------------------------------------------------------------------------------------------------------------------------------------------------------------------------------------------------------------------------------------------------------------------------------------------------------------------------------------------------------------------------------------------------------------------------------------------------------------------------------------------------------------------------------------------------------------------------------------------------------------------------------------------------------------------------------------------------------------------------------------------------------------------------------------------------------------------------------------------------------------------------------------------------------------------------------------------------------------------------------------------------------------------------------------------------------------------------------------------------------------------------------------------------------------------------------------------------------------------------------------------------------------------------------------------------------------------------------------------------------------------------------------------------------------|----------------------------------------------------------------------------------------------------------------|----------------------------------------------------------------------------------------|---------------------------------------------------------------------------------------------------------------------------------------------------------------------------------------------------------------------------------------------------------------------------------------------------------------------------------------------------------------------------------------------------------------------------------------------------------------------------------------------------------|
| EPI_ISL_412971                                                                                                                                                                                                                                                                                                                                                                                                                                                                                                                                                                                                                                                                                                                                                                                                                                                                                                                                                                                                                                                                                                                                                                                                                                                                                                                                                                                                                                                                                                                                                                                                                                                                                                                                                                                                                                                                                                                                                                                                                                                                                                                                                                                                                                                                                                                                                                                                                                                                                                                                                                                                                                                                                                                                                                                                                                                                                                                                                                                 | HUS Diagnostikkakeskus, Hallinto                                                                               | Department of Virology Faculty of Medicine, Medicum University of Helsinki             | Teemu Smura, Suvi Kiviainen, Hannimari Kallio-Kokko, Olli Vapalahti                                                                                                                                                                                                                                                                                                                                                                                                                                     |
| EPI_ISL_413602, EPI_ISL_413603, EPI_ISL_413604, EPI_ISL_413605, EPI_ISL_414640, EPI_ISL_414641, EPI_ISL_414643, EPI_ISL_414644, EPI_ISL_414645, EPI_ISL_414646, EPI_ISL_418385, EPI_ISL_418387, EPI_ISL_418388, EPI_ISL_418389, EPI_ISL_418390, EPI_ISL_418391, EPI_ISL_418393, EPI_ISL_418394, EPI_ISL_418395, EPI_ISL_418396, EPI_ISL_418397, EPI_ISL_418398, EPI_ISL_418399, EPI_ISL_418400, EPI_ISL_418401, EPI_ISL_418402, EPI_ISL_418404, EPI_ISL_418405, EPI_ISL_418407, EPI_ISL_418409, EPI_ISL_418410                                                                                                                                                                                                                                                                                                                                                                                                                                                                                                                                                                                                                                                                                                                                                                                                                                                                                                                                                                                                                                                                                                                                                                                                                                                                                                                                                                                                                                                                                                                                                                                                                                                                                                                                                                                                                                                                                                                                                                                                                                                                                                                                                                                                                                                                                                                                                                                                                                                                                 | Department of Virology and Immunology, University of Helsinki and Helsinki University Hospital, Huslab Finland | Department of Virology, Faculty of Medicine, University of Helsinki, Helsinki, Finland | Teemu Smura, Hannimari Kallio-Kokko, Olli Vapalahti                                                                                                                                                                                                                                                                                                                                                                                                                                                     |
| see above                                                                                                                                                                                                                                                                                                                                                                                                                                                                                                                                                                                                                                                                                                                                                                                                                                                                                                                                                                                                                                                                                                                                                                                                                                                                                                                                                                                                                                                                                                                                                                                                                                                                                                                                                                                                                                                                                                                                                                                                                                                                                                                                                                                                                                                                                                                                                                                                                                                                                                                                                                                                                                                                                                                                                                                                                                                                                                                                                                                      | Department of Virology and Immunology, University of Helsinki and Helsinki University Hospital, Huslab Finland | Department of Virology, Faculty of Medicine, University of Helsinki, Helsinki, Finland | Teemu Smura, Hannimari Kallio-Kokko, Olli Vapalahti                                                                                                                                                                                                                                                                                                                                                                                                                                                     |
| EPI_ISL_435055                                                                                                                                                                                                                                                                                                                                                                                                                                                                                                                                                                                                                                                                                                                                                                                                                                                                                                                                                                                                                                                                                                                                                                                                                                                                                                                                                                                                                                                                                                                                                                                                                                                                                                                                                                                                                                                                                                                                                                                                                                                                                                                                                                                                                                                                                                                                                                                                                                                                                                                                                                                                                                                                                                                                                                                                                                                                                                                                                                                 | Gujarat Biotechnology Research Centre                                                                          | Gujarat Biotechnology Research Centre                                                  | Tejas Shah, Ankit Hinsu, Pritesh Sabara, Apurvasinh Puvar, Janvi Ravai, Monika Gandhi, Pinal Trivedi, Maharshi Pandya, Amit Kanani, Akanksha Verma, Nitin Savaliya, Raghawendra Kumar, Dinesh Kumar, Zuber Saiyed, Dipa Kinariwala, Disha Patel, Binita Aring, Neeta Vaghela, Sonia Barve, Bhavesh Modi, Kairavi Joshi, Gaurishankar Shrimali, Nidhi Sood, Pranay Shah, R D Dixit, Snehal Bagatharia, Kamlesh J Upadhyay, Ramesh Pandit, Anjali Rajwal, Chaitanya Joshi, Madhvi Joshi                   |
| EPI_ISL_444460                                                                                                                                                                                                                                                                                                                                                                                                                                                                                                                                                                                                                                                                                                                                                                                                                                                                                                                                                                                                                                                                                                                                                                                                                                                                                                                                                                                                                                                                                                                                                                                                                                                                                                                                                                                                                                                                                                                                                                                                                                                                                                                                                                                                                                                                                                                                                                                                                                                                                                                                                                                                                                                                                                                                                                                                                                                                                                                                                                                 | B.J. Medical College and Civil hospital                                                                        | Gujarat Biotechnology Research Centre                                                  | Tejas Shah, Ankit Hinsu, Pritesh Sabara, Apurvasinh Puvar, Janvi Ravai, Monika Gandhi, Pinal Trivedi, Maharshi Pandya, Amit Kanani, Akanksha Verma, Nitin Savaliya, Raghawendra Kumar, Dinesh Kumar, Zuber Saiyed, Dipa Kinariwala, Disha Patel, Binita Aring, Neeta Khandelwal, Geeta Vaghela, Sonia Barve, Bhavesh Modi, Kairavi Joshi, Gaurishankar Shrimali, Nidhi Sood, Pranay Shah, R D Dixit, Snehal Bagatharia, Kamlesh J Upadhyay, Ramesh Pandit, Afzal Ansari, Chaitanya Joshi, Madhvi Joshi  |
| EPI_ISL_447032                                                                                                                                                                                                                                                                                                                                                                                                                                                                                                                                                                                                                                                                                                                                                                                                                                                                                                                                                                                                                                                                                                                                                                                                                                                                                                                                                                                                                                                                                                                                                                                                                                                                                                                                                                                                                                                                                                                                                                                                                                                                                                                                                                                                                                                                                                                                                                                                                                                                                                                                                                                                                                                                                                                                                                                                                                                                                                                                                                                 | B.J. Medical College and Civil hospital                                                                        | Gujarat Biotechnology Research Centre                                                  | Tejas Shah, Ankit Hinsu, Pritesh Sabara, Apurvasinh Puvar, Janvi Ravai, Monika Gandhi, Pinal Trivedi, Maharshi Pandya, Amit Kanani, Akanksha Verma, Nitin Savaliya, Raghawendra Kumar, Dinesh Kumar, Zuber Saiyed, Dipa Kinariwala, Disha Patel, Binita Aring, Neeta Khandelwal, Geeta Vaghela, Sonia Barve, Bhavesh Modi, Kairavi Joshi, Gaurishankar Shrimali, Nidhi Sood, Pranay Shah, R D Dixit, Snehal Bagatharia, Ramesh Pandit, Kamlesh J Upadhyay, Pooja P Doshi, Chaitanya Joshi, Madhvi Joshi |
| EPI_ISL_447541                                                                                                                                                                                                                                                                                                                                                                                                                                                                                                                                                                                                                                                                                                                                                                                                                                                                                                                                                                                                                                                                                                                                                                                                                                                                                                                                                                                                                                                                                                                                                                                                                                                                                                                                                                                                                                                                                                                                                                                                                                                                                                                                                                                                                                                                                                                                                                                                                                                                                                                                                                                                                                                                                                                                                                                                                                                                                                                                                                                 | Gujarat Biotechnology Research Centre                                                                          | Gujarat Biotechnology Research Centre                                                  | Tejas Shah, Ankit Hinsu, Pritesh Sabara, Apurvasinh Puvar, Janvi Ravai, Monika Gandhi, Pinal Trivedi, Maharshi Pandya, Amit Kanani, Akanksha Verma, Nitin Savaliya, Raghawendra Kumar, Dinesh Kumar, Zuber Saiyed, Dipa Kinariwala, Disha Patel, Binita Aring, Neeta Khandelwal, Geeta Vaghela, Sonia Barve, Bhavesh Modi, Kairavi Joshi, Gaurishankar Shrimali, Nidhi Sood, Pranay Shah, R D Dixit, Snehal Bagatharia, Kamlesh J Upadhyay, Ramesh Pandit, Anjali Rajwar, Chaitanya Joshi, Madhvi Joshi |
| EPI_ISL_455020                                                                                                                                                                                                                                                                                                                                                                                                                                                                                                                                                                                                                                                                                                                                                                                                                                                                                                                                                                                                                                                                                                                                                                                                                                                                                                                                                                                                                                                                                                                                                                                                                                                                                                                                                                                                                                                                                                                                                                                                                                                                                                                                                                                                                                                                                                                                                                                                                                                                                                                                                                                                                                                                                                                                                                                                                                                                                                                                                                                 | Government Medical College, Vadodara                                                                           | Gujarat Biotechnology Research Centre                                                  | Tejas Shah, Ankit Hinsu, Pritesh Sabara, Apurvasinh Puvar, Janvi Ravai, Zarna Patel, Monika Gandhi, Pinal Trivedi, Maharshi Pandya, Amit Kanani, Nidhi Patel, Nitin Savaliya, Raghawendra Kumar, Dinesh Kumar, Zuber Saiyed, Komal Patel, Labdhi Pandya, Snehal Bagatharia, Tanuja Javadekar, R N Daveshwar, Ramesh Pandit, Bhavya Jindal, Bhavesh Modi, Gaurishankar Shrimali, R D Dixit, A M Kadri, Umang Mishra, Chaitanya Joshi, Madhvi Joshi,                                                      |
| EPI_ISL_458104                                                                                                                                                                                                                                                                                                                                                                                                                                                                                                                                                                                                                                                                                                                                                                                                                                                                                                                                                                                                                                                                                                                                                                                                                                                                                                                                                                                                                                                                                                                                                                                                                                                                                                                                                                                                                                                                                                                                                                                                                                                                                                                                                                                                                                                                                                                                                                                                                                                                                                                                                                                                                                                                                                                                                                                                                                                                                                                                                                                 | Gujarat Biotechnology Research Centre                                                                          | Gujarat Biotechnology Research Centre                                                  | Tejas Shah, Ankit Hinsu, Pritesh Sabara, Apurvasinh Puvar, Janvi Ravai, Zarna Patel, Monika Gandhi, Pinal Trivedi, Maharshi Pandya, Amit Kanani, Nidhi Patel, Nitin Savaliya, Raghawendra Kumar, Dinesh Kumar, Zuber Saiyed, Komal Patel, Labdhi Pandya, Snehal Bagatharia, Ramesh Pandit, Bhavya Jindal, Bhavesh Modi, Gaurishankar Shrimali, R D Dixit, A M Kadri, Umang Mishra, Chaitanya Joshi, Madhvi Joshi, , , ,                                                                                 |
| EPI_ISL_462990                                                                                                                                                                                                                                                                                                                                                                                                                                                                                                                                                                                                                                                                                                                                                                                                                                                                                                                                                                                                                                                                                                                                                                                                                                                                                                                                                                                                                                                                                                                                                                                                                                                                                                                                                                                                                                                                                                                                                                                                                                                                                                                                                                                                                                                                                                                                                                                                                                                                                                                                                                                                                                                                                                                                                                                                                                                                                                                                                                                 | University Clinical Centre of the Republic of Srpska                                                           | University of Sarajevo, Veterinary Faculty                                             | Teufik, G., Šejla, G., Toni, E., Maja, T., Mirsada, H., Aida, K., Alma, Š.A.                                                                                                                                                                                                                                                                                                                                                                                                                            |
| EPI_ISL_467033                                                                                                                                                                                                                                                                                                                                                                                                                                                                                                                                                                                                                                                                                                                                                                                                                                                                                                                                                                                                                                                                                                                                                                                                                                                                                                                                                                                                                                                                                                                                                                                                                                                                                                                                                                                                                                                                                                                                                                                                                                                                                                                                                                                                                                                                                                                                                                                                                                                                                                                                                                                                                                                                                                                                                                                                                                                                                                                                                                                 | GMERS Medical College and Hospital, Gandhinagar                                                                | Gujarat Biotechnology Research Centre                                                  | Tejas Shah, Ankit Hinsu, Pritesh Sabara, Apurvasinh Puvar, Janvi Ravai, Zarna Patel, Monika Gandhi, Pinal Trivedi, Maharshi Pandya, Nidhi Patel, Nitin Savaliya, Raghawendra Kumar, Dinesh Kumar, Zuber Saiyed, Komal Patel, Labdhi Pandya, Snehal Bagatharia, Seema Bhatt, Gaurishankar Shrimali, Bhavesh Modi, Bharti Rajani, Priti Pandita, R D Dixit, A M Kadri, Harsh Bakshi, Chaitanya Joshi, Madhvi Joshi                                                                                        |
| EPI_ISL_469024                                                                                                                                                                                                                                                                                                                                                                                                                                                                                                                                                                                                                                                                                                                                                                                                                                                                                                                                                                                                                                                                                                                                                                                                                                                                                                                                                                                                                                                                                                                                                                                                                                                                                                                                                                                                                                                                                                                                                                                                                                                                                                                                                                                                                                                                                                                                                                                                                                                                                                                                                                                                                                                                                                                                                                                                                                                                                                                                                                                 | B.J. Medical College and Civil hospital                                                                        | Gujarat Biotechnology Research Centre                                                  | Tejas Shah, Ankit Hinsu, Pritesh Sabara, Apurvasinh Puvar, Janvi Ravai, Zarna Patel, Monika Gandhi, Pinal Trivedi, Maharshi Pandya, Nidhi Patel, Nitin Savaliya, Raghawendra Kumar, Dinesh Kumar, Zuber Saiyed, Komal Patel, Labdhi Pandya, Snehal Bagatharia, Pranay Shah, Kamlesh J Upadhyay, Nirav Mungalpara, Priti Pandita, R D Dixit, A M Kadri, Harsh Bakshi, Chaitanya Joshi, Madhvi Joshi                                                                                                      |
| EPI_ISL_469046                                                                                                                                                                                                                                                                                                                                                                                                                                                                                                                                                                                                                                                                                                                                                                                                                                                                                                                                                                                                                                                                                                                                                                                                                                                                                                                                                                                                                                                                                                                                                                                                                                                                                                                                                                                                                                                                                                                                                                                                                                                                                                                                                                                                                                                                                                                                                                                                                                                                                                                                                                                                                                                                                                                                                                                                                                                                                                                                                                                 | Dr. N. D. Desai Medical College & Hospital                                                                     | Gujarat Biotechnology Research Centre                                                  | Tejas Shah, Ankit Hinsu, Pritesh Sabara, Apurvasinh Puvar, Janvi Ravai, Zarna Patel, Monika Gandhi, Pinal Trivedi, Maharshi Pandya, Nidhi Patel, Nitin Savaliya, Raghawendra Kumar, Dinesh Kumar, Zuber Saiyed, Komal Patel, Labdhi Pandya, Snehal Bagatharia, J G Buch, Jigar Gusani, Supreet Prabhu, Pooja P Doshi, R D Dixit, A M Kadri, Harsh Bakshi, Chaitanya Joshi, Madhvi Joshi                                                                                                                 |
| EPI_ISL_481514, EPI_ISL_481516, EPI_ISL_481517, EPI_ISL_481518, EPI_ISL_481519, EPI_ISL_481520, EPI_ISL_481521, EPI_ISL_481522, EPI_ISL_481523, EPI_ISL_481525, EPI_ISL_481526, EPI_ISL_481528, EPI_ISL_481529, EPI_ISL_481533, EPI_ISL_481534, EPI_ISL_481535, EPI_ISL_481536, EPI_ISL_481537, EPI_ISL_481538, EPI_ISL_481541, EPI_ISL_481542, EPI_ISL_481543, EPI_ISL_481545, EPI_ISL_481548, EPI_ISL_481550, EPI_ISL_481551, EPI_ISL_481552, EPI_ISL_481553, EPI_ISL_481554, EPI_ISL_481555, EPI_ISL_481556, EPI_ISL_481558, EPI_ISL_481560, EPI_ISL_481563, EPI_ISL_481564, EPI_ISL_481566, EPI_ISL_481567, EPI_ISL_481569, EPI_ISL_481570, EPI_ISL_481572, EPI_ISL_481573, EPI_ISL_481574, EPI_ISL_481576, EPI_ISL_481577, EPI_ISL_481578, EPI_ISL_481579, EPI_ISL_481580, EPI_ISL_481581, EPI_ISL_481582, EPI_ISL_481584, EPI_ISL_481585, EPI_ISL_481586, EPI_ISL_481587, EPI_ISL_481588, EPI_ISL_481589, EPI_ISL_481590, EPI_ISL_481591, EPI_ISL_481592, EPI_ISL_481594, EPI_ISL_481595, EPI_ISL_481596, EPI_ISL_481597, EPI_ISL_481598, EPI_ISL_481600, EPI_ISL_481602, EPI_ISL_481603, EPI_ISL_481604, EPI_ISL_481605, EPI_ISL_481606, EPI_ISL_481607, EPI_ISL_481608, EPI_ISL_481609, EPI_ISL_481610, EPI_ISL_481611, EPI_ISL_481612, EPI_ISL_481613, EPI_ISL_481614, EPI_ISL_481615, EPI_ISL_481616, EPI_ISL_481617, EPI_ISL_481618, EPI_ISL_481619, EPI_ISL_481620, EPI_ISL_481621, EPI_ISL_481623, EPI_ISL_481624, EPI_ISL_481625, EPI_ISL_481626, EPI_ISL_481627, EPI_ISL_481628, EPI_ISL_481630, EPI_ISL_481631, EPI_ISL_481634, EPI_ISL_481635, EPI_ISL_481636, EPI_ISL_481637, EPI_ISL_481638, EPI_ISL_481640, EPI_ISL_481641, EPI_ISL_481643, EPI_ISL_481644, EPI_ISL_481645, EPI_ISL_481646, EPI_ISL_481647, EPI_ISL_481651, EPI_ISL_481652, EPI_ISL_481653, EPI_ISL_481654, EPI_ISL_481655, EPI_ISL_481656, EPI_ISL_481657, EPI_ISL_481658, EPI_ISL_481659, EPI_ISL_481660, EPI_ISL_481661, EPI_ISL_481662, EPI_ISL_481663, EPI_ISL_481664, EPI_ISL_481665, EPI_ISL_481666, EPI_ISL_481667, EPI_ISL_481668, EPI_ISL_481669, EPI_ISL_481670, EPI_ISL_481671, EPI_ISL_481672, EPI_ISL_481673, EPI_ISL_481674, EPI_ISL_481675, EPI_ISL_481676, EPI_ISL_481677, EPI_ISL_481680, EPI_ISL_481681, EPI_ISL_481683, EPI_ISL_481685, EPI_ISL_481686, EPI_ISL_481687, EPI_ISL_481688, EPI_ISL_481689, EPI_ISL_481690, EPI_ISL_481691, EPI_ISL_481692, EPI_ISL_481693, EPI_ISL_481695, EPI_ISL_481696, EPI_ISL_481698, EPI_ISL_481699, EPI_ISL_481701, EPI_ISL_481702, EPI_ISL_481703, EPI_ISL_481705, EPI_ISL_481706, EPI_ISL_481707, EPI_ISL_481708, EPI_ISL_481709, EPI_ISL_481710, EPI_ISL_481711, EPI_ISL_481712, EPI_ISL_481713, EPI_ISL_481715, EPI_ISL_481716, EPI_ISL_481717, EPI_ISL_481718, EPI_ISL_481719, EPI_ISL_481721, EPI_ISL_481722, EPI_ISL_481724, EPI_ISL_481726, EPI_ISL_481728, EPI_ISL_481729, EPI_ISL_481731, EPI_ISL_481732, EPI_ISL_481733, EPI_ISL_481734, EPI_ISL_481735, EPI_ISL_481736, EPI_ISL_481737, EPI_ISL_481738, EPI_ISL_481739, EPI_ISL_481740 | Department of Virology and Immunology, University of Helsinki and Helsinki University Hospital, Huslab Finland | Department of Virology, Faculty of Medicine, University of Helsinki, Helsinki, Finland | Teemu Smura, Hannimari Kallio-Kokko, Jenni Virtanen, Maija Suvanto, Sari Hannula, Harri Kangas, Pekka Ellonen, Olli Vapalahti                                                                                                                                                                                                                                                                                                                                                                           |
| see above                                                                                                                                                                                                                                                                                                                                                                                                                                                                                                                                                                                                                                                                                                                                                                                                                                                                                                                                                                                                                                                                                                                                                                                                                                                                                                                                                                                                                                                                                                                                                                                                                                                                                                                                                                                                                                                                                                                                                                                                                                                                                                                                                                                                                                                                                                                                                                                                                                                                                                                                                                                                                                                                                                                                                                                                                                                                                                                                                                                      | Department of Virology and Immunology, University of Helsinki and Helsinki University Hospital, Huslab Finland | Department of Virology, Faculty of Medicine, University of Helsinki, Helsinki, Finland | Teemu Smura, Hannimari Kallio-Kokko, Jenni Virtanen, Maija Suvanto, Sari Hannula, Harri Kangas, Pekka Ellonen, Olli Vapalahti                                                                                                                                                                                                                                                                                                                                                                           |
| EPI_ISL_510533, EPI_ISL_510534                                                                                                                                                                                                                                                                                                                                                                                                                                                                                                                                                                                                                                                                                                                                                                                                                                                                                                                                                                                                                                                                                                                                                                                                                                                                                                                                                                                                                                                                                                                                                                                                                                                                                                                                                                                                                                                                                                                                                                                                                                                                                                                                                                                                                                                                                                                                                                                                                                                                                                                                                                                                                                                                                                                                                                                                                                                                                                                                                                 | Faculty of Medicine, Bursa Uludag University                                                                   | Bursa Uludag University                                                                | Temel, S.G., Saglik, I., Özemri Sa, ., Alemdar, A.                                                                                                                                                                                                                                                                                                                                                                                                                                                      |
| EPI_ISL_541752, EPI_ISL_541754, EPI_ISL_541755, EPI_ISL_541757, EPI_ISL_541758, EPI_ISL_541759, EPI_ISL_541760, EPI_ISL_541761, EPI_ISL_541762, EPI_ISL_541763, EPI_ISL_541764, EPI_ISL_541765, EPI_ISL_541766, EPI_ISL_541768, EPI_ISL_541769, EPI_ISL_541770, EPI_ISL_541771, EPI_ISL_541772, EPI_ISL_541775, EPI_ISL_541776, EPI_ISL_541777, EPI_ISL_541778, EPI_ISL_541779, EPI_ISL_541780, EPI_ISL_541781, EPI_ISL_541782, EPI_ISL_541783                                                                                                                                                                                                                                                                                                                                                                                                                                                                                                                                                                                                                                                                                                                                                                                                                                                                                                                                                                                                                                                                                                                                                                                                                                                                                                                                                                                                                                                                                                                                                                                                                                                                                                                                                                                                                                                                                                                                                                                                                                                                                                                                                                                                                                                                                                                                                                                                                                                                                                                                                 | Department of Virology and Immunology, University of Helsinki and Helsinki University Hospital, Huslab Finland | Department of Virology, Faculty of Medicine, University of Helsinki, Helsinki, Finland | Teemu Smura, Hannimari Kallio-Kokko, Jenni Virtanen, Maija Suvanto, Sari Hannula, Harri Kangas, Pekka Ellonen, Olli Vapalahti                                                                                                                                                                                                                                                                                                                                                                           |
| see above                                                                                                                                                                                                                                                                                                                                                                                                                                                                                                                                                                                                                                                                                                                                                                                                                                                                                                                                                                                                                                                                                                                                                                                                                                                                                                                                                                                                                                                                                                                                                                                                                                                                                                                                                                                                                                                                                                                                                                                                                                                                                                                                                                                                                                                                                                                                                                                                                                                                                                                                                                                                                                                                                                                                                                                                                                                                                                                                                                                      | Barts Health NHS Trust                                                                                         | Wellcome Sanger Institute for the COVID-19 Genomics UK (COG-UK) consortium             | Teresa Cutino-Moguel, Mark Hopkins, Beatrix Kele, David Harrington and Alex Alderton, Roberto Amato, Sonia Goncalves, Ewan Harrison, David K. Jackson, Ian Johnston, Dominic Kwiatkowski, Cordelia Langford, John Sillitoe on behalf of the Wellcome Sanger Institute COVID-19 Surveillance Team                                                                                                                                                                                                        |
| EPI_ISL_549821                                                                                                                                                                                                                                                                                                                                                                                                                                                                                                                                                                                                                                                                                                                                                                                                                                                                                                                                                                                                                                                                                                                                                                                                                                                                                                                                                                                                                                                                                                                                                                                                                                                                                                                                                                                                                                                                                                                                                                                                                                                                                                                                                                                                                                                                                                                                                                                                                                                                                                                                                                                                                                                                                                                                                                                                                                                                                                                                                                                 | Lighthouse Lab in Milton Keynes                                                                                | Wellcome Sanger Institute for the COVID-19 Genomics UK (COG-UK) consortium             | The Lighthouse Lab in Alderley Park and Alex Alderton, Roberto Amato, Sonia Goncalves, Ewan Harrison, David K. Jackson, Ian Johnston, Dominic Kwiatkowski, Cordelia Langford, John Sillitoe on behalf of the Wellcome Sanger Institute COVID-19 Surveillance Team                                                                                                                                                                                                                                       |
| EPI_ISL_549842, EPI_ISL_549843, EPI_ISL_549847, EPI_ISL_549849, EPI_ISL_549862                                                                                                                                                                                                                                                                                                                                                                                                                                                                                                                                                                                                                                                                                                                                                                                                                                                                                                                                                                                                                                                                                                                                                                                                                                                                                                                                                                                                                                                                                                                                                                                                                                                                                                                                                                                                                                                                                                                                                                                                                                                                                                                                                                                                                                                                                                                                                                                                                                                                                                                                                                                                                                                                                                                                                                                                                                                                                                                 | Lighthouse Lab in Milton Keynes                                                                                | Wellcome Sanger Institute for the COVID-19 Genomics UK (COG-UK) consortium             | The Lighthouse Lab in Milton Keynes and Alex Alderton, Roberto Amato, Sonia Goncalves, Ewan Harrison, David K. Jackson, Ian Johnston, Dominic Kwiatkowski, Cordelia Langford, John Sillitoe on behalf of the Wellcome Sanger Institute COVID-19 Surveillance Team ( <a href="http://www.sanger.ac.uk/covid-team">http://www.sanger.ac.uk/covid-team</a> )                                                                                                                                               |
| EPI_ISL_549863                                                                                                                                                                                                                                                                                                                                                                                                                                                                                                                                                                                                                                                                                                                                                                                                                                                                                                                                                                                                                                                                                                                                                                                                                                                                                                                                                                                                                                                                                                                                                                                                                                                                                                                                                                                                                                                                                                                                                                                                                                                                                                                                                                                                                                                                                                                                                                                                                                                                                                                                                                                                                                                                                                                                                                                                                                                                                                                                                                                 | Lighthouse Lab in Milton Keynes                                                                                | Wellcome Sanger Institute for the COVID-19 Genomics UK (COG-UK) consortium             | The Lighthouse Lab in Alderley Park and Alex Alderton, Roberto Amato, Sonia Goncalves, Ewan Harrison, David K. Jackson, Ian Johnston, Dominic Kwiatkowski, Cordelia Langford, John Sillitoe on behalf of the Wellcome Sanger Institute COVID-19 Surveillance Team                                                                                                                                                                                                                                       |
| EPI_ISL_549867, EPI_ISL_549869, EPI_ISL_549870, EPI_ISL_549874, EPI_ISL_549891, EPI_ISL_549912,                                                                                                                                                                                                                                                                                                                                                                                                                                                                                                                                                                                                                                                                                                                                                                                                                                                                                                                                                                                                                                                                                                                                                                                                                                                                                                                                                                                                                                                                                                                                                                                                                                                                                                                                                                                                                                                                                                                                                                                                                                                                                                                                                                                                                                                                                                                                                                                                                                                                                                                                                                                                                                                                                                                                                                                                                                                                                                | Lighthouse Lab in Milton Keynes                                                                                | Wellcome Sanger Institute for the COVID-19 Genomics UK (COG-UK) consortium             | The Lighthouse Lab in Milton Keynes and Alex Alderton, Roberto Amato, Sonia Goncalves, Ewan Harrison, David K. Jackson, Ian Johnston, Dominic Kwiatkowski, Cordelia Langford, John Sillitoe on behalf of the Wellcome Sanger Institute COVID-19 Surveillance Team ( <a href="http://www.sanger.ac.uk/covid-team">http://www.sanger.ac.uk/covid-team</a> )                                                                                                                                               |





























































|                                                                                                                                                                                                |                                 |                                                                            |                                                                                                                                                                                                                                                                                                                                                           |
|------------------------------------------------------------------------------------------------------------------------------------------------------------------------------------------------|---------------------------------|----------------------------------------------------------------------------|-----------------------------------------------------------------------------------------------------------------------------------------------------------------------------------------------------------------------------------------------------------------------------------------------------------------------------------------------------------|
| EPI_ISL_553851, EPI_ISL_553852, EPI_ISL_553853, EPI_ISL_553854, EPI_ISL_553855, EPI_ISL_553856                                                                                                 | Lighthouse Lab in Alderley Park | Wellcome Sanger Institute for the COVID-19 Genomics UK (COG-UK) consortium | The Lighthouse Lab in Alderley Park and Alex Alderton, Roberto Amato, Sonia Goncalves, Ewan Harrison, David K. Jackson, Ian Johnston, Dominic Kwiatkowski, Cordelia Langford, John Sillitoe on behalf of the Wellcome Sanger Institute COVID-19 Surveillance Team                                                                                         |
| EPI_ISL_553857, EPI_ISL_553858, EPI_ISL_553859, EPI_ISL_553860, EPI_ISL_553861, EPI_ISL_553862, EPI_ISL_553863                                                                                 | Lighthouse Lab in Alderley Park | Wellcome Sanger Institute for the COVID-19 Genomics UK (COG-UK) consortium | The Lighthouse Lab in Alderley Park and Alex Alderton, Roberto Amato, Sonia Goncalves, Ewan Harrison, David K. Jackson, Ian Johnston, Dominic Kwiatkowski, Cordelia Langford, John Sillitoe on behalf of the Wellcome Sanger Institute COVID-19 Surveillance Team ( <a href="http://www.sanger.ac.uk/covid-team">http://www.sanger.ac.uk/covid-team</a> ) |
| EPI_ISL_553864, EPI_ISL_553865, EPI_ISL_553866                                                                                                                                                 | Lighthouse Lab in Alderley Park | Wellcome Sanger Institute for the COVID-19 Genomics UK (COG-UK) consortium | The Lighthouse Lab in Alderley Park and Alex Alderton, Roberto Amato, Sonia Goncalves, Ewan Harrison, David K. Jackson, Ian Johnston, Dominic Kwiatkowski, Cordelia Langford, John Sillitoe on behalf of the Wellcome Sanger Institute COVID-19 Surveillance Team                                                                                         |
| EPI_ISL_553867, EPI_ISL_553868, EPI_ISL_553869, EPI_ISL_553870                                                                                                                                 | Lighthouse Lab in Alderley Park | Wellcome Sanger Institute for the COVID-19 Genomics UK (COG-UK) Consortium | The Lighthouse Lab in Alderley Park and Alex Alderton, Roberto Amato, Sonia Goncalves, Ewan Harrison, David K. Jackson, Ian Johnston, Dominic Kwiatkowski, Cordelia Langford, John Sillitoe on behalf of the Wellcome Sanger Institute COVID-19 Surveillance Team                                                                                         |
| EPI_ISL_553872, EPI_ISL_553873, EPI_ISL_553874, EPI_ISL_553875                                                                                                                                 | Lighthouse Lab in Alderley Park | Wellcome Sanger Institute for the COVID-19 Genomics UK (COG-UK) consortium | The Lighthouse Lab in Alderley Park and Alex Alderton, Roberto Amato, Sonia Goncalves, Ewan Harrison, David K. Jackson, Ian Johnston, Dominic Kwiatkowski, Cordelia Langford, John Sillitoe on behalf of the Wellcome Sanger Institute COVID-19 Surveillance Team ( <a href="http://www.sanger.ac.uk/covid-team">http://www.sanger.ac.uk/covid-team</a> ) |
| EPI_ISL_553876, EPI_ISL_553877, EPI_ISL_553878, EPI_ISL_553881, EPI_ISL_553882, EPI_ISL_553883, EPI_ISL_553884, EPI_ISL_553886, EPI_ISL_553887                                                 | Lighthouse Lab in Alderley Park | Wellcome Sanger Institute for the COVID-19 Genomics UK (COG-UK) consortium | The Lighthouse Lab in Alderley Park and Alex Alderton, Roberto Amato, Sonia Goncalves, Ewan Harrison, David K. Jackson, Ian Johnston, Dominic Kwiatkowski, Cordelia Langford, John Sillitoe on behalf of the Wellcome Sanger Institute COVID-19 Surveillance Team                                                                                         |
| EPI_ISL_553888, EPI_ISL_553889, EPI_ISL_553890                                                                                                                                                 | Lighthouse Lab in Alderley Park | Wellcome Sanger Institute for the COVID-19 Genomics UK (COG-UK) consortium | The Lighthouse Lab in Alderley Park and Alex Alderton, Roberto Amato, Sonia Goncalves, Ewan Harrison, David K. Jackson, Ian Johnston, Dominic Kwiatkowski, Cordelia Langford, John Sillitoe on behalf of the Wellcome Sanger Institute COVID-19 Surveillance Team                                                                                         |
| EPI_ISL_553891, EPI_ISL_553892, EPI_ISL_553894, EPI_ISL_553895, EPI_ISL_553898, EPI_ISL_553899, EPI_ISL_553900, EPI_ISL_553901, EPI_ISL_553902                                                 | Lighthouse Lab in Alderley Park | Wellcome Sanger Institute for the COVID-19 Genomics UK (COG-UK) consortium | The Lighthouse Lab in Alderley Park and Alex Alderton, Roberto Amato, Sonia Goncalves, Ewan Harrison, David K. Jackson, Ian Johnston, Dominic Kwiatkowski, Cordelia Langford, John Sillitoe on behalf of the Wellcome Sanger Institute COVID-19 Surveillance Team                                                                                         |
| EPI_ISL_553903, EPI_ISL_553904, EPI_ISL_553906, EPI_ISL_553908, EPI_ISL_553909, EPI_ISL_553910, EPI_ISL_553911, EPI_ISL_553912, EPI_ISL_553913, EPI_ISL_553914, EPI_ISL_553915, EPI_ISL_553916 | Lighthouse Lab in Alderley Park | Wellcome Sanger Institute for the COVID-19 Genomics UK (COG-UK) consortium | The Lighthouse Lab in Alderley Park and Alex Alderton, Roberto Amato, Sonia Goncalves, Ewan Harrison, David K. Jackson, Ian Johnston, Dominic Kwiatkowski, Cordelia Langford, John Sillitoe on behalf of the Wellcome Sanger Institute COVID-19 Surveillance Team                                                                                         |
| see above, EPI_ISL_553917, EPI_ISL_553918, EPI_ISL_553919, EPI_ISL_553920, EPI_ISL_553921, EPI_ISL_553922, EPI_ISL_553923, EPI_ISL_553924, EPI_ISL_553925, EPI_ISL_553926, EPI_ISL_553927      | Lighthouse Lab in Alderley Park | Wellcome Sanger Institute for the COVID-19 Genomics UK (COG-UK) consortium | The Lighthouse Lab in Alderley Park and Alex Alderton, Roberto Amato, Sonia Goncalves, Ewan Harrison, David K. Jackson, Ian Johnston, Dominic Kwiatkowski, Cordelia Langford, John Sillitoe on behalf of the Wellcome Sanger Institute COVID-19 Surveillance Team                                                                                         |































































































|                                                                                                                                                                                                                                                                                                                                                                                                                                                                                                                                                                                                                                                                                                                                                                                                                                                                                                                                                                                                                | (COG-UK) consortium             | Kwiatkowski, Cordelia Langford, John Sillitoe on behalf of the Wellcome Sanger Institute COVID-19 Surveillance Team<br>( <a href="http://www.sanger.ac.uk/covid-team">http://www.sanger.ac.uk/covid-team</a> ) |
|----------------------------------------------------------------------------------------------------------------------------------------------------------------------------------------------------------------------------------------------------------------------------------------------------------------------------------------------------------------------------------------------------------------------------------------------------------------------------------------------------------------------------------------------------------------------------------------------------------------------------------------------------------------------------------------------------------------------------------------------------------------------------------------------------------------------------------------------------------------------------------------------------------------------------------------------------------------------------------------------------------------|---------------------------------|----------------------------------------------------------------------------------------------------------------------------------------------------------------------------------------------------------------|
| EPI_ISL_559297, EPI_ISL_559298, EPI_ISL_559299, EPI_ISL_559301, EPI_ISL_559302, EPI_ISL_559303, EPI_ISL_559304, EPI_ISL_559305, EPI_ISL_559306, EPI_ISL_559307, EPI_ISL_559308, EPI_ISL_559309, EPI_ISL_559310, EPI_ISL_559311, EPI_ISL_559313, EPI_ISL_559316, EPI_ISL_559317, EPI_ISL_559318, EPI_ISL_559321, EPI_ISL_559322, EPI_ISL_559323, EPI_ISL_559324, EPI_ISL_559325                                                                                                                                                                                                                                                                                                                                                                                                                                                                                                                                                                                                                                 | see above                       | Lighthouse Lab in Alderley Park                                                                                                                                                                                |
| EPI_ISL_559326                                                                                                                                                                                                                                                                                                                                                                                                                                                                                                                                                                                                                                                                                                                                                                                                                                                                                                                                                                                                 | Lighthouse Lab in Milton Keynes | Wellcome Sanger Institute for the COVID-19 Genomics UK (COG-UK) consortium                                                                                                                                     |
| EPI_ISL_559327, EPI_ISL_559328, EPI_ISL_559329, EPI_ISL_559330, EPI_ISL_559332, EPI_ISL_559333, EPI_ISL_559334, EPI_ISL_559336                                                                                                                                                                                                                                                                                                                                                                                                                                                                                                                                                                                                                                                                                                                                                                                                                                                                                 | Lighthouse Lab in Alderley Park | Wellcome Sanger Institute for the COVID-19 Genomics UK (COG-UK) consortium                                                                                                                                     |
| EPI_ISL_559337                                                                                                                                                                                                                                                                                                                                                                                                                                                                                                                                                                                                                                                                                                                                                                                                                                                                                                                                                                                                 | Lighthouse Lab in Alderley Park | Wellcome Sanger Institute for the COVID-19 Genomics UK (COG-UK) Consortium                                                                                                                                     |
| EPI_ISL_559338, EPI_ISL_559339, EPI_ISL_559340, EPI_ISL_559341, EPI_ISL_559342, EPI_ISL_559343, EPI_ISL_559344, EPI_ISL_559345, EPI_ISL_559346, EPI_ISL_559347, EPI_ISL_559348, EPI_ISL_559349, EPI_ISL_559350, EPI_ISL_559351                                                                                                                                                                                                                                                                                                                                                                                                                                                                                                                                                                                                                                                                                                                                                                                 | see above                       | Lighthouse Lab in Alderley Park                                                                                                                                                                                |
| EPI_ISL_559353                                                                                                                                                                                                                                                                                                                                                                                                                                                                                                                                                                                                                                                                                                                                                                                                                                                                                                                                                                                                 | Lighthouse Lab in Alderley Park | Wellcome Sanger Institute for the COVID-19 Genomics UK (COG-UK) Consortium                                                                                                                                     |
| EPI_ISL_559356, EPI_ISL_559357, EPI_ISL_559358, EPI_ISL_559359, EPI_ISL_559360, EPI_ISL_559361, EPI_ISL_559362, EPI_ISL_559363, EPI_ISL_559364, EPI_ISL_559365, EPI_ISL_559366, EPI_ISL_559367, EPI_ISL_559369, EPI_ISL_559370, EPI_ISL_559371, EPI_ISL_559372, EPI_ISL_559373, EPI_ISL_559374, EPI_ISL_559375, EPI_ISL_559376, EPI_ISL_559377, EPI_ISL_559378, EPI_ISL_559379, EPI_ISL_559380, EPI_ISL_559381, EPI_ISL_559382, EPI_ISL_559383, EPI_ISL_559384, EPI_ISL_559385, EPI_ISL_559386, EPI_ISL_559387, EPI_ISL_559388, EPI_ISL_559389, EPI_ISL_559390, EPI_ISL_559391, EPI_ISL_559392, EPI_ISL_559393, EPI_ISL_559394, EPI_ISL_559395, EPI_ISL_559396, EPI_ISL_559397, EPI_ISL_559398, EPI_ISL_559399, EPI_ISL_559400, EPI_ISL_559401, EPI_ISL_559402, EPI_ISL_559403, EPI_ISL_559404, EPI_ISL_559405, EPI_ISL_559406, EPI_ISL_559407, EPI_ISL_559408, EPI_ISL_559409, EPI_ISL_559410, EPI_ISL_559411, EPI_ISL_559412, EPI_ISL_559413, EPI_ISL_559414, EPI_ISL_559415, EPI_ISL_559416, EPI_ISL_559417 | see above                       | Lighthouse Lab in Alderley Park                                                                                                                                                                                |
| EPI_ISL_559418                                                                                                                                                                                                                                                                                                                                                                                                                                                                                                                                                                                                                                                                                                                                                                                                                                                                                                                                                                                                 | Lighthouse Lab in Alderley Park | Wellcome Sanger Institute for the COVID-19 Genomics UK (COG-UK) consortium                                                                                                                                     |
| EPI_ISL_559419, EPI_ISL_559420, EPI_ISL_559421, EPI_ISL_559422, EPI_ISL_559423, EPI_ISL_559424, EPI_ISL_559425, EPI_ISL_559426, EPI_ISL_559427, EPI_ISL_559428, EPI_ISL_559429, EPI_ISL_559430, EPI_ISL_559431, EPI_ISL_559432, EPI_ISL_559433, EPI_ISL_559434, EPI_ISL_559435, EPI_ISL_559436, EPI_ISL_559437, EPI_ISL_559438, EPI_ISL_559439, EPI_ISL_559440, EPI_ISL_559441, EPI_ISL_559442, EPI_ISL_559443, EPI_ISL_559444, EPI_ISL_559445, EPI_ISL_559446                                                                                                                                                                                                                                                                                                                                                                                                                                                                                                                                                 | see above                       | Lighthouse Lab in Alderley Park                                                                                                                                                                                |
| EPI_ISL_559447                                                                                                                                                                                                                                                                                                                                                                                                                                                                                                                                                                                                                                                                                                                                                                                                                                                                                                                                                                                                 | Lighthouse Lab in Alderley Park | Wellcome Sanger Institute for the COVID-19 Genomics UK (COG-UK) Consortium                                                                                                                                     |
| EPI_ISL_559448, EPI_ISL_559449, EPI_ISL_559450, EPI_ISL_559451, EPI_ISL_559452, EPI_ISL_559453, EPI_ISL_559454, EPI_ISL_559455, EPI_ISL_559456, EPI_ISL_559457, EPI_ISL_559458, EPI_ISL_559459, EPI_ISL_559460, EPI_ISL_559461, EPI_ISL_559462, EPI_ISL_559463, EPI_ISL_559464                                                                                                                                                                                                                                                                                                                                                                                                                                                                                                                                                                                                                                                                                                                                 | see above                       | Lighthouse Lab in Alderley Park                                                                                                                                                                                |
| EPI_ISL_559465                                                                                                                                                                                                                                                                                                                                                                                                                                                                                                                                                                                                                                                                                                                                                                                                                                                                                                                                                                                                 | Lighthouse Lab in Alderley Park | Wellcome Sanger Institute for the COVID-19 Genomics UK (COG-UK) consortium                                                                                                                                     |
| EPI_ISL_559466, EPI_ISL_559467, EPI_ISL_559468, EPI_ISL_559469, EPI_ISL_559470, EPI_ISL_559471, EPI_ISL_559472, EPI_ISL_559473, EPI_ISL_559474, EPI_ISL_559475, EPI_ISL_559476, EPI_ISL_559477, EPI_ISL_559478, EPI_ISL_559479, EPI_ISL_559480, EPI_ISL_559481, EPI_ISL_559482, EPI_ISL_559483, EPI_ISL_559484, EPI_ISL_559485, EPI_ISL_559486, EPI_ISL_559487, EPI_ISL_559488, EPI_ISL_559489, EPI_ISL_559490, EPI_ISL_559491, EPI_ISL_559492, EPI_ISL_559493                                                                                                                                                                                                                                                                                                                                                                                                                                                                                                                                                 | see above                       | Lighthouse Lab in Alderley Park                                                                                                                                                                                |
| EPI_ISL_559494                                                                                                                                                                                                                                                                                                                                                                                                                                                                                                                                                                                                                                                                                                                                                                                                                                                                                                                                                                                                 | Lighthouse Lab in Alderley Park | Wellcome Sanger Institute for the COVID-19 Genomics UK (COG-UK) consortium                                                                                                                                     |
| EPI_ISL_559495, EPI_ISL_559496, EPI_ISL_559497, EPI_ISL_559498, EPI_ISL_559499, EPI_ISL_559500, EPI_ISL_559501, EPI_ISL_559502, EPI_ISL_559503, EPI_ISL_559504, EPI_ISL_559505, EPI_ISL_559506, EPI_ISL_559507, EPI_ISL_559508, EPI_ISL_559509, EPI_ISL_559510, EPI_ISL_559511, EPI_ISL_559512, EPI_ISL_559513, EPI_ISL_559514, EPI_ISL_559515, EPI_ISL_559516, EPI_ISL_559517, EPI_ISL_559518, EPI_ISL_559519, EPI_ISL_559520, EPI_ISL_559521, EPI_ISL_559522, EPI_ISL_559523                                                                                                                                                                                                                                                                                                                                                                                                                                                                                                                                 | see above                       | Lighthouse Lab in Alderley Park                                                                                                                                                                                |
| EPI_ISL_559524                                                                                                                                                                                                                                                                                                                                                                                                                                                                                                                                                                                                                                                                                                                                                                                                                                                                                                                                                                                                 | Lighthouse Lab in Alderley Park | Wellcome Sanger Institute for the COVID-19 Genomics UK (COG-UK) consortium                                                                                                                                     |
| EPI_ISL_559525, EPI_ISL_559526, EPI_ISL_559527, EPI_ISL_559528, EPI_ISL_559529, EPI_ISL_559530, EPI_ISL_559531, EPI_ISL_559532, EPI_ISL_559533, EPI_ISL_559534, EPI_ISL_559535, EPI_ISL_559536, EPI_ISL_559537, EPI_ISL_559538, EPI_ISL_559539, EPI_ISL_559540, EPI_ISL_559541, EPI_ISL_559542, EPI_ISL_559543, EPI_ISL_559544                                                                                                                                                                                                                                                                                                                                                                                                                                                                                                                                                                                                                                                                                 | see above                       | Lighthouse Lab in Alderley Park                                                                                                                                                                                |
| EPI_ISL_559545                                                                                                                                                                                                                                                                                                                                                                                                                                                                                                                                                                                                                                                                                                                                                                                                                                                                                                                                                                                                 | Lighthouse Lab in Alderley Park | Wellcome Sanger Institute for the COVID-19 Genomics UK (COG-UK) consortium                                                                                                                                     |
| EPI_ISL_559546, EPI_ISL_559547                                                                                                                                                                                                                                                                                                                                                                                                                                                                                                                                                                                                                                                                                                                                                                                                                                                                                                                                                                                 | Lighthouse Lab in Alderley Park | Wellcome Sanger Institute for the COVID-19 Genomics UK (COG-UK) consortium                                                                                                                                     |
| EPI_ISL_559548                                                                                                                                                                                                                                                                                                                                                                                                                                                                                                                                                                                                                                                                                                                                                                                                                                                                                                                                                                                                 | Lighthouse Lab in Alderley Park | Wellcome Sanger Institute for the COVID-19 Genomics UK (COG-UK) consortium                                                                                                                                     |
| EPI_ISL_559549                                                                                                                                                                                                                                                                                                                                                                                                                                                                                                                                                                                                                                                                                                                                                                                                                                                                                                                                                                                                 | Lighthouse Lab in Alderley Park | Wellcome Sanger Institute for the COVID-19 Genomics UK (COG-UK) consortium                                                                                                                                     |
| EPI_ISL_559550, EPI_ISL_559551, EPI_ISL_559552                                                                                                                                                                                                                                                                                                                                                                                                                                                                                                                                                                                                                                                                                                                                                                                                                                                                                                                                                                 | Lighthouse Lab in Alderley Park | Wellcome Sanger Institute for the COVID-19 Genomics UK (COG-UK) consortium                                                                                                                                     |















EPI\_ISL\_862101, EPI\_ISL\_862102, EPI\_ISL\_862103, EPI\_ISL\_862105, EPI\_ISL\_862107, EPI\_ISL\_862108, EPI\_ISL\_862110, EPI\_ISL\_862111, EPI\_ISL\_862112, EPI\_ISL\_862113, EPI\_ISL\_862114, EPI\_ISL\_862115, EPI\_ISL\_862116, EPI\_ISL\_862119, EPI\_ISL\_862120

see above

Department of Virology and Immunology, University of  
Helsinki and Helsinki University Hospital, Huslab Finland

Department of Virology, Faculty of Medicine, University of  
Helsinki, Helsinki, Finland

Teemu Smura, Ravi Kant, Phuoc Truong, Hussein Alburkat, Hanna Liimatainen, Hannimari Kallio-Kokko, Jenni Virtanen, Maija Suvanto, Sari Hannula, Harri Kangas, Pekka Ellonen, Olli Vapalahti

EPI\_ISL\_863541, EPI\_ISL\_863551, EPI\_ISL\_863554, EPI\_ISL\_863558, EPI\_ISL\_863563, EPI\_ISL\_863570, EPI\_ISL\_863587, EPI\_ISL\_863592, EPI\_ISL\_863595, EPI\_ISL\_863598, EPI\_ISL\_863606, EPI\_ISL\_863612, EPI\_ISL\_863617, EPI\_ISL\_863630, EPI\_ISL\_863634, EPI\_ISL\_863638, EPI\_ISL\_863662, EPI\_ISL\_863686, EPI\_ISL\_863697, EPI\_ISL\_863705, EPI\_ISL\_863709, EPI\_ISL\_863728, EPI\_ISL\_863731, EPI\_ISL\_863742, EPI\_ISL\_863744, EPI\_ISL\_863747, EPI\_ISL\_863759, EPI\_ISL\_863760, EPI\_ISL\_863765, EPI\_ISL\_863769, EPI\_ISL\_863771, EPI\_ISL\_863774, EPI\_ISL\_863785, EPI\_ISL\_863787, EPI\_ISL\_863789, EPI\_ISL\_863807, EPI\_ISL\_863810, EPI\_ISL\_863813, EPI\_ISL\_863814, EPI\_ISL\_863815, EPI\_ISL\_863848, EPI\_ISL\_863852, EPI\_ISL\_863859, EPI\_ISL\_863912, EPI\_ISL\_863922, EPI\_ISL\_863969, EPI\_ISL\_864133, EPI\_ISL\_864165, EPI\_ISL\_864173, EPI\_ISL\_864193, EPI\_ISL\_864205, EPI\_ISL\_864211, EPI\_ISL\_864229, EPI\_ISL\_864235, EPI\_ISL\_864237, EPI\_ISL\_864241, EPI\_ISL\_864265, EPI\_ISL\_864266, EPI\_ISL\_864271, EPI\_ISL\_864273, EPI\_ISL\_864274, EPI\_ISL\_864291, EPI\_ISL\_864297, EPI\_ISL\_864301, EPI\_ISL\_864305, EPI\_ISL\_864307, EPI\_ISL\_864311, EPI\_ISL\_864317, EPI\_ISL\_864332, EPI\_ISL\_864342, EPI\_ISL\_864366, EPI\_ISL\_864372, EPI\_ISL\_864396, EPI\_ISL\_864406, EPI\_ISL\_864407, EPI\_ISL\_864408, EPI\_ISL\_864411, EPI\_ISL\_864412, EPI\_ISL\_864417, EPI\_ISL\_864431, EPI\_ISL\_864436, EPI\_ISL\_864441, EPI\_ISL\_864448, EPI\_ISL\_864451, EPI\_ISL\_864472, EPI\_ISL\_864474, EPI\_ISL\_864477, EPI\_ISL\_864485, EPI\_ISL\_864486, EPI\_ISL\_864489, EPI\_ISL\_864490, EPI\_ISL\_864496, EPI\_ISL\_864500, EPI\_ISL\_864502, EPI\_ISL\_864510, EPI\_ISL\_864511, EPI\_ISL\_864515, EPI\_ISL\_864523, EPI\_ISL\_864526, EPI\_ISL\_864527, EPI\_ISL\_864536, EPI\_ISL\_864537, EPI\_ISL\_864538, EPI\_ISL\_864541, EPI\_ISL\_873285, EPI\_ISL\_873301, EPI\_ISL\_873329, EPI\_ISL\_873366, EPI\_ISL\_873394, EPI\_ISL\_873396, EPI\_ISL\_873405, EPI\_ISL\_873410, EPI\_ISL\_873417, EPI\_ISL\_873420, EPI\_ISL\_873440, EPI\_ISL\_873470, EPI\_ISL\_873496, EPI\_ISL\_873502, EPI\_ISL\_873508, EPI\_ISL\_873522, EPI\_ISL\_873533, EPI\_ISL\_873536, EPI\_ISL\_873542, EPI\_ISL\_873545, EPI\_ISL\_873546, EPI\_ISL\_873549, EPI\_ISL\_873550, EPI\_ISL\_873559, EPI\_ISL\_873565, EPI\_ISL\_873570, EPI\_ISL\_873581, EPI\_ISL\_873584, EPI\_ISL\_873585, EPI\_ISL\_873588, EPI\_ISL\_873589, EPI\_ISL\_873591, EPI\_ISL\_873593, EPI\_ISL\_873597, EPI\_ISL\_873607, EPI\_ISL\_873619, EPI\_ISL\_873628, EPI\_ISL\_873654, EPI\_ISL\_873657, EPI\_ISL\_873660, EPI\_ISL\_873684, EPI\_ISL\_873744, EPI\_ISL\_873769, EPI\_ISL\_873786, EPI\_ISL\_873834, EPI\_ISL\_873848, EPI\_ISL\_873857, EPI\_ISL\_873875, EPI\_ISL\_873921, EPI\_ISL\_873923, EPI\_ISL\_873926, EPI\_ISL\_873928, EPI\_ISL\_874990, EPI\_ISL\_874991, EPI\_ISL\_874992, EPI\_ISL\_874997, EPI\_ISL\_875006, EPI\_ISL\_875017, EPI\_ISL\_875019, EPI\_ISL\_875024, EPI\_ISL\_875029, EPI\_ISL\_875037, EPI\_ISL\_875043, EPI\_ISL\_875046, EPI\_ISL\_875060, EPI\_ISL\_875067, EPI\_ISL\_875080, EPI\_ISL\_875084, EPI\_ISL\_875094, EPI\_ISL\_875098, EPI\_ISL\_875110, EPI\_ISL\_875116, EPI\_ISL\_875123, EPI\_ISL\_875128, EPI\_ISL\_875129, EPI\_ISL\_875132, EPI\_ISL\_875133, EPI\_ISL\_875135, EPI\_ISL\_875154, EPI\_ISL\_875165, EPI\_ISL\_875167, EPI\_ISL\_875181, EPI\_ISL\_875186, EPI\_ISL\_875190, EPI\_ISL\_875192, EPI\_ISL\_875195, EPI\_ISL\_875198, EPI\_ISL\_875201, EPI\_ISL\_875208, EPI\_ISL\_875222, EPI\_ISL\_875226, EPI\_ISL\_875234, EPI\_ISL\_875237, EPI\_ISL\_875255, EPI\_ISL\_875257, EPI\_ISL\_875260, EPI\_ISL\_875271, EPI\_ISL\_875284, EPI\_ISL\_875289, EPI\_ISL\_875317, EPI\_ISL\_875319, EPI\_ISL\_875322, EPI\_ISL\_875337, EPI\_ISL\_875339, EPI\_ISL\_875341, EPI\_ISL\_878769, EPI\_ISL\_878772, EPI\_ISL\_878778, EPI\_ISL\_878798, EPI\_ISL\_878824, EPI\_ISL\_878874, EPI\_ISL\_878896, EPI\_ISL\_878945, EPI\_ISL\_878960, EPI\_ISL\_878962, EPI\_ISL\_878990, EPI\_ISL\_879034, EPI\_ISL\_879038, EPI\_ISL\_879052, EPI\_ISL\_879092, EPI\_ISL\_879096, EPI\_ISL\_879395, EPI\_ISL\_879404, EPI\_ISL\_879464, EPI\_ISL\_879477, EPI\_ISL\_879495, EPI\_ISL\_879548, EPI\_ISL\_879549, EPI\_ISL\_879553, EPI\_ISL\_879561, EPI\_ISL\_879576, EPI\_ISL\_879586, EPI\_ISL\_879597, EPI\_ISL\_879611, EPI\_ISL\_879623, EPI\_ISL\_879653, EPI\_ISL\_879656, EPI\_ISL\_879710, EPI\_ISL\_880592, EPI\_ISL\_880596, EPI\_ISL\_880608, EPI\_ISL\_880612, EPI\_ISL\_880619, EPI\_ISL\_880629, EPI\_ISL\_880631, EPI\_ISL\_880635, EPI\_ISL\_880638, EPI\_ISL\_880647, EPI\_ISL\_880650, EPI\_ISL\_880651, EPI\_ISL\_880662, EPI\_ISL\_880671, EPI\_ISL\_880675, EPI\_ISL\_880699, EPI\_ISL\_880705, EPI\_ISL\_880715, EPI\_ISL\_880717, EPI\_ISL\_880724, EPI\_ISL\_880732, EPI\_ISL\_880739, EPI\_ISL\_880743, EPI\_ISL\_880751, EPI\_ISL\_880761, EPI\_ISL\_880766, EPI\_ISL\_880769, EPI\_ISL\_880789, EPI\_ISL\_880792, EPI\_ISL\_880795, EPI\_ISL\_880796, EPI\_ISL\_880805, EPI\_ISL\_880806, EPI\_ISL\_880812, EPI\_ISL\_880814, EPI\_ISL\_880817, EPI\_ISL\_880818, EPI\_ISL\_880819, EPI\_ISL\_880820, EPI\_ISL\_880834, EPI\_ISL\_880837, EPI\_ISL\_880843, EPI\_ISL\_880846, EPI\_ISL\_880847, EPI\_ISL\_880848, EPI\_ISL\_880850, EPI\_ISL\_880852, EPI\_ISL\_880854, EPI\_ISL\_880855, EPI\_ISL\_880865, EPI\_ISL\_880867, EPI\_ISL\_880870, EPI\_ISL\_880874, EPI\_ISL\_880879, EPI\_ISL\_880886, EPI\_ISL\_880887, EPI\_ISL\_880895, EPI\_ISL\_880898, EPI\_ISL\_880899, EPI\_ISL\_880902, EPI\_ISL\_880915, EPI\_ISL\_880916, EPI\_ISL\_880922, EPI\_ISL\_880923, EPI\_ISL\_880929, EPI\_ISL\_881621, EPI\_ISL\_882611

see above

Lighthouse Lab in Milton Keynes

Wellcome Sanger Institute for the COVID-19 Genomics UK  
(COG-UK) Consortium

The Lighthouse Lab in Milton Keynes and Alex Alderton, Roberto Amato, Sonia Goncalves, Ewan Harrison, David K. Jackson, Ian Johnston, Dominic Kwiatkowski, Cordelia Langford, John Sillitoe on behalf of the Wellcome Sanger Institute COVID-19 Surveillance Team































We gratefully acknowledge the following Authors from the Originating laboratories responsible for obtaining the specimens, as well as the Submitting laboratories where the genome data were generated and shared via GISAID, on which this research is based.

All Submitters of data may be contacted directly via [www.gisaid.org](http://www.gisaid.org)

Authors are sorted alphabetically.

| Accession ID                                                                                                                                                                                                                                                                                                                                                                                                                                                                                                                                                                                                                                                                                                                                                                                                                                                                                                                                                                                                                                   | Originating Laboratory                                                                                                                                                                            | Submitting Laboratory                                                                                                                                                                                                                                                        | Authors                                                                                                                                                                                                                                                                                                                                                                                                                                                                                                                                            |
|------------------------------------------------------------------------------------------------------------------------------------------------------------------------------------------------------------------------------------------------------------------------------------------------------------------------------------------------------------------------------------------------------------------------------------------------------------------------------------------------------------------------------------------------------------------------------------------------------------------------------------------------------------------------------------------------------------------------------------------------------------------------------------------------------------------------------------------------------------------------------------------------------------------------------------------------------------------------------------------------------------------------------------------------|---------------------------------------------------------------------------------------------------------------------------------------------------------------------------------------------------|------------------------------------------------------------------------------------------------------------------------------------------------------------------------------------------------------------------------------------------------------------------------------|----------------------------------------------------------------------------------------------------------------------------------------------------------------------------------------------------------------------------------------------------------------------------------------------------------------------------------------------------------------------------------------------------------------------------------------------------------------------------------------------------------------------------------------------------|
| EPI_ISL_414518                                                                                                                                                                                                                                                                                                                                                                                                                                                                                                                                                                                                                                                                                                                                                                                                                                                                                                                                                                                                                                 | Tai Lung Veterinary Laboratory, Agriculture, Fisheries and Conservation Department                                                                                                                | School of Public Health, The University of Hong Kong                                                                                                                                                                                                                         | Thomas S.H. Chung, Christopher J Brackman, Daniel K.W. Chu, Leo L.M. Poon, Malik Peiris                                                                                                                                                                                                                                                                                                                                                                                                                                                            |
| EPI_ISL_416733                                                                                                                                                                                                                                                                                                                                                                                                                                                                                                                                                                                                                                                                                                                                                                                                                                                                                                                                                                                                                                 | Virology Department, Sheffield Teaching Hospitals NHS Foundation Trust                                                                                                                            | Department of Infection, Immunity and Cardiovascular Disease, The Florey Institute, The Medical School, University of Sheffield                                                                                                                                              | Thushan de Silva, Matthew Parker, Adri Angyal, Rebecca Brown, Matthew Wyles, Mehmet Yavuz, Mohammad Raza, Cariad Evans                                                                                                                                                                                                                                                                                                                                                                                                                             |
| EPI_ISL_418299, EPI_ISL_418318                                                                                                                                                                                                                                                                                                                                                                                                                                                                                                                                                                                                                                                                                                                                                                                                                                                                                                                                                                                                                 | Virology Department, Sheffield Teaching Hospitals NHS Foundation Trust                                                                                                                            | Department of Infection, Immunity and Cardiovascular Disease, The Florey Institute, The Medical School, University of Sheffield                                                                                                                                              | Thushan de Silva, Matthew Parker, Adri Angyal, Rebecca Brown, Rachel Tucker, Paul Parsons, Danielle Groves, Alex Keeley, Dave Partridge, Matthew Wyles, Benjamin Lindsey, Mehmet Yavuz, Mohammad Raza, Cariad Evans                                                                                                                                                                                                                                                                                                                                |
| EPI_ISL_420164, EPI_ISL_420176, EPI_ISL_420177, EPI_ISL_420181, EPI_ISL_420188, EPI_ISL_420202, EPI_ISL_420210, EPI_ISL_420223, EPI_ISL_420224, EPI_ISL_420232, EPI_ISL_420240, EPI_ISL_420247, EPI_ISL_420259, EPI_ISL_420265, EPI_ISL_420266, EPI_ISL_420279                                                                                                                                                                                                                                                                                                                                                                                                                                                                                                                                                                                                                                                                                                                                                                                 | see above                                                                                                                                                                                         | Department of Infection, Immunity and Cardiovascular Disease, The Florey Institute, The Medical School, University of Sheffield                                                                                                                                              | Thushan de Silva, Matthew Parker, Adri Angyal, Rebecca Brown, Rachel Tucker, Paul Parsons, Luke Green, Danielle Groves, Alex Keeley, Dave Partridge, Matthew Wyles, Benjamin Lindsey, Mehmet Yavuz, Mohammad Raza, Cariad Evans                                                                                                                                                                                                                                                                                                                    |
| EPI_ISL_431117                                                                                                                                                                                                                                                                                                                                                                                                                                                                                                                                                                                                                                                                                                                                                                                                                                                                                                                                                                                                                                 | Department of Microbiology, Gandhi Medical College and Hospital, Secendrabad, Hyderabad, India                                                                                                    | Department of Microbiology, Gandhi Medical College and Hospital, Secendrabad, Hyderabad, India                                                                                                                                                                               | Thrilok Chander B, Muttineni Radhakrishna, Nagamani K, Raja Rao M, Kalyani Putty, Ravikumara P, Sunitha P, Pankaj Singh D, Anand Kumar K, Amit A. Upadhyay, Steven E. Bosinger, Rama Amara                                                                                                                                                                                                                                                                                                                                                         |
| EPI_ISL_432456, EPI_ISL_432464, EPI_ISL_432479, EPI_ISL_432482, EPI_ISL_432489, EPI_ISL_432490, EPI_ISL_432492, EPI_ISL_432517, EPI_ISL_432530, EPI_ISL_432537, EPI_ISL_432544, EPI_ISL_432550, EPI_ISL_432562, EPI_ISL_432570, EPI_ISL_432571, EPI_ISL_432587, EPI_ISL_432625, EPI_ISL_432628, EPI_ISL_432631, EPI_ISL_432632, EPI_ISL_432633, EPI_ISL_432644, EPI_ISL_432647, EPI_ISL_432655, EPI_ISL_432661, EPI_ISL_432663, EPI_ISL_432717, EPI_ISL_432718, EPI_ISL_432731, EPI_ISL_432744, EPI_ISL_432754, EPI_ISL_432755, EPI_ISL_432757, EPI_ISL_432768, EPI_ISL_432774, EPI_ISL_432779, EPI_ISL_432780, EPI_ISL_432788, EPI_ISL_432792, EPI_ISL_432798, EPI_ISL_432799, EPI_ISL_432802, EPI_ISL_432807, EPI_ISL_432812, EPI_ISL_432815, EPI_ISL_432817, EPI_ISL_432827, EPI_ISL_432829, EPI_ISL_432839, EPI_ISL_432846, EPI_ISL_432856, EPI_ISL_432863, EPI_ISL_432864                                                                                                                                                                 | COVID-19 Genomics UK (COG-UK) Consortium                                                                                                                                                          | Thushan de Silva, Matthew Parker, Adri Angyal, Rebecca Brown, Luke Green, Rachel Tucker, Paul Parsons, Danielle Groves, Alex Keeley, Dave Partridge, Matthew Wyles, Benjamin Lindsey, Mehmet Yavuz, Mohammad Raza, Cariad Evans                                              |                                                                                                                                                                                                                                                                                                                                                                                                                                                                                                                                                    |
| see above                                                                                                                                                                                                                                                                                                                                                                                                                                                                                                                                                                                                                                                                                                                                                                                                                                                                                                                                                                                                                                      | Virology Department, Sheffield Teaching Hospitals NHS Foundation Trust / Virology Department, Sheffield Teaching Hospitals NHS Foundation Trust                                                   | COVID-19 Genomics UK (COG-UK) Consortium                                                                                                                                                                                                                                     | Thushan de Silva, Matthew Parker, Adri Angyal, Rebecca Brown, Luke Green, Rachel Tucker, Paul Parsons, Danielle Groves, Alex Keeley, Dave Partridge, Matthew Wyles, Benjamin Lindsey, Mehmet Yavuz, Mohammad Raza, Cariad Evans                                                                                                                                                                                                                                                                                                                    |
| EPI_ISL_441903, EPI_ISL_441909, EPI_ISL_441911, EPI_ISL_441915, EPI_ISL_441918, EPI_ISL_441921, EPI_ISL_441922, EPI_ISL_441928, EPI_ISL_441941, EPI_ISL_441942, EPI_ISL_441947, EPI_ISL_441955, EPI_ISL_441959, EPI_ISL_441968, EPI_ISL_441969, EPI_ISL_441993, EPI_ISL_441997, EPI_ISL_442004, EPI_ISL_442005, EPI_ISL_442010, EPI_ISL_442011, EPI_ISL_442016, EPI_ISL_442017, EPI_ISL_442021, EPI_ISL_442345, EPI_ISL_442354, EPI_ISL_442355, EPI_ISL_442356, EPI_ISL_442361, EPI_ISL_442371, EPI_ISL_442383, EPI_ISL_442409, EPI_ISL_442412, EPI_ISL_442422, EPI_ISL_442429, EPI_ISL_442440, EPI_ISL_442442, EPI_ISL_442463, EPI_ISL_442482, EPI_ISL_442494, EPI_ISL_442499, EPI_ISL_442508, EPI_ISL_442511, EPI_ISL_442514, EPI_ISL_448832, EPI_ISL_448862, EPI_ISL_448869, EPI_ISL_448876, EPI_ISL_448895                                                                                                                                                                                                                                 | see above                                                                                                                                                                                         | Thushan de Silva, Matthew Parker, Nikki Smith, Adri Angyal, Rebecca Brown, Luke Green, Rachel Tucker, Paul Parsons, Danielle Groves, Katie Johnson, Laura Carrilero, Alex Keeley, Dave Partridge, Matthew Wyles, Benjamin Lindsey, Mehmet Yavuz, Mohammad Raza, Cariad Evans |                                                                                                                                                                                                                                                                                                                                                                                                                                                                                                                                                    |
| EPI_ISL_448902                                                                                                                                                                                                                                                                                                                                                                                                                                                                                                                                                                                                                                                                                                                                                                                                                                                                                                                                                                                                                                 | Virology Laboratory, Castle Hill Hospital, Hull University Teaching Hospitals NHS Trust/Department of Infection, Immunity and Cardiovascular Disease, The Medical School, University of Sheffield | COVID-19 Genomics UK (COG-UK) Consortium                                                                                                                                                                                                                                     | Thushan de Silva, Matthew Parker, Nikki Smith, Adri Angyal, Rebecca Brown, Luke Green, Rachel Tucker, Paul Parsons, Danielle Groves, Katie Johnson, Laura Carrilero, Alex Keeley, Dave Partridge, Matthew Wyles, Benjamin Lindsey, Mehmet Yavuz, Mohammad Raza, Cariad Evans                                                                                                                                                                                                                                                                       |
| EPI_ISL_453704, EPI_ISL_453718, EPI_ISL_453719, EPI_ISL_453722, EPI_ISL_453724, EPI_ISL_453730, EPI_ISL_453739, EPI_ISL_453764, EPI_ISL_453767, EPI_ISL_457595, EPI_ISL_457599, EPI_ISL_457601, EPI_ISL_457604, EPI_ISL_457605, EPI_ISL_457606, EPI_ISL_457607, EPI_ISL_457608, EPI_ISL_457612, EPI_ISL_457619, EPI_ISL_457645, EPI_ISL_457650, EPI_ISL_457652, EPI_ISL_457663, EPI_ISL_457665, EPI_ISL_457675, EPI_ISL_457684, EPI_ISL_462000, EPI_ISL_462002, EPI_ISL_462018, EPI_ISL_462021, EPI_ISL_462038, EPI_ISL_462048, EPI_ISL_462056, EPI_ISL_462057, EPI_ISL_462061, EPI_ISL_462068, EPI_ISL_462069, EPI_ISL_462077, EPI_ISL_462078, EPI_ISL_462081, EPI_ISL_462083, EPI_ISL_475342, EPI_ISL_475370, EPI_ISL_475374, EPI_ISL_475388, EPI_ISL_475391, EPI_ISL_475397, EPI_ISL_475400, EPI_ISL_475415, EPI_ISL_475418, EPI_ISL_475437, EPI_ISL_475445, EPI_ISL_475458, EPI_ISL_475483, EPI_ISL_475484, EPI_ISL_475485, EPI_ISL_475487, EPI_ISL_475489, EPI_ISL_475491, EPI_ISL_475493, EPI_ISL_475497, EPI_ISL_475500, EPI_ISL_475507 | see above                                                                                                                                                                                         | Thushan de Silva, Matthew Parker, Nikki Smith, Adri Angyal, Rebecca Brown, Luke Green, Rachel Tucker, Paul Parsons, Danielle Groves, Katie Johnson, Laura Carrilero, Alex Keeley, Dave Partridge, Matthew Wyles, Benjamin Lindsey, Mehmet Yavuz, Mohammad Raza, Cariad Evans |                                                                                                                                                                                                                                                                                                                                                                                                                                                                                                                                                    |
| EPI_ISL_476705                                                                                                                                                                                                                                                                                                                                                                                                                                                                                                                                                                                                                                                                                                                                                                                                                                                                                                                                                                                                                                 | Labor Kneifler GmbH & Co. KG                                                                                                                                                                      | Heinrich Pette Institute, Leibniz Institute for Experimental Virology                                                                                                                                                                                                        | Thomas Günther, Adam Grundhoff, Manja Czech-Sioli, Nicole Fischer, Matthias Ottinger, Melanie M. Brinkmann                                                                                                                                                                                                                                                                                                                                                                                                                                         |
| EPI_ISL_479201, EPI_ISL_479203, EPI_ISL_479209, EPI_ISL_479238, EPI_ISL_479247, EPI_ISL_479253, EPI_ISL_479254, EPI_ISL_479254, EPI_ISL_479274, EPI_ISL_479277, EPI_ISL_484437, EPI_ISL_484441, EPI_ISL_484451, EPI_ISL_484452, EPI_ISL_484456, EPI_ISL_484480, EPI_ISL_484486, EPI_ISL_484517                                                                                                                                                                                                                                                                                                                                                                                                                                                                                                                                                                                                                                                                                                                                                 | see above                                                                                                                                                                                         | COVID-19 Genomics UK (COG-UK) Consortium                                                                                                                                                                                                                                     | Thushan de Silva, Matthew Parker, Nikki Smith, Adri Angyal, Rebecca Brown, Luke Green, Rachel Tucker, Paul Parsons, Danielle Groves, Katie Johnson, Laura Carrilero, Alex Keeley, Dave Partridge, Matthew Wyles, Benjamin Lindsey, Mehmet Yavuz, Mohammad Raza, Cariad Evans                                                                                                                                                                                                                                                                       |
| EPI_ISL_487398, EPI_ISL_487399, EPI_ISL_487400, EPI_ISL_487401, EPI_ISL_487402, EPI_ISL_487403, EPI_ISL_487404, EPI_ISL_487405, EPI_ISL_487406, EPI_ISL_487407, EPI_ISL_487408, EPI_ISL_487409, EPI_ISL_487410, EPI_ISL_487411, EPI_ISL_487412, EPI_ISL_487413, EPI_ISL_487414, EPI_ISL_487415, EPI_ISL_487416, EPI_ISL_487417, EPI_ISL_487418, EPI_ISL_487419, EPI_ISL_487420, EPI_ISL_487421, EPI_ISL_487422, EPI_ISL_487423, EPI_ISL_487424, EPI_ISL_487425, EPI_ISL_487426, EPI_ISL_487427, EPI_ISL_487428, EPI_ISL_487429, EPI_ISL_487430, EPI_ISL_487431                                                                                                                                                                                                                                                                                                                                                                                                                                                                                 | see above                                                                                                                                                                                         | Heinrich Pette Institute, Leibniz Institute for Experimental Virology                                                                                                                                                                                                        | Thomas Günther, Adam Grundhoff, Manja Czech-Sioli, Nicole Fischer, Matthias Ottinger, Melanie M. Brinkmann                                                                                                                                                                                                                                                                                                                                                                                                                                         |
| EPI_ISL_490583, EPI_ISL_490590, EPI_ISL_490595, EPI_ISL_490618, EPI_ISL_490623, EPI_ISL_490636, EPI_ISL_493676, EPI_ISL_493682, EPI_ISL_493683, EPI_ISL_493690, EPI_ISL_493697, EPI_ISL_493699, EPI_ISL_493701, EPI_ISL_493715, EPI_ISL_493716, EPI_ISL_493723, EPI_ISL_493724, EPI_ISL_493725, EPI_ISL_493729, EPI_ISL_499331, EPI_ISL_499344, EPI_ISL_507160, EPI_ISL_507178, EPI_ISL_517557, EPI_ISL_517569, EPI_ISL_526445                                                                                                                                                                                                                                                                                                                                                                                                                                                                                                                                                                                                                 | see above                                                                                                                                                                                         | COVID-19 Genomics UK (COG-UK) Consortium                                                                                                                                                                                                                                     | Thushan de Silva, Matthew Parker, Nikki Smith, Adri Angyal, Rebecca Brown, Luke Green, Rachel Tucker, Paul Parsons, Danielle Groves, Katie Johnson, Laura Carrilero, Alex Keeley, Dave Partridge, Matthew Wyles, Benjamin Lindsey, Mehmet Yavuz, Mohammad Raza, Cariad Evans                                                                                                                                                                                                                                                                       |
| EPI_ISL_528810, EPI_ISL_528811, EPI_ISL_528812, EPI_ISL_528817, EPI_ISL_528821                                                                                                                                                                                                                                                                                                                                                                                                                                                                                                                                                                                                                                                                                                                                                                                                                                                                                                                                                                 | Department of Medicine, Gandhi hospital, Hyderabad                                                                                                                                                | CSIR-Centre for Cellular and Molecular Biology                                                                                                                                                                                                                               | Thrilok Chander Bingi, Rajarao Mesipogu, Vinayasekar Aedula, Lamuk Zaveri, Shagufta Khan, Namami Gaur, Sakshi Shambhavi, Nikhil Hajirnis, M Soujanya Reddy, Pratheusa Maccha, Tulasi Nagabandi, Purushotham Vodnala, Payel Mukherjee, Sofia Banu, Pniya Singh, Onkar Kulkarni, Dhiviya Vedagiri, Divya Gupta, Vishal Sah, Santosh Kumar Kuncha, Krishnan Harinivas Harshan, Archana Bharadwaj Siva, Kartik Bharadwaj Tallapaka, Renu Sudhakar, Somesh Gorum, Gungamala Srinivas Reddy, Sujoy Deb, Swati Bayyana, Rakesh K Mishra, Divya Tej Sowpat |
| EPI_ISL_529353, EPI_ISL_529407, EPI_ISL_529500, EPI_ISL_529502, EPI_ISL_529677, EPI_ISL_535043, EPI_ISL_535044, EPI_ISL_535050, EPI_ISL_535061, EPI_ISL_535062, EPI_ISL_535091, EPI_ISL_535094                                                                                                                                                                                                                                                                                                                                                                                                                                                                                                                                                                                                                                                                                                                                                                                                                                                 | see above                                                                                                                                                                                         | COVID-19 Genomics UK (COG-UK) Consortium                                                                                                                                                                                                                                     | Thushan de Silva, Matthew Parker, Nikki Smith, Adri Angyal, Rebecca Brown, Luke Green, Rachel Tucker, Paul Parsons, Danielle Groves, Katie Johnson, Laura Carrilero, Alex Keeley, Dave Partridge, Matthew Wyles, Benjamin Lindsey, Mehmet Yavuz, Mohammad Raza, Cariad Evans                                                                                                                                                                                                                                                                       |



























We gratefully acknowledge the following Authors from the Originating Laboratories responsible for obtaining the specimens, as well as the Submitting laboratories where the genome data were generated and shared via GISAID, on which this research is based.

All Submitters of data may be contacted directly via [www.gisaid.org](http://www.gisaid.org)

Authors are sorted alphabetically.

| Accession ID                                                                                                                                                                                                                                                                                                                                                                                                                                                                                                                                                                                                                                                                                                                                                                                                                                                                                                                                                                                                                                                                                                                                                                                                                                                                                                                                                                                                                                                                                                                                                                                                                                                                                                                                                                                                                                                                                                                                                                                                                                                                                                                                                                                                                                                                                                                                                                                                                                                                                                                                                                                                                                                                                                                                                                                                                                                                                                                                                                                                                                                                                                                                                                                                                                                                                                                                                                                                                                                                                                                                                                                                                                                                                                                                                                                                                    | Originating Laboratory                                                                            | Submitting Laboratory                                                                                                           | Authors                                                                                                                                                                                                                                                                     |
|---------------------------------------------------------------------------------------------------------------------------------------------------------------------------------------------------------------------------------------------------------------------------------------------------------------------------------------------------------------------------------------------------------------------------------------------------------------------------------------------------------------------------------------------------------------------------------------------------------------------------------------------------------------------------------------------------------------------------------------------------------------------------------------------------------------------------------------------------------------------------------------------------------------------------------------------------------------------------------------------------------------------------------------------------------------------------------------------------------------------------------------------------------------------------------------------------------------------------------------------------------------------------------------------------------------------------------------------------------------------------------------------------------------------------------------------------------------------------------------------------------------------------------------------------------------------------------------------------------------------------------------------------------------------------------------------------------------------------------------------------------------------------------------------------------------------------------------------------------------------------------------------------------------------------------------------------------------------------------------------------------------------------------------------------------------------------------------------------------------------------------------------------------------------------------------------------------------------------------------------------------------------------------------------------------------------------------------------------------------------------------------------------------------------------------------------------------------------------------------------------------------------------------------------------------------------------------------------------------------------------------------------------------------------------------------------------------------------------------------------------------------------------------------------------------------------------------------------------------------------------------------------------------------------------------------------------------------------------------------------------------------------------------------------------------------------------------------------------------------------------------------------------------------------------------------------------------------------------------------------------------------------------------------------------------------------------------------------------------------------------------------------------------------------------------------------------------------------------------------------------------------------------------------------------------------------------------------------------------------------------------------------------------------------------------------------------------------------------------------------------------------------------------------------------------------------------------|---------------------------------------------------------------------------------------------------|---------------------------------------------------------------------------------------------------------------------------------|-----------------------------------------------------------------------------------------------------------------------------------------------------------------------------------------------------------------------------------------------------------------------------|
| EPI_ISL_408666, EPI_ISL_408667                                                                                                                                                                                                                                                                                                                                                                                                                                                                                                                                                                                                                                                                                                                                                                                                                                                                                                                                                                                                                                                                                                                                                                                                                                                                                                                                                                                                                                                                                                                                                                                                                                                                                                                                                                                                                                                                                                                                                                                                                                                                                                                                                                                                                                                                                                                                                                                                                                                                                                                                                                                                                                                                                                                                                                                                                                                                                                                                                                                                                                                                                                                                                                                                                                                                                                                                                                                                                                                                                                                                                                                                                                                                                                                                                                                                  | Dept. of Virology III, National Institute of Infectious Diseases                                  | Pathogen Genomics Center, National Institute of Infectious Diseases                                                             | Tsuyoshi Sekizuka, Shutoku Matsuyama, Naganori Nao, Kazuya Shirato, Makoto Takeda, Makoto Kuroda                                                                                                                                                                            |
| EPI_ISL_413599                                                                                                                                                                                                                                                                                                                                                                                                                                                                                                                                                                                                                                                                                                                                                                                                                                                                                                                                                                                                                                                                                                                                                                                                                                                                                                                                                                                                                                                                                                                                                                                                                                                                                                                                                                                                                                                                                                                                                                                                                                                                                                                                                                                                                                                                                                                                                                                                                                                                                                                                                                                                                                                                                                                                                                                                                                                                                                                                                                                                                                                                                                                                                                                                                                                                                                                                                                                                                                                                                                                                                                                                                                                                                                                                                                                                                  | Centre for Infectious Diseases and Microbiology - Public Health                                   | NSW Health Pathology - Institute of Clinical Pathology and Medical Research; Westmead Hospital; University of Sydney            | Timms, V, Eden J-S, Lam C, Gray K, Rockett R, Gall, M, Carter I, Rahman H, Holmes EC, O'Sullivan MV, Sintchenko V, Chen SC, Maddocks S, Kok J and Dwyer DE for the 2019-nCoV Study Group*                                                                                   |
| EPI_ISL_414500, EPI_ISL_414501                                                                                                                                                                                                                                                                                                                                                                                                                                                                                                                                                                                                                                                                                                                                                                                                                                                                                                                                                                                                                                                                                                                                                                                                                                                                                                                                                                                                                                                                                                                                                                                                                                                                                                                                                                                                                                                                                                                                                                                                                                                                                                                                                                                                                                                                                                                                                                                                                                                                                                                                                                                                                                                                                                                                                                                                                                                                                                                                                                                                                                                                                                                                                                                                                                                                                                                                                                                                                                                                                                                                                                                                                                                                                                                                                                                                  | Virology Department, Sheffield Teaching Hospitals NHS Foundation Trust                            | Department of Infection, Immunity and Cardiovascular Disease, The Florey Institute, The Medical School, University of Sheffield | Thushan de Silva, Matthew Parker, Matthew Wyles, Mehmet Yavuz, Mohammad Raza, Cariad Evans                                                                                                                                                                                  |
| EPI_ISL_416567, EPI_ISL_416569, EPI_ISL_416571, EPI_ISL_416572, EPI_ISL_416576, EPI_ISL_416578, EPI_ISL_416581, EPI_ISL_416582, EPI_ISL_416585, EPI_ISL_416587, EPI_ISL_416588, EPI_ISL_416589, EPI_ISL_416592, EPI_ISL_416594, EPI_ISL_416597, EPI_ISL_416599, EPI_ISL_416601, EPI_ISL_416602, EPI_ISL_416607, EPI_ISL_416608, EPI_ISL_416609, EPI_ISL_416611, EPI_ISL_416614, EPI_ISL_416615, EPI_ISL_416618, EPI_ISL_416619, EPI_ISL_416621, EPI_ISL_416623, EPI_ISL_416625, EPI_ISL_416628, EPI_ISL_416630, EPI_ISL_416632                                                                                                                                                                                                                                                                                                                                                                                                                                                                                                                                                                                                                                                                                                                                                                                                                                                                                                                                                                                                                                                                                                                                                                                                                                                                                                                                                                                                                                                                                                                                                                                                                                                                                                                                                                                                                                                                                                                                                                                                                                                                                                                                                                                                                                                                                                                                                                                                                                                                                                                                                                                                                                                                                                                                                                                                                                                                                                                                                                                                                                                                                                                                                                                                                                                                                                  | Japanese Quarantine Stations                                                                      | Pathogen Genomics Center, National Institute of Infectious Diseases                                                             | Tsuyoshi Sekizuka, Kentaro Itokawa, Rina Tanaka, Masanori Hashino, Tsutomu Kageyama, Shinji Saito, Ikuyo Takayama, Hideki Hasegawa, Takuri Takahashi, Hajime Kamiya, Takuya Yamagishi, Motoi Suzuki, Takaji Wakita, Makoto Kuroda                                           |
| EPI_ISL_416730, EPI_ISL_416731, EPI_ISL_416732, EPI_ISL_416734, EPI_ISL_416735, EPI_ISL_416736, EPI_ISL_416737, EPI_ISL_416738, EPI_ISL_416739, EPI_ISL_416740                                                                                                                                                                                                                                                                                                                                                                                                                                                                                                                                                                                                                                                                                                                                                                                                                                                                                                                                                                                                                                                                                                                                                                                                                                                                                                                                                                                                                                                                                                                                                                                                                                                                                                                                                                                                                                                                                                                                                                                                                                                                                                                                                                                                                                                                                                                                                                                                                                                                                                                                                                                                                                                                                                                                                                                                                                                                                                                                                                                                                                                                                                                                                                                                                                                                                                                                                                                                                                                                                                                                                                                                                                                                  | Virology Department, Sheffield Teaching Hospitals NHS Foundation Trust                            | Department of Infection, Immunity and Cardiovascular Disease, The Florey Institute, The Medical School, University of Sheffield | Thushan de Silva, Matthew Parker, Adri Angyal, Rebecca Brown, Matthew Wyles, Mehmet Yavuz, Mohammad Raza, Cariad Evans                                                                                                                                                      |
| EPI_ISL_417387, EPI_ISL_417404                                                                                                                                                                                                                                                                                                                                                                                                                                                                                                                                                                                                                                                                                                                                                                                                                                                                                                                                                                                                                                                                                                                                                                                                                                                                                                                                                                                                                                                                                                                                                                                                                                                                                                                                                                                                                                                                                                                                                                                                                                                                                                                                                                                                                                                                                                                                                                                                                                                                                                                                                                                                                                                                                                                                                                                                                                                                                                                                                                                                                                                                                                                                                                                                                                                                                                                                                                                                                                                                                                                                                                                                                                                                                                                                                                                                  | Centre for Infectious Diseases and Microbiology Public Health                                     | NSW Health Pathology - Institute of Clinical Pathology and Medical Research; Westmead Hospital; University of Sydney            | Timms V, Gall M, Arnott A, Sadsad R, Carter I, Rahman H, Holmes EC, O'Sullivan MV, Sintchenko V, Chen SC, Maddocks S, Kok J, Dwyer DE, Rockett R, Eden J-S, Lam C and Gray K for the 2019-nCoV Study Group                                                                  |
| EPI_ISL_418270                                                                                                                                                                                                                                                                                                                                                                                                                                                                                                                                                                                                                                                                                                                                                                                                                                                                                                                                                                                                                                                                                                                                                                                                                                                                                                                                                                                                                                                                                                                                                                                                                                                                                                                                                                                                                                                                                                                                                                                                                                                                                                                                                                                                                                                                                                                                                                                                                                                                                                                                                                                                                                                                                                                                                                                                                                                                                                                                                                                                                                                                                                                                                                                                                                                                                                                                                                                                                                                                                                                                                                                                                                                                                                                                                                                                                  | KU Leuven, Clinical and Epidemiological Virology                                                  | KU Leuven, Clinical and Epidemiological Virology                                                                                | Tony Wawina, Joan Marti-Carreras, Bert Vanmechelen, Piet Maes                                                                                                                                                                                                               |
| EPI_ISL_418286, EPI_ISL_418287, EPI_ISL_418288, EPI_ISL_418289, EPI_ISL_418290, EPI_ISL_418291, EPI_ISL_418292, EPI_ISL_418293, EPI_ISL_418294, EPI_ISL_418295, EPI_ISL_418296, EPI_ISL_418297, EPI_ISL_418298, EPI_ISL_418300, EPI_ISL_418301, EPI_ISL_418302, EPI_ISL_418303, EPI_ISL_418304, EPI_ISL_418305, EPI_ISL_418306, EPI_ISL_418307, EPI_ISL_418308, EPI_ISL_418309, EPI_ISL_418310, EPI_ISL_418311, EPI_ISL_418312, EPI_ISL_418313, EPI_ISL_418314, EPI_ISL_418315, EPI_ISL_418316, EPI_ISL_418317, EPI_ISL_418318, EPI_ISL_418319, EPI_ISL_418320, EPI_ISL_418321                                                                                                                                                                                                                                                                                                                                                                                                                                                                                                                                                                                                                                                                                                                                                                                                                                                                                                                                                                                                                                                                                                                                                                                                                                                                                                                                                                                                                                                                                                                                                                                                                                                                                                                                                                                                                                                                                                                                                                                                                                                                                                                                                                                                                                                                                                                                                                                                                                                                                                                                                                                                                                                                                                                                                                                                                                                                                                                                                                                                                                                                                                                                                                                                                                                  | Virology Department, Sheffield Teaching Hospitals NHS Foundation Trust                            | Department of Infection, Immunity and Cardiovascular Disease, The Florey Institute, The Medical School, University of Sheffield | Thushan de Silva, Matthew Parker, Adri Angyal, Rebecca Brown, Rachel Tucker, Paul Parsons, Danielle Groves, Alex Keeley, Dave Partridge, Matthew Wyles, Benjamin Lindsey, Mehmet Yavuz, Mohammad Raza, Cariad Evans                                                         |
| EPI_ISL_419302, EPI_ISL_419305, EPI_ISL_419306, EPI_ISL_419307                                                                                                                                                                                                                                                                                                                                                                                                                                                                                                                                                                                                                                                                                                                                                                                                                                                                                                                                                                                                                                                                                                                                                                                                                                                                                                                                                                                                                                                                                                                                                                                                                                                                                                                                                                                                                                                                                                                                                                                                                                                                                                                                                                                                                                                                                                                                                                                                                                                                                                                                                                                                                                                                                                                                                                                                                                                                                                                                                                                                                                                                                                                                                                                                                                                                                                                                                                                                                                                                                                                                                                                                                                                                                                                                                                  | Saitama Prefectural Institute of Public Health                                                    | Pathogen Genomics Center, National Institute of Infectious Diseases                                                             | Tsuyoshi Sekizuka, Michiyo Shinohara, Tsuyoshi Kishimoto, Kentaro Itokawa, Rina Tanaka, Masanori Hashino, Hajime Kamiya, Motoi Suzuki, Makoto Kuroda                                                                                                                        |
| EPI_ISL_419309                                                                                                                                                                                                                                                                                                                                                                                                                                                                                                                                                                                                                                                                                                                                                                                                                                                                                                                                                                                                                                                                                                                                                                                                                                                                                                                                                                                                                                                                                                                                                                                                                                                                                                                                                                                                                                                                                                                                                                                                                                                                                                                                                                                                                                                                                                                                                                                                                                                                                                                                                                                                                                                                                                                                                                                                                                                                                                                                                                                                                                                                                                                                                                                                                                                                                                                                                                                                                                                                                                                                                                                                                                                                                                                                                                                                                  | Chiba Prefectural Institute of Public Health                                                      | Pathogen Genomics Center, National Institute of Infectious Diseases                                                             | Tsuyoshi Sekizuka, Masakatsu Taira, Yushi Hachisu, Kentaro Itokawa, Rina Tanaka, Masanori Hashino, Hajime Kamiya, Motoi Suzuki, Makoto Kuroda                                                                                                                               |
| EPI_ISL_420154, EPI_ISL_420155, EPI_ISL_420156, EPI_ISL_420157, EPI_ISL_420158, EPI_ISL_420159, EPI_ISL_420160, EPI_ISL_420161, EPI_ISL_420162, EPI_ISL_420163, EPI_ISL_420165, EPI_ISL_420166, EPI_ISL_420167, EPI_ISL_420168, EPI_ISL_420169, EPI_ISL_420170, EPI_ISL_420171, EPI_ISL_420172, EPI_ISL_420173, EPI_ISL_420174, EPI_ISL_420175, EPI_ISL_420178, EPI_ISL_420179, EPI_ISL_420180, EPI_ISL_420182, EPI_ISL_420183, EPI_ISL_420184, EPI_ISL_420185, EPI_ISL_420186, EPI_ISL_420187, EPI_ISL_420189, EPI_ISL_420190, EPI_ISL_420191, EPI_ISL_420192, EPI_ISL_420193, EPI_ISL_420194, EPI_ISL_420195, EPI_ISL_420196, EPI_ISL_420197, EPI_ISL_420198, EPI_ISL_420199, EPI_ISL_420200, EPI_ISL_420201, EPI_ISL_420203, EPI_ISL_420204, EPI_ISL_420205, EPI_ISL_420206, EPI_ISL_420207, EPI_ISL_420208, EPI_ISL_420209, EPI_ISL_420211, EPI_ISL_420212, EPI_ISL_420213, EPI_ISL_420214, EPI_ISL_420215, EPI_ISL_420216, EPI_ISL_420217, EPI_ISL_420218, EPI_ISL_420219, EPI_ISL_420220, EPI_ISL_420221, EPI_ISL_420222, EPI_ISL_420225, EPI_ISL_420226, EPI_ISL_420227, EPI_ISL_420228, EPI_ISL_420229, EPI_ISL_420230, EPI_ISL_420231, EPI_ISL_420233, EPI_ISL_420234, EPI_ISL_420235, EPI_ISL_420236, EPI_ISL_420237, EPI_ISL_420239, EPI_ISL_420241, EPI_ISL_420242, EPI_ISL_420243, EPI_ISL_420244, EPI_ISL_420245, EPI_ISL_420246, EPI_ISL_420248, EPI_ISL_420249, EPI_ISL_420250, EPI_ISL_420251, EPI_ISL_420252, EPI_ISL_420253, EPI_ISL_420254, EPI_ISL_420255, EPI_ISL_420256, EPI_ISL_420257, EPI_ISL_420258, EPI_ISL_420260, EPI_ISL_420261, EPI_ISL_420262, EPI_ISL_420263, EPI_ISL_420264, EPI_ISL_420267, EPI_ISL_420268, EPI_ISL_420269, EPI_ISL_420270, EPI_ISL_420271, EPI_ISL_420272, EPI_ISL_420273, EPI_ISL_420274, EPI_ISL_420275, EPI_ISL_420276, EPI_ISL_420277, EPI_ISL_420278, EPI_ISL_420280, EPI_ISL_420281, EPI_ISL_420282, EPI_ISL_420283, EPI_ISL_420284, EPI_ISL_420285, EPI_ISL_420286, EPI_ISL_420287, EPI_ISL_420288, EPI_ISL_420289, EPI_ISL_420290, EPI_ISL_420291, EPI_ISL_420292                                                                                                                                                                                                                                                                                                                                                                                                                                                                                                                                                                                                                                                                                                                                                                                                                                                                                                                                                                                                                                                                                                                                                                                                                                                                                                                                                                                                                                                                                                                                                                                                                                                                                                                                                                                                  | Virology Department, Sheffield Teaching Hospitals NHS Foundation Trust                            | Department of Infection, Immunity and Cardiovascular Disease, The Florey Institute, The Medical School, University of Sheffield | Thushan de Silva, Matthew Parker, Adri Angyal, Rebecca Brown, Rachel Tucker, Paul Parsons, Luke Green, Danielle Groves, Alex Keeley, Dave Partridge, Matthew Wyles, Benjamin Lindsey, Mehmet Yavuz, Mohammad Raza, Cariad Evans                                             |
| EPI_ISL_420541                                                                                                                                                                                                                                                                                                                                                                                                                                                                                                                                                                                                                                                                                                                                                                                                                                                                                                                                                                                                                                                                                                                                                                                                                                                                                                                                                                                                                                                                                                                                                                                                                                                                                                                                                                                                                                                                                                                                                                                                                                                                                                                                                                                                                                                                                                                                                                                                                                                                                                                                                                                                                                                                                                                                                                                                                                                                                                                                                                                                                                                                                                                                                                                                                                                                                                                                                                                                                                                                                                                                                                                                                                                                                                                                                                                                                  | Institute of Microbiology and Immunology, Faculty of Medicine, University of Ljubljana            | Institute of Microbiology and Immunology, Faculty of Medicine, University of Ljubljana                                          | Tomaž Mark Zorec, Samo Zakotnik, Lucijan Skubic, Miša Korva, Tatjana Avši - Županc, Mario Poljak                                                                                                                                                                            |
| EPI_ISL_421279, EPI_ISL_421281                                                                                                                                                                                                                                                                                                                                                                                                                                                                                                                                                                                                                                                                                                                                                                                                                                                                                                                                                                                                                                                                                                                                                                                                                                                                                                                                                                                                                                                                                                                                                                                                                                                                                                                                                                                                                                                                                                                                                                                                                                                                                                                                                                                                                                                                                                                                                                                                                                                                                                                                                                                                                                                                                                                                                                                                                                                                                                                                                                                                                                                                                                                                                                                                                                                                                                                                                                                                                                                                                                                                                                                                                                                                                                                                                                                                  | Clinical Diagnostics Laboratory, Diagnostic & Experimental Pathology, Lilly Research Laboratories | Clinical Diagnostics Laboratory, Diagnostic & Experimental Pathology, Lilly Research Laboratories                               | Tim Holzer, Mayuri Vaidya, Angie Fulford, Sam McNeely, Rachael Redmond, Phil Ebert, John Calley, Leslie O'Neill Reising, Pat Finnegan, Erin Wray, John McElwee, Jeff FILL, Joe Oakley, Andrew Schade                                                                        |
| EPI_ISL_427643, EPI_ISL_427646, EPI_ISL_427649, EPI_ISL_427663, EPI_ISL_427664, EPI_ISL_427665, EPI_ISL_427678, EPI_ISL_427682, EPI_ISL_427692, EPI_ISL_427695, EPI_ISL_427698, EPI_ISL_427704                                                                                                                                                                                                                                                                                                                                                                                                                                                                                                                                                                                                                                                                                                                                                                                                                                                                                                                                                                                                                                                                                                                                                                                                                                                                                                                                                                                                                                                                                                                                                                                                                                                                                                                                                                                                                                                                                                                                                                                                                                                                                                                                                                                                                                                                                                                                                                                                                                                                                                                                                                                                                                                                                                                                                                                                                                                                                                                                                                                                                                                                                                                                                                                                                                                                                                                                                                                                                                                                                                                                                                                                                                  | Centre for Infectious Diseases and Microbiology Public Health                                     | NSW Health Pathology - Institute of Clinical Pathology and Medical Research; Westmead Hospital; University of Sydney            | Timms V, Gall M, Arnott A, Sadsad R, Draper J, Sim E, Bachmann N, Rockett R, Lam C, Gray K, Carter I, Holmes EC, O'Sullivan MV, Byun R, Sintchenko V, Chen SC, Eden JS, Maddocks S, Kok J, Propenko M, Sorrell T, Chang S, Basile K, Dwyer DE for the 2019-nCoV Study Group |
| EPI_ISL_427719                                                                                                                                                                                                                                                                                                                                                                                                                                                                                                                                                                                                                                                                                                                                                                                                                                                                                                                                                                                                                                                                                                                                                                                                                                                                                                                                                                                                                                                                                                                                                                                                                                                                                                                                                                                                                                                                                                                                                                                                                                                                                                                                                                                                                                                                                                                                                                                                                                                                                                                                                                                                                                                                                                                                                                                                                                                                                                                                                                                                                                                                                                                                                                                                                                                                                                                                                                                                                                                                                                                                                                                                                                                                                                                                                                                                                  | ACT Pathology, The Canberra Hospital                                                              | NSW Health Pathology - Institute of Clinical Pathology and Medical Research; Westmead Hospital; University of Sydney            | Timms V, Gall M, Arnott A, Sadsad R, Draper J, Sim E, Bachmann N, Rockett R, Lam C, Gray K, Carter I, Holmes EC, O'Sullivan MV, Byun R, Sintchenko V, Chen SC, Eden JS, Maddocks S, Kok J, Propenko M, Sorrell T, Chang S, Basile K, Dwyer DE for the 2019-nCoV Study Group |
| EPI_ISL_427725, EPI_ISL_427734, EPI_ISL_427748, EPI_ISL_427771, EPI_ISL_427794, EPI_ISL_427803, EPI_ISL_427806                                                                                                                                                                                                                                                                                                                                                                                                                                                                                                                                                                                                                                                                                                                                                                                                                                                                                                                                                                                                                                                                                                                                                                                                                                                                                                                                                                                                                                                                                                                                                                                                                                                                                                                                                                                                                                                                                                                                                                                                                                                                                                                                                                                                                                                                                                                                                                                                                                                                                                                                                                                                                                                                                                                                                                                                                                                                                                                                                                                                                                                                                                                                                                                                                                                                                                                                                                                                                                                                                                                                                                                                                                                                                                                  | Centre for Infectious Diseases and Microbiology Public Health                                     | NSW Health Pathology - Institute of Clinical Pathology and Medical Research; Westmead Hospital; University of Sydney            | Timms V, Gall M, Arnott A, Sadsad R, Draper J, Sim E, Bachmann N, Rockett R, Lam C, Gray K, Carter I, Holmes EC, O'Sullivan MV, Byun R, Sintchenko V, Chen SC, Eden JS, Maddocks S, Kok J, Propenko M, Sorrell T, Chang S, Basile K, Dwyer DE for the 2019-nCoV Study Group |
| EPI_ISL_429126, EPI_ISL_429127                                                                                                                                                                                                                                                                                                                                                                                                                                                                                                                                                                                                                                                                                                                                                                                                                                                                                                                                                                                                                                                                                                                                                                                                                                                                                                                                                                                                                                                                                                                                                                                                                                                                                                                                                                                                                                                                                                                                                                                                                                                                                                                                                                                                                                                                                                                                                                                                                                                                                                                                                                                                                                                                                                                                                                                                                                                                                                                                                                                                                                                                                                                                                                                                                                                                                                                                                                                                                                                                                                                                                                                                                                                                                                                                                                                                  | Unilabs Skovde                                                                                    | The Public Health Agency of Sweden                                                                                              | Tobias Kollberg, Helena Enroth, Olov Svarstrom, Maria Lind Karlberg, Anna-Malin Linde, Oskar Karlsson Lindsjo, Anna Risberg, Shaman Muradrasoli, Karin Tegmark-Wisell                                                                                                       |
| EPI_ISL_432451, EPI_ISL_432452, EPI_ISL_432453, EPI_ISL_432454, EPI_ISL_432455, EPI_ISL_432457, EPI_ISL_432458, EPI_ISL_432459, EPI_ISL_432460, EPI_ISL_432461, EPI_ISL_432462, EPI_ISL_432463, EPI_ISL_432465, EPI_ISL_432466, EPI_ISL_432467, EPI_ISL_432468, EPI_ISL_432469, EPI_ISL_432470, EPI_ISL_432471, EPI_ISL_432472, EPI_ISL_432473, EPI_ISL_432474, EPI_ISL_432475, EPI_ISL_432476, EPI_ISL_432477, EPI_ISL_432478, EPI_ISL_432480, EPI_ISL_432481, EPI_ISL_432482, EPI_ISL_432483, EPI_ISL_432484, EPI_ISL_432485, EPI_ISL_432486, EPI_ISL_432487, EPI_ISL_432488, EPI_ISL_432491, EPI_ISL_432493, EPI_ISL_432494, EPI_ISL_432495, EPI_ISL_432496, EPI_ISL_432497, EPI_ISL_432498, EPI_ISL_432499, EPI_ISL_432500, EPI_ISL_432501, EPI_ISL_432502, EPI_ISL_432503, EPI_ISL_432504, EPI_ISL_432505, EPI_ISL_432506, EPI_ISL_432507, EPI_ISL_432508, EPI_ISL_432509, EPI_ISL_432510, EPI_ISL_432511, EPI_ISL_432512, EPI_ISL_432513, EPI_ISL_432514, EPI_ISL_432515, EPI_ISL_432516, EPI_ISL_432518, EPI_ISL_432519, EPI_ISL_432520, EPI_ISL_432521, EPI_ISL_432522, EPI_ISL_432523, EPI_ISL_432524, EPI_ISL_432525, EPI_ISL_432526, EPI_ISL_432527, EPI_ISL_432528, EPI_ISL_432529, EPI_ISL_432531, EPI_ISL_432532, EPI_ISL_432533, EPI_ISL_432534, EPI_ISL_432535, EPI_ISL_432536, EPI_ISL_432538, EPI_ISL_432539, EPI_ISL_432540, EPI_ISL_432541, EPI_ISL_432542, EPI_ISL_432543, EPI_ISL_432544, EPI_ISL_432545, EPI_ISL_432546, EPI_ISL_432547, EPI_ISL_432548, EPI_ISL_432549, EPI_ISL_432551, EPI_ISL_432552, EPI_ISL_432553, EPI_ISL_432554, EPI_ISL_432555, EPI_ISL_432556, EPI_ISL_432557, EPI_ISL_432558, EPI_ISL_432559, EPI_ISL_432560, EPI_ISL_432561, EPI_ISL_432562, EPI_ISL_432563, EPI_ISL_432564, EPI_ISL_432565, EPI_ISL_432566, EPI_ISL_432567, EPI_ISL_432568, EPI_ISL_432569, EPI_ISL_432571, EPI_ISL_432572, EPI_ISL_432573, EPI_ISL_432574, EPI_ISL_432575, EPI_ISL_432576, EPI_ISL_432577, EPI_ISL_432578, EPI_ISL_432579, EPI_ISL_432580, EPI_ISL_432581, EPI_ISL_432582, EPI_ISL_432583, EPI_ISL_432584, EPI_ISL_432585, EPI_ISL_432586, EPI_ISL_432587, EPI_ISL_432588, EPI_ISL_432589, EPI_ISL_432590, EPI_ISL_432591, EPI_ISL_432592, EPI_ISL_432593, EPI_ISL_432594, EPI_ISL_432595, EPI_ISL_432596, EPI_ISL_432597, EPI_ISL_432598, EPI_ISL_432599, EPI_ISL_432600, EPI_ISL_432601, EPI_ISL_432602, EPI_ISL_432603, EPI_ISL_432604, EPI_ISL_432605, EPI_ISL_432606, EPI_ISL_432607, EPI_ISL_432608, EPI_ISL_432609, EPI_ISL_432610, EPI_ISL_432611, EPI_ISL_432612, EPI_ISL_432613, EPI_ISL_432615, EPI_ISL_432616, EPI_ISL_432617, EPI_ISL_432618, EPI_ISL_432619, EPI_ISL_432620, EPI_ISL_432621, EPI_ISL_432622, EPI_ISL_432623, EPI_ISL_432624, EPI_ISL_432625, EPI_ISL_432626, EPI_ISL_432627, EPI_ISL_432628, EPI_ISL_432629, EPI_ISL_432630, EPI_ISL_432631, EPI_ISL_432632, EPI_ISL_432633, EPI_ISL_432634, EPI_ISL_432635, EPI_ISL_432636, EPI_ISL_432637, EPI_ISL_432638, EPI_ISL_432639, EPI_ISL_432640, EPI_ISL_432641, EPI_ISL_432642, EPI_ISL_432643, EPI_ISL_432644, EPI_ISL_432645, EPI_ISL_432646, EPI_ISL_432647, EPI_ISL_432648, EPI_ISL_432649, EPI_ISL_432650, EPI_ISL_432651, EPI_ISL_432652, EPI_ISL_432653, EPI_ISL_432654, EPI_ISL_432655, EPI_ISL_432656, EPI_ISL_432657, EPI_ISL_432658, EPI_ISL_432659, EPI_ISL_432660, EPI_ISL_432661, EPI_ISL_432662, EPI_ISL_432664, EPI_ISL_432665, EPI_ISL_432666, EPI_ISL_432667, EPI_ISL_432711, EPI_ISL_432712, EPI_ISL_432713, EPI_ISL_432714, EPI_ISL_432715, EPI_ISL_432716, EPI_ISL_432717, EPI_ISL_432718, EPI_ISL_432719, EPI_ISL_432720, EPI_ISL_432721, EPI_ISL_432722, EPI_ISL_432723, EPI_ISL_432724, EPI_ISL_432725, EPI_ISL_432726, EPI_ISL_432727, EPI_ISL_432728, EPI_ISL_432729, EPI_ISL_432730, EPI_ISL_432732, EPI_ISL_432733, EPI_ISL_432734, EPI_ISL_432735, EPI_ISL_432736, EPI_ISL_432737, | Centre for Infectious Diseases and Microbiology Public Health                                     | NSW Health Pathology - Institute of Clinical Pathology and Medical Research; Westmead Hospital; University of Sydney            | Timms V, Gall M, Arnott A, Sadsad R, Draper J, Sim E, Bachmann N, Rockett R, Lam C, Gray K, Carter I, Holmes EC, O'Sullivan MV, Byun R, Sintchenko V, Chen SC, Eden JS, Maddocks S, Kok J, Propenko M, Sorrell T, Chang S, Basile K, Dwyer DE for the 2019-nCoV Study Group |







|                                                                                                                                                                                                                                                                                                                                                                                                                                                                                                                                                                                                                                                                                                                                                                                                                                                                                                                                                                                                                                                                                                                                                                                                                                                                                                                                |                                                                           |                                                                                                                                                                                  |                                                                                                                                                                |                                                                                                                                                                                                                                                                             |
|--------------------------------------------------------------------------------------------------------------------------------------------------------------------------------------------------------------------------------------------------------------------------------------------------------------------------------------------------------------------------------------------------------------------------------------------------------------------------------------------------------------------------------------------------------------------------------------------------------------------------------------------------------------------------------------------------------------------------------------------------------------------------------------------------------------------------------------------------------------------------------------------------------------------------------------------------------------------------------------------------------------------------------------------------------------------------------------------------------------------------------------------------------------------------------------------------------------------------------------------------------------------------------------------------------------------------------|---------------------------------------------------------------------------|----------------------------------------------------------------------------------------------------------------------------------------------------------------------------------|----------------------------------------------------------------------------------------------------------------------------------------------------------------|-----------------------------------------------------------------------------------------------------------------------------------------------------------------------------------------------------------------------------------------------------------------------------|
| EPI_ISL_476995, EPI_ISL_476996, EPI_ISL_476997, EPI_ISL_476998, EPI_ISL_476999, EPI_ISL_477000, EPI_ISL_477001, EPI_ISL_477002, EPI_ISL_477003, EPI_ISL_477004, EPI_ISL_477005, EPI_ISL_477006, EPI_ISL_477007                                                                                                                                                                                                                                                                                                                                                                                                                                                                                                                                                                                                                                                                                                                                                                                                                                                                                                                                                                                                                                                                                                                 | see above                                                                 | KU Leuven, Rega Institute, Clinical and Epidemiological Virology                                                                                                                 | KU Leuven, Rega Institute, Clinical and Epidemiological Virology                                                                                               | Tony Wawina-Bokalanga, Joan Marti-Carerras, Bert Vanmechelen, Piet Maes                                                                                                                                                                                                     |
| EPI_ISL_479195, EPI_ISL_479196, EPI_ISL_479197, EPI_ISL_479198, EPI_ISL_479199, EPI_ISL_479200, EPI_ISL_479202, EPI_ISL_479204, EPI_ISL_479205, EPI_ISL_479206, EPI_ISL_479207, EPI_ISL_479208, EPI_ISL_479210, EPI_ISL_479211, EPI_ISL_479212, EPI_ISL_479213, EPI_ISL_479214, EPI_ISL_479215, EPI_ISL_479216, EPI_ISL_479217, EPI_ISL_479218, EPI_ISL_479219, EPI_ISL_479220, EPI_ISL_479221, EPI_ISL_479222, EPI_ISL_479223, EPI_ISL_479224, EPI_ISL_479225, EPI_ISL_479226, EPI_ISL_479227, EPI_ISL_479228, EPI_ISL_479229, EPI_ISL_479230, EPI_ISL_479231, EPI_ISL_479232, EPI_ISL_479233, EPI_ISL_479234, EPI_ISL_479235, EPI_ISL_479236, EPI_ISL_479237, EPI_ISL_479239, EPI_ISL_479240, EPI_ISL_479241, EPI_ISL_479242, EPI_ISL_479243, EPI_ISL_479244, EPI_ISL_479245, EPI_ISL_479246, EPI_ISL_479248, EPI_ISL_479249, EPI_ISL_479250, EPI_ISL_479251, EPI_ISL_479252, EPI_ISL_479255, EPI_ISL_479256, EPI_ISL_479257, EPI_ISL_479258, EPI_ISL_479259, EPI_ISL_479260, EPI_ISL_479261, EPI_ISL_479262, EPI_ISL_479263, EPI_ISL_479264, EPI_ISL_479265, EPI_ISL_479266, EPI_ISL_479267, EPI_ISL_479268, EPI_ISL_479269, EPI_ISL_479270, EPI_ISL_479271, EPI_ISL_479272, EPI_ISL_479273, EPI_ISL_479275, EPI_ISL_479276, EPI_ISL_479278, EPI_ISL_479279, EPI_ISL_479280, EPI_ISL_479281, EPI_ISL_479282, EPI_ISL_479283 | see above                                                                 | Virology Department, Sheffield Teaching Hospitals NHS Foundation Trust/Department of Infection, Immunity and Cardiovascular Disease, The Medical School, University of Sheffield | COVID-19 Genomics UK (COG-UK) Consortium                                                                                                                       | Thushan de Silva, Matthew Parker, Nikki Smith, Adri Agyal, Rebecca Brown, Luke Green, Rachel Tucker, Paul Parsons, Danielle Groves, Katie Johnson, Laura Carrilero, Alex Keeley, Dave Partridge, Matthew Wyles, Benjamin Lindsey, Mehmet Yavuz, Mohammad Raza, Cariad Evans |
| EPI_ISL_479796                                                                                                                                                                                                                                                                                                                                                                                                                                                                                                                                                                                                                                                                                                                                                                                                                                                                                                                                                                                                                                                                                                                                                                                                                                                                                                                 | Ishikawa Prefectural Institute of Public Health and Environmental Science | Pathogen Genomics Center, National Institute of Infectious Diseases                                                                                                              | Tsuyoshi Sekizuka, Sanae Kuramoto, Eri Nariai, Kentaro Itokawa, Rina Tanaka, Masanori Hashino, Hajime Kamiya, Motoi Suzuki, Makoto Kuroda                      |                                                                                                                                                                                                                                                                             |
| EPI_ISL_479797, EPI_ISL_479803, EPI_ISL_479804                                                                                                                                                                                                                                                                                                                                                                                                                                                                                                                                                                                                                                                                                                                                                                                                                                                                                                                                                                                                                                                                                                                                                                                                                                                                                 | Sagamihara City Public Health Research Institute                          | Pathogen Genomics Center, National Institute of Infectious Diseases                                                                                                              | Tsuyoshi Sekizuka, Hiroshi Nakamura, Kentaro Itokawa, Rina Tanaka, Masanori Hashino, Hajime Kamiya, Motoi Suzuki, Makoto Kuroda                                |                                                                                                                                                                                                                                                                             |
| EPI_ISL_479807                                                                                                                                                                                                                                                                                                                                                                                                                                                                                                                                                                                                                                                                                                                                                                                                                                                                                                                                                                                                                                                                                                                                                                                                                                                                                                                 | Saitama Prefectural Institute of Public Health                            | Pathogen Genomics Center, National Institute of Infectious Diseases                                                                                                              | Tsuyoshi Sekizuka, Hayato Ehara, Kentaro Itokawa, Rina Tanaka, Masanori Hashino, Hajime Kamiya, Motoi Suzuki, Makoto Kuroda                                    |                                                                                                                                                                                                                                                                             |
| EPI_ISL_479810                                                                                                                                                                                                                                                                                                                                                                                                                                                                                                                                                                                                                                                                                                                                                                                                                                                                                                                                                                                                                                                                                                                                                                                                                                                                                                                 | Chiba Prefectural Institute of Public Health                              | Pathogen Genomics Center, National Institute of Infectious Diseases                                                                                                              | Tsuyoshi Sekizuka, Masakatsu Taira, Kentaro Itokawa, Rina Tanaka, Masanori Hashino, Hajime Kamiya, Motoi Suzuki, Makoto Kuroda                                 |                                                                                                                                                                                                                                                                             |
| EPI_ISL_479813, EPI_ISL_479818, EPI_ISL_479819, EPI_ISL_479820                                                                                                                                                                                                                                                                                                                                                                                                                                                                                                                                                                                                                                                                                                                                                                                                                                                                                                                                                                                                                                                                                                                                                                                                                                                                 | Hokkaido Institute of Public Health                                       | Pathogen Genomics Center, National Institute of Infectious Diseases                                                                                                              | Tsuyoshi Sekizuka, Rika Komagome, Kentaro Itokawa, Rina Tanaka, Masanori Hashino, Hajime Kamiya, Motoi Suzuki, Makoto Kuroda                                   |                                                                                                                                                                                                                                                                             |
| EPI_ISL_479821                                                                                                                                                                                                                                                                                                                                                                                                                                                                                                                                                                                                                                                                                                                                                                                                                                                                                                                                                                                                                                                                                                                                                                                                                                                                                                                 | Department of Infectious Diseases, Kobe Institute of Health               | Pathogen Genomics Center, National Institute of Infectious Diseases                                                                                                              | Tsuyoshi Sekizuka, Ryohei Nomoto, Kentaro Itokawa, Rina Tanaka, Masanori Hashino, Hajime Kamiya, Motoi Suzuki, Makoto Kuroda                                   |                                                                                                                                                                                                                                                                             |
| EPI_ISL_479823                                                                                                                                                                                                                                                                                                                                                                                                                                                                                                                                                                                                                                                                                                                                                                                                                                                                                                                                                                                                                                                                                                                                                                                                                                                                                                                 | Kochi Prefectural Institute of Public Health                              | Pathogen Genomics Center, National Institute of Infectious Diseases                                                                                                              | Tsuyoshi Sekizuka, Akihiko Tokaji, Kentaro Itokawa, Rina Tanaka, Masanori Hashino, Hajime Kamiya, Motoi Suzuki, Makoto Kuroda                                  |                                                                                                                                                                                                                                                                             |
| EPI_ISL_479825                                                                                                                                                                                                                                                                                                                                                                                                                                                                                                                                                                                                                                                                                                                                                                                                                                                                                                                                                                                                                                                                                                                                                                                                                                                                                                                 | Tokyo Metropolitan Institute of Public Health                             | Pathogen Genomics Center, National Institute of Infectious Diseases                                                                                                              | Tsuyoshi Sekizuka, Kenji Sadamasu, Takashi Chiba, Mami Nagashima, Kentaro Itokawa, Rina Tanaka, Masanori Hashino, Hajime Kamiya, Motoi Suzuki, Makoto Kuroda   |                                                                                                                                                                                                                                                                             |
| EPI_ISL_479826, EPI_ISL_479827, EPI_ISL_479828, EPI_ISL_479830, EPI_ISL_479834, EPI_ISL_479837, EPI_ISL_479839, EPI_ISL_479840, EPI_ISL_479841, EPI_ISL_479842, EPI_ISL_479844, EPI_ISL_479845, EPI_ISL_479846, EPI_ISL_479849                                                                                                                                                                                                                                                                                                                                                                                                                                                                                                                                                                                                                                                                                                                                                                                                                                                                                                                                                                                                                                                                                                 | see above                                                                 | Sapporo City Institute of Public Health                                                                                                                                          | Pathogen Genomics Center, National Institute of Infectious Diseases                                                                                            | Tsuyoshi Sekizuka, Asami Ohnishi, Kentaro Itokawa, Rina Tanaka, Masanori Hashino, Hajime Kamiya, Motoi Suzuki, Makoto Kuroda                                                                                                                                                |
| EPI_ISL_479850, EPI_ISL_479851                                                                                                                                                                                                                                                                                                                                                                                                                                                                                                                                                                                                                                                                                                                                                                                                                                                                                                                                                                                                                                                                                                                                                                                                                                                                                                 | Gunma Prefectural Institute of Public Health and Environmental Sciences   | Pathogen Genomics Center, National Institute of Infectious Diseases                                                                                                              | Tsuyoshi Sekizuka, Hiroyuki Tsukagoshi, Kentaro Itokawa, Rina Tanaka, Masanori Hashino, Hajime Kamiya, Motoi Suzuki, Makoto Kuroda                             |                                                                                                                                                                                                                                                                             |
| EPI_ISL_479860                                                                                                                                                                                                                                                                                                                                                                                                                                                                                                                                                                                                                                                                                                                                                                                                                                                                                                                                                                                                                                                                                                                                                                                                                                                                                                                 | Department of Infectious Diseases, Kobe Institute of Health               | Pathogen Genomics Center, National Institute of Infectious Diseases                                                                                                              | Tsuyoshi Sekizuka, Ryohei Nomoto, Kentaro Itokawa, Rina Tanaka, Masanori Hashino, Hajime Kamiya, Motoi Suzuki, Makoto Kuroda                                   |                                                                                                                                                                                                                                                                             |
| EPI_ISL_479862, EPI_ISL_479863, EPI_ISL_479865, EPI_ISL_479866, EPI_ISL_479867                                                                                                                                                                                                                                                                                                                                                                                                                                                                                                                                                                                                                                                                                                                                                                                                                                                                                                                                                                                                                                                                                                                                                                                                                                                 | Wakayama Prefectural Research Center of Environment and Public Health     | Pathogen Genomics Center, National Institute of Infectious Diseases                                                                                                              | Tsuyoshi Sekizuka, Fumio Terasoma, Yosuke Hamajima, Kentaro Itokawa, Rina Tanaka, Masanori Hashino, Hajime Kamiya, Motoi Suzuki, Makoto Kuroda                 |                                                                                                                                                                                                                                                                             |
| EPI_ISL_479869                                                                                                                                                                                                                                                                                                                                                                                                                                                                                                                                                                                                                                                                                                                                                                                                                                                                                                                                                                                                                                                                                                                                                                                                                                                                                                                 | Niigata Prefectural Institute of Public Health and Environmental Sciences | Pathogen Genomics Center, National Institute of Infectious Diseases                                                                                                              | Tsuyoshi Sekizuka, Reiko Arai, Kentaro Itokawa, Rina Tanaka, Masanori Hashino, Hajime Kamiya, Motoi Suzuki, Makoto Kuroda                                      |                                                                                                                                                                                                                                                                             |
| EPI_ISL_479871                                                                                                                                                                                                                                                                                                                                                                                                                                                                                                                                                                                                                                                                                                                                                                                                                                                                                                                                                                                                                                                                                                                                                                                                                                                                                                                 | Sagamihara City Public Health Research Institute                          | Pathogen Genomics Center, National Institute of Infectious Diseases                                                                                                              | Tsuyoshi Sekizuka, Hiroshi Nakamura, Kentaro Itokawa, Rina Tanaka, Masanori Hashino, Hajime Kamiya, Motoi Suzuki, Makoto Kuroda                                |                                                                                                                                                                                                                                                                             |
| EPI_ISL_479872, EPI_ISL_479876, EPI_ISL_479878, EPI_ISL_479880, EPI_ISL_479881, EPI_ISL_479882                                                                                                                                                                                                                                                                                                                                                                                                                                                                                                                                                                                                                                                                                                                                                                                                                                                                                                                                                                                                                                                                                                                                                                                                                                 | Sapporo City Institute of Public Health                                   | Pathogen Genomics Center, National Institute of Infectious Diseases                                                                                                              | Tsuyoshi Sekizuka, Asami Ohnishi, Kentaro Itokawa, Rina Tanaka, Masanori Hashino, Hajime Kamiya, Motoi Suzuki, Makoto Kuroda                                   |                                                                                                                                                                                                                                                                             |
| EPI_ISL_479886, EPI_ISL_479890, EPI_ISL_479892, EPI_ISL_479893, EPI_ISL_479894                                                                                                                                                                                                                                                                                                                                                                                                                                                                                                                                                                                                                                                                                                                                                                                                                                                                                                                                                                                                                                                                                                                                                                                                                                                 | Tokyo Metropolitan Institute of Public Health                             | Pathogen Genomics Center, National Institute of Infectious Diseases                                                                                                              | Tsuyoshi Sekizuka, Kenji Sadamasu, Takashi Chiba, Mami Nagashima, Kentaro Itokawa, Rina Tanaka, Masanori Hashino, Hajime Kamiya, Motoi Suzuki, Makoto Kuroda   |                                                                                                                                                                                                                                                                             |
| EPI_ISL_479897, EPI_ISL_479898, EPI_ISL_479901                                                                                                                                                                                                                                                                                                                                                                                                                                                                                                                                                                                                                                                                                                                                                                                                                                                                                                                                                                                                                                                                                                                                                                                                                                                                                 | Gunma Prefectural Institute of Public Health and Environmental Sciences   | Pathogen Genomics Center, National Institute of Infectious Diseases                                                                                                              | Tsuyoshi Sekizuka, Hiroyuki Tsukagoshi, Kentaro Itokawa, Rina Tanaka, Masanori Hashino, Hajime Kamiya, Motoi Suzuki, Makoto Kuroda                             |                                                                                                                                                                                                                                                                             |
| EPI_ISL_479907, EPI_ISL_479909, EPI_ISL_479912                                                                                                                                                                                                                                                                                                                                                                                                                                                                                                                                                                                                                                                                                                                                                                                                                                                                                                                                                                                                                                                                                                                                                                                                                                                                                 | Himeji City Institute of Environment and Health                           | Pathogen Genomics Center, National Institute of Infectious Diseases                                                                                                              | Tsuyoshi Sekizuka, Kentaro Itokawa, Rina Tanaka, Masanori Hashino, Hajime Kamiya, Motoi Suzuki, Makoto Kuroda                                                  |                                                                                                                                                                                                                                                                             |
| EPI_ISL_479913, EPI_ISL_479914, EPI_ISL_479916, EPI_ISL_479918                                                                                                                                                                                                                                                                                                                                                                                                                                                                                                                                                                                                                                                                                                                                                                                                                                                                                                                                                                                                                                                                                                                                                                                                                                                                 | Niigata City Public Health Research Institute                             | Pathogen Genomics Center, National Institute of Infectious Diseases                                                                                                              | Tsuyoshi Sekizuka, Yurie Takahashi, Kentaro Itokawa, Rina Tanaka, Masanori Hashino, Hajime Kamiya, Motoi Suzuki, Makoto Kuroda                                 |                                                                                                                                                                                                                                                                             |
| EPI_ISL_479925                                                                                                                                                                                                                                                                                                                                                                                                                                                                                                                                                                                                                                                                                                                                                                                                                                                                                                                                                                                                                                                                                                                                                                                                                                                                                                                 | Sakai City Institute of Public Health                                     | Pathogen Genomics Center, National Institute of Infectious Diseases                                                                                                              | Tsuyoshi Sekizuka, Tatsuya Miyoshi, Kentaro Itokawa, Rina Tanaka, Masanori Hashino, Hajime Kamiya, Motoi Suzuki, Makoto Kuroda                                 |                                                                                                                                                                                                                                                                             |
| EPI_ISL_479929, EPI_ISL_479930, EPI_ISL_479931, EPI_ISL_479932, EPI_ISL_479933, EPI_ISL_479934, EPI_ISL_479935                                                                                                                                                                                                                                                                                                                                                                                                                                                                                                                                                                                                                                                                                                                                                                                                                                                                                                                                                                                                                                                                                                                                                                                                                 | Saitama Prefectural Institute of Public Health                            | Pathogen Genomics Center, National Institute of Infectious Diseases                                                                                                              | Tsuyoshi Sekizuka, Hayato Ehara, Kentaro Itokawa, Rina Tanaka, Masanori Hashino, Hajime Kamiya, Motoi Suzuki, Makoto Kuroda                                    |                                                                                                                                                                                                                                                                             |
| EPI_ISL_479939, EPI_ISL_479941, EPI_ISL_479942, EPI_ISL_479943                                                                                                                                                                                                                                                                                                                                                                                                                                                                                                                                                                                                                                                                                                                                                                                                                                                                                                                                                                                                                                                                                                                                                                                                                                                                 | Ibaraki Prefectural Institute of Public Health                            | Pathogen Genomics Center, National Institute of Infectious Diseases                                                                                                              | Tsuyoshi Sekizuka, Keiko Goto, Kentaro Itokawa, Rina Tanaka, Masanori Hashino, Hajime Kamiya, Motoi Suzuki, Makoto Kuroda                                      |                                                                                                                                                                                                                                                                             |
| EPI_ISL_479944, EPI_ISL_479945, EPI_ISL_479947, EPI_ISL_479954, EPI_ISL_479955                                                                                                                                                                                                                                                                                                                                                                                                                                                                                                                                                                                                                                                                                                                                                                                                                                                                                                                                                                                                                                                                                                                                                                                                                                                 | Osaka Institute of Public Health                                          | Pathogen Genomics Center, National Institute of Infectious Diseases                                                                                                              | Tsuyoshi Sekizuka, Satoshi Hiroi, Saeko Morikawa, Kazushi Motomura, Kentaro Itokawa, Rina Tanaka, Masanori Hashino, Hajime Kamiya, Motoi Suzuki, Makoto Kuroda |                                                                                                                                                                                                                                                                             |
| EPI_ISL_479960, EPI_ISL_479961, EPI_ISL_479964                                                                                                                                                                                                                                                                                                                                                                                                                                                                                                                                                                                                                                                                                                                                                                                                                                                                                                                                                                                                                                                                                                                                                                                                                                                                                 | Tokyo Metropolitan Institute of Public Health                             | Pathogen Genomics Center, National Institute of Infectious Diseases                                                                                                              | Tsuyoshi Sekizuka, Kenji Sadamasu, Takashi Chiba, Mami Nagashima, Kentaro Itokawa, Rina Tanaka, Masanori Hashino, Hajime Kamiya, Motoi Suzuki, Makoto Kuroda   |                                                                                                                                                                                                                                                                             |
| EPI_ISL_479969, EPI_ISL_479972, EPI_ISL_479973, EPI_ISL_479974, EPI_ISL_479977, EPI_ISL_479978                                                                                                                                                                                                                                                                                                                                                                                                                                                                                                                                                                                                                                                                                                                                                                                                                                                                                                                                                                                                                                                                                                                                                                                                                                 | Fukui Prefectural Institute of Public Health and Environmental Science    | Pathogen Genomics Center, National Institute of Infectious Diseases                                                                                                              | Tsuyoshi Sekizuka, Miho Toho, Kentaro Itokawa, Rina Tanaka, Masanori Hashino, Hajime Kamiya, Motoi Suzuki, Makoto Kuroda                                       |                                                                                                                                                                                                                                                                             |
| EPI_ISL_479980, EPI_ISL_479981, EPI_ISL_479983, EPI_ISL_479984                                                                                                                                                                                                                                                                                                                                                                                                                                                                                                                                                                                                                                                                                                                                                                                                                                                                                                                                                                                                                                                                                                                                                                                                                                                                 | Oita Prefectural Institute of Public Health and Environmental Science     | Pathogen Genomics Center, National Institute of Infectious Diseases                                                                                                              | Tsuyoshi Sekizuka, Mari Sasaki, Kentaro Itokawa, Rina Tanaka, Masanori Hashino, Hajime Kamiya, Motoi Suzuki, Makoto Kuroda                                     |                                                                                                                                                                                                                                                                             |







|                                                                                                                                                                                                                                                                                                                                                                                                                                                                                                                                                                                                                                                                                                                                                                                                                                                                                                                                                                                                                                                                                                                                                                                                                                                                                                                                                                                                                                                                                                                                                                                                                                                                                                                                                                                                                                                                                                                                                                                                                                                                                                                                                                                                                                                                                                                                                                                                                                                                                |                                                                                                                                                                                                                                                                                                                                                                                                                                                                                                |                                                                                                                                                                                  |                                                                                  |                                                                                                                                                                                                                                                                              |
|--------------------------------------------------------------------------------------------------------------------------------------------------------------------------------------------------------------------------------------------------------------------------------------------------------------------------------------------------------------------------------------------------------------------------------------------------------------------------------------------------------------------------------------------------------------------------------------------------------------------------------------------------------------------------------------------------------------------------------------------------------------------------------------------------------------------------------------------------------------------------------------------------------------------------------------------------------------------------------------------------------------------------------------------------------------------------------------------------------------------------------------------------------------------------------------------------------------------------------------------------------------------------------------------------------------------------------------------------------------------------------------------------------------------------------------------------------------------------------------------------------------------------------------------------------------------------------------------------------------------------------------------------------------------------------------------------------------------------------------------------------------------------------------------------------------------------------------------------------------------------------------------------------------------------------------------------------------------------------------------------------------------------------------------------------------------------------------------------------------------------------------------------------------------------------------------------------------------------------------------------------------------------------------------------------------------------------------------------------------------------------------------------------------------------------------------------------------------------------|------------------------------------------------------------------------------------------------------------------------------------------------------------------------------------------------------------------------------------------------------------------------------------------------------------------------------------------------------------------------------------------------------------------------------------------------------------------------------------------------|----------------------------------------------------------------------------------------------------------------------------------------------------------------------------------|----------------------------------------------------------------------------------|------------------------------------------------------------------------------------------------------------------------------------------------------------------------------------------------------------------------------------------------------------------------------|
| EPI_ISL_679870, EPI_ISL_679871, EPI_ISL_679873, EPI_ISL_679874, EPI_ISL_679875, EPI_ISL_679876, EPI_ISL_679877, EPI_ISL_679878, EPI_ISL_679880, EPI_ISL_679881, EPI_ISL_679882, EPI_ISL_679883, EPI_ISL_679884, EPI_ISL_679885, EPI_ISL_679886, EPI_ISL_679887, EPI_ISL_679888, EPI_ISL_679889, EPI_ISL_679890, EPI_ISL_679893, EPI_ISL_679894, EPI_ISL_679895, EPI_ISL_679896, EPI_ISL_679897, EPI_ISL_679898, EPI_ISL_679900, EPI_ISL_679901, EPI_ISL_679902, EPI_ISL_679903, EPI_ISL_679904, EPI_ISL_679905, EPI_ISL_679907, EPI_ISL_679908, EPI_ISL_679909, EPI_ISL_679910, EPI_ISL_679911, EPI_ISL_679912, EPI_ISL_679913, EPI_ISL_679914, EPI_ISL_679915, EPI_ISL_679916, EPI_ISL_679918, EPI_ISL_679919, EPI_ISL_679920, EPI_ISL_679921, EPI_ISL_679922, EPI_ISL_679923, EPI_ISL_679986, EPI_ISL_679987, EPI_ISL_679988, EPI_ISL_679989, EPI_ISL_679990, EPI_ISL_679992, EPI_ISL_679993, EPI_ISL_679994, EPI_ISL_679995, EPI_ISL_679996, EPI_ISL_679997, EPI_ISL_679998, EPI_ISL_679999, EPI_ISL_680000, EPI_ISL_680001, EPI_ISL_680002, EPI_ISL_680004, EPI_ISL_680005, EPI_ISL_680006, EPI_ISL_680007, EPI_ISL_680008, EPI_ISL_680009, EPI_ISL_680010, EPI_ISL_680011, EPI_ISL_680012, EPI_ISL_680013, EPI_ISL_680014, EPI_ISL_680015, EPI_ISL_680016, EPI_ISL_680017, EPI_ISL_680018, EPI_ISL_680019, EPI_ISL_680120, EPI_ISL_680121, EPI_ISL_680122, EPI_ISL_680124, EPI_ISL_680125, EPI_ISL_680126, EPI_ISL_680127, EPI_ISL_680129, EPI_ISL_680130, EPI_ISL_680131, EPI_ISL_680133, EPI_ISL_680134, EPI_ISL_680137, EPI_ISL_680138, EPI_ISL_680139, EPI_ISL_680140, EPI_ISL_680141, EPI_ISL_680142, EPI_ISL_680143, EPI_ISL_680144, EPI_ISL_680145, EPI_ISL_680148, EPI_ISL_680149, EPI_ISL_680151, EPI_ISL_680152, EPI_ISL_680153, EPI_ISL_680154, EPI_ISL_680156, EPI_ISL_680157, EPI_ISL_680158, EPI_ISL_680159, EPI_ISL_680160, EPI_ISL_680161, EPI_ISL_680162, EPI_ISL_680163, EPI_ISL_680164, EPI_ISL_680165, EPI_ISL_680166, EPI_ISL_680167, EPI_ISL_680168, EPI_ISL_680170, EPI_ISL_680171, EPI_ISL_680172, EPI_ISL_680173, EPI_ISL_680174, EPI_ISL_680175, EPI_ISL_680176, EPI_ISL_680177, EPI_ISL_680178, EPI_ISL_680179, EPI_ISL_680180, EPI_ISL_680182, EPI_ISL_680183, EPI_ISL_680184, EPI_ISL_680185, EPI_ISL_680186, EPI_ISL_680187, EPI_ISL_680189, EPI_ISL_680190, EPI_ISL_680191, EPI_ISL_680192, EPI_ISL_680193, EPI_ISL_680194, EPI_ISL_680196, EPI_ISL_680556, EPI_ISL_680557, EPI_ISL_680558, EPI_ISL_680559, EPI_ISL_680560, EPI_ISL_680561 | see above                                                                                                                                                                                                                                                                                                                                                                                                                                                                                      | Virology Department, Sheffield Teaching Hospitals NHS Foundation Trust/Department of Infection, Immunity and Cardiovascular Disease, The Medical School, University of Sheffield | COVID-19 Genomics UK (COG-UK) Consortium                                         | Thushan de Silva, Matthew Parker, Nikki Smith, Adri Angyal, Rebecca Brown, Luke Green, Rachel Tucker, Paul Parsons, Danielle Groves, Katie Johnson, Laura Carrilero, Alex Keeley, Dave Partridge, Matthew Wyles, Benjamin Lindsey, Mehmet Yavuz, Mohammad Raza, Cariad Evans |
| EPI_ISL_684115, EPI_ISL_684119, EPI_ISL_684122, EPI_ISL_684123                                                                                                                                                                                                                                                                                                                                                                                                                                                                                                                                                                                                                                                                                                                                                                                                                                                                                                                                                                                                                                                                                                                                                                                                                                                                                                                                                                                                                                                                                                                                                                                                                                                                                                                                                                                                                                                                                                                                                                                                                                                                                                                                                                                                                                                                                                                                                                                                                 | EPI_ISL_684127                                                                                                                                                                                                                                                                                                                                                                                                                                                                                 | Pathogen Genomics Center, National Institute of Infectious Diseases                                                                                                              | Pathogen Genomics Center, National Institute of Infectious Diseases              | Tsuyoshi Sekizuka, Kentaro Itokawa, Rina Tanaka, Masanori Hashino, Makoto Kuroda                                                                                                                                                                                             |
| EPI_ISL_684129, EPI_ISL_684131, EPI_ISL_684134                                                                                                                                                                                                                                                                                                                                                                                                                                                                                                                                                                                                                                                                                                                                                                                                                                                                                                                                                                                                                                                                                                                                                                                                                                                                                                                                                                                                                                                                                                                                                                                                                                                                                                                                                                                                                                                                                                                                                                                                                                                                                                                                                                                                                                                                                                                                                                                                                                 | EPI_ISL_684136, EPI_ISL_684138                                                                                                                                                                                                                                                                                                                                                                                                                                                                 | Pathogen Genomics Center, National Institute of Infectious Diseases                                                                                                              | Pathogen Genomics Center, National Institute of Infectious Diseases              | Tsuyoshi Sekizuka, Kentaro Itokawa, Rina Tanaka, Masanori Hashino, Makoto Kuroda                                                                                                                                                                                             |
| EPI_ISL_684139, EPI_ISL_684140, EPI_ISL_684143, EPI_ISL_684145, EPI_ISL_684146                                                                                                                                                                                                                                                                                                                                                                                                                                                                                                                                                                                                                                                                                                                                                                                                                                                                                                                                                                                                                                                                                                                                                                                                                                                                                                                                                                                                                                                                                                                                                                                                                                                                                                                                                                                                                                                                                                                                                                                                                                                                                                                                                                                                                                                                                                                                                                                                 | EPI_ISL_684147                                                                                                                                                                                                                                                                                                                                                                                                                                                                                 | Pathogen Genomics Center, National Institute of Infectious Diseases                                                                                                              | Pathogen Genomics Center, National Institute of Infectious Diseases              | Tsuyoshi Sekizuka, Kentaro Itokawa, Rina Tanaka, Masanori Hashino, Makoto Kuroda                                                                                                                                                                                             |
| EPI_ISL_684149                                                                                                                                                                                                                                                                                                                                                                                                                                                                                                                                                                                                                                                                                                                                                                                                                                                                                                                                                                                                                                                                                                                                                                                                                                                                                                                                                                                                                                                                                                                                                                                                                                                                                                                                                                                                                                                                                                                                                                                                                                                                                                                                                                                                                                                                                                                                                                                                                                                                 | EPI_ISL_684150, EPI_ISL_684151, EPI_ISL_684153, EPI_ISL_684157, EPI_ISL_684158                                                                                                                                                                                                                                                                                                                                                                                                                 | Sakai City Institute of Public Health                                                                                                                                            | Pathogen Genomics Center, National Institute of Infectious Diseases              | Tsuyoshi Sekizuka, Kentaro Itokawa, Rina Tanaka, Masanori Hashino, Makoto Kuroda                                                                                                                                                                                             |
| EPI_ISL_684159, EPI_ISL_684160, EPI_ISL_684161                                                                                                                                                                                                                                                                                                                                                                                                                                                                                                                                                                                                                                                                                                                                                                                                                                                                                                                                                                                                                                                                                                                                                                                                                                                                                                                                                                                                                                                                                                                                                                                                                                                                                                                                                                                                                                                                                                                                                                                                                                                                                                                                                                                                                                                                                                                                                                                                                                 | EPI_ISL_684165, EPI_ISL_684167, EPI_ISL_684168, EPI_ISL_684169, EPI_ISL_684170, EPI_ISL_684171, EPI_ISL_684172, EPI_ISL_684176, EPI_ISL_684179, EPI_ISL_684183, EPI_ISL_684185, EPI_ISL_684186, EPI_ISL_684187, EPI_ISL_684189, EPI_ISL_684191, EPI_ISL_684195, EPI_ISL_684197, EPI_ISL_684200, EPI_ISL_684201, EPI_ISL_684203, EPI_ISL_684204, EPI_ISL_684205, EPI_ISL_684208, EPI_ISL_684210, EPI_ISL_684213, EPI_ISL_684216                                                                 | Saitama Prefectural Institute of Public Health                                                                                                                                   | Pathogen Genomics Center, National Institute of Infectious Diseases              | Tsuyoshi Sekizuka, Kentaro Itokawa, Rina Tanaka, Masanori Hashino, Makoto Kuroda                                                                                                                                                                                             |
| see above                                                                                                                                                                                                                                                                                                                                                                                                                                                                                                                                                                                                                                                                                                                                                                                                                                                                                                                                                                                                                                                                                                                                                                                                                                                                                                                                                                                                                                                                                                                                                                                                                                                                                                                                                                                                                                                                                                                                                                                                                                                                                                                                                                                                                                                                                                                                                                                                                                                                      | EPI_ISL_684220, EPI_ISL_684222, EPI_ISL_684224, EPI_ISL_684225, EPI_ISL_684226, EPI_ISL_684230, EPI_ISL_684231, EPI_ISL_684233, EPI_ISL_684234, EPI_ISL_684237, EPI_ISL_684241, EPI_ISL_684244, EPI_ISL_684252, EPI_ISL_684253, EPI_ISL_684255, EPI_ISL_684256, EPI_ISL_684257, EPI_ISL_684258, EPI_ISL_684260, EPI_ISL_684261, EPI_ISL_684263, EPI_ISL_684266, EPI_ISL_684268, EPI_ISL_684272, EPI_ISL_684275, EPI_ISL_684279, EPI_ISL_684280, EPI_ISL_684286, EPI_ISL_684287, EPI_ISL_684288 | Chiba Prefectural Institute of Public Health                                                                                                                                     | Pathogen Genomics Center, National Institute of Infectious Diseases              | Tsuyoshi Sekizuka, Kentaro Itokawa, Rina Tanaka, Masanori Hashino, Makoto Kuroda                                                                                                                                                                                             |
| see above                                                                                                                                                                                                                                                                                                                                                                                                                                                                                                                                                                                                                                                                                                                                                                                                                                                                                                                                                                                                                                                                                                                                                                                                                                                                                                                                                                                                                                                                                                                                                                                                                                                                                                                                                                                                                                                                                                                                                                                                                                                                                                                                                                                                                                                                                                                                                                                                                                                                      | EPI_ISL_684289, EPI_ISL_684290, EPI_ISL_684292, EPI_ISL_684295, EPI_ISL_684298, EPI_ISL_684299, EPI_ISL_684302, EPI_ISL_684303, EPI_ISL_684306, EPI_ISL_684308, EPI_ISL_684309, EPI_ISL_684310, EPI_ISL_684311, EPI_ISL_684315, EPI_ISL_684323                                                                                                                                                                                                                                                 | Gunma Prefectural Institute of Public Health and Environmental Sciences                                                                                                          | Pathogen Genomics Center, National Institute of Infectious Diseases              | Tsuyoshi Sekizuka, Kentaro Itokawa, Rina Tanaka, Masanori Hashino, Makoto Kuroda                                                                                                                                                                                             |
| see above                                                                                                                                                                                                                                                                                                                                                                                                                                                                                                                                                                                                                                                                                                                                                                                                                                                                                                                                                                                                                                                                                                                                                                                                                                                                                                                                                                                                                                                                                                                                                                                                                                                                                                                                                                                                                                                                                                                                                                                                                                                                                                                                                                                                                                                                                                                                                                                                                                                                      | EPI_ISL_684327, EPI_ISL_684336                                                                                                                                                                                                                                                                                                                                                                                                                                                                 | Pathogen Genomics Center, National Institute of Infectious Diseases                                                                                                              | Pathogen Genomics Center, National Institute of Infectious Diseases              | Tsuyoshi Sekizuka, Kentaro Itokawa, Rina Tanaka, Masanori Hashino, Makoto Kuroda                                                                                                                                                                                             |
| EPI_ISL_684339, EPI_ISL_684342, EPI_ISL_684347, EPI_ISL_684350, EPI_ISL_684351, EPI_ISL_684353, EPI_ISL_684356, EPI_ISL_684357, EPI_ISL_684360, EPI_ISL_684362, EPI_ISL_684364, EPI_ISL_684365, EPI_ISL_684367, EPI_ISL_684368, EPI_ISL_684373, EPI_ISL_684375, EPI_ISL_684380, EPI_ISL_684382, EPI_ISL_684384, EPI_ISL_684386, EPI_ISL_684389, EPI_ISL_684390, EPI_ISL_684391, EPI_ISL_684393, EPI_ISL_684396, EPI_ISL_684397, EPI_ISL_684398, EPI_ISL_684401, EPI_ISL_684403, EPI_ISL_684406, EPI_ISL_684407                                                                                                                                                                                                                                                                                                                                                                                                                                                                                                                                                                                                                                                                                                                                                                                                                                                                                                                                                                                                                                                                                                                                                                                                                                                                                                                                                                                                                                                                                                                                                                                                                                                                                                                                                                                                                                                                                                                                                                 | Pathogen Genomics Center, National Institute of Infectious Diseases                                                                                                                                                                                                                                                                                                                                                                                                                            | Pathogen Genomics Center, National Institute of Infectious Diseases                                                                                                              | Tsuyoshi Sekizuka, Kentaro Itokawa, Rina Tanaka, Masanori Hashino, Makoto Kuroda |                                                                                                                                                                                                                                                                              |
| see above                                                                                                                                                                                                                                                                                                                                                                                                                                                                                                                                                                                                                                                                                                                                                                                                                                                                                                                                                                                                                                                                                                                                                                                                                                                                                                                                                                                                                                                                                                                                                                                                                                                                                                                                                                                                                                                                                                                                                                                                                                                                                                                                                                                                                                                                                                                                                                                                                                                                      | EPI_ISL_684408, EPI_ISL_684413, EPI_ISL_684416, EPI_ISL_684418, EPI_ISL_684420, EPI_ISL_684422, EPI_ISL_684423, EPI_ISL_684427, EPI_ISL_684432, EPI_ISL_684444, EPI_ISL_684445, EPI_ISL_684447, EPI_ISL_684449, EPI_ISL_684450, EPI_ISL_684454, EPI_ISL_684458, EPI_ISL_684462, EPI_ISL_684463, EPI_ISL_684468, EPI_ISL_684474, EPI_ISL_684475, EPI_ISL_684476, EPI_ISL_684477, EPI_ISL_684480, EPI_ISL_684482                                                                                 | Pathogen Genomics Center, National Institute of Infectious Diseases                                                                                                              | Pathogen Genomics Center, National Institute of Infectious Diseases              | Tsuyoshi Sekizuka, Kentaro Itokawa, Rina Tanaka, Masanori Hashino, Makoto Kuroda                                                                                                                                                                                             |
| see above                                                                                                                                                                                                                                                                                                                                                                                                                                                                                                                                                                                                                                                                                                                                                                                                                                                                                                                                                                                                                                                                                                                                                                                                                                                                                                                                                                                                                                                                                                                                                                                                                                                                                                                                                                                                                                                                                                                                                                                                                                                                                                                                                                                                                                                                                                                                                                                                                                                                      | EPI_ISL_684487, EPI_ISL_684492, EPI_ISL_684495, EPI_ISL_684496, EPI_ISL_684498, EPI_ISL_684499, EPI_ISL_684500, EPI_ISL_684501, EPI_ISL_684502, EPI_ISL_684504                                                                                                                                                                                                                                                                                                                                 | Fukuoka Institute of Health and Environmental Sciences                                                                                                                           | Pathogen Genomics Center, National Institute of Infectious Diseases              | Tsuyoshi Sekizuka, Kentaro Itokawa, Rina Tanaka, Masanori Hashino, Makoto Kuroda                                                                                                                                                                                             |
| EPI_ISL_684509, EPI_ISL_684514, EPI_ISL_684517, EPI_ISL_684520, EPI_ISL_684521                                                                                                                                                                                                                                                                                                                                                                                                                                                                                                                                                                                                                                                                                                                                                                                                                                                                                                                                                                                                                                                                                                                                                                                                                                                                                                                                                                                                                                                                                                                                                                                                                                                                                                                                                                                                                                                                                                                                                                                                                                                                                                                                                                                                                                                                                                                                                                                                 | EPI_ISL_684523, EPI_ISL_684525, EPI_ISL_684529, EPI_ISL_684532, EPI_ISL_684534, EPI_ISL_684535, EPI_ISL_684536, EPI_ISL_684537, EPI_ISL_684538, EPI_ISL_684540, EPI_ISL_684544, EPI_ISL_684545, EPI_ISL_684546, EPI_ISL_684550, EPI_ISL_684552, EPI_ISL_684561, EPI_ISL_684562                                                                                                                                                                                                                 | Pathogen Genomics Center, National Institute of Infectious Diseases                                                                                                              | Pathogen Genomics Center, National Institute of Infectious Diseases              | Tsuyoshi Sekizuka, Kentaro Itokawa, Rina Tanaka, Masanori Hashino, Makoto Kuroda                                                                                                                                                                                             |
| see above                                                                                                                                                                                                                                                                                                                                                                                                                                                                                                                                                                                                                                                                                                                                                                                                                                                                                                                                                                                                                                                                                                                                                                                                                                                                                                                                                                                                                                                                                                                                                                                                                                                                                                                                                                                                                                                                                                                                                                                                                                                                                                                                                                                                                                                                                                                                                                                                                                                                      | EPI_ISL_684566, EPI_ISL_684567, EPI_ISL_684568, EPI_ISL_684569, EPI_ISL_684570, EPI_ISL_684574, EPI_ISL_684575                                                                                                                                                                                                                                                                                                                                                                                 | Pathogen Genomics Center, National Institute of Infectious Diseases                                                                                                              | Pathogen Genomics Center, National Institute of Infectious Diseases              | Tsuyoshi Sekizuka, Kentaro Itokawa, Rina Tanaka, Masanori Hashino, Makoto Kuroda                                                                                                                                                                                             |
| EPI_ISL_684578, EPI_ISL_684579, EPI_ISL_684584, EPI_ISL_684597, EPI_ISL_684598, EPI_ISL_684600, EPI_ISL_684606, EPI_ISL_684608, EPI_ISL_684609, EPI_ISL_684610, EPI_ISL_684612, EPI_ISL_684613, EPI_ISL_684614                                                                                                                                                                                                                                                                                                                                                                                                                                                                                                                                                                                                                                                                                                                                                                                                                                                                                                                                                                                                                                                                                                                                                                                                                                                                                                                                                                                                                                                                                                                                                                                                                                                                                                                                                                                                                                                                                                                                                                                                                                                                                                                                                                                                                                                                 | see above                                                                                                                                                                                                                                                                                                                                                                                                                                                                                      | Gunma Prefectural Institute of Public Health and Environmental Sciences                                                                                                          | Pathogen Genomics Center, National Institute of Infectious Diseases              | Tsuyoshi Sekizuka, Kentaro Itokawa, Rina Tanaka, Masanori Hashino, Makoto Kuroda                                                                                                                                                                                             |
| see above                                                                                                                                                                                                                                                                                                                                                                                                                                                                                                                                                                                                                                                                                                                                                                                                                                                                                                                                                                                                                                                                                                                                                                                                                                                                                                                                                                                                                                                                                                                                                                                                                                                                                                                                                                                                                                                                                                                                                                                                                                                                                                                                                                                                                                                                                                                                                                                                                                                                      | EPI_ISL_684578, EPI_ISL_684579, EPI_ISL_684584, EPI_ISL_684597, EPI_ISL_684598, EPI_ISL_684600, EPI_ISL_684606, EPI_ISL_684608, EPI_ISL_684609, EPI_ISL_684610, EPI_ISL_684612, EPI_ISL_684613, EPI_ISL_684614                                                                                                                                                                                                                                                                                 | Pathogen Genomics Center, National Institute of Infectious Diseases                                                                                                              | Pathogen Genomics Center, National Institute of Infectious Diseases              | Tsuyoshi Sekizuka, Kentaro Itokawa, Rina Tanaka, Masanori Hashino, Makoto Kuroda                                                                                                                                                                                             |





















EPI\_ISL\_868508, EPI\_ISL\_868509, EPI\_ISL\_868510, EPI\_ISL\_868511, EPI\_ISL\_868512, EPI\_ISL\_868513, EPI\_ISL\_868514, EPI\_ISL\_868515, EPI\_ISL\_868516, EPI\_ISL\_868517, EPI\_ISL\_868518, EPI\_ISL\_868519, EPI\_ISL\_868520, EPI\_ISL\_868521, EPI\_ISL\_868523, EPI\_ISL\_868524, EPI\_ISL\_868525, EPI\_ISL\_868527, EPI\_ISL\_868528, EPI\_ISL\_868531, EPI\_ISL\_868532, EPI\_ISL\_868533, EPI\_ISL\_868534, EPI\_ISL\_868535, EPI\_ISL\_868536, EPI\_ISL\_868537, EPI\_ISL\_868538, EPI\_ISL\_868539, EPI\_ISL\_868540, EPI\_ISL\_868541, EPI\_ISL\_868542, EPI\_ISL\_868543, EPI\_ISL\_868544, EPI\_ISL\_868545, EPI\_ISL\_868546, EPI\_ISL\_868547, EPI\_ISL\_868549, EPI\_ISL\_868550, EPI\_ISL\_868551, EPI\_ISL\_868552, EPI\_ISL\_868553, EPI\_ISL\_868555, EPI\_ISL\_868556, EPI\_ISL\_868558, EPI\_ISL\_868559, EPI\_ISL\_868560, EPI\_ISL\_868561, EPI\_ISL\_868563, EPI\_ISL\_868565, EPI\_ISL\_868566, EPI\_ISL\_868567, EPI\_ISL\_868568, EPI\_ISL\_868569, EPI\_ISL\_868572, EPI\_ISL\_868573, EPI\_ISL\_868575, EPI\_ISL\_868576, EPI\_ISL\_868578, EPI\_ISL\_868580, EPI\_ISL\_868581, EPI\_ISL\_868582, EPI\_ISL\_868583, EPI\_ISL\_868584, EPI\_ISL\_868585, EPI\_ISL\_868586, EPI\_ISL\_868587, EPI\_ISL\_868588, EPI\_ISL\_868590, EPI\_ISL\_868591, EPI\_ISL\_868592, EPI\_ISL\_868593, EPI\_ISL\_868594, EPI\_ISL\_868595, EPI\_ISL\_868596, EPI\_ISL\_868597, EPI\_ISL\_868598, EPI\_ISL\_868599, EPI\_ISL\_868601, EPI\_ISL\_868603, EPI\_ISL\_868604, EPI\_ISL\_868605, EPI\_ISL\_868606, EPI\_ISL\_868607, EPI\_ISL\_868608, EPI\_ISL\_868609, EPI\_ISL\_868612, EPI\_ISL\_868613, EPI\_ISL\_868614, EPI\_ISL\_868615, EPI\_ISL\_868616, EPI\_ISL\_868618, EPI\_ISL\_868619, EPI\_ISL\_868620, EPI\_ISL\_868621, EPI\_ISL\_868622, EPI\_ISL\_868623, EPI\_ISL\_868624, EPI\_ISL\_868625, EPI\_ISL\_868626, EPI\_ISL\_868627, EPI\_ISL\_868628, EPI\_ISL\_868629, EPI\_ISL\_868630, EPI\_ISL\_868632, EPI\_ISL\_868634, EPI\_ISL\_868635, EPI\_ISL\_868637, EPI\_ISL\_868638, EPI\_ISL\_868639, EPI\_ISL\_868640, EPI\_ISL\_868641, EPI\_ISL\_868642, EPI\_ISL\_868643, EPI\_ISL\_868644, EPI\_ISL\_868645, EPI\_ISL\_868647, EPI\_ISL\_868648, EPI\_ISL\_868649, EPI\_ISL\_868650, EPI\_ISL\_868651, EPI\_ISL\_868652, EPI\_ISL\_868653, EPI\_ISL\_868654, EPI\_ISL\_868655, EPI\_ISL\_868656, EPI\_ISL\_868657, EPI\_ISL\_868661, EPI\_ISL\_868662, EPI\_ISL\_868663, EPI\_ISL\_868664, EPI\_ISL\_868665, EPI\_ISL\_868666, EPI\_ISL\_868667, EPI\_ISL\_868668, EPI\_ISL\_868669, EPI\_ISL\_868671, EPI\_ISL\_868672, EPI\_ISL\_868674, EPI\_ISL\_868675, EPI\_ISL\_868676, EPI\_ISL\_868678, EPI\_ISL\_868681, EPI\_ISL\_868682, EPI\_ISL\_868683, EPI\_ISL\_868684, EPI\_ISL\_868685, EPI\_ISL\_868686, EPI\_ISL\_868688, EPI\_ISL\_868690, EPI\_ISL\_868691, EPI\_ISL\_868692, EPI\_ISL\_868693, EPI\_ISL\_868694, EPI\_ISL\_868695, EPI\_ISL\_868696, EPI\_ISL\_868698, EPI\_ISL\_868699, EPI\_ISL\_868700, EPI\_ISL\_868701, EPI\_ISL\_868702, EPI\_ISL\_868704, EPI\_ISL\_868708, EPI\_ISL\_868709, EPI\_ISL\_868711, EPI\_ISL\_868712, EPI\_ISL\_868713, EPI\_ISL\_868714, EPI\_ISL\_868715

see above

Virology Department, Sheffield Teaching Hospitals NHS Foundation Trust/Department of Infection, Immunity and Cardiovascular Disease, The Medical School, University of Sheffield

COVID-19 Genomics UK (COG-UK) Consortium

Thushan de Silva, Matthew Parker, Nikki Smith, Adri Angyal, Rebecca Brown, Luke Green, Rachel Tucker, Paul Parsons, Danielle Groves, Katie Johnson, Laura Carrilero, Alex Keeley, Dave Partridge, Matthew Wyles, Benjamin Lindsey, Mehmet Yavuz, Mohammad Raza, Cariad Evans

EPI\_ISL\_882648, EPI\_ISL\_882649

Swiss National Reference Centre for Influenza Virology laboratory, CNRI

Swiss National Reference Centre for Influenza Virology laboratory, CNRI

Tim Roloff, Ana Rita Gonçalves, Madlen Stange, Helena MB Seth-Smith, Alfredo Mari, Karoline Leuzinger, Julia Bielicki, Manuel Battegay, Hans Hirsch, Laurent Kaiser, Adrian Egli

EPI\_ISL\_884864

Pathogen Genomics Center, National Institute of Infectious Diseases

Pathogen Genomics Center, National Institute of Infectious Diseases

Tsuyoshi Sekizuka, Kentaro Itokawa, Rina Tanaka, Masanori Hashino, Makoto Kuroda

EPI\_ISL\_888683, EPI\_ISL\_888684, EPI\_ISL\_888685, EPI\_ISL\_888686, EPI\_ISL\_888687, EPI\_ISL\_888688, EPI\_ISL\_888689, EPI\_ISL\_888690, EPI\_ISL\_888691, EPI\_ISL\_888692, EPI\_ISL\_888693, EPI\_ISL\_888694, EPI\_ISL\_888695, EPI\_ISL\_888696, EPI\_ISL\_888697, EPI\_ISL\_888698, EPI\_ISL\_888699, EPI\_ISL\_888700, EPI\_ISL\_888701, EPI\_ISL\_888702, EPI\_ISL\_888703, EPI\_ISL\_888704, EPI\_ISL\_888705, EPI\_ISL\_888706, EPI\_ISL\_888707, EPI\_ISL\_888708, EPI\_ISL\_888709, EPI\_ISL\_888710, EPI\_ISL\_888711, EPI\_ISL\_888712, EPI\_ISL\_888713, EPI\_ISL\_888714, EPI\_ISL\_888715, EPI\_ISL\_888716, EPI\_ISL\_888717, EPI\_ISL\_888718, EPI\_ISL\_888719, EPI\_ISL\_888720, EPI\_ISL\_888721, EPI\_ISL\_888722, EPI\_ISL\_888723, EPI\_ISL\_888724, EPI\_ISL\_888725, EPI\_ISL\_888726, EPI\_ISL\_888727, EPI\_ISL\_888728, EPI\_ISL\_888729, EPI\_ISL\_888730, EPI\_ISL\_888731, EPI\_ISL\_888732, EPI\_ISL\_888733, EPI\_ISL\_888734, EPI\_ISL\_888735, EPI\_ISL\_888736, EPI\_ISL\_888737, EPI\_ISL\_888738, EPI\_ISL\_888739, EPI\_ISL\_888740, EPI\_ISL\_888741, EPI\_ISL\_888742, EPI\_ISL\_888743, EPI\_ISL\_888744, EPI\_ISL\_888745, EPI\_ISL\_888746, EPI\_ISL\_888747, EPI\_ISL\_888748, EPI\_ISL\_888749, EPI\_ISL\_888750, EPI\_ISL\_888751, EPI\_ISL\_888752, EPI\_ISL\_888753, EPI\_ISL\_888754, EPI\_ISL\_888755, EPI\_ISL\_888756, EPI\_ISL\_888757, EPI\_ISL\_888758, EPI\_ISL\_888759, EPI\_ISL\_888760, EPI\_ISL\_888761, EPI\_ISL\_888762, EPI\_ISL\_888763, EPI\_ISL\_888764, EPI\_ISL\_888765, EPI\_ISL\_888766, EPI\_ISL\_888767, EPI\_ISL\_888768, EPI\_ISL\_888769, EPI\_ISL\_888770, EPI\_ISL\_888771, EPI\_ISL\_888772, EPI\_ISL\_888773, EPI\_ISL\_888774, EPI\_ISL\_888775, EPI\_ISL\_888776, EPI\_ISL\_888777, EPI\_ISL\_888778, EPI\_ISL\_888779, EPI\_ISL\_888780, EPI\_ISL\_888781, EPI\_ISL\_888782, EPI\_ISL\_888783, EPI\_ISL\_888784, EPI\_ISL\_888785, EPI\_ISL\_888786, EPI\_ISL\_888787, EPI\_ISL\_888788, EPI\_ISL\_888789, EPI\_ISL\_888790, EPI\_ISL\_890238, EPI\_ISL\_890239, EPI\_ISL\_890240, EPI\_ISL\_890241, EPI\_ISL\_890242, EPI\_ISL\_890243, EPI\_ISL\_890244, EPI\_ISL\_890245, EPI\_ISL\_890246, EPI\_ISL\_890247, EPI\_ISL\_890248, EPI\_ISL\_890249, EPI\_ISL\_890250, EPI\_ISL\_890251, EPI\_ISL\_890252, EPI\_ISL\_890253, EPI\_ISL\_890254, EPI\_ISL\_890255, EPI\_ISL\_890256, EPI\_ISL\_890257, EPI\_ISL\_890258, EPI\_ISL\_890259, EPI\_ISL\_890260, EPI\_ISL\_890261, EPI\_ISL\_890262, EPI\_ISL\_890263, EPI\_ISL\_890264, EPI\_ISL\_890265, EPI\_ISL\_890266, EPI\_ISL\_890267, EPI\_ISL\_890268, EPI\_ISL\_890269, EPI\_ISL\_890270, EPI\_ISL\_890271, EPI\_ISL\_890272, EPI\_ISL\_890273, EPI\_ISL\_890274, EPI\_ISL\_890275, EPI\_ISL\_890276, EPI\_ISL\_890277, EPI\_ISL\_890278, EPI\_ISL\_890279, EPI\_ISL\_890280, EPI\_ISL\_890281, EPI\_ISL\_890282, EPI\_ISL\_890283, EPI\_ISL\_890284, EPI\_ISL\_890285, EPI\_ISL\_890286, EPI\_ISL\_890287, EPI\_ISL\_890288, EPI\_ISL\_890289, EPI\_ISL\_890290, EPI\_ISL\_890291, EPI\_ISL\_890292, EPI\_ISL\_890293, EPI\_ISL\_890294, EPI\_ISL\_890295, EPI\_ISL\_890296, EPI\_ISL\_890297, EPI\_ISL\_890298, EPI\_ISL\_890299, EPI\_ISL\_890300, EPI\_ISL\_890301, EPI\_ISL\_890302, EPI\_ISL\_890303, EPI\_ISL\_890304, EPI\_ISL\_890305, EPI\_ISL\_890306, EPI\_ISL\_890307, EPI\_ISL\_890308, EPI\_ISL\_890309, EPI\_ISL\_890310, EPI\_ISL\_890311, EPI\_ISL\_890312, EPI\_ISL\_890313, EPI\_ISL\_890314, EPI\_ISL\_890315, EPI\_ISL\_890316, EPI\_ISL\_890317, EPI\_ISL\_890318, EPI\_ISL\_890319, EPI\_ISL\_890320, EPI\_ISL\_890321, EPI\_ISL\_890322, EPI\_ISL\_890323, EPI\_ISL\_890324, EPI\_ISL\_890325, EPI\_ISL\_890326, EPI\_ISL\_890327, EPI\_ISL\_890328, EPI\_ISL\_890329, EPI\_ISL\_890330, EPI\_ISL\_890331, EPI\_ISL\_890332, EPI\_ISL\_890333, EPI\_ISL\_890334, EPI\_ISL\_890335, EPI\_ISL\_890336, EPI\_ISL\_890337, EPI\_ISL\_890338, EPI\_ISL\_890339, EPI\_ISL\_890340, EPI\_ISL\_890341, EPI\_ISL\_890342, EPI\_ISL\_890343, EPI\_ISL\_890344, EPI\_ISL\_890345

see above

KU Leuven, Rega Institute, Clinical and Epidemiological Virology

KU Leuven, Rega Institute, Clinical and Epidemiological Virology

Tony Wawina-Bokalanga, Bert Vanmechelen, Joan Marti-Carerras, Piet Maes

We gratefully acknowledge the following Authors from the Originating laboratories responsible for obtaining the specimens, as well as the Submitting laboratories where the genome data were generated and shared via GISAID, on which this research is based.

All Submitters of data may be contacted directly via [www.gisaid.org](http://www.gisaid.org)

Authors are sorted alphabetically.

| Accession ID                                                                                                                                                                                                                                                                                                                                                                                                                                                                                                                                                                                                                   | Originating Laboratory                                                                                             | Submitting Laboratory                                                                                                                                                                                                             | Authors                                                                                                                                                                                                                                                                                                                                                                        |
|--------------------------------------------------------------------------------------------------------------------------------------------------------------------------------------------------------------------------------------------------------------------------------------------------------------------------------------------------------------------------------------------------------------------------------------------------------------------------------------------------------------------------------------------------------------------------------------------------------------------------------|--------------------------------------------------------------------------------------------------------------------|-----------------------------------------------------------------------------------------------------------------------------------------------------------------------------------------------------------------------------------|--------------------------------------------------------------------------------------------------------------------------------------------------------------------------------------------------------------------------------------------------------------------------------------------------------------------------------------------------------------------------------|
| EPI_ISL_406862                                                                                                                                                                                                                                                                                                                                                                                                                                                                                                                                                                                                                 | Charité Universitätsmedizin Berlin, Institute of Virology; Institut für Mikrobiologie der Bundeswehr, Munich       | Charité Universitätsmedizin Berlin, Institute of Virology                                                                                                                                                                         | Victor M Corman, Julia Schneider, Talitha Veith, Barbara Mühlemann, Markus Antwerpen, Christian Drosten, Roman Wölfel                                                                                                                                                                                                                                                          |
| EPI_ISL_407084                                                                                                                                                                                                                                                                                                                                                                                                                                                                                                                                                                                                                 | Department of Virology III, National Institute of Infectious Diseases                                              | Pathogen Genomics Center, National Institute of Infectious Diseases                                                                                                                                                               | Tsuyoshi Sekizuka, Shutoku Matsuyama, Naganori Nao, Kazuya Shirato, Shinji Watanabe, Makoto Takeda, Makoto Kuroda                                                                                                                                                                                                                                                              |
| EPI_ISL_408665                                                                                                                                                                                                                                                                                                                                                                                                                                                                                                                                                                                                                 | Dept. of Virology III, National Institute of Infectious Diseases                                                   | Pathogen Genomics Center, National Institute of Infectious Diseases                                                                                                                                                               | Tsuyoshi Sekizuka, Shutoku Matsuyama, Naganori Nao, Kazuya Shirato, Makoto Takeda, Makoto Kuroda                                                                                                                                                                                                                                                                               |
| EPI_ISL_408668                                                                                                                                                                                                                                                                                                                                                                                                                                                                                                                                                                                                                 | National Influenza Center - National Institute of Hygiene and Epidemiology (NIHE)                                  | National Influenza Center - National Institute of Hygiene and Epidemiology (NIHE)                                                                                                                                                 | Ung Thi Hong Trang, Hoang Vu Mai Phuong, Nguyen Le Khanh Hang, Nguyen Vu Son, Le Thi Thanh, Vuong Duc Cuong, Nguyen Phuong Anh, Pham Thi Hien, Tran Thu Huong, Le Thi Quynh Mai,                                                                                                                                                                                               |
| EPI_ISL_408669                                                                                                                                                                                                                                                                                                                                                                                                                                                                                                                                                                                                                 | Dept. of Virology III, National Institute of Infectious Diseases                                                   | Pathogen Genomics Center, National Institute of Infectious Diseases                                                                                                                                                               | Tsuyoshi Sekizuka, Shutoku Matsuyama, Naganori Nao, Kazuya Shirato, Makoto Takeda, Makoto Kuroda                                                                                                                                                                                                                                                                               |
| EPI_ISL_410531, EPI_ISL_410532                                                                                                                                                                                                                                                                                                                                                                                                                                                                                                                                                                                                 | Dept. of Pathology, National Institute of Infectious Diseases                                                      | Pathogen Genomics Center, National Institute of Infectious Diseases                                                                                                                                                               | Tsuyoshi Sekizuka, Harutaka Katano, Shutoku Matsuyama, Naganori Nao, Kazuya Shirato, Motoi Suzuki, Hideki Hasegawa, Takaji Wakita, Makoto Takeda, Tadaki Suzuki, Makoto Kuroda                                                                                                                                                                                                 |
| EPI_ISL_413459                                                                                                                                                                                                                                                                                                                                                                                                                                                                                                                                                                                                                 | Department of Pathology, Toshima Hospital                                                                          | Pathogen Genomics Center, National Institute of Infectious Diseases                                                                                                                                                               | Tsuyoshi Sekizuka, Kentaro Itokawa, Takuya Adachi, Masahiro Sano, Jun Yamazaki, Ippei Miyamoto, Haruka Nishioka, Ja-Mun Chong, Noriko Nakajima, Yuko Sato, Minoru Tobiume, Harutaka Katano, Tadaki Suzuki, Makoto Kuroda                                                                                                                                                       |
| EPI_ISL_416565, EPI_ISL_416566, EPI_ISL_416568, EPI_ISL_416570, EPI_ISL_416573, EPI_ISL_416574, EPI_ISL_416575, EPI_ISL_416577, EPI_ISL_416579, EPI_ISL_416580, EPI_ISL_416583, EPI_ISL_416584, EPI_ISL_416586, EPI_ISL_416590, EPI_ISL_416591, EPI_ISL_416593, EPI_ISL_416595, EPI_ISL_416596, EPI_ISL_416598, EPI_ISL_416600, EPI_ISL_416603, EPI_ISL_416604, EPI_ISL_416605, EPI_ISL_416606, EPI_ISL_416610, EPI_ISL_416612, EPI_ISL_416613, EPI_ISL_416616, EPI_ISL_416617, EPI_ISL_416620, EPI_ISL_416622, EPI_ISL_416624, EPI_ISL_416626, EPI_ISL_416627, EPI_ISL_416629, EPI_ISL_416631, EPI_ISL_416633, EPI_ISL_416634 | Pathogen Genomics Center, National Institute of Infectious Diseases                                                | Tsuyoshi Sekizuka, Kentaro Itokawa, Rina Tanaka, Masanori Hashino, Tsutomu Kageyama, Shinji Saito, Ikuyo Takayama, Hideki Hasegawa, Takuri Takahashi, Hajime Kamiya, Takuya Yamagishi, Motoi Suzuki, Takaji Wakita, Makoto Kuroda |                                                                                                                                                                                                                                                                                                                                                                                |
| see above                                                                                                                                                                                                                                                                                                                                                                                                                                                                                                                                                                                                                      | Japanese Quarantine Stations                                                                                       | Pathogen Genomics Center, National Institute of Infectious Diseases                                                                                                                                                               | Tsuyoshi Sekizuka, Kentaro Itokawa, Rina Tanaka, Masanori Hashino, Tsutomu Kageyama, Shinji Saito, Ikuyo Takayama, Hideki Hasegawa, Takuri Takahashi, Hajime Kamiya, Takuya Yamagishi, Motoi Suzuki, Takaji Wakita, Makoto Kuroda                                                                                                                                              |
| EPI_ISL_416742                                                                                                                                                                                                                                                                                                                                                                                                                                                                                                                                                                                                                 | NRL for Influenza, Centrum Epidemiology and Microbiology of National Institute of Public Health, Czech Republic    | Charite Universitaetsmedizin Berlin, Institute of Virology                                                                                                                                                                        | Victor M Corman, Julia Schneider, Jorn Beheim-Schwarzbach, Talitha Veith, Barbara Muehleemann, Terry Jones, Akexander Nagy, Jaromira Vecerova, Dusan Trnka, Ludmila Novakova, Helena Jirincova, Christian Drosten                                                                                                                                                              |
| EPI_ISL_417034                                                                                                                                                                                                                                                                                                                                                                                                                                                                                                                                                                                                                 | Laboratorio de Ecologia de Doencas Transmissíveis na Amazonia, Instituto Leonidas e Maria Deane - Fiocruz Amazonia | Laboratorio de Ecologia de Doencas Transmissíveis na Amazonia, Instituto Leonidas e Maria Deane - Fiocruz Amazonia                                                                                                                | Valdinet Nascimento, André Corado, Fernanda Nascimento, Ágatha Costa, Debora Duarte, Luciana Gonçalves, Michele Jesus, Sérgio Luz, Felipe Naveca on behalf of the Fiocruz COVID-19 Genomic Surveillance Network                                                                                                                                                                |
| EPI_ISL_419296                                                                                                                                                                                                                                                                                                                                                                                                                                                                                                                                                                                                                 | Kochi Prefectural Institute of Public Health                                                                       | Pathogen Genomics Center, National Institute of Infectious Diseases                                                                                                                                                               | Tsuyoshi Sekizuka, Akihiko Tokaji, Kentaro Itokawa, Rina Tanaka, Masanori Hashino, Hajime Kamiya, Motoi Suzuki, Makoto Kuroda                                                                                                                                                                                                                                                  |
| EPI_ISL_419297, EPI_ISL_419298                                                                                                                                                                                                                                                                                                                                                                                                                                                                                                                                                                                                 | Chiba Prefectural Institute of Public Health                                                                       | Pathogen Genomics Center, National Institute of Infectious Diseases                                                                                                                                                               | Tsuyoshi Sekizuka, Masakatsu Taira, Yushi Hachisu, Kentaro Itokawa, Rina Tanaka, Masanori Hashino, Hajime Kamiya, Motoi Suzuki, Makoto Kuroda                                                                                                                                                                                                                                  |
| EPI_ISL_419299, EPI_ISL_419300                                                                                                                                                                                                                                                                                                                                                                                                                                                                                                                                                                                                 | Ishikawa Prefectural Institute of Public Health and Environmental Science                                          | Pathogen Genomics Center, National Institute of Infectious Diseases                                                                                                                                                               | Tsuyoshi Sekizuka, Sanae Kuramoto, Eri Nariai, Kentaro Itokawa, Rina Tanaka, Masanori Hashino, Hajime Kamiya, Motoi Suzuki, Makoto Kuroda                                                                                                                                                                                                                                      |
| EPI_ISL_419301, EPI_ISL_419303, EPI_ISL_419304, EPI_ISL_419308                                                                                                                                                                                                                                                                                                                                                                                                                                                                                                                                                                 | Saitama Prefectural Institute of Public Health                                                                     | Pathogen Genomics Center, National Institute of Infectious Diseases                                                                                                                                                               | Tsuyoshi Sekizuka, Michiyo Shinohara, Tsuyoshi Kishimoto, Kentaro Itokawa, Rina Tanaka, Masanori Hashino, Hajime Kamiya, Motoi Suzuki, Makoto Kuroda                                                                                                                                                                                                                           |
| EPI_ISL_419310, EPI_ISL_419311                                                                                                                                                                                                                                                                                                                                                                                                                                                                                                                                                                                                 | Chiba Prefectural Institute of Public Health                                                                       | Pathogen Genomics Center, National Institute of Infectious Diseases                                                                                                                                                               | Tsuyoshi Sekizuka, Masakatsu Taira, Yushi Hachisu, Kentaro Itokawa, Rina Tanaka, Masanori Hashino, Hajime Kamiya, Motoi Suzuki, Makoto Kuroda                                                                                                                                                                                                                                  |
| EPI_ISL_419691                                                                                                                                                                                                                                                                                                                                                                                                                                                                                                                                                                                                                 | E. Gulbja Laboratorija                                                                                             | Charite Universitaetsmedizin Berlin, Institute of Virology                                                                                                                                                                        | Victor M Corman, Julia Schneider, Barbara Mühlemann, Talitha Veith, Jorn Beheim-Schwarzbach, Terry Jones, Dr. Didzis Gavars, Mikus Gavars, Dmitrijs Perminovs, Christian Drosten                                                                                                                                                                                               |
| EPI_ISL_419693                                                                                                                                                                                                                                                                                                                                                                                                                                                                                                                                                                                                                 | The Republican Research and Practical Center for Epidemiology and Microbiology                                     | Charite Universitaetsmedizin Berlin, Institute of Virology                                                                                                                                                                        | Victor M Corman, Julia Schneider, Barbara Mühlemann, Talitha Veith, Jorn Beheim-Schwarzbach, Terry Jones, Natalia Shmialiova, Natalia Sivets, Christian Drosten                                                                                                                                                                                                                |
| EPI_ISL_420121                                                                                                                                                                                                                                                                                                                                                                                                                                                                                                                                                                                                                 | Servicio de Microbiología. Consorcio Hospital General Universitario de Valencia                                    | Sequencing and Bioinformatics Service and Molecular Epidemiology Research Group. FISABIO-Public Health                                                                                                                            | Vicente Soriano Chirona, Maria Alma Bracho, Griselda De Marco, Beatriz Beamud, Lidia Ruiz Roldan, Marta Pla Diaz, Neris Garcia-Gonzalez, Loreto Ferrús Abad, Inma Galán Vendrell, Paula Ruiz-Hueso, Mariana Reyes-Prieto, María Dolores Ocete, Lúcia Martínez-Priego, Concepcion Gimeno, Giuseppe D'Auria, Fernando Gonzalez-Candelas                                          |
| EPI_ISL_425190                                                                                                                                                                                                                                                                                                                                                                                                                                                                                                                                                                                                                 | Servicio de Microbiología. Consorcio Hospital General Universitario de Valencia                                    | Sequencing and Bioinformatics Service and Molecular Epidemiology Research Group. FISABIO-Public Health                                                                                                                            | Vicente Soriano Chirona, Ivan Ansari, David Navarro, Maria Alma Bracho, Griselda De Marco, Beatriz Beamud, Lidia Ruiz Roldan, Marta Pla Diaz, Neris Garcia-Gonzalez, Inma Galán Vendrell, Sandra Carbo, Loreto Ferrús Abad, Paula Ruiz-Hueso, Mariana Reyes-Prieto, Lúcia Martínez-Priego, Giuseppe D'Auria, Fernando Gonzalez-Candelas                                        |
| EPI_ISL_425202                                                                                                                                                                                                                                                                                                                                                                                                                                                                                                                                                                                                                 | Servicio de Microbiología. Hospital Clínico Universitario de Valencia                                              | Sequencing and Bioinformatics Service and Molecular Epidemiology Research Group. FISABIO-Public Health                                                                                                                            | Vicente Soriano Chirona, Maria Alma Bracho, Griselda De Marco, Beatriz Beamud, Lidia Ruiz Roldan, Marta Pla Diaz, Neris Garcia-Gonzalez, Loreto Ferrús Abad, María Dolores Ocete, Inma Galán Vendrell, Paula Ruiz-Hueso, Mariana Reyes-Prieto, Lúcia Martínez-Priego, Concepcion Gimeno, Giuseppe D'Auria, Fernando Gonzalez-Candelas                                          |
| EPI_ISL_428202, EPI_ISL_428203, EPI_ISL_428204, EPI_ISL_428205, EPI_ISL_428206                                                                                                                                                                                                                                                                                                                                                                                                                                                                                                                                                 | Nebraska Public Health Laboratory                                                                                  | UNMC COVID-19 Response Team                                                                                                                                                                                                       | UNMC COVID-19 Response Team                                                                                                                                                                                                                                                                                                                                                    |
| EPI_ISL_430469                                                                                                                                                                                                                                                                                                                                                                                                                                                                                                                                                                                                                 | Hellenic Pasteur Institute, Public Health Laboratories                                                             | Hellenic Pasteur Institute, Public Health Laboratories, Unit of Bioinformatics and Applied Genomics                                                                                                                               | Vasiliki Pogka, Timokratis Karamitros, Athanasios Kossyvakis, Antonios Kalliaropoulos, Horefti Elina, Evangelidou Maria, Androniki Voulgari-Kokota, Aspasia Kontou, Andreas Mentis                                                                                                                                                                                             |
| EPI_ISL_436289, EPI_ISL_436309, EPI_ISL_436329, EPI_ISL_436349, EPI_ISL_436400                                                                                                                                                                                                                                                                                                                                                                                                                                                                                                                                                 | Servicio de Microbiología. Hospital Clínico Universitario de Valencia                                              | Sequencing and Bioinformatics Service and Molecular Epidemiology Research Group. FISABIO-Public Health                                                                                                                            | Vicente Soriano Chirona, Ivan Ansari, David Navarro, Maria Alma Bracho, Griselda De Marco, Beatriz Beamud, Lidia Ruiz Roldan, Marta Pla Diaz, Neris Garcia-Gonzalez, Inma Galán Vendrell, Sandra Carbo, Loreto Ferrús Abad, Paula Ruiz-Hueso, Mariana Reyes-Prieto, Lúcia Martínez-Priego, Giuseppe D'Auria, Fernando Gonzalez-Candelas                                        |
| EPI_ISL_437689                                                                                                                                                                                                                                                                                                                                                                                                                                                                                                                                                                                                                 | Laboratory for Urgent Response to Biological Threats                                                               | Institut Pasteur CIBU / ERI                                                                                                                                                                                                       | V. Caro, A. Kwasiborski, V. Hourdel, C. Balière, J. Vanhomwegen, C. Batéjat, JC. Manuguerra                                                                                                                                                                                                                                                                                    |
| EPI_ISL_437690                                                                                                                                                                                                                                                                                                                                                                                                                                                                                                                                                                                                                 | Laboratory for Urgent Response to Biological Threats                                                               | Institut Pasteur CIBU /ERI                                                                                                                                                                                                        | V. Caro, A. Kwasiborski, H. Hourdel, C. Balière, J. Vanhomwegen, C. Batéjat, JC. Manuguerra                                                                                                                                                                                                                                                                                    |
| EPI_ISL_444022, EPI_ISL_445078, EPI_ISL_445079, EPI_ISL_445080, EPI_ISL_445081, EPI_ISL_445082, EPI_ISL_445083, EPI_ISL_445084                                                                                                                                                                                                                                                                                                                                                                                                                                                                                                 | Baylor College of Medicine                                                                                         | Baylor College of Medicine: HGSC                                                                                                                                                                                                  | Vasanthi Avadhanula, Erin Nicholson, David Henke, Pedro Piedra, Harsha Doddapaneni, Donna Muzny, Qingchang Heng, Hsu Chao, Zeineen Momin, Hua Shen, George Weissenberger, Kavya Kottapalli, Yimiti Meiteguli, Sejal Salvi, GINGER Metcalf, Vipin Menon, Sara J.J. Cregeen, Matthew C. Ross, Tulin Ayvaz, Richard Suggang, Kristi L. Hoffman, Matthew Wong, Joseph F. Petrosino |
| EPI_ISL_447481, EPI_ISL_447495,                                                                                                                                                                                                                                                                                                                                                                                                                                                                                                                                                                                                | Servicio de Microbiología. Hospital Clínico Universitario de                                                       | Sequencing and Bioinformatics Service and Molecular                                                                                                                                                                               | Vicente Soriano Chirona, Ivan Ansari, Lúcia Martínez-Priego, Giuseppe 'Auria, David Navarro, Eliseo Albert, Maria Alma Bracho, Lidia Ruiz Roldan, Neris                                                                                                                                                                                                                        |



|                                                                                                                                                                                                                                                                                                                                                                                                                                                                                                                                                                                                                                                                                                                                                                                                                                                                                                                                                                                                                                                                |                                                                                                                                      |                                                                                                                                       |                                                                                                                                                                                                                                                                                                                                                                                                                                                                                                                                        |
|----------------------------------------------------------------------------------------------------------------------------------------------------------------------------------------------------------------------------------------------------------------------------------------------------------------------------------------------------------------------------------------------------------------------------------------------------------------------------------------------------------------------------------------------------------------------------------------------------------------------------------------------------------------------------------------------------------------------------------------------------------------------------------------------------------------------------------------------------------------------------------------------------------------------------------------------------------------------------------------------------------------------------------------------------------------|--------------------------------------------------------------------------------------------------------------------------------------|---------------------------------------------------------------------------------------------------------------------------------------|----------------------------------------------------------------------------------------------------------------------------------------------------------------------------------------------------------------------------------------------------------------------------------------------------------------------------------------------------------------------------------------------------------------------------------------------------------------------------------------------------------------------------------------|
| EPI_ISL_447509, EPI_ISL_447522                                                                                                                                                                                                                                                                                                                                                                                                                                                                                                                                                                                                                                                                                                                                                                                                                                                                                                                                                                                                                                 | Valencia                                                                                                                             | Epidemiology Research Group. FISABIO-Public Health                                                                                    | Garcia-Gonzalez, Inma Galán Vendrell, Sandra Carbo, Loreto Ferrús Abad, Paula Ruiz-Hueso, Mariana Reyes-Prieto, Fernando Gonzalez-Candelas                                                                                                                                                                                                                                                                                                                                                                                             |
| EPI_ISL_447579, EPI_ISL_447580, EPI_ISL_447582, EPI_ISL_447583                                                                                                                                                                                                                                                                                                                                                                                                                                                                                                                                                                                                                                                                                                                                                                                                                                                                                                                                                                                                 | CSIR-Centre for Cellular and Molecular Biology                                                                                       | CSIR-Centre for Cellular and Molecular Biology                                                                                        | Tulasi Nagabandi, Namami Gaur, Sakshi Shambhavi, Lamuk Zaveri, Shagufta Khan, Purushotham Vodnala, Payel Mukherjee, Sofia Banu, Priya Singh, Dhiviya Vedagiri, Divya Gupta, Vishal Sah, Santosh Kumar Kuncha, Krishnan Harinivas Harshan, Archana Bharadwaj Siva, Karthik Bharadwaj Tallapaka, Rakesh K Mishra, Divya Tej Sowpati                                                                                                                                                                                                      |
| EPI_ISL_447608, EPI_ISL_447609, EPI_ISL_447610, EPI_ISL_447611, EPI_ISL_447612, EPI_ISL_447613                                                                                                                                                                                                                                                                                                                                                                                                                                                                                                                                                                                                                                                                                                                                                                                                                                                                                                                                                                 | Goethe University Hospital Frankfurt                                                                                                 | Institute for Medical Virology, Goethe University Hospital Frankfurt                                                                  | Tuna Toptan, Sebastian Hoehl, Sandra Westhaus, Denisa Bojkova, Annemarie Berger, Björn Rotter, Klaus Hoffmeier, Jindrich Cinatl, Sandra Ciesek, and Marek Widera                                                                                                                                                                                                                                                                                                                                                                       |
| EPI_ISL_447860, EPI_ISL_447861                                                                                                                                                                                                                                                                                                                                                                                                                                                                                                                                                                                                                                                                                                                                                                                                                                                                                                                                                                                                                                 | CSIR-Centre for Cellular and Molecular Biology                                                                                       | CSIR-Centre for Cellular and Molecular Biology                                                                                        | Tulasi Nagabandi, Namami Gaur, Sakshi Shambhavi, Lamuk Zaveri, Shagufta Khan, Purushotham Vodnala, Payel Mukherjee, Sofia Banu, Priya Singh, Dhiviya Vedagiri, Divya Gupta, Vishal Sah, Santosh Kumar Kuncha, Krishnan Harinivas Harshan, Archana Bharadwaj Siva, Karthik Bharadwaj Tallapaka, Rakesh K Mishra, Divya Tej Sowpati                                                                                                                                                                                                      |
| EPI_ISL_450331                                                                                                                                                                                                                                                                                                                                                                                                                                                                                                                                                                                                                                                                                                                                                                                                                                                                                                                                                                                                                                                 | CSIR-Centre for Cellular and Molecular Biology                                                                                       | CSIR-Centre for Cellular and Molecular Biology                                                                                        | Tulasi Nagabandi, Namami Gaur, Sakshi Shambhavi, Lamuk Zaveri, Shagufta Khan, Purushotham Vodnala, Payel Mukherjee, Sofia Banu, Priya Singh, Dhiviya Vedagiri, Divya Gupta, Vishal Sah, Santosh Kumar Kuncha, Krishnan Harinivas Harshan, Archana Bharadwaj Siva, Karthik Bharadwaj Tallapaka, G. Aditya Kumar, Koushick Sivakumar, Pooja Ramesh Gupta, Rajan Kumar Jha, Shradha Vijay Lahoti, Deepak Kumar, Devi Prasad Vijayashankara, Disha Nanda, Divya Das, Jotin Gogoi, Manish Bhattacharjee, Rakesh K Mishra, Divya Tej Sowpati |
| EPI_ISL_450496                                                                                                                                                                                                                                                                                                                                                                                                                                                                                                                                                                                                                                                                                                                                                                                                                                                                                                                                                                                                                                                 | National Public Health Surveillance Laboratory, Vilnius, Lithuania                                                                   | Charite Universitaetsmedizin Berlin, Institute of Virology                                                                            | Victor M Corman, Jorn Beheim-Schwarzbach, Talitha Veith, Barbara Muehleemann, Julia Schneider, Terry Jones, Ana Steponkiene, Christian Drosten                                                                                                                                                                                                                                                                                                                                                                                         |
| EPI_ISL_451310, EPI_ISL_451311                                                                                                                                                                                                                                                                                                                                                                                                                                                                                                                                                                                                                                                                                                                                                                                                                                                                                                                                                                                                                                 | Hellenic Pasteur Institute, National Influenza Reference Laboratory of Southern Greece & Unit of Bioinformatics and Applied Genomics | Hellenic Pasteur Institute, National Influenza Reference Laboratory of Southern Greece & Unit of Bioinformatics and Applied Genomics  | Vasiliki Pogka, Timokratris Karamitros, Athanasios Kossvyvakis, Antonios Kalliaropoulos, Horefti Elina, Evangelidou Maria, Androniki Voulgari-Kokota, Aspasia Kontou, Andreas Mentis                                                                                                                                                                                                                                                                                                                                                   |
| EPI_ISL_452218, EPI_ISL_452219, EPI_ISL_452220, EPI_ISL_452221, EPI_ISL_452222, EPI_ISL_452223                                                                                                                                                                                                                                                                                                                                                                                                                                                                                                                                                                                                                                                                                                                                                                                                                                                                                                                                                                 | Goethe University Hospital Frankfurt                                                                                                 | Institute for Medical Virology, Goethe University Hospital Frankfurt                                                                  | Tuna Toptan, Sebastian Hoehl, Sandra Westhaus, Denisa Bojkova, Annemarie Berger, Björn Rotter, Klaus Hoffmeier, Jindrich Cinatl, Sandra Ciesek, and Marek Widera                                                                                                                                                                                                                                                                                                                                                                       |
| EPI_ISL_454749                                                                                                                                                                                                                                                                                                                                                                                                                                                                                                                                                                                                                                                                                                                                                                                                                                                                                                                                                                                                                                                 | Japanese Quarantine Stations                                                                                                         | Pathogen Genomics Center, National Institute of Infectious Diseases                                                                   | Tsuyoshi Sekizuka, Kentaro Itokawa, Rina Tanaka, Masanori Hashino, Tsutomu Kageyama, Shinji Saito, Ikuyo Takayama, Hideki Hasegawa, Takuri Takahashi, Hajime Kamiya, Takuya Yamagishi, Motoi Suzuki, Takaji Wakita, Makoto Kuroda                                                                                                                                                                                                                                                                                                      |
| EPI_ISL_455723                                                                                                                                                                                                                                                                                                                                                                                                                                                                                                                                                                                                                                                                                                                                                                                                                                                                                                                                                                                                                                                 | Servicio de Microbiología. Hospital Clínico Universitario de Valencia                                                                | Sequencing and Bioinformatics Service and Molecular Epidemiology Research Group. FISABIO-Public Health, and SeqCOVID-Spain Consortium | Vicente Soriano Chirona, Ivan Ansari, Lúcia Martínez-Priego, Giuseppe 'Auria, David Navarro, Eliseo Albert, Maria Alma Bracho, Lidia Ruiz Roldan, Neris Garcia-Gonzalez, Inma Galán Vendrell, Sandra Carbo, Loreto Ferrús Abad, Paula Ruiz-Hueso, Mariana Reyes-Prieto, Fernando Gonzalez-Candelas                                                                                                                                                                                                                                     |
| EPI_ISL_457720, EPI_ISL_457722, EPI_ISL_457725, EPI_ISL_457729, EPI_ISL_457738, EPI_ISL_457739                                                                                                                                                                                                                                                                                                                                                                                                                                                                                                                                                                                                                                                                                                                                                                                                                                                                                                                                                                 | SYNLAB Eesti OU                                                                                                                      | Charite Universitaetsmedizin Berlin, Institute of Virology                                                                            | Victor M Corman, Jorn Beheim-Schwarzbach, Barbara Muehleemann, Talitha Veith, Julia Schneider, Paul Naaber, Terry Jones, Christian Drosten                                                                                                                                                                                                                                                                                                                                                                                             |
| EPI_ISL_458050                                                                                                                                                                                                                                                                                                                                                                                                                                                                                                                                                                                                                                                                                                                                                                                                                                                                                                                                                                                                                                                 | CSIR-Centre for Cellular and Molecular Biology                                                                                       | CSIR-Centre for Cellular and Molecular Biology                                                                                        | Tulasi Nagabandi, Namami Gaur, Sakshi Shambhavi, Lamuk Zaveri, Shagufta Khan, Purushotham Vodnala, Payel Mukherjee, Sofia Banu, Priya Singh, Dhiviya Vedagiri, Divya Gupta, Vishal Sah, Santosh Kumar Kuncha, Krishnan Harinivas Harshan, Archana Bharadwaj Siva, Karthik Bharadwaj Tallapaka, Kezia J Ann, Radhika Khandelwal, Roshan Maku Venkata, Shemin Mansuri, Sonu Uday, Rakesh K Mishra, Divya Tej Sowpati                                                                                                                     |
| EPI_ISL_458056                                                                                                                                                                                                                                                                                                                                                                                                                                                                                                                                                                                                                                                                                                                                                                                                                                                                                                                                                                                                                                                 | CSIR-Centre for Cellular and Molecular Biology                                                                                       | CSIR-Centre for Cellular and Molecular Biology                                                                                        | Tulasi Nagabandi, Namami Gaur, Sakshi Shambhavi, Lamuk Zaveri, Shagufta Khan, Purushotham Vodnala, Payel Mukherjee, Sofia Banu, Priya Singh, Dhiviya Vedagiri, Divya Gupta, Vishal Sah, Santosh Kumar Kuncha, Krishnan Harinivas Harshan, Archana Bharadwaj Siva, Karthik Bharadwaj Tallapaka, G. Aditya Kumar, Koushick Sivakumar, Pooja Ramesh Gupta, Rajan Kumar Jha, Shradha Vijay Lahoti, Rakesh K Mishra, Divya Tej Sowpati                                                                                                      |
| EPI_ISL_462451, EPI_ISL_462452, EPI_ISL_462453, EPI_ISL_462457, EPI_ISL_462459, EPI_ISL_462461, EPI_ISL_462468, EPI_ISL_462469, EPI_ISL_462470, EPI_ISL_462475                                                                                                                                                                                                                                                                                                                                                                                                                                                                                                                                                                                                                                                                                                                                                                                                                                                                                                 | Clinical Center, University of Sarajevo                                                                                              | Charite Universitaetsmedizin Berlin, Institute of Virology                                                                            | Victor M Corman, Jorn Beheim-Schwarzbach, Barbara Muehleemann, Talitha Veith, Julia Schneider, Terry Jones, Amela Dedic-Ljubovic, Irma Salmovic-Besic, Suzana Arapic, Almedina Hadzihasanovic-Moro, Selma Mutevlic, Christian Drosten                                                                                                                                                                                                                                                                                                  |
| EPI_ISL_466652, EPI_ISL_466653, EPI_ISL_466654, EPI_ISL_466655, EPI_ISL_466656, EPI_ISL_466657, EPI_ISL_466658, EPI_ISL_466659, EPI_ISL_466660, EPI_ISL_466661, EPI_ISL_466662, EPI_ISL_466663, EPI_ISL_466664, EPI_ISL_466665, EPI_ISL_466666, EPI_ISL_466667, EPI_ISL_466670, EPI_ISL_466671, EPI_ISL_466672, EPI_ISL_466673, EPI_ISL_466674, EPI_ISL_466675, EPI_ISL_466676, EPI_ISL_466677, EPI_ISL_466678, EPI_ISL_466679, EPI_ISL_466680, EPI_ISL_466681, EPI_ISL_466682, EPI_ISL_466683, EPI_ISL_467298                                                                                                                                                                                                                                                                                                                                                                                                                                                                                                                                                 | UNMC COVID-19 Response Team                                                                                                          | UNMC COVID-19 Response Team                                                                                                           |                                                                                                                                                                                                                                                                                                                                                                                                                                                                                                                                        |
| see above                                                                                                                                                                                                                                                                                                                                                                                                                                                                                                                                                                                                                                                                                                                                                                                                                                                                                                                                                                                                                                                      | Nebraska Public Health Laboratory                                                                                                    | UNMC COVID-19 Response Team                                                                                                           | UNMC COVID-19 Response Team                                                                                                                                                                                                                                                                                                                                                                                                                                                                                                            |
| EPI_ISL_467780, EPI_ISL_467781                                                                                                                                                                                                                                                                                                                                                                                                                                                                                                                                                                                                                                                                                                                                                                                                                                                                                                                                                                                                                                 | National Influenza Centre Romania                                                                                                    | Charite Universitaetsmedizin Berlin, Institute of Virology                                                                            | Victor M Corman, Jorn Beheim-Schwarzbach, Barbara Muehleemann, Talitha Veith, Julia Schneider, Terry Jones, L. Ustean, N. Paraschiv, M. Lazar, Christian Drosten                                                                                                                                                                                                                                                                                                                                                                       |
| EPI_ISL_471611                                                                                                                                                                                                                                                                                                                                                                                                                                                                                                                                                                                                                                                                                                                                                                                                                                                                                                                                                                                                                                                 | CSIR-Centre for Cellular and Molecular Biology                                                                                       | CSIR-Centre for Cellular and Molecular Biology                                                                                        | Tulasi Nagabandi, Namami Gaur, Sakshi Shambhavi, Lamuk Zaveri, Shagufta Khan, Purushotham Vodnala, Payel Mukherjee, Sofia Banu, Priya Singh, Dhiviya Vedagiri, Divya Gupta, Vishal Sah, Santosh Kumar Kuncha, Krishnan Harinivas Harshan, Archana Bharadwaj Siva, Karthik Bharadwaj Tallapaka, G. Aditya Kumar, Koushick Sivakumar, Pooja Ramesh Gupta, Rajan Kumar Jha, Shradha Vijay Lahoti, Rakesh K Mishra, Divya Tej Sowpati                                                                                                      |
| EPI_ISL_471612                                                                                                                                                                                                                                                                                                                                                                                                                                                                                                                                                                                                                                                                                                                                                                                                                                                                                                                                                                                                                                                 | CSIR-Centre for Cellular and Molecular Biology                                                                                       | CSIR-Centre for Cellular and Molecular Biology                                                                                        | Tulasi Nagabandi, Namami Gaur, Sakshi Shambhavi, Lamuk Zaveri, Shagufta Khan, Purushotham Vodnala, Payel Mukherjee, Sofia Banu, Priya Singh, Dhiviya Vedagiri, Divya Gupta, Vishal Sah, Santosh Kumar Kuncha, Krishnan Harinivas Harshan, Archana Bharadwaj Siva, Karthik Bharadwaj Tallapaka, Kezia J Ann, Radhika Khandelwal, Roshan Maku Venkata, Shemin Mansuri, Sonu Uday, Rakesh K Mishra, Divya Tej Sowpati                                                                                                                     |
| EPI_ISL_471613                                                                                                                                                                                                                                                                                                                                                                                                                                                                                                                                                                                                                                                                                                                                                                                                                                                                                                                                                                                                                                                 | CSIR-Centre for Cellular and Molecular Biology                                                                                       | CSIR-Centre for Cellular and Molecular Biology                                                                                        | Tulasi Nagabandi, Namami Gaur, Sakshi Shambhavi, Lamuk Zaveri, Shagufta Khan, Purushotham Vodnala, Payel Mukherjee, Sofia Banu, Priya Singh, Dhiviya Vedagiri, Divya Gupta, Vishal Sah, Santosh Kumar Kuncha, Krishnan Harinivas Harshan, Archana Bharadwaj Siva, Karthik Bharadwaj Tallapaka, G. Aditya Kumar, Koushick Sivakumar, Pooja Ramesh Gupta, Rajan Kumar Jha, Shradha Vijay Lahoti, Rakesh K Mishra, Divya Tej Sowpati                                                                                                      |
| EPI_ISL_471614                                                                                                                                                                                                                                                                                                                                                                                                                                                                                                                                                                                                                                                                                                                                                                                                                                                                                                                                                                                                                                                 | CSIR-Centre for Cellular and Molecular Biology                                                                                       | CSIR-Centre for Cellular and Molecular Biology                                                                                        | Tulasi Nagabandi, Namami Gaur, Sakshi Shambhavi, Lamuk Zaveri, Shagufta Khan, Purushotham Vodnala, Payel Mukherjee, Sofia Banu, Priya Singh, Dhiviya Vedagiri, Divya Gupta, Vishal Sah, Santosh Kumar Kuncha, Krishnan Harinivas Harshan, Archana Bharadwaj Siva, Karthik Bharadwaj Tallapaka, Kezia J Ann, Radhika Khandelwal, Roshan Maku Venkata, Shemin Mansuri, Sonu Uday, Rakesh K Mishra, Divya Tej Sowpati                                                                                                                     |
| EPI_ISL_471639                                                                                                                                                                                                                                                                                                                                                                                                                                                                                                                                                                                                                                                                                                                                                                                                                                                                                                                                                                                                                                                 | CSIR-Centre for Cellular and Molecular Biology                                                                                       | CSIR-Centre for Cellular and Molecular Biology                                                                                        | Tulasi Nagabandi, Namami Gaur, Sakshi Shambhavi, Lamuk Zaveri, Shagufta Khan, Purushotham Vodnala, Payel Mukherjee, Sofia Banu, Priya Singh, Dhiviya Vedagiri, Divya Gupta, Vishal Sah, Santosh Kumar Kuncha, Krishnan Harinivas Harshan, Archana Bharadwaj Siva, Karthik Bharadwaj Tallapaka, G. Aditya Kumar, Koushick Sivakumar, Pooja Ramesh Gupta, Rajan Kumar Jha, Shradha Vijay Lahoti, Rakesh K Mishra, Divya Tej Sowpati                                                                                                      |
| EPI_ISL_471640                                                                                                                                                                                                                                                                                                                                                                                                                                                                                                                                                                                                                                                                                                                                                                                                                                                                                                                                                                                                                                                 | CSIR-Centre for Cellular and Molecular Biology                                                                                       | CSIR-Centre for Cellular and Molecular Biology                                                                                        | Tulasi Nagabandi, Namami Gaur, Sakshi Shambhavi, Lamuk Zaveri, Shagufta Khan, Purushotham Vodnala, Payel Mukherjee, Sofia Banu, Priya Singh, Dhiviya Vedagiri, Divya Gupta, Vishal Sah, Santosh Kumar Kuncha, Krishnan Harinivas Harshan, Archana Bharadwaj Siva, Karthik Bharadwaj Tallapaka, Kezia J Ann, Radhika Khandelwal, Roshan Maku Venkata, Shemin Mansuri, Sonu Uday, Rakesh K Mishra, Divya Tej Sowpati                                                                                                                     |
| EPI_ISL_471643                                                                                                                                                                                                                                                                                                                                                                                                                                                                                                                                                                                                                                                                                                                                                                                                                                                                                                                                                                                                                                                 | CSIR-Centre for Cellular and Molecular Biology                                                                                       | CSIR-Centre for Cellular and Molecular Biology                                                                                        | Tulasi Nagabandi, Namami Gaur, Sakshi Shambhavi, Lamuk Zaveri, Shagufta Khan, Purushotham Vodnala, Payel Mukherjee, Sofia Banu, Priya Singh, Dhiviya Vedagiri, Divya Gupta, Vishal Sah, Santosh Kumar Kuncha, Krishnan Harinivas Harshan, Archana Bharadwaj Siva, Karthik Bharadwaj Tallapaka, G. Aditya Kumar, Koushick Sivakumar, Pooja Ramesh Gupta, Rajan Kumar Jha, Shradha Vijay Lahoti, Rakesh K Mishra, Divya Tej Sowpati                                                                                                      |
| EPI_ISL_471644                                                                                                                                                                                                                                                                                                                                                                                                                                                                                                                                                                                                                                                                                                                                                                                                                                                                                                                                                                                                                                                 | CSIR-Centre for Cellular and Molecular Biology                                                                                       | CSIR-Centre for Cellular and Molecular Biology                                                                                        | Tulasi Nagabandi, Namami Gaur, Sakshi Shambhavi, Lamuk Zaveri, Shagufta Khan, Purushotham Vodnala, Payel Mukherjee, Sofia Banu, Priya Singh, Dhiviya Vedagiri, Divya Gupta, Vishal Sah, Santosh Kumar Kuncha, Krishnan Harinivas Harshan, Archana Bharadwaj Siva, Karthik Bharadwaj Tallapaka, Kezia J Ann, Radhika Khandelwal, Roshan Maku Venkata, Shemin Mansuri, Sonu Uday, Rakesh K Mishra, Divya Tej Sowpati                                                                                                                     |
| EPI_ISL_475174, EPI_ISL_475175, EPI_ISL_475176, EPI_ISL_475177, EPI_ISL_475178, EPI_ISL_475179, EPI_ISL_475180, EPI_ISL_475181, EPI_ISL_475182, EPI_ISL_475183, EPI_ISL_475184, EPI_ISL_475185, EPI_ISL_475186, EPI_ISL_475187, EPI_ISL_475188, EPI_ISL_475189, EPI_ISL_475190, EPI_ISL_475191, EPI_ISL_475192, EPI_ISL_475193, EPI_ISL_475194, EPI_ISL_475195, EPI_ISL_475196, EPI_ISL_475197, EPI_ISL_475198, EPI_ISL_475199, EPI_ISL_475200, EPI_ISL_475201, EPI_ISL_475202, EPI_ISL_475203, EPI_ISL_475204, EPI_ISL_475205, EPI_ISL_475206, EPI_ISL_475207, EPI_ISL_475208, EPI_ISL_475209, EPI_ISL_475210, EPI_ISL_475211, EPI_ISL_475212, EPI_ISL_475213, EPI_ISL_475214, EPI_ISL_475215, EPI_ISL_475216, EPI_ISL_475217, EPI_ISL_475218, EPI_ISL_475219, EPI_ISL_475220, EPI_ISL_475221, EPI_ISL_475222, EPI_ISL_475223, EPI_ISL_475224, EPI_ISL_475225, EPI_ISL_475226, EPI_ISL_475227, EPI_ISL_475228, EPI_ISL_475229, EPI_ISL_475230, EPI_ISL_475231, EPI_ISL_475232, EPI_ISL_475233, EPI_ISL_475234, EPI_ISL_475235, EPI_ISL_475236, EPI_ISL_475237 |                                                                                                                                      |                                                                                                                                       |                                                                                                                                                                                                                                                                                                                                                                                                                                                                                                                                        |

| see above                                                                                                                                                      | Nebraska Public Health Laboratory                                         | UNMC COVID-19 Response Team                                         | UNMC COVID-19 Response Team                                                                                                                                                                                                                                                                                                                                                                                                                                                                                                                                                                                                                                                                                                                                                                                                                                                                                                                                                                                                                             |
|----------------------------------------------------------------------------------------------------------------------------------------------------------------|---------------------------------------------------------------------------|---------------------------------------------------------------------|---------------------------------------------------------------------------------------------------------------------------------------------------------------------------------------------------------------------------------------------------------------------------------------------------------------------------------------------------------------------------------------------------------------------------------------------------------------------------------------------------------------------------------------------------------------------------------------------------------------------------------------------------------------------------------------------------------------------------------------------------------------------------------------------------------------------------------------------------------------------------------------------------------------------------------------------------------------------------------------------------------------------------------------------------------|
| EPI_ISL_477204                                                                                                                                                 | Prof. Massimo Zollo CEINGE TASK-FORCE COVID19 - Regione Campania          | Prof. Massimo Zollo CEINGE TASK-FORCE COVID19 - Regione Campania    | Veronica Ferrucci1,2, Dae young Kong8, Fatemeh asadzadeh1,2, Laura Marrone1,2, Roberto Siciliano1,2, Rino Cerino3, Giovanna Fusco3, Marika Comegna1,2, Angelo Boccia2, Maurizio Viscardi3, Giorgia Borriello3, Sergio Brandi3, Claudia Tiberio4, Luigi Atripaldi4, Giovanni Paoletta1,2, Giuseppe Castaldo1,2, Stefano Pascarella4, Martina Bianchi4, Lorenzo Chiariotti1,2, Jae Myun Lee5, Jae Ho Jung6, Kyong Seop Yun7, Hong Yeoul Kim 7,8* and Massimo Zollo1,2* 1 CEINGE Biotecnologie Avanzate, Naples, Italia 2 Dipartimento di Medicina Molecolare e Biotecnologie Mediche DMMBM University of Naples Federico II, Italia 3 Istituto Zooprofilattico Sperimentale del Mezzogiorno, Naples, Italia 4 -U.O.C. di Patologia Clinica Ospedale D. Cotugno, Azienda Sanitaria Ospedali dei Colli, Naples, Italy. 5 Università La Sapienza di Roma, Italia 6 Department of Microbiology, Yonsei University College of Medicine, Seoul, Korea 7 Department of Surgery, Yonsei University College of Medicine, Seoul, Korea 8 Haim bio co., Ltd., Indust |
| EPI_ISL_479792, EPI_ISL_479793, EPI_ISL_479794, EPI_ISL_479795                                                                                                 | Hokkaido Institute of Public Health                                       | Pathogen Genomics Center, National Institute of Infectious Diseases | Tsuyoshi Sekizuka, Rika Komagome, Kentaro Itokawa, Rina Tanaka, Masanori Hashino, Hajime Kamiya, Motoi Suzuki, Makoto Kuroda                                                                                                                                                                                                                                                                                                                                                                                                                                                                                                                                                                                                                                                                                                                                                                                                                                                                                                                            |
| EPI_ISL_479798                                                                                                                                                 | Sagamihara City Public Health Research Institute                          | Pathogen Genomics Center, National Institute of Infectious Diseases | Tsuyoshi Sekizuka, Hiroshi Nakamura, Kentaro Itokawa, Rina Tanaka, Masanori Hashino, Hajime Kamiya, Motoi Suzuki, Makoto Kuroda                                                                                                                                                                                                                                                                                                                                                                                                                                                                                                                                                                                                                                                                                                                                                                                                                                                                                                                         |
| EPI_ISL_479799, EPI_ISL_479800                                                                                                                                 | Sapporo City Institute of Public Health                                   | Pathogen Genomics Center, National Institute of Infectious Diseases | Tsuyoshi Sekizuka, Asami Ohnishi, Kentaro Itokawa, Rina Tanaka, Masanori Hashino, Hajime Kamiya, Motoi Suzuki, Makoto Kuroda                                                                                                                                                                                                                                                                                                                                                                                                                                                                                                                                                                                                                                                                                                                                                                                                                                                                                                                            |
| EPI_ISL_479801                                                                                                                                                 | Hokkaido Institute of Public Health                                       | Pathogen Genomics Center, National Institute of Infectious Diseases | Tsuyoshi Sekizuka, Rika Komagome, Kentaro Itokawa, Rina Tanaka, Masanori Hashino, Hajime Kamiya, Motoi Suzuki, Makoto Kuroda                                                                                                                                                                                                                                                                                                                                                                                                                                                                                                                                                                                                                                                                                                                                                                                                                                                                                                                            |
| EPI_ISL_479802                                                                                                                                                 | Sagamihara City Public Health Research Institute                          | Pathogen Genomics Center, National Institute of Infectious Diseases | Tsuyoshi Sekizuka, Hiroshi Nakamura, Kentaro Itokawa, Rina Tanaka, Masanori Hashino, Hajime Kamiya, Motoi Suzuki, Makoto Kuroda                                                                                                                                                                                                                                                                                                                                                                                                                                                                                                                                                                                                                                                                                                                                                                                                                                                                                                                         |
| EPI_ISL_479805, EPI_ISL_479806, EPI_ISL_479808                                                                                                                 | Saitama Prefectural Institute of Public Health                            | Pathogen Genomics Center, National Institute of Infectious Diseases | Tsuyoshi Sekizuka, Hayato Ehara, Kentaro Itokawa, Rina Tanaka, Masanori Hashino, Hajime Kamiya, Motoi Suzuki, Makoto Kuroda                                                                                                                                                                                                                                                                                                                                                                                                                                                                                                                                                                                                                                                                                                                                                                                                                                                                                                                             |
| EPI_ISL_479809, EPI_ISL_479811                                                                                                                                 | Chiba Prefectural Institute of Public Health                              | Pathogen Genomics Center, National Institute of Infectious Diseases | Tsuyoshi Sekizuka, Masakatsu Taira, Kentaro Itokawa, Rina Tanaka, Masanori Hashino, Hajime Kamiya, Motoi Suzuki, Makoto Kuroda                                                                                                                                                                                                                                                                                                                                                                                                                                                                                                                                                                                                                                                                                                                                                                                                                                                                                                                          |
| EPI_ISL_479812, EPI_ISL_479814, EPI_ISL_479815, EPI_ISL_479816, EPI_ISL_479817                                                                                 | Hokkaido Institute of Public Health                                       | Pathogen Genomics Center, National Institute of Infectious Diseases | Tsuyoshi Sekizuka, Rika Komagome, Kentaro Itokawa, Rina Tanaka, Masanori Hashino, Hajime Kamiya, Motoi Suzuki, Makoto Kuroda                                                                                                                                                                                                                                                                                                                                                                                                                                                                                                                                                                                                                                                                                                                                                                                                                                                                                                                            |
| EPI_ISL_479822                                                                                                                                                 | Department of Infectious Diseases, Kobe Institute of Health               | Pathogen Genomics Center, National Institute of Infectious Diseases | Tsuyoshi Sekizuka, Ryohei Nomoto, Kentaro Itokawa, Rina Tanaka, Masanori Hashino, Hajime Kamiya, Motoi Suzuki, Makoto Kuroda                                                                                                                                                                                                                                                                                                                                                                                                                                                                                                                                                                                                                                                                                                                                                                                                                                                                                                                            |
| EPI_ISL_479824                                                                                                                                                 | Kumamoto Prefectural Institute of Public Health and Environmental Science | Pathogen Genomics Center, National Institute of Infectious Diseases | Tsuyoshi Sekizuka, Shunsuke Yahiro, Kentaro Itokawa, Rina Tanaka, Masanori Hashino, Hajime Kamiya, Motoi Suzuki, Makoto Kuroda                                                                                                                                                                                                                                                                                                                                                                                                                                                                                                                                                                                                                                                                                                                                                                                                                                                                                                                          |
| EPI_ISL_479829, EPI_ISL_479831, EPI_ISL_479832, EPI_ISL_479833, EPI_ISL_479835, EPI_ISL_479836, EPI_ISL_479838, EPI_ISL_479843, EPI_ISL_479847, EPI_ISL_479848 | Sapporo City Institute of Public Health                                   | Pathogen Genomics Center, National Institute of Infectious Diseases | Tsuyoshi Sekizuka, Asami Ohnishi, Kentaro Itokawa, Rina Tanaka, Masanori Hashino, Hajime Kamiya, Motoi Suzuki, Makoto Kuroda                                                                                                                                                                                                                                                                                                                                                                                                                                                                                                                                                                                                                                                                                                                                                                                                                                                                                                                            |
| EPI_ISL_479852, EPI_ISL_479853, EPI_ISL_479854                                                                                                                 | Gunma Prefectural Institute of Public Health and Environmental Sciences   | Pathogen Genomics Center, National Institute of Infectious Diseases | Tsuyoshi Sekizuka, Hiroyuki Tsukagoshi, Kentaro Itokawa, Rina Tanaka, Masanori Hashino, Hajime Kamiya, Motoi Suzuki, Makoto Kuroda                                                                                                                                                                                                                                                                                                                                                                                                                                                                                                                                                                                                                                                                                                                                                                                                                                                                                                                      |
| EPI_ISL_479855, EPI_ISL_479856, EPI_ISL_479857, EPI_ISL_479858, EPI_ISL_479859, EPI_ISL_479861                                                                 | Department of Infectious Diseases, Kobe Institute of Health               | Pathogen Genomics Center, National Institute of Infectious Diseases | Tsuyoshi Sekizuka, Ryohei Nomoto, Kentaro Itokawa, Rina Tanaka, Masanori Hashino, Hajime Kamiya, Motoi Suzuki, Makoto Kuroda                                                                                                                                                                                                                                                                                                                                                                                                                                                                                                                                                                                                                                                                                                                                                                                                                                                                                                                            |
| EPI_ISL_479864                                                                                                                                                 | Wakayama Prefectural Research Center of Environment and Public Health     | Pathogen Genomics Center, National Institute of Infectious Diseases | Tsuyoshi Sekizuka, Fumio Terasoma, Yosuke Hamajima, Kentaro Itokawa, Rina Tanaka, Masanori Hashino, Hajime Kamiya, Motoi Suzuki, Makoto Kuroda                                                                                                                                                                                                                                                                                                                                                                                                                                                                                                                                                                                                                                                                                                                                                                                                                                                                                                          |
| EPI_ISL_479868                                                                                                                                                 | Department of Infectious Diseases, Kobe Institute of Health               | Pathogen Genomics Center, National Institute of Infectious Diseases | Tsuyoshi Sekizuka, Ryohei Nomoto, Kentaro Itokawa, Rina Tanaka, Masanori Hashino, Hajime Kamiya, Motoi Suzuki, Makoto Kuroda                                                                                                                                                                                                                                                                                                                                                                                                                                                                                                                                                                                                                                                                                                                                                                                                                                                                                                                            |
| EPI_ISL_479870                                                                                                                                                 | Sagamihara City Public Health Research Institute                          | Pathogen Genomics Center, National Institute of Infectious Diseases | Tsuyoshi Sekizuka, Hiroshi Nakamura, Kentaro Itokawa, Rina Tanaka, Masanori Hashino, Hajime Kamiya, Motoi Suzuki, Makoto Kuroda                                                                                                                                                                                                                                                                                                                                                                                                                                                                                                                                                                                                                                                                                                                                                                                                                                                                                                                         |
| EPI_ISL_479873, EPI_ISL_479874, EPI_ISL_479875, EPI_ISL_479877, EPI_ISL_479879, EPI_ISL_479883, EPI_ISL_479884, EPI_ISL_479885                                 | Sapporo City Institute of Public Health                                   | Pathogen Genomics Center, National Institute of Infectious Diseases | Tsuyoshi Sekizuka, Asami Ohnishi, Kentaro Itokawa, Rina Tanaka, Masanori Hashino, Hajime Kamiya, Motoi Suzuki, Makoto Kuroda                                                                                                                                                                                                                                                                                                                                                                                                                                                                                                                                                                                                                                                                                                                                                                                                                                                                                                                            |
| EPI_ISL_479887, EPI_ISL_479888, EPI_ISL_479889, EPI_ISL_479891, EPI_ISL_479895                                                                                 | Tokyo Metropolitan Institute of Public Health                             | Pathogen Genomics Center, National Institute of Infectious Diseases | Tsuyoshi Sekizuka, Kenji Sadamasu, Takashi Chiba, Mami Nagashima, Kentaro Itokawa, Rina Tanaka, Masanori Hashino, Hajime Kamiya, Motoi Suzuki, Makoto Kuroda                                                                                                                                                                                                                                                                                                                                                                                                                                                                                                                                                                                                                                                                                                                                                                                                                                                                                            |
| EPI_ISL_479896, EPI_ISL_479899, EPI_ISL_479900                                                                                                                 | Gunma Prefectural Institute of Public Health and Environmental Sciences   | Pathogen Genomics Center, National Institute of Infectious Diseases | Tsuyoshi Sekizuka, Hiroyuki Tsukagoshi, Kentaro Itokawa, Rina Tanaka, Masanori Hashino, Hajime Kamiya, Motoi Suzuki, Makoto Kuroda                                                                                                                                                                                                                                                                                                                                                                                                                                                                                                                                                                                                                                                                                                                                                                                                                                                                                                                      |
| EPI_ISL_479902                                                                                                                                                 | Niigata Prefectural Institute of Public Health and Environmental Sciences | Pathogen Genomics Center, National Institute of Infectious Diseases | Tsuyoshi Sekizuka, Reiko Arai, Kentaro Itokawa, Rina Tanaka, Masanori Hashino, Hajime Kamiya, Motoi Suzuki, Makoto Kuroda                                                                                                                                                                                                                                                                                                                                                                                                                                                                                                                                                                                                                                                                                                                                                                                                                                                                                                                               |
| EPI_ISL_479903, EPI_ISL_479904, EPI_ISL_479905, EPI_ISL_479906, EPI_ISL_479908, EPI_ISL_479910, EPI_ISL_479911                                                 | Himeji City Institute of Environment and Health                           | Pathogen Genomics Center, National Institute of Infectious Diseases | Tsuyoshi Sekizuka, Kentaro Itokawa, Rina Tanaka, Masanori Hashino, Hajime Kamiya, Motoi Suzuki, Makoto Kuroda                                                                                                                                                                                                                                                                                                                                                                                                                                                                                                                                                                                                                                                                                                                                                                                                                                                                                                                                           |
| EPI_ISL_479915, EPI_ISL_479917, EPI_ISL_479919, EPI_ISL_479920, EPI_ISL_479921, EPI_ISL_479922, EPI_ISL_479923, EPI_ISL_479924                                 | Niigata City Public Health Research Institute                             | Pathogen Genomics Center, National Institute of Infectious Diseases | Tsuyoshi Sekizuka, Yurie Takahashi, Kentaro Itokawa, Rina Tanaka, Masanori Hashino, Hajime Kamiya, Motoi Suzuki, Makoto Kuroda                                                                                                                                                                                                                                                                                                                                                                                                                                                                                                                                                                                                                                                                                                                                                                                                                                                                                                                          |
| EPI_ISL_479926, EPI_ISL_479927                                                                                                                                 | Sakai City Institute of Public Health                                     | Pathogen Genomics Center, National Institute of Infectious Diseases | Tsuyoshi Sekizuka, Tatsuya Miyoshi, Kentaro Itokawa, Rina Tanaka, Masanori Hashino, Hajime Kamiya, Motoi Suzuki, Makoto Kuroda                                                                                                                                                                                                                                                                                                                                                                                                                                                                                                                                                                                                                                                                                                                                                                                                                                                                                                                          |
| EPI_ISL_479928                                                                                                                                                 | Saitama Prefectural Institute of Public Health                            | Pathogen Genomics Center, National Institute of Infectious Diseases | Tsuyoshi Sekizuka, Hayato Ehara, Kentaro Itokawa, Rina Tanaka, Masanori Hashino, Hajime Kamiya, Motoi Suzuki, Makoto Kuroda                                                                                                                                                                                                                                                                                                                                                                                                                                                                                                                                                                                                                                                                                                                                                                                                                                                                                                                             |
| EPI_ISL_479936, EPI_ISL_479937, EPI_ISL_479938, EPI_ISL_479940                                                                                                 | Ibaraki Prefectural Institute of Public Health                            | Pathogen Genomics Center, National Institute of Infectious Diseases | Tsuyoshi Sekizuka, Keiko Goto, Kentaro Itokawa, Rina Tanaka, Masanori Hashino, Hajime Kamiya, Motoi Suzuki, Makoto Kuroda                                                                                                                                                                                                                                                                                                                                                                                                                                                                                                                                                                                                                                                                                                                                                                                                                                                                                                                               |
| EPI_ISL_479946, EPI_ISL_479948, EPI_ISL_479949, EPI_ISL_479950,                                                                                                | Osaka Institute of Public Health                                          | Pathogen Genomics Center, National Institute of Infectious Diseases | Tsuyoshi Sekizuka, Satoshi Hiroi, Saeko Morikawa, Kazushi Motomura, Kentaro Itokawa, Rina Tanaka, Masanori Hashino, Hajime Kamiya, Motoi Suzuki, Makoto Kuroda                                                                                                                                                                                                                                                                                                                                                                                                                                                                                                                                                                                                                                                                                                                                                                                                                                                                                          |

|                                                                                                                                                                                                                                                                                                                                                                                                                                                                                |                                                                             |                                                                     |                                                                                                                                                                                                  |
|--------------------------------------------------------------------------------------------------------------------------------------------------------------------------------------------------------------------------------------------------------------------------------------------------------------------------------------------------------------------------------------------------------------------------------------------------------------------------------|-----------------------------------------------------------------------------|---------------------------------------------------------------------|--------------------------------------------------------------------------------------------------------------------------------------------------------------------------------------------------|
| EPI_ISL_479951, EPI_ISL_479952, EPI_ISL_479953, EPI_ISL_479956, EPI_ISL_479957, EPI_ISL_479958                                                                                                                                                                                                                                                                                                                                                                                 | Tokyo Metropolitan Institute of Public Health                               | Pathogen Genomics Center, National Institute of Infectious Diseases | Tsuyoshi Sekizuka, Kenji Sadamasu, Takashi Chiba, Mami Nagashima, Kentaro Itokawa, Rina Tanaka, Masanori Hashino, Hajime Kamiya, Motoi Suzuki, Makoto Kuroda                                     |
| EPI_ISL_479959, EPI_ISL_479962, EPI_ISL_479963, EPI_ISL_479965                                                                                                                                                                                                                                                                                                                                                                                                                 | Osaka Institute of Public Health                                            | Pathogen Genomics Center, National Institute of Infectious Diseases | Tsuyoshi Sekizuka, Satoshi Hiroi, Saeko Morikawa, Kazushi Motomura, Kentaro Itokawa, Rina Tanaka, Masanori Hashino, Hajime Kamiya, Motoi Suzuki, Makoto Kuroda                                   |
| EPI_ISL_479967, EPI_ISL_479968, EPI_ISL_479970, EPI_ISL_479971, EPI_ISL_479975, EPI_ISL_479976                                                                                                                                                                                                                                                                                                                                                                                 | Fukui Prefectural Institute of Public Health and Environmental Science      | Pathogen Genomics Center, National Institute of Infectious Diseases | Tsuyoshi Sekizuka, Miho Toho, Kentaro Itokawa, Rina Tanaka, Masanori Hashino, Hajime Kamiya, Motoi Suzuki, Makoto Kuroda                                                                         |
| EPI_ISL_479979, EPI_ISL_479982                                                                                                                                                                                                                                                                                                                                                                                                                                                 | Oita Prefectural Institute of Public Health and Environmental Science       | Pathogen Genomics Center, National Institute of Infectious Diseases | Tsuyoshi Sekizuka, Mari Sasaki, Kentaro Itokawa, Rina Tanaka, Masanori Hashino, Hajime Kamiya, Motoi Suzuki, Makoto Kuroda                                                                       |
| EPI_ISL_479985                                                                                                                                                                                                                                                                                                                                                                                                                                                                 | Ibaraki Prefectural Institute of Public Health                              | Pathogen Genomics Center, National Institute of Infectious Diseases | Tsuyoshi Sekizuka, Keiko Goto, Kentaro Itokawa, Rina Tanaka, Masanori Hashino, Hajime Kamiya, Motoi Suzuki, Makoto Kuroda                                                                        |
| EPI_ISL_479986, EPI_ISL_479987, EPI_ISL_479988                                                                                                                                                                                                                                                                                                                                                                                                                                 | Department of Infectious Diseases, Kobe Institute of Health                 | Pathogen Genomics Center, National Institute of Infectious Diseases | Tsuyoshi Sekizuka, Ryohei Nomoto, Kentaro Itokawa, Rina Tanaka, Masanori Hashino, Hajime Kamiya, Motoi Suzuki, Makoto Kuroda                                                                     |
| EPI_ISL_479991, EPI_ISL_479992, EPI_ISL_479995                                                                                                                                                                                                                                                                                                                                                                                                                                 | Kumamoto City Public Health Research Institute                              | Pathogen Genomics Center, National Institute of Infectious Diseases | Tsuyoshi Sekizuka, Kaori Tashiro, Kentaro Itokawa, Rina Tanaka, Masanori Hashino, Hajime Kamiya, Motoi Suzuki, Makoto Kuroda                                                                     |
| EPI_ISL_479997, EPI_ISL_480000                                                                                                                                                                                                                                                                                                                                                                                                                                                 | Nagano Environmental Conservation Research Institute                        | Pathogen Genomics Center, National Institute of Infectious Diseases | Tsuyoshi Sekizuka, Naoko Shimodaira, Kentaro Itokawa, Rina Tanaka, Masanori Hashino, Hajime Kamiya, Motoi Suzuki, Makoto Kuroda                                                                  |
| EPI_ISL_480002                                                                                                                                                                                                                                                                                                                                                                                                                                                                 | Nagasaki Prefectural Institute for Environmental Research and Public Health | Pathogen Genomics Center, National Institute of Infectious Diseases | Tsuyoshi Sekizuka, Fumiaki Matsumoto, Kentaro Itokawa, Rina Tanaka, Masanori Hashino, Hajime Kamiya, Motoi Suzuki, Makoto Kuroda                                                                 |
| EPI_ISL_480004, EPI_ISL_480006, EPI_ISL_480007, EPI_ISL_480008, EPI_ISL_480009, EPI_ISL_480010, EPI_ISL_480011, EPI_ISL_480013, EPI_ISL_480014                                                                                                                                                                                                                                                                                                                                 | Chiba Prefectural Institute of Public Health                                | Pathogen Genomics Center, National Institute of Infectious Diseases | Tsuyoshi Sekizuka, Masakatsu Taira, Kentaro Itokawa, Rina Tanaka, Masanori Hashino, Hajime Kamiya, Motoi Suzuki, Makoto Kuroda                                                                   |
| EPI_ISL_480016, EPI_ISL_480019, EPI_ISL_480020                                                                                                                                                                                                                                                                                                                                                                                                                                 | Gunma Prefectural Institute of Public Health and Environmental Sciences     | Pathogen Genomics Center, National Institute of Infectious Diseases | Tsuyoshi Sekizuka, Hiroyuki Tsukagoshi, Kentaro Itokawa, Rina Tanaka, Masanori Hashino, Hajime Kamiya, Motoi Suzuki, Makoto Kuroda                                                               |
| EPI_ISL_480023, EPI_ISL_480024, EPI_ISL_480027, EPI_ISL_480028, EPI_ISL_480029                                                                                                                                                                                                                                                                                                                                                                                                 | Ibaraki Prefectural Institute of Public Health                              | Pathogen Genomics Center, National Institute of Infectious Diseases | Tsuyoshi Sekizuka, Keiko Goto, Kentaro Itokawa, Rina Tanaka, Masanori Hashino, Hajime Kamiya, Motoi Suzuki, Makoto Kuroda                                                                        |
| EPI_ISL_480031, EPI_ISL_480033, EPI_ISL_480034, EPI_ISL_480035, EPI_ISL_480036, EPI_ISL_480037, EPI_ISL_480038, EPI_ISL_480040                                                                                                                                                                                                                                                                                                                                                 | Tochigi Prefectural Institute of Public Health and Environmental Science    | Pathogen Genomics Center, National Institute of Infectious Diseases | Tsuyoshi Sekizuka, Ako Nakajima, Kentaro Itokawa, Rina Tanaka, Masanori Hashino, Hajime Kamiya, Motoi Suzuki, Makoto Kuroda                                                                      |
| EPI_ISL_480043, EPI_ISL_480045, EPI_ISL_480047, EPI_ISL_480049, EPI_ISL_480054, EPI_ISL_480056, EPI_ISL_480057, EPI_ISL_480060, EPI_ISL_480061, EPI_ISL_480062, EPI_ISL_480063, EPI_ISL_480064                                                                                                                                                                                                                                                                                 | Nagoya City Public Health Research Institute                                | Pathogen Genomics Center, National Institute of Infectious Diseases | Tsuyoshi Sekizuka, Takuya Miki, Shinichiro Shibata, Kentaro Itokawa, Rina Tanaka, Masanori Hashino, Hajime Kamiya, Motoi Suzuki, Makoto Kuroda                                                   |
| see above                                                                                                                                                                                                                                                                                                                                                                                                                                                                      | Sakai City Institute of Public Health                                       | Pathogen Genomics Center, National Institute of Infectious Diseases | Tsuyoshi Sekizuka, Tatsuya Miyoshi, Kentaro Itokawa, Rina Tanaka, Masanori Hashino, Hajime Kamiya, Motoi Suzuki, Makoto Kuroda                                                                   |
| EPI_ISL_480067, EPI_ISL_480070, EPI_ISL_480071                                                                                                                                                                                                                                                                                                                                                                                                                                 | Shizuoka City Institute of Environmental Sciences and Public Health         | Pathogen Genomics Center, National Institute of Infectious Diseases | Tsuyoshi Sekizuka, Takaharu Maehata, Sou Okamura, Yuji Kanazawa, Kenji Yagi, Kentaro Itokawa, Rina Tanaka, Masanori Hashino, Hajime Kamiya, Motoi Suzuki, Makoto Kuroda                          |
| EPI_ISL_480074, EPI_ISL_480076, EPI_ISL_480077, EPI_ISL_480078, EPI_ISL_480079, EPI_ISL_480080                                                                                                                                                                                                                                                                                                                                                                                 | Gifu Prefectural Institute of Public Health and Environmental Sciences      | Pathogen Genomics Center, National Institute of Infectious Diseases | Tsuyoshi Sekizuka, Yoshihiko Kameyama, Kentaro Itokawa, Rina Tanaka, Masanori Hashino, Hajime Kamiya, Motoi Suzuki, Makoto Kuroda                                                                |
| EPI_ISL_480083, EPI_ISL_480084, EPI_ISL_480085, EPI_ISL_480086, EPI_ISL_480087, EPI_ISL_480088, EPI_ISL_480089                                                                                                                                                                                                                                                                                                                                                                 | Department of Infectious Diseases, Kobe Institute of Health                 | Pathogen Genomics Center, National Institute of Infectious Diseases | Tsuyoshi Sekizuka, Ryohei Nomoto, Kentaro Itokawa, Rina Tanaka, Masanori Hashino, Hajime Kamiya, Motoi Suzuki, Makoto Kuroda                                                                     |
| EPI_ISL_480090, EPI_ISL_480092, EPI_ISL_480095, EPI_ISL_480097, EPI_ISL_480098, EPI_ISL_480099, EPI_ISL_480100, EPI_ISL_480101, EPI_ISL_480102                                                                                                                                                                                                                                                                                                                                 | Koshigaya City Public Health Center                                         | Pathogen Genomics Center, National Institute of Infectious Diseases | Tsuyoshi Sekizuka, Yuka Furui, Aya Tamura, Kyohei Sakata, Takumi Daimon, Yoko Togawa, Yoshiko Hamada, Kentaro Itokawa, Rina Tanaka, Masanori Hashino, Hajime Kamiya, Motoi Suzuki, Makoto Kuroda |
| EPI_ISL_480103, EPI_ISL_480104, EPI_ISL_480106, EPI_ISL_480108                                                                                                                                                                                                                                                                                                                                                                                                                 | Oita Prefectural Institute of Public Health and Environmental Science       | Pathogen Genomics Center, National Institute of Infectious Diseases | Tsuyoshi Sekizuka, Mari Sasaki, Kentaro Itokawa, Rina Tanaka, Masanori Hashino, Hajime Kamiya, Motoi Suzuki, Makoto Kuroda                                                                       |
| EPI_ISL_480112, EPI_ISL_480113, EPI_ISL_480114, EPI_ISL_480115, EPI_ISL_480117, EPI_ISL_480118, EPI_ISL_480119                                                                                                                                                                                                                                                                                                                                                                 |                                                                             |                                                                     |                                                                                                                                                                                                  |
| EPI_ISL_480120, EPI_ISL_480121, EPI_ISL_480125, EPI_ISL_480127, EPI_ISL_480128, EPI_ISL_480129, EPI_ISL_480131, EPI_ISL_480132, EPI_ISL_480133, EPI_ISL_480134, EPI_ISL_480136, EPI_ISL_480137, EPI_ISL_480138, EPI_ISL_480139, EPI_ISL_480140, EPI_ISL_480143, EPI_ISL_480145, EPI_ISL_480147, EPI_ISL_480148, EPI_ISL_480149, EPI_ISL_480152, EPI_ISL_480153, EPI_ISL_480154, EPI_ISL_480155, EPI_ISL_480158, EPI_ISL_480160, EPI_ISL_480161, EPI_ISL_480167, EPI_ISL_480168 | Fukui Prefectural Institute of Public Health and Environmental Science      | Pathogen Genomics Center, National Institute of Infectious Diseases | Tsuyoshi Sekizuka, Miho Toho, Kentaro Itokawa, Rina Tanaka, Masanori Hashino, Hajime Kamiya, Motoi Suzuki, Makoto Kuroda                                                                         |
| see above                                                                                                                                                                                                                                                                                                                                                                                                                                                                      | Gunma Prefectural Institute of Public Health and Environmental Sciences     | Pathogen Genomics Center, National Institute of Infectious Diseases | Tsuyoshi Sekizuka, Hiroyuki Tsukagoshi, Kentaro Itokawa, Rina Tanaka, Masanori Hashino, Hajime Kamiya, Motoi Suzuki, Makoto Kuroda                                                               |
| EPI_ISL_480169, EPI_ISL_480170, EPI_ISL_480171, EPI_ISL_480174, EPI_ISL_480175, EPI_ISL_480176, EPI_ISL_480177                                                                                                                                                                                                                                                                                                                                                                 | Hiroshima City Institute of Public Health                                   | Pathogen Genomics Center, National Institute of Infectious Diseases | Tsuyoshi Sekizuka, Kota Noritsune, Kentaro Itokawa, Rina Tanaka, Masanori Hashino, Hajime Kamiya, Motoi Suzuki, Makoto Kuroda                                                                    |
| EPI_ISL_480178, EPI_ISL_480179                                                                                                                                                                                                                                                                                                                                                                                                                                                 | Ibaraki Prefectural Institute of Public Health                              | Pathogen Genomics Center, National Institute of Infectious Diseases | Tsuyoshi Sekizuka, Keiko Goto, Kentaro Itokawa, Rina Tanaka, Masanori Hashino, Hajime Kamiya, Motoi Suzuki, Makoto Kuroda                                                                        |
| EPI_ISL_480180, EPI_ISL_480181, EPI_ISL_480182, EPI_ISL_480183, EPI_ISL_480184, EPI_ISL_480189                                                                                                                                                                                                                                                                                                                                                                                 | Ota Health Center Welfare Section                                           | Pathogen Genomics Center, National Institute of Infectious Diseases | Tsuyoshi Sekizuka, Chika Takahashi, Kentaro Itokawa, Rina Tanaka, Masanori Hashino, Hajime Kamiya, Motoi Suzuki, Makoto Kuroda                                                                   |
| EPI_ISL_480191, EPI_ISL_480193, EPI_ISL_480194, EPI_ISL_480195                                                                                                                                                                                                                                                                                                                                                                                                                 |                                                                             |                                                                     |                                                                                                                                                                                                  |

|                                                                                                                                                                                                                                                                                                                                                                                                                                                                                                                                                                                                                                                                                                                                                                                                                                                                                                                                                                                                                                                                                                                                                                                                                                                                                                                                                                                                                                                                                                                                                                                                                                                                |                                                                                                                                      |                                                                                                                                      |                                                                                                                                                                                                                                                                                                                                                                                                                                                                                                         |                  |
|----------------------------------------------------------------------------------------------------------------------------------------------------------------------------------------------------------------------------------------------------------------------------------------------------------------------------------------------------------------------------------------------------------------------------------------------------------------------------------------------------------------------------------------------------------------------------------------------------------------------------------------------------------------------------------------------------------------------------------------------------------------------------------------------------------------------------------------------------------------------------------------------------------------------------------------------------------------------------------------------------------------------------------------------------------------------------------------------------------------------------------------------------------------------------------------------------------------------------------------------------------------------------------------------------------------------------------------------------------------------------------------------------------------------------------------------------------------------------------------------------------------------------------------------------------------------------------------------------------------------------------------------------------------|--------------------------------------------------------------------------------------------------------------------------------------|--------------------------------------------------------------------------------------------------------------------------------------|---------------------------------------------------------------------------------------------------------------------------------------------------------------------------------------------------------------------------------------------------------------------------------------------------------------------------------------------------------------------------------------------------------------------------------------------------------------------------------------------------------|------------------|
| EPI_ISL_480196, EPI_ISL_480197, EPI_ISL_480198, EPI_ISL_480199, EPI_ISL_480201, EPI_ISL_480202                                                                                                                                                                                                                                                                                                                                                                                                                                                                                                                                                                                                                                                                                                                                                                                                                                                                                                                                                                                                                                                                                                                                                                                                                                                                                                                                                                                                                                                                                                                                                                 | Toyama Institute of Health                                                                                                           | Pathogen Genomics Center, National Institute of Infectious Diseases                                                                  | Tsuyoshi Sekizuka, Masae Itamochi, Kazunori Oishi, Kentaro Itokawa, Rina Tanaka, Masanori Hashino, Hajime Kamiya, Motoi Suzuki, Makoto Kuroda                                                                                                                                                                                                                                                                                                                                                           |                  |
| EPI_ISL_480204                                                                                                                                                                                                                                                                                                                                                                                                                                                                                                                                                                                                                                                                                                                                                                                                                                                                                                                                                                                                                                                                                                                                                                                                                                                                                                                                                                                                                                                                                                                                                                                                                                                 | Akita City Public Health Center                                                                                                      | Pathogen Genomics Center, National Institute of Infectious Diseases                                                                  | Tsuyoshi Sekizuka, Koichi Ito, Kentaro Itokawa, Rina Tanaka, Masanori Hashino, Hajime Kamiya, Motoi Suzuki, Makoto Kuroda                                                                                                                                                                                                                                                                                                                                                                               |                  |
| EPI_ISL_480205, EPI_ISL_480206, EPI_ISL_480207                                                                                                                                                                                                                                                                                                                                                                                                                                                                                                                                                                                                                                                                                                                                                                                                                                                                                                                                                                                                                                                                                                                                                                                                                                                                                                                                                                                                                                                                                                                                                                                                                 | Department of Infectious Diseases, Kobe Institute of Health                                                                          | Pathogen Genomics Center, National Institute of Infectious Diseases                                                                  | Tsuyoshi Sekizuka, Ryohei Nomoto, Kentaro Itokawa, Rina Tanaka, Masanori Hashino, Hajime Kamiya, Motoi Suzuki, Makoto Kuroda                                                                                                                                                                                                                                                                                                                                                                            |                  |
| EPI_ISL_480208                                                                                                                                                                                                                                                                                                                                                                                                                                                                                                                                                                                                                                                                                                                                                                                                                                                                                                                                                                                                                                                                                                                                                                                                                                                                                                                                                                                                                                                                                                                                                                                                                                                 | Pathogen Genomics Center, National Institute of Infectious Diseases                                                                  | Pathogen Genomics Center, National Institute of Infectious Diseases                                                                  | Tsuyoshi Sekizuka, Ryohei Nomoto, Kentaro Itokawa, Rina Tanaka, Masanori Hashino, Hajime Kamiya, Motoi Suzuki, Makoto Kuroda                                                                                                                                                                                                                                                                                                                                                                            |                  |
| EPI_ISL_480210, EPI_ISL_480213, EPI_ISL_480214, EPI_ISL_480215, EPI_ISL_480217, EPI_ISL_480218, EPI_ISL_480219, EPI_ISL_480220                                                                                                                                                                                                                                                                                                                                                                                                                                                                                                                                                                                                                                                                                                                                                                                                                                                                                                                                                                                                                                                                                                                                                                                                                                                                                                                                                                                                                                                                                                                                 | Department of Infectious Diseases, Kobe Institute of Health                                                                          | Pathogen Genomics Center, National Institute of Infectious Diseases                                                                  | Tsuyoshi Sekizuka, Ryohei Nomoto, Kentaro Itokawa, Rina Tanaka, Masanori Hashino, Hajime Kamiya, Motoi Suzuki, Makoto Kuroda                                                                                                                                                                                                                                                                                                                                                                            |                  |
| EPI_ISL_480221, EPI_ISL_480222                                                                                                                                                                                                                                                                                                                                                                                                                                                                                                                                                                                                                                                                                                                                                                                                                                                                                                                                                                                                                                                                                                                                                                                                                                                                                                                                                                                                                                                                                                                                                                                                                                 | Koshigaya City Public Health Center                                                                                                  | Pathogen Genomics Center, National Institute of Infectious Diseases                                                                  | Tsuyoshi Sekizuka, Yuka Furui, Aya Tamura, Kyohei Sakata, Takumi Daimon, Yoko Togawa, Yoshiko Hamada, Kentaro Itokawa, Rina Tanaka, Masanori Hashino, Hajime Kamiya, Motoi Suzuki, Makoto Kuroda                                                                                                                                                                                                                                                                                                        |                  |
| EPI_ISL_480225                                                                                                                                                                                                                                                                                                                                                                                                                                                                                                                                                                                                                                                                                                                                                                                                                                                                                                                                                                                                                                                                                                                                                                                                                                                                                                                                                                                                                                                                                                                                                                                                                                                 | Fukui Prefectural Institute of Public Health and Environmental Science                                                               | Pathogen Genomics Center, National Institute of Infectious Diseases                                                                  | Tsuyoshi Sekizuka, Miho Toho, Kentaro Itokawa, Rina Tanaka, Masanori Hashino, Hajime Kamiya, Motoi Suzuki, Makoto Kuroda                                                                                                                                                                                                                                                                                                                                                                                |                  |
| EPI_ISL_480226                                                                                                                                                                                                                                                                                                                                                                                                                                                                                                                                                                                                                                                                                                                                                                                                                                                                                                                                                                                                                                                                                                                                                                                                                                                                                                                                                                                                                                                                                                                                                                                                                                                 | Niigata Prefectural Institute of Public Health and Environmental Sciences                                                            | Pathogen Genomics Center, National Institute of Infectious Diseases                                                                  | Tsuyoshi Sekizuka, Reiko Arai, Kentaro Itokawa, Rina Tanaka, Masanori Hashino, Hajime Kamiya, Motoi Suzuki, Makoto Kuroda                                                                                                                                                                                                                                                                                                                                                                               |                  |
| EPI_ISL_484709, EPI_ISL_484710, EPI_ISL_484711, EPI_ISL_484712, EPI_ISL_484713, EPI_ISL_484714, EPI_ISL_484715, EPI_ISL_484716, EPI_ISL_484717, EPI_ISL_484718, EPI_ISL_484719, EPI_ISL_484720, EPI_ISL_484721, EPI_ISL_484722, EPI_ISL_484723, EPI_ISL_484724, EPI_ISL_484725, EPI_ISL_484726, EPI_ISL_484727, EPI_ISL_484728, EPI_ISL_484729, EPI_ISL_484730, EPI_ISL_484731, EPI_ISL_484732, EPI_ISL_484733, EPI_ISL_484734, EPI_ISL_484735, EPI_ISL_484736, EPI_ISL_484737, EPI_ISL_484738, EPI_ISL_484739, EPI_ISL_484740, EPI_ISL_484741, EPI_ISL_484742, EPI_ISL_484743, EPI_ISL_484744, EPI_ISL_484745, EPI_ISL_484746, EPI_ISL_484747, EPI_ISL_484748, EPI_ISL_484749, EPI_ISL_484750, EPI_ISL_484751, EPI_ISL_484752, EPI_ISL_484753, EPI_ISL_484754, EPI_ISL_484755, EPI_ISL_484756, EPI_ISL_484757, EPI_ISL_484758, EPI_ISL_484759, EPI_ISL_484760, EPI_ISL_484761, EPI_ISL_484762, EPI_ISL_484763, EPI_ISL_484764, EPI_ISL_484765, EPI_ISL_484766, EPI_ISL_484767, EPI_ISL_484768, EPI_ISL_484769, EPI_ISL_484770, EPI_ISL_484771, EPI_ISL_484772, EPI_ISL_484773, EPI_ISL_484774, EPI_ISL_484775, EPI_ISL_484776, EPI_ISL_484777, EPI_ISL_484778, EPI_ISL_484779, EPI_ISL_484780, EPI_ISL_484781, EPI_ISL_484782, EPI_ISL_484783, EPI_ISL_484784, EPI_ISL_484785, EPI_ISL_484786, EPI_ISL_484787, EPI_ISL_484788, EPI_ISL_484789, EPI_ISL_484790, EPI_ISL_484791, EPI_ISL_484792, EPI_ISL_484793, EPI_ISL_484794, EPI_ISL_484795, EPI_ISL_484796, EPI_ISL_484797, EPI_ISL_484798, EPI_ISL_484799, EPI_ISL_484800, EPI_ISL_484801, EPI_ISL_484802, EPI_ISL_484803, EPI_ISL_484804, EPI_ISL_484805, EPI_ISL_484806, EPI_ISL_487229, EPI_ISL_487230 | University of Michigan Clinical Microbiology Laboratory                                                                              | Lauring Lab, University of Michigan, Department of Microbiology and Immunology                                                       | Valesano et al.                                                                                                                                                                                                                                                                                                                                                                                                                                                                                         |                  |
| EPI_ISL_487370, EPI_ISL_487377, EPI_ISL_487379, EPI_ISL_487381                                                                                                                                                                                                                                                                                                                                                                                                                                                                                                                                                                                                                                                                                                                                                                                                                                                                                                                                                                                                                                                                                                                                                                                                                                                                                                                                                                                                                                                                                                                                                                                                 | Hellenic Pasteur Institute, National Influenza Reference laboratory of Southern Greece & Unit of Bioinformatics and Applied Genomics | Hellenic Pasteur Institute, National Influenza Reference laboratory of Southern Greece & Unit of Bioinformatics and Applied Genomics | Vasiliki Pogka, Timokratis Karamitros, Athanasios Kossyvakis, Antonios Kalliaropoulos, Horefti Elina, Evangelidou Maria, Androniki Voulgari-Kokota, Aspasia Kontou, Andreas Mentis                                                                                                                                                                                                                                                                                                                      |                  |
| EPI_ISL_490210, EPI_ISL_490211, EPI_ISL_490212, EPI_ISL_490213, EPI_ISL_490214, EPI_ISL_490215, EPI_ISL_490216, EPI_ISL_490217, EPI_ISL_490218, EPI_ISL_490219, EPI_ISL_490220, EPI_ISL_490221, EPI_ISL_490222, EPI_ISL_490223                                                                                                                                                                                                                                                                                                                                                                                                                                                                                                                                                                                                                                                                                                                                                                                                                                                                                                                                                                                                                                                                                                                                                                                                                                                                                                                                                                                                                                 | see above                                                                                                                            | Quest Diagnostics                                                                                                                    | Q Squared Solutions - QRTP facility                                                                                                                                                                                                                                                                                                                                                                                                                                                                     | Victor J Weigman |
| EPI_ISL_491298                                                                                                                                                                                                                                                                                                                                                                                                                                                                                                                                                                                                                                                                                                                                                                                                                                                                                                                                                                                                                                                                                                                                                                                                                                                                                                                                                                                                                                                                                                                                                                                                                                                 | Rural Health Unit - Calauan, Laguna                                                                                                  | Research Institute for Tropical Medicine                                                                                             | Tujan, M.A.A., Onza,O.J.T., Polotan,F.G.M., Medado,I.A.P., Bautista,C.T., Brunker, K., Mercado,E.S., Manalo, D.L., Demetria, C.S.                                                                                                                                                                                                                                                                                                                                                                       |                  |
| EPI_ISL_492078, EPI_ISL_492082, EPI_ISL_492083, EPI_ISL_492084, EPI_ISL_492085                                                                                                                                                                                                                                                                                                                                                                                                                                                                                                                                                                                                                                                                                                                                                                                                                                                                                                                                                                                                                                                                                                                                                                                                                                                                                                                                                                                                                                                                                                                                                                                 | Institute for Public Health of the Republic of North Macedonia                                                                       | Charite Universitatsmedizin Berlin, Institute of Virology                                                                            | Victor M Corman, Joern Beheim-Schwarzbach, Barbara Muhlemann, Talitha Veith, Julia Schneider, Elizabeta Jancheska, Maja Kuzmanovska, Golubinka Bosevska, Terry Jones, Christian Drosten                                                                                                                                                                                                                                                                                                                 |                  |
| EPI_ISL_495032, EPI_ISL_495050                                                                                                                                                                                                                                                                                                                                                                                                                                                                                                                                                                                                                                                                                                                                                                                                                                                                                                                                                                                                                                                                                                                                                                                                                                                                                                                                                                                                                                                                                                                                                                                                                                 | GMERS Medical College & Hospital, Gotri, Vadodara                                                                                    | Gujarat Biotechnology Research Centre                                                                                                | Varsha Godbole, Apurvashin Puvar, Janvi Raval, Zarna Patel, Monika Gandhi, Pinal Trivedi, Maharshi Pandya, Nidhi Patel, Nitin Savaliya, Raghawendra Kumar, Dinesh Kumar, Zuber Saiyed, Komal Patel, Labdhi Pandya, Afzal Ansari, Nikha Trivedi, Meenakshi Shah, Neena Doshi, R D Dixit, A M Kadri, Harsh Bakshi, Chaitanya Joshi, Madhvi Joshi                                                                                                                                                          |                  |
| EPI_ISL_495176                                                                                                                                                                                                                                                                                                                                                                                                                                                                                                                                                                                                                                                                                                                                                                                                                                                                                                                                                                                                                                                                                                                                                                                                                                                                                                                                                                                                                                                                                                                                                                                                                                                 | CSIR-Centre for Cellular and Molecular Biology                                                                                       | CSIR-Centre for Cellular and Molecular Biology                                                                                       | Tulasi Nagabandi, Namami Gaur, Sakshi Shambhavi, Lamuk Zaveri, Shagufta Khan, Nikhil Hajirnis, M Soujanya Reddy, Pratheusa Maccha, Purushotham Vodnala, Payel Mukherjee, Sofia Banu, Priya Singh, Onkar Kulkarni, Dhiviya Vedagiri, Divya Gupta, Vishal Sah, Santosh Kumar Kuncha, Krishnan Harinivas Harshan, Archana Bharadwaj Siva, Karthik Bharadwaj Tallapaka,G. Aditya Kumar, Koushick Sivakumar, Pooja Ramesh Gupta, Rajan Kumar Jha, Shraddha Vijay Lahoti, Rakesh K Mishra, Divya Tej Sowpati  |                  |
| EPI_ISL_495198                                                                                                                                                                                                                                                                                                                                                                                                                                                                                                                                                                                                                                                                                                                                                                                                                                                                                                                                                                                                                                                                                                                                                                                                                                                                                                                                                                                                                                                                                                                                                                                                                                                 | CSIR-Centre for Cellular and Molecular Biology                                                                                       | CSIR-Centre for Cellular and Molecular Biology                                                                                       | Tulasi Nagabandi, Namami Gaur, Sakshi Shambhavi, Lamuk Zaveri, Shagufta Khan, Nikhil Hajirnis, M Soujanya Reddy, Pratheusa Maccha, Purushotham Vodnala, Payel Mukherjee, Sofia Banu, Priya Singh, Onkar Kulkarni, Dhiviya Vedagiri, Divya Gupta, Vishal Sah, Santosh Kumar Kuncha, Krishnan Harinivas Harshan, Archana Bharadwaj Siva, Karthik Bharadwaj Tallapaka,Kezia J Ann, Radhika Khandelwal, Roshan Maku Venkata, Shemin Mansuri, Sonu Uday, Rakesh K Mishra, Divya Tej Sowpati                  |                  |
| EPI_ISL_495203, EPI_ISL_495214                                                                                                                                                                                                                                                                                                                                                                                                                                                                                                                                                                                                                                                                                                                                                                                                                                                                                                                                                                                                                                                                                                                                                                                                                                                                                                                                                                                                                                                                                                                                                                                                                                 | CSIR-Centre for Cellular and Molecular Biology                                                                                       | CSIR-Centre for Cellular and Molecular Biology                                                                                       | Tulasi Nagabandi, Namami Gaur, Sakshi Shambhavi, Lamuk Zaveri, Shagufta Khan, Nikhil Hajirnis, M Soujanya Reddy, Pratheusa Maccha, Purushotham Vodnala, Payel Mukherjee, Sofia Banu, Priya Singh, Onkar Kulkarni , Dhiviya Vedagiri, Divya Gupta, Vishal Sah, Santosh Kumar Kuncha, Krishnan Harinivas Harshan, Archana Bharadwaj Siva, Karthik Bharadwaj Tallapaka,G. Aditya Kumar, Koushick Sivakumar, Pooja Ramesh Gupta, Rajan Kumar Jha, Shraddha Vijay Lahoti, Rakesh K Mishra, Divya Tej Sowpati |                  |
| EPI_ISL_495235                                                                                                                                                                                                                                                                                                                                                                                                                                                                                                                                                                                                                                                                                                                                                                                                                                                                                                                                                                                                                                                                                                                                                                                                                                                                                                                                                                                                                                                                                                                                                                                                                                                 | CSIR-Centre for Cellular and Molecular Biology                                                                                       | CSIR-Centre for Cellular and Molecular Biology                                                                                       | Tulasi Nagabandi, Namami Gaur, Sakshi Shambhavi, Lamuk Zaveri, Shagufta Khan, Nikhil Hajirnis, M Soujanya Reddy, Pratheusa Maccha, Purushotham Vodnala, Payel Mukherjee, Sofia Banu, Priya Singh, Onkar Kulkarni, Dhiviya Vedagiri, Divya Gupta, Vishal Sah, Santosh Kumar Kuncha, Krishnan Harinivas Harshan, Archana Bharadwaj Siva, Karthik Bharadwaj Tallapaka,G. Aditya Kumar, Koushick Sivakumar, Pooja Ramesh Gupta, Rajan Kumar Jha, Shraddha Vijay Lahoti, Rakesh K Mishra, Divya Tej Sowpati  |                  |
| EPI_ISL_495242                                                                                                                                                                                                                                                                                                                                                                                                                                                                                                                                                                                                                                                                                                                                                                                                                                                                                                                                                                                                                                                                                                                                                                                                                                                                                                                                                                                                                                                                                                                                                                                                                                                 | CSIR-Centre for Cellular and Molecular Biology                                                                                       | CSIR-Centre for Cellular and Molecular Biology                                                                                       | Tulasi Nagabandi, Namami Gaur, Sakshi Shambhavi, Lamuk Zaveri, Shagufta Khan, Nikhil Hajirnis, M Soujanya Reddy, Pratheusa Maccha, Purushotham Vodnala, Payel Mukherjee, Sofia Banu, Priya Singh, Onkar Kulkarni, Dhiviya Vedagiri, Divya Gupta, Vishal Sah, Santosh Kumar Kuncha, Krishnan Harinivas Harshan, Archana Bharadwaj Siva, Karthik Bharadwaj Tallapaka,Kezia J Ann, Radhika Khandelwal, Roshan Maku Venkata, Shemin Mansuri, Sonu Uday, Rakesh K Mishra, Divya Tej Sowpati                  |                  |
| EPI_ISL_495255, EPI_ISL_495263                                                                                                                                                                                                                                                                                                                                                                                                                                                                                                                                                                                                                                                                                                                                                                                                                                                                                                                                                                                                                                                                                                                                                                                                                                                                                                                                                                                                                                                                                                                                                                                                                                 | CSIR-Centre for Cellular and Molecular Biology                                                                                       | CSIR-Centre for Cellular and Molecular Biology                                                                                       | Tulasi Nagabandi, Namami Gaur, Sakshi Shambhavi, Lamuk Zaveri, Shagufta Khan, Nikhil Hajirnis, M Soujanya Reddy, Pratheusa Maccha, Purushotham Vodnala, Payel Mukherjee, Sofia Banu, Priya Singh, Onkar Kulkarni, Dhiviya Vedagiri, Divya Gupta, Vishal Sah, Santosh Kumar Kuncha, Krishnan Harinivas Harshan, Archana Bharadwaj Siva, Karthik Bharadwaj Tallapaka,G. Aditya Kumar, Koushick Sivakumar, Pooja Ramesh Gupta, Rajan Kumar Jha, Shraddha Vijay Lahoti, Rakesh K Mishra, Divya Tej Sowpati  |                  |
| EPI_ISL_495267                                                                                                                                                                                                                                                                                                                                                                                                                                                                                                                                                                                                                                                                                                                                                                                                                                                                                                                                                                                                                                                                                                                                                                                                                                                                                                                                                                                                                                                                                                                                                                                                                                                 | CSIR-Centre for Cellular and Molecular Biology                                                                                       | CSIR-Centre for Cellular and Molecular Biology                                                                                       | Tulasi Nagabandi, Namami Gaur, Sakshi Shambhavi, Lamuk Zaveri, Shagufta Khan, Nikhil Hajirnis, M Soujanya Reddy, Pratheusa Maccha, Purushotham Vodnala, Payel Mukherjee, Sofia Banu, Priya Singh, Onkar Kulkarni, Dhiviya Vedagiri, Divya Gupta, Vishal Sah, Santosh Kumar Kuncha, Krishnan Harinivas Harshan, Archana Bharadwaj Siva, Karthik Bharadwaj Tallapaka,Kezia J Ann, Radhika Khandelwal, Roshan Maku Venkata, Shemin Mansuri, Sonu Uday, Rakesh K Mishra, Divya Tej Sowpati                  |                  |
| EPI_ISL_495268                                                                                                                                                                                                                                                                                                                                                                                                                                                                                                                                                                                                                                                                                                                                                                                                                                                                                                                                                                                                                                                                                                                                                                                                                                                                                                                                                                                                                                                                                                                                                                                                                                                 | CSIR-Centre for Cellular and Molecular Biology                                                                                       | CSIR-Centre for Cellular and Molecular Biology                                                                                       | Tulasi Nagabandi, Namami Gaur, Sakshi Shambhavi, Lamuk Zaveri, Shagufta Khan, Nikhil Hajirnis, M Soujanya Reddy, Pratheusa Maccha, Purushotham Vodnala, Payel Mukherjee, Sofia Banu, Priya Singh, Onkar Kulkarni , Dhiviya Vedagiri, Divya Gupta, Vishal Sah, Santosh Kumar Kuncha, Krishnan Harinivas Harshan, Archana Bharadwaj Siva, Karthik Bharadwaj Tallapaka,G. Aditya Kumar, Koushick Sivakumar, Pooja Ramesh Gupta, Rajan Kumar Jha, Shraddha Vijay Lahoti, Rakesh K Mishra, Divya Tej Sowpati |                  |
| EPI_ISL_495563, EPI_ISL_495564, EPI_ISL_495565, EPI_ISL_495566, EPI_ISL_495567, EPI_ISL_495568, EPI_ISL_495569, EPI_ISL_495570, EPI_ISL_495571, EPI_ISL_495572, EPI_ISL_495573, EPI_ISL_495574, EPI_ISL_495575, EPI_ISL_495576, EPI_ISL_495577, EPI_ISL_495578, EPI_ISL_495579, EPI_ISL_495580, EPI_ISL_495581, EPI_ISL_495582, EPI_ISL_495583, EPI_ISL_495584, EPI_ISL_495585, EPI_ISL_495586, EPI_ISL_495587, EPI_ISL_495588, EPI_ISL_495589, EPI_ISL_495590, EPI_ISL_495591, EPI_ISL_495592, EPI_ISL_495593, EPI_ISL_495594, EPI_ISL_495595, EPI_ISL_495596                                                                                                                                                                                                                                                                                                                                                                                                                                                                                                                                                                                                                                                                                                                                                                                                                                                                                                                                                                                                                                                                                                 | see above                                                                                                                            | University of Michigan Clinical Microbiology Laboratory                                                                              | Lauring Lab, University of Michigan, Department of Microbiology and Immunology                                                                                                                                                                                                                                                                                                                                                                                                                          | Valesano et al.  |

|                                                                                                                                                                                                                                                |                                                                                                                 |                                                                                                                                      |                                                                                                                                                                                                                                                                                                                                                                                                                                                                                                         |
|------------------------------------------------------------------------------------------------------------------------------------------------------------------------------------------------------------------------------------------------|-----------------------------------------------------------------------------------------------------------------|--------------------------------------------------------------------------------------------------------------------------------------|---------------------------------------------------------------------------------------------------------------------------------------------------------------------------------------------------------------------------------------------------------------------------------------------------------------------------------------------------------------------------------------------------------------------------------------------------------------------------------------------------------|
| EPI_ISL_501167, EPI_ISL_501168, EPI_ISL_501169, EPI_ISL_501171, EPI_ISL_501172, EPI_ISL_501173, EPI_ISL_501174                                                                                                                                 | Baylor College of Medicine                                                                                      | Baylor College of Medicine: HGSC                                                                                                     | Vasanthi Avadhanula, Erin Nicholson, David Henke, Pedro Piedra, Harsha Doddapaneni, Donna Muzny, Qingchang Meng, Hsu Chao, Zeineen Momin, Hua Shen, George Weissenberger, Kavya Kottapalli, Yimti Meiheerguli, Sejal Salvi, Ginger Metcalf, Vipin Menon, Sara J.J. Cregeen, Matthew C. Ross, Tulin Ayvaz, Richard Suggang, Kristi L. Hoffman, Matthew Wong, Joseph F. Petrosino                                                                                                                         |
| EPI_ISL_501230                                                                                                                                                                                                                                 | Hellenic Pasteur Institute, Public Health Laboratories                                                          | Hellenic Pasteur Institute, National Influenza Reference laboratory of Southern Greece & Unit of Bioinformatics and Applied Genomics | Vasiliki Pogka, Timokratis Karamitros, Athanasios Kossovakis, Antonios Kalliaropoulos, Horefti Elina, Evangelidou Maria, Androniki Voulgari-Kokota, Aspasia Kontou, Andreas Mentis                                                                                                                                                                                                                                                                                                                      |
| EPI_ISL_501231, EPI_ISL_501232, EPI_ISL_501233, EPI_ISL_501234, EPI_ISL_501235, EPI_ISL_501236, EPI_ISL_501237, EPI_ISL_501238, EPI_ISL_501241, EPI_ISL_501242, EPI_ISL_501246, EPI_ISL_501248, EPI_ISL_501249, EPI_ISL_501250, EPI_ISL_501251 | see above                                                                                                       | Hellenic Pasteur Institute, National Influenza Reference laboratory of Southern Greece & Unit of Bioinformatics and Applied Genomics | Vasiliki Pogka, Timokratis Karamitros, Athanasios Kossovakis, Antonios Kalliaropoulos, Horefti Elina, Evangelidou Maria, Androniki Voulgari-Kokota, Aspasia Kontou, Andreas Mentis                                                                                                                                                                                                                                                                                                                      |
| EPI_ISL_508864, EPI_ISL_508866, EPI_ISL_508868, EPI_ISL_508870                                                                                                                                                                                 | Division of Infectious Diseases and Hospital Epidemiology, University Hospital Zürich                           | Institute of Medical Virology, University of Zurich                                                                                  | Verena Kufner, Maryam Zaheri, Dana Weissberg, Jürg Böni, Silvana K. Rampini, Peter W. Schreiber, Irene A. Abela, Hugo Sax, Aline Wolfensberger, Michael Huber                                                                                                                                                                                                                                                                                                                                           |
| EPI_ISL_513294                                                                                                                                                                                                                                 | Baylor College of Medicine                                                                                      | Baylor College of Medicine: HGSC                                                                                                     | Vasanthi Avadhanula, Erin Nicholson, David Henke, Pedro Piedra, Harsha Doddapaneni, Donna Muzny, Qingchang Meng, Hsu Chao, Zeineen Momin, Hua Shen, George Weissenberger, Kavya Kottapalli, Yimti Meiheerguli, Sejal Salvi, Ginger Metcalf, Vipin Menon, Sara J.J. Cregeen, Matthew C. Ross, Tulin Ayvaz, Richard Suggang, Kristi L. Hoffman, Matthew Wong, Joseph F. Petrosino                                                                                                                         |
| EPI_ISL_514432                                                                                                                                                                                                                                 | Prof. Massimo Zollo CEINGE TASK-FORCE COVID19 - Regione Campania                                                | Prof. Massimo Zollo CEINGE TASK-FORCE COVID19 - Regione Campania                                                                     | Veronica Ferrucci, Dae young Kong, Fatemeh asadzadeh, Laura Marrone, Roberto Siciliano, Rino Cerino, Giovanna Fusco, Marika Comegna, Angelo Boccia, Maurizio Viscardi, Giorgia Borriello, Sergio Brandi, Claudia Tiberio, Luigi Atripaldi, Giovanni Paoiella, Giuseppe Castaldo, Stefano Pascarella, Martina Bianchi, Lorenzo Chiariotti, Jae Myun Lee, Jae Ho Jung, Kyong Seop Yun, Hong Yeoul Kim and Massimo Zollo                                                                                   |
| EPI_ISL_516627                                                                                                                                                                                                                                 | SYNLAB Eesti OU                                                                                                 | Charite Universitätsmedizin Berlin, Institute of Virology                                                                            | Victor M Corman, Jorn Beheim-Schwarzbach, Barbara Muehleemann, Talitha Veith, Julia Schneider, Paul Naaber, Terry Jones, Christian Drosten                                                                                                                                                                                                                                                                                                                                                              |
| EPI_ISL_516629, EPI_ISL_516630, EPI_ISL_516631, EPI_ISL_516634, EPI_ISL_516639                                                                                                                                                                 | Charite Universitätsmedizin Berlin, Institut für Virologie/Labor Berlin                                         | Charite Universitätsmedizin Berlin, Institut für Virologie/Labor Berlin                                                              | Victor M Corman, Barbara Muehleemann, Jörn Beheim-Schwarzbach, Julia Schneider, Talitha Veith, Terry Jones, Christian Drosten                                                                                                                                                                                                                                                                                                                                                                           |
| EPI_ISL_516922, EPI_ISL_516923, EPI_ISL_516927, EPI_ISL_516932, EPI_ISL_516933                                                                                                                                                                 | Department for Molecular Diagnostics, Centre for Medical Microbiology, Institute of Public Health of Montenegro | Charite Universitätsmedizin Berlin, Institut für Virologie                                                                           | Victor M Corman, Terry Jones, Jörn Beheim-Schwarzbach, Barbara Muehleemann, Talitha Veith, Julia Schneider, Marija Govedarica and Danijela Vujošević, Christian Drosten                                                                                                                                                                                                                                                                                                                                 |
| EPI_ISL_516934, EPI_ISL_516935, EPI_ISL_516936, EPI_ISL_516938                                                                                                                                                                                 | Nicolae Testemitanu State University of Medicine and Pharmacy                                                   | International Centre for Genetic Engineering and Biotechnology (ICGEB) and ARGO Open Lab Platform for Genome Sequencing              | Ulinici M, Licastro D, Dal Monego S, Rajasekharan S, Marcello A                                                                                                                                                                                                                                                                                                                                                                                                                                         |
| EPI_ISL_516989                                                                                                                                                                                                                                 | Public Health Authority of the Slovak Republic, Department of Medical Microbiology                              | Charite Universitätsmedizin Berlin, Institute of Virology                                                                            | Victor M Corman, Terry Jones, Jörn Beheim-Schwarzbach, Barbara Muehleemann, Talitha Veith, Julia Schneider, Mgr. Edita Staronova, Christian Drosten                                                                                                                                                                                                                                                                                                                                                     |
| EPI_ISL_523964                                                                                                                                                                                                                                 | National Agency for Public Health, Republic of Moldova                                                          | Charite Universitätsmedizin Berlin, Institute of Virology                                                                            | Victor M Corman, Jorn Beheim-Schwarzbach, Barbara Muehleemann, Talitha Veith, Julia Schneider, Ala Halacu, Mariana Apostol, Terry Jones, Christian Drosten                                                                                                                                                                                                                                                                                                                                              |
| EPI_ISL_524482                                                                                                                                                                                                                                 | University Hospital Zürich                                                                                      | Institute of Medical Virology, University of Zurich                                                                                  | Verena Kufner, Maryam Zaheri, Gabriela Ziltener, Stefan Schmutz, Patrick Redli, Fiona Steiner, Jon Huder, Riccarda Capaul, Andrea Zbinden, Jürg Böni, Michael Huber, Alexandra Trkola                                                                                                                                                                                                                                                                                                                   |
| EPI_ISL_524483                                                                                                                                                                                                                                 | Division of Infectious Diseases, University Hospital Zürich                                                     | Institute of Medical Virology, University of Zurich                                                                                  | Verena Kufner, Maryam Zaheri, Gabriela Ziltener, Stefan Schmutz, Patrick Redli, Fiona Steiner, Jon Huder, Riccarda Capaul, Andrea Zbinden, Jürg Böni, Michael Huber, Alexandra Trkola                                                                                                                                                                                                                                                                                                                   |
| EPI_ISL_524484                                                                                                                                                                                                                                 | Hospital Schwyz                                                                                                 | Institute of Medical Virology, University of Zurich                                                                                  | Verena Kufner, Maryam Zaheri, Gabriela Ziltener, Stefan Schmutz, Patrick Redli, Fiona Steiner, Jon Huder, Riccarda Capaul, Andrea Zbinden, Jürg Böni, Michael Huber, Alexandra Trkola                                                                                                                                                                                                                                                                                                                   |
| EPI_ISL_524485                                                                                                                                                                                                                                 | Division of Infectious Diseases, University Hospital Zürich                                                     | Institute of Medical Virology, University of Zurich                                                                                  | Verena Kufner, Maryam Zaheri, Gabriela Ziltener, Stefan Schmutz, Patrick Redli, Fiona Steiner, Jon Huder, Riccarda Capaul, Andrea Zbinden, Jürg Böni, Michael Huber, Alexandra Trkola                                                                                                                                                                                                                                                                                                                   |
| EPI_ISL_528824, EPI_ISL_528830, EPI_ISL_528836, EPI_ISL_528840, EPI_ISL_528853, EPI_ISL_528860                                                                                                                                                 | CSIR-Centre for Cellular and Molecular Biology                                                                  | CSIR-Centre for Cellular and Molecular Biology                                                                                       | Tulasi Nagabandi, Namami Gaur, Sakshi Shambhavi, Lamuk Zaveri, Shagufta Khan, Nikhil Hajirnis, M Soujanya Reddy, Pratheusa Maccha, Purushotham Vodnala, Payel Mukherjee, Sofia Banu, Priya Singh, Onkar Kulkarni, Dhiviya Vedagiri, Divya Gupta, Vishal Sah, Santosh Kumar Kuncha, Krishnan Harinivas Harshan, Archana Bharadwaj Siva, Karthik Bharadwaj Tallapaka, G. Aditya Kumar, Koushick Sivakumar, Pooja Ramesh Gupta, Rajan Kumar Jha, Shraddha Vijay Lahoti, Rakesh K Mishra, Divya Tej Sowpati |
| EPI_ISL_529135                                                                                                                                                                                                                                 | Department of Virology III, National Institute of Infectious Diseases                                           | Pathogen Genomics Center, National Institute of Infectious Diseases                                                                  | Tsuyoshi Sekizuka, Shutoku Matsuyama, Kentaro Itokawa, Rina Tanaka, Masanori Hashino, Makoto Takeda, Takaji Wakita, Makoto Kuroda                                                                                                                                                                                                                                                                                                                                                                       |
| EPI_ISL_539643                                                                                                                                                                                                                                 | CSIR-Centre for Cellular and Molecular Biology                                                                  | CSIR-Centre for Cellular and Molecular Biology                                                                                       | Tulasi Nagabandi, Namami Gaur, Sakshi Shambhavi, Lamuk Zaveri, Shagufta Khan, Nikhil Hajirnis, M Soujanya Reddy, Pratheusa Maccha, Purushotham Vodnala, Payel Mukherjee, Sofia Banu, Priya Singh, Onkar Kulkarni, Dhiviya Vedagiri, Divya Gupta, Vishal Sah, Santosh Kumar Kuncha, Krishnan Harinivas Harshan, Archana Bharadwaj Siva, Karthik Bharadwaj Tallapaka, G. Aditya Kumar, Koushick Sivakumar, Pooja Ramesh Gupta, Rajan Kumar Jha, Shraddha Vijay Lahoti, Rakesh K Mishra, Divya Tej Sowpati |
| EPI_ISL_539644                                                                                                                                                                                                                                 | CSIR-Centre for Cellular and Molecular Biology                                                                  | CSIR-Centre for Cellular and Molecular Biology                                                                                       | Tulasi Nagabandi, Namami Gaur, Sakshi Shambhavi, Lamuk Zaveri, Shagufta Khan, Nikhil Hajirnis, M Soujanya Reddy, Pratheusa Maccha, Purushotham Vodnala, Payel Mukherjee, Sofia Banu, Priya Singh, Onkar Kulkarni, Dhiviya Vedagiri, Divya Gupta, Vishal Sah, Santosh Kumar Kuncha, Krishnan Harinivas Harshan, Archana Bharadwaj Siva, Karthik Bharadwaj Tallapaka, G. Aditya Kumar, Koushick Sivakumar, Pooja Ramesh Gupta, Rajan Kumar Jha, Shraddha Vijay Lahoti, Rakesh K Mishra, Divya Tej Sowpati |
| EPI_ISL_539645                                                                                                                                                                                                                                 | CSIR-Centre for Cellular and Molecular Biology                                                                  | CSIR-Centre for Cellular and Molecular Biology                                                                                       | Tulasi Nagabandi, Namami Gaur, Sakshi Shambhavi, Lamuk Zaveri, Shagufta Khan, Nikhil Hajirnis, M Soujanya Reddy, Pratheusa Maccha, Purushotham Vodnala, Payel Mukherjee, Sofia Banu, Priya Singh, Onkar Kulkarni, Dhiviya Vedagiri, Divya Gupta, Vishal Sah, Santosh Kumar Kuncha, Krishnan Harinivas Harshan, Archana Bharadwaj Siva, Karthik Bharadwaj Tallapaka, G. Aditya Kumar, Koushick Sivakumar, Pooja Ramesh Gupta, Rajan Kumar Jha, Shraddha Vijay Lahoti, Rakesh K Mishra, Divya Tej Sowpati |
| EPI_ISL_539673                                                                                                                                                                                                                                 | CSIR-Centre for Cellular and Molecular Biology                                                                  | CSIR-Centre for Cellular and Molecular Biology                                                                                       | Tulasi Nagabandi, Namami Gaur, Sakshi Shambhavi, Lamuk Zaveri, Shagufta Khan, Nikhil Hajirnis, M Soujanya Reddy, Pratheusa Maccha, Purushotham Vodnala, Payel Mukherjee, Sofia Banu, Priya Singh, Onkar Kulkarni, Dhiviya Vedagiri, Divya Gupta, Vishal Sah, Santosh Kumar Kuncha, Krishnan Harinivas Harshan, Archana Bharadwaj Siva, Karthik Bharadwaj Tallapaka, G. Aditya Kumar, Koushick Sivakumar, Pooja Ramesh Gupta, Rajan Kumar Jha, Shraddha Vijay Lahoti, Rakesh K Mishra, Divya Tej Sowpati |
| EPI_ISL_539674                                                                                                                                                                                                                                 | CSIR-Centre for Cellular and Molecular Biology                                                                  | CSIR-Centre for Cellular and Molecular Biology                                                                                       | Tulasi Nagabandi, Namami Gaur, Sakshi Shambhavi, Lamuk Zaveri, Shagufta Khan, Nikhil Hajirnis, M Soujanya Reddy, Pratheusa Maccha, Purushotham Vodnala, Payel Mukherjee, Sofia Banu, Priya Singh, Onkar Kulkarni, Dhiviya Vedagiri, Divya Gupta, Vishal Sah, Santosh Kumar Kuncha, Krishnan Harinivas Harshan, Archana Bharadwaj Siva, Karthik Bharadwaj Tallapaka, G. Aditya Kumar, Koushick Sivakumar, Pooja Ramesh Gupta, Rajan Kumar Jha, Shraddha Vijay Lahoti, Rakesh K Mishra, Divya Tej Sowpati |
| EPI_ISL_539675                                                                                                                                                                                                                                 | CSIR-Centre for Cellular and Molecular Biology                                                                  | CSIR-Centre for Cellular and Molecular Biology                                                                                       | Tulasi Nagabandi, Namami Gaur, Sakshi Shambhavi, Lamuk Zaveri, Shagufta Khan, Nikhil Hajirnis, M Soujanya Reddy, Pratheusa Maccha, Purushotham Vodnala, Payel Mukherjee, Sofia Banu, Priya Singh, Onkar Kulkarni, Dhiviya Vedagiri, Divya Gupta, Vishal Sah, Santosh Kumar Kuncha, Krishnan Harinivas Harshan, Archana Bharadwaj Siva, Karthik Bharadwaj Tallapaka, G. Aditya Kumar, Koushick Sivakumar, Pooja Ramesh Gupta, Rajan Kumar Jha, Shraddha Vijay Lahoti, Rakesh K Mishra, Divya Tej Sowpati |
| EPI_ISL_539703                                                                                                                                                                                                                                 | CSIR-Centre for Cellular and Molecular Biology                                                                  | CSIR-Centre for Cellular and Molecular Biology                                                                                       | Tulasi Nagabandi, Namami Gaur, Sakshi Shambhavi, Lamuk Zaveri, Shagufta Khan, Nikhil Hajirnis, M Soujanya Reddy, Pratheusa Maccha, Purushotham Vodnala, Payel Mukherjee, Sofia Banu, Priya Singh, Onkar Kulkarni, Dhiviya Vedagiri, Divya Gupta, Vishal Sah, Santosh Kumar Kuncha, Krishnan Harinivas Harshan, Archana Bharadwaj Siva, Karthik Bharadwaj Tallapaka, G. Aditya Kumar, Koushick Sivakumar, Pooja Ramesh Gupta, Rajan Kumar Jha, Shraddha Vijay Lahoti, Rakesh K Mishra, Divya Tej Sowpati |





























|                                                                                                                                                                                                                                                                                                                                                                                                                                                                                                                                                                                                                                                                                                                                                                                                                                                                                                                                                                                                                                                                                                                                                                                                                                                                                                                                                                                                                                                                                                                |                                                                         |                                                                                |                                                                                                                                                                                                                                                                                                                                                                                                           |  |
|----------------------------------------------------------------------------------------------------------------------------------------------------------------------------------------------------------------------------------------------------------------------------------------------------------------------------------------------------------------------------------------------------------------------------------------------------------------------------------------------------------------------------------------------------------------------------------------------------------------------------------------------------------------------------------------------------------------------------------------------------------------------------------------------------------------------------------------------------------------------------------------------------------------------------------------------------------------------------------------------------------------------------------------------------------------------------------------------------------------------------------------------------------------------------------------------------------------------------------------------------------------------------------------------------------------------------------------------------------------------------------------------------------------------------------------------------------------------------------------------------------------|-------------------------------------------------------------------------|--------------------------------------------------------------------------------|-----------------------------------------------------------------------------------------------------------------------------------------------------------------------------------------------------------------------------------------------------------------------------------------------------------------------------------------------------------------------------------------------------------|--|
|                                                                                                                                                                                                                                                                                                                                                                                                                                                                                                                                                                                                                                                                                                                                                                                                                                                                                                                                                                                                                                                                                                                                                                                                                                                                                                                                                                                                                                                                                                                | Kiel                                                                    |                                                                                |                                                                                                                                                                                                                                                                                                                                                                                                           |  |
| EPI_ISL_729366                                                                                                                                                                                                                                                                                                                                                                                                                                                                                                                                                                                                                                                                                                                                                                                                                                                                                                                                                                                                                                                                                                                                                                                                                                                                                                                                                                                                                                                                                                 | Charité Universitätsmedizin Berlin, Institut für Virologie/Labor Berlin | Charité Universitätsmedizin Berlin, Institut für Virologie                     | Victor M Corman, Barbara Mühlemann, Jörn Beheim-Schwarzbach, Talitha Veith, Julia Schneider, Terry Jones, Christian Drosten                                                                                                                                                                                                                                                                               |  |
| EPI_ISL_729367                                                                                                                                                                                                                                                                                                                                                                                                                                                                                                                                                                                                                                                                                                                                                                                                                                                                                                                                                                                                                                                                                                                                                                                                                                                                                                                                                                                                                                                                                                 | A. Krumbholz, Labor Dr. Krause und Kollegen MVZ GmbH, Kiel              | Charité Universitätsmedizin Berlin, Institut für Virologie                     | Victor M Corman, Barbara Mühlemann, Jörn Beheim-Schwarzbach, Talitha Veith, Julia Schneider, Terry Jones, Christian Drosten                                                                                                                                                                                                                                                                               |  |
| EPI_ISL_729370                                                                                                                                                                                                                                                                                                                                                                                                                                                                                                                                                                                                                                                                                                                                                                                                                                                                                                                                                                                                                                                                                                                                                                                                                                                                                                                                                                                                                                                                                                 | Charité Universitätsmedizin Berlin, Institut für Virologie/Labor Berlin | Charité Universitätsmedizin Berlin, Institut für Virologie                     | Victor M Corman, Barbara Mühlemann, Jörn Beheim-Schwarzbach, Talitha Veith, Julia Schneider, Terry Jones, Christian Drosten                                                                                                                                                                                                                                                                               |  |
| EPI_ISL_729371, EPI_ISL_729372, EPI_ISL_729373, EPI_ISL_729375                                                                                                                                                                                                                                                                                                                                                                                                                                                                                                                                                                                                                                                                                                                                                                                                                                                                                                                                                                                                                                                                                                                                                                                                                                                                                                                                                                                                                                                 | A. Krumbholz, Labor Dr. Krause und Kollegen MVZ GmbH, Kiel              | Charité Universitätsmedizin Berlin, Institut für Virologie                     | Victor M Corman, Barbara Mühlemann, Jörn Beheim-Schwarzbach, Talitha Veith, Julia Schneider, Terry Jones, Christian Drosten                                                                                                                                                                                                                                                                               |  |
| EPI_ISL_729378                                                                                                                                                                                                                                                                                                                                                                                                                                                                                                                                                                                                                                                                                                                                                                                                                                                                                                                                                                                                                                                                                                                                                                                                                                                                                                                                                                                                                                                                                                 | Charité Universitätsmedizin Berlin, Institut für Virologie/Labor Berlin | Charité Universitätsmedizin Berlin, Institut für Virologie                     | Victor M Corman, Barbara Mühlemann, Jörn Beheim-Schwarzbach, Talitha Veith, Julia Schneider, Terry Jones, Christian Drosten                                                                                                                                                                                                                                                                               |  |
| EPI_ISL_729386                                                                                                                                                                                                                                                                                                                                                                                                                                                                                                                                                                                                                                                                                                                                                                                                                                                                                                                                                                                                                                                                                                                                                                                                                                                                                                                                                                                                                                                                                                 | A. Krumbholz, Labor Dr. Krause und Kollegen MVZ GmbH, Kiel              | Charité Universitätsmedizin Berlin, Institut für Virologie                     | Victor M Corman, Barbara Mühlemann, Jörn Beheim-Schwarzbach, Talitha Veith, Julia Schneider, Terry Jones, Christian Drosten                                                                                                                                                                                                                                                                               |  |
| EPI_ISL_729387, EPI_ISL_729388                                                                                                                                                                                                                                                                                                                                                                                                                                                                                                                                                                                                                                                                                                                                                                                                                                                                                                                                                                                                                                                                                                                                                                                                                                                                                                                                                                                                                                                                                 | Charité Universitätsmedizin Berlin, Institut für Virologie/Labor Berlin | Charité Universitätsmedizin Berlin, Institut für Virologie                     | Victor M Corman, Barbara Mühlemann, Jörn Beheim-Schwarzbach, Talitha Veith, Julia Schneider, Terry Jones, Christian Drosten                                                                                                                                                                                                                                                                               |  |
| EPI_ISL_729389, EPI_ISL_729391, EPI_ISL_729394, EPI_ISL_729395, EPI_ISL_729397                                                                                                                                                                                                                                                                                                                                                                                                                                                                                                                                                                                                                                                                                                                                                                                                                                                                                                                                                                                                                                                                                                                                                                                                                                                                                                                                                                                                                                 | A. Krumbholz, Labor Dr. Krause und Kollegen MVZ GmbH, Kiel              | Charité Universitätsmedizin Berlin, Institut für Virologie                     | Victor M Corman, Barbara Mühlemann, Jörn Beheim-Schwarzbach, Talitha Veith, Julia Schneider, Terry Jones, Christian Drosten                                                                                                                                                                                                                                                                               |  |
| EPI_ISL_729398                                                                                                                                                                                                                                                                                                                                                                                                                                                                                                                                                                                                                                                                                                                                                                                                                                                                                                                                                                                                                                                                                                                                                                                                                                                                                                                                                                                                                                                                                                 | Charité Universitätsmedizin Berlin, Institut für Virologie/Labor Berlin | Charité Universitätsmedizin Berlin, Institut für Virologie                     | Victor M Corman, Barbara Mühlemann, Jörn Beheim-Schwarzbach, Talitha Veith, Julia Schneider, Terry Jones, Christian Drosten                                                                                                                                                                                                                                                                               |  |
| EPI_ISL_729401                                                                                                                                                                                                                                                                                                                                                                                                                                                                                                                                                                                                                                                                                                                                                                                                                                                                                                                                                                                                                                                                                                                                                                                                                                                                                                                                                                                                                                                                                                 | A. Krumbholz, Labor Dr. Krause und Kollegen MVZ GmbH, Kiel              | Charité Universitätsmedizin Berlin, Institut für Virologie                     | Victor M Corman, Barbara Mühlemann, Jörn Beheim-Schwarzbach, Talitha Veith, Julia Schneider, Terry Jones, Christian Drosten                                                                                                                                                                                                                                                                               |  |
| EPI_ISL_729408, EPI_ISL_729409, EPI_ISL_729412, EPI_ISL_729413, EPI_ISL_729415                                                                                                                                                                                                                                                                                                                                                                                                                                                                                                                                                                                                                                                                                                                                                                                                                                                                                                                                                                                                                                                                                                                                                                                                                                                                                                                                                                                                                                 | Charité Universitätsmedizin Berlin, Institut für Virologie/Labor Berlin | Charité Universitätsmedizin Berlin, Institut für Virologie                     | Victor M Corman, Barbara Mühlemann, Jörn Beheim-Schwarzbach, Talitha Veith, Julia Schneider, Terry Jones, Christian Drosten                                                                                                                                                                                                                                                                               |  |
| EPI_ISL_729418, EPI_ISL_729419, EPI_ISL_729426, EPI_ISL_729432, EPI_ISL_729441, EPI_ISL_729442, EPI_ISL_729445, EPI_ISL_729449, EPI_ISL_729456, EPI_ISL_729458, EPI_ISL_729459, EPI_ISL_729471, EPI_ISL_729472                                                                                                                                                                                                                                                                                                                                                                                                                                                                                                                                                                                                                                                                                                                                                                                                                                                                                                                                                                                                                                                                                                                                                                                                                                                                                                 |                                                                         |                                                                                |                                                                                                                                                                                                                                                                                                                                                                                                           |  |
| see above                                                                                                                                                                                                                                                                                                                                                                                                                                                                                                                                                                                                                                                                                                                                                                                                                                                                                                                                                                                                                                                                                                                                                                                                                                                                                                                                                                                                                                                                                                      | A. Krumbholz, Labor Dr. Krause und Kollegen MVZ GmbH, Kiel              | Charité Universitätsmedizin Berlin, Institut für Virologie                     | Victor M Corman, Barbara Mühlemann, Jörn Beheim-Schwarzbach, Talitha Veith, Julia Schneider, Terry Jones, Christian Drosten                                                                                                                                                                                                                                                                               |  |
| EPI_ISL_729475, EPI_ISL_729480, EPI_ISL_729481, EPI_ISL_729482, EPI_ISL_729483, EPI_ISL_729485, EPI_ISL_729488, EPI_ISL_729489, EPI_ISL_729496, EPI_ISL_729497, EPI_ISL_729499                                                                                                                                                                                                                                                                                                                                                                                                                                                                                                                                                                                                                                                                                                                                                                                                                                                                                                                                                                                                                                                                                                                                                                                                                                                                                                                                 |                                                                         |                                                                                |                                                                                                                                                                                                                                                                                                                                                                                                           |  |
| see above                                                                                                                                                                                                                                                                                                                                                                                                                                                                                                                                                                                                                                                                                                                                                                                                                                                                                                                                                                                                                                                                                                                                                                                                                                                                                                                                                                                                                                                                                                      | Charité Universitätsmedizin Berlin, Institut für Virologie/Labor Berlin | Charité Universitätsmedizin Berlin, Institut für Virologie                     | Victor M Corman, Barbara Mühlemann, Jörn Beheim-Schwarzbach, Talitha Veith, Julia Schneider, Terry Jones, Christian Drosten                                                                                                                                                                                                                                                                               |  |
| EPI_ISL_729501, EPI_ISL_729504, EPI_ISL_729508, EPI_ISL_729510, EPI_ISL_729515, EPI_ISL_729517, EPI_ISL_729519, EPI_ISL_729522, EPI_ISL_729527, EPI_ISL_729528                                                                                                                                                                                                                                                                                                                                                                                                                                                                                                                                                                                                                                                                                                                                                                                                                                                                                                                                                                                                                                                                                                                                                                                                                                                                                                                                                 | A. Krumbholz, Labor Dr. Krause und Kollegen MVZ GmbH, Kiel              | Charité Universitätsmedizin Berlin, Institut für Virologie                     | Victor M Corman, Barbara Mühlemann, Jörn Beheim-Schwarzbach, Talitha Veith, Julia Schneider, Terry Jones, Christian Drosten                                                                                                                                                                                                                                                                               |  |
| EPI_ISL_729529, EPI_ISL_729534                                                                                                                                                                                                                                                                                                                                                                                                                                                                                                                                                                                                                                                                                                                                                                                                                                                                                                                                                                                                                                                                                                                                                                                                                                                                                                                                                                                                                                                                                 | Charité Universitätsmedizin Berlin, Institut für Virologie/Labor Berlin | Charité Universitätsmedizin Berlin, Institut für Virologie                     | Victor M Corman, Barbara Mühlemann, Jörn Beheim-Schwarzbach, Talitha Veith, Julia Schneider, Terry Jones, Christian Drosten                                                                                                                                                                                                                                                                               |  |
| EPI_ISL_729536, EPI_ISL_729537, EPI_ISL_729542, EPI_ISL_729544, EPI_ISL_729546, EPI_ISL_729547, EPI_ISL_729549                                                                                                                                                                                                                                                                                                                                                                                                                                                                                                                                                                                                                                                                                                                                                                                                                                                                                                                                                                                                                                                                                                                                                                                                                                                                                                                                                                                                 | A. Krumbholz, Labor Dr. Krause und Kollegen MVZ GmbH, Kiel              | Charité Universitätsmedizin Berlin, Institut für Virologie                     | Victor M Corman, Barbara Mühlemann, Jörn Beheim-Schwarzbach, Talitha Veith, Julia Schneider, Terry Jones, Christian Drosten                                                                                                                                                                                                                                                                               |  |
| EPI_ISL_729555, EPI_ISL_729556, EPI_ISL_729557, EPI_ISL_729559, EPI_ISL_729560                                                                                                                                                                                                                                                                                                                                                                                                                                                                                                                                                                                                                                                                                                                                                                                                                                                                                                                                                                                                                                                                                                                                                                                                                                                                                                                                                                                                                                 | Charité Universitätsmedizin Berlin, Institut für Virologie/Labor Berlin | Charité Universitätsmedizin Berlin, Institut für Virologie                     | Victor M Corman, Barbara Mühlemann, Jörn Beheim-Schwarzbach, Talitha Veith, Julia Schneider, Terry Jones, Christian Drosten                                                                                                                                                                                                                                                                               |  |
| EPI_ISL_729562, EPI_ISL_729567, EPI_ISL_729568, EPI_ISL_729570, EPI_ISL_729571, EPI_ISL_729572, EPI_ISL_729573, EPI_ISL_729574, EPI_ISL_729576, EPI_ISL_729577, EPI_ISL_729580, EPI_ISL_729584, EPI_ISL_729586, EPI_ISL_729588, EPI_ISL_729592                                                                                                                                                                                                                                                                                                                                                                                                                                                                                                                                                                                                                                                                                                                                                                                                                                                                                                                                                                                                                                                                                                                                                                                                                                                                 |                                                                         |                                                                                |                                                                                                                                                                                                                                                                                                                                                                                                           |  |
| see above                                                                                                                                                                                                                                                                                                                                                                                                                                                                                                                                                                                                                                                                                                                                                                                                                                                                                                                                                                                                                                                                                                                                                                                                                                                                                                                                                                                                                                                                                                      | A. Krumbholz, Labor Dr. Krause und Kollegen MVZ GmbH, Kiel              | Charité Universitätsmedizin Berlin, Institut für Virologie                     | Victor M Corman, Barbara Mühlemann, Jörn Beheim-Schwarzbach, Talitha Veith, Julia Schneider, Terry Jones, Christian Drosten                                                                                                                                                                                                                                                                               |  |
| EPI_ISL_729599, EPI_ISL_729602, EPI_ISL_729607                                                                                                                                                                                                                                                                                                                                                                                                                                                                                                                                                                                                                                                                                                                                                                                                                                                                                                                                                                                                                                                                                                                                                                                                                                                                                                                                                                                                                                                                 | Charité Universitätsmedizin Berlin, Institut für Virologie/Labor Berlin | Charité Universitätsmedizin Berlin, Institut für Virologie                     | Victor M Corman, Barbara Mühlemann, Jörn Beheim-Schwarzbach, Talitha Veith, Julia Schneider, Terry Jones, Christian Drosten                                                                                                                                                                                                                                                                               |  |
| EPI_ISL_729608, EPI_ISL_729609, EPI_ISL_729612, EPI_ISL_729613, EPI_ISL_729614, EPI_ISL_729619, EPI_ISL_729620, EPI_ISL_729625, EPI_ISL_729631, EPI_ISL_729633, EPI_ISL_729634, EPI_ISL_729635, EPI_ISL_729636, EPI_ISL_729642, EPI_ISL_729648, EPI_ISL_729650, EPI_ISL_729652, EPI_ISL_729653, EPI_ISL_729657, EPI_ISL_729659, EPI_ISL_729661, EPI_ISL_729664, EPI_ISL_729665, EPI_ISL_729666, EPI_ISL_729671, EPI_ISL_729677, EPI_ISL_729679, EPI_ISL_729681, EPI_ISL_729686, EPI_ISL_729695, EPI_ISL_729698, EPI_ISL_729699, EPI_ISL_729701, EPI_ISL_729702, EPI_ISL_729704, EPI_ISL_729708, EPI_ISL_729709, EPI_ISL_729711, EPI_ISL_729716, EPI_ISL_729718, EPI_ISL_729722, EPI_ISL_729723, EPI_ISL_729724, EPI_ISL_729727, EPI_ISL_729728, EPI_ISL_729729, EPI_ISL_729733                                                                                                                                                                                                                                                                                                                                                                                                                                                                                                                                                                                                                                                                                                                                 |                                                                         |                                                                                |                                                                                                                                                                                                                                                                                                                                                                                                           |  |
| see above                                                                                                                                                                                                                                                                                                                                                                                                                                                                                                                                                                                                                                                                                                                                                                                                                                                                                                                                                                                                                                                                                                                                                                                                                                                                                                                                                                                                                                                                                                      | A. Krumbholz, Labor Dr. Krause und Kollegen MVZ GmbH, Kiel              | Charité Universitätsmedizin Berlin, Institut für Virologie                     | Victor M Corman, Barbara Mühlemann, Jörn Beheim-Schwarzbach, Talitha Veith, Julia Schneider, Terry Jones, Christian Drosten                                                                                                                                                                                                                                                                               |  |
| EPI_ISL_730564, EPI_ISL_730565, EPI_ISL_730566                                                                                                                                                                                                                                                                                                                                                                                                                                                                                                                                                                                                                                                                                                                                                                                                                                                                                                                                                                                                                                                                                                                                                                                                                                                                                                                                                                                                                                                                 | University of Michigan Clinical Microbiology Laboratory                 | Lauring Lab, University of Michigan, Department of Microbiology and Immunology | Valesano                                                                                                                                                                                                                                                                                                                                                                                                  |  |
| EPI_ISL_732820, EPI_ISL_732821, EPI_ISL_732822, EPI_ISL_732823, EPI_ISL_732824, EPI_ISL_732825, EPI_ISL_732826                                                                                                                                                                                                                                                                                                                                                                                                                                                                                                                                                                                                                                                                                                                                                                                                                                                                                                                                                                                                                                                                                                                                                                                                                                                                                                                                                                                                 | Nebraska Public Health Laboratory                                       | UNMC COVID-19 Response Team                                                    | UNMC COVID-19 Response Team                                                                                                                                                                                                                                                                                                                                                                               |  |
| EPI_ISL_735440, EPI_ISL_735443, EPI_ISL_736892, EPI_ISL_736893, EPI_ISL_736895, EPI_ISL_736897, EPI_ISL_736898, EPI_ISL_736899, EPI_ISL_736900, EPI_ISL_736904, EPI_ISL_736908, EPI_ISL_736909, EPI_ISL_736912, EPI_ISL_736914, EPI_ISL_736916, EPI_ISL_736918, EPI_ISL_736919, EPI_ISL_736922, EPI_ISL_736923, EPI_ISL_736924, EPI_ISL_737208                                                                                                                                                                                                                                                                                                                                                                                                                                                                                                                                                                                                                                                                                                                                                                                                                                                                                                                                                                                                                                                                                                                                                                 |                                                                         |                                                                                |                                                                                                                                                                                                                                                                                                                                                                                                           |  |
| see above                                                                                                                                                                                                                                                                                                                                                                                                                                                                                                                                                                                                                                                                                                                                                                                                                                                                                                                                                                                                                                                                                                                                                                                                                                                                                                                                                                                                                                                                                                      | Pathogen Genomics Center, National Institute of Infectious Diseases     | Pathogen Genomics Center, National Institute of Infectious Diseases            | Tsuyoshi Sekizuka, Kentaro Itokawa, Rina Tanaka, Masanori Hashino, Makoto Kuroda                                                                                                                                                                                                                                                                                                                          |  |
| EPI_ISL_751796, EPI_ISL_751797, EPI_ISL_751798                                                                                                                                                                                                                                                                                                                                                                                                                                                                                                                                                                                                                                                                                                                                                                                                                                                                                                                                                                                                                                                                                                                                                                                                                                                                                                                                                                                                                                                                 | Public Health Ontario Laboratory                                        | Public Health Ontario Laboratory                                               | Vanessa G Allen, Philip Banh, Richard de Borja, Yao Chen, Alreza Eshaghi, Nahuel Fittipaldi, Christine Frantz, Jonathan B Gubbay, Jennifer L Guthrie, Lawrence Heisler, Esha Joshi, Michael Laszloffy, Aimin Li, Michael CY Li, Dean Maxwell, Sandeep Nagra, Samir N Patel, Heather Rilkooff, Jared Simpson, Karthikeyan Sivaraman, Yogi Sundaravadanam, Sarah Teatero, Andre Villegas, Sandra Zittermann |  |
| EPI_ISL_753704, EPI_ISL_753706, EPI_ISL_753708, EPI_ISL_753709, EPI_ISL_753710, EPI_ISL_753715, EPI_ISL_753717, EPI_ISL_753719, EPI_ISL_753721, EPI_ISL_753721, EPI_ISL_753730, EPI_ISL_753736, EPI_ISL_753738, EPI_ISL_753739, EPI_ISL_753740, EPI_ISL_753741, EPI_ISL_753746, EPI_ISL_753748, EPI_ISL_753749, EPI_ISL_753753, EPI_ISL_753759, EPI_ISL_753760, EPI_ISL_753766, EPI_ISL_753768, EPI_ISL_753777, EPI_ISL_753782, EPI_ISL_753783, EPI_ISL_753787, EPI_ISL_753791, EPI_ISL_753795, EPI_ISL_753796, EPI_ISL_753799, EPI_ISL_753801, EPI_ISL_753805, EPI_ISL_753806, EPI_ISL_753810, EPI_ISL_753812, EPI_ISL_753814, EPI_ISL_753815, EPI_ISL_753816, EPI_ISL_753817, EPI_ISL_753819, EPI_ISL_753821, EPI_ISL_753822, EPI_ISL_753827, EPI_ISL_753828, EPI_ISL_753829, EPI_ISL_753830, EPI_ISL_753831, EPI_ISL_753832, EPI_ISL_753833, EPI_ISL_753839, EPI_ISL_753841, EPI_ISL_753842, EPI_ISL_753844, EPI_ISL_753848, EPI_ISL_753849, EPI_ISL_753853, EPI_ISL_753854, EPI_ISL_753856, EPI_ISL_753862, EPI_ISL_753864, EPI_ISL_753865, EPI_ISL_753866, EPI_ISL_753867, EPI_ISL_753871, EPI_ISL_753873, EPI_ISL_753877, EPI_ISL_753881, EPI_ISL_753882, EPI_ISL_753883, EPI_ISL_753884, EPI_ISL_753891, EPI_ISL_753900, EPI_ISL_753903, EPI_ISL_753905, EPI_ISL_753906, EPI_ISL_753914, EPI_ISL_753916, EPI_ISL_753917, EPI_ISL_753923, EPI_ISL_753925, EPI_ISL_753926, EPI_ISL_753934, EPI_ISL_753935, EPI_ISL_753937, EPI_ISL_753942, EPI_ISL_753944, EPI_ISL_753951, EPI_ISL_753954, EPI_ISL_753957 |                                                                         |                                                                                |                                                                                                                                                                                                                                                                                                                                                                                                           |  |

|                                                                                                                                                                                                                                                                                                                                                                                                                                                                                                                                                                                                                                                                                                                                                                                                                                                                                                                                                                                                                                                                                                                                                                                                                                                                                                                                                                                                                                                                                                                                                                                                                                                                                                                                                                                                                                                                                                                                                                                                                                                                                                                                                                                                                                                                                                                                                                                                                                                                                                                                                                                                                                                                                                                                                                                                                                                                                                                                                                                                                                                                                                                                                                                                                                                                                                                                                                |           |                                                                                                                    |                                                                                                                    |                                                                                                                                                                                                                                                                                                                                                                                                           |
|----------------------------------------------------------------------------------------------------------------------------------------------------------------------------------------------------------------------------------------------------------------------------------------------------------------------------------------------------------------------------------------------------------------------------------------------------------------------------------------------------------------------------------------------------------------------------------------------------------------------------------------------------------------------------------------------------------------------------------------------------------------------------------------------------------------------------------------------------------------------------------------------------------------------------------------------------------------------------------------------------------------------------------------------------------------------------------------------------------------------------------------------------------------------------------------------------------------------------------------------------------------------------------------------------------------------------------------------------------------------------------------------------------------------------------------------------------------------------------------------------------------------------------------------------------------------------------------------------------------------------------------------------------------------------------------------------------------------------------------------------------------------------------------------------------------------------------------------------------------------------------------------------------------------------------------------------------------------------------------------------------------------------------------------------------------------------------------------------------------------------------------------------------------------------------------------------------------------------------------------------------------------------------------------------------------------------------------------------------------------------------------------------------------------------------------------------------------------------------------------------------------------------------------------------------------------------------------------------------------------------------------------------------------------------------------------------------------------------------------------------------------------------------------------------------------------------------------------------------------------------------------------------------------------------------------------------------------------------------------------------------------------------------------------------------------------------------------------------------------------------------------------------------------------------------------------------------------------------------------------------------------------------------------------------------------------------------------------------------------|-----------|--------------------------------------------------------------------------------------------------------------------|--------------------------------------------------------------------------------------------------------------------|-----------------------------------------------------------------------------------------------------------------------------------------------------------------------------------------------------------------------------------------------------------------------------------------------------------------------------------------------------------------------------------------------------------|
| EPI_ISL_753959, EPI_ISL_753960, EPI_ISL_753961, EPI_ISL_753964, EPI_ISL_753965, EPI_ISL_753966, EPI_ISL_753967, EPI_ISL_753969, EPI_ISL_753973, EPI_ISL_753976, EPI_ISL_753981, EPI_ISL_753984, EPI_ISL_753988, EPI_ISL_753991, EPI_ISL_753995, EPI_ISL_753996, EPI_ISL_753998, EPI_ISL_754000, EPI_ISL_754001, EPI_ISL_754005, EPI_ISL_754009, EPI_ISL_754011, EPI_ISL_754012, EPI_ISL_754017, EPI_ISL_754021, EPI_ISL_754025, EPI_ISL_754027, EPI_ISL_754030, EPI_ISL_754032, EPI_ISL_754033, EPI_ISL_754034, EPI_ISL_754038, EPI_ISL_754040, EPI_ISL_754042, EPI_ISL_754044, EPI_ISL_754046, EPI_ISL_754052                                                                                                                                                                                                                                                                                                                                                                                                                                                                                                                                                                                                                                                                                                                                                                                                                                                                                                                                                                                                                                                                                                                                                                                                                                                                                                                                                                                                                                                                                                                                                                                                                                                                                                                                                                                                                                                                                                                                                                                                                                                                                                                                                                                                                                                                                                                                                                                                                                                                                                                                                                                                                                                                                                                                                 | see above | Charité Universitätsmedizin Berlin, Institut für Virologie/Labor Berlin                                            | Charité Universitätsmedizin Berlin, Institut für Virologie                                                         | Victor M Corman, Jörn Beheim-Schwarzbach, Barbara Mühlemann, Julia Schneider, Talitha Veith, Terry Jones, Christian Drosten                                                                                                                                                                                                                                                                               |
| EPI_ISL_754074, EPI_ISL_754075, EPI_ISL_754076, EPI_ISL_754077, EPI_ISL_754078, EPI_ISL_754079, EPI_ISL_754080, EPI_ISL_754081, EPI_ISL_754082, EPI_ISL_754083, EPI_ISL_754084, EPI_ISL_754085, EPI_ISL_754086, EPI_ISL_754087, EPI_ISL_754088, EPI_ISL_754089, EPI_ISL_754090, EPI_ISL_754091, EPI_ISL_754092, EPI_ISL_754093, EPI_ISL_754094, EPI_ISL_754095, EPI_ISL_754096, EPI_ISL_754097, EPI_ISL_754098, EPI_ISL_754099, EPI_ISL_754100, EPI_ISL_754101, EPI_ISL_754102, EPI_ISL_754103, EPI_ISL_754104, EPI_ISL_754105, EPI_ISL_754106, EPI_ISL_754107, EPI_ISL_754108                                                                                                                                                                                                                                                                                                                                                                                                                                                                                                                                                                                                                                                                                                                                                                                                                                                                                                                                                                                                                                                                                                                                                                                                                                                                                                                                                                                                                                                                                                                                                                                                                                                                                                                                                                                                                                                                                                                                                                                                                                                                                                                                                                                                                                                                                                                                                                                                                                                                                                                                                                                                                                                                                                                                                                                 | see above | National Public Health Laboratory, National Centre for Infectious Diseases                                         | National Public Health Laboratory, National Centre for Infectious Diseases                                         | Tze Minn Mak, Sophie Octavia, Zhenyang Zhou, Lin Cui, Raymond Tzer Pin Lin                                                                                                                                                                                                                                                                                                                                |
| EPI_ISL_754194                                                                                                                                                                                                                                                                                                                                                                                                                                                                                                                                                                                                                                                                                                                                                                                                                                                                                                                                                                                                                                                                                                                                                                                                                                                                                                                                                                                                                                                                                                                                                                                                                                                                                                                                                                                                                                                                                                                                                                                                                                                                                                                                                                                                                                                                                                                                                                                                                                                                                                                                                                                                                                                                                                                                                                                                                                                                                                                                                                                                                                                                                                                                                                                                                                                                                                                                                 | see above | Charité Universitätsmedizin Berlin, Institut für Virologie/Labor Berlin                                            | Charité Universitätsmedizin Berlin, Institut für Virologie                                                         | Victor M Corman, Jörn Beheim-Schwarzbach, Barbara Mühlemann, Julia Schneider, Talitha Veith, Terry Jones, Christian Drosten                                                                                                                                                                                                                                                                               |
| EPI_ISL_768526, EPI_ISL_768527                                                                                                                                                                                                                                                                                                                                                                                                                                                                                                                                                                                                                                                                                                                                                                                                                                                                                                                                                                                                                                                                                                                                                                                                                                                                                                                                                                                                                                                                                                                                                                                                                                                                                                                                                                                                                                                                                                                                                                                                                                                                                                                                                                                                                                                                                                                                                                                                                                                                                                                                                                                                                                                                                                                                                                                                                                                                                                                                                                                                                                                                                                                                                                                                                                                                                                                                 | see above | Department of Virology I, National Institute of Infectious Diseases                                                | Pathogen Genomics Center, National Institute of Infectious Diseases                                                | Tsuyoshi Sekizuka, Shuetsu Fukushima, Souichi Yamada, Kentaro Itokawa, Rina Tanaka, Masanori Hashino, Makoto Kuroda                                                                                                                                                                                                                                                                                       |
| EPI_ISL_768618, EPI_ISL_768619, EPI_ISL_768620, EPI_ISL_768621, EPI_ISL_768622, EPI_ISL_768623, EPI_ISL_768624, EPI_ISL_768625, EPI_ISL_768626, EPI_ISL_768627, EPI_ISL_768628, EPI_ISL_768629, EPI_ISL_768630, EPI_ISL_768631, EPI_ISL_768632                                                                                                                                                                                                                                                                                                                                                                                                                                                                                                                                                                                                                                                                                                                                                                                                                                                                                                                                                                                                                                                                                                                                                                                                                                                                                                                                                                                                                                                                                                                                                                                                                                                                                                                                                                                                                                                                                                                                                                                                                                                                                                                                                                                                                                                                                                                                                                                                                                                                                                                                                                                                                                                                                                                                                                                                                                                                                                                                                                                                                                                                                                                 | see above | National Public Health Laboratory, National Centre for Infectious Diseases                                         | National Public Health Laboratory, National Centre for Infectious Diseases                                         | Tze Minn Mak, Sophie Octavia, Zhenyang Zhou, Lin Cui, Raymond Tzer Pin Lin                                                                                                                                                                                                                                                                                                                                |
| EPI_ISL_768637, EPI_ISL_768639, EPI_ISL_768640, EPI_ISL_768641, EPI_ISL_768642, EPI_ISL_768643, EPI_ISL_768644, EPI_ISL_768645, EPI_ISL_768646, EPI_ISL_768647, EPI_ISL_768648, EPI_ISL_768652, EPI_ISL_768653, EPI_ISL_768654, EPI_ISL_768655, EPI_ISL_768656, EPI_ISL_768658, EPI_ISL_768660, EPI_ISL_768661, EPI_ISL_768662, EPI_ISL_768665, EPI_ISL_768667, EPI_ISL_768668, EPI_ISL_768669, EPI_ISL_768670, EPI_ISL_768671, EPI_ISL_768672, EPI_ISL_768673, EPI_ISL_768674, EPI_ISL_768675, EPI_ISL_768676, EPI_ISL_768677, EPI_ISL_768678, EPI_ISL_768680, EPI_ISL_768681, EPI_ISL_768682, EPI_ISL_768685, EPI_ISL_768688, EPI_ISL_768690, EPI_ISL_768692, EPI_ISL_768693, EPI_ISL_768695, EPI_ISL_768696, EPI_ISL_768697, EPI_ISL_768698, EPI_ISL_768699, EPI_ISL_768701, EPI_ISL_768703, EPI_ISL_768704, EPI_ISL_768705, EPI_ISL_768706, EPI_ISL_768707, EPI_ISL_768708, EPI_ISL_768709, EPI_ISL_768710, EPI_ISL_768711, EPI_ISL_768712, EPI_ISL_768713, EPI_ISL_768714, EPI_ISL_768715, EPI_ISL_768716, EPI_ISL_768718, EPI_ISL_768719, EPI_ISL_768720, EPI_ISL_768721, EPI_ISL_768723, EPI_ISL_768724                                                                                                                                                                                                                                                                                                                                                                                                                                                                                                                                                                                                                                                                                                                                                                                                                                                                                                                                                                                                                                                                                                                                                                                                                                                                                                                                                                                                                                                                                                                                                                                                                                                                                                                                                                                                                                                                                                                                                                                                                                                                                                                                                                                                                                                 | see above | Pathogen Genomics Center, National Institute of Infectious Diseases                                                | Pathogen Genomics Center, National Institute of Infectious Diseases                                                | Tsuyoshi Sekizuka, Kentaro Itokawa, Rina Tanaka, Masanori Hashino, Makoto Kuroda                                                                                                                                                                                                                                                                                                                          |
| EPI_ISL_775021, EPI_ISL_775022, EPI_ISL_775023, EPI_ISL_775024, EPI_ISL_775025, EPI_ISL_775026, EPI_ISL_775027, EPI_ISL_775028, EPI_ISL_775029, EPI_ISL_775030, EPI_ISL_775031, EPI_ISL_775032, EPI_ISL_775033, EPI_ISL_775034, EPI_ISL_775035, EPI_ISL_775036, EPI_ISL_775037, EPI_ISL_775038, EPI_ISL_775039, EPI_ISL_775040, EPI_ISL_775041, EPI_ISL_775042, EPI_ISL_775043, EPI_ISL_775044, EPI_ISL_775045, EPI_ISL_775046, EPI_ISL_775047, EPI_ISL_775048, EPI_ISL_775049, EPI_ISL_775050, EPI_ISL_775051, EPI_ISL_775052, EPI_ISL_775053, EPI_ISL_775054, EPI_ISL_775055, EPI_ISL_775056, EPI_ISL_775057, EPI_ISL_775058, EPI_ISL_775059, EPI_ISL_775060, EPI_ISL_775061, EPI_ISL_775062, EPI_ISL_775063, EPI_ISL_775064, EPI_ISL_775065, EPI_ISL_775066, EPI_ISL_775067, EPI_ISL_775068, EPI_ISL_775069, EPI_ISL_775070, EPI_ISL_775071, EPI_ISL_775072, EPI_ISL_775073, EPI_ISL_775074, EPI_ISL_775075, EPI_ISL_775076, EPI_ISL_775077, EPI_ISL_775078, EPI_ISL_775079, EPI_ISL_775080, EPI_ISL_775081, EPI_ISL_775082, EPI_ISL_775083, EPI_ISL_775084, EPI_ISL_775085, EPI_ISL_775086, EPI_ISL_775087, EPI_ISL_775088, EPI_ISL_775089, EPI_ISL_775090, EPI_ISL_775091, EPI_ISL_775092, EPI_ISL_775093, EPI_ISL_775094, EPI_ISL_775095, EPI_ISL_775096, EPI_ISL_775097, EPI_ISL_775098, EPI_ISL_775099, EPI_ISL_775100, EPI_ISL_775101, EPI_ISL_775102, EPI_ISL_775103, EPI_ISL_775104, EPI_ISL_775105, EPI_ISL_775106, EPI_ISL_775107, EPI_ISL_775108, EPI_ISL_775109, EPI_ISL_775110, EPI_ISL_775111, EPI_ISL_775112, EPI_ISL_775113, EPI_ISL_775114, EPI_ISL_775115, EPI_ISL_775116, EPI_ISL_775117, EPI_ISL_775118, EPI_ISL_775119, EPI_ISL_775120, EPI_ISL_775121, EPI_ISL_775122, EPI_ISL_775123, EPI_ISL_775124, EPI_ISL_775125, EPI_ISL_775126, EPI_ISL_775127, EPI_ISL_775128, EPI_ISL_775129, EPI_ISL_775130, EPI_ISL_775131, EPI_ISL_775132, EPI_ISL_775133, EPI_ISL_775134, EPI_ISL_775135, EPI_ISL_775136, EPI_ISL_775137, EPI_ISL_775138, EPI_ISL_775139, EPI_ISL_775140, EPI_ISL_775141, EPI_ISL_775142, EPI_ISL_775143, EPI_ISL_775144, EPI_ISL_775145, EPI_ISL_775146, EPI_ISL_775147, EPI_ISL_775148, EPI_ISL_775149, EPI_ISL_775150, EPI_ISL_775151, EPI_ISL_775152, EPI_ISL_775153, EPI_ISL_775154, EPI_ISL_775155, EPI_ISL_775156, EPI_ISL_775157, EPI_ISL_775158, EPI_ISL_775159, EPI_ISL_775160, EPI_ISL_775161, EPI_ISL_775162, EPI_ISL_775163, EPI_ISL_775164, EPI_ISL_775165, EPI_ISL_775166, EPI_ISL_775167, EPI_ISL_775168, EPI_ISL_775169, EPI_ISL_775170, EPI_ISL_775171, EPI_ISL_775172, EPI_ISL_775173, EPI_ISL_775174, EPI_ISL_775175, EPI_ISL_775176, EPI_ISL_775177, EPI_ISL_775178, EPI_ISL_775179, EPI_ISL_775180, EPI_ISL_775181, EPI_ISL_775182, EPI_ISL_775183, EPI_ISL_775184, EPI_ISL_775185, EPI_ISL_775186, EPI_ISL_775187, EPI_ISL_775188, EPI_ISL_775189, EPI_ISL_775190, EPI_ISL_775191, EPI_ISL_775192, EPI_ISL_775193, EPI_ISL_775194, EPI_ISL_775195, EPI_ISL_775196, EPI_ISL_775197, EPI_ISL_775198, EPI_ISL_775199, EPI_ISL_775200, EPI_ISL_775201, EPI_ISL_775202, EPI_ISL_775203, EPI_ISL_775204, EPI_ISL_775205, EPI_ISL_775206, EPI_ISL_775207, EPI_ISL_775208, EPI_ISL_775209, EPI_ISL_775210, EPI_ISL_775211, EPI_ISL_775212, EPI_ISL_778845, EPI_ISL_778846, EPI_ISL_778847, EPI_ISL_778848, EPI_ISL_778849, EPI_ISL_778850, EPI_ISL_778851, EPI_ISL_778852, EPI_ISL_778853, EPI_ISL_778854 | see above | Public Health Ontario Laboratory                                                                                   | Public Health Ontario Laboratory                                                                                   | Vanessa G Allen, Philip Banh, Richard de Borja, Yao Chen, Alireza Eshaghi, Nahuel Fittipaldi, Christine Frantz, Jonathan B Gubbay, Jennifer L Guthrie, Lawrence Heisler, Esha Joshi, Michael Laszloffy, Aimin Li, Michael CY Li, Dean Maxwell, Sandeep Nagra, Samir N Patel, Heather Rilkoif, Jared Simpson, Karthikeyan Sivaraman, Yogi Sundaravadanam, Sarah Teatero, Andre Villegas, Sandra Zittermann |
| EPI_ISL_779199, EPI_ISL_779201, EPI_ISL_779203, EPI_ISL_779204, EPI_ISL_779206, EPI_ISL_779207, EPI_ISL_779208, EPI_ISL_779209, EPI_ISL_779210, EPI_ISL_779211, EPI_ISL_779212, EPI_ISL_779213, EPI_ISL_779214, EPI_ISL_779217, EPI_ISL_779218, EPI_ISL_779219, EPI_ISL_779220, EPI_ISL_779222, EPI_ISL_779225, EPI_ISL_779226, EPI_ISL_779227, EPI_ISL_779231, EPI_ISL_779232, EPI_ISL_779233, EPI_ISL_779236, EPI_ISL_779237, EPI_ISL_779238, EPI_ISL_779239, EPI_ISL_779241, EPI_ISL_779243, EPI_ISL_779245, EPI_ISL_779250, EPI_ISL_779251, EPI_ISL_779252, EPI_ISL_779253, EPI_ISL_779662, EPI_ISL_779663, EPI_ISL_779664, EPI_ISL_779665, EPI_ISL_779666, EPI_ISL_779667, EPI_ISL_779668, EPI_ISL_779669, EPI_ISL_779671, EPI_ISL_779668, EPI_ISL_779693, EPI_ISL_779695, EPI_ISL_779696, EPI_ISL_779697, EPI_ISL_779672, EPI_ISL_779676, EPI_ISL_779673, EPI_ISL_779674, EPI_ISL_779675, EPI_ISL_779678, EPI_ISL_779679, EPI_ISL_779680, EPI_ISL_779681, EPI_ISL_779682, EPI_ISL_779687, EPI_ISL_779688, EPI_ISL_779689, EPI_ISL_779691, EPI_ISL_779693, EPI_ISL_779695, EPI_ISL_779696, EPI_ISL_779697, EPI_ISL_779698, EPI_ISL_779699, EPI_ISL_779700                                                                                                                                                                                                                                                                                                                                                                                                                                                                                                                                                                                                                                                                                                                                                                                                                                                                                                                                                                                                                                                                                                                                                                                                                                                                                                                                                                                                                                                                                                                                                                                                                                                                                                                                                                                                                                                                                                                                                                                                                                                                                                                                                                                                 | see above | Pathogen Genomics Center, National Institute of Infectious Diseases                                                | Pathogen Genomics Center, National Institute of Infectious Diseases                                                | Tsuyoshi Sekizuka, Kentaro Itokawa, Rina Tanaka, Masanori Hashino, Makoto Kuroda                                                                                                                                                                                                                                                                                                                          |
| EPI_ISL_792560                                                                                                                                                                                                                                                                                                                                                                                                                                                                                                                                                                                                                                                                                                                                                                                                                                                                                                                                                                                                                                                                                                                                                                                                                                                                                                                                                                                                                                                                                                                                                                                                                                                                                                                                                                                                                                                                                                                                                                                                                                                                                                                                                                                                                                                                                                                                                                                                                                                                                                                                                                                                                                                                                                                                                                                                                                                                                                                                                                                                                                                                                                                                                                                                                                                                                                                                                 | see above | Laboratorio de Ecologia de Doencas Transmissíveis na Amazonia, Instituto Leonidas e Maria Deane - Fiocruz Amazonia | Laboratorio de Ecologia de Doencas Transmissíveis na Amazonia, Instituto Leonidas e Maria Deane - Fiocruz Amazonia | Valdinete Nascimento, Victor Souza, André Corado, Fernanda Nascimento, George Silva, Ágatha Costa, Karina Pessoa, Debora Duarte, Luciana Gonçalves, Maria Júlia Brandão, Michele Jesus, Felipe Naveca on behalf of the Fiocruz COVID-19 Genomic Surveillance Network                                                                                                                                      |
| EPI_ISL_801386, EPI_ISL_801387, EPI_ISL_801388, EPI_ISL_801389, EPI_ISL_801390, EPI_ISL_801391, EPI_ISL_801392, EPI_ISL_801393, EPI_ISL_801394, EPI_ISL_801395, EPI_ISL_801396                                                                                                                                                                                                                                                                                                                                                                                                                                                                                                                                                                                                                                                                                                                                                                                                                                                                                                                                                                                                                                                                                                                                                                                                                                                                                                                                                                                                                                                                                                                                                                                                                                                                                                                                                                                                                                                                                                                                                                                                                                                                                                                                                                                                                                                                                                                                                                                                                                                                                                                                                                                                                                                                                                                                                                                                                                                                                                                                                                                                                                                                                                                                                                                 | see above | Laboratorio de Ecologia de Doencas Transmissíveis na Amazonia, Instituto Leonidas e Maria Deane - Fiocruz Amazonia | Laboratorio de Ecologia de Doencas Transmissíveis na Amazonia, Instituto Leonidas e Maria Deane - Fiocruz Amazonia | Valdinete Nascimento, Victor Souza, André Corado, Fernanda Nascimento, George Silva, Ágatha Costa, Debora Duarte, Luciana Gonçalves, Maria Júlia Brandão, Michele Jesus, Felipe Naveca on behalf of the Fiocruz COVID-19 Genomic Surveillance Network                                                                                                                                                     |
| EPI_ISL_801397, EPI_ISL_801398, EPI_ISL_801399, EPI_ISL_801400, EPI_ISL_801401, EPI_ISL_801402, EPI_ISL_801403                                                                                                                                                                                                                                                                                                                                                                                                                                                                                                                                                                                                                                                                                                                                                                                                                                                                                                                                                                                                                                                                                                                                                                                                                                                                                                                                                                                                                                                                                                                                                                                                                                                                                                                                                                                                                                                                                                                                                                                                                                                                                                                                                                                                                                                                                                                                                                                                                                                                                                                                                                                                                                                                                                                                                                                                                                                                                                                                                                                                                                                                                                                                                                                                                                                 | see above | Laboratório Central de Saúde Pública do Estado do Amazonas (LACEN-AM)                                              | Laboratorio de Ecologia de Doencas Transmissíveis na Amazonia, Instituto Leonidas e Maria Deane - Fiocruz Amazonia | Valdinete Nascimento, Victor Souza, André Corado, Fernanda Nascimento, George Silva, Ágatha Costa, Debora Duarte, Luciana Gonçalves, Maria Júlia Brandão, Michele Jesus, Felipe Naveca on behalf of the Fiocruz COVID-19 Genomic Surveillance Network                                                                                                                                                     |
| EPI_ISL_803920, EPI_ISL_803921, EPI_ISL_803923, EPI_ISL_803926, EPI_ISL_803927, EPI_ISL_803928, EPI_ISL_803930, EPI_ISL_803931, EPI_ISL_803933, EPI_ISL_803934, EPI_ISL_803935, EPI_ISL_803937, EPI_ISL_803938, EPI_ISL_803941, EPI_ISL_803942, EPI_ISL_803943, EPI_ISL_803944, EPI_ISL_803945, EPI_ISL_803946, EPI_ISL_803947, EPI_ISL_803948, EPI_ISL_803951, EPI_ISL_803952, EPI_ISL_803953                                                                                                                                                                                                                                                                                                                                                                                                                                                                                                                                                                                                                                                                                                                                                                                                                                                                                                                                                                                                                                                                                                                                                                                                                                                                                                                                                                                                                                                                                                                                                                                                                                                                                                                                                                                                                                                                                                                                                                                                                                                                                                                                                                                                                                                                                                                                                                                                                                                                                                                                                                                                                                                                                                                                                                                                                                                                                                                                                                 | see above | Pathogen Genomics Center, National Institute of Infectious Diseases                                                | Pathogen Genomics Center, National Institute of Infectious Diseases                                                | Tsuyoshi Sekizuka, Kentaro Itokawa, Rina Tanaka, Masanori Hashino, Makoto Kuroda                                                                                                                                                                                                                                                                                                                          |
| EPI_ISL_803958, EPI_ISL_803959, EPI_ISL_803960, EPI_ISL_803961, EPI_ISL_803962, EPI_ISL_803963, EPI_ISL_803964, EPI_ISL_803965, EPI_ISL_803966, EPI_ISL_803967, EPI_ISL_803968, EPI_ISL_803969, EPI_ISL_803970, EPI_ISL_803971, EPI_ISL_803972, EPI_ISL_803973, EPI_ISL_803974, EPI_ISL_803975, EPI_ISL_803976, EPI_ISL_803977, EPI_ISL_803978, EPI_ISL_803979, EPI_ISL_803980, EPI_ISL_803981, EPI_ISL_803982, EPI_ISL_803983, EPI_ISL_803984, EPI_ISL_803985, EPI_ISL_803986, EPI_ISL_803987, EPI_ISL_803988, EPI_ISL_803989, EPI_ISL_803990, EPI_ISL_803991, EPI_ISL_803992, EPI_ISL_803993, EPI_ISL_803994, EPI_ISL_803995, EPI_ISL_803996, EPI_ISL_803997, EPI_ISL_803998, EPI_ISL_803999, EPI_ISL_804000, EPI_ISL_804001, EPI_ISL_804002, EPI_ISL_804003, EPI_ISL_804004, EPI_ISL_804005, EPI_ISL_804006                                                                                                                                                                                                                                                                                                                                                                                                                                                                                                                                                                                                                                                                                                                                                                                                                                                                                                                                                                                                                                                                                                                                                                                                                                                                                                                                                                                                                                                                                                                                                                                                                                                                                                                                                                                                                                                                                                                                                                                                                                                                                                                                                                                                                                                                                                                                                                                                                                                                                                                                                 | see above | National Public Health Laboratory, National Centre for Infectious Diseases                                         | National Public Health Laboratory, National Centre for Infectious Diseases                                         | Tze Minn Mak, Sophie Octavia, Zhenyang Zhou, Lin Cui, Raymond Tzer Pin Lin                                                                                                                                                                                                                                                                                                                                |
| EPI_ISL_804007, EPI_ISL_804008                                                                                                                                                                                                                                                                                                                                                                                                                                                                                                                                                                                                                                                                                                                                                                                                                                                                                                                                                                                                                                                                                                                                                                                                                                                                                                                                                                                                                                                                                                                                                                                                                                                                                                                                                                                                                                                                                                                                                                                                                                                                                                                                                                                                                                                                                                                                                                                                                                                                                                                                                                                                                                                                                                                                                                                                                                                                                                                                                                                                                                                                                                                                                                                                                                                                                                                                 | see above | Department of Virology I, National Institute of Infectious Diseases                                                | Pathogen Genomics Center, National Institute of Infectious Diseases                                                | Tsuyoshi Sekizuka, Shuetsu Fukushima, Souichi Yamada, Kentaro Itokawa, Rina Tanaka, Masanori Hashino, Makoto Kuroda                                                                                                                                                                                                                                                                                       |
| EPI_ISL_806526, EPI_ISL_806534, EPI_ISL_806536, EPI_ISL_806538, EPI_ISL_806540                                                                                                                                                                                                                                                                                                                                                                                                                                                                                                                                                                                                                                                                                                                                                                                                                                                                                                                                                                                                                                                                                                                                                                                                                                                                                                                                                                                                                                                                                                                                                                                                                                                                                                                                                                                                                                                                                                                                                                                                                                                                                                                                                                                                                                                                                                                                                                                                                                                                                                                                                                                                                                                                                                                                                                                                                                                                                                                                                                                                                                                                                                                                                                                                                                                                                 | see above | Charité Universitätsmedizin Berlin, Institut für Virologie/Labor Berlin                                            | Charité Universitätsmedizin Berlin, Institut für Virologie                                                         | Victor M Corman, Jörn Beheim-Schwarzbach, Barbara Mühlemann, Julia Schneider, Talitha Veith, Cornelia Schlee, Tomasz Zemojtel, Terry Jones, Christian Drosten                                                                                                                                                                                                                                             |
| EPI_ISL_811148, EPI_ISL_811149                                                                                                                                                                                                                                                                                                                                                                                                                                                                                                                                                                                                                                                                                                                                                                                                                                                                                                                                                                                                                                                                                                                                                                                                                                                                                                                                                                                                                                                                                                                                                                                                                                                                                                                                                                                                                                                                                                                                                                                                                                                                                                                                                                                                                                                                                                                                                                                                                                                                                                                                                                                                                                                                                                                                                                                                                                                                                                                                                                                                                                                                                                                                                                                                                                                                                                                                 | see above | Laboratorio de Ecologia de Doencas Transmissíveis na Amazonia, Instituto Leonidas e Maria Deane - Fiocruz Amazonia | Laboratorio de Ecologia de Doencas Transmissíveis na Amazonia, Instituto Leonidas e Maria Deane - Fiocruz Amazonia | Valdinete Nascimento, Victor Souza, André Corado, Fernanda Nascimento, George Silva, Ágatha Costa, Debora Duarte, Luciana Gonçalves, Matilde Mejia, Karina Pessoa, Maria Júlia Brandão, Michele Jesus, Felipe Naveca on behalf of the Fiocruz COVID-19 Genomic Surveillance Network                                                                                                                       |
| EPI_ISL_824749, EPI_ISL_824750, EPI_ISL_824751, EPI_ISL_824755, EPI_ISL_824758, EPI_ISL_824766, EPI_ISL_824772, EPI_ISL_824773, EPI_ISL_824774, EPI_ISL_824775, EPI_ISL_824776, EPI_ISL_824777, EPI_ISL_824782, EPI_ISL_824783                                                                                                                                                                                                                                                                                                                                                                                                                                                                                                                                                                                                                                                                                                                                                                                                                                                                                                                                                                                                                                                                                                                                                                                                                                                                                                                                                                                                                                                                                                                                                                                                                                                                                                                                                                                                                                                                                                                                                                                                                                                                                                                                                                                                                                                                                                                                                                                                                                                                                                                                                                                                                                                                                                                                                                                                                                                                                                                                                                                                                                                                                                                                 | see above | A. Krumbholz, Labor Dr. Krause und Kollegen MVZ GmbH, Kiel                                                         | Charité Universitätsmedizin Berlin, Institut für Virologie                                                         | Victor M Corman, Jörn Beheim-Schwarzbach, Julia Schneider, Talitha Veith, Barbara Mühlemann, Terry Jones, Christian Drosten                                                                                                                                                                                                                                                                               |

|                                                                                                                                                                                                                                                                                                                                                                                                                                                                                                                                                                                                                                                                                                                                                                                                                                                                                                                                                                                                                                                                                                                                                                                                                                                                                                                                                                                                                                                                                                                                                                                                                                                                                                                                                                                                                                                                                                                                                                                                                                                                                                                                                                                                                                                                                                                                                                                                |                                                                                                  |                                                                                                                    |                                                                                                                                                                                               |                                                                                                                                                                                                                                                                                                                                                                                                                             |
|------------------------------------------------------------------------------------------------------------------------------------------------------------------------------------------------------------------------------------------------------------------------------------------------------------------------------------------------------------------------------------------------------------------------------------------------------------------------------------------------------------------------------------------------------------------------------------------------------------------------------------------------------------------------------------------------------------------------------------------------------------------------------------------------------------------------------------------------------------------------------------------------------------------------------------------------------------------------------------------------------------------------------------------------------------------------------------------------------------------------------------------------------------------------------------------------------------------------------------------------------------------------------------------------------------------------------------------------------------------------------------------------------------------------------------------------------------------------------------------------------------------------------------------------------------------------------------------------------------------------------------------------------------------------------------------------------------------------------------------------------------------------------------------------------------------------------------------------------------------------------------------------------------------------------------------------------------------------------------------------------------------------------------------------------------------------------------------------------------------------------------------------------------------------------------------------------------------------------------------------------------------------------------------------------------------------------------------------------------------------------------------------|--------------------------------------------------------------------------------------------------|--------------------------------------------------------------------------------------------------------------------|-----------------------------------------------------------------------------------------------------------------------------------------------------------------------------------------------|-----------------------------------------------------------------------------------------------------------------------------------------------------------------------------------------------------------------------------------------------------------------------------------------------------------------------------------------------------------------------------------------------------------------------------|
| EPI_ISL_824921, EPI_ISL_824943                                                                                                                                                                                                                                                                                                                                                                                                                                                                                                                                                                                                                                                                                                                                                                                                                                                                                                                                                                                                                                                                                                                                                                                                                                                                                                                                                                                                                                                                                                                                                                                                                                                                                                                                                                                                                                                                                                                                                                                                                                                                                                                                                                                                                                                                                                                                                                 | Charité Universitätsmedizin Berlin, Institute of Virology, Charitéplatz 1, 10117 Berlin, Germany | Charité Universitätsmedizin Berlin, Institute of Virology, Charitéplatz 1, 10117 Berlin, Germany                   | Victor M Corman, Jörn Beheim-Schwarzbach, Tobias Bleicker, Julia Tesch, Barbara Mühlemann, Talitha Veith, Julia Schneider, Terry Jones, Christian Drosten                                     |                                                                                                                                                                                                                                                                                                                                                                                                                             |
| EPI_ISL_825064, EPI_ISL_825065, EPI_ISL_825066, EPI_ISL_825067, EPI_ISL_825068, EPI_ISL_825069, EPI_ISL_825070, EPI_ISL_825071, EPI_ISL_825072, EPI_ISL_825073, EPI_ISL_825074, EPI_ISL_825075, EPI_ISL_825076, EPI_ISL_825077, EPI_ISL_825078, EPI_ISL_825079, EPI_ISL_825080, EPI_ISL_825081, EPI_ISL_825082, EPI_ISL_825083                                                                                                                                                                                                                                                                                                                                                                                                                                                                                                                                                                                                                                                                                                                                                                                                                                                                                                                                                                                                                                                                                                                                                                                                                                                                                                                                                                                                                                                                                                                                                                                                                                                                                                                                                                                                                                                                                                                                                                                                                                                                 | see above                                                                                        | National Public Health Laboratory, National Centre for Infectious Diseases                                         | National Public Health Laboratory, National Centre for Infectious Diseases                                                                                                                    | Tze Minn Mak, Sophie Octavia, Zhenyang Zhou, Lin Cui, Raymond Tzer Pin Lin                                                                                                                                                                                                                                                                                                                                                  |
| EPI_ISL_825386, EPI_ISL_825387, EPI_ISL_825388, EPI_ISL_825389, EPI_ISL_825390, EPI_ISL_825391, EPI_ISL_825392, EPI_ISL_825393, EPI_ISL_825394, EPI_ISL_825395, EPI_ISL_825396, EPI_ISL_825397, EPI_ISL_825398, EPI_ISL_825400, EPI_ISL_825401, EPI_ISL_825403, EPI_ISL_825404, EPI_ISL_825405, EPI_ISL_825406, EPI_ISL_825407, EPI_ISL_825408, EPI_ISL_825411, EPI_ISL_825412, EPI_ISL_825414, EPI_ISL_825415, EPI_ISL_825419, EPI_ISL_825420, EPI_ISL_825421, EPI_ISL_825425, EPI_ISL_825430, EPI_ISL_825431, EPI_ISL_825433, EPI_ISL_825435, EPI_ISL_825436                                                                                                                                                                                                                                                                                                                                                                                                                                                                                                                                                                                                                                                                                                                                                                                                                                                                                                                                                                                                                                                                                                                                                                                                                                                                                                                                                                                                                                                                                                                                                                                                                                                                                                                                                                                                                                 | see above                                                                                        | Pathogen Genomics Center, National Institute of Infectious Diseases                                                | Pathogen Genomics Center, National Institute of Infectious Diseases                                                                                                                           | Tsuyoshi Sekizuka, Kentaro Itokawa, Rina Tanaka, Masanori Hashino, Makoto Kuroda                                                                                                                                                                                                                                                                                                                                            |
| EPI_ISL_826319, EPI_ISL_826320, EPI_ISL_826321, EPI_ISL_826322, EPI_ISL_826323, EPI_ISL_826324, EPI_ISL_826325, EPI_ISL_826326, EPI_ISL_826327, EPI_ISL_826328, EPI_ISL_826329, EPI_ISL_826330, EPI_ISL_826331, EPI_ISL_826332, EPI_ISL_826333, EPI_ISL_826334, EPI_ISL_826335, EPI_ISL_826336, EPI_ISL_826337, EPI_ISL_826338, EPI_ISL_826339, EPI_ISL_826340, EPI_ISL_826341, EPI_ISL_826342, EPI_ISL_826343, EPI_ISL_826344, EPI_ISL_826345, EPI_ISL_826346, EPI_ISL_826347, EPI_ISL_826348, EPI_ISL_826349, EPI_ISL_826350, EPI_ISL_826351, EPI_ISL_826352, EPI_ISL_826353, EPI_ISL_826354, EPI_ISL_826355, EPI_ISL_826356, EPI_ISL_826357, EPI_ISL_826358, EPI_ISL_826359, EPI_ISL_826360, EPI_ISL_826361, EPI_ISL_826362, EPI_ISL_826363, EPI_ISL_826364, EPI_ISL_826365, EPI_ISL_826366, EPI_ISL_826367, EPI_ISL_826368, EPI_ISL_826369, EPI_ISL_826370, EPI_ISL_826371, EPI_ISL_826372, EPI_ISL_826373, EPI_ISL_826374, EPI_ISL_826375, EPI_ISL_826376, EPI_ISL_826377, EPI_ISL_826378, EPI_ISL_826379, EPI_ISL_826380, EPI_ISL_826381, EPI_ISL_826382, EPI_ISL_826383, EPI_ISL_826384, EPI_ISL_826385, EPI_ISL_826386, EPI_ISL_826387, EPI_ISL_826388, EPI_ISL_826389, EPI_ISL_826390, EPI_ISL_826391, EPI_ISL_826392, EPI_ISL_826393, EPI_ISL_826394, EPI_ISL_826395, EPI_ISL_826396, EPI_ISL_826397, EPI_ISL_826398, EPI_ISL_826399, EPI_ISL_826400, EPI_ISL_826401, EPI_ISL_826402, EPI_ISL_826403, EPI_ISL_826404, EPI_ISL_826405, EPI_ISL_826406, EPI_ISL_826407, EPI_ISL_826408, EPI_ISL_826409, EPI_ISL_826410, EPI_ISL_826411, EPI_ISL_826412, EPI_ISL_826413, EPI_ISL_826414, EPI_ISL_826415, EPI_ISL_826416, EPI_ISL_826417, EPI_ISL_826418, EPI_ISL_826419, EPI_ISL_826420, EPI_ISL_826421, EPI_ISL_826422, EPI_ISL_826423, EPI_ISL_826424, EPI_ISL_826425, EPI_ISL_826426, EPI_ISL_826427, EPI_ISL_826428, EPI_ISL_826429, EPI_ISL_826430, EPI_ISL_826431, EPI_ISL_826432, EPI_ISL_826433, EPI_ISL_826434, EPI_ISL_826435, EPI_ISL_826436, EPI_ISL_826437, EPI_ISL_826438, EPI_ISL_826439, EPI_ISL_826440, EPI_ISL_826441, EPI_ISL_826442, EPI_ISL_826443, EPI_ISL_826444, EPI_ISL_826445, EPI_ISL_826446, EPI_ISL_826447, EPI_ISL_826448, EPI_ISL_826449, EPI_ISL_826450, EPI_ISL_826451, EPI_ISL_826452, EPI_ISL_826453, EPI_ISL_826454, EPI_ISL_826455, EPI_ISL_826456, EPI_ISL_827438, EPI_ISL_827439, EPI_ISL_827441, EPI_ISL_827443, EPI_ISL_827445, EPI_ISL_827446 | see above                                                                                        | University of Michigan Clinical Microbiology Laboratory                                                            | Lauring Lab, University of Michigan, Department of Microbiology and Immunology                                                                                                                | Valesano                                                                                                                                                                                                                                                                                                                                                                                                                    |
| EPI_ISL_833131, EPI_ISL_833132, EPI_ISL_833133, EPI_ISL_833134, EPI_ISL_833135, EPI_ISL_833136, EPI_ISL_833137, EPI_ISL_833138, EPI_ISL_833139, EPI_ISL_833140                                                                                                                                                                                                                                                                                                                                                                                                                                                                                                                                                                                                                                                                                                                                                                                                                                                                                                                                                                                                                                                                                                                                                                                                                                                                                                                                                                                                                                                                                                                                                                                                                                                                                                                                                                                                                                                                                                                                                                                                                                                                                                                                                                                                                                 | EPI_ISL_833367, EPI_ISL_833368, EPI_ISL_833371, EPI_ISL_833372                                   | Laboratório de Ecologia de Doenças Transmissíveis na Amazonia, Instituto Leonidas e Maria Deane - Fiocruz Amazonia | Laboratório de Ecologia de Doenças Transmissíveis na Amazonia, Instituto Leonidas e Maria Deane - Fiocruz Amazonia                                                                            | Valdinete Nascimento, Victor Souza, André Corado, Fernanda Nascimento, George Silva, Ágatha Costa, Debora Duarte, Karina Pessoa, Matilde Mejía, Luciana Gonçalves, Maria Júlia Brandão, Michele Jesus, Felipe Naveca on behalf of the Fiocruz COVID-19 Genomic Surveillance Network                                                                                                                                         |
| EPI_ISL_833373, EPI_ISL_833374, EPI_ISL_833375, EPI_ISL_833376, EPI_ISL_833377, EPI_ISL_833378, EPI_ISL_833379, EPI_ISL_833380, EPI_ISL_833381, EPI_ISL_833382, EPI_ISL_833383, EPI_ISL_833384, EPI_ISL_833385, EPI_ISL_833386, EPI_ISL_833387                                                                                                                                                                                                                                                                                                                                                                                                                                                                                                                                                                                                                                                                                                                                                                                                                                                                                                                                                                                                                                                                                                                                                                                                                                                                                                                                                                                                                                                                                                                                                                                                                                                                                                                                                                                                                                                                                                                                                                                                                                                                                                                                                 | see above                                                                                        | Pathogen Genomics Center, National Institute of Infectious Diseases                                                | Pathogen Genomics Center, National Institute of Infectious Diseases                                                                                                                           | Tsuyoshi Sekizuka, Kentaro Itokawa, Rina Tanaka, Masanori Hashino, Makoto Kuroda                                                                                                                                                                                                                                                                                                                                            |
| EPI_ISL_846656, EPI_ISL_846657, EPI_ISL_846658, EPI_ISL_846659, EPI_ISL_846660, EPI_ISL_846661, EPI_ISL_846662, EPI_ISL_846663, EPI_ISL_846664, EPI_ISL_846665, EPI_ISL_846666, EPI_ISL_846667, EPI_ISL_846668, EPI_ISL_846669, EPI_ISL_846670, EPI_ISL_846671, EPI_ISL_846672, EPI_ISL_846673, EPI_ISL_846674, EPI_ISL_846675, EPI_ISL_846676, EPI_ISL_846677, EPI_ISL_846678, EPI_ISL_846679, EPI_ISL_846680, EPI_ISL_846681, EPI_ISL_846682, EPI_ISL_846683, EPI_ISL_846684, EPI_ISL_846685, EPI_ISL_846686, EPI_ISL_846687, EPI_ISL_846688, EPI_ISL_846689, EPI_ISL_846690, EPI_ISL_846691, EPI_ISL_846692, EPI_ISL_846693, EPI_ISL_846694, EPI_ISL_846695, EPI_ISL_846696, EPI_ISL_846697, EPI_ISL_846698, EPI_ISL_846699, EPI_ISL_846700, EPI_ISL_846701, EPI_ISL_846702, EPI_ISL_846703, EPI_ISL_846704, EPI_ISL_846705, EPI_ISL_846706, EPI_ISL_846707, EPI_ISL_846708, EPI_ISL_846709, EPI_ISL_846710, EPI_ISL_846711, EPI_ISL_846712, EPI_ISL_846713, EPI_ISL_846714, EPI_ISL_846715, EPI_ISL_846716, EPI_ISL_846717, EPI_ISL_846718, EPI_ISL_846719, EPI_ISL_846720, EPI_ISL_846721, EPI_ISL_846722, EPI_ISL_846723, EPI_ISL_846724, EPI_ISL_846725, EPI_ISL_846726, EPI_ISL_846727, EPI_ISL_846728, EPI_ISL_846729, EPI_ISL_846730, EPI_ISL_846731, EPI_ISL_846732, EPI_ISL_846733, EPI_ISL_846734, EPI_ISL_846735, EPI_ISL_846736, EPI_ISL_846737, EPI_ISL_846738, EPI_ISL_846739, EPI_ISL_846740, EPI_ISL_846741, EPI_ISL_846742, EPI_ISL_846743, EPI_ISL_846744, EPI_ISL_846745, EPI_ISL_846746, EPI_ISL_846747, EPI_ISL_846748, EPI_ISL_846749, EPI_ISL_846750, EPI_ISL_846751, EPI_ISL_846752, EPI_ISL_846753, EPI_ISL_846754, EPI_ISL_846755, EPI_ISL_846756, EPI_ISL_846757, EPI_ISL_846758, EPI_ISL_846759, EPI_ISL_846760, EPI_ISL_846761, EPI_ISL_846762, EPI_ISL_846763, EPI_ISL_846764, EPI_ISL_846765, EPI_ISL_846766, EPI_ISL_846767, EPI_ISL_846768, EPI_ISL_846769, EPI_ISL_846770, EPI_ISL_846771, EPI_ISL_846772, EPI_ISL_846773, EPI_ISL_847821, EPI_ISL_847822                                                                                                                                                                                                                                                                                                                                                                                                 | see above                                                                                        | University of Michigan Clinical Microbiology Laboratory                                                            | Lauring Lab, University of Michigan, Department of Microbiology and Immunology                                                                                                                | Valesano                                                                                                                                                                                                                                                                                                                                                                                                                    |
| EPI_ISL_849802, EPI_ISL_849810, EPI_ISL_849813, EPI_ISL_849815, EPI_ISL_849816, EPI_ISL_849819, EPI_ISL_849825, EPI_ISL_849827, EPI_ISL_849835, EPI_ISL_849836, EPI_ISL_849837, EPI_ISL_849839, EPI_ISL_849840, EPI_ISL_849842, EPI_ISL_849851, EPI_ISL_849861, EPI_ISL_849862, EPI_ISL_849866                                                                                                                                                                                                                                                                                                                                                                                                                                                                                                                                                                                                                                                                                                                                                                                                                                                                                                                                                                                                                                                                                                                                                                                                                                                                                                                                                                                                                                                                                                                                                                                                                                                                                                                                                                                                                                                                                                                                                                                                                                                                                                 | see above                                                                                        | A. Krumbholz, Labor Dr. Krause und Kollegen MVZ GmbH, Kiel                                                         | Charité Universitätsmedizin Berlin, Institut für Virologie                                                                                                                                    | Victor M Corman, Jörn Beheim-Schwarzbach, Talitha Veith, Julia Schneider, Tobias Bleicker, Julia Tesch, Barbara Mühlemann, Terry Jones, Christian Drosten                                                                                                                                                                                                                                                                   |
| EPI_ISL_851041, EPI_ISL_851043, EPI_ISL_851044, EPI_ISL_851045                                                                                                                                                                                                                                                                                                                                                                                                                                                                                                                                                                                                                                                                                                                                                                                                                                                                                                                                                                                                                                                                                                                                                                                                                                                                                                                                                                                                                                                                                                                                                                                                                                                                                                                                                                                                                                                                                                                                                                                                                                                                                                                                                                                                                                                                                                                                 | EPI_ISL_852604, EPI_ISL_852605                                                                   | Pathogen Genomics Center, National Institute of Infectious Diseases                                                | Pathogen Genomics Center, National Institute of Infectious Diseases                                                                                                                           | Tsuyoshi Sekizuka, Kentaro Itokawa, Rina Tanaka, Masanori Hashino, Makoto Kuroda                                                                                                                                                                                                                                                                                                                                            |
| EPI_ISL_853398                                                                                                                                                                                                                                                                                                                                                                                                                                                                                                                                                                                                                                                                                                                                                                                                                                                                                                                                                                                                                                                                                                                                                                                                                                                                                                                                                                                                                                                                                                                                                                                                                                                                                                                                                                                                                                                                                                                                                                                                                                                                                                                                                                                                                                                                                                                                                                                 | Charité Universitätsmedizin Berlin, Institut für Virologie/Labor Berlin                          | Virology Unit, Institut Pasteur du Cambodge                                                                        | G5 Evolutionary Genomics of RNA viruses, Virology Department, Institut Pasteur                                                                                                                | Vibol Hul, Deborah Delaune, Erik A Karlsson, Ou Tey Putita, Alexandre Hassanin, Artem Baidaliuk, Fabiana Gámbaro, Vuong Tan Tu, Lucy Keatts, Jonna Mazet, Christine Johnson, Philippe Buchy, Philippe Dussart, Tracey Goldstein, Etienne Simon-Lorière, Veasna Duong                                                                                                                                                        |
| EPI_ISL_854613, EPI_ISL_854614, EPI_ISL_854615, EPI_ISL_854616, EPI_ISL_854617, EPI_ISL_854618, EPI_ISL_854619, EPI_ISL_854620, EPI_ISL_854621, EPI_ISL_854622, EPI_ISL_854623, EPI_ISL_854624, EPI_ISL_854625, EPI_ISL_854626, EPI_ISL_854627, EPI_ISL_854628, EPI_ISL_854629, EPI_ISL_854630, EPI_ISL_854631, EPI_ISL_854632, EPI_ISL_854633, EPI_ISL_854634, EPI_ISL_854635, EPI_ISL_854636, EPI_ISL_854637, EPI_ISL_854638, EPI_ISL_854639, EPI_ISL_854640, EPI_ISL_854641, EPI_ISL_854642, EPI_ISL_854643, EPI_ISL_854644, EPI_ISL_854645, EPI_ISL_854646, EPI_ISL_854647, EPI_ISL_854648, EPI_ISL_854649, EPI_ISL_854650, EPI_ISL_854651, EPI_ISL_854652, EPI_ISL_854653, EPI_ISL_854654, EPI_ISL_854655, EPI_ISL_854656, EPI_ISL_854657, EPI_ISL_854658, EPI_ISL_854659, EPI_ISL_854660, EPI_ISL_854661, EPI_ISL_854662, EPI_ISL_854663, EPI_ISL_854664, EPI_ISL_854665, EPI_ISL_854666, EPI_ISL_854667, EPI_ISL_854668, EPI_ISL_854669, EPI_ISL_854670, EPI_ISL_854671, EPI_ISL_854672, EPI_ISL_854673, EPI_ISL_854674, EPI_ISL_854675, EPI_ISL_854676, EPI_ISL_854677, EPI_ISL_854678, EPI_ISL_854679, EPI_ISL_854680, EPI_ISL_854681, EPI_ISL_854682, EPI_ISL_854683, EPI_ISL_854684, EPI_ISL_854685, EPI_ISL_854686, EPI_ISL_854687, EPI_ISL_854688, EPI_ISL_854689, EPI_ISL_854690, EPI_ISL_854691, EPI_ISL_854692, EPI_ISL_854693, EPI_ISL_854694, EPI_ISL_854695, EPI_ISL_854696, EPI_ISL_854697, EPI_ISL_854698, EPI_ISL_854699, EPI_ISL_854700, EPI_ISL_854701, EPI_ISL_854702, EPI_ISL_854703, EPI_ISL_854704, EPI_ISL_854705, EPI_ISL_854706, EPI_ISL_854707, EPI_ISL_854708, EPI_ISL_854709, EPI_ISL_854710, EPI_ISL_854711, EPI_ISL_854712, EPI_ISL_854713, EPI_ISL_854714, EPI_ISL_854715, EPI_ISL_854716, EPI_ISL_854717, EPI_ISL_854718, EPI_ISL_854719, EPI_ISL_854720, EPI_ISL_854721, EPI_ISL_854722, EPI_ISL_854723, EPI_ISL_854724, EPI_ISL_854725, EPI_ISL_854726, EPI_ISL_854727, EPI_ISL_854728, EPI_ISL_854729, EPI_ISL_854730, EPI_ISL_854731, EPI_ISL_854732, EPI_ISL_854733, EPI_ISL_854734, EPI_ISL_854735, EPI_ISL_854736, EPI_ISL_854737, EPI_ISL_854738, EPI_ISL_854739, EPI_ISL_854740, EPI_ISL_854741, EPI_ISL_854742, EPI_ISL_854743, EPI_ISL_854744                                                                                                                                                                                                 | see above                                                                                        | Charité Universitätsmedizin Berlin, Institut für Virologie/Labor Berlin                                            | Charité Universitätsmedizin Berlin, Institut für Virologie                                                                                                                                    | Victor M Corman, Julia Schneider, Barbara Mühlemann, Jörn Beheim-Schwarzbach, Talitha Veith, Julia Tesch, Tobias Bleicker, Terry Jones, Christian Drosten                                                                                                                                                                                                                                                                   |
| EPI_ISL_856681                                                                                                                                                                                                                                                                                                                                                                                                                                                                                                                                                                                                                                                                                                                                                                                                                                                                                                                                                                                                                                                                                                                                                                                                                                                                                                                                                                                                                                                                                                                                                                                                                                                                                                                                                                                                                                                                                                                                                                                                                                                                                                                                                                                                                                                                                                                                                                                 | Charité Universitätsmedizin Berlin, Institute of Virology, Charitéplatz 1, 10117 Berlin, Germany | Charité Universitätsmedizin Berlin, Institute of Virology, Charitéplatz 1, 10117 Berlin, Germany                   | Charité Universitätsmedizin Berlin, Institute of Virology, Charitéplatz 1, 10117 Berlin, Germany                                                                                              | Victor M Corman, Julia Schneider, Jörn Beheim-Schwarzbach, Tobias Bleicker, Julia Tesch, Barbara Mühlemann, Talitha Veith, Terry Jones, Christian Drosten                                                                                                                                                                                                                                                                   |
| EPI_ISL_857469, EPI_ISL_857470, EPI_ISL_857471, EPI_ISL_857472, EPI_ISL_857473, EPI_ISL_857474, EPI_ISL_857475, EPI_ISL_857476, EPI_ISL_857477, EPI_ISL_857478, EPI_ISL_857479, EPI_ISL_857480, EPI_ISL_857481, EPI_ISL_857482, EPI_ISL_857483, EPI_ISL_857484, EPI_ISL_857485                                                                                                                                                                                                                                                                                                                                                                                                                                                                                                                                                                                                                                                                                                                                                                                                                                                                                                                                                                                                                                                                                                                                                                                                                                                                                                                                                                                                                                                                                                                                                                                                                                                                                                                                                                                                                                                                                                                                                                                                                                                                                                                 | see above                                                                                        | Public Health Ontario Laboratory                                                                                   | Public Health Ontario Laboratory                                                                                                                                                              | Vanessa G Allen, Philip Banh, Yao Chen, Richard de Borja, Alireza Eshaghi, Nahuel Fittipaldi, Christine Frantz, Jonathan B Gubbay, Jennifer L Guthrie, Lawrence Heisler, Esha Joshi, Michael Laszloffy, Aimin Li, Michael CY Li, Dean Maxwell, Sandeep Nagra, Samir N Patel, Jared Simpson, Karthikeyan Sivaraman, Ashleigh Sullivan, Yogi Sundaravadanam, Sarah Teatero, Matthew Watson, Andre Villegas, Sandra Zittermann |
| EPI_ISL_860097, EPI_ISL_860098, EPI_ISL_860099, EPI_ISL_860101, EPI_ISL_860102, EPI_ISL_860104, EPI_ISL_860106, EPI_ISL_860108, EPI_ISL_860110, EPI_ISL_860111, EPI_ISL_860113                                                                                                                                                                                                                                                                                                                                                                                                                                                                                                                                                                                                                                                                                                                                                                                                                                                                                                                                                                                                                                                                                                                                                                                                                                                                                                                                                                                                                                                                                                                                                                                                                                                                                                                                                                                                                                                                                                                                                                                                                                                                                                                                                                                                                 | see above                                                                                        | National Public Health Laboratory, National Centre for Infectious Diseases                                         | National Public Health Laboratory, National Centre for Infectious Diseases                                                                                                                    | Tze Minn Mak, Sophie Octavia, Zhenyang Zhou, Lin Cui, Raymond Tzer Pin Lin                                                                                                                                                                                                                                                                                                                                                  |
| EPI_ISL_860727, EPI_ISL_860728                                                                                                                                                                                                                                                                                                                                                                                                                                                                                                                                                                                                                                                                                                                                                                                                                                                                                                                                                                                                                                                                                                                                                                                                                                                                                                                                                                                                                                                                                                                                                                                                                                                                                                                                                                                                                                                                                                                                                                                                                                                                                                                                                                                                                                                                                                                                                                 | see above                                                                                        | Pathogen Genomics Center, National Institute of Infectious Diseases                                                | Pathogen Genomics Center, National Institute of Infectious Diseases                                                                                                                           | Tsuyoshi Sekizuka, Kentaro Itokawa, Rina Tanaka, Masanori Hashino, Makoto Kuroda                                                                                                                                                                                                                                                                                                                                            |
| EPI_ISL_860787                                                                                                                                                                                                                                                                                                                                                                                                                                                                                                                                                                                                                                                                                                                                                                                                                                                                                                                                                                                                                                                                                                                                                                                                                                                                                                                                                                                                                                                                                                                                                                                                                                                                                                                                                                                                                                                                                                                                                                                                                                                                                                                                                                                                                                                                                                                                                                                 | University of Michigan Clinical Microbiology Laboratory                                          | University of Michigan Clinical Microbiology Laboratory                                                            | Lauring Lab, University of Michigan, Department of Microbiology and Immunology                                                                                                                | Valesano                                                                                                                                                                                                                                                                                                                                                                                                                    |
| EPI_ISL_860797, EPI_ISL_860803, EPI_ISL_860806, EPI_ISL_860810, EPI_ISL_860811, EPI_ISL_860812,                                                                                                                                                                                                                                                                                                                                                                                                                                                                                                                                                                                                                                                                                                                                                                                                                                                                                                                                                                                                                                                                                                                                                                                                                                                                                                                                                                                                                                                                                                                                                                                                                                                                                                                                                                                                                                                                                                                                                                                                                                                                                                                                                                                                                                                                                                | WHO/Minsk                                                                                        | Charité Universitätsmedizin Berlin, Institute of Virology, Charitéplatz 1, 10117 Berlin, Germany                   | Charité Universitätsmedizin Berlin, Institute of Virology, Charitéplatz 1, 10117 Berlin, Germany                                                                                              | Victor M Corman, Julia Schneider, Jörn Beheim-Schwarzbach, Tobias Bleicker, Julia Tesch, Barbara Mühlemann, Talitha Veith, Terry Jones, Christian Drosten                                                                                                                                                                                                                                                                   |
|                                                                                                                                                                                                                                                                                                                                                                                                                                                                                                                                                                                                                                                                                                                                                                                                                                                                                                                                                                                                                                                                                                                                                                                                                                                                                                                                                                                                                                                                                                                                                                                                                                                                                                                                                                                                                                                                                                                                                                                                                                                                                                                                                                                                                                                                                                                                                                                                |                                                                                                  | Charité Universitätsmedizin Berlin, Institut für Virologie                                                         | Victor M Corman, Barbara Mühlemann, Jörn Beheim-Schwarzbach, Talitha Veith, Julia Tesch, Tobias Bleicker, Julia Schneider, Shmaliyova Natalia, Sivets Natalia, Terry Jones, Christian Drosten |                                                                                                                                                                                                                                                                                                                                                                                                                             |





We gratefully acknowledge the following Authors from the Originating laboratories responsible for obtaining the specimens, as well as the Submitting laboratories where the genome data were generated and shared via GISAID, on which this research is based.

All Submitters of data may be contacted directly via [www.gisaid.org](http://www.gisaid.org)

Authors are sorted alphabetically.

| Accession ID                                   | Originating Laboratory                                                                                                                       | Submitting Laboratory                                                                                                                                                                                                      | Authors                                                                                                                                                                                                                                                                                                            |
|------------------------------------------------|----------------------------------------------------------------------------------------------------------------------------------------------|----------------------------------------------------------------------------------------------------------------------------------------------------------------------------------------------------------------------------|--------------------------------------------------------------------------------------------------------------------------------------------------------------------------------------------------------------------------------------------------------------------------------------------------------------------|
| EPI_ISL_402119                                 | National Institute for Viral Disease Control and Prevention, China CDC                                                                       | National Institute for Viral Disease Control and Prevention, China CDC                                                                                                                                                     | Wenjie TanXiang ZhaoWenling WangXuejun MaYongzhong JiangRoujian Lu, Ji Wang, Weimin ZhouPeihua NiuPeipei LiuFaxian ZhanWeifeng ShiBaoying HuangJun LiuLi ZhaoYao MengXiaozhou HeFei YeNa ZhuYang LiJing ChenWenbo XuGeorge F. GaoGuizhen Wu                                                                        |
| EPI_ISL_402120                                 | National Institute for Viral Disease Control and Prevention, China CDC                                                                       | National Institute for Viral Disease Control and Prevention, China CDC                                                                                                                                                     | Wenjie TanXiang ZhaoWenling WangXuejun MaYongzhong JiangRoujian LuJi WangWeimin ZhouPeihua NiuPeipei LiuFaxian ZhanWeifeng ShiBaoying HuangJun LiuLi ZhaoYao MengXiaozhou HeFei YeNa ZhuYang LiJing ChenWenbo XuGeorge F. GaoGuizhen Wu                                                                            |
| EPI_ISL_402121                                 | National Institute for Viral Disease Control and Prevention, China CDC                                                                       | National Institute for Viral Disease Control and Prevention, China CDC                                                                                                                                                     | Wenjie TanXuejun MaXiang ZhaoWenling WangYongzhong JiangRoujian LuJi WangPeihua Niu, Weimin Zhou, Faxian ZhanWeifeng ShiBaoying HuangJun LiuLi ZhaoYao MengFei YeNa Zhu, Xiaozhou HePeipei Liu, Yang LiJing ChenWenbo XuGeorge F. GaoGuizhen Wu                                                                    |
| EPI_ISL_402125                                 | National Institute for Communicable Disease Control and Prevention (ICDC) Chinese Center for Disease Control and Prevention (China CDC)      | National Institute for Communicable Disease Control and Prevention (ICDC) Chinese Center for Disease Control and Prevention (China CDC)                                                                                    | Zhang,Y.-Z., Wu,F., Chen,Y.-M., Pei,Y.-Y., Xu,L., Wang,W., Zhao,S., Yu,B., Hu,Y., Tao,Z.-W., Song,Z.-G., Tian,J.-H., Zhang,Y.-L., Liu,Y., Zheng,J.-J., Dai,F.-H., Wang,Q.-M., She,J.-L. and Zhu,T.-Y.                                                                                                              |
| EPI_ISL_402131                                 | Wuhan Institute of Virology, Chinese Academy of Sciences                                                                                     | Wuhan Institute of Virology, Chinese Academy of Sciences                                                                                                                                                                   | Yan Zhu, Ping Yu, Bei Li, Ben Hu, Hao-Rui Si, Xing-Lou Yang, Peng Zhou, Zheng-Li Shi                                                                                                                                                                                                                               |
| EPI_ISL_404227                                 | Zhejiang Provincial Center for Disease Control and Prevention                                                                                | Department of Microbiology, Zhejiang Provincial Center for Disease Control and Prevention                                                                                                                                  | Yin Chen, Yanjun Zhang, Haiyan Mao, Junhang Pan, Xiuyu Lou, Yiyu Lu, Juying Yan, Hanping Zhu, Jian Gao, Yan Feng, Yi Sun, Hao Yan, Zhen Li, Yisheng Sun, Liming Gong, Qiong Ge, Wen Shi, Xinying Wang, Wenwu Yao, Zhangnv Yang, Fang Xu, Chen Chen, Enfu Chen, Zhen Wang, Zhiping Chen, Jianmin Jiang, Chonggao Hu |
| EPI_ISL_404228                                 | Zhejiang Provincial Center for Disease Control and Prevention                                                                                | Department of Microbiology, Zhejiang Provincial Center for Disease Control and Prevention                                                                                                                                  | Yanjun Zhang, Yin Chen, Haiyan Mao, Junhang Pan, Xiuyu Lou, Yiyu Lu, Juying Yan, Hanping Zhu, Jian Gao, Yan Feng, Yi Sun, Hao Yan, Zhen Li, Yisheng Sun, Liming Gong, Qiong Ge, Wen Shi, Xinying Wang, Wenwu Yao, Zhangnv Yang, Fang Xu, Chen Chen, Enfu Chen, Zhen Wang, Zhiping Chen, Jianmin Jiang, Chonggao Hu |
| EPI_ISL_404253                                 | IL Department of Public Health Chicago Laboratory                                                                                            | Pathogen Discovery, Respiratory Viruses Branch, Division of Viral Diseases, Centers for Diseases Control and Prevention                                                                                                    | Ying Tao, Krista Queen, Clinton R. Paden, Jing Zhang, Yan Li, Anna Uehara, Xiaoyan Lu, Brian Lynch, Senthil Kumar K. Sakhthivel, Brett L. Whitaker, Shifaq Kamili, Lijuan Wang, Janna' R. Murray, Susan I. Gerber, Stephen Lindstrom, Suxiang Tong                                                                 |
| EPI_ISL_406223                                 | Arizona Department of Health Services                                                                                                        | Pathogen Discovery, Respiratory Viruses Branch, Division of Viral Diseases, Centers for Disease Control and Prevention                                                                                                     | Ying Tao, Clinton R. Paden, Krista Queen, Anna Uehara, Yan Li, Jing Zhang, Xiaoyan Lu, Brian Lynch, Senthil Kumar K. Sakhthivel, Brett L. Whitaker, Shifaq Kamili, Lijuan Wang, Janna' R. Murray, Susan I. Gerber, Stephen Lindstrom, Suxiang Tong                                                                 |
| EPI_ISL_406592                                 | Shenzhen Third People's Hospital                                                                                                             | Shenzhen Key Laboratory of Pathogen and Immunity, National Clinical Research Center for Infectious Disease, Shenzhen Third People's Hospital                                                                               | Yang Yang, Chenguang Shen, Li Xing, Zhixiang Xu, Haixia Zheng, Yingxia Liu                                                                                                                                                                                                                                         |
| EPI_ISL_406593, EPI_ISL_406594, EPI_ISL_406595 | Shenzhen Key Laboratory of Pathogen and Immunity, National Clinical Research Center for Infectious Disease, Shenzhen Third People's Hospital | Shenzhen Key Laboratory of Pathogen and Immunity, National Clinical Research Center for Infectious Disease, Shenzhen Third People's Hospital                                                                               | Yang Yang, Chenguang Shen, Li Xing, Zhixiang Xu, Haixia Zheng, Yingxia Liu                                                                                                                                                                                                                                         |
| EPI_ISL_406798, EPI_ISL_406800, EPI_ISL_406801 | General Hospital of Central Theater Command of People's Liberation Army of China                                                             | BGI & Institute of Microbiology, Chinese Academy of Sciences & Shandong First Medical University & Shandong Academy of Medical Sciences & General Hospital of Central Theater Command of People's Liberation Army of China | Weijun Chen, Yuhai Bi, Weifeng Shi and Zhenhong Hu                                                                                                                                                                                                                                                                 |
| EPI_ISL_406970                                 | Hangzhou Center for Disease and Control Microbiology Lab                                                                                     | Hangzhou Center for Disease and Control Microbiology Lab                                                                                                                                                                   | Yu Hua, Wang Haoqiu, Li Jun, Yu Xinfeng                                                                                                                                                                                                                                                                            |
| EPI_ISL_408010                                 | California Department of Health                                                                                                              | Pathogen Discovery, Respiratory Viruses Branch, Division of Viral Diseases, Centers for Diseases Control and Prevention                                                                                                    | Ying Tao, Krista Queen, Jing Zhang, Yan Li, Anna Uehara, Clinton Paden, Xiaoyan Lu, Brian Lynch, Senthil Kumar K. Sakhthivel, Brett L. Whitaker, Shifaq Kamili, Lijuan Wang, Janna' R. Murray, Susan I. Gerber, Stephen Lindstrom, Suxiang Tong                                                                    |
| EPI_ISL_408478                                 | Yongchuan District Center for Disease Control and Prevention                                                                                 | Chongqing Municipal Center for Disease Control and Prevention                                                                                                                                                              | Ye Sheng, Tang Yun, Ling Hua, Yu zhen, Chen Shuang, Tan ZhangPing, Su Kun, Li Qing, Tang Wenge, Rong Rong                                                                                                                                                                                                          |
| EPI_ISL_408479                                 | Zhongxian Center for Disease Control and Prevention                                                                                          | Chongqing Municipal Center for Disease Control and Prevention                                                                                                                                                              | Ye Sheng, Tang Yun, Ling Hua, Zhang Hong, Yu zhen, Chen Shuang, Tan ZhangPing, Su Kun, Li Qin, Tang Wenge, Rong Rong                                                                                                                                                                                               |
| EPI_ISL_408480                                 | National Institute for Viral Disease Control and Prevention, China CDC                                                                       | National Institute for Viral Disease Control & Prevention, CCDC                                                                                                                                                            | Wenjie TanXiaoqing FuXiang ZhaoWenling Wang Peihua NiuRoujian Lu, Yanhong SunBaoying HuangLi ZhaoFei YeWenbo XuGeorge F. GaoGuizhen Wu                                                                                                                                                                             |
| EPI_ISL_408481                                 | National Institute for Viral Disease Control and Prevention, China CDC                                                                       | National Institute for Viral Disease Control & Prevention, CCDC                                                                                                                                                            | Wenjie Tan, Hengqin Wang, Xiang Zhao, Wenling Wang, Peihua Niu, Roujian Lu, Sheng Ye, Baoying Huang, Li Zhao, Fei Ye, Wenbo Xu, George F. Gao, Guizhen Wu                                                                                                                                                          |
| EPI_ISL_408482                                 | National Institute for Viral Disease Control and Prevention, China CDC                                                                       | National Institute for Viral Disease Control & Prevention, CCDC                                                                                                                                                            | Wenjie Tan, Zhaoguo Wang, Xiang Zhao, Wenling Wang, Peihua Niu, Roujian Lu, Ti Liu, Baoying Huang, Li Zhao, Fei Ye, Wenbo Xu, George F. Gao, Guizhen Wu                                                                                                                                                            |
| EPI_ISL_408483                                 | National Institute for Viral Disease Control and Prevention, China CDC                                                                       | National Institute for Viral Disease Control & Prevention, CCDC                                                                                                                                                            | Wenjie TanZhen Teng, Xiang ZhaoWenling Wang Peihua NiuRoujian Lu, Chongshan Li, Baoying HuangLi ZhaoFei YeWenbo XuGeorge F. GaoGuizhen Wu                                                                                                                                                                          |
| EPI_ISL_408484                                 | National Institute for Viral Disease Control and Prevention, China CDC                                                                       | National Institute for Viral Disease Control & Prevention, CCDC                                                                                                                                                            | Wenjie Tan, Jianan Xu, Wenling Wang, Peihua Niu, Roujian Lu, Huiping Yang, Xiang Zhao, Baoying Huang, Li Zhao, Fei Ye, Wenbo Xu, George F. Gao, Guizhen Wu                                                                                                                                                         |
| EPI_ISL_408485                                 | National Institute for Viral Disease Control and Prevention, China CDC                                                                       | National Institute for Viral Disease Control & Prevention, CCDC                                                                                                                                                            | Wenjie Tan, Quanyi Wang, Wenling Wang, Peihua Niu, Roujian Lu, Yang Pan, Xiang Zhao, Baoying Huang, Li Zhao, Fei Ye, Wenbo Xu, George F. Gao, Guizhen Wu                                                                                                                                                           |
| EPI_ISL_408486                                 | National Institute for Viral Disease Control and Prevention, China CDC                                                                       | National Institute for Viral Disease Control & Prevention, CCDC                                                                                                                                                            | Wenjie Tan, Yong Shi, Wenling Wang, Peihua Niu, Roujian Lu, Jianxiong Li, Xiang Zhao, Baoying Huang, Li Zhao, Fei Ye, Wenbo Xu, George F. Gao, Guizhen Wu                                                                                                                                                          |
| EPI_ISL_408487                                 | National Institute for Viral Disease Control and Prevention, China CDC                                                                       | National Institute for Viral Disease Control & Prevention, China CDC                                                                                                                                                       | Wenjie Tan, Jin Xu, Wenling Wang, Peihua Niu, Roujian Lu, Xueyong Huang, Xiang Zhao, Baoying Huang, Li Zhao, Fei Ye, Wenbo Xu, George F. Gao, Guizhen Wu                                                                                                                                                           |
| EPI_ISL_408488                                 | National Institute for Viral Disease Control and Prevention, China CDC                                                                       | National Institute for Viral Disease Control & Prevention, CCDC                                                                                                                                                            | Wenjie Tan, Shenjiao Wang, Wenling Wang, Peihua Niu, Roujian Lu, Kangchen Zhao, Xiang Zhao, Baoying Huang, Li Zhao, Fei Ye, Wenbo Xu, George F. Gao, Guizhen Wu                                                                                                                                                    |
| EPI_ISL_408511, EPI_ISL_408512                 | Institute of Viral Disease Control and Prevention, China CDC                                                                                 | Institute of Viral Disease Control and Prevention, China CDC                                                                                                                                                               | William J. Liu, Peipei Liu, Xiang Zhao, Peihua Niu, Yingze Zhao, Wenwen Lei, Ziqian Xu, Beiwei Ye, Weifeng Shi, Roujian Lu, Wenjie Tan, Zhixiao Chen, Yuchao Wu, Juan Song, Dayan Wang, Jun Han, Wenbo Xu, George F. Gao, Guizhen Wu                                                                               |
| EPI_ISL_408514, EPI_ISL_408515                 | Institute of Viral Disease Control and Prevention, China CDC                                                                                 | Institute of Viral Disease Control and Prevention, China CDC                                                                                                                                                               | William J. Liu, Peipei Liu, Xiang Zhao, Peihua Niu, Yingze Zhao, Wenwen Lei, Ziqian Xu, Shumei Zou, Wei Zhen, Beiwei Ye, Mengjie Yang, Weifeng Shi, Roujian Lu, Wenjie Tan, Zhixiao Chen, Yuchao Wu, Juan Song, Weimin Zhou, Dayan Wang, Jun Han, Wenbo Xu, George F. Gao, Guizhen Wu                              |
| EPI_ISL_408978                                 | Wuhan Fourth Hospital                                                                                                                        | Beijing Genomics Institute (BGI)                                                                                                                                                                                           | Weijun Chen                                                                                                                                                                                                                                                                                                        |
| EPI_ISL_410045                                 | IL Department of Public Health Chicago Laboratory                                                                                            | Pathogen Discovery, Respiratory Viruses Branch, Division of                                                                                                                                                                | Yan Li, Jing Zhang, Krista Queen, Ying Tao, Anna Uehara, Clinton R. Paden, Xiaoyan Lu, Brian Lynch, Senthil Kumar K. Sakhthivel, Brett L. Whitaker,                                                                                                                                                                |

|                                                                                                                                |                                                                                                                                                                                                                  |                                                                                                                                   |                                                                                                                                                                                                                                                                                                                                                                                                                                               |
|--------------------------------------------------------------------------------------------------------------------------------|------------------------------------------------------------------------------------------------------------------------------------------------------------------------------------------------------------------|-----------------------------------------------------------------------------------------------------------------------------------|-----------------------------------------------------------------------------------------------------------------------------------------------------------------------------------------------------------------------------------------------------------------------------------------------------------------------------------------------------------------------------------------------------------------------------------------------|
|                                                                                                                                |                                                                                                                                                                                                                  | Viral Diseases, Centers for Diseases Control and Prevention                                                                       | Shifaq Kamili, Lijuan Wang, Janna' R. Murray, Susan I. Gerber, Stephen Lindstrom, Suxiang Tong                                                                                                                                                                                                                                                                                                                                                |
| EPI_ISL_410538, EPI_ISL_410539, EPI_ISL_410540, EPI_ISL_410541, EPI_ISL_410542, EPI_ISL_410543, EPI_ISL_410544                 | Beijing Institute of Microbiology and Epidemiology                                                                                                                                                               | Beijing Institute of Microbiology and Epidemiology                                                                                | Wu-Chun Cao; Tommy Tsan-Yuk Lam; Na Jia; Ya-Wei Zhang; Jia-Fu Jiang; Bao-Gui Jiang                                                                                                                                                                                                                                                                                                                                                            |
| EPI_ISL_410721                                                                                                                 | South China Agricultural University                                                                                                                                                                              | South China Agricultural University                                                                                               | Yongyi Shen, Lihua Xiao, Wu Chen                                                                                                                                                                                                                                                                                                                                                                                                              |
| EPI_ISL_412386                                                                                                                 | Beijing Ditan Hospital, Capital Medical University                                                                                                                                                               | National Institute for Communicable Disease Control and Prevention, Chinese Center for Disease Control and Prevention             | Xinmin Xu, Xin Lu, Pan Xiang, Haijian Zhou, Biao Kan, Yajie Wang, Jingyuan Liu, Yanwen Xiong, Huizhu Wang, Ruihong Li, Fangfang Jin, Jie Gong, Xiaoping Chen, Lili Gao, Haofeng Xiong, Lin Pu, Chuansheng Li, Ming Zhang, Jianbo Tan, Yao Sun, Yufeng Liu, Hebing Guo, Jingjing Hao                                                                                                                                                           |
| EPI_ISL_412912                                                                                                                 | State Health Office Baden-Württemberg                                                                                                                                                                            | Charite Universitätsmedizin Berlin, Institute of Virology                                                                         | Victor M Corman, Julia Schneider, Barbara Muhlemann, Talitha Veith, Jörn Beheim-Schwarzbach, Terry Jones, Rainer Oehme, Silke Fischer, Christian Drosten                                                                                                                                                                                                                                                                                      |
| EPI_ISL_412976, EPI_ISL_412977                                                                                                 | Shandong First Medical University & Shandong Academy of Medical Sciences                                                                                                                                         | Institute of Microbiology, Chinese Academy of Sciences                                                                            | Weifeng Shi, Tao Hu, Hong Zhou, Juan Li, Xing Chen, Alice Catherine Hughes, Yuhai Bi                                                                                                                                                                                                                                                                                                                                                          |
| EPI_ISL_413485                                                                                                                 | Department of microbiology laboratory, Anhui Provincial Center for Disease Control and Prevention                                                                                                                | Department of microbiology laboratory, Anhui Provincial Center for Disease Control and Prevention                                 | Weiwei Li, Jun He, Yong Sun, Junling Yu, Qingqing Chen, Yuan Yuan, Yonglin Shi, Zhuhui Zhang, Yinglu Ge, Weidong Li, Bin Su, Zhirong Liu                                                                                                                                                                                                                                                                                                      |
| EPI_ISL_413557, EPI_ISL_413558, EPI_ISL_413559, EPI_ISL_413561                                                                 | California Department of Public Health                                                                                                                                                                           | Chiu Laboratory, University of California, San Francisco                                                                          | Xianding Deng, Scot Federman, Chao-Yang Pan, Hugo Guevara, Wei Gu, Debra A. Wadford, and Charles Y. Chiu                                                                                                                                                                                                                                                                                                                                      |
| EPI_ISL_413612, EPI_ISL_413613, EPI_ISL_413614, EPI_ISL_413615, EPI_ISL_413616, EPI_ISL_413617                                 | unknown                                                                                                                                                                                                          | Pathogen Discovery, Respiratory Viruses Branch, Division of Viral Diseases, Centers for Diseases Control and Prevention           | Ying Tao, Clinton R. Paden, Krista Queen, Anna Uehara, Jing Zhang, Yan Li, Haibin Wang, Shifaq Kamili, Xiaoyan Lu, Brian Lynch, Senthil Kumar K. Sakthivel, Brett L. Whitaker, Lijuan Wang, Janna' R. Murray, Jasmine Padilla, Justin Lee, Susan I. Gerber, Stephen Lindstrom, Suxiang Tong                                                                                                                                                   |
| EPI_ISL_413869                                                                                                                 | Guangdong Provincial Institution of Public Health, Guangdong Provincial Center for Disease Control and Prevention                                                                                                | Guangdong Provincial Institution of Public Health                                                                                 | Jing Lu, Louis du Plessis, Liu Zhe, Jiufeng Sun, Sarah François, Huifang Lin, Moritz Kraemer, Jingju Peng, Qianlin Xiong, Runyu Yuan, Lilian Zeng, Pingping Zhou, Chuming Liang, Tao Liu, Wei Li, Juan Su, Huanying Zheng, Kang Min, Song Tie, Bo Peng, Shisong Fang, Wenzhe Su, Kuibiao Li, Rulin Sun, Ru bai, Xi Tang, Minfeng Liang, Nuno Faria, Josh Quick, Andrew Rambaut, Verity Hill, Wenjun Ma, Nick Loman, Oliver Pybus, Changwen Ke |
| EPI_ISL_413922, EPI_ISL_413924, EPI_ISL_413925, EPI_ISL_413926, EPI_ISL_413928                                                 | California Department of Public Health                                                                                                                                                                           | Chiu Laboratory, University of California, San Francisco                                                                          | Xianding Deng, Scot Federman, Chao-Yang Pan, Hugo Guevara, Wei Gu, Debra A. Wadford, and Charles Y. Chiu                                                                                                                                                                                                                                                                                                                                      |
| EPI_ISL_413930                                                                                                                 | California Department of Public Health                                                                                                                                                                           | Chiu Laboratory UCSF-Abbott Viral Diagnostics and Discovery Center University of California, San Francisco                        | Xianding Deng, Scot Federman, Guixia Yu, Chao-Yang Pan, Hugo Guevara, Alicia Sotomayor-Gonzalez, Allan Gopez, Wei Gu, Steve Miller, Debra A. Wadford, and Charles Y. Chiu                                                                                                                                                                                                                                                                     |
| EPI_ISL_413931                                                                                                                 | California Department of Public Health                                                                                                                                                                           | Chiu Laboratory, University of California, San Francisco                                                                          | Xianding Deng, Scot Federman, Chao-Yang Pan, Hugo Guevara, Wei Gu, Debra A. Wadford, and Charles Y. Chiu                                                                                                                                                                                                                                                                                                                                      |
| EPI_ISL_414479, EPI_ISL_414480, EPI_ISL_414481                                                                                 | unknown                                                                                                                                                                                                          | Pathogen Discovery, Respiratory Viruses Branch, Division of Viral Diseases, Centers for Disease Control and Prevention            | Ying Tao, Krista Queen, Clinton R. Paden, Anna Uehara, Jing Zhang, Yan Li, Mary S. Keckler, Alison S. Laufer Halpin, Haibin Wang, Jasmine Padilla, Justin Lee, Christopher A. Elkins, Susan I. Gerber, Suxiang Tong                                                                                                                                                                                                                           |
| EPI_ISL_414510                                                                                                                 | Key Laboratory of Medical Molecular Virology (MOE/NHC/CAMS), School of Basic Medicine, Shanghai Medical College, Fudan University                                                                                | Key Laboratory of Medical Molecular Virology (MOE/NHC/CAMS), School of Basic Medicine, Shanghai Medical College, Fudan University | Zhang,R., Yi,Z., Wang,Y., Teng,Z., Xu,W., Song,W., Cai,X., Sun,Z., Gu,C., Zhou,Y., Chen,H., Ye,R., Han,W., Zhu,Y., Feng,F., Fang,F., Li,C., Zhang,X., Qu,D., Fu,C., Xie,Y. and Yuan,Z.                                                                                                                                                                                                                                                        |
| EPI_ISL_414663, EPI_ISL_414686                                                                                                 | State Key Laboratory of Respiratory Disease, National Clinical Research Center for Respiratory Disease, Guangzhou Institute of Respiratory Health, the First Affiliated Hospital of Guangzhou Medical University | The First Affiliated Hospital of Guangzhou Medical University & BGI-Shenzhen                                                      | Zhao et al                                                                                                                                                                                                                                                                                                                                                                                                                                    |
| EPI_ISL_414687                                                                                                                 | State Key Laboratory of Respiratory Disease, National Clinical Research Center for Respiratory Disease, Guangzhou Institute of Respiratory Health, the First Affiliated Hospital of Guangzhou Medical University | the First Affiliated Hospital of Guangzhou Medical University & BGI-Shenzhen                                                      | Zhao et al                                                                                                                                                                                                                                                                                                                                                                                                                                    |
| EPI_ISL_414688, EPI_ISL_414689, EPI_ISL_414690, EPI_ISL_414691, EPI_ISL_414692                                                 | State Key Laboratory of Respiratory Disease, National Clinical Research Center for Respiratory Disease, Guangzhou Institute of Respiratory Health, the First Affiliated Hospital of Guangzhou Medical University | The First Affiliated Hospital of Guangzhou Medical University & BGI-Shenzhen                                                      | Zhao et al                                                                                                                                                                                                                                                                                                                                                                                                                                    |
| EPI_ISL_414934, EPI_ISL_414935, EPI_ISL_414936, EPI_ISL_414937, EPI_ISL_414938, EPI_ISL_414939, EPI_ISL_414940, EPI_ISL_414941 | Shandong Provincial Center for Disease Control and Prevention                                                                                                                                                    | Beijing Institute of Microbiology and Epidemiology                                                                                | Xiao-Lin Jiang, Xiao-Li Zhang, Xiang-Na Zhao, Cun-Bao Li, Jie Lei, Zeng-Qiang Kou, Wen-Kui Sun, Yang Hang, Feng Gao, Sheng-Xiang Ji, Can-Fang Lin, Bo Pang, Ming-Xiao Yao, Guo-Lin Wang, Lin Yao, Li-Jun Duan, Xiao Wei, Dian-Ming Kang, Mai-Juan Ma                                                                                                                                                                                          |
| EPI_ISL_416314, EPI_ISL_416315                                                                                                 | Department of Microbiology, Faculty of Medicine, The Chinese University of Hong Kong, Hong Kong SAR, China                                                                                                       | Department of Microbiology, Faculty of Medicine, Chinese University of Hong Kong, Hong Kong SAR, China                            | Zigui Chen, Paul KS Chan                                                                                                                                                                                                                                                                                                                                                                                                                      |
| EPI_ISL_416538                                                                                                                 | Wellington Hospital                                                                                                                                                                                              | Institute of Environmental Science and Research (ESR)                                                                             | Wellington SCL, Wellington Hospital, Riddiford Street, Newtown, Wellington 6021, New Zealand                                                                                                                                                                                                                                                                                                                                                  |
| EPI_ISL_416741                                                                                                                 | National Public Health Surveillance Laboratory, Vilnius, Lithuania                                                                                                                                               | Charite Universitaetsmedizin Berlin, Institute of Virology                                                                        | Victor M Corman, Julia Schneider, Jorn Beheim-Schwarzbach, Talitha Veith, Barbara Muehleemann, Terry Jones, Ana Steponkiene, Christian Drosten                                                                                                                                                                                                                                                                                                |
| EPI_ISL_416743                                                                                                                 | NRL for Influenza, Centrum Epidemiology and Microbiology of National Institute of Public Health, Czech Republic                                                                                                  | Charite Universitaetsmedizin Berlin, Institute of Virology                                                                        | Victor M Corman, Julia Schneider, Jorn Beheim-Schwarzbach, Talitha Veith, Barbara Muehleemann, Terry Jones, Akexander Nagy, Jaromira Vecerova, Dusan Trnka, Ludmila Novakova, Helena Jirincova, Christian Drosten                                                                                                                                                                                                                             |
| EPI_ISL_417316                                                                                                                 | Chiu Laboratory, University of California, San Francisco                                                                                                                                                         | Chiu Laboratory, University of California, San Francisco                                                                          | Xianding Deng, Scot Federman, Wei Gu, and Charles Y. Chiu                                                                                                                                                                                                                                                                                                                                                                                     |
| EPI_ISL_417317, EPI_ISL_417318, EPI_ISL_417319, EPI_ISL_417320, EPI_ISL_417321                                                 | Santa Clara County Public Health Department                                                                                                                                                                      | Chiu Laboratory, University of California, San Francisco                                                                          | Xianding Deng, Scot Federman, Wei Gu, Elsa Villarino, Brandon Bonin, Debra A. Wadford, and Charles Y. Chiu                                                                                                                                                                                                                                                                                                                                    |
| EPI_ISL_417322, EPI_ISL_417323, EPI_ISL_417324, EPI_ISL_417325, EPI_ISL_417326, EPI_ISL_417327, EPI_ISL_417328, EPI_ISL_417329 | California Department of Public Health                                                                                                                                                                           | Chiu Laboratory, University of California, San Francisco                                                                          | Xianding Deng, Scot Federman, Chao-Yang Pan, Hugo Guevara, Wei Gu, Debra A. Wadford, and Charles Y. Chiu                                                                                                                                                                                                                                                                                                                                      |
| EPI_ISL_417330, EPI_ISL_417331, EPI_ISL_417332                                                                                 | Chiu Laboratory, University of California, San Francisco                                                                                                                                                         | Chiu Laboratory, University of California, San Francisco                                                                          | Xianding Deng, Scot Federman, Wei Gu, and Charles Y. Chiu                                                                                                                                                                                                                                                                                                                                                                                     |
| EPI_ISL_417917                                                                                                                 | Department of Medical Microbiology, University Malaysia Medical Centre                                                                                                                                           | Department of Medical Microbiology                                                                                                | Yoong Min CHONG, Sasheela PONNAMPALAVANAR, Sharifah Faridah SYED OMAR, Adeeba KAMARULZAMAN, Vijayan MUNUSAMY, Chee Kuan WONG, Cindy Shuan Ju TEH, I-Ching SAM, Yoke Fun Chan, University Malaysia Medical Centre COVID Team                                                                                                                                                                                                                   |
| EPI_ISL_417918                                                                                                                 | Department of Medical Microbiology, University Malaysia Medical Centre                                                                                                                                           | Department of Medical Microbiology, Faculty of Medicine, University of Malaysia                                                   | Yoong Min CHONG, Sasheela PONNAMPALAVANAR, Sharifah Faridah SYED OMAR, Adeeba KAMARULZAMAN, Vijayan MUNUSAMY, Chee Kuan WONG, Cindy Shuan Ju TEH, I-Ching SAM, Yoke Fun Chan, University Malaysia Medical Centre COVID Team                                                                                                                                                                                                                   |
| EPI_ISL_417919                                                                                                                 | Department of Medical Microbiology, University Malaysia Medical Centre                                                                                                                                           | Department of Medical Microbiology, Faculty of Medicine, University of Malaysia                                                   | Yoong Min CHONG, Sasheela PONNAMPALAVANAR, Sharifah Faridah SYED OMAR, Adeeba KAMARULZAMAN, Vijayan MUNUSAMY, Chee Kuan WONG, Fadhil Hadi JAMALUDDIN, Han Ming GAN, Cindy Shuan Ju TEH, I-Ching SAM, Yoke Fun CHAN, University Malaysia Medical Centre COVID Team                                                                                                                                                                             |



|                                                                                                                                                                                                                                                                                                |                                                                                |                                                                                                                        |                                                                                                                                                                                                                                                   |
|------------------------------------------------------------------------------------------------------------------------------------------------------------------------------------------------------------------------------------------------------------------------------------------------|--------------------------------------------------------------------------------|------------------------------------------------------------------------------------------------------------------------|---------------------------------------------------------------------------------------------------------------------------------------------------------------------------------------------------------------------------------------------------|
| EPI_ISL_417920                                                                                                                                                                                                                                                                                 | Department of Medical Microbiology, University Malaya Medical Centre           | Department of Medical Microbiology, Faculty of Medicine, University of Malaya                                          | Yoong Min CHONG, Sasheela PONNAMPALAVANAR, Sharifah Faridah SYED OMAR, Adeeba KAMARULZAMAN, Vijayan MUNUSAMY, Chee Kuan WONG, Fadhil Hadi JAMALUDDIN, Cindy Shuan Ju TEH, I-Ching SAM, Yoke Fun Chan, University Malaya Medical Centre COVID Team |
| EPI_ISL_418441, EPI_ISL_418442, EPI_ISL_418502, EPI_ISL_418503, EPI_ISL_418504, EPI_ISL_418506                                                                                                                                                                                                 | Hangzhou Center for Disease Control and Prevention                             | Inspection Center of Hangzhou Center for Disease Control and Prevention                                                | Yu hua, Wang haoqiu, Li jun, Yu xinfeng, Pan jingcao                                                                                                                                                                                              |
| EPI_ISL_418507, EPI_ISL_418508, EPI_ISL_418509, EPI_ISL_418510                                                                                                                                                                                                                                 | Hangzhou Center for Disease Control and Prevention                             | Inspection Center of Hangzhou Center for Disease Control and Prevention                                                | Yu hua, Wang haoqiu, Li jun, Yu xinfeng, Pan jingcao                                                                                                                                                                                              |
| EPI_ISL_418511, EPI_ISL_418512, EPI_ISL_418513, EPI_ISL_418514, EPI_ISL_418515                                                                                                                                                                                                                 | Hangzhou Center for Disease Control and Prevention                             | Inspection Center of Hangzhou Center for Disease Control and Prevention                                                | Yu hua, Wang haoqiu, Li jun, Yu xinfeng, Pan jingcao                                                                                                                                                                                              |
| EPI_ISL_418778, EPI_ISL_418779, EPI_ISL_418780, EPI_ISL_418781, EPI_ISL_418782, EPI_ISL_418783, EPI_ISL_418784, EPI_ISL_418785, EPI_ISL_418786, EPI_ISL_418787, EPI_ISL_418788, EPI_ISL_418789, EPI_ISL_418790, EPI_ISL_418791                                                                 | see above                                                                      | WA State Department of Health                                                                                          | Pathogen Discovery, Respiratory Viruses Branch, Division of Viral Diseases, Centers for Disease Control and Prevention                                                                                                                            |
| EPI_ISL_418864                                                                                                                                                                                                                                                                                 | Virginia DCLS                                                                  | Virginia DCLS                                                                                                          | Virginia DCLS                                                                                                                                                                                                                                     |
| EPI_ISL_418865, EPI_ISL_418956, EPI_ISL_418957, EPI_ISL_418958, EPI_ISL_419256, EPI_ISL_419257, EPI_ISL_419258, EPI_ISL_419260, EPI_ISL_419261, EPI_ISL_419262, EPI_ISL_419263                                                                                                                 | California Department of Public Health                                         | University of California, San Francisco                                                                                | Xianding Deng, Scot Federman, Chao-Yang Pan, Hugo Guevara, Wei Gu, Debra A. Wadford, and Charles Y. Chiu                                                                                                                                          |
| EPI_ISL_419553                                                                                                                                                                                                                                                                                 | RI State Health Laboratories                                                   | Pathogen Discovery, Respiratory Viruses Branch, Division of Viral Diseases, Centers for Disease Control and Prevention | Ying Tao, Jing Zhang, Krista Queen, Anna Uehara, Clinton R. Paden, Yan Li, Haibin Wang, Jasmine Padilla, Justin Lee, Suxiang Tong                                                                                                                 |
| EPI_ISL_419554                                                                                                                                                                                                                                                                                 | California Department of Public Health                                         | Pathogen Discovery, Respiratory Viruses Branch, Division of Viral Diseases, Centers for Disease Control and Prevention | Ying Tao, Jing Zhang, Krista Queen, Anna Uehara, Clinton R. Paden, Yan Li, Haibin Wang, Jasmine Padilla, Justin Lee, Suxiang Tong                                                                                                                 |
| EPI_ISL_419555                                                                                                                                                                                                                                                                                 | WA State Department of Health                                                  | Pathogen Discovery, Respiratory Viruses Branch, Division of Viral Diseases, Centers for Disease Control and Prevention | Ying Tao, Jing Zhang, Krista Queen, Anna Uehara, Clinton R. Paden, Yan Li, Haibin Wang, Jasmine Padilla, Justin Lee, Suxiang Tong                                                                                                                 |
| EPI_ISL_419556, EPI_ISL_419557                                                                                                                                                                                                                                                                 | GA Department of Public Health Laboratory                                      | Pathogen Discovery, Respiratory Viruses Branch, Division of Viral Diseases, Centers for Disease Control and Prevention | Ying Tao, Jing Zhang, Krista Queen, Anna Uehara, Clinton R. Paden, Yan Li, Haibin Wang, Jasmine Padilla, Justin Lee, Suxiang Tong                                                                                                                 |
| EPI_ISL_419558                                                                                                                                                                                                                                                                                 | OR State PHL-Virology/Immunology Section                                       | Pathogen Discovery, Respiratory Viruses Branch, Division of Viral Diseases, Centers for Disease Control and Prevention | Ying Tao, Jing Zhang, Krista Queen, Anna Uehara, Clinton R. Paden, Yan Li, Haibin Wang, Jasmine Padilla, Justin Lee, Suxiang Tong                                                                                                                 |
| EPI_ISL_419692                                                                                                                                                                                                                                                                                 | The Republican Research and Practical Center for Epidemiology and Microbiology | Charite Universitätsmedizin Berlin, Institute of Virology                                                              | Victor M Corman, Julia Schneider, Barbara Mühlemann, Talitha Veith, Jorn Beheim-Schwarzbach, Terry Jones, Natalia Shmialova, Natalia Sivets, Christian Drosten                                                                                    |
| EPI_ISL_419706, EPI_ISL_419708, EPI_ISL_419710, EPI_ISL_419711, EPI_ISL_419712, EPI_ISL_419713, EPI_ISL_420018, EPI_ISL_420019, EPI_ISL_420020, EPI_ISL_420021, EPI_ISL_420022, EPI_ISL_420023, EPI_ISL_420024, EPI_ISL_420025, EPI_ISL_420026, EPI_ISL_420027, EPI_ISL_420028, EPI_ISL_420029 | see above                                                                      | Virginia DCLS                                                                                                          | Virginia DCLS                                                                                                                                                                                                                                     |
| EPI_ISL_420065, EPI_ISL_420066, EPI_ISL_420067                                                                                                                                                                                                                                                 | Health Board Laboratory of Communicable Diseases                               | Charite Universitätsmedizin Berlin, Institute of Virology                                                              | Victor M Corman, Jorn Beheim-Schwarzbach, Barbara Mühlemann, Talitha Veith, Julia Schneider, Liidia Dotsenko, Natalja Kuznetsova, Terry Jones, Christian Drosten                                                                                  |
| EPI_ISL_420540                                                                                                                                                                                                                                                                                 | SYNLAB Eesti OÜ                                                                | Charite Universitätsmedizin Berlin, Institute of Virology                                                              | Victor M Corman, Jorn Beheim-Schwarzbach, Barbara Mühlemann, Talitha Veith, Julia Schneider, Paul Naaber, Terry Jones, Christian Drosten                                                                                                          |
| EPI_ISL_420628, EPI_ISL_420629, EPI_ISL_420630                                                                                                                                                                                                                                                 | Virginia DCLS                                                                  | Virginia DCLS                                                                                                          | Virginia DCLS                                                                                                                                                                                                                                     |
| EPI_ISL_422425                                                                                                                                                                                                                                                                                 | Zhejiang Provincial Center for Disease Control and Prevention                  | Zhejiang Provincial Center for Disease Control and Prevention                                                          | Yan Jun Zhang, Yi Sun                                                                                                                                                                                                                             |
| EPI_ISL_424349                                                                                                                                                                                                                                                                                 | Human Genetic Research Center, Kawsar Biotech Company                          | Human Genetic Research Center, Kawsar Biotech Company                                                                  | Zeinali, S., Khosravi, M.A., Abbasalipour Bashash, M., Mostafavi Jabbari, S., Firoozi, M., Pourtavakoli, S., Khateri, E., Zeinali, R. and Hoseini, F.                                                                                             |
| EPI_ISL_424841, EPI_ISL_424842                                                                                                                                                                                                                                                                 | SC Dept of Health and Env. Control-Bureau of Laboratories                      | Pathogen Discovery, Respiratory Viruses Branch, Division of Viral Diseases, Centers for Disease Control and Prevention | Yan Li, Krista Queen, Clinton R. Paden, Rachel Marine, Anna Uehara, Ying Tao, Jing Zhang, Haibin Wang, Mary S. Keckler, Alison S. Laufer Halpin, Christopher A. Elkins, Suxiang Tong                                                              |
| EPI_ISL_424843, EPI_ISL_424844, EPI_ISL_424845, EPI_ISL_424846, EPI_ISL_424847                                                                                                                                                                                                                 | MA State Public Health Laboratory                                              | Pathogen Discovery, Respiratory Viruses Branch, Division of Viral Diseases, Centers for Disease Control and Prevention | Yan Li, Krista Queen, Clinton R. Paden, Rachel Marine, Anna Uehara, Ying Tao, Jing Zhang, Haibin Wang, Mary S. Keckler, Alison S. Laufer Halpin, Christopher A. Elkins, Suxiang Tong                                                              |
| EPI_ISL_424848, EPI_ISL_424849                                                                                                                                                                                                                                                                 | AZ SPHL, Arizona Department of Health Services                                 | Pathogen Discovery, Respiratory Viruses Branch, Division of Viral Diseases, Centers for Disease Control and Prevention | Yan Li, Krista Queen, Clinton R. Paden, Rachel Marine, Anna Uehara, Ying Tao, Jing Zhang, Haibin Wang, Mary S. Keckler, Alison S. Laufer Halpin, Christopher A. Elkins, Suxiang Tong                                                              |
| EPI_ISL_424850, EPI_ISL_424851                                                                                                                                                                                                                                                                 | IL Department of Public Health Chicago Laboratory                              | Pathogen Discovery, Respiratory Viruses Branch, Division of Viral Diseases, Centers for Disease Control and Prevention | Yan Li, Krista Queen, Clinton R. Paden, Rachel Marine, Anna Uehara, Ying Tao, Jing Zhang, Haibin Wang, Mary S. Keckler, Alison S. Laufer Halpin, Christopher A. Elkins, Suxiang Tong                                                              |
| EPI_ISL_424852                                                                                                                                                                                                                                                                                 | DC Public Health Lab/ Dept. of Forensic Sciences                               | Pathogen Discovery, Respiratory Viruses Branch, Division of Viral Diseases, Centers for Disease Control and Prevention | Yan Li, Krista Queen, Clinton R. Paden, Rachel Marine, Anna Uehara, Ying Tao, Jing Zhang, Haibin Wang, Mary S. Keckler, Alison S. Laufer Halpin, Christopher A. Elkins, Suxiang Tong                                                              |
| EPI_ISL_424853, EPI_ISL_424854                                                                                                                                                                                                                                                                 | FL Bureau of Public Health Laboratories-Miami                                  | Pathogen Discovery, Respiratory Viruses Branch, Division of Viral Diseases, Centers for Disease Control and Prevention | Yan Li, Krista Queen, Clinton R. Paden, Rachel Marine, Anna Uehara, Ying Tao, Jing Zhang, Haibin Wang, Mary S. Keckler, Alison S. Laufer Halpin, Christopher A. Elkins, Suxiang Tong                                                              |
| EPI_ISL_424855                                                                                                                                                                                                                                                                                 | FL Bureau of Public Health Laboratories-Tampa                                  | Pathogen Discovery, Respiratory Viruses Branch, Division of Viral Diseases, Centers for Disease Control and Prevention | Yan Li, Krista Queen, Clinton R. Paden, Rachel Marine, Anna Uehara, Ying Tao, Jing Zhang, Haibin Wang, Mary S. Keckler, Alison S. Laufer Halpin, Christopher A. Elkins, Suxiang Tong                                                              |
| EPI_ISL_424856, EPI_ISL_424857                                                                                                                                                                                                                                                                 | FL Bur. of Public Health Laboratories-Jacksonville                             | Pathogen Discovery, Respiratory Viruses Branch, Division of Viral Diseases, Centers for Disease Control and Prevention | Yan Li, Krista Queen, Clinton R. Paden, Rachel Marine, Anna Uehara, Ying Tao, Jing Zhang, Haibin Wang, Mary S. Keckler, Alison S. Laufer Halpin, Christopher A. Elkins, Suxiang Tong                                                              |
| EPI_ISL_424858, EPI_ISL_424859, EPI_ISL_424860, EPI_ISL_424861, EPI_ISL_424862, EPI_ISL_424863, EPI_ISL_424864                                                                                                                                                                                 | GA Department of Public Health Laboratory                                      | Pathogen Discovery, Respiratory Viruses Branch, Division of Viral Diseases, Centers for Disease Control and Prevention | Yan Li, Krista Queen, Clinton R. Paden, Rachel Marine, Anna Uehara, Ying Tao, Jing Zhang, Haibin Wang, Mary S. Keckler, Alison S. Laufer Halpin, Christopher A. Elkins, Suxiang Tong                                                              |
| EPI_ISL_424865                                                                                                                                                                                                                                                                                 | IA State Hygienic Laboratory                                                   | Pathogen Discovery, Respiratory Viruses Branch, Division of Viral Diseases, Centers for Disease Control and Prevention | Yan Li, Krista Queen, Clinton R. Paden, Rachel Marine, Anna Uehara, Ying Tao, Jing Zhang, Haibin Wang, Mary S. Keckler, Alison S. Laufer Halpin, Christopher A. Elkins, Suxiang Tong                                                              |
| EPI_ISL_424866                                                                                                                                                                                                                                                                                 | IN State Department of Health Laboratory Services                              | Pathogen Discovery, Respiratory Viruses Branch, Division of Viral Diseases, Centers for Disease Control and Prevention | Yan Li, Krista Queen, Clinton R. Paden, Rachel Marine, Anna Uehara, Ying Tao, Jing Zhang, Haibin Wang, Mary S. Keckler, Alison S. Laufer Halpin, Christopher A. Elkins, Suxiang Tong                                                              |

|                                                                                                                                                                                                                                                                                                                                                                |                                                                                                                                                                                                 |                                                                                                                                        |                                                                                                                                                                                                                                                                                                                                      |
|----------------------------------------------------------------------------------------------------------------------------------------------------------------------------------------------------------------------------------------------------------------------------------------------------------------------------------------------------------------|-------------------------------------------------------------------------------------------------------------------------------------------------------------------------------------------------|----------------------------------------------------------------------------------------------------------------------------------------|--------------------------------------------------------------------------------------------------------------------------------------------------------------------------------------------------------------------------------------------------------------------------------------------------------------------------------------|
| EPI_ISL_424867                                                                                                                                                                                                                                                                                                                                                 | KS Health and Environmental Laboratories                                                                                                                                                        | Pathogen Discovery, Respiratory Viruses Branch, Division of Viral Diseases, Centers for Disease Control and Prevention                 | Yan Li, Krista Queen, Clinton R. Paden, Rachel Marine, Anna Uehara, Ying Tao, Jing Zhang, Haibin Wang, Mary S. Keckler, Alison S. Laufer Halpin, Christopher A. Elkins, Suxiang Tong                                                                                                                                                 |
| EPI_ISL_424868                                                                                                                                                                                                                                                                                                                                                 | LA Office of Public Health Laboratories                                                                                                                                                         | Pathogen Discovery, Respiratory Viruses Branch, Division of Viral Diseases, Centers for Disease Control and Prevention                 | Yan Li, Krista Queen, Clinton R. Paden, Rachel Marine, Anna Uehara, Ying Tao, Jing Zhang, Haibin Wang, Mary S. Keckler, Alison S. Laufer Halpin, Christopher A. Elkins, Suxiang Tong                                                                                                                                                 |
| EPI_ISL_424869                                                                                                                                                                                                                                                                                                                                                 | MD DOH Laboratories Administration                                                                                                                                                              | Pathogen Discovery, Respiratory Viruses Branch, Division of Viral Diseases, Centers for Disease Control and Prevention                 | Yan Li, Krista Queen, Clinton R. Paden, Rachel Marine, Anna Uehara, Ying Tao, Jing Zhang, Haibin Wang, Mary S. Keckler, Alison S. Laufer Halpin, Christopher A. Elkins, Suxiang Tong                                                                                                                                                 |
| EPI_ISL_424870                                                                                                                                                                                                                                                                                                                                                 | MO State Public Health Laboratory                                                                                                                                                               | Pathogen Discovery, Respiratory Viruses Branch, Division of Viral Diseases, Centers for Disease Control and Prevention                 | Yan Li, Krista Queen, Clinton R. Paden, Rachel Marine, Anna Uehara, Ying Tao, Jing Zhang, Haibin Wang, Mary S. Keckler, Alison S. Laufer Halpin, Christopher A. Elkins, Suxiang Tong                                                                                                                                                 |
| EPI_ISL_424871, EPI_ISL_424872, EPI_ISL_424873                                                                                                                                                                                                                                                                                                                 | NC State Laboratory of Public Health                                                                                                                                                            | Pathogen Discovery, Respiratory Viruses Branch, Division of Viral Diseases, Centers for Disease Control and Prevention                 | Yan Li, Krista Queen, Clinton R. Paden, Rachel Marine, Anna Uehara, Ying Tao, Jing Zhang, Haibin Wang, Mary S. Keckler, Alison S. Laufer Halpin, Christopher A. Elkins, Suxiang Tong                                                                                                                                                 |
| EPI_ISL_424874, EPI_ISL_424875                                                                                                                                                                                                                                                                                                                                 | NE Public Health Laboratory                                                                                                                                                                     | Pathogen Discovery, Respiratory Viruses Branch, Division of Viral Diseases, Centers for Disease Control and Prevention                 | Yan Li, Krista Queen, Clinton R. Paden, Rachel Marine, Anna Uehara, Ying Tao, Jing Zhang, Haibin Wang, Mary S. Keckler, Alison S. Laufer Halpin, Christopher A. Elkins, Suxiang Tong                                                                                                                                                 |
| EPI_ISL_424876, EPI_ISL_424877                                                                                                                                                                                                                                                                                                                                 | NH Dept. of Health and Human Services Public Health Labs                                                                                                                                        | Pathogen Discovery, Respiratory Viruses Branch, Division of Viral Diseases, Centers for Disease Control and Prevention                 | Yan Li, Krista Queen, Clinton R. Paden, Rachel Marine, Anna Uehara, Ying Tao, Jing Zhang, Haibin Wang, Mary S. Keckler, Alison S. Laufer Halpin, Christopher A. Elkins, Suxiang Tong                                                                                                                                                 |
| EPI_ISL_424878                                                                                                                                                                                                                                                                                                                                                 | NJ Public Health and Environmental Laboratories                                                                                                                                                 | Pathogen Discovery, Respiratory Viruses Branch, Division of Viral Diseases, Centers for Disease Control and Prevention                 | Yan Li, Krista Queen, Clinton R. Paden, Rachel Marine, Anna Uehara, Ying Tao, Jing Zhang, Haibin Wang, Mary S. Keckler, Alison S. Laufer Halpin, Christopher A. Elkins, Suxiang Tong                                                                                                                                                 |
| EPI_ISL_424879                                                                                                                                                                                                                                                                                                                                                 | NV-Southern Nevada Public Health Laboratory                                                                                                                                                     | Pathogen Discovery, Respiratory Viruses Branch, Division of Viral Diseases, Centers for Disease Control and Prevention                 | Yan Li, Krista Queen, Clinton R. Paden, Rachel Marine, Anna Uehara, Ying Tao, Jing Zhang, Haibin Wang, Mary S. Keckler, Alison S. Laufer Halpin, Christopher A. Elkins, Suxiang Tong                                                                                                                                                 |
| EPI_ISL_424880                                                                                                                                                                                                                                                                                                                                                 | OH Department of Health Laboratory                                                                                                                                                              | Pathogen Discovery, Respiratory Viruses Branch, Division of Viral Diseases, Centers for Disease Control and Prevention                 | Yan Li, Krista Queen, Clinton R. Paden, Rachel Marine, Anna Uehara, Ying Tao, Jing Zhang, Haibin Wang, Mary S. Keckler, Alison S. Laufer Halpin, Christopher A. Elkins, Suxiang Tong                                                                                                                                                 |
| EPI_ISL_424881, EPI_ISL_424882, EPI_ISL_424883, EPI_ISL_424884, EPI_ISL_424885, EPI_ISL_424886                                                                                                                                                                                                                                                                 | PA Department of Health, Bureau of Laboratories                                                                                                                                                 | Pathogen Discovery, Respiratory Viruses Branch, Division of Viral Diseases, Centers for Disease Control and Prevention                 | Yan Li, Krista Queen, Clinton R. Paden, Rachel Marine, Anna Uehara, Ying Tao, Jing Zhang, Haibin Wang, Mary S. Keckler, Alison S. Laufer Halpin, Christopher A. Elkins, Suxiang Tong                                                                                                                                                 |
| EPI_ISL_424887                                                                                                                                                                                                                                                                                                                                                 | RI State Health Laboratories                                                                                                                                                                    | Pathogen Discovery, Respiratory Viruses Branch, Division of Viral Diseases, Centers for Disease Control and Prevention                 | Yan Li, Krista Queen, Clinton R. Paden, Rachel Marine, Anna Uehara, Ying Tao, Jing Zhang, Haibin Wang, Mary S. Keckler, Alison S. Laufer Halpin, Christopher A. Elkins, Suxiang Tong                                                                                                                                                 |
| EPI_ISL_424888                                                                                                                                                                                                                                                                                                                                                 | SC Dept of Health and Env. Control-Bureau of Laboratories                                                                                                                                       | Pathogen Discovery, Respiratory Viruses Branch, Division of Viral Diseases, Centers for Disease Control and Prevention                 | Yan Li, Krista Queen, Clinton R. Paden, Rachel Marine, Anna Uehara, Ying Tao, Jing Zhang, Haibin Wang, Mary S. Keckler, Alison S. Laufer Halpin, Christopher A. Elkins, Suxiang Tong                                                                                                                                                 |
| EPI_ISL_424889, EPI_ISL_424890                                                                                                                                                                                                                                                                                                                                 | UT-Unified State Labs: Public Health Utah DOH                                                                                                                                                   | Pathogen Discovery, Respiratory Viruses Branch, Division of Viral Diseases, Centers for Disease Control and Prevention                 | Yan Li, Krista Queen, Clinton R. Paden, Rachel Marine, Anna Uehara, Ying Tao, Jing Zhang, Haibin Wang, Mary S. Keckler, Alison S. Laufer Halpin, Christopher A. Elkins, Suxiang Tong                                                                                                                                                 |
| EPI_ISL_424891, EPI_ISL_424892, EPI_ISL_424893, EPI_ISL_424894                                                                                                                                                                                                                                                                                                 | VA-Division of Consolidated Laboratory Services                                                                                                                                                 | Pathogen Discovery, Respiratory Viruses Branch, Division of Viral Diseases, Centers for Disease Control and Prevention                 | Yan Li, Krista Queen, Clinton R. Paden, Rachel Marine, Anna Uehara, Ying Tao, Jing Zhang, Haibin Wang, Mary S. Keckler, Alison S. Laufer Halpin, Christopher A. Elkins, Suxiang Tong                                                                                                                                                 |
| EPI_ISL_424895, EPI_ISL_424896, EPI_ISL_424897, EPI_ISL_424898, EPI_ISL_424899, EPI_ISL_424900                                                                                                                                                                                                                                                                 | IA State Hygienic Laboratory                                                                                                                                                                    | Pathogen Discovery, Respiratory Viruses Branch, Division of Viral Diseases, Centers for Disease Control and Prevention                 | Ying Tao, Clinton R. Paden, Jing Zhang, Krista Queen, Anna Uehara, Yan Li, Haibin Wang, Mary S. Keckler, Alison S. Laufer Halpin, Christopher A. Elkins, Suxiang Tong                                                                                                                                                                |
| EPI_ISL_424901                                                                                                                                                                                                                                                                                                                                                 | NJ Public Health and Environmental Laboratories                                                                                                                                                 | Pathogen Discovery, Respiratory Viruses Branch, Division of Viral Diseases, Centers for Disease Control and Prevention                 | Ying Tao, Clinton R. Paden, Jing Zhang, Krista Queen, Anna Uehara, Yan Li, Haibin Wang, Mary S. Keckler, Alison S. Laufer Halpin, Christopher A. Elkins, Suxiang Tong                                                                                                                                                                |
| EPI_ISL_424902, EPI_ISL_424903, EPI_ISL_424904, EPI_ISL_424905                                                                                                                                                                                                                                                                                                 | SC Dept of Health and Env. Control-Bureau of Laboratories                                                                                                                                       | Pathogen Discovery, Respiratory Viruses Branch, Division of Viral Diseases, Centers for Disease Control and Prevention                 | Ying Tao, Clinton R. Paden, Jing Zhang, Krista Queen, Anna Uehara, Yan Li, Haibin Wang, Mary S. Keckler, Alison S. Laufer Halpin, Christopher A. Elkins, Suxiang Tong                                                                                                                                                                |
| EPI_ISL_424906                                                                                                                                                                                                                                                                                                                                                 | NYC Department of Health and Mental Hygiene                                                                                                                                                     | Pathogen Discovery, Respiratory Viruses Branch, Division of Viral Diseases, Centers for Disease Control and Prevention                 | Ying Tao, Clinton R. Paden, Jing Zhang, Krista Queen, Anna Uehara, Yan Li, Haibin Wang, Mary S. Keckler, Alison S. Laufer Halpin, Christopher A. Elkins, Suxiang Tong                                                                                                                                                                |
| EPI_ISL_424907                                                                                                                                                                                                                                                                                                                                                 | VA-Division of Consolidated Laboratory Services                                                                                                                                                 | Pathogen Discovery, Respiratory Viruses Branch, Division of Viral Diseases, Centers for Disease Control and Prevention                 | Ying Tao, Clinton R. Paden, Jing Zhang, Krista Queen, Anna Uehara, Yan Li, Haibin Wang, Mary S. Keckler, Alison S. Laufer Halpin, Christopher A. Elkins, Suxiang Tong                                                                                                                                                                |
| EPI_ISL_424908, EPI_ISL_424909, EPI_ISL_424910, EPI_ISL_424911, EPI_ISL_424912, EPI_ISL_424913, EPI_ISL_424914, EPI_ISL_424915, EPI_ISL_424916, EPI_ISL_424917, EPI_ISL_424918, EPI_ISL_424919, EPI_ISL_424920                                                                                                                                                 | MA State Public Health Laboratory                                                                                                                                                               | Pathogen Discovery, Respiratory Viruses Branch, Division of Viral Diseases, Centers for Disease Control and Prevention                 | Ying Tao, Clinton R. Paden, Jing Zhang, Krista Queen, Anna Uehara, Yan Li, Haibin Wang, Mary S. Keckler, Alison S. Laufer Halpin, Christopher A. Elkins, Suxiang Tong                                                                                                                                                                |
| EPI_ISL_426437, EPI_ISL_426440, EPI_ISL_426441, EPI_ISL_426443, EPI_ISL_426444, EPI_ISL_426446, EPI_ISL_426447, EPI_ISL_426448, EPI_ISL_426449, EPI_ISL_426451, EPI_ISL_426452, EPI_ISL_426453                                                                                                                                                                 | WA State Department of Health                                                                                                                                                                   | Pathogen Discovery, Respiratory Viruses Branch, Division of Viral Diseases, Centers for Disease Control and Prevention                 | Ying Tao, Jing Zhang, Clinton R. Paden, Krista Queen, Anna Uehara, Yan Li, Haibin Wang, Jessica Jacobs, Denny Russell, Brian Hiatt, Jessica Gant, Suxiang Tong                                                                                                                                                                       |
| EPI_ISL_426454, EPI_ISL_426455, EPI_ISL_426456, EPI_ISL_426457, EPI_ISL_426458, EPI_ISL_426459, EPI_ISL_426460, EPI_ISL_426461, EPI_ISL_426462, EPI_ISL_426463, EPI_ISL_426464, EPI_ISL_426465, EPI_ISL_426466, EPI_ISL_426467, EPI_ISL_426468, EPI_ISL_426469, EPI_ISL_426470, EPI_ISL_426471, EPI_ISL_426472, EPI_ISL_426473, EPI_ISL_426474, EPI_ISL_426475 | Virginia DCLS                                                                                                                                                                                   | Virginia DCLS                                                                                                                          | Virginia DCLS                                                                                                                                                                                                                                                                                                                        |
| see above                                                                                                                                                                                                                                                                                                                                                      | Virginia DCLS                                                                                                                                                                                   | Virginia DCLS                                                                                                                          | Virginia DCLS                                                                                                                                                                                                                                                                                                                        |
| EPI_ISL_428925, EPI_ISL_428926, EPI_ISL_428927, EPI_ISL_428928, EPI_ISL_428929, EPI_ISL_428930, EPI_ISL_428931, EPI_ISL_428932                                                                                                                                                                                                                                 | ViroGenetics - BSL3 Laboratory of Virology; Human Genome Variation Research Group & Genomics Centre MCB; Bioinformatics Research Group; Wojewódzka Stacja Sanitarno-Epidemiologiczna w Krakowie | ViroGenetics - BSL3 Laboratory of Virology; Human Genome Variation Research Group & Genomics Centre MCB; Bioinformatics Research Group | Wojciech Branicki, Ewelina Popiech, Micha Kowalski, Agnieszka Starowicz, Adrianna Klajmon, Aleksandra Pisarek, Danuta Piniewska-Róg, Kamila Marszaek, Tomasz Gromowski, Katarzyna Kopera, Katarzyna Dudek, Inga Drebort, Katarzyna Gwa, Magda Pachota, Aleksandra Synowicz, Marek Sanak, Jarosaw Foremny, Pawe P abaj, Krzysztof Pyr |
| EPI_ISL_429074, EPI_ISL_429075, EPI_ISL_429077, EPI_ISL_429082, EPI_ISL_429083, EPI_ISL_429085, EPI_ISL_429088, EPI_ISL_429089, EPI_ISL_429090, EPI_ISL_429091, EPI_ISL_429092, EPI_ISL_429093, EPI_ISL_429096, EPI_ISL_429097, EPI_ISL_429098                                                                                                                 | The First Affiliated Hospital of Guangzhou Medical University                                                                                                                                   | BGI-shenzhen & The First Affiliated Hospital of Guangzhou Medical University                                                           | Yanqun Wang, Daxi Wang, Lu Zhang, Wanying Sun, Zhaoyong Zhang et al.                                                                                                                                                                                                                                                                 |
| EPI_ISL_429239                                                                                                                                                                                                                                                                                                                                                 | Department of Clinical Laboratory, the First People's Hospital of Yunnan Province                                                                                                               | Department of Clinical Laboratory, the First People's Hospital of Yunnan Province                                                      | Yi Sun, Ziqin Dian, Ya Xu, Guiqian Zhang, Xin Fan, Yu Zhang                                                                                                                                                                                                                                                                          |
| EPI_ISL_429852, EPI_ISL_429853, EPI_ISL_429854, EPI_ISL_429855                                                                                                                                                                                                                                                                                                 | Centers for Disease Control and Prevention of Lishui                                                                                                                                            | Department of InspectionCenters for Disease Control and Prevention of Lishui                                                           | Wang Xiaoguang, Ji Qiaoying, Ji Jiansong, Ye Bifeng, Ye Ling                                                                                                                                                                                                                                                                         |
| EPI_ISL_429875, EPI_ISL_429876                                                                                                                                                                                                                                                                                                                                 | California Department of Public Health                                                                                                                                                          | Chiu Laboratory, University of California, San Francisco                                                                               | Xianding Deng, Scot Federman, Chao-Yang Pan, Hugo Guevara, Wei Gu, Debra A. Wadford, and Charles Y. Chiu                                                                                                                                                                                                                             |
| EPI_ISL_429877, EPI_ISL_429878                                                                                                                                                                                                                                                                                                                                 | Chiu Laboratory, University of California, San Francisco                                                                                                                                        | Chiu Laboratory, University of California, San Francisco                                                                               | Xianding Deng, Scot Federman, Wei Gu, and Charles Y. Chiu                                                                                                                                                                                                                                                                            |
| EPI_ISL_429879, EPI_ISL_429880                                                                                                                                                                                                                                                                                                                                 | Santa Clara County Public Health Department                                                                                                                                                     | Chiu Laboratory, University of California, San Francisco                                                                               | Xianding Deng, Scot Federman, Wei Gu, Elsa Villarino, Brandon Bonin, Debra A. Wadford, and Charles Y. Chiu                                                                                                                                                                                                                           |
| EPI_ISL_429881                                                                                                                                                                                                                                                                                                                                                 | California Department of Public Health                                                                                                                                                          | Chiu Laboratory, University of California, San Francisco                                                                               | Xianding Deng, Scot Federman, Wei Gu, and Charles Y. Chiu                                                                                                                                                                                                                                                                            |
| EPI_ISL_429969, EPI_ISL_429970, EPI_ISL_429971, EPI_ISL_429972, EPI_ISL_429973, EPI_ISL_429974, EPI_ISL_429975, EPI_ISL_429976, EPI_ISL_429977, EPI_ISL_429978, EPI_ISL_429979, EPI_ISL_429980, EPI_ISL_429981, EPI_ISL_429982, EPI_ISL_429983, EPI_ISL_429984, EPI_ISL_429985, EPI_ISL_429986, EPI_ISL_429987, EPI_ISL_429988, EPI_ISL_429989                 | Virginia DCLS                                                                                                                                                                                   | Virginia DCLS                                                                                                                          | Virginia DCLS                                                                                                                                                                                                                                                                                                                        |
| see above                                                                                                                                                                                                                                                                                                                                                      | Virginia DCLS                                                                                                                                                                                   | Virginia DCLS                                                                                                                          | Virginia DCLS                                                                                                                                                                                                                                                                                                                        |

|                                                                                                                                                                                                                                                                                                                                                                                                                                                                                                                                                                                                                                                                                                                                                                                                                                                                                                                                                                                                                                                                                                                                                                                                                                                                                                                                                                                                                                                                                                |                                                                            |                                                                                                                        |                                                                                                                                                                                                                                                                                                                                                                                                                                                                                                               |                                                                                                                                                                                                                                                                                                           |
|------------------------------------------------------------------------------------------------------------------------------------------------------------------------------------------------------------------------------------------------------------------------------------------------------------------------------------------------------------------------------------------------------------------------------------------------------------------------------------------------------------------------------------------------------------------------------------------------------------------------------------------------------------------------------------------------------------------------------------------------------------------------------------------------------------------------------------------------------------------------------------------------------------------------------------------------------------------------------------------------------------------------------------------------------------------------------------------------------------------------------------------------------------------------------------------------------------------------------------------------------------------------------------------------------------------------------------------------------------------------------------------------------------------------------------------------------------------------------------------------|----------------------------------------------------------------------------|------------------------------------------------------------------------------------------------------------------------|---------------------------------------------------------------------------------------------------------------------------------------------------------------------------------------------------------------------------------------------------------------------------------------------------------------------------------------------------------------------------------------------------------------------------------------------------------------------------------------------------------------|-----------------------------------------------------------------------------------------------------------------------------------------------------------------------------------------------------------------------------------------------------------------------------------------------------------|
| EPI_ISL_430847                                                                                                                                                                                                                                                                                                                                                                                                                                                                                                                                                                                                                                                                                                                                                                                                                                                                                                                                                                                                                                                                                                                                                                                                                                                                                                                                                                                                                                                                                 | HS mikrobiologi virus                                                      | The Public Health Agency of Sweden                                                                                     | Zhibing Yun, Oskar Karlsson Lindsjo, Maria Lind Karlberg, Anna-Malin Linde, Olov Svartstrom, Anna Risberg, Shaman Muradrasoli, Karin Tegmark-Wisell                                                                                                                                                                                                                                                                                                                                                           |                                                                                                                                                                                                                                                                                                           |
| EPI_ISL_434534                                                                                                                                                                                                                                                                                                                                                                                                                                                                                                                                                                                                                                                                                                                                                                                                                                                                                                                                                                                                                                                                                                                                                                                                                                                                                                                                                                                                                                                                                 | National Institute for Viral Disease Control and Prevention, China CDC     | National Institute for Viral Disease Control and Prevention, China CDC, Yunnan Provincial CDC                          | Wenjie Tan, Roujian Lu, Wenling Wang, Peihua Niu, Huijuan Wang, Baoying Huang, Li Zhao, Fei Ye, Guizhen Wu                                                                                                                                                                                                                                                                                                                                                                                                    |                                                                                                                                                                                                                                                                                                           |
| EPI_ISL_434590, EPI_ISL_434591, EPI_ISL_434592, EPI_ISL_434593, EPI_ISL_434594, EPI_ISL_434595, EPI_ISL_434596, EPI_ISL_434597, EPI_ISL_434598, EPI_ISL_434599, EPI_ISL_434600, EPI_ISL_434601, EPI_ISL_434602, EPI_ISL_434603, EPI_ISL_434604, EPI_ISL_434605, EPI_ISL_434606                                                                                                                                                                                                                                                                                                                                                                                                                                                                                                                                                                                                                                                                                                                                                                                                                                                                                                                                                                                                                                                                                                                                                                                                                 | see above                                                                  | Virginia DCLS                                                                                                          | Virginia DCLS                                                                                                                                                                                                                                                                                                                                                                                                                                                                                                 |                                                                                                                                                                                                                                                                                                           |
| EPI_ISL_435286                                                                                                                                                                                                                                                                                                                                                                                                                                                                                                                                                                                                                                                                                                                                                                                                                                                                                                                                                                                                                                                                                                                                                                                                                                                                                                                                                                                                                                                                                 | Central Virology Laboratory, Israel Ministry of Health                     | Central Virology Laboratory, Israel Ministry of Health                                                                 | eta Zuckerman, Efrat Bucris, Oran Erster, Orna Mor, Ella Mendelson, Michal Mandelboim, Danit Sofer                                                                                                                                                                                                                                                                                                                                                                                                            |                                                                                                                                                                                                                                                                                                           |
| EPI_ISL_435580, EPI_ISL_435581, EPI_ISL_435582, EPI_ISL_435583, EPI_ISL_435584, EPI_ISL_435585, EPI_ISL_435586, EPI_ISL_435587, EPI_ISL_435588, EPI_ISL_435589, EPI_ISL_435590, EPI_ISL_435591, EPI_ISL_435592, EPI_ISL_435593, EPI_ISL_435594, EPI_ISL_435595, EPI_ISL_435596, EPI_ISL_435597, EPI_ISL_435598, EPI_ISL_435599, EPI_ISL_435600, EPI_ISL_435601, EPI_ISL_435602, EPI_ISL_435603, EPI_ISL_435604, EPI_ISL_435605, EPI_ISL_435606, EPI_ISL_435607, EPI_ISL_435608, EPI_ISL_435609, EPI_ISL_435610, EPI_ISL_435611, EPI_ISL_435612, EPI_ISL_435613, EPI_ISL_435614, EPI_ISL_435615, EPI_ISL_435616, EPI_ISL_435617, EPI_ISL_435618, EPI_ISL_435619, EPI_ISL_435620, EPI_ISL_435621, EPI_ISL_435622, EPI_ISL_435623, EPI_ISL_435624, EPI_ISL_435625, EPI_ISL_435626, EPI_ISL_435627, EPI_ISL_435628, EPI_ISL_435629, EPI_ISL_435630, EPI_ISL_435631, EPI_ISL_435632, EPI_ISL_435633, EPI_ISL_435634, EPI_ISL_435635, EPI_ISL_435636, EPI_ISL_435637, EPI_ISL_435638, EPI_ISL_435639, EPI_ISL_435640, EPI_ISL_435641, EPI_ISL_435642, EPI_ISL_435643, EPI_ISL_435644, EPI_ISL_435645, EPI_ISL_435646, EPI_ISL_435647, EPI_ISL_435648, EPI_ISL_435649, EPI_ISL_435650, EPI_ISL_435651, EPI_ISL_435652, EPI_ISL_435653, EPI_ISL_435654, EPI_ISL_435655, EPI_ISL_435656, EPI_ISL_435657, EPI_ISL_435658, EPI_ISL_435659, EPI_ISL_435660, EPI_ISL_435661, EPI_ISL_435662, EPI_ISL_435663, EPI_ISL_435664, EPI_ISL_435665, EPI_ISL_435666, EPI_ISL_435667, EPI_ISL_435668, EPI_ISL_435669 | see above                                                                  | Santa Clara County Public Health Department                                                                            | Chiu Laboratory, University of California, San Francisco                                                                                                                                                                                                                                                                                                                                                                                                                                                      | Xianding Deng, Scot Federman, Wei Gu, Elsa Villarino, Brandon Bonin, Debra A. Wadford, and Charles Y. Chiu                                                                                                                                                                                                |
| EPI_ISL_436040, EPI_ISL_436041, EPI_ISL_436042, EPI_ISL_436043                                                                                                                                                                                                                                                                                                                                                                                                                                                                                                                                                                                                                                                                                                                                                                                                                                                                                                                                                                                                                                                                                                                                                                                                                                                                                                                                                                                                                                 | DC Public Health Lab Dept of Forensic Science                              | Pathogen Discovery, Respiratory Viruses Branch, Division of Viral Diseases, Centers for Disease Control and Prevention | Ying Tao, Jing Zhang, Krista Queen, Yan Li, Anna Uehara, Clinton R. Paden, Haibin Wang, Zachary Weiner, Bettina Bankamp, Suxiang Tong                                                                                                                                                                                                                                                                                                                                                                         |                                                                                                                                                                                                                                                                                                           |
| EPI_ISL_436044                                                                                                                                                                                                                                                                                                                                                                                                                                                                                                                                                                                                                                                                                                                                                                                                                                                                                                                                                                                                                                                                                                                                                                                                                                                                                                                                                                                                                                                                                 | Louisiana Office of Public Health Laboratories                             | Pathogen Discovery, Respiratory Viruses Branch, Division of Viral Diseases, Centers for Disease Control and Prevention | Ying Tao, Jing Zhang, Krista Queen, Yan Li, Anna Uehara, Clinton R. Paden, Haibin Wang, Zachary Weiner, Bettina Bankamp, Suxiang Tong                                                                                                                                                                                                                                                                                                                                                                         |                                                                                                                                                                                                                                                                                                           |
| EPI_ISL_436045, EPI_ISL_436046                                                                                                                                                                                                                                                                                                                                                                                                                                                                                                                                                                                                                                                                                                                                                                                                                                                                                                                                                                                                                                                                                                                                                                                                                                                                                                                                                                                                                                                                 | US VI Department of Health                                                 | Pathogen Discovery, Respiratory Viruses Branch, Division of Viral Diseases, Centers for Disease Control and Prevention | Ying Tao, Jing Zhang, Krista Queen, Yan Li, Anna Uehara, Clinton R. Paden, Haibin Wang, Zachary Weiner, Bettina Bankamp, Suxiang Tong                                                                                                                                                                                                                                                                                                                                                                         |                                                                                                                                                                                                                                                                                                           |
| EPI_ISL_436047, EPI_ISL_436048, EPI_ISL_436049, EPI_ISL_436050, EPI_ISL_436051, EPI_ISL_436052, EPI_ISL_436053, EPI_ISL_436054, EPI_ISL_436055, EPI_ISL_436056, EPI_ISL_436057, EPI_ISL_436058, EPI_ISL_436059, EPI_ISL_436060, EPI_ISL_436061, EPI_ISL_436062, EPI_ISL_436063, EPI_ISL_436064, EPI_ISL_436065, EPI_ISL_436066, EPI_ISL_436067, EPI_ISL_436068, EPI_ISL_436069, EPI_ISL_436070, EPI_ISL_436071, EPI_ISL_436072, EPI_ISL_436073, EPI_ISL_436074, EPI_ISL_436075, EPI_ISL_436076, EPI_ISL_436077, EPI_ISL_436078, EPI_ISL_436079, EPI_ISL_436080, EPI_ISL_436081, EPI_ISL_436082                                                                                                                                                                                                                                                                                                                                                                                                                                                                                                                                                                                                                                                                                                                                                                                                                                                                                                 | see above                                                                  | NYC Department of Health and Mental Hygiene                                                                            | Pathogen Discovery, Respiratory Viruses Branch, Division of Viral Diseases, Centers for Disease Control and Prevention                                                                                                                                                                                                                                                                                                                                                                                        | Ying Tao, Krista Queen, Christy Harrison, Jennifer Rakeman, Clinton R. Paden, Jing Zhang, Anna Uehara, Yan Li, Haibin Wang, Jasmine Padilla, Justin Lee, Bettina Bankamp, Zachary Weiner, Suxiang Tong                                                                                                    |
| EPI_ISL_437387, EPI_ISL_437388, EPI_ISL_437389, EPI_ISL_437390, EPI_ISL_437391, EPI_ISL_437392, EPI_ISL_437393, EPI_ISL_437394, EPI_ISL_437395, EPI_ISL_437396, EPI_ISL_437397, EPI_ISL_437398, EPI_ISL_437399, EPI_ISL_437400, EPI_ISL_437401, EPI_ISL_437402, EPI_ISL_437403, EPI_ISL_437404, EPI_ISL_437405, EPI_ISL_437406, EPI_ISL_437407, EPI_ISL_437408, EPI_ISL_437409, EPI_ISL_437410, EPI_ISL_437411, EPI_ISL_437412, EPI_ISL_437413, EPI_ISL_437414, EPI_ISL_437415, EPI_ISL_437416, EPI_ISL_437417, EPI_ISL_437418, EPI_ISL_437419, EPI_ISL_437420, EPI_ISL_437421, EPI_ISL_437422, EPI_ISL_437423, EPI_ISL_437424, EPI_ISL_437425, EPI_ISL_437426, EPI_ISL_437427, EPI_ISL_437428, EPI_ISL_437429, EPI_ISL_437430, EPI_ISL_437431, EPI_ISL_437432                                                                                                                                                                                                                                                                                                                                                                                                                                                                                                                                                                                                                                                                                                                                 | see above                                                                  | Virginia DCLS                                                                                                          | Virginia DCLS                                                                                                                                                                                                                                                                                                                                                                                                                                                                                                 |                                                                                                                                                                                                                                                                                                           |
| EPI_ISL_437443                                                                                                                                                                                                                                                                                                                                                                                                                                                                                                                                                                                                                                                                                                                                                                                                                                                                                                                                                                                                                                                                                                                                                                                                                                                                                                                                                                                                                                                                                 | Department of MicroBiology, Government Medical College, Surat              | Gujarat Biotechnology Research Centre                                                                                  | Zuber Saiyed, Dipa Kinariwala, Disha Patel, Binita Aring, Neeta Khandelwal, Geeta Vaghela, Sonia Barve, Bhavesh Modi, Kairavi Joshi, Gaurishankar Shrimali, Nidhi Sood, Pranay Shah, R D Dixit, Snehal Bagatharia, Kamlesh J Upadhyay, Ramesh Pandit, Tejas Shah, Ankit Hinsu, Pritesh Sabara, Apurvashin Puvar, Janvi Raval, Monika Gandhi, Pinal Trivedi, Maharshi Pandya, Amit Kanani, Akanksha Verma, Nitin Savaliya, Raghawendra Kumar, Dinesh Kumar, Sharmistha Majumdar, Chaitanya Joshi, Madhvi Joshi |                                                                                                                                                                                                                                                                                                           |
| EPI_ISL_437763, EPI_ISL_437764, EPI_ISL_437765, EPI_ISL_437766, EPI_ISL_437767, EPI_ISL_437768, EPI_ISL_437769, EPI_ISL_437770, EPI_ISL_437771, EPI_ISL_437772, EPI_ISL_437773, EPI_ISL_437774, EPI_ISL_437775, EPI_ISL_437776, EPI_ISL_437777, EPI_ISL_437778, EPI_ISL_437779, EPI_ISL_437780, EPI_ISL_437781, EPI_ISL_437782, EPI_ISL_437783, EPI_ISL_437784, EPI_ISL_437785, EPI_ISL_437786, EPI_ISL_437787, EPI_ISL_437788, EPI_ISL_437789, EPI_ISL_437790, EPI_ISL_437791, EPI_ISL_437792, EPI_ISL_437793, EPI_ISL_437794, EPI_ISL_437795, EPI_ISL_437796, EPI_ISL_437797, EPI_ISL_437798, EPI_ISL_437799, EPI_ISL_437800, EPI_ISL_437801, EPI_ISL_437802                                                                                                                                                                                                                                                                                                                                                                                                                                                                                                                                                                                                                                                                                                                                                                                                                                 | see above                                                                  | Virginia DCLS                                                                                                          | Virginia DCLS                                                                                                                                                                                                                                                                                                                                                                                                                                                                                                 |                                                                                                                                                                                                                                                                                                           |
| EPI_ISL_444473                                                                                                                                                                                                                                                                                                                                                                                                                                                                                                                                                                                                                                                                                                                                                                                                                                                                                                                                                                                                                                                                                                                                                                                                                                                                                                                                                                                                                                                                                 | B.J. Medical College and Civil hospital                                    | Gujarat Biotechnology Research Centre                                                                                  | Zuber Saiyed, Dipa Kinariwala, Disha Patel, Binita Aring, Neeta Khandelwal, Geeta Vaghela, Sonia Barve, Bhavesh Modi, Kairavi Joshi, Gaurishankar Shrimali, Nidhi Sood, Pranay Shah, R D Dixit, Snehal Bagatharia, Kamlesh J Upadhyay, Ramesh Pandit, Tejas Shah, Ankit Hinsu, Pritesh Sabara, Apurvashin Puvar, Janvi Raval, Monika Gandhi, Pinal Trivedi, Maharshi Pandya, Amit Kanani, Akanksha Verma, Nitin Savaliya, Raghawendra Kumar, Dinesh Kumar, Armi Chaudhari, Chaitanya Joshi, Madhvi Joshi      |                                                                                                                                                                                                                                                                                                           |
| EPI_ISL_444487, EPI_ISL_444488, EPI_ISL_444490, EPI_ISL_444491, EPI_ISL_444492                                                                                                                                                                                                                                                                                                                                                                                                                                                                                                                                                                                                                                                                                                                                                                                                                                                                                                                                                                                                                                                                                                                                                                                                                                                                                                                                                                                                                 | Karolinska Universitetslaboratoriet                                        | CTMR, Karolinska Institutet, Stockholm, Sweden                                                                         | Yue Hu, Stefanie Prast-Nielsen, Jingkai Ji, Fredrik Boulund, Jing Wang, Shuijin Li, Yinghua Zha, Caroline Bjurnemark, Linnéa Pávénius, Marica Hamsten, Vivien Lan Yang Swartz, Lars Engstrand                                                                                                                                                                                                                                                                                                                 |                                                                                                                                                                                                                                                                                                           |
| EPI_ISL_444610                                                                                                                                                                                                                                                                                                                                                                                                                                                                                                                                                                                                                                                                                                                                                                                                                                                                                                                                                                                                                                                                                                                                                                                                                                                                                                                                                                                                                                                                                 | U.S. Naval Medical Research Center Biological Defense Research Directorate | U.S. Naval Medical Research Center Biological Defense Research Directorate                                             | Voegtly,L.J., Cer,R.Z., Pena-Gomez,D., Paskey,A.C., Long,K.A., Hollis,E.M., Pan,R.W., Balansy-Ames,M.S., Myers,C.A., Christy,N.C. and Bishop-Lilly,K.A.                                                                                                                                                                                                                                                                                                                                                       |                                                                                                                                                                                                                                                                                                           |
| EPI_ISL_445086                                                                                                                                                                                                                                                                                                                                                                                                                                                                                                                                                                                                                                                                                                                                                                                                                                                                                                                                                                                                                                                                                                                                                                                                                                                                                                                                                                                                                                                                                 | Laboratory Diagnostic, Veterinary Specialized Institute Kraljevo           | Laboratory Diagnostic, Veterinary Specialized Institute Kraljevo                                                       | Vidanovic,D., Tesovic,B., Sekler,M., Dmitric,M., Debeljak,Z., Matovic,K., Vaskovic,N., Petrovic,T., Volkening,J. and Alfonso,C.L.                                                                                                                                                                                                                                                                                                                                                                             |                                                                                                                                                                                                                                                                                                           |
| EPI_ISL_445087                                                                                                                                                                                                                                                                                                                                                                                                                                                                                                                                                                                                                                                                                                                                                                                                                                                                                                                                                                                                                                                                                                                                                                                                                                                                                                                                                                                                                                                                                 | Laboratory Diagnostic, Veterinary Specialized Institute Kraljevo           | Laboratory Diagnostic, Veterinary Specialized Institute Kraljevo                                                       | Vidanovic,D., Tesovic,B., Sekler,M., Dmitric,M., Debeljak,Z., Matovic,K., Vaskovic,N., Petrovic,T., Volkening,J. and Alfonso,C.                                                                                                                                                                                                                                                                                                                                                                               |                                                                                                                                                                                                                                                                                                           |
| EPI_ISL_447045                                                                                                                                                                                                                                                                                                                                                                                                                                                                                                                                                                                                                                                                                                                                                                                                                                                                                                                                                                                                                                                                                                                                                                                                                                                                                                                                                                                                                                                                                 | B.J. Medical College and Civil hospital                                    | Gujarat Biotechnology Research Centre                                                                                  | Zuber Saiyed, Dipa Kinariwala, Disha Patel, Binita Aring, Neeta Khandelwal, Geeta Vaghela, Sonia Barve, Bhavesh Modi, Kairavi Joshi, Gaurishankar Shrimali, Nidhi Sood, Pranay Shah, R D Dixit, Snehal Bagatharia, Kamlesh J Upadhyay, Ramesh Pandit, Tejas Shah, Ankit Hinsu, Pritesh Sabara, Apurvashin Puvar, Janvi Raval, Monika Gandhi, Pinal Trivedi, Maharshi Pandya, Amit Kanani, Akanksha Verma, Nitin Savaliya, Raghawendra Kumar, Dinesh Kumar, Neha Rajpara, Chaitanya Joshi, Madhvi Joshi        |                                                                                                                                                                                                                                                                                                           |
| EPI_ISL_447554                                                                                                                                                                                                                                                                                                                                                                                                                                                                                                                                                                                                                                                                                                                                                                                                                                                                                                                                                                                                                                                                                                                                                                                                                                                                                                                                                                                                                                                                                 | GMERS Medical College and Hospital, Gandhinagar                            | Gujarat Biotechnology Research Centre                                                                                  | Zuber Saiyed, Dipa Kinariwala, Disha Patel, Binita Aring, Neeta Khandelwal, Geeta Vaghela, Sonia Barve, Bhavesh Modi, Kairavi Joshi, Gaurishankar Shrimali, Nidhi Sood, Pranay Shah, R D Dixit, Snehal Bagatharia, Kamlesh J Upadhyay, Ramesh Pandit, Tejas Shah, Ankit Hinsu, Pritesh Sabara, Apurvashin Puvar, Janvi Raval, Monika Gandhi, Pinal Trivedi, Maharshi Pandya, Amit Kanani, Akanksha Verma, Nitin Savaliya, Raghawendra Kumar, Dinesh Kumar, Sharmistha Majumdar, Chaitanya Joshi, Madhvi Joshi |                                                                                                                                                                                                                                                                                                           |
| EPI_ISL_447623, EPI_ISL_447624, EPI_ISL_447625, EPI_ISL_447626, EPI_ISL_447627, EPI_ISL_447628, EPI_ISL_447629, EPI_ISL_447630                                                                                                                                                                                                                                                                                                                                                                                                                                                                                                                                                                                                                                                                                                                                                                                                                                                                                                                                                                                                                                                                                                                                                                                                                                                                                                                                                                 | Virology, Wageningen Bioveterinary Research                                | Virology, Wageningen Bioveterinary Research                                                                            | van der Poel,W.H.M., Hakze van der Honing,R.W., Harders,F.                                                                                                                                                                                                                                                                                                                                                                                                                                                    |                                                                                                                                                                                                                                                                                                           |
| EPI_ISL_447886                                                                                                                                                                                                                                                                                                                                                                                                                                                                                                                                                                                                                                                                                                                                                                                                                                                                                                                                                                                                                                                                                                                                                                                                                                                                                                                                                                                                                                                                                 | unknown                                                                    | Pathogen Discovery                                                                                                     | Ying Tao, Yan Li, Jing Zhang, Clinton R. Paden, Krista Queen, Anna Uehara, Haibin Wang, Julu Bhatnagar, Suxiang Tong                                                                                                                                                                                                                                                                                                                                                                                          |                                                                                                                                                                                                                                                                                                           |
| EPI_ISL_449476, EPI_ISL_449477, EPI_ISL_449478, EPI_ISL_449479, EPI_ISL_449480, EPI_ISL_449481, EPI_ISL_449482, EPI_ISL_449483, EPI_ISL_449484, EPI_ISL_449485, EPI_ISL_449486                                                                                                                                                                                                                                                                                                                                                                                                                                                                                                                                                                                                                                                                                                                                                                                                                                                                                                                                                                                                                                                                                                                                                                                                                                                                                                                 | see above                                                                  | unknown                                                                                                                | Department of Respiratory and Critical Care                                                                                                                                                                                                                                                                                                                                                                                                                                                                   | Wang,X., Zhou,Q., He,Y., Liu,L., Ma,X., Wei,X., Jiang,N., Liang,L., Zheng,Y., Ma,L., Xu,Y., Yang,D., Zhang,J., Yang,B., Jiang,N., Zheng,Y., Ma,L., Xu,Y., Yang,D., Zhang,J., Yang,B., Jiang,N., Deng,T., Zhai,B., Gao,Y., Liu,W., Bai,X., Pan,T., Wang,G., Chang,Y., Zhang,Z., Shi,H., Ma,W.L. and Gao,Z. |
| EPI_ISL_450232, EPI_ISL_450233, EPI_ISL_450234, EPI_ISL_450235, EPI_ISL_450236, EPI_ISL_450237, EPI_ISL_450238, EPI_ISL_450239, EPI_ISL_450240                                                                                                                                                                                                                                                                                                                                                                                                                                                                                                                                                                                                                                                                                                                                                                                                                                                                                                                                                                                                                                                                                                                                                                                                                                                                                                                                                 | UCSF Clinical Microbiology Laboratory                                      | Chiu Laboratory, University of California, San Francisco                                                               | Xianding Deng, Scot Federman, Wei Gu, and Charles Y. Chiu                                                                                                                                                                                                                                                                                                                                                                                                                                                     |                                                                                                                                                                                                                                                                                                           |
| EPI_ISL_450444                                                                                                                                                                                                                                                                                                                                                                                                                                                                                                                                                                                                                                                                                                                                                                                                                                                                                                                                                                                                                                                                                                                                                                                                                                                                                                                                                                                                                                                                                 | 20 Dongda Street, Fengtai District, Beijing, Beijing 100071, China         | Dept. OPA, Beijing Institute of Microbiology and Epidemiology                                                          | Zhang,X.A., Fan,H., Qi,R.Z., Zheng,W., Zheng,K., Gong,J.H., Fang,L.Q. and Liu,W.                                                                                                                                                                                                                                                                                                                                                                                                                              |                                                                                                                                                                                                                                                                                                           |
| EPI_ISL_450497                                                                                                                                                                                                                                                                                                                                                                                                                                                                                                                                                                                                                                                                                                                                                                                                                                                                                                                                                                                                                                                                                                                                                                                                                                                                                                                                                                                                                                                                                 | National Public Health Surveillance Laboratory, Vilnius, Lithuania         | Charite Universitaetsmedizin Berlin, Institute of Virology                                                             | Victor M Corman, Jorn Beheim-Schwarzbach, Talitha Veith, Barbara Muehlemann, Julia Schneider, Terry Jones, Ana Steponkiene, Christian Drosten                                                                                                                                                                                                                                                                                                                                                                 |                                                                                                                                                                                                                                                                                                           |

|                                                                                                                                                                                                                                                                                                                                                                                                                                                                                                                                                                                                                                                                                                                                                                                                                                                                                                                                                                                                                |                                                                                 |                                                                                                                        |                                                                                                                                                                                                                                                                                                                                                                                                                                                                      |
|----------------------------------------------------------------------------------------------------------------------------------------------------------------------------------------------------------------------------------------------------------------------------------------------------------------------------------------------------------------------------------------------------------------------------------------------------------------------------------------------------------------------------------------------------------------------------------------------------------------------------------------------------------------------------------------------------------------------------------------------------------------------------------------------------------------------------------------------------------------------------------------------------------------------------------------------------------------------------------------------------------------|---------------------------------------------------------------------------------|------------------------------------------------------------------------------------------------------------------------|----------------------------------------------------------------------------------------------------------------------------------------------------------------------------------------------------------------------------------------------------------------------------------------------------------------------------------------------------------------------------------------------------------------------------------------------------------------------|
| EPI_ISL_450498                                                                                                                                                                                                                                                                                                                                                                                                                                                                                                                                                                                                                                                                                                                                                                                                                                                                                                                                                                                                 | Health Board Laboratory of Communicable Diseases                                | Charite Universitätsmedizin Berlin, Institute of Virology                                                              | Victor M Corman, Jörn Beheim-Schwarzbach, Barbara Muhlemann, Talitha Veith, Julia Schneider, Lidia Dotsenko, Natalja Kuznetsova, Terry Jones, Christian Drosten                                                                                                                                                                                                                                                                                                      |
| EPI_ISL_450784                                                                                                                                                                                                                                                                                                                                                                                                                                                                                                                                                                                                                                                                                                                                                                                                                                                                                                                                                                                                 | Government Medical College-Bhavnagar                                            | Gujarat Biotechnology Research Centre                                                                                  | Zarna Patel, Ramesh Pandit, Tejas Shah, Ankit Hinsu, Pritesh Sabara, Apurvasinh Puvar, Janvi Raval, Monika Gandhi, Pinal Trivedi, Maharshi Pandya, Amit Kanani, Nidhi Patel, Nitin Savaliya, Raghawendra Kumar, Dinesh Kumar, Zuber Saiyed, Komal Patel, Labdhi Pandya, Snehal Bagatharia, Kairavi Desai, Saklain Malek, Shirish Patel, Bhavesh Modi, Gaurishankar Shrimali, R D Dixit, A M Kadri, Afzal Ansari, Chaitanya Joshi, Madhvi Joshi                       |
| EPI_ISL_450788                                                                                                                                                                                                                                                                                                                                                                                                                                                                                                                                                                                                                                                                                                                                                                                                                                                                                                                                                                                                 | Pandit Deendayal Upadhyay Government Medical College, Rajkot                    | Gujarat Biotechnology Research Centre                                                                                  | Zarna Patel, Tejas Shah, Ankit Hinsu, Pritesh Sabara, Apurvasinh Puvar, Janvi Raval, Monika Gandhi, Pinal Trivedi, Maharshi Pandya, Amit Kanani, Nidhi Patel, Nitin Savaliya, Raghawendra Kumar, Dinesh Kumar, Zuber Saiyed, Komal Patel, Labdhi Pandya, Snehal Bagatharia, Prakash Modi, Sejul Antala, Manish Pattani, Manish Pattani, Ramesh Pandit, Bhavesh Modi, Gaurishankar Shrimali, R D Dixit, A M Kadri, Camelia Chakraborty, Chaitanya Joshi, Madhvi Joshi |
| EPI_ISL_450790                                                                                                                                                                                                                                                                                                                                                                                                                                                                                                                                                                                                                                                                                                                                                                                                                                                                                                                                                                                                 | Pandit Deendayal Upadhyay Government Medical College, Rajkot                    | Gujarat Biotechnology Research Centre                                                                                  | Zarna Patel, Pritesh Sabara, Apurvasinh Puvar, Janvi Raval, Monika Gandhi, Pinal Trivedi, Maharshi Pandya, Amit Kanani, Nidhi Patel, Nitin Savaliya, Raghawendra Kumar, Dinesh Kumar, Zuber Saiyed, Komal Patel, Labdhi Pandya, Snehal Bagatharia, Prakash Modi, Sejul Antala, Manish Pattani, Ramesh Pandit, Tejas Shah, Ankit Hinsu, Bhavesh Modi, Gaurishankar Shrimali, R D Dixit, A M Kadri, Sharmista Majumdar, Chaitanya Joshi, Madhvi Joshi                  |
| EPI_ISL_450791                                                                                                                                                                                                                                                                                                                                                                                                                                                                                                                                                                                                                                                                                                                                                                                                                                                                                                                                                                                                 | Pandit Deendayal Upadhyay Government Medical College, Rajkot                    | Gujarat Biotechnology Research Centre                                                                                  | Zarna Patel, Apurvasinh Puvar, Janvi Raval, Monika Gandhi, Pinal Trivedi, Maharshi Pandya, Amit Kanani, Nidhi Patel, Nitin Savaliya, Raghawendra Kumar, Dinesh Kumar, Zuber Saiyed, Komal Patel, Labdhi Pandya, Snehal Bagatharia, Prakash Modi, Sejul Antala, Manish Pattani, Ramesh Pandit, Tejas Shah, Ankit Hinsu, Pritesh Sabara, Bhavesh Modi, Gaurishankar Shrimali, R D Dixit, A M Kadri, Pooja P Doshi, Chaitanya Joshi, Madhvi Joshi                       |
| EPI_ISL_450793, EPI_ISL_450794, EPI_ISL_450795, EPI_ISL_450796, EPI_ISL_450797, EPI_ISL_450799                                                                                                                                                                                                                                                                                                                                                                                                                                                                                                                                                                                                                                                                                                                                                                                                                                                                                                                 | Jamaica Ministry of Health and Wellness                                         | Pathogen Discovery, Respiratory Viruses Branch, Division of Viral Diseases, Centers for Disease Control and Prevention | Yan Li, Anna Montmayer, Ying Tao, Krista Queen, Jing Zhang, Anna Uehara, Clinton R. Paden, Rachel Marine, Haibin Wang, Zachary Weiner, Bettina Bankamp, Suxiang Tong                                                                                                                                                                                                                                                                                                 |
| EPI_ISL_450800                                                                                                                                                                                                                                                                                                                                                                                                                                                                                                                                                                                                                                                                                                                                                                                                                                                                                                                                                                                                 | AR Dept. of Health-Public Health Lab                                            | Pathogen Discovery, Respiratory Viruses Branch, Division of Viral Diseases, Centers for Disease Control and Prevention | Yan Li, Anna Montmayer, Ying Tao, Krista Queen, Jing Zhang, Anna Uehara, Clinton R. Paden, Rachel Marine, Haibin Wang, Zachary Weiner, Bettina Bankamp, Suxiang Tong                                                                                                                                                                                                                                                                                                 |
| EPI_ISL_450801                                                                                                                                                                                                                                                                                                                                                                                                                                                                                                                                                                                                                                                                                                                                                                                                                                                                                                                                                                                                 | Georgia Department of Health                                                    | Pathogen Discovery, Respiratory Viruses Branch, Division of Viral Diseases, Centers for Disease Control and Prevention | Yan Li, Anna Montmayer, Ying Tao, Krista Queen, Jing Zhang, Anna Uehara, Clinton R. Paden, Rachel Marine, Haibin Wang, Zachary Weiner, Bettina Bankamp, Suxiang Tong                                                                                                                                                                                                                                                                                                 |
| EPI_ISL_450802, EPI_ISL_450803                                                                                                                                                                                                                                                                                                                                                                                                                                                                                                                                                                                                                                                                                                                                                                                                                                                                                                                                                                                 | PA Department of Health, Bureau of Laboratories                                 | Pathogen Discovery, Respiratory Viruses Branch, Division of Viral Diseases, Centers for Disease Control and Prevention | Yan Li, Anna Montmayer, Ying Tao, Krista Queen, Jing Zhang, Anna Uehara, Clinton R. Paden, Rachel Marine, Haibin Wang, Zachary Weiner, Bettina Bankamp, Suxiang Tong                                                                                                                                                                                                                                                                                                 |
| EPI_ISL_450804, EPI_ISL_450806                                                                                                                                                                                                                                                                                                                                                                                                                                                                                                                                                                                                                                                                                                                                                                                                                                                                                                                                                                                 | VI-US Virgin Islands Department of Health                                       | Pathogen Discovery, Respiratory Viruses Branch, Division of Viral Diseases, Centers for Disease Control and Prevention | Yan Li, Anna Montmayer, Ying Tao, Krista Queen, Jing Zhang, Anna Uehara, Clinton R. Paden, Rachel Marine, Haibin Wang, Zachary Weiner, Bettina Bankamp, Suxiang Tong                                                                                                                                                                                                                                                                                                 |
| EPI_ISL_451150                                                                                                                                                                                                                                                                                                                                                                                                                                                                                                                                                                                                                                                                                                                                                                                                                                                                                                                                                                                                 | M.P Shah Government Medocal college Jamnagar                                    | Gujarat Biotechnology Research Centre                                                                                  | Zarna Patel, Monika Gandhi, Pinal Trivedi, Maharshi Pandya, Amit Kanani, Nidhi Patel, Nitin Savaliya, Raghawendra Kumar, Dinesh Kumar, Zuber Saiyed, Komal Patel, Labdhi Pandya, Snehal Bagatharia, Ramesh Pandit, Tejas Shah, Ankit Hinsu, Pritesh Sabara, Apurvasinh Puvar, Binita Aring, Janvi Raval, Bhavesh Modi, Gaurishankar Shrimali, R D Dixit, A M Kadri, Pragya Sharma, Chaitanya Joshi, Madhvi Joshi,                                                    |
| EPI_ISL_451161                                                                                                                                                                                                                                                                                                                                                                                                                                                                                                                                                                                                                                                                                                                                                                                                                                                                                                                                                                                                 | Government Medical College, Vadodara                                            | Gujarat Biotechnology Research Centre                                                                                  | Zuber Saiyed, Komal Patel, Labdhi Pandya, Snehal Bagatharia, Ramesh Pandit, Tejas Shah, Ankit Hinsu, Pritesh Sabara, Apurvasinh Puvar, Janvi Raval, Zarna Patel, Monika Gandhi, Pinal Trivedi, Maharshi Pandya, Manish Pattani, Manish Pattani, Tanuja Javadekar , Amit Kanani, Nidhi Patel, Nitin Savaliya, Raghawendra Kumar, Dinesh Kumar, Bhavesh Modi, Gaurishankar Shrimali, R D Dixit, A M Kadri, Akanksha Verma, Chaitanya Joshi, Madhvi Joshi               |
| EPI_ISL_451934                                                                                                                                                                                                                                                                                                                                                                                                                                                                                                                                                                                                                                                                                                                                                                                                                                                                                                                                                                                                 | Research Unit, University Hospital for Infectious Diseases "Dr. Fran Mihaljevi" | Cicin Sain lab, Helmholtz Centre for Infection Research                                                                | Zeeshan Chaudhry, Kathrin Eschke, Željka Maak Šafranko, Ivan-Christian Kurolt                                                                                                                                                                                                                                                                                                                                                                                        |
| EPI_ISL_451948                                                                                                                                                                                                                                                                                                                                                                                                                                                                                                                                                                                                                                                                                                                                                                                                                                                                                                                                                                                                 | The Republican Research and Practical Center for Epidemiology and Microbiology  | Charite Universitätsmedizin Berlin, Institute of Virology                                                              | Victor M Corman, Barbara Muhlemann, Talitha Veith, Jörn Beheim-Schwarzbach, Julia Schneider, Terry Jones, Natalia Shmialova, Natalia Sivets, Christian Drosten                                                                                                                                                                                                                                                                                                       |
| EPI_ISL_452105                                                                                                                                                                                                                                                                                                                                                                                                                                                                                                                                                                                                                                                                                                                                                                                                                                                                                                                                                                                                 | Texas DSHS Lab Services                                                         | Pathogen Discovery, Respiratory Viruses Branch, Division of Viral Diseases, Centers for Disease Control and Prevention | Yan Li, Anna Montmayer, Ying Tao, Krista Queen, Jing Zhang, Anna Uehara, Clinton R. Paden, Rachel Marine, Mary S. Keckler, Alison S. Laufer Halpin, Haibin Wang, Christopher A. Elkins, Zachary Weiner, Suxiang Tong                                                                                                                                                                                                                                                 |
| EPI_ISL_452106, EPI_ISL_452107                                                                                                                                                                                                                                                                                                                                                                                                                                                                                                                                                                                                                                                                                                                                                                                                                                                                                                                                                                                 | LA Office of Public Health Laboratories                                         | Pathogen Discovery, Respiratory Viruses Branch, Division of Viral Diseases, Centers for Disease Control and Prevention | Yan Li, Anna Montmayer, Ying Tao, Krista Queen, Jing Zhang, Anna Uehara, Clinton R. Paden, Rachel Marine, Mary S. Keckler, Alison S. Laufer Halpin, Haibin Wang, Christopher A. Elkins, Zachary Weiner, Suxiang Tong                                                                                                                                                                                                                                                 |
| EPI_ISL_452108                                                                                                                                                                                                                                                                                                                                                                                                                                                                                                                                                                                                                                                                                                                                                                                                                                                                                                                                                                                                 | MN Department of Health                                                         | Pathogen Discovery, Respiratory Viruses Branch, Division of Viral Diseases, Centers for Disease Control and Prevention | Yan Li, Anna Montmayer, Ying Tao, Krista Queen, Jing Zhang, Anna Uehara, Clinton R. Paden, Rachel Marine, Mary S. Keckler, Alison S. Laufer Halpin, Haibin Wang, Christopher A. Elkins, Zachary Weiner, Suxiang Tong                                                                                                                                                                                                                                                 |
| EPI_ISL_452109                                                                                                                                                                                                                                                                                                                                                                                                                                                                                                                                                                                                                                                                                                                                                                                                                                                                                                                                                                                                 | NM Department of Health                                                         | Pathogen Discovery, Respiratory Viruses Branch, Division of Viral Diseases, Centers for Disease Control and Prevention | Yan Li, Anna Montmayer, Ying Tao, Krista Queen, Jing Zhang, Anna Uehara, Clinton R. Paden, Rachel Marine, Mary S. Keckler, Alison S. Laufer Halpin, Haibin Wang, Christopher A. Elkins, Zachary Weiner, Suxiang Tong                                                                                                                                                                                                                                                 |
| EPI_ISL_452110, EPI_ISL_452111                                                                                                                                                                                                                                                                                                                                                                                                                                                                                                                                                                                                                                                                                                                                                                                                                                                                                                                                                                                 | FL Bureau of Public Health Laboratories                                         | Pathogen Discovery, Respiratory Viruses Branch, Division of Viral Diseases, Centers for Disease Control and Prevention | Yan Li, Anna Montmayer, Ying Tao, Krista Queen, Jing Zhang, Anna Uehara, Clinton R. Paden, Rachel Marine, Mary S. Keckler, Alison S. Laufer Halpin, Haibin Wang, Christopher A. Elkins, Zachary Weiner, Suxiang Tong                                                                                                                                                                                                                                                 |
| EPI_ISL_452112                                                                                                                                                                                                                                                                                                                                                                                                                                                                                                                                                                                                                                                                                                                                                                                                                                                                                                                                                                                                 | Texas DSHS Lab Services                                                         | Pathogen Discovery, Respiratory Viruses Branch, Division of Viral Diseases, Centers for Disease Control and Prevention | Yan Li, Anna Montmayer, Ying Tao, Krista Queen, Jing Zhang, Anna Uehara, Clinton R. Paden, Rachel Marine, Mary S. Keckler, Alison S. Laufer Halpin, Haibin Wang, Christopher A. Elkins, Zachary Weiner, Suxiang Tong                                                                                                                                                                                                                                                 |
| EPI_ISL_452113                                                                                                                                                                                                                                                                                                                                                                                                                                                                                                                                                                                                                                                                                                                                                                                                                                                                                                                                                                                                 | MN Department of Health                                                         | Pathogen Discovery, Respiratory Viruses Branch, Division of Viral Diseases, Centers for Disease Control and Prevention | Yan Li, Anna Montmayer, Ying Tao, Krista Queen, Jing Zhang, Anna Uehara, Clinton R. Paden, Rachel Marine, Mary S. Keckler, Alison S. Laufer Halpin, Haibin Wang, Christopher A. Elkins, Zachary Weiner, Suxiang Tong                                                                                                                                                                                                                                                 |
| EPI_ISL_452114                                                                                                                                                                                                                                                                                                                                                                                                                                                                                                                                                                                                                                                                                                                                                                                                                                                                                                                                                                                                 | KS Health and Environmental Laboratories                                        | Pathogen Discovery, Respiratory Viruses Branch, Division of Viral Diseases, Centers for Disease Control and Prevention | Yan Li, Anna Montmayer, Ying Tao, Krista Queen, Jing Zhang, Anna Uehara, Clinton R. Paden, Rachel Marine, Mary S. Keckler, Alison S. Laufer Halpin, Haibin Wang, Christopher A. Elkins, Zachary Weiner, Suxiang Tong                                                                                                                                                                                                                                                 |
| EPI_ISL_452115                                                                                                                                                                                                                                                                                                                                                                                                                                                                                                                                                                                                                                                                                                                                                                                                                                                                                                                                                                                                 | Texas DSHS Lab Services                                                         | Pathogen Discovery, Respiratory Viruses Branch, Division of Viral Diseases, Centers for Disease Control and Prevention | Yan Li, Anna Montmayer, Ying Tao, Krista Queen, Jing Zhang, Anna Uehara, Clinton R. Paden, Rachel Marine, Mary S. Keckler, Alison S. Laufer Halpin, Haibin Wang, Christopher A. Elkins, Zachary Weiner, Suxiang Tong                                                                                                                                                                                                                                                 |
| EPI_ISL_452116, EPI_ISL_452117                                                                                                                                                                                                                                                                                                                                                                                                                                                                                                                                                                                                                                                                                                                                                                                                                                                                                                                                                                                 | NJ Public Health and Environmental Laboratories                                 | Pathogen Discovery, Respiratory Viruses Branch, Division of Viral Diseases, Centers for Disease Control and Prevention | Yan Li, Anna Montmayer, Ying Tao, Krista Queen, Jing Zhang, Anna Uehara, Clinton R. Paden, Rachel Marine, Mary S. Keckler, Alison S. Laufer Halpin, Haibin Wang, Christopher A. Elkins, Zachary Weiner, Suxiang Tong                                                                                                                                                                                                                                                 |
| EPI_ISL_452118                                                                                                                                                                                                                                                                                                                                                                                                                                                                                                                                                                                                                                                                                                                                                                                                                                                                                                                                                                                                 | AZ SPHL, Arizona Department of Health Services                                  | Pathogen Discovery, Respiratory Viruses Branch, Division of Viral Diseases, Centers for Disease Control and Prevention | Yan Li, Anna Montmayer, Ying Tao, Krista Queen, Jing Zhang, Anna Uehara, Clinton R. Paden, Rachel Marine, Mary S. Keckler, Alison S. Laufer Halpin, Haibin Wang, Christopher A. Elkins, Zachary Weiner, Suxiang Tong                                                                                                                                                                                                                                                 |
| EPI_ISL_452119                                                                                                                                                                                                                                                                                                                                                                                                                                                                                                                                                                                                                                                                                                                                                                                                                                                                                                                                                                                                 | VI-US Virgin Islands Department of Health                                       | Pathogen Discovery, Respiratory Viruses Branch, Division of Viral Diseases, Centers for Disease Control and Prevention | Yan Li, Anna Montmayer, Ying Tao, Krista Queen, Jing Zhang, Anna Uehara, Clinton R. Paden, Rachel Marine, Mary S. Keckler, Alison S. Laufer Halpin, Haibin Wang, Christopher A. Elkins, Zachary Weiner, Suxiang Tong                                                                                                                                                                                                                                                 |
| EPI_ISL_452796, EPI_ISL_452797, EPI_ISL_452798, EPI_ISL_452799, EPI_ISL_452800, EPI_ISL_452801, EPI_ISL_452802, EPI_ISL_452803, EPI_ISL_452804, EPI_ISL_452805, EPI_ISL_452806, EPI_ISL_452807, EPI_ISL_452808, EPI_ISL_452809, EPI_ISL_452810, EPI_ISL_452811, EPI_ISL_452812, EPI_ISL_452813, EPI_ISL_452814, EPI_ISL_452815, EPI_ISL_452816, EPI_ISL_452817, EPI_ISL_452818, EPI_ISL_452819, EPI_ISL_452820, EPI_ISL_452821, EPI_ISL_452822, EPI_ISL_452823, EPI_ISL_452824, EPI_ISL_452825, EPI_ISL_452826, EPI_ISL_452827, EPI_ISL_452828, EPI_ISL_452829, EPI_ISL_452830, EPI_ISL_452831, EPI_ISL_452832, EPI_ISL_452833, EPI_ISL_452834, EPI_ISL_452835, EPI_ISL_452836, EPI_ISL_452837, EPI_ISL_452838, EPI_ISL_452839, EPI_ISL_452840, EPI_ISL_452841, EPI_ISL_452842, EPI_ISL_452843, EPI_ISL_452844, EPI_ISL_452845, EPI_ISL_452846, EPI_ISL_452847, EPI_ISL_452848, EPI_ISL_452849, EPI_ISL_452850, EPI_ISL_452851, EPI_ISL_452852, EPI_ISL_452853, EPI_ISL_452854, EPI_ISL_452855, EPI_ISL_452856 | Virginia DCLS                                                                   | Virginia DCLS                                                                                                          | Virginia DCLS                                                                                                                                                                                                                                                                                                                                                                                                                                                        |
| see above                                                                                                                                                                                                                                                                                                                                                                                                                                                                                                                                                                                                                                                                                                                                                                                                                                                                                                                                                                                                      | Virginia DCLS                                                                   | Virginia DCLS                                                                                                          | Virginia DCLS                                                                                                                                                                                                                                                                                                                                                                                                                                                        |
| EPI_ISL_454646                                                                                                                                                                                                                                                                                                                                                                                                                                                                                                                                                                                                                                                                                                                                                                                                                                                                                                                                                                                                 | City of El Paso Department of Public Health Laboratory                          | Pathogen Discovery, Respiratory Viruses Branch, Division of Viral Diseases, Centers for Disease Control and Prevention | Ying Tao, Clinton R. Paden, Jing Zhang, Anna Uehara, Krista Queen, Yan Li, Haibin Wang, Zachary Weiner, Michael Bowen, Suxiang Tong                                                                                                                                                                                                                                                                                                                                  |
| EPI_ISL_454647, EPI_ISL_454648, EPI_ISL_454649, EPI_ISL_454650, EPI_ISL_454651, EPI_ISL_454652                                                                                                                                                                                                                                                                                                                                                                                                                                                                                                                                                                                                                                                                                                                                                                                                                                                                                                                 | VI-US Virgin Islands Department of Health                                       | Pathogen Discovery, Respiratory Viruses Branch, Division of Viral Diseases, Centers for Disease Control and Prevention | Ying Tao, Clinton R. Paden, Jing Zhang, Anna Uehara, Krista Queen, Yan Li, Haibin Wang, Zachary Weiner, Bettina Bankamp, Suxiang Tong                                                                                                                                                                                                                                                                                                                                |
| EPI_ISL_454795                                                                                                                                                                                                                                                                                                                                                                                                                                                                                                                                                                                                                                                                                                                                                                                                                                                                                                                                                                                                 | Veterinary Specialized Institute Kraljevo                                       | Veterinary Specialized Institute Kraljevo                                                                              | Vidanovic,D., Tesovic,B., Sekler,M., Dmitric,M., Debeljak,Z., Matovic,K., Vaskovic,N., Petrovic,T., Volkening,J. and Alfonso,C.L.                                                                                                                                                                                                                                                                                                                                    |
| EPI_ISL_455025                                                                                                                                                                                                                                                                                                                                                                                                                                                                                                                                                                                                                                                                                                                                                                                                                                                                                                                                                                                                 | Government Medical College, Vadodara                                            | Gujarat Biotechnology Research Centre                                                                                  | Zarna Patel, Monika Gandhi, Pinal Trivedi, Maharshi Pandya, Amit Kanani, Nidhi Patel, Nitin Savaliya, Raghawendra Kumar, Dinesh Kumar, Zuber Saiyed,                                                                                                                                                                                                                                                                                                                 |

|                                                                                                                                                                                                                                                                                                                                                                                                                                                                                                                                                                                                                                                                                                                                |                                                                                                            |                                                                                                                                       |                                                                                                                                                                                                                                                                                                                                                                                                                                                                                                                                                                                                                                      |
|--------------------------------------------------------------------------------------------------------------------------------------------------------------------------------------------------------------------------------------------------------------------------------------------------------------------------------------------------------------------------------------------------------------------------------------------------------------------------------------------------------------------------------------------------------------------------------------------------------------------------------------------------------------------------------------------------------------------------------|------------------------------------------------------------------------------------------------------------|---------------------------------------------------------------------------------------------------------------------------------------|--------------------------------------------------------------------------------------------------------------------------------------------------------------------------------------------------------------------------------------------------------------------------------------------------------------------------------------------------------------------------------------------------------------------------------------------------------------------------------------------------------------------------------------------------------------------------------------------------------------------------------------|
|                                                                                                                                                                                                                                                                                                                                                                                                                                                                                                                                                                                                                                                                                                                                |                                                                                                            |                                                                                                                                       | Komal Patel, Labdhi Pandya, Snehal Bagatharia, Tanuja Javadekar, R N Daveswar, Ramesh Pandit, Tejas Shah, Ankit Hinsu, Pritesh Sabara, Apurvasinh Puvar, Janvi Raval, Akanksha Verma, Bhavesh Modi, Gaurishankar Shrimali, R D Dixit, A M Kadri, Umang Mishra, Chaitanya Joshi, Madhvi Joshi,                                                                                                                                                                                                                                                                                                                                        |
| EPI_ISL_455480                                                                                                                                                                                                                                                                                                                                                                                                                                                                                                                                                                                                                                                                                                                 | Veterinary Specialized Institute Kraljevo                                                                  | Veterinary Specialized Institute Kraljevo                                                                                             | Vidanovic,D., Tesovic,B., Banovic Djeri.B., Sekler,M., Dmitric,M., Debeljak,Z., Matovic,K., Vaskovic,N., Petrovic,T., Volkening,J. and Alfonso,C.L.                                                                                                                                                                                                                                                                                                                                                                                                                                                                                  |
| EPI_ISL_455735, EPI_ISL_455736                                                                                                                                                                                                                                                                                                                                                                                                                                                                                                                                                                                                                                                                                                 | Servicio de Microbiologia. Hospital_Arnau_de_Vilanova                                                      | Sequencing and Bioinformatics Service and Molecular Epidemiology Research Group. FISABIO-Public Health, and SeqCOVID-Spain Consortium | Victoria Dominguez, Maria Alma Bracho, Griselda De Marco, Lidia Ruiz Roldan, Neris Garcia-Gonzalez, Inma Galán Vendrell, Sandra Carbo, Loreto Ferrús Abad, Paula Ruiz-Hueso, Mariana Reyes-Prieto, Vicente Soriano Chirona, Ivan Ansari, Lúcia Martínez-Priego, Giuseppe A'uria, Fernando Gonzalez-Candelas                                                                                                                                                                                                                                                                                                                          |
| EPI_ISL_457687, EPI_ISL_457688, EPI_ISL_457689, EPI_ISL_457690, EPI_ISL_457691, EPI_ISL_457692, EPI_ISL_457693, EPI_ISL_457694, EPI_ISL_457695, EPI_ISL_457696, EPI_ISL_457697, EPI_ISL_457698                                                                                                                                                                                                                                                                                                                                                                                                                                                                                                                                 |                                                                                                            |                                                                                                                                       |                                                                                                                                                                                                                                                                                                                                                                                                                                                                                                                                                                                                                                      |
| see above                                                                                                                                                                                                                                                                                                                                                                                                                                                                                                                                                                                                                                                                                                                      | The First Affiliated Hospital of Guangzhou Medical University, Guangzhou, China                            | BGI-shenzhen & The First Affiliated Hospital of Guangzhou Medical University                                                          | Yanqun Wang, Daxi Wang, Lu Zhang, Wanying Sun, Zhaoyong Zhang et al.                                                                                                                                                                                                                                                                                                                                                                                                                                                                                                                                                                 |
| EPI_ISL_457719, EPI_ISL_457723, EPI_ISL_457727, EPI_ISL_457731, EPI_ISL_457734, EPI_ISL_457735, EPI_ISL_457737, EPI_ISL_457740                                                                                                                                                                                                                                                                                                                                                                                                                                                                                                                                                                                                 | SYNLAB Eesti OU                                                                                            | Charite Universitätsmedizin Berlin, Institute of Virology                                                                             | Victor M Corman, Jorn Beheim-Schwarzbach, Barbara Muhlemann, Talitha Veith, Julia Schneider, Paul Naaber, Terry Jones, Christian Drosten                                                                                                                                                                                                                                                                                                                                                                                                                                                                                             |
| EPI_ISL_458097                                                                                                                                                                                                                                                                                                                                                                                                                                                                                                                                                                                                                                                                                                                 | B.J. Medical College and Civil hospital                                                                    | Gujarat Biotechnology Research Centre                                                                                                 | Zuber Saiyed, Komal Patel, Labdhi Pandya, Snehal Bagatharia, Dhaval Vaghela, Ramesh Patel, Pranay Shah, Kamlesh J Upadhyay, Ramesh Pandit, Tejas Shah, Ankit Hinsu, Pritesh Sabara, Apurvasinh Puvar, Janvi Raval, Zarna Patel, Monika Gandhi, Pinal Trivedi, Maharshi Pandya, Amit Kanani, Nidhi Patel, Nitin Savaliya, Raghawendra Kumar, Dinesh Kumar, Zuber Saiyed, Komal Patel, Labdhi Pandya, Snehal Bagatharia, Ramesh Pandit, Tejas Shah, Ankit Hinsu, Pritesh Sabara, Apurvasinh Puvar, Janvi Raval, Akanksha Verma, Bhavesh Modi, Gaurishankar Shrimali, R D Dixit, A M Kadri, Umang Mishra, Chaitanya Joshi, Madhvi Joshi |
| EPI_ISL_458109                                                                                                                                                                                                                                                                                                                                                                                                                                                                                                                                                                                                                                                                                                                 | Gujarat Biotechnology Research Centre                                                                      | Gujarat Biotechnology Research Centre                                                                                                 | Zarna Patel, Monika Gandhi, Pinal Trivedi, Maharshi Pandya, Amit Kanani, Nidhi Patel, Nitin Savaliya, Raghawendra Kumar, Dinesh Kumar, Zuber Saiyed, Komal Patel, Labdhi Pandya, Snehal Bagatharia, Ramesh Pandit, Tejas Shah, Ankit Hinsu, Pritesh Sabara, Apurvasinh Puvar, Janvi Raval, Akanksha Verma, Bhavesh Modi, Gaurishankar Shrimali, R D Dixit, A M Kadri, Umang Mishra, Chaitanya Joshi, Madhvi Joshi, , , ,                                                                                                                                                                                                             |
| EPI_ISL_459909                                                                                                                                                                                                                                                                                                                                                                                                                                                                                                                                                                                                                                                                                                                 | Zoonotic and Exotic infection Diseases Division, Harbin Veterinary Research Institute, CAAS                | Zoonotic and Exotic infection Diseases Division, Harbin Veterinary Research Institute, CAAS                                           | Zhigao Bu, Jinliang Wang                                                                                                                                                                                                                                                                                                                                                                                                                                                                                                                                                                                                             |
| EPI_ISL_462434, EPI_ISL_462435, EPI_ISL_462436, EPI_ISL_462437, EPI_ISL_462438                                                                                                                                                                                                                                                                                                                                                                                                                                                                                                                                                                                                                                                 | unknown                                                                                                    | Laboratory Diagnostic                                                                                                                 | Vidanovic,D., Tesovic,B., Banovic Djeri.B., Knezevic,A., Jankovic,M., Sekler,M., Dmitric,M., Petrovic,T., Volkening,J., Afonso,C.L.                                                                                                                                                                                                                                                                                                                                                                                                                                                                                                  |
| EPI_ISL_462450, EPI_ISL_462454, EPI_ISL_462455, EPI_ISL_462456, EPI_ISL_462458, EPI_ISL_462460, EPI_ISL_462462, EPI_ISL_462463, EPI_ISL_462464, EPI_ISL_462465, EPI_ISL_462466, EPI_ISL_462467, EPI_ISL_462471, EPI_ISL_462472, EPI_ISL_462473, EPI_ISL_462474, EPI_ISL_462476                                                                                                                                                                                                                                                                                                                                                                                                                                                 |                                                                                                            |                                                                                                                                       |                                                                                                                                                                                                                                                                                                                                                                                                                                                                                                                                                                                                                                      |
| see above                                                                                                                                                                                                                                                                                                                                                                                                                                                                                                                                                                                                                                                                                                                      | Clinical Center, University of Sarajevo                                                                    | Charite Universitätsmedizin Berlin, Institute of Virology                                                                             | Victor M Corman, Jorn Beheim-Schwarzbach, Barbara Muehleemann, Talitha Veith, Julia Schneider, Terry Jones, Amela Dedeic-Ljubovic, Irma Salimovic-Besic, Suzana Arapic, Almedina Hadzihanovic-Moro, Selma Mutevelic, Christian Drosten                                                                                                                                                                                                                                                                                                                                                                                               |
| EPI_ISL_463094, EPI_ISL_463095, EPI_ISL_463096, EPI_ISL_463097, EPI_ISL_463098, EPI_ISL_463099, EPI_ISL_463100, EPI_ISL_463101, EPI_ISL_463102, EPI_ISL_463103, EPI_ISL_463104, EPI_ISL_463105, EPI_ISL_463106, EPI_ISL_463107, EPI_ISL_463108, EPI_ISL_463109, EPI_ISL_463110, EPI_ISL_463111, EPI_ISL_463112, EPI_ISL_463113, EPI_ISL_463114, EPI_ISL_463115, EPI_ISL_463116, EPI_ISL_463117, EPI_ISL_463118, EPI_ISL_463119, EPI_ISL_463120, EPI_ISL_463121, EPI_ISL_463122, EPI_ISL_463123, EPI_ISL_463124, EPI_ISL_463125, EPI_ISL_463126, EPI_ISL_463127, EPI_ISL_463128, EPI_ISL_463129, EPI_ISL_463130, EPI_ISL_463131, EPI_ISL_463132, EPI_ISL_463133, EPI_ISL_463134, EPI_ISL_463135, EPI_ISL_463136, EPI_ISL_463137 |                                                                                                            |                                                                                                                                       |                                                                                                                                                                                                                                                                                                                                                                                                                                                                                                                                                                                                                                      |
| see above                                                                                                                                                                                                                                                                                                                                                                                                                                                                                                                                                                                                                                                                                                                      | Virginia DCLS                                                                                              | Virginia DCLS                                                                                                                         | Virginia DCLS                                                                                                                                                                                                                                                                                                                                                                                                                                                                                                                                                                                                                        |
| EPI_ISL_467038                                                                                                                                                                                                                                                                                                                                                                                                                                                                                                                                                                                                                                                                                                                 | GMERS Medical College and Hospital, Gandhinagar                                                            | Gujarat Biotechnology Research Centre                                                                                                 | Zarna Patel, Monika Gandhi, Pinal Trivedi, Maharshi Pandya, Nidhi Patel, Nitin Savaliya, Raghawendra Kumar, Dinesh Kumar, Zuber Saiyed, Komal Patel, Labdhi Pandya, Snehal Bagatharia, Seema Bhatt, Gaurishankar Shrimali, Bhavesh Modi, Bharti Rajani, Tejas Shah, Ankit Hinsu, Pritesh Sabara, Apurvasinh Puvar, Janvi Raval, Neelam Nathani, R D Dixit, A M Kadri, Harsh Bakshi, Chaitanya Joshi, Madhvi Joshi                                                                                                                                                                                                                    |
| EPI_ISL_467048                                                                                                                                                                                                                                                                                                                                                                                                                                                                                                                                                                                                                                                                                                                 | B.J. Medical College and Civil hospital                                                                    | Gujarat Biotechnology Research Centre                                                                                                 | Zuber Saiyed, Komal Patel, Labdhi Pandya, Snehal Bagatharia, Pranay Shah, Kamlesh J Upadhyay, Nirav Mungalpara, Tejas Shah, Ankit Hinsu, Pritesh Sabara, Apurvasinh Puvar, Janvi Raval, Zarna Patel, Monika Gandhi, Pinal Trivedi, Maharshi Pandya, Nidhi Patel, Nitin Savaliya, Raghawendra Kumar, Dinesh Kumar, Fenil Patel, R D Dixit, A M Kadri, Harsh Bakshi, Chaitanya Joshi, Madhvi Joshi                                                                                                                                                                                                                                     |
| EPI_ISL_467778, EPI_ISL_467779                                                                                                                                                                                                                                                                                                                                                                                                                                                                                                                                                                                                                                                                                                 | National Influenza Centre Romania                                                                          | Charite Universitätsmedizin Berlin, Institute of Virology                                                                             | Victor M Corman, Jorn Beheim-Schwarzbach, Barbara Muehleemann, Talitha Veith, Julia Schneider, Terry Jones, L. Ustea, N. Paraschiv, M. Lazar, Christian Drosten                                                                                                                                                                                                                                                                                                                                                                                                                                                                      |
| EPI_ISL_467782, EPI_ISL_467783, EPI_ISL_467784, EPI_ISL_467785, EPI_ISL_467786, EPI_ISL_467787, EPI_ISL_467788, EPI_ISL_467789, EPI_ISL_467790, EPI_ISL_467791, EPI_ISL_467792, EPI_ISL_467793, EPI_ISL_467794, EPI_ISL_467795, EPI_ISL_467796, EPI_ISL_467797, EPI_ISL_467798, EPI_ISL_467799, EPI_ISL_467800, EPI_ISL_467801, EPI_ISL_467802, EPI_ISL_467803, EPI_ISL_467804, EPI_ISL_467805, EPI_ISL_467806, EPI_ISL_467807, EPI_ISL_467808                                                                                                                                                                                                                                                                                 |                                                                                                            |                                                                                                                                       |                                                                                                                                                                                                                                                                                                                                                                                                                                                                                                                                                                                                                                      |
| see above                                                                                                                                                                                                                                                                                                                                                                                                                                                                                                                                                                                                                                                                                                                      | Virginia DCLS                                                                                              | Virginia DCLS                                                                                                                         | Virginia DCLS                                                                                                                                                                                                                                                                                                                                                                                                                                                                                                                                                                                                                        |
| EPI_ISL_467809                                                                                                                                                                                                                                                                                                                                                                                                                                                                                                                                                                                                                                                                                                                 | Cedars-Sinai Medical Center, Department of Pathology & Laboratory Medicine, Molecular Pathology Laboratory | Cedars-Sinai Medical Center, Molecular Pathology Laboratory of Department of Pathology & Laboratory Medicine and Genomic Core         | Wenjuan Zhang, John Paul Govindavari, Brian Davis, Stephanie Chen, Jong Taek Kim, Jianbo Song, Jean Lopategui, Jasmine T Plummer, Eric Vail                                                                                                                                                                                                                                                                                                                                                                                                                                                                                          |
| EPI_ISL_467928, EPI_ISL_467929, EPI_ISL_467930, EPI_ISL_467931, EPI_ISL_467932, EPI_ISL_467933, EPI_ISL_467934, EPI_ISL_467935, EPI_ISL_467936, EPI_ISL_467937, EPI_ISL_467938, EPI_ISL_467939, EPI_ISL_467940, EPI_ISL_467941, EPI_ISL_467942, EPI_ISL_467943, EPI_ISL_467944                                                                                                                                                                                                                                                                                                                                                                                                                                                 |                                                                                                            |                                                                                                                                       |                                                                                                                                                                                                                                                                                                                                                                                                                                                                                                                                                                                                                                      |
| see above                                                                                                                                                                                                                                                                                                                                                                                                                                                                                                                                                                                                                                                                                                                      | Virginia DCLS                                                                                              | Virginia DCLS                                                                                                                         | Virginia DCLS                                                                                                                                                                                                                                                                                                                                                                                                                                                                                                                                                                                                                        |
| EPI_ISL_468044, EPI_ISL_468045, EPI_ISL_468046, EPI_ISL_468047, EPI_ISL_468048, EPI_ISL_468049, EPI_ISL_468050, EPI_ISL_468051, EPI_ISL_468052, EPI_ISL_468053, EPI_ISL_468054, EPI_ISL_468055                                                                                                                                                                                                                                                                                                                                                                                                                                                                                                                                 |                                                                                                            |                                                                                                                                       |                                                                                                                                                                                                                                                                                                                                                                                                                                                                                                                                                                                                                                      |
| see above                                                                                                                                                                                                                                                                                                                                                                                                                                                                                                                                                                                                                                                                                                                      | Egyptian National Cancer Institute (ENCI)                                                                  | Egyptian National Cancer Institute (ENCI)                                                                                             | Zekri, Abdel Rahman N, Amer,K.E., Ahmed,O.S., Soliman,H.K., Hafez,M.M., Bahnassy,A.A., Abdelhamid,W., Gad,A., Ali,M., Hassan,W., Samir,M., Raouf,A., Hamdy,M.S., Soliman,M.S., Elsissey,M.H., Elkhatieb,S.M., Ezzelarab,M.H., Abouelhoda, Mohamed                                                                                                                                                                                                                                                                                                                                                                                    |
| EPI_ISL_468056                                                                                                                                                                                                                                                                                                                                                                                                                                                                                                                                                                                                                                                                                                                 | Egyptian National Cancer Institute (ENCI)                                                                  | Egyptian National Cancer Institute (ENCI)                                                                                             | Zekri, Abdel Rahman N, Amer,K.E., Ahmed,O.S., Soliman,H.K., Ali,M.A., Hassan,W.A., Mahmoud,A.A., Khattab,A.A., Hafez,M.M., Abouelhoda, Mohamed                                                                                                                                                                                                                                                                                                                                                                                                                                                                                       |
| EPI_ISL_468057, EPI_ISL_468058, EPI_ISL_468059                                                                                                                                                                                                                                                                                                                                                                                                                                                                                                                                                                                                                                                                                 | Egyptian National Cancer Institute (ENCI)                                                                  | Egyptian National Cancer Institute (ENCI)                                                                                             | Zekri, Abdel Rahman N, Amer,K.E., Ahmed,O.S., Soliman,H.K., Hafez,M.M., Bahnassy,A.A., Abdelhamid,W., Gad,A., Ali,M., Hassan,W., Samir,M., Raouf,A., Hamdy,M.S., Soliman,M.S., Elsissey,M.H., Elkhatieb,S.M., Ezzelarab,M.H., Abouelhoda, Mohamed                                                                                                                                                                                                                                                                                                                                                                                    |
| EPI_ISL_468060, EPI_ISL_468061, EPI_ISL_468062                                                                                                                                                                                                                                                                                                                                                                                                                                                                                                                                                                                                                                                                                 | Egyptian National Cancer Institute (ENCI)                                                                  | Egyptian National Cancer Institute (ENCI)                                                                                             | Zekri, Abdel Rahman N, Amer,K.E., Ahmed,O.S., Soliman,H.K., Ali,M.A., Hassan,W.A., Mahmoud,A.A., Khattab,A.A., Hafez,M.M., Abouelhoda, Mohamed                                                                                                                                                                                                                                                                                                                                                                                                                                                                                       |
| EPI_ISL_469029                                                                                                                                                                                                                                                                                                                                                                                                                                                                                                                                                                                                                                                                                                                 | Government Medical College, Vadodara                                                                       | Gujarat Biotechnology Research Centre                                                                                                 | Zarna Patel, Monika Gandhi, Pinal Trivedi, Maharshi Pandya, Nidhi Patel, Nitin Savaliya, Raghawendra Kumar, Dinesh Kumar, Zuber Saiyed, Komal Patel, Labdhi Pandya, Snehal Bagatharia, Meenakshi Shah, Neena Doshi, Varsha Godbole, Tejas Shah, Ankit Hinsu, Pritesh Sabara, Apurvasinh Puvar, Janvi Raval, Neelam Nathani, R D Dixit, A M Kadri, Harsh Bakshi, Chaitanya Joshi, Madhvi Joshi                                                                                                                                                                                                                                        |
| EPI_ISL_469037                                                                                                                                                                                                                                                                                                                                                                                                                                                                                                                                                                                                                                                                                                                 | GMERS Medical College & Hospital                                                                           | Gujarat Biotechnology Research Centre                                                                                                 | Zuber Saiyed, Komal Patel, Labdhi Pandya, Snehal Bagatharia, Meenakshi Shah, Neena Doshi, Varsha Godbole, Tejas Shah, Ankit Hinsu, Pritesh Sabara, Apurvasinh Puvar, Janvi Raval, Zarna Patel, Monika Gandhi, Pinal Trivedi, Maharshi Pandya, Nidhi Patel, Nitin Savaliya, Raghawendra Kumar, Dinesh Kumar, Pragy Sharma, R D Dixit, A M Kadri, Harsh Bakshi, Chaitanya Joshi, Madhvi Joshi                                                                                                                                                                                                                                          |
| EPI_ISL_469254                                                                                                                                                                                                                                                                                                                                                                                                                                                                                                                                                                                                                                                                                                                 | National Institute for Viral Disease Control and Prevention, China CDC                                     | Institute of Viral Disease Control and Prevention, China CDC                                                                          | Wenjie Tan, Lijuan Chen, Peihua NiuBaoying Huang, Li Zhao, Yubai Bi, Wenling Wang, Roujian Lu, Dayan Wang, Wenbo Xu, George Fu Gao, Chun Huang, Guizhen Wu                                                                                                                                                                                                                                                                                                                                                                                                                                                                           |
| EPI_ISL_469255                                                                                                                                                                                                                                                                                                                                                                                                                                                                                                                                                                                                                                                                                                                 | National Institute for Viral Disease Control and Prevention, China CDC                                     | Institute of Viral Disease Control and Prevention, China CDC                                                                          | Xiang ZhaoLijuan Chen, Dayan Wang, Yong Zhang, Yao MengZhixiao ChenYuchao Wu, Jun Han, Weifeng Shi, Yanhai Wang, William J. Liu, Shiwen Wang, George F. Gao, Wenbo Xu, Chun Huang, Guizhen Wu                                                                                                                                                                                                                                                                                                                                                                                                                                        |
| EPI_ISL_469256                                                                                                                                                                                                                                                                                                                                                                                                                                                                                                                                                                                                                                                                                                                 | National Institute for Viral Disease Control and Prevention, China CDC                                     | National Institute for Viral Disease Control and Prevention, China CDC                                                                | Xiang ZhaoLijuan Chen, Dayan Wang, Yong Zhang, Yao MengZhixiao ChenYuchao Wu, Jun Han, Weifeng Shi, Yanhai Wang, William J. Liu, Shiwen Wang, George F. Gao, Wenbo Xu, Chun Huang, Guizhen Wu                                                                                                                                                                                                                                                                                                                                                                                                                                        |
| EPI_ISL_469275                                                                                                                                                                                                                                                                                                                                                                                                                                                                                                                                                                                                                                                                                                                 | Egyptian National Cancer Institute (ENCI)                                                                  | Human Genome Center                                                                                                                   | Zekri, Abdel Rahman N, Amer,K.E., Ahmed,O.S., Soliman,H.K., Hafez,M.M., Bahnassy,A.A., Abdelhamid,W., Gad,A., Ali,M., Hassan,W., Samir,M., Raouf,A., Hamdy,M.S., Soliman,M.S., Elsissey,M.H., Elkhatieb,S.M., Ezzelarab,M.H., Abouelhoda, Mohamed                                                                                                                                                                                                                                                                                                                                                                                    |

|                                                                                                                                                                                                                                                                                                                                                                                                                                                                                                                                                                                                                                                                                                                                                                                                                                                                                                                                                                                                                                                                                                                                                                                                                                                                                                                                                                                                                                                                                                                                                                                                                                                                                                                                                                                                                                                                                                                                                                                                                                                                                                                                                                                                                                                                                                                                                                                |                                                                                                            |                                                                                                                               |                                                                                                                                                                                                                                                                                                                                                                                               |
|--------------------------------------------------------------------------------------------------------------------------------------------------------------------------------------------------------------------------------------------------------------------------------------------------------------------------------------------------------------------------------------------------------------------------------------------------------------------------------------------------------------------------------------------------------------------------------------------------------------------------------------------------------------------------------------------------------------------------------------------------------------------------------------------------------------------------------------------------------------------------------------------------------------------------------------------------------------------------------------------------------------------------------------------------------------------------------------------------------------------------------------------------------------------------------------------------------------------------------------------------------------------------------------------------------------------------------------------------------------------------------------------------------------------------------------------------------------------------------------------------------------------------------------------------------------------------------------------------------------------------------------------------------------------------------------------------------------------------------------------------------------------------------------------------------------------------------------------------------------------------------------------------------------------------------------------------------------------------------------------------------------------------------------------------------------------------------------------------------------------------------------------------------------------------------------------------------------------------------------------------------------------------------------------------------------------------------------------------------------------------------|------------------------------------------------------------------------------------------------------------|-------------------------------------------------------------------------------------------------------------------------------|-----------------------------------------------------------------------------------------------------------------------------------------------------------------------------------------------------------------------------------------------------------------------------------------------------------------------------------------------------------------------------------------------|
| EPI_ISL_471467, EPI_ISL_471468, EPI_ISL_471469, EPI_ISL_471470                                                                                                                                                                                                                                                                                                                                                                                                                                                                                                                                                                                                                                                                                                                                                                                                                                                                                                                                                                                                                                                                                                                                                                                                                                                                                                                                                                                                                                                                                                                                                                                                                                                                                                                                                                                                                                                                                                                                                                                                                                                                                                                                                                                                                                                                                                                 | South China Agricultural University                                                                        | South China Agricultural University                                                                                           | Yongyi Shen, Wu Chen                                                                                                                                                                                                                                                                                                                                                                          |
| EPI_ISL_475027                                                                                                                                                                                                                                                                                                                                                                                                                                                                                                                                                                                                                                                                                                                                                                                                                                                                                                                                                                                                                                                                                                                                                                                                                                                                                                                                                                                                                                                                                                                                                                                                                                                                                                                                                                                                                                                                                                                                                                                                                                                                                                                                                                                                                                                                                                                                                                 | Banas Medical College and Research Institute                                                               | Gujarat Biotechnology Research Centre                                                                                         | Viren S Doshi, Pritesh Sabara, Apurvasinh Puvar, Janvi Raval, Zarna Patel, Monika Gandhi, Pinal Trivedi, Maharshi Pandya, Nidhi Patel, Nitin Savaliya, Raghawendra Kumar, Dinesh Kumar, Zuber Saiyed, Komal Patel, Labdhi Pandya, Snehal Bagatharia, Radhika Khara, Sunil R Joshi, Afzal Ansari, R D Dixit, A M Kadri, Harsh Bakshi, Chaitanya Joshi, Madhvi Joshi                            |
| EPI_ISL_475031                                                                                                                                                                                                                                                                                                                                                                                                                                                                                                                                                                                                                                                                                                                                                                                                                                                                                                                                                                                                                                                                                                                                                                                                                                                                                                                                                                                                                                                                                                                                                                                                                                                                                                                                                                                                                                                                                                                                                                                                                                                                                                                                                                                                                                                                                                                                                                 | Department of MicroBiology, Government Medical College, Surat                                              | Gujarat Biotechnology Research Centre                                                                                         | Zarna Patel, Monika Gandhi, Pinal Trivedi, Maharshi Pandya, Nidhi Patel, Nitin Savaliya, Raghawendra Kumar, Dinesh Kumar, Zuber Saiyed, Komal Patel, Labdhi Pandya, Snehal Bagatharia, Naresh Chauhan, Summaiya Mullan, Amit gamit, Pritesh Sabara, Apurvasinh Puvar, Janvi Raval, Bhavya Jindal, R D Dixit, A M Kadri, Harsh Bakshi, Chaitanya Joshi, Madhvi Joshi                           |
| EPI_ISL_475039                                                                                                                                                                                                                                                                                                                                                                                                                                                                                                                                                                                                                                                                                                                                                                                                                                                                                                                                                                                                                                                                                                                                                                                                                                                                                                                                                                                                                                                                                                                                                                                                                                                                                                                                                                                                                                                                                                                                                                                                                                                                                                                                                                                                                                                                                                                                                                 | Department of MicroBiology, Government Medical College, Surat                                              | Gujarat Biotechnology Research Centre                                                                                         | Zuber Saiyed, Komal Patel, Labdhi Pandya, Snehal Bagatharia, Naresh Chauhan, Summaiya Mullan, Amit gamit, Pritesh Sabara, Apurvasinh Puvar, Janvi Raval, Zarna Patel, Monika Gandhi, Pinal Trivedi, Maharshi Pandya, Nidhi Patel, Nitin Savaliya, Raghawendra Kumar, Dinesh Kumar, Fenil Patel, R D Dixit, A M Kadri, Harsh Bakshi, Chaitanya Joshi, Madhvi Joshi                             |
| EPI_ISL_475049                                                                                                                                                                                                                                                                                                                                                                                                                                                                                                                                                                                                                                                                                                                                                                                                                                                                                                                                                                                                                                                                                                                                                                                                                                                                                                                                                                                                                                                                                                                                                                                                                                                                                                                                                                                                                                                                                                                                                                                                                                                                                                                                                                                                                                                                                                                                                                 | GMERS Medical College & Hospital                                                                           | Gujarat Biotechnology Research Centre                                                                                         | Zarna Patel, Monika Gandhi, Pinal Trivedi, Maharshi Pandya, Nidhi Patel, Nitin Savaliya, Raghawendra Kumar, Dinesh Kumar, Zuber Saiyed, Komal Patel, Labdhi Pandya, Snehal Bagatharia, Meenakshi Shah, Neena Doshi, Varsha Godbole, Pritesh Sabara, Apurvasinh Puvar, Janvi Raval, Afzal Ansari, R D Dixit, A M Kadri, Harsh Bakshi, Chaitanya Joshi, Madhvi Joshi                            |
| EPI_ISL_475057                                                                                                                                                                                                                                                                                                                                                                                                                                                                                                                                                                                                                                                                                                                                                                                                                                                                                                                                                                                                                                                                                                                                                                                                                                                                                                                                                                                                                                                                                                                                                                                                                                                                                                                                                                                                                                                                                                                                                                                                                                                                                                                                                                                                                                                                                                                                                                 | Dr. N. D. Desai Medical College & Hospital                                                                 | Gujarat Biotechnology Research Centre                                                                                         | Zuber Saiyed, Komal Patel, Labdhi Pandya, Supreet Prabhu, Snehal Bagatharia, Jigar Gusani, J G Buch, Pritesh Sabara, Apurvasinh Puvar, Janvi Raval, Zarna Patel, Monika Gandhi, Pinal Trivedi, Maharshi Pandya, Nidhi Patel, Nitin Savaliya, Raghawendra Kumar, Dinesh Kumar, Priti Pandita, R D Dixit, A M Kadri, Harsh Bakshi, Chaitanya Joshi, Madhvi Joshi                                |
| EPI_ISL_475574, EPI_ISL_475575, EPI_ISL_475576, EPI_ISL_475577, EPI_ISL_475578, EPI_ISL_475579, EPI_ISL_475580, EPI_ISL_475581, EPI_ISL_475582, EPI_ISL_475583, EPI_ISL_475584, EPI_ISL_475585, EPI_ISL_475586, EPI_ISL_475587, EPI_ISL_475588, EPI_ISL_475589, EPI_ISL_475590, EPI_ISL_475591, EPI_ISL_475592, EPI_ISL_475593, EPI_ISL_475594, EPI_ISL_475595, EPI_ISL_475596, EPI_ISL_475597, EPI_ISL_475598, EPI_ISL_475599, EPI_ISL_475600, EPI_ISL_475601, EPI_ISL_475602, EPI_ISL_475603, EPI_ISL_475604, EPI_ISL_475605, EPI_ISL_475606, EPI_ISL_475607, EPI_ISL_475608, EPI_ISL_475609, EPI_ISL_475610, EPI_ISL_475611, EPI_ISL_475612, EPI_ISL_475613, EPI_ISL_475614, EPI_ISL_475615, EPI_ISL_475616, EPI_ISL_475617, EPI_ISL_475618, EPI_ISL_475619, EPI_ISL_475620, EPI_ISL_475621, EPI_ISL_475622, EPI_ISL_475623, EPI_ISL_475624, EPI_ISL_475625, EPI_ISL_475626, EPI_ISL_475627, EPI_ISL_475628, EPI_ISL_475629, EPI_ISL_475630, EPI_ISL_475631, EPI_ISL_475632, EPI_ISL_475633, EPI_ISL_475634, EPI_ISL_475635, EPI_ISL_475636, EPI_ISL_475637, EPI_ISL_475638, EPI_ISL_475639, EPI_ISL_475640, EPI_ISL_475641, EPI_ISL_475642, EPI_ISL_475643, EPI_ISL_475644, EPI_ISL_475645, EPI_ISL_475646, EPI_ISL_475647, EPI_ISL_475648, EPI_ISL_475649, EPI_ISL_475650, EPI_ISL_475651, EPI_ISL_475652, EPI_ISL_475653, EPI_ISL_475654, EPI_ISL_475655, EPI_ISL_475656, EPI_ISL_475657, EPI_ISL_475658, EPI_ISL_475659, EPI_ISL_475660, EPI_ISL_475661, EPI_ISL_475662, EPI_ISL_475663, EPI_ISL_475664, EPI_ISL_475665, EPI_ISL_475666, EPI_ISL_475667, EPI_ISL_475668, EPI_ISL_475669, EPI_ISL_475670, EPI_ISL_475671, EPI_ISL_475672, EPI_ISL_475673, EPI_ISL_475674, EPI_ISL_475675, EPI_ISL_475676, EPI_ISL_475677, EPI_ISL_475678, EPI_ISL_475679, EPI_ISL_475680, EPI_ISL_475681, EPI_ISL_475682, EPI_ISL_475683, EPI_ISL_475684, EPI_ISL_475685, EPI_ISL_475686, EPI_ISL_475687, EPI_ISL_475688, EPI_ISL_475689, EPI_ISL_475690, EPI_ISL_475691, EPI_ISL_475692, EPI_ISL_475693, EPI_ISL_475694, EPI_ISL_475695, EPI_ISL_475696, EPI_ISL_475697, EPI_ISL_475698, EPI_ISL_475699, EPI_ISL_475700, EPI_ISL_475701, EPI_ISL_475702, EPI_ISL_475703, EPI_ISL_475704, EPI_ISL_475705, EPI_ISL_475706, EPI_ISL_475707, EPI_ISL_475708, EPI_ISL_475709, EPI_ISL_475710, EPI_ISL_475711, EPI_ISL_475712, EPI_ISL_475713, EPI_ISL_475714, EPI_ISL_475715, EPI_ISL_475716 | Cedars-Sinai Medical Center, Department of Pathology & Laboratory Medicine, Molecular Pathology Laboratory | Cedars-Sinai Medical Center, Molecular Pathology Laboratory of Department of Pathology & Laboratory Medicine and Genomic Core | Wenjuan Zhang, John Paul Govindavari, Brian Davis, Stephanie Chen, Jong Taek Kim, Jianbo Song, Jean Lopategui, Jasmine T Plummer, Eric Vail                                                                                                                                                                                                                                                   |
| EPI_ISL_475722, EPI_ISL_475723, EPI_ISL_475724                                                                                                                                                                                                                                                                                                                                                                                                                                                                                                                                                                                                                                                                                                                                                                                                                                                                                                                                                                                                                                                                                                                                                                                                                                                                                                                                                                                                                                                                                                                                                                                                                                                                                                                                                                                                                                                                                                                                                                                                                                                                                                                                                                                                                                                                                                                                 | Egyptian National Cancer Institute (ENCI)                                                                  | Egyptian National Cancer Institute (ENCI)                                                                                     | Zekri, Abdel Rahman N, Amer,K.E., Ahmed,O.S., Soliman,H.K., Hafez,M.M., Bahnassy,A.A., Abdelhamid,W., Gad,A., Ali,M., Hassan,W., Samir,M., Raouf,A., Hamdy,M.S., Soliman,M.S., Elsissey,M.H., Elkhatieb,S.M., Ezzelarab,M.H., Abouelhoda, Mohamed                                                                                                                                             |
| EPI_ISL_476822, EPI_ISL_476823, EPI_ISL_476824, EPI_ISL_476825, EPI_ISL_476826, EPI_ISL_476827, EPI_ISL_476828, EPI_ISL_476829, EPI_ISL_476830, EPI_ISL_476831, EPI_ISL_476832, EPI_ISL_476833, EPI_ISL_476834                                                                                                                                                                                                                                                                                                                                                                                                                                                                                                                                                                                                                                                                                                                                                                                                                                                                                                                                                                                                                                                                                                                                                                                                                                                                                                                                                                                                                                                                                                                                                                                                                                                                                                                                                                                                                                                                                                                                                                                                                                                                                                                                                                 | Laboratoire des Fièvres Hémorragiques Virales du Benin                                                     | Charité-Universitätsmedizin Berlin                                                                                            | Yadouleton,ANGES; Sander Anna-Lena; Moreira-Soto Andres; Drexler, Jan Felix                                                                                                                                                                                                                                                                                                                   |
| EPI_ISL_476857                                                                                                                                                                                                                                                                                                                                                                                                                                                                                                                                                                                                                                                                                                                                                                                                                                                                                                                                                                                                                                                                                                                                                                                                                                                                                                                                                                                                                                                                                                                                                                                                                                                                                                                                                                                                                                                                                                                                                                                                                                                                                                                                                                                                                                                                                                                                                                 | GMERS Medical College & Hospital, Gotri, Vadodara                                                          | Gujarat Biotechnology Research Centre                                                                                         | Zarna Patel, Monika Gandhi, Pinal Trivedi, Maharshi Pandya, Nidhi Patel, Nitin Savaliya, Raghawendra Kumar, Dinesh Kumar, Zuber Saiyed, Komal Patel, Labdhi Pandya, Afzal Ansari, Nikha Trivedi, Meenakshi Shah, Neena Doshi, Varsha Godbole, Apurvasinh Puvar, Janvi Raval, R D Dixit, A M Kadri, Harsh Bakshi, Chaitanya Joshi, Madhvi Joshi                                                |
| EPI_ISL_476865                                                                                                                                                                                                                                                                                                                                                                                                                                                                                                                                                                                                                                                                                                                                                                                                                                                                                                                                                                                                                                                                                                                                                                                                                                                                                                                                                                                                                                                                                                                                                                                                                                                                                                                                                                                                                                                                                                                                                                                                                                                                                                                                                                                                                                                                                                                                                                 | GMERS Medical College and Hospital, Gandhinagar                                                            | Gujarat Biotechnology Research Centre                                                                                         | Zuber Saiyed, Komal Patel, Labdhi Pandya, Afzal Ansari, Nikha Trivedi, Seema Bhatt, Gaurishankar Shrimali, Bhavesh Modi, Bharti Rajani, Apurvasinh Puvar, Janvi Raval, Zarna Patel, Monika Gandhi, Pinal Trivedi, Maharshi Pandya, Nidhi Patel, Nitin Savaliya, Raghawendra Kumar, Dinesh Kumar, Zuber Saiyed, Komal Patel, R D Dixit, A M Kadri, Harsh Bakshi, Chaitanya Joshi, Madhvi Joshi |
| EPI_ISL_476875                                                                                                                                                                                                                                                                                                                                                                                                                                                                                                                                                                                                                                                                                                                                                                                                                                                                                                                                                                                                                                                                                                                                                                                                                                                                                                                                                                                                                                                                                                                                                                                                                                                                                                                                                                                                                                                                                                                                                                                                                                                                                                                                                                                                                                                                                                                                                                 | Department of MicroBiology, Government Medical College, Surat                                              | Gujarat Biotechnology Research Centre                                                                                         | Zarna Patel, Monika Gandhi, Pinal Trivedi, Maharshi Pandya, Nidhi Patel, Nitin Savaliya, Raghawendra Kumar, Dinesh Kumar, Zuber Saiyed, Komal Patel, Labdhi Pandya, Afzal Ansari, Nikha Trivedi, Naresh Chauhan, Summaiya Mullan, Amit gamit, Apurvasinh Puvar, Janvi Raval, R D Dixit, A M Kadri, Harsh Bakshi, Chaitanya Joshi, Madhvi Joshi                                                |
| EPI_ISL_476882                                                                                                                                                                                                                                                                                                                                                                                                                                                                                                                                                                                                                                                                                                                                                                                                                                                                                                                                                                                                                                                                                                                                                                                                                                                                                                                                                                                                                                                                                                                                                                                                                                                                                                                                                                                                                                                                                                                                                                                                                                                                                                                                                                                                                                                                                                                                                                 | Department of MicroBiology, Government Medical College, Surat                                              | Gujarat Biotechnology Research Centre                                                                                         | Zuber Saiyed, Komal Patel, Labdhi Pandya, Afzal Ansari, Nikha Trivedi, Naresh Chauhan, Summaiya Mullan, Amit gamit, Apurvasinh Puvar, Janvi Raval, Zarna Patel, Monika Gandhi, Pinal Trivedi, Maharshi Pandya, Nidhi Patel, Nitin Savaliya, Raghawendra Kumar, Dinesh Kumar, R D Dixit, A M Kadri, Harsh Bakshi, Chaitanya Joshi, Madhvi Joshi                                                |
| EPI_ISL_477161                                                                                                                                                                                                                                                                                                                                                                                                                                                                                                                                                                                                                                                                                                                                                                                                                                                                                                                                                                                                                                                                                                                                                                                                                                                                                                                                                                                                                                                                                                                                                                                                                                                                                                                                                                                                                                                                                                                                                                                                                                                                                                                                                                                                                                                                                                                                                                 | Egyptian National Cancer Institute (ENCI)                                                                  | Egyptian National Cancer Institute (ENCI)                                                                                     | Zekri, Abdel Rahman N, Amer,K.E., Ahmed,O.S., Soliman,H.K., Hafez,M.M., Bahnassy,A.A., Abdelhamid,W., Gad,A., Ali,M., Hassan,W., Samir,M., Raouf,A., Hamdy,M.S., Soliman,M.S., Elsissey,M.H., Elkhatieb,S.M., Ezzelarab,M.H., Abouelhoda, Mohamed                                                                                                                                             |
| EPI_ISL_477631, EPI_ISL_477632, EPI_ISL_477633, EPI_ISL_477634, EPI_ISL_477635, EPI_ISL_477636, EPI_ISL_477637, EPI_ISL_477638, EPI_ISL_477639, EPI_ISL_477640, EPI_ISL_477641, EPI_ISL_477642, EPI_ISL_477643, EPI_ISL_477644, EPI_ISL_477645, EPI_ISL_477646, EPI_ISL_477647, EPI_ISL_477648, EPI_ISL_477649, EPI_ISL_477650, EPI_ISL_477651, EPI_ISL_477652, EPI_ISL_477653, EPI_ISL_477654, EPI_ISL_477655, EPI_ISL_477656, EPI_ISL_477657, EPI_ISL_477658, EPI_ISL_477659, EPI_ISL_477660, EPI_ISL_477661, EPI_ISL_477662, EPI_ISL_477663, EPI_ISL_477664, EPI_ISL_477665, EPI_ISL_477666, EPI_ISL_477667, EPI_ISL_477668, EPI_ISL_477669, EPI_ISL_477670, EPI_ISL_477671, EPI_ISL_477672                                                                                                                                                                                                                                                                                                                                                                                                                                                                                                                                                                                                                                                                                                                                                                                                                                                                                                                                                                                                                                                                                                                                                                                                                                                                                                                                                                                                                                                                                                                                                                                                                                                                                 | Virginia DCLS                                                                                              | Virginia DCLS                                                                                                                 | Virginia DCLS                                                                                                                                                                                                                                                                                                                                                                                 |
| EPI_ISL_478672, EPI_ISL_479686, EPI_ISL_479687, EPI_ISL_479688, EPI_ISL_479689, EPI_ISL_479690, EPI_ISL_479691, EPI_ISL_479692, EPI_ISL_479693, EPI_ISL_479694, EPI_ISL_479695, EPI_ISL_479696, EPI_ISL_479697, EPI_ISL_479698, EPI_ISL_479699, EPI_ISL_479700, EPI_ISL_479701, EPI_ISL_479702, EPI_ISL_479703, EPI_ISL_479704, EPI_ISL_479705, EPI_ISL_479706, EPI_ISL_479707, EPI_ISL_479708, EPI_ISL_479709, EPI_ISL_479710, EPI_ISL_479711, EPI_ISL_479712, EPI_ISL_479713, EPI_ISL_479714, EPI_ISL_479715, EPI_ISL_479716, EPI_ISL_479717, EPI_ISL_479718, EPI_ISL_479719, EPI_ISL_479720, EPI_ISL_479721, EPI_ISL_479722, EPI_ISL_479723, EPI_ISL_479724, EPI_ISL_479725, EPI_ISL_479726, EPI_ISL_479727                                                                                                                                                                                                                                                                                                                                                                                                                                                                                                                                                                                                                                                                                                                                                                                                                                                                                                                                                                                                                                                                                                                                                                                                                                                                                                                                                                                                                                                                                                                                                                                                                                                                 | see above                                                                                                  | see above                                                                                                                     | see above                                                                                                                                                                                                                                                                                                                                                                                     |
| EPI_ISL_479728                                                                                                                                                                                                                                                                                                                                                                                                                                                                                                                                                                                                                                                                                                                                                                                                                                                                                                                                                                                                                                                                                                                                                                                                                                                                                                                                                                                                                                                                                                                                                                                                                                                                                                                                                                                                                                                                                                                                                                                                                                                                                                                                                                                                                                                                                                                                                                 | Egyptian National Cancer Institute (ENCI)                                                                  | Egyptian National Cancer Institute (ENCI)                                                                                     | Zekri, Abdel Rahman N, Amer,K.E., Ahmed,O.S., Soliman,H.K., Hafez,M.M., Bahnassy,A.A., Abdelhamid,W., Gad,A., Ali,M., Hassan,W., Samir,M., Raouf,A., Hamdy,M.S., Soliman,M.S., Elsissey,M.H., Elkhatieb,S.M., Ezzelarab,M.H., Abouelhoda, Mohamed                                                                                                                                             |
| EPI_ISL_479729, EPI_ISL_479730, EPI_ISL_479731, EPI_ISL_479732, EPI_ISL_479733, EPI_ISL_479734, EPI_ISL_479735                                                                                                                                                                                                                                                                                                                                                                                                                                                                                                                                                                                                                                                                                                                                                                                                                                                                                                                                                                                                                                                                                                                                                                                                                                                                                                                                                                                                                                                                                                                                                                                                                                                                                                                                                                                                                                                                                                                                                                                                                                                                                                                                                                                                                                                                 | Egyptian National Cancer Institute (ENCI)                                                                  | Egyptian National Cancer Institute (ENCI)                                                                                     | Zekri, Abdel Rahman N, Amer,K.E., Ahmed,O.S., Soliman,H.K., Hafez,M.M., Bahnassy,A.A., Abdelhamid,W., Gad,A., Ali,M., Hassan,W., Samir,M., Raouf,A., Hamdy,M.S., Soliman,M.S., Elsissey,M.H., Elkhatieb,S.M., Ezzelarab,M.H., Abouelhoda, Mohamed                                                                                                                                             |
| EPI_ISL_482744                                                                                                                                                                                                                                                                                                                                                                                                                                                                                                                                                                                                                                                                                                                                                                                                                                                                                                                                                                                                                                                                                                                                                                                                                                                                                                                                                                                                                                                                                                                                                                                                                                                                                                                                                                                                                                                                                                                                                                                                                                                                                                                                                                                                                                                                                                                                                                 | Laboratory Diagnostic, Veterinary Specialized Institute Kraljevo                                           | Laboratory Diagnostic, Veterinary Specialized Institute Kraljevo                                                              | Vidanovic,D., Tesovic,B., Banovic Djeri,B., Knezevic,A., Vidanovic,D., Tesovic,B., Banovic Djeri,B., Knezevic,A., Afonso,C.                                                                                                                                                                                                                                                                   |
| EPI_ISL_483828                                                                                                                                                                                                                                                                                                                                                                                                                                                                                                                                                                                                                                                                                                                                                                                                                                                                                                                                                                                                                                                                                                                                                                                                                                                                                                                                                                                                                                                                                                                                                                                                                                                                                                                                                                                                                                                                                                                                                                                                                                                                                                                                                                                                                                                                                                                                                                 | GMERS Medical College Himmatnagar                                                                          | Gujarat Biotechnology Research Centre                                                                                         | Zarna Patel, Monika Gandhi, Pinal Trivedi, Maharshi Pandya, Nidhi Patel, Nitin Savaliya, Raghawendra Kumar, Dinesh Kumar, Zuber Saiyed, Komal Patel, Labdhi Pandya, Afzal Ansari, Nikha Trivedi, Himanshu Khatri, Mayur Gandhi, Apurvasinh Puvar, Janvi Raval, R D Dixit, A M Kadri, Harsh Bakshi, Chaitanya Joshi, Madhvi Joshi                                                              |
| EPI_ISL_483836                                                                                                                                                                                                                                                                                                                                                                                                                                                                                                                                                                                                                                                                                                                                                                                                                                                                                                                                                                                                                                                                                                                                                                                                                                                                                                                                                                                                                                                                                                                                                                                                                                                                                                                                                                                                                                                                                                                                                                                                                                                                                                                                                                                                                                                                                                                                                                 | Pandit Deendayal Upadhyay Government Medical College, Rajkot                                               | Gujarat Biotechnology Research Centre                                                                                         | Zuber Saiyed, Komal Patel, Labdhi Pandya, Afzal Ansari, Nikha Trivedi, Gauravi Dhruv, Arti Trivedi, Apurvasinh Puvar, Janvi Raval, Zarna Patel, Monika Gandhi, Pinal Trivedi, Maharshi Pandya, Nidhi Patel, Nitin Savaliya, Raghawendra Kumar, Dinesh Kumar, R D Dixit, A M Kadri, Harsh Bakshi, Chaitanya Joshi, Madhvi Joshi                                                                |
| EPI_ISL_483845                                                                                                                                                                                                                                                                                                                                                                                                                                                                                                                                                                                                                                                                                                                                                                                                                                                                                                                                                                                                                                                                                                                                                                                                                                                                                                                                                                                                                                                                                                                                                                                                                                                                                                                                                                                                                                                                                                                                                                                                                                                                                                                                                                                                                                                                                                                                                                 | Pandit Deendayal Upadhyay Government Medical College, Rajkot                                               | Gujarat Biotechnology Research Centre                                                                                         | Zarna Patel, Monika Gandhi, Pinal Trivedi, Maharshi Pandya, Nidhi Patel, Nitin Savaliya, Raghawendra Kumar, Dinesh Kumar, Zuber Saiyed, Komal Patel, Labdhi Pandya, Afzal Ansari, Nikha Trivedi, Gauravi Dhruv, Arti Trivedi, Apurvasinh Puvar, Janvi Raval, R D Dixit, A M Kadri, Harsh Bakshi, Chaitanya Joshi, Madhvi Joshi                                                                |
| EPI_ISL_483853                                                                                                                                                                                                                                                                                                                                                                                                                                                                                                                                                                                                                                                                                                                                                                                                                                                                                                                                                                                                                                                                                                                                                                                                                                                                                                                                                                                                                                                                                                                                                                                                                                                                                                                                                                                                                                                                                                                                                                                                                                                                                                                                                                                                                                                                                                                                                                 | Department of Microbiology, Government Medical College, Surat                                              | Gujarat Biotechnology Research Centre                                                                                         | Zuber Saiyed, Komal Patel, Labdhi Pandya, Afzal Ansari, Nikha Trivedi, Naresh Chauhan, Summaiya Mullan, Amit gamit, Apurvasinh Puvar, Janvi Raval, Zarna Patel, Monika Gandhi, Pinal Trivedi, Maharshi Pandya, Nidhi Patel, Nitin Savaliya, Raghawendra Kumar, Dinesh Kumar, R D Dixit, A M Kadri, Harsh                                                                                      |

|                                                                                                                                                                                                                                                                                                                                                                                                                                                                                                                                                                                                                                                                                                                                                                                                                                                                                                                                                                |                                                                                                             |                                                                                                             |                                                                                                                                                                                                                                                                                                                                                           |
|----------------------------------------------------------------------------------------------------------------------------------------------------------------------------------------------------------------------------------------------------------------------------------------------------------------------------------------------------------------------------------------------------------------------------------------------------------------------------------------------------------------------------------------------------------------------------------------------------------------------------------------------------------------------------------------------------------------------------------------------------------------------------------------------------------------------------------------------------------------------------------------------------------------------------------------------------------------|-------------------------------------------------------------------------------------------------------------|-------------------------------------------------------------------------------------------------------------|-----------------------------------------------------------------------------------------------------------------------------------------------------------------------------------------------------------------------------------------------------------------------------------------------------------------------------------------------------------|
|                                                                                                                                                                                                                                                                                                                                                                                                                                                                                                                                                                                                                                                                                                                                                                                                                                                                                                                                                                |                                                                                                             |                                                                                                             | Bakshi, Chaitanya Joshi, Madhvi Joshi                                                                                                                                                                                                                                                                                                                     |
| EPI_ISL_483863                                                                                                                                                                                                                                                                                                                                                                                                                                                                                                                                                                                                                                                                                                                                                                                                                                                                                                                                                 | Department of Microbiology, Government Medical College, Surat                                               | Gujarat Biotechnology Research Centre                                                                       | Zarna Patel, Monika Gandhi, Pinal Trivedi, Maharshi Pandya, Nidhi Patel, Nitin Savaliya, Raghawendra Kumar, Dinesh Kumar, Zuber Saiyed, Komal Patel, Labdhi Pandya, Afzal Ansari, Nikha Trivedi, Naresh Chauhan, Summaiya Mullan, Amit gamit, Apurvasinh Puvar, Janvi Raval, R D Dixit, A M Kadri, Harsh Bakshi, Chaitanya Joshi, Madhvi Joshi            |
| EPI_ISL_483871                                                                                                                                                                                                                                                                                                                                                                                                                                                                                                                                                                                                                                                                                                                                                                                                                                                                                                                                                 | Department of Microbiology, Government Medical College, Surat                                               | Gujarat Biotechnology Research Centre                                                                       | Zuber Saiyed, Komal Patel, Labdhi Pandya, Afzal Ansari, Nikha Trivedi, Naresh Chauhan, Summaiya Mullan, Amit gamit, Apurvasinh Puvar, Janvi Raval, Zarna Patel, Monika Gandhi, Pinal Trivedi, Maharshi Pandya, Nidhi Patel, Nitin Savaliya, Raghawendra Kumar, Dinesh Kumar, R D Dixit, A M Kadri, Harsh Bakshi, Chaitanya Joshi, Madhvi Joshi            |
| EPI_ISL_485401                                                                                                                                                                                                                                                                                                                                                                                                                                                                                                                                                                                                                                                                                                                                                                                                                                                                                                                                                 | Communicable Disease Laboratory, Public Health Directorate                                                  | Communicable Disease Laboratory, Public Health Directorate                                                  | Zaed,A., Al-Wasti,H., Al-Taif,Z. and Shehab,F.                                                                                                                                                                                                                                                                                                            |
| EPI_ISL_485814, EPI_ISL_485815, EPI_ISL_485816, EPI_ISL_485817, EPI_ISL_485818, EPI_ISL_485819, EPI_ISL_485820, EPI_ISL_485821, EPI_ISL_485822, EPI_ISL_485823, EPI_ISL_485824, EPI_ISL_485825, EPI_ISL_485826, EPI_ISL_485827, EPI_ISL_485828, EPI_ISL_485829, EPI_ISL_485830, EPI_ISL_485831, EPI_ISL_485832, EPI_ISL_485833, EPI_ISL_485834, EPI_ISL_485835, EPI_ISL_485836, EPI_ISL_485837, EPI_ISL_485838, EPI_ISL_485839, EPI_ISL_485840, EPI_ISL_485841, EPI_ISL_485842, EPI_ISL_485843, EPI_ISL_485844, EPI_ISL_485845, EPI_ISL_485846, EPI_ISL_485847, EPI_ISL_485848, EPI_ISL_485849, EPI_ISL_485850, EPI_ISL_485851, EPI_ISL_485852, EPI_ISL_485853, EPI_ISL_485854, EPI_ISL_485855, EPI_ISL_485856, EPI_ISL_485857, EPI_ISL_485858, EPI_ISL_485859, EPI_ISL_485860, EPI_ISL_485861, EPI_ISL_485862, EPI_ISL_485863, EPI_ISL_485864, EPI_ISL_485865, EPI_ISL_485866, EPI_ISL_485867, EPI_ISL_485868, EPI_ISL_485869, EPI_ISL_485870, EPI_ISL_485871 |                                                                                                             |                                                                                                             |                                                                                                                                                                                                                                                                                                                                                           |
| see above                                                                                                                                                                                                                                                                                                                                                                                                                                                                                                                                                                                                                                                                                                                                                                                                                                                                                                                                                      | Virginia DCLS                                                                                               | Virginia DCLS                                                                                               | Virginia DCLS                                                                                                                                                                                                                                                                                                                                             |
| EPI_ISL_486645                                                                                                                                                                                                                                                                                                                                                                                                                                                                                                                                                                                                                                                                                                                                                                                                                                                                                                                                                 | Renmin Hospital of Wuhan University Hubei General Hospital                                                  | State Key Laboratory of Agriculture Microbiology, Huazhong Agric                                            | Zhong Zou                                                                                                                                                                                                                                                                                                                                                 |
| EPI_ISL_486887                                                                                                                                                                                                                                                                                                                                                                                                                                                                                                                                                                                                                                                                                                                                                                                                                                                                                                                                                 | National Influenza Center, Bahrain                                                                          | National Influenza Center, Bahrain                                                                          | Zaed,A., Altaif,Z., Shehab,F., AlWasti,H.                                                                                                                                                                                                                                                                                                                 |
| EPI_ISL_487273                                                                                                                                                                                                                                                                                                                                                                                                                                                                                                                                                                                                                                                                                                                                                                                                                                                                                                                                                 | unknown                                                                                                     | Communicable Disease Laboratory, Public Health Directorate                                                  | Zaed,A., Shehab,F., AlWasti,H., Altaif,Z.                                                                                                                                                                                                                                                                                                                 |
| EPI_ISL_492075, EPI_ISL_492076, EPI_ISL_492077, EPI_ISL_492079, EPI_ISL_492080, EPI_ISL_492081, EPI_ISL_492086                                                                                                                                                                                                                                                                                                                                                                                                                                                                                                                                                                                                                                                                                                                                                                                                                                                 | Institute for Public Health of the Republic of North Macedonia                                              | Charite Universitätsmedizin Berlin, Institute of Virology                                                   | Victor M Corman, Joern Beheim-Schwarzbach, Barbara Muhlemann, Talitha Veith, Julia Schneider, Elizabeta Jancheska, Maja Kuzmanovska, Golubinka Bosevska, Terry Jones, Christian Drosten                                                                                                                                                                   |
| EPI_ISL_495015                                                                                                                                                                                                                                                                                                                                                                                                                                                                                                                                                                                                                                                                                                                                                                                                                                                                                                                                                 | B.J. Medical College and Civil hospital                                                                     | Gujarat Biotechnology Research Centre                                                                       | Zarna Patel, Monika Gandhi, Pinal Trivedi, Maharshi Pandya, Nidhi Patel, Nitin Savaliya, Raghawendra Kumar, Dinesh Kumar, Zuber Saiyed, Komal Patel, Labdhi Pandya, Afzal Ansari, Nikha Trivedi, Pranay Shah, Kamlesh J Upadhyay, Sanjay Kapadia, Apurvasinh Puvar, Janvi Raval, R D Dixit, A M Kadri, Harsh Bakshi, Chaitanya Joshi, Madhvi Joshi        |
| EPI_ISL_495035                                                                                                                                                                                                                                                                                                                                                                                                                                                                                                                                                                                                                                                                                                                                                                                                                                                                                                                                                 | GMERS Medical College & Hospital, Gotri, Vadodara                                                           | Gujarat Biotechnology Research Centre                                                                       | Zarna Patel, Monika Gandhi, Pinal Trivedi, Maharshi Pandya, Nidhi Patel, Nitin Savaliya, Raghawendra Kumar, Dinesh Kumar, Zuber Saiyed, Komal Patel, Labdhi Pandya, Afzal Ansari, Nikha Trivedi, Meenakshi Shah, Neena Doshi, Varsha Godbole, Apurvasinh Puvar, Janvi Raval, R D Dixit, A M Kadri, Harsh Bakshi, Chaitanya Joshi, Madhvi Joshi            |
| EPI_ISL_495043                                                                                                                                                                                                                                                                                                                                                                                                                                                                                                                                                                                                                                                                                                                                                                                                                                                                                                                                                 | GMERS Medical College & Hospital, Gotri, Vadodara                                                           | Gujarat Biotechnology Research Centre                                                                       | Zuber Saiyed, Komal Patel, Labdhi Pandya, Afzal Ansari, Nikha Trivedi, Meenakshi Shah, Neena Doshi, Varsha Godbole, Apurvasinh Puvar, Janvi Raval, R D Dixit, A M Kadri, Harsh Bakshi, Chaitanya Joshi, Madhvi Joshi                                                                                                                                      |
| EPI_ISL_495053                                                                                                                                                                                                                                                                                                                                                                                                                                                                                                                                                                                                                                                                                                                                                                                                                                                                                                                                                 | GMERS Medical College & Hospital, Gotri, Vadodara                                                           | Gujarat Biotechnology Research Centre                                                                       | Zarna Patel, Monika Gandhi, Pinal Trivedi, Maharshi Pandya, Nidhi Patel, Nitin Savaliya, Raghawendra Kumar, Dinesh Kumar, Zuber Saiyed, Komal Patel, Labdhi Pandya, Afzal Ansari, Nikha Trivedi, Meenakshi Shah, Neena Doshi, Varsha Godbole, Apurvasinh Puvar, Janvi Raval, R D Dixit, A M Kadri, Harsh Bakshi, Chaitanya Joshi, Madhvi Joshi            |
| EPI_ISL_495061                                                                                                                                                                                                                                                                                                                                                                                                                                                                                                                                                                                                                                                                                                                                                                                                                                                                                                                                                 | GMERS Medical College & Hospital, Gotri, Vadodara                                                           | Gujarat Biotechnology Research Centre                                                                       | Zuber Saiyed, Komal Patel, Labdhi Pandya, Afzal Ansari, Nikha Trivedi, Meenakshi Shah, Neena Doshi, Varsha Godbole, Apurvasinh Puvar, Janvi Raval, Zarna Patel, Monika Gandhi, Pinal Trivedi, Maharshi Pandya, Nidhi Patel, Nitin Savaliya, Raghawendra Kumar, Dinesh Kumar, R D Dixit, A M Kadri, Harsh Bakshi, Chaitanya Joshi, Madhvi Joshi            |
| EPI_ISL_495072                                                                                                                                                                                                                                                                                                                                                                                                                                                                                                                                                                                                                                                                                                                                                                                                                                                                                                                                                 | Department of MicroBiology, Government Medical College, Surat                                               | Gujarat Biotechnology Research Centre                                                                       | Zarna Patel, Monika Gandhi, Pinal Trivedi, Maharshi Pandya, Nidhi Patel, Nitin Savaliya, Raghawendra Kumar, Dinesh Kumar, Zuber Saiyed, Komal Patel, Labdhi Pandya, Afzal Ansari, Nikha Trivedi, Naresh Chauhan, Summaiya Mullan, Amit gamit, Apurvasinh Puvar, Janvi Raval, R D Dixit, A M Kadri, Harsh Bakshi, Chaitanya Joshi, Madhvi Joshi            |
| EPI_ISL_495298, EPI_ISL_495299, EPI_ISL_495300, EPI_ISL_495301, EPI_ISL_495302, EPI_ISL_495303, EPI_ISL_495304, EPI_ISL_495305, EPI_ISL_495306, EPI_ISL_495307, EPI_ISL_495308, EPI_ISL_495309, EPI_ISL_495310, EPI_ISL_495311, EPI_ISL_495312, EPI_ISL_495313, EPI_ISL_495314, EPI_ISL_495315, EPI_ISL_495316, EPI_ISL_495317, EPI_ISL_495318, EPI_ISL_495319, EPI_ISL_495320, EPI_ISL_495321, EPI_ISL_495322, EPI_ISL_495323, EPI_ISL_495324, EPI_ISL_495325, EPI_ISL_495326, EPI_ISL_495327, EPI_ISL_495328, EPI_ISL_495329                                                                                                                                                                                                                                                                                                                                                                                                                                 |                                                                                                             |                                                                                                             |                                                                                                                                                                                                                                                                                                                                                           |
| see above                                                                                                                                                                                                                                                                                                                                                                                                                                                                                                                                                                                                                                                                                                                                                                                                                                                                                                                                                      | Virginia DCLS                                                                                               | Virginia DCLS                                                                                               | Virginia DCLS                                                                                                                                                                                                                                                                                                                                             |
| EPI_ISL_495459                                                                                                                                                                                                                                                                                                                                                                                                                                                                                                                                                                                                                                                                                                                                                                                                                                                                                                                                                 | Centers for Disease Control and Prevention of Lishui                                                        | Department of InspectionCenters for Disease Control and Prevention of Lishui                                | Wang Xiaoguang, Ji Qiaoying, Ji Jiansong, Ye Bifeng, Ye Ling                                                                                                                                                                                                                                                                                              |
| EPI_ISL_497950                                                                                                                                                                                                                                                                                                                                                                                                                                                                                                                                                                                                                                                                                                                                                                                                                                                                                                                                                 | Shaoxing CDC                                                                                                | Zhejiang Provincial Center for Disease Control and Prevention                                               | Yin Chen, Yanjun Zhang, Haiyan Mao, Junhang Pan, Xiuyu Lou, Yi Sun, Hao Yan, Zhen Li, Wen Shi                                                                                                                                                                                                                                                             |
| EPI_ISL_498691, EPI_ISL_498692, EPI_ISL_498693, EPI_ISL_498694                                                                                                                                                                                                                                                                                                                                                                                                                                                                                                                                                                                                                                                                                                                                                                                                                                                                                                 | National Institute for Viral Disease Control and Prevention, China CDC                                      | National Institute for Viral Disease Control and Prevention, China CDC                                      | Xiang Zhao, LingLing Mao, Yao Meng, Zhixiao Chen, Yuchao Wu, Yong Zhang, Bo Zhijian, Jianqun Zhang, Yang Song, Dayan Wang, WenQing Yao, Wenbo Xu                                                                                                                                                                                                          |
| EPI_ISL_500831, EPI_ISL_500832, EPI_ISL_500833, EPI_ISL_500834, EPI_ISL_500835, EPI_ISL_500836, EPI_ISL_500837, EPI_ISL_500838, EPI_ISL_500839, EPI_ISL_500840, EPI_ISL_500841, EPI_ISL_500842, EPI_ISL_500843, EPI_ISL_500844, EPI_ISL_500845, EPI_ISL_500846, EPI_ISL_500847, EPI_ISL_500848, EPI_ISL_500849, EPI_ISL_500850, EPI_ISL_500851, EPI_ISL_500852, EPI_ISL_500853, EPI_ISL_500854, EPI_ISL_500855, EPI_ISL_500856, EPI_ISL_500857, EPI_ISL_500858, EPI_ISL_500859, EPI_ISL_500860, EPI_ISL_500861, EPI_ISL_500862, EPI_ISL_500863                                                                                                                                                                                                                                                                                                                                                                                                                 |                                                                                                             |                                                                                                             |                                                                                                                                                                                                                                                                                                                                                           |
| see above                                                                                                                                                                                                                                                                                                                                                                                                                                                                                                                                                                                                                                                                                                                                                                                                                                                                                                                                                      | Virginia DCLS                                                                                               | Virginia DCLS                                                                                               | Virginia DCLS                                                                                                                                                                                                                                                                                                                                             |
| EPI_ISL_500946                                                                                                                                                                                                                                                                                                                                                                                                                                                                                                                                                                                                                                                                                                                                                                                                                                                                                                                                                 | GMERS Medical College & Hospital, Gotri, Vadodara                                                           | Gujarat Biotechnology Research Centre                                                                       | Zuber Saiyed, Komal Patel, Labdhi Pandya, Afzal Ansari, Nikha Trivedi, Meenakshi Shah, Neena Doshi, Varsha Godbole, Apurvasinh Puvar, Janvi Raval, Zarna Patel, Monika Gandhi, Pinal Trivedi, Maharshi Pandya, Nidhi Patel, Nitin Savaliya, Raghawendra Kumar, Dinesh Kumar, R D Dixit, A M Kadri, Harsh Bakshi, Chaitanya Joshi, Madhvi Joshi            |
| EPI_ISL_500948                                                                                                                                                                                                                                                                                                                                                                                                                                                                                                                                                                                                                                                                                                                                                                                                                                                                                                                                                 | Department of MicroBiology, Government Medical College, Surat                                               | Gujarat Biotechnology Research Centre                                                                       | Zuber Saiyed, Komal Patel, Labdhi Pandya, Afzal Ansari, Nikha Trivedi, Naresh Chauhan, Summaiya Mullan, Amit gamit, Apurvasinh Puvar, Janvi Raval, Zarna Patel, Monika Gandhi, Pinal Trivedi, Maharshi Pandya, Nidhi Patel, Nitin Savaliya, Raghawendra Kumar, Dinesh Kumar, R D Dixit, A M Kadri, Harsh Bakshi, Chaitanya Joshi, Madhvi Joshi            |
| EPI_ISL_501176, EPI_ISL_501177, EPI_ISL_501178, EPI_ISL_501179, EPI_ISL_501180, EPI_ISL_501181, EPI_ISL_501182, EPI_ISL_501183, EPI_ISL_501184, EPI_ISL_501185, EPI_ISL_501186, EPI_ISL_501187, EPI_ISL_501188, EPI_ISL_501189, EPI_ISL_501190, EPI_ISL_501191, EPI_ISL_501192, EPI_ISL_501193, EPI_ISL_501194, EPI_ISL_501195, EPI_ISL_501196, EPI_ISL_501197, EPI_ISL_501198, EPI_ISL_501199, EPI_ISL_501200, EPI_ISL_501201, EPI_ISL_501202, EPI_ISL_501203, EPI_ISL_501204, EPI_ISL_501205, EPI_ISL_501206, EPI_ISL_501207, EPI_ISL_501208, EPI_ISL_501209, EPI_ISL_501210, EPI_ISL_501211, EPI_ISL_501212, EPI_ISL_501213, EPI_ISL_501214, EPI_ISL_501215, EPI_ISL_501216, EPI_ISL_501217, EPI_ISL_501218, EPI_ISL_501219, EPI_ISL_501220, EPI_ISL_501221, EPI_ISL_501222, EPI_ISL_501223, EPI_ISL_501224, EPI_ISL_501225, EPI_ISL_501226, EPI_ISL_501227, EPI_ISL_501228                                                                                 |                                                                                                             |                                                                                                             |                                                                                                                                                                                                                                                                                                                                                           |
| see above                                                                                                                                                                                                                                                                                                                                                                                                                                                                                                                                                                                                                                                                                                                                                                                                                                                                                                                                                      | Department of Medical Microbiology, University Malaysia Medical Centre                                      | Department of Medical Microbiology, Faculty of Medicine, University of Malaysia                             | Yoong Min CHONG, Jennifer Chong, I-Ching SAM, Yoke Fun CHAN, University Malaysia Medical Centre COVID Team                                                                                                                                                                                                                                                |
| EPI_ISL_502779                                                                                                                                                                                                                                                                                                                                                                                                                                                                                                                                                                                                                                                                                                                                                                                                                                                                                                                                                 | LACEN/PE                                                                                                    | LABBE, Federal University of Pernambuco                                                                     | WILSON JOSE DA SILVA JUNIOR, HEIDI LACERDA ALVES DA CRUZ, MARCOS DA SILVEIRA REGUEIRA NETO, BRUNO SAMPAIO, SERGIO DE SA LEITAO PAIVA JUNIOR, ZILDENE DE SOUSA SILVEIRA, MAIRA GALDINO DA ROCHA PITTA, MICHELLY CRISTINY PEREIRA, MARCOS ANTONIO DE MORAIS JUNIOR, ANTONIO CARLOS DE FREITAS, VALDIR DE QUEIROZ BALBINO.                                   |
| EPI_ISL_502875                                                                                                                                                                                                                                                                                                                                                                                                                                                                                                                                                                                                                                                                                                                                                                                                                                                                                                                                                 | LACEN/PE                                                                                                    | LABBE, Federal University of Pernambuco                                                                     | WILSON JOSE DA SILVA JUNIOR, HEIDI LACERDA ALVES DA CRUZ, MARCOS DA SILVEIRA REGUEIRA NETO, BRUNO SAMPAIO, SERGIO DE SA LEITAO PAIVA JUNIOR, ZILDENE DE SOUSA SILVEIRA, MAIRA GALDINO DA ROCHA PITTA, MICHELLY CRISTINY PEREIRA, REGINALDO GONCALVES DE LIMA NETO, MARCOS ANTONIO DE MORAIS JUNIOR, ANTONIO CARLOS DE FREITAS, VALDIR DE QUEIROZ BALBINO. |
| EPI_ISL_506996, EPI_ISL_506997, EPI_ISL_506998, EPI_ISL_506999, EPI_ISL_507000                                                                                                                                                                                                                                                                                                                                                                                                                                                                                                                                                                                                                                                                                                                                                                                                                                                                                 | Department of Medical Microbiology, University Malaysia Medical Centre                                      | Department of Medical Microbiology, Faculty of Medicine, University of Malaysia                             | Yoong Min CHONG, Jennifer Chong, I-Ching SAM, Yoke Fun CHAN, University Malaysia Medical Centre COVID Team                                                                                                                                                                                                                                                |
| EPI_ISL_507039                                                                                                                                                                                                                                                                                                                                                                                                                                                                                                                                                                                                                                                                                                                                                                                                                                                                                                                                                 | Department of Microbiology, College of Medicine and Medical Research Institute Chungbuk National University | Department of Microbiology, College of Medicine and Medical Research Institute Chungbuk National University | Young-II Kim, Mark Anthony B. Casel, Se-Mi Kim, Seong-Gyu Kim, Su-Jin Park, Eun-Ha Kim, Hye Won Jeong, Young Ki Choi                                                                                                                                                                                                                                      |

|                                                                                                                                                                                                                                                                                                                                                                                                                                                                                                                                                                                                                                                                                                                                                                                                                                                                                                                                                                                                                                |                                                                                                                 |                                                                                                                        |                                                                                                                                                                                                                                                                                                                                                    |                                                                                                                                      |
|--------------------------------------------------------------------------------------------------------------------------------------------------------------------------------------------------------------------------------------------------------------------------------------------------------------------------------------------------------------------------------------------------------------------------------------------------------------------------------------------------------------------------------------------------------------------------------------------------------------------------------------------------------------------------------------------------------------------------------------------------------------------------------------------------------------------------------------------------------------------------------------------------------------------------------------------------------------------------------------------------------------------------------|-----------------------------------------------------------------------------------------------------------------|------------------------------------------------------------------------------------------------------------------------|----------------------------------------------------------------------------------------------------------------------------------------------------------------------------------------------------------------------------------------------------------------------------------------------------------------------------------------------------|--------------------------------------------------------------------------------------------------------------------------------------|
| EPI_ISL_509424, EPI_ISL_509425, EPI_ISL_509426, EPI_ISL_509427, EPI_ISL_509428, EPI_ISL_509429                                                                                                                                                                                                                                                                                                                                                                                                                                                                                                                                                                                                                                                                                                                                                                                                                                                                                                                                 | Microbiology and Immunology, University of South Alabama                                                        | Microbiology and Immunology, University of South Alabama                                                               | Wood,R.R., Roberts,R.A., Houserova,D., Borchert,G.M., Fouty,B., Rayner,J.O.                                                                                                                                                                                                                                                                        |                                                                                                                                      |
| EPI_ISL_509662                                                                                                                                                                                                                                                                                                                                                                                                                                                                                                                                                                                                                                                                                                                                                                                                                                                                                                                                                                                                                 | Georgia Department of Health                                                                                    | Pathogen Discovery, Respiratory Viruses Branch, Division of Viral Diseases, Centers for Disease Control and Prevention | Yan Li, Anna Montmayeur, Jing Zhang, Krista Queen, Anna Uehara, Ying Tao, Rachel Marine, Clinton R. Paden, Haibin Wang, Suxiang Tong                                                                                                                                                                                                               |                                                                                                                                      |
| EPI_ISL_509663, EPI_ISL_509664, EPI_ISL_509665, EPI_ISL_509666, EPI_ISL_509667, EPI_ISL_509668, EPI_ISL_509670, EPI_ISL_509671, EPI_ISL_509672, EPI_ISL_509673, EPI_ISL_509674, EPI_ISL_509675, EPI_ISL_509676, EPI_ISL_509677, EPI_ISL_509678, EPI_ISL_509679, EPI_ISL_509680, EPI_ISL_509681, EPI_ISL_509682                                                                                                                                                                                                                                                                                                                                                                                                                                                                                                                                                                                                                                                                                                                 | see above                                                                                                       | AR Dept. of Health-Public Health Lab                                                                                   | Pathogen Discovery, Respiratory Viruses Branch, Division of Viral Diseases, Centers for Disease Control and Prevention                                                                                                                                                                                                                             | Yan Li, Anna Montmayeur, Jing Zhang, Krista Queen, Anna Uehara, Ying Tao, Rachel Marine, Clinton R. Paden, Haibin Wang, Suxiang Tong |
| EPI_ISL_509688                                                                                                                                                                                                                                                                                                                                                                                                                                                                                                                                                                                                                                                                                                                                                                                                                                                                                                                                                                                                                 | Alabama Department of Public Health Bureau of Clinical Laboratories                                             | Pathogen Discovery, Respiratory Viruses Branch, Division of Viral Diseases, Centers for Disease Control and Prevention | Ying Tao, Jing Zhang, Krista Queen, Anna Uehara, Yan Li, Clinton Paden, Haibin Wang, Suxiang Tong                                                                                                                                                                                                                                                  |                                                                                                                                      |
| EPI_ISL_509689, EPI_ISL_509690, EPI_ISL_509691, EPI_ISL_509692, EPI_ISL_509693, EPI_ISL_509694                                                                                                                                                                                                                                                                                                                                                                                                                                                                                                                                                                                                                                                                                                                                                                                                                                                                                                                                 | Utah Public Health Laboratory                                                                                   | Pathogen Discovery, Respiratory Viruses Branch, Division of Viral Diseases, Centers for Disease Control and Prevention | Ying Tao, Jing Zhang, Krista Queen, Anna Uehara, Yan Li, Clinton Paden, Haibin Wang, Suxiang Tong                                                                                                                                                                                                                                                  |                                                                                                                                      |
| EPI_ISL_509695, EPI_ISL_509696, EPI_ISL_509697, EPI_ISL_509698, EPI_ISL_509699, EPI_ISL_509700, EPI_ISL_509701, EPI_ISL_509702, EPI_ISL_509703                                                                                                                                                                                                                                                                                                                                                                                                                                                                                                                                                                                                                                                                                                                                                                                                                                                                                 | Guatemala Ministry of Public Health                                                                             | Pathogen Discovery, Respiratory Viruses Branch, Division of Viral Diseases, Centers for Disease Control and Prevention | Ying Tao, Jing Zhang, Krista Queen, Anna Uehara, Yan Li, Clinton Paden, Haibin Wang, Suxiang Tong                                                                                                                                                                                                                                                  |                                                                                                                                      |
| EPI_ISL_509704, EPI_ISL_509705, EPI_ISL_509706                                                                                                                                                                                                                                                                                                                                                                                                                                                                                                                                                                                                                                                                                                                                                                                                                                                                                                                                                                                 | Wisconsin Department of Health Services                                                                         | Pathogen Discovery, Respiratory Viruses Branch, Division of Viral Diseases, Centers for Disease Control and Prevention | Ying Tao, Jing Zhang, Krista Queen, Anna Uehara, Yan Li, Clinton Paden, Haibin Wang, Suxiang Tong                                                                                                                                                                                                                                                  |                                                                                                                                      |
| EPI_ISL_512065                                                                                                                                                                                                                                                                                                                                                                                                                                                                                                                                                                                                                                                                                                                                                                                                                                                                                                                                                                                                                 | B.J. Medical College and Civil hospital, Ahmedabad                                                              | Gujarat Biotechnology Research Centre                                                                                  | Zuber Saiyed, Komal Patel, Labdhi Pandya, Afzal Ansari, Nikha Trivedi, Pranay Shah, Kamlesh J Upadhyay, Sanjay Kapadia, Apurvasinh Puvar, Janvi Raval, Zarna Patel, Monika Gandhi, Pinal Trivedi, Maharshi Pandya, Nidhi Patel, Nitin Savaliya, Raghawendra Kumar, Dinesh Kumar, R D Dixit, A M Kadri, Harsh Bakshi, Chaitanya Joshi, Madhvi Joshi |                                                                                                                                      |
| EPI_ISL_514062, EPI_ISL_514063, EPI_ISL_514064, EPI_ISL_514066, EPI_ISL_514069, EPI_ISL_514070, EPI_ISL_514073, EPI_ISL_514074, EPI_ISL_514077, EPI_ISL_514078, EPI_ISL_514079, EPI_ISL_514084, EPI_ISL_514088, EPI_ISL_514090, EPI_ISL_514091, EPI_ISL_514092                                                                                                                                                                                                                                                                                                                                                                                                                                                                                                                                                                                                                                                                                                                                                                 | see above                                                                                                       | Navy and Marine Corps Public Health Center                                                                             | Pathogen Discovery, Respiratory Viruses Branch, Division of Viral Diseases, Centers for Disease Control and Prevention                                                                                                                                                                                                                             | Yan Li, Anna Montmayeur, Krista Queen, Jing Zhang, Ying Tao, Anna Uehara, Rachel Marine, Clinton R. Paden, Haibin Wang, Suxiang Tong |
| EPI_ISL_514425, EPI_ISL_514426, EPI_ISL_514427, EPI_ISL_514428, EPI_ISL_514429, EPI_ISL_514430, EPI_ISL_514431                                                                                                                                                                                                                                                                                                                                                                                                                                                                                                                                                                                                                                                                                                                                                                                                                                                                                                                 | Laboratory Diagnostic, Veterinary Specialized Institute Kraljevo                                                | Laboratory Diagnostic, Veterinary Specialized Institute Kraljevo                                                       | Vidanovic,D., Tesovic,B., Knezevic,A., Jankovic,M., Sekler,M., Banovic Djeri.B., Volkening,J., Afonso,C., Petrovic,T.                                                                                                                                                                                                                              |                                                                                                                                      |
| EPI_ISL_514436                                                                                                                                                                                                                                                                                                                                                                                                                                                                                                                                                                                                                                                                                                                                                                                                                                                                                                                                                                                                                 | Dr. RSS Hospital, Modasa                                                                                        | Gujarat Biotechnology Research Centre                                                                                  | Zarna Patel, Monika Gandhi, Pinal Trivedi, Maharshi Pandya, Nidhi Patel, Nitin Savaliya, Raghawendra Kumar, Dinesh Kumar, Zuber Saiyed, Komal Patel, Labdhi Pandya, Afzal Ansari, Nikha Trivedi, Pranay Shah, Kamlesh J Upadhyay, Sanjay Kapadia, Apurvasinh Puvar, Janvi Raval, R D Dixit, A M Kadri, Harsh Bakshi, Chaitanya Joshi, Madhvi Joshi |                                                                                                                                      |
| EPI_ISL_514584                                                                                                                                                                                                                                                                                                                                                                                                                                                                                                                                                                                                                                                                                                                                                                                                                                                                                                                                                                                                                 | B.J. Medical College and Civil hospital, Ahmedabad                                                              | Gujarat Biotechnology Research Centre                                                                                  | Zuber Saiyed, Komal Patel, Labdhi Pandya, Afzal Ansari, Nikha Trivedi, Pranay Shah, Kamlesh J Upadhyay, Sanjay Kapadia, Apurvasinh Puvar, Janvi Raval, Zarna Patel, Monika Gandhi, Pinal Trivedi, Maharshi Pandya, Nidhi Patel, Nitin Savaliya, Raghawendra Kumar, Dinesh Kumar, R D Dixit, A M Kadri, Harsh Bakshi, Chaitanya Joshi, Madhvi Joshi |                                                                                                                                      |
| EPI_ISL_514594                                                                                                                                                                                                                                                                                                                                                                                                                                                                                                                                                                                                                                                                                                                                                                                                                                                                                                                                                                                                                 | B.J. Medical College and Civil hospital, Ahmedabad                                                              | Gujarat Biotechnology Research Centre                                                                                  | Zarna Patel, Monika Gandhi, Pinal Trivedi, Maharshi Pandya, Nidhi Patel, Nitin Savaliya, Raghawendra Kumar, Dinesh Kumar, Zuber Saiyed, Komal Patel, Labdhi Pandya, Afzal Ansari, Nikha Trivedi, Pranay Shah, Kamlesh J Upadhyay, Sanjay Kapadia, Apurvasinh Puvar, Janvi Raval, R D Dixit, A M Kadri, Harsh Bakshi, Chaitanya Joshi, Madhvi Joshi |                                                                                                                                      |
| EPI_ISL_514602                                                                                                                                                                                                                                                                                                                                                                                                                                                                                                                                                                                                                                                                                                                                                                                                                                                                                                                                                                                                                 | B.J. Medical College and Civil hospital, Ahmedabad                                                              | Gujarat Biotechnology Research Centre                                                                                  | Zuber Saiyed, Komal Patel, Labdhi Pandya, Afzal Ansari, Nikha Trivedi, Pranay Shah, Kamlesh J Upadhyay, Sanjay Kapadia, Apurvasinh Puvar, Janvi Raval, Zarna Patel, Monika Gandhi, Pinal Trivedi, Maharshi Pandya, Nidhi Patel, Nitin Savaliya, Raghawendra Kumar, Dinesh Kumar, R D Dixit, A M Kadri, Harsh Bakshi, Chaitanya Joshi, Madhvi Joshi |                                                                                                                                      |
| EPI_ISL_514751                                                                                                                                                                                                                                                                                                                                                                                                                                                                                                                                                                                                                                                                                                                                                                                                                                                                                                                                                                                                                 | CoronaNet Lab- TaskForce Regione Campania, CEINGE Biotechnologie Avanzate, Via G. Salvatore                     | CoronaNet Lab- TaskForce Regione Campania, CEINGE Biotechnologie Avanzate, Via G. Salvatore                            | Zollo,M., Ferrucci,V., Kong,Dy., Asadzadeh,F., Marrone,L., Siciliano,R., Cerino,R., Fusco,G., Comegna,M., Boccia,A.,Viscardi,M., Borriello,G., Brandi,S., Tiberio,C., Atripaldi,L.,Paolella,G., Castaldo,G., Pascarella,S., Bianchi,M., Chiarotti,L.,Lee,J.M., Jung,J.H., Yun,K.S. and Kim,H.Y.                                                    |                                                                                                                                      |
| EPI_ISL_516632, EPI_ISL_516633, EPI_ISL_516635, EPI_ISL_516636, EPI_ISL_516637, EPI_ISL_516638, EPI_ISL_516640, EPI_ISL_516641, EPI_ISL_516642, EPI_ISL_516643, EPI_ISL_516644, EPI_ISL_516645                                                                                                                                                                                                                                                                                                                                                                                                                                                                                                                                                                                                                                                                                                                                                                                                                                 | see above                                                                                                       | Charite Universitätsmedizin Berlin, Institut für Virologie/Labor Berlin                                                | Charite Universitätsmedizin Berlin, Institut für Virologie/Labor Berlin                                                                                                                                                                                                                                                                            | Victor M Corman, Barbara Muehlmann, Jörn Beheim-Schwarzbach, Julia Schneider, Talitha Veith, Terry Jones, Christian Drosten          |
| EPI_ISL_516655, EPI_ISL_516656, EPI_ISL_516657, EPI_ISL_516658, EPI_ISL_516659, EPI_ISL_516660, EPI_ISL_516661, EPI_ISL_516662, EPI_ISL_516663, EPI_ISL_516664, EPI_ISL_516665, EPI_ISL_516666, EPI_ISL_516667, EPI_ISL_516668, EPI_ISL_516669, EPI_ISL_516670, EPI_ISL_516671, EPI_ISL_516672, EPI_ISL_516673, EPI_ISL_516674, EPI_ISL_516675, EPI_ISL_516676, EPI_ISL_516677, EPI_ISL_516678, EPI_ISL_516679, EPI_ISL_516680, EPI_ISL_516681, EPI_ISL_516682, EPI_ISL_516683, EPI_ISL_516684, EPI_ISL_516687, EPI_ISL_516688, EPI_ISL_516689, EPI_ISL_516690, EPI_ISL_516692, EPI_ISL_516693, EPI_ISL_516694, EPI_ISL_516695, EPI_ISL_516696, EPI_ISL_516697, EPI_ISL_516698, EPI_ISL_516699, EPI_ISL_516700, EPI_ISL_516701, EPI_ISL_516702, EPI_ISL_516703, EPI_ISL_516704, EPI_ISL_516705, EPI_ISL_516706, EPI_ISL_516707, EPI_ISL_516708, EPI_ISL_516710, EPI_ISL_516711, EPI_ISL_516712, EPI_ISL_516713, EPI_ISL_516714, EPI_ISL_516715, EPI_ISL_516716, EPI_ISL_516717, EPI_ISL_516718, EPI_ISL_516719, EPI_ISL_516720 | see above                                                                                                       | Virginia DCLS                                                                                                          | Virginia DCLS                                                                                                                                                                                                                                                                                                                                      | Virginia DCLS                                                                                                                        |
| EPI_ISL_516924, EPI_ISL_516925, EPI_ISL_516926, EPI_ISL_516928, EPI_ISL_516929, EPI_ISL_516930, EPI_ISL_516931                                                                                                                                                                                                                                                                                                                                                                                                                                                                                                                                                                                                                                                                                                                                                                                                                                                                                                                 | Department for Molecular Diagnostics, Centre for Medical Microbiology, Institute of Public Health of Montenegro | Charite Universitätsmedizin Berlin, Institut für Virologie                                                             | Victor M Corman, Terry Jones, Jörn Beheim-Schwarzbach, Barbara Muehlmann, Talitha Veith, Julia Schneider, Marija Govedarica and Danijela Vujošević, Christian Drosten                                                                                                                                                                              |                                                                                                                                      |
| EPI_ISL_516988                                                                                                                                                                                                                                                                                                                                                                                                                                                                                                                                                                                                                                                                                                                                                                                                                                                                                                                                                                                                                 | Public Health Authority of the Slovak Republic, Department of Medical Microbiology                              | Charite Universitätsmedizin Berlin, Institute of Virology                                                              | Victor M Corman, Terry Jones, Jörn Beheim-Schwarzbach, Barbara Muehlmann, Talitha Veith, Julia Schneider, Mgr. Edit Staronova, Christian Drosten                                                                                                                                                                                                   |                                                                                                                                      |
| EPI_ISL_522777, EPI_ISL_522778, EPI_ISL_522779, EPI_ISL_522780, EPI_ISL_522781, EPI_ISL_522782, EPI_ISL_522783, EPI_ISL_522784, EPI_ISL_522785, EPI_ISL_522786, EPI_ISL_522787, EPI_ISL_522788, EPI_ISL_522789, EPI_ISL_522790, EPI_ISL_522791, EPI_ISL_522792, EPI_ISL_522793, EPI_ISL_522794, EPI_ISL_522795, EPI_ISL_522796, EPI_ISL_522797, EPI_ISL_522798, EPI_ISL_522799, EPI_ISL_522800, EPI_ISL_522801, EPI_ISL_522802, EPI_ISL_522803, EPI_ISL_522804, EPI_ISL_522805, EPI_ISL_522806, EPI_ISL_522807, EPI_ISL_522808, EPI_ISL_522809, EPI_ISL_522810, EPI_ISL_522811, EPI_ISL_522812, EPI_ISL_522813, EPI_ISL_522814, EPI_ISL_522815, EPI_ISL_522816, EPI_ISL_522817, EPI_ISL_522818, EPI_ISL_522819, EPI_ISL_522820, EPI_ISL_522821, EPI_ISL_522822, EPI_ISL_522823                                                                                                                                                                                                                                                 | see above                                                                                                       | Virginia DCLS                                                                                                          | Virginia DCLS                                                                                                                                                                                                                                                                                                                                      | Virginia DCLS                                                                                                                        |
| EPI_ISL_523960                                                                                                                                                                                                                                                                                                                                                                                                                                                                                                                                                                                                                                                                                                                                                                                                                                                                                                                                                                                                                 | National Agency for Public Health, Republic of Moldova                                                          | Charite Universitätsmedizin Berlin, Institute of Virology                                                              | Victor M Corman, Jörn Beheim-Schwarzbach, Barbara Muehlmann, Talitha Veith, Julia Schneider, Ala Halacu, Mariana Apostol, Terry Jones, Christian Drosten                                                                                                                                                                                           |                                                                                                                                      |
| EPI_ISL_523962                                                                                                                                                                                                                                                                                                                                                                                                                                                                                                                                                                                                                                                                                                                                                                                                                                                                                                                                                                                                                 | National Agency for Public Health, Republic of Moldova                                                          | Charite Universitätsmedizin Berlin, Institute of Virology                                                              | Victor M Corman, Jörn Beheim-Schwarzbach, Barbara Muehlmann, Talitha Veith, Julia Schneider, Elizabeta Jancheska, Maja Kuzmanovska, Golubinka Bosevska, Terry Jones, Christian Drosten                                                                                                                                                             |                                                                                                                                      |
| EPI_ISL_523966, EPI_ISL_523968                                                                                                                                                                                                                                                                                                                                                                                                                                                                                                                                                                                                                                                                                                                                                                                                                                                                                                                                                                                                 | National Agency for Public Health, Republic of Moldova                                                          | Charite Universitätsmedizin Berlin, Institute of Virology                                                              | Victor M Corman, Jörn Beheim-Schwarzbach, Barbara Muehlmann, Talitha Veith, Julia Schneider, Ala Halacu, Mariana Apostol, Terry Jones, Christian Drosten                                                                                                                                                                                           |                                                                                                                                      |
| EPI_ISL_524426                                                                                                                                                                                                                                                                                                                                                                                                                                                                                                                                                                                                                                                                                                                                                                                                                                                                                                                                                                                                                 | Egyptian National Cancer Institute (ENCI)                                                                       | Egyptian National Cancer Institute (ENCI)                                                                              | Zekri, Abdel Rahman N., Amer,K.E., Ahmed,O.S., Soliman,H.K., Ali,M.A., Hassan,W.A., Mahmoud,A.A., Khattab,A.A., Hafez,M.M., Abouelhoda, Mohamed                                                                                                                                                                                                    |                                                                                                                                      |
| EPI_ISL_524427                                                                                                                                                                                                                                                                                                                                                                                                                                                                                                                                                                                                                                                                                                                                                                                                                                                                                                                                                                                                                 | Egyptian National Cancer Institute (ENCI)                                                                       | Egyptian National Cancer Institute (ENCI)                                                                              | Zekri, Abdel Rahman N., Amer,K.E., Ahmed,O.S., Soliman,H.K., Hafez,M.M., Bahnassy,A.A., Abdelhamid,W., Gad,A., Ali,M., Hassan,W., Samir,M., Raouf,A., Hamdy,M.S., Soliman,M.S., Elsisy,M.H., Elkhateeb,S.M., Ezzelarab,M.H., Abouelhoda, Mohamed                                                                                                   |                                                                                                                                      |
| EPI_ISL_524715                                                                                                                                                                                                                                                                                                                                                                                                                                                                                                                                                                                                                                                                                                                                                                                                                                                                                                                                                                                                                 | B.J. Medical College and Civil hospital, Ahmedabad                                                              | Gujarat Biotechnology Research Centre                                                                                  | Zarna Patel, Monika Gandhi, Pinal Trivedi, Maharshi Pandya, Nidhi Patel, Nitin Savaliya, Raghawendra Kumar, Dinesh Kumar, Zuber Saiyed, Komal Patel,                                                                                                                                                                                               |                                                                                                                                      |



|                                                                                                                                                                                                                                                                                                                                                                                                                                                                                                                                                                                                                                                                                                                                                                                                                                                                                                                                                                                                                                                                                                                                                                                                                                                                                                                                                                                                                                                                                                                                                                                                                                                                                                                                                                                                                                                                                                                                                                                                                                                                                                                                                                                                                                                                                                                                                                                                                                                                                                                                                                                                                |                                                                                                    |                                                                                                                                                                                                               |                                                                                                                                                                                                                                                                                                                                                                                              |
|----------------------------------------------------------------------------------------------------------------------------------------------------------------------------------------------------------------------------------------------------------------------------------------------------------------------------------------------------------------------------------------------------------------------------------------------------------------------------------------------------------------------------------------------------------------------------------------------------------------------------------------------------------------------------------------------------------------------------------------------------------------------------------------------------------------------------------------------------------------------------------------------------------------------------------------------------------------------------------------------------------------------------------------------------------------------------------------------------------------------------------------------------------------------------------------------------------------------------------------------------------------------------------------------------------------------------------------------------------------------------------------------------------------------------------------------------------------------------------------------------------------------------------------------------------------------------------------------------------------------------------------------------------------------------------------------------------------------------------------------------------------------------------------------------------------------------------------------------------------------------------------------------------------------------------------------------------------------------------------------------------------------------------------------------------------------------------------------------------------------------------------------------------------------------------------------------------------------------------------------------------------------------------------------------------------------------------------------------------------------------------------------------------------------------------------------------------------------------------------------------------------------------------------------------------------------------------------------------------------|----------------------------------------------------------------------------------------------------|---------------------------------------------------------------------------------------------------------------------------------------------------------------------------------------------------------------|----------------------------------------------------------------------------------------------------------------------------------------------------------------------------------------------------------------------------------------------------------------------------------------------------------------------------------------------------------------------------------------------|
| EPI_ISL_524723                                                                                                                                                                                                                                                                                                                                                                                                                                                                                                                                                                                                                                                                                                                                                                                                                                                                                                                                                                                                                                                                                                                                                                                                                                                                                                                                                                                                                                                                                                                                                                                                                                                                                                                                                                                                                                                                                                                                                                                                                                                                                                                                                                                                                                                                                                                                                                                                                                                                                                                                                                                                 | B.J. Medical College and Civil hospital, Ahmedabad                                                 | Gujarat Biotechnology Research Centre                                                                                                                                                                         | Labdhi Pandya, Afzal Ansari, Nikha Trivedi, Pranay Shah, Kamlesh J Upadhyay, Sanjay Kapadia, Apurvasinh Puvar, Janvi Raval, R D Dixit, A M Kadri, Harsh Bakshi, Chaitanya Joshi, Madhvi Joshi                                                                                                                                                                                                |
| EPI_ISL_524737                                                                                                                                                                                                                                                                                                                                                                                                                                                                                                                                                                                                                                                                                                                                                                                                                                                                                                                                                                                                                                                                                                                                                                                                                                                                                                                                                                                                                                                                                                                                                                                                                                                                                                                                                                                                                                                                                                                                                                                                                                                                                                                                                                                                                                                                                                                                                                                                                                                                                                                                                                                                 | GMERS Medical College and Hospital, Gandhinagar                                                    | Gujarat Biotechnology Research Centre                                                                                                                                                                         | Zarna Patel, Monika Gandhi, Pinal Trivedi, Maharshi Pandya, Nidhi Patel, Nitin Savaliya, Raghawendra Kumar, Dinesh Kumar, Zuber Saiyed, Komal Patel, Labdhi Pandya, Afzal Ansari, Nikha Trivedi, Seema Bhatt, Gaurishankar Shrimali, Bhavesh Modi, Bharti Rajani, Apurvasinh Puvar, Janvi Raval, R D Dixit, A M Kadri, Harsh Bakshi, Chaitanya Joshi, Madhvi Joshi                           |
| EPI_ISL_524743                                                                                                                                                                                                                                                                                                                                                                                                                                                                                                                                                                                                                                                                                                                                                                                                                                                                                                                                                                                                                                                                                                                                                                                                                                                                                                                                                                                                                                                                                                                                                                                                                                                                                                                                                                                                                                                                                                                                                                                                                                                                                                                                                                                                                                                                                                                                                                                                                                                                                                                                                                                                 | GMERS Medical College and Hospital, Gandhinagar                                                    | Gujarat Biotechnology Research Centre                                                                                                                                                                         | Zuber Saiyed, Komal Patel, Labdhi Pandya, Afzal Ansari, Nikha Trivedi, Seema Bhatt, Gaurishankar Shrimali, Bhavesh Modi, Bharti Rajani, Apurvasinh Puvar, Janvi Raval, Zarna Patel, Monika Gandhi, Pinal Trivedi, Maharshi Pandya, Nidhi Patel, Nitin Savaliya, Raghawendra Kumar, Dinesh Kumar, R D Dixit, A M Kadri, Harsh Bakshi, Chaitanya Joshi, Madhvi Joshi                           |
| EPI_ISL_524751                                                                                                                                                                                                                                                                                                                                                                                                                                                                                                                                                                                                                                                                                                                                                                                                                                                                                                                                                                                                                                                                                                                                                                                                                                                                                                                                                                                                                                                                                                                                                                                                                                                                                                                                                                                                                                                                                                                                                                                                                                                                                                                                                                                                                                                                                                                                                                                                                                                                                                                                                                                                 | Sir M P Shah Government Medical College, Jamnagar                                                  | Gujarat Biotechnology Research Centre                                                                                                                                                                         | Zarna Patel, Monika Gandhi, Pinal Trivedi, Maharshi Pandya, Nidhi Patel, Nitin Savaliya, Raghawendra Kumar, Dinesh Kumar, Zuber Saiyed, Komal Patel, Labdhi Pandya, Afzal Ansari, Nikha Trivedi, Binita Aring, Apurvasinh Puvar, Janvi Raval, R D Dixit, A M Kadri, Harsh Bakshi, Chaitanya Joshi, Madhvi Joshi                                                                              |
| EPI_ISL_524759                                                                                                                                                                                                                                                                                                                                                                                                                                                                                                                                                                                                                                                                                                                                                                                                                                                                                                                                                                                                                                                                                                                                                                                                                                                                                                                                                                                                                                                                                                                                                                                                                                                                                                                                                                                                                                                                                                                                                                                                                                                                                                                                                                                                                                                                                                                                                                                                                                                                                                                                                                                                 | GMERS Medical College and Hospital, Dharpur, Patan                                                 | Gujarat Biotechnology Research Centre                                                                                                                                                                         | Zuber Saiyed, Komal Patel, Labdhi Pandya, Afzal Ansari, Nikha Trivedi, A N Parmar, Apurvasinh Puvar, Janvi Raval, Zarna Patel, Monika Gandhi, Pinal Trivedi, Maharshi Pandya, Nidhi Patel, Nitin Savaliya, Raghawendra Kumar, Dinesh Kumar, R D Dixit, A M Kadri, Harsh Bakshi, Chaitanya Joshi, Madhvi Joshi                                                                                |
| EPI_ISL_525189, EPI_ISL_525190, EPI_ISL_525191, EPI_ISL_525192, EPI_ISL_525193, EPI_ISL_525194, EPI_ISL_525195, EPI_ISL_525196, EPI_ISL_525197, EPI_ISL_525198, EPI_ISL_525199, EPI_ISL_525200, EPI_ISL_525201, EPI_ISL_525202, EPI_ISL_525203, EPI_ISL_525204, EPI_ISL_525205                                                                                                                                                                                                                                                                                                                                                                                                                                                                                                                                                                                                                                                                                                                                                                                                                                                                                                                                                                                                                                                                                                                                                                                                                                                                                                                                                                                                                                                                                                                                                                                                                                                                                                                                                                                                                                                                                                                                                                                                                                                                                                                                                                                                                                                                                                                                 | see above                                                                                          | Virginia DCLS                                                                                                                                                                                                 | Virginia DCLS                                                                                                                                                                                                                                                                                                                                                                                |
| EPI_ISL_525421                                                                                                                                                                                                                                                                                                                                                                                                                                                                                                                                                                                                                                                                                                                                                                                                                                                                                                                                                                                                                                                                                                                                                                                                                                                                                                                                                                                                                                                                                                                                                                                                                                                                                                                                                                                                                                                                                                                                                                                                                                                                                                                                                                                                                                                                                                                                                                                                                                                                                                                                                                                                 | B.J. Medical College and Civil hospital, Ahmedabad                                                 | Gujarat Biotechnology Research Centre                                                                                                                                                                         | Zarna Patel, Monika Gandhi, Pinal Trivedi, Maharshi Pandya, Nidhi Patel, Nitin Savaliya, Raghawendra Kumar, Dinesh Kumar, Zuber Saiyed, Komal Patel, Labdhi Pandya, Afzal Ansari, Nikha Trivedi, Pranay Shah, Kamlesh J Upadhyay, Sanjay Kapadia, Apurvasinh Puvar, Janvi Raval, R D Dixit, A M Kadri, Harsh Bakshi, Chaitanya Joshi, Madhvi Joshi                                           |
| EPI_ISL_526775, EPI_ISL_526776, EPI_ISL_526777, EPI_ISL_526778, EPI_ISL_526779, EPI_ISL_526780, EPI_ISL_526781, EPI_ISL_526782, EPI_ISL_526783, EPI_ISL_526784, EPI_ISL_526785, EPI_ISL_526786, EPI_ISL_526787, EPI_ISL_526788, EPI_ISL_526789, EPI_ISL_526790, EPI_ISL_526791, EPI_ISL_526792, EPI_ISL_526793, EPI_ISL_526794, EPI_ISL_526795, EPI_ISL_526796, EPI_ISL_526797, EPI_ISL_526798, EPI_ISL_526799, EPI_ISL_526800, EPI_ISL_526801, EPI_ISL_526802, EPI_ISL_526803, EPI_ISL_526804, EPI_ISL_526805, EPI_ISL_526806, EPI_ISL_526807, EPI_ISL_526808, EPI_ISL_526809, EPI_ISL_526810, EPI_ISL_526811, EPI_ISL_526812, EPI_ISL_526813, EPI_ISL_526814, EPI_ISL_526815, EPI_ISL_526816, EPI_ISL_526817, EPI_ISL_526818, EPI_ISL_526819, EPI_ISL_526820, EPI_ISL_526821, EPI_ISL_526822, EPI_ISL_526823, EPI_ISL_526824, EPI_ISL_526825, EPI_ISL_526826, EPI_ISL_526827, EPI_ISL_526828, EPI_ISL_526829, EPI_ISL_526830, EPI_ISL_526831, EPI_ISL_526832, EPI_ISL_526833, EPI_ISL_526834, EPI_ISL_526835, EPI_ISL_526836, EPI_ISL_526837, EPI_ISL_526838, EPI_ISL_526839, EPI_ISL_526840, EPI_ISL_526841, EPI_ISL_526842, EPI_ISL_526843, EPI_ISL_526844, EPI_ISL_526845, EPI_ISL_526846, EPI_ISL_526847, EPI_ISL_526848, EPI_ISL_526849, EPI_ISL_526850, EPI_ISL_526851, EPI_ISL_526852, EPI_ISL_526853, EPI_ISL_526854, EPI_ISL_526855, EPI_ISL_526856, EPI_ISL_526857, EPI_ISL_526858, EPI_ISL_526859, EPI_ISL_526860, EPI_ISL_526861, EPI_ISL_526862, EPI_ISL_526863, EPI_ISL_526864, EPI_ISL_526865, EPI_ISL_526866, EPI_ISL_526867, EPI_ISL_526868, EPI_ISL_526869, EPI_ISL_526870, EPI_ISL_526871, EPI_ISL_526872, EPI_ISL_526873, EPI_ISL_526874, EPI_ISL_526875, EPI_ISL_526876, EPI_ISL_526877, EPI_ISL_526878, EPI_ISL_526879, EPI_ISL_526880, EPI_ISL_526881, EPI_ISL_526882, EPI_ISL_526883, EPI_ISL_526884, EPI_ISL_526885, EPI_ISL_526886, EPI_ISL_526887, EPI_ISL_526888, EPI_ISL_526889, EPI_ISL_526890, EPI_ISL_526891, EPI_ISL_526892, EPI_ISL_526893, EPI_ISL_526894, EPI_ISL_526895, EPI_ISL_526896, EPI_ISL_526897, EPI_ISL_526898, EPI_ISL_526899, EPI_ISL_526900, EPI_ISL_526901, EPI_ISL_526902, EPI_ISL_526903, EPI_ISL_526904, EPI_ISL_526905, EPI_ISL_526906, EPI_ISL_526907, EPI_ISL_526908, EPI_ISL_526909, EPI_ISL_526910, EPI_ISL_526911, EPI_ISL_526912, EPI_ISL_526913, EPI_ISL_526914, EPI_ISL_526915, EPI_ISL_526916, EPI_ISL_526917, EPI_ISL_526918, EPI_ISL_526919, EPI_ISL_526920, EPI_ISL_526921, EPI_ISL_526922, EPI_ISL_526923, EPI_ISL_526924, EPI_ISL_526925, EPI_ISL_526926, EPI_ISL_526927, EPI_ISL_526928, EPI_ISL_526929, EPI_ISL_526930, EPI_ISL_526931 | see above                                                                                          | Virginia DCLS                                                                                                                                                                                                 | Virginia DCLS                                                                                                                                                                                                                                                                                                                                                                                |
| EPI_ISL_527632, EPI_ISL_527633, EPI_ISL_527634, EPI_ISL_527635, EPI_ISL_527636, EPI_ISL_527637, EPI_ISL_527638, EPI_ISL_527639, EPI_ISL_527640, EPI_ISL_527641, EPI_ISL_527642, EPI_ISL_527643, EPI_ISL_527644, EPI_ISL_527645, EPI_ISL_527646, EPI_ISL_527647, EPI_ISL_527648, EPI_ISL_527649, EPI_ISL_527650, EPI_ISL_527651, EPI_ISL_527652, EPI_ISL_527653, EPI_ISL_527654, EPI_ISL_527655, EPI_ISL_527656, EPI_ISL_527657                                                                                                                                                                                                                                                                                                                                                                                                                                                                                                                                                                                                                                                                                                                                                                                                                                                                                                                                                                                                                                                                                                                                                                                                                                                                                                                                                                                                                                                                                                                                                                                                                                                                                                                                                                                                                                                                                                                                                                                                                                                                                                                                                                                 | see above                                                                                          | AR Dept. of Health-Public Health Lab                                                                                                                                                                          | Pathogen Discovery, Respiratory Viruses Branch, Division of Viral Diseases, Centers for Disease Control and Prevention                                                                                                                                                                                                                                                                       |
| EPI_ISL_527658, EPI_ISL_527659, EPI_ISL_527660, EPI_ISL_527661, EPI_ISL_527662, EPI_ISL_527663, EPI_ISL_527664, EPI_ISL_527665                                                                                                                                                                                                                                                                                                                                                                                                                                                                                                                                                                                                                                                                                                                                                                                                                                                                                                                                                                                                                                                                                                                                                                                                                                                                                                                                                                                                                                                                                                                                                                                                                                                                                                                                                                                                                                                                                                                                                                                                                                                                                                                                                                                                                                                                                                                                                                                                                                                                                 | GA Department of Public Health Laboratory                                                          | Pathogen Discovery, Respiratory Viruses Branch, Division of Viral Diseases, Centers for Disease Control and Prevention                                                                                        | Ying Tao, Jing Zhang, Yan Li, Krista Queen, Anna Uehara, Clinton Paden, Haibin Wang, Suxiang Tong                                                                                                                                                                                                                                                                                            |
| EPI_ISL_527667, EPI_ISL_527668, EPI_ISL_527669, EPI_ISL_527670, EPI_ISL_527671, EPI_ISL_527672, EPI_ISL_527673, EPI_ISL_527674, EPI_ISL_527675, EPI_ISL_527676, EPI_ISL_527677, EPI_ISL_527678, EPI_ISL_527679, EPI_ISL_527680, EPI_ISL_527681, EPI_ISL_527682, EPI_ISL_527683, EPI_ISL_527684, EPI_ISL_527685, EPI_ISL_527686, EPI_ISL_527687, EPI_ISL_527688, EPI_ISL_527689, EPI_ISL_527690, EPI_ISL_527691, EPI_ISL_527693, EPI_ISL_527694, EPI_ISL_527695, EPI_ISL_527696, EPI_ISL_527697, EPI_ISL_527698, EPI_ISL_527699, EPI_ISL_527700, EPI_ISL_527702, EPI_ISL_527703, EPI_ISL_527704, EPI_ISL_527705, EPI_ISL_527706, EPI_ISL_527707, EPI_ISL_527708, EPI_ISL_527709, EPI_ISL_527710, EPI_ISL_527711, EPI_ISL_527712, EPI_ISL_527713, EPI_ISL_527715, EPI_ISL_527718, EPI_ISL_527719, EPI_ISL_527721, EPI_ISL_527722, EPI_ISL_527723, EPI_ISL_527725, EPI_ISL_527726, EPI_ISL_527727, EPI_ISL_527728, EPI_ISL_527729, EPI_ISL_527730, EPI_ISL_527732, EPI_ISL_527733, EPI_ISL_527736                                                                                                                                                                                                                                                                                                                                                                                                                                                                                                                                                                                                                                                                                                                                                                                                                                                                                                                                                                                                                                                                                                                                                                                                                                                                                                                                                                                                                                                                                                                                                                                                                 | see above                                                                                          | MN PHL Division, Minnesota Department of Health                                                                                                                                                               | Pathogen Discovery, Respiratory Viruses Branch, Division of Viral Diseases, Centers for Disease Control and Prevention                                                                                                                                                                                                                                                                       |
| EPI_ISL_527737                                                                                                                                                                                                                                                                                                                                                                                                                                                                                                                                                                                                                                                                                                                                                                                                                                                                                                                                                                                                                                                                                                                                                                                                                                                                                                                                                                                                                                                                                                                                                                                                                                                                                                                                                                                                                                                                                                                                                                                                                                                                                                                                                                                                                                                                                                                                                                                                                                                                                                                                                                                                 | WI State Laboratory of Hygiene                                                                     | Pathogen Discovery, Respiratory Viruses Branch, Division of Viral Diseases, Centers for Disease Control and Prevention                                                                                        | Ying Tao, Jing Zhang, Yan Li, Krista Queen, Anna Uehara, Clinton Paden, Haibin Wang, Suxiang Tong                                                                                                                                                                                                                                                                                            |
| EPI_ISL_527871                                                                                                                                                                                                                                                                                                                                                                                                                                                                                                                                                                                                                                                                                                                                                                                                                                                                                                                                                                                                                                                                                                                                                                                                                                                                                                                                                                                                                                                                                                                                                                                                                                                                                                                                                                                                                                                                                                                                                                                                                                                                                                                                                                                                                                                                                                                                                                                                                                                                                                                                                                                                 | Institute of Medical Biology, Chinese Academy of Medical Sciences and Peking Union Medical College | Institute of Medical Biology, Chinese Academy of Medical Sciences and Peking Union Medical College                                                                                                            | Xu,X., Liao,Y., Wang,L., Zhou,X., Xie,Z., Chen,H., Fan,S., Liu,L.,Zheng,H., Jiang,G. and Li,Q.                                                                                                                                                                                                                                                                                               |
| EPI_ISL_528573, EPI_ISL_528574, EPI_ISL_528575, EPI_ISL_528576, EPI_ISL_528577, EPI_ISL_528578, EPI_ISL_528579, EPI_ISL_528580                                                                                                                                                                                                                                                                                                                                                                                                                                                                                                                                                                                                                                                                                                                                                                                                                                                                                                                                                                                                                                                                                                                                                                                                                                                                                                                                                                                                                                                                                                                                                                                                                                                                                                                                                                                                                                                                                                                                                                                                                                                                                                                                                                                                                                                                                                                                                                                                                                                                                 | National Genomics Core-Center for DNA Fingerprinting and Diagnostics                               | National Genomics Core- Center for DNA Fingerprinting and Diagnostics (NGC-CDFD)- DBT's PAN-INDIA-1000 Genome consortium                                                                                      | Vinay Donipadi, G Shashikanth, Heena Shah, Bala Pratyusha, Parveen Kumar, Sandip Patar, Mugdha Singh, Reelina Basu, Dhanraj Adey, Bharath Kumar, Bhavani Sontam, Shaikh Nasar Vali, R Harinarayanan, Rashna Bhandari, Murali Dharan Bashyam, Debashish Mitra, Divya Vashisht, Ashwin Dalal                                                                                                   |
| EPI_ISL_528639, EPI_ISL_528640, EPI_ISL_528641, EPI_ISL_528642, EPI_ISL_528643, EPI_ISL_528644, EPI_ISL_528645, EPI_ISL_528646, EPI_ISL_528647, EPI_ISL_528648, EPI_ISL_528649, EPI_ISL_528650, EPI_ISL_528651, EPI_ISL_528652, EPI_ISL_528653, EPI_ISL_528654, EPI_ISL_528655, EPI_ISL_528656, EPI_ISL_528657, EPI_ISL_528658, EPI_ISL_528659, EPI_ISL_528660, EPI_ISL_528661, EPI_ISL_528662                                                                                                                                                                                                                                                                                                                                                                                                                                                                                                                                                                                                                                                                                                                                                                                                                                                                                                                                                                                                                                                                                                                                                                                                                                                                                                                                                                                                                                                                                                                                                                                                                                                                                                                                                                                                                                                                                                                                                                                                                                                                                                                                                                                                                 | see above                                                                                          | Virginia DCLS                                                                                                                                                                                                 | Virginia DCLS                                                                                                                                                                                                                                                                                                                                                                                |
| EPI_ISL_528663, EPI_ISL_528664, EPI_ISL_528665, EPI_ISL_528666, EPI_ISL_528667, EPI_ISL_528668, EPI_ISL_528669, EPI_ISL_528670, EPI_ISL_528671, EPI_ISL_528672, EPI_ISL_528673, EPI_ISL_528674, EPI_ISL_528675, EPI_ISL_528676, EPI_ISL_528677, EPI_ISL_528678, EPI_ISL_528679, EPI_ISL_528680, EPI_ISL_528681, EPI_ISL_528682                                                                                                                                                                                                                                                                                                                                                                                                                                                                                                                                                                                                                                                                                                                                                                                                                                                                                                                                                                                                                                                                                                                                                                                                                                                                                                                                                                                                                                                                                                                                                                                                                                                                                                                                                                                                                                                                                                                                                                                                                                                                                                                                                                                                                                                                                 | see above                                                                                          | Virginia Division of Consolidated Laboratory Services (DCLS)                                                                                                                                                  | Virginia DCLS                                                                                                                                                                                                                                                                                                                                                                                |
| EPI_ISL_528683, EPI_ISL_528684                                                                                                                                                                                                                                                                                                                                                                                                                                                                                                                                                                                                                                                                                                                                                                                                                                                                                                                                                                                                                                                                                                                                                                                                                                                                                                                                                                                                                                                                                                                                                                                                                                                                                                                                                                                                                                                                                                                                                                                                                                                                                                                                                                                                                                                                                                                                                                                                                                                                                                                                                                                 | NCDC Institute of Genomics and Integrative Biology                                                 | NCDC Institute of Genomics and Integrative Biology                                                                                                                                                            | Vivekanand A, Mahesh S. Dhar, Bharathram Uppili, Akshay Kanakan, Simmi Tiwari, RadhaKrishnan VS, Robin Marwal, Azka Khan, Ajit Shewale, Pooja Sharma, Tushar Nale, Rajesh Pandey, Sandhya Kabra, Mohammed Faruq, Sujeet Singh, Anurag Agrawal, Partha Rakshit                                                                                                                                |
| EPI_ISL_528685                                                                                                                                                                                                                                                                                                                                                                                                                                                                                                                                                                                                                                                                                                                                                                                                                                                                                                                                                                                                                                                                                                                                                                                                                                                                                                                                                                                                                                                                                                                                                                                                                                                                                                                                                                                                                                                                                                                                                                                                                                                                                                                                                                                                                                                                                                                                                                                                                                                                                                                                                                                                 | IIP Institute of Genomics and Integrative Biology                                                  | IIP Institute of Genomics and Integrative Biology                                                                                                                                                             | Vivekanand A, Mahesh S. Dhar, Bharathram Uppili, Akshay Kanakan, Simmi Tiwari, RadhaKrishnan VS, Robin Marwal, Azka Khan, Ajit Shewale, Pooja Sharma, Tushar Nale, Rajesh Pandey, Sandhya Kabra, Mohammed Faruq, Sujeet Singh, Anurag Agrawal, Partha Rakshit                                                                                                                                |
| EPI_ISL_528746                                                                                                                                                                                                                                                                                                                                                                                                                                                                                                                                                                                                                                                                                                                                                                                                                                                                                                                                                                                                                                                                                                                                                                                                                                                                                                                                                                                                                                                                                                                                                                                                                                                                                                                                                                                                                                                                                                                                                                                                                                                                                                                                                                                                                                                                                                                                                                                                                                                                                                                                                                                                 | Immanuel Hospital                                                                                  | Molecular Genetics Laboratory-Faculty of Medicine-Universitas Padjadjaran: School of Life Sciences and Technology & School of Pharmacy-Institut Teknologi Bandung; Laboratorium Kesehatan Provinsi Jawa Barat | Yunia Sribudiani, Tri Hanggono Achmad, Mas Rizky A.A. Syamsunarno, Fensi Amalina, Catur Riani, Azzania Fibriani, Husna Nugrahapraja, Marselina Irasonia Tan, Tarwadi, Ema Rahmawati, Savira Ekawardhani, Hesti Lina Wiraswati, Ryan Bayusantika Ristandi, Rifky Waluyajati Rachman, Cut Nur Cinthia Alamanda, Lia Faridah, Hammam Riza, Sony Solistia Wirawan, Agung Eru Wibowo, Ivan Faizal |
| EPI_ISL_528751                                                                                                                                                                                                                                                                                                                                                                                                                                                                                                                                                                                                                                                                                                                                                                                                                                                                                                                                                                                                                                                                                                                                                                                                                                                                                                                                                                                                                                                                                                                                                                                                                                                                                                                                                                                                                                                                                                                                                                                                                                                                                                                                                                                                                                                                                                                                                                                                                                                                                                                                                                                                 | Santo Borromeus Hospital                                                                           | Molecular Genetics Laboratory-Faculty of Medicine-Universitas Padjadjaran: School of Life Sciences and Technology & School of Pharmacy-Institut Teknologi Bandung; Laboratorium Kesehatan Provinsi Jawa Barat | Yunia Sribudiani, Tri Hanggono Achmad, Mas Rizky A.A. Syamsunarno, Fensi Amalina, Catur Riani, Azzania Fibriani, Husna Nugrahapraja, Marselina Irasonia Tan, Tarwadi, Ema Rahmawati, Savira Ekawardhani, Hesti Lina Wiraswati, Ryan Bayusantika Ristandi, Rifky Waluyajati Rachman, Cut Nur Cinthia Alamanda, Lia Faridah, Hammam Riza, Sony Solistia Wirawan, Agung Eru Wibowo, Ivan Faizal |
| EPI_ISL_528813, EPI_ISL_528815, EPI_ISL_528818, EPI_ISL_528822                                                                                                                                                                                                                                                                                                                                                                                                                                                                                                                                                                                                                                                                                                                                                                                                                                                                                                                                                                                                                                                                                                                                                                                                                                                                                                                                                                                                                                                                                                                                                                                                                                                                                                                                                                                                                                                                                                                                                                                                                                                                                                                                                                                                                                                                                                                                                                                                                                                                                                                                                 | Department of Medicine, Gandhi hospital, Hyderabad                                                 | CSIR-Centre for Cellular and Molecular Biology                                                                                                                                                                | Vinayasekhar Aedula, Thrilok Chander Bingi, Rajarao Mesipogu, Shagufta Khan, Lamuk Zaveri, Namami Gaur, Sakshi Shambhavi, Nikhil Hajirnis, M Soujanya Reddy, Pratheusa Maccha, Tulasi Nagabandi, Purushotham Vodnala, Payel Mukherjee, Sofia Banu, Priya Singh, Onkar Kulkarni, Dhiviya                                                                                                      |

|                                                                                                                                                                                                                                                                                                                                                                                                                                                                                                                                                                                                                                                                                                                                                                |                                                                  |                                                                                                                        |                                                                                                                                                                                                                                                                                                                                                                                                                                                                                                                                                                                                          |                                                                                                                                  |
|----------------------------------------------------------------------------------------------------------------------------------------------------------------------------------------------------------------------------------------------------------------------------------------------------------------------------------------------------------------------------------------------------------------------------------------------------------------------------------------------------------------------------------------------------------------------------------------------------------------------------------------------------------------------------------------------------------------------------------------------------------------|------------------------------------------------------------------|------------------------------------------------------------------------------------------------------------------------|----------------------------------------------------------------------------------------------------------------------------------------------------------------------------------------------------------------------------------------------------------------------------------------------------------------------------------------------------------------------------------------------------------------------------------------------------------------------------------------------------------------------------------------------------------------------------------------------------------|----------------------------------------------------------------------------------------------------------------------------------|
| EPI_ISL_529141, EPI_ISL_529142, EPI_ISL_529143, EPI_ISL_529144, EPI_ISL_529145                                                                                                                                                                                                                                                                                                                                                                                                                                                                                                                                                                                                                                                                                 | Egyptian National Cancer Institute (ENCI)                        | Egyptian National Cancer Institute (ENCI)                                                                              | Vedagiri, Divya Gupta, Vishal Sah, Santosh Kumar Kuncha, Krishnan Harinivas Harshan, Archana Bharadwaj Siva, Karthik Bharadwaj Tallapaka, Umesh Kumar, Unis Ahmad Bhat, Ajay Sarawagi, Priyanka Pant, Rajkanwar Nathawat, Rakesh K Mishra, Divya Tej Sowpati                                                                                                                                                                                                                                                                                                                                             |                                                                                                                                  |
| EPI_ISL_529908, EPI_ISL_529909, EPI_ISL_529910, EPI_ISL_529911, EPI_ISL_529912, EPI_ISL_529913, EPI_ISL_529914, EPI_ISL_529915, EPI_ISL_529916, EPI_ISL_529917, EPI_ISL_529918, EPI_ISL_529919, EPI_ISL_529920, EPI_ISL_529921, EPI_ISL_529922, EPI_ISL_529923, EPI_ISL_529924, EPI_ISL_529925, EPI_ISL_529926, EPI_ISL_529927, EPI_ISL_529928, EPI_ISL_529929, EPI_ISL_529930, EPI_ISL_529931, EPI_ISL_529932, EPI_ISL_529933, EPI_ISL_529934, EPI_ISL_529935, EPI_ISL_529936                                                                                                                                                                                                                                                                                 | see above                                                        | Virginia Division of Consolidated Laboratory Services                                                                  | Virginia DCLS                                                                                                                                                                                                                                                                                                                                                                                                                                                                                                                                                                                            |                                                                                                                                  |
| EPI_ISL_529937, EPI_ISL_529938, EPI_ISL_529939, EPI_ISL_529940, EPI_ISL_529941, EPI_ISL_529942, EPI_ISL_529943, EPI_ISL_529944, EPI_ISL_529945, EPI_ISL_529946, EPI_ISL_529947, EPI_ISL_529948, EPI_ISL_529949, EPI_ISL_529950, EPI_ISL_529951, EPI_ISL_529952, EPI_ISL_529953, EPI_ISL_529954, EPI_ISL_529955, EPI_ISL_529956, EPI_ISL_529957, EPI_ISL_529958, EPI_ISL_529959, EPI_ISL_529960                                                                                                                                                                                                                                                                                                                                                                 | see above                                                        | Virginia DCLS                                                                                                          | Virginia DCLS                                                                                                                                                                                                                                                                                                                                                                                                                                                                                                                                                                                            |                                                                                                                                  |
| EPI_ISL_535305, EPI_ISL_535306, EPI_ISL_535307, EPI_ISL_535308, EPI_ISL_535309, EPI_ISL_535310, EPI_ISL_535311, EPI_ISL_535312, EPI_ISL_535313, EPI_ISL_535314, EPI_ISL_535315, EPI_ISL_535316, EPI_ISL_535317, EPI_ISL_535318, EPI_ISL_535319, EPI_ISL_535320, EPI_ISL_535321, EPI_ISL_535322, EPI_ISL_535323, EPI_ISL_535324, EPI_ISL_535325, EPI_ISL_535326, EPI_ISL_535327, EPI_ISL_535328, EPI_ISL_535329, EPI_ISL_535330, EPI_ISL_535331, EPI_ISL_535332, EPI_ISL_535333, EPI_ISL_535334, EPI_ISL_535335, EPI_ISL_535336, EPI_ISL_535337, EPI_ISL_535338, EPI_ISL_535339, EPI_ISL_535340, EPI_ISL_535343, EPI_ISL_535347, EPI_ISL_535349, EPI_ISL_535350, EPI_ISL_535352, EPI_ISL_535353, EPI_ISL_535354, EPI_ISL_535355, EPI_ISL_535356, EPI_ISL_535358 | see above                                                        | LA Office of Public Health Laboratories                                                                                | Pathogen Discovery, Respiratory Viruses Branch, Division of Viral Diseases, Centers for Disease Control and Prevention                                                                                                                                                                                                                                                                                                                                                                                                                                                                                   | Ying Tao, Jing Zhang, Yan Li, Krista Queen, Anna Uehara, Clinton Paden, Haibin Wang, Suxiang Tong                                |
| EPI_ISL_535651, EPI_ISL_535653, EPI_ISL_535655, EPI_ISL_535656, EPI_ISL_535657, EPI_ISL_535660                                                                                                                                                                                                                                                                                                                                                                                                                                                                                                                                                                                                                                                                 | AR Dept. of Health-Public Health Lab                             | Pathogen Discovery, Respiratory Viruses Branch, Division of Viral Diseases, Centers for Disease Control and Prevention | Yan Li, Jing Zhang, Ying Tao, Krista Queen, Brian Lynch, Anna Uehara, Clinton R. Paden, Rachel Marine, Haibin Wang, Suxiang Tong                                                                                                                                                                                                                                                                                                                                                                                                                                                                         |                                                                                                                                  |
| EPI_ISL_535662, EPI_ISL_535663, EPI_ISL_535664, EPI_ISL_535665, EPI_ISL_535666, EPI_ISL_535667, EPI_ISL_535668, EPI_ISL_535669, EPI_ISL_535670, EPI_ISL_535671, EPI_ISL_535672, EPI_ISL_535673, EPI_ISL_535674, EPI_ISL_535675, EPI_ISL_535676, EPI_ISL_535677, EPI_ISL_535678, EPI_ISL_535679, EPI_ISL_535680, EPI_ISL_535681, EPI_ISL_535682, EPI_ISL_535683, EPI_ISL_535684, EPI_ISL_535685, EPI_ISL_535686, EPI_ISL_535687, EPI_ISL_535688, EPI_ISL_535689, EPI_ISL_535690, EPI_ISL_535691, EPI_ISL_535692, EPI_ISL_535693, EPI_ISL_535694, EPI_ISL_535695, EPI_ISL_535696, EPI_ISL_535697, EPI_ISL_535698, EPI_ISL_535699, EPI_ISL_535700, EPI_ISL_535702                                                                                                 | see above                                                        | CDPH, Microbial Diseases Laboratory                                                                                    | Pathogen Discovery, Respiratory Viruses Branch, Division of Viral Diseases, Centers for Disease Control and Prevention                                                                                                                                                                                                                                                                                                                                                                                                                                                                                   | Yan Li, Jing Zhang, Ying Tao, Krista Queen, Brian Lynch, Anna Uehara, Clinton R. Paden, Rachel Marine, Haibin Wang, Suxiang Tong |
| EPI_ISL_535703                                                                                                                                                                                                                                                                                                                                                                                                                                                                                                                                                                                                                                                                                                                                                 |                                                                  | CDPH, Microbial Diseases Laboratory                                                                                    | Pathogen Discovery, Respiratory Viruses Branch, Division of Viral Diseases, Centers for Disease Control and Prevention                                                                                                                                                                                                                                                                                                                                                                                                                                                                                   | Ying Tao, Jing Zhang, Yan Li, Krista Queen, Anna Uehara, Clinton R. Paden, Haibin Wang, Suxiang Tong                             |
| EPI_ISL_535704, EPI_ISL_535705                                                                                                                                                                                                                                                                                                                                                                                                                                                                                                                                                                                                                                                                                                                                 |                                                                  | CDPH, Microbial Diseases Laboratory                                                                                    | Pathogen Discovery, Respiratory Viruses Branch, Division of Viral Diseases, Centers for Disease Control and Prevention                                                                                                                                                                                                                                                                                                                                                                                                                                                                                   | Yan Li, Jing Zhang, Ying Tao, Krista Queen, Brian Lynch, Anna Uehara, Clinton R. Paden, Rachel Marine, Haibin Wang, Suxiang Tong |
| EPI_ISL_535706                                                                                                                                                                                                                                                                                                                                                                                                                                                                                                                                                                                                                                                                                                                                                 |                                                                  | CDPH, Microbial Diseases Laboratory                                                                                    | Pathogen Discovery, Respiratory Viruses Branch, Division of Viral Diseases, Centers for Disease Control and Prevention                                                                                                                                                                                                                                                                                                                                                                                                                                                                                   | Ying Tao, Jing Zhang, Yan Li, Krista Queen, Anna Uehara, Clinton R. Paden, Haibin Wang, Suxiang Tong                             |
| EPI_ISL_535707, EPI_ISL_535709, EPI_ISL_535710, EPI_ISL_535711, EPI_ISL_535712, EPI_ISL_535713, EPI_ISL_535714, EPI_ISL_535715                                                                                                                                                                                                                                                                                                                                                                                                                                                                                                                                                                                                                                 |                                                                  | CDPH, Microbial Diseases Laboratory                                                                                    | Pathogen Discovery, Respiratory Viruses Branch, Division of Viral Diseases, Centers for Disease Control and Prevention                                                                                                                                                                                                                                                                                                                                                                                                                                                                                   | Yan Li, Jing Zhang, Ying Tao, Krista Queen, Brian Lynch, Anna Uehara, Clinton R. Paden, Rachel Marine, Haibin Wang, Suxiang Tong |
| EPI_ISL_536399                                                                                                                                                                                                                                                                                                                                                                                                                                                                                                                                                                                                                                                                                                                                                 | Laboratory of Immunovirology, Universidad de Antioquia           | Instituto Nacional de Salud - Unidad de Secuenciación y Genómica                                                       | Wbeimar Aguilar-Jimenez, Lizdany Flórez, Francisco J. Díaz, Katherine Laiton-Donato, Carlos Franco-Muñoz, Diego Álvarez-Díaz and Marcela Mercado-Reyes                                                                                                                                                                                                                                                                                                                                                                                                                                                   |                                                                                                                                  |
| EPI_ISL_536788, EPI_ISL_536789                                                                                                                                                                                                                                                                                                                                                                                                                                                                                                                                                                                                                                                                                                                                 | Southern Community Labs Dunedin                                  | Institute of Environmental Science and Research (ESR)                                                                  | Xiaoyun Ren, Matt Storey, Nikki Freed, Muhammad Faisal, Jing Wang, Hermes Perez, Anja Werno, Antje van der Linden, Arlo Upton, Chris Mansell, David Hammer, Dragana Drinkovic, Gary McAuliffe, Hana Sofia Andersson, James Ussher, Jill Sherwood, Josh Freeman, Julia Howard, Juliet Elvy, Mary DeAlmeida, Matt Blakiston, Matthew Rogers, Max Bloomfield, Michael Addidle, Michelle Balm, Sally Roberts, Sarah Jefferies, Sharmini Muttaiyah, Susan Morpeth, Susan Taylor, Timothy Blackmore, Vani Sathyendran, Veronica Playle, Virginia Hope, Erasmus Smit, Lauren Jelly, Olin Silander, Joep de Ligt |                                                                                                                                  |
| EPI_ISL_536790, EPI_ISL_536791                                                                                                                                                                                                                                                                                                                                                                                                                                                                                                                                                                                                                                                                                                                                 | Waikato Hospital                                                 | Institute of Environmental Science and Research (ESR)                                                                  | Xiaoyun Ren, Matt Storey, Nikki Freed, Muhammad Faisal, Jing Wang, Hermes Perez, Anja Werno, Antje van der Linden, Arlo Upton, Chris Mansell, David Hammer, Dragana Drinkovic, Gary McAuliffe, Hana Sofia Andersson, James Ussher, Jill Sherwood, Josh Freeman, Julia Howard, Juliet Elvy, Mary DeAlmeida, Matt Blakiston, Matthew Rogers, Max Bloomfield, Michael Addidle, Michelle Balm, Sally Roberts, Sarah Jefferies, Sharmini Muttaiyah, Susan Morpeth, Susan Taylor, Timothy Blackmore, Vani Sathyendran, Veronica Playle, Virginia Hope, Erasmus Smit, Lauren Jelly, Olin Silander, Joep de Ligt |                                                                                                                                  |
| EPI_ISL_536792                                                                                                                                                                                                                                                                                                                                                                                                                                                                                                                                                                                                                                                                                                                                                 | Canterbury Health Laboratories                                   | Institute of Environmental Science and Research (ESR)                                                                  | Xiaoyun Ren, Matt Storey, Nikki Freed, Muhammad Faisal, Jing Wang, Hermes Perez, Anja Werno, Antje van der Linden, Arlo Upton, Chris Mansell, David Hammer, Dragana Drinkovic, Gary McAuliffe, Hana Sofia Andersson, James Ussher, Jill Sherwood, Josh Freeman, Julia Howard, Juliet Elvy, Mary DeAlmeida, Matt Blakiston, Matthew Rogers, Max Bloomfield, Michael Addidle, Michelle Balm, Sally Roberts, Sarah Jefferies, Sharmini Muttaiyah, Susan Morpeth, Susan Taylor, Timothy Blackmore, Vani Sathyendran, Veronica Playle, Virginia Hope, Erasmus Smit, Lauren Jelly, Olin Silander, Joep de Ligt |                                                                                                                                  |
| EPI_ISL_537996, EPI_ISL_537997, EPI_ISL_537998, EPI_ISL_537999, EPI_ISL_538000, EPI_ISL_538001, EPI_ISL_538002                                                                                                                                                                                                                                                                                                                                                                                                                                                                                                                                                                                                                                                 | Servicio de Microbiología. Hospital Arnau de Vilanova            | SeqCOVID-SPAIN consortium/IBV(CSIC)                                                                                    | Victoria Dominguez, Maria Alma Bracho, Griselda De Marco, Lidia Ruiz Roldan, Neris Garcia-Gonzalez, Inma Galán Vendrell, Sandra Carbo, Loreto Ferrús Abad, Paula Ruiz-Hueso, Mariana Reyes-Prieto, Vicente Soriano Chirona, Ivan Ansari, Lúcia Martínez-Priego, Giuseppe D'Auria, Fernando Gonzalez-Candelas and SeqCOVID-SPAIN consortium                                                                                                                                                                                                                                                               |                                                                                                                                  |
| EPI_ISL_540431                                                                                                                                                                                                                                                                                                                                                                                                                                                                                                                                                                                                                                                                                                                                                 | IN State Department of Health Laboratory Services                | Pathogen Discovery, Respiratory Viruses Branch, Division of Viral Diseases, Centers for Disease Control and Prevention | Yan Li, Jing Zhang, Anna Montmayeur, Krista Queen, Ying Tao, Anna Uehara, Clinton R. Paden, Rachel Marine, Haibin Wang, Suxiang Tong                                                                                                                                                                                                                                                                                                                                                                                                                                                                     |                                                                                                                                  |
| EPI_ISL_540432, EPI_ISL_540433                                                                                                                                                                                                                                                                                                                                                                                                                                                                                                                                                                                                                                                                                                                                 | TN Division of Laboratory Services                               | Pathogen Discovery, Respiratory Viruses Branch, Division of Viral Diseases, Centers for Disease Control and Prevention | Yan Li, Jing Zhang, Anna Montmayeur, Krista Queen, Ying Tao, Anna Uehara, Clinton R. Paden, Rachel Marine, Haibin Wang, Suxiang Tong                                                                                                                                                                                                                                                                                                                                                                                                                                                                     |                                                                                                                                  |
| EPI_ISL_540434                                                                                                                                                                                                                                                                                                                                                                                                                                                                                                                                                                                                                                                                                                                                                 | TN Division of Laboratory Services                               | Pathogen Discovery, Respiratory Viruses Branch, Division of Viral Diseases, Centers for Disease Control and Prevention | Ying Tao, Yan Li, Jing Zhang, Krista Queen, Anna Uehara, Clinton R. Paden, Haibin Wang, Suxiang Tong                                                                                                                                                                                                                                                                                                                                                                                                                                                                                                     |                                                                                                                                  |
| EPI_ISL_540436, EPI_ISL_540437, EPI_ISL_540438                                                                                                                                                                                                                                                                                                                                                                                                                                                                                                                                                                                                                                                                                                                 | WI State Laboratory of Hygiene                                   | Pathogen Discovery, Respiratory Viruses Branch, Division of Viral Diseases, Centers for Disease Control and Prevention | Yan Li, Jing Zhang, Anna Montmayeur, Krista Queen, Ying Tao, Anna Uehara, Clinton R. Paden, Rachel Marine, Haibin Wang, Suxiang Tong                                                                                                                                                                                                                                                                                                                                                                                                                                                                     |                                                                                                                                  |
| EPI_ISL_540439                                                                                                                                                                                                                                                                                                                                                                                                                                                                                                                                                                                                                                                                                                                                                 | WVDHHR - Office of Laboratory Services                           | Pathogen Discovery, Respiratory Viruses Branch, Division of Viral Diseases, Centers for Disease Control and Prevention | Ying Tao, Yan Li, Jing Zhang, Krista Queen, Anna Uehara, Clinton R. Paden, Haibin Wang, Suxiang Tong                                                                                                                                                                                                                                                                                                                                                                                                                                                                                                     |                                                                                                                                  |
| EPI_ISL_540441                                                                                                                                                                                                                                                                                                                                                                                                                                                                                                                                                                                                                                                                                                                                                 | NC State Laboratory of Public Health                             | Pathogen Discovery, Respiratory Viruses Branch, Division of Viral Diseases, Centers for Disease Control and Prevention | Yan Li, Jing Zhang, Anna Montmayeur, Krista Queen, Ying Tao, Anna Uehara, Clinton R. Paden, Rachel Marine, Haibin Wang, Suxiang Tong                                                                                                                                                                                                                                                                                                                                                                                                                                                                     |                                                                                                                                  |
| EPI_ISL_541649, EPI_ISL_541650, EPI_ISL_541651, EPI_ISL_541652, EPI_ISL_541653, EPI_ISL_541654, EPI_ISL_541655                                                                                                                                                                                                                                                                                                                                                                                                                                                                                                                                                                                                                                                 | Laboratory Diagnostic, Veterinary Specialized Institute Kraljevo | Laboratory Diagnostic, Veterinary Specialized Institute Kraljevo                                                       | Vidanovic,D., Tesovic,B., Knezevic,A., Jovanovic,T., Jankovic,M., Sekler,M., Banovic Djeri,B., Volkening,J., Afonso,C., Petrovic,T.                                                                                                                                                                                                                                                                                                                                                                                                                                                                      |                                                                                                                                  |
| EPI_ISL_541656                                                                                                                                                                                                                                                                                                                                                                                                                                                                                                                                                                                                                                                                                                                                                 | Laboratory Diagnostic, Veterinary Specialized Institute Kraljevo | Laboratory Diagnostic, Veterinary Specialized Institute Kraljevo                                                       | Vidanovic,D., Tesovic,B., Knezevic,A., Jovanovic,T., Jankovic,M., Sekler,M., Banovic Djeri,B., Volkening,J., Afonso,C., Petrovic,T.                                                                                                                                                                                                                                                                                                                                                                                                                                                                      |                                                                                                                                  |
| EPI_ISL_541657, EPI_ISL_541658, EPI_ISL_541659, EPI_ISL_541660, EPI_ISL_541661, EPI_ISL_541662                                                                                                                                                                                                                                                                                                                                                                                                                                                                                                                                                                                                                                                                 | Laboratory Diagnostic, Veterinary Specialized Institute Kraljevo | Laboratory Diagnostic, Veterinary Specialized Institute Kraljevo                                                       | Vidanovic,D., Tesovic,B., Knezevic,A., Jovanovic,T., Jankovic,M., Sekler,M., Banovic Djeri,B., Volkening,J., Afonso,C., Petrovic,T.                                                                                                                                                                                                                                                                                                                                                                                                                                                                      |                                                                                                                                  |







| Hospital Organization Nagoya Medical Center                                                                                                                                                                                                                                                                                                                                                                                                                                                                                                                                                                                                                                                                                                                                                                                                                                                                                                                                                                                                                                                                                                                                                                                                                                                                                                                                                                                                                                                                                                                                                                                                                                                                                                                                                                                                                                                                                                                                                                                                                    |                                                                                                  | Nagoya Medical Center                                                                                                  |                                                                                                                        | Yokomaku, Yasumasa Iwatani                                                                                                                                                                                                                                                                                                                                                                                                                                                                                                                                                                               |  |  |
|----------------------------------------------------------------------------------------------------------------------------------------------------------------------------------------------------------------------------------------------------------------------------------------------------------------------------------------------------------------------------------------------------------------------------------------------------------------------------------------------------------------------------------------------------------------------------------------------------------------------------------------------------------------------------------------------------------------------------------------------------------------------------------------------------------------------------------------------------------------------------------------------------------------------------------------------------------------------------------------------------------------------------------------------------------------------------------------------------------------------------------------------------------------------------------------------------------------------------------------------------------------------------------------------------------------------------------------------------------------------------------------------------------------------------------------------------------------------------------------------------------------------------------------------------------------------------------------------------------------------------------------------------------------------------------------------------------------------------------------------------------------------------------------------------------------------------------------------------------------------------------------------------------------------------------------------------------------------------------------------------------------------------------------------------------------|--------------------------------------------------------------------------------------------------|------------------------------------------------------------------------------------------------------------------------|------------------------------------------------------------------------------------------------------------------------|----------------------------------------------------------------------------------------------------------------------------------------------------------------------------------------------------------------------------------------------------------------------------------------------------------------------------------------------------------------------------------------------------------------------------------------------------------------------------------------------------------------------------------------------------------------------------------------------------------|--|--|
| EPI_ISL_572195, EPI_ISL_572196, EPI_ISL_572197, EPI_ISL_572198, EPI_ISL_572199, EPI_ISL_572200, EPI_ISL_572201, EPI_ISL_572202, EPI_ISL_572203, EPI_ISL_572204, EPI_ISL_572205, EPI_ISL_572206, EPI_ISL_572207, EPI_ISL_572208, EPI_ISL_572209, EPI_ISL_572210, EPI_ISL_572211, EPI_ISL_572212, EPI_ISL_572213, EPI_ISL_572214, EPI_ISL_572215, EPI_ISL_572216, EPI_ISL_572217, EPI_ISL_572218, EPI_ISL_572219, EPI_ISL_572220, EPI_ISL_572221, EPI_ISL_572222, EPI_ISL_572223, EPI_ISL_572224, EPI_ISL_572225, EPI_ISL_572226, EPI_ISL_572227, EPI_ISL_572228, EPI_ISL_572229, EPI_ISL_572230, EPI_ISL_572231, EPI_ISL_572232, EPI_ISL_572233, EPI_ISL_572234, EPI_ISL_572235, EPI_ISL_572236, EPI_ISL_572237, EPI_ISL_572238, EPI_ISL_572239, EPI_ISL_572240, EPI_ISL_572241, EPI_ISL_572242, EPI_ISL_572243, EPI_ISL_572244, EPI_ISL_572245, EPI_ISL_572246, EPI_ISL_572247, EPI_ISL_572248, EPI_ISL_572249, EPI_ISL_572250, EPI_ISL_572251, EPI_ISL_572252, EPI_ISL_572253, EPI_ISL_572254, EPI_ISL_572255, EPI_ISL_572256, EPI_ISL_572257, EPI_ISL_572258, EPI_ISL_572259, EPI_ISL_572260, EPI_ISL_572261, EPI_ISL_572262, EPI_ISL_572263, EPI_ISL_572264, EPI_ISL_572265, EPI_ISL_572266, EPI_ISL_572267, EPI_ISL_572268, EPI_ISL_572269, EPI_ISL_572270, EPI_ISL_572271, EPI_ISL_572272, EPI_ISL_572273, EPI_ISL_572274, EPI_ISL_572275, EPI_ISL_572276, EPI_ISL_572277, EPI_ISL_572278, EPI_ISL_572279, EPI_ISL_572280, EPI_ISL_572281, EPI_ISL_572282, EPI_ISL_572283, EPI_ISL_572284, EPI_ISL_572285, EPI_ISL_572286, EPI_ISL_572287, EPI_ISL_572288, EPI_ISL_572289, EPI_ISL_572290, EPI_ISL_572291, EPI_ISL_572292, EPI_ISL_572293, EPI_ISL_572294, EPI_ISL_572295, EPI_ISL_572296, EPI_ISL_572297, EPI_ISL_572298, EPI_ISL_572299, EPI_ISL_572300, EPI_ISL_572301, EPI_ISL_572302, EPI_ISL_572303, EPI_ISL_572304, EPI_ISL_572305, EPI_ISL_572306, EPI_ISL_572307, EPI_ISL_572308, EPI_ISL_572309, EPI_ISL_572310, EPI_ISL_572311, EPI_ISL_572312, EPI_ISL_572313, EPI_ISL_572314, EPI_ISL_572315, EPI_ISL_572316, EPI_ISL_572317, EPI_ISL_572318 |                                                                                                  |                                                                                                                        |                                                                                                                        |                                                                                                                                                                                                                                                                                                                                                                                                                                                                                                                                                                                                          |  |  |
| see above                                                                                                                                                                                                                                                                                                                                                                                                                                                                                                                                                                                                                                                                                                                                                                                                                                                                                                                                                                                                                                                                                                                                                                                                                                                                                                                                                                                                                                                                                                                                                                                                                                                                                                                                                                                                                                                                                                                                                                                                                                                      | Virginia DCLS                                                                                    | Virginia DCLS                                                                                                          | Virginia DCLS                                                                                                          |                                                                                                                                                                                                                                                                                                                                                                                                                                                                                                                                                                                                          |  |  |
| EPI_ISL_576170, EPI_ISL_576171                                                                                                                                                                                                                                                                                                                                                                                                                                                                                                                                                                                                                                                                                                                                                                                                                                                                                                                                                                                                                                                                                                                                                                                                                                                                                                                                                                                                                                                                                                                                                                                                                                                                                                                                                                                                                                                                                                                                                                                                                                 | PA Department of Health, Bureau of Laboratories                                                  | Pathogen Discovery, Respiratory Viruses Branch, Division of Viral Diseases, Centers for Disease Control and Prevention | Pathogen Discovery, Respiratory Viruses Branch, Division of Viral Diseases, Centers for Disease Control and Prevention | Yan Li, Anna Montmayeur, Brian Lynch, Jing Zhang, Krista Queen, Ying Tao, Anna Uehara, Rachel Marine, Clinton R. Paden, Peter Cook, Haibin Wang, Suxiang Tong                                                                                                                                                                                                                                                                                                                                                                                                                                            |  |  |
| EPI_ISL_576172                                                                                                                                                                                                                                                                                                                                                                                                                                                                                                                                                                                                                                                                                                                                                                                                                                                                                                                                                                                                                                                                                                                                                                                                                                                                                                                                                                                                                                                                                                                                                                                                                                                                                                                                                                                                                                                                                                                                                                                                                                                 | TN Division of Laboratory Services                                                               | Pathogen Discovery, Respiratory Viruses Branch, Division of Viral Diseases, Centers for Disease Control and Prevention | Pathogen Discovery, Respiratory Viruses Branch, Division of Viral Diseases, Centers for Disease Control and Prevention | Yan Li, Anna Montmayeur, Brian Lynch, Jing Zhang, Krista Queen, Ying Tao, Anna Uehara, Rachel Marine, Clinton R. Paden, Peter Cook, Haibin Wang, Suxiang Tong                                                                                                                                                                                                                                                                                                                                                                                                                                            |  |  |
| EPI_ISL_576173                                                                                                                                                                                                                                                                                                                                                                                                                                                                                                                                                                                                                                                                                                                                                                                                                                                                                                                                                                                                                                                                                                                                                                                                                                                                                                                                                                                                                                                                                                                                                                                                                                                                                                                                                                                                                                                                                                                                                                                                                                                 | FL Department of Health-Bureau of Epidemiology                                                   | Pathogen Discovery, Respiratory Viruses Branch, Division of Viral Diseases, Centers for Disease Control and Prevention | Pathogen Discovery, Respiratory Viruses Branch, Division of Viral Diseases, Centers for Disease Control and Prevention | Ying Tao, Jing Zhang, Brian Lynch, Yan Li, Krista Queen, Anna Uehara, Clinton R. Paden, Peter Cook, Haibin Wang, Suxiang Tong                                                                                                                                                                                                                                                                                                                                                                                                                                                                            |  |  |
| EPI_ISL_576174                                                                                                                                                                                                                                                                                                                                                                                                                                                                                                                                                                                                                                                                                                                                                                                                                                                                                                                                                                                                                                                                                                                                                                                                                                                                                                                                                                                                                                                                                                                                                                                                                                                                                                                                                                                                                                                                                                                                                                                                                                                 | VA-Division of Consolidated Laboratory Services                                                  | Pathogen Discovery, Respiratory Viruses Branch, Division of Viral Diseases, Centers for Disease Control and Prevention | Pathogen Discovery, Respiratory Viruses Branch, Division of Viral Diseases, Centers for Disease Control and Prevention | Ying Tao, Jing Zhang, Brian Lynch, Yan Li, Krista Queen, Anna Uehara, Clinton R. Paden, Peter Cook, Haibin Wang, Suxiang Tong                                                                                                                                                                                                                                                                                                                                                                                                                                                                            |  |  |
| EPI_ISL_576175, EPI_ISL_576176                                                                                                                                                                                                                                                                                                                                                                                                                                                                                                                                                                                                                                                                                                                                                                                                                                                                                                                                                                                                                                                                                                                                                                                                                                                                                                                                                                                                                                                                                                                                                                                                                                                                                                                                                                                                                                                                                                                                                                                                                                 | TN Division of Laboratory Services                                                               | Pathogen Discovery, Respiratory Viruses Branch, Division of Viral Diseases, Centers for Disease Control and Prevention | Pathogen Discovery, Respiratory Viruses Branch, Division of Viral Diseases, Centers for Disease Control and Prevention | Yan Li, Anna Montmayeur, Brian Lynch, Jing Zhang, Krista Queen, Ying Tao, Anna Uehara, Rachel Marine, Clinton R. Paden, Peter Cook, Haibin Wang, Suxiang Tong                                                                                                                                                                                                                                                                                                                                                                                                                                            |  |  |
| EPI_ISL_576177                                                                                                                                                                                                                                                                                                                                                                                                                                                                                                                                                                                                                                                                                                                                                                                                                                                                                                                                                                                                                                                                                                                                                                                                                                                                                                                                                                                                                                                                                                                                                                                                                                                                                                                                                                                                                                                                                                                                                                                                                                                 | CA, CDPH, Viral and Rickettsial Disease Laboratory                                               | Pathogen Discovery, Respiratory Viruses Branch, Division of Viral Diseases, Centers for Disease Control and Prevention | Pathogen Discovery, Respiratory Viruses Branch, Division of Viral Diseases, Centers for Disease Control and Prevention | Ying Tao, Jing Zhang, Brian Lynch, Yan Li, Krista Queen, Anna Uehara, Clinton R. Paden, Peter Cook, Haibin Wang, Suxiang Tong                                                                                                                                                                                                                                                                                                                                                                                                                                                                            |  |  |
| EPI_ISL_576178                                                                                                                                                                                                                                                                                                                                                                                                                                                                                                                                                                                                                                                                                                                                                                                                                                                                                                                                                                                                                                                                                                                                                                                                                                                                                                                                                                                                                                                                                                                                                                                                                                                                                                                                                                                                                                                                                                                                                                                                                                                 | DC Public Health Lab/ Dept. of Forensic Sciences                                                 | Pathogen Discovery, Respiratory Viruses Branch, Division of Viral Diseases, Centers for Disease Control and Prevention | Pathogen Discovery, Respiratory Viruses Branch, Division of Viral Diseases, Centers for Disease Control and Prevention | Ying Tao, Jing Zhang, Brian Lynch, Yan Li, Krista Queen, Anna Uehara, Clinton R. Paden, Peter Cook, Haibin Wang, Suxiang Tong                                                                                                                                                                                                                                                                                                                                                                                                                                                                            |  |  |
| EPI_ISL_576179, EPI_ISL_576180, EPI_ISL_576181, EPI_ISL_576182, EPI_ISL_576183, EPI_ISL_576184, EPI_ISL_576185, EPI_ISL_576186, EPI_ISL_576187, EPI_ISL_576188                                                                                                                                                                                                                                                                                                                                                                                                                                                                                                                                                                                                                                                                                                                                                                                                                                                                                                                                                                                                                                                                                                                                                                                                                                                                                                                                                                                                                                                                                                                                                                                                                                                                                                                                                                                                                                                                                                 | WI State Laboratory of Hygiene                                                                   | Pathogen Discovery, Respiratory Viruses Branch, Division of Viral Diseases, Centers for Disease Control and Prevention | Pathogen Discovery, Respiratory Viruses Branch, Division of Viral Diseases, Centers for Disease Control and Prevention | Ying Tao, Jing Zhang, Brian Lynch, Yan Li, Krista Queen, Anna Uehara, Clinton R. Paden, Peter Cook, Haibin Wang, Suxiang Tong                                                                                                                                                                                                                                                                                                                                                                                                                                                                            |  |  |
| EPI_ISL_576189, EPI_ISL_576190, EPI_ISL_576191, EPI_ISL_576192, EPI_ISL_576193, EPI_ISL_576194, EPI_ISL_576195                                                                                                                                                                                                                                                                                                                                                                                                                                                                                                                                                                                                                                                                                                                                                                                                                                                                                                                                                                                                                                                                                                                                                                                                                                                                                                                                                                                                                                                                                                                                                                                                                                                                                                                                                                                                                                                                                                                                                 | GA Department of Public Health Laboratory                                                        | Pathogen Discovery, Respiratory Viruses Branch, Division of Viral Diseases, Centers for Disease Control and Prevention | Pathogen Discovery, Respiratory Viruses Branch, Division of Viral Diseases, Centers for Disease Control and Prevention | Ying Tao, Jing Zhang, Brian Lynch, Yan Li, Krista Queen, Anna Uehara, Clinton R. Paden, Peter Cook, Haibin Wang, Suxiang Tong                                                                                                                                                                                                                                                                                                                                                                                                                                                                            |  |  |
| EPI_ISL_576196, EPI_ISL_576197                                                                                                                                                                                                                                                                                                                                                                                                                                                                                                                                                                                                                                                                                                                                                                                                                                                                                                                                                                                                                                                                                                                                                                                                                                                                                                                                                                                                                                                                                                                                                                                                                                                                                                                                                                                                                                                                                                                                                                                                                                 | AR Dept. of Health-Public Health Lab                                                             | Pathogen Discovery, Respiratory Viruses Branch, Division of Viral Diseases, Centers for Disease Control and Prevention | Pathogen Discovery, Respiratory Viruses Branch, Division of Viral Diseases, Centers for Disease Control and Prevention | Ying Tao, Jing Zhang, Brian Lynch, Yan Li, Krista Queen, Anna Uehara, Clinton R. Paden, Peter Cook, Haibin Wang, Suxiang Tong                                                                                                                                                                                                                                                                                                                                                                                                                                                                            |  |  |
| EPI_ISL_576363, EPI_ISL_576364, EPI_ISL_576365, EPI_ISL_576366, EPI_ISL_576367, EPI_ISL_576368, EPI_ISL_576369, EPI_ISL_576370                                                                                                                                                                                                                                                                                                                                                                                                                                                                                                                                                                                                                                                                                                                                                                                                                                                                                                                                                                                                                                                                                                                                                                                                                                                                                                                                                                                                                                                                                                                                                                                                                                                                                                                                                                                                                                                                                                                                 | Utah Public Health Laboratory, Utah Public Health Laboratory Infectious Disease submission group | Utah Public Health Laboratory, Utah Public Health Laboratory Infectious Disease submission group                       | Utah Public Health Laboratory, Utah Public Health Laboratory Infectious Disease submission group                       | Young,E.L., Oakeson,K., Sangster,A., Hirschi,B., Butz,H.                                                                                                                                                                                                                                                                                                                                                                                                                                                                                                                                                 |  |  |
| EPI_ISL_576371, EPI_ISL_576372, EPI_ISL_576373                                                                                                                                                                                                                                                                                                                                                                                                                                                                                                                                                                                                                                                                                                                                                                                                                                                                                                                                                                                                                                                                                                                                                                                                                                                                                                                                                                                                                                                                                                                                                                                                                                                                                                                                                                                                                                                                                                                                                                                                                 | Cancer Biology Department, National Cancer Institute                                             | Cancer Biology Department, National Cancer Institute                                                                   | Cancer Biology Department, National Cancer Institute                                                                   | Zekri,A.N., Soliman,H.K., Ahmed,O.S., Hafez,M.M., Hamdy,M.S., Abouelhoda,M.                                                                                                                                                                                                                                                                                                                                                                                                                                                                                                                              |  |  |
| EPI_ISL_577598                                                                                                                                                                                                                                                                                                                                                                                                                                                                                                                                                                                                                                                                                                                                                                                                                                                                                                                                                                                                                                                                                                                                                                                                                                                                                                                                                                                                                                                                                                                                                                                                                                                                                                                                                                                                                                                                                                                                                                                                                                                 | Utah Public Health Laboratory, Utah Public Health Laboratory Infectious Disease submission group | Utah Public Health Laboratory                                                                                          | Utah Public Health Laboratory                                                                                          | Young,E.L., Oakeson,K., Sangster,A., Hirschi,B., Butz,H.                                                                                                                                                                                                                                                                                                                                                                                                                                                                                                                                                 |  |  |
| EPI_ISL_577599                                                                                                                                                                                                                                                                                                                                                                                                                                                                                                                                                                                                                                                                                                                                                                                                                                                                                                                                                                                                                                                                                                                                                                                                                                                                                                                                                                                                                                                                                                                                                                                                                                                                                                                                                                                                                                                                                                                                                                                                                                                 | Utah Public Health Laboratory, Utah Public Health Laboratory Infectious Disease submission group | Utah Public Health Laboratory, Utah Public Health Laboratory Infectious Disease submission group                       | Utah Public Health Laboratory, Utah Public Health Laboratory Infectious Disease submission group                       | Young,E.L., Oakeson,K., Sangster,A., Hirschi,B., Butz,H.                                                                                                                                                                                                                                                                                                                                                                                                                                                                                                                                                 |  |  |
| EPI_ISL_577600                                                                                                                                                                                                                                                                                                                                                                                                                                                                                                                                                                                                                                                                                                                                                                                                                                                                                                                                                                                                                                                                                                                                                                                                                                                                                                                                                                                                                                                                                                                                                                                                                                                                                                                                                                                                                                                                                                                                                                                                                                                 | Utah Public Health Laboratory, Utah Public Health Laboratory Infectious Disease submission group | Utah Public Health Laboratory                                                                                          | Utah Public Health Laboratory                                                                                          | Young,E.L., Oakeson,K., Sangster,A., Hirschi,B., Butz,H.                                                                                                                                                                                                                                                                                                                                                                                                                                                                                                                                                 |  |  |
| EPI_ISL_577601, EPI_ISL_577603                                                                                                                                                                                                                                                                                                                                                                                                                                                                                                                                                                                                                                                                                                                                                                                                                                                                                                                                                                                                                                                                                                                                                                                                                                                                                                                                                                                                                                                                                                                                                                                                                                                                                                                                                                                                                                                                                                                                                                                                                                 | Utah Public Health Laboratory, Utah Public Health Laboratory Infectious Disease submission group | Utah Public Health Laboratory, Utah Public Health Laboratory Infectious Disease submission group                       | Utah Public Health Laboratory, Utah Public Health Laboratory Infectious Disease submission group                       | Young,E.L., Oakeson,K., Sangster,A., Hirschi,B., Butz,H.                                                                                                                                                                                                                                                                                                                                                                                                                                                                                                                                                 |  |  |
| EPI_ISL_577734, EPI_ISL_577736, EPI_ISL_577738                                                                                                                                                                                                                                                                                                                                                                                                                                                                                                                                                                                                                                                                                                                                                                                                                                                                                                                                                                                                                                                                                                                                                                                                                                                                                                                                                                                                                                                                                                                                                                                                                                                                                                                                                                                                                                                                                                                                                                                                                 | Institute of Virology, Biomedical Research Center of the Slovak Academy of Sciences, Bratislava  | Faculty of Natural Sciences, Comenius University, Bratislava                                                           | Faculty of Natural Sciences, Comenius University, Bratislava                                                           | Viktória Hodorová, Kristína Boršová, Broa Brejová, Viktória abanová, Dominika Friová, Sabina Fumaová Havlíková, Juraj Kopáek, Martina Liková, ubomira Lukáiková, Martina Neboháová, Monika Sláviková, Edit Staroová, Elena Tichá, Tomáš Vlna, Jozef Nosek, Boris Klempa                                                                                                                                                                                                                                                                                                                                  |  |  |
| EPI_ISL_579058                                                                                                                                                                                                                                                                                                                                                                                                                                                                                                                                                                                                                                                                                                                                                                                                                                                                                                                                                                                                                                                                                                                                                                                                                                                                                                                                                                                                                                                                                                                                                                                                                                                                                                                                                                                                                                                                                                                                                                                                                                                 | LabTests                                                                                         | Institute of Environmental Science and Research (ESR)                                                                  | Institute of Environmental Science and Research (ESR)                                                                  | Xiaoyun Ren, Matt Storey, Nikki Freed, Muhammad Faisal, Jing Wang, Hermes Perez, Anja Werno, Antje van der Linden, Arlo Upton, Chris Mansell, David Hammer, Dragana Drinkovic, Gary McAuliffe, Hana Sofia Andersson, James Ussher, Jill Sherwood, Josh Freeman, Julia Howard, Juliet Elvy, Mary DeAlmeida, Matt Blakiston, Matthew Rogers, Max Bloomfield, Michael Addidle, Michelle Balm, Sally Roberts, Sarah Jefferies, Sharmini Muttaiyah, Susan Morpeth, Susan Taylor, Timothy Blackmore, Vani Sathyendran, Veronica Playle, Virginia Hope, Erasmus Smit, Lauren Jelly, Olin Silander, Joep de Ligt |  |  |
| EPI_ISL_579059                                                                                                                                                                                                                                                                                                                                                                                                                                                                                                                                                                                                                                                                                                                                                                                                                                                                                                                                                                                                                                                                                                                                                                                                                                                                                                                                                                                                                                                                                                                                                                                                                                                                                                                                                                                                                                                                                                                                                                                                                                                 | LabPLUS                                                                                          | Institute of Environmental Science and Research (ESR)                                                                  | Institute of Environmental Science and Research (ESR)                                                                  | Xiaoyun Ren, Matt Storey, Nikki Freed, Muhammad Faisal, Jing Wang, Hermes Perez, Anja Werno, Antje van der Linden, Arlo Upton, Chris Mansell, David Hammer, Dragana Drinkovic, Gary McAuliffe, Hana Sofia Andersson, James Ussher, Jill Sherwood, Josh Freeman, Julia Howard, Juliet Elvy, Mary DeAlmeida, Matt Blakiston, Matthew Rogers, Max Bloomfield, Michael Addidle, Michelle Balm, Sally Roberts, Sarah Jefferies, Sharmini Muttaiyah, Susan Morpeth, Susan Taylor, Timothy Blackmore, Vani Sathyendran, Veronica Playle, Virginia Hope, Erasmus Smit, Lauren Jelly, Olin Silander, Joep de Ligt |  |  |
| EPI_ISL_579060, EPI_ISL_579061, EPI_ISL_579062, EPI_ISL_579063, EPI_ISL_579064, EPI_ISL_579065, EPI_ISL_579066, EPI_ISL_579067, EPI_ISL_579068, EPI_ISL_579069, EPI_ISL_579070, EPI_ISL_579071, EPI_ISL_579072, EPI_ISL_579073, EPI_ISL_579074, EPI_ISL_579075, EPI_ISL_579076, EPI_ISL_579077, EPI_ISL_579078, EPI_ISL_579079, EPI_ISL_579080, EPI_ISL_579081, EPI_ISL_579082, EPI_ISL_579083, EPI_ISL_579084, EPI_ISL_579085, EPI_ISL_579086, EPI_ISL_579087, EPI_ISL_579088, EPI_ISL_579089, EPI_ISL_579090, EPI_ISL_579091, EPI_ISL_579092                                                                                                                                                                                                                                                                                                                                                                                                                                                                                                                                                                                                                                                                                                                                                                                                                                                                                                                                                                                                                                                                                                                                                                                                                                                                                                                                                                                                                                                                                                                 | see above                                                                                        | Canterbury Health Laboratories                                                                                         | Institute of Environmental Science and Research (ESR)                                                                  | Xiaoyun Ren, Matt Storey, Nikki Freed, Muhammad Faisal, Jing Wang, Hermes Perez, Anja Werno, Antje van der Linden, Arlo Upton, Chris Mansell, David Hammer, Dragana Drinkovic, Gary McAuliffe, Hana Sofia Andersson, James Ussher, Jill Sherwood, Josh Freeman, Julia Howard, Juliet Elvy, Mary DeAlmeida, Matt Blakiston, Matthew Rogers, Max Bloomfield, Michael Addidle, Michelle Balm, Sally Roberts, Sarah Jefferies, Sharmini Muttaiyah, Susan Morpeth, Susan Taylor, Timothy Blackmore, Vani Sathyendran, Veronica Playle, Virginia Hope, Erasmus Smit, Lauren Jelly, Olin Silander, Joep de Ligt |  |  |
| EPI_ISL_579093, EPI_ISL_579094, EPI_ISL_579095, EPI_ISL_579096                                                                                                                                                                                                                                                                                                                                                                                                                                                                                                                                                                                                                                                                                                                                                                                                                                                                                                                                                                                                                                                                                                                                                                                                                                                                                                                                                                                                                                                                                                                                                                                                                                                                                                                                                                                                                                                                                                                                                                                                 | North Shore Hospital                                                                             | Institute of Environmental Science and Research (ESR)                                                                  | Institute of Environmental Science and Research (ESR)                                                                  | Xiaoyun Ren, Matt Storey, Nikki Freed, Muhammad Faisal, Jing Wang, Hermes Perez, Anja Werno, Antje van der Linden, Arlo Upton, Chris Mansell, David Hammer, Dragana Drinkovic, Gary McAuliffe, Hana Sofia Andersson, James Ussher, Jill Sherwood, Josh Freeman, Julia Howard, Juliet Elvy, Mary DeAlmeida, Matt Blakiston, Matthew Rogers, Max Bloomfield, Michael Addidle, Michelle Balm, Sally Roberts, Sarah Jefferies, Sharmini Muttaiyah, Susan Morpeth, Susan Taylor, Timothy Blackmore, Vani Sathyendran, Veronica Playle, Virginia Hope, Erasmus Smit, Lauren Jelly, Olin Silander, Joep de Ligt |  |  |
| EPI_ISL_579097, EPI_ISL_579098                                                                                                                                                                                                                                                                                                                                                                                                                                                                                                                                                                                                                                                                                                                                                                                                                                                                                                                                                                                                                                                                                                                                                                                                                                                                                                                                                                                                                                                                                                                                                                                                                                                                                                                                                                                                                                                                                                                                                                                                                                 | LabPLUS                                                                                          | Institute of Environmental Science and Research (ESR)                                                                  | Institute of Environmental Science and Research (ESR)                                                                  | Xiaoyun Ren, Matt Storey, Nikki Freed, Muhammad Faisal, Jing Wang, Hermes Perez, Anja Werno, Antje van der Linden, Arlo Upton, Chris Mansell, David Hammer, Dragana Drinkovic, Gary McAuliffe, Hana Sofia Andersson, James Ussher, Jill Sherwood, Josh Freeman, Julia Howard, Juliet Elvy, Mary DeAlmeida, Matt Blakiston, Matthew Rogers, Max Bloomfield, Michael Addidle, Michelle Balm, Sally Roberts, Sarah Jefferies, Sharmini Muttaiyah, Susan Morpeth, Susan Taylor, Timothy Blackmore, Vani Sathyendran, Veronica Playle, Virginia Hope, Erasmus Smit, Lauren Jelly, Olin Silander, Joep de Ligt |  |  |
| EPI_ISL_579099                                                                                                                                                                                                                                                                                                                                                                                                                                                                                                                                                                                                                                                                                                                                                                                                                                                                                                                                                                                                                                                                                                                                                                                                                                                                                                                                                                                                                                                                                                                                                                                                                                                                                                                                                                                                                                                                                                                                                                                                                                                 | LabTests                                                                                         | Institute of Environmental Science and Research (ESR)                                                                  | Institute of Environmental Science and Research (ESR)                                                                  | Xiaoyun Ren, Matt Storey, Nikki Freed, Muhammad Faisal, Jing Wang, Hermes Perez, Anja Werno, Antje van der Linden, Arlo Upton, Chris Mansell, David Hammer, Dragana Drinkovic, Gary McAuliffe, Hana Sofia Andersson, James Ussher, Jill Sherwood, Josh Freeman, Julia Howard, Juliet Elvy, Mary                                                                                                                                                                                                                                                                                                          |  |  |







|                                                                                                                                                                                                                                                                                                                                                                                                                                                                                |                                                                                                            |                                                                                                                        |                                                                                                                                                                                                                                                                                                                                                    |                                                                                                                                                                                                                                                                                                                                                                                                                                                                                                                                                                                                         |
|--------------------------------------------------------------------------------------------------------------------------------------------------------------------------------------------------------------------------------------------------------------------------------------------------------------------------------------------------------------------------------------------------------------------------------------------------------------------------------|------------------------------------------------------------------------------------------------------------|------------------------------------------------------------------------------------------------------------------------|----------------------------------------------------------------------------------------------------------------------------------------------------------------------------------------------------------------------------------------------------------------------------------------------------------------------------------------------------|---------------------------------------------------------------------------------------------------------------------------------------------------------------------------------------------------------------------------------------------------------------------------------------------------------------------------------------------------------------------------------------------------------------------------------------------------------------------------------------------------------------------------------------------------------------------------------------------------------|
| EPI_ISL_581546, EPI_ISL_581547, EPI_ISL_581548, EPI_ISL_581549, EPI_ISL_581550, EPI_ISL_581551, EPI_ISL_581552, EPI_ISL_581553, EPI_ISL_581554, EPI_ISL_581555, EPI_ISL_581556, EPI_ISL_581557, EPI_ISL_581558, EPI_ISL_581559, EPI_ISL_581560, EPI_ISL_581561, EPI_ISL_581562, EPI_ISL_581563, EPI_ISL_581564, EPI_ISL_581565, EPI_ISL_581566, EPI_ISL_581567, EPI_ISL_581568, EPI_ISL_581569, EPI_ISL_581570, EPI_ISL_581571, EPI_ISL_581572, EPI_ISL_581573, EPI_ISL_581574 | see above                                                                                                  | Virginia DCLS                                                                                                          | Virginia DCLS                                                                                                                                                                                                                                                                                                                                      | Virginia DCLS                                                                                                                                                                                                                                                                                                                                                                                                                                                                                                                                                                                           |
| EPI_ISL_582017                                                                                                                                                                                                                                                                                                                                                                                                                                                                 |                                                                                                            | LabPLUS                                                                                                                | Institute of Environmental Science and Research (ESR)                                                                                                                                                                                                                                                                                              | Xiaoyun Ren, Matt Storey, Nikki Freed, Muhammad Faisal, Jing Wang, Hermes Perez, Anja Werno, Antje van der Linden, Arlo Upton, Chris Mansell, David Hammer, Dragana Drinkovic, Gary McAuliffe, Hana Sofia Andersson, James Ussher, Jill Sherwood, Josh Freeman, Julia Howard, Juliet Ely, Mary DeAlmeida, Matt Blakiston, Matthew Rogers, Max Bloomfield, Michael Addidle, Michelle Balm, Sally Roberts, Sarah Jefferies, Sharmini Muttaiyah, Susan Morpeth, Susan Taylor, Timothy Blackmore, Vani Sathyendran, Veronica Playle, Virginia Hope, Erasmus Smit, Lauren Jelly, Olin Silander, Joep de Ligt |
| EPI_ISL_582018, EPI_ISL_582019, EPI_ISL_582020, EPI_ISL_582021                                                                                                                                                                                                                                                                                                                                                                                                                 |                                                                                                            | PathLab Bay of Plenty                                                                                                  | Institute of Environmental Science and Research (ESR)                                                                                                                                                                                                                                                                                              | Xiaoyun Ren, Matt Storey, Nikki Freed, Muhammad Faisal, Jing Wang, Hermes Perez, Anja Werno, Antje van der Linden, Arlo Upton, Chris Mansell, David Hammer, Dragana Drinkovic, Gary McAuliffe, Hana Sofia Andersson, James Ussher, Jill Sherwood, Josh Freeman, Julia Howard, Juliet Ely, Mary DeAlmeida, Matt Blakiston, Matthew Rogers, Max Bloomfield, Michael Addidle, Michelle Balm, Sally Roberts, Sarah Jefferies, Sharmini Muttaiyah, Susan Morpeth, Susan Taylor, Timothy Blackmore, Vani Sathyendran, Veronica Playle, Virginia Hope, Erasmus Smit, Lauren Jelly, Olin Silander, Joep de Ligt |
| EPI_ISL_582022, EPI_ISL_582023                                                                                                                                                                                                                                                                                                                                                                                                                                                 |                                                                                                            | Pathlab Lakes                                                                                                          | Institute of Environmental Science and Research (ESR)                                                                                                                                                                                                                                                                                              | Xiaoyun Ren, Matt Storey, Nikki Freed, Muhammad Faisal, Jing Wang, Hermes Perez, Anja Werno, Antje van der Linden, Arlo Upton, Chris Mansell, David Hammer, Dragana Drinkovic, Gary McAuliffe, Hana Sofia Andersson, James Ussher, Jill Sherwood, Josh Freeman, Julia Howard, Juliet Ely, Mary DeAlmeida, Matt Blakiston, Matthew Rogers, Max Bloomfield, Michael Addidle, Michelle Balm, Sally Roberts, Sarah Jefferies, Sharmini Muttaiyah, Susan Morpeth, Susan Taylor, Timothy Blackmore, Vani Sathyendran, Veronica Playle, Virginia Hope, Erasmus Smit, Lauren Jelly, Olin Silander, Joep de Ligt |
| EPI_ISL_582033                                                                                                                                                                                                                                                                                                                                                                                                                                                                 | Department of Pathology, School of Medicine, Imam Khomeini Hospital, Tehran University of Medical Sciences | Genetics Research Center. University Of Social Welfare And Rehabilitation Sciences                                     | Zohreh Fattahi, Marzieh Mohseni, Khadijeh Jalalvand, Azam Ghaziasadi, Seyede elham Mortazavi, Ali Jafarpour, Azar Hadadi, Alireza Abdollahi, Ali Jafarpour, Azam Ghaziasad, Seyede elham Mortazavi, Saber Soltani, Reza Najafipour , Kimia Kahrizi, Seyed Mohammad Jazayeri, Hossein Najmabadi                                                     |                                                                                                                                                                                                                                                                                                                                                                                                                                                                                                                                                                                                         |
| EPI_ISL_582524, EPI_ISL_582525, EPI_ISL_582526, EPI_ISL_582527, EPI_ISL_582528, EPI_ISL_582529                                                                                                                                                                                                                                                                                                                                                                                 | Veterinary Specialized Institute "Kraljevo", Serbia                                                        | Veterinary Specialized Institute "Kraljevo", Serbia                                                                    | Vidanovic,D., Tesovic,B., Knezevic,A., Jovanovic,T., Jankovic,M., Sekler,M., Banovic Djeri,B., Petrovic,T., Volkening,J., Afonso,C.                                                                                                                                                                                                                |                                                                                                                                                                                                                                                                                                                                                                                                                                                                                                                                                                                                         |
| EPI_ISL_582530                                                                                                                                                                                                                                                                                                                                                                                                                                                                 | Laboratory Diagnostic, Veterinary Specialized Institute Kraljevo                                           | Laboratory Diagnostic, Veterinary Specialized Institute Kraljevo                                                       | Vidanovic,D., Tesovic,B., Knezevic,A., Jovanovic,T., Jankovic,M., Sekler,M., Banovic Djeri,B., Petrovic,T., Volkening,J., Afonso,C.                                                                                                                                                                                                                |                                                                                                                                                                                                                                                                                                                                                                                                                                                                                                                                                                                                         |
| EPI_ISL_582531, EPI_ISL_582532, EPI_ISL_582533, EPI_ISL_582534                                                                                                                                                                                                                                                                                                                                                                                                                 | Veterinary Specialized Institute "Kraljevo", Serbia                                                        | Veterinary Specialized Institute "Kraljevo", Serbia                                                                    | Vidanovic,D., Tesovic,B., Knezevic,A., Jovanovic,T., Jankovic,M., Sekler,M., Banovic Djeri,B., Petrovic,T., Volkening,J., Afonso,C.                                                                                                                                                                                                                |                                                                                                                                                                                                                                                                                                                                                                                                                                                                                                                                                                                                         |
| EPI_ISL_583481, EPI_ISL_583483, EPI_ISL_583485, EPI_ISL_583489                                                                                                                                                                                                                                                                                                                                                                                                                 | Institute of Virology, Biomedical Research Center of the Slovak Academy of Sciences, Bratislava            | Faculty of Natural Sciences, Comenius University, Bratislava                                                           | Viktória Hodorová, Kristína Boršová, Broa Brejčová, Viktória abanová, Dominika Friová, Sabina Fumaová Havlíková, Juraj Kopáek, Martina Liková, ubomira Lukáiková, Martina Neboháová, Monika Sláviková, Edita Staroová, Elena Tichá, Tomáš Vina, Jozef Nosek, Boris Klempa                                                                          |                                                                                                                                                                                                                                                                                                                                                                                                                                                                                                                                                                                                         |
| EPI_ISL_586519                                                                                                                                                                                                                                                                                                                                                                                                                                                                 | B.J. Medical College and Civil hospital, Ahmedabad                                                         | Gujarat Biotechnology Research Centre                                                                                  | Zuber Saiyed, Komal Patel, Labdhi Pandya, Afzal Ansari, Nikha Trivedi, Pranay Shah, Kamlesh J Upadhyay, Sanjay Kapadia, Apurvasinh Puvar, Janvi Raval, Zarna Patel, Monika Gandhi, Pinal Trivedi, Maharshi Pandya, Nidhi Patel, Nitin Savaliya, Raghawendra Kumar, Dinesh Kumar, R D Dixit, A M Kadri, Harsh Bakshi, Chaitanya Joshi, Madhvi Joshi |                                                                                                                                                                                                                                                                                                                                                                                                                                                                                                                                                                                                         |
| EPI_ISL_586528                                                                                                                                                                                                                                                                                                                                                                                                                                                                 | B.J. Medical College and Civil hospital, Ahmedabad                                                         | Gujarat Biotechnology Research Centre                                                                                  | Zarna Patel, Monika Gandhi, Pinal Trivedi, Maharshi Pandya, Nidhi Patel, Nitin Savaliya, Raghawendra Kumar, Dinesh Kumar, Zuber Saiyed, Komal Patel, Labdhi Pandya, Afzal Ansari, Nikha Trivedi, Pranay Shah, Kamlesh J Upadhyay, Sanjay Kapadia, Apurvasinh Puvar, Janvi Raval, R D Dixit, A M Kadri, Harsh Bakshi, Chaitanya Joshi, Madhvi Joshi |                                                                                                                                                                                                                                                                                                                                                                                                                                                                                                                                                                                                         |
| EPI_ISL_586531                                                                                                                                                                                                                                                                                                                                                                                                                                                                 | General Hospital,Chhotaudepur                                                                              | Gujarat Biotechnology Research Centre                                                                                  | Yogesh Parmar, Arti Thakur, Dharak Pandya, Maharshi Pandya, Nidhi Patel, Nitin Savaliya, Raghawendra Kumar, Dinesh Kumar, Zuber Saiyed, Komal Patel, Labdhi Pandya, Afzal Ansari, Nikha Trivedi, Apurvasinh Puvar, Janvi Raval, Zarna Patel, Monika Gandhi, Pinal Trivedi, R D Dixit, A M Kadri, Harsh Bakshi, Chaitanya Joshi, Madhvi Joshi       |                                                                                                                                                                                                                                                                                                                                                                                                                                                                                                                                                                                                         |
| EPI_ISL_586541                                                                                                                                                                                                                                                                                                                                                                                                                                                                 | Zydus Medical Hospital,Dahod                                                                               | Gujarat Biotechnology Research Centre                                                                                  | Zuber Saiyed, Komal Patel, Labdhi Pandya, Afzal Ansari, Nikha Trivedi, Apurvasinh Puvar, Janvi Raval, Zarna Patel, Monika Gandhi, Pinal Trivedi, Maharshi Pandya, Nidhi Patel, Kalpesh Labana, Mohit Desai, Nitin Savaliya, Raghawendra Kumar, Dinesh Kumar, R D Dixit, A M Kadri, Harsh Bakshi, Chaitanya Joshi, Madhvi Joshi                     |                                                                                                                                                                                                                                                                                                                                                                                                                                                                                                                                                                                                         |
| EPI_ISL_586558                                                                                                                                                                                                                                                                                                                                                                                                                                                                 | CCC,Veraval                                                                                                | Gujarat Biotechnology Research Centre                                                                                  | Zuber Saiyed, Komal Patel, Labdhi Pandya, Afzal Ansari, Nikha Trivedi, Jignesh Parmar, Jitendra Bamrotia, Apurvasinh Puvar, Janvi Raval, Zarna Patel, Monika Gandhi, Pinal Trivedi, Maharshi Pandya, Nidhi Patel, Nitin Savaliya, Raghawendra Kumar, Dinesh Kumar, R D Dixit, A M Kadri, Harsh Bakshi, Chaitanya Joshi, Madhvi Joshi               |                                                                                                                                                                                                                                                                                                                                                                                                                                                                                                                                                                                                         |
| EPI_ISL_586567, EPI_ISL_586568                                                                                                                                                                                                                                                                                                                                                                                                                                                 | Saikrishna Hospital,Mehsana                                                                                | Gujarat Biotechnology Research Centre                                                                                  | Zarna Patel, Monika Gandhi, Pinal Trivedi, Maharshi Pandya, Nidhi Patel, Nitin Savaliya, Raghawendra Kumar, Dinesh Kumar, Zuber Saiyed, Komal Patel, Labdhi Pandya, Afzal Ansari, Nikha Trivedi, Harshadbnai Parmar, Apurvasinh Puvar, Janvi Raval, R D Dixit, A M Kadri, Harsh Bakshi, Chaitanya Joshi, Madhvi Joshi                              |                                                                                                                                                                                                                                                                                                                                                                                                                                                                                                                                                                                                         |
| EPI_ISL_590692                                                                                                                                                                                                                                                                                                                                                                                                                                                                 | Government Hospital,Veraval                                                                                | Gujarat Biotechnology Research Centre                                                                                  | Zarna Patel, Monika Gandhi, Pinal Trivedi, Maharshi Pandya, Nidhi Patel, Nitin Savaliya, Raghawendra Kumar, Dinesh Kumar, Zuber Saiyed, Komal Patel, Labdhi Pandya, Afzal Ansari, Nikha Trivedi, Jignesh Parmar, Jitendra Bamrotia, Apurvasinh Puvar, Janvi Raval, R D Dixit, A M Kadri, Harsh Bakshi, Chaitanya Joshi, Madhvi Joshi               |                                                                                                                                                                                                                                                                                                                                                                                                                                                                                                                                                                                                         |
| EPI_ISL_594185, EPI_ISL_594186, EPI_ISL_594187, EPI_ISL_594188                                                                                                                                                                                                                                                                                                                                                                                                                 | Department of Pathology, School of Medicine, Imam Khomeini Hospital, Tehran University of Medical Sciences | Genetics Research Center, University of Social Welfare and Rehabilitation Sciences                                     | Zohreh Fattahi, Marzieh Mohseni, Khadijeh Jalalvand, Azam Ghaziasadi, Seyede elham Mortazavi, Ali Jafarpour, Azar Hadadi, Alireza Abdollahi, Ali Jafarpour, Azam Ghaziasad, Seyede elham Mortazavi, Saber Soltani, Reza Najafipour, Kimia Kahrizi, Seyed Mohammad Jazayeri, Hossein Najmabadi                                                      |                                                                                                                                                                                                                                                                                                                                                                                                                                                                                                                                                                                                         |
| EPI_ISL_594447, EPI_ISL_594448, EPI_ISL_594449, EPI_ISL_594450, EPI_ISL_594451, EPI_ISL_594452, EPI_ISL_594453, EPI_ISL_594454                                                                                                                                                                                                                                                                                                                                                 | Washington State Public Health Laboratories                                                                | Pathogen Discovery, Respiratory Viruses Branch, Division of Viral Diseases, Centers for Disease Control and Prevention | Ying Tao, Yan Li, Clinton Paden, Jing Zhang, Krista Queen, Anna Uehara, Haibin Wang, Julu Bhatnagar, Suxiang Tong                                                                                                                                                                                                                                  |                                                                                                                                                                                                                                                                                                                                                                                                                                                                                                                                                                                                         |
| EPI_ISL_594455                                                                                                                                                                                                                                                                                                                                                                                                                                                                 | Texas Department of State Health Services Public Health Laboratory                                         | Pathogen Discovery, Respiratory Viruses Branch, Division of Viral Diseases, Centers for Disease Control and Prevention | Ying Tao, Yan Li, Clinton Paden, Jing Zhang, Krista Queen, Anna Uehara, Haibin Wang, Julu Bhatnagar, Suxiang Tong                                                                                                                                                                                                                                  |                                                                                                                                                                                                                                                                                                                                                                                                                                                                                                                                                                                                         |
| EPI_ISL_594456                                                                                                                                                                                                                                                                                                                                                                                                                                                                 | Georgia Public Health Laboratory                                                                           | Pathogen Discovery, Respiratory Viruses Branch, Division of Viral Diseases, Centers for Disease Control and Prevention | Ying Tao, Yan Li, Clinton Paden, Jing Zhang, Krista Queen, Anna Uehara, Haibin Wang, Julu Bhatnagar, Suxiang Tong                                                                                                                                                                                                                                  |                                                                                                                                                                                                                                                                                                                                                                                                                                                                                                                                                                                                         |
| EPI_ISL_594457                                                                                                                                                                                                                                                                                                                                                                                                                                                                 | NYS Department of Health                                                                                   | Pathogen Discovery, Respiratory Viruses Branch, Division of Viral Diseases, Centers for Disease Control and Prevention | Ying Tao, Yan Li, Clinton Paden, Jing Zhang, Krista Queen, Anna Uehara, Haibin Wang, Julu Bhatnagar, Suxiang Tong                                                                                                                                                                                                                                  |                                                                                                                                                                                                                                                                                                                                                                                                                                                                                                                                                                                                         |
| EPI_ISL_594458                                                                                                                                                                                                                                                                                                                                                                                                                                                                 | California Department of Public Health                                                                     | Pathogen Discovery, Respiratory Viruses Branch, Division of Viral Diseases, Centers for Disease Control and Prevention | Ying Tao, Yan Li, Clinton Paden, Jing Zhang, Krista Queen, Anna Uehara, Haibin Wang, Julu Bhatnagar, Suxiang Tong                                                                                                                                                                                                                                  |                                                                                                                                                                                                                                                                                                                                                                                                                                                                                                                                                                                                         |
| EPI_ISL_594459                                                                                                                                                                                                                                                                                                                                                                                                                                                                 | Washington State Public Health Laboratories                                                                | Pathogen Discovery, Respiratory Viruses Branch, Division of Viral Diseases, Centers for Disease Control and Prevention | Ying Tao, Yan Li, Clinton Paden, Jing Zhang, Krista Queen, Anna Uehara, Haibin Wang, Julu Bhatnagar, Suxiang Tong                                                                                                                                                                                                                                  |                                                                                                                                                                                                                                                                                                                                                                                                                                                                                                                                                                                                         |
| EPI_ISL_594460                                                                                                                                                                                                                                                                                                                                                                                                                                                                 | DC Department of Forensic Sciences                                                                         | Pathogen Discovery, Respiratory Viruses Branch, Division of Viral Diseases, Centers for Disease Control and Prevention | Ying Tao, Yan Li, Clinton Paden, Jing Zhang, Krista Queen, Anna Uehara, Haibin Wang, Julu Bhatnagar, Suxiang Tong                                                                                                                                                                                                                                  |                                                                                                                                                                                                                                                                                                                                                                                                                                                                                                                                                                                                         |
| EPI_ISL_594461                                                                                                                                                                                                                                                                                                                                                                                                                                                                 | FL Bureau of Public Health Laboratories                                                                    | Pathogen Discovery, Respiratory Viruses Branch, Division of Viral Diseases, Centers for Disease Control and Prevention | Ying Tao, Yan Li, Clinton Paden, Jing Zhang, Krista Queen, Anna Uehara, Haibin Wang, Julu Bhatnagar, Suxiang Tong                                                                                                                                                                                                                                  |                                                                                                                                                                                                                                                                                                                                                                                                                                                                                                                                                                                                         |
| EPI_ISL_594462                                                                                                                                                                                                                                                                                                                                                                                                                                                                 | NM Department of Health                                                                                    | Pathogen Discovery, Respiratory Viruses Branch, Division of Viral Diseases, Centers for Disease Control and Prevention | Ying Tao, Yan Li, Clinton Paden, Jing Zhang, Krista Queen, Anna Uehara, Haibin Wang, Julu Bhatnagar, Suxiang Tong                                                                                                                                                                                                                                  |                                                                                                                                                                                                                                                                                                                                                                                                                                                                                                                                                                                                         |
| EPI_ISL_594463                                                                                                                                                                                                                                                                                                                                                                                                                                                                 | MN Department of Health                                                                                    | Pathogen Discovery, Respiratory Viruses Branch, Division of Viral Diseases, Centers for Disease Control and Prevention | Ying Tao, Yan Li, Clinton Paden, Jing Zhang, Krista Queen, Anna Uehara, Haibin Wang, Julu Bhatnagar, Suxiang Tong                                                                                                                                                                                                                                  |                                                                                                                                                                                                                                                                                                                                                                                                                                                                                                                                                                                                         |
| EPI_ISL_594464                                                                                                                                                                                                                                                                                                                                                                                                                                                                 | Texas Department of State Health Services Public Health Laboratory                                         | Pathogen Discovery, Respiratory Viruses Branch, Division of Viral Diseases, Centers for Disease Control and Prevention | Ying Tao, Yan Li, Clinton Paden, Jing Zhang, Krista Queen, Anna Uehara, Haibin Wang, Julu Bhatnagar, Suxiang Tong                                                                                                                                                                                                                                  |                                                                                                                                                                                                                                                                                                                                                                                                                                                                                                                                                                                                         |

|                                                                                                                                                                                                                                                                                                                                                                                                                                                                                                                                                                                                                                                                                                                                                                                                                                                                                                                                                                                                                                                                                                                                                                                                                                                                                                                                                                                                                                                                                                                                                                                                                                                                                                                                                                                                                                                                                                                                                                                                                                                                                                                                                                                                                                                                                                                                                                                                                                                                                                                                                                                                                                                                                                                                                                                                                                                                                                                                                                                                                                                                                                                                                                                                                                                                                                                                                                                                                                                                                                                                                                                                                                                                                                                                                                                                                                                                                                                                                                                                                                                                                                                                                                                                                                                |                                                                                                                                                    |                                                                                                                        |                                                                                                                                                                                                                                                                                                                                                                                                                                                                                                                                                                                                         |
|------------------------------------------------------------------------------------------------------------------------------------------------------------------------------------------------------------------------------------------------------------------------------------------------------------------------------------------------------------------------------------------------------------------------------------------------------------------------------------------------------------------------------------------------------------------------------------------------------------------------------------------------------------------------------------------------------------------------------------------------------------------------------------------------------------------------------------------------------------------------------------------------------------------------------------------------------------------------------------------------------------------------------------------------------------------------------------------------------------------------------------------------------------------------------------------------------------------------------------------------------------------------------------------------------------------------------------------------------------------------------------------------------------------------------------------------------------------------------------------------------------------------------------------------------------------------------------------------------------------------------------------------------------------------------------------------------------------------------------------------------------------------------------------------------------------------------------------------------------------------------------------------------------------------------------------------------------------------------------------------------------------------------------------------------------------------------------------------------------------------------------------------------------------------------------------------------------------------------------------------------------------------------------------------------------------------------------------------------------------------------------------------------------------------------------------------------------------------------------------------------------------------------------------------------------------------------------------------------------------------------------------------------------------------------------------------------------------------------------------------------------------------------------------------------------------------------------------------------------------------------------------------------------------------------------------------------------------------------------------------------------------------------------------------------------------------------------------------------------------------------------------------------------------------------------------------------------------------------------------------------------------------------------------------------------------------------------------------------------------------------------------------------------------------------------------------------------------------------------------------------------------------------------------------------------------------------------------------------------------------------------------------------------------------------------------------------------------------------------------------------------------------------------------------------------------------------------------------------------------------------------------------------------------------------------------------------------------------------------------------------------------------------------------------------------------------------------------------------------------------------------------------------------------------------------------------------------------------------------------------|----------------------------------------------------------------------------------------------------------------------------------------------------|------------------------------------------------------------------------------------------------------------------------|---------------------------------------------------------------------------------------------------------------------------------------------------------------------------------------------------------------------------------------------------------------------------------------------------------------------------------------------------------------------------------------------------------------------------------------------------------------------------------------------------------------------------------------------------------------------------------------------------------|
| EPI_ISL_594465                                                                                                                                                                                                                                                                                                                                                                                                                                                                                                                                                                                                                                                                                                                                                                                                                                                                                                                                                                                                                                                                                                                                                                                                                                                                                                                                                                                                                                                                                                                                                                                                                                                                                                                                                                                                                                                                                                                                                                                                                                                                                                                                                                                                                                                                                                                                                                                                                                                                                                                                                                                                                                                                                                                                                                                                                                                                                                                                                                                                                                                                                                                                                                                                                                                                                                                                                                                                                                                                                                                                                                                                                                                                                                                                                                                                                                                                                                                                                                                                                                                                                                                                                                                                                                 | FL Bureau of Public Health Laboratories                                                                                                            | Pathogen Discovery, Respiratory Viruses Branch, Division of Viral Diseases, Centers for Disease Control and Prevention | Ying Tao, Yan Li, Clinton Paden, Jing Zhang, Krista Queen, Anna Uehara, Haibin Wang, Julu Bhatnagar, Suxiang Tong                                                                                                                                                                                                                                                                                                                                                                                                                                                                                       |
| EPI_ISL_596451, EPI_ISL_596452                                                                                                                                                                                                                                                                                                                                                                                                                                                                                                                                                                                                                                                                                                                                                                                                                                                                                                                                                                                                                                                                                                                                                                                                                                                                                                                                                                                                                                                                                                                                                                                                                                                                                                                                                                                                                                                                                                                                                                                                                                                                                                                                                                                                                                                                                                                                                                                                                                                                                                                                                                                                                                                                                                                                                                                                                                                                                                                                                                                                                                                                                                                                                                                                                                                                                                                                                                                                                                                                                                                                                                                                                                                                                                                                                                                                                                                                                                                                                                                                                                                                                                                                                                                                                 | Department of Pathology, School of Medicine, Imam Khomeini Hospital, Tehran University of Medical Sciences                                         | Genetics Research Center, University of Social Welfare and Rehabilitation Sciences                                     | Zohreh Fattahi, Marzieh Mohseni, Khadijeh Jalalvand, Azam Ghaziasadi, Seyede elham Mortazavi, Ali Jafarpour, Azar Hadadi, Alireza Abdollahi, Ali Jafarpour, Azam Ghaziasad, Seyede elham Mortazavi, Saber Soltani, Reza Najafipour, Kimia Kahrizi, Seyed Mohammad Jazayeri, Hossein Najmabadi                                                                                                                                                                                                                                                                                                           |
| EPI_ISL_596453                                                                                                                                                                                                                                                                                                                                                                                                                                                                                                                                                                                                                                                                                                                                                                                                                                                                                                                                                                                                                                                                                                                                                                                                                                                                                                                                                                                                                                                                                                                                                                                                                                                                                                                                                                                                                                                                                                                                                                                                                                                                                                                                                                                                                                                                                                                                                                                                                                                                                                                                                                                                                                                                                                                                                                                                                                                                                                                                                                                                                                                                                                                                                                                                                                                                                                                                                                                                                                                                                                                                                                                                                                                                                                                                                                                                                                                                                                                                                                                                                                                                                                                                                                                                                                 | Booali Laboratory, Qom, Iran. Department of Virology, School of Public Health, Tehran University of Medical Sciences, Tehran, Iran.                | Genetics Research Center, University of Social Welfare and Rehabilitation Sciences                                     | Zohreh Fattahi, Marzieh Mohseni, Khadijeh Jalalvand, Azam Ghaziasadi, Seyede elham Mortazavi, Ali Jafarpour, Mohammad Khazeni, Seyed Amir Momeni, Kimia Kahrizi, Seyed Mohammad Jazayeri, Hossein Najmabadi                                                                                                                                                                                                                                                                                                                                                                                             |
| EPI_ISL_596454                                                                                                                                                                                                                                                                                                                                                                                                                                                                                                                                                                                                                                                                                                                                                                                                                                                                                                                                                                                                                                                                                                                                                                                                                                                                                                                                                                                                                                                                                                                                                                                                                                                                                                                                                                                                                                                                                                                                                                                                                                                                                                                                                                                                                                                                                                                                                                                                                                                                                                                                                                                                                                                                                                                                                                                                                                                                                                                                                                                                                                                                                                                                                                                                                                                                                                                                                                                                                                                                                                                                                                                                                                                                                                                                                                                                                                                                                                                                                                                                                                                                                                                                                                                                                                 | Infectious Disease and Tropical Medicine Research Center, Resistant Tuberculosis Institute, Zahedan University of Medical Sciences, Zahedan, Iran. | Genetics Research Center, University of Social Welfare and Rehabilitation Sciences                                     | Zohreh Fattahi, Marzieh Mohseni, Khadijeh Jalalvand, Azam Ghaziasadi, Seyede elham Mortazavi, Ali Jafarpour, Ebrahim Kord, Seyed Mohammad Hashemi-Shahri, Kimia Kahrizi, Seyed Mohammad Jazayeri, Hossein Najmabadi                                                                                                                                                                                                                                                                                                                                                                                     |
| EPI_ISL_596455                                                                                                                                                                                                                                                                                                                                                                                                                                                                                                                                                                                                                                                                                                                                                                                                                                                                                                                                                                                                                                                                                                                                                                                                                                                                                                                                                                                                                                                                                                                                                                                                                                                                                                                                                                                                                                                                                                                                                                                                                                                                                                                                                                                                                                                                                                                                                                                                                                                                                                                                                                                                                                                                                                                                                                                                                                                                                                                                                                                                                                                                                                                                                                                                                                                                                                                                                                                                                                                                                                                                                                                                                                                                                                                                                                                                                                                                                                                                                                                                                                                                                                                                                                                                                                 | Department of Pathology, School of Medicine, Imam Khomeini Hospital, Tehran University of Medical Sciences                                         | Genetics Research Center, University of Social Welfare and Rehabilitation Sciences                                     | Zohreh Fattahi, Marzieh Mohseni, Khadijeh Jalalvand, Azam Ghaziasadi, Seyede elham Mortazavi, Ali Jafarpour, Azar Hadadi, Alireza Abdollahi, Ali Jafarpour, Azam Ghaziasad, Seyede elham Mortazavi, Saber Soltani, Reza Najafipour, Kimia Kahrizi, Seyed Mohammad Jazayeri, Hossein Najmabadi                                                                                                                                                                                                                                                                                                           |
| EPI_ISL_602556, EPI_ISL_602557, EPI_ISL_602558, EPI_ISL_603049, EPI_ISL_603050, EPI_ISL_603051, EPI_ISL_603052, EPI_ISL_603053, EPI_ISL_603054, EPI_ISL_603055, EPI_ISL_603058, EPI_ISL_603059, EPI_ISL_603061, EPI_ISL_603064, EPI_ISL_603065, EPI_ISL_603066, EPI_ISL_603067, EPI_ISL_603068, EPI_ISL_603069, EPI_ISL_603070, EPI_ISL_603072, EPI_ISL_603073, EPI_ISL_603074, EPI_ISL_603075, EPI_ISL_603078, EPI_ISL_603079                                                                                                                                                                                                                                                                                                                                                                                                                                                                                                                                                                                                                                                                                                                                                                                                                                                                                                                                                                                                                                                                                                                                                                                                                                                                                                                                                                                                                                                                                                                                                                                                                                                                                                                                                                                                                                                                                                                                                                                                                                                                                                                                                                                                                                                                                                                                                                                                                                                                                                                                                                                                                                                                                                                                                                                                                                                                                                                                                                                                                                                                                                                                                                                                                                                                                                                                                                                                                                                                                                                                                                                                                                                                                                                                                                                                                 |                                                                                                                                                    |                                                                                                                        |                                                                                                                                                                                                                                                                                                                                                                                                                                                                                                                                                                                                         |
| see above                                                                                                                                                                                                                                                                                                                                                                                                                                                                                                                                                                                                                                                                                                                                                                                                                                                                                                                                                                                                                                                                                                                                                                                                                                                                                                                                                                                                                                                                                                                                                                                                                                                                                                                                                                                                                                                                                                                                                                                                                                                                                                                                                                                                                                                                                                                                                                                                                                                                                                                                                                                                                                                                                                                                                                                                                                                                                                                                                                                                                                                                                                                                                                                                                                                                                                                                                                                                                                                                                                                                                                                                                                                                                                                                                                                                                                                                                                                                                                                                                                                                                                                                                                                                                                      | Utah Public Health Laboratory, Utah Public Health Laboratory Infectious Disease submission group                                                   | Utah Public Health Laboratory, Utah Public Health Laboratory Infectious Disease submission group                       | Young,E.L., Oakeson,K.                                                                                                                                                                                                                                                                                                                                                                                                                                                                                                                                                                                  |
| EPI_ISL_605931                                                                                                                                                                                                                                                                                                                                                                                                                                                                                                                                                                                                                                                                                                                                                                                                                                                                                                                                                                                                                                                                                                                                                                                                                                                                                                                                                                                                                                                                                                                                                                                                                                                                                                                                                                                                                                                                                                                                                                                                                                                                                                                                                                                                                                                                                                                                                                                                                                                                                                                                                                                                                                                                                                                                                                                                                                                                                                                                                                                                                                                                                                                                                                                                                                                                                                                                                                                                                                                                                                                                                                                                                                                                                                                                                                                                                                                                                                                                                                                                                                                                                                                                                                                                                                 | Utah Public Health Laboratory, Utah Public Health Laboratory Infectious Disease submission group                                                   | Utah Public Health Laboratory, Utah Public Health Laboratory Infectious Disease submission group                       | Young,E.L. and Oakeson,K.                                                                                                                                                                                                                                                                                                                                                                                                                                                                                                                                                                               |
| EPI_ISL_609971, EPI_ISL_609972, EPI_ISL_609973, EPI_ISL_609974, EPI_ISL_609975, EPI_ISL_609976, EPI_ISL_609977, EPI_ISL_609978, EPI_ISL_609979, EPI_ISL_609980, EPI_ISL_609981, EPI_ISL_609982, EPI_ISL_609983, EPI_ISL_609984, EPI_ISL_609985, EPI_ISL_609986, EPI_ISL_609987, EPI_ISL_609988, EPI_ISL_610118, EPI_ISL_610119, EPI_ISL_610120, EPI_ISL_610121, EPI_ISL_610122, EPI_ISL_610123, EPI_ISL_610124, EPI_ISL_610125, EPI_ISL_610126, EPI_ISL_610127, EPI_ISL_610128, EPI_ISL_610129, EPI_ISL_610130, EPI_ISL_610131, EPI_ISL_610132, EPI_ISL_610133, EPI_ISL_610134, EPI_ISL_610135, EPI_ISL_610136, EPI_ISL_610137, EPI_ISL_610138, EPI_ISL_610139, EPI_ISL_610140, EPI_ISL_610141, EPI_ISL_610142, EPI_ISL_610143, EPI_ISL_610144, EPI_ISL_610145, EPI_ISL_610146, EPI_ISL_610147, EPI_ISL_610148, EPI_ISL_610149, EPI_ISL_610150, EPI_ISL_610151, EPI_ISL_610152, EPI_ISL_610153, EPI_ISL_610154, EPI_ISL_610155, EPI_ISL_610156, EPI_ISL_610157, EPI_ISL_610158, EPI_ISL_610159, EPI_ISL_610160, EPI_ISL_610161, EPI_ISL_610162, EPI_ISL_610163, EPI_ISL_610164, EPI_ISL_610165, EPI_ISL_610166, EPI_ISL_610167, EPI_ISL_610168, EPI_ISL_610169, EPI_ISL_610170, EPI_ISL_610171, EPI_ISL_610172, EPI_ISL_610173, EPI_ISL_610174, EPI_ISL_610175, EPI_ISL_610176, EPI_ISL_610177, EPI_ISL_610178, EPI_ISL_610179, EPI_ISL_610180, EPI_ISL_610181, EPI_ISL_610182, EPI_ISL_610183, EPI_ISL_610184, EPI_ISL_610185, EPI_ISL_610186, EPI_ISL_610187, EPI_ISL_610188, EPI_ISL_610189, EPI_ISL_610190, EPI_ISL_610191, EPI_ISL_610192, EPI_ISL_610193, EPI_ISL_610194, EPI_ISL_610195, EPI_ISL_610196, EPI_ISL_610197, EPI_ISL_610198, EPI_ISL_610199, EPI_ISL_610200, EPI_ISL_614001, EPI_ISL_614002, EPI_ISL_614003, EPI_ISL_614004, EPI_ISL_614005, EPI_ISL_614006, EPI_ISL_614007, EPI_ISL_614008, EPI_ISL_614009, EPI_ISL_614010, EPI_ISL_614011, EPI_ISL_614012, EPI_ISL_614013, EPI_ISL_614014, EPI_ISL_614015, EPI_ISL_614016, EPI_ISL_614017, EPI_ISL_614018, EPI_ISL_614019, EPI_ISL_614020, EPI_ISL_614021, EPI_ISL_614022, EPI_ISL_614023, EPI_ISL_614024, EPI_ISL_614025, EPI_ISL_614026, EPI_ISL_614027, EPI_ISL_614028, EPI_ISL_614029, EPI_ISL_614030, EPI_ISL_614031, EPI_ISL_614032, EPI_ISL_614033, EPI_ISL_614034, EPI_ISL_614035, EPI_ISL_614036, EPI_ISL_614037, EPI_ISL_614038, EPI_ISL_614039, EPI_ISL_614040, EPI_ISL_614041, EPI_ISL_614042, EPI_ISL_614043, EPI_ISL_614044, EPI_ISL_614045, EPI_ISL_614046, EPI_ISL_614047, EPI_ISL_614048, EPI_ISL_614049, EPI_ISL_614050, EPI_ISL_614051, EPI_ISL_614052, EPI_ISL_614053, EPI_ISL_614054, EPI_ISL_614055, EPI_ISL_614056, EPI_ISL_614057, EPI_ISL_614058, EPI_ISL_614059, EPI_ISL_614060, EPI_ISL_614061, EPI_ISL_614062, EPI_ISL_614063, EPI_ISL_614064, EPI_ISL_614065, EPI_ISL_614066, EPI_ISL_614067, EPI_ISL_614068, EPI_ISL_614069, EPI_ISL_614070, EPI_ISL_614071, EPI_ISL_614072, EPI_ISL_614073, EPI_ISL_614074, EPI_ISL_614075, EPI_ISL_614076, EPI_ISL_614077, EPI_ISL_614078, EPI_ISL_614079, EPI_ISL_614080, EPI_ISL_614081, EPI_ISL_614082, EPI_ISL_614083, EPI_ISL_614084, EPI_ISL_614085, EPI_ISL_614086, EPI_ISL_614087, EPI_ISL_614088, EPI_ISL_614089, EPI_ISL_614090, EPI_ISL_614091, EPI_ISL_614092, EPI_ISL_614093, EPI_ISL_614094, EPI_ISL_614095, EPI_ISL_614096, EPI_ISL_614097, EPI_ISL_614098, EPI_ISL_614099, EPI_ISL_614100, EPI_ISL_614101, EPI_ISL_614102, EPI_ISL_614103, EPI_ISL_614104, EPI_ISL_614105, EPI_ISL_614106, EPI_ISL_614107, EPI_ISL_614108, EPI_ISL_614109, EPI_ISL_614110, EPI_ISL_614111, EPI_ISL_614112, EPI_ISL_614113, EPI_ISL_614114, EPI_ISL_614115, EPI_ISL_614116, EPI_ISL_614117, EPI_ISL_614118, EPI_ISL_614119, EPI_ISL_614120, EPI_ISL_614121, EPI_ISL_614122, EPI_ISL_614123, EPI_ISL_614124, EPI_ISL_614125, EPI_ISL_614126, EPI_ISL_614127, EPI_ISL_614128, EPI_ISL_614129, EPI_ISL_614130, EPI_ISL_614131, EPI_ISL_614132, EPI_ISL_614133, EPI_ISL_614134, EPI_ISL_614135, EPI_ISL_614136, EPI_ISL_614137, EPI_ISL_614138, EPI_ISL_614139, EPI_ISL_614140, EPI_ISL_614141, EPI_ISL_614142, EPI_ISL_614143, EPI_ISL_614144, EPI_ISL_614145, EPI_ISL_614146, EPI_ISL_614147, EPI_ISL_614148, EPI_ISL_614149, EPI_ISL_614150, EPI_ISL_614151, EPI_ISL_614152, EPI_ISL_614153, EPI_ISL_614154 |                                                                                                                                                    |                                                                                                                        |                                                                                                                                                                                                                                                                                                                                                                                                                                                                                                                                                                                                         |
| see above                                                                                                                                                                                                                                                                                                                                                                                                                                                                                                                                                                                                                                                                                                                                                                                                                                                                                                                                                                                                                                                                                                                                                                                                                                                                                                                                                                                                                                                                                                                                                                                                                                                                                                                                                                                                                                                                                                                                                                                                                                                                                                                                                                                                                                                                                                                                                                                                                                                                                                                                                                                                                                                                                                                                                                                                                                                                                                                                                                                                                                                                                                                                                                                                                                                                                                                                                                                                                                                                                                                                                                                                                                                                                                                                                                                                                                                                                                                                                                                                                                                                                                                                                                                                                                      | Virginia DCLS                                                                                                                                      | Virginia DCLS                                                                                                          | Virginia DCLS                                                                                                                                                                                                                                                                                                                                                                                                                                                                                                                                                                                           |
| EPI_ISL_614157                                                                                                                                                                                                                                                                                                                                                                                                                                                                                                                                                                                                                                                                                                                                                                                                                                                                                                                                                                                                                                                                                                                                                                                                                                                                                                                                                                                                                                                                                                                                                                                                                                                                                                                                                                                                                                                                                                                                                                                                                                                                                                                                                                                                                                                                                                                                                                                                                                                                                                                                                                                                                                                                                                                                                                                                                                                                                                                                                                                                                                                                                                                                                                                                                                                                                                                                                                                                                                                                                                                                                                                                                                                                                                                                                                                                                                                                                                                                                                                                                                                                                                                                                                                                                                 | NCDC/IGIB                                                                                                                                          | NCDC/IGIB                                                                                                              | Vivekanand A, Mahesh S. Dhar, Bharathram Uppili, Akshay Kanakan, Simmi Tiwari, RadhaKrishnan VS, Robin Marwal, Azka Khan, Ajit Shewale, Pooja Sharma, Tushar Nale, Rajesh Pandey, Sandhya Kabra, Mohammed Faruq, Sujeet Singh, Anurag Agrawal, Partha Rakshit                                                                                                                                                                                                                                                                                                                                           |
| EPI_ISL_620407, EPI_ISL_620408, EPI_ISL_620410                                                                                                                                                                                                                                                                                                                                                                                                                                                                                                                                                                                                                                                                                                                                                                                                                                                                                                                                                                                                                                                                                                                                                                                                                                                                                                                                                                                                                                                                                                                                                                                                                                                                                                                                                                                                                                                                                                                                                                                                                                                                                                                                                                                                                                                                                                                                                                                                                                                                                                                                                                                                                                                                                                                                                                                                                                                                                                                                                                                                                                                                                                                                                                                                                                                                                                                                                                                                                                                                                                                                                                                                                                                                                                                                                                                                                                                                                                                                                                                                                                                                                                                                                                                                 | Utah Public Health Laboratory, Utah Public Health Laboratory Infectious Disease submission group                                                   | Utah Public Health Laboratory, Utah Public Health Laboratory Infectious Disease submission group                       | Young,E.L., Oakeson,K.F.                                                                                                                                                                                                                                                                                                                                                                                                                                                                                                                                                                                |
| EPI_ISL_622768, EPI_ISL_622769, EPI_ISL_622770, EPI_ISL_622771                                                                                                                                                                                                                                                                                                                                                                                                                                                                                                                                                                                                                                                                                                                                                                                                                                                                                                                                                                                                                                                                                                                                                                                                                                                                                                                                                                                                                                                                                                                                                                                                                                                                                                                                                                                                                                                                                                                                                                                                                                                                                                                                                                                                                                                                                                                                                                                                                                                                                                                                                                                                                                                                                                                                                                                                                                                                                                                                                                                                                                                                                                                                                                                                                                                                                                                                                                                                                                                                                                                                                                                                                                                                                                                                                                                                                                                                                                                                                                                                                                                                                                                                                                                 | Canterbury Health Laboratories                                                                                                                     | Institute of Environmental Science and Research (ESR)                                                                  | Xiaoyun Ren, Matt Storey, Nikki Freed, Muhammad Faisal, Jing Wang, Hermes Perez, Anja Werno, Antje van der Linden, Arlo Upton, Chris Mansell, David Hammer, Dragana Drinkovic, Gary McAuliffe, Hana Sofia Andersson, James Ussher, Jill Sherwood, Josh Freeman, Julia Howard, Juliet Elvy, Mary DeAlmeida, Matt Blakiston, Matthew Rogers, Max Bloomfield, Michael Addidle, Michelle Balm, Sally Roberts, Sarah Jefferies, Sharmini Muttaiyah, Susan Morpeth, Susan Taylor, Timothy Blackmore, Vani Sathyendran, Veronica Playle, Virginia Hope, Erasmus Smit, Lauren Jelly, Olin Silander, Joep de Lig |
| EPI_ISL_622772                                                                                                                                                                                                                                                                                                                                                                                                                                                                                                                                                                                                                                                                                                                                                                                                                                                                                                                                                                                                                                                                                                                                                                                                                                                                                                                                                                                                                                                                                                                                                                                                                                                                                                                                                                                                                                                                                                                                                                                                                                                                                                                                                                                                                                                                                                                                                                                                                                                                                                                                                                                                                                                                                                                                                                                                                                                                                                                                                                                                                                                                                                                                                                                                                                                                                                                                                                                                                                                                                                                                                                                                                                                                                                                                                                                                                                                                                                                                                                                                                                                                                                                                                                                                                                 | Middlemore Hospital                                                                                                                                | Institute of Environmental Science and Research (ESR)                                                                  | Xiaoyun Ren, Matt Storey, Nikki Freed, Muhammad Faisal, Jing Wang, Hermes Perez, Anja Werno, Antje van der Linden, Arlo Upton, Chris Mansell, David Hammer, Dragana Drinkovic, Gary McAuliffe, Hana Sofia Andersson, James Ussher, Jill Sherwood, Josh Freeman, Julia Howard, Juliet Elvy, Mary DeAlmeida, Matt Blakiston, Matthew Rogers, Max Bloomfield, Michael Addidle, Michelle Balm, Sally Roberts, Sarah Jefferies, Sharmini Muttaiyah, Susan Morpeth, Susan Taylor, Timothy Blackmore, Vani Sathyendran, Veronica Playle, Virginia Hope, Erasmus Smit, Lauren Jelly, Olin Silander, Joep de Lig |
| EPI_ISL_622773, EPI_ISL_622774                                                                                                                                                                                                                                                                                                                                                                                                                                                                                                                                                                                                                                                                                                                                                                                                                                                                                                                                                                                                                                                                                                                                                                                                                                                                                                                                                                                                                                                                                                                                                                                                                                                                                                                                                                                                                                                                                                                                                                                                                                                                                                                                                                                                                                                                                                                                                                                                                                                                                                                                                                                                                                                                                                                                                                                                                                                                                                                                                                                                                                                                                                                                                                                                                                                                                                                                                                                                                                                                                                                                                                                                                                                                                                                                                                                                                                                                                                                                                                                                                                                                                                                                                                                                                 | LabPLUS                                                                                                                                            | Institute of Environmental Science and Research (ESR)                                                                  | Xiaoyun Ren, Matt Storey, Nikki Freed, Muhammad Faisal, Jing Wang, Hermes Perez, Anja Werno, Antje van der Linden, Arlo Upton, Chris Mansell, David Hammer, Dragana Drinkovic, Gary McAuliffe, Hana Sofia Andersson, James Ussher, Jill Sherwood, Josh Freeman, Julia Howard, Juliet Elvy, Mary DeAlmeida, Matt Blakiston, Matthew Rogers, Max Bloomfield, Michael Addidle, Michelle Balm, Sally Roberts, Sarah Jefferies, Sharmini Muttaiyah, Susan Morpeth, Susan Taylor, Timothy Blackmore, Vani Sathyendran, Veronica Playle, Virginia Hope, Erasmus Smit, Lauren Jelly, Olin Silander, Joep de Lig |
| EPI_ISL_622775                                                                                                                                                                                                                                                                                                                                                                                                                                                                                                                                                                                                                                                                                                                                                                                                                                                                                                                                                                                                                                                                                                                                                                                                                                                                                                                                                                                                                                                                                                                                                                                                                                                                                                                                                                                                                                                                                                                                                                                                                                                                                                                                                                                                                                                                                                                                                                                                                                                                                                                                                                                                                                                                                                                                                                                                                                                                                                                                                                                                                                                                                                                                                                                                                                                                                                                                                                                                                                                                                                                                                                                                                                                                                                                                                                                                                                                                                                                                                                                                                                                                                                                                                                                                                                 | Canterbury Health Laboratories                                                                                                                     | Institute of Environmental Science and Research (ESR)                                                                  | Xiaoyun Ren, Matt Storey, Nikki Freed, Muhammad Faisal, Jing Wang, Hermes Perez, Anja Werno, Antje van der Linden, Arlo Upton, Chris Mansell, David Hammer, Dragana Drinkovic, Gary McAuliffe, Hana Sofia Andersson, James Ussher, Jill Sherwood, Josh Freeman, Julia Howard, Juliet Elvy, Mary DeAlmeida, Matt Blakiston, Matthew Rogers, Max Bloomfield, Michael Addidle, Michelle Balm, Sally Roberts, Sarah Jefferies, Sharmini Muttaiyah, Susan Morpeth, Susan Taylor, Timothy Blackmore, Vani Sathyendran, Veronica Playle, Virginia Hope, Erasmus Smit, Lauren Jelly, Olin Silander, Joep de Lig |
| EPI_ISL_622776                                                                                                                                                                                                                                                                                                                                                                                                                                                                                                                                                                                                                                                                                                                                                                                                                                                                                                                                                                                                                                                                                                                                                                                                                                                                                                                                                                                                                                                                                                                                                                                                                                                                                                                                                                                                                                                                                                                                                                                                                                                                                                                                                                                                                                                                                                                                                                                                                                                                                                                                                                                                                                                                                                                                                                                                                                                                                                                                                                                                                                                                                                                                                                                                                                                                                                                                                                                                                                                                                                                                                                                                                                                                                                                                                                                                                                                                                                                                                                                                                                                                                                                                                                                                                                 | Middlemore Hospital                                                                                                                                | Institute of Environmental Science and Research (ESR)                                                                  | Xiaoyun Ren, Matt Storey, Nikki Freed, Muhammad Faisal, Jing Wang, Hermes Perez, Anja Werno, Antje van der Linden, Arlo Upton, Chris Mansell, David Hammer, Dragana Drinkovic, Gary McAuliffe, Hana Sofia Andersson, James Ussher, Jill Sherwood, Josh Freeman, Julia Howard, Juliet Elvy, Mary DeAlmeida, Matt Blakiston, Matthew Rogers, Max Bloomfield, Michael Addidle, Michelle Balm, Sally Roberts, Sarah Jefferies, Sharmini Muttaiyah, Susan Morpeth, Susan Taylor, Timothy Blackmore, Vani Sathyendran, Veronica Playle, Virginia Hope, Erasmus Smit, Lauren Jelly, Olin Silander, Joep de Lig |
| EPI_ISL_622777                                                                                                                                                                                                                                                                                                                                                                                                                                                                                                                                                                                                                                                                                                                                                                                                                                                                                                                                                                                                                                                                                                                                                                                                                                                                                                                                                                                                                                                                                                                                                                                                                                                                                                                                                                                                                                                                                                                                                                                                                                                                                                                                                                                                                                                                                                                                                                                                                                                                                                                                                                                                                                                                                                                                                                                                                                                                                                                                                                                                                                                                                                                                                                                                                                                                                                                                                                                                                                                                                                                                                                                                                                                                                                                                                                                                                                                                                                                                                                                                                                                                                                                                                                                                                                 | LabPLUS                                                                                                                                            | Institute of Environmental Science and Research (ESR)                                                                  | Xiaoyun Ren, Matt Storey, Nikki Freed, Muhammad Faisal, Jing Wang, Hermes Perez, Anja Werno, Antje van der Linden, Arlo Upton, Chris Mansell, David Hammer, Dragana Drinkovic, Gary McAuliffe, Hana Sofia Andersson, James Ussher, Jill Sherwood, Josh Freeman, Julia Howard, Juliet Elvy, Mary DeAlmeida, Matt Blakiston, Matthew Rogers, Max Bloomfield, Michael Addidle, Michelle Balm, Sally Roberts, Sarah Jefferies, Sharmini Muttaiyah, Susan Morpeth, Susan Taylor, Timothy Blackmore, Vani Sathyendran, Veronica Playle, Virginia Hope, Erasmus Smit, Lauren Jelly, Olin Silander, Joep de Lig |
| EPI_ISL_622778                                                                                                                                                                                                                                                                                                                                                                                                                                                                                                                                                                                                                                                                                                                                                                                                                                                                                                                                                                                                                                                                                                                                                                                                                                                                                                                                                                                                                                                                                                                                                                                                                                                                                                                                                                                                                                                                                                                                                                                                                                                                                                                                                                                                                                                                                                                                                                                                                                                                                                                                                                                                                                                                                                                                                                                                                                                                                                                                                                                                                                                                                                                                                                                                                                                                                                                                                                                                                                                                                                                                                                                                                                                                                                                                                                                                                                                                                                                                                                                                                                                                                                                                                                                                                                 | LabTests                                                                                                                                           | Institute of Environmental Science and Research (ESR)                                                                  | Xiaoyun Ren, Matt Storey, Nikki Freed, Muhammad Faisal, Jing Wang, Hermes Perez, Anja Werno, Antje van der Linden, Arlo Upton, Chris Mansell, David Hammer, Dragana Drinkovic, Gary McAuliffe, Hana Sofia Andersson, James Ussher, Jill Sherwood, Josh Freeman, Julia Howard, Juliet Elvy, Mary DeAlmeida, Matt Blakiston, Matthew Rogers, Max Bloomfield, Michael Addidle, Michelle Balm, Sally Roberts, Sarah Jefferies, Sharmini Muttaiyah, Susan Morpeth, Susan Taylor, Timothy Blackmore, Vani Sathyendran, Veronica Playle, Virginia Hope, Erasmus Smit, Lauren Jelly, Olin Silander, Joep de Lig |
| EPI_ISL_622779                                                                                                                                                                                                                                                                                                                                                                                                                                                                                                                                                                                                                                                                                                                                                                                                                                                                                                                                                                                                                                                                                                                                                                                                                                                                                                                                                                                                                                                                                                                                                                                                                                                                                                                                                                                                                                                                                                                                                                                                                                                                                                                                                                                                                                                                                                                                                                                                                                                                                                                                                                                                                                                                                                                                                                                                                                                                                                                                                                                                                                                                                                                                                                                                                                                                                                                                                                                                                                                                                                                                                                                                                                                                                                                                                                                                                                                                                                                                                                                                                                                                                                                                                                                                                                 | LabPLUS                                                                                                                                            | Institute of Environmental Science and Research (ESR)                                                                  | Xiaoyun Ren, Matt Storey, Nikki Freed, Muhammad Faisal, Jing Wang, Hermes Perez, Anja Werno, Antje van der Linden, Arlo Upton, Chris Mansell, David Hammer, Dragana Drinkovic, Gary McAuliffe, Hana Sofia Andersson, James Ussher, Jill Sherwood, Josh Freeman, Julia Howard, Juliet Elvy, Mary DeAlmeida, Matt Blakiston, Matthew Rogers, Max Bloomfield, Michael Addidle, Michelle Balm, Sally Roberts, Sarah Jefferies, Sharmini Muttaiyah, Susan Morpeth, Susan Taylor, Timothy Blackmore, Vani Sathyendran, Veronica Playle, Virginia Hope, Erasmus Smit, Lauren Jelly, Olin Silander, Joep de Lig |
| EPI_ISL_622780, EPI_ISL_622781, EPI_ISL_622782                                                                                                                                                                                                                                                                                                                                                                                                                                                                                                                                                                                                                                                                                                                                                                                                                                                                                                                                                                                                                                                                                                                                                                                                                                                                                                                                                                                                                                                                                                                                                                                                                                                                                                                                                                                                                                                                                                                                                                                                                                                                                                                                                                                                                                                                                                                                                                                                                                                                                                                                                                                                                                                                                                                                                                                                                                                                                                                                                                                                                                                                                                                                                                                                                                                                                                                                                                                                                                                                                                                                                                                                                                                                                                                                                                                                                                                                                                                                                                                                                                                                                                                                                                                                 | Canterbury Health Laboratories                                                                                                                     | Institute of Environmental Science and Research (ESR)                                                                  | Xiaoyun Ren, Matt Storey, Nikki Freed, Muhammad Faisal, Jing Wang, Hermes Perez, Anja Werno, Antje van der Linden, Arlo Upton, Chris Mansell, David Hammer, Dragana Drinkovic, Gary McAuliffe, Hana Sofia Andersson, James Ussher, Jill Sherwood, Josh Freeman, Julia Howard, Juliet Elvy, Mary DeAlmeida, Matt Blakiston, Matthew Rogers, Max Bloomfield, Michael Addidle, Michelle Balm, Sally Roberts, Sarah Jefferies, Sharmini Muttaiyah, Susan Morpeth, Susan Taylor, Timothy Blackmore, Vani Sathyendran, Veronica Playle, Virginia Hope, Erasmus Smit, Lauren Jelly, Olin Silander, Joep de Lig |
| EPI_ISL_622783                                                                                                                                                                                                                                                                                                                                                                                                                                                                                                                                                                                                                                                                                                                                                                                                                                                                                                                                                                                                                                                                                                                                                                                                                                                                                                                                                                                                                                                                                                                                                                                                                                                                                                                                                                                                                                                                                                                                                                                                                                                                                                                                                                                                                                                                                                                                                                                                                                                                                                                                                                                                                                                                                                                                                                                                                                                                                                                                                                                                                                                                                                                                                                                                                                                                                                                                                                                                                                                                                                                                                                                                                                                                                                                                                                                                                                                                                                                                                                                                                                                                                                                                                                                                                                 | Middlemore Hospital                                                                                                                                | Institute of Environmental Science and Research (ESR)                                                                  | Xiaoyun Ren, Matt Storey, Nikki Freed, Muhammad Faisal, Jing Wang, Hermes Perez, Anja Werno, Antje van der Linden, Arlo Upton, Chris Mansell, David Hammer, Dragana Drinkovic, Gary McAuliffe, Hana Sofia Andersson, James Ussher, Jill Sherwood, Josh Freeman, Julia Howard, Juliet Elvy, Mary DeAlmeida, Matt Blakiston, Matthew Rogers, Max Bloomfield, Michael Addidle, Michelle Balm, Sally Roberts, Sarah Jefferies, Sharmini Muttaiyah, Susan Morpeth, Susan Taylor, Timothy Blackmore, Vani Sathyendran, Veronica Playle, Virginia Hope, Erasmus Smit, Lauren Jelly, Olin Silander, Joep de Lig |
| EPI_ISL_622784                                                                                                                                                                                                                                                                                                                                                                                                                                                                                                                                                                                                                                                                                                                                                                                                                                                                                                                                                                                                                                                                                                                                                                                                                                                                                                                                                                                                                                                                                                                                                                                                                                                                                                                                                                                                                                                                                                                                                                                                                                                                                                                                                                                                                                                                                                                                                                                                                                                                                                                                                                                                                                                                                                                                                                                                                                                                                                                                                                                                                                                                                                                                                                                                                                                                                                                                                                                                                                                                                                                                                                                                                                                                                                                                                                                                                                                                                                                                                                                                                                                                                                                                                                                                                                 | Canterbury Health Laboratories                                                                                                                     | Institute of Environmental Science and Research (ESR)                                                                  | Xiaoyun Ren, Matt Storey, Nikki Freed, Muhammad Faisal, Jing Wang, Hermes Perez, Anja Werno, Antje van der Linden, Arlo Upton, Chris Mansell, David Hammer, Dragana Drinkovic, Gary McAuliffe, Hana Sofia Andersson, James Ussher, Jill Sherwood, Josh Freeman, Julia Howard, Juliet Elvy, Mary                                                                                                                                                                                                                                                                                                         |



|                                                                                                                                                                                                                                                                                                                                                                                                                                                                                                                                                                                                                                                                                                                                                                                                                                                                                                                                                                                                                                                                                                                                                                                                                                                                                                                                                                                                                                                                                                                                                                                                                                                                                                                                                                                                |           |                                                                                                        |                                                                                                                        |                                                                                                                                                                                                                                                                                                                                                                                                                                                                                                                                                                                                         |
|------------------------------------------------------------------------------------------------------------------------------------------------------------------------------------------------------------------------------------------------------------------------------------------------------------------------------------------------------------------------------------------------------------------------------------------------------------------------------------------------------------------------------------------------------------------------------------------------------------------------------------------------------------------------------------------------------------------------------------------------------------------------------------------------------------------------------------------------------------------------------------------------------------------------------------------------------------------------------------------------------------------------------------------------------------------------------------------------------------------------------------------------------------------------------------------------------------------------------------------------------------------------------------------------------------------------------------------------------------------------------------------------------------------------------------------------------------------------------------------------------------------------------------------------------------------------------------------------------------------------------------------------------------------------------------------------------------------------------------------------------------------------------------------------|-----------|--------------------------------------------------------------------------------------------------------|------------------------------------------------------------------------------------------------------------------------|---------------------------------------------------------------------------------------------------------------------------------------------------------------------------------------------------------------------------------------------------------------------------------------------------------------------------------------------------------------------------------------------------------------------------------------------------------------------------------------------------------------------------------------------------------------------------------------------------------|
| EPI_ISL_636989, EPI_ISL_636990, EPI_ISL_636991, EPI_ISL_636992, EPI_ISL_636993, EPI_ISL_636994, EPI_ISL_636995, EPI_ISL_636996, EPI_ISL_636997, EPI_ISL_636998, EPI_ISL_636999, EPI_ISL_637000, EPI_ISL_637001, EPI_ISL_637002, EPI_ISL_637003, EPI_ISL_637004, EPI_ISL_637005, EPI_ISL_637006, EPI_ISL_637007, EPI_ISL_637008, EPI_ISL_637009, EPI_ISL_637010, EPI_ISL_637011, EPI_ISL_637012, EPI_ISL_637013, EPI_ISL_637014, EPI_ISL_637015, EPI_ISL_637016, EPI_ISL_637017, EPI_ISL_637018, EPI_ISL_637019, EPI_ISL_637020, EPI_ISL_637021, EPI_ISL_637075                                                                                                                                                                                                                                                                                                                                                                                                                                                                                                                                                                                                                                                                                                                                                                                                                                                                                                                                                                                                                                                                                                                                                                                                                                 | see above | Department of Infectious Diseases and Immunology, National Hospital Organization Nagoya Medical Center | Clinical Research Center, National Hospital Organization Nagoya Medical Center                                         | Yoshihiro Nakata, Hiroataka Ode, Mai Kubota, Masakazu Matsuda, Kazuhiro Matsuoka, Miho Nakasuji, Mikiko Mori, Mayumi Imahashi, Yoshiyuki Yokomaku, Yasumasa Iwatani                                                                                                                                                                                                                                                                                                                                                                                                                                     |
| EPI_ISL_637084                                                                                                                                                                                                                                                                                                                                                                                                                                                                                                                                                                                                                                                                                                                                                                                                                                                                                                                                                                                                                                                                                                                                                                                                                                                                                                                                                                                                                                                                                                                                                                                                                                                                                                                                                                                 |           | LabTests                                                                                               | Institute of Environmental Science and Research (ESR)                                                                  | Xiaoyun Ren, Matt Storey, Nikki Freed, Muhammad Faisal, Jing Wang, Hermes Perez, Anja Werno, Antje van der Linden, Arlo Upton, Chris Mansell, David Hammer, Dragana Drinkovic, Gary McAuliffe, Hana Sofia Andersson, James Ussher, Jill Sherwood, Josh Freeman, Julia Howard, Juliet Elvy, Mary DeAlmeida, Matt Blakiston, Matthew Rogers, Max Bloomfield, Michael Addidle, Michelle Balm, Sally Roberts, Sarah Jefferies, Sharmini Muttaiyah, Susan Morpeth, Susan Taylor, Timothy Blackmore, Vani Sathyendran, Veronica Playle, Virginia Hope, Erasmus Smit, Lauren Jelly, Olin Silander, Joep de Lig |
| EPI_ISL_637085                                                                                                                                                                                                                                                                                                                                                                                                                                                                                                                                                                                                                                                                                                                                                                                                                                                                                                                                                                                                                                                                                                                                                                                                                                                                                                                                                                                                                                                                                                                                                                                                                                                                                                                                                                                 |           | Wellington SCL (WN)                                                                                    | Institute of Environmental Science and Research (ESR)                                                                  | Xiaoyun Ren, Matt Storey, Nikki Freed, Muhammad Faisal, Jing Wang, Hermes Perez, Anja Werno, Antje van der Linden, Arlo Upton, Chris Mansell, David Hammer, Dragana Drinkovic, Gary McAuliffe, Hana Sofia Andersson, James Ussher, Jill Sherwood, Josh Freeman, Julia Howard, Juliet Elvy, Mary DeAlmeida, Matt Blakiston, Matthew Rogers, Max Bloomfield, Michael Addidle, Michelle Balm, Sally Roberts, Sarah Jefferies, Sharmini Muttaiyah, Susan Morpeth, Susan Taylor, Timothy Blackmore, Vani Sathyendran, Veronica Playle, Virginia Hope, Erasmus Smit, Lauren Jelly, Olin Silander, Joep de Lig |
| EPI_ISL_637086, EPI_ISL_637087                                                                                                                                                                                                                                                                                                                                                                                                                                                                                                                                                                                                                                                                                                                                                                                                                                                                                                                                                                                                                                                                                                                                                                                                                                                                                                                                                                                                                                                                                                                                                                                                                                                                                                                                                                 |           | Middlemore Hospital                                                                                    | Institute of Environmental Science and Research (ESR)                                                                  | Xiaoyun Ren, Matt Storey, Nikki Freed, Muhammad Faisal, Jing Wang, Hermes Perez, Anja Werno, Antje van der Linden, Arlo Upton, Chris Mansell, David Hammer, Dragana Drinkovic, Gary McAuliffe, Hana Sofia Andersson, James Ussher, Jill Sherwood, Josh Freeman, Julia Howard, Juliet Elvy, Mary DeAlmeida, Matt Blakiston, Matthew Rogers, Max Bloomfield, Michael Addidle, Michelle Balm, Sally Roberts, Sarah Jefferies, Sharmini Muttaiyah, Susan Morpeth, Susan Taylor, Timothy Blackmore, Vani Sathyendran, Veronica Playle, Virginia Hope, Erasmus Smit, Lauren Jelly, Olin Silander, Joep de Lig |
| EPI_ISL_637088                                                                                                                                                                                                                                                                                                                                                                                                                                                                                                                                                                                                                                                                                                                                                                                                                                                                                                                                                                                                                                                                                                                                                                                                                                                                                                                                                                                                                                                                                                                                                                                                                                                                                                                                                                                 |           | PathLab Bay of Plenty                                                                                  | Institute of Environmental Science and Research (ESR)                                                                  | Xiaoyun Ren, Matt Storey, Nikki Freed, Muhammad Faisal, Jing Wang, Hermes Perez, Anja Werno, Antje van der Linden, Arlo Upton, Chris Mansell, David Hammer, Dragana Drinkovic, Gary McAuliffe, Hana Sofia Andersson, James Ussher, Jill Sherwood, Josh Freeman, Julia Howard, Juliet Elvy, Mary DeAlmeida, Matt Blakiston, Matthew Rogers, Max Bloomfield, Michael Addidle, Michelle Balm, Sally Roberts, Sarah Jefferies, Sharmini Muttaiyah, Susan Morpeth, Susan Taylor, Timothy Blackmore, Vani Sathyendran, Veronica Playle, Virginia Hope, Erasmus Smit, Lauren Jelly, Olin Silander, Joep de Lig |
| EPI_ISL_637089, EPI_ISL_637090, EPI_ISL_637091, EPI_ISL_637092, EPI_ISL_637093, EPI_ISL_637094, EPI_ISL_637095                                                                                                                                                                                                                                                                                                                                                                                                                                                                                                                                                                                                                                                                                                                                                                                                                                                                                                                                                                                                                                                                                                                                                                                                                                                                                                                                                                                                                                                                                                                                                                                                                                                                                 |           | LabPLUS                                                                                                | Institute of Environmental Science and Research (ESR)                                                                  | Xiaoyun Ren, Matt Storey, Nikki Freed, Muhammad Faisal, Jing Wang, Hermes Perez, Anja Werno, Antje van der Linden, Arlo Upton, Chris Mansell, David Hammer, Dragana Drinkovic, Gary McAuliffe, Hana Sofia Andersson, James Ussher, Jill Sherwood, Josh Freeman, Julia Howard, Juliet Elvy, Mary DeAlmeida, Matt Blakiston, Matthew Rogers, Max Bloomfield, Michael Addidle, Michelle Balm, Sally Roberts, Sarah Jefferies, Sharmini Muttaiyah, Susan Morpeth, Susan Taylor, Timothy Blackmore, Vani Sathyendran, Veronica Playle, Virginia Hope, Erasmus Smit, Lauren Jelly, Olin Silander, Joep de Lig |
| EPI_ISL_637096                                                                                                                                                                                                                                                                                                                                                                                                                                                                                                                                                                                                                                                                                                                                                                                                                                                                                                                                                                                                                                                                                                                                                                                                                                                                                                                                                                                                                                                                                                                                                                                                                                                                                                                                                                                 |           | LabTests                                                                                               | Institute of Environmental Science and Research (ESR)                                                                  | Xiaoyun Ren, Matt Storey, Nikki Freed, Muhammad Faisal, Jing Wang, Hermes Perez, Anja Werno, Antje van der Linden, Arlo Upton, Chris Mansell, David Hammer, Dragana Drinkovic, Gary McAuliffe, Hana Sofia Andersson, James Ussher, Jill Sherwood, Josh Freeman, Julia Howard, Juliet Elvy, Mary DeAlmeida, Matt Blakiston, Matthew Rogers, Max Bloomfield, Michael Addidle, Michelle Balm, Sally Roberts, Sarah Jefferies, Sharmini Muttaiyah, Susan Morpeth, Susan Taylor, Timothy Blackmore, Vani Sathyendran, Veronica Playle, Virginia Hope, Erasmus Smit, Lauren Jelly, Olin Silander, Joep de Lig |
| EPI_ISL_644565, EPI_ISL_644566, EPI_ISL_644567                                                                                                                                                                                                                                                                                                                                                                                                                                                                                                                                                                                                                                                                                                                                                                                                                                                                                                                                                                                                                                                                                                                                                                                                                                                                                                                                                                                                                                                                                                                                                                                                                                                                                                                                                 |           | Laboratory Diagnostic, Veterinary Specialized Institute Kraljevo                                       | Laboratory Diagnostic, Veterinary Specialized Institute Kraljevo                                                       | Vidanovic,D., Tesovic,B., Knezevic,A., Jovanovic,T., Jankovic,M., Sekler,M., Banovic Djeri,B., Petrovic,T., Volkening,J., Afonso.C.                                                                                                                                                                                                                                                                                                                                                                                                                                                                     |
| EPI_ISL_644568, EPI_ISL_644569, EPI_ISL_644570, EPI_ISL_644571, EPI_ISL_644572, EPI_ISL_644573, EPI_ISL_644574, EPI_ISL_644575, EPI_ISL_644576, EPI_ISL_644577, EPI_ISL_644578, EPI_ISL_644580, EPI_ISL_644581, EPI_ISL_644582, EPI_ISL_644583                                                                                                                                                                                                                                                                                                                                                                                                                                                                                                                                                                                                                                                                                                                                                                                                                                                                                                                                                                                                                                                                                                                                                                                                                                                                                                                                                                                                                                                                                                                                                 |           | Veterinary Specialized Institute "Kraljevo", Serbia                                                    | Veterinary Specialized Institute "Kraljevo", Serbia                                                                    | Vidanovic,D., Tesovic,B., Knezevic,A., Jovanovic,T., Jankovic,M., Sekler,M., Banovic Djeri,B., Petrovic,T., Volkening,J., Afonso.C.                                                                                                                                                                                                                                                                                                                                                                                                                                                                     |
| EPI_ISL_644665, EPI_ISL_644667, EPI_ISL_644668, EPI_ISL_644669, EPI_ISL_644670                                                                                                                                                                                                                                                                                                                                                                                                                                                                                                                                                                                                                                                                                                                                                                                                                                                                                                                                                                                                                                                                                                                                                                                                                                                                                                                                                                                                                                                                                                                                                                                                                                                                                                                 |           | Utah Public Health Laboratory, Utah Public Health Laboratory Infectious Disease submission group       | Utah Public Health Laboratory, Utah Public Health Laboratory Infectious Disease submission group                       | Young,E.L., Oakeson,K.F.                                                                                                                                                                                                                                                                                                                                                                                                                                                                                                                                                                                |
| EPI_ISL_644825, EPI_ISL_644826, EPI_ISL_644827, EPI_ISL_644828, EPI_ISL_644829, EPI_ISL_644830, EPI_ISL_644831, EPI_ISL_644832, EPI_ISL_644833, EPI_ISL_644834, EPI_ISL_644835, EPI_ISL_644836, EPI_ISL_644837, EPI_ISL_644838, EPI_ISL_644839, EPI_ISL_644840, EPI_ISL_644841, EPI_ISL_644842, EPI_ISL_644843, EPI_ISL_644844, EPI_ISL_644845, EPI_ISL_644846, EPI_ISL_644847, EPI_ISL_644848, EPI_ISL_644849, EPI_ISL_644850, EPI_ISL_644851, EPI_ISL_644852, EPI_ISL_644853, EPI_ISL_644854, EPI_ISL_644855, EPI_ISL_644856, EPI_ISL_644857, EPI_ISL_644858, EPI_ISL_644859, EPI_ISL_644860, EPI_ISL_644861, EPI_ISL_644862, EPI_ISL_644863, EPI_ISL_644864, EPI_ISL_644865, EPI_ISL_644866, EPI_ISL_644867, EPI_ISL_644868, EPI_ISL_644869, EPI_ISL_644870, EPI_ISL_644871, EPI_ISL_644872, EPI_ISL_644873, EPI_ISL_644874, EPI_ISL_644875, EPI_ISL_644876, EPI_ISL_644877, EPI_ISL_644878, EPI_ISL_644879, EPI_ISL_644880, EPI_ISL_644881, EPI_ISL_644882, EPI_ISL_644883, EPI_ISL_644884, EPI_ISL_644885, EPI_ISL_644886, EPI_ISL_644887, EPI_ISL_644888, EPI_ISL_644889, EPI_ISL_644890, EPI_ISL_644891, EPI_ISL_644892, EPI_ISL_644893, EPI_ISL_644894, EPI_ISL_644895, EPI_ISL_644896, EPI_ISL_644897, EPI_ISL_644898, EPI_ISL_644899, EPI_ISL_644900, EPI_ISL_644901, EPI_ISL_644902, EPI_ISL_644903, EPI_ISL_644904, EPI_ISL_644905, EPI_ISL_644906, EPI_ISL_644907, EPI_ISL_644908, EPI_ISL_644909, EPI_ISL_644910, EPI_ISL_644911, EPI_ISL_644912, EPI_ISL_644913, EPI_ISL_644914, EPI_ISL_644915, EPI_ISL_644916, EPI_ISL_644917, EPI_ISL_644918, EPI_ISL_644919, EPI_ISL_644920, EPI_ISL_644921, EPI_ISL_644922, EPI_ISL_644923, EPI_ISL_644924, EPI_ISL_644925, EPI_ISL_644926, EPI_ISL_644927, EPI_ISL_644928, EPI_ISL_644929, EPI_ISL_644930, EPI_ISL_644931, EPI_ISL_644932 | see above | Virginia DCLS                                                                                          | Virginia DCLS                                                                                                          | Virginia DCLS                                                                                                                                                                                                                                                                                                                                                                                                                                                                                                                                                                                           |
| EPI_ISL_647985                                                                                                                                                                                                                                                                                                                                                                                                                                                                                                                                                                                                                                                                                                                                                                                                                                                                                                                                                                                                                                                                                                                                                                                                                                                                                                                                                                                                                                                                                                                                                                                                                                                                                                                                                                                 |           | RI State Health Laboratories                                                                           | Pathogen Discovery, Respiratory Viruses Branch, Division of Viral Diseases, Centers for Disease Control and Prevention | Yan Li, Jing Zhang, Ying Tao, Brian Lynch, Krista Queen, Anna Montmayeur, Anna Uehara, Clinton R. Paden, Rachel Marine, Haibin Wang, Suxiang Tong                                                                                                                                                                                                                                                                                                                                                                                                                                                       |
| EPI_ISL_647986                                                                                                                                                                                                                                                                                                                                                                                                                                                                                                                                                                                                                                                                                                                                                                                                                                                                                                                                                                                                                                                                                                                                                                                                                                                                                                                                                                                                                                                                                                                                                                                                                                                                                                                                                                                 |           | Indiana State Department of Health                                                                     | Pathogen Discovery, Respiratory Viruses Branch, Division of Viral Diseases, Centers for Disease Control and Prevention | Yan Li, Jing Zhang, Ying Tao, Brian Lynch, Krista Queen, Anna Montmayeur, Anna Uehara, Clinton R. Paden, Rachel Marine, Haibin Wang, Suxiang Tong                                                                                                                                                                                                                                                                                                                                                                                                                                                       |
| EPI_ISL_647987, EPI_ISL_647988, EPI_ISL_647989                                                                                                                                                                                                                                                                                                                                                                                                                                                                                                                                                                                                                                                                                                                                                                                                                                                                                                                                                                                                                                                                                                                                                                                                                                                                                                                                                                                                                                                                                                                                                                                                                                                                                                                                                 |           | GA Department of Public Health Laboratory                                                              | Pathogen Discovery, Respiratory Viruses Branch, Division of Viral Diseases, Centers for Disease Control and Prevention | Yan Li, Jing Zhang, Ying Tao, Brian Lynch, Krista Queen, Anna Montmayeur, Anna Uehara, Clinton R. Paden, Rachel Marine, Haibin Wang, Suxiang Tong                                                                                                                                                                                                                                                                                                                                                                                                                                                       |
| EPI_ISL_647990, EPI_ISL_647991, EPI_ISL_647992, EPI_ISL_647993, EPI_ISL_647994, EPI_ISL_647995, EPI_ISL_647996, EPI_ISL_647997, EPI_ISL_647998, EPI_ISL_647999, EPI_ISL_648000, EPI_ISL_648001                                                                                                                                                                                                                                                                                                                                                                                                                                                                                                                                                                                                                                                                                                                                                                                                                                                                                                                                                                                                                                                                                                                                                                                                                                                                                                                                                                                                                                                                                                                                                                                                 |           | see above                                                                                              | IA State Hygienic Laboratory                                                                                           | Ying Tao, Yan Li, Jing Zhang, Brian Lynch, Krista Queen, Anna Uehara, Clinton R. Paden, Haibin Wang, Suxiang Tong                                                                                                                                                                                                                                                                                                                                                                                                                                                                                       |
| EPI_ISL_648002, EPI_ISL_648003                                                                                                                                                                                                                                                                                                                                                                                                                                                                                                                                                                                                                                                                                                                                                                                                                                                                                                                                                                                                                                                                                                                                                                                                                                                                                                                                                                                                                                                                                                                                                                                                                                                                                                                                                                 |           | GA Department of Public Health Laboratory                                                              | Pathogen Discovery, Respiratory Viruses Branch, Division of Viral Diseases, Centers for Disease Control and Prevention | Yan Li, Jing Zhang, Ying Tao, Brian Lynch, Krista Queen, Anna Montmayeur, Anna Uehara, Clinton R. Paden, Rachel Marine, Haibin Wang, Suxiang Tong                                                                                                                                                                                                                                                                                                                                                                                                                                                       |
| EPI_ISL_648004, EPI_ISL_648005, EPI_ISL_648006, EPI_ISL_648007, EPI_ISL_648008, EPI_ISL_648009, EPI_ISL_648010, EPI_ISL_648011, EPI_ISL_648012, EPI_ISL_648013, EPI_ISL_648014, EPI_ISL_648015, EPI_ISL_648016, EPI_ISL_648017, EPI_ISL_648018, EPI_ISL_648019, EPI_ISL_648020, EPI_ISL_648021, EPI_ISL_648022, EPI_ISL_648023, EPI_ISL_648024, EPI_ISL_648025, EPI_ISL_648026, EPI_ISL_648027, EPI_ISL_648028, EPI_ISL_648029, EPI_ISL_648030, EPI_ISL_648031, EPI_ISL_648032, EPI_ISL_648033, EPI_ISL_648034                                                                                                                                                                                                                                                                                                                                                                                                                                                                                                                                                                                                                                                                                                                                                                                                                                                                                                                                                                                                                                                                                                                                                                                                                                                                                 |           | see above                                                                                              | MS Public Health Laboratory                                                                                            | Yan Li, Jing Zhang, Ying Tao, Brian Lynch, Krista Queen, Anna Montmayeur, Anna Uehara, Clinton R. Paden, Rachel Marine, Haibin Wang, Suxiang Tong                                                                                                                                                                                                                                                                                                                                                                                                                                                       |
| EPI_ISL_648035, EPI_ISL_648036                                                                                                                                                                                                                                                                                                                                                                                                                                                                                                                                                                                                                                                                                                                                                                                                                                                                                                                                                                                                                                                                                                                                                                                                                                                                                                                                                                                                                                                                                                                                                                                                                                                                                                                                                                 |           | WI State Laboratory of Hygiene                                                                         | Pathogen Discovery, Respiratory Viruses Branch, Division of Viral Diseases, Centers for Disease Control and Prevention | Yan Li, Jing Zhang, Ying Tao, Brian Lynch, Krista Queen, Anna Montmayeur, Anna Uehara, Clinton R. Paden, Rachel Marine, Haibin Wang, Suxiang Tong                                                                                                                                                                                                                                                                                                                                                                                                                                                       |
| EPI_ISL_648037, EPI_ISL_648038, EPI_ISL_648039, EPI_ISL_648040, EPI_ISL_648041, EPI_ISL_648042                                                                                                                                                                                                                                                                                                                                                                                                                                                                                                                                                                                                                                                                                                                                                                                                                                                                                                                                                                                                                                                                                                                                                                                                                                                                                                                                                                                                                                                                                                                                                                                                                                                                                                 |           | MS Public Health Laboratory                                                                            | Pathogen Discovery, Respiratory Viruses Branch, Division of Viral Diseases, Centers for Disease Control and Prevention | Yan Li, Jing Zhang, Ying Tao, Brian Lynch, Krista Queen, Anna Montmayeur, Anna Uehara, Clinton R. Paden, Rachel Marine, Haibin Wang, Suxiang Tong                                                                                                                                                                                                                                                                                                                                                                                                                                                       |
| EPI_ISL_648122                                                                                                                                                                                                                                                                                                                                                                                                                                                                                                                                                                                                                                                                                                                                                                                                                                                                                                                                                                                                                                                                                                                                                                                                                                                                                                                                                                                                                                                                                                                                                                                                                                                                                                                                                                                 |           | VA-Division of Consolidated Laboratory Services                                                        | Pathogen Discovery, Respiratory Viruses Branch, Division of Viral Diseases, Centers for Disease Control and Prevention | Yan Li, Jing Zhang, Ying Tao, Brian Lynch, Krista Queen, Anna Montmayeur, Anna Uehara, Clinton R. Paden, Rachel Marine, Haibin Wang, Suxiang Tong                                                                                                                                                                                                                                                                                                                                                                                                                                                       |
| EPI_ISL_648123                                                                                                                                                                                                                                                                                                                                                                                                                                                                                                                                                                                                                                                                                                                                                                                                                                                                                                                                                                                                                                                                                                                                                                                                                                                                                                                                                                                                                                                                                                                                                                                                                                                                                                                                                                                 |           | GA Department of Public Health Laboratory                                                              | Pathogen Discovery, Respiratory Viruses Branch, Division of Viral Diseases, Centers for Disease Control and Prevention | Yan Li, Jing Zhang, Ying Tao, Brian Lynch, Krista Queen, Anna Montmayeur, Anna Uehara, Clinton R. Paden, Rachel Marine, Haibin Wang, Suxiang Tong                                                                                                                                                                                                                                                                                                                                                                                                                                                       |
| EPI_ISL_648822                                                                                                                                                                                                                                                                                                                                                                                                                                                                                                                                                                                                                                                                                                                                                                                                                                                                                                                                                                                                                                                                                                                                                                                                                                                                                                                                                                                                                                                                                                                                                                                                                                                                                                                                                                                 |           | Virus Ecology Section, RML                                                                             | Virus Ecology Section, RML                                                                                             | van Doremalen,N., Holbrook,M.G., Barbian,K.D., Bushmaker,C., Bushmaker,T., Martens,C.A. and Munster,V.J                                                                                                                                                                                                                                                                                                                                                                                                                                                                                                 |
| EPI_ISL_649121, EPI_ISL_649122                                                                                                                                                                                                                                                                                                                                                                                                                                                                                                                                                                                                                                                                                                                                                                                                                                                                                                                                                                                                                                                                                                                                                                                                                                                                                                                                                                                                                                                                                                                                                                                                                                                                                                                                                                 |           | Middlemore Hospital                                                                                    | Institute of Environmental Science and Research (ESR)                                                                  | Xiaoyun Ren, Matt Storey, Nikki Freed, Muhammad Faisal, Jing Wang, Hermes Perez, Anja Werno, Antje van der Linden, Arlo Upton, Chris Mansell, David Hammer, Dragana Drinkovic, Gary McAuliffe, Hana Sofia Andersson, James Ussher, Jill Sherwood, Josh Freeman, Julia Howard, Juliet Elvy, Mary DeAlmeida, Matt Blakiston, Matthew Rogers, Max Bloomfield, Michael Addidle, Michelle Balm, Sally Roberts, Sarah Jefferies, Sharmini Muttaiyah, Susan Morpeth, Susan Taylor, Timothy Blackmore, Vani Sathyendran, Veronica Playle, Virginia Hope, Erasmus Smit, Lauren Jelly, Olin Silander, Joep de Lig |
| EPI_ISL_649123                                                                                                                                                                                                                                                                                                                                                                                                                                                                                                                                                                                                                                                                                                                                                                                                                                                                                                                                                                                                                                                                                                                                                                                                                                                                                                                                                                                                                                                                                                                                                                                                                                                                                                                                                                                 |           | Wellington SCL (WN)                                                                                    | Institute of Environmental Science and Research (ESR)                                                                  | Xiaoyun Ren, Matt Storey, Nikki Freed, Muhammad Faisal, Jing Wang, Hermes Perez, Anja Werno, Antje van der Linden, Arlo Upton, Chris Mansell, David Hammer, Dragana Drinkovic, Gary McAuliffe, Hana Sofia Andersson, James Ussher, Jill Sherwood, Josh Freeman, Julia Howard, Juliet Elvy, Mary                                                                                                                                                                                                                                                                                                         |

|                                                                                                                                                                                                                                                                                                                                                                                                                                                                                                                                                                                                                                                                                                                                                                                                                                                                                                                                                                                                                                                                                                                                                                                                                                                                                                                                                                                                                                                                                                                                                                                                                                                                                                                                                                                |                                       |                                                                                   |                                                                                                                                                                                                                                                                                                                                                                                                                                                                                                                                                                                                        |                                                                                                                                                                                                                                                                                                                                                                                                                                                                                                                                                                                                        |                                                                                                                                                    |
|--------------------------------------------------------------------------------------------------------------------------------------------------------------------------------------------------------------------------------------------------------------------------------------------------------------------------------------------------------------------------------------------------------------------------------------------------------------------------------------------------------------------------------------------------------------------------------------------------------------------------------------------------------------------------------------------------------------------------------------------------------------------------------------------------------------------------------------------------------------------------------------------------------------------------------------------------------------------------------------------------------------------------------------------------------------------------------------------------------------------------------------------------------------------------------------------------------------------------------------------------------------------------------------------------------------------------------------------------------------------------------------------------------------------------------------------------------------------------------------------------------------------------------------------------------------------------------------------------------------------------------------------------------------------------------------------------------------------------------------------------------------------------------|---------------------------------------|-----------------------------------------------------------------------------------|--------------------------------------------------------------------------------------------------------------------------------------------------------------------------------------------------------------------------------------------------------------------------------------------------------------------------------------------------------------------------------------------------------------------------------------------------------------------------------------------------------------------------------------------------------------------------------------------------------|--------------------------------------------------------------------------------------------------------------------------------------------------------------------------------------------------------------------------------------------------------------------------------------------------------------------------------------------------------------------------------------------------------------------------------------------------------------------------------------------------------------------------------------------------------------------------------------------------------|----------------------------------------------------------------------------------------------------------------------------------------------------|
| EPI_ISL_649124                                                                                                                                                                                                                                                                                                                                                                                                                                                                                                                                                                                                                                                                                                                                                                                                                                                                                                                                                                                                                                                                                                                                                                                                                                                                                                                                                                                                                                                                                                                                                                                                                                                                                                                                                                 | Waikato Hospital                      | Institute of Environmental Science and Research (ESR)                             | DeAlmeida, Matt Blakiston, Matthew Rogers, Max Bloomfield, Michael Addidle, Michelle Balm, Sally Roberts, Sarah Jefferies, Sharmini Muttaiyah, Susan Morpeth, Susan Taylor, Timothy Blackmore, Vani Sathyendran, Veronica Playle, Virginia Hope, Erasmus Smit, Lauren Jelly, Olin Silander, Joep de Lig                                                                                                                                                                                                                                                                                                |                                                                                                                                                                                                                                                                                                                                                                                                                                                                                                                                                                                                        |                                                                                                                                                    |
| EPI_ISL_649125                                                                                                                                                                                                                                                                                                                                                                                                                                                                                                                                                                                                                                                                                                                                                                                                                                                                                                                                                                                                                                                                                                                                                                                                                                                                                                                                                                                                                                                                                                                                                                                                                                                                                                                                                                 | Wellington SCL (WN)                   | Institute of Environmental Science and Research (ESR)                             | Xiaoyun Ren, Matt Storey, Nikki Freed, Muhammad Faisal, Jing Wang, Hermes Perez, Anja Werno, Antje van der Linden, Arlo Upton, Chris Mansell, David Hammer, Dragana Drinkovic, Gary McAuliffe, Hana Sofia Andersson, James Ussher, Jill Sherwood, Josh Freeman, Julia Howard, Juliet Ely, Mary DeAlmeida, Matt Blakiston, Matthew Rogers, Max Bloomfield, Michael Addidle, Michelle Balm, Sally Roberts, Sarah Jefferies, Sharmini Muttaiyah, Susan Morpeth, Susan Taylor, Timothy Blackmore, Vani Sathyendran, Veronica Playle, Virginia Hope, Erasmus Smit, Lauren Jelly, Olin Silander, Joep de Lig |                                                                                                                                                                                                                                                                                                                                                                                                                                                                                                                                                                                                        |                                                                                                                                                    |
| EPI_ISL_654868                                                                                                                                                                                                                                                                                                                                                                                                                                                                                                                                                                                                                                                                                                                                                                                                                                                                                                                                                                                                                                                                                                                                                                                                                                                                                                                                                                                                                                                                                                                                                                                                                                                                                                                                                                 | Pasteur Institute in Ho Chi Minh city | Department of Microbiology and Immunology - Pasteur Institute in Ho Chi Minh city | ào Huy Mnh, Phm Th Thu Hng, V Phm Hng Nhung, Cao Minh Thng, Hnh Th Kim Loan, Nguyn Hoång Quân, Hnh Phng Tho, Hoång Nh ào, Nguyn Trung Hiu, Nguyn Hoång Anh, Nguyn Thu Ngc, Phm Th Nhung, Nguyn Th Ngc Tho, Hà Bích Ngc, Nguyn Th Thanh Thng, Hoång Minh, Trn Th Hng Kim, Nguyn Thanh Long, Phm Duy Quang, Lng Chn Quang, Hoång Quc Cng, Nguyn V Thng, Phan Trng Lân                                                                                                                                                                                                                                    |                                                                                                                                                                                                                                                                                                                                                                                                                                                                                                                                                                                                        |                                                                                                                                                    |
| EPI_ISL_654875                                                                                                                                                                                                                                                                                                                                                                                                                                                                                                                                                                                                                                                                                                                                                                                                                                                                                                                                                                                                                                                                                                                                                                                                                                                                                                                                                                                                                                                                                                                                                                                                                                                                                                                                                                 | Pasteur Institute in Ho Chi Minh city | Department of Microbiology and Immunology - Pasteur Institute in Ho Chi Minh city | V Phm Hng Nhung, ào Huy Mnh, Phm Th Thu Hng, Cao Minh Thng, Hnh Th Kim Loan, Nguyn Hoång Quân, Hnh Phng Tho, Hoång Nh ào, Nguyn Trung Hiu, Nguyn Hoång Anh, Nguyn Vit Thinh, Phm Th Nhung, Nguyn Th Ngc Tho, ng Thanh Giang, Nguyn Th Thanh Thng, Hoång Minh, Trn Th Hng Kim, Nguyn Thanh Long, Phm Duy Quang, Lng Chn Quang, Hoång Quc Cng, Nguyn V Thng, Phan Trng Lân                                                                                                                                                                                                                               |                                                                                                                                                                                                                                                                                                                                                                                                                                                                                                                                                                                                        |                                                                                                                                                    |
| EPI_ISL_654876                                                                                                                                                                                                                                                                                                                                                                                                                                                                                                                                                                                                                                                                                                                                                                                                                                                                                                                                                                                                                                                                                                                                                                                                                                                                                                                                                                                                                                                                                                                                                                                                                                                                                                                                                                 | Pasteur Institute in Ho Chi Minh city | Department of Microbiology and Immunology - Pasteur Institute in Ho Chi Minh city | V Phm Hng Nhung, ào Huy Mnh, Phm Th Thu Hng, Cao Minh Thng, Hnh Th Kim Loan, Nguyn Hoång Quân, Hnh Phng Tho, Hoång Nh ào, Nguyn Trung Hiu, Nguyn Hoång Anh, Nguyn Thu Ngc, Trng Công Hiu, Nguyn Th Ngc Tho, ng Thanh Giang, Nguyn Th Thanh Thng, Hoång Minh, Trn Th Hng Kim, Nguyn Thanh Long, Phm Duy Quang, Lng Chn Quang, Hoång Quc Cng, Phan Trng Lân, Nguyn V Thng                                                                                                                                                                                                                                |                                                                                                                                                                                                                                                                                                                                                                                                                                                                                                                                                                                                        |                                                                                                                                                    |
| EPI_ISL_654877                                                                                                                                                                                                                                                                                                                                                                                                                                                                                                                                                                                                                                                                                                                                                                                                                                                                                                                                                                                                                                                                                                                                                                                                                                                                                                                                                                                                                                                                                                                                                                                                                                                                                                                                                                 | Pasteur Institute in Ho Chi Minh city | Department of Microbiology and Immunology - Pasteur Institute in Ho Chi Minh city | ng Thanh Giang, Phm Duy Quang, ào Huy Mnh, Phm Th Thu Hng, V Phm Hng Nhung, Cao Minh Thng, Hnh Th Kim Loan, Nguyn Hoång Quân, Hnh Phng Tho, Hoång Nh ào, Nguyn Trung Hiu, Nguyn Hoång Anh, Nguyn Thu Ngc, Phm Th Nhung, Trng Thng Dung, Nguyn Th Thanh Thng, Hoång Minh, Trn Th Hng Kim, Nguyn Thanh Long, Lng Chn Quang, Hoång Quc Cng, Nguyn V Thng, Phan Trng Lân                                                                                                                                                                                                                                   |                                                                                                                                                                                                                                                                                                                                                                                                                                                                                                                                                                                                        |                                                                                                                                                    |
| EPI_ISL_654890                                                                                                                                                                                                                                                                                                                                                                                                                                                                                                                                                                                                                                                                                                                                                                                                                                                                                                                                                                                                                                                                                                                                                                                                                                                                                                                                                                                                                                                                                                                                                                                                                                                                                                                                                                 | Pasteur Institute in Ho Chi Minh city | Department of Microbiology and Immunology - Pasteur Institute in Ho Chi Minh city | Thái Hùng, Lê Xuân Huy, Nguyn Bo Triu, Hnh Kim Mai, Trnh Hoång Long, Lê Th Kim Trang, Phan Trng Lân, ào Huy Mnh, Phm Th Thu Hng, V Phm Hng Nhung, Cao Minh Thng, Hnh Th Kim Loan, Nguyn Hoång Quân, Hnh Phng Tho, Hoång Nh ào, Nguyn Trung Hiu, Nguyn Hoång Anh, Nguyn Thu Ngc, Phm Th Nhung, Nguyn Th Ngc Tho, ng Thanh Giang, Nguyn Th Thanh Thng, Hoång Minh, Trn Th Hng Kim, Nguyn Thanh Long, Phm Duy Quang, Lng Chn Quang, Hoång Quc Cng, Nguyn V Thng                                                                                                                                           |                                                                                                                                                                                                                                                                                                                                                                                                                                                                                                                                                                                                        |                                                                                                                                                    |
| EPI_ISL_654891                                                                                                                                                                                                                                                                                                                                                                                                                                                                                                                                                                                                                                                                                                                                                                                                                                                                                                                                                                                                                                                                                                                                                                                                                                                                                                                                                                                                                                                                                                                                                                                                                                                                                                                                                                 | Pasteur Institute in Ho Chi Minh city | Department of Microbiology and Immunology - Pasteur Institute in Ho Chi Minh city | Thái Hùng, Lê Xuân Huy, Nguyn Bo Triu, Hnh Kim Mai, Trnh Hoång Long, Lê Th Kim Trang, Hoång Quc Cng, ào Huy Mnh, Phm Th Thu Hng, V Phm Hng Nhung, Cao Minh Thng, Hnh Th Kim Loan, Nguyn Hoång Quân, Hnh Phng Tho, Hoång Nh ào, Nguyn Trung Hiu, Nguyn Hoång Anh, Nguyn Thu Ngc, Phm Th Nhung, Nguyn Th Ngc Tho, ng Thanh Giang, Nguyn Th Thanh Thng, Hoång Minh, Trn Th Hng Kim, Nguyn Thanh Long, Phm Duy Quang, Lng Chn Quang, Nguyn V Thng, Phan Trng Lân                                                                                                                                           |                                                                                                                                                                                                                                                                                                                                                                                                                                                                                                                                                                                                        |                                                                                                                                                    |
| EPI_ISL_661179, EPI_ISL_661180, EPI_ISL_661181, EPI_ISL_661182, EPI_ISL_661183, EPI_ISL_661184, EPI_ISL_661185, EPI_ISL_661186, EPI_ISL_661187, EPI_ISL_661188, EPI_ISL_661189, EPI_ISL_661190, EPI_ISL_661191, EPI_ISL_661192, EPI_ISL_661193, EPI_ISL_661194, EPI_ISL_661195, EPI_ISL_661196, EPI_ISL_661197, EPI_ISL_661198, EPI_ISL_661199, EPI_ISL_661200                                                                                                                                                                                                                                                                                                                                                                                                                                                                                                                                                                                                                                                                                                                                                                                                                                                                                                                                                                                                                                                                                                                                                                                                                                                                                                                                                                                                                 | see above                             | Scientific Veterinary Institute Novi Sad                                          | Vidanovic,D., Tesovic,B., Knezevic,A., Jovanovic,T., Jankovic,M., Sekler,M., Banovic Djeri,B., Petrovic,T., Volkening,J., Afonso,C.                                                                                                                                                                                                                                                                                                                                                                                                                                                                    |                                                                                                                                                                                                                                                                                                                                                                                                                                                                                                                                                                                                        |                                                                                                                                                    |
| EPI_ISL_661255, EPI_ISL_661256, EPI_ISL_661257, EPI_ISL_661258, EPI_ISL_661259                                                                                                                                                                                                                                                                                                                                                                                                                                                                                                                                                                                                                                                                                                                                                                                                                                                                                                                                                                                                                                                                                                                                                                                                                                                                                                                                                                                                                                                                                                                                                                                                                                                                                                 | see above                             | LabPLUS                                                                           | Xiaoyun Ren, Matt Storey, Nikki Freed, Muhammad Faisal, Jing Wang, Hermes Perez, Anja Werno, Antje van der Linden, Arlo Upton, Chris Mansell, David Hammer, Dragana Drinkovic, Gary McAuliffe, Hana Sofia Andersson, James Ussher, Jill Sherwood, Josh Freeman, Julia Howard, Juliet Ely, Mary DeAlmeida, Matt Blakiston, Matthew Rogers, Max Bloomfield, Michael Addidle, Michelle Balm, Sally Roberts, Sarah Jefferies, Sharmini Muttaiyah, Susan Morpeth, Susan Taylor, Timothy Blackmore, Vani Sathyendran, Veronica Playle, Virginia Hope, Erasmus Smit, Lauren Jelly, Olin Silander, Joep de Lig |                                                                                                                                                                                                                                                                                                                                                                                                                                                                                                                                                                                                        |                                                                                                                                                    |
| EPI_ISL_661260                                                                                                                                                                                                                                                                                                                                                                                                                                                                                                                                                                                                                                                                                                                                                                                                                                                                                                                                                                                                                                                                                                                                                                                                                                                                                                                                                                                                                                                                                                                                                                                                                                                                                                                                                                 | Canterbury Health Laboratories        | Institute of Environmental Science and Research (ESR)                             | Xiaoyun Ren, Matt Storey, Nikki Freed, Muhammad Faisal, Jing Wang, Hermes Perez, Anja Werno, Antje van der Linden, Arlo Upton, Chris Mansell, David Hammer, Dragana Drinkovic, Gary McAuliffe, Hana Sofia Andersson, James Ussher, Jill Sherwood, Josh Freeman, Julia Howard, Juliet Ely, Mary DeAlmeida, Matt Blakiston, Matthew Rogers, Max Bloomfield, Michael Addidle, Michelle Balm, Sally Roberts, Sarah Jefferies, Sharmini Muttaiyah, Susan Morpeth, Susan Taylor, Timothy Blackmore, Vani Sathyendran, Veronica Playle, Virginia Hope, Erasmus Smit, Lauren Jelly, Olin Silander, Joep de Lig |                                                                                                                                                                                                                                                                                                                                                                                                                                                                                                                                                                                                        |                                                                                                                                                    |
| EPI_ISL_661261, EPI_ISL_661262, EPI_ISL_661263, EPI_ISL_661264                                                                                                                                                                                                                                                                                                                                                                                                                                                                                                                                                                                                                                                                                                                                                                                                                                                                                                                                                                                                                                                                                                                                                                                                                                                                                                                                                                                                                                                                                                                                                                                                                                                                                                                 | see above                             | LabPLUS                                                                           | Xiaoyun Ren, Matt Storey, Nikki Freed, Muhammad Faisal, Jing Wang, Hermes Perez, Anja Werno, Antje van der Linden, Arlo Upton, Chris Mansell, David Hammer, Dragana Drinkovic, Gary McAuliffe, Hana Sofia Andersson, James Ussher, Jill Sherwood, Josh Freeman, Julia Howard, Juliet Ely, Mary DeAlmeida, Matt Blakiston, Matthew Rogers, Max Bloomfield, Michael Addidle, Michelle Balm, Sally Roberts, Sarah Jefferies, Sharmini Muttaiyah, Susan Morpeth, Susan Taylor, Timothy Blackmore, Vani Sathyendran, Veronica Playle, Virginia Hope, Erasmus Smit, Lauren Jelly, Olin Silander, Joep de Lig |                                                                                                                                                                                                                                                                                                                                                                                                                                                                                                                                                                                                        |                                                                                                                                                    |
| EPI_ISL_661265                                                                                                                                                                                                                                                                                                                                                                                                                                                                                                                                                                                                                                                                                                                                                                                                                                                                                                                                                                                                                                                                                                                                                                                                                                                                                                                                                                                                                                                                                                                                                                                                                                                                                                                                                                 | Middlemore Hospital                   | Institute of Environmental Science and Research (ESR)                             | Xiaoyun Ren, Matt Storey, Nikki Freed, Muhammad Faisal, Jing Wang, Hermes Perez, Anja Werno, Antje van der Linden, Arlo Upton, Chris Mansell, David Hammer, Dragana Drinkovic, Gary McAuliffe, Hana Sofia Andersson, James Ussher, Jill Sherwood, Josh Freeman, Julia Howard, Juliet Ely, Mary DeAlmeida, Matt Blakiston, Matthew Rogers, Max Bloomfield, Michael Addidle, Michelle Balm, Sally Roberts, Sarah Jefferies, Sharmini Muttaiyah, Susan Morpeth, Susan Taylor, Timothy Blackmore, Vani Sathyendran, Veronica Playle, Virginia Hope, Erasmus Smit, Lauren Jelly, Olin Silander, Joep de Lig |                                                                                                                                                                                                                                                                                                                                                                                                                                                                                                                                                                                                        |                                                                                                                                                    |
| EPI_ISL_671764, EPI_ISL_671765, EPI_ISL_671766, EPI_ISL_671767, EPI_ISL_671768, EPI_ISL_672663                                                                                                                                                                                                                                                                                                                                                                                                                                                                                                                                                                                                                                                                                                                                                                                                                                                                                                                                                                                                                                                                                                                                                                                                                                                                                                                                                                                                                                                                                                                                                                                                                                                                                 | see above                             | Santa Clara County Public Health Department                                       | Xiandong Deng, Scot Federman, Wei Gu, Elsa Villarino, Brandon Bonin, Debra A. Wadford, and Charles Y. Chiu                                                                                                                                                                                                                                                                                                                                                                                                                                                                                             |                                                                                                                                                                                                                                                                                                                                                                                                                                                                                                                                                                                                        |                                                                                                                                                    |
| EPI_ISL_676574, EPI_ISL_676575, EPI_ISL_676576, EPI_ISL_676577, EPI_ISL_676578, EPI_ISL_676579, EPI_ISL_676580, EPI_ISL_676581, EPI_ISL_676582, EPI_ISL_676583, EPI_ISL_676584, EPI_ISL_676585, EPI_ISL_676586, EPI_ISL_676587, EPI_ISL_676588, EPI_ISL_676589, EPI_ISL_676590, EPI_ISL_676591, EPI_ISL_676592, EPI_ISL_676593, EPI_ISL_676594, EPI_ISL_676595, EPI_ISL_676596, EPI_ISL_676597, EPI_ISL_676598, EPI_ISL_676599, EPI_ISL_676600, EPI_ISL_676601, EPI_ISL_676602, EPI_ISL_676603                                                                                                                                                                                                                                                                                                                                                                                                                                                                                                                                                                                                                                                                                                                                                                                                                                                                                                                                                                                                                                                                                                                                                                                                                                                                                 | see above                             | Scientific Veterinary Institute Novi Sad                                          | Vidanovic,D., Tesovic,B., Knezevic,A., Jovanovic,T., Jankovic,M., Sekler,M., Banovic Djeri,B., Petrovic,T., Volkening,J., Afonso,C.                                                                                                                                                                                                                                                                                                                                                                                                                                                                    |                                                                                                                                                                                                                                                                                                                                                                                                                                                                                                                                                                                                        |                                                                                                                                                    |
| EPI_ISL_677134, EPI_ISL_677135, EPI_ISL_677136, EPI_ISL_677137, EPI_ISL_677138, EPI_ISL_677139, EPI_ISL_677140, EPI_ISL_677141, EPI_ISL_677142, EPI_ISL_677143, EPI_ISL_677144, EPI_ISL_677145, EPI_ISL_677146, EPI_ISL_677147, EPI_ISL_677148, EPI_ISL_677149, EPI_ISL_677150, EPI_ISL_677151, EPI_ISL_677152, EPI_ISL_677153, EPI_ISL_677154, EPI_ISL_677155, EPI_ISL_677156, EPI_ISL_677157, EPI_ISL_677158, EPI_ISL_677159, EPI_ISL_677160, EPI_ISL_677161, EPI_ISL_677162, EPI_ISL_677163, EPI_ISL_677164, EPI_ISL_677165, EPI_ISL_677166, EPI_ISL_677167, EPI_ISL_677168, EPI_ISL_677169, EPI_ISL_677170, EPI_ISL_677171, EPI_ISL_677172, EPI_ISL_677173, EPI_ISL_677174, EPI_ISL_677175, EPI_ISL_677176, EPI_ISL_677177, EPI_ISL_677178, EPI_ISL_677179, EPI_ISL_677180, EPI_ISL_677181, EPI_ISL_677182, EPI_ISL_677183, EPI_ISL_677184, EPI_ISL_677185, EPI_ISL_677186, EPI_ISL_677187, EPI_ISL_677188, EPI_ISL_677189, EPI_ISL_677190, EPI_ISL_677191, EPI_ISL_677192, EPI_ISL_677193, EPI_ISL_677194, EPI_ISL_677195, EPI_ISL_677196, EPI_ISL_677197, EPI_ISL_677198, EPI_ISL_677199, EPI_ISL_677200, EPI_ISL_677201, EPI_ISL_677202, EPI_ISL_677203, EPI_ISL_677204, EPI_ISL_677205, EPI_ISL_677206, EPI_ISL_677207, EPI_ISL_677208, EPI_ISL_677209, EPI_ISL_677210, EPI_ISL_677211, EPI_ISL_677212, EPI_ISL_677213, EPI_ISL_677214, EPI_ISL_677215, EPI_ISL_677216, EPI_ISL_677217, EPI_ISL_677218, EPI_ISL_677219, EPI_ISL_677220, EPI_ISL_677221, EPI_ISL_677222, EPI_ISL_677223, EPI_ISL_677224, EPI_ISL_677225, EPI_ISL_677226, EPI_ISL_677227, EPI_ISL_677228, EPI_ISL_677229, EPI_ISL_677230, EPI_ISL_677231, EPI_ISL_677232, EPI_ISL_677233, EPI_ISL_677234, EPI_ISL_677235, EPI_ISL_677236, EPI_ISL_677237, EPI_ISL_677238, EPI_ISL_677239, EPI_ISL_677240 | see above                             | Virginia Division of Consolidated Laboratory Services                             | Virginia Division of Consolidated Laboratory Services                                                                                                                                                                                                                                                                                                                                                                                                                                                                                                                                                  | Virginia DCLS                                                                                                                                                                                                                                                                                                                                                                                                                                                                                                                                                                                          |                                                                                                                                                    |
| EPI_ISL_678486, EPI_ISL_678487, EPI_ISL_678488, EPI_ISL_678489, EPI_ISL_678490, EPI_ISL_678491, EPI_ISL_678492, EPI_ISL_678493                                                                                                                                                                                                                                                                                                                                                                                                                                                                                                                                                                                                                                                                                                                                                                                                                                                                                                                                                                                                                                                                                                                                                                                                                                                                                                                                                                                                                                                                                                                                                                                                                                                 | see above                             | Virginia Division of Consolidated Laboratory Services                             | Virginia Division of Consolidated Laboratory Services                                                                                                                                                                                                                                                                                                                                                                                                                                                                                                                                                  | Virginia DCLS                                                                                                                                                                                                                                                                                                                                                                                                                                                                                                                                                                                          | Vidanovic,D., Tesovic,B., Knezevic,A., Jovanovic,T., Jankovic,M., Sekler,M., Banovic Djeri,B., Petrovic,T., Mrkovacki, S., Volkening,J., Afonso,C. |
| EPI_ISL_681776, EPI_ISL_681777, EPI_ISL_681778, EPI_ISL_681779, EPI_ISL_681780, EPI_ISL_681781, EPI_ISL_681782, EPI_ISL_681783, EPI_ISL_681784, EPI_ISL_681785, EPI_ISL_681786, EPI_ISL_681787, EPI_ISL_681788, EPI_ISL_681789, EPI_ISL_681790, EPI_ISL_681791, EPI_ISL_681792, EPI_ISL_681793, EPI_ISL_681794, EPI_ISL_681795, EPI_ISL_681796, EPI_ISL_681797, EPI_ISL_681798, EPI_ISL_681799, EPI_ISL_681800, EPI_ISL_681801, EPI_ISL_681802, EPI_ISL_681803, EPI_ISL_681804, EPI_ISL_681805, EPI_ISL_681806, EPI_ISL_681807, EPI_ISL_681808, EPI_ISL_681809, EPI_ISL_681810, EPI_ISL_681811, EPI_ISL_681812, EPI_ISL_681813, EPI_ISL_681814, EPI_ISL_681815, EPI_ISL_681816, EPI_ISL_681817, EPI_ISL_681818, EPI_ISL_681819, EPI_ISL_681820, EPI_ISL_681821, EPI_ISL_681822, EPI_ISL_681823, EPI_ISL_681824, EPI_ISL_681825, EPI_ISL_681826, EPI_ISL_681827, EPI_ISL_681828                                                                                                                                                                                                                                                                                                                                                                                                                                                                                                                                                                                                                                                                                                                                                                                                                                                                                                 | see above                             | GA Department of Public Health Laboratory                                         | Pathogen Discovery, Respiratory Viruses Branch, Division of Viral Diseases, Centers for Disease Control and Prevention                                                                                                                                                                                                                                                                                                                                                                                                                                                                                 | Yan Li, Ying Tao, Jing Zhang, Krista Queen, Anna Uehara, Peter Cook, Clinton R. Paden, Haibin Wang, Suxiang Tong                                                                                                                                                                                                                                                                                                                                                                                                                                                                                       |                                                                                                                                                    |
| EPI_ISL_682278, EPI_ISL_682279, EPI_ISL_682280, EPI_ISL_682281, EPI_ISL_682282                                                                                                                                                                                                                                                                                                                                                                                                                                                                                                                                                                                                                                                                                                                                                                                                                                                                                                                                                                                                                                                                                                                                                                                                                                                                                                                                                                                                                                                                                                                                                                                                                                                                                                 | see above                             | Middlemore Hospital                                                               | Institute of Environmental Science and Research (ESR)                                                                                                                                                                                                                                                                                                                                                                                                                                                                                                                                                  | Xiaoyun Ren, Matt Storey, Nikki Freed, Muhammad Faisal, Jing Wang, Hermes Perez, Anja Werno, Antje van der Linden, Arlo Upton, Chris Mansell, David Hammer, Dragana Drinkovic, Gary McAuliffe, Hana Sofia Andersson, James Ussher, Jill Sherwood, Josh Freeman, Julia Howard, Juliet Ely, Mary DeAlmeida, Matt Blakiston, Matthew Rogers, Max Bloomfield, Michael Addidle, Michelle Balm, Sally Roberts, Sarah Jefferies, Sharmini Muttaiyah, Susan Morpeth, Susan Taylor, Timothy Blackmore, Vani Sathyendran, Veronica Playle, Virginia Hope, Erasmus Smit, Lauren Jelly, Olin Silander, Joep de Lig |                                                                                                                                                    |

|                                                                                                                                                                                                                                                                                                                                                                                                                                                                                |                                                                                                    |                                                                                                    |                                                                                                                                                                                                                                                                                                                                                                                                                                                                                                                                                                                                        |
|--------------------------------------------------------------------------------------------------------------------------------------------------------------------------------------------------------------------------------------------------------------------------------------------------------------------------------------------------------------------------------------------------------------------------------------------------------------------------------|----------------------------------------------------------------------------------------------------|----------------------------------------------------------------------------------------------------|--------------------------------------------------------------------------------------------------------------------------------------------------------------------------------------------------------------------------------------------------------------------------------------------------------------------------------------------------------------------------------------------------------------------------------------------------------------------------------------------------------------------------------------------------------------------------------------------------------|
| EPI_ISL_682283, EPI_ISL_682284, EPI_ISL_682285, EPI_ISL_682286                                                                                                                                                                                                                                                                                                                                                                                                                 | Canterbury Health Laboratories                                                                     | Institute of Environmental Science and Research (ESR)                                              | Xiaoyun Ren, Matt Storey, Nikki Freed, Muhammad Faisal, Jing Wang, Hermes Perez, Anja Werno, Antje van der Linden, Arlo Upton, Chris Mansell, David Hammer, Dragana Drinkovic, Gary McAuliffe, Hana Sofia Andersson, James Ussher, Jill Sherwood, Josh Freeman, Julia Howard, Juliet Ely, Mary DeAlmeida, Matt Blakiston, Matthew Rogers, Max Bloomfield, Michael Addidle, Michelle Balm, Sally Roberts, Sarah Jefferies, Sharmini Muttaiyah, Susan Morpeth, Susan Taylor, Timothy Blackmore, Vani Sathyendran, Veronica Playle, Virginia Hope, Erasmus Smit, Lauren Jelly, Olin Silander, Joep de Lig |
| EPI_ISL_682287, EPI_ISL_682288, EPI_ISL_682289, EPI_ISL_682290                                                                                                                                                                                                                                                                                                                                                                                                                 | Middlemore Hospital                                                                                | Institute of Environmental Science and Research (ESR)                                              | Xiaoyun Ren, Matt Storey, Nikki Freed, Muhammad Faisal, Jing Wang, Hermes Perez, Anja Werno, Antje van der Linden, Arlo Upton, Chris Mansell, David Hammer, Dragana Drinkovic, Gary McAuliffe, Hana Sofia Andersson, James Ussher, Jill Sherwood, Josh Freeman, Julia Howard, Juliet Ely, Mary DeAlmeida, Matt Blakiston, Matthew Rogers, Max Bloomfield, Michael Addidle, Michelle Balm, Sally Roberts, Sarah Jefferies, Sharmini Muttaiyah, Susan Morpeth, Susan Taylor, Timothy Blackmore, Vani Sathyendran, Veronica Playle, Virginia Hope, Erasmus Smit, Lauren Jelly, Olin Silander, Joep de Lig |
| EPI_ISL_682291, EPI_ISL_682292, EPI_ISL_682293, EPI_ISL_682294                                                                                                                                                                                                                                                                                                                                                                                                                 | LabPLUS                                                                                            | Institute of Environmental Science and Research (ESR)                                              | Xiaoyun Ren, Matt Storey, Nikki Freed, Muhammad Faisal, Jing Wang, Hermes Perez, Anja Werno, Antje van der Linden, Arlo Upton, Chris Mansell, David Hammer, Dragana Drinkovic, Gary McAuliffe, Hana Sofia Andersson, James Ussher, Jill Sherwood, Josh Freeman, Julia Howard, Juliet Ely, Mary DeAlmeida, Matt Blakiston, Matthew Rogers, Max Bloomfield, Michael Addidle, Michelle Balm, Sally Roberts, Sarah Jefferies, Sharmini Muttaiyah, Susan Morpeth, Susan Taylor, Timothy Blackmore, Vani Sathyendran, Veronica Playle, Virginia Hope, Erasmus Smit, Lauren Jelly, Olin Silander, Joep de Lig |
| EPI_ISL_682295, EPI_ISL_682296                                                                                                                                                                                                                                                                                                                                                                                                                                                 | Canterbury Health Laboratories                                                                     | Institute of Environmental Science and Research (ESR)                                              | Xiaoyun Ren, Matt Storey, Nikki Freed, Muhammad Faisal, Jing Wang, Hermes Perez, Anja Werno, Antje van der Linden, Arlo Upton, Chris Mansell, David Hammer, Dragana Drinkovic, Gary McAuliffe, Hana Sofia Andersson, James Ussher, Jill Sherwood, Josh Freeman, Julia Howard, Juliet Ely, Mary DeAlmeida, Matt Blakiston, Matthew Rogers, Max Bloomfield, Michael Addidle, Michelle Balm, Sally Roberts, Sarah Jefferies, Sharmini Muttaiyah, Susan Morpeth, Susan Taylor, Timothy Blackmore, Vani Sathyendran, Veronica Playle, Virginia Hope, Erasmus Smit, Lauren Jelly, Olin Silander, Joep de Lig |
| EPI_ISL_683451                                                                                                                                                                                                                                                                                                                                                                                                                                                                 | National Center of Disease Control and Prevention of the Republic of Armenia                       | Charité Universitätsmedizin Berlin, Institute of Virology                                          | Victor M Corman, National Center of Disease Control and Prevention of the Republic of Armenia Terry Jones, Jörn Beheim-Schwarzbach, Barbara Muehleemann, Talitha Veith, Julia Schneider, Christian Drosten                                                                                                                                                                                                                                                                                                                                                                                             |
| EPI_ISL_707794                                                                                                                                                                                                                                                                                                                                                                                                                                                                 | Waikato Hospital                                                                                   | Institute of Environmental Science and Research (ESR)                                              | Xiaoyun Ren, Matt Storey, Nikki Freed, Muhammad Faisal, Jing Wang, Hermes Perez, Anja Werno, Antje van der Linden, Arlo Upton, Chris Mansell, David Hammer, Dragana Drinkovic, Gary McAuliffe, Hana Sofia Andersson, James Ussher, Jill Sherwood, Josh Freeman, Julia Howard, Juliet Ely, Mary DeAlmeida, Matt Blakiston, Matthew Rogers, Max Bloomfield, Michael Addidle, Michelle Balm, Sally Roberts, Sarah Jefferies, Sharmini Muttaiyah, Susan Morpeth, Susan Taylor, Timothy Blackmore, Vani Sathyendran, Veronica Playle, Virginia Hope, Erasmus Smit, Lauren Jelly, Olin Silander, Joep de Lig |
| EPI_ISL_707795, EPI_ISL_707796, EPI_ISL_707797, EPI_ISL_707798, EPI_ISL_707799, EPI_ISL_707800, EPI_ISL_707801, EPI_ISL_707802, EPI_ISL_707803, EPI_ISL_707804, EPI_ISL_707805                                                                                                                                                                                                                                                                                                 | see above                                                                                          | LabPLUS                                                                                            | Institute of Environmental Science and Research (ESR)                                                                                                                                                                                                                                                                                                                                                                                                                                                                                                                                                  |
| EPI_ISL_707806, EPI_ISL_707807                                                                                                                                                                                                                                                                                                                                                                                                                                                 | Middlemore Hospital                                                                                | Institute of Environmental Science and Research (ESR)                                              | Xiaoyun Ren, Matt Storey, Nikki Freed, Muhammad Faisal, Jing Wang, Hermes Perez, Anja Werno, Antje van der Linden, Arlo Upton, Chris Mansell, David Hammer, Dragana Drinkovic, Gary McAuliffe, Hana Sofia Andersson, James Ussher, Jill Sherwood, Josh Freeman, Julia Howard, Juliet Ely, Mary DeAlmeida, Matt Blakiston, Matthew Rogers, Max Bloomfield, Michael Addidle, Michelle Balm, Sally Roberts, Sarah Jefferies, Sharmini Muttaiyah, Susan Morpeth, Susan Taylor, Timothy Blackmore, Vani Sathyendran, Veronica Playle, Virginia Hope, Erasmus Smit, Lauren Jelly, Olin Silander, Joep de Lig |
| EPI_ISL_707890                                                                                                                                                                                                                                                                                                                                                                                                                                                                 | Medical Research Center, Faculty of Medicine, Syarif Hidayatullah State Islamic University Jakarta | Medical Research Center, Faculty of Medicine, Syarif Hidayatullah State Islamic University Jakarta | Zeti Harriyati, Chris Adhiyanto, Laifa Hendamin, Erike A Suwarsono, Dennis Nurjadi                                                                                                                                                                                                                                                                                                                                                                                                                                                                                                                     |
| EPI_ISL_710485, EPI_ISL_710486                                                                                                                                                                                                                                                                                                                                                                                                                                                 | Utah Public Health Laboratory, Utah Public Health Laboratory Infectious Disease submission group   | Utah Public Health Laboratory, Utah Public Health Laboratory Infectious Disease submission group   | Young,E.L., Oakeson,K.F.                                                                                                                                                                                                                                                                                                                                                                                                                                                                                                                                                                               |
| EPI_ISL_718251, EPI_ISL_718253, EPI_ISL_718258, EPI_ISL_718260                                                                                                                                                                                                                                                                                                                                                                                                                 | Institute of Virology, Biomedical Research Center of the Slovak Academy of Sciences, Bratislava    | Faculty of Natural Sciences, Comenius University, Bratislava                                       | Viktória Hodorová, Kristína Boršová, Broa Brejová, Viktória abanová, Sabina Fumaová Havlíková, Juraj Kopáek, Martina Liková, ubomíra Lukáiková, Martina Neboháová, Monika Sláviková, Tomáš Vína, Jozef Nosek, Boris Klempa                                                                                                                                                                                                                                                                                                                                                                             |
| EPI_ISL_723470, EPI_ISL_723471, EPI_ISL_723472, EPI_ISL_723473, EPI_ISL_723474, EPI_ISL_723475, EPI_ISL_723476, EPI_ISL_723477, EPI_ISL_723478, EPI_ISL_723479, EPI_ISL_723480, EPI_ISL_723481, EPI_ISL_723482, EPI_ISL_723483, EPI_ISL_723484, EPI_ISL_723485, EPI_ISL_723486, EPI_ISL_723487, EPI_ISL_723488, EPI_ISL_723489, EPI_ISL_723490, EPI_ISL_723491                                                                                                                 | see above                                                                                          | Virginia DCLS                                                                                      | Virginia DCLS                                                                                                                                                                                                                                                                                                                                                                                                                                                                                                                                                                                          |
| EPI_ISL_723492, EPI_ISL_723493, EPI_ISL_723494, EPI_ISL_723495, EPI_ISL_723496, EPI_ISL_723497, EPI_ISL_723498, EPI_ISL_723499, EPI_ISL_723500, EPI_ISL_723501, EPI_ISL_723502, EPI_ISL_723503, EPI_ISL_723504, EPI_ISL_723505, EPI_ISL_723506, EPI_ISL_723507, EPI_ISL_723508, EPI_ISL_723509, EPI_ISL_723510, EPI_ISL_723511, EPI_ISL_723512, EPI_ISL_723513, EPI_ISL_723514, EPI_ISL_723515, EPI_ISL_723516, EPI_ISL_723517, EPI_ISL_723518, EPI_ISL_723519, EPI_ISL_723520 | see above                                                                                          | Virginia Division of Consolidated Laboratory Services (DCLS)                                       | Virginia Division of Consolidated Laboratory Services (DCLS)                                                                                                                                                                                                                                                                                                                                                                                                                                                                                                                                           |
| EPI_ISL_729337, EPI_ISL_729338, EPI_ISL_729341, EPI_ISL_729342, EPI_ISL_729343, EPI_ISL_729344                                                                                                                                                                                                                                                                                                                                                                                 | A. Krumbholz, Labor Dr. Krause und Kollegen MVZ GmbH, Kiel                                         | Charité Universitätsmedizin Berlin, Institut für Virologie                                         | Victor M Corman, Barbara Muehleemann, Jörn Beheim-Schwarzbach, Talitha Veith, Julia Schneider, Terry Jones, Christian Drosten                                                                                                                                                                                                                                                                                                                                                                                                                                                                          |
| EPI_ISL_729346                                                                                                                                                                                                                                                                                                                                                                                                                                                                 | Charité Universitätsmedizin Berlin, Institut für Virologie/Labor Berlin                            | Charité Universitätsmedizin Berlin, Institut für Virologie                                         | Victor M Corman, Barbara Muehleemann, Jörn Beheim-Schwarzbach, Talitha Veith, Julia Schneider, Terry Jones, Christian Drosten                                                                                                                                                                                                                                                                                                                                                                                                                                                                          |
| EPI_ISL_729347                                                                                                                                                                                                                                                                                                                                                                                                                                                                 | A. Krumbholz, Labor Dr. Krause und Kollegen MVZ GmbH, Kiel                                         | Charité Universitätsmedizin Berlin, Institut für Virologie                                         | Victor M Corman, Barbara Muehleemann, Jörn Beheim-Schwarzbach, Talitha Veith, Julia Schneider, Terry Jones, Christian Drosten                                                                                                                                                                                                                                                                                                                                                                                                                                                                          |
| EPI_ISL_729348                                                                                                                                                                                                                                                                                                                                                                                                                                                                 | Charité Universitätsmedizin Berlin, Institut für Virologie/Labor Berlin                            | Charité Universitätsmedizin Berlin, Institut für Virologie                                         | Victor M Corman, Barbara Muehleemann, Jörn Beheim-Schwarzbach, Talitha Veith, Julia Schneider, Terry Jones, Christian Drosten                                                                                                                                                                                                                                                                                                                                                                                                                                                                          |
| EPI_ISL_729349, EPI_ISL_729350, EPI_ISL_729352, EPI_ISL_729354                                                                                                                                                                                                                                                                                                                                                                                                                 | A. Krumbholz, Labor Dr. Krause und Kollegen MVZ GmbH, Kiel                                         | Charité Universitätsmedizin Berlin, Institut für Virologie                                         | Victor M Corman, Barbara Muehleemann, Jörn Beheim-Schwarzbach, Talitha Veith, Julia Schneider, Terry Jones, Christian Drosten                                                                                                                                                                                                                                                                                                                                                                                                                                                                          |
| EPI_ISL_729355, EPI_ISL_729357                                                                                                                                                                                                                                                                                                                                                                                                                                                 | Charité Universitätsmedizin Berlin, Institut für Virologie/Labor Berlin                            | Charité Universitätsmedizin Berlin, Institut für Virologie                                         | Victor M Corman, Barbara Muehleemann, Jörn Beheim-Schwarzbach, Talitha Veith, Julia Schneider, Terry Jones, Christian Drosten                                                                                                                                                                                                                                                                                                                                                                                                                                                                          |
| EPI_ISL_729358, EPI_ISL_729359                                                                                                                                                                                                                                                                                                                                                                                                                                                 | A. Krumbholz, Labor Dr. Krause und Kollegen MVZ GmbH, Kiel                                         | Charité Universitätsmedizin Berlin, Institut für Virologie                                         | Victor M Corman, Barbara Muehleemann, Jörn Beheim-Schwarzbach, Talitha Veith, Julia Schneider, Terry Jones, Christian Drosten                                                                                                                                                                                                                                                                                                                                                                                                                                                                          |
| EPI_ISL_729360                                                                                                                                                                                                                                                                                                                                                                                                                                                                 | Charité Universitätsmedizin Berlin, Institut für Virologie/Labor Berlin                            | Charité Universitätsmedizin Berlin, Institut für Virologie                                         | Victor M Corman, Barbara Muehleemann, Jörn Beheim-Schwarzbach, Talitha Veith, Julia Schneider, Terry Jones, Christian Drosten                                                                                                                                                                                                                                                                                                                                                                                                                                                                          |
| EPI_ISL_729362, EPI_ISL_729364                                                                                                                                                                                                                                                                                                                                                                                                                                                 | A. Krumbholz, Labor Dr. Krause und Kollegen MVZ GmbH, Kiel                                         | Charité Universitätsmedizin Berlin, Institut für Virologie                                         | Victor M Corman, Barbara Muehleemann, Jörn Beheim-Schwarzbach, Talitha Veith, Julia Schneider, Terry Jones, Christian Drosten                                                                                                                                                                                                                                                                                                                                                                                                                                                                          |
| EPI_ISL_729365                                                                                                                                                                                                                                                                                                                                                                                                                                                                 | Charité Universitätsmedizin Berlin, Institut für Virologie/Labor Berlin                            | Charité Universitätsmedizin Berlin, Institut für Virologie                                         | Victor M Corman, Barbara Muehleemann, Jörn Beheim-Schwarzbach, Talitha Veith, Julia Schneider, Terry Jones, Christian Drosten                                                                                                                                                                                                                                                                                                                                                                                                                                                                          |
| EPI_ISL_729368, EPI_ISL_729369, EPI_ISL_729374, EPI_ISL_729376                                                                                                                                                                                                                                                                                                                                                                                                                 | A. Krumbholz, Labor Dr. Krause und Kollegen MVZ GmbH, Kiel                                         | Charité Universitätsmedizin Berlin, Institut für Virologie                                         | Victor M Corman, Barbara Muehleemann, Jörn Beheim-Schwarzbach, Talitha Veith, Julia Schneider, Terry Jones, Christian Drosten                                                                                                                                                                                                                                                                                                                                                                                                                                                                          |
| EPI_ISL_729377                                                                                                                                                                                                                                                                                                                                                                                                                                                                 | Charité Universitätsmedizin Berlin, Institut für Virologie/Labor Berlin                            | Charité Universitätsmedizin Berlin, Institut für Virologie                                         | Victor M Corman, Barbara Muehleemann, Jörn Beheim-Schwarzbach, Talitha Veith, Julia Schneider, Terry Jones, Christian Drosten                                                                                                                                                                                                                                                                                                                                                                                                                                                                          |
| EPI_ISL_729379, EPI_ISL_729380, EPI_ISL_729381                                                                                                                                                                                                                                                                                                                                                                                                                                 | A. Krumbholz, Labor Dr. Krause und Kollegen MVZ GmbH, Kiel                                         | Charité Universitätsmedizin Berlin, Institut für Virologie                                         | Victor M Corman, Barbara Muehleemann, Jörn Beheim-Schwarzbach, Talitha Veith, Julia Schneider, Terry Jones, Christian Drosten                                                                                                                                                                                                                                                                                                                                                                                                                                                                          |
| EPI_ISL_729382                                                                                                                                                                                                                                                                                                                                                                                                                                                                 | Charité Universitätsmedizin Berlin, Institut für Virologie/Labor Berlin                            | Charité Universitätsmedizin Berlin, Institut für Virologie                                         | Victor M Corman, Barbara Muehleemann, Jörn Beheim-Schwarzbach, Talitha Veith, Julia Schneider, Terry Jones, Christian Drosten                                                                                                                                                                                                                                                                                                                                                                                                                                                                          |
| EPI_ISL_729383, EPI_ISL_729384,                                                                                                                                                                                                                                                                                                                                                                                                                                                | A. Krumbholz, Labor Dr. Krause und Kollegen MVZ GmbH,                                              | Charité Universitätsmedizin Berlin, Institut für Virologie                                         | Victor M Corman, Barbara Muehleemann, Jörn Beheim-Schwarzbach, Talitha Veith, Julia Schneider, Terry Jones, Christian Drosten                                                                                                                                                                                                                                                                                                                                                                                                                                                                          |

|                                                                                                                                                                                                                                                                                                                                                                                                                                                                                                                                                                                                                                                                                                                                                                                                                                                                                                                                                                                                                                                                                                                                                                                                                                                                                                                |                                                                         |                                                            |                                                                                                                                                                                                                                                                                                                                                                                                                                                                                                                                                                                                        |
|----------------------------------------------------------------------------------------------------------------------------------------------------------------------------------------------------------------------------------------------------------------------------------------------------------------------------------------------------------------------------------------------------------------------------------------------------------------------------------------------------------------------------------------------------------------------------------------------------------------------------------------------------------------------------------------------------------------------------------------------------------------------------------------------------------------------------------------------------------------------------------------------------------------------------------------------------------------------------------------------------------------------------------------------------------------------------------------------------------------------------------------------------------------------------------------------------------------------------------------------------------------------------------------------------------------|-------------------------------------------------------------------------|------------------------------------------------------------|--------------------------------------------------------------------------------------------------------------------------------------------------------------------------------------------------------------------------------------------------------------------------------------------------------------------------------------------------------------------------------------------------------------------------------------------------------------------------------------------------------------------------------------------------------------------------------------------------------|
| EPI_ISL_729385, EPI_ISL_729390, EPI_ISL_729392, EPI_ISL_729393, EPI_ISL_729396, EPI_ISL_729399                                                                                                                                                                                                                                                                                                                                                                                                                                                                                                                                                                                                                                                                                                                                                                                                                                                                                                                                                                                                                                                                                                                                                                                                                 | Kiel                                                                    |                                                            |                                                                                                                                                                                                                                                                                                                                                                                                                                                                                                                                                                                                        |
| EPI_ISL_729400, EPI_ISL_729402                                                                                                                                                                                                                                                                                                                                                                                                                                                                                                                                                                                                                                                                                                                                                                                                                                                                                                                                                                                                                                                                                                                                                                                                                                                                                 | Charité Universitätsmedizin Berlin, Institut für Virologie/Labor Berlin | Charité Universitätsmedizin Berlin, Institut für Virologie | Victor M Corman, Barbara Mühlemann, Jörn Beheim-Schwarzbach, Talitha Veith, Julia Schneider, Terry Jones, Christian Drosten                                                                                                                                                                                                                                                                                                                                                                                                                                                                            |
| EPI_ISL_729403                                                                                                                                                                                                                                                                                                                                                                                                                                                                                                                                                                                                                                                                                                                                                                                                                                                                                                                                                                                                                                                                                                                                                                                                                                                                                                 | A. Krumbholz, Labor Dr. Krause und Kollegen MVZ GmbH, Kiel              | Charité Universitätsmedizin Berlin, Institut für Virologie | Victor M Corman, Barbara Mühlemann, Jörn Beheim-Schwarzbach, Talitha Veith, Julia Schneider, Terry Jones, Christian Drosten                                                                                                                                                                                                                                                                                                                                                                                                                                                                            |
| EPI_ISL_729404, EPI_ISL_729405, EPI_ISL_729406                                                                                                                                                                                                                                                                                                                                                                                                                                                                                                                                                                                                                                                                                                                                                                                                                                                                                                                                                                                                                                                                                                                                                                                                                                                                 | Charité Universitätsmedizin Berlin, Institut für Virologie/Labor Berlin | Charité Universitätsmedizin Berlin, Institut für Virologie | Victor M Corman, Barbara Mühlemann, Jörn Beheim-Schwarzbach, Talitha Veith, Julia Schneider, Terry Jones, Christian Drosten                                                                                                                                                                                                                                                                                                                                                                                                                                                                            |
| EPI_ISL_729407                                                                                                                                                                                                                                                                                                                                                                                                                                                                                                                                                                                                                                                                                                                                                                                                                                                                                                                                                                                                                                                                                                                                                                                                                                                                                                 | A. Krumbholz, Labor Dr. Krause und Kollegen MVZ GmbH, Kiel              | Charité Universitätsmedizin Berlin, Institut für Virologie | Victor M Corman, Barbara Mühlemann, Jörn Beheim-Schwarzbach, Talitha Veith, Julia Schneider, Terry Jones, Christian Drosten                                                                                                                                                                                                                                                                                                                                                                                                                                                                            |
| EPI_ISL_729410                                                                                                                                                                                                                                                                                                                                                                                                                                                                                                                                                                                                                                                                                                                                                                                                                                                                                                                                                                                                                                                                                                                                                                                                                                                                                                 | Charité Universitätsmedizin Berlin, Institut für Virologie/Labor Berlin | Charité Universitätsmedizin Berlin, Institut für Virologie | Victor M Corman, Barbara Mühlemann, Jörn Beheim-Schwarzbach, Talitha Veith, Julia Schneider, Terry Jones, Christian Drosten                                                                                                                                                                                                                                                                                                                                                                                                                                                                            |
| EPI_ISL_729411, EPI_ISL_729414, EPI_ISL_729416, EPI_ISL_729417, EPI_ISL_729420, EPI_ISL_729421, EPI_ISL_729422, EPI_ISL_729423, EPI_ISL_729424, EPI_ISL_729425, EPI_ISL_729427, EPI_ISL_729428, EPI_ISL_729429, EPI_ISL_729430, EPI_ISL_729431, EPI_ISL_729433, EPI_ISL_729434, EPI_ISL_729435, EPI_ISL_729436, EPI_ISL_729437, EPI_ISL_729438, EPI_ISL_729439, EPI_ISL_729440, EPI_ISL_729443, EPI_ISL_729444, EPI_ISL_729446, EPI_ISL_729447, EPI_ISL_729448, EPI_ISL_729450, EPI_ISL_729451, EPI_ISL_729452, EPI_ISL_729453, EPI_ISL_729454, EPI_ISL_729455, EPI_ISL_729457, EPI_ISL_729460, EPI_ISL_729461, EPI_ISL_729462, EPI_ISL_729463, EPI_ISL_729464, EPI_ISL_729465, EPI_ISL_729466, EPI_ISL_729467                                                                                                                                                                                                                                                                                                                                                                                                                                                                                                                                                                                                 |                                                                         |                                                            |                                                                                                                                                                                                                                                                                                                                                                                                                                                                                                                                                                                                        |
| see above                                                                                                                                                                                                                                                                                                                                                                                                                                                                                                                                                                                                                                                                                                                                                                                                                                                                                                                                                                                                                                                                                                                                                                                                                                                                                                      | A. Krumbholz, Labor Dr. Krause und Kollegen MVZ GmbH, Kiel              | Charité Universitätsmedizin Berlin, Institut für Virologie | Victor M Corman, Barbara Mühlemann, Jörn Beheim-Schwarzbach, Talitha Veith, Julia Schneider, Terry Jones, Christian Drosten                                                                                                                                                                                                                                                                                                                                                                                                                                                                            |
| EPI_ISL_729468                                                                                                                                                                                                                                                                                                                                                                                                                                                                                                                                                                                                                                                                                                                                                                                                                                                                                                                                                                                                                                                                                                                                                                                                                                                                                                 | Charité Universitätsmedizin Berlin, Institut für Virologie/Labor Berlin | Charité Universitätsmedizin Berlin, Institut für Virologie | Victor M Corman, Barbara Mühlemann, Jörn Beheim-Schwarzbach, Talitha Veith, Julia Schneider, Terry Jones, Christian Drosten                                                                                                                                                                                                                                                                                                                                                                                                                                                                            |
| EPI_ISL_729469, EPI_ISL_729470                                                                                                                                                                                                                                                                                                                                                                                                                                                                                                                                                                                                                                                                                                                                                                                                                                                                                                                                                                                                                                                                                                                                                                                                                                                                                 | A. Krumbholz, Labor Dr. Krause und Kollegen MVZ GmbH, Kiel              | Charité Universitätsmedizin Berlin, Institut für Virologie | Victor M Corman, Barbara Mühlemann, Jörn Beheim-Schwarzbach, Talitha Veith, Julia Schneider, Terry Jones, Christian Drosten                                                                                                                                                                                                                                                                                                                                                                                                                                                                            |
| EPI_ISL_729473, EPI_ISL_729474, EPI_ISL_729476, EPI_ISL_729477, EPI_ISL_729478, EPI_ISL_729479, EPI_ISL_729484, EPI_ISL_729486, EPI_ISL_729487, EPI_ISL_729490, EPI_ISL_729491, EPI_ISL_729492, EPI_ISL_729493, EPI_ISL_729494, EPI_ISL_729495                                                                                                                                                                                                                                                                                                                                                                                                                                                                                                                                                                                                                                                                                                                                                                                                                                                                                                                                                                                                                                                                 |                                                                         |                                                            |                                                                                                                                                                                                                                                                                                                                                                                                                                                                                                                                                                                                        |
| see above                                                                                                                                                                                                                                                                                                                                                                                                                                                                                                                                                                                                                                                                                                                                                                                                                                                                                                                                                                                                                                                                                                                                                                                                                                                                                                      | Charité Universitätsmedizin Berlin, Institut für Virologie/Labor Berlin | Charité Universitätsmedizin Berlin, Institut für Virologie | Victor M Corman, Barbara Mühlemann, Jörn Beheim-Schwarzbach, Talitha Veith, Julia Schneider, Terry Jones, Christian Drosten                                                                                                                                                                                                                                                                                                                                                                                                                                                                            |
| EPI_ISL_729498, EPI_ISL_729500, EPI_ISL_729502, EPI_ISL_729503, EPI_ISL_729505, EPI_ISL_729506, EPI_ISL_729507, EPI_ISL_729509, EPI_ISL_729511, EPI_ISL_729512, EPI_ISL_729513                                                                                                                                                                                                                                                                                                                                                                                                                                                                                                                                                                                                                                                                                                                                                                                                                                                                                                                                                                                                                                                                                                                                 |                                                                         |                                                            |                                                                                                                                                                                                                                                                                                                                                                                                                                                                                                                                                                                                        |
| see above                                                                                                                                                                                                                                                                                                                                                                                                                                                                                                                                                                                                                                                                                                                                                                                                                                                                                                                                                                                                                                                                                                                                                                                                                                                                                                      | A. Krumbholz, Labor Dr. Krause und Kollegen MVZ GmbH, Kiel              | Charité Universitätsmedizin Berlin, Institut für Virologie | Victor M Corman, Barbara Mühlemann, Jörn Beheim-Schwarzbach, Talitha Veith, Julia Schneider, Terry Jones, Christian Drosten                                                                                                                                                                                                                                                                                                                                                                                                                                                                            |
| EPI_ISL_729514                                                                                                                                                                                                                                                                                                                                                                                                                                                                                                                                                                                                                                                                                                                                                                                                                                                                                                                                                                                                                                                                                                                                                                                                                                                                                                 | Charité Universitätsmedizin Berlin, Institut für Virologie/Labor Berlin | Charité Universitätsmedizin Berlin, Institut für Virologie | Victor M Corman, Barbara Mühlemann, Jörn Beheim-Schwarzbach, Talitha Veith, Julia Schneider, Terry Jones, Christian Drosten                                                                                                                                                                                                                                                                                                                                                                                                                                                                            |
| EPI_ISL_729516, EPI_ISL_729518, EPI_ISL_729520, EPI_ISL_729521, EPI_ISL_729523, EPI_ISL_729524, EPI_ISL_729525, EPI_ISL_729526                                                                                                                                                                                                                                                                                                                                                                                                                                                                                                                                                                                                                                                                                                                                                                                                                                                                                                                                                                                                                                                                                                                                                                                 | A. Krumbholz, Labor Dr. Krause und Kollegen MVZ GmbH, Kiel              | Charité Universitätsmedizin Berlin, Institut für Virologie | Victor M Corman, Barbara Mühlemann, Jörn Beheim-Schwarzbach, Talitha Veith, Julia Schneider, Terry Jones, Christian Drosten                                                                                                                                                                                                                                                                                                                                                                                                                                                                            |
| EPI_ISL_729530, EPI_ISL_729531, EPI_ISL_729532, EPI_ISL_729533                                                                                                                                                                                                                                                                                                                                                                                                                                                                                                                                                                                                                                                                                                                                                                                                                                                                                                                                                                                                                                                                                                                                                                                                                                                 | Charité Universitätsmedizin Berlin, Institut für Virologie/Labor Berlin | Charité Universitätsmedizin Berlin, Institut für Virologie | Victor M Corman, Barbara Mühlemann, Jörn Beheim-Schwarzbach, Talitha Veith, Julia Schneider, Terry Jones, Christian Drosten                                                                                                                                                                                                                                                                                                                                                                                                                                                                            |
| EPI_ISL_729535, EPI_ISL_729538, EPI_ISL_729539, EPI_ISL_729540, EPI_ISL_729541, EPI_ISL_729543, EPI_ISL_729545                                                                                                                                                                                                                                                                                                                                                                                                                                                                                                                                                                                                                                                                                                                                                                                                                                                                                                                                                                                                                                                                                                                                                                                                 | A. Krumbholz, Labor Dr. Krause und Kollegen MVZ GmbH, Kiel              | Charité Universitätsmedizin Berlin, Institut für Virologie | Victor M Corman, Barbara Mühlemann, Jörn Beheim-Schwarzbach, Talitha Veith, Julia Schneider, Terry Jones, Christian Drosten                                                                                                                                                                                                                                                                                                                                                                                                                                                                            |
| EPI_ISL_729548                                                                                                                                                                                                                                                                                                                                                                                                                                                                                                                                                                                                                                                                                                                                                                                                                                                                                                                                                                                                                                                                                                                                                                                                                                                                                                 | Charité Universitätsmedizin Berlin, Institut für Virologie/Labor Berlin | Charité Universitätsmedizin Berlin, Institut für Virologie | Victor M Corman, Barbara Mühlemann, Jörn Beheim-Schwarzbach, Talitha Veith, Julia Schneider, Terry Jones, Christian Drosten                                                                                                                                                                                                                                                                                                                                                                                                                                                                            |
| EPI_ISL_729550, EPI_ISL_729551, EPI_ISL_729552                                                                                                                                                                                                                                                                                                                                                                                                                                                                                                                                                                                                                                                                                                                                                                                                                                                                                                                                                                                                                                                                                                                                                                                                                                                                 | A. Krumbholz, Labor Dr. Krause und Kollegen MVZ GmbH, Kiel              | Charité Universitätsmedizin Berlin, Institut für Virologie | Victor M Corman, Barbara Mühlemann, Jörn Beheim-Schwarzbach, Talitha Veith, Julia Schneider, Terry Jones, Christian Drosten                                                                                                                                                                                                                                                                                                                                                                                                                                                                            |
| EPI_ISL_729553, EPI_ISL_729554, EPI_ISL_729558, EPI_ISL_729561                                                                                                                                                                                                                                                                                                                                                                                                                                                                                                                                                                                                                                                                                                                                                                                                                                                                                                                                                                                                                                                                                                                                                                                                                                                 | Charité Universitätsmedizin Berlin, Institut für Virologie/Labor Berlin | Charité Universitätsmedizin Berlin, Institut für Virologie | Victor M Corman, Barbara Mühlemann, Jörn Beheim-Schwarzbach, Talitha Veith, Julia Schneider, Terry Jones, Christian Drosten                                                                                                                                                                                                                                                                                                                                                                                                                                                                            |
| EPI_ISL_729563, EPI_ISL_729564, EPI_ISL_729565, EPI_ISL_729566, EPI_ISL_729569, EPI_ISL_729575, EPI_ISL_729578, EPI_ISL_729579, EPI_ISL_729581, EPI_ISL_729582, EPI_ISL_729583, EPI_ISL_729585, EPI_ISL_729587, EPI_ISL_729589, EPI_ISL_729590, EPI_ISL_729591, EPI_ISL_729593, EPI_ISL_729594, EPI_ISL_729595                                                                                                                                                                                                                                                                                                                                                                                                                                                                                                                                                                                                                                                                                                                                                                                                                                                                                                                                                                                                 |                                                                         |                                                            |                                                                                                                                                                                                                                                                                                                                                                                                                                                                                                                                                                                                        |
| see above                                                                                                                                                                                                                                                                                                                                                                                                                                                                                                                                                                                                                                                                                                                                                                                                                                                                                                                                                                                                                                                                                                                                                                                                                                                                                                      | A. Krumbholz, Labor Dr. Krause und Kollegen MVZ GmbH, Kiel              | Charité Universitätsmedizin Berlin, Institut für Virologie | Victor M Corman, Barbara Mühlemann, Jörn Beheim-Schwarzbach, Talitha Veith, Julia Schneider, Terry Jones, Christian Drosten                                                                                                                                                                                                                                                                                                                                                                                                                                                                            |
| EPI_ISL_729596, EPI_ISL_729597, EPI_ISL_729598, EPI_ISL_729600, EPI_ISL_729601, EPI_ISL_729603, EPI_ISL_729604, EPI_ISL_729605, EPI_ISL_729606                                                                                                                                                                                                                                                                                                                                                                                                                                                                                                                                                                                                                                                                                                                                                                                                                                                                                                                                                                                                                                                                                                                                                                 | Charité Universitätsmedizin Berlin, Institut für Virologie/Labor Berlin | Charité Universitätsmedizin Berlin, Institut für Virologie | Victor M Corman, Barbara Mühlemann, Jörn Beheim-Schwarzbach, Talitha Veith, Julia Schneider, Terry Jones, Christian Drosten                                                                                                                                                                                                                                                                                                                                                                                                                                                                            |
| EPI_ISL_729610, EPI_ISL_729611, EPI_ISL_729615, EPI_ISL_729616, EPI_ISL_729617, EPI_ISL_729618, EPI_ISL_729621, EPI_ISL_729622, EPI_ISL_729623, EPI_ISL_729624, EPI_ISL_729626, EPI_ISL_729627, EPI_ISL_729628, EPI_ISL_729629, EPI_ISL_729630, EPI_ISL_729632, EPI_ISL_729633, EPI_ISL_729638, EPI_ISL_729639, EPI_ISL_729640, EPI_ISL_729641, EPI_ISL_729643, EPI_ISL_729644, EPI_ISL_729645, EPI_ISL_729646, EPI_ISL_729647, EPI_ISL_729649, EPI_ISL_729651, EPI_ISL_729654, EPI_ISL_729655, EPI_ISL_729656, EPI_ISL_729658, EPI_ISL_729660, EPI_ISL_729662, EPI_ISL_729663, EPI_ISL_729667, EPI_ISL_729668, EPI_ISL_729669, EPI_ISL_729670, EPI_ISL_729672, EPI_ISL_729673, EPI_ISL_729674, EPI_ISL_729675, EPI_ISL_729676, EPI_ISL_729678, EPI_ISL_729680, EPI_ISL_729682, EPI_ISL_729683, EPI_ISL_729684, EPI_ISL_729685, EPI_ISL_729687, EPI_ISL_729689, EPI_ISL_729690, EPI_ISL_729691, EPI_ISL_729692, EPI_ISL_729693, EPI_ISL_729694, EPI_ISL_729696, EPI_ISL_729697, EPI_ISL_729700, EPI_ISL_729703, EPI_ISL_729705, EPI_ISL_729706, EPI_ISL_729707, EPI_ISL_729710, EPI_ISL_729712, EPI_ISL_729713, EPI_ISL_729714, EPI_ISL_729715, EPI_ISL_729717, EPI_ISL_729719, EPI_ISL_729720, EPI_ISL_729721, EPI_ISL_729725, EPI_ISL_729726, EPI_ISL_729730, EPI_ISL_729731, EPI_ISL_729732, EPI_ISL_729734 |                                                                         |                                                            |                                                                                                                                                                                                                                                                                                                                                                                                                                                                                                                                                                                                        |
| see above                                                                                                                                                                                                                                                                                                                                                                                                                                                                                                                                                                                                                                                                                                                                                                                                                                                                                                                                                                                                                                                                                                                                                                                                                                                                                                      | A. Krumbholz, Labor Dr. Krause und Kollegen MVZ GmbH, Kiel              | Charité Universitätsmedizin Berlin, Institut für Virologie | Victor M Corman, Barbara Mühlemann, Jörn Beheim-Schwarzbach, Talitha Veith, Julia Schneider, Terry Jones, Christian Drosten                                                                                                                                                                                                                                                                                                                                                                                                                                                                            |
| EPI_ISL_732962                                                                                                                                                                                                                                                                                                                                                                                                                                                                                                                                                                                                                                                                                                                                                                                                                                                                                                                                                                                                                                                                                                                                                                                                                                                                                                 | LabPLUS                                                                 | Institute of Environmental Science and Research (ESR)      | Xiaoyun Ren, Matt Storey, Nikki Freed, Muhammad Faisal, Jing Wang, Hermes Perez, Anja Werno, Antje van der Linden, Arlo Upton, Chris Mansell, David Hammer, Dragana Drinkovic, Gary McAuliffe, Hana Sofia Andersson, James Ussher, Jill Sherwood, Josh Freeman, Julia Howard, Juliet Ely, Mary DeAlmeida, Matt Blakiston, Matthew Rogers, Max Bloomfield, Michael Addidle, Michelle Balm, Sally Roberts, Sarah Jefferies, Sharmini Muttaiyah, Susan Morpeth, Susan Taylor, Timothy Blackmore, Vani Sathyendran, Veronica Playle, Virginia Hope, Erasmus Smit, Lauren Jelly, Olin Silander, Joep de Lig |
| EPI_ISL_732963                                                                                                                                                                                                                                                                                                                                                                                                                                                                                                                                                                                                                                                                                                                                                                                                                                                                                                                                                                                                                                                                                                                                                                                                                                                                                                 | Canterbury Health Laboratories                                          | Institute of Environmental Science and Research (ESR)      | Xiaoyun Ren, Matt Storey, Nikki Freed, Muhammad Faisal, Jing Wang, Hermes Perez, Anja Werno, Antje van der Linden, Arlo Upton, Chris Mansell, David Hammer, Dragana Drinkovic, Gary McAuliffe, Hana Sofia Andersson, James Ussher, Jill Sherwood, Josh Freeman, Julia Howard, Juliet Ely, Mary DeAlmeida, Matt Blakiston, Matthew Rogers, Max Bloomfield, Michael Addidle, Michelle Balm, Sally Roberts, Sarah Jefferies, Sharmini Muttaiyah, Susan Morpeth, Susan Taylor, Timothy Blackmore, Vani Sathyendran, Veronica Playle, Virginia Hope, Erasmus Smit, Lauren Jelly, Olin Silander, Joep de Lig |
| EPI_ISL_732964, EPI_ISL_732965, EPI_ISL_732966, EPI_ISL_732967                                                                                                                                                                                                                                                                                                                                                                                                                                                                                                                                                                                                                                                                                                                                                                                                                                                                                                                                                                                                                                                                                                                                                                                                                                                 | LabPLUS                                                                 | Institute of Environmental Science and Research (ESR)      | Xiaoyun Ren, Matt Storey, Nikki Freed, Muhammad Faisal, Jing Wang, Hermes Perez, Anja Werno, Antje van der Linden, Arlo Upton, Chris Mansell, David Hammer, Dragana Drinkovic, Gary McAuliffe, Hana Sofia Andersson, James Ussher, Jill Sherwood, Josh Freeman, Julia Howard, Juliet Ely, Mary DeAlmeida, Matt Blakiston, Matthew Rogers, Max Bloomfield, Michael Addidle, Michelle Balm, Sally Roberts, Sarah Jefferies, Sharmini Muttaiyah, Susan                                                                                                                                                    |

|                                                                                                                                                                                                                                                                                                                                                                                                                                                                                                                                                                                                                                                                                                                                                                                                                                                                                                                                                                                                                                                                                                                                                                                                                                                                                                                                                                                                                                                                                                                                                                                                                                                                                                                                                                                                                                                                                                                                                                                                                                                                                                                                                                                                                                                                                                                                                                                                                                                                                                                                                                                                                                                                                                                                                                                                                                                                                                                                                                                                                                                                                                                                                                                                                                                                                                                                                                                                                                                                                                                                                                                                                                                                                                                                                                                                                                                                                                |                                                                                  |                                                                      |                                                                                                                                                                                                                                                                                                                                                                                                                                                                                                                                                                                                        |
|------------------------------------------------------------------------------------------------------------------------------------------------------------------------------------------------------------------------------------------------------------------------------------------------------------------------------------------------------------------------------------------------------------------------------------------------------------------------------------------------------------------------------------------------------------------------------------------------------------------------------------------------------------------------------------------------------------------------------------------------------------------------------------------------------------------------------------------------------------------------------------------------------------------------------------------------------------------------------------------------------------------------------------------------------------------------------------------------------------------------------------------------------------------------------------------------------------------------------------------------------------------------------------------------------------------------------------------------------------------------------------------------------------------------------------------------------------------------------------------------------------------------------------------------------------------------------------------------------------------------------------------------------------------------------------------------------------------------------------------------------------------------------------------------------------------------------------------------------------------------------------------------------------------------------------------------------------------------------------------------------------------------------------------------------------------------------------------------------------------------------------------------------------------------------------------------------------------------------------------------------------------------------------------------------------------------------------------------------------------------------------------------------------------------------------------------------------------------------------------------------------------------------------------------------------------------------------------------------------------------------------------------------------------------------------------------------------------------------------------------------------------------------------------------------------------------------------------------------------------------------------------------------------------------------------------------------------------------------------------------------------------------------------------------------------------------------------------------------------------------------------------------------------------------------------------------------------------------------------------------------------------------------------------------------------------------------------------------------------------------------------------------------------------------------------------------------------------------------------------------------------------------------------------------------------------------------------------------------------------------------------------------------------------------------------------------------------------------------------------------------------------------------------------------------------------------------------------------------------------------------------------------|----------------------------------------------------------------------------------|----------------------------------------------------------------------|--------------------------------------------------------------------------------------------------------------------------------------------------------------------------------------------------------------------------------------------------------------------------------------------------------------------------------------------------------------------------------------------------------------------------------------------------------------------------------------------------------------------------------------------------------------------------------------------------------|
|                                                                                                                                                                                                                                                                                                                                                                                                                                                                                                                                                                                                                                                                                                                                                                                                                                                                                                                                                                                                                                                                                                                                                                                                                                                                                                                                                                                                                                                                                                                                                                                                                                                                                                                                                                                                                                                                                                                                                                                                                                                                                                                                                                                                                                                                                                                                                                                                                                                                                                                                                                                                                                                                                                                                                                                                                                                                                                                                                                                                                                                                                                                                                                                                                                                                                                                                                                                                                                                                                                                                                                                                                                                                                                                                                                                                                                                                                                |                                                                                  |                                                                      | Morpeth, Susan Taylor, Timothy Blackmore, Vani Sathyendran, Veronica Playle, Virginia Hope, Erasmus Smit, Lauren Jelly, Olin Silander, Joep de Ligt                                                                                                                                                                                                                                                                                                                                                                                                                                                    |
| EPI_ISL_732968, EPI_ISL_732969, EPI_ISL_732970                                                                                                                                                                                                                                                                                                                                                                                                                                                                                                                                                                                                                                                                                                                                                                                                                                                                                                                                                                                                                                                                                                                                                                                                                                                                                                                                                                                                                                                                                                                                                                                                                                                                                                                                                                                                                                                                                                                                                                                                                                                                                                                                                                                                                                                                                                                                                                                                                                                                                                                                                                                                                                                                                                                                                                                                                                                                                                                                                                                                                                                                                                                                                                                                                                                                                                                                                                                                                                                                                                                                                                                                                                                                                                                                                                                                                                                 | Middlemore Hospital                                                              | Institute of Environmental Science and Research (ESR)                | Xiaoyun Ren, Matt Storey, Nikki Freed, Muhammad Faisal, Jing Wang, Hermes Perez, Anja Werno, Antje van der Linden, Arlo Upton, Chris Mansell, David Hammer, Dragana Drinkovic, Gary McAuliffe, Hana Sofia Andersson, James Ussher, Jill Sherwood, Josh Freeman, Julia Howard, Juliet Ely, Mary DeAlmeida, Matt Blakiston, Matthew Rogers, Max Bloomfield, Michael Addidle, Michelle Balm, Sally Roberts, Sarah Jefferies, Sharmini Muttayah, Susan Morpeth, Susan Taylor, Timothy Blackmore, Vani Sathyendran, Veronica Playle, Virginia Hope, Erasmus Smit, Lauren Jelly, Olin Silander, Joep de Ligt |
| EPI_ISL_734170, EPI_ISL_734171, EPI_ISL_734172, EPI_ISL_734173, EPI_ISL_734174, EPI_ISL_734175, EPI_ISL_734176, EPI_ISL_734177, EPI_ISL_734178, EPI_ISL_734179, EPI_ISL_734180, EPI_ISL_734181, EPI_ISL_734182, EPI_ISL_734183, EPI_ISL_734184, EPI_ISL_734185, EPI_ISL_734186, EPI_ISL_734187, EPI_ISL_734188, EPI_ISL_734189, EPI_ISL_734190, EPI_ISL_734191, EPI_ISL_734192, EPI_ISL_734193, EPI_ISL_734194, EPI_ISL_734195, EPI_ISL_734196, EPI_ISL_734197, EPI_ISL_734198, EPI_ISL_734199, EPI_ISL_734200, EPI_ISL_734201, EPI_ISL_734202, EPI_ISL_734203, EPI_ISL_734204, EPI_ISL_734205, EPI_ISL_734206, EPI_ISL_734207, EPI_ISL_734208, EPI_ISL_734209, EPI_ISL_734210, EPI_ISL_734211, EPI_ISL_734212, EPI_ISL_734213, EPI_ISL_734214, EPI_ISL_734215, EPI_ISL_734216, EPI_ISL_734217, EPI_ISL_734218, EPI_ISL_734219, EPI_ISL_734220, EPI_ISL_734221, EPI_ISL_734222, EPI_ISL_734223, EPI_ISL_734224, EPI_ISL_734225, EPI_ISL_734226, EPI_ISL_734227, EPI_ISL_734228, EPI_ISL_734229, EPI_ISL_734230, EPI_ISL_734231, EPI_ISL_734232, EPI_ISL_734233, EPI_ISL_734234, EPI_ISL_734235, EPI_ISL_734236, EPI_ISL_734237, EPI_ISL_734238, EPI_ISL_734239, EPI_ISL_734240, EPI_ISL_734241, EPI_ISL_734242, EPI_ISL_734243, EPI_ISL_734244, EPI_ISL_734245, EPI_ISL_734246, EPI_ISL_734247, EPI_ISL_734248, EPI_ISL_734249, EPI_ISL_734250, EPI_ISL_734251, EPI_ISL_734252, EPI_ISL_734253, EPI_ISL_734254, EPI_ISL_734255, EPI_ISL_734256, EPI_ISL_734257, EPI_ISL_734258, EPI_ISL_734259, EPI_ISL_734260, EPI_ISL_734261, EPI_ISL_734262, EPI_ISL_734263, EPI_ISL_734264, EPI_ISL_734265, EPI_ISL_734266, EPI_ISL_734267, EPI_ISL_734268, EPI_ISL_734269, EPI_ISL_734270, EPI_ISL_734271, EPI_ISL_734272, EPI_ISL_734273, EPI_ISL_734274, EPI_ISL_734275, EPI_ISL_734276, EPI_ISL_734277, EPI_ISL_734278, EPI_ISL_734279, EPI_ISL_734280, EPI_ISL_734281, EPI_ISL_734282, EPI_ISL_734283, EPI_ISL_734284, EPI_ISL_734285, EPI_ISL_734286                                                                                                                                                                                                                                                                                                                                                                                                                                                                                                                                                                                                                                                                                                                                                                                                                                                                                                                                                                                                                                                                                                                                                                                                                                                                                                                                                                                                                                                                                                                                                                                                                                                                                                                                                                                                                                                                                                                                                 | Virginia Division of Consolidated Laboratory Services (DCLS)                     |                                                                      |                                                                                                                                                                                                                                                                                                                                                                                                                                                                                                                                                                                                        |
| see above                                                                                                                                                                                                                                                                                                                                                                                                                                                                                                                                                                                                                                                                                                                                                                                                                                                                                                                                                                                                                                                                                                                                                                                                                                                                                                                                                                                                                                                                                                                                                                                                                                                                                                                                                                                                                                                                                                                                                                                                                                                                                                                                                                                                                                                                                                                                                                                                                                                                                                                                                                                                                                                                                                                                                                                                                                                                                                                                                                                                                                                                                                                                                                                                                                                                                                                                                                                                                                                                                                                                                                                                                                                                                                                                                                                                                                                                                      | Virginia Division of Consolidated Laboratory Services (DCLS)                     | Virginia Division of Consolidated Laboratory Services (DCLS)         | Virginia DCLS                                                                                                                                                                                                                                                                                                                                                                                                                                                                                                                                                                                          |
| EPI_ISL_735436                                                                                                                                                                                                                                                                                                                                                                                                                                                                                                                                                                                                                                                                                                                                                                                                                                                                                                                                                                                                                                                                                                                                                                                                                                                                                                                                                                                                                                                                                                                                                                                                                                                                                                                                                                                                                                                                                                                                                                                                                                                                                                                                                                                                                                                                                                                                                                                                                                                                                                                                                                                                                                                                                                                                                                                                                                                                                                                                                                                                                                                                                                                                                                                                                                                                                                                                                                                                                                                                                                                                                                                                                                                                                                                                                                                                                                                                                 | Nucleic Acid Testing - Rwanda National Reference Laboratory                      | GIGA Medical Genomics                                                | Yvan Butera, Keith Durkin, Maria Artesi, Bouchra Boujemla, Robert Rutayisire, Patrick Tuyisenge, Esperence Umumararungu, Sébastien Bontems, Marie-Pierre Hayette, Swabu Gatara, Jacob Souopgui, Sabin Nsanzimana, Vincent Bours, Léon Mutesa                                                                                                                                                                                                                                                                                                                                                           |
| EPI_ISL_735437                                                                                                                                                                                                                                                                                                                                                                                                                                                                                                                                                                                                                                                                                                                                                                                                                                                                                                                                                                                                                                                                                                                                                                                                                                                                                                                                                                                                                                                                                                                                                                                                                                                                                                                                                                                                                                                                                                                                                                                                                                                                                                                                                                                                                                                                                                                                                                                                                                                                                                                                                                                                                                                                                                                                                                                                                                                                                                                                                                                                                                                                                                                                                                                                                                                                                                                                                                                                                                                                                                                                                                                                                                                                                                                                                                                                                                                                                 | Nucleic Acid Testing - Rwanda National Reference Laboratory                      | GIGA Medical Genomics                                                | Yvan Butera, Keith Durkin, Maria Artesi, Bouchra Boujemla, Robert Rutayisire, Patrick Tuyisenge, Esperence Umumararungu, Sébastien Bontems, Marie-Pierre Hayette, Swabu Gatara, Jacob Souopgui, Sabin Nsanzimana, Vincent Bours, Léon Mutesa                                                                                                                                                                                                                                                                                                                                                           |
| EPI_ISL_735438                                                                                                                                                                                                                                                                                                                                                                                                                                                                                                                                                                                                                                                                                                                                                                                                                                                                                                                                                                                                                                                                                                                                                                                                                                                                                                                                                                                                                                                                                                                                                                                                                                                                                                                                                                                                                                                                                                                                                                                                                                                                                                                                                                                                                                                                                                                                                                                                                                                                                                                                                                                                                                                                                                                                                                                                                                                                                                                                                                                                                                                                                                                                                                                                                                                                                                                                                                                                                                                                                                                                                                                                                                                                                                                                                                                                                                                                                 | Nucleic Acid Testing - Rwanda National Reference Laboratory                      | GIGA Medical Genomics                                                | Yvan Butera, Keith Durkin, Maria Artesi, Bouchra Boujemla, Robert Rutayisire, Patrick Tuyisenge, Esperence Umumararungu, Sébastien Bontems, Marie-Pierre Hayette, Swabu Gatara, Jacob Souopgui, Sabin Nsanzimana, Vincent Bours, Léon Mutesa                                                                                                                                                                                                                                                                                                                                                           |
| EPI_ISL_735444                                                                                                                                                                                                                                                                                                                                                                                                                                                                                                                                                                                                                                                                                                                                                                                                                                                                                                                                                                                                                                                                                                                                                                                                                                                                                                                                                                                                                                                                                                                                                                                                                                                                                                                                                                                                                                                                                                                                                                                                                                                                                                                                                                                                                                                                                                                                                                                                                                                                                                                                                                                                                                                                                                                                                                                                                                                                                                                                                                                                                                                                                                                                                                                                                                                                                                                                                                                                                                                                                                                                                                                                                                                                                                                                                                                                                                                                                 | Nucleic Acid Testing - Rwanda National Reference Laboratory                      | GIGA Medical Genomics                                                | Yvan Butera, Keith Durkin, Maria Artesi, Bouchra Boujemla, Robert Rutayisire, Patrick Tuyisenge, Esperence Umumararungu, Sébastien Bontems, Marie-Pierre Hayette, Swabu Gatara, Jacob Souopgui, Sabin Nsanzimana, Vincent Bours, Léon Mutesa                                                                                                                                                                                                                                                                                                                                                           |
| EPI_ISL_735445                                                                                                                                                                                                                                                                                                                                                                                                                                                                                                                                                                                                                                                                                                                                                                                                                                                                                                                                                                                                                                                                                                                                                                                                                                                                                                                                                                                                                                                                                                                                                                                                                                                                                                                                                                                                                                                                                                                                                                                                                                                                                                                                                                                                                                                                                                                                                                                                                                                                                                                                                                                                                                                                                                                                                                                                                                                                                                                                                                                                                                                                                                                                                                                                                                                                                                                                                                                                                                                                                                                                                                                                                                                                                                                                                                                                                                                                                 | Rwanda National Reference Laboratory                                             | GIGA Medical Genomics                                                | Yvan Butera, Keith Durkin, Maria Artesi, Bouchra Boujemla, Robert Rutayisire, Patrick Tuyisenge, Esperence Umumararungu, Sébastien Bontems, Marie-Pierre Hayette, Swabu Gatara, Jacob Souopgui, Sabin Nsanzimana, Vincent Bours, Léon Mutesa                                                                                                                                                                                                                                                                                                                                                           |
| EPI_ISL_735446, EPI_ISL_735447, EPI_ISL_735448                                                                                                                                                                                                                                                                                                                                                                                                                                                                                                                                                                                                                                                                                                                                                                                                                                                                                                                                                                                                                                                                                                                                                                                                                                                                                                                                                                                                                                                                                                                                                                                                                                                                                                                                                                                                                                                                                                                                                                                                                                                                                                                                                                                                                                                                                                                                                                                                                                                                                                                                                                                                                                                                                                                                                                                                                                                                                                                                                                                                                                                                                                                                                                                                                                                                                                                                                                                                                                                                                                                                                                                                                                                                                                                                                                                                                                                 | Nucleic Acid Testing - Rwanda National Reference Laboratory                      | GIGA Medical Genomics                                                | Yvan Butera, Keith Durkin, Maria Artesi, Bouchra Boujemla, Robert Rutayisire, Patrick Tuyisenge, Esperence Umumararungu, Sébastien Bontems, Marie-Pierre Hayette, Swabu Gatara, Jacob Souopgui, Sabin Nsanzimana, Vincent Bours, Léon Mutesa                                                                                                                                                                                                                                                                                                                                                           |
| EPI_ISL_738147, EPI_ISL_738194, EPI_ISL_738243                                                                                                                                                                                                                                                                                                                                                                                                                                                                                                                                                                                                                                                                                                                                                                                                                                                                                                                                                                                                                                                                                                                                                                                                                                                                                                                                                                                                                                                                                                                                                                                                                                                                                                                                                                                                                                                                                                                                                                                                                                                                                                                                                                                                                                                                                                                                                                                                                                                                                                                                                                                                                                                                                                                                                                                                                                                                                                                                                                                                                                                                                                                                                                                                                                                                                                                                                                                                                                                                                                                                                                                                                                                                                                                                                                                                                                                 | Microbiology and Virology Unit, Florence Careggi University Hospital             | Microbiology and Virology Unit, Florence Careggi University Hospital | Vincenzo Di Pilato, Marco Coppi, Alberto Antonelli, Simona Pollini, Gian Maria Rossolini                                                                                                                                                                                                                                                                                                                                                                                                                                                                                                               |
| EPI_ISL_745090                                                                                                                                                                                                                                                                                                                                                                                                                                                                                                                                                                                                                                                                                                                                                                                                                                                                                                                                                                                                                                                                                                                                                                                                                                                                                                                                                                                                                                                                                                                                                                                                                                                                                                                                                                                                                                                                                                                                                                                                                                                                                                                                                                                                                                                                                                                                                                                                                                                                                                                                                                                                                                                                                                                                                                                                                                                                                                                                                                                                                                                                                                                                                                                                                                                                                                                                                                                                                                                                                                                                                                                                                                                                                                                                                                                                                                                                                 | Institute for Medical Microbiology, School of Medicine, University of Goettingen | Institut of Human Genetics, University Medicine Goettingen           | Zautner A, Zibat A, Gross U, Wollnik B                                                                                                                                                                                                                                                                                                                                                                                                                                                                                                                                                                 |
| EPI_ISL_753702, EPI_ISL_753703, EPI_ISL_753705, EPI_ISL_753707, EPI_ISL_753711, EPI_ISL_753712, EPI_ISL_753713, EPI_ISL_753714, EPI_ISL_753716, EPI_ISL_753718, EPI_ISL_753720, EPI_ISL_753722, EPI_ISL_753723, EPI_ISL_753724, EPI_ISL_753725, EPI_ISL_753726, EPI_ISL_753727, EPI_ISL_753728, EPI_ISL_753729, EPI_ISL_753731, EPI_ISL_753732, EPI_ISL_753733, EPI_ISL_753734, EPI_ISL_753735, EPI_ISL_753737, EPI_ISL_753742, EPI_ISL_753743, EPI_ISL_753744, EPI_ISL_753745, EPI_ISL_753747, EPI_ISL_753750, EPI_ISL_753751, EPI_ISL_753752, EPI_ISL_753754, EPI_ISL_753755, EPI_ISL_753756, EPI_ISL_753757, EPI_ISL_753758, EPI_ISL_753761, EPI_ISL_753762, EPI_ISL_753763, EPI_ISL_753764, EPI_ISL_753765, EPI_ISL_753767, EPI_ISL_753769, EPI_ISL_753770, EPI_ISL_753771, EPI_ISL_753772, EPI_ISL_753773, EPI_ISL_753774, EPI_ISL_753775, EPI_ISL_753776, EPI_ISL_753778, EPI_ISL_753779, EPI_ISL_753780, EPI_ISL_753781, EPI_ISL_753784, EPI_ISL_753785, EPI_ISL_753786, EPI_ISL_753788, EPI_ISL_753789, EPI_ISL_753790, EPI_ISL_753792, EPI_ISL_753793, EPI_ISL_753794, EPI_ISL_753797, EPI_ISL_753798, EPI_ISL_753800, EPI_ISL_753802, EPI_ISL_753803, EPI_ISL_753807, EPI_ISL_753808, EPI_ISL_753809, EPI_ISL_753811, EPI_ISL_753813, EPI_ISL_753818, EPI_ISL_753820, EPI_ISL_753823, EPI_ISL_753824, EPI_ISL_753825, EPI_ISL_753826, EPI_ISL_753833, EPI_ISL_753834, EPI_ISL_753835, EPI_ISL_753836, EPI_ISL_753837, EPI_ISL_753840, EPI_ISL_753843, EPI_ISL_753845, EPI_ISL_753846, EPI_ISL_753847, EPI_ISL_753850, EPI_ISL_753851, EPI_ISL_753852, EPI_ISL_753855, EPI_ISL_753857, EPI_ISL_753858, EPI_ISL_753859, EPI_ISL_753860, EPI_ISL_753861, EPI_ISL_753863, EPI_ISL_753868, EPI_ISL_753869, EPI_ISL_753870, EPI_ISL_753872, EPI_ISL_753874, EPI_ISL_753875, EPI_ISL_753876, EPI_ISL_753878, EPI_ISL_753879, EPI_ISL_753882, EPI_ISL_753885, EPI_ISL_753886, EPI_ISL_753887, EPI_ISL_753888, EPI_ISL_753889, EPI_ISL_753890, EPI_ISL_753892, EPI_ISL_753893, EPI_ISL_753894, EPI_ISL_753895, EPI_ISL_753896, EPI_ISL_753897, EPI_ISL_753898, EPI_ISL_753902, EPI_ISL_753903, EPI_ISL_753904, EPI_ISL_753905, EPI_ISL_753906, EPI_ISL_753907, EPI_ISL_753908, EPI_ISL_753909, EPI_ISL_753910, EPI_ISL_753911, EPI_ISL_753912, EPI_ISL_753913, EPI_ISL_753915, EPI_ISL_753918, EPI_ISL_753919, EPI_ISL_753920, EPI_ISL_753921, EPI_ISL_753922, EPI_ISL_753923, EPI_ISL_753924, EPI_ISL_753925, EPI_ISL_753926, EPI_ISL_753927, EPI_ISL_753928, EPI_ISL_753929, EPI_ISL_753930, EPI_ISL_753931, EPI_ISL_753932, EPI_ISL_753933, EPI_ISL_753936, EPI_ISL_753938, EPI_ISL_753939, EPI_ISL_753940, EPI_ISL_753941, EPI_ISL_753943, EPI_ISL_753944, EPI_ISL_753945, EPI_ISL_753946, EPI_ISL_753947, EPI_ISL_753948, EPI_ISL_753949, EPI_ISL_753950, EPI_ISL_753952, EPI_ISL_753953, EPI_ISL_753955, EPI_ISL_753956, EPI_ISL_753958, EPI_ISL_753962, EPI_ISL_753963, EPI_ISL_753968, EPI_ISL_753970, EPI_ISL_753971, EPI_ISL_753972, EPI_ISL_753974, EPI_ISL_753975, EPI_ISL_753977, EPI_ISL_753978, EPI_ISL_753979, EPI_ISL_753980, EPI_ISL_753982, EPI_ISL_753983, EPI_ISL_753985, EPI_ISL_753986, EPI_ISL_753987, EPI_ISL_753989, EPI_ISL_753990, EPI_ISL_753992, EPI_ISL_753993, EPI_ISL_753994, EPI_ISL_753997, EPI_ISL_753999, EPI_ISL_754002, EPI_ISL_754003, EPI_ISL_754004, EPI_ISL_754006, EPI_ISL_754007, EPI_ISL_754008, EPI_ISL_754010, EPI_ISL_754013, EPI_ISL_754014, EPI_ISL_754015, EPI_ISL_754016, EPI_ISL_754018, EPI_ISL_754019, EPI_ISL_754020, EPI_ISL_754022, EPI_ISL_754023, EPI_ISL_754024, EPI_ISL_754026, EPI_ISL_754028, EPI_ISL_754029, EPI_ISL_754031, EPI_ISL_754035, EPI_ISL_754036, EPI_ISL_754037, EPI_ISL_754039, EPI_ISL_754041, EPI_ISL_754043, EPI_ISL_754045, EPI_ISL_754047, EPI_ISL_754048, EPI_ISL_754049, EPI_ISL_754050, EPI_ISL_754051, EPI_ISL_754053, EPI_ISL_754054, EPI_ISL_754055, EPI_ISL_754056, EPI_ISL_754057, EPI_ISL_754058 | Charité Universitätsmedizin Berlin, Institut für Virologie/Labor Berlin          |                                                                      |                                                                                                                                                                                                                                                                                                                                                                                                                                                                                                                                                                                                        |
| see above                                                                                                                                                                                                                                                                                                                                                                                                                                                                                                                                                                                                                                                                                                                                                                                                                                                                                                                                                                                                                                                                                                                                                                                                                                                                                                                                                                                                                                                                                                                                                                                                                                                                                                                                                                                                                                                                                                                                                                                                                                                                                                                                                                                                                                                                                                                                                                                                                                                                                                                                                                                                                                                                                                                                                                                                                                                                                                                                                                                                                                                                                                                                                                                                                                                                                                                                                                                                                                                                                                                                                                                                                                                                                                                                                                                                                                                                                      | Charité Universitätsmedizin Berlin, Institut für Virologie                       | Charité Universitätsmedizin Berlin, Institut für Virologie           | Victor M Corman, Jörn Beheim-Schwarzbach, Barbara Mühlemann, Julia Schneider, Talitha Veith, Terry Jones, Christian Drosten                                                                                                                                                                                                                                                                                                                                                                                                                                                                            |
| EPI_ISL_754174, EPI_ISL_754175                                                                                                                                                                                                                                                                                                                                                                                                                                                                                                                                                                                                                                                                                                                                                                                                                                                                                                                                                                                                                                                                                                                                                                                                                                                                                                                                                                                                                                                                                                                                                                                                                                                                                                                                                                                                                                                                                                                                                                                                                                                                                                                                                                                                                                                                                                                                                                                                                                                                                                                                                                                                                                                                                                                                                                                                                                                                                                                                                                                                                                                                                                                                                                                                                                                                                                                                                                                                                                                                                                                                                                                                                                                                                                                                                                                                                                                                 | Charité Universitätsmedizin Berlin, Institut für Virologie                       | Charité Universitätsmedizin Berlin, Institut für Virologie           | Victor M Corman, Julia Schneider, Jörn Beheim-Schwarzbach, Barbara Mühlemann, Talitha Veith, Terry Jones, Christian Drosten                                                                                                                                                                                                                                                                                                                                                                                                                                                                            |
| EPI_ISL_754184, EPI_ISL_754185, EPI_ISL_754186, EPI_ISL_754187, EPI_ISL_754188, EPI_ISL_754189, EPI_ISL_754190, EPI_ISL_754191, EPI_ISL_754192, EPI_ISL_754193                                                                                                                                                                                                                                                                                                                                                                                                                                                                                                                                                                                                                                                                                                                                                                                                                                                                                                                                                                                                                                                                                                                                                                                                                                                                                                                                                                                                                                                                                                                                                                                                                                                                                                                                                                                                                                                                                                                                                                                                                                                                                                                                                                                                                                                                                                                                                                                                                                                                                                                                                                                                                                                                                                                                                                                                                                                                                                                                                                                                                                                                                                                                                                                                                                                                                                                                                                                                                                                                                                                                                                                                                                                                                                                                 | Charité Universitätsmedizin Berlin, Institut für Virologie/Labor Berlin          | Charité Universitätsmedizin Berlin, Institut für Virologie           | Victor M Corman, Jörn Beheim-Schwarzbach, Barbara Mühlemann, Julia Schneider, Talitha Veith, Terry Jones, Christian Drosten                                                                                                                                                                                                                                                                                                                                                                                                                                                                            |
| EPI_ISL_755619, EPI_ISL_755620, EPI_ISL_755621, EPI_ISL_755622, EPI_ISL_755623                                                                                                                                                                                                                                                                                                                                                                                                                                                                                                                                                                                                                                                                                                                                                                                                                                                                                                                                                                                                                                                                                                                                                                                                                                                                                                                                                                                                                                                                                                                                                                                                                                                                                                                                                                                                                                                                                                                                                                                                                                                                                                                                                                                                                                                                                                                                                                                                                                                                                                                                                                                                                                                                                                                                                                                                                                                                                                                                                                                                                                                                                                                                                                                                                                                                                                                                                                                                                                                                                                                                                                                                                                                                                                                                                                                                                 | Canterbury Health Laboratories                                                   | Institute of Environmental Science and Research (ESR)                | Xiaoyun Ren, Matt Storey, Nikki Freed, Muhammad Faisal, Jing Wang, Hermes Perez, Anja Werno, Antje van der Linden, Arlo Upton, Chris Mansell, David Hammer, Dragana Drinkovic, Gary McAuliffe, Hana Sofia Andersson, James Ussher, Jill Sherwood, Josh Freeman, Julia Howard, Juliet Ely, Mary DeAlmeida, Matt Blakiston, Matthew Rogers, Max Bloomfield, Michael Addidle, Michelle Balm, Sally Roberts, Sarah Jefferies, Sharmini Muttayah, Susan Morpeth, Susan Taylor, Timothy Blackmore, Vani Sathyendran, Veronica Playle, Virginia Hope, Erasmus Smit, Lauren Jelly, Olin Silander, Joep de Ligt |
| EPI_ISL_755624, EPI_ISL_755625                                                                                                                                                                                                                                                                                                                                                                                                                                                                                                                                                                                                                                                                                                                                                                                                                                                                                                                                                                                                                                                                                                                                                                                                                                                                                                                                                                                                                                                                                                                                                                                                                                                                                                                                                                                                                                                                                                                                                                                                                                                                                                                                                                                                                                                                                                                                                                                                                                                                                                                                                                                                                                                                                                                                                                                                                                                                                                                                                                                                                                                                                                                                                                                                                                                                                                                                                                                                                                                                                                                                                                                                                                                                                                                                                                                                                                                                 | Middlemore Hospital                                                              | Institute of Environmental Science and Research (ESR)                | Xiaoyun Ren, Matt Storey, Nikki Freed, Muhammad Faisal, Jing Wang, Hermes Perez, Anja Werno, Antje van der Linden, Arlo Upton, Chris Mansell, David Hammer, Dragana Drinkovic, Gary McAuliffe, Hana Sofia Andersson, James Ussher, Jill Sherwood, Josh Freeman, Julia Howard, Juliet Ely, Mary DeAlmeida, Matt Blakiston, Matthew Rogers, Max Bloomfield, Michael Addidle, Michelle Balm, Sally Roberts, Sarah Jefferies, Sharmini Muttayah, Susan Morpeth, Susan Taylor, Timothy Blackmore, Vani Sathyendran, Veronica Playle, Virginia Hope, Erasmus Smit, Lauren Jelly, Olin Silander, Joep de Ligt |
| EPI_ISL_755626                                                                                                                                                                                                                                                                                                                                                                                                                                                                                                                                                                                                                                                                                                                                                                                                                                                                                                                                                                                                                                                                                                                                                                                                                                                                                                                                                                                                                                                                                                                                                                                                                                                                                                                                                                                                                                                                                                                                                                                                                                                                                                                                                                                                                                                                                                                                                                                                                                                                                                                                                                                                                                                                                                                                                                                                                                                                                                                                                                                                                                                                                                                                                                                                                                                                                                                                                                                                                                                                                                                                                                                                                                                                                                                                                                                                                                                                                 | PathLab Bay of Plenty                                                            | Institute of Environmental Science and Research (ESR)                | Xiaoyun Ren, Matt Storey, Nikki Freed, Muhammad Faisal, Jing Wang, Hermes Perez, Anja Werno, Antje van der Linden, Arlo Upton, Chris Mansell, David Hammer, Dragana Drinkovic, Gary McAuliffe, Hana Sofia Andersson, James Ussher, Jill Sherwood, Josh Freeman, Julia Howard, Juliet Ely, Mary DeAlmeida, Matt Blakiston, Matthew Rogers, Max Bloomfield, Michael Addidle, Michelle Balm, Sally Roberts, Sarah Jefferies, Sharmini Muttayah, Susan Morpeth, Susan Taylor, Timothy Blackmore, Vani Sathyendran, Veronica Playle, Virginia Hope, Erasmus Smit, Lauren Jelly, Olin Silander, Joep de Ligt |
| EPI_ISL_755627, EPI_ISL_755628, EPI_ISL_755629, EPI_ISL_755630, EPI_ISL_755631, EPI_ISL_755632, EPI_ISL_755633                                                                                                                                                                                                                                                                                                                                                                                                                                                                                                                                                                                                                                                                                                                                                                                                                                                                                                                                                                                                                                                                                                                                                                                                                                                                                                                                                                                                                                                                                                                                                                                                                                                                                                                                                                                                                                                                                                                                                                                                                                                                                                                                                                                                                                                                                                                                                                                                                                                                                                                                                                                                                                                                                                                                                                                                                                                                                                                                                                                                                                                                                                                                                                                                                                                                                                                                                                                                                                                                                                                                                                                                                                                                                                                                                                                 | LabPLUS                                                                          | Institute of Environmental Science and Research (ESR)                | Xiaoyun Ren, Matt Storey, Nikki Freed, Muhammad Faisal, Jing Wang, Hermes Perez, Anja Werno, Antje van der Linden, Arlo Upton, Chris Mansell, David Hammer, Dragana Drinkovic, Gary McAuliffe, Hana Sofia Andersson, James Ussher, Jill Sherwood, Josh Freeman, Julia Howard, Juliet Ely, Mary DeAlmeida, Matt Blakiston, Matthew Rogers, Max Bloomfield, Michael Addidle, Michelle Balm, Sally Roberts, Sarah Jefferies, Sharmini Muttayah, Susan Morpeth, Susan Taylor, Timothy Blackmore, Vani Sathyendran, Veronica Playle, Virginia Hope, Erasmus Smit, Lauren Jelly, Olin Silander, Joep de Ligt |
| EPI_ISL_755634, EPI_ISL_755635, EPI_ISL_755636                                                                                                                                                                                                                                                                                                                                                                                                                                                                                                                                                                                                                                                                                                                                                                                                                                                                                                                                                                                                                                                                                                                                                                                                                                                                                                                                                                                                                                                                                                                                                                                                                                                                                                                                                                                                                                                                                                                                                                                                                                                                                                                                                                                                                                                                                                                                                                                                                                                                                                                                                                                                                                                                                                                                                                                                                                                                                                                                                                                                                                                                                                                                                                                                                                                                                                                                                                                                                                                                                                                                                                                                                                                                                                                                                                                                                                                 | Middlemore Hospital                                                              | Institute of Environmental Science and Research (ESR)                | Xiaoyun Ren, Matt Storey, Nikki Freed, Muhammad Faisal, Jing Wang, Hermes Perez, Anja Werno, Antje van der Linden, Arlo Upton, Chris Mansell, David Hammer, Dragana Drinkovic, Gary McAuliffe, Hana Sofia Andersson, James Ussher, Jill Sherwood, Josh Freeman, Julia Howard, Juliet Ely, Mary DeAlmeida, Matt Blakiston, Matthew Rogers, Max Bloomfield, Michael Addidle, Michelle Balm, Sally Roberts, Sarah Jefferies, Sharmini Muttayah, Susan Morpeth, Susan Taylor, Timothy Blackmore, Vani Sathyendran, Veronica Playle, Virginia Hope, Erasmus Smit, Lauren Jelly, Olin Silander, Joep de Ligt |
| EPI_ISL_755637                                                                                                                                                                                                                                                                                                                                                                                                                                                                                                                                                                                                                                                                                                                                                                                                                                                                                                                                                                                                                                                                                                                                                                                                                                                                                                                                                                                                                                                                                                                                                                                                                                                                                                                                                                                                                                                                                                                                                                                                                                                                                                                                                                                                                                                                                                                                                                                                                                                                                                                                                                                                                                                                                                                                                                                                                                                                                                                                                                                                                                                                                                                                                                                                                                                                                                                                                                                                                                                                                                                                                                                                                                                                                                                                                                                                                                                                                 | LabPLUS                                                                          | Institute of Environmental Science and Research (ESR)                | Xiaoyun Ren, Matt Storey, Nikki Freed, Muhammad Faisal, Jing Wang, Hermes Perez, Anja Werno, Antje van der Linden, Arlo Upton, Chris Mansell, David Hammer, Dragana Drinkovic, Gary McAuliffe, Hana Sofia Andersson, James Ussher, Jill Sherwood, Josh Freeman, Julia Howard, Juliet Ely, Mary DeAlmeida, Matt Blakiston, Matthew Rogers, Max Bloomfield, Michael Addidle, Michelle Balm, Sally Roberts, Sarah Jefferies, Sharmini Muttayah, Susan Morpeth, Susan Taylor, Timothy Blackmore, Vani Sathyendran, Veronica Playle, Virginia Hope, Erasmus Smit, Lauren Jelly, Olin Silander, Joep de Ligt |
| EPI_ISL_755638                                                                                                                                                                                                                                                                                                                                                                                                                                                                                                                                                                                                                                                                                                                                                                                                                                                                                                                                                                                                                                                                                                                                                                                                                                                                                                                                                                                                                                                                                                                                                                                                                                                                                                                                                                                                                                                                                                                                                                                                                                                                                                                                                                                                                                                                                                                                                                                                                                                                                                                                                                                                                                                                                                                                                                                                                                                                                                                                                                                                                                                                                                                                                                                                                                                                                                                                                                                                                                                                                                                                                                                                                                                                                                                                                                                                                                                                                 | Canterbury Health Laboratories                                                   | Institute of Environmental Science and Research (ESR)                | Xiaoyun Ren, Matt Storey, Nikki Freed, Muhammad Faisal, Jing Wang, Hermes Perez, Anja Werno, Antje van der Linden, Arlo Upton, Chris Mansell, David Hammer, Dragana Drinkovic, Gary McAuliffe, Hana Sofia Andersson, James Ussher, Jill Sherwood, Josh Freeman, Julia Howard, Juliet Ely, Mary DeAlmeida, Matt Blakiston, Matthew Rogers, Max Bloomfield, Michael Addidle, Michelle Balm, Sally Roberts, Sarah Jefferies, Sharmini Muttayah, Susan Morpeth, Susan Taylor, Timothy Blackmore, Vani Sathyendran, Veronica Playle, Virginia Hope, Erasmus Smit, Lauren Jelly, Olin Silander, Joep de Ligt |



|                                                                                                                                                                                                                                                                                                                                                                                                                                                                                                                                                                                                                                                                                                                                                                                                                                                                                                                |                                                                                                   |                                                                                                                                                  |                                                                                                                                                                                                                                                                                                                                                                                                                                                                                                                                                                                                          |
|----------------------------------------------------------------------------------------------------------------------------------------------------------------------------------------------------------------------------------------------------------------------------------------------------------------------------------------------------------------------------------------------------------------------------------------------------------------------------------------------------------------------------------------------------------------------------------------------------------------------------------------------------------------------------------------------------------------------------------------------------------------------------------------------------------------------------------------------------------------------------------------------------------------|---------------------------------------------------------------------------------------------------|--------------------------------------------------------------------------------------------------------------------------------------------------|----------------------------------------------------------------------------------------------------------------------------------------------------------------------------------------------------------------------------------------------------------------------------------------------------------------------------------------------------------------------------------------------------------------------------------------------------------------------------------------------------------------------------------------------------------------------------------------------------------|
| EPI_ISL_763066                                                                                                                                                                                                                                                                                                                                                                                                                                                                                                                                                                                                                                                                                                                                                                                                                                                                                                 | Puskesmas Grogol, Sukoharjo                                                                       | Universitas Sebelas Maret (UNS); Rumah Sakit UNS (RS-UNS); National Institute of Health Research and Development, Indonesian Ministry of Health. | DeAlmeida, Matt Blakiston, Matthew Rogers, Max Bloomfield, Michael Addidle, Michelle Balm, Sally Roberts, Sarah Jefferies, Sharmini Muttayyah, Susan Morpeth, Susan Taylor, Timothy Blackmore, Vani Sathyendran, Veronica Playle, Virginia Hope, Erasmus Smit, Lauren Jelly, Olin Silander, Joep de Ligt                                                                                                                                                                                                                                                                                                 |
| EPI_ISL_763070                                                                                                                                                                                                                                                                                                                                                                                                                                                                                                                                                                                                                                                                                                                                                                                                                                                                                                 | Puskesmas Jambu Kulon, Klaten                                                                     | Universitas Sebelas Maret (UNS); Rumah Sakit UNS (RS-UNS); National Institute of Health Research and Development, Indonesian Ministry of Health. | Yulia Sari, Hartono, Maryani, Afif A Ghufron, Hana A Pawestri, Kartika, Dewi Puspa, Hartanti Dian Ika, Arie A Nugraha, Vivi Setiawaty, Betty Suryawati.                                                                                                                                                                                                                                                                                                                                                                                                                                                  |
| EPI_ISL_778842, EPI_ISL_778865, EPI_ISL_778866                                                                                                                                                                                                                                                                                                                                                                                                                                                                                                                                                                                                                                                                                                                                                                                                                                                                 | Clinical Pathology Labs                                                                           | Centers for Disease Control and Prevention Division of Viral Diseases, Pathogen Discovery                                                        | Ying Tao Yan Li Jing Zhang Krista Queen Anna Uehara Peter Cook Clinton R. Paden Haibin Wang Suxiang Tong                                                                                                                                                                                                                                                                                                                                                                                                                                                                                                 |
| EPI_ISL_779403                                                                                                                                                                                                                                                                                                                                                                                                                                                                                                                                                                                                                                                                                                                                                                                                                                                                                                 | Institute of Virology, Biomedical Research Center of the Slovak Academy of Sciences, Bratislava   | Faculty of Natural Sciences, Comenius University, Bratislava                                                                                     | Viktória Hodorová, Kristína Bořšová, Broa Brejová, Viktória abanová, Sabina Fumaová Havlíková, Juraj Kopáek, Martina Liková, ubomíra Lukáiková, Martina Neboháová, Monika Sláviková, Tomáš Vína, Jozef Nosek, Boris Klempa                                                                                                                                                                                                                                                                                                                                                                               |
| EPI_ISL_779651, EPI_ISL_779653, EPI_ISL_779655, EPI_ISL_779660                                                                                                                                                                                                                                                                                                                                                                                                                                                                                                                                                                                                                                                                                                                                                                                                                                                 | Institute of Virology, Biomedical Research Center of the Slovak Academy of Sciences, Bratislava   | Faculty of Natural Sciences, Comenius University, Bratislava                                                                                     | Viktória abanová, Kristína Bořšová, Broa Brejová, Viktória Hodorová, Sabina Fumaová Havlíková, Juraj Kopáek, Martina Liková, ubomíra Lukáiková, Martina Neboháová, Monika Sláviková, Andrej Belák, Tomáš Vína, Jozef Nosek, Boris Klempa                                                                                                                                                                                                                                                                                                                                                                 |
| EPI_ISL_788979, EPI_ISL_788981                                                                                                                                                                                                                                                                                                                                                                                                                                                                                                                                                                                                                                                                                                                                                                                                                                                                                 | Institute of Virology, Biomedical Research Center of the Slovak Academy of Sciences, Bratislava   | Faculty of Natural Sciences, Comenius University, Bratislava                                                                                     | Viktória abanová, Kristína Bořšová, Broa Brejová, Viktória Hodorová, Sabina Fumaová Havlíková, Juraj Kopáek, Martina Liková, ubomíra Lukáiková, Martina Neboháová, Monika Sláviková, Tomáš Vína, Jozef Nosek, Boris Klempa                                                                                                                                                                                                                                                                                                                                                                               |
| EPI_ISL_788987, EPI_ISL_791990                                                                                                                                                                                                                                                                                                                                                                                                                                                                                                                                                                                                                                                                                                                                                                                                                                                                                 | Institute of Virology, Biomedical Research Center of the Slovak Academy of Sciences, Bratislava   | Faculty of Natural Sciences, Comenius University, Bratislava                                                                                     | Viktória abanová, Kristína Bořšová, Broa Brejová, Viktória Hodorová, Sabina Fumaová Havlíková, Juraj Kopáek, Martina Liková, ubomíra Lukáiková, Martina Neboháová, Monika Sláviková, Alena Košálová, Peter Sabaka, Tomáš Vína, Jozef Nosek, Boris Klempa                                                                                                                                                                                                                                                                                                                                                 |
| EPI_ISL_794610, EPI_ISL_794611, EPI_ISL_794612, EPI_ISL_794613, EPI_ISL_794614, EPI_ISL_794615, EPI_ISL_794616, EPI_ISL_794617, EPI_ISL_794618, EPI_ISL_794619, EPI_ISL_794620, EPI_ISL_794621, EPI_ISL_794622, EPI_ISL_794623                                                                                                                                                                                                                                                                                                                                                                                                                                                                                                                                                                                                                                                                                 | see above                                                                                         | LabPLUS                                                                                                                                          | Institute of Environmental Science and Research (ESR)                                                                                                                                                                                                                                                                                                                                                                                                                                                                                                                                                    |
| EPI_ISL_794624, EPI_ISL_794625, EPI_ISL_794626                                                                                                                                                                                                                                                                                                                                                                                                                                                                                                                                                                                                                                                                                                                                                                                                                                                                 | Middlemore Hospital                                                                               | Institute of Environmental Science and Research (ESR)                                                                                            | Xiaoyun Ren, Matt Storey, Nikki Freed, Muhammad Faisal, Jing Wang, Hermes Perez, Anja Werno, Antje van der Linden, Arlo Upton, Chris Mansell, David Hammer, Dragana Drinkovic, Gary McAuliffe, Hana Sofia Andersson, James Ussher, Jill Sherwood, Josh Freeman, Julia Howard, Juliet Elvy, Mary DeAlmeida, Matt Blakiston, Matthew Rogers, Max Bloomfield, Michael Addidle, Michelle Balm, Sally Roberts, Sarah Jefferies, Sharmini Muttayyah, Susan Morpeth, Susan Taylor, Timothy Blackmore, Vani Sathyendran, Veronica Playle, Virginia Hope, Erasmus Smit, Lauren Jelly, Olin Silander, Joep de Ligt |
| EPI_ISL_794627                                                                                                                                                                                                                                                                                                                                                                                                                                                                                                                                                                                                                                                                                                                                                                                                                                                                                                 | Canterbury Health Laboratories                                                                    | Institute of Environmental Science and Research (ESR)                                                                                            | Xiaoyun Ren, Matt Storey, Nikki Freed, Muhammad Faisal, Jing Wang, Hermes Perez, Anja Werno, Antje van der Linden, Arlo Upton, Chris Mansell, David Hammer, Dragana Drinkovic, Gary McAuliffe, Hana Sofia Andersson, James Ussher, Jill Sherwood, Josh Freeman, Julia Howard, Juliet Elvy, Mary DeAlmeida, Matt Blakiston, Matthew Rogers, Max Bloomfield, Michael Addidle, Michelle Balm, Sally Roberts, Sarah Jefferies, Sharmini Muttayyah, Susan Morpeth, Susan Taylor, Timothy Blackmore, Vani Sathyendran, Veronica Playle, Virginia Hope, Erasmus Smit, Lauren Jelly, Olin Silander, Joep de Ligt |
| EPI_ISL_801522, EPI_ISL_801523, EPI_ISL_801524, EPI_ISL_801525, EPI_ISL_801526, EPI_ISL_801527, EPI_ISL_801528, EPI_ISL_801529, EPI_ISL_801530, EPI_ISL_801531, EPI_ISL_801532, EPI_ISL_801533, EPI_ISL_801534, EPI_ISL_801535, EPI_ISL_801536                                                                                                                                                                                                                                                                                                                                                                                                                                                                                                                                                                                                                                                                 | see above                                                                                         | Sonic Reference Laboratory                                                                                                                       | Pathogen Discovery, Respiratory Viruses Branch, Division of Viral Diseases, Centers for Disease Control and Prevention                                                                                                                                                                                                                                                                                                                                                                                                                                                                                   |
| EPI_ISL_801537                                                                                                                                                                                                                                                                                                                                                                                                                                                                                                                                                                                                                                                                                                                                                                                                                                                                                                 | Sunrise Medical Labs                                                                              | Pathogen Discovery, Respiratory Viruses Branch, Division of Viral Diseases, Centers for Disease Control and Prevention                           | Ying Tao, Yan Li, Jing Zhang, Krista Queen, Anna Uehara, Peter Cook, Clinton R. Paden, Haibin Wang, Suxiang Tong                                                                                                                                                                                                                                                                                                                                                                                                                                                                                         |
| EPI_ISL_802994, EPI_ISL_802995                                                                                                                                                                                                                                                                                                                                                                                                                                                                                                                                                                                                                                                                                                                                                                                                                                                                                 | Charite Universitätsmedizin Berlin, Institut für Virologie, Charitéplatz 1, 10117 Berlin, Germany | Charite Universitätsmedizin Berlin, Institut für Virologie, Charitéplatz 1, 10117 Berlin, Germany                                                | Victor M Corman, Tobias Bleicker, Julia Tesch, Jörn Beheim-Schwarzbach, Barbara Mühlemann, Talitha Veith, Julia Schneider, Terry Jones, Christian Drosten                                                                                                                                                                                                                                                                                                                                                                                                                                                |
| EPI_ISL_806527, EPI_ISL_806528, EPI_ISL_806529, EPI_ISL_806530, EPI_ISL_806531, EPI_ISL_806532, EPI_ISL_806533, EPI_ISL_806535, EPI_ISL_806537, EPI_ISL_806539, EPI_ISL_806541, EPI_ISL_806542                                                                                                                                                                                                                                                                                                                                                                                                                                                                                                                                                                                                                                                                                                                 | see above                                                                                         | Charité Universitätsmedizin Berlin, Institut für Virologie/Labor Berlin                                                                          | Charité Universitätsmedizin Berlin, Institut für Virologie                                                                                                                                                                                                                                                                                                                                                                                                                                                                                                                                               |
| EPI_ISL_812131                                                                                                                                                                                                                                                                                                                                                                                                                                                                                                                                                                                                                                                                                                                                                                                                                                                                                                 | GA Department of Public Health Laboratory                                                         | Pathogen Discovery, Respiratory Viruses Branch, Division of Viral Diseases, Centers for Disease Control and Prevention                           | Victor M Corman, Jörn Beheim-Schwarzbach, Barbara Mühlemann, Julia Schneider, Talitha Veith, Cornelia Schlee, Tomasz Zemojtel, Terry Jones, Christian Drosten                                                                                                                                                                                                                                                                                                                                                                                                                                            |
| EPI_ISL_812132                                                                                                                                                                                                                                                                                                                                                                                                                                                                                                                                                                                                                                                                                                                                                                                                                                                                                                 | TN Division of Laboratory Services                                                                | Pathogen Discovery, Respiratory Viruses Branch, Division of Viral Diseases, Centers for Disease Control and Prevention                           | Yan Li, Ying Tao, Anna Montmayer, Jing Zhang, Brian Lynch, Krista Queen, Anna Uehara, Rachel Marine, Peter Cook, Clinton R. Paden, Haibin Wang, Suxiang Tong                                                                                                                                                                                                                                                                                                                                                                                                                                             |
| EPI_ISL_812133                                                                                                                                                                                                                                                                                                                                                                                                                                                                                                                                                                                                                                                                                                                                                                                                                                                                                                 | GA Department of Public Health Laboratory                                                         | Pathogen Discovery, Respiratory Viruses Branch, Division of Viral Diseases, Centers for Disease Control and Prevention                           | Yan Li, Ying Tao, Anna Montmayer, Jing Zhang, Brian Lynch, Krista Queen, Anna Uehara, Rachel Marine, Peter Cook, Clinton R. Paden, Haibin Wang, Suxiang Tong                                                                                                                                                                                                                                                                                                                                                                                                                                             |
| EPI_ISL_812134, EPI_ISL_812135                                                                                                                                                                                                                                                                                                                                                                                                                                                                                                                                                                                                                                                                                                                                                                                                                                                                                 | UT-Unified State Labs: Public Health Utah DOH                                                     | Pathogen Discovery, Respiratory Viruses Branch, Division of Viral Diseases, Centers for Disease Control and Prevention                           | Yan Li, Ying Tao, Anna Montmayer, Jing Zhang, Brian Lynch, Krista Queen, Anna Uehara, Rachel Marine, Peter Cook, Clinton R. Paden, Haibin Wang, Suxiang Tong                                                                                                                                                                                                                                                                                                                                                                                                                                             |
| EPI_ISL_812136, EPI_ISL_812137                                                                                                                                                                                                                                                                                                                                                                                                                                                                                                                                                                                                                                                                                                                                                                                                                                                                                 | GA Department of Public Health Laboratory                                                         | Pathogen Discovery, Respiratory Viruses Branch, Division of Viral Diseases, Centers for Disease Control and Prevention                           | Yan Li, Ying Tao, Anna Montmayer, Jing Zhang, Brian Lynch, Krista Queen, Anna Uehara, Rachel Marine, Peter Cook, Clinton R. Paden, Haibin Wang, Suxiang Tong                                                                                                                                                                                                                                                                                                                                                                                                                                             |
| EPI_ISL_812138                                                                                                                                                                                                                                                                                                                                                                                                                                                                                                                                                                                                                                                                                                                                                                                                                                                                                                 | FL Bureau of Public Health Laboratories-Tampa                                                     | Pathogen Discovery, Respiratory Viruses Branch, Division of Viral Diseases, Centers for Disease Control and Prevention                           | Yan Li, Ying Tao, Anna Montmayer, Jing Zhang, Brian Lynch, Krista Queen, Anna Uehara, Rachel Marine, Peter Cook, Clinton R. Paden, Haibin Wang, Suxiang Tong                                                                                                                                                                                                                                                                                                                                                                                                                                             |
| EPI_ISL_812139                                                                                                                                                                                                                                                                                                                                                                                                                                                                                                                                                                                                                                                                                                                                                                                                                                                                                                 | TN Division of Laboratory Services                                                                | Pathogen Discovery, Respiratory Viruses Branch, Division of Viral Diseases, Centers for Disease Control and Prevention                           | Yan Li, Ying Tao, Anna Montmayer, Jing Zhang, Brian Lynch, Krista Queen, Anna Uehara, Rachel Marine, Peter Cook, Clinton R. Paden, Haibin Wang, Suxiang Tong                                                                                                                                                                                                                                                                                                                                                                                                                                             |
| EPI_ISL_812140                                                                                                                                                                                                                                                                                                                                                                                                                                                                                                                                                                                                                                                                                                                                                                                                                                                                                                 | GA Department of Public Health Laboratory                                                         | Pathogen Discovery, Respiratory Viruses Branch, Division of Viral Diseases, Centers for Disease Control and Prevention                           | Yan Li, Ying Tao, Anna Montmayer, Jing Zhang, Brian Lynch, Krista Queen, Anna Uehara, Rachel Marine, Peter Cook, Clinton R. Paden, Haibin Wang, Suxiang Tong                                                                                                                                                                                                                                                                                                                                                                                                                                             |
| EPI_ISL_812141                                                                                                                                                                                                                                                                                                                                                                                                                                                                                                                                                                                                                                                                                                                                                                                                                                                                                                 | CT-Dr. Katherine A. Kelley State Public Health Lab                                                | Pathogen Discovery, Respiratory Viruses Branch, Division of Viral Diseases, Centers for Disease Control and Prevention                           | Yan Li, Ying Tao, Anna Montmayer, Jing Zhang, Brian Lynch, Krista Queen, Anna Uehara, Rachel Marine, Peter Cook, Clinton R. Paden, Haibin Wang, Suxiang Tong                                                                                                                                                                                                                                                                                                                                                                                                                                             |
| EPI_ISL_812142                                                                                                                                                                                                                                                                                                                                                                                                                                                                                                                                                                                                                                                                                                                                                                                                                                                                                                 | FL Bureau of Public Health Laboratories-Tampa                                                     | Pathogen Discovery, Respiratory Viruses Branch, Division of Viral Diseases, Centers for Disease Control and Prevention                           | Yan Li, Ying Tao, Anna Montmayer, Jing Zhang, Brian Lynch, Krista Queen, Anna Uehara, Rachel Marine, Peter Cook, Clinton R. Paden, Haibin Wang, Suxiang Tong                                                                                                                                                                                                                                                                                                                                                                                                                                             |
| EPI_ISL_812143, EPI_ISL_812144, EPI_ISL_812145, EPI_ISL_812146, EPI_ISL_812147, EPI_ISL_812148, EPI_ISL_812149, EPI_ISL_812150, EPI_ISL_812151, EPI_ISL_812152, EPI_ISL_812153, EPI_ISL_812154, EPI_ISL_812155, EPI_ISL_812156, EPI_ISL_812157, EPI_ISL_812158, EPI_ISL_812159, EPI_ISL_812160, EPI_ISL_812161, EPI_ISL_812162, EPI_ISL_812163, EPI_ISL_812164, EPI_ISL_812165, EPI_ISL_812166, EPI_ISL_812167, EPI_ISL_812168, EPI_ISL_812169, EPI_ISL_812170, EPI_ISL_812171, EPI_ISL_812172, EPI_ISL_812173, EPI_ISL_812174, EPI_ISL_812175, EPI_ISL_812176, EPI_ISL_812177, EPI_ISL_812178, EPI_ISL_812179, EPI_ISL_812180, EPI_ISL_812181, EPI_ISL_812182, EPI_ISL_812183, EPI_ISL_812184, EPI_ISL_812185, EPI_ISL_812186, EPI_ISL_812187, EPI_ISL_812188, EPI_ISL_812189, EPI_ISL_812190, EPI_ISL_812191, EPI_ISL_812192, EPI_ISL_812193, EPI_ISL_812194, EPI_ISL_812195, EPI_ISL_812196, EPI_ISL_812197 | see above                                                                                         | GA Department of Public Health Laboratory                                                                                                        |                                                                                                                                                                                                                                                                                                                                                                                                                                                                                                                                                                                                          |
| EPI_ISL_812198                                                                                                                                                                                                                                                                                                                                                                                                                                                                                                                                                                                                                                                                                                                                                                                                                                                                                                 | MN PHL Division, Minnesota Department of Health                                                   | Pathogen Discovery, Respiratory Viruses Branch, Division of Viral Diseases, Centers for Disease Control and Prevention                           | Yan Li, Ying Tao, Anna Montmayer, Jing Zhang, Brian Lynch, Krista Queen, Anna Uehara, Rachel Marine, Peter Cook, Clinton R. Paden, Haibin Wang, Suxiang Tong                                                                                                                                                                                                                                                                                                                                                                                                                                             |
| EPI_ISL_812199, EPI_ISL_812200                                                                                                                                                                                                                                                                                                                                                                                                                                                                                                                                                                                                                                                                                                                                                                                                                                                                                 | NM Dept. Health, Scientific Laboratory Division                                                   | Pathogen Discovery, Respiratory Viruses Branch, Division of Viral Diseases, Centers for Disease Control and Prevention                           | Yan Li, Ying Tao, Anna Montmayer, Jing Zhang, Brian Lynch, Krista Queen, Anna Uehara, Rachel Marine, Peter Cook, Clinton R. Paden, Haibin Wang, Suxiang Tong                                                                                                                                                                                                                                                                                                                                                                                                                                             |
| EPI_ISL_812201                                                                                                                                                                                                                                                                                                                                                                                                                                                                                                                                                                                                                                                                                                                                                                                                                                                                                                 | NYC Department of Health and Mental Hygiene                                                       | Pathogen Discovery, Respiratory Viruses Branch, Division of                                                                                      | Yan Li, Ying Tao, Anna Montmayer, Jing Zhang, Brian Lynch, Krista Queen, Anna Uehara, Rachel Marine, Peter Cook, Clinton R. Paden, Haibin Wang,                                                                                                                                                                                                                                                                                                                                                                                                                                                          |

|                                                                                                                                                                                                                                                                                                                                                                                                                                                                                                                                                                                                                                                                                                                                                                                                                                                                                                                                                                                                                                                                                                                                                                                                                                                                                                                                                                                                                                                                                                                                                                                                                                                                                                                                                                                                                                                                                                                                                                                                                                                                                                                                                                                                                                                                                                                                                                                                                                                                                                                                                                                                                                                                                                                                                                                                                                                                                                                                                                                                                                                                                |                                                                                                  |                                                                                                                                                                                                                                             |                                                                                                                                                                                                                                                                                                                                                                                                                                                                                                                                                                                                        |
|--------------------------------------------------------------------------------------------------------------------------------------------------------------------------------------------------------------------------------------------------------------------------------------------------------------------------------------------------------------------------------------------------------------------------------------------------------------------------------------------------------------------------------------------------------------------------------------------------------------------------------------------------------------------------------------------------------------------------------------------------------------------------------------------------------------------------------------------------------------------------------------------------------------------------------------------------------------------------------------------------------------------------------------------------------------------------------------------------------------------------------------------------------------------------------------------------------------------------------------------------------------------------------------------------------------------------------------------------------------------------------------------------------------------------------------------------------------------------------------------------------------------------------------------------------------------------------------------------------------------------------------------------------------------------------------------------------------------------------------------------------------------------------------------------------------------------------------------------------------------------------------------------------------------------------------------------------------------------------------------------------------------------------------------------------------------------------------------------------------------------------------------------------------------------------------------------------------------------------------------------------------------------------------------------------------------------------------------------------------------------------------------------------------------------------------------------------------------------------------------------------------------------------------------------------------------------------------------------------------------------------------------------------------------------------------------------------------------------------------------------------------------------------------------------------------------------------------------------------------------------------------------------------------------------------------------------------------------------------------------------------------------------------------------------------------------------------|--------------------------------------------------------------------------------------------------|---------------------------------------------------------------------------------------------------------------------------------------------------------------------------------------------------------------------------------------------|--------------------------------------------------------------------------------------------------------------------------------------------------------------------------------------------------------------------------------------------------------------------------------------------------------------------------------------------------------------------------------------------------------------------------------------------------------------------------------------------------------------------------------------------------------------------------------------------------------|
| EPI_ISL_812202, EPI_ISL_812203                                                                                                                                                                                                                                                                                                                                                                                                                                                                                                                                                                                                                                                                                                                                                                                                                                                                                                                                                                                                                                                                                                                                                                                                                                                                                                                                                                                                                                                                                                                                                                                                                                                                                                                                                                                                                                                                                                                                                                                                                                                                                                                                                                                                                                                                                                                                                                                                                                                                                                                                                                                                                                                                                                                                                                                                                                                                                                                                                                                                                                                 | RI State Health Laboratories                                                                     | Viral Diseases, Centers for Disease Control and Prevention<br>Pathogen Discovery, Respiratory Viruses Branch, Division of Viral Diseases, Centers for Disease Control and Prevention                                                        | Suxiang Tong<br>Yan Li, Ying Tao, Anna Montmayeur, Jing Zhang, Brian Lynch, Krista Queen, Anna Uehara, Rachel Marine, Peter Cook, Clinton R. Paden, Haibin Wang, Suxiang Tong                                                                                                                                                                                                                                                                                                                                                                                                                          |
| EPI_ISL_812204, EPI_ISL_812205, EPI_ISL_812206, EPI_ISL_812207, EPI_ISL_812208, EPI_ISL_812209, EPI_ISL_812210, EPI_ISL_812211, EPI_ISL_812212, EPI_ISL_812213, EPI_ISL_812214, EPI_ISL_812215, EPI_ISL_812216, EPI_ISL_812217, EPI_ISL_812218, EPI_ISL_812219, EPI_ISL_812220, EPI_ISL_812221, EPI_ISL_812222, EPI_ISL_812223, EPI_ISL_812224, EPI_ISL_812225, EPI_ISL_812226, EPI_ISL_812227, EPI_ISL_812228, EPI_ISL_812229, EPI_ISL_812230, EPI_ISL_812231                                                                                                                                                                                                                                                                                                                                                                                                                                                                                                                                                                                                                                                                                                                                                                                                                                                                                                                                                                                                                                                                                                                                                                                                                                                                                                                                                                                                                                                                                                                                                                                                                                                                                                                                                                                                                                                                                                                                                                                                                                                                                                                                                                                                                                                                                                                                                                                                                                                                                                                                                                                                                 | see above                                                                                        | TN Division of Laboratory Services<br>Pathogen Discovery, Respiratory Viruses Branch, Division of Viral Diseases, Centers for Disease Control and Prevention                                                                                | Yan Li, Ying Tao, Anna Montmayeur, Jing Zhang, Brian Lynch, Krista Queen, Anna Uehara, Rachel Marine, Peter Cook, Clinton R. Paden, Haibin Wang, Suxiang Tong                                                                                                                                                                                                                                                                                                                                                                                                                                          |
| EPI_ISL_812232                                                                                                                                                                                                                                                                                                                                                                                                                                                                                                                                                                                                                                                                                                                                                                                                                                                                                                                                                                                                                                                                                                                                                                                                                                                                                                                                                                                                                                                                                                                                                                                                                                                                                                                                                                                                                                                                                                                                                                                                                                                                                                                                                                                                                                                                                                                                                                                                                                                                                                                                                                                                                                                                                                                                                                                                                                                                                                                                                                                                                                                                 | UT-Unified State Labs: Public Health Utah DOH                                                    | Pathogen Discovery, Respiratory Viruses Branch, Division of Viral Diseases, Centers for Disease Control and Prevention                                                                                                                      | Yan Li, Ying Tao, Anna Montmayeur, Jing Zhang, Brian Lynch, Krista Queen, Anna Uehara, Rachel Marine, Peter Cook, Clinton R. Paden, Haibin Wang, Suxiang Tong                                                                                                                                                                                                                                                                                                                                                                                                                                          |
| EPI_ISL_818342                                                                                                                                                                                                                                                                                                                                                                                                                                                                                                                                                                                                                                                                                                                                                                                                                                                                                                                                                                                                                                                                                                                                                                                                                                                                                                                                                                                                                                                                                                                                                                                                                                                                                                                                                                                                                                                                                                                                                                                                                                                                                                                                                                                                                                                                                                                                                                                                                                                                                                                                                                                                                                                                                                                                                                                                                                                                                                                                                                                                                                                                 | Charité Universitätsmedizin Berlin, Institute of Virology                                        | Charité Universitätsmedizin Berlin, Institute of Virology                                                                                                                                                                                   | Victor M Corman, Julia Schneider, Jörn Beheim-Schwarzbach, Barbara Mühlemann, Talitha Veith, Terry Jones, Christian Drosten                                                                                                                                                                                                                                                                                                                                                                                                                                                                            |
| EPI_ISL_824555, EPI_ISL_824556, EPI_ISL_824557, EPI_ISL_824558, EPI_ISL_824559, EPI_ISL_824560, EPI_ISL_824561, EPI_ISL_824562, EPI_ISL_824563, EPI_ISL_824564, EPI_ISL_824565, EPI_ISL_824566, EPI_ISL_824567, EPI_ISL_824568, EPI_ISL_824569, EPI_ISL_824570, EPI_ISL_824571, EPI_ISL_824572, EPI_ISL_824573, EPI_ISL_824574, EPI_ISL_824575, EPI_ISL_824576, EPI_ISL_824577, EPI_ISL_824578, EPI_ISL_824579, EPI_ISL_824580, EPI_ISL_824581, EPI_ISL_824582, EPI_ISL_824583, EPI_ISL_824584, EPI_ISL_824585, EPI_ISL_824586, EPI_ISL_824587, EPI_ISL_824588, EPI_ISL_824589, EPI_ISL_824590, EPI_ISL_824591, EPI_ISL_824592, EPI_ISL_824593, EPI_ISL_824594, EPI_ISL_824595, EPI_ISL_824596, EPI_ISL_824597, EPI_ISL_824598, EPI_ISL_824599, EPI_ISL_824600, EPI_ISL_824601, EPI_ISL_824602, EPI_ISL_824603, EPI_ISL_824604, EPI_ISL_824605, EPI_ISL_824606, EPI_ISL_824607, EPI_ISL_824608, EPI_ISL_824609, EPI_ISL_824610, EPI_ISL_824611, EPI_ISL_824612, EPI_ISL_824613, EPI_ISL_824614, EPI_ISL_824615, EPI_ISL_824616, EPI_ISL_824618, EPI_ISL_824619, EPI_ISL_824620, EPI_ISL_824621, EPI_ISL_824622, EPI_ISL_824623, EPI_ISL_824624, EPI_ISL_824625, EPI_ISL_824626, EPI_ISL_824627, EPI_ISL_824628, EPI_ISL_824629, EPI_ISL_824630, EPI_ISL_824631, EPI_ISL_824632, EPI_ISL_824633, EPI_ISL_824634, EPI_ISL_824635, EPI_ISL_824636, EPI_ISL_824637, EPI_ISL_824638, EPI_ISL_824639, EPI_ISL_824640, EPI_ISL_824641, EPI_ISL_824642, EPI_ISL_824643, EPI_ISL_824644, EPI_ISL_824645, EPI_ISL_824646, EPI_ISL_824647, EPI_ISL_824648, EPI_ISL_824649, EPI_ISL_824650, EPI_ISL_824651, EPI_ISL_824652, EPI_ISL_824653, EPI_ISL_824654, EPI_ISL_824655, EPI_ISL_824656, EPI_ISL_824658, EPI_ISL_824659, EPI_ISL_824660, EPI_ISL_824661, EPI_ISL_824662, EPI_ISL_824663, EPI_ISL_824664, EPI_ISL_824665, EPI_ISL_824666, EPI_ISL_824667, EPI_ISL_824668, EPI_ISL_824669, EPI_ISL_824670, EPI_ISL_824671, EPI_ISL_824672, EPI_ISL_824673, EPI_ISL_824674, EPI_ISL_824675, EPI_ISL_824676, EPI_ISL_824677, EPI_ISL_824678, EPI_ISL_824679, EPI_ISL_824680, EPI_ISL_824681, EPI_ISL_824682, EPI_ISL_824683, EPI_ISL_824684, EPI_ISL_824685, EPI_ISL_824686, EPI_ISL_824687, EPI_ISL_824688, EPI_ISL_824689, EPI_ISL_824690, EPI_ISL_824691, EPI_ISL_824692, EPI_ISL_824693, EPI_ISL_824694, EPI_ISL_824695, EPI_ISL_824696, EPI_ISL_824697, EPI_ISL_824698, EPI_ISL_824699, EPI_ISL_824700, EPI_ISL_824701, EPI_ISL_824702, EPI_ISL_824703, EPI_ISL_824704, EPI_ISL_824705, EPI_ISL_824706, EPI_ISL_824707, EPI_ISL_824708, EPI_ISL_824709, EPI_ISL_824710, EPI_ISL_824711, EPI_ISL_824712, EPI_ISL_824713, EPI_ISL_824714, EPI_ISL_824715, EPI_ISL_824716, EPI_ISL_824717, EPI_ISL_824718, EPI_ISL_824719, EPI_ISL_824720, EPI_ISL_824721, EPI_ISL_824722, EPI_ISL_824723, EPI_ISL_824724, EPI_ISL_824725, EPI_ISL_824726, EPI_ISL_824727, EPI_ISL_824728, EPI_ISL_824729, EPI_ISL_824730, EPI_ISL_824731, EPI_ISL_824732, EPI_ISL_824733, EPI_ISL_824734, EPI_ISL_824735, EPI_ISL_824736, EPI_ISL_824737, EPI_ISL_824738, EPI_ISL_824739, EPI_ISL_824740, EPI_ISL_824741 | see above                                                                                        | Cedars-Sinai Medical Center, Department of Pathology & Laboratory Medicine, Molecular Pathology Laboratory<br>Cedars-Sinai Medical Center, Molecular Pathology Laboratory of Department of Pathology & Laboratory Medicine and Genomic Core | Wenjuan Zhang, Brian Davis, Stephanie Chen, Jorge Mario Sincuir Martinez, Jasmine T Plummer, Eric Vail                                                                                                                                                                                                                                                                                                                                                                                                                                                                                                 |
| EPI_ISL_824742, EPI_ISL_824743, EPI_ISL_824744, EPI_ISL_824745, EPI_ISL_824746, EPI_ISL_824747, EPI_ISL_824748, EPI_ISL_824752, EPI_ISL_824753, EPI_ISL_824754, EPI_ISL_824756, EPI_ISL_824757, EPI_ISL_824759, EPI_ISL_824760, EPI_ISL_824761, EPI_ISL_824762, EPI_ISL_824763, EPI_ISL_824764, EPI_ISL_824765, EPI_ISL_824767, EPI_ISL_824768, EPI_ISL_824769, EPI_ISL_824770, EPI_ISL_824771, EPI_ISL_824777, EPI_ISL_824778, EPI_ISL_824779, EPI_ISL_824780, EPI_ISL_824781, EPI_ISL_824784, EPI_ISL_824785, EPI_ISL_824786, EPI_ISL_824864                                                                                                                                                                                                                                                                                                                                                                                                                                                                                                                                                                                                                                                                                                                                                                                                                                                                                                                                                                                                                                                                                                                                                                                                                                                                                                                                                                                                                                                                                                                                                                                                                                                                                                                                                                                                                                                                                                                                                                                                                                                                                                                                                                                                                                                                                                                                                                                                                                                                                                                                 | see above                                                                                        | A. Krumbholz, Labor Dr. Krause und Kollegen MVZ GmbH, Kiel<br>Charité Universitätsmedizin Berlin, Institute of Virology, Charitéplatz 1, 10117 Berlin, Germany                                                                              | Charité Universitätsmedizin Berlin, Institut für Virologie<br>Victor M Corman, Jörn Beheim-Schwarzbach, Julia Schneider, Talitha Veith, Barbara Mühlemann, Terry Jones, Christian Drosten                                                                                                                                                                                                                                                                                                                                                                                                              |
| EPI_ISL_824920, EPI_ISL_824942, EPI_ISL_824944, EPI_ISL_824985, EPI_ISL_824986                                                                                                                                                                                                                                                                                                                                                                                                                                                                                                                                                                                                                                                                                                                                                                                                                                                                                                                                                                                                                                                                                                                                                                                                                                                                                                                                                                                                                                                                                                                                                                                                                                                                                                                                                                                                                                                                                                                                                                                                                                                                                                                                                                                                                                                                                                                                                                                                                                                                                                                                                                                                                                                                                                                                                                                                                                                                                                                                                                                                 | Charité Universitätsmedizin Berlin, Institute of Virology, Charitéplatz 1, 10117 Berlin, Germany | Charité Universitätsmedizin Berlin, Institute of Virology, Charitéplatz 1, 10117 Berlin, Germany                                                                                                                                            | Victor M Corman, Jörn Beheim-Schwarzbach, Tobias Bleicker, Julia Tesch, Barbara Mühlemann, Talitha Veith, Julia Schneider, Terry Jones, Christian Drosten                                                                                                                                                                                                                                                                                                                                                                                                                                              |
| EPI_ISL_825017, EPI_ISL_825018, EPI_ISL_825019, EPI_ISL_825020, EPI_ISL_825022, EPI_ISL_825023, EPI_ISL_825024, EPI_ISL_825025, EPI_ISL_825026, EPI_ISL_825027                                                                                                                                                                                                                                                                                                                                                                                                                                                                                                                                                                                                                                                                                                                                                                                                                                                                                                                                                                                                                                                                                                                                                                                                                                                                                                                                                                                                                                                                                                                                                                                                                                                                                                                                                                                                                                                                                                                                                                                                                                                                                                                                                                                                                                                                                                                                                                                                                                                                                                                                                                                                                                                                                                                                                                                                                                                                                                                 | Utah Public Health Laboratory, Utah Public Health Laboratory Infectious Disease submission group | Utah Public Health Laboratory, Utah Public Health Laboratory Infectious Disease submission group                                                                                                                                            | Young,E.L., Oakeson,K.F., Gallagher,T.                                                                                                                                                                                                                                                                                                                                                                                                                                                                                                                                                                 |
| EPI_ISL_825038                                                                                                                                                                                                                                                                                                                                                                                                                                                                                                                                                                                                                                                                                                                                                                                                                                                                                                                                                                                                                                                                                                                                                                                                                                                                                                                                                                                                                                                                                                                                                                                                                                                                                                                                                                                                                                                                                                                                                                                                                                                                                                                                                                                                                                                                                                                                                                                                                                                                                                                                                                                                                                                                                                                                                                                                                                                                                                                                                                                                                                                                 | B.J. Medical College and Civil hospital, Ahmedabad                                               | Gujarat Biotechnology Research Centre                                                                                                                                                                                                       | Zuber Saiyed, Labdhi Pandya, Afzal Ansari, Nikha Trivedi, Apurvasinh Puvar, Ramesh Pandit, Janvi Raval, Zarna Patel, Nitin Savaliya, Dinesh Kumar, Pranay Shah, Kamlesh J Upadhyay, Sanjay Kapadia, Dipa Kinariwala, Chaitanya Joshi, Madhvi Joshi                                                                                                                                                                                                                                                                                                                                                     |
| EPI_ISL_825055                                                                                                                                                                                                                                                                                                                                                                                                                                                                                                                                                                                                                                                                                                                                                                                                                                                                                                                                                                                                                                                                                                                                                                                                                                                                                                                                                                                                                                                                                                                                                                                                                                                                                                                                                                                                                                                                                                                                                                                                                                                                                                                                                                                                                                                                                                                                                                                                                                                                                                                                                                                                                                                                                                                                                                                                                                                                                                                                                                                                                                                                 | GMERS Medical College and Hospital, Gotri, Vadodara                                              | Gujarat Biotechnology Research Centre                                                                                                                                                                                                       | Zarna Patel, Nitin Savaliya, Dinesh Kumar, Zuber Saiyed, Afzal Ansari, Nikha Trivedi, Apurvasinh Puvar, Ramesh Pandit, Janvi Raval, Mitesh Kamothi, Bihika Duttaray, Kalpesh Mistry, Chaitanya Joshi, Madhvi Joshi                                                                                                                                                                                                                                                                                                                                                                                     |
| EPI_ISL_825058                                                                                                                                                                                                                                                                                                                                                                                                                                                                                                                                                                                                                                                                                                                                                                                                                                                                                                                                                                                                                                                                                                                                                                                                                                                                                                                                                                                                                                                                                                                                                                                                                                                                                                                                                                                                                                                                                                                                                                                                                                                                                                                                                                                                                                                                                                                                                                                                                                                                                                                                                                                                                                                                                                                                                                                                                                                                                                                                                                                                                                                                 | GMERS Medical College and Hospital, Gotri, Vadodara                                              | Gujarat Biotechnology Research Centre                                                                                                                                                                                                       | Zuber Saiyed, Afzal Ansari, Nikha Trivedi, Apurvasinh Puvar, Ramesh Pandit, Janvi Raval, Zarna Patel, Nitin Savaliya, Dinesh Kumar, Mitesh Kamothi, Bihika Duttaray, Kalpesh Mistry, Chaitanya Joshi, Madhvi Joshi                                                                                                                                                                                                                                                                                                                                                                                     |
| EPI_ISL_825155, EPI_ISL_825156                                                                                                                                                                                                                                                                                                                                                                                                                                                                                                                                                                                                                                                                                                                                                                                                                                                                                                                                                                                                                                                                                                                                                                                                                                                                                                                                                                                                                                                                                                                                                                                                                                                                                                                                                                                                                                                                                                                                                                                                                                                                                                                                                                                                                                                                                                                                                                                                                                                                                                                                                                                                                                                                                                                                                                                                                                                                                                                                                                                                                                                 | Microbiology and Virology Unit, Florence Careggi University Hospital                             | Microbiology and Virology Unit, Florence Careggi University Hospital                                                                                                                                                                        | Vincenzo Di Pilato, Marco Coppi, Fabio Morecchiato, Alberto Antonelli, Emanuele Gori, Gian Maria Rossolini                                                                                                                                                                                                                                                                                                                                                                                                                                                                                             |
| EPI_ISL_831474, EPI_ISL_831645, EPI_ISL_831646, EPI_ISL_831660                                                                                                                                                                                                                                                                                                                                                                                                                                                                                                                                                                                                                                                                                                                                                                                                                                                                                                                                                                                                                                                                                                                                                                                                                                                                                                                                                                                                                                                                                                                                                                                                                                                                                                                                                                                                                                                                                                                                                                                                                                                                                                                                                                                                                                                                                                                                                                                                                                                                                                                                                                                                                                                                                                                                                                                                                                                                                                                                                                                                                 | Laboratório de Microbiologia Molecular - Universidade FEEVALE                                    | Universidade Federal de Ciências da Saúde de Porto Alegre                                                                                                                                                                                   | Vinicius Bonetti Franceschi, Amanda de Menezes Mayer, Gabriel Dickn Caldana, Carla Andretta Moreira Neves, Patricia Aline Gröhs Ferrareze, Gabriela Bettella Cybis, Ricardo Ariel Zimmerman, Livia Kmetzsch, Fernando Rosado Spilki, Claudia Elizabeth Thompson                                                                                                                                                                                                                                                                                                                                        |
| EPI_ISL_831666, EPI_ISL_831667, EPI_ISL_831670, EPI_ISL_831672, EPI_ISL_831675                                                                                                                                                                                                                                                                                                                                                                                                                                                                                                                                                                                                                                                                                                                                                                                                                                                                                                                                                                                                                                                                                                                                                                                                                                                                                                                                                                                                                                                                                                                                                                                                                                                                                                                                                                                                                                                                                                                                                                                                                                                                                                                                                                                                                                                                                                                                                                                                                                                                                                                                                                                                                                                                                                                                                                                                                                                                                                                                                                                                 | Institute of Virology, Biomedical Research Center of the Slovak Academy of Sciences, Bratislava  | Faculty of Natural Sciences, Comenius University, Bratislava                                                                                                                                                                                | Viktória abanová, Kristína Bořšová, Broa Břejová, Viktória Hodorová, Sabina Fumaová Havlíková, Juraj Kopáček, Martina Liková, ubomíra Lukáiková, Martina Neboháková, Monika Sláviková, Tomáš Vína, Jozef Nosek, Boris Klempa                                                                                                                                                                                                                                                                                                                                                                           |
| EPI_ISL_831678, EPI_ISL_831681, EPI_ISL_831683, EPI_ISL_831685, EPI_ISL_831688, EPI_ISL_831689, EPI_ISL_831892, EPI_ISL_831898, EPI_ISL_831913, EPI_ISL_831938, EPI_ISL_831939, EPI_ISL_831940, EPI_ISL_832009, EPI_ISL_832010, EPI_ISL_832011, EPI_ISL_832012, EPI_ISL_832013                                                                                                                                                                                                                                                                                                                                                                                                                                                                                                                                                                                                                                                                                                                                                                                                                                                                                                                                                                                                                                                                                                                                                                                                                                                                                                                                                                                                                                                                                                                                                                                                                                                                                                                                                                                                                                                                                                                                                                                                                                                                                                                                                                                                                                                                                                                                                                                                                                                                                                                                                                                                                                                                                                                                                                                                 | see above                                                                                        | Laboratório de Microbiologia Molecular - Universidade FEEVALE<br>Universidade Federal de Ciências da Saúde de Porto Alegre                                                                                                                  | Vinicius Bonetti Franceschi, Amanda de Menezes Mayer, Gabriel Dickn Caldana, Carla Andretta Moreira Neves, Patricia Aline Gröhs Ferrareze, Gabriela Bettella Cybis, Ricardo Ariel Zimmerman, Livia Kmetzsch, Fernando Rosado Spilki, Claudia Elizabeth Thompson                                                                                                                                                                                                                                                                                                                                        |
| EPI_ISL_833511, EPI_ISL_833512, EPI_ISL_833513, EPI_ISL_833514, EPI_ISL_833515, EPI_ISL_833516, EPI_ISL_833517, EPI_ISL_833518, EPI_ISL_833519, EPI_ISL_833520, EPI_ISL_833521                                                                                                                                                                                                                                                                                                                                                                                                                                                                                                                                                                                                                                                                                                                                                                                                                                                                                                                                                                                                                                                                                                                                                                                                                                                                                                                                                                                                                                                                                                                                                                                                                                                                                                                                                                                                                                                                                                                                                                                                                                                                                                                                                                                                                                                                                                                                                                                                                                                                                                                                                                                                                                                                                                                                                                                                                                                                                                 | see above                                                                                        | Veterinary Specialized Instute "Nis"<br>Veterinary Specialized Institute "Novi Sad"<br>Veterinary Specialized Institute "Sabac", Serbia                                                                                                     | Vidanovic,D., Tesovic,B., Manic,M., Petrovic,M.,Knezevic,A., Jovanovic,T., Jankovic,M., Sekler,M., Banovic Djeri.B., Petrovic,T., Volkening,J., Afonso,C.<br>Vidanovic,D., Tesovic,B., Manic,M., Petrovic,M.,Knezevic,A., Jovanovic,T., Jankovic,M., Sekler,M., Banovic Djeri.B., Petrovic,T., Volkening,J., Afonso,C.<br>Vidanovic,D., Tesovic,B., Mrkovacki, S., Vujinovic,S., ,Knezevic,A., Jovanovic,T., Jankovic,M., Sekler,M., Banovic Djeri.B., Petrovic,T., Volkening,J., Afonso,C.                                                                                                            |
| EPI_ISL_833573, EPI_ISL_833574, EPI_ISL_833575                                                                                                                                                                                                                                                                                                                                                                                                                                                                                                                                                                                                                                                                                                                                                                                                                                                                                                                                                                                                                                                                                                                                                                                                                                                                                                                                                                                                                                                                                                                                                                                                                                                                                                                                                                                                                                                                                                                                                                                                                                                                                                                                                                                                                                                                                                                                                                                                                                                                                                                                                                                                                                                                                                                                                                                                                                                                                                                                                                                                                                 | Veterinary Specialized Instute "Nis"                                                             | Veterinary Specialized Institute "Nis", Serbia                                                                                                                                                                                              | Vidanovic,D., Tesovic,B., Manic,M., Petrovic,M.,Knezevic,A., Jovanovic,T., Jankovic,M., Sekler,M., Banovic Djeri.B., Petrovic,T., Volkening,J., Afonso,C.                                                                                                                                                                                                                                                                                                                                                                                                                                              |
| EPI_ISL_833576, EPI_ISL_833577                                                                                                                                                                                                                                                                                                                                                                                                                                                                                                                                                                                                                                                                                                                                                                                                                                                                                                                                                                                                                                                                                                                                                                                                                                                                                                                                                                                                                                                                                                                                                                                                                                                                                                                                                                                                                                                                                                                                                                                                                                                                                                                                                                                                                                                                                                                                                                                                                                                                                                                                                                                                                                                                                                                                                                                                                                                                                                                                                                                                                                                 | Veterinary Specialized Instute "Nis"                                                             | Veterinary Specialized Institute "Nis", Serbia                                                                                                                                                                                              | Vidanovic,D., Tesovic,B., Manic,M., Petrovic,M.,Knezevic,A., Jovanovic,T., Jankovic,M., Sekler,M., Banovic Djeri.B., Petrovic,T., Volkening,J., Afonso,C.                                                                                                                                                                                                                                                                                                                                                                                                                                              |
| EPI_ISL_833578                                                                                                                                                                                                                                                                                                                                                                                                                                                                                                                                                                                                                                                                                                                                                                                                                                                                                                                                                                                                                                                                                                                                                                                                                                                                                                                                                                                                                                                                                                                                                                                                                                                                                                                                                                                                                                                                                                                                                                                                                                                                                                                                                                                                                                                                                                                                                                                                                                                                                                                                                                                                                                                                                                                                                                                                                                                                                                                                                                                                                                                                 | National Reference Laboratory for COVID-19, Pasteur Institute of Iran                            | National Reference Laboratory for COVID-19, Pasteur Institute of Iran                                                                                                                                                                       | Zahra Ahmadi, Marzieh Sadjadi, Tahmineh Jalali, Mohammad Hassan Pouriayevali, Mahsa Tavakoli, Zahra Fereydouni, Setareh Kashanian, Sanam Azad-Manjiri, Tahereh Mohammadi, Kayhan Azadmanesh, Zabihollah Shoja, Parastoo Yekta, Farideh Niknam, HESSAM NEMATI, Ahmad Ghasemi, Sahar Khakifrouz, Sepideh Gerdooei,Maryam Rostamtabar,Sana Eybpoosh,Mohammad Mehdi Mortazavipour, Mohamad Sadegh Shams Nosrati, Zeynab VeisiZadeh, Mostafa Salehi-Vaziri                                                                                                                                                  |
| EPI_ISL_843193                                                                                                                                                                                                                                                                                                                                                                                                                                                                                                                                                                                                                                                                                                                                                                                                                                                                                                                                                                                                                                                                                                                                                                                                                                                                                                                                                                                                                                                                                                                                                                                                                                                                                                                                                                                                                                                                                                                                                                                                                                                                                                                                                                                                                                                                                                                                                                                                                                                                                                                                                                                                                                                                                                                                                                                                                                                                                                                                                                                                                                                                 | LabPLUS                                                                                          | Institute of Environmental Science and Research (ESR)                                                                                                                                                                                       | Xiaoyun Ren, Matt Storey, Nikki Freed, Muhammad Faisal, Jing Wang, Hermes Perez, Anja Werno, Antje van der Linden, Arlo Upton, Chris Mansell, David Hammer, Dragana Drinkovic, Gary McAuliffe, Hana Sofia Andersson, James Ussher, Jill Sherwood, Josh Freeman, Julia Howard, Juliet Ely, Mary DeAlmeida, Matt Blakiston, Matthew Rogers, Max Bloomfield, Michael Addidle, Michelle Balm, Sally Roberts, Sarah Jefferies, Sharmini Muttaiyah, Susan Morpeth, Susan Taylor, Timothy Blackmore, Vani Sathyendran, Veronica Playle, Virginia Hope, Erasmus Smit, Lauren Jelly, Olin Silander, Joep de Lig |
| EPI_ISL_843194, EPI_ISL_843195                                                                                                                                                                                                                                                                                                                                                                                                                                                                                                                                                                                                                                                                                                                                                                                                                                                                                                                                                                                                                                                                                                                                                                                                                                                                                                                                                                                                                                                                                                                                                                                                                                                                                                                                                                                                                                                                                                                                                                                                                                                                                                                                                                                                                                                                                                                                                                                                                                                                                                                                                                                                                                                                                                                                                                                                                                                                                                                                                                                                                                                 | Canterbury Health Laboratories                                                                   | Institute of Environmental Science and Research (ESR)                                                                                                                                                                                       | Xiaoyun Ren, Matt Storey, Nikki Freed, Muhammad Faisal, Jing Wang, Hermes Perez, Anja Werno, Antje van der Linden, Arlo Upton, Chris Mansell, David Hammer, Dragana Drinkovic, Gary McAuliffe, Hana Sofia Andersson, James Ussher, Jill Sherwood, Josh Freeman, Julia Howard, Juliet Ely, Mary DeAlmeida, Matt Blakiston, Matthew Rogers, Max Bloomfield, Michael Addidle, Michelle Balm, Sally Roberts, Sarah Jefferies, Sharmini Muttaiyah, Susan Morpeth, Susan Taylor, Timothy Blackmore, Vani Sathyendran, Veronica Playle, Virginia Hope, Erasmus Smit, Lauren Jelly, Olin Silander, Joep de Lig |
| EPI_ISL_843196                                                                                                                                                                                                                                                                                                                                                                                                                                                                                                                                                                                                                                                                                                                                                                                                                                                                                                                                                                                                                                                                                                                                                                                                                                                                                                                                                                                                                                                                                                                                                                                                                                                                                                                                                                                                                                                                                                                                                                                                                                                                                                                                                                                                                                                                                                                                                                                                                                                                                                                                                                                                                                                                                                                                                                                                                                                                                                                                                                                                                                                                 | LabPLUS                                                                                          | Institute of Environmental Science and Research (ESR)                                                                                                                                                                                       | Xiaoyun Ren, Matt Storey, Nikki Freed, Muhammad Faisal, Jing Wang, Hermes Perez, Anja Werno, Antje van der Linden, Arlo Upton, Chris Mansell, David Hammer, Dragana Drinkovic, Gary McAuliffe, Hana Sofia Andersson, James Ussher, Jill Sherwood, Josh Freeman, Julia Howard, Juliet Ely, Mary DeAlmeida, Matt Blakiston, Matthew Rogers, Max Bloomfield, Michael Addidle, Michelle Balm, Sally Roberts, Sarah Jefferies, Sharmini Muttaiyah, Susan                                                                                                                                                    |

|                                                                                                                                                                                                                                                                                                                                                                                                                                                                                                                                                                                                                                                                                                                                                                                                                                                                                                                |                                                                                                  |                                                                                                                                                                      |                                                                                                                                                                                                                                                                                                                                                                                                                                                                                                                                                                                                                                                                                                                                                             |                                                                                                                                                                                               |
|----------------------------------------------------------------------------------------------------------------------------------------------------------------------------------------------------------------------------------------------------------------------------------------------------------------------------------------------------------------------------------------------------------------------------------------------------------------------------------------------------------------------------------------------------------------------------------------------------------------------------------------------------------------------------------------------------------------------------------------------------------------------------------------------------------------------------------------------------------------------------------------------------------------|--------------------------------------------------------------------------------------------------|----------------------------------------------------------------------------------------------------------------------------------------------------------------------|-------------------------------------------------------------------------------------------------------------------------------------------------------------------------------------------------------------------------------------------------------------------------------------------------------------------------------------------------------------------------------------------------------------------------------------------------------------------------------------------------------------------------------------------------------------------------------------------------------------------------------------------------------------------------------------------------------------------------------------------------------------|-----------------------------------------------------------------------------------------------------------------------------------------------------------------------------------------------|
| EPI_ISL_843197, EPI_ISL_843198, EPI_ISL_843199, EPI_ISL_843200                                                                                                                                                                                                                                                                                                                                                                                                                                                                                                                                                                                                                                                                                                                                                                                                                                                 | Canterbury Health Laboratories                                                                   | Institute of Environmental Science and Research (ESR)                                                                                                                | Morpeth, Susan Taylor, Timothy Blackmore, Vani Sathyendran, Veronica Playle, Virginia Hope, Erasmus Smit, Lauren Jelly, Olin Silander, Joep de Ligt Xiaoyun Ren, Matt Storey, Nikki Freed, Muhammad Faisal, Jing Wang, Hermes Perez, Anja Werno, Antje van der Linden, Arlo Upton, Chris Mansell, David Hammer, Dragana Drinkovic, Gary McAuliffe, Hana Sofia Andersson, James Ussher, Jill Sherwood, Josh Freeman, Julia Howard, Juliet Ely, Mary DeAlmeida, Matt Blakiston, Matthew Rogers, Max Bloomfield, Michael Addidle, Michelle Balm, Sally Roberts, Sarah Jefferies, Sharmini Muttaiyah, Susan Morpeth, Susan Taylor, Timothy Blackmore, Vani Sathyendran, Veronica Playle, Virginia Hope, Erasmus Smit, Lauren Jelly, Olin Silander, Joep de Ligt |                                                                                                                                                                                               |
| EPI_ISL_846587                                                                                                                                                                                                                                                                                                                                                                                                                                                                                                                                                                                                                                                                                                                                                                                                                                                                                                 | National Institute of Public Health - National Institute of Hygiene                              | National Institute of Public Health - National Institute of Hygiene                                                                                                  | Wokowicz Tomasz, Zacharczuk Katarzyna, Gawor Jan                                                                                                                                                                                                                                                                                                                                                                                                                                                                                                                                                                                                                                                                                                            |                                                                                                                                                                                               |
| EPI_ISL_848069                                                                                                                                                                                                                                                                                                                                                                                                                                                                                                                                                                                                                                                                                                                                                                                                                                                                                                 | Tulane Medical Center                                                                            | Centers for Disease Control and Prevention Division of Viral Diseases, Pathogen Discovery                                                                            | Ying Tao, Yan Li, Jing Zhang, Krista Queen, Anna Uehara, Peter Cook, Clinton R. Paden, Haibin Wang, Suxiang Tong                                                                                                                                                                                                                                                                                                                                                                                                                                                                                                                                                                                                                                            |                                                                                                                                                                                               |
| EPI_ISL_848200, EPI_ISL_848201, EPI_ISL_848202                                                                                                                                                                                                                                                                                                                                                                                                                                                                                                                                                                                                                                                                                                                                                                                                                                                                 | Charité Universitätsmedizin Berlin, Institute of Virology, Charitéplatz 1, 10117 Berlin, Germany | Charité Universitätsmedizin Berlin, Institute of Virology, Charitéplatz 1, 10117 Berlin, Germany                                                                     | Victor M Corman, Julia Schneider, Jörn Beheim-Schwarzbach, Tobias Bleicker, Julia Tesch, Barbara Mühlemann, Talitha Veith, Terry Jones, Christian Drosten                                                                                                                                                                                                                                                                                                                                                                                                                                                                                                                                                                                                   |                                                                                                                                                                                               |
| EPI_ISL_849794, EPI_ISL_849795, EPI_ISL_849796, EPI_ISL_849797, EPI_ISL_849798, EPI_ISL_849799, EPI_ISL_849800, EPI_ISL_849801, EPI_ISL_849803, EPI_ISL_849804, EPI_ISL_849805, EPI_ISL_849806, EPI_ISL_849807, EPI_ISL_849808, EPI_ISL_849809, EPI_ISL_849811, EPI_ISL_849812, EPI_ISL_849814, EPI_ISL_849817, EPI_ISL_849818, EPI_ISL_849820, EPI_ISL_849821, EPI_ISL_849822, EPI_ISL_849823, EPI_ISL_849824, EPI_ISL_849826, EPI_ISL_849828, EPI_ISL_849829, EPI_ISL_849830, EPI_ISL_849831, EPI_ISL_849832, EPI_ISL_849833, EPI_ISL_849834, EPI_ISL_849838, EPI_ISL_849841, EPI_ISL_849843, EPI_ISL_849844, EPI_ISL_849845, EPI_ISL_849846, EPI_ISL_849847, EPI_ISL_849848, EPI_ISL_849849, EPI_ISL_849850, EPI_ISL_849852, EPI_ISL_849853, EPI_ISL_849854, EPI_ISL_849855, EPI_ISL_849856, EPI_ISL_849857, EPI_ISL_849858, EPI_ISL_849859, EPI_ISL_849860, EPI_ISL_849863, EPI_ISL_849864, EPI_ISL_849865 | see above                                                                                        | A. Krumbholz, Labor Dr. Krause und Kollegen MVZ GmbH, Kiel                                                                                                           | Charité Universitätsmedizin Berlin, Institut für Virologie                                                                                                                                                                                                                                                                                                                                                                                                                                                                                                                                                                                                                                                                                                  | Victor M Corman, Jörn Beheim-Schwarzbach, Talitha Veith, Julia Schneider, Tobias Bleicker, Julia Tesch, Barbara Mühlemann, Terry Jones, Christian Drosten                                     |
| EPI_ISL_850946, EPI_ISL_850947, EPI_ISL_850948, EPI_ISL_850949, EPI_ISL_850950, EPI_ISL_850951                                                                                                                                                                                                                                                                                                                                                                                                                                                                                                                                                                                                                                                                                                                                                                                                                 | National Institute for Viral Disease Control and Prevention, China CDC                           | National Institute for Viral Disease Control and Prevention, China CDC                                                                                               | Xiang Zhao, Yenan Feng, Zhixiao Chen, Yao Meng, Yuchao Wu, Yang Song, Ji Wang, Kai Nie, Yong Zhang, Yanhai Wang, Weimin Zhou, Wenjie Tan, Jun Han, Shiwen Wang, Wenbo Xu, Cao Chen, Dayan Wang                                                                                                                                                                                                                                                                                                                                                                                                                                                                                                                                                              |                                                                                                                                                                                               |
| EPI_ISL_853394, EPI_ISL_853395, EPI_ISL_853396, EPI_ISL_853397, EPI_ISL_853399, EPI_ISL_853400, EPI_ISL_853401, EPI_ISL_853402, EPI_ISL_853403, EPI_ISL_853404                                                                                                                                                                                                                                                                                                                                                                                                                                                                                                                                                                                                                                                                                                                                                 | Charité Universitätsmedizin Berlin, Institut für Virologie/Labor Berlin                          | Charité Universitätsmedizin Berlin, Institut für Virologie                                                                                                           | Victor M Corman, Julia Schneider, Barbara Mühlemann, Jörn Beheim-Schwarzbach, Talitha Veith, Julia Tesch, Tobias Bleicker, Terry Jones, Christian Drosten                                                                                                                                                                                                                                                                                                                                                                                                                                                                                                                                                                                                   |                                                                                                                                                                                               |
| EPI_ISL_856678, EPI_ISL_856680, EPI_ISL_856683                                                                                                                                                                                                                                                                                                                                                                                                                                                                                                                                                                                                                                                                                                                                                                                                                                                                 | Charité Universitätsmedizin Berlin, Institute of Virology, Charitéplatz 1, 10117 Berlin, Germany | Charité Universitätsmedizin Berlin, Institute of Virology, Charitéplatz 1, 10117 Berlin, Germany                                                                     | Victor M Corman, Julia Schneider, Jörn Beheim-Schwarzbach, Tobias Bleicker, Julia Tesch, Barbara Mühlemann, Talitha Veith, Terry Jones, Christian Drosten                                                                                                                                                                                                                                                                                                                                                                                                                                                                                                                                                                                                   |                                                                                                                                                                                               |
| EPI_ISL_856910, EPI_ISL_856911                                                                                                                                                                                                                                                                                                                                                                                                                                                                                                                                                                                                                                                                                                                                                                                                                                                                                 | National Institute of Public Health - National Institute of Hygiene                              | National Institute of Public Health - National Institute of Hygiene                                                                                                  | Wokowicz Tomasz, Zacharczuk Katarzyna, Gawor Jan                                                                                                                                                                                                                                                                                                                                                                                                                                                                                                                                                                                                                                                                                                            |                                                                                                                                                                                               |
| EPI_ISL_857315, EPI_ISL_857316, EPI_ISL_857317, EPI_ISL_857318, EPI_ISL_857319, EPI_ISL_857320, EPI_ISL_857321, EPI_ISL_857322, EPI_ISL_857323, EPI_ISL_857324, EPI_ISL_857325, EPI_ISL_857326, EPI_ISL_857327, EPI_ISL_857328, EPI_ISL_857329, EPI_ISL_857330, EPI_ISL_857331, EPI_ISL_857332, EPI_ISL_857333, EPI_ISL_857334, EPI_ISL_857335, EPI_ISL_857336, EPI_ISL_857337, EPI_ISL_857338, EPI_ISL_857339, EPI_ISL_857340, EPI_ISL_857341, EPI_ISL_857342, EPI_ISL_857343, EPI_ISL_857344, EPI_ISL_857345, EPI_ISL_857346, EPI_ISL_857347                                                                                                                                                                                                                                                                                                                                                                 | see above                                                                                        | Cancer Biology Department, National Cancer Institute                                                                                                                 | Cancer Biology Department, National Cancer Institute                                                                                                                                                                                                                                                                                                                                                                                                                                                                                                                                                                                                                                                                                                        | Zekri,A.N., Sedawy,M.G., Ahmed,O.S., Hafez,M.M., Soliman,H.K., Bahnassy,A.A., Elhosieny,F.W., Gad,A.E., Hamdy,M.S., Soliman,M.S., Soliman,L., Abouelhoda,M.                                   |
| EPI_ISL_860761, EPI_ISL_860784, EPI_ISL_860785, EPI_ISL_860786, EPI_ISL_860788, EPI_ISL_860789, EPI_ISL_860790                                                                                                                                                                                                                                                                                                                                                                                                                                                                                                                                                                                                                                                                                                                                                                                                 | Charité Universitätsmedizin Berlin, Institute of Virology, Charitéplatz 1, 10117 Berlin, Germany | Charité Universitätsmedizin Berlin, Institute of Virology, Charitéplatz 1, 10117 Berlin, Germany                                                                     | Victor M Corman, Julia Schneider, Jörn Beheim-Schwarzbach, Tobias Bleicker, Julia Tesch, Barbara Mühlemann, Talitha Veith, Terry Jones, Christian Drosten                                                                                                                                                                                                                                                                                                                                                                                                                                                                                                                                                                                                   |                                                                                                                                                                                               |
| EPI_ISL_860798, EPI_ISL_860799, EPI_ISL_860800, EPI_ISL_860801, EPI_ISL_860802, EPI_ISL_860804, EPI_ISL_860805, EPI_ISL_860807, EPI_ISL_860808, EPI_ISL_860809, EPI_ISL_860813, EPI_ISL_860816, EPI_ISL_860817, EPI_ISL_861457, EPI_ISL_861458                                                                                                                                                                                                                                                                                                                                                                                                                                                                                                                                                                                                                                                                 | see above                                                                                        | WHO/Minsk                                                                                                                                                            | Charité Universitätsmedizin Berlin, Institut für Virologie                                                                                                                                                                                                                                                                                                                                                                                                                                                                                                                                                                                                                                                                                                  | Victor M Corman, Barbara Mühlemann, Jörn Beheim-Schwarzbach, Talitha Veith, Julia Tesch, Tobias Bleicker, Julia Schneider, Shmialiova Natalia, Sivets Natalia, Terry Jones, Christian Drosten |
| EPI_ISL_862124, EPI_ISL_862126, EPI_ISL_862127, EPI_ISL_862129, EPI_ISL_862131, EPI_ISL_862132, EPI_ISL_862134, EPI_ISL_862135, EPI_ISL_862138, EPI_ISL_862139, EPI_ISL_862140, EPI_ISL_862141, EPI_ISL_862143, EPI_ISL_862145, EPI_ISL_862148, EPI_ISL_862150, EPI_ISL_862153, EPI_ISL_862156, EPI_ISL_862157, EPI_ISL_862158, EPI_ISL_862159, EPI_ISL_862160, EPI_ISL_862161, EPI_ISL_862162, EPI_ISL_862164, EPI_ISL_862165, EPI_ISL_862166, EPI_ISL_862167, EPI_ISL_862169, EPI_ISL_862170, EPI_ISL_862171, EPI_ISL_862173, EPI_ISL_862175, EPI_ISL_862176, EPI_ISL_862181, EPI_ISL_862184, EPI_ISL_862185, EPI_ISL_862186, EPI_ISL_862187, EPI_ISL_862189, EPI_ISL_862659, EPI_ISL_862660, EPI_ISL_862661, EPI_ISL_862663, EPI_ISL_862664                                                                                                                                                                 | see above                                                                                        | Charité Universitätsmedizin Berlin, Institut für Virologie/Labor Berlin                                                                                              | Charité Universitätsmedizin Berlin, Institut für Virologie                                                                                                                                                                                                                                                                                                                                                                                                                                                                                                                                                                                                                                                                                                  | Victor M Corman, Barbara Mühlemann, Jörn Beheim-Schwarzbach, Tobias Bleicker, Julia Tesch, Talitha Veith, Julia Schneider, Terry Jones, Christian Drosten                                     |
| EPI_ISL_862728, EPI_ISL_862730, EPI_ISL_862731, EPI_ISL_862733, EPI_ISL_862734, EPI_ISL_862735, EPI_ISL_862738, EPI_ISL_862739, EPI_ISL_862740, EPI_ISL_862741, EPI_ISL_862742, EPI_ISL_862743, EPI_ISL_862744, EPI_ISL_862745, EPI_ISL_862746, EPI_ISL_862747, EPI_ISL_862748, EPI_ISL_862749, EPI_ISL_862750, EPI_ISL_862751, EPI_ISL_862752, EPI_ISL_862753, EPI_ISL_862754, EPI_ISL_862755, EPI_ISL_862756, EPI_ISL_862757, EPI_ISL_862758, EPI_ISL_862759, EPI_ISL_862760, EPI_ISL_862761, EPI_ISL_862762, EPI_ISL_862763, EPI_ISL_862764, EPI_ISL_862766, EPI_ISL_862767, EPI_ISL_862768, EPI_ISL_862769, EPI_ISL_862770, EPI_ISL_862771, EPI_ISL_862772, EPI_ISL_862773, EPI_ISL_862774, EPI_ISL_862775, EPI_ISL_862776, EPI_ISL_862777, EPI_ISL_862778, EPI_ISL_862780, EPI_ISL_862781, EPI_ISL_862782                                                                                                 | see above                                                                                        | Utah Public Health Laboratory, Infectious Disease submission group                                                                                                   | Utah Public Health Laboratory, Infectious Disease submission group                                                                                                                                                                                                                                                                                                                                                                                                                                                                                                                                                                                                                                                                                          | Young,E.L., Oakeson,K.F., Gallagher,T.                                                                                                                                                        |
| EPI_ISL_862783, EPI_ISL_862784, EPI_ISL_862785, EPI_ISL_862786, EPI_ISL_862787, EPI_ISL_862788, EPI_ISL_862789, EPI_ISL_862790, EPI_ISL_862791, EPI_ISL_862792, EPI_ISL_862793, EPI_ISL_862794, EPI_ISL_862795, EPI_ISL_862796, EPI_ISL_862797, EPI_ISL_862798, EPI_ISL_862799, EPI_ISL_862800, EPI_ISL_862801, EPI_ISL_862802, EPI_ISL_862803, EPI_ISL_862804, EPI_ISL_862805, EPI_ISL_862806, EPI_ISL_862807, EPI_ISL_862808, EPI_ISL_862809, EPI_ISL_862810, EPI_ISL_862811, EPI_ISL_862812, EPI_ISL_862813                                                                                                                                                                                                                                                                                                                                                                                                 | see above                                                                                        | Cancer Biology Department, National Cancer Institute                                                                                                                 | Cancer Biology Department, National Cancer Institute                                                                                                                                                                                                                                                                                                                                                                                                                                                                                                                                                                                                                                                                                                        | Zekri,A.N., Sedawy,M.G., Ahmed,O.S., Hafez,M.M., Soliman,H.K., Bahnassy,A.A., Elhosieny,F.W., Gad,A.E., Hamdy,M.S., Soliman,M.S., Soliman,L., Abouelhoda,M.                                   |
| EPI_ISL_864580                                                                                                                                                                                                                                                                                                                                                                                                                                                                                                                                                                                                                                                                                                                                                                                                                                                                                                 | National Institute of Public Health - National Institute of Hygiene                              | National Institute of Public Health - National Institute of Hygiene, DNA Sequencing and Synthesis Facility (oligo.pl) - Institute of Biochemistry and Biophysics PAS | Wokowicz Tomasz, Zacharczuk Katarzyna, Gawor Jan                                                                                                                                                                                                                                                                                                                                                                                                                                                                                                                                                                                                                                                                                                            |                                                                                                                                                                                               |
| EPI_ISL_869082, EPI_ISL_869084                                                                                                                                                                                                                                                                                                                                                                                                                                                                                                                                                                                                                                                                                                                                                                                                                                                                                 | A. Krumbholz, Labor Dr. Krause und Kollegen MVZ GmbH, Kiel                                       | Charité Universitätsmedizin Berlin, Institut für Virologie                                                                                                           | Victor M Corman, Barbara Mühlemann, Jörn Beheim-Schwarzbach, Tobias Bleicker, Julia Tesch, Talitha Veith, Julia Schneider, Terry Jones, Christian Drosten                                                                                                                                                                                                                                                                                                                                                                                                                                                                                                                                                                                                   |                                                                                                                                                                                               |
| EPI_ISL_869085                                                                                                                                                                                                                                                                                                                                                                                                                                                                                                                                                                                                                                                                                                                                                                                                                                                                                                 | Charité Universitätsmedizin Berlin, Institut für Virologie/Labor Berlin                          | Charité Universitätsmedizin Berlin, Institut für Virologie                                                                                                           | Victor M Corman, Barbara Mühlemann, Jörn Beheim-Schwarzbach, Tobias Bleicker, Julia Tesch, Talitha Veith, Julia Schneider, Terry Jones, Christian Drosten                                                                                                                                                                                                                                                                                                                                                                                                                                                                                                                                                                                                   |                                                                                                                                                                                               |
| EPI_ISL_869086, EPI_ISL_869087, EPI_ISL_869090, EPI_ISL_869091, EPI_ISL_869092, EPI_ISL_869094, EPI_ISL_869095, EPI_ISL_869101, EPI_ISL_869102, EPI_ISL_869103, EPI_ISL_869104, EPI_ISL_869106, EPI_ISL_869107, EPI_ISL_869108, EPI_ISL_869109, EPI_ISL_869110, EPI_ISL_869111, EPI_ISL_869112, EPI_ISL_869113, EPI_ISL_869117                                                                                                                                                                                                                                                                                                                                                                                                                                                                                                                                                                                 | see above                                                                                        | A. Krumbholz, Labor Dr. Krause und Kollegen MVZ GmbH, Kiel                                                                                                           | Charité Universitätsmedizin Berlin, Institut für Virologie                                                                                                                                                                                                                                                                                                                                                                                                                                                                                                                                                                                                                                                                                                  | Victor M Corman, Barbara Mühlemann, Jörn Beheim-Schwarzbach, Tobias Bleicker, Julia Tesch, Talitha Veith, Julia Schneider, Terry Jones, Christian Drosten                                     |
| EPI_ISL_869119                                                                                                                                                                                                                                                                                                                                                                                                                                                                                                                                                                                                                                                                                                                                                                                                                                                                                                 | Charité Universitätsmedizin Berlin, Institut für Virologie/Labor Berlin                          | Charité Universitätsmedizin Berlin, Institut für Virologie                                                                                                           | Victor M Corman, Barbara Mühlemann, Jörn Beheim-Schwarzbach, Tobias Bleicker, Julia Tesch, Talitha Veith, Julia Schneider, Terry Jones, Christian Drosten                                                                                                                                                                                                                                                                                                                                                                                                                                                                                                                                                                                                   |                                                                                                                                                                                               |
| EPI_ISL_869121, EPI_ISL_869122                                                                                                                                                                                                                                                                                                                                                                                                                                                                                                                                                                                                                                                                                                                                                                                                                                                                                 | A. Krumbholz, Labor Dr. Krause und Kollegen MVZ GmbH, Kiel                                       | Charité Universitätsmedizin Berlin, Institut für Virologie                                                                                                           | Victor M Corman, Barbara Mühlemann, Jörn Beheim-Schwarzbach, Tobias Bleicker, Julia Tesch, Talitha Veith, Julia Schneider, Terry Jones, Christian Drosten                                                                                                                                                                                                                                                                                                                                                                                                                                                                                                                                                                                                   |                                                                                                                                                                                               |
| EPI_ISL_869124, EPI_ISL_869125, EPI_ISL_869127, EPI_ISL_869128, EPI_ISL_869129, EPI_ISL_869130, EPI_ISL_869132                                                                                                                                                                                                                                                                                                                                                                                                                                                                                                                                                                                                                                                                                                                                                                                                 | Charité Universitätsmedizin Berlin, Institut für Virologie/Labor Berlin                          | Charité Universitätsmedizin Berlin, Institut für Virologie                                                                                                           | Victor M Corman, Barbara Mühlemann, Jörn Beheim-Schwarzbach, Tobias Bleicker, Julia Tesch, Talitha Veith, Julia Schneider, Terry Jones, Christian Drosten                                                                                                                                                                                                                                                                                                                                                                                                                                                                                                                                                                                                   |                                                                                                                                                                                               |

|                                                                                                                                                                                                                                                                                                                                                                                                                                                                                                                                                                                                                |                                                                                                                          |                                                                                                                          |                                                                                                                                                                                                                                                                                                                                                                                                                                                                                                                                                                                                         |
|----------------------------------------------------------------------------------------------------------------------------------------------------------------------------------------------------------------------------------------------------------------------------------------------------------------------------------------------------------------------------------------------------------------------------------------------------------------------------------------------------------------------------------------------------------------------------------------------------------------|--------------------------------------------------------------------------------------------------------------------------|--------------------------------------------------------------------------------------------------------------------------|---------------------------------------------------------------------------------------------------------------------------------------------------------------------------------------------------------------------------------------------------------------------------------------------------------------------------------------------------------------------------------------------------------------------------------------------------------------------------------------------------------------------------------------------------------------------------------------------------------|
| EPI_ISL_869137, EPI_ISL_869138, EPI_ISL_869140, EPI_ISL_869141, EPI_ISL_869142                                                                                                                                                                                                                                                                                                                                                                                                                                                                                                                                 | A. Krumbholz, Labor Dr. Krause und Kollegen MVZ GmbH, Kiel                                                               | Charité Universitätsmedizin Berlin, Institut für Virologie                                                               | Victor M Corman, Barbara Mühlemann, Jörn Beheim-Schwarzbach, Tobias Bleicker, Julia Tesch, Talitha Veith, Julia Schneider, Terry Jones, Christian Drosten                                                                                                                                                                                                                                                                                                                                                                                                                                               |
| EPI_ISL_869143                                                                                                                                                                                                                                                                                                                                                                                                                                                                                                                                                                                                 | Charité Universitätsmedizin Berlin, Institut für Virologie/Labor Berlin                                                  | Charité Universitätsmedizin Berlin, Institut für Virologie                                                               | Victor M Corman, Barbara Mühlemann, Jörn Beheim-Schwarzbach, Tobias Bleicker, Julia Tesch, Talitha Veith, Julia Schneider, Terry Jones, Christian Drosten                                                                                                                                                                                                                                                                                                                                                                                                                                               |
| EPI_ISL_875344                                                                                                                                                                                                                                                                                                                                                                                                                                                                                                                                                                                                 | Charité Universitätsmedizin Berlin, Institute of Virology, Charitéplatz 1, 10117 Berlin, Germany                         | Charité Universitätsmedizin Berlin, Institute of Virology, Charitéplatz 1, 10117 Berlin, Germany                         | Victor M Corman, Julia Schneider, Jörn Beheim-Schwarzbach, Tobias Bleicker, Julia Tesch, Barbara Mühlemann, Talitha Veith, Terry Jones, Christian Drosten                                                                                                                                                                                                                                                                                                                                                                                                                                               |
| EPI_ISL_875521, EPI_ISL_875522, EPI_ISL_875524, EPI_ISL_875530, EPI_ISL_875531, EPI_ISL_875533, EPI_ISL_875536, EPI_ISL_875538                                                                                                                                                                                                                                                                                                                                                                                                                                                                                 | Institute of Virology, Biomedical Research Center of the Slovak Academy of Sciences, Bratislava                          | Faculty of Natural Sciences, Comenius University, Bratislava                                                             | Viktória abanová, Kristína Boršová, Broa Brejová, Viktória Hodorová, Sabina Fumaová Havlíková, Juraj Kopáek, Martina Liková, ubomíra Lukáiková, Martina Neboháová, Monika Sláviková, Tomáš Vína, Jozef Nosek, Boris Klempa                                                                                                                                                                                                                                                                                                                                                                              |
| EPI_ISL_876588, EPI_ISL_876589                                                                                                                                                                                                                                                                                                                                                                                                                                                                                                                                                                                 | Blackhawk Genomics                                                                                                       | Pathogen Discovery, Respiratory Viruses Branch, Division of Viral Diseases, Centers for Disease Control and Prevention   | Ying Tao, Yan Li, Jing Zhang, Krista Queen, Anna Uehara, Peter Cook, Clinton R. Paden, Haibin Wang, Suxiang Tong                                                                                                                                                                                                                                                                                                                                                                                                                                                                                        |
| EPI_ISL_876590, EPI_ISL_876591, EPI_ISL_876592, EPI_ISL_876593, EPI_ISL_876594, EPI_ISL_876595, EPI_ISL_876596                                                                                                                                                                                                                                                                                                                                                                                                                                                                                                 | TN Division of Laboratory Services                                                                                       | Pathogen Discovery, Respiratory Viruses Branch, Division of Viral Diseases, Centers for Disease Control and Prevention   | Ying Tao, Yan Li, Jing Zhang, Krista Queen, Anna Uehara, Peter Cook, Clinton R. Paden, Haibin Wang, Suxiang Tong                                                                                                                                                                                                                                                                                                                                                                                                                                                                                        |
| EPI_ISL_877205, EPI_ISL_877206, EPI_ISL_877207, EPI_ISL_877208, EPI_ISL_877209, EPI_ISL_877210, EPI_ISL_877211, EPI_ISL_877212, EPI_ISL_877213                                                                                                                                                                                                                                                                                                                                                                                                                                                                 | LabPLUS                                                                                                                  | Institute of Environmental Science and Research (ESR)                                                                    | Xiaoyun Ren, Matt Storey, Nikki Freed, Muhammad Faisal, Jing Wang, Hermes Perez, Anja Werno, Antje van der Linden, Arlo Upton, Chris Mansell, David Hammer, Dragana Drinkovic, Gary McAuliffe, Hana Sofia Andersson, James Ussher, Jill Sherwood, Josh Freeman, Julia Howard, Juliet Elvy, Mary DeAlmeida, Matt Blakiston, Matthew Rogers, Max Bloomfield, Michael Addidle, Michelle Balm, Sally Roberts, Sarah Jefferies, Sharmini Muttaiyah, Susan Morpeth, Susan Taylor, Timothy Blackmore, Vani Sathyendran, Veronica Playle, Virginia Hope, Erasmus Smit, Lauren Jelly, Olin Silander, Joep de Lig |
| EPI_ISL_877214, EPI_ISL_877215, EPI_ISL_877216, EPI_ISL_877217, EPI_ISL_877218                                                                                                                                                                                                                                                                                                                                                                                                                                                                                                                                 | Middlemore Hospital                                                                                                      | Institute of Environmental Science and Research (ESR)                                                                    | Xiaoyun Ren, Matt Storey, Nikki Freed, Muhammad Faisal, Jing Wang, Hermes Perez, Anja Werno, Antje van der Linden, Arlo Upton, Chris Mansell, David Hammer, Dragana Drinkovic, Gary McAuliffe, Hana Sofia Andersson, James Ussher, Jill Sherwood, Josh Freeman, Julia Howard, Juliet Elvy, Mary DeAlmeida, Matt Blakiston, Matthew Rogers, Max Bloomfield, Michael Addidle, Michelle Balm, Sally Roberts, Sarah Jefferies, Sharmini Muttaiyah, Susan Morpeth, Susan Taylor, Timothy Blackmore, Vani Sathyendran, Veronica Playle, Virginia Hope, Erasmus Smit, Lauren Jelly, Olin Silander, Joep de Lig |
| EPI_ISL_877219, EPI_ISL_877220                                                                                                                                                                                                                                                                                                                                                                                                                                                                                                                                                                                 | Canterbury Health Laboratories                                                                                           | Institute of Environmental Science and Research (ESR)                                                                    | Xiaoyun Ren, Matt Storey, Nikki Freed, Muhammad Faisal, Jing Wang, Hermes Perez, Anja Werno, Antje van der Linden, Arlo Upton, Chris Mansell, David Hammer, Dragana Drinkovic, Gary McAuliffe, Hana Sofia Andersson, James Ussher, Jill Sherwood, Josh Freeman, Julia Howard, Juliet Elvy, Mary DeAlmeida, Matt Blakiston, Matthew Rogers, Max Bloomfield, Michael Addidle, Michelle Balm, Sally Roberts, Sarah Jefferies, Sharmini Muttaiyah, Susan Morpeth, Susan Taylor, Timothy Blackmore, Vani Sathyendran, Veronica Playle, Virginia Hope, Erasmus Smit, Lauren Jelly, Olin Silander, Joep de Lig |
| EPI_ISL_877221, EPI_ISL_877222, EPI_ISL_877223, EPI_ISL_877224, EPI_ISL_877225, EPI_ISL_877226                                                                                                                                                                                                                                                                                                                                                                                                                                                                                                                 | LabPLUS                                                                                                                  | Institute of Environmental Science and Research (ESR)                                                                    | Xiaoyun Ren, Matt Storey, Nikki Freed, Muhammad Faisal, Jing Wang, Hermes Perez, Anja Werno, Antje van der Linden, Arlo Upton, Chris Mansell, David Hammer, Dragana Drinkovic, Gary McAuliffe, Hana Sofia Andersson, James Ussher, Jill Sherwood, Josh Freeman, Julia Howard, Juliet Elvy, Mary DeAlmeida, Matt Blakiston, Matthew Rogers, Max Bloomfield, Michael Addidle, Michelle Balm, Sally Roberts, Sarah Jefferies, Sharmini Muttaiyah, Susan Morpeth, Susan Taylor, Timothy Blackmore, Vani Sathyendran, Veronica Playle, Virginia Hope, Erasmus Smit, Lauren Jelly, Olin Silander, Joep de Lig |
| EPI_ISL_882957                                                                                                                                                                                                                                                                                                                                                                                                                                                                                                                                                                                                 | Specjalistyczny Szpital im. Dra A. Sokoowskiego                                                                          | National Institute of Public Health - National Institute of Hygiene                                                      | Wokowicz Tomasz, Zacharczuk Katarzyna, Gawor Jan                                                                                                                                                                                                                                                                                                                                                                                                                                                                                                                                                        |
| EPI_ISL_882958, EPI_ISL_882959                                                                                                                                                                                                                                                                                                                                                                                                                                                                                                                                                                                 | National Institute of Public Health - National Institute of Hygiene                                                      | National Institute of Public Health - National Institute of Hygiene                                                      | Wokowicz Tomasz, Zacharczuk Katarzyna, Gawor Jan                                                                                                                                                                                                                                                                                                                                                                                                                                                                                                                                                        |
| EPI_ISL_882960, EPI_ISL_882961                                                                                                                                                                                                                                                                                                                                                                                                                                                                                                                                                                                 | Laboratorium Diagnostyki Mikrobiologicznej z Pracowni Prtka Grulicy SPSzW im. Jana Boego w Lublinie                      | National Institute of Public Health - National Institute of Hygiene                                                      | Wokowicz Tomasz, Zacharczuk Katarzyna, Gawor Jan                                                                                                                                                                                                                                                                                                                                                                                                                                                                                                                                                        |
| EPI_ISL_882962                                                                                                                                                                                                                                                                                                                                                                                                                                                                                                                                                                                                 | National Institute of Public Health - National Institute of Hygiene                                                      | National Institute of Public Health - National Institute of Hygiene                                                      | Wokowicz Tomasz, Zacharczuk Katarzyna, Gawor Jan                                                                                                                                                                                                                                                                                                                                                                                                                                                                                                                                                        |
| EPI_ISL_887589, EPI_ISL_888120                                                                                                                                                                                                                                                                                                                                                                                                                                                                                                                                                                                 | SC Dept of Health and Env. Control-Bureau of Laboratories                                                                | Centers for Disease Control and Prevention Division of Viral Diseases, Pathogen Discovery                                | Yan Li, Anna Montmayeur, Ying Tao, Jing Zhang, Krista Queen, Anna Uehara, Rachel Marine, Peter Cook, Clinton R. Paden, Haibin Wang, Suxiang Tong                                                                                                                                                                                                                                                                                                                                                                                                                                                        |
| EPI_ISL_888979                                                                                                                                                                                                                                                                                                                                                                                                                                                                                                                                                                                                 | RS Bhakti Mulia                                                                                                          | Eijkman Institute for Molecular Biology, Ministry of Research and Technology/National Agency for Research and Innovation | Willy Agustine, Edison Johar, Hidayat Trimarsanto, Iskandar Adnan, Lydia V. Panggalo, Sukma Oktavianthi, Frilasita A Yudhaputri, Safarina G Malik, Khin Saw Myint, Amin Soebandrio                                                                                                                                                                                                                                                                                                                                                                                                                      |
| EPI_ISL_889003, EPI_ISL_889004                                                                                                                                                                                                                                                                                                                                                                                                                                                                                                                                                                                 | RS Mitra Keluarga Gading Serpong                                                                                         | Eijkman Institute for Molecular Biology, Ministry of Research and Technology/National Agency for Research and Innovation | Willy Agustine, Edison Johar, Hidayat Trimarsanto, Iskandar Adnan, Lydia V. Panggalo, Sukma Oktavianthi, Frilasita A Yudhaputri, Safarina G Malik, Khin Saw Myint, Amin Soebandrio                                                                                                                                                                                                                                                                                                                                                                                                                      |
| EPI_ISL_889005                                                                                                                                                                                                                                                                                                                                                                                                                                                                                                                                                                                                 | Eijkman Institute for Molecular Biology, Ministry of Research and Technology/National Agency for Research and Innovation | Eijkman Institute for Molecular Biology, Ministry of Research and Technology/National Agency for Research and Innovation | Willy Agustine, Edison Johar, Hidayat Trimarsanto, Iskandar Adnan, Lydia V. Panggalo, Sukma Oktavianthi, Frilasita A Yudhaputri, Safarina G Malik, Khin Saw Myint, Amin Soebandrio                                                                                                                                                                                                                                                                                                                                                                                                                      |
| EPI_ISL_889006                                                                                                                                                                                                                                                                                                                                                                                                                                                                                                                                                                                                 | RSU Harapan Bunda                                                                                                        | Eijkman Institute for Molecular Biology, Ministry of Research and Technology/National Agency for Research and Innovation | Willy Agustine, Edison Johar, Hidayat Trimarsanto, Iskandar Adnan, Lydia V. Panggalo, Sukma Oktavianthi, Frilasita A Yudhaputri, Safarina G Malik, Khin Saw Myint, Amin Soebandrio                                                                                                                                                                                                                                                                                                                                                                                                                      |
| EPI_ISL_889007                                                                                                                                                                                                                                                                                                                                                                                                                                                                                                                                                                                                 | RSUD Cileungsi                                                                                                           | Eijkman Institute for Molecular Biology, Ministry of Research and Technology/National Agency for Research and Innovation | Willy Agustine, Edison Johar, Hidayat Trimarsanto, Iskandar Adnan, Lydia V. Panggalo, Sukma Oktavianthi, Frilasita A Yudhaputri, Safarina G Malik, Khin Saw Myint, Amin Soebandrio                                                                                                                                                                                                                                                                                                                                                                                                                      |
| EPI_ISL_890195, EPI_ISL_890196, EPI_ISL_890197, EPI_ISL_890198, EPI_ISL_890199, EPI_ISL_890200, EPI_ISL_890201, EPI_ISL_890202, EPI_ISL_890203, EPI_ISL_890204, EPI_ISL_890205, EPI_ISL_890206, EPI_ISL_890207, EPI_ISL_890208, EPI_ISL_890209, EPI_ISL_890210, EPI_ISL_890211, EPI_ISL_890212, EPI_ISL_890213, EPI_ISL_890214, EPI_ISL_890215, EPI_ISL_890216, EPI_ISL_890217, EPI_ISL_890218, EPI_ISL_890219, EPI_ISL_890220, EPI_ISL_890221, EPI_ISL_890222, EPI_ISL_890223, EPI_ISL_890224, EPI_ISL_890225, EPI_ISL_890226, EPI_ISL_890227, EPI_ISL_890228, EPI_ISL_890229, EPI_ISL_890230, EPI_ISL_890231 | see above                                                                                                                | Cancer Biology Department, National Cancer Institute                                                                     | Zekri,A.N., Sedawy,M.G., Ahmed,O.S., Hafez,M.M., Soliman,H.K., Bahnassy,A.A., Elhosieny,F.W., Gad,A.E., Hamdy,M.S., Soliman,M.S., Soliman,L., Abouelhoda,M.                                                                                                                                                                                                                                                                                                                                                                                                                                             |

We gratefully acknowledge the following Authors from the Originating laboratories responsible for obtaining the specimens, as well as the Submitting laboratories where the genome data were generated and shared via GISAID, on which this research is based.

All Submitters of data may be contacted directly via [www.gisaid.org](http://www.gisaid.org)

Authors are sorted alphabetically.

| Accession ID                                                                                                                                                                                                                                                                                                                                                                                                                                                   | Originating Laboratory                                                                                                                         | Submitting Laboratory                                                                                                                          | Authors                                                                                                                                                                                                                                                                                                                                                                                                                                                                                                                                                                                                                                                                                                                                                                                                                                                                                                                                                                                                                                                    |
|----------------------------------------------------------------------------------------------------------------------------------------------------------------------------------------------------------------------------------------------------------------------------------------------------------------------------------------------------------------------------------------------------------------------------------------------------------------|------------------------------------------------------------------------------------------------------------------------------------------------|------------------------------------------------------------------------------------------------------------------------------------------------|------------------------------------------------------------------------------------------------------------------------------------------------------------------------------------------------------------------------------------------------------------------------------------------------------------------------------------------------------------------------------------------------------------------------------------------------------------------------------------------------------------------------------------------------------------------------------------------------------------------------------------------------------------------------------------------------------------------------------------------------------------------------------------------------------------------------------------------------------------------------------------------------------------------------------------------------------------------------------------------------------------------------------------------------------------|
| EPI_ISL_481219                                                                                                                                                                                                                                                                                                                                                                                                                                                 | Oslo University Hospital, Department of Medical Microbiology                                                                                   | Norwegian Institute of Public Health, Department of Virology                                                                                   | Kathrine Stene-Johansen, Kamilla Heddeland Instefjord, Hilde Elshaug, Rasmus Riis Kopperud, Karoline Bragstad, Olav Hungnes                                                                                                                                                                                                                                                                                                                                                                                                                                                                                                                                                                                                                                                                                                                                                                                                                                                                                                                                |
| EPI_ISL_481284                                                                                                                                                                                                                                                                                                                                                                                                                                                 | Department of Experimental Modeling and Pathogenesis of Infectious Diseases, Federal Research Center of Fundamental and Translational Medicine | Department of Experimental Modeling and Pathogenesis of Infectious Diseases, Federal Research Center of Fundamental and Translational Medicine | Sobolev,I.A., Shanshin,D.V., Chepurnov,A.A., Kononova,J.V., Bondar,A.A., Alekseev,A.Y. and Shestopalov,A.M.                                                                                                                                                                                                                                                                                                                                                                                                                                                                                                                                                                                                                                                                                                                                                                                                                                                                                                                                                |
| EPI_ISL_481511, EPI_ISL_481512, EPI_ISL_481716, EPI_ISL_481741, EPI_ISL_481759, EPI_ISL_481760, EPI_ISL_481762                                                                                                                                                                                                                                                                                                                                                 | Prof. Massimo Zollo CEINGE TASK-FORCE COVID19 - Regione Campania                                                                               | Prof. Massimo Zollo CEINGE TASK-FORCE COVID19 - Regione Campania                                                                               | Veronica Ferrucci1,2, Dae young Kong8, Fatemeh asadzadeh1,2, Laura Marrone1,2, Roberto Siciliano1,2, Rino Cerino3, Giovanna Fusco3, Marika Comegna1,2, Angelo Boccia2, Maurizio Viscardi3, Giorgia Borriello3, Sergio Brandi3, Claudia Tiberio4, Luigi Atripaldi4, Giovanni Paoletta1,2, Giuseppe Castaldo1,2, Stefano Pascarella4, Martina Bianchi4, Lorenzo Chiariotti1,2, Jae Myun Lee5, Jae Ho Jung6, Kyong Seop Yun7, Hong Yeoul Kim 7,8* and Massimo Zollo1,2* 1 CEINGE Biotechnologie Avanzate, Naples, Italia 2 Dipartimento di Medicina Molecolare e Biotechnologie Mediche DMMBM University of Naples Federico II, Italia 3 Istituto Zooprofilattico Sperimentale del Mezzogiorno, Naples, Italia 4 -U.O.C. di Patologia Clinica Ospedale D. Cotugno, Azienda Sanitaria Ospedali dei Colli, Naples, Italy, 5 Università La Sapienza di Roma, Italia 6 Department of Microbiology, Yonsei University College of Medicine, Seoul, Korea 7 Department of Surgery, Yonsei University College of Medicine, Seoul, Korea 8 Haim bio co., Ltd, , Indust |
| EPI_ISL_482742                                                                                                                                                                                                                                                                                                                                                                                                                                                 | Molecular and Cell Biology, Globe Biotech Limited                                                                                              | Molecular and Cell Biology, Globe Biotech Limited                                                                                              | Baray,J.C., Mahmud,A., Khan,M.R., Chowdhury,M.M.H., Roy,R., Islam,F., Nag,K. and Sultana,N.                                                                                                                                                                                                                                                                                                                                                                                                                                                                                                                                                                                                                                                                                                                                                                                                                                                                                                                                                                |
| EPI_ISL_482777                                                                                                                                                                                                                                                                                                                                                                                                                                                 | Queen Elizabeth Hospital                                                                                                                       | Hong Kong Department of Health                                                                                                                 | Mak Gannon C.K., Cheng Peter K.C., Lam Edman T.K., Chan Rickjason C.W., Tsang Dominic N.C.                                                                                                                                                                                                                                                                                                                                                                                                                                                                                                                                                                                                                                                                                                                                                                                                                                                                                                                                                                 |
| EPI_ISL_482778                                                                                                                                                                                                                                                                                                                                                                                                                                                 | Tuen Mun Hospital                                                                                                                              | Hong Kong Department of Health                                                                                                                 | Mak Gannon C.K., Cheng Peter K.C., Lam Edman T.K., Chan Rickjason C.W., Tsang Dominic N.C.                                                                                                                                                                                                                                                                                                                                                                                                                                                                                                                                                                                                                                                                                                                                                                                                                                                                                                                                                                 |
| EPI_ISL_482779, EPI_ISL_482780                                                                                                                                                                                                                                                                                                                                                                                                                                 | Prince of Wales Hospital                                                                                                                       | Hong Kong Department of Health                                                                                                                 | Mak Gannon C.K., Cheng Peter K.C., Lam Edman T.K., Chan Rickjason C.W., Tsang Dominic N.C.                                                                                                                                                                                                                                                                                                                                                                                                                                                                                                                                                                                                                                                                                                                                                                                                                                                                                                                                                                 |
| EPI_ISL_482781                                                                                                                                                                                                                                                                                                                                                                                                                                                 | Centre for Health Protection                                                                                                                   | Hong Kong Department of Health                                                                                                                 | Mak Gannon C.K., Cheng Peter K.C., Lam Edman T.K., Chan Rickjason C.W., Tsang Dominic N.C.                                                                                                                                                                                                                                                                                                                                                                                                                                                                                                                                                                                                                                                                                                                                                                                                                                                                                                                                                                 |
| EPI_ISL_482782, EPI_ISL_482783                                                                                                                                                                                                                                                                                                                                                                                                                                 | Tuen Mun Hospital                                                                                                                              | Hong Kong Department of Health                                                                                                                 | Mak Gannon C.K., Cheng Peter K.C., Lam Edman T.K., Chan Rickjason C.W., Tsang Dominic N.C.                                                                                                                                                                                                                                                                                                                                                                                                                                                                                                                                                                                                                                                                                                                                                                                                                                                                                                                                                                 |
| EPI_ISL_482784                                                                                                                                                                                                                                                                                                                                                                                                                                                 | Prince of Wales Hospital                                                                                                                       | Hong Kong Department of Health                                                                                                                 | Mak Gannon C.K., Cheng Peter K.C., Lam Edman T.K., Chan Rickjason C.W., Tsang Dominic N.C.                                                                                                                                                                                                                                                                                                                                                                                                                                                                                                                                                                                                                                                                                                                                                                                                                                                                                                                                                                 |
| EPI_ISL_483625                                                                                                                                                                                                                                                                                                                                                                                                                                                 | Molecular Microbiology of Laboratory, Institute of Biotechnology, Vietnam Academy of Science and Technology                                    | Molecular Microbiology of Laboratory, Institute of Biotechnology, Vietnam Academy of Science and Technology                                    | Bui Thi,D.T., Nguyen,H.T., Tran,T.X., Nguyen,D.D., Pham,L.T., Vu,H.T., Le Thi,Q.M., Nguyen Le,H.K., Hoang Vu,P.M., Dang,A.D., Dong,Q.V. and Dinh,K.D.                                                                                                                                                                                                                                                                                                                                                                                                                                                                                                                                                                                                                                                                                                                                                                                                                                                                                                      |
| EPI_ISL_485575, EPI_ISL_485576, EPI_ISL_485577, EPI_ISL_485578, EPI_ISL_485579, EPI_ISL_485580, EPI_ISL_485581, EPI_ISL_485582, EPI_ISL_485583, EPI_ISL_485584, EPI_ISL_485585, EPI_ISL_485586, EPI_ISL_485587, EPI_ISL_485588, EPI_ISL_485589, EPI_ISL_485590, EPI_ISL_485591, EPI_ISL_485592, EPI_ISL_485593, EPI_ISL_485594, EPI_ISL_485595, EPI_ISL_485596, EPI_ISL_485597, EPI_ISL_485598, EPI_ISL_485599, EPI_ISL_485600, EPI_ISL_485601, EPI_ISL_485602 | see above                                                                                                                                      | Instituto de diagnóstico y Referencia Epidemiologicos (INDRE)                                                                                  | Barrera-Badillo,G., Ramirez-Gonzalez,E.                                                                                                                                                                                                                                                                                                                                                                                                                                                                                                                                                                                                                                                                                                                                                                                                                                                                                                                                                                                                                    |
| EPI_ISL_486884, EPI_ISL_486885                                                                                                                                                                                                                                                                                                                                                                                                                                 | Hamedan University of Medical Sciences                                                                                                         | Hamedan University of Medical Sciences                                                                                                         | Teimoori,A., Azizi jallilan,F., Ansari,N., Jamehdor,S., Zanjani,M., Nazari,A., Saadat,N. and Mazaheri,Z.                                                                                                                                                                                                                                                                                                                                                                                                                                                                                                                                                                                                                                                                                                                                                                                                                                                                                                                                                   |
| EPI_ISL_493078                                                                                                                                                                                                                                                                                                                                                                                                                                                 | Washington University in St. Louis                                                                                                             | Washington University in St. Louis                                                                                                             | David Wang, Carey-Ann Burnham, Scott Handley, Lindsay Droit, Stephen Tahan                                                                                                                                                                                                                                                                                                                                                                                                                                                                                                                                                                                                                                                                                                                                                                                                                                                                                                                                                                                 |
| EPI_ISL_499042                                                                                                                                                                                                                                                                                                                                                                                                                                                 | National Institute for Biological Standards and Control (NIBSC)                                                                                | National Institute for Biological Standards and Control (NIBSC)                                                                                | Javier Martin, Dimitra Klapsa, Thomas Wiltton                                                                                                                                                                                                                                                                                                                                                                                                                                                                                                                                                                                                                                                                                                                                                                                                                                                                                                                                                                                                              |
| EPI_ISL_500801, EPI_ISL_500802, EPI_ISL_500803, EPI_ISL_500804, EPI_ISL_500805, EPI_ISL_500806, EPI_ISL_500807, EPI_ISL_500809, EPI_ISL_500811, EPI_ISL_500812, EPI_ISL_500813, EPI_ISL_500814, EPI_ISL_500815, EPI_ISL_500816, EPI_ISL_500817, EPI_ISL_500818, EPI_ISL_500820, EPI_ISL_500821, EPI_ISL_500822, EPI_ISL_500823, EPI_ISL_500824, EPI_ISL_500825, EPI_ISL_500828, EPI_ISL_500829, EPI_ISL_500830                                                 | see above                                                                                                                                      | National Institute for Biological Standards and Control                                                                                        | Javier Martin, Dimitra Klapsa, Thomas Wiltton                                                                                                                                                                                                                                                                                                                                                                                                                                                                                                                                                                                                                                                                                                                                                                                                                                                                                                                                                                                                              |
| EPI_ISL_509418, EPI_ISL_509419, EPI_ISL_509420, EPI_ISL_509421, EPI_ISL_509422, EPI_ISL_509423                                                                                                                                                                                                                                                                                                                                                                 | National Institute for Biological Standards and Control                                                                                        | National Institute for Biological Standards and Control                                                                                        | Viscardi,M., Cozzolino,L., Fusco,G.                                                                                                                                                                                                                                                                                                                                                                                                                                                                                                                                                                                                                                                                                                                                                                                                                                                                                                                                                                                                                        |
| EPI_ISL_510081, EPI_ISL_510082                                                                                                                                                                                                                                                                                                                                                                                                                                 | Communicable Disease Branch                                                                                                                    | Hong Kong Department of Health                                                                                                                 | Mak Gannon C.K., Lam Edman T.K., Chan Rickjason C.W., Tsang Dominic N.C.                                                                                                                                                                                                                                                                                                                                                                                                                                                                                                                                                                                                                                                                                                                                                                                                                                                                                                                                                                                   |
| EPI_ISL_510083                                                                                                                                                                                                                                                                                                                                                                                                                                                 | Princess Margaret Hospital                                                                                                                     | Hong Kong Department of Health                                                                                                                 | Mak Gannon C.K., Lam Edman T.K., Chan Rickjason C.W., Tsang Dominic N.C.                                                                                                                                                                                                                                                                                                                                                                                                                                                                                                                                                                                                                                                                                                                                                                                                                                                                                                                                                                                   |
| EPI_ISL_510084                                                                                                                                                                                                                                                                                                                                                                                                                                                 | Prince of Wales Hospital                                                                                                                       | Hong Kong Department of Health                                                                                                                 | Mak Gannon C.K., Lam Edman T.K., Chan Rickjason C.W., Tsang Dominic N.C.                                                                                                                                                                                                                                                                                                                                                                                                                                                                                                                                                                                                                                                                                                                                                                                                                                                                                                                                                                                   |
| EPI_ISL_510085                                                                                                                                                                                                                                                                                                                                                                                                                                                 | Yan Chai Hospital                                                                                                                              | Hong Kong Department of Health                                                                                                                 | Mak Gannon C.K., Lam Edman T.K., Chan Rickjason C.W., Tsang Dominic N.C.                                                                                                                                                                                                                                                                                                                                                                                                                                                                                                                                                                                                                                                                                                                                                                                                                                                                                                                                                                                   |
| EPI_ISL_510086                                                                                                                                                                                                                                                                                                                                                                                                                                                 | Kwong Wah Hospital                                                                                                                             | Hong Kong Department of Health                                                                                                                 | Mak Gannon C.K., Lam Edman T.K., Chan Rickjason C.W., Tsang Dominic N.C.                                                                                                                                                                                                                                                                                                                                                                                                                                                                                                                                                                                                                                                                                                                                                                                                                                                                                                                                                                                   |
| EPI_ISL_510087                                                                                                                                                                                                                                                                                                                                                                                                                                                 | Private medical practitioner                                                                                                                   | Hong Kong Department of Health                                                                                                                 | Mak Gannon C.K., Lam Edman T.K., Chan Rickjason C.W., Tsang Dominic N.C.                                                                                                                                                                                                                                                                                                                                                                                                                                                                                                                                                                                                                                                                                                                                                                                                                                                                                                                                                                                   |
| EPI_ISL_510088                                                                                                                                                                                                                                                                                                                                                                                                                                                 | United Christian Hospital                                                                                                                      | Hong Kong Department of Health                                                                                                                 | Mak Gannon C.K., Lam Edman T.K., Chan Rickjason C.W., Tsang Dominic N.C.                                                                                                                                                                                                                                                                                                                                                                                                                                                                                                                                                                                                                                                                                                                                                                                                                                                                                                                                                                                   |
| EPI_ISL_510089                                                                                                                                                                                                                                                                                                                                                                                                                                                 | Queen Elizabeth Hospital                                                                                                                       | Hong Kong Department of Health                                                                                                                 | Mak Gannon C.K., Lam Edman T.K., Chan Rickjason C.W., Tsang Dominic N.C.                                                                                                                                                                                                                                                                                                                                                                                                                                                                                                                                                                                                                                                                                                                                                                                                                                                                                                                                                                                   |
| EPI_ISL_510090                                                                                                                                                                                                                                                                                                                                                                                                                                                 | Hong Kong Baptist Hospital                                                                                                                     | Hong Kong Department of Health                                                                                                                 | Mak Gannon C.K., Lam Edman T.K., Chan Rickjason C.W., Tsang Dominic N.C.                                                                                                                                                                                                                                                                                                                                                                                                                                                                                                                                                                                                                                                                                                                                                                                                                                                                                                                                                                                   |
| EPI_ISL_510091                                                                                                                                                                                                                                                                                                                                                                                                                                                 | Kwong Wah Hospital                                                                                                                             | Hong Kong Department of Health                                                                                                                 | Mak Gannon C.K., Lam Edman T.K., Chan Rickjason C.W., Tsang Dominic N.C.                                                                                                                                                                                                                                                                                                                                                                                                                                                                                                                                                                                                                                                                                                                                                                                                                                                                                                                                                                                   |
| EPI_ISL_510092, EPI_ISL_510093, EPI_ISL_510094, EPI_ISL_510095, EPI_ISL_510096                                                                                                                                                                                                                                                                                                                                                                                 | Queen Elizabeth Hospital                                                                                                                       | Hong Kong Department of Health                                                                                                                 | Mak Gannon C.K., Lam Edman T.K., Chan Rickjason C.W., Tsang Dominic N.C.                                                                                                                                                                                                                                                                                                                                                                                                                                                                                                                                                                                                                                                                                                                                                                                                                                                                                                                                                                                   |
| EPI_ISL_510097, EPI_ISL_510098                                                                                                                                                                                                                                                                                                                                                                                                                                 | United Christian Hospital                                                                                                                      | Hong Kong Department of Health                                                                                                                 | Mak Gannon C.K., Lam Edman T.K., Chan Rickjason C.W., Tsang Dominic N.C.                                                                                                                                                                                                                                                                                                                                                                                                                                                                                                                                                                                                                                                                                                                                                                                                                                                                                                                                                                                   |
| EPI_ISL_510099                                                                                                                                                                                                                                                                                                                                                                                                                                                 | Queen Mary Hospital                                                                                                                            | Hong Kong Department of Health                                                                                                                 | Mak Gannon C.K., Lam Edman T.K., Chan Rickjason C.W., Tsang Dominic N.C.                                                                                                                                                                                                                                                                                                                                                                                                                                                                                                                                                                                                                                                                                                                                                                                                                                                                                                                                                                                   |
| EPI_ISL_510100                                                                                                                                                                                                                                                                                                                                                                                                                                                 | Tuen Mun Hospital                                                                                                                              | Hong Kong Department of Health                                                                                                                 | Mak Gannon C.K., Lam Edman T.K., Chan Rickjason C.W., Tsang Dominic N.C.                                                                                                                                                                                                                                                                                                                                                                                                                                                                                                                                                                                                                                                                                                                                                                                                                                                                                                                                                                                   |
| EPI_ISL_510101                                                                                                                                                                                                                                                                                                                                                                                                                                                 | Pamela Youde Nethersole Eastern Hospital                                                                                                       | Hong Kong Department of Health                                                                                                                 | Mak Gannon C.K., Lam Edman T.K., Chan Rickjason C.W., Tsang Dominic N.C.                                                                                                                                                                                                                                                                                                                                                                                                                                                                                                                                                                                                                                                                                                                                                                                                                                                                                                                                                                                   |
| EPI_ISL_512773, EPI_ISL_513296                                                                                                                                                                                                                                                                                                                                                                                                                                 | Center for Precision Medicine, Meizhou People's Hospital (Huangtang Hospital)                                                                  | Center for Precision Medicine, Meizhou People's Hospital (Huangtang Hospital)                                                                  | Guo,X., Wu,H., Yu,Z. and Huang,Q.                                                                                                                                                                                                                                                                                                                                                                                                                                                                                                                                                                                                                                                                                                                                                                                                                                                                                                                                                                                                                          |
| EPI_ISL_514093                                                                                                                                                                                                                                                                                                                                                                                                                                                 | National Scientific Center for Especially Dangerous Infections (NSCEDI)                                                                        | Kazakh National Agrarian University (KazNAU) TreeGene LLP Genetic Laboratory                                                                   | Belousov Vyacheslav, Strochkov Vitaliy, Tabynov Kaisarr, Sandybayev Nurlan, Tabynov Kairat, Turebekov Nurkeldy, Granica Joanna, Solomadin Maksim, Yerubayev Toktassyn, Yespolov Tlektes                                                                                                                                                                                                                                                                                                                                                                                                                                                                                                                                                                                                                                                                                                                                                                                                                                                                    |
| EPI_ISL_514094, EPI_ISL_514095, EPI_ISL_514096, EPI_ISL_514097,                                                                                                                                                                                                                                                                                                                                                                                                | Molecular Diagnostics, Central Public Health Laboratory                                                                                        | Molecular Diagnostics, Central Public Health Laboratory                                                                                        | Dler,H., Dlshad,H., Furat,S., Sharmeen,F.-A., Dalia,F., Mohsen,A., Hemdad,A., Fahmi,A., Hemn,M., Idrees,H.                                                                                                                                                                                                                                                                                                                                                                                                                                                                                                                                                                                                                                                                                                                                                                                                                                                                                                                                                 |

|                                                                                                                                                                                                                                                                                                                                                                                                                                                                                                                                                                                                                                |                                                                                                            |                                                                                                            |                                                                                                                                                                                                                                                          |                                                                                                                               |
|--------------------------------------------------------------------------------------------------------------------------------------------------------------------------------------------------------------------------------------------------------------------------------------------------------------------------------------------------------------------------------------------------------------------------------------------------------------------------------------------------------------------------------------------------------------------------------------------------------------------------------|------------------------------------------------------------------------------------------------------------|------------------------------------------------------------------------------------------------------------|----------------------------------------------------------------------------------------------------------------------------------------------------------------------------------------------------------------------------------------------------------|-------------------------------------------------------------------------------------------------------------------------------|
| EPI_ISL_514098, EPI_ISL_514099, EPI_ISL_514100                                                                                                                                                                                                                                                                                                                                                                                                                                                                                                                                                                                 |                                                                                                            |                                                                                                            |                                                                                                                                                                                                                                                          |                                                                                                                               |
| EPI_ISL_514126                                                                                                                                                                                                                                                                                                                                                                                                                                                                                                                                                                                                                 | National Scientific Center for Especially Dangerous Infections (NSCED)                                     | Kazakh National Agrarian University (KazNAU) TreeGene LLP Genetic Laboratory                               | Tabynov Kaissar, Belousov Vyacheslav, Strochkov Vitaliy, Sandybayev Nurlan, Tabynov Kairat, Turebekov Nurkeldy, Granica Joanna, Solomadina Maksim, Yerubayev Toktassyn, Yespolov Tlektes                                                                 |                                                                                                                               |
| EPI_ISL_523824                                                                                                                                                                                                                                                                                                                                                                                                                                                                                                                                                                                                                 | Communicable Disease Branch                                                                                | Hong Kong Department of Health                                                                             | Mak Gannon C.K., Lam Edman T.K., Chan Rickjason C.W., Tsang Dominic N.C.                                                                                                                                                                                 |                                                                                                                               |
| EPI_ISL_523825                                                                                                                                                                                                                                                                                                                                                                                                                                                                                                                                                                                                                 | United Christian Hospital                                                                                  | Hong Kong Department of Health                                                                             | Mak Gannon C.K., Lam Edman T.K., Chan Rickjason C.W., Tsang Dominic N.C.                                                                                                                                                                                 |                                                                                                                               |
| EPI_ISL_523826, EPI_ISL_523827                                                                                                                                                                                                                                                                                                                                                                                                                                                                                                                                                                                                 | Queen Mary Hospital                                                                                        | Hong Kong Department of Health                                                                             | Mak Gannon C.K., Lam Edman T.K., Chan Rickjason C.W., Tsang Dominic N.C.                                                                                                                                                                                 |                                                                                                                               |
| EPI_ISL_523828, EPI_ISL_523829                                                                                                                                                                                                                                                                                                                                                                                                                                                                                                                                                                                                 | Tuen Mun Hospital                                                                                          | Hong Kong Department of Health                                                                             | Mak Gannon C.K., Lam Edman T.K., Chan Rickjason C.W., Tsang Dominic N.C.                                                                                                                                                                                 |                                                                                                                               |
| EPI_ISL_523830, EPI_ISL_523831                                                                                                                                                                                                                                                                                                                                                                                                                                                                                                                                                                                                 | Our Lady of Maryknoll Hospital                                                                             | Hong Kong Department of Health                                                                             | Mak Gannon C.K., Lam Edman T.K., Chan Rickjason C.W., Tsang Dominic N.C.                                                                                                                                                                                 |                                                                                                                               |
| EPI_ISL_523832, EPI_ISL_523833, EPI_ISL_523834                                                                                                                                                                                                                                                                                                                                                                                                                                                                                                                                                                                 | Tuen Mun Hospital                                                                                          | Hong Kong Department of Health                                                                             | Mak Gannon C.K., Lam Edman T.K., Chan Rickjason C.W., Tsang Dominic N.C.                                                                                                                                                                                 |                                                                                                                               |
| EPI_ISL_523835, EPI_ISL_523836                                                                                                                                                                                                                                                                                                                                                                                                                                                                                                                                                                                                 | Queen Elizabeth Hospital                                                                                   | Hong Kong Department of Health                                                                             | Mak Gannon C.K., Lam Edman T.K., Chan Rickjason C.W., Tsang Dominic N.C.                                                                                                                                                                                 |                                                                                                                               |
| EPI_ISL_523837                                                                                                                                                                                                                                                                                                                                                                                                                                                                                                                                                                                                                 | Yan Chai Hospital                                                                                          | Hong Kong Department of Health                                                                             | Mak Gannon C.K., Lam Edman T.K., Chan Rickjason C.W., Tsang Dominic N.C.                                                                                                                                                                                 |                                                                                                                               |
| EPI_ISL_523838                                                                                                                                                                                                                                                                                                                                                                                                                                                                                                                                                                                                                 | Princess Margaret Hospital                                                                                 | Hong Kong Department of Health                                                                             | Mak Gannon C.K., Lam Edman T.K., Chan Rickjason C.W., Tsang Dominic N.C.                                                                                                                                                                                 |                                                                                                                               |
| EPI_ISL_523839                                                                                                                                                                                                                                                                                                                                                                                                                                                                                                                                                                                                                 | Tseung Kwan O Hospital                                                                                     | Hong Kong Department of Health                                                                             | Mak Gannon C.K., Lam Edman T.K., Chan Rickjason C.W., Tsang Dominic N.C.                                                                                                                                                                                 |                                                                                                                               |
| EPI_ISL_523840                                                                                                                                                                                                                                                                                                                                                                                                                                                                                                                                                                                                                 | Our Lady of Maryknoll Hospital                                                                             | Hong Kong Department of Health                                                                             | Mak Gannon C.K., Lam Edman T.K., Chan Rickjason C.W., Tsang Dominic N.C.                                                                                                                                                                                 |                                                                                                                               |
| EPI_ISL_523841                                                                                                                                                                                                                                                                                                                                                                                                                                                                                                                                                                                                                 | Queen Elizabeth Hospital                                                                                   | Hong Kong Department of Health                                                                             | Mak Gannon C.K., Lam Edman T.K., Chan Rickjason C.W., Tsang Dominic N.C.                                                                                                                                                                                 |                                                                                                                               |
| EPI_ISL_523842                                                                                                                                                                                                                                                                                                                                                                                                                                                                                                                                                                                                                 | Kwong Wah Hospital                                                                                         | Hong Kong Department of Health                                                                             | Mak Gannon C.K., Lam Edman T.K., Chan Rickjason C.W., Tsang Dominic N.C.                                                                                                                                                                                 |                                                                                                                               |
| EPI_ISL_523843, EPI_ISL_523844, EPI_ISL_523845, EPI_ISL_523846, EPI_ISL_523847                                                                                                                                                                                                                                                                                                                                                                                                                                                                                                                                                 | Queen Elizabeth Hospital                                                                                   | Hong Kong Department of Health                                                                             | Mak Gannon C.K., Lam Edman T.K., Chan Rickjason C.W., Tsang Dominic N.C.                                                                                                                                                                                 |                                                                                                                               |
| EPI_ISL_523848, EPI_ISL_523849                                                                                                                                                                                                                                                                                                                                                                                                                                                                                                                                                                                                 | United Christian Hospital                                                                                  | Hong Kong Department of Health                                                                             | Mak Gannon C.K., Lam Edman T.K., Chan Rickjason C.W., Tsang Dominic N.C.                                                                                                                                                                                 |                                                                                                                               |
| EPI_ISL_523850, EPI_ISL_523851, EPI_ISL_523852                                                                                                                                                                                                                                                                                                                                                                                                                                                                                                                                                                                 | Tseung Kwan O Hospital                                                                                     | Hong Kong Department of Health                                                                             | Mak Gannon C.K., Lam Edman T.K., Chan Rickjason C.W., Tsang Dominic N.C.                                                                                                                                                                                 |                                                                                                                               |
| EPI_ISL_523853                                                                                                                                                                                                                                                                                                                                                                                                                                                                                                                                                                                                                 | Hong Kong Baptist Hospital                                                                                 | Hong Kong Department of Health                                                                             | Mak Gannon C.K., Lam Edman T.K., Chan Rickjason C.W., Tsang Dominic N.C.                                                                                                                                                                                 |                                                                                                                               |
| EPI_ISL_523854                                                                                                                                                                                                                                                                                                                                                                                                                                                                                                                                                                                                                 | Alice Ho Miu Ling Nethersole Hospital                                                                      | Hong Kong Department of Health                                                                             | Mak Gannon C.K., Lam Edman T.K., Chan Rickjason C.W., Tsang Dominic N.C.                                                                                                                                                                                 |                                                                                                                               |
| EPI_ISL_523855                                                                                                                                                                                                                                                                                                                                                                                                                                                                                                                                                                                                                 | Kwong Wah Hospital                                                                                         | Hong Kong Department of Health                                                                             | Mak Gannon C.K., Lam Edman T.K., Chan Rickjason C.W., Tsang Dominic N.C.                                                                                                                                                                                 |                                                                                                                               |
| EPI_ISL_525498, EPI_ISL_525499, EPI_ISL_525500, EPI_ISL_525501, EPI_ISL_525502, EPI_ISL_525503, EPI_ISL_525504, EPI_ISL_525505, EPI_ISL_525506, EPI_ISL_525507, EPI_ISL_525508, EPI_ISL_525509, EPI_ISL_525510, EPI_ISL_525511, EPI_ISL_525512, EPI_ISL_525513, EPI_ISL_525514, EPI_ISL_525515, EPI_ISL_525516, EPI_ISL_525517, EPI_ISL_525518, EPI_ISL_525519, EPI_ISL_525520, EPI_ISL_525521, EPI_ISL_525522, EPI_ISL_525523, EPI_ISL_525524, EPI_ISL_525525, EPI_ISL_525526, EPI_ISL_525527, EPI_ISL_525528, EPI_ISL_525529, EPI_ISL_525530, EPI_ISL_525531, EPI_ISL_525532, EPI_ISL_525533, EPI_ISL_525534, EPI_ISL_525535 |                                                                                                            |                                                                                                            |                                                                                                                                                                                                                                                          |                                                                                                                               |
| see above                                                                                                                                                                                                                                                                                                                                                                                                                                                                                                                                                                                                                      | Clinical Laboratory Sciences, University of Babylon                                                        | Clinical Laboratory Sciences, University of Babylon                                                        | Hashim,H.O., Mohammed,M.K., Mousa,M.J., Abdulaameer,H.H., Alhassnawi,A.T., Hassan,S.A., Al-Shuhaib,M.B.S.                                                                                                                                                |                                                                                                                               |
| EPI_ISL_526246, EPI_ISL_526247, EPI_ISL_526248, EPI_ISL_526249, EPI_ISL_526250, EPI_ISL_526251, EPI_ISL_526252                                                                                                                                                                                                                                                                                                                                                                                                                                                                                                                 | Instituto Adolfo Lutz                                                                                      | Instituto Adolfo Lutz Laboratório de Vírus Respiratórios                                                   | Katia Corrêa de Oliveira Santos, Fabiana Cristina Pereira dos Santos, Maira Marcelle Birochi, Cecília Simões Santos, Ana Maria Sardinha Afonso, Maira do Carmo Sampaio Tavares Timenetsky                                                                |                                                                                                                               |
| EPI_ISL_538524, EPI_ISL_538525, EPI_ISL_538526, EPI_ISL_538527, EPI_ISL_538528, EPI_ISL_538529, EPI_ISL_538530, EPI_ISL_538531, EPI_ISL_538532, EPI_ISL_538533, EPI_ISL_538534, EPI_ISL_538535, EPI_ISL_538536, EPI_ISL_538537, EPI_ISL_538538, EPI_ISL_538539, EPI_ISL_538540, EPI_ISL_538541, EPI_ISL_538542, EPI_ISL_538543, EPI_ISL_538544, EPI_ISL_538545, EPI_ISL_538546, EPI_ISL_538547, EPI_ISL_538548, EPI_ISL_538549, EPI_ISL_538550, EPI_ISL_538551                                                                                                                                                                 |                                                                                                            |                                                                                                            |                                                                                                                                                                                                                                                          |                                                                                                                               |
| see above                                                                                                                                                                                                                                                                                                                                                                                                                                                                                                                                                                                                                      | Department of Microbiology, The University of Hong Kong                                                    | Department of Microbiology, The University of Hong Kong                                                    |                                                                                                                                                                                                                                                          | Kelvin K.W. To, Kwok-Yung Yuen                                                                                                |
| EPI_ISL_539870, EPI_ISL_539871, EPI_ISL_539872, EPI_ISL_539873, EPI_ISL_539874, EPI_ISL_539875, EPI_ISL_539876, EPI_ISL_539877, EPI_ISL_539878                                                                                                                                                                                                                                                                                                                                                                                                                                                                                 | Center for Microbiology and Cell Biology, Instituto Venezolano de Investigaciones Científicas (CMBC, IVIC) | Center for Microbiology and Cell Biology, Instituto Venezolano de Investigaciones Científicas (CMBC, IVIC) |                                                                                                                                                                                                                                                          | Loureiro,C.L., Jaspe,R.C., D'Angelo,P., Garzaro,D., Rodriguez,L., Alarcon,V., Delgado,M., Aguilar,M., Rangel,H.R., Pujol,F.H. |
| EPI_ISL_541400                                                                                                                                                                                                                                                                                                                                                                                                                                                                                                                                                                                                                 | Laboratório de Virologia Comparada e Ambiental- LVCA-IOC                                                   | Laboratory of Respiratory Viruses and Measles, Oswaldo Cruz Institute, FIOCRUZ                             | Paola Resende, Luciana Appolinario, Tulio Machado Fumian, Tatiana Prado, Camille Ferreira Mannarino, Fernando Motta, Ana Carolina Mendonça, Marilda Siqueira, Marize Pereira Miagostovich on behalf of the Fiocruz COVID-19 Genomic Surveillance Network |                                                                                                                               |
| EPI_ISL_548259                                                                                                                                                                                                                                                                                                                                                                                                                                                                                                                                                                                                                 | Genome Centre                                                                                              | Genome Centre                                                                                              | Md. Tanvir Islam, Md. Shazid Hasan, Najmuj Sakib, A. S. M. Rubayet Ul Alam, Pravas Chandra Roy, Tanay Chakrovarty, Ovinu Kibria Islam, Hassan M. Al-Emran, Iqbal Kabir Jahid, M. Anwar Hossain                                                           |                                                                                                                               |
| EPI_ISL_548261                                                                                                                                                                                                                                                                                                                                                                                                                                                                                                                                                                                                                 | Genome Center                                                                                              | Genome Center                                                                                              | Najjuj Sakib, A. S. M. Rubayet- Ul- Alam, Tanay Chakrovarty, Md. Shazid Hasan, Hassan M. Al-Emran, Ovinu Kibria Islam, Md. Tanvir Islam, Pravas Chandra Roy, Md. Iqbal Kabir Jahid, Md. Anwar Hossain                                                    |                                                                                                                               |
| EPI_ISL_548262                                                                                                                                                                                                                                                                                                                                                                                                                                                                                                                                                                                                                 | Genome Center                                                                                              | Genome Center                                                                                              | Tanay Chakrovarty, Najjuj Sakib, A. S. M. Rubayet- Ul- Alam, Md. Shazid Hasan, Hassan M. Al-Emran, Ovinu Kibria Islam, Md. Tanvir Islam, Pravas Chandra Roy, Md. Iqbal Kabir Jahid, Md. Anwar Hossain                                                    |                                                                                                                               |
| EPI_ISL_548263                                                                                                                                                                                                                                                                                                                                                                                                                                                                                                                                                                                                                 | Genome Center                                                                                              | Genome Center                                                                                              | A. S. M. Rubayet- Ul- Alam, Md. Shazid Hasan, Najjuj Sakib, Ovinu Kibria Islam, Tanay Chakrovarty, Md. Tanvir Islam, Hassan M. Al-Emran, Pravas Chandra Roy, Md. Iqbal Kabir Jahid, Md. Anwar Hossain                                                    |                                                                                                                               |
| EPI_ISL_548947                                                                                                                                                                                                                                                                                                                                                                                                                                                                                                                                                                                                                 | Virology, Iran University of Medical Sciences                                                              | Virology, Iran University of Medical Sciences                                                              | Keyvani,H., Ranjbar,Mm., Keyvani,F., Soleimani,S.                                                                                                                                                                                                        |                                                                                                                               |
| EPI_ISL_561375                                                                                                                                                                                                                                                                                                                                                                                                                                                                                                                                                                                                                 | Genome Center                                                                                              | Genome Center                                                                                              | Md. Shazid Hasan, Najmuj Sakib, Tanay Chakrovarty, Hassan M. Al-Emran, Ovinu Kibria Islam, A. S. M. Rubayet- Ul- Alam, Md. Tanvir Islam, Pravas Chandra Roy, Md. Iqbal Kabir Jahid, Md. Anwar Hossain                                                    |                                                                                                                               |
| EPI_ISL_561376                                                                                                                                                                                                                                                                                                                                                                                                                                                                                                                                                                                                                 | Genome Center                                                                                              | Genome Center                                                                                              | Tanay Chakrovarty, Md. Shazid Hasan, Najmuj Sakib, Hassan M. Al-Emran, Ovinu Kibria Islam, A. S. M. Rubayet- Ul- Alam, Md. Tanvir Islam, Pravas Chandra Roy, Md. Iqbal Kabir Jahid, Md. Anwar Hossain                                                    |                                                                                                                               |
| EPI_ISL_561377                                                                                                                                                                                                                                                                                                                                                                                                                                                                                                                                                                                                                 | Genome Center                                                                                              | Genome Center                                                                                              | A. S. M. Rubayet- Ul- Alam, Md. Shazid Hasan, Najmuj Sakib, Tanay Chakrovarty, Hassan M. Al-Emran, Ovinu Kibria Islam, Md. Tanvir Islam, Pravas Chandra Roy, Md. Iqbal Kabir Jahid, Md. Anwar Hossain                                                    |                                                                                                                               |
| EPI_ISL_561630                                                                                                                                                                                                                                                                                                                                                                                                                                                                                                                                                                                                                 | Genome Center                                                                                              | Genome Center                                                                                              | Ovinu Kibria Islam,Najmuj Sakib, Tanay Chakrovarty, Md. Shazid Hasan, Hassan M. Al-Emran, A. S. M. Rubayet- Ul- Alam, Md. Tanvir Islam, Pravas Chandra Roy, Md. Iqbal Kabir Jahid, Md. Anwar Hossain                                                     |                                                                                                                               |
| EPI_ISL_568478                                                                                                                                                                                                                                                                                                                                                                                                                                                                                                                                                                                                                 | Virology, Iran University of Medical Sciences                                                              | Virology, Iran University of Medical Sciences                                                              | Keyvani,H., Ranjbar,M.M., Keyvani,F., Soleimani,S.                                                                                                                                                                                                       |                                                                                                                               |
| EPI_ISL_568479                                                                                                                                                                                                                                                                                                                                                                                                                                                                                                                                                                                                                 | Virology, Iran University of Medical Sciences                                                              | Virology, Iran University of Medical Sciences                                                              | Keyvani,H., Ranjbar,Mm., Keyvani,F., soleimani,s.                                                                                                                                                                                                        |                                                                                                                               |
| EPI_ISL_568480                                                                                                                                                                                                                                                                                                                                                                                                                                                                                                                                                                                                                 | Virology, Iran University of Medical Sciences                                                              | Virology, Iran University of Medical Sciences                                                              | Keyvani,H., Ranjbar,Mm., Keyvani,F., Soleimani,S.                                                                                                                                                                                                        |                                                                                                                               |
| EPI_ISL_568481                                                                                                                                                                                                                                                                                                                                                                                                                                                                                                                                                                                                                 | Virology, Iran University of Medical Sciences                                                              | Virology, Iran University of Medical Sciences                                                              | Keyvani,H., Ranjbar,M.M., Keyvani,F., Soleimani,S.                                                                                                                                                                                                       |                                                                                                                               |
| EPI_ISL_568482                                                                                                                                                                                                                                                                                                                                                                                                                                                                                                                                                                                                                 | Virology, Iran University of Medical Sciences                                                              | Virology, Iran University of Medical Sciences                                                              | Keyvani,H., Ranjbar,Mm., Keyvani,F., Sileimani,S.                                                                                                                                                                                                        |                                                                                                                               |



|                                                                                                                         |                                                                                                                         |                                                                                                                         |                                                                                                        |
|-------------------------------------------------------------------------------------------------------------------------|-------------------------------------------------------------------------------------------------------------------------|-------------------------------------------------------------------------------------------------------------------------|--------------------------------------------------------------------------------------------------------|
| EPI_ISL_591063                                                                                                          | Infectious Diseases and Tropical Medicine Research Center,<br>Infectious Diseases and Tropical Medicine Research Center | Infectious Diseases and Tropical Medicine Research Center,<br>Infectious Diseases and Tropical Medicine Research Center | Ahangarzadeh,S., Haghighi Javanmard,S., Shariati,L.                                                    |
| EPI_ISL_591064                                                                                                          | Infectious Diseases and Tropical Medicine Research Center,<br>Infectious Diseases and Tropical Medicine Research Center | Infectious Diseases and Tropical Medicine Research Center,<br>Infectious Diseases and Tropical Medicine Research Center | Haghighi Javanmard,S., Shariati,I., Ahangarzadeh,S., Ataei,B., Shoaie,P.                               |
| EPI_ISL_591065                                                                                                          | Infectious Diseases and Tropical Medicine Research Center,<br>Infectious Diseases and Tropical Medicine Research Center | Infectious Diseases and Tropical Medicine Research Center,<br>Infectious Diseases and Tropical Medicine Research Center | Haghighi Javanmard,S., Ahangarzadeh,S., Shariati,L., Ataei,B., Shoaie,P., Ranjbar,M.M.                 |
| EPI_ISL_591316, EPI_ISL_591317,<br>EPI_ISL_591318, EPI_ISL_591319,<br>EPI_ISL_591320, EPI_ISL_591321,<br>EPI_ISL_591322 | Virology, Iran University of Medical Sciences                                                                           | Virology, Iran University of Medical Sciences                                                                           | Keyvani,H., Ranjbar,Mm., Keyvani,F., Soleimani,S.                                                      |
| EPI_ISL_591323                                                                                                          | Virology, Iran University of Medical Sciences                                                                           | Virology, Iran University of Medical Sciences                                                                           | Keyvani,H., Ranjbar,Mm., Soleimani,S., Keyvani,F.                                                      |
| EPI_ISL_591324                                                                                                          | Virology, Iran University of Medical Sciences                                                                           | Virology, Iran University of Medical Sciences                                                                           | Keyvani,H., Ranjbar,Mm., Keyvani,F., Soleimani,S.                                                      |
| EPI_ISL_591325                                                                                                          | Virology, Iran University of Medical Sciences                                                                           | Virology, Iran University of Medical Sciences                                                                           | Keyvani,H., Ranjbar,Mm., Keyvani,F. and Soleimani,S.                                                   |
| EPI_ISL_591341                                                                                                          | Infectious Diseases and Tropical Medicine Research Center,<br>Infectious Diseases and Tropical Medicine Research Center | Infectious Diseases and Tropical Medicine Research Center,<br>Infectious Diseases and Tropical Medicine Research Center | Haghighi Javanmard,S., Ahangarzadeh,S., Shariati,L., Ataei,B., Shoaie,P., Ranjbar,M.M., Abutalebian,S. |
| EPI_ISL_591342                                                                                                          | Infectious Diseases and Tropical Medicine Research Center,<br>Infectious Diseases and Tropical Medicine Research Center | Infectious Diseases and Tropical Medicine Research Center,<br>Infectious Diseases and Tropical Medicine Research Center | Haghighi Javanmard,S., Ahangarzadeh,S., Shariati,L., Abutalebian,S., Ataei,B., Ranjbar,M.M., Shoaie,P. |
| EPI_ISL_591343                                                                                                          | Infectious Diseases and Tropical Medicine Research Center,<br>Infectious Diseases and Tropical Medicine Research Center | Infectious Diseases and Tropical Medicine Research Center,<br>Infectious Diseases and Tropical Medicine Research Center | Haghighi Javanmard,S., Ahangarzadeh,S., Shariati,L., Ataei,B., Shoaie,P., Ranjbar,M.M., Abutalebian,S. |
| EPI_ISL_591344, EPI_ISL_591345                                                                                          | Infectious Diseases and Tropical Medicine Research Center,<br>Infectious Diseases and Tropical Medicine Research Center | Infectious Diseases and Tropical Medicine Research Center,<br>Infectious Diseases and Tropical Medicine Research Center | Ahangarzadeh,S., Haghighi Javanmard,S., Abutalebian,S., Shoaie,P., Ataei,B., Shariati,L.               |
| EPI_ISL_591346                                                                                                          | Infectious Diseases and Tropical Medicine Research Center,<br>Infectious Diseases and Tropical Medicine Research Center | Infectious Diseases and Tropical Medicine Research Center,<br>Infectious Diseases and Tropical Medicine Research Center | Haghighi Javanmard,S., Abutalebian,S., Shoaie,P., Ataei,B., Shariati,L., Ahangarzadeh,S.               |
| EPI_ISL_596378, EPI_ISL_596379,<br>EPI_ISL_596380, EPI_ISL_596381,<br>EPI_ISL_596382, EPI_ISL_596383                    | Virology, Iran University of Medical Sciences                                                                           | Virology, Iran University of Medical Sciences                                                                           | Keyvani,H., Ranjbar,Mm., Keyvani,F., Soleimani,S.                                                      |
| EPI_ISL_596384                                                                                                          | Virology, Iran University of Medical Sciences                                                                           | Virology, Iran University of Medical Sciences                                                                           | Keyvani,H., Ranjbar,M.M., Keyvani,F., Soleimani,S.                                                     |
| EPI_ISL_596385                                                                                                          | Virology, Mechnikov Research Institute for Vaccines & Sera                                                              | Virology, Mechnikov Research Institute for Vaccines & Sera                                                              | Faizuloev,E. and Korchevaya,E.                                                                         |
| EPI_ISL_602562, EPI_ISL_602563                                                                                          | Department of Microbiology and Immunology, Stony Brook<br>University                                                    | Department of Microbiology and Immunology, Stony Brook<br>University                                                    | Nascimento Conde,J., Luperchio,A.M., Gorbunova,E.E., Mackow,E.R.                                       |
| EPI_ISL_602582, EPI_ISL_602583                                                                                          | Private medical practitioner                                                                                            | Hong Kong Department of Health                                                                                          | Mak Gannon C.K., Lam Edman T.K., Chan Rickjason C.W., Tsang Dominic N.C.                               |
| EPI_ISL_602584                                                                                                          | Queen Mary Hospital                                                                                                     | Hong Kong Department of Health                                                                                          | Mak Gannon C.K., Lam Edman T.K., Chan Rickjason C.W., Tsang Dominic N.C.                               |
| EPI_ISL_602585                                                                                                          | Private medical practitioner                                                                                            | Hong Kong Department of Health                                                                                          | Mak Gannon C.K., Lam Edman T.K., Chan Rickjason C.W., Tsang Dominic N.C.                               |
| EPI_ISL_602586                                                                                                          | Queen Elizabeth Hospital                                                                                                | Hong Kong Department of Health                                                                                          | Mak Gannon C.K., Lam Edman T.K., Chan Rickjason C.W., Tsang Dominic N.C.                               |
| EPI_ISL_602587                                                                                                          | Private medical practitioner                                                                                            | Hong Kong Department of Health                                                                                          | Mak Gannon C.K., Lam Edman T.K., Chan Rickjason C.W., Tsang Dominic N.C.                               |
| EPI_ISL_602588                                                                                                          | United Christian Hospital                                                                                               | Hong Kong Department of Health                                                                                          | Mak Gannon C.K., Lam Edman T.K., Chan Rickjason C.W., Tsang Dominic N.C.                               |
| EPI_ISL_602589                                                                                                          | Queen Elizabeth Hospital                                                                                                | Hong Kong Department of Health                                                                                          | Mak Gannon C.K., Lam Edman T.K., Chan Rickjason C.W., Tsang Dominic N.C.                               |
| EPI_ISL_602590                                                                                                          | Caritas Medical Centre                                                                                                  | Hong Kong Department of Health                                                                                          | Mak Gannon C.K., Lam Edman T.K., Chan Rickjason C.W., Tsang Dominic N.C.                               |
| EPI_ISL_602591                                                                                                          | Queen Elizabeth Hospital                                                                                                | Hong Kong Department of Health                                                                                          | Mak Gannon C.K., Lam Edman T.K., Chan Rickjason C.W., Tsang Dominic N.C.                               |
| EPI_ISL_602592                                                                                                          | United Christian Hospital                                                                                               | Hong Kong Department of Health                                                                                          | Mak Gannon C.K., Lam Edman T.K., Chan Rickjason C.W., Tsang Dominic N.C.                               |
| EPI_ISL_602593                                                                                                          | Queen Mary Hospital                                                                                                     | Hong Kong Department of Health                                                                                          | Mak Gannon C.K., Lam Edman T.K., Chan Rickjason C.W., Tsang Dominic N.C.                               |
| EPI_ISL_602594                                                                                                          | Prince of Wales Hospital                                                                                                | Hong Kong Department of Health                                                                                          | Mak Gannon C.K., Lam Edman T.K., Chan Rickjason C.W., Tsang Dominic N.C.                               |
| EPI_ISL_602595, EPI_ISL_602596                                                                                          | Pamela Youde Nethersole Eastern Hospital                                                                                | Hong Kong Department of Health                                                                                          | Mak Gannon C.K., Lam Edman T.K., Chan Rickjason C.W., Tsang Dominic N.C.                               |
| EPI_ISL_602597                                                                                                          | Private medical practitioner                                                                                            | Hong Kong Department of Health                                                                                          | Mak Gannon C.K., Lam Edman T.K., Chan Rickjason C.W., Tsang Dominic N.C.                               |
| EPI_ISL_602598                                                                                                          | Our Lady of Maryknoll Hospital                                                                                          | Hong Kong Department of Health                                                                                          | Mak Gannon C.K., Lam Edman T.K., Chan Rickjason C.W., Tsang Dominic N.C.                               |
| EPI_ISL_602599                                                                                                          | Tseung Kwan O Hospital                                                                                                  | Hong Kong Department of Health                                                                                          | Mak Gannon C.K., Lam Edman T.K., Chan Rickjason C.W., Tsang Dominic N.C.                               |
| EPI_ISL_602600                                                                                                          | United Christian Hospital                                                                                               | Hong Kong Department of Health                                                                                          | Mak Gannon C.K., Lam Edman T.K., Chan Rickjason C.W., Tsang Dominic N.C.                               |
| EPI_ISL_602601                                                                                                          | Tseung Kwan O Hospital                                                                                                  | Hong Kong Department of Health                                                                                          | Mak Gannon C.K., Lam Edman T.K., Chan Rickjason C.W., Tsang Dominic N.C.                               |
| EPI_ISL_602602                                                                                                          | Ruttonjee Hospital                                                                                                      | Hong Kong Department of Health                                                                                          | Mak Gannon C.K., Lam Edman T.K., Chan Rickjason C.W., Tsang Dominic N.C.                               |
| EPI_ISL_602603, EPI_ISL_602604                                                                                          | Queen Mary Hospital                                                                                                     | Hong Kong Department of Health                                                                                          | Mak Gannon C.K., Lam Edman T.K., Chan Rickjason C.W., Tsang Dominic N.C.                               |
| EPI_ISL_602605                                                                                                          | Pamela Youde Nethersole Eastern Hospital                                                                                | Hong Kong Department of Health                                                                                          | Mak Gannon C.K., Lam Edman T.K., Chan Rickjason C.W., Tsang Dominic N.C.                               |
| EPI_ISL_602606                                                                                                          | Queen Elizabeth Hospital                                                                                                | Hong Kong Department of Health                                                                                          | Mak Gannon C.K., Lam Edman T.K., Chan Rickjason C.W., Tsang Dominic N.C.                               |
| EPI_ISL_602607                                                                                                          | Tuen Mun Hospital                                                                                                       | Hong Kong Department of Health                                                                                          | Mak Gannon C.K., Lam Edman T.K., Chan Rickjason C.W., Tsang Dominic N.C.                               |
| EPI_ISL_602608                                                                                                          | United Christian Hospital                                                                                               | Hong Kong Department of Health                                                                                          | Mak Gannon C.K., Lam Edman T.K., Chan Rickjason C.W., Tsang Dominic N.C.                               |
| EPI_ISL_602609                                                                                                          | Pamela Youde Nethersole Eastern Hospital                                                                                | Hong Kong Department of Health                                                                                          | Mak Gannon C.K., Lam Edman T.K., Chan Rickjason C.W., Tsang Dominic N.C.                               |
| EPI_ISL_602610                                                                                                          | Queen Mary Hospital                                                                                                     | Hong Kong Department of Health                                                                                          | Mak Gannon C.K., Lam Edman T.K., Chan Rickjason C.W., Tsang Dominic N.C.                               |
| EPI_ISL_602611                                                                                                          | Queen Elizabeth Hospital                                                                                                | Hong Kong Department of Health                                                                                          | Mak Gannon C.K., Lam Edman T.K., Chan Rickjason C.W., Tsang Dominic N.C.                               |
| EPI_ISL_602612                                                                                                          | Tseung Kwan O Hospital                                                                                                  | Hong Kong Department of Health                                                                                          | Mak Gannon C.K., Lam Edman T.K., Chan Rickjason C.W., Tsang Dominic N.C.                               |
| EPI_ISL_602613, EPI_ISL_602614,<br>EPI_ISL_602615                                                                       | Pamela Youde Nethersole Eastern Hospital                                                                                | Hong Kong Department of Health                                                                                          | Mak Gannon C.K., Lam Edman T.K., Chan Rickjason C.W., Tsang Dominic N.C.                               |
| EPI_ISL_602616                                                                                                          | Kwong Wah Hospital                                                                                                      | Hong Kong Department of Health                                                                                          | Mak Gannon C.K., Lam Edman T.K., Chan Rickjason C.W., Tsang Dominic N.C.                               |
| EPI_ISL_602617, EPI_ISL_602618                                                                                          | Queen Mary Hospital                                                                                                     | Hong Kong Department of Health                                                                                          | Mak Gannon C.K., Lam Edman T.K., Chan Rickjason C.W., Tsang Dominic N.C.                               |
| EPI_ISL_602619                                                                                                          | United Christian Hospital                                                                                               | Hong Kong Department of Health                                                                                          | Mak Gannon C.K., Lam Edman T.K., Chan Rickjason C.W., Tsang Dominic N.C.                               |



|                                                                                                                                |                                                                                                                                                              |                                                                                                                                                              |                                                                                                                                                                                                                                                                                                                                                                                                         |
|--------------------------------------------------------------------------------------------------------------------------------|--------------------------------------------------------------------------------------------------------------------------------------------------------------|--------------------------------------------------------------------------------------------------------------------------------------------------------------|---------------------------------------------------------------------------------------------------------------------------------------------------------------------------------------------------------------------------------------------------------------------------------------------------------------------------------------------------------------------------------------------------------|
| EPI_ISL_602620                                                                                                                 | Queen Elizabeth Hospital                                                                                                                                     | Hong Kong Department of Health                                                                                                                               | Mak Gannon C.K., Lam Edman T.K., Chan Rickjason C.W., Tsang Dominic N.C.                                                                                                                                                                                                                                                                                                                                |
| EPI_ISL_602621                                                                                                                 | GLENEAGLES HONG KONG (CLINICAL LAB)                                                                                                                          | Hong Kong Department of Health                                                                                                                               | Mak Gannon C.K., Lam Edman T.K., Chan Rickjason C.W., Tsang Dominic N.C.                                                                                                                                                                                                                                                                                                                                |
| EPI_ISL_605924, EPI_ISL_605925, EPI_ISL_605926, EPI_ISL_605927, EPI_ISL_605928                                                 | Emergence des Maladies Virales, Centre Interdisciplinaire de Recherches Medicales de Franceville                                                             | Emergence des Maladies Virales, Centre Interdisciplinaire de Recherches Medicales de Franceville                                                             | Lekana-Douki,S.E., N'diimabaka,N., Mbongo kama,E., Kandet Yattara,M., Mints Ndonga,A., Ngonga Dikongo,A.M., Andeko,J.C., Zong Minko,O., Lekana-Douki,J.-B.                                                                                                                                                                                                                                              |
| EPI_ISL_615067                                                                                                                 | Rwanda National Reference Laboratory                                                                                                                         | Rwanda National Reference Laboratory                                                                                                                         | Mukantwari Enatha,Stefan Rooke,Aine O'Toole,UMuringa Jeanne d'Arc                                                                                                                                                                                                                                                                                                                                       |
| EPI_ISL_615069                                                                                                                 | Rwanda National Reference Laboratory                                                                                                                         | Rwanda National Laboratory                                                                                                                                   | Mukantwari Enatha,Stefan Rooke,Aine O'Toole,Umuringa Jeanne d'Arc                                                                                                                                                                                                                                                                                                                                       |
| EPI_ISL_620406                                                                                                                 | Biomedical Science and Technology, Konkuk University, Laboratory of Cytokine Immunology (Room 601-1) IBST,Konkuk University                                  | Biomedical Science and Technology, Konkuk University, Laboratory of Cytokine Immunology (Room 601-1) IBST,Konkuk University                                  | Kim,S.                                                                                                                                                                                                                                                                                                                                                                                                  |
| EPI_ISL_635199                                                                                                                 | Bamrasnaradura Infectious Disease Institute                                                                                                                  | Molecular HIV and Emerging Infectious Diseases Laboratory                                                                                                    | Sumonml UTTAYAMAKUL                                                                                                                                                                                                                                                                                                                                                                                     |
| EPI_ISL_637022                                                                                                                 | Tin Shui Wai Hospital                                                                                                                                        | Hong Kong Department of Health                                                                                                                               | Mak Gannon C.K., Lam Edman T.K., Chan Rickjason C.W., Tsang Dominic N.C.                                                                                                                                                                                                                                                                                                                                |
| EPI_ISL_637023                                                                                                                 | Queen Elizabeth Hospital                                                                                                                                     | Hong Kong Department of Health                                                                                                                               | Mak Gannon C.K., Lam Edman T.K., Chan Rickjason C.W., Tsang Dominic N.C.                                                                                                                                                                                                                                                                                                                                |
| EPI_ISL_637024                                                                                                                 | Pamela Youde Nethersole Eastern Hospital                                                                                                                     | Hong Kong Department of Health                                                                                                                               | Mak Gannon C.K., Lam Edman T.K., Chan Rickjason C.W., Tsang Dominic N.C.                                                                                                                                                                                                                                                                                                                                |
| EPI_ISL_637025                                                                                                                 | Queen Elizabeth Hospital                                                                                                                                     | Hong Kong Department of Health                                                                                                                               | Mak Gannon C.K., Lam Edman T.K., Chan Rickjason C.W., Tsang Dominic N.C.                                                                                                                                                                                                                                                                                                                                |
| EPI_ISL_637026                                                                                                                 | Kwong Wah Hospital                                                                                                                                           | Hong Kong Department of Health                                                                                                                               | Mak Gannon C.K., Lam Edman T.K., Chan Rickjason C.W., Tsang Dominic N.C.                                                                                                                                                                                                                                                                                                                                |
| EPI_ISL_637027                                                                                                                 | Hong Kong Baptist Hospital                                                                                                                                   | Hong Kong Department of Health                                                                                                                               | Mak Gannon C.K., Lam Edman T.K., Chan Rickjason C.W., Tsang Dominic N.C.                                                                                                                                                                                                                                                                                                                                |
| EPI_ISL_637028                                                                                                                 | Queen Mary Hospital                                                                                                                                          | Hong Kong Department of Health                                                                                                                               | Mak Gannon C.K., Lam Edman T.K., Chan Rickjason C.W., Tsang Dominic N.C.                                                                                                                                                                                                                                                                                                                                |
| EPI_ISL_637029                                                                                                                 | Caritas Medical Centre                                                                                                                                       | Hong Kong Department of Health                                                                                                                               | Mak Gannon C.K., Lam Edman T.K., Chan Rickjason C.W., Tsang Dominic N.C.                                                                                                                                                                                                                                                                                                                                |
| EPI_ISL_637030, EPI_ISL_637031                                                                                                 | Prince of Wales Hospital                                                                                                                                     | Hong Kong Department of Health                                                                                                                               | Mak Gannon C.K., Lam Edman T.K., Chan Rickjason C.W., Tsang Dominic N.C.                                                                                                                                                                                                                                                                                                                                |
| EPI_ISL_637032                                                                                                                 | Private medical practitioner                                                                                                                                 | Hong Kong Department of Health                                                                                                                               | Mak Gannon C.K., Lam Edman T.K., Chan Rickjason C.W., Tsang Dominic N.C.                                                                                                                                                                                                                                                                                                                                |
| EPI_ISL_637033                                                                                                                 | Chun Yeung Estate Quarantine Center                                                                                                                          | Hong Kong Department of Health                                                                                                                               | Mak Gannon C.K., Lam Edman T.K., Chan Rickjason C.W., Tsang Dominic N.C.                                                                                                                                                                                                                                                                                                                                |
| EPI_ISL_637034                                                                                                                 | Queen Elizabeth Hospital                                                                                                                                     | Hong Kong Department of Health                                                                                                                               | Mak Gannon C.K., Lam Edman T.K., Chan Rickjason C.W., Tsang Dominic N.C.                                                                                                                                                                                                                                                                                                                                |
| EPI_ISL_637035                                                                                                                 | Princess Margaret Hospital                                                                                                                                   | Hong Kong Department of Health                                                                                                                               | Mak Gannon C.K., Lam Edman T.K., Chan Rickjason C.W., Tsang Dominic N.C.                                                                                                                                                                                                                                                                                                                                |
| EPI_ISL_637036                                                                                                                 | Tseung Kwan O Hospital                                                                                                                                       | Hong Kong Department of Health                                                                                                                               | Mak Gannon C.K., Lam Edman T.K., Chan Rickjason C.W., Tsang Dominic N.C.                                                                                                                                                                                                                                                                                                                                |
| EPI_ISL_637037, EPI_ISL_637038, EPI_ISL_637039                                                                                 | Queen Elizabeth Hospital                                                                                                                                     | Hong Kong Department of Health                                                                                                                               | Mak Gannon C.K., Lam Edman T.K., Chan Rickjason C.W., Tsang Dominic N.C.                                                                                                                                                                                                                                                                                                                                |
| EPI_ISL_637040                                                                                                                 | Prince of Wales Hospital                                                                                                                                     | Hong Kong Department of Health                                                                                                                               | Mak Gannon C.K., Lam Edman T.K., Chan Rickjason C.W., Tsang Dominic N.C.                                                                                                                                                                                                                                                                                                                                |
| EPI_ISL_637041                                                                                                                 | Private medical practitioner                                                                                                                                 | Hong Kong Department of Health                                                                                                                               | Mak Gannon C.K., Lam Edman T.K., Chan Rickjason C.W., Tsang Dominic N.C.                                                                                                                                                                                                                                                                                                                                |
| EPI_ISL_637042                                                                                                                 | Prince of Wales Hospital                                                                                                                                     | Hong Kong Department of Health                                                                                                                               | Mak Gannon C.K., Lam Edman T.K., Chan Rickjason C.W., Tsang Dominic N.C.                                                                                                                                                                                                                                                                                                                                |
| EPI_ISL_637043                                                                                                                 | Temporary Specimen Collection Centre at the AsiaWorld-Expo                                                                                                   | Hong Kong Department of Health                                                                                                                               | Mak Gannon C.K., Lam Edman T.K., Chan Rickjason C.W., Tsang Dominic N.C.                                                                                                                                                                                                                                                                                                                                |
| EPI_ISL_637076, EPI_ISL_637077, EPI_ISL_637078, EPI_ISL_637079, EPI_ISL_637080, EPI_ISL_637081, EPI_ISL_637082, EPI_ISL_637083 | WHO WPRO Regional Polio Reference Laboratory, National Institute for Viral Disease Control and Prevention, Chinese Center for Disease Control and Prevention | WHO WPRO Regional Polio Reference Laboratory, National Institute for Viral Disease Control and Prevention, Chinese Center for Disease Control and Prevention | Zhang,Y., Chen,C., Song,Y., Zhu,S., Wang,D., Zhang,H., Han,G., Weng,Y., Xu,J., Yu,P., Jiang,W., Yang,X., Lang,Z., Yan,D., Wang,Y., Song,J., Gao,G.F., Wu,G., Xu,W.                                                                                                                                                                                                                                      |
| EPI_ISL_644822                                                                                                                 | National Microbiology Reference Laboratory                                                                                                                   | Quadram Institute Bioscience                                                                                                                                 | Thanh Le Viet, Andrew J. Page, Justin O'Grady, Gemma Kay, David Baker, Gaetan Thilliez, Ana-Victoria Gutierrez, Robert Kingsley, Leonardo de Oliveira Martins, Sekesai Zinyowera, Tatenda Takawira, Muchaneta Mugabe, Gibson Mhlanga, Portia Manangazira, Andrew Tarupira, Hlanai Gumbo, Agnes Juru, Charles Nyagupe, Alexander Goredema, Isaac Phiri, Barbra Murwira, Beuty Makamure, Tapfumanai Mashe |
| EPI_ISL_649145, EPI_ISL_649146, EPI_ISL_649147, EPI_ISL_649148                                                                 | Animal health and public health, Escola de Medicina Veterinaria                                                                                              | Animal health and public health, Escola de Medicina Veterinaria                                                                                              | Ribeiro Junior,J.C., da Silva,M.O., Carvalho,R.F., dos Santos,I.G.C., Ribeiro,J.                                                                                                                                                                                                                                                                                                                        |
| EPI_ISL_660111                                                                                                                 | Infectious Diseases and Tropical Medicine Research Center, Infectious Diseases and Tropical Medicine Research Center                                         | Infectious Diseases and Tropical Medicine Research Center, Infectious Diseases and Tropical Medicine Research Center                                         | Haghjooy Javanmard,S., Ahangarzadeh,S., Shariati,L., Ataei,B., Aboutalebian,S.                                                                                                                                                                                                                                                                                                                          |
| EPI_ISL_660112                                                                                                                 | Infectious Diseases and Tropical Medicine Research Center, Infectious Diseases and Tropical Medicine Research Center                                         | Infectious Diseases and Tropical Medicine Research Center, Infectious Diseases and Tropical Medicine Research Center                                         | Ahangarzadeh,S., Haghjooy Javanmard,S., Aboutalebian,S., Ataei,B., Shariati,L.                                                                                                                                                                                                                                                                                                                          |
| EPI_ISL_660113                                                                                                                 | Infectious Diseases and Tropical Medicine Research Center, Infectious Diseases and Tropical Medicine Research Center                                         | Infectious Diseases and Tropical Medicine Research Center, Infectious Diseases and Tropical Medicine Research Center                                         | Ahangarzadeh,S., Ataei,B., Shariati,L., Haghjooy javanmard,S.                                                                                                                                                                                                                                                                                                                                           |
| EPI_ISL_660114, EPI_ISL_660115                                                                                                 | Infectious Diseases and Tropical Medicine Research Center, Infectious Diseases and Tropical Medicine Research Center                                         | Infectious Diseases and Tropical Medicine Research Center, Infectious Diseases and Tropical Medicine Research Center                                         | Ahangarzadeh,S., Ataei,B., Shariati,L., Haghjooy Javanmard,S.                                                                                                                                                                                                                                                                                                                                           |
| EPI_ISL_660116                                                                                                                 | Infectious Diseases and Tropical Medicine Research Center, Infectious Diseases and Tropical Medicine Research Center                                         | Infectious Diseases and Tropical Medicine Research Center, Infectious Diseases and Tropical Medicine Research Center                                         | Ahangarzadeh,S., Haghjooy Javanmard,S., Aboutalebian,S., Ataei,B., Shariati,L.                                                                                                                                                                                                                                                                                                                          |
| EPI_ISL_660117, EPI_ISL_660118                                                                                                 | Infectious Diseases and Tropical Medicine Research Center, Infectious Diseases and Tropical Medicine Research Center                                         | Infectious Diseases and Tropical Medicine Research Center, Infectious Diseases and Tropical Medicine Research Center                                         | Haghjooy Javanmard,S., Ahangarzadeh,S., Shariati,L., Ataei,B., Aboutalebian,S.                                                                                                                                                                                                                                                                                                                          |
| EPI_ISL_661266, EPI_ISL_661267, EPI_ISL_661268, EPI_ISL_661269                                                                 | Russian Academy of Sciences, Federal Research Center for Virology and Microbiology                                                                           | Russian Academy of Sciences, Federal Research Center for Virology and Microbiology                                                                           | Titov,I., Nefedeva,M., Egorova,I., Malogolovkin,A.                                                                                                                                                                                                                                                                                                                                                      |
| EPI_ISL_666616                                                                                                                 | Research institute for Biotechnology and Bio-engineering, Isfahan University of Technology                                                                   | Research institute for Biotechnology and Bio-engineering, Isfahan University of Technology                                                                   | Jalali,S.A.H., Mohammadinezhad,R., Soleimani-Zad,S. and Allafchian,A                                                                                                                                                                                                                                                                                                                                    |
| EPI_ISL_667761                                                                                                                 | Microbiology, Infectious Diseases and Immunology, Centre de Recherche du Centre Hospitalier de l'Universite de Montreal                                      | Microbiology, Infectious Diseases and Immunology, Centre de Recherche du Centre Hospitalier de l'Universite de Montreal                                      | Benoit,P., Point,F., Gagnon,S., Hardy,I., Kaufmann,D., Tremblay,C., Coutlee,F., Grandjean-Lapierre,S.                                                                                                                                                                                                                                                                                                   |
| EPI_ISL_672575, EPI_ISL_672576                                                                                                 | Infectious Diseases and Tropical Medicine Research Center, Infectious Diseases and Tropical Medicine Research Center                                         | Infectious Diseases and Tropical Medicine Research Center, Infectious Diseases and Tropical Medicine Research Center                                         | Ahangarzadeh,S., Ataei,B., Shariati,L., Haghjooy Javanmard,S.                                                                                                                                                                                                                                                                                                                                           |
| EPI_ISL_672577                                                                                                                 | Infectious Diseases and Tropical Medicine Research Center, Infectious Diseases and Tropical Medicine Research Center                                         | Infectious Diseases and Tropical Medicine Research Center, Infectious Diseases and Tropical Medicine Research Center                                         | Haghjooy Javanmard,S., Ahangarzadeh,S., Shariati,L., Ataei,B., Aboutalebian,S., Shoaiei,P.                                                                                                                                                                                                                                                                                                              |
| EPI_ISL_672578                                                                                                                 | Infectious Diseases and Tropical Medicine Research Center, Infectious Diseases and Tropical Medicine Research Center                                         | Infectious Diseases and Tropical Medicine Research Center, Infectious Diseases and Tropical Medicine Research Center                                         | Ahangarzadeh,S., Ataei,B., Shariati,L., Haghjooy Javanmard,S., Aboutalebian,S., Shoaiei,P.                                                                                                                                                                                                                                                                                                              |
| EPI_ISL_672579                                                                                                                 | Infectious Diseases and Tropical Medicine Research Center, Infectious Diseases and Tropical Medicine Research Center                                         | Infectious Diseases and Tropical Medicine Research Center, Infectious Diseases and Tropical Medicine Research Center                                         | Ahangarzadeh,S., Ataei,B., Shariati,L., Haghjooy Javanmard,S., Shoaiei,P., Aboutalebian,S.                                                                                                                                                                                                                                                                                                              |

|                                                                                                                                |                                                                                                                                                                                                                             |                                                                                                                                                                                                                             |                                                                                                                                                                              |
|--------------------------------------------------------------------------------------------------------------------------------|-----------------------------------------------------------------------------------------------------------------------------------------------------------------------------------------------------------------------------|-----------------------------------------------------------------------------------------------------------------------------------------------------------------------------------------------------------------------------|------------------------------------------------------------------------------------------------------------------------------------------------------------------------------|
| EPI_ISL_672580                                                                                                                 | Infectious Diseases and Tropical Medicine Research Center, Infectious Diseases and Tropical Medicine Research Center                                                                                                        | Infectious Diseases and Tropical Medicine Research Center, Infectious Diseases and Tropical Medicine Research Center                                                                                                        | Ahangarzadeh,S., Shariati,L., Haghjooy Javanmard,S., Aboutalebian,S., Shoaiei,P., Ataei,B.                                                                                   |
| EPI_ISL_672581                                                                                                                 | Infectious Diseases and Tropical Medicine Research Center, Infectious Diseases and Tropical Medicine Research Center                                                                                                        | Infectious Diseases and Tropical Medicine Research Center, Infectious Diseases and Tropical Medicine Research Center                                                                                                        | Ahangarzadeh,S., Ataei,B., Shariati,L., Haghjooy Javanmard,S., Shoaiei,P., Aboutalebian,S.                                                                                   |
| EPI_ISL_672582                                                                                                                 | Infectious Diseases and Tropical Medicine Research Center, Infectious Diseases and Tropical Medicine Research Center                                                                                                        | Infectious Diseases and Tropical Medicine Research Center, Infectious Diseases and Tropical Medicine Research Center                                                                                                        | Ahangarzadeh,S., Haghjooy Javanmard,S., Shoaiei,P., Ataei,B., Shariati,L.                                                                                                    |
| EPI_ISL_672583                                                                                                                 | Infectious Diseases and Tropical Medicine Research Center, Infectious Diseases and Tropical Medicine Research Center                                                                                                        | Infectious Diseases and Tropical Medicine Research Center, Infectious Diseases and Tropical Medicine Research Center                                                                                                        | Ahangarzadeh,S., Ataei,B., Shariati,L., Haghjooy Javanmard,S., Shoaiei,P., Aboutalebian,S.                                                                                   |
| EPI_ISL_672584                                                                                                                 | Infectious Diseases and Tropical Medicine Research Center, Infectious Diseases and Tropical Medicine Research Center                                                                                                        | Infectious Diseases and Tropical Medicine Research Center, Infectious Diseases and Tropical Medicine Research Center                                                                                                        | Ahangarzadeh,S., Haghjooy Javanmard,S., Shoaiei,P., Ataei,B., Shariati,L.                                                                                                    |
| EPI_ISL_672585                                                                                                                 | Infectious Diseases and Tropical Medicine Research Center, Infectious Diseases and Tropical Medicine Research Center                                                                                                        | Infectious Diseases and Tropical Medicine Research Center, Infectious Diseases and Tropical Medicine Research Center                                                                                                        | Haghjooy Javanmard,S., Shoaiei,P., Ataei,B., Shariati,L., Ahangarzadeh,S.                                                                                                    |
| EPI_ISL_672586                                                                                                                 | Infectious Diseases and Tropical Medicine Research Center, Infectious Diseases and Tropical Medicine Research Center                                                                                                        | Infectious Diseases and Tropical Medicine Research Center, Infectious Diseases and Tropical Medicine Research Center                                                                                                        | Haghjooy Javanmard,S., Ataei,B., Shariati,L., Ahangarzadeh,S.                                                                                                                |
| EPI_ISL_672587                                                                                                                 | Infectious Diseases and Tropical Medicine Research Center, Infectious Diseases and Tropical Medicine Research Center                                                                                                        | Infectious Diseases and Tropical Medicine Research Center, Infectious Diseases and Tropical Medicine Research Center                                                                                                        | Haghjooy Javanmard,S., Ahangarzadeh,S., Shariati,L., Shoaiei,P.                                                                                                              |
| EPI_ISL_672588, EPI_ISL_672589, EPI_ISL_672590, EPI_ISL_672591, EPI_ISL_672592, EPI_ISL_672593, EPI_ISL_672594, EPI_ISL_672595 | Infectious Diseases and Tropical Medicine Research Center, Infectious Diseases and Tropical Medicine Research Center                                                                                                        | Infectious Diseases and Tropical Medicine Research Center, Infectious Diseases and Tropical Medicine Research Center                                                                                                        | Ahangarzadeh,S., Haghjooy Javanmard,S., Shoaiei,P., Ataei,B., Shariati,L.                                                                                                    |
| EPI_ISL_672596                                                                                                                 | Infectious Diseases and Tropical Medicine Research Center, Infectious Diseases and Tropical Medicine Research Center                                                                                                        | Infectious Diseases and Tropical Medicine Research Center, Infectious Diseases and Tropical Medicine Research Center                                                                                                        | Ahangarzadeh,S., Haghjooy Javanmard,S., Ataei,B., Shariati,L., Aboutalebian,S.                                                                                               |
| EPI_ISL_672597, EPI_ISL_672598, EPI_ISL_672599, EPI_ISL_672600                                                                 | Infectious Diseases and Tropical Medicine Research Center, Infectious Diseases and Tropical Medicine Research Center                                                                                                        | Infectious Diseases and Tropical Medicine Research Center, Infectious Diseases and Tropical Medicine Research Center                                                                                                        | Ahangarzadeh,S., Haghjooy Javanmard,S., Shariati,L., Aboutalebian,S., Ataei,B.                                                                                               |
| EPI_ISL_672601, EPI_ISL_672602, EPI_ISL_672603, EPI_ISL_672604, EPI_ISL_672605, EPI_ISL_672606, EPI_ISL_672607                 | Infectious Diseases and Tropical Medicine Research Center, Infectious Diseases and Tropical Medicine Research Center                                                                                                        | Infectious Diseases and Tropical Medicine Research Center, Infectious Diseases and Tropical Medicine Research Center                                                                                                        | Ahangarzadeh,S., Haghjooy Javanmard,S., Shariati,L., Aboutalebian,S., Ataei,B., Shoaiei,P.                                                                                   |
| EPI_ISL_678294                                                                                                                 | Area of Virology, Serology and Virology Division (SAVID), New South Wales Health Pathology Randwick                                                                                                                         | Virology Research Laboratory; Area of Virology, Serology and Virology Division (SAVID), New South Wales Health Pathology Randwick                                                                                           | Foster, C.; Au, J.; Ruiz Silva, M.; Deveson, I.; Bull, R.; Van Hal, S.; Rawlinson, W.                                                                                        |
| EPI_ISL_693249                                                                                                                 | Biomedical Sciences for Health, University of Milan                                                                                                                                                                         | Biomedical Sciences for Health, University of Milan                                                                                                                                                                         | Amendola,A., Bianchi,S., Gori,M., Colzani,D., Canuti,M., Borghi,E.,Raviglione,M., Zuccotti,G.V. and Tanzi,E.                                                                 |
| EPI_ISL_699570, EPI_ISL_699571, EPI_ISL_699572, EPI_ISL_699573                                                                 | Group of Genetic Engineering and Biotechnology, Federal Budget Institution of Science 'Central Research Institute of Epidemiology' of The Federal Service on Customers' Rights Protection and Human Well-being Surveillance | Group of Genetic Engineering and Biotechnology, Federal Budget Institution of Science 'Central Research Institute of Epidemiology' of The Federal Service on Customers' Rights Protection and Human Well-being Surveillance | Cherkashina,A.S., Golubeva,A.G., Soloviova,E.D., Zotova,M.I., Berlina,Y.Y., Valdokhina,A.V., Bulanenko,V.P., Speranskaya,A.S., Tivanova,E.V., Shipulina,O.Y., Akimkin,V.G.   |
| EPI_ISL_699574, EPI_ISL_699575, EPI_ISL_699576, EPI_ISL_699577                                                                 | Group of Genetic Engineering and Biotechnology, Federal Budget Institution of Science 'Central Research Institute of Epidemiology' of The Federal Service on Customers' Rights Protection and Human Well-being Surveillance | Group of Genetic Engineering and Biotechnology, Federal Budget Institution of Science 'Central Research Institute of Epidemiology' of The Federal Service on Customers' Rights Protection and Human Well-being Surveillance | Cherkashina,A.S., Golubeva,A.G., Soloviova,E.D., Zotova,M.I., Berlina,Y.Y., Valdokhina,A.V., Bulanenko,V.P., Speranskaya,A.S., Tivanova,E.V., Shipulina,O.Y., Akimkin,V.G.   |
| EPI_ISL_710479                                                                                                                 | Group of Genetic Engineering and Biotechnology, Federal Budget Institution of Science 'Central Research Institute of Epidemiology' of The Federal Service on Customers' Rights Protection and Human Well-being Surveillance | Group of Genetic Engineering and Biotechnology, Federal Budget Institution of Science 'Central Research Institute of Epidemiology' of The Federal Service on Customers' Rights Protection and Human Well-being Surveillance | Cherkashina,A.S., Golubeva,A.G., Soloviova,E.D., Zotova,M.I., Berlina,Y.Y., Valdokhina,A.V., Bulanenko,V.P., Speranskaya,A.S.,Tivanova,E.V., Shipulina,O.Y. and Akimkin,V.G. |
| EPI_ISL_730578, EPI_ISL_730579, EPI_ISL_730580, EPI_ISL_730581                                                                 | Home Quarantine Taskforce                                                                                                                                                                                                   | Hong Kong Department of Health                                                                                                                                                                                              | Mak Gannon C.K., Lam Edman T.K., Chan Rickjason C.W., Tsang Dominic N.C.                                                                                                     |
| EPI_ISL_730582                                                                                                                 | Hong Kong Adventist Hospital - Tsuen Wan                                                                                                                                                                                    | Hong Kong Department of Health                                                                                                                                                                                              | Mak Gannon C.K., Lam Edman T.K., Chan Rickjason C.W., Tsang Dominic N.C.                                                                                                     |
| EPI_ISL_730583, EPI_ISL_730584                                                                                                 | Hong Kong Sanatorium & Hospital                                                                                                                                                                                             | Hong Kong Department of Health                                                                                                                                                                                              | Mak Gannon C.K., Lam Edman T.K., Chan Rickjason C.W., Tsang Dominic N.C.                                                                                                     |
| EPI_ISL_730585, EPI_ISL_730586, EPI_ISL_730587                                                                                 | Pamela Youde Nethersole Eastern Hospital                                                                                                                                                                                    | Hong Kong Department of Health                                                                                                                                                                                              | Mak Gannon C.K., Lam Edman T.K., Chan Rickjason C.W., Tsang Dominic N.C.                                                                                                     |
| EPI_ISL_730588, EPI_ISL_730589, EPI_ISL_730590                                                                                 | Prince of Wales Hospital                                                                                                                                                                                                    | Hong Kong Department of Health                                                                                                                                                                                              | Mak Gannon C.K., Lam Edman T.K., Chan Rickjason C.W., Tsang Dominic N.C.                                                                                                     |
| EPI_ISL_730591, EPI_ISL_730592                                                                                                 | Princess Margaret Hospital                                                                                                                                                                                                  | Hong Kong Department of Health                                                                                                                                                                                              | Mak Gannon C.K., Lam Edman T.K., Chan Rickjason C.W., Tsang Dominic N.C.                                                                                                     |
| EPI_ISL_730593                                                                                                                 | Private medical practitioner                                                                                                                                                                                                | Hong Kong Department of Health                                                                                                                                                                                              | Mak Gannon C.K., Lam Edman T.K., Chan Rickjason C.W., Tsang Dominic N.C.                                                                                                     |
| EPI_ISL_730594, EPI_ISL_730595                                                                                                 | Queen Elizabeth Hospital                                                                                                                                                                                                    | Hong Kong Department of Health                                                                                                                                                                                              | Mak Gannon C.K., Lam Edman T.K., Chan Rickjason C.W., Tsang Dominic N.C.                                                                                                     |
| EPI_ISL_730596, EPI_ISL_730597, EPI_ISL_730598, EPI_ISL_730599, EPI_ISL_730600                                                 | Queen Mary Hospital                                                                                                                                                                                                         | Hong Kong Department of Health                                                                                                                                                                                              | Mak Gannon C.K., Lam Edman T.K., Chan Rickjason C.W., Tsang Dominic N.C.                                                                                                     |
| EPI_ISL_730601                                                                                                                 | Temporary Specimen Collection Centre at the AsiaWorld-Expo                                                                                                                                                                  | Hong Kong Department of Health                                                                                                                                                                                              | Mak Gannon C.K., Lam Edman T.K., Chan Rickjason C.W., Tsang Dominic N.C.                                                                                                     |
| EPI_ISL_730602, EPI_ISL_730603                                                                                                 | Tseung Kwan O Hospital                                                                                                                                                                                                      | Hong Kong Department of Health                                                                                                                                                                                              | Mak Gannon C.K., Lam Edman T.K., Chan Rickjason C.W., Tsang Dominic N.C.                                                                                                     |
| EPI_ISL_730604, EPI_ISL_730605, EPI_ISL_730606, EPI_ISL_730607, EPI_ISL_730608, EPI_ISL_730609, EPI_ISL_730610                 | Tuen Mun Hospital                                                                                                                                                                                                           | Hong Kong Department of Health                                                                                                                                                                                              | Mak Gannon C.K., Lam Edman T.K., Chan Rickjason C.W., Tsang Dominic N.C.                                                                                                     |
| EPI_ISL_730611                                                                                                                 | Union Hospital                                                                                                                                                                                                              | Hong Kong Department of Health                                                                                                                                                                                              | Mak Gannon C.K., Lam Edman T.K., Chan Rickjason C.W., Tsang Dominic N.C.                                                                                                     |
| EPI_ISL_730612, EPI_ISL_730613, EPI_ISL_730614, EPI_ISL_730615, EPI_ISL_730616                                                 | United Christian Hospital                                                                                                                                                                                                   | Hong Kong Department of Health                                                                                                                                                                                              | Mak Gannon C.K., Lam Edman T.K., Chan Rickjason C.W., Tsang Dominic N.C.                                                                                                     |
| EPI_ISL_730617                                                                                                                 | Universal Community Testing Programme                                                                                                                                                                                       | Hong Kong Department of Health                                                                                                                                                                                              | Mak Gannon C.K., Lam Edman T.K., Chan Rickjason C.W., Tsang Dominic N.C.                                                                                                     |
| EPI_ISL_730618, EPI_ISL_730619                                                                                                 | Yan Chai Hospital                                                                                                                                                                                                           | Hong Kong Department of Health                                                                                                                                                                                              | Mak Gannon C.K., Lam Edman T.K., Chan Rickjason C.W., Tsang Dominic N.C.                                                                                                     |

|                                                                                                                                                                                                                                                                                                                                                                                                                                                                                                                                                                                                                                                                                                                                                                                                                                                                                                                                                                                                                                                                                                                                                                                                                                                                                                                                                                                                                                                                                                                                                                                                                                                                                                                                                                                                                                                                                                                                                                                                                                                                                                                                                                                                                                                                                                                                                                                                                                                                                                                                                                                                                                                                                                                                                                                                                                                                                                                                                                                                |                                                                                                                                                                                                                             |                                                                                                                                                                                                                             |                                                                                                                                                                                                                                                                                                                                                                                                                                                                                                                                                                                                                                                                                                                                                                                                                               |                                                                                                                                                                                                                                                                                                                                                      |
|------------------------------------------------------------------------------------------------------------------------------------------------------------------------------------------------------------------------------------------------------------------------------------------------------------------------------------------------------------------------------------------------------------------------------------------------------------------------------------------------------------------------------------------------------------------------------------------------------------------------------------------------------------------------------------------------------------------------------------------------------------------------------------------------------------------------------------------------------------------------------------------------------------------------------------------------------------------------------------------------------------------------------------------------------------------------------------------------------------------------------------------------------------------------------------------------------------------------------------------------------------------------------------------------------------------------------------------------------------------------------------------------------------------------------------------------------------------------------------------------------------------------------------------------------------------------------------------------------------------------------------------------------------------------------------------------------------------------------------------------------------------------------------------------------------------------------------------------------------------------------------------------------------------------------------------------------------------------------------------------------------------------------------------------------------------------------------------------------------------------------------------------------------------------------------------------------------------------------------------------------------------------------------------------------------------------------------------------------------------------------------------------------------------------------------------------------------------------------------------------------------------------------------------------------------------------------------------------------------------------------------------------------------------------------------------------------------------------------------------------------------------------------------------------------------------------------------------------------------------------------------------------------------------------------------------------------------------------------------------------|-----------------------------------------------------------------------------------------------------------------------------------------------------------------------------------------------------------------------------|-----------------------------------------------------------------------------------------------------------------------------------------------------------------------------------------------------------------------------|-------------------------------------------------------------------------------------------------------------------------------------------------------------------------------------------------------------------------------------------------------------------------------------------------------------------------------------------------------------------------------------------------------------------------------------------------------------------------------------------------------------------------------------------------------------------------------------------------------------------------------------------------------------------------------------------------------------------------------------------------------------------------------------------------------------------------------|------------------------------------------------------------------------------------------------------------------------------------------------------------------------------------------------------------------------------------------------------------------------------------------------------------------------------------------------------|
| EPI_ISL_735250, EPI_ISL_735251, EPI_ISL_735252, EPI_ISL_735253, EPI_ISL_735254, EPI_ISL_735255, EPI_ISL_735256, EPI_ISL_735257, EPI_ISL_735258                                                                                                                                                                                                                                                                                                                                                                                                                                                                                                                                                                                                                                                                                                                                                                                                                                                                                                                                                                                                                                                                                                                                                                                                                                                                                                                                                                                                                                                                                                                                                                                                                                                                                                                                                                                                                                                                                                                                                                                                                                                                                                                                                                                                                                                                                                                                                                                                                                                                                                                                                                                                                                                                                                                                                                                                                                                 | Group of Genetic Engineering and Biotechnology, Federal Budget Institution of Science 'Central Research Institute of Epidemiology' of The Federal Service on Customers' Rights Protection and Human Well-being Surveillance | Group of Genetic Engineering and Biotechnology, Federal Budget Institution of Science 'Central Research Institute of Epidemiology' of The Federal Service on Customers' Rights Protection and Human Well-being Surveillance | Cherkashina,A.S., Golubeva,A.G., Solovyova,E.D., Valdokhina,A.V., Bulanenko,V.P., Zotova,M.I., Berlina,Y.Y., Speranskaya,A.S., Tivanova,E.V., Shipulina,O.Y., Akimkin,V.G.                                                                                                                                                                                                                                                                                                                                                                                                                                                                                                                                                                                                                                                    |                                                                                                                                                                                                                                                                                                                                                      |
| EPI_ISL_735491                                                                                                                                                                                                                                                                                                                                                                                                                                                                                                                                                                                                                                                                                                                                                                                                                                                                                                                                                                                                                                                                                                                                                                                                                                                                                                                                                                                                                                                                                                                                                                                                                                                                                                                                                                                                                                                                                                                                                                                                                                                                                                                                                                                                                                                                                                                                                                                                                                                                                                                                                                                                                                                                                                                                                                                                                                                                                                                                                                                 | Virology Laboratory, Ospedali Riuniti, Ancona                                                                                                                                                                               | Virology Laboratory, Ospedali Riuniti, Ancona                                                                                                                                                                               | Stefano Menzo, Roberta Longo, Laura Di Sante, Sara Caucci, Patrizia Bagnarelli                                                                                                                                                                                                                                                                                                                                                                                                                                                                                                                                                                                                                                                                                                                                                |                                                                                                                                                                                                                                                                                                                                                      |
| EPI_ISL_738081, EPI_ISL_738082                                                                                                                                                                                                                                                                                                                                                                                                                                                                                                                                                                                                                                                                                                                                                                                                                                                                                                                                                                                                                                                                                                                                                                                                                                                                                                                                                                                                                                                                                                                                                                                                                                                                                                                                                                                                                                                                                                                                                                                                                                                                                                                                                                                                                                                                                                                                                                                                                                                                                                                                                                                                                                                                                                                                                                                                                                                                                                                                                                 | Biology, College of Education                                                                                                                                                                                               | Biology, College of Education                                                                                                                                                                                               | Nirani,S.S., Al-Jaf,S.M., Mahmood,Z.H.                                                                                                                                                                                                                                                                                                                                                                                                                                                                                                                                                                                                                                                                                                                                                                                        |                                                                                                                                                                                                                                                                                                                                                      |
| EPI_ISL_738138, EPI_ISL_738140                                                                                                                                                                                                                                                                                                                                                                                                                                                                                                                                                                                                                                                                                                                                                                                                                                                                                                                                                                                                                                                                                                                                                                                                                                                                                                                                                                                                                                                                                                                                                                                                                                                                                                                                                                                                                                                                                                                                                                                                                                                                                                                                                                                                                                                                                                                                                                                                                                                                                                                                                                                                                                                                                                                                                                                                                                                                                                                                                                 | Molecular Diagnostics Mater Dei Hospital                                                                                                                                                                                    | Molecular Diagnostics Mater Dei Hospital                                                                                                                                                                                    | Graziella Zahra, Rebecca Borg, Chanelle Cilia                                                                                                                                                                                                                                                                                                                                                                                                                                                                                                                                                                                                                                                                                                                                                                                 |                                                                                                                                                                                                                                                                                                                                                      |
| EPI_ISL_745191, EPI_ISL_746320                                                                                                                                                                                                                                                                                                                                                                                                                                                                                                                                                                                                                                                                                                                                                                                                                                                                                                                                                                                                                                                                                                                                                                                                                                                                                                                                                                                                                                                                                                                                                                                                                                                                                                                                                                                                                                                                                                                                                                                                                                                                                                                                                                                                                                                                                                                                                                                                                                                                                                                                                                                                                                                                                                                                                                                                                                                                                                                                                                 | Mubarak Al-Kabeer Hospital                                                                                                                                                                                                  | Virology Unit, Microbiology Department, Faculty of Medicine, Kuwait University                                                                                                                                              | Nada Madi                                                                                                                                                                                                                                                                                                                                                                                                                                                                                                                                                                                                                                                                                                                                                                                                                     |                                                                                                                                                                                                                                                                                                                                                      |
| EPI_ISL_746322                                                                                                                                                                                                                                                                                                                                                                                                                                                                                                                                                                                                                                                                                                                                                                                                                                                                                                                                                                                                                                                                                                                                                                                                                                                                                                                                                                                                                                                                                                                                                                                                                                                                                                                                                                                                                                                                                                                                                                                                                                                                                                                                                                                                                                                                                                                                                                                                                                                                                                                                                                                                                                                                                                                                                                                                                                                                                                                                                                                 | Mubarak Al-Kabeer Hospital                                                                                                                                                                                                  | Virology Unit, Department of Microbiology, Faculty of Medicine, Kuwait University                                                                                                                                           | Nada Madi                                                                                                                                                                                                                                                                                                                                                                                                                                                                                                                                                                                                                                                                                                                                                                                                                     |                                                                                                                                                                                                                                                                                                                                                      |
| EPI_ISL_759868                                                                                                                                                                                                                                                                                                                                                                                                                                                                                                                                                                                                                                                                                                                                                                                                                                                                                                                                                                                                                                                                                                                                                                                                                                                                                                                                                                                                                                                                                                                                                                                                                                                                                                                                                                                                                                                                                                                                                                                                                                                                                                                                                                                                                                                                                                                                                                                                                                                                                                                                                                                                                                                                                                                                                                                                                                                                                                                                                                                 | Virology, Iran University of Medical Sciences                                                                                                                                                                               | Razi Vaccine and Serum Research Institute, Co.                                                                                                                                                                              | Keyvani,H., Ranjbar,Mm., Keyvani,F. and Soleimani,S.                                                                                                                                                                                                                                                                                                                                                                                                                                                                                                                                                                                                                                                                                                                                                                          |                                                                                                                                                                                                                                                                                                                                                      |
| EPI_ISL_765478                                                                                                                                                                                                                                                                                                                                                                                                                                                                                                                                                                                                                                                                                                                                                                                                                                                                                                                                                                                                                                                                                                                                                                                                                                                                                                                                                                                                                                                                                                                                                                                                                                                                                                                                                                                                                                                                                                                                                                                                                                                                                                                                                                                                                                                                                                                                                                                                                                                                                                                                                                                                                                                                                                                                                                                                                                                                                                                                                                                 | EHPAD                                                                                                                                                                                                                       | National Reference Center for Viruses of Respiratory Infections, Institut Pasteur, Paris                                                                                                                                    | Marion Barbet, Sylvie Behillil, Méline Bizard, Angela Brisebarre, Camille Capel, Etienne Simon-Lorière, Vincent Enouf, Maud Vanpeene, Sylvie van der Werf                                                                                                                                                                                                                                                                                                                                                                                                                                                                                                                                                                                                                                                                     |                                                                                                                                                                                                                                                                                                                                                      |
| EPI_ISL_767839, EPI_ISL_767840                                                                                                                                                                                                                                                                                                                                                                                                                                                                                                                                                                                                                                                                                                                                                                                                                                                                                                                                                                                                                                                                                                                                                                                                                                                                                                                                                                                                                                                                                                                                                                                                                                                                                                                                                                                                                                                                                                                                                                                                                                                                                                                                                                                                                                                                                                                                                                                                                                                                                                                                                                                                                                                                                                                                                                                                                                                                                                                                                                 | Virology, Iran University of Medical Sciences                                                                                                                                                                               | Virology, Iran University of Medical Sciences                                                                                                                                                                               | Keyvani,H., Ranjbar,M.M., Keyvani,F., Soleimani,S.                                                                                                                                                                                                                                                                                                                                                                                                                                                                                                                                                                                                                                                                                                                                                                            |                                                                                                                                                                                                                                                                                                                                                      |
| EPI_ISL_767841, EPI_ISL_767842, EPI_ISL_767843, EPI_ISL_767844, EPI_ISL_767845, EPI_ISL_767846, EPI_ISL_767847, EPI_ISL_767848, EPI_ISL_767849                                                                                                                                                                                                                                                                                                                                                                                                                                                                                                                                                                                                                                                                                                                                                                                                                                                                                                                                                                                                                                                                                                                                                                                                                                                                                                                                                                                                                                                                                                                                                                                                                                                                                                                                                                                                                                                                                                                                                                                                                                                                                                                                                                                                                                                                                                                                                                                                                                                                                                                                                                                                                                                                                                                                                                                                                                                 | Virology, Iran University of Medical Sciences                                                                                                                                                                               | Virology, Iran University of Medical Sciences                                                                                                                                                                               | Keyvani,H., Ranjbar,Mm., Keyvani,F., Soleimani,S.                                                                                                                                                                                                                                                                                                                                                                                                                                                                                                                                                                                                                                                                                                                                                                             |                                                                                                                                                                                                                                                                                                                                                      |
| EPI_ISL_768761                                                                                                                                                                                                                                                                                                                                                                                                                                                                                                                                                                                                                                                                                                                                                                                                                                                                                                                                                                                                                                                                                                                                                                                                                                                                                                                                                                                                                                                                                                                                                                                                                                                                                                                                                                                                                                                                                                                                                                                                                                                                                                                                                                                                                                                                                                                                                                                                                                                                                                                                                                                                                                                                                                                                                                                                                                                                                                                                                                                 | AIID                                                                                                                                                                                                                        | Irish Coronavirus Sequencing Consortium - National Virus Reference Laboratory                                                                                                                                               | Michael Carr, Gabriel Gonzalez, Alejandro Abner Garcia Leon, Patrick Mallon                                                                                                                                                                                                                                                                                                                                                                                                                                                                                                                                                                                                                                                                                                                                                   |                                                                                                                                                                                                                                                                                                                                                      |
| EPI_ISL_771371                                                                                                                                                                                                                                                                                                                                                                                                                                                                                                                                                                                                                                                                                                                                                                                                                                                                                                                                                                                                                                                                                                                                                                                                                                                                                                                                                                                                                                                                                                                                                                                                                                                                                                                                                                                                                                                                                                                                                                                                                                                                                                                                                                                                                                                                                                                                                                                                                                                                                                                                                                                                                                                                                                                                                                                                                                                                                                                                                                                 | CardioVir EA-4684, University of Reims Champagne Ardenne                                                                                                                                                                    | CardioVir EA-4684, University of Reims Champagne Ardenne                                                                                                                                                                    | Callon,D., N'Guyen,Y., Lebreil,A.-L., Fomes,P. and Andreoletti,L.                                                                                                                                                                                                                                                                                                                                                                                                                                                                                                                                                                                                                                                                                                                                                             |                                                                                                                                                                                                                                                                                                                                                      |
| EPI_ISL_779383, EPI_ISL_779384, EPI_ISL_779385, EPI_ISL_779386, EPI_ISL_779387, EPI_ISL_779388, EPI_ISL_779389, EPI_ISL_779390, EPI_ISL_779391, EPI_ISL_779392, EPI_ISL_779393, EPI_ISL_779394, EPI_ISL_779395                                                                                                                                                                                                                                                                                                                                                                                                                                                                                                                                                                                                                                                                                                                                                                                                                                                                                                                                                                                                                                                                                                                                                                                                                                                                                                                                                                                                                                                                                                                                                                                                                                                                                                                                                                                                                                                                                                                                                                                                                                                                                                                                                                                                                                                                                                                                                                                                                                                                                                                                                                                                                                                                                                                                                                                 | see above                                                                                                                                                                                                                   | see above                                                                                                                                                                                                                   | see above                                                                                                                                                                                                                                                                                                                                                                                                                                                                                                                                                                                                                                                                                                                                                                                                                     |                                                                                                                                                                                                                                                                                                                                                      |
| see above                                                                                                                                                                                                                                                                                                                                                                                                                                                                                                                                                                                                                                                                                                                                                                                                                                                                                                                                                                                                                                                                                                                                                                                                                                                                                                                                                                                                                                                                                                                                                                                                                                                                                                                                                                                                                                                                                                                                                                                                                                                                                                                                                                                                                                                                                                                                                                                                                                                                                                                                                                                                                                                                                                                                                                                                                                                                                                                                                                                      | Siloam Hospital Lippo Village                                                                                                                                                                                               | Mochtar Riady Institute for Nanotechnology-Universitas Pelita Harapan                                                                                                                                                       | Aksar C Lages, David Rustandi, Ivet M Suriapranata, Rinaldy Kusuma, Febi Andriani, Tri Shinta Kurniasih, Riska N Taufik, Young O Larasati, Rury M Wahyuni, Irawan Yusuf                                                                                                                                                                                                                                                                                                                                                                                                                                                                                                                                                                                                                                                       |                                                                                                                                                                                                                                                                                                                                                      |
| EPI_ISL_794609                                                                                                                                                                                                                                                                                                                                                                                                                                                                                                                                                                                                                                                                                                                                                                                                                                                                                                                                                                                                                                                                                                                                                                                                                                                                                                                                                                                                                                                                                                                                                                                                                                                                                                                                                                                                                                                                                                                                                                                                                                                                                                                                                                                                                                                                                                                                                                                                                                                                                                                                                                                                                                                                                                                                                                                                                                                                                                                                                                                 | Virology, tehran university of medical sciences                                                                                                                                                                             | Virology, tehran university of medical sciences                                                                                                                                                                             | Soltani,S., Zandi,M. and Abbasi,S.                                                                                                                                                                                                                                                                                                                                                                                                                                                                                                                                                                                                                                                                                                                                                                                            |                                                                                                                                                                                                                                                                                                                                                      |
| EPI_ISL_803107                                                                                                                                                                                                                                                                                                                                                                                                                                                                                                                                                                                                                                                                                                                                                                                                                                                                                                                                                                                                                                                                                                                                                                                                                                                                                                                                                                                                                                                                                                                                                                                                                                                                                                                                                                                                                                                                                                                                                                                                                                                                                                                                                                                                                                                                                                                                                                                                                                                                                                                                                                                                                                                                                                                                                                                                                                                                                                                                                                                 | COVID-19 National Reference Laboratory, Pasteur Institute of Iran                                                                                                                                                           | COVID-19 National Reference Laboratory, Pasteur Institute of Iran                                                                                                                                                           | Jalali,T., Pouriayevali,M.H., Shoja,Z., Ahmadi,Z., Sadjadi,M., TavakoliRad,M., Azadmanjiri,S., Fereydouni,Z., Mohebbali,M., Zarei,Z., Hassanpour,G., Zainali,M., Gouya,M.M., Khayatizadeh,S.,Parsaei,M., Sarafraz,N., Hassanzadeh,M., Azarm,A., Karami,C.,Sasani,F., Heidari,Z. and Salehi-Vaziri,M.                                                                                                                                                                                                                                                                                                                                                                                                                                                                                                                          |                                                                                                                                                                                                                                                                                                                                                      |
| EPI_ISL_804042                                                                                                                                                                                                                                                                                                                                                                                                                                                                                                                                                                                                                                                                                                                                                                                                                                                                                                                                                                                                                                                                                                                                                                                                                                                                                                                                                                                                                                                                                                                                                                                                                                                                                                                                                                                                                                                                                                                                                                                                                                                                                                                                                                                                                                                                                                                                                                                                                                                                                                                                                                                                                                                                                                                                                                                                                                                                                                                                                                                 | SC (UCO) Igiene e Sanità Pubblica (funzione integrata con SC Microbiologia e Virologia) e Laboratory of Molecular Virology of the International Centre for Genetic Engineering and Biotechnology (ICGEB)                    | ARGO Laboratorio Genomica ed Epigenomica                                                                                                                                                                                    | Licastro D, Dal Monego S, Degasperi M, Marcello A, D'Agaro P                                                                                                                                                                                                                                                                                                                                                                                                                                                                                                                                                                                                                                                                                                                                                                  |                                                                                                                                                                                                                                                                                                                                                      |
| EPI_ISL_804950, EPI_ISL_804951                                                                                                                                                                                                                                                                                                                                                                                                                                                                                                                                                                                                                                                                                                                                                                                                                                                                                                                                                                                                                                                                                                                                                                                                                                                                                                                                                                                                                                                                                                                                                                                                                                                                                                                                                                                                                                                                                                                                                                                                                                                                                                                                                                                                                                                                                                                                                                                                                                                                                                                                                                                                                                                                                                                                                                                                                                                                                                                                                                 | Hospital Comarcal de Melilla                                                                                                                                                                                                | Instituto de Salud Carlos III                                                                                                                                                                                               | Iglesias-Caballero, M. Molinero Calamita, M. González-Esguevillas, M. Camarero, S. Pozo, F. Casas, I. Jiménez, P. Jiménez, M. Zaballos, A. Monzón, S. Varona, S. Juliá, M. Cuesta, I, J. López                                                                                                                                                                                                                                                                                                                                                                                                                                                                                                                                                                                                                                |                                                                                                                                                                                                                                                                                                                                                      |
| EPI_ISL_807148, EPI_ISL_807149                                                                                                                                                                                                                                                                                                                                                                                                                                                                                                                                                                                                                                                                                                                                                                                                                                                                                                                                                                                                                                                                                                                                                                                                                                                                                                                                                                                                                                                                                                                                                                                                                                                                                                                                                                                                                                                                                                                                                                                                                                                                                                                                                                                                                                                                                                                                                                                                                                                                                                                                                                                                                                                                                                                                                                                                                                                                                                                                                                 | Department of Virology                                                                                                                                                                                                      | Department of Virology                                                                                                                                                                                                      | Massab Umair, Aamer Ikram, Muhammad Salman, Sana Tamim, Nazish Badar, Adnan Khurshid, Salmaan Sharif, Zaira Rehman, Abdul Ahad, Hamza Ahmad, Samee Ullah                                                                                                                                                                                                                                                                                                                                                                                                                                                                                                                                                                                                                                                                      |                                                                                                                                                                                                                                                                                                                                                      |
| EPI_ISL_807157                                                                                                                                                                                                                                                                                                                                                                                                                                                                                                                                                                                                                                                                                                                                                                                                                                                                                                                                                                                                                                                                                                                                                                                                                                                                                                                                                                                                                                                                                                                                                                                                                                                                                                                                                                                                                                                                                                                                                                                                                                                                                                                                                                                                                                                                                                                                                                                                                                                                                                                                                                                                                                                                                                                                                                                                                                                                                                                                                                                 | Mubarak Al-Kabeer Hospital                                                                                                                                                                                                  | Virology Unit, Department of Microbiology, Faculty of Medicine                                                                                                                                                              | Dr. Nada Madi, Dr. Mohammed Sadeq, Mrs. Anfal Al-Adwani                                                                                                                                                                                                                                                                                                                                                                                                                                                                                                                                                                                                                                                                                                                                                                       |                                                                                                                                                                                                                                                                                                                                                      |
| EPI_ISL_812969                                                                                                                                                                                                                                                                                                                                                                                                                                                                                                                                                                                                                                                                                                                                                                                                                                                                                                                                                                                                                                                                                                                                                                                                                                                                                                                                                                                                                                                                                                                                                                                                                                                                                                                                                                                                                                                                                                                                                                                                                                                                                                                                                                                                                                                                                                                                                                                                                                                                                                                                                                                                                                                                                                                                                                                                                                                                                                                                                                                 | Institute for Forensic Medicine, Faculty of Medicine, University of Belgrade                                                                                                                                                | Institute for Forensic Medicine, Faculty of Medicine, University of Belgrade                                                                                                                                                | Skadric,I.R. and Bogdanovic,M.D.                                                                                                                                                                                                                                                                                                                                                                                                                                                                                                                                                                                                                                                                                                                                                                                              |                                                                                                                                                                                                                                                                                                                                                      |
| EPI_ISL_814092, EPI_ISL_814093, EPI_ISL_814094, EPI_ISL_814095, EPI_ISL_814096, EPI_ISL_814097, EPI_ISL_814098, EPI_ISL_814099, EPI_ISL_814100, EPI_ISL_814101, EPI_ISL_814102, EPI_ISL_814103, EPI_ISL_814104, EPI_ISL_814105, EPI_ISL_814106, EPI_ISL_814107, EPI_ISL_814108, EPI_ISL_814109, EPI_ISL_814110, EPI_ISL_814111, EPI_ISL_814112, EPI_ISL_814113, EPI_ISL_814114, EPI_ISL_814115, EPI_ISL_814116, EPI_ISL_814117, EPI_ISL_814118, EPI_ISL_814119, EPI_ISL_814120, EPI_ISL_814121, EPI_ISL_814122, EPI_ISL_814123, EPI_ISL_814124, EPI_ISL_814125, EPI_ISL_814126, EPI_ISL_814127, EPI_ISL_814128, EPI_ISL_814129, EPI_ISL_814130, EPI_ISL_814131, EPI_ISL_814132, EPI_ISL_814133, EPI_ISL_814134, EPI_ISL_814135, EPI_ISL_814136, EPI_ISL_814137, EPI_ISL_814138, EPI_ISL_814139, EPI_ISL_814140, EPI_ISL_814141, EPI_ISL_814142, EPI_ISL_814143, EPI_ISL_814144, EPI_ISL_814145, EPI_ISL_814146, EPI_ISL_814147, EPI_ISL_814148, EPI_ISL_814149, EPI_ISL_814150, EPI_ISL_814151, EPI_ISL_814152, EPI_ISL_814153, EPI_ISL_814154, EPI_ISL_814155, EPI_ISL_814156, EPI_ISL_814157, EPI_ISL_814158, EPI_ISL_814159, EPI_ISL_814160, EPI_ISL_814161, EPI_ISL_814162, EPI_ISL_814163, EPI_ISL_814164, EPI_ISL_814165, EPI_ISL_814166, EPI_ISL_814167, EPI_ISL_814168, EPI_ISL_814169, EPI_ISL_814170, EPI_ISL_814171, EPI_ISL_814172, EPI_ISL_814173, EPI_ISL_814174, EPI_ISL_814175, EPI_ISL_814176, EPI_ISL_814177, EPI_ISL_814178, EPI_ISL_814179, EPI_ISL_814180, EPI_ISL_814181, EPI_ISL_814182, EPI_ISL_814183, EPI_ISL_814184, EPI_ISL_814185, EPI_ISL_814186, EPI_ISL_814187, EPI_ISL_814188, EPI_ISL_814189, EPI_ISL_814190, EPI_ISL_814191, EPI_ISL_814192, EPI_ISL_814193, EPI_ISL_814194, EPI_ISL_814195, EPI_ISL_814196, EPI_ISL_814197, EPI_ISL_814198, EPI_ISL_814199, EPI_ISL_814200, EPI_ISL_814201, EPI_ISL_814202, EPI_ISL_814203, EPI_ISL_814204, EPI_ISL_814205, EPI_ISL_814206, EPI_ISL_814207, EPI_ISL_814208, EPI_ISL_814209, EPI_ISL_814210, EPI_ISL_814211, EPI_ISL_814212, EPI_ISL_814213, EPI_ISL_814214, EPI_ISL_814215, EPI_ISL_814216, EPI_ISL_814217, EPI_ISL_814218, EPI_ISL_814219, EPI_ISL_814220, EPI_ISL_814221, EPI_ISL_814222, EPI_ISL_814223, EPI_ISL_814224, EPI_ISL_814225, EPI_ISL_814226, EPI_ISL_814227, EPI_ISL_814228, EPI_ISL_814229, EPI_ISL_814230, EPI_ISL_814231, EPI_ISL_814232, EPI_ISL_814233, EPI_ISL_814234, EPI_ISL_814235, EPI_ISL_814236, EPI_ISL_814237, EPI_ISL_814238, EPI_ISL_814239, EPI_ISL_814240, EPI_ISL_814241, EPI_ISL_814242, EPI_ISL_814243, EPI_ISL_814244, EPI_ISL_814245, EPI_ISL_814246, EPI_ISL_814247, EPI_ISL_814248, EPI_ISL_814249, EPI_ISL_814250, EPI_ISL_814251, EPI_ISL_814252, EPI_ISL_814253, EPI_ISL_814254, EPI_ISL_814255, EPI_ISL_814256, EPI_ISL_814257, EPI_ISL_814258, EPI_ISL_814259, EPI_ISL_814260, EPI_ISL_814261, EPI_ISL_814262, EPI_ISL_814263, EPI_ISL_814264, EPI_ISL_814265, EPI_ISL_814266, EPI_ISL_814267, EPI_ISL_814268, EPI_ISL_814269, EPI_ISL_814270, EPI_ISL_814271 | see above                                                                                                                                                                                                                   | Israel Central Virology laboratory                                                                                                                                                                                          | Israel National Consortium for SARS-CoV-2 sequencing                                                                                                                                                                                                                                                                                                                                                                                                                                                                                                                                                                                                                                                                                                                                                                          | Neta Zuckerman, Efrat Dahan Bucris, Michal Mandelboim, Dana Bar-Ilan, Oran Erster, Tzvia Mann, Omer Murik, David A. Zeevi, Assaf Rokney, Joseph Jaffe, Eva Nachum, Maya Davidovich Cohen, Ephraim Fass, Gal Zizelski Valenci, Mor Rubinstein, Efrat Rorman, Israel Nissán, Efrat Glick-Saar, Omri Nayshool, Gideon Rechavi, Ella Mendelson, Orna Mor |
| EPI_ISL_816270                                                                                                                                                                                                                                                                                                                                                                                                                                                                                                                                                                                                                                                                                                                                                                                                                                                                                                                                                                                                                                                                                                                                                                                                                                                                                                                                                                                                                                                                                                                                                                                                                                                                                                                                                                                                                                                                                                                                                                                                                                                                                                                                                                                                                                                                                                                                                                                                                                                                                                                                                                                                                                                                                                                                                                                                                                                                                                                                                                                 | Virology Department, Sheffield Teaching Hospitals NHS Foundation Trust/Department of Infection, Immunity and Cardiovascular Disease, The Medical School, University of Sheffield                                            | COVID-19 Genomics UK (COG-UK) Consortium                                                                                                                                                                                    | Thushan de Silva, Matthew Parker, Nikki Smith, Adri Agyal, Rebecca Brown, Luke Green, Rachel Tucker, Paul Parsons, Danielle Groves, Katie Johnson, Laura Carrilero, Alex Keeley, Dave Partridge, Matthew Wyles, Benjamin Lindsey, Mehmet Yavuz, Mohammad Raza, Cariad Evans                                                                                                                                                                                                                                                                                                                                                                                                                                                                                                                                                   |                                                                                                                                                                                                                                                                                                                                                      |
| EPI_ISL_825489                                                                                                                                                                                                                                                                                                                                                                                                                                                                                                                                                                                                                                                                                                                                                                                                                                                                                                                                                                                                                                                                                                                                                                                                                                                                                                                                                                                                                                                                                                                                                                                                                                                                                                                                                                                                                                                                                                                                                                                                                                                                                                                                                                                                                                                                                                                                                                                                                                                                                                                                                                                                                                                                                                                                                                                                                                                                                                                                                                                 | NHLS-IALCH                                                                                                                                                                                                                  | KRISP, KZN Research Innovation and Sequencing Platform                                                                                                                                                                      | Gandhari J, Pillay S, Lessells R, Mdlalose K, York D, Khan S, Tegally H, Wilkinson E, de Oliveira T                                                                                                                                                                                                                                                                                                                                                                                                                                                                                                                                                                                                                                                                                                                           |                                                                                                                                                                                                                                                                                                                                                      |
| EPI_ISL_827469, EPI_ISL_828744, EPI_ISL_829037                                                                                                                                                                                                                                                                                                                                                                                                                                                                                                                                                                                                                                                                                                                                                                                                                                                                                                                                                                                                                                                                                                                                                                                                                                                                                                                                                                                                                                                                                                                                                                                                                                                                                                                                                                                                                                                                                                                                                                                                                                                                                                                                                                                                                                                                                                                                                                                                                                                                                                                                                                                                                                                                                                                                                                                                                                                                                                                                                 | deCODE genetics                                                                                                                                                                                                             | deCODE genetics                                                                                                                                                                                                             | Daniel F Gudbjartsson; Agnar Helgason; Hakon Jonsson; Olafur T Magnusson; Pall Melsted; Gudmundur L Norddahl; Jona Saemundsdottir; Asgeir Sigurdsson; Patrick Sulem; Arna B Agustsdottir; Hannes Eggertsson; Berglind Eirisdottir; Run Fridrikdottir; Elisabet E Gardsardottir; Gudmundur Georsson; Olafia S Gretarsdottir; Kjartan R Gudmundsson; Thora R Gunnarsdottir; Arnaldur Gylfason; Hilma Holm; Brynjar O Jenson; Aslaug Jonasdottir; Kamilla S Josefsdottir; Thordur Kristjansson; Droplaug N Magnusdottir; Solvi Rognvaldsson; Louise le Roux; Gudrun Sigmundsdottir; Gardar Sveinbjornsson; Kristin E Sveinsdottir; Maney Sveinsdottir; Emil A Thorarensen; Bjarni Thorbjornsson; Gisli Masson; Ingileif Jonsdottir; Alma Moller; Thorolfur Gudnason; Karl G Kristinnson; Unnur Thorsteinsdottir; Kari Stefansson |                                                                                                                                                                                                                                                                                                                                                      |
| EPI_ISL_832178, EPI_ISL_832179, EPI_ISL_832180                                                                                                                                                                                                                                                                                                                                                                                                                                                                                                                                                                                                                                                                                                                                                                                                                                                                                                                                                                                                                                                                                                                                                                                                                                                                                                                                                                                                                                                                                                                                                                                                                                                                                                                                                                                                                                                                                                                                                                                                                                                                                                                                                                                                                                                                                                                                                                                                                                                                                                                                                                                                                                                                                                                                                                                                                                                                                                                                                 | Hospital                                                                                                                                                                                                                    | National Reference Center for Viruses of Respiratory Infections, Institut Pasteur, Paris                                                                                                                                    | Marion Barbet, Sylvie Behillil, Méline Bizard, Angela Brisebarre, Camille Capel, Etienne Simon-Lorière, Vincent Enouf, Maud Vanpeene, Sylvie van der Werf, Laurent Roudiere                                                                                                                                                                                                                                                                                                                                                                                                                                                                                                                                                                                                                                                   |                                                                                                                                                                                                                                                                                                                                                      |
| EPI_ISL_832182, EPI_ISL_832183, EPI_ISL_832188, EPI_ISL_832190, EPI_ISL_832191                                                                                                                                                                                                                                                                                                                                                                                                                                                                                                                                                                                                                                                                                                                                                                                                                                                                                                                                                                                                                                                                                                                                                                                                                                                                                                                                                                                                                                                                                                                                                                                                                                                                                                                                                                                                                                                                                                                                                                                                                                                                                                                                                                                                                                                                                                                                                                                                                                                                                                                                                                                                                                                                                                                                                                                                                                                                                                                 | Laboratory Analyses Med                                                                                                                                                                                                     | National Reference Center for Viruses of Respiratory Infections, Institut Pasteur, Paris                                                                                                                                    | Marion Barbet, Sylvie Behillil, Méline Bizard, Angela Brisebarre, Camille Capel, Etienne Simon-Lorière, Vincent Enouf, Maud Vanpeene, Sylvie van der Werf, Briec Letaure                                                                                                                                                                                                                                                                                                                                                                                                                                                                                                                                                                                                                                                      |                                                                                                                                                                                                                                                                                                                                                      |
| EPI_ISL_832197                                                                                                                                                                                                                                                                                                                                                                                                                                                                                                                                                                                                                                                                                                                                                                                                                                                                                                                                                                                                                                                                                                                                                                                                                                                                                                                                                                                                                                                                                                                                                                                                                                                                                                                                                                                                                                                                                                                                                                                                                                                                                                                                                                                                                                                                                                                                                                                                                                                                                                                                                                                                                                                                                                                                                                                                                                                                                                                                                                                 | Hospital                                                                                                                                                                                                                    | National Reference Center for Viruses of Respiratory Infections, Institut Pasteur, Paris                                                                                                                                    | Marion Barbet, Sylvie Behillil, Méline Bizard, Angela Brisebarre, Camille Capel, Etienne Simon-Lorière, Vincent Enouf, Maud Vanpeene, Sylvie van der Werf, Esther Gyde                                                                                                                                                                                                                                                                                                                                                                                                                                                                                                                                                                                                                                                        |                                                                                                                                                                                                                                                                                                                                                      |

|                                                                                                                                                                                                                                                                                                                                                                                                                                                                                                                                                                                                                                                                                                                                                                                                                                                                                                                                                                                                                                                |                                                                                                                                                                                                   |                                                                                                                                                                                                                                                                                                                                                                                                                                                                                                                                                                                                                                                                                                                                                                                                                                                    |                                                                                                                                                                                                                                                                                                                                                                                                                                                                                                                                                                                                                 |
|------------------------------------------------------------------------------------------------------------------------------------------------------------------------------------------------------------------------------------------------------------------------------------------------------------------------------------------------------------------------------------------------------------------------------------------------------------------------------------------------------------------------------------------------------------------------------------------------------------------------------------------------------------------------------------------------------------------------------------------------------------------------------------------------------------------------------------------------------------------------------------------------------------------------------------------------------------------------------------------------------------------------------------------------|---------------------------------------------------------------------------------------------------------------------------------------------------------------------------------------------------|----------------------------------------------------------------------------------------------------------------------------------------------------------------------------------------------------------------------------------------------------------------------------------------------------------------------------------------------------------------------------------------------------------------------------------------------------------------------------------------------------------------------------------------------------------------------------------------------------------------------------------------------------------------------------------------------------------------------------------------------------------------------------------------------------------------------------------------------------|-----------------------------------------------------------------------------------------------------------------------------------------------------------------------------------------------------------------------------------------------------------------------------------------------------------------------------------------------------------------------------------------------------------------------------------------------------------------------------------------------------------------------------------------------------------------------------------------------------------------|
| EPI_ISL_832201, EPI_ISL_832202                                                                                                                                                                                                                                                                                                                                                                                                                                                                                                                                                                                                                                                                                                                                                                                                                                                                                                                                                                                                                 | Hospital                                                                                                                                                                                          | National Reference Center for Viruses of Respiratory Infections, Institut Pasteur, Paris                                                                                                                                                                                                                                                                                                                                                                                                                                                                                                                                                                                                                                                                                                                                                           | Marion Barbet, Sylvie Behillil, Méline Bizard, Angela Brisebarre, Camille Capel, Etienne Simon-Lorière, Vincent Enouf, Maud Vanpeene, Sylvie van der Werf, Patricia Stoessel-Thouvenin                                                                                                                                                                                                                                                                                                                                                                                                                          |
| EPI_ISL_848070, EPI_ISL_848071, EPI_ISL_848074, EPI_ISL_848076, EPI_ISL_848078, EPI_ISL_848079, EPI_ISL_848080, EPI_ISL_848081, EPI_ISL_848082                                                                                                                                                                                                                                                                                                                                                                                                                                                                                                                                                                                                                                                                                                                                                                                                                                                                                                 | Laboratory of Clinical Research on Dermatoozoonoses in Domestic Animals, Evandro Chagas National Institute of Infectious Diseases, Oswaldo Cruz Foundation (Fiocruz), Rio de Janeiro, RJ, Brazil. | Laboratory of Respiratory Viruses and Measles, Oswaldo Cruz Institute, FIOCRUZ                                                                                                                                                                                                                                                                                                                                                                                                                                                                                                                                                                                                                                                                                                                                                                     | Guilherme Amaral Calvet, Michelle Fernanda Borges da Silva, Anielle de Pina Costa, Ezequias Batista Martins, Isabella Campos Vargas de Moraes, Lusiele Guaraldo, Patrícia Brasil, Sandro Antônio Pereira, Rodrigo Caldas Menezes, Isabella Dib Ferreira Gremião, Lucas Oliveira Keidel, Shanna Araujo dos Santos, Artur Augusto Velho Mendes Junior, Renato Orsini Ornellas, Maria Ogrzewalska, PaolaCristina Resende, Alex Pauvolid-Corrêa, Fernando do Couto Motta, Alice Sampaio Barreto da Rocha, Thiago C. Souza, Marilda Mendonça Siqueira on behalf of the Fiocruz COVID-19 Genomic Surveillance Network |
| EPI_ISL_860632                                                                                                                                                                                                                                                                                                                                                                                                                                                                                                                                                                                                                                                                                                                                                                                                                                                                                                                                                                                                                                 | Ampath-Netcare                                                                                                                                                                                    | KRISP, KZn Research Innovation and Sequencing Platform                                                                                                                                                                                                                                                                                                                                                                                                                                                                                                                                                                                                                                                                                                                                                                                             | Giandhari J, Pillay S, Lessells R, Mdlalose K, York D, Khan S, Tegally H, Wilkinson E, de Oliveira T                                                                                                                                                                                                                                                                                                                                                                                                                                                                                                            |
| EPI_ISL_862049                                                                                                                                                                                                                                                                                                                                                                                                                                                                                                                                                                                                                                                                                                                                                                                                                                                                                                                                                                                                                                 | Department of Microbiology, National Influenza Reference Laboratory for Northern Greece                                                                                                           | Department of Microbiology, National Influenza Reference Laboratory for Northern Greece                                                                                                                                                                                                                                                                                                                                                                                                                                                                                                                                                                                                                                                                                                                                                            | Anna Papa, Styliani Pappa                                                                                                                                                                                                                                                                                                                                                                                                                                                                                                                                                                                       |
| EPI_ISL_869166                                                                                                                                                                                                                                                                                                                                                                                                                                                                                                                                                                                                                                                                                                                                                                                                                                                                                                                                                                                                                                 | Laboratory of Microbiology, ASST Setaletlaghi, Varese, Italy                                                                                                                                      | Laboratory of Microbiology, ASST Setaletlaghi, Varese, Italy                                                                                                                                                                                                                                                                                                                                                                                                                                                                                                                                                                                                                                                                                                                                                                                       | Maggi,F., Novazzi,F., Genoni,A., Baj,A., Spezia,P.G., Focosi,D., Zago,C., Colombo,A., Cassani,G., Pasciuta,R., Tamborini,A.,Rossi,A., Prestia,M., Capuano,R., Azzi,L., Donadini,A., Catanoso,G., Grossi,P., Maffioli,L. and Bonelli,G.                                                                                                                                                                                                                                                                                                                                                                          |
| EPI_ISL_869240                                                                                                                                                                                                                                                                                                                                                                                                                                                                                                                                                                                                                                                                                                                                                                                                                                                                                                                                                                                                                                 | Laboratory of Microbiology, ASST Setaletlaghi, Varese, Italy                                                                                                                                      | Laboratory of Microbiology, ASST Setaletlaghi, Varese, Italy                                                                                                                                                                                                                                                                                                                                                                                                                                                                                                                                                                                                                                                                                                                                                                                       | Novazzi,F., Genoni,A., Focosi,D., Baj,A., Spezia,P.G., Zago,C., Colombo,A., Cassani,G., Pasciuta,R., Tamborini,A.,Rossi,A., Prestia,M., Capuano,R., Azzi,L., Donadini,A.,Catanoso,G., Maggi,F.                                                                                                                                                                                                                                                                                                                                                                                                                  |
| EPI_ISL_872897                                                                                                                                                                                                                                                                                                                                                                                                                                                                                                                                                                                                                                                                                                                                                                                                                                                                                                                                                                                                                                 | Stem Cell Research and Development Center                                                                                                                                                         | Stem Cell Research and Development Center                                                                                                                                                                                                                                                                                                                                                                                                                                                                                                                                                                                                                                                                                                                                                                                                          | Igo Syaiful Ihsan, Eryk Hendrianto, Naimah Putri, Deya Karsari, Nora Ertanti, Aristika Dinaryanti, Purwati                                                                                                                                                                                                                                                                                                                                                                                                                                                                                                      |
| EPI_ISL_873209                                                                                                                                                                                                                                                                                                                                                                                                                                                                                                                                                                                                                                                                                                                                                                                                                                                                                                                                                                                                                                 | Medicine and Surgery, University of Insubria                                                                                                                                                      | Medicine and Surgery, University of Insubria                                                                                                                                                                                                                                                                                                                                                                                                                                                                                                                                                                                                                                                                                                                                                                                                       | Maggi,F., Novazzi,F., Genoni,A., Baj,A., Spezia,P.G., Focosi,D., Zago,C., Colombo,A., Cassani,G., Pasciuta,R., Tamborini,A.,Rossi,A., Prestia,M., Capuano,R., Azzi,L., Donadini,A.,Catanoso,G., Grossi,P., Maffioli,L. and Bonelli,G.                                                                                                                                                                                                                                                                                                                                                                           |
| EPI_ISL_875342                                                                                                                                                                                                                                                                                                                                                                                                                                                                                                                                                                                                                                                                                                                                                                                                                                                                                                                                                                                                                                 | Pakistan Institute of Medical Sciences                                                                                                                                                            | Department of Virology                                                                                                                                                                                                                                                                                                                                                                                                                                                                                                                                                                                                                                                                                                                                                                                                                             | Massab Umair, Aamer Ikram, Muhammad Salman, Sana Tamim, Nazish Badar, Adnan Khurshid, Zaira Rahman, Abdul Ahad, Hamza Ahmad                                                                                                                                                                                                                                                                                                                                                                                                                                                                                     |
| EPI_ISL_875343, EPI_ISL_875345                                                                                                                                                                                                                                                                                                                                                                                                                                                                                                                                                                                                                                                                                                                                                                                                                                                                                                                                                                                                                 | Pakistan Institute of Medical Sciences                                                                                                                                                            | Department of Virology                                                                                                                                                                                                                                                                                                                                                                                                                                                                                                                                                                                                                                                                                                                                                                                                                             | Massab Umair, Aamer Ikram, Muhammad Salman, Sana Tamim, Nazish Badar, Adnan Khurshid, Zaira Rahman, Abdul Ahad, Hamza Ahmad                                                                                                                                                                                                                                                                                                                                                                                                                                                                                     |
| EPI_ISL_877764                                                                                                                                                                                                                                                                                                                                                                                                                                                                                                                                                                                                                                                                                                                                                                                                                                                                                                                                                                                                                                 | COVID-19 lab, MMC Department of Microbiology, Mymensingh Medical college                                                                                                                          | Department of Pathology, Bangladesh Agricultural University & Department of Microbiology, Mymensingh Medical College                                                                                                                                                                                                                                                                                                                                                                                                                                                                                                                                                                                                                                                                                                                               | Afrin, S. Z. Paul, S. K. Parvin, R.                                                                                                                                                                                                                                                                                                                                                                                                                                                                                                                                                                             |
| EPI_ISL_882614, EPI_ISL_882619, EPI_ISL_882622, EPI_ISL_882626, EPI_ISL_882630, EPI_ISL_882633, EPI_ISL_882634                                                                                                                                                                                                                                                                                                                                                                                                                                                                                                                                                                                                                                                                                                                                                                                                                                                                                                                                 | COVID lab, Mymensingh Medical College                                                                                                                                                             | Department of Pathology, Bangladesh Agricultural University & Department of Microbiology, Mymensingh Medical College                                                                                                                                                                                                                                                                                                                                                                                                                                                                                                                                                                                                                                                                                                                               | Afrin, S. Z. Paul, S. K. Parvin, R.                                                                                                                                                                                                                                                                                                                                                                                                                                                                                                                                                                             |
| EPI_ISL_883155                                                                                                                                                                                                                                                                                                                                                                                                                                                                                                                                                                                                                                                                                                                                                                                                                                                                                                                                                                                                                                 | San Donato Arezzo Analysis Laboratory - Clinical Molecular Pathology sector                                                                                                                       | San Donato Arezzo Analysis Laboratory - Clinical Molecular Pathology sector                                                                                                                                                                                                                                                                                                                                                                                                                                                                                                                                                                                                                                                                                                                                                                        | Alessandro Pancrazzi and Alice Moncada                                                                                                                                                                                                                                                                                                                                                                                                                                                                                                                                                                          |
| EPI_ISL_884865                                                                                                                                                                                                                                                                                                                                                                                                                                                                                                                                                                                                                                                                                                                                                                                                                                                                                                                                                                                                                                 | Medicine and Surgery, University of Insubria                                                                                                                                                      | University of Insubria                                                                                                                                                                                                                                                                                                                                                                                                                                                                                                                                                                                                                                                                                                                                                                                                                             | Novazzi,F., Genoni,A., Focosi,D., Baj,A., Spezia,P.G., Zago,C.,Colombo,A., Cassani,G., Pasciuta,R., Tamborini,A., Rossi,A.,Prestia,M., Capuano,R., Azzi,L., Donadini,A., Catanoso,G. and Maggi,F.                                                                                                                                                                                                                                                                                                                                                                                                               |
| EPI_ISL_886172, EPI_ISL_886176, EPI_ISL_886178, EPI_ISL_887054, EPI_ISL_887056, EPI_ISL_887058, EPI_ISL_887061, EPI_ISL_887062, EPI_ISL_887067, EPI_ISL_887071, EPI_ISL_887073, EPI_ISL_887075, EPI_ISL_887090, EPI_ISL_887908, EPI_ISL_887909, EPI_ISL_887910, EPI_ISL_887911, EPI_ISL_887913, EPI_ISL_887914, EPI_ISL_887915, EPI_ISL_887916, EPI_ISL_887917, EPI_ISL_887918, EPI_ISL_887919, EPI_ISL_887920, EPI_ISL_887921, EPI_ISL_887923, EPI_ISL_887924, EPI_ISL_887927, EPI_ISL_887928, EPI_ISL_887929, EPI_ISL_887930, EPI_ISL_887931, EPI_ISL_887932, EPI_ISL_887933, EPI_ISL_887936, EPI_ISL_887939, EPI_ISL_887940, EPI_ISL_887942, EPI_ISL_887943, EPI_ISL_887944, EPI_ISL_888279, EPI_ISL_888280, EPI_ISL_888281, EPI_ISL_888282, EPI_ISL_888283, EPI_ISL_888285, EPI_ISL_888286, EPI_ISL_888287, EPI_ISL_888288, EPI_ISL_888289, EPI_ISL_888292, EPI_ISL_888294, EPI_ISL_888295, EPI_ISL_888297, EPI_ISL_888298, EPI_ISL_888300, EPI_ISL_888302, EPI_ISL_888303, EPI_ISL_888304, EPI_ISL_888310, EPI_ISL_888439, EPI_ISL_888443 | Genomics and Discovery, Respiratory Viruses Branch, Division of Viral Diseases, Centers for Disease Control and Prevention                                                                        | Peter W. Cook,Dhwani Batra,Ben L. Rambo-Martin,Summer Galloway,Brian Krueger,Minoo Agarwal,Eyad Almasri,Debbie Boles,Ayla Burns,Nuthawin Charoensri,Oren Cohen,Susan Countryman,Mary Ann Cristobal,Bobbi Croy,Suzanne Dale,Hrushikesh Deshmukh,Amanda Douglas,Vincent Drouillon,Marcia Eisenberg,Howard Engler,Rama Ghatti,Prashant Gupta,Susan Hicks,Jake Humphrey,Lax Iyer,Manoj Jain,Mohan Koli,Tim Kuphal,Stanley Letovsky,Michael Levandoski,Craig Lukasik,Jonathan Meltzer,Brian Norvell,Mindy Nye,Scott Parker,Christos Petropoulos,John Pruitt,Steven Ragan,Scott Ryan,Mike Sapeta,Jana Schroth,Suresh Babu Selvaraju,Goran Stevovic,Amanda Suchanek,Andrea Throop,Lyndon Tilson,Thomas Urban,Joe Voshell,Kimberly Wagner,Jonathan Williams,Mary Williamson,Qian Zeng,Tricia Zwiefelhofer,Clinton R. Paden,Suxiang Tong,Duncan MacCannell, |                                                                                                                                                                                                                                                                                                                                                                                                                                                                                                                                                                                                                 |
| see above                                                                                                                                                                                                                                                                                                                                                                                                                                                                                                                                                                                                                                                                                                                                                                                                                                                                                                                                                                                                                                      | Labcorp                                                                                                                                                                                           |                                                                                                                                                                                                                                                                                                                                                                                                                                                                                                                                                                                                                                                                                                                                                                                                                                                    |                                                                                                                                                                                                                                                                                                                                                                                                                                                                                                                                                                                                                 |
